# Supplementary material for: Responses to Reduced Feeding Frequency in Captive-Born Cheetahs (Acinonyx jubatus): Implications for Behavioural and Physiological Stress and Gastrointestinal Health
Source: MDPI journal article supplement (doi:10.3390/ani13172783), 2023-08-31
Supplement: s1 [file s1]

Table S1

**Table S1.** The proportion of scan samples in which each behaviour was observed for the study cheetahs (CH-2205, -2206, -2207, -2271, -2276, and -2277) during the treatment (week [Wk] one, two, and three) and control and on feed versus fast day.

| Behaviour               | Study Period  |                         |                         |                         | Feed/Fast Day |                  |                  |
|-------------------------|---------------|-------------------------|-------------------------|-------------------------|---------------|------------------|------------------|
|                         | Treatment (%) | Treatment (Wk 1)<br>(%) | Treatment (Wk 2)<br>(%) | Treatment (Wk 3)<br>(%) | Control (%)   | Feeding Days (%) | Fasting Days (%) |
| Inactive                | 40.37         | 37.02                   | 40.61                   | 42.13                   | 43.72         | 40.11            | 51.30            |
| Appetitive behaviour    | 10.74         | 8.17                    | 14.33                   | 9.27                    | 13.45         | 12.70            | 9.42             |
| Attention               | 7.82          | 12.50                   | 6.14                    | 6.46                    | 6.84          | 7.70             | 5.52             |
| Auto-grooming           | 2.33          | 0.48                    | 2.73                    | 3.09                    | 2.47          | 2.22             | 3.25             |
| Locomotion              | 21.35         | 18.27                   | 18.09                   | 25.84                   | 14.80         | 18.32            | 16.56            |
| Maintenance             | 0.35          | 0.00                    | 0.34                    | 0.56                    | 0.22          | 0.21             | 0.65             |
| Olfactory exploration   | 1.63          | 1.92                    | 0.68                    | 2.25                    | 1.23          | 1.46             | 1.30             |
| Scent-marking           | 3.73          | 6.25                    | 3.07                    | 2.81                    | 2.91          | 3.33             | 3.25             |
| Standing                | 0.35          | 0.48                    | 0.34                    | 0.28                    | 0.22          | 0.35             | 0.00             |
| Stereotypical           | 0.23          | 0.96                    | 0.00                    | 0.00                    | 0.11          | 0.21             | 0.00             |
| Vocalisation            | 0.47          | 0.00                    | 1.02                    | 0.28                    | 0.22          | 0.14             | 1.30             |
| Affiliative behaviour   | 1.40          | 1.44                    | 2.39                    | 0.56                    | 2.13          | 1.80             | 1.62             |
| Agnostic behaviour      | 0.23          | 0.00                    | 0.68                    | 0.00                    | 0.45          | 0.28             | 0.65             |
| Interspecific behaviour | 8.98          | 12.50                   | 9.56                    | 6.46                    | 7.51          | 8.88             | 5.19             |
| Out of sight            | 0.00          | 0.00                    | 0.00                    | 0.00                    | 3.70          | 2.29             | 0.00             |



Table S2

**Table S2.** The proportion of faecal samples collected of each faecal consistency score for the study cheetahs (CH-2205, -2206, -2207, -2271, -2276, and -2277) during the treatment (week [Wk] one, two, and three) and control and on feed versus fast day.

[illegible]



Table S3

**Table S3.** Biologger recordings for the study cheetahs during the treatment and control.

|         | Treatment                   |                 |                 |                          | Control                     |                 |                 |                          |
|---------|-----------------------------|-----------------|-----------------|--------------------------|-----------------------------|-----------------|-----------------|--------------------------|
|         | T <sub>b</sub> <sup>1</sup> | HR <sup>2</sup> | LA <sup>3</sup> | Filtered HR <sup>2</sup> | T <sub>b</sub> <sup>1</sup> | HR <sup>2</sup> | LA <sup>3</sup> | Filtered HR <sup>2</sup> |
| CH-2205 | 6048                        | 6048            | 30240           | 5075                     | 6048                        | 6048            | 30240           | 5222                     |
| CH-2206 | 6048                        | 6048            | 30240           | 5744                     | 6048                        | 6048            | 30240           | 5705                     |
| CH-2207 | 0                           | 0               | 0               | 0                        | 0                           | 0               | 0               | 0                        |
| CH-2271 | 0                           | 0               | 0               | 0                        | 0                           | 0               | 0               | 0                        |
| CH-2276 | 6048                        | 6048            | 30240           | 5525                     | 3203                        | 3203            | 15967           | 2954                     |
| CH-2277 | 0                           | 0               | 0               | 0                        | 0                           | 0               | 0               | 0                        |

<sup>1</sup> T<sub>b</sub>, body temperature; <sup>2</sup> HR, heart rate; <sup>3</sup> LA, locomotor activity.



Figure S1

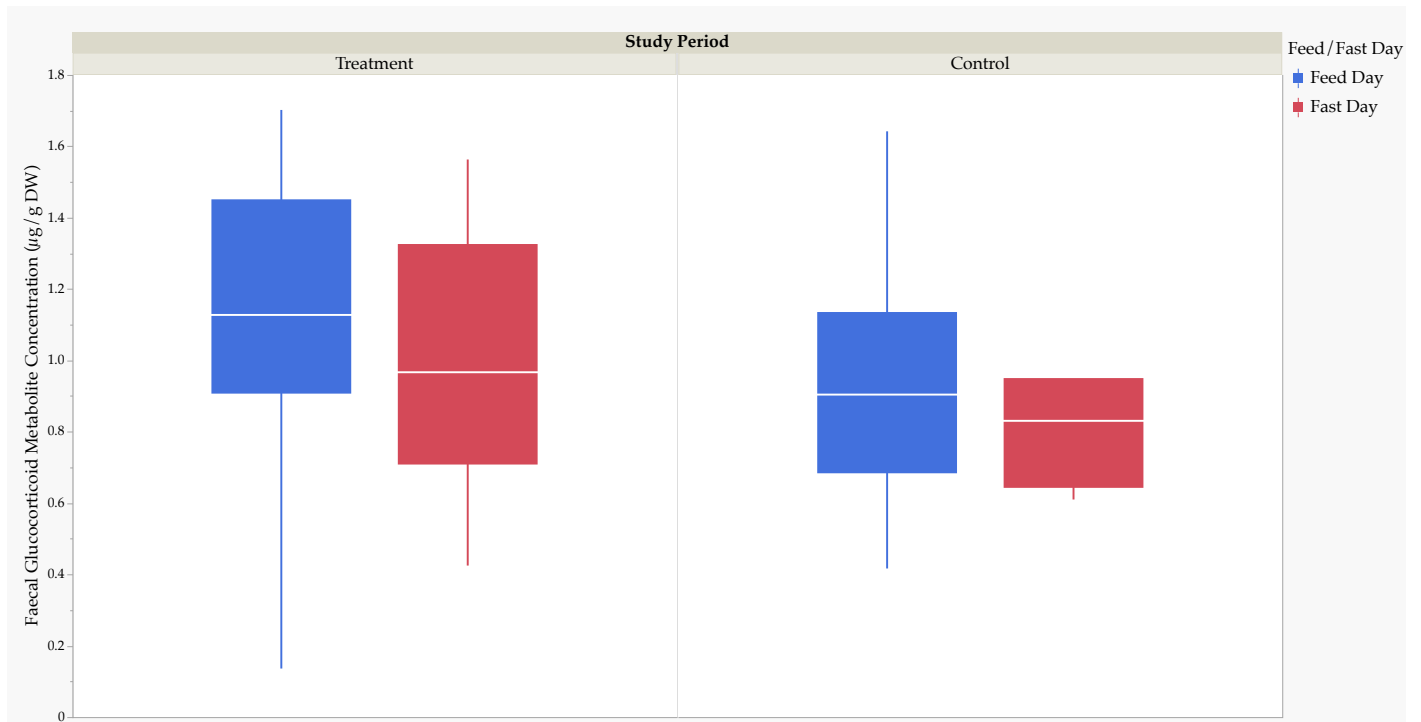

**Figure S1.** Box and whisker plot of faecal glucocorticoid metabolite concentration (µg/g dry weight [DW]) for the study cheetahs (CH-2205, -2206, -2207, -2271, -2276, and -2277). Effect of feed versus fast day by the study period.



Figure S2

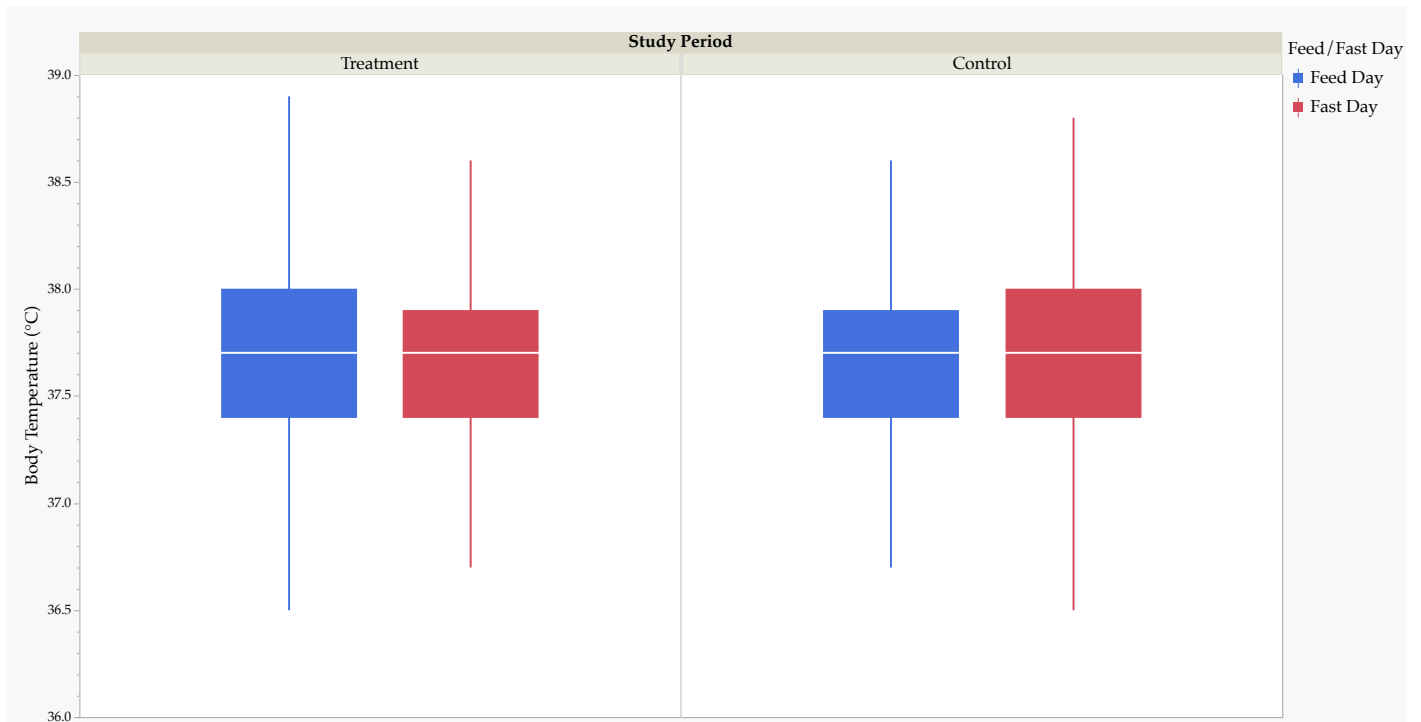

**Figure S2.** Box and whisker plot of body temperature (°C) for the study cheetahs (CH-2205, -2206, and -2276). Effect of feed versus fast day by the study period.



Figure S3

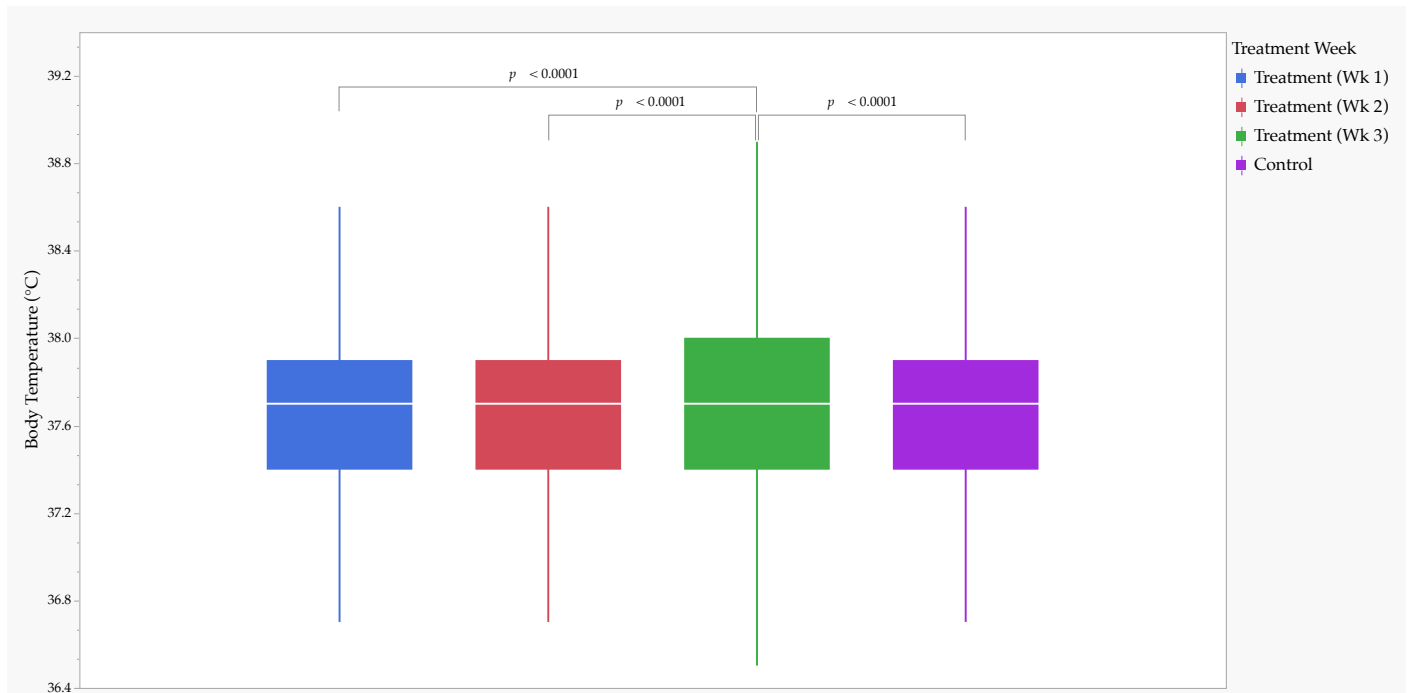

**Figure S3.** Box and whisker plot of body temperature (°C) for the study cheetahs (CH-2205, -2206, and -2276). Effect of treatment week (Wk; one, two, and three). Statistics were performed using Tukey's honestly significant difference post hoc test.



Figure S4

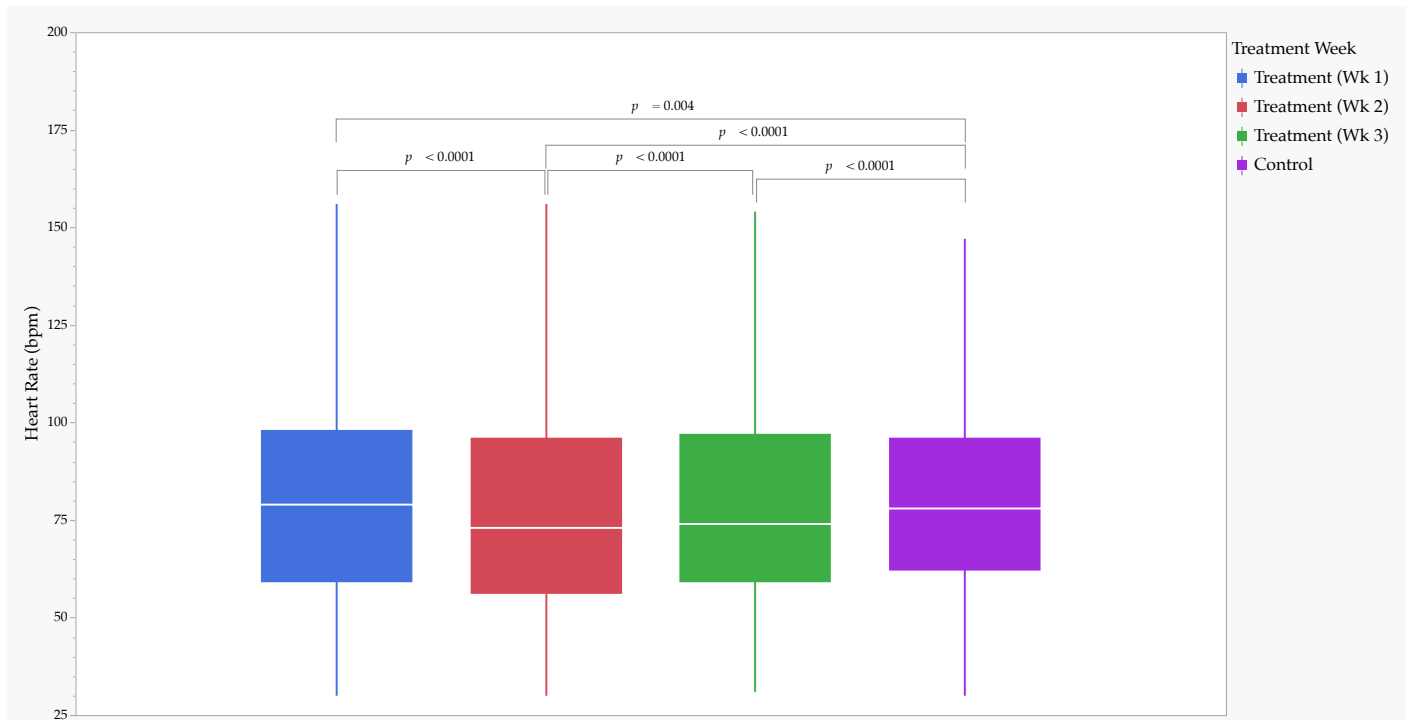

**Figure S4.** Box and whisker plot of heart rate (beats per minute [bpm]) for the study cheetahs (CH-2205, -2206, and -2276). Effect of treatment week (Wk; one, two, and three). Statistics were performed using Tukey's honestly significant difference post hoc test.



| Date       | Cheetah ID | Sex    | Age Group | Week             | Study Period | Feed/Fast Day | Minute | Hour          | Part of the Day | Behaviour            |
|------------|------------|--------|-----------|------------------|--------------|---------------|--------|---------------|-----------------|----------------------|
| 2019/04/24 | CH2207     | Female | Three y/o | Treatment (Wk 1) | Treatment    | Fast Day      | 07:45  | 07:00 - 07:59 | Morning         | Locomotion           |
| 2019/04/24 | CH2207     | Female | Three y/o | Treatment (Wk 1) | Treatment    | Fast Day      | 07:50  | 07:00 - 07:59 | Morning         | Auto-grooming        |
| 2019/04/24 | CH2207     | Female | Three y/o | Treatment (Wk 1) | Treatment    | Fast Day      | 07:55  | 07:00 - 07:59 | Morning         | Locomotion           |
| 2019/04/24 | CH2207     | Female | Three y/o | Treatment (Wk 1) | Treatment    | Fast Day      | 08:00  | 08:00 - 08:59 | Late Morning    | Scent-marking        |
| 2019/04/24 | CH2207     | Female | Three y/o | Treatment (Wk 1) | Treatment    | Fast Day      | 08:05  | 08:00 - 08:59 | Late Morning    | Locomotion           |
| 2019/04/24 | CH2207     | Female | Three y/o | Treatment (Wk 1) | Treatment    | Fast Day      | 08:10  | 08:00 - 08:59 | Late Morning    | Appetitive behaviour |
| 2019/04/24 | CH2207     | Female | Three y/o | Treatment (Wk 1) | Treatment    | Fast Day      | 08:15  | 08:00 - 08:59 | Late Morning    | Appetitive behaviour |
| 2019/04/24 | CH2207     | Female | Three y/o | Treatment (Wk 1) | Treatment    | Fast Day      | 08:20  | 08:00 - 08:59 | Late Morning    | Scent-marking        |
| 2019/04/24 | CH2207     | Female | Three y/o | Treatment (Wk 1) | Treatment    | Fast Day      | 08:25  | 08:00 - 08:59 | Late Morning    | Appetitive behaviour |
| 2019/04/24 | CH2207     | Female | Three y/o | Treatment (Wk 1) | Treatment    | Fast Day      | 08:30  | 08:00 - 08:59 | Late Morning    | Appetitive behaviour |
| 2019/04/24 | CH2207     | Female | Three y/o | Treatment (Wk 1) | Treatment    | Fast Day      | 08:35  | 08:00 - 08:59 | Late Morning    | Scent-marking        |
| 2019/04/24 | CH2207     | Female | Three y/o | Treatment (Wk 1) | Treatment    | Fast Day      | 08:40  | 08:00 - 08:59 | Late Morning    | Scent-marking        |
| 2019/04/30 | CH2207     | Female | Three y/o | Treatment (Wk 2) | Treatment    | Feed Day      | 08:10  | 08:00 - 08:59 | Late Morning    | Inactive             |
| 2019/04/30 | CH2207     | Female | Three y/o | Treatment (Wk 2) | Treatment    | Feed Day      | 08:15  | 08:00 - 08:59 | Late Morning    | Inactive             |
| 2019/04/30 | CH2207     | Female | Three y/o | Treatment (Wk 2) | Treatment    | Feed Day      | 08:20  | 08:00 - 08:59 | Late Morning    | Appetitive behaviour |
| 2019/04/30 | CH2207     | Female | Three y/o | Treatment (Wk 2) | Treatment    | Feed Day      | 08:25  | 08:00 - 08:59 | Late Morning    | Locomotion           |
| 2019/04/30 | CH2207     | Female | Three y/o | Treatment (Wk 2) | Treatment    | Feed Day      | 08:30  | 08:00 - 08:59 | Late Morning    | Appetitive behaviour |
| 2019/04/30 | CH2207     | Female | Three y/o | Treatment (Wk 2) | Treatment    | Feed Day      | 08:35  | 08:00 - 08:59 | Late Morning    | Appetitive behaviour |
| 2019/04/30 | CH2207     | Female | Three y/o | Treatment (Wk 2) | Treatment    | Feed Day      | 08:40  | 08:00 - 08:59 | Late Morning    | Appetitive behaviour |
| 2019/04/30 | CH2207     | Female | Three y/o | Treatment (Wk 2) | Treatment    | Feed Day      | 08:45  | 08:00 - 08:59 | Late Morning    | Appetitive behaviour |
| 2019/04/30 | CH2207     | Female | Three y/o | Treatment (Wk 2) | Treatment    | Feed Day      | 08:50  | 08:00 - 08:59 | Late Morning    | Appetitive behaviour |
| 2019/04/30 | CH2207     | Female | Three y/o | Treatment (Wk 2) | Treatment    | Feed Day      | 08:55  | 08:00 - 08:59 | Late Morning    | Locomotion           |
| 2019/04/30 | CH2207     | Female | Three y/o | Treatment (Wk 2) | Treatment    | Feed Day      | 09:00  | 09:00 - 09:59 | Late Morning    | Auto-grooming        |
| 2019/04/30 | CH2207     | Female | Three y/o | Treatment (Wk 2) | Treatment    | Feed Day      | 09:05  | 09:00 - 09:59 | Late Morning    | Inactive             |
| 2019/05/01 | CH2207     | Female | Three y/o | Treatment (Wk 2) | Treatment    | Fast Day      | 09:05  | 09:00 - 09:59 | Late Morning    | Appetitive behaviour |
| 2019/05/01 | CH2207     | Female | Three y/o | Treatment (Wk 2) | Treatment    | Fast Day      | 09:10  | 09:00 - 09:59 | Late Morning    | Locomotion           |
| 2019/05/01 | CH2207     | Female | Three y/o | Treatment (Wk 2) | Treatment    | Fast Day      | 09:15  | 09:00 - 09:59 | Late Morning    | Locomotion           |
| 2019/05/01 | CH2207     | Female | Three y/o | Treatment (Wk 2) | Treatment    | Fast Day      | 09:20  | 09:00 - 09:59 | Late Morning    | Inactive             |
| 2019/05/01 | CH2207     | Female | Three y/o | Treatment (Wk 2) | Treatment    | Fast Day      | 09:25  | 09:00 - 09:59 | Late Morning    | Inactive             |
| 2019/05/01 | CH2207     | Female | Three y/o | Treatment (Wk 2) | Treatment    | Fast Day      | 09:30  | 09:00 - 09:59 | Late Morning    | Appetitive behaviour |
| 2019/05/01 | CH2207     | Female | Three y/o | Treatment (Wk 2) | Treatment    | Fast Day      | 09:35  | 09:00 - 09:59 | Late Morning    | Locomotion           |
| 2019/05/01 | CH2207     | Female | Three y/o | Treatment (Wk 2) | Treatment    | Fast Day      | 09:40  | 09:00 - 09:59 | Late Morning    | Locomotion           |
| 2019/05/01 | CH2207     | Female | Three y/o | Treatment (Wk 2) | Treatment    | Fast Day      | 09:45  | 09:00 - 09:59 | Late Morning    | Locomotion           |
| 2019/05/01 | CH2207     | Female | Three y/o | Treatment (Wk 2) | Treatment    | Fast Day      | 09:50  | 09:00 - 09:59 | Late Morning    | Locomotion           |
| 2019/05/01 | CH2207     | Female | Three y/o | Treatment (Wk 2) | Treatment    | Fast Day      | 09:55  | 09:00 - 09:59 | Late Morning    | Inactive             |







## Dataset S1: BEHAVIOUR\_1

[illegible]



## Dataset S1: BEHAVIOUR\_1

[illegible]



## Dataset S1: BEHAVIOUR\_1

[illegible]



## Dataset S1: BEHAVIOUR\_1

|            |        |      |           |                  |           |          |       |               |              |                         |
|------------|--------|------|-----------|------------------|-----------|----------|-------|---------------|--------------|-------------------------|
| 2019/05/20 | CH2206 | Male | Three y/o | Treatment (Wk 1) | Treatment | Feed Day | 10:10 | 10:00 - 10:59 | Late Morning | Appetitive behaviour    |
| 2019/05/20 | CH2205 | Male | Three y/o | Treatment (Wk 1) | Treatment | Feed Day | 10:15 | 10:00 - 10:59 | Late Morning | Attention               |
| 2019/05/20 | CH2206 | Male | Three y/o | Treatment (Wk 1) | Treatment | Feed Day | 10:15 | 10:00 - 10:59 | Late Morning | Appetitive behaviour    |
| 2019/05/20 | CH2205 | Male | Three y/o | Treatment (Wk 1) | Treatment | Feed Day | 10:20 | 10:00 - 10:59 | Late Morning | Locomotion              |
| 2019/05/20 | CH2206 | Male | Three y/o | Treatment (Wk 1) | Treatment | Feed Day | 10:20 | 10:00 - 10:59 | Late Morning | Locomotion              |
| 2019/05/20 | CH2205 | Male | Three y/o | Treatment (Wk 1) | Treatment | Feed Day | 10:25 | 10:00 - 10:59 | Late Morning | Appetitive behaviour    |
| 2019/05/20 | CH2206 | Male | Three y/o | Treatment (Wk 1) | Treatment | Feed Day | 10:25 | 10:00 - 10:59 | Late Morning | Appetitive behaviour    |
| 2019/05/20 | CH2205 | Male | Three y/o | Treatment (Wk 1) | Treatment | Feed Day | 10:30 | 10:00 - 10:59 | Late Morning | Inactive                |
| 2019/05/20 | CH2206 | Male | Three y/o | Treatment (Wk 1) | Treatment | Feed Day | 10:30 | 10:00 - 10:59 | Late Morning | Inactive                |
| 2019/05/22 | CH2205 | Male | Three y/o | Treatment (Wk 2) | Treatment | Fast Day | 08:15 | 08:00 - 08:59 | Late Morning | Locomotion              |
| 2019/05/22 | CH2206 | Male | Three y/o | Treatment (Wk 2) | Treatment | Fast Day | 08:15 | 08:00 - 08:59 | Late Morning | Attention               |
| 2019/05/22 | CH2205 | Male | Three y/o | Treatment (Wk 2) | Treatment | Fast Day | 08:20 | 08:00 - 08:59 | Late Morning | Locomotion              |
| 2019/05/22 | CH2206 | Male | Three y/o | Treatment (Wk 2) | Treatment | Fast Day | 08:20 | 08:00 - 08:59 | Late Morning | Locomotion              |
| 2019/05/22 | CH2205 | Male | Three y/o | Treatment (Wk 2) | Treatment | Fast Day | 08:25 | 08:00 - 08:59 | Late Morning | Inactive                |
| 2019/05/22 | CH2206 | Male | Three y/o | Treatment (Wk 2) | Treatment | Fast Day | 08:25 | 08:00 - 08:59 | Late Morning | Auto-grooming           |
| 2019/05/22 | CH2205 | Male | Three y/o | Treatment (Wk 2) | Treatment | Fast Day | 08:30 | 08:00 - 08:59 | Late Morning | Auto-grooming           |
| 2019/05/22 | CH2206 | Male | Three y/o | Treatment (Wk 2) | Treatment | Fast Day | 08:30 | 08:00 - 08:59 | Late Morning | Appetitive behaviour    |
| 2019/05/22 | CH2205 | Male | Three y/o | Treatment (Wk 2) | Treatment | Fast Day | 08:35 | 08:00 - 08:59 | Late Morning | Locomotion              |
| 2019/05/22 | CH2206 | Male | Three y/o | Treatment (Wk 2) | Treatment | Fast Day | 08:35 | 08:00 - 08:59 | Late Morning | Appetitive behaviour    |
| 2019/05/22 | CH2205 | Male | Three y/o | Treatment (Wk 2) | Treatment | Fast Day | 08:40 | 08:00 - 08:59 | Late Morning | Appetitive behaviour    |
| 2019/05/22 | CH2206 | Male | Three y/o | Treatment (Wk 2) | Treatment | Fast Day | 08:40 | 08:00 - 08:59 | Late Morning | Appetitive behaviour    |
| 2019/05/22 | CH2205 | Male | Three y/o | Treatment (Wk 2) | Treatment | Fast Day | 08:45 | 08:00 - 08:59 | Late Morning | Appetitive behaviour    |
| 2019/05/22 | CH2206 | Male | Three y/o | Treatment (Wk 2) | Treatment | Fast Day | 08:45 | 08:00 - 08:59 | Late Morning | Appetitive behaviour    |
| 2019/05/22 | CH2205 | Male | Three y/o | Treatment (Wk 2) | Treatment | Fast Day | 08:50 | 08:00 - 08:59 | Late Morning | Interspecific behaviour |
| 2019/05/22 | CH2206 | Male | Three y/o | Treatment (Wk 2) | Treatment | Fast Day | 08:50 | 08:00 - 08:59 | Late Morning | Appetitive behaviour    |
| 2019/05/22 | CH2205 | Male | Three y/o | Treatment (Wk 2) | Treatment | Fast Day | 08:55 | 08:00 - 08:59 | Late Morning | Appetitive behaviour    |
| 2019/05/22 | CH2206 | Male | Three y/o | Treatment (Wk 2) | Treatment | Fast Day | 08:55 | 08:00 - 08:59 | Late Morning | Interspecific behaviour |
| 2019/05/22 | CH2205 | Male | Three y/o | Treatment (Wk 2) | Treatment | Fast Day | 09:00 | 09:00 - 09:59 | Late Morning | Vocalisation            |
| 2019/05/22 | CH2206 | Male | Three y/o | Treatment (Wk 2) | Treatment | Fast Day | 09:00 | 09:00 - 09:59 | Late Morning | Locomotion              |
| 2019/05/22 | CH2205 | Male | Three y/o | Treatment (Wk 2) | Treatment | Fast Day | 09:05 | 09:00 - 09:59 | Late Morning | Vocalisation            |
| 2019/05/22 | CH2206 | Male | Three y/o | Treatment (Wk 2) | Treatment | Fast Day | 09:05 | 09:00 - 09:59 | Late Morning | Inactive                |
| 2019/05/22 | CH2205 | Male | Three y/o | Treatment (Wk 2) | Treatment | Fast Day | 09:10 | 09:00 - 09:59 | Late Morning | Vocalisation            |
| 2019/05/22 | CH2206 | Male | Three y/o | Treatment (Wk 2) | Treatment | Fast Day | 09:10 | 09:00 - 09:59 | Late Morning | Locomotion              |
| 2019/05/23 | CH2205 | Male | Three y/o | Treatment (Wk 2) | Treatment | Feed Day | 09:10 | 09:00 - 09:59 | Late Morning | Attention               |
| 2019/05/23 | CH2206 | Male | Three y/o | Treatment (Wk 2) | Treatment | Feed Day | 09:10 | 09:00 - 09:59 | Late Morning | Attention               |
| 2019/05/23 | CH2205 | Male | Three y/o | Treatment (Wk 2) | Treatment | Feed Day | 09:15 | 09:00 - 09:59 | Late Morning | Locomotion              |
| 2019/05/23 | CH2206 | Male | Three y/o | Treatment (Wk 2) | Treatment | Feed Day | 09:15 | 09:00 - 09:59 | Late Morning | Attention               |



Dataset S1: BEHAVIOUR\_1

[illegible]



## Dataset S1: BEHAVIOUR\_1

|            |        |      |           |                  |           |          |       |               |              |                         |
|------------|--------|------|-----------|------------------|-----------|----------|-------|---------------|--------------|-------------------------|
| 2019/05/26 | CH2206 | Male | Three y/o | Treatment (Wk 2) | Treatment | Fast Day | 12:45 | 12:00 - 12:59 | Afternoon    | Inactive                |
| 2019/05/26 | CH2205 | Male | Three y/o | Treatment (Wk 2) | Treatment | Fast Day | 12:50 | 12:00 - 12:59 | Afternoon    | Inactive                |
| 2019/05/26 | CH2206 | Male | Three y/o | Treatment (Wk 2) | Treatment | Fast Day | 12:50 | 12:00 - 12:59 | Afternoon    | Inactive                |
| 2019/05/26 | CH2205 | Male | Three y/o | Treatment (Wk 2) | Treatment | Fast Day | 12:55 | 12:00 - 12:59 | Afternoon    | Auto-grooming           |
| 2019/05/26 | CH2206 | Male | Three y/o | Treatment (Wk 2) | Treatment | Fast Day | 12:55 | 12:00 - 12:59 | Afternoon    | Inactive                |
| 2019/05/26 | CH2205 | Male | Three y/o | Treatment (Wk 2) | Treatment | Fast Day | 13:00 | 13:00 - 13:59 | Afternoon    | Inactive                |
| 2019/05/26 | CH2206 | Male | Three y/o | Treatment (Wk 2) | Treatment | Fast Day | 13:00 | 13:00 - 13:59 | Afternoon    | Inactive                |
| 2019/05/27 | CH2205 | Male | Three y/o | Treatment (Wk 2) | Treatment | Feed Day | 09:40 | 09:00 - 09:59 | Late Morning | Standing                |
| 2019/05/27 | CH2206 | Male | Three y/o | Treatment (Wk 2) | Treatment | Feed Day | 09:40 | 09:00 - 09:59 | Late Morning | Auto-grooming           |
| 2019/05/27 | CH2205 | Male | Three y/o | Treatment (Wk 2) | Treatment | Feed Day | 09:45 | 09:00 - 09:59 | Late Morning | Interspecific behaviour |
| 2019/05/27 | CH2206 | Male | Three y/o | Treatment (Wk 2) | Treatment | Feed Day | 09:45 | 09:00 - 09:59 | Late Morning | Appetitive behaviour    |
| 2019/05/27 | CH2205 | Male | Three y/o | Treatment (Wk 2) | Treatment | Feed Day | 09:50 | 09:00 - 09:59 | Late Morning | Inactive                |
| 2019/05/27 | CH2206 | Male | Three y/o | Treatment (Wk 2) | Treatment | Feed Day | 09:50 | 09:00 - 09:59 | Late Morning | Locomotion              |
| 2019/05/27 | CH2205 | Male | Three y/o | Treatment (Wk 2) | Treatment | Feed Day | 09:55 | 09:00 - 09:59 | Late Morning | Locomotion              |
| 2019/05/27 | CH2206 | Male | Three y/o | Treatment (Wk 2) | Treatment | Feed Day | 09:55 | 09:00 - 09:59 | Late Morning | Locomotion              |
| 2019/05/27 | CH2205 | Male | Three y/o | Treatment (Wk 2) | Treatment | Feed Day | 10:00 | 10:00 - 10:59 | Late Morning | Interspecific behaviour |
| 2019/05/27 | CH2206 | Male | Three y/o | Treatment (Wk 2) | Treatment | Feed Day | 10:00 | 10:00 - 10:59 | Late Morning | Locomotion              |
| 2019/05/27 | CH2205 | Male | Three y/o | Treatment (Wk 2) | Treatment | Feed Day | 10:05 | 10:00 - 10:59 | Late Morning | Locomotion              |
| 2019/05/27 | CH2206 | Male | Three y/o | Treatment (Wk 2) | Treatment | Feed Day | 10:05 | 10:00 - 10:59 | Late Morning | Locomotion              |
| 2019/05/27 | CH2205 | Male | Three y/o | Treatment (Wk 2) | Treatment | Feed Day | 10:10 | 10:00 - 10:59 | Late Morning | Olfactory exploration   |
| 2019/05/27 | CH2206 | Male | Three y/o | Treatment (Wk 2) | Treatment | Feed Day | 10:10 | 10:00 - 10:59 | Late Morning | Appetitive behaviour    |
| 2019/05/27 | CH2205 | Male | Three y/o | Treatment (Wk 2) | Treatment | Feed Day | 10:15 | 10:00 - 10:59 | Late Morning | Interspecific behaviour |
| 2019/05/27 | CH2206 | Male | Three y/o | Treatment (Wk 2) | Treatment | Feed Day | 10:15 | 10:00 - 10:59 | Late Morning | Appetitive behaviour    |
| 2019/05/27 | CH2205 | Male | Three y/o | Treatment (Wk 2) | Treatment | Feed Day | 10:20 | 10:00 - 10:59 | Late Morning | Interspecific behaviour |
| 2019/05/27 | CH2206 | Male | Three y/o | Treatment (Wk 2) | Treatment | Feed Day | 10:20 | 10:00 - 10:59 | Late Morning | Appetitive behaviour    |
| 2019/05/27 | CH2205 | Male | Three y/o | Treatment (Wk 2) | Treatment | Feed Day | 10:25 | 10:00 - 10:59 | Late Morning | Inactive                |
| 2019/05/27 | CH2206 | Male | Three y/o | Treatment (Wk 2) | Treatment | Feed Day | 10:25 | 10:00 - 10:59 | Late Morning | Interspecific behaviour |
| 2019/05/27 | CH2205 | Male | Three y/o | Treatment (Wk 2) | Treatment | Feed Day | 10:30 | 10:00 - 10:59 | Late Morning | Interspecific behaviour |
| 2019/05/27 | CH2206 | Male | Three y/o | Treatment (Wk 2) | Treatment | Feed Day | 10:30 | 10:00 - 10:59 | Late Morning | Interspecific behaviour |
| 2019/05/27 | CH2205 | Male | Three y/o | Treatment (Wk 2) | Treatment | Feed Day | 10:35 | 10:00 - 10:59 | Late Morning | Interspecific behaviour |
| 2019/05/27 | CH2206 | Male | Three y/o | Treatment (Wk 2) | Treatment | Feed Day | 10:35 | 10:00 - 10:59 | Late Morning | Interspecific behaviour |
| 2019/05/28 | CH2205 | Male | Three y/o | Treatment (Wk 2) | Treatment | Feed Day | 10:05 | 10:00 - 10:59 | Late Morning | Olfactory exploration   |
| 2019/05/28 | CH2206 | Male | Three y/o | Treatment (Wk 2) | Treatment | Feed Day | 10:05 | 10:00 - 10:59 | Late Morning | Locomotion              |
| 2019/05/28 | CH2205 | Male | Three y/o | Treatment (Wk 2) | Treatment | Feed Day | 10:10 | 10:00 - 10:59 | Late Morning | Locomotion              |
| 2019/05/28 | CH2206 | Male | Three y/o | Treatment (Wk 2) | Treatment | Feed Day | 10:10 | 10:00 - 10:59 | Late Morning | Appetitive behaviour    |
| 2019/05/28 | CH2205 | Male | Three y/o | Treatment (Wk 2) | Treatment | Feed Day | 10:15 | 10:00 - 10:59 | Late Morning | Scent-marking           |
| 2019/05/28 | CH2206 | Male | Three y/o | Treatment (Wk 2) | Treatment | Feed Day | 10:15 | 10:00 - 10:59 | Late Morning | Appetitive behaviour    |



## Dataset S1: BEHAVIOUR\_1

[illegible]



Dataset S1: BEHAVIOUR\_1

[illegible]



## Dataset S1: BEHAVIOUR\_1

[illegible]



## Dataset S1: BEHAVIOUR\_1

|            |        |      |           |                  |           |          |       |               |              |                         |
|------------|--------|------|-----------|------------------|-----------|----------|-------|---------------|--------------|-------------------------|
| 2019/06/01 | CH2206 | Male | Three y/o | Treatment (Wk 3) | Treatment | Feed Day | 13:35 | 13:00 - 13:59 | Afternoon    | Appetitive behaviour    |
| 2019/06/01 | CH2205 | Male | Three y/o | Treatment (Wk 3) | Treatment | Feed Day | 13:40 | 13:00 - 13:59 | Afternoon    | Appetitive behaviour    |
| 2019/06/01 | CH2206 | Male | Three y/o | Treatment (Wk 3) | Treatment | Feed Day | 13:40 | 13:00 - 13:59 | Afternoon    | Appetitive behaviour    |
| 2019/06/02 | CH2205 | Male | Three y/o | Treatment (Wk 3) | Treatment | Fast Day | 11:55 | 11:00 - 11:59 | Late Morning | Appetitive behaviour    |
| 2019/06/02 | CH2206 | Male | Three y/o | Treatment (Wk 3) | Treatment | Fast Day | 11:55 | 11:00 - 11:59 | Late Morning | Appetitive behaviour    |
| 2019/06/02 | CH2205 | Male | Three y/o | Treatment (Wk 3) | Treatment | Fast Day | 12:00 | 12:00 - 12:59 | Afternoon    | Locomotion              |
| 2019/06/02 | CH2206 | Male | Three y/o | Treatment (Wk 3) | Treatment | Fast Day | 12:00 | 12:00 - 12:59 | Afternoon    | Scent-marking           |
| 2019/06/02 | CH2205 | Male | Three y/o | Treatment (Wk 3) | Treatment | Fast Day | 12:05 | 12:00 - 12:59 | Afternoon    | Interspecific behaviour |
| 2019/06/02 | CH2206 | Male | Three y/o | Treatment (Wk 3) | Treatment | Fast Day | 12:05 | 12:00 - 12:59 | Afternoon    | Interspecific behaviour |
| 2019/06/02 | CH2205 | Male | Three y/o | Treatment (Wk 3) | Treatment | Fast Day | 12:10 | 12:00 - 12:59 | Afternoon    | Scent-marking           |
| 2019/06/02 | CH2206 | Male | Three y/o | Treatment (Wk 3) | Treatment | Fast Day | 12:10 | 12:00 - 12:59 | Afternoon    | Interspecific behaviour |
| 2019/06/02 | CH2205 | Male | Three y/o | Treatment (Wk 3) | Treatment | Fast Day | 12:15 | 12:00 - 12:59 | Afternoon    | Maintenance             |
| 2019/06/02 | CH2206 | Male | Three y/o | Treatment (Wk 3) | Treatment | Fast Day | 12:15 | 12:00 - 12:59 | Afternoon    | Interspecific behaviour |
| 2019/06/02 | CH2205 | Male | Three y/o | Treatment (Wk 3) | Treatment | Fast Day | 12:20 | 12:00 - 12:59 | Afternoon    | Inactive                |
| 2019/06/02 | CH2206 | Male | Three y/o | Treatment (Wk 3) | Treatment | Fast Day | 12:20 | 12:00 - 12:59 | Afternoon    | Inactive                |
| 2019/06/02 | CH2205 | Male | Three y/o | Treatment (Wk 3) | Treatment | Fast Day | 12:25 | 12:00 - 12:59 | Afternoon    | Inactive                |
| 2019/06/02 | CH2206 | Male | Three y/o | Treatment (Wk 3) | Treatment | Fast Day | 12:25 | 12:00 - 12:59 | Afternoon    | Inactive                |
| 2019/06/02 | CH2205 | Male | Three y/o | Treatment (Wk 3) | Treatment | Fast Day | 12:30 | 12:00 - 12:59 | Afternoon    | Inactive                |
| 2019/06/02 | CH2206 | Male | Three y/o | Treatment (Wk 3) | Treatment | Fast Day | 12:30 | 12:00 - 12:59 | Afternoon    | Inactive                |
| 2019/06/02 | CH2205 | Male | Three y/o | Treatment (Wk 3) | Treatment | Fast Day | 12:35 | 12:00 - 12:59 | Afternoon    | Inactive                |
| 2019/06/02 | CH2206 | Male | Three y/o | Treatment (Wk 3) | Treatment | Fast Day | 12:35 | 12:00 - 12:59 | Afternoon    | Inactive                |
| 2019/06/02 | CH2205 | Male | Three y/o | Treatment (Wk 3) | Treatment | Fast Day | 12:40 | 12:00 - 12:59 | Afternoon    | Inactive                |
| 2019/06/02 | CH2206 | Male | Three y/o | Treatment (Wk 3) | Treatment | Fast Day | 12:40 | 12:00 - 12:59 | Afternoon    | Inactive                |
| 2019/06/02 | CH2205 | Male | Three y/o | Treatment (Wk 3) | Treatment | Fast Day | 12:45 | 12:00 - 12:59 | Afternoon    | Inactive                |
| 2019/06/02 | CH2206 | Male | Three y/o | Treatment (Wk 3) | Treatment | Fast Day | 12:45 | 12:00 - 12:59 | Afternoon    | Inactive                |
| 2019/06/02 | CH2205 | Male | Three y/o | Treatment (Wk 3) | Treatment | Fast Day | 12:50 | 12:00 - 12:59 | Afternoon    | Inactive                |
| 2019/06/02 | CH2206 | Male | Three y/o | Treatment (Wk 3) | Treatment | Fast Day | 12:50 | 12:00 - 12:59 | Afternoon    | Inactive                |
| 2019/06/03 | CH2205 | Male | Three y/o | Treatment (Wk 3) | Treatment | Feed Day | 09:50 | 09:00 - 09:59 | Late Morning | Scent-marking           |
| 2019/06/03 | CH2206 | Male | Three y/o | Treatment (Wk 3) | Treatment | Feed Day | 09:50 | 09:00 - 09:59 | Late Morning | Attention               |
| 2019/06/03 | CH2205 | Male | Three y/o | Treatment (Wk 3) | Treatment | Feed Day | 09:55 | 09:00 - 09:59 | Late Morning | Olfactory exploration   |
| 2019/06/03 | CH2206 | Male | Three y/o | Treatment (Wk 3) | Treatment | Feed Day | 09:55 | 09:00 - 09:59 | Late Morning | Locomotion              |
| 2019/06/03 | CH2205 | Male | Three y/o | Treatment (Wk 3) | Treatment | Feed Day | 10:00 | 10:00 - 10:59 | Late Morning | Scent-marking           |
| 2019/06/03 | CH2206 | Male | Three y/o | Treatment (Wk 3) | Treatment | Feed Day | 10:00 | 10:00 - 10:59 | Late Morning | Attention               |
| 2019/06/03 | CH2205 | Male | Three y/o | Treatment (Wk 3) | Treatment | Feed Day | 10:05 | 10:00 - 10:59 | Late Morning | Locomotion              |
| 2019/06/03 | CH2206 | Male | Three y/o | Treatment (Wk 3) | Treatment | Feed Day | 10:05 | 10:00 - 10:59 | Late Morning | Locomotion              |
| 2019/06/03 | CH2205 | Male | Three y/o | Treatment (Wk 3) | Treatment | Feed Day | 10:10 | 10:00 - 10:59 | Late Morning | Locomotion              |
| 2019/06/03 | CH2206 | Male | Three y/o | Treatment (Wk 3) | Treatment | Feed Day | 10:10 | 10:00 - 10:59 | Late Morning | Locomotion              |



## Dataset S1: BEHAVIOUR\_1

[illegible]



Dataset S1: BEHAVIOUR\_1

[illegible]



## Dataset S1: BEHAVIOUR\_1

|            |        |        |           |         |         |          |       |               |              |                         |
|------------|--------|--------|-----------|---------|---------|----------|-------|---------------|--------------|-------------------------|
| 2019/06/07 | CH2205 | Male   | Three y/o | Control | Control | Feed Day | 09:05 | 09:00 - 09:59 | Late Morning | Scent-marking           |
| 2019/06/07 | CH2206 | Male   | Three y/o | Control | Control | Feed Day | 09:05 | 09:00 - 09:59 | Late Morning | Attention               |
| 2019/06/07 | CH2205 | Male   | Three y/o | Control | Control | Feed Day | 09:10 | 09:00 - 09:59 | Late Morning | Interspecific behaviour |
| 2019/06/07 | CH2206 | Male   | Three y/o | Control | Control | Feed Day | 09:10 | 09:00 - 09:59 | Late Morning | Auto-grooming           |
| 2019/06/07 | CH2205 | Male   | Three y/o | Control | Control | Feed Day | 09:15 | 09:00 - 09:59 | Late Morning | Affiliative behaviour   |
| 2019/06/07 | CH2206 | Male   | Three y/o | Control | Control | Feed Day | 09:15 | 09:00 - 09:59 | Late Morning | Affiliative behaviour   |
| 2019/06/07 | CH2205 | Male   | Three y/o | Control | Control | Feed Day | 09:20 | 09:00 - 09:59 | Late Morning | Interspecific behaviour |
| 2019/06/07 | CH2206 | Male   | Three y/o | Control | Control | Feed Day | 09:20 | 09:00 - 09:59 | Late Morning | Interspecific behaviour |
| 2019/06/07 | CH2205 | Male   | Three y/o | Control | Control | Feed Day | 09:25 | 09:00 - 09:59 | Late Morning | Interspecific behaviour |
| 2019/06/07 | CH2206 | Male   | Three y/o | Control | Control | Feed Day | 09:25 | 09:00 - 09:59 | Late Morning | Interspecific behaviour |
| 2019/06/07 | CH2205 | Male   | Three y/o | Control | Control | Feed Day | 09:30 | 09:00 - 09:59 | Late Morning | Interspecific behaviour |
| 2019/06/07 | CH2206 | Male   | Three y/o | Control | Control | Feed Day | 09:30 | 09:00 - 09:59 | Late Morning | Olfactory exploration   |
| 2019/06/07 | CH2205 | Male   | Three y/o | Control | Control | Feed Day | 09:35 | 09:00 - 09:59 | Late Morning | Scent-marking           |
| 2019/06/07 | CH2206 | Male   | Three y/o | Control | Control | Feed Day | 09:35 | 09:00 - 09:59 | Late Morning | Locomotion              |
| 2019/06/07 | CH2205 | Male   | Three y/o | Control | Control | Feed Day | 09:40 | 09:00 - 09:59 | Late Morning | Out of sight            |
| 2019/06/07 | CH2206 | Male   | Three y/o | Control | Control | Feed Day | 09:40 | 09:00 - 09:59 | Late Morning | Out of sight            |
| 2019/06/07 | CH2205 | Male   | Three y/o | Control | Control | Feed Day | 09:45 | 09:00 - 09:59 | Late Morning | Out of sight            |
| 2019/06/07 | CH2206 | Male   | Three y/o | Control | Control | Feed Day | 09:45 | 09:00 - 09:59 | Late Morning | Out of sight            |
| 2019/06/07 | CH2205 | Male   | Three y/o | Control | Control | Feed Day | 09:50 | 09:00 - 09:59 | Late Morning | Out of sight            |
| 2019/06/07 | CH2206 | Male   | Three y/o | Control | Control | Feed Day | 09:50 | 09:00 - 09:59 | Late Morning | Out of sight            |
| 2019/06/07 | CH2205 | Male   | Three y/o | Control | Control | Feed Day | 09:55 | 09:00 - 09:59 | Late Morning | Out of sight            |
| 2019/06/07 | CH2206 | Male   | Three y/o | Control | Control | Feed Day | 09:55 | 09:00 - 09:59 | Late Morning | Out of sight            |
| 2019/06/07 | CH2205 | Male   | Three y/o | Control | Control | Feed Day | 10:00 | 10:00-10:59   | Late Morning | Out of sight            |
| 2019/06/07 | CH2206 | Male   | Three y/o | Control | Control | Feed Day | 10:00 | 10:00-10:59   | Late Morning | Out of sight            |
| 2019/06/07 | CH2207 | Female | Three y/o | Control | Control | Feed Day | 10:00 | 10:00 - 10:59 | Late Morning | Inactive                |
| 2019/06/07 | CH2207 | Female | Three y/o | Control | Control | Feed Day | 10:05 | 10:00 - 10:59 | Late Morning | Inactive                |
| 2019/06/07 | CH2207 | Female | Three y/o | Control | Control | Feed Day | 10:10 | 10:00 - 10:59 | Late Morning | Inactive                |
| 2019/06/07 | CH2207 | Female | Three y/o | Control | Control | Feed Day | 10:15 | 10:00 - 10:59 | Late Morning | Inactive                |
| 2019/06/07 | CH2207 | Female | Three y/o | Control | Control | Feed Day | 10:20 | 10:00 - 10:59 | Late Morning | Attention               |
| 2019/06/07 | CH2207 | Female | Three y/o | Control | Control | Feed Day | 10:25 | 10:00 - 10:59 | Late Morning | Inactive                |
| 2019/06/07 | CH2207 | Female | Three y/o | Control | Control | Feed Day | 10:30 | 10:00 - 10:59 | Late Morning | Attention               |
| 2019/06/07 | CH2207 | Female | Three y/o | Control | Control | Feed Day | 10:35 | 10:00 - 10:59 | Late Morning | Inactive                |
| 2019/06/07 | CH2207 | Female | Three y/o | Control | Control | Feed Day | 10:40 | 10:00 - 10:59 | Late Morning | Inactive                |
| 2019/06/07 | CH2207 | Female | Three y/o | Control | Control | Feed Day | 10:45 | 10:00 - 10:59 | Late Morning | Inactive                |
| 2019/06/07 | CH2207 | Female | Three y/o | Control | Control | Feed Day | 10:50 | 10:00 - 10:59 | Late Morning | Inactive                |
| 2019/06/07 | CH2207 | Female | Three y/o | Control | Control | Feed Day | 10:55 | 10:00 - 10:59 | Late Morning | Appetitive behaviour    |
| 2019/06/08 | CH2207 | Female | Three y/o | Control | Control | Feed Day | 08:55 | 08:00 - 08:59 | Late Morning | Attention               |



## Dataset S1: BEHAVIOUR\_1

|            |        |        |           |         |         |          |       |               |              |                       |
|------------|--------|--------|-----------|---------|---------|----------|-------|---------------|--------------|-----------------------|
| 2019/06/08 | CH2207 | Female | Three y/o | Control | Control | Feed Day | 09:00 | 09:00 - 09:59 | Late Morning | Attention             |
| 2019/06/08 | CH2207 | Female | Three y/o | Control | Control | Feed Day | 09:05 | 09:00 - 09:59 | Late Morning | Attention             |
| 2019/06/08 | CH2207 | Female | Three y/o | Control | Control | Feed Day | 09:10 | 09:00 - 09:59 | Late Morning | Inactive              |
| 2019/06/08 | CH2207 | Female | Three y/o | Control | Control | Feed Day | 09:15 | 09:00 - 09:59 | Late Morning | Auto-grooming         |
| 2019/06/08 | CH2207 | Female | Three y/o | Control | Control | Feed Day | 09:20 | 09:00 - 09:59 | Late Morning | Attention             |
| 2019/06/08 | CH2207 | Female | Three y/o | Control | Control | Feed Day | 09:25 | 09:00 - 09:59 | Late Morning | Attention             |
| 2019/06/08 | CH2207 | Female | Three y/o | Control | Control | Feed Day | 09:30 | 09:00 - 09:59 | Late Morning | Attention             |
| 2019/06/08 | CH2207 | Female | Three y/o | Control | Control | Feed Day | 09:35 | 09:00 - 09:59 | Late Morning | Attention             |
| 2019/06/08 | CH2207 | Female | Three y/o | Control | Control | Feed Day | 09:40 | 09:00 - 09:59 | Late Morning | Scent-marking         |
| 2019/06/08 | CH2207 | Female | Three y/o | Control | Control | Feed Day | 09:45 | 09:00 - 09:59 | Late Morning | Locomotion            |
| 2019/06/08 | CH2205 | Male   | Three y/o | Control | Control | Feed Day | 09:50 | 09:00 - 09:59 | Late Morning | Scent-marking         |
| 2019/06/08 | CH2206 | Male   | Three y/o | Control | Control | Feed Day | 09:50 | 09:00 - 09:59 | Late Morning | Attention             |
| 2019/06/08 | CH2207 | Female | Three y/o | Control | Control | Feed Day | 09:50 | 09:00 - 09:59 | Late Morning | Locomotion            |
| 2019/06/08 | CH2205 | Male   | Three y/o | Control | Control | Feed Day | 09:55 | 09:00 - 09:59 | Late Morning | Attention             |
| 2019/06/08 | CH2206 | Male   | Three y/o | Control | Control | Feed Day | 09:55 | 09:00 - 09:59 | Late Morning | Locomotion            |
| 2019/06/08 | CH2205 | Male   | Three y/o | Control | Control | Feed Day | 10:00 | 10:00 - 10:59 | Late Morning | Inactive              |
| 2019/06/08 | CH2206 | Male   | Three y/o | Control | Control | Feed Day | 10:00 | 10:00 - 10:59 | Late Morning | Locomotion            |
| 2019/06/08 | CH2205 | Male   | Three y/o | Control | Control | Feed Day | 10:05 | 10:00 - 10:59 | Late Morning | Inactive              |
| 2019/06/08 | CH2206 | Male   | Three y/o | Control | Control | Feed Day | 10:05 | 10:00 - 10:59 | Late Morning | Auto-grooming         |
| 2019/06/08 | CH2205 | Male   | Three y/o | Control | Control | Feed Day | 10:10 | 10:00 - 10:59 | Late Morning | Affiliative behaviour |
| 2019/06/08 | CH2206 | Male   | Three y/o | Control | Control | Feed Day | 10:10 | 10:00 - 10:59 | Late Morning | Affiliative behaviour |
| 2019/06/08 | CH2205 | Male   | Three y/o | Control | Control | Feed Day | 10:15 | 10:00 - 10:59 | Late Morning | Locomotion            |
| 2019/06/08 | CH2206 | Male   | Three y/o | Control | Control | Feed Day | 10:15 | 10:00 - 10:59 | Late Morning | Attention             |
| 2019/06/08 | CH2205 | Male   | Three y/o | Control | Control | Feed Day | 10:20 | 10:00 - 10:59 | Late Morning | Locomotion            |
| 2019/06/08 | CH2206 | Male   | Three y/o | Control | Control | Feed Day | 10:20 | 10:00 - 10:59 | Late Morning | Inactive              |
| 2019/06/08 | CH2205 | Male   | Three y/o | Control | Control | Feed Day | 10:25 | 10:00 - 10:59 | Late Morning | Inactive              |
| 2019/06/08 | CH2206 | Male   | Three y/o | Control | Control | Feed Day | 10:25 | 10:00 - 10:59 | Late Morning | Inactive              |
| 2019/06/08 | CH2205 | Male   | Three y/o | Control | Control | Feed Day | 10:30 | 10:00 - 10:59 | Late Morning | Inactive              |
| 2019/06/08 | CH2206 | Male   | Three y/o | Control | Control | Feed Day | 10:30 | 10:00 - 10:59 | Late Morning | Inactive              |
| 2019/06/08 | CH2205 | Male   | Three y/o | Control | Control | Feed Day | 10:35 | 10:00 - 10:59 | Late Morning | Inactive              |
| 2019/06/08 | CH2206 | Male   | Three y/o | Control | Control | Feed Day | 10:35 | 10:00 - 10:59 | Late Morning | Inactive              |
| 2019/06/08 | CH2205 | Male   | Three y/o | Control | Control | Feed Day | 10:40 | 10:00 - 10:59 | Late Morning | Inactive              |
| 2019/06/08 | CH2206 | Male   | Three y/o | Control | Control | Feed Day | 10:40 | 10:00 - 10:59 | Late Morning | Inactive              |
| 2019/06/08 | CH2205 | Male   | Three y/o | Control | Control | Feed Day | 10:45 | 10:00 - 10:59 | Late Morning | Inactive              |
| 2019/06/08 | CH2206 | Male   | Three y/o | Control | Control | Feed Day | 10:45 | 10:00 - 10:59 | Late Morning | Inactive              |
| 2019/06/11 | CH2207 | Female | Three y/o | Control | Control | Feed Day | 08:35 | 08:00 - 08:59 | Late Morning | Appetitive behaviour  |
| 2019/06/11 | CH2207 | Female | Three y/o | Control | Control | Feed Day | 08:40 | 08:00 - 08:59 | Late Morning | Appetitive behaviour  |



## Dataset S1: BEHAVIOUR\_1

|            |        |        |           |         |         |          |       |               |              |                         |
|------------|--------|--------|-----------|---------|---------|----------|-------|---------------|--------------|-------------------------|
| 2019/06/11 | CH2207 | Female | Three y/o | Control | Control | Feed Day | 08:45 | 08:00 - 08:59 | Late Morning | Appetitive behaviour    |
| 2019/06/11 | CH2207 | Female | Three y/o | Control | Control | Feed Day | 08:50 | 08:00 - 08:59 | Late Morning | Locomotion              |
| 2019/06/11 | CH2207 | Female | Three y/o | Control | Control | Feed Day | 08:55 | 08:00 - 08:59 | Late Morning | Locomotion              |
| 2019/06/11 | CH2207 | Female | Three y/o | Control | Control | Feed Day | 09:00 | 09:00 - 09:59 | Late Morning | Locomotion              |
| 2019/06/11 | CH2207 | Female | Three y/o | Control | Control | Feed Day | 09:05 | 09:00 - 09:59 | Late Morning | Locomotion              |
| 2019/06/11 | CH2207 | Female | Three y/o | Control | Control | Feed Day | 09:10 | 09:00 - 09:59 | Late Morning | Locomotion              |
| 2019/06/11 | CH2207 | Female | Three y/o | Control | Control | Feed Day | 09:15 | 09:00 - 09:59 | Late Morning | Appetitive behaviour    |
| 2019/06/11 | CH2207 | Female | Three y/o | Control | Control | Feed Day | 09:20 | 09:00 - 09:59 | Late Morning | Appetitive behaviour    |
| 2019/06/11 | CH2207 | Female | Three y/o | Control | Control | Feed Day | 09:25 | 09:00 - 09:59 | Late Morning | Inactive                |
| 2019/06/11 | CH2205 | Male   | Three y/o | Control | Control | Feed Day | 09:25 | 09:00 - 09:59 | Late Morning | Appetitive behaviour    |
| 2019/06/11 | CH2206 | Male   | Three y/o | Control | Control | Feed Day | 09:25 | 09:00 - 09:59 | Late Morning | Appetitive behaviour    |
| 2019/06/11 | CH2207 | Female | Three y/o | Control | Control | Feed Day | 09:30 | 09:00 - 09:59 | Late Morning | Inactive                |
| 2019/06/11 | CH2205 | Male   | Three y/o | Control | Control | Feed Day | 09:30 | 09:00 - 09:59 | Late Morning | Vocalisation            |
| 2019/06/11 | CH2206 | Male   | Three y/o | Control | Control | Feed Day | 09:30 | 09:00 - 09:59 | Late Morning | Appetitive behaviour    |
| 2019/06/11 | CH2205 | Male   | Three y/o | Control | Control | Feed Day | 09:35 | 09:00 - 09:59 | Late Morning | Inactive                |
| 2019/06/11 | CH2206 | Male   | Three y/o | Control | Control | Feed Day | 09:35 | 09:00 - 09:59 | Late Morning | Locomotion              |
| 2019/06/11 | CH2205 | Male   | Three y/o | Control | Control | Feed Day | 09:40 | 09:00 - 09:59 | Late Morning | Locomotion              |
| 2019/06/11 | CH2206 | Male   | Three y/o | Control | Control | Feed Day | 09:40 | 09:00 - 09:59 | Late Morning | Locomotion              |
| 2019/06/11 | CH2205 | Male   | Three y/o | Control | Control | Feed Day | 09:45 | 09:00 - 09:59 | Late Morning | Locomotion              |
| 2019/06/11 | CH2206 | Male   | Three y/o | Control | Control | Feed Day | 09:45 | 09:00 - 09:59 | Late Morning | Interspecific behaviour |
| 2019/06/11 | CH2205 | Male   | Three y/o | Control | Control | Feed Day | 09:50 | 09:00 - 09:59 | Late Morning | Inactive                |
| 2019/06/11 | CH2206 | Male   | Three y/o | Control | Control | Feed Day | 09:50 | 09:00 - 09:59 | Late Morning | Inactive                |
| 2019/06/11 | CH2205 | Male   | Three y/o | Control | Control | Feed Day | 09:55 | 09:00 - 09:59 | Late Morning | Inactive                |
| 2019/06/11 | CH2206 | Male   | Three y/o | Control | Control | Feed Day | 09:55 | 09:00 - 09:59 | Late Morning | Inactive                |
| 2019/06/11 | CH2205 | Male   | Three y/o | Control | Control | Feed Day | 10:00 | 10:00 - 10:59 | Late Morning | Inactive                |
| 2019/06/11 | CH2206 | Male   | Three y/o | Control | Control | Feed Day | 10:00 | 10:00 - 10:59 | Late Morning | Inactive                |
| 2019/06/11 | CH2205 | Male   | Three y/o | Control | Control | Feed Day | 10:05 | 10:00 - 10:59 | Late Morning | Affiliative behaviour   |
| 2019/06/11 | CH2206 | Male   | Three y/o | Control | Control | Feed Day | 10:05 | 10:00 - 10:59 | Late Morning | Affiliative behaviour   |
| 2019/06/11 | CH2205 | Male   | Three y/o | Control | Control | Feed Day | 10:10 | 10:00 - 10:59 | Late Morning | Interspecific behaviour |
| 2019/06/11 | CH2206 | Male   | Three y/o | Control | Control | Feed Day | 10:10 | 10:00 - 10:59 | Late Morning | Scent-marking           |
| 2019/06/11 | CH2205 | Male   | Three y/o | Control | Control | Feed Day | 10:15 | 10:00 - 10:59 | Late Morning | Locomotion              |
| 2019/06/11 | CH2206 | Male   | Three y/o | Control | Control | Feed Day | 10:15 | 10:00 - 10:59 | Late Morning | Locomotion              |
| 2019/06/11 | CH2205 | Male   | Three y/o | Control | Control | Feed Day | 10:20 | 10:00 - 10:59 | Late Morning | Inactive                |
| 2019/06/11 | CH2206 | Male   | Three y/o | Control | Control | Feed Day | 10:20 | 10:00 - 10:59 | Late Morning | Inactive                |
| 2019/06/12 | CH2205 | Male   | Three y/o | Control | Control | Feed Day | 08:45 | 08:00 - 08:59 | Late Morning | Locomotion              |
| 2019/06/12 | CH2206 | Male   | Three y/o | Control | Control | Feed Day | 08:45 | 08:00 - 08:59 | Late Morning | Locomotion              |
| 2019/06/12 | CH2205 | Male   | Three y/o | Control | Control | Feed Day | 08:50 | 08:00 - 08:59 | Late Morning | Locomotion              |



## Dataset S1: BEHAVIOUR\_1

|            |        |        |           |         |         |          |       |               |              |                         |
|------------|--------|--------|-----------|---------|---------|----------|-------|---------------|--------------|-------------------------|
| 2019/06/12 | CH2206 | Male   | Three y/o | Control | Control | Feed Day | 08:50 | 08:00 - 08:59 | Late Morning | Olfactory exploration   |
| 2019/06/12 | CH2205 | Male   | Three y/o | Control | Control | Feed Day | 08:55 | 08:00 - 08:59 | Late Morning | Locomotion              |
| 2019/06/12 | CH2206 | Male   | Three y/o | Control | Control | Feed Day | 08:55 | 08:00 - 08:59 | Late Morning | Interspecific behaviour |
| 2019/06/12 | CH2205 | Male   | Three y/o | Control | Control | Feed Day | 09:00 | 09:00 - 09:59 | Late Morning | Attention               |
| 2019/06/12 | CH2206 | Male   | Three y/o | Control | Control | Feed Day | 09:00 | 09:00 - 09:59 | Late Morning | Locomotion              |
| 2019/06/12 | CH2205 | Male   | Three y/o | Control | Control | Feed Day | 09:05 | 09:00 - 09:59 | Late Morning | Scent-marking           |
| 2019/06/12 | CH2206 | Male   | Three y/o | Control | Control | Feed Day | 09:05 | 09:00 - 09:59 | Late Morning | Interspecific behaviour |
| 2019/06/12 | CH2205 | Male   | Three y/o | Control | Control | Feed Day | 09:10 | 09:00 - 09:59 | Late Morning | Locomotion              |
| 2019/06/12 | CH2206 | Male   | Three y/o | Control | Control | Feed Day | 09:10 | 09:00 - 09:59 | Late Morning | Interspecific behaviour |
| 2019/06/12 | CH2205 | Male   | Three y/o | Control | Control | Feed Day | 09:15 | 09:00 - 09:59 | Late Morning | Attention               |
| 2019/06/12 | CH2206 | Male   | Three y/o | Control | Control | Feed Day | 09:15 | 09:00 - 09:59 | Late Morning | Inactive                |
| 2019/06/12 | CH2205 | Male   | Three y/o | Control | Control | Feed Day | 09:20 | 09:00 - 09:59 | Late Morning | Inactive                |
| 2019/06/12 | CH2206 | Male   | Three y/o | Control | Control | Feed Day | 09:20 | 09:00 - 09:59 | Late Morning | Inactive                |
| 2019/06/12 | CH2205 | Male   | Three y/o | Control | Control | Feed Day | 09:25 | 09:00 - 09:59 | Late Morning | Attention               |
| 2019/06/12 | CH2206 | Male   | Three y/o | Control | Control | Feed Day | 09:25 | 09:00 - 09:59 | Late Morning | Attention               |
| 2019/06/12 | CH2205 | Male   | Three y/o | Control | Control | Feed Day | 09:30 | 09:00 - 09:59 | Late Morning | Scent-marking           |
| 2019/06/12 | CH2206 | Male   | Three y/o | Control | Control | Feed Day | 09:30 | 09:00 - 09:59 | Late Morning | Locomotion              |
| 2019/06/12 | CH2205 | Male   | Three y/o | Control | Control | Feed Day | 09:35 | 09:00 - 09:59 | Late Morning | Locomotion              |
| 2019/06/12 | CH2206 | Male   | Three y/o | Control | Control | Feed Day | 09:35 | 09:00 - 09:59 | Late Morning | Interspecific behaviour |
| 2019/06/12 | CH2205 | Male   | Three y/o | Control | Control | Feed Day | 09:40 | 09:00 - 09:59 | Late Morning | Out of sight            |
| 2019/06/12 | CH2206 | Male   | Three y/o | Control | Control | Feed Day | 09:40 | 09:00 - 09:59 | Late Morning | Inactive                |
| 2019/06/12 | CH2207 | Female | Three y/o | Control | Control | Feed Day | 09:45 | 09:00 - 09:59 | Late Morning | Locomotion              |
| 2019/06/12 | CH2207 | Female | Three y/o | Control | Control | Feed Day | 09:50 | 09:00 - 09:59 | Late Morning | Auto-grooming           |
| 2019/06/12 | CH2207 | Female | Three y/o | Control | Control | Feed Day | 09:55 | 09:00 - 09:59 | Late Morning | Attention               |
| 2019/06/12 | CH2207 | Female | Three y/o | Control | Control | Feed Day | 10:00 | 10:00 - 10:59 | Late Morning | Inactive                |
| 2019/06/12 | CH2207 | Female | Three y/o | Control | Control | Feed Day | 10:05 | 10:00 - 10:59 | Late Morning | Scent-marking           |
| 2019/06/12 | CH2207 | Female | Three y/o | Control | Control | Feed Day | 10:10 | 10:00 - 10:59 | Late Morning | Attention               |
| 2019/06/12 | CH2207 | Female | Three y/o | Control | Control | Feed Day | 10:15 | 10:00 - 10:59 | Late Morning | Attention               |
| 2019/06/12 | CH2207 | Female | Three y/o | Control | Control | Feed Day | 10:20 | 10:00 - 10:59 | Late Morning | Attention               |
| 2019/06/12 | CH2207 | Female | Three y/o | Control | Control | Feed Day | 10:25 | 10:00 - 10:59 | Late Morning | Attention               |
| 2019/06/12 | CH2207 | Female | Three y/o | Control | Control | Feed Day | 10:30 | 10:00 - 10:59 | Late Morning | Attention               |
| 2019/06/12 | CH2207 | Female | Three y/o | Control | Control | Feed Day | 10:35 | 10:00 - 10:59 | Late Morning | Attention               |
| 2019/06/12 | CH2207 | Female | Three y/o | Control | Control | Feed Day | 10:40 | 10:00 - 10:59 | Late Morning | Appetitive behaviour    |
| 2019/06/13 | CH2207 | Female | Three y/o | Control | Control | Feed Day | 09:25 | 09:00 - 09:59 | Late Morning | Inactive                |
| 2019/06/13 | CH2207 | Female | Three y/o | Control | Control | Feed Day | 09:30 | 09:00 - 09:59 | Late Morning | Locomotion              |
| 2019/06/13 | CH2207 | Female | Three y/o | Control | Control | Feed Day | 09:35 | 09:00 - 09:59 | Late Morning | Appetitive behaviour    |
| 2019/06/13 | CH2207 | Female | Three y/o | Control | Control | Feed Day | 09:40 | 09:00 - 09:59 | Late Morning | Affiliative behaviour   |



## Dataset S1: BEHAVIOUR\_1

|            |        |        |           |         |         |          |       |               |              |                       |
|------------|--------|--------|-----------|---------|---------|----------|-------|---------------|--------------|-----------------------|
| 2019/06/13 | CH2207 | Female | Three y/o | Control | Control | Feed Day | 09:45 | 09:00 - 09:59 | Late Morning | Agnostic behaviour    |
| 2019/06/13 | CH2207 | Female | Three y/o | Control | Control | Feed Day | 09:50 | 09:00 - 09:59 | Late Morning | Inactive              |
| 2019/06/13 | CH2207 | Female | Three y/o | Control | Control | Feed Day | 09:55 | 09:00 - 09:59 | Late Morning | Inactive              |
| 2019/06/13 | CH2207 | Female | Three y/o | Control | Control | Feed Day | 10:00 | 10:00 - 10:59 | Late Morning | Auto-grooming         |
| 2019/06/13 | CH2207 | Female | Three y/o | Control | Control | Feed Day | 10:05 | 10:00 - 10:59 | Late Morning | Auto-grooming         |
| 2019/06/13 | CH2207 | Female | Three y/o | Control | Control | Feed Day | 10:10 | 10:00 - 10:59 | Late Morning | Inactive              |
| 2019/06/13 | CH2207 | Female | Three y/o | Control | Control | Feed Day | 10:15 | 10:00 - 10:59 | Late Morning | Attention             |
| 2019/06/13 | CH2207 | Female | Three y/o | Control | Control | Feed Day | 10:20 | 10:00 - 10:59 | Late Morning | Inactive              |
| 2019/06/13 | CH2205 | Male   | Three y/o | Control | Control | Feed Day | 10:20 | 10:00 - 10:59 | Late Morning | Attention             |
| 2019/06/13 | CH2206 | Male   | Three y/o | Control | Control | Feed Day | 10:20 | 10:00 - 10:59 | Late Morning | Attention             |
| 2019/06/13 | CH2205 | Male   | Three y/o | Control | Control | Feed Day | 10:25 | 10:00 - 10:59 | Late Morning | Scent-marking         |
| 2019/06/13 | CH2206 | Male   | Three y/o | Control | Control | Feed Day | 10:25 | 10:00 - 10:59 | Late Morning | Inactive              |
| 2019/06/13 | CH2205 | Male   | Three y/o | Control | Control | Feed Day | 10:30 | 10:00 - 10:59 | Late Morning | Inactive              |
| 2019/06/13 | CH2206 | Male   | Three y/o | Control | Control | Feed Day | 10:30 | 10:00 - 10:59 | Late Morning | Inactive              |
| 2019/06/13 | CH2205 | Male   | Three y/o | Control | Control | Feed Day | 10:35 | 10:00 - 10:59 | Late Morning | Inactive              |
| 2019/06/13 | CH2206 | Male   | Three y/o | Control | Control | Feed Day | 10:35 | 10:00 - 10:59 | Late Morning | Inactive              |
| 2019/06/13 | CH2205 | Male   | Three y/o | Control | Control | Feed Day | 10:40 | 10:00 - 10:59 | Late Morning | Attention             |
| 2019/06/13 | CH2206 | Male   | Three y/o | Control | Control | Feed Day | 10:40 | 10:00 - 10:59 | Late Morning | Attention             |
| 2019/06/13 | CH2205 | Male   | Three y/o | Control | Control | Feed Day | 10:45 | 10:00 - 10:59 | Late Morning | Locomotion            |
| 2019/06/13 | CH2206 | Male   | Three y/o | Control | Control | Feed Day | 10:45 | 10:00 - 10:59 | Late Morning | Inactive              |
| 2019/06/13 | CH2205 | Male   | Three y/o | Control | Control | Feed Day | 10:50 | 10:00 - 10:59 | Late Morning | Locomotion            |
| 2019/06/13 | CH2206 | Male   | Three y/o | Control | Control | Feed Day | 10:50 | 10:00 - 10:59 | Late Morning | Locomotion            |
| 2019/06/13 | CH2205 | Male   | Three y/o | Control | Control | Feed Day | 10:55 | 10:00 - 10:59 | Late Morning | Locomotion            |
| 2019/06/13 | CH2206 | Male   | Three y/o | Control | Control | Feed Day | 10:55 | 10:00 - 10:59 | Late Morning | Locomotion            |
| 2019/06/13 | CH2205 | Male   | Three y/o | Control | Control | Feed Day | 11:00 | 11:00 - 11:59 | Late Morning | Locomotion            |
| 2019/06/13 | CH2206 | Male   | Three y/o | Control | Control | Feed Day | 11:00 | 11:00 - 11:59 | Late Morning | Locomotion            |
| 2019/06/13 | CH2205 | Male   | Three y/o | Control | Control | Feed Day | 11:05 | 11:00 - 11:59 | Late Morning | Scent-marking         |
| 2019/06/13 | CH2206 | Male   | Three y/o | Control | Control | Feed Day | 11:05 | 11:00 - 11:59 | Late Morning | Locomotion            |
| 2019/06/13 | CH2205 | Male   | Three y/o | Control | Control | Feed Day | 11:10 | 11:00 - 11:59 | Late Morning | Attention             |
| 2019/06/13 | CH2206 | Male   | Three y/o | Control | Control | Feed Day | 11:10 | 11:00 - 11:59 | Late Morning | Attention             |
| 2019/06/13 | CH2205 | Male   | Three y/o | Control | Control | Feed Day | 11:15 | 11:00 - 11:59 | Late Morning | Attention             |
| 2019/06/13 | CH2206 | Male   | Three y/o | Control | Control | Feed Day | 11:15 | 11:00 - 11:59 | Late Morning | Locomotion            |
| 2019/06/14 | CH2205 | Male   | Three y/o | Control | Control | Feed Day | 08:55 | 08:00 - 08:59 | Late Morning | Locomotion            |
| 2019/06/14 | CH2206 | Male   | Three y/o | Control | Control | Feed Day | 08:55 | 08:00 - 08:59 | Late Morning | Locomotion            |
| 2019/06/14 | CH2205 | Male   | Three y/o | Control | Control | Feed Day | 09:00 | 09:00 - 09:59 | Late Morning | Locomotion            |
| 2019/06/14 | CH2206 | Male   | Three y/o | Control | Control | Feed Day | 09:00 | 09:00 - 09:59 | Late Morning | Locomotion            |
| 2019/06/14 | CH2205 | Male   | Three y/o | Control | Control | Feed Day | 09:05 | 09:00 - 09:59 | Late Morning | Olfactory exploration |



## Dataset S1: BEHAVIOUR\_1

|            |        |        |           |         |         |          |       |               |              |                       |
|------------|--------|--------|-----------|---------|---------|----------|-------|---------------|--------------|-----------------------|
| 2019/06/14 | CH2206 | Male   | Three y/o | Control | Control | Feed Day | 09:05 | 09:00 - 09:59 | Late Morning | Locomotion            |
| 2019/06/14 | CH2205 | Male   | Three y/o | Control | Control | Feed Day | 09:10 | 09:00 - 09:59 | Late Morning | Locomotion            |
| 2019/06/14 | CH2206 | Male   | Three y/o | Control | Control | Feed Day | 09:10 | 09:00 - 09:59 | Late Morning | Scent-marking         |
| 2019/06/14 | CH2205 | Male   | Three y/o | Control | Control | Feed Day | 09:15 | 09:00 - 09:59 | Late Morning | Locomotion            |
| 2019/06/14 | CH2206 | Male   | Three y/o | Control | Control | Feed Day | 09:15 | 09:00 - 09:59 | Late Morning | Attention             |
| 2019/06/14 | CH2205 | Male   | Three y/o | Control | Control | Feed Day | 09:20 | 09:00 - 09:59 | Late Morning | Olfactory exploration |
| 2019/06/14 | CH2206 | Male   | Three y/o | Control | Control | Feed Day | 09:20 | 09:00 - 09:59 | Late Morning | Scent-marking         |
| 2019/06/14 | CH2205 | Male   | Three y/o | Control | Control | Feed Day | 09:25 | 09:00 - 09:59 | Late Morning | Inactive              |
| 2019/06/14 | CH2206 | Male   | Three y/o | Control | Control | Feed Day | 09:25 | 09:00 - 09:59 | Late Morning | Inactive              |
| 2019/06/14 | CH2205 | Male   | Three y/o | Control | Control | Feed Day | 09:30 | 09:00 - 09:59 | Late Morning | Inactive              |
| 2019/06/14 | CH2206 | Male   | Three y/o | Control | Control | Feed Day | 09:30 | 09:00 - 09:59 | Late Morning | Inactive              |
| 2019/06/14 | CH2205 | Male   | Three y/o | Control | Control | Feed Day | 09:35 | 09:00 - 09:59 | Late Morning | Inactive              |
| 2019/06/14 | CH2206 | Male   | Three y/o | Control | Control | Feed Day | 09:35 | 09:00 - 09:59 | Late Morning | Inactive              |
| 2019/06/14 | CH2205 | Male   | Three y/o | Control | Control | Feed Day | 09:40 | 09:00 - 09:59 | Late Morning | Inactive              |
| 2019/06/14 | CH2206 | Male   | Three y/o | Control | Control | Feed Day | 09:40 | 09:00 - 09:59 | Late Morning | Inactive              |
| 2019/06/14 | CH2205 | Male   | Three y/o | Control | Control | Feed Day | 09:45 | 09:00 - 09:59 | Late Morning | Inactive              |
| 2019/06/14 | CH2206 | Male   | Three y/o | Control | Control | Feed Day | 09:45 | 09:00 - 09:59 | Late Morning | Inactive              |
| 2019/06/14 | CH2205 | Male   | Three y/o | Control | Control | Feed Day | 09:50 | 09:00 - 09:59 | Late Morning | Inactive              |
| 2019/06/14 | CH2206 | Male   | Three y/o | Control | Control | Feed Day | 09:50 | 09:00 - 09:59 | Late Morning | Inactive              |
| 2019/06/14 | CH2207 | Female | Three y/o | Control | Control | Feed Day | 11:00 | 11:00 - 11:59 | Late Morning | Attention             |
| 2019/06/14 | CH2207 | Female | Three y/o | Control | Control | Feed Day | 11:05 | 11:00 - 11:59 | Late Morning | Appetitive behaviour  |
| 2019/06/14 | CH2207 | Female | Three y/o | Control | Control | Feed Day | 11:10 | 11:00 - 11:59 | Late Morning | Locomotion            |
| 2019/06/14 | CH2207 | Female | Three y/o | Control | Control | Feed Day | 11:15 | 11:00 - 11:59 | Late Morning | Locomotion            |
| 2019/06/14 | CH2207 | Female | Three y/o | Control | Control | Feed Day | 11:20 | 11:00 - 11:59 | Late Morning | Appetitive behaviour  |
| 2019/06/14 | CH2207 | Female | Three y/o | Control | Control | Feed Day | 11:25 | 11:00 - 11:59 | Late Morning | Appetitive behaviour  |
| 2019/06/14 | CH2207 | Female | Three y/o | Control | Control | Feed Day | 11:30 | 11:00 - 11:59 | Late Morning | Inactive              |
| 2019/06/14 | CH2207 | Female | Three y/o | Control | Control | Feed Day | 11:35 | 11:00 - 11:59 | Late Morning | Auto-grooming         |
| 2019/06/14 | CH2207 | Female | Three y/o | Control | Control | Feed Day | 11:40 | 11:00 - 11:59 | Late Morning | Inactive              |
| 2019/06/14 | CH2207 | Female | Three y/o | Control | Control | Feed Day | 11:45 | 11:00 - 11:59 | Late Morning | Appetitive behaviour  |
| 2019/06/14 | CH2207 | Female | Three y/o | Control | Control | Feed Day | 11:50 | 11:00 - 11:59 | Late Morning | Inactive              |
| 2019/06/14 | CH2207 | Female | Three y/o | Control | Control | Feed Day | 11:55 | 11:00 - 11:59 | Late Morning | Inactive              |
| 2019/06/15 | CH2207 | Female | Three y/o | Control | Control | Feed Day | 09:05 | 09:00 - 09:59 | Late Morning | Attention             |
| 2019/06/15 | CH2207 | Female | Three y/o | Control | Control | Feed Day | 09:10 | 09:00 - 09:59 | Late Morning | Locomotion            |
| 2019/06/15 | CH2207 | Female | Three y/o | Control | Control | Feed Day | 09:15 | 09:00 - 09:59 | Late Morning | Agnostic behaviour    |
| 2019/06/15 | CH2207 | Female | Three y/o | Control | Control | Feed Day | 09:20 | 09:00 - 09:59 | Late Morning | Auto-grooming         |
| 2019/06/15 | CH2207 | Female | Three y/o | Control | Control | Feed Day | 09:25 | 09:00 - 09:59 | Late Morning | Auto-grooming         |
| 2019/06/15 | CH2207 | Female | Three y/o | Control | Control | Feed Day | 09:30 | 09:00 - 09:59 | Late Morning | Appetitive behaviour  |



## Dataset S1: BEHAVIOUR\_1

|            |        |        |           |         |         |          |       |               |              |                         |
|------------|--------|--------|-----------|---------|---------|----------|-------|---------------|--------------|-------------------------|
| 2019/06/15 | CH2207 | Female | Three y/o | Control | Control | Feed Day | 09:35 | 09:00 - 09:59 | Late Morning | Auto-grooming           |
| 2019/06/15 | CH2207 | Female | Three y/o | Control | Control | Feed Day | 09:40 | 09:00 - 09:59 | Late Morning | Appetitive behaviour    |
| 2019/06/15 | CH2207 | Female | Three y/o | Control | Control | Feed Day | 09:45 | 09:00 - 09:59 | Late Morning | Appetitive behaviour    |
| 2019/06/15 | CH2207 | Female | Three y/o | Control | Control | Feed Day | 09:50 | 09:00 - 09:59 | Late Morning | Appetitive behaviour    |
| 2019/06/15 | CH2207 | Female | Three y/o | Control | Control | Feed Day | 09:55 | 09:00 - 09:59 | Late Morning | Inactive                |
| 2019/06/15 | CH2207 | Female | Three y/o | Control | Control | Feed Day | 10:00 | 10:00 - 10:59 | Late Morning | Appetitive behaviour    |
| 2019/06/15 | CH2205 | Male   | Three y/o | Control | Control | Feed Day | 10:00 | 10:00 - 10:59 | Late Morning | Vocalisation            |
| 2019/06/15 | CH2206 | Male   | Three y/o | Control | Control | Feed Day | 10:00 | 10:00 - 10:59 | Late Morning | Locomotion              |
| 2019/06/15 | CH2205 | Male   | Three y/o | Control | Control | Feed Day | 10:05 | 10:00 - 10:59 | Late Morning | Locomotion              |
| 2019/06/15 | CH2206 | Male   | Three y/o | Control | Control | Feed Day | 10:05 | 10:00 - 10:59 | Late Morning | Olfactory exploration   |
| 2019/06/15 | CH2205 | Male   | Three y/o | Control | Control | Feed Day | 10:10 | 10:00 - 10:59 | Late Morning | Locomotion              |
| 2019/06/15 | CH2206 | Male   | Three y/o | Control | Control | Feed Day | 10:10 | 10:00 - 10:59 | Late Morning | Interspecific behaviour |
| 2019/06/15 | CH2205 | Male   | Three y/o | Control | Control | Feed Day | 10:15 | 10:00 - 10:59 | Late Morning | Interspecific behaviour |
| 2019/06/15 | CH2206 | Male   | Three y/o | Control | Control | Feed Day | 10:15 | 10:00 - 10:59 | Late Morning | Interspecific behaviour |
| 2019/06/15 | CH2205 | Male   | Three y/o | Control | Control | Feed Day | 10:20 | 10:00 - 10:59 | Late Morning | Locomotion              |
| 2019/06/15 | CH2206 | Male   | Three y/o | Control | Control | Feed Day | 10:20 | 10:00 - 10:59 | Late Morning | Inactive                |
| 2019/06/15 | CH2205 | Male   | Three y/o | Control | Control | Feed Day | 10:25 | 10:00 - 10:59 | Late Morning | Inactive                |
| 2019/06/15 | CH2206 | Male   | Three y/o | Control | Control | Feed Day | 10:25 | 10:00 - 10:59 | Late Morning | Inactive                |
| 2019/06/15 | CH2205 | Male   | Three y/o | Control | Control | Feed Day | 10:30 | 10:00 - 10:59 | Late Morning | Auto-grooming           |
| 2019/06/15 | CH2206 | Male   | Three y/o | Control | Control | Feed Day | 10:30 | 10:00 - 10:59 | Late Morning | Inactive                |
| 2019/06/15 | CH2205 | Male   | Three y/o | Control | Control | Feed Day | 10:35 | 10:00 - 10:59 | Late Morning | Inactive                |
| 2019/06/15 | CH2206 | Male   | Three y/o | Control | Control | Feed Day | 10:35 | 10:00 - 10:59 | Late Morning | Inactive                |
| 2019/06/15 | CH2205 | Male   | Three y/o | Control | Control | Feed Day | 10:40 | 10:00 - 10:59 | Late Morning | Inactive                |
| 2019/06/15 | CH2206 | Male   | Three y/o | Control | Control | Feed Day | 10:40 | 10:00 - 10:59 | Late Morning | Inactive                |
| 2019/06/15 | CH2205 | Male   | Three y/o | Control | Control | Feed Day | 10:45 | 10:00 - 10:59 | Late Morning | Inactive                |
| 2019/06/15 | CH2206 | Male   | Three y/o | Control | Control | Feed Day | 10:45 | 10:00 - 10:59 | Late Morning | Inactive                |
| 2019/06/15 | CH2205 | Male   | Three y/o | Control | Control | Feed Day | 10:50 | 10:00 - 10:59 | Late Morning | Inactive                |
| 2019/06/15 | CH2206 | Male   | Three y/o | Control | Control | Feed Day | 10:50 | 10:00 - 10:59 | Late Morning | Inactive                |
| 2019/06/15 | CH2205 | Male   | Three y/o | Control | Control | Feed Day | 10:55 | 10:00 - 10:59 | Late Morning | Inactive                |
| 2019/06/15 | CH2206 | Male   | Three y/o | Control | Control | Feed Day | 10:55 | 10:00 - 10:59 | Late Morning | Inactive                |
| 2019/06/18 | CH2205 | Male   | Three y/o | Control | Control | Feed Day | 10:10 | 10:00 - 10:59 | Late Morning | Olfactory exploration   |
| 2019/06/18 | CH2206 | Male   | Three y/o | Control | Control | Feed Day | 10:10 | 10:00 - 10:59 | Late Morning | Olfactory exploration   |
| 2019/06/18 | CH2205 | Male   | Three y/o | Control | Control | Feed Day | 10:15 | 10:00 - 10:59 | Late Morning | Attention               |
| 2019/06/18 | CH2206 | Male   | Three y/o | Control | Control | Feed Day | 10:15 | 10:00 - 10:59 | Late Morning | Locomotion              |
| 2019/06/18 | CH2205 | Male   | Three y/o | Control | Control | Feed Day | 10:20 | 10:00 - 10:59 | Late Morning | Inactive                |
| 2019/06/18 | CH2206 | Male   | Three y/o | Control | Control | Feed Day | 10:20 | 10:00 - 10:59 | Late Morning | Inactive                |
| 2019/06/18 | CH2205 | Male   | Three y/o | Control | Control | Feed Day | 10:25 | 10:00 - 10:59 | Late Morning | Inactive                |



## Dataset S1: BEHAVIOUR\_1

|            |        |        |           |         |         |          |       |               |              |                         |
|------------|--------|--------|-----------|---------|---------|----------|-------|---------------|--------------|-------------------------|
| 2019/06/18 | CH2206 | Male   | Three y/o | Control | Control | Feed Day | 10:25 | 10:00 - 10:59 | Late Morning | Inactive                |
| 2019/06/18 | CH2205 | Male   | Three y/o | Control | Control | Feed Day | 10:30 | 10:00 - 10:59 | Late Morning | Inactive                |
| 2019/06/18 | CH2206 | Male   | Three y/o | Control | Control | Feed Day | 10:30 | 10:00 - 10:59 | Late Morning | Locomotion              |
| 2019/06/18 | CH2205 | Male   | Three y/o | Control | Control | Feed Day | 10:35 | 10:00 - 10:59 | Late Morning | Inactive                |
| 2019/06/18 | CH2206 | Male   | Three y/o | Control | Control | Feed Day | 10:35 | 10:00 - 10:59 | Late Morning | Inactive                |
| 2019/06/18 | CH2205 | Male   | Three y/o | Control | Control | Feed Day | 10:40 | 10:00 - 10:59 | Late Morning | Inactive                |
| 2019/06/18 | CH2206 | Male   | Three y/o | Control | Control | Feed Day | 10:40 | 10:00 - 10:59 | Late Morning | Inactive                |
| 2019/06/18 | CH2205 | Male   | Three y/o | Control | Control | Feed Day | 10:45 | 10:00 - 10:59 | Late Morning | Inactive                |
| 2019/06/18 | CH2206 | Male   | Three y/o | Control | Control | Feed Day | 10:45 | 10:00 - 10:59 | Late Morning | Inactive                |
| 2019/06/18 | CH2205 | Male   | Three y/o | Control | Control | Feed Day | 10:50 | 10:00 - 10:59 | Late Morning | Inactive                |
| 2019/06/18 | CH2206 | Male   | Three y/o | Control | Control | Feed Day | 10:50 | 10:00 - 10:59 | Late Morning | Inactive                |
| 2019/06/18 | CH2205 | Male   | Three y/o | Control | Control | Feed Day | 10:55 | 10:00 - 10:59 | Late Morning | Inactive                |
| 2019/06/18 | CH2206 | Male   | Three y/o | Control | Control | Feed Day | 10:55 | 10:00 - 10:59 | Late Morning | Inactive                |
| 2019/06/18 | CH2205 | Male   | Three y/o | Control | Control | Feed Day | 11:00 | 11:00 - 11:59 | Late Morning | Inactive                |
| 2019/06/18 | CH2206 | Male   | Three y/o | Control | Control | Feed Day | 11:00 | 11:00 - 11:59 | Late Morning | Interspecific behaviour |
| 2019/06/18 | CH2205 | Male   | Three y/o | Control | Control | Feed Day | 11:05 | 11:00 - 11:59 | Late Morning | Inactive                |
| 2019/06/18 | CH2206 | Male   | Three y/o | Control | Control | Feed Day | 11:05 | 11:00 - 11:59 | Late Morning | Interspecific behaviour |
| 2019/06/18 | CH2207 | Female | Three y/o | Control | Control | Feed Day | 11:05 | 11:00 - 11:59 | Late Morning | Scent-marking           |
| 2019/06/18 | CH2207 | Female | Three y/o | Control | Control | Feed Day | 11:10 | 11:00 - 11:59 | Late Morning | Scent-marking           |
| 2019/06/18 | CH2207 | Female | Three y/o | Control | Control | Feed Day | 11:15 | 11:00 - 11:59 | Late Morning | Locomotion              |
| 2019/06/18 | CH2207 | Female | Three y/o | Control | Control | Feed Day | 11:20 | 11:00 - 11:59 | Late Morning | Appetitive behaviour    |
| 2019/06/18 | CH2207 | Female | Three y/o | Control | Control | Feed Day | 11:25 | 11:00 - 11:59 | Late Morning | Appetitive behaviour    |
| 2019/06/18 | CH2207 | Female | Three y/o | Control | Control | Feed Day | 11:30 | 11:00 - 11:59 | Late Morning | Appetitive behaviour    |
| 2019/06/18 | CH2207 | Female | Three y/o | Control | Control | Feed Day | 11:35 | 11:00 - 11:59 | Late Morning | Inactive                |
| 2019/06/18 | CH2207 | Female | Three y/o | Control | Control | Feed Day | 11:40 | 11:00 - 11:59 | Late Morning | Inactive                |
| 2019/06/18 | CH2207 | Female | Three y/o | Control | Control | Feed Day | 11:45 | 11:00 - 11:59 | Late Morning | Inactive                |
| 2019/06/18 | CH2207 | Female | Three y/o | Control | Control | Feed Day | 11:50 | 11:00 - 11:59 | Late Morning | Inactive                |
| 2019/06/18 | CH2207 | Female | Three y/o | Control | Control | Feed Day | 11:55 | 11:00 - 11:59 | Late Morning | Inactive                |
| 2019/06/18 | CH2207 | Female | Three y/o | Control | Control | Feed Day | 12:00 | 12:00 - 12:59 | Afternoon    | Inactive                |
| 2019/06/19 | CH2207 | Female | Three y/o | Control | Control | Feed Day | 08:45 | 08:00 - 08:59 | Late Morning | Attention               |
| 2019/06/19 | CH2207 | Female | Three y/o | Control | Control | Feed Day | 08:50 | 08:00 - 08:59 | Late Morning | Attention               |
| 2019/06/19 | CH2207 | Female | Three y/o | Control | Control | Feed Day | 08:55 | 08:00 - 08:59 | Late Morning | Attention               |
| 2019/06/19 | CH2207 | Female | Three y/o | Control | Control | Feed Day | 09:00 | 09:00 - 09:59 | Late Morning | Inactive                |
| 2019/06/19 | CH2207 | Female | Three y/o | Control | Control | Feed Day | 09:05 | 09:00 - 09:59 | Late Morning | Scent-marking           |
| 2019/06/19 | CH2207 | Female | Three y/o | Control | Control | Feed Day | 09:10 | 09:00 - 09:59 | Late Morning | Auto-grooming           |
| 2019/06/19 | CH2207 | Female | Three y/o | Control | Control | Feed Day | 09:15 | 09:00 - 09:59 | Late Morning | Auto-grooming           |
| 2019/06/19 | CH2207 | Female | Three y/o | Control | Control | Feed Day | 09:20 | 09:00 - 09:59 | Late Morning | Auto-grooming           |



## Dataset S1: BEHAVIOUR\_1

|            |        |        |           |                  |           |          |       |               |              |                         |
|------------|--------|--------|-----------|------------------|-----------|----------|-------|---------------|--------------|-------------------------|
| 2019/06/19 | CH2207 | Female | Three y/o | Control          | Control   | Feed Day | 09:25 | 09:00 - 09:59 | Late Morning | Locomotion              |
| 2019/06/19 | CH2207 | Female | Three y/o | Control          | Control   | Feed Day | 09:30 | 09:00 - 09:59 | Late Morning | Attention               |
| 2019/06/19 | CH2207 | Female | Three y/o | Control          | Control   | Feed Day | 09:35 | 09:00 - 09:59 | Late Morning | Locomotion              |
| 2019/06/19 | CH2207 | Female | Three y/o | Control          | Control   | Feed Day | 09:40 | 09:00 - 09:59 | Late Morning | Inactive                |
| 2019/06/19 | CH2205 | Male   | Three y/o | Control          | Control   | Feed Day | 09:45 | 09:00 - 09:59 | Late Morning | Inactive                |
| 2019/06/19 | CH2206 | Male   | Three y/o | Control          | Control   | Feed Day | 09:45 | 09:00 - 09:59 | Late Morning | Olfactory exploration   |
| 2019/06/19 | CH2205 | Male   | Three y/o | Control          | Control   | Feed Day | 09:50 | 09:00 - 09:59 | Late Morning | Affiliative behaviour   |
| 2019/06/19 | CH2206 | Male   | Three y/o | Control          | Control   | Feed Day | 09:50 | 09:00 - 09:59 | Late Morning | Affiliative behaviour   |
| 2019/06/19 | CH2205 | Male   | Three y/o | Control          | Control   | Feed Day | 09:55 | 09:00 - 09:59 | Late Morning | Locomotion              |
| 2019/06/19 | CH2206 | Male   | Three y/o | Control          | Control   | Feed Day | 09:55 | 09:00 - 09:59 | Late Morning | Affiliative behaviour   |
| 2019/06/19 | CH2205 | Male   | Three y/o | Control          | Control   | Feed Day | 10:00 | 10:00 - 10:59 | Late Morning | Scent-marking           |
| 2019/06/19 | CH2206 | Male   | Three y/o | Control          | Control   | Feed Day | 10:00 | 10:00 - 10:59 | Late Morning | Auto-grooming           |
| 2019/06/19 | CH2205 | Male   | Three y/o | Control          | Control   | Feed Day | 10:05 | 10:00 - 10:59 | Late Morning | Inactive                |
| 2019/06/19 | CH2206 | Male   | Three y/o | Control          | Control   | Feed Day | 10:05 | 10:00 - 10:59 | Late Morning | Inactive                |
| 2019/06/19 | CH2205 | Male   | Three y/o | Control          | Control   | Feed Day | 10:10 | 10:00 - 10:59 | Late Morning | Inactive                |
| 2019/06/19 | CH2206 | Male   | Three y/o | Control          | Control   | Feed Day | 10:10 | 10:00 - 10:59 | Late Morning | Inactive                |
| 2019/06/19 | CH2205 | Male   | Three y/o | Control          | Control   | Feed Day | 10:15 | 10:00 - 10:59 | Late Morning | Attention               |
| 2019/06/19 | CH2206 | Male   | Three y/o | Control          | Control   | Feed Day | 10:15 | 10:00 - 10:59 | Late Morning | Inactive                |
| 2019/06/19 | CH2205 | Male   | Three y/o | Control          | Control   | Feed Day | 10:20 | 10:00 - 10:59 | Late Morning | Inactive                |
| 2019/06/19 | CH2206 | Male   | Three y/o | Control          | Control   | Feed Day | 10:20 | 10:00 - 10:59 | Late Morning | Olfactory exploration   |
| 2019/06/19 | CH2205 | Male   | Three y/o | Control          | Control   | Feed Day | 10:25 | 10:00 - 10:59 | Late Morning | Interspecific behaviour |
| 2019/06/19 | CH2206 | Male   | Three y/o | Control          | Control   | Feed Day | 10:25 | 10:00 - 10:59 | Late Morning | Inactive                |
| 2019/06/19 | CH2205 | Male   | Three y/o | Control          | Control   | Feed Day | 10:30 | 10:00 - 10:59 | Late Morning | Interspecific behaviour |
| 2019/06/19 | CH2206 | Male   | Three y/o | Control          | Control   | Feed Day | 10:30 | 10:00 - 10:59 | Late Morning | Inactive                |
| 2019/06/19 | CH2205 | Male   | Three y/o | Control          | Control   | Feed Day | 10:35 | 10:00 - 10:59 | Late Morning | Inactive                |
| 2019/06/19 | CH2206 | Male   | Three y/o | Control          | Control   | Feed Day | 10:35 | 10:00 - 10:59 | Late Morning | Inactive                |
| 2019/06/19 | CH2205 | Male   | Three y/o | Control          | Control   | Feed Day | 10:40 | 10:00 - 10:59 | Late Morning | Inactive                |
| 2019/06/19 | CH2206 | Male   | Three y/o | Control          | Control   | Feed Day | 10:40 | 10:00 - 10:59 | Late Morning | Inactive                |
| 2019/07/09 | CH2271 | Male   | Two y/o   | Treatment (Wk 1) | Treatment | Feed Day | 11:35 | 11:00 - 11:59 | Late Morning | Locomotion              |
| 2019/07/09 | CH2271 | Male   | Two y/o   | Treatment (Wk 1) | Treatment | Feed Day | 11:40 | 11:00 - 11:59 | Late Morning | Interspecific behaviour |
| 2019/07/09 | CH2271 | Male   | Two y/o   | Treatment (Wk 1) | Treatment | Feed Day | 11:45 | 11:00 - 11:59 | Late Morning | Interspecific behaviour |
| 2019/07/09 | CH2271 | Male   | Two y/o   | Treatment (Wk 1) | Treatment | Feed Day | 11:50 | 11:00 - 11:59 | Late Morning | Scent-marking           |
| 2019/07/09 | CH2271 | Male   | Two y/o   | Treatment (Wk 1) | Treatment | Feed Day | 11:55 | 11:00 - 11:59 | Late Morning | Interspecific behaviour |
| 2019/07/09 | CH2271 | Male   | Two y/o   | Treatment (Wk 1) | Treatment | Feed Day | 12:00 | 12:00 - 12:59 | Afternoon    | Inactive                |
| 2019/07/09 | CH2271 | Male   | Two y/o   | Treatment (Wk 1) | Treatment | Feed Day | 12:05 | 12:00 - 12:59 | Afternoon    | Interspecific behaviour |
| 2019/07/09 | CH2271 | Male   | Two y/o   | Treatment (Wk 1) | Treatment | Feed Day | 12:10 | 12:00 - 12:59 | Afternoon    | Inactive                |
| 2019/07/09 | CH2271 | Male   | Two y/o   | Treatment (Wk 1) | Treatment | Feed Day | 12:15 | 12:00 - 12:59 | Afternoon    | Interspecific behaviour |



## Dataset S1: BEHAVIOUR\_1

|            |        |      |         |                  |           |          |       |               |              |                         |
|------------|--------|------|---------|------------------|-----------|----------|-------|---------------|--------------|-------------------------|
| 2019/07/09 | CH2271 | Male | Two y/o | Treatment (Wk 1) | Treatment | Feed Day | 12:20 | 12:00 - 12:59 | Afternoon    | Interspecific behaviour |
| 2019/07/09 | CH2271 | Male | Two y/o | Treatment (Wk 1) | Treatment | Feed Day | 12:25 | 12:00 - 12:59 | Afternoon    | Inactive                |
| 2019/07/09 | CH2271 | Male | Two y/o | Treatment (Wk 1) | Treatment | Feed Day | 12:30 | 12:00 - 12:59 | Afternoon    | Interspecific behaviour |
| 2019/07/10 | CH2271 | Male | Two y/o | Treatment (Wk 1) | Treatment | Fast Day | 11:55 | 11:00 - 11:59 | Late Morning | Interspecific behaviour |
| 2019/07/10 | CH2271 | Male | Two y/o | Treatment (Wk 1) | Treatment | Fast Day | 12:00 | 12:00 - 12:59 | Afternoon    | Affiliative behaviour   |
| 2019/07/10 | CH2271 | Male | Two y/o | Treatment (Wk 1) | Treatment | Fast Day | 12:05 | 12:00 - 12:59 | Afternoon    | Inactive                |
| 2019/07/10 | CH2271 | Male | Two y/o | Treatment (Wk 1) | Treatment | Fast Day | 12:10 | 12:00 - 12:59 | Afternoon    | Inactive                |
| 2019/07/10 | CH2271 | Male | Two y/o | Treatment (Wk 1) | Treatment | Fast Day | 12:15 | 12:00 - 12:59 | Afternoon    | Inactive                |
| 2019/07/10 | CH2271 | Male | Two y/o | Treatment (Wk 1) | Treatment | Fast Day | 12:20 | 12:00 - 12:59 | Afternoon    | Locomotion              |
| 2019/07/10 | CH2271 | Male | Two y/o | Treatment (Wk 1) | Treatment | Fast Day | 12:25 | 12:00 - 12:59 | Afternoon    | Inactive                |
| 2019/07/10 | CH2271 | Male | Two y/o | Treatment (Wk 1) | Treatment | Fast Day | 12:30 | 12:00 - 12:59 | Afternoon    | Inactive                |
| 2019/07/10 | CH2271 | Male | Two y/o | Treatment (Wk 1) | Treatment | Fast Day | 12:35 | 12:00 - 12:59 | Afternoon    | Inactive                |
| 2019/07/10 | CH2271 | Male | Two y/o | Treatment (Wk 1) | Treatment | Fast Day | 12:40 | 12:00 - 12:59 | Afternoon    | Scent-marking           |
| 2019/07/10 | CH2271 | Male | Two y/o | Treatment (Wk 1) | Treatment | Fast Day | 12:45 | 12:00 - 12:59 | Afternoon    | Attention               |
| 2019/07/10 | CH2271 | Male | Two y/o | Treatment (Wk 1) | Treatment | Fast Day | 12:50 | 12:00 - 12:59 | Afternoon    | Inactive                |
| 2019/07/11 | CH2271 | Male | Two y/o | Treatment (Wk 1) | Treatment | Feed Day | 08:35 | 08:00 - 08:59 | Late Morning | Interspecific behaviour |
| 2019/07/11 | CH2271 | Male | Two y/o | Treatment (Wk 1) | Treatment | Feed Day | 08:40 | 08:00 - 08:59 | Late Morning | Locomotion              |
| 2019/07/11 | CH2271 | Male | Two y/o | Treatment (Wk 1) | Treatment | Feed Day | 08:45 | 08:00 - 08:59 | Late Morning | Scent-marking           |
| 2019/07/11 | CH2271 | Male | Two y/o | Treatment (Wk 1) | Treatment | Feed Day | 08:50 | 08:00 - 08:59 | Late Morning | Interspecific behaviour |
| 2019/07/11 | CH2271 | Male | Two y/o | Treatment (Wk 1) | Treatment | Feed Day | 08:55 | 08:00 - 08:59 | Late Morning | Appetitive behaviour    |
| 2019/07/11 | CH2271 | Male | Two y/o | Treatment (Wk 1) | Treatment | Feed Day | 09:00 | 09:00 - 09:59 | Late Morning | Appetitive behaviour    |
| 2019/07/11 | CH2271 | Male | Two y/o | Treatment (Wk 1) | Treatment | Feed Day | 09:05 | 09:00 - 09:59 | Late Morning | Interspecific behaviour |
| 2019/07/11 | CH2271 | Male | Two y/o | Treatment (Wk 1) | Treatment | Feed Day | 09:10 | 09:00 - 09:59 | Late Morning | Appetitive behaviour    |
| 2019/07/11 | CH2271 | Male | Two y/o | Treatment (Wk 1) | Treatment | Feed Day | 09:15 | 09:00 - 09:59 | Late Morning | Appetitive behaviour    |
| 2019/07/11 | CH2271 | Male | Two y/o | Treatment (Wk 1) | Treatment | Feed Day | 09:20 | 09:00 - 09:59 | Late Morning | Scent-marking           |
| 2019/07/11 | CH2271 | Male | Two y/o | Treatment (Wk 1) | Treatment | Feed Day | 09:25 | 09:00 - 09:59 | Late Morning | Interspecific behaviour |
| 2019/07/11 | CH2271 | Male | Two y/o | Treatment (Wk 1) | Treatment | Feed Day | 09:30 | 09:00 - 09:59 | Late Morning | Locomotion              |
| 2019/07/12 | CH2271 | Male | Two y/o | Treatment (Wk 1) | Treatment | Feed Day | 08:40 | 08:00 - 08:59 | Late Morning | Interspecific behaviour |
| 2019/07/12 | CH2271 | Male | Two y/o | Treatment (Wk 1) | Treatment | Feed Day | 08:45 | 08:00 - 08:59 | Late Morning | Affiliative behaviour   |
| 2019/07/12 | CH2271 | Male | Two y/o | Treatment (Wk 1) | Treatment | Feed Day | 08:50 | 08:00 - 08:59 | Late Morning | Attention               |
| 2019/07/12 | CH2271 | Male | Two y/o | Treatment (Wk 1) | Treatment | Feed Day | 08:55 | 08:00 - 08:59 | Late Morning | Attention               |
| 2019/07/12 | CH2271 | Male | Two y/o | Treatment (Wk 1) | Treatment | Feed Day | 09:00 | 09:00 - 09:59 | Late Morning | Locomotion              |
| 2019/07/12 | CH2271 | Male | Two y/o | Treatment (Wk 1) | Treatment | Feed Day | 09:05 | 08:00 - 08:59 | Late Morning | Locomotion              |
| 2019/07/12 | CH2271 | Male | Two y/o | Treatment (Wk 1) | Treatment | Feed Day | 09:10 | 08:00 - 08:59 | Late Morning | Locomotion              |
| 2019/07/12 | CH2271 | Male | Two y/o | Treatment (Wk 1) | Treatment | Feed Day | 09:15 | 09:00 - 09:59 | Late Morning | Locomotion              |
| 2019/07/12 | CH2271 | Male | Two y/o | Treatment (Wk 1) | Treatment | Feed Day | 09:20 | 09:00 - 09:59 | Late Morning | Locomotion              |
| 2019/07/12 | CH2271 | Male | Two y/o | Treatment (Wk 1) | Treatment | Feed Day | 09:25 | 09:00 - 09:59 | Late Morning | Locomotion              |



## Dataset S1: BEHAVIOUR\_1

[illegible]



## Dataset S1: BEHAVIOUR\_1

|            |        |      |         |                  |           |          |       |               |              |                         |
|------------|--------|------|---------|------------------|-----------|----------|-------|---------------|--------------|-------------------------|
| 2019/07/17 | CH2271 | Male | Two y/o | Treatment (Wk 2) | Treatment | Fast Day | 09:45 | 09:00 - 09:59 | Late Morning | Locomotion              |
| 2019/07/18 | CH2271 | Male | Two y/o | Treatment (Wk 2) | Treatment | Feed Day | 09:55 | 09:00 - 09:59 | Late Morning | Affiliative behaviour   |
| 2019/07/18 | CH2271 | Male | Two y/o | Treatment (Wk 2) | Treatment | Feed Day | 10:00 | 10:00 - 10:59 | Late Morning | Interspecific behaviour |
| 2019/07/18 | CH2271 | Male | Two y/o | Treatment (Wk 2) | Treatment | Feed Day | 10:05 | 10:00 - 10:59 | Late Morning | Inactive                |
| 2019/07/18 | CH2271 | Male | Two y/o | Treatment (Wk 2) | Treatment | Feed Day | 10:10 | 10:00 - 10:59 | Late Morning | Inactive                |
| 2019/07/18 | CH2271 | Male | Two y/o | Treatment (Wk 2) | Treatment | Feed Day | 10:15 | 10:00 - 10:59 | Late Morning | Inactive                |
| 2019/07/18 | CH2271 | Male | Two y/o | Treatment (Wk 2) | Treatment | Feed Day | 10:20 | 10:00 - 10:59 | Late Morning | Inactive                |
| 2019/07/18 | CH2271 | Male | Two y/o | Treatment (Wk 2) | Treatment | Feed Day | 10:25 | 10:00 - 10:59 | Late Morning | Inactive                |
| 2019/07/18 | CH2271 | Male | Two y/o | Treatment (Wk 2) | Treatment | Feed Day | 10:30 | 10:00 - 10:59 | Late Morning | Attention               |
| 2019/07/18 | CH2271 | Male | Two y/o | Treatment (Wk 2) | Treatment | Feed Day | 10:35 | 10:00 - 10:59 | Late Morning | Inactive                |
| 2019/07/19 | CH2271 | Male | Two y/o | Treatment (Wk 2) | Treatment | Feed Day | 09:30 | 09:00 - 09:59 | Late Morning | Appetitive behaviour    |
| 2019/07/19 | CH2271 | Male | Two y/o | Treatment (Wk 2) | Treatment | Feed Day | 09:35 | 09:00 - 09:59 | Late Morning | Appetitive behaviour    |
| 2019/07/19 | CH2271 | Male | Two y/o | Treatment (Wk 2) | Treatment | Feed Day | 09:40 | 09:00 - 09:59 | Late Morning | Affiliative behaviour   |
| 2019/07/19 | CH2271 | Male | Two y/o | Treatment (Wk 2) | Treatment | Feed Day | 09:45 | 09:00 - 09:59 | Late Morning | Appetitive behaviour    |
| 2019/07/19 | CH2271 | Male | Two y/o | Treatment (Wk 2) | Treatment | Feed Day | 09:50 | 09:00 - 09:59 | Late Morning | Appetitive behaviour    |
| 2019/07/19 | CH2271 | Male | Two y/o | Treatment (Wk 2) | Treatment | Feed Day | 09:55 | 09:00 - 09:59 | Late Morning | Appetitive behaviour    |
| 2019/07/19 | CH2271 | Male | Two y/o | Treatment (Wk 2) | Treatment | Feed Day | 10:00 | 10:00 - 10:59 | Late Morning | Locomotion              |
| 2019/07/19 | CH2271 | Male | Two y/o | Treatment (Wk 2) | Treatment | Feed Day | 10:05 | 10:00 - 10:59 | Late Morning | Appetitive behaviour    |
| 2019/07/19 | CH2271 | Male | Two y/o | Treatment (Wk 2) | Treatment | Feed Day | 10:10 | 10:00 - 10:59 | Late Morning | Appetitive behaviour    |
| 2019/07/19 | CH2271 | Male | Two y/o | Treatment (Wk 2) | Treatment | Feed Day | 10:15 | 10:00 - 10:59 | Late Morning | Scent-marking           |
| 2019/07/19 | CH2271 | Male | Two y/o | Treatment (Wk 2) | Treatment | Feed Day | 10:20 | 10:00 - 10:59 | Late Morning | Interspecific behaviour |
| 2019/07/19 | CH2271 | Male | Two y/o | Treatment (Wk 2) | Treatment | Feed Day | 10:25 | 10:00 - 10:59 | Late Morning | Locomotion              |
| 2019/07/22 | CH2271 | Male | Two y/o | Treatment (Wk 2) | Treatment | Feed Day | 09:30 | 09:00 - 09:59 | Late Morning | Interspecific behaviour |
| 2019/07/22 | CH2271 | Male | Two y/o | Treatment (Wk 2) | Treatment | Feed Day | 09:35 | 09:00 - 09:59 | Late Morning | Locomotion              |
| 2019/07/22 | CH2271 | Male | Two y/o | Treatment (Wk 2) | Treatment | Feed Day | 09:40 | 09:00 - 09:59 | Late Morning | Scent-marking           |
| 2019/07/22 | CH2271 | Male | Two y/o | Treatment (Wk 2) | Treatment | Feed Day | 09:45 | 09:00 - 09:59 | Late Morning | Locomotion              |
| 2019/07/22 | CH2271 | Male | Two y/o | Treatment (Wk 2) | Treatment | Feed Day | 09:50 | 09:00 - 09:59 | Late Morning | Interspecific behaviour |
| 2019/07/22 | CH2271 | Male | Two y/o | Treatment (Wk 2) | Treatment | Feed Day | 09:55 | 09:00 - 09:59 | Late Morning | Locomotion              |
| 2019/07/22 | CH2271 | Male | Two y/o | Treatment (Wk 2) | Treatment | Feed Day | 10:00 | 10:00 - 10:59 | Late Morning | Locomotion              |
| 2019/07/22 | CH2271 | Male | Two y/o | Treatment (Wk 2) | Treatment | Feed Day | 10:05 | 10:00 - 10:59 | Late Morning | Locomotion              |
| 2019/07/22 | CH2271 | Male | Two y/o | Treatment (Wk 2) | Treatment | Feed Day | 10:10 | 10:00 - 10:59 | Late Morning | Locomotion              |
| 2019/07/22 | CH2271 | Male | Two y/o | Treatment (Wk 2) | Treatment | Feed Day | 10:15 | 10:00 - 10:59 | Late Morning | Inactive                |
| 2019/07/22 | CH2271 | Male | Two y/o | Treatment (Wk 2) | Treatment | Feed Day | 10:20 | 10:00 - 10:59 | Late Morning | Inactive                |
| 2019/07/22 | CH2271 | Male | Two y/o | Treatment (Wk 2) | Treatment | Feed Day | 10:25 | 10:00 - 10:59 | Late Morning | Locomotion              |
| 2019/07/23 | CH2271 | Male | Two y/o | Treatment (Wk 3) | Treatment | Feed Day | 08:30 | 08:00 - 08:59 | Late Morning | Attention               |
| 2019/07/23 | CH2271 | Male | Two y/o | Treatment (Wk 3) | Treatment | Feed Day | 08:35 | 08:00 - 08:59 | Late Morning | Locomotion              |
| 2019/07/23 | CH2271 | Male | Two y/o | Treatment (Wk 3) | Treatment | Feed Day | 08:40 | 08:00 - 08:59 | Late Morning | Scent-marking           |



## Dataset S1: BEHAVIOUR\_1

|            |        |      |         |                  |           |          |       |               |              |                         |
|------------|--------|------|---------|------------------|-----------|----------|-------|---------------|--------------|-------------------------|
| 2019/07/23 | CH2271 | Male | Two y/o | Treatment (Wk 3) | Treatment | Feed Day | 08:45 | 08:00 - 08:59 | Late Morning | Attention               |
| 2019/07/23 | CH2271 | Male | Two y/o | Treatment (Wk 3) | Treatment | Feed Day | 08:50 | 08:00 - 08:59 | Late Morning | Locomotion              |
| 2019/07/23 | CH2271 | Male | Two y/o | Treatment (Wk 3) | Treatment | Feed Day | 08:55 | 08:00 - 08:59 | Late Morning | Locomotion              |
| 2019/07/23 | CH2271 | Male | Two y/o | Treatment (Wk 3) | Treatment | Feed Day | 09:00 | 09:00 - 09:59 | Late Morning | Scent-marking           |
| 2019/07/23 | CH2271 | Male | Two y/o | Treatment (Wk 3) | Treatment | Feed Day | 09:05 | 09:00 - 09:59 | Late Morning | Locomotion              |
| 2019/07/23 | CH2271 | Male | Two y/o | Treatment (Wk 3) | Treatment | Feed Day | 09:10 | 09:00 - 09:59 | Late Morning | Inactive                |
| 2019/07/23 | CH2271 | Male | Two y/o | Treatment (Wk 3) | Treatment | Feed Day | 09:15 | 09:00 - 09:59 | Late Morning | Locomotion              |
| 2019/07/23 | CH2271 | Male | Two y/o | Treatment (Wk 3) | Treatment | Feed Day | 09:20 | 09:00 - 09:59 | Late Morning | Locomotion              |
| 2019/07/23 | CH2271 | Male | Two y/o | Treatment (Wk 3) | Treatment | Feed Day | 09:25 | 09:00 - 09:59 | Late Morning | Locomotion              |
| 2019/07/24 | CH2271 | Male | Two y/o | Treatment (Wk 3) | Treatment | Fast Day | 09:30 | 09:00 - 09:59 | Late Morning | Locomotion              |
| 2019/07/24 | CH2271 | Male | Two y/o | Treatment (Wk 3) | Treatment | Fast Day | 09:35 | 09:00 - 09:59 | Late Morning | Inactive                |
| 2019/07/24 | CH2271 | Male | Two y/o | Treatment (Wk 3) | Treatment | Fast Day | 09:40 | 09:00 - 09:59 | Late Morning | Inactive                |
| 2019/07/24 | CH2271 | Male | Two y/o | Treatment (Wk 3) | Treatment | Fast Day | 09:45 | 09:00 - 09:59 | Late Morning | Inactive                |
| 2019/07/24 | CH2271 | Male | Two y/o | Treatment (Wk 3) | Treatment | Fast Day | 09:50 | 09:00 - 09:59 | Late Morning | Inactive                |
| 2019/07/24 | CH2271 | Male | Two y/o | Treatment (Wk 3) | Treatment | Fast Day | 09:55 | 09:00 - 09:59 | Late Morning | Inactive                |
| 2019/07/24 | CH2271 | Male | Two y/o | Treatment (Wk 3) | Treatment | Fast Day | 10:00 | 10:00 - 10:59 | Late Morning | Inactive                |
| 2019/07/24 | CH2271 | Male | Two y/o | Treatment (Wk 3) | Treatment | Fast Day | 10:05 | 10:00 - 10:59 | Late Morning | Inactive                |
| 2019/07/24 | CH2271 | Male | Two y/o | Treatment (Wk 3) | Treatment | Fast Day | 10:10 | 10:00 - 10:59 | Late Morning | Inactive                |
| 2019/07/24 | CH2271 | Male | Two y/o | Treatment (Wk 3) | Treatment | Fast Day | 10:15 | 10:00 - 10:59 | Late Morning | Inactive                |
| 2019/07/24 | CH2271 | Male | Two y/o | Treatment (Wk 3) | Treatment | Fast Day | 10:20 | 10:00 - 10:59 | Late Morning | Inactive                |
| 2019/07/24 | CH2271 | Male | Two y/o | Treatment (Wk 3) | Treatment | Fast Day | 10:25 | 10:00 - 10:59 | Late Morning | Interspecific behaviour |
| 2019/07/25 | CH2271 | Male | Two y/o | Treatment (Wk 3) | Treatment | Feed Day | 08:40 | 08:00 - 08:59 | Late Morning | Attention               |
| 2019/07/25 | CH2271 | Male | Two y/o | Treatment (Wk 3) | Treatment | Feed Day | 08:45 | 08:00 - 08:59 | Late Morning | Locomotion              |
| 2019/07/25 | CH2271 | Male | Two y/o | Treatment (Wk 3) | Treatment | Feed Day | 08:50 | 08:00 - 08:59 | Late Morning | Olfactory exploration   |
| 2019/07/25 | CH2271 | Male | Two y/o | Treatment (Wk 3) | Treatment | Feed Day | 08:55 | 08:00 - 08:59 | Late Morning | Inactive                |
| 2019/07/25 | CH2271 | Male | Two y/o | Treatment (Wk 3) | Treatment | Feed Day | 09:00 | 09:00 - 09:59 | Late Morning | Appetitive behaviour    |
| 2019/07/25 | CH2271 | Male | Two y/o | Treatment (Wk 3) | Treatment | Feed Day | 09:05 | 09:00 - 09:59 | Late Morning | Appetitive behaviour    |
| 2019/07/25 | CH2271 | Male | Two y/o | Treatment (Wk 3) | Treatment | Feed Day | 09:10 | 09:00 - 09:59 | Late Morning | Affiliative behaviour   |
| 2019/07/25 | CH2271 | Male | Two y/o | Treatment (Wk 3) | Treatment | Feed Day | 09:15 | 09:00 - 09:59 | Late Morning | Locomotion              |
| 2019/07/25 | CH2271 | Male | Two y/o | Treatment (Wk 3) | Treatment | Feed Day | 09:20 | 09:00 - 09:59 | Late Morning | Locomotion              |
| 2019/07/25 | CH2271 | Male | Two y/o | Treatment (Wk 3) | Treatment | Feed Day | 09:25 | 09:00 - 09:59 | Late Morning | Affiliative behaviour   |
| 2019/07/25 | CH2271 | Male | Two y/o | Treatment (Wk 3) | Treatment | Feed Day | 09:30 | 09:00 - 09:59 | Late Morning | Locomotion              |
| 2019/07/25 | CH2271 | Male | Two y/o | Treatment (Wk 3) | Treatment | Feed Day | 09:35 | 09:00 - 09:59 | Late Morning | Attention               |
| 2019/07/26 | CH2271 | Male | Two y/o | Treatment (Wk 3) | Treatment | Feed Day | 08:45 | 08:00 - 08:59 | Late Morning | Locomotion              |
| 2019/07/26 | CH2271 | Male | Two y/o | Treatment (Wk 3) | Treatment | Feed Day | 08:50 | 08:00 - 08:59 | Late Morning | Attention               |
| 2019/07/26 | CH2271 | Male | Two y/o | Treatment (Wk 3) | Treatment | Feed Day | 08:55 | 08:00 - 08:59 | Late Morning | Attention               |
| 2019/07/26 | CH2271 | Male | Two y/o | Treatment (Wk 3) | Treatment | Feed Day | 09:00 | 09:00 - 09:59 | Late Morning | Locomotion              |



## Dataset S1: BEHAVIOUR\_1

|            |        |        |         |                  |           |          |       |               |              |                         |
|------------|--------|--------|---------|------------------|-----------|----------|-------|---------------|--------------|-------------------------|
| 2019/07/26 | CH2271 | Male   | Two y/o | Treatment (Wk 3) | Treatment | Feed Day | 09:05 | 09:00 - 09:59 | Late Morning | Locomotion              |
| 2019/07/26 | CH2271 | Male   | Two y/o | Treatment (Wk 3) | Treatment | Feed Day | 09:10 | 09:00 - 09:59 | Late Morning | Locomotion              |
| 2019/07/26 | CH2271 | Male   | Two y/o | Treatment (Wk 3) | Treatment | Feed Day | 09:15 | 09:00 - 09:59 | Late Morning | Locomotion              |
| 2019/07/26 | CH2271 | Male   | Two y/o | Treatment (Wk 3) | Treatment | Feed Day | 09:20 | 09:00 - 09:59 | Late Morning | Locomotion              |
| 2019/07/26 | CH2271 | Male   | Two y/o | Treatment (Wk 3) | Treatment | Feed Day | 09:25 | 09:00 - 09:59 | Late Morning | Locomotion              |
| 2019/07/26 | CH2271 | Male   | Two y/o | Treatment (Wk 3) | Treatment | Feed Day | 09:30 | 09:00 - 09:59 | Late Morning | Locomotion              |
| 2019/07/26 | CH2271 | Male   | Two y/o | Treatment (Wk 3) | Treatment | Feed Day | 09:35 | 09:00 - 09:59 | Late Morning | Locomotion              |
| 2019/07/26 | CH2271 | Male   | Two y/o | Treatment (Wk 3) | Treatment | Feed Day | 09:40 | 09:00 - 09:59 | Late Morning | Attention               |
| 2019/07/29 | CH2271 | Male   | Two y/o | Treatment (Wk 3) | Treatment | Feed Day | 09:30 | 09:00 - 09:59 | Late Morning | Locomotion              |
| 2019/07/29 | CH2271 | Male   | Two y/o | Treatment (Wk 3) | Treatment | Feed Day | 09:35 | 09:00 - 09:59 | Late Morning | Appetitive behaviour    |
| 2019/07/29 | CH2271 | Male   | Two y/o | Treatment (Wk 3) | Treatment | Feed Day | 09:40 | 09:00 - 09:59 | Late Morning | Interspecific behaviour |
| 2019/07/29 | CH2271 | Male   | Two y/o | Treatment (Wk 3) | Treatment | Feed Day | 09:45 | 09:00 - 09:59 | Late Morning | Inactive                |
| 2019/07/29 | CH2271 | Male   | Two y/o | Treatment (Wk 3) | Treatment | Feed Day | 09:50 | 09:00 - 09:59 | Late Morning | Interspecific behaviour |
| 2019/07/29 | CH2271 | Male   | Two y/o | Treatment (Wk 3) | Treatment | Feed Day | 09:55 | 09:00 - 09:59 | Late Morning | Standing                |
| 2019/07/29 | CH2271 | Male   | Two y/o | Treatment (Wk 3) | Treatment | Feed Day | 10:00 | 10:00 - 10:59 | Late Morning | Inactive                |
| 2019/07/29 | CH2271 | Male   | Two y/o | Treatment (Wk 3) | Treatment | Feed Day | 10:05 | 10:00 - 10:59 | Late Morning | Inactive                |
| 2019/07/29 | CH2271 | Male   | Two y/o | Treatment (Wk 3) | Treatment | Feed Day | 10:10 | 10:00 - 10:59 | Late Morning | Locomotion              |
| 2019/07/29 | CH2271 | Male   | Two y/o | Treatment (Wk 3) | Treatment | Feed Day | 10:15 | 10:00 - 10:59 | Late Morning | Interspecific behaviour |
| 2019/07/29 | CH2271 | Male   | Two y/o | Treatment (Wk 3) | Treatment | Feed Day | 10:20 | 10:00 - 10:59 | Late Morning | Scent-marking           |
| 2019/07/29 | CH2271 | Male   | Two y/o | Treatment (Wk 3) | Treatment | Feed Day | 10:25 | 10:00 - 10:59 | Late Morning | Inactive                |
| 2019/08/01 | CH2276 | Female | Two y/o | Treatment (Wk 1) | Treatment | Feed Day | 11:50 | 11:00 - 11:59 | Late Morning | Inactive                |
| 2019/08/01 | CH2277 | Female | Two y/o | Treatment (Wk 1) | Treatment | Feed Day | 11:50 | 11:00 - 11:59 | Late Morning | Inactive                |
| 2019/08/01 | CH2276 | Female | Two y/o | Treatment (Wk 1) | Treatment | Feed Day | 11:55 | 11:00 - 11:59 | Late Morning | Inactive                |
| 2019/08/01 | CH2277 | Female | Two y/o | Treatment (Wk 1) | Treatment | Feed Day | 11:55 | 11:00 - 11:59 | Late Morning | Inactive                |
| 2019/08/01 | CH2276 | Female | Two y/o | Treatment (Wk 1) | Treatment | Feed Day | 12:00 | 12:00 - 12:59 | Afternoon    | Inactive                |
| 2019/08/01 | CH2277 | Female | Two y/o | Treatment (Wk 1) | Treatment | Feed Day | 12:00 | 12:00 - 12:59 | Afternoon    | Inactive                |
| 2019/08/01 | CH2276 | Female | Two y/o | Treatment (Wk 1) | Treatment | Feed Day | 12:05 | 12:00 - 12:59 | Afternoon    | Inactive                |
| 2019/08/01 | CH2277 | Female | Two y/o | Treatment (Wk 1) | Treatment | Feed Day | 12:05 | 12:00 - 12:59 | Afternoon    | Inactive                |
| 2019/08/01 | CH2276 | Female | Two y/o | Treatment (Wk 1) | Treatment | Feed Day | 12:10 | 12:00 - 12:59 | Afternoon    | Scent-marking           |
| 2019/08/01 | CH2277 | Female | Two y/o | Treatment (Wk 1) | Treatment | Feed Day | 12:10 | 12:00 - 12:59 | Afternoon    | Scent-marking           |
| 2019/08/01 | CH2276 | Female | Two y/o | Treatment (Wk 1) | Treatment | Feed Day | 12:15 | 12:00 - 12:59 | Afternoon    | Inactive                |
| 2019/08/01 | CH2277 | Female | Two y/o | Treatment (Wk 1) | Treatment | Feed Day | 12:15 | 12:00 - 12:59 | Afternoon    | Inactive                |
| 2019/08/01 | CH2276 | Female | Two y/o | Treatment (Wk 1) | Treatment | Feed Day | 12:20 | 12:00 - 12:59 | Afternoon    | Inactive                |
| 2019/08/01 | CH2277 | Female | Two y/o | Treatment (Wk 1) | Treatment | Feed Day | 12:20 | 12:00 - 12:59 | Afternoon    | Inactive                |
| 2019/08/01 | CH2276 | Female | Two y/o | Treatment (Wk 1) | Treatment | Feed Day | 12:25 | 12:00 - 12:59 | Afternoon    | Inactive                |
| 2019/08/01 | CH2277 | Female | Two y/o | Treatment (Wk 1) | Treatment | Feed Day | 12:25 | 12:00 - 12:59 | Afternoon    | Inactive                |
| 2019/08/01 | CH2276 | Female | Two y/o | Treatment (Wk 1) | Treatment | Feed Day | 12:30 | 12:00 - 12:59 | Afternoon    | Stereotypical           |



## Dataset S1: BEHAVIOUR\_1

[illegible]



## Dataset S1: BEHAVIOUR\_1

|            |        |        |         |         |         |          |       |               |              |                         |
|------------|--------|--------|---------|---------|---------|----------|-------|---------------|--------------|-------------------------|
| 2019/08/22 | CH2271 | Male   | Two y/o | Control | Control | Feed Day | 12:30 | 12:00 - 12:59 | Afternoon    | Inactive                |
| 2019/08/22 | CH2271 | Male   | Two y/o | Control | Control | Feed Day | 12:35 | 12:00 - 12:59 | Afternoon    | Inactive                |
| 2019/08/22 | CH2271 | Male   | Two y/o | Control | Control | Feed Day | 12:40 | 12:00 - 12:59 | Afternoon    | Appetitive behaviour    |
| 2019/08/22 | CH2271 | Male   | Two y/o | Control | Control | Feed Day | 12:45 | 12:00 - 12:59 | Afternoon    | Appetitive behaviour    |
| 2019/08/22 | CH2271 | Male   | Two y/o | Control | Control | Feed Day | 12:50 | 12:00 - 12:59 | Afternoon    | Appetitive behaviour    |
| 2019/08/22 | CH2271 | Male   | Two y/o | Control | Control | Feed Day | 12:55 | 12:00 - 12:59 | Afternoon    | Maintenance             |
| 2019/08/22 | CH2271 | Male   | Two y/o | Control | Control | Feed Day | 13:00 | 13:00 - 13:59 | Afternoon    | Inactive                |
| 2019/08/22 | CH2271 | Male   | Two y/o | Control | Control | Feed Day | 13:05 | 13:00 - 13:59 | Afternoon    | Inactive                |
| 2019/08/22 | CH2271 | Male   | Two y/o | Control | Control | Feed Day | 13:10 | 13:00 - 13:59 | Afternoon    | Inactive                |
| 2019/08/22 | CH2276 | Female | Two y/o | Control | Control | Fast Day | 13:10 | 13:00 - 13:59 | Afternoon    | Inactive                |
| 2019/08/22 | CH2277 | Female | Two y/o | Control | Control | Fast Day | 13:10 | 13:00 - 13:59 | Afternoon    | Inactive                |
| 2019/08/22 | CH2271 | Male   | Two y/o | Control | Control | Feed Day | 13:15 | 13:00 - 13:59 | Afternoon    | Inactive                |
| 2019/08/22 | CH2276 | Female | Two y/o | Control | Control | Fast Day | 13:15 | 13:00 - 13:59 | Afternoon    | Interspecific behaviour |
| 2019/08/22 | CH2277 | Female | Two y/o | Control | Control | Fast Day | 13:15 | 13:00 - 13:59 | Afternoon    | Locomotion              |
| 2019/08/22 | CH2276 | Female | Two y/o | Control | Control | Fast Day | 13:20 | 13:00 - 13:59 | Afternoon    | Affiliative behaviour   |
| 2019/08/22 | CH2277 | Female | Two y/o | Control | Control | Fast Day | 13:20 | 13:00 - 13:59 | Afternoon    | Affiliative behaviour   |
| 2019/08/22 | CH2276 | Female | Two y/o | Control | Control | Fast Day | 13:25 | 13:00 - 13:59 | Afternoon    | Inactive                |
| 2019/08/22 | CH2277 | Female | Two y/o | Control | Control | Fast Day | 13:25 | 13:00 - 13:59 | Afternoon    | Locomotion              |
| 2019/08/22 | CH2276 | Female | Two y/o | Control | Control | Fast Day | 13:30 | 13:00 - 13:59 | Afternoon    | Inactive                |
| 2019/08/22 | CH2277 | Female | Two y/o | Control | Control | Fast Day | 13:30 | 13:00 - 13:59 | Afternoon    | Inactive                |
| 2019/08/22 | CH2276 | Female | Two y/o | Control | Control | Fast Day | 13:35 | 13:00 - 13:59 | Afternoon    | Inactive                |
| 2019/08/22 | CH2277 | Female | Two y/o | Control | Control | Fast Day | 13:35 | 13:00 - 13:59 | Afternoon    | Inactive                |
| 2019/08/22 | CH2276 | Female | Two y/o | Control | Control | Fast Day | 13:40 | 13:00 - 13:59 | Afternoon    | Inactive                |
| 2019/08/22 | CH2277 | Female | Two y/o | Control | Control | Fast Day | 13:40 | 13:00 - 13:59 | Afternoon    | Inactive                |
| 2019/08/22 | CH2276 | Female | Two y/o | Control | Control | Fast Day | 13:45 | 13:00 - 13:59 | Afternoon    | Inactive                |
| 2019/08/22 | CH2277 | Female | Two y/o | Control | Control | Fast Day | 13:45 | 13:00 - 13:59 | Afternoon    | Inactive                |
| 2019/08/23 | CH2276 | Female | Two y/o | Control | Control | Feed Day | 10:55 | 10:00 - 10:59 | Late Morning | Inactive                |
| 2019/08/23 | CH2277 | Female | Two y/o | Control | Control | Feed Day | 10:55 | 10:00 - 10:59 | Late Morning | Inactive                |
| 2019/08/23 | CH2276 | Female | Two y/o | Control | Control | Feed Day | 11:00 | 11:00 - 11:59 | Late Morning | Inactive                |
| 2019/08/23 | CH2277 | Female | Two y/o | Control | Control | Feed Day | 11:00 | 11:00 - 11:59 | Late Morning | Inactive                |
| 2019/08/23 | CH2276 | Female | Two y/o | Control | Control | Feed Day | 11:05 | 11:00 - 11:59 | Late Morning | Scent-marking           |
| 2019/08/23 | CH2277 | Female | Two y/o | Control | Control | Feed Day | 11:05 | 11:00 - 11:59 | Late Morning | Locomotion              |
| 2019/08/23 | CH2276 | Female | Two y/o | Control | Control | Feed Day | 11:10 | 11:00 - 11:59 | Late Morning | Affiliative behaviour   |
| 2019/08/23 | CH2277 | Female | Two y/o | Control | Control | Feed Day | 11:10 | 11:00 - 11:59 | Late Morning | Affiliative behaviour   |
| 2019/08/23 | CH2276 | Female | Two y/o | Control | Control | Feed Day | 11:15 | 11:00 - 11:59 | Late Morning | Attention               |
| 2019/08/23 | CH2277 | Female | Two y/o | Control | Control | Feed Day | 11:15 | 11:00 - 11:59 | Late Morning | Auto-grooming           |
| 2019/08/23 | CH2276 | Female | Two y/o | Control | Control | Feed Day | 11:20 | 11:00 - 11:59 | Late Morning | Inactive                |



## Dataset S1: BEHAVIOUR\_1

[illegible]



## Dataset S1: BEHAVIOUR\_1

[illegible]



## Dataset S1: BEHAVIOUR\_1

|            |        |        |         |         |         |          |       |               |              |                         |
|------------|--------|--------|---------|---------|---------|----------|-------|---------------|--------------|-------------------------|
| 2019/08/27 | CH2277 | Female | Two y/o | Control | Control | Feed Day | 08:05 | 08:00 - 08:59 | Late Morning | Attention               |
| 2019/08/27 | CH2276 | Female | Two y/o | Control | Control | Feed Day | 08:10 | 08:00 - 08:59 | Late Morning | Agnostic behaviour      |
| 2019/08/27 | CH2277 | Female | Two y/o | Control | Control | Feed Day | 08:10 | 08:00 - 08:59 | Late Morning | Inactive                |
| 2019/08/27 | CH2276 | Female | Two y/o | Control | Control | Feed Day | 08:15 | 08:00 - 08:59 | Late Morning | Agnostic behaviour      |
| 2019/08/27 | CH2277 | Female | Two y/o | Control | Control | Feed Day | 08:15 | 08:00 - 08:59 | Late Morning | Inactive                |
| 2019/08/27 | CH2276 | Female | Two y/o | Control | Control | Feed Day | 08:20 | 08:00 - 08:59 | Late Morning | Inactive                |
| 2019/08/27 | CH2277 | Female | Two y/o | Control | Control | Feed Day | 08:20 | 08:00 - 08:59 | Late Morning | Auto-grooming           |
| 2019/08/27 | CH2276 | Female | Two y/o | Control | Control | Feed Day | 08:25 | 08:00 - 08:59 | Late Morning | Appetitive behaviour    |
| 2019/08/27 | CH2277 | Female | Two y/o | Control | Control | Feed Day | 08:25 | 08:00 - 08:59 | Late Morning | Appetitive behaviour    |
| 2019/08/27 | CH2271 | Male   | Two y/o | Control | Control | Feed Day | 08:30 | 08:00 - 08:59 | Late Morning | Locomotion              |
| 2019/08/27 | CH2276 | Female | Two y/o | Control | Control | Feed Day | 08:30 | 08:00 - 08:59 | Late Morning | Appetitive behaviour    |
| 2019/08/27 | CH2277 | Female | Two y/o | Control | Control | Feed Day | 08:30 | 08:00 - 08:59 | Late Morning | Appetitive behaviour    |
| 2019/08/27 | CH2271 | Male   | Two y/o | Control | Control | Feed Day | 08:35 | 08:00 - 08:59 | Late Morning | Inactive                |
| 2019/08/27 | CH2271 | Male   | Two y/o | Control | Control | Feed Day | 08:40 | 08:00 - 08:59 | Late Morning | Inactive                |
| 2019/08/27 | CH2271 | Male   | Two y/o | Control | Control | Feed Day | 08:45 | 08:00 - 08:59 | Late Morning | Inactive                |
| 2019/08/27 | CH2271 | Male   | Two y/o | Control | Control | Feed Day | 08:50 | 08:00 - 08:59 | Late Morning | Appetitive behaviour    |
| 2019/08/27 | CH2271 | Male   | Two y/o | Control | Control | Feed Day | 08:55 | 08:00 - 08:59 | Late Morning | Interspecific behaviour |
| 2019/08/27 | CH2271 | Male   | Two y/o | Control | Control | Feed Day | 09:00 | 09:00 - 09:59 | Late Morning | Inactive                |
| 2019/08/27 | CH2271 | Male   | Two y/o | Control | Control | Feed Day | 09:05 | 09:00 - 09:59 | Late Morning | Locomotion              |
| 2019/08/27 | CH2271 | Male   | Two y/o | Control | Control | Feed Day | 09:10 | 09:00 - 09:59 | Late Morning | Locomotion              |
| 2019/08/27 | CH2271 | Male   | Two y/o | Control | Control | Feed Day | 09:15 | 09:00 - 09:59 | Late Morning | Locomotion              |
| 2019/08/27 | CH2271 | Male   | Two y/o | Control | Control | Feed Day | 09:20 | 09:00 - 09:59 | Late Morning | Interspecific behaviour |
| 2019/08/27 | CH2271 | Male   | Two y/o | Control | Control | Feed Day | 09:25 | 09:00 - 09:59 | Late Morning | Locomotion              |
| 2019/08/28 | CH2271 | Male   | Two y/o | Control | Control | Feed Day | 07:40 | 07:00 - 07:59 | Late Morning | Locomotion              |
| 2019/08/28 | CH2271 | Male   | Two y/o | Control | Control | Feed Day | 07:45 | 07:00 - 07:59 | Late Morning | Inactive                |
| 2019/08/28 | CH2271 | Male   | Two y/o | Control | Control | Feed Day | 07:50 | 07:00 - 07:59 | Late Morning | Inactive                |
| 2019/08/28 | CH2271 | Male   | Two y/o | Control | Control | Feed Day | 07:55 | 07:00 - 07:59 | Late Morning | Inactive                |
| 2019/08/28 | CH2271 | Male   | Two y/o | Control | Control | Feed Day | 08:00 | 08:00 - 08:59 | Late Morning | Locomotion              |
| 2019/08/28 | CH2271 | Male   | Two y/o | Control | Control | Feed Day | 08:05 | 08:00 - 08:59 | Late Morning | Locomotion              |
| 2019/08/28 | CH2271 | Male   | Two y/o | Control | Control | Feed Day | 08:10 | 08:00 - 08:59 | Late Morning | Locomotion              |
| 2019/08/28 | CH2271 | Male   | Two y/o | Control | Control | Feed Day | 08:15 | 08:00 - 08:59 | Late Morning | Locomotion              |
| 2019/08/28 | CH2271 | Male   | Two y/o | Control | Control | Feed Day | 08:20 | 08:00 - 08:59 | Late Morning | Appetitive behaviour    |
| 2019/08/28 | CH2271 | Male   | Two y/o | Control | Control | Feed Day | 08:25 | 08:00 - 08:59 | Late Morning | Appetitive behaviour    |
| 2019/08/28 | CH2271 | Male   | Two y/o | Control | Control | Feed Day | 08:30 | 08:00 - 08:59 | Late Morning | Appetitive behaviour    |
| 2019/08/28 | CH2271 | Male   | Two y/o | Control | Control | Feed Day | 08:35 | 08:00 - 08:59 | Late Morning | Appetitive behaviour    |
| 2019/08/28 | CH2276 | Female | Two y/o | Control | Control | Feed Day | 08:35 | 08:00 - 08:59 | Late Morning | Inactive                |
| 2019/08/28 | CH2277 | Female | Two y/o | Control | Control | Feed Day | 08:35 | 08:00 - 08:59 | Late Morning | Locomotion              |



## Dataset S1: BEHAVIOUR\_1

|            |        |        |         |         |         |          |       |               |              |                         |
|------------|--------|--------|---------|---------|---------|----------|-------|---------------|--------------|-------------------------|
| 2019/08/28 | CH2276 | Female | Two y/o | Control | Control | Feed Day | 08:40 | 08:00 - 08:59 | Late Morning | Scent-marking           |
| 2019/08/28 | CH2277 | Female | Two y/o | Control | Control | Feed Day | 08:40 | 08:00 - 08:59 | Late Morning | Appetitive behaviour    |
| 2019/08/28 | CH2276 | Female | Two y/o | Control | Control | Feed Day | 08:45 | 08:00 - 08:59 | Late Morning | Appetitive behaviour    |
| 2019/08/28 | CH2277 | Female | Two y/o | Control | Control | Feed Day | 08:45 | 08:00 - 08:59 | Late Morning | Attention               |
| 2019/08/28 | CH2276 | Female | Two y/o | Control | Control | Feed Day | 08:50 | 08:00 - 08:59 | Late Morning | Locomotion              |
| 2019/08/28 | CH2277 | Female | Two y/o | Control | Control | Feed Day | 08:50 | 08:00 - 08:59 | Late Morning | Attention               |
| 2019/08/28 | CH2276 | Female | Two y/o | Control | Control | Feed Day | 08:55 | 08:00 - 08:59 | Late Morning | Locomotion              |
| 2019/08/28 | CH2277 | Female | Two y/o | Control | Control | Feed Day | 08:55 | 08:00 - 08:59 | Late Morning | Appetitive behaviour    |
| 2019/08/28 | CH2276 | Female | Two y/o | Control | Control | Feed Day | 09:00 | 09:00 - 09:59 | Late Morning | Scent-marking           |
| 2019/08/28 | CH2277 | Female | Two y/o | Control | Control | Feed Day | 09:00 | 09:00 - 09:59 | Late Morning | Appetitive behaviour    |
| 2019/08/28 | CH2276 | Female | Two y/o | Control | Control | Feed Day | 09:05 | 09:00 - 09:59 | Late Morning | Appetitive behaviour    |
| 2019/08/28 | CH2277 | Female | Two y/o | Control | Control | Feed Day | 09:05 | 09:00 - 09:59 | Late Morning | Appetitive behaviour    |
| 2019/08/28 | CH2276 | Female | Two y/o | Control | Control | Feed Day | 09:10 | 09:00 - 09:59 | Late Morning | Interspecific behaviour |
| 2019/08/28 | CH2277 | Female | Two y/o | Control | Control | Feed Day | 09:10 | 09:00 - 09:59 | Late Morning | Interspecific behaviour |
| 2019/08/28 | CH2276 | Female | Two y/o | Control | Control | Feed Day | 09:15 | 09:00 - 09:59 | Late Morning | Appetitive behaviour    |
| 2019/08/28 | CH2277 | Female | Two y/o | Control | Control | Feed Day | 09:15 | 09:00 - 09:59 | Late Morning | Appetitive behaviour    |
| 2019/08/28 | CH2276 | Female | Two y/o | Control | Control | Feed Day | 09:20 | 09:00 - 09:59 | Late Morning | Locomotion              |
| 2019/08/28 | CH2277 | Female | Two y/o | Control | Control | Feed Day | 09:20 | 09:00 - 09:59 | Late Morning | Appetitive behaviour    |
| 2019/08/28 | CH2276 | Female | Two y/o | Control | Control | Feed Day | 09:25 | 09:00 - 09:59 | Late Morning | Appetitive behaviour    |
| 2019/08/28 | CH2277 | Female | Two y/o | Control | Control | Feed Day | 09:25 | 09:00 - 09:59 | Late Morning | Appetitive behaviour    |
| 2019/08/28 | CH2276 | Female | Two y/o | Control | Control | Feed Day | 09:30 | 09:00 - 09:59 | Late Morning | Inactive                |
| 2019/08/28 | CH2277 | Female | Two y/o | Control | Control | Feed Day | 09:30 | 09:00 - 09:59 | Late Morning | Inactive                |
| 2019/08/29 | CH2276 | Female | Two y/o | Control | Control | Feed Day | 07:50 | 07:00 - 07:59 | Morning      | Inactive                |
| 2019/08/29 | CH2277 | Female | Two y/o | Control | Control | Feed Day | 07:50 | 07:00 - 07:59 | Morning      | Locomotion              |
| 2019/08/29 | CH2276 | Female | Two y/o | Control | Control | Feed Day | 07:55 | 07:00 - 07:59 | Morning      | Inactive                |
| 2019/08/29 | CH2277 | Female | Two y/o | Control | Control | Feed Day | 07:55 | 07:00 - 07:59 | Morning      | Interspecific behaviour |
| 2019/08/29 | CH2276 | Female | Two y/o | Control | Control | Feed Day | 08:00 | 08:00 - 08:59 | Late Morning | Interspecific behaviour |
| 2019/08/29 | CH2277 | Female | Two y/o | Control | Control | Feed Day | 08:00 | 08:00 - 08:59 | Late Morning | Locomotion              |
| 2019/08/29 | CH2276 | Female | Two y/o | Control | Control | Feed Day | 08:05 | 08:00 - 08:59 | Late Morning | Inactive                |
| 2019/08/29 | CH2277 | Female | Two y/o | Control | Control | Feed Day | 08:05 | 08:00 - 08:59 | Late Morning | Locomotion              |
| 2019/08/29 | CH2276 | Female | Two y/o | Control | Control | Feed Day | 08:10 | 08:00 - 08:59 | Late Morning | Inactive                |
| 2019/08/29 | CH2277 | Female | Two y/o | Control | Control | Feed Day | 08:10 | 08:00 - 08:59 | Late Morning | Appetitive behaviour    |
| 2019/08/29 | CH2276 | Female | Two y/o | Control | Control | Feed Day | 08:15 | 08:00 - 08:59 | Late Morning | Inactive                |
| 2019/08/29 | CH2277 | Female | Two y/o | Control | Control | Feed Day | 08:15 | 08:00 - 08:59 | Late Morning | Appetitive behaviour    |
| 2019/08/29 | CH2276 | Female | Two y/o | Control | Control | Feed Day | 08:20 | 08:00 - 08:59 | Late Morning | Locomotion              |
| 2019/08/29 | CH2277 | Female | Two y/o | Control | Control | Feed Day | 08:20 | 08:00 - 08:59 | Late Morning | Appetitive behaviour    |
| 2019/08/29 | CH2276 | Female | Two y/o | Control | Control | Feed Day | 08:25 | 08:00 - 08:59 | Late Morning | Locomotion              |



## Dataset S1: BEHAVIOUR\_1

|            |        |        |         |         |         |          |       |               |              |                         |
|------------|--------|--------|---------|---------|---------|----------|-------|---------------|--------------|-------------------------|
| 2019/08/29 | CH2277 | Female | Two y/o | Control | Control | Feed Day | 08:25 | 08:00 - 08:59 | Late Morning | Appetitive behaviour    |
| 2019/08/29 | CH2276 | Female | Two y/o | Control | Control | Feed Day | 08:30 | 08:00 - 08:59 | Late Morning | Interspecific behaviour |
| 2019/08/29 | CH2277 | Female | Two y/o | Control | Control | Feed Day | 08:30 | 08:00 - 08:59 | Late Morning | Inactive                |
| 2019/08/29 | CH2276 | Female | Two y/o | Control | Control | Feed Day | 08:35 | 08:00 - 08:59 | Late Morning | Interspecific behaviour |
| 2019/08/29 | CH2277 | Female | Two y/o | Control | Control | Feed Day | 08:35 | 08:00 - 08:59 | Late Morning | Appetitive behaviour    |
| 2019/08/29 | CH2276 | Female | Two y/o | Control | Control | Feed Day | 08:40 | 08:00 - 08:59 | Late Morning | Interspecific behaviour |
| 2019/08/29 | CH2277 | Female | Two y/o | Control | Control | Feed Day | 08:40 | 08:00 - 08:59 | Late Morning | Appetitive behaviour    |
| 2019/08/29 | CH2271 | Male   | Two y/o | Control | Control | Feed Day | 08:45 | 08:00 - 08:59 | Late Morning | Locomotion              |
| 2019/08/29 | CH2276 | Female | Two y/o | Control | Control | Feed Day | 08:45 | 08:00 - 08:59 | Late Morning | Inactive                |
| 2019/08/29 | CH2277 | Female | Two y/o | Control | Control | Feed Day | 08:45 | 08:00 - 08:59 | Late Morning | Interspecific behaviour |
| 2019/08/29 | CH2271 | Male   | Two y/o | Control | Control | Feed Day | 08:50 | 08:00 - 08:59 | Late Morning | Locomotion              |
| 2019/08/29 | CH2271 | Male   | Two y/o | Control | Control | Feed Day | 08:55 | 08:00 - 08:59 | Late Morning | Affiliative behaviour   |
| 2019/08/29 | CH2271 | Male   | Two y/o | Control | Control | Feed Day | 09:00 | 09:00 - 09:59 | Late Morning | Locomotion              |
| 2019/08/29 | CH2271 | Male   | Two y/o | Control | Control | Feed Day | 09:05 | 09:00 - 09:59 | Late Morning | Locomotion              |
| 2019/08/29 | CH2271 | Male   | Two y/o | Control | Control | Feed Day | 09:10 | 09:00 - 09:59 | Late Morning | Inactive                |
| 2019/08/29 | CH2271 | Male   | Two y/o | Control | Control | Feed Day | 09:15 | 09:00 - 09:59 | Late Morning | Inactive                |
| 2019/08/29 | CH2271 | Male   | Two y/o | Control | Control | Feed Day | 09:20 | 09:00 - 09:59 | Late Morning | Inactive                |
| 2019/08/29 | CH2271 | Male   | Two y/o | Control | Control | Feed Day | 09:25 | 09:00 - 09:59 | Late Morning | Inactive                |
| 2019/08/29 | CH2271 | Male   | Two y/o | Control | Control | Feed Day | 09:30 | 09:00 - 09:59 | Late Morning | Inactive                |
| 2019/08/29 | CH2271 | Male   | Two y/o | Control | Control | Feed Day | 09:35 | 09:00 - 09:59 | Late Morning | Inactive                |
| 2019/08/29 | CH2271 | Male   | Two y/o | Control | Control | Feed Day | 09:40 | 09:00 - 09:59 | Late Morning | Inactive                |
| 2019/08/30 | CH2271 | Male   | Two y/o | Control | Control | Feed Day | 07:55 | 07:00 - 07:59 | Morning      | Attention               |
| 2019/08/30 | CH2271 | Male   | Two y/o | Control | Control | Feed Day | 08:00 | 08:00 - 08:59 | Late Morning | Auto-grooming           |
| 2019/08/30 | CH2271 | Male   | Two y/o | Control | Control | Feed Day | 08:05 | 08:00 - 08:59 | Late Morning | Locomotion              |
| 2019/08/30 | CH2271 | Male   | Two y/o | Control | Control | Feed Day | 08:10 | 08:00 - 08:59 | Late Morning | Attention               |
| 2019/08/30 | CH2271 | Male   | Two y/o | Control | Control | Feed Day | 08:15 | 08:00 - 08:59 | Late Morning | Locomotion              |
| 2019/08/30 | CH2271 | Male   | Two y/o | Control | Control | Feed Day | 08:20 | 08:00 - 08:59 | Late Morning | Locomotion              |
| 2019/08/30 | CH2271 | Male   | Two y/o | Control | Control | Feed Day | 08:25 | 08:00 - 08:59 | Late Morning | Locomotion              |
| 2019/08/30 | CH2271 | Male   | Two y/o | Control | Control | Feed Day | 08:30 | 08:00 - 08:59 | Late Morning | Appetitive behaviour    |
| 2019/08/30 | CH2271 | Male   | Two y/o | Control | Control | Feed Day | 08:35 | 08:00 - 08:59 | Late Morning | Attention               |
| 2019/08/30 | CH2271 | Male   | Two y/o | Control | Control | Feed Day | 08:40 | 08:00 - 08:59 | Late Morning | Appetitive behaviour    |
| 2019/08/30 | CH2271 | Male   | Two y/o | Control | Control | Feed Day | 08:45 | 08:00 - 08:59 | Late Morning | Maintenance             |
| 2019/08/30 | CH2276 | Female | Two y/o | Control | Control | Feed Day | 08:50 | 08:00 - 08:59 | Late Morning | Inactive                |
| 2019/08/30 | CH2277 | Female | Two y/o | Control | Control | Feed Day | 08:50 | 08:00 - 08:59 | Late Morning | Locomotion              |
| 2019/08/30 | CH2271 | Male   | Two y/o | Control | Control | Feed Day | 08:50 | 08:00 - 08:59 | Late Morning | Appetitive behaviour    |
| 2019/08/30 | CH2276 | Female | Two y/o | Control | Control | Feed Day | 08:55 | 08:00 - 08:59 | Late Morning | Inactive                |
| 2019/08/30 | CH2277 | Female | Two y/o | Control | Control | Feed Day | 08:55 | 08:00 - 08:59 | Late Morning | Inactive                |



## Dataset S1: BEHAVIOUR\_1

[illegible]



## Dataset S1: BEHAVIOUR\_1

|            |        |        |         |         |         |          |       |               |              |                         |
|------------|--------|--------|---------|---------|---------|----------|-------|---------------|--------------|-------------------------|
| 2019/08/31 | CH2277 | Female | Two y/o | Control | Control | Feed Day | 14:20 | 14:00 - 14:59 | Afternoon    | Interspecific behaviour |
| 2019/08/31 | CH2276 | Female | Two y/o | Control | Control | Feed Day | 14:25 | 14:00 - 14:59 | Afternoon    | Inactive                |
| 2019/08/31 | CH2277 | Female | Two y/o | Control | Control | Feed Day | 14:25 | 14:00 - 14:59 | Afternoon    | Interspecific behaviour |
| 2019/08/31 | CH2276 | Female | Two y/o | Control | Control | Feed Day | 14:30 | 14:00 - 14:59 | Afternoon    | Inactive                |
| 2019/08/31 | CH2277 | Female | Two y/o | Control | Control | Feed Day | 14:30 | 14:00 - 14:59 | Afternoon    | Inactive                |
| 2019/08/31 | CH2271 | Male   | Two y/o | Control | Control | Feed Day | 14:35 | 14:00 - 14:59 | Afternoon    | Locomotion              |
| 2019/08/31 | CH2276 | Female | Two y/o | Control | Control | Feed Day | 14:35 | 14:00 - 14:59 | Afternoon    | Inactive                |
| 2019/08/31 | CH2277 | Female | Two y/o | Control | Control | Feed Day | 14:35 | 14:00 - 14:59 | Afternoon    | Inactive                |
| 2019/08/31 | CH2271 | Male   | Two y/o | Control | Control | Feed Day | 14:40 | 14:00 - 14:59 | Afternoon    | Attention               |
| 2019/08/31 | CH2271 | Male   | Two y/o | Control | Control | Feed Day | 14:45 | 14:00 - 14:59 | Afternoon    | Stereotypical           |
| 2019/08/31 | CH2271 | Male   | Two y/o | Control | Control | Feed Day | 14:50 | 14:00 - 14:59 | Afternoon    | Locomotion              |
| 2019/08/31 | CH2271 | Male   | Two y/o | Control | Control | Feed Day | 14:55 | 14:00 - 14:59 | Afternoon    | Inactive                |
| 2019/08/31 | CH2271 | Male   | Two y/o | Control | Control | Feed Day | 15:00 | 15:00 - 15:59 | Afternoon    | Inactive                |
| 2019/08/31 | CH2271 | Male   | Two y/o | Control | Control | Feed Day | 15:05 | 15:00 - 15:59 | Afternoon    | Inactive                |
| 2019/08/31 | CH2271 | Male   | Two y/o | Control | Control | Feed Day | 15:10 | 15:00 - 15:59 | Afternoon    | Inactive                |
| 2019/08/31 | CH2271 | Male   | Two y/o | Control | Control | Feed Day | 15:15 | 15:00 - 15:59 | Afternoon    | Inactive                |
| 2019/08/31 | CH2271 | Male   | Two y/o | Control | Control | Feed Day | 15:20 | 15:00 - 15:59 | Afternoon    | Inactive                |
| 2019/08/31 | CH2271 | Male   | Two y/o | Control | Control | Feed Day | 15:25 | 15:00 - 15:59 | Afternoon    | Inactive                |
| 2019/08/31 | CH2271 | Male   | Two y/o | Control | Control | Feed Day | 15:30 | 15:00 - 15:59 | Afternoon    | Inactive                |
| 2019/09/03 | CH2271 | Male   | Two y/o | Control | Control | Feed Day | 11:05 | 11:00 - 11:59 | Late Morning | Inactive                |
| 2019/09/03 | CH2271 | Male   | Two y/o | Control | Control | Feed Day | 11:10 | 11:00 - 11:59 | Late Morning | Inactive                |
| 2019/09/03 | CH2271 | Male   | Two y/o | Control | Control | Feed Day | 11:15 | 11:00 - 11:59 | Late Morning | Inactive                |
| 2019/09/03 | CH2271 | Male   | Two y/o | Control | Control | Feed Day | 11:20 | 11:00 - 11:59 | Late Morning | Inactive                |
| 2019/09/03 | CH2271 | Male   | Two y/o | Control | Control | Feed Day | 11:25 | 11:00 - 11:59 | Late Morning | Locomotion              |
| 2019/09/03 | CH2271 | Male   | Two y/o | Control | Control | Feed Day | 11:30 | 11:00 - 11:59 | Late Morning | Locomotion              |
| 2019/09/03 | CH2271 | Male   | Two y/o | Control | Control | Feed Day | 11:35 | 11:00 - 11:59 | Late Morning | Inactive                |
| 2019/09/03 | CH2271 | Male   | Two y/o | Control | Control | Feed Day | 11:40 | 11:00 - 11:59 | Late Morning | Inactive                |
| 2019/09/03 | CH2271 | Male   | Two y/o | Control | Control | Feed Day | 11:45 | 11:00 - 11:59 | Late Morning | Inactive                |
| 2019/09/03 | CH2271 | Male   | Two y/o | Control | Control | Feed Day | 11:50 | 11:00 - 11:59 | Late Morning | Inactive                |
| 2019/09/03 | CH2271 | Male   | Two y/o | Control | Control | Feed Day | 11:55 | 11:00 - 11:59 | Late Morning | Inactive                |
| 2019/09/03 | CH2271 | Male   | Two y/o | Control | Control | Feed Day | 12:00 | 12:00 - 12:59 | Afternoon    | Inactive                |
| 2019/09/03 | CH2276 | Female | Two y/o | Control | Control | Feed Day | 12:00 | 12:00 - 12:59 | Afternoon    | Locomotion              |
| 2019/09/03 | CH2277 | Female | Two y/o | Control | Control | Feed Day | 12:00 | 12:00 - 12:59 | Afternoon    | Inactive                |
| 2019/09/03 | CH2276 | Female | Two y/o | Control | Control | Feed Day | 12:05 | 12:00 - 12:59 | Afternoon    | Inactive                |
| 2019/09/03 | CH2277 | Female | Two y/o | Control | Control | Feed Day | 12:05 | 12:00 - 12:59 | Afternoon    | Inactive                |
| 2019/09/03 | CH2276 | Female | Two y/o | Control | Control | Feed Day | 12:10 | 12:00 - 12:59 | Afternoon    | Inactive                |
| 2019/09/03 | CH2277 | Female | Two y/o | Control | Control | Feed Day | 12:10 | 12:00 - 12:59 | Afternoon    | Inactive                |



## Dataset S1: BEHAVIOUR\_1

[illegible]



## Dataset S1: BEHAVIOUR\_1

|            |        |        |         |         |         |          |       |               |              |                         |
|------------|--------|--------|---------|---------|---------|----------|-------|---------------|--------------|-------------------------|
| 2019/09/04 | CH2277 | Female | Two y/o | Control | Control | Feed Day | 12:00 | 12:00 - 12:59 | Afternoon    | Inactive                |
| 2019/09/04 | CH2271 | Male   | Two y/o | Control | Control | Feed Day | 12:05 | 12:00 - 12:59 | Afternoon    | Inactive                |
| 2019/09/04 | CH2276 | Female | Two y/o | Control | Control | Feed Day | 12:05 | 12:00 - 12:59 | Afternoon    | Out of sight            |
| 2019/09/04 | CH2277 | Female | Two y/o | Control | Control | Feed Day | 12:05 | 12:00 - 12:59 | Afternoon    | Inactive                |
| 2019/09/04 | CH2271 | Male   | Two y/o | Control | Control | Feed Day | 12:10 | 12:00 - 12:59 | Afternoon    | Auto-grooming           |
| 2019/09/04 | CH2276 | Female | Two y/o | Control | Control | Feed Day | 12:10 | 12:00 - 12:59 | Afternoon    | Out of sight            |
| 2019/09/04 | CH2277 | Female | Two y/o | Control | Control | Feed Day | 12:10 | 12:00 - 12:59 | Afternoon    | Inactive                |
| 2019/09/04 | CH2271 | Male   | Two y/o | Control | Control | Feed Day | 12:15 | 12:00 - 12:59 | Afternoon    | Inactive                |
| 2019/09/04 | CH2271 | Male   | Two y/o | Control | Control | Feed Day | 12:20 | 12:00 - 12:59 | Afternoon    | Scent-marking           |
| 2019/09/04 | CH2271 | Male   | Two y/o | Control | Control | Feed Day | 12:25 | 12:00 - 12:59 | Afternoon    | Inactive                |
| 2019/09/04 | CH2271 | Male   | Two y/o | Control | Control | Feed Day | 12:30 | 12:00 - 12:59 | Afternoon    | Inactive                |
| 2019/09/04 | CH2271 | Male   | Two y/o | Control | Control | Feed Day | 12:35 | 12:00 - 12:59 | Afternoon    | Inactive                |
| 2019/09/04 | CH2271 | Male   | Two y/o | Control | Control | Feed Day | 12:40 | 12:00 - 12:59 | Afternoon    | Inactive                |
| 2019/09/04 | CH2271 | Male   | Two y/o | Control | Control | Feed Day | 12:45 | 12:00 - 12:59 | Afternoon    | Inactive                |
| 2019/09/04 | CH2271 | Male   | Two y/o | Control | Control | Feed Day | 12:50 | 12:00 - 12:59 | Afternoon    | Inactive                |
| 2019/09/04 | CH2271 | Male   | Two y/o | Control | Control | Feed Day | 12:55 | 12:00 - 12:59 | Afternoon    | Inactive                |
| 2019/09/04 | CH2271 | Male   | Two y/o | Control | Control | Feed Day | 13:00 | 13:00 - 13:59 | Afternoon    | Inactive                |
| 2019/09/05 | CH2271 | Male   | Two y/o | Control | Control | Feed Day | 11:25 | 11:00 - 11:59 | Late Morning | Locomotion              |
| 2019/09/05 | CH2271 | Male   | Two y/o | Control | Control | Feed Day | 11:30 | 11:00 - 11:59 | Late Morning | Scent-marking           |
| 2019/09/05 | CH2271 | Male   | Two y/o | Control | Control | Feed Day | 11:35 | 11:00 - 11:59 | Late Morning | Scent-marking           |
| 2019/09/05 | CH2271 | Male   | Two y/o | Control | Control | Feed Day | 11:40 | 11:00 - 11:59 | Late Morning | Attention               |
| 2019/09/05 | CH2271 | Male   | Two y/o | Control | Control | Feed Day | 11:45 | 11:00 - 11:59 | Late Morning | Locomotion              |
| 2019/09/05 | CH2271 | Male   | Two y/o | Control | Control | Feed Day | 11:50 | 11:00 - 11:59 | Late Morning | Interspecific behaviour |
| 2019/09/05 | CH2271 | Male   | Two y/o | Control | Control | Feed Day | 11:55 | 11:00 - 11:59 | Late Morning | Interspecific behaviour |
| 2019/09/05 | CH2271 | Male   | Two y/o | Control | Control | Feed Day | 12:00 | 12:00 - 12:59 | Afternoon    | Inactive                |
| 2019/09/05 | CH2271 | Male   | Two y/o | Control | Control | Feed Day | 12:05 | 12:00 - 12:59 | Afternoon    | Interspecific behaviour |
| 2019/09/05 | CH2276 | Female | Two y/o | Control | Control | Feed Day | 12:05 | 12:00 - 12:59 | Afternoon    | Inactive                |
| 2019/09/05 | CH2277 | Female | Two y/o | Control | Control | Feed Day | 12:05 | 12:00 - 12:59 | Afternoon    | Inactive                |
| 2019/09/05 | CH2271 | Male   | Two y/o | Control | Control | Feed Day | 12:10 | 12:00 - 12:59 | Afternoon    | Locomotion              |
| 2019/09/05 | CH2276 | Female | Two y/o | Control | Control | Feed Day | 12:10 | 12:00 - 12:59 | Afternoon    | Interspecific behaviour |
| 2019/09/05 | CH2277 | Female | Two y/o | Control | Control | Feed Day | 12:10 | 12:00 - 12:59 | Afternoon    | Interspecific behaviour |
| 2019/09/05 | CH2271 | Male   | Two y/o | Control | Control | Feed Day | 12:15 | 12:00 - 12:59 | Afternoon    | Inactive                |
| 2019/09/05 | CH2276 | Female | Two y/o | Control | Control | Feed Day | 12:15 | 12:00 - 12:59 | Afternoon    | Interspecific behaviour |
| 2019/09/05 | CH2277 | Female | Two y/o | Control | Control | Feed Day | 12:15 | 12:00 - 12:59 | Afternoon    | Interspecific behaviour |
| 2019/09/05 | CH2271 | Male   | Two y/o | Control | Control | Feed Day | 12:20 | 12:00 - 12:59 | Afternoon    | Inactive                |
| 2019/09/05 | CH2276 | Female | Two y/o | Control | Control | Feed Day | 12:20 | 12:00 - 12:59 | Afternoon    | Inactive                |
| 2019/09/05 | CH2277 | Female | Two y/o | Control | Control | Feed Day | 12:20 | 12:00 - 12:59 | Afternoon    | Inactive                |



## Dataset S1: BEHAVIOUR\_1

|            |        |        |         |         |         |          |       |               |              |                         |
|------------|--------|--------|---------|---------|---------|----------|-------|---------------|--------------|-------------------------|
| 2019/09/05 | CH2276 | Female | Two y/o | Control | Control | Feed Day | 12:25 | 12:00 - 12:59 | Afternoon    | Inactive                |
| 2019/09/05 | CH2277 | Female | Two y/o | Control | Control | Feed Day | 12:25 | 12:00 - 12:59 | Afternoon    | Inactive                |
| 2019/09/05 | CH2276 | Female | Two y/o | Control | Control | Feed Day | 12:30 | 12:00 - 12:59 | Afternoon    | Inactive                |
| 2019/09/05 | CH2277 | Female | Two y/o | Control | Control | Feed Day | 12:30 | 12:00 - 12:59 | Afternoon    | Inactive                |
| 2019/09/05 | CH2276 | Female | Two y/o | Control | Control | Feed Day | 12:35 | 12:00 - 12:59 | Afternoon    | Inactive                |
| 2019/09/05 | CH2277 | Female | Two y/o | Control | Control | Feed Day | 12:35 | 12:00 - 12:59 | Afternoon    | Inactive                |
| 2019/09/05 | CH2276 | Female | Two y/o | Control | Control | Feed Day | 12:40 | 12:00 - 12:59 | Afternoon    | Inactive                |
| 2019/09/05 | CH2277 | Female | Two y/o | Control | Control | Feed Day | 12:40 | 12:00 - 12:59 | Afternoon    | Inactive                |
| 2019/09/05 | CH2276 | Female | Two y/o | Control | Control | Feed Day | 12:45 | 12:00 - 12:59 | Afternoon    | Inactive                |
| 2019/09/05 | CH2277 | Female | Two y/o | Control | Control | Feed Day | 12:45 | 12:00 - 12:59 | Afternoon    | Inactive                |
| 2019/09/05 | CH2276 | Female | Two y/o | Control | Control | Feed Day | 12:50 | 12:00 - 12:59 | Afternoon    | Inactive                |
| 2019/09/05 | CH2277 | Female | Two y/o | Control | Control | Feed Day | 12:50 | 12:00 - 12:59 | Afternoon    | Inactive                |
| 2019/09/05 | CH2276 | Female | Two y/o | Control | Control | Feed Day | 12:55 | 12:00 - 12:59 | Afternoon    | Inactive                |
| 2019/09/05 | CH2277 | Female | Two y/o | Control | Control | Feed Day | 12:55 | 12:00 - 12:59 | Afternoon    | Inactive                |
| 2019/09/05 | CH2276 | Female | Two y/o | Control | Control | Feed Day | 13:00 | 13:00 - 13:59 | Afternoon    | Inactive                |
| 2019/09/05 | CH2277 | Female | Two y/o | Control | Control | Feed Day | 13:00 | 13:00 - 13:59 | Afternoon    | Inactive                |
| 2019/09/06 | CH2276 | Female | Two y/o | Control | Control | Feed Day | 07:40 | 07:00 - 07:59 | Morning      | Locomotion              |
| 2019/09/06 | CH2277 | Female | Two y/o | Control | Control | Feed Day | 07:40 | 07:00 - 07:59 | Morning      | Interspecific behaviour |
| 2019/09/06 | CH2276 | Female | Two y/o | Control | Control | Feed Day | 07:45 | 07:00 - 07:59 | Morning      | Appetitive behaviour    |
| 2019/09/06 | CH2277 | Female | Two y/o | Control | Control | Feed Day | 07:45 | 07:00 - 07:59 | Morning      | Attention               |
| 2019/09/06 | CH2276 | Female | Two y/o | Control | Control | Feed Day | 07:50 | 07:00 - 07:59 | Morning      | Appetitive behaviour    |
| 2019/09/06 | CH2277 | Female | Two y/o | Control | Control | Feed Day | 07:50 | 07:00 - 07:59 | Morning      | Attention               |
| 2019/09/06 | CH2276 | Female | Two y/o | Control | Control | Feed Day | 07:55 | 07:00 - 07:59 | Morning      | Appetitive behaviour    |
| 2019/09/06 | CH2277 | Female | Two y/o | Control | Control | Feed Day | 07:55 | 07:00 - 07:59 | Morning      | Locomotion              |
| 2019/09/06 | CH2276 | Female | Two y/o | Control | Control | Feed Day | 08:00 | 08:00 - 08:59 | Late Morning | Appetitive behaviour    |
| 2019/09/06 | CH2277 | Female | Two y/o | Control | Control | Feed Day | 08:00 | 08:00 - 08:59 | Late Morning | Appetitive behaviour    |
| 2019/09/06 | CH2276 | Female | Two y/o | Control | Control | Feed Day | 08:05 | 08:00 - 08:59 | Late Morning | Appetitive behaviour    |
| 2019/09/06 | CH2277 | Female | Two y/o | Control | Control | Feed Day | 08:05 | 08:00 - 08:59 | Late Morning | Appetitive behaviour    |
| 2019/09/06 | CH2276 | Female | Two y/o | Control | Control | Feed Day | 08:10 | 08:00 - 08:59 | Late Morning | Out of sight            |
| 2019/09/06 | CH2277 | Female | Two y/o | Control | Control | Feed Day | 08:10 | 08:00 - 08:59 | Late Morning | Locomotion              |
| 2019/09/06 | CH2276 | Female | Two y/o | Control | Control | Feed Day | 08:15 | 08:00 - 08:59 | Late Morning | Out of sight            |
| 2019/09/06 | CH2277 | Female | Two y/o | Control | Control | Feed Day | 08:15 | 08:00 - 08:59 | Late Morning | Auto-grooming           |
| 2019/09/06 | CH2277 | Female | Two y/o | Control | Control | Feed Day | 08:20 | 08:00 - 08:59 | Late Morning | Locomotion              |
| 2019/09/06 | CH2276 | Female | Two y/o | Control | Control | Feed Day | 08:20 | 08:00 - 08:59 | Late Morning | Locomotion              |
| 2019/09/06 | CH2277 | Female | Two y/o | Control | Control | Feed Day | 08:25 | 08:00 - 08:59 | Late Morning | Interspecific behaviour |
| 2019/09/06 | CH2276 | Female | Two y/o | Control | Control | Feed Day | 08:25 | 08:00 - 08:59 | Late Morning | Interspecific behaviour |
| 2019/09/06 | CH2277 | Female | Two y/o | Control | Control | Feed Day | 08:30 | 08:00 - 08:59 | Late Morning | Interspecific behaviour |



## Dataset S1: BEHAVIOUR\_1

|            |        |        |         |         |         |          |       |               |              |                         |
|------------|--------|--------|---------|---------|---------|----------|-------|---------------|--------------|-------------------------|
| 2019/09/06 | CH2276 | Female | Two y/o | Control | Control | Feed Day | 08:30 | 08:00 - 08:59 | Late Morning | Interspecific behaviour |
| 2019/09/06 | CH2271 | Male   | Two y/o | Control | Control | Feed Day | 08:35 | 08:00 - 08:59 | Late Morning | Affiliative behaviour   |
| 2019/09/06 | CH2277 | Female | Two y/o | Control | Control | Feed Day | 08:35 | 08:00 - 08:59 | Late Morning | Appetitive behaviour    |
| 2019/09/06 | CH2276 | Female | Two y/o | Control | Control | Feed Day | 08:35 | 08:00 - 08:59 | Late Morning | Appetitive behaviour    |
| 2019/09/06 | CH2271 | Male   | Two y/o | Control | Control | Feed Day | 08:40 | 08:00 - 08:59 | Late Morning | Locomotion              |
| 2019/09/06 | CH2271 | Male   | Two y/o | Control | Control | Feed Day | 08:45 | 08:00 - 08:59 | Late Morning | Locomotion              |
| 2019/09/06 | CH2271 | Male   | Two y/o | Control | Control | Feed Day | 08:50 | 08:00 - 08:59 | Late Morning | Locomotion              |
| 2019/09/06 | CH2271 | Male   | Two y/o | Control | Control | Feed Day | 08:55 | 08:00 - 08:59 | Late Morning | Locomotion              |
| 2019/09/06 | CH2271 | Male   | Two y/o | Control | Control | Feed Day | 09:00 | 09:00 - 09:59 | Late Morning | Locomotion              |
| 2019/09/06 | CH2271 | Male   | Two y/o | Control | Control | Feed Day | 09:05 | 09:00 - 09:59 | Late Morning | Interspecific behaviour |
| 2019/09/06 | CH2271 | Male   | Two y/o | Control | Control | Feed Day | 09:10 | 09:00 - 09:59 | Late Morning | Locomotion              |
| 2019/09/06 | CH2271 | Male   | Two y/o | Control | Control | Feed Day | 09:15 | 09:00 - 09:59 | Late Morning | Interspecific behaviour |
| 2019/09/06 | CH2271 | Male   | Two y/o | Control | Control | Feed Day | 09:20 | 09:00 - 09:59 | Late Morning | Appetitive behaviour    |
| 2019/09/06 | CH2271 | Male   | Two y/o | Control | Control | Feed Day | 09:25 | 09:00 - 09:59 | Late Morning | Appetitive behaviour    |
| 2019/09/06 | CH2271 | Male   | Two y/o | Control | Control | Feed Day | 09:30 | 09:00 - 09:59 | Late Morning | Appetitive behaviour    |
| 2019/09/07 | CH2271 | Male   | Two y/o | Control | Control | Feed Day | 07:45 | 07:00 - 07:59 | Morning      | Locomotion              |
| 2019/09/07 | CH2271 | Male   | Two y/o | Control | Control | Feed Day | 07:50 | 07:00 - 07:59 | Morning      | Inactive                |
| 2019/09/07 | CH2271 | Male   | Two y/o | Control | Control | Feed Day | 07:55 | 07:00 - 07:59 | Morning      | Inactive                |
| 2019/09/07 | CH2271 | Male   | Two y/o | Control | Control | Feed Day | 08:00 | 08:00 - 08:59 | Late Morning | Inactive                |
| 2019/09/07 | CH2271 | Male   | Two y/o | Control | Control | Feed Day | 08:05 | 08:00 - 08:59 | Late Morning | Inactive                |
| 2019/09/07 | CH2271 | Male   | Two y/o | Control | Control | Feed Day | 08:10 | 08:00 - 08:59 | Late Morning | Inactive                |
| 2019/09/07 | CH2271 | Male   | Two y/o | Control | Control | Feed Day | 08:15 | 08:00 - 08:59 | Late Morning | Inactive                |
| 2019/09/07 | CH2271 | Male   | Two y/o | Control | Control | Feed Day | 08:20 | 08:00 - 08:59 | Late Morning | Scent-marking           |
| 2019/09/07 | CH2271 | Male   | Two y/o | Control | Control | Feed Day | 08:25 | 08:00 - 08:59 | Late Morning | Auto-grooming           |
| 2019/09/07 | CH2276 | Female | Two y/o | Control | Control | Feed Day | 08:25 | 08:00 - 08:59 | Late Morning | Appetitive behaviour    |
| 2019/09/07 | CH2277 | Female | Two y/o | Control | Control | Feed Day | 08:25 | 08:00 - 08:59 | Late Morning | Inactive                |
| 2019/09/07 | CH2271 | Male   | Two y/o | Control | Control | Feed Day | 08:30 | 08:00 - 08:59 | Late Morning | Interspecific behaviour |
| 2019/09/07 | CH2276 | Female | Two y/o | Control | Control | Feed Day | 08:30 | 08:00 - 08:59 | Late Morning | Appetitive behaviour    |
| 2019/09/07 | CH2277 | Female | Two y/o | Control | Control | Feed Day | 08:30 | 08:00 - 08:59 | Late Morning | Appetitive behaviour    |
| 2019/09/07 | CH2271 | Male   | Two y/o | Control | Control | Feed Day | 08:35 | 08:00 - 08:59 | Late Morning | Appetitive behaviour    |
| 2019/09/07 | CH2276 | Female | Two y/o | Control | Control | Feed Day | 08:35 | 08:00 - 08:59 | Late Morning | Appetitive behaviour    |
| 2019/09/07 | CH2277 | Female | Two y/o | Control | Control | Feed Day | 08:35 | 08:00 - 08:59 | Late Morning | Appetitive behaviour    |
| 2019/09/07 | CH2271 | Male   | Two y/o | Control | Control | Feed Day | 08:40 | 08:00 - 08:59 | Late Morning | Appetitive behaviour    |
| 2019/09/07 | CH2276 | Female | Two y/o | Control | Control | Feed Day | 08:40 | 08:00 - 08:59 | Late Morning | Appetitive behaviour    |
| 2019/09/07 | CH2277 | Female | Two y/o | Control | Control | Feed Day | 08:40 | 08:00 - 08:59 | Late Morning | Appetitive behaviour    |
| 2019/09/07 | CH2276 | Female | Two y/o | Control | Control | Feed Day | 08:45 | 08:00 - 08:59 | Late Morning | Appetitive behaviour    |
| 2019/09/07 | CH2277 | Female | Two y/o | Control | Control | Feed Day | 08:45 | 08:00 - 08:59 | Late Morning | Appetitive behaviour    |



## Dataset S1: BEHAVIOUR\_1

|            |        |        |         |         |         |          |       |               |              |                         |
|------------|--------|--------|---------|---------|---------|----------|-------|---------------|--------------|-------------------------|
| 2019/09/07 | CH2276 | Female | Two y/o | Control | Control | Feed Day | 08:50 | 08:00 - 08:59 | Late Morning | Appetitive behaviour    |
| 2019/09/07 | CH2277 | Female | Two y/o | Control | Control | Feed Day | 08:50 | 08:00 - 08:59 | Late Morning | Appetitive behaviour    |
| 2019/09/07 | CH2276 | Female | Two y/o | Control | Control | Feed Day | 08:55 | 08:00 - 08:59 | Late Morning | Appetitive behaviour    |
| 2019/09/07 | CH2277 | Female | Two y/o | Control | Control | Feed Day | 08:55 | 08:00 - 08:59 | Late Morning | Appetitive behaviour    |
| 2019/09/07 | CH2276 | Female | Two y/o | Control | Control | Feed Day | 09:00 | 09:00 - 09:59 | Late Morning | Appetitive behaviour    |
| 2019/09/07 | CH2277 | Female | Two y/o | Control | Control | Feed Day | 09:00 | 09:00 - 09:59 | Late Morning | Appetitive behaviour    |
| 2019/09/07 | CH2276 | Female | Two y/o | Control | Control | Feed Day | 09:05 | 09:00 - 09:59 | Late Morning | Appetitive behaviour    |
| 2019/09/07 | CH2277 | Female | Two y/o | Control | Control | Feed Day | 09:05 | 09:00 - 09:59 | Late Morning | Standing                |
| 2019/09/07 | CH2276 | Female | Two y/o | Control | Control | Feed Day | 09:10 | 09:00 - 09:59 | Late Morning | Appetitive behaviour    |
| 2019/09/07 | CH2277 | Female | Two y/o | Control | Control | Feed Day | 09:10 | 09:00 - 09:59 | Late Morning | Interspecific behaviour |
| 2019/09/07 | CH2276 | Female | Two y/o | Control | Control | Feed Day | 09:15 | 09:00 - 09:59 | Late Morning | Interspecific behaviour |
| 2019/09/07 | CH2277 | Female | Two y/o | Control | Control | Feed Day | 09:15 | 09:00 - 09:59 | Late Morning | Interspecific behaviour |
| 2019/09/07 | CH2276 | Female | Two y/o | Control | Control | Feed Day | 09:20 | 09:00 - 09:59 | Late Morning | Interspecific behaviour |
| 2019/09/07 | CH2277 | Female | Two y/o | Control | Control | Feed Day | 09:20 | 09:00 - 09:59 | Late Morning | Interspecific behaviour |
| 2019/09/10 | CH2276 | Female | Two y/o | Control | Control | Feed Day | 07:45 | 07:00 - 07:59 | Morning      | Locomotion              |
| 2019/09/10 | CH2277 | Female | Two y/o | Control | Control | Feed Day | 07:45 | 07:00 - 07:59 | Morning      | Attention               |
| 2019/09/10 | CH2276 | Female | Two y/o | Control | Control | Feed Day | 07:50 | 07:00 - 07:59 | Morning      | Locomotion              |
| 2019/09/10 | CH2277 | Female | Two y/o | Control | Control | Feed Day | 07:50 | 07:00 - 07:59 | Morning      | Locomotion              |
| 2019/09/10 | CH2276 | Female | Two y/o | Control | Control | Feed Day | 07:55 | 07:00 - 07:59 | Morning      | Affiliative behaviour   |
| 2019/09/10 | CH2277 | Female | Two y/o | Control | Control | Feed Day | 07:55 | 07:00 - 07:59 | Morning      | Affiliative behaviour   |
| 2019/09/10 | CH2276 | Female | Two y/o | Control | Control | Feed Day | 08:00 | 08:00 - 08:59 | Late Morning | Out of sight            |
| 2019/09/10 | CH2277 | Female | Two y/o | Control | Control | Feed Day | 08:00 | 08:00 - 08:59 | Late Morning | Appetitive behaviour    |
| 2019/09/10 | CH2276 | Female | Two y/o | Control | Control | Feed Day | 08:05 | 08:00 - 08:59 | Late Morning | Out of sight            |
| 2019/09/10 | CH2277 | Female | Two y/o | Control | Control | Feed Day | 08:05 | 08:00 - 08:59 | Late Morning | Locomotion              |
| 2019/09/10 | CH2276 | Female | Two y/o | Control | Control | Feed Day | 08:10 | 08:00 - 08:59 | Late Morning | Out of sight            |
| 2019/09/10 | CH2277 | Female | Two y/o | Control | Control | Feed Day | 08:10 | 08:00 - 08:59 | Late Morning | Inactive                |
| 2019/09/10 | CH2276 | Female | Two y/o | Control | Control | Feed Day | 08:15 | 08:00 - 08:59 | Late Morning | Out of sight            |
| 2019/09/10 | CH2277 | Female | Two y/o | Control | Control | Feed Day | 08:15 | 08:00 - 08:59 | Late Morning | Inactive                |
| 2019/09/10 | CH2276 | Female | Two y/o | Control | Control | Feed Day | 08:20 | 08:00 - 08:59 | Late Morning | Locomotion              |
| 2019/09/10 | CH2277 | Female | Two y/o | Control | Control | Feed Day | 08:20 | 08:00 - 08:59 | Late Morning | Interspecific behaviour |
| 2019/09/10 | CH2276 | Female | Two y/o | Control | Control | Feed Day | 08:25 | 08:00 - 08:59 | Late Morning | Interspecific behaviour |
| 2019/09/10 | CH2277 | Female | Two y/o | Control | Control | Feed Day | 08:25 | 08:00 - 08:59 | Late Morning | Appetitive behaviour    |
| 2019/09/10 | CH2276 | Female | Two y/o | Control | Control | Feed Day | 08:30 | 08:00 - 08:59 | Late Morning | Interspecific behaviour |
| 2019/09/10 | CH2277 | Female | Two y/o | Control | Control | Feed Day | 08:30 | 08:00 - 08:59 | Late Morning | Interspecific behaviour |
| 2019/09/10 | CH2276 | Female | Two y/o | Control | Control | Feed Day | 08:35 | 08:00 - 08:59 | Late Morning | Appetitive behaviour    |
| 2019/09/10 | CH2277 | Female | Two y/o | Control | Control | Feed Day | 08:35 | 08:00 - 08:59 | Late Morning | Appetitive behaviour    |
| 2019/09/10 | CH2271 | Male   | Two y/o | Control | Control | Feed Day | 08:40 | 08:00 - 08:59 | Late Morning | Olfactory exploration   |



## Dataset S1: BEHAVIOUR\_1

|            |        |        |         |         |         |          |       |               |              |                         |
|------------|--------|--------|---------|---------|---------|----------|-------|---------------|--------------|-------------------------|
| 2019/09/10 | CH2276 | Female | Two y/o | Control | Control | Feed Day | 08:40 | 08:00 - 08:59 | Late Morning | Locomotion              |
| 2019/09/10 | CH2277 | Female | Two y/o | Control | Control | Feed Day | 08:40 | 08:00 - 08:59 | Late Morning | Locomotion              |
| 2019/09/10 | CH2271 | Male   | Two y/o | Control | Control | Feed Day | 08:45 | 08:00 - 08:59 | Late Morning | Scent-marking           |
| 2019/09/10 | CH2271 | Male   | Two y/o | Control | Control | Feed Day | 08:50 | 08:00 - 08:59 | Late Morning | Inactive                |
| 2019/09/10 | CH2271 | Male   | Two y/o | Control | Control | Feed Day | 08:55 | 08:00 - 08:59 | Late Morning | Locomotion              |
| 2019/09/10 | CH2271 | Male   | Two y/o | Control | Control | Feed Day | 09:00 | 09:00 - 09:59 | Late Morning | Locomotion              |
| 2019/09/10 | CH2271 | Male   | Two y/o | Control | Control | Feed Day | 09:05 | 09:00 - 09:59 | Late Morning | Locomotion              |
| 2019/09/10 | CH2271 | Male   | Two y/o | Control | Control | Feed Day | 09:10 | 09:00 - 09:59 | Late Morning | Affiliative behaviour   |
| 2019/09/10 | CH2271 | Male   | Two y/o | Control | Control | Feed Day | 09:15 | 09:00 - 09:59 | Late Morning | Locomotion              |
| 2019/09/10 | CH2271 | Male   | Two y/o | Control | Control | Feed Day | 09:20 | 09:00 - 09:59 | Late Morning | Appetitive behaviour    |
| 2019/09/10 | CH2271 | Male   | Two y/o | Control | Control | Feed Day | 09:25 | 09:00 - 09:59 | Late Morning | Inactive                |
| 2019/09/10 | CH2271 | Male   | Two y/o | Control | Control | Feed Day | 09:30 | 09:00 - 09:59 | Late Morning | Inactive                |
| 2019/09/10 | CH2271 | Male   | Two y/o | Control | Control | Feed Day | 09:35 | 09:00 - 09:59 | Late Morning | Locomotion              |
| 2019/09/11 | CH2271 | Male   | Two y/o | Control | Control | Feed Day | 07:45 | 07:00 - 07:59 | Morning      | Locomotion              |
| 2019/09/11 | CH2271 | Male   | Two y/o | Control | Control | Feed Day | 07:50 | 07:00 - 07:59 | Morning      | Scent-marking           |
| 2019/09/11 | CH2271 | Male   | Two y/o | Control | Control | Feed Day | 07:55 | 07:00 - 07:59 | Morning      | Locomotion              |
| 2019/09/11 | CH2271 | Male   | Two y/o | Control | Control | Feed Day | 08:00 | 08:00 - 08:59 | Late Morning | Locomotion              |
| 2019/09/11 | CH2271 | Male   | Two y/o | Control | Control | Feed Day | 08:05 | 08:00 - 08:59 | Late Morning | Locomotion              |
| 2019/09/11 | CH2271 | Male   | Two y/o | Control | Control | Feed Day | 08:10 | 08:00 - 08:59 | Late Morning | Locomotion              |
| 2019/09/11 | CH2271 | Male   | Two y/o | Control | Control | Feed Day | 08:15 | 08:00 - 08:59 | Late Morning | Olfactory exploration   |
| 2019/09/11 | CH2271 | Male   | Two y/o | Control | Control | Feed Day | 08:20 | 08:00 - 08:59 | Late Morning | Inactive                |
| 2019/09/11 | CH2271 | Male   | Two y/o | Control | Control | Feed Day | 08:25 | 08:00 - 08:59 | Late Morning | Inactive                |
| 2019/09/11 | CH2271 | Male   | Two y/o | Control | Control | Feed Day | 08:30 | 08:00 - 08:59 | Late Morning | Interspecific behaviour |
| 2019/09/11 | CH2271 | Male   | Two y/o | Control | Control | Feed Day | 08:35 | 08:00 - 08:59 | Late Morning | Appetitive behaviour    |
| 2019/09/11 | CH2276 | Female | Two y/o | Control | Control | Feed Day | 08:35 | 08:00 - 08:59 | Late Morning | Interspecific behaviour |
| 2019/09/11 | CH2277 | Female | Two y/o | Control | Control | Feed Day | 08:35 | 08:00 - 08:59 | Late Morning | Interspecific behaviour |
| 2019/09/11 | CH2271 | Male   | Two y/o | Control | Control | Feed Day | 08:40 | 08:00 - 08:59 | Late Morning | Appetitive behaviour    |
| 2019/09/11 | CH2276 | Female | Two y/o | Control | Control | Feed Day | 08:40 | 08:00 - 08:59 | Late Morning | Appetitive behaviour    |
| 2019/09/11 | CH2277 | Female | Two y/o | Control | Control | Feed Day | 08:40 | 08:00 - 08:59 | Late Morning | Appetitive behaviour    |
| 2019/09/11 | CH2276 | Female | Two y/o | Control | Control | Feed Day | 08:45 | 08:00 - 08:59 | Late Morning | Appetitive behaviour    |
| 2019/09/11 | CH2277 | Female | Two y/o | Control | Control | Feed Day | 08:45 | 08:00 - 08:59 | Late Morning | Appetitive behaviour    |
| 2019/09/11 | CH2276 | Female | Two y/o | Control | Control | Feed Day | 08:50 | 08:00 - 08:59 | Late Morning | Appetitive behaviour    |
| 2019/09/11 | CH2277 | Female | Two y/o | Control | Control | Feed Day | 08:50 | 08:00 - 08:59 | Late Morning | Appetitive behaviour    |
| 2019/09/11 | CH2276 | Female | Two y/o | Control | Control | Feed Day | 08:55 | 08:00 - 08:59 | Late Morning | Appetitive behaviour    |
| 2019/09/11 | CH2277 | Female | Two y/o | Control | Control | Feed Day | 08:55 | 08:00 - 08:59 | Late Morning | Appetitive behaviour    |
| 2019/09/11 | CH2276 | Female | Two y/o | Control | Control | Feed Day | 09:00 | 09:00 - 09:59 | Late Morning | Appetitive behaviour    |
| 2019/09/11 | CH2277 | Female | Two y/o | Control | Control | Feed Day | 09:00 | 09:00 - 09:59 | Late Morning | Appetitive behaviour    |



Dataset S1: BEHAVIOUR\_1

|            |        |        |         |         |         |          |       |               |              |                         |
|------------|--------|--------|---------|---------|---------|----------|-------|---------------|--------------|-------------------------|
| 2019/09/11 | CH2276 | Female | Two y/o | Control | Control | Feed Day | 09:05 | 09:00 - 09:59 | Late Morning | Interspecific behaviour |
| 2019/09/11 | CH2277 | Female | Two y/o | Control | Control | Feed Day | 09:05 | 09:00 - 09:59 | Late Morning | Standing                |
| 2019/09/11 | CH2276 | Female | Two y/o | Control | Control | Feed Day | 09:10 | 09:00 - 09:59 | Late Morning | Inactive                |
| 2019/09/11 | CH2277 | Female | Two y/o | Control | Control | Feed Day | 09:10 | 09:00 - 09:59 | Late Morning | Inactive                |
| 2019/09/11 | CH2276 | Female | Two y/o | Control | Control | Feed Day | 09:15 | 09:00 - 09:59 | Late Morning | Inactive                |
| 2019/09/11 | CH2277 | Female | Two y/o | Control | Control | Feed Day | 09:15 | 09:00 - 09:59 | Late Morning | Inactive                |
| 2019/09/11 | CH2276 | Female | Two y/o | Control | Control | Feed Day | 09:20 | 09:00 - 09:59 | Late Morning | Inactive                |
| 2019/09/11 | CH2277 | Female | Two y/o | Control | Control | Feed Day | 09:20 | 09:00 - 09:59 | Late Morning | Inactive                |
| 2019/09/11 | CH2276 | Female | Two y/o | Control | Control | Feed Day | 09:25 | 09:00 - 09:59 | Late Morning | Inactive                |
| 2019/09/11 | CH2277 | Female | Two y/o | Control | Control | Feed Day | 09:25 | 09:00 - 09:59 | Late Morning | Inactive                |
| 2019/09/11 | CH2276 | Female | Two y/o | Control | Control | Feed Day | 09:30 | 09:00 - 09:59 | Late Morning | Inactive                |
| 2019/09/11 | CH2277 | Female | Two y/o | Control | Control | Feed Day | 09:30 | 09:00 - 09:59 | Late Morning | Inactive                |



| Date       | Cheeth ID | Sex    | Age Group | Week             | Study Period | Feed/Fast Day | Inactive | Appetite behavior | Attention | Auto-grooming | Environmental enrichment | Locomotion | Maintenance | Olfactory exploration | Scent-marking | Standing | Stereotypical | Vocalization | Affiliative behaviour | Agonistic behaviour | Inter-specific behaviour | Out of sight | Inactive X | Appetite behavior X | Attention X | Auto-grooming X | Locomotion X | Maintenance X | Olfactory exploration X | Scent-marking X | Standing X | Stereotypical X | Vocalization X | Affiliative behaviour X | Agonistic behaviour X | Inter-specific behaviour X | Out of sight X |  |
|------------|-----------|--------|-----------|------------------|--------------|---------------|----------|-------------------|-----------|---------------|--------------------------|------------|-------------|-----------------------|---------------|----------|---------------|--------------|-----------------------|---------------------|--------------------------|--------------|------------|---------------------|-------------|-----------------|--------------|---------------|-------------------------|-----------------|------------|-----------------|----------------|-------------------------|-----------------------|----------------------------|----------------|--|
| 2019/04/24 | C12207    | Female | Three y/o | Treatment (Wk 1) | Treatment    | Fast Day      |          | 0.33              |           | 0.08          |                          | 0.25       |             |                       | 0.33          |          |               |              |                       |                     |                          |              |            |                     |             |                 |              |               |                         |                 |            |                 |                |                         |                       |                            |                |  |
| 2019/04/26 | C12207    | Female | Three y/o | Treatment (Wk 2) | Treatment    | Feed Day      | 0.25     | 0.50              |           | 0.08          |                          | 0.17       |             |                       |               |          |               |              |                       |                     |                          |              |            |                     |             |                 |              |               |                         |                 |            |                 |                |                         |                       |                            |                |  |
| 2019/05/01 | C12207    | Female | Three y/o | Treatment (Wk 2) | Treatment    | Fast Day      | 0.33     | 0.17              | 0.33      |               |                          | 0.33       |             |                       |               |          |               |              |                       |                     |                          |              |            |                     |             |                 |              |               |                         |                 |            |                 |                |                         |                       |                            |                |  |
| 2019/05/05 | C12207    | Female | Three y/o | Treatment (Wk 2) | Treatment    | Fast Day      | 0.42     | 0.08              |           | 0.08          |                          | 0.33       |             |                       |               | 0.08     |               |              |                       |                     |                          |              |            |                     |             |                 |              |               |                         |                 |            |                 |                |                         |                       |                            |                |  |
| 2019/05/07 | C12207    | Female | Three y/o | Treatment (Wk 3) | Treatment    | Feed Day      | 0.42     |                   |           | 0.08          |                          | 0.50       |             |                       |               |          |               |              |                       |                     |                          |              |            |                     |             |                 |              |               |                         |                 |            |                 |                |                         |                       |                            |                |  |
| 2019/05/08 | C12207    | Female | Three y/o | Treatment (Wk 3) | Treatment    | Fast Day      | 0.43     |                   | 0.08      |               |                          | 0.43       |             |                       |               |          |               |              |                       |                     |                          |              |            |                     |             |                 |              |               |                         |                 |            |                 |                |                         |                       |                            |                |  |
| 2019/05/10 | C12207    | Female | Three y/o | Treatment (Wk 3) | Treatment    | Feed Day      | 1.00     |                   |           |               |                          |            |             |                       |               |          |               |              |                       |                     |                          |              |            |                     |             |                 |              |               |                         |                 |            |                 |                |                         |                       |                            |                |  |
| 2019/05/11 | C12207    | Female | Three y/o | Treatment (Wk 3) | Treatment    | Fast Day      | 0.33     |                   | 0.08      | 0.42          |                          | 0.08       |             |                       | 0.08          |          |               |              |                       |                     |                          |              |            |                     |             |                 |              |               |                         |                 |            |                 |                |                         |                       |                            |                |  |
| 2019/05/12 | C12207    | Female | Three y/o | Treatment (Wk 3) | Treatment    | Fast Day      | 0.33     |                   | 0.08      |               |                          | 0.17       |             |                       | 0.17          |          |               |              |                       |                     |                          |              |            |                     |             |                 |              |               |                         |                 |            |                 |                |                         |                       |                            |                |  |
| 2019/05/13 | C12207    | Female | Three y/o | Treatment (Wk 3) | Treatment    | Feed Day      | 0.08     |                   | 0.08      |               | 0.17                     | 0.75       |             |                       | 0.08          |          |               |              |                       |                     |                          |              |            |                     |             |                 |              |               |                         |                 |            |                 |                |                         |                       |                            |                |  |
| 2019/05/15 | C12206    | Male   | Three y/o | Treatment (Wk 1) | Treatment    | Fast Day      | 0.67     |                   |           |               |                          | 0.17       |             |                       |               |          |               |              |                       |                     |                          |              |            |                     |             |                 |              |               |                         |                 |            |                 |                |                         |                       |                            |                |  |
| 2019/05/15 | C12206    | Male   | Three y/o | Treatment (Wk 1) | Treatment    | Fast Day      | 0.25     | 0.33              |           |               |                          | 0.33       |             |                       |               |          |               |              |                       |                     |                          |              |            |                     |             |                 |              |               |                         |                 |            |                 |                |                         |                       |                            |                |  |
| 2019/05/17 | C12205    | Male   | Three y/o | Treatment (Wk 1) | Treatment    | Feed Day      | 0.17     |                   | 0.17      |               |                          | 0.98       |             |                       | 0.08          |          |               |              |                       |                     |                          |              |            |                     |             |                 |              |               |                         |                 |            |                 |                |                         |                       |                            |                |  |
| 2019/05/17 | C12206    | Male   | Three y/o | Treatment (Wk 1) | Treatment    | Feed Day      | 0.08     | 0.25              | 0.25      |               |                          | 0.25       |             |                       | 0.08          | 0.08     |               |              |                       |                     |                          |              |            |                     |             |                 |              |               |                         |                 |            |                 |                |                         |                       |                            |                |  |
| 2019/05/20 | C12205    | Male   | Three y/o | Treatment (Wk 1) | Treatment    | Feed Day      | 0.33     |                   | 0.08      | 0.33          |                          | 0.17       |             |                       |               |          |               |              |                       |                     |                          |              |            |                     |             |                 |              |               |                         |                 |            |                 |                |                         |                       |                            |                |  |
| 2019/05/20 | C12206    | Male   | Three y/o | Treatment (Wk 1) | Treatment    | Feed Day      | 0.08     | 0.42              | 0.25      |               |                          | 0.08       |             |                       |               |          |               |              |                       |                     |                          |              |            |                     |             |                 |              |               |                         |                 |            |                 |                |                         |                       |                            |                |  |
| 2019/05/22 | C12206    | Male   | Three y/o | Treatment (Wk 2) | Treatment    | Fast Day      | 0.08     | 0.25              |           | 0.08          |                          | 0.25       |             |                       |               |          |               |              |                       |                     |                          |              |            |                     |             |                 |              |               |                         |                 |            |                 |                |                         |                       |                            |                |  |
| 2019/05/22 | C12206    | Male   | Three y/o | Treatment (Wk 2) | Treatment    | Fast Day      | 0.08     | 0.42              | 0.08      |               |                          | 0.25       |             |                       |               |          |               |              |                       |                     |                          |              |            |                     |             |                 |              |               |                         |                 |            |                 |                |                         |                       |                            |                |  |
| 2019/05/23 | C12205    | Male   | Three y/o | Treatment (Wk 2) | Treatment    | Feed Day      | 0.98     |                   | 0.25      |               |                          | 0.08       |             |                       |               |          |               |              |                       |                     |                          |              |            |                     |             |                 |              |               |                         |                 |            |                 |                |                         |                       |                            |                |  |
| 2019/05/23 | C12206    | Male   | Three y/o | Treatment (Wk 2) | Treatment    | Fast Day      | 0.98     |                   | 0.25      | 0.08          |                          | 0.08       |             |                       |               |          |               |              |                       |                     |                          |              |            |                     |             |                 |              |               |                         |                 |            |                 |                |                         |                       |                            |                |  |
| 2019/05/26 | C12205    | Male   | Three y/o | Treatment (Wk 2) | Treatment    | Feed Day      | 0.98     |                   | 0.25      | 0.08          |                          | 0.08       |             |                       |               |          |               |              |                       |                     |                          |              |            |                     |             |                 |              |               |                         |                 |            |                 |                |                         |                       |                            |                |  |
| 2019/05/26 | C12206    | Male   | Three y/o | Treatment (Wk 2) | Treatment    | Fast Day      | 1.00     |                   |           |               |                          | 0.83       |             |                       |               |          |               |              |                       |                     |                          |              |            |                     |             |                 |              |               |                         |                 |            |                 |                |                         |                       |                            |                |  |
| 2019/05/27 | C12205    | Male   | Three y/o | Treatment (Wk 2) | Treatment    | Feed Day      | 0.17     |                   |           |               |                          | 0.17       |             |                       | 0.08          |          |               |              |                       |                     |                          |              |            |                     |             |                 |              |               |                         |                 |            |                 |                |                         |                       |                            |                |  |
| 2019/05/27 | C12206    | Male   | Three y/o | Treatment (Wk 2) | Treatment    | Feed Day      | 0.17     |                   | 0.33      |               | 0.08                     |            |             |                       |               |          |               |              |                       |                     |                          |              |            |                     |             |                 |              |               |                         |                 |            |                 |                |                         |                       |                            |                |  |
| 2019/05/28 | C12205    | Male   | Three y/o | Treatment (Wk 2) | Treatment    | Feed Day      |          |                   | 0.33      |               |                          | 0.25       |             |                       | 0.08          | 0.17     |               |              |                       |                     |                          |              |            |                     |             |                 |              |               |                         |                 |            |                 |                |                         |                       |                            |                |  |
| 2019/05/28 | C12206    | Male   | Three y/o | Treatment (Wk 2) | Treatment    | Feed Day      |          | 0.50              | 0.08      |               |                          | 0.25       |             |                       |               | 0.17     |               |              |                       |                     |                          |              |            |                     |             |                 |              |               |                         |                 |            |                 |                |                         |                       |                            |                |  |
| 2019/05/29 | C12205    | Male   | Three y/o | Treatment (Wk 3) | Treatment    | Fast Day      | 0.17     |                   | 0.08      |               |                          | 0.33       |             |                       |               |          |               |              |                       |                     |                          |              |            |                     |             |                 |              |               |                         |                 |            |                 |                |                         |                       |                            |                |  |
| 2019/05/29 | C12206    | Male   | Three y/o | Treatment (Wk 3) | Treatment    | Fast Day      | 0.08     | 0.42              |           |               |                          | 0.42       |             |                       | 0.08          |          |               |              |                       |                     |                          |              |            |                     |             |                 |              |               |                         |                 |            |                 |                |                         |                       |                            |                |  |
| 2019/05/30 | C12205    | Male   | Three y/o | Treatment (Wk 3) | Treatment    | Feed Day      | 0.08     |                   |           | 0.08          |                          | 0.25       |             |                       |               |          |               |              |                       |                     |                          |              |            |                     |             |                 |              |               |                         |                 |            |                 |                |                         |                       |                            |                |  |
| 2019/05/30 | C12206    | Male   | Three y/o | Treatment (Wk 3) | Treatment    | Feed Day      | 0.98     |                   |           |               |                          | 0.98       |             |                       |               |          |               |              |                       |                     |                          |              |            |                     |             |                 |              |               |                         |                 |            |                 |                |                         |                       |                            |                |  |
| 2019/05/31 | C12205    | Male   | Three y/o | Treatment (Wk 3) | Treatment    | Feed Day      | 0.42     |                   | 0.17      |               |                          | 0.25       |             |                       |               |          |               |              |                       |                     |                          |              |            |                     |             |                 |              |               |                         |                 |            |                 |                |                         |                       |                            |                |  |
| 2019/05/31 | C12206    | Male   | Three y/o | Treatment (Wk 3) | Treatment    | Feed Day      | 0.08     | 0.08              |           |               |                          | 0.08       |             |                       |               |          |               |              |                       |                     |                          |              |            |                     |             |                 |              |               |                         |                 |            |                 |                |                         |                       |                            |                |  |
| 2019/06/01 | C12205    | Male   | Three y/o | Treatment (Wk 3) | Treatment    | Feed Day      | 0.08     | 0.75              | 0.08      |               |                          | 0.08       |             |                       |               |          |               |              |                       |                     |                          |              |            |                     |             |                 |              |               |                         |                 |            |                 |                |                         |                       |                            |                |  |
| 2019/06/01 | C12206    | Male   | Three y/o | Treatment (Wk 3) | Treatment    | Feed Day      | 0.08     | 0.92              |           |               |                          | 0.08       |             |                       |               |          |               |              |                       |                     |                          |              |            |                     |             |                 |              |               |                         |                 |            |                 |                |                         |                       |                            |                |  |
| 2019/06/02 | C12205    | Male   | Three y/o | Treatment (Wk 3) | Treatment    | Fast Day      | 0.98     |                   | 0.08      |               |                          | 0.98       |             |                       | 0.08          |          |               |              |                       |                     |                          |              |            |                     |             |                 |              |               |                         |                 |            |                 |                |                         |                       |                            |                |  |
| 2019/06/02 | C12206    | Male   | Three y/o | Treatment (Wk 3) | Treatment    | Fast Day      | 0.98     |                   | 0.08      |               |                          | 0.98       |             |                       | 0.08          |          |               |              |                       |                     |                          |              |            |                     |             |                 |              |               |                         |                 |            |                 |                |                         |                       |                            |                |  |
| 2019/06/03 | C12205    | Male   | Three y/o | Treatment (Wk 3) | Treatment    | Feed Day      | 0.25     |                   | 0.17      |               |                          | 0.33       |             |                       | 0.08          | 0.17     |               |              |                       |                     |                          |              |            |                     |             |                 |              |               |                         |                 |            |                 |                |                         |                       |                            |                |  |
| 2019/06/03 | C12206    | Male   | Three y/o | Treatment (Wk 3) | Treatment    | Feed Day      | 0.17     |                   | 0.08      | 0.08          |                          | 0.33       |             |                       |               |          |               |              |                       |                     |                          |              |            |                     |             |                 |              |               |                         |                 |            |                 |                |                         |                       |                            |                |  |
| 2019/06/04 | C12205    | Male   | Three y/o | Treatment (Wk 3) | Treatment    | Feed Day      | 0.25     |                   | 0.08      |               |                          | 0.67       |             |                       |               |          |               |              |                       |                     |                          |              |            |                     |             |                 |              |               |                         |                 |            |                 |                |                         |                       |                            |                |  |
| 2019/06/04 | C12206    | Male   | Three y/o | Treatment (Wk 3) | Treatment    | Feed Day      | 0.25     |                   | 0.08      |               |                          | 0.67       |             |                       |               |          |               |              |                       |                     |                          |              |            |                     |             |                 |              |               |                         |                 |            |                 |                |                         |                       |                            |                |  |
| 2019/06/06 | C12205    | Male   | Three y/o | Control          | Control      | Feed Day      | 0.25     |                   | 0.33      |               | 0.42                     | 0.42       |             |                       |               |          |               |              |                       |                     |                          |              |            |                     |             |                 |              |               |                         |                 |            |                 |                |                         |                       |                            |                |  |
| 2019/06/06 | C12206    | Male   | Three y/o | Control          | Control      | Feed Day      | 0.25     | 0.67              | 0.08      |               |                          | 0.08       |             |                       |               |          |               |              |                       |                     |                          |              |            |                     |             |                 |              |               |                         |                 |            |                 |                |                         |                       |                            |                |  |
| 2019/06/06 | C12207    | Female | Three y/o | Control          | Control      | Feed Day      |          | 0.17              |           |               |                          | 0.08       |             |                       |               |          |               |              |                       |                     |                          |              |            |                     |             |                 |              |               |                         |                 |            |                 |                |                         |                       |                            |                |  |
| 2019/06/07 | C12205    | Male   | Three y/o | Control          | Control      | Feed Day      |          |                   |           |               |                          | 0.08       |             |                       |               |          |               |              |                       |                     |                          |              |            |                     |             |                 |              |               |                         |                 |            |                 |                |                         |                       |                            |                |  |
| 2019/06/07 | C12206    | Male   | Three y/o | Control          | Control      | Feed Day      |          |                   |           |               |                          | 0.08       |             |                       | 0.08          |          |               |              |                       |                     |                          |              |            |                     |             |                 |              |               |                         |                 |            |                 |                |                         |                       |                            |                |  |
| 2019/06/07 | C12207    | Female | Three y/o | Control          | Control      | Feed Day      | 0.75     | 0.08              | 0.17      |               |                          | 0.17       |             |                       |               |          |               |              |                       |                     |                          |              |            |                     |             |                 |              |               |                         |                 |            |                 |                |                         |                       |                            |                |  |
| 2019/06/08 | C12205    | Male   | Three y/o | Control          | Control      | Feed Day      | 0.98     |                   |           |               |                          | 0.17       |             |                       |               |          |               |              |                       |                     |                          |              |            |                     |             |                 |              |               |                         |                 |            |                 |                |                         |                       |                            |                |  |
| 2019/06/08 | C12206    | Male   | Three y/o | Control          | Control      | Feed Day      | 0.50     |                   | 0.17      | 0.08          |                          | 0.17       |             |                       | 0.08          |          |               |              |                       |                     |                          |              |            |                     |             |                 |              |               |                         |                 |            |                 |                |                         |                       |                            |                |  |
| 2019/06/08 | C12207    | Female | Three y/o | Control          | Control      | Feed Day      | 0.98     |                   |           | 0.08          |                          | 0.98       |             |                       |               |          |               |              |                       |                     |                          |              |            |                     |             |                 |              |               |                         |                 |            |                 |                |                         |                       |                            |                |  |
| 2019/06/11 | C12205    | Male   | Three y/o | Control          | Control      | Feed Day      | 0.42     |                   | 0.08      |               |                          | 0.25       |             |                       |               |          |               |              |                       |                     |                          |              |            |                     |             |                 |              |               |                         |                 |            |                 |                |                         |                       |                            |                |  |
| 2019/06/11 | C12206    | Male   | Three y/o | Control          | Control      | Feed Day      | 0.33     |                   | 0.17      |               |                          | 0.25       |             |                       | 0.08          |          |               |              |                       |                     |                          |              |            |                     |             |                 |              |               |                         |                 |            |                 |                |                         |                       |                            |                |  |
| 2019/06/11 | C12207    | Female | Three y/o | Control          | Control      | Feed Day      | 0.42     |                   | 0.17      |               |                          | 0.42       |             |                       | 0.08          |          |               |              |                       |                     |                          |              |            |                     |             |                 |              |               |                         |                 |            |                 |                |                         |                       |                            |                |  |
| 2019/06/12 | C12205    | Male   | Three y/o | Control          | Control      | Feed Day      | 0.08     |                   |           |               |                          | 0.42       |             |                       |               |          |               |              |                       |                     |                          |              |            |                     |             |                 |              |               |                         |                 |            |                 |                |                         |                       |                            |                |  |
| 2019/06/12 | C12206    | Male   | Three y/o | Control          | Control      | Feed Day      | 0.25     |                   | 0.08      |               |                          | 0.25       |             |                       | 0.08          |          |               |              |                       |                     |                          |              |            |                     |             |                 |              |               |                         |                 |            |                 |                |                         |                       |                            |                |  |
| 2019/06/12 | C12207    | Female | Three y/o | Control          | Control      | Feed Day      | 0.98     |                   | 0.38      | 0.08          |                          | 0.08       |             |                       |               |          |               |              |                       |                     |                          |              |            |                     |             |                 |              |               |                         |                 |            |                 |                |                         |                       |                            |                |  |
| 2019/06/13 | C12205    | Male   | Three y/o | Control          | Control      | Feed Day      | 0.17     |                   |           |               |                          | 0.33       |             |                       |               |          |               |              |                       |                     |                          |              |            |                     |             |                 |              |               |                         |                 |            |                 |                |                         |                       |                            |                |  |
| 2019/06/13 | C12206    | Male   | Three y/o | Control          | Control      | Feed Day      | 0.33     |                   | 0.25      |               |                          | 0.42       |             |                       |               |          |               |              |                       |                     |                          |              |            |                     |             |                 |              |               |                         |                 |            |                 |                |                         |                       |                            |                |  |
| 2019/06/13 | C12207    | Female | Three y/o | Control          | Control      | Feed Day      | 0.42     |                   |           |               |                          | 0.42       |             |                       |               |          |               |              |                       |                     |                          |              |            |                     |             |                 |              |               |                         |                 |            |                 |                |                         |                       |                            |                |  |



|            |        |        |         |         |         |          |      |      |      |      |      |      |      |      |       |       |       |       |       |       |       |
|------------|--------|--------|---------|---------|---------|----------|------|------|------|------|------|------|------|------|-------|-------|-------|-------|-------|-------|-------|
| 2019/08/31 | CH2271 | Male   | Two y/o | Control | Control | Feed Day | 0.67 | 0.08 |      |      | 0.17 | 0.08 |      |      | -0.25 | -0.21 |       | -0.36 | -0.21 |       |       |
| 2019/08/31 | CH2276 | Female | Two y/o | Control | Control | Feed Day | 0.92 |      |      |      | 0.08 |      |      |      | -0.08 |       |       | -0.31 |       |       |       |
| 2019/08/31 | CH2277 | Female | Two y/o | Control | Control | Feed Day | 0.75 |      |      |      |      |      |      | 0.25 | -0.18 |       |       |       |       | -0.13 |       |
| 2019/09/03 | CH2271 | Male   | Two y/o | Control | Control | Feed Day | 0.83 |      |      |      | 0.17 |      |      |      | -0.12 |       |       | -0.36 |       |       |       |
| 2019/09/03 | CH2276 | Female | Two y/o | Control | Control | Feed Day | 0.92 |      |      |      | 0.08 |      |      |      | -0.06 |       |       | -0.31 |       |       |       |
| 2019/09/03 | CH2277 | Female | Two y/o | Control | Control | Feed Day | 1.00 |      |      |      |      |      |      |      | 0.00  |       |       |       |       |       |       |
| 2019/09/04 | CH2271 | Male   | Two y/o | Control | Control | Feed Day | 0.83 |      | 0.08 |      |      |      |      |      | -0.12 |       | -0.07 |       | -0.09 |       |       |
| 2019/09/04 | CH2276 | Female | Two y/o | Control | Control | Feed Day | 0.42 |      |      |      |      |      | 0.58 |      | -0.47 |       |       |       |       |       | -0.32 |
| 2019/09/04 | CH2277 | Female | Two y/o | Control | Control | Feed Day | 1.00 |      |      |      |      |      |      |      | 0.00  |       |       |       |       |       |       |
| 2019/09/05 | CH2271 | Male   | Two y/o | Control | Control | Feed Day | 0.25 | 0.08 |      | 0.25 |      | 0.17 |      | 0.25 | -0.64 | -0.21 |       | -0.28 | -0.02 |       | -0.13 |
| 2019/09/05 | CH2276 | Female | Two y/o | Control | Control | Feed Day | 0.83 |      |      |      |      |      |      | 0.17 | -0.12 |       |       |       |       |       | -0.18 |
| 2019/09/05 | CH2277 | Female | Two y/o | Control | Control | Feed Day | 0.83 |      |      |      |      |      |      | 0.17 | -0.12 |       |       |       |       |       | -0.18 |
| 2019/09/06 | CH2271 | Male   | Two y/o | Control | Control | Feed Day | 0.25 |      |      | 0.50 |      | 0.08 |      | 0.17 |       |       |       | -0.14 |       |       | -0.18 |
| 2019/09/06 | CH2276 | Female | Two y/o | Control | Control | Feed Day | 0.30 |      |      | 0.30 |      |      | 0.17 | 0.17 | -0.18 |       |       | -0.36 | -0.07 |       | -0.18 |
| 2019/09/06 | CH2277 | Female | Two y/o | Control | Control | Feed Day | 0.25 | 0.17 | 0.08 | 0.25 |      |      |      | 0.25 | -0.34 | -0.10 | -0.07 | -0.28 |       |       | -0.13 |
| 2019/09/07 | CH2271 | Male   | Two y/o | Control | Control | Feed Day | 0.50 | 0.17 | 0.08 | 0.08 |      |      |      | 0.08 | -0.43 |       | -0.07 | -0.51 | -0.09 |       | -0.30 |
| 2019/09/07 | CH2276 | Female | Two y/o | Control | Control | Feed Day | 0.83 |      |      |      |      |      |      | 0.17 | -0.05 |       |       |       |       |       | -0.18 |
| 2019/09/07 | CH2277 | Female | Two y/o | Control | Control | Feed Day | 0.08 | 0.38 |      | 0.08 |      | 0.08 |      | 0.25 | -0.88 | -0.14 |       |       |       |       | -0.13 |
| 2019/09/10 | CH2271 | Male   | Two y/o | Control | Control | Feed Day | 0.25 | 0.08 |      | 0.08 |      | 0.08 |      | 0.08 | -0.64 | -0.38 |       | -0.17 | -0.06 | -0.09 | -0.21 |
| 2019/09/10 | CH2276 | Female | Two y/o | Control | Control | Feed Day | 0.08 |      |      |      |      |      | 0.17 | 0.33 | -0.58 |       |       | -0.22 |       |       | -0.07 |
| 2019/09/10 | CH2277 | Female | Two y/o | Control | Control | Feed Day | 0.17 | 0.25 | 0.08 |      |      |      | 0.08 |      | -0.75 | -0.34 | -0.21 | -0.28 |       |       | -0.18 |
| 2019/09/11 | CH2271 | Male   | Two y/o | Control | Control | Feed Day | 0.17 | 0.17 |      |      |      |      |      | 0.08 | -0.75 | -0.43 |       | -0.30 |       |       | -0.54 |
| 2019/09/11 | CH2276 | Female | Two y/o | Control | Control | Feed Day | 0.42 |      | 0.08 | 0.08 |      |      |      | 0.17 | -0.47 | -0.22 |       | -0.17 | -0.06 | -0.09 | -0.07 |
| 2019/09/11 | CH2277 | Female | Two y/o | Control | Control | Feed Day | 0.42 | 0.42 |      |      |      | 0.08 |      | 0.08 | -0.47 | -0.22 |       |       |       |       | -0.18 |
| 2019/09/11 | CH2277 | Female | Two y/o | Control | Control | Feed Day | 0.42 | 0.42 |      |      |      |      |      | 0.08 | -0.47 | -0.22 |       |       | -0.21 |       | -0.30 |



| Date       | Cheetah ID | Sex    | Age Group | Week             | Study Period | Feed/Fast Day | Faecal Consistency Score | Faecal Consistency Score (grade) | Faecal Glucocorticoid Metabolite Concentration (µg/g DW) | Undigested Food | Faecal Consistency Score (grade) X | Faecal Glucocorticoid Metabolite Concentration (µg/g DW) X |
|------------|------------|--------|-----------|------------------|--------------|---------------|--------------------------|----------------------------------|----------------------------------------------------------|-----------------|------------------------------------|------------------------------------------------------------|
| 2019/04/24 | CH2207     | Female | Three y/o | Treatment (Wk 1) | Treatment    | Fast Day      | Firm                     | 5                                |                                                          | No              | 4,97                               |                                                            |
| 2019/04/25 | CH2207     | Female | Three y/o | Treatment (Wk 1) | Treatment    | Feed Day      | Soft with shape          | 3                                |                                                          | No              | 3,11                               |                                                            |
| 2019/04/26 | CH2207     | Female | Three y/o | Treatment (Wk 1) | Treatment    | Feed Day      | Firm and dry             | 4                                |                                                          | No              | 4,12                               |                                                            |
| 2019/04/27 | CH2207     | Female | Three y/o | Treatment (Wk 1) | Treatment    | Fast Day      | Soft without shape       | 2                                |                                                          | No              | 1,84                               |                                                            |
| 2019/04/28 | CH2207     | Female | Three y/o | Treatment (Wk 1) | Treatment    | Fast Day      | Firm                     | 5                                |                                                          | No              | 4,97                               |                                                            |
| 2019/04/30 | CH2207     | Female | Three y/o | Treatment (Wk 2) | Treatment    | Feed Day      | Firm and dry             | 4                                |                                                          | No              | 4,12                               |                                                            |
| 2019/05/01 | CH2207     | Female | Three y/o | Treatment (Wk 2) | Treatment    | Fast Day      | Firm and dry             | 4                                |                                                          | No              | 4,12                               |                                                            |
| 2019/05/02 | CH2207     | Female | Three y/o | Treatment (Wk 2) | Treatment    | Feed Day      | Soft without shape       | 2                                |                                                          | No              | 1,84                               |                                                            |
| 2019/05/03 | CH2207     | Female | Three y/o | Treatment (Wk 2) | Treatment    | Feed Day      | Firm and dry             | 4                                |                                                          | No              | 4,12                               |                                                            |
| 2019/05/04 | CH2207     | Female | Three y/o | Treatment (Wk 2) | Treatment    | Fast Day      | Firm and dry             | 4                                |                                                          | No              | 4,12                               |                                                            |
| 2019/05/05 | CH2207     | Female | Three y/o | Treatment (Wk 2) | Treatment    | Fast Day      | Soft with shape          | 3                                |                                                          | No              | 3,11                               |                                                            |
| 2019/05/06 | CH2207     | Female | Three y/o | Treatment (Wk 2) | Treatment    | Feed Day      | Soft with shape          | 3                                |                                                          | No              | 3,11                               |                                                            |
| 2019/05/07 | CH2207     | Female | Three y/o | Treatment (Wk 3) | Treatment    | Feed Day      | Firm                     | 5                                |                                                          | Yes             | 4,97                               |                                                            |
| 2019/05/08 | CH2207     | Female | Three y/o | Treatment (Wk 3) | Treatment    | Fast Day      | Firm                     | 5                                |                                                          | No              | 4,97                               |                                                            |
| 2019/05/09 | CH2207     | Female | Three y/o | Treatment (Wk 3) | Treatment    | Feed Day      | Firm and dry             | 4                                |                                                          | No              | 4,12                               |                                                            |
| 2019/05/10 | CH2207     | Female | Three y/o | Treatment (Wk 3) | Treatment    | Feed Day      | Firm                     | 5                                |                                                          | No              | 4,97                               |                                                            |
| 2019/05/11 | CH2207     | Female | Three y/o | Treatment (Wk 3) | Treatment    | Fast Day      | Soft with shape          | 3                                |                                                          | No              | 3,11                               |                                                            |
| 2019/05/12 | CH2207     | Female | Three y/o | Treatment (Wk 3) | Treatment    | Fast Day      | Firm                     | 5                                |                                                          | No              | 4,97                               |                                                            |
| 2019/05/13 | CH2207     | Female | Three y/o | Treatment (Wk 3) | Treatment    | Feed Day      | Firm and dry             | 4                                |                                                          | No              | 4,12                               |                                                            |
| 2019/05/15 | CH2205     | Male   | Three y/o | Treatment (Wk 1) | Treatment    | Fast Day      | Firm                     | 5                                | 0,96                                                     | No              | 4,97                               | -0,04                                                      |
| 2019/05/15 | CH2206     | Male   | Three y/o | Treatment (Wk 1) | Treatment    | Fast Day      | Firm                     | 5                                | 1,56                                                     | No              | 4,97                               | 0,47                                                       |
| 2019/05/16 | CH2205     | Male   | Three y/o | Treatment (Wk 1) | Treatment    | Feed Day      | Soft with shape          | 3                                | 1,21                                                     | No              | 3,11                               | 0,19                                                       |
| 2019/05/16 | CH2206     | Male   | Three y/o | Treatment (Wk 1) | Treatment    | Feed Day      | Firm and dry             | 4                                | 1,07                                                     | No              | 4,12                               | 0,06                                                       |
| 2019/05/17 | CH2205     | Male   | Three y/o | Treatment (Wk 1) | Treatment    | Feed Day      | Firm                     | 5                                | 0,99                                                     | No              | 4,97                               | -0,01                                                      |
| 2019/05/17 | CH2206     | Male   | Three y/o | Treatment (Wk 1) | Treatment    | Feed Day      | Firm and dry             | 4                                | 1,01                                                     | No              | 4,12                               | 0,01                                                       |
| 2019/05/18 | CH2206     | Male   | Three y/o | Treatment (Wk 1) | Treatment    | Fast Day      | Soft with shape          | 3                                | 1,35                                                     | Yes             | 3,11                               | 0,31                                                       |
| 2019/05/19 | CH2205     | Male   | Three y/o | Treatment (Wk 1) | Treatment    | Fast Day      | Firm and dry             | 4                                | 0,83                                                     | No              | 4,12                               | -0,18                                                      |
| 2019/05/19 | CH2206     | Male   | Three y/o | Treatment (Wk 1) | Treatment    | Fast Day      | Soft with shape          | 3                                | 1,32                                                     | No              | 3,11                               | 0,28                                                       |
| 2019/05/21 | CH2205     | Male   | Three y/o | Treatment (Wk 1) | Treatment    | Feed Day      | Soft with shape          | 3                                | 1,60                                                     | No              | 3,11                               | 0,50                                                       |
| 2019/05/21 | CH2206     | Male   | Three y/o | Treatment (Wk 1) | Treatment    | Feed Day      | Soft with shape          | 3                                | 1,68                                                     | No              | 3,11                               | 0,56                                                       |
| 2019/05/22 | CH2205     | Male   | Three y/o | Treatment (Wk 2) | Treatment    | Fast Day      | Soft with shape          | 3                                | 1,19                                                     | Yes             | 3,11                               | 0,17                                                       |
| 2019/05/22 | CH2206     | Male   | Three y/o | Treatment (Wk 2) | Treatment    | Fast Day      | Firm and dry             | 4                                | 1,10                                                     | No              | 4,12                               | 0,09                                                       |
| 2019/05/23 | CH2205     | Male   | Three y/o | Treatment (Wk 2) | Treatment    | Feed Day      | Firm and dry             | 4                                | 0,71                                                     | No              | 4,12                               | -0,32                                                      |
| 2019/05/23 | CH2206     | Male   | Three y/o | Treatment (Wk 2) | Treatment    | Feed Day      | Firm and dry             | 4                                | 1,15                                                     | No              | 4,12                               | 0,14                                                       |
| 2019/05/24 | CH2205     | Male   | Three y/o | Treatment (Wk 2) | Treatment    | Feed Day      | Firm                     | 5                                | 1,47                                                     | No              | 4,97                               | 0,40                                                       |
| 2019/05/24 | CH2206     | Male   | Three y/o | Treatment (Wk 2) | Treatment    | Feed Day      | Firm and dry             | 4                                | 1,70                                                     | No              | 4,12                               | 0,57                                                       |
| 2019/05/25 | CH2205     | Male   | Three y/o | Treatment (Wk 2) | Treatment    | Fast Day      | Firm                     | 5                                | 0,97                                                     | No              | 4,97                               | -0,03                                                      |
| 2019/05/25 | CH2206     | Male   | Three y/o | Treatment (Wk 2) | Treatment    | Fast Day      | Soft with shape          | 3                                | 1,35                                                     | No              | 3,11                               | 0,31                                                       |
| 2019/05/27 | CH2206     | Male   | Three y/o | Treatment (Wk 2) | Treatment    | Feed Day      | Soft with shape          | 3                                | 3,35                                                     | No              | 3,11                               | 1,47                                                       |
| 2019/05/28 | CH2205     | Male   | Three y/o | Treatment (Wk 2) | Treatment    | Feed Day      | Soft with shape          | 3                                | 1,41                                                     | Yes             | 3,11                               | 0,35                                                       |
| 2019/05/29 | CH2205     | Male   | Three y/o | Treatment (Wk 3) | Treatment    | Feed Day      | Soft with shape          | 3                                | 1,18                                                     | No              | 3,11                               | 0,17                                                       |
| 2019/05/30 | CH2206     | Male   | Three y/o | Treatment (Wk 3) | Treatment    | Feed Day      | Soft with shape          | 3                                | 0,62                                                     | Yes             | 3,11                               | -0,43                                                      |
| 2019/05/31 | CH2205     | Male   | Three y/o | Treatment (Wk 3) | Treatment    | Feed Day      | Soft with shape          | 3                                | 1,40                                                     | No              | 3,11                               | 0,35                                                       |
| 2019/05/31 | CH2206     | Male   | Three y/o | Treatment (Wk 3) | Treatment    | Feed Day      | Soft with shape          | 3                                | 1,32                                                     | Yes             | 3,11                               | 0,29                                                       |



Dataset S1: FAECAL

|            |        |        |           |                  |           |          |                    |   |      |     |      |       |
|------------|--------|--------|-----------|------------------|-----------|----------|--------------------|---|------|-----|------|-------|
| 2019/06/01 | CH2205 | Male   | Three y/o | Treatment (Wk 3) | Treatment | Feed Day | Soft with shape    | 3 | 0,80 | Yes | 3,11 | -0,22 |
| 2019/06/01 | CH2206 | Male   | Three y/o | Treatment (Wk 3) | Treatment | Feed Day | Soft with shape    | 3 | 1,04 | Yes | 3,11 | 0,04  |
| 2019/06/02 | CH2205 | Male   | Three y/o | Treatment (Wk 3) | Treatment | Fast Day | Soft with shape    | 3 | 0,74 | No  | 3,11 | -0,28 |
| 2019/06/02 | CH2206 | Male   | Three y/o | Treatment (Wk 3) | Treatment | Fast Day | Firm               | 5 | 0,93 | No  | 4,97 | -0,07 |
| 2019/06/03 | CH2206 | Male   | Three y/o | Treatment (Wk 3) | Treatment | Feed Day | Soft with shape    | 3 | 1,08 | No  | 3,11 | 0,08  |
| 2019/06/04 | CH2205 | Male   | Three y/o | Treatment (Wk 3) | Treatment | Feed Day | Soft without shape | 2 | 1,65 | Yes | 1,84 | 0,54  |
| 2019/06/04 | CH2206 | Male   | Three y/o | Treatment (Wk 3) | Treatment | Feed Day | Soft with shape    | 3 | 1,40 | No  | 3,11 | 0,35  |
| 2019/06/06 | CH2205 | Male   | Three y/o | Control          | Control   | Feed Day | Soft without shape | 2 | 1,54 | No  | 1,84 | 0,45  |
| 2019/06/06 | CH2206 | Male   | Three y/o | Control          | Control   | Feed Day | Soft with shape    | 3 | 0,74 | Yes | 3,11 | -0,28 |
| 2019/06/06 | CH2207 | Female | Three y/o | Control          | Control   | Feed Day | Firm               | 5 |      | No  | 4,97 |       |
| 2019/06/07 | CH2205 | Male   | Three y/o | Control          | Control   | Feed Day | Soft without shape | 2 | 0,58 | Yes | 1,84 | -0,49 |
| 2019/06/07 | CH2206 | Male   | Three y/o | Control          | Control   | Feed Day | Firm               | 5 | 0,90 | No  | 4,97 | -0,10 |
| 2019/06/07 | CH2207 | Female | Three y/o | Control          | Control   | Feed Day | Soft with shape    | 3 |      | No  | 3,11 |       |
| 2019/06/08 | CH2205 | Male   | Three y/o | Control          | Control   | Feed Day | Firm               | 5 | 0,53 | No  | 4,97 | -0,56 |
| 2019/06/08 | CH2206 | Male   | Three y/o | Control          | Control   | Feed Day | Soft with shape    | 3 | 0,53 | Yes | 3,11 | -0,56 |
| 2019/06/08 | CH2207 | Female | Three y/o | Control          | Control   | Feed Day | Soft with shape    | 3 |      | No  | 3,11 |       |
| 2019/06/09 | CH2205 | Male   | Three y/o | Control          | Control   | Feed Day | Soft with shape    | 3 | 0,93 | No  | 3,11 | -0,07 |
| 2019/06/09 | CH2207 | Female | Three y/o | Control          | Control   | Feed Day | Soft with shape    | 3 |      | No  | 3,11 |       |
| 2019/06/10 | CH2206 | Male   | Three y/o | Control          | Control   | Fast Day | Soft without shape | 2 | 0,64 | No  | 1,84 | -0,40 |
| 2019/06/10 | CH2207 | Female | Three y/o | Control          | Control   | Fast Day | Soft with shape    | 3 |      | Yes | 3,11 |       |
| 2019/06/11 | CH2206 | Male   | Three y/o | Control          | Control   | Feed Day | Firm               | 5 | 0,55 | No  | 4,97 | -0,53 |
| 2019/06/11 | CH2207 | Female | Three y/o | Control          | Control   | Feed Day | Soft with shape    | 3 |      | No  | 3,11 |       |
| 2019/06/12 | CH2205 | Male   | Three y/o | Control          | Control   | Feed Day | Soft with shape    | 3 | 1,00 | No  | 3,11 | 0,00  |
| 2019/06/12 | CH2206 | Male   | Three y/o | Control          | Control   | Feed Day | Soft with shape    | 3 | 1,60 | No  | 3,11 | 0,50  |
| 2019/06/12 | CH2207 | Female | Three y/o | Control          | Control   | Feed Day | Firm and dry       | 4 |      | No  | 4,12 |       |
| 2019/06/13 | CH2205 | Male   | Three y/o | Control          | Control   | Feed Day | Soft with shape    | 3 | 1,04 | Yes | 3,11 | 0,04  |
| 2019/06/13 | CH2207 | Female | Three y/o | Control          | Control   | Feed Day | Soft with shape    | 3 |      | No  | 3,11 |       |
| 2019/06/14 | CH2205 | Male   | Three y/o | Control          | Control   | Feed Day | Soft with shape    | 3 | 1,29 | No  | 3,11 | 0,26  |
| 2019/06/14 | CH2206 | Male   | Three y/o | Control          | Control   | Feed Day | Soft with shape    | 3 | 1,11 | No  | 3,11 | 0,10  |
| 2019/06/14 | CH2207 | Female | Three y/o | Control          | Control   | Feed Day | Soft without shape | 2 |      | No  | 1,84 |       |
| 2019/06/15 | CH2205 | Male   | Three y/o | Control          | Control   | Feed Day | Soft with shape    | 3 | 1,34 | No  | 3,11 | 0,30  |
| 2019/06/15 | CH2207 | Female | Three y/o | Control          | Control   | Feed Day | Soft with shape    | 3 |      | No  | 3,11 |       |
| 2019/06/16 | CH2205 | Male   | Three y/o | Control          | Control   | Feed Day | Soft with shape    | 3 | 2,04 | No  | 3,11 | 0,79  |
| 2019/06/16 | CH2206 | Male   | Three y/o | Control          | Control   | Feed Day | Soft with shape    | 3 | 1,64 | No  | 3,11 | 0,53  |
| 2019/06/16 | CH2207 | Female | Three y/o | Control          | Control   | Feed Day | Soft with shape    | 3 |      | No  | 3,11 |       |
| 2019/06/17 | CH2205 | Male   | Three y/o | Control          | Control   | Fast Day | Soft without shape | 2 | 1,42 | No  | 1,84 | 0,37  |
| 2019/06/17 | CH2206 | Male   | Three y/o | Control          | Control   | Fast Day | Firm               | 5 | 0,95 | No  | 4,97 | -0,05 |
| 2019/06/17 | CH2207 | Female | Three y/o | Control          | Control   | Fast Day | Firm and dry       | 4 |      | No  | 4,12 |       |
| 2019/06/18 | CH2205 | Male   | Three y/o | Control          | Control   | Feed Day | Soft with shape    | 3 | 0,63 | Yes | 3,11 | -0,42 |
| 2019/06/18 | CH2206 | Male   | Three y/o | Control          | Control   | Feed Day | Firm and dry       | 4 | 0,62 | No  | 4,12 | -0,43 |
| 2019/06/18 | CH2207 | Female | Three y/o | Control          | Control   | Feed Day | Soft with shape    | 3 |      | No  | 3,11 |       |
| 2019/06/19 | CH2205 | Male   | Three y/o | Control          | Control   | Feed Day | Soft with shape    | 3 | 0,68 | Yes | 3,11 | -0,36 |
| 2019/06/19 | CH2206 | Male   | Three y/o | Control          | Control   | Feed Day | Soft with shape    | 3 | 0,69 | No  | 3,11 | -0,34 |
| 2019/06/19 | CH2207 | Female | Three y/o | Control          | Control   | Feed Day | Firm               | 5 |      | No  | 4,97 |       |
| 2019/06/20 | CH2205 | Male   | Three y/o | Control          | Control   | Feed Day | Soft with shape    | 3 | 1,02 | No  | 3,11 | 0,02  |
| 2019/06/20 | CH2206 | Male   | Three y/o | Control          | Control   | Feed Day | Firm and dry       | 4 | 0,67 | Yes | 4,12 | -0,36 |
| 2019/06/20 | CH2207 | Female | Three y/o | Control          | Control   | Feed Day | Soft without shape | 2 |      | No  | 1,84 |       |
| 2019/06/21 | CH2205 | Male   | Three y/o | Control          | Control   | Feed Day | Soft without shape | 2 | 0,81 | No  | 1,84 | -0,19 |
| 2019/06/21 | CH2207 | Female | Three y/o | Control          | Control   | Feed Day | Firm and dry       | 4 |      | No  | 4,12 |       |



Dataset S1: FAECAL

|            |        |        |           |                  |           |          |                    |   |      |     |      |       |
|------------|--------|--------|-----------|------------------|-----------|----------|--------------------|---|------|-----|------|-------|
| 2019/06/22 | CH2205 | Male   | Three y/o | Control          | Control   | Feed Day | Firm               | 5 | 0,96 | No  | 4,97 | -0,04 |
| 2019/06/22 | CH2207 | Female | Three y/o | Control          | Control   | Feed Day | Soft with shape    | 3 |      | No  | 3,11 |       |
| 2019/06/23 | CH2205 | Male   | Three y/o | Control          | Control   | Feed Day | Firm and dry       | 4 | 0,42 | No  | 4,12 | -0,74 |
| 2019/06/23 | CH2206 | Male   | Three y/o | Control          | Control   | Feed Day | Soft without shape | 2 | 1,50 | No  | 1,84 | 0,42  |
| 2019/06/23 | CH2207 | Female | Three y/o | Control          | Control   | Feed Day | Soft with shape    | 3 |      | No  | 3,11 |       |
| 2019/06/24 | CH2205 | Male   | Three y/o | Control          | Control   | Fast Day | Soft without shape | 2 | 0,89 | Yes | 1,84 | -0,11 |
| 2019/06/24 | CH2206 | Male   | Three y/o | Control          | Control   | Fast Day | Soft without shape | 2 | 0,61 | Yes | 1,84 | -0,44 |
| 2019/06/24 | CH2207 | Female | Three y/o | Control          | Control   | Fast Day | Soft without shape | 2 |      | Yes | 1,84 |       |
| 2019/06/25 | CH2207 | Female | Three y/o | Control          | Control   | Feed Day | Soft with shape    | 3 |      | No  | 3,11 |       |
| 2019/06/26 | CH2205 | Male   | Three y/o | Control          | Control   | Feed Day | Soft with shape    | 3 | 1,11 | No  | 3,11 | 0,10  |
| 2019/06/26 | CH2206 | Male   | Three y/o | Control          | Control   | Feed Day | Soft with shape    | 3 | 1,51 | No  | 3,11 | 0,43  |
| 2019/07/09 | CH2271 | Male   | Two y/o   | Treatment (Wk 1) | Treatment | Feed Day | Firm               | 5 | 0,14 | Yes | 4,97 | -1,41 |
| 2019/07/11 | CH2271 | Male   | Two y/o   | Treatment (Wk 1) | Treatment | Feed Day | Firm               | 5 | 1,21 | No  | 4,97 | 0,19  |
| 2019/07/12 | CH2271 | Male   | Two y/o   | Treatment (Wk 1) | Treatment | Feed Day | Soft with shape    | 3 | 0,90 | No  | 3,11 | -0,10 |
| 2019/07/13 | CH2271 | Male   | Two y/o   | Treatment (Wk 1) | Treatment | Feed Day | Soft with shape    | 3 | 1,33 | No  | 3,11 | 0,29  |
| 2019/07/14 | CH2271 | Male   | Two y/o   | Treatment (Wk 1) | Treatment | Fast Day | Soft with shape    | 3 | 1,23 | No  | 3,11 | 0,21  |
| 2019/07/15 | CH2271 | Male   | Two y/o   | Treatment (Wk 1) | Treatment | Feed Day | Firm               | 5 | 1,56 | No  | 4,97 | 0,47  |
| 2019/07/16 | CH2271 | Male   | Two y/o   | Treatment (Wk 2) | Treatment | Feed Day | Soft with shape    | 3 | 1,49 | No  | 3,11 | 0,42  |
| 2019/07/17 | CH2271 | Male   | Two y/o   | Treatment (Wk 2) | Treatment | Fast Day | Firm               | 5 | 1,16 | No  | 4,97 | 0,15  |
| 2019/07/18 | CH2271 | Male   | Two y/o   | Treatment (Wk 2) | Treatment | Feed Day | Soft with shape    | 3 | 1,49 | No  | 3,11 | 0,42  |
| 2019/07/19 | CH2271 | Male   | Two y/o   | Treatment (Wk 2) | Treatment | Feed Day | Soft with shape    | 3 | 1,07 | Yes | 3,11 | 0,06  |
| 2019/07/20 | CH2271 | Male   | Two y/o   | Treatment (Wk 2) | Treatment | Feed Day | Soft with shape    | 3 | 1,40 | No  | 3,11 | 0,35  |
| 2019/07/21 | CH2271 | Male   | Two y/o   | Treatment (Wk 2) | Treatment | Fast Day | Soft with shape    | 3 | 0,57 | No  | 3,11 | -0,50 |
| 2019/07/22 | CH2271 | Male   | Two y/o   | Treatment (Wk 2) | Treatment | Feed Day | Soft with shape    | 3 | 0,89 | No  | 3,11 | -0,11 |
| 2019/07/23 | CH2271 | Male   | Two y/o   | Treatment (Wk 3) | Treatment | Feed Day | Soft with shape    | 3 | 1,22 | No  | 3,11 | 0,20  |
| 2019/07/24 | CH2271 | Male   | Two y/o   | Treatment (Wk 3) | Treatment | Fast Day | Firm               | 5 | 1,17 | No  | 4,97 | 0,15  |
| 2019/07/25 | CH2271 | Male   | Two y/o   | Treatment (Wk 3) | Treatment | Feed Day | Firm               | 5 | 1,18 | No  | 4,97 | 0,17  |
| 2019/07/26 | CH2271 | Male   | Two y/o   | Treatment (Wk 3) | Treatment | Feed Day | Soft with shape    | 3 | 1,47 | No  | 3,11 | 0,40  |
| 2019/07/27 | CH2271 | Male   | Two y/o   | Treatment (Wk 3) | Treatment | Feed Day | Soft with shape    | 3 | 0,58 | No  | 3,11 | -0,49 |
| 2019/07/28 | CH2271 | Male   | Two y/o   | Treatment (Wk 3) | Treatment | Fast Day | Firm               | 5 | 1,43 | No  | 4,97 | 0,37  |
| 2019/07/31 | CH2277 | Female | Two y/o   | Treatment (Wk 1) | Treatment | Fast Day | Soft with shape    | 3 | 0,69 | Yes | 3,11 | -0,34 |
| 2019/08/01 | CH2276 | Female | Two y/o   | Treatment (Wk 1) | Treatment | Feed Day | Soft with shape    | 3 | 1,66 | No  | 3,11 | 0,54  |
| 2019/08/02 | CH2276 | Female | Two y/o   | Treatment (Wk 1) | Treatment | Feed Day | Soft with shape    | 3 | 1,62 | No  | 3,11 | 0,51  |
| 2019/08/02 | CH2277 | Female | Two y/o   | Treatment (Wk 1) | Treatment | Feed Day | Soft with shape    | 3 | 0,92 | No  | 3,11 | -0,08 |
| 2019/08/03 | CH2276 | Female | Two y/o   | Treatment (Wk 1) | Treatment | Feed Day | Soft without shape | 2 | 0,47 | No  | 1,84 | -0,65 |
| 2019/08/04 | CH2276 | Female | Two y/o   | Treatment (Wk 1) | Treatment | Fast Day | Soft with shape    | 3 | 0,65 | No  | 3,11 | -0,40 |
| 2019/08/04 | CH2277 | Female | Two y/o   | Treatment (Wk 1) | Treatment | Fast Day | Firm               | 5 | 0,45 | No  | 4,97 | -0,68 |
| 2019/08/05 | CH2276 | Female | Two y/o   | Treatment (Wk 1) | Treatment | Feed Day | Firm and dry       | 4 | 1,08 | No  | 4,12 | 0,08  |
| 2019/08/05 | CH2277 | Female | Two y/o   | Treatment (Wk 1) | Treatment | Feed Day | Firm and dry       | 4 | 0,96 | No  | 4,12 | -0,04 |
| 2019/08/06 | CH2276 | Female | Two y/o   | Treatment (Wk 1) | Treatment | Feed Day | Soft with shape    | 3 | 2,54 | No  | 3,11 | 1,07  |
| 2019/08/06 | CH2277 | Female | Two y/o   | Treatment (Wk 1) | Treatment | Feed Day | Firm               | 5 | 1,10 | No  | 4,97 | 0,10  |
| 2019/08/07 | CH2276 | Female | Two y/o   | Treatment (Wk 2) | Treatment | Fast Day | Soft without shape | 2 | 1,54 | No  | 1,84 | 0,46  |
| 2019/08/07 | CH2277 | Female | Two y/o   | Treatment (Wk 2) | Treatment | Fast Day | Soft with shape    | 3 | 1,46 | No  | 3,11 | 0,40  |
| 2019/08/08 | CH2276 | Female | Two y/o   | Treatment (Wk 2) | Treatment | Feed Day | Firm               | 5 | 1,61 | No  | 4,97 | 0,51  |
| 2019/08/08 | CH2277 | Female | Two y/o   | Treatment (Wk 2) | Treatment | Feed Day | Firm               | 5 | 1,25 | No  | 4,97 | 0,22  |
| 2019/08/09 | CH2277 | Female | Two y/o   | Treatment (Wk 2) | Treatment | Feed Day | Soft with shape    | 3 | 1,60 | No  | 3,11 | 0,50  |
| 2019/08/10 | CH2276 | Female | Two y/o   | Treatment (Wk 2) | Treatment | Feed Day | Firm               | 5 | 1,41 | No  | 4,97 | 0,36  |
| 2019/08/10 | CH2277 | Female | Two y/o   | Treatment (Wk 2) | Treatment | Feed Day | Firm               | 5 | 1,06 | No  | 4,97 | 0,06  |
| 2019/08/11 | CH2276 | Female | Two y/o   | Treatment (Wk 2) | Treatment | Fast Day | Soft with shape    | 3 | 0,43 | Yes | 3,11 | -0,72 |



Dataset S1: FAECAL

|            |        |        |         |                  |           |          |                 |   |      |     |      |       |
|------------|--------|--------|---------|------------------|-----------|----------|-----------------|---|------|-----|------|-------|
| 2019/08/11 | CH2277 | Female | Two y/o | Treatment (Wk 2) | Treatment | Fast Day | Soft with shape | 3 | 0,85 | Yes | 3,11 | -0,16 |
| 2019/08/12 | CH2276 | Female | Two y/o | Treatment (Wk 2) | Treatment | Feed Day | Firm and dry    | 4 | 0,43 | No  | 4,12 | -0,71 |
| 2019/08/12 | CH2277 | Female | Two y/o | Treatment (Wk 2) | Treatment | Feed Day | Firm and dry    | 4 | 0,54 | No  | 4,12 | -0,55 |
| 2019/08/13 | CH2276 | Female | Two y/o | Treatment (Wk 2) | Treatment | Feed Day | Firm and dry    | 4 | 1,09 | No  | 4,12 | 0,09  |
| 2019/08/13 | CH2277 | Female | Two y/o | Treatment (Wk 2) | Treatment | Feed Day | Soft with shape | 3 | 0,79 | No  | 3,11 | -0,23 |
| 2019/08/14 | CH2276 | Female | Two y/o | Treatment (Wk 3) | Treatment | Fast Day | Soft with shape | 3 | 0,83 | Yes | 3,11 | -0,18 |
| 2019/08/14 | CH2277 | Female | Two y/o | Treatment (Wk 3) | Treatment | Fast Day | Firm            | 5 | 0,59 | No  | 4,97 | -0,47 |
| 2019/08/15 | CH2276 | Female | Two y/o | Treatment (Wk 3) | Treatment | Feed Day | Firm            | 5 | 1,26 | No  | 4,97 | 0,24  |
| 2019/08/15 | CH2277 | Female | Two y/o | Treatment (Wk 3) | Treatment | Feed Day | Firm            | 5 | 0,67 | No  | 4,97 | -0,36 |
| 2019/08/16 | CH2276 | Female | Two y/o | Treatment (Wk 3) | Treatment | Feed Day | Firm            | 5 | 1,08 | Yes | 4,97 | 0,07  |
| 2019/08/17 | CH2276 | Female | Two y/o | Treatment (Wk 3) | Treatment | Feed Day | Firm            | 5 | 1,03 | No  | 4,97 | 0,03  |
| 2019/08/17 | CH2277 | Female | Two y/o | Treatment (Wk 3) | Treatment | Feed Day | Firm and dry    | 4 | 0,69 | No  | 4,12 | -0,34 |
| 2019/08/18 | CH2277 | Female | Two y/o | Treatment (Wk 3) | Treatment | Fast Day | Firm            | 5 | 0,72 | No  | 4,97 | -0,31 |
| 2019/08/19 | CH2277 | Female | Two y/o | Treatment (Wk 3) | Treatment | Feed Day | Firm and dry    | 4 | 0,72 | No  | 4,12 | -0,31 |
| 2019/08/20 | CH2276 | Female | Two y/o | Treatment (Wk 3) | Treatment | Feed Day | Soft with shape | 3 | 0,58 | No  | 3,11 | -0,48 |
| 2019/08/20 | CH2277 | Female | Two y/o | Treatment (Wk 3) | Treatment | Feed Day | Soft with shape | 3 | 0,94 | No  | 3,11 | -0,06 |
| 2019/08/22 | CH2271 | Male   | Two y/o | Control          | Control   | Feed Day | Firm and dry    | 4 | 0,98 | No  | 4,12 | -0,02 |
| 2019/08/22 | CH2276 | Female | Two y/o | Control          | Control   | Fast Day | Soft with shape | 3 | 0,80 | No  | 3,11 | -0,21 |
| 2019/08/22 | CH2277 | Female | Two y/o | Control          | Control   | Fast Day | Soft with shape | 3 | 0,83 | No  | 3,11 | -0,18 |
| 2019/08/23 | CH2271 | Male   | Two y/o | Control          | Control   | Feed Day | Firm and dry    | 4 | 0,98 | No  | 4,12 | -0,02 |
| 2019/08/24 | CH2276 | Female | Two y/o | Control          | Control   | Feed Day | Firm            | 5 | 1,41 | No  | 4,97 | 0,36  |
| 2019/08/24 | CH2277 | Female | Two y/o | Control          | Control   | Feed Day | Firm            | 5 | 0,62 | No  | 4,97 | -0,43 |
| 2019/08/25 | CH2271 | Male   | Two y/o | Control          | Control   | Feed Day | Firm and dry    | 4 | 0,74 | No  | 4,12 | -0,27 |
| 2019/08/25 | CH2277 | Female | Two y/o | Control          | Control   | Feed Day | Firm            | 5 | 0,85 | No  | 4,97 | -0,15 |
| 2019/08/26 | CH2271 | Male   | Two y/o | Control          | Control   | Feed Day | Firm            | 5 | 0,65 | Yes | 4,97 | -0,39 |
| 2019/08/26 | CH2276 | Female | Two y/o | Control          | Control   | Feed Day | Firm            | 5 | 1,64 | No  | 4,97 | 0,53  |
| 2019/08/26 | CH2277 | Female | Two y/o | Control          | Control   | Feed Day | Soft with shape | 3 | 1,25 | No  | 3,11 | 0,23  |
| 2019/08/27 | CH2271 | Male   | Two y/o | Control          | Control   | Feed Day | Soft with shape | 3 | 0,96 | Yes | 3,11 | -0,04 |
| 2019/08/27 | CH2276 | Female | Two y/o | Control          | Control   | Feed Day | Soft with shape | 3 | 0,86 | No  | 3,11 | -0,14 |
| 2019/08/28 | CH2271 | Male   | Two y/o | Control          | Control   | Feed Day | Soft with shape | 3 | 1,33 | No  | 3,11 | 0,29  |
| 2019/08/28 | CH2276 | Female | Two y/o | Control          | Control   | Feed Day | Firm            | 5 | 1,30 | Yes | 4,97 | 0,27  |
| 2019/08/28 | CH2277 | Female | Two y/o | Control          | Control   | Feed Day | Firm            | 5 | 1,47 | No  | 4,97 | 0,40  |
| 2019/08/29 | CH2271 | Male   | Two y/o | Control          | Control   | Feed Day | Firm and dry    | 4 | 1,01 | No  | 4,12 | 0,01  |
| 2019/08/29 | CH2277 | Female | Two y/o | Control          | Control   | Feed Day | Firm            | 5 | 1,09 | No  | 4,97 | 0,09  |
| 2019/08/30 | CH2271 | Male   | Two y/o | Control          | Control   | Feed Day | Firm and dry    | 4 | 0,92 | No  | 4,12 | -0,08 |
| 2019/08/30 | CH2276 | Female | Two y/o | Control          | Control   | Feed Day | Firm            | 5 | 1,39 | Yes | 4,97 | 0,34  |
| 2019/08/30 | CH2277 | Female | Two y/o | Control          | Control   | Feed Day | Firm and dry    | 4 | 0,59 | No  | 4,12 | -0,47 |
| 2019/08/31 | CH2271 | Male   | Two y/o | Control          | Control   | Feed Day | Firm            | 5 | 0,96 | Yes | 4,97 | -0,04 |
| 2019/08/31 | CH2276 | Female | Two y/o | Control          | Control   | Feed Day | Firm and dry    | 4 | 0,80 | No  | 4,12 | -0,22 |
| 2019/08/31 | CH2277 | Female | Two y/o | Control          | Control   | Feed Day | Firm            | 5 | 0,63 | No  | 4,97 | -0,42 |
| 2019/09/01 | CH2271 | Male   | Two y/o | Control          | Control   | Feed Day | Soft with shape | 3 | 1,12 | Yes | 3,11 | 0,11  |
| 2019/09/01 | CH2276 | Female | Two y/o | Control          | Control   | Feed Day | Firm and dry    | 4 | 0,68 | No  | 4,12 | -0,35 |
| 2019/09/01 | CH2277 | Female | Two y/o | Control          | Control   | Feed Day | Firm            | 5 | 0,74 | No  | 4,97 | -0,28 |
| 2019/09/02 | CH2271 | Male   | Two y/o | Control          | Control   | Feed Day | Soft with shape | 3 | 0,52 | No  | 3,11 | -0,57 |
| 2019/09/02 | CH2276 | Female | Two y/o | Control          | Control   | Feed Day | Soft with shape | 3 | 0,90 | No  | 3,11 | -0,10 |
| 2019/09/02 | CH2277 | Female | Two y/o | Control          | Control   | Feed Day | Soft with shape | 3 | 0,52 | No  | 3,11 | -0,57 |
| 2019/09/03 | CH2271 | Male   | Two y/o | Control          | Control   | Feed Day | Firm            | 5 | 0,64 | No  | 4,97 | -0,41 |
| 2019/09/03 | CH2277 | Female | Two y/o | Control          | Control   | Feed Day | Soft with shape | 3 | 0,69 | No  | 3,11 | -0,34 |
| 2019/09/04 | CH2271 | Male   | Two y/o | Control          | Control   | Feed Day | Soft with shape | 3 | 1,15 | No  | 3,11 | 0,14  |



## Dataset S1: FAECAL

|            |        |        |         |         |         |          |                 |   |      |     |      |       |
|------------|--------|--------|---------|---------|---------|----------|-----------------|---|------|-----|------|-------|
| 2019/09/04 | CH2276 | Female | Two y/o | Control | Control | Feed Day | Soft with shape | 3 | 1,20 | No  | 3,11 | 0,18  |
| 2019/09/04 | CH2277 | Female | Two y/o | Control | Control | Feed Day | Soft with shape | 3 | 0,66 | Yes | 3,11 | -0,38 |
| 2019/09/05 | CH2271 | Male   | Two y/o | Control | Control | Feed Day | Firm and dry    | 4 | 0,59 | No  | 4,12 | -0,47 |
| 2019/09/05 | CH2276 | Female | Two y/o | Control | Control | Feed Day | Firm            | 5 | 1,11 | No  | 4,97 | 0,10  |
| 2019/09/05 | CH2277 | Female | Two y/o | Control | Control | Feed Day | Firm            | 5 | 0,85 | No  | 4,97 | -0,15 |
| 2019/09/06 | CH2271 | Male   | Two y/o | Control | Control | Feed Day | Soft with shape | 3 | 0,87 | Yes | 3,11 | -0,13 |
| 2019/09/06 | CH2276 | Female | Two y/o | Control | Control | Feed Day | Firm            | 5 | 1,01 | Yes | 4,97 | 0,01  |
| 2019/09/06 | CH2277 | Female | Two y/o | Control | Control | Feed Day | Soft with shape | 3 | 0,60 | No  | 3,11 | -0,46 |
| 2019/09/07 | CH2271 | Male   | Two y/o | Control | Control | Feed Day | Firm and dry    | 4 | 0,88 | No  | 4,12 | -0,13 |
| 2019/09/07 | CH2276 | Female | Two y/o | Control | Control | Feed Day | Soft with shape | 3 | 1,08 | Yes | 3,11 | 0,08  |
| 2019/09/07 | CH2277 | Female | Two y/o | Control | Control | Feed Day | Firm            | 5 | 0,75 | No  | 4,97 | -0,27 |
| 2019/09/08 | CH2276 | Female | Two y/o | Control | Control | Feed Day | Firm            | 5 | 0,87 | No  | 4,97 | -0,13 |
| 2019/09/08 | CH2277 | Female | Two y/o | Control | Control | Feed Day | Firm and dry    | 4 | 0,79 | No  | 4,12 | -0,22 |
| 2019/09/09 | CH2271 | Male   | Two y/o | Control | Control | Feed Day | Firm            | 5 | 0,94 | No  | 4,97 | -0,06 |
| 2019/09/09 | CH2276 | Female | Two y/o | Control | Control | Feed Day | Firm and dry    | 4 | 0,85 | No  | 4,12 | -0,16 |
| 2019/09/09 | CH2277 | Female | Two y/o | Control | Control | Feed Day | Firm and dry    | 4 | 0,73 | No  | 4,12 | -0,30 |
| 2019/09/10 | CH2271 | Male   | Two y/o | Control | Control | Feed Day | Soft with shape | 3 | 1,39 | No  | 3,11 | 0,34  |
| 2019/09/10 | CH2276 | Female | Two y/o | Control | Control | Feed Day | Soft with shape | 3 | 0,78 | No  | 3,11 | -0,23 |
| 2019/09/10 | CH2277 | Female | Two y/o | Control | Control | Feed Day | Soft with shape | 3 | 0,90 | No  | 3,11 | -0,10 |
| 2019/09/11 | CH2271 | Male   | Two y/o | Control | Control | Feed Day | Soft with shape | 3 | 1,47 | No  | 3,11 | 0,41  |
| 2019/09/11 | CH2276 | Female | Two y/o | Control | Control | Feed Day | Soft with shape | 3 | 1,05 | Yes | 3,11 | 0,05  |
| 2019/09/11 | CH2277 | Female | Two y/o | Control | Control | Feed Day | Soft with shape | 3 | 1,32 | No  | 3,11 | 0,28  |



| # | Date       | Cheetah ID | Sex  | Age Group | Week             | Study Period | Feed/Fast Day | Feeding Time | Minute | Hour          | Part of the Day | Body Temperature (°C) | Heart Rate (bpm) | Locomotor Activity (ODBA) | Locomotor Activity (ODBA) - Outliers | Body Temperature (°C) X | Heart Rate (bpm) X | Locomotor Activity (ODBA) - Outliers X |
|---|------------|------------|------|-----------|------------------|--------------|---------------|--------------|--------|---------------|-----------------|-----------------------|------------------|---------------------------|--------------------------------------|-------------------------|--------------------|----------------------------------------|
| 1 | 2019/05/15 | CH2205     | Male | Three y/o | Treatment (Wk 1) | Treatment    | Fast Day      | No           | 00:00  | 00:00 - 00:59 | Early Morning   | 37,6                  | 55               | 7,2                       | 7,2                                  | 18,75                   | 547,52             | 65,66                                  |
|   | 2019/05/15 | CH2206     | Male | Three y/o | Treatment (Wk 1) | Treatment    | Fast Day      | No           | 00:00  | 00:00 - 00:59 | Early Morning   | 37,6                  | 87               | 33,2                      | 33,2                                 | 18,75                   | 583,64             | 117,68                                 |
|   | 2019/05/15 | CH2205     | Male | Three y/o | Treatment (Wk 1) | Treatment    | Fast Day      | No           | 00:05  | 00:00 - 00:59 | Early Morning   | 37,6                  | 41               | 9,4                       | 9,4                                  | 18,75                   | 522,29             | 74,66                                  |
|   | 2019/05/15 | CH2206     | Male | Three y/o | Treatment (Wk 1) | Treatment    | Fast Day      | No           | 00:05  | 00:00 - 00:59 | Early Morning   | 37,5                  | 57               | 28,2                      | 28,2                                 | 18,65                   | 550,47             | 112,07                                 |
|   | 2019/05/15 | CH2205     | Male | Three y/o | Treatment (Wk 1) | Treatment    | Fast Day      | No           | 00:10  | 00:00 - 00:59 | Early Morning   | 37,6                  | 84               | 7,4                       | 7,4                                  | 18,75                   | 581,01             | 66,59                                  |
|   | 2019/05/15 | CH2206     | Male | Three y/o | Treatment (Wk 1) | Treatment    | Fast Day      | No           | 00:10  | 00:00 - 00:59 | Early Morning   | 37,5                  | 75               | 15,2                      | 15,2                                 | 18,65                   | 572,36             | 90,96                                  |
|   | 2019/05/15 | CH2205     | Male | Three y/o | Treatment (Wk 1) | Treatment    | Fast Day      | No           | 00:15  | 00:00 - 00:59 | Early Morning   | 37,7                  | 61               | 6,2                       | 6,2                                  | 18,85                   | 556,01             | 60,63                                  |
|   | 2019/05/15 | CH2206     | Male | Three y/o | Treatment (Wk 1) | Treatment    | Fast Day      | No           | 00:15  | 00:00 - 00:59 | Early Morning   | 37,7                  | 47               | 19,8                      | 19,8                                 | 18,85                   | 534,23             | 99,97                                  |
|   | 2019/05/15 | CH2205     | Male | Three y/o | Treatment (Wk 1) | Treatment    | Fast Day      | No           | 00:20  | 00:00 - 00:59 | Early Morning   | 37,7                  | 62               | 11,4                      | 11,4                                 | 18,85                   | 557,33             | 81,19                                  |
|   | 2019/05/15 | CH2206     | Male | Three y/o | Treatment (Wk 1) | Treatment    | Fast Day      | No           | 00:20  | 00:00 - 00:59 | Early Morning   | 37,7                  | 95               | 21,4                      | 21,4                                 | 18,85                   | 590,14             | 102,63                                 |
|   | 2019/05/15 | CH2205     | Male | Three y/o | Treatment (Wk 1) | Treatment    | Fast Day      | No           | 00:25  | 00:00 - 00:59 | Early Morning   | 37,7                  | 71               | 9,6                       | 9,6                                  | 18,85                   | 568,10             | 75,37                                  |
|   | 2019/05/15 | CH2206     | Male | Three y/o | Treatment (Wk 1) | Treatment    | Fast Day      | No           | 00:25  | 00:00 - 00:59 | Early Morning   | 37,7                  | 53               | 19,2                      | 19,2                                 | 18,85                   | 544,43             | 98,92                                  |
|   | 2019/05/15 | CH2205     | Male | Three y/o | Treatment (Wk 1) | Treatment    | Fast Day      | No           | 00:30  | 00:00 - 00:59 | Early Morning   | 37,7                  | 50               | 8,0                       | 8,0                                  | 18,85                   | 539,52             | 69,22                                  |
|   | 2019/05/15 | CH2206     | Male | Three y/o | Treatment (Wk 1) | Treatment    | Fast Day      | No           | 00:30  | 00:00 - 00:59 | Early Morning   | 37,7                  | 96               | 22,8                      | 22,8                                 | 18,85                   | 590,91             | 104,79                                 |
|   | 2019/05/15 | CH2205     | Male | Three y/o | Treatment (Wk 1) | Treatment    | Fast Day      | No           | 00:35  | 00:00 - 00:59 | Early Morning   | 37,7                  | 45               | 9,4                       | 9,4                                  | 18,85                   | 530,47             | 74,66                                  |
|   | 2019/05/15 | CH2206     | Male | Three y/o | Treatment (Wk 1) | Treatment    | Fast Day      | No           | 00:35  | 00:00 - 00:59 | Early Morning   | 37,7                  | 52               | 25,2                      | 25,2                                 | 18,85                   | 542,83             | 108,22                                 |
|   | 2019/05/15 | CH2205     | Male | Three y/o | Treatment (Wk 1) | Treatment    | Fast Day      | No           | 00:40  | 00:00 - 00:59 | Early Morning   | 37,7                  | 64               | 8,8                       | 8,8                                  | 18,85                   | 559,88             | 72,43                                  |
|   | 2019/05/15 | CH2206     | Male | Three y/o | Treatment (Wk 1) | Treatment    | Fast Day      | No           | 00:40  | 00:00 - 00:59 | Early Morning   | 37,5                  | 80               | 29,4                      | 29,4                                 | 18,65                   | 577,31             | 113,50                                 |
|   | 2019/05/15 | CH2205     | Male | Three y/o | Treatment (Wk 1) | Treatment    | Fast Day      | No           | 00:45  | 00:00 - 00:59 | Early Morning   | 37,7                  | 56               | 20,8                      | 20,8                                 | 18,85                   | 549,01             | 101,65                                 |
|   | 2019/05/15 | CH2206     | Male | Three y/o | Treatment (Wk 1) | Treatment    | Fast Day      | No           | 00:45  | 00:00 - 00:59 | Early Morning   | 37,5                  | 53               | 29,2                      | 29,2                                 | 18,65                   | 544,43             | 113,27                                 |
|   | 2019/05/15 | CH2205     | Male | Three y/o | Treatment (Wk 1) | Treatment    | Fast Day      | No           | 00:50  | 00:00 - 00:59 | Early Morning   | 37,7                  | 57               | 12,2                      | 12,2                                 | 18,85                   | 550,47             | 83,49                                  |
|   | 2019/05/15 | CH2206     | Male | Three y/o | Treatment (Wk 1) | Treatment    | Fast Day      | No           | 00:50  | 00:00 - 00:59 | Early Morning   | 37,7                  | 84               | 23,0                      | 23,0                                 | 18,85                   | 581,01             | 105,09                                 |
|   | 2019/05/15 | CH2205     | Male | Three y/o | Treatment (Wk 1) | Treatment    | Fast Day      | No           | 00:55  | 00:00 - 00:59 | Early Morning   | 37,6                  | 92               | 7,6                       | 7,6                                  | 18,75                   | 587,78             | 67,49                                  |
|   | 2019/05/15 | CH2206     | Male | Three y/o | Treatment (Wk 1) | Treatment    | Fast Day      | No           | 00:55  | 00:00 - 00:59 | Early Morning   | 37,7                  | 86               | 23,0                      | 23,0                                 | 18,85                   | 582,77             | 105,09                                 |
|   | 2019/05/15 | CH2205     | Male | Three y/o | Treatment (Wk 1) | Treatment    | Fast Day      | No           | 01:00  | 01:00 - 01:59 | Early Morning   | 37,6                  | 81               | 27,8                      | 27,8                                 | 18,75                   | 578,26             | 111,58                                 |
|   | 2019/05/15 | CH2206     | Male | Three y/o | Treatment (Wk 1) | Treatment    | Fast Day      | No           | 01:00  | 01:00 - 01:59 | Early Morning   | 37,7                  | 94               | 28,2                      | 28,2                                 | 18,85                   | 589,37             | 112,07                                 |
|   | 2019/05/15 | CH2205     | Male | Three y/o | Treatment (Wk 1) | Treatment    | Fast Day      | No           | 01:05  | 01:00 - 01:59 | Early Morning   | 37,6                  | 61               | 27,4                      | 27,4                                 | 18,75                   | 556,01             | 111,09                                 |
|   | 2019/05/15 | CH2206     | Male | Three y/o | Treatment (Wk 1) | Treatment    | Fast Day      | No           | 01:05  | 01:00 - 01:59 | Early Morning   | 37,7                  | 89               | 39,4                      | 39,4                                 | 18,85                   | 585,33             | 123,57                                 |
|   | 2019/05/15 | CH2205     | Male | Three y/o | Treatment (Wk 1) | Treatment    | Fast Day      | No           | 01:10  | 01:00 - 01:59 | Early Morning   | 37,6                  | 64               | 11,0                      | 11,0                                 | 18,75                   | 559,88             | 79,98                                  |
|   | 2019/05/15 | CH2206     | Male | Three y/o | Treatment (Wk 1) | Treatment    | Fast Day      | No           | 01:10  | 01:00 - 01:59 | Early Morning   | 37,5                  | 92               | 60,4                      | 60,4                                 | 18,65                   | 587,78             | 138,32                                 |
|   | 2019/05/15 | CH2205     | Male | Three y/o | Treatment (Wk 1) | Treatment    | Fast Day      | No           | 01:15  | 01:00 - 01:59 | Early Morning   | 37,5                  | 53               | 7,0                       | 7,0                                  | 18,65                   | 544,43             | 64,72                                  |
|   | 2019/05/15 | CH2206     | Male | Three y/o | Treatment (Wk 1) | Treatment    | Fast Day      | No           | 01:15  | 01:00 - 01:59 | Early Morning   | 37,4                  | 56               | 57,2                      | 57,2                                 | 18,55                   | 549,01             | 136,44                                 |
|   | 2019/05/15 | CH2205     | Male | Three y/o | Treatment (Wk 1) | Treatment    | Fast Day      | No           | 01:20  | 01:00 - 01:59 | Early Morning   | 37,5                  | 45               | 6,6                       | 6,6                                  | 18,65                   | 530,47             | 62,73                                  |
|   | 2019/05/15 | CH2206     | Male | Three y/o | Treatment (Wk 1) | Treatment    | Fast Day      | No           | 01:20  | 01:00 - 01:59 | Early Morning   | 37,5                  | 80               | 55,2                      | 55,2                                 | 18,65                   | 577,31             | 135,21                                 |
|   | 2019/05/15 | CH2205     | Male | Three y/o | Treatment (Wk 1) | Treatment    | Fast Day      | No           | 01:25  | 01:00 - 01:59 | Early Morning   | 37,5                  | 55               | 21,4                      | 21,4                                 | 18,65                   | 547,52             | 102,63                                 |
|   | 2019/05/15 | CH2206     | Male | Three y/o | Treatment (Wk 1) | Treatment    | Fast Day      | No           | 01:25  | 01:00 - 01:59 | Early Morning   | 37,5                  | 61               | 56,8                      | 56,8                                 | 18,65                   | 556,01             | 136,20                                 |
|   | 2019/05/15 | CH2205     | Male | Three y/o | Treatment (Wk 1) | Treatment    | Fast Day      | No           | 01:30  | 01:00 - 01:59 | Early Morning   | 37,5                  | 58               | 17,2                      | 17,2                                 | 18,65                   | 551,90             | 95,17                                  |
|   | 2019/05/15 | CH2206     | Male | Three y/o | Treatment (Wk 1) | Treatment    | Fast Day      | No           | 01:30  | 01:00 - 01:59 | Early Morning   | 37,5                  | 87               | 56,4                      | 56,4                                 | 18,65                   | 583,64             | 135,95                                 |
|   | 2019/05/15 | CH2205     | Male | Three y/o | Treatment (Wk 1) | Treatment    | Fast Day      | No           | 01:35  | 01:00 - 01:59 | Early Morning   | 37,4                  | 32               | 14,0                      | 14,0                                 | 18,55                   | 499,63             | 88,17                                  |
|   | 2019/05/15 | CH2206     | Male | Three y/o | Treatment (Wk 1) | Treatment    | Fast Day      | No           | 01:35  | 01:00 - 01:59 | Early Morning   | 37,5                  | 63               | 39,4                      | 39,4                                 | 18,65                   | 558,62             | 123,57                                 |
|   | 2019/05/15 | CH2205     | Male | Three y/o | Treatment (Wk 1) | Treatment    | Fast Day      | No           | 01:40  | 01:00 - 01:59 | Early Morning   | 37,3                  | 44               | 15,4                      | 15,4                                 | 18,46                   | 528,51             | 91,41                                  |
|   | 2019/05/15 | CH2206     | Male | Three y/o | Treatment (Wk 1) | Treatment    | Fast Day      | No           | 01:40  | 01:00 - 01:59 | Early Morning   | 37,5                  | 54               | 16,6                      | 16,6                                 | 18,65                   | 545,99             | 93,96                                  |
|   | 2019/05/15 | CH2205     | Male | Three y/o | Treatment (Wk 1) | Treatment    | Fast Day      | No           | 01:45  | 01:00 - 01:59 | Early Morning   | 37,3                  | 47               | 30,6                      | 30,6                                 | 18,46                   | 534,23             | 114,87                                 |
|   | 2019/05/15 | CH2206     | Male | Three y/o | Treatment (Wk 1) | Treatment    | Fast Day      | No           | 01:45  | 01:00 - 01:59 | Early Morning   | 37,6                  | 73               | 21,2                      | 21,2                                 | 18,75                   | 570,27             | 102,31                                 |
|   | 2019/05/15 | CH2205     | Male | Three y/o | Treatment (Wk 1) | Treatment    | Fast Day      | No           | 01:50  | 01:00 - 01:59 | Early Morning   | 37,2                  | 50               | 17,2                      | 17,2                                 | 18,36                   | 539,52             | 95,17                                  |
|   | 2019/05/15 | CH2206     | Male | Three y/o | Treatment (Wk 1) | Treatment    | Fast Day      | No           | 01:50  | 01:00 - 01:59 | Early Morning   | 37,6                  | 65               | 12,6                      | 12,6                                 | 18,75                   | 561,12             | 84,59                                  |
|   | 2019/05/15 | CH2205     | Male | Three y/o | Treatment (Wk 1) | Treatment    | Fast Day      | No           | 01:55  | 01:00 - 01:59 | Early Morning   | 37,3                  | 86               | 18,0                      | 18,0                                 | 18,46                   | 582,77             | 96,72                                  |
|   | 2019/05/15 | CH2206     | Male | Three y/o | Treatment (Wk 1) | Treatment    | Fast Day      | No           | 01:55  | 01:00 - 01:59 | Early Morning   | 37,5                  | 68               | 36,4                      | 36,4                                 | 18,65                   | 564,71             | 120,84                                 |
|   | 2019/05/15 | CH2205     | Male | Three y/o | Treatment (Wk 1) | Treatment    | Fast Day      | No           | 02:00  | 02:00 - 02:59 | Early Morning   | 37,4                  | 105              | 12,2                      | 12,2                                 | 18,55                   | 597,38             | 83,49                                  |
|   | 2019/05/15 | CH2206     | Male | Three y/o | Treatment (Wk 1) | Treatment    | Fast Day      | No           | 02:00  | 02:00 - 02:59 | Early Morning   | 37,7                  | 131              | 37,6                      | 37,6                                 | 18,85                   | 612,80             | 121,96                                 |
|   | 2019/05/15 | CH2205     | Male | Three y/o | Treatment (Wk 1) | Treatment    | Fast Day      | No           | 02:05  | 02:00 - 02:59 | Early Morning   | 37,4                  | 46               | 10,6                      | 10,6                                 | 18,55                   | 532,38             | 78,73                                  |
|   | 2019/05/15 | CH2206     | Male | Three y/o | Treatment (Wk 1) | Treatment    | Fast Day      | No           | 02:05  | 02:00 - 02:59 | Early Morning   | 37,5                  | 110              | 27,2                      | 27,2                                 | 18,65                   | 600,69             | 110,83                                 |
|   | 2019/05/15 | CH2205     | Male | Three y/o | Treatment (Wk 1) | Treatment    | Fast Day      | No           | 02:10  | 02:00 - 02:59 | Early Morning   | 37,2                  | 91               | 27,6                      | 27,6                                 | 18,36                   | 586,98             | 111,33                                 |
|   | 2019/05/15 | CH2206     | Male | Three y/o | Treatment (Wk 1) | Treatment    | Fast Day      | No           | 02:10  | 02:00 - 02:59 | Early Morning   | 37,5                  | 109              | 53,6                      | 53,6                                 | 18,65                   | 600,04             | 134,19                                 |
|   | 2019/05/15 | CH2205     | Male | Three y/o | Treatment (Wk 1) | Treatment    | Fast Day      | No           | 02:15  | 02:00 - 02:59 | Early Morning   | 37,3                  | 49               | 290,2                     | 290,2                                | 18,46                   | 537,80             | 193,25                                 |
|   | 2019/05/15 | CH2206     | Male | Three y/o | Treatment (Wk 1) | Treatment    | Fast Day      | No           | 02:15  | 02:00 - 02:59 | Early Morning   | 37,4                  | 98               | 95,2                      | 95,2                                 | 18,55                   | 592,41             | 154,13                                 |
|   | 2019/05/15 | CH2205     | Male | Three y/o | Treatment (Wk 1) | Treatment    | Fast Day      | No           | 02:20  | 02:00 - 02:59 | Early Morning   | 37,3                  | 137              | 49,6                      | 49,6                                 | 18,46                   | 615,83             | 131,51                                 |
|   | 2019/05/15 | CH2206     | Male | Three y/o | Treatment (Wk 1) | Treatment    | Fast Day      | No           | 02:20  | 02:00 - 02:59 | Early Morning   | 37,4                  | 120              | 51,0                      | 51,0                                 | 18,55                   | 606,78             | 132,47                                 |
|   | 2019/05/15 | CH2205     | Male | Three y/o | Treatment (Wk 1) | Treatment    | Fast Day      | No           | 02:25  | 02:00 - 02:59 | Early Morning   | 37,3                  |                  | 95,4                      | 95,4                                 | 18,46                   |                    | 154,20                                 |
|   | 2019/05/15 | CH2206     | Male | Three y/o | Treatment (Wk 1) | Treatment    | Fast Day      | No           | 02:25  | 02:00 - 02:59 | Early Morning   | 37,3                  | 112              | 104,2                     | 104,2                                | 18,46                   | 601,96             | 157,28                                 |
|   | 2019/05/15 | CH2205     | Male | Three y/o | Treatment (Wk 1) | Treatment    | Fast Day      | No           | 02:30  | 02:00 - 02:59 | Early Morning   | 37,4                  | 107              | 56,6                      | 56,6                                 | 18,55                   | 598,73             | 136,07                                 |
|   | 2019/05/15 | CH2206     | Male | Three y/o | Treatment (Wk 1) | Treatment    | Fast Day      | No           | 02:30  | 02:00 - 02:59 | Early Morning   | 37,3                  | 59               | 35,2                      | 35,2                                 | 18,46                   | 553,30             | 119,69                                 |
|   | 2019/05/15 | CH2205     | Male | Three y/o | Treatment (Wk 1) | Treatment    | Fast Day      | No           | 02:35  | 02:00 - 02:59 | Early Morning   | 37,5                  |                  | 7,6                       | 7,6                                  | 18,65                   |                    | 67,49                                  |
|   | 2019/05/15 | CH2206     | Male | Three y/o | Treatment (Wk 1) | Treatment    | Fast Day      | No           | 02:35  | 02:00 - 02:59 | Early Morning   | 37,3                  | 55               | 42,2                      | 42,2                                 | 18,46                   | 547,52             | 125,93                                 |
|   | 2019/05/15 | CH2205     | Male | Three y/o | Treatment (Wk 1) | Treatment    | Fast Day      | No           | 02:40  | 02:00 - 02:59 | Early Morning   | 37,3                  |                  | 3,6                       | 3,6                                  | 18,46                   |                    | 42,42                                  |
|   | 2019/05/15 | CH2206     | Male | Three y/o | Treatment (Wk 1) | Treatment    | Fast Day      | No           | 02:40  | 02:00 - 02:59 | Early Morning   | 37,2                  | 66               | 48,0                      | 48,0                                 | 18,36                   | 562,34             | 130,38                                 |
|   | 2019/05/15 | CH2205     | Male | Three y/o | Treatment (Wk 1) | Treatment    | Fast Day      | No           | 02:45  | 02:00 - 02:59 | Early Morning   | 37,3                  | 49               | 4,4                       | 4,4                                  | 18,46                   | 537,80             | 49,12                                  |



|            |        |      |           |                  |           |          |    |       |               |               |      |     |       |       |       |        |        |
|------------|--------|------|-----------|------------------|-----------|----------|----|-------|---------------|---------------|------|-----|-------|-------|-------|--------|--------|
| 2019/05/15 | CH2206 | Male | Three y/o | Treatment (Wk 1) | Treatment | Fast Day | No | 02:45 | 02:00 - 02:59 | Early Morning | 37,1 | 73  | 42,4  | 42,4  | 18,26 | 570,27 | 126,10 |
| 2019/05/15 | CH2205 | Male | Three y/o | Treatment (Wk 1) | Treatment | Fast Day | No | 02:50 | 02:00 - 02:59 | Early Morning | 37,3 | 60  | 1,2   | 1,2   | 18,46 | 554,67 | 5,99   |
| 2019/05/15 | CH2206 | Male | Three y/o | Treatment (Wk 1) | Treatment | Fast Day | No | 02:50 | 02:00 - 02:59 | Early Morning | 37,1 |     | 63,2  | 63,2  | 18,26 |        | 139,89 |
| 2019/05/15 | CH2205 | Male | Three y/o | Treatment (Wk 1) | Treatment | Fast Day | No | 02:55 | 02:00 - 02:59 | Early Morning | 37,3 |     | 12,8  | 12,8  | 18,46 |        | 85,12  |
| 2019/05/15 | CH2206 | Male | Three y/o | Treatment (Wk 1) | Treatment | Fast Day | No | 02:55 | 02:00 - 02:59 | Early Morning | 37,1 | 96  | 45,2  | 45,2  | 18,26 | 590,91 | 128,30 |
| 2019/05/15 | CH2205 | Male | Three y/o | Treatment (Wk 1) | Treatment | Fast Day | No | 03:00 | 03:00 - 03:59 | Early Morning | 37,3 | 55  | 13,6  | 13,6  | 18,46 | 547,52 | 87,18  |
| 2019/05/15 | CH2206 | Male | Three y/o | Treatment (Wk 1) | Treatment | Fast Day | No | 03:00 | 03:00 - 03:59 | Early Morning | 37,0 | 81  | 51,6  | 51,6  | 18,16 | 578,26 | 132,87 |
| 2019/05/15 | CH2205 | Male | Three y/o | Treatment (Wk 1) | Treatment | Fast Day | No | 03:05 | 03:00 - 03:59 | Early Morning | 37,3 | 73  | 10,2  | 10,2  | 18,46 | 570,27 | 77,43  |
| 2019/05/15 | CH2206 | Male | Three y/o | Treatment (Wk 1) | Treatment | Fast Day | No | 03:05 | 03:00 - 03:59 | Early Morning | 36,8 | 44  | 44,2  | 44,2  | 17,96 | 528,51 | 127,53 |
| 2019/05/15 | CH2205 | Male | Three y/o | Treatment (Wk 1) | Treatment | Fast Day | No | 03:10 | 03:00 - 03:59 | Early Morning | 37,4 | 61  | 8,2   | 8,2   | 18,55 | 556,01 | 70,05  |
| 2019/05/15 | CH2206 | Male | Three y/o | Treatment (Wk 1) | Treatment | Fast Day | No | 03:10 | 03:00 - 03:59 | Early Morning | 36,6 | 85  | 45,8  | 45,8  | 17,77 | 581,90 | 128,76 |
| 2019/05/15 | CH2205 | Male | Three y/o | Treatment (Wk 1) | Treatment | Fast Day | No | 03:15 | 03:00 - 03:59 | Early Morning | 37,4 | 49  | 5,4   | 5,4   | 18,55 | 537,80 | 55,99  |
| 2019/05/15 | CH2206 | Male | Three y/o | Treatment (Wk 1) | Treatment | Fast Day | No | 03:15 | 03:00 - 03:59 | Early Morning | 36,7 | 62  | 48,8  | 48,8  | 17,87 | 557,33 | 130,95 |
| 2019/05/15 | CH2205 | Male | Three y/o | Treatment (Wk 1) | Treatment | Fast Day | No | 03:20 | 03:00 - 03:59 | Early Morning | 37,4 | 78  | 13,2  | 13,2  | 18,55 | 575,38 | 86,17  |
| 2019/05/15 | CH2206 | Male | Three y/o | Treatment (Wk 1) | Treatment | Fast Day | No | 03:20 | 03:00 - 03:59 | Early Morning | 36,8 | 68  | 54,4  | 54,4  | 17,96 | 564,71 | 134,70 |
| 2019/05/15 | CH2205 | Male | Three y/o | Treatment (Wk 1) | Treatment | Fast Day | No | 03:25 | 03:00 - 03:59 | Early Morning | 37,4 | 42  | 16,6  | 16,6  | 18,55 | 524,42 | 93,96  |
| 2019/05/15 | CH2206 | Male | Three y/o | Treatment (Wk 1) | Treatment | Fast Day | No | 03:25 | 03:00 - 03:59 | Early Morning | 36,6 | 52  | 55,0  | 55,0  | 17,77 | 542,83 | 135,08 |
| 2019/05/15 | CH2205 | Male | Three y/o | Treatment (Wk 1) | Treatment | Fast Day | No | 03:30 | 03:00 - 03:59 | Early Morning | 37,3 | 62  | 12,2  | 12,2  | 18,46 | 557,33 | 83,49  |
| 2019/05/15 | CH2206 | Male | Three y/o | Treatment (Wk 1) | Treatment | Fast Day | No | 03:30 | 03:00 - 03:59 | Early Morning | 36,5 | 41  | 54,2  | 54,2  | 17,67 | 522,29 | 134,57 |
| 2019/05/15 | CH2205 | Male | Three y/o | Treatment (Wk 1) | Treatment | Fast Day | No | 03:35 | 03:00 - 03:59 | Early Morning | 37,2 | 38  | 13,0  | 13,0  | 18,36 | 515,48 | 85,65  |
| 2019/05/15 | CH2206 | Male | Three y/o | Treatment (Wk 1) | Treatment | Fast Day | No | 03:35 | 03:00 - 03:59 | Early Morning | 36,9 | 53  | 55,0  | 55,0  | 18,06 | 544,43 | 135,08 |
| 2019/05/15 | CH2205 | Male | Three y/o | Treatment (Wk 1) | Treatment | Fast Day | No | 03:40 | 03:00 - 03:59 | Early Morning | 37,2 | 40  | 12,8  | 12,8  | 18,36 | 520,09 | 85,12  |
| 2019/05/15 | CH2206 | Male | Three y/o | Treatment (Wk 1) | Treatment | Fast Day | No | 03:40 | 03:00 - 03:59 | Early Morning | 37,0 | 52  | 53,4  | 53,4  | 18,16 | 542,83 | 134,06 |
| 2019/05/15 | CH2205 | Male | Three y/o | Treatment (Wk 1) | Treatment | Fast Day | No | 03:45 | 03:00 - 03:59 | Early Morning | 37,2 | 40  | 18,8  | 18,8  | 18,36 | 520,09 | 98,20  |
| 2019/05/15 | CH2206 | Male | Three y/o | Treatment (Wk 1) | Treatment | Fast Day | No | 03:45 | 03:00 - 03:59 | Early Morning | 37,0 | 84  | 58,2  | 58,2  | 18,16 | 581,01 | 137,04 |
| 2019/05/15 | CH2205 | Male | Three y/o | Treatment (Wk 1) | Treatment | Fast Day | No | 03:50 | 03:00 - 03:59 | Early Morning | 37,1 | 77  | 16,6  | 16,6  | 18,26 | 574,39 | 93,96  |
| 2019/05/15 | CH2206 | Male | Three y/o | Treatment (Wk 1) | Treatment | Fast Day | No | 03:50 | 03:00 - 03:59 | Early Morning | 37,0 | 98  | 55,8  | 55,8  | 18,16 | 592,41 | 135,58 |
| 2019/05/15 | CH2205 | Male | Three y/o | Treatment (Wk 1) | Treatment | Fast Day | No | 03:55 | 03:00 - 03:59 | Early Morning | 37,1 | 58  | 21,4  | 21,4  | 18,26 | 551,90 | 102,63 |
| 2019/05/15 | CH2206 | Male | Three y/o | Treatment (Wk 1) | Treatment | Fast Day | No | 03:55 | 03:00 - 03:59 | Early Morning | 36,9 | 47  | 60,2  | 60,2  | 18,06 | 534,23 | 138,21 |
| 2019/05/15 | CH2205 | Male | Three y/o | Treatment (Wk 1) | Treatment | Fast Day | No | 04:00 | 04:00 - 04:59 | Morning       | 37,1 |     | 22,4  | 22,4  | 18,26 |        | 104,19 |
| 2019/05/15 | CH2206 | Male | Three y/o | Treatment (Wk 1) | Treatment | Fast Day | No | 04:00 | 04:00 - 04:59 | Morning       | 36,9 | 48  | 53,2  | 53,2  | 18,06 | 536,04 | 133,93 |
| 2019/05/15 | CH2205 | Male | Three y/o | Treatment (Wk 1) | Treatment | Fast Day | No | 04:05 | 04:00 - 04:59 | Morning       | 37,1 |     | 15,6  | 15,6  | 18,26 |        | 91,85  |
| 2019/05/15 | CH2206 | Male | Three y/o | Treatment (Wk 1) | Treatment | Fast Day | No | 04:05 | 04:00 - 04:59 | Morning       | 36,9 | 74  | 60,2  | 60,2  | 18,06 | 571,33 | 138,21 |
| 2019/05/15 | CH2205 | Male | Three y/o | Treatment (Wk 1) | Treatment | Fast Day | No | 04:10 | 04:00 - 04:59 | Morning       | 37,1 | 46  | 16,4  | 16,4  | 18,26 | 532,38 | 93,55  |
| 2019/05/15 | CH2206 | Male | Three y/o | Treatment (Wk 1) | Treatment | Fast Day | No | 04:10 | 04:00 - 04:59 | Morning       | 36,9 | 41  | 46,6  | 46,6  | 18,06 | 522,29 | 129,35 |
| 2019/05/15 | CH2205 | Male | Three y/o | Treatment (Wk 1) | Treatment | Fast Day | No | 04:15 | 04:00 - 04:59 | Morning       | 37,0 | 45  | 16,6  | 16,6  | 18,16 | 530,47 | 93,96  |
| 2019/05/15 | CH2206 | Male | Three y/o | Treatment (Wk 1) | Treatment | Fast Day | No | 04:15 | 04:00 - 04:59 | Morning       | 36,9 | 84  | 49,6  | 49,6  | 18,06 | 581,01 | 131,51 |
| 2019/05/15 | CH2205 | Male | Three y/o | Treatment (Wk 1) | Treatment | Fast Day | No | 04:20 | 04:00 - 04:59 | Morning       | 37,0 | 62  | 13,6  | 13,6  | 18,16 | 557,33 | 87,18  |
| 2019/05/15 | CH2206 | Male | Three y/o | Treatment (Wk 1) | Treatment | Fast Day | No | 04:20 | 04:00 - 04:59 | Morning       | 36,9 | 46  | 57,8  | 57,8  | 18,06 | 532,38 | 136,80 |
| 2019/05/15 | CH2205 | Male | Three y/o | Treatment (Wk 1) | Treatment | Fast Day | No | 04:25 | 04:00 - 04:59 | Morning       | 37,0 | 47  | 14,6  | 14,6  | 18,16 | 534,23 | 89,59  |
| 2019/05/15 | CH2206 | Male | Three y/o | Treatment (Wk 1) | Treatment | Fast Day | No | 04:25 | 04:00 - 04:59 | Morning       | 36,9 | 55  | 57,4  | 57,4  | 18,06 | 547,52 | 136,56 |
| 2019/05/15 | CH2205 | Male | Three y/o | Treatment (Wk 1) | Treatment | Fast Day | No | 04:30 | 04:00 - 04:59 | Morning       | 37,0 | 52  | 17,0  | 17,0  | 18,16 | 542,83 | 94,77  |
| 2019/05/15 | CH2206 | Male | Three y/o | Treatment (Wk 1) | Treatment | Fast Day | No | 04:30 | 04:00 - 04:59 | Morning       | 36,9 | 84  | 13,4  | 13,4  | 18,06 | 581,01 | 86,68  |
| 2019/05/15 | CH2205 | Male | Three y/o | Treatment (Wk 1) | Treatment | Fast Day | No | 04:35 | 04:00 - 04:59 | Morning       | 37,0 |     | 18,2  | 18,2  | 18,16 |        | 97,10  |
| 2019/05/15 | CH2206 | Male | Three y/o | Treatment (Wk 1) | Treatment | Fast Day | No | 04:35 | 04:00 - 04:59 | Morning       | 37,0 | 78  | 4,8   | 4,8   | 18,16 | 575,38 | 52,04  |
| 2019/05/15 | CH2205 | Male | Three y/o | Treatment (Wk 1) | Treatment | Fast Day | No | 04:40 | 04:00 - 04:59 | Morning       | 37,0 | 80  | 15,4  | 15,4  | 18,16 | 577,31 | 91,41  |
| 2019/05/15 | CH2206 | Male | Three y/o | Treatment (Wk 1) | Treatment | Fast Day | No | 04:40 | 04:00 - 04:59 | Morning       | 37,0 | 47  | 15,4  | 15,4  | 18,16 | 534,23 | 91,41  |
| 2019/05/15 | CH2205 | Male | Three y/o | Treatment (Wk 1) | Treatment | Fast Day | No | 04:45 | 04:00 - 04:59 | Morning       | 37,0 | 44  | 10,6  | 10,6  | 18,16 | 528,51 | 78,73  |
| 2019/05/15 | CH2206 | Male | Three y/o | Treatment (Wk 1) | Treatment | Fast Day | No | 04:45 | 04:00 - 04:59 | Morning       | 36,9 | 47  | 21,0  | 21,0  | 18,06 | 534,23 | 101,98 |
| 2019/05/15 | CH2205 | Male | Three y/o | Treatment (Wk 1) | Treatment | Fast Day | No | 04:50 | 04:00 - 04:59 | Morning       | 37,0 |     | 8,2   | 8,2   | 18,16 |        | 70,05  |
| 2019/05/15 | CH2206 | Male | Three y/o | Treatment (Wk 1) | Treatment | Fast Day | No | 04:50 | 04:00 - 04:59 | Morning       | 36,8 | 47  | 17,2  | 17,2  | 17,96 | 534,23 | 95,17  |
| 2019/05/15 | CH2205 | Male | Three y/o | Treatment (Wk 1) | Treatment | Fast Day | No | 04:55 | 04:00 - 04:59 | Morning       | 36,9 | 60  | 9,6   | 9,6   | 18,06 | 554,67 | 75,37  |
| 2019/05/15 | CH2206 | Male | Three y/o | Treatment (Wk 1) | Treatment | Fast Day | No | 04:55 | 04:00 - 04:59 | Morning       | 36,8 | 42  | 12,8  | 12,8  | 17,96 | 524,42 | 85,12  |
| 2019/05/15 | CH2205 | Male | Three y/o | Treatment (Wk 1) | Treatment | Fast Day | No | 05:00 | 05:00 - 05:59 | Morning       | 36,8 | 65  | 8,0   | 8,0   | 17,96 | 561,12 | 69,22  |
| 2019/05/15 | CH2206 | Male | Three y/o | Treatment (Wk 1) | Treatment | Fast Day | No | 05:00 | 05:00 - 05:59 | Morning       | 36,8 | 48  | 18,0  | 18,0  | 17,96 | 536,04 | 96,72  |
| 2019/05/15 | CH2205 | Male | Three y/o | Treatment (Wk 1) | Treatment | Fast Day | No | 05:05 | 05:00 - 05:59 | Morning       | 36,8 |     | 29,0  | 29,0  | 17,96 |        | 113,03 |
| 2019/05/15 | CH2206 | Male | Three y/o | Treatment (Wk 1) | Treatment | Fast Day | No | 05:05 | 05:00 - 05:59 | Morning       | 36,8 | 64  | 23,8  | 23,8  | 17,96 | 559,88 | 106,26 |
| 2019/05/15 | CH2205 | Male | Three y/o | Treatment (Wk 1) | Treatment | Fast Day | No | 05:10 | 05:00 - 05:59 | Morning       | 37,0 | 125 | 16,8  | 16,8  | 18,16 | 609,60 | 94,37  |
| 2019/05/15 | CH2206 | Male | Three y/o | Treatment (Wk 1) | Treatment | Fast Day | No | 05:10 | 05:00 - 05:59 | Morning       | 36,8 | 156 | 88,4  | 88,4  | 17,96 | 624,43 | 151,55 |
| 2019/05/15 | CH2205 | Male | Three y/o | Treatment (Wk 1) | Treatment | Fast Day | No | 05:15 | 05:00 - 05:59 | Morning       | 37,0 | 60  | 7,6   | 7,6   | 18,16 | 554,67 | 67,49  |
| 2019/05/15 | CH2206 | Male | Three y/o | Treatment (Wk 1) | Treatment | Fast Day | No | 05:15 | 05:00 - 05:59 | Morning       | 37,0 | 101 | 126,6 | 126,6 | 18,16 | 594,59 | 164,08 |
| 2019/05/15 | CH2205 | Male | Three y/o | Treatment (Wk 1) | Treatment | Fast Day | No | 05:20 | 05:00 - 05:59 | Morning       | 37,0 | 64  | 4,4   | 4,4   | 18,16 | 559,88 | 49,12  |
| 2019/05/15 | CH2206 | Male | Three y/o | Treatment (Wk 1) | Treatment | Fast Day | No | 05:20 | 05:00 - 05:59 | Morning       | 37,0 |     | 52,2  | 52,2  | 18,16 |        | 133,27 |
| 2019/05/15 | CH2205 | Male | Three y/o | Treatment (Wk 1) | Treatment | Fast Day | No | 05:25 | 05:00 - 05:59 | Morning       | 36,8 |     | 2,8   | 2,8   | 17,96 |        | 34,04  |
| 2019/05/15 | CH2206 | Male | Three y/o | Treatment (Wk 1) | Treatment | Fast Day | No | 05:25 | 05:00 - 05:59 | Morning       | 36,8 | 53  | 25,0  | 25,0  | 17,96 | 544,43 | 107,94 |
| 2019/05/15 | CH2205 | Male | Three y/o | Treatment (Wk 1) | Treatment | Fast Day | No | 05:30 | 05:00 - 05:59 | Morning       | 36,8 | 61  | 5,0   | 5,0   | 17,96 | 556,01 | 53,41  |
| 2019/05/15 | CH2206 | Male | Three y/o | Treatment (Wk 1) | Treatment | Fast Day | No | 05:30 | 05:00 - 05:59 | Morning       | 36,5 | 68  | 28,0  | 28,0  | 17,67 | 564,71 | 111,83 |
| 2019/05/15 | CH2205 | Male | Three y/o | Treatment (Wk 1) | Treatment | Fast Day | No | 05:35 | 05:00 - 05:59 | Morning       | 36,8 | 41  | 7,2   | 7,2   | 17,96 | 522,29 | 65,66  |
| 2019/05/15 | CH2206 | Male | Three y/o | Treatment (Wk 1) | Treatment | Fast Day | No | 05:35 | 05:00 - 05:59 | Morning       | 36,4 | 83  | 28,8  | 28,8  | 17,57 | 580,11 | 112,79 |
| 2019/05/15 | CH2205 | Male | Three y/o | Treatment (Wk 1) | Treatment | Fast Day | No | 05:40 | 05:00 - 05:59 | Morning       | 36,8 | 51  | 13,8  | 13,8  | 17,96 | 541,20 | 87,68  |



|            |        |      |           |                  |           |          |    |       |               |              |      |     |       |       |       |        |        |
|------------|--------|------|-----------|------------------|-----------|----------|----|-------|---------------|--------------|------|-----|-------|-------|-------|--------|--------|
| 2019/05/15 | CH2206 | Male | Three y/o | Treatment (Wk 1) | Treatment | Fast Day | No | 05:40 | 05:00 - 05:59 | Morning      | 36,3 | 97  | 35,0  | 35,0  | 17,48 | 591,66 | 119,49 |
| 2019/05/15 | CH2205 | Male | Three y/o | Treatment (Wk 1) | Treatment | Fast Day | No | 05:45 | 05:00 - 05:59 | Morning      | 36,8 | 43  | 3,0   | 3,0   | 17,96 | 526,50 | 36,34  |
| 2019/05/15 | CH2206 | Male | Three y/o | Treatment (Wk 1) | Treatment | Fast Day | No | 05:45 | 05:00 - 05:59 | Morning      | 36,3 | 46  | 35,4  | 35,4  | 17,48 | 532,38 | 119,88 |
| 2019/05/15 | CH2205 | Male | Three y/o | Treatment (Wk 1) | Treatment | Fast Day | No | 05:50 | 05:00 - 05:59 | Morning      | 36,7 | 50  | 5,6   | 5,6   | 17,87 | 539,52 | 57,21  |
| 2019/05/15 | CH2206 | Male | Three y/o | Treatment (Wk 1) | Treatment | Fast Day | No | 05:50 | 05:00 - 05:59 | Morning      | 36,3 | 44  | 37,4  | 37,4  | 17,48 | 528,51 | 121,77 |
| 2019/05/15 | CH2205 | Male | Three y/o | Treatment (Wk 1) | Treatment | Fast Day | No | 05:55 | 05:00 - 05:59 | Morning      | 36,6 | 46  | 8,8   | 8,8   | 17,77 | 532,38 | 72,43  |
| 2019/05/15 | CH2206 | Male | Three y/o | Treatment (Wk 1) | Treatment | Fast Day | No | 05:55 | 05:00 - 05:59 | Morning      | 36,1 | 47  | 51,2  | 51,2  | 17,29 | 534,23 | 132,61 |
| 2019/05/15 | CH2205 | Male | Three y/o | Treatment (Wk 1) | Treatment | Fast Day | No | 06:00 | 06:00 - 06:59 | Morning      | 36,6 | 54  | 11,4  | 11,4  | 17,77 | 545,99 | 81,19  |
| 2019/05/15 | CH2206 | Male | Three y/o | Treatment (Wk 1) | Treatment | Fast Day | No | 06:00 | 06:00 - 06:59 | Morning      | 36,4 | 44  | 44,6  | 44,6  | 17,57 | 528,51 | 127,84 |
| 2019/05/15 | CH2205 | Male | Three y/o | Treatment (Wk 1) | Treatment | Fast Day | No | 06:05 | 06:00 - 06:59 | Morning      | 36,5 |     | 116,2 | 116,2 | 17,67 |        | 161,08 |
| 2019/05/15 | CH2206 | Male | Three y/o | Treatment (Wk 1) | Treatment | Fast Day | No | 06:05 | 06:00 - 06:59 | Morning      | 36,4 | 114 | 105,8 | 105,8 | 17,57 | 603,20 | 157,81 |
| 2019/05/15 | CH2205 | Male | Three y/o | Treatment (Wk 1) | Treatment | Fast Day | No | 06:10 | 06:00 - 06:59 | Morning      | 36,6 |     | 230,8 | 230,8 | 17,77 |        | 185,16 |
| 2019/05/15 | CH2206 | Male | Three y/o | Treatment (Wk 1) | Treatment | Fast Day | No | 06:10 | 06:00 - 06:59 | Morning      | 36,6 |     | 235,0 | 235,0 | 17,77 |        | 185,80 |
| 2019/05/15 | CH2205 | Male | Three y/o | Treatment (Wk 1) | Treatment | Fast Day | No | 06:15 | 06:00 - 06:59 | Morning      | 36,8 | 94  | 47,0  | 47,0  | 17,96 | 589,37 | 129,65 |
| 2019/05/15 | CH2206 | Male | Three y/o | Treatment (Wk 1) | Treatment | Fast Day | No | 06:15 | 06:00 - 06:59 | Morning      | 36,8 |     | 57,8  | 57,8  | 17,96 |        | 136,80 |
| 2019/05/15 | CH2205 | Male | Three y/o | Treatment (Wk 1) | Treatment | Fast Day | No | 06:20 | 06:00 - 06:59 | Morning      | 36,9 |     | 79,8  | 79,8  | 18,06 |        | 147,99 |
| 2019/05/15 | CH2206 | Male | Three y/o | Treatment (Wk 1) | Treatment | Fast Day | No | 06:20 | 06:00 - 06:59 | Morning      | 37,1 | 121 | 78,2  | 78,2  | 18,26 | 607,35 | 147,28 |
| 2019/05/15 | CH2205 | Male | Three y/o | Treatment (Wk 1) | Treatment | Fast Day | No | 06:25 | 06:00 - 06:59 | Morning      | 37,0 | 73  | 153,8 | 153,8 | 18,16 | 570,27 | 170,89 |
| 2019/05/15 | CH2206 | Male | Three y/o | Treatment (Wk 1) | Treatment | Fast Day | No | 06:25 | 06:00 - 06:59 | Morning      | 37,1 |     | 32,2  | 32,2  | 18,26 |        | 116,63 |
| 2019/05/15 | CH2205 | Male | Three y/o | Treatment (Wk 1) | Treatment | Fast Day | No | 06:30 | 06:00 - 06:59 | Morning      | 37,1 |     | 125,0 | 125,0 | 18,26 |        | 163,63 |
| 2019/05/15 | CH2206 | Male | Three y/o | Treatment (Wk 1) | Treatment | Fast Day | No | 06:30 | 06:00 - 06:59 | Morning      | 37,3 | 92  | 248,6 | 248,6 | 18,46 | 587,78 | 187,78 |
| 2019/05/15 | CH2205 | Male | Three y/o | Treatment (Wk 1) | Treatment | Fast Day | No | 06:35 | 06:00 - 06:59 | Morning      | 37,3 |     | 158,4 | 158,4 | 18,46 |        | 171,93 |
| 2019/05/15 | CH2206 | Male | Three y/o | Treatment (Wk 1) | Treatment | Fast Day | No | 06:35 | 06:00 - 06:59 | Morning      | 37,4 | 129 | 61,0  | 61,0  | 18,55 | 611,75 | 138,67 |
| 2019/05/15 | CH2205 | Male | Three y/o | Treatment (Wk 1) | Treatment | Fast Day | No | 06:40 | 06:00 - 06:59 | Morning      | 37,3 | 115 | 106,6 | 106,6 | 18,46 | 603,82 | 158,07 |
| 2019/05/15 | CH2206 | Male | Three y/o | Treatment (Wk 1) | Treatment | Fast Day | No | 06:40 | 06:00 - 06:59 | Morning      | 37,4 | 115 | 78,6  | 78,6  | 18,55 | 603,82 | 147,46 |
| 2019/05/15 | CH2205 | Male | Three y/o | Treatment (Wk 1) | Treatment | Fast Day | No | 06:45 | 06:00 - 06:59 | Morning      | 37,4 | 121 | 34,8  | 34,8  | 18,55 | 607,35 | 119,29 |
| 2019/05/15 | CH2206 | Male | Three y/o | Treatment (Wk 1) | Treatment | Fast Day | No | 06:45 | 06:00 - 06:59 | Morning      | 37,5 | 126 | 353,4 | 353,4 | 18,65 | 610,14 | 200,22 |
| 2019/05/15 | CH2205 | Male | Three y/o | Treatment (Wk 1) | Treatment | Fast Day | No | 06:50 | 06:00 - 06:59 | Morning      | 37,4 | 85  | 172,8 | 172,8 | 18,55 | 581,90 | 174,98 |
| 2019/05/15 | CH2206 | Male | Three y/o | Treatment (Wk 1) | Treatment | Fast Day | No | 06:50 | 06:00 - 06:59 | Morning      | 37,5 | 89  | 47,2  | 47,2  | 18,65 | 585,33 | 129,80 |
| 2019/05/15 | CH2205 | Male | Three y/o | Treatment (Wk 1) | Treatment | Fast Day | No | 06:55 | 06:00 - 06:59 | Morning      | 37,5 | 66  | 76,6  | 76,6  | 18,65 | 562,34 | 146,57 |
| 2019/05/15 | CH2206 | Male | Three y/o | Treatment (Wk 1) | Treatment | Fast Day | No | 06:55 | 06:00 - 06:59 | Morning      | 37,5 | 101 | 121,2 | 121,2 | 18,65 | 594,59 | 162,56 |
| 2019/05/15 | CH2205 | Male | Three y/o | Treatment (Wk 1) | Treatment | Fast Day | No | 07:00 | 07:00 - 07:59 | Morning      | 37,6 |     | 93,0  | 93,0  | 18,75 |        | 153,31 |
| 2019/05/15 | CH2206 | Male | Three y/o | Treatment (Wk 1) | Treatment | Fast Day | No | 07:00 | 07:00 - 07:59 | Morning      | 37,5 | 117 | 119,0 | 119,0 | 18,65 | 605,02 | 161,92 |
| 2019/05/15 | CH2205 | Male | Three y/o | Treatment (Wk 1) | Treatment | Fast Day | No | 07:05 | 07:00 - 07:59 | Morning      | 37,5 |     | 42,4  | 42,4  | 18,65 |        | 126,10 |
| 2019/05/15 | CH2206 | Male | Three y/o | Treatment (Wk 1) | Treatment | Fast Day | No | 07:05 | 07:00 - 07:59 | Morning      | 37,5 | 105 | 122,6 | 122,6 | 18,65 | 597,38 | 162,96 |
| 2019/05/15 | CH2205 | Male | Three y/o | Treatment (Wk 1) | Treatment | Fast Day | No | 07:10 | 07:00 - 07:59 | Morning      | 37,3 |     | 190,8 | 190,8 | 18,46 |        | 178,46 |
| 2019/05/15 | CH2206 | Male | Three y/o | Treatment (Wk 1) | Treatment | Fast Day | No | 07:10 | 07:00 - 07:59 | Morning      | 37,7 | 94  | 726,0 | 726,0 | 18,85 | 589,37 | 225,86 |
| 2019/05/15 | CH2205 | Male | Three y/o | Treatment (Wk 1) | Treatment | Fast Day | No | 07:15 | 07:00 - 07:59 | Morning      | 37,5 | 109 | 59,2  | 59,2  | 18,65 | 600,04 | 137,63 |
| 2019/05/15 | CH2206 | Male | Three y/o | Treatment (Wk 1) | Treatment | Fast Day | No | 07:15 | 07:00 - 07:59 | Morning      | 37,7 | 110 | 89,6  | 89,6  | 18,85 | 600,69 | 152,02 |
| 2019/05/15 | CH2205 | Male | Three y/o | Treatment (Wk 1) | Treatment | Fast Day | No | 07:20 | 07:00 - 07:59 | Morning      | 37,5 |     | 96,2  | 96,2  | 18,65 |        | 154,49 |
| 2019/05/15 | CH2206 | Male | Three y/o | Treatment (Wk 1) | Treatment | Fast Day | No | 07:20 | 07:00 - 07:59 | Morning      | 37,7 | 124 | 101,4 | 101,4 | 18,85 | 609,04 | 156,33 |
| 2019/05/15 | CH2205 | Male | Three y/o | Treatment (Wk 1) | Treatment | Fast Day | No | 07:25 | 07:00 - 07:59 | Morning      | 37,6 |     | 37,0  | 37,0  | 18,75 |        | 121,40 |
| 2019/05/15 | CH2206 | Male | Three y/o | Treatment (Wk 1) | Treatment | Fast Day | No | 07:25 | 07:00 - 07:59 | Morning      | 37,7 | 79  | 236,6 | 236,6 | 18,85 | 576,36 | 186,04 |
| 2019/05/15 | CH2205 | Male | Three y/o | Treatment (Wk 1) | Treatment | Fast Day | No | 07:30 | 07:00 - 07:59 | Morning      | 37,5 | 90  | 7,2   | 7,2   | 18,65 | 586,16 | 65,66  |
| 2019/05/15 | CH2206 | Male | Three y/o | Treatment (Wk 1) | Treatment | Fast Day | No | 07:30 | 07:00 - 07:59 | Morning      | 37,7 | 115 | 107,8 | 107,8 | 18,85 | 603,82 | 158,46 |
| 2019/05/15 | CH2205 | Male | Three y/o | Treatment (Wk 1) | Treatment | Fast Day | No | 07:35 | 07:00 - 07:59 | Morning      | 37,4 |     | 148,8 | 148,8 | 18,55 |        | 169,74 |
| 2019/05/15 | CH2206 | Male | Three y/o | Treatment (Wk 1) | Treatment | Fast Day | No | 07:35 | 07:00 - 07:59 | Morning      | 37,7 | 117 | 77,2  | 77,2  | 18,85 | 605,02 | 146,84 |
| 2019/05/15 | CH2205 | Male | Three y/o | Treatment (Wk 1) | Treatment | Fast Day | No | 07:40 | 07:00 - 07:59 | Morning      | 37,5 | 98  | 227,8 | 227,8 | 18,65 | 592,41 | 184,70 |
| 2019/05/15 | CH2206 | Male | Three y/o | Treatment (Wk 1) | Treatment | Fast Day | No | 07:40 | 07:00 - 07:59 | Morning      | 37,7 | 109 | 224,4 | 224,4 | 18,85 | 600,04 | 184,17 |
| 2019/05/15 | CH2205 | Male | Three y/o | Treatment (Wk 1) | Treatment | Fast Day | No | 07:45 | 07:00 - 07:59 | Morning      | 37,6 | 141 | 288,0 | 288,0 | 18,75 | 617,75 | 192,98 |
| 2019/05/15 | CH2206 | Male | Three y/o | Treatment (Wk 1) | Treatment | Fast Day | No | 07:45 | 07:00 - 07:59 | Morning      | 37,8 | 162 | 955,8 |       | 18,95 | 626,88 |        |
| 2019/05/15 | CH2205 | Male | Three y/o | Treatment (Wk 1) | Treatment | Fast Day | No | 07:50 | 07:00 - 07:59 | Morning      | 37,5 | 82  | 6,8   | 6,8   | 18,65 | 579,19 | 63,74  |
| 2019/05/15 | CH2206 | Male | Three y/o | Treatment (Wk 1) | Treatment | Fast Day | No | 07:50 | 07:00 - 07:59 | Morning      | 37,9 | 51  | 50,2  | 50,2  | 19,05 | 541,20 | 131,92 |
| 2019/05/15 | CH2205 | Male | Three y/o | Treatment (Wk 1) | Treatment | Fast Day | No | 07:55 | 07:00 - 07:59 | Morning      | 37,6 | 66  | 8,6   | 8,6   | 18,75 | 562,34 | 71,66  |
| 2019/05/15 | CH2206 | Male | Three y/o | Treatment (Wk 1) | Treatment | Fast Day | No | 07:55 | 07:00 - 07:59 | Morning      | 37,7 | 54  | 306,0 | 306,0 | 18,85 | 545,99 | 195,12 |
| 2019/05/15 | CH2205 | Male | Three y/o | Treatment (Wk 1) | Treatment | Fast Day | No | 08:00 | 08:00 - 08:59 | Late Morning | 37,6 | 152 | 14,8  | 14,8  | 18,75 | 622,73 | 90,05  |
| 2019/05/15 | CH2206 | Male | Three y/o | Treatment (Wk 1) | Treatment | Fast Day | No | 08:00 | 08:00 - 08:59 | Late Morning | 37,7 | 37  | 75,4  | 75,4  | 18,85 | 513,06 | 146,02 |
| 2019/05/15 | CH2205 | Male | Three y/o | Treatment (Wk 1) | Treatment | Fast Day | No | 08:05 | 08:00 - 08:59 | Late Morning | 37,6 | 49  | 6,8   | 6,8   | 18,75 | 537,80 | 63,74  |
| 2019/05/15 | CH2206 | Male | Three y/o | Treatment (Wk 1) | Treatment | Fast Day | No | 08:05 | 08:00 - 08:59 | Late Morning | 37,7 | 99  | 254,4 | 254,4 | 18,85 | 593,14 | 188,60 |
| 2019/05/15 | CH2205 | Male | Three y/o | Treatment (Wk 1) | Treatment | Fast Day | No | 08:10 | 08:00 - 08:59 | Late Morning | 37,5 | 96  | 73,2  | 73,2  | 18,65 | 590,91 | 144,99 |
| 2019/05/15 | CH2206 | Male | Three y/o | Treatment (Wk 1) | Treatment | Fast Day | No | 08:10 | 08:00 - 08:59 | Late Morning | 37,7 | 123 | 96,4  | 96,4  | 18,85 | 608,49 | 154,57 |
| 2019/05/15 | CH2205 | Male | Three y/o | Treatment (Wk 1) | Treatment | Fast Day | No | 08:15 | 08:00 - 08:59 | Late Morning | 37,5 |     | 95,6  | 95,6  | 18,65 |        | 154,28 |
| 2019/05/15 | CH2206 | Male | Three y/o | Treatment (Wk 1) | Treatment | Fast Day | No | 08:15 | 08:00 - 08:59 | Late Morning | 37,6 | 115 | 174,6 | 174,6 | 18,75 | 603,82 | 175,34 |
| 2019/05/15 | CH2205 | Male | Three y/o | Treatment (Wk 1) | Treatment | Fast Day | No | 08:20 | 08:00 - 08:59 | Late Morning | 37,5 | 67  | 79,4  | 79,4  | 18,65 | 563,53 | 147,81 |
| 2019/05/15 | CH2206 | Male | Three y/o | Treatment (Wk 1) | Treatment | Fast Day | No | 08:20 | 08:00 - 08:59 | Late Morning | 37,7 | 112 | 163,2 | 163,2 | 18,85 | 601,96 | 172,97 |
| 2019/05/15 | CH2205 | Male | Three y/o | Treatment (Wk 1) | Treatment | Fast Day | No | 08:25 | 08:00 - 08:59 | Late Morning | 37,5 | 96  | 185,0 | 185,0 | 18,65 | 590,91 | 177,38 |
| 2019/05/15 | CH2206 | Male | Three y/o | Treatment (Wk 1) | Treatment | Fast Day | No | 08:25 | 08:00 - 08:59 | Late Morning | 37,7 | 118 | 52,6  | 52,6  | 18,85 | 605,61 | 133,54 |
| 2019/05/15 | CH2205 | Male | Three y/o | Treatment (Wk 1) | Treatment | Fast Day | No | 08:30 | 08:00 - 08:59 | Late Morning | 37,5 | 84  | 75,8  | 75,8  | 18,65 | 581,01 | 146,20 |
| 2019/05/15 | CH2206 | Male | Three y/o | Treatment (Wk 1) | Treatment | Fast Day | No | 08:30 | 08:00 - 08:59 | Late Morning | 37,7 | 128 | 26,2  | 26,2  | 18,85 | 611,22 | 109,55 |
| 2019/05/15 | CH2205 | Male | Three y/o | Treatment (Wk 1) | Treatment | Fast Day | No | 08:35 | 08:00 - 08:59 | Late Morning | 37,6 | 132 | 62,2  | 62,2  | 18,75 | 613,32 | 139,34 |



|            |        |      |           |                  |           |          |    |       |               |              |      |     |       |       |       |        |        |
|------------|--------|------|-----------|------------------|-----------|----------|----|-------|---------------|--------------|------|-----|-------|-------|-------|--------|--------|
| 2019/05/15 | CH2206 | Male | Three y/o | Treatment (Wk 1) | Treatment | Fast Day | No | 08:35 | 08:00 - 08:59 | Late Morning | 37,5 | 131 | 110,0 | 110,0 | 18,65 | 612,80 | 159,17 |
| 2019/05/15 | CH2205 | Male | Three y/o | Treatment (Wk 1) | Treatment | Fast Day | No | 08:40 | 08:00 - 08:59 | Late Morning | 37,7 | 100 | 80,2  | 80,2  | 18,85 | 593,87 | 148,16 |
| 2019/05/15 | CH2206 | Male | Three y/o | Treatment (Wk 1) | Treatment | Fast Day | No | 08:40 | 08:00 - 08:59 | Late Morning | 37,7 | 104 | 154,6 | 154,6 | 18,85 | 596,69 | 171,08 |
| 2019/05/15 | CH2205 | Male | Three y/o | Treatment (Wk 1) | Treatment | Fast Day | No | 08:45 | 08:00 - 08:59 | Late Morning | 37,7 | 107 | 134,8 | 134,8 | 18,85 | 598,73 | 166,28 |
| 2019/05/15 | CH2206 | Male | Three y/o | Treatment (Wk 1) | Treatment | Fast Day | No | 08:45 | 08:00 - 08:59 | Late Morning | 37,7 | 111 | 113,6 | 113,6 | 18,85 | 601,33 | 160,29 |
| 2019/05/15 | CH2205 | Male | Three y/o | Treatment (Wk 1) | Treatment | Fast Day | No | 08:50 | 08:00 - 08:59 | Late Morning | 37,7 | 83  | 3,6   | 3,6   | 18,85 | 580,11 | 42,42  |
| 2019/05/15 | CH2206 | Male | Three y/o | Treatment (Wk 1) | Treatment | Fast Day | No | 08:50 | 08:00 - 08:59 | Late Morning | 37,7 | 111 | 124,0 | 124,0 | 18,85 | 601,33 | 163,35 |
| 2019/05/15 | CH2205 | Male | Three y/o | Treatment (Wk 1) | Treatment | Fast Day | No | 08:55 | 08:00 - 08:59 | Late Morning | 37,7 |     | 128,2 | 128,2 | 18,85 |        | 164,52 |
| 2019/05/15 | CH2206 | Male | Three y/o | Treatment (Wk 1) | Treatment | Fast Day | No | 08:55 | 08:00 - 08:59 | Late Morning | 37,5 | 114 | 284,6 | 284,6 | 18,65 | 603,20 | 192,56 |
| 2019/05/15 | CH2205 | Male | Three y/o | Treatment (Wk 1) | Treatment | Fast Day | No | 09:00 | 09:00 - 09:59 | Late Morning | 37,8 | 68  | 11,4  | 11,4  | 18,95 | 564,71 | 81,19  |
| 2019/05/15 | CH2206 | Male | Three y/o | Treatment (Wk 1) | Treatment | Fast Day | No | 09:00 | 09:00 - 09:59 | Late Morning | 37,7 | 67  | 40,2  | 40,2  | 18,85 | 563,53 | 124,26 |
| 2019/05/15 | CH2205 | Male | Three y/o | Treatment (Wk 1) | Treatment | Fast Day | No | 09:05 | 09:00 - 09:59 | Late Morning | 37,7 | 73  | 7,8   | 7,8   | 18,85 | 570,27 | 68,36  |
| 2019/05/15 | CH2206 | Male | Three y/o | Treatment (Wk 1) | Treatment | Fast Day | No | 09:05 | 09:00 - 09:59 | Late Morning | 37,5 | 52  | 43,4  | 43,4  | 18,65 | 542,83 | 126,90 |
| 2019/05/15 | CH2205 | Male | Three y/o | Treatment (Wk 1) | Treatment | Fast Day | No | 09:10 | 09:00 - 09:59 | Late Morning | 37,7 |     | 12,6  | 12,6  | 18,85 |        | 84,59  |
| 2019/05/15 | CH2206 | Male | Three y/o | Treatment (Wk 1) | Treatment | Fast Day | No | 09:10 | 09:00 - 09:59 | Late Morning | 37,5 | 56  | 63,0  | 63,0  | 18,65 | 549,01 | 139,78 |
| 2019/05/15 | CH2205 | Male | Three y/o | Treatment (Wk 1) | Treatment | Fast Day | No | 09:15 | 09:00 - 09:59 | Late Morning | 37,7 |     | 81,6  | 81,6  | 18,85 |        | 148,76 |
| 2019/05/15 | CH2206 | Male | Three y/o | Treatment (Wk 1) | Treatment | Fast Day | No | 09:15 | 09:00 - 09:59 | Late Morning | 37,7 | 60  | 69,0  | 69,0  | 18,85 | 554,67 | 142,94 |
| 2019/05/15 | CH2205 | Male | Three y/o | Treatment (Wk 1) | Treatment | Fast Day | No | 09:20 | 09:00 - 09:59 | Late Morning | 37,7 | 78  | 19,4  | 19,4  | 18,85 | 575,38 | 99,28  |
| 2019/05/15 | CH2206 | Male | Three y/o | Treatment (Wk 1) | Treatment | Fast Day | No | 09:20 | 09:00 - 09:59 | Late Morning | 37,5 | 126 | 80,0  | 80,0  | 18,65 | 610,14 | 148,08 |
| 2019/05/15 | CH2205 | Male | Three y/o | Treatment (Wk 1) | Treatment | Fast Day | No | 09:25 | 09:00 - 09:59 | Late Morning | 37,6 | 88  | 75,0  | 75,0  | 18,75 | 584,49 | 145,83 |
| 2019/05/15 | CH2206 | Male | Three y/o | Treatment (Wk 1) | Treatment | Fast Day | No | 09:25 | 09:00 - 09:59 | Late Morning | 37,5 | 76  | 130,4 | 130,4 | 18,65 | 573,39 | 165,11 |
| 2019/05/15 | CH2205 | Male | Three y/o | Treatment (Wk 1) | Treatment | Fast Day | No | 09:30 | 09:00 - 09:59 | Late Morning | 37,6 | 103 | 35,0  | 35,0  | 18,75 | 596,00 | 119,49 |
| 2019/05/15 | CH2206 | Male | Three y/o | Treatment (Wk 1) | Treatment | Fast Day | No | 09:30 | 09:00 - 09:59 | Late Morning | 37,4 | 80  | 297,4 | 297,4 | 18,55 | 577,31 | 194,11 |
| 2019/05/15 | CH2205 | Male | Three y/o | Treatment (Wk 1) | Treatment | Fast Day | No | 09:35 | 09:00 - 09:59 | Late Morning | 37,6 | 191 | 41,8  | 41,8  | 18,75 | 637,33 | 125,60 |
| 2019/05/15 | CH2206 | Male | Three y/o | Treatment (Wk 1) | Treatment | Fast Day | No | 09:35 | 09:00 - 09:59 | Late Morning | 37,5 | 92  | 71,0  | 71,0  | 18,65 | 587,78 | 143,93 |
| 2019/05/15 | CH2205 | Male | Three y/o | Treatment (Wk 1) | Treatment | Fast Day | No | 09:40 | 09:00 - 09:59 | Late Morning | 37,6 |     | 114,6 | 114,6 | 18,75 |        | 160,60 |
| 2019/05/15 | CH2206 | Male | Three y/o | Treatment (Wk 1) | Treatment | Fast Day | No | 09:40 | 09:00 - 09:59 | Late Morning | 37,4 | 54  | 48,8  | 48,8  | 18,55 | 545,99 | 130,95 |
| 2019/05/15 | CH2205 | Male | Three y/o | Treatment (Wk 1) | Treatment | Fast Day | No | 09:45 | 09:00 - 09:59 | Late Morning | 37,6 | 77  | 18,0  | 18,0  | 18,75 | 574,39 | 96,72  |
| 2019/05/15 | CH2206 | Male | Three y/o | Treatment (Wk 1) | Treatment | Fast Day | No | 09:45 | 09:00 - 09:59 | Late Morning | 37,4 | 52  | 52,0  | 52,0  | 18,55 | 542,83 | 133,14 |
| 2019/05/15 | CH2205 | Male | Three y/o | Treatment (Wk 1) | Treatment | Fast Day | No | 09:50 | 09:00 - 09:59 | Late Morning | 37,6 | 68  | 11,0  | 11,0  | 18,75 | 564,71 | 79,98  |
| 2019/05/15 | CH2206 | Male | Three y/o | Treatment (Wk 1) | Treatment | Fast Day | No | 09:50 | 09:00 - 09:59 | Late Morning | 37,3 | 46  | 116,4 | 116,4 | 18,46 | 532,38 | 161,14 |
| 2019/05/15 | CH2205 | Male | Three y/o | Treatment (Wk 1) | Treatment | Fast Day | No | 09:55 | 09:00 - 09:59 | Late Morning | 37,6 | 165 | 171,4 | 171,4 | 18,75 | 628,06 | 174,70 |
| 2019/05/15 | CH2206 | Male | Three y/o | Treatment (Wk 1) | Treatment | Fast Day | No | 09:55 | 09:00 - 09:59 | Late Morning | 37,2 | 137 | 46,4  | 46,4  | 18,36 | 615,83 | 129,21 |
| 2019/05/15 | CH2205 | Male | Three y/o | Treatment (Wk 1) | Treatment | Fast Day | No | 10:00 | 10:00 - 10:59 | Late Morning | 37,7 | 85  | 30,0  | 30,0  | 18,85 | 581,90 | 114,20 |
| 2019/05/15 | CH2206 | Male | Three y/o | Treatment (Wk 1) | Treatment | Fast Day | No | 10:00 | 10:00 - 10:59 | Late Morning | 37,1 | 46  | 55,4  | 55,4  | 18,26 | 532,38 | 135,33 |
| 2019/05/15 | CH2205 | Male | Three y/o | Treatment (Wk 1) | Treatment | Fast Day | No | 10:05 | 10:00 - 10:59 | Late Morning | 37,6 | 64  | 25,8  | 25,8  | 18,75 | 559,88 | 109,02 |
| 2019/05/15 | CH2206 | Male | Three y/o | Treatment (Wk 1) | Treatment | Fast Day | No | 10:05 | 10:00 - 10:59 | Late Morning | 37,0 | 84  | 39,2  | 39,2  | 18,16 | 581,01 | 123,39 |
| 2019/05/15 | CH2205 | Male | Three y/o | Treatment (Wk 1) | Treatment | Fast Day | No | 10:10 | 10:00 - 10:59 | Late Morning | 37,7 |     | 19,2  | 19,2  | 18,85 |        | 98,92  |
| 2019/05/15 | CH2206 | Male | Three y/o | Treatment (Wk 1) | Treatment | Fast Day | No | 10:10 | 10:00 - 10:59 | Late Morning | 37,1 | 61  | 31,0  | 31,0  | 18,26 | 556,01 | 115,32 |
| 2019/05/15 | CH2205 | Male | Three y/o | Treatment (Wk 1) | Treatment | Fast Day | No | 10:15 | 10:00 - 10:59 | Late Morning | 37,7 |     | 48,2  | 48,2  | 18,85 |        | 130,52 |
| 2019/05/15 | CH2206 | Male | Three y/o | Treatment (Wk 1) | Treatment | Fast Day | No | 10:15 | 10:00 - 10:59 | Late Morning | 37,2 | 45  | 20,8  | 20,8  | 18,36 | 530,47 | 101,65 |
| 2019/05/15 | CH2205 | Male | Three y/o | Treatment (Wk 1) | Treatment | Fast Day | No | 10:20 | 10:00 - 10:59 | Late Morning | 37,7 | 72  | 14,2  | 14,2  | 18,85 | 569,20 | 88,65  |
| 2019/05/15 | CH2206 | Male | Three y/o | Treatment (Wk 1) | Treatment | Fast Day | No | 10:20 | 10:00 - 10:59 | Late Morning | 37,2 | 44  | 19,6  | 19,6  | 18,36 | 528,51 | 99,63  |
| 2019/05/15 | CH2205 | Male | Three y/o | Treatment (Wk 1) | Treatment | Fast Day | No | 10:25 | 10:00 - 10:59 | Late Morning | 37,7 | 61  | 10,4  | 10,4  | 18,85 | 556,01 | 78,08  |
| 2019/05/15 | CH2206 | Male | Three y/o | Treatment (Wk 1) | Treatment | Fast Day | No | 10:25 | 10:00 - 10:59 | Late Morning | 37,3 | 51  | 47,0  | 47,0  | 18,46 | 541,20 | 129,65 |
| 2019/05/15 | CH2205 | Male | Three y/o | Treatment (Wk 1) | Treatment | Fast Day | No | 10:30 | 10:00 - 10:59 | Late Morning | 37,5 |     | 11,2  | 11,2  | 18,65 |        | 80,59  |
| 2019/05/15 | CH2206 | Male | Three y/o | Treatment (Wk 1) | Treatment | Fast Day | No | 10:30 | 10:00 - 10:59 | Late Morning | 37,2 | 54  | 61,6  | 61,6  | 18,36 | 545,99 | 139,00 |
| 2019/05/15 | CH2205 | Male | Three y/o | Treatment (Wk 1) | Treatment | Fast Day | No | 10:35 | 10:00 - 10:59 | Late Morning | 37,5 | 63  | 8,2   | 8,2   | 18,65 | 558,62 | 70,05  |
| 2019/05/15 | CH2206 | Male | Three y/o | Treatment (Wk 1) | Treatment | Fast Day | No | 10:35 | 10:00 - 10:59 | Late Morning | 36,9 | 74  | 54,4  | 54,4  | 18,06 | 571,33 | 134,70 |
| 2019/05/15 | CH2205 | Male | Three y/o | Treatment (Wk 1) | Treatment | Fast Day | No | 10:40 | 10:00 - 10:59 | Late Morning | 37,5 | 76  | 13,8  | 13,8  | 18,65 | 573,39 | 87,68  |
| 2019/05/15 | CH2206 | Male | Three y/o | Treatment (Wk 1) | Treatment | Fast Day | No | 10:40 | 10:00 - 10:59 | Late Morning | 36,8 | 108 | 93,2  | 93,2  | 17,96 | 599,39 | 153,39 |
| 2019/05/15 | CH2205 | Male | Three y/o | Treatment (Wk 1) | Treatment | Fast Day | No | 10:45 | 10:00 - 10:59 | Late Morning | 37,5 | 90  | 43,4  | 43,4  | 18,65 | 586,16 | 126,90 |
| 2019/05/15 | CH2206 | Male | Three y/o | Treatment (Wk 1) | Treatment | Fast Day | No | 10:45 | 10:00 - 10:59 | Late Morning | 36,9 | 83  | 76,4  | 76,4  | 18,06 | 580,11 | 146,48 |
| 2019/05/15 | CH2205 | Male | Three y/o | Treatment (Wk 1) | Treatment | Fast Day | No | 10:50 | 10:00 - 10:59 | Late Morning | 37,5 |     | 21,2  | 21,2  | 18,65 |        | 102,31 |
| 2019/05/15 | CH2206 | Male | Three y/o | Treatment (Wk 1) | Treatment | Fast Day | No | 10:50 | 10:00 - 10:59 | Late Morning | 37,0 | 54  | 24,0  | 24,0  | 18,16 | 545,99 | 106,55 |
| 2019/05/15 | CH2205 | Male | Three y/o | Treatment (Wk 1) | Treatment | Fast Day | No | 10:55 | 10:00 - 10:59 | Late Morning | 37,4 | 118 | 16,8  | 16,8  | 18,55 | 605,61 | 94,37  |
| 2019/05/15 | CH2206 | Male | Three y/o | Treatment (Wk 1) | Treatment | Fast Day | No | 10:55 | 10:00 - 10:59 | Late Morning | 37,0 | 53  | 28,6  | 28,6  | 18,16 | 544,43 | 112,56 |
| 2019/05/15 | CH2205 | Male | Three y/o | Treatment (Wk 1) | Treatment | Fast Day | No | 11:00 | 11:00 - 11:59 | Late Morning | 37,4 | 61  | 77,0  | 77,0  | 18,55 | 556,01 | 146,75 |
| 2019/05/15 | CH2206 | Male | Three y/o | Treatment (Wk 1) | Treatment | Fast Day | No | 11:00 | 11:00 - 11:59 | Late Morning | 37,1 | 70  | 20,6  | 20,6  | 18,26 | 566,99 | 101,32 |
| 2019/05/15 | CH2205 | Male | Three y/o | Treatment (Wk 1) | Treatment | Fast Day | No | 11:05 | 11:00 - 11:59 | Late Morning | 37,4 | 78  | 23,4  | 23,4  | 18,55 | 575,38 | 105,68 |
| 2019/05/15 | CH2206 | Male | Three y/o | Treatment (Wk 1) | Treatment | Fast Day | No | 11:05 | 11:00 - 11:59 | Late Morning | 37,2 | 54  | 6,6   | 6,6   | 18,36 | 545,99 | 62,73  |
| 2019/05/15 | CH2205 | Male | Three y/o | Treatment (Wk 1) | Treatment | Fast Day | No | 11:10 | 11:00 - 11:59 | Late Morning | 37,4 | 76  | 132,2 | 132,2 | 18,55 | 573,39 | 165,59 |
| 2019/05/15 | CH2206 | Male | Three y/o | Treatment (Wk 1) | Treatment | Fast Day | No | 11:10 | 11:00 - 11:59 | Late Morning | 37,2 | 93  | 533,8 | 533,8 | 18,36 | 588,58 | 214,88 |
| 2019/05/15 | CH2205 | Male | Three y/o | Treatment (Wk 1) | Treatment | Fast Day | No | 11:15 | 11:00 - 11:59 | Late Morning | 37,4 |     | 675,0 | 675,0 | 18,55 |        | 223,25 |
| 2019/05/15 | CH2206 | Male | Three y/o | Treatment (Wk 1) | Treatment | Fast Day | No | 11:15 | 11:00 - 11:59 | Late Morning | 37,3 | 56  | 124,0 | 124,0 | 18,46 | 549,01 | 163,35 |
| 2019/05/15 | CH2205 | Male | Three y/o | Treatment (Wk 1) | Treatment | Fast Day | No | 11:20 | 11:00 - 11:59 | Late Morning | 37,5 | 90  | 150,6 | 150,6 | 18,65 | 586,16 | 170,16 |
| 2019/05/15 | CH2206 | Male | Three y/o | Treatment (Wk 1) | Treatment | Fast Day | No | 11:20 | 11:00 - 11:59 | Late Morning | 37,3 | 85  | 26,2  | 26,2  | 18,46 | 581,90 | 109,55 |
| 2019/05/15 | CH2205 | Male | Three y/o | Treatment (Wk 1) | Treatment | Fast Day | No | 11:25 | 11:00 - 11:59 | Late Morning | 37,5 | 102 | 37,8  | 37,8  | 18,65 | 595,30 | 122,14 |
| 2019/05/15 | CH2206 | Male | Three y/o | Treatment (Wk 1) | Treatment | Fast Day | No | 11:25 | 11:00 - 11:59 | Late Morning | 37,3 | 57  | 78,2  | 78,2  | 18,46 | 550,47 | 147,28 |
| 2019/05/15 | CH2205 | Male | Three y/o | Treatment (Wk 1) | Treatment | Fast Day | No | 11:30 | 11:00 - 11:59 | Late Morning | 37,6 |     | 41,8  | 41,8  | 18,75 |        | 125,60 |



|            |        |      |           |                  |           |          |    |       |               |              |      |     |      |      |       |        |        |
|------------|--------|------|-----------|------------------|-----------|----------|----|-------|---------------|--------------|------|-----|------|------|-------|--------|--------|
| 2019/05/15 | CH2206 | Male | Three y/o | Treatment (Wk 1) | Treatment | Fast Day | No | 11:30 | 11:00 - 11:59 | Late Morning | 37,4 | 120 | 48,4 | 48,4 | 18,55 | 606,78 | 130,66 |
| 2019/05/15 | CH2205 | Male | Three y/o | Treatment (Wk 1) | Treatment | Fast Day | No | 11:35 | 11:00 - 11:59 | Late Morning | 37,7 |     | 48,2 | 48,2 | 18,85 |        | 130,52 |
| 2019/05/15 | CH2206 | Male | Three y/o | Treatment (Wk 1) | Treatment | Fast Day | No | 11:35 | 11:00 - 11:59 | Late Morning | 37,5 | 51  | 8,8  | 8,8  | 18,65 | 541,20 | 72,43  |
| 2019/05/15 | CH2205 | Male | Three y/o | Treatment (Wk 1) | Treatment | Fast Day | No | 11:40 | 11:00 - 11:59 | Late Morning | 37,6 | 86  | 44,0 | 44,0 | 18,75 | 582,77 | 127,37 |
| 2019/05/15 | CH2206 | Male | Three y/o | Treatment (Wk 1) | Treatment | Fast Day | No | 11:40 | 11:00 - 11:59 | Late Morning | 37,4 | 120 | 49,4 | 49,4 | 18,55 | 606,78 | 131,37 |
| 2019/05/15 | CH2205 | Male | Three y/o | Treatment (Wk 1) | Treatment | Fast Day | No | 11:45 | 11:00 - 11:59 | Late Morning | 37,5 | 94  | 90,4 | 90,4 | 18,65 | 589,37 | 152,33 |
| 2019/05/15 | CH2206 | Male | Three y/o | Treatment (Wk 1) | Treatment | Fast Day | No | 11:45 | 11:00 - 11:59 | Late Morning | 37,4 | 96  | 32,0 | 32,0 | 18,55 | 590,91 | 116,41 |
| 2019/05/15 | CH2205 | Male | Three y/o | Treatment (Wk 1) | Treatment | Fast Day | No | 11:50 | 11:00 - 11:59 | Late Morning | 37,6 | 70  | 24,6 | 24,6 | 18,75 | 566,99 | 107,39 |
| 2019/05/15 | CH2206 | Male | Three y/o | Treatment (Wk 1) | Treatment | Fast Day | No | 11:50 | 11:00 - 11:59 | Late Morning | 37,4 | 48  | 37,8 | 37,8 | 18,55 | 536,04 | 122,14 |
| 2019/05/15 | CH2205 | Male | Three y/o | Treatment (Wk 1) | Treatment | Fast Day | No | 11:55 | 11:00 - 11:59 | Late Morning | 37,5 |     | 44,2 | 44,2 | 18,65 |        | 127,53 |
| 2019/05/15 | CH2206 | Male | Three y/o | Treatment (Wk 1) | Treatment | Fast Day | No | 11:55 | 11:00 - 11:59 | Late Morning | 37,4 | 108 | 39,0 | 39,0 | 18,55 | 599,39 | 123,22 |
| 2019/05/15 | CH2205 | Male | Three y/o | Treatment (Wk 1) | Treatment | Fast Day | No | 12:00 | 12:00 - 12:59 | Afternoon    | 37,6 | 197 | 21,8 | 21,8 | 18,75 | 639,25 | 103,26 |
| 2019/05/15 | CH2206 | Male | Three y/o | Treatment (Wk 1) | Treatment | Fast Day | No | 12:00 | 12:00 - 12:59 | Afternoon    | 37,4 | 68  | 34,2 | 34,2 | 18,55 | 564,71 | 118,70 |
| 2019/05/15 | CH2205 | Male | Three y/o | Treatment (Wk 1) | Treatment | Fast Day | No | 12:05 | 12:00 - 12:59 | Afternoon    | 37,5 | 70  | 6,8  | 6,8  | 18,65 | 566,99 | 63,74  |
| 2019/05/15 | CH2206 | Male | Three y/o | Treatment (Wk 1) | Treatment | Fast Day | No | 12:05 | 12:00 - 12:59 | Afternoon    | 37,4 | 58  | 31,8 | 31,8 | 18,55 | 551,90 | 116,20 |
| 2019/05/15 | CH2205 | Male | Three y/o | Treatment (Wk 1) | Treatment | Fast Day | No | 12:10 | 12:00 - 12:59 | Afternoon    | 37,5 | 59  | 9,4  | 9,4  | 18,65 | 553,30 | 74,66  |
| 2019/05/15 | CH2206 | Male | Three y/o | Treatment (Wk 1) | Treatment | Fast Day | No | 12:10 | 12:00 - 12:59 | Afternoon    | 37,4 | 125 | 46,0 | 46,0 | 18,55 | 609,60 | 128,91 |
| 2019/05/15 | CH2205 | Male | Three y/o | Treatment (Wk 1) | Treatment | Fast Day | No | 12:15 | 12:00 - 12:59 | Afternoon    | 37,5 | 65  | 11,4 | 11,4 | 18,65 | 561,12 | 81,19  |
| 2019/05/15 | CH2206 | Male | Three y/o | Treatment (Wk 1) | Treatment | Fast Day | No | 12:15 | 12:00 - 12:59 | Afternoon    | 37,5 | 73  | 48,0 | 48,0 | 18,65 | 570,27 | 130,38 |
| 2019/05/15 | CH2205 | Male | Three y/o | Treatment (Wk 1) | Treatment | Fast Day | No | 12:20 | 12:00 - 12:59 | Afternoon    | 37,5 | 64  | 13,6 | 13,6 | 18,65 | 559,88 | 87,18  |
| 2019/05/15 | CH2206 | Male | Three y/o | Treatment (Wk 1) | Treatment | Fast Day | No | 12:20 | 12:00 - 12:59 | Afternoon    | 37,5 | 76  | 47,0 | 47,0 | 18,65 | 573,39 | 129,65 |
| 2019/05/15 | CH2205 | Male | Three y/o | Treatment (Wk 1) | Treatment | Fast Day | No | 12:25 | 12:00 - 12:59 | Afternoon    | 37,5 | 56  | 9,2  | 9,2  | 18,65 | 549,01 | 73,94  |
| 2019/05/15 | CH2206 | Male | Three y/o | Treatment (Wk 1) | Treatment | Fast Day | No | 12:25 | 12:00 - 12:59 | Afternoon    | 37,5 | 60  | 51,8 | 51,8 | 18,65 | 554,67 | 133,01 |
| 2019/05/15 | CH2205 | Male | Three y/o | Treatment (Wk 1) | Treatment | Fast Day | No | 12:30 | 12:00 - 12:59 | Afternoon    | 37,5 | 68  | 17,2 | 17,2 | 18,65 | 564,71 | 95,17  |
| 2019/05/15 | CH2206 | Male | Three y/o | Treatment (Wk 1) | Treatment | Fast Day | No | 12:30 | 12:00 - 12:59 | Afternoon    | 37,5 | 66  | 50,6 | 50,6 | 18,65 | 562,34 | 132,20 |
| 2019/05/15 | CH2205 | Male | Three y/o | Treatment (Wk 1) | Treatment | Fast Day | No | 12:35 | 12:00 - 12:59 | Afternoon    | 37,5 | 86  | 10,4 | 10,4 | 18,65 | 582,77 | 78,08  |
| 2019/05/15 | CH2206 | Male | Three y/o | Treatment (Wk 1) | Treatment | Fast Day | No | 12:35 | 12:00 - 12:59 | Afternoon    | 37,7 | 59  | 51,2 | 51,2 | 18,85 | 553,30 | 132,61 |
| 2019/05/15 | CH2205 | Male | Three y/o | Treatment (Wk 1) | Treatment | Fast Day | No | 12:40 | 12:00 - 12:59 | Afternoon    | 37,5 | 62  | 15,2 | 15,2 | 18,65 | 557,33 | 90,96  |
| 2019/05/15 | CH2206 | Male | Three y/o | Treatment (Wk 1) | Treatment | Fast Day | No | 12:40 | 12:00 - 12:59 | Afternoon    | 37,7 | 82  | 50,4 | 50,4 | 18,85 | 579,19 | 132,06 |
| 2019/05/15 | CH2205 | Male | Three y/o | Treatment (Wk 1) | Treatment | Fast Day | No | 12:45 | 12:00 - 12:59 | Afternoon    | 37,5 | 76  | 18,4 | 18,4 | 18,65 | 573,39 | 97,47  |
| 2019/05/15 | CH2206 | Male | Three y/o | Treatment (Wk 1) | Treatment | Fast Day | No | 12:45 | 12:00 - 12:59 | Afternoon    | 37,7 | 77  | 53,2 | 53,2 | 18,85 | 574,39 | 133,93 |
| 2019/05/15 | CH2205 | Male | Three y/o | Treatment (Wk 1) | Treatment | Fast Day | No | 12:50 | 12:00 - 12:59 | Afternoon    | 37,5 | 64  | 14,2 | 14,2 | 18,65 | 559,88 | 88,65  |
| 2019/05/15 | CH2206 | Male | Three y/o | Treatment (Wk 1) | Treatment | Fast Day | No | 12:50 | 12:00 - 12:59 | Afternoon    | 37,7 | 68  | 49,8 | 49,8 | 18,85 | 564,71 | 131,65 |
| 2019/05/15 | CH2205 | Male | Three y/o | Treatment (Wk 1) | Treatment | Fast Day | No | 12:55 | 12:00 - 12:59 | Afternoon    | 37,6 | 120 | 18,4 | 18,4 | 18,75 | 606,78 | 97,47  |
| 2019/05/15 | CH2206 | Male | Three y/o | Treatment (Wk 1) | Treatment | Fast Day | No | 12:55 | 12:00 - 12:59 | Afternoon    | 37,7 | 90  | 51,2 | 51,2 | 18,85 | 586,16 | 132,61 |
| 2019/05/15 | CH2205 | Male | Three y/o | Treatment (Wk 1) | Treatment | Fast Day | No | 13:00 | 13:00 - 13:59 | Afternoon    | 37,6 | 73  | 15,8 | 15,8 | 18,75 | 570,27 | 92,28  |
| 2019/05/15 | CH2206 | Male | Three y/o | Treatment (Wk 1) | Treatment | Fast Day | No | 13:00 | 13:00 - 13:59 | Afternoon    | 37,7 | 62  | 52,6 | 52,6 | 18,85 | 557,33 | 133,54 |
| 2019/05/15 | CH2205 | Male | Three y/o | Treatment (Wk 1) | Treatment | Fast Day | No | 13:05 | 13:00 - 13:59 | Afternoon    | 37,6 | 67  | 18,4 | 18,4 | 18,75 | 563,53 | 97,47  |
| 2019/05/15 | CH2206 | Male | Three y/o | Treatment (Wk 1) | Treatment | Fast Day | No | 13:05 | 13:00 - 13:59 | Afternoon    | 37,7 | 77  | 48,8 | 48,8 | 18,85 | 574,39 | 130,95 |
| 2019/05/15 | CH2205 | Male | Three y/o | Treatment (Wk 1) | Treatment | Fast Day | No | 13:10 | 13:00 - 13:59 | Afternoon    | 37,7 | 60  | 21,6 | 21,6 | 18,85 | 554,67 | 102,94 |
| 2019/05/15 | CH2206 | Male | Three y/o | Treatment (Wk 1) | Treatment | Fast Day | No | 13:10 | 13:00 - 13:59 | Afternoon    | 37,7 | 97  | 41,4 | 41,4 | 18,85 | 591,66 | 125,27 |
| 2019/05/15 | CH2205 | Male | Three y/o | Treatment (Wk 1) | Treatment | Fast Day | No | 13:15 | 13:00 - 13:59 | Afternoon    | 37,7 | 64  | 19,6 | 19,6 | 18,85 | 559,88 | 99,63  |
| 2019/05/15 | CH2206 | Male | Three y/o | Treatment (Wk 1) | Treatment | Fast Day | No | 13:15 | 13:00 - 13:59 | Afternoon    | 37,7 | 78  | 19,8 | 19,8 | 18,85 | 575,38 | 99,97  |
| 2019/05/15 | CH2205 | Male | Three y/o | Treatment (Wk 1) | Treatment | Fast Day | No | 13:20 | 13:00 - 13:59 | Afternoon    | 37,7 | 64  | 20,6 | 20,6 | 18,85 | 559,88 | 101,32 |
| 2019/05/15 | CH2206 | Male | Three y/o | Treatment (Wk 1) | Treatment | Fast Day | No | 13:20 | 13:00 - 13:59 | Afternoon    | 37,7 | 69  | 17,6 | 17,6 | 18,85 | 565,86 | 95,95  |
| 2019/05/15 | CH2205 | Male | Three y/o | Treatment (Wk 1) | Treatment | Fast Day | No | 13:25 | 13:00 - 13:59 | Afternoon    | 37,7 | 76  | 37,6 | 37,6 | 18,85 | 573,39 | 121,96 |
| 2019/05/15 | CH2206 | Male | Three y/o | Treatment (Wk 1) | Treatment | Fast Day | No | 13:25 | 13:00 - 13:59 | Afternoon    | 37,7 | 63  | 41,4 | 41,4 | 18,85 | 558,62 | 125,27 |
| 2019/05/15 | CH2205 | Male | Three y/o | Treatment (Wk 1) | Treatment | Fast Day | No | 13:30 | 13:00 - 13:59 | Afternoon    | 37,7 | 60  | 15,0 | 15,0 | 18,85 | 554,67 | 90,51  |
| 2019/05/15 | CH2206 | Male | Three y/o | Treatment (Wk 1) | Treatment | Fast Day | No | 13:30 | 13:00 - 13:59 | Afternoon    | 37,7 | 53  | 58,2 | 58,2 | 18,85 | 544,43 | 137,04 |
| 2019/05/15 | CH2205 | Male | Three y/o | Treatment (Wk 1) | Treatment | Fast Day | No | 13:35 | 13:00 - 13:59 | Afternoon    | 37,7 | 58  | 12,2 | 12,2 | 18,85 | 551,90 | 83,49  |
| 2019/05/15 | CH2206 | Male | Three y/o | Treatment (Wk 1) | Treatment | Fast Day | No | 13:35 | 13:00 - 13:59 | Afternoon    | 37,7 | 83  | 62,4 | 62,4 | 18,85 | 580,11 | 139,45 |
| 2019/05/15 | CH2205 | Male | Three y/o | Treatment (Wk 1) | Treatment | Fast Day | No | 13:40 | 13:00 - 13:59 | Afternoon    | 37,7 | 84  | 13,8 | 13,8 | 18,85 | 581,01 | 87,68  |
| 2019/05/15 | CH2206 | Male | Three y/o | Treatment (Wk 1) | Treatment | Fast Day | No | 13:40 | 13:00 - 13:59 | Afternoon    | 37,8 | 100 | 39,0 | 39,0 | 18,95 | 593,87 | 123,22 |
| 2019/05/15 | CH2205 | Male | Three y/o | Treatment (Wk 1) | Treatment | Fast Day | No | 13:45 | 13:00 - 13:59 | Afternoon    | 37,7 | 57  | 13,2 | 13,2 | 18,85 | 550,47 | 86,17  |
| 2019/05/15 | CH2206 | Male | Three y/o | Treatment (Wk 1) | Treatment | Fast Day | No | 13:45 | 13:00 - 13:59 | Afternoon    | 37,8 | 79  | 48,6 | 48,6 | 18,95 | 576,36 | 130,81 |
| 2019/05/15 | CH2205 | Male | Three y/o | Treatment (Wk 1) | Treatment | Fast Day | No | 13:50 | 13:00 - 13:59 | Afternoon    | 37,7 | 102 | 17,8 | 17,8 | 18,85 | 595,30 | 96,34  |
| 2019/05/15 | CH2206 | Male | Three y/o | Treatment (Wk 1) | Treatment | Fast Day | No | 13:50 | 13:00 - 13:59 | Afternoon    | 37,8 | 98  | 29,0 | 29,0 | 18,95 | 592,41 | 113,03 |
| 2019/05/15 | CH2205 | Male | Three y/o | Treatment (Wk 1) | Treatment | Fast Day | No | 13:55 | 13:00 - 13:59 | Afternoon    | 37,7 | 59  | 18,8 | 18,8 | 18,85 | 553,30 | 98,20  |
| 2019/05/15 | CH2206 | Male | Three y/o | Treatment (Wk 1) | Treatment | Fast Day | No | 13:55 | 13:00 - 13:59 | Afternoon    | 37,8 | 80  | 21,0 | 21,0 | 18,95 | 577,31 | 101,98 |
| 2019/05/15 | CH2205 | Male | Three y/o | Treatment (Wk 1) | Treatment | Fast Day | No | 14:00 | 14:00 - 14:59 | Afternoon    | 37,7 | 74  | 14,0 | 14,0 | 18,85 | 571,33 | 88,17  |
| 2019/05/15 | CH2206 | Male | Three y/o | Treatment (Wk 1) | Treatment | Fast Day | No | 14:00 | 14:00 - 14:59 | Afternoon    | 37,8 | 77  | 5,6  | 5,6  | 18,95 | 574,39 | 57,21  |
| 2019/05/15 | CH2205 | Male | Three y/o | Treatment (Wk 1) | Treatment | Fast Day | No | 14:05 | 14:00 - 14:59 | Afternoon    | 37,7 | 69  | 19,2 | 19,2 | 18,85 | 565,86 | 98,92  |
| 2019/05/15 | CH2206 | Male | Three y/o | Treatment (Wk 1) | Treatment | Fast Day | No | 14:05 | 14:00 - 14:59 | Afternoon    | 37,8 | 77  | 13,8 | 13,8 | 18,95 | 574,39 | 87,68  |
| 2019/05/15 | CH2205 | Male | Three y/o | Treatment (Wk 1) | Treatment | Fast Day | No | 14:10 | 14:00 - 14:59 | Afternoon    | 37,9 | 61  | 17,8 | 17,8 | 19,05 | 556,01 | 96,34  |
| 2019/05/15 | CH2206 | Male | Three y/o | Treatment (Wk 1) | Treatment | Fast Day | No | 14:10 | 14:00 - 14:59 | Afternoon    | 37,8 | 94  | 3,4  | 3,4  | 18,95 | 589,37 | 40,51  |
| 2019/05/15 | CH2205 | Male | Three y/o | Treatment (Wk 1) | Treatment | Fast Day | No | 14:15 | 14:00 - 14:59 | Afternoon    | 37,9 | 95  | 14,6 | 14,6 | 19,05 | 590,14 | 89,59  |
| 2019/05/15 | CH2206 | Male | Three y/o | Treatment (Wk 1) | Treatment | Fast Day | No | 14:15 | 14:00 - 14:59 | Afternoon    | 37,7 | 67  | 6,2  | 6,2  | 18,85 | 563,53 | 60,63  |
| 2019/05/15 | CH2205 | Male | Three y/o | Treatment (Wk 1) | Treatment | Fast Day | No | 14:20 | 14:00 - 14:59 | Afternoon    | 37,9 | 73  | 16,2 | 16,2 | 19,05 | 570,27 | 93,13  |
| 2019/05/15 | CH2206 | Male | Three y/o | Treatment (Wk 1) | Treatment | Fast Day | No | 14:20 | 14:00 - 14:59 | Afternoon    | 37,7 | 87  | 6,6  | 6,6  | 18,85 | 583,64 | 62,73  |
| 2019/05/15 | CH2205 | Male | Three y/o | Treatment (Wk 1) | Treatment | Fast Day | No | 14:25 | 14:00 - 14:59 | Afternoon    | 37,9 | 64  | 22,2 | 22,2 | 19,05 | 559,88 | 103,88 |



|            |        |      |           |                  |           |          |    |       |               |           |      |       |       |       |       |        |        |
|------------|--------|------|-----------|------------------|-----------|----------|----|-------|---------------|-----------|------|-------|-------|-------|-------|--------|--------|
| 2019/05/15 | CH2206 | Male | Three y/o | Treatment (Wk 1) | Treatment | Fast Day | No | 14:25 | 14:00 - 14:59 | Afternoon | 37,8 | 70    | 27,4  | 27,4  | 18,95 | 566,99 | 111,09 |
| 2019/05/15 | CH2205 | Male | Three y/o | Treatment (Wk 1) | Treatment | Fast Day | No | 14:30 | 14:00 - 14:59 | Afternoon | 37,9 | 63    | 26,0  | 26,0  | 19,05 | 558,62 | 109,29 |
| 2019/05/15 | CH2206 | Male | Three y/o | Treatment (Wk 1) | Treatment | Fast Day | No | 14:30 | 14:00 - 14:59 | Afternoon | 37,8 | 77    | 34,2  | 34,2  | 18,95 | 574,39 | 118,70 |
| 2019/05/15 | CH2205 | Male | Three y/o | Treatment (Wk 1) | Treatment | Fast Day | No | 14:35 | 14:00 - 14:59 | Afternoon | 37,9 | 67    | 22,6  | 22,6  | 19,05 | 563,53 | 104,49 |
| 2019/05/15 | CH2206 | Male | Three y/o | Treatment (Wk 1) | Treatment | Fast Day | No | 14:35 | 14:00 - 14:59 | Afternoon | 37,8 | 57    | 28,8  | 28,8  | 18,95 | 550,47 | 112,79 |
| 2019/05/15 | CH2205 | Male | Three y/o | Treatment (Wk 1) | Treatment | Fast Day | No | 14:40 | 14:00 - 14:59 | Afternoon | 37,9 | 63    | 20,8  | 20,8  | 19,05 | 558,62 | 101,65 |
| 2019/05/15 | CH2206 | Male | Three y/o | Treatment (Wk 1) | Treatment | Fast Day | No | 14:40 | 14:00 - 14:59 | Afternoon | 37,8 | 71    | 27,0  | 27,0  | 18,95 | 568,10 | 110,58 |
| 2019/05/15 | CH2205 | Male | Three y/o | Treatment (Wk 1) | Treatment | Fast Day | No | 14:45 | 14:00 - 14:59 | Afternoon | 37,9 | 68    | 33,2  | 33,2  | 19,05 | 564,71 | 117,68 |
| 2019/05/15 | CH2206 | Male | Three y/o | Treatment (Wk 1) | Treatment | Fast Day | No | 14:45 | 14:00 - 14:59 | Afternoon | 37,8 | 63    | 29,6  | 29,6  | 18,95 | 558,62 | 113,73 |
| 2019/05/15 | CH2205 | Male | Three y/o | Treatment (Wk 1) | Treatment | Fast Day | No | 14:50 | 14:00 - 14:59 | Afternoon | 37,9 | 67    | 21,2  | 21,2  | 19,05 | 563,53 | 102,31 |
| 2019/05/15 | CH2206 | Male | Three y/o | Treatment (Wk 1) | Treatment | Fast Day | No | 14:50 | 14:00 - 14:59 | Afternoon | 37,9 | 75    | 18,4  | 18,4  | 19,05 | 572,36 | 97,47  |
| 2019/05/15 | CH2205 | Male | Three y/o | Treatment (Wk 1) | Treatment | Fast Day | No | 14:55 | 14:00 - 14:59 | Afternoon | 37,9 | 65    | 21,6  | 21,6  | 19,05 | 561,12 | 102,94 |
| 2019/05/15 | CH2206 | Male | Three y/o | Treatment (Wk 1) | Treatment | Fast Day | No | 14:55 | 14:00 - 14:59 | Afternoon | 37,9 | 85    | 9,2   | 9,2   | 19,05 | 581,90 | 73,94  |
| 2019/05/15 | CH2205 | Male | Three y/o | Treatment (Wk 1) | Treatment | Fast Day | No | 15:00 | 15:00 - 15:59 | Afternoon | 37,9 | 73    | 22,6  | 22,6  | 19,05 | 570,27 | 104,49 |
| 2019/05/15 | CH2206 | Male | Three y/o | Treatment (Wk 1) | Treatment | Fast Day | No | 15:00 | 15:00 - 15:59 | Afternoon | 37,9 | 94    | 10,0  | 10,0  | 19,05 | 589,37 | 76,76  |
| 2019/05/15 | CH2205 | Male | Three y/o | Treatment (Wk 1) | Treatment | Fast Day | No | 15:05 | 15:00 - 15:59 | Afternoon | 37,9 | 68    | 18,8  | 18,8  | 19,05 | 564,71 | 98,20  |
| 2019/05/15 | CH2206 | Male | Three y/o | Treatment (Wk 1) | Treatment | Fast Day | No | 15:05 | 15:00 - 15:59 | Afternoon | 37,9 | 92    | 24,2  | 24,2  | 19,05 | 587,78 | 106,83 |
| 2019/05/15 | CH2205 | Male | Three y/o | Treatment (Wk 1) | Treatment | Fast Day | No | 15:10 | 15:00 - 15:59 | Afternoon | 37,9 | 57    | 17,4  | 17,4  | 19,05 | 550,47 | 95,56  |
| 2019/05/15 | CH2206 | Male | Three y/o | Treatment (Wk 1) | Treatment | Fast Day | No | 15:10 | 15:00 - 15:59 | Afternoon | 37,9 | 88    | 20,0  | 20,0  | 19,05 | 584,49 | 100,31 |
| 2019/05/15 | CH2205 | Male | Three y/o | Treatment (Wk 1) | Treatment | Fast Day | No | 15:15 | 15:00 - 15:59 | Afternoon | 37,9 | 62    | 17,6  | 17,6  | 19,05 | 557,33 | 95,95  |
| 2019/05/15 | CH2206 | Male | Three y/o | Treatment (Wk 1) | Treatment | Fast Day | No | 15:15 | 15:00 - 15:59 | Afternoon | 37,9 | 77    | 28,0  | 28,0  | 19,05 | 574,39 | 111,83 |
| 2019/05/15 | CH2205 | Male | Three y/o | Treatment (Wk 1) | Treatment | Fast Day | No | 15:20 | 15:00 - 15:59 | Afternoon | 37,9 | 67    | 15,6  | 15,6  | 19,05 | 563,53 | 91,85  |
| 2019/05/15 | CH2206 | Male | Three y/o | Treatment (Wk 1) | Treatment | Fast Day | No | 15:20 | 15:00 - 15:59 | Afternoon | 37,8 | 61    | 20,8  | 20,8  | 18,95 | 556,01 | 101,65 |
| 2019/05/15 | CH2205 | Male | Three y/o | Treatment (Wk 1) | Treatment | Fast Day | No | 15:25 | 15:00 - 15:59 | Afternoon | 37,9 | 69    | 21,2  | 21,2  | 19,05 | 565,86 | 102,31 |
| 2019/05/15 | CH2206 | Male | Three y/o | Treatment (Wk 1) | Treatment | Fast Day | No | 15:25 | 15:00 - 15:59 | Afternoon | 37,8 | 80    | 16,8  | 16,8  | 18,95 | 577,31 | 94,37  |
| 2019/05/15 | CH2205 | Male | Three y/o | Treatment (Wk 1) | Treatment | Fast Day | No | 15:30 | 15:00 - 15:59 | Afternoon | 37,9 | 90    | 22,0  | 22,0  | 19,05 | 570,27 | 103,57 |
| 2019/05/15 | CH2206 | Male | Three y/o | Treatment (Wk 1) | Treatment | Fast Day | No | 15:30 | 15:00 - 15:59 | Afternoon | 37,8 | 90    | 36,8  | 36,8  | 18,95 | 586,16 | 121,22 |
| 2019/05/15 | CH2205 | Male | Three y/o | Treatment (Wk 1) | Treatment | Fast Day | No | 15:35 | 15:00 - 15:59 | Afternoon | 37,9 | 158   | 30,8  | 30,8  | 19,05 | 625,26 | 115,10 |
| 2019/05/15 | CH2206 | Male | Three y/o | Treatment (Wk 1) | Treatment | Fast Day | No | 15:35 | 15:00 - 15:59 | Afternoon | 37,9 | 134   | 234,6 | 234,6 | 19,05 | 614,33 | 185,74 |
| 2019/05/15 | CH2205 | Male | Three y/o | Treatment (Wk 1) | Treatment | Fast Day | No | 15:40 | 15:00 - 15:59 | Afternoon | 37,9 | 98    | 25,2  | 25,2  | 19,05 | 592,41 | 108,22 |
| 2019/05/15 | CH2206 | Male | Three y/o | Treatment (Wk 1) | Treatment | Fast Day | No | 15:40 | 15:00 - 15:59 | Afternoon | 37,9 | 98    | 519,4 | 519,4 | 19,05 | 592,41 | 108,22 |
| 2019/05/15 | CH2205 | Male | Three y/o | Treatment (Wk 1) | Treatment | Fast Day | No | 15:45 | 15:00 - 15:59 | Afternoon | 37,9 | 53    | 52,2  | 52,2  | 19,05 | 544,43 | 133,27 |
| 2019/05/15 | CH2206 | Male | Three y/o | Treatment (Wk 1) | Treatment | Fast Day | No | 15:45 | 15:00 - 15:59 | Afternoon | 38,0 | 117   | 415,6 | 415,6 | 19,15 | 605,02 | 205,97 |
| 2019/05/15 | CH2205 | Male | Three y/o | Treatment (Wk 1) | Treatment | Fast Day | No | 15:50 | 15:00 - 15:59 | Afternoon | 37,9 | 91    | 23,0  | 23,0  | 19,05 | 586,98 | 105,09 |
| 2019/05/15 | CH2206 | Male | Three y/o | Treatment (Wk 1) | Treatment | Fast Day | No | 15:50 | 15:00 - 15:59 | Afternoon | 38,3 | 36,8  | 36,8  | 36,8  | 19,46 | 586,98 | 105,09 |
| 2019/05/15 | CH2205 | Male | Three y/o | Treatment (Wk 1) | Treatment | Fast Day | No | 15:55 | 15:00 - 15:59 | Afternoon | 37,9 | 73    | 7,0   | 7,0   | 19,05 | 570,27 | 64,72  |
| 2019/05/15 | CH2206 | Male | Three y/o | Treatment (Wk 1) | Treatment | Fast Day | No | 15:55 | 15:00 - 15:59 | Afternoon | 38,3 | 125   | 40,6  | 40,6  | 19,46 | 609,60 | 124,60 |
| 2019/05/15 | CH2205 | Male | Three y/o | Treatment (Wk 1) | Treatment | Fast Day | No | 16:00 | 16:00 - 16:59 | Evening   | 37,9 | 26,6  | 26,6  | 26,6  | 19,05 | 556,01 | 101,65 |
| 2019/05/15 | CH2206 | Male | Three y/o | Treatment (Wk 1) | Treatment | Fast Day | No | 16:00 | 16:00 - 16:59 | Evening   | 38,2 | 100,2 | 100,2 | 100,2 | 19,36 | 586,98 | 105,09 |
| 2019/05/15 | CH2205 | Male | Three y/o | Treatment (Wk 1) | Treatment | Fast Day | No | 16:05 | 16:00 - 16:59 | Evening   | 37,9 | 72    | 12,2  | 12,2  | 19,05 | 569,20 | 83,49  |
| 2019/05/15 | CH2206 | Male | Three y/o | Treatment (Wk 1) | Treatment | Fast Day | No | 16:05 | 16:00 - 16:59 | Evening   | 38,2 | 98    | 39,0  | 39,0  | 19,36 | 592,41 | 123,22 |
| 2019/05/15 | CH2205 | Male | Three y/o | Treatment (Wk 1) | Treatment | Fast Day | No | 16:10 | 16:00 - 16:59 | Evening   | 37,9 | 88    | 9,8   | 9,8   | 19,05 | 584,49 | 76,07  |
| 2019/05/15 | CH2206 | Male | Three y/o | Treatment (Wk 1) | Treatment | Fast Day | No | 16:10 | 16:00 - 16:59 | Evening   | 38,2 | 120   | 75,2  | 75,2  | 19,36 | 606,78 | 145,93 |
| 2019/05/15 | CH2205 | Male | Three y/o | Treatment (Wk 1) | Treatment | Fast Day | No | 16:15 | 16:00 - 16:59 | Evening   | 37,9 | 67    | 10,2  | 10,2  | 19,05 | 563,53 | 77,43  |
| 2019/05/15 | CH2206 | Male | Three y/o | Treatment (Wk 1) | Treatment | Fast Day | No | 16:15 | 16:00 - 16:59 | Evening   | 38,2 | 70    | 38,0  | 38,0  | 19,36 | 566,99 | 122,32 |
| 2019/05/15 | CH2205 | Male | Three y/o | Treatment (Wk 1) | Treatment | Fast Day | No | 16:20 | 16:00 - 16:59 | Evening   | 38,0 | 60    | 11,2  | 11,2  | 19,15 | 554,67 | 80,59  |
| 2019/05/15 | CH2206 | Male | Three y/o | Treatment (Wk 1) | Treatment | Fast Day | No | 16:20 | 16:00 - 16:59 | Evening   | 38,2 | 144,2 | 144,2 | 144,2 | 19,36 | 586,98 | 105,09 |
| 2019/05/15 | CH2205 | Male | Three y/o | Treatment (Wk 1) | Treatment | Fast Day | No | 16:25 | 16:00 - 16:59 | Evening   | 38,0 | 54    | 6,0   | 6,0   | 19,15 | 545,99 | 59,53  |
| 2019/05/15 | CH2206 | Male | Three y/o | Treatment (Wk 1) | Treatment | Fast Day | No | 16:25 | 16:00 - 16:59 | Evening   | 38,2 | 92    | 46,4  | 46,4  | 19,36 | 587,78 | 129,21 |
| 2019/05/15 | CH2205 | Male | Three y/o | Treatment (Wk 1) | Treatment | Fast Day | No | 16:30 | 16:00 - 16:59 | Evening   | 38,0 | 65    | 6,6   | 6,6   | 19,15 | 561,12 | 62,73  |
| 2019/05/15 | CH2206 | Male | Three y/o | Treatment (Wk 1) | Treatment | Fast Day | No | 16:30 | 16:00 - 16:59 | Evening   | 38,2 | 86    | 31,0  | 31,0  | 19,36 | 582,77 | 115,32 |
| 2019/05/15 | CH2205 | Male | Three y/o | Treatment (Wk 1) | Treatment | Fast Day | No | 16:35 | 16:00 - 16:59 | Evening   | 38,1 | 53    | 3,8   | 3,8   | 19,26 | 544,43 | 44,22  |
| 2019/05/15 | CH2206 | Male | Three y/o | Treatment (Wk 1) | Treatment | Fast Day | No | 16:35 | 16:00 - 16:59 | Evening   | 38,2 | 87    | 32,4  | 32,4  | 19,36 | 583,64 | 116,84 |
| 2019/05/15 | CH2205 | Male | Three y/o | Treatment (Wk 1) | Treatment | Fast Day | No | 16:40 | 16:00 - 16:59 | Evening   | 38,1 | 61    | 8,0   | 8,0   | 19,26 | 556,01 | 69,22  |
| 2019/05/15 | CH2206 | Male | Three y/o | Treatment (Wk 1) | Treatment | Fast Day | No | 16:40 | 16:00 - 16:59 | Evening   | 38,2 | 48    | 34,6  | 34,6  | 19,36 | 536,04 | 119,10 |
| 2019/05/15 | CH2205 | Male | Three y/o | Treatment (Wk 1) | Treatment | Fast Day | No | 16:45 | 16:00 - 16:59 | Evening   | 38,1 | 71    | 1,4   | 1,4   | 19,26 | 568,10 | 11,07  |
| 2019/05/15 | CH2206 | Male | Three y/o | Treatment (Wk 1) | Treatment | Fast Day | No | 16:45 | 16:00 - 16:59 | Evening   | 38,2 | 70    | 44,2  | 44,2  | 19,36 | 566,99 | 127,53 |
| 2019/05/15 | CH2205 | Male | Three y/o | Treatment (Wk 1) | Treatment | Fast Day | No | 16:50 | 16:00 - 16:59 | Evening   | 38,1 | 67    | 5,6   | 5,6   | 19,26 | 563,53 | 57,21  |
| 2019/05/15 | CH2206 | Male | Three y/o | Treatment (Wk 1) | Treatment | Fast Day | No | 16:50 | 16:00 - 16:59 | Evening   | 38,1 | 73    | 49,2  | 49,2  | 19,26 | 570,27 | 131,23 |
| 2019/05/15 | CH2205 | Male | Three y/o | Treatment (Wk 1) | Treatment | Fast Day | No | 16:55 | 16:00 - 16:59 | Evening   | 38,1 | 64    | 11,0  | 11,0  | 19,26 | 559,88 | 79,98  |
| 2019/05/15 | CH2206 | Male | Three y/o | Treatment (Wk 1) | Treatment | Fast Day | No | 16:55 | 16:00 - 16:59 | Evening   | 38,1 | 73    | 39,8  | 39,8  | 19,26 | 570,27 | 123,91 |
| 2019/05/15 | CH2205 | Male | Three y/o | Treatment (Wk 1) | Treatment | Fast Day | No | 17:00 | 17:00 - 17:59 | Evening   | 38,1 | 81    | 6,0   | 6,0   | 19,26 | 578,26 | 59,53  |
| 2019/05/15 | CH2206 | Male | Three y/o | Treatment (Wk 1) | Treatment | Fast Day | No | 17:00 | 17:00 - 17:59 | Evening   | 38,1 | 86    | 18,6  | 18,6  | 19,26 | 582,77 | 97,84  |
| 2019/05/15 | CH2205 | Male | Three y/o | Treatment (Wk 1) | Treatment | Fast Day | No | 17:05 | 17:00 - 17:59 | Evening   | 38,1 | 52    | 7,2   | 7,2   | 19,26 | 542,83 | 65,66  |
| 2019/05/15 | CH2206 | Male | Three y/o | Treatment (Wk 1) | Treatment | Fast Day | No | 17:05 | 17:00 - 17:59 | Evening   | 38,0 | 76    | 58,0  | 58,0  | 19,15 | 573,39 | 136,92 |
| 2019/05/15 | CH2205 | Male | Three y/o | Treatment (Wk 1) | Treatment | Fast Day | No | 17:10 | 17:00 - 17:59 | Evening   | 38,1 | 148   | 11,6  | 11,6  | 19,26 | 620,97 | 81,78  |
| 2019/05/15 | CH2206 | Male | Three y/o | Treatment (Wk 1) | Treatment | Fast Day | No | 17:10 | 17:00 - 17:59 | Evening   | 38,1 | 97    | 65,4  | 65,4  | 19,26 | 591,66 | 141,08 |
| 2019/05/15 | CH2205 | Male | Three y/o | Treatment (Wk 1) | Treatment | Fast Day | No | 17:15 | 17:00 - 17:59 | Evening   | 38,1 | 76    | 10,8  | 10,8  | 19,26 | 573,39 | 79,36  |
| 2019/05/15 | CH2206 | Male | Three y/o | Treatment (Wk 1) | Treatment | Fast Day | No | 17:15 | 17:00 - 17:59 | Evening   | 38,0 | 105   | 56,4  | 56,4  | 19,15 | 597,38 | 135,95 |
| 2019/05/15 | CH2205 | Male | Three y/o | Treatment (Wk 1) | Treatment | Fast Day | No | 17:20 | 17:00 - 17:59 | Evening   | 38,1 | 5,2   | 5,2   | 5,2   | 19,26 | 54,72  | 54,72  |



|            |        |      |           |                  |           |          |    |       |               |         |      |     |      |      |       |        |        |
|------------|--------|------|-----------|------------------|-----------|----------|----|-------|---------------|---------|------|-----|------|------|-------|--------|--------|
| 2019/05/15 | CH2206 | Male | Three y/o | Treatment (Wk 1) | Treatment | Fast Day | No | 17:20 | 17:00 - 17:59 | Evening | 38,1 | 86  | 58,0 | 58,0 | 19,26 | 582,77 | 136,92 |
| 2019/05/15 | CH2205 | Male | Three y/o | Treatment (Wk 1) | Treatment | Fast Day | No | 17:25 | 17:00 - 17:59 | Evening | 38,1 |     | 6,6  | 6,6  | 19,26 |        | 62,73  |
| 2019/05/15 | CH2206 | Male | Three y/o | Treatment (Wk 1) | Treatment | Fast Day | No | 17:25 | 17:00 - 17:59 | Evening | 38,0 | 98  | 55,4 | 55,4 | 19,15 | 592,41 | 135,33 |
| 2019/05/15 | CH2205 | Male | Three y/o | Treatment (Wk 1) | Treatment | Fast Day | No | 17:30 | 17:00 - 17:59 | Evening | 38,1 | 84  | 7,8  | 7,8  | 19,26 | 581,01 | 68,36  |
| 2019/05/15 | CH2206 | Male | Three y/o | Treatment (Wk 1) | Treatment | Fast Day | No | 17:30 | 17:00 - 17:59 | Evening | 38,1 | 188 | 44,8 | 44,8 | 19,26 | 636,34 | 127,99 |
| 2019/05/15 | CH2205 | Male | Three y/o | Treatment (Wk 1) | Treatment | Fast Day | No | 17:35 | 17:00 - 17:59 | Evening | 38,1 | 75  | 5,6  | 5,6  | 19,26 | 572,36 | 57,21  |
| 2019/05/15 | CH2206 | Male | Three y/o | Treatment (Wk 1) | Treatment | Fast Day | No | 17:35 | 17:00 - 17:59 | Evening | 38,0 | 85  | 57,2 | 57,2 | 19,15 | 581,90 | 136,44 |
| 2019/05/15 | CH2205 | Male | Three y/o | Treatment (Wk 1) | Treatment | Fast Day | No | 17:40 | 17:00 - 17:59 | Evening | 38,1 |     | 8,8  | 8,8  | 19,26 |        | 72,43  |
| 2019/05/15 | CH2206 | Male | Three y/o | Treatment (Wk 1) | Treatment | Fast Day | No | 17:40 | 17:00 - 17:59 | Evening | 38,0 | 65  | 60,6 | 60,6 | 19,15 | 561,12 | 138,44 |
| 2019/05/15 | CH2205 | Male | Three y/o | Treatment (Wk 1) | Treatment | Fast Day | No | 17:45 | 17:00 - 17:59 | Evening | 38,0 |     | 11,6 | 11,6 | 19,15 |        | 81,78  |
| 2019/05/15 | CH2206 | Male | Three y/o | Treatment (Wk 1) | Treatment | Fast Day | No | 17:45 | 17:00 - 17:59 | Evening | 38,0 | 60  | 60,6 | 60,6 | 19,15 | 554,67 | 138,44 |
| 2019/05/15 | CH2205 | Male | Three y/o | Treatment (Wk 1) | Treatment | Fast Day | No | 17:50 | 17:00 - 17:59 | Evening | 37,9 |     | 51,0 | 51,0 | 19,05 |        | 132,47 |
| 2019/05/15 | CH2206 | Male | Three y/o | Treatment (Wk 1) | Treatment | Fast Day | No | 17:50 | 17:00 - 17:59 | Evening | 38,0 | 59  | 63,0 | 63,0 | 19,15 | 553,30 | 139,78 |
| 2019/05/15 | CH2205 | Male | Three y/o | Treatment (Wk 1) | Treatment | Fast Day | No | 17:55 | 17:00 - 17:59 | Evening | 37,9 | 94  | 27,6 | 27,6 | 19,05 | 589,37 | 111,33 |
| 2019/05/15 | CH2206 | Male | Three y/o | Treatment (Wk 1) | Treatment | Fast Day | No | 17:55 | 17:00 - 17:59 | Evening | 38,0 | 95  | 33,0 | 33,0 | 19,15 | 590,14 | 117,47 |
| 2019/05/15 | CH2205 | Male | Three y/o | Treatment (Wk 1) | Treatment | Fast Day | No | 18:00 | 18:00 - 18:59 | Evening | 37,7 |     | 26,0 | 26,0 | 18,85 |        | 109,29 |
| 2019/05/15 | CH2206 | Male | Three y/o | Treatment (Wk 1) | Treatment | Fast Day | No | 18:00 | 18:00 - 18:59 | Evening | 38,0 | 99  | 37,6 | 37,6 | 19,15 | 593,14 | 121,96 |
| 2019/05/15 | CH2205 | Male | Three y/o | Treatment (Wk 1) | Treatment | Fast Day | No | 18:05 | 18:00 - 18:59 | Evening | 37,6 |     | 25,4 | 25,4 | 18,75 |        | 108,49 |
| 2019/05/15 | CH2206 | Male | Three y/o | Treatment (Wk 1) | Treatment | Fast Day | No | 18:05 | 18:00 - 18:59 | Evening | 37,9 |     | 45,2 | 45,2 | 19,05 |        | 128,30 |
| 2019/05/15 | CH2205 | Male | Three y/o | Treatment (Wk 1) | Treatment | Fast Day | No | 18:10 | 18:00 - 18:59 | Evening | 37,7 | 82  | 28,6 | 28,6 | 18,85 | 579,19 | 112,56 |
| 2019/05/15 | CH2206 | Male | Three y/o | Treatment (Wk 1) | Treatment | Fast Day | No | 18:10 | 18:00 - 18:59 | Evening | 37,9 | 55  | 15,4 | 15,4 | 19,05 | 547,52 | 91,41  |
| 2019/05/15 | CH2205 | Male | Three y/o | Treatment (Wk 1) | Treatment | Fast Day | No | 18:15 | 18:00 - 18:59 | Evening | 37,9 | 79  | 26,0 | 26,0 | 19,05 | 576,36 | 109,29 |
| 2019/05/15 | CH2206 | Male | Three y/o | Treatment (Wk 1) | Treatment | Fast Day | No | 18:15 | 18:00 - 18:59 | Evening | 37,7 | 94  | 23,4 | 23,4 | 18,85 | 589,37 | 105,68 |
| 2019/05/15 | CH2205 | Male | Three y/o | Treatment (Wk 1) | Treatment | Fast Day | No | 18:20 | 18:00 - 18:59 | Evening | 37,9 | 61  | 30,0 | 30,0 | 19,05 | 556,01 | 114,20 |
| 2019/05/15 | CH2206 | Male | Three y/o | Treatment (Wk 1) | Treatment | Fast Day | No | 18:20 | 18:00 - 18:59 | Evening | 37,7 | 94  | 31,2 | 31,2 | 18,85 | 589,37 | 115,54 |
| 2019/05/15 | CH2205 | Male | Three y/o | Treatment (Wk 1) | Treatment | Fast Day | No | 18:25 | 18:00 - 18:59 | Evening | 38,0 | 57  | 25,6 | 25,6 | 19,15 | 550,47 | 108,76 |
| 2019/05/15 | CH2206 | Male | Three y/o | Treatment (Wk 1) | Treatment | Fast Day | No | 18:25 | 18:00 - 18:59 | Evening | 37,5 | 48  | 29,4 | 29,4 | 18,65 | 536,04 | 113,50 |
| 2019/05/15 | CH2205 | Male | Three y/o | Treatment (Wk 1) | Treatment | Fast Day | No | 18:30 | 18:00 - 18:59 | Evening | 38,0 | 49  | 27,4 | 27,4 | 19,15 | 537,80 | 111,09 |
| 2019/05/15 | CH2206 | Male | Three y/o | Treatment (Wk 1) | Treatment | Fast Day | No | 18:30 | 18:00 - 18:59 | Evening | 37,3 | 83  | 24,6 | 24,6 | 18,46 | 580,11 | 107,39 |
| 2019/05/15 | CH2205 | Male | Three y/o | Treatment (Wk 1) | Treatment | Fast Day | No | 18:35 | 18:00 - 18:59 | Evening | 38,0 | 92  | 28,2 | 28,2 | 19,15 | 587,78 | 112,07 |
| 2019/05/15 | CH2206 | Male | Three y/o | Treatment (Wk 1) | Treatment | Fast Day | No | 18:35 | 18:00 - 18:59 | Evening | 37,2 | 90  | 26,4 | 26,4 | 18,36 | 586,16 | 109,81 |
| 2019/05/15 | CH2205 | Male | Three y/o | Treatment (Wk 1) | Treatment | Fast Day | No | 18:40 | 18:00 - 18:59 | Evening | 38,1 | 84  | 26,0 | 26,0 | 19,26 | 581,01 | 109,29 |
| 2019/05/15 | CH2206 | Male | Three y/o | Treatment (Wk 1) | Treatment | Fast Day | No | 18:40 | 18:00 - 18:59 | Evening | 37,2 | 83  | 35,2 | 35,2 | 18,36 | 580,11 | 119,69 |
| 2019/05/15 | CH2205 | Male | Three y/o | Treatment (Wk 1) | Treatment | Fast Day | No | 18:45 | 18:00 - 18:59 | Evening | 38,1 | 52  | 23,6 | 23,6 | 19,26 | 542,83 | 105,97 |
| 2019/05/15 | CH2206 | Male | Three y/o | Treatment (Wk 1) | Treatment | Fast Day | No | 18:45 | 18:00 - 18:59 | Evening | 37,5 | 84  | 39,2 | 39,2 | 18,65 | 581,01 | 123,39 |
| 2019/05/15 | CH2205 | Male | Three y/o | Treatment (Wk 1) | Treatment | Fast Day | No | 18:50 | 18:00 - 18:59 | Evening | 38,1 | 53  | 24,0 | 24,0 | 19,26 | 544,43 | 106,55 |
| 2019/05/15 | CH2206 | Male | Three y/o | Treatment (Wk 1) | Treatment | Fast Day | No | 18:50 | 18:00 - 18:59 | Evening | 37,7 | 47  | 40,4 | 40,4 | 18,85 | 534,23 | 124,43 |
| 2019/05/15 | CH2205 | Male | Three y/o | Treatment (Wk 1) | Treatment | Fast Day | No | 18:55 | 18:00 - 18:59 | Evening | 38,0 | 62  | 18,8 | 18,8 | 19,15 | 557,33 | 98,20  |
| 2019/05/15 | CH2206 | Male | Three y/o | Treatment (Wk 1) | Treatment | Fast Day | No | 18:55 | 18:00 - 18:59 | Evening | 37,7 | 145 | 38,2 | 38,2 | 18,85 | 619,62 | 122,50 |
| 2019/05/15 | CH2205 | Male | Three y/o | Treatment (Wk 1) | Treatment | Fast Day | No | 19:00 | 19:00 - 19:59 | Evening | 38,0 | 51  | 21,2 | 21,2 | 19,15 | 541,20 | 102,31 |
| 2019/05/15 | CH2206 | Male | Three y/o | Treatment (Wk 1) | Treatment | Fast Day | No | 19:00 | 19:00 - 19:59 | Evening | 37,8 | 49  | 33,2 | 33,2 | 18,95 | 537,80 | 117,68 |
| 2019/05/15 | CH2205 | Male | Three y/o | Treatment (Wk 1) | Treatment | Fast Day | No | 19:05 | 19:00 - 19:59 | Evening | 37,9 | 53  | 18,4 | 18,4 | 19,05 | 544,43 | 97,47  |
| 2019/05/15 | CH2206 | Male | Three y/o | Treatment (Wk 1) | Treatment | Fast Day | No | 19:05 | 19:00 - 19:59 | Evening | 37,8 | 92  | 35,2 | 35,2 | 18,95 | 587,78 | 119,69 |
| 2019/05/15 | CH2205 | Male | Three y/o | Treatment (Wk 1) | Treatment | Fast Day | No | 19:10 | 19:00 - 19:59 | Evening | 37,9 | 73  | 19,8 | 19,8 | 19,05 | 570,27 | 99,97  |
| 2019/05/15 | CH2206 | Male | Three y/o | Treatment (Wk 1) | Treatment | Fast Day | No | 19:10 | 19:00 - 19:59 | Evening | 37,8 | 83  | 35,2 | 35,2 | 18,95 | 580,11 | 119,69 |
| 2019/05/15 | CH2205 | Male | Three y/o | Treatment (Wk 1) | Treatment | Fast Day | No | 19:15 | 19:00 - 19:59 | Evening | 38,0 | 66  | 22,0 | 22,0 | 19,15 | 562,34 | 103,57 |
| 2019/05/15 | CH2206 | Male | Three y/o | Treatment (Wk 1) | Treatment | Fast Day | No | 19:15 | 19:00 - 19:59 | Evening | 37,8 | 53  | 32,4 | 32,4 | 18,95 | 544,43 | 116,84 |
| 2019/05/15 | CH2205 | Male | Three y/o | Treatment (Wk 1) | Treatment | Fast Day | No | 19:20 | 19:00 - 19:59 | Evening | 38,0 | 56  | 19,2 | 19,2 | 19,15 | 549,01 | 98,92  |
| 2019/05/15 | CH2206 | Male | Three y/o | Treatment (Wk 1) | Treatment | Fast Day | No | 19:20 | 19:00 - 19:59 | Evening | 37,8 | 90  | 37,0 | 37,0 | 18,95 | 586,16 | 121,40 |
| 2019/05/15 | CH2205 | Male | Three y/o | Treatment (Wk 1) | Treatment | Fast Day | No | 19:25 | 19:00 - 19:59 | Evening | 38,0 | 47  | 23,2 | 23,2 | 19,15 | 534,23 | 105,39 |
| 2019/05/15 | CH2206 | Male | Three y/o | Treatment (Wk 1) | Treatment | Fast Day | No | 19:25 | 19:00 - 19:59 | Evening | 37,8 | 75  | 36,4 | 36,4 | 18,95 | 572,36 | 120,84 |
| 2019/05/15 | CH2205 | Male | Three y/o | Treatment (Wk 1) | Treatment | Fast Day | No | 19:30 | 19:00 - 19:59 | Evening | 38,0 | 68  | 23,6 | 23,6 | 19,15 | 564,71 | 105,97 |
| 2019/05/15 | CH2206 | Male | Three y/o | Treatment (Wk 1) | Treatment | Fast Day | No | 19:30 | 19:00 - 19:59 | Evening | 37,8 | 67  | 24,2 | 24,2 | 18,95 | 563,53 | 106,83 |
| 2019/05/15 | CH2205 | Male | Three y/o | Treatment (Wk 1) | Treatment | Fast Day | No | 19:35 | 19:00 - 19:59 | Evening | 38,0 | 50  | 21,2 | 21,2 | 19,15 | 539,52 | 102,31 |
| 2019/05/15 | CH2206 | Male | Three y/o | Treatment (Wk 1) | Treatment | Fast Day | No | 19:35 | 19:00 - 19:59 | Evening | 37,9 | 51  | 24,8 | 24,8 | 19,05 | 541,20 | 107,67 |
| 2019/05/15 | CH2205 | Male | Three y/o | Treatment (Wk 1) | Treatment | Fast Day | No | 19:40 | 19:00 - 19:59 | Evening | 38,0 | 73  | 18,0 | 18,0 | 19,15 | 570,27 | 96,72  |
| 2019/05/15 | CH2206 | Male | Three y/o | Treatment (Wk 1) | Treatment | Fast Day | No | 19:40 | 19:00 - 19:59 | Evening | 37,9 | 45  | 42,0 | 42,0 | 19,05 | 530,47 | 125,77 |
| 2019/05/15 | CH2205 | Male | Three y/o | Treatment (Wk 1) | Treatment | Fast Day | No | 19:45 | 19:00 - 19:59 | Evening | 38,0 | 54  | 25,2 | 25,2 | 19,15 | 545,99 | 108,22 |
| 2019/05/15 | CH2206 | Male | Three y/o | Treatment (Wk 1) | Treatment | Fast Day | No | 19:45 | 19:00 - 19:59 | Evening | 37,9 | 48  | 35,6 | 35,6 | 19,05 | 536,04 | 120,08 |
| 2019/05/15 | CH2205 | Male | Three y/o | Treatment (Wk 1) | Treatment | Fast Day | No | 19:50 | 19:00 - 19:59 | Evening | 38,0 | 44  | 19,6 | 19,6 | 19,15 | 528,51 | 99,63  |
| 2019/05/15 | CH2206 | Male | Three y/o | Treatment (Wk 1) | Treatment | Fast Day | No | 19:50 | 19:00 - 19:59 | Evening | 37,9 | 61  | 36,6 | 36,6 | 19,05 | 556,01 | 121,03 |
| 2019/05/15 | CH2205 | Male | Three y/o | Treatment (Wk 1) | Treatment | Fast Day | No | 19:55 | 19:00 - 19:59 | Evening | 38,0 | 90  | 23,2 | 23,2 | 19,15 | 586,16 | 105,39 |
| 2019/05/15 | CH2206 | Male | Three y/o | Treatment (Wk 1) | Treatment | Fast Day | No | 19:55 | 19:00 - 19:59 | Evening | 37,9 | 43  | 29,8 | 29,8 | 19,05 | 526,50 | 113,97 |
| 2019/05/15 | CH2205 | Male | Three y/o | Treatment (Wk 1) | Treatment | Fast Day | No | 20:00 | 20:00 - 20:59 | Night   | 38,0 | 57  | 24,2 | 24,2 | 19,15 | 550,47 | 106,83 |
| 2019/05/15 | CH2206 | Male | Three y/o | Treatment (Wk 1) | Treatment | Fast Day | No | 20:00 | 20:00 - 20:59 | Night   | 37,9 | 84  | 27,0 | 27,0 | 19,05 | 581,01 | 110,58 |
| 2019/05/15 | CH2205 | Male | Three y/o | Treatment (Wk 1) | Treatment | Fast Day | No | 20:05 | 20:00 - 20:59 | Night   | 38,0 | 53  | 24,4 | 24,4 | 19,15 | 544,43 | 107,11 |
| 2019/05/15 | CH2206 | Male | Three y/o | Treatment (Wk 1) | Treatment | Fast Day | No | 20:05 | 20:00 - 20:59 | Night   | 37,9 | 93  | 26,6 | 26,6 | 19,05 | 588,58 | 110,07 |
| 2019/05/15 | CH2205 | Male | Three y/o | Treatment (Wk 1) | Treatment | Fast Day | No | 20:10 | 20:00 - 20:59 | Night   | 38,0 | 84  | 24,0 | 24,0 | 19,15 | 581,01 | 106,55 |
| 2019/05/15 | CH2206 | Male | Three y/o | Treatment (Wk 1) | Treatment | Fast Day | No | 20:10 | 20:00 - 20:59 | Night   | 37,9 | 47  | 3,8  | 3,8  | 19,05 | 534,23 | 44,22  |
| 2019/05/15 | CH2205 | Male | Three y/o | Treatment (Wk 1) | Treatment | Fast Day | No | 20:15 | 20:00 - 20:59 | Night   | 38,0 | 44  | 24,2 | 24,2 | 19,15 | 528,51 | 106,83 |



|            |        |      |           |                  |           |          |    |       |               |       |      |     |      |      |       |        |        |
|------------|--------|------|-----------|------------------|-----------|----------|----|-------|---------------|-------|------|-----|------|------|-------|--------|--------|
| 2019/05/15 | CH2206 | Male | Three y/o | Treatment (Wk 1) | Treatment | Fast Day | No | 20:15 | 20:00 - 20:59 | Night | 37,9 | 81  | 8,2  | 8,2  | 19,05 | 578,26 | 70,05  |
| 2019/05/15 | CH2205 | Male | Three y/o | Treatment (Wk 1) | Treatment | Fast Day | No | 20:20 | 20:00 - 20:59 | Night | 38,0 | 96  | 20,4 | 20,4 | 19,15 | 590,91 | 100,99 |
| 2019/05/15 | CH2206 | Male | Three y/o | Treatment (Wk 1) | Treatment | Fast Day | No | 20:20 | 20:00 - 20:59 | Night | 37,9 | 77  | 3,4  | 3,4  | 19,05 | 574,39 | 40,51  |
| 2019/05/15 | CH2205 | Male | Three y/o | Treatment (Wk 1) | Treatment | Fast Day | No | 20:25 | 20:00 - 20:59 | Night | 38,0 | 89  | 21,2 | 21,2 | 19,15 | 585,33 | 102,31 |
| 2019/05/15 | CH2206 | Male | Three y/o | Treatment (Wk 1) | Treatment | Fast Day | No | 20:25 | 20:00 - 20:59 | Night | 37,9 | 89  | 6,2  | 6,2  | 19,05 | 585,33 | 60,63  |
| 2019/05/15 | CH2205 | Male | Three y/o | Treatment (Wk 1) | Treatment | Fast Day | No | 20:30 | 20:00 - 20:59 | Night | 38,0 | 51  | 22,4 | 22,4 | 19,15 | 541,20 | 104,19 |
| 2019/05/15 | CH2206 | Male | Three y/o | Treatment (Wk 1) | Treatment | Fast Day | No | 20:30 | 20:00 - 20:59 | Night | 37,9 | 85  | 9,8  | 9,8  | 19,05 | 581,90 | 76,07  |
| 2019/05/15 | CH2205 | Male | Three y/o | Treatment (Wk 1) | Treatment | Fast Day | No | 20:35 | 20:00 - 20:59 | Night | 38,0 | 77  | 21,4 | 21,4 | 19,15 | 574,39 | 102,63 |
| 2019/05/15 | CH2206 | Male | Three y/o | Treatment (Wk 1) | Treatment | Fast Day | No | 20:35 | 20:00 - 20:59 | Night | 37,9 | 58  | 18,4 | 18,4 | 19,05 | 551,90 | 97,47  |
| 2019/05/15 | CH2205 | Male | Three y/o | Treatment (Wk 1) | Treatment | Fast Day | No | 20:40 | 20:00 - 20:59 | Night | 37,9 | 62  | 21,0 | 21,0 | 19,05 | 557,33 | 101,98 |
| 2019/05/15 | CH2206 | Male | Three y/o | Treatment (Wk 1) | Treatment | Fast Day | No | 20:40 | 20:00 - 20:59 | Night | 37,9 | 45  | 24,0 | 24,0 | 19,05 | 530,47 | 106,55 |
| 2019/05/15 | CH2205 | Male | Three y/o | Treatment (Wk 1) | Treatment | Fast Day | No | 20:45 | 20:00 - 20:59 | Night | 37,9 | 60  | 24,0 | 24,0 | 19,05 | 554,67 | 106,55 |
| 2019/05/15 | CH2206 | Male | Three y/o | Treatment (Wk 1) | Treatment | Fast Day | No | 20:45 | 20:00 - 20:59 | Night | 37,9 | 63  | 19,8 | 19,8 | 19,05 | 558,62 | 99,97  |
| 2019/05/15 | CH2205 | Male | Three y/o | Treatment (Wk 1) | Treatment | Fast Day | No | 20:50 | 20:00 - 20:59 | Night | 37,9 | 119 | 20,6 | 20,6 | 19,05 | 606,20 | 101,32 |
| 2019/05/15 | CH2206 | Male | Three y/o | Treatment (Wk 1) | Treatment | Fast Day | No | 20:50 | 20:00 - 20:59 | Night | 37,9 | 70  | 6,4  | 6,4  | 19,05 | 566,99 | 61,70  |
| 2019/05/15 | CH2205 | Male | Three y/o | Treatment (Wk 1) | Treatment | Fast Day | No | 20:55 | 20:00 - 20:59 | Night | 37,9 | 54  | 17,6 | 17,6 | 19,05 | 545,99 | 95,95  |
| 2019/05/15 | CH2206 | Male | Three y/o | Treatment (Wk 1) | Treatment | Fast Day | No | 20:55 | 20:00 - 20:59 | Night | 37,8 | 57  | 3,4  | 3,4  | 18,95 | 550,47 | 40,51  |
| 2019/05/15 | CH2205 | Male | Three y/o | Treatment (Wk 1) | Treatment | Fast Day | No | 21:00 | 21:00 - 21:59 | Night | 37,9 | 43  | 15,4 | 15,4 | 19,05 | 526,50 | 91,41  |
| 2019/05/15 | CH2206 | Male | Three y/o | Treatment (Wk 1) | Treatment | Fast Day | No | 21:00 | 21:00 - 21:59 | Night | 37,7 | 58  | 8,2  | 8,2  | 18,85 | 551,90 | 70,05  |
| 2019/05/15 | CH2205 | Male | Three y/o | Treatment (Wk 1) | Treatment | Fast Day | No | 21:05 | 21:00 - 21:59 | Night | 37,7 | 92  | 19,6 | 19,6 | 18,85 | 587,78 | 99,63  |
| 2019/05/15 | CH2206 | Male | Three y/o | Treatment (Wk 1) | Treatment | Fast Day | No | 21:05 | 21:00 - 21:59 | Night | 37,5 | 86  | 14,8 | 14,8 | 18,65 | 582,77 | 90,05  |
| 2019/05/15 | CH2205 | Male | Three y/o | Treatment (Wk 1) | Treatment | Fast Day | No | 21:10 | 21:00 - 21:59 | Night | 37,7 | 54  | 19,0 | 19,0 | 18,85 | 545,99 | 98,56  |
| 2019/05/15 | CH2206 | Male | Three y/o | Treatment (Wk 1) | Treatment | Fast Day | No | 21:10 | 21:00 - 21:59 | Night | 37,7 | 108 | 34,4 | 34,4 | 18,85 | 599,39 | 118,90 |
| 2019/05/15 | CH2205 | Male | Three y/o | Treatment (Wk 1) | Treatment | Fast Day | No | 21:15 | 21:00 - 21:59 | Night | 37,7 | 83  | 17,2 | 17,2 | 18,85 | 580,11 | 95,17  |
| 2019/05/15 | CH2206 | Male | Three y/o | Treatment (Wk 1) | Treatment | Fast Day | No | 21:15 | 21:00 - 21:59 | Night | 37,7 | 50  | 20,4 | 20,4 | 18,85 | 539,52 | 100,99 |
| 2019/05/15 | CH2205 | Male | Three y/o | Treatment (Wk 1) | Treatment | Fast Day | No | 21:20 | 21:00 - 21:59 | Night | 37,7 | 61  | 21,2 | 21,2 | 18,85 | 556,01 | 102,31 |
| 2019/05/15 | CH2206 | Male | Three y/o | Treatment (Wk 1) | Treatment | Fast Day | No | 21:20 | 21:00 - 21:59 | Night | 37,8 | 82  | 11,8 | 11,8 | 18,95 | 579,19 | 82,36  |
| 2019/05/15 | CH2205 | Male | Three y/o | Treatment (Wk 1) | Treatment | Fast Day | No | 21:25 | 21:00 - 21:59 | Night | 37,6 | 93  | 13,8 | 13,8 | 18,75 | 588,58 | 87,68  |
| 2019/05/15 | CH2206 | Male | Three y/o | Treatment (Wk 1) | Treatment | Fast Day | No | 21:25 | 21:00 - 21:59 | Night | 37,8 | 94  | 42,4 | 42,4 | 18,95 | 589,37 | 126,10 |
| 2019/05/15 | CH2205 | Male | Three y/o | Treatment (Wk 1) | Treatment | Fast Day | No | 21:30 | 21:00 - 21:59 | Night | 37,6 | 68  | 8,6  | 8,6  | 18,75 | 564,71 | 71,66  |
| 2019/05/15 | CH2206 | Male | Three y/o | Treatment (Wk 1) | Treatment | Fast Day | No | 21:30 | 21:00 - 21:59 | Night | 37,8 | 115 | 23,8 | 23,8 | 18,95 | 603,82 | 106,26 |
| 2019/05/15 | CH2205 | Male | Three y/o | Treatment (Wk 1) | Treatment | Fast Day | No | 21:35 | 21:00 - 21:59 | Night | 37,6 | 50  | 7,0  | 7,0  | 18,75 | 539,52 | 64,72  |
| 2019/05/15 | CH2206 | Male | Three y/o | Treatment (Wk 1) | Treatment | Fast Day | No | 21:35 | 21:00 - 21:59 | Night | 37,4 | 64  | 22,2 | 22,2 | 18,55 | 559,88 | 103,88 |
| 2019/05/15 | CH2205 | Male | Three y/o | Treatment (Wk 1) | Treatment | Fast Day | No | 21:40 | 21:00 - 21:59 | Night | 37,6 | 83  | 2,6  | 2,6  | 18,75 | 580,11 | 31,57  |
| 2019/05/15 | CH2206 | Male | Three y/o | Treatment (Wk 1) | Treatment | Fast Day | No | 21:40 | 21:00 - 21:59 | Night | 37,0 | 50  | 18,4 | 18,4 | 18,16 | 539,52 | 97,47  |
| 2019/05/15 | CH2205 | Male | Three y/o | Treatment (Wk 1) | Treatment | Fast Day | No | 21:45 | 21:00 - 21:59 | Night | 37,7 | 51  | 3,6  | 3,6  | 18,85 | 541,20 | 42,42  |
| 2019/05/15 | CH2206 | Male | Three y/o | Treatment (Wk 1) | Treatment | Fast Day | No | 21:45 | 21:00 - 21:59 | Night | 36,6 | 88  | 42,6 | 42,6 | 17,77 | 584,49 | 126,26 |
| 2019/05/15 | CH2205 | Male | Three y/o | Treatment (Wk 1) | Treatment | Fast Day | No | 21:50 | 21:00 - 21:59 | Night | 37,7 | 60  | 14,4 | 14,4 | 18,85 | 554,67 | 89,12  |
| 2019/05/15 | CH2206 | Male | Three y/o | Treatment (Wk 1) | Treatment | Fast Day | No | 21:50 | 21:00 - 21:59 | Night | 36,4 | 68  | 48,4 | 48,4 | 17,57 | 564,71 | 130,66 |
| 2019/05/15 | CH2205 | Male | Three y/o | Treatment (Wk 1) | Treatment | Fast Day | No | 21:55 | 21:00 - 21:59 | Night | 37,7 | 86  | 17,0 | 17,0 | 18,85 | 582,77 | 94,77  |
| 2019/05/15 | CH2206 | Male | Three y/o | Treatment (Wk 1) | Treatment | Fast Day | No | 21:55 | 21:00 - 21:59 | Night | 36,4 | 73  | 48,6 | 48,6 | 17,57 | 570,27 | 130,81 |
| 2019/05/15 | CH2205 | Male | Three y/o | Treatment (Wk 1) | Treatment | Fast Day | No | 22:00 | 22:00 - 22:59 | Night | 37,8 | 60  | 16,6 | 16,6 | 18,95 | 554,67 | 93,96  |
| 2019/05/15 | CH2206 | Male | Three y/o | Treatment (Wk 1) | Treatment | Fast Day | No | 22:00 | 22:00 - 22:59 | Night | 36,5 | 63  | 47,0 | 47,0 | 17,67 | 558,62 | 129,65 |
| 2019/05/15 | CH2205 | Male | Three y/o | Treatment (Wk 1) | Treatment | Fast Day | No | 22:05 | 22:00 - 22:59 | Night | 37,9 | 56  | 17,6 | 17,6 | 19,05 | 549,01 | 95,95  |
| 2019/05/15 | CH2206 | Male | Three y/o | Treatment (Wk 1) | Treatment | Fast Day | No | 22:05 | 22:00 - 22:59 | Night | 36,6 | 69  | 43,6 | 43,6 | 17,77 | 565,86 | 127,06 |
| 2019/05/15 | CH2205 | Male | Three y/o | Treatment (Wk 1) | Treatment | Fast Day | No | 22:10 | 22:00 - 22:59 | Night | 37,9 | 88  | 20,4 | 20,4 | 19,05 | 584,49 | 100,99 |
| 2019/05/15 | CH2206 | Male | Three y/o | Treatment (Wk 1) | Treatment | Fast Day | No | 22:10 | 22:00 - 22:59 | Night | 36,8 | 49  | 58,2 | 58,2 | 17,96 | 537,80 | 137,04 |
| 2019/05/15 | CH2205 | Male | Three y/o | Treatment (Wk 1) | Treatment | Fast Day | No | 22:15 | 22:00 - 22:59 | Night | 37,9 | 60  | 17,8 | 17,8 | 19,05 | 554,67 | 96,34  |
| 2019/05/15 | CH2206 | Male | Three y/o | Treatment (Wk 1) | Treatment | Fast Day | No | 22:15 | 22:00 - 22:59 | Night | 36,9 | 70  | 62,0 | 62,0 | 18,06 | 566,99 | 139,23 |
| 2019/05/15 | CH2205 | Male | Three y/o | Treatment (Wk 1) | Treatment | Fast Day | No | 22:20 | 22:00 - 22:59 | Night | 37,9 | 60  | 19,4 | 19,4 | 19,05 | 554,67 | 99,28  |
| 2019/05/15 | CH2206 | Male | Three y/o | Treatment (Wk 1) | Treatment | Fast Day | No | 22:20 | 22:00 - 22:59 | Night | 37,0 | 58  | 63,8 | 63,8 | 18,16 | 551,90 | 140,22 |
| 2019/05/15 | CH2205 | Male | Three y/o | Treatment (Wk 1) | Treatment | Fast Day | No | 22:25 | 22:00 - 22:59 | Night | 37,9 | 85  | 19,4 | 19,4 | 19,05 | 581,90 | 99,28  |
| 2019/05/15 | CH2206 | Male | Three y/o | Treatment (Wk 1) | Treatment | Fast Day | No | 22:25 | 22:00 - 22:59 | Night | 37,1 | 93  | 54,6 | 54,6 | 18,26 | 588,58 | 134,83 |
| 2019/05/15 | CH2205 | Male | Three y/o | Treatment (Wk 1) | Treatment | Fast Day | No | 22:30 | 22:00 - 22:59 | Night | 37,9 | 61  | 19,2 | 19,2 | 19,05 | 556,01 | 98,92  |
| 2019/05/15 | CH2206 | Male | Three y/o | Treatment (Wk 1) | Treatment | Fast Day | No | 22:30 | 22:00 - 22:59 | Night | 37,2 | 90  | 50,2 | 50,2 | 18,36 | 586,16 | 131,92 |
| 2019/05/15 | CH2205 | Male | Three y/o | Treatment (Wk 1) | Treatment | Fast Day | No | 22:35 | 22:00 - 22:59 | Night | 37,7 | 59  | 15,6 | 15,6 | 18,85 | 553,30 | 91,85  |
| 2019/05/15 | CH2206 | Male | Three y/o | Treatment (Wk 1) | Treatment | Fast Day | No | 22:35 | 22:00 - 22:59 | Night | 37,3 | 40  | 49,0 | 49,0 | 18,46 | 520,09 | 131,09 |
| 2019/05/15 | CH2205 | Male | Three y/o | Treatment (Wk 1) | Treatment | Fast Day | No | 22:40 | 22:00 - 22:59 | Night | 37,7 |     | 20,0 | 20,0 | 18,85 |        | 100,31 |
| 2019/05/15 | CH2206 | Male | Three y/o | Treatment (Wk 1) | Treatment | Fast Day | No | 22:40 | 22:00 - 22:59 | Night | 37,4 | 91  | 40,2 | 40,2 | 18,55 | 586,98 | 124,26 |
| 2019/05/15 | CH2205 | Male | Three y/o | Treatment (Wk 1) | Treatment | Fast Day | No | 22:45 | 22:00 - 22:59 | Night | 37,7 | 90  | 15,6 | 15,6 | 18,85 | 586,16 | 91,85  |
| 2019/05/15 | CH2206 | Male | Three y/o | Treatment (Wk 1) | Treatment | Fast Day | No | 22:45 | 22:00 - 22:59 | Night | 37,5 | 51  | 45,2 | 45,2 | 18,65 | 541,20 | 128,30 |
| 2019/05/15 | CH2205 | Male | Three y/o | Treatment (Wk 1) | Treatment | Fast Day | No | 22:50 | 22:00 - 22:59 | Night | 37,7 |     | 19,8 | 19,8 | 18,85 |        | 99,97  |
| 2019/05/15 | CH2206 | Male | Three y/o | Treatment (Wk 1) | Treatment | Fast Day | No | 22:50 | 22:00 - 22:59 | Night | 37,5 | 41  | 49,4 | 49,4 | 18,65 | 522,29 | 131,37 |
| 2019/05/15 | CH2205 | Male | Three y/o | Treatment (Wk 1) | Treatment | Fast Day | No | 22:55 | 22:00 - 22:59 | Night | 37,7 |     | 12,8 | 12,8 | 18,85 |        | 85,12  |
| 2019/05/15 | CH2206 | Male | Three y/o | Treatment (Wk 1) | Treatment | Fast Day | No | 22:55 | 22:00 - 22:59 | Night | 37,5 | 57  | 47,2 | 47,2 | 18,65 | 550,47 | 129,80 |
| 2019/05/15 | CH2205 | Male | Three y/o | Treatment (Wk 1) | Treatment | Fast Day | No | 23:00 | 23:00 - 23:59 | Night | 37,7 |     | 15,6 | 15,6 | 18,85 |        | 91,85  |
| 2019/05/15 | CH2206 | Male | Three y/o | Treatment (Wk 1) | Treatment | Fast Day | No | 23:00 | 23:00 - 23:59 | Night | 37,7 | 82  | 47,0 | 47,0 | 18,85 | 579,19 | 129,65 |
| 2019/05/15 | CH2205 | Male | Three y/o | Treatment (Wk 1) | Treatment | Fast Day | No | 23:05 | 23:00 - 23:59 | Night | 37,7 | 46  | 16,0 | 16,0 | 18,85 | 532,38 | 92,71  |
| 2019/05/15 | CH2206 | Male | Three y/o | Treatment (Wk 1) | Treatment | Fast Day | No | 23:05 | 23:00 - 23:59 | Night | 37,7 | 46  | 39,4 | 39,4 | 18,85 | 532,38 | 123,57 |
| 2019/05/15 | CH2205 | Male | Three y/o | Treatment (Wk 1) | Treatment | Fast Day | No | 23:10 | 23:00 - 23:59 | Night | 37,7 |     | 17,4 | 17,4 | 18,85 |        | 95,56  |



|   |            |        |      |           |                  |           |          |    |       |               |               |      |     |      |      |       |        |        |
|---|------------|--------|------|-----------|------------------|-----------|----------|----|-------|---------------|---------------|------|-----|------|------|-------|--------|--------|
|   | 2019/05/15 | CH2206 | Male | Three y/o | Treatment (Wk 1) | Treatment | Fast Day | No | 23:10 | 23:00 - 23:59 | Night         | 37,7 | 98  | 33,4 | 33,4 | 18,85 | 592,41 | 117,88 |
|   | 2019/05/15 | CH2205 | Male | Three y/o | Treatment (Wk 1) | Treatment | Fast Day | No | 23:15 | 23:00 - 23:59 | Night         | 37,7 |     | 8,6  | 8,6  | 18,85 |        | 71,66  |
|   | 2019/05/15 | CH2206 | Male | Three y/o | Treatment (Wk 1) | Treatment | Fast Day | No | 23:15 | 23:00 - 23:59 | Night         | 37,7 | 81  | 25,4 | 25,4 | 18,85 | 578,26 | 108,49 |
|   | 2019/05/15 | CH2205 | Male | Three y/o | Treatment (Wk 1) | Treatment | Fast Day | No | 23:20 | 23:00 - 23:59 | Night         | 37,7 | 79  | 7,8  | 7,8  | 18,85 | 576,36 | 68,36  |
|   | 2019/05/15 | CH2206 | Male | Three y/o | Treatment (Wk 1) | Treatment | Fast Day | No | 23:20 | 23:00 - 23:59 | Night         | 37,7 | 93  | 24,0 | 24,0 | 18,85 | 588,58 | 106,55 |
|   | 2019/05/15 | CH2205 | Male | Three y/o | Treatment (Wk 1) | Treatment | Fast Day | No | 23:25 | 23:00 - 23:59 | Night         | 37,7 | 89  | 10,4 | 10,4 | 18,85 | 585,33 | 78,08  |
|   | 2019/05/15 | CH2206 | Male | Three y/o | Treatment (Wk 1) | Treatment | Fast Day | No | 23:25 | 23:00 - 23:59 | Night         | 37,7 | 67  | 36,0 | 36,0 | 18,85 | 563,53 | 120,46 |
|   | 2019/05/15 | CH2205 | Male | Three y/o | Treatment (Wk 1) | Treatment | Fast Day | No | 23:30 | 23:00 - 23:59 | Night         | 37,7 | 96  | 20,4 | 20,4 | 18,85 | 590,91 | 100,99 |
|   | 2019/05/15 | CH2206 | Male | Three y/o | Treatment (Wk 1) | Treatment | Fast Day | No | 23:30 | 23:00 - 23:59 | Night         | 37,5 | 47  | 17,8 | 17,8 | 18,65 | 534,23 | 96,34  |
|   | 2019/05/15 | CH2205 | Male | Three y/o | Treatment (Wk 1) | Treatment | Fast Day | No | 23:35 | 23:00 - 23:59 | Night         | 37,9 | 61  | 17,4 | 17,4 | 19,05 | 556,01 | 95,56  |
|   | 2019/05/15 | CH2206 | Male | Three y/o | Treatment (Wk 1) | Treatment | Fast Day | No | 23:35 | 23:00 - 23:59 | Night         | 37,7 | 67  | 19,4 | 19,4 | 18,85 | 563,53 | 99,28  |
|   | 2019/05/15 | CH2205 | Male | Three y/o | Treatment (Wk 1) | Treatment | Fast Day | No | 23:40 | 23:00 - 23:59 | Night         | 37,9 | 58  | 18,6 | 18,6 | 19,05 | 551,90 | 97,84  |
|   | 2019/05/15 | CH2206 | Male | Three y/o | Treatment (Wk 1) | Treatment | Fast Day | No | 23:40 | 23:00 - 23:59 | Night         | 37,7 | 57  | 30,0 | 30,0 | 18,85 | 550,47 | 114,20 |
|   | 2019/05/15 | CH2205 | Male | Three y/o | Treatment (Wk 1) | Treatment | Fast Day | No | 23:45 | 23:00 - 23:59 | Night         | 37,9 | 81  | 23,0 | 23,0 | 19,05 | 578,26 | 105,09 |
|   | 2019/05/15 | CH2206 | Male | Three y/o | Treatment (Wk 1) | Treatment | Fast Day | No | 23:45 | 23:00 - 23:59 | Night         | 37,5 | 86  | 28,8 | 28,8 | 18,65 | 582,77 | 112,79 |
|   | 2019/05/15 | CH2205 | Male | Three y/o | Treatment (Wk 1) | Treatment | Fast Day | No | 23:50 | 23:00 - 23:59 | Night         | 37,9 | 95  | 20,2 | 20,2 | 19,05 | 590,14 | 100,65 |
|   | 2019/05/15 | CH2206 | Male | Three y/o | Treatment (Wk 1) | Treatment | Fast Day | No | 23:50 | 23:00 - 23:59 | Night         | 37,5 | 58  | 23,8 | 23,8 | 18,65 | 551,90 | 106,26 |
|   | 2019/05/15 | CH2205 | Male | Three y/o | Treatment (Wk 1) | Treatment | Fast Day | No | 23:55 | 23:00 - 23:59 | Night         | 37,9 |     | 14,8 | 14,8 | 19,05 |        | 90,05  |
|   | 2019/05/15 | CH2206 | Male | Three y/o | Treatment (Wk 1) | Treatment | Fast Day | No | 23:55 | 23:00 - 23:59 | Night         | 37,4 | 90  | 29,0 | 29,0 | 18,55 | 586,16 | 113,03 |
| 2 | 2019/05/16 | CH2205 | Male | Three y/o | Treatment (Wk 1) | Treatment | Feed Day | No | 00:00 | 00:00 - 00:59 | Early Morning | 37,9 | 114 | 20,2 | 20,2 | 19,05 | 603,20 | 100,65 |
|   | 2019/05/16 | CH2206 | Male | Three y/o | Treatment (Wk 1) | Treatment | Feed Day | No | 00:00 | 00:00 - 00:59 | Early Morning | 37,4 | 48  | 32,0 | 32,0 | 18,55 | 536,04 | 116,41 |
|   | 2019/05/16 | CH2205 | Male | Three y/o | Treatment (Wk 1) | Treatment | Feed Day | No | 00:05 | 00:00 - 00:59 | Early Morning | 37,7 |     | 17,6 | 17,6 | 18,85 |        | 95,95  |
|   | 2019/05/16 | CH2206 | Male | Three y/o | Treatment (Wk 1) | Treatment | Feed Day | No | 00:05 | 00:00 - 00:59 | Early Morning | 37,4 | 66  | 35,4 | 35,4 | 18,55 | 562,34 | 119,88 |
|   | 2019/05/16 | CH2205 | Male | Three y/o | Treatment (Wk 1) | Treatment | Feed Day | No | 00:10 | 00:00 - 00:59 | Early Morning | 37,7 | 58  | 26,2 | 26,2 | 18,85 | 551,90 | 109,55 |
|   | 2019/05/16 | CH2206 | Male | Three y/o | Treatment (Wk 1) | Treatment | Feed Day | No | 00:10 | 00:00 - 00:59 | Early Morning | 37,3 | 47  | 31,8 | 31,8 | 18,46 | 534,23 | 116,20 |
|   | 2019/05/16 | CH2205 | Male | Three y/o | Treatment (Wk 1) | Treatment | Feed Day | No | 00:15 | 00:00 - 00:59 | Early Morning | 37,7 | 56  | 26,4 | 26,4 | 18,85 | 549,01 | 109,81 |
|   | 2019/05/16 | CH2206 | Male | Three y/o | Treatment (Wk 1) | Treatment | Feed Day | No | 00:15 | 00:00 - 00:59 | Early Morning | 37,3 | 69  | 39,0 | 39,0 | 18,46 | 565,86 | 123,22 |
|   | 2019/05/16 | CH2205 | Male | Three y/o | Treatment (Wk 1) | Treatment | Feed Day | No | 00:20 | 00:00 - 00:59 | Early Morning | 37,7 | 85  | 24,6 | 24,6 | 18,85 | 581,90 | 107,39 |
|   | 2019/05/16 | CH2206 | Male | Three y/o | Treatment (Wk 1) | Treatment | Feed Day | No | 00:20 | 00:00 - 00:59 | Early Morning | 37,3 | 80  | 36,6 | 36,6 | 18,46 | 577,31 | 121,03 |
|   | 2019/05/16 | CH2205 | Male | Three y/o | Treatment (Wk 1) | Treatment | Feed Day | No | 00:25 | 00:00 - 00:59 | Early Morning | 37,6 | 50  | 29,0 | 29,0 | 18,75 | 539,52 | 113,03 |
|   | 2019/05/16 | CH2206 | Male | Three y/o | Treatment (Wk 1) | Treatment | Feed Day | No | 00:25 | 00:00 - 00:59 | Early Morning | 37,4 | 68  | 37,0 | 37,0 | 18,55 | 564,71 | 121,40 |
|   | 2019/05/16 | CH2205 | Male | Three y/o | Treatment (Wk 1) | Treatment | Feed Day | No | 00:30 | 00:00 - 00:59 | Early Morning | 37,5 | 85  | 26,0 | 26,0 | 18,65 | 581,90 | 109,29 |
|   | 2019/05/16 | CH2206 | Male | Three y/o | Treatment (Wk 1) | Treatment | Feed Day | No | 00:30 | 00:00 - 00:59 | Early Morning | 37,5 | 92  | 35,2 | 35,2 | 18,65 | 587,78 | 119,69 |
|   | 2019/05/16 | CH2205 | Male | Three y/o | Treatment (Wk 1) | Treatment | Feed Day | No | 00:35 | 00:00 - 00:59 | Early Morning | 37,5 | 50  | 16,2 | 16,2 | 18,65 | 539,52 | 93,13  |
|   | 2019/05/16 | CH2206 | Male | Three y/o | Treatment (Wk 1) | Treatment | Feed Day | No | 00:35 | 00:00 - 00:59 | Early Morning | 37,5 | 66  | 40,0 | 40,0 | 18,65 | 562,34 | 124,09 |
|   | 2019/05/16 | CH2205 | Male | Three y/o | Treatment (Wk 1) | Treatment | Feed Day | No | 00:40 | 00:00 - 00:59 | Early Morning | 37,5 | 50  | 17,4 | 17,4 | 18,65 | 539,52 | 95,56  |
|   | 2019/05/16 | CH2206 | Male | Three y/o | Treatment (Wk 1) | Treatment | Feed Day | No | 00:40 | 00:00 - 00:59 | Early Morning | 37,5 | 72  | 39,0 | 39,0 | 18,65 | 569,20 | 123,22 |
|   | 2019/05/16 | CH2205 | Male | Three y/o | Treatment (Wk 1) | Treatment | Feed Day | No | 00:45 | 00:00 - 00:59 | Early Morning | 37,5 | 197 | 16,0 | 16,0 | 18,65 | 639,25 | 92,71  |
|   | 2019/05/16 | CH2206 | Male | Three y/o | Treatment (Wk 1) | Treatment | Feed Day | No | 00:45 | 00:00 - 00:59 | Early Morning | 37,5 | 84  | 35,6 | 35,6 | 18,65 | 581,01 | 120,08 |
|   | 2019/05/16 | CH2205 | Male | Three y/o | Treatment (Wk 1) | Treatment | Feed Day | No | 00:50 | 00:00 - 00:59 | Early Morning | 37,5 |     | 6,2  | 6,2  | 18,65 |        | 60,63  |
|   | 2019/05/16 | CH2206 | Male | Three y/o | Treatment (Wk 1) | Treatment | Feed Day | No | 00:50 | 00:00 - 00:59 | Early Morning | 37,5 | 68  | 35,2 | 35,2 | 18,65 | 564,71 | 119,69 |
|   | 2019/05/16 | CH2205 | Male | Three y/o | Treatment (Wk 1) | Treatment | Feed Day | No | 00:55 | 00:00 - 00:59 | Early Morning | 37,5 |     | 3,4  | 3,4  | 18,65 |        | 40,51  |
|   | 2019/05/16 | CH2206 | Male | Three y/o | Treatment (Wk 1) | Treatment | Feed Day | No | 00:55 | 00:00 - 00:59 | Early Morning | 37,5 | 110 | 39,6 | 39,6 | 18,65 | 600,69 | 123,74 |
|   | 2019/05/16 | CH2205 | Male | Three y/o | Treatment (Wk 1) | Treatment | Feed Day | No | 01:00 | 01:00 - 01:59 | Early Morning | 37,4 |     | 6,6  | 6,6  | 18,55 |        | 62,73  |
|   | 2019/05/16 | CH2206 | Male | Three y/o | Treatment (Wk 1) | Treatment | Feed Day | No | 01:00 | 01:00 - 01:59 | Early Morning | 37,5 | 110 | 39,4 | 39,4 | 18,65 | 600,69 | 123,57 |
|   | 2019/05/16 | CH2205 | Male | Three y/o | Treatment (Wk 1) | Treatment | Feed Day | No | 01:05 | 01:00 - 01:59 | Early Morning | 37,3 |     | 10,8 | 10,8 | 18,46 |        | 79,36  |
|   | 2019/05/16 | CH2206 | Male | Three y/o | Treatment (Wk 1) | Treatment | Feed Day | No | 01:05 | 01:00 - 01:59 | Early Morning | 37,5 | 90  | 40,0 | 40,0 | 18,65 | 586,16 | 124,09 |
|   | 2019/05/16 | CH2205 | Male | Three y/o | Treatment (Wk 1) | Treatment | Feed Day | No | 01:10 | 01:00 - 01:59 | Early Morning | 37,3 | 56  | 20,8 | 20,8 | 18,46 | 549,01 | 101,65 |
|   | 2019/05/16 | CH2206 | Male | Three y/o | Treatment (Wk 1) | Treatment | Feed Day | No | 01:10 | 01:00 - 01:59 | Early Morning | 37,5 | 51  | 36,8 | 36,8 | 18,65 | 541,20 | 121,22 |
|   | 2019/05/16 | CH2205 | Male | Three y/o | Treatment (Wk 1) | Treatment | Feed Day | No | 01:15 | 01:00 - 01:59 | Early Morning | 37,3 | 46  | 20,8 | 20,8 | 18,46 | 532,38 | 101,65 |
|   | 2019/05/16 | CH2206 | Male | Three y/o | Treatment (Wk 1) | Treatment | Feed Day | No | 01:15 | 01:00 - 01:59 | Early Morning | 37,4 | 93  | 44,0 | 44,0 | 18,55 | 588,58 | 127,37 |
|   | 2019/05/16 | CH2205 | Male | Three y/o | Treatment (Wk 1) | Treatment | Feed Day | No | 01:20 | 01:00 - 01:59 | Early Morning | 37,3 | 98  | 18,2 | 18,2 | 18,46 | 592,41 | 97,10  |
|   | 2019/05/16 | CH2206 | Male | Three y/o | Treatment (Wk 1) | Treatment | Feed Day | No | 01:20 | 01:00 - 01:59 | Early Morning | 37,5 | 135 | 53,0 | 53,0 | 18,65 | 614,84 | 133,80 |
|   | 2019/05/16 | CH2205 | Male | Three y/o | Treatment (Wk 1) | Treatment | Feed Day | No | 01:25 | 01:00 - 01:59 | Early Morning | 37,3 | 98  | 14,2 | 14,2 | 18,46 | 592,41 | 88,65  |
|   | 2019/05/16 | CH2206 | Male | Three y/o | Treatment (Wk 1) | Treatment | Feed Day | No | 01:25 | 01:00 - 01:59 | Early Morning | 37,4 | 124 | 33,4 | 33,4 | 18,55 | 609,04 | 117,88 |
|   | 2019/05/16 | CH2205 | Male | Three y/o | Treatment (Wk 1) | Treatment | Feed Day | No | 01:30 | 01:00 - 01:59 | Early Morning | 37,3 | 68  | 13,4 | 13,4 | 18,46 | 564,71 | 86,68  |
|   | 2019/05/16 | CH2206 | Male | Three y/o | Treatment (Wk 1) | Treatment | Feed Day | No | 01:30 | 01:00 - 01:59 | Early Morning | 37,3 | 94  | 41,6 | 41,6 | 18,46 | 589,37 | 125,44 |
|   | 2019/05/16 | CH2205 | Male | Three y/o | Treatment (Wk 1) | Treatment | Feed Day | No | 01:35 | 01:00 - 01:59 | Early Morning | 37,3 | 77  | 12,4 | 12,4 | 18,46 | 574,39 | 84,04  |
|   | 2019/05/16 | CH2206 | Male | Three y/o | Treatment (Wk 1) | Treatment | Feed Day | No | 01:35 | 01:00 - 01:59 | Early Morning | 36,9 | 71  | 42,2 | 42,2 | 18,06 | 568,10 | 125,93 |
|   | 2019/05/16 | CH2205 | Male | Three y/o | Treatment (Wk 1) | Treatment |          |    |       |               |               |      |     |      |      |       |        |        |



|            |        |      |           |                  |           |          |    |       |               |               |      |     |       |       |       |        |        |
|------------|--------|------|-----------|------------------|-----------|----------|----|-------|---------------|---------------|------|-----|-------|-------|-------|--------|--------|
| 2019/05/16 | CH2206 | Male | Three y/o | Treatment (Wk 1) | Treatment | Feed Day | No | 02:05 | 02:00 - 02:59 | Early Morning | 37,3 | 83  | 5,2   | 5,2   | 18,46 | 580,11 | 54,72  |
| 2019/05/16 | CH2205 | Male | Three y/o | Treatment (Wk 1) | Treatment | Feed Day | No | 02:10 | 02:00 - 02:59 | Early Morning | 37,6 | 77  | 8,8   | 8,8   | 18,75 | 574,39 | 72,43  |
| 2019/05/16 | CH2206 | Male | Three y/o | Treatment (Wk 1) | Treatment | Feed Day | No | 02:10 | 02:00 - 02:59 | Early Morning | 37,3 | 109 | 4,0   | 4,0   | 18,46 | 600,04 | 45,94  |
| 2019/05/16 | CH2205 | Male | Three y/o | Treatment (Wk 1) | Treatment | Feed Day | No | 02:15 | 02:00 - 02:59 | Early Morning | 37,6 | 86  | 8,4   | 8,4   | 18,75 | 582,77 | 70,86  |
| 2019/05/16 | CH2206 | Male | Three y/o | Treatment (Wk 1) | Treatment | Feed Day | No | 02:15 | 02:00 - 02:59 | Early Morning | 37,4 | 86  | 5,0   | 5,0   | 18,55 | 582,77 | 53,41  |
| 2019/05/16 | CH2205 | Male | Three y/o | Treatment (Wk 1) | Treatment | Feed Day | No | 02:20 | 02:00 - 02:59 | Early Morning | 37,6 | 67  | 4,0   | 4,0   | 18,75 | 563,53 | 45,94  |
| 2019/05/16 | CH2206 | Male | Three y/o | Treatment (Wk 1) | Treatment | Feed Day | No | 02:20 | 02:00 - 02:59 | Early Morning | 37,4 | 81  | 3,2   | 3,2   | 18,55 | 578,26 | 38,49  |
| 2019/05/16 | CH2205 | Male | Three y/o | Treatment (Wk 1) | Treatment | Feed Day | No | 02:25 | 02:00 - 02:59 | Early Morning | 37,6 | 95  | 7,0   | 7,0   | 18,75 | 590,14 | 64,72  |
| 2019/05/16 | CH2206 | Male | Three y/o | Treatment (Wk 1) | Treatment | Feed Day | No | 02:25 | 02:00 - 02:59 | Early Morning | 37,4 | 58  | 4,4   | 4,4   | 18,55 | 551,90 | 49,12  |
| 2019/05/16 | CH2205 | Male | Three y/o | Treatment (Wk 1) | Treatment | Feed Day | No | 02:30 | 02:00 - 02:59 | Early Morning | 37,5 | 54  | 5,8   | 5,8   | 18,65 | 545,99 | 58,39  |
| 2019/05/16 | CH2206 | Male | Three y/o | Treatment (Wk 1) | Treatment | Feed Day | No | 02:30 | 02:00 - 02:59 | Early Morning | 37,5 | 86  | 7,2   | 7,2   | 18,65 | 582,77 | 65,66  |
| 2019/05/16 | CH2205 | Male | Three y/o | Treatment (Wk 1) | Treatment | Feed Day | No | 02:35 | 02:00 - 02:59 | Early Morning | 37,5 | 89  | 7,6   | 7,6   | 18,65 | 585,33 | 67,49  |
| 2019/05/16 | CH2206 | Male | Three y/o | Treatment (Wk 1) | Treatment | Feed Day | No | 02:35 | 02:00 - 02:59 | Early Morning | 37,5 | 60  | 14,6  | 14,6  | 18,65 | 554,67 | 89,59  |
| 2019/05/16 | CH2205 | Male | Three y/o | Treatment (Wk 1) | Treatment | Feed Day | No | 02:40 | 02:00 - 02:59 | Early Morning | 37,5 | 92  | 7,0   | 7,0   | 18,65 | 587,78 | 64,72  |
| 2019/05/16 | CH2206 | Male | Three y/o | Treatment (Wk 1) | Treatment | Feed Day | No | 02:40 | 02:00 - 02:59 | Early Morning | 37,5 | 89  | 12,0  | 12,0  | 18,65 | 585,33 | 82,93  |
| 2019/05/16 | CH2205 | Male | Three y/o | Treatment (Wk 1) | Treatment | Feed Day | No | 02:45 | 02:00 - 02:59 | Early Morning | 37,6 | 89  | 4,0   | 4,0   | 18,75 | 585,33 | 45,94  |
| 2019/05/16 | CH2206 | Male | Three y/o | Treatment (Wk 1) | Treatment | Feed Day | No | 02:45 | 02:00 - 02:59 | Early Morning | 37,5 | 50  | 6,6   | 6,6   | 18,65 | 539,52 | 62,73  |
| 2019/05/16 | CH2205 | Male | Three y/o | Treatment (Wk 1) | Treatment | Feed Day | No | 02:50 | 02:00 - 02:59 | Early Morning | 37,5 | 53  | 8,0   | 8,0   | 18,65 | 544,43 | 69,22  |
| 2019/05/16 | CH2206 | Male | Three y/o | Treatment (Wk 1) | Treatment | Feed Day | No | 02:50 | 02:00 - 02:59 | Early Morning | 37,5 | 88  | 11,2  | 11,2  | 18,65 | 584,49 | 80,59  |
| 2019/05/16 | CH2205 | Male | Three y/o | Treatment (Wk 1) | Treatment | Feed Day | No | 02:55 | 02:00 - 02:59 | Early Morning | 37,5 | 53  | 4,8   | 4,8   | 18,65 | 544,43 | 52,04  |
| 2019/05/16 | CH2206 | Male | Three y/o | Treatment (Wk 1) | Treatment | Feed Day | No | 02:55 | 02:00 - 02:59 | Early Morning | 37,5 | 98  | 8,6   | 8,6   | 18,65 | 592,41 | 71,66  |
| 2019/05/16 | CH2205 | Male | Three y/o | Treatment (Wk 1) | Treatment | Feed Day | No | 03:00 | 03:00 - 03:59 | Early Morning | 37,5 | 53  | 5,4   | 5,4   | 18,65 | 544,43 | 55,99  |
| 2019/05/16 | CH2206 | Male | Three y/o | Treatment (Wk 1) | Treatment | Feed Day | No | 03:00 | 03:00 - 03:59 | Early Morning | 37,5 | 77  | 13,6  | 13,6  | 18,65 | 574,39 | 87,18  |
| 2019/05/16 | CH2205 | Male | Three y/o | Treatment (Wk 1) | Treatment | Feed Day | No | 03:05 | 03:00 - 03:59 | Early Morning | 37,5 | 60  | 4,8   | 4,8   | 18,65 | 554,67 | 52,04  |
| 2019/05/16 | CH2206 | Male | Three y/o | Treatment (Wk 1) | Treatment | Feed Day | No | 03:05 | 03:00 - 03:59 | Early Morning | 37,6 | 90  | 13,2  | 13,2  | 18,75 | 586,16 | 86,17  |
| 2019/05/16 | CH2205 | Male | Three y/o | Treatment (Wk 1) | Treatment | Feed Day | No | 03:10 | 03:00 - 03:59 | Early Morning | 37,5 | 63  | 5,0   | 5,0   | 18,65 | 558,62 | 53,41  |
| 2019/05/16 | CH2206 | Male | Three y/o | Treatment (Wk 1) | Treatment | Feed Day | No | 03:10 | 03:00 - 03:59 | Early Morning | 37,7 | 80  | 10,4  | 10,4  | 18,85 | 577,31 | 78,08  |
| 2019/05/16 | CH2205 | Male | Three y/o | Treatment (Wk 1) | Treatment | Feed Day | No | 03:15 | 03:00 - 03:59 | Early Morning | 37,6 | 69  | 3,6   | 3,6   | 18,75 | 565,86 | 42,42  |
| 2019/05/16 | CH2206 | Male | Three y/o | Treatment (Wk 1) | Treatment | Feed Day | No | 03:15 | 03:00 - 03:59 | Early Morning | 37,7 | 60  | 6,2   | 6,2   | 18,85 | 554,67 | 60,63  |
| 2019/05/16 | CH2205 | Male | Three y/o | Treatment (Wk 1) | Treatment | Feed Day | No | 03:20 | 03:00 - 03:59 | Early Morning | 37,6 | 82  | 4,8   | 4,8   | 18,75 | 579,19 | 52,04  |
| 2019/05/16 | CH2206 | Male | Three y/o | Treatment (Wk 1) | Treatment | Feed Day | No | 03:20 | 03:00 - 03:59 | Early Morning | 37,7 | 48  | 10,4  | 10,4  | 18,85 | 536,04 | 78,08  |
| 2019/05/16 | CH2205 | Male | Three y/o | Treatment (Wk 1) | Treatment | Feed Day | No | 03:25 | 03:00 - 03:59 | Early Morning | 37,6 | 51  | 14,4  | 14,4  | 18,75 | 541,20 | 89,12  |
| 2019/05/16 | CH2206 | Male | Three y/o | Treatment (Wk 1) | Treatment | Feed Day | No | 03:25 | 03:00 - 03:59 | Early Morning | 37,7 | 42  | 10,4  | 10,4  | 18,85 | 524,42 | 78,08  |
| 2019/05/16 | CH2205 | Male | Three y/o | Treatment (Wk 1) | Treatment | Feed Day | No | 03:30 | 03:00 - 03:59 | Early Morning | 37,6 | 51  | 8,0   | 8,0   | 18,75 | 541,20 | 69,22  |
| 2019/05/16 | CH2206 | Male | Three y/o | Treatment (Wk 1) | Treatment | Feed Day | No | 03:30 | 03:00 - 03:59 | Early Morning | 37,7 | 47  | 15,0  | 15,0  | 18,85 | 534,23 | 90,51  |
| 2019/05/16 | CH2205 | Male | Three y/o | Treatment (Wk 1) | Treatment | Feed Day | No | 03:35 | 03:00 - 03:59 | Early Morning | 37,5 | 82  | 13,6  | 13,6  | 18,65 | 579,19 | 87,18  |
| 2019/05/16 | CH2206 | Male | Three y/o | Treatment (Wk 1) | Treatment | Feed Day | No | 03:35 | 03:00 - 03:59 | Early Morning | 37,7 | 86  | 15,2  | 15,2  | 18,85 | 582,77 | 90,96  |
| 2019/05/16 | CH2205 | Male | Three y/o | Treatment (Wk 1) | Treatment | Feed Day | No | 03:40 | 03:00 - 03:59 | Early Morning | 37,5 |     | 13,4  | 13,4  | 18,65 |        | 86,68  |
| 2019/05/16 | CH2206 | Male | Three y/o | Treatment (Wk 1) | Treatment | Feed Day | No | 03:40 | 03:00 - 03:59 | Early Morning | 37,7 | 75  | 21,4  | 21,4  | 18,85 | 572,36 | 102,63 |
| 2019/05/16 | CH2205 | Male | Three y/o | Treatment (Wk 1) | Treatment | Feed Day | No | 03:45 | 03:00 - 03:59 | Early Morning | 37,4 | 57  | 15,0  | 15,0  | 18,55 | 550,47 | 90,51  |
| 2019/05/16 | CH2206 | Male | Three y/o | Treatment (Wk 1) | Treatment | Feed Day | No | 03:45 | 03:00 - 03:59 | Early Morning | 37,7 | 73  | 16,0  | 16,0  | 18,85 | 570,27 | 92,71  |
| 2019/05/16 | CH2205 | Male | Three y/o | Treatment (Wk 1) | Treatment | Feed Day | No | 03:50 | 03:00 - 03:59 | Early Morning | 37,3 | 50  | 18,2  | 18,2  | 18,46 | 539,52 | 97,10  |
| 2019/05/16 | CH2206 | Male | Three y/o | Treatment (Wk 1) | Treatment | Feed Day | No | 03:50 | 03:00 - 03:59 | Early Morning | 37,6 | 74  | 18,8  | 18,8  | 18,75 | 571,33 | 98,20  |
| 2019/05/16 | CH2205 | Male | Three y/o | Treatment (Wk 1) | Treatment | Feed Day | No | 03:55 | 03:00 - 03:59 | Early Morning | 37,3 | 53  | 11,8  | 11,8  | 18,46 | 544,43 | 82,36  |
| 2019/05/16 | CH2206 | Male | Three y/o | Treatment (Wk 1) | Treatment | Feed Day | No | 03:55 | 03:00 - 03:59 | Early Morning | 37,7 | 43  | 27,2  | 27,2  | 18,85 | 526,50 | 110,83 |
| 2019/05/16 | CH2205 | Male | Three y/o | Treatment (Wk 1) | Treatment | Feed Day | No | 04:00 | 04:00 - 04:59 | Morning       | 37,4 | 78  | 17,8  | 17,8  | 18,55 | 575,38 | 96,34  |
| 2019/05/16 | CH2206 | Male | Three y/o | Treatment (Wk 1) | Treatment | Feed Day | No | 04:00 | 04:00 - 04:59 | Morning       | 37,7 | 52  | 25,8  | 25,8  | 18,85 | 542,83 | 109,02 |
| 2019/05/16 | CH2205 | Male | Three y/o | Treatment (Wk 1) | Treatment | Feed Day | No | 04:05 | 04:00 - 04:59 | Morning       | 37,4 | 97  | 19,4  | 19,4  | 18,55 | 591,66 | 99,28  |
| 2019/05/16 | CH2206 | Male | Three y/o | Treatment (Wk 1) | Treatment | Feed Day | No | 04:05 | 04:00 - 04:59 | Morning       | 37,7 | 47  | 26,8  | 26,8  | 18,85 | 534,23 | 110,33 |
| 2019/05/16 | CH2205 | Male | Three y/o | Treatment (Wk 1) | Treatment | Feed Day | No | 04:10 | 04:00 - 04:59 | Morning       | 37,3 |     | 9,2   | 9,2   | 18,46 |        | 73,94  |
| 2019/05/16 | CH2206 | Male | Three y/o | Treatment (Wk 1) | Treatment | Feed Day | No | 04:10 | 04:00 - 04:59 | Morning       | 37,7 | 73  | 22,2  | 22,2  | 18,85 | 570,27 | 103,88 |
| 2019/05/16 | CH2205 | Male | Three y/o | Treatment (Wk 1) | Treatment | Feed Day | No | 04:15 | 04:00 - 04:59 | Morning       | 37,4 |     | 11,0  | 11,0  | 18,55 |        | 79,98  |
| 2019/05/16 | CH2206 | Male | Three y/o | Treatment (Wk 1) | Treatment | Feed Day | No | 04:15 | 04:00 - 04:59 | Morning       | 37,7 | 52  | 28,6  | 28,6  | 18,85 | 542,83 | 112,56 |
| 2019/05/16 | CH2205 | Male | Three y/o | Treatment (Wk 1) | Treatment | Feed Day | No | 04:20 | 04:00 - 04:59 | Morning       | 37,5 | 102 | 8,2   | 8,2   | 18,65 | 595,30 | 70,05  |
| 2019/05/16 | CH2206 | Male | Three y/o | Treatment (Wk 1) | Treatment | Feed Day | No | 04:20 | 04:00 - 04:59 | Morning       | 37,7 | 121 | 59,0  | 59,0  | 18,85 | 607,35 | 137,51 |
| 2019/05/16 | CH2205 | Male | Three y/o | Treatment (Wk 1) | Treatment | Feed Day | No | 04:25 | 04:00 - 04:59 | Morning       | 37,5 | 191 | 10,8  | 10,8  | 18,65 | 637,33 | 79,36  |
| 2019/05/16 | CH2206 | Male | Three y/o | Treatment (Wk 1) | Treatment | Feed Day | No | 04:25 | 04:00 - 04:59 | Morning       | 37,7 | 99  | 44,6  | 44,6  | 18,85 | 593,14 | 127,84 |
| 2019/05/16 | CH2205 | Male | Three y/o | Treatment (Wk 1) | Treatment | Feed Day | No | 04:30 | 04:00 - 04:59 | Morning       | 37,5 | 99  | 20,2  | 20,2  | 18,65 | 593,14 | 100,65 |
| 2019/05/16 | CH2206 | Male | Three y/o | Treatment (Wk 1) | Treatment | Feed Day | No | 04:30 | 04:00 - 04:59 | Morning       | 37,7 | 98  | 113,8 | 113,8 | 18,85 | 592,41 | 160,35 |
| 2019/05/16 | CH2205 | Male | Three y/o | Treatment (Wk 1) | Treatment | Feed Day | No | 04:35 | 04:00 - 04:59 | Morning       | 37,5 | 106 | 33,6  | 33,6  | 18,65 | 598,06 | 118,09 |
| 2019/05/16 | CH2206 | Male | Three y/o | Treatment (Wk 1) | Treatment | Feed Day | No | 04:35 | 04:00 - 04:59 | Morning       | 37,7 | 132 | 119,8 | 119,8 | 18,85 | 613,32 | 162,15 |
| 2019/05/16 | CH2205 | Male | Three y/o | Treatment (Wk 1) | Treatment | Feed Day | No | 04:40 | 04:00 - 04:59 | Morning       | 37,5 |     | 128,0 | 128,0 | 18,65 |        | 164,46 |
| 2019/05/16 | CH2206 | Male | Three y/o | Treatment (Wk 1) | Treatment | Feed Day | No | 04:40 | 04:00 - 04:59 | Morning       | 37,5 | 131 | 57,0  | 57,0  | 18,65 | 612,80 | 136,32 |
| 2019/05/16 | CH2205 | Male | Three y/o | Treatment (Wk 1) | Treatment | Feed Day | No | 04:45 | 04:00 - 04:59 | Morning       | 37,4 | 61  | 180,6 | 180,6 | 18,55 | 556,01 | 176,53 |
| 2019/05/16 | CH2206 | Male | Three y/o | Treatment (Wk 1) | Treatment | Feed Day | No | 04:45 | 04:00 - 04:59 | Morning       | 37,4 | 88  | 63,2  | 63,2  | 18,55 | 584,49 | 139,89 |
| 2019/05/16 | CH2205 | Male | Three y/o | Treatment (Wk 1) | Treatment | Feed Day | No | 04:50 | 04:00 - 04:59 | Morning       | 37,4 |     | 12,4  | 12,4  | 18,55 |        | 84,04  |
| 2019/05/16 | CH2206 | Male | Three y/o | Treatment (Wk 1) | Treatment | Feed Day | No | 04:50 | 04:00 - 04:59 | Morning       | 37,4 | 92  | 33,0  | 33,0  | 18,55 | 587,78 | 117,47 |
| 2019/05/16 | CH2205 | Male | Three y/o | Treatment (Wk 1) | Treatment | Feed Day | No | 04:55 | 04:00 - 04:59 | Morning       | 37,3 |     | 17,8  | 17,8  | 18,46 |        | 96,34  |
| 2019/05/16 | CH2206 | Male | Three y/o | Treatment (Wk 1) | Treatment | Feed Day | No | 04:55 | 04:00 - 04:59 | Morning       | 37,1 | 78  | 35,2  | 35,2  | 18,26 | 575,38 | 119,69 |
| 2019/05/16 | CH2205 | Male | Three y/o | Treatment (Wk 1) | Treatment | Feed Day | No | 05:00 | 05:00 - 05:59 | Morning       | 37,2 | 43  | 21,0  | 21,0  | 18,36 | 526,50 | 101,98 |



|            |        |      |           |                  |           |          |    |       |               |         |      |     |       |       |       |        |        |
|------------|--------|------|-----------|------------------|-----------|----------|----|-------|---------------|---------|------|-----|-------|-------|-------|--------|--------|
| 2019/05/16 | CH2206 | Male | Three y/o | Treatment (Wk 1) | Treatment | Feed Day | No | 05:00 | 05:00 - 05:59 | Morning | 36,8 | 64  | 42,0  | 42,0  | 17,96 | 559,88 | 125,77 |
| 2019/05/16 | CH2205 | Male | Three y/o | Treatment (Wk 1) | Treatment | Feed Day | No | 05:05 | 05:00 - 05:59 | Morning | 37,3 | 73  | 11,8  | 11,8  | 18,46 | 570,27 | 82,36  |
| 2019/05/16 | CH2206 | Male | Three y/o | Treatment (Wk 1) | Treatment | Feed Day | No | 05:05 | 05:00 - 05:59 | Morning | 36,5 | 113 | 47,6  | 47,6  | 17,67 | 602,58 | 130,09 |
| 2019/05/16 | CH2205 | Male | Three y/o | Treatment (Wk 1) | Treatment | Feed Day | No | 05:10 | 05:00 - 05:59 | Morning | 37,3 | 75  | 9,8   | 9,8   | 18,46 | 572,36 | 76,07  |
| 2019/05/16 | CH2206 | Male | Three y/o | Treatment (Wk 1) | Treatment | Feed Day | No | 05:10 | 05:00 - 05:59 | Morning | 36,5 | 73  | 61,2  | 61,2  | 17,67 | 570,27 | 138,78 |
| 2019/05/16 | CH2205 | Male | Three y/o | Treatment (Wk 1) | Treatment | Feed Day | No | 05:15 | 05:00 - 05:59 | Morning | 37,3 | 44  | 8,2   | 8,2   | 18,46 | 528,51 | 70,05  |
| 2019/05/16 | CH2206 | Male | Three y/o | Treatment (Wk 1) | Treatment | Feed Day | No | 05:15 | 05:00 - 05:59 | Morning | 36,1 | 72  | 59,2  | 59,2  | 17,29 | 569,20 | 137,63 |
| 2019/05/16 | CH2205 | Male | Three y/o | Treatment (Wk 1) | Treatment | Feed Day | No | 05:20 | 05:00 - 05:59 | Morning | 37,3 | 79  | 5,8   | 5,8   | 18,46 | 576,36 | 58,39  |
| 2019/05/16 | CH2206 | Male | Three y/o | Treatment (Wk 1) | Treatment | Feed Day | No | 05:20 | 05:00 - 05:59 | Morning | 35,9 | 57  | 41,4  | 41,4  | 17,09 | 550,47 | 125,27 |
| 2019/05/16 | CH2205 | Male | Three y/o | Treatment (Wk 1) | Treatment | Feed Day | No | 05:25 | 05:00 - 05:59 | Morning | 37,2 | 52  | 2,4   | 2,4   | 18,36 | 542,83 | 28,91  |
| 2019/05/16 | CH2206 | Male | Three y/o | Treatment (Wk 1) | Treatment | Feed Day | No | 05:25 | 05:00 - 05:59 | Morning | 36,4 | 88  | 28,6  | 28,6  | 17,57 | 584,49 | 112,56 |
| 2019/05/16 | CH2205 | Male | Three y/o | Treatment (Wk 1) | Treatment | Feed Day | No | 05:30 | 05:00 - 05:59 | Morning | 37,2 | 52  | 1,2   | 1,2   | 18,36 | 542,83 | 5,99   |
| 2019/05/16 | CH2206 | Male | Three y/o | Treatment (Wk 1) | Treatment | Feed Day | No | 05:30 | 05:00 - 05:59 | Morning | 36,5 | 74  | 25,8  | 25,8  | 17,67 | 571,33 | 109,02 |
| 2019/05/16 | CH2205 | Male | Three y/o | Treatment (Wk 1) | Treatment | Feed Day | No | 05:35 | 05:00 - 05:59 | Morning | 37,1 | 85  | 7,8   | 7,8   | 18,26 | 581,90 | 68,36  |
| 2019/05/16 | CH2206 | Male | Three y/o | Treatment (Wk 1) | Treatment | Feed Day | No | 05:35 | 05:00 - 05:59 | Morning | 36,6 | 77  | 29,6  | 29,6  | 17,77 | 574,39 | 113,73 |
| 2019/05/16 | CH2205 | Male | Three y/o | Treatment (Wk 1) | Treatment | Feed Day | No | 05:40 | 05:00 - 05:59 | Morning | 37,2 | 55  | 4,4   | 4,4   | 18,36 | 547,52 | 49,12  |
| 2019/05/16 | CH2206 | Male | Three y/o | Treatment (Wk 1) | Treatment | Feed Day | No | 05:40 | 05:00 - 05:59 | Morning | 36,6 | 47  | 40,8  | 40,8  | 17,77 | 534,23 | 124,77 |
| 2019/05/16 | CH2205 | Male | Three y/o | Treatment (Wk 1) | Treatment | Feed Day | No | 05:45 | 05:00 - 05:59 | Morning | 37,3 | 82  | 7,6   | 7,6   | 18,46 | 579,19 | 67,49  |
| 2019/05/16 | CH2206 | Male | Three y/o | Treatment (Wk 1) | Treatment | Feed Day | No | 05:45 | 05:00 - 05:59 | Morning | 36,8 | 80  | 48,8  | 48,8  | 17,96 | 577,31 | 130,95 |
| 2019/05/16 | CH2205 | Male | Three y/o | Treatment (Wk 1) | Treatment | Feed Day | No | 05:50 | 05:00 - 05:59 | Morning | 37,3 | 60  | 9,8   | 9,8   | 18,46 | 554,67 | 76,07  |
| 2019/05/16 | CH2206 | Male | Three y/o | Treatment (Wk 1) | Treatment | Feed Day | No | 05:50 | 05:00 - 05:59 | Morning | 36,9 | 50  | 46,6  | 46,6  | 18,06 | 539,52 | 129,35 |
| 2019/05/16 | CH2205 | Male | Three y/o | Treatment (Wk 1) | Treatment | Feed Day | No | 05:55 | 05:00 - 05:59 | Morning | 37,3 | 73  | 18,2  | 18,2  | 18,46 | 570,27 | 97,10  |
| 2019/05/16 | CH2206 | Male | Three y/o | Treatment (Wk 1) | Treatment | Feed Day | No | 05:55 | 05:00 - 05:59 | Morning | 37,1 | 80  | 39,8  | 39,8  | 18,26 | 577,31 | 123,91 |
| 2019/05/16 | CH2205 | Male | Three y/o | Treatment (Wk 1) | Treatment | Feed Day | No | 06:00 | 06:00 - 06:59 | Morning | 37,3 | 117 | 3,6   | 3,6   | 18,46 | 605,02 | 42,42  |
| 2019/05/16 | CH2206 | Male | Three y/o | Treatment (Wk 1) | Treatment | Feed Day | No | 06:00 | 06:00 - 06:59 | Morning | 37,1 | 75  | 43,8  | 43,8  | 18,26 | 572,36 | 127,22 |
| 2019/05/16 | CH2205 | Male | Three y/o | Treatment (Wk 1) | Treatment | Feed Day | No | 06:05 | 06:00 - 06:59 | Morning | 37,1 | 110 | 97,8  | 97,8  | 18,26 | 600,69 | 155,07 |
| 2019/05/16 | CH2206 | Male | Three y/o | Treatment (Wk 1) | Treatment | Feed Day | No | 06:05 | 06:00 - 06:59 | Morning | 37,1 | 121 | 183,0 | 183,0 | 18,26 | 607,35 | 177,00 |
| 2019/05/16 | CH2205 | Male | Three y/o | Treatment (Wk 1) | Treatment | Feed Day | No | 06:10 | 06:00 - 06:59 | Morning | 37,2 | 172 | 37,4  | 37,4  | 18,36 | 630,73 | 121,77 |
| 2019/05/16 | CH2206 | Male | Three y/o | Treatment (Wk 1) | Treatment | Feed Day | No | 06:10 | 06:00 - 06:59 | Morning | 37,2 |     | 113,2 | 113,2 | 18,36 |        | 160,17 |
| 2019/05/16 | CH2205 | Male | Three y/o | Treatment (Wk 1) | Treatment | Feed Day | No | 06:15 | 06:00 - 06:59 | Morning | 37,3 | 128 | 100,2 | 100,2 | 18,46 | 611,22 | 155,91 |
| 2019/05/16 | CH2206 | Male | Three y/o | Treatment (Wk 1) | Treatment | Feed Day | No | 06:15 | 06:00 - 06:59 | Morning | 37,2 | 111 | 13,8  | 13,8  | 18,36 | 601,33 | 87,68  |
| 2019/05/16 | CH2205 | Male | Three y/o | Treatment (Wk 1) | Treatment | Feed Day | No | 06:20 | 06:00 - 06:59 | Morning | 37,4 | 140 | 92,8  | 92,8  | 18,55 | 617,28 | 153,24 |
| 2019/05/16 | CH2206 | Male | Three y/o | Treatment (Wk 1) | Treatment | Feed Day | No | 06:20 | 06:00 - 06:59 | Morning | 37,1 | 104 | 164,8 | 164,8 | 18,26 | 596,69 | 173,32 |
| 2019/05/16 | CH2205 | Male | Three y/o | Treatment (Wk 1) | Treatment | Feed Day | No | 06:25 | 06:00 - 06:59 | Morning | 37,4 |     | 124,8 | 124,8 | 18,55 |        | 163,58 |
| 2019/05/16 | CH2206 | Male | Three y/o | Treatment (Wk 1) | Treatment | Feed Day | No | 06:25 | 06:00 - 06:59 | Morning | 37,2 | 117 | 104,4 | 104,4 | 18,36 | 605,02 | 157,35 |
| 2019/05/16 | CH2205 | Male | Three y/o | Treatment (Wk 1) | Treatment | Feed Day | No | 06:30 | 06:00 - 06:59 | Morning | 37,5 | 115 | 92,8  | 92,8  | 18,65 | 603,82 | 153,24 |
| 2019/05/16 | CH2206 | Male | Three y/o | Treatment (Wk 1) | Treatment | Feed Day | No | 06:30 | 06:00 - 06:59 | Morning | 37,4 | 118 | 113,6 | 113,6 | 18,55 | 605,61 | 160,29 |
| 2019/05/16 | CH2205 | Male | Three y/o | Treatment (Wk 1) | Treatment | Feed Day | No | 06:35 | 06:00 - 06:59 | Morning | 37,7 | 63  | 218,0 | 218,0 | 18,85 | 558,62 | 183,15 |
| 2019/05/16 | CH2206 | Male | Three y/o | Treatment (Wk 1) | Treatment | Feed Day | No | 06:35 | 06:00 - 06:59 | Morning | 37,7 | 114 | 165,8 | 165,8 | 18,85 | 603,20 | 173,53 |
| 2019/05/16 | CH2205 | Male | Three y/o | Treatment (Wk 1) | Treatment | Feed Day | No | 06:40 | 06:00 - 06:59 | Morning | 37,7 | 125 | 227,4 | 227,4 | 18,85 | 609,60 | 184,64 |
| 2019/05/16 | CH2206 | Male | Three y/o | Treatment (Wk 1) | Treatment | Feed Day | No | 06:40 | 06:00 - 06:59 | Morning | 37,7 | 109 | 121,6 | 121,6 | 18,85 | 600,04 | 162,67 |
| 2019/05/16 | CH2205 | Male | Three y/o | Treatment (Wk 1) | Treatment | Feed Day | No | 06:45 | 06:00 - 06:59 | Morning | 37,6 | 57  | 143,8 | 143,8 | 18,75 | 550,47 | 168,54 |
| 2019/05/16 | CH2206 | Male | Three y/o | Treatment (Wk 1) | Treatment | Feed Day | No | 06:45 | 06:00 - 06:59 | Morning | 37,5 | 106 | 100,6 | 100,6 | 18,65 | 598,06 | 156,05 |
| 2019/05/16 | CH2205 | Male | Three y/o | Treatment (Wk 1) | Treatment | Feed Day | No | 06:50 | 06:00 - 06:59 | Morning | 37,6 | 188 | 225,0 | 225,0 | 18,75 | 636,34 | 184,27 |
| 2019/05/16 | CH2206 | Male | Three y/o | Treatment (Wk 1) | Treatment | Feed Day | No | 06:50 | 06:00 - 06:59 | Morning | 37,5 | 114 | 121,2 | 121,2 | 18,65 | 603,20 | 162,56 |
| 2019/05/16 | CH2205 | Male | Three y/o | Treatment (Wk 1) | Treatment | Feed Day | No | 06:55 | 06:00 - 06:59 | Morning | 37,6 | 73  | 242,0 | 242,0 | 18,75 | 570,27 | 186,83 |
| 2019/05/16 | CH2206 | Male | Three y/o | Treatment (Wk 1) | Treatment | Feed Day | No | 06:55 | 06:00 - 06:59 | Morning | 37,5 | 104 | 80,8  | 80,8  | 18,65 | 596,69 | 148,42 |
| 2019/05/16 | CH2205 | Male | Three y/o | Treatment (Wk 1) | Treatment | Feed Day | No | 07:00 | 07:00 - 07:59 | Morning | 37,6 | 140 | 93,6  | 93,6  | 18,75 | 617,28 | 153,54 |
| 2019/05/16 | CH2206 | Male | Three y/o | Treatment (Wk 1) | Treatment | Feed Day | No | 07:00 | 07:00 - 07:59 | Morning | 37,5 | 125 | 478,8 | 478,8 | 18,65 | 609,60 | 211,00 |
| 2019/05/16 | CH2205 | Male | Three y/o | Treatment (Wk 1) | Treatment | Feed Day | No | 07:05 | 07:00 - 07:59 | Morning | 37,6 | 79  | 295,6 | 295,6 | 18,75 | 576,36 | 193,90 |
| 2019/05/16 | CH2206 | Male | Three y/o | Treatment (Wk 1) | Treatment | Feed Day | No | 07:05 | 07:00 - 07:59 | Morning | 37,5 | 137 | 403,6 | 403,6 | 18,65 | 615,83 | 204,93 |
| 2019/05/16 | CH2205 | Male | Three y/o | Treatment (Wk 1) | Treatment | Feed Day | No | 07:10 | 07:00 - 07:59 | Morning | 37,6 | 103 | 351,8 | 351,8 | 18,75 | 596,00 | 200,06 |
| 2019/05/16 | CH2206 | Male | Three y/o | Treatment (Wk 1) | Treatment | Feed Day | No | 07:10 | 07:00 - 07:59 | Morning | 37,7 |     | 153,4 | 153,4 | 18,85 |        | 170,80 |
| 2019/05/16 | CH2205 | Male | Three y/o | Treatment (Wk 1) | Treatment | Feed Day | No | 07:15 | 07:00 - 07:59 | Morning | 37,7 |     | 254,4 | 254,4 | 18,85 |        | 188,60 |
| 2019/05/16 | CH2206 | Male | Three y/o | Treatment (Wk 1) | Treatment | Feed Day | No | 07:15 | 07:00 - 07:59 | Morning | 37,7 |     | 44,8  | 44,8  | 18,85 |        | 127,99 |
| 2019/05/16 | CH2205 | Male | Three y/o | Treatment (Wk 1) | Treatment | Feed Day | No | 07:20 | 07:00 - 07:59 | Morning | 37,6 | 103 | 17,6  | 17,6  | 18,75 | 596,00 | 95,95  |
| 2019/05/16 | CH2206 | Male | Three y/o | Treatment (Wk 1) | Treatment | Feed Day | No | 07:20 | 07:00 - 07:59 | Morning | 37,4 | 75  | 54,4  | 54,4  | 18,55 | 572,36 | 134,70 |
| 2019/05/16 | CH2205 | Male | Three y/o | Treatment (Wk 1) | Treatment | Feed Day | No | 07:25 | 07:00 - 07:59 | Morning | 37,6 |     | 6,4   | 6,4   | 18,75 |        | 61,70  |
| 2019/05/16 | CH2206 | Male | Three y/o | Treatment (Wk 1) | Treatment | Feed Day | No | 07:25 | 07:00 - 07:59 | Morning | 37,1 | 98  | 150,6 | 150,6 | 18,26 | 592,41 | 170,16 |
| 2019/05/16 | CH2205 | Male | Three y/o | Treatment (Wk 1) | Treatment | Feed Day | No | 07:30 | 07:00 - 07:59 | Morning | 37,6 | 64  | 76,8  | 76,8  | 18,75 | 559,88 | 146,66 |
| 2019/05/16 | CH2206 | Male | Three y/o | Treatment (Wk 1) | Treatment | Feed Day | No | 07:30 | 07:00 - 07:59 | Morning | 37,2 |     | 89,8  | 89,8  | 18,36 |        | 152,10 |
| 2019/05/16 | CH2205 | Male | Three y/o | Treatment (Wk 1) | Treatment | Feed Day | No | 07:35 | 07:00 - 07:59 | Morning | 37,6 | 54  | 104,0 | 104,0 | 18,75 | 545,99 | 157,21 |
| 2019/05/16 | CH2206 | Male | Three y/o | Treatment (Wk 1) | Treatment | Feed Day | No | 07:35 | 07:00 - 07:59 | Morning | 37,3 | 103 | 175,6 | 175,6 | 18,46 | 596,00 | 175,55 |
| 2019/05/16 | CH2205 | Male | Three y/o | Treatment (Wk 1) | Treatment | Feed Day | No | 07:40 | 07:00 - 07:59 | Morning | 37,6 | 91  | 95,2  | 95,2  | 18,75 | 586,98 | 154,13 |
| 2019/05/16 | CH2206 | Male | Three y/o | Treatment (Wk 1) | Treatment | Feed Day | No | 07:40 | 07:00 - 07:59 | Morning | 37,4 | 110 | 376,0 | 376,0 | 18,55 | 600,69 | 202,42 |
| 2019/05/16 | CH2205 | Male | Three y/o | Treatment (Wk 1) | Treatment | Feed Day | No | 07:45 | 07:00 - 07:59 | Morning | 37,5 | 115 | 270,2 | 270,2 | 18,65 | 603,82 | 190,72 |
| 2019/05/16 | CH2206 | Male | Three y/o | Treatment (Wk 1) | Treatment | Feed Day | No | 07:45 | 07:00 - 07:59 | Morning | 37,5 | 125 | 158,0 | 158,0 | 18,65 | 609,60 | 171,84 |
| 2019/05/16 | CH2205 | Male | Three y/o | Treatment (Wk 1) | Treatment | Feed Day | No | 07:50 | 07:00 - 07:59 | Morning | 37,6 |     | 58,2  | 58,2  | 18,75 |        | 137,04 |
| 2019/05/16 | CH2206 | Male | Three y/o | Treatment (Wk 1) | Treatment | Feed Day | No | 07:50 | 07:00 - 07:59 | Morning | 37,5 | 172 | 69,6  | 69,6  | 18,65 | 630,73 | 143,24 |
| 2019/05/16 | CH2205 | Male | Three y/o | Treatment (Wk 1) | Treatment | Feed Day | No | 07:55 | 07:00 - 07:59 | Morning | 37,6 | 90  | 119,4 | 119,4 | 18,75 | 586,16 | 162,03 |



|            |        |      |           |                  |           |          |     |       |               |              |      |     |       |       |       |        |        |
|------------|--------|------|-----------|------------------|-----------|----------|-----|-------|---------------|--------------|------|-----|-------|-------|-------|--------|--------|
| 2019/05/16 | CH2206 | Male | Three y/o | Treatment (Wk 1) | Treatment | Feed Day | No  | 07:55 | 07:00 - 07:59 | Morning      | 37,5 | 113 | 95,2  | 95,2  | 18,65 | 602,58 | 154,13 |
| 2019/05/16 | CH2205 | Male | Three y/o | Treatment (Wk 1) | Treatment | Feed Day | No  | 08:00 | 08:00 - 08:59 | Late Morning | 37,5 | 98  | 45,0  | 45,0  | 18,65 | 592,41 | 128,15 |
| 2019/05/16 | CH2206 | Male | Three y/o | Treatment (Wk 1) | Treatment | Feed Day | No  | 08:00 | 08:00 - 08:59 | Late Morning | 37,5 | 106 | 131,0 | 131,0 | 18,65 | 598,06 | 165,27 |
| 2019/05/16 | CH2205 | Male | Three y/o | Treatment (Wk 1) | Treatment | Feed Day | No  | 08:05 | 08:00 - 08:59 | Late Morning | 37,5 |     | 33,6  | 33,6  | 18,65 |        | 118,09 |
| 2019/05/16 | CH2206 | Male | Three y/o | Treatment (Wk 1) | Treatment | Feed Day | No  | 08:05 | 08:00 - 08:59 | Late Morning | 37,5 | 124 | 114,4 | 114,4 | 18,65 | 609,04 | 160,54 |
| 2019/05/16 | CH2205 | Male | Three y/o | Treatment (Wk 1) | Treatment | Feed Day | No  | 08:10 | 08:00 - 08:59 | Late Morning | 37,4 | 61  | 24,8  | 24,8  | 18,55 | 556,01 | 107,67 |
| 2019/05/16 | CH2206 | Male | Three y/o | Treatment (Wk 1) | Treatment | Feed Day | No  | 08:10 | 08:00 - 08:59 | Late Morning | 37,5 | 109 | 80,0  | 80,0  | 18,65 | 600,04 | 148,08 |
| 2019/05/16 | CH2205 | Male | Three y/o | Treatment (Wk 1) | Treatment | Feed Day | No  | 08:15 | 08:00 - 08:59 | Late Morning | 37,4 |     | 20,0  | 20,0  | 18,55 |        | 100,31 |
| 2019/05/16 | CH2206 | Male | Three y/o | Treatment (Wk 1) | Treatment | Feed Day | No  | 08:15 | 08:00 - 08:59 | Late Morning | 37,7 | 108 | 87,0  | 87,0  | 18,85 | 599,39 | 150,99 |
| 2019/05/16 | CH2205 | Male | Three y/o | Treatment (Wk 1) | Treatment | Feed Day | No  | 08:20 | 08:00 - 08:59 | Late Morning | 37,3 | 55  | 16,2  | 16,2  | 18,46 | 547,52 | 93,13  |
| 2019/05/16 | CH2206 | Male | Three y/o | Treatment (Wk 1) | Treatment | Feed Day | No  | 08:20 | 08:00 - 08:59 | Late Morning | 37,7 | 94  | 106,4 | 106,4 | 18,85 | 589,37 | 158,01 |
| 2019/05/16 | CH2205 | Male | Three y/o | Treatment (Wk 1) | Treatment | Feed Day | No  | 08:25 | 08:00 - 08:59 | Late Morning | 37,2 |     | 16,6  | 16,6  | 18,36 |        | 93,96  |
| 2019/05/16 | CH2206 | Male | Three y/o | Treatment (Wk 1) | Treatment | Feed Day | No  | 08:25 | 08:00 - 08:59 | Late Morning | 37,7 | 113 | 126,6 | 126,6 | 18,85 | 602,58 | 164,08 |
| 2019/05/16 | CH2205 | Male | Three y/o | Treatment (Wk 1) | Treatment | Feed Day | No  | 08:30 | 08:00 - 08:59 | Late Morning | 37,2 | 53  | 84,4  | 84,4  | 18,36 | 544,43 | 149,94 |
| 2019/05/16 | CH2206 | Male | Three y/o | Treatment (Wk 1) | Treatment | Feed Day | No  | 08:30 | 08:00 - 08:59 | Late Morning | 37,6 | 141 | 33,6  | 33,6  | 18,75 | 617,75 | 118,09 |
| 2019/05/16 | CH2205 | Male | Three y/o | Treatment (Wk 1) | Treatment | Feed Day | No  | 08:35 | 08:00 - 08:59 | Late Morning | 37,3 |     | 128,8 | 128,8 | 18,46 |        | 164,68 |
| 2019/05/16 | CH2206 | Male | Three y/o | Treatment (Wk 1) | Treatment | Feed Day | No  | 08:35 | 08:00 - 08:59 | Late Morning | 37,7 | 64  | 275,4 | 275,4 | 18,85 | 559,88 | 191,40 |
| 2019/05/16 | CH2205 | Male | Three y/o | Treatment (Wk 1) | Treatment | Feed Day | No  | 08:40 | 08:00 - 08:59 | Late Morning | 37,3 | 97  | 109,2 | 109,2 | 18,46 | 591,66 | 158,91 |
| 2019/05/16 | CH2206 | Male | Three y/o | Treatment (Wk 1) | Treatment | Feed Day | No  | 08:40 | 08:00 - 08:59 | Late Morning | 37,9 |     | 157,8 | 157,8 | 19,05 |        | 171,79 |
| 2019/05/16 | CH2205 | Male | Three y/o | Treatment (Wk 1) | Treatment | Feed Day | No  | 08:45 | 08:00 - 08:59 | Late Morning | 37,3 | 88  | 43,2  | 43,2  | 18,46 | 584,49 | 126,74 |
| 2019/05/16 | CH2206 | Male | Three y/o | Treatment (Wk 1) | Treatment | Feed Day | No  | 08:45 | 08:00 - 08:59 | Late Morning | 37,9 | 105 | 152,0 | 152,0 | 19,05 | 597,38 | 170,48 |
| 2019/05/16 | CH2205 | Male | Three y/o | Treatment (Wk 1) | Treatment | Feed Day | No  | 08:50 | 08:00 - 08:59 | Late Morning | 37,3 | 83  | 59,0  | 59,0  | 18,46 | 580,11 | 137,51 |
| 2019/05/16 | CH2206 | Male | Three y/o | Treatment (Wk 1) | Treatment | Feed Day | No  | 08:50 | 08:00 - 08:59 | Late Morning | 37,8 |     | 111,6 | 111,6 | 18,95 |        | 159,67 |
| 2019/05/16 | CH2205 | Male | Three y/o | Treatment (Wk 1) | Treatment | Feed Day | No  | 08:55 | 08:00 - 08:59 | Late Morning | 37,4 |     | 18,8  | 18,8  | 18,55 |        | 98,20  |
| 2019/05/16 | CH2206 | Male | Three y/o | Treatment (Wk 1) | Treatment | Feed Day | No  | 08:55 | 08:00 - 08:59 | Late Morning | 37,8 | 141 | 101,0 | 101,0 | 18,95 | 617,75 | 156,19 |
| 2019/05/16 | CH2205 | Male | Three y/o | Treatment (Wk 1) | Treatment | Feed Day | No  | 09:00 | 09:00 - 09:59 | Late Morning | 37,5 | 60  | 87,4  | 87,4  | 18,65 | 554,67 | 151,15 |
| 2019/05/16 | CH2206 | Male | Three y/o | Treatment (Wk 1) | Treatment | Feed Day | No  | 09:00 | 09:00 - 09:59 | Late Morning | 37,8 | 124 | 145,8 | 145,8 | 18,95 | 609,04 | 169,02 |
| 2019/05/16 | CH2205 | Male | Three y/o | Treatment (Wk 1) | Treatment | Feed Day | No  | 09:05 | 09:00 - 09:59 | Late Morning | 37,6 | 73  | 40,8  | 40,8  | 18,75 | 570,27 | 124,77 |
| 2019/05/16 | CH2206 | Male | Three y/o | Treatment (Wk 1) | Treatment | Feed Day | No  | 09:05 | 09:00 - 09:59 | Late Morning | 37,7 | 119 | 97,4  | 97,4  | 18,85 | 606,20 | 154,93 |
| 2019/05/16 | CH2205 | Male | Three y/o | Treatment (Wk 1) | Treatment | Feed Day | No  | 09:10 | 09:00 - 09:59 | Late Morning | 37,6 | 51  | 13,6  | 13,6  | 18,75 | 541,20 | 87,18  |
| 2019/05/16 | CH2206 | Male | Three y/o | Treatment (Wk 1) | Treatment | Feed Day | No  | 09:10 | 09:00 - 09:59 | Late Morning | 37,7 | 96  | 18,2  | 18,2  | 18,85 | 590,91 | 97,10  |
| 2019/05/16 | CH2205 | Male | Three y/o | Treatment (Wk 1) | Treatment | Feed Day | No  | 09:15 | 09:00 - 09:59 | Late Morning | 37,6 | 58  | 54,0  | 54,0  | 18,75 | 551,90 | 134,45 |
| 2019/05/16 | CH2206 | Male | Three y/o | Treatment (Wk 1) | Treatment | Feed Day | No  | 09:15 | 09:00 - 09:59 | Late Morning | 37,7 | 90  | 14,0  | 14,0  | 18,85 | 586,16 | 88,17  |
| 2019/05/16 | CH2205 | Male | Three y/o | Treatment (Wk 1) | Treatment | Feed Day | No  | 09:20 | 09:00 - 09:59 | Late Morning | 37,5 | 68  | 15,6  | 15,6  | 18,65 | 564,71 | 91,85  |
| 2019/05/16 | CH2206 | Male | Three y/o | Treatment (Wk 1) | Treatment | Feed Day | No  | 09:20 | 09:00 - 09:59 | Late Morning | 37,7 | 67  | 17,0  | 17,0  | 18,85 | 563,53 | 94,77  |
| 2019/05/16 | CH2205 | Male | Three y/o | Treatment (Wk 1) | Treatment | Feed Day | No  | 09:25 | 09:00 - 09:59 | Late Morning | 37,4 | 117 | 19,6  | 19,6  | 18,55 | 605,02 | 99,63  |
| 2019/05/16 | CH2206 | Male | Three y/o | Treatment (Wk 1) | Treatment | Feed Day | No  | 09:25 | 09:00 - 09:59 | Late Morning | 37,7 | 47  | 14,6  | 14,6  | 18,85 | 534,23 | 89,59  |
| 2019/05/16 | CH2205 | Male | Three y/o | Treatment (Wk 1) | Treatment | Feed Day | No  | 09:30 | 09:00 - 09:59 | Late Morning | 37,4 | 53  | 13,0  | 13,0  | 18,55 | 544,43 | 85,65  |
| 2019/05/16 | CH2206 | Male | Three y/o | Treatment (Wk 1) | Treatment | Feed Day | No  | 09:30 | 09:00 - 09:59 | Late Morning | 37,7 | 54  | 22,8  | 22,8  | 18,85 | 545,99 | 104,79 |
| 2019/05/16 | CH2205 | Male | Three y/o | Treatment (Wk 1) | Treatment | Feed Day | No  | 09:35 | 09:00 - 09:59 | Late Morning | 37,4 | 44  | 20,4  | 20,4  | 18,55 | 528,51 | 100,99 |
| 2019/05/16 | CH2206 | Male | Three y/o | Treatment (Wk 1) | Treatment | Feed Day | No  | 09:35 | 09:00 - 09:59 | Late Morning | 37,5 | 54  | 26,8  | 26,8  | 18,65 | 545,99 | 110,33 |
| 2019/05/16 | CH2205 | Male | Three y/o | Treatment (Wk 1) | Treatment | Feed Day | No  | 09:40 | 09:00 - 09:59 | Late Morning | 37,4 | 86  | 75,2  | 75,2  | 18,55 | 582,77 | 145,93 |
| 2019/05/16 | CH2206 | Male | Three y/o | Treatment (Wk 1) | Treatment | Feed Day | No  | 09:40 | 09:00 - 09:59 | Late Morning | 37,5 |     | 32,4  | 32,4  | 18,65 |        | 116,84 |
| 2019/05/16 | CH2205 | Male | Three y/o | Treatment (Wk 1) | Treatment | Feed Day | No  | 09:45 | 09:00 - 09:59 | Late Morning | 37,4 | 56  | 149,8 | 149,8 | 18,55 | 549,01 | 169,97 |
| 2019/05/16 | CH2206 | Male | Three y/o | Treatment (Wk 1) | Treatment | Feed Day | No  | 09:45 | 09:00 - 09:59 | Late Morning | 37,5 | 113 | 106,0 | 106,0 | 18,65 | 602,58 | 157,88 |
| 2019/05/16 | CH2205 | Male | Three y/o | Treatment (Wk 1) | Treatment | Feed Day | No  | 09:50 | 09:00 - 09:59 | Late Morning | 37,4 |     | 31,6  | 31,6  | 18,55 |        | 115,98 |
| 2019/05/16 | CH2206 | Male | Three y/o | Treatment (Wk 1) | Treatment | Feed Day | No  | 09:50 | 09:00 - 09:59 | Late Morning | 37,5 | 117 | 52,2  | 52,2  | 18,65 | 605,02 | 133,27 |
| 2019/05/16 | CH2205 | Male | Three y/o | Treatment (Wk 1) | Treatment | Feed Day | No  | 09:55 | 09:00 - 09:59 | Late Morning | 37,3 | 49  | 9,0   | 9,0   | 18,46 | 537,80 | 73,19  |
| 2019/05/16 | CH2206 | Male | Three y/o | Treatment (Wk 1) | Treatment | Feed Day | No  | 09:55 | 09:00 - 09:59 | Late Morning | 37,5 | 77  | 38,4  | 38,4  | 18,65 | 574,39 | 122,68 |
| 2019/05/16 | CH2205 | Male | Three y/o | Treatment (Wk 1) | Treatment | Feed Day | No  | 10:00 | 10:00 - 10:59 | Late Morning | 37,4 | 47  | 9,4   | 9,4   | 18,55 | 534,23 | 74,66  |
| 2019/05/16 | CH2206 | Male | Three y/o | Treatment (Wk 1) | Treatment | Feed Day | No  | 10:00 | 10:00 - 10:59 | Late Morning | 37,5 | 50  | 28,8  | 28,8  | 18,65 | 539,52 | 112,79 |
| 2019/05/16 | CH2205 | Male | Three y/o | Treatment (Wk 1) | Treatment | Feed Day | No  | 10:05 | 10:00 - 10:59 | Late Morning | 37,4 | 48  | 8,2   | 8,2   | 18,55 | 536,04 | 70,05  |
| 2019/05/16 | CH2206 | Male | Three y/o | Treatment (Wk 1) | Treatment | Feed Day | No  | 10:05 | 10:00 - 10:59 | Late Morning | 37,5 | 56  | 25,8  | 25,8  | 18,65 | 549,01 | 109,02 |
| 2019/05/16 | CH2205 | Male | Three y/o | Treatment (Wk 1) | Treatment | Feed Day | No  | 10:10 | 10:00 - 10:59 | Late Morning | 37,4 | 43  | 7,6   | 7,6   | 18,55 | 526,50 | 67,49  |
| 2019/05/16 | CH2206 | Male | Three y/o | Treatment (Wk 1) | Treatment | Feed Day | No  | 10:10 | 10:00 - 10:59 | Late Morning | 37,5 | 44  | 28,6  | 28,6  | 18,65 | 528,51 | 112,56 |
| 2019/05/16 | CH2205 | Male | Three y/o | Treatment (Wk 1) | Treatment | Feed Day | No  | 10:15 | 10:00 - 10:59 | Late Morning | 37,4 | 53  | 8,8   | 8,8   | 18,55 | 544,43 | 72,43  |
| 2019/05/16 | CH2206 | Male | Three y/o | Treatment (Wk 1) | Treatment | Feed Day | No  | 10:15 | 10:00 - 10:59 | Late Morning | 37,4 | 59  | 24,6  | 24,6  | 18,55 | 553,30 | 107,39 |
| 2019/05/16 | CH2205 | Male | Three y/o | Treatment (Wk 1) | Treatment | Feed Day | No  | 10:20 | 10:00 - 10:59 | Late Morning | 37,4 | 48  | 7,0   | 7,0   | 18,55 | 536,04 | 64,72  |
| 2019/05/16 | CH2206 | Male | Three y/o | Treatment (Wk 1) | Treatment | Feed Day | No  | 10:20 | 10:00 - 10:59 | Late Morning | 37,4 | 51  | 22,6  | 22,6  | 18,55 | 541,20 | 104,49 |
| 2019/05/16 | CH2205 | Male | Three y/o | Treatment (Wk 1) | Treatment | Feed Day | No  | 10:25 | 10:00 - 10:59 | Late Morning | 37,4 | 38  | 8,4   | 8,4   | 18,55 | 515,48 | 70,86  |
| 2019/05/16 | CH2206 | Male | Three y/o | Treatment (Wk 1) | Treatment | Feed Day | No  | 10:25 | 10:00 - 10:59 | Late Morning | 37,4 | 64  | 16,2  | 16,2  | 18,55 | 559,88 | 93,13  |
| 2019/05/16 | CH2205 | Male | Three y/o | Treatment (Wk 1) | Treatment | Feed Day | Yes | 10:30 | 10:00 - 10:59 | Late Morning | 37,4 | 42  | 8,2   | 8,2   | 18,55 | 524,42 | 70,05  |
| 2019/05/16 | CH2206 | Male | Three y/o | Treatment (Wk 1) | Treatment | Feed Day | Yes | 10:30 | 10:00 - 10:59 | Late Morning | 37,4 | 48  | 29,8  | 29,8  | 18,55 | 536,04 | 113,97 |
| 2019/05/16 | CH2205 | Male | Three y/o | Treatment (Wk 1) | Treatment | Feed Day | Yes | 10:35 | 10:00 - 10:59 | Late Morning | 37,3 | 46  | 5,6   | 5,6   | 18,46 | 532,38 | 57,21  |
| 2019/05/16 | CH2206 | Male | Three y/o | Treatment (Wk 1) | Treatment | Feed Day | Yes | 10:35 | 10:00 - 10:59 | Late Morning | 37,4 | 44  | 57,8  | 57,8  | 18,55 | 528,51 | 136,80 |
| 2019/05/16 | CH2205 | Male | Three y/o | Treatment (Wk 1) | Treatment | Feed Day | Yes | 10:40 | 10:00 - 10:59 | Late Morning | 37,3 | 44  | 7,4   | 7,4   | 18,46 | 528,51 | 66,59  |
| 2019/05/16 | CH2206 | Male | Three y/o | Treatment (Wk 1) | Treatment | Feed Day | Yes | 10:40 | 10:00 - 10:59 | Late Morning | 37,4 | 65  | 47,4  | 47,4  | 18,55 | 561,12 | 129,94 |
| 2019/05/16 | CH2205 | Male | Three y/o | Treatment (Wk 1) | Treatment | Feed Day | Yes | 10:45 | 10:00 - 10:59 | Late Morning | 37,3 | 41  | 6,4   | 6,4   | 18,46 | 522,29 | 61,70  |
| 2019/05/16 | CH2206 | Male | Three y/o | Treatment (Wk 1) | Treatment | Feed Day | Yes | 10:45 | 10:00 - 10:59 | Late Morning | 37,4 | 42  | 47,2  | 47,2  | 18,55 | 524,42 | 129,80 |
| 2019/05/16 | CH2205 | Male | Three y/o | Treatment (Wk 1) | Treatment | Feed Day | Yes | 10:50 | 10:00 - 10:59 | Late Morning | 37,3 | 40  | 5,6   | 5,6   | 18,46 | 520,09 | 57,21  |



|            |        |      |           |                  |           |          |     |       |               |              |      |     |       |       |       |        |        |
|------------|--------|------|-----------|------------------|-----------|----------|-----|-------|---------------|--------------|------|-----|-------|-------|-------|--------|--------|
| 2019/05/16 | CH2206 | Male | Three y/o | Treatment (Wk 1) | Treatment | Feed Day | Yes | 10:50 | 10:00 - 10:59 | Late Morning | 37,4 | 44  | 47,4  | 47,4  | 18,55 | 528,51 | 129,94 |
| 2019/05/16 | CH2205 | Male | Three y/o | Treatment (Wk 1) | Treatment | Feed Day | Yes | 10:55 | 10:00 - 10:59 | Late Morning | 37,2 | 39  | 7,0   | 7,0   | 18,36 | 517,82 | 64,72  |
| 2019/05/16 | CH2206 | Male | Three y/o | Treatment (Wk 1) | Treatment | Feed Day | Yes | 10:55 | 10:00 - 10:59 | Late Morning | 37,4 | 44  | 26,8  | 26,8  | 18,55 | 528,51 | 110,33 |
| 2019/05/16 | CH2205 | Male | Three y/o | Treatment (Wk 1) | Treatment | Feed Day | Yes | 11:00 | 11:00 - 11:59 | Late Morning | 37,2 | 61  | 9,0   | 9,0   | 18,36 | 556,01 | 73,19  |
| 2019/05/16 | CH2206 | Male | Three y/o | Treatment (Wk 1) | Treatment | Feed Day | Yes | 11:00 | 11:00 - 11:59 | Late Morning | 37,4 | 42  | 28,2  | 28,2  | 18,55 | 524,42 | 112,07 |
| 2019/05/16 | CH2205 | Male | Three y/o | Treatment (Wk 1) | Treatment | Feed Day | Yes | 11:05 | 11:00 - 11:59 | Late Morning | 37,2 | 96  | 17,6  | 17,6  | 18,36 | 590,91 | 95,95  |
| 2019/05/16 | CH2206 | Male | Three y/o | Treatment (Wk 1) | Treatment | Feed Day | Yes | 11:05 | 11:00 - 11:59 | Late Morning | 37,3 | 43  | 27,2  | 27,2  | 18,46 | 526,50 | 110,83 |
| 2019/05/16 | CH2205 | Male | Three y/o | Treatment (Wk 1) | Treatment | Feed Day | Yes | 11:10 | 11:00 - 11:59 | Late Morning | 37,2 | 59  | 20,8  | 20,8  | 18,36 | 553,30 | 101,65 |
| 2019/05/16 | CH2206 | Male | Three y/o | Treatment (Wk 1) | Treatment | Feed Day | Yes | 11:10 | 11:00 - 11:59 | Late Morning | 37,3 | 67  | 55,4  | 55,4  | 18,46 | 563,53 | 135,33 |
| 2019/05/16 | CH2205 | Male | Three y/o | Treatment (Wk 1) | Treatment | Feed Day | Yes | 11:15 | 11:00 - 11:59 | Late Morning | 37,3 | 58  | 29,4  | 29,4  | 18,46 | 551,90 | 113,50 |
| 2019/05/16 | CH2206 | Male | Three y/o | Treatment (Wk 1) | Treatment | Feed Day | Yes | 11:15 | 11:00 - 11:59 | Late Morning | 37,3 | 104 | 36,8  | 36,8  | 18,46 | 596,69 | 121,22 |
| 2019/05/16 | CH2205 | Male | Three y/o | Treatment (Wk 1) | Treatment | Feed Day | Yes | 11:20 | 11:00 - 11:59 | Late Morning | 37,3 | 82  | 16,8  | 16,8  | 18,46 | 579,19 | 94,37  |
| 2019/05/16 | CH2206 | Male | Three y/o | Treatment (Wk 1) | Treatment | Feed Day | Yes | 11:20 | 11:00 - 11:59 | Late Morning | 37,3 | 78  | 46,0  | 46,0  | 18,46 | 575,38 | 128,91 |
| 2019/05/16 | CH2205 | Male | Three y/o | Treatment (Wk 1) | Treatment | Feed Day | Yes | 11:25 | 11:00 - 11:59 | Late Morning | 37,2 | 152 | 73,0  | 73,0  | 18,36 | 622,73 | 144,89 |
| 2019/05/16 | CH2206 | Male | Three y/o | Treatment (Wk 1) | Treatment | Feed Day | Yes | 11:25 | 11:00 - 11:59 | Late Morning | 37,4 | 51  | 105,2 | 105,2 | 18,55 | 541,20 | 157,61 |
| 2019/05/16 | CH2205 | Male | Three y/o | Treatment (Wk 1) | Treatment | Feed Day | No  | 11:30 | 11:00 - 11:59 | Late Morning | 37,2 | 99  | 20,6  | 20,6  | 18,36 | 593,14 | 101,32 |
| 2019/05/16 | CH2206 | Male | Three y/o | Treatment (Wk 1) | Treatment | Feed Day | No  | 11:30 | 11:00 - 11:59 | Late Morning | 37,3 | 109 | 187,2 | 187,2 | 18,46 | 600,04 | 177,79 |
| 2019/05/16 | CH2205 | Male | Three y/o | Treatment (Wk 1) | Treatment | Feed Day | No  | 11:35 | 11:00 - 11:59 | Late Morning | 37,2 | 100 | 132,4 | 132,4 | 18,36 | 593,87 | 165,65 |
| 2019/05/16 | CH2206 | Male | Three y/o | Treatment (Wk 1) | Treatment | Feed Day | No  | 11:35 | 11:00 - 11:59 | Late Morning | 37,4 |     | 35,6  | 35,6  | 18,55 |        | 120,08 |
| 2019/05/16 | CH2205 | Male | Three y/o | Treatment (Wk 1) | Treatment | Feed Day | No  | 11:40 | 11:00 - 11:59 | Late Morning | 37,5 |     | 68,4  | 68,4  | 18,65 |        | 142,64 |
| 2019/05/16 | CH2206 | Male | Three y/o | Treatment (Wk 1) | Treatment | Feed Day | No  | 11:40 | 11:00 - 11:59 | Late Morning | 37,4 |     | 26,4  | 26,4  | 18,55 |        | 109,81 |
| 2019/05/16 | CH2205 | Male | Three y/o | Treatment (Wk 1) | Treatment | Feed Day | No  | 11:45 | 11:00 - 11:59 | Late Morning | 37,4 |     | 9,4   | 9,4   | 18,55 |        | 74,66  |
| 2019/05/16 | CH2206 | Male | Three y/o | Treatment (Wk 1) | Treatment | Feed Day | No  | 11:45 | 11:00 - 11:59 | Late Morning | 37,3 | 92  | 12,4  | 12,4  | 18,46 | 587,78 | 84,04  |
| 2019/05/16 | CH2205 | Male | Three y/o | Treatment (Wk 1) | Treatment | Feed Day | No  | 11:50 | 11:00 - 11:59 | Late Morning | 37,3 |     | 211,6 | 211,6 | 18,46 |        | 182,10 |
| 2019/05/16 | CH2206 | Male | Three y/o | Treatment (Wk 1) | Treatment | Feed Day | No  | 11:50 | 11:00 - 11:59 | Late Morning | 37,3 |     | 42,6  | 42,6  | 18,46 |        | 126,26 |
| 2019/05/16 | CH2205 | Male | Three y/o | Treatment (Wk 1) | Treatment | Feed Day | No  | 11:55 | 11:00 - 11:59 | Late Morning | 37,4 | 152 | 257,4 | 257,4 | 18,55 | 622,73 | 189,01 |
| 2019/05/16 | CH2206 | Male | Three y/o | Treatment (Wk 1) | Treatment | Feed Day | No  | 11:55 | 11:00 - 11:59 | Late Morning | 37,2 | 177 | 12,6  | 12,6  | 18,36 | 632,55 | 84,59  |
| 2019/05/16 | CH2205 | Male | Three y/o | Treatment (Wk 1) | Treatment | Feed Day | No  | 12:00 | 12:00 - 12:59 | Afternoon    | 37,5 | 111 | 162,4 | 162,4 | 18,65 | 601,33 | 172,80 |
| 2019/05/16 | CH2206 | Male | Three y/o | Treatment (Wk 1) | Treatment | Feed Day | No  | 12:00 | 12:00 - 12:59 | Afternoon    | 37,3 | 90  | 12,0  | 12,0  | 18,46 | 586,16 | 82,93  |
| 2019/05/16 | CH2205 | Male | Three y/o | Treatment (Wk 1) | Treatment | Feed Day | No  | 12:05 | 12:00 - 12:59 | Afternoon    | 37,6 | 104 | 87,8  | 87,8  | 18,75 | 596,69 | 151,31 |
| 2019/05/16 | CH2206 | Male | Three y/o | Treatment (Wk 1) | Treatment | Feed Day | No  | 12:05 | 12:00 - 12:59 | Afternoon    | 37,3 | 103 | 82,4  | 82,4  | 18,46 | 596,00 | 149,10 |
| 2019/05/16 | CH2205 | Male | Three y/o | Treatment (Wk 1) | Treatment | Feed Day | No  | 12:10 | 12:00 - 12:59 | Afternoon    | 37,7 | 85  | 134,0 | 134,0 | 18,85 | 581,90 | 166,07 |
| 2019/05/16 | CH2206 | Male | Three y/o | Treatment (Wk 1) | Treatment | Feed Day | No  | 12:10 | 12:00 - 12:59 | Afternoon    | 37,4 | 87  | 10,0  | 10,0  | 18,55 | 583,64 | 76,76  |
| 2019/05/16 | CH2205 | Male | Three y/o | Treatment (Wk 1) | Treatment | Feed Day | No  | 12:15 | 12:00 - 12:59 | Afternoon    | 37,9 | 94  | 129,6 | 129,6 | 19,05 | 589,37 | 164,90 |
| 2019/05/16 | CH2206 | Male | Three y/o | Treatment (Wk 1) | Treatment | Feed Day | No  | 12:15 | 12:00 - 12:59 | Afternoon    | 37,4 | 88  | 15,8  | 15,8  | 18,55 | 584,49 | 92,28  |
| 2019/05/16 | CH2205 | Male | Three y/o | Treatment (Wk 1) | Treatment | Feed Day | No  | 12:20 | 12:00 - 12:59 | Afternoon    | 37,9 | 114 | 52,0  | 52,0  | 19,05 | 603,20 | 133,14 |
| 2019/05/16 | CH2206 | Male | Three y/o | Treatment (Wk 1) | Treatment | Feed Day | No  | 12:20 | 12:00 - 12:59 | Afternoon    | 37,3 | 82  | 27,0  | 27,0  | 18,46 | 579,19 | 110,58 |
| 2019/05/16 | CH2205 | Male | Three y/o | Treatment (Wk 1) | Treatment | Feed Day | No  | 12:25 | 12:00 - 12:59 | Afternoon    | 37,7 | 89  | 71,2  | 71,2  | 18,85 | 585,33 | 144,03 |
| 2019/05/16 | CH2206 | Male | Three y/o | Treatment (Wk 1) | Treatment | Feed Day | No  | 12:25 | 12:00 - 12:59 | Afternoon    | 37,4 | 182 | 65,0  | 65,0  | 18,55 | 634,31 | 140,87 |
| 2019/05/16 | CH2205 | Male | Three y/o | Treatment (Wk 1) | Treatment | Feed Day | No  | 12:30 | 12:00 - 12:59 | Afternoon    | 37,7 | 69  | 24,8  | 24,8  | 18,85 | 565,86 | 107,67 |
| 2019/05/16 | CH2206 | Male | Three y/o | Treatment (Wk 1) | Treatment | Feed Day | No  | 12:30 | 12:00 - 12:59 | Afternoon    | 37,5 | 95  | 37,4  | 37,4  | 18,65 | 590,14 | 121,77 |
| 2019/05/16 | CH2205 | Male | Three y/o | Treatment (Wk 1) | Treatment | Feed Day | No  | 12:35 | 12:00 - 12:59 | Afternoon    | 37,7 | 61  | 26,8  | 26,8  | 18,85 | 556,01 | 110,33 |
| 2019/05/16 | CH2206 | Male | Three y/o | Treatment (Wk 1) | Treatment | Feed Day | No  | 12:35 | 12:00 - 12:59 | Afternoon    | 37,5 | 69  | 35,6  | 35,6  | 18,65 | 565,86 | 120,08 |
| 2019/05/16 | CH2205 | Male | Three y/o | Treatment (Wk 1) | Treatment | Feed Day | No  | 12:40 | 12:00 - 12:59 | Afternoon    | 37,7 | 67  | 88,6  | 88,6  | 18,85 | 563,53 | 151,63 |
| 2019/05/16 | CH2206 | Male | Three y/o | Treatment (Wk 1) | Treatment | Feed Day | No  | 12:40 | 12:00 - 12:59 | Afternoon    | 37,5 | 84  | 36,2  | 36,2  | 18,65 | 581,01 | 120,65 |
| 2019/05/16 | CH2205 | Male | Three y/o | Treatment (Wk 1) | Treatment | Feed Day | No  | 12:45 | 12:00 - 12:59 | Afternoon    | 37,7 | 60  | 4,6   | 4,6   | 18,85 | 554,67 | 50,61  |
| 2019/05/16 | CH2206 | Male | Three y/o | Treatment (Wk 1) | Treatment | Feed Day | No  | 12:45 | 12:00 - 12:59 | Afternoon    | 37,5 | 79  | 52,0  | 52,0  | 18,65 | 576,36 | 133,14 |
| 2019/05/16 | CH2205 | Male | Three y/o | Treatment (Wk 1) | Treatment | Feed Day | No  | 12:50 | 12:00 - 12:59 | Afternoon    | 37,7 | 63  | 7,0   | 7,0   | 18,85 | 558,62 | 64,72  |
| 2019/05/16 | CH2206 | Male | Three y/o | Treatment (Wk 1) | Treatment | Feed Day | No  | 12:50 | 12:00 - 12:59 | Afternoon    | 37,5 | 90  | 40,2  | 40,2  | 18,65 | 586,16 | 124,26 |
| 2019/05/16 | CH2205 | Male | Three y/o | Treatment (Wk 1) | Treatment | Feed Day | No  | 12:55 | 12:00 - 12:59 | Afternoon    | 37,7 | 52  | 4,4   | 4,4   | 18,85 | 542,83 | 49,12  |
| 2019/05/16 | CH2206 | Male | Three y/o | Treatment (Wk 1) | Treatment | Feed Day | No  | 12:55 | 12:00 - 12:59 | Afternoon    | 37,7 | 62  | 36,0  | 36,0  | 18,85 | 557,33 | 120,46 |
| 2019/05/16 | CH2205 | Male | Three y/o | Treatment (Wk 1) | Treatment | Feed Day | No  | 13:00 | 13:00 - 13:59 | Afternoon    | 37,7 | 91  | 15,4  | 15,4  | 18,85 | 586,98 | 91,41  |
| 2019/05/16 | CH2206 | Male | Three y/o | Treatment (Wk 1) | Treatment | Feed Day | No  | 13:00 | 13:00 - 13:59 | Afternoon    | 37,7 |     | 78,0  | 78,0  | 18,85 |        | 147,20 |
| 2019/05/16 | CH2205 | Male | Three y/o | Treatment (Wk 1) | Treatment | Feed Day | No  | 13:05 | 13:00 - 13:59 | Afternoon    | 37,7 | 64  | 12,8  | 12,8  | 18,85 | 559,88 | 85,12  |
| 2019/05/16 | CH2206 | Male | Three y/o | Treatment (Wk 1) | Treatment | Feed Day | No  | 13:05 | 13:00 - 13:59 | Afternoon    | 37,7 | 65  | 12,2  | 12,2  | 18,85 | 561,12 | 83,49  |
| 2019/05/16 | CH2205 | Male | Three y/o | Treatment (Wk 1) | Treatment | Feed Day | No  | 13:10 | 13:00 - 13:59 | Afternoon    | 37,8 | 70  | 13,6  | 13,6  | 18,95 | 566,99 | 87,18  |
| 2019/05/16 | CH2206 | Male | Three y/o | Treatment (Wk 1) | Treatment | Feed Day | No  | 13:10 | 13:00 - 13:59 | Afternoon    | 37,8 | 89  | 10,6  | 10,6  | 18,95 | 585,33 | 78,73  |
| 2019/05/16 | CH2205 | Male | Three y/o | Treatment (Wk 1) | Treatment | Feed Day | No  | 13:15 | 13:00 - 13:59 | Afternoon    | 37,8 | 66  | 13,8  | 13,8  | 18,95 | 562,34 | 87,68  |
| 2019/05/16 | CH2206 | Male | Three y/o | Treatment (Wk 1) | Treatment | Feed Day | No  | 13:15 | 13:00 - 13:59 | Afternoon    | 37,8 | 87  | 14,4  | 14,4  | 18,95 | 583,64 | 89,12  |
| 2019/05/16 | CH2205 | Male | Three y/o | Treatment (Wk 1) | Treatment | Feed Day | No  | 13:20 | 13:00 - 13:59 | Afternoon    | 37,8 | 55  | 15,6  | 15,6  | 18,95 | 547,52 | 91,85  |
| 2019/05/16 | CH2206 | Male | Three y/o | Treatment (Wk 1) | Treatment | Feed Day | No  | 13:20 | 13:00 - 13:59 | Afternoon    | 37,8 | 87  | 11,2  | 11,2  | 18,95 | 583,64 | 80,59  |
| 2019/05/16 | CH2205 | Male | Three y/o | Treatment (Wk 1) | Treatment | Feed Day | No  | 13:25 | 13:00 - 13:59 | Afternoon    | 37,7 |     | 16,6  | 16,6  | 18,85 |        | 93,96  |
| 2019/05/16 | CH2206 | Male | Three y/o | Treatment (Wk 1) | Treatment | Feed Day | No  | 13:25 | 13:00 - 13:59 | Afternoon    | 37,8 | 78  | 15,8  | 15,8  | 18,95 | 575,38 | 92,28  |
| 2019/05/16 | CH2205 | Male | Three y/o | Treatment (Wk 1) | Treatment | Feed Day | No  | 13:30 | 13:00 - 13:59 | Afternoon    | 37,7 | 78  | 16,8  | 16,8  | 18,85 | 575,38 | 94,37  |
| 2019/05/16 | CH2206 | Male | Three y/o | Treatment (Wk 1) | Treatment | Feed Day | No  | 13:30 | 13:00 - 13:59 | Afternoon    | 37,8 | 78  | 11,0  | 11,0  | 18,95 | 575,38 | 79,98  |
| 2019/05/16 | CH2205 | Male | Three y/o | Treatment (Wk 1) | Treatment | Feed Day | No  | 13:35 | 13:00 - 13:59 | Afternoon    | 37,7 | 60  | 20,2  | 20,2  | 18,85 | 554,67 | 100,65 |
| 2019/05/16 | CH2206 | Male | Three y/o | Treatment (Wk 1) | Treatment | Feed Day | No  | 13:35 | 13:00 - 13:59 | Afternoon    | 37,8 | 76  | 13,2  | 13,2  | 18,95 | 573,39 | 86,17  |
| 2019/05/16 | CH2205 | Male | Three y/o | Treatment (Wk 1) | Treatment | Feed Day | No  | 13:40 | 13:00 - 13:59 | Afternoon    | 37,7 | 57  | 15,8  | 15,8  | 18,85 | 550,47 | 92,28  |
| 2019/05/16 | CH2206 | Male | Three y/o | Treatment (Wk 1) | Treatment | Feed Day | No  | 13:40 | 13:00 - 13:59 | Afternoon    | 37,8 | 78  | 16,8  | 16,8  | 18,95 | 575,38 | 94,37  |
| 2019/05/16 | CH2205 | Male | Three y/o | Treatment (Wk 1) | Treatment | Feed Day | No  | 13:45 | 13:00 - 13:59 | Afternoon    | 37,7 |     | 20,8  | 20,8  | 18,85 |        | 101,65 |



|            |        |      |           |                  |           |          |    |       |               |           |      |     |       |       |       |        |        |
|------------|--------|------|-----------|------------------|-----------|----------|----|-------|---------------|-----------|------|-----|-------|-------|-------|--------|--------|
| 2019/05/16 | CH2206 | Male | Three y/o | Treatment (Wk 1) | Treatment | Feed Day | No | 13:45 | 13:00 - 13:59 | Afternoon | 37,8 | 94  | 23,2  | 23,2  | 18,95 | 589,37 | 105,39 |
| 2019/05/16 | CH2205 | Male | Three y/o | Treatment (Wk 1) | Treatment | Feed Day | No | 13:50 | 13:00 - 13:59 | Afternoon | 37,7 | 89  | 27,2  | 27,2  | 18,85 | 585,33 | 110,83 |
| 2019/05/16 | CH2206 | Male | Three y/o | Treatment (Wk 1) | Treatment | Feed Day | No | 13:50 | 13:00 - 13:59 | Afternoon | 37,8 | 90  | 35,6  | 35,6  | 18,95 | 586,16 | 120,08 |
| 2019/05/16 | CH2205 | Male | Three y/o | Treatment (Wk 1) | Treatment | Feed Day | No | 13:55 | 13:00 - 13:59 | Afternoon | 37,7 | 61  | 27,2  | 27,2  | 18,85 | 556,01 | 110,83 |
| 2019/05/16 | CH2206 | Male | Three y/o | Treatment (Wk 1) | Treatment | Feed Day | No | 13:55 | 13:00 - 13:59 | Afternoon | 37,8 | 90  | 40,2  | 40,2  | 18,95 | 586,16 | 124,26 |
| 2019/05/16 | CH2205 | Male | Three y/o | Treatment (Wk 1) | Treatment | Feed Day | No | 14:00 | 14:00 - 14:59 | Afternoon | 37,7 | 88  | 29,0  | 29,0  | 18,85 | 584,49 | 113,03 |
| 2019/05/16 | CH2206 | Male | Three y/o | Treatment (Wk 1) | Treatment | Feed Day | No | 14:00 | 14:00 - 14:59 | Afternoon | 37,8 | 112 | 12,4  | 12,4  | 18,95 | 601,96 | 84,04  |
| 2019/05/16 | CH2205 | Male | Three y/o | Treatment (Wk 1) | Treatment | Feed Day | No | 14:05 | 14:00 - 14:59 | Afternoon | 37,7 | 64  | 25,2  | 25,2  | 18,85 | 559,88 | 108,22 |
| 2019/05/16 | CH2206 | Male | Three y/o | Treatment (Wk 1) | Treatment | Feed Day | No | 14:05 | 14:00 - 14:59 | Afternoon | 37,9 | 96  | 18,8  | 18,8  | 19,05 | 590,91 | 98,20  |
| 2019/05/16 | CH2205 | Male | Three y/o | Treatment (Wk 1) | Treatment | Feed Day | No | 14:10 | 14:00 - 14:59 | Afternoon | 37,7 | 65  | 27,8  | 27,8  | 18,85 | 561,12 | 111,58 |
| 2019/05/16 | CH2206 | Male | Three y/o | Treatment (Wk 1) | Treatment | Feed Day | No | 14:10 | 14:00 - 14:59 | Afternoon | 37,9 | 92  | 8,2   | 8,2   | 19,05 | 587,78 | 70,05  |
| 2019/05/16 | CH2205 | Male | Three y/o | Treatment (Wk 1) | Treatment | Feed Day | No | 14:15 | 14:00 - 14:59 | Afternoon | 37,7 | 71  | 25,4  | 25,4  | 18,85 | 568,10 | 108,49 |
| 2019/05/16 | CH2206 | Male | Three y/o | Treatment (Wk 1) | Treatment | Feed Day | No | 14:15 | 14:00 - 14:59 | Afternoon | 37,9 | 86  | 10,6  | 10,6  | 19,05 | 582,77 | 78,73  |
| 2019/05/16 | CH2205 | Male | Three y/o | Treatment (Wk 1) | Treatment | Feed Day | No | 14:20 | 14:00 - 14:59 | Afternoon | 37,7 | 75  | 29,4  | 29,4  | 18,85 | 572,36 | 113,50 |
| 2019/05/16 | CH2206 | Male | Three y/o | Treatment (Wk 1) | Treatment | Feed Day | No | 14:20 | 14:00 - 14:59 | Afternoon | 37,9 | 100 | 8,6   | 8,6   | 19,05 | 593,87 | 71,66  |
| 2019/05/16 | CH2205 | Male | Three y/o | Treatment (Wk 1) | Treatment | Feed Day | No | 14:25 | 14:00 - 14:59 | Afternoon | 37,7 | 63  | 25,6  | 25,6  | 18,85 | 558,62 | 108,76 |
| 2019/05/16 | CH2206 | Male | Three y/o | Treatment (Wk 1) | Treatment | Feed Day | No | 14:25 | 14:00 - 14:59 | Afternoon | 37,9 | 74  | 14,4  | 14,4  | 19,05 | 571,33 | 89,12  |
| 2019/05/16 | CH2205 | Male | Three y/o | Treatment (Wk 1) | Treatment | Feed Day | No | 14:30 | 14:00 - 14:59 | Afternoon | 37,7 | 58  | 27,4  | 27,4  | 18,85 | 551,90 | 111,09 |
| 2019/05/16 | CH2206 | Male | Three y/o | Treatment (Wk 1) | Treatment | Feed Day | No | 14:30 | 14:00 - 14:59 | Afternoon | 37,9 | 90  | 24,0  | 24,0  | 19,05 | 586,16 | 106,55 |
| 2019/05/16 | CH2205 | Male | Three y/o | Treatment (Wk 1) | Treatment | Feed Day | No | 14:35 | 14:00 - 14:59 | Afternoon | 37,7 | 66  | 56,2  | 56,2  | 18,85 | 562,34 | 135,83 |
| 2019/05/16 | CH2206 | Male | Three y/o | Treatment (Wk 1) | Treatment | Feed Day | No | 14:35 | 14:00 - 14:59 | Afternoon | 37,9 | 83  | 29,8  | 29,8  | 19,05 | 580,11 | 113,97 |
| 2019/05/16 | CH2205 | Male | Three y/o | Treatment (Wk 1) | Treatment | Feed Day | No | 14:40 | 14:00 - 14:59 | Afternoon | 37,9 | 67  | 16,2  | 16,2  | 19,05 | 563,53 | 93,13  |
| 2019/05/16 | CH2206 | Male | Three y/o | Treatment (Wk 1) | Treatment | Feed Day | No | 14:40 | 14:00 - 14:59 | Afternoon | 37,9 | 83  | 52,6  | 52,6  | 19,05 | 580,11 | 133,54 |
| 2019/05/16 | CH2205 | Male | Three y/o | Treatment (Wk 1) | Treatment | Feed Day | No | 14:45 | 14:00 - 14:59 | Afternoon | 37,9 | 61  | 20,4  | 20,4  | 19,05 | 556,01 | 100,99 |
| 2019/05/16 | CH2206 | Male | Three y/o | Treatment (Wk 1) | Treatment | Feed Day | No | 14:45 | 14:00 - 14:59 | Afternoon | 37,9 | 94  | 43,4  | 43,4  | 19,05 | 589,37 | 126,90 |
| 2019/05/16 | CH2205 | Male | Three y/o | Treatment (Wk 1) | Treatment | Feed Day | No | 14:50 | 14:00 - 14:59 | Afternoon | 37,9 | 70  | 20,2  | 20,2  | 19,05 | 566,99 | 100,65 |
| 2019/05/16 | CH2206 | Male | Three y/o | Treatment (Wk 1) | Treatment | Feed Day | No | 14:50 | 14:00 - 14:59 | Afternoon | 37,9 | 81  | 30,2  | 30,2  | 19,05 | 578,26 | 114,42 |
| 2019/05/16 | CH2205 | Male | Three y/o | Treatment (Wk 1) | Treatment | Feed Day | No | 14:55 | 14:00 - 14:59 | Afternoon | 37,9 | 78  | 20,4  | 20,4  | 19,05 | 575,38 | 100,99 |
| 2019/05/16 | CH2206 | Male | Three y/o | Treatment (Wk 1) | Treatment | Feed Day | No | 14:55 | 14:00 - 14:59 | Afternoon | 37,9 | 85  | 15,0  | 15,0  | 19,05 | 581,90 | 90,51  |
| 2019/05/16 | CH2205 | Male | Three y/o | Treatment (Wk 1) | Treatment | Feed Day | No | 15:00 | 15:00 - 15:59 | Afternoon | 37,9 | 45  | 18,6  | 18,6  | 19,05 | 530,47 | 97,84  |
| 2019/05/16 | CH2206 | Male | Three y/o | Treatment (Wk 1) | Treatment | Feed Day | No | 15:00 | 15:00 - 15:59 | Afternoon | 37,9 | 92  | 24,6  | 24,6  | 19,05 | 587,78 | 107,39 |
| 2019/05/16 | CH2205 | Male | Three y/o | Treatment (Wk 1) | Treatment | Feed Day | No | 15:05 | 15:00 - 15:59 | Afternoon | 37,9 | 66  | 22,2  | 22,2  | 19,05 | 562,34 | 103,88 |
| 2019/05/16 | CH2206 | Male | Three y/o | Treatment (Wk 1) | Treatment | Feed Day | No | 15:05 | 15:00 - 15:59 | Afternoon | 37,9 | 75  | 27,8  | 27,8  | 19,05 | 572,36 | 111,58 |
| 2019/05/16 | CH2205 | Male | Three y/o | Treatment (Wk 1) | Treatment | Feed Day | No | 15:10 | 15:00 - 15:59 | Afternoon | 37,9 | 66  | 14,8  | 14,8  | 19,05 | 562,34 | 90,05  |
| 2019/05/16 | CH2206 | Male | Three y/o | Treatment (Wk 1) | Treatment | Feed Day | No | 15:10 | 15:00 - 15:59 | Afternoon | 37,9 | 85  | 26,6  | 26,6  | 19,05 | 581,90 | 110,07 |
| 2019/05/16 | CH2205 | Male | Three y/o | Treatment (Wk 1) | Treatment | Feed Day | No | 15:15 | 15:00 - 15:59 | Afternoon | 37,9 | 61  | 21,0  | 21,0  | 19,05 | 556,01 | 101,98 |
| 2019/05/16 | CH2206 | Male | Three y/o | Treatment (Wk 1) | Treatment | Feed Day | No | 15:15 | 15:00 - 15:59 | Afternoon | 37,9 | 80  | 28,2  | 28,2  | 19,05 | 577,31 | 112,07 |
| 2019/05/16 | CH2205 | Male | Three y/o | Treatment (Wk 1) | Treatment | Feed Day | No | 15:20 | 15:00 - 15:59 | Afternoon | 37,9 | 45  | 17,8  | 17,8  | 19,05 | 530,47 | 96,34  |
| 2019/05/16 | CH2206 | Male | Three y/o | Treatment (Wk 1) | Treatment | Feed Day | No | 15:20 | 15:00 - 15:59 | Afternoon | 37,9 | 63  | 33,0  | 33,0  | 19,05 | 558,62 | 117,47 |
| 2019/05/16 | CH2205 | Male | Three y/o | Treatment (Wk 1) | Treatment | Feed Day | No | 15:25 | 15:00 - 15:59 | Afternoon | 37,9 | 64  | 18,8  | 18,8  | 19,05 | 559,88 | 98,20  |
| 2019/05/16 | CH2206 | Male | Three y/o | Treatment (Wk 1) | Treatment | Feed Day | No | 15:25 | 15:00 - 15:59 | Afternoon | 37,9 | 88  | 33,8  | 33,8  | 19,05 | 584,49 | 118,29 |
| 2019/05/16 | CH2205 | Male | Three y/o | Treatment (Wk 1) | Treatment | Feed Day | No | 15:30 | 15:00 - 15:59 | Afternoon | 37,9 | 70  | 19,6  | 19,6  | 19,05 | 566,99 | 99,63  |
| 2019/05/16 | CH2206 | Male | Three y/o | Treatment (Wk 1) | Treatment | Feed Day | No | 15:30 | 15:00 - 15:59 | Afternoon | 37,9 | 57  | 31,6  | 31,6  | 19,05 | 550,47 | 115,98 |
| 2019/05/16 | CH2205 | Male | Three y/o | Treatment (Wk 1) | Treatment | Feed Day | No | 15:35 | 15:00 - 15:59 | Afternoon | 37,9 | 79  | 19,8  | 19,8  | 19,05 | 576,36 | 99,97  |
| 2019/05/16 | CH2206 | Male | Three y/o | Treatment (Wk 1) | Treatment | Feed Day | No | 15:35 | 15:00 - 15:59 | Afternoon | 38,0 | 50  | 37,4  | 37,4  | 19,15 | 539,52 | 121,77 |
| 2019/05/16 | CH2205 | Male | Three y/o | Treatment (Wk 1) | Treatment | Feed Day | No | 15:40 | 15:00 - 15:59 | Afternoon | 37,9 | 64  | 19,2  | 19,2  | 19,05 | 559,88 | 98,92  |
| 2019/05/16 | CH2206 | Male | Three y/o | Treatment (Wk 1) | Treatment | Feed Day | No | 15:40 | 15:00 - 15:59 | Afternoon | 38,0 | 86  | 38,4  | 38,4  | 19,15 | 582,77 | 122,68 |
| 2019/05/16 | CH2205 | Male | Three y/o | Treatment (Wk 1) | Treatment | Feed Day | No | 15:45 | 15:00 - 15:59 | Afternoon | 37,9 | 61  | 18,4  | 18,4  | 19,05 | 556,01 | 97,47  |
| 2019/05/16 | CH2206 | Male | Three y/o | Treatment (Wk 1) | Treatment | Feed Day | No | 15:45 | 15:00 - 15:59 | Afternoon | 38,0 | 118 | 48,4  | 48,4  | 19,15 | 605,61 | 130,66 |
| 2019/05/16 | CH2205 | Male | Three y/o | Treatment (Wk 1) | Treatment | Feed Day | No | 15:50 | 15:00 - 15:59 | Afternoon | 37,9 | 68  | 15,4  | 15,4  | 19,05 | 564,71 | 91,41  |
| 2019/05/16 | CH2206 | Male | Three y/o | Treatment (Wk 1) | Treatment | Feed Day | No | 15:50 | 15:00 - 15:59 | Afternoon | 38,0 | 68  | 40,8  | 40,8  | 19,15 | 564,71 | 124,77 |
| 2019/05/16 | CH2205 | Male | Three y/o | Treatment (Wk 1) | Treatment | Feed Day | No | 15:55 | 15:00 - 15:59 | Afternoon | 38,0 | 76  | 9,6   | 9,6   | 19,15 | 573,39 | 75,37  |
| 2019/05/16 | CH2206 | Male | Three y/o | Treatment (Wk 1) | Treatment | Feed Day | No | 15:55 | 15:00 - 15:59 | Afternoon | 38,0 | 73  | 25,2  | 25,2  | 19,15 | 570,27 | 108,22 |
| 2019/05/16 | CH2205 | Male | Three y/o | Treatment (Wk 1) | Treatment | Feed Day | No | 16:00 | 16:00 - 16:59 | Evening   | 38,0 | 43  | 3,8   | 3,8   | 19,15 | 526,50 | 44,22  |
| 2019/05/16 | CH2206 | Male | Three y/o | Treatment (Wk 1) | Treatment | Feed Day | No | 16:00 | 16:00 - 16:59 | Evening   | 38,0 | 77  | 20,2  | 20,2  | 19,15 | 574,39 | 100,65 |
| 2019/05/16 | CH2205 | Male | Three y/o | Treatment (Wk 1) | Treatment | Feed Day | No | 16:05 | 16:00 - 16:59 | Evening   | 38,0 | 102 | 12,4  | 12,4  | 19,15 | 595,30 | 84,04  |
| 2019/05/16 | CH2206 | Male | Three y/o | Treatment (Wk 1) | Treatment | Feed Day | No | 16:05 | 16:00 - 16:59 | Evening   | 38,0 | 86  | 48,4  | 48,4  | 19,15 | 582,77 | 130,66 |
| 2019/05/16 | CH2205 | Male | Three y/o | Treatment (Wk 1) | Treatment | Feed Day | No | 16:10 | 16:00 - 16:59 | Evening   | 38,0 | 68  | 19,6  | 19,6  | 19,15 | 564,71 | 99,63  |
| 2019/05/16 | CH2206 | Male | Three y/o | Treatment (Wk 1) | Treatment | Feed Day | No | 16:10 | 16:00 - 16:59 | Evening   | 38,0 | 88  | 40,2  | 40,2  | 19,15 | 584,49 | 124,26 |
| 2019/05/16 | CH2205 | Male | Three y/o | Treatment (Wk 1) | Treatment | Feed Day | No | 16:15 | 16:00 - 16:59 | Evening   | 38,0 | 75  | 49,8  | 49,8  | 19,15 | 572,36 | 131,65 |
| 2019/05/16 | CH2206 | Male | Three y/o | Treatment (Wk 1) | Treatment | Feed Day | No | 16:15 | 16:00 - 16:59 | Evening   | 37,9 | 86  | 41,8  | 41,8  | 19,05 | 582,77 | 125,60 |
| 2019/05/16 | CH2205 | Male | Three y/o | Treatment (Wk 1) | Treatment | Feed Day | No | 16:20 | 16:00 - 16:59 | Evening   | 38,0 | 35  | 113,2 | 113,2 | 19,15 | 507,97 | 160,17 |
| 2019/05/16 | CH2206 | Male | Three y/o | Treatment (Wk 1) | Treatment | Feed Day | No | 16:20 | 16:00 - 16:59 | Evening   | 38,0 | 101 | 101,4 | 101,4 | 19,15 | 594,59 | 156,33 |
| 2019/05/16 | CH2205 | Male | Three y/o | Treatment (Wk 1) | Treatment | Feed Day | No | 16:25 | 16:00 - 16:59 | Evening   | 37,9 | 145 | 119,8 | 119,8 | 19,05 | 619,62 | 162,15 |
| 2019/05/16 | CH2206 | Male | Three y/o | Treatment (Wk 1) | Treatment | Feed Day | No | 16:25 | 16:00 - 16:59 | Evening   | 37,9 | 84  | 114,8 | 114,8 | 19,05 | 581,01 | 160,66 |
| 2019/05/16 | CH2205 | Male | Three y/o | Treatment (Wk 1) | Treatment | Feed Day | No | 16:30 | 16:00 - 16:59 | Evening   | 37,7 |     | 56,0  | 56,0  | 18,85 |        | 135,70 |
| 2019/05/16 | CH2206 | Male | Three y/o | Treatment (Wk 1) | Treatment | Feed Day | No | 16:30 | 16:00 - 16:59 | Evening   | 37,8 | 104 | 34,4  | 34,4  | 18,95 | 596,69 | 118,90 |
| 2019/05/16 | CH2205 | Male | Three y/o | Treatment (Wk 1) | Treatment | Feed Day | No | 16:35 | 16:00 - 16:59 | Evening   | 37,7 | 100 | 168,2 | 168,2 | 18,85 | 593,87 | 174,03 |
| 2019/05/16 | CH2206 | Male | Three y/o | Treatment (Wk 1) | Treatment | Feed Day | No | 16:35 | 16:00 - 16:59 | Evening   | 37,9 | 96  | 51,8  | 51,8  | 19,05 | 590,91 | 133,01 |
| 2019/05/16 | CH2205 | Male | Three y/o | Treatment (Wk 1) | Treatment | Feed Day | No | 16:40 | 16:00 - 16:59 | Evening   | 37,7 |     | 128,4 | 128,4 | 18,85 |        | 164,57 |



|            |        |      |           |                  |           |          |    |       |               |         |      |     |       |       |       |        |        |
|------------|--------|------|-----------|------------------|-----------|----------|----|-------|---------------|---------|------|-----|-------|-------|-------|--------|--------|
| 2019/05/16 | CH2206 | Male | Three y/o | Treatment (Wk 1) | Treatment | Feed Day | No | 16:40 | 16:00 - 16:59 | Evening | 37,8 | 73  | 26,0  | 26,0  | 18,95 | 570,27 | 109,29 |
| 2019/05/16 | CH2205 | Male | Three y/o | Treatment (Wk 1) | Treatment | Feed Day | No | 16:45 | 16:00 - 16:59 | Evening | 37,9 | 129 | 67,6  | 67,6  | 19,05 | 611,75 | 142,23 |
| 2019/05/16 | CH2206 | Male | Three y/o | Treatment (Wk 1) | Treatment | Feed Day | No | 16:45 | 16:00 - 16:59 | Evening | 37,9 | 74  | 54,8  | 54,8  | 19,05 | 571,33 | 134,96 |
| 2019/05/16 | CH2205 | Male | Three y/o | Treatment (Wk 1) | Treatment | Feed Day | No | 16:50 | 16:00 - 16:59 | Evening | 37,9 | 70  | 29,6  | 29,6  | 19,05 | 566,99 | 113,73 |
| 2019/05/16 | CH2206 | Male | Three y/o | Treatment (Wk 1) | Treatment | Feed Day | No | 16:50 | 16:00 - 16:59 | Evening | 37,9 | 68  | 38,4  | 38,4  | 19,05 | 564,71 | 122,68 |
| 2019/05/16 | CH2205 | Male | Three y/o | Treatment (Wk 1) | Treatment | Feed Day | No | 16:55 | 16:00 - 16:59 | Evening | 37,9 | 95  | 24,2  | 24,2  | 19,05 | 590,14 | 106,83 |
| 2019/05/16 | CH2206 | Male | Three y/o | Treatment (Wk 1) | Treatment | Feed Day | No | 16:55 | 16:00 - 16:59 | Evening | 37,9 | 77  | 29,2  | 29,2  | 19,05 | 574,39 | 113,27 |
| 2019/05/16 | CH2205 | Male | Three y/o | Treatment (Wk 1) | Treatment | Feed Day | No | 17:00 | 17:00 - 17:59 | Evening | 37,9 | 145 | 95,4  | 95,4  | 19,05 | 619,62 | 154,20 |
| 2019/05/16 | CH2206 | Male | Three y/o | Treatment (Wk 1) | Treatment | Feed Day | No | 17:00 | 17:00 - 17:59 | Evening | 38,0 | 120 | 25,2  | 25,2  | 19,15 | 606,78 | 108,22 |
| 2019/05/16 | CH2205 | Male | Three y/o | Treatment (Wk 1) | Treatment | Feed Day | No | 17:05 | 17:00 - 17:59 | Evening | 37,9 | 69  | 14,8  | 14,8  | 19,05 | 565,86 | 90,05  |
| 2019/05/16 | CH2206 | Male | Three y/o | Treatment (Wk 1) | Treatment | Feed Day | No | 17:05 | 17:00 - 17:59 | Evening | 37,9 | 112 | 64,6  | 64,6  | 19,05 | 601,96 | 140,65 |
| 2019/05/16 | CH2205 | Male | Three y/o | Treatment (Wk 1) | Treatment | Feed Day | No | 17:10 | 17:00 - 17:59 | Evening | 37,9 | 61  | 10,8  | 10,8  | 19,05 | 556,01 | 79,36  |
| 2019/05/16 | CH2206 | Male | Three y/o | Treatment (Wk 1) | Treatment | Feed Day | No | 17:10 | 17:00 - 17:59 | Evening | 37,9 | 73  | 27,8  | 27,8  | 19,05 | 570,27 | 111,58 |
| 2019/05/16 | CH2205 | Male | Three y/o | Treatment (Wk 1) | Treatment | Feed Day | No | 17:15 | 17:00 - 17:59 | Evening | 38,0 | 88  | 207,4 | 207,4 | 19,15 | 584,49 | 181,40 |
| 2019/05/16 | CH2206 | Male | Three y/o | Treatment (Wk 1) | Treatment | Feed Day | No | 17:15 | 17:00 - 17:59 | Evening | 37,9 | 92  | 63,4  | 63,4  | 19,05 | 587,78 | 140,00 |
| 2019/05/16 | CH2205 | Male | Three y/o | Treatment (Wk 1) | Treatment | Feed Day | No | 17:20 | 17:00 - 17:59 | Evening | 38,0 | 80  | 56,6  | 56,6  | 19,15 | 577,31 | 136,07 |
| 2019/05/16 | CH2206 | Male | Three y/o | Treatment (Wk 1) | Treatment | Feed Day | No | 17:20 | 17:00 - 17:59 | Evening | 37,9 | 120 | 65,4  | 65,4  | 19,05 | 606,78 | 141,08 |
| 2019/05/16 | CH2205 | Male | Three y/o | Treatment (Wk 1) | Treatment | Feed Day | No | 17:25 | 17:00 - 17:59 | Evening | 38,0 | 88  | 6,6   | 6,6   | 19,15 | 584,49 | 62,73  |
| 2019/05/16 | CH2206 | Male | Three y/o | Treatment (Wk 1) | Treatment | Feed Day | No | 17:25 | 17:00 - 17:59 | Evening | 37,9 | 82  | 42,6  | 42,6  | 19,05 | 579,19 | 126,26 |
| 2019/05/16 | CH2205 | Male | Three y/o | Treatment (Wk 1) | Treatment | Feed Day | No | 17:30 | 17:00 - 17:59 | Evening | 37,9 |     | 7,6   | 7,6   | 19,05 |        | 67,49  |
| 2019/05/16 | CH2206 | Male | Three y/o | Treatment (Wk 1) | Treatment | Feed Day | No | 17:30 | 17:00 - 17:59 | Evening | 37,9 | 51  | 54,8  | 54,8  | 19,05 | 541,20 | 134,96 |
| 2019/05/16 | CH2205 | Male | Three y/o | Treatment (Wk 1) | Treatment | Feed Day | No | 17:35 | 17:00 - 17:59 | Evening | 37,9 | 73  | 5,8   | 5,8   | 19,05 | 570,27 | 58,39  |
| 2019/05/16 | CH2206 | Male | Three y/o | Treatment (Wk 1) | Treatment | Feed Day | No | 17:35 | 17:00 - 17:59 | Evening | 37,8 | 84  | 52,4  | 52,4  | 18,95 | 581,01 | 133,41 |
| 2019/05/16 | CH2205 | Male | Three y/o | Treatment (Wk 1) | Treatment | Feed Day | No | 17:40 | 17:00 - 17:59 | Evening | 37,9 | 63  | 7,4   | 7,4   | 19,05 | 558,62 | 66,59  |
| 2019/05/16 | CH2206 | Male | Three y/o | Treatment (Wk 1) | Treatment | Feed Day | No | 17:40 | 17:00 - 17:59 | Evening | 38,0 | 50  | 45,2  | 45,2  | 18,95 | 539,52 | 128,30 |
| 2019/05/16 | CH2205 | Male | Three y/o | Treatment (Wk 1) | Treatment | Feed Day | No | 17:45 | 17:00 - 17:59 | Evening | 38,0 | 54  | 6,8   | 6,8   | 19,15 | 545,99 | 63,74  |
| 2019/05/16 | CH2206 | Male | Three y/o | Treatment (Wk 1) | Treatment | Feed Day | No | 17:45 | 17:00 - 17:59 | Evening | 37,8 | 62  | 44,6  | 44,6  | 18,95 | 557,33 | 127,84 |
| 2019/05/16 | CH2205 | Male | Three y/o | Treatment (Wk 1) | Treatment | Feed Day | No | 17:50 | 17:00 - 17:59 | Evening | 38,0 | 78  | 6,0   | 6,0   | 19,15 | 575,38 | 59,53  |
| 2019/05/16 | CH2206 | Male | Three y/o | Treatment (Wk 1) | Treatment | Feed Day | No | 17:50 | 17:00 - 17:59 | Evening | 37,8 | 82  | 41,0  | 41,0  | 18,95 | 579,19 | 124,94 |
| 2019/05/16 | CH2205 | Male | Three y/o | Treatment (Wk 1) | Treatment | Feed Day | No | 17:55 | 17:00 - 17:59 | Evening | 38,0 | 74  | 5,8   | 5,8   | 19,15 | 571,33 | 58,39  |
| 2019/05/16 | CH2206 | Male | Three y/o | Treatment (Wk 1) | Treatment | Feed Day | No | 17:55 | 17:00 - 17:59 | Evening | 37,9 | 51  | 26,0  | 26,0  | 19,05 | 541,20 | 109,29 |
| 2019/05/16 | CH2205 | Male | Three y/o | Treatment (Wk 1) | Treatment | Feed Day | No | 18:00 | 18:00 - 18:59 | Evening | 38,0 | 86  | 2,8   | 2,8   | 19,15 | 582,77 | 34,04  |
| 2019/05/16 | CH2206 | Male | Three y/o | Treatment (Wk 1) | Treatment | Feed Day | No | 18:00 | 18:00 - 18:59 | Evening | 38,0 | 87  | 30,4  | 30,4  | 19,15 | 583,64 | 114,65 |
| 2019/05/16 | CH2205 | Male | Three y/o | Treatment (Wk 1) | Treatment | Feed Day | No | 18:05 | 18:00 - 18:59 | Evening | 38,0 | 48  | 3,4   | 3,4   | 19,15 | 536,04 | 40,51  |
| 2019/05/16 | CH2206 | Male | Three y/o | Treatment (Wk 1) | Treatment | Feed Day | No | 18:05 | 18:00 - 18:59 | Evening | 38,0 | 86  | 26,6  | 26,6  | 19,15 | 582,77 | 110,07 |
| 2019/05/16 | CH2205 | Male | Three y/o | Treatment (Wk 1) | Treatment | Feed Day | No | 18:10 | 18:00 - 18:59 | Evening | 37,9 | 90  | 3,6   | 3,6   | 19,05 | 586,16 | 42,42  |
| 2019/05/16 | CH2206 | Male | Three y/o | Treatment (Wk 1) | Treatment | Feed Day | No | 18:10 | 18:00 - 18:59 | Evening | 38,0 | 57  | 19,2  | 19,2  | 19,15 | 550,47 | 98,92  |
| 2019/05/16 | CH2205 | Male | Three y/o | Treatment (Wk 1) | Treatment | Feed Day | No | 18:15 | 18:00 - 18:59 | Evening | 37,9 | 53  | 5,2   | 5,2   | 19,05 | 544,43 | 54,72  |
| 2019/05/16 | CH2206 | Male | Three y/o | Treatment (Wk 1) | Treatment | Feed Day | No | 18:15 | 18:00 - 18:59 | Evening | 38,0 | 101 | 12,8  | 12,8  | 19,15 | 594,59 | 85,12  |
| 2019/05/16 | CH2205 | Male | Three y/o | Treatment (Wk 1) | Treatment | Feed Day | No | 18:20 | 18:00 - 18:59 | Evening | 38,0 | 57  | 4,2   | 4,2   | 19,15 | 550,47 | 47,57  |
| 2019/05/16 | CH2206 | Male | Three y/o | Treatment (Wk 1) | Treatment | Feed Day | No | 18:20 | 18:00 - 18:59 | Evening | 38,1 | 102 | 49,4  | 49,4  | 19,26 | 595,30 | 131,37 |
| 2019/05/16 | CH2205 | Male | Three y/o | Treatment (Wk 1) | Treatment | Feed Day | No | 18:25 | 18:00 - 18:59 | Evening | 38,0 | 64  | 3,2   | 3,2   | 19,15 | 559,88 | 38,49  |
| 2019/05/16 | CH2206 | Male | Three y/o | Treatment (Wk 1) | Treatment | Feed Day | No | 18:25 | 18:00 - 18:59 | Evening | 38,0 | 72  | 39,2  | 39,2  | 19,15 | 569,20 | 123,39 |
| 2019/05/16 | CH2205 | Male | Three y/o | Treatment (Wk 1) | Treatment | Feed Day | No | 18:30 | 18:00 - 18:59 | Evening | 38,0 | 64  | 5,4   | 5,4   | 19,15 | 559,88 | 55,99  |
| 2019/05/16 | CH2206 | Male | Three y/o | Treatment (Wk 1) | Treatment | Feed Day | No | 18:30 | 18:00 - 18:59 | Evening | 37,9 | 77  | 35,2  | 35,2  | 19,05 | 574,39 | 119,69 |
| 2019/05/16 | CH2205 | Male | Three y/o | Treatment (Wk 1) | Treatment | Feed Day | No | 18:35 | 18:00 - 18:59 | Evening | 38,0 | 54  | 7,6   | 7,6   | 19,15 | 545,99 | 67,49  |
| 2019/05/16 | CH2206 | Male | Three y/o | Treatment (Wk 1) | Treatment | Feed Day | No | 18:35 | 18:00 - 18:59 | Evening | 38,0 | 88  | 33,2  | 33,2  | 19,15 | 584,49 | 117,68 |
| 2019/05/16 | CH2205 | Male | Three y/o | Treatment (Wk 1) | Treatment | Feed Day | No | 18:40 | 18:00 - 18:59 | Evening | 38,0 | 61  | 6,4   | 6,4   | 19,15 | 556,01 | 61,70  |
| 2019/05/16 | CH2206 | Male | Three y/o | Treatment (Wk 1) | Treatment | Feed Day | No | 18:40 | 18:00 - 18:59 | Evening | 38,0 | 73  | 26,8  | 26,8  | 19,15 | 570,27 | 110,33 |
| 2019/05/16 | CH2205 | Male | Three y/o | Treatment (Wk 1) | Treatment | Feed Day | No | 18:45 | 18:00 - 18:59 | Evening | 38,1 | 46  | 10,6  | 10,6  | 19,26 | 532,38 | 78,73  |
| 2019/05/16 | CH2206 | Male | Three y/o | Treatment (Wk 1) | Treatment | Feed Day | No | 18:45 | 18:00 - 18:59 | Evening | 37,9 | 52  | 47,6  | 47,6  | 19,05 | 542,83 | 130,09 |
| 2019/05/16 | CH2205 | Male | Three y/o | Treatment (Wk 1) | Treatment | Feed Day | No | 18:50 | 18:00 - 18:59 | Evening | 38,1 | 65  | 9,2   | 9,2   | 19,26 | 561,12 | 73,94  |
| 2019/05/16 | CH2206 | Male | Three y/o | Treatment (Wk 1) | Treatment | Feed Day | No | 18:50 | 18:00 - 18:59 | Evening | 37,9 | 68  | 59,0  | 59,0  | 19,05 | 564,71 | 137,51 |
| 2019/05/16 | CH2205 | Male | Three y/o | Treatment (Wk 1) | Treatment | Feed Day | No | 18:55 | 18:00 - 18:59 | Evening | 38,0 |     | 3,8   | 3,8   | 19,15 |        | 44,22  |
| 2019/05/16 | CH2206 | Male | Three y/o | Treatment (Wk 1) | Treatment | Feed Day | No | 18:55 | 18:00 - 18:59 | Evening | 37,9 | 99  | 57,4  | 57,4  | 19,05 | 593,14 | 136,56 |
| 2019/05/16 | CH2205 | Male | Three y/o | Treatment (Wk 1) | Treatment | Feed Day | No | 19:00 | 19:00 - 19:59 | Evening | 38,0 |     | 8,4   | 8,4   | 19,15 |        | 70,86  |
| 2019/05/16 | CH2206 | Male | Three y/o | Treatment (Wk 1) | Treatment | Feed Day | No | 19:00 | 19:00 - 19:59 | Evening | 37,9 | 87  | 50,0  | 50,0  | 19,05 | 583,64 | 131,79 |
| 2019/05/16 | CH2205 | Male | Three y/o | Treatment (Wk 1) | Treatment | Feed Day | No | 19:05 | 19:00 - 19:59 | Evening | 38,0 | 75  | 12,4  | 12,4  | 19,15 | 572,36 | 84,04  |
| 2019/05/16 | CH2206 | Male | Three y/o | Treatment (Wk 1) | Treatment | Feed Day | No | 19:05 | 19:00 - 19:59 | Evening | 37,9 | 47  | 52,6  | 52,6  | 19,05 | 534,23 | 133,54 |
| 2019/05/16 | CH2205 | Male | Three y/o | Treatment (Wk 1) | Treatment | Feed Day | No | 19:10 | 19:00 - 19:59 | Evening | 38,0 | 83  | 8,6   | 8,6   | 19,15 | 580,11 | 71,66  |
| 2019/05/16 | CH2206 | Male | Three y/o | Treatment (Wk 1) | Treatment | Feed Day | No | 19:10 | 19:00 - 19:59 | Evening | 37,9 | 90  | 49,6  | 49,6  | 19,05 | 586,16 | 131,51 |
| 2019/05/16 | CH2205 | Male | Three y/o | Treatment (Wk 1) | Treatment | Feed Day | No | 19:15 | 19:00 - 19:59 | Evening | 37,9 | 53  | 8,8   | 8,8   | 19,05 | 544,43 | 72,43  |
| 2019/05/16 | CH2206 | Male | Three y/o | Treatment (Wk 1) | Treatment | Feed Day | No | 19:15 | 19:00 - 19:59 | Evening | 37,9 | 79  | 50,8  | 50,8  | 19,05 | 576,36 | 132,33 |
| 2019/05/16 | CH2205 | Male | Three y/o | Treatment (Wk 1) | Treatment | Feed Day | No | 19:20 | 19:00 - 19:59 | Evening | 37,9 | 82  | 9,6   | 9,6   | 19,05 | 579,19 | 75,37  |
| 2019/05/16 | CH2206 | Male | Three y/o | Treatment (Wk 1) | Treatment | Feed Day | No | 19:20 | 19:00 - 19:59 | Evening | 38,0 | 90  | 60,2  | 60,2  | 19,15 | 586,16 | 138,21 |
| 2019/05/16 | CH2205 | Male | Three y/o | Treatment (Wk 1) | Treatment | Feed Day | No | 19:25 | 19:00 - 19:59 | Evening | 38,0 | 65  | 15,2  | 15,2  | 19,15 | 561,12 | 90,96  |
| 2019/05/16 | CH2206 | Male | Three y/o | Treatment (Wk 1) | Treatment | Feed Day | No | 19:25 | 19:00 - 19:59 | Evening | 37,9 | 78  | 52,6  | 52,6  | 19,05 | 575,38 | 133,54 |
| 2019/05/16 | CH2205 | Male | Three y/o | Treatment (Wk 1) | Treatment | Feed Day | No | 19:30 | 19:00 - 19:59 | Evening | 38,0 | 73  | 14,6  | 14,6  | 19,15 | 570,27 | 89,59  |
| 2019/05/16 | CH2206 | Male | Three y/o | Treatment (Wk 1) | Treatment | Feed Day | No | 19:30 | 19:00 - 19:59 | Evening | 37,8 | 123 | 53,0  | 53,0  | 18,95 | 608,49 | 133,80 |
| 2019/05/16 | CH2205 | Male | Three y/o | Treatment (Wk 1) | Treatment | Feed Day | No | 19:35 | 19:00 - 19:59 | Evening | 38,1 | 59  | 11,2  | 11,2  | 19,26 | 553,30 | 80,59  |



|            |        |      |           |                  |           |          |    |       |               |         |      |     |      |      |       |        |        |
|------------|--------|------|-----------|------------------|-----------|----------|----|-------|---------------|---------|------|-----|------|------|-------|--------|--------|
| 2019/05/16 | CH2206 | Male | Three y/o | Treatment (Wk 1) | Treatment | Feed Day | No | 19:35 | 19:00 - 19:59 | Evening | 37,6 | 71  | 61,0 | 61,0 | 18,75 | 568,10 | 138,67 |
| 2019/05/16 | CH2205 | Male | Three y/o | Treatment (Wk 1) | Treatment | Feed Day | No | 19:40 | 19:00 - 19:59 | Evening | 38,1 | 72  | 13,0 | 13,0 | 19,26 | 569,20 | 85,65  |
| 2019/05/16 | CH2206 | Male | Three y/o | Treatment (Wk 1) | Treatment | Feed Day | No | 19:40 | 19:00 - 19:59 | Evening | 37,5 | 88  | 62,2 | 62,2 | 18,65 | 584,49 | 139,34 |
| 2019/05/16 | CH2205 | Male | Three y/o | Treatment (Wk 1) | Treatment | Feed Day | No | 19:45 | 19:00 - 19:59 | Evening | 38,1 | 64  | 8,8  | 8,8  | 19,26 | 559,88 | 72,43  |
| 2019/05/16 | CH2206 | Male | Three y/o | Treatment (Wk 1) | Treatment | Feed Day | No | 19:45 | 19:00 - 19:59 | Evening | 37,4 | 79  | 60,6 | 60,6 | 18,55 | 576,36 | 138,44 |
| 2019/05/16 | CH2205 | Male | Three y/o | Treatment (Wk 1) | Treatment | Feed Day | No | 19:50 | 19:00 - 19:59 | Evening | 38,1 | 80  | 10,8 | 10,8 | 19,26 | 577,31 | 79,36  |
| 2019/05/16 | CH2206 | Male | Three y/o | Treatment (Wk 1) | Treatment | Feed Day | No | 19:50 | 19:00 - 19:59 | Evening | 37,4 | 88  | 60,4 | 60,4 | 18,55 | 584,49 | 138,32 |
| 2019/05/16 | CH2205 | Male | Three y/o | Treatment (Wk 1) | Treatment | Feed Day | No | 19:55 | 19:00 - 19:59 | Evening | 38,2 | 89  | 9,4  | 9,4  | 19,36 | 585,33 | 74,66  |
| 2019/05/16 | CH2206 | Male | Three y/o | Treatment (Wk 1) | Treatment | Feed Day | No | 19:55 | 19:00 - 19:59 | Evening | 37,4 | 77  | 51,8 | 51,8 | 18,55 | 574,39 | 133,01 |
| 2019/05/16 | CH2205 | Male | Three y/o | Treatment (Wk 1) | Treatment | Feed Day | No | 20:00 | 20:00 - 20:59 | Night   | 38,2 | 75  | 7,6  | 7,6  | 19,36 | 572,36 | 67,49  |
| 2019/05/16 | CH2206 | Male | Three y/o | Treatment (Wk 1) | Treatment | Feed Day | No | 20:00 | 20:00 - 20:59 | Night   | 37,7 | 98  | 37,0 | 37,0 | 18,85 | 592,41 | 121,40 |
| 2019/05/16 | CH2205 | Male | Three y/o | Treatment (Wk 1) | Treatment | Feed Day | No | 20:05 | 20:00 - 20:59 | Night   | 38,2 | 53  | 7,4  | 7,4  | 19,36 | 544,43 | 66,59  |
| 2019/05/16 | CH2206 | Male | Three y/o | Treatment (Wk 1) | Treatment | Feed Day | No | 20:05 | 20:00 - 20:59 | Night   | 37,9 | 51  | 38,6 | 38,6 | 19,05 | 541,20 | 122,86 |
| 2019/05/16 | CH2205 | Male | Three y/o | Treatment (Wk 1) | Treatment | Feed Day | No | 20:10 | 20:00 - 20:59 | Night   | 38,2 | 59  | 14,8 | 14,8 | 19,36 | 553,30 | 90,05  |
| 2019/05/16 | CH2206 | Male | Three y/o | Treatment (Wk 1) | Treatment | Feed Day | No | 20:10 | 20:00 - 20:59 | Night   | 37,9 | 84  | 19,6 | 19,6 | 19,05 | 581,01 | 99,63  |
| 2019/05/16 | CH2205 | Male | Three y/o | Treatment (Wk 1) | Treatment | Feed Day | No | 20:15 | 20:00 - 20:59 | Night   | 38,2 | 61  | 8,2  | 8,2  | 19,36 | 556,01 | 70,05  |
| 2019/05/16 | CH2206 | Male | Three y/o | Treatment (Wk 1) | Treatment | Feed Day | No | 20:15 | 20:00 - 20:59 | Night   | 37,9 | 46  | 9,0  | 9,0  | 19,05 | 532,38 | 73,19  |
| 2019/05/16 | CH2205 | Male | Three y/o | Treatment (Wk 1) | Treatment | Feed Day | No | 20:20 | 20:00 - 20:59 | Night   | 38,2 | 49  | 10,6 | 10,6 | 19,36 | 537,80 | 78,73  |
| 2019/05/16 | CH2206 | Male | Three y/o | Treatment (Wk 1) | Treatment | Feed Day | No | 20:20 | 20:00 - 20:59 | Night   | 38,0 | 60  | 12,0 | 12,0 | 19,15 | 554,67 | 82,93  |
| 2019/05/16 | CH2205 | Male | Three y/o | Treatment (Wk 1) | Treatment | Feed Day | No | 20:25 | 20:00 - 20:59 | Night   | 38,2 | 86  | 16,8 | 16,8 | 19,36 | 582,77 | 94,37  |
| 2019/05/16 | CH2206 | Male | Three y/o | Treatment (Wk 1) | Treatment | Feed Day | No | 20:25 | 20:00 - 20:59 | Night   | 38,0 | 95  | 15,2 | 15,2 | 19,15 | 590,14 | 90,96  |
| 2019/05/16 | CH2205 | Male | Three y/o | Treatment (Wk 1) | Treatment | Feed Day | No | 20:30 | 20:00 - 20:59 | Night   | 38,2 | 61  | 15,8 | 15,8 | 19,36 | 556,01 | 92,28  |
| 2019/05/16 | CH2206 | Male | Three y/o | Treatment (Wk 1) | Treatment | Feed Day | No | 20:30 | 20:00 - 20:59 | Night   | 37,9 | 49  | 17,6 | 17,6 | 19,05 | 537,80 | 95,95  |
| 2019/05/16 | CH2205 | Male | Three y/o | Treatment (Wk 1) | Treatment | Feed Day | No | 20:35 | 20:00 - 20:59 | Night   | 38,1 | 90  | 11,8 | 11,8 | 19,26 | 586,16 | 82,36  |
| 2019/05/16 | CH2206 | Male | Three y/o | Treatment (Wk 1) | Treatment | Feed Day | No | 20:35 | 20:00 - 20:59 | Night   | 37,9 | 96  | 17,8 | 17,8 | 19,05 | 590,91 | 96,34  |
| 2019/05/16 | CH2205 | Male | Three y/o | Treatment (Wk 1) | Treatment | Feed Day | No | 20:40 | 20:00 - 20:59 | Night   | 38,1 | 53  | 13,6 | 13,6 | 19,26 | 544,43 | 87,18  |
| 2019/05/16 | CH2206 | Male | Three y/o | Treatment (Wk 1) | Treatment | Feed Day | No | 20:40 | 20:00 - 20:59 | Night   | 38,0 | 84  | 14,2 | 14,2 | 19,15 | 581,01 | 88,65  |
| 2019/05/16 | CH2205 | Male | Three y/o | Treatment (Wk 1) | Treatment | Feed Day | No | 20:45 | 20:00 - 20:59 | Night   | 38,1 | 83  | 10,4 | 10,4 | 19,26 | 580,11 | 78,08  |
| 2019/05/16 | CH2206 | Male | Three y/o | Treatment (Wk 1) | Treatment | Feed Day | No | 20:45 | 20:00 - 20:59 | Night   | 37,9 | 65  | 13,2 | 13,2 | 19,05 | 561,12 | 86,17  |
| 2019/05/16 | CH2205 | Male | Three y/o | Treatment (Wk 1) | Treatment | Feed Day | No | 20:50 | 20:00 - 20:59 | Night   | 38,1 | 68  | 12,6 | 12,6 | 19,26 | 564,71 | 84,59  |
| 2019/05/16 | CH2206 | Male | Three y/o | Treatment (Wk 1) | Treatment | Feed Day | No | 20:50 | 20:00 - 20:59 | Night   | 37,9 | 45  | 27,0 | 27,0 | 19,05 | 530,47 | 110,58 |
| 2019/05/16 | CH2205 | Male | Three y/o | Treatment (Wk 1) | Treatment | Feed Day | No | 20:55 | 20:00 - 20:59 | Night   | 38,1 | 63  | 12,6 | 12,6 | 19,26 | 558,62 | 84,59  |
| 2019/05/16 | CH2206 | Male | Three y/o | Treatment (Wk 1) | Treatment | Feed Day | No | 20:55 | 20:00 - 20:59 | Night   | 37,9 | 65  | 29,8 | 29,8 | 19,05 | 561,12 | 113,97 |
| 2019/05/16 | CH2205 | Male | Three y/o | Treatment (Wk 1) | Treatment | Feed Day | No | 21:00 | 21:00 - 21:59 | Night   | 38,1 | 89  | 7,6  | 7,6  | 19,26 | 585,33 | 67,49  |
| 2019/05/16 | CH2206 | Male | Three y/o | Treatment (Wk 1) | Treatment | Feed Day | No | 21:00 | 21:00 - 21:59 | Night   | 38,0 | 64  | 23,8 | 23,8 | 19,15 | 559,88 | 106,26 |
| 2019/05/16 | CH2205 | Male | Three y/o | Treatment (Wk 1) | Treatment | Feed Day | No | 21:05 | 21:00 - 21:59 | Night   | 38,1 | 63  | 13,4 | 13,4 | 19,26 | 558,62 | 86,68  |
| 2019/05/16 | CH2206 | Male | Three y/o | Treatment (Wk 1) | Treatment | Feed Day | No | 21:05 | 21:00 - 21:59 | Night   | 38,0 | 54  | 17,8 | 17,8 | 19,15 | 545,99 | 96,34  |
| 2019/05/16 | CH2205 | Male | Three y/o | Treatment (Wk 1) | Treatment | Feed Day | No | 21:10 | 21:00 - 21:59 | Night   | 38,1 | 111 | 13,0 | 13,0 | 19,26 | 601,33 | 85,65  |
| 2019/05/16 | CH2206 | Male | Three y/o | Treatment (Wk 1) | Treatment | Feed Day | No | 21:10 | 21:00 - 21:59 | Night   | 38,0 | 108 | 55,6 | 55,6 | 19,15 | 599,39 | 135,46 |
| 2019/05/16 | CH2205 | Male | Three y/o | Treatment (Wk 1) | Treatment | Feed Day | No | 21:15 | 21:00 - 21:59 | Night   | 38,1 | 95  | 9,4  | 9,4  | 19,26 | 590,14 | 74,66  |
| 2019/05/16 | CH2206 | Male | Three y/o | Treatment (Wk 1) | Treatment | Feed Day | No | 21:15 | 21:00 - 21:59 | Night   | 37,9 | 98  | 60,8 | 60,8 | 19,05 | 592,41 | 138,55 |
| 2019/05/16 | CH2205 | Male | Three y/o | Treatment (Wk 1) | Treatment | Feed Day | No | 21:20 | 21:00 - 21:59 | Night   | 38,1 | 56  | 8,4  | 8,4  | 19,26 | 549,01 | 70,86  |
| 2019/05/16 | CH2206 | Male | Three y/o | Treatment (Wk 1) | Treatment | Feed Day | No | 21:20 | 21:00 - 21:59 | Night   | 37,8 | 83  | 61,2 | 61,2 | 18,95 | 580,11 | 138,78 |
| 2019/05/16 | CH2205 | Male | Three y/o | Treatment (Wk 1) | Treatment | Feed Day | No | 21:25 | 21:00 - 21:59 | Night   | 38,0 | 54  | 9,0  | 9,0  | 19,15 | 545,99 | 73,19  |
| 2019/05/16 | CH2206 | Male | Three y/o | Treatment (Wk 1) | Treatment | Feed Day | No | 21:25 | 21:00 - 21:59 | Night   | 37,8 | 85  | 56,6 | 56,6 | 18,95 | 581,90 | 136,07 |
| 2019/05/16 | CH2205 | Male | Three y/o | Treatment (Wk 1) | Treatment | Feed Day | No | 21:30 | 21:00 - 21:59 | Night   | 38,0 | 174 | 10,2 | 10,2 | 19,15 | 631,46 | 77,43  |
| 2019/05/16 | CH2206 | Male | Three y/o | Treatment (Wk 1) | Treatment | Feed Day | No | 21:30 | 21:00 - 21:59 | Night   | 37,7 | 83  | 47,2 | 47,2 | 18,85 | 580,11 | 129,80 |
| 2019/05/16 | CH2205 | Male | Three y/o | Treatment (Wk 1) | Treatment | Feed Day | No | 21:35 | 21:00 - 21:59 | Night   | 37,9 |     | 6,0  | 6,0  | 19,05 |        | 59,53  |
| 2019/05/16 | CH2206 | Male | Three y/o | Treatment (Wk 1) | Treatment | Feed Day | No | 21:35 | 21:00 - 21:59 | Night   | 37,8 | 54  | 47,6 | 47,6 | 18,95 | 545,99 | 130,09 |
| 2019/05/16 | CH2205 | Male | Three y/o | Treatment (Wk 1) | Treatment | Feed Day | No | 21:40 | 21:00 - 21:59 | Night   | 37,9 | 45  | 9,6  | 9,6  | 19,05 | 530,47 | 75,37  |
| 2019/05/16 | CH2206 | Male | Three y/o | Treatment (Wk 1) | Treatment | Feed Day | No | 21:40 | 21:00 - 21:59 | Night   | 37,8 | 83  | 44,2 | 44,2 | 18,95 | 580,11 | 127,53 |
| 2019/05/16 | CH2205 | Male | Three y/o | Treatment (Wk 1) | Treatment | Feed Day | No | 21:45 | 21:00 - 21:59 | Night   | 37,9 | 69  | 9,4  | 9,4  | 19,05 | 565,86 | 74,66  |
| 2019/05/16 | CH2206 | Male | Three y/o | Treatment (Wk 1) | Treatment | Feed Day | No | 21:45 | 21:00 - 21:59 | Night   | 37,7 | 50  | 10,4 | 10,4 | 18,85 | 539,52 | 78,08  |
| 2019/05/16 | CH2205 | Male | Three y/o | Treatment (Wk 1) | Treatment | Feed Day | No | 21:50 | 21:00 - 21:59 | Night   | 38,0 | 49  | 5,6  | 5,6  | 19,15 | 537,80 | 57,21  |
| 2019/05/16 | CH2206 | Male | Three y/o | Treatment (Wk 1) | Treatment | Feed Day | No | 21:50 | 21:00 - 21:59 | Night   | 37,5 | 90  | 6,6  | 6,6  | 18,65 | 586,16 | 62,73  |
| 2019/05/16 | CH2205 | Male | Three y/o | Treatment (Wk 1) | Treatment | Feed Day | No | 21:55 | 21:00 - 21:59 | Night   | 38,0 | 51  | 8,4  | 8,4  | 19,15 | 541,20 | 70,86  |
| 2019/05/16 | CH2206 | Male | Three y/o | Treatment (Wk 1) | Treatment | Feed Day | No | 21:55 | 21:00 - 21:59 | Night   | 37,5 | 61  | 6,8  | 6,8  | 18,65 | 556,01 | 63,74  |
| 2019/05/16 | CH2205 | Male | Three y/o | Treatment (Wk 1) | Treatment | Feed Day | No | 22:00 | 22:00 - 22:59 | Night   | 38,0 | 62  | 7,0  | 7,0  | 19,15 | 557,33 | 64,72  |
| 2019/05/16 | CH2206 | Male | Three y/o | Treatment (Wk 1) | Treatment | Feed Day | No | 22:00 | 22:00 - 22:59 | Night   | 37,5 | 83  | 9,0  | 9,0  | 18,65 | 580,11 | 73,19  |
| 2019/05/16 | CH2205 | Male | Three y/o | Treatment (Wk 1) | Treatment | Feed Day | No | 22:05 | 22:00 - 22:59 | Night   | 38,0 | 72  | 9,6  | 9,6  | 19,15 | 569,20 | 75,37  |
| 2019/05/16 | CH2206 | Male | Three y/o | Treatment (Wk 1) | Treatment | Feed Day | No | 22:05 | 22:00 - 22:59 | Night   | 37,5 | 79  | 10,8 | 10,8 | 18,65 | 576,36 | 79,36  |
| 2019/05/16 | CH2205 | Male | Three y/o | Treatment (Wk 1) | Treatment | Feed Day | No | 22:10 | 22:00 - 22:59 | Night   | 38,0 | 68  | 14,0 | 14,0 | 19,15 | 564,71 | 88,17  |
| 2019/05/16 | CH2206 | Male | Three y/o | Treatment (Wk 1) | Treatment | Feed Day | No | 22:10 | 22:00 - 22:59 | Night   | 37,7 | 89  | 13,8 | 13,8 | 18,85 | 585,33 | 87,68  |
| 2019/05/16 | CH2205 | Male | Three y/o | Treatment (Wk 1) | Treatment | Feed Day | No | 22:15 | 22:00 - 22:59 | Night   | 38,1 | 49  | 9,2  | 9,2  | 19,26 | 537,80 | 73,94  |
| 2019/05/16 | CH2206 | Male | Three y/o | Treatment (Wk 1) | Treatment | Feed Day | No | 22:15 | 22:00 - 22:59 | Night   | 37,7 | 84  | 10,4 | 10,4 | 18,85 | 581,01 | 78,08  |
| 2019/05/16 | CH2205 | Male | Three y/o | Treatment (Wk 1) | Treatment | Feed Day | No | 22:20 | 22:00 - 22:59 | Night   | 38,1 | 83  | 9,0  | 9,0  | 19,26 | 580,11 | 73,19  |
| 2019/05/16 | CH2206 | Male | Three y/o | Treatment (Wk 1) | Treatment | Feed Day | No | 22:20 | 22:00 - 22:59 | Night   | 37,7 | 47  | 21,6 | 21,6 | 18,85 | 534,23 | 102,94 |
| 2019/05/16 | CH2205 | Male | Three y/o | Treatment (Wk 1) | Treatment | Feed Day | No | 22:25 | 22:00 - 22:59 | Night   | 38,1 | 48  | 8,6  | 8,6  | 19,26 | 536,04 | 71,66  |
| 2019/05/16 | CH2206 | Male | Three y/o | Treatment (Wk 1) | Treatment | Feed Day | No | 22:25 | 22:00 - 22:59 | Night   | 37,8 | 80  | 18,0 | 18,0 | 18,95 | 577,31 | 96,72  |
| 2019/05/16 | CH2205 | Male | Three y/o | Treatment (Wk 1) | Treatment | Feed Day | No | 22:30 | 22:00 - 22:59 | Night   | 38,1 | 46  | 9,8  | 9,8  | 19,26 | 532,38 | 76,07  |



|   |            |        |      |           |                  |           |          |    |       |               |               |      |     |       |       |       |        |        |
|---|------------|--------|------|-----------|------------------|-----------|----------|----|-------|---------------|---------------|------|-----|-------|-------|-------|--------|--------|
|   | 2019/05/16 | CH2206 | Male | Three y/o | Treatment (Wk 1) | Treatment | Feed Day | No | 22:30 | 22:00 - 22:59 | Night         | 37,8 | 51  | 21,0  | 21,0  | 18,95 | 541,20 | 101,98 |
|   | 2019/05/16 | CH2205 | Male | Three y/o | Treatment (Wk 1) | Treatment | Feed Day | No | 22:35 | 22:00 - 22:59 | Night         | 38,1 | 83  | 7,2   | 7,2   | 19,26 | 580,11 | 65,66  |
|   | 2019/05/16 | CH2206 | Male | Three y/o | Treatment (Wk 1) | Treatment | Feed Day | No | 22:35 | 22:00 - 22:59 | Night         | 37,8 | 55  | 17,8  | 17,8  | 18,95 | 547,52 | 96,34  |
|   | 2019/05/16 | CH2205 | Male | Three y/o | Treatment (Wk 1) | Treatment | Feed Day | No | 22:40 | 22:00 - 22:59 | Night         | 38,1 | 92  | 9,0   | 9,0   | 19,26 | 587,78 | 73,19  |
|   | 2019/05/16 | CH2206 | Male | Three y/o | Treatment (Wk 1) | Treatment | Feed Day | No | 22:40 | 22:00 - 22:59 | Night         | 37,8 | 117 | 52,0  | 52,0  | 18,95 | 605,02 | 133,14 |
|   | 2019/05/16 | CH2205 | Male | Three y/o | Treatment (Wk 1) | Treatment | Feed Day | No | 22:45 | 22:00 - 22:59 | Night         | 38,1 | 56  | 12,2  | 12,2  | 19,26 | 549,01 | 83,49  |
|   | 2019/05/16 | CH2206 | Male | Three y/o | Treatment (Wk 1) | Treatment | Feed Day | No | 22:45 | 22:00 - 22:59 | Night         | 37,7 | 79  | 53,4  | 53,4  | 18,85 | 576,36 | 134,06 |
|   | 2019/05/16 | CH2205 | Male | Three y/o | Treatment (Wk 1) | Treatment | Feed Day | No | 22:50 | 22:00 - 22:59 | Night         | 38,1 | 59  | 12,2  | 12,2  | 19,26 | 553,30 | 83,49  |
|   | 2019/05/16 | CH2206 | Male | Three y/o | Treatment (Wk 1) | Treatment | Feed Day | No | 22:50 | 22:00 - 22:59 | Night         | 37,7 | 84  | 36,4  | 36,4  | 18,85 | 581,01 | 120,84 |
|   | 2019/05/16 | CH2205 | Male | Three y/o | Treatment (Wk 1) | Treatment | Feed Day | No | 22:55 | 22:00 - 22:59 | Night         | 38,1 | 42  | 8,8   | 8,8   | 19,26 | 524,42 | 72,43  |
|   | 2019/05/16 | CH2206 | Male | Three y/o | Treatment (Wk 1) | Treatment | Feed Day | No | 22:55 | 22:00 - 22:59 | Night         | 37,7 | 45  | 39,4  | 39,4  | 18,85 | 530,47 | 123,57 |
|   | 2019/05/16 | CH2205 | Male | Three y/o | Treatment (Wk 1) | Treatment | Feed Day | No | 23:00 | 23:00 - 23:59 | Night         | 38,1 | 65  | 13,6  | 13,6  | 19,26 | 561,12 | 87,18  |
|   | 2019/05/16 | CH2206 | Male | Three y/o | Treatment (Wk 1) | Treatment | Feed Day | No | 23:00 | 23:00 - 23:59 | Night         | 37,7 | 78  | 42,0  | 42,0  | 18,85 | 575,38 | 125,77 |
|   | 2019/05/16 | CH2205 | Male | Three y/o | Treatment (Wk 1) | Treatment | Feed Day | No | 23:05 | 23:00 - 23:59 | Night         | 38,1 | 82  | 9,2   | 9,2   | 19,26 | 579,19 | 73,94  |
|   | 2019/05/16 | CH2206 | Male | Three y/o | Treatment (Wk 1) | Treatment | Feed Day | No | 23:05 | 23:00 - 23:59 | Night         | 37,7 | 72  | 54,0  | 54,0  | 18,85 | 569,20 | 134,45 |
|   | 2019/05/16 | CH2205 | Male | Three y/o | Treatment (Wk 1) | Treatment | Feed Day | No | 23:10 | 23:00 - 23:59 | Night         | 38,0 | 64  | 9,6   | 9,6   | 19,15 | 559,88 | 75,37  |
|   | 2019/05/16 | CH2206 | Male | Three y/o | Treatment (Wk 1) | Treatment | Feed Day | No | 23:10 | 23:00 - 23:59 | Night         | 37,8 | 109 | 53,0  | 53,0  | 18,95 | 600,04 | 133,80 |
|   | 2019/05/16 | CH2205 | Male | Three y/o | Treatment (Wk 1) | Treatment | Feed Day | No | 23:15 | 23:00 - 23:59 | Night         | 38,0 | 71  | 9,4   | 9,4   | 19,15 | 568,10 | 74,66  |
|   | 2019/05/16 | CH2206 | Male | Three y/o | Treatment (Wk 1) | Treatment | Feed Day | No | 23:15 | 23:00 - 23:59 | Night         | 37,7 | 84  | 52,4  | 52,4  | 18,85 | 581,01 | 133,41 |
|   | 2019/05/16 | CH2205 | Male | Three y/o | Treatment (Wk 1) | Treatment | Feed Day | No | 23:20 | 23:00 - 23:59 | Night         | 38,0 | 46  | 8,6   | 8,6   | 19,15 | 532,38 | 71,66  |
|   | 2019/05/16 | CH2206 | Male | Three y/o | Treatment (Wk 1) | Treatment | Feed Day | No | 23:20 | 23:00 - 23:59 | Night         | 37,7 | 89  | 47,4  | 47,4  | 18,85 | 585,33 | 129,94 |
|   | 2019/05/16 | CH2205 | Male | Three y/o | Treatment (Wk 1) | Treatment | Feed Day | No | 23:25 | 23:00 - 23:59 | Night         | 38,0 | 66  | 10,0  | 10,0  | 19,15 | 562,34 | 76,76  |
|   | 2019/05/16 | CH2206 | Male | Three y/o | Treatment (Wk 1) | Treatment | Feed Day | No | 23:25 | 23:00 - 23:59 | Night         | 37,7 | 60  | 48,0  | 48,0  | 18,85 | 554,67 | 130,38 |
|   | 2019/05/16 | CH2205 | Male | Three y/o | Treatment (Wk 1) | Treatment | Feed Day | No | 23:30 | 23:00 - 23:59 | Night         | 38,0 | 94  | 11,4  | 11,4  | 19,15 | 589,37 | 81,19  |
|   | 2019/05/16 | CH2206 | Male | Three y/o | Treatment (Wk 1) | Treatment | Feed Day | No | 23:30 | 23:00 - 23:59 | Night         | 37,7 | 68  | 39,6  | 39,6  | 18,85 | 564,71 | 123,74 |
|   | 2019/05/16 | CH2205 | Male | Three y/o | Treatment (Wk 1) | Treatment | Feed Day | No | 23:35 | 23:00 - 23:59 | Night         | 38,0 | 79  | 10,6  | 10,6  | 19,15 | 576,36 | 78,73  |
|   | 2019/05/16 | CH2206 | Male | Three y/o | Treatment (Wk 1) | Treatment | Feed Day | No | 23:35 | 23:00 - 23:59 | Night         | 37,7 | 94  | 35,6  | 35,6  | 18,85 | 589,37 | 120,08 |
|   | 2019/05/16 | CH2205 | Male | Three y/o | Treatment (Wk 1) | Treatment | Feed Day | No | 23:40 | 23:00 - 23:59 | Night         | 38,0 | 55  | 9,8   | 9,8   | 19,15 | 547,52 | 76,07  |
|   | 2019/05/16 | CH2206 | Male | Three y/o | Treatment (Wk 1) | Treatment | Feed Day | No | 23:40 | 23:00 - 23:59 | Night         | 37,5 | 81  | 47,2  | 47,2  | 18,65 | 578,26 | 129,80 |
|   | 2019/05/16 | CH2205 | Male | Three y/o | Treatment (Wk 1) | Treatment | Feed Day | No | 23:45 | 23:00 - 23:59 | Night         | 38,0 | 51  | 14,6  | 14,6  | 19,15 | 541,20 | 89,59  |
|   | 2019/05/16 | CH2206 | Male | Three y/o | Treatment (Wk 1) | Treatment | Feed Day | No | 23:45 | 23:00 - 23:59 | Night         | 37,5 | 47  | 47,0  | 47,0  | 18,65 | 534,23 | 129,65 |
|   | 2019/05/16 | CH2205 | Male | Three y/o | Treatment (Wk 1) | Treatment | Feed Day | No | 23:50 | 23:00 - 23:59 | Night         | 38,0 | 52  | 16,6  | 16,6  | 19,15 | 542,83 | 93,96  |
|   | 2019/05/16 | CH2206 | Male | Three y/o | Treatment (Wk 1) | Treatment | Feed Day | No | 23:50 | 23:00 - 23:59 | Night         | 37,5 | 88  | 48,8  | 48,8  | 18,65 | 584,49 | 130,95 |
|   | 2019/05/16 | CH2205 | Male | Three y/o | Treatment (Wk 1) | Treatment | Feed Day | No | 23:55 | 23:00 - 23:59 | Night         | 38,0 | 46  | 14,8  | 14,8  | 19,15 | 532,38 | 90,05  |
|   | 2019/05/16 | CH2206 | Male | Three y/o | Treatment (Wk 1) | Treatment | Feed Day | No | 23:55 | 23:00 - 23:59 | Night         | 37,5 | 93  | 52,0  | 52,0  | 18,65 | 588,58 | 133,14 |
| 3 | 2019/05/17 | CH2205 | Male | Three y/o | Treatment (Wk 1) | Treatment | Feed Day | No | 00:00 | 00:00 - 00:59 | Early Morning | 38,0 | 44  | 12,0  | 12,0  | 19,15 | 528,51 | 82,93  |
|   | 2019/05/17 | CH2206 | Male | Three y/o | Treatment (Wk 1) | Treatment | Feed Day | No | 00:00 | 00:00 - 00:59 | Early Morning | 37,5 | 88  | 53,6  | 53,6  | 18,65 | 584,49 | 134,19 |
|   | 2019/05/17 | CH2205 | Male | Three y/o | Treatment (Wk 1) | Treatment | Feed Day | No | 00:05 | 00:00 - 00:59 | Early Morning | 38,0 | 49  | 305,2 | 305,2 | 19,15 | 537,80 | 195,03 |
|   | 2019/05/17 | CH2206 | Male | Three y/o | Treatment (Wk 1) | Treatment | Feed Day | No | 00:05 | 00:00 - 00:59 | Early Morning | 37,5 | 96  | 31,8  | 31,8  | 18,65 | 590,91 | 116,20 |
|   | 2019/05/17 | CH2205 | Male | Three y/o | Treatment (Wk 1) | Treatment | Feed Day | No | 00:10 | 00:00 - 00:59 | Early Morning | 38,0 |     | 23,0  | 23,0  | 19,15 |        | 105,09 |
|   | 2019/05/17 | CH2206 | Male | Three y/o | Treatment (Wk 1) | Treatment | Feed Day | No | 00:10 | 00:00 - 00:59 | Early Morning | 37,7 | 51  | 10,8  | 10,8  | 18,85 | 541,20 | 79,36  |
|   | 2019/05/17 | CH2205 | Male | Three y/o | Treatment (Wk 1) | Treatment | Feed Day | No | 00:15 | 00:00 - 00:59 | Early Morning | 38,0 | 194 | 26,4  | 26,4  | 19,15 | 638,30 | 109,81 |
|   | 2019/05/17 | CH2206 | Male | Three y/o | Treatment (Wk 1) | Treatment | Feed Day | No | 00:15 | 00:00 - 00:59 | Early Morning | 37,7 | 97  | 10,0  | 10,0  | 18,85 | 591,66 | 76,76  |
|   | 2019/05/17 | CH2205 | Male | Three y/o | Treatment (Wk 1) | Treatment | Feed Day | No | 00:20 | 00:00 - 00:59 | Early Morning | 37,9 | 73  | 4,4   | 4,4   | 19,05 | 570,27 | 49,12  |
|   | 2019/05/17 | CH2206 | Male | Three y/o | Treatment (Wk 1) | Treatment | Feed Day | No | 00:20 | 00:00 - 00:59 | Early Morning | 37,7 | 56  | 12,4  | 12,4  | 18,85 | 549,01 | 84,04  |
|   | 2019/05/17 | CH2205 | Male | Three y/o | Treatment (Wk 1) | Treatment | Feed Day | No | 00:25 | 00:00 - 00:59 | Early Morning | 37,9 | 98  | 7,0   | 7,0   | 19,05 | 592,41 | 64,72  |
|   | 2019/05/17 | CH2206 | Male | Three y/o | Treatment (Wk 1) | Treatment | Feed Day | No | 00:25 | 00:00 - 00:59 | Early Morning | 37,7 | 76  | 7,0   | 7,0   | 18,85 | 573,39 | 64,72  |
|   | 2019/05/17 | CH2205 | Male | Three y/o | Treatment (Wk 1) | Treatment | Feed Day | No | 00:30 | 00:00 - 00:59 | Early Morning | 37,7 | 62  | 3,4   | 3,4   | 18,85 | 557,33 | 40,51  |
|   | 2019/05/17 | CH2206 | Male | Three y/o | Treatment (Wk 1) | Treatment | Feed Day | No | 00:30 | 00:00 - 00:59 | Early Morning | 37,7 | 78  | 13,8  | 13,8  | 18,85 | 575,38 | 87,68  |
|   | 2019/05/17 | CH2205 | Male | Three y/o | Treatment (Wk 1) | Treatment | Feed Day | No | 00:35 | 00:00 - 00:59 | Early Morning | 37,7 | 88  | 8,6   | 8,6   | 18,85 | 584,49 | 71,66  |
|   | 2019/05/17 | CH2206 | Male | Three y/o | Treatment (Wk 1) | Treatment | Feed Day | No | 00:35 | 00:00 - 00:59 | Early Morning | 37,7 | 88  | 19,6  | 19,6  | 18,85 | 584,49 | 99,63  |
|   | 2019/05/17 | CH2205 | Male | Three y/o | Treatment (Wk 1) | Treatment | Feed Day | No | 00:40 | 00:00 - 00:59 | Early Morning | 37,7 | 91  | 6,8   | 6,8   | 18,85 | 586,98 | 63,74  |
|   | 2019/05/17 | CH2206 | Male | Three y/o | Treatment (Wk 1) | Treatment | Feed Day | No | 00:40 | 00:00 - 00:59 | Early Morning | 37,7 | 80  | 20,6  | 20,6  | 18,85 | 577,31 | 101,32 |
|   | 2019/05/17 | CH2205 | Male | Three y/o | Treatment (Wk 1) | Treatment | Feed Day | No | 00:45 | 00:00 - 00:59 | Early Morning | 37,7 | 42  | 7,2   | 7,2   | 18,85 | 524,42 | 65,66  |
|   | 2019/05/17 | CH2206 | Male | Three y/o | Treatment (Wk 1) | Treatment | Feed Day | No | 00:45 | 00:00 - 00:59 | Early Morning | 37,7 | 47  | 19,2  | 19,2  | 18,85 | 534,23 | 98,92  |
|   | 2019/05/17 | CH2205 | Male | Three y/o | Treatment (Wk 1) | Treatment | Feed Day | No | 00:50 | 00:00 - 00:59 | Early Morning | 37,7 | 79  | 5,2   | 5,2   | 18,85 | 576,36 | 54,72  |
|   | 2019/05/17 | CH2206 | Male | Three y/o | Treatment (Wk 1) | Treatment | Feed Day | No | 00:50 | 00:00 - 00:59 | Early Morning | 37,7 | 60  | 12,8  | 12,8  | 18,85 | 554,67 | 85,12  |
|   | 2019/05/17 | CH2205 | Male | Three y/o | Treatment (Wk 1) | Treatment | Feed Day | No | 00:55 | 00:00 - 00:59 | Early Morning | 37,7 | 57  | 6,6   | 6,6   | 18,85 | 550,47 | 62,73  |
|   | 2019/05/17 | CH2206 | Male | Three y/o | Treatment (Wk 1) | Treatment | Feed Day | No | 00:55 | 00:00 - 00:59 | Early Morning | 37,8 | 53  | 21,0  | 21,0  | 18,95 | 544,43 | 101,98 |
|   | 2019/05/17 | CH2205 | Male | Three y/o | Treatment (Wk 1) | Treatment | Feed Day | No | 01:00 | 01:00 - 01:59 | Early Morning | 37,7 | 55  | 9,2   | 9,2   | 18,85 | 547,52 | 73,94  |
|   | 2019/05/17 | CH2206 | Male | Three y/o | Treatment (Wk 1) | Treatment | Feed Day | No | 01:00 | 01:00 - 01:59 | Early Morning | 37,8 | 45  | 26,4  | 26,4  | 18,95 | 530,47 | 109,81 |
|   | 2019/05/17 | CH2205 | Male | Three y/o | Treatment (Wk 1) | Treatment | Feed Day | No | 01:05 | 01:00 - 01:59 | Early Morning | 37,7 | 98  | 7,4   | 7,4   | 18,85 | 592,41 | 66,59  |
|   | 2019/05/17 | CH2206 | Male | Three y/o | Treatment (Wk 1) | Treatment | Feed Day | No | 01:05 | 01:00 - 01:59 | Early Morning | 37,7 | 83  | 31,8  | 31,8  | 18,85 | 580,11 | 116,20 |
|   | 2019/05/17 | CH2205 | Male | Three y/o | Treatment (Wk 1) | Treatment | Feed Day | No | 01:10 | 01:00 - 01:59 | Early Morning | 37,7 | 88  | 6,0   | 6,0   | 18,85 | 584,49 | 59,53  |
|   | 2019/05/17 | CH2206 | Male | Three y/o | Treatment (Wk 1) | Treatment | Feed Day | No | 01:10 | 01:00 - 01:59 | Early Morning | 37,5 | 56  | 29,8  | 29,8  | 18,65 | 549,01 | 113,97 |
|   | 2019/05/17 | CH2205 | Male | Three y/o | Treatment (Wk 1) | Treatment | Feed Day | No | 01:15 | 01:00 - 01:59 | Early Morning | 37,7 | 49  | 6,8   | 6,8   | 18,85 | 537,80 | 63,74  |
|   | 2019/05/17 | CH2206 | Male | Three y/o | Treatment (Wk 1) | Treatment | Feed Day | No | 01:15 | 01:00 - 01:59 | Early Morning | 37,3 | 46  | 17,6  | 17,6  | 18,46 | 532,38 | 95,95  |
|   | 2019/05/17 | CH2205 | Male | Three y/o | Treatment (Wk 1) | Treatment | Feed Day | No | 01:20 | 01:00 - 01:59 | Early Morning | 37,7 | 62  | 4,8   | 4,8   | 18,85 | 557,33 | 52,04  |
|   | 2019/05/17 | CH2206 | Male | Three y/o | Treatment (Wk 1) | Treatment | Feed Day | No | 01:20 | 01:00 - 01:59 | Early Morning | 37,3 | 80  | 14,6  | 14,6  | 18,46 | 577,31 | 89,59  |
|   | 2019/05/17 | CH2205 | Male | Three y/o | Treatment (Wk 1) | Treatment | Feed Day | No | 01:25 | 01:00 - 01:59 | Early Morning | 37,7 | 80  | 10,0  | 10,0  | 18,85 | 577,31 | 76,76  |



|            |        |      |           |                  |           |          |    |       |               |               |      |     |       |       |       |        |        |
|------------|--------|------|-----------|------------------|-----------|----------|----|-------|---------------|---------------|------|-----|-------|-------|-------|--------|--------|
| 2019/05/17 | CH2206 | Male | Three y/o | Treatment (Wk 1) | Treatment | Feed Day | No | 01:25 | 01:00 - 01:59 | Early Morning | 37,3 | 45  | 20,6  | 20,6  | 18,46 | 530,47 | 101,32 |
| 2019/05/17 | CH2205 | Male | Three y/o | Treatment (Wk 1) | Treatment | Feed Day | No | 01:30 | 01:00 - 01:59 | Early Morning | 37,9 | 57  | 11,4  | 11,4  | 19,05 | 550,47 | 81,19  |
| 2019/05/17 | CH2206 | Male | Three y/o | Treatment (Wk 1) | Treatment | Feed Day | No | 01:30 | 01:00 - 01:59 | Early Morning | 37,4 | 62  | 19,2  | 19,2  | 18,55 | 557,33 | 98,92  |
| 2019/05/17 | CH2205 | Male | Three y/o | Treatment (Wk 1) | Treatment | Feed Day | No | 01:35 | 01:00 - 01:59 | Early Morning | 37,9 | 45  | 15,8  | 15,8  | 19,05 | 530,47 | 92,28  |
| 2019/05/17 | CH2206 | Male | Three y/o | Treatment (Wk 1) | Treatment | Feed Day | No | 01:35 | 01:00 - 01:59 | Early Morning | 37,5 | 55  | 15,4  | 15,4  | 18,65 | 547,52 | 91,41  |
| 2019/05/17 | CH2205 | Male | Three y/o | Treatment (Wk 1) | Treatment | Feed Day | No | 01:40 | 01:00 - 01:59 | Early Morning | 37,8 | 49  | 15,4  | 15,4  | 18,95 | 537,80 | 91,41  |
| 2019/05/17 | CH2206 | Male | Three y/o | Treatment (Wk 1) | Treatment | Feed Day | No | 01:40 | 01:00 - 01:59 | Early Morning | 37,5 | 77  | 17,8  | 17,8  | 18,65 | 574,39 | 96,34  |
| 2019/05/17 | CH2205 | Male | Three y/o | Treatment (Wk 1) | Treatment | Feed Day | No | 01:45 | 01:00 - 01:59 | Early Morning | 37,7 | 54  | 20,8  | 20,8  | 18,85 | 545,99 | 101,65 |
| 2019/05/17 | CH2206 | Male | Three y/o | Treatment (Wk 1) | Treatment | Feed Day | No | 01:45 | 01:00 - 01:59 | Early Morning | 37,5 | 94  | 36,2  | 36,2  | 18,65 | 589,37 | 120,65 |
| 2019/05/17 | CH2205 | Male | Three y/o | Treatment (Wk 1) | Treatment | Feed Day | No | 01:50 | 01:00 - 01:59 | Early Morning | 37,9 | 128 | 65,8  | 65,8  | 19,05 | 611,22 | 141,29 |
| 2019/05/17 | CH2206 | Male | Three y/o | Treatment (Wk 1) | Treatment | Feed Day | No | 01:50 | 01:00 - 01:59 | Early Morning | 37,3 | 96  | 37,6  | 37,6  | 18,46 | 590,91 | 121,96 |
| 2019/05/17 | CH2205 | Male | Three y/o | Treatment (Wk 1) | Treatment | Feed Day | No | 01:55 | 01:00 - 01:59 | Early Morning | 37,9 | 131 | 95,4  | 95,4  | 19,05 | 612,80 | 154,20 |
| 2019/05/17 | CH2206 | Male | Three y/o | Treatment (Wk 1) | Treatment | Feed Day | No | 01:55 | 01:00 - 01:59 | Early Morning | 37,5 | 117 | 198,8 | 198,8 | 18,65 | 605,02 | 179,91 |
| 2019/05/17 | CH2205 | Male | Three y/o | Treatment (Wk 1) | Treatment | Feed Day | No | 02:00 | 02:00 - 02:59 | Early Morning | 37,7 | 120 | 67,0  | 67,0  | 18,85 | 606,78 | 141,92 |
| 2019/05/17 | CH2206 | Male | Three y/o | Treatment (Wk 1) | Treatment | Feed Day | No | 02:00 | 02:00 - 02:59 | Early Morning | 37,5 | 108 | 48,2  | 48,2  | 18,65 | 599,39 | 130,52 |
| 2019/05/17 | CH2205 | Male | Three y/o | Treatment (Wk 1) | Treatment | Feed Day | No | 02:05 | 02:00 - 02:59 | Early Morning | 37,6 | 85  | 183,6 | 183,6 | 18,75 | 581,90 | 177,11 |
| 2019/05/17 | CH2206 | Male | Three y/o | Treatment (Wk 1) | Treatment | Feed Day | No | 02:05 | 02:00 - 02:59 | Early Morning | 37,4 | 110 | 84,2  | 84,2  | 18,55 | 600,69 | 149,85 |
| 2019/05/17 | CH2205 | Male | Three y/o | Treatment (Wk 1) | Treatment | Feed Day | No | 02:10 | 02:00 - 02:59 | Early Morning | 37,7 | 114 | 28,0  | 28,0  | 18,85 | 603,20 | 111,83 |
| 2019/05/17 | CH2206 | Male | Three y/o | Treatment (Wk 1) | Treatment | Feed Day | No | 02:10 | 02:00 - 02:59 | Early Morning | 37,5 | 119 | 68,2  | 68,2  | 18,65 | 606,20 | 142,53 |
| 2019/05/17 | CH2205 | Male | Three y/o | Treatment (Wk 1) | Treatment | Feed Day | No | 02:15 | 02:00 - 02:59 | Early Morning | 37,6 | 118 | 93,0  | 93,0  | 18,75 | 605,61 | 153,31 |
| 2019/05/17 | CH2206 | Male | Three y/o | Treatment (Wk 1) | Treatment | Feed Day | No | 02:15 | 02:00 - 02:59 | Early Morning | 37,5 | 94  | 186,8 | 186,8 | 18,65 | 589,37 | 177,72 |
| 2019/05/17 | CH2205 | Male | Three y/o | Treatment (Wk 1) | Treatment | Feed Day | No | 02:20 | 02:00 - 02:59 | Early Morning | 37,7 | 107 | 59,6  | 59,6  | 18,85 | 598,73 | 137,86 |
| 2019/05/17 | CH2206 | Male | Three y/o | Treatment (Wk 1) | Treatment | Feed Day | No | 02:20 | 02:00 - 02:59 | Early Morning | 37,4 | 111 | 7,2   | 7,2   | 18,55 | 601,33 | 65,66  |
| 2019/05/17 | CH2205 | Male | Three y/o | Treatment (Wk 1) | Treatment | Feed Day | No | 02:25 | 02:00 - 02:59 | Early Morning | 37,6 |     | 26,4  | 26,4  | 18,75 |        | 109,81 |
| 2019/05/17 | CH2206 | Male | Three y/o | Treatment (Wk 1) | Treatment | Feed Day | No | 02:25 | 02:00 - 02:59 | Early Morning | 37,1 | 48  | 5,4   | 5,4   | 18,26 | 536,04 | 55,99  |
| 2019/05/17 | CH2205 | Male | Three y/o | Treatment (Wk 1) | Treatment | Feed Day | No | 02:30 | 02:00 - 02:59 | Early Morning | 37,3 |     | 21,0  | 21,0  | 18,46 |        | 101,98 |
| 2019/05/17 | CH2206 | Male | Three y/o | Treatment (Wk 1) | Treatment | Feed Day | No | 02:30 | 02:00 - 02:59 | Early Morning | 36,8 | 169 | 3,0   | 3,0   | 17,96 | 629,60 | 36,34  |
| 2019/05/17 | CH2205 | Male | Three y/o | Treatment (Wk 1) | Treatment | Feed Day | No | 02:35 | 02:00 - 02:59 | Early Morning | 37,2 | 109 | 50,0  | 50,0  | 18,36 | 600,04 | 131,79 |
| 2019/05/17 | CH2206 | Male | Three y/o | Treatment (Wk 1) | Treatment | Feed Day | No | 02:35 | 02:00 - 02:59 | Early Morning | 36,6 | 182 | 12,0  | 12,0  | 17,77 | 634,31 | 82,93  |
| 2019/05/17 | CH2205 | Male | Three y/o | Treatment (Wk 1) | Treatment | Feed Day | No | 02:40 | 02:00 - 02:59 | Early Morning | 37,3 | 109 | 85,8  | 85,8  | 18,46 | 600,04 | 150,51 |
| 2019/05/17 | CH2206 | Male | Three y/o | Treatment (Wk 1) | Treatment | Feed Day | No | 02:40 | 02:00 - 02:59 | Early Morning | 36,8 | 165 | 229,2 | 229,2 | 17,96 | 628,06 | 184,92 |
| 2019/05/17 | CH2205 | Male | Three y/o | Treatment (Wk 1) | Treatment | Feed Day | No | 02:45 | 02:00 - 02:59 | Early Morning | 37,5 | 112 | 33,0  | 33,0  | 18,65 | 601,96 | 117,47 |
| 2019/05/17 | CH2206 | Male | Three y/o | Treatment (Wk 1) | Treatment | Feed Day | No | 02:45 | 02:00 - 02:59 | Early Morning | 37,1 | 126 | 155,4 | 155,4 | 18,26 | 610,14 | 171,26 |
| 2019/05/17 | CH2205 | Male | Three y/o | Treatment (Wk 1) | Treatment | Feed Day | No | 02:50 | 02:00 - 02:59 | Early Morning | 37,6 |     | 96,2  | 96,2  | 18,75 |        | 154,49 |
| 2019/05/17 | CH2206 | Male | Three y/o | Treatment (Wk 1) | Treatment | Feed Day | No | 02:50 | 02:00 - 02:59 | Early Morning | 37,2 | 109 | 101,0 | 101,0 | 18,36 | 600,04 | 156,19 |
| 2019/05/17 | CH2205 | Male | Three y/o | Treatment (Wk 1) | Treatment | Feed Day | No | 02:55 | 02:00 - 02:59 | Early Morning | 37,6 | 52  | 59,6  | 59,6  | 18,75 | 542,83 | 137,86 |
| 2019/05/17 | CH2206 | Male | Three y/o | Treatment (Wk 1) | Treatment | Feed Day | No | 02:55 | 02:00 - 02:59 | Early Morning | 37,2 | 113 | 34,4  | 34,4  | 18,36 | 602,58 | 118,90 |
| 2019/05/17 | CH2205 | Male | Three y/o | Treatment (Wk 1) | Treatment | Feed Day | No | 03:00 | 03:00 - 03:59 | Early Morning | 37,5 | 73  | 3,4   | 3,4   | 18,65 | 570,27 | 40,51  |
| 2019/05/17 | CH2206 | Male | Three y/o | Treatment (Wk 1) | Treatment | Feed Day | No | 03:00 | 03:00 - 03:59 | Early Morning | 37,1 | 78  | 57,8  | 57,8  | 18,26 | 575,38 | 136,80 |
| 2019/05/17 | CH2205 | Male | Three y/o | Treatment (Wk 1) | Treatment | Feed Day | No | 03:05 | 03:00 - 03:59 | Early Morning | 37,3 | 51  | 4,0   | 4,0   | 18,46 | 541,20 | 45,94  |
| 2019/05/17 | CH2206 | Male | Three y/o | Treatment (Wk 1) | Treatment | Feed Day | No | 03:05 | 03:00 - 03:59 | Early Morning | 36,8 | 47  | 33,8  | 33,8  | 17,96 | 534,23 | 118,29 |
| 2019/05/17 | CH2205 | Male | Three y/o | Treatment (Wk 1) | Treatment | Feed Day | No | 03:10 | 03:00 - 03:59 | Early Morning | 37,2 | 53  | 14,2  | 14,2  | 18,36 | 544,43 | 88,65  |
| 2019/05/17 | CH2206 | Male | Three y/o | Treatment (Wk 1) | Treatment | Feed Day | No | 03:10 | 03:00 - 03:59 | Early Morning | 36,5 | 48  | 30,6  | 30,6  | 17,67 | 536,04 | 114,87 |
| 2019/05/17 | CH2205 | Male | Three y/o | Treatment (Wk 1) | Treatment | Feed Day | No | 03:15 | 03:00 - 03:59 | Early Morning | 37,2 | 72  | 14,4  | 14,4  | 18,36 | 569,20 | 89,12  |
| 2019/05/17 | CH2206 | Male | Three y/o | Treatment (Wk 1) | Treatment | Feed Day | No | 03:15 | 03:00 - 03:59 | Early Morning | 36,5 | 47  | 21,4  | 21,4  | 17,67 | 534,23 | 102,63 |
| 2019/05/17 | CH2205 | Male | Three y/o | Treatment (Wk 1) | Treatment | Feed Day | No | 03:20 | 03:00 - 03:59 | Early Morning | 37,3 | 87  | 18,8  | 18,8  | 18,46 | 583,64 | 98,20  |
| 2019/05/17 | CH2206 | Male | Three y/o | Treatment (Wk 1) | Treatment | Feed Day | No | 03:20 | 03:00 - 03:59 | Early Morning | 37,3 | 55  | 13,6  | 13,6  | 18,46 | 547,52 | 87,18  |
| 2019/05/17 | CH2205 | Male | Three y/o | Treatment (Wk 1) | Treatment | Feed Day | No | 03:25 | 03:00 - 03:59 | Early Morning | 37,4 | 84  | 19,8  | 19,8  | 18,55 | 581,01 | 99,97  |
| 2019/05/17 | CH2206 | Male | Three y/o | Treatment (Wk 1) | Treatment | Feed Day | No | 03:25 | 03:00 - 03:59 | Early Morning | 37,4 | 60  | 17,4  | 17,4  | 18,55 | 554,67 | 95,56  |
| 2019/05/17 | CH2205 | Male | Three y/o | Treatment (Wk 1) | Treatment | Feed Day | No | 03:30 | 03:00 - 03:59 | Early Morning | 37,4 | 50  | 21,4  | 21,4  | 18,55 | 539,52 | 102,63 |
| 2019/05/17 | CH2206 | Male | Three y/o | Treatment (Wk 1) | Treatment | Feed Day | No | 03:30 | 03:00 - 03:59 | Early Morning | 37,4 | 180 | 57,2  | 57,2  | 18,55 | 633,61 | 136,44 |
| 2019/05/17 | CH2205 | Male | Three y/o | Treatment (Wk 1) | Treatment | Feed Day | No | 03:35 | 03:00 - 03:59 | Early Morning | 37,5 | 58  | 13,6  | 13,6  | 18,65 | 551,90 | 87,18  |
| 2019/05/17 | CH2206 | Male | Three y/o | Treatment (Wk 1) | Treatment | Feed Day | No | 03:35 | 03:00 - 03:59 | Early Morning | 37,3 | 79  | 58,2  | 58,2  | 18,46 | 576,36 | 137,04 |
| 2019/05/17 | CH2205 | Male | Three y/o | Treatment (Wk 1) | Treatment | Feed Day | No | 03:40 | 03:00 - 03:59 | Early Morning | 37,5 | 79  | 18,6  | 18,6  | 18,65 | 576,36 | 97,84  |
| 2019/05/17 | CH2206 | Male | Three y/o | Treatment (Wk 1) | Treatment | Feed Day | No | 03:40 | 03:00 - 03:59 | Early Morning | 37,3 | 86  | 47,4  | 47,4  | 18,46 | 582,77 | 129,94 |
| 2019/05/17 | CH2205 | Male | Three y/o | Treatment (Wk 1) | Treatment | Feed Day | No | 03:45 | 03:00 - 03:59 | Early Morning | 37,4 | 93  | 4,4   | 4,4   | 18,55 | 588,58 | 49,12  |
| 2019/05/17 | CH2206 | Male | Three y/o | Treatment (Wk 1) | Treatment | Feed Day | No | 03:45 | 03:00 - 03:59 | Early Morning | 37,3 | 83  | 65,0  | 65,0  | 18,46 | 580,11 | 140,87 |
| 2019/05/17 | CH2205 | Male | Three y/o | Treatment (Wk 1) | Treatment | Feed Day | No | 03:50 | 03:00 - 03:59 | Early Morning | 37,6 | 61  | 5,6   | 5,6   | 18,75 | 556,01 | 57,21  |
| 2019/05/17 | CH2206 | Male | Three y/o | Treatment (Wk 1) | Treatment | Feed Day | No | 03:50 | 03:00 - 03:59 | Early Morning | 37,2 | 57  | 63,6  | 63,6  | 18,36 | 550,47 | 140,11 |
| 2019/05/17 | CH2205 | Male | Three y/o | Treatment (Wk 1) | Treatment | Feed Day | No | 03:55 | 03:00 - 03:59 | Early Morning | 37,6 | 68  | 6,6   | 6,6   | 18,75 | 564,71 | 62,73  |
| 2019/05/17 | CH2206 | Male | Three y/o | Treatment (Wk 1) | Treatment | Feed Day | No | 03:55 | 03:00 - 03:59 | Early Morning | 37,2 | 59  | 60,8  | 60,8  | 18,36 | 553,30 | 138,55 |
| 2019/05/17 | CH2205 | Male | Three y/o | Treatment (Wk 1) | Treatment | Feed Day | No | 04:00 | 04:00 - 04:59 | Morning       | 37,6 | 80  | 5,4   | 5,4   | 18,75 | 577,31 | 55,99  |
| 2019/05/17 | CH2206 | Male | Three y/o | Treatment (Wk 1) | Treatment | Feed Day | No | 04:00 | 04:00 - 04:59 | Morning       | 37,6 | 80  | 54,6  | 54,6  | 18,36 | 577,31 | 134,83 |
| 2019/05/17 | CH2205 | Male | Three y/o | Treatment (Wk 1) | Treatment | Feed Day | No | 04:05 | 04:00 - 04:59 | Morning       | 37,6 | 55  | 3,4   | 3,4   | 18,75 | 547,52 | 40,51  |
| 2019/05/17 | CH2206 | Male | Three y/o | Treatment (Wk 1) | Treatment | Feed Day | No | 04:05 | 04:00 - 04:59 | Morning       | 37,3 | 85  | 46,4  | 46,4  | 18,46 | 581,90 | 129,21 |
| 2019/05/17 | CH2205 | Male | Three y/o | Treatment (Wk 1) | Treatment | Feed Day | No | 04:10 | 04:00 - 04:59 | Morning       | 37,6 | 154 | 12,8  | 12,8  | 18,75 | 623,58 | 85,12  |
| 2019/05/17 | CH2206 | Male | Three y/o | Treatment (Wk 1) | Treatment | Feed Day | No | 04:10 | 04:00 - 04:59 | Morning       | 37,3 | 106 | 60,2  | 60,2  | 18,46 | 598,06 | 138,21 |
| 2019/05/17 | CH2205 | Male | Three y/o | Treatment (Wk 1) | Treatment | Feed Day | No | 04:15 | 04:00 - 04:59 | Morning       | 37,5 | 92  | 4,2   | 4,2   | 18,65 | 587,78 | 47,57  |
| 2019/05/17 | CH2206 | Male | Three y/o | Treatment (Wk 1) | Treatment | Feed Day | No | 04:15 | 04:00 - 04:59 | Morning       | 37,3 | 73  | 62,0  | 62,0  | 18,46 | 570,27 | 139,23 |
| 2019/05/17 | CH2205 | Male | Three y/o | Treatment (Wk 1) | Treatment | Feed Day | No | 04:20 | 04:00 - 04:59 | Morning       | 37,4 | 57  | 3,2   | 3,2   | 18,55 | 550,47 | 38,49  |



|            |        |      |           |                  |           |          |    |       |               |         |      |     |       |       |       |        |        |
|------------|--------|------|-----------|------------------|-----------|----------|----|-------|---------------|---------|------|-----|-------|-------|-------|--------|--------|
| 2019/05/17 | CH2206 | Male | Three y/o | Treatment (Wk 1) | Treatment | Feed Day | No | 04:20 | 04:00 - 04:59 | Morning | 37,4 | 83  | 45,2  | 45,2  | 18,55 | 580,11 | 128,30 |
| 2019/05/17 | CH2205 | Male | Three y/o | Treatment (Wk 1) | Treatment | Feed Day | No | 04:25 | 04:00 - 04:59 | Morning | 37,4 | 64  | 5,4   | 5,4   | 18,55 | 559,88 | 55,99  |
| 2019/05/17 | CH2206 | Male | Three y/o | Treatment (Wk 1) | Treatment | Feed Day | No | 04:25 | 04:00 - 04:59 | Morning | 37,4 | 57  | 38,4  | 38,4  | 18,55 | 550,47 | 122,68 |
| 2019/05/17 | CH2205 | Male | Three y/o | Treatment (Wk 1) | Treatment | Feed Day | No | 04:30 | 04:00 - 04:59 | Morning | 37,5 | 88  | 4,4   | 4,4   | 18,65 | 584,49 | 49,12  |
| 2019/05/17 | CH2206 | Male | Three y/o | Treatment (Wk 1) | Treatment | Feed Day | No | 04:30 | 04:00 - 04:59 | Morning | 37,4 | 39  | 56,4  | 56,4  | 18,55 | 517,82 | 135,95 |
| 2019/05/17 | CH2205 | Male | Three y/o | Treatment (Wk 1) | Treatment | Feed Day | No | 04:35 | 04:00 - 04:59 | Morning | 37,5 | 55  | 6,2   | 6,2   | 18,65 | 547,52 | 60,63  |
| 2019/05/17 | CH2206 | Male | Three y/o | Treatment (Wk 1) | Treatment | Feed Day | No | 04:35 | 04:00 - 04:59 | Morning | 37,4 | 45  | 56,2  | 56,2  | 18,55 | 530,47 | 135,83 |
| 2019/05/17 | CH2205 | Male | Three y/o | Treatment (Wk 1) | Treatment | Feed Day | No | 04:40 | 04:00 - 04:59 | Morning | 37,6 | 86  | 4,2   | 4,2   | 18,75 | 582,77 | 47,57  |
| 2019/05/17 | CH2206 | Male | Three y/o | Treatment (Wk 1) | Treatment | Feed Day | No | 04:40 | 04:00 - 04:59 | Morning | 37,4 | 73  | 57,6  | 57,6  | 18,55 | 570,27 | 136,68 |
| 2019/05/17 | CH2205 | Male | Three y/o | Treatment (Wk 1) | Treatment | Feed Day | No | 04:45 | 04:00 - 04:59 | Morning | 37,6 | 48  | 20,4  | 20,4  | 18,75 | 536,04 | 100,99 |
| 2019/05/17 | CH2206 | Male | Three y/o | Treatment (Wk 1) | Treatment | Feed Day | No | 04:45 | 04:00 - 04:59 | Morning | 37,3 | 58  | 59,0  | 59,0  | 18,46 | 551,90 | 137,51 |
| 2019/05/17 | CH2205 | Male | Three y/o | Treatment (Wk 1) | Treatment | Feed Day | No | 04:50 | 04:00 - 04:59 | Morning | 37,6 | 86  | 5,2   | 5,2   | 18,75 | 582,77 | 54,72  |
| 2019/05/17 | CH2206 | Male | Three y/o | Treatment (Wk 1) | Treatment | Feed Day | No | 04:50 | 04:00 - 04:59 | Morning | 37,3 | 50  | 67,2  | 67,2  | 18,46 | 539,52 | 142,02 |
| 2019/05/17 | CH2205 | Male | Three y/o | Treatment (Wk 1) | Treatment | Feed Day | No | 04:55 | 04:00 - 04:59 | Morning | 37,6 | 62  | 6,6   | 6,6   | 18,75 | 557,33 | 62,73  |
| 2019/05/17 | CH2206 | Male | Three y/o | Treatment (Wk 1) | Treatment | Feed Day | No | 04:55 | 04:00 - 04:59 | Morning | 37,3 | 53  | 60,0  | 60,0  | 18,46 | 544,43 | 138,09 |
| 2019/05/17 | CH2205 | Male | Three y/o | Treatment (Wk 1) | Treatment | Feed Day | No | 05:00 | 05:00 - 05:59 | Morning | 37,6 | 46  | 5,0   | 5,0   | 18,75 | 532,38 | 53,41  |
| 2019/05/17 | CH2206 | Male | Three y/o | Treatment (Wk 1) | Treatment | Feed Day | No | 05:00 | 05:00 - 05:59 | Morning | 37,2 | 89  | 62,0  | 62,0  | 18,36 | 585,33 | 139,23 |
| 2019/05/17 | CH2205 | Male | Three y/o | Treatment (Wk 1) | Treatment | Feed Day | No | 05:05 | 05:00 - 05:59 | Morning | 37,6 | 90  | 3,8   | 3,8   | 18,75 | 586,16 | 44,22  |
| 2019/05/17 | CH2206 | Male | Three y/o | Treatment (Wk 1) | Treatment | Feed Day | No | 05:05 | 05:00 - 05:59 | Morning | 37,2 | 43  | 8,6   | 8,6   | 18,36 | 526,50 | 71,66  |
| 2019/05/17 | CH2205 | Male | Three y/o | Treatment (Wk 1) | Treatment | Feed Day | No | 05:10 | 05:00 - 05:59 | Morning | 37,7 | 53  | 3,6   | 3,6   | 18,85 | 544,43 | 42,42  |
| 2019/05/17 | CH2206 | Male | Three y/o | Treatment (Wk 1) | Treatment | Feed Day | No | 05:10 | 05:00 - 05:59 | Morning | 37,0 | 52  | 20,0  | 20,0  | 18,16 | 542,83 | 100,31 |
| 2019/05/17 | CH2205 | Male | Three y/o | Treatment (Wk 1) | Treatment | Feed Day | No | 05:15 | 05:00 - 05:59 | Morning | 37,7 | 61  | 12,2  | 12,2  | 18,85 | 556,01 | 83,49  |
| 2019/05/17 | CH2206 | Male | Three y/o | Treatment (Wk 1) | Treatment | Feed Day | No | 05:15 | 05:00 - 05:59 | Morning | 37,1 | 99  | 62,0  | 62,0  | 18,26 | 593,14 | 139,23 |
| 2019/05/17 | CH2205 | Male | Three y/o | Treatment (Wk 1) | Treatment | Feed Day | No | 05:20 | 05:00 - 05:59 | Morning | 37,6 | 43  | 7,2   | 7,2   | 18,75 | 526,50 | 65,66  |
| 2019/05/17 | CH2206 | Male | Three y/o | Treatment (Wk 1) | Treatment | Feed Day | No | 05:20 | 05:00 - 05:59 | Morning | 37,2 | 83  | 60,0  | 60,0  | 18,36 | 580,11 | 138,09 |
| 2019/05/17 | CH2205 | Male | Three y/o | Treatment (Wk 1) | Treatment | Feed Day | No | 05:25 | 05:00 - 05:59 | Morning | 37,6 | 78  | 17,4  | 17,4  | 18,75 | 575,38 | 95,56  |
| 2019/05/17 | CH2206 | Male | Three y/o | Treatment (Wk 1) | Treatment | Feed Day | No | 05:25 | 05:00 - 05:59 | Morning | 37,2 | 53  | 55,8  | 55,8  | 18,36 | 544,43 | 135,58 |
| 2019/05/17 | CH2205 | Male | Three y/o | Treatment (Wk 1) | Treatment | Feed Day | No | 05:30 | 05:00 - 05:59 | Morning | 37,5 | 54  | 8,6   | 8,6   | 18,65 | 545,99 | 71,66  |
| 2019/05/17 | CH2206 | Male | Three y/o | Treatment (Wk 1) | Treatment | Feed Day | No | 05:30 | 05:00 - 05:59 | Morning | 37,1 | 66  | 52,8  | 52,8  | 18,26 | 562,34 | 133,67 |
| 2019/05/17 | CH2205 | Male | Three y/o | Treatment (Wk 1) | Treatment | Feed Day | No | 05:35 | 05:00 - 05:59 | Morning | 37,6 | 60  | 9,4   | 9,4   | 18,75 | 554,67 | 74,66  |
| 2019/05/17 | CH2206 | Male | Three y/o | Treatment (Wk 1) | Treatment | Feed Day | No | 05:35 | 05:00 - 05:59 | Morning | 37,1 | 49  | 73,2  | 73,2  | 18,26 | 537,80 | 144,99 |
| 2019/05/17 | CH2205 | Male | Three y/o | Treatment (Wk 1) | Treatment | Feed Day | No | 05:40 | 05:00 - 05:59 | Morning | 37,6 | 61  | 21,0  | 21,0  | 18,75 | 556,01 | 101,98 |
| 2019/05/17 | CH2206 | Male | Three y/o | Treatment (Wk 1) | Treatment | Feed Day | No | 05:40 | 05:00 - 05:59 | Morning | 37,2 | 111 | 96,0  | 96,0  | 18,36 | 601,33 | 154,42 |
| 2019/05/17 | CH2205 | Male | Three y/o | Treatment (Wk 1) | Treatment | Feed Day | No | 05:45 | 05:00 - 05:59 | Morning | 37,6 | 112 | 12,4  | 12,4  | 18,75 | 601,96 | 84,04  |
| 2019/05/17 | CH2206 | Male | Three y/o | Treatment (Wk 1) | Treatment | Feed Day | No | 05:45 | 05:00 - 05:59 | Morning | 37,2 | 138 | 104,8 | 104,8 | 18,36 | 616,31 | 157,48 |
| 2019/05/17 | CH2205 | Male | Three y/o | Treatment (Wk 1) | Treatment | Feed Day | No | 05:50 | 05:00 - 05:59 | Morning | 37,5 |     | 8,2   | 8,2   | 18,65 |        | 70,05  |
| 2019/05/17 | CH2206 | Male | Three y/o | Treatment (Wk 1) | Treatment | Feed Day | No | 05:50 | 05:00 - 05:59 | Morning | 37,3 | 128 | 101,4 | 101,4 | 18,46 | 611,22 | 156,33 |
| 2019/05/17 | CH2205 | Male | Three y/o | Treatment (Wk 1) | Treatment | Feed Day | No | 05:55 | 05:00 - 05:59 | Morning | 37,3 |     | 15,4  | 15,4  | 18,46 |        | 91,41  |
| 2019/05/17 | CH2206 | Male | Three y/o | Treatment (Wk 1) | Treatment | Feed Day | No | 05:55 | 05:00 - 05:59 | Morning | 37,0 | 84  | 59,2  | 59,2  | 18,16 | 581,01 | 137,63 |
| 2019/05/17 | CH2205 | Male | Three y/o | Treatment (Wk 1) | Treatment | Feed Day | No | 06:00 | 06:00 - 06:59 | Morning | 37,3 | 79  | 13,8  | 13,8  | 18,46 | 576,36 | 87,68  |
| 2019/05/17 | CH2206 | Male | Three y/o | Treatment (Wk 1) | Treatment | Feed Day | No | 06:00 | 06:00 - 06:59 | Morning | 36,7 | 110 | 46,0  | 46,0  | 17,87 | 600,69 | 128,91 |
| 2019/05/17 | CH2205 | Male | Three y/o | Treatment (Wk 1) | Treatment | Feed Day | No | 06:05 | 06:00 - 06:59 | Morning | 37,2 | 70  | 19,4  | 19,4  | 18,36 | 566,99 | 99,28  |
| 2019/05/17 | CH2206 | Male | Three y/o | Treatment (Wk 1) | Treatment | Feed Day | No | 06:05 | 06:00 - 06:59 | Morning | 36,6 | 76  | 95,6  | 95,6  | 17,77 | 573,39 | 154,28 |
| 2019/05/17 | CH2205 | Male | Three y/o | Treatment (Wk 1) | Treatment | Feed Day | No | 06:10 | 06:00 - 06:59 | Morning | 37,3 | 98  | 68,2  | 68,2  | 18,46 | 592,41 | 142,53 |
| 2019/05/17 | CH2206 | Male | Three y/o | Treatment (Wk 1) | Treatment | Feed Day | No | 06:10 | 06:00 - 06:59 | Morning | 37,0 | 113 | 118,6 | 118,6 | 18,16 | 602,58 | 161,80 |
| 2019/05/17 | CH2205 | Male | Three y/o | Treatment (Wk 1) | Treatment | Feed Day | No | 06:15 | 06:00 - 06:59 | Morning | 37,3 | 118 | 179,2 | 179,2 | 18,46 | 605,61 | 176,26 |
| 2019/05/17 | CH2206 | Male | Three y/o | Treatment (Wk 1) | Treatment | Feed Day | No | 06:15 | 06:00 - 06:59 | Morning | 37,1 | 121 | 324,8 | 324,8 | 18,26 | 607,35 | 197,23 |
| 2019/05/17 | CH2205 | Male | Three y/o | Treatment (Wk 1) | Treatment | Feed Day | No | 06:20 | 06:00 - 06:59 | Morning | 37,4 | 191 | 95,8  | 95,8  | 18,55 | 637,33 | 154,35 |
| 2019/05/17 | CH2206 | Male | Three y/o | Treatment (Wk 1) | Treatment | Feed Day | No | 06:20 | 06:00 - 06:59 | Morning | 37,3 | 132 | 117,6 | 117,6 | 18,46 | 613,32 | 161,50 |
| 2019/05/17 | CH2205 | Male | Three y/o | Treatment (Wk 1) | Treatment | Feed Day | No | 06:25 | 06:00 - 06:59 | Morning | 37,4 | 123 | 103,4 | 103,4 | 18,55 | 608,49 | 157,01 |
| 2019/05/17 | CH2206 | Male | Three y/o | Treatment (Wk 1) | Treatment | Feed Day | No | 06:25 | 06:00 - 06:59 | Morning | 37,4 | 103 | 104,4 | 104,4 | 18,55 | 596,00 | 157,35 |
| 2019/05/17 | CH2205 | Male | Three y/o | Treatment (Wk 1) | Treatment | Feed Day | No | 06:30 | 06:00 - 06:59 | Morning | 37,4 | 162 | 111,4 | 111,4 | 18,55 | 626,88 | 159,61 |
| 2019/05/17 | CH2206 | Male | Three y/o | Treatment (Wk 1) | Treatment | Feed Day | No | 06:30 | 06:00 - 06:59 | Morning | 37,5 |     | 128,4 | 128,4 | 18,65 |        | 164,57 |
| 2019/05/17 | CH2205 | Male | Three y/o | Treatment (Wk 1) | Treatment | Feed Day | No | 06:35 | 06:00 - 06:59 | Morning | 37,4 | 117 | 93,6  | 93,6  | 18,55 | 605,02 | 153,54 |
| 2019/05/17 | CH2206 | Male | Three y/o | Treatment (Wk 1) | Treatment | Feed Day | No | 06:35 | 06:00 - 06:59 | Morning | 37,5 | 123 | 112,2 | 112,2 | 18,65 | 608,49 | 159,86 |
| 2019/05/17 | CH2205 | Male | Three y/o | Treatment (Wk 1) | Treatment | Feed Day | No | 06:40 | 06:00 - 06:59 | Morning | 37,5 | 108 | 381,2 | 381,2 | 18,65 | 599,39 | 202,91 |
| 2019/05/17 | CH2206 | Male | Three y/o | Treatment (Wk 1) | Treatment | Feed Day | No | 06:40 | 06:00 - 06:59 | Morning | 37,5 | 102 | 163,8 | 163,8 | 18,65 | 595,30 | 173,10 |
| 2019/05/17 | CH2205 | Male | Three y/o | Treatment (Wk 1) | Treatment | Feed Day | No | 06:45 | 06:00 - 06:59 | Morning | 37,6 | 111 | 150,0 | 150,0 | 18,75 | 601,33 | 170,02 |
| 2019/05/17 | CH2206 | Male | Three y/o | Treatment (Wk 1) | Treatment | Feed Day | No | 06:45 | 06:00 - 06:59 | Morning | 37,5 | 121 | 280,8 | 280,8 | 18,65 | 607,35 | 192,08 |
| 2019/05/17 | CH2205 | Male | Three y/o | Treatment (Wk 1) | Treatment | Feed Day | No | 06:50 | 06:00 - 06:59 | Morning | 37,5 |     | 44,8  | 44,8  | 18,65 |        | 127,99 |
| 2019/05/17 | CH2206 | Male | Three y/o | Treatment (Wk 1) | Treatment | Feed Day | No | 06:50 | 06:00 - 06:59 | Morning | 37,5 | 62  | 99,0  | 99,0  | 18,65 | 557,33 | 155,49 |
| 2019/05/17 | CH2205 | Male | Three y/o | Treatment (Wk 1) | Treatment | Feed Day | No | 06:55 | 06:00 - 06:59 | Morning | 37,6 | 112 | 29,2  | 29,2  | 18,75 | 601,96 | 113,27 |
| 2019/05/17 | CH2206 | Male | Three y/o | Treatment (Wk 1) | Treatment | Feed Day | No | 06:55 | 06:00 - 06:59 | Morning | 37,5 | 115 | 90,0  | 90,0  | 18,65 | 603,82 | 152,17 |
| 2019/05/17 | CH2205 | Male | Three y/o | Treatment (Wk 1) | Treatment | Feed Day | No | 07:00 | 07:00 - 07:59 | Morning | 37,5 | 90  | 43,4  | 43,4  | 18,65 | 586,16 | 126,90 |
| 2019/05/17 | CH2206 | Male | Three y/o | Treatment (Wk 1) | Treatment | Feed Day | No | 07:00 | 07:00 - 07:59 | Morning | 37,6 | 103 | 105,0 | 105,0 | 18,75 | 596,00 | 157,55 |
| 2019/05/17 | CH2205 | Male | Three y/o | Treatment (Wk 1) | Treatment | Feed Day | No | 07:05 | 07:00 - 07:59 | Morning | 37,6 | 160 | 195,2 | 195,2 | 18,75 | 626,07 | 179,26 |
| 2019/05/17 | CH2206 | Male | Three y/o | Treatment (Wk 1) | Treatment | Feed Day | No | 07:05 | 07:00 - 07:59 | Morning | 37,5 | 106 | 100,6 | 100,6 | 18,65 | 598,06 | 156,05 |
| 2019/05/17 | CH2205 | Male | Three y/o | Treatment (Wk 1) | Treatment | Feed Day | No | 07:10 | 07:00 - 07:59 | Morning | 37,7 | 103 | 79,4  | 79,4  | 18,85 | 596,00 | 147,81 |
| 2019/05/17 | CH2206 | Male | Three y/o | Treatment (Wk 1) | Treatment | Feed Day | No | 07:10 | 07:00 - 07:59 | Morning | 37,7 |     | 182,8 | 182,8 | 18,85 |        | 176,96 |
| 2019/05/17 | CH2205 | Male | Three y/o | Treatment (Wk 1) | Treatment | Feed Day | No | 07:15 | 07:00 - 07:59 | Morning | 37,8 | 103 | 23,6  | 23,6  | 18,95 | 596,00 | 105,97 |



|            |        |      |           |                  |           |          |    |       |               |              |      |     |       |       |       |        |        |
|------------|--------|------|-----------|------------------|-----------|----------|----|-------|---------------|--------------|------|-----|-------|-------|-------|--------|--------|
| 2019/05/17 | CH2206 | Male | Three y/o | Treatment (Wk 1) | Treatment | Feed Day | No | 07:15 | 07:00 - 07:59 | Morning      | 37,7 | 111 | 254,2 | 254,2 | 18,85 | 601,33 | 188,57 |
| 2019/05/17 | CH2205 | Male | Three y/o | Treatment (Wk 1) | Treatment | Feed Day | No | 07:20 | 07:00 - 07:59 | Morning      | 37,7 | 86  | 60,8  | 60,8  | 18,85 | 582,77 | 138,55 |
| 2019/05/17 | CH2206 | Male | Three y/o | Treatment (Wk 1) | Treatment | Feed Day | No | 07:20 | 07:00 - 07:59 | Morning      | 37,8 | 121 | 121,8 | 121,8 | 18,95 | 607,35 | 162,73 |
| 2019/05/17 | CH2205 | Male | Three y/o | Treatment (Wk 1) | Treatment | Feed Day | No | 07:25 | 07:00 - 07:59 | Morning      | 37,9 | 134 | 176,8 | 176,8 | 19,05 | 614,33 | 175,78 |
| 2019/05/17 | CH2206 | Male | Three y/o | Treatment (Wk 1) | Treatment | Feed Day | No | 07:25 | 07:00 - 07:59 | Morning      | 37,9 |     | 110,6 | 110,6 | 19,05 |        | 159,36 |
| 2019/05/17 | CH2205 | Male | Three y/o | Treatment (Wk 1) | Treatment | Feed Day | No | 07:30 | 07:00 - 07:59 | Morning      | 37,9 | 53  | 336,6 | 336,6 | 19,05 | 544,43 | 198,49 |
| 2019/05/17 | CH2206 | Male | Three y/o | Treatment (Wk 1) | Treatment | Feed Day | No | 07:30 | 07:00 - 07:59 | Morning      | 37,8 | 177 | 127,2 | 127,2 | 18,95 | 632,55 | 164,24 |
| 2019/05/17 | CH2205 | Male | Three y/o | Treatment (Wk 1) | Treatment | Feed Day | No | 07:35 | 07:00 - 07:59 | Morning      | 37,7 | 94  | 262,2 | 262,2 | 18,85 | 589,37 | 189,66 |
| 2019/05/17 | CH2206 | Male | Three y/o | Treatment (Wk 1) | Treatment | Feed Day | No | 07:35 | 07:00 - 07:59 | Morning      | 37,8 | 129 | 271,8 | 271,8 | 18,95 | 611,75 | 190,93 |
| 2019/05/17 | CH2205 | Male | Three y/o | Treatment (Wk 1) | Treatment | Feed Day | No | 07:40 | 07:00 - 07:59 | Morning      | 37,7 | 103 | 70,8  | 70,8  | 18,85 | 596,00 | 143,83 |
| 2019/05/17 | CH2206 | Male | Three y/o | Treatment (Wk 1) | Treatment | Feed Day | No | 07:40 | 07:00 - 07:59 | Morning      | 37,7 | 58  | 161,4 | 161,4 | 18,85 | 551,90 | 172,59 |
| 2019/05/17 | CH2205 | Male | Three y/o | Treatment (Wk 1) | Treatment | Feed Day | No | 07:45 | 07:00 - 07:59 | Morning      | 37,6 | 90  | 135,0 | 135,0 | 18,75 | 586,16 | 166,33 |
| 2019/05/17 | CH2206 | Male | Three y/o | Treatment (Wk 1) | Treatment | Feed Day | No | 07:45 | 07:00 - 07:59 | Morning      | 37,7 | 180 | 153,6 | 153,6 | 18,85 | 633,61 | 170,85 |
| 2019/05/17 | CH2205 | Male | Three y/o | Treatment (Wk 1) | Treatment | Feed Day | No | 07:50 | 07:00 - 07:59 | Morning      | 37,7 | 101 | 932,6 |       | 18,85 | 594,59 |        |
| 2019/05/17 | CH2206 | Male | Three y/o | Treatment (Wk 1) | Treatment | Feed Day | No | 07:50 | 07:00 - 07:59 | Morning      | 37,7 | 134 | 129,4 | 129,4 | 18,85 | 614,33 | 164,84 |
| 2019/05/17 | CH2205 | Male | Three y/o | Treatment (Wk 1) | Treatment | Feed Day | No | 07:55 | 07:00 - 07:59 | Morning      | 37,9 | 103 | 5,6   | 5,6   | 19,05 | 596,00 | 57,21  |
| 2019/05/17 | CH2206 | Male | Three y/o | Treatment (Wk 1) | Treatment | Feed Day | No | 07:55 | 07:00 - 07:59 | Morning      | 37,8 |     | 138,4 | 138,4 | 18,95 |        | 167,20 |
| 2019/05/17 | CH2205 | Male | Three y/o | Treatment (Wk 1) | Treatment | Feed Day | No | 08:00 | 08:00 - 08:59 | Late Morning | 37,6 | 71  | 5,2   | 5,2   | 18,75 | 568,10 | 54,72  |
| 2019/05/17 | CH2206 | Male | Three y/o | Treatment (Wk 1) | Treatment | Feed Day | No | 08:00 | 08:00 - 08:59 | Late Morning | 37,8 | 104 | 263,2 | 263,2 | 18,95 | 596,69 | 189,80 |
| 2019/05/17 | CH2205 | Male | Three y/o | Treatment (Wk 1) | Treatment | Feed Day | No | 08:05 | 08:00 - 08:59 | Late Morning | 37,7 |     | 61,6  | 61,6  | 18,85 |        | 139,00 |
| 2019/05/17 | CH2206 | Male | Three y/o | Treatment (Wk 1) | Treatment | Feed Day | No | 08:05 | 08:00 - 08:59 | Late Morning | 37,8 | 126 | 58,8  | 58,8  | 18,95 | 610,14 | 137,39 |
| 2019/05/17 | CH2205 | Male | Three y/o | Treatment (Wk 1) | Treatment | Feed Day | No | 08:10 | 08:00 - 08:59 | Late Morning | 37,7 | 93  | 119,6 | 119,6 | 18,85 | 588,58 | 162,09 |
| 2019/05/17 | CH2206 | Male | Three y/o | Treatment (Wk 1) | Treatment | Feed Day | No | 08:10 | 08:00 - 08:59 | Late Morning | 37,5 | 71  | 29,6  | 29,6  | 18,65 | 568,10 | 113,73 |
| 2019/05/17 | CH2205 | Male | Three y/o | Treatment (Wk 1) | Treatment | Feed Day | No | 08:15 | 08:00 - 08:59 | Late Morning | 37,7 | 105 | 79,8  | 79,8  | 18,85 | 597,38 | 147,99 |
| 2019/05/17 | CH2206 | Male | Three y/o | Treatment (Wk 1) | Treatment | Feed Day | No | 08:15 | 08:00 - 08:59 | Late Morning | 37,5 | 117 | 126,2 | 126,2 | 18,65 | 605,02 | 163,97 |
| 2019/05/17 | CH2205 | Male | Three y/o | Treatment (Wk 1) | Treatment | Feed Day | No | 08:20 | 08:00 - 08:59 | Late Morning | 37,6 | 40  | 21,4  | 21,4  | 18,75 | 520,09 | 102,63 |
| 2019/05/17 | CH2206 | Male | Three y/o | Treatment (Wk 1) | Treatment | Feed Day | No | 08:20 | 08:00 - 08:59 | Late Morning | 37,7 | 104 | 150,4 | 150,4 | 18,85 | 596,69 | 170,11 |
| 2019/05/17 | CH2205 | Male | Three y/o | Treatment (Wk 1) | Treatment | Feed Day | No | 08:25 | 08:00 - 08:59 | Late Morning | 37,5 | 72  | 5,6   | 5,6   | 18,65 | 569,20 | 57,21  |
| 2019/05/17 | CH2206 | Male | Three y/o | Treatment (Wk 1) | Treatment | Feed Day | No | 08:25 | 08:00 - 08:59 | Late Morning | 37,6 | 108 | 118,4 | 118,4 | 18,75 | 599,39 | 161,74 |
| 2019/05/17 | CH2205 | Male | Three y/o | Treatment (Wk 1) | Treatment | Feed Day | No | 08:30 | 08:00 - 08:59 | Late Morning | 37,6 |     | 26,0  | 26,0  | 18,75 |        | 109,29 |
| 2019/05/17 | CH2206 | Male | Three y/o | Treatment (Wk 1) | Treatment | Feed Day | No | 08:30 | 08:00 - 08:59 | Late Morning | 37,7 | 108 | 178,4 | 178,4 | 18,85 | 599,39 | 176,10 |
| 2019/05/17 | CH2205 | Male | Three y/o | Treatment (Wk 1) | Treatment | Feed Day | No | 08:35 | 08:00 - 08:59 | Late Morning | 37,7 |     | 18,6  | 18,6  | 18,85 |        | 97,84  |
| 2019/05/17 | CH2206 | Male | Three y/o | Treatment (Wk 1) | Treatment | Feed Day | No | 08:35 | 08:00 - 08:59 | Late Morning | 37,5 | 135 | 198,0 | 198,0 | 18,65 | 614,84 | 179,77 |
| 2019/05/17 | CH2205 | Male | Three y/o | Treatment (Wk 1) | Treatment | Feed Day | No | 08:40 | 08:00 - 08:59 | Late Morning | 37,7 | 75  | 80,2  | 80,2  | 18,85 | 572,36 | 148,16 |
| 2019/05/17 | CH2206 | Male | Three y/o | Treatment (Wk 1) | Treatment | Feed Day | No | 08:40 | 08:00 - 08:59 | Late Morning | 37,7 | 104 | 138,2 | 138,2 | 18,85 | 596,69 | 167,15 |
| 2019/05/17 | CH2205 | Male | Three y/o | Treatment (Wk 1) | Treatment | Feed Day | No | 08:45 | 08:00 - 08:59 | Late Morning | 37,7 | 92  | 76,0  | 76,0  | 18,85 | 587,78 | 146,29 |
| 2019/05/17 | CH2206 | Male | Three y/o | Treatment (Wk 1) | Treatment | Feed Day | No | 08:45 | 08:00 - 08:59 | Late Morning | 37,8 | 110 | 154,8 | 154,8 | 18,95 | 600,69 | 171,12 |
| 2019/05/17 | CH2205 | Male | Three y/o | Treatment (Wk 1) | Treatment | Feed Day | No | 08:50 | 08:00 - 08:59 | Late Morning | 37,7 | 70  | 85,2  | 85,2  | 18,85 | 566,99 | 150,27 |
| 2019/05/17 | CH2206 | Male | Three y/o | Treatment (Wk 1) | Treatment | Feed Day | No | 08:50 | 08:00 - 08:59 | Late Morning | 37,8 | 100 | 132,6 | 132,6 | 18,95 | 593,87 | 165,70 |
| 2019/05/17 | CH2205 | Male | Three y/o | Treatment (Wk 1) | Treatment | Feed Day | No | 08:55 | 08:00 - 08:59 | Late Morning | 37,9 | 66  | 254,8 | 254,8 | 19,05 | 562,34 | 188,65 |
| 2019/05/17 | CH2206 | Male | Three y/o | Treatment (Wk 1) | Treatment | Feed Day | No | 08:55 | 08:00 - 08:59 | Late Morning | 37,9 | 105 | 58,2  | 58,2  | 19,05 | 597,38 | 137,04 |
| 2019/05/17 | CH2205 | Male | Three y/o | Treatment (Wk 1) | Treatment | Feed Day | No | 09:00 | 09:00 - 09:59 | Late Morning | 37,7 | 67  | 14,2  | 14,2  | 18,85 | 563,53 | 88,65  |
| 2019/05/17 | CH2206 | Male | Three y/o | Treatment (Wk 1) | Treatment | Feed Day | No | 09:00 | 09:00 - 09:59 | Late Morning | 37,8 | 150 | 333,8 | 333,8 | 18,95 | 621,86 | 198,20 |
| 2019/05/17 | CH2205 | Male | Three y/o | Treatment (Wk 1) | Treatment | Feed Day | No | 09:05 | 09:00 - 09:59 | Late Morning | 37,6 |     | 56,2  | 56,2  | 18,75 |        | 135,83 |
| 2019/05/17 | CH2206 | Male | Three y/o | Treatment (Wk 1) | Treatment | Feed Day | No | 09:05 | 09:00 - 09:59 | Late Morning | 37,8 | 141 | 75,6  | 75,6  | 18,95 | 617,75 | 146,11 |
| 2019/05/17 | CH2205 | Male | Three y/o | Treatment (Wk 1) | Treatment | Feed Day | No | 09:10 | 09:00 - 09:59 | Late Morning | 37,6 |     | 12,6  | 12,6  | 18,75 |        | 84,59  |
| 2019/05/17 | CH2206 | Male | Three y/o | Treatment (Wk 1) | Treatment | Feed Day | No | 09:10 | 09:00 - 09:59 | Late Morning | 37,8 | 103 | 103,4 | 103,4 | 18,95 | 596,00 | 157,01 |
| 2019/05/17 | CH2205 | Male | Three y/o | Treatment (Wk 1) | Treatment | Feed Day | No | 09:15 | 09:00 - 09:59 | Late Morning | 37,5 | 57  | 14,4  | 14,4  | 18,65 | 550,47 | 89,12  |
| 2019/05/17 | CH2206 | Male | Three y/o | Treatment (Wk 1) | Treatment | Feed Day | No | 09:15 | 09:00 - 09:59 | Late Morning | 37,8 |     | 112,2 | 112,2 | 18,95 |        | 159,86 |
| 2019/05/17 | CH2205 | Male | Three y/o | Treatment (Wk 1) | Treatment | Feed Day | No | 09:20 | 09:00 - 09:59 | Late Morning | 37,6 |     | 17,6  | 17,6  | 18,75 |        | 95,95  |
| 2019/05/17 | CH2206 | Male | Three y/o | Treatment (Wk 1) | Treatment | Feed Day | No | 09:20 | 09:00 - 09:59 | Late Morning | 37,8 | 121 | 75,6  | 75,6  | 18,95 | 607,35 | 146,11 |
| 2019/05/17 | CH2205 | Male | Three y/o | Treatment (Wk 1) | Treatment | Feed Day | No | 09:25 | 09:00 - 09:59 | Late Morning | 37,5 |     | 81,2  | 81,2  | 18,65 |        | 148,59 |
| 2019/05/17 | CH2206 | Male | Three y/o | Treatment (Wk 1) | Treatment | Feed Day | No | 09:25 | 09:00 - 09:59 | Late Morning | 37,7 | 120 | 181,2 | 181,2 | 18,85 | 606,78 | 176,65 |
| 2019/05/17 | CH2205 | Male | Three y/o | Treatment (Wk 1) | Treatment | Feed Day | No | 09:30 | 09:00 - 09:59 | Late Morning | 37,6 | 99  | 298,4 | 298,4 | 18,75 | 593,14 | 194,23 |
| 2019/05/17 | CH2206 | Male | Three y/o | Treatment (Wk 1) | Treatment | Feed Day | No | 09:30 | 09:00 - 09:59 | Late Morning | 37,8 | 115 | 108,2 | 108,2 | 18,95 | 603,82 | 158,59 |
| 2019/05/17 | CH2205 | Male | Three y/o | Treatment (Wk 1) | Treatment | Feed Day | No | 09:35 | 09:00 - 09:59 | Late Morning | 37,7 |     | 19,8  | 19,8  | 18,85 |        | 99,97  |
| 2019/05/17 | CH2206 | Male | Three y/o | Treatment (Wk 1) | Treatment | Feed Day | No | 09:35 | 09:00 - 09:59 | Late Morning | 37,8 | 131 | 146,4 | 146,4 | 18,95 | 612,80 | 169,17 |
| 2019/05/17 | CH2205 | Male | Three y/o | Treatment (Wk 1) | Treatment | Feed Day | No | 09:40 | 09:00 - 09:59 | Late Morning | 37,7 | 103 | 63,2  | 63,2  | 18,85 | 596,00 | 139,89 |
| 2019/05/17 | CH2206 | Male | Three y/o | Treatment (Wk 1) | Treatment | Feed Day | No | 09:40 | 09:00 - 09:59 | Late Morning | 37,8 | 125 | 62,2  | 62,2  | 18,95 | 609,60 | 139,34 |
| 2019/05/17 | CH2205 | Male | Three y/o | Treatment (Wk 1) | Treatment | Feed Day | No | 09:45 | 09:00 - 09:59 | Late Morning | 37,9 | 97  | 62,2  | 62,2  | 19,05 | 591,66 | 139,34 |
| 2019/05/17 | CH2206 | Male | Three y/o | Treatment (Wk 1) | Treatment | Feed Day | No | 09:45 | 09:00 - 09:59 | Late Morning | 37,9 | 104 | 76,4  | 76,4  | 19,05 | 596,69 | 146,48 |
| 2019/05/17 | CH2205 | Male | Three y/o | Treatment (Wk 1) | Treatment | Feed Day | No | 09:50 | 09:00 - 09:59 | Late Morning | 37,8 | 70  | 5,6   | 5,6   | 18,95 | 566,99 | 57,21  |
| 2019/05/17 | CH2206 | Male | Three y/o | Treatment (Wk 1) | Treatment | Feed Day | No | 09:50 | 09:00 - 09:59 | Late Morning | 37,9 | 123 | 26,8  | 26,8  | 19,05 | 608,49 | 110,33 |
| 2019/05/17 | CH2205 | Male | Three y/o | Treatment (Wk 1) | Treatment | Feed Day | No | 09:55 | 09:00 - 09:59 | Late Morning | 37,7 | 66  | 34,4  | 34,4  | 18,85 | 562,34 | 118,90 |
| 2019/05/17 | CH2206 | Male | Three y/o | Treatment (Wk 1) | Treatment | Feed Day | No | 09:55 | 09:00 - 09:59 | Late Morning | 37,8 | 72  | 29,2  | 29,2  | 18,95 | 569,20 | 113,27 |
| 2019/05/17 | CH2205 | Male | Three y/o | Treatment (Wk 1) | Treatment | Feed Day | No | 10:00 | 10:00 - 10:59 | Late Morning | 37,7 | 75  | 15,4  | 15,4  | 18,85 | 572,36 | 91,41  |
| 2019/05/17 | CH2206 | Male | Three y/o | Treatment (Wk 1) | Treatment | Feed Day | No | 10:00 | 10:00 - 10:59 | Late Morning | 37,7 | 51  | 25,8  | 25,8  | 18,85 | 541,20 | 109,02 |
| 2019/05/17 | CH2205 | Male | Three y/o | Treatment (Wk 1) | Treatment | Feed Day | No | 10:05 | 10:00 - 10:59 | Late Morning | 37,7 | 52  | 17,4  | 17,4  | 18,85 | 542,83 | 95,56  |
| 2019/05/17 | CH2206 | Male | Three y/o | Treatment (Wk 1) | Treatment | Feed Day | No | 10:05 | 10:00 - 10:59 | Late Morning | 37,8 | 71  | 23,2  | 23,2  | 18,95 | 568,10 | 105,39 |
| 2019/05/17 | CH2205 | Male | Three y/o | Treatment (Wk 1) | Treatment | Feed Day | No | 10:10 | 10:00 - 10:59 | Late Morning | 37,7 | 60  | 20,6  | 20,6  | 18,85 | 554,67 | 101,32 |



|            |        |      |           |                  |           |          |     |       |               |              |      |     |       |       |       |        |        |
|------------|--------|------|-----------|------------------|-----------|----------|-----|-------|---------------|--------------|------|-----|-------|-------|-------|--------|--------|
| 2019/05/17 | CH2206 | Male | Three y/o | Treatment (Wk 1) | Treatment | Feed Day | No  | 10:10 | 10:00 - 10:59 | Late Morning | 37,7 | 57  | 29,2  | 29,2  | 18,85 | 550,47 | 113,27 |
| 2019/05/17 | CH2205 | Male | Three y/o | Treatment (Wk 1) | Treatment | Feed Day | No  | 10:15 | 10:00 - 10:59 | Late Morning | 37,6 | 63  | 22,0  | 22,0  | 18,75 | 558,62 | 103,57 |
| 2019/05/17 | CH2206 | Male | Three y/o | Treatment (Wk 1) | Treatment | Feed Day | No  | 10:15 | 10:00 - 10:59 | Late Morning | 37,7 | 83  | 40,4  | 40,4  | 18,85 | 580,11 | 124,43 |
| 2019/05/17 | CH2205 | Male | Three y/o | Treatment (Wk 1) | Treatment | Feed Day | No  | 10:20 | 10:00 - 10:59 | Late Morning | 37,6 | 44  | 25,0  | 25,0  | 18,75 | 528,51 | 107,94 |
| 2019/05/17 | CH2206 | Male | Three y/o | Treatment (Wk 1) | Treatment | Feed Day | No  | 10:20 | 10:00 - 10:59 | Late Morning | 37,7 | 61  | 21,4  | 21,4  | 18,85 | 556,01 | 102,63 |
| 2019/05/17 | CH2205 | Male | Three y/o | Treatment (Wk 1) | Treatment | Feed Day | No  | 10:25 | 10:00 - 10:59 | Late Morning | 37,6 | 47  | 20,8  | 20,8  | 18,75 | 534,23 | 101,65 |
| 2019/05/17 | CH2206 | Male | Three y/o | Treatment (Wk 1) | Treatment | Feed Day | No  | 10:25 | 10:00 - 10:59 | Late Morning | 37,8 | 62  | 26,8  | 26,8  | 18,95 | 557,33 | 110,33 |
| 2019/05/17 | CH2205 | Male | Three y/o | Treatment (Wk 1) | Treatment | Feed Day | Yes | 10:30 | 10:00 - 10:59 | Late Morning | 37,6 | 45  | 23,8  | 23,8  | 18,75 | 530,47 | 106,26 |
| 2019/05/17 | CH2206 | Male | Three y/o | Treatment (Wk 1) | Treatment | Feed Day | Yes | 10:30 | 10:00 - 10:59 | Late Morning | 37,7 | 72  | 40,6  | 40,6  | 18,85 | 569,20 | 124,60 |
| 2019/05/17 | CH2205 | Male | Three y/o | Treatment (Wk 1) | Treatment | Feed Day | Yes | 10:35 | 10:00 - 10:59 | Late Morning | 37,6 | 57  | 20,8  | 20,8  | 18,75 | 550,47 | 101,65 |
| 2019/05/17 | CH2206 | Male | Three y/o | Treatment (Wk 1) | Treatment | Feed Day | Yes | 10:35 | 10:00 - 10:59 | Late Morning | 37,7 | 69  | 40,0  | 40,0  | 18,85 | 565,86 | 124,09 |
| 2019/05/17 | CH2205 | Male | Three y/o | Treatment (Wk 1) | Treatment | Feed Day | Yes | 10:40 | 10:00 - 10:59 | Late Morning | 37,5 | 40  | 26,4  | 26,4  | 18,65 | 520,09 | 109,81 |
| 2019/05/17 | CH2206 | Male | Three y/o | Treatment (Wk 1) | Treatment | Feed Day | Yes | 10:40 | 10:00 - 10:59 | Late Morning | 37,7 | 55  | 34,0  | 34,0  | 18,85 | 547,52 | 118,49 |
| 2019/05/17 | CH2205 | Male | Three y/o | Treatment (Wk 1) | Treatment | Feed Day | Yes | 10:45 | 10:00 - 10:59 | Late Morning | 37,5 | 39  | 20,2  | 20,2  | 18,65 | 517,82 | 100,65 |
| 2019/05/17 | CH2206 | Male | Three y/o | Treatment (Wk 1) | Treatment | Feed Day | Yes | 10:45 | 10:00 - 10:59 | Late Morning | 37,7 | 51  | 67,0  | 67,0  | 18,85 | 541,20 | 141,92 |
| 2019/05/17 | CH2205 | Male | Three y/o | Treatment (Wk 1) | Treatment | Feed Day | Yes | 10:50 | 10:00 - 10:59 | Late Morning | 37,5 | 53  | 15,0  | 15,0  | 18,65 | 544,43 | 90,51  |
| 2019/05/17 | CH2206 | Male | Three y/o | Treatment (Wk 1) | Treatment | Feed Day | Yes | 10:50 | 10:00 - 10:59 | Late Morning | 37,7 | 59  | 63,4  | 63,4  | 18,85 | 553,30 | 140,00 |
| 2019/05/17 | CH2205 | Male | Three y/o | Treatment (Wk 1) | Treatment | Feed Day | Yes | 10:55 | 10:00 - 10:59 | Late Morning | 37,5 | 62  | 21,0  | 21,0  | 18,65 | 557,33 | 101,98 |
| 2019/05/17 | CH2206 | Male | Three y/o | Treatment (Wk 1) | Treatment | Feed Day | Yes | 10:55 | 10:00 - 10:59 | Late Morning | 37,7 | 56  | 64,8  | 64,8  | 18,85 | 549,01 | 140,76 |
| 2019/05/17 | CH2205 | Male | Three y/o | Treatment (Wk 1) | Treatment | Feed Day | Yes | 11:00 | 11:00 - 11:59 | Late Morning | 37,5 | 53  | 17,6  | 17,6  | 18,65 | 544,43 | 95,95  |
| 2019/05/17 | CH2206 | Male | Three y/o | Treatment (Wk 1) | Treatment | Feed Day | Yes | 11:00 | 11:00 - 11:59 | Late Morning | 37,7 | 55  | 40,6  | 40,6  | 18,85 | 547,52 | 124,60 |
| 2019/05/17 | CH2205 | Male | Three y/o | Treatment (Wk 1) | Treatment | Feed Day | Yes | 11:05 | 11:00 - 11:59 | Late Morning | 37,5 | 52  | 25,2  | 25,2  | 18,65 | 542,83 | 108,22 |
| 2019/05/17 | CH2206 | Male | Three y/o | Treatment (Wk 1) | Treatment | Feed Day | Yes | 11:05 | 11:00 - 11:59 | Late Morning | 37,7 | 44  | 45,8  | 45,8  | 18,85 | 528,51 | 128,76 |
| 2019/05/17 | CH2205 | Male | Three y/o | Treatment (Wk 1) | Treatment | Feed Day | Yes | 11:10 | 11:00 - 11:59 | Late Morning | 37,5 | 73  | 53,8  | 53,8  | 18,65 | 570,27 | 134,32 |
| 2019/05/17 | CH2206 | Male | Three y/o | Treatment (Wk 1) | Treatment | Feed Day | Yes | 11:10 | 11:00 - 11:59 | Late Morning | 37,5 | 98  | 74,4  | 74,4  | 18,65 | 592,41 | 145,55 |
| 2019/05/17 | CH2205 | Male | Three y/o | Treatment (Wk 1) | Treatment | Feed Day | Yes | 11:15 | 11:00 - 11:59 | Late Morning | 37,6 |     | 65,4  | 65,4  | 18,75 |        | 141,08 |
| 2019/05/17 | CH2206 | Male | Three y/o | Treatment (Wk 1) | Treatment | Feed Day | Yes | 11:15 | 11:00 - 11:59 | Late Morning | 37,5 | 112 | 108,2 | 108,2 | 18,65 | 601,96 | 158,59 |
| 2019/05/17 | CH2205 | Male | Three y/o | Treatment (Wk 1) | Treatment | Feed Day | Yes | 11:20 | 11:00 - 11:59 | Late Morning | 37,5 | 152 | 52,4  | 52,4  | 18,65 | 622,73 | 133,41 |
| 2019/05/17 | CH2206 | Male | Three y/o | Treatment (Wk 1) | Treatment | Feed Day | Yes | 11:20 | 11:00 - 11:59 | Late Morning | 37,5 | 91  | 33,6  | 33,6  | 18,65 | 586,98 | 118,09 |
| 2019/05/17 | CH2205 | Male | Three y/o | Treatment (Wk 1) | Treatment | Feed Day | Yes | 11:25 | 11:00 - 11:59 | Late Morning | 37,5 | 103 | 185,2 | 185,2 | 18,65 | 596,00 | 177,42 |
| 2019/05/17 | CH2206 | Male | Three y/o | Treatment (Wk 1) | Treatment | Feed Day | Yes | 11:25 | 11:00 - 11:59 | Late Morning | 37,5 | 129 | 41,8  | 41,8  | 18,65 | 611,75 | 125,60 |
| 2019/05/17 | CH2205 | Male | Three y/o | Treatment (Wk 1) | Treatment | Feed Day | No  | 11:30 | 11:00 - 11:59 | Late Morning | 37,5 |     | 65,4  | 65,4  | 18,65 |        | 141,08 |
| 2019/05/17 | CH2206 | Male | Three y/o | Treatment (Wk 1) | Treatment | Feed Day | No  | 11:30 | 11:00 - 11:59 | Late Morning | 37,5 | 104 | 82,2  | 82,2  | 18,65 | 596,69 | 149,02 |
| 2019/05/17 | CH2205 | Male | Three y/o | Treatment (Wk 1) | Treatment | Feed Day | No  | 11:35 | 11:00 - 11:59 | Late Morning | 37,5 | 98  | 30,4  | 30,4  | 18,65 | 592,41 | 114,65 |
| 2019/05/17 | CH2206 | Male | Three y/o | Treatment (Wk 1) | Treatment | Feed Day | No  | 11:35 | 11:00 - 11:59 | Late Morning | 37,5 |     | 53,4  | 53,4  | 18,65 |        | 134,06 |
| 2019/05/17 | CH2205 | Male | Three y/o | Treatment (Wk 1) | Treatment | Feed Day | No  | 11:40 | 11:00 - 11:59 | Late Morning | 37,4 | 78  | 29,0  | 29,0  | 18,55 | 575,38 | 113,03 |
| 2019/05/17 | CH2206 | Male | Three y/o | Treatment (Wk 1) | Treatment | Feed Day | No  | 11:40 | 11:00 - 11:59 | Late Morning | 37,4 | 99  | 84,8  | 84,8  | 18,55 | 593,14 | 150,10 |
| 2019/05/17 | CH2205 | Male | Three y/o | Treatment (Wk 1) | Treatment | Feed Day | No  | 11:45 | 11:00 - 11:59 | Late Morning | 37,5 | 75  | 234,4 | 234,4 | 18,65 | 572,36 | 185,71 |
| 2019/05/17 | CH2206 | Male | Three y/o | Treatment (Wk 1) | Treatment | Feed Day | No  | 11:45 | 11:00 - 11:59 | Late Morning | 37,4 | 102 | 28,4  | 28,4  | 18,55 | 595,30 | 112,31 |
| 2019/05/17 | CH2205 | Male | Three y/o | Treatment (Wk 1) | Treatment | Feed Day | No  | 11:50 | 11:00 - 11:59 | Late Morning | 37,5 |     | 76,2  | 76,2  | 18,65 |        | 146,38 |
| 2019/05/17 | CH2206 | Male | Three y/o | Treatment (Wk 1) | Treatment | Feed Day | No  | 11:50 | 11:00 - 11:59 | Late Morning | 37,4 | 84  | 37,2  | 37,2  | 18,55 | 581,01 | 121,59 |
| 2019/05/17 | CH2205 | Male | Three y/o | Treatment (Wk 1) | Treatment | Feed Day | No  | 11:55 | 11:00 - 11:59 | Late Morning | 37,4 | 174 | 33,0  | 33,0  | 18,55 | 631,46 | 117,47 |
| 2019/05/17 | CH2206 | Male | Three y/o | Treatment (Wk 1) | Treatment | Feed Day | No  | 11:55 | 11:00 - 11:59 | Late Morning | 37,5 | 80  | 41,0  | 41,0  | 18,65 | 577,31 | 124,94 |
| 2019/05/17 | CH2205 | Male | Three y/o | Treatment (Wk 1) | Treatment | Feed Day | No  | 12:00 | 12:00 - 12:59 | Afternoon    | 37,4 | 102 | 51,6  | 51,6  | 18,55 | 595,30 | 132,87 |
| 2019/05/17 | CH2206 | Male | Three y/o | Treatment (Wk 1) | Treatment | Feed Day | No  | 12:00 | 12:00 - 12:59 | Afternoon    | 37,5 | 112 | 42,2  | 42,2  | 18,65 | 601,96 | 125,93 |
| 2019/05/17 | CH2205 | Male | Three y/o | Treatment (Wk 1) | Treatment | Feed Day | No  | 12:05 | 12:00 - 12:59 | Afternoon    | 37,5 | 92  | 97,6  | 97,6  | 18,65 | 587,78 | 155,00 |
| 2019/05/17 | CH2206 | Male | Three y/o | Treatment (Wk 1) | Treatment | Feed Day | No  | 12:05 | 12:00 - 12:59 | Afternoon    | 37,5 | 73  | 27,6  | 27,6  | 18,65 | 570,27 | 111,33 |
| 2019/05/17 | CH2205 | Male | Three y/o | Treatment (Wk 1) | Treatment | Feed Day | No  | 12:10 | 12:00 - 12:59 | Afternoon    | 37,6 | 83  | 8,4   | 8,4   | 18,75 | 580,11 | 70,86  |
| 2019/05/17 | CH2206 | Male | Three y/o | Treatment (Wk 1) | Treatment | Feed Day | No  | 12:10 | 12:00 - 12:59 | Afternoon    | 37,5 | 55  | 41,4  | 41,4  | 18,65 | 547,52 | 125,27 |
| 2019/05/17 | CH2205 | Male | Three y/o | Treatment (Wk 1) | Treatment | Feed Day | No  | 12:15 | 12:00 - 12:59 | Afternoon    | 37,6 |     | 16,4  | 16,4  | 18,75 |        | 93,55  |
| 2019/05/17 | CH2206 | Male | Three y/o | Treatment (Wk 1) | Treatment | Feed Day | No  | 12:15 | 12:00 - 12:59 | Afternoon    | 37,5 | 72  | 22,2  | 22,2  | 18,65 | 569,20 | 103,88 |
| 2019/05/17 | CH2205 | Male | Three y/o | Treatment (Wk 1) | Treatment | Feed Day | No  | 12:20 | 12:00 - 12:59 | Afternoon    | 37,6 | 38  | 34,4  | 34,4  | 18,75 | 515,48 | 118,90 |
| 2019/05/17 | CH2206 | Male | Three y/o | Treatment (Wk 1) | Treatment | Feed Day | No  | 12:20 | 12:00 - 12:59 | Afternoon    | 37,5 | 99  | 10,2  | 10,2  | 18,65 | 593,14 | 77,43  |
| 2019/05/17 | CH2205 | Male | Three y/o | Treatment (Wk 1) | Treatment | Feed Day | No  | 12:25 | 12:00 - 12:59 | Afternoon    | 37,6 | 68  | 16,0  | 16,0  | 18,75 | 564,71 | 92,71  |
| 2019/05/17 | CH2206 | Male | Three y/o | Treatment (Wk 1) | Treatment | Feed Day | No  | 12:25 | 12:00 - 12:59 | Afternoon    | 37,5 | 57  | 6,6   | 6,6   | 18,65 | 550,47 | 62,73  |
| 2019/05/17 | CH2205 | Male | Three y/o | Treatment (Wk 1) | Treatment | Feed Day | No  | 12:30 | 12:00 - 12:59 | Afternoon    | 37,6 | 65  | 17,4  | 17,4  | 18,75 | 561,12 | 95,56  |
| 2019/05/17 | CH2206 | Male | Three y/o | Treatment (Wk 1) | Treatment | Feed Day | No  | 12:30 | 12:00 - 12:59 | Afternoon    | 37,5 | 67  | 6,4   | 6,4   | 18,65 | 563,53 | 61,70  |
| 2019/05/17 | CH2205 | Male | Three y/o | Treatment (Wk 1) | Treatment | Feed Day | No  | 12:35 | 12:00 - 12:59 | Afternoon    | 37,6 | 62  | 15,2  | 15,2  | 18,75 | 557,33 | 90,96  |
| 2019/05/17 | CH2206 | Male | Three y/o | Treatment (Wk 1) | Treatment | Feed Day | No  | 12:35 | 12:00 - 12:59 | Afternoon    | 37,5 | 86  | 11,8  | 11,8  | 18,65 | 582,77 | 82,36  |
| 2019/05/17 | CH2205 | Male | Three y/o | Treatment (Wk 1) | Treatment | Feed Day | No  | 12:40 | 12:00 - 12:59 | Afternoon    | 37,6 | 70  | 22,6  | 22,6  | 18,75 | 566,99 | 104,49 |
| 2019/05/17 | CH2206 | Male | Three y/o | Treatment (Wk 1) | Treatment | Feed Day | No  | 12:40 | 12:00 - 12:59 | Afternoon    | 37,5 | 72  | 27,8  | 27,8  | 18,65 | 569,20 | 111,58 |
| 2019/05/17 | CH2205 | Male | Three y/o | Treatment (Wk 1) | Treatment | Feed Day | No  | 12:45 | 12:00 - 12:59 | Afternoon    | 37,6 | 123 | 25,6  | 25,6  | 18,75 | 608,49 | 108,76 |
| 2019/05/17 | CH2206 | Male | Three y/o | Treatment (Wk 1) | Treatment | Feed Day | No  | 12:45 | 12:00 - 12:59 | Afternoon    | 37,7 | 104 | 8,4   | 8,4   | 18,85 | 596,69 | 70,86  |
| 2019/05/17 | CH2205 | Male | Three y/o | Treatment (Wk 1) | Treatment | Feed Day | No  | 12:50 | 12:00 - 12:59 | Afternoon    | 37,6 | 70  | 23,4  | 23,4  | 18,75 | 566,99 | 105,68 |
| 2019/05/17 | CH2206 | Male | Three y/o | Treatment (Wk 1) | Treatment | Feed Day | No  | 12:50 | 12:00 - 12:59 | Afternoon    | 37,7 | 81  | 3,2   | 3,2   | 18,85 | 578,26 | 38,49  |
| 2019/05/17 | CH2205 | Male | Three y/o | Treatment (Wk 1) | Treatment | Feed Day | No  | 12:55 | 12:00 - 12:59 | Afternoon    | 37,6 | 63  | 17,2  | 17,2  | 18,75 | 558,62 | 95,17  |
| 2019/05/17 | CH2206 | Male | Three y/o | Treatment (Wk 1) | Treatment | Feed Day | No  | 12:55 | 12:00 - 12:59 | Afternoon    | 37,7 | 48  | 7,6   | 7,6   | 18,85 | 536,04 | 67,49  |
| 2019/05/17 | CH2205 | Male | Three y/o | Treatment (Wk 1) | Treatment | Feed Day | No  | 13:00 | 13:00 - 13:59 | Afternoon    | 37,6 | 53  | 20,0  | 20,0  | 18,75 | 544,43 | 100,31 |
| 2019/05/17 | CH2206 | Male | Three y/o | Treatment (Wk 1) | Treatment | Feed Day | No  | 13:00 | 13:00 - 13:59 | Afternoon    | 37,7 | 79  | 9,2   | 9,2   | 18,85 | 576,36 | 73,94  |
| 2019/05/17 | CH2205 | Male | Three y/o | Treatment (Wk 1) | Treatment | Feed Day | No  | 13:05 | 13:00 - 13:59 | Afternoon    | 37,6 | 84  | 18,2  | 18,2  | 18,75 | 581,01 | 97,10  |



|            |        |      |           |                  |           |          |    |       |               |           |      |     |       |       |       |        |        |
|------------|--------|------|-----------|------------------|-----------|----------|----|-------|---------------|-----------|------|-----|-------|-------|-------|--------|--------|
| 2019/05/17 | CH2206 | Male | Three y/o | Treatment (Wk 1) | Treatment | Feed Day | No | 13:05 | 13:00 - 13:59 | Afternoon | 37,7 | 64  | 11,2  | 11,2  | 18,85 | 559,88 | 80,59  |
| 2019/05/17 | CH2205 | Male | Three y/o | Treatment (Wk 1) | Treatment | Feed Day | No | 13:10 | 13:00 - 13:59 | Afternoon | 37,6 | 52  | 22,4  | 22,4  | 18,75 | 542,83 | 104,19 |
| 2019/05/17 | CH2206 | Male | Three y/o | Treatment (Wk 1) | Treatment | Feed Day | No | 13:10 | 13:00 - 13:59 | Afternoon | 37,7 | 77  | 12,8  | 12,8  | 18,85 | 574,39 | 85,12  |
| 2019/05/17 | CH2205 | Male | Three y/o | Treatment (Wk 1) | Treatment | Feed Day | No | 13:15 | 13:00 - 13:59 | Afternoon | 37,6 | 64  | 14,6  | 14,6  | 18,75 | 559,88 | 89,59  |
| 2019/05/17 | CH2206 | Male | Three y/o | Treatment (Wk 1) | Treatment | Feed Day | No | 13:15 | 13:00 - 13:59 | Afternoon | 37,7 | 75  | 13,4  | 13,4  | 18,85 | 572,36 | 86,68  |
| 2019/05/17 | CH2205 | Male | Three y/o | Treatment (Wk 1) | Treatment | Feed Day | No | 13:20 | 13:00 - 13:59 | Afternoon | 37,6 | 56  | 24,0  | 24,0  | 18,75 | 549,01 | 106,55 |
| 2019/05/17 | CH2206 | Male | Three y/o | Treatment (Wk 1) | Treatment | Feed Day | No | 13:20 | 13:00 - 13:59 | Afternoon | 37,7 | 45  | 19,8  | 19,8  | 18,85 | 530,47 | 99,97  |
| 2019/05/17 | CH2205 | Male | Three y/o | Treatment (Wk 1) | Treatment | Feed Day | No | 13:25 | 13:00 - 13:59 | Afternoon | 37,7 | 46  | 27,6  | 27,6  | 18,85 | 532,38 | 111,33 |
| 2019/05/17 | CH2206 | Male | Three y/o | Treatment (Wk 1) | Treatment | Feed Day | No | 13:25 | 13:00 - 13:59 | Afternoon | 37,7 | 137 | 31,8  | 31,8  | 18,85 | 615,83 | 116,20 |
| 2019/05/17 | CH2205 | Male | Three y/o | Treatment (Wk 1) | Treatment | Feed Day | No | 13:30 | 13:00 - 13:59 | Afternoon | 37,6 | 62  | 15,2  | 15,2  | 18,75 | 557,33 | 90,96  |
| 2019/05/17 | CH2206 | Male | Three y/o | Treatment (Wk 1) | Treatment | Feed Day | No | 13:30 | 13:00 - 13:59 | Afternoon | 37,8 | 94  | 39,0  | 39,0  | 18,95 | 589,37 | 123,22 |
| 2019/05/17 | CH2205 | Male | Three y/o | Treatment (Wk 1) | Treatment | Feed Day | No | 13:35 | 13:00 - 13:59 | Afternoon | 37,5 | 86  | 16,8  | 16,8  | 18,65 | 582,77 | 94,37  |
| 2019/05/17 | CH2206 | Male | Three y/o | Treatment (Wk 1) | Treatment | Feed Day | No | 13:35 | 13:00 - 13:59 | Afternoon | 37,7 | 90  | 44,6  | 44,6  | 18,85 | 586,16 | 127,84 |
| 2019/05/17 | CH2205 | Male | Three y/o | Treatment (Wk 1) | Treatment | Feed Day | No | 13:40 | 13:00 - 13:59 | Afternoon | 37,5 | 51  | 16,0  | 16,0  | 18,65 | 541,20 | 92,71  |
| 2019/05/17 | CH2206 | Male | Three y/o | Treatment (Wk 1) | Treatment | Feed Day | No | 13:40 | 13:00 - 13:59 | Afternoon | 37,8 | 84  | 46,6  | 46,6  | 18,95 | 581,01 | 129,35 |
| 2019/05/17 | CH2205 | Male | Three y/o | Treatment (Wk 1) | Treatment | Feed Day | No | 13:45 | 13:00 - 13:59 | Afternoon | 37,6 | 57  | 1,2   | 1,2   | 18,75 | 550,47 | 5,99   |
| 2019/05/17 | CH2206 | Male | Three y/o | Treatment (Wk 1) | Treatment | Feed Day | No | 13:45 | 13:00 - 13:59 | Afternoon | 37,8 | 91  | 39,6  | 39,6  | 18,95 | 586,98 | 123,74 |
| 2019/05/17 | CH2205 | Male | Three y/o | Treatment (Wk 1) | Treatment | Feed Day | No | 13:50 | 13:00 - 13:59 | Afternoon | 37,7 | 57  | 3,4   | 3,4   | 18,85 | 550,47 | 40,51  |
| 2019/05/17 | CH2206 | Male | Three y/o | Treatment (Wk 1) | Treatment | Feed Day | No | 13:50 | 13:00 - 13:59 | Afternoon | 37,8 | 103 | 39,8  | 39,8  | 18,95 | 596,00 | 123,91 |
| 2019/05/17 | CH2205 | Male | Three y/o | Treatment (Wk 1) | Treatment | Feed Day | No | 13:55 | 13:00 - 13:59 | Afternoon | 37,7 | 58  | 4,2   | 4,2   | 18,85 | 551,90 | 47,57  |
| 2019/05/17 | CH2206 | Male | Three y/o | Treatment (Wk 1) | Treatment | Feed Day | No | 13:55 | 13:00 - 13:59 | Afternoon | 37,8 | 86  | 17,4  | 17,4  | 18,95 | 582,77 | 95,56  |
| 2019/05/17 | CH2205 | Male | Three y/o | Treatment (Wk 1) | Treatment | Feed Day | No | 14:00 | 14:00 - 14:59 | Afternoon | 37,7 | 84  | 3,0   | 3,0   | 18,85 | 581,01 | 36,34  |
| 2019/05/17 | CH2206 | Male | Three y/o | Treatment (Wk 1) | Treatment | Feed Day | No | 14:00 | 14:00 - 14:59 | Afternoon | 37,8 | 91  | 15,8  | 15,8  | 18,95 | 586,98 | 92,28  |
| 2019/05/17 | CH2205 | Male | Three y/o | Treatment (Wk 1) | Treatment | Feed Day | No | 14:05 | 14:00 - 14:59 | Afternoon | 37,7 | 69  | 4,2   | 4,2   | 18,85 | 565,86 | 47,57  |
| 2019/05/17 | CH2206 | Male | Three y/o | Treatment (Wk 1) | Treatment | Feed Day | No | 14:05 | 14:00 - 14:59 | Afternoon | 37,8 | 100 | 11,2  | 11,2  | 18,95 | 593,87 | 80,59  |
| 2019/05/17 | CH2205 | Male | Three y/o | Treatment (Wk 1) | Treatment | Feed Day | No | 14:10 | 14:00 - 14:59 | Afternoon | 37,7 | 80  | 8,6   | 8,6   | 18,85 | 577,31 | 71,66  |
| 2019/05/17 | CH2206 | Male | Three y/o | Treatment (Wk 1) | Treatment | Feed Day | No | 14:10 | 14:00 - 14:59 | Afternoon | 37,9 | 95  | 11,0  | 11,0  | 19,05 | 590,14 | 79,98  |
| 2019/05/17 | CH2205 | Male | Three y/o | Treatment (Wk 1) | Treatment | Feed Day | No | 14:15 | 14:00 - 14:59 | Afternoon | 37,7 |     | 14,2  | 14,2  | 18,85 |        | 88,65  |
| 2019/05/17 | CH2206 | Male | Three y/o | Treatment (Wk 1) | Treatment | Feed Day | No | 14:15 | 14:00 - 14:59 | Afternoon | 37,9 | 86  | 13,6  | 13,6  | 19,05 | 582,77 | 87,18  |
| 2019/05/17 | CH2205 | Male | Three y/o | Treatment (Wk 1) | Treatment | Feed Day | No | 14:20 | 14:00 - 14:59 | Afternoon | 37,7 |     | 11,4  | 11,4  | 18,85 |        | 81,19  |
| 2019/05/17 | CH2206 | Male | Three y/o | Treatment (Wk 1) | Treatment | Feed Day | No | 14:20 | 14:00 - 14:59 | Afternoon | 37,9 | 113 | 4,8   | 4,8   | 19,05 | 602,58 | 52,04  |
| 2019/05/17 | CH2205 | Male | Three y/o | Treatment (Wk 1) | Treatment | Feed Day | No | 14:25 | 14:00 - 14:59 | Afternoon | 37,7 |     | 20,0  | 20,0  | 18,85 |        | 100,31 |
| 2019/05/17 | CH2206 | Male | Three y/o | Treatment (Wk 1) | Treatment | Feed Day | No | 14:25 | 14:00 - 14:59 | Afternoon | 37,9 | 92  | 14,8  | 14,8  | 19,05 | 587,78 | 90,05  |
| 2019/05/17 | CH2205 | Male | Three y/o | Treatment (Wk 1) | Treatment | Feed Day | No | 14:30 | 14:00 - 14:59 | Afternoon | 37,9 |     | 4,8   | 4,8   | 19,05 |        | 52,04  |
| 2019/05/17 | CH2206 | Male | Three y/o | Treatment (Wk 1) | Treatment | Feed Day | No | 14:30 | 14:00 - 14:59 | Afternoon | 37,9 | 120 | 31,2  | 31,2  | 19,05 | 606,78 | 115,54 |
| 2019/05/17 | CH2205 | Male | Three y/o | Treatment (Wk 1) | Treatment | Feed Day | No | 14:35 | 14:00 - 14:59 | Afternoon | 37,9 | 88  | 32,4  | 32,4  | 19,05 | 584,49 | 116,84 |
| 2019/05/17 | CH2206 | Male | Three y/o | Treatment (Wk 1) | Treatment | Feed Day | No | 14:35 | 14:00 - 14:59 | Afternoon | 37,9 | 91  | 97,8  | 97,8  | 19,05 | 586,98 | 155,07 |
| 2019/05/17 | CH2205 | Male | Three y/o | Treatment (Wk 1) | Treatment | Feed Day | No | 14:40 | 14:00 - 14:59 | Afternoon | 37,7 |     | 15,8  | 15,8  | 18,85 |        | 92,28  |
| 2019/05/17 | CH2206 | Male | Three y/o | Treatment (Wk 1) | Treatment | Feed Day | No | 14:40 | 14:00 - 14:59 | Afternoon | 37,9 | 103 | 34,4  | 34,4  | 19,05 | 596,00 | 118,90 |
| 2019/05/17 | CH2205 | Male | Three y/o | Treatment (Wk 1) | Treatment | Feed Day | No | 14:45 | 14:00 - 14:59 | Afternoon | 37,7 | 77  | 14,2  | 14,2  | 18,85 | 574,39 | 88,65  |
| 2019/05/17 | CH2206 | Male | Three y/o | Treatment (Wk 1) | Treatment | Feed Day | No | 14:45 | 14:00 - 14:59 | Afternoon | 37,9 | 112 | 33,2  | 33,2  | 19,05 | 601,96 | 117,68 |
| 2019/05/17 | CH2205 | Male | Three y/o | Treatment (Wk 1) | Treatment | Feed Day | No | 14:50 | 14:00 - 14:59 | Afternoon | 37,7 |     | 42,2  | 42,2  | 18,85 |        | 125,93 |
| 2019/05/17 | CH2206 | Male | Three y/o | Treatment (Wk 1) | Treatment | Feed Day | No | 14:50 | 14:00 - 14:59 | Afternoon | 37,9 | 125 | 194,4 | 194,4 | 19,05 | 609,60 | 179,12 |
| 2019/05/17 | CH2205 | Male | Three y/o | Treatment (Wk 1) | Treatment | Feed Day | No | 14:55 | 14:00 - 14:59 | Afternoon | 37,7 | 167 | 24,6  | 24,6  | 18,85 | 628,84 | 107,39 |
| 2019/05/17 | CH2206 | Male | Three y/o | Treatment (Wk 1) | Treatment | Feed Day | No | 14:55 | 14:00 - 14:59 | Afternoon | 37,9 | 115 | 45,8  | 45,8  | 19,05 | 603,82 | 128,76 |
| 2019/05/17 | CH2205 | Male | Three y/o | Treatment (Wk 1) | Treatment | Feed Day | No | 15:00 | 15:00 - 15:59 | Afternoon | 37,7 |     | 10,8  | 10,8  | 18,85 |        | 79,36  |
| 2019/05/17 | CH2206 | Male | Three y/o | Treatment (Wk 1) | Treatment | Feed Day | No | 15:00 | 15:00 - 15:59 | Afternoon | 37,9 | 111 | 16,4  | 16,4  | 19,05 | 601,33 | 93,55  |
| 2019/05/17 | CH2205 | Male | Three y/o | Treatment (Wk 1) | Treatment | Feed Day | No | 15:05 | 15:00 - 15:59 | Afternoon | 37,7 | 75  | 22,6  | 22,6  | 18,85 | 572,36 | 104,49 |
| 2019/05/17 | CH2206 | Male | Three y/o | Treatment (Wk 1) | Treatment | Feed Day | No | 15:05 | 15:00 - 15:59 | Afternoon | 37,8 | 84  | 77,8  | 77,8  | 18,95 | 581,01 | 147,11 |
| 2019/05/17 | CH2205 | Male | Three y/o | Treatment (Wk 1) | Treatment | Feed Day | No | 15:10 | 15:00 - 15:59 | Afternoon | 37,9 | 65  | 32,2  | 32,2  | 19,05 | 561,12 | 116,63 |
| 2019/05/17 | CH2206 | Male | Three y/o | Treatment (Wk 1) | Treatment | Feed Day | No | 15:10 | 15:00 - 15:59 | Afternoon | 37,9 | 115 | 35,2  | 35,2  | 19,05 | 603,82 | 119,69 |
| 2019/05/17 | CH2205 | Male | Three y/o | Treatment (Wk 1) | Treatment | Feed Day | No | 15:15 | 15:00 - 15:59 | Afternoon | 37,9 | 76  | 24,8  | 24,8  | 19,05 | 573,39 | 107,67 |
| 2019/05/17 | CH2206 | Male | Three y/o | Treatment (Wk 1) | Treatment | Feed Day | No | 15:15 | 15:00 - 15:59 | Afternoon | 37,9 | 86  | 19,6  | 19,6  | 19,05 | 582,77 | 99,63  |
| 2019/05/17 | CH2205 | Male | Three y/o | Treatment (Wk 1) | Treatment | Feed Day | No | 15:20 | 15:00 - 15:59 | Afternoon | 37,9 | 71  | 21,8  | 21,8  | 19,05 | 568,10 | 103,26 |
| 2019/05/17 | CH2206 | Male | Three y/o | Treatment (Wk 1) | Treatment | Feed Day | No | 15:20 | 15:00 - 15:59 | Afternoon | 37,9 | 81  | 15,2  | 15,2  | 19,05 | 578,26 | 90,96  |
| 2019/05/17 | CH2205 | Male | Three y/o | Treatment (Wk 1) | Treatment | Feed Day | No | 15:25 | 15:00 - 15:59 | Afternoon | 37,9 | 55  | 25,0  | 25,0  | 19,05 | 547,52 | 107,94 |
| 2019/05/17 | CH2206 | Male | Three y/o | Treatment (Wk 1) | Treatment | Feed Day | No | 15:25 | 15:00 - 15:59 | Afternoon | 37,9 | 79  | 8,4   | 8,4   | 19,05 | 576,36 | 70,86  |
| 2019/05/17 | CH2205 | Male | Three y/o | Treatment (Wk 1) | Treatment | Feed Day | No | 15:30 | 15:00 - 15:59 | Afternoon | 38,0 | 56  | 19,4  | 19,4  | 19,15 | 549,01 | 99,28  |
| 2019/05/17 | CH2206 | Male | Three y/o | Treatment (Wk 1) | Treatment | Feed Day | No | 15:30 | 15:00 - 15:59 | Afternoon | 37,9 | 80  | 5,2   | 5,2   | 19,05 | 577,31 | 54,72  |
| 2019/05/17 | CH2205 | Male | Three y/o | Treatment (Wk 1) | Treatment | Feed Day | No | 15:35 | 15:00 - 15:59 | Afternoon | 38,0 | 54  | 25,0  | 25,0  | 19,15 | 545,99 | 107,94 |
| 2019/05/17 | CH2206 | Male | Three y/o | Treatment (Wk 1) | Treatment | Feed Day | No | 15:35 | 15:00 - 15:59 | Afternoon | 37,9 | 77  | 3,6   | 3,6   | 19,05 | 574,39 | 42,42  |
| 2019/05/17 | CH2205 | Male | Three y/o | Treatment (Wk 1) | Treatment | Feed Day | No | 15:40 | 15:00 - 15:59 | Afternoon | 38,0 | 86  | 171,6 | 171,6 | 19,15 | 582,77 | 174,74 |
| 2019/05/17 | CH2206 | Male | Three y/o | Treatment (Wk 1) | Treatment | Feed Day | No | 15:40 | 15:00 - 15:59 | Afternoon | 37,9 | 108 | 55,0  | 55,0  | 19,05 | 599,39 | 135,08 |
| 2019/05/17 | CH2205 | Male | Three y/o | Treatment (Wk 1) | Treatment | Feed Day | No | 15:45 | 15:00 - 15:59 | Afternoon | 37,9 | 64  | 29,0  | 29,0  | 19,05 | 559,88 | 113,03 |
| 2019/05/17 | CH2206 | Male | Three y/o | Treatment (Wk 1) | Treatment | Feed Day | No | 15:45 | 15:00 - 15:59 | Afternoon | 37,9 | 82  | 39,0  | 39,0  | 19,05 | 579,19 | 123,22 |
| 2019/05/17 | CH2205 | Male | Three y/o | Treatment (Wk 1) | Treatment | Feed Day | No | 15:50 | 15:00 - 15:59 | Afternoon | 37,9 | 118 | 21,4  | 21,4  | 19,05 | 605,61 | 102,63 |
| 2019/05/17 | CH2206 | Male | Three y/o | Treatment (Wk 1) | Treatment | Feed Day | No | 15:50 | 15:00 - 15:59 | Afternoon | 37,9 | 82  | 36,8  | 36,8  | 19,05 | 579,19 | 121,22 |
| 2019/05/17 | CH2205 | Male | Three y/o | Treatment (Wk 1) | Treatment | Feed Day | No | 15:55 | 15:00 - 15:59 | Afternoon | 37,9 | 73  | 19,6  | 19,6  | 19,05 | 570,27 | 99,63  |
| 2019/05/17 | CH2206 | Male | Three y/o | Treatment (Wk 1) | Treatment | Feed Day | No | 15:55 | 15:00 - 15:59 | Afternoon | 37,9 |     | 39,6  | 39,6  | 19,05 |        | 123,74 |
| 2019/05/17 | CH2205 | Male | Three y/o | Treatment (Wk 1) | Treatment | Feed Day | No | 16:00 | 16:00 - 16:59 | Evening   | 37,9 | 62  | 16,6  | 16,6  | 19,05 | 557,33 | 93,96  |



|            |        |      |           |                  |           |          |    |       |               |         |      |     |       |       |       |        |        |
|------------|--------|------|-----------|------------------|-----------|----------|----|-------|---------------|---------|------|-----|-------|-------|-------|--------|--------|
| 2019/05/17 | CH2206 | Male | Three y/o | Treatment (Wk 1) | Treatment | Feed Day | No | 16:00 | 16:00 - 16:59 | Evening | 37,9 | 82  | 41,6  | 41,6  | 19,05 | 579,19 | 125,44 |
| 2019/05/17 | CH2205 | Male | Three y/o | Treatment (Wk 1) | Treatment | Feed Day | No | 16:05 | 16:00 - 16:59 | Evening | 38,0 | 64  | 4,6   | 4,6   | 19,15 | 559,88 | 50,61  |
| 2019/05/17 | CH2206 | Male | Three y/o | Treatment (Wk 1) | Treatment | Feed Day | No | 16:05 | 16:00 - 16:59 | Evening | 37,9 | 90  | 40,2  | 40,2  | 19,05 | 586,16 | 124,26 |
| 2019/05/17 | CH2205 | Male | Three y/o | Treatment (Wk 1) | Treatment | Feed Day | No | 16:10 | 16:00 - 16:59 | Evening | 38,0 | 74  | 6,0   | 6,0   | 19,15 | 571,33 | 59,53  |
| 2019/05/17 | CH2206 | Male | Three y/o | Treatment (Wk 1) | Treatment | Feed Day | No | 16:10 | 16:00 - 16:59 | Evening | 37,9 | 68  | 45,2  | 45,2  | 19,05 | 564,71 | 128,30 |
| 2019/05/17 | CH2205 | Male | Three y/o | Treatment (Wk 1) | Treatment | Feed Day | No | 16:15 | 16:00 - 16:59 | Evening | 38,0 | 75  | 7,4   | 7,4   | 19,15 | 572,36 | 66,59  |
| 2019/05/17 | CH2206 | Male | Three y/o | Treatment (Wk 1) | Treatment | Feed Day | No | 16:15 | 16:00 - 16:59 | Evening | 38,0 | 86  | 42,4  | 42,4  | 19,15 | 582,77 | 126,10 |
| 2019/05/17 | CH2205 | Male | Three y/o | Treatment (Wk 1) | Treatment | Feed Day | No | 16:20 | 16:00 - 16:59 | Evening | 38,1 | 55  | 6,6   | 6,6   | 19,26 | 547,52 | 62,73  |
| 2019/05/17 | CH2206 | Male | Three y/o | Treatment (Wk 1) | Treatment | Feed Day | No | 16:20 | 16:00 - 16:59 | Evening | 38,0 | 94  | 45,4  | 45,4  | 19,15 | 589,37 | 128,45 |
| 2019/05/17 | CH2205 | Male | Three y/o | Treatment (Wk 1) | Treatment | Feed Day | No | 16:25 | 16:00 - 16:59 | Evening | 38,1 |     | 20,2  | 20,2  | 19,26 |        | 100,65 |
| 2019/05/17 | CH2206 | Male | Three y/o | Treatment (Wk 1) | Treatment | Feed Day | No | 16:25 | 16:00 - 16:59 | Evening | 38,0 | 70  | 42,2  | 42,2  | 19,15 | 566,99 | 125,93 |
| 2019/05/17 | CH2205 | Male | Three y/o | Treatment (Wk 1) | Treatment | Feed Day | No | 16:30 | 16:00 - 16:59 | Evening | 38,1 | 78  | 22,4  | 22,4  | 19,26 | 575,38 | 104,19 |
| 2019/05/17 | CH2206 | Male | Three y/o | Treatment (Wk 1) | Treatment | Feed Day | No | 16:30 | 16:00 - 16:59 | Evening | 38,0 | 86  | 44,0  | 44,0  | 19,15 | 582,77 | 127,37 |
| 2019/05/17 | CH2205 | Male | Three y/o | Treatment (Wk 1) | Treatment | Feed Day | No | 16:35 | 16:00 - 16:59 | Evening | 38,1 | 63  | 27,6  | 27,6  | 19,26 | 558,62 | 111,33 |
| 2019/05/17 | CH2206 | Male | Three y/o | Treatment (Wk 1) | Treatment | Feed Day | No | 16:35 | 16:00 - 16:59 | Evening | 38,0 | 74  | 49,2  | 49,2  | 19,15 | 571,33 | 131,23 |
| 2019/05/17 | CH2205 | Male | Three y/o | Treatment (Wk 1) | Treatment | Feed Day | No | 16:40 | 16:00 - 16:59 | Evening | 38,2 | 72  | 23,6  | 23,6  | 19,36 | 569,20 | 105,97 |
| 2019/05/17 | CH2206 | Male | Three y/o | Treatment (Wk 1) | Treatment | Feed Day | No | 16:40 | 16:00 - 16:59 | Evening | 38,0 | 83  | 47,0  | 47,0  | 19,15 | 580,11 | 129,65 |
| 2019/05/17 | CH2205 | Male | Three y/o | Treatment (Wk 1) | Treatment | Feed Day | No | 16:45 | 16:00 - 16:59 | Evening | 38,2 | 70  | 27,4  | 27,4  | 19,36 | 566,99 | 111,09 |
| 2019/05/17 | CH2206 | Male | Three y/o | Treatment (Wk 1) | Treatment | Feed Day | No | 16:45 | 16:00 - 16:59 | Evening | 38,0 | 86  | 42,4  | 42,4  | 19,15 | 582,77 | 126,10 |
| 2019/05/17 | CH2205 | Male | Three y/o | Treatment (Wk 1) | Treatment | Feed Day | No | 16:50 | 16:00 - 16:59 | Evening | 38,2 | 58  | 21,0  | 21,0  | 19,36 | 551,90 | 101,98 |
| 2019/05/17 | CH2206 | Male | Three y/o | Treatment (Wk 1) | Treatment | Feed Day | No | 16:50 | 16:00 - 16:59 | Evening | 38,0 | 94  | 14,6  | 14,6  | 19,15 | 589,37 | 89,59  |
| 2019/05/17 | CH2205 | Male | Three y/o | Treatment (Wk 1) | Treatment | Feed Day | No | 16:55 | 16:00 - 16:59 | Evening | 38,2 | 61  | 27,4  | 27,4  | 19,36 | 556,01 | 111,09 |
| 2019/05/17 | CH2206 | Male | Three y/o | Treatment (Wk 1) | Treatment | Feed Day | No | 16:55 | 16:00 - 16:59 | Evening | 38,0 | 86  | 8,0   | 8,0   | 19,15 | 582,77 | 69,22  |
| 2019/05/17 | CH2205 | Male | Three y/o | Treatment (Wk 1) | Treatment | Feed Day | No | 17:00 | 17:00 - 17:59 | Evening | 38,2 | 94  | 25,4  | 25,4  | 19,36 | 589,37 | 108,49 |
| 2019/05/17 | CH2206 | Male | Three y/o | Treatment (Wk 1) | Treatment | Feed Day | No | 17:00 | 17:00 - 17:59 | Evening | 38,0 | 76  | 8,6   | 8,6   | 19,15 | 573,39 | 71,66  |
| 2019/05/17 | CH2205 | Male | Three y/o | Treatment (Wk 1) | Treatment | Feed Day | No | 17:05 | 17:00 - 17:59 | Evening | 38,2 | 79  | 15,0  | 15,0  | 19,36 | 576,36 | 90,51  |
| 2019/05/17 | CH2206 | Male | Three y/o | Treatment (Wk 1) | Treatment | Feed Day | No | 17:05 | 17:00 - 17:59 | Evening | 38,0 | 86  | 6,6   | 6,6   | 19,15 | 582,77 | 62,73  |
| 2019/05/17 | CH2205 | Male | Three y/o | Treatment (Wk 1) | Treatment | Feed Day | No | 17:10 | 17:00 - 17:59 | Evening | 38,2 | 59  | 13,4  | 13,4  | 19,36 | 553,30 | 86,68  |
| 2019/05/17 | CH2206 | Male | Three y/o | Treatment (Wk 1) | Treatment | Feed Day | No | 17:10 | 17:00 - 17:59 | Evening | 38,0 | 88  | 15,0  | 15,0  | 19,15 | 584,49 | 90,51  |
| 2019/05/17 | CH2205 | Male | Three y/o | Treatment (Wk 1) | Treatment | Feed Day | No | 17:15 | 17:00 - 17:59 | Evening | 38,2 | 73  | 28,4  | 28,4  | 19,36 | 570,27 | 112,31 |
| 2019/05/17 | CH2206 | Male | Three y/o | Treatment (Wk 1) | Treatment | Feed Day | No | 17:15 | 17:00 - 17:59 | Evening | 38,0 | 102 | 15,6  | 15,6  | 19,15 | 595,30 | 91,85  |
| 2019/05/17 | CH2205 | Male | Three y/o | Treatment (Wk 1) | Treatment | Feed Day | No | 17:20 | 17:00 - 17:59 | Evening | 38,2 | 64  | 26,0  | 26,0  | 19,36 | 559,88 | 109,29 |
| 2019/05/17 | CH2206 | Male | Three y/o | Treatment (Wk 1) | Treatment | Feed Day | No | 17:20 | 17:00 - 17:59 | Evening | 38,0 | 83  | 27,8  | 27,8  | 19,15 | 580,11 | 111,58 |
| 2019/05/17 | CH2205 | Male | Three y/o | Treatment (Wk 1) | Treatment | Feed Day | No | 17:25 | 17:00 - 17:59 | Evening | 38,2 | 81  | 24,6  | 24,6  | 19,36 | 578,26 | 107,39 |
| 2019/05/17 | CH2206 | Male | Three y/o | Treatment (Wk 1) | Treatment | Feed Day | No | 17:25 | 17:00 - 17:59 | Evening | 38,0 | 80  | 9,8   | 9,8   | 19,15 | 577,31 | 76,07  |
| 2019/05/17 | CH2205 | Male | Three y/o | Treatment (Wk 1) | Treatment | Feed Day | No | 17:30 | 17:00 - 17:59 | Evening | 38,1 | 60  | 6,6   | 6,6   | 19,26 | 554,67 | 62,73  |
| 2019/05/17 | CH2206 | Male | Three y/o | Treatment (Wk 1) | Treatment | Feed Day | No | 17:30 | 17:00 - 17:59 | Evening | 38,0 | 49  | 7,8   | 7,8   | 19,15 | 537,80 | 68,36  |
| 2019/05/17 | CH2205 | Male | Three y/o | Treatment (Wk 1) | Treatment | Feed Day | No | 17:35 | 17:00 - 17:59 | Evening | 38,0 | 59  | 6,4   | 6,4   | 19,15 | 553,30 | 61,70  |
| 2019/05/17 | CH2206 | Male | Three y/o | Treatment (Wk 1) | Treatment | Feed Day | No | 17:35 | 17:00 - 17:59 | Evening | 38,0 | 88  | 13,8  | 13,8  | 19,15 | 584,49 | 87,68  |
| 2019/05/17 | CH2205 | Male | Three y/o | Treatment (Wk 1) | Treatment | Feed Day | No | 17:40 | 17:00 - 17:59 | Evening | 38,0 | 55  | 3,8   | 3,8   | 19,15 | 547,52 | 44,22  |
| 2019/05/17 | CH2206 | Male | Three y/o | Treatment (Wk 1) | Treatment | Feed Day | No | 17:40 | 17:00 - 17:59 | Evening | 38,0 | 89  | 20,8  | 20,8  | 19,15 | 585,33 | 101,65 |
| 2019/05/17 | CH2205 | Male | Three y/o | Treatment (Wk 1) | Treatment | Feed Day | No | 17:45 | 17:00 - 17:59 | Evening | 38,0 | 48  | 4,2   | 4,2   | 19,15 | 536,04 | 47,57  |
| 2019/05/17 | CH2206 | Male | Three y/o | Treatment (Wk 1) | Treatment | Feed Day | No | 17:45 | 17:00 - 17:59 | Evening | 38,0 | 69  | 13,6  | 13,6  | 19,15 | 565,86 | 87,18  |
| 2019/05/17 | CH2205 | Male | Three y/o | Treatment (Wk 1) | Treatment | Feed Day | No | 17:50 | 17:00 - 17:59 | Evening | 38,0 | 86  | 14,0  | 14,0  | 19,15 | 582,77 | 88,17  |
| 2019/05/17 | CH2206 | Male | Three y/o | Treatment (Wk 1) | Treatment | Feed Day | No | 17:50 | 17:00 - 17:59 | Evening | 38,0 | 78  | 22,8  | 22,8  | 19,15 | 575,38 | 104,79 |
| 2019/05/17 | CH2205 | Male | Three y/o | Treatment (Wk 1) | Treatment | Feed Day | No | 17:55 | 17:00 - 17:59 | Evening | 38,1 | 94  | 143,4 | 143,4 | 19,26 | 589,37 | 168,44 |
| 2019/05/17 | CH2206 | Male | Three y/o | Treatment (Wk 1) | Treatment | Feed Day | No | 17:55 | 17:00 - 17:59 | Evening | 38,0 |     | 43,8  | 43,8  | 19,15 |        | 127,22 |
| 2019/05/17 | CH2205 | Male | Three y/o | Treatment (Wk 1) | Treatment | Feed Day | No | 18:00 | 18:00 - 18:59 | Evening | 37,9 |     | 8,6   | 8,6   | 19,05 |        | 71,66  |
| 2019/05/17 | CH2206 | Male | Three y/o | Treatment (Wk 1) | Treatment | Feed Day | No | 18:00 | 18:00 - 18:59 | Evening | 38,0 | 108 | 71,4  | 71,4  | 19,15 | 599,39 | 144,12 |
| 2019/05/17 | CH2205 | Male | Three y/o | Treatment (Wk 1) | Treatment | Feed Day | No | 18:05 | 18:00 - 18:59 | Evening | 37,8 |     | 65,4  | 65,4  | 18,95 |        | 141,08 |
| 2019/05/17 | CH2206 | Male | Three y/o | Treatment (Wk 1) | Treatment | Feed Day | No | 18:05 | 18:00 - 18:59 | Evening | 37,9 | 138 | 48,6  | 48,6  | 19,05 | 616,31 | 130,81 |
| 2019/05/17 | CH2205 | Male | Three y/o | Treatment (Wk 1) | Treatment | Feed Day | No | 18:10 | 18:00 - 18:59 | Evening | 37,7 |     | 39,8  | 39,8  | 18,85 |        | 123,91 |
| 2019/05/17 | CH2206 | Male | Three y/o | Treatment (Wk 1) | Treatment | Feed Day | No | 18:10 | 18:00 - 18:59 | Evening | 37,8 | 131 | 58,6  | 58,6  | 18,95 | 612,80 | 137,28 |
| 2019/05/17 | CH2205 | Male | Three y/o | Treatment (Wk 1) | Treatment | Feed Day | No | 18:15 | 18:00 - 18:59 | Evening | 37,7 | 108 | 18,6  | 18,6  | 18,85 | 599,39 | 97,84  |
| 2019/05/17 | CH2206 | Male | Three y/o | Treatment (Wk 1) | Treatment | Feed Day | No | 18:15 | 18:00 - 18:59 | Evening | 37,9 |     | 106,2 | 106,2 | 19,05 |        | 157,94 |
| 2019/05/17 | CH2205 | Male | Three y/o | Treatment (Wk 1) | Treatment | Feed Day | No | 18:20 | 18:00 - 18:59 | Evening | 37,7 | 138 | 24,2  | 24,2  | 18,85 | 616,31 | 106,83 |
| 2019/05/17 | CH2206 | Male | Three y/o | Treatment (Wk 1) | Treatment | Feed Day | No | 18:20 | 18:00 - 18:59 | Evening | 37,9 | 110 | 42,8  | 42,8  | 19,05 | 600,69 | 126,42 |
| 2019/05/17 | CH2205 | Male | Three y/o | Treatment (Wk 1) | Treatment | Feed Day | No | 18:25 | 18:00 - 18:59 | Evening | 37,7 | 174 | 34,8  | 34,8  | 18,85 | 631,46 | 119,29 |
| 2019/05/17 | CH2206 | Male | Three y/o | Treatment (Wk 1) | Treatment | Feed Day | No | 18:25 | 18:00 - 18:59 | Evening | 37,8 | 103 | 51,4  | 51,4  | 18,95 | 596,00 | 132,74 |
| 2019/05/17 | CH2205 | Male | Three y/o | Treatment (Wk 1) | Treatment | Feed Day | No | 18:30 | 18:00 - 18:59 | Evening | 37,6 |     | 21,2  | 21,2  | 18,75 |        | 102,31 |
| 2019/05/17 | CH2206 | Male | Three y/o | Treatment (Wk 1) | Treatment | Feed Day | No | 18:30 | 18:00 - 18:59 | Evening | 37,8 | 75  | 55,6  | 55,6  | 18,95 | 572,36 | 135,46 |
| 2019/05/17 | CH2205 | Male | Three y/o | Treatment (Wk 1) | Treatment | Feed Day | No | 18:35 | 18:00 - 18:59 | Evening | 37,7 | 76  | 14,2  | 14,2  | 18,85 | 573,39 | 88,65  |
| 2019/05/17 | CH2206 | Male | Three y/o | Treatment (Wk 1) | Treatment | Feed Day | No | 18:35 | 18:00 - 18:59 | Evening | 37,8 | 87  | 59,4  | 59,4  | 18,95 | 583,64 | 137,75 |
| 2019/05/17 | CH2205 | Male | Three y/o | Treatment (Wk 1) | Treatment | Feed Day | No | 18:40 | 18:00 - 18:59 | Evening | 37,9 | 64  | 14,0  | 14,0  | 19,05 | 559,88 | 88,17  |
| 2019/05/17 | CH2206 | Male | Three y/o | Treatment (Wk 1) | Treatment | Feed Day | No | 18:40 | 18:00 - 18:59 | Evening | 37,8 | 82  | 51,4  | 51,4  | 18,95 | 579,19 | 132,74 |
| 2019/05/17 | CH2205 | Male | Three y/o | Treatment (Wk 1) | Treatment | Feed Day | No | 18:45 | 18:00 - 18:59 | Evening | 38,0 | 82  | 13,4  | 13,4  | 19,15 | 579,19 | 86,68  |
| 2019/05/17 | CH2206 | Male | Three y/o | Treatment (Wk 1) | Treatment | Feed Day | No | 18:45 | 18:00 - 18:59 | Evening | 37,8 | 82  | 53,4  | 53,4  | 18,95 | 579,19 | 134,06 |
| 2019/05/17 | CH2205 | Male | Three y/o | Treatment (Wk 1) | Treatment | Feed Day | No | 18:50 | 18:00 - 18:59 | Evening | 38,0 | 84  | 13,2  | 13,2  | 19,15 | 581,01 | 86,17  |
| 2019/05/17 | CH2206 | Male | Three y/o | Treatment (Wk 1) | Treatment | Feed Day | No | 18:50 | 18:00 - 18:59 | Evening | 37,8 | 81  | 52,8  | 52,8  | 18,95 | 578,26 | 133,67 |
| 2019/05/17 | CH2205 | Male | Three y/o | Treatment (Wk 1) | Treatment | Feed Day | No | 18:55 | 18:00 - 18:59 | Evening | 38,1 | 82  | 12,8  | 12,8  | 19,26 | 579,19 | 85,12  |



|            |        |      |           |                  |           |          |    |       |               |         |      |     |      |      |       |        |        |
|------------|--------|------|-----------|------------------|-----------|----------|----|-------|---------------|---------|------|-----|------|------|-------|--------|--------|
| 2019/05/17 | CH2206 | Male | Three y/o | Treatment (Wk 1) | Treatment | Feed Day | No | 18:55 | 18:00 - 18:59 | Evening | 37,9 | 89  | 61,4 | 61,4 | 19,05 | 585,33 | 138,89 |
| 2019/05/17 | CH2205 | Male | Three y/o | Treatment (Wk 1) | Treatment | Feed Day | No | 19:00 | 19:00 - 19:59 | Evening | 38,1 | 87  | 8,6  | 8,6  | 19,26 | 583,64 | 71,66  |
| 2019/05/17 | CH2206 | Male | Three y/o | Treatment (Wk 1) | Treatment | Feed Day | No | 19:00 | 19:00 - 19:59 | Evening | 37,9 | 90  | 58,6 | 58,6 | 19,05 | 586,16 | 137,28 |
| 2019/05/17 | CH2205 | Male | Three y/o | Treatment (Wk 1) | Treatment | Feed Day | No | 19:05 | 19:00 - 19:59 | Evening | 38,1 | 84  | 12,4 | 12,4 | 19,26 | 581,01 | 84,04  |
| 2019/05/17 | CH2206 | Male | Three y/o | Treatment (Wk 1) | Treatment | Feed Day | No | 19:05 | 19:00 - 19:59 | Evening | 37,9 | 80  | 52,4 | 52,4 | 19,05 | 577,31 | 133,41 |
| 2019/05/17 | CH2205 | Male | Three y/o | Treatment (Wk 1) | Treatment | Feed Day | No | 19:10 | 19:00 - 19:59 | Evening | 38,2 | 51  | 10,2 | 10,2 | 19,36 | 541,20 | 77,43  |
| 2019/05/17 | CH2206 | Male | Three y/o | Treatment (Wk 1) | Treatment | Feed Day | No | 19:10 | 19:00 - 19:59 | Evening | 37,9 | 89  | 52,8 | 52,8 | 19,05 | 585,33 | 133,67 |
| 2019/05/17 | CH2205 | Male | Three y/o | Treatment (Wk 1) | Treatment | Feed Day | No | 19:15 | 19:00 - 19:59 | Evening | 38,2 | 80  | 12,8 | 12,8 | 19,36 | 577,31 | 85,12  |
| 2019/05/17 | CH2206 | Male | Three y/o | Treatment (Wk 1) | Treatment | Feed Day | No | 19:15 | 19:00 - 19:59 | Evening | 37,9 | 77  | 50,2 | 50,2 | 19,05 | 574,39 | 131,92 |
| 2019/05/17 | CH2205 | Male | Three y/o | Treatment (Wk 1) | Treatment | Feed Day | No | 19:20 | 19:00 - 19:59 | Evening | 38,2 | 69  | 11,4 | 11,4 | 19,36 | 565,86 | 81,19  |
| 2019/05/17 | CH2206 | Male | Three y/o | Treatment (Wk 1) | Treatment | Feed Day | No | 19:20 | 19:00 - 19:59 | Evening | 37,9 | 89  | 54,4 | 54,4 | 19,05 | 585,33 | 134,70 |
| 2019/05/17 | CH2205 | Male | Three y/o | Treatment (Wk 1) | Treatment | Feed Day | No | 19:25 | 19:00 - 19:59 | Evening | 38,2 | 67  | 13,8 | 13,8 | 19,36 | 563,53 | 87,68  |
| 2019/05/17 | CH2206 | Male | Three y/o | Treatment (Wk 1) | Treatment | Feed Day | No | 19:25 | 19:00 - 19:59 | Evening | 37,9 | 84  | 51,4 | 51,4 | 19,05 | 581,01 | 132,74 |
| 2019/05/17 | CH2205 | Male | Three y/o | Treatment (Wk 1) | Treatment | Feed Day | No | 19:30 | 19:00 - 19:59 | Evening | 38,2 | 50  | 8,4  | 8,4  | 19,36 | 539,52 | 70,86  |
| 2019/05/17 | CH2206 | Male | Three y/o | Treatment (Wk 1) | Treatment | Feed Day | No | 19:30 | 19:00 - 19:59 | Evening | 37,9 | 66  | 57,8 | 57,8 | 19,05 | 562,34 | 136,80 |
| 2019/05/17 | CH2205 | Male | Three y/o | Treatment (Wk 1) | Treatment | Feed Day | No | 19:35 | 19:00 - 19:59 | Evening | 38,1 | 53  | 5,4  | 5,4  | 19,26 | 544,43 | 55,99  |
| 2019/05/17 | CH2206 | Male | Three y/o | Treatment (Wk 1) | Treatment | Feed Day | No | 19:35 | 19:00 - 19:59 | Evening | 38,0 | 109 | 57,2 | 57,2 | 19,15 | 600,04 | 136,44 |
| 2019/05/17 | CH2205 | Male | Three y/o | Treatment (Wk 1) | Treatment | Feed Day | No | 19:40 | 19:00 - 19:59 | Evening | 38,1 | 92  | 6,6  | 6,6  | 19,26 | 587,78 | 62,73  |
| 2019/05/17 | CH2206 | Male | Three y/o | Treatment (Wk 1) | Treatment | Feed Day | No | 19:40 | 19:00 - 19:59 | Evening | 38,0 | 63  | 51,6 | 51,6 | 19,15 | 558,62 | 132,87 |
| 2019/05/17 | CH2205 | Male | Three y/o | Treatment (Wk 1) | Treatment | Feed Day | No | 19:45 | 19:00 - 19:59 | Evening | 38,1 | 68  | 3,2  | 3,2  | 19,26 | 564,71 | 38,49  |
| 2019/05/17 | CH2206 | Male | Three y/o | Treatment (Wk 1) | Treatment | Feed Day | No | 19:45 | 19:00 - 19:59 | Evening | 38,0 | 56  | 46,4 | 46,4 | 19,15 | 549,01 | 129,21 |
| 2019/05/17 | CH2205 | Male | Three y/o | Treatment (Wk 1) | Treatment | Feed Day | No | 19:50 | 19:00 - 19:59 | Evening | 38,1 | 94  | 9,8  | 9,8  | 19,26 | 589,37 | 76,07  |
| 2019/05/17 | CH2206 | Male | Three y/o | Treatment (Wk 1) | Treatment | Feed Day | No | 19:50 | 19:00 - 19:59 | Evening | 38,0 | 64  | 45,8 | 45,8 | 19,15 | 559,88 | 128,76 |
| 2019/05/17 | CH2205 | Male | Three y/o | Treatment (Wk 1) | Treatment | Feed Day | No | 19:55 | 19:00 - 19:59 | Evening | 38,1 | 102 | 10,2 | 10,2 | 19,26 | 595,30 | 77,43  |
| 2019/05/17 | CH2206 | Male | Three y/o | Treatment (Wk 1) | Treatment | Feed Day | No | 19:55 | 19:00 - 19:59 | Evening | 38,0 | 75  | 51,8 | 51,8 | 19,15 | 572,36 | 133,01 |
| 2019/05/17 | CH2205 | Male | Three y/o | Treatment (Wk 1) | Treatment | Feed Day | No | 20:00 | 20:00 - 20:59 | Night   | 38,1 | 97  | 8,8  | 8,8  | 19,26 | 591,66 | 72,43  |
| 2019/05/17 | CH2206 | Male | Three y/o | Treatment (Wk 1) | Treatment | Feed Day | No | 20:00 | 20:00 - 20:59 | Night   | 38,0 | 59  | 53,0 | 53,0 | 19,15 | 553,30 | 133,80 |
| 2019/05/17 | CH2205 | Male | Three y/o | Treatment (Wk 1) | Treatment | Feed Day | No | 20:05 | 20:00 - 20:59 | Night   | 38,1 | 89  | 11,4 | 11,4 | 19,26 | 585,33 | 81,19  |
| 2019/05/17 | CH2206 | Male | Three y/o | Treatment (Wk 1) | Treatment | Feed Day | No | 20:05 | 20:00 - 20:59 | Night   | 38,0 | 47  | 48,4 | 48,4 | 19,15 | 534,23 | 130,66 |
| 2019/05/17 | CH2205 | Male | Three y/o | Treatment (Wk 1) | Treatment | Feed Day | No | 20:10 | 20:00 - 20:59 | Night   | 38,1 | 103 | 5,0  | 5,0  | 19,26 | 596,00 | 53,41  |
| 2019/05/17 | CH2206 | Male | Three y/o | Treatment (Wk 1) | Treatment | Feed Day | No | 20:10 | 20:00 - 20:59 | Night   | 38,0 | 79  | 47,6 | 47,6 | 19,15 | 576,36 | 130,09 |
| 2019/05/17 | CH2205 | Male | Three y/o | Treatment (Wk 1) | Treatment | Feed Day | No | 20:15 | 20:00 - 20:59 | Night   | 38,1 | 51  | 17,8 | 17,8 | 19,26 | 541,20 | 96,34  |
| 2019/05/17 | CH2206 | Male | Three y/o | Treatment (Wk 1) | Treatment | Feed Day | No | 20:15 | 20:00 - 20:59 | Night   | 38,0 | 91  | 15,4 | 15,4 | 19,15 | 586,98 | 91,41  |
| 2019/05/17 | CH2205 | Male | Three y/o | Treatment (Wk 1) | Treatment | Feed Day | No | 20:20 | 20:00 - 20:59 | Night   | 38,1 | 73  | 12,4 | 12,4 | 19,26 | 570,27 | 84,04  |
| 2019/05/17 | CH2206 | Male | Three y/o | Treatment (Wk 1) | Treatment | Feed Day | No | 20:20 | 20:00 - 20:59 | Night   | 38,0 | 50  | 10,2 | 10,2 | 19,15 | 539,52 | 77,43  |
| 2019/05/17 | CH2205 | Male | Three y/o | Treatment (Wk 1) | Treatment | Feed Day | No | 20:25 | 20:00 - 20:59 | Night   | 38,1 |     | 27,2 | 27,2 | 19,26 |        | 110,83 |
| 2019/05/17 | CH2206 | Male | Three y/o | Treatment (Wk 1) | Treatment | Feed Day | No | 20:25 | 20:00 - 20:59 | Night   | 38,0 | 86  | 3,6  | 3,6  | 19,15 | 582,77 | 42,42  |
| 2019/05/17 | CH2205 | Male | Three y/o | Treatment (Wk 1) | Treatment | Feed Day | No | 20:30 | 20:00 - 20:59 | Night   | 38,1 |     | 33,0 | 33,0 | 19,26 |        | 117,47 |
| 2019/05/17 | CH2206 | Male | Three y/o | Treatment (Wk 1) | Treatment | Feed Day | No | 20:30 | 20:00 - 20:59 | Night   | 37,9 | 84  | 6,2  | 6,2  | 19,05 | 581,01 | 60,63  |
| 2019/05/17 | CH2205 | Male | Three y/o | Treatment (Wk 1) | Treatment | Feed Day | No | 20:35 | 20:00 - 20:59 | Night   | 38,0 |     | 25,8 | 25,8 | 19,15 |        | 109,02 |
| 2019/05/17 | CH2206 | Male | Three y/o | Treatment (Wk 1) | Treatment | Feed Day | No | 20:35 | 20:00 - 20:59 | Night   | 37,9 | 85  | 6,0  | 6,0  | 19,05 | 581,90 | 59,53  |
| 2019/05/17 | CH2205 | Male | Three y/o | Treatment (Wk 1) | Treatment | Feed Day | No | 20:40 | 20:00 - 20:59 | Night   | 38,0 | 71  | 10,0 | 10,0 | 19,15 | 568,10 | 76,76  |
| 2019/05/17 | CH2206 | Male | Three y/o | Treatment (Wk 1) | Treatment | Feed Day | No | 20:40 | 20:00 - 20:59 | Night   | 37,9 | 46  | 4,0  | 4,0  | 19,05 | 532,38 | 45,94  |
| 2019/05/17 | CH2205 | Male | Three y/o | Treatment (Wk 1) | Treatment | Feed Day | No | 20:45 | 20:00 - 20:59 | Night   | 38,0 | 68  | 9,0  | 9,0  | 19,15 | 564,71 | 73,19  |
| 2019/05/17 | CH2206 | Male | Three y/o | Treatment (Wk 1) | Treatment | Feed Day | No | 20:45 | 20:00 - 20:59 | Night   | 37,9 | 86  | 13,2 | 13,2 | 19,05 | 582,77 | 86,17  |
| 2019/05/17 | CH2205 | Male | Three y/o | Treatment (Wk 1) | Treatment | Feed Day | No | 20:50 | 20:00 - 20:59 | Night   | 38,0 | 88  | 6,4  | 6,4  | 19,15 | 584,49 | 61,70  |
| 2019/05/17 | CH2206 | Male | Three y/o | Treatment (Wk 1) | Treatment | Feed Day | No | 20:50 | 20:00 - 20:59 | Night   | 37,9 | 82  | 16,2 | 16,2 | 19,05 | 579,19 | 93,13  |
| 2019/05/17 | CH2205 | Male | Three y/o | Treatment (Wk 1) | Treatment | Feed Day | No | 20:55 | 20:00 - 20:59 | Night   | 38,1 | 93  | 12,4 | 12,4 | 19,26 | 588,58 | 84,04  |
| 2019/05/17 | CH2206 | Male | Three y/o | Treatment (Wk 1) | Treatment | Feed Day | No | 20:55 | 20:00 - 20:59 | Night   | 37,9 | 48  | 21,8 | 21,8 | 19,05 | 536,04 | 103,26 |
| 2019/05/17 | CH2205 | Male | Three y/o | Treatment (Wk 1) | Treatment | Feed Day | No | 21:00 | 21:00 - 21:59 | Night   | 38,1 | 62  | 10,4 | 10,4 | 19,26 | 557,33 | 78,08  |
| 2019/05/17 | CH2206 | Male | Three y/o | Treatment (Wk 1) | Treatment | Feed Day | No | 21:00 | 21:00 - 21:59 | Night   | 37,9 |     | 34,8 | 34,8 | 19,05 |        | 119,29 |
| 2019/05/17 | CH2205 | Male | Three y/o | Treatment (Wk 1) | Treatment | Feed Day | No | 21:05 | 21:00 - 21:59 | Night   | 38,1 | 56  | 5,6  | 5,6  | 19,26 | 549,01 | 57,21  |
| 2019/05/17 | CH2206 | Male | Three y/o | Treatment (Wk 1) | Treatment | Feed Day | No | 21:05 | 21:00 - 21:59 | Night   | 37,8 | 91  | 33,8 | 33,8 | 18,95 | 586,98 | 118,29 |
| 2019/05/17 | CH2205 | Male | Three y/o | Treatment (Wk 1) | Treatment | Feed Day | No | 21:10 | 21:00 - 21:59 | Night   | 38,1 | 65  | 9,8  | 9,8  | 19,26 | 561,12 | 76,07  |
| 2019/05/17 | CH2206 | Male | Three y/o | Treatment (Wk 1) | Treatment | Feed Day | No | 21:10 | 21:00 - 21:59 | Night   | 37,7 | 96  | 63,4 | 63,4 | 18,85 | 590,91 | 140,00 |
| 2019/05/17 | CH2205 | Male | Three y/o | Treatment (Wk 1) | Treatment | Feed Day | No | 21:15 | 21:00 - 21:59 | Night   | 38,1 | 58  | 12,0 | 12,0 | 19,26 | 551,90 | 82,93  |
| 2019/05/17 | CH2206 | Male | Three y/o | Treatment (Wk 1) | Treatment | Feed Day | No | 21:15 | 21:00 - 21:59 | Night   | 37,7 | 87  | 64,4 | 64,4 | 18,85 | 583,64 | 140,55 |
| 2019/05/17 | CH2205 | Male | Three y/o | Treatment (Wk 1) | Treatment | Feed Day | No | 21:20 | 21:00 - 21:59 | Night   | 38,1 | 95  | 12,6 | 12,6 | 19,26 | 590,14 | 84,59  |
| 2019/05/17 | CH2206 | Male | Three y/o | Treatment (Wk 1) | Treatment | Feed Day | No | 21:20 | 21:00 - 21:59 | Night   | 37,7 | 58  | 64,2 | 64,2 | 18,85 | 551,90 | 140,44 |
| 2019/05/17 | CH2205 | Male | Three y/o | Treatment (Wk 1) | Treatment | Feed Day | No | 21:25 | 21:00 - 21:59 | Night   | 38,1 | 60  | 12,6 | 12,6 | 19,26 | 554,67 | 84,59  |
| 2019/05/17 | CH2206 | Male | Three y/o | Treatment (Wk 1) | Treatment | Feed Day | No | 21:25 | 21:00 - 21:59 | Night   | 37,8 | 73  | 63,2 | 63,2 | 18,95 | 570,27 | 139,89 |
| 2019/05/17 | CH2205 | Male | Three y/o | Treatment (Wk 1) | Treatment | Feed Day | No | 21:30 | 21:00 - 21:59 | Night   | 38,0 | 46  | 11,0 | 11,0 | 19,15 | 532,38 | 79,98  |
| 2019/05/17 | CH2206 | Male | Three y/o | Treatment (Wk 1) | Treatment | Feed Day | No | 21:30 | 21:00 - 21:59 | Night   | 37,8 | 64  | 61,6 | 61,6 | 18,95 | 559,88 | 139,00 |
| 2019/05/17 | CH2205 | Male | Three y/o | Treatment (Wk 1) | Treatment | Feed Day | No | 21:35 | 21:00 - 21:59 | Night   | 38,0 | 79  | 11,2 | 11,2 | 19,15 | 576,36 | 80,59  |
| 2019/05/17 | CH2206 | Male | Three y/o | Treatment (Wk 1) | Treatment | Feed Day | No | 21:35 | 21:00 - 21:59 | Night   | 37,9 | 80  | 67,2 | 67,2 | 19,05 | 577,31 | 142,02 |
| 2019/05/17 | CH2205 | Male | Three y/o | Treatment (Wk 1) | Treatment | Feed Day | No | 21:40 | 21:00 - 21:59 | Night   | 38,0 | 90  | 15,0 | 15,0 | 19,15 | 586,16 | 90,51  |
| 2019/05/17 | CH2206 | Male | Three y/o | Treatment (Wk 1) | Treatment | Feed Day | No | 21:40 | 21:00 - 21:59 | Night   | 37,9 | 66  | 60,4 | 60,4 | 19,05 | 562,34 | 138,32 |
| 2019/05/17 | CH2205 | Male | Three y/o | Treatment (Wk 1) | Treatment | Feed Day | No | 21:45 | 21:00 - 21:59 | Night   | 38,0 | 57  | 14,8 | 14,8 | 19,15 | 550,47 | 90,05  |
| 2019/05/17 | CH2206 | Male | Three y/o | Treatment (Wk 1) | Treatment | Feed Day | No | 21:45 | 21:00 - 21:59 | Night   | 37,9 | 70  | 65,4 | 65,4 | 19,05 | 566,99 | 141,08 |
| 2019/05/17 | CH2205 | Male | Three y/o | Treatment (Wk 1) | Treatment | Feed Day | No | 21:50 | 21:00 - 21:59 | Night   | 38,0 | 89  | 19,2 | 19,2 | 19,15 | 585,33 | 98,92  |



|   |            |        |      |           |                  |           |          |    |       |               |               |      |     |      |      |       |        |        |
|---|------------|--------|------|-----------|------------------|-----------|----------|----|-------|---------------|---------------|------|-----|------|------|-------|--------|--------|
|   | 2019/05/17 | CH2206 | Male | Three y/o | Treatment (Wk 1) | Treatment | Feed Day | No | 21:50 | 21:00 - 21:59 | Night         | 37,9 | 83  | 59,8 | 59,8 | 19,05 | 580,11 | 137,98 |
|   | 2019/05/17 | CH2205 | Male | Three y/o | Treatment (Wk 1) | Treatment | Feed Day | No | 21:55 | 21:00 - 21:59 | Night         | 38,0 | 72  | 17,8 | 17,8 | 19,15 | 569,20 | 96,34  |
|   | 2019/05/17 | CH2206 | Male | Three y/o | Treatment (Wk 1) | Treatment | Feed Day | No | 21:55 | 21:00 - 21:59 | Night         | 37,9 | 84  | 60,6 | 60,6 | 19,05 | 581,01 | 138,44 |
|   | 2019/05/17 | CH2205 | Male | Three y/o | Treatment (Wk 1) | Treatment | Feed Day | No | 22:00 | 22:00 - 22:59 | Night         | 38,0 | 95  | 19,4 | 19,4 | 19,15 | 590,14 | 99,28  |
|   | 2019/05/17 | CH2206 | Male | Three y/o | Treatment (Wk 1) | Treatment | Feed Day | No | 22:00 | 22:00 - 22:59 | Night         | 37,9 | 54  | 60,8 | 60,8 | 19,05 | 545,99 | 138,55 |
|   | 2019/05/17 | CH2205 | Male | Three y/o | Treatment (Wk 1) | Treatment | Feed Day | No | 22:05 | 22:00 - 22:59 | Night         | 38,0 | 73  | 21,0 | 21,0 | 19,15 | 570,27 | 101,98 |
|   | 2019/05/17 | CH2206 | Male | Three y/o | Treatment (Wk 1) | Treatment | Feed Day | No | 22:05 | 22:00 - 22:59 | Night         | 37,9 | 65  | 58,6 | 58,6 | 19,05 | 561,12 | 137,28 |
|   | 2019/05/17 | CH2205 | Male | Three y/o | Treatment (Wk 1) | Treatment | Feed Day | No | 22:10 | 22:00 - 22:59 | Night         | 38,0 | 74  | 17,6 | 17,6 | 19,15 | 571,33 | 95,95  |
|   | 2019/05/17 | CH2206 | Male | Three y/o | Treatment (Wk 1) | Treatment | Feed Day | No | 22:10 | 22:00 - 22:59 | Night         | 38,0 | 81  | 61,2 | 61,2 | 19,15 | 578,26 | 138,78 |
|   | 2019/05/17 | CH2205 | Male | Three y/o | Treatment (Wk 1) | Treatment | Feed Day | No | 22:15 | 22:00 - 22:59 | Night         | 38,0 | 68  | 19,2 | 19,2 | 19,15 | 564,71 | 98,92  |
|   | 2019/05/17 | CH2206 | Male | Three y/o | Treatment (Wk 1) | Treatment | Feed Day | No | 22:15 | 22:00 - 22:59 | Night         | 38,0 | 79  | 62,0 | 62,0 | 19,15 | 576,36 | 139,23 |
|   | 2019/05/17 | CH2205 | Male | Three y/o | Treatment (Wk 1) | Treatment | Feed Day | No | 22:20 | 22:00 - 22:59 | Night         | 38,0 | 72  | 24,4 | 24,4 | 19,15 | 569,20 | 107,11 |
|   | 2019/05/17 | CH2206 | Male | Three y/o | Treatment (Wk 1) | Treatment | Feed Day | No | 22:20 | 22:00 - 22:59 | Night         | 38,0 | 80  | 61,4 | 61,4 | 19,15 | 577,31 | 138,89 |
|   | 2019/05/17 | CH2205 | Male | Three y/o | Treatment (Wk 1) | Treatment | Feed Day | No | 22:25 | 22:00 - 22:59 | Night         | 37,9 | 59  | 17,6 | 17,6 | 19,05 | 553,30 | 95,95  |
|   | 2019/05/17 | CH2206 | Male | Three y/o | Treatment (Wk 1) | Treatment | Feed Day | No | 22:25 | 22:00 - 22:59 | Night         | 38,0 | 84  | 62,2 | 62,2 | 19,15 | 581,01 | 139,34 |
|   | 2019/05/17 | CH2205 | Male | Three y/o | Treatment (Wk 1) | Treatment | Feed Day | No | 22:30 | 22:00 - 22:59 | Night         | 37,9 | 54  | 21,0 | 21,0 | 19,05 | 545,99 | 101,98 |
|   | 2019/05/17 | CH2206 | Male | Three y/o | Treatment (Wk 1) | Treatment | Feed Day | No | 22:30 | 22:00 - 22:59 | Night         | 38,0 | 80  | 55,2 | 55,2 | 19,15 | 577,31 | 135,21 |
|   | 2019/05/17 | CH2205 | Male | Three y/o | Treatment (Wk 1) | Treatment | Feed Day | No | 22:35 | 22:00 - 22:59 | Night         | 37,9 | 88  | 17,8 | 17,8 | 19,05 | 584,49 | 96,34  |
|   | 2019/05/17 | CH2206 | Male | Three y/o | Treatment (Wk 1) | Treatment | Feed Day | No | 22:35 | 22:00 - 22:59 | Night         | 38,0 | 83  | 63,0 | 63,0 | 19,15 | 580,11 | 139,78 |
|   | 2019/05/17 | CH2205 | Male | Three y/o | Treatment (Wk 1) | Treatment | Feed Day | No | 22:40 | 22:00 - 22:59 | Night         | 37,9 | 37  | 20,0 | 20,0 | 19,05 | 513,06 | 100,31 |
|   | 2019/05/17 | CH2206 | Male | Three y/o | Treatment (Wk 1) | Treatment | Feed Day | No | 22:40 | 22:00 - 22:59 | Night         | 38,0 | 65  | 61,6 | 61,6 | 19,15 | 561,12 | 139,00 |
|   | 2019/05/17 | CH2205 | Male | Three y/o | Treatment (Wk 1) | Treatment | Feed Day | No | 22:45 | 22:00 - 22:59 | Night         | 37,9 | 93  | 27,4 | 27,4 | 19,05 | 588,58 | 111,09 |
|   | 2019/05/17 | CH2206 | Male | Three y/o | Treatment (Wk 1) | Treatment | Feed Day | No | 22:45 | 22:00 - 22:59 | Night         | 38,0 | 58  | 57,6 | 57,6 | 19,15 | 551,90 | 136,68 |
|   | 2019/05/17 | CH2205 | Male | Three y/o | Treatment (Wk 1) | Treatment | Feed Day | No | 22:50 | 22:00 - 22:59 | Night         | 37,9 | 50  | 28,6 | 28,6 | 19,05 | 539,52 | 112,56 |
|   | 2019/05/17 | CH2206 | Male | Three y/o | Treatment (Wk 1) | Treatment | Feed Day | No | 22:50 | 22:00 - 22:59 | Night         | 38,0 | 102 | 57,0 | 57,0 | 19,15 | 595,30 | 136,32 |
|   | 2019/05/17 | CH2205 | Male | Three y/o | Treatment (Wk 1) | Treatment | Feed Day | No | 22:55 | 22:00 - 22:59 | Night         | 37,9 | 72  | 30,6 | 30,6 | 19,05 | 569,20 | 114,87 |
|   | 2019/05/17 | CH2206 | Male | Three y/o | Treatment (Wk 1) | Treatment | Feed Day | No | 22:55 | 22:00 - 22:59 | Night         | 38,0 | 83  | 55,2 | 55,2 | 19,15 | 580,11 | 135,21 |
|   | 2019/05/17 | CH2205 | Male | Three y/o | Treatment (Wk 1) | Treatment | Feed Day | No | 23:00 | 23:00 - 23:59 | Night         | 37,9 | 68  | 27,6 | 27,6 | 19,05 | 564,71 | 111,33 |
|   | 2019/05/17 | CH2206 | Male | Three y/o | Treatment (Wk 1) | Treatment | Feed Day | No | 23:00 | 23:00 - 23:59 | Night         | 38,0 | 94  | 60,8 | 60,8 | 19,15 | 589,37 | 138,55 |
|   | 2019/05/17 | CH2205 | Male | Three y/o | Treatment (Wk 1) | Treatment | Feed Day | No | 23:05 | 23:00 - 23:59 | Night         | 37,9 | 89  | 21,6 | 21,6 | 19,05 | 585,33 | 102,94 |
|   | 2019/05/17 | CH2206 | Male | Three y/o | Treatment (Wk 1) | Treatment | Feed Day | No | 23:05 | 23:00 - 23:59 | Night         | 38,0 | 91  | 58,6 | 58,6 | 19,15 | 586,98 | 137,28 |
|   | 2019/05/17 | CH2205 | Male | Three y/o | Treatment (Wk 1) | Treatment | Feed Day | No | 23:10 | 23:00 - 23:59 | Night         | 37,7 | 117 | 33,2 | 33,2 | 18,85 | 605,02 | 117,68 |
|   | 2019/05/17 | CH2206 | Male | Three y/o | Treatment (Wk 1) | Treatment | Feed Day | No | 23:10 | 23:00 - 23:59 | Night         | 38,0 | 78  | 55,4 | 55,4 | 19,15 | 575,38 | 135,33 |
|   | 2019/05/17 | CH2205 | Male | Three y/o | Treatment (Wk 1) | Treatment | Feed Day | No | 23:15 | 23:00 - 23:59 | Night         | 37,4 |     | 33,6 | 33,6 | 18,55 |        | 118,09 |
|   | 2019/05/17 | CH2206 | Male | Three y/o | Treatment (Wk 1) | Treatment | Feed Day | No | 23:15 | 23:00 - 23:59 | Night         | 38,0 | 79  | 52,4 | 52,4 | 19,15 | 576,36 | 133,41 |
|   | 2019/05/17 | CH2205 | Male | Three y/o | Treatment (Wk 1) | Treatment | Feed Day | No | 23:20 | 23:00 - 23:59 | Night         | 37,2 |     | 32,4 | 32,4 | 18,36 |        | 116,84 |
|   | 2019/05/17 | CH2206 | Male | Three y/o | Treatment (Wk 1) | Treatment | Feed Day | No | 23:20 | 23:00 - 23:59 | Night         | 38,0 | 78  | 50,0 | 50,0 | 19,15 | 575,38 | 131,79 |
|   | 2019/05/17 | CH2205 | Male | Three y/o | Treatment (Wk 1) | Treatment | Feed Day | No | 23:25 | 23:00 - 23:59 | Night         | 37,3 |     | 21,4 | 21,4 | 18,46 |        | 102,63 |
|   | 2019/05/17 | CH2206 | Male | Three y/o | Treatment (Wk 1) | Treatment | Feed Day | No | 23:25 | 23:00 - 23:59 | Night         | 38,0 | 69  | 56,2 | 56,2 | 19,15 | 565,86 | 135,83 |
|   | 2019/05/17 | CH2205 | Male | Three y/o | Treatment (Wk 1) | Treatment | Feed Day | No | 23:30 | 23:00 - 23:59 | Night         | 37,3 | 54  | 20,2 | 20,2 | 18,46 | 545,99 | 100,65 |
|   | 2019/05/17 | CH2206 | Male | Three y/o | Treatment (Wk 1) | Treatment | Feed Day | No | 23:30 | 23:00 - 23:59 | Night         | 37,9 | 67  | 59,0 | 59,0 | 19,05 | 563,53 | 137,51 |
|   | 2019/05/17 | CH2205 | Male | Three y/o | Treatment (Wk 1) | Treatment | Feed Day | No | 23:35 | 23:00 - 23:59 | Night         | 37,4 | 73  | 11,4 | 11,4 | 18,55 | 570,27 | 81,19  |
|   | 2019/05/17 | CH2206 | Male | Three y/o | Treatment (Wk 1) | Treatment | Feed Day | No | 23:35 | 23:00 - 23:59 | Night         | 37,9 | 81  | 44,2 | 44,2 | 19,05 | 578,26 | 127,53 |
|   | 2019/05/17 | CH2205 | Male | Three y/o | Treatment (Wk 1) | Treatment | Feed Day | No | 23:40 | 23:00 - 23:59 | Night         | 37,5 | 50  | 13,4 | 13,4 | 18,65 | 539,52 | 86,68  |
|   | 2019/05/17 | CH2206 | Male | Three y/o | Treatment (Wk 1) | Treatment | Feed Day | No | 23:40 | 23:00 - 23:59 | Night         | 37,8 | 65  | 36,8 | 36,8 | 18,95 | 561,12 | 121,22 |
|   | 2019/05/17 | CH2205 | Male | Three y/o | Treatment (Wk 1) | Treatment | Feed Day | No | 23:45 | 23:00 - 23:59 | Night         | 37,6 | 92  | 7,4  | 7,4  | 18,75 | 587,78 | 66,59  |
|   | 2019/05/17 | CH2206 | Male | Three y/o | Treatment (Wk 1) | Treatment | Feed Day | No | 23:45 | 23:00 - 23:59 | Night         | 37,8 | 42  | 41,6 | 41,6 | 18,95 | 524,42 | 125,44 |
|   | 2019/05/17 | CH2205 | Male | Three y/o | Treatment (Wk 1) | Treatment | Feed Day | No | 23:50 | 23:00 - 23:59 | Night         | 37,6 | 59  | 13,2 | 13,2 | 18,75 | 553,30 | 86,17  |
|   | 2019/05/17 | CH2206 | Male | Three y/o | Treatment (Wk 1) | Treatment | Feed Day | No | 23:50 | 23:00 - 23:59 | Night         | 37,8 | 88  | 59,6 | 59,6 | 18,95 | 584,49 | 137,86 |
|   | 2019/05/17 | CH2205 | Male | Three y/o | Treatment (Wk 1) | Treatment | Feed Day | No | 23:55 | 23:00 - 23:59 | Night         | 37,7 | 51  | 12,2 | 12,2 | 18,85 | 541,20 | 83,49  |
|   | 2019/05/17 | CH2206 | Male | Three y/o | Treatment (Wk 1) | Treatment | Feed Day | No | 23:55 | 23:00 - 23:59 | Night         | 37,8 | 81  | 38,4 | 38,4 | 18,95 | 578,26 | 122,68 |
| 4 | 2019/05/18 | CH2205 | Male | Three y/o | Treatment (Wk 1) | Treatment | Fast Day | No | 00:00 | 00:00 - 00:59 | Early Morning | 37,7 | 88  | 11,0 | 11,0 | 18,85 | 584,49 | 79,98  |
|   | 2019/05/18 | CH2206 | Male | Three y/o | Treatment (Wk 1) | Treatment | Fast Day | No | 00:00 | 00:00 - 00:59 | Early Morning | 37,7 | 80  | 33,6 | 33,6 | 18,85 | 577,31 | 118,09 |
|   | 2019/05/18 | CH2205 | Male | Three y/o | Treatment (Wk 1) | Treatment | Fast Day | No | 00:05 | 00:00 - 00:59 | Early Morning | 37,7 | 56  | 10,0 | 10,0 | 18,85 | 549,01 | 76,76  |
|   | 2019/05/18 | CH2206 | Male | Three y/o | Treatment (Wk 1) | Treatment | Fast Day | No | 00:05 | 00:00 - 00:59 | Early Morning | 37,7 | 104 | 40,4 | 40,4 | 18,85 | 596,69 | 124,43 |
|   | 2019/05/18 | CH2205 | Male | Three y/o | Treatment (Wk 1) | Treatment | Fast Day | No | 00:10 | 00:00 - 00:59 | Early Morning | 37,7 | 64  | 13,2 | 13,2 | 18,85 | 559,88 | 86,17  |
|   | 2019/05/18 | CH2206 | Male | Three y/o | Treatment (Wk 1) | Treatment | Fast Day | No | 00:10 | 00:00 - 00:59 | Early Morning | 37,7 | 44  | 44,2 | 44,2 | 18,85 | 528,51 | 127,53 |
|   | 2019/05/18 | CH2205 | Male | Three y/o | Treatment (Wk 1) | Treatment | Fast Day | No | 00:15 | 00:00 - 00:59 | Early Morning | 37,7 | 63  | 10,4 | 10,4 | 18,85 | 558,62 | 78,08  |
|   | 2019/05/18 | CH2206 | Male | Three y/o | Treatment (Wk 1) | Treatment | Fast Day | No | 00:15 | 00:00 - 00:59 | Early Morning | 37,7 | 50  | 41,4 | 41,4 | 18,85 | 539,52 | 125,27 |
|   | 2019/05/18 | CH2205 | Male | Three y/o | Treatment (Wk 1) | Treatment | Fast Day | No | 00:20 | 00:00 - 00:59 | Early Morning | 37,7 | 43  | 13,2 | 13,2 | 18,85 | 526,50 | 86,17  |
|   | 2019/05/18 | CH2206 | Male | Three y/o | Treatment (Wk 1) | Treatment | Fast Day | No | 00:20 | 00:00 - 00:59 | Early Morning | 37,7 | 45  | 38,6 | 38,6 | 18,85 | 530,47 | 122,86 |
|   | 2019/05/18 | CH2205 | Male | Three y/o | Treatment (Wk 1) | Treatment | Fast Day | No | 00:25 | 00:00 - 00:59 | Early Morning | 37,7 | 73  | 9,6  | 9,6  | 18,85 | 570,27 | 75,37  |
|   | 2019/05/18 | CH2206 | Male | Three y/o | Treatment (Wk 1) | Treatment | Fast Day | No | 00:25 | 00:00 - 00:59 | Early Morning | 37,5 | 84  | 56,0 | 56,0 | 18,65 | 581,01 | 135,70 |
|   | 2019/05/18 | CH2205 | Male | Three y/o | Treatment (Wk 1) | Treatment | Fast Day | No | 00:30 | 00:00 - 00:59 | Early Morning | 37,7 | 95  | 8,8  | 8,8  | 18,85 | 590,14 | 72,43  |
|   | 2019/05/18 | CH2206 | Male | Three y/o | Treatment (Wk 1) | Treatment | Fast Day | No | 00:30 | 00:00 - 00:59 | Early Morning | 37,5 | 86  | 59,4 | 59,4 | 18,65 | 582,77 | 137,75 |
|   | 2019/05/18 | CH2205 | Male | Three y/o | Treatment (Wk 1) | Treatment | Fast Day | No | 00:35 | 00:00 - 00:59 | Early Morning | 37,7 | 92  | 8,4  | 8,4  | 18,85 | 587,78 | 70,86  |
|   | 2019/05/18 | CH2206 | Male | Three y/o | Treatment (Wk 1) | Treatment | Fast Day | No | 00:35 | 00:00 - 00:59 | Early Morning | 37,5 | 75  | 52,8 | 52,8 | 18,65 | 572,36 | 133,67 |
|   | 2019/05/18 | CH2205 | Male | Three y/o | Treatment (Wk 1) | Treatment | Fast Day | No | 00:40 | 00:00 - 00:59 | Early Morning | 37,7 | 115 | 7,0  | 7,0  | 18,85 | 603,82 | 64,72  |
|   | 2019/05/18 | CH2206 | Male | Three y/o | Treatment (Wk 1) | Treatment | Fast Day | No | 00:40 | 00:00 - 00:59 | Early Morning | 37,5 | 135 | 51,4 | 51,4 | 18,65 | 614,84 | 132,74 |
|   | 2019/05/18 | CH2205 | Male | Three y/o | Treatment (Wk 1) | Treatment | Fast Day | No | 00:45 | 00:00 - 00:59 | Early Morning | 37,7 | 56  | 13,8 | 13,8 | 18,85 | 549,01 | 87,68  |



|            |        |      |           |                  |           |          |    |       |               |               |      |     |      |      |       |        |        |
|------------|--------|------|-----------|------------------|-----------|----------|----|-------|---------------|---------------|------|-----|------|------|-------|--------|--------|
| 2019/05/18 | CH2206 | Male | Three y/o | Treatment (Wk 1) | Treatment | Fast Day | No | 00:45 | 00:00 - 00:59 | Early Morning | 37,5 | 72  | 28,8 | 28,8 | 18,65 | 569,20 | 112,79 |
| 2019/05/18 | CH2205 | Male | Three y/o | Treatment (Wk 1) | Treatment | Fast Day | No | 00:50 | 00:00 - 00:59 | Early Morning | 37,7 | 93  | 10,8 | 10,8 | 18,85 | 588,58 | 79,36  |
| 2019/05/18 | CH2206 | Male | Three y/o | Treatment (Wk 1) | Treatment | Fast Day | No | 00:50 | 00:00 - 00:59 | Early Morning | 37,5 | 113 | 29,6 | 29,6 | 18,65 | 602,58 | 113,73 |
| 2019/05/18 | CH2205 | Male | Three y/o | Treatment (Wk 1) | Treatment | Fast Day | No | 00:55 | 00:00 - 00:59 | Early Morning | 37,7 | 50  | 12,0 | 12,0 | 18,85 | 539,52 | 82,93  |
| 2019/05/18 | CH2206 | Male | Three y/o | Treatment (Wk 1) | Treatment | Fast Day | No | 00:55 | 00:00 - 00:59 | Early Morning | 37,5 | 111 | 22,4 | 22,4 | 18,65 | 601,33 | 104,19 |
| 2019/05/18 | CH2205 | Male | Three y/o | Treatment (Wk 1) | Treatment | Fast Day | No | 01:00 | 01:00 - 01:59 | Early Morning | 37,7 | 100 | 10,4 | 10,4 | 18,85 | 593,87 | 78,08  |
| 2019/05/18 | CH2206 | Male | Three y/o | Treatment (Wk 1) | Treatment | Fast Day | No | 01:00 | 01:00 - 01:59 | Early Morning | 37,5 | 131 | 84,2 | 84,2 | 18,65 | 612,80 | 149,85 |
| 2019/05/18 | CH2205 | Male | Three y/o | Treatment (Wk 1) | Treatment | Fast Day | No | 01:05 | 01:00 - 01:59 | Early Morning | 37,7 |     | 30,0 | 30,0 | 18,85 |        | 114,20 |
| 2019/05/18 | CH2206 | Male | Three y/o | Treatment (Wk 1) | Treatment | Fast Day | No | 01:05 | 01:00 - 01:59 | Early Morning | 37,4 |     | 43,8 | 43,8 | 18,55 |        | 127,22 |
| 2019/05/18 | CH2205 | Male | Three y/o | Treatment (Wk 1) | Treatment | Fast Day | No | 01:10 | 01:00 - 01:59 | Early Morning | 37,6 |     | 32,6 | 32,6 | 18,75 |        | 117,05 |
| 2019/05/18 | CH2206 | Male | Three y/o | Treatment (Wk 1) | Treatment | Fast Day | No | 01:10 | 01:00 - 01:59 | Early Morning | 37,3 | 82  | 46,2 | 46,2 | 18,46 | 579,19 | 129,06 |
| 2019/05/18 | CH2205 | Male | Three y/o | Treatment (Wk 1) | Treatment | Fast Day | No | 01:15 | 01:00 - 01:59 | Early Morning | 37,5 |     | 30,0 | 30,0 | 18,65 |        | 114,20 |
| 2019/05/18 | CH2206 | Male | Three y/o | Treatment (Wk 1) | Treatment | Fast Day | No | 01:15 | 01:00 - 01:59 | Early Morning | 37,2 | 70  | 49,0 | 49,0 | 18,36 | 566,99 | 131,09 |
| 2019/05/18 | CH2205 | Male | Three y/o | Treatment (Wk 1) | Treatment | Fast Day | No | 01:20 | 01:00 - 01:59 | Early Morning | 37,6 |     | 33,0 | 33,0 | 18,75 |        | 117,47 |
| 2019/05/18 | CH2206 | Male | Three y/o | Treatment (Wk 1) | Treatment | Fast Day | No | 01:20 | 01:00 - 01:59 | Early Morning | 37,1 | 61  | 53,4 | 53,4 | 18,26 | 556,01 | 134,06 |
| 2019/05/18 | CH2205 | Male | Three y/o | Treatment (Wk 1) | Treatment | Fast Day | No | 01:25 | 01:00 - 01:59 | Early Morning | 37,6 | 86  | 26,6 | 26,6 | 18,75 | 582,77 | 110,07 |
| 2019/05/18 | CH2206 | Male | Three y/o | Treatment (Wk 1) | Treatment | Fast Day | No | 01:25 | 01:00 - 01:59 | Early Morning | 37,0 | 44  | 54,0 | 54,0 | 18,16 | 528,51 | 134,45 |
| 2019/05/18 | CH2205 | Male | Three y/o | Treatment (Wk 1) | Treatment | Fast Day | No | 01:30 | 01:00 - 01:59 | Early Morning | 37,5 | 58  | 20,2 | 20,2 | 18,65 | 551,90 | 100,65 |
| 2019/05/18 | CH2206 | Male | Three y/o | Treatment (Wk 1) | Treatment | Fast Day | No | 01:30 | 01:00 - 01:59 | Early Morning | 37,0 | 49  | 53,4 | 53,4 | 18,16 | 537,80 | 134,06 |
| 2019/05/18 | CH2205 | Male | Three y/o | Treatment (Wk 1) | Treatment | Fast Day | No | 01:35 | 01:00 - 01:59 | Early Morning | 37,5 | 83  | 17,8 | 17,8 | 18,65 | 580,11 | 96,34  |
| 2019/05/18 | CH2206 | Male | Three y/o | Treatment (Wk 1) | Treatment | Fast Day | No | 01:35 | 01:00 - 01:59 | Early Morning | 37,0 | 80  | 39,2 | 39,2 | 18,16 | 577,31 | 123,39 |
| 2019/05/18 | CH2205 | Male | Three y/o | Treatment (Wk 1) | Treatment | Fast Day | No | 01:40 | 01:00 - 01:59 | Early Morning | 37,4 | 51  | 15,4 | 15,4 | 18,55 | 541,20 | 91,41  |
| 2019/05/18 | CH2206 | Male | Three y/o | Treatment (Wk 1) | Treatment | Fast Day | No | 01:40 | 01:00 - 01:59 | Early Morning | 36,9 | 79  | 35,4 | 35,4 | 18,06 | 576,36 | 119,88 |
| 2019/05/18 | CH2205 | Male | Three y/o | Treatment (Wk 1) | Treatment | Fast Day | No | 01:45 | 01:00 - 01:59 | Early Morning | 37,3 | 83  | 21,4 | 21,4 | 18,46 | 580,11 | 102,63 |
| 2019/05/18 | CH2206 | Male | Three y/o | Treatment (Wk 1) | Treatment | Fast Day | No | 01:45 | 01:00 - 01:59 | Early Morning | 36,8 | 45  | 36,6 | 36,6 | 17,96 | 530,47 | 121,03 |
| 2019/05/18 | CH2205 | Male | Three y/o | Treatment (Wk 1) | Treatment | Fast Day | No | 01:50 | 01:00 - 01:59 | Early Morning | 37,3 | 83  | 27,8 | 27,8 | 18,46 | 580,11 | 111,58 |
| 2019/05/18 | CH2206 | Male | Three y/o | Treatment (Wk 1) | Treatment | Fast Day | No | 01:50 | 01:00 - 01:59 | Early Morning | 36,8 | 108 | 34,2 | 34,2 | 17,96 | 599,39 | 118,70 |
| 2019/05/18 | CH2205 | Male | Three y/o | Treatment (Wk 1) | Treatment | Fast Day | No | 01:55 | 01:00 - 01:59 | Early Morning | 37,2 | 52  | 26,8 | 26,8 | 18,36 | 542,83 | 110,33 |
| 2019/05/18 | CH2206 | Male | Three y/o | Treatment (Wk 1) | Treatment | Fast Day | No | 01:55 | 01:00 - 01:59 | Early Morning | 36,8 | 83  | 35,8 | 35,8 | 17,96 | 580,11 | 120,27 |
| 2019/05/18 | CH2205 | Male | Three y/o | Treatment (Wk 1) | Treatment | Fast Day | No | 02:00 | 02:00 - 02:59 | Early Morning | 37,2 | 67  | 25,4 | 25,4 | 18,36 | 563,53 | 108,49 |
| 2019/05/18 | CH2206 | Male | Three y/o | Treatment (Wk 1) | Treatment | Fast Day | No | 02:00 | 02:00 - 02:59 | Early Morning | 36,8 | 87  | 37,6 | 37,6 | 17,96 | 583,64 | 121,96 |
| 2019/05/18 | CH2205 | Male | Three y/o | Treatment (Wk 1) | Treatment | Fast Day | No | 02:05 | 02:00 - 02:59 | Early Morning | 37,2 | 41  | 25,8 | 25,8 | 18,36 | 522,29 | 109,02 |
| 2019/05/18 | CH2206 | Male | Three y/o | Treatment (Wk 1) | Treatment | Fast Day | No | 02:05 | 02:00 - 02:59 | Early Morning | 36,8 | 45  | 35,4 | 35,4 | 17,96 | 530,47 | 119,88 |
| 2019/05/18 | CH2205 | Male | Three y/o | Treatment (Wk 1) | Treatment | Fast Day | No | 02:10 | 02:00 - 02:59 | Early Morning | 37,3 | 75  | 33,4 | 33,4 | 18,46 | 572,36 | 117,88 |
| 2019/05/18 | CH2206 | Male | Three y/o | Treatment (Wk 1) | Treatment | Fast Day | No | 02:10 | 02:00 - 02:59 | Early Morning | 36,8 | 76  | 35,6 | 35,6 | 17,96 | 573,39 | 120,08 |
| 2019/05/18 | CH2205 | Male | Three y/o | Treatment (Wk 1) | Treatment | Fast Day | No | 02:15 | 02:00 - 02:59 | Early Morning | 37,2 | 63  | 25,8 | 25,8 | 18,36 | 558,62 | 109,02 |
| 2019/05/18 | CH2206 | Male | Three y/o | Treatment (Wk 1) | Treatment | Fast Day | No | 02:15 | 02:00 - 02:59 | Early Morning | 36,8 | 44  | 42,0 | 42,0 | 17,96 | 528,51 | 125,77 |
| 2019/05/18 | CH2205 | Male | Three y/o | Treatment (Wk 1) | Treatment | Fast Day | No | 02:20 | 02:00 - 02:59 | Early Morning | 37,3 | 58  | 23,0 | 23,0 | 18,46 | 551,90 | 105,09 |
| 2019/05/18 | CH2206 | Male | Three y/o | Treatment (Wk 1) | Treatment | Fast Day | No | 02:20 | 02:00 - 02:59 | Early Morning | 36,8 | 93  | 14,2 | 14,2 | 17,96 | 588,58 | 88,65  |
| 2019/05/18 | CH2205 | Male | Three y/o | Treatment (Wk 1) | Treatment | Fast Day | No | 02:25 | 02:00 - 02:59 | Early Morning | 37,4 | 85  | 28,2 | 28,2 | 18,55 | 581,90 | 112,07 |
| 2019/05/18 | CH2206 | Male | Three y/o | Treatment (Wk 1) | Treatment | Fast Day | No | 02:25 | 02:00 - 02:59 | Early Morning | 36,9 | 55  | 13,0 | 13,0 | 18,06 | 547,52 | 85,65  |
| 2019/05/18 | CH2205 | Male | Three y/o | Treatment (Wk 1) | Treatment | Fast Day | No | 02:30 | 02:00 - 02:59 | Early Morning | 37,5 | 53  | 26,6 | 26,6 | 18,65 | 544,43 | 110,07 |
| 2019/05/18 | CH2206 | Male | Three y/o | Treatment (Wk 1) | Treatment | Fast Day | No | 02:30 | 02:00 - 02:59 | Early Morning | 36,9 | 92  | 20,8 | 20,8 | 18,06 | 587,78 | 101,65 |
| 2019/05/18 | CH2205 | Male | Three y/o | Treatment (Wk 1) | Treatment | Fast Day | No | 02:35 | 02:00 - 02:59 | Early Morning | 37,5 | 61  | 24,4 | 24,4 | 18,65 | 556,01 | 107,11 |
| 2019/05/18 | CH2206 | Male | Three y/o | Treatment (Wk 1) | Treatment | Fast Day | No | 02:35 | 02:00 - 02:59 | Early Morning | 36,9 | 80  | 5,8  | 5,8  | 18,06 | 577,31 | 58,39  |
| 2019/05/18 | CH2205 | Male | Three y/o | Treatment (Wk 1) | Treatment | Fast Day | No | 02:40 | 02:00 - 02:59 | Early Morning | 37,6 | 48  | 15,8 | 15,8 | 18,75 | 536,04 | 92,28  |
| 2019/05/18 | CH2206 | Male | Three y/o | Treatment (Wk 1) | Treatment | Fast Day | No | 02:40 | 02:00 - 02:59 | Early Morning | 36,9 | 63  | 6,4  | 6,4  | 18,06 | 558,62 | 61,70  |
| 2019/05/18 | CH2205 | Male | Three y/o | Treatment (Wk 1) | Treatment | Fast Day | No | 02:45 | 02:00 - 02:59 | Early Morning | 37,5 | 45  | 14,6 | 14,6 | 18,65 | 530,47 | 89,59  |
| 2019/05/18 | CH2206 | Male | Three y/o | Treatment (Wk 1) | Treatment | Fast Day | No | 02:45 | 02:00 - 02:59 | Early Morning | 36,9 | 53  | 15,8 | 15,8 | 18,06 | 544,43 | 92,28  |
| 2019/05/18 | CH2205 | Male | Three y/o | Treatment (Wk 1) | Treatment | Fast Day | No | 02:50 | 02:00 - 02:59 | Early Morning | 37,4 | 82  | 13,2 | 13,2 | 18,55 | 579,19 | 86,17  |
| 2019/05/18 | CH2206 | Male | Three y/o | Treatment (Wk 1) | Treatment | Fast Day | No | 02:50 | 02:00 - 02:59 | Early Morning | 37,0 | 57  | 17,8 | 17,8 | 18,16 | 550,47 | 96,34  |
| 2019/05/18 | CH2205 | Male | Three y/o | Treatment (Wk 1) | Treatment | Fast Day | No | 02:55 | 02:00 - 02:59 | Early Morning | 37,4 | 92  | 14,6 | 14,6 | 18,55 | 587,78 | 89,59  |
| 2019/05/18 | CH2206 | Male | Three y/o | Treatment (Wk 1) | Treatment | Fast Day | No | 02:55 | 02:00 - 02:59 | Early Morning | 37,1 | 44  | 12,6 | 12,6 | 18,26 | 528,51 | 84,59  |
| 2019/05/18 | CH2205 | Male | Three y/o | Treatment (Wk 1) | Treatment | Fast Day | No | 03:00 | 03:00 - 03:59 | Early Morning | 37,3 |     | 33,8 | 33,8 | 18,46 |        | 118,29 |
| 2019/05/18 | CH2206 | Male | Three y/o | Treatment (Wk 1) | Treatment | Fast Day | No | 03:00 | 03:00 - 03:59 | Early Morning | 37,2 | 49  | 60,0 | 60,0 | 18,36 | 537,80 | 138,09 |
| 2019/05/18 | CH2205 | Male | Three y/o | Treatment (Wk 1) | Treatment | Fast Day | No | 03:05 | 03:00 - 03:59 | Early Morning | 37,4 |     | 32,2 | 32,2 | 18,55 |        | 116,63 |
| 2019/05/18 | CH2206 | Male | Three y/o | Treatment (Wk 1) | Treatment | Fast Day | No | 03:05 | 03:00 - 03:59 | Early Morning | 37,2 | 72  | 54,4 | 54,4 | 18,36 | 569,20 | 134,70 |
| 2019/05/18 | CH2205 | Male | Three y/o | Treatment (Wk 1) | Treatment | Fast Day | No | 03:10 | 03:00 - 03:59 | Early Morning | 37,4 |     | 33,8 | 33,8 | 18,55 |        | 118,29 |
| 2019/05/18 | CH2206 | Male | Three y/o | Treatment (Wk 1) | Treatment | Fast Day | No | 03:10 | 03:00 - 03:59 | Early Morning | 37,2 | 48  | 58,6 | 58,6 | 18,36 | 536,04 | 137,28 |
| 2019/05/18 | CH2205 | Male | Three y/o | Treatment (Wk 1) | Treatment | Fast Day | No | 03:15 | 03:00 - 03:59 | Early Morning | 37,4 |     | 29,2 | 29,2 | 18,55 |        | 113,27 |
| 2019/05/18 | CH2206 | Male | Three y/o | Treatment (Wk 1) | Treatment | Fast Day | No | 03:15 | 03:00 - 03:59 | Early Morning | 37,1 | 84  | 54,2 | 54,2 | 18,26 | 581,01 | 134,57 |
| 2019/05/18 | CH2205 | Male | Three y/o | Treatment (Wk 1) | Treatment | Fast Day | No | 03:20 | 03:00 - 03:59 | Early Morning | 37,4 |     | 27,0 | 27,0 | 18,55 |        | 110,58 |
| 2019/05/18 | CH2206 | Male | Three y/o | Treatment (Wk 1) | Treatment | Fast Day | No | 03:20 | 03:00 - 03:59 | Early Morning | 37,1 | 79  | 62,2 | 62,2 | 18,26 | 576,36 | 139,34 |
| 2019/05/18 | CH2205 | Male | Three y/o | Treatment (Wk 1) | Treatment | Fast Day | No | 03:25 | 03:00 - 03:59 | Early Morning | 37,4 |     | 27,0 | 27,0 | 18,55 |        | 110,58 |
| 2019/05/18 | CH2206 | Male | Three y/o | Treatment (Wk 1) | Treatment | Fast Day | No | 03:25 | 03:00 - 03:59 | Early Morning | 37,1 | 78  | 58,4 | 58,4 | 18,26 | 575,38 | 137,16 |
| 2019/05/18 | CH2205 | Male | Three y/o | Treatment (Wk 1) | Treatment | Fast Day | No | 03:30 | 03:00 - 03:59 | Early Morning | 37,4 | 69  | 27,0 | 27,0 | 18,55 | 565,86 | 110,58 |
| 2019/05/18 | CH2206 | Male | Three y/o | Treatment (Wk 1) | Treatment | Fast Day | No | 03:30 | 03:00 - 03:59 | Early Morning | 37,2 | 58  | 60,4 | 60,4 | 18,36 | 551,90 | 138,32 |
| 2019/05/18 | CH2205 | Male | Three y/o | Treatment (Wk 1) | Treatment | Fast Day | No | 03:35 | 03:00 - 03:59 | Early Morning | 37,4 | 56  | 23,2 | 23,2 | 18,55 | 549,01 | 105,39 |
| 2019/05/18 | CH2206 | Male | Three y/o | Treatment (Wk 1) | Treatment | Fast Day | No | 03:35 | 03:00 - 03:59 | Early Morning | 37,2 | 46  | 61,4 | 61,4 | 18,36 | 532,38 | 138,89 |
| 2019/05/18 | CH2205 | Male | Three y/o | Treatment (Wk 1) | Treatment | Fast Day | No | 03:40 | 03:00 - 03:59 | Early Morning | 37,4 | 62  | 23,2 | 23,2 | 18,55 | 557,33 | 105,39 |



|            |        |      |           |                  |           |          |    |       |               |               |      |     |       |       |       |        |        |
|------------|--------|------|-----------|------------------|-----------|----------|----|-------|---------------|---------------|------|-----|-------|-------|-------|--------|--------|
| 2019/05/18 | CH2206 | Male | Three y/o | Treatment (Wk 1) | Treatment | Fast Day | No | 03:40 | 03:00 - 03:59 | Early Morning | 37,3 | 57  | 64,0  | 64,0  | 18,46 | 550,47 | 140,33 |
| 2019/05/18 | CH2205 | Male | Three y/o | Treatment (Wk 1) | Treatment | Fast Day | No | 03:45 | 03:00 - 03:59 | Early Morning | 37,4 | 50  | 14,4  | 14,4  | 18,55 | 539,52 | 89,12  |
| 2019/05/18 | CH2206 | Male | Three y/o | Treatment (Wk 1) | Treatment | Fast Day | No | 03:45 | 03:00 - 03:59 | Early Morning | 37,2 | 55  | 66,4  | 66,4  | 18,36 | 547,52 | 141,61 |
| 2019/05/18 | CH2205 | Male | Three y/o | Treatment (Wk 1) | Treatment | Fast Day | No | 03:50 | 03:00 - 03:59 | Early Morning | 37,4 | 55  | 10,2  | 10,2  | 18,55 | 547,52 | 77,43  |
| 2019/05/18 | CH2206 | Male | Three y/o | Treatment (Wk 1) | Treatment | Fast Day | No | 03:50 | 03:00 - 03:59 | Early Morning | 37,2 | 55  | 59,2  | 59,2  | 18,36 | 547,52 | 137,63 |
| 2019/05/18 | CH2205 | Male | Three y/o | Treatment (Wk 1) | Treatment | Fast Day | No | 03:55 | 03:00 - 03:59 | Early Morning | 37,4 | 82  | 7,6   | 7,6   | 18,55 | 579,19 | 67,49  |
| 2019/05/18 | CH2206 | Male | Three y/o | Treatment (Wk 1) | Treatment | Fast Day | No | 03:55 | 03:00 - 03:59 | Early Morning | 37,2 | 71  | 63,0  | 63,0  | 18,36 | 568,10 | 139,78 |
| 2019/05/18 | CH2205 | Male | Three y/o | Treatment (Wk 1) | Treatment | Fast Day | No | 04:00 | 04:00 - 04:59 | Morning       | 37,4 | 47  | 6,6   | 6,6   | 18,55 | 534,23 | 62,73  |
| 2019/05/18 | CH2206 | Male | Three y/o | Treatment (Wk 1) | Treatment | Fast Day | No | 04:00 | 04:00 - 04:59 | Morning       | 37,2 | 48  | 66,4  | 66,4  | 18,36 | 536,04 | 141,61 |
| 2019/05/18 | CH2205 | Male | Three y/o | Treatment (Wk 1) | Treatment | Fast Day | No | 04:05 | 04:00 - 04:59 | Morning       | 37,4 | 52  | 66,4  | 66,4  | 18,55 | 542,83 | 141,61 |
| 2019/05/18 | CH2206 | Male | Three y/o | Treatment (Wk 1) | Treatment | Fast Day | No | 04:05 | 04:00 - 04:59 | Morning       | 37,2 | 57  | 51,4  | 51,4  | 18,36 | 550,47 | 132,74 |
| 2019/05/18 | CH2205 | Male | Three y/o | Treatment (Wk 1) | Treatment | Fast Day | No | 04:10 | 04:00 - 04:59 | Morning       | 37,5 | 162 | 98,8  | 98,8  | 18,65 | 626,88 | 155,42 |
| 2019/05/18 | CH2206 | Male | Three y/o | Treatment (Wk 1) | Treatment | Fast Day | No | 04:10 | 04:00 - 04:59 | Morning       | 37,3 | 118 | 153,2 | 153,2 | 18,46 | 605,61 | 170,76 |
| 2019/05/18 | CH2205 | Male | Three y/o | Treatment (Wk 1) | Treatment | Fast Day | No | 04:15 | 04:00 - 04:59 | Morning       | 37,4 |     | 18,8  | 18,8  | 18,55 |        | 98,20  |
| 2019/05/18 | CH2206 | Male | Three y/o | Treatment (Wk 1) | Treatment | Fast Day | No | 04:15 | 04:00 - 04:59 | Morning       | 37,3 |     | 140,2 | 140,2 | 18,46 | 600,69 | 167,65 |
| 2019/05/18 | CH2205 | Male | Three y/o | Treatment (Wk 1) | Treatment | Fast Day | No | 04:20 | 04:00 - 04:59 | Morning       | 37,3 | 132 | 57,6  | 57,6  | 18,46 | 613,32 | 136,68 |
| 2019/05/18 | CH2206 | Male | Three y/o | Treatment (Wk 1) | Treatment | Fast Day | No | 04:20 | 04:00 - 04:59 | Morning       | 37,2 | 98  | 226,0 | 226,0 | 18,36 | 592,41 | 184,42 |
| 2019/05/18 | CH2205 | Male | Three y/o | Treatment (Wk 1) | Treatment | Fast Day | No | 04:25 | 04:00 - 04:59 | Morning       | 37,3 | 121 | 250,4 | 250,4 | 18,46 | 607,35 | 188,04 |
| 2019/05/18 | CH2206 | Male | Three y/o | Treatment (Wk 1) | Treatment | Fast Day | No | 04:25 | 04:00 - 04:59 | Morning       | 37,2 | 118 | 244,8 | 244,8 | 18,36 | 605,61 | 187,24 |
| 2019/05/18 | CH2205 | Male | Three y/o | Treatment (Wk 1) | Treatment | Fast Day | No | 04:30 | 04:00 - 04:59 | Morning       | 37,3 | 177 | 80,2  | 80,2  | 18,46 | 632,55 | 148,16 |
| 2019/05/18 | CH2206 | Male | Three y/o | Treatment (Wk 1) | Treatment | Fast Day | No | 04:30 | 04:00 - 04:59 | Morning       | 37,3 | 112 | 116,6 | 116,6 | 18,46 | 601,96 | 161,20 |
| 2019/05/18 | CH2205 | Male | Three y/o | Treatment (Wk 1) | Treatment | Fast Day | No | 04:35 | 04:00 - 04:59 | Morning       | 37,4 | 107 | 25,0  | 25,0  | 18,55 | 598,73 | 107,94 |
| 2019/05/18 | CH2206 | Male | Three y/o | Treatment (Wk 1) | Treatment | Fast Day | No | 04:35 | 04:00 - 04:59 | Morning       | 37,3 | 102 | 205,2 | 205,2 | 18,46 | 595,30 | 181,02 |
| 2019/05/18 | CH2205 | Male | Three y/o | Treatment (Wk 1) | Treatment | Fast Day | No | 04:40 | 04:00 - 04:59 | Morning       | 37,1 | 72  | 21,0  | 21,0  | 18,26 | 569,20 | 101,98 |
| 2019/05/18 | CH2206 | Male | Three y/o | Treatment (Wk 1) | Treatment | Fast Day | No | 04:40 | 04:00 - 04:59 | Morning       | 37,4 | 120 | 53,2  | 53,2  | 18,55 | 606,78 | 133,93 |
| 2019/05/18 | CH2205 | Male | Three y/o | Treatment (Wk 1) | Treatment | Fast Day | No | 04:45 | 04:00 - 04:59 | Morning       | 37,0 | 98  | 23,0  | 23,0  | 18,16 | 592,41 | 105,09 |
| 2019/05/18 | CH2206 | Male | Three y/o | Treatment (Wk 1) | Treatment | Fast Day | No | 04:45 | 04:00 - 04:59 | Morning       | 37,2 | 48  | 63,8  | 63,8  | 18,36 | 536,04 | 140,22 |
| 2019/05/18 | CH2205 | Male | Three y/o | Treatment (Wk 1) | Treatment | Fast Day | No | 04:50 | 04:00 - 04:59 | Morning       | 36,9 | 80  | 24,2  | 24,2  | 18,06 | 577,31 | 106,83 |
| 2019/05/18 | CH2206 | Male | Three y/o | Treatment (Wk 1) | Treatment | Fast Day | No | 04:50 | 04:00 - 04:59 | Morning       | 37,0 | 54  | 113,2 | 113,2 | 18,16 | 545,99 | 160,17 |
| 2019/05/18 | CH2205 | Male | Three y/o | Treatment (Wk 1) | Treatment | Fast Day | No | 04:55 | 04:00 - 04:59 | Morning       | 36,9 |     | 35,4  | 35,4  | 18,06 |        | 119,88 |
| 2019/05/18 | CH2206 | Male | Three y/o | Treatment (Wk 1) | Treatment | Fast Day | No | 04:55 | 04:00 - 04:59 | Morning       | 37,2 | 114 | 117,6 | 117,6 | 18,36 | 603,20 | 161,50 |
| 2019/05/18 | CH2205 | Male | Three y/o | Treatment (Wk 1) | Treatment | Fast Day | No | 05:00 | 05:00 - 05:59 | Morning       | 37,1 |     | 30,0  | 30,0  | 18,26 |        | 114,20 |
| 2019/05/18 | CH2206 | Male | Three y/o | Treatment (Wk 1) | Treatment | Fast Day | No | 05:00 | 05:00 - 05:59 | Morning       | 37,3 | 107 | 99,0  | 99,0  | 18,46 | 598,73 | 155,49 |
| 2019/05/18 | CH2205 | Male | Three y/o | Treatment (Wk 1) | Treatment | Fast Day | No | 05:05 | 05:00 - 05:59 | Morning       | 37,0 | 160 | 243,8 | 243,8 | 18,16 | 626,07 | 187,09 |
| 2019/05/18 | CH2206 | Male | Three y/o | Treatment (Wk 1) | Treatment | Fast Day | No | 05:05 | 05:00 - 05:59 | Morning       | 37,3 | 110 | 46,2  | 46,2  | 18,46 | 600,69 | 129,06 |
| 2019/05/18 | CH2205 | Male | Three y/o | Treatment (Wk 1) | Treatment | Fast Day | No | 05:10 | 05:00 - 05:59 | Morning       | 37,1 | 109 | 143,0 | 143,0 | 18,26 | 600,04 | 168,34 |
| 2019/05/18 | CH2206 | Male | Three y/o | Treatment (Wk 1) | Treatment | Fast Day | No | 05:10 | 05:00 - 05:59 | Morning       | 37,4 | 103 | 180,8 | 180,8 | 18,55 | 596,00 | 176,57 |
| 2019/05/18 | CH2205 | Male | Three y/o | Treatment (Wk 1) | Treatment | Fast Day | No | 05:15 | 05:00 - 05:59 | Morning       | 37,2 |     | 145,6 | 145,6 | 18,36 |        | 168,97 |
| 2019/05/18 | CH2206 | Male | Three y/o | Treatment (Wk 1) | Treatment | Fast Day | No | 05:15 | 05:00 - 05:59 | Morning       | 37,4 | 137 | 187,6 | 187,6 | 18,55 | 615,83 | 177,87 |
| 2019/05/18 | CH2205 | Male | Three y/o | Treatment (Wk 1) | Treatment | Fast Day | No | 05:20 | 05:00 - 05:59 | Morning       | 37,2 |     | 116,6 | 116,6 | 18,36 |        | 161,20 |
| 2019/05/18 | CH2206 | Male | Three y/o | Treatment (Wk 1) | Treatment | Fast Day | No | 05:20 | 05:00 - 05:59 | Morning       | 37,5 | 117 | 140,2 | 140,2 | 18,65 | 605,02 | 167,65 |
| 2019/05/18 | CH2205 | Male | Three y/o | Treatment (Wk 1) | Treatment | Fast Day | No | 05:25 | 05:00 - 05:59 | Morning       | 37,3 | 99  | 130,4 | 130,4 | 18,46 | 593,14 | 165,11 |
| 2019/05/18 | CH2206 | Male | Three y/o | Treatment (Wk 1) | Treatment | Fast Day | No | 05:25 | 05:00 - 05:59 | Morning       | 37,4 | 84  | 225,8 | 225,8 | 18,55 | 581,01 | 184,39 |
| 2019/05/18 | CH2205 | Male | Three y/o | Treatment (Wk 1) | Treatment | Fast Day | No | 05:30 | 05:00 - 05:59 | Morning       | 37,1 | 117 | 22,0  | 22,0  | 18,26 | 605,02 | 103,57 |
| 2019/05/18 | CH2206 | Male | Three y/o | Treatment (Wk 1) | Treatment | Fast Day | No | 05:30 | 05:00 - 05:59 | Morning       | 37,5 | 108 | 156,6 | 156,6 | 18,65 | 599,39 | 171,53 |
| 2019/05/18 | CH2205 | Male | Three y/o | Treatment (Wk 1) | Treatment | Fast Day | No | 05:35 | 05:00 - 05:59 | Morning       | 37,0 |     | 24,0  | 24,0  | 18,16 |        | 106,55 |
| 2019/05/18 | CH2206 | Male | Three y/o | Treatment (Wk 1) | Treatment | Fast Day | No | 05:35 | 05:00 - 05:59 | Morning       | 37,5 | 101 | 148,4 | 148,4 | 18,65 | 594,59 | 169,64 |
| 2019/05/18 | CH2205 | Male | Three y/o | Treatment (Wk 1) | Treatment | Fast Day | No | 05:40 | 05:00 - 05:59 | Morning       | 37,0 | 115 | 72,8  | 72,8  | 18,16 | 603,82 | 144,80 |
| 2019/05/18 | CH2206 | Male | Three y/o | Treatment (Wk 1) | Treatment | Fast Day | No | 05:40 | 05:00 - 05:59 | Morning       | 37,5 | 110 | 137,0 | 137,0 | 18,65 | 600,69 | 166,84 |
| 2019/05/18 | CH2205 | Male | Three y/o | Treatment (Wk 1) | Treatment | Fast Day | No | 05:45 | 05:00 - 05:59 | Morning       | 37,1 |     | 53,0  | 53,0  | 18,26 |        | 133,80 |
| 2019/05/18 | CH2206 | Male | Three y/o | Treatment (Wk 1) | Treatment | Fast Day | No | 05:45 | 05:00 - 05:59 | Morning       | 37,7 | 104 | 134,8 | 134,8 | 18,85 | 596,69 | 166,28 |
| 2019/05/18 | CH2205 | Male | Three y/o | Treatment (Wk 1) | Treatment | Fast Day | No | 05:50 | 05:00 - 05:59 | Morning       | 37,3 | 78  | 73,8  | 73,8  | 18,46 | 575,38 | 145,27 |
| 2019/05/18 | CH2206 | Male | Three y/o | Treatment (Wk 1) | Treatment | Fast Day | No | 05:50 | 05:00 - 05:59 | Morning       | 37,7 | 174 | 64,0  | 64,0  | 18,85 | 631,46 | 140,33 |
| 2019/05/18 | CH2205 | Male | Three y/o | Treatment (Wk 1) | Treatment | Fast Day | No | 05:55 | 05:00 - 05:59 | Morning       | 37,3 | 79  | 278,8 | 278,8 | 18,46 | 576,36 | 191,83 |
| 2019/05/18 | CH2206 | Male | Three y/o | Treatment (Wk 1) | Treatment | Fast Day | No | 05:55 | 05:00 - 05:59 | Morning       | 37,7 | 103 | 176,0 | 176,0 | 18,85 | 596,00 | 175,63 |
| 2019/05/18 | CH2205 | Male | Three y/o | Treatment (Wk 1) | Treatment | Fast Day | No | 06:00 | 06:00 - 06:59 | Morning       | 37,4 | 98  | 112,2 | 112,2 | 18,55 | 592,41 | 159,86 |
| 2019/05/18 | CH2206 | Male | Three y/o | Treatment (Wk 1) | Treatment | Fast Day | No | 06:00 | 06:00 - 06:59 | Morning       | 37,7 | 137 | 84,8  | 84,8  | 18,85 | 615,83 | 150,10 |
| 2019/05/18 | CH2205 | Male | Three y/o | Treatment (Wk 1) | Treatment | Fast Day | No | 06:05 | 06:00 - 06:59 | Morning       | 37,4 | 120 | 71,0  | 71,0  | 18,55 | 606,78 | 143,93 |
| 2019/05/18 | CH2206 | Male | Three y/o | Treatment (Wk 1) | Treatment | Fast Day | No | 06:05 | 06:00 - 06:59 | Morning       | 37,8 | 125 | 55,4  | 55,4  | 18,95 | 609,60 | 135,33 |
| 2019/05/18 | CH2205 | Male | Three y/o | Treatment (Wk 1) | Treatment | Fast Day | No | 06:10 | 06:00 - 06:59 | Morning       | 37,6 |     | 102,0 | 102,0 | 18,75 |        | 156,53 |
| 2019/05/18 | CH2206 | Male | Three y/o | Treatment (Wk 1) | Treatment | Fast Day | No | 06:10 | 06:00 - 06:59 | Morning       | 38,0 | 106 | 15,8  | 15,8  | 19,15 | 598,06 | 92,28  |
| 2019/05/18 | CH2205 | Male | Three y/o | Treatment (Wk 1) | Treatment | Fast Day | No | 06:15 | 06:00 - 06:59 | Morning       | 37,6 | 91  | 55,4  | 55,4  | 18,75 | 586,98 | 135,33 |
| 2019/05/18 | CH2206 | Male | Three y/o | Treatment (Wk 1) | Treatment | Fast Day | No | 06:15 | 06:00 - 06:59 | Morning       | 38,0 | 98  | 43,6  | 43,6  | 19,15 | 592,41 | 127,06 |
| 2019/05/18 | CH2205 | Male | Three y/o | Treatment (Wk 1) | Treatment | Fast Day | No | 06:20 | 06:00 - 06:59 | Morning       | 37,5 |     | 20,6  | 20,6  | 18,65 |        | 101,32 |
| 2019/05/18 | CH2206 | Male | Three y/o | Treatment (Wk 1) | Treatment | Fast Day | No | 06:20 | 06:00 - 06:59 | Morning       | 37,9 | 113 | 147,8 | 147,8 | 19,05 | 602,58 | 169,50 |
| 2019/05/18 | CH2205 | Male | Three y/o | Treatment (Wk 1) | Treatment | Fast Day | No | 06:25 | 06:00 - 06:59 | Morning       | 37,3 |     | 15,6  | 15,6  | 18,46 |        | 91,85  |
| 2019/05/18 | CH2206 | Male | Three y/o | Treatment (Wk 1) | Treatment | Fast Day | No | 06:25 | 06:00 - 06:59 | Morning       | 37,8 | 117 | 70,8  | 70,8  | 18,95 | 605,02 | 143,83 |
| 2019/05/18 | CH2205 | Male | Three y/o | Treatment (Wk 1) | Treatment | Fast Day | No | 06:30 | 06:00 - 06:59 | Morning       | 37,4 | 89  | 104,8 | 104,8 | 18,55 | 585,33 | 157,48 |
| 2019/05/18 | CH2206 | Male | Three y/o | Treatment (Wk 1) | Treatment | Fast Day | No | 06:30 | 06:00 - 06:59 | Morning       | 37,8 | 131 | 207,8 | 207,8 | 18,95 | 612,80 | 181,47 |
| 2019/05/18 | CH2205 | Male | Three y/o | Treatment (Wk 1) | Treatment | Fast Day | No | 06:35 | 06:00 - 06:59 | Morning       | 37,4 | 180 | 375,6 | 375,6 | 18,55 | 633,61 | 202,38 |



|            |        |      |           |                  |           |          |    |       |               |              |      |     |       |       |       |        |        |
|------------|--------|------|-----------|------------------|-----------|----------|----|-------|---------------|--------------|------|-----|-------|-------|-------|--------|--------|
| 2019/05/18 | CH2206 | Male | Three y/o | Treatment (Wk 1) | Treatment | Fast Day | No | 06:35 | 06:00 - 06:59 | Morning      | 37,7 | 167 | 193,2 | 193,2 | 18,85 | 628,84 | 178,90 |
| 2019/05/18 | CH2205 | Male | Three y/o | Treatment (Wk 1) | Treatment | Fast Day | No | 06:40 | 06:00 - 06:59 | Morning      | 37,4 | 107 | 68,6  | 68,6  | 18,55 | 598,73 | 142,74 |
| 2019/05/18 | CH2206 | Male | Three y/o | Treatment (Wk 1) | Treatment | Fast Day | No | 06:40 | 06:00 - 06:59 | Morning      | 37,7 | 113 | 156,2 | 156,2 | 18,85 | 602,58 | 171,44 |
| 2019/05/18 | CH2205 | Male | Three y/o | Treatment (Wk 1) | Treatment | Fast Day | No | 06:45 | 06:00 - 06:59 | Morning      | 37,5 | 45  | 105,2 | 105,2 | 18,65 | 530,47 | 157,61 |
| 2019/05/18 | CH2206 | Male | Three y/o | Treatment (Wk 1) | Treatment | Fast Day | No | 06:45 | 06:00 - 06:59 | Morning      | 37,4 |     | 180,0 | 180,0 | 18,85 |        | 176,41 |
| 2019/05/18 | CH2205 | Male | Three y/o | Treatment (Wk 1) | Treatment | Fast Day | No | 06:50 | 06:00 - 06:59 | Morning      | 37,7 | 49  | 70,2  | 70,2  | 18,55 | 537,80 | 143,54 |
| 2019/05/18 | CH2206 | Male | Three y/o | Treatment (Wk 1) | Treatment | Fast Day | No | 06:50 | 06:00 - 06:59 | Morning      | 37,7 | 128 | 81,4  | 81,4  | 18,85 | 611,22 | 148,68 |
| 2019/05/18 | CH2205 | Male | Three y/o | Treatment (Wk 1) | Treatment | Fast Day | No | 06:55 | 06:00 - 06:59 | Morning      | 37,5 | 126 | 160,2 | 160,2 | 18,65 | 610,14 | 172,32 |
| 2019/05/18 | CH2206 | Male | Three y/o | Treatment (Wk 1) | Treatment | Fast Day | No | 06:55 | 06:00 - 06:59 | Morning      | 37,7 | 111 | 156,2 | 156,2 | 18,85 | 601,33 | 171,44 |
| 2019/05/18 | CH2205 | Male | Three y/o | Treatment (Wk 1) | Treatment | Fast Day | No | 07:00 | 07:00 - 07:59 | Morning      | 37,5 | 68  | 310,8 | 310,8 | 18,65 | 564,71 | 195,67 |
| 2019/05/18 | CH2206 | Male | Three y/o | Treatment (Wk 1) | Treatment | Fast Day | No | 07:00 | 07:00 - 07:59 | Morning      | 37,7 |     | 132,4 | 132,4 | 18,85 |        | 165,65 |
| 2019/05/18 | CH2205 | Male | Three y/o | Treatment (Wk 1) | Treatment | Fast Day | No | 07:05 | 07:00 - 07:59 | Morning      | 37,5 | 95  | 119,0 | 119,0 | 18,65 | 590,14 | 161,92 |
| 2019/05/18 | CH2206 | Male | Three y/o | Treatment (Wk 1) | Treatment | Fast Day | No | 07:05 | 07:00 - 07:59 | Morning      | 37,7 | 115 | 96,2  | 96,2  | 18,85 | 603,82 | 154,49 |
| 2019/05/18 | CH2205 | Male | Three y/o | Treatment (Wk 1) | Treatment | Fast Day | No | 07:10 | 07:00 - 07:59 | Morning      | 37,5 | 115 | 125,6 | 125,6 | 18,65 | 603,82 | 163,80 |
| 2019/05/18 | CH2206 | Male | Three y/o | Treatment (Wk 1) | Treatment | Fast Day | No | 07:10 | 07:00 - 07:59 | Morning      | 37,7 |     | 262,8 | 262,8 | 18,85 |        | 189,74 |
| 2019/05/18 | CH2205 | Male | Three y/o | Treatment (Wk 1) | Treatment | Fast Day | No | 07:15 | 07:00 - 07:59 | Morning      | 37,5 | 51  | 63,0  | 63,0  | 18,65 | 541,20 | 139,78 |
| 2019/05/18 | CH2206 | Male | Three y/o | Treatment (Wk 1) | Treatment | Fast Day | No | 07:15 | 07:00 - 07:59 | Morning      | 37,7 | 118 | 167,0 | 167,0 | 18,85 | 605,61 | 173,78 |
| 2019/05/18 | CH2205 | Male | Three y/o | Treatment (Wk 1) | Treatment | Fast Day | No | 07:20 | 07:00 - 07:59 | Morning      | 37,6 | 101 | 91,2  | 91,2  | 18,75 | 594,59 | 152,63 |
| 2019/05/18 | CH2206 | Male | Three y/o | Treatment (Wk 1) | Treatment | Fast Day | No | 07:20 | 07:00 - 07:59 | Morning      | 37,7 | 174 | 127,0 | 127,0 | 18,85 | 631,46 | 164,19 |
| 2019/05/18 | CH2205 | Male | Three y/o | Treatment (Wk 1) | Treatment | Fast Day | No | 07:25 | 07:00 - 07:59 | Morning      | 37,6 | 80  | 113,0 | 113,0 | 18,75 | 577,31 | 160,11 |
| 2019/05/18 | CH2206 | Male | Three y/o | Treatment (Wk 1) | Treatment | Fast Day | No | 07:25 | 07:00 - 07:59 | Morning      | 37,7 | 103 | 78,4  | 78,4  | 18,85 | 596,00 | 147,37 |
| 2019/05/18 | CH2205 | Male | Three y/o | Treatment (Wk 1) | Treatment | Fast Day | No | 07:30 | 07:00 - 07:59 | Morning      | 37,6 | 103 | 162,0 | 162,0 | 18,75 | 596,00 | 172,72 |
| 2019/05/18 | CH2206 | Male | Three y/o | Treatment (Wk 1) | Treatment | Fast Day | No | 07:30 | 07:00 - 07:59 | Morning      | 37,7 | 113 | 83,8  | 83,8  | 18,85 | 602,58 | 149,69 |
| 2019/05/18 | CH2205 | Male | Three y/o | Treatment (Wk 1) | Treatment | Fast Day | No | 07:35 | 07:00 - 07:59 | Morning      | 37,6 | 101 | 138,8 | 138,8 | 18,75 | 594,59 | 167,30 |
| 2019/05/18 | CH2206 | Male | Three y/o | Treatment (Wk 1) | Treatment | Fast Day | No | 07:35 | 07:00 - 07:59 | Morning      | 37,8 | 111 | 206,2 | 206,2 | 18,95 | 601,33 | 181,19 |
| 2019/05/18 | CH2205 | Male | Three y/o | Treatment (Wk 1) | Treatment | Fast Day | No | 07:40 | 07:00 - 07:59 | Morning      | 37,6 |     | 62,4  | 62,4  | 18,75 |        | 139,45 |
| 2019/05/18 | CH2206 | Male | Three y/o | Treatment (Wk 1) | Treatment | Fast Day | No | 07:40 | 07:00 - 07:59 | Morning      | 37,8 |     | 318,0 | 318,0 | 18,95 |        | 196,48 |
| 2019/05/18 | CH2205 | Male | Three y/o | Treatment (Wk 1) | Treatment | Fast Day | No | 07:45 | 07:00 - 07:59 | Morning      | 37,6 |     | 59,2  | 59,2  | 18,75 |        | 137,63 |
| 2019/05/18 | CH2206 | Male | Three y/o | Treatment (Wk 1) | Treatment | Fast Day | No | 07:45 | 07:00 - 07:59 | Morning      | 37,8 | 128 | 102,2 | 102,2 | 18,95 | 611,22 | 156,60 |
| 2019/05/18 | CH2205 | Male | Three y/o | Treatment (Wk 1) | Treatment | Fast Day | No | 07:50 | 07:00 - 07:59 | Morning      | 37,6 | 104 | 262,6 | 262,6 | 18,75 | 596,69 | 189,72 |
| 2019/05/18 | CH2206 | Male | Three y/o | Treatment (Wk 1) | Treatment | Fast Day | No | 07:50 | 07:00 - 07:59 | Morning      | 37,8 | 117 | 169,6 | 169,6 | 18,95 | 605,02 | 174,32 |
| 2019/05/18 | CH2205 | Male | Three y/o | Treatment (Wk 1) | Treatment | Fast Day | No | 07:55 | 07:00 - 07:59 | Morning      | 37,6 | 108 | 70,4  | 70,4  | 18,75 | 599,39 | 143,64 |
| 2019/05/18 | CH2206 | Male | Three y/o | Treatment (Wk 1) | Treatment | Fast Day | No | 07:55 | 07:00 - 07:59 | Morning      | 37,8 | 115 | 138,2 | 138,2 | 18,95 | 603,82 | 167,15 |
| 2019/05/18 | CH2205 | Male | Three y/o | Treatment (Wk 1) | Treatment | Fast Day | No | 08:00 | 08:00 - 08:59 | Late Morning | 37,7 | 129 | 124,4 | 124,4 | 18,85 | 611,75 | 163,47 |
| 2019/05/18 | CH2206 | Male | Three y/o | Treatment (Wk 1) | Treatment | Fast Day | No | 08:00 | 08:00 - 08:59 | Late Morning | 37,8 | 84  | 233,0 | 233,0 | 18,95 | 581,01 | 185,50 |
| 2019/05/18 | CH2205 | Male | Three y/o | Treatment (Wk 1) | Treatment | Fast Day | No | 08:05 | 08:00 - 08:59 | Late Morning | 37,6 | 54  | 88,6  | 88,6  | 18,75 | 545,99 | 151,63 |
| 2019/05/18 | CH2206 | Male | Three y/o | Treatment (Wk 1) | Treatment | Fast Day | No | 08:05 | 08:00 - 08:59 | Late Morning | 37,8 | 101 | 110,8 | 110,8 | 18,95 | 594,59 | 159,42 |
| 2019/05/18 | CH2205 | Male | Three y/o | Treatment (Wk 1) | Treatment | Fast Day | No | 08:10 | 08:00 - 08:59 | Late Morning | 37,6 |     | 426,0 | 426,0 | 18,75 |        | 206,85 |
| 2019/05/18 | CH2206 | Male | Three y/o | Treatment (Wk 1) | Treatment | Fast Day | No | 08:10 | 08:00 - 08:59 | Late Morning | 37,8 | 108 | 95,6  | 95,6  | 18,95 | 599,39 | 154,28 |
| 2019/05/18 | CH2205 | Male | Three y/o | Treatment (Wk 1) | Treatment | Fast Day | No | 08:15 | 08:00 - 08:59 | Late Morning | 37,6 | 53  | 24,0  | 24,0  | 18,75 | 544,43 | 106,55 |
| 2019/05/18 | CH2206 | Male | Three y/o | Treatment (Wk 1) | Treatment | Fast Day | No | 08:15 | 08:00 - 08:59 | Late Morning | 37,8 | 129 | 78,0  | 78,0  | 18,95 | 611,75 | 147,20 |
| 2019/05/18 | CH2205 | Male | Three y/o | Treatment (Wk 1) | Treatment | Fast Day | No | 08:20 | 08:00 - 08:59 | Late Morning | 37,5 | 72  | 32,6  | 32,6  | 18,65 | 569,20 | 117,05 |
| 2019/05/18 | CH2206 | Male | Three y/o | Treatment (Wk 1) | Treatment | Fast Day | No | 08:20 | 08:00 - 08:59 | Late Morning | 37,8 |     | 83,6  | 83,6  | 18,95 |        | 149,61 |
| 2019/05/18 | CH2205 | Male | Three y/o | Treatment (Wk 1) | Treatment | Fast Day | No | 08:25 | 08:00 - 08:59 | Late Morning | 37,4 |     | 22,8  | 22,8  | 18,55 |        | 104,79 |
| 2019/05/18 | CH2206 | Male | Three y/o | Treatment (Wk 1) | Treatment | Fast Day | No | 08:25 | 08:00 - 08:59 | Late Morning | 37,7 | 103 | 207,2 | 207,2 | 18,85 | 596,00 | 181,36 |
| 2019/05/18 | CH2205 | Male | Three y/o | Treatment (Wk 1) | Treatment | Fast Day | No | 08:30 | 08:00 - 08:59 | Late Morning | 37,5 | 64  | 43,4  | 43,4  | 18,65 | 559,88 | 126,90 |
| 2019/05/18 | CH2206 | Male | Three y/o | Treatment (Wk 1) | Treatment | Fast Day | No | 08:30 | 08:00 - 08:59 | Late Morning | 37,7 | 121 | 90,4  | 90,4  | 18,85 | 607,35 | 152,33 |
| 2019/05/18 | CH2205 | Male | Three y/o | Treatment (Wk 1) | Treatment | Fast Day | No | 08:35 | 08:00 - 08:59 | Late Morning | 37,6 |     | 99,6  | 99,6  | 18,75 |        | 155,70 |
| 2019/05/18 | CH2206 | Male | Three y/o | Treatment (Wk 1) | Treatment | Fast Day | No | 08:35 | 08:00 - 08:59 | Late Morning | 37,8 | 104 | 149,4 | 149,4 | 18,95 | 596,69 | 169,88 |
| 2019/05/18 | CH2205 | Male | Three y/o | Treatment (Wk 1) | Treatment | Fast Day | No | 08:40 | 08:00 - 08:59 | Late Morning | 37,7 | 102 | 79,2  | 79,2  | 18,85 | 595,30 | 147,73 |
| 2019/05/18 | CH2206 | Male | Three y/o | Treatment (Wk 1) | Treatment | Fast Day | No | 08:40 | 08:00 - 08:59 | Late Morning | 37,7 | 109 | 72,6  | 72,6  | 18,85 | 600,04 | 144,70 |
| 2019/05/18 | CH2205 | Male | Three y/o | Treatment (Wk 1) | Treatment | Fast Day | No | 08:45 | 08:00 - 08:59 | Late Morning | 37,6 | 67  | 37,8  | 37,8  | 18,75 | 563,53 | 122,14 |
| 2019/05/18 | CH2206 | Male | Three y/o | Treatment (Wk 1) | Treatment | Fast Day | No | 08:45 | 08:00 - 08:59 | Late Morning | 37,7 |     | 186,6 | 186,6 | 18,85 |        | 177,68 |
| 2019/05/18 | CH2205 | Male | Three y/o | Treatment (Wk 1) | Treatment | Fast Day | No | 08:50 | 08:00 - 08:59 | Late Morning | 37,6 | 97  | 54,6  | 54,6  | 18,75 | 591,66 | 134,83 |
| 2019/05/18 | CH2206 | Male | Three y/o | Treatment (Wk 1) | Treatment | Fast Day | No | 08:50 | 08:00 - 08:59 | Late Morning | 37,7 | 124 | 404,8 | 404,8 | 18,85 | 609,04 | 205,04 |
| 2019/05/18 | CH2205 | Male | Three y/o | Treatment (Wk 1) | Treatment | Fast Day | No | 08:55 | 08:00 - 08:59 | Late Morning | 37,6 | 62  | 13,4  | 13,4  | 18,75 | 557,33 | 86,68  |
| 2019/05/18 | CH2206 | Male | Three y/o | Treatment (Wk 1) | Treatment | Fast Day | No | 08:55 | 08:00 - 08:59 | Late Morning | 37,7 | 103 | 36,2  | 36,2  | 18,85 | 596,00 | 120,65 |
| 2019/05/18 | CH2205 | Male | Three y/o | Treatment (Wk 1) | Treatment | Fast Day | No | 09:00 | 09:00 - 09:59 | Late Morning | 37,6 | 60  | 13,2  | 13,2  | 18,75 | 554,67 | 86,17  |
| 2019/05/18 | CH2206 | Male | Three y/o | Treatment (Wk 1) | Treatment | Fast Day | No | 09:00 | 09:00 - 09:59 | Late Morning | 37,7 | 112 | 136,0 | 136,0 | 18,85 | 601,96 | 166,59 |
| 2019/05/18 | CH2205 | Male | Three y/o | Treatment (Wk 1) | Treatment | Fast Day | No | 09:05 | 09:00 - 09:59 | Late Morning | 37,6 |     | 17,2  | 17,2  | 18,75 |        | 95,17  |
| 2019/05/18 | CH2206 | Male | Three y/o | Treatment (Wk 1) | Treatment | Fast Day | No | 09:05 | 09:00 - 09:59 | Late Morning | 37,6 | 90  | 153,4 | 153,4 | 18,75 | 586,16 | 170,80 |
| 2019/05/18 | CH2205 | Male | Three y/o | Treatment (Wk 1) | Treatment | Fast Day | No | 09:10 | 09:00 - 09:59 | Late Morning | 37,6 |     | 6,0   | 6,0   | 18,75 |        | 59,53  |
| 2019/05/18 | CH2206 | Male | Three y/o | Treatment (Wk 1) | Treatment | Fast Day | No | 09:10 | 09:00 - 09:59 | Late Morning | 37,7 | 115 | 124,6 | 124,6 | 18,85 | 603,82 | 163,52 |
| 2019/05/18 | CH2205 | Male | Three y/o | Treatment (Wk 1) | Treatment | Fast Day | No | 09:15 | 09:00 - 09:59 | Late Morning | 37,5 |     | 9,4   | 9,4   | 18,65 |        | 74,66  |
| 2019/05/18 | CH2206 | Male | Three y/o | Treatment (Wk 1) | Treatment | Fast Day | No | 09:15 | 09:00 - 09:59 | Late Morning | 37,6 | 115 | 140,0 | 140,0 | 18,75 | 603,82 | 167,60 |
| 2019/05/18 | CH2205 | Male | Three y/o | Treatment (Wk 1) | Treatment | Fast Day | No | 09:20 | 09:00 - 09:59 | Late Morning | 37,6 | 47  | 8,2   | 8,2   | 18,75 | 534,23 | 70,05  |
| 2019/05/18 | CH2206 | Male | Three y/o | Treatment (Wk 1) | Treatment | Fast Day | No | 09:20 | 09:00 - 09:59 | Late Morning | 37,5 | 194 | 20,4  | 20,4  | 18,65 | 638,30 | 100,99 |
| 2019/05/18 | CH2205 | Male | Three y/o | Treatment (Wk 1) | Treatment | Fast Day | No | 09:25 | 09:00 - 09:59 | Late Morning | 37,6 | 58  | 46,0  | 46,0  | 18,75 | 551,90 | 128,91 |
| 2019/05/18 | CH2206 | Male | Three y/o | Treatment (Wk 1) | Treatment | Fast Day | No | 09:25 | 09:00 - 09:59 | Late Morning | 37,5 | 162 | 121,2 | 121,2 | 18,65 | 626,88 | 162,56 |
| 2019/05/18 | CH2205 | Male | Three y/o | Treatment (Wk 1) | Treatment | Fast Day | No | 09:30 | 09:00 - 09:59 | Late Morning | 37,6 | 57  | 6,4   | 6,4   | 18,75 | 550,47 | 61,70  |



|            |        |      |           |                  |           |          |    |       |               |              |      |     |       |       |       |        |        |
|------------|--------|------|-----------|------------------|-----------|----------|----|-------|---------------|--------------|------|-----|-------|-------|-------|--------|--------|
| 2019/05/18 | CH2206 | Male | Three y/o | Treatment (Wk 1) | Treatment | Fast Day | No | 09:30 | 09:00 - 09:59 | Late Morning | 37,7 | 110 | 24,6  | 24,6  | 18,85 | 600,69 | 107,39 |
| 2019/05/18 | CH2205 | Male | Three y/o | Treatment (Wk 1) | Treatment | Fast Day | No | 09:35 | 09:00 - 09:59 | Late Morning | 37,6 | 55  | 6,2   | 6,2   | 18,75 | 547,52 | 60,63  |
| 2019/05/18 | CH2206 | Male | Three y/o | Treatment (Wk 1) | Treatment | Fast Day | No | 09:35 | 09:00 - 09:59 | Late Morning | 37,7 | 91  | 77,4  | 77,4  | 18,85 | 586,98 | 146,93 |
| 2019/05/18 | CH2205 | Male | Three y/o | Treatment (Wk 1) | Treatment | Fast Day | No | 09:40 | 09:00 - 09:59 | Late Morning | 37,6 | 53  | 5,8   | 5,8   | 18,75 | 544,43 | 58,39  |
| 2019/05/18 | CH2206 | Male | Three y/o | Treatment (Wk 1) | Treatment | Fast Day | No | 09:40 | 09:00 - 09:59 | Late Morning | 37,8 | 96  | 78,2  | 78,2  | 18,95 | 590,91 | 147,28 |
| 2019/05/18 | CH2205 | Male | Three y/o | Treatment (Wk 1) | Treatment | Fast Day | No | 09:45 | 09:00 - 09:59 | Late Morning | 37,6 | 51  | 3,6   | 3,6   | 18,75 | 541,20 | 42,42  |
| 2019/05/18 | CH2206 | Male | Three y/o | Treatment (Wk 1) | Treatment | Fast Day | No | 09:45 | 09:00 - 09:59 | Late Morning | 37,8 | 91  | 4,4   | 4,4   | 18,95 | 586,98 | 49,12  |
| 2019/05/18 | CH2205 | Male | Three y/o | Treatment (Wk 1) | Treatment | Fast Day | No | 09:50 | 09:00 - 09:59 | Late Morning | 37,6 | 63  | 2,8   | 2,8   | 18,75 | 558,62 | 34,04  |
| 2019/05/18 | CH2206 | Male | Three y/o | Treatment (Wk 1) | Treatment | Fast Day | No | 09:50 | 09:00 - 09:59 | Late Morning | 37,7 | 54  | 19,2  | 19,2  | 18,85 | 545,99 | 98,92  |
| 2019/05/18 | CH2205 | Male | Three y/o | Treatment (Wk 1) | Treatment | Fast Day | No | 09:55 | 09:00 - 09:59 | Late Morning | 37,6 | 45  | 3,4   | 3,4   | 18,75 | 530,47 | 40,51  |
| 2019/05/18 | CH2206 | Male | Three y/o | Treatment (Wk 1) | Treatment | Fast Day | No | 09:55 | 09:00 - 09:59 | Late Morning | 37,7 | 50  | 40,0  | 40,0  | 18,85 | 539,52 | 124,09 |
| 2019/05/18 | CH2205 | Male | Three y/o | Treatment (Wk 1) | Treatment | Fast Day | No | 10:00 | 10:00 - 10:59 | Late Morning | 37,5 | 47  | 5,2   | 5,2   | 18,65 | 534,23 | 54,72  |
| 2019/05/18 | CH2206 | Male | Three y/o | Treatment (Wk 1) | Treatment | Fast Day | No | 10:00 | 10:00 - 10:59 | Late Morning | 37,5 | 50  | 35,2  | 35,2  | 18,65 | 539,52 | 119,69 |
| 2019/05/18 | CH2205 | Male | Three y/o | Treatment (Wk 1) | Treatment | Fast Day | No | 10:05 | 10:00 - 10:59 | Late Morning | 37,5 | 42  | 13,4  | 13,4  | 18,65 | 524,42 | 86,68  |
| 2019/05/18 | CH2206 | Male | Three y/o | Treatment (Wk 1) | Treatment | Fast Day | No | 10:05 | 10:00 - 10:59 | Late Morning | 37,5 | 46  | 28,0  | 28,0  | 18,65 | 532,38 | 111,83 |
| 2019/05/18 | CH2205 | Male | Three y/o | Treatment (Wk 1) | Treatment | Fast Day | No | 10:10 | 10:00 - 10:59 | Late Morning | 37,5 | 66  | 5,2   | 5,2   | 18,65 | 562,34 | 54,72  |
| 2019/05/18 | CH2206 | Male | Three y/o | Treatment (Wk 1) | Treatment | Fast Day | No | 10:10 | 10:00 - 10:59 | Late Morning | 37,5 | 112 | 103,6 | 103,6 | 18,65 | 601,96 | 157,08 |
| 2019/05/18 | CH2205 | Male | Three y/o | Treatment (Wk 1) | Treatment | Fast Day | No | 10:15 | 10:00 - 10:59 | Late Morning | 37,5 | 51  | 41,8  | 41,8  | 18,65 | 541,20 | 125,60 |
| 2019/05/18 | CH2206 | Male | Three y/o | Treatment (Wk 1) | Treatment | Fast Day | No | 10:15 | 10:00 - 10:59 | Late Morning | 37,5 | 98  | 209,4 | 209,4 | 18,65 | 592,41 | 181,74 |
| 2019/05/18 | CH2205 | Male | Three y/o | Treatment (Wk 1) | Treatment | Fast Day | No | 10:20 | 10:00 - 10:59 | Late Morning | 37,5 | 57  | 9,2   | 9,2   | 18,65 | 550,47 | 73,94  |
| 2019/05/18 | CH2206 | Male | Three y/o | Treatment (Wk 1) | Treatment | Fast Day | No | 10:20 | 10:00 - 10:59 | Late Morning | 37,5 | 108 | 90,6  | 90,6  | 18,65 | 599,39 | 152,40 |
| 2019/05/18 | CH2205 | Male | Three y/o | Treatment (Wk 1) | Treatment | Fast Day | No | 10:25 | 10:00 - 10:59 | Late Morning | 37,5 | 51  | 4,8   | 4,8   | 18,65 | 541,20 | 52,04  |
| 2019/05/18 | CH2206 | Male | Three y/o | Treatment (Wk 1) | Treatment | Fast Day | No | 10:25 | 10:00 - 10:59 | Late Morning | 37,5 | 119 | 147,8 | 147,8 | 18,65 | 606,20 | 169,50 |
| 2019/05/18 | CH2205 | Male | Three y/o | Treatment (Wk 1) | Treatment | Fast Day | No | 10:30 | 10:00 - 10:59 | Late Morning | 37,4 | 51  | 14,0  | 14,0  | 18,55 | 541,20 | 88,17  |
| 2019/05/18 | CH2206 | Male | Three y/o | Treatment (Wk 1) | Treatment | Fast Day | No | 10:30 | 10:00 - 10:59 | Late Morning | 37,7 | 105 | 211,2 | 211,2 | 18,85 | 597,38 | 182,04 |
| 2019/05/18 | CH2205 | Male | Three y/o | Treatment (Wk 1) | Treatment | Fast Day | No | 10:35 | 10:00 - 10:59 | Late Morning | 37,4 | 65  | 9,0   | 9,0   | 18,55 | 561,12 | 73,19  |
| 2019/05/18 | CH2206 | Male | Three y/o | Treatment (Wk 1) | Treatment | Fast Day | No | 10:35 | 10:00 - 10:59 | Late Morning | 37,5 | 77  | 21,2  | 21,2  | 18,65 | 574,39 | 102,31 |
| 2019/05/18 | CH2205 | Male | Three y/o | Treatment (Wk 1) | Treatment | Fast Day | No | 10:40 | 10:00 - 10:59 | Late Morning | 37,4 | 50  | 3,8   | 3,8   | 18,55 | 539,52 | 44,22  |
| 2019/05/18 | CH2206 | Male | Three y/o | Treatment (Wk 1) | Treatment | Fast Day | No | 10:40 | 10:00 - 10:59 | Late Morning | 37,5 | 73  | 31,8  | 31,8  | 18,65 | 570,27 | 116,20 |
| 2019/05/18 | CH2205 | Male | Three y/o | Treatment (Wk 1) | Treatment | Fast Day | No | 10:45 | 10:00 - 10:59 | Late Morning | 37,4 | 57  | 5,0   | 5,0   | 18,55 | 550,47 | 53,41  |
| 2019/05/18 | CH2206 | Male | Three y/o | Treatment (Wk 1) | Treatment | Fast Day | No | 10:45 | 10:00 - 10:59 | Late Morning | 37,5 | 57  | 35,4  | 35,4  | 18,65 | 550,47 | 119,88 |
| 2019/05/18 | CH2205 | Male | Three y/o | Treatment (Wk 1) | Treatment | Fast Day | No | 10:50 | 10:00 - 10:59 | Late Morning | 37,4 |     | 24,8  | 24,8  | 18,55 |        | 107,67 |
| 2019/05/18 | CH2206 | Male | Three y/o | Treatment (Wk 1) | Treatment | Fast Day | No | 10:50 | 10:00 - 10:59 | Late Morning | 37,5 | 53  | 32,0  | 32,0  | 18,65 | 544,43 | 116,41 |
| 2019/05/18 | CH2205 | Male | Three y/o | Treatment (Wk 1) | Treatment | Fast Day | No | 10:55 | 10:00 - 10:59 | Late Morning | 37,4 | 43  | 32,8  | 32,8  | 18,55 | 526,50 | 117,26 |
| 2019/05/18 | CH2206 | Male | Three y/o | Treatment (Wk 1) | Treatment | Fast Day | No | 10:55 | 10:00 - 10:59 | Late Morning | 37,5 | 82  | 24,0  | 24,0  | 18,65 | 579,19 | 106,55 |
| 2019/05/18 | CH2205 | Male | Three y/o | Treatment (Wk 1) | Treatment | Fast Day | No | 11:00 | 11:00 - 11:59 | Late Morning | 37,4 |     | 14,4  | 14,4  | 18,55 |        | 89,12  |
| 2019/05/18 | CH2206 | Male | Three y/o | Treatment (Wk 1) | Treatment | Fast Day | No | 11:00 | 11:00 - 11:59 | Late Morning | 37,7 |     | 197,4 | 197,4 | 18,85 |        | 179,66 |
| 2019/05/18 | CH2205 | Male | Three y/o | Treatment (Wk 1) | Treatment | Fast Day | No | 11:05 | 11:00 - 11:59 | Late Morning | 37,4 | 32  | 43,6  | 43,6  | 18,55 | 499,63 | 127,06 |
| 2019/05/18 | CH2206 | Male | Three y/o | Treatment (Wk 1) | Treatment | Fast Day | No | 11:05 | 11:00 - 11:59 | Late Morning | 37,7 | 111 | 87,8  | 87,8  | 18,85 | 601,33 | 151,31 |
| 2019/05/18 | CH2205 | Male | Three y/o | Treatment (Wk 1) | Treatment | Fast Day | No | 11:10 | 11:00 - 11:59 | Late Morning | 37,3 | 46  | 125,2 | 125,2 | 18,46 | 532,38 | 163,69 |
| 2019/05/18 | CH2206 | Male | Three y/o | Treatment (Wk 1) | Treatment | Fast Day | No | 11:10 | 11:00 - 11:59 | Late Morning | 37,7 | 103 | 150,0 | 150,0 | 18,85 | 596,00 | 170,02 |
| 2019/05/18 | CH2205 | Male | Three y/o | Treatment (Wk 1) | Treatment | Fast Day | No | 11:15 | 11:00 - 11:59 | Late Morning | 37,4 | 77  | 66,2  | 66,2  | 18,55 | 574,39 | 141,50 |
| 2019/05/18 | CH2206 | Male | Three y/o | Treatment (Wk 1) | Treatment | Fast Day | No | 11:15 | 11:00 - 11:59 | Late Morning | 37,7 | 97  | 87,4  | 87,4  | 18,85 | 591,66 | 151,15 |
| 2019/05/18 | CH2205 | Male | Three y/o | Treatment (Wk 1) | Treatment | Fast Day | No | 11:20 | 11:00 - 11:59 | Late Morning | 37,4 |     | 34,0  | 34,0  | 18,55 |        | 118,49 |
| 2019/05/18 | CH2206 | Male | Three y/o | Treatment (Wk 1) | Treatment | Fast Day | No | 11:20 | 11:00 - 11:59 | Late Morning | 37,5 | 113 | 223,4 | 223,4 | 18,65 | 602,58 | 184,01 |
| 2019/05/18 | CH2205 | Male | Three y/o | Treatment (Wk 1) | Treatment | Fast Day | No | 11:25 | 11:00 - 11:59 | Late Morning | 37,6 |     | 74,6  | 74,6  | 18,75 |        | 145,65 |
| 2019/05/18 | CH2206 | Male | Three y/o | Treatment (Wk 1) | Treatment | Fast Day | No | 11:25 | 11:00 - 11:59 | Late Morning | 37,6 |     | 174,2 | 174,2 | 18,75 |        | 175,26 |
| 2019/05/18 | CH2205 | Male | Three y/o | Treatment (Wk 1) | Treatment | Fast Day | No | 11:30 | 11:00 - 11:59 | Late Morning | 37,9 | 107 | 100,2 | 100,2 | 19,05 | 598,73 | 155,91 |
| 2019/05/18 | CH2206 | Male | Three y/o | Treatment (Wk 1) | Treatment | Fast Day | No | 11:30 | 11:00 - 11:59 | Late Morning | 37,6 | 126 | 153,0 | 153,0 | 18,75 | 610,14 | 170,71 |
| 2019/05/18 | CH2205 | Male | Three y/o | Treatment (Wk 1) | Treatment | Fast Day | No | 11:35 | 11:00 - 11:59 | Late Morning | 38,0 | 98  | 63,2  | 63,2  | 19,15 | 592,41 | 139,89 |
| 2019/05/18 | CH2206 | Male | Three y/o | Treatment (Wk 1) | Treatment | Fast Day | No | 11:35 | 11:00 - 11:59 | Late Morning | 37,7 | 131 | 80,8  | 80,8  | 18,85 | 612,80 | 148,42 |
| 2019/05/18 | CH2205 | Male | Three y/o | Treatment (Wk 1) | Treatment | Fast Day | No | 11:40 | 11:00 - 11:59 | Late Morning | 38,0 | 84  | 30,0  | 30,0  | 19,15 | 581,01 | 114,20 |
| 2019/05/18 | CH2206 | Male | Three y/o | Treatment (Wk 1) | Treatment | Fast Day | No | 11:40 | 11:00 - 11:59 | Late Morning | 37,7 | 119 | 124,8 | 124,8 | 18,85 | 606,20 | 163,58 |
| 2019/05/18 | CH2205 | Male | Three y/o | Treatment (Wk 1) | Treatment | Fast Day | No | 11:45 | 11:00 - 11:59 | Late Morning | 38,0 | 74  | 23,4  | 23,4  | 19,15 | 571,33 | 105,68 |
| 2019/05/18 | CH2206 | Male | Three y/o | Treatment (Wk 1) | Treatment | Fast Day | No | 11:45 | 11:00 - 11:59 | Late Morning | 37,7 |     | 38,8  | 38,8  | 18,85 |        | 123,04 |
| 2019/05/18 | CH2205 | Male | Three y/o | Treatment (Wk 1) | Treatment | Fast Day | No | 11:50 | 11:00 - 11:59 | Late Morning | 37,9 | 56  | 30,4  | 30,4  | 19,05 | 549,01 | 114,65 |
| 2019/05/18 | CH2206 | Male | Three y/o | Treatment (Wk 1) | Treatment | Fast Day | No | 11:50 | 11:00 - 11:59 | Late Morning | 37,8 | 51  | 226,6 | 226,6 | 18,95 | 541,20 | 184,52 |
| 2019/05/18 | CH2205 | Male | Three y/o | Treatment (Wk 1) | Treatment | Fast Day | No | 11:55 | 11:00 - 11:59 | Late Morning | 38,0 |     | 91,4  | 91,4  | 19,15 |        | 152,71 |
| 2019/05/18 | CH2206 | Male | Three y/o | Treatment (Wk 1) | Treatment | Fast Day | No | 11:55 | 11:00 - 11:59 | Late Morning | 37,9 | 99  | 43,8  | 43,8  | 19,05 | 593,14 | 127,22 |
| 2019/05/18 | CH2205 | Male | Three y/o | Treatment (Wk 1) | Treatment | Fast Day | No | 12:00 | 12:00 - 12:59 | Afternoon    | 38,0 | 70  | 15,8  | 15,8  | 19,15 | 566,99 | 92,28  |
| 2019/05/18 | CH2206 | Male | Three y/o | Treatment (Wk 1) | Treatment | Fast Day | No | 12:00 | 12:00 - 12:59 | Afternoon    | 37,9 | 84  | 117,6 | 117,6 | 19,05 | 581,01 | 161,50 |
| 2019/05/18 | CH2205 | Male | Three y/o | Treatment (Wk 1) | Treatment | Fast Day | No | 12:05 | 12:00 - 12:59 | Afternoon    | 37,9 |     | 18,2  | 18,2  | 19,05 |        | 97,10  |
| 2019/05/18 | CH2206 | Male | Three y/o | Treatment (Wk 1) | Treatment | Fast Day | No | 12:05 | 12:00 - 12:59 | Afternoon    | 37,9 | 109 | 12,2  | 12,2  | 19,05 | 600,04 | 83,49  |
| 2019/05/18 | CH2205 | Male | Three y/o | Treatment (Wk 1) | Treatment | Fast Day | No | 12:10 | 12:00 - 12:59 | Afternoon    | 37,7 | 59  | 28,0  | 28,0  | 18,85 | 553,30 | 111,83 |
| 2019/05/18 | CH2206 | Male | Three y/o | Treatment (Wk 1) | Treatment | Fast Day | No | 12:10 | 12:00 - 12:59 | Afternoon    | 37,9 | 59  | 9,4   | 9,4   | 19,05 | 553,30 | 74,66  |
| 2019/05/18 | CH2205 | Male | Three y/o | Treatment (Wk 1) | Treatment | Fast Day | No | 12:15 | 12:00 - 12:59 | Afternoon    | 37,9 | 131 | 68,2  | 68,2  | 19,05 | 612,80 | 142,53 |
| 2019/05/18 | CH2206 | Male | Three y/o | Treatment (Wk 1) | Treatment | Fast Day | No | 12:15 | 12:00 - 12:59 | Afternoon    | 37,8 | 65  | 42,4  | 42,4  | 18,95 | 561,12 | 126,10 |
| 2019/05/18 | CH2205 | Male | Three y/o | Treatment (Wk 1) | Treatment | Fast Day | No | 12:20 | 12:00 - 12:59 | Afternoon    | 38,0 |     | 190,8 | 190,8 | 19,15 |        | 178,46 |
| 2019/05/18 | CH2206 | Male | Three y/o | Treatment (Wk 1) | Treatment | Fast Day | No | 12:20 | 12:00 - 12:59 | Afternoon    | 37,8 | 67  | 41,0  | 41,0  | 18,95 | 563,53 | 124,94 |
| 2019/05/18 | CH2205 | Male | Three y/o | Treatment (Wk 1) | Treatment | Fast Day | No | 12:25 | 12:00 - 12:59 | Afternoon    | 37,9 |     | 29,4  | 29,4  | 19,05 |        | 113,50 |



|            |        |      |           |                  |           |          |    |       |               |           |      |     |       |       |       |        |        |
|------------|--------|------|-----------|------------------|-----------|----------|----|-------|---------------|-----------|------|-----|-------|-------|-------|--------|--------|
| 2019/05/18 | CH2206 | Male | Three y/o | Treatment (Wk 1) | Treatment | Fast Day | No | 12:25 | 12:00 - 12:59 | Afternoon | 37,8 | 52  | 38,4  | 38,4  | 18,95 | 542,83 | 122,68 |
| 2019/05/18 | CH2205 | Male | Three y/o | Treatment (Wk 1) | Treatment | Fast Day | No | 12:30 | 12:00 - 12:59 | Afternoon | 37,8 | 48  | 1,8   | 1,8   | 18,95 | 536,04 | 19,38  |
| 2019/05/18 | CH2206 | Male | Three y/o | Treatment (Wk 1) | Treatment | Fast Day | No | 12:30 | 12:00 - 12:59 | Afternoon | 37,8 | 68  | 37,2  | 37,2  | 18,95 | 564,71 | 121,59 |
| 2019/05/18 | CH2205 | Male | Three y/o | Treatment (Wk 1) | Treatment | Fast Day | No | 12:35 | 12:00 - 12:59 | Afternoon | 37,9 | 65  | 11,0  | 11,0  | 19,05 | 561,12 | 79,98  |
| 2019/05/18 | CH2206 | Male | Three y/o | Treatment (Wk 1) | Treatment | Fast Day | No | 12:35 | 12:00 - 12:59 | Afternoon | 37,8 | 46  | 30,4  | 30,4  | 18,95 | 532,38 | 114,65 |
| 2019/05/18 | CH2205 | Male | Three y/o | Treatment (Wk 1) | Treatment | Fast Day | No | 12:40 | 12:00 - 12:59 | Afternoon | 37,9 | 92  | 95,2  | 95,2  | 19,05 | 587,78 | 154,13 |
| 2019/05/18 | CH2206 | Male | Three y/o | Treatment (Wk 1) | Treatment | Fast Day | No | 12:40 | 12:00 - 12:59 | Afternoon | 37,8 | 48  | 42,6  | 42,6  | 18,95 | 536,04 | 126,26 |
| 2019/05/18 | CH2205 | Male | Three y/o | Treatment (Wk 1) | Treatment | Fast Day | No | 12:45 | 12:00 - 12:59 | Afternoon | 37,9 | 60  | 18,4  | 18,4  | 19,05 | 554,67 | 97,47  |
| 2019/05/18 | CH2206 | Male | Three y/o | Treatment (Wk 1) | Treatment | Fast Day | No | 12:45 | 12:00 - 12:59 | Afternoon | 37,7 | 40  | 36,2  | 36,2  | 18,85 | 520,09 | 120,65 |
| 2019/05/18 | CH2205 | Male | Three y/o | Treatment (Wk 1) | Treatment | Fast Day | No | 12:50 | 12:00 - 12:59 | Afternoon | 37,9 | 55  | 19,2  | 19,2  | 19,05 | 547,52 | 98,92  |
| 2019/05/18 | CH2206 | Male | Three y/o | Treatment (Wk 1) | Treatment | Fast Day | No | 12:50 | 12:00 - 12:59 | Afternoon | 37,7 | 54  | 46,2  | 46,2  | 18,85 | 545,99 | 129,06 |
| 2019/05/18 | CH2205 | Male | Three y/o | Treatment (Wk 1) | Treatment | Fast Day | No | 12:55 | 12:00 - 12:59 | Afternoon | 37,9 | 58  | 24,2  | 24,2  | 19,05 | 551,90 | 106,83 |
| 2019/05/18 | CH2206 | Male | Three y/o | Treatment (Wk 1) | Treatment | Fast Day | No | 12:55 | 12:00 - 12:59 | Afternoon | 37,7 | 50  | 53,4  | 53,4  | 18,85 | 539,52 | 134,06 |
| 2019/05/18 | CH2205 | Male | Three y/o | Treatment (Wk 1) | Treatment | Fast Day | No | 13:00 | 13:00 - 13:59 | Afternoon | 37,9 | 52  | 24,4  | 24,4  | 19,05 | 542,83 | 107,11 |
| 2019/05/18 | CH2206 | Male | Three y/o | Treatment (Wk 1) | Treatment | Fast Day | No | 13:00 | 13:00 - 13:59 | Afternoon | 37,7 | 60  | 36,8  | 36,8  | 18,85 | 554,67 | 121,22 |
| 2019/05/18 | CH2205 | Male | Three y/o | Treatment (Wk 1) | Treatment | Fast Day | No | 13:05 | 13:00 - 13:59 | Afternoon | 37,7 | 51  | 60,6  | 60,6  | 18,85 | 541,20 | 138,44 |
| 2019/05/18 | CH2206 | Male | Three y/o | Treatment (Wk 1) | Treatment | Fast Day | No | 13:05 | 13:00 - 13:59 | Afternoon | 37,7 | 44  | 36,6  | 36,6  | 18,85 | 528,51 | 121,03 |
| 2019/05/18 | CH2205 | Male | Three y/o | Treatment (Wk 1) | Treatment | Fast Day | No | 13:10 | 13:00 - 13:59 | Afternoon | 37,7 |     | 115,2 | 115,2 | 18,85 |        | 160,78 |
| 2019/05/18 | CH2206 | Male | Three y/o | Treatment (Wk 1) | Treatment | Fast Day | No | 13:10 | 13:00 - 13:59 | Afternoon | 37,5 | 68  | 34,4  | 34,4  | 18,65 | 564,71 | 118,90 |
| 2019/05/18 | CH2205 | Male | Three y/o | Treatment (Wk 1) | Treatment | Fast Day | No | 13:15 | 13:00 - 13:59 | Afternoon | 37,6 | 141 | 169,6 | 169,6 | 18,75 | 617,75 | 174,32 |
| 2019/05/18 | CH2206 | Male | Three y/o | Treatment (Wk 1) | Treatment | Fast Day | No | 13:15 | 13:00 - 13:59 | Afternoon | 37,5 |     | 108,8 | 108,8 | 18,65 |        | 158,79 |
| 2019/05/18 | CH2205 | Male | Three y/o | Treatment (Wk 1) | Treatment | Fast Day | No | 13:20 | 13:00 - 13:59 | Afternoon | 37,6 | 106 | 128,6 | 128,6 | 18,75 | 598,06 | 164,63 |
| 2019/05/18 | CH2206 | Male | Three y/o | Treatment (Wk 1) | Treatment | Fast Day | No | 13:20 | 13:00 - 13:59 | Afternoon | 37,5 | 97  | 52,8  | 52,8  | 18,65 | 591,66 | 133,67 |
| 2019/05/18 | CH2205 | Male | Three y/o | Treatment (Wk 1) | Treatment | Fast Day | No | 13:25 | 13:00 - 13:59 | Afternoon | 37,6 | 88  | 14,0  | 14,0  | 18,75 | 584,49 | 88,17  |
| 2019/05/18 | CH2206 | Male | Three y/o | Treatment (Wk 1) | Treatment | Fast Day | No | 13:25 | 13:00 - 13:59 | Afternoon | 37,4 | 68  | 26,6  | 26,6  | 18,55 | 564,71 | 110,07 |
| 2019/05/18 | CH2205 | Male | Three y/o | Treatment (Wk 1) | Treatment | Fast Day | No | 13:30 | 13:00 - 13:59 | Afternoon | 37,5 | 62  | 21,0  | 21,0  | 18,65 | 557,33 | 101,98 |
| 2019/05/18 | CH2206 | Male | Three y/o | Treatment (Wk 1) | Treatment | Fast Day | No | 13:30 | 13:00 - 13:59 | Afternoon | 37,3 | 51  | 19,4  | 19,4  | 18,46 | 541,20 | 99,28  |
| 2019/05/18 | CH2205 | Male | Three y/o | Treatment (Wk 1) | Treatment | Fast Day | No | 13:35 | 13:00 - 13:59 | Afternoon | 37,6 | 108 | 159,0 | 159,0 | 18,75 | 599,39 | 172,06 |
| 2019/05/18 | CH2206 | Male | Three y/o | Treatment (Wk 1) | Treatment | Fast Day | No | 13:35 | 13:00 - 13:59 | Afternoon | 37,2 | 54  | 17,6  | 17,6  | 18,36 | 545,99 | 95,95  |
| 2019/05/18 | CH2205 | Male | Three y/o | Treatment (Wk 1) | Treatment | Fast Day | No | 13:40 | 13:00 - 13:59 | Afternoon | 37,7 | 93  | 131,0 | 131,0 | 18,85 | 588,58 | 165,27 |
| 2019/05/18 | CH2206 | Male | Three y/o | Treatment (Wk 1) | Treatment | Fast Day | No | 13:40 | 13:00 - 13:59 | Afternoon | 37,2 | 47  | 38,8  | 38,8  | 18,36 | 534,23 | 123,04 |
| 2019/05/18 | CH2205 | Male | Three y/o | Treatment (Wk 1) | Treatment | Fast Day | No | 13:45 | 13:00 - 13:59 | Afternoon | 37,7 | 110 | 98,0  | 98,0  | 18,85 | 600,69 | 155,14 |
| 2019/05/18 | CH2206 | Male | Three y/o | Treatment (Wk 1) | Treatment | Fast Day | No | 13:45 | 13:00 - 13:59 | Afternoon | 37,3 | 96  | 54,2  | 54,2  | 18,46 | 590,91 | 134,57 |
| 2019/05/18 | CH2205 | Male | Three y/o | Treatment (Wk 1) | Treatment | Fast Day | No | 13:50 | 13:00 - 13:59 | Afternoon | 37,7 | 96  | 76,6  | 76,6  | 18,85 | 590,91 | 146,57 |
| 2019/05/18 | CH2206 | Male | Three y/o | Treatment (Wk 1) | Treatment | Fast Day | No | 13:50 | 13:00 - 13:59 | Afternoon | 37,3 | 108 | 303,6 | 303,6 | 18,46 | 599,39 | 194,84 |
| 2019/05/18 | CH2205 | Male | Three y/o | Treatment (Wk 1) | Treatment | Fast Day | No | 13:55 | 13:00 - 13:59 | Afternoon | 37,9 |     | 60,0  | 60,0  | 19,05 |        | 138,09 |
| 2019/05/18 | CH2206 | Male | Three y/o | Treatment (Wk 1) | Treatment | Fast Day | No | 13:55 | 13:00 - 13:59 | Afternoon | 37,4 |     | 125,8 | 125,8 | 18,55 |        | 163,86 |
| 2019/05/18 | CH2205 | Male | Three y/o | Treatment (Wk 1) | Treatment | Fast Day | No | 14:00 | 14:00 - 14:59 | Afternoon | 37,9 | 99  | 52,2  | 52,2  | 19,05 | 593,14 | 133,27 |
| 2019/05/18 | CH2206 | Male | Three y/o | Treatment (Wk 1) | Treatment | Fast Day | No | 14:00 | 14:00 - 14:59 | Afternoon | 37,4 |     | 80,2  | 80,2  | 18,55 |        | 148,16 |
| 2019/05/18 | CH2205 | Male | Three y/o | Treatment (Wk 1) | Treatment | Fast Day | No | 14:05 | 14:00 - 14:59 | Afternoon | 37,9 | 137 | 587,0 | 587,0 | 19,05 | 615,83 | 218,26 |
| 2019/05/18 | CH2206 | Male | Three y/o | Treatment (Wk 1) | Treatment | Fast Day | No | 14:05 | 14:00 - 14:59 | Afternoon | 37,4 | 103 | 70,2  | 70,2  | 18,55 | 596,00 | 143,54 |
| 2019/05/18 | CH2205 | Male | Three y/o | Treatment (Wk 1) | Treatment | Fast Day | No | 14:10 | 14:00 - 14:59 | Afternoon | 37,9 |     | 109,6 | 109,6 | 19,05 |        | 159,04 |
| 2019/05/18 | CH2206 | Male | Three y/o | Treatment (Wk 1) | Treatment | Fast Day | No | 14:10 | 14:00 - 14:59 | Afternoon | 37,5 | 115 | 31,8  | 31,8  | 18,65 | 603,82 | 116,20 |
| 2019/05/18 | CH2205 | Male | Three y/o | Treatment (Wk 1) | Treatment | Fast Day | No | 14:15 | 14:00 - 14:59 | Afternoon | 37,9 | 73  | 179,2 | 179,2 | 19,05 | 570,27 | 176,26 |
| 2019/05/18 | CH2206 | Male | Three y/o | Treatment (Wk 1) | Treatment | Fast Day | No | 14:15 | 14:00 - 14:59 | Afternoon | 37,6 | 95  | 134,8 | 134,8 | 18,75 | 590,14 | 166,28 |
| 2019/05/18 | CH2205 | Male | Three y/o | Treatment (Wk 1) | Treatment | Fast Day | No | 14:20 | 14:00 - 14:59 | Afternoon | 38,0 |     | 70,0  | 70,0  | 19,15 |        | 143,44 |
| 2019/05/18 | CH2206 | Male | Three y/o | Treatment (Wk 1) | Treatment | Fast Day | No | 14:20 | 14:00 - 14:59 | Afternoon | 37,6 |     | 329,8 | 329,8 | 18,75 |        | 197,77 |
| 2019/05/18 | CH2205 | Male | Three y/o | Treatment (Wk 1) | Treatment | Fast Day | No | 14:25 | 14:00 - 14:59 | Afternoon | 38,0 |     | 139,4 | 139,4 | 19,15 |        | 167,45 |
| 2019/05/18 | CH2206 | Male | Three y/o | Treatment (Wk 1) | Treatment | Fast Day | No | 14:25 | 14:00 - 14:59 | Afternoon | 37,7 | 138 | 105,6 | 105,6 | 18,85 | 616,31 | 157,74 |
| 2019/05/18 | CH2205 | Male | Three y/o | Treatment (Wk 1) | Treatment | Fast Day | No | 14:30 | 14:00 - 14:59 | Afternoon | 38,0 | 137 | 120,6 | 120,6 | 19,15 | 615,83 | 162,38 |
| 2019/05/18 | CH2206 | Male | Three y/o | Treatment (Wk 1) | Treatment | Fast Day | No | 14:30 | 14:00 - 14:59 | Afternoon | 37,8 | 91  | 107,8 | 107,8 | 18,95 | 586,98 | 158,46 |
| 2019/05/18 | CH2205 | Male | Three y/o | Treatment (Wk 1) | Treatment | Fast Day | No | 14:35 | 14:00 - 14:59 | Afternoon | 38,1 |     | 149,6 | 149,6 | 19,26 |        | 169,92 |
| 2019/05/18 | CH2206 | Male | Three y/o | Treatment (Wk 1) | Treatment | Fast Day | No | 14:35 | 14:00 - 14:59 | Afternoon | 37,8 | 56  | 148,2 | 148,2 | 18,95 | 549,01 | 169,59 |
| 2019/05/18 | CH2205 | Male | Three y/o | Treatment (Wk 1) | Treatment | Fast Day | No | 14:40 | 14:00 - 14:59 | Afternoon | 38,1 | 58  | 14,4  | 14,4  | 19,26 | 551,90 | 89,12  |
| 2019/05/18 | CH2206 | Male | Three y/o | Treatment (Wk 1) | Treatment | Fast Day | No | 14:40 | 14:00 - 14:59 | Afternoon | 37,8 | 61  | 55,2  | 55,2  | 18,95 | 556,01 | 135,21 |
| 2019/05/18 | CH2205 | Male | Three y/o | Treatment (Wk 1) | Treatment | Fast Day | No | 14:45 | 14:00 - 14:59 | Afternoon | 38,1 | 98  | 45,6  | 45,6  | 19,26 | 592,41 | 128,61 |
| 2019/05/18 | CH2206 | Male | Three y/o | Treatment (Wk 1) | Treatment | Fast Day | No | 14:45 | 14:00 - 14:59 | Afternoon | 37,8 | 46  | 8,8   | 8,8   | 18,95 | 532,38 | 72,43  |
| 2019/05/18 | CH2205 | Male | Three y/o | Treatment (Wk 1) | Treatment | Fast Day | No | 14:50 | 14:00 - 14:59 | Afternoon | 38,1 | 113 | 145,0 | 145,0 | 19,26 | 602,58 | 168,83 |
| 2019/05/18 | CH2206 | Male | Three y/o | Treatment (Wk 1) | Treatment | Fast Day | No | 14:50 | 14:00 - 14:59 | Afternoon | 37,8 | 50  | 12,6  | 12,6  | 18,95 | 539,52 | 84,59  |
| 2019/05/18 | CH2205 | Male | Three y/o | Treatment (Wk 1) | Treatment | Fast Day | No | 14:55 | 14:00 - 14:59 | Afternoon | 38,1 | 148 | 52,6  | 52,6  | 19,26 | 620,97 | 133,54 |
| 2019/05/18 | CH2206 | Male | Three y/o | Treatment (Wk 1) | Treatment | Fast Day | No | 14:55 | 14:00 - 14:59 | Afternoon | 37,8 | 57  | 4,2   | 4,2   | 18,95 | 550,47 | 47,57  |
| 2019/05/18 | CH2205 | Male | Three y/o | Treatment (Wk 1) | Treatment | Fast Day | No | 15:00 | 15:00 - 15:59 | Afternoon | 38,0 | 40  | 30,4  | 30,4  | 19,15 | 520,09 | 114,65 |
| 2019/05/18 | CH2206 | Male | Three y/o | Treatment (Wk 1) | Treatment | Fast Day | No | 15:00 | 15:00 - 15:59 | Afternoon | 37,9 | 47  | 4,6   | 4,6   | 19,05 | 534,23 | 50,61  |
| 2019/05/18 | CH2205 | Male | Three y/o | Treatment (Wk 1) | Treatment | Fast Day | No | 15:05 | 15:00 - 15:59 | Afternoon | 38,0 | 68  | 117,8 | 117,8 | 19,15 | 564,71 | 161,56 |
| 2019/05/18 | CH2206 | Male | Three y/o | Treatment (Wk 1) | Treatment | Fast Day | No | 15:05 | 15:00 - 15:59 | Afternoon | 37,8 | 43  | 117,8 | 117,8 | 18,95 | 526,50 | 161,56 |
| 2019/05/18 | CH2205 | Male | Three y/o | Treatment (Wk 1) | Treatment | Fast Day | No | 15:10 | 15:00 - 15:59 | Afternoon | 38,1 | 99  | 232,0 | 232,0 | 19,26 | 593,14 | 185,35 |
| 2019/05/18 | CH2206 | Male | Three y/o | Treatment (Wk 1) | Treatment | Fast Day | No | 15:10 | 15:00 - 15:59 | Afternoon | 37,9 | 121 | 236,6 | 236,6 | 19,05 | 607,35 | 186,04 |
| 2019/05/18 | CH2205 | Male | Three y/o | Treatment (Wk 1) | Treatment | Fast Day | No | 15:15 | 15:00 - 15:59 | Afternoon | 38,1 |     | 530,8 | 530,8 | 19,26 |        | 214,68 |
| 2019/05/18 | CH2206 | Male | Three y/o | Treatment (Wk 1) | Treatment | Fast Day | No | 15:15 | 15:00 - 15:59 | Afternoon | 37,9 | 150 | 267,6 | 267,6 | 19,05 | 621,86 | 190,38 |
| 2019/05/18 | CH2205 | Male | Three y/o | Treatment (Wk 1) | Treatment | Fast Day | No | 15:20 | 15:00 - 15:59 | Afternoon | 38,3 | 180 | 16,0  | 16,0  | 19,46 | 633,61 | 92,71  |



|            |        |      |           |                  |           |          |    |       |               |           |      |     |       |       |       |        |        |
|------------|--------|------|-----------|------------------|-----------|----------|----|-------|---------------|-----------|------|-----|-------|-------|-------|--------|--------|
| 2019/05/18 | CH2206 | Male | Three y/o | Treatment (Wk 1) | Treatment | Fast Day | No | 15:20 | 15:00 - 15:59 | Afternoon | 38,0 | 148 | 32,8  | 32,8  | 19,15 | 620,97 | 117,26 |
| 2019/05/18 | CH2205 | Male | Three y/o | Treatment (Wk 1) | Treatment | Fast Day | No | 15:25 | 15:00 - 15:59 | Afternoon | 38,3 | 64  | 12,8  | 12,8  | 19,46 | 559,88 | 85,12  |
| 2019/05/18 | CH2206 | Male | Three y/o | Treatment (Wk 1) | Treatment | Fast Day | No | 15:25 | 15:00 - 15:59 | Afternoon | 38,1 | 75  | 56,0  | 56,0  | 19,26 | 572,36 | 135,70 |
| 2019/05/18 | CH2205 | Male | Three y/o | Treatment (Wk 1) | Treatment | Fast Day | No | 15:30 | 15:00 - 15:59 | Afternoon | 38,3 | 61  | 12,2  | 12,2  | 19,46 | 556,01 | 83,49  |
| 2019/05/18 | CH2206 | Male | Three y/o | Treatment (Wk 1) | Treatment | Fast Day | No | 15:30 | 15:00 - 15:59 | Afternoon | 38,0 | 66  | 106,4 | 106,4 | 19,15 | 562,34 | 158,01 |
| 2019/05/18 | CH2205 | Male | Three y/o | Treatment (Wk 1) | Treatment | Fast Day | No | 15:35 | 15:00 - 15:59 | Afternoon | 38,4 | 51  | 21,6  | 21,6  | 19,56 | 541,20 | 102,94 |
| 2019/05/18 | CH2206 | Male | Three y/o | Treatment (Wk 1) | Treatment | Fast Day | No | 15:35 | 15:00 - 15:59 | Afternoon | 38,0 | 92  | 61,6  | 61,6  | 19,15 | 587,78 | 139,00 |
| 2019/05/18 | CH2205 | Male | Three y/o | Treatment (Wk 1) | Treatment | Fast Day | No | 15:40 | 15:00 - 15:59 | Afternoon | 38,3 |     | 14,2  | 14,2  | 19,46 |        | 88,65  |
| 2019/05/18 | CH2206 | Male | Three y/o | Treatment (Wk 1) | Treatment | Fast Day | No | 15:40 | 15:00 - 15:59 | Afternoon | 38,1 | 96  | 159,4 | 159,4 | 19,26 | 590,91 | 172,15 |
| 2019/05/18 | CH2205 | Male | Three y/o | Treatment (Wk 1) | Treatment | Fast Day | No | 15:45 | 15:00 - 15:59 | Afternoon | 38,2 | 106 | 85,0  | 85,0  | 19,36 | 598,06 | 150,18 |
| 2019/05/18 | CH2206 | Male | Three y/o | Treatment (Wk 1) | Treatment | Fast Day | No | 15:45 | 15:00 - 15:59 | Afternoon | 38,0 | 114 | 133,8 | 133,8 | 19,15 | 603,20 | 166,01 |
| 2019/05/18 | CH2205 | Male | Three y/o | Treatment (Wk 1) | Treatment | Fast Day | No | 15:50 | 15:00 - 15:59 | Afternoon | 38,1 | 85  | 108,8 | 108,8 | 19,26 | 581,90 | 158,79 |
| 2019/05/18 | CH2206 | Male | Three y/o | Treatment (Wk 1) | Treatment | Fast Day | No | 15:50 | 15:00 - 15:59 | Afternoon | 38,1 | 125 | 264,6 | 264,6 | 19,26 | 609,60 | 189,98 |
| 2019/05/18 | CH2205 | Male | Three y/o | Treatment (Wk 1) | Treatment | Fast Day | No | 15:55 | 15:00 - 15:59 | Afternoon | 38,2 | 94  | 445,8 | 445,8 | 19,36 | 589,37 | 208,46 |
| 2019/05/18 | CH2206 | Male | Three y/o | Treatment (Wk 1) | Treatment | Fast Day | No | 15:55 | 15:00 - 15:59 | Afternoon | 38,1 | 98  | 398,2 | 398,2 | 19,26 | 592,41 | 204,45 |
| 2019/05/18 | CH2205 | Male | Three y/o | Treatment (Wk 1) | Treatment | Fast Day | No | 16:00 | 16:00 - 16:59 | Evening   | 38,1 | 56  | 15,2  | 15,2  | 19,26 | 549,01 | 90,96  |
| 2019/05/18 | CH2206 | Male | Three y/o | Treatment (Wk 1) | Treatment | Fast Day | No | 16:00 | 16:00 - 16:59 | Evening   | 38,1 | 105 | 126,6 | 126,6 | 19,26 | 597,38 | 164,08 |
| 2019/05/18 | CH2205 | Male | Three y/o | Treatment (Wk 1) | Treatment | Fast Day | No | 16:05 | 16:00 - 16:59 | Evening   | 38,1 | 65  | 13,4  | 13,4  | 19,26 | 561,12 | 86,68  |
| 2019/05/18 | CH2206 | Male | Three y/o | Treatment (Wk 1) | Treatment | Fast Day | No | 16:05 | 16:00 - 16:59 | Evening   | 38,1 |     | 253,8 | 253,8 | 19,26 |        | 188,51 |
| 2019/05/18 | CH2205 | Male | Three y/o | Treatment (Wk 1) | Treatment | Fast Day | No | 16:10 | 16:00 - 16:59 | Evening   | 38,2 |     | 11,6  | 11,6  | 19,36 |        | 81,78  |
| 2019/05/18 | CH2206 | Male | Three y/o | Treatment (Wk 1) | Treatment | Fast Day | No | 16:10 | 16:00 - 16:59 | Evening   | 38,2 | 109 | 113,6 | 113,6 | 19,36 | 600,04 | 160,29 |
| 2019/05/18 | CH2205 | Male | Three y/o | Treatment (Wk 1) | Treatment | Fast Day | No | 16:15 | 16:00 - 16:59 | Evening   | 38,2 | 49  | 8,0   | 8,0   | 19,36 | 537,80 | 69,22  |
| 2019/05/18 | CH2206 | Male | Three y/o | Treatment (Wk 1) | Treatment | Fast Day | No | 16:15 | 16:00 - 16:59 | Evening   | 38,1 | 111 | 164,6 | 164,6 | 19,26 | 601,33 | 173,27 |
| 2019/05/18 | CH2205 | Male | Three y/o | Treatment (Wk 1) | Treatment | Fast Day | No | 16:20 | 16:00 - 16:59 | Evening   | 38,2 | 62  | 2,6   | 2,6   | 19,36 | 557,33 | 31,57  |
| 2019/05/18 | CH2206 | Male | Three y/o | Treatment (Wk 1) | Treatment | Fast Day | No | 16:20 | 16:00 - 16:59 | Evening   | 38,2 | 94  | 256,2 | 256,2 | 19,36 | 589,37 | 188,84 |
| 2019/05/18 | CH2205 | Male | Three y/o | Treatment (Wk 1) | Treatment | Fast Day | No | 16:25 | 16:00 - 16:59 | Evening   | 38,1 | 47  | 4,0   | 4,0   | 19,26 | 534,23 | 45,94  |
| 2019/05/18 | CH2206 | Male | Three y/o | Treatment (Wk 1) | Treatment | Fast Day | No | 16:25 | 16:00 - 16:59 | Evening   | 38,2 | 94  | 58,2  | 58,2  | 19,36 | 589,37 | 137,04 |
| 2019/05/18 | CH2205 | Male | Three y/o | Treatment (Wk 1) | Treatment | Fast Day | No | 16:30 | 16:00 - 16:59 | Evening   | 38,1 | 53  | 6,0   | 6,0   | 19,26 | 544,43 | 59,53  |
| 2019/05/18 | CH2206 | Male | Three y/o | Treatment (Wk 1) | Treatment | Fast Day | No | 16:30 | 16:00 - 16:59 | Evening   | 38,1 | 97  | 68,8  | 68,8  | 19,26 | 591,66 | 142,84 |
| 2019/05/18 | CH2205 | Male | Three y/o | Treatment (Wk 1) | Treatment | Fast Day | No | 16:35 | 16:00 - 16:59 | Evening   | 38,1 | 45  | 1,6   | 1,6   | 19,26 | 530,47 | 15,48  |
| 2019/05/18 | CH2206 | Male | Three y/o | Treatment (Wk 1) | Treatment | Fast Day | No | 16:35 | 16:00 - 16:59 | Evening   | 38,1 | 54  | 28,0  | 28,0  | 19,26 | 545,99 | 111,83 |
| 2019/05/18 | CH2205 | Male | Three y/o | Treatment (Wk 1) | Treatment | Fast Day | No | 16:40 | 16:00 - 16:59 | Evening   | 38,0 | 51  | 10,4  | 10,4  | 19,15 | 541,20 | 78,08  |
| 2019/05/18 | CH2206 | Male | Three y/o | Treatment (Wk 1) | Treatment | Fast Day | No | 16:40 | 16:00 - 16:59 | Evening   | 38,1 | 52  | 24,6  | 24,6  | 19,26 | 542,83 | 107,39 |
| 2019/05/18 | CH2205 | Male | Three y/o | Treatment (Wk 1) | Treatment | Fast Day | No | 16:45 | 16:00 - 16:59 | Evening   | 38,1 | 54  | 6,0   | 6,0   | 19,26 | 545,99 | 59,53  |
| 2019/05/18 | CH2206 | Male | Three y/o | Treatment (Wk 1) | Treatment | Fast Day | No | 16:45 | 16:00 - 16:59 | Evening   | 38,1 | 60  | 27,8  | 27,8  | 19,26 | 554,67 | 111,58 |
| 2019/05/18 | CH2205 | Male | Three y/o | Treatment (Wk 1) | Treatment | Fast Day | No | 16:50 | 16:00 - 16:59 | Evening   | 38,0 | 67  | 12,0  | 12,0  | 19,15 | 563,53 | 82,93  |
| 2019/05/18 | CH2206 | Male | Three y/o | Treatment (Wk 1) | Treatment | Fast Day | No | 16:50 | 16:00 - 16:59 | Evening   | 38,1 | 48  | 24,2  | 24,2  | 19,26 | 536,04 | 106,83 |
| 2019/05/18 | CH2205 | Male | Three y/o | Treatment (Wk 1) | Treatment | Fast Day | No | 16:55 | 16:00 - 16:59 | Evening   | 38,0 |     | 6,2   | 6,2   | 19,15 |        | 60,63  |
| 2019/05/18 | CH2206 | Male | Three y/o | Treatment (Wk 1) | Treatment | Fast Day | No | 16:55 | 16:00 - 16:59 | Evening   | 38,0 | 57  | 254,6 | 254,6 | 19,15 | 550,47 | 188,62 |
| 2019/05/18 | CH2205 | Male | Three y/o | Treatment (Wk 1) | Treatment | Fast Day | No | 17:00 | 17:00 - 17:59 | Evening   | 37,9 |     | 188,8 | 188,8 | 19,05 |        | 178,09 |
| 2019/05/18 | CH2206 | Male | Three y/o | Treatment (Wk 1) | Treatment | Fast Day | No | 17:00 | 17:00 - 17:59 | Evening   | 38,1 |     | 188,0 | 188,0 | 19,26 |        | 177,94 |
| 2019/05/18 | CH2205 | Male | Three y/o | Treatment (Wk 1) | Treatment | Fast Day | No | 17:05 | 17:00 - 17:59 | Evening   | 37,9 | 45  | 69,4  | 69,4  | 19,05 | 530,47 | 143,14 |
| 2019/05/18 | CH2206 | Male | Three y/o | Treatment (Wk 1) | Treatment | Fast Day | No | 17:05 | 17:00 - 17:59 | Evening   | 37,9 | 105 | 422,6 | 422,6 | 19,26 | 597,38 | 206,57 |
| 2019/05/18 | CH2205 | Male | Three y/o | Treatment (Wk 1) | Treatment | Fast Day | No | 17:10 | 17:00 - 17:59 | Evening   | 37,9 | 63  | 34,8  | 34,8  | 19,05 | 558,62 | 119,29 |
| 2019/05/18 | CH2206 | Male | Three y/o | Treatment (Wk 1) | Treatment | Fast Day | No | 17:10 | 17:00 - 17:59 | Evening   | 38,1 | 97  | 56,6  | 56,6  | 19,26 | 591,66 | 136,07 |
| 2019/05/18 | CH2205 | Male | Three y/o | Treatment (Wk 1) | Treatment | Fast Day | No | 17:15 | 17:00 - 17:59 | Evening   | 37,9 |     | 51,2  | 51,2  | 19,05 |        | 132,61 |
| 2019/05/18 | CH2206 | Male | Three y/o | Treatment (Wk 1) | Treatment | Fast Day | No | 17:15 | 17:00 - 17:59 | Evening   | 38,1 | 123 | 183,2 | 183,2 | 19,26 | 608,49 | 177,03 |
| 2019/05/18 | CH2205 | Male | Three y/o | Treatment (Wk 1) | Treatment | Fast Day | No | 17:20 | 17:00 - 17:59 | Evening   | 37,9 | 80  | 141,6 | 141,6 | 19,05 | 577,31 | 168,00 |
| 2019/05/18 | CH2206 | Male | Three y/o | Treatment (Wk 1) | Treatment | Fast Day | No | 17:20 | 17:00 - 17:59 | Evening   | 38,2 | 118 | 116,8 | 116,8 | 19,36 | 605,61 | 161,26 |
| 2019/05/18 | CH2205 | Male | Three y/o | Treatment (Wk 1) | Treatment | Fast Day | No | 17:25 | 17:00 - 17:59 | Evening   | 37,9 | 158 | 72,0  | 72,0  | 19,05 | 625,26 | 144,42 |
| 2019/05/18 | CH2206 | Male | Three y/o | Treatment (Wk 1) | Treatment | Fast Day | No | 17:25 | 17:00 - 17:59 | Evening   | 38,2 | 103 | 338,2 | 338,2 | 19,36 | 596,00 | 198,66 |
| 2019/05/18 | CH2205 | Male | Three y/o | Treatment (Wk 1) | Treatment | Fast Day | No | 17:30 | 17:00 - 17:59 | Evening   | 37,9 | 70  | 26,0  | 26,0  | 19,05 | 566,99 | 109,29 |
| 2019/05/18 | CH2206 | Male | Three y/o | Treatment (Wk 1) | Treatment | Fast Day | No | 17:30 | 17:00 - 17:59 | Evening   | 38,2 | 132 | 112,2 | 112,2 | 19,36 | 613,32 | 159,86 |
| 2019/05/18 | CH2205 | Male | Three y/o | Treatment (Wk 1) | Treatment | Fast Day | No | 17:35 | 17:00 - 17:59 | Evening   | 38,0 | 98  | 73,4  | 73,4  | 19,15 | 592,41 | 145,08 |
| 2019/05/18 | CH2206 | Male | Three y/o | Treatment (Wk 1) | Treatment | Fast Day | No | 17:35 | 17:00 - 17:59 | Evening   | 38,2 | 101 | 131,4 | 131,4 | 19,36 | 594,59 | 165,38 |
| 2019/05/18 | CH2205 | Male | Three y/o | Treatment (Wk 1) | Treatment | Fast Day | No | 17:40 | 17:00 - 17:59 | Evening   | 38,0 | 172 | 925,2 |       | 19,15 | 630,73 |        |
| 2019/05/18 | CH2206 | Male | Three y/o | Treatment (Wk 1) | Treatment | Fast Day | No | 17:40 | 17:00 - 17:59 | Evening   | 38,3 | 145 | 73,6  | 73,6  | 19,46 | 619,62 | 145,18 |
| 2019/05/18 | CH2205 | Male | Three y/o | Treatment (Wk 1) | Treatment | Fast Day | No | 17:45 | 17:00 - 17:59 | Evening   | 38,0 | 76  | 67,2  | 67,2  | 19,15 | 573,39 | 142,02 |
| 2019/05/18 | CH2206 | Male | Three y/o | Treatment (Wk 1) | Treatment | Fast Day | No | 17:45 | 17:00 - 17:59 | Evening   | 38,3 | 108 | 106,6 | 106,6 | 19,46 | 599,39 | 158,07 |
| 2019/05/18 | CH2205 | Male | Three y/o | Treatment (Wk 1) | Treatment | Fast Day | No | 17:50 | 17:00 - 17:59 | Evening   | 38,0 |     | 28,6  | 28,6  | 19,15 |        | 112,56 |
| 2019/05/18 | CH2206 | Male | Three y/o | Treatment (Wk 1) | Treatment | Fast Day | No | 17:50 | 17:00 - 17:59 | Evening   | 38,2 | 102 | 64,0  | 64,0  | 19,36 | 595,30 | 140,33 |
| 2019/05/18 | CH2205 | Male | Three y/o | Treatment (Wk 1) | Treatment | Fast Day | No | 17:55 | 17:00 - 17:59 | Evening   | 38,1 |     | 30,4  | 30,4  | 19,26 |        | 114,65 |
| 2019/05/18 | CH2206 | Male | Three y/o | Treatment (Wk 1) | Treatment | Fast Day | No | 17:55 | 17:00 - 17:59 | Evening   | 38,1 | 84  | 56,0  | 56,0  | 19,26 | 581,01 | 135,70 |
| 2019/05/18 | CH2205 | Male | Three y/o | Treatment (Wk 1) | Treatment | Fast Day | No | 18:00 | 18:00 - 18:59 | Evening   | 38,1 | 84  | 34,4  | 34,4  | 19,26 | 581,01 | 118,90 |
| 2019/05/18 | CH2206 | Male | Three y/o | Treatment (Wk 1) | Treatment | Fast Day | No | 18:00 | 18:00 - 18:59 | Evening   | 38,0 | 63  | 56,0  | 56,0  | 19,15 | 558,62 | 135,70 |
| 2019/05/18 | CH2205 | Male | Three y/o | Treatment (Wk 1) | Treatment | Fast Day | No | 18:05 | 18:00 - 18:59 | Evening   | 38,1 | 50  | 36,2  | 36,2  | 19,26 | 539,52 | 120,65 |
| 2019/05/18 | CH2206 | Male | Three y/o | Treatment (Wk 1) | Treatment | Fast Day | No | 18:05 | 18:00 - 18:59 | Evening   | 37,9 | 90  | 65,0  | 65,0  | 19,05 | 586,16 | 140,87 |
| 2019/05/18 | CH2205 | Male | Three y/o | Treatment (Wk 1) | Treatment | Fast Day | No | 18:10 | 18:00 - 18:59 | Evening   | 38,0 |     | 31,6  | 31,6  | 19,15 |        | 115,98 |
| 2019/05/18 | CH2206 | Male | Three y/o | Treatment (Wk 1) | Treatment | Fast Day | No | 18:10 | 18:00 - 18:59 | Evening   | 37,8 | 49  | 47,0  | 47,0  | 18,95 | 537,80 | 129,65 |
| 2019/05/18 | CH2205 | Male | Three y/o | Treatment (Wk 1) | Treatment | Fast Day | No | 18:15 | 18:00 - 18:59 | Evening   | 38,0 |     | 26,8  | 26,8  | 19,15 |        | 110,33 |



|            |        |      |           |                  |           |          |    |       |               |         |      |    |      |      |       |        |        |
|------------|--------|------|-----------|------------------|-----------|----------|----|-------|---------------|---------|------|----|------|------|-------|--------|--------|
| 2019/05/18 | CH2206 | Male | Three y/o | Treatment (Wk 1) | Treatment | Fast Day | No | 18:15 | 18:00 - 18:59 | Evening | 37,7 | 60 | 47,0 | 47,0 | 18,85 | 554,67 | 129,65 |
| 2019/05/18 | CH2205 | Male | Three y/o | Treatment (Wk 1) | Treatment | Fast Day | No | 18:20 | 18:00 - 18:59 | Evening | 38,0 | 65 | 12,2 | 12,2 | 19,15 | 561,12 | 83,49  |
| 2019/05/18 | CH2206 | Male | Three y/o | Treatment (Wk 1) | Treatment | Fast Day | No | 18:20 | 18:00 - 18:59 | Evening | 37,5 | 47 | 55,6 | 55,6 | 18,65 | 534,23 | 135,46 |
| 2019/05/18 | CH2205 | Male | Three y/o | Treatment (Wk 1) | Treatment | Fast Day | No | 18:25 | 18:00 - 18:59 | Evening | 38,0 | 47 | 16,6 | 16,6 | 19,15 | 534,23 | 93,96  |
| 2019/05/18 | CH2206 | Male | Three y/o | Treatment (Wk 1) | Treatment | Fast Day | No | 18:25 | 18:00 - 18:59 | Evening | 37,5 | 47 | 60,6 | 60,6 | 18,65 | 534,23 | 138,44 |
| 2019/05/18 | CH2205 | Male | Three y/o | Treatment (Wk 1) | Treatment | Fast Day | No | 18:30 | 18:00 - 18:59 | Evening | 37,9 | 39 | 7,0  | 7,0  | 19,05 | 517,82 | 64,72  |
| 2019/05/18 | CH2206 | Male | Three y/o | Treatment (Wk 1) | Treatment | Fast Day | No | 18:30 | 18:00 - 18:59 | Evening | 37,5 | 46 | 59,8 | 59,8 | 18,65 | 532,38 | 137,98 |
| 2019/05/18 | CH2205 | Male | Three y/o | Treatment (Wk 1) | Treatment | Fast Day | No | 18:35 | 18:00 - 18:59 | Evening | 37,9 | 39 | 13,4 | 13,4 | 19,05 | 517,82 | 86,68  |
| 2019/05/18 | CH2206 | Male | Three y/o | Treatment (Wk 1) | Treatment | Fast Day | No | 18:35 | 18:00 - 18:59 | Evening | 37,7 | 50 | 58,4 | 58,4 | 18,85 | 539,52 | 137,16 |
| 2019/05/18 | CH2205 | Male | Three y/o | Treatment (Wk 1) | Treatment | Fast Day | No | 18:40 | 18:00 - 18:59 | Evening | 37,9 | 49 | 16,0 | 16,0 | 19,05 | 537,80 | 92,71  |
| 2019/05/18 | CH2206 | Male | Three y/o | Treatment (Wk 1) | Treatment | Fast Day | No | 18:40 | 18:00 - 18:59 | Evening | 37,7 | 59 | 67,2 | 67,2 | 18,85 | 553,30 | 142,02 |
| 2019/05/18 | CH2205 | Male | Three y/o | Treatment (Wk 1) | Treatment | Fast Day | No | 18:45 | 18:00 - 18:59 | Evening | 37,7 | 48 | 23,2 | 23,2 | 18,85 | 536,04 | 105,39 |
| 2019/05/18 | CH2206 | Male | Three y/o | Treatment (Wk 1) | Treatment | Fast Day | No | 18:45 | 18:00 - 18:59 | Evening | 37,7 | 45 | 52,8 | 52,8 | 18,85 | 530,47 | 133,67 |
| 2019/05/18 | CH2205 | Male | Three y/o | Treatment (Wk 1) | Treatment | Fast Day | No | 18:50 | 18:00 - 18:59 | Evening | 37,6 | 75 | 20,4 | 20,4 | 18,75 | 572,36 | 100,99 |
| 2019/05/18 | CH2206 | Male | Three y/o | Treatment (Wk 1) | Treatment | Fast Day | No | 18:50 | 18:00 - 18:59 | Evening | 37,5 | 47 | 58,4 | 58,4 | 18,65 | 534,23 | 137,16 |
| 2019/05/18 | CH2205 | Male | Three y/o | Treatment (Wk 1) | Treatment | Fast Day | No | 18:55 | 18:00 - 18:59 | Evening | 37,6 | 44 | 20,6 | 20,6 | 18,75 | 528,51 | 101,32 |
| 2019/05/18 | CH2206 | Male | Three y/o | Treatment (Wk 1) | Treatment | Fast Day | No | 18:55 | 18:00 - 18:59 | Evening | 37,4 | 45 | 59,0 | 59,0 | 18,55 | 530,47 | 137,51 |
| 2019/05/18 | CH2205 | Male | Three y/o | Treatment (Wk 1) | Treatment | Fast Day | No | 19:00 | 19:00 - 19:59 | Evening | 37,5 | 41 | 16,8 | 16,8 | 18,65 | 522,29 | 94,37  |
| 2019/05/18 | CH2206 | Male | Three y/o | Treatment (Wk 1) | Treatment | Fast Day | No | 19:00 | 19:00 - 19:59 | Evening | 37,4 | 72 | 58,4 | 58,4 | 18,55 | 569,20 | 137,16 |
| 2019/05/18 | CH2205 | Male | Three y/o | Treatment (Wk 1) | Treatment | Fast Day | No | 19:05 | 19:00 - 19:59 | Evening | 37,5 | 50 | 13,4 | 13,4 | 18,65 | 539,52 | 86,68  |
| 2019/05/18 | CH2206 | Male | Three y/o | Treatment (Wk 1) | Treatment | Fast Day | No | 19:05 | 19:00 - 19:59 | Evening | 37,3 | 68 | 59,8 | 59,8 | 18,46 | 564,71 | 137,98 |
| 2019/05/18 | CH2205 | Male | Three y/o | Treatment (Wk 1) | Treatment | Fast Day | No | 19:10 | 19:00 - 19:59 | Evening | 37,5 | 73 | 19,0 | 19,0 | 18,65 | 570,27 | 98,56  |
| 2019/05/18 | CH2206 | Male | Three y/o | Treatment (Wk 1) | Treatment | Fast Day | No | 19:10 | 19:00 - 19:59 | Evening | 37,3 | 44 | 57,6 | 57,6 | 18,46 | 528,51 | 136,68 |
| 2019/05/18 | CH2205 | Male | Three y/o | Treatment (Wk 1) | Treatment | Fast Day | No | 19:15 | 19:00 - 19:59 | Evening | 37,5 | 51 | 24,8 | 24,8 | 18,65 | 541,20 | 107,67 |
| 2019/05/18 | CH2206 | Male | Three y/o | Treatment (Wk 1) | Treatment | Fast Day | No | 19:15 | 19:00 - 19:59 | Evening | 37,2 | 48 | 63,4 | 63,4 | 18,36 | 536,04 | 140,00 |
| 2019/05/18 | CH2205 | Male | Three y/o | Treatment (Wk 1) | Treatment | Fast Day | No | 19:20 | 19:00 - 19:59 | Evening | 37,5 |    | 24,6 | 24,6 | 18,65 |        | 107,39 |
| 2019/05/18 | CH2206 | Male | Three y/o | Treatment (Wk 1) | Treatment | Fast Day | No | 19:20 | 19:00 - 19:59 | Evening | 37,2 | 94 | 57,8 | 57,8 | 18,36 | 589,37 | 136,80 |
| 2019/05/18 | CH2205 | Male | Three y/o | Treatment (Wk 1) | Treatment | Fast Day | No | 19:25 | 19:00 - 19:59 | Evening | 37,7 |    | 22,0 | 22,0 | 18,85 |        | 103,57 |
| 2019/05/18 | CH2206 | Male | Three y/o | Treatment (Wk 1) | Treatment | Fast Day | No | 19:25 | 19:00 - 19:59 | Evening | 37,2 | 47 | 56,2 | 56,2 | 18,36 | 534,23 | 135,83 |
| 2019/05/18 | CH2205 | Male | Three y/o | Treatment (Wk 1) | Treatment | Fast Day | No | 19:30 | 19:00 - 19:59 | Evening | 37,6 |    | 24,4 | 24,4 | 18,75 |        | 107,11 |
| 2019/05/18 | CH2206 | Male | Three y/o | Treatment (Wk 1) | Treatment | Fast Day | No | 19:30 | 19:00 - 19:59 | Evening | 37,1 | 49 | 56,6 | 56,6 | 18,26 | 537,80 | 136,07 |
| 2019/05/18 | CH2205 | Male | Three y/o | Treatment (Wk 1) | Treatment | Fast Day | No | 19:35 | 19:00 - 19:59 | Evening | 37,6 |    | 22,0 | 22,0 | 18,75 |        | 103,57 |
| 2019/05/18 | CH2206 | Male | Three y/o | Treatment (Wk 1) | Treatment | Fast Day | No | 19:35 | 19:00 - 19:59 | Evening | 37,1 | 51 | 63,0 | 63,0 | 18,26 | 541,20 | 139,78 |
| 2019/05/18 | CH2205 | Male | Three y/o | Treatment (Wk 1) | Treatment | Fast Day | No | 19:40 | 19:00 - 19:59 | Evening | 37,6 |    | 23,2 | 23,2 | 18,75 |        | 105,39 |
| 2019/05/18 | CH2206 | Male | Three y/o | Treatment (Wk 1) | Treatment | Fast Day | No | 19:40 | 19:00 - 19:59 | Evening | 37,0 | 46 | 51,8 | 51,8 | 18,16 | 532,38 | 133,01 |
| 2019/05/18 | CH2205 | Male | Three y/o | Treatment (Wk 1) | Treatment | Fast Day | No | 19:45 | 19:00 - 19:59 | Evening | 37,6 |    | 27,8 | 27,8 | 18,75 |        | 111,58 |
| 2019/05/18 | CH2206 | Male | Three y/o | Treatment (Wk 1) | Treatment | Fast Day | No | 19:45 | 19:00 - 19:59 | Evening | 37,0 | 48 | 18,2 | 18,2 | 18,16 | 536,04 | 97,10  |
| 2019/05/18 | CH2205 | Male | Three y/o | Treatment (Wk 1) | Treatment | Fast Day | No | 19:50 | 19:00 - 19:59 | Evening | 37,5 |    | 25,2 | 25,2 | 18,65 |        | 108,22 |
| 2019/05/18 | CH2206 | Male | Three y/o | Treatment (Wk 1) | Treatment | Fast Day | No | 19:50 | 19:00 - 19:59 | Evening | 37,0 | 40 | 11,2 | 11,2 | 18,16 | 520,09 | 80,59  |
| 2019/05/18 | CH2205 | Male | Three y/o | Treatment (Wk 1) | Treatment | Fast Day | No | 19:55 | 19:00 - 19:59 | Evening | 37,5 |    | 27,0 | 27,0 | 18,65 |        | 110,58 |
| 2019/05/18 | CH2206 | Male | Three y/o | Treatment (Wk 1) | Treatment | Fast Day | No | 19:55 | 19:00 - 19:59 | Evening | 37,1 | 43 | 13,6 | 13,6 | 18,26 | 526,50 | 87,18  |
| 2019/05/18 | CH2205 | Male | Three y/o | Treatment (Wk 1) | Treatment | Fast Day | No | 20:00 | 20:00 - 20:59 | Night   | 37,5 |    | 20,4 | 20,4 | 18,65 |        | 100,99 |
| 2019/05/18 | CH2206 | Male | Three y/o | Treatment (Wk 1) | Treatment | Fast Day | No | 20:00 | 20:00 - 20:59 | Night   | 37,3 | 48 | 17,4 | 17,4 | 18,46 | 536,04 | 95,56  |
| 2019/05/18 | CH2205 | Male | Three y/o | Treatment (Wk 1) | Treatment | Fast Day | No | 20:05 | 20:00 - 20:59 | Night   | 37,5 |    | 23,8 | 23,8 | 18,65 |        | 106,26 |
| 2019/05/18 | CH2206 | Male | Three y/o | Treatment (Wk 1) | Treatment | Fast Day | No | 20:05 | 20:00 - 20:59 | Night   | 37,3 | 63 | 21,4 | 21,4 | 18,46 | 558,62 | 102,63 |
| 2019/05/18 | CH2205 | Male | Three y/o | Treatment (Wk 1) | Treatment | Fast Day | No | 20:10 | 20:00 - 20:59 | Night   | 37,4 | 90 | 28,4 | 28,4 | 18,55 | 586,16 | 112,31 |
| 2019/05/18 | CH2206 | Male | Three y/o | Treatment (Wk 1) | Treatment | Fast Day | No | 20:10 | 20:00 - 20:59 | Night   | 37,3 | 42 | 16,6 | 16,6 | 18,46 | 524,42 | 93,96  |
| 2019/05/18 | CH2205 | Male | Three y/o | Treatment (Wk 1) | Treatment | Fast Day | No | 20:15 | 20:00 - 20:59 | Night   | 37,5 |    | 60,6 | 60,6 | 18,65 |        | 138,44 |
| 2019/05/18 | CH2206 | Male | Three y/o | Treatment (Wk 1) | Treatment | Fast Day | No | 20:15 | 20:00 - 20:59 | Night   | 37,3 | 55 | 13,2 | 13,2 | 18,46 | 547,52 | 86,17  |
| 2019/05/18 | CH2205 | Male | Three y/o | Treatment (Wk 1) | Treatment | Fast Day | No | 20:20 | 20:00 - 20:59 | Night   | 37,5 |    | 15,2 | 15,2 | 18,65 |        | 90,96  |
| 2019/05/18 | CH2206 | Male | Three y/o | Treatment (Wk 1) | Treatment | Fast Day | No | 20:20 | 20:00 - 20:59 | Night   | 37,4 | 60 | 25,8 | 25,8 | 18,55 | 554,67 | 109,02 |
| 2019/05/18 | CH2205 | Male | Three y/o | Treatment (Wk 1) | Treatment | Fast Day | No | 20:25 | 20:00 - 20:59 | Night   | 37,4 | 83 | 23,0 | 23,0 | 18,55 | 580,11 | 105,09 |
| 2019/05/18 | CH2206 | Male | Three y/o | Treatment (Wk 1) | Treatment | Fast Day | No | 20:25 | 20:00 - 20:59 | Night   | 37,4 | 67 | 53,8 | 53,8 | 18,55 | 563,53 | 134,32 |
| 2019/05/18 | CH2205 | Male | Three y/o | Treatment (Wk 1) | Treatment | Fast Day | No | 20:30 | 20:00 - 20:59 | Night   | 37,2 | 78 | 20,0 | 20,0 | 18,36 | 575,38 | 100,31 |
| 2019/05/18 | CH2206 | Male | Three y/o | Treatment (Wk 1) | Treatment | Fast Day | No | 20:30 | 20:00 - 20:59 | Night   | 37,4 | 48 | 58,6 | 58,6 | 18,55 | 536,04 | 137,28 |
| 2019/05/18 | CH2205 | Male | Three y/o | Treatment (Wk 1) | Treatment | Fast Day | No | 20:35 | 20:00 - 20:59 | Night   | 37,2 | 53 | 23,4 | 23,4 | 18,36 | 544,43 | 105,68 |
| 2019/05/18 | CH2206 | Male | Three y/o | Treatment (Wk 1) | Treatment | Fast Day | No | 20:35 | 20:00 - 20:59 | Night   | 37,4 | 50 | 60,2 | 60,2 | 18,55 | 539,52 | 138,21 |
| 2019/05/18 | CH2205 | Male | Three y/o | Treatment (Wk 1) | Treatment | Fast Day | No | 20:40 | 20:00 - 20:59 | Night   | 37,2 | 43 | 22,4 | 22,4 | 18,36 | 526,50 | 104,19 |
| 2019/05/18 | CH2206 | Male | Three y/o | Treatment (Wk 1) | Treatment | Fast Day | No | 20:40 | 20:00 - 20:59 | Night   | 37,4 | 43 | 55,8 | 55,8 | 18,55 | 526,50 | 135,58 |
| 2019/05/18 | CH2205 | Male | Three y/o | Treatment (Wk 1) | Treatment | Fast Day | No | 20:45 | 20:00 - 20:59 | Night   | 37,2 | 35 | 21,4 | 21,4 | 18,36 | 507,97 | 102,63 |
| 2019/05/18 | CH2206 | Male | Three y/o | Treatment (Wk 1) | Treatment | Fast Day | No | 20:45 | 20:00 - 20:59 | Night   | 37,4 | 40 | 52,4 | 52,4 | 18,55 | 520,09 | 133,41 |
| 2019/05/18 | CH2205 | Male | Three y/o | Treatment (Wk 1) | Treatment | Fast Day | No | 20:50 | 20:00 - 20:59 | Night   | 37,2 | 43 | 21,4 | 21,4 | 18,36 | 526,50 | 102,63 |
| 2019/05/18 | CH2206 | Male | Three y/o | Treatment (Wk 1) | Treatment | Fast Day | No | 20:50 | 20:00 - 20:59 | Night   | 37,4 | 67 | 28,4 | 28,4 | 18,55 | 563,53 | 112,31 |
| 2019/05/18 | CH2205 | Male | Three y/o | Treatment (Wk 1) | Treatment | Fast Day | No | 20:55 | 20:00 - 20:59 | Night   | 37,4 | 49 | 18,6 | 18,6 | 18,55 | 537,80 | 97,84  |
| 2019/05/18 | CH2206 | Male | Three y/o | Treatment (Wk 1) | Treatment | Fast Day | No | 20:55 | 20:00 - 20:59 | Night   | 37,3 | 47 | 44,8 | 44,8 | 18,46 | 534,23 | 127,99 |
| 2019/05/18 | CH2205 | Male | Three y/o | Treatment (Wk 1) | Treatment | Fast Day | No | 21:00 | 21:00 - 21:59 | Night   | 37,4 | 49 | 20,2 | 20,2 | 18,55 | 537,80 | 100,65 |
| 2019/05/18 | CH2206 | Male | Three y/o | Treatment (Wk 1) | Treatment | Fast Day | No | 21:00 | 21:00 - 21:59 | Night   | 37,3 | 44 | 43,0 | 43,0 | 18,46 | 528,51 | 126,58 |
| 2019/05/18 | CH2205 | Male | Three y/o | Treatment (Wk 1) | Treatment | Fast Day | No | 21:05 | 21:00 - 21:59 | Night   | 37,4 |    | 27,6 | 27,6 | 18,55 |        | 111,33 |
| 2019/05/18 | CH2206 | Male | Three y/o | Treatment (Wk 1) | Treatment | Fast Day | No | 21:05 | 21:00 - 21:59 | Night   | 37,3 | 44 | 32,4 | 32,4 | 18,46 | 528,51 | 116,84 |
| 2019/05/18 | CH2205 | Male | Three y/o | Treatment (Wk 1) | Treatment | Fast Day | No | 21:10 | 21:00 - 21:59 | Night   | 37,4 |    | 19,8 | 19,8 | 18,55 |        | 99,97  |



|   |            |        |      |           |                  |           |          |    |       |               |               |      |     |      |      |       |        |        |
|---|------------|--------|------|-----------|------------------|-----------|----------|----|-------|---------------|---------------|------|-----|------|------|-------|--------|--------|
|   | 2019/05/18 | CH2206 | Male | Three y/o | Treatment (Wk 1) | Treatment | Fast Day | No | 21:10 | 21:00 - 21:59 | Night         | 37,3 |     | 34,2 | 34,2 | 18,46 |        | 118,70 |
|   | 2019/05/18 | CH2205 | Male | Three y/o | Treatment (Wk 1) | Treatment | Fast Day | No | 21:15 | 21:00 - 21:59 | Night         | 37,4 | 42  | 16,0 | 16,0 | 18,55 | 524,42 | 92,71  |
|   | 2019/05/18 | CH2206 | Male | Three y/o | Treatment (Wk 1) | Treatment | Fast Day | No | 21:15 | 21:00 - 21:59 | Night         | 37,3 | 51  | 23,4 | 23,4 | 18,46 | 541,20 | 105,68 |
|   | 2019/05/18 | CH2205 | Male | Three y/o | Treatment (Wk 1) | Treatment | Fast Day | No | 21:20 | 21:00 - 21:59 | Night         | 37,4 | 79  | 15,4 | 15,4 | 18,55 | 576,36 | 91,41  |
|   | 2019/05/18 | CH2206 | Male | Three y/o | Treatment (Wk 1) | Treatment | Fast Day | No | 21:20 | 21:00 - 21:59 | Night         | 37,3 | 46  | 8,4  | 8,4  | 18,46 | 532,38 | 70,86  |
|   | 2019/05/18 | CH2205 | Male | Three y/o | Treatment (Wk 1) | Treatment | Fast Day | No | 21:25 | 21:00 - 21:59 | Night         | 37,4 | 44  | 19,8 | 19,8 | 18,55 | 528,51 | 99,97  |
|   | 2019/05/18 | CH2206 | Male | Three y/o | Treatment (Wk 1) | Treatment | Fast Day | No | 21:25 | 21:00 - 21:59 | Night         | 37,3 | 47  | 7,0  | 7,0  | 18,46 | 534,23 | 64,72  |
|   | 2019/05/18 | CH2205 | Male | Three y/o | Treatment (Wk 1) | Treatment | Fast Day | No | 21:30 | 21:00 - 21:59 | Night         | 37,4 | 55  | 22,0 | 22,0 | 18,55 | 547,52 | 103,57 |
|   | 2019/05/18 | CH2206 | Male | Three y/o | Treatment (Wk 1) | Treatment | Fast Day | No | 21:30 | 21:00 - 21:59 | Night         | 37,3 | 45  | 20,8 | 20,8 | 18,46 | 530,47 | 101,65 |
|   | 2019/05/18 | CH2205 | Male | Three y/o | Treatment (Wk 1) | Treatment | Fast Day | No | 21:35 | 21:00 - 21:59 | Night         | 37,4 | 46  | 20,0 | 20,0 | 18,55 | 532,38 | 100,31 |
|   | 2019/05/18 | CH2206 | Male | Three y/o | Treatment (Wk 1) | Treatment | Fast Day | No | 21:35 | 21:00 - 21:59 | Night         | 37,3 | 53  | 21,0 | 21,0 | 18,46 | 544,43 | 101,98 |
|   | 2019/05/18 | CH2205 | Male | Three y/o | Treatment (Wk 1) | Treatment | Fast Day | No | 21:40 | 21:00 - 21:59 | Night         | 37,4 | 38  | 18,6 | 18,6 | 18,55 | 515,48 | 97,84  |
|   | 2019/05/18 | CH2206 | Male | Three y/o | Treatment (Wk 1) | Treatment | Fast Day | No | 21:40 | 21:00 - 21:59 | Night         | 37,2 | 51  | 19,2 | 19,2 | 18,36 | 541,20 | 98,92  |
|   | 2019/05/18 | CH2205 | Male | Three y/o | Treatment (Wk 1) | Treatment | Fast Day | No | 21:45 | 21:00 - 21:59 | Night         | 37,4 | 60  | 18,8 | 18,8 | 18,55 | 554,67 | 98,20  |
|   | 2019/05/18 | CH2206 | Male | Three y/o | Treatment (Wk 1) | Treatment | Fast Day | No | 21:45 | 21:00 - 21:59 | Night         | 37,2 | 43  | 18,8 | 18,8 | 18,36 | 526,50 | 98,20  |
|   | 2019/05/18 | CH2205 | Male | Three y/o | Treatment (Wk 1) | Treatment | Fast Day | No | 21:50 | 21:00 - 21:59 | Night         | 37,4 | 83  | 23,4 | 23,4 | 18,55 | 580,11 | 105,68 |
|   | 2019/05/18 | CH2206 | Male | Three y/o | Treatment (Wk 1) | Treatment | Fast Day | No | 21:50 | 21:00 - 21:59 | Night         | 37,2 | 45  | 12,2 | 12,2 | 18,36 | 530,47 | 83,49  |
|   | 2019/05/18 | CH2205 | Male | Three y/o | Treatment (Wk 1) | Treatment | Fast Day | No | 21:55 | 21:00 - 21:59 | Night         | 37,4 | 44  | 29,0 | 29,0 | 18,55 | 528,51 | 113,03 |
|   | 2019/05/18 | CH2206 | Male | Three y/o | Treatment (Wk 1) | Treatment | Fast Day | No | 21:55 | 21:00 - 21:59 | Night         | 37,2 | 45  | 11,2 | 11,2 | 18,36 | 530,47 | 80,59  |
|   | 2019/05/18 | CH2205 | Male | Three y/o | Treatment (Wk 1) | Treatment | Fast Day | No | 22:00 | 22:00 - 22:59 | Night         | 37,4 | 56  | 24,8 | 24,8 | 18,55 | 549,01 | 107,67 |
|   | 2019/05/18 | CH2206 | Male | Three y/o | Treatment (Wk 1) | Treatment | Fast Day | No | 22:00 | 22:00 - 22:59 | Night         | 37,2 | 45  | 7,4  | 7,4  | 18,36 | 530,47 | 66,59  |
|   | 2019/05/18 | CH2205 | Male | Three y/o | Treatment (Wk 1) | Treatment | Fast Day | No | 22:05 | 22:00 - 22:59 | Night         | 37,4 | 44  | 26,0 | 26,0 | 18,55 | 528,51 | 109,29 |
|   | 2019/05/18 | CH2206 | Male | Three y/o | Treatment (Wk 1) | Treatment | Fast Day | No | 22:05 | 22:00 - 22:59 | Night         | 37,2 | 73  | 14,2 | 14,2 | 18,36 | 570,27 | 88,65  |
|   | 2019/05/18 | CH2205 | Male | Three y/o | Treatment (Wk 1) | Treatment | Fast Day | No | 22:10 | 22:00 - 22:59 | Night         | 37,4 | 57  | 24,6 | 24,6 | 18,55 | 550,47 | 107,39 |
|   | 2019/05/18 | CH2206 | Male | Three y/o | Treatment (Wk 1) | Treatment | Fast Day | No | 22:10 | 22:00 - 22:59 | Night         | 37,2 | 47  | 14,0 | 14,0 | 18,36 | 534,23 | 88,17  |
|   | 2019/05/18 | CH2205 | Male | Three y/o | Treatment (Wk 1) | Treatment | Fast Day | No | 22:15 | 22:00 - 22:59 | Night         | 37,4 | 55  | 26,8 | 26,8 | 18,55 | 547,52 | 110,33 |
|   | 2019/05/18 | CH2206 | Male | Three y/o | Treatment (Wk 1) | Treatment | Fast Day | No | 22:15 | 22:00 - 22:59 | Night         | 37,2 | 40  | 9,0  | 9,0  | 18,36 | 520,09 | 73,19  |
|   | 2019/05/18 | CH2205 | Male | Three y/o | Treatment (Wk 1) | Treatment | Fast Day | No | 22:20 | 22:00 - 22:59 | Night         | 37,4 | 43  | 27,6 | 27,6 | 18,55 | 526,50 | 111,33 |
|   | 2019/05/18 | CH2206 | Male | Three y/o | Treatment (Wk 1) | Treatment | Fast Day | No | 22:20 | 22:00 - 22:59 | Night         | 37,3 | 36  | 5,6  | 5,6  | 18,46 | 510,56 | 57,21  |
|   | 2019/05/18 | CH2205 | Male | Three y/o | Treatment (Wk 1) | Treatment | Fast Day | No | 22:25 | 22:00 - 22:59 | Night         | 37,4 | 45  | 24,6 | 24,6 | 18,55 | 530,47 | 107,39 |
|   | 2019/05/18 | CH2206 | Male | Three y/o | Treatment (Wk 1) | Treatment | Fast Day | No | 22:25 | 22:00 - 22:59 | Night         | 37,3 | 49  | 7,6  | 7,6  | 18,46 | 537,80 | 67,49  |
|   | 2019/05/18 | CH2205 | Male | Three y/o | Treatment (Wk 1) | Treatment | Fast Day | No | 22:30 | 22:00 - 22:59 | Night         | 37,4 | 50  | 22,8 | 22,8 | 18,55 | 539,52 | 104,79 |
|   | 2019/05/18 | CH2206 | Male | Three y/o | Treatment (Wk 1) | Treatment | Fast Day | No | 22:30 | 22:00 - 22:59 | Night         | 37,3 | 75  | 34,0 | 34,0 | 18,46 | 572,36 | 118,49 |
|   | 2019/05/18 | CH2205 | Male | Three y/o | Treatment (Wk 1) | Treatment | Fast Day | No | 22:35 | 22:00 - 22:59 | Night         | 37,4 |     | 18,2 | 18,2 | 18,55 |        | 97,10  |
|   | 2019/05/18 | CH2206 | Male | Three y/o | Treatment (Wk 1) | Treatment | Fast Day | No | 22:35 | 22:00 - 22:59 | Night         | 37,2 | 54  | 32,6 | 32,6 | 18,36 | 545,99 | 117,05 |
|   | 2019/05/18 | CH2205 | Male | Three y/o | Treatment (Wk 1) | Treatment | Fast Day | No | 22:40 | 22:00 - 22:59 | Night         | 37,3 | 46  | 18,0 | 18,0 | 18,46 | 532,38 | 96,72  |
|   | 2019/05/18 | CH2206 | Male | Three y/o | Treatment (Wk 1) | Treatment | Fast Day | No | 22:40 | 22:00 - 22:59 | Night         | 37,2 | 44  | 34,6 | 34,6 | 18,36 | 528,51 | 119,10 |
|   | 2019/05/18 | CH2205 | Male | Three y/o | Treatment (Wk 1) | Treatment | Fast Day | No | 22:45 | 22:00 - 22:59 | Night         | 37,4 | 42  | 14,2 | 14,2 | 18,55 | 524,42 | 88,65  |
|   | 2019/05/18 | CH2206 | Male | Three y/o | Treatment (Wk 1) | Treatment | Fast Day | No | 22:45 | 22:00 - 22:59 | Night         | 37,2 | 44  | 32,6 | 32,6 | 18,36 | 528,51 | 117,05 |
|   | 2019/05/18 | CH2205 | Male | Three y/o | Treatment (Wk 1) | Treatment | Fast Day | No | 22:50 | 22:00 - 22:59 | Night         | 37,4 | 43  | 13,6 | 13,6 | 18,55 | 526,50 | 87,18  |
|   | 2019/05/18 | CH2206 | Male | Three y/o | Treatment (Wk 1) | Treatment | Fast Day | No | 22:50 | 22:00 - 22:59 | Night         | 37,2 | 40  | 31,4 | 31,4 | 18,36 | 520,09 | 115,76 |
|   | 2019/05/18 | CH2205 | Male | Three y/o | Treatment (Wk 1) | Treatment | Fast Day | No | 22:55 | 22:00 - 22:59 | Night         | 37,4 | 48  | 18,4 | 18,4 | 18,55 | 536,04 | 97,47  |
|   | 2019/05/18 | CH2206 | Male | Three y/o | Treatment (Wk 1) | Treatment | Fast Day | No | 22:55 | 22:00 - 22:59 | Night         | 37,1 | 38  | 27,8 | 27,8 | 18,26 | 515,48 | 111,58 |
|   | 2019/05/18 | CH2205 | Male | Three y/o | Treatment (Wk 1) | Treatment | Fast Day | No | 23:00 | 23:00 - 23:59 | Night         | 37,4 |     | 12,0 | 12,0 | 18,55 |        | 82,93  |
|   | 2019/05/18 | CH2206 | Male | Three y/o | Treatment (Wk 1) | Treatment | Fast Day | No | 23:00 | 23:00 - 23:59 | Night         | 37,1 | 76  | 32,4 | 32,4 | 18,26 | 573,39 | 116,84 |
|   | 2019/05/18 | CH2205 | Male | Three y/o | Treatment (Wk 1) | Treatment | Fast Day | No | 23:05 | 23:00 - 23:59 | Night         | 37,4 | 57  | 13,2 | 13,2 | 18,55 | 550,47 | 86,17  |
|   | 2019/05/18 | CH2206 | Male | Three y/o | Treatment (Wk 1) | Treatment | Fast Day | No | 23:05 | 23:00 - 23:59 | Night         | 37,1 | 47  | 34,6 | 34,6 | 18,26 | 534,23 | 119,10 |
|   | 2019/05/18 | CH2205 | Male | Three y/o | Treatment (Wk 1) | Treatment | Fast Day | No | 23:10 | 23:00 - 23:59 | Night         | 37,4 | 34  | 14,2 | 14,2 | 18,55 | 505,29 | 88,65  |
|   | 2019/05/18 | CH2206 | Male | Three y/o | Treatment (Wk 1) | Treatment | Fast Day | No | 23:10 | 23:00 - 23:59 | Night         | 37,1 | 67  | 37,8 | 37,8 | 18,26 | 563,53 | 122,14 |
|   | 2019/05/18 | CH2205 | Male | Three y/o | Treatment (Wk 1) | Treatment | Fast Day | No | 23:15 | 23:00 - 23:59 | Night         | 37,4 | 88  | 10,6 | 10,6 | 18,55 | 584,49 | 78,73  |
|   | 2019/05/18 | CH2206 | Male | Three y/o | Treatment (Wk 1) | Treatment | Fast Day | No | 23:15 | 23:00 - 23:59 | Night         | 37,1 | 57  | 37,2 | 37,2 | 18,26 | 550,47 | 121,59 |
|   | 2019/05/18 | CH2205 | Male | Three y/o | Treatment (Wk 1) | Treatment | Fast Day | No | 23:20 | 23:00 - 23:59 | Night         | 37,4 | 88  | 7,6  | 7,6  | 18,55 | 584,49 | 67,49  |
|   | 2019/05/18 | CH2206 | Male | Three y/o | Treatment (Wk 1) | Treatment | Fast Day | No | 23:20 | 23:00 - 23:59 | Night         | 37,1 | 42  | 33,2 | 33,2 | 18,26 | 524,42 | 117,68 |
|   | 2019/05/18 | CH2205 | Male | Three y/o | Treatment (Wk 1) | Treatment | Fast Day | No | 23:25 | 23:00 - 23:59 | Night         | 37,4 | 53  | 15,8 | 15,8 | 18,55 | 544,43 | 92,28  |
|   | 2019/05/18 | CH2206 | Male | Three y/o | Treatment (Wk 1) | Treatment | Fast Day | No | 23:25 | 23:00 - 23:59 | Night         | 37,1 | 50  | 39,8 | 39,8 | 18,26 | 539,52 | 123,91 |
|   | 2019/05/18 | CH2205 | Male | Three y/o | Treatment (Wk 1) | Treatment | Fast Day | No | 23:30 | 23:00 - 23:59 | Night         | 37,3 | 45  | 15,0 | 15,0 | 18,46 | 530,47 | 90,51  |
|   | 2019/05/18 | CH2206 | Male | Three y/o | Treatment (Wk 1) | Treatment | Fast Day | No | 23:30 | 23:00 - 23:59 | Night         | 37,1 | 43  | 40,0 | 40,0 | 18,26 | 526,50 | 124,09 |
|   | 2019/05/18 | CH2205 | Male | Three y/o | Treatment (Wk 1) | Treatment | Fast Day | No | 23:35 | 23:00 - 23:59 | Night         | 37,3 | 43  | 20,8 | 20,8 | 18,46 | 526,50 | 101,65 |
|   | 2019/05/18 | CH2206 | Male | Three y/o | Treatment (Wk 1) | Treatment | Fast Day | No | 23:35 | 23:00 - 23:59 | Night         | 37,0 | 51  | 34,8 | 34,8 | 18,16 | 541,20 | 119,29 |
|   | 2019/05/18 | CH2205 | Male | Three y/o | Treatment (Wk 1) | Treatment | Fast Day | No | 23:40 | 23:00 - 23:59 | Night         | 37,3 | 46  | 13,2 | 13,2 | 18,46 | 532,38 | 86,17  |
|   | 2019/05/18 | CH2206 | Male | Three y/o | Treatment (Wk 1) | Treatment | Fast Day | No | 23:40 | 23:00 - 23:59 | Night         | 37,0 | 53  | 24,2 | 24,2 | 18,16 | 544,43 | 106,83 |
|   | 2019/05/18 | CH2205 | Male | Three y/o | Treatment (Wk 1) | Treatment | Fast Day | No | 23:45 | 23:00 - 23:59 | Night         | 37,3 | 41  | 20,6 | 20,6 | 18,46 | 522,29 | 101,32 |
|   | 2019/05/18 | CH2206 | Male | Three y/o | Treatment (Wk 1) | Treatment | Fast Day | No | 23:45 | 23:00 - 23:59 | Night         | 37,0 | 45  | 30,4 | 30,4 | 18,16 | 530,47 | 114,65 |
|   | 2019/05/18 | CH2205 | Male | Three y/o | Treatment (Wk 1) | Treatment | Fast Day | No | 23:50 | 23:00 - 23:59 | Night         | 37,4 | 128 | 70,2 | 70,2 | 18,55 | 611,22 | 143,54 |
|   | 2019/05/18 | CH2206 | Male | Three y/o | Treatment (Wk 1) | Treatment | Fast Day | No | 23:50 | 23:00 - 23:59 | Night         | 37,1 | 129 | 43,4 | 43,4 | 18,26 | 611,75 | 126,90 |
|   | 2019/05/18 | CH2205 | Male | Three y/o | Treatment (Wk 1) | Treatment | Fast Day | No | 23:55 | 23:00 - 23:59 | Night         | 37,4 |     | 21,0 | 21,0 | 18,55 |        | 101,98 |
|   | 2019/05/18 | CH2206 | Male | Three y/o | Treatment (Wk 1) | Treatment | Fast Day | No | 23:55 | 23:00 - 23:59 | Night         | 37,1 | 172 | 43,2 | 43,2 | 18,26 | 630,73 | 126,74 |
| 5 | 2019/05/19 | CH2205 | Male | Three y/o | Treatment (Wk 1) | Treatment | Fast Day | No | 00:00 | 00:00 - 00:59 | Early Morning | 37,3 | 81  | 13,8 | 13,8 | 18,46 | 578,26 | 87,68  |
|   | 2019/05/19 | CH2206 | Male | Three y/o | Treatment (Wk 1) | Treatment | Fast Day | No | 00:00 | 00:00 - 00:59 | Early Morning | 37,1 | 43  | 60,0 | 60,0 | 18,26 | 526,50 | 138,09 |
|   | 2019/05/19 | CH2205 | Male | Three y/o | Treatment (Wk 1) | Treatment | Fast Day | No | 00:05 | 00:00 - 00:59 | Early Morning | 37,3 | 54  | 16,0 | 16,0 | 18,46 | 545,99 | 92,71  |



|            |        |      |           |                  |           |          |    |       |               |               |      |     |       |       |       |        |        |
|------------|--------|------|-----------|------------------|-----------|----------|----|-------|---------------|---------------|------|-----|-------|-------|-------|--------|--------|
| 2019/05/19 | CH2206 | Male | Three y/o | Treatment (Wk 1) | Treatment | Fast Day | No | 00:05 | 00:00 - 00:59 | Early Morning | 37,0 | 44  | 57,8  | 57,8  | 18,16 | 528,51 | 136,80 |
| 2019/05/19 | CH2205 | Male | Three y/o | Treatment (Wk 1) | Treatment | Fast Day | No | 00:10 | 00:00 - 00:59 | Early Morning | 37,2 | 87  | 14,4  | 14,4  | 18,36 | 583,64 | 89,12  |
| 2019/05/19 | CH2206 | Male | Three y/o | Treatment (Wk 1) | Treatment | Fast Day | No | 00:10 | 00:00 - 00:59 | Early Morning | 36,9 | 51  | 54,0  | 54,0  | 18,06 | 541,20 | 134,45 |
| 2019/05/19 | CH2205 | Male | Three y/o | Treatment (Wk 1) | Treatment | Fast Day | No | 00:15 | 00:00 - 00:59 | Early Morning | 37,2 | 43  | 4,6   | 4,6   | 18,36 | 526,50 | 50,61  |
| 2019/05/19 | CH2206 | Male | Three y/o | Treatment (Wk 1) | Treatment | Fast Day | No | 00:15 | 00:00 - 00:59 | Early Morning | 36,9 | 53  | 47,2  | 47,2  | 18,06 | 544,43 | 129,80 |
| 2019/05/19 | CH2205 | Male | Three y/o | Treatment (Wk 1) | Treatment | Fast Day | No | 00:20 | 00:00 - 00:59 | Early Morning | 37,1 | 67  | 8,2   | 8,2   | 18,26 | 563,53 | 70,05  |
| 2019/05/19 | CH2206 | Male | Three y/o | Treatment (Wk 1) | Treatment | Fast Day | No | 00:20 | 00:00 - 00:59 | Early Morning | 37,0 | 44  | 47,6  | 47,6  | 18,16 | 528,51 | 130,09 |
| 2019/05/19 | CH2205 | Male | Three y/o | Treatment (Wk 1) | Treatment | Fast Day | No | 00:25 | 00:00 - 00:59 | Early Morning | 37,1 | 57  | 17,0  | 17,0  | 18,26 | 550,47 | 94,77  |
| 2019/05/19 | CH2206 | Male | Three y/o | Treatment (Wk 1) | Treatment | Fast Day | No | 00:25 | 00:00 - 00:59 | Early Morning | 37,0 | 129 | 51,6  | 51,6  | 18,16 | 611,75 | 132,87 |
| 2019/05/19 | CH2205 | Male | Three y/o | Treatment (Wk 1) | Treatment | Fast Day | No | 00:30 | 00:00 - 00:59 | Early Morning | 37,2 | 87  | 97,6  | 97,6  | 18,36 | 583,64 | 155,00 |
| 2019/05/19 | CH2206 | Male | Three y/o | Treatment (Wk 1) | Treatment | Fast Day | No | 00:30 | 00:00 - 00:59 | Early Morning | 37,2 |     | 70,8  | 70,8  | 18,36 |        | 143,83 |
| 2019/05/19 | CH2205 | Male | Three y/o | Treatment (Wk 1) | Treatment | Fast Day | No | 00:35 | 00:00 - 00:59 | Early Morning | 37,4 | 112 | 62,4  | 62,4  | 18,55 | 601,96 | 139,45 |
| 2019/05/19 | CH2206 | Male | Three y/o | Treatment (Wk 1) | Treatment | Fast Day | No | 00:35 | 00:00 - 00:59 | Early Morning | 37,1 | 132 | 138,4 | 138,4 | 18,26 | 613,32 | 167,20 |
| 2019/05/19 | CH2205 | Male | Three y/o | Treatment (Wk 1) | Treatment | Fast Day | No | 00:40 | 00:00 - 00:59 | Early Morning | 37,4 | 64  | 87,6  | 87,6  | 18,55 | 559,88 | 151,23 |
| 2019/05/19 | CH2206 | Male | Three y/o | Treatment (Wk 1) | Treatment | Fast Day | No | 00:40 | 00:00 - 00:59 | Early Morning | 37,2 | 104 | 162,2 | 162,2 | 18,36 | 596,69 | 172,76 |
| 2019/05/19 | CH2205 | Male | Three y/o | Treatment (Wk 1) | Treatment | Fast Day | No | 00:45 | 00:00 - 00:59 | Early Morning | 37,4 | 63  | 225,8 | 225,8 | 18,55 | 558,62 | 184,39 |
| 2019/05/19 | CH2206 | Male | Three y/o | Treatment (Wk 1) | Treatment | Fast Day | No | 00:45 | 00:00 - 00:59 | Early Morning | 37,4 | 129 | 275,8 | 275,8 | 18,55 | 611,75 | 191,45 |
| 2019/05/19 | CH2205 | Male | Three y/o | Treatment (Wk 1) | Treatment | Fast Day | No | 00:50 | 00:00 - 00:59 | Early Morning | 37,5 | 109 | 178,4 | 178,4 | 18,65 | 600,04 | 176,10 |
| 2019/05/19 | CH2206 | Male | Three y/o | Treatment (Wk 1) | Treatment | Fast Day | No | 00:50 | 00:00 - 00:59 | Early Morning | 37,4 |     | 82,6  | 82,6  | 18,55 |        | 149,19 |
| 2019/05/19 | CH2205 | Male | Three y/o | Treatment (Wk 1) | Treatment | Fast Day | No | 00:55 | 00:00 - 00:59 | Early Morning | 37,4 | 119 | 109,4 | 109,4 | 18,55 | 606,20 | 158,98 |
| 2019/05/19 | CH2206 | Male | Three y/o | Treatment (Wk 1) | Treatment | Fast Day | No | 00:55 | 00:00 - 00:59 | Early Morning | 37,5 | 119 | 101,2 | 101,2 | 18,65 | 606,20 | 156,26 |
| 2019/05/19 | CH2205 | Male | Three y/o | Treatment (Wk 1) | Treatment | Fast Day | No | 01:00 | 01:00 - 01:59 | Early Morning | 37,5 | 158 | 79,4  | 79,4  | 18,65 | 625,26 | 147,81 |
| 2019/05/19 | CH2206 | Male | Three y/o | Treatment (Wk 1) | Treatment | Fast Day | No | 01:00 | 01:00 - 01:59 | Early Morning | 37,7 | 109 | 122,6 | 122,6 | 18,85 | 600,04 | 162,96 |
| 2019/05/19 | CH2205 | Male | Three y/o | Treatment (Wk 1) | Treatment | Fast Day | No | 01:05 | 01:00 - 01:59 | Early Morning | 37,5 | 74  | 78,6  | 78,6  | 18,65 | 571,33 | 147,46 |
| 2019/05/19 | CH2206 | Male | Three y/o | Treatment (Wk 1) | Treatment | Fast Day | No | 01:05 | 01:00 - 01:59 | Early Morning | 37,7 |     | 56,0  | 56,0  | 18,85 |        | 135,70 |
| 2019/05/19 | CH2205 | Male | Three y/o | Treatment (Wk 1) | Treatment | Fast Day | No | 01:10 | 01:00 - 01:59 | Early Morning | 37,4 | 120 | 34,2  | 34,2  | 18,55 | 606,78 | 118,70 |
| 2019/05/19 | CH2206 | Male | Three y/o | Treatment (Wk 1) | Treatment | Fast Day | No | 01:10 | 01:00 - 01:59 | Early Morning | 37,7 | 78  | 38,2  | 38,2  | 18,85 | 575,38 | 122,50 |
| 2019/05/19 | CH2205 | Male | Three y/o | Treatment (Wk 1) | Treatment | Fast Day | No | 01:15 | 01:00 - 01:59 | Early Morning | 37,2 | 99  | 38,8  | 38,8  | 18,36 | 593,14 | 123,04 |
| 2019/05/19 | CH2206 | Male | Three y/o | Treatment (Wk 1) | Treatment | Fast Day | No | 01:15 | 01:00 - 01:59 | Early Morning | 37,3 | 88  | 51,8  | 51,8  | 18,46 | 584,49 | 133,01 |
| 2019/05/19 | CH2205 | Male | Three y/o | Treatment (Wk 1) | Treatment | Fast Day | No | 01:20 | 01:00 - 01:59 | Early Morning | 37,2 |     | 28,6  | 28,6  | 18,36 |        | 112,56 |
| 2019/05/19 | CH2206 | Male | Three y/o | Treatment (Wk 1) | Treatment | Fast Day | No | 01:20 | 01:00 - 01:59 | Early Morning | 37,2 | 45  | 64,2  | 64,2  | 18,36 | 530,47 | 140,44 |
| 2019/05/19 | CH2205 | Male | Three y/o | Treatment (Wk 1) | Treatment | Fast Day | No | 01:25 | 01:00 - 01:59 | Early Morning | 37,1 | 109 | 30,2  | 30,2  | 18,26 | 600,04 | 114,42 |
| 2019/05/19 | CH2206 | Male | Three y/o | Treatment (Wk 1) | Treatment | Fast Day | No | 01:25 | 01:00 - 01:59 | Early Morning | 37,1 | 71  | 63,0  | 63,0  | 18,26 | 568,10 | 139,78 |
| 2019/05/19 | CH2205 | Male | Three y/o | Treatment (Wk 1) | Treatment | Fast Day | No | 01:30 | 01:00 - 01:59 | Early Morning | 37,1 |     | 34,8  | 34,8  | 18,26 |        | 119,29 |
| 2019/05/19 | CH2206 | Male | Three y/o | Treatment (Wk 1) | Treatment | Fast Day | No | 01:30 | 01:00 - 01:59 | Early Morning | 37,1 | 49  | 51,4  | 51,4  | 18,26 | 537,80 | 132,74 |
| 2019/05/19 | CH2205 | Male | Three y/o | Treatment (Wk 1) | Treatment | Fast Day | No | 01:35 | 01:00 - 01:59 | Early Morning | 37,1 | 80  | 25,0  | 25,0  | 18,26 | 577,31 | 107,94 |
| 2019/05/19 | CH2206 | Male | Three y/o | Treatment (Wk 1) | Treatment | Fast Day | No | 01:35 | 01:00 - 01:59 | Early Morning | 37,1 | 55  | 49,0  | 49,0  | 18,26 | 547,52 | 131,09 |
| 2019/05/19 | CH2205 | Male | Three y/o | Treatment (Wk 1) | Treatment | Fast Day | No | 01:40 | 01:00 - 01:59 | Early Morning | 37,2 | 43  | 18,6  | 18,6  | 18,36 | 526,50 | 97,84  |
| 2019/05/19 | CH2206 | Male | Three y/o | Treatment (Wk 1) | Treatment | Fast Day | No | 01:40 | 01:00 - 01:59 | Early Morning | 37,3 | 50  | 50,4  | 50,4  | 18,46 | 539,52 | 132,06 |
| 2019/05/19 | CH2205 | Male | Three y/o | Treatment (Wk 1) | Treatment | Fast Day | No | 01:45 | 01:00 - 01:59 | Early Morning | 37,3 | 60  | 20,2  | 20,2  | 18,46 | 554,67 | 100,65 |
| 2019/05/19 | CH2206 | Male | Three y/o | Treatment (Wk 1) | Treatment | Fast Day | No | 01:45 | 01:00 - 01:59 | Early Morning | 37,4 | 57  | 56,0  | 56,0  | 18,55 | 550,47 | 135,70 |
| 2019/05/19 | CH2205 | Male | Three y/o | Treatment (Wk 1) | Treatment | Fast Day | No | 01:50 | 01:00 - 01:59 | Early Morning | 37,4 | 36  | 17,4  | 17,4  | 18,55 | 510,56 | 95,56  |
| 2019/05/19 | CH2206 | Male | Three y/o | Treatment (Wk 1) | Treatment | Fast Day | No | 01:50 | 01:00 - 01:59 | Early Morning | 37,4 | 40  | 49,0  | 49,0  | 18,55 | 520,09 | 131,09 |
| 2019/05/19 | CH2205 | Male | Three y/o | Treatment (Wk 1) | Treatment | Fast Day | No | 01:55 | 01:00 - 01:59 | Early Morning | 37,4 | 74  | 13,2  | 13,2  | 18,55 | 571,33 | 86,17  |
| 2019/05/19 | CH2206 | Male | Three y/o | Treatment (Wk 1) | Treatment | Fast Day | No | 01:55 | 01:00 - 01:59 | Early Morning | 37,4 | 48  | 49,4  | 49,4  | 18,55 | 536,04 | 131,37 |
| 2019/05/19 | CH2205 | Male | Three y/o | Treatment (Wk 1) | Treatment | Fast Day | No | 02:00 | 02:00 - 02:59 | Early Morning | 37,5 | 47  | 16,0  | 16,0  | 18,65 | 534,23 | 92,71  |
| 2019/05/19 | CH2206 | Male | Three y/o | Treatment (Wk 1) | Treatment | Fast Day | No | 02:00 | 02:00 - 02:59 | Early Morning | 37,4 | 57  | 58,8  | 58,8  | 18,55 | 550,47 | 137,39 |
| 2019/05/19 | CH2205 | Male | Three y/o | Treatment (Wk 1) | Treatment | Fast Day | No | 02:05 | 02:00 - 02:59 | Early Morning | 37,5 | 98  | 18,4  | 18,4  | 18,65 | 592,41 | 97,47  |
| 2019/05/19 | CH2206 | Male | Three y/o | Treatment (Wk 1) | Treatment | Fast Day | No | 02:05 | 02:00 - 02:59 | Early Morning | 37,4 | 79  | 66,4  | 66,4  | 18,55 | 576,36 | 141,61 |
| 2019/05/19 | CH2205 | Male | Three y/o | Treatment (Wk 1) | Treatment | Fast Day | No | 02:10 | 02:00 - 02:59 | Early Morning | 37,5 | 44  | 18,2  | 18,2  | 18,65 | 528,51 | 97,10  |
| 2019/05/19 | CH2206 | Male | Three y/o | Treatment (Wk 1) | Treatment | Fast Day | No | 02:10 | 02:00 - 02:59 | Early Morning | 37,4 | 73  | 58,8  | 58,8  | 18,55 | 570,27 | 137,39 |
| 2019/05/19 | CH2205 | Male | Three y/o | Treatment (Wk 1) | Treatment | Fast Day | No | 02:15 | 02:00 - 02:59 | Early Morning | 37,5 | 58  | 24,4  | 24,4  | 18,65 | 551,90 | 107,11 |
| 2019/05/19 | CH2206 | Male | Three y/o | Treatment (Wk 1) | Treatment | Fast Day | No | 02:15 | 02:00 - 02:59 | Early Morning | 37,3 | 54  | 48,8  | 48,8  | 18,46 | 545,99 | 130,95 |
| 2019/05/19 | CH2205 | Male | Three y/o | Treatment (Wk 1) | Treatment | Fast Day | No | 02:20 | 02:00 - 02:59 | Early Morning | 37,3 |     | 21,2  | 21,2  | 18,46 |        | 102,31 |
| 2019/05/19 | CH2206 | Male | Three y/o | Treatment (Wk 1) | Treatment | Fast Day | No | 02:20 | 02:00 - 02:59 | Early Morning | 37,3 | 41  | 59,4  | 59,4  | 18,46 | 522,29 | 137,75 |
| 2019/05/19 | CH2205 | Male | Three y/o | Treatment (Wk 1) | Treatment | Fast Day | No | 02:25 | 02:00 - 02:59 | Early Morning | 37,3 |     | 26,0  | 26,0  | 18,46 |        | 109,29 |
| 2019/05/19 | CH2206 | Male | Three y/o | Treatment (Wk 1) | Treatment | Fast Day | No | 02:25 | 02:00 - 02:59 | Early Morning | 37,3 | 59  | 60,8  | 60,8  | 18,46 | 553,30 | 138,55 |
| 2019/05/19 | CH2205 | Male | Three y/o | Treatment (Wk 1) | Treatment | Fast Day | No | 02:30 | 02:00 - 02:59 | Early Morning | 37,3 | 147 | 26,8  | 26,8  | 18,46 | 620,52 | 110,33 |
| 2019/05/19 | CH2206 | Male | Three y/o | Treatment (Wk 1) | Treatment | Fast Day | No | 02:30 | 02:00 - 02:59 | Early Morning | 37,3 | 44  | 63,2  | 63,2  | 18,46 | 528,51 | 139,89 |
| 2019/05/19 | CH2205 | Male | Three y/o | Treatment (Wk 1) | Treatment | Fast Day | No | 02:35 | 02:00 - 02:59 | Early Morning | 37,3 | 50  | 23,4  | 23,4  | 18,46 | 539,52 | 105,68 |
| 2019/05/19 | CH2206 | Male | Three y/o | Treatment (Wk 1) | Treatment | Fast Day | No | 02:35 | 02:00 - 02:59 | Early Morning | 37,3 | 75  | 51,6  | 51,6  | 18,46 | 572,36 | 132,87 |
| 2019/05/19 | CH2205 | Male | Three y/o | Treatment (Wk 1) | Treatment | Fast Day | No | 02:40 | 02:00 - 02:59 | Early Morning | 37,3 |     | 23,6  | 23,6  | 18,46 |        | 105,97 |
| 2019/05/19 | CH2206 | Male | Three y/o | Treatment (Wk 1) | Treatment | Fast Day | No | 02:40 | 02:00 - 02:59 | Early Morning | 37,3 | 71  | 50,2  | 50,2  | 18,46 | 568,10 | 131,92 |
| 2019/05/19 | CH2205 | Male | Three y/o | Treatment (Wk 1) | Treatment | Fast Day | No | 02:45 | 02:00 - 02:59 | Early Morning | 37,2 | 41  | 26,6  | 26,6  | 18,36 | 522,29 | 110,07 |
| 2019/05/19 | CH2206 | Male | Three y/o | Treatment (Wk 1) | Treatment | Fast Day | No | 02:45 | 02:00 - 02:59 | Early Morning | 37,3 | 43  | 48,2  | 48,2  | 18,46 | 526,50 | 130,52 |
| 2019/05/19 | CH2205 | Male | Three y/o | Treatment (Wk 1) | Treatment | Fast Day | No | 02:50 | 02:00 - 02:59 | Early Morning | 37,2 |     | 25,4  | 25,4  | 18,36 |        | 108,49 |
| 2019/05/19 | CH2206 | Male | Three y/o | Treatment (Wk 1) | Treatment | Fast Day | No | 02:50 | 02:00 - 02:59 | Early Morning | 37,3 | 47  | 48,0  | 48,0  | 18,46 | 534,23 | 130,38 |
| 2019/05/19 | CH2205 | Male | Three y/o | Treatment (Wk 1) | Treatment | Fast Day | No | 02:55 | 02:00 - 02:59 | Early Morning | 37,2 | 50  | 17,6  | 17,6  | 18,36 | 539,52 | 95,95  |
| 2019/05/19 | CH2206 | Male | Three y/o | Treatment (Wk 1) | Treatment | Fast Day | No | 02:55 | 02:00 - 02:59 | Early Morning | 37,3 | 45  | 44,4  | 44,4  | 18,46 | 530,47 | 127,69 |
| 2019/05/19 | CH2205 | Male | Three y/o | Treatment (Wk 1) | Treatment | Fast Day | No | 03:00 | 03:00 - 03:59 | Early Morning | 37,2 | 52  | 18,6  | 18,6  | 18,36 | 542,83 | 97,84  |



|            |        |      |           |                  |           |          |    |       |               |               |      |     |       |       |       |        |        |
|------------|--------|------|-----------|------------------|-----------|----------|----|-------|---------------|---------------|------|-----|-------|-------|-------|--------|--------|
| 2019/05/19 | CH2206 | Male | Three y/o | Treatment (Wk 1) | Treatment | Fast Day | No | 03:00 | 03:00 - 03:59 | Early Morning | 37,3 | 49  | 41,2  | 41,2  | 18,46 | 537,80 | 125,11 |
| 2019/05/19 | CH2205 | Male | Three y/o | Treatment (Wk 1) | Treatment | Fast Day | No | 03:05 | 03:00 - 03:59 | Early Morning | 37,2 | 91  | 19,2  | 19,2  | 18,36 | 586,98 | 98,92  |
| 2019/05/19 | CH2206 | Male | Three y/o | Treatment (Wk 1) | Treatment | Fast Day | No | 03:05 | 03:00 - 03:59 | Early Morning | 37,3 | 50  | 41,6  | 41,6  | 18,46 | 539,52 | 125,44 |
| 2019/05/19 | CH2205 | Male | Three y/o | Treatment (Wk 1) | Treatment | Fast Day | No | 03:10 | 03:00 - 03:59 | Early Morning | 37,2 | 37  | 22,2  | 22,2  | 18,36 | 513,06 | 103,88 |
| 2019/05/19 | CH2206 | Male | Three y/o | Treatment (Wk 1) | Treatment | Fast Day | No | 03:10 | 03:00 - 03:59 | Early Morning | 37,3 | 51  | 47,6  | 47,6  | 18,46 | 541,20 | 130,09 |
| 2019/05/19 | CH2205 | Male | Three y/o | Treatment (Wk 1) | Treatment | Fast Day | No | 03:15 | 03:00 - 03:59 | Early Morning | 37,2 | 51  | 22,2  | 22,2  | 18,36 | 541,20 | 103,88 |
| 2019/05/19 | CH2206 | Male | Three y/o | Treatment (Wk 1) | Treatment | Fast Day | No | 03:15 | 03:00 - 03:59 | Early Morning | 37,3 | 68  | 43,8  | 43,8  | 18,46 | 564,71 | 127,22 |
| 2019/05/19 | CH2205 | Male | Three y/o | Treatment (Wk 1) | Treatment | Fast Day | No | 03:20 | 03:00 - 03:59 | Early Morning | 37,2 | 148 | 5,2   | 5,2   | 18,36 | 620,97 | 54,72  |
| 2019/05/19 | CH2206 | Male | Three y/o | Treatment (Wk 1) | Treatment | Fast Day | No | 03:20 | 03:00 - 03:59 | Early Morning | 37,3 | 76  | 17,4  | 17,4  | 18,46 | 573,39 | 95,56  |
| 2019/05/19 | CH2205 | Male | Three y/o | Treatment (Wk 1) | Treatment | Fast Day | No | 03:25 | 03:00 - 03:59 | Early Morning | 37,2 | 51  | 3,0   | 3,0   | 18,36 | 541,20 | 36,34  |
| 2019/05/19 | CH2206 | Male | Three y/o | Treatment (Wk 1) | Treatment | Fast Day | No | 03:25 | 03:00 - 03:59 | Early Morning | 37,3 | 49  | 31,4  | 31,4  | 18,46 | 537,80 | 115,76 |
| 2019/05/19 | CH2205 | Male | Three y/o | Treatment (Wk 1) | Treatment | Fast Day | No | 03:30 | 03:00 - 03:59 | Early Morning | 37,3 | 43  | 3,0   | 3,0   | 18,46 | 526,50 | 36,34  |
| 2019/05/19 | CH2206 | Male | Three y/o | Treatment (Wk 1) | Treatment | Fast Day | No | 03:30 | 03:00 - 03:59 | Early Morning | 37,3 | 63  | 34,6  | 34,6  | 18,46 | 558,62 | 119,10 |
| 2019/05/19 | CH2205 | Male | Three y/o | Treatment (Wk 1) | Treatment | Fast Day | No | 03:35 | 03:00 - 03:59 | Early Morning | 37,3 | 43  | 3,4   | 3,4   | 18,46 | 526,50 | 40,51  |
| 2019/05/19 | CH2206 | Male | Three y/o | Treatment (Wk 1) | Treatment | Fast Day | No | 03:35 | 03:00 - 03:59 | Early Morning | 37,2 | 38  | 24,6  | 24,6  | 18,36 | 515,48 | 107,39 |
| 2019/05/19 | CH2205 | Male | Three y/o | Treatment (Wk 1) | Treatment | Fast Day | No | 03:40 | 03:00 - 03:59 | Early Morning | 37,3 | 47  | 4,2   | 4,2   | 18,46 | 534,23 | 47,57  |
| 2019/05/19 | CH2206 | Male | Three y/o | Treatment (Wk 1) | Treatment | Fast Day | No | 03:40 | 03:00 - 03:59 | Early Morning | 37,2 | 45  | 17,2  | 17,2  | 18,36 | 530,47 | 95,17  |
| 2019/05/19 | CH2205 | Male | Three y/o | Treatment (Wk 1) | Treatment | Fast Day | No | 03:45 | 03:00 - 03:59 | Early Morning | 37,3 | 67  | 39,8  | 39,8  | 18,46 | 563,53 | 123,91 |
| 2019/05/19 | CH2206 | Male | Three y/o | Treatment (Wk 1) | Treatment | Fast Day | No | 03:45 | 03:00 - 03:59 | Early Morning | 37,1 | 41  | 37,8  | 37,8  | 18,26 | 522,29 | 122,14 |
| 2019/05/19 | CH2205 | Male | Three y/o | Treatment (Wk 1) | Treatment | Fast Day | No | 03:50 | 03:00 - 03:59 | Early Morning | 37,3 | 145 | 35,4  | 35,4  | 18,46 | 619,62 | 119,88 |
| 2019/05/19 | CH2206 | Male | Three y/o | Treatment (Wk 1) | Treatment | Fast Day | No | 03:50 | 03:00 - 03:59 | Early Morning | 37,0 | 141 | 29,6  | 29,6  | 18,16 | 617,75 | 113,73 |
| 2019/05/19 | CH2205 | Male | Three y/o | Treatment (Wk 1) | Treatment | Fast Day | No | 03:55 | 03:00 - 03:59 | Early Morning | 37,3 |     | 40,6  | 40,6  | 18,46 |        | 124,60 |
| 2019/05/19 | CH2206 | Male | Three y/o | Treatment (Wk 1) | Treatment | Fast Day | No | 03:55 | 03:00 - 03:59 | Early Morning | 37,1 | 128 | 134,0 | 134,0 | 18,26 | 611,22 | 166,07 |
| 2019/05/19 | CH2205 | Male | Three y/o | Treatment (Wk 1) | Treatment | Fast Day | No | 04:00 | 04:00 - 04:59 | Morning       | 37,3 |     | 157,6 | 157,6 | 18,46 |        | 171,75 |
| 2019/05/19 | CH2206 | Male | Three y/o | Treatment (Wk 1) | Treatment | Fast Day | No | 04:00 | 04:00 - 04:59 | Morning       | 37,2 | 107 | 55,0  | 55,0  | 18,36 | 598,73 | 135,08 |
| 2019/05/19 | CH2205 | Male | Three y/o | Treatment (Wk 1) | Treatment | Fast Day | No | 04:05 | 04:00 - 04:59 | Morning       | 37,2 | 49  | 175,0 | 175,0 | 18,36 | 537,80 | 175,43 |
| 2019/05/19 | CH2206 | Male | Three y/o | Treatment (Wk 1) | Treatment | Fast Day | No | 04:05 | 04:00 - 04:59 | Morning       | 37,2 | 120 | 194,4 | 194,4 | 18,36 | 606,78 | 179,12 |
| 2019/05/19 | CH2205 | Male | Three y/o | Treatment (Wk 1) | Treatment | Fast Day | No | 04:10 | 04:00 - 04:59 | Morning       | 37,3 | 60  | 163,2 | 163,2 | 18,46 | 554,67 | 172,97 |
| 2019/05/19 | CH2206 | Male | Three y/o | Treatment (Wk 1) | Treatment | Fast Day | No | 04:10 | 04:00 - 04:59 | Morning       | 37,3 | 59  | 179,4 | 179,4 | 18,46 | 553,30 | 176,30 |
| 2019/05/19 | CH2205 | Male | Three y/o | Treatment (Wk 1) | Treatment | Fast Day | No | 04:15 | 04:00 - 04:59 | Morning       | 37,4 | 113 | 93,8  | 93,8  | 18,55 | 602,58 | 153,61 |
| 2019/05/19 | CH2206 | Male | Three y/o | Treatment (Wk 1) | Treatment | Fast Day | No | 04:15 | 04:00 - 04:59 | Morning       | 37,4 | 135 | 103,0 | 103,0 | 18,55 | 614,84 | 156,87 |
| 2019/05/19 | CH2205 | Male | Three y/o | Treatment (Wk 1) | Treatment | Fast Day | No | 04:20 | 04:00 - 04:59 | Morning       | 37,6 |     | 23,8  | 23,8  | 18,75 |        | 106,26 |
| 2019/05/19 | CH2206 | Male | Three y/o | Treatment (Wk 1) | Treatment | Fast Day | No | 04:20 | 04:00 - 04:59 | Morning       | 37,5 | 129 | 186,2 | 186,2 | 18,65 | 611,75 | 177,60 |
| 2019/05/19 | CH2205 | Male | Three y/o | Treatment (Wk 1) | Treatment | Fast Day | No | 04:25 | 04:00 - 04:59 | Morning       | 37,7 | 98  | 275,2 | 275,2 | 18,85 | 592,41 | 191,37 |
| 2019/05/19 | CH2206 | Male | Three y/o | Treatment (Wk 1) | Treatment | Fast Day | No | 04:25 | 04:00 - 04:59 | Morning       | 37,7 | 114 | 111,0 | 111,0 | 18,85 | 603,20 | 159,48 |
| 2019/05/19 | CH2205 | Male | Three y/o | Treatment (Wk 1) | Treatment | Fast Day | No | 04:30 | 04:00 - 04:59 | Morning       | 37,7 | 125 | 18,8  | 18,8  | 18,85 | 609,60 | 98,20  |
| 2019/05/19 | CH2206 | Male | Three y/o | Treatment (Wk 1) | Treatment | Fast Day | No | 04:30 | 04:00 - 04:59 | Morning       | 37,7 |     | 130,0 | 130,0 | 18,85 |        | 165,01 |
| 2019/05/19 | CH2205 | Male | Three y/o | Treatment (Wk 1) | Treatment | Fast Day | No | 04:35 | 04:00 - 04:59 | Morning       | 38,0 |     | 34,2  | 34,2  | 19,15 |        | 118,70 |
| 2019/05/19 | CH2206 | Male | Three y/o | Treatment (Wk 1) | Treatment | Fast Day | No | 04:35 | 04:00 - 04:59 | Morning       | 37,8 | 123 | 227,0 | 227,0 | 18,95 | 608,49 | 184,58 |
| 2019/05/19 | CH2205 | Male | Three y/o | Treatment (Wk 1) | Treatment | Fast Day | No | 04:40 | 04:00 - 04:59 | Morning       | 37,6 |     | 18,0  | 18,0  | 18,75 |        | 96,72  |
| 2019/05/19 | CH2206 | Male | Three y/o | Treatment (Wk 1) | Treatment | Fast Day | No | 04:40 | 04:00 - 04:59 | Morning       | 37,8 | 112 | 29,2  | 29,2  | 18,95 | 601,96 | 113,27 |
| 2019/05/19 | CH2205 | Male | Three y/o | Treatment (Wk 1) | Treatment | Fast Day | No | 04:45 | 04:00 - 04:59 | Morning       | 37,7 | 99  | 69,0  | 69,0  | 18,85 | 593,14 | 142,94 |
| 2019/05/19 | CH2206 | Male | Three y/o | Treatment (Wk 1) | Treatment | Fast Day | No | 04:45 | 04:00 - 04:59 | Morning       | 37,7 | 129 | 151,2 | 151,2 | 18,85 | 611,75 | 170,30 |
| 2019/05/19 | CH2205 | Male | Three y/o | Treatment (Wk 1) | Treatment | Fast Day | No | 04:50 | 04:00 - 04:59 | Morning       | 37,5 | 117 | 47,6  | 47,6  | 18,65 | 605,02 | 130,09 |
| 2019/05/19 | CH2206 | Male | Three y/o | Treatment (Wk 1) | Treatment | Fast Day | No | 04:50 | 04:00 - 04:59 | Morning       | 37,8 | 129 | 76,2  | 76,2  | 18,95 | 611,75 | 146,38 |
| 2019/05/19 | CH2205 | Male | Three y/o | Treatment (Wk 1) | Treatment | Fast Day | No | 04:55 | 04:00 - 04:59 | Morning       | 37,3 | 64  | 24,2  | 24,2  | 18,46 | 559,88 | 106,83 |
| 2019/05/19 | CH2206 | Male | Three y/o | Treatment (Wk 1) | Treatment | Fast Day | No | 04:55 | 04:00 - 04:59 | Morning       | 37,7 | 107 | 18,4  | 18,4  | 18,85 | 598,73 | 97,47  |
| 2019/05/19 | CH2205 | Male | Three y/o | Treatment (Wk 1) | Treatment | Fast Day | No | 05:00 | 05:00 - 05:59 | Morning       | 37,3 | 56  | 34,0  | 34,0  | 18,46 | 549,01 | 118,49 |
| 2019/05/19 | CH2206 | Male | Three y/o | Treatment (Wk 1) | Treatment | Fast Day | No | 05:00 | 05:00 - 05:59 | Morning       | 37,2 | 57  | 22,0  | 22,0  | 18,36 | 550,47 | 103,57 |
| 2019/05/19 | CH2205 | Male | Three y/o | Treatment (Wk 1) | Treatment | Fast Day | No | 05:05 | 05:00 - 05:59 | Morning       | 37,4 |     | 25,0  | 25,0  | 18,55 |        | 107,94 |
| 2019/05/19 | CH2206 | Male | Three y/o | Treatment (Wk 1) | Treatment | Fast Day | No | 05:05 | 05:00 - 05:59 | Morning       | 37,0 | 50  | 13,4  | 13,4  | 18,16 | 539,52 | 86,68  |
| 2019/05/19 | CH2205 | Male | Three y/o | Treatment (Wk 1) | Treatment | Fast Day | No | 05:10 | 05:00 - 05:59 | Morning       | 37,4 |     | 27,8  | 27,8  | 18,55 |        | 111,58 |
| 2019/05/19 | CH2206 | Male | Three y/o | Treatment (Wk 1) | Treatment | Fast Day | No | 05:10 | 05:00 - 05:59 | Morning       | 36,8 | 74  | 27,6  | 27,6  | 17,96 | 571,33 | 111,33 |
| 2019/05/19 | CH2205 | Male | Three y/o | Treatment (Wk 1) | Treatment | Fast Day | No | 05:15 | 05:00 - 05:59 | Morning       | 37,4 | 52  | 27,2  | 27,2  | 18,55 | 542,83 | 110,83 |
| 2019/05/19 | CH2206 | Male | Three y/o | Treatment (Wk 1) | Treatment | Fast Day | No | 05:15 | 05:00 - 05:59 | Morning       | 36,8 | 49  | 29,0  | 29,0  | 17,96 | 537,80 | 113,03 |
| 2019/05/19 | CH2205 | Male | Three y/o | Treatment (Wk 1) | Treatment | Fast Day | No | 05:20 | 05:00 - 05:59 | Morning       | 37,3 |     | 31,4  | 31,4  | 18,46 |        | 115,76 |
| 2019/05/19 | CH2206 | Male | Three y/o | Treatment (Wk 1) | Treatment | Fast Day | No | 05:20 | 05:00 - 05:59 | Morning       | 36,8 | 45  | 34,4  | 34,4  | 17,96 | 530,47 | 118,90 |
| 2019/05/19 | CH2205 | Male | Three y/o | Treatment (Wk 1) | Treatment | Fast Day | No | 05:25 | 05:00 - 05:59 | Morning       | 37,3 |     | 30,8  | 30,8  | 18,46 |        | 115,10 |
| 2019/05/19 | CH2206 | Male | Three y/o | Treatment (Wk 1) | Treatment | Fast Day | No | 05:25 | 05:00 - 05:59 | Morning       | 36,9 | 78  | 33,0  | 33,0  | 18,06 | 575,38 | 117,47 |
| 2019/05/19 | CH2205 | Male | Three y/o | Treatment (Wk 1) | Treatment | Fast Day | No | 05:30 | 05:00 - 05:59 | Morning       | 37,3 |     | 26,6  | 26,6  | 18,46 |        | 110,07 |
| 2019/05/19 | CH2206 | Male | Three y/o | Treatment (Wk 1) | Treatment | Fast Day | No | 05:30 | 05:00 - 05:59 | Morning       | 36,9 | 44  | 32,8  | 32,8  | 18,06 | 528,51 | 117,26 |
| 2019/05/19 | CH2205 | Male | Three y/o | Treatment (Wk 1) | Treatment | Fast Day | No | 05:35 | 05:00 - 05:59 | Morning       | 37,3 | 68  | 28,6  | 28,6  | 18,46 | 564,71 | 112,56 |
| 2019/05/19 | CH2206 | Male | Three y/o | Treatment (Wk 1) | Treatment | Fast Day | No | 05:35 | 05:00 - 05:59 | Morning       | 37,0 | 65  | 34,6  | 34,6  | 18,16 | 561,12 | 119,10 |
| 2019/05/19 | CH2205 | Male | Three y/o | Treatment (Wk 1) | Treatment | Fast Day | No | 05:40 | 05:00 - 05:59 | Morning       | 37,3 | 40  | 26,6  | 26,6  | 18,46 | 520,09 | 110,07 |
| 2019/05/19 | CH2206 | Male | Three y/o | Treatment (Wk 1) | Treatment | Fast Day | No | 05:40 | 05:00 - 05:59 | Morning       | 37,0 | 45  | 40,2  | 40,2  | 18,16 | 530,47 | 124,26 |
| 2019/05/19 | CH2205 | Male | Three y/o | Treatment (Wk 1) | Treatment | Fast Day | No | 05:45 | 05:00 - 05:59 | Morning       | 37,3 | 68  | 28,0  | 28,0  | 18,46 | 564,71 | 111,83 |
| 2019/05/19 | CH2206 | Male | Three y/o | Treatment (Wk 1) | Treatment | Fast Day | No | 05:45 | 05:00 - 05:59 | Morning       | 37,1 | 48  | 38,0  | 38,0  | 18,26 | 536,04 | 122,32 |
| 2019/05/19 | CH2205 | Male | Three y/o | Treatment (Wk 1) | Treatment | Fast Day | No | 05:50 | 05:00 - 05:59 | Morning       | 37,3 |     | 30,0  | 30,0  | 18,46 |        | 114,20 |
| 2019/05/19 | CH2206 | Male | Three y/o | Treatment (Wk 1) | Treatment | Fast Day | No | 05:50 | 05:00 - 05:59 | Morning       | 37,1 | 75  | 39,0  | 39,0  | 18,26 | 572,36 | 123,22 |
| 2019/05/19 | CH2205 | Male | Three y/o | Treatment (Wk 1) | Treatment | Fast Day | No | 05:55 | 05:00 - 05:59 | Morning       | 37,4 | 112 | 27,4  | 27,4  | 18,55 | 601,96 | 111,09 |



|            |        |      |           |                  |           |          |    |       |               |              |      |     |       |       |       |        |        |
|------------|--------|------|-----------|------------------|-----------|----------|----|-------|---------------|--------------|------|-----|-------|-------|-------|--------|--------|
| 2019/05/19 | CH2206 | Male | Three y/o | Treatment (Wk 1) | Treatment | Fast Day | No | 05:55 | 05:00 - 05:59 | Morning      | 37,1 | 78  | 26,2  | 26,2  | 18,26 | 575,38 | 109,55 |
| 2019/05/19 | CH2205 | Male | Three y/o | Treatment (Wk 1) | Treatment | Fast Day | No | 06:00 | 06:00 - 06:59 | Morning      | 37,4 | 46  | 2,2   | 2,2   | 18,55 | 532,38 | 26,02  |
| 2019/05/19 | CH2206 | Male | Three y/o | Treatment (Wk 1) | Treatment | Fast Day | No | 06:00 | 06:00 - 06:59 | Morning      | 37,1 | 50  | 30,0  | 30,0  | 18,26 | 539,52 | 114,20 |
| 2019/05/19 | CH2205 | Male | Three y/o | Treatment (Wk 1) | Treatment | Fast Day | No | 06:05 | 06:00 - 06:59 | Morning      | 37,2 | 66  | 6,2   | 6,2   | 18,36 | 562,34 | 60,63  |
| 2019/05/19 | CH2206 | Male | Three y/o | Treatment (Wk 1) | Treatment | Fast Day | No | 06:05 | 06:00 - 06:59 | Morning      | 37,1 | 50  | 22,2  | 22,2  | 18,26 | 539,52 | 103,88 |
| 2019/05/19 | CH2205 | Male | Three y/o | Treatment (Wk 1) | Treatment | Fast Day | No | 06:10 | 06:00 - 06:59 | Morning      | 37,2 | 50  | 10,8  | 10,8  | 18,36 | 539,52 | 79,36  |
| 2019/05/19 | CH2206 | Male | Three y/o | Treatment (Wk 1) | Treatment | Fast Day | No | 06:10 | 06:00 - 06:59 | Morning      | 37,1 | 82  | 41,6  | 41,6  | 18,26 | 579,19 | 125,44 |
| 2019/05/19 | CH2205 | Male | Three y/o | Treatment (Wk 1) | Treatment | Fast Day | No | 06:15 | 06:00 - 06:59 | Morning      | 37,2 | 55  | 12,6  | 12,6  | 18,36 | 547,52 | 84,59  |
| 2019/05/19 | CH2206 | Male | Three y/o | Treatment (Wk 1) | Treatment | Fast Day | No | 06:15 | 06:00 - 06:59 | Morning      | 37,2 | 48  | 44,4  | 44,4  | 18,36 | 536,04 | 127,69 |
| 2019/05/19 | CH2205 | Male | Three y/o | Treatment (Wk 1) | Treatment | Fast Day | No | 06:20 | 06:00 - 06:59 | Morning      | 37,3 | 56  | 12,2  | 12,2  | 18,46 | 549,01 | 83,49  |
| 2019/05/19 | CH2206 | Male | Three y/o | Treatment (Wk 1) | Treatment | Fast Day | No | 06:20 | 06:00 - 06:59 | Morning      | 37,2 | 79  | 39,8  | 39,8  | 18,36 | 576,36 | 123,91 |
| 2019/05/19 | CH2205 | Male | Three y/o | Treatment (Wk 1) | Treatment | Fast Day | No | 06:25 | 06:00 - 06:59 | Morning      | 37,3 | 86  | 17,0  | 17,0  | 18,46 | 582,77 | 94,77  |
| 2019/05/19 | CH2206 | Male | Three y/o | Treatment (Wk 1) | Treatment | Fast Day | No | 06:25 | 06:00 - 06:59 | Morning      | 37,2 | 86  | 33,6  | 33,6  | 18,36 | 582,77 | 118,09 |
| 2019/05/19 | CH2205 | Male | Three y/o | Treatment (Wk 1) | Treatment | Fast Day | No | 06:30 | 06:00 - 06:59 | Morning      | 37,3 | 113 | 124,2 | 124,2 | 18,46 | 602,58 | 163,41 |
| 2019/05/19 | CH2206 | Male | Three y/o | Treatment (Wk 1) | Treatment | Fast Day | No | 06:30 | 06:00 - 06:59 | Morning      | 37,3 | 51  | 108,0 | 108,0 | 18,46 | 541,20 | 158,53 |
| 2019/05/19 | CH2205 | Male | Three y/o | Treatment (Wk 1) | Treatment | Fast Day | No | 06:35 | 06:00 - 06:59 | Morning      | 37,3 | 182 | 192,2 | 192,2 | 18,46 | 634,31 | 178,72 |
| 2019/05/19 | CH2206 | Male | Three y/o | Treatment (Wk 1) | Treatment | Fast Day | No | 06:35 | 06:00 - 06:59 | Morning      | 37,4 | 128 | 148,4 | 148,4 | 18,55 | 611,22 | 169,64 |
| 2019/05/19 | CH2205 | Male | Three y/o | Treatment (Wk 1) | Treatment | Fast Day | No | 06:40 | 06:00 - 06:59 | Morning      | 37,3 | 101 | 129,6 | 129,6 | 18,46 | 594,59 | 164,90 |
| 2019/05/19 | CH2206 | Male | Three y/o | Treatment (Wk 1) | Treatment | Fast Day | No | 06:40 | 06:00 - 06:59 | Morning      | 37,4 | 162 | 396,8 | 396,8 | 18,55 | 626,88 | 204,33 |
| 2019/05/19 | CH2205 | Male | Three y/o | Treatment (Wk 1) | Treatment | Fast Day | No | 06:45 | 06:00 - 06:59 | Morning      | 37,3 | 109 | 171,2 | 171,2 | 18,46 | 600,04 | 174,65 |
| 2019/05/19 | CH2206 | Male | Three y/o | Treatment (Wk 1) | Treatment | Fast Day | No | 06:45 | 06:00 - 06:59 | Morning      | 37,5 |     | 95,4  | 95,4  | 18,65 |        | 154,20 |
| 2019/05/19 | CH2205 | Male | Three y/o | Treatment (Wk 1) | Treatment | Fast Day | No | 06:50 | 06:00 - 06:59 | Morning      | 37,4 | 114 | 145,2 | 145,2 | 18,55 | 603,20 | 168,88 |
| 2019/05/19 | CH2206 | Male | Three y/o | Treatment (Wk 1) | Treatment | Fast Day | No | 06:50 | 06:00 - 06:59 | Morning      | 37,7 | 118 | 413,4 | 413,4 | 18,85 | 605,61 | 205,78 |
| 2019/05/19 | CH2205 | Male | Three y/o | Treatment (Wk 1) | Treatment | Fast Day | No | 06:55 | 06:00 - 06:59 | Morning      | 37,4 |     | 160,2 | 160,2 | 18,55 |        | 172,32 |
| 2019/05/19 | CH2206 | Male | Three y/o | Treatment (Wk 1) | Treatment | Fast Day | No | 06:55 | 06:00 - 06:59 | Morning      | 37,8 | 128 | 295,2 | 295,2 | 18,95 | 611,22 | 193,85 |
| 2019/05/19 | CH2205 | Male | Three y/o | Treatment (Wk 1) | Treatment | Fast Day | No | 07:00 | 07:00 - 07:59 | Morning      | 37,5 | 103 | 138,2 | 138,2 | 18,65 | 596,00 | 167,15 |
| 2019/05/19 | CH2206 | Male | Three y/o | Treatment (Wk 1) | Treatment | Fast Day | No | 07:00 | 07:00 - 07:59 | Morning      | 37,9 | 110 | 237,0 | 237,0 | 19,05 | 600,69 | 186,10 |
| 2019/05/19 | CH2205 | Male | Three y/o | Treatment (Wk 1) | Treatment | Fast Day | No | 07:05 | 07:00 - 07:59 | Morning      | 37,5 | 98  | 82,8  | 82,8  | 18,65 | 592,41 | 149,27 |
| 2019/05/19 | CH2206 | Male | Three y/o | Treatment (Wk 1) | Treatment | Fast Day | No | 07:05 | 07:00 - 07:59 | Morning      | 37,9 |     | 725,4 | 725,4 | 19,05 |        | 225,83 |
| 2019/05/19 | CH2205 | Male | Three y/o | Treatment (Wk 1) | Treatment | Fast Day | No | 07:10 | 07:00 - 07:59 | Morning      | 37,7 | 71  | 165,4 | 165,4 | 18,85 | 568,10 | 173,44 |
| 2019/05/19 | CH2206 | Male | Three y/o | Treatment (Wk 1) | Treatment | Fast Day | No | 07:10 | 07:00 - 07:59 | Morning      | 38,0 | 134 | 71,4  | 71,4  | 19,15 | 614,33 | 144,12 |
| 2019/05/19 | CH2205 | Male | Three y/o | Treatment (Wk 1) | Treatment | Fast Day | No | 07:15 | 07:00 - 07:59 | Morning      | 37,9 | 59  | 225,2 | 225,2 | 19,05 | 553,30 | 184,30 |
| 2019/05/19 | CH2206 | Male | Three y/o | Treatment (Wk 1) | Treatment | Fast Day | No | 07:15 | 07:00 - 07:59 | Morning      | 38,1 | 117 | 233,6 | 233,6 | 19,26 | 605,02 | 185,59 |
| 2019/05/19 | CH2205 | Male | Three y/o | Treatment (Wk 1) | Treatment | Fast Day | No | 07:20 | 07:00 - 07:59 | Morning      | 38,0 |     | 199,8 | 199,8 | 19,15 |        | 180,08 |
| 2019/05/19 | CH2206 | Male | Three y/o | Treatment (Wk 1) | Treatment | Fast Day | No | 07:20 | 07:00 - 07:59 | Morning      | 38,1 | 131 | 164,2 | 164,2 | 19,26 | 612,80 | 173,19 |
| 2019/05/19 | CH2205 | Male | Three y/o | Treatment (Wk 1) | Treatment | Fast Day | No | 07:25 | 07:00 - 07:59 | Morning      | 38,1 |     | 118,0 | 118,0 | 19,26 |        | 161,62 |
| 2019/05/19 | CH2206 | Male | Three y/o | Treatment (Wk 1) | Treatment | Fast Day | No | 07:25 | 07:00 - 07:59 | Morning      | 38,1 | 126 | 131,4 | 131,4 | 19,26 | 610,14 | 165,38 |
| 2019/05/19 | CH2205 | Male | Three y/o | Treatment (Wk 1) | Treatment | Fast Day | No | 07:30 | 07:00 - 07:59 | Morning      | 38,1 | 89  | 41,6  | 41,6  | 19,26 | 585,33 | 125,44 |
| 2019/05/19 | CH2206 | Male | Three y/o | Treatment (Wk 1) | Treatment | Fast Day | No | 07:30 | 07:00 - 07:59 | Morning      | 38,3 |     | 133,4 | 133,4 | 19,46 |        | 165,91 |
| 2019/05/19 | CH2205 | Male | Three y/o | Treatment (Wk 1) | Treatment | Fast Day | No | 07:35 | 07:00 - 07:59 | Morning      | 37,7 | 160 | 79,0  | 79,0  | 18,85 | 626,07 | 147,64 |
| 2019/05/19 | CH2206 | Male | Three y/o | Treatment (Wk 1) | Treatment | Fast Day | No | 07:35 | 07:00 - 07:59 | Morning      | 38,2 | 124 | 146,2 | 146,2 | 19,36 | 609,04 | 169,12 |
| 2019/05/19 | CH2205 | Male | Three y/o | Treatment (Wk 1) | Treatment | Fast Day | No | 07:40 | 07:00 - 07:59 | Morning      | 37,5 |     | 10,0  | 10,0  | 18,65 |        | 76,76  |
| 2019/05/19 | CH2206 | Male | Three y/o | Treatment (Wk 1) | Treatment | Fast Day | No | 07:40 | 07:00 - 07:59 | Morning      | 38,1 | 104 | 74,2  | 74,2  | 19,26 | 596,69 | 145,46 |
| 2019/05/19 | CH2205 | Male | Three y/o | Treatment (Wk 1) | Treatment | Fast Day | No | 07:45 | 07:00 - 07:59 | Morning      | 37,3 |     | 108,0 | 108,0 | 18,46 |        | 158,53 |
| 2019/05/19 | CH2206 | Male | Three y/o | Treatment (Wk 1) | Treatment | Fast Day | No | 07:45 | 07:00 - 07:59 | Morning      | 38,1 | 129 | 125,2 | 125,2 | 19,26 | 611,75 | 163,69 |
| 2019/05/19 | CH2205 | Male | Three y/o | Treatment (Wk 1) | Treatment | Fast Day | No | 07:50 | 07:00 - 07:59 | Morning      | 37,4 | 97  | 242,6 | 242,6 | 18,55 | 591,66 | 186,92 |
| 2019/05/19 | CH2206 | Male | Three y/o | Treatment (Wk 1) | Treatment | Fast Day | No | 07:50 | 07:00 - 07:59 | Morning      | 38,1 | 158 | 263,6 | 263,6 | 19,26 | 625,26 | 189,85 |
| 2019/05/19 | CH2205 | Male | Three y/o | Treatment (Wk 1) | Treatment | Fast Day | No | 07:55 | 07:00 - 07:59 | Morning      | 37,5 | 108 | 33,4  | 33,4  | 18,65 | 599,39 | 117,88 |
| 2019/05/19 | CH2206 | Male | Three y/o | Treatment (Wk 1) | Treatment | Fast Day | No | 07:55 | 07:00 - 07:59 | Morning      | 38,0 | 110 | 465,8 | 465,8 | 19,15 | 600,69 | 210,03 |
| 2019/05/19 | CH2205 | Male | Three y/o | Treatment (Wk 1) | Treatment | Fast Day | No | 08:00 | 08:00 - 08:59 | Late Morning | 37,6 | 101 | 320,0 | 320,0 | 18,75 | 594,59 | 196,70 |
| 2019/05/19 | CH2206 | Male | Three y/o | Treatment (Wk 1) | Treatment | Fast Day | No | 08:00 | 08:00 - 08:59 | Late Morning | 38,0 | 106 | 128,6 | 128,6 | 19,15 | 598,06 | 164,63 |
| 2019/05/19 | CH2205 | Male | Three y/o | Treatment (Wk 1) | Treatment | Fast Day | No | 08:05 | 08:00 - 08:59 | Late Morning | 37,6 | 106 | 127,4 | 127,4 | 18,75 | 598,06 | 164,30 |
| 2019/05/19 | CH2206 | Male | Three y/o | Treatment (Wk 1) | Treatment | Fast Day | No | 08:05 | 08:00 - 08:59 | Late Morning | 38,0 | 118 | 206,8 | 206,8 | 19,15 | 605,61 | 181,30 |
| 2019/05/19 | CH2205 | Male | Three y/o | Treatment (Wk 1) | Treatment | Fast Day | No | 08:10 | 08:00 - 08:59 | Late Morning | 37,6 | 54  | 106,4 | 106,4 | 18,75 | 545,99 | 158,01 |
| 2019/05/19 | CH2206 | Male | Three y/o | Treatment (Wk 1) | Treatment | Fast Day | No | 08:10 | 08:00 - 08:59 | Late Morning | 38,0 | 131 | 134,8 | 134,8 | 19,15 | 612,80 | 166,28 |
| 2019/05/19 | CH2205 | Male | Three y/o | Treatment (Wk 1) | Treatment | Fast Day | No | 08:15 | 08:00 - 08:59 | Late Morning | 37,7 | 75  | 99,2  | 99,2  | 18,85 | 572,36 | 155,56 |
| 2019/05/19 | CH2206 | Male | Three y/o | Treatment (Wk 1) | Treatment | Fast Day | No | 08:15 | 08:00 - 08:59 | Late Morning | 38,0 | 114 | 130,6 | 130,6 | 19,15 | 603,20 | 165,17 |
| 2019/05/19 | CH2205 | Male | Three y/o | Treatment (Wk 1) | Treatment | Fast Day | No | 08:20 | 08:00 - 08:59 | Late Morning | 37,7 |     | 131,8 | 131,8 | 18,85 |        | 165,49 |
| 2019/05/19 | CH2206 | Male | Three y/o | Treatment (Wk 1) | Treatment | Fast Day | No | 08:20 | 08:00 - 08:59 | Late Morning | 37,9 |     | 176,4 | 176,4 | 19,05 |        | 175,71 |
| 2019/05/19 | CH2205 | Male | Three y/o | Treatment (Wk 1) | Treatment | Fast Day | No | 08:25 | 08:00 - 08:59 | Late Morning | 37,7 | 51  | 120,2 | 120,2 | 18,85 | 541,20 | 162,27 |
| 2019/05/19 | CH2206 | Male | Three y/o | Treatment (Wk 1) | Treatment | Fast Day | No | 08:25 | 08:00 - 08:59 | Late Morning | 37,9 | 114 | 154,4 | 154,4 | 19,05 | 603,20 | 171,03 |
| 2019/05/19 | CH2205 | Male | Three y/o | Treatment (Wk 1) | Treatment | Fast Day | No | 08:30 | 08:00 - 08:59 | Late Morning | 37,7 |     | 212,4 | 212,4 | 18,85 |        | 182,24 |
| 2019/05/19 | CH2206 | Male | Three y/o | Treatment (Wk 1) | Treatment | Fast Day | No | 08:30 | 08:00 - 08:59 | Late Morning | 37,9 | 115 | 523,8 | 523,8 | 19,05 | 603,82 | 214,20 |
| 2019/05/19 | CH2205 | Male | Three y/o | Treatment (Wk 1) | Treatment | Fast Day | No | 08:35 | 08:00 - 08:59 | Late Morning | 37,7 | 83  | 114,0 | 114,0 | 18,85 | 580,11 | 160,42 |
| 2019/05/19 | CH2206 | Male | Three y/o | Treatment (Wk 1) | Treatment | Fast Day | No | 08:35 | 08:00 - 08:59 | Late Morning | 37,9 | 111 | 84,4  | 84,4  | 19,05 | 601,33 | 149,94 |
| 2019/05/19 | CH2205 | Male | Three y/o | Treatment (Wk 1) | Treatment | Fast Day | No | 08:40 | 08:00 - 08:59 | Late Morning | 37,8 | 66  | 14,4  | 14,4  | 18,95 | 562,34 | 89,12  |
| 2019/05/19 | CH2206 | Male | Three y/o | Treatment (Wk 1) | Treatment | Fast Day | No | 08:40 | 08:00 - 08:59 | Late Morning | 37,9 | 112 | 130,2 | 130,2 | 19,05 | 601,96 | 165,06 |
| 2019/05/19 | CH2205 | Male | Three y/o | Treatment (Wk 1) | Treatment | Fast Day | No | 08:45 | 08:00 - 08:59 | Late Morning | 37,9 | 108 | 129,0 | 129,0 | 19,05 | 599,39 | 164,74 |
| 2019/05/19 | CH2206 | Male | Three y/o | Treatment (Wk 1) | Treatment | Fast Day | No | 08:45 | 08:00 - 08:59 | Late Morning | 37,9 | 110 | 87,2  | 87,2  | 19,05 | 600,69 | 151,07 |
| 2019/05/19 | CH2205 | Male | Three y/o | Treatment (Wk 1) | Treatment | Fast Day | No | 08:50 | 08:00 - 08:59 | Late Morning | 37,9 |     | 63,6  | 63,6  | 19,05 |        | 140,11 |



|            |        |      |           |                  |           |          |    |       |               |              |      |     |        |       |       |        |        |
|------------|--------|------|-----------|------------------|-----------|----------|----|-------|---------------|--------------|------|-----|--------|-------|-------|--------|--------|
| 2019/05/19 | CH2206 | Male | Three y/o | Treatment (Wk 1) | Treatment | Fast Day | No | 08:50 | 08:00 - 08:59 | Late Morning | 37,9 | 58  | 155,6  | 155,6 | 19,05 | 551,90 | 171,30 |
| 2019/05/19 | CH2205 | Male | Three y/o | Treatment (Wk 1) | Treatment | Fast Day | No | 08:55 | 08:00 - 08:59 | Late Morning | 37,7 | 82  | 470,0  | 470,0 | 18,85 | 579,19 | 210,34 |
| 2019/05/19 | CH2206 | Male | Three y/o | Treatment (Wk 1) | Treatment | Fast Day | No | 08:55 | 08:00 - 08:59 | Late Morning | 37,9 | 115 | 655,4  | 655,4 | 19,05 | 603,82 | 222,20 |
| 2019/05/19 | CH2205 | Male | Three y/o | Treatment (Wk 1) | Treatment | Fast Day | No | 09:00 | 09:00 - 09:59 | Late Morning | 37,7 | 56  | 185,0  | 185,0 | 18,85 | 549,01 | 177,38 |
| 2019/05/19 | CH2206 | Male | Three y/o | Treatment (Wk 1) | Treatment | Fast Day | No | 09:00 | 09:00 - 09:59 | Late Morning | 37,9 | 126 | 290,2  | 290,2 | 19,05 | 610,14 | 193,25 |
| 2019/05/19 | CH2205 | Male | Three y/o | Treatment (Wk 1) | Treatment | Fast Day | No | 09:05 | 09:00 - 09:59 | Late Morning | 37,7 |     | 40,4   | 40,4  | 18,85 |        | 124,43 |
| 2019/05/19 | CH2206 | Male | Three y/o | Treatment (Wk 1) | Treatment | Fast Day | No | 09:05 | 09:00 - 09:59 | Late Morning | 37,9 | 117 | 103,2  | 103,2 | 19,05 | 605,02 | 156,94 |
| 2019/05/19 | CH2205 | Male | Three y/o | Treatment (Wk 1) | Treatment | Fast Day | No | 09:10 | 09:00 - 09:59 | Late Morning | 37,6 | 100 | 72,6   | 72,6  | 18,75 | 593,87 | 144,70 |
| 2019/05/19 | CH2206 | Male | Three y/o | Treatment (Wk 1) | Treatment | Fast Day | No | 09:10 | 09:00 - 09:59 | Late Morning | 37,9 | 115 | 94,2   | 94,2  | 19,05 | 603,82 | 153,76 |
| 2019/05/19 | CH2205 | Male | Three y/o | Treatment (Wk 1) | Treatment | Fast Day | No | 09:15 | 09:00 - 09:59 | Late Morning | 37,6 | 80  | 27,0   | 27,0  | 18,75 | 577,31 | 110,58 |
| 2019/05/19 | CH2206 | Male | Three y/o | Treatment (Wk 1) | Treatment | Fast Day | No | 09:15 | 09:00 - 09:59 | Late Morning | 37,9 | 129 | 110,4  | 110,4 | 19,05 | 611,75 | 159,30 |
| 2019/05/19 | CH2205 | Male | Three y/o | Treatment (Wk 1) | Treatment | Fast Day | No | 09:20 | 09:00 - 09:59 | Late Morning | 37,6 | 120 | 60,4   | 60,4  | 18,75 | 606,78 | 138,32 |
| 2019/05/19 | CH2206 | Male | Three y/o | Treatment (Wk 1) | Treatment | Fast Day | No | 09:20 | 09:00 - 09:59 | Late Morning | 37,9 | 121 | 154,2  | 154,2 | 19,05 | 607,35 | 170,99 |
| 2019/05/19 | CH2205 | Male | Three y/o | Treatment (Wk 1) | Treatment | Fast Day | No | 09:25 | 09:00 - 09:59 | Late Morning | 37,5 |     | 267,0  | 267,0 | 18,65 |        | 190,30 |
| 2019/05/19 | CH2206 | Male | Three y/o | Treatment (Wk 1) | Treatment | Fast Day | No | 09:25 | 09:00 - 09:59 | Late Morning | 37,9 | 91  | 218,0  | 218,0 | 19,05 | 586,98 | 183,15 |
| 2019/05/19 | CH2205 | Male | Three y/o | Treatment (Wk 1) | Treatment | Fast Day | No | 09:30 | 09:00 - 09:59 | Late Morning | 37,6 | 119 | 345,6  | 345,6 | 18,75 | 606,20 | 199,43 |
| 2019/05/19 | CH2206 | Male | Three y/o | Treatment (Wk 1) | Treatment | Fast Day | No | 09:30 | 09:00 - 09:59 | Late Morning | 37,9 | 141 | 186,8  | 186,8 | 19,05 | 617,75 | 177,72 |
| 2019/05/19 | CH2205 | Male | Three y/o | Treatment (Wk 1) | Treatment | Fast Day | No | 09:35 | 09:00 - 09:59 | Late Morning | 37,7 |     | 138,4  | 138,4 | 18,85 |        | 167,20 |
| 2019/05/19 | CH2206 | Male | Three y/o | Treatment (Wk 1) | Treatment | Fast Day | No | 09:35 | 09:00 - 09:59 | Late Morning | 37,9 | 118 | 136,6  | 136,6 | 19,05 | 605,61 | 166,74 |
| 2019/05/19 | CH2205 | Male | Three y/o | Treatment (Wk 1) | Treatment | Fast Day | No | 09:40 | 09:00 - 09:59 | Late Morning | 37,7 | 106 | 25,8   | 25,8  | 18,85 | 598,06 | 109,02 |
| 2019/05/19 | CH2206 | Male | Three y/o | Treatment (Wk 1) | Treatment | Fast Day | No | 09:40 | 09:00 - 09:59 | Late Morning | 37,9 | 180 | 140,0  | 140,0 | 19,05 | 633,61 | 167,60 |
| 2019/05/19 | CH2205 | Male | Three y/o | Treatment (Wk 1) | Treatment | Fast Day | No | 09:45 | 09:00 - 09:59 | Late Morning | 37,7 |     | 242,8  | 242,8 | 18,85 |        | 186,95 |
| 2019/05/19 | CH2206 | Male | Three y/o | Treatment (Wk 1) | Treatment | Fast Day | No | 09:45 | 09:00 - 09:59 | Late Morning | 37,9 | 119 | 127,6  | 127,6 | 19,05 | 606,20 | 164,35 |
| 2019/05/19 | CH2205 | Male | Three y/o | Treatment (Wk 1) | Treatment | Fast Day | No | 09:50 | 09:00 - 09:59 | Late Morning | 37,7 | 128 | 50,2   | 50,2  | 18,85 | 611,22 | 131,92 |
| 2019/05/19 | CH2206 | Male | Three y/o | Treatment (Wk 1) | Treatment | Fast Day | No | 09:50 | 09:00 - 09:59 | Late Morning | 37,8 | 111 | 130,6  | 130,6 | 18,95 | 601,33 | 165,17 |
| 2019/05/19 | CH2205 | Male | Three y/o | Treatment (Wk 1) | Treatment | Fast Day | No | 09:55 | 09:00 - 09:59 | Late Morning | 37,8 | 103 | 76,8   | 76,8  | 18,95 | 596,00 | 146,66 |
| 2019/05/19 | CH2206 | Male | Three y/o | Treatment (Wk 1) | Treatment | Fast Day | No | 09:55 | 09:00 - 09:59 | Late Morning | 37,9 | 57  | 60,0   | 60,0  | 19,05 | 550,47 | 138,09 |
| 2019/05/19 | CH2205 | Male | Three y/o | Treatment (Wk 1) | Treatment | Fast Day | No | 10:00 | 10:00 - 10:59 | Late Morning | 37,7 |     | 323,2  | 323,2 | 18,85 |        | 197,06 |
| 2019/05/19 | CH2206 | Male | Three y/o | Treatment (Wk 1) | Treatment | Fast Day | No | 10:00 | 10:00 - 10:59 | Late Morning | 37,9 | 49  | 126,8  | 126,8 | 19,05 | 537,80 | 164,13 |
| 2019/05/19 | CH2205 | Male | Three y/o | Treatment (Wk 1) | Treatment | Fast Day | No | 10:05 | 10:00 - 10:59 | Late Morning | 37,9 | 97  | 24,4   | 24,4  | 19,05 | 591,66 | 107,11 |
| 2019/05/19 | CH2206 | Male | Three y/o | Treatment (Wk 1) | Treatment | Fast Day | No | 10:05 | 10:00 - 10:59 | Late Morning | 38,0 | 54  | 110,0  | 110,0 | 19,15 | 545,99 | 159,17 |
| 2019/05/19 | CH2205 | Male | Three y/o | Treatment (Wk 1) | Treatment | Fast Day | No | 10:10 | 10:00 - 10:59 | Late Morning | 37,7 | 113 | 66,2   | 66,2  | 18,85 | 602,58 | 141,50 |
| 2019/05/19 | CH2206 | Male | Three y/o | Treatment (Wk 1) | Treatment | Fast Day | No | 10:10 | 10:00 - 10:59 | Late Morning | 37,9 | 118 | 84,0   | 84,0  | 19,05 | 605,61 | 149,77 |
| 2019/05/19 | CH2205 | Male | Three y/o | Treatment (Wk 1) | Treatment | Fast Day | No | 10:15 | 10:00 - 10:59 | Late Morning | 37,9 | 109 | 110,2  | 110,2 | 19,05 | 600,04 | 159,23 |
| 2019/05/19 | CH2206 | Male | Three y/o | Treatment (Wk 1) | Treatment | Fast Day | No | 10:15 | 10:00 - 10:59 | Late Morning | 37,9 | 143 | 225,4  | 225,4 | 19,05 | 618,69 | 184,33 |
| 2019/05/19 | CH2205 | Male | Three y/o | Treatment (Wk 1) | Treatment | Fast Day | No | 10:20 | 10:00 - 10:59 | Late Morning | 37,9 | 54  | 99,0   | 99,0  | 19,05 | 545,99 | 155,49 |
| 2019/05/19 | CH2206 | Male | Three y/o | Treatment (Wk 1) | Treatment | Fast Day | No | 10:20 | 10:00 - 10:59 | Late Morning | 38,0 | 126 | 196,2  | 196,2 | 19,15 | 610,14 | 179,44 |
| 2019/05/19 | CH2205 | Male | Three y/o | Treatment (Wk 1) | Treatment | Fast Day | No | 10:25 | 10:00 - 10:59 | Late Morning | 37,7 |     | 36,4   | 36,4  | 18,85 |        | 120,84 |
| 2019/05/19 | CH2206 | Male | Three y/o | Treatment (Wk 1) | Treatment | Fast Day | No | 10:25 | 10:00 - 10:59 | Late Morning | 38,0 | 119 | 33,8   | 33,8  | 19,15 | 606,20 | 118,29 |
| 2019/05/19 | CH2205 | Male | Three y/o | Treatment (Wk 1) | Treatment | Fast Day | No | 10:30 | 10:00 - 10:59 | Late Morning | 37,6 | 63  | 36,2   | 36,2  | 18,75 | 558,62 | 120,65 |
| 2019/05/19 | CH2206 | Male | Three y/o | Treatment (Wk 1) | Treatment | Fast Day | No | 10:30 | 10:00 - 10:59 | Late Morning | 38,0 | 78  | 27,8   | 27,8  | 19,15 | 575,38 | 111,58 |
| 2019/05/19 | CH2205 | Male | Three y/o | Treatment (Wk 1) | Treatment | Fast Day | No | 10:35 | 10:00 - 10:59 | Late Morning | 37,6 | 60  | 35,4   | 35,4  | 18,75 | 554,67 | 119,88 |
| 2019/05/19 | CH2206 | Male | Three y/o | Treatment (Wk 1) | Treatment | Fast Day | No | 10:35 | 10:00 - 10:59 | Late Morning | 37,7 | 62  | 30,2   | 30,2  | 18,85 | 557,33 | 114,42 |
| 2019/05/19 | CH2205 | Male | Three y/o | Treatment (Wk 1) | Treatment | Fast Day | No | 10:40 | 10:00 - 10:59 | Late Morning | 37,5 |     | 12,6   | 12,6  | 18,65 |        | 84,59  |
| 2019/05/19 | CH2206 | Male | Three y/o | Treatment (Wk 1) | Treatment | Fast Day | No | 10:40 | 10:00 - 10:59 | Late Morning | 37,4 | 48  | 20,2   | 20,2  | 18,55 | 536,04 | 100,65 |
| 2019/05/19 | CH2205 | Male | Three y/o | Treatment (Wk 1) | Treatment | Fast Day | No | 10:45 | 10:00 - 10:59 | Late Morning | 37,5 | 55  | 16,0   | 16,0  | 18,65 | 547,52 | 92,71  |
| 2019/05/19 | CH2206 | Male | Three y/o | Treatment (Wk 1) | Treatment | Fast Day | No | 10:45 | 10:00 - 10:59 | Late Morning | 37,4 | 48  | 3,4    | 3,4   | 18,55 | 536,04 | 40,51  |
| 2019/05/19 | CH2205 | Male | Three y/o | Treatment (Wk 1) | Treatment | Fast Day | No | 10:50 | 10:00 - 10:59 | Late Morning | 37,5 | 50  | 14,8   | 14,8  | 18,65 | 539,52 | 90,05  |
| 2019/05/19 | CH2206 | Male | Three y/o | Treatment (Wk 1) | Treatment | Fast Day | No | 10:50 | 10:00 - 10:59 | Late Morning | 37,3 | 95  | 20,6   | 20,6  | 18,46 | 590,14 | 101,32 |
| 2019/05/19 | CH2205 | Male | Three y/o | Treatment (Wk 1) | Treatment | Fast Day | No | 10:55 | 10:00 - 10:59 | Late Morning | 37,5 | 51  | 20,0   | 20,0  | 18,65 | 541,20 | 100,31 |
| 2019/05/19 | CH2206 | Male | Three y/o | Treatment (Wk 1) | Treatment | Fast Day | No | 10:55 | 10:00 - 10:59 | Late Morning | 37,4 | 47  | 28,2   | 28,2  | 18,55 | 534,23 | 112,07 |
| 2019/05/19 | CH2205 | Male | Three y/o | Treatment (Wk 1) | Treatment | Fast Day | No | 11:00 | 11:00 - 11:59 | Late Morning | 37,5 | 73  | 43,0   | 43,0  | 18,65 | 570,27 | 126,58 |
| 2019/05/19 | CH2206 | Male | Three y/o | Treatment (Wk 1) | Treatment | Fast Day | No | 11:00 | 11:00 - 11:59 | Late Morning | 37,5 | 115 | 59,8   | 59,8  | 18,65 | 603,82 | 137,98 |
| 2019/05/19 | CH2205 | Male | Three y/o | Treatment (Wk 1) | Treatment | Fast Day | No | 11:05 | 11:00 - 11:59 | Late Morning | 37,4 | 104 | 74,2   | 74,2  | 18,55 | 596,69 | 145,46 |
| 2019/05/19 | CH2206 | Male | Three y/o | Treatment (Wk 1) | Treatment | Fast Day | No | 11:05 | 11:00 - 11:59 | Late Morning | 37,5 | 114 | 137,6  | 137,6 | 18,65 | 603,20 | 166,99 |
| 2019/05/19 | CH2205 | Male | Three y/o | Treatment (Wk 1) | Treatment | Fast Day | No | 11:10 | 11:00 - 11:59 | Late Morning | 37,4 | 46  | 353,8  | 353,8 | 18,55 | 532,38 | 200,26 |
| 2019/05/19 | CH2206 | Male | Three y/o | Treatment (Wk 1) | Treatment | Fast Day | No | 11:10 | 11:00 - 11:59 | Late Morning | 37,5 | 114 | 116,0  | 116,0 | 18,65 | 603,20 | 161,02 |
| 2019/05/19 | CH2205 | Male | Three y/o | Treatment (Wk 1) | Treatment | Fast Day | No | 11:15 | 11:00 - 11:59 | Late Morning | 37,4 | 103 | 184,2  | 184,2 | 18,55 | 596,00 | 177,23 |
| 2019/05/19 | CH2206 | Male | Three y/o | Treatment (Wk 1) | Treatment | Fast Day | No | 11:15 | 11:00 - 11:59 | Late Morning | 37,7 | 107 | 122,6  | 122,6 | 18,85 | 598,73 | 162,96 |
| 2019/05/19 | CH2205 | Male | Three y/o | Treatment (Wk 1) | Treatment | Fast Day | No | 11:20 | 11:00 - 11:59 | Late Morning | 37,4 | 98  | 94,8   | 94,8  | 18,55 | 592,41 | 153,98 |
| 2019/05/19 | CH2206 | Male | Three y/o | Treatment (Wk 1) | Treatment | Fast Day | No | 11:20 | 11:00 - 11:59 | Late Morning | 37,7 | 105 | 191,4  | 191,4 | 18,85 | 597,38 | 178,57 |
| 2019/05/19 | CH2205 | Male | Three y/o | Treatment (Wk 1) | Treatment | Fast Day | No | 11:25 | 11:00 - 11:59 | Late Morning | 37,5 | 109 | 93,4   | 93,4  | 18,65 | 600,04 | 153,46 |
| 2019/05/19 | CH2206 | Male | Three y/o | Treatment (Wk 1) | Treatment | Fast Day | No | 11:25 | 11:00 - 11:59 | Late Morning | 37,7 | 101 | 61,4   | 61,4  | 18,85 | 594,59 | 138,89 |
| 2019/05/19 | CH2205 | Male | Three y/o | Treatment (Wk 1) | Treatment | Fast Day | No | 11:30 | 11:00 - 11:59 | Late Morning | 37,6 |     | 51,2   | 51,2  | 18,75 |        | 132,61 |
| 2019/05/19 | CH2206 | Male | Three y/o | Treatment (Wk 1) | Treatment | Fast Day | No | 11:30 | 11:00 - 11:59 | Late Morning | 37,7 | 117 | 120,6  | 120,6 | 18,85 | 605,02 | 162,38 |
| 2019/05/19 | CH2205 | Male | Three y/o | Treatment (Wk 1) | Treatment | Fast Day | No | 11:35 | 11:00 - 11:59 | Late Morning | 37,5 | 53  | 783,8  | 783,8 | 18,65 | 544,43 | 228,60 |
| 2019/05/19 | CH2206 | Male | Three y/o | Treatment (Wk 1) | Treatment | Fast Day | No | 11:35 | 11:00 - 11:59 | Late Morning | 37,8 |     | 1206,6 |       | 18,95 |        |        |
| 2019/05/19 | CH2205 | Male | Three y/o | Treatment (Wk 1) | Treatment | Fast Day | No | 11:40 | 11:00 - 11:59 | Late Morning | 38,0 |     | 151,6  | 151,6 | 19,15 |        | 170,39 |
| 2019/05/19 | CH2206 | Male | Three y/o | Treatment (Wk 1) | Treatment | Fast Day | No | 11:40 | 11:00 - 11:59 | Late Morning | 37,9 | 119 | 65,4   | 65,4  | 19,05 | 606,20 | 141,08 |
| 2019/05/19 | CH2205 | Male | Three y/o | Treatment (Wk 1) | Treatment | Fast Day | No | 11:45 | 11:00 - 11:59 | Late Morning | 38,0 | 73  | 407,8  | 407,8 | 19,15 | 570,27 | 205,30 |



|            |        |      |           |                  |           |          |    |       |               |              |      |     |       |       |       |        |        |
|------------|--------|------|-----------|------------------|-----------|----------|----|-------|---------------|--------------|------|-----|-------|-------|-------|--------|--------|
| 2019/05/19 | CH2206 | Male | Three y/o | Treatment (Wk 1) | Treatment | Fast Day | No | 11:45 | 11:00 - 11:59 | Late Morning | 37,9 | 150 | 459,8 | 459,8 | 19,05 | 621,86 | 209,56 |
| 2019/05/19 | CH2205 | Male | Three y/o | Treatment (Wk 1) | Treatment | Fast Day | No | 11:50 | 11:00 - 11:59 | Late Morning | 38,0 | 89  | 169,8 | 169,8 | 19,15 | 585,33 | 174,37 |
| 2019/05/19 | CH2206 | Male | Three y/o | Treatment (Wk 1) | Treatment | Fast Day | No | 11:50 | 11:00 - 11:59 | Late Morning | 37,9 |     | 79,2  | 79,2  | 19,05 |        | 147,73 |
| 2019/05/19 | CH2205 | Male | Three y/o | Treatment (Wk 1) | Treatment | Fast Day | No | 11:55 | 11:00 - 11:59 | Late Morning | 38,0 | 111 | 86,0  | 86,0  | 19,15 | 601,33 | 150,59 |
| 2019/05/19 | CH2206 | Male | Three y/o | Treatment (Wk 1) | Treatment | Fast Day | No | 11:55 | 11:00 - 11:59 | Late Morning | 38,0 | 115 | 439,4 | 439,4 | 19,15 | 603,82 | 207,95 |
| 2019/05/19 | CH2205 | Male | Three y/o | Treatment (Wk 1) | Treatment | Fast Day | No | 12:00 | 12:00 - 12:59 | Afternoon    | 38,0 | 84  | 254,2 | 254,2 | 19,15 | 581,01 | 188,57 |
| 2019/05/19 | CH2206 | Male | Three y/o | Treatment (Wk 1) | Treatment | Fast Day | No | 12:00 | 12:00 - 12:59 | Afternoon    | 38,0 | 131 | 152,0 | 152,0 | 19,15 | 612,80 | 170,48 |
| 2019/05/19 | CH2205 | Male | Three y/o | Treatment (Wk 1) | Treatment | Fast Day | No | 12:05 | 12:00 - 12:59 | Afternoon    | 38,0 | 119 | 145,0 | 145,0 | 19,15 | 606,20 | 168,83 |
| 2019/05/19 | CH2206 | Male | Three y/o | Treatment (Wk 1) | Treatment | Fast Day | No | 12:05 | 12:00 - 12:59 | Afternoon    | 38,0 | 141 | 74,8  | 74,8  | 19,15 | 617,75 | 145,74 |
| 2019/05/19 | CH2205 | Male | Three y/o | Treatment (Wk 1) | Treatment | Fast Day | No | 12:10 | 12:00 - 12:59 | Afternoon    | 38,0 | 191 | 137,0 | 137,0 | 19,15 | 637,33 | 166,84 |
| 2019/05/19 | CH2206 | Male | Three y/o | Treatment (Wk 1) | Treatment | Fast Day | No | 12:10 | 12:00 - 12:59 | Afternoon    | 38,0 | 112 | 112,0 | 112,0 | 19,15 | 601,96 | 159,80 |
| 2019/05/19 | CH2205 | Male | Three y/o | Treatment (Wk 1) | Treatment | Fast Day | No | 12:15 | 12:00 - 12:59 | Afternoon    | 38,0 | 87  | 142,2 | 142,2 | 19,15 | 583,64 | 168,15 |
| 2019/05/19 | CH2206 | Male | Three y/o | Treatment (Wk 1) | Treatment | Fast Day | No | 12:15 | 12:00 - 12:59 | Afternoon    | 38,0 | 124 | 329,4 | 329,4 | 19,15 | 609,04 | 197,73 |
| 2019/05/19 | CH2205 | Male | Three y/o | Treatment (Wk 1) | Treatment | Fast Day | No | 12:20 | 12:00 - 12:59 | Afternoon    | 38,0 |     | 325,4 | 325,4 | 19,15 |        | 197,30 |
| 2019/05/19 | CH2206 | Male | Three y/o | Treatment (Wk 1) | Treatment | Fast Day | No | 12:20 | 12:00 - 12:59 | Afternoon    | 38,0 |     | 69,4  | 69,4  | 19,15 |        | 143,14 |
| 2019/05/19 | CH2205 | Male | Three y/o | Treatment (Wk 1) | Treatment | Fast Day | No | 12:25 | 12:00 - 12:59 | Afternoon    | 38,3 |     | 28,0  | 28,0  | 19,46 |        | 111,83 |
| 2019/05/19 | CH2206 | Male | Three y/o | Treatment (Wk 1) | Treatment | Fast Day | No | 12:25 | 12:00 - 12:59 | Afternoon    | 38,1 | 117 | 127,4 | 127,4 | 19,26 | 605,02 | 164,30 |
| 2019/05/19 | CH2205 | Male | Three y/o | Treatment (Wk 1) | Treatment | Fast Day | No | 12:30 | 12:00 - 12:59 | Afternoon    | 38,3 | 82  | 5,2   | 5,2   | 19,46 | 579,19 | 54,72  |
| 2019/05/19 | CH2206 | Male | Three y/o | Treatment (Wk 1) | Treatment | Fast Day | No | 12:30 | 12:00 - 12:59 | Afternoon    | 38,1 | 106 | 39,6  | 39,6  | 19,26 | 598,06 | 123,74 |
| 2019/05/19 | CH2205 | Male | Three y/o | Treatment (Wk 1) | Treatment | Fast Day | No | 12:35 | 12:00 - 12:59 | Afternoon    | 38,3 | 63  | 74,6  | 74,6  | 19,46 | 558,62 | 145,65 |
| 2019/05/19 | CH2206 | Male | Three y/o | Treatment (Wk 1) | Treatment | Fast Day | No | 12:35 | 12:00 - 12:59 | Afternoon    | 38,1 | 73  | 36,0  | 36,0  | 19,26 | 570,27 | 120,46 |
| 2019/05/19 | CH2205 | Male | Three y/o | Treatment (Wk 1) | Treatment | Fast Day | No | 12:40 | 12:00 - 12:59 | Afternoon    | 38,3 | 101 | 132,4 | 132,4 | 19,46 | 594,59 | 165,65 |
| 2019/05/19 | CH2206 | Male | Three y/o | Treatment (Wk 1) | Treatment | Fast Day | No | 12:40 | 12:00 - 12:59 | Afternoon    | 38,0 | 112 | 104,2 | 104,2 | 19,15 | 601,96 | 157,28 |
| 2019/05/19 | CH2205 | Male | Three y/o | Treatment (Wk 1) | Treatment | Fast Day | No | 12:45 | 12:00 - 12:59 | Afternoon    | 38,3 | 101 | 32,4  | 32,4  | 19,46 | 594,59 | 116,84 |
| 2019/05/19 | CH2206 | Male | Three y/o | Treatment (Wk 1) | Treatment | Fast Day | No | 12:45 | 12:00 - 12:59 | Afternoon    | 38,1 | 126 | 118,6 | 118,6 | 19,26 | 610,14 | 161,80 |
| 2019/05/19 | CH2205 | Male | Three y/o | Treatment (Wk 1) | Treatment | Fast Day | No | 12:50 | 12:00 - 12:59 | Afternoon    | 38,1 | 138 | 30,2  | 30,2  | 19,26 | 616,31 | 114,42 |
| 2019/05/19 | CH2206 | Male | Three y/o | Treatment (Wk 1) | Treatment | Fast Day | No | 12:50 | 12:00 - 12:59 | Afternoon    | 38,0 |     | 84,8  | 84,8  | 19,15 |        | 150,10 |
| 2019/05/19 | CH2205 | Male | Three y/o | Treatment (Wk 1) | Treatment | Fast Day | No | 12:55 | 12:00 - 12:59 | Afternoon    | 38,1 | 63  | 20,4  | 20,4  | 19,26 | 558,62 | 100,99 |
| 2019/05/19 | CH2206 | Male | Three y/o | Treatment (Wk 1) | Treatment | Fast Day | No | 12:55 | 12:00 - 12:59 | Afternoon    | 38,0 | 131 | 293,8 | 293,8 | 19,15 | 612,80 | 193,68 |
| 2019/05/19 | CH2205 | Male | Three y/o | Treatment (Wk 1) | Treatment | Fast Day | No | 13:00 | 13:00 - 13:59 | Afternoon    | 38,1 | 86  | 50,4  | 50,4  | 19,26 | 582,77 | 132,06 |
| 2019/05/19 | CH2206 | Male | Three y/o | Treatment (Wk 1) | Treatment | Fast Day | No | 13:00 | 13:00 - 13:59 | Afternoon    | 38,0 | 147 | 447,8 | 447,8 | 19,15 | 620,52 | 208,62 |
| 2019/05/19 | CH2205 | Male | Three y/o | Treatment (Wk 1) | Treatment | Fast Day | No | 13:05 | 13:00 - 13:59 | Afternoon    | 38,1 | 64  | 9,0   | 9,0   | 19,26 | 559,88 | 73,19  |
| 2019/05/19 | CH2206 | Male | Three y/o | Treatment (Wk 1) | Treatment | Fast Day | No | 13:05 | 13:00 - 13:59 | Afternoon    | 38,0 | 80  | 37,8  | 37,8  | 19,15 | 577,31 | 122,14 |
| 2019/05/19 | CH2205 | Male | Three y/o | Treatment (Wk 1) | Treatment | Fast Day | No | 13:10 | 13:00 - 13:59 | Afternoon    | 38,1 | 61  | 11,0  | 11,0  | 19,26 | 556,01 | 79,98  |
| 2019/05/19 | CH2206 | Male | Three y/o | Treatment (Wk 1) | Treatment | Fast Day | No | 13:10 | 13:00 - 13:59 | Afternoon    | 38,0 | 70  | 25,8  | 25,8  | 19,15 | 566,99 | 109,02 |
| 2019/05/19 | CH2205 | Male | Three y/o | Treatment (Wk 1) | Treatment | Fast Day | No | 13:15 | 13:00 - 13:59 | Afternoon    | 38,1 | 49  | 6,0   | 6,0   | 19,26 | 537,80 | 59,53  |
| 2019/05/19 | CH2206 | Male | Three y/o | Treatment (Wk 1) | Treatment | Fast Day | No | 13:15 | 13:00 - 13:59 | Afternoon    | 38,0 |     | 69,6  | 69,6  | 19,15 |        | 143,24 |
| 2019/05/19 | CH2205 | Male | Three y/o | Treatment (Wk 1) | Treatment | Fast Day | No | 13:20 | 13:00 - 13:59 | Afternoon    | 38,0 | 71  | 2,8   | 2,8   | 19,15 | 568,10 | 34,04  |
| 2019/05/19 | CH2206 | Male | Three y/o | Treatment (Wk 1) | Treatment | Fast Day | No | 13:20 | 13:00 - 13:59 | Afternoon    | 38,0 | 74  | 21,2  | 21,2  | 19,15 | 571,33 | 102,31 |
| 2019/05/19 | CH2205 | Male | Three y/o | Treatment (Wk 1) | Treatment | Fast Day | No | 13:25 | 13:00 - 13:59 | Afternoon    | 38,0 | 50  | 9,8   | 9,8   | 19,15 | 539,52 | 76,07  |
| 2019/05/19 | CH2206 | Male | Three y/o | Treatment (Wk 1) | Treatment | Fast Day | No | 13:25 | 13:00 - 13:59 | Afternoon    | 38,0 | 61  | 47,0  | 47,0  | 19,15 | 556,01 | 129,65 |
| 2019/05/19 | CH2205 | Male | Three y/o | Treatment (Wk 1) | Treatment | Fast Day | No | 13:30 | 13:00 - 13:59 | Afternoon    | 38,0 | 104 | 25,4  | 25,4  | 19,15 | 596,69 | 108,49 |
| 2019/05/19 | CH2206 | Male | Three y/o | Treatment (Wk 1) | Treatment | Fast Day | No | 13:30 | 13:00 - 13:59 | Afternoon    | 38,0 | 83  | 88,2  | 88,2  | 19,15 | 580,11 | 151,47 |
| 2019/05/19 | CH2205 | Male | Three y/o | Treatment (Wk 1) | Treatment | Fast Day | No | 13:35 | 13:00 - 13:59 | Afternoon    | 38,0 | 56  | 10,0  | 10,0  | 19,15 | 549,01 | 76,76  |
| 2019/05/19 | CH2206 | Male | Three y/o | Treatment (Wk 1) | Treatment | Fast Day | No | 13:35 | 13:00 - 13:59 | Afternoon    | 38,0 | 69  | 33,6  | 33,6  | 19,15 | 565,86 | 118,09 |
| 2019/05/19 | CH2205 | Male | Three y/o | Treatment (Wk 1) | Treatment | Fast Day | No | 13:40 | 13:00 - 13:59 | Afternoon    | 37,9 | 46  | 7,8   | 7,8   | 19,05 | 532,38 | 68,36  |
| 2019/05/19 | CH2206 | Male | Three y/o | Treatment (Wk 1) | Treatment | Fast Day | No | 13:40 | 13:00 - 13:59 | Afternoon    | 38,0 | 52  | 36,6  | 36,6  | 19,15 | 542,83 | 121,03 |
| 2019/05/19 | CH2205 | Male | Three y/o | Treatment (Wk 1) | Treatment | Fast Day | No | 13:45 | 13:00 - 13:59 | Afternoon    | 37,9 | 56  | 10,4  | 10,4  | 19,05 | 549,01 | 78,08  |
| 2019/05/19 | CH2206 | Male | Three y/o | Treatment (Wk 1) | Treatment | Fast Day | No | 13:45 | 13:00 - 13:59 | Afternoon    | 37,9 | 47  | 59,8  | 59,8  | 19,05 | 534,23 | 137,98 |
| 2019/05/19 | CH2205 | Male | Three y/o | Treatment (Wk 1) | Treatment | Fast Day | No | 13:50 | 13:00 - 13:59 | Afternoon    | 37,9 | 52  | 11,8  | 11,8  | 19,05 | 542,83 | 82,36  |
| 2019/05/19 | CH2206 | Male | Three y/o | Treatment (Wk 1) | Treatment | Fast Day | No | 13:50 | 13:00 - 13:59 | Afternoon    | 37,9 | 59  | 62,8  | 62,8  | 19,05 | 553,30 | 139,67 |
| 2019/05/19 | CH2205 | Male | Three y/o | Treatment (Wk 1) | Treatment | Fast Day | No | 13:55 | 13:00 - 13:59 | Afternoon    | 37,9 | 53  | 3,4   | 3,4   | 19,05 | 544,43 | 40,51  |
| 2019/05/19 | CH2206 | Male | Three y/o | Treatment (Wk 1) | Treatment | Fast Day | No | 13:55 | 13:00 - 13:59 | Afternoon    | 38,0 | 67  | 64,8  | 64,8  | 19,15 | 563,53 | 140,76 |
| 2019/05/19 | CH2205 | Male | Three y/o | Treatment (Wk 1) | Treatment | Fast Day | No | 14:00 | 14:00 - 14:59 | Afternoon    | 37,7 | 48  | 6,2   | 6,2   | 18,85 | 536,04 | 60,63  |
| 2019/05/19 | CH2206 | Male | Three y/o | Treatment (Wk 1) | Treatment | Fast Day | No | 14:00 | 14:00 - 14:59 | Afternoon    | 38,0 | 64  | 48,2  | 48,2  | 19,15 | 559,88 | 130,52 |
| 2019/05/19 | CH2205 | Male | Three y/o | Treatment (Wk 1) | Treatment | Fast Day | No | 14:05 | 14:00 - 14:59 | Afternoon    | 37,7 | 69  | 9,2   | 9,2   | 18,85 | 565,86 | 73,94  |
| 2019/05/19 | CH2206 | Male | Three y/o | Treatment (Wk 1) | Treatment | Fast Day | No | 14:05 | 14:00 - 14:59 | Afternoon    | 38,0 | 72  | 19,6  | 19,6  | 19,15 | 569,20 | 99,63  |
| 2019/05/19 | CH2205 | Male | Three y/o | Treatment (Wk 1) | Treatment | Fast Day | No | 14:10 | 14:00 - 14:59 | Afternoon    | 37,7 | 67  | 7,4   | 7,4   | 18,85 | 563,53 | 66,59  |
| 2019/05/19 | CH2206 | Male | Three y/o | Treatment (Wk 1) | Treatment | Fast Day | No | 14:10 | 14:00 - 14:59 | Afternoon    | 38,0 | 52  | 10,6  | 10,6  | 19,15 | 542,83 | 78,73  |
| 2019/05/19 | CH2205 | Male | Three y/o | Treatment (Wk 1) | Treatment | Fast Day | No | 14:15 | 14:00 - 14:59 | Afternoon    | 37,6 | 50  | 5,2   | 5,2   | 18,75 | 539,52 | 54,72  |
| 2019/05/19 | CH2206 | Male | Three y/o | Treatment (Wk 1) | Treatment | Fast Day | No | 14:15 | 14:00 - 14:59 | Afternoon    | 38,0 | 46  | 9,0   | 9,0   | 19,15 | 532,38 | 73,19  |
| 2019/05/19 | CH2205 | Male | Three y/o | Treatment (Wk 1) | Treatment | Fast Day | No | 14:20 | 14:00 - 14:59 | Afternoon    | 37,6 | 44  | 20,2  | 20,2  | 18,75 | 528,51 | 100,65 |
| 2019/05/19 | CH2206 | Male | Three y/o | Treatment (Wk 1) | Treatment | Fast Day | No | 14:20 | 14:00 - 14:59 | Afternoon    | 38,0 | 63  | 5,0   | 5,0   | 19,15 | 558,62 | 53,41  |
| 2019/05/19 | CH2205 | Male | Three y/o | Treatment (Wk 1) | Treatment | Fast Day | No | 14:25 | 14:00 - 14:59 | Afternoon    | 37,6 |     | 27,6  | 27,6  | 18,75 |        | 111,33 |
| 2019/05/19 | CH2206 | Male | Three y/o | Treatment (Wk 1) | Treatment | Fast Day | No | 14:25 | 14:00 - 14:59 | Afternoon    | 38,0 | 59  | 18,0  | 18,0  | 19,15 | 553,30 | 96,72  |
| 2019/05/19 | CH2205 | Male | Three y/o | Treatment (Wk 1) | Treatment | Fast Day | No | 14:30 | 14:00 - 14:59 | Afternoon    | 37,5 | 65  | 18,8  | 18,8  | 18,65 | 561,12 | 98,20  |
| 2019/05/19 | CH2206 | Male | Three y/o | Treatment (Wk 1) | Treatment | Fast Day | No | 14:30 | 14:00 - 14:59 | Afternoon    | 37,9 | 77  | 26,0  | 26,0  | 19,05 | 574,39 | 109,29 |
| 2019/05/19 | CH2205 | Male | Three y/o | Treatment (Wk 1) | Treatment | Fast Day | No | 14:35 | 14:00 - 14:59 | Afternoon    | 37,4 | 53  | 10,8  | 10,8  | 18,55 | 544,43 | 79,36  |
| 2019/05/19 | CH2206 | Male | Three y/o | Treatment (Wk 1) | Treatment | Fast Day | No | 14:35 | 14:00 - 14:59 | Afternoon    | 37,9 | 78  | 26,2  | 26,2  | 19,05 | 575,38 | 109,55 |
| 2019/05/19 | CH2205 | Male | Three y/o | Treatment (Wk 1) | Treatment | Fast Day | No | 14:40 | 14:00 - 14:59 | Afternoon    | 37,4 | 38  | 7,0   | 7,0   | 18,55 | 515,48 | 64,72  |



|            |        |      |           |                  |           |          |    |       |               |           |      |     |       |       |       |        |        |
|------------|--------|------|-----------|------------------|-----------|----------|----|-------|---------------|-----------|------|-----|-------|-------|-------|--------|--------|
| 2019/05/19 | CH2206 | Male | Three y/o | Treatment (Wk 1) | Treatment | Fast Day | No | 14:40 | 14:00 - 14:59 | Afternoon | 37,9 | 67  | 26,2  | 26,2  | 19,05 | 563,53 | 109,55 |
| 2019/05/19 | CH2205 | Male | Three y/o | Treatment (Wk 1) | Treatment | Fast Day | No | 14:45 | 14:00 - 14:59 | Afternoon | 37,4 | 61  | 20,2  | 20,2  | 18,55 | 556,01 | 100,65 |
| 2019/05/19 | CH2206 | Male | Three y/o | Treatment (Wk 1) | Treatment | Fast Day | No | 14:45 | 14:00 - 14:59 | Afternoon | 37,9 | 54  | 9,4   | 9,4   | 19,05 | 545,99 | 74,66  |
| 2019/05/19 | CH2205 | Male | Three y/o | Treatment (Wk 1) | Treatment | Fast Day | No | 14:50 | 14:00 - 14:59 | Afternoon | 37,4 |     | 42,6  | 42,6  | 18,55 |        | 126,26 |
| 2019/05/19 | CH2206 | Male | Three y/o | Treatment (Wk 1) | Treatment | Fast Day | No | 14:50 | 14:00 - 14:59 | Afternoon | 37,9 | 72  | 26,2  | 26,2  | 19,05 | 569,20 | 109,55 |
| 2019/05/19 | CH2205 | Male | Three y/o | Treatment (Wk 1) | Treatment | Fast Day | No | 14:55 | 14:00 - 14:59 | Afternoon | 37,3 | 79  | 21,8  | 21,8  | 18,46 | 576,36 | 103,26 |
| 2019/05/19 | CH2206 | Male | Three y/o | Treatment (Wk 1) | Treatment | Fast Day | No | 14:55 | 14:00 - 14:59 | Afternoon | 37,8 | 51  | 34,0  | 34,0  | 18,95 | 541,20 | 118,49 |
| 2019/05/19 | CH2205 | Male | Three y/o | Treatment (Wk 1) | Treatment | Fast Day | No | 15:00 | 15:00 - 15:59 | Afternoon | 37,3 | 43  | 29,2  | 29,2  | 18,46 | 526,50 | 113,27 |
| 2019/05/19 | CH2206 | Male | Three y/o | Treatment (Wk 1) | Treatment | Fast Day | No | 15:00 | 15:00 - 15:59 | Afternoon | 37,8 | 62  | 15,0  | 15,0  | 18,95 | 557,33 | 90,51  |
| 2019/05/19 | CH2205 | Male | Three y/o | Treatment (Wk 1) | Treatment | Fast Day | No | 15:05 | 15:00 - 15:59 | Afternoon | 37,3 | 47  | 43,4  | 43,4  | 18,46 | 534,23 | 126,90 |
| 2019/05/19 | CH2206 | Male | Three y/o | Treatment (Wk 1) | Treatment | Fast Day | No | 15:05 | 15:00 - 15:59 | Afternoon | 37,8 | 50  | 57,2  | 57,2  | 18,95 | 539,52 | 136,44 |
| 2019/05/19 | CH2205 | Male | Three y/o | Treatment (Wk 1) | Treatment | Fast Day | No | 15:10 | 15:00 - 15:59 | Afternoon | 37,4 |     | 27,4  | 27,4  | 18,55 |        | 111,09 |
| 2019/05/19 | CH2206 | Male | Three y/o | Treatment (Wk 1) | Treatment | Fast Day | No | 15:10 | 15:00 - 15:59 | Afternoon | 37,8 | 117 | 20,8  | 20,8  | 18,95 | 605,02 | 101,65 |
| 2019/05/19 | CH2205 | Male | Three y/o | Treatment (Wk 1) | Treatment | Fast Day | No | 15:15 | 15:00 - 15:59 | Afternoon | 37,4 | 50  | 57,4  | 57,4  | 18,55 | 539,52 | 136,56 |
| 2019/05/19 | CH2206 | Male | Three y/o | Treatment (Wk 1) | Treatment | Fast Day | No | 15:15 | 15:00 - 15:59 | Afternoon | 37,8 | 47  | 48,6  | 48,6  | 18,95 | 534,23 | 130,81 |
| 2019/05/19 | CH2205 | Male | Three y/o | Treatment (Wk 1) | Treatment | Fast Day | No | 15:20 | 15:00 - 15:59 | Afternoon | 37,4 | 64  | 50,0  | 50,0  | 18,55 | 559,88 | 131,79 |
| 2019/05/19 | CH2206 | Male | Three y/o | Treatment (Wk 1) | Treatment | Fast Day | No | 15:20 | 15:00 - 15:59 | Afternoon | 37,8 | 108 | 215,2 | 215,2 | 18,95 | 599,39 | 182,70 |
| 2019/05/19 | CH2205 | Male | Three y/o | Treatment (Wk 1) | Treatment | Fast Day | No | 15:25 | 15:00 - 15:59 | Afternoon | 37,5 | 109 | 313,8 | 313,8 | 18,65 | 600,04 | 196,01 |
| 2019/05/19 | CH2206 | Male | Three y/o | Treatment (Wk 1) | Treatment | Fast Day | No | 15:25 | 15:00 - 15:59 | Afternoon | 37,8 | 107 | 325,6 | 325,6 | 18,95 | 598,73 | 197,32 |
| 2019/05/19 | CH2205 | Male | Three y/o | Treatment (Wk 1) | Treatment | Fast Day | No | 15:30 | 15:00 - 15:59 | Afternoon | 37,6 | 70  | 324,4 | 324,4 | 18,75 | 566,99 | 197,19 |
| 2019/05/19 | CH2206 | Male | Three y/o | Treatment (Wk 1) | Treatment | Fast Day | No | 15:30 | 15:00 - 15:59 | Afternoon | 37,8 | 112 | 257,4 | 257,4 | 18,95 | 601,96 | 189,01 |
| 2019/05/19 | CH2205 | Male | Three y/o | Treatment (Wk 1) | Treatment | Fast Day | No | 15:35 | 15:00 - 15:59 | Afternoon | 37,7 | 143 | 21,4  | 21,4  | 18,85 | 618,69 | 102,63 |
| 2019/05/19 | CH2206 | Male | Three y/o | Treatment (Wk 1) | Treatment | Fast Day | No | 15:35 | 15:00 - 15:59 | Afternoon | 37,8 | 113 | 81,2  | 81,2  | 18,95 | 602,58 | 148,59 |
| 2019/05/19 | CH2205 | Male | Three y/o | Treatment (Wk 1) | Treatment | Fast Day | No | 15:40 | 15:00 - 15:59 | Afternoon | 37,9 | 63  | 24,4  | 24,4  | 19,05 | 558,62 | 107,11 |
| 2019/05/19 | CH2206 | Male | Three y/o | Treatment (Wk 1) | Treatment | Fast Day | No | 15:40 | 15:00 - 15:59 | Afternoon | 37,8 | 84  | 216,0 | 216,0 | 18,95 | 581,01 | 182,83 |
| 2019/05/19 | CH2205 | Male | Three y/o | Treatment (Wk 1) | Treatment | Fast Day | No | 15:45 | 15:00 - 15:59 | Afternoon | 37,9 | 65  | 16,0  | 16,0  | 19,05 | 561,12 | 92,71  |
| 2019/05/19 | CH2206 | Male | Three y/o | Treatment (Wk 1) | Treatment | Fast Day | No | 15:45 | 15:00 - 15:59 | Afternoon | 37,9 | 55  | 72,0  | 72,0  | 19,05 | 547,52 | 144,42 |
| 2019/05/19 | CH2205 | Male | Three y/o | Treatment (Wk 1) | Treatment | Fast Day | No | 15:50 | 15:00 - 15:59 | Afternoon | 38,0 | 58  | 31,4  | 31,4  | 19,15 | 551,90 | 115,76 |
| 2019/05/19 | CH2206 | Male | Three y/o | Treatment (Wk 1) | Treatment | Fast Day | No | 15:50 | 15:00 - 15:59 | Afternoon | 37,9 | 108 | 55,4  | 55,4  | 19,05 | 599,39 | 135,33 |
| 2019/05/19 | CH2205 | Male | Three y/o | Treatment (Wk 1) | Treatment | Fast Day | No | 15:55 | 15:00 - 15:59 | Afternoon | 38,0 | 63  | 25,0  | 25,0  | 19,15 | 558,62 | 107,94 |
| 2019/05/19 | CH2206 | Male | Three y/o | Treatment (Wk 1) | Treatment | Fast Day | No | 15:55 | 15:00 - 15:59 | Afternoon | 37,9 | 63  | 64,0  | 64,0  | 19,05 | 558,62 | 140,33 |
| 2019/05/19 | CH2205 | Male | Three y/o | Treatment (Wk 1) | Treatment | Fast Day | No | 16:00 | 16:00 - 16:59 | Evening   | 38,0 | 49  | 24,0  | 24,0  | 19,15 | 537,80 | 106,55 |
| 2019/05/19 | CH2206 | Male | Three y/o | Treatment (Wk 1) | Treatment | Fast Day | No | 16:00 | 16:00 - 16:59 | Evening   | 38,0 | 57  | 66,0  | 66,0  | 19,15 | 550,47 | 141,40 |
| 2019/05/19 | CH2205 | Male | Three y/o | Treatment (Wk 1) | Treatment | Fast Day | No | 16:05 | 16:00 - 16:59 | Evening   | 38,1 | 48  | 50,2  | 50,2  | 19,26 | 536,04 | 131,92 |
| 2019/05/19 | CH2206 | Male | Three y/o | Treatment (Wk 1) | Treatment | Fast Day | No | 16:05 | 16:00 - 16:59 | Evening   | 38,0 | 55  | 48,4  | 48,4  | 19,15 | 547,52 | 130,66 |
| 2019/05/19 | CH2205 | Male | Three y/o | Treatment (Wk 1) | Treatment | Fast Day | No | 16:10 | 16:00 - 16:59 | Evening   | 38,1 | 96  | 10,6  | 10,6  | 19,26 | 590,91 | 78,73  |
| 2019/05/19 | CH2206 | Male | Three y/o | Treatment (Wk 1) | Treatment | Fast Day | No | 16:10 | 16:00 - 16:59 | Evening   | 38,0 | 90  | 79,4  | 79,4  | 19,15 | 586,16 | 147,81 |
| 2019/05/19 | CH2205 | Male | Three y/o | Treatment (Wk 1) | Treatment | Fast Day | No | 16:15 | 16:00 - 16:59 | Evening   | 38,1 | 90  | 55,0  | 55,0  | 19,26 | 586,16 | 135,08 |
| 2019/05/19 | CH2206 | Male | Three y/o | Treatment (Wk 1) | Treatment | Fast Day | No | 16:15 | 16:00 - 16:59 | Evening   | 38,0 | 118 | 166,8 | 166,8 | 19,15 | 605,61 | 173,74 |
| 2019/05/19 | CH2205 | Male | Three y/o | Treatment (Wk 1) | Treatment | Fast Day | No | 16:20 | 16:00 - 16:59 | Evening   | 38,1 | 93  | 95,0  | 95,0  | 19,26 | 588,58 | 154,06 |
| 2019/05/19 | CH2206 | Male | Three y/o | Treatment (Wk 1) | Treatment | Fast Day | No | 16:20 | 16:00 - 16:59 | Evening   | 38,0 | 108 | 35,4  | 35,4  | 19,15 | 599,39 | 119,88 |
| 2019/05/19 | CH2205 | Male | Three y/o | Treatment (Wk 1) | Treatment | Fast Day | No | 16:25 | 16:00 - 16:59 | Evening   | 38,1 | 90  | 24,6  | 24,6  | 19,26 | 586,16 | 107,39 |
| 2019/05/19 | CH2206 | Male | Three y/o | Treatment (Wk 1) | Treatment | Fast Day | No | 16:25 | 16:00 - 16:59 | Evening   | 38,0 |     | 83,2  | 83,2  | 19,15 |        | 149,44 |
| 2019/05/19 | CH2205 | Male | Three y/o | Treatment (Wk 1) | Treatment | Fast Day | No | 16:30 | 16:00 - 16:59 | Evening   | 38,1 | 59  | 11,0  | 11,0  | 19,26 | 553,30 | 79,98  |
| 2019/05/19 | CH2206 | Male | Three y/o | Treatment (Wk 1) | Treatment | Fast Day | No | 16:30 | 16:00 - 16:59 | Evening   | 37,9 | 94  | 149,6 | 149,6 | 19,05 | 589,37 | 169,92 |
| 2019/05/19 | CH2205 | Male | Three y/o | Treatment (Wk 1) | Treatment | Fast Day | No | 16:35 | 16:00 - 16:59 | Evening   | 38,0 | 80  | 40,8  | 40,8  | 19,15 | 577,31 | 124,77 |
| 2019/05/19 | CH2206 | Male | Three y/o | Treatment (Wk 1) | Treatment | Fast Day | No | 16:35 | 16:00 - 16:59 | Evening   | 38,0 | 121 | 114,6 | 114,6 | 19,15 | 607,35 | 160,60 |
| 2019/05/19 | CH2205 | Male | Three y/o | Treatment (Wk 1) | Treatment | Fast Day | No | 16:40 | 16:00 - 16:59 | Evening   | 38,1 | 69  | 42,4  | 42,4  | 19,26 | 565,86 | 126,10 |
| 2019/05/19 | CH2206 | Male | Three y/o | Treatment (Wk 1) | Treatment | Fast Day | No | 16:40 | 16:00 - 16:59 | Evening   | 38,0 | 126 | 172,0 | 172,0 | 19,15 | 610,14 | 174,82 |
| 2019/05/19 | CH2205 | Male | Three y/o | Treatment (Wk 1) | Treatment | Fast Day | No | 16:45 | 16:00 - 16:59 | Evening   | 38,0 | 56  | 37,8  | 37,8  | 19,15 | 549,01 | 122,14 |
| 2019/05/19 | CH2206 | Male | Three y/o | Treatment (Wk 1) | Treatment | Fast Day | No | 16:45 | 16:00 - 16:59 | Evening   | 38,1 | 118 | 85,2  | 85,2  | 19,26 | 605,61 | 150,27 |
| 2019/05/19 | CH2205 | Male | Three y/o | Treatment (Wk 1) | Treatment | Fast Day | No | 16:50 | 16:00 - 16:59 | Evening   | 38,0 |     | 35,2  | 35,2  | 19,15 |        | 119,69 |
| 2019/05/19 | CH2206 | Male | Three y/o | Treatment (Wk 1) | Treatment | Fast Day | No | 16:50 | 16:00 - 16:59 | Evening   | 38,1 | 113 | 92,8  | 92,8  | 19,26 | 602,58 | 153,24 |
| 2019/05/19 | CH2205 | Male | Three y/o | Treatment (Wk 1) | Treatment | Fast Day | No | 16:55 | 16:00 - 16:59 | Evening   | 38,0 | 72  | 33,2  | 33,2  | 19,15 | 569,20 | 117,68 |
| 2019/05/19 | CH2206 | Male | Three y/o | Treatment (Wk 1) | Treatment | Fast Day | No | 16:55 | 16:00 - 16:59 | Evening   | 38,2 | 109 | 214,4 | 214,4 | 19,36 | 600,04 | 182,57 |
| 2019/05/19 | CH2205 | Male | Three y/o | Treatment (Wk 1) | Treatment | Fast Day | No | 17:00 | 17:00 - 17:59 | Evening   | 37,9 | 54  | 32,6  | 32,6  | 19,05 | 545,99 | 117,05 |
| 2019/05/19 | CH2206 | Male | Three y/o | Treatment (Wk 1) | Treatment | Fast Day | No | 17:00 | 17:00 - 17:59 | Evening   | 38,2 | 110 | 93,4  | 93,4  | 19,36 | 600,69 | 153,46 |
| 2019/05/19 | CH2205 | Male | Three y/o | Treatment (Wk 1) | Treatment | Fast Day | No | 17:05 | 17:00 - 17:59 | Evening   | 37,9 | 54  | 28,8  | 28,8  | 19,05 | 545,99 | 112,79 |
| 2019/05/19 | CH2206 | Male | Three y/o | Treatment (Wk 1) | Treatment | Fast Day | No | 17:05 | 17:00 - 17:59 | Evening   | 38,2 | 120 | 188,8 | 188,8 | 19,36 | 606,78 | 178,09 |
| 2019/05/19 | CH2205 | Male | Three y/o | Treatment (Wk 1) | Treatment | Fast Day | No | 17:10 | 17:00 - 17:59 | Evening   | 37,9 | 42  | 32,0  | 32,0  | 19,05 | 524,42 | 116,41 |
| 2019/05/19 | CH2206 | Male | Three y/o | Treatment (Wk 1) | Treatment | Fast Day | No | 17:10 | 17:00 - 17:59 | Evening   | 38,3 | 113 | 157,2 | 157,2 | 19,46 | 602,58 | 171,66 |
| 2019/05/19 | CH2205 | Male | Three y/o | Treatment (Wk 1) | Treatment | Fast Day | No | 17:15 | 17:00 - 17:59 | Evening   | 38,0 | 125 | 137,6 | 137,6 | 19,15 | 609,60 | 166,99 |
| 2019/05/19 | CH2206 | Male | Three y/o | Treatment (Wk 1) | Treatment | Fast Day | No | 17:15 | 17:00 - 17:59 | Evening   | 38,3 | 118 | 55,0  | 55,0  | 19,46 | 605,61 | 135,08 |
| 2019/05/19 | CH2205 | Male | Three y/o | Treatment (Wk 1) | Treatment | Fast Day | No | 17:20 | 17:00 - 17:59 | Evening   | 38,0 | 98  | 64,0  | 64,0  | 19,15 | 592,41 | 140,33 |
| 2019/05/19 | CH2206 | Male | Three y/o | Treatment (Wk 1) | Treatment | Fast Day | No | 17:20 | 17:00 - 17:59 | Evening   | 38,3 | 47  | 41,8  | 41,8  | 19,46 | 534,23 | 125,60 |
| 2019/05/19 | CH2205 | Male | Three y/o | Treatment (Wk 1) | Treatment | Fast Day | No | 17:25 | 17:00 - 17:59 | Evening   | 38,0 | 78  | 42,8  | 42,8  | 19,15 | 575,38 | 126,42 |
| 2019/05/19 | CH2206 | Male | Three y/o | Treatment (Wk 1) | Treatment | Fast Day | No | 17:25 | 17:00 - 17:59 | Evening   | 38,2 | 79  | 42,0  | 42,0  | 19,36 | 576,36 | 125,77 |
| 2019/05/19 | CH2205 | Male | Three y/o | Treatment (Wk 1) | Treatment | Fast Day | No | 17:30 | 17:00 - 17:59 | Evening   | 38,0 | 63  | 30,2  | 30,2  | 19,15 | 558,62 | 114,42 |
| 2019/05/19 | CH2206 | Male | Three y/o | Treatment (Wk 1) | Treatment | Fast Day | No | 17:30 | 17:00 - 17:59 | Evening   | 38,1 | 73  | 48,4  | 48,4  | 19,26 | 570,27 | 130,66 |
| 2019/05/19 | CH2205 | Male | Three y/o | Treatment (Wk 1) | Treatment | Fast Day | No | 17:35 | 17:00 - 17:59 | Evening   | 38,0 | 43  | 32,0  | 32,0  | 19,15 | 526,50 | 116,41 |



|            |        |      |           |                  |           |          |    |       |               |         |      |     |      |      |       |        |        |
|------------|--------|------|-----------|------------------|-----------|----------|----|-------|---------------|---------|------|-----|------|------|-------|--------|--------|
| 2019/05/19 | CH2206 | Male | Three y/o | Treatment (Wk 1) | Treatment | Fast Day | No | 17:35 | 17:00 - 17:59 | Evening | 38,0 | 57  | 51,0 | 51,0 | 19,15 | 550,47 | 132,47 |
| 2019/05/19 | CH2205 | Male | Three y/o | Treatment (Wk 1) | Treatment | Fast Day | No | 17:40 | 17:00 - 17:59 | Evening | 38,0 |     | 36,6 | 36,6 | 19,15 |        | 121,03 |
| 2019/05/19 | CH2206 | Male | Three y/o | Treatment (Wk 1) | Treatment | Fast Day | No | 17:40 | 17:00 - 17:59 | Evening | 37,8 | 54  | 37,8 | 37,8 | 18,95 | 545,99 | 122,14 |
| 2019/05/19 | CH2205 | Male | Three y/o | Treatment (Wk 1) | Treatment | Fast Day | No | 17:45 | 17:00 - 17:59 | Evening | 37,9 | 50  | 31,6 | 31,6 | 19,05 | 539,52 | 115,98 |
| 2019/05/19 | CH2206 | Male | Three y/o | Treatment (Wk 1) | Treatment | Fast Day | No | 17:45 | 17:00 - 17:59 | Evening | 37,8 | 67  | 39,8 | 39,8 | 18,95 | 563,53 | 123,91 |
| 2019/05/19 | CH2205 | Male | Three y/o | Treatment (Wk 1) | Treatment | Fast Day | No | 17:50 | 17:00 - 17:59 | Evening | 37,9 |     | 26,4 | 26,4 | 19,05 |        | 109,81 |
| 2019/05/19 | CH2206 | Male | Three y/o | Treatment (Wk 1) | Treatment | Fast Day | No | 17:50 | 17:00 - 17:59 | Evening | 37,8 | 125 | 29,0 | 29,0 | 18,95 | 609,60 | 113,03 |
| 2019/05/19 | CH2205 | Male | Three y/o | Treatment (Wk 1) | Treatment | Fast Day | No | 17:55 | 17:00 - 17:59 | Evening | 37,7 | 59  | 31,8 | 31,8 | 18,85 | 553,30 | 116,20 |
| 2019/05/19 | CH2206 | Male | Three y/o | Treatment (Wk 1) | Treatment | Fast Day | No | 17:55 | 17:00 - 17:59 | Evening | 37,9 |     | 34,8 | 34,8 | 19,05 |        | 119,29 |
| 2019/05/19 | CH2205 | Male | Three y/o | Treatment (Wk 1) | Treatment | Fast Day | No | 18:00 | 18:00 - 18:59 | Evening | 37,7 | 48  | 24,6 | 24,6 | 18,85 | 536,04 | 107,39 |
| 2019/05/19 | CH2206 | Male | Three y/o | Treatment (Wk 1) | Treatment | Fast Day | No | 18:00 | 18:00 - 18:59 | Evening | 37,8 | 57  | 36,4 | 36,4 | 18,95 | 550,47 | 120,84 |
| 2019/05/19 | CH2205 | Male | Three y/o | Treatment (Wk 1) | Treatment | Fast Day | No | 18:05 | 18:00 - 18:59 | Evening | 37,7 | 51  | 16,0 | 16,0 | 18,85 | 541,20 | 92,71  |
| 2019/05/19 | CH2206 | Male | Three y/o | Treatment (Wk 1) | Treatment | Fast Day | No | 18:05 | 18:00 - 18:59 | Evening | 37,8 |     | 28,2 | 28,2 | 18,95 |        | 112,07 |
| 2019/05/19 | CH2205 | Male | Three y/o | Treatment (Wk 1) | Treatment | Fast Day | No | 18:10 | 18:00 - 18:59 | Evening | 37,7 | 41  | 13,6 | 13,6 | 18,85 | 522,29 | 87,18  |
| 2019/05/19 | CH2206 | Male | Three y/o | Treatment (Wk 1) | Treatment | Fast Day | No | 18:10 | 18:00 - 18:59 | Evening | 37,8 |     | 43,2 | 43,2 | 18,95 |        | 126,74 |
| 2019/05/19 | CH2205 | Male | Three y/o | Treatment (Wk 1) | Treatment | Fast Day | No | 18:15 | 18:00 - 18:59 | Evening | 37,7 | 49  | 9,4  | 9,4  | 18,85 | 537,80 | 74,66  |
| 2019/05/19 | CH2206 | Male | Three y/o | Treatment (Wk 1) | Treatment | Fast Day | No | 18:15 | 18:00 - 18:59 | Evening | 37,7 | 47  | 37,8 | 37,8 | 18,85 | 534,23 | 122,14 |
| 2019/05/19 | CH2205 | Male | Three y/o | Treatment (Wk 1) | Treatment | Fast Day | No | 18:20 | 18:00 - 18:59 | Evening | 37,7 |     | 15,4 | 15,4 | 18,85 |        | 91,41  |
| 2019/05/19 | CH2206 | Male | Three y/o | Treatment (Wk 1) | Treatment | Fast Day | No | 18:20 | 18:00 - 18:59 | Evening | 37,7 |     | 48,4 | 48,4 | 18,85 |        | 130,66 |
| 2019/05/19 | CH2205 | Male | Three y/o | Treatment (Wk 1) | Treatment | Fast Day | No | 18:25 | 18:00 - 18:59 | Evening | 37,7 | 35  | 13,2 | 13,2 | 18,85 | 507,97 | 86,17  |
| 2019/05/19 | CH2206 | Male | Three y/o | Treatment (Wk 1) | Treatment | Fast Day | No | 18:25 | 18:00 - 18:59 | Evening | 37,7 | 68  | 49,2 | 49,2 | 18,85 | 564,71 | 131,23 |
| 2019/05/19 | CH2205 | Male | Three y/o | Treatment (Wk 1) | Treatment | Fast Day | No | 18:30 | 18:00 - 18:59 | Evening | 37,7 | 47  | 7,0  | 7,0  | 18,85 | 534,23 | 64,72  |
| 2019/05/19 | CH2206 | Male | Three y/o | Treatment (Wk 1) | Treatment | Fast Day | No | 18:30 | 18:00 - 18:59 | Evening | 37,6 | 43  | 46,0 | 46,0 | 18,75 | 526,50 | 128,91 |
| 2019/05/19 | CH2205 | Male | Three y/o | Treatment (Wk 1) | Treatment | Fast Day | No | 18:35 | 18:00 - 18:59 | Evening | 37,7 | 55  | 10,4 | 10,4 | 18,85 | 547,52 | 78,08  |
| 2019/05/19 | CH2206 | Male | Three y/o | Treatment (Wk 1) | Treatment | Fast Day | No | 18:35 | 18:00 - 18:59 | Evening | 37,7 |     | 47,4 | 47,4 | 18,85 |        | 129,94 |
| 2019/05/19 | CH2205 | Male | Three y/o | Treatment (Wk 1) | Treatment | Fast Day | No | 18:40 | 18:00 - 18:59 | Evening | 37,6 | 56  | 7,6  | 7,6  | 18,75 | 549,01 | 67,49  |
| 2019/05/19 | CH2206 | Male | Three y/o | Treatment (Wk 1) | Treatment | Fast Day | No | 18:40 | 18:00 - 18:59 | Evening | 37,7 | 54  | 31,2 | 31,2 | 18,85 | 545,99 | 115,54 |
| 2019/05/19 | CH2205 | Male | Three y/o | Treatment (Wk 1) | Treatment | Fast Day | No | 18:45 | 18:00 - 18:59 | Evening | 37,6 | 38  | 6,0  | 6,0  | 18,75 | 515,48 | 59,53  |
| 2019/05/19 | CH2206 | Male | Three y/o | Treatment (Wk 1) | Treatment | Fast Day | No | 18:45 | 18:00 - 18:59 | Evening | 37,8 | 180 | 29,2 | 29,2 | 18,95 | 633,61 | 113,27 |
| 2019/05/19 | CH2205 | Male | Three y/o | Treatment (Wk 1) | Treatment | Fast Day | No | 18:50 | 18:00 - 18:59 | Evening | 37,6 | 43  | 7,4  | 7,4  | 18,75 | 526,50 | 66,59  |
| 2019/05/19 | CH2206 | Male | Three y/o | Treatment (Wk 1) | Treatment | Fast Day | No | 18:50 | 18:00 - 18:59 | Evening | 37,8 | 62  | 27,2 | 27,2 | 18,95 | 557,33 | 110,83 |
| 2019/05/19 | CH2205 | Male | Three y/o | Treatment (Wk 1) | Treatment | Fast Day | No | 18:55 | 18:00 - 18:59 | Evening | 37,6 | 41  | 6,0  | 6,0  | 18,75 | 522,29 | 59,53  |
| 2019/05/19 | CH2206 | Male | Three y/o | Treatment (Wk 1) | Treatment | Fast Day | No | 18:55 | 18:00 - 18:59 | Evening | 37,7 | 75  | 27,8 | 27,8 | 18,85 | 572,36 | 111,58 |
| 2019/05/19 | CH2205 | Male | Three y/o | Treatment (Wk 1) | Treatment | Fast Day | No | 19:00 | 19:00 - 19:59 | Evening | 37,6 | 44  | 4,0  | 4,0  | 18,75 | 528,51 | 45,94  |
| 2019/05/19 | CH2206 | Male | Three y/o | Treatment (Wk 1) | Treatment | Fast Day | No | 19:00 | 19:00 - 19:59 | Evening | 37,7 | 47  | 26,8 | 26,8 | 18,85 | 534,23 | 110,33 |
| 2019/05/19 | CH2205 | Male | Three y/o | Treatment (Wk 1) | Treatment | Fast Day | No | 19:05 | 19:00 - 19:59 | Evening | 37,6 | 60  | 11,0 | 11,0 | 18,75 | 554,67 | 79,98  |
| 2019/05/19 | CH2206 | Male | Three y/o | Treatment (Wk 1) | Treatment | Fast Day | No | 19:05 | 19:00 - 19:59 | Evening | 37,7 | 59  | 31,8 | 31,8 | 18,85 | 553,30 | 116,20 |
| 2019/05/19 | CH2205 | Male | Three y/o | Treatment (Wk 1) | Treatment | Fast Day | No | 19:10 | 19:00 - 19:59 | Evening | 37,6 | 108 | 32,2 | 32,2 | 18,75 | 599,39 | 116,63 |
| 2019/05/19 | CH2206 | Male | Three y/o | Treatment (Wk 1) | Treatment | Fast Day | No | 19:10 | 19:00 - 19:59 | Evening | 37,7 | 75  | 18,6 | 18,6 | 18,85 | 572,36 | 97,84  |
| 2019/05/19 | CH2205 | Male | Three y/o | Treatment (Wk 1) | Treatment | Fast Day | No | 19:15 | 19:00 - 19:59 | Evening | 37,7 | 46  | 23,2 | 23,2 | 18,85 | 532,38 | 105,39 |
| 2019/05/19 | CH2206 | Male | Three y/o | Treatment (Wk 1) | Treatment | Fast Day | No | 19:15 | 19:00 - 19:59 | Evening | 37,7 | 70  | 17,4 | 17,4 | 18,85 | 566,99 | 95,56  |
| 2019/05/19 | CH2205 | Male | Three y/o | Treatment (Wk 1) | Treatment | Fast Day | No | 19:20 | 19:00 - 19:59 | Evening | 37,6 | 40  | 24,6 | 24,6 | 18,75 | 520,09 | 107,39 |
| 2019/05/19 | CH2206 | Male | Three y/o | Treatment (Wk 1) | Treatment | Fast Day | No | 19:20 | 19:00 - 19:59 | Evening | 37,6 | 46  | 15,8 | 15,8 | 18,75 | 532,38 | 92,28  |
| 2019/05/19 | CH2205 | Male | Three y/o | Treatment (Wk 1) | Treatment | Fast Day | No | 19:25 | 19:00 - 19:59 | Evening | 37,6 | 62  | 23,0 | 23,0 | 18,75 | 557,33 | 105,09 |
| 2019/05/19 | CH2206 | Male | Three y/o | Treatment (Wk 1) | Treatment | Fast Day | No | 19:25 | 19:00 - 19:59 | Evening | 37,5 | 40  | 12,6 | 12,6 | 18,65 | 520,09 | 84,59  |
| 2019/05/19 | CH2205 | Male | Three y/o | Treatment (Wk 1) | Treatment | Fast Day | No | 19:30 | 19:00 - 19:59 | Evening | 37,5 | 44  | 21,4 | 21,4 | 18,65 | 528,51 | 102,63 |
| 2019/05/19 | CH2206 | Male | Three y/o | Treatment (Wk 1) | Treatment | Fast Day | No | 19:30 | 19:00 - 19:59 | Evening | 37,5 | 43  | 10,4 | 10,4 | 18,65 | 526,50 | 78,08  |
| 2019/05/19 | CH2205 | Male | Three y/o | Treatment (Wk 1) | Treatment | Fast Day | No | 19:35 | 19:00 - 19:59 | Evening | 37,5 | 45  | 22,4 | 22,4 | 18,65 | 530,47 | 104,19 |
| 2019/05/19 | CH2206 | Male | Three y/o | Treatment (Wk 1) | Treatment | Fast Day | No | 19:35 | 19:00 - 19:59 | Evening | 37,5 | 83  | 4,8  | 4,8  | 18,65 | 580,11 | 52,04  |
| 2019/05/19 | CH2205 | Male | Three y/o | Treatment (Wk 1) | Treatment | Fast Day | No | 19:40 | 19:00 - 19:59 | Evening | 37,5 | 48  | 21,4 | 21,4 | 18,65 | 536,04 | 102,63 |
| 2019/05/19 | CH2206 | Male | Three y/o | Treatment (Wk 1) | Treatment | Fast Day | No | 19:40 | 19:00 - 19:59 | Evening | 37,4 | 47  | 9,4  | 9,4  | 18,55 | 534,23 | 74,66  |
| 2019/05/19 | CH2205 | Male | Three y/o | Treatment (Wk 1) | Treatment | Fast Day | No | 19:45 | 19:00 - 19:59 | Evening | 37,4 | 41  | 24,2 | 24,2 | 18,55 | 522,29 | 106,83 |
| 2019/05/19 | CH2206 | Male | Three y/o | Treatment (Wk 1) | Treatment | Fast Day | No | 19:45 | 19:00 - 19:59 | Evening | 37,4 | 49  | 12,0 | 12,0 | 18,55 | 537,80 | 82,93  |
| 2019/05/19 | CH2205 | Male | Three y/o | Treatment (Wk 1) | Treatment | Fast Day | No | 19:50 | 19:00 - 19:59 | Evening | 37,4 | 55  | 23,8 | 23,8 | 18,55 | 547,52 | 106,26 |
| 2019/05/19 | CH2206 | Male | Three y/o | Treatment (Wk 1) | Treatment | Fast Day | No | 19:50 | 19:00 - 19:59 | Evening | 37,3 | 48  | 14,6 | 14,6 | 18,46 | 536,04 | 89,59  |
| 2019/05/19 | CH2205 | Male | Three y/o | Treatment (Wk 1) | Treatment | Fast Day | No | 19:55 | 19:00 - 19:59 | Evening | 37,4 | 75  | 24,4 | 24,4 | 18,55 | 572,36 | 107,11 |
| 2019/05/19 | CH2206 | Male | Three y/o | Treatment (Wk 1) | Treatment | Fast Day | No | 19:55 | 19:00 - 19:59 | Evening | 37,3 | 38  | 13,2 | 13,2 | 18,46 | 515,48 | 86,17  |
| 2019/05/19 | CH2205 | Male | Three y/o | Treatment (Wk 1) | Treatment | Fast Day | No | 20:00 | 20:00 - 20:59 | Night   | 37,4 | 65  | 57,6 | 57,6 | 18,55 | 561,12 | 136,68 |
| 2019/05/19 | CH2206 | Male | Three y/o | Treatment (Wk 1) | Treatment | Fast Day | No | 20:00 | 20:00 - 20:59 | Night   | 37,3 | 61  | 38,4 | 38,4 | 18,46 | 556,01 | 122,68 |
| 2019/05/19 | CH2205 | Male | Three y/o | Treatment (Wk 1) | Treatment | Fast Day | No | 20:05 | 20:00 - 20:59 | Night   | 37,4 | 68  | 22,6 | 22,6 | 18,55 | 564,71 | 104,49 |
| 2019/05/19 | CH2206 | Male | Three y/o | Treatment (Wk 1) | Treatment | Fast Day | No | 20:05 | 20:00 - 20:59 | Night   | 37,3 | 45  | 60,4 | 60,4 | 18,46 | 530,47 | 138,32 |
| 2019/05/19 | CH2205 | Male | Three y/o | Treatment (Wk 1) | Treatment | Fast Day | No | 20:10 | 20:00 - 20:59 | Night   | 37,3 | 43  | 22,6 | 22,6 | 18,46 | 526,50 | 104,49 |
| 2019/05/19 | CH2206 | Male | Three y/o | Treatment (Wk 1) | Treatment | Fast Day | No | 20:10 | 20:00 - 20:59 | Night   | 37,3 | 44  | 65,0 | 65,0 | 18,46 | 528,51 | 140,87 |
| 2019/05/19 | CH2205 | Male | Three y/o | Treatment (Wk 1) | Treatment | Fast Day | No | 20:15 | 20:00 - 20:59 | Night   | 37,2 | 78  | 19,8 | 19,8 | 18,36 | 575,38 | 99,97  |
| 2019/05/19 | CH2206 | Male | Three y/o | Treatment (Wk 1) | Treatment | Fast Day | No | 20:15 | 20:00 - 20:59 | Night   | 37,3 | 46  | 62,2 | 62,2 | 18,46 | 532,38 | 139,34 |
| 2019/05/19 | CH2205 | Male | Three y/o | Treatment (Wk 1) | Treatment | Fast Day | No | 20:20 | 20:00 - 20:59 | Night   | 37,1 | 58  | 22,0 | 22,0 | 18,26 | 551,90 | 103,57 |
| 2019/05/19 | CH2206 | Male | Three y/o | Treatment (Wk 1) | Treatment | Fast Day | No | 20:20 | 20:00 - 20:59 | Night   | 37,3 | 76  | 66,8 | 66,8 | 18,46 | 573,39 | 141,81 |
| 2019/05/19 | CH2205 | Male | Three y/o | Treatment (Wk 1) | Treatment | Fast Day | No | 20:25 | 20:00 - 20:59 | Night   | 37,1 | 94  | 27,4 | 27,4 | 18,26 | 589,37 | 111,09 |
| 2019/05/19 | CH2206 | Male | Three y/o | Treatment (Wk 1) | Treatment | Fast Day | No | 20:25 | 20:00 - 20:59 | Night   | 37,3 | 39  | 65,8 | 65,8 | 18,46 | 517,82 | 141,29 |
| 2019/05/19 | CH2205 | Male | Three y/o | Treatment (Wk 1) | Treatment | Fast Day | No | 20:30 | 20:00 - 20:59 | Night   | 37,1 | 40  | 22,8 | 22,8 | 18,26 | 520,09 | 104,79 |



|            |        |      |           |                  |           |          |    |       |               |       |      |     |      |      |       |        |        |
|------------|--------|------|-----------|------------------|-----------|----------|----|-------|---------------|-------|------|-----|------|------|-------|--------|--------|
| 2019/05/19 | CH2206 | Male | Three y/o | Treatment (Wk 1) | Treatment | Fast Day | No | 20:30 | 20:00 - 20:59 | Night | 37,3 | 83  | 64,6 | 64,6 | 18,46 | 580,11 | 140,65 |
| 2019/05/19 | CH2205 | Male | Three y/o | Treatment (Wk 1) | Treatment | Fast Day | No | 20:35 | 20:00 - 20:59 | Night | 37,0 | 45  | 23,8 | 23,8 | 18,16 | 530,47 | 106,26 |
| 2019/05/19 | CH2206 | Male | Three y/o | Treatment (Wk 1) | Treatment | Fast Day | No | 20:35 | 20:00 - 20:59 | Night | 37,3 | 46  | 63,8 | 63,8 | 18,46 | 532,38 | 140,22 |
| 2019/05/19 | CH2205 | Male | Three y/o | Treatment (Wk 1) | Treatment | Fast Day | No | 20:40 | 20:00 - 20:59 | Night | 37,1 | 44  | 25,8 | 25,8 | 18,26 | 528,51 | 109,02 |
| 2019/05/19 | CH2206 | Male | Three y/o | Treatment (Wk 1) | Treatment | Fast Day | No | 20:40 | 20:00 - 20:59 | Night | 37,3 | 44  | 63,8 | 63,8 | 18,46 | 528,51 | 140,22 |
| 2019/05/19 | CH2205 | Male | Three y/o | Treatment (Wk 1) | Treatment | Fast Day | No | 20:45 | 20:00 - 20:59 | Night | 37,1 | 68  | 26,6 | 26,6 | 18,26 | 564,71 | 110,07 |
| 2019/05/19 | CH2206 | Male | Three y/o | Treatment (Wk 1) | Treatment | Fast Day | No | 20:45 | 20:00 - 20:59 | Night | 37,3 | 42  | 65,2 | 65,2 | 18,46 | 524,42 | 140,97 |
| 2019/05/19 | CH2205 | Male | Three y/o | Treatment (Wk 1) | Treatment | Fast Day | No | 20:50 | 20:00 - 20:59 | Night | 37,1 | 75  | 20,6 | 20,6 | 18,26 | 572,36 | 101,32 |
| 2019/05/19 | CH2206 | Male | Three y/o | Treatment (Wk 1) | Treatment | Fast Day | No | 20:50 | 20:00 - 20:59 | Night | 37,3 | 76  | 63,2 | 63,2 | 18,46 | 573,39 | 139,89 |
| 2019/05/19 | CH2205 | Male | Three y/o | Treatment (Wk 1) | Treatment | Fast Day | No | 20:55 | 20:00 - 20:59 | Night | 37,2 | 41  | 30,2 | 30,2 | 18,36 | 522,29 | 114,42 |
| 2019/05/19 | CH2206 | Male | Three y/o | Treatment (Wk 1) | Treatment | Fast Day | No | 20:55 | 20:00 - 20:59 | Night | 37,3 | 38  | 56,6 | 56,6 | 18,46 | 515,48 | 136,07 |
| 2019/05/19 | CH2205 | Male | Three y/o | Treatment (Wk 1) | Treatment | Fast Day | No | 21:00 | 21:00 - 21:59 | Night | 37,2 |     | 26,6 | 26,6 | 18,36 |        | 110,07 |
| 2019/05/19 | CH2206 | Male | Three y/o | Treatment (Wk 1) | Treatment | Fast Day | No | 21:00 | 21:00 - 21:59 | Night | 37,3 | 48  | 62,8 | 62,8 | 18,46 | 536,04 | 139,67 |
| 2019/05/19 | CH2205 | Male | Three y/o | Treatment (Wk 1) | Treatment | Fast Day | No | 21:05 | 21:00 - 21:59 | Night | 37,1 |     | 32,8 | 32,8 | 18,26 |        | 117,26 |
| 2019/05/19 | CH2206 | Male | Three y/o | Treatment (Wk 1) | Treatment | Fast Day | No | 21:05 | 21:00 - 21:59 | Night | 37,3 | 49  | 60,2 | 60,2 | 18,46 | 537,80 | 138,21 |
| 2019/05/19 | CH2205 | Male | Three y/o | Treatment (Wk 1) | Treatment | Fast Day | No | 21:10 | 21:00 - 21:59 | Night | 37,1 | 55  | 24,4 | 24,4 | 18,26 | 547,52 | 107,11 |
| 2019/05/19 | CH2206 | Male | Three y/o | Treatment (Wk 1) | Treatment | Fast Day | No | 21:10 | 21:00 - 21:59 | Night | 37,3 | 80  | 62,2 | 62,2 | 18,46 | 577,31 | 139,34 |
| 2019/05/19 | CH2205 | Male | Three y/o | Treatment (Wk 1) | Treatment | Fast Day | No | 21:15 | 21:00 - 21:59 | Night | 37,2 |     | 23,0 | 23,0 | 18,36 |        | 105,09 |
| 2019/05/19 | CH2206 | Male | Three y/o | Treatment (Wk 1) | Treatment | Fast Day | No | 21:15 | 21:00 - 21:59 | Night | 37,3 | 50  | 62,6 | 62,6 | 18,46 | 539,52 | 139,56 |
| 2019/05/19 | CH2205 | Male | Three y/o | Treatment (Wk 1) | Treatment | Fast Day | No | 21:20 | 21:00 - 21:59 | Night | 37,3 | 62  | 21,0 | 21,0 | 18,46 | 557,33 | 101,98 |
| 2019/05/19 | CH2206 | Male | Three y/o | Treatment (Wk 1) | Treatment | Fast Day | No | 21:20 | 21:00 - 21:59 | Night | 37,3 | 43  | 64,2 | 64,2 | 18,46 | 526,50 | 140,44 |
| 2019/05/19 | CH2205 | Male | Three y/o | Treatment (Wk 1) | Treatment | Fast Day | No | 21:25 | 21:00 - 21:59 | Night | 37,3 | 46  | 27,0 | 27,0 | 18,46 | 532,38 | 110,58 |
| 2019/05/19 | CH2206 | Male | Three y/o | Treatment (Wk 1) | Treatment | Fast Day | No | 21:25 | 21:00 - 21:59 | Night | 37,3 | 40  | 63,8 | 63,8 | 18,46 | 520,09 | 140,22 |
| 2019/05/19 | CH2205 | Male | Three y/o | Treatment (Wk 1) | Treatment | Fast Day | No | 21:30 | 21:00 - 21:59 | Night | 37,3 |     | 20,2 | 20,2 | 18,46 |        | 100,65 |
| 2019/05/19 | CH2206 | Male | Three y/o | Treatment (Wk 1) | Treatment | Fast Day | No | 21:30 | 21:00 - 21:59 | Night | 37,3 | 44  | 67,6 | 67,6 | 18,46 | 528,51 | 142,23 |
| 2019/05/19 | CH2205 | Male | Three y/o | Treatment (Wk 1) | Treatment | Fast Day | No | 21:35 | 21:00 - 21:59 | Night | 37,3 | 51  | 21,8 | 21,8 | 18,46 | 541,20 | 103,26 |
| 2019/05/19 | CH2206 | Male | Three y/o | Treatment (Wk 1) | Treatment | Fast Day | No | 21:35 | 21:00 - 21:59 | Night | 37,4 | 78  | 64,4 | 64,4 | 18,55 | 575,38 | 140,55 |
| 2019/05/19 | CH2205 | Male | Three y/o | Treatment (Wk 1) | Treatment | Fast Day | No | 21:40 | 21:00 - 21:59 | Night | 37,3 |     | 18,0 | 18,0 | 18,46 |        | 96,72  |
| 2019/05/19 | CH2206 | Male | Three y/o | Treatment (Wk 1) | Treatment | Fast Day | No | 21:40 | 21:00 - 21:59 | Night | 37,4 | 109 | 64,4 | 64,4 | 18,55 | 600,04 | 140,55 |
| 2019/05/19 | CH2205 | Male | Three y/o | Treatment (Wk 1) | Treatment | Fast Day | No | 21:45 | 21:00 - 21:59 | Night | 37,3 |     | 19,4 | 19,4 | 18,46 |        | 99,28  |
| 2019/05/19 | CH2206 | Male | Three y/o | Treatment (Wk 1) | Treatment | Fast Day | No | 21:45 | 21:00 - 21:59 | Night | 37,4 | 46  | 62,6 | 62,6 | 18,55 | 532,38 | 139,56 |
| 2019/05/19 | CH2205 | Male | Three y/o | Treatment (Wk 1) | Treatment | Fast Day | No | 21:50 | 21:00 - 21:59 | Night | 37,3 |     | 20,6 | 20,6 | 18,46 |        | 101,32 |
| 2019/05/19 | CH2206 | Male | Three y/o | Treatment (Wk 1) | Treatment | Fast Day | No | 21:50 | 21:00 - 21:59 | Night | 37,4 | 43  | 65,4 | 65,4 | 18,55 | 526,50 | 141,08 |
| 2019/05/19 | CH2205 | Male | Three y/o | Treatment (Wk 1) | Treatment | Fast Day | No | 21:55 | 21:00 - 21:59 | Night | 37,3 |     | 14,2 | 14,2 | 18,46 |        | 88,65  |
| 2019/05/19 | CH2206 | Male | Three y/o | Treatment (Wk 1) | Treatment | Fast Day | No | 21:55 | 21:00 - 21:59 | Night | 37,3 | 49  | 63,0 | 63,0 | 18,46 | 537,80 | 139,78 |
| 2019/05/19 | CH2205 | Male | Three y/o | Treatment (Wk 1) | Treatment | Fast Day | No | 22:00 | 22:00 - 22:59 | Night | 37,4 | 63  | 9,6  | 9,6  | 18,55 | 558,62 | 75,37  |
| 2019/05/19 | CH2206 | Male | Three y/o | Treatment (Wk 1) | Treatment | Fast Day | No | 22:00 | 22:00 - 22:59 | Night | 37,3 | 51  | 62,8 | 62,8 | 18,46 | 541,20 | 139,67 |
| 2019/05/19 | CH2205 | Male | Three y/o | Treatment (Wk 1) | Treatment | Fast Day | No | 22:05 | 22:00 - 22:59 | Night | 37,4 | 45  | 7,6  | 7,6  | 18,55 | 530,47 | 67,49  |
| 2019/05/19 | CH2206 | Male | Three y/o | Treatment (Wk 1) | Treatment | Fast Day | No | 22:05 | 22:00 - 22:59 | Night | 37,3 | 50  | 59,6 | 59,6 | 18,46 | 539,52 | 137,86 |
| 2019/05/19 | CH2205 | Male | Three y/o | Treatment (Wk 1) | Treatment | Fast Day | No | 22:10 | 22:00 - 22:59 | Night | 37,4 | 54  | 8,4  | 8,4  | 18,55 | 545,99 | 70,86  |
| 2019/05/19 | CH2206 | Male | Three y/o | Treatment (Wk 1) | Treatment | Fast Day | No | 22:10 | 22:00 - 22:59 | Night | 37,3 | 50  | 52,8 | 52,8 | 18,46 | 539,52 | 133,67 |
| 2019/05/19 | CH2205 | Male | Three y/o | Treatment (Wk 1) | Treatment | Fast Day | No | 22:15 | 22:00 - 22:59 | Night | 37,4 | 44  | 6,2  | 6,2  | 18,55 | 528,51 | 60,63  |
| 2019/05/19 | CH2206 | Male | Three y/o | Treatment (Wk 1) | Treatment | Fast Day | No | 22:15 | 22:00 - 22:59 | Night | 37,3 | 43  | 50,0 | 50,0 | 18,46 | 526,50 | 131,79 |
| 2019/05/19 | CH2205 | Male | Three y/o | Treatment (Wk 1) | Treatment | Fast Day | No | 22:20 | 22:00 - 22:59 | Night | 37,4 | 69  | 6,6  | 6,6  | 18,55 | 565,86 | 62,73  |
| 2019/05/19 | CH2206 | Male | Three y/o | Treatment (Wk 1) | Treatment | Fast Day | No | 22:20 | 22:00 - 22:59 | Night | 37,3 | 55  | 57,2 | 57,2 | 18,46 | 547,52 | 136,44 |
| 2019/05/19 | CH2205 | Male | Three y/o | Treatment (Wk 1) | Treatment | Fast Day | No | 22:25 | 22:00 - 22:59 | Night | 37,4 | 45  | 8,2  | 8,2  | 18,55 | 530,47 | 70,05  |
| 2019/05/19 | CH2206 | Male | Three y/o | Treatment (Wk 1) | Treatment | Fast Day | No | 22:25 | 22:00 - 22:59 | Night | 37,3 | 79  | 61,8 | 61,8 | 18,46 | 576,36 | 139,12 |
| 2019/05/19 | CH2205 | Male | Three y/o | Treatment (Wk 1) | Treatment | Fast Day | No | 22:30 | 22:00 - 22:59 | Night | 37,4 | 80  | 2,8  | 2,8  | 18,55 | 577,31 | 34,04  |
| 2019/05/19 | CH2206 | Male | Three y/o | Treatment (Wk 1) | Treatment | Fast Day | No | 22:30 | 22:00 - 22:59 | Night | 37,3 | 40  | 60,0 | 60,0 | 18,46 | 520,09 | 138,09 |
| 2019/05/19 | CH2205 | Male | Three y/o | Treatment (Wk 1) | Treatment | Fast Day | No | 22:35 | 22:00 - 22:59 | Night | 37,4 | 73  | 2,2  | 2,2  | 18,55 | 570,27 | 26,02  |
| 2019/05/19 | CH2206 | Male | Three y/o | Treatment (Wk 1) | Treatment | Fast Day | No | 22:35 | 22:00 - 22:59 | Night | 37,3 | 78  | 54,6 | 54,6 | 18,46 | 575,38 | 134,83 |
| 2019/05/19 | CH2205 | Male | Three y/o | Treatment (Wk 1) | Treatment | Fast Day | No | 22:40 | 22:00 - 22:59 | Night | 37,3 | 51  | 3,6  | 3,6  | 18,46 | 541,20 | 42,42  |
| 2019/05/19 | CH2206 | Male | Three y/o | Treatment (Wk 1) | Treatment | Fast Day | No | 22:40 | 22:00 - 22:59 | Night | 37,3 | 47  | 57,0 | 57,0 | 18,46 | 534,23 | 136,32 |
| 2019/05/19 | CH2205 | Male | Three y/o | Treatment (Wk 1) | Treatment | Fast Day | No | 22:45 | 22:00 - 22:59 | Night | 37,3 | 50  | 4,2  | 4,2  | 18,46 | 539,52 | 47,57  |
| 2019/05/19 | CH2206 | Male | Three y/o | Treatment (Wk 1) | Treatment | Fast Day | No | 22:45 | 22:00 - 22:59 | Night | 37,3 | 44  | 56,0 | 56,0 | 18,46 | 528,51 | 135,70 |
| 2019/05/19 | CH2205 | Male | Three y/o | Treatment (Wk 1) | Treatment | Fast Day | No | 22:50 | 22:00 - 22:59 | Night | 37,3 | 40  | 4,2  | 4,2  | 18,46 | 520,09 | 47,57  |
| 2019/05/19 | CH2206 | Male | Three y/o | Treatment (Wk 1) | Treatment | Fast Day | No | 22:50 | 22:00 - 22:59 | Night | 37,3 | 46  | 58,0 | 58,0 | 18,46 | 532,38 | 136,92 |
| 2019/05/19 | CH2205 | Male | Three y/o | Treatment (Wk 1) | Treatment | Fast Day | No | 22:55 | 22:00 - 22:59 | Night | 37,3 | 42  | 5,0  | 5,0  | 18,46 | 524,42 | 53,41  |
| 2019/05/19 | CH2206 | Male | Three y/o | Treatment (Wk 1) | Treatment | Fast Day | No | 22:55 | 22:00 - 22:59 | Night | 37,3 | 41  | 53,6 | 53,6 | 18,46 | 522,29 | 134,19 |
| 2019/05/19 | CH2205 | Male | Three y/o | Treatment (Wk 1) | Treatment | Fast Day | No | 23:00 | 23:00 - 23:59 | Night | 37,3 | 86  | 5,2  | 5,2  | 18,46 | 582,77 | 54,72  |
| 2019/05/19 | CH2206 | Male | Three y/o | Treatment (Wk 1) | Treatment | Fast Day | No | 23:00 | 23:00 - 23:59 | Night | 37,3 | 38  | 59,8 | 59,8 | 18,46 | 515,48 | 137,98 |
| 2019/05/19 | CH2205 | Male | Three y/o | Treatment (Wk 1) | Treatment | Fast Day | No | 23:05 | 23:00 - 23:59 | Night | 37,3 | 88  | 6,4  | 6,4  | 18,46 | 584,49 | 61,70  |
| 2019/05/19 | CH2206 | Male | Three y/o | Treatment (Wk 1) | Treatment | Fast Day | No | 23:05 | 23:00 - 23:59 | Night | 37,3 | 49  | 67,4 | 67,4 | 18,46 | 537,80 | 142,12 |
| 2019/05/19 | CH2205 | Male | Three y/o | Treatment (Wk 1) | Treatment | Fast Day | No | 23:10 | 23:00 - 23:59 | Night | 37,2 | 40  | 5,6  | 5,6  | 18,36 | 520,09 | 57,21  |
| 2019/05/19 | CH2206 | Male | Three y/o | Treatment (Wk 1) | Treatment | Fast Day | No | 23:10 | 23:00 - 23:59 | Night | 37,2 | 48  | 60,2 | 60,2 | 18,36 | 536,04 | 138,21 |
| 2019/05/19 | CH2205 | Male | Three y/o | Treatment (Wk 1) | Treatment | Fast Day | No | 23:15 | 23:00 - 23:59 | Night | 37,1 | 43  | 6,4  | 6,4  | 18,26 | 526,50 | 61,70  |
| 2019/05/19 | CH2206 | Male | Three y/o | Treatment (Wk 1) | Treatment | Fast Day | No | 23:15 | 23:00 - 23:59 | Night | 37,2 | 48  | 68,0 | 68,0 | 18,36 | 536,04 | 142,43 |
| 2019/05/19 | CH2205 | Male | Three y/o | Treatment (Wk 1) | Treatment | Fast Day | No | 23:20 | 23:00 - 23:59 | Night | 37,1 | 53  | 8,8  | 8,8  | 18,26 | 544,43 | 72,43  |
| 2019/05/19 | CH2206 | Male | Three y/o | Treatment (Wk 1) | Treatment | Fast Day | No | 23:20 | 23:00 - 23:59 | Night | 37,2 | 41  | 67,6 | 67,6 | 18,36 | 522,29 | 142,23 |
| 2019/05/19 | CH2205 | Male | Three y/o | Treatment (Wk 1) | Treatment | Fast Day | No | 23:25 | 23:00 - 23:59 | Night | 37,0 | 45  | 7,4  | 7,4  | 18,16 | 530,47 | 66,59  |



|   |            |        |      |           |                  |           |          |    |       |               |               |      |     |       |       |       |        |        |
|---|------------|--------|------|-----------|------------------|-----------|----------|----|-------|---------------|---------------|------|-----|-------|-------|-------|--------|--------|
|   | 2019/05/19 | CH2206 | Male | Three y/o | Treatment (Wk 1) | Treatment | Fast Day | No | 23:25 | 23:00 - 23:59 | Night         | 37,2 | 44  | 64,4  | 64,4  | 18,36 | 528,51 | 140,55 |
|   | 2019/05/19 | CH2205 | Male | Three y/o | Treatment (Wk 1) | Treatment | Fast Day | No | 23:30 | 23:00 - 23:59 | Night         | 37,2 | 57  | 6,2   | 6,2   | 18,36 | 550,47 | 60,63  |
|   | 2019/05/19 | CH2206 | Male | Three y/o | Treatment (Wk 1) | Treatment | Fast Day | No | 23:30 | 23:00 - 23:59 | Night         | 37,2 | 44  | 79,6  | 79,6  | 18,36 | 528,51 | 147,90 |
|   | 2019/05/19 | CH2205 | Male | Three y/o | Treatment (Wk 1) | Treatment | Fast Day | No | 23:35 | 23:00 - 23:59 | Night         | 37,2 | 41  | 9,6   | 9,6   | 18,36 | 522,29 | 75,37  |
|   | 2019/05/19 | CH2206 | Male | Three y/o | Treatment (Wk 1) | Treatment | Fast Day | No | 23:35 | 23:00 - 23:59 | Night         | 37,2 | 53  | 66,4  | 66,4  | 18,36 | 544,43 | 141,61 |
|   | 2019/05/19 | CH2205 | Male | Three y/o | Treatment (Wk 1) | Treatment | Fast Day | No | 23:40 | 23:00 - 23:59 | Night         | 37,2 | 42  | 19,0  | 19,0  | 18,36 | 524,42 | 98,56  |
|   | 2019/05/19 | CH2206 | Male | Three y/o | Treatment (Wk 1) | Treatment | Fast Day | No | 23:40 | 23:00 - 23:59 | Night         | 37,3 | 45  | 47,0  | 47,0  | 18,46 | 530,47 | 129,65 |
|   | 2019/05/19 | CH2205 | Male | Three y/o | Treatment (Wk 1) | Treatment | Fast Day | No | 23:45 | 23:00 - 23:59 | Night         | 37,3 | 77  | 18,0  | 18,0  | 18,46 | 574,39 | 96,72  |
|   | 2019/05/19 | CH2206 | Male | Three y/o | Treatment (Wk 1) | Treatment | Fast Day | No | 23:45 | 23:00 - 23:59 | Night         | 37,3 | 95  | 31,6  | 31,6  | 18,46 | 590,14 | 115,98 |
|   | 2019/05/19 | CH2205 | Male | Three y/o | Treatment (Wk 1) | Treatment | Fast Day | No | 23:50 | 23:00 - 23:59 | Night         | 37,3 | 38  | 12,2  | 12,2  | 18,46 | 515,48 | 83,49  |
|   | 2019/05/19 | CH2206 | Male | Three y/o | Treatment (Wk 1) | Treatment | Fast Day | No | 23:50 | 23:00 - 23:59 | Night         | 37,3 | 87  | 47,4  | 47,4  | 18,46 | 583,64 | 129,94 |
|   | 2019/05/19 | CH2205 | Male | Three y/o | Treatment (Wk 1) | Treatment | Fast Day | No | 23:55 | 23:00 - 23:59 | Night         | 37,3 | 56  | 8,6   | 8,6   | 18,46 | 549,01 | 71,66  |
|   | 2019/05/19 | CH2206 | Male | Three y/o | Treatment (Wk 1) | Treatment | Fast Day | No | 23:55 | 23:00 - 23:59 | Night         | 37,1 | 43  | 42,8  | 42,8  | 18,26 | 526,50 | 126,42 |
| 6 | 2019/05/20 | CH2205 | Male | Three y/o | Treatment (Wk 1) | Treatment | Feed Day | No | 00:00 | 00:00 - 00:59 | Early Morning | 37,3 | 49  | 15,6  | 15,6  | 18,46 | 537,80 | 91,85  |
|   | 2019/05/20 | CH2206 | Male | Three y/o | Treatment (Wk 1) | Treatment | Feed Day | No | 00:00 | 00:00 - 00:59 | Early Morning | 37,3 | 60  | 42,2  | 42,2  | 18,46 | 554,67 | 125,93 |
|   | 2019/05/20 | CH2205 | Male | Three y/o | Treatment (Wk 1) | Treatment | Feed Day | No | 00:05 | 00:00 - 00:59 | Early Morning | 37,3 | 65  | 14,8  | 14,8  | 18,46 | 561,12 | 90,05  |
|   | 2019/05/20 | CH2206 | Male | Three y/o | Treatment (Wk 1) | Treatment | Feed Day | No | 00:05 | 00:00 - 00:59 | Early Morning | 37,3 | 57  | 43,2  | 43,2  | 18,46 | 550,47 | 126,74 |
|   | 2019/05/20 | CH2205 | Male | Three y/o | Treatment (Wk 1) | Treatment | Feed Day | No | 00:10 | 00:00 - 00:59 | Early Morning | 37,2 | 46  | 7,4   | 7,4   | 18,36 | 532,38 | 66,59  |
|   | 2019/05/20 | CH2206 | Male | Three y/o | Treatment (Wk 1) | Treatment | Feed Day | No | 00:10 | 00:00 - 00:59 | Early Morning | 37,2 | 59  | 1,4   | 1,4   | 18,36 | 553,30 | 11,07  |
|   | 2019/05/20 | CH2205 | Male | Three y/o | Treatment (Wk 1) | Treatment | Feed Day | No | 00:15 | 00:00 - 00:59 | Early Morning | 37,2 | 39  | 10,0  | 10,0  | 18,36 | 517,82 | 76,76  |
|   | 2019/05/20 | CH2206 | Male | Three y/o | Treatment (Wk 1) | Treatment | Feed Day | No | 00:15 | 00:00 - 00:59 | Early Morning | 37,2 | 79  | 5,8   | 5,8   | 18,36 | 576,36 | 58,39  |
|   | 2019/05/20 | CH2205 | Male | Three y/o | Treatment (Wk 1) | Treatment | Feed Day | No | 00:20 | 00:00 - 00:59 | Early Morning | 37,2 | 71  | 10,4  | 10,4  | 18,36 | 568,10 | 78,08  |
|   | 2019/05/20 | CH2206 | Male | Three y/o | Treatment (Wk 1) | Treatment | Feed Day | No | 00:20 | 00:00 - 00:59 | Early Morning | 37,2 | 83  | 6,6   | 6,6   | 18,36 | 580,11 | 62,73  |
|   | 2019/05/20 | CH2205 | Male | Three y/o | Treatment (Wk 1) | Treatment | Feed Day | No | 00:25 | 00:00 - 00:59 | Early Morning | 37,3 | 53  | 8,8   | 8,8   | 18,46 | 544,43 | 72,43  |
|   | 2019/05/20 | CH2206 | Male | Three y/o | Treatment (Wk 1) | Treatment | Feed Day | No | 00:25 | 00:00 - 00:59 | Early Morning | 37,2 | 42  | 6,4   | 6,4   | 18,36 | 524,42 | 61,70  |
|   | 2019/05/20 | CH2205 | Male | Three y/o | Treatment (Wk 1) | Treatment | Feed Day | No | 00:30 | 00:00 - 00:59 | Early Morning | 37,3 | 42  | 8,0   | 8,0   | 18,46 | 524,42 | 69,22  |
|   | 2019/05/20 | CH2206 | Male | Three y/o | Treatment (Wk 1) | Treatment | Feed Day | No | 00:30 | 00:00 - 00:59 | Early Morning | 37,2 | 45  | 8,4   | 8,4   | 18,36 | 530,47 | 70,86  |
|   | 2019/05/20 | CH2205 | Male | Three y/o | Treatment (Wk 1) | Treatment | Feed Day | No | 00:35 | 00:00 - 00:59 | Early Morning | 37,3 | 44  | 5,2   | 5,2   | 18,46 | 528,51 | 54,72  |
|   | 2019/05/20 | CH2206 | Male | Three y/o | Treatment (Wk 1) | Treatment | Feed Day | No | 00:35 | 00:00 - 00:59 | Early Morning | 37,1 | 48  | 9,8   | 9,8   | 18,26 | 536,04 | 76,07  |
|   | 2019/05/20 | CH2205 | Male | Three y/o | Treatment (Wk 1) | Treatment | Feed Day | No | 00:40 | 00:00 - 00:59 | Early Morning | 37,3 | 47  | 12,0  | 12,0  | 18,46 | 534,23 | 82,93  |
|   | 2019/05/20 | CH2206 | Male | Three y/o | Treatment (Wk 1) | Treatment | Feed Day | No | 00:40 | 00:00 - 00:59 | Early Morning | 37,1 | 50  | 5,6   | 5,6   | 18,26 | 539,52 | 57,21  |
|   | 2019/05/20 | CH2205 | Male | Three y/o | Treatment (Wk 1) | Treatment | Feed Day | No | 00:45 | 00:00 - 00:59 | Early Morning | 37,3 | 51  | 4,8   | 4,8   | 18,46 | 541,20 | 52,04  |
|   | 2019/05/20 | CH2206 | Male | Three y/o | Treatment (Wk 1) | Treatment | Feed Day | No | 00:45 | 00:00 - 00:59 | Early Morning | 37,0 | 44  | 8,2   | 8,2   | 18,16 | 528,51 | 70,05  |
|   | 2019/05/20 | CH2205 | Male | Three y/o | Treatment (Wk 1) | Treatment | Feed Day | No | 00:50 | 00:00 - 00:59 | Early Morning | 37,3 | 108 | 36,4  | 36,4  | 18,46 | 599,39 | 120,84 |
|   | 2019/05/20 | CH2206 | Male | Three y/o | Treatment (Wk 1) | Treatment | Feed Day | No | 00:50 | 00:00 - 00:59 | Early Morning | 37,0 | 172 | 75,0  | 75,0  | 18,16 | 630,73 | 145,83 |
|   | 2019/05/20 | CH2205 | Male | Three y/o | Treatment (Wk 1) | Treatment | Feed Day | No | 00:55 | 00:00 - 00:59 | Early Morning | 37,3 | 111 | 145,4 | 145,4 | 18,46 | 601,33 | 168,93 |
|   | 2019/05/20 | CH2206 | Male | Three y/o | Treatment (Wk 1) | Treatment | Feed Day | No | 00:55 | 00:00 - 00:59 | Early Morning | 37,2 | 121 | 126,0 | 126,0 | 18,36 | 607,35 | 163,91 |
|   | 2019/05/20 | CH2205 | Male | Three y/o | Treatment (Wk 1) | Treatment | Feed Day | No | 01:00 | 01:00 - 01:59 | Early Morning | 37,3 | 113 | 25,2  | 25,2  | 18,46 | 602,58 | 108,22 |
|   | 2019/05/20 | CH2206 | Male | Three y/o | Treatment (Wk 1) | Treatment | Feed Day | No | 01:00 | 01:00 - 01:59 | Early Morning | 37,3 |     | 212,0 | 212,0 | 18,46 |        | 182,17 |
|   | 2019/05/20 | CH2205 | Male | Three y/o | Treatment (Wk 1) | Treatment | Feed Day | No | 01:05 | 01:00 - 01:59 | Early Morning | 37,3 | 114 | 67,6  | 67,6  | 18,46 | 603,20 | 142,23 |
|   | 2019/05/20 | CH2206 | Male | Three y/o | Treatment (Wk 1) | Treatment | Feed Day | No | 01:05 | 01:00 - 01:59 | Early Morning | 37,4 | 96  | 64,4  | 64,4  | 18,55 | 590,91 | 140,55 |
|   | 2019/05/20 | CH2205 | Male | Three y/o | Treatment (Wk 1) | Treatment | Feed Day | No | 01:10 | 01:00 - 01:59 | Early Morning | 37,3 | 124 | 42,4  | 42,4  | 18,46 | 609,04 | 126,10 |
|   | 2019/05/20 | CH2206 | Male | Three y/o | Treatment (Wk 1) | Treatment | Feed Day | No | 01:10 | 01:00 - 01:59 | Early Morning | 37,5 | 123 | 105,8 | 105,8 | 18,65 | 608,49 | 157,81 |
|   | 2019/05/20 | CH2205 | Male | Three y/o | Treatment (Wk 1) | Treatment | Feed Day | No | 01:15 | 01:00 - 01:59 | Early Morning | 37,4 | 108 | 106,0 | 106,0 | 18,55 | 599,39 | 157,88 |
|   | 2019/05/20 | CH2206 | Male | Three y/o | Treatment (Wk 1) | Treatment | Feed Day | No | 01:15 | 01:00 - 01:59 | Early Morning | 37,7 | 117 | 79,4  | 79,4  | 18,85 | 605,02 | 147,81 |
|   | 2019/05/20 | CH2205 | Male | Three y/o | Treatment (Wk 1) | Treatment | Feed Day | No | 01:20 | 01:00 - 01:59 | Early Morning | 37,4 |     | 72,2  | 72,2  | 18,55 |        | 144,51 |
|   | 2019/05/20 | CH2206 | Male | Three y/o | Treatment (Wk 1) | Treatment | Feed Day | No | 01:20 | 01:00 - 01:59 | Early Morning | 37,7 | 108 | 172,4 | 172,4 | 18,85 | 599,39 | 174,90 |
|   | 2019/05/20 | CH2205 | Male | Three y/o | Treatment (Wk 1) | Treatment | Feed Day | No | 01:25 | 01:00 - 01:59 | Early Morning | 37,6 | 49  | 315,4 | 315,4 | 18,75 | 537,80 | 196,19 |
|   | 2019/05/20 | CH2206 | Male | Three y/o | Treatment (Wk 1) | Treatment | Feed Day | No | 01:25 | 01:00 - 01:59 | Early Morning | 37,8 | 100 | 109,0 | 109,0 | 18,95 | 593,87 | 158,85 |
|   | 2019/05/20 | CH2205 | Male | Three y/o | Treatment (Wk 1) | Treatment | Feed Day | No | 01:30 | 01:00 - 01:59 | Early Morning | 37,6 |     | 17,8  | 17,8  | 18,75 |        | 96,34  |
|   | 2019/05/20 | CH2206 | Male | Three y/o | Treatment (Wk 1) | Treatment | Feed Day | No | 01:30 | 01:00 - 01:59 | Early Morning | 37,7 | 90  | 76,2  | 76,2  | 18,85 | 586,16 | 146,38 |
|   | 2019/05/20 | CH2205 | Male | Three y/o | Treatment (Wk 1) | Treatment | Feed Day | No | 01:35 | 01:00 - 01:59 | Early Morning | 37,6 | 150 | 35,4  | 35,4  | 18,75 | 621,86 | 119,88 |
|   | 2019/05/20 | CH2206 | Male | Three y/o | Treatment (Wk 1) | Treatment | Feed Day | No | 01:35 | 01:00 - 01:59 | Early Morning | 37,7 | 119 | 139,6 | 139,6 | 18,85 | 606,20 | 167,50 |
|   | 2019/05/20 | CH2205 | Male | Three y/o | Treatment (Wk 1) | Treatment | Feed Day | No | 01:40 | 01:00 - 01:59 | Early Morning | 37,6 | 86  | 35,0  | 35,0  | 18,75 | 582,77 | 119,49 |
|   | 2019/05/20 | CH2206 | Male | Three y/o | Treatment (Wk 1) | Treatment | Feed Day | No | 01:40 | 01:00 - 01:59 | Early Morning | 37,8 | 121 | 42,6  | 42,6  | 18,95 | 607,35 | 126,26 |
|   | 2019/05/20 | CH2205 | Male | Three y/o | Treatment (Wk 1) | Treatment | Feed Day | No | 01:45 | 01:00 - 01:59 | Early Morning | 37,5 |     | 21,8  | 21,8  | 18,65 |        | 103,26 |
|   | 2019/05/20 | CH2206 | Male | Three y/o | Treatment (Wk 1) | Treatment | Feed Day | No | 01:45 | 01:00 - 01:59 | Early Morning | 37,4 | 73  | 91,8  | 91,8  | 18,55 | 570,27 | 152,86 |
|   | 2019/05/20 | CH2205 | Male | Three y/o | Treatment (Wk 1) | Treatment | Feed Day | No | 01:50 | 01:00 - 01:59 | Early Morning | 37,5 | 46  | 4,4   | 4,4   | 18,65 | 532,38 | 49,12  |
|   | 2019/05/20 | CH2206 | Male | Three y/o | Treatment (Wk 1) | Treatment | Feed Day | No | 01:50 | 01:00 - 01:59 | Early Morning | 37,4 | 99  | 57,8  | 57,8  | 18,55 | 593,14 | 136,80 |
|   | 2019/05/20 | CH2205 | Male | Three y/o | Treatment (Wk 1) | Treatment | Feed Day | No | 01:55 | 01:00 - 01:59 | Early Morning | 37,5 | 49  | 5,6   | 5,6   | 18,65 | 537,80 | 57,21  |
|   | 2019/05/20 | CH2206 | Male | Three y/o | Treatment (Wk 1) | Treatment | Feed Day | No | 01:55 | 01:00 - 01:59 | Early Morning | 37,5 | 119 | 82,6  | 82,6  | 18,65 | 606,20 | 149,19 |
|   | 2019/05/20 | CH2205 | Male | Three y/o | Treatment (Wk 1) | Treatment | Feed Day | No | 02:00 | 02:00 - 02:59 | Early Morning | 37,6 | 83  | 20,4  | 20,4  | 18,75 | 580,11 | 100,99 |
|   | 2019/05/20 | CH2206 | Male | Three y/o | Treatment (Wk 1) | Treatment | Feed Day | No | 02:00 | 02:00 - 02:59 | Early Morning | 37,5 | 92  | 55,0  | 55,0  | 18,65 | 587,78 | 135,08 |
|   | 2019/05/20 | CH2205 | Male | Three y/o | Treatment (Wk 1) | Treatment | Feed Day | No | 02:05 | 02:00 - 02:59 | Early Morning | 37,5 | 112 | 27,2  | 27,2  | 18,65 | 601,96 | 110,83 |
|   | 2019/05/20 | CH2206 | Male | Three y/o | Treatment (Wk 1) | Treatment | Feed Day | No | 02:05 | 02:00 - 02:59 | Early Morning | 37,5 | 101 | 94,0  | 94,0  | 18,65 | 594,59 | 153,69 |
|   | 2019/05/20 | CH2205 | Male | Three y/o | Treatment (Wk 1) | Treatment | Feed Day | No | 02:10 | 02:00 - 02:59 | Early Morning | 37,5 |     | 27,6  | 27,6  | 18,65 |        | 111,33 |
|   | 2019/05/20 | CH2206 | Male | Three y/o | Treatment (Wk 1) | Treatment | Feed Day | No | 02:10 | 02:00 - 02:59 | Early Morning | 37,7 | 105 | 253,6 | 253,6 | 18,85 | 597,38 | 188,48 |
|   | 2019/05/20 | CH2205 | Male | Three y/o | Treatment (Wk 1) | Treatment | Feed Day | No | 02:15 | 02:00 - 02:59 | Early Morning | 37,5 |     | 29,8  | 29,8  | 18,65 |        | 113,97 |
|   | 2019/05/20 | CH2206 | Male | Three y/o | Treatment (Wk 1) | Treatment | Feed Day | No | 02:15 | 02:00 - 02:59 | Early Morning | 37,7 | 51  | 43,2  | 43,2  | 18,85 | 541,20 | 126,74 |
|   | 2019/05/20 | CH2205 | Male | Three y/o | Treatment (Wk 1) | Treatment | Feed Day | No | 02:20 | 02:00 - 02:59 | Early Morning | 37,5 | 39  | 20,2  | 20,2  | 18,65 | 517,82 | 100,65 |



|            |        |      |           |                  |           |          |    |       |               |               |      |     |      |      |       |        |        |
|------------|--------|------|-----------|------------------|-----------|----------|----|-------|---------------|---------------|------|-----|------|------|-------|--------|--------|
| 2019/05/20 | CH2206 | Male | Three y/o | Treatment (Wk 1) | Treatment | Feed Day | No | 02:20 | 02:00 - 02:59 | Early Morning | 37,3 | 86  | 49,6 | 49,6 | 18,46 | 582,77 | 131,51 |
| 2019/05/20 | CH2205 | Male | Three y/o | Treatment (Wk 1) | Treatment | Feed Day | No | 02:25 | 02:00 - 02:59 | Early Morning | 37,4 | 51  | 4,8  | 4,8  | 18,55 | 541,20 | 52,04  |
| 2019/05/20 | CH2206 | Male | Three y/o | Treatment (Wk 1) | Treatment | Feed Day | No | 02:25 | 02:00 - 02:59 | Early Morning | 37,1 | 100 | 54,6 | 54,6 | 18,26 | 593,87 | 134,83 |
| 2019/05/20 | CH2205 | Male | Three y/o | Treatment (Wk 1) | Treatment | Feed Day | No | 02:30 | 02:00 - 02:59 | Early Morning | 37,4 | 52  | 4,2  | 4,2  | 18,55 | 542,83 | 47,57  |
| 2019/05/20 | CH2206 | Male | Three y/o | Treatment (Wk 1) | Treatment | Feed Day | No | 02:30 | 02:00 - 02:59 | Early Morning | 37,0 | 78  | 58,8 | 58,8 | 18,16 | 575,38 | 137,39 |
| 2019/05/20 | CH2205 | Male | Three y/o | Treatment (Wk 1) | Treatment | Feed Day | No | 02:35 | 02:00 - 02:59 | Early Morning | 37,3 | 45  | 5,2  | 5,2  | 18,46 | 530,47 | 54,72  |
| 2019/05/20 | CH2206 | Male | Three y/o | Treatment (Wk 1) | Treatment | Feed Day | No | 02:35 | 02:00 - 02:59 | Early Morning | 37,0 | 72  | 57,8 | 57,8 | 18,16 | 569,20 | 136,80 |
| 2019/05/20 | CH2205 | Male | Three y/o | Treatment (Wk 1) | Treatment | Feed Day | No | 02:40 | 02:00 - 02:59 | Early Morning | 37,3 | 64  | 9,0  | 9,0  | 18,46 | 559,88 | 73,19  |
| 2019/05/20 | CH2206 | Male | Three y/o | Treatment (Wk 1) | Treatment | Feed Day | No | 02:40 | 02:00 - 02:59 | Early Morning | 37,1 | 47  | 51,8 | 51,8 | 18,26 | 534,23 | 133,01 |
| 2019/05/20 | CH2205 | Male | Three y/o | Treatment (Wk 1) | Treatment | Feed Day | No | 02:45 | 02:00 - 02:59 | Early Morning | 37,3 | 73  | 5,6  | 5,6  | 18,46 | 570,27 | 57,21  |
| 2019/05/20 | CH2206 | Male | Three y/o | Treatment (Wk 1) | Treatment | Feed Day | No | 02:45 | 02:00 - 02:59 | Early Morning | 37,2 | 66  | 44,4 | 44,4 | 18,36 | 562,34 | 127,69 |
| 2019/05/20 | CH2205 | Male | Three y/o | Treatment (Wk 1) | Treatment | Feed Day | No | 02:50 | 02:00 - 02:59 | Early Morning | 37,3 | 45  | 5,0  | 5,0  | 18,46 | 530,47 | 53,41  |
| 2019/05/20 | CH2206 | Male | Three y/o | Treatment (Wk 1) | Treatment | Feed Day | No | 02:50 | 02:00 - 02:59 | Early Morning | 37,3 | 47  | 6,8  | 6,8  | 18,46 | 534,23 | 63,74  |
| 2019/05/20 | CH2205 | Male | Three y/o | Treatment (Wk 1) | Treatment | Feed Day | No | 02:55 | 02:00 - 02:59 | Early Morning | 37,3 | 67  | 6,4  | 6,4  | 18,46 | 563,53 | 61,70  |
| 2019/05/20 | CH2206 | Male | Three y/o | Treatment (Wk 1) | Treatment | Feed Day | No | 02:55 | 02:00 - 02:59 | Early Morning | 37,3 | 46  | 12,8 | 12,8 | 18,46 | 532,38 | 85,12  |
| 2019/05/20 | CH2205 | Male | Three y/o | Treatment (Wk 1) | Treatment | Feed Day | No | 03:00 | 03:00 - 03:59 | Early Morning | 37,3 | 39  | 17,2 | 17,2 | 18,46 | 517,82 | 95,17  |
| 2019/05/20 | CH2206 | Male | Three y/o | Treatment (Wk 1) | Treatment | Feed Day | No | 03:00 | 03:00 - 03:59 | Early Morning | 37,3 | 72  | 24,6 | 24,6 | 18,46 | 569,20 | 107,39 |
| 2019/05/20 | CH2205 | Male | Three y/o | Treatment (Wk 1) | Treatment | Feed Day | No | 03:05 | 03:00 - 03:59 | Early Morning | 37,3 |     | 25,0 | 25,0 | 18,46 |        | 107,94 |
| 2019/05/20 | CH2206 | Male | Three y/o | Treatment (Wk 1) | Treatment | Feed Day | No | 03:05 | 03:00 - 03:59 | Early Morning | 37,3 | 47  | 57,6 | 57,6 | 18,46 | 534,23 | 136,68 |
| 2019/05/20 | CH2205 | Male | Three y/o | Treatment (Wk 1) | Treatment | Feed Day | No | 03:10 | 03:00 - 03:59 | Early Morning | 37,3 |     | 19,4 | 19,4 | 18,46 |        | 99,28  |
| 2019/05/20 | CH2206 | Male | Three y/o | Treatment (Wk 1) | Treatment | Feed Day | No | 03:10 | 03:00 - 03:59 | Early Morning | 37,3 | 79  | 57,4 | 57,4 | 18,46 | 576,36 | 136,56 |
| 2019/05/20 | CH2205 | Male | Three y/o | Treatment (Wk 1) | Treatment | Feed Day | No | 03:15 | 03:00 - 03:59 | Early Morning | 37,3 | 42  | 13,2 | 13,2 | 18,46 | 524,42 | 86,17  |
| 2019/05/20 | CH2206 | Male | Three y/o | Treatment (Wk 1) | Treatment | Feed Day | No | 03:15 | 03:00 - 03:59 | Early Morning | 37,3 | 41  | 57,6 | 57,6 | 18,46 | 522,29 | 136,68 |
| 2019/05/20 | CH2205 | Male | Three y/o | Treatment (Wk 1) | Treatment | Feed Day | No | 03:20 | 03:00 - 03:59 | Early Morning | 37,3 | 46  | 21,6 | 21,6 | 18,46 | 532,38 | 102,94 |
| 2019/05/20 | CH2206 | Male | Three y/o | Treatment (Wk 1) | Treatment | Feed Day | No | 03:20 | 03:00 - 03:59 | Early Morning | 37,3 | 65  | 54,4 | 54,4 | 18,46 | 561,12 | 134,70 |
| 2019/05/20 | CH2205 | Male | Three y/o | Treatment (Wk 1) | Treatment | Feed Day | No | 03:25 | 03:00 - 03:59 | Early Morning | 37,2 | 63  | 19,2 | 19,2 | 18,36 | 558,62 | 98,92  |
| 2019/05/20 | CH2206 | Male | Three y/o | Treatment (Wk 1) | Treatment | Feed Day | No | 03:25 | 03:00 - 03:59 | Early Morning | 37,3 | 76  | 61,4 | 61,4 | 18,46 | 573,39 | 138,89 |
| 2019/05/20 | CH2205 | Male | Three y/o | Treatment (Wk 1) | Treatment | Feed Day | No | 03:30 | 03:00 - 03:59 | Early Morning | 37,2 | 70  | 20,0 | 20,0 | 18,36 | 566,99 | 100,31 |
| 2019/05/20 | CH2206 | Male | Three y/o | Treatment (Wk 1) | Treatment | Feed Day | No | 03:30 | 03:00 - 03:59 | Early Morning | 37,3 | 73  | 59,4 | 59,4 | 18,46 | 570,27 | 137,75 |
| 2019/05/20 | CH2205 | Male | Three y/o | Treatment (Wk 1) | Treatment | Feed Day | No | 03:35 | 03:00 - 03:59 | Early Morning | 37,2 | 98  | 17,8 | 17,8 | 18,36 | 592,41 | 96,34  |
| 2019/05/20 | CH2206 | Male | Three y/o | Treatment (Wk 1) | Treatment | Feed Day | No | 03:35 | 03:00 - 03:59 | Early Morning | 37,3 | 41  | 62,8 | 62,8 | 18,46 | 522,29 | 139,67 |
| 2019/05/20 | CH2205 | Male | Three y/o | Treatment (Wk 1) | Treatment | Feed Day | No | 03:40 | 03:00 - 03:59 | Early Morning | 37,2 | 63  | 22,6 | 22,6 | 18,36 | 558,62 | 104,49 |
| 2019/05/20 | CH2206 | Male | Three y/o | Treatment (Wk 1) | Treatment | Feed Day | No | 03:40 | 03:00 - 03:59 | Early Morning | 37,2 | 42  | 62,2 | 62,2 | 18,36 | 524,42 | 139,34 |
| 2019/05/20 | CH2205 | Male | Three y/o | Treatment (Wk 1) | Treatment | Feed Day | No | 03:45 | 03:00 - 03:59 | Early Morning | 37,2 | 69  | 20,0 | 20,0 | 18,36 | 565,86 | 100,31 |
| 2019/05/20 | CH2206 | Male | Three y/o | Treatment (Wk 1) | Treatment | Feed Day | No | 03:45 | 03:00 - 03:59 | Early Morning | 37,2 | 48  | 52,6 | 52,6 | 18,36 | 536,04 | 133,54 |
| 2019/05/20 | CH2205 | Male | Three y/o | Treatment (Wk 1) | Treatment | Feed Day | No | 03:50 | 03:00 - 03:59 | Early Morning | 37,2 | 79  | 20,2 | 20,2 | 18,36 | 576,36 | 100,65 |
| 2019/05/20 | CH2206 | Male | Three y/o | Treatment (Wk 1) | Treatment | Feed Day | No | 03:50 | 03:00 - 03:59 | Early Morning | 37,2 | 45  | 13,6 | 13,6 | 18,36 | 530,47 | 87,18  |
| 2019/05/20 | CH2205 | Male | Three y/o | Treatment (Wk 1) | Treatment | Feed Day | No | 03:55 | 03:00 - 03:59 | Early Morning | 37,2 | 49  | 19,4 | 19,4 | 18,36 | 537,80 | 99,28  |
| 2019/05/20 | CH2206 | Male | Three y/o | Treatment (Wk 1) | Treatment | Feed Day | No | 03:55 | 03:00 - 03:59 | Early Morning | 37,2 | 76  | 11,4 | 11,4 | 18,36 | 573,39 | 81,19  |
| 2019/05/20 | CH2205 | Male | Three y/o | Treatment (Wk 1) | Treatment | Feed Day | No | 04:00 | 04:00 - 04:59 | Morning       | 37,2 | 57  | 21,0 | 21,0 | 18,36 | 550,47 | 101,98 |
| 2019/05/20 | CH2206 | Male | Three y/o | Treatment (Wk 1) | Treatment | Feed Day | No | 04:00 | 04:00 - 04:59 | Morning       | 37,2 | 49  | 9,6  | 9,6  | 18,36 | 537,80 | 75,37  |
| 2019/05/20 | CH2205 | Male | Three y/o | Treatment (Wk 1) | Treatment | Feed Day | No | 04:05 | 04:00 - 04:59 | Morning       | 37,2 | 82  | 19,0 | 19,0 | 18,36 | 579,19 | 98,56  |
| 2019/05/20 | CH2206 | Male | Three y/o | Treatment (Wk 1) | Treatment | Feed Day | No | 04:05 | 04:00 - 04:59 | Morning       | 37,1 | 63  | 9,2  | 9,2  | 18,26 | 558,62 | 73,94  |
| 2019/05/20 | CH2205 | Male | Three y/o | Treatment (Wk 1) | Treatment | Feed Day | No | 04:10 | 04:00 - 04:59 | Morning       | 37,2 | 102 | 19,2 | 19,2 | 18,36 | 595,30 | 98,92  |
| 2019/05/20 | CH2206 | Male | Three y/o | Treatment (Wk 1) | Treatment | Feed Day | No | 04:10 | 04:00 - 04:59 | Morning       | 37,1 | 46  | 9,4  | 9,4  | 18,26 | 532,38 | 74,66  |
| 2019/05/20 | CH2205 | Male | Three y/o | Treatment (Wk 1) | Treatment | Feed Day | No | 04:15 | 04:00 - 04:59 | Morning       | 37,2 | 39  | 19,4 | 19,4 | 18,36 | 517,82 | 99,28  |
| 2019/05/20 | CH2206 | Male | Three y/o | Treatment (Wk 1) | Treatment | Feed Day | No | 04:15 | 04:00 - 04:59 | Morning       | 37,1 | 51  | 11,4 | 11,4 | 18,26 | 541,20 | 81,19  |
| 2019/05/20 | CH2205 | Male | Three y/o | Treatment (Wk 1) | Treatment | Feed Day | No | 04:20 | 04:00 - 04:59 | Morning       | 37,2 | 46  | 13,4 | 13,4 | 18,36 | 532,38 | 86,68  |
| 2019/05/20 | CH2206 | Male | Three y/o | Treatment (Wk 1) | Treatment | Feed Day | No | 04:20 | 04:00 - 04:59 | Morning       | 37,1 | 47  | 13,8 | 13,8 | 18,26 | 534,23 | 87,68  |
| 2019/05/20 | CH2205 | Male | Three y/o | Treatment (Wk 1) | Treatment | Feed Day | No | 04:25 | 04:00 - 04:59 | Morning       | 37,2 | 42  | 18,0 | 18,0 | 18,36 | 524,42 | 96,72  |
| 2019/05/20 | CH2206 | Male | Three y/o | Treatment (Wk 1) | Treatment | Feed Day | No | 04:25 | 04:00 - 04:59 | Morning       | 37,1 | 46  | 14,2 | 14,2 | 18,26 | 532,38 | 88,65  |
| 2019/05/20 | CH2205 | Male | Three y/o | Treatment (Wk 1) | Treatment | Feed Day | No | 04:30 | 04:00 - 04:59 | Morning       | 37,2 | 48  | 15,8 | 15,8 | 18,36 | 536,04 | 92,28  |
| 2019/05/20 | CH2206 | Male | Three y/o | Treatment (Wk 1) | Treatment | Feed Day | No | 04:30 | 04:00 - 04:59 | Morning       | 37,1 | 48  | 35,8 | 35,8 | 18,26 | 536,04 | 120,27 |
| 2019/05/20 | CH2205 | Male | Three y/o | Treatment (Wk 1) | Treatment | Feed Day | No | 04:35 | 04:00 - 04:59 | Morning       | 37,2 | 58  | 14,0 | 14,0 | 18,36 | 551,90 | 88,17  |
| 2019/05/20 | CH2206 | Male | Three y/o | Treatment (Wk 1) | Treatment | Feed Day | No | 04:35 | 04:00 - 04:59 | Morning       | 37,1 | 64  | 17,2 | 17,2 | 18,26 | 559,88 | 95,17  |
| 2019/05/20 | CH2205 | Male | Three y/o | Treatment (Wk 1) | Treatment | Feed Day | No | 04:40 | 04:00 - 04:59 | Morning       | 37,1 | 38  | 15,0 | 15,0 | 18,26 | 515,48 | 90,51  |
| 2019/05/20 | CH2206 | Male | Three y/o | Treatment (Wk 1) | Treatment | Feed Day | No | 04:40 | 04:00 - 04:59 | Morning       | 37,1 | 47  | 17,6 | 17,6 | 18,26 | 534,23 | 95,95  |
| 2019/05/20 | CH2205 | Male | Three y/o | Treatment (Wk 1) | Treatment | Feed Day | No | 04:45 | 04:00 - 04:59 | Morning       | 37,1 | 39  | 35,0 | 35,0 | 18,26 | 517,82 | 119,49 |
| 2019/05/20 | CH2206 | Male | Three y/o | Treatment (Wk 1) | Treatment | Feed Day | No | 04:45 | 04:00 - 04:59 | Morning       | 37,1 | 73  | 20,6 | 20,6 | 18,26 | 570,27 | 101,32 |
| 2019/05/20 | CH2205 | Male | Three y/o | Treatment (Wk 1) | Treatment | Feed Day | No | 04:50 | 04:00 - 04:59 | Morning       | 37,1 | 43  | 31,4 | 31,4 | 18,26 | 526,50 | 115,76 |
| 2019/05/20 | CH2206 | Male | Three y/o | Treatment (Wk 1) | Treatment | Feed Day | No | 04:50 | 04:00 - 04:59 | Morning       | 37,0 | 45  | 35,8 | 35,8 | 18,16 | 530,47 | 120,27 |
| 2019/05/20 | CH2205 | Male | Three y/o | Treatment (Wk 1) | Treatment | Feed Day | No | 04:55 | 04:00 - 04:59 | Morning       | 37,1 | 56  | 30,8 | 30,8 | 18,26 | 549,01 | 115,10 |
| 2019/05/20 | CH2206 | Male | Three y/o | Treatment (Wk 1) | Treatment | Feed Day | No | 04:55 | 04:00 - 04:59 | Morning       | 37,0 | 41  | 42,2 | 42,2 | 18,16 | 522,29 | 125,93 |
| 2019/05/20 | CH2205 | Male | Three y/o | Treatment (Wk 1) | Treatment | Feed Day | No | 05:00 | 05:00 - 05:59 | Morning       | 37,2 |     | 33,0 | 33,0 | 18,36 |        | 117,47 |
| 2019/05/20 | CH2206 | Male | Three y/o | Treatment (Wk 1) | Treatment | Feed Day | No | 05:00 | 05:00 - 05:59 | Morning       | 37,0 | 49  | 60,0 | 60,0 | 18,16 | 537,80 | 138,09 |
| 2019/05/20 | CH2205 | Male | Three y/o | Treatment (Wk 1) | Treatment | Feed Day | No | 05:05 | 05:00 - 05:59 | Morning       | 37,1 |     | 30,6 | 30,6 | 18,26 |        | 114,87 |
| 2019/05/20 | CH2206 | Male | Three y/o | Treatment (Wk 1) | Treatment | Feed Day | No | 05:05 | 05:00 - 05:59 | Morning       | 36,9 | 43  | 24,8 | 24,8 | 18,06 | 526,50 | 107,67 |
| 2019/05/20 | CH2205 | Male | Three y/o | Treatment (Wk 1) | Treatment | Feed Day | No | 05:10 | 05:00 - 05:59 | Morning       | 37,0 | 51  | 20,6 | 20,6 | 18,16 | 541,20 | 101,32 |
| 2019/05/20 | CH2206 | Male | Three y/o | Treatment (Wk 1) | Treatment | Feed Day | No | 05:10 | 05:00 - 05:59 | Morning       | 36,9 | 54  | 3,0  | 3,0  | 18,06 | 545,99 | 36,34  |
| 2019/05/20 | CH2205 | Male | Three y/o | Treatment (Wk 1) | Treatment | Feed Day | No | 05:15 | 05:00 - 05:59 | Morning       | 37,0 | 44  | 23,8 | 23,8 | 18,16 | 528,51 | 106,26 |



|            |        |      |           |                  |           |          |    |       |               |              |      |     |       |       |       |        |        |
|------------|--------|------|-----------|------------------|-----------|----------|----|-------|---------------|--------------|------|-----|-------|-------|-------|--------|--------|
| 2019/05/20 | CH2206 | Male | Three y/o | Treatment (Wk 1) | Treatment | Feed Day | No | 05:15 | 05:00 - 05:59 | Morning      | 36,9 | 48  | 5,4   | 5,4   | 18,06 | 536,04 | 55,99  |
| 2019/05/20 | CH2205 | Male | Three y/o | Treatment (Wk 1) | Treatment | Feed Day | No | 05:20 | 05:00 - 05:59 | Morning      | 37,0 | 41  | 25,4  | 25,4  | 18,16 | 522,29 | 108,49 |
| 2019/05/20 | CH2206 | Male | Three y/o | Treatment (Wk 1) | Treatment | Feed Day | No | 05:20 | 05:00 - 05:59 | Morning      | 36,9 | 44  | 4,2   | 4,2   | 18,06 | 528,51 | 47,57  |
| 2019/05/20 | CH2205 | Male | Three y/o | Treatment (Wk 1) | Treatment | Feed Day | No | 05:25 | 05:00 - 05:59 | Morning      | 37,0 | 50  | 24,4  | 24,4  | 18,16 | 539,52 | 107,11 |
| 2019/05/20 | CH2206 | Male | Three y/o | Treatment (Wk 1) | Treatment | Feed Day | No | 05:25 | 05:00 - 05:59 | Morning      | 36,9 | 37  | 1,0   | 1,0   | 18,06 | 513,06 | 0,00   |
| 2019/05/20 | CH2205 | Male | Three y/o | Treatment (Wk 1) | Treatment | Feed Day | No | 05:30 | 05:00 - 05:59 | Morning      | 37,0 | 48  | 23,8  | 23,8  | 18,16 | 536,04 | 106,26 |
| 2019/05/20 | CH2206 | Male | Three y/o | Treatment (Wk 1) | Treatment | Feed Day | No | 05:30 | 05:00 - 05:59 | Morning      | 36,9 | 48  | 3,4   | 3,4   | 18,06 | 536,04 | 40,51  |
| 2019/05/20 | CH2205 | Male | Three y/o | Treatment (Wk 1) | Treatment | Feed Day | No | 05:35 | 05:00 - 05:59 | Morning      | 37,0 | 55  | 24,4  | 24,4  | 18,16 | 547,52 | 107,11 |
| 2019/05/20 | CH2206 | Male | Three y/o | Treatment (Wk 1) | Treatment | Feed Day | No | 05:35 | 05:00 - 05:59 | Morning      | 36,9 | 47  | 21,0  | 21,0  | 18,06 | 534,23 | 101,98 |
| 2019/05/20 | CH2205 | Male | Three y/o | Treatment (Wk 1) | Treatment | Feed Day | No | 05:40 | 05:00 - 05:59 | Morning      | 37,1 | 46  | 16,8  | 16,8  | 18,26 | 532,38 | 94,37  |
| 2019/05/20 | CH2206 | Male | Three y/o | Treatment (Wk 1) | Treatment | Feed Day | No | 05:40 | 05:00 - 05:59 | Morning      | 37,0 | 43  | 42,6  | 42,6  | 18,16 | 526,50 | 126,26 |
| 2019/05/20 | CH2205 | Male | Three y/o | Treatment (Wk 1) | Treatment | Feed Day | No | 05:45 | 05:00 - 05:59 | Morning      | 37,1 | 49  | 15,4  | 15,4  | 18,26 | 537,80 | 91,41  |
| 2019/05/20 | CH2206 | Male | Three y/o | Treatment (Wk 1) | Treatment | Feed Day | No | 05:45 | 05:00 - 05:59 | Morning      | 37,0 | 64  | 52,4  | 52,4  | 18,16 | 559,88 | 133,41 |
| 2019/05/20 | CH2205 | Male | Three y/o | Treatment (Wk 1) | Treatment | Feed Day | No | 05:50 | 05:00 - 05:59 | Morning      | 37,1 | 46  | 14,0  | 14,0  | 18,26 | 532,38 | 88,17  |
| 2019/05/20 | CH2206 | Male | Three y/o | Treatment (Wk 1) | Treatment | Feed Day | No | 05:50 | 05:00 - 05:59 | Morning      | 37,0 | 67  | 58,4  | 58,4  | 18,16 | 563,53 | 137,16 |
| 2019/05/20 | CH2205 | Male | Three y/o | Treatment (Wk 1) | Treatment | Feed Day | No | 05:55 | 05:00 - 05:59 | Morning      | 37,2 | 134 | 30,2  | 30,2  | 18,36 | 614,33 | 114,42 |
| 2019/05/20 | CH2206 | Male | Three y/o | Treatment (Wk 1) | Treatment | Feed Day | No | 05:55 | 05:00 - 05:59 | Morning      | 37,1 | 119 | 52,0  | 52,0  | 18,26 | 606,20 | 133,14 |
| 2019/05/20 | CH2205 | Male | Three y/o | Treatment (Wk 1) | Treatment | Feed Day | No | 06:00 | 06:00 - 06:59 | Morning      | 37,2 | 108 | 62,2  | 62,2  | 18,36 | 599,39 | 139,34 |
| 2019/05/20 | CH2206 | Male | Three y/o | Treatment (Wk 1) | Treatment | Feed Day | No | 06:00 | 06:00 - 06:59 | Morning      | 37,2 | 134 | 178,6 | 178,6 | 18,36 | 614,33 | 176,14 |
| 2019/05/20 | CH2205 | Male | Three y/o | Treatment (Wk 1) | Treatment | Feed Day | No | 06:05 | 06:00 - 06:59 | Morning      | 37,2 | 115 | 119,6 | 119,6 | 18,36 | 603,82 | 162,09 |
| 2019/05/20 | CH2206 | Male | Three y/o | Treatment (Wk 1) | Treatment | Feed Day | No | 06:05 | 06:00 - 06:59 | Morning      | 37,3 |     | 108,2 | 108,2 | 18,46 |        | 158,59 |
| 2019/05/20 | CH2205 | Male | Three y/o | Treatment (Wk 1) | Treatment | Feed Day | No | 06:10 | 06:00 - 06:59 | Morning      | 37,2 | 84  | 56,4  | 56,4  | 18,36 | 581,01 | 135,95 |
| 2019/05/20 | CH2206 | Male | Three y/o | Treatment (Wk 1) | Treatment | Feed Day | No | 06:10 | 06:00 - 06:59 | Morning      | 37,3 | 124 | 75,2  | 75,2  | 18,46 | 609,04 | 145,93 |
| 2019/05/20 | CH2205 | Male | Three y/o | Treatment (Wk 1) | Treatment | Feed Day | No | 06:15 | 06:00 - 06:59 | Morning      | 37,2 | 191 | 387,4 | 387,4 | 18,36 | 637,33 | 203,48 |
| 2019/05/20 | CH2206 | Male | Three y/o | Treatment (Wk 1) | Treatment | Feed Day | No | 06:15 | 06:00 - 06:59 | Morning      | 37,5 | 47  | 136,2 | 136,2 | 18,65 | 534,23 | 166,64 |
| 2019/05/20 | CH2205 | Male | Three y/o | Treatment (Wk 1) | Treatment | Feed Day | No | 06:20 | 06:00 - 06:59 | Morning      | 37,3 | 109 | 205,2 | 205,2 | 18,46 | 600,04 | 181,02 |
| 2019/05/20 | CH2206 | Male | Three y/o | Treatment (Wk 1) | Treatment | Feed Day | No | 06:20 | 06:00 - 06:59 | Morning      | 37,7 | 125 | 193,4 | 193,4 | 18,85 | 609,60 | 178,94 |
| 2019/05/20 | CH2205 | Male | Three y/o | Treatment (Wk 1) | Treatment | Feed Day | No | 06:25 | 06:00 - 06:59 | Morning      | 37,4 | 117 | 248,8 | 248,8 | 18,55 | 605,02 | 187,81 |
| 2019/05/20 | CH2206 | Male | Three y/o | Treatment (Wk 1) | Treatment | Feed Day | No | 06:25 | 06:00 - 06:59 | Morning      | 37,7 | 114 | 142,2 | 142,2 | 18,85 | 603,20 | 168,15 |
| 2019/05/20 | CH2205 | Male | Three y/o | Treatment (Wk 1) | Treatment | Feed Day | No | 06:30 | 06:00 - 06:59 | Morning      | 37,5 | 103 | 85,6  | 85,6  | 18,65 | 596,00 | 150,43 |
| 2019/05/20 | CH2206 | Male | Three y/o | Treatment (Wk 1) | Treatment | Feed Day | No | 06:30 | 06:00 - 06:59 | Morning      | 37,8 | 123 | 364,6 | 364,6 | 18,95 | 608,49 | 201,33 |
| 2019/05/20 | CH2205 | Male | Three y/o | Treatment (Wk 1) | Treatment | Feed Day | No | 06:35 | 06:00 - 06:59 | Morning      | 37,5 | 84  | 27,4  | 27,4  | 18,65 | 581,01 | 111,09 |
| 2019/05/20 | CH2206 | Male | Three y/o | Treatment (Wk 1) | Treatment | Feed Day | No | 06:35 | 06:00 - 06:59 | Morning      | 37,9 | 132 | 148,8 | 148,8 | 19,05 | 613,32 | 169,74 |
| 2019/05/20 | CH2205 | Male | Three y/o | Treatment (Wk 1) | Treatment | Feed Day | No | 06:40 | 06:00 - 06:59 | Morning      | 37,5 | 53  | 368,0 | 368,0 | 18,65 | 544,43 | 201,66 |
| 2019/05/20 | CH2206 | Male | Three y/o | Treatment (Wk 1) | Treatment | Feed Day | No | 06:40 | 06:00 - 06:59 | Morning      | 37,9 | 104 | 77,4  | 77,4  | 19,05 | 596,69 | 146,93 |
| 2019/05/20 | CH2205 | Male | Three y/o | Treatment (Wk 1) | Treatment | Feed Day | No | 06:45 | 06:00 - 06:59 | Morning      | 37,6 | 115 | 82,2  | 82,2  | 18,75 | 603,82 | 149,02 |
| 2019/05/20 | CH2206 | Male | Three y/o | Treatment (Wk 1) | Treatment | Feed Day | No | 06:45 | 06:00 - 06:59 | Morning      | 37,9 | 119 | 193,6 | 193,6 | 19,05 | 606,20 | 178,97 |
| 2019/05/20 | CH2205 | Male | Three y/o | Treatment (Wk 1) | Treatment | Feed Day | No | 06:50 | 06:00 - 06:59 | Morning      | 37,6 | 88  | 41,0  | 41,0  | 18,75 | 584,49 | 124,94 |
| 2019/05/20 | CH2206 | Male | Three y/o | Treatment (Wk 1) | Treatment | Feed Day | No | 06:50 | 06:00 - 06:59 | Morning      | 37,8 | 119 | 336,8 | 336,8 | 18,95 | 606,20 | 198,52 |
| 2019/05/20 | CH2205 | Male | Three y/o | Treatment (Wk 1) | Treatment | Feed Day | No | 06:55 | 06:00 - 06:59 | Morning      | 37,6 |     | 157,6 | 157,6 | 18,75 |        | 171,75 |
| 2019/05/20 | CH2206 | Male | Three y/o | Treatment (Wk 1) | Treatment | Feed Day | No | 06:55 | 06:00 - 06:59 | Morning      | 37,9 | 111 | 103,4 | 103,4 | 19,05 | 601,33 | 157,01 |
| 2019/05/20 | CH2205 | Male | Three y/o | Treatment (Wk 1) | Treatment | Feed Day | No | 07:00 | 07:00 - 07:59 | Morning      | 37,7 | 49  | 54,8  | 54,8  | 18,85 | 537,80 | 134,96 |
| 2019/05/20 | CH2206 | Male | Three y/o | Treatment (Wk 1) | Treatment | Feed Day | No | 07:00 | 07:00 - 07:59 | Morning      | 37,9 | 106 | 252,0 | 252,0 | 19,05 | 598,06 | 188,26 |
| 2019/05/20 | CH2205 | Male | Three y/o | Treatment (Wk 1) | Treatment | Feed Day | No | 07:05 | 07:00 - 07:59 | Morning      | 37,6 | 74  | 18,4  | 18,4  | 18,75 | 571,33 | 97,47  |
| 2019/05/20 | CH2206 | Male | Three y/o | Treatment (Wk 1) | Treatment | Feed Day | No | 07:05 | 07:00 - 07:59 | Morning      | 37,9 | 59  | 188,8 | 188,8 | 19,05 | 553,30 | 178,09 |
| 2019/05/20 | CH2205 | Male | Three y/o | Treatment (Wk 1) | Treatment | Feed Day | No | 07:10 | 07:00 - 07:59 | Morning      | 37,5 |     | 20,0  | 20,0  | 18,65 |        | 100,31 |
| 2019/05/20 | CH2206 | Male | Three y/o | Treatment (Wk 1) | Treatment | Feed Day | No | 07:10 | 07:00 - 07:59 | Morning      | 37,9 | 137 | 115,4 | 115,4 | 19,05 | 615,83 | 160,84 |
| 2019/05/20 | CH2205 | Male | Three y/o | Treatment (Wk 1) | Treatment | Feed Day | No | 07:15 | 07:00 - 07:59 | Morning      | 37,3 | 88  | 129,4 | 129,4 | 18,46 | 584,49 | 164,84 |
| 2019/05/20 | CH2206 | Male | Three y/o | Treatment (Wk 1) | Treatment | Feed Day | No | 07:15 | 07:00 - 07:59 | Morning      | 37,9 | 121 | 495,2 | 495,2 | 19,05 | 607,35 | 212,20 |
| 2019/05/20 | CH2205 | Male | Three y/o | Treatment (Wk 1) | Treatment | Feed Day | No | 07:20 | 07:00 - 07:59 | Morning      | 37,7 | 71  | 88,4  | 88,4  | 18,85 | 568,10 | 151,55 |
| 2019/05/20 | CH2206 | Male | Three y/o | Treatment (Wk 1) | Treatment | Feed Day | No | 07:20 | 07:00 - 07:59 | Morning      | 37,9 |     | 185,6 | 185,6 | 19,05 |        | 177,49 |
| 2019/05/20 | CH2205 | Male | Three y/o | Treatment (Wk 1) | Treatment | Feed Day | No | 07:25 | 07:00 - 07:59 | Morning      | 37,9 | 94  | 39,8  | 39,8  | 19,05 | 589,37 | 123,91 |
| 2019/05/20 | CH2206 | Male | Three y/o | Treatment (Wk 1) | Treatment | Feed Day | No | 07:25 | 07:00 - 07:59 | Morning      | 38,0 | 112 | 221,8 | 221,8 | 19,15 | 601,96 | 183,76 |
| 2019/05/20 | CH2205 | Male | Three y/o | Treatment (Wk 1) | Treatment | Feed Day | No | 07:30 | 07:00 - 07:59 | Morning      | 37,7 | 102 | 118,0 | 118,0 | 18,85 | 595,30 | 161,62 |
| 2019/05/20 | CH2206 | Male | Three y/o | Treatment (Wk 1) | Treatment | Feed Day | No | 07:30 | 07:00 - 07:59 | Morning      | 37,9 | 94  | 282,0 | 282,0 | 19,05 | 589,37 | 192,23 |
| 2019/05/20 | CH2205 | Male | Three y/o | Treatment (Wk 1) | Treatment | Feed Day | No | 07:35 | 07:00 - 07:59 | Morning      | 37,7 | 112 | 181,6 | 181,6 | 18,85 | 601,96 | 176,73 |
| 2019/05/20 | CH2206 | Male | Three y/o | Treatment (Wk 1) | Treatment | Feed Day | No | 07:35 | 07:00 - 07:59 | Morning      | 38,0 | 118 | 141,8 | 141,8 | 19,15 | 605,61 | 168,05 |
| 2019/05/20 | CH2205 | Male | Three y/o | Treatment (Wk 1) | Treatment | Feed Day | No | 07:40 | 07:00 - 07:59 | Morning      | 37,7 | 115 | 143,8 | 143,8 | 18,85 | 603,82 | 168,54 |
| 2019/05/20 | CH2206 | Male | Three y/o | Treatment (Wk 1) | Treatment | Feed Day | No | 07:40 | 07:00 - 07:59 | Morning      | 37,9 | 117 | 117,0 | 117,0 | 19,05 | 605,02 | 161,32 |
| 2019/05/20 | CH2205 | Male | Three y/o | Treatment (Wk 1) | Treatment | Feed Day | No | 07:45 | 07:00 - 07:59 | Morning      | 37,7 | 105 | 91,4  | 91,4  | 18,85 | 597,38 | 152,71 |
| 2019/05/20 | CH2206 | Male | Three y/o | Treatment (Wk 1) | Treatment | Feed Day | No | 07:45 | 07:00 - 07:59 | Morning      | 37,9 | 105 | 306,6 | 306,6 | 19,05 | 597,38 | 195,19 |
| 2019/05/20 | CH2205 | Male | Three y/o | Treatment (Wk 1) | Treatment | Feed Day | No | 07:50 | 07:00 - 07:59 | Morning      | 37,7 | 109 | 100,6 | 100,6 | 18,85 | 600,04 | 156,05 |
| 2019/05/20 | CH2206 | Male | Three y/o | Treatment (Wk 1) | Treatment | Feed Day | No | 07:50 | 07:00 - 07:59 | Morning      | 37,9 | 126 | 259,6 | 259,6 | 19,05 | 610,14 | 189,31 |
| 2019/05/20 | CH2205 | Male | Three y/o | Treatment (Wk 1) | Treatment | Feed Day | No | 07:55 | 07:00 - 07:59 | Morning      | 37,6 |     | 23,0  | 23,0  | 18,75 |        | 105,09 |
| 2019/05/20 | CH2206 | Male | Three y/o | Treatment (Wk 1) | Treatment | Feed Day | No | 07:55 | 07:00 - 07:59 | Morning      | 37,9 | 93  | 48,8  | 48,8  | 19,05 | 588,58 | 130,95 |
| 2019/05/20 | CH2205 | Male | Three y/o | Treatment (Wk 1) | Treatment | Feed Day | No | 08:00 | 08:00 - 08:59 | Late Morning | 37,4 |     | 30,6  | 30,6  | 18,55 |        | 114,87 |
| 2019/05/20 | CH2206 | Male | Three y/o | Treatment (Wk 1) | Treatment | Feed Day | No | 08:00 | 08:00 - 08:59 | Late Morning | 37,8 | 103 | 164,0 | 164,0 | 18,95 | 596,00 | 173,15 |
| 2019/05/20 | CH2205 | Male | Three y/o | Treatment (Wk 1) | Treatment | Feed Day | No | 08:05 | 08:00 - 08:59 | Late Morning | 37,4 |     | 19,6  | 19,6  | 18,55 |        | 99,63  |
| 2019/05/20 | CH2206 | Male | Three y/o | Treatment (Wk 1) | Treatment | Feed Day | No | 08:05 | 08:00 - 08:59 | Late Morning | 37,8 | 114 | 55,0  | 55,0  | 18,95 | 603,20 | 135,08 |
| 2019/05/20 | CH2205 | Male | Three y/o | Treatment (Wk 1) | Treatment | Feed Day | No | 08:10 | 08:00 - 08:59 | Late Morning | 37,4 | 59  | 259,6 | 259,6 | 18,55 | 553,30 | 189,31 |



|            |        |      |           |                  |           |          |     |       |               |              |      |     |       |       |       |        |        |
|------------|--------|------|-----------|------------------|-----------|----------|-----|-------|---------------|--------------|------|-----|-------|-------|-------|--------|--------|
| 2019/05/20 | CH2206 | Male | Three y/o | Treatment (Wk 1) | Treatment | Feed Day | No  | 08:10 | 08:00 - 08:59 | Late Morning | 37,8 | 107 | 239,2 | 239,2 | 18,95 | 598,73 | 186,42 |
| 2019/05/20 | CH2205 | Male | Three y/o | Treatment (Wk 1) | Treatment | Feed Day | No  | 08:15 | 08:00 - 08:59 | Late Morning | 37,4 | 102 | 32,8  | 32,8  | 18,55 | 595,30 | 117,26 |
| 2019/05/20 | CH2206 | Male | Three y/o | Treatment (Wk 1) | Treatment | Feed Day | No  | 08:15 | 08:00 - 08:59 | Late Morning | 37,8 | 115 | 179,8 | 179,8 | 18,95 | 603,82 | 176,38 |
| 2019/05/20 | CH2205 | Male | Three y/o | Treatment (Wk 1) | Treatment | Feed Day | No  | 08:20 | 08:00 - 08:59 | Late Morning | 37,3 | 104 | 146,0 | 146,0 | 18,46 | 596,69 | 169,07 |
| 2019/05/20 | CH2206 | Male | Three y/o | Treatment (Wk 1) | Treatment | Feed Day | No  | 08:20 | 08:00 - 08:59 | Late Morning | 37,8 | 105 | 341,6 | 341,6 | 18,95 | 597,38 | 199,02 |
| 2019/05/20 | CH2205 | Male | Three y/o | Treatment (Wk 1) | Treatment | Feed Day | No  | 08:25 | 08:00 - 08:59 | Late Morning | 37,4 | 98  | 140,2 | 140,2 | 18,55 | 592,41 | 167,65 |
| 2019/05/20 | CH2206 | Male | Three y/o | Treatment (Wk 1) | Treatment | Feed Day | No  | 08:25 | 08:00 - 08:59 | Late Morning | 37,8 | 104 | 141,0 | 141,0 | 18,95 | 596,69 | 167,85 |
| 2019/05/20 | CH2205 | Male | Three y/o | Treatment (Wk 1) | Treatment | Feed Day | No  | 08:30 | 08:00 - 08:59 | Late Morning | 37,4 | 174 | 306,6 | 306,6 | 18,55 | 631,46 | 195,19 |
| 2019/05/20 | CH2206 | Male | Three y/o | Treatment (Wk 1) | Treatment | Feed Day | No  | 08:30 | 08:00 - 08:59 | Late Morning | 37,8 | 114 | 100,0 | 100,0 | 18,95 | 603,20 | 155,84 |
| 2019/05/20 | CH2205 | Male | Three y/o | Treatment (Wk 1) | Treatment | Feed Day | No  | 08:35 | 08:00 - 08:59 | Late Morning | 37,5 | 188 | 17,0  | 17,0  | 18,65 | 636,34 | 94,77  |
| 2019/05/20 | CH2206 | Male | Three y/o | Treatment (Wk 1) | Treatment | Feed Day | No  | 08:35 | 08:00 - 08:59 | Late Morning | 37,8 | 105 | 201,2 | 201,2 | 18,95 | 597,38 | 180,33 |
| 2019/05/20 | CH2205 | Male | Three y/o | Treatment (Wk 1) | Treatment | Feed Day | No  | 08:40 | 08:00 - 08:59 | Late Morning | 37,5 | 59  | 4,4   | 4,4   | 18,65 | 553,30 | 49,12  |
| 2019/05/20 | CH2206 | Male | Three y/o | Treatment (Wk 1) | Treatment | Feed Day | No  | 08:40 | 08:00 - 08:59 | Late Morning | 37,8 | 108 | 194,2 | 194,2 | 18,95 | 599,39 | 179,08 |
| 2019/05/20 | CH2205 | Male | Three y/o | Treatment (Wk 1) | Treatment | Feed Day | No  | 08:45 | 08:00 - 08:59 | Late Morning | 37,7 | 160 | 24,6  | 24,6  | 18,85 | 626,07 | 107,39 |
| 2019/05/20 | CH2206 | Male | Three y/o | Treatment (Wk 1) | Treatment | Feed Day | No  | 08:45 | 08:00 - 08:59 | Late Morning | 37,8 | 123 | 67,8  | 67,8  | 18,95 | 608,49 | 142,33 |
| 2019/05/20 | CH2205 | Male | Three y/o | Treatment (Wk 1) | Treatment | Feed Day | No  | 08:50 | 08:00 - 08:59 | Late Morning | 37,6 | 98  | 145,4 | 145,4 | 18,75 | 592,41 | 168,93 |
| 2019/05/20 | CH2206 | Male | Three y/o | Treatment (Wk 1) | Treatment | Feed Day | No  | 08:50 | 08:00 - 08:59 | Late Morning | 37,9 | 104 | 183,0 | 183,0 | 19,05 | 596,69 | 177,00 |
| 2019/05/20 | CH2205 | Male | Three y/o | Treatment (Wk 1) | Treatment | Feed Day | No  | 08:55 | 08:00 - 08:59 | Late Morning | 37,6 | 66  | 4,0   | 4,0   | 18,75 | 562,34 | 45,94  |
| 2019/05/20 | CH2206 | Male | Three y/o | Treatment (Wk 1) | Treatment | Feed Day | No  | 08:55 | 08:00 - 08:59 | Late Morning | 37,9 | 77  | 78,8  | 78,8  | 19,05 | 574,39 | 147,55 |
| 2019/05/20 | CH2205 | Male | Three y/o | Treatment (Wk 1) | Treatment | Feed Day | No  | 09:00 | 09:00 - 09:59 | Late Morning | 37,7 | 55  | 4,8   | 4,8   | 18,85 | 547,52 | 52,04  |
| 2019/05/20 | CH2206 | Male | Three y/o | Treatment (Wk 1) | Treatment | Feed Day | No  | 09:00 | 09:00 - 09:59 | Late Morning | 37,9 | 128 | 119,2 | 119,2 | 19,05 | 611,22 | 161,97 |
| 2019/05/20 | CH2205 | Male | Three y/o | Treatment (Wk 1) | Treatment | Feed Day | No  | 09:05 | 09:00 - 09:59 | Late Morning | 37,7 | 50  | 56,4  | 56,4  | 18,85 | 539,52 | 135,95 |
| 2019/05/20 | CH2206 | Male | Three y/o | Treatment (Wk 1) | Treatment | Feed Day | No  | 09:05 | 09:00 - 09:59 | Late Morning | 37,9 | 52  | 53,0  | 53,0  | 19,05 | 542,83 | 133,80 |
| 2019/05/20 | CH2205 | Male | Three y/o | Treatment (Wk 1) | Treatment | Feed Day | No  | 09:10 | 09:00 - 09:59 | Late Morning | 37,7 | 74  | 36,6  | 36,6  | 18,85 | 571,33 | 121,03 |
| 2019/05/20 | CH2206 | Male | Three y/o | Treatment (Wk 1) | Treatment | Feed Day | No  | 09:10 | 09:00 - 09:59 | Late Morning | 37,9 | 118 | 85,6  | 85,6  | 19,05 | 605,61 | 150,43 |
| 2019/05/20 | CH2205 | Male | Three y/o | Treatment (Wk 1) | Treatment | Feed Day | No  | 09:15 | 09:00 - 09:59 | Late Morning | 37,7 | 86  | 88,2  | 88,2  | 18,85 | 582,77 | 151,47 |
| 2019/05/20 | CH2206 | Male | Three y/o | Treatment (Wk 1) | Treatment | Feed Day | No  | 09:15 | 09:00 - 09:59 | Late Morning | 37,9 | 115 | 126,6 | 126,6 | 19,05 | 603,82 | 164,08 |
| 2019/05/20 | CH2205 | Male | Three y/o | Treatment (Wk 1) | Treatment | Feed Day | No  | 09:20 | 09:00 - 09:59 | Late Morning | 37,7 | 97  | 149,2 | 149,2 | 18,85 | 591,66 | 169,83 |
| 2019/05/20 | CH2206 | Male | Three y/o | Treatment (Wk 1) | Treatment | Feed Day | No  | 09:20 | 09:00 - 09:59 | Late Morning | 37,9 |     | 373,4 | 373,4 | 19,05 |        | 202,17 |
| 2019/05/20 | CH2205 | Male | Three y/o | Treatment (Wk 1) | Treatment | Feed Day | No  | 09:25 | 09:00 - 09:59 | Late Morning | 37,9 | 140 | 69,8  | 69,8  | 19,05 | 617,28 | 143,34 |
| 2019/05/20 | CH2206 | Male | Three y/o | Treatment (Wk 1) | Treatment | Feed Day | No  | 09:25 | 09:00 - 09:59 | Late Morning | 37,9 |     | 189,6 | 189,6 | 19,05 |        | 178,24 |
| 2019/05/20 | CH2205 | Male | Three y/o | Treatment (Wk 1) | Treatment | Feed Day | No  | 09:30 | 09:00 - 09:59 | Late Morning | 37,9 | 68  | 23,2  | 23,2  | 19,05 | 564,71 | 105,39 |
| 2019/05/20 | CH2206 | Male | Three y/o | Treatment (Wk 1) | Treatment | Feed Day | No  | 09:30 | 09:00 - 09:59 | Late Morning | 37,9 | 143 | 59,8  | 59,8  | 19,05 | 618,69 | 137,98 |
| 2019/05/20 | CH2205 | Male | Three y/o | Treatment (Wk 1) | Treatment | Feed Day | No  | 09:35 | 09:00 - 09:59 | Late Morning | 38,0 | 103 | 57,8  | 57,8  | 19,15 | 596,00 | 136,80 |
| 2019/05/20 | CH2206 | Male | Three y/o | Treatment (Wk 1) | Treatment | Feed Day | No  | 09:35 | 09:00 - 09:59 | Late Morning | 37,8 | 51  | 397,6 | 397,6 | 18,95 | 541,20 | 204,40 |
| 2019/05/20 | CH2205 | Male | Three y/o | Treatment (Wk 1) | Treatment | Feed Day | No  | 09:40 | 09:00 - 09:59 | Late Morning | 37,9 |     | 177,6 | 177,6 | 19,05 |        | 175,94 |
| 2019/05/20 | CH2206 | Male | Three y/o | Treatment (Wk 1) | Treatment | Feed Day | No  | 09:40 | 09:00 - 09:59 | Late Morning | 37,9 | 104 | 165,6 | 165,6 | 19,05 | 596,69 | 173,49 |
| 2019/05/20 | CH2205 | Male | Three y/o | Treatment (Wk 1) | Treatment | Feed Day | No  | 09:45 | 09:00 - 09:59 | Late Morning | 37,9 | 63  | 18,4  | 18,4  | 19,05 | 558,62 | 97,47  |
| 2019/05/20 | CH2206 | Male | Three y/o | Treatment (Wk 1) | Treatment | Feed Day | No  | 09:45 | 09:00 - 09:59 | Late Morning | 37,9 | 101 | 114,0 | 114,0 | 19,05 | 594,59 | 160,42 |
| 2019/05/20 | CH2205 | Male | Three y/o | Treatment (Wk 1) | Treatment | Feed Day | No  | 09:50 | 09:00 - 09:59 | Late Morning | 38,0 | 56  | 10,2  | 10,2  | 19,15 | 549,01 | 77,43  |
| 2019/05/20 | CH2206 | Male | Three y/o | Treatment (Wk 1) | Treatment | Feed Day | No  | 09:50 | 09:00 - 09:59 | Late Morning | 37,9 | 180 | 189,4 | 189,4 | 19,05 | 633,61 | 178,20 |
| 2019/05/20 | CH2205 | Male | Three y/o | Treatment (Wk 1) | Treatment | Feed Day | No  | 09:55 | 09:00 - 09:59 | Late Morning | 38,0 | 49  | 23,8  | 23,8  | 19,15 | 537,80 | 106,26 |
| 2019/05/20 | CH2206 | Male | Three y/o | Treatment (Wk 1) | Treatment | Feed Day | No  | 09:55 | 09:00 - 09:59 | Late Morning | 37,9 | 120 | 167,4 | 167,4 | 19,05 | 606,78 | 173,87 |
| 2019/05/20 | CH2205 | Male | Three y/o | Treatment (Wk 1) | Treatment | Feed Day | No  | 10:00 | 10:00 - 10:59 | Late Morning | 37,9 |     | 50,0  | 50,0  | 19,05 |        | 131,79 |
| 2019/05/20 | CH2206 | Male | Three y/o | Treatment (Wk 1) | Treatment | Feed Day | No  | 10:00 | 10:00 - 10:59 | Late Morning | 37,9 | 105 | 80,0  | 80,0  | 19,05 | 597,38 | 148,08 |
| 2019/05/20 | CH2205 | Male | Three y/o | Treatment (Wk 1) | Treatment | Feed Day | No  | 10:05 | 10:00 - 10:59 | Late Morning | 37,9 | 81  | 131,4 | 131,4 | 19,05 | 578,26 | 165,38 |
| 2019/05/20 | CH2206 | Male | Three y/o | Treatment (Wk 1) | Treatment | Feed Day | No  | 10:05 | 10:00 - 10:59 | Late Morning | 37,9 | 99  | 155,4 | 155,4 | 19,05 | 593,14 | 171,26 |
| 2019/05/20 | CH2205 | Male | Three y/o | Treatment (Wk 1) | Treatment | Feed Day | No  | 10:10 | 10:00 - 10:59 | Late Morning | 37,9 | 70  | 10,4  | 10,4  | 19,05 | 566,99 | 78,08  |
| 2019/05/20 | CH2206 | Male | Three y/o | Treatment (Wk 1) | Treatment | Feed Day | No  | 10:10 | 10:00 - 10:59 | Late Morning | 38,0 | 140 | 225,0 | 225,0 | 19,15 | 617,28 | 184,27 |
| 2019/05/20 | CH2205 | Male | Three y/o | Treatment (Wk 1) | Treatment | Feed Day | No  | 10:15 | 10:00 - 10:59 | Late Morning | 37,9 |     | 33,4  | 33,4  | 19,05 |        | 117,88 |
| 2019/05/20 | CH2206 | Male | Three y/o | Treatment (Wk 1) | Treatment | Feed Day | No  | 10:15 | 10:00 - 10:59 | Late Morning | 38,0 | 125 | 289,4 | 289,4 | 19,15 | 609,60 | 193,15 |
| 2019/05/20 | CH2205 | Male | Three y/o | Treatment (Wk 1) | Treatment | Feed Day | No  | 10:20 | 10:00 - 10:59 | Late Morning | 37,9 |     | 332,2 | 332,2 | 19,05 |        | 198,03 |
| 2019/05/20 | CH2206 | Male | Three y/o | Treatment (Wk 1) | Treatment | Feed Day | No  | 10:20 | 10:00 - 10:59 | Late Morning | 38,0 | 102 | 111,0 | 111,0 | 19,15 | 595,30 | 159,48 |
| 2019/05/20 | CH2205 | Male | Three y/o | Treatment (Wk 1) | Treatment | Feed Day | No  | 10:25 | 10:00 - 10:59 | Late Morning | 37,9 |     | 20,6  | 20,6  | 19,05 |        | 101,32 |
| 2019/05/20 | CH2206 | Male | Three y/o | Treatment (Wk 1) | Treatment | Feed Day | No  | 10:25 | 10:00 - 10:59 | Late Morning | 38,0 | 101 | 69,0  | 69,0  | 19,15 | 594,59 | 142,94 |
| 2019/05/20 | CH2205 | Male | Three y/o | Treatment (Wk 1) | Treatment | Feed Day | Yes | 10:30 | 10:00 - 10:59 | Late Morning | 37,7 |     | 31,8  | 31,8  | 18,85 |        | 116,20 |
| 2019/05/20 | CH2206 | Male | Three y/o | Treatment (Wk 1) | Treatment | Feed Day | Yes | 10:30 | 10:00 - 10:59 | Late Morning | 37,9 | 76  | 59,2  | 59,2  | 19,05 | 573,39 | 137,63 |
| 2019/05/20 | CH2205 | Male | Three y/o | Treatment (Wk 1) | Treatment | Feed Day | Yes | 10:35 | 10:00 - 10:59 | Late Morning | 37,7 | 67  | 31,0  | 31,0  | 18,85 | 563,53 | 115,32 |
| 2019/05/20 | CH2206 | Male | Three y/o | Treatment (Wk 1) | Treatment | Feed Day | Yes | 10:35 | 10:00 - 10:59 | Late Morning | 38,0 | 62  | 132,6 | 132,6 | 19,15 | 557,33 | 165,70 |
| 2019/05/20 | CH2205 | Male | Three y/o | Treatment (Wk 1) | Treatment | Feed Day | Yes | 10:40 | 10:00 - 10:59 | Late Morning | 37,9 |     | 109,6 | 109,6 | 19,05 |        | 159,04 |
| 2019/05/20 | CH2206 | Male | Three y/o | Treatment (Wk 1) | Treatment | Feed Day | Yes | 10:40 | 10:00 - 10:59 | Late Morning | 38,0 |     | 116,2 | 116,2 | 19,15 |        | 161,08 |
| 2019/05/20 | CH2205 | Male | Three y/o | Treatment (Wk 1) | Treatment | Feed Day | Yes | 10:45 | 10:00 - 10:59 | Late Morning | 38,0 |     | 120,6 | 120,6 | 19,15 |        | 162,38 |
| 2019/05/20 | CH2206 | Male | Three y/o | Treatment (Wk 1) | Treatment | Feed Day | Yes | 10:45 | 10:00 - 10:59 | Late Morning | 38,0 | 125 | 38,2  | 38,2  | 19,15 | 609,60 | 122,50 |
| 2019/05/20 | CH2205 | Male | Three y/o | Treatment (Wk 1) | Treatment | Feed Day | Yes | 10:50 | 10:00 - 10:59 | Late Morning | 38,1 | 123 | 291,2 | 291,2 | 19,26 | 608,49 | 193,37 |
| 2019/05/20 | CH2206 | Male | Three y/o | Treatment (Wk 1) | Treatment | Feed Day | Yes | 10:50 | 10:00 - 10:59 | Late Morning | 37,9 | 86  | 45,8  | 45,8  | 19,05 | 582,77 | 128,76 |
| 2019/05/20 | CH2205 | Male | Three y/o | Treatment (Wk 1) | Treatment | Feed Day | Yes | 10:55 | 10:00 - 10:59 | Late Morning | 38,1 | 137 | 65,4  | 65,4  | 19,26 | 615,83 | 141,08 |
| 2019/05/20 | CH2206 | Male | Three y/o | Treatment (Wk 1) | Treatment | Feed Day | Yes | 10:55 | 10:00 - 10:59 | Late Morning | 38,0 | 96  | 79,8  | 79,8  | 19,15 | 590,91 | 147,99 |
| 2019/05/20 | CH2205 | Male | Three y/o | Treatment (Wk 1) | Treatment | Feed Day | Yes | 11:00 | 11:00 - 11:59 | Late Morning | 38,2 | 113 | 25,2  | 25,2  | 19,36 | 602,58 | 108,22 |
| 2019/05/20 | CH2206 | Male | Three y/o | Treatment (Wk 1) | Treatment | Feed Day | Yes | 11:00 | 11:00 - 11:59 | Late Morning | 38,0 | 101 | 396,0 | 396,0 | 19,15 | 594,59 | 204,26 |
| 2019/05/20 | CH2205 | Male | Three y/o | Treatment (Wk 1) | Treatment | Feed Day | Yes | 11:05 | 11:00 - 11:59 | Late Morning | 38,2 | 105 | 18,0  | 18,0  | 19,36 | 597,38 | 96,72  |



|            |        |      |           |                  |           |          |     |       |               |              |      |     |       |       |       |        |        |
|------------|--------|------|-----------|------------------|-----------|----------|-----|-------|---------------|--------------|------|-----|-------|-------|-------|--------|--------|
| 2019/05/20 | CH2206 | Male | Three y/o | Treatment (Wk 1) | Treatment | Feed Day | Yes | 11:05 | 11:00 - 11:59 | Late Morning | 38,0 | 106 | 55,0  | 55,0  | 19,15 | 598,06 | 135,08 |
| 2019/05/20 | CH2205 | Male | Three y/o | Treatment (Wk 1) | Treatment | Feed Day | Yes | 11:10 | 11:00 - 11:59 | Late Morning | 38,2 | 112 | 97,6  | 97,6  | 19,36 | 601,96 | 155,00 |
| 2019/05/20 | CH2206 | Male | Three y/o | Treatment (Wk 1) | Treatment | Feed Day | Yes | 11:10 | 11:00 - 11:59 | Late Morning | 38,0 | 108 | 365,8 | 365,8 | 19,15 | 599,39 | 201,44 |
| 2019/05/20 | CH2205 | Male | Three y/o | Treatment (Wk 1) | Treatment | Feed Day | Yes | 11:15 | 11:00 - 11:59 | Late Morning | 38,2 |     | 64,4  | 64,4  | 19,36 |        | 140,55 |
| 2019/05/20 | CH2206 | Male | Three y/o | Treatment (Wk 1) | Treatment | Feed Day | Yes | 11:15 | 11:00 - 11:59 | Late Morning | 38,1 | 115 | 162,8 | 162,8 | 19,26 | 603,82 | 172,89 |
| 2019/05/20 | CH2205 | Male | Three y/o | Treatment (Wk 1) | Treatment | Feed Day | Yes | 11:20 | 11:00 - 11:59 | Late Morning | 38,3 | 120 | 36,8  | 36,8  | 19,46 | 606,78 | 121,22 |
| 2019/05/20 | CH2206 | Male | Three y/o | Treatment (Wk 1) | Treatment | Feed Day | Yes | 11:20 | 11:00 - 11:59 | Late Morning | 38,1 |     | 67,2  | 67,2  | 19,26 |        | 142,02 |
| 2019/05/20 | CH2205 | Male | Three y/o | Treatment (Wk 1) | Treatment | Feed Day | Yes | 11:25 | 11:00 - 11:59 | Late Morning | 38,1 |     | 30,0  | 30,0  | 19,26 |        | 114,20 |
| 2019/05/20 | CH2206 | Male | Three y/o | Treatment (Wk 1) | Treatment | Feed Day | Yes | 11:25 | 11:00 - 11:59 | Late Morning | 37,8 |     | 88,8  | 88,8  | 18,95 |        | 151,71 |
| 2019/05/20 | CH2205 | Male | Three y/o | Treatment (Wk 1) | Treatment | Feed Day | No  | 11:30 | 11:00 - 11:59 | Late Morning | 37,9 | 110 | 628,4 | 628,4 | 19,05 | 600,69 | 220,70 |
| 2019/05/20 | CH2206 | Male | Three y/o | Treatment (Wk 1) | Treatment | Feed Day | No  | 11:30 | 11:00 - 11:59 | Late Morning | 37,8 | 85  | 54,0  | 54,0  | 18,95 | 581,90 | 134,45 |
| 2019/05/20 | CH2205 | Male | Three y/o | Treatment (Wk 1) | Treatment | Feed Day | No  | 11:35 | 11:00 - 11:59 | Late Morning | 38,0 | 117 | 38,6  | 38,6  | 19,15 | 605,02 | 122,86 |
| 2019/05/20 | CH2206 | Male | Three y/o | Treatment (Wk 1) | Treatment | Feed Day | No  | 11:35 | 11:00 - 11:59 | Late Morning | 37,8 | 132 | 121,8 | 121,8 | 18,95 | 613,32 | 162,73 |
| 2019/05/20 | CH2205 | Male | Three y/o | Treatment (Wk 1) | Treatment | Feed Day | No  | 11:40 | 11:00 - 11:59 | Late Morning | 38,0 | 107 | 38,2  | 38,2  | 19,15 | 598,73 | 122,50 |
| 2019/05/20 | CH2206 | Male | Three y/o | Treatment (Wk 1) | Treatment | Feed Day | No  | 11:40 | 11:00 - 11:59 | Late Morning | 37,9 | 103 | 29,0  | 29,0  | 19,05 | 596,00 | 113,03 |
| 2019/05/20 | CH2205 | Male | Three y/o | Treatment (Wk 1) | Treatment | Feed Day | No  | 11:45 | 11:00 - 11:59 | Late Morning | 37,9 |     | 87,2  | 87,2  | 19,05 |        | 151,07 |
| 2019/05/20 | CH2206 | Male | Three y/o | Treatment (Wk 1) | Treatment | Feed Day | No  | 11:45 | 11:00 - 11:59 | Late Morning | 37,8 |     | 310,8 | 310,8 | 18,95 |        | 195,67 |
| 2019/05/20 | CH2205 | Male | Three y/o | Treatment (Wk 1) | Treatment | Feed Day | No  | 11:50 | 11:00 - 11:59 | Late Morning | 38,0 |     | 142,6 | 142,6 | 19,15 |        | 168,24 |
| 2019/05/20 | CH2206 | Male | Three y/o | Treatment (Wk 1) | Treatment | Feed Day | No  | 11:50 | 11:00 - 11:59 | Late Morning | 37,9 | 134 | 171,4 | 171,4 | 19,05 | 614,33 | 174,70 |
| 2019/05/20 | CH2205 | Male | Three y/o | Treatment (Wk 1) | Treatment | Feed Day | No  | 11:55 | 11:00 - 11:59 | Late Morning | 38,2 | 114 | 43,8  | 43,8  | 19,36 | 603,20 | 127,22 |
| 2019/05/20 | CH2206 | Male | Three y/o | Treatment (Wk 1) | Treatment | Feed Day | No  | 11:55 | 11:00 - 11:59 | Late Morning | 38,0 | 113 | 186,4 | 186,4 | 19,15 | 602,58 | 177,64 |
| 2019/05/20 | CH2205 | Male | Three y/o | Treatment (Wk 1) | Treatment | Feed Day | No  | 12:00 | 12:00 - 12:59 | Afternoon    | 38,2 | 93  | 147,4 | 147,4 | 19,36 | 588,58 | 169,40 |
| 2019/05/20 | CH2206 | Male | Three y/o | Treatment (Wk 1) | Treatment | Feed Day | No  | 12:00 | 12:00 - 12:59 | Afternoon    | 38,1 | 114 | 40,8  | 40,8  | 19,26 | 603,20 | 124,77 |
| 2019/05/20 | CH2205 | Male | Three y/o | Treatment (Wk 1) | Treatment | Feed Day | No  | 12:05 | 12:00 - 12:59 | Afternoon    | 38,3 |     | 46,6  | 46,6  | 19,46 |        | 129,35 |
| 2019/05/20 | CH2206 | Male | Three y/o | Treatment (Wk 1) | Treatment | Feed Day | No  | 12:05 | 12:00 - 12:59 | Afternoon    | 38,1 | 128 | 112,6 | 112,6 | 19,26 | 611,22 | 159,98 |
| 2019/05/20 | CH2205 | Male | Three y/o | Treatment (Wk 1) | Treatment | Feed Day | No  | 12:10 | 12:00 - 12:59 | Afternoon    | 38,3 |     | 26,4  | 26,4  | 19,46 |        | 109,81 |
| 2019/05/20 | CH2206 | Male | Three y/o | Treatment (Wk 1) | Treatment | Feed Day | No  | 12:10 | 12:00 - 12:59 | Afternoon    | 38,1 | 125 | 81,0  | 81,0  | 19,26 | 609,60 | 148,51 |
| 2019/05/20 | CH2205 | Male | Three y/o | Treatment (Wk 1) | Treatment | Feed Day | No  | 12:15 | 12:00 - 12:59 | Afternoon    | 38,2 | 119 | 97,2  | 97,2  | 19,36 | 606,20 | 154,85 |
| 2019/05/20 | CH2206 | Male | Three y/o | Treatment (Wk 1) | Treatment | Feed Day | No  | 12:15 | 12:00 - 12:59 | Afternoon    | 38,1 | 123 | 79,4  | 79,4  | 19,26 | 608,49 | 147,81 |
| 2019/05/20 | CH2205 | Male | Three y/o | Treatment (Wk 1) | Treatment | Feed Day | No  | 12:20 | 12:00 - 12:59 | Afternoon    | 38,3 | 107 | 163,4 | 163,4 | 19,46 | 598,73 | 173,02 |
| 2019/05/20 | CH2206 | Male | Three y/o | Treatment (Wk 1) | Treatment | Feed Day | No  | 12:20 | 12:00 - 12:59 | Afternoon    | 38,1 | 100 | 70,4  | 70,4  | 19,26 | 593,87 | 143,64 |
| 2019/05/20 | CH2205 | Male | Three y/o | Treatment (Wk 1) | Treatment | Feed Day | No  | 12:25 | 12:00 - 12:59 | Afternoon    | 38,5 |     | 60,2  | 60,2  | 19,66 |        | 138,21 |
| 2019/05/20 | CH2206 | Male | Three y/o | Treatment (Wk 1) | Treatment | Feed Day | No  | 12:25 | 12:00 - 12:59 | Afternoon    | 38,3 |     | 139,8 | 139,8 | 19,46 |        | 167,55 |
| 2019/05/20 | CH2205 | Male | Three y/o | Treatment (Wk 1) | Treatment | Feed Day | No  | 12:30 | 12:00 - 12:59 | Afternoon    | 38,4 | 92  | 27,4  | 27,4  | 19,56 | 587,78 | 111,09 |
| 2019/05/20 | CH2206 | Male | Three y/o | Treatment (Wk 1) | Treatment | Feed Day | No  | 12:30 | 12:00 - 12:59 | Afternoon    | 38,4 | 140 | 116,4 | 116,4 | 19,56 | 617,28 | 161,14 |
| 2019/05/20 | CH2205 | Male | Three y/o | Treatment (Wk 1) | Treatment | Feed Day | No  | 12:35 | 12:00 - 12:59 | Afternoon    | 38,5 |     | 23,8  | 23,8  | 19,66 |        | 106,26 |
| 2019/05/20 | CH2206 | Male | Three y/o | Treatment (Wk 1) | Treatment | Feed Day | No  | 12:35 | 12:00 - 12:59 | Afternoon    | 38,4 | 143 | 144,6 | 144,6 | 19,56 | 618,69 | 168,73 |
| 2019/05/20 | CH2205 | Male | Three y/o | Treatment (Wk 1) | Treatment | Feed Day | No  | 12:40 | 12:00 - 12:59 | Afternoon    | 38,5 | 98  | 149,4 | 149,4 | 19,66 | 592,41 | 169,88 |
| 2019/05/20 | CH2206 | Male | Three y/o | Treatment (Wk 1) | Treatment | Feed Day | No  | 12:40 | 12:00 - 12:59 | Afternoon    | 38,6 | 64  | 200,6 | 200,6 | 19,76 | 559,88 | 180,22 |
| 2019/05/20 | CH2205 | Male | Three y/o | Treatment (Wk 1) | Treatment | Feed Day | No  | 12:45 | 12:00 - 12:59 | Afternoon    | 38,4 | 112 | 79,8  | 79,8  | 19,56 | 601,96 | 147,99 |
| 2019/05/20 | CH2206 | Male | Three y/o | Treatment (Wk 1) | Treatment | Feed Day | No  | 12:45 | 12:00 - 12:59 | Afternoon    | 38,6 | 126 | 654,6 | 654,6 | 19,76 | 610,14 | 222,15 |
| 2019/05/20 | CH2205 | Male | Three y/o | Treatment (Wk 1) | Treatment | Feed Day | No  | 12:50 | 12:00 - 12:59 | Afternoon    | 38,3 | 138 | 2,6   | 2,6   | 19,46 | 616,31 | 31,57  |
| 2019/05/20 | CH2206 | Male | Three y/o | Treatment (Wk 1) | Treatment | Feed Day | No  | 12:50 | 12:00 - 12:59 | Afternoon    | 38,5 | 129 | 51,8  | 51,8  | 19,66 | 611,75 | 133,01 |
| 2019/05/20 | CH2205 | Male | Three y/o | Treatment (Wk 1) | Treatment | Feed Day | No  | 12:55 | 12:00 - 12:59 | Afternoon    | 38,1 |     | 130,6 | 130,6 | 19,26 |        | 165,17 |
| 2019/05/20 | CH2206 | Male | Three y/o | Treatment (Wk 1) | Treatment | Feed Day | No  | 12:55 | 12:00 - 12:59 | Afternoon    | 38,4 | 108 | 45,8  | 45,8  | 19,56 | 599,39 | 128,76 |
| 2019/05/20 | CH2205 | Male | Three y/o | Treatment (Wk 1) | Treatment | Feed Day | No  | 13:00 | 13:00 - 13:59 | Afternoon    | 38,1 | 113 | 51,6  | 51,6  | 19,26 | 602,58 | 132,87 |
| 2019/05/20 | CH2206 | Male | Three y/o | Treatment (Wk 1) | Treatment | Feed Day | No  | 13:00 | 13:00 - 13:59 | Afternoon    | 38,3 | 88  | 49,8  | 49,8  | 19,46 | 584,49 | 131,65 |
| 2019/05/20 | CH2205 | Male | Three y/o | Treatment (Wk 1) | Treatment | Feed Day | No  | 13:05 | 13:00 - 13:59 | Afternoon    | 38,1 |     | 20,2  | 20,2  | 19,26 |        | 100,65 |
| 2019/05/20 | CH2206 | Male | Three y/o | Treatment (Wk 1) | Treatment | Feed Day | No  | 13:05 | 13:00 - 13:59 | Afternoon    | 38,2 | 81  | 50,2  | 50,2  | 19,36 | 578,26 | 131,92 |
| 2019/05/20 | CH2205 | Male | Three y/o | Treatment (Wk 1) | Treatment | Feed Day | No  | 13:10 | 13:00 - 13:59 | Afternoon    | 37,9 | 76  | 20,8  | 20,8  | 19,05 | 573,39 | 101,65 |
| 2019/05/20 | CH2206 | Male | Three y/o | Treatment (Wk 1) | Treatment | Feed Day | No  | 13:10 | 13:00 - 13:59 | Afternoon    | 38,2 | 94  | 52,0  | 52,0  | 19,36 | 589,37 | 133,14 |
| 2019/05/20 | CH2205 | Male | Three y/o | Treatment (Wk 1) | Treatment | Feed Day | No  | 13:15 | 13:00 - 13:59 | Afternoon    | 37,7 | 77  | 34,4  | 34,4  | 18,85 | 574,39 | 118,90 |
| 2019/05/20 | CH2206 | Male | Three y/o | Treatment (Wk 1) | Treatment | Feed Day | No  | 13:15 | 13:00 - 13:59 | Afternoon    | 38,1 | 90  | 50,6  | 50,6  | 19,26 | 586,16 | 132,20 |
| 2019/05/20 | CH2205 | Male | Three y/o | Treatment (Wk 1) | Treatment | Feed Day | No  | 13:20 | 13:00 - 13:59 | Afternoon    | 37,7 | 68  | 15,4  | 15,4  | 18,85 | 564,71 | 91,41  |
| 2019/05/20 | CH2206 | Male | Three y/o | Treatment (Wk 1) | Treatment | Feed Day | No  | 13:20 | 13:00 - 13:59 | Afternoon    | 38,1 | 67  | 48,0  | 48,0  | 19,26 | 563,53 | 130,38 |
| 2019/05/20 | CH2205 | Male | Three y/o | Treatment (Wk 1) | Treatment | Feed Day | No  | 13:25 | 13:00 - 13:59 | Afternoon    | 37,7 | 88  | 15,2  | 15,2  | 18,85 | 584,49 | 90,96  |
| 2019/05/20 | CH2206 | Male | Three y/o | Treatment (Wk 1) | Treatment | Feed Day | No  | 13:25 | 13:00 - 13:59 | Afternoon    | 38,0 | 120 | 63,4  | 63,4  | 19,15 | 606,78 | 140,00 |
| 2019/05/20 | CH2205 | Male | Three y/o | Treatment (Wk 1) | Treatment | Feed Day | No  | 13:30 | 13:00 - 13:59 | Afternoon    | 37,8 | 70  | 14,2  | 14,2  | 18,95 | 566,99 | 88,65  |
| 2019/05/20 | CH2206 | Male | Three y/o | Treatment (Wk 1) | Treatment | Feed Day | No  | 13:30 | 13:00 - 13:59 | Afternoon    | 38,0 | 86  | 45,8  | 45,8  | 19,15 | 582,77 | 128,76 |
| 2019/05/20 | CH2205 | Male | Three y/o | Treatment (Wk 1) | Treatment | Feed Day | No  | 13:35 | 13:00 - 13:59 | Afternoon    | 37,7 | 69  | 13,0  | 13,0  | 18,85 | 565,86 | 85,65  |
| 2019/05/20 | CH2206 | Male | Three y/o | Treatment (Wk 1) | Treatment | Feed Day | No  | 13:35 | 13:00 - 13:59 | Afternoon    | 38,0 | 106 | 54,8  | 54,8  | 19,15 | 598,06 | 134,96 |
| 2019/05/20 | CH2205 | Male | Three y/o | Treatment (Wk 1) | Treatment | Feed Day | No  | 13:40 | 13:00 - 13:59 | Afternoon    | 37,7 | 72  | 12,2  | 12,2  | 18,85 | 569,20 | 83,49  |
| 2019/05/20 | CH2206 | Male | Three y/o | Treatment (Wk 1) | Treatment | Feed Day | No  | 13:40 | 13:00 - 13:59 | Afternoon    | 38,0 | 95  | 38,6  | 38,6  | 19,15 | 590,14 | 122,86 |
| 2019/05/20 | CH2205 | Male | Three y/o | Treatment (Wk 1) | Treatment | Feed Day | No  | 13:45 | 13:00 - 13:59 | Afternoon    | 37,7 | 76  | 27,8  | 27,8  | 18,85 | 573,39 | 111,58 |
| 2019/05/20 | CH2206 | Male | Three y/o | Treatment (Wk 1) | Treatment | Feed Day | No  | 13:45 | 13:00 - 13:59 | Afternoon    | 38,1 |     | 178,8 | 178,8 | 19,26 |        | 176,18 |
| 2019/05/20 | CH2205 | Male | Three y/o | Treatment (Wk 1) | Treatment | Feed Day | No  | 13:50 | 13:00 - 13:59 | Afternoon    | 37,6 | 88  | 28,6  | 28,6  | 18,75 | 584,49 | 112,56 |
| 2019/05/20 | CH2206 | Male | Three y/o | Treatment (Wk 1) | Treatment | Feed Day | No  | 13:50 | 13:00 - 13:59 | Afternoon    | 38,2 | 129 | 217,6 | 217,6 | 19,36 | 611,75 | 183,09 |
| 2019/05/20 | CH2205 | Male | Three y/o | Treatment (Wk 1) | Treatment | Feed Day | No  | 13:55 | 13:00 - 13:59 | Afternoon    | 37,6 |     | 35,2  | 35,2  | 18,75 |        | 119,69 |
| 2019/05/20 | CH2206 | Male | Three y/o | Treatment (Wk 1) | Treatment | Feed Day | No  | 13:55 | 13:00 - 13:59 | Afternoon    | 38,2 |     | 453,4 | 453,4 | 19,36 |        | 209,07 |
| 2019/05/20 | CH2205 | Male | Three y/o | Treatment (Wk 1) | Treatment | Feed Day | No  | 14:00 | 14:00 - 14:59 | Afternoon    | 37,8 | 174 | 85,0  | 85,0  | 18,95 | 631,46 | 150,18 |



|            |        |      |           |                  |           |          |    |       |               |           |      |     |       |       |       |        |        |
|------------|--------|------|-----------|------------------|-----------|----------|----|-------|---------------|-----------|------|-----|-------|-------|-------|--------|--------|
| 2019/05/20 | CH2206 | Male | Three y/o | Treatment (Wk 1) | Treatment | Feed Day | No | 14:00 | 14:00 - 14:59 | Afternoon | 38,3 | 129 | 336,0 | 336,0 | 19,46 | 611,75 | 198,43 |
| 2019/05/20 | CH2205 | Male | Three y/o | Treatment (Wk 1) | Treatment | Feed Day | No | 14:05 | 14:00 - 14:59 | Afternoon | 37,9 | 120 | 21,2  | 21,2  | 19,05 | 606,78 | 102,31 |
| 2019/05/20 | CH2206 | Male | Three y/o | Treatment (Wk 1) | Treatment | Feed Day | No | 14:05 | 14:00 - 14:59 | Afternoon | 38,3 | 98  | 44,4  | 44,4  | 19,46 | 592,41 | 127,69 |
| 2019/05/20 | CH2205 | Male | Three y/o | Treatment (Wk 1) | Treatment | Feed Day | No | 14:10 | 14:00 - 14:59 | Afternoon | 37,9 |     | 29,8  | 29,8  | 19,05 |        | 113,97 |
| 2019/05/20 | CH2206 | Male | Three y/o | Treatment (Wk 1) | Treatment | Feed Day | No | 14:10 | 14:00 - 14:59 | Afternoon | 38,1 | 48  | 48,0  | 48,0  | 19,26 | 536,04 | 130,38 |
| 2019/05/20 | CH2205 | Male | Three y/o | Treatment (Wk 1) | Treatment | Feed Day | No | 14:15 | 14:00 - 14:59 | Afternoon | 37,9 | 97  | 21,0  | 21,0  | 19,05 | 591,66 | 101,98 |
| 2019/05/20 | CH2206 | Male | Three y/o | Treatment (Wk 1) | Treatment | Feed Day | No | 14:15 | 14:00 - 14:59 | Afternoon | 38,0 | 77  | 52,2  | 52,2  | 19,15 | 574,39 | 133,27 |
| 2019/05/20 | CH2205 | Male | Three y/o | Treatment (Wk 1) | Treatment | Feed Day | No | 14:20 | 14:00 - 14:59 | Afternoon | 37,9 | 83  | 20,0  | 20,0  | 19,05 | 580,11 | 100,31 |
| 2019/05/20 | CH2206 | Male | Three y/o | Treatment (Wk 1) | Treatment | Feed Day | No | 14:20 | 14:00 - 14:59 | Afternoon | 38,0 | 81  | 48,2  | 48,2  | 19,15 | 578,26 | 130,52 |
| 2019/05/20 | CH2205 | Male | Three y/o | Treatment (Wk 1) | Treatment | Feed Day | No | 14:25 | 14:00 - 14:59 | Afternoon | 37,9 |     | 29,6  | 29,6  | 19,05 |        | 113,73 |
| 2019/05/20 | CH2206 | Male | Three y/o | Treatment (Wk 1) | Treatment | Feed Day | No | 14:25 | 14:00 - 14:59 | Afternoon | 37,9 | 84  | 56,4  | 56,4  | 19,05 | 581,01 | 135,95 |
| 2019/05/20 | CH2205 | Male | Three y/o | Treatment (Wk 1) | Treatment | Feed Day | No | 14:30 | 14:00 - 14:59 | Afternoon | 37,9 | 180 | 75,6  | 75,6  | 19,05 | 633,61 | 146,11 |
| 2019/05/20 | CH2206 | Male | Three y/o | Treatment (Wk 1) | Treatment | Feed Day | No | 14:30 | 14:00 - 14:59 | Afternoon | 38,0 |     | 144,6 | 144,6 | 19,15 |        | 168,73 |
| 2019/05/20 | CH2205 | Male | Three y/o | Treatment (Wk 1) | Treatment | Feed Day | No | 14:35 | 14:00 - 14:59 | Afternoon | 37,9 |     | 35,8  | 35,8  | 19,05 |        | 120,27 |
| 2019/05/20 | CH2206 | Male | Three y/o | Treatment (Wk 1) | Treatment | Feed Day | No | 14:35 | 14:00 - 14:59 | Afternoon | 38,1 | 132 | 42,2  | 42,2  | 19,26 | 613,32 | 125,93 |
| 2019/05/20 | CH2205 | Male | Three y/o | Treatment (Wk 1) | Treatment | Feed Day | No | 14:40 | 14:00 - 14:59 | Afternoon | 37,6 | 60  | 31,8  | 31,8  | 18,75 | 554,67 | 116,20 |
| 2019/05/20 | CH2206 | Male | Three y/o | Treatment (Wk 1) | Treatment | Feed Day | No | 14:40 | 14:00 - 14:59 | Afternoon | 38,0 | 188 | 30,2  | 30,2  | 19,15 | 636,34 | 114,42 |
| 2019/05/20 | CH2205 | Male | Three y/o | Treatment (Wk 1) | Treatment | Feed Day | No | 14:45 | 14:00 - 14:59 | Afternoon | 37,7 | 83  | 20,0  | 20,0  | 18,85 | 580,11 | 100,31 |
| 2019/05/20 | CH2206 | Male | Three y/o | Treatment (Wk 1) | Treatment | Feed Day | No | 14:45 | 14:00 - 14:59 | Afternoon | 37,9 | 72  | 25,4  | 25,4  | 19,05 | 569,20 | 108,49 |
| 2019/05/20 | CH2205 | Male | Three y/o | Treatment (Wk 1) | Treatment | Feed Day | No | 14:50 | 14:00 - 14:59 | Afternoon | 37,9 | 89  | 8,8   | 8,8   | 19,05 | 585,33 | 72,43  |
| 2019/05/20 | CH2206 | Male | Three y/o | Treatment (Wk 1) | Treatment | Feed Day | No | 14:50 | 14:00 - 14:59 | Afternoon | 37,9 | 90  | 28,2  | 28,2  | 19,05 | 586,16 | 112,07 |
| 2019/05/20 | CH2205 | Male | Three y/o | Treatment (Wk 1) | Treatment | Feed Day | No | 14:55 | 14:00 - 14:59 | Afternoon | 37,9 | 63  | 15,0  | 15,0  | 19,05 | 558,62 | 90,51  |
| 2019/05/20 | CH2206 | Male | Three y/o | Treatment (Wk 1) | Treatment | Feed Day | No | 14:55 | 14:00 - 14:59 | Afternoon | 37,9 | 87  | 19,0  | 19,0  | 19,05 | 583,64 | 98,56  |
| 2019/05/20 | CH2205 | Male | Three y/o | Treatment (Wk 1) | Treatment | Feed Day | No | 15:00 | 15:00 - 15:59 | Afternoon | 38,0 | 65  | 15,2  | 15,2  | 19,15 | 561,12 | 90,96  |
| 2019/05/20 | CH2206 | Male | Three y/o | Treatment (Wk 1) | Treatment | Feed Day | No | 15:00 | 15:00 - 15:59 | Afternoon | 37,9 | 86  | 27,8  | 27,8  | 19,05 | 582,77 | 111,58 |
| 2019/05/20 | CH2205 | Male | Three y/o | Treatment (Wk 1) | Treatment | Feed Day | No | 15:05 | 15:00 - 15:59 | Afternoon | 38,0 | 92  | 38,6  | 38,6  | 19,15 | 587,78 | 122,86 |
| 2019/05/20 | CH2206 | Male | Three y/o | Treatment (Wk 1) | Treatment | Feed Day | No | 15:05 | 15:00 - 15:59 | Afternoon | 37,9 | 102 | 34,4  | 34,4  | 19,05 | 595,30 | 118,90 |
| 2019/05/20 | CH2205 | Male | Three y/o | Treatment (Wk 1) | Treatment | Feed Day | No | 15:10 | 15:00 - 15:59 | Afternoon | 38,0 |     | 30,6  | 30,6  | 19,15 |        | 114,87 |
| 2019/05/20 | CH2206 | Male | Three y/o | Treatment (Wk 1) | Treatment | Feed Day | No | 15:10 | 15:00 - 15:59 | Afternoon | 37,9 | 98  | 33,0  | 33,0  | 19,05 | 592,41 | 117,47 |
| 2019/05/20 | CH2205 | Male | Three y/o | Treatment (Wk 1) | Treatment | Feed Day | No | 15:15 | 15:00 - 15:59 | Afternoon | 38,0 |     | 32,4  | 32,4  | 19,15 |        | 116,84 |
| 2019/05/20 | CH2206 | Male | Three y/o | Treatment (Wk 1) | Treatment | Feed Day | No | 15:15 | 15:00 - 15:59 | Afternoon | 38,0 | 90  | 34,4  | 34,4  | 19,15 | 586,16 | 118,90 |
| 2019/05/20 | CH2205 | Male | Three y/o | Treatment (Wk 1) | Treatment | Feed Day | No | 15:20 | 15:00 - 15:59 | Afternoon | 38,1 | 108 | 49,0  | 49,0  | 19,26 | 599,39 | 131,09 |
| 2019/05/20 | CH2206 | Male | Three y/o | Treatment (Wk 1) | Treatment | Feed Day | No | 15:20 | 15:00 - 15:59 | Afternoon | 38,1 | 131 | 36,6  | 36,6  | 19,26 | 612,80 | 121,03 |
| 2019/05/20 | CH2205 | Male | Three y/o | Treatment (Wk 1) | Treatment | Feed Day | No | 15:25 | 15:00 - 15:59 | Afternoon | 38,0 |     | 33,4  | 33,4  | 19,15 |        | 117,88 |
| 2019/05/20 | CH2206 | Male | Three y/o | Treatment (Wk 1) | Treatment | Feed Day | No | 15:25 | 15:00 - 15:59 | Afternoon | 38,1 | 81  | 91,6  | 91,6  | 19,26 | 578,26 | 152,79 |
| 2019/05/20 | CH2205 | Male | Three y/o | Treatment (Wk 1) | Treatment | Feed Day | No | 15:30 | 15:00 - 15:59 | Afternoon | 37,9 |     | 104,8 | 104,8 | 19,05 |        | 157,48 |
| 2019/05/20 | CH2206 | Male | Three y/o | Treatment (Wk 1) | Treatment | Feed Day | No | 15:30 | 15:00 - 15:59 | Afternoon | 38,2 |     | 525,4 | 525,4 | 19,36 |        | 214,31 |
| 2019/05/20 | CH2205 | Male | Three y/o | Treatment (Wk 1) | Treatment | Feed Day | No | 15:35 | 15:00 - 15:59 | Afternoon | 38,1 | 141 | 34,8  | 34,8  | 19,26 | 617,75 | 119,29 |
| 2019/05/20 | CH2206 | Male | Three y/o | Treatment (Wk 1) | Treatment | Feed Day | No | 15:35 | 15:00 - 15:59 | Afternoon | 38,3 |     | 73,8  | 73,8  | 19,46 |        | 145,27 |
| 2019/05/20 | CH2205 | Male | Three y/o | Treatment (Wk 1) | Treatment | Feed Day | No | 15:40 | 15:00 - 15:59 | Afternoon | 38,0 |     | 43,2  | 43,2  | 19,15 |        | 126,74 |
| 2019/05/20 | CH2206 | Male | Three y/o | Treatment (Wk 1) | Treatment | Feed Day | No | 15:40 | 15:00 - 15:59 | Afternoon | 38,3 | 47  | 24,0  | 24,0  | 19,46 | 534,23 | 106,55 |
| 2019/05/20 | CH2205 | Male | Three y/o | Treatment (Wk 1) | Treatment | Feed Day | No | 15:45 | 15:00 - 15:59 | Afternoon | 37,7 | 94  | 19,4  | 19,4  | 18,85 | 589,37 | 99,28  |
| 2019/05/20 | CH2206 | Male | Three y/o | Treatment (Wk 1) | Treatment | Feed Day | No | 15:45 | 15:00 - 15:59 | Afternoon | 38,2 | 114 | 35,0  | 35,0  | 19,36 | 603,20 | 119,49 |
| 2019/05/20 | CH2205 | Male | Three y/o | Treatment (Wk 1) | Treatment | Feed Day | No | 15:50 | 15:00 - 15:59 | Afternoon | 37,7 | 102 | 39,4  | 39,4  | 18,85 | 595,30 | 123,57 |
| 2019/05/20 | CH2206 | Male | Three y/o | Treatment (Wk 1) | Treatment | Feed Day | No | 15:50 | 15:00 - 15:59 | Afternoon | 38,0 | 91  | 61,0  | 61,0  | 19,15 | 586,98 | 138,67 |
| 2019/05/20 | CH2205 | Male | Three y/o | Treatment (Wk 1) | Treatment | Feed Day | No | 15:55 | 15:00 - 15:59 | Afternoon | 37,9 | 103 | 67,2  | 67,2  | 19,05 | 596,00 | 142,02 |
| 2019/05/20 | CH2206 | Male | Three y/o | Treatment (Wk 1) | Treatment | Feed Day | No | 15:55 | 15:00 - 15:59 | Afternoon | 38,2 |     | 48,8  | 48,8  | 19,36 |        | 130,95 |
| 2019/05/20 | CH2205 | Male | Three y/o | Treatment (Wk 1) | Treatment | Feed Day | No | 16:00 | 16:00 - 16:59 | Evening   | 38,0 | 103 | 19,4  | 19,4  | 19,15 | 596,00 | 99,28  |
| 2019/05/20 | CH2206 | Male | Three y/o | Treatment (Wk 1) | Treatment | Feed Day | No | 16:00 | 16:00 - 16:59 | Evening   | 38,2 | 162 | 170,2 | 170,2 | 19,36 | 626,88 | 174,45 |
| 2019/05/20 | CH2205 | Male | Three y/o | Treatment (Wk 1) | Treatment | Feed Day | No | 16:05 | 16:00 - 16:59 | Evening   | 38,1 | 100 | 151,2 | 151,2 | 19,26 | 593,87 | 170,30 |
| 2019/05/20 | CH2206 | Male | Three y/o | Treatment (Wk 1) | Treatment | Feed Day | No | 16:05 | 16:00 - 16:59 | Evening   | 38,2 | 112 | 94,8  | 94,8  | 19,36 | 601,96 | 153,98 |
| 2019/05/20 | CH2205 | Male | Three y/o | Treatment (Wk 1) | Treatment | Feed Day | No | 16:10 | 16:00 - 16:59 | Evening   | 38,2 |     | 30,4  | 30,4  | 19,36 |        | 114,65 |
| 2019/05/20 | CH2206 | Male | Three y/o | Treatment (Wk 1) | Treatment | Feed Day | No | 16:10 | 16:00 - 16:59 | Evening   | 38,2 | 45  | 141,8 | 141,8 | 19,36 | 530,47 | 168,05 |
| 2019/05/20 | CH2205 | Male | Three y/o | Treatment (Wk 1) | Treatment | Feed Day | No | 16:15 | 16:00 - 16:59 | Evening   | 38,2 | 86  | 18,2  | 18,2  | 19,36 | 582,77 | 97,10  |
| 2019/05/20 | CH2206 | Male | Three y/o | Treatment (Wk 1) | Treatment | Feed Day | No | 16:15 | 16:00 - 16:59 | Evening   | 38,3 | 114 | 15,8  | 15,8  | 19,46 | 603,20 | 92,28  |
| 2019/05/20 | CH2205 | Male | Three y/o | Treatment (Wk 1) | Treatment | Feed Day | No | 16:20 | 16:00 - 16:59 | Evening   | 38,2 | 129 | 23,2  | 23,2  | 19,36 | 611,75 | 105,39 |
| 2019/05/20 | CH2206 | Male | Three y/o | Treatment (Wk 1) | Treatment | Feed Day | No | 16:20 | 16:00 - 16:59 | Evening   | 38,2 | 75  | 199,0 | 199,0 | 19,36 | 572,36 | 179,94 |
| 2019/05/20 | CH2205 | Male | Three y/o | Treatment (Wk 1) | Treatment | Feed Day | No | 16:25 | 16:00 - 16:59 | Evening   | 38,2 |     | 30,2  | 30,2  | 19,36 |        | 114,42 |
| 2019/05/20 | CH2206 | Male | Three y/o | Treatment (Wk 1) | Treatment | Feed Day | No | 16:25 | 16:00 - 16:59 | Evening   | 38,2 |     | 248,0 | 248,0 | 19,36 |        | 605,02 |
| 2019/05/20 | CH2205 | Male | Three y/o | Treatment (Wk 1) | Treatment | Feed Day | No | 16:30 | 16:00 - 16:59 | Evening   | 38,1 | 123 | 46,8  | 46,8  | 19,26 | 608,49 | 129,50 |
| 2019/05/20 | CH2206 | Male | Three y/o | Treatment (Wk 1) | Treatment | Feed Day | No | 16:30 | 16:00 - 16:59 | Evening   | 38,3 | 114 | 130,2 | 130,2 | 19,46 | 603,20 | 165,06 |
| 2019/05/20 | CH2205 | Male | Three y/o | Treatment (Wk 1) | Treatment | Feed Day | No | 16:35 | 16:00 - 16:59 | Evening   | 38,2 | 138 | 179,2 | 179,2 | 19,36 | 616,31 | 176,26 |
| 2019/05/20 | CH2206 | Male | Three y/o | Treatment (Wk 1) | Treatment | Feed Day | No | 16:35 | 16:00 - 16:59 | Evening   | 38,3 | 59  | 44,4  | 44,4  | 19,46 | 553,30 | 127,69 |
| 2019/05/20 | CH2205 | Male | Three y/o | Treatment (Wk 1) | Treatment | Feed Day | No | 16:40 | 16:00 - 16:59 | Evening   | 38,1 | 129 | 53,8  | 53,8  | 19,26 | 611,75 | 134,32 |
| 2019/05/20 | CH2206 | Male | Three y/o | Treatment (Wk 1) | Treatment | Feed Day | No | 16:40 | 16:00 - 16:59 | Evening   | 38,2 | 91  | 83,8  | 83,8  | 19,36 | 586,98 | 149,69 |
| 2019/05/20 | CH2205 | Male | Three y/o | Treatment (Wk 1) | Treatment | Feed Day | No | 16:45 | 16:00 - 16:59 | Evening   | 38,1 | 101 | 35,8  | 35,8  | 19,26 | 594,59 | 120,27 |
| 2019/05/20 | CH2206 | Male | Three y/o | Treatment (Wk 1) | Treatment | Feed Day | No | 16:45 | 16:00 - 16:59 | Evening   | 38,2 | 118 | 200,8 | 200,8 | 19,36 | 605,61 | 180,26 |
| 2019/05/20 | CH2205 | Male | Three y/o | Treatment (Wk 1) | Treatment | Feed Day | No | 16:50 | 16:00 - 16:59 | Evening   | 38,2 |     | 61,0  | 61,0  | 19,36 |        | 138,67 |
| 2019/05/20 | CH2206 | Male | Three y/o | Treatment (Wk 1) | Treatment | Feed Day | No | 16:50 | 16:00 - 16:59 | Evening   | 38,2 | 107 | 25,6  | 25,6  | 19,36 | 598,73 | 108,76 |
| 2019/05/20 | CH2205 | Male | Three y/o | Treatment (Wk 1) | Treatment | Feed Day | No | 16:55 | 16:00 - 16:59 | Evening   | 38,0 | 88  | 33,4  | 33,4  | 19,15 | 584,49 | 117,88 |



|            |        |      |           |                  |           |          |    |       |               |         |      |     |      |      |       |        |        |
|------------|--------|------|-----------|------------------|-----------|----------|----|-------|---------------|---------|------|-----|------|------|-------|--------|--------|
| 2019/05/20 | CH2206 | Male | Three y/o | Treatment (Wk 1) | Treatment | Feed Day | No | 16:55 | 16:00 - 16:59 | Evening | 38,2 | 88  | 43,2 | 43,2 | 19,36 | 584,49 | 126,74 |
| 2019/05/20 | CH2205 | Male | Three y/o | Treatment (Wk 1) | Treatment | Feed Day | No | 17:00 | 17:00 - 17:59 | Evening | 37,9 | 115 | 34,2 | 34,2 | 19,05 | 603,82 | 118,70 |
| 2019/05/20 | CH2206 | Male | Three y/o | Treatment (Wk 1) | Treatment | Feed Day | No | 17:00 | 17:00 - 17:59 | Evening | 38,0 | 87  | 41,2 | 41,2 | 19,15 | 583,64 | 125,11 |
| 2019/05/20 | CH2205 | Male | Three y/o | Treatment (Wk 1) | Treatment | Feed Day | No | 17:05 | 17:00 - 17:59 | Evening | 38,0 |     | 30,0 | 30,0 | 19,15 |        | 114,20 |
| 2019/05/20 | CH2206 | Male | Three y/o | Treatment (Wk 1) | Treatment | Feed Day | No | 17:05 | 17:00 - 17:59 | Evening | 37,9 | 46  | 43,8 | 43,8 | 19,05 | 532,38 | 127,22 |
| 2019/05/20 | CH2205 | Male | Three y/o | Treatment (Wk 1) | Treatment | Feed Day | No | 17:10 | 17:00 - 17:59 | Evening | 37,6 | 107 | 33,0 | 33,0 | 18,75 | 598,73 | 117,47 |
| 2019/05/20 | CH2206 | Male | Three y/o | Treatment (Wk 1) | Treatment | Feed Day | No | 17:10 | 17:00 - 17:59 | Evening | 37,8 | 56  | 42,8 | 42,8 | 18,95 | 549,01 | 126,42 |
| 2019/05/20 | CH2205 | Male | Three y/o | Treatment (Wk 1) | Treatment | Feed Day | No | 17:15 | 17:00 - 17:59 | Evening | 37,4 |     | 33,0 | 33,0 | 18,55 |        | 117,47 |
| 2019/05/20 | CH2206 | Male | Three y/o | Treatment (Wk 1) | Treatment | Feed Day | No | 17:15 | 17:00 - 17:59 | Evening | 37,7 | 80  | 50,8 | 50,8 | 18,85 | 577,31 | 132,33 |
| 2019/05/20 | CH2205 | Male | Three y/o | Treatment (Wk 1) | Treatment | Feed Day | No | 17:20 | 17:00 - 17:59 | Evening | 37,3 | 143 | 64,6 | 64,6 | 18,46 | 618,69 | 140,65 |
| 2019/05/20 | CH2206 | Male | Three y/o | Treatment (Wk 1) | Treatment | Feed Day | No | 17:20 | 17:00 - 17:59 | Evening | 37,7 | 50  | 50,8 | 50,8 | 18,85 | 539,52 | 132,33 |
| 2019/05/20 | CH2205 | Male | Three y/o | Treatment (Wk 1) | Treatment | Feed Day | No | 17:25 | 17:00 - 17:59 | Evening | 37,4 |     | 38,4 | 38,4 | 18,55 |        | 122,68 |
| 2019/05/20 | CH2206 | Male | Three y/o | Treatment (Wk 1) | Treatment | Feed Day | No | 17:25 | 17:00 - 17:59 | Evening | 37,5 | 105 | 60,4 | 60,4 | 18,65 | 597,38 | 138,32 |
| 2019/05/20 | CH2205 | Male | Three y/o | Treatment (Wk 1) | Treatment | Feed Day | No | 17:30 | 17:00 - 17:59 | Evening | 37,5 |     | 25,2 | 25,2 | 18,65 |        | 108,22 |
| 2019/05/20 | CH2206 | Male | Three y/o | Treatment (Wk 1) | Treatment | Feed Day | No | 17:30 | 17:00 - 17:59 | Evening | 37,5 | 48  | 70,4 | 70,4 | 18,65 | 536,04 | 143,64 |
| 2019/05/20 | CH2205 | Male | Three y/o | Treatment (Wk 1) | Treatment | Feed Day | No | 17:35 | 17:00 - 17:59 | Evening | 37,5 | 86  | 22,0 | 22,0 | 18,65 | 582,77 | 103,57 |
| 2019/05/20 | CH2206 | Male | Three y/o | Treatment (Wk 1) | Treatment | Feed Day | No | 17:35 | 17:00 - 17:59 | Evening | 37,7 | 82  | 61,8 | 61,8 | 18,85 | 579,19 | 139,12 |
| 2019/05/20 | CH2205 | Male | Three y/o | Treatment (Wk 1) | Treatment | Feed Day | No | 17:40 | 17:00 - 17:59 | Evening | 37,5 | 76  | 25,8 | 25,8 | 18,65 | 573,39 | 109,02 |
| 2019/05/20 | CH2206 | Male | Three y/o | Treatment (Wk 1) | Treatment | Feed Day | No | 17:40 | 17:00 - 17:59 | Evening | 37,7 | 86  | 52,2 | 52,2 | 18,85 | 582,77 | 133,27 |
| 2019/05/20 | CH2205 | Male | Three y/o | Treatment (Wk 1) | Treatment | Feed Day | No | 17:45 | 17:00 - 17:59 | Evening | 37,5 | 64  | 21,0 | 21,0 | 18,65 | 559,88 | 101,98 |
| 2019/05/20 | CH2206 | Male | Three y/o | Treatment (Wk 1) | Treatment | Feed Day | No | 17:45 | 17:00 - 17:59 | Evening | 37,8 |     | 37,6 | 37,6 | 18,95 |        | 121,96 |
| 2019/05/20 | CH2205 | Male | Three y/o | Treatment (Wk 1) | Treatment | Feed Day | No | 17:50 | 17:00 - 17:59 | Evening | 37,5 | 68  | 19,0 | 19,0 | 18,65 | 564,71 | 98,56  |
| 2019/05/20 | CH2206 | Male | Three y/o | Treatment (Wk 1) | Treatment | Feed Day | No | 17:50 | 17:00 - 17:59 | Evening | 37,8 | 81  | 46,4 | 46,4 | 18,95 | 578,26 | 129,21 |
| 2019/05/20 | CH2205 | Male | Three y/o | Treatment (Wk 1) | Treatment | Feed Day | No | 17:55 | 17:00 - 17:59 | Evening | 37,5 | 77  | 21,0 | 21,0 | 18,65 | 574,39 | 101,98 |
| 2019/05/20 | CH2206 | Male | Three y/o | Treatment (Wk 1) | Treatment | Feed Day | No | 17:55 | 17:00 - 17:59 | Evening | 37,8 | 84  | 48,0 | 48,0 | 18,95 | 581,01 | 130,38 |
| 2019/05/20 | CH2205 | Male | Three y/o | Treatment (Wk 1) | Treatment | Feed Day | No | 18:00 | 18:00 - 18:59 | Evening | 37,6 | 70  | 24,2 | 24,2 | 18,75 | 566,99 | 106,83 |
| 2019/05/20 | CH2206 | Male | Three y/o | Treatment (Wk 1) | Treatment | Feed Day | No | 18:00 | 18:00 - 18:59 | Evening | 37,9 | 68  | 51,2 | 51,2 | 19,05 | 564,71 | 132,61 |
| 2019/05/20 | CH2205 | Male | Three y/o | Treatment (Wk 1) | Treatment | Feed Day | No | 18:05 | 18:00 - 18:59 | Evening | 37,6 | 120 | 21,2 | 21,2 | 18,75 | 606,78 | 102,31 |
| 2019/05/20 | CH2206 | Male | Three y/o | Treatment (Wk 1) | Treatment | Feed Day | No | 18:05 | 18:00 - 18:59 | Evening | 37,9 | 86  | 60,2 | 60,2 | 19,05 | 582,77 | 138,21 |
| 2019/05/20 | CH2205 | Male | Three y/o | Treatment (Wk 1) | Treatment | Feed Day | No | 18:10 | 18:00 - 18:59 | Evening | 37,7 | 78  | 20,8 | 20,8 | 18,85 | 575,38 | 101,65 |
| 2019/05/20 | CH2206 | Male | Three y/o | Treatment (Wk 1) | Treatment | Feed Day | No | 18:10 | 18:00 - 18:59 | Evening | 37,9 | 70  | 56,0 | 56,0 | 19,05 | 566,99 | 135,70 |
| 2019/05/20 | CH2205 | Male | Three y/o | Treatment (Wk 1) | Treatment | Feed Day | No | 18:15 | 18:00 - 18:59 | Evening | 37,7 | 43  | 18,8 | 18,8 | 18,85 | 526,50 | 98,20  |
| 2019/05/20 | CH2206 | Male | Three y/o | Treatment (Wk 1) | Treatment | Feed Day | No | 18:15 | 18:00 - 18:59 | Evening | 38,0 | 80  | 44,0 | 44,0 | 19,15 | 577,31 | 127,37 |
| 2019/05/20 | CH2205 | Male | Three y/o | Treatment (Wk 1) | Treatment | Feed Day | No | 18:20 | 18:00 - 18:59 | Evening | 37,9 | 108 | 26,8 | 26,8 | 19,05 | 599,39 | 110,33 |
| 2019/05/20 | CH2206 | Male | Three y/o | Treatment (Wk 1) | Treatment | Feed Day | No | 18:20 | 18:00 - 18:59 | Evening | 38,0 | 123 | 34,2 | 34,2 | 19,15 | 608,49 | 118,70 |
| 2019/05/20 | CH2205 | Male | Three y/o | Treatment (Wk 1) | Treatment | Feed Day | No | 18:25 | 18:00 - 18:59 | Evening | 37,9 | 82  | 20,4 | 20,4 | 19,05 | 579,19 | 100,99 |
| 2019/05/20 | CH2206 | Male | Three y/o | Treatment (Wk 1) | Treatment | Feed Day | No | 18:25 | 18:00 - 18:59 | Evening | 37,9 | 76  | 28,2 | 28,2 | 19,05 | 573,39 | 112,07 |
| 2019/05/20 | CH2205 | Male | Three y/o | Treatment (Wk 1) | Treatment | Feed Day | No | 18:30 | 18:00 - 18:59 | Evening | 38,0 |     | 29,8 | 29,8 | 19,15 |        | 113,97 |
| 2019/05/20 | CH2206 | Male | Three y/o | Treatment (Wk 1) | Treatment | Feed Day | No | 18:30 | 18:00 - 18:59 | Evening | 37,9 | 162 | 46,4 | 46,4 | 19,05 | 626,88 | 129,21 |
| 2019/05/20 | CH2205 | Male | Three y/o | Treatment (Wk 1) | Treatment | Feed Day | No | 18:35 | 18:00 - 18:59 | Evening | 37,9 |     | 34,4 | 34,4 | 19,05 |        | 118,90 |
| 2019/05/20 | CH2206 | Male | Three y/o | Treatment (Wk 1) | Treatment | Feed Day | No | 18:35 | 18:00 - 18:59 | Evening | 37,8 | 82  | 79,6 | 79,6 | 18,95 | 579,19 | 147,90 |
| 2019/05/20 | CH2205 | Male | Three y/o | Treatment (Wk 1) | Treatment | Feed Day | No | 18:40 | 18:00 - 18:59 | Evening | 37,9 |     | 35,0 | 35,0 | 19,05 |        | 119,49 |
| 2019/05/20 | CH2206 | Male | Three y/o | Treatment (Wk 1) | Treatment | Feed Day | No | 18:40 | 18:00 - 18:59 | Evening | 37,8 | 83  | 20,0 | 20,0 | 18,95 | 580,11 | 100,31 |
| 2019/05/20 | CH2205 | Male | Three y/o | Treatment (Wk 1) | Treatment | Feed Day | No | 18:45 | 18:00 - 18:59 | Evening | 37,8 | 119 | 26,6 | 26,6 | 18,95 | 606,20 | 110,07 |
| 2019/05/20 | CH2206 | Male | Three y/o | Treatment (Wk 1) | Treatment | Feed Day | No | 18:45 | 18:00 - 18:59 | Evening | 37,8 | 74  | 9,8  | 9,8  | 18,95 | 571,33 | 76,07  |
| 2019/05/20 | CH2205 | Male | Three y/o | Treatment (Wk 1) | Treatment | Feed Day | No | 18:50 | 18:00 - 18:59 | Evening | 37,7 |     | 24,0 | 24,0 | 18,85 |        | 106,55 |
| 2019/05/20 | CH2206 | Male | Three y/o | Treatment (Wk 1) | Treatment | Feed Day | No | 18:50 | 18:00 - 18:59 | Evening | 37,9 | 82  | 8,2  | 8,2  | 19,05 | 579,19 | 70,05  |
| 2019/05/20 | CH2205 | Male | Three y/o | Treatment (Wk 1) | Treatment | Feed Day | No | 18:55 | 18:00 - 18:59 | Evening | 37,7 | 84  | 24,4 | 24,4 | 18,85 | 581,01 | 107,11 |
| 2019/05/20 | CH2206 | Male | Three y/o | Treatment (Wk 1) | Treatment | Feed Day | No | 18:55 | 18:00 - 18:59 | Evening | 37,9 | 79  | 8,0  | 8,0  | 19,05 | 576,36 | 69,22  |
| 2019/05/20 | CH2205 | Male | Three y/o | Treatment (Wk 1) | Treatment | Feed Day | No | 19:00 | 19:00 - 19:59 | Evening | 37,7 | 58  | 22,8 | 22,8 | 18,85 | 551,90 | 104,79 |
| 2019/05/20 | CH2206 | Male | Three y/o | Treatment (Wk 1) | Treatment | Feed Day | No | 19:00 | 19:00 - 19:59 | Evening | 38,0 | 78  | 5,8  | 5,8  | 19,15 | 575,38 | 58,39  |
| 2019/05/20 | CH2205 | Male | Three y/o | Treatment (Wk 1) | Treatment | Feed Day | No | 19:05 | 19:00 - 19:59 | Evening | 37,7 | 58  | 24,8 | 24,8 | 18,85 | 551,90 | 107,67 |
| 2019/05/20 | CH2206 | Male | Three y/o | Treatment (Wk 1) | Treatment | Feed Day | No | 19:05 | 19:00 - 19:59 | Evening | 38,0 | 63  | 6,0  | 6,0  | 19,15 | 558,62 | 59,53  |
| 2019/05/20 | CH2205 | Male | Three y/o | Treatment (Wk 1) | Treatment | Feed Day | No | 19:10 | 19:00 - 19:59 | Evening | 37,7 | 59  | 22,2 | 22,2 | 18,85 | 553,30 | 103,88 |
| 2019/05/20 | CH2206 | Male | Three y/o | Treatment (Wk 1) | Treatment | Feed Day | No | 19:10 | 19:00 - 19:59 | Evening | 38,0 | 49  | 41,4 | 41,4 | 19,15 | 537,80 | 125,27 |
| 2019/05/20 | CH2205 | Male | Three y/o | Treatment (Wk 1) | Treatment | Feed Day | No | 19:15 | 19:00 - 19:59 | Evening | 37,8 | 68  | 19,0 | 19,0 | 18,95 | 564,71 | 98,56  |
| 2019/05/20 | CH2206 | Male | Three y/o | Treatment (Wk 1) | Treatment | Feed Day | No | 19:15 | 19:00 - 19:59 | Evening | 38,0 | 84  | 61,8 | 61,8 | 19,15 | 581,01 | 139,12 |
| 2019/05/20 | CH2205 | Male | Three y/o | Treatment (Wk 1) | Treatment | Feed Day | No | 19:20 | 19:00 - 19:59 | Evening | 37,9 | 79  | 21,0 | 21,0 | 19,05 | 576,36 | 101,98 |
| 2019/05/20 | CH2206 | Male | Three y/o | Treatment (Wk 1) | Treatment | Feed Day | No | 19:20 | 19:00 - 19:59 | Evening | 37,9 | 73  | 47,6 | 47,6 | 19,05 | 570,27 | 130,09 |
| 2019/05/20 | CH2205 | Male | Three y/o | Treatment (Wk 1) | Treatment | Feed Day | No | 19:25 | 19:00 - 19:59 | Evening | 38,0 | 84  | 22,4 | 22,4 | 19,15 | 581,01 | 104,19 |
| 2019/05/20 | CH2206 | Male | Three y/o | Treatment (Wk 1) | Treatment | Feed Day | No | 19:25 | 19:00 - 19:59 | Evening | 37,8 | 46  | 50,6 | 50,6 | 18,95 | 532,38 | 132,20 |
| 2019/05/20 | CH2205 | Male | Three y/o | Treatment (Wk 1) | Treatment | Feed Day | No | 19:30 | 19:00 - 19:59 | Evening | 38,0 | 98  | 16,0 | 16,0 | 19,15 | 592,41 | 92,71  |
| 2019/05/20 | CH2206 | Male | Three y/o | Treatment (Wk 1) | Treatment | Feed Day | No | 19:30 | 19:00 - 19:59 | Evening | 37,7 | 46  | 47,4 | 47,4 | 18,85 | 532,38 | 129,94 |
| 2019/05/20 | CH2205 | Male | Three y/o | Treatment (Wk 1) | Treatment | Feed Day | No | 19:35 | 19:00 - 19:59 | Evening | 38,1 | 82  | 18,4 | 18,4 | 19,26 | 579,19 | 97,47  |
| 2019/05/20 | CH2206 | Male | Three y/o | Treatment (Wk 1) | Treatment | Feed Day | No | 19:35 | 19:00 - 19:59 | Evening | 37,7 | 84  | 49,2 | 49,2 | 18,85 | 581,01 | 131,23 |
| 2019/05/20 | CH2205 | Male | Three y/o | Treatment (Wk 1) | Treatment | Feed Day | No | 19:40 | 19:00 - 19:59 | Evening | 38,1 | 58  | 17,2 | 17,2 | 19,26 | 551,90 | 95,17  |
| 2019/05/20 | CH2206 | Male | Three y/o | Treatment (Wk 1) | Treatment | Feed Day | No | 19:40 | 19:00 - 19:59 | Evening | 37,7 | 57  | 57,2 | 57,2 | 18,85 | 550,47 | 136,44 |
| 2019/05/20 | CH2205 | Male | Three y/o | Treatment (Wk 1) | Treatment | Feed Day | No | 19:45 | 19:00 - 19:59 | Evening | 38,1 | 83  | 15,8 | 15,8 | 19,26 | 580,11 | 92,28  |
| 2019/05/20 | CH2206 | Male | Three y/o | Treatment (Wk 1) | Treatment | Feed Day | No | 19:45 | 19:00 - 19:59 | Evening | 37,6 | 83  | 61,2 | 61,2 | 18,75 | 580,11 | 138,78 |
| 2019/05/20 | CH2205 | Male | Three y/o | Treatment (Wk 1) | Treatment | Feed Day | No | 19:50 | 19:00 - 19:59 | Evening | 38,1 | 44  | 17,8 | 17,8 | 19,26 | 528,51 | 96,34  |



|            |        |      |           |                  |           |          |    |       |               |         |      |     |      |      |       |        |        |
|------------|--------|------|-----------|------------------|-----------|----------|----|-------|---------------|---------|------|-----|------|------|-------|--------|--------|
| 2019/05/20 | CH2206 | Male | Three y/o | Treatment (Wk 1) | Treatment | Feed Day | No | 19:50 | 19:00 - 19:59 | Evening | 37,5 | 86  | 57,4 | 57,4 | 18,65 | 582,77 | 136,56 |
| 2019/05/20 | CH2205 | Male | Three y/o | Treatment (Wk 1) | Treatment | Feed Day | No | 19:55 | 19:00 - 19:59 | Evening | 38,1 | 58  | 14,2 | 14,2 | 19,26 | 551,90 | 88,65  |
| 2019/05/20 | CH2206 | Male | Three y/o | Treatment (Wk 1) | Treatment | Feed Day | No | 19:55 | 19:00 - 19:59 | Evening | 37,6 | 45  | 58,8 | 58,8 | 18,75 | 530,47 | 137,39 |
| 2019/05/20 | CH2205 | Male | Three y/o | Treatment (Wk 1) | Treatment | Feed Day | No | 20:00 | 20:00 - 20:59 | Night   | 38,1 | 86  | 19,4 | 19,4 | 19,26 | 582,77 | 99,28  |
| 2019/05/20 | CH2206 | Male | Three y/o | Treatment (Wk 1) | Treatment | Feed Day | No | 20:00 | 20:00 - 20:59 | Night   | 37,7 | 50  | 60,0 | 60,0 | 18,85 | 539,52 | 138,09 |
| 2019/05/20 | CH2205 | Male | Three y/o | Treatment (Wk 1) | Treatment | Feed Day | No | 20:05 | 20:00 - 20:59 | Night   | 38,0 | 84  | 15,6 | 15,6 | 19,15 | 581,01 | 91,85  |
| 2019/05/20 | CH2206 | Male | Three y/o | Treatment (Wk 1) | Treatment | Feed Day | No | 20:05 | 20:00 - 20:59 | Night   | 37,7 | 84  | 65,2 | 65,2 | 18,85 | 581,01 | 140,97 |
| 2019/05/20 | CH2205 | Male | Three y/o | Treatment (Wk 1) | Treatment | Feed Day | No | 20:10 | 20:00 - 20:59 | Night   | 38,0 | 58  | 10,0 | 10,0 | 19,15 | 551,90 | 76,76  |
| 2019/05/20 | CH2206 | Male | Three y/o | Treatment (Wk 1) | Treatment | Feed Day | No | 20:10 | 20:00 - 20:59 | Night   | 37,7 | 51  | 59,0 | 59,0 | 18,85 | 541,20 | 137,51 |
| 2019/05/20 | CH2205 | Male | Three y/o | Treatment (Wk 1) | Treatment | Feed Day | No | 20:15 | 20:00 - 20:59 | Night   | 38,0 | 55  | 12,6 | 12,6 | 19,15 | 547,52 | 84,59  |
| 2019/05/20 | CH2206 | Male | Three y/o | Treatment (Wk 1) | Treatment | Feed Day | No | 20:15 | 20:00 - 20:59 | Night   | 37,7 | 65  | 68,6 | 68,6 | 18,85 | 561,12 | 142,74 |
| 2019/05/20 | CH2205 | Male | Three y/o | Treatment (Wk 1) | Treatment | Feed Day | No | 20:20 | 20:00 - 20:59 | Night   | 38,0 | 80  | 14,0 | 14,0 | 19,15 | 577,31 | 88,17  |
| 2019/05/20 | CH2206 | Male | Three y/o | Treatment (Wk 1) | Treatment | Feed Day | No | 20:20 | 20:00 - 20:59 | Night   | 37,7 | 74  | 63,4 | 63,4 | 18,85 | 571,33 | 140,00 |
| 2019/05/20 | CH2205 | Male | Three y/o | Treatment (Wk 1) | Treatment | Feed Day | No | 20:25 | 20:00 - 20:59 | Night   | 38,0 | 63  | 11,4 | 11,4 | 19,15 | 558,62 | 81,19  |
| 2019/05/20 | CH2206 | Male | Three y/o | Treatment (Wk 1) | Treatment | Feed Day | No | 20:25 | 20:00 - 20:59 | Night   | 37,7 | 47  | 63,0 | 63,0 | 18,85 | 534,23 | 139,78 |
| 2019/05/20 | CH2205 | Male | Three y/o | Treatment (Wk 1) | Treatment | Feed Day | No | 20:30 | 20:00 - 20:59 | Night   | 38,0 | 85  | 10,4 | 10,4 | 19,15 | 581,90 | 78,08  |
| 2019/05/20 | CH2206 | Male | Three y/o | Treatment (Wk 1) | Treatment | Feed Day | No | 20:30 | 20:00 - 20:59 | Night   | 37,7 | 58  | 64,0 | 64,0 | 18,85 | 551,90 | 140,33 |
| 2019/05/20 | CH2205 | Male | Three y/o | Treatment (Wk 1) | Treatment | Feed Day | No | 20:35 | 20:00 - 20:59 | Night   | 38,0 | 47  | 19,0 | 19,0 | 19,15 | 534,23 | 98,56  |
| 2019/05/20 | CH2206 | Male | Three y/o | Treatment (Wk 1) | Treatment | Feed Day | No | 20:35 | 20:00 - 20:59 | Night   | 37,7 | 77  | 62,4 | 62,4 | 18,85 | 574,39 | 139,45 |
| 2019/05/20 | CH2205 | Male | Three y/o | Treatment (Wk 1) | Treatment | Feed Day | No | 20:40 | 20:00 - 20:59 | Night   | 38,0 | 68  | 12,0 | 12,0 | 19,15 | 564,71 | 82,93  |
| 2019/05/20 | CH2206 | Male | Three y/o | Treatment (Wk 1) | Treatment | Feed Day | No | 20:40 | 20:00 - 20:59 | Night   | 37,7 | 84  | 67,0 | 67,0 | 18,85 | 581,01 | 141,92 |
| 2019/05/20 | CH2205 | Male | Three y/o | Treatment (Wk 1) | Treatment | Feed Day | No | 20:45 | 20:00 - 20:59 | Night   | 38,0 | 54  | 12,0 | 12,0 | 19,15 | 545,99 | 82,93  |
| 2019/05/20 | CH2206 | Male | Three y/o | Treatment (Wk 1) | Treatment | Feed Day | No | 20:45 | 20:00 - 20:59 | Night   | 37,7 | 74  | 61,4 | 61,4 | 18,85 | 571,33 | 138,89 |
| 2019/05/20 | CH2205 | Male | Three y/o | Treatment (Wk 1) | Treatment | Feed Day | No | 20:50 | 20:00 - 20:59 | Night   | 38,0 | 94  | 13,6 | 13,6 | 19,15 | 589,37 | 87,18  |
| 2019/05/20 | CH2206 | Male | Three y/o | Treatment (Wk 1) | Treatment | Feed Day | No | 20:50 | 20:00 - 20:59 | Night   | 37,7 | 46  | 54,6 | 54,6 | 18,85 | 532,38 | 134,83 |
| 2019/05/20 | CH2205 | Male | Three y/o | Treatment (Wk 1) | Treatment | Feed Day | No | 20:55 | 20:00 - 20:59 | Night   | 37,9 |     | 11,2 | 11,2 | 19,05 |        | 80,59  |
| 2019/05/20 | CH2206 | Male | Three y/o | Treatment (Wk 1) | Treatment | Feed Day | No | 20:55 | 20:00 - 20:59 | Night   | 37,6 | 44  | 48,6 | 48,6 | 18,75 | 528,51 | 130,81 |
| 2019/05/20 | CH2205 | Male | Three y/o | Treatment (Wk 1) | Treatment | Feed Day | No | 21:00 | 21:00 - 21:59 | Night   | 37,9 | 59  | 8,8  | 8,8  | 19,05 | 553,30 | 72,43  |
| 2019/05/20 | CH2206 | Male | Three y/o | Treatment (Wk 1) | Treatment | Feed Day | No | 21:00 | 21:00 - 21:59 | Night   | 37,5 | 90  | 50,2 | 50,2 | 18,65 | 586,16 | 131,92 |
| 2019/05/20 | CH2205 | Male | Three y/o | Treatment (Wk 1) | Treatment | Feed Day | No | 21:05 | 21:00 - 21:59 | Night   | 37,9 | 61  | 8,2  | 8,2  | 19,05 | 556,01 | 70,05  |
| 2019/05/20 | CH2206 | Male | Three y/o | Treatment (Wk 1) | Treatment | Feed Day | No | 21:05 | 21:00 - 21:59 | Night   | 37,5 | 89  | 56,4 | 56,4 | 18,65 | 585,33 | 135,95 |
| 2019/05/20 | CH2205 | Male | Three y/o | Treatment (Wk 1) | Treatment | Feed Day | No | 21:10 | 21:00 - 21:59 | Night   | 37,9 | 100 | 5,6  | 5,6  | 19,05 | 593,87 | 57,21  |
| 2019/05/20 | CH2206 | Male | Three y/o | Treatment (Wk 1) | Treatment | Feed Day | No | 21:10 | 21:00 - 21:59 | Night   | 37,4 | 89  | 64,6 | 64,6 | 18,55 | 585,33 | 140,65 |
| 2019/05/20 | CH2205 | Male | Three y/o | Treatment (Wk 1) | Treatment | Feed Day | No | 21:15 | 21:00 - 21:59 | Night   | 37,9 | 92  | 2,6  | 2,6  | 19,05 | 587,78 | 31,57  |
| 2019/05/20 | CH2206 | Male | Three y/o | Treatment (Wk 1) | Treatment | Feed Day | No | 21:15 | 21:00 - 21:59 | Night   | 37,4 | 90  | 59,2 | 59,2 | 18,55 | 586,16 | 137,63 |
| 2019/05/20 | CH2205 | Male | Three y/o | Treatment (Wk 1) | Treatment | Feed Day | No | 21:20 | 21:00 - 21:59 | Night   | 37,9 | 62  | 3,2  | 3,2  | 19,05 | 557,33 | 38,49  |
| 2019/05/20 | CH2206 | Male | Three y/o | Treatment (Wk 1) | Treatment | Feed Day | No | 21:20 | 21:00 - 21:59 | Night   | 37,4 | 44  | 59,6 | 59,6 | 18,55 | 528,51 | 137,86 |
| 2019/05/20 | CH2205 | Male | Three y/o | Treatment (Wk 1) | Treatment | Feed Day | No | 21:25 | 21:00 - 21:59 | Night   | 37,9 | 58  | 1,2  | 1,2  | 19,05 | 551,90 | 5,99   |
| 2019/05/20 | CH2206 | Male | Three y/o | Treatment (Wk 1) | Treatment | Feed Day | No | 21:25 | 21:00 - 21:59 | Night   | 37,4 | 84  | 62,8 | 62,8 | 18,55 | 581,01 | 139,67 |
| 2019/05/20 | CH2205 | Male | Three y/o | Treatment (Wk 1) | Treatment | Feed Day | No | 21:30 | 21:00 - 21:59 | Night   | 37,9 | 84  | 4,4  | 4,4  | 19,05 | 581,01 | 49,12  |
| 2019/05/20 | CH2206 | Male | Three y/o | Treatment (Wk 1) | Treatment | Feed Day | No | 21:30 | 21:00 - 21:59 | Night   | 37,4 | 88  | 61,0 | 61,0 | 18,55 | 584,49 | 138,67 |
| 2019/05/20 | CH2205 | Male | Three y/o | Treatment (Wk 1) | Treatment | Feed Day | No | 21:35 | 21:00 - 21:59 | Night   | 37,9 | 56  | 5,0  | 5,0  | 19,05 | 549,01 | 53,41  |
| 2019/05/20 | CH2206 | Male | Three y/o | Treatment (Wk 1) | Treatment | Feed Day | No | 21:35 | 21:00 - 21:59 | Night   | 37,4 | 61  | 62,2 | 62,2 | 18,55 | 556,01 | 139,34 |
| 2019/05/20 | CH2205 | Male | Three y/o | Treatment (Wk 1) | Treatment | Feed Day | No | 21:40 | 21:00 - 21:59 | Night   | 37,9 | 63  | 5,8  | 5,8  | 19,05 | 558,62 | 58,39  |
| 2019/05/20 | CH2206 | Male | Three y/o | Treatment (Wk 1) | Treatment | Feed Day | No | 21:40 | 21:00 - 21:59 | Night   | 37,4 | 50  | 56,2 | 56,2 | 18,55 | 539,52 | 135,83 |
| 2019/05/20 | CH2205 | Male | Three y/o | Treatment (Wk 1) | Treatment | Feed Day | No | 21:45 | 21:00 - 21:59 | Night   | 37,9 | 60  | 7,2  | 7,2  | 19,05 | 554,67 | 65,66  |
| 2019/05/20 | CH2206 | Male | Three y/o | Treatment (Wk 1) | Treatment | Feed Day | No | 21:45 | 21:00 - 21:59 | Night   | 37,4 | 87  | 47,6 | 47,6 | 18,55 | 583,64 | 130,09 |
| 2019/05/20 | CH2205 | Male | Three y/o | Treatment (Wk 1) | Treatment | Feed Day | No | 21:50 | 21:00 - 21:59 | Night   | 37,9 | 88  | 5,4  | 5,4  | 19,05 | 584,49 | 55,99  |
| 2019/05/20 | CH2206 | Male | Three y/o | Treatment (Wk 1) | Treatment | Feed Day | No | 21:50 | 21:00 - 21:59 | Night   | 37,7 | 46  | 46,4 | 46,4 | 18,85 | 532,38 | 129,21 |
| 2019/05/20 | CH2205 | Male | Three y/o | Treatment (Wk 1) | Treatment | Feed Day | No | 21:55 | 21:00 - 21:59 | Night   | 37,9 | 54  | 6,4  | 6,4  | 19,05 | 545,99 | 61,70  |
| 2019/05/20 | CH2206 | Male | Three y/o | Treatment (Wk 1) | Treatment | Feed Day | No | 21:55 | 21:00 - 21:59 | Night   | 37,7 | 64  | 45,2 | 45,2 | 18,85 | 559,88 | 128,30 |
| 2019/05/20 | CH2205 | Male | Three y/o | Treatment (Wk 1) | Treatment | Feed Day | No | 22:00 | 22:00 - 22:59 | Night   | 37,9 | 78  | 3,2  | 3,2  | 19,05 | 575,38 | 38,49  |
| 2019/05/20 | CH2206 | Male | Three y/o | Treatment (Wk 1) | Treatment | Feed Day | No | 22:00 | 22:00 - 22:59 | Night   | 37,5 | 102 | 53,2 | 53,2 | 18,65 | 595,30 | 133,93 |
| 2019/05/20 | CH2205 | Male | Three y/o | Treatment (Wk 1) | Treatment | Feed Day | No | 22:05 | 22:00 - 22:59 | Night   | 37,9 | 78  | 2,2  | 2,2  | 19,05 | 575,38 | 26,02  |
| 2019/05/20 | CH2206 | Male | Three y/o | Treatment (Wk 1) | Treatment | Feed Day | No | 22:05 | 22:00 - 22:59 | Night   | 37,5 | 69  | 58,6 | 58,6 | 18,65 | 565,86 | 137,28 |
| 2019/05/20 | CH2205 | Male | Three y/o | Treatment (Wk 1) | Treatment | Feed Day | No | 22:10 | 22:00 - 22:59 | Night   | 37,9 | 51  | 28,4 | 28,4 | 19,05 | 541,20 | 112,31 |
| 2019/05/20 | CH2206 | Male | Three y/o | Treatment (Wk 1) | Treatment | Feed Day | No | 22:10 | 22:00 - 22:59 | Night   | 37,5 | 76  | 94,4 | 94,4 | 18,65 | 573,39 | 153,84 |
| 2019/05/20 | CH2205 | Male | Three y/o | Treatment (Wk 1) | Treatment | Feed Day | No | 22:15 | 22:00 - 22:59 | Night   | 37,8 | 62  | 5,6  | 5,6  | 18,95 | 557,33 | 57,21  |
| 2019/05/20 | CH2206 | Male | Three y/o | Treatment (Wk 1) | Treatment | Feed Day | No | 22:15 | 22:00 - 22:59 | Night   | 37,4 | 83  | 62,4 | 62,4 | 18,55 | 580,11 | 139,45 |
| 2019/05/20 | CH2205 | Male | Three y/o | Treatment (Wk 1) | Treatment | Feed Day | No | 22:20 | 22:00 - 22:59 | Night   | 37,6 | 92  | 2,8  | 2,8  | 18,75 | 587,78 | 34,04  |
| 2019/05/20 | CH2206 | Male | Three y/o | Treatment (Wk 1) | Treatment | Feed Day | No | 22:20 | 22:00 - 22:59 | Night   | 37,3 | 44  | 60,4 | 60,4 | 18,46 | 528,51 | 138,32 |
| 2019/05/20 | CH2205 | Male | Three y/o | Treatment (Wk 1) | Treatment | Feed Day | No | 22:25 | 22:00 - 22:59 | Night   | 37,6 | 94  | 8,8  | 8,8  | 18,75 | 589,37 | 72,43  |
| 2019/05/20 | CH2206 | Male | Three y/o | Treatment (Wk 1) | Treatment | Feed Day | No | 22:25 | 22:00 - 22:59 | Night   | 37,3 | 69  | 60,6 | 60,6 | 18,46 | 565,86 | 138,44 |
| 2019/05/20 | CH2205 | Male | Three y/o | Treatment (Wk 1) | Treatment | Feed Day | No | 22:30 | 22:00 - 22:59 | Night   | 37,6 | 93  | 19,2 | 19,2 | 18,75 | 588,58 | 98,92  |
| 2019/05/20 | CH2206 | Male | Three y/o | Treatment (Wk 1) | Treatment | Feed Day | No | 22:30 | 22:00 - 22:59 | Night   | 37,4 | 79  | 39,2 | 39,2 | 18,55 | 576,36 | 123,39 |
| 2019/05/20 | CH2205 | Male | Three y/o | Treatment (Wk 1) | Treatment | Feed Day | No | 22:35 | 22:00 - 22:59 | Night   | 37,7 | 65  | 21,0 | 21,0 | 18,85 | 561,12 | 101,98 |
| 2019/05/20 | CH2206 | Male | Three y/o | Treatment (Wk 1) | Treatment | Feed Day | No | 22:35 | 22:00 - 22:59 | Night   | 37,4 | 42  | 7,2  | 7,2  | 18,55 | 524,42 | 65,66  |
| 2019/05/20 | CH2205 | Male | Three y/o | Treatment (Wk 1) | Treatment | Feed Day | No | 22:40 | 22:00 - 22:59 | Night   | 37,7 | 73  | 19,8 | 19,8 | 18,85 | 570,27 | 99,97  |
| 2019/05/20 | CH2206 | Male | Three y/o | Treatment (Wk 1) | Treatment | Feed Day | No | 22:40 | 22:00 - 22:59 | Night   | 37,4 | 78  | 4,6  | 4,6  | 18,55 | 575,38 | 50,61  |
| 2019/05/20 | CH2205 | Male | Three y/o | Treatment (Wk 1) | Treatment | Feed Day | No | 22:45 | 22:00 - 22:59 | Night   | 37,7 | 63  | 18,6 | 18,6 | 18,85 | 558,62 | 97,84  |



|   |            |        |      |           |                  |           |          |    |       |               |               |      |     |      |      |       |        |        |
|---|------------|--------|------|-----------|------------------|-----------|----------|----|-------|---------------|---------------|------|-----|------|------|-------|--------|--------|
|   | 2019/05/20 | CH2206 | Male | Three y/o | Treatment (Wk 1) | Treatment | Feed Day | No | 22:45 | 22:00 - 22:59 | Night         | 37,4 | 51  | 7,6  | 7,6  | 18,55 | 541,20 | 67,49  |
|   | 2019/05/20 | CH2205 | Male | Three y/o | Treatment (Wk 1) | Treatment | Feed Day | No | 22:50 | 22:00 - 22:59 | Night         | 37,7 | 55  | 18,4 | 18,4 | 18,85 | 547,52 | 97,47  |
|   | 2019/05/20 | CH2206 | Male | Three y/o | Treatment (Wk 1) | Treatment | Feed Day | No | 22:50 | 22:00 - 22:59 | Night         | 37,4 | 84  | 6,0  | 6,0  | 18,55 | 581,01 | 59,53  |
|   | 2019/05/20 | CH2205 | Male | Three y/o | Treatment (Wk 1) | Treatment | Feed Day | No | 22:55 | 22:00 - 22:59 | Night         | 37,7 | 73  | 25,0 | 25,0 | 18,85 | 570,27 | 107,94 |
|   | 2019/05/20 | CH2206 | Male | Three y/o | Treatment (Wk 1) | Treatment | Feed Day | No | 22:55 | 22:00 - 22:59 | Night         | 37,4 | 72  | 10,0 | 10,0 | 18,55 | 569,20 | 76,76  |
|   | 2019/05/20 | CH2205 | Male | Three y/o | Treatment (Wk 1) | Treatment | Feed Day | No | 23:00 | 23:00 - 23:59 | Night         | 37,7 | 60  | 15,4 | 15,4 | 18,85 | 554,67 | 91,41  |
|   | 2019/05/20 | CH2206 | Male | Three y/o | Treatment (Wk 1) | Treatment | Feed Day | No | 23:00 | 23:00 - 23:59 | Night         | 37,4 | 86  | 3,8  | 3,8  | 18,55 | 582,77 | 44,22  |
|   | 2019/05/20 | CH2205 | Male | Three y/o | Treatment (Wk 1) | Treatment | Feed Day | No | 23:05 | 23:00 - 23:59 | Night         | 37,7 | 93  | 17,4 | 17,4 | 18,85 | 588,58 | 95,56  |
|   | 2019/05/20 | CH2206 | Male | Three y/o | Treatment (Wk 1) | Treatment | Feed Day | No | 23:05 | 23:00 - 23:59 | Night         | 37,4 | 84  | 10,4 | 10,4 | 18,55 | 581,01 | 78,08  |
|   | 2019/05/20 | CH2205 | Male | Three y/o | Treatment (Wk 1) | Treatment | Feed Day | No | 23:10 | 23:00 - 23:59 | Night         | 37,7 | 73  | 23,8 | 23,8 | 18,85 | 570,27 | 106,26 |
|   | 2019/05/20 | CH2206 | Male | Three y/o | Treatment (Wk 1) | Treatment | Feed Day | No | 23:10 | 23:00 - 23:59 | Night         | 37,4 | 67  | 8,0  | 8,0  | 18,55 | 563,53 | 69,22  |
|   | 2019/05/20 | CH2205 | Male | Three y/o | Treatment (Wk 1) | Treatment | Feed Day | No | 23:15 | 23:00 - 23:59 | Night         | 37,7 | 56  | 20,2 | 20,2 | 18,85 | 549,01 | 100,65 |
|   | 2019/05/20 | CH2206 | Male | Three y/o | Treatment (Wk 1) | Treatment | Feed Day | No | 23:15 | 23:00 - 23:59 | Night         | 37,3 | 51  | 4,8  | 4,8  | 18,46 | 541,20 | 52,04  |
|   | 2019/05/20 | CH2205 | Male | Three y/o | Treatment (Wk 1) | Treatment | Feed Day | No | 23:20 | 23:00 - 23:59 | Night         | 37,6 | 41  | 20,4 | 20,4 | 18,75 | 522,29 | 100,99 |
|   | 2019/05/20 | CH2206 | Male | Three y/o | Treatment (Wk 1) | Treatment | Feed Day | No | 23:20 | 23:00 - 23:59 | Night         | 37,3 | 63  | 4,6  | 4,6  | 18,46 | 558,62 | 50,61  |
|   | 2019/05/20 | CH2205 | Male | Three y/o | Treatment (Wk 1) | Treatment | Feed Day | No | 23:25 | 23:00 - 23:59 | Night         | 37,6 | 46  | 18,2 | 18,2 | 18,75 | 532,38 | 97,10  |
|   | 2019/05/20 | CH2206 | Male | Three y/o | Treatment (Wk 1) | Treatment | Feed Day | No | 23:25 | 23:00 - 23:59 | Night         | 37,3 | 77  | 5,4  | 5,4  | 18,46 | 574,39 | 55,99  |
|   | 2019/05/20 | CH2205 | Male | Three y/o | Treatment (Wk 1) | Treatment | Feed Day | No | 23:30 | 23:00 - 23:59 | Night         | 37,6 | 41  | 17,0 | 17,0 | 18,75 | 522,29 | 94,77  |
|   | 2019/05/20 | CH2206 | Male | Three y/o | Treatment (Wk 1) | Treatment | Feed Day | No | 23:30 | 23:00 - 23:59 | Night         | 37,3 | 43  | 6,8  | 6,8  | 18,46 | 526,50 | 63,74  |
|   | 2019/05/20 | CH2205 | Male | Three y/o | Treatment (Wk 1) | Treatment | Feed Day | No | 23:35 | 23:00 - 23:59 | Night         | 37,6 | 50  | 25,2 | 25,2 | 18,75 | 539,52 | 108,22 |
|   | 2019/05/20 | CH2206 | Male | Three y/o | Treatment (Wk 1) | Treatment | Feed Day | No | 23:35 | 23:00 - 23:59 | Night         | 37,3 | 65  | 11,6 | 11,6 | 18,46 | 561,12 | 81,78  |
|   | 2019/05/20 | CH2205 | Male | Three y/o | Treatment (Wk 1) | Treatment | Feed Day | No | 23:40 | 23:00 - 23:59 | Night         | 37,7 | 57  | 20,2 | 20,2 | 18,85 | 550,47 | 100,65 |
|   | 2019/05/20 | CH2206 | Male | Three y/o | Treatment (Wk 1) | Treatment | Feed Day | No | 23:40 | 23:00 - 23:59 | Night         | 37,3 | 79  | 28,4 | 28,4 | 18,46 | 576,36 | 112,31 |
|   | 2019/05/20 | CH2205 | Male | Three y/o | Treatment (Wk 1) | Treatment | Feed Day | No | 23:45 | 23:00 - 23:59 | Night         | 37,7 | 50  | 22,4 | 22,4 | 18,85 | 539,52 | 104,19 |
|   | 2019/05/20 | CH2206 | Male | Three y/o | Treatment (Wk 1) | Treatment | Feed Day | No | 23:45 | 23:00 - 23:59 | Night         | 37,4 | 67  | 17,0 | 17,0 | 18,55 | 563,53 | 94,77  |
|   | 2019/05/20 | CH2205 | Male | Three y/o | Treatment (Wk 1) | Treatment | Feed Day | No | 23:50 | 23:00 - 23:59 | Night         | 37,7 | 92  | 18,6 | 18,6 | 18,85 | 587,78 | 97,84  |
|   | 2019/05/20 | CH2206 | Male | Three y/o | Treatment (Wk 1) | Treatment | Feed Day | No | 23:50 | 23:00 - 23:59 | Night         | 37,5 | 59  | 19,8 | 19,8 | 18,65 | 553,30 | 99,97  |
|   | 2019/05/20 | CH2205 | Male | Three y/o | Treatment (Wk 1) | Treatment | Feed Day | No | 23:55 | 23:00 - 23:59 | Night         | 37,7 | 95  | 21,8 | 21,8 | 18,85 | 590,14 | 103,26 |
|   | 2019/05/20 | CH2206 | Male | Three y/o | Treatment (Wk 1) | Treatment | Feed Day | No | 23:55 | 23:00 - 23:59 | Night         | 37,5 | 88  | 13,4 | 13,4 | 18,65 | 584,49 | 86,68  |
| 7 | 2019/05/21 | CH2205 | Male | Three y/o | Treatment (Wk 1) | Treatment | Feed Day | No | 00:00 | 00:00 - 00:59 | Early Morning | 37,7 | 90  | 22,4 | 22,4 | 18,85 | 586,16 | 104,19 |
|   | 2019/05/21 | CH2206 | Male | Three y/o | Treatment (Wk 1) | Treatment | Feed Day | No | 00:00 | 00:00 - 00:59 | Early Morning | 37,5 | 45  | 20,2 | 20,2 | 18,65 | 530,47 | 100,65 |
|   | 2019/05/21 | CH2205 | Male | Three y/o | Treatment (Wk 1) | Treatment | Feed Day | No | 00:05 | 00:00 - 00:59 | Early Morning | 37,7 | 54  | 23,8 | 23,8 | 18,85 | 545,99 | 106,26 |
|   | 2019/05/21 | CH2206 | Male | Three y/o | Treatment (Wk 1) | Treatment | Feed Day | No | 00:05 | 00:00 - 00:59 | Early Morning | 37,5 | 89  | 17,4 | 17,4 | 18,65 | 585,33 | 95,56  |
|   | 2019/05/21 | CH2205 | Male | Three y/o | Treatment (Wk 1) | Treatment | Feed Day | No | 00:10 | 00:00 - 00:59 | Early Morning | 37,7 | 75  | 24,4 | 24,4 | 18,85 | 572,36 | 107,11 |
|   | 2019/05/21 | CH2206 | Male | Three y/o | Treatment (Wk 1) | Treatment | Feed Day | No | 00:10 | 00:00 - 00:59 | Early Morning | 37,5 | 66  | 15,4 | 15,4 | 18,65 | 562,34 | 91,41  |
|   | 2019/05/21 | CH2205 | Male | Three y/o | Treatment (Wk 1) | Treatment | Feed Day | No | 00:15 | 00:00 - 00:59 | Early Morning | 37,7 | 89  | 17,8 | 17,8 | 18,85 | 585,33 | 96,34  |
|   | 2019/05/21 | CH2206 | Male | Three y/o | Treatment (Wk 1) | Treatment | Feed Day | No | 00:15 | 00:00 - 00:59 | Early Morning | 37,5 | 87  | 24,0 | 24,0 | 18,65 | 583,64 | 106,55 |
|   | 2019/05/21 | CH2205 | Male | Three y/o | Treatment (Wk 1) | Treatment | Feed Day | No | 00:20 | 00:00 - 00:59 | Early Morning | 37,7 | 55  | 22,0 | 22,0 | 18,85 | 547,52 | 103,57 |
|   | 2019/05/21 | CH2206 | Male | Three y/o | Treatment (Wk 1) | Treatment | Feed Day | No | 00:20 | 00:00 - 00:59 | Early Morning | 37,5 | 56  | 29,2 | 29,2 | 18,65 | 549,01 | 113,27 |
|   | 2019/05/21 | CH2205 | Male | Three y/o | Treatment (Wk 1) | Treatment | Feed Day | No | 00:25 | 00:00 - 00:59 | Early Morning | 37,7 | 167 | 21,0 | 21,0 | 18,85 | 628,84 | 101,98 |
|   | 2019/05/21 | CH2206 | Male | Three y/o | Treatment (Wk 1) | Treatment | Feed Day | No | 00:25 | 00:00 - 00:59 | Early Morning | 37,5 | 101 | 67,8 | 67,8 | 18,65 | 594,59 | 142,33 |
|   | 2019/05/21 | CH2205 | Male | Three y/o | Treatment (Wk 1) | Treatment | Feed Day | No | 00:30 | 00:00 - 00:59 | Early Morning | 37,7 | 115 | 20,6 | 20,6 | 18,85 | 603,82 | 101,32 |
|   | 2019/05/21 | CH2206 | Male | Three y/o | Treatment (Wk 1) | Treatment | Feed Day | No | 00:30 | 00:00 - 00:59 | Early Morning | 37,5 | 85  | 58,0 | 58,0 | 18,65 | 581,90 | 136,92 |
|   | 2019/05/21 | CH2205 | Male | Three y/o | Treatment (Wk 1) | Treatment | Feed Day | No | 00:35 | 00:00 - 00:59 | Early Morning | 37,6 | 86  | 20,6 | 20,6 | 18,75 | 582,77 | 101,32 |
|   | 2019/05/21 | CH2206 | Male | Three y/o | Treatment (Wk 1) | Treatment | Feed Day | No | 00:35 | 00:00 - 00:59 | Early Morning | 37,5 | 46  | 65,0 | 65,0 | 18,65 | 532,38 | 140,87 |
|   | 2019/05/21 | CH2205 | Male | Three y/o | Treatment (Wk 1) | Treatment | Feed Day | No | 00:40 | 00:00 - 00:59 | Early Morning | 37,6 | 51  | 19,0 | 19,0 | 18,75 | 541,20 | 98,56  |
|   | 2019/05/21 | CH2206 | Male | Three y/o | Treatment (Wk 1) | Treatment | Feed Day | No | 00:40 | 00:00 - 00:59 | Early Morning | 37,5 | 87  | 58,2 | 58,2 | 18,65 | 583,64 | 137,04 |
|   | 2019/05/21 | CH2205 | Male | Three y/o | Treatment (Wk 1) | Treatment | Feed Day | No | 00:45 | 00:00 - 00:59 | Early Morning | 37,7 | 46  | 17,8 | 17,8 | 18,85 | 532,38 | 96,34  |
|   | 2019/05/21 | CH2206 | Male | Three y/o | Treatment (Wk 1) | Treatment | Feed Day | No | 00:45 | 00:00 - 00:59 | Early Morning | 37,5 | 53  | 58,2 | 58,2 | 18,65 | 544,43 | 137,04 |
|   | 2019/05/21 | CH2205 | Male | Three y/o | Treatment (Wk 1) | Treatment | Feed Day | No | 00:50 | 00:00 - 00:59 | Early Morning | 37,7 | 57  | 19,0 | 19,0 | 18,85 | 550,47 | 98,56  |
|   | 2019/05/21 | CH2206 | Male | Three y/o | Treatment (Wk 1) | Treatment | Feed Day | No | 00:50 | 00:00 - 00:59 | Early Morning | 37,5 | 86  | 55,4 | 55,4 | 18,65 | 582,77 | 135,33 |
|   | 2019/05/21 | CH2205 | Male | Three y/o | Treatment (Wk 1) | Treatment | Feed Day | No | 00:55 | 00:00 - 00:59 | Early Morning | 37,6 | 62  | 13,8 | 13,8 | 18,75 | 557,33 | 87,68  |
|   | 2019/05/21 | CH2206 | Male | Three y/o | Treatment (Wk 1) | Treatment | Feed Day | No | 00:55 | 00:00 - 00:59 | Early Morning | 37,5 | 52  | 48,8 | 48,8 | 18,65 | 542,83 | 130,95 |
|   | 2019/05/21 | CH2205 | Male | Three y/o | Treatment (Wk 1) | Treatment | Feed Day | No | 01:00 | 01:00 - 01:59 | Early Morning | 37,5 | 45  | 18,6 | 18,6 | 18,65 | 530,47 | 97,84  |
|   | 2019/05/21 | CH2206 | Male | Three y/o | Treatment (Wk 1) | Treatment | Feed Day | No | 01:00 | 01:00 - 01:59 | Early Morning | 37,5 | 47  | 55,8 | 55,8 | 18,65 | 534,23 | 135,58 |
|   | 2019/05/21 | CH2205 | Male | Three y/o | Treatment (Wk 1) | Treatment | Feed Day | No | 01:05 | 01:00 - 01:59 | Early Morning | 37,4 | 54  | 11,8 | 11,8 | 18,55 | 545,99 | 82,36  |
|   | 2019/05/21 | CH2206 | Male | Three y/o | Treatment (Wk 1) | Treatment | Feed Day | No | 01:05 | 01:00 - 01:59 | Early Morning | 37,5 | 90  | 57,4 | 57,4 | 18,65 | 586,16 | 136,56 |
|   | 2019/05/21 | CH2205 | Male | Three y/o | Treatment (Wk 1) | Treatment | Feed Day | No | 01:10 | 01:00 - 01:59 | Early Morning | 37,4 | 55  | 19,8 | 19,8 | 18,55 | 547,52 | 99,97  |
|   | 2019/05/21 | CH2206 | Male | Three y/o | Treatment (Wk 1) | Treatment | Feed Day | No | 01:10 | 01:00 - 01:59 | Early Morning | 37,5 |     | 43,8 | 43,8 | 18,65 |        | 127,22 |
|   | 2019/05/21 | CH2205 | Male | Three y/o | Treatment (Wk 1) | Treatment | Feed Day | No | 01:15 | 01:00 - 01:59 | Early Morning | 37,5 | 63  | 7,6  | 7,6  | 18,65 | 558,62 | 67,49  |
|   | 2019/05/21 | CH2206 | Male | Three y/o | Treatment (Wk 1) | Treatment | Feed Day | No | 01:15 | 01:00 - 01:59 | Early Morning | 37,4 | 54  | 35,2 | 35,2 | 18,55 | 545,99 | 119,69 |
|   | 2019/05/21 | CH2205 | Male | Three y/o | Treatment (Wk 1) | Treatment | Feed Day | No | 01:20 | 01:00 - 01:59 | Early Morning | 37,6 | 44  | 3,8  | 3,8  | 18,75 | 528,51 | 44,22  |
|   | 2019/05/21 | CH2206 | Male | Three y/o | Treatment (Wk 1) | Treatment | Feed Day | No | 01:20 | 01:00 - 01:59 | Early Morning | 37,3 | 42  | 22,2 | 22,2 | 18,46 | 524,42 | 103,88 |
|   | 2019/05/21 | CH2205 | Male | Three y/o | Treatment (Wk 1) | Treatment | Feed Day | No | 01:25 | 01:00 - 01:59 | Early Morning | 37,7 | 51  | 6,6  | 6,6  | 18,85 | 541,20 | 62,73  |
|   | 2019/05/21 | CH2206 | Male | Three y/o | Treatment (Wk 1) | Treatment | Feed Day | No | 01:25 | 01:00 - 01:59 | Early Morning | 37,3 | 49  | 21,4 | 21,4 | 18,46 | 537,80 | 102,63 |
|   | 2019/05/21 | CH2205 | Male | Three y/o | Treatment (Wk 1) | Treatment | Feed Day | No | 01:30 | 01:00 - 01:59 | Early Morning | 37,7 | 52  | 5,2  | 5,2  | 18,85 | 542,83 | 54,72  |
|   | 2019/05/21 | CH2206 | Male | Three y/o | Treatment (Wk 1) | Treatment | Feed Day | No | 01:30 | 01:00 - 01:59 | Early Morning | 37,5 | 54  | 19,6 | 19,6 | 18,65 | 545,99 | 99,63  |
|   | 2019/05/21 | CH2205 | Male | Three y/o | Treatment (Wk 1) | Treatment | Feed Day | No | 01:35 | 01:00 - 01:59 | Early Morning | 37,6 | 83  | 3,6  | 3,6  | 18,75 | 580,11 | 42,42  |
|   | 2019/05/21 | CH2206 | Male | Three y/o | Treatment (Wk 1) | Treatment | Feed Day | No | 01:35 | 01:00 - 01:59 | Early Morning | 37,5 | 90  | 36,0 | 36,0 | 18,65 | 586,16 | 120,46 |
|   | 2019/05/21 | CH2205 | Male | Three y/o | Treatment (Wk 1) | Treatment | Feed Day | No | 01:40 | 01:00 - 01:59 | Early Morning | 37,6 | 89  | 6,2  | 6,2  | 18,75 | 585,33 | 60,63  |



|            |        |      |           |                  |           |          |    |       |               |               |      |     |       |       |       |        |        |
|------------|--------|------|-----------|------------------|-----------|----------|----|-------|---------------|---------------|------|-----|-------|-------|-------|--------|--------|
| 2019/05/21 | CH2206 | Male | Three y/o | Treatment (Wk 1) | Treatment | Feed Day | No | 01:40 | 01:00 - 01:59 | Early Morning | 37,5 | 46  | 64,2  | 64,2  | 18,65 | 532,38 | 140,44 |
| 2019/05/21 | CH2205 | Male | Three y/o | Treatment (Wk 1) | Treatment | Feed Day | No | 01:45 | 01:00 - 01:59 | Early Morning | 37,6 | 78  | 11,0  | 11,0  | 18,75 | 575,38 | 79,98  |
| 2019/05/21 | CH2206 | Male | Three y/o | Treatment (Wk 1) | Treatment | Feed Day | No | 01:45 | 01:00 - 01:59 | Early Morning | 37,4 | 43  | 61,0  | 61,0  | 18,55 | 526,50 | 138,67 |
| 2019/05/21 | CH2205 | Male | Three y/o | Treatment (Wk 1) | Treatment | Feed Day | No | 01:50 | 01:00 - 01:59 | Early Morning | 37,6 | 79  | 9,8   | 9,8   | 18,75 | 576,36 | 76,07  |
| 2019/05/21 | CH2206 | Male | Three y/o | Treatment (Wk 1) | Treatment | Feed Day | No | 01:50 | 01:00 - 01:59 | Early Morning | 37,4 | 54  | 63,4  | 63,4  | 18,55 | 545,99 | 140,00 |
| 2019/05/21 | CH2205 | Male | Three y/o | Treatment (Wk 1) | Treatment | Feed Day | No | 01:55 | 01:00 - 01:59 | Early Morning | 37,6 | 129 | 30,2  | 30,2  | 18,75 | 611,75 | 114,42 |
| 2019/05/21 | CH2206 | Male | Three y/o | Treatment (Wk 1) | Treatment | Feed Day | No | 01:55 | 01:00 - 01:59 | Early Morning | 37,4 | 88  | 64,4  | 64,4  | 18,55 | 584,49 | 140,55 |
| 2019/05/21 | CH2205 | Male | Three y/o | Treatment (Wk 1) | Treatment | Feed Day | No | 02:00 | 02:00 - 02:59 | Early Morning | 37,5 |     | 30,6  | 30,6  | 18,65 |        | 114,87 |
| 2019/05/21 | CH2206 | Male | Three y/o | Treatment (Wk 1) | Treatment | Feed Day | No | 02:00 | 02:00 - 02:59 | Early Morning | 37,4 | 42  | 61,8  | 61,8  | 18,55 | 524,42 | 139,12 |
| 2019/05/21 | CH2205 | Male | Three y/o | Treatment (Wk 1) | Treatment | Feed Day | No | 02:05 | 02:00 - 02:59 | Early Morning | 37,6 |     | 29,0  | 29,0  | 18,75 |        | 113,03 |
| 2019/05/21 | CH2206 | Male | Three y/o | Treatment (Wk 1) | Treatment | Feed Day | No | 02:05 | 02:00 - 02:59 | Early Morning | 37,4 | 85  | 62,0  | 62,0  | 18,55 | 581,90 | 139,23 |
| 2019/05/21 | CH2205 | Male | Three y/o | Treatment (Wk 1) | Treatment | Feed Day | No | 02:10 | 02:00 - 02:59 | Early Morning | 37,6 |     | 32,0  | 32,0  | 18,75 |        | 116,41 |
| 2019/05/21 | CH2206 | Male | Three y/o | Treatment (Wk 1) | Treatment | Feed Day | No | 02:10 | 02:00 - 02:59 | Early Morning | 37,3 | 57  | 61,4  | 61,4  | 18,46 | 550,47 | 138,89 |
| 2019/05/21 | CH2205 | Male | Three y/o | Treatment (Wk 1) | Treatment | Feed Day | No | 02:15 | 02:00 - 02:59 | Early Morning | 37,6 | 57  | 20,6  | 20,6  | 18,75 | 550,47 | 101,32 |
| 2019/05/21 | CH2206 | Male | Three y/o | Treatment (Wk 1) | Treatment | Feed Day | No | 02:15 | 02:00 - 02:59 | Early Morning | 37,3 |     | 61,6  | 61,6  | 18,46 |        | 581,01 |
| 2019/05/21 | CH2205 | Male | Three y/o | Treatment (Wk 1) | Treatment | Feed Day | No | 02:20 | 02:00 - 02:59 | Early Morning | 37,6 | 84  | 18,0  | 18,0  | 18,75 | 526,50 | 96,72  |
| 2019/05/21 | CH2206 | Male | Three y/o | Treatment (Wk 1) | Treatment | Feed Day | No | 02:20 | 02:00 - 02:59 | Early Morning | 37,3 | 45  | 57,2  | 57,2  | 18,46 | 530,47 | 136,44 |
| 2019/05/21 | CH2205 | Male | Three y/o | Treatment (Wk 1) | Treatment | Feed Day | No | 02:25 | 02:00 - 02:59 | Early Morning | 37,6 | 88  | 19,0  | 19,0  | 18,75 | 584,49 | 98,56  |
| 2019/05/21 | CH2206 | Male | Three y/o | Treatment (Wk 1) | Treatment | Feed Day | No | 02:25 | 02:00 - 02:59 | Early Morning | 37,3 | 57  | 62,2  | 62,2  | 18,46 | 550,47 | 139,34 |
| 2019/05/21 | CH2205 | Male | Three y/o | Treatment (Wk 1) | Treatment | Feed Day | No | 02:30 | 02:00 - 02:59 | Early Morning | 37,5 | 49  | 19,2  | 19,2  | 18,65 | 537,80 | 98,92  |
| 2019/05/21 | CH2206 | Male | Three y/o | Treatment (Wk 1) | Treatment | Feed Day | No | 02:30 | 02:00 - 02:59 | Early Morning | 37,3 | 84  | 61,2  | 61,2  | 18,46 | 581,01 | 138,78 |
| 2019/05/21 | CH2205 | Male | Three y/o | Treatment (Wk 1) | Treatment | Feed Day | No | 02:35 | 02:00 - 02:59 | Early Morning | 37,5 | 57  | 21,0  | 21,0  | 18,65 | 550,47 | 101,98 |
| 2019/05/21 | CH2206 | Male | Three y/o | Treatment (Wk 1) | Treatment | Feed Day | No | 02:35 | 02:00 - 02:59 | Early Morning | 37,3 | 42  | 54,8  | 54,8  | 18,46 | 524,42 | 134,96 |
| 2019/05/21 | CH2205 | Male | Three y/o | Treatment (Wk 1) | Treatment | Feed Day | No | 02:40 | 02:00 - 02:59 | Early Morning | 37,5 | 59  | 16,6  | 16,6  | 18,65 | 553,30 | 93,96  |
| 2019/05/21 | CH2206 | Male | Three y/o | Treatment (Wk 1) | Treatment | Feed Day | No | 02:40 | 02:00 - 02:59 | Early Morning | 37,3 | 40  | 56,8  | 56,8  | 18,46 | 520,09 | 136,20 |
| 2019/05/21 | CH2205 | Male | Three y/o | Treatment (Wk 1) | Treatment | Feed Day | No | 02:45 | 02:00 - 02:59 | Early Morning | 37,5 | 88  | 21,0  | 21,0  | 18,65 | 584,49 | 101,98 |
| 2019/05/21 | CH2206 | Male | Three y/o | Treatment (Wk 1) | Treatment | Feed Day | No | 02:45 | 02:00 - 02:59 | Early Morning | 37,3 | 86  | 57,6  | 57,6  | 18,46 | 582,77 | 136,68 |
| 2019/05/21 | CH2205 | Male | Three y/o | Treatment (Wk 1) | Treatment | Feed Day | No | 02:50 | 02:00 - 02:59 | Early Morning | 37,5 | 86  | 21,0  | 21,0  | 18,65 | 582,77 | 101,98 |
| 2019/05/21 | CH2206 | Male | Three y/o | Treatment (Wk 1) | Treatment | Feed Day | No | 02:50 | 02:00 - 02:59 | Early Morning | 37,3 | 57  | 7,8   | 7,8   | 18,46 | 550,47 | 68,36  |
| 2019/05/21 | CH2205 | Male | Three y/o | Treatment (Wk 1) | Treatment | Feed Day | No | 02:55 | 02:00 - 02:59 | Early Morning | 37,5 | 71  | 34,6  | 34,6  | 18,65 | 568,10 | 119,10 |
| 2019/05/21 | CH2206 | Male | Three y/o | Treatment (Wk 1) | Treatment | Feed Day | No | 02:55 | 02:00 - 02:59 | Early Morning | 37,4 | 45  | 9,4   | 9,4   | 18,55 | 530,47 | 74,66  |
| 2019/05/21 | CH2205 | Male | Three y/o | Treatment (Wk 1) | Treatment | Feed Day | No | 03:00 | 03:00 - 03:59 | Early Morning | 37,5 | 55  | 25,8  | 25,8  | 18,65 | 547,52 | 109,02 |
| 2019/05/21 | CH2206 | Male | Three y/o | Treatment (Wk 1) | Treatment | Feed Day | No | 03:00 | 03:00 - 03:59 | Early Morning | 37,4 | 64  | 12,4  | 12,4  | 18,55 | 559,88 | 84,04  |
| 2019/05/21 | CH2205 | Male | Three y/o | Treatment (Wk 1) | Treatment | Feed Day | No | 03:05 | 03:00 - 03:59 | Early Morning | 37,5 | 92  | 27,0  | 27,0  | 18,65 | 587,78 | 110,58 |
| 2019/05/21 | CH2206 | Male | Three y/o | Treatment (Wk 1) | Treatment | Feed Day | No | 03:05 | 03:00 - 03:59 | Early Morning | 37,4 | 88  | 16,4  | 16,4  | 18,55 | 584,49 | 93,55  |
| 2019/05/21 | CH2205 | Male | Three y/o | Treatment (Wk 1) | Treatment | Feed Day | No | 03:10 | 03:00 - 03:59 | Early Morning | 37,5 | 51  | 25,2  | 25,2  | 18,65 | 541,20 | 108,22 |
| 2019/05/21 | CH2206 | Male | Three y/o | Treatment (Wk 1) | Treatment | Feed Day | No | 03:10 | 03:00 - 03:59 | Early Morning | 37,4 | 41  | 20,0  | 20,0  | 18,55 | 522,29 | 100,31 |
| 2019/05/21 | CH2205 | Male | Three y/o | Treatment (Wk 1) | Treatment | Feed Day | No | 03:15 | 03:00 - 03:59 | Early Morning | 37,5 | 50  | 15,0  | 15,0  | 18,65 | 539,52 | 90,51  |
| 2019/05/21 | CH2206 | Male | Three y/o | Treatment (Wk 1) | Treatment | Feed Day | No | 03:15 | 03:00 - 03:59 | Early Morning | 37,3 | 46  | 15,4  | 15,4  | 18,46 | 532,38 | 91,41  |
| 2019/05/21 | CH2205 | Male | Three y/o | Treatment (Wk 1) | Treatment | Feed Day | No | 03:20 | 03:00 - 03:59 | Early Morning | 37,6 | 82  | 12,6  | 12,6  | 18,75 | 579,19 | 84,59  |
| 2019/05/21 | CH2206 | Male | Three y/o | Treatment (Wk 1) | Treatment | Feed Day | No | 03:20 | 03:00 - 03:59 | Early Morning | 37,4 | 75  | 15,0  | 15,0  | 18,55 | 572,36 | 90,51  |
| 2019/05/21 | CH2205 | Male | Three y/o | Treatment (Wk 1) | Treatment | Feed Day | No | 03:25 | 03:00 - 03:59 | Early Morning | 37,6 | 61  | 9,8   | 9,8   | 18,75 | 556,01 | 76,07  |
| 2019/05/21 | CH2206 | Male | Three y/o | Treatment (Wk 1) | Treatment | Feed Day | No | 03:25 | 03:00 - 03:59 | Early Morning | 37,3 | 88  | 14,6  | 14,6  | 18,46 | 584,49 | 89,59  |
| 2019/05/21 | CH2205 | Male | Three y/o | Treatment (Wk 1) | Treatment | Feed Day | No | 03:30 | 03:00 - 03:59 | Early Morning | 37,6 | 67  | 9,2   | 9,2   | 18,75 | 563,53 | 73,94  |
| 2019/05/21 | CH2206 | Male | Three y/o | Treatment (Wk 1) | Treatment | Feed Day | No | 03:30 | 03:00 - 03:59 | Early Morning | 37,4 | 86  | 11,2  | 11,2  | 18,55 | 582,77 | 80,59  |
| 2019/05/21 | CH2205 | Male | Three y/o | Treatment (Wk 1) | Treatment | Feed Day | No | 03:35 | 03:00 - 03:59 | Early Morning | 37,6 | 53  | 8,2   | 8,2   | 18,75 | 544,43 | 70,05  |
| 2019/05/21 | CH2206 | Male | Three y/o | Treatment (Wk 1) | Treatment | Feed Day | No | 03:35 | 03:00 - 03:59 | Early Morning | 37,4 | 47  | 8,2   | 8,2   | 18,55 | 534,23 | 70,05  |
| 2019/05/21 | CH2205 | Male | Three y/o | Treatment (Wk 1) | Treatment | Feed Day | No | 03:40 | 03:00 - 03:59 | Early Morning | 37,6 | 82  | 7,2   | 7,2   | 18,75 | 579,19 | 65,66  |
| 2019/05/21 | CH2206 | Male | Three y/o | Treatment (Wk 1) | Treatment | Feed Day | No | 03:40 | 03:00 - 03:59 | Early Morning | 37,4 | 55  | 4,2   | 4,2   | 18,55 | 547,52 | 47,57  |
| 2019/05/21 | CH2205 | Male | Three y/o | Treatment (Wk 1) | Treatment | Feed Day | No | 03:45 | 03:00 - 03:59 | Early Morning | 37,6 | 46  | 11,0  | 11,0  | 18,75 | 532,38 | 79,98  |
| 2019/05/21 | CH2206 | Male | Three y/o | Treatment (Wk 1) | Treatment | Feed Day | No | 03:45 | 03:00 - 03:59 | Early Morning | 37,4 | 60  | 5,4   | 5,4   | 18,55 | 554,67 | 55,99  |
| 2019/05/21 | CH2205 | Male | Three y/o | Treatment (Wk 1) | Treatment | Feed Day | No | 03:50 | 03:00 - 03:59 | Early Morning | 37,6 | 54  | 17,2  | 17,2  | 18,75 | 545,99 | 95,17  |
| 2019/05/21 | CH2206 | Male | Three y/o | Treatment (Wk 1) | Treatment | Feed Day | No | 03:50 | 03:00 - 03:59 | Early Morning | 37,4 | 97  | 146,8 | 146,8 | 18,55 | 591,66 | 169,26 |
| 2019/05/21 | CH2205 | Male | Three y/o | Treatment (Wk 1) | Treatment | Feed Day | No | 03:55 | 03:00 - 03:59 | Early Morning | 37,6 | 88  | 34,6  | 34,6  | 18,75 | 584,49 | 119,10 |
| 2019/05/21 | CH2206 | Male | Three y/o | Treatment (Wk 1) | Treatment | Feed Day | No | 03:55 | 03:00 - 03:59 | Early Morning | 37,4 | 123 | 226,6 | 226,6 | 18,55 | 608,49 | 184,52 |
| 2019/05/21 | CH2205 | Male | Three y/o | Treatment (Wk 1) | Treatment | Feed Day | No | 04:00 | 04:00 - 04:59 | Morning       | 37,5 | 120 | 67,0  | 67,0  | 18,65 | 606,78 | 141,92 |
| 2019/05/21 | CH2206 | Male | Three y/o | Treatment (Wk 1) | Treatment | Feed Day | No | 04:00 | 04:00 - 04:59 | Morning       | 37,4 | 114 | 154,4 | 154,4 | 18,55 | 603,20 | 171,03 |
| 2019/05/21 | CH2205 | Male | Three y/o | Treatment (Wk 1) | Treatment | Feed Day | No | 04:05 | 04:00 - 04:59 | Morning       | 37,5 | 131 | 49,8  | 49,8  | 18,65 | 612,80 | 131,65 |
| 2019/05/21 | CH2206 | Male | Three y/o | Treatment (Wk 1) | Treatment | Feed Day | No | 04:05 | 04:00 - 04:59 | Morning       | 37,4 | 138 | 59,8  | 59,8  | 18,55 | 616,31 | 137,98 |
| 2019/05/21 | CH2205 | Male | Three y/o | Treatment (Wk 1) | Treatment | Feed Day | No | 04:10 | 04:00 - 04:59 | Morning       | 37,4 | 111 | 76,4  | 76,4  | 18,55 | 601,33 | 146,48 |
| 2019/05/21 | CH2206 | Male | Three y/o | Treatment (Wk 1) | Treatment | Feed Day | No | 04:10 | 04:00 - 04:59 | Morning       | 37,4 | 125 | 60,2  | 60,2  | 18,55 | 609,60 | 138,21 |
| 2019/05/21 | CH2205 | Male | Three y/o | Treatment (Wk 1) | Treatment | Feed Day | No | 04:15 | 04:00 - 04:59 | Morning       | 37,5 | 79  | 208,8 | 208,8 | 18,65 | 576,36 | 181,63 |
| 2019/05/21 | CH2206 | Male | Three y/o | Treatment (Wk 1) | Treatment | Feed Day | No | 04:15 | 04:00 - 04:59 | Morning       | 37,3 | 131 | 229,4 | 229,4 | 18,46 | 612,80 | 184,95 |
| 2019/05/21 | CH2205 | Male | Three y/o | Treatment (Wk 1) | Treatment | Feed Day | No | 04:20 | 04:00 - 04:59 | Morning       | 37,5 | 56  | 167,0 | 167,0 | 18,65 | 549,01 | 173,78 |
| 2019/05/21 | CH2206 | Male | Three y/o | Treatment (Wk 1) | Treatment | Feed Day | No | 04:20 | 04:00 - 04:59 | Morning       | 37,4 | 145 | 103,4 | 103,4 | 18,55 | 619,62 | 157,01 |
| 2019/05/21 | CH2205 | Male | Three y/o | Treatment (Wk 1) | Treatment | Feed Day | No | 04:25 | 04:00 - 04:59 | Morning       | 37,5 | 128 | 82,4  | 82,4  | 18,65 | 611,22 | 149,10 |
| 2019/05/21 | CH2206 | Male | Three y/o | Treatment (Wk 1) | Treatment | Feed Day | No | 04:25 | 04:00 - 04:59 | Morning       | 37,5 | 135 | 116,8 | 116,8 | 18,65 | 614,84 | 161,26 |
| 2019/05/21 | CH2205 | Male | Three y/o | Treatment (Wk 1) | Treatment | Feed Day | No | 04:30 | 04:00 - 04:59 | Morning       | 37,5 | 84  | 147,8 | 147,8 | 18,65 | 581,01 | 169,50 |
| 2019/05/21 | CH2206 | Male | Three y/o | Treatment (Wk 1) | Treatment | Feed Day | No | 04:30 | 04:00 - 04:59 | Morning       | 37,6 | 114 | 224,8 | 224,8 | 18,75 | 603,20 | 184,23 |
| 2019/05/21 | CH2205 | Male | Three y/o | Treatment (Wk 1) | Treatment | Feed Day | No | 04:35 | 04:00 - 04:59 | Morning       | 37,6 |     | 62,6  | 62,6  | 18,75 |        | 139,56 |



|            |        |      |           |                  |           |          |    |       |               |         |      |     |       |       |       |        |        |
|------------|--------|------|-----------|------------------|-----------|----------|----|-------|---------------|---------|------|-----|-------|-------|-------|--------|--------|
| 2019/05/21 | CH2206 | Male | Three y/o | Treatment (Wk 1) | Treatment | Feed Day | No | 04:35 | 04:00 - 04:59 | Morning | 37,7 | 106 | 61,0  | 61,0  | 18,85 | 598,06 | 138,67 |
| 2019/05/21 | CH2205 | Male | Three y/o | Treatment (Wk 1) | Treatment | Feed Day | No | 04:40 | 04:00 - 04:59 | Morning | 37,6 | 60  | 200,6 | 200,6 | 18,75 | 554,67 | 180,22 |
| 2019/05/21 | CH2206 | Male | Three y/o | Treatment (Wk 1) | Treatment | Feed Day | No | 04:40 | 04:00 - 04:59 | Morning | 37,7 | 110 | 347,0 | 347,0 | 18,85 | 600,69 | 199,57 |
| 2019/05/21 | CH2205 | Male | Three y/o | Treatment (Wk 1) | Treatment | Feed Day | No | 04:45 | 04:00 - 04:59 | Morning | 37,7 |     | 72,0  | 72,0  | 18,85 |        | 144,42 |
| 2019/05/21 | CH2206 | Male | Three y/o | Treatment (Wk 1) | Treatment | Feed Day | No | 04:45 | 04:00 - 04:59 | Morning | 37,7 |     | 98,2  | 98,2  | 18,85 |        | 155,21 |
| 2019/05/21 | CH2205 | Male | Three y/o | Treatment (Wk 1) | Treatment | Feed Day | No | 04:50 | 04:00 - 04:59 | Morning | 37,7 | 141 | 211,6 | 211,6 | 18,85 | 617,75 | 182,10 |
| 2019/05/21 | CH2206 | Male | Three y/o | Treatment (Wk 1) | Treatment | Feed Day | No | 04:50 | 04:00 - 04:59 | Morning | 37,7 | 128 | 174,2 | 174,2 | 18,85 | 611,22 | 175,26 |
| 2019/05/21 | CH2205 | Male | Three y/o | Treatment (Wk 1) | Treatment | Feed Day | No | 04:55 | 04:00 - 04:59 | Morning | 37,7 | 104 | 94,8  | 94,8  | 18,85 | 596,69 | 153,98 |
| 2019/05/21 | CH2206 | Male | Three y/o | Treatment (Wk 1) | Treatment | Feed Day | No | 04:55 | 04:00 - 04:59 | Morning | 37,7 | 131 | 219,0 | 219,0 | 18,85 | 612,80 | 183,31 |
| 2019/05/21 | CH2205 | Male | Three y/o | Treatment (Wk 1) | Treatment | Feed Day | No | 05:00 | 05:00 - 05:59 | Morning | 37,7 | 111 | 25,0  | 25,0  | 18,85 | 601,33 | 107,94 |
| 2019/05/21 | CH2206 | Male | Three y/o | Treatment (Wk 1) | Treatment | Feed Day | No | 05:00 | 05:00 - 05:59 | Morning | 37,7 | 119 | 9,0   | 9,0   | 18,85 | 606,20 | 73,19  |
| 2019/05/21 | CH2205 | Male | Three y/o | Treatment (Wk 1) | Treatment | Feed Day | No | 05:05 | 05:00 - 05:59 | Morning | 37,6 | 35  | 64,4  | 64,4  | 18,75 | 507,97 | 140,55 |
| 2019/05/21 | CH2206 | Male | Three y/o | Treatment (Wk 1) | Treatment | Feed Day | No | 05:05 | 05:00 - 05:59 | Morning | 37,7 | 131 | 339,2 | 339,2 | 18,85 | 612,80 | 198,77 |
| 2019/05/21 | CH2205 | Male | Three y/o | Treatment (Wk 1) | Treatment | Feed Day | No | 05:10 | 05:00 - 05:59 | Morning | 37,5 | 96  | 141,4 | 141,4 | 18,65 | 590,91 | 167,95 |
| 2019/05/21 | CH2206 | Male | Three y/o | Treatment (Wk 1) | Treatment | Feed Day | No | 05:10 | 05:00 - 05:59 | Morning | 37,7 |     | 182,6 | 182,6 | 18,85 |        | 176,92 |
| 2019/05/21 | CH2205 | Male | Three y/o | Treatment (Wk 1) | Treatment | Feed Day | No | 05:15 | 05:00 - 05:59 | Morning | 37,6 | 94  | 27,8  | 27,8  | 18,75 | 589,37 | 111,58 |
| 2019/05/21 | CH2206 | Male | Three y/o | Treatment (Wk 1) | Treatment | Feed Day | No | 05:15 | 05:00 - 05:59 | Morning | 37,7 | 124 | 60,8  | 60,8  | 18,85 | 609,04 | 138,55 |
| 2019/05/21 | CH2205 | Male | Three y/o | Treatment (Wk 1) | Treatment | Feed Day | No | 05:20 | 05:00 - 05:59 | Morning | 37,5 | 51  | 210,0 | 210,0 | 18,65 | 541,20 | 181,84 |
| 2019/05/21 | CH2206 | Male | Three y/o | Treatment (Wk 1) | Treatment | Feed Day | No | 05:20 | 05:00 - 05:59 | Morning | 37,8 | 126 | 57,4  | 57,4  | 18,95 | 610,14 | 136,56 |
| 2019/05/21 | CH2205 | Male | Three y/o | Treatment (Wk 1) | Treatment | Feed Day | No | 05:25 | 05:00 - 05:59 | Morning | 37,6 | 138 | 326,4 | 326,4 | 18,75 | 616,31 | 197,41 |
| 2019/05/21 | CH2206 | Male | Three y/o | Treatment (Wk 1) | Treatment | Feed Day | No | 05:25 | 05:00 - 05:59 | Morning | 37,8 | 174 | 30,0  | 30,0  | 18,95 | 631,46 | 114,20 |
| 2019/05/21 | CH2205 | Male | Three y/o | Treatment (Wk 1) | Treatment | Feed Day | No | 05:30 | 05:00 - 05:59 | Morning | 37,6 | 124 | 69,2  | 69,2  | 18,75 | 609,04 | 143,04 |
| 2019/05/21 | CH2206 | Male | Three y/o | Treatment (Wk 1) | Treatment | Feed Day | No | 05:30 | 05:00 - 05:59 | Morning | 37,9 | 141 | 143,2 | 143,2 | 19,05 | 617,75 | 168,39 |
| 2019/05/21 | CH2205 | Male | Three y/o | Treatment (Wk 1) | Treatment | Feed Day | No | 05:35 | 05:00 - 05:59 | Morning | 37,4 | 74  | 10,2  | 10,2  | 18,55 | 571,33 | 77,43  |
| 2019/05/21 | CH2206 | Male | Three y/o | Treatment (Wk 1) | Treatment | Feed Day | No | 05:35 | 05:00 - 05:59 | Morning | 37,8 | 107 | 25,0  | 25,0  | 18,95 | 598,73 | 107,94 |
| 2019/05/21 | CH2205 | Male | Three y/o | Treatment (Wk 1) | Treatment | Feed Day | No | 05:40 | 05:00 - 05:59 | Morning | 37,4 |     | 25,6  | 25,6  | 18,55 |        | 108,76 |
| 2019/05/21 | CH2206 | Male | Three y/o | Treatment (Wk 1) | Treatment | Feed Day | No | 05:40 | 05:00 - 05:59 | Morning | 37,4 | 103 | 70,4  | 70,4  | 18,55 | 596,00 | 143,64 |
| 2019/05/21 | CH2205 | Male | Three y/o | Treatment (Wk 1) | Treatment | Feed Day | No | 05:45 | 05:00 - 05:59 | Morning | 37,4 |     | 36,0  | 36,0  | 18,55 |        | 120,46 |
| 2019/05/21 | CH2206 | Male | Three y/o | Treatment (Wk 1) | Treatment | Feed Day | No | 05:45 | 05:00 - 05:59 | Morning | 37,4 | 98  | 125,6 | 125,6 | 18,55 | 592,41 | 163,80 |
| 2019/05/21 | CH2205 | Male | Three y/o | Treatment (Wk 1) | Treatment | Feed Day | No | 05:50 | 05:00 - 05:59 | Morning | 37,5 | 152 | 248,0 | 248,0 | 18,65 | 622,73 | 187,70 |
| 2019/05/21 | CH2206 | Male | Three y/o | Treatment (Wk 1) | Treatment | Feed Day | No | 05:50 | 05:00 - 05:59 | Morning | 37,6 | 128 | 148,8 | 148,8 | 18,75 | 611,22 | 169,74 |
| 2019/05/21 | CH2205 | Male | Three y/o | Treatment (Wk 1) | Treatment | Feed Day | No | 05:55 | 05:00 - 05:59 | Morning | 37,7 | 60  | 87,2  | 87,2  | 18,85 | 554,67 | 151,07 |
| 2019/05/21 | CH2206 | Male | Three y/o | Treatment (Wk 1) | Treatment | Feed Day | No | 05:55 | 05:00 - 05:59 | Morning | 37,7 | 124 | 314,6 | 314,6 | 18,85 | 609,04 | 196,10 |
| 2019/05/21 | CH2205 | Male | Three y/o | Treatment (Wk 1) | Treatment | Feed Day | No | 06:00 | 06:00 - 06:59 | Morning | 37,6 | 111 | 101,8 | 101,8 | 18,75 | 601,33 | 156,47 |
| 2019/05/21 | CH2206 | Male | Three y/o | Treatment (Wk 1) | Treatment | Feed Day | No | 06:00 | 06:00 - 06:59 | Morning | 37,7 | 115 | 89,0  | 89,0  | 18,85 | 603,82 | 151,78 |
| 2019/05/21 | CH2205 | Male | Three y/o | Treatment (Wk 1) | Treatment | Feed Day | No | 06:05 | 06:00 - 06:59 | Morning | 37,6 | 53  | 90,8  | 90,8  | 18,75 | 544,43 | 152,48 |
| 2019/05/21 | CH2206 | Male | Three y/o | Treatment (Wk 1) | Treatment | Feed Day | No | 06:05 | 06:00 - 06:59 | Morning | 37,4 | 118 | 124,0 | 124,0 | 18,55 | 605,61 | 163,35 |
| 2019/05/21 | CH2205 | Male | Three y/o | Treatment (Wk 1) | Treatment | Feed Day | No | 06:10 | 06:00 - 06:59 | Morning | 37,5 | 56  | 243,6 | 243,6 | 18,65 | 549,01 | 187,07 |
| 2019/05/21 | CH2206 | Male | Three y/o | Treatment (Wk 1) | Treatment | Feed Day | No | 06:10 | 06:00 - 06:59 | Morning | 37,5 | 118 | 75,0  | 75,0  | 18,65 | 605,61 | 145,83 |
| 2019/05/21 | CH2205 | Male | Three y/o | Treatment (Wk 1) | Treatment | Feed Day | No | 06:15 | 06:00 - 06:59 | Morning | 37,5 | 71  | 43,4  | 43,4  | 18,65 | 568,10 | 126,90 |
| 2019/05/21 | CH2206 | Male | Three y/o | Treatment (Wk 1) | Treatment | Feed Day | No | 06:15 | 06:00 - 06:59 | Morning | 37,5 |     | 151,8 | 151,8 | 18,65 |        | 170,44 |
| 2019/05/21 | CH2205 | Male | Three y/o | Treatment (Wk 1) | Treatment | Feed Day | No | 06:20 | 06:00 - 06:59 | Morning | 37,5 | 115 | 110,6 | 110,6 | 18,65 | 603,82 | 159,36 |
| 2019/05/21 | CH2206 | Male | Three y/o | Treatment (Wk 1) | Treatment | Feed Day | No | 06:20 | 06:00 - 06:59 | Morning | 37,6 | 140 | 61,6  | 61,6  | 18,75 | 617,28 | 139,00 |
| 2019/05/21 | CH2205 | Male | Three y/o | Treatment (Wk 1) | Treatment | Feed Day | No | 06:25 | 06:00 - 06:59 | Morning | 37,6 | 106 | 106,2 | 106,2 | 18,75 | 598,06 | 157,94 |
| 2019/05/21 | CH2206 | Male | Three y/o | Treatment (Wk 1) | Treatment | Feed Day | No | 06:25 | 06:00 - 06:59 | Morning | 37,7 | 54  | 215,2 | 215,2 | 18,85 | 545,99 | 182,70 |
| 2019/05/21 | CH2205 | Male | Three y/o | Treatment (Wk 1) | Treatment | Feed Day | No | 06:30 | 06:00 - 06:59 | Morning | 37,5 | 103 | 137,6 | 137,6 | 18,65 | 596,00 | 166,99 |
| 2019/05/21 | CH2206 | Male | Three y/o | Treatment (Wk 1) | Treatment | Feed Day | No | 06:30 | 06:00 - 06:59 | Morning | 37,7 | 121 | 80,0  | 80,0  | 18,85 | 607,35 | 148,08 |
| 2019/05/21 | CH2205 | Male | Three y/o | Treatment (Wk 1) | Treatment | Feed Day | No | 06:35 | 06:00 - 06:59 | Morning | 37,5 | 52  | 44,6  | 44,6  | 18,65 | 542,83 | 127,84 |
| 2019/05/21 | CH2206 | Male | Three y/o | Treatment (Wk 1) | Treatment | Feed Day | No | 06:35 | 06:00 - 06:59 | Morning | 37,7 | 108 | 289,2 | 289,2 | 18,85 | 599,39 | 193,12 |
| 2019/05/21 | CH2205 | Male | Three y/o | Treatment (Wk 1) | Treatment | Feed Day | No | 06:40 | 06:00 - 06:59 | Morning | 37,4 |     | 30,6  | 30,6  | 18,55 |        | 114,87 |
| 2019/05/21 | CH2206 | Male | Three y/o | Treatment (Wk 1) | Treatment | Feed Day | No | 06:40 | 06:00 - 06:59 | Morning | 37,7 | 113 | 94,6  | 94,6  | 18,85 | 602,58 | 153,91 |
| 2019/05/21 | CH2205 | Male | Three y/o | Treatment (Wk 1) | Treatment | Feed Day | No | 06:45 | 06:00 - 06:59 | Morning | 37,1 | 124 | 27,0  | 27,0  | 18,26 | 609,04 | 110,58 |
| 2019/05/21 | CH2206 | Male | Three y/o | Treatment (Wk 1) | Treatment | Feed Day | No | 06:45 | 06:00 - 06:59 | Morning | 37,7 | 111 | 388,6 | 388,6 | 18,85 | 601,33 | 203,59 |
| 2019/05/21 | CH2205 | Male | Three y/o | Treatment (Wk 1) | Treatment | Feed Day | No | 06:50 | 06:00 - 06:59 | Morning | 37,0 |     | 25,6  | 25,6  | 18,16 |        | 108,76 |
| 2019/05/21 | CH2206 | Male | Three y/o | Treatment (Wk 1) | Treatment | Feed Day | No | 06:50 | 06:00 - 06:59 | Morning | 37,7 | 117 | 93,2  | 93,2  | 18,85 | 605,02 | 153,39 |
| 2019/05/21 | CH2205 | Male | Three y/o | Treatment (Wk 1) | Treatment | Feed Day | No | 06:55 | 06:00 - 06:59 | Morning | 37,1 | 61  | 27,2  | 27,2  | 18,26 | 556,01 | 110,83 |
| 2019/05/21 | CH2206 | Male | Three y/o | Treatment (Wk 1) | Treatment | Feed Day | No | 06:55 | 06:00 - 06:59 | Morning | 37,7 | 126 | 201,4 | 201,4 | 18,85 | 610,14 | 180,36 |
| 2019/05/21 | CH2205 | Male | Three y/o | Treatment (Wk 1) | Treatment | Feed Day | No | 07:00 | 07:00 - 07:59 | Morning | 37,3 | 54  | 24,4  | 24,4  | 18,46 | 545,99 | 107,11 |
| 2019/05/21 | CH2206 | Male | Three y/o | Treatment (Wk 1) | Treatment | Feed Day | No | 07:00 | 07:00 - 07:59 | Morning | 37,7 | 108 | 100,0 | 100,0 | 18,85 | 599,39 | 155,84 |
| 2019/05/21 | CH2205 | Male | Three y/o | Treatment (Wk 1) | Treatment | Feed Day | No | 07:05 | 07:00 - 07:59 | Morning | 37,2 |     | 20,2  | 20,2  | 18,36 |        | 100,65 |
| 2019/05/21 | CH2206 | Male | Three y/o | Treatment (Wk 1) | Treatment | Feed Day | No | 07:05 | 07:00 - 07:59 | Morning | 37,7 |     | 170,6 | 170,6 | 18,85 |        | 174,53 |
| 2019/05/21 | CH2205 | Male | Three y/o | Treatment (Wk 1) | Treatment | Feed Day | No | 07:10 | 07:00 - 07:59 | Morning | 37,2 |     | 77,6  | 77,6  | 18,36 |        | 147,02 |
| 2019/05/21 | CH2206 | Male | Three y/o | Treatment (Wk 1) | Treatment | Feed Day | No | 07:10 | 07:00 - 07:59 | Morning | 37,7 | 131 | 102,8 | 102,8 | 18,85 | 612,80 | 156,81 |
| 2019/05/21 | CH2205 | Male | Three y/o | Treatment (Wk 1) | Treatment | Feed Day | No | 07:15 | 07:00 - 07:59 | Morning | 37,3 | 102 | 37,8  | 37,8  | 18,46 | 595,30 | 122,14 |
| 2019/05/21 | CH2206 | Male | Three y/o | Treatment (Wk 1) | Treatment | Feed Day | No | 07:15 | 07:00 - 07:59 | Morning | 37,7 | 134 | 90,0  | 90,0  | 18,85 | 614,33 | 152,17 |
| 2019/05/21 | CH2205 | Male | Three y/o | Treatment (Wk 1) | Treatment | Feed Day | No | 07:20 | 07:00 - 07:59 | Morning | 37,3 | 52  | 92,8  | 92,8  | 18,46 | 542,83 | 153,24 |
| 2019/05/21 | CH2206 | Male | Three y/o | Treatment (Wk 1) | Treatment | Feed Day | No | 07:20 | 07:00 - 07:59 | Morning | 37,7 | 112 | 142,2 | 142,2 | 18,85 | 601,96 | 168,15 |
| 2019/05/21 | CH2205 | Male | Three y/o | Treatment (Wk 1) | Treatment | Feed Day | No | 07:25 | 07:00 - 07:59 | Morning | 37,3 | 98  | 148,8 | 148,8 | 18,46 | 592,41 | 169,74 |
| 2019/05/21 | CH2206 | Male | Three y/o | Treatment (Wk 1) | Treatment | Feed Day | No | 07:25 | 07:00 - 07:59 | Morning | 37,7 | 121 | 25,8  | 25,8  | 18,85 | 607,35 | 109,02 |
| 2019/05/21 | CH2205 | Male | Three y/o | Treatment (Wk 1) | Treatment | Feed Day | No | 07:30 | 07:00 - 07:59 | Morning | 37,4 | 83  | 157,6 | 157,6 | 18,55 | 580,11 | 171,75 |



|            |        |      |           |                  |           |          |    |       |               |              |      |     |       |       |       |        |        |
|------------|--------|------|-----------|------------------|-----------|----------|----|-------|---------------|--------------|------|-----|-------|-------|-------|--------|--------|
| 2019/05/21 | CH2206 | Male | Three y/o | Treatment (Wk 1) | Treatment | Feed Day | No | 07:30 | 07:00 - 07:59 | Morning      | 37,7 | 106 | 120,2 | 120,2 | 18,85 | 598,06 | 162,27 |
| 2019/05/21 | CH2205 | Male | Three y/o | Treatment (Wk 1) | Treatment | Feed Day | No | 07:35 | 07:00 - 07:59 | Morning      | 37,5 | 169 | 108,8 | 108,8 | 18,65 | 629,60 | 158,79 |
| 2019/05/21 | CH2206 | Male | Three y/o | Treatment (Wk 1) | Treatment | Feed Day | No | 07:35 | 07:00 - 07:59 | Morning      | 37,7 | 124 | 801,8 | 801,8 | 18,85 | 609,04 | 229,41 |
| 2019/05/21 | CH2205 | Male | Three y/o | Treatment (Wk 1) | Treatment | Feed Day | No | 07:40 | 07:00 - 07:59 | Morning      | 37,9 | 152 | 63,2  | 63,2  | 19,05 | 622,73 | 139,89 |
| 2019/05/21 | CH2206 | Male | Three y/o | Treatment (Wk 1) | Treatment | Feed Day | No | 07:40 | 07:00 - 07:59 | Morning      | 37,8 | 140 | 231,8 | 231,8 | 18,95 | 617,28 | 185,31 |
| 2019/05/21 | CH2205 | Male | Three y/o | Treatment (Wk 1) | Treatment | Feed Day | No | 07:45 | 07:00 - 07:59 | Morning      | 37,7 | 75  | 73,4  | 73,4  | 18,85 | 572,36 | 145,08 |
| 2019/05/21 | CH2206 | Male | Three y/o | Treatment (Wk 1) | Treatment | Feed Day | No | 07:45 | 07:00 - 07:59 | Morning      | 37,8 | 102 | 94,6  | 94,6  | 18,95 | 595,30 | 153,91 |
| 2019/05/21 | CH2205 | Male | Three y/o | Treatment (Wk 1) | Treatment | Feed Day | No | 07:50 | 07:00 - 07:59 | Morning      | 37,6 |     | 60,8  | 60,8  | 18,75 |        | 138,55 |
| 2019/05/21 | CH2206 | Male | Three y/o | Treatment (Wk 1) | Treatment | Feed Day | No | 07:50 | 07:00 - 07:59 | Morning      | 37,8 | 105 | 108,4 | 108,4 | 18,95 | 597,38 | 158,66 |
| 2019/05/21 | CH2205 | Male | Three y/o | Treatment (Wk 1) | Treatment | Feed Day | No | 07:55 | 07:00 - 07:59 | Morning      | 37,7 | 91  | 106,0 | 106,0 | 18,85 | 586,98 | 157,88 |
| 2019/05/21 | CH2206 | Male | Three y/o | Treatment (Wk 1) | Treatment | Feed Day | No | 07:55 | 07:00 - 07:59 | Morning      | 37,8 | 58  | 145,6 | 145,6 | 18,95 | 551,90 | 168,97 |
| 2019/05/21 | CH2205 | Male | Three y/o | Treatment (Wk 1) | Treatment | Feed Day | No | 08:00 | 08:00 - 08:59 | Late Morning | 37,6 | 147 | 78,2  | 78,2  | 18,75 | 620,52 | 147,28 |
| 2019/05/21 | CH2206 | Male | Three y/o | Treatment (Wk 1) | Treatment | Feed Day | No | 08:00 | 08:00 - 08:59 | Late Morning | 37,7 | 54  | 246,8 | 246,8 | 18,85 | 545,99 | 187,53 |
| 2019/05/21 | CH2205 | Male | Three y/o | Treatment (Wk 1) | Treatment | Feed Day | No | 08:05 | 08:00 - 08:59 | Late Morning | 37,5 | 84  | 111,6 | 111,6 | 18,65 | 581,01 | 159,67 |
| 2019/05/21 | CH2206 | Male | Three y/o | Treatment (Wk 1) | Treatment | Feed Day | No | 08:05 | 08:00 - 08:59 | Late Morning | 37,4 |     | 266,8 | 266,8 | 18,55 |        | 190,28 |
| 2019/05/21 | CH2205 | Male | Three y/o | Treatment (Wk 1) | Treatment | Feed Day | No | 08:10 | 08:00 - 08:59 | Late Morning | 37,5 | 99  | 200,4 | 200,4 | 18,65 | 593,14 | 180,19 |
| 2019/05/21 | CH2206 | Male | Three y/o | Treatment (Wk 1) | Treatment | Feed Day | No | 08:10 | 08:00 - 08:59 | Late Morning | 37,5 | 160 | 100,6 | 100,6 | 18,65 | 626,07 | 156,05 |
| 2019/05/21 | CH2205 | Male | Three y/o | Treatment (Wk 1) | Treatment | Feed Day | No | 08:15 | 08:00 - 08:59 | Late Morning | 37,4 | 84  | 31,4  | 31,4  | 18,55 | 581,01 | 115,76 |
| 2019/05/21 | CH2206 | Male | Three y/o | Treatment (Wk 1) | Treatment | Feed Day | No | 08:15 | 08:00 - 08:59 | Late Morning | 37,4 | 58  | 47,6  | 47,6  | 18,55 | 551,90 | 130,09 |
| 2019/05/21 | CH2205 | Male | Three y/o | Treatment (Wk 1) | Treatment | Feed Day | No | 08:20 | 08:00 - 08:59 | Late Morning | 37,0 | 185 | 30,2  | 30,2  | 18,16 | 635,34 | 114,42 |
| 2019/05/21 | CH2206 | Male | Three y/o | Treatment (Wk 1) | Treatment | Feed Day | No | 08:20 | 08:00 - 08:59 | Late Morning | 37,0 | 69  | 47,6  | 47,6  | 18,16 | 565,86 | 130,09 |
| 2019/05/21 | CH2205 | Male | Three y/o | Treatment (Wk 1) | Treatment | Feed Day | No | 08:25 | 08:00 - 08:59 | Late Morning | 36,7 |     | 34,0  | 34,0  | 17,87 |        | 118,49 |
| 2019/05/21 | CH2206 | Male | Three y/o | Treatment (Wk 1) | Treatment | Feed Day | No | 08:25 | 08:00 - 08:59 | Late Morning | 36,8 | 77  | 41,4  | 41,4  | 17,96 | 574,39 | 125,27 |
| 2019/05/21 | CH2205 | Male | Three y/o | Treatment (Wk 1) | Treatment | Feed Day | No | 08:30 | 08:00 - 08:59 | Late Morning | 36,8 | 72  | 29,8  | 29,8  | 17,96 | 569,20 | 113,97 |
| 2019/05/21 | CH2206 | Male | Three y/o | Treatment (Wk 1) | Treatment | Feed Day | No | 08:30 | 08:00 - 08:59 | Late Morning | 36,6 | 48  | 30,0  | 30,0  | 17,77 | 536,04 | 114,20 |
| 2019/05/21 | CH2205 | Male | Three y/o | Treatment (Wk 1) | Treatment | Feed Day | No | 08:35 | 08:00 - 08:59 | Late Morning | 37,0 | 64  | 29,6  | 29,6  | 18,16 | 559,88 | 113,73 |
| 2019/05/21 | CH2206 | Male | Three y/o | Treatment (Wk 1) | Treatment | Feed Day | No | 08:35 | 08:00 - 08:59 | Late Morning | 36,8 | 90  | 23,4  | 23,4  | 17,96 | 586,16 | 105,68 |
| 2019/05/21 | CH2205 | Male | Three y/o | Treatment (Wk 1) | Treatment | Feed Day | No | 08:40 | 08:00 - 08:59 | Late Morning | 37,1 |     | 35,0  | 35,0  | 18,26 |        | 119,49 |
| 2019/05/21 | CH2206 | Male | Three y/o | Treatment (Wk 1) | Treatment | Feed Day | No | 08:40 | 08:00 - 08:59 | Late Morning | 36,7 | 85  | 37,4  | 37,4  | 17,87 | 581,90 | 121,77 |
| 2019/05/21 | CH2205 | Male | Three y/o | Treatment (Wk 1) | Treatment | Feed Day | No | 08:45 | 08:00 - 08:59 | Late Morning | 37,2 | 96  | 46,8  | 46,8  | 18,36 | 590,91 | 129,50 |
| 2019/05/21 | CH2206 | Male | Three y/o | Treatment (Wk 1) | Treatment | Feed Day | No | 08:45 | 08:00 - 08:59 | Late Morning | 36,6 | 113 | 84,8  | 84,8  | 17,77 | 602,58 | 150,10 |
| 2019/05/21 | CH2205 | Male | Three y/o | Treatment (Wk 1) | Treatment | Feed Day | No | 08:50 | 08:00 - 08:59 | Late Morning | 37,2 |     | 109,2 | 109,2 | 18,36 |        | 158,91 |
| 2019/05/21 | CH2206 | Male | Three y/o | Treatment (Wk 1) | Treatment | Feed Day | No | 08:50 | 08:00 - 08:59 | Late Morning | 37,0 | 131 | 83,6  | 83,6  | 18,16 | 612,80 | 149,61 |
| 2019/05/21 | CH2205 | Male | Three y/o | Treatment (Wk 1) | Treatment | Feed Day | No | 08:55 | 08:00 - 08:59 | Late Morning | 37,4 | 101 | 175,2 | 175,2 | 18,55 | 594,59 | 175,47 |
| 2019/05/21 | CH2206 | Male | Three y/o | Treatment (Wk 1) | Treatment | Feed Day | No | 08:55 | 08:00 - 08:59 | Late Morning | 37,2 | 107 | 221,4 | 221,4 | 18,36 | 598,73 | 183,70 |
| 2019/05/21 | CH2205 | Male | Three y/o | Treatment (Wk 1) | Treatment | Feed Day | No | 09:00 | 09:00 - 09:59 | Late Morning | 37,4 | 135 | 100,4 | 100,4 | 18,55 | 614,84 | 155,98 |
| 2019/05/21 | CH2206 | Male | Three y/o | Treatment (Wk 1) | Treatment | Feed Day | No | 09:00 | 09:00 - 09:59 | Late Morning | 37,3 | 108 | 77,4  | 77,4  | 18,46 | 599,39 | 146,93 |
| 2019/05/21 | CH2205 | Male | Three y/o | Treatment (Wk 1) | Treatment | Feed Day | No | 09:05 | 09:00 - 09:59 | Late Morning | 37,4 |     | 83,0  | 83,0  | 18,55 |        | 149,36 |
| 2019/05/21 | CH2206 | Male | Three y/o | Treatment (Wk 1) | Treatment | Feed Day | No | 09:05 | 09:00 - 09:59 | Late Morning | 37,4 | 110 | 266,8 | 266,8 | 18,55 | 600,69 | 190,28 |
| 2019/05/21 | CH2205 | Male | Three y/o | Treatment (Wk 1) | Treatment | Feed Day | No | 09:10 | 09:00 - 09:59 | Late Morning | 37,5 | 57  | 79,8  | 79,8  | 18,65 | 550,47 | 147,99 |
| 2019/05/21 | CH2206 | Male | Three y/o | Treatment (Wk 1) | Treatment | Feed Day | No | 09:10 | 09:00 - 09:59 | Late Morning | 37,5 | 99  | 52,0  | 52,0  | 18,65 | 593,14 | 133,14 |
| 2019/05/21 | CH2205 | Male | Three y/o | Treatment (Wk 1) | Treatment | Feed Day | No | 09:15 | 09:00 - 09:59 | Late Morning | 37,5 |     | 164,6 | 164,6 | 18,65 |        | 173,27 |
| 2019/05/21 | CH2206 | Male | Three y/o | Treatment (Wk 1) | Treatment | Feed Day | No | 09:15 | 09:00 - 09:59 | Late Morning | 37,7 | 119 | 326,8 | 326,8 | 18,85 | 606,20 | 197,45 |
| 2019/05/21 | CH2205 | Male | Three y/o | Treatment (Wk 1) | Treatment | Feed Day | No | 09:20 | 09:00 - 09:59 | Late Morning | 37,5 | 172 | 28,2  | 28,2  | 18,65 | 630,73 | 112,07 |
| 2019/05/21 | CH2206 | Male | Three y/o | Treatment (Wk 1) | Treatment | Feed Day | No | 09:20 | 09:00 - 09:59 | Late Morning | 37,7 | 108 | 304,6 | 304,6 | 18,85 | 599,39 | 194,96 |
| 2019/05/21 | CH2205 | Male | Three y/o | Treatment (Wk 1) | Treatment | Feed Day | No | 09:25 | 09:00 - 09:59 | Late Morning | 37,6 | 185 | 14,4  | 14,4  | 18,75 | 635,34 | 89,12  |
| 2019/05/21 | CH2206 | Male | Three y/o | Treatment (Wk 1) | Treatment | Feed Day | No | 09:25 | 09:00 - 09:59 | Late Morning | 37,7 | 104 | 131,8 | 131,8 | 18,85 | 596,69 | 165,49 |
| 2019/05/21 | CH2205 | Male | Three y/o | Treatment (Wk 1) | Treatment | Feed Day | No | 09:30 | 09:00 - 09:59 | Late Morning | 37,7 | 63  | 56,2  | 56,2  | 18,85 | 558,62 | 135,83 |
| 2019/05/21 | CH2206 | Male | Three y/o | Treatment (Wk 1) | Treatment | Feed Day | No | 09:30 | 09:00 - 09:59 | Late Morning | 37,8 | 109 | 85,6  | 85,6  | 18,95 | 600,04 | 150,43 |
| 2019/05/21 | CH2205 | Male | Three y/o | Treatment (Wk 1) | Treatment | Feed Day | No | 09:35 | 09:00 - 09:59 | Late Morning | 37,5 | 65  | 24,4  | 24,4  | 18,65 | 561,12 | 107,11 |
| 2019/05/21 | CH2206 | Male | Three y/o | Treatment (Wk 1) | Treatment | Feed Day | No | 09:35 | 09:00 - 09:59 | Late Morning | 37,7 | 45  | 43,6  | 43,6  | 18,85 | 530,47 | 127,06 |
| 2019/05/21 | CH2205 | Male | Three y/o | Treatment (Wk 1) | Treatment | Feed Day | No | 09:40 | 09:00 - 09:59 | Late Morning | 37,3 |     | 24,0  | 24,0  | 18,46 |        | 106,55 |
| 2019/05/21 | CH2206 | Male | Three y/o | Treatment (Wk 1) | Treatment | Feed Day | No | 09:40 | 09:00 - 09:59 | Late Morning | 37,8 | 72  | 31,8  | 31,8  | 18,95 | 569,20 | 116,20 |
| 2019/05/21 | CH2205 | Male | Three y/o | Treatment (Wk 1) | Treatment | Feed Day | No | 09:45 | 09:00 - 09:59 | Late Morning | 37,4 | 87  | 11,6  | 11,6  | 18,55 | 583,64 | 81,78  |
| 2019/05/21 | CH2206 | Male | Three y/o | Treatment (Wk 1) | Treatment | Feed Day | No | 09:45 | 09:00 - 09:59 | Late Morning | 37,8 | 45  | 20,4  | 20,4  | 18,95 | 530,47 | 100,99 |
| 2019/05/21 | CH2205 | Male | Three y/o | Treatment (Wk 1) | Treatment | Feed Day | No | 09:50 | 09:00 - 09:59 | Late Morning | 37,4 |     | 7,4   | 7,4   | 18,55 |        | 66,59  |
| 2019/05/21 | CH2206 | Male | Three y/o | Treatment (Wk 1) | Treatment | Feed Day | No | 09:50 | 09:00 - 09:59 | Late Morning | 37,9 | 47  | 34,2  | 34,2  | 19,05 | 534,23 | 118,70 |
| 2019/05/21 | CH2205 | Male | Three y/o | Treatment (Wk 1) | Treatment | Feed Day | No | 09:55 | 09:00 - 09:59 | Late Morning | 37,5 | 49  | 5,8   | 5,8   | 18,65 | 537,80 | 58,39  |
| 2019/05/21 | CH2206 | Male | Three y/o | Treatment (Wk 1) | Treatment | Feed Day | No | 09:55 | 09:00 - 09:59 | Late Morning | 37,9 | 51  | 37,2  | 37,2  | 19,05 | 541,20 | 121,59 |
| 2019/05/21 | CH2205 | Male | Three y/o | Treatment (Wk 1) | Treatment | Feed Day | No | 10:00 | 10:00 - 10:59 | Late Morning | 37,5 | 40  | 16,4  | 16,4  | 18,65 | 520,09 | 93,55  |
| 2019/05/21 | CH2206 | Male | Three y/o | Treatment (Wk 1) | Treatment | Feed Day | No | 10:00 | 10:00 - 10:59 | Late Morning | 37,8 | 53  | 35,8  | 35,8  | 18,95 | 544,43 | 120,27 |
| 2019/05/21 | CH2205 | Male | Three y/o | Treatment (Wk 1) | Treatment | Feed Day | No | 10:05 | 10:00 - 10:59 | Late Morning | 37,6 |     | 20,8  | 20,8  | 18,75 |        | 101,65 |
| 2019/05/21 | CH2206 | Male | Three y/o | Treatment (Wk 1) | Treatment | Feed Day | No | 10:05 | 10:00 - 10:59 | Late Morning | 37,8 | 48  | 37,0  | 37,0  | 18,95 | 536,04 | 121,40 |
| 2019/05/21 | CH2205 | Male | Three y/o | Treatment (Wk 1) | Treatment | Feed Day | No | 10:10 | 10:00 - 10:59 | Late Morning | 37,6 | 82  | 6,6   | 6,6   | 18,75 | 579,19 | 62,73  |
| 2019/05/21 | CH2206 | Male | Three y/o | Treatment (Wk 1) | Treatment | Feed Day | No | 10:10 | 10:00 - 10:59 | Late Morning | 37,8 | 49  | 27,2  | 27,2  | 18,95 | 537,80 | 110,83 |
| 2019/05/21 | CH2205 | Male | Three y/o | Treatment (Wk 1) | Treatment | Feed Day | No | 10:15 | 10:00 - 10:59 | Late Morning | 37,6 | 73  | 12,4  | 12,4  | 18,75 | 570,27 | 84,04  |
| 2019/05/21 | CH2206 | Male | Three y/o | Treatment (Wk 1) | Treatment | Feed Day | No | 10:15 | 10:00 - 10:59 | Late Morning | 37,8 | 50  | 35,2  | 35,2  | 18,95 | 539,52 | 119,69 |
| 2019/05/21 | CH2205 | Male | Three y/o | Treatment (Wk 1) | Treatment | Feed Day | No | 10:20 | 10:00 - 10:59 | Late Morning | 37,5 | 49  | 30,0  | 30,0  | 18,65 | 537,80 | 114,20 |
| 2019/05/21 | CH2206 | Male | Three y/o | Treatment (Wk 1) | Treatment | Feed Day | No | 10:20 | 10:00 - 10:59 | Late Morning | 37,8 | 48  | 34,4  | 34,4  | 18,95 | 536,04 | 118,90 |
| 2019/05/21 | CH2205 | Male | Three y/o | Treatment (Wk 1) | Treatment | Feed Day | No | 10:25 | 10:00 - 10:59 | Late Morning | 37,6 | 64  | 8,6   | 8,6   | 18,75 | 559,88 | 71,66  |



|            |        |      |           |                  |           |          |     |       |               |              |      |     |       |       |       |        |        |
|------------|--------|------|-----------|------------------|-----------|----------|-----|-------|---------------|--------------|------|-----|-------|-------|-------|--------|--------|
| 2019/05/21 | CH2206 | Male | Three y/o | Treatment (Wk 1) | Treatment | Feed Day | No  | 10:25 | 10:00 - 10:59 | Late Morning | 37,7 | 57  | 35,8  | 35,8  | 18,85 | 550,47 | 120,27 |
| 2019/05/21 | CH2205 | Male | Three y/o | Treatment (Wk 1) | Treatment | Feed Day | Yes | 10:30 | 10:00 - 10:59 | Late Morning | 37,6 | 69  | 20,0  | 20,0  | 18,75 | 565,86 | 100,31 |
| 2019/05/21 | CH2206 | Male | Three y/o | Treatment (Wk 1) | Treatment | Feed Day | Yes | 10:30 | 10:00 - 10:59 | Late Morning | 37,7 | 77  | 45,8  | 45,8  | 18,85 | 574,39 | 128,76 |
| 2019/05/21 | CH2205 | Male | Three y/o | Treatment (Wk 1) | Treatment | Feed Day | Yes | 10:35 | 10:00 - 10:59 | Late Morning | 37,6 | 68  | 12,4  | 12,4  | 18,75 | 564,71 | 84,04  |
| 2019/05/21 | CH2206 | Male | Three y/o | Treatment (Wk 1) | Treatment | Feed Day | Yes | 10:35 | 10:00 - 10:59 | Late Morning | 37,7 | 47  | 33,8  | 33,8  | 18,85 | 534,23 | 118,29 |
| 2019/05/21 | CH2205 | Male | Three y/o | Treatment (Wk 1) | Treatment | Feed Day | Yes | 10:40 | 10:00 - 10:59 | Late Morning | 37,6 | 61  | 7,4   | 7,4   | 18,75 | 556,01 | 66,59  |
| 2019/05/21 | CH2206 | Male | Three y/o | Treatment (Wk 1) | Treatment | Feed Day | Yes | 10:40 | 10:00 - 10:59 | Late Morning | 37,7 | 46  | 37,6  | 37,6  | 18,85 | 532,38 | 121,96 |
| 2019/05/21 | CH2205 | Male | Three y/o | Treatment (Wk 1) | Treatment | Feed Day | Yes | 10:45 | 10:00 - 10:59 | Late Morning | 37,5 | 51  | 54,4  | 54,4  | 18,65 | 541,20 | 134,70 |
| 2019/05/21 | CH2206 | Male | Three y/o | Treatment (Wk 1) | Treatment | Feed Day | Yes | 10:45 | 10:00 - 10:59 | Late Morning | 37,7 | 53  | 58,4  | 58,4  | 18,85 | 544,43 | 137,16 |
| 2019/05/21 | CH2205 | Male | Three y/o | Treatment (Wk 1) | Treatment | Feed Day | Yes | 10:50 | 10:00 - 10:59 | Late Morning | 37,5 | 156 | 157,8 | 157,8 | 18,65 | 624,43 | 171,79 |
| 2019/05/21 | CH2206 | Male | Three y/o | Treatment (Wk 1) | Treatment | Feed Day | Yes | 10:50 | 10:00 - 10:59 | Late Morning | 37,5 | 98  | 183,6 | 183,6 | 18,65 | 592,41 | 177,11 |
| 2019/05/21 | CH2205 | Male | Three y/o | Treatment (Wk 1) | Treatment | Feed Day | Yes | 10:55 | 10:00 - 10:59 | Late Morning | 37,5 |     | 103,6 | 103,6 | 18,65 |        | 157,08 |
| 2019/05/21 | CH2206 | Male | Three y/o | Treatment (Wk 1) | Treatment | Feed Day | Yes | 10:55 | 10:00 - 10:59 | Late Morning | 37,5 | 101 | 149,2 | 149,2 | 18,65 | 594,59 | 169,83 |
| 2019/05/21 | CH2205 | Male | Three y/o | Treatment (Wk 1) | Treatment | Feed Day | Yes | 11:00 | 11:00 - 11:59 | Late Morning | 37,5 | 104 | 90,2  | 90,2  | 18,65 | 596,69 | 152,25 |
| 2019/05/21 | CH2206 | Male | Three y/o | Treatment (Wk 1) | Treatment | Feed Day | Yes | 11:00 | 11:00 - 11:59 | Late Morning | 37,5 |     | 49,2  | 49,2  | 18,65 |        | 131,23 |
| 2019/05/21 | CH2205 | Male | Three y/o | Treatment (Wk 1) | Treatment | Feed Day | Yes | 11:05 | 11:00 - 11:59 | Late Morning | 37,6 | 103 | 71,8  | 71,8  | 18,75 | 596,00 | 144,32 |
| 2019/05/21 | CH2206 | Male | Three y/o | Treatment (Wk 1) | Treatment | Feed Day | Yes | 11:05 | 11:00 - 11:59 | Late Morning | 37,6 |     | 191,6 | 191,6 | 18,75 |        | 178,61 |
| 2019/05/21 | CH2205 | Male | Three y/o | Treatment (Wk 1) | Treatment | Feed Day | Yes | 11:10 | 11:00 - 11:59 | Late Morning | 37,7 |     | 309,2 | 309,2 | 18,85 |        | 195,49 |
| 2019/05/21 | CH2206 | Male | Three y/o | Treatment (Wk 1) | Treatment | Feed Day | Yes | 11:10 | 11:00 - 11:59 | Late Morning | 37,7 | 107 | 90,6  | 90,6  | 18,85 | 598,73 | 152,40 |
| 2019/05/21 | CH2205 | Male | Three y/o | Treatment (Wk 1) | Treatment | Feed Day | Yes | 11:15 | 11:00 - 11:59 | Late Morning | 37,7 | 57  | 37,4  | 37,4  | 18,85 | 550,47 | 121,77 |
| 2019/05/21 | CH2206 | Male | Three y/o | Treatment (Wk 1) | Treatment | Feed Day | Yes | 11:15 | 11:00 - 11:59 | Late Morning | 37,7 | 111 | 115,6 | 115,6 | 18,85 | 601,33 | 160,90 |
| 2019/05/21 | CH2205 | Male | Three y/o | Treatment (Wk 1) | Treatment | Feed Day | Yes | 11:20 | 11:00 - 11:59 | Late Morning | 37,9 | 99  | 36,2  | 36,2  | 19,05 | 593,14 | 120,65 |
| 2019/05/21 | CH2206 | Male | Three y/o | Treatment (Wk 1) | Treatment | Feed Day | Yes | 11:20 | 11:00 - 11:59 | Late Morning | 37,7 | 106 | 99,2  | 99,2  | 18,85 | 598,06 | 155,56 |
| 2019/05/21 | CH2205 | Male | Three y/o | Treatment (Wk 1) | Treatment | Feed Day | Yes | 11:25 | 11:00 - 11:59 | Late Morning | 37,7 |     | 46,6  | 46,6  | 18,85 |        | 129,35 |
| 2019/05/21 | CH2206 | Male | Three y/o | Treatment (Wk 1) | Treatment | Feed Day | Yes | 11:25 | 11:00 - 11:59 | Late Morning | 37,7 | 92  | 30,8  | 30,8  | 18,85 | 587,78 | 115,10 |
| 2019/05/21 | CH2205 | Male | Three y/o | Treatment (Wk 1) | Treatment | Feed Day | No  | 11:30 | 11:00 - 11:59 | Late Morning | 37,7 | 118 | 131,6 | 131,6 | 18,85 | 605,61 | 165,43 |
| 2019/05/21 | CH2206 | Male | Three y/o | Treatment (Wk 1) | Treatment | Feed Day | No  | 11:30 | 11:00 - 11:59 | Late Morning | 37,7 | 109 | 50,2  | 50,2  | 18,85 | 600,04 | 131,92 |
| 2019/05/21 | CH2205 | Male | Three y/o | Treatment (Wk 1) | Treatment | Feed Day | No  | 11:35 | 11:00 - 11:59 | Late Morning | 37,9 | 57  | 39,8  | 39,8  | 19,05 | 550,47 | 123,91 |
| 2019/05/21 | CH2206 | Male | Three y/o | Treatment (Wk 1) | Treatment | Feed Day | No  | 11:35 | 11:00 - 11:59 | Late Morning | 37,5 | 49  | 34,8  | 34,8  | 18,65 | 537,80 | 119,29 |
| 2019/05/21 | CH2205 | Male | Three y/o | Treatment (Wk 1) | Treatment | Feed Day | No  | 11:40 | 11:00 - 11:59 | Late Morning | 38,0 | 102 | 187,6 | 187,6 | 19,15 | 595,30 | 177,87 |
| 2019/05/21 | CH2206 | Male | Three y/o | Treatment (Wk 1) | Treatment | Feed Day | No  | 11:40 | 11:00 - 11:59 | Late Morning | 37,7 | 86  | 96,0  | 96,0  | 18,85 | 582,77 | 154,42 |
| 2019/05/21 | CH2205 | Male | Three y/o | Treatment (Wk 1) | Treatment | Feed Day | No  | 11:45 | 11:00 - 11:59 | Late Morning | 38,0 | 98  | 72,2  | 72,2  | 19,15 | 592,41 | 144,51 |
| 2019/05/21 | CH2206 | Male | Three y/o | Treatment (Wk 1) | Treatment | Feed Day | No  | 11:45 | 11:00 - 11:59 | Late Morning | 37,8 | 111 | 43,6  | 43,6  | 18,95 | 601,33 | 127,06 |
| 2019/05/21 | CH2205 | Male | Three y/o | Treatment (Wk 1) | Treatment | Feed Day | No  | 11:50 | 11:00 - 11:59 | Late Morning | 38,0 | 86  | 32,0  | 32,0  | 19,15 | 582,77 | 116,41 |
| 2019/05/21 | CH2206 | Male | Three y/o | Treatment (Wk 1) | Treatment | Feed Day | No  | 11:50 | 11:00 - 11:59 | Late Morning | 37,8 | 101 | 43,2  | 43,2  | 18,95 | 594,59 | 126,74 |
| 2019/05/21 | CH2205 | Male | Three y/o | Treatment (Wk 1) | Treatment | Feed Day | No  | 11:55 | 11:00 - 11:59 | Late Morning | 37,9 | 104 | 168,2 | 168,2 | 19,05 | 596,69 | 174,03 |
| 2019/05/21 | CH2206 | Male | Three y/o | Treatment (Wk 1) | Treatment | Feed Day | No  | 11:55 | 11:00 - 11:59 | Late Morning | 37,8 | 75  | 236,0 | 236,0 | 18,95 | 572,36 | 185,95 |
| 2019/05/21 | CH2205 | Male | Three y/o | Treatment (Wk 1) | Treatment | Feed Day | No  | 12:00 | 12:00 - 12:59 | Afternoon    | 37,9 | 135 | 17,6  | 17,6  | 19,05 | 614,84 | 95,95  |
| 2019/05/21 | CH2206 | Male | Three y/o | Treatment (Wk 1) | Treatment | Feed Day | No  | 12:00 | 12:00 - 12:59 | Afternoon    | 37,8 | 109 | 116,4 | 116,4 | 18,95 | 600,04 | 161,14 |
| 2019/05/21 | CH2205 | Male | Three y/o | Treatment (Wk 1) | Treatment | Feed Day | No  | 12:05 | 12:00 - 12:59 | Afternoon    | 38,0 | 70  | 17,2  | 17,2  | 19,15 | 566,99 | 95,17  |
| 2019/05/21 | CH2206 | Male | Three y/o | Treatment (Wk 1) | Treatment | Feed Day | No  | 12:05 | 12:00 - 12:59 | Afternoon    | 37,9 | 138 | 135,6 | 135,6 | 19,05 | 616,31 | 166,48 |
| 2019/05/21 | CH2205 | Male | Three y/o | Treatment (Wk 1) | Treatment | Feed Day | No  | 12:10 | 12:00 - 12:59 | Afternoon    | 38,0 | 87  | 10,2  | 10,2  | 19,15 | 583,64 | 77,43  |
| 2019/05/21 | CH2206 | Male | Three y/o | Treatment (Wk 1) | Treatment | Feed Day | No  | 12:10 | 12:00 - 12:59 | Afternoon    | 37,9 | 99  | 18,0  | 18,0  | 19,05 | 593,14 | 96,72  |
| 2019/05/21 | CH2205 | Male | Three y/o | Treatment (Wk 1) | Treatment | Feed Day | No  | 12:15 | 12:00 - 12:59 | Afternoon    | 38,0 | 67  | 8,4   | 8,4   | 19,15 | 563,53 | 70,86  |
| 2019/05/21 | CH2206 | Male | Three y/o | Treatment (Wk 1) | Treatment | Feed Day | No  | 12:15 | 12:00 - 12:59 | Afternoon    | 37,8 | 89  | 24,4  | 24,4  | 18,95 | 585,33 | 107,11 |
| 2019/05/21 | CH2205 | Male | Three y/o | Treatment (Wk 1) | Treatment | Feed Day | No  | 12:20 | 12:00 - 12:59 | Afternoon    | 38,0 | 64  | 34,4  | 34,4  | 19,15 | 559,88 | 118,90 |
| 2019/05/21 | CH2206 | Male | Three y/o | Treatment (Wk 1) | Treatment | Feed Day | No  | 12:20 | 12:00 - 12:59 | Afternoon    | 37,8 | 73  | 44,6  | 44,6  | 18,95 | 570,27 | 127,84 |
| 2019/05/21 | CH2205 | Male | Three y/o | Treatment (Wk 1) | Treatment | Feed Day | No  | 12:25 | 12:00 - 12:59 | Afternoon    | 38,0 | 111 | 95,2  | 95,2  | 19,15 | 601,33 | 154,13 |
| 2019/05/21 | CH2206 | Male | Three y/o | Treatment (Wk 1) | Treatment | Feed Day | No  | 12:25 | 12:00 - 12:59 | Afternoon    | 37,8 | 63  | 33,2  | 33,2  | 18,95 | 558,62 | 117,68 |
| 2019/05/21 | CH2205 | Male | Three y/o | Treatment (Wk 1) | Treatment | Feed Day | No  | 12:30 | 12:00 - 12:59 | Afternoon    | 38,0 | 62  | 14,0  | 14,0  | 19,15 | 557,33 | 88,17  |
| 2019/05/21 | CH2206 | Male | Three y/o | Treatment (Wk 1) | Treatment | Feed Day | No  | 12:30 | 12:00 - 12:59 | Afternoon    | 37,9 | 71  | 26,6  | 26,6  | 19,05 | 568,10 | 110,07 |
| 2019/05/21 | CH2205 | Male | Three y/o | Treatment (Wk 1) | Treatment | Feed Day | No  | 12:35 | 12:00 - 12:59 | Afternoon    | 38,0 | 77  | 5,6   | 5,6   | 19,15 | 574,39 | 57,21  |
| 2019/05/21 | CH2206 | Male | Three y/o | Treatment (Wk 1) | Treatment | Feed Day | No  | 12:35 | 12:00 - 12:59 | Afternoon    | 37,9 | 80  | 28,0  | 28,0  | 19,05 | 577,31 | 111,83 |
| 2019/05/21 | CH2205 | Male | Three y/o | Treatment (Wk 1) | Treatment | Feed Day | No  | 12:40 | 12:00 - 12:59 | Afternoon    | 38,0 | 78  | 5,8   | 5,8   | 19,15 | 575,38 | 58,39  |
| 2019/05/21 | CH2206 | Male | Three y/o | Treatment (Wk 1) | Treatment | Feed Day | No  | 12:40 | 12:00 - 12:59 | Afternoon    | 37,9 | 99  | 32,4  | 32,4  | 19,05 | 593,14 | 116,84 |
| 2019/05/21 | CH2205 | Male | Three y/o | Treatment (Wk 1) | Treatment | Feed Day | No  | 12:45 | 12:00 - 12:59 | Afternoon    | 38,0 | 66  | 3,4   | 3,4   | 19,15 | 562,34 | 40,51  |
| 2019/05/21 | CH2206 | Male | Three y/o | Treatment (Wk 1) | Treatment | Feed Day | No  | 12:45 | 12:00 - 12:59 | Afternoon    | 37,9 | 88  | 21,2  | 21,2  | 19,05 | 584,49 | 102,31 |
| 2019/05/21 | CH2205 | Male | Three y/o | Treatment (Wk 1) | Treatment | Feed Day | No  | 12:50 | 12:00 - 12:59 | Afternoon    | 38,0 | 63  | 5,2   | 5,2   | 19,15 | 558,62 | 54,72  |
| 2019/05/21 | CH2206 | Male | Three y/o | Treatment (Wk 1) | Treatment | Feed Day | No  | 12:50 | 12:00 - 12:59 | Afternoon    | 37,9 | 65  | 26,0  | 26,0  | 19,05 | 561,12 | 109,29 |
| 2019/05/21 | CH2205 | Male | Three y/o | Treatment (Wk 1) | Treatment | Feed Day | No  | 12:55 | 12:00 - 12:59 | Afternoon    | 38,1 | 84  | 2,8   | 2,8   | 19,26 | 581,01 | 34,04  |
| 2019/05/21 | CH2206 | Male | Three y/o | Treatment (Wk 1) | Treatment | Feed Day | No  | 12:55 | 12:00 - 12:59 | Afternoon    | 37,9 | 80  | 24,6  | 24,6  | 19,05 | 577,31 | 107,39 |
| 2019/05/21 | CH2205 | Male | Three y/o | Treatment (Wk 1) | Treatment | Feed Day | No  | 13:00 | 13:00 - 13:59 | Afternoon    | 38,0 |     | 31,2  | 31,2  | 19,15 |        | 115,54 |
| 2019/05/21 | CH2206 | Male | Three y/o | Treatment (Wk 1) | Treatment | Feed Day | No  | 13:00 | 13:00 - 13:59 | Afternoon    | 37,9 | 68  | 28,0  | 28,0  | 19,05 | 564,71 | 111,83 |
| 2019/05/21 | CH2205 | Male | Three y/o | Treatment (Wk 1) | Treatment | Feed Day | No  | 13:05 | 13:00 - 13:59 | Afternoon    | 38,0 | 64  | 18,4  | 18,4  | 19,15 | 559,88 | 97,47  |
| 2019/05/21 | CH2206 | Male | Three y/o | Treatment (Wk 1) | Treatment | Feed Day | No  | 13:05 | 13:00 - 13:59 | Afternoon    | 37,9 | 79  | 28,2  | 28,2  | 19,05 | 576,36 | 112,07 |
| 2019/05/21 | CH2205 | Male | Three y/o | Treatment (Wk 1) | Treatment | Feed Day | No  | 13:10 | 13:00 - 13:59 | Afternoon    | 38,0 | 93  | 4,2   | 4,2   | 19,15 | 588,58 | 47,57  |
| 2019/05/21 | CH2206 | Male | Three y/o | Treatment (Wk 1) | Treatment | Feed Day | No  | 13:10 | 13:00 - 13:59 | Afternoon    | 37,9 | 92  | 37,6  | 37,6  | 19,05 | 587,78 | 121,96 |
| 2019/05/21 | CH2205 | Male | Three y/o | Treatment (Wk 1) | Treatment | Feed Day | No  | 13:15 | 13:00 - 13:59 | Afternoon    | 38,0 | 90  | 5,6   | 5,6   | 19,15 | 586,16 | 57,21  |
| 2019/05/21 | CH2206 | Male | Three y/o | Treatment (Wk 1) | Treatment | Feed Day | No  | 13:15 | 13:00 - 13:59 | Afternoon    | 37,8 | 86  | 36,8  | 36,8  | 18,95 | 582,77 | 121,22 |
| 2019/05/21 | CH2205 | Male | Three y/o | Treatment (Wk 1) | Treatment | Feed Day | No  | 13:20 | 13:00 - 13:59 | Afternoon    | 38,1 | 60  | 20,0  | 20,0  | 19,26 | 554,67 | 100,31 |



|            |        |      |           |                  |           |          |    |       |               |           |      |     |       |       |       |        |        |
|------------|--------|------|-----------|------------------|-----------|----------|----|-------|---------------|-----------|------|-----|-------|-------|-------|--------|--------|
| 2019/05/21 | CH2206 | Male | Three y/o | Treatment (Wk 1) | Treatment | Feed Day | No | 13:20 | 13:00 - 13:59 | Afternoon | 37,8 | 82  | 42,6  | 42,6  | 18,95 | 579,19 | 126,26 |
| 2019/05/21 | CH2205 | Male | Three y/o | Treatment (Wk 1) | Treatment | Feed Day | No | 13:25 | 13:00 - 13:59 | Afternoon | 38,0 |     | 95,6  | 95,6  | 19,15 |        | 154,28 |
| 2019/05/21 | CH2206 | Male | Three y/o | Treatment (Wk 1) | Treatment | Feed Day | No | 13:25 | 13:00 - 13:59 | Afternoon | 37,8 | 55  | 54,4  | 54,4  | 18,95 | 547,52 | 134,70 |
| 2019/05/21 | CH2205 | Male | Three y/o | Treatment (Wk 1) | Treatment | Feed Day | No | 13:30 | 13:00 - 13:59 | Afternoon | 37,9 | 108 | 63,0  | 63,0  | 19,05 | 599,39 | 139,78 |
| 2019/05/21 | CH2206 | Male | Three y/o | Treatment (Wk 1) | Treatment | Feed Day | No | 13:30 | 13:00 - 13:59 | Afternoon | 37,8 | 112 | 47,0  | 47,0  | 18,95 | 601,96 | 129,65 |
| 2019/05/21 | CH2205 | Male | Three y/o | Treatment (Wk 1) | Treatment | Feed Day | No | 13:35 | 13:00 - 13:59 | Afternoon | 37,7 |     | 26,6  | 26,6  | 18,85 |        | 110,07 |
| 2019/05/21 | CH2206 | Male | Three y/o | Treatment (Wk 1) | Treatment | Feed Day | No | 13:35 | 13:00 - 13:59 | Afternoon | 37,8 | 76  | 10,0  | 10,0  | 18,95 | 573,39 | 76,76  |
| 2019/05/21 | CH2205 | Male | Three y/o | Treatment (Wk 1) | Treatment | Feed Day | No | 13:40 | 13:00 - 13:59 | Afternoon | 37,7 | 63  | 33,0  | 33,0  | 18,85 | 558,62 | 117,47 |
| 2019/05/21 | CH2206 | Male | Three y/o | Treatment (Wk 1) | Treatment | Feed Day | No | 13:40 | 13:00 - 13:59 | Afternoon | 37,8 | 97  | 15,0  | 15,0  | 18,95 | 591,66 | 90,51  |
| 2019/05/21 | CH2205 | Male | Three y/o | Treatment (Wk 1) | Treatment | Feed Day | No | 13:45 | 13:00 - 13:59 | Afternoon | 37,9 | 124 | 22,8  | 22,8  | 19,05 | 609,04 | 104,79 |
| 2019/05/21 | CH2206 | Male | Three y/o | Treatment (Wk 1) | Treatment | Feed Day | No | 13:45 | 13:00 - 13:59 | Afternoon | 37,8 | 97  | 8,8   | 8,8   | 18,95 | 591,66 | 72,43  |
| 2019/05/21 | CH2205 | Male | Three y/o | Treatment (Wk 1) | Treatment | Feed Day | No | 13:50 | 13:00 - 13:59 | Afternoon | 37,9 | 84  | 26,8  | 26,8  | 19,05 | 581,01 | 110,33 |
| 2019/05/21 | CH2206 | Male | Three y/o | Treatment (Wk 1) | Treatment | Feed Day | No | 13:50 | 13:00 - 13:59 | Afternoon | 37,8 | 88  | 26,8  | 26,8  | 18,95 | 584,49 | 110,33 |
| 2019/05/21 | CH2205 | Male | Three y/o | Treatment (Wk 1) | Treatment | Feed Day | No | 13:55 | 13:00 - 13:59 | Afternoon | 37,9 | 43  | 230,6 | 230,6 | 19,05 | 526,50 | 185,13 |
| 2019/05/21 | CH2206 | Male | Three y/o | Treatment (Wk 1) | Treatment | Feed Day | No | 13:55 | 13:00 - 13:59 | Afternoon | 37,9 | 93  | 26,4  | 26,4  | 19,05 | 588,58 | 109,81 |
| 2019/05/21 | CH2205 | Male | Three y/o | Treatment (Wk 1) | Treatment | Feed Day | No | 14:00 | 14:00 - 14:59 | Afternoon | 38,0 |     | 49,0  | 49,0  | 19,15 |        | 131,09 |
| 2019/05/21 | CH2206 | Male | Three y/o | Treatment (Wk 1) | Treatment | Feed Day | No | 14:00 | 14:00 - 14:59 | Afternoon | 37,9 | 106 | 145,6 | 145,6 | 19,05 | 598,06 | 168,97 |
| 2019/05/21 | CH2205 | Male | Three y/o | Treatment (Wk 1) | Treatment | Feed Day | No | 14:05 | 14:00 - 14:59 | Afternoon | 37,9 | 74  | 21,2  | 21,2  | 19,05 | 571,33 | 102,31 |
| 2019/05/21 | CH2206 | Male | Three y/o | Treatment (Wk 1) | Treatment | Feed Day | No | 14:05 | 14:00 - 14:59 | Afternoon | 37,9 | 93  | 100,8 | 100,8 | 19,05 | 588,58 | 156,12 |
| 2019/05/21 | CH2205 | Male | Three y/o | Treatment (Wk 1) | Treatment | Feed Day | No | 14:10 | 14:00 - 14:59 | Afternoon | 38,0 |     | 10,8  | 10,8  | 19,15 |        | 79,36  |
| 2019/05/21 | CH2206 | Male | Three y/o | Treatment (Wk 1) | Treatment | Feed Day | No | 14:10 | 14:00 - 14:59 | Afternoon | 37,9 | 91  | 5,2   | 5,2   | 19,05 | 586,98 | 54,72  |
| 2019/05/21 | CH2205 | Male | Three y/o | Treatment (Wk 1) | Treatment | Feed Day | No | 14:15 | 14:00 - 14:59 | Afternoon | 38,0 | 83  | 5,0   | 5,0   | 19,15 | 580,11 | 53,41  |
| 2019/05/21 | CH2206 | Male | Three y/o | Treatment (Wk 1) | Treatment | Feed Day | No | 14:15 | 14:00 - 14:59 | Afternoon | 37,9 | 77  | 4,6   | 4,6   | 19,05 | 574,39 | 50,61  |
| 2019/05/21 | CH2205 | Male | Three y/o | Treatment (Wk 1) | Treatment | Feed Day | No | 14:20 | 14:00 - 14:59 | Afternoon | 38,1 | 64  | 9,0   | 9,0   | 19,26 | 559,88 | 73,19  |
| 2019/05/21 | CH2206 | Male | Three y/o | Treatment (Wk 1) | Treatment | Feed Day | No | 14:20 | 14:00 - 14:59 | Afternoon | 37,9 | 74  | 6,2   | 6,2   | 19,05 | 571,33 | 60,63  |
| 2019/05/21 | CH2205 | Male | Three y/o | Treatment (Wk 1) | Treatment | Feed Day | No | 14:25 | 14:00 - 14:59 | Afternoon | 38,1 | 66  | 12,8  | 12,8  | 19,26 | 562,34 | 85,12  |
| 2019/05/21 | CH2206 | Male | Three y/o | Treatment (Wk 1) | Treatment | Feed Day | No | 14:25 | 14:00 - 14:59 | Afternoon | 37,9 | 86  | 2,4   | 2,4   | 19,05 | 582,77 | 28,91  |
| 2019/05/21 | CH2205 | Male | Three y/o | Treatment (Wk 1) | Treatment | Feed Day | No | 14:30 | 14:00 - 14:59 | Afternoon | 38,1 | 55  | 20,6  | 20,6  | 19,26 | 547,52 | 101,32 |
| 2019/05/21 | CH2206 | Male | Three y/o | Treatment (Wk 1) | Treatment | Feed Day | No | 14:30 | 14:00 - 14:59 | Afternoon | 38,0 | 84  | 4,4   | 4,4   | 19,15 | 581,01 | 49,12  |
| 2019/05/21 | CH2205 | Male | Three y/o | Treatment (Wk 1) | Treatment | Feed Day | No | 14:35 | 14:00 - 14:59 | Afternoon | 38,1 | 86  | 20,6  | 20,6  | 19,26 | 582,77 | 101,32 |
| 2019/05/21 | CH2206 | Male | Three y/o | Treatment (Wk 1) | Treatment | Feed Day | No | 14:35 | 14:00 - 14:59 | Afternoon | 38,0 |     | 40,6  | 40,6  | 19,15 |        | 124,60 |
| 2019/05/21 | CH2205 | Male | Three y/o | Treatment (Wk 1) | Treatment | Feed Day | No | 14:40 | 14:00 - 14:59 | Afternoon | 38,1 | 63  | 10,8  | 10,8  | 19,26 | 558,62 | 79,36  |
| 2019/05/21 | CH2206 | Male | Three y/o | Treatment (Wk 1) | Treatment | Feed Day | No | 14:40 | 14:00 - 14:59 | Afternoon | 38,0 | 90  | 54,6  | 54,6  | 19,15 | 586,16 | 134,83 |
| 2019/05/21 | CH2205 | Male | Three y/o | Treatment (Wk 1) | Treatment | Feed Day | No | 14:45 | 14:00 - 14:59 | Afternoon | 38,1 | 68  | 4,8   | 4,8   | 19,26 | 564,71 | 52,04  |
| 2019/05/21 | CH2206 | Male | Three y/o | Treatment (Wk 1) | Treatment | Feed Day | No | 14:45 | 14:00 - 14:59 | Afternoon | 38,0 | 85  | 57,0  | 57,0  | 19,15 | 581,90 | 136,32 |
| 2019/05/21 | CH2205 | Male | Three y/o | Treatment (Wk 1) | Treatment | Feed Day | No | 14:50 | 14:00 - 14:59 | Afternoon | 38,2 |     | 11,2  | 11,2  | 19,36 |        | 80,59  |
| 2019/05/21 | CH2206 | Male | Three y/o | Treatment (Wk 1) | Treatment | Feed Day | No | 14:50 | 14:00 - 14:59 | Afternoon | 38,1 | 88  | 47,4  | 47,4  | 19,26 | 584,49 | 129,94 |
| 2019/05/21 | CH2205 | Male | Three y/o | Treatment (Wk 1) | Treatment | Feed Day | No | 14:55 | 14:00 - 14:59 | Afternoon | 38,2 | 69  | 14,0  | 14,0  | 19,36 | 565,86 | 88,17  |
| 2019/05/21 | CH2206 | Male | Three y/o | Treatment (Wk 1) | Treatment | Feed Day | No | 14:55 | 14:00 - 14:59 | Afternoon | 38,1 | 72  | 53,4  | 53,4  | 19,26 | 569,20 | 134,06 |
| 2019/05/21 | CH2205 | Male | Three y/o | Treatment (Wk 1) | Treatment | Feed Day | No | 15:00 | 15:00 - 15:59 | Afternoon | 38,2 | 74  | 10,2  | 10,2  | 19,36 | 571,33 | 77,43  |
| 2019/05/21 | CH2206 | Male | Three y/o | Treatment (Wk 1) | Treatment | Feed Day | No | 15:00 | 15:00 - 15:59 | Afternoon | 38,1 | 76  | 55,6  | 55,6  | 19,26 | 573,39 | 135,46 |
| 2019/05/21 | CH2205 | Male | Three y/o | Treatment (Wk 1) | Treatment | Feed Day | No | 15:05 | 15:00 - 15:59 | Afternoon | 38,2 | 72  | 7,2   | 7,2   | 19,36 | 569,20 | 65,66  |
| 2019/05/21 | CH2206 | Male | Three y/o | Treatment (Wk 1) | Treatment | Feed Day | No | 15:05 | 15:00 - 15:59 | Afternoon | 38,1 | 84  | 54,6  | 54,6  | 19,26 | 581,01 | 134,83 |
| 2019/05/21 | CH2205 | Male | Three y/o | Treatment (Wk 1) | Treatment | Feed Day | No | 15:10 | 15:00 - 15:59 | Afternoon | 38,2 | 63  | 8,8   | 8,8   | 19,36 | 558,62 | 72,43  |
| 2019/05/21 | CH2206 | Male | Three y/o | Treatment (Wk 1) | Treatment | Feed Day | No | 15:10 | 15:00 - 15:59 | Afternoon | 38,1 | 74  | 48,2  | 48,2  | 19,26 | 571,33 | 130,52 |
| 2019/05/21 | CH2205 | Male | Three y/o | Treatment (Wk 1) | Treatment | Feed Day | No | 15:15 | 15:00 - 15:59 | Afternoon | 38,2 | 68  | 6,2   | 6,2   | 19,36 | 564,71 | 60,63  |
| 2019/05/21 | CH2206 | Male | Three y/o | Treatment (Wk 1) | Treatment | Feed Day | No | 15:15 | 15:00 - 15:59 | Afternoon | 38,2 | 61  | 54,4  | 54,4  | 19,36 | 556,01 | 134,70 |
| 2019/05/21 | CH2205 | Male | Three y/o | Treatment (Wk 1) | Treatment | Feed Day | No | 15:20 | 15:00 - 15:59 | Afternoon | 38,2 | 90  | 10,2  | 10,2  | 19,36 | 586,16 | 77,43  |
| 2019/05/21 | CH2206 | Male | Three y/o | Treatment (Wk 1) | Treatment | Feed Day | No | 15:20 | 15:00 - 15:59 | Afternoon | 38,2 | 101 | 49,8  | 49,8  | 19,36 | 594,59 | 131,65 |
| 2019/05/21 | CH2205 | Male | Three y/o | Treatment (Wk 1) | Treatment | Feed Day | No | 15:25 | 15:00 - 15:59 | Afternoon | 38,2 | 76  | 3,6   | 3,6   | 19,36 | 573,39 | 42,42  |
| 2019/05/21 | CH2206 | Male | Three y/o | Treatment (Wk 1) | Treatment | Feed Day | No | 15:25 | 15:00 - 15:59 | Afternoon | 38,2 | 97  | 44,2  | 44,2  | 19,36 | 591,66 | 127,53 |
| 2019/05/21 | CH2205 | Male | Three y/o | Treatment (Wk 1) | Treatment | Feed Day | No | 15:30 | 15:00 - 15:59 | Afternoon | 38,2 | 86  | 3,8   | 3,8   | 19,36 | 582,77 | 44,22  |
| 2019/05/21 | CH2206 | Male | Three y/o | Treatment (Wk 1) | Treatment | Feed Day | No | 15:30 | 15:00 - 15:59 | Afternoon | 38,2 | 68  | 39,2  | 39,2  | 19,36 | 564,71 | 123,39 |
| 2019/05/21 | CH2205 | Male | Three y/o | Treatment (Wk 1) | Treatment | Feed Day | No | 15:35 | 15:00 - 15:59 | Afternoon | 38,2 | 77  | 3,2   | 3,2   | 19,36 | 574,39 | 38,49  |
| 2019/05/21 | CH2206 | Male | Three y/o | Treatment (Wk 1) | Treatment | Feed Day | No | 15:35 | 15:00 - 15:59 | Afternoon | 38,2 | 56  | 35,2  | 35,2  | 19,36 | 549,01 | 119,69 |
| 2019/05/21 | CH2205 | Male | Three y/o | Treatment (Wk 1) | Treatment | Feed Day | No | 15:40 | 15:00 - 15:59 | Afternoon | 38,2 | 49  | 32,8  | 32,8  | 19,36 | 537,80 | 117,26 |
| 2019/05/21 | CH2206 | Male | Three y/o | Treatment (Wk 1) | Treatment | Feed Day | No | 15:40 | 15:00 - 15:59 | Afternoon | 38,2 | 94  | 56,2  | 56,2  | 19,36 | 589,37 | 135,83 |
| 2019/05/21 | CH2205 | Male | Three y/o | Treatment (Wk 1) | Treatment | Feed Day | No | 15:45 | 15:00 - 15:59 | Afternoon | 38,1 | 124 | 72,0  | 72,0  | 19,26 | 609,04 | 144,42 |
| 2019/05/21 | CH2206 | Male | Three y/o | Treatment (Wk 1) | Treatment | Feed Day | No | 15:45 | 15:00 - 15:59 | Afternoon | 38,2 | 106 | 48,8  | 48,8  | 19,36 | 598,06 | 130,95 |
| 2019/05/21 | CH2205 | Male | Three y/o | Treatment (Wk 1) | Treatment | Feed Day | No | 15:50 | 15:00 - 15:59 | Afternoon | 38,0 | 75  | 11,8  | 11,8  | 19,15 | 572,36 | 82,36  |
| 2019/05/21 | CH2206 | Male | Three y/o | Treatment (Wk 1) | Treatment | Feed Day | No | 15:50 | 15:00 - 15:59 | Afternoon | 38,1 | 115 | 55,4  | 55,4  | 19,26 | 603,82 | 135,33 |
| 2019/05/21 | CH2205 | Male | Three y/o | Treatment (Wk 1) | Treatment | Feed Day | No | 15:55 | 15:00 - 15:59 | Afternoon | 38,1 | 63  | 13,4  | 13,4  | 19,26 | 558,62 | 86,68  |
| 2019/05/21 | CH2206 | Male | Three y/o | Treatment (Wk 1) | Treatment | Feed Day | No | 15:55 | 15:00 - 15:59 | Afternoon | 38,1 | 98  | 95,2  | 95,2  | 19,26 | 592,41 | 154,13 |
| 2019/05/21 | CH2205 | Male | Three y/o | Treatment (Wk 1) | Treatment | Feed Day | No | 16:00 | 16:00 - 16:59 | Evening   | 38,0 | 74  | 10,0  | 10,0  | 19,15 | 571,33 | 76,76  |
| 2019/05/21 | CH2206 | Male | Three y/o | Treatment (Wk 1) | Treatment | Feed Day | No | 16:00 | 16:00 - 16:59 | Evening   | 38,1 | 93  | 4,4   | 4,4   | 19,26 | 588,58 | 49,12  |
| 2019/05/21 | CH2205 | Male | Three y/o | Treatment (Wk 1) | Treatment | Feed Day | No | 16:05 | 16:00 - 16:59 | Evening   | 38,1 | 54  | 6,6   | 6,6   | 19,26 | 545,99 | 62,73  |
| 2019/05/21 | CH2206 | Male | Three y/o | Treatment (Wk 1) | Treatment | Feed Day | No | 16:05 | 16:00 - 16:59 | Evening   | 38,1 | 90  | 9,4   | 9,4   | 19,26 | 586,16 | 74,66  |
| 2019/05/21 | CH2205 | Male | Three y/o | Treatment (Wk 1) | Treatment | Feed Day | No | 16:10 | 16:00 - 16:59 | Evening   | 38,1 | 66  | 8,4   | 8,4   | 19,26 | 562,34 | 70,86  |
| 2019/05/21 | CH2206 | Male | Three y/o | Treatment (Wk 1) | Treatment | Feed Day | No | 16:10 | 16:00 - 16:59 | Evening   | 38,1 | 90  | 15,6  | 15,6  | 19,26 | 586,16 | 91,85  |
| 2019/05/21 | CH2205 | Male | Three y/o | Treatment (Wk 1) | Treatment | Feed Day | No | 16:15 | 16:00 - 16:59 | Evening   | 38,1 | 46  | 10,4  | 10,4  | 19,26 | 532,38 | 78,08  |



|            |        |      |           |                  |           |          |    |       |               |         |      |     |       |       |       |        |        |
|------------|--------|------|-----------|------------------|-----------|----------|----|-------|---------------|---------|------|-----|-------|-------|-------|--------|--------|
| 2019/05/21 | CH2206 | Male | Three y/o | Treatment (Wk 1) | Treatment | Feed Day | No | 16:15 | 16:00 - 16:59 | Evening | 38,1 | 82  | 28,4  | 28,4  | 19,26 | 579,19 | 112,31 |
| 2019/05/21 | CH2205 | Male | Three y/o | Treatment (Wk 1) | Treatment | Feed Day | No | 16:20 | 16:00 - 16:59 | Evening | 38,2 | 78  | 12,0  | 12,0  | 19,36 | 575,38 | 82,93  |
| 2019/05/21 | CH2206 | Male | Three y/o | Treatment (Wk 1) | Treatment | Feed Day | No | 16:20 | 16:00 - 16:59 | Evening | 38,1 | 45  | 39,4  | 39,4  | 19,26 | 530,47 | 123,57 |
| 2019/05/21 | CH2205 | Male | Three y/o | Treatment (Wk 1) | Treatment | Feed Day | No | 16:25 | 16:00 - 16:59 | Evening | 38,2 | 57  | 13,6  | 13,6  | 19,36 | 550,47 | 87,18  |
| 2019/05/21 | CH2206 | Male | Three y/o | Treatment (Wk 1) | Treatment | Feed Day | No | 16:25 | 16:00 - 16:59 | Evening | 38,0 | 78  | 27,8  | 27,8  | 19,15 | 575,38 | 111,58 |
| 2019/05/21 | CH2205 | Male | Three y/o | Treatment (Wk 1) | Treatment | Feed Day | No | 16:30 | 16:00 - 16:59 | Evening | 38,2 | 68  | 9,2   | 9,2   | 19,36 | 564,71 | 73,94  |
| 2019/05/21 | CH2206 | Male | Three y/o | Treatment (Wk 1) | Treatment | Feed Day | No | 16:30 | 16:00 - 16:59 | Evening | 37,9 | 82  | 31,6  | 31,6  | 19,05 | 579,19 | 115,98 |
| 2019/05/21 | CH2205 | Male | Three y/o | Treatment (Wk 1) | Treatment | Feed Day | No | 16:35 | 16:00 - 16:59 | Evening | 38,2 | 61  | 6,2   | 6,2   | 19,36 | 556,01 | 60,63  |
| 2019/05/21 | CH2206 | Male | Three y/o | Treatment (Wk 1) | Treatment | Feed Day | No | 16:35 | 16:00 - 16:59 | Evening | 37,9 | 76  | 45,6  | 45,6  | 19,05 | 573,39 | 128,61 |
| 2019/05/21 | CH2205 | Male | Three y/o | Treatment (Wk 1) | Treatment | Feed Day | No | 16:40 | 16:00 - 16:59 | Evening | 38,2 | 60  | 12,2  | 12,2  | 19,36 | 554,67 | 83,49  |
| 2019/05/21 | CH2206 | Male | Three y/o | Treatment (Wk 1) | Treatment | Feed Day | No | 16:40 | 16:00 - 16:59 | Evening | 37,9 | 80  | 49,0  | 49,0  | 19,05 | 577,31 | 131,09 |
| 2019/05/21 | CH2205 | Male | Three y/o | Treatment (Wk 1) | Treatment | Feed Day | No | 16:45 | 16:00 - 16:59 | Evening | 38,2 | 75  | 11,6  | 11,6  | 19,36 | 572,36 | 81,78  |
| 2019/05/21 | CH2206 | Male | Three y/o | Treatment (Wk 1) | Treatment | Feed Day | No | 16:45 | 16:00 - 16:59 | Evening | 37,9 | 87  | 42,2  | 42,2  | 19,05 | 583,64 | 125,93 |
| 2019/05/21 | CH2205 | Male | Three y/o | Treatment (Wk 1) | Treatment | Feed Day | No | 16:50 | 16:00 - 16:59 | Evening | 38,2 | 56  | 8,8   | 8,8   | 19,36 | 549,01 | 72,43  |
| 2019/05/21 | CH2206 | Male | Three y/o | Treatment (Wk 1) | Treatment | Feed Day | No | 16:50 | 16:00 - 16:59 | Evening | 37,8 | 76  | 23,8  | 23,8  | 18,95 | 573,39 | 106,26 |
| 2019/05/21 | CH2205 | Male | Three y/o | Treatment (Wk 1) | Treatment | Feed Day | No | 16:55 | 16:00 - 16:59 | Evening | 38,2 | 89  | 12,4  | 12,4  | 19,36 | 585,33 | 84,04  |
| 2019/05/21 | CH2206 | Male | Three y/o | Treatment (Wk 1) | Treatment | Feed Day | No | 16:55 | 16:00 - 16:59 | Evening | 37,9 | 77  | 8,0   | 8,0   | 19,05 | 574,39 | 69,22  |
| 2019/05/21 | CH2205 | Male | Three y/o | Treatment (Wk 1) | Treatment | Feed Day | No | 17:00 | 17:00 - 17:59 | Evening | 38,1 | 80  | 9,0   | 9,0   | 19,26 | 577,31 | 73,19  |
| 2019/05/21 | CH2206 | Male | Three y/o | Treatment (Wk 1) | Treatment | Feed Day | No | 17:00 | 17:00 - 17:59 | Evening | 37,9 | 78  | 28,6  | 28,6  | 19,05 | 575,38 | 112,56 |
| 2019/05/21 | CH2205 | Male | Three y/o | Treatment (Wk 1) | Treatment | Feed Day | No | 17:05 | 17:00 - 17:59 | Evening | 38,1 | 131 | 19,0  | 19,0  | 19,26 | 612,80 | 98,56  |
| 2019/05/21 | CH2206 | Male | Three y/o | Treatment (Wk 1) | Treatment | Feed Day | No | 17:05 | 17:00 - 17:59 | Evening | 37,9 | 44  | 41,2  | 41,2  | 19,05 | 528,51 | 125,11 |
| 2019/05/21 | CH2205 | Male | Three y/o | Treatment (Wk 1) | Treatment | Feed Day | No | 17:10 | 17:00 - 17:59 | Evening | 38,0 | 56  | 155,4 | 155,4 | 19,15 | 549,01 | 171,26 |
| 2019/05/21 | CH2206 | Male | Three y/o | Treatment (Wk 1) | Treatment | Feed Day | No | 17:10 | 17:00 - 17:59 | Evening | 37,9 | 87  | 32,4  | 32,4  | 19,05 | 583,64 | 116,84 |
| 2019/05/21 | CH2205 | Male | Three y/o | Treatment (Wk 1) | Treatment | Feed Day | No | 17:15 | 17:00 - 17:59 | Evening | 38,0 | 172 | 92,0  | 92,0  | 19,15 | 630,73 | 152,94 |
| 2019/05/21 | CH2206 | Male | Three y/o | Treatment (Wk 1) | Treatment | Feed Day | No | 17:15 | 17:00 - 17:59 | Evening | 37,8 | 62  | 15,4  | 15,4  | 18,95 | 557,33 | 91,41  |
| 2019/05/21 | CH2205 | Male | Three y/o | Treatment (Wk 1) | Treatment | Feed Day | No | 17:20 | 17:00 - 17:59 | Evening | 37,9 | 93  | 44,4  | 44,4  | 19,05 | 588,58 | 127,69 |
| 2019/05/21 | CH2206 | Male | Three y/o | Treatment (Wk 1) | Treatment | Feed Day | No | 17:20 | 17:00 - 17:59 | Evening | 37,7 | 43  | 26,4  | 26,4  | 18,85 | 526,50 | 109,81 |
| 2019/05/21 | CH2205 | Male | Three y/o | Treatment (Wk 1) | Treatment | Feed Day | No | 17:25 | 17:00 - 17:59 | Evening | 37,9 |     | 16,8  | 16,8  | 19,05 |        | 94,37  |
| 2019/05/21 | CH2206 | Male | Three y/o | Treatment (Wk 1) | Treatment | Feed Day | No | 17:25 | 17:00 - 17:59 | Evening | 37,7 | 73  | 45,2  | 45,2  | 18,85 | 570,27 | 128,30 |
| 2019/05/21 | CH2205 | Male | Three y/o | Treatment (Wk 1) | Treatment | Feed Day | No | 17:30 | 17:00 - 17:59 | Evening | 37,9 |     | 13,2  | 13,2  | 19,05 |        | 86,17  |
| 2019/05/21 | CH2206 | Male | Three y/o | Treatment (Wk 1) | Treatment | Feed Day | No | 17:30 | 17:00 - 17:59 | Evening | 37,7 | 76  | 36,2  | 36,2  | 18,85 | 573,39 | 120,65 |
| 2019/05/21 | CH2205 | Male | Three y/o | Treatment (Wk 1) | Treatment | Feed Day | No | 17:35 | 17:00 - 17:59 | Evening | 37,9 | 95  | 14,6  | 14,6  | 19,05 | 590,14 | 89,59  |
| 2019/05/21 | CH2206 | Male | Three y/o | Treatment (Wk 1) | Treatment | Feed Day | No | 17:35 | 17:00 - 17:59 | Evening | 37,8 | 82  | 30,6  | 30,6  | 18,95 | 579,19 | 114,87 |
| 2019/05/21 | CH2205 | Male | Three y/o | Treatment (Wk 1) | Treatment | Feed Day | No | 17:40 | 17:00 - 17:59 | Evening | 38,0 | 67  | 11,0  | 11,0  | 19,15 | 563,53 | 79,98  |
| 2019/05/21 | CH2206 | Male | Three y/o | Treatment (Wk 1) | Treatment | Feed Day | No | 17:40 | 17:00 - 17:59 | Evening | 37,9 | 80  | 38,2  | 38,2  | 19,05 | 577,31 | 122,50 |
| 2019/05/21 | CH2205 | Male | Three y/o | Treatment (Wk 1) | Treatment | Feed Day | No | 17:45 | 17:00 - 17:59 | Evening | 38,0 | 77  | 11,0  | 11,0  | 19,15 | 574,39 | 79,98  |
| 2019/05/21 | CH2206 | Male | Three y/o | Treatment (Wk 1) | Treatment | Feed Day | No | 17:45 | 17:00 - 17:59 | Evening | 37,9 | 61  | 36,2  | 36,2  | 19,05 | 556,01 | 120,65 |
| 2019/05/21 | CH2205 | Male | Three y/o | Treatment (Wk 1) | Treatment | Feed Day | No | 17:50 | 17:00 - 17:59 | Evening | 38,0 | 56  | 17,6  | 17,6  | 19,15 | 549,01 | 95,95  |
| 2019/05/21 | CH2206 | Male | Three y/o | Treatment (Wk 1) | Treatment | Feed Day | No | 17:50 | 17:00 - 17:59 | Evening | 37,9 | 76  | 46,8  | 46,8  | 19,05 | 573,39 | 129,50 |
| 2019/05/21 | CH2205 | Male | Three y/o | Treatment (Wk 1) | Treatment | Feed Day | No | 17:55 | 17:00 - 17:59 | Evening | 38,0 | 80  | 15,4  | 15,4  | 19,15 | 577,31 | 91,41  |
| 2019/05/21 | CH2206 | Male | Three y/o | Treatment (Wk 1) | Treatment | Feed Day | No | 17:55 | 17:00 - 17:59 | Evening | 37,9 | 91  | 28,8  | 28,8  | 19,05 | 586,98 | 112,79 |
| 2019/05/21 | CH2205 | Male | Three y/o | Treatment (Wk 1) | Treatment | Feed Day | No | 18:00 | 18:00 - 18:59 | Evening | 38,0 | 87  | 13,8  | 13,8  | 19,15 | 583,64 | 87,68  |
| 2019/05/21 | CH2206 | Male | Three y/o | Treatment (Wk 1) | Treatment | Feed Day | No | 18:00 | 18:00 - 18:59 | Evening | 37,9 | 81  | 44,6  | 44,6  | 19,05 | 578,26 | 127,84 |
| 2019/05/21 | CH2205 | Male | Three y/o | Treatment (Wk 1) | Treatment | Feed Day | No | 18:05 | 18:00 - 18:59 | Evening | 37,9 | 95  | 23,2  | 23,2  | 19,05 | 590,14 | 105,39 |
| 2019/05/21 | CH2206 | Male | Three y/o | Treatment (Wk 1) | Treatment | Feed Day | No | 18:05 | 18:00 - 18:59 | Evening | 37,9 | 49  | 131,8 | 131,8 | 19,05 | 537,80 | 165,49 |
| 2019/05/21 | CH2205 | Male | Three y/o | Treatment (Wk 1) | Treatment | Feed Day | No | 18:10 | 18:00 - 18:59 | Evening | 37,9 | 98  | 23,2  | 23,2  | 19,05 | 592,41 | 105,39 |
| 2019/05/21 | CH2206 | Male | Three y/o | Treatment (Wk 1) | Treatment | Feed Day | No | 18:10 | 18:00 - 18:59 | Evening | 37,9 | 129 | 149,4 | 149,4 | 19,05 | 611,75 | 169,88 |
| 2019/05/21 | CH2205 | Male | Three y/o | Treatment (Wk 1) | Treatment | Feed Day | No | 18:15 | 18:00 - 18:59 | Evening | 38,0 | 97  | 21,6  | 21,6  | 19,15 | 591,66 | 102,94 |
| 2019/05/21 | CH2206 | Male | Three y/o | Treatment (Wk 1) | Treatment | Feed Day | No | 18:15 | 18:00 - 18:59 | Evening | 37,8 | 51  | 55,2  | 55,2  | 18,95 | 541,20 | 135,21 |
| 2019/05/21 | CH2205 | Male | Three y/o | Treatment (Wk 1) | Treatment | Feed Day | No | 18:20 | 18:00 - 18:59 | Evening | 38,0 | 152 | 6,0   | 6,0   | 19,15 | 622,73 | 59,53  |
| 2019/05/21 | CH2206 | Male | Three y/o | Treatment (Wk 1) | Treatment | Feed Day | No | 18:20 | 18:00 - 18:59 | Evening | 37,7 | 81  | 54,6  | 54,6  | 18,85 | 578,26 | 134,83 |
| 2019/05/21 | CH2205 | Male | Three y/o | Treatment (Wk 1) | Treatment | Feed Day | No | 18:25 | 18:00 - 18:59 | Evening | 37,7 | 64  | 3,0   | 3,0   | 18,85 | 559,88 | 36,34  |
| 2019/05/21 | CH2206 | Male | Three y/o | Treatment (Wk 1) | Treatment | Feed Day | No | 18:25 | 18:00 - 18:59 | Evening | 37,7 | 46  | 53,2  | 53,2  | 18,85 | 532,38 | 133,93 |
| 2019/05/21 | CH2205 | Male | Three y/o | Treatment (Wk 1) | Treatment | Feed Day | No | 18:30 | 18:00 - 18:59 | Evening | 37,5 | 64  | 7,4   | 7,4   | 18,65 | 559,88 | 66,59  |
| 2019/05/21 | CH2206 | Male | Three y/o | Treatment (Wk 1) | Treatment | Feed Day | No | 18:30 | 18:00 - 18:59 | Evening | 37,8 | 81  | 62,6  | 62,6  | 18,95 | 578,26 | 139,56 |
| 2019/05/21 | CH2205 | Male | Three y/o | Treatment (Wk 1) | Treatment | Feed Day | No | 18:35 | 18:00 - 18:59 | Evening | 37,3 | 62  | 3,4   | 3,4   | 18,46 | 557,33 | 40,51  |
| 2019/05/21 | CH2206 | Male | Three y/o | Treatment (Wk 1) | Treatment | Feed Day | No | 18:35 | 18:00 - 18:59 | Evening | 37,8 | 66  | 61,8  | 61,8  | 18,95 | 562,34 | 139,12 |
| 2019/05/21 | CH2205 | Male | Three y/o | Treatment (Wk 1) | Treatment | Feed Day | No | 18:40 | 18:00 - 18:59 | Evening | 37,3 | 73  | 3,0   | 3,0   | 18,46 | 570,27 | 36,34  |
| 2019/05/21 | CH2206 | Male | Three y/o | Treatment (Wk 1) | Treatment | Feed Day | No | 18:40 | 18:00 - 18:59 | Evening | 37,8 | 85  | 49,2  | 49,2  | 18,95 | 581,90 | 131,23 |
| 2019/05/21 | CH2205 | Male | Three y/o | Treatment (Wk 1) | Treatment | Feed Day | No | 18:45 | 18:00 - 18:59 | Evening | 37,2 |     | 3,6   | 3,6   | 18,36 |        | 42,42  |
| 2019/05/21 | CH2206 | Male | Three y/o | Treatment (Wk 1) | Treatment | Feed Day | No | 18:45 | 18:00 - 18:59 | Evening | 37,7 | 77  | 51,4  | 51,4  | 18,85 | 574,39 | 132,74 |
| 2019/05/21 | CH2205 | Male | Three y/o | Treatment (Wk 1) | Treatment | Feed Day | No | 18:50 | 18:00 - 18:59 | Evening | 37,1 | 88  | 5,2   | 5,2   | 18,26 | 584,49 | 54,72  |
| 2019/05/21 | CH2206 | Male | Three y/o | Treatment (Wk 1) | Treatment | Feed Day | No | 18:50 | 18:00 - 18:59 | Evening | 37,8 | 67  | 61,6  | 61,6  | 18,95 | 563,53 | 139,00 |
| 2019/05/21 | CH2205 | Male | Three y/o | Treatment (Wk 1) | Treatment | Feed Day | No | 18:55 | 18:00 - 18:59 | Evening | 37,1 | 61  | 4,2   | 4,2   | 18,26 | 556,01 | 47,57  |
| 2019/05/21 | CH2206 | Male | Three y/o | Treatment (Wk 1) | Treatment | Feed Day | No | 18:55 | 18:00 - 18:59 | Evening | 37,5 | 48  | 57,6  | 57,6  | 18,65 | 536,04 | 136,68 |
| 2019/05/21 | CH2205 | Male | Three y/o | Treatment (Wk 1) | Treatment | Feed Day | No | 19:00 | 19:00 - 19:59 | Evening | 37,0 | 57  | 4,0   | 4,0   | 18,16 | 550,47 | 45,94  |
| 2019/05/21 | CH2206 | Male | Three y/o | Treatment (Wk 1) | Treatment | Feed Day | No | 19:00 | 19:00 - 19:59 | Evening | 37,7 | 86  | 55,6  | 55,6  | 18,85 | 582,77 | 135,46 |
| 2019/05/21 | CH2205 | Male | Three y/o | Treatment (Wk 1) | Treatment | Feed Day | No | 19:05 | 19:00 - 19:59 | Evening | 37,0 | 94  | 4,6   | 4,6   | 18,16 | 589,37 | 50,61  |
| 2019/05/21 | CH2206 | Male | Three y/o | Treatment (Wk 1) | Treatment | Feed Day | No | 19:05 | 19:00 - 19:59 | Evening | 37,8 | 60  | 54,0  | 54,0  | 18,95 | 554,67 | 134,45 |
| 2019/05/21 | CH2205 | Male | Three y/o | Treatment (Wk 1) | Treatment | Feed Day | No | 19:10 | 19:00 - 19:59 | Evening | 37,0 | 93  | 7,6   | 7,6   | 18,16 | 588,58 | 67,49  |



|            |        |      |           |                  |           |          |    |       |               |         |      |     |      |      |       |        |        |
|------------|--------|------|-----------|------------------|-----------|----------|----|-------|---------------|---------|------|-----|------|------|-------|--------|--------|
| 2019/05/21 | CH2206 | Male | Three y/o | Treatment (Wk 1) | Treatment | Feed Day | No | 19:10 | 19:00 - 19:59 | Evening | 37,8 | 80  | 55,0 | 55,0 | 18,95 | 577,31 | 135,08 |
| 2019/05/21 | CH2205 | Male | Three y/o | Treatment (Wk 1) | Treatment | Feed Day | No | 19:15 | 19:00 - 19:59 | Evening | 37,1 | 83  | 6,4  | 6,4  | 18,26 | 580,11 | 61,70  |
| 2019/05/21 | CH2206 | Male | Three y/o | Treatment (Wk 1) | Treatment | Feed Day | No | 19:15 | 19:00 - 19:59 | Evening | 37,8 | 90  | 56,0 | 56,0 | 18,95 | 586,16 | 135,70 |
| 2019/05/21 | CH2205 | Male | Three y/o | Treatment (Wk 1) | Treatment | Feed Day | No | 19:20 | 19:00 - 19:59 | Evening | 37,0 | 94  | 1,8  | 1,8  | 18,16 | 589,37 | 19,38  |
| 2019/05/21 | CH2206 | Male | Three y/o | Treatment (Wk 1) | Treatment | Feed Day | No | 19:20 | 19:00 - 19:59 | Evening | 37,9 | 46  | 49,4 | 49,4 | 19,05 | 532,38 | 131,37 |
| 2019/05/21 | CH2205 | Male | Three y/o | Treatment (Wk 1) | Treatment | Feed Day | No | 19:25 | 19:00 - 19:59 | Evening | 37,0 | 83  | 3,4  | 3,4  | 18,16 | 580,11 | 40,51  |
| 2019/05/21 | CH2206 | Male | Three y/o | Treatment (Wk 1) | Treatment | Feed Day | No | 19:25 | 19:00 - 19:59 | Evening | 37,8 | 77  | 42,8 | 42,8 | 18,95 | 574,39 | 126,42 |
| 2019/05/21 | CH2205 | Male | Three y/o | Treatment (Wk 1) | Treatment | Feed Day | No | 19:30 | 19:00 - 19:59 | Evening | 36,8 | 90  | 8,8  | 8,8  | 17,96 | 586,16 | 72,43  |
| 2019/05/21 | CH2206 | Male | Three y/o | Treatment (Wk 1) | Treatment | Feed Day | No | 19:30 | 19:00 - 19:59 | Evening | 37,8 | 47  | 43,8 | 43,8 | 18,95 | 534,23 | 127,22 |
| 2019/05/21 | CH2205 | Male | Three y/o | Treatment (Wk 1) | Treatment | Feed Day | No | 19:35 | 19:00 - 19:59 | Evening | 37,0 | 97  | 9,4  | 9,4  | 18,16 | 591,66 | 74,66  |
| 2019/05/21 | CH2206 | Male | Three y/o | Treatment (Wk 1) | Treatment | Feed Day | No | 19:35 | 19:00 - 19:59 | Evening | 37,8 | 63  | 42,6 | 42,6 | 18,95 | 558,62 | 126,26 |
| 2019/05/21 | CH2205 | Male | Three y/o | Treatment (Wk 1) | Treatment | Feed Day | No | 19:40 | 19:00 - 19:59 | Evening | 37,1 | 84  | 11,0 | 11,0 | 18,26 | 581,01 | 79,98  |
| 2019/05/21 | CH2206 | Male | Three y/o | Treatment (Wk 1) | Treatment | Feed Day | No | 19:40 | 19:00 - 19:59 | Evening | 37,9 | 94  | 46,0 | 46,0 | 19,05 | 589,37 | 128,91 |
| 2019/05/21 | CH2205 | Male | Three y/o | Treatment (Wk 1) | Treatment | Feed Day | No | 19:45 | 19:00 - 19:59 | Evening | 37,2 | 100 | 8,0  | 8,0  | 18,36 | 593,87 | 69,22  |
| 2019/05/21 | CH2206 | Male | Three y/o | Treatment (Wk 1) | Treatment | Feed Day | No | 19:45 | 19:00 - 19:59 | Evening | 37,9 | 94  | 56,0 | 56,0 | 19,05 | 589,37 | 135,70 |
| 2019/05/21 | CH2205 | Male | Three y/o | Treatment (Wk 1) | Treatment | Feed Day | No | 19:50 | 19:00 - 19:59 | Evening | 37,3 | 94  | 3,8  | 3,8  | 18,46 | 589,37 | 44,22  |
| 2019/05/21 | CH2206 | Male | Three y/o | Treatment (Wk 1) | Treatment | Feed Day | No | 19:50 | 19:00 - 19:59 | Evening | 37,8 | 49  | 54,0 | 54,0 | 18,95 | 537,80 | 134,45 |
| 2019/05/21 | CH2205 | Male | Three y/o | Treatment (Wk 1) | Treatment | Feed Day | No | 19:55 | 19:00 - 19:59 | Evening | 37,3 | 58  | 9,4  | 9,4  | 18,46 | 551,90 | 74,66  |
| 2019/05/21 | CH2206 | Male | Three y/o | Treatment (Wk 1) | Treatment | Feed Day | No | 19:55 | 19:00 - 19:59 | Evening | 37,8 | 44  | 60,4 | 60,4 | 18,95 | 528,51 | 138,32 |
| 2019/05/21 | CH2205 | Male | Three y/o | Treatment (Wk 1) | Treatment | Feed Day | No | 20:00 | 20:00 - 20:59 | Night   | 37,4 | 57  | 44,4 | 44,4 | 18,55 | 550,47 | 127,69 |
| 2019/05/21 | CH2206 | Male | Three y/o | Treatment (Wk 1) | Treatment | Feed Day | No | 20:00 | 20:00 - 20:59 | Night   | 37,8 | 67  | 47,0 | 47,0 | 18,95 | 563,53 | 129,65 |
| 2019/05/21 | CH2205 | Male | Three y/o | Treatment (Wk 1) | Treatment | Feed Day | No | 20:05 | 20:00 - 20:59 | Night   | 37,5 | 90  | 3,4  | 3,4  | 18,65 | 586,16 | 40,51  |
| 2019/05/21 | CH2206 | Male | Three y/o | Treatment (Wk 1) | Treatment | Feed Day | No | 20:05 | 20:00 - 20:59 | Night   | 37,8 | 76  | 36,4 | 36,4 | 18,95 | 573,39 | 120,84 |
| 2019/05/21 | CH2205 | Male | Three y/o | Treatment (Wk 1) | Treatment | Feed Day | No | 20:10 | 20:00 - 20:59 | Night   | 37,4 | 70  | 4,2  | 4,2  | 18,55 | 566,99 | 47,57  |
| 2019/05/21 | CH2206 | Male | Three y/o | Treatment (Wk 1) | Treatment | Feed Day | No | 20:10 | 20:00 - 20:59 | Night   | 37,8 | 55  | 35,4 | 35,4 | 18,95 | 547,52 | 119,88 |
| 2019/05/21 | CH2205 | Male | Three y/o | Treatment (Wk 1) | Treatment | Feed Day | No | 20:15 | 20:00 - 20:59 | Night   | 37,2 | 109 | 4,4  | 4,4  | 18,36 | 600,04 | 49,12  |
| 2019/05/21 | CH2206 | Male | Three y/o | Treatment (Wk 1) | Treatment | Feed Day | No | 20:15 | 20:00 - 20:59 | Night   | 37,9 | 96  | 41,4 | 41,4 | 19,05 | 590,91 | 125,27 |
| 2019/05/21 | CH2205 | Male | Three y/o | Treatment (Wk 1) | Treatment | Feed Day | No | 20:20 | 20:00 - 20:59 | Night   | 37,0 | 65  | 5,6  | 5,6  | 18,16 | 561,12 | 57,21  |
| 2019/05/21 | CH2206 | Male | Three y/o | Treatment (Wk 1) | Treatment | Feed Day | No | 20:20 | 20:00 - 20:59 | Night   | 37,8 | 51  | 44,4 | 44,4 | 18,95 | 541,20 | 127,69 |
| 2019/05/21 | CH2205 | Male | Three y/o | Treatment (Wk 1) | Treatment | Feed Day | No | 20:25 | 20:00 - 20:59 | Night   | 36,8 | 57  | 5,0  | 5,0  | 17,96 | 550,47 | 53,41  |
| 2019/05/21 | CH2206 | Male | Three y/o | Treatment (Wk 1) | Treatment | Feed Day | No | 20:25 | 20:00 - 20:59 | Night   | 37,8 | 45  | 49,8 | 49,8 | 18,95 | 530,47 | 131,65 |
| 2019/05/21 | CH2205 | Male | Three y/o | Treatment (Wk 1) | Treatment | Feed Day | No | 20:30 | 20:00 - 20:59 | Night   | 36,8 | 57  | 6,6  | 6,6  | 17,96 | 550,47 | 62,73  |
| 2019/05/21 | CH2206 | Male | Three y/o | Treatment (Wk 1) | Treatment | Feed Day | No | 20:30 | 20:00 - 20:59 | Night   | 37,8 | 87  | 55,4 | 55,4 | 18,95 | 583,64 | 135,33 |
| 2019/05/21 | CH2205 | Male | Three y/o | Treatment (Wk 1) | Treatment | Feed Day | No | 20:35 | 20:00 - 20:59 | Night   | 36,8 | 93  | 11,6 | 11,6 | 17,96 | 588,58 | 81,78  |
| 2019/05/21 | CH2206 | Male | Three y/o | Treatment (Wk 1) | Treatment | Feed Day | No | 20:35 | 20:00 - 20:59 | Night   | 37,7 | 66  | 65,8 | 65,8 | 18,85 | 562,34 | 141,29 |
| 2019/05/21 | CH2205 | Male | Three y/o | Treatment (Wk 1) | Treatment | Feed Day | No | 20:40 | 20:00 - 20:59 | Night   | 36,8 | 118 | 3,4  | 3,4  | 17,96 | 605,61 | 40,51  |
| 2019/05/21 | CH2206 | Male | Three y/o | Treatment (Wk 1) | Treatment | Feed Day | No | 20:40 | 20:00 - 20:59 | Night   | 37,5 | 64  | 63,6 | 63,6 | 18,65 | 559,88 | 140,11 |
| 2019/05/21 | CH2205 | Male | Three y/o | Treatment (Wk 1) | Treatment | Feed Day | No | 20:45 | 20:00 - 20:59 | Night   | 36,8 | 55  | 7,6  | 7,6  | 17,96 | 547,52 | 67,49  |
| 2019/05/21 | CH2206 | Male | Three y/o | Treatment (Wk 1) | Treatment | Feed Day | No | 20:45 | 20:00 - 20:59 | Night   | 37,4 | 47  | 61,0 | 61,0 | 18,55 | 534,23 | 138,67 |
| 2019/05/21 | CH2205 | Male | Three y/o | Treatment (Wk 1) | Treatment | Feed Day | No | 20:50 | 20:00 - 20:59 | Night   | 36,7 | 119 | 9,4  | 9,4  | 17,87 | 606,20 | 74,66  |
| 2019/05/21 | CH2206 | Male | Three y/o | Treatment (Wk 1) | Treatment | Feed Day | No | 20:50 | 20:00 - 20:59 | Night   | 37,3 | 81  | 56,6 | 56,6 | 18,46 | 578,26 | 136,07 |
| 2019/05/21 | CH2205 | Male | Three y/o | Treatment (Wk 1) | Treatment | Feed Day | No | 20:55 | 20:00 - 20:59 | Night   | 37,0 | 112 | 30,6 | 30,6 | 18,16 | 601,96 | 114,87 |
| 2019/05/21 | CH2206 | Male | Three y/o | Treatment (Wk 1) | Treatment | Feed Day | No | 20:55 | 20:00 - 20:59 | Night   | 37,3 | 140 | 45,6 | 45,6 | 18,46 | 617,28 | 128,61 |
| 2019/05/21 | CH2205 | Male | Three y/o | Treatment (Wk 1) | Treatment | Feed Day | No | 21:00 | 21:00 - 21:59 | Night   | 37,0 | 93  | 20,6 | 20,6 | 18,16 | 588,58 | 101,32 |
| 2019/05/21 | CH2206 | Male | Three y/o | Treatment (Wk 1) | Treatment | Feed Day | No | 21:00 | 21:00 - 21:59 | Night   | 37,2 | 71  | 46,4 | 46,4 | 18,36 | 568,10 | 129,21 |
| 2019/05/21 | CH2205 | Male | Three y/o | Treatment (Wk 1) | Treatment | Feed Day | No | 21:05 | 21:00 - 21:59 | Night   | 37,1 | 91  | 21,6 | 21,6 | 18,26 | 586,98 | 102,94 |
| 2019/05/21 | CH2206 | Male | Three y/o | Treatment (Wk 1) | Treatment | Feed Day | No | 21:05 | 21:00 - 21:59 | Night   | 37,1 | 90  | 47,6 | 47,6 | 18,26 | 586,16 | 130,09 |
| 2019/05/21 | CH2205 | Male | Three y/o | Treatment (Wk 1) | Treatment | Feed Day | No | 21:10 | 21:00 - 21:59 | Night   | 37,1 | 60  | 23,4 | 23,4 | 18,26 | 554,67 | 105,68 |
| 2019/05/21 | CH2206 | Male | Three y/o | Treatment (Wk 1) | Treatment | Feed Day | No | 21:10 | 21:00 - 21:59 | Night   | 37,0 | 83  | 50,4 | 50,4 | 18,16 | 580,11 | 132,06 |
| 2019/05/21 | CH2205 | Male | Three y/o | Treatment (Wk 1) | Treatment | Feed Day | No | 21:15 | 21:00 - 21:59 | Night   | 37,1 | 59  | 22,6 | 22,6 | 18,26 | 553,30 | 104,49 |
| 2019/05/21 | CH2206 | Male | Three y/o | Treatment (Wk 1) | Treatment | Feed Day | No | 21:15 | 21:00 - 21:59 | Night   | 37,0 | 60  | 42,6 | 42,6 | 18,16 | 554,67 | 126,26 |
| 2019/05/21 | CH2205 | Male | Three y/o | Treatment (Wk 1) | Treatment | Feed Day | No | 21:20 | 21:00 - 21:59 | Night   | 37,2 | 62  | 22,6 | 22,6 | 18,36 | 557,33 | 104,49 |
| 2019/05/21 | CH2206 | Male | Three y/o | Treatment (Wk 1) | Treatment | Feed Day | No | 21:20 | 21:00 - 21:59 | Night   | 37,0 | 87  | 26,8 | 26,8 | 18,16 | 583,64 | 110,33 |
| 2019/05/21 | CH2205 | Male | Three y/o | Treatment (Wk 1) | Treatment | Feed Day | No | 21:25 | 21:00 - 21:59 | Night   | 37,2 | 54  | 24,2 | 24,2 | 18,36 | 545,99 | 106,83 |
| 2019/05/21 | CH2206 | Male | Three y/o | Treatment (Wk 1) | Treatment | Feed Day | No | 21:25 | 21:00 - 21:59 | Night   | 37,2 | 81  | 30,6 | 30,6 | 18,36 | 578,26 | 114,87 |
| 2019/05/21 | CH2205 | Male | Three y/o | Treatment (Wk 1) | Treatment | Feed Day | No | 21:30 | 21:00 - 21:59 | Night   | 37,2 | 51  | 26,4 | 26,4 | 18,36 | 541,20 | 109,81 |
| 2019/05/21 | CH2206 | Male | Three y/o | Treatment (Wk 1) | Treatment | Feed Day | No | 21:30 | 21:00 - 21:59 | Night   | 37,3 | 80  | 33,0 | 33,0 | 18,46 | 577,31 | 117,47 |
| 2019/05/21 | CH2205 | Male | Three y/o | Treatment (Wk 1) | Treatment | Feed Day | No | 21:35 | 21:00 - 21:59 | Night   | 37,2 | 63  | 33,6 | 33,6 | 18,36 | 558,62 | 118,09 |
| 2019/05/21 | CH2206 | Male | Three y/o | Treatment (Wk 1) | Treatment | Feed Day | No | 21:35 | 21:00 - 21:59 | Night   | 37,4 | 93  | 34,6 | 34,6 | 18,55 | 588,58 | 119,10 |
| 2019/05/21 | CH2205 | Male | Three y/o | Treatment (Wk 1) | Treatment | Feed Day | No | 21:40 | 21:00 - 21:59 | Night   | 37,3 | 83  | 48,4 | 48,4 | 18,46 | 580,11 | 130,66 |
| 2019/05/21 | CH2206 | Male | Three y/o | Treatment (Wk 1) | Treatment | Feed Day | No | 21:40 | 21:00 - 21:59 | Night   | 37,4 |     | 31,8 | 31,8 | 18,55 |        | 116,20 |
| 2019/05/21 | CH2205 | Male | Three y/o | Treatment (Wk 1) | Treatment | Feed Day | No | 21:45 | 21:00 - 21:59 | Night   | 37,4 |     | 21,8 | 21,8 | 18,55 |        | 103,26 |
| 2019/05/21 | CH2206 | Male | Three y/o | Treatment (Wk 1) | Treatment | Feed Day | No | 21:45 | 21:00 - 21:59 | Night   | 37,5 | 45  | 58,4 | 58,4 | 18,65 | 530,47 | 137,16 |
| 2019/05/21 | CH2205 | Male | Three y/o | Treatment (Wk 1) | Treatment | Feed Day | No | 21:50 | 21:00 - 21:59 | Night   | 37,4 |     | 30,8 | 30,8 | 18,55 |        | 115,10 |
| 2019/05/21 | CH2206 | Male | Three y/o | Treatment (Wk 1) | Treatment | Feed Day | No | 21:50 | 21:00 - 21:59 | Night   | 37,5 | 90  | 63,4 | 63,4 | 18,65 | 586,16 | 140,00 |
| 2019/05/21 | CH2205 | Male | Three y/o | Treatment (Wk 1) | Treatment | Feed Day | No | 21:55 | 21:00 - 21:59 | Night   | 37,5 |     | 28,2 | 28,2 | 18,65 |        | 112,07 |
| 2019/05/21 | CH2206 | Male | Three y/o | Treatment (Wk 1) | Treatment | Feed Day | No | 21:55 | 21:00 - 21:59 | Night   | 37,5 | 44  | 70,8 | 70,8 | 18,65 | 528,51 | 143,83 |
| 2019/05/21 | CH2205 | Male | Three y/o | Treatment (Wk 1) | Treatment | Feed Day | No | 22:00 | 22:00 - 22:59 | Night   | 37,6 | 95  | 17,6 | 17,6 | 18,75 | 590,14 | 95,95  |
| 2019/05/21 | CH2206 | Male | Three y/o | Treatment (Wk 1) | Treatment | Feed Day | No | 22:00 | 22:00 - 22:59 | Night   | 37,5 | 92  | 27,4 | 27,4 | 18,65 | 587,78 | 111,09 |
| 2019/05/21 | CH2205 | Male | Three y/o | Treatment (Wk 1) | Treatment | Feed Day | No | 22:05 | 22:00 - 22:59 | Night   | 37,7 |     | 11,6 | 11,6 | 18,85 |        | 81,78  |



|   |            |        |      |           |                  |           |          |    |       |               |               |      |     |      |      |       |        |        |
|---|------------|--------|------|-----------|------------------|-----------|----------|----|-------|---------------|---------------|------|-----|------|------|-------|--------|--------|
|   | 2019/05/21 | CH2206 | Male | Three y/o | Treatment (Wk 1) | Treatment | Feed Day | No | 22:05 | 22:00 - 22:59 | Night         | 37,5 | 63  | 25,8 | 25,8 | 18,65 | 558,62 | 109,02 |
|   | 2019/05/21 | CH2205 | Male | Three y/o | Treatment (Wk 1) | Treatment | Feed Day | No | 22:10 | 22:00 - 22:59 | Night         | 37,9 | 49  | 20,4 | 20,4 | 19,05 | 537,80 | 100,99 |
|   | 2019/05/21 | CH2206 | Male | Three y/o | Treatment (Wk 1) | Treatment | Feed Day | No | 22:10 | 22:00 - 22:59 | Night         | 37,5 | 62  | 24,2 | 24,2 | 18,65 | 557,33 | 106,83 |
|   | 2019/05/21 | CH2205 | Male | Three y/o | Treatment (Wk 1) | Treatment | Feed Day | No | 22:15 | 22:00 - 22:59 | Night         | 37,9 | 44  | 13,2 | 13,2 | 19,05 | 528,51 | 86,17  |
|   | 2019/05/21 | CH2206 | Male | Three y/o | Treatment (Wk 1) | Treatment | Feed Day | No | 22:15 | 22:00 - 22:59 | Night         | 37,6 | 80  | 27,6 | 27,6 | 18,75 | 577,31 | 111,33 |
|   | 2019/05/21 | CH2205 | Male | Three y/o | Treatment (Wk 1) | Treatment | Feed Day | No | 22:20 | 22:00 - 22:59 | Night         | 37,9 | 51  | 13,2 | 13,2 | 19,05 | 541,20 | 86,17  |
|   | 2019/05/21 | CH2206 | Male | Three y/o | Treatment (Wk 1) | Treatment | Feed Day | No | 22:20 | 22:00 - 22:59 | Night         | 37,7 | 81  | 26,2 | 26,2 | 18,85 | 578,26 | 109,55 |
|   | 2019/05/21 | CH2205 | Male | Three y/o | Treatment (Wk 1) | Treatment | Feed Day | No | 22:25 | 22:00 - 22:59 | Night         | 37,9 | 47  | 25,8 | 25,8 | 19,05 | 534,23 | 109,02 |
|   | 2019/05/21 | CH2206 | Male | Three y/o | Treatment (Wk 1) | Treatment | Feed Day | No | 22:25 | 22:00 - 22:59 | Night         | 37,7 | 45  | 20,6 | 20,6 | 18,85 | 530,47 | 101,32 |
|   | 2019/05/21 | CH2205 | Male | Three y/o | Treatment (Wk 1) | Treatment | Feed Day | No | 22:30 | 22:00 - 22:59 | Night         | 37,9 | 67  | 15,8 | 15,8 | 19,05 | 563,53 | 92,28  |
|   | 2019/05/21 | CH2206 | Male | Three y/o | Treatment (Wk 1) | Treatment | Feed Day | No | 22:30 | 22:00 - 22:59 | Night         | 37,7 | 82  | 24,6 | 24,6 | 18,85 | 579,19 | 107,39 |
|   | 2019/05/21 | CH2205 | Male | Three y/o | Treatment (Wk 1) | Treatment | Feed Day | No | 22:35 | 22:00 - 22:59 | Night         | 37,9 | 104 | 15,8 | 15,8 | 19,05 | 596,69 | 92,28  |
|   | 2019/05/21 | CH2206 | Male | Three y/o | Treatment (Wk 1) | Treatment | Feed Day | No | 22:35 | 22:00 - 22:59 | Night         | 37,7 | 56  | 26,6 | 26,6 | 18,85 | 549,01 | 110,07 |
|   | 2019/05/21 | CH2205 | Male | Three y/o | Treatment (Wk 1) | Treatment | Feed Day | No | 22:40 | 22:00 - 22:59 | Night         | 37,9 | 79  | 18,4 | 18,4 | 19,05 | 576,36 | 97,47  |
|   | 2019/05/21 | CH2206 | Male | Three y/o | Treatment (Wk 1) | Treatment | Feed Day | No | 22:40 | 22:00 - 22:59 | Night         | 37,7 | 45  | 31,2 | 31,2 | 18,85 | 530,47 | 115,54 |
|   | 2019/05/21 | CH2205 | Male | Three y/o | Treatment (Wk 1) | Treatment | Feed Day | No | 22:45 | 22:00 - 22:59 | Night         | 37,9 | 47  | 18,8 | 18,8 | 19,05 | 534,23 | 98,20  |
|   | 2019/05/21 | CH2206 | Male | Three y/o | Treatment (Wk 1) | Treatment | Feed Day | No | 22:45 | 22:00 - 22:59 | Night         | 37,7 | 86  | 28,6 | 28,6 | 18,85 | 582,77 | 112,56 |
|   | 2019/05/21 | CH2205 | Male | Three y/o | Treatment (Wk 1) | Treatment | Feed Day | No | 22:50 | 22:00 - 22:59 | Night         | 37,9 | 61  | 20,6 | 20,6 | 19,05 | 556,01 | 101,32 |
|   | 2019/05/21 | CH2206 | Male | Three y/o | Treatment (Wk 1) | Treatment | Feed Day | No | 22:50 | 22:00 - 22:59 | Night         | 37,8 | 82  | 17,8 | 17,8 | 18,95 | 579,19 | 96,34  |
|   | 2019/05/21 | CH2205 | Male | Three y/o | Treatment (Wk 1) | Treatment | Feed Day | No | 22:55 | 22:00 - 22:59 | Night         | 37,9 | 93  | 19,2 | 19,2 | 19,05 | 588,58 | 98,92  |
|   | 2019/05/21 | CH2206 | Male | Three y/o | Treatment (Wk 1) | Treatment | Feed Day | No | 22:55 | 22:00 - 22:59 | Night         | 37,8 | 42  | 17,8 | 17,8 | 18,95 | 524,42 | 96,34  |
|   | 2019/05/21 | CH2205 | Male | Three y/o | Treatment (Wk 1) | Treatment | Feed Day | No | 23:00 | 23:00 - 23:59 | Night         | 37,9 | 64  | 19,6 | 19,6 | 19,05 | 559,88 | 99,63  |
|   | 2019/05/21 | CH2206 | Male | Three y/o | Treatment (Wk 1) | Treatment | Feed Day | No | 23:00 | 23:00 - 23:59 | Night         | 37,8 | 65  | 17,4 | 17,4 | 18,95 | 561,12 | 95,56  |
|   | 2019/05/21 | CH2205 | Male | Three y/o | Treatment (Wk 1) | Treatment | Feed Day | No | 23:05 | 23:00 - 23:59 | Night         | 37,9 | 59  | 20,0 | 20,0 | 19,05 | 553,30 | 100,31 |
|   | 2019/05/21 | CH2206 | Male | Three y/o | Treatment (Wk 1) | Treatment | Feed Day | No | 23:05 | 23:00 - 23:59 | Night         | 37,8 | 80  | 18,4 | 18,4 | 18,95 | 577,31 | 97,47  |
|   | 2019/05/21 | CH2205 | Male | Three y/o | Treatment (Wk 1) | Treatment | Feed Day | No | 23:10 | 23:00 - 23:59 | Night         | 37,9 | 86  | 20,8 | 20,8 | 19,05 | 582,77 | 101,65 |
|   | 2019/05/21 | CH2206 | Male | Three y/o | Treatment (Wk 1) | Treatment | Feed Day | No | 23:10 | 23:00 - 23:59 | Night         | 37,8 | 50  | 19,0 | 19,0 | 18,95 | 539,52 | 98,56  |
|   | 2019/05/21 | CH2205 | Male | Three y/o | Treatment (Wk 1) | Treatment | Feed Day | No | 23:15 | 23:00 - 23:59 | Night         | 37,9 | 47  | 23,8 | 23,8 | 19,05 | 534,23 | 106,26 |
|   | 2019/05/21 | CH2206 | Male | Three y/o | Treatment (Wk 1) | Treatment | Feed Day | No | 23:15 | 23:00 - 23:59 | Night         | 37,8 | 79  | 14,2 | 14,2 | 18,95 | 576,36 | 88,65  |
|   | 2019/05/21 | CH2205 | Male | Three y/o | Treatment (Wk 1) | Treatment | Feed Day | No | 23:20 | 23:00 - 23:59 | Night         | 37,9 | 59  | 37,0 | 37,0 | 19,05 | 553,30 | 121,40 |
|   | 2019/05/21 | CH2206 | Male | Three y/o | Treatment (Wk 1) | Treatment | Feed Day | No | 23:20 | 23:00 - 23:59 | Night         | 37,8 | 106 | 67,8 | 67,8 | 18,95 | 598,06 | 142,33 |
|   | 2019/05/21 | CH2205 | Male | Three y/o | Treatment (Wk 1) | Treatment | Feed Day | No | 23:25 | 23:00 - 23:59 | Night         | 37,7 | 94  | 15,2 | 15,2 | 18,85 | 589,37 | 90,96  |
|   | 2019/05/21 | CH2206 | Male | Three y/o | Treatment (Wk 1) | Treatment | Feed Day | No | 23:25 | 23:00 - 23:59 | Night         | 37,7 | 47  | 39,0 | 39,0 | 18,85 | 534,23 | 123,22 |
|   | 2019/05/21 | CH2205 | Male | Three y/o | Treatment (Wk 1) | Treatment | Feed Day | No | 23:30 | 23:00 - 23:59 | Night         | 37,7 | 58  | 9,0  | 9,0  | 18,85 | 551,90 | 73,19  |
|   | 2019/05/21 | CH2206 | Male | Three y/o | Treatment (Wk 1) | Treatment | Feed Day | No | 23:30 | 23:00 - 23:59 | Night         | 37,7 | 86  | 20,0 | 20,0 | 18,85 | 582,77 | 100,31 |
|   | 2019/05/21 | CH2205 | Male | Three y/o | Treatment (Wk 1) | Treatment | Feed Day | No | 23:35 | 23:00 - 23:59 | Night         | 37,7 | 77  | 11,0 | 11,0 | 18,85 | 574,39 | 79,98  |
|   | 2019/05/21 | CH2206 | Male | Three y/o | Treatment (Wk 1) | Treatment | Feed Day | No | 23:35 | 23:00 - 23:59 | Night         | 37,7 | 46  | 19,6 | 19,6 | 18,85 | 532,38 | 99,63  |
|   | 2019/05/21 | CH2205 | Male | Three y/o | Treatment (Wk 1) | Treatment | Feed Day | No | 23:40 | 23:00 - 23:59 | Night         | 37,7 | 48  | 11,6 | 11,6 | 18,85 | 536,04 | 81,78  |
|   | 2019/05/21 | CH2206 | Male | Three y/o | Treatment (Wk 1) | Treatment | Feed Day | No | 23:40 | 23:00 - 23:59 | Night         | 37,8 | 82  | 14,4 | 14,4 | 18,95 | 579,19 | 89,12  |
|   | 2019/05/21 | CH2205 | Male | Three y/o | Treatment (Wk 1) | Treatment | Feed Day | No | 23:45 | 23:00 - 23:59 | Night         | 37,7 | 62  | 10,0 | 10,0 | 18,85 | 557,33 | 76,76  |
|   | 2019/05/21 | CH2206 | Male | Three y/o | Treatment (Wk 1) | Treatment | Feed Day | No | 23:45 | 23:00 - 23:59 | Night         | 37,8 | 68  | 2,6  | 2,6  | 18,95 | 564,71 | 31,57  |
|   | 2019/05/21 | CH2205 | Male | Three y/o | Treatment (Wk 1) | Treatment | Feed Day | No | 23:50 | 23:00 - 23:59 | Night         | 37,7 |     | 30,2 | 30,2 | 18,85 |        | 114,42 |
|   | 2019/05/21 | CH2206 | Male | Three y/o | Treatment (Wk 1) | Treatment | Feed Day | No | 23:50 | 23:00 - 23:59 | Night         | 37,8 | 88  | 10,4 | 10,4 | 18,95 | 584,49 | 78,08  |
|   | 2019/05/21 | CH2205 | Male | Three y/o | Treatment (Wk 1) | Treatment | Feed Day | No | 23:55 | 23:00 - 23:59 | Night         | 37,9 | 63  | 7,6  | 7,6  | 19,05 | 558,62 | 67,49  |
|   | 2019/05/21 | CH2206 | Male | Three y/o | Treatment (Wk 1) | Treatment | Feed Day | No | 23:55 | 23:00 - 23:59 | Night         | 37,8 | 46  | 13,8 | 13,8 | 18,95 | 532,38 | 87,68  |
| 8 | 2019/05/22 | CH2205 | Male | Three y/o | Treatment (Wk 2) | Treatment | Fast Day | No | 00:00 | 00:00 - 00:59 | Early Morning | 37,9 | 58  | 7,4  | 7,4  | 19,05 | 551,90 | 66,59  |
|   | 2019/05/22 | CH2206 | Male | Three y/o | Treatment (Wk 2) | Treatment | Fast Day | No | 00:00 | 00:00 - 00:59 | Early Morning | 37,8 | 86  | 12,4 | 12,4 | 18,95 | 582,77 | 84,04  |
|   | 2019/05/22 | CH2205 | Male | Three y/o | Treatment (Wk 2) | Treatment | Fast Day | No | 00:05 | 00:00 - 00:59 | Early Morning | 37,8 | 52  | 7,0  | 7,0  | 18,95 | 542,83 | 64,72  |
|   | 2019/05/22 | CH2206 | Male | Three y/o | Treatment (Wk 2) | Treatment | Fast Day | No | 00:05 | 00:00 - 00:59 | Early Morning | 37,8 | 90  | 10,2 | 10,2 | 18,95 | 586,16 | 77,43  |
|   | 2019/05/22 | CH2205 | Male | Three y/o | Treatment (Wk 2) | Treatment | Fast Day | No | 00:10 | 00:00 - 00:59 | Early Morning | 37,7 | 92  | 7,4  | 7,4  | 18,85 | 587,78 | 66,59  |
|   | 2019/05/22 | CH2206 | Male | Three y/o | Treatment (Wk 2) | Treatment | Fast Day | No | 00:10 | 00:00 - 00:59 | Early Morning | 37,8 | 99  | 14,8 | 14,8 | 18,95 | 593,14 | 90,05  |
|   | 2019/05/22 | CH2205 | Male | Three y/o | Treatment (Wk 2) | Treatment | Fast Day | No | 00:15 | 00:00 - 00:59 | Early Morning | 37,7 | 45  | 8,2  | 8,2  | 18,85 | 530,47 | 70,05  |
|   | 2019/05/22 | CH2206 | Male | Three y/o | Treatment (Wk 2) | Treatment | Fast Day | No | 00:15 | 00:00 - 00:59 | Early Morning | 37,8 | 82  | 10,0 | 10,0 | 18,95 | 579,19 | 76,76  |
|   | 2019/05/22 | CH2205 | Male | Three y/o | Treatment (Wk 2) | Treatment | Fast Day | No | 00:20 | 00:00 - 00:59 | Early Morning | 37,7 | 59  | 8,2  | 8,2  | 18,85 | 553,30 | 70,05  |
|   | 2019/05/22 | CH2206 | Male | Three y/o | Treatment (Wk 2) | Treatment | Fast Day | No | 00:20 | 00:00 - 00:59 | Early Morning | 37,8 | 55  | 11,8 | 11,8 | 18,95 | 547,52 | 82,36  |
|   | 2019/05/22 | CH2205 | Male | Three y/o | Treatment (Wk 2) | Treatment | Fast Day | No | 00:25 | 00:00 - 00:59 | Early Morning | 37,7 |     | 4,0  | 4,0  | 18,85 |        | 45,94  |
|   | 2019/05/22 | CH2206 | Male | Three y/o | Treatment (Wk 2) | Treatment | Fast Day | No | 00:25 | 00:00 - 00:59 | Early Morning | 37,8 | 100 | 4,2  | 4,2  | 18,95 | 593,87 | 47,57  |
|   | 2019/05/22 | CH2205 | Male | Three y/o | Treatment (Wk 2) | Treatment | Fast Day | No | 00:30 | 00:00 - 00:59 | Early Morning | 37,7 | 103 | 7,0  | 7,0  | 18,85 | 596,00 | 64,72  |
|   | 2019/05/22 | CH2206 | Male | Three y/o | Treatment (Wk 2) | Treatment | Fast Day | No | 00:30 | 00:00 - 00:59 | Early Morning | 37,8 | 104 | 3,6  | 3,6  | 18,95 | 596,69 | 42,42  |
|   | 2019/05/22 | CH2205 | Male | Three y/o | Treatment (Wk 2) | Treatment | Fast Day | No | 00:35 | 00:00 - 00:59 | Early Morning | 37,7 | 86  | 8,4  | 8,4  | 18,85 | 582,77 | 70,86  |
|   | 2019/05/22 | CH2206 | Male | Three y/o | Treatment (Wk 2) | Treatment | Fast Day | No | 00:35 | 00:00 - 00:59 | Early Morning | 37,8 | 54  | 5,4  | 5,4  | 18,95 | 545,99 | 55,99  |
|   | 2019/05/22 | CH2205 | Male | Three y/o | Treatment (Wk 2) | Treatment | Fast Day | No | 00:40 | 00:00 - 00:59 | Early Morning | 37,7 | 55  | 9,2  | 9,2  | 18,85 | 547,52 | 73,94  |
|   | 2019/05/22 | CH2206 | Male | Three y/o | Treatment (Wk 2) | Treatment | Fast Day | No | 00:40 | 00:00 - 00:59 | Early Morning | 37,8 | 43  | 4,4  | 4,4  | 18,95 | 526,50 | 49,12  |
|   | 2019/05/22 | CH2205 | Male | Three y/o | Treatment (Wk 2) | Treatment | Fast Day | No | 00:45 | 00:00 - 00:59 | Early Morning | 37,7 | 61  | 5,6  | 5,6  | 18,85 | 556,01 | 57,21  |
|   | 2019/05/22 | CH2206 | Male | Three y/o | Treatment (Wk 2) | Treatment | Fast Day | No | 00:45 | 00:00 - 00:59 | Early Morning | 37,8 | 84  | 7,8  | 7,8  | 18,95 | 581,01 | 68,36  |
|   | 2019/05/22 | CH2205 | Male | Three y/o | Treatment (Wk 2) | Treatment | Fast Day | No | 00:50 | 00:00 - 00:59 | Early Morning | 37,7 | 99  | 2,4  | 2,4  | 18,85 | 593,14 | 28,91  |
|   | 2019/05/22 | CH2206 | Male | Three y/o | Treatment (Wk 2) | Treatment | Fast Day | No | 00:50 | 00:00 - 00:59 | Early Morning | 37,8 | 83  | 4,8  | 4,8  | 18,95 | 580,11 | 52,04  |
|   | 2019/05/22 | CH2205 | Male | Three y/o | Treatment (Wk 2) | Treatment | Fast Day | No | 00:55 | 00:00 - 00:59 | Early Morning | 37,7 | 55  | 7,4  | 7,4  | 18,85 | 547,52 | 66,59  |
|   | 2019/05/22 | CH2206 | Male | Three y/o | Treatment (Wk 2) | Treatment | Fast Day | No | 00:55 | 00:00 - 00:59 | Early Morning | 37,8 | 84  | 4,8  | 4,8  | 18,95 | 581,01 | 52,04  |
|   | 2019/05/22 | CH2205 | Male | Three y/o | Treatment (Wk 2) | Treatment | Fast Day | No | 01:00 | 01:00 - 01:59 | Early Morning | 37,7 | 58  | 14,2 | 14,2 | 18,85 | 551,90 | 88,65  |



|            |        |      |           |                  |           |          |    |       |               |               |      |     |      |      |       |        |        |
|------------|--------|------|-----------|------------------|-----------|----------|----|-------|---------------|---------------|------|-----|------|------|-------|--------|--------|
| 2019/05/22 | CH2206 | Male | Three y/o | Treatment (Wk 2) | Treatment | Fast Day | No | 01:00 | 01:00 - 01:59 | Early Morning | 37,8 | 79  | 3,6  | 3,6  | 18,95 | 576,36 | 42,42  |
| 2019/05/22 | CH2205 | Male | Three y/o | Treatment (Wk 2) | Treatment | Fast Day | No | 01:05 | 01:00 - 01:59 | Early Morning | 37,7 | 99  | 11,4 | 11,4 | 18,85 | 593,14 | 81,19  |
| 2019/05/22 | CH2206 | Male | Three y/o | Treatment (Wk 2) | Treatment | Fast Day | No | 01:05 | 01:00 - 01:59 | Early Morning | 37,8 | 56  | 1,2  | 1,2  | 18,95 | 549,01 | 5,99   |
| 2019/05/22 | CH2205 | Male | Three y/o | Treatment (Wk 2) | Treatment | Fast Day | No | 01:10 | 01:00 - 01:59 | Early Morning | 37,7 | 90  | 10,4 | 10,4 | 18,85 | 586,16 | 78,08  |
| 2019/05/22 | CH2206 | Male | Three y/o | Treatment (Wk 2) | Treatment | Fast Day | No | 01:10 | 01:00 - 01:59 | Early Morning | 37,8 | 76  | 1,2  | 1,2  | 18,95 | 573,39 | 5,99   |
| 2019/05/22 | CH2205 | Male | Three y/o | Treatment (Wk 2) | Treatment | Fast Day | No | 01:15 | 01:00 - 01:59 | Early Morning | 37,7 | 61  | 13,0 | 13,0 | 18,85 | 556,01 | 85,65  |
| 2019/05/22 | CH2206 | Male | Three y/o | Treatment (Wk 2) | Treatment | Fast Day | No | 01:15 | 01:00 - 01:59 | Early Morning | 37,8 | 91  | 2,6  | 2,6  | 18,95 | 586,98 | 31,57  |
| 2019/05/22 | CH2205 | Male | Three y/o | Treatment (Wk 2) | Treatment | Fast Day | No | 01:20 | 01:00 - 01:59 | Early Morning | 37,7 | 57  | 8,2  | 8,2  | 18,85 | 550,47 | 70,05  |
| 2019/05/22 | CH2206 | Male | Three y/o | Treatment (Wk 2) | Treatment | Fast Day | No | 01:20 | 01:00 - 01:59 | Early Morning | 37,8 | 79  | 7,2  | 7,2  | 18,95 | 576,36 | 65,66  |
| 2019/05/22 | CH2205 | Male | Three y/o | Treatment (Wk 2) | Treatment | Fast Day | No | 01:25 | 01:00 - 01:59 | Early Morning | 37,7 | 45  | 13,0 | 13,0 | 18,85 | 530,47 | 85,65  |
| 2019/05/22 | CH2206 | Male | Three y/o | Treatment (Wk 2) | Treatment | Fast Day | No | 01:25 | 01:00 - 01:59 | Early Morning | 37,8 | 44  | 13,4 | 13,4 | 18,95 | 528,51 | 86,68  |
| 2019/05/22 | CH2205 | Male | Three y/o | Treatment (Wk 2) | Treatment | Fast Day | No | 01:30 | 01:00 - 01:59 | Early Morning | 37,7 | 51  | 9,8  | 9,8  | 18,85 | 541,20 | 76,07  |
| 2019/05/22 | CH2206 | Male | Three y/o | Treatment (Wk 2) | Treatment | Fast Day | No | 01:30 | 01:00 - 01:59 | Early Morning | 37,8 | 86  | 11,2 | 11,2 | 18,95 | 582,77 | 80,59  |
| 2019/05/22 | CH2205 | Male | Three y/o | Treatment (Wk 2) | Treatment | Fast Day | No | 01:35 | 01:00 - 01:59 | Early Morning | 37,7 | 90  | 9,6  | 9,6  | 18,85 | 586,16 | 75,37  |
| 2019/05/22 | CH2206 | Male | Three y/o | Treatment (Wk 2) | Treatment | Fast Day | No | 01:35 | 01:00 - 01:59 | Early Morning | 37,8 | 94  | 10,6 | 10,6 | 18,95 | 589,37 | 78,73  |
| 2019/05/22 | CH2205 | Male | Three y/o | Treatment (Wk 2) | Treatment | Fast Day | No | 01:40 | 01:00 - 01:59 | Early Morning | 37,7 | 48  | 11,4 | 11,4 | 18,85 | 536,04 | 81,19  |
| 2019/05/22 | CH2206 | Male | Three y/o | Treatment (Wk 2) | Treatment | Fast Day | No | 01:40 | 01:00 - 01:59 | Early Morning | 37,8 | 93  | 10,2 | 10,2 | 18,95 | 588,58 | 77,43  |
| 2019/05/22 | CH2205 | Male | Three y/o | Treatment (Wk 2) | Treatment | Fast Day | No | 01:45 | 01:00 - 01:59 | Early Morning | 37,7 | 75  | 13,2 | 13,2 | 18,85 | 572,36 | 86,17  |
| 2019/05/22 | CH2206 | Male | Three y/o | Treatment (Wk 2) | Treatment | Fast Day | No | 01:45 | 01:00 - 01:59 | Early Morning | 37,8 | 76  | 13,2 | 13,2 | 18,95 | 573,39 | 86,17  |
| 2019/05/22 | CH2205 | Male | Three y/o | Treatment (Wk 2) | Treatment | Fast Day | No | 01:50 | 01:00 - 01:59 | Early Morning | 37,7 | 48  | 9,4  | 9,4  | 18,85 | 536,04 | 74,66  |
| 2019/05/22 | CH2206 | Male | Three y/o | Treatment (Wk 2) | Treatment | Fast Day | No | 01:50 | 01:00 - 01:59 | Early Morning | 37,8 | 50  | 14,6 | 14,6 | 18,95 | 539,52 | 89,59  |
| 2019/05/22 | CH2205 | Male | Three y/o | Treatment (Wk 2) | Treatment | Fast Day | No | 01:55 | 01:00 - 01:59 | Early Morning | 37,7 | 55  | 13,2 | 13,2 | 18,85 | 547,52 | 86,17  |
| 2019/05/22 | CH2206 | Male | Three y/o | Treatment (Wk 2) | Treatment | Fast Day | No | 01:55 | 01:00 - 01:59 | Early Morning | 37,8 | 79  | 12,6 | 12,6 | 18,95 | 576,36 | 84,59  |
| 2019/05/22 | CH2205 | Male | Three y/o | Treatment (Wk 2) | Treatment | Fast Day | No | 02:00 | 02:00 - 02:59 | Early Morning | 37,7 | 94  | 15,4 | 15,4 | 18,85 | 589,37 | 91,41  |
| 2019/05/22 | CH2206 | Male | Three y/o | Treatment (Wk 2) | Treatment | Fast Day | No | 02:00 | 02:00 - 02:59 | Early Morning | 37,8 | 62  | 8,6  | 8,6  | 18,95 | 557,33 | 71,66  |
| 2019/05/22 | CH2205 | Male | Three y/o | Treatment (Wk 2) | Treatment | Fast Day | No | 02:05 | 02:00 - 02:59 | Early Morning | 37,7 | 46  | 16,2 | 16,2 | 18,85 | 532,38 | 93,13  |
| 2019/05/22 | CH2206 | Male | Three y/o | Treatment (Wk 2) | Treatment | Fast Day | No | 02:05 | 02:00 - 02:59 | Early Morning | 37,8 | 45  | 11,0 | 11,0 | 18,95 | 530,47 | 79,98  |
| 2019/05/22 | CH2205 | Male | Three y/o | Treatment (Wk 2) | Treatment | Fast Day | No | 02:10 | 02:00 - 02:59 | Early Morning | 37,7 | 57  | 31,2 | 31,2 | 18,85 | 550,47 | 115,54 |
| 2019/05/22 | CH2206 | Male | Three y/o | Treatment (Wk 2) | Treatment | Fast Day | No | 02:10 | 02:00 - 02:59 | Early Morning | 37,8 |     | 59,0 | 59,0 | 18,95 |        | 137,51 |
| 2019/05/22 | CH2205 | Male | Three y/o | Treatment (Wk 2) | Treatment | Fast Day | No | 02:15 | 02:00 - 02:59 | Early Morning | 37,7 | 88  | 49,6 | 49,6 | 18,85 | 584,49 | 131,51 |
| 2019/05/22 | CH2206 | Male | Three y/o | Treatment (Wk 2) | Treatment | Fast Day | No | 02:15 | 02:00 - 02:59 | Early Morning | 37,8 | 91  | 58,8 | 58,8 | 18,95 | 586,98 | 137,39 |
| 2019/05/22 | CH2205 | Male | Three y/o | Treatment (Wk 2) | Treatment | Fast Day | No | 02:20 | 02:00 - 02:59 | Early Morning | 37,6 | 92  | 28,8 | 28,8 | 18,75 | 587,78 | 112,79 |
| 2019/05/22 | CH2206 | Male | Three y/o | Treatment (Wk 2) | Treatment | Fast Day | No | 02:20 | 02:00 - 02:59 | Early Morning | 37,8 | 84  | 39,4 | 39,4 | 18,95 | 581,01 | 123,57 |
| 2019/05/22 | CH2205 | Male | Three y/o | Treatment (Wk 2) | Treatment | Fast Day | No | 02:25 | 02:00 - 02:59 | Early Morning | 37,5 | 50  | 22,6 | 22,6 | 18,65 | 539,52 | 104,49 |
| 2019/05/22 | CH2206 | Male | Three y/o | Treatment (Wk 2) | Treatment | Fast Day | No | 02:25 | 02:00 - 02:59 | Early Morning | 37,7 | 51  | 33,4 | 33,4 | 18,85 | 541,20 | 117,88 |
| 2019/05/22 | CH2205 | Male | Three y/o | Treatment (Wk 2) | Treatment | Fast Day | No | 02:30 | 02:00 - 02:59 | Early Morning | 37,5 | 85  | 5,6  | 5,6  | 18,65 | 581,90 | 57,21  |
| 2019/05/22 | CH2206 | Male | Three y/o | Treatment (Wk 2) | Treatment | Fast Day | No | 02:30 | 02:00 - 02:59 | Early Morning | 37,5 | 61  | 12,0 | 12,0 | 18,65 | 556,01 | 82,93  |
| 2019/05/22 | CH2205 | Male | Three y/o | Treatment (Wk 2) | Treatment | Fast Day | No | 02:35 | 02:00 - 02:59 | Early Morning | 37,5 | 84  | 3,8  | 3,8  | 18,65 | 581,01 | 44,22  |
| 2019/05/22 | CH2206 | Male | Three y/o | Treatment (Wk 2) | Treatment | Fast Day | No | 02:35 | 02:00 - 02:59 | Early Morning | 37,5 | 48  | 24,2 | 24,2 | 18,65 | 536,04 | 106,83 |
| 2019/05/22 | CH2205 | Male | Three y/o | Treatment (Wk 2) | Treatment | Fast Day | No | 02:40 | 02:00 - 02:59 | Early Morning | 37,4 | 55  | 5,4  | 5,4  | 18,55 | 547,52 | 55,99  |
| 2019/05/22 | CH2206 | Male | Three y/o | Treatment (Wk 2) | Treatment | Fast Day | No | 02:40 | 02:00 - 02:59 | Early Morning | 37,5 | 83  | 13,8 | 13,8 | 18,65 | 580,11 | 87,68  |
| 2019/05/22 | CH2205 | Male | Three y/o | Treatment (Wk 2) | Treatment | Fast Day | No | 02:45 | 02:00 - 02:59 | Early Morning | 37,5 | 62  | 14,2 | 14,2 | 18,65 | 557,33 | 88,65  |
| 2019/05/22 | CH2206 | Male | Three y/o | Treatment (Wk 2) | Treatment | Fast Day | No | 02:45 | 02:00 - 02:59 | Early Morning | 37,6 | 74  | 7,8  | 7,8  | 18,75 | 571,33 | 68,36  |
| 2019/05/22 | CH2205 | Male | Three y/o | Treatment (Wk 2) | Treatment | Fast Day | No | 02:50 | 02:00 - 02:59 | Early Morning | 37,5 | 83  | 9,2  | 9,2  | 18,65 | 580,11 | 73,94  |
| 2019/05/22 | CH2206 | Male | Three y/o | Treatment (Wk 2) | Treatment | Fast Day | No | 02:50 | 02:00 - 02:59 | Early Morning | 37,5 | 76  | 13,2 | 13,2 | 18,65 | 573,39 | 86,17  |
| 2019/05/22 | CH2205 | Male | Three y/o | Treatment (Wk 2) | Treatment | Fast Day | No | 02:55 | 02:00 - 02:59 | Early Morning | 37,5 | 91  | 18,4 | 18,4 | 18,65 | 586,98 | 97,47  |
| 2019/05/22 | CH2206 | Male | Three y/o | Treatment (Wk 2) | Treatment | Fast Day | No | 02:55 | 02:00 - 02:59 | Early Morning | 37,5 | 60  | 10,2 | 10,2 | 18,65 | 554,67 | 77,43  |
| 2019/05/22 | CH2205 | Male | Three y/o | Treatment (Wk 2) | Treatment | Fast Day | No | 03:00 | 03:00 - 03:59 | Early Morning | 37,5 | 68  | 16,4 | 16,4 | 18,65 | 564,71 | 93,55  |
| 2019/05/22 | CH2206 | Male | Three y/o | Treatment (Wk 2) | Treatment | Fast Day | No | 03:00 | 03:00 - 03:59 | Early Morning | 37,5 | 61  | 10,0 | 10,0 | 18,65 | 556,01 | 76,76  |
| 2019/05/22 | CH2205 | Male | Three y/o | Treatment (Wk 2) | Treatment | Fast Day | No | 03:05 | 03:00 - 03:59 | Early Morning | 37,5 | 75  | 15,0 | 15,0 | 18,65 | 572,36 | 90,51  |
| 2019/05/22 | CH2206 | Male | Three y/o | Treatment (Wk 2) | Treatment | Fast Day | No | 03:05 | 03:00 - 03:59 | Early Morning | 37,5 | 58  | 11,6 | 11,6 | 18,65 | 551,90 | 81,78  |
| 2019/05/22 | CH2205 | Male | Three y/o | Treatment (Wk 2) | Treatment | Fast Day | No | 03:10 | 03:00 - 03:59 | Early Morning | 37,6 | 52  | 19,2 | 19,2 | 18,75 | 542,83 | 98,92  |
| 2019/05/22 | CH2206 | Male | Three y/o | Treatment (Wk 2) | Treatment | Fast Day | No | 03:10 | 03:00 - 03:59 | Early Morning | 37,5 | 59  | 17,0 | 17,0 | 18,65 | 553,30 | 94,77  |
| 2019/05/22 | CH2205 | Male | Three y/o | Treatment (Wk 2) | Treatment | Fast Day | No | 03:15 | 03:00 - 03:59 | Early Morning | 37,6 | 83  | 16,2 | 16,2 | 18,75 | 580,11 | 93,13  |
| 2019/05/22 | CH2206 | Male | Three y/o | Treatment (Wk 2) | Treatment | Fast Day | No | 03:15 | 03:00 - 03:59 | Early Morning | 37,5 | 50  | 9,6  | 9,6  | 18,65 | 539,52 | 75,37  |
| 2019/05/22 | CH2205 | Male | Three y/o | Treatment (Wk 2) | Treatment | Fast Day | No | 03:20 | 03:00 - 03:59 | Early Morning | 37,6 | 58  | 10,2 | 10,2 | 18,75 | 551,90 | 77,43  |
| 2019/05/22 | CH2206 | Male | Three y/o | Treatment (Wk 2) | Treatment | Fast Day | No | 03:20 | 03:00 - 03:59 | Early Morning | 37,5 | 81  | 9,8  | 9,8  | 18,65 | 578,26 | 76,07  |
| 2019/05/22 | CH2205 | Male | Three y/o | Treatment (Wk 2) | Treatment | Fast Day | No | 03:25 | 03:00 - 03:59 | Early Morning | 37,6 | 70  | 14,0 | 14,0 | 18,75 | 566,99 | 88,17  |
| 2019/05/22 | CH2206 | Male | Three y/o | Treatment (Wk 2) | Treatment | Fast Day | No | 03:25 | 03:00 - 03:59 | Early Morning | 37,4 | 92  | 13,0 | 13,0 | 18,55 | 587,78 | 85,65  |
| 2019/05/22 | CH2205 | Male | Three y/o | Treatment (Wk 2) | Treatment | Fast Day | No | 03:30 | 03:00 - 03:59 | Early Morning | 37,6 | 78  | 2,6  | 2,6  | 18,75 | 575,38 | 31,57  |
| 2019/05/22 | CH2206 | Male | Three y/o | Treatment (Wk 2) | Treatment | Fast Day | No | 03:30 | 03:00 - 03:59 | Early Morning | 37,4 | 48  | 4,6  | 4,6  | 18,55 | 536,04 | 50,61  |
| 2019/05/22 | CH2205 | Male | Three y/o | Treatment (Wk 2) | Treatment | Fast Day | No | 03:35 | 03:00 - 03:59 | Early Morning | 37,5 | 59  | 14,0 | 14,0 | 18,65 | 553,30 | 88,17  |
| 2019/05/22 | CH2206 | Male | Three y/o | Treatment (Wk 2) | Treatment | Fast Day | No | 03:35 | 03:00 - 03:59 | Early Morning | 37,5 | 57  | 6,6  | 6,6  | 18,65 | 550,47 | 62,73  |
| 2019/05/22 | CH2205 | Male | Three y/o | Treatment (Wk 2) | Treatment | Fast Day | No | 03:40 | 03:00 - 03:59 | Early Morning | 37,5 | 69  | 10,6 | 10,6 | 18,65 | 565,86 | 78,73  |
| 2019/05/22 | CH2206 | Male | Three y/o | Treatment (Wk 2) | Treatment | Fast Day | No | 03:40 | 03:00 - 03:59 | Early Morning | 37,4 | 80  | 5,6  | 5,6  | 18,55 | 577,31 | 57,21  |
| 2019/05/22 | CH2205 | Male | Three y/o | Treatment (Wk 2) | Treatment | Fast Day | No | 03:45 | 03:00 - 03:59 | Early Morning | 37,5 | 82  | 7,0  | 7,0  | 18,65 | 579,19 | 64,72  |
| 2019/05/22 | CH2206 | Male | Three y/o | Treatment (Wk 2) | Treatment | Fast Day | No | 03:45 | 03:00 - 03:59 | Early Morning | 37,4 | 45  | 3,6  | 3,6  | 18,55 | 530,47 | 42,42  |
| 2019/05/22 | CH2205 | Male | Three y/o | Treatment (Wk 2) | Treatment | Fast Day | No | 03:50 | 03:00 - 03:59 | Early Morning | 37,5 | 55  | 6,4  | 6,4  | 18,65 | 547,52 | 61,70  |
| 2019/05/22 | CH2206 | Male | Three y/o | Treatment (Wk 2) | Treatment | Fast Day | No | 03:50 | 03:00 - 03:59 | Early Morning | 37,3 | 105 | 18,4 | 18,4 | 18,46 | 597,38 | 97,47  |
| 2019/05/22 | CH2205 | Male | Three y/o | Treatment (Wk 2) | Treatment | Fast Day | No | 03:55 | 03:00 - 03:59 | Early Morning | 37,4 | 49  | 10,2 | 10,2 | 18,55 | 537,80 | 77,43  |



|            |        |      |           |                  |           |          |    |       |               |               |      |     |       |       |       |        |        |
|------------|--------|------|-----------|------------------|-----------|----------|----|-------|---------------|---------------|------|-----|-------|-------|-------|--------|--------|
| 2019/05/22 | CH2206 | Male | Three y/o | Treatment (Wk 2) | Treatment | Fast Day | No | 03:55 | 03:00 - 03:59 | Early Morning | 37,3 | 90  | 8,4   | 8,4   | 18,46 | 586,16 | 70,86  |
| 2019/05/22 | CH2205 | Male | Three y/o | Treatment (Wk 2) | Treatment | Fast Day | No | 04:00 | 04:00 - 04:59 | Morning       | 37,4 | 49  | 15,4  | 15,4  | 18,55 | 537,80 | 91,41  |
| 2019/05/22 | CH2206 | Male | Three y/o | Treatment (Wk 2) | Treatment | Fast Day | No | 04:00 | 04:00 - 04:59 | Morning       | 37,3 | 71  | 7,4   | 7,4   | 18,46 | 568,10 | 66,59  |
| 2019/05/22 | CH2205 | Male | Three y/o | Treatment (Wk 2) | Treatment | Fast Day | No | 04:05 | 04:00 - 04:59 | Morning       | 37,4 | 65  | 12,2  | 12,2  | 18,55 | 561,12 | 83,49  |
| 2019/05/22 | CH2206 | Male | Three y/o | Treatment (Wk 2) | Treatment | Fast Day | No | 04:05 | 04:00 - 04:59 | Morning       | 37,2 | 79  | 5,2   | 5,2   | 18,36 | 576,36 | 54,72  |
| 2019/05/22 | CH2205 | Male | Three y/o | Treatment (Wk 2) | Treatment | Fast Day | No | 04:10 | 04:00 - 04:59 | Morning       | 37,4 | 51  | 19,2  | 19,2  | 18,55 | 541,20 | 98,92  |
| 2019/05/22 | CH2206 | Male | Three y/o | Treatment (Wk 2) | Treatment | Fast Day | No | 04:10 | 04:00 - 04:59 | Morning       | 37,2 | 80  | 9,8   | 9,8   | 18,36 | 577,31 | 76,07  |
| 2019/05/22 | CH2205 | Male | Three y/o | Treatment (Wk 2) | Treatment | Fast Day | No | 04:15 | 04:00 - 04:59 | Morning       | 37,4 | 56  | 14,0  | 14,0  | 18,55 | 549,01 | 88,17  |
| 2019/05/22 | CH2206 | Male | Three y/o | Treatment (Wk 2) | Treatment | Fast Day | No | 04:15 | 04:00 - 04:59 | Morning       | 37,3 | 86  | 15,2  | 15,2  | 18,46 | 582,77 | 90,96  |
| 2019/05/22 | CH2205 | Male | Three y/o | Treatment (Wk 2) | Treatment | Fast Day | No | 04:20 | 04:00 - 04:59 | Morning       | 37,4 | 90  | 22,0  | 22,0  | 18,55 | 586,16 | 103,57 |
| 2019/05/22 | CH2206 | Male | Three y/o | Treatment (Wk 2) | Treatment | Fast Day | No | 04:20 | 04:00 - 04:59 | Morning       | 37,3 | 50  | 20,2  | 20,2  | 18,46 | 539,52 | 100,65 |
| 2019/05/22 | CH2205 | Male | Three y/o | Treatment (Wk 2) | Treatment | Fast Day | No | 04:25 | 04:00 - 04:59 | Morning       | 37,5 | 110 | 196,0 | 196,0 | 18,65 | 600,69 | 179,41 |
| 2019/05/22 | CH2206 | Male | Three y/o | Treatment (Wk 2) | Treatment | Fast Day | No | 04:25 | 04:00 - 04:59 | Morning       | 37,3 | 134 | 54,4  | 54,4  | 18,46 | 614,33 | 134,70 |
| 2019/05/22 | CH2205 | Male | Three y/o | Treatment (Wk 2) | Treatment | Fast Day | No | 04:30 | 04:00 - 04:59 | Morning       | 37,4 |     | 111,0 | 111,0 | 18,55 |        | 159,48 |
| 2019/05/22 | CH2206 | Male | Three y/o | Treatment (Wk 2) | Treatment | Fast Day | No | 04:30 | 04:00 - 04:59 | Morning       | 37,2 | 169 | 85,4  | 85,4  | 18,36 | 629,60 | 150,35 |
| 2019/05/22 | CH2205 | Male | Three y/o | Treatment (Wk 2) | Treatment | Fast Day | No | 04:35 | 04:00 - 04:59 | Morning       | 37,3 | 120 | 307,4 | 307,4 | 18,46 | 606,78 | 195,28 |
| 2019/05/22 | CH2206 | Male | Three y/o | Treatment (Wk 2) | Treatment | Fast Day | No | 04:35 | 04:00 - 04:59 | Morning       | 37,3 | 126 | 135,8 | 135,8 | 18,46 | 610,14 | 166,53 |
| 2019/05/22 | CH2205 | Male | Three y/o | Treatment (Wk 2) | Treatment | Fast Day | No | 04:40 | 04:00 - 04:59 | Morning       | 37,3 | 103 | 185,2 | 185,2 | 18,46 | 596,00 | 177,42 |
| 2019/05/22 | CH2206 | Male | Three y/o | Treatment (Wk 2) | Treatment | Fast Day | No | 04:40 | 04:00 - 04:59 | Morning       | 37,3 | 131 | 48,6  | 48,6  | 18,46 | 612,80 | 130,81 |
| 2019/05/22 | CH2205 | Male | Three y/o | Treatment (Wk 2) | Treatment | Fast Day | No | 04:45 | 04:00 - 04:59 | Morning       | 37,3 | 40  | 184,0 | 184,0 | 18,46 | 520,09 | 177,19 |
| 2019/05/22 | CH2206 | Male | Three y/o | Treatment (Wk 2) | Treatment | Fast Day | No | 04:45 | 04:00 - 04:59 | Morning       | 37,2 | 134 | 85,6  | 85,6  | 18,36 | 614,33 | 150,43 |
| 2019/05/22 | CH2205 | Male | Three y/o | Treatment (Wk 2) | Treatment | Fast Day | No | 04:50 | 04:00 - 04:59 | Morning       | 37,4 | 76  | 82,6  | 82,6  | 18,55 | 573,39 | 149,19 |
| 2019/05/22 | CH2206 | Male | Three y/o | Treatment (Wk 2) | Treatment | Fast Day | No | 04:50 | 04:00 - 04:59 | Morning       | 36,9 | 90  | 58,6  | 58,6  | 18,06 | 586,16 | 137,28 |
| 2019/05/22 | CH2205 | Male | Three y/o | Treatment (Wk 2) | Treatment | Fast Day | No | 04:55 | 04:00 - 04:59 | Morning       | 37,4 | 99  | 107,0 | 107,0 | 18,55 | 593,14 | 158,20 |
| 2019/05/22 | CH2206 | Male | Three y/o | Treatment (Wk 2) | Treatment | Fast Day | No | 04:55 | 04:00 - 04:59 | Morning       | 36,8 | 88  | 61,0  | 61,0  | 17,96 | 584,49 | 138,67 |
| 2019/05/22 | CH2205 | Male | Three y/o | Treatment (Wk 2) | Treatment | Fast Day | No | 05:00 | 05:00 - 05:59 | Morning       | 37,5 | 150 | 19,0  | 19,0  | 18,65 | 621,86 | 98,56  |
| 2019/05/22 | CH2206 | Male | Three y/o | Treatment (Wk 2) | Treatment | Fast Day | No | 05:00 | 05:00 - 05:59 | Morning       | 36,8 | 68  | 63,0  | 63,0  | 17,96 | 564,71 | 139,78 |
| 2019/05/22 | CH2205 | Male | Three y/o | Treatment (Wk 2) | Treatment | Fast Day | No | 05:05 | 05:00 - 05:59 | Morning       | 37,5 | 188 | 162,4 | 162,4 | 18,65 | 636,34 | 172,80 |
| 2019/05/22 | CH2206 | Male | Three y/o | Treatment (Wk 2) | Treatment | Fast Day | No | 05:05 | 05:00 - 05:59 | Morning       | 36,9 | 57  | 62,4  | 62,4  | 18,06 | 550,47 | 139,45 |
| 2019/05/22 | CH2205 | Male | Three y/o | Treatment (Wk 2) | Treatment | Fast Day | No | 05:10 | 05:00 - 05:59 | Morning       | 37,6 |     | 288,6 | 288,6 | 18,75 |        | 193,05 |
| 2019/05/22 | CH2206 | Male | Three y/o | Treatment (Wk 2) | Treatment | Fast Day | No | 05:10 | 05:00 - 05:59 | Morning       | 36,9 | 46  | 58,0  | 58,0  | 18,06 | 532,38 | 136,92 |
| 2019/05/22 | CH2205 | Male | Three y/o | Treatment (Wk 2) | Treatment | Fast Day | No | 05:15 | 05:00 - 05:59 | Morning       | 37,5 | 70  | 27,6  | 27,6  | 18,65 | 566,99 | 111,33 |
| 2019/05/22 | CH2206 | Male | Three y/o | Treatment (Wk 2) | Treatment | Fast Day | No | 05:15 | 05:00 - 05:59 | Morning       | 36,9 | 59  | 53,6  | 53,6  | 18,06 | 553,30 | 134,19 |
| 2019/05/22 | CH2205 | Male | Three y/o | Treatment (Wk 2) | Treatment | Fast Day | No | 05:20 | 05:00 - 05:59 | Morning       | 37,3 |     | 33,4  | 33,4  | 18,46 |        | 117,88 |
| 2019/05/22 | CH2206 | Male | Three y/o | Treatment (Wk 2) | Treatment | Fast Day | No | 05:20 | 05:00 - 05:59 | Morning       | 37,0 | 84  | 39,2  | 39,2  | 18,16 | 581,01 | 123,39 |
| 2019/05/22 | CH2205 | Male | Three y/o | Treatment (Wk 2) | Treatment | Fast Day | No | 05:25 | 05:00 - 05:59 | Morning       | 37,1 | 68  | 5,8   | 5,8   | 18,26 | 564,71 | 58,39  |
| 2019/05/22 | CH2206 | Male | Three y/o | Treatment (Wk 2) | Treatment | Fast Day | No | 05:25 | 05:00 - 05:59 | Morning       | 37,0 | 94  | 56,0  | 56,0  | 18,16 | 589,37 | 135,70 |
| 2019/05/22 | CH2205 | Male | Three y/o | Treatment (Wk 2) | Treatment | Fast Day | No | 05:30 | 05:00 - 05:59 | Morning       | 36,8 | 56  | 10,4  | 10,4  | 17,96 | 549,01 | 78,08  |
| 2019/05/22 | CH2206 | Male | Three y/o | Treatment (Wk 2) | Treatment | Fast Day | No | 05:30 | 05:00 - 05:59 | Morning       | 36,8 | 90  | 48,8  | 48,8  | 17,96 | 586,16 | 130,95 |
| 2019/05/22 | CH2205 | Male | Three y/o | Treatment (Wk 2) | Treatment | Fast Day | No | 05:35 | 05:00 - 05:59 | Morning       | 36,8 | 48  | 10,6  | 10,6  | 17,96 | 536,04 | 78,73  |
| 2019/05/22 | CH2206 | Male | Three y/o | Treatment (Wk 2) | Treatment | Fast Day | No | 05:35 | 05:00 - 05:59 | Morning       | 36,6 | 62  | 42,8  | 42,8  | 17,77 | 557,33 | 126,42 |
| 2019/05/22 | CH2205 | Male | Three y/o | Treatment (Wk 2) | Treatment | Fast Day | No | 05:40 | 05:00 - 05:59 | Morning       | 37,1 | 48  | 3,6   | 3,6   | 18,26 | 536,04 | 42,42  |
| 2019/05/22 | CH2206 | Male | Three y/o | Treatment (Wk 2) | Treatment | Fast Day | No | 05:40 | 05:00 - 05:59 | Morning       | 36,6 | 47  | 42,6  | 42,6  | 17,77 | 534,23 | 126,26 |
| 2019/05/22 | CH2205 | Male | Three y/o | Treatment (Wk 2) | Treatment | Fast Day | No | 05:45 | 05:00 - 05:59 | Morning       | 37,3 | 71  | 3,4   | 3,4   | 18,46 | 568,10 | 40,51  |
| 2019/05/22 | CH2206 | Male | Three y/o | Treatment (Wk 2) | Treatment | Fast Day | No | 05:45 | 05:00 - 05:59 | Morning       | 36,6 | 51  | 51,2  | 51,2  | 17,77 | 541,20 | 132,61 |
| 2019/05/22 | CH2205 | Male | Three y/o | Treatment (Wk 2) | Treatment | Fast Day | No | 05:50 | 05:00 - 05:59 | Morning       | 37,3 | 154 | 15,2  | 15,2  | 18,46 | 623,58 | 90,96  |
| 2019/05/22 | CH2206 | Male | Three y/o | Treatment (Wk 2) | Treatment | Fast Day | No | 05:50 | 05:00 - 05:59 | Morning       | 36,8 | 131 | 17,6  | 17,6  | 17,96 | 612,80 | 95,95  |
| 2019/05/22 | CH2205 | Male | Three y/o | Treatment (Wk 2) | Treatment | Fast Day | No | 05:55 | 05:00 - 05:59 | Morning       | 37,3 | 74  | 17,4  | 17,4  | 18,46 | 571,33 | 95,56  |
| 2019/05/22 | CH2206 | Male | Three y/o | Treatment (Wk 2) | Treatment | Fast Day | No | 05:55 | 05:00 - 05:59 | Morning       | 37,1 | 59  | 35,2  | 35,2  | 18,26 | 553,30 | 119,69 |
| 2019/05/22 | CH2205 | Male | Three y/o | Treatment (Wk 2) | Treatment | Fast Day | No | 06:00 | 06:00 - 06:59 | Morning       | 37,3 | 42  | 13,8  | 13,8  | 18,46 | 524,42 | 87,68  |
| 2019/05/22 | CH2206 | Male | Three y/o | Treatment (Wk 2) | Treatment | Fast Day | No | 06:00 | 06:00 - 06:59 | Morning       | 37,1 | 51  | 41,2  | 41,2  | 18,26 | 541,20 | 125,11 |
| 2019/05/22 | CH2205 | Male | Three y/o | Treatment (Wk 2) | Treatment | Fast Day | No | 06:05 | 06:00 - 06:59 | Morning       | 37,3 | 56  | 13,0  | 13,0  | 18,46 | 549,01 | 85,65  |
| 2019/05/22 | CH2206 | Male | Three y/o | Treatment (Wk 2) | Treatment | Fast Day | No | 06:05 | 06:00 - 06:59 | Morning       | 37,2 | 45  | 39,8  | 39,8  | 18,36 | 530,47 | 123,91 |
| 2019/05/22 | CH2205 | Male | Three y/o | Treatment (Wk 2) | Treatment | Fast Day | No | 06:10 | 06:00 - 06:59 | Morning       | 37,3 | 46  | 9,0   | 9,0   | 18,46 | 532,38 | 73,19  |
| 2019/05/22 | CH2206 | Male | Three y/o | Treatment (Wk 2) | Treatment | Fast Day | No | 06:10 | 06:00 - 06:59 | Morning       | 37,2 | 42  | 46,4  | 46,4  | 18,36 | 524,42 | 129,21 |
| 2019/05/22 | CH2205 | Male | Three y/o | Treatment (Wk 2) | Treatment | Fast Day | No | 06:15 | 06:00 - 06:59 | Morning       | 37,2 | 46  | 9,2   | 9,2   | 18,36 | 532,38 | 73,94  |
| 2019/05/22 | CH2206 | Male | Three y/o | Treatment (Wk 2) | Treatment | Fast Day | No | 06:15 | 06:00 - 06:59 | Morning       | 37,2 | 83  | 53,8  | 53,8  | 18,36 | 580,11 | 134,32 |
| 2019/05/22 | CH2205 | Male | Three y/o | Treatment (Wk 2) | Treatment | Fast Day | No | 06:20 | 06:00 - 06:59 | Morning       | 37,2 | 49  | 7,8   | 7,8   | 18,36 | 537,80 | 68,36  |
| 2019/05/22 | CH2206 | Male | Three y/o | Treatment (Wk 2) | Treatment | Fast Day | No | 06:20 | 06:00 - 06:59 | Morning       | 37,2 | 56  | 50,4  | 50,4  | 18,36 | 549,01 | 132,06 |
| 2019/05/22 | CH2205 | Male | Three y/o | Treatment (Wk 2) | Treatment | Fast Day | No | 06:25 | 06:00 - 06:59 | Morning       | 37,2 | 44  | 18,4  | 18,4  | 18,36 | 528,51 | 97,47  |
| 2019/05/22 | CH2206 | Male | Three y/o | Treatment (Wk 2) | Treatment | Fast Day | No | 06:25 | 06:00 - 06:59 | Morning       | 37,2 | 49  | 44,8  | 44,8  | 18,36 | 537,80 | 127,99 |
| 2019/05/22 | CH2205 | Male | Three y/o | Treatment (Wk 2) | Treatment | Fast Day | No | 06:30 | 06:00 - 06:59 | Morning       | 37,2 | 140 | 53,8  | 53,8  | 18,36 | 617,28 | 134,32 |
| 2019/05/22 | CH2206 | Male | Three y/o | Treatment (Wk 2) | Treatment | Fast Day | No | 06:30 | 06:00 - 06:59 | Morning       | 37,3 | 141 | 67,8  | 67,8  | 18,46 | 617,75 | 142,33 |
| 2019/05/22 | CH2205 | Male | Three y/o | Treatment (Wk 2) | Treatment | Fast Day | No | 06:35 | 06:00 - 06:59 | Morning       | 37,2 | 77  | 49,2  | 49,2  | 18,36 | 574,39 | 131,23 |
| 2019/05/22 | CH2206 | Male | Three y/o | Treatment (Wk 2) | Treatment | Fast Day | No | 06:35 | 06:00 - 06:59 | Morning       | 37,3 | 147 | 106,0 | 106,0 | 18,46 | 620,52 | 157,88 |
| 2019/05/22 | CH2205 | Male | Three y/o | Treatment (Wk 2) | Treatment | Fast Day | No | 06:40 | 06:00 - 06:59 | Morning       | 37,3 | 132 | 40,6  | 40,6  | 18,46 | 613,32 | 124,60 |
| 2019/05/22 | CH2206 | Male | Three y/o | Treatment (Wk 2) | Treatment | Fast Day | No | 06:40 | 06:00 - 06:59 | Morning       | 37,4 | 141 | 123,2 | 123,2 | 18,55 | 617,75 | 163,13 |
| 2019/05/22 | CH2205 | Male | Three y/o | Treatment (Wk 2) | Treatment | Fast Day | No | 06:45 | 06:00 - 06:59 | Morning       | 37,3 | 129 | 103,6 | 103,6 | 18,46 | 611,75 | 157,08 |
| 2019/05/22 | CH2206 | Male | Three y/o | Treatment (Wk 2) | Treatment | Fast Day | No | 06:45 | 06:00 - 06:59 | Morning       | 37,4 | 120 | 579,4 | 579,4 | 18,55 | 606,78 | 217,80 |
| 2019/05/22 | CH2205 | Male | Three y/o | Treatment (Wk 2) | Treatment | Fast Day | No | 06:50 | 06:00 - 06:59 | Morning       | 37,3 | 103 | 221,8 | 221,8 | 18,46 | 596,00 | 183,76 |



|            |        |      |           |                  |           |          |    |       |               |              |      |     |       |       |       |        |        |
|------------|--------|------|-----------|------------------|-----------|----------|----|-------|---------------|--------------|------|-----|-------|-------|-------|--------|--------|
| 2019/05/22 | CH2206 | Male | Three y/o | Treatment (Wk 2) | Treatment | Fast Day | No | 06:50 | 06:00 - 06:59 | Morning      | 37,5 | 119 | 52,0  | 52,0  | 18,65 | 606,20 | 133,14 |
| 2019/05/22 | CH2205 | Male | Three y/o | Treatment (Wk 2) | Treatment | Fast Day | No | 06:55 | 06:00 - 06:59 | Morning      | 37,4 | 66  | 346,8 | 346,8 | 18,55 | 562,34 | 199,55 |
| 2019/05/22 | CH2206 | Male | Three y/o | Treatment (Wk 2) | Treatment | Fast Day | No | 06:55 | 06:00 - 06:59 | Morning      | 37,5 | 124 | 290,4 | 290,4 | 18,65 | 609,04 | 193,27 |
| 2019/05/22 | CH2205 | Male | Three y/o | Treatment (Wk 2) | Treatment | Fast Day | No | 07:00 | 07:00 - 07:59 | Morning      | 37,5 | 107 | 135,0 | 135,0 | 18,65 | 598,73 | 166,33 |
| 2019/05/22 | CH2206 | Male | Three y/o | Treatment (Wk 2) | Treatment | Fast Day | No | 07:00 | 07:00 - 07:59 | Morning      | 37,6 | 126 | 284,0 | 284,0 | 18,75 | 610,14 | 192,48 |
| 2019/05/22 | CH2205 | Male | Three y/o | Treatment (Wk 2) | Treatment | Fast Day | No | 07:05 | 07:00 - 07:59 | Morning      | 37,4 | 55  | 117,0 | 117,0 | 18,55 | 547,52 | 161,32 |
| 2019/05/22 | CH2206 | Male | Three y/o | Treatment (Wk 2) | Treatment | Fast Day | No | 07:05 | 07:00 - 07:59 | Morning      | 37,5 | 126 | 91,0  | 91,0  | 18,65 | 610,14 | 152,56 |
| 2019/05/22 | CH2205 | Male | Three y/o | Treatment (Wk 2) | Treatment | Fast Day | No | 07:10 | 07:00 - 07:59 | Morning      | 37,6 | 115 | 87,0  | 87,0  | 18,75 | 603,82 | 150,99 |
| 2019/05/22 | CH2206 | Male | Three y/o | Treatment (Wk 2) | Treatment | Fast Day | No | 07:10 | 07:00 - 07:59 | Morning      | 37,9 | 140 | 300,6 | 300,6 | 19,05 | 617,28 | 194,49 |
| 2019/05/22 | CH2205 | Male | Three y/o | Treatment (Wk 2) | Treatment | Fast Day | No | 07:15 | 07:00 - 07:59 | Morning      | 37,5 |     | 336,4 | 336,4 | 18,65 |        | 198,47 |
| 2019/05/22 | CH2206 | Male | Three y/o | Treatment (Wk 2) | Treatment | Fast Day | No | 07:15 | 07:00 - 07:59 | Morning      | 37,8 | 117 | 215,4 | 215,4 | 18,95 | 605,02 | 182,73 |
| 2019/05/22 | CH2205 | Male | Three y/o | Treatment (Wk 2) | Treatment | Fast Day | No | 07:20 | 07:00 - 07:59 | Morning      | 37,5 | 103 | 131,0 | 131,0 | 18,65 | 596,00 | 165,27 |
| 2019/05/22 | CH2206 | Male | Three y/o | Treatment (Wk 2) | Treatment | Fast Day | No | 07:20 | 07:00 - 07:59 | Morning      | 37,8 |     | 345,4 | 345,4 | 18,95 |        | 199,41 |
| 2019/05/22 | CH2205 | Male | Three y/o | Treatment (Wk 2) | Treatment | Fast Day | No | 07:25 | 07:00 - 07:59 | Morning      | 37,7 |     | 157,0 | 157,0 | 18,85 |        | 171,62 |
| 2019/05/22 | CH2206 | Male | Three y/o | Treatment (Wk 2) | Treatment | Fast Day | No | 07:25 | 07:00 - 07:59 | Morning      | 37,8 | 105 | 137,2 | 137,2 | 18,95 |        | 597,38 |
| 2019/05/22 | CH2205 | Male | Three y/o | Treatment (Wk 2) | Treatment | Fast Day | No | 07:30 | 07:00 - 07:59 | Morning      | 37,6 | 59  | 56,2  | 56,2  | 18,75 | 553,30 | 135,83 |
| 2019/05/22 | CH2206 | Male | Three y/o | Treatment (Wk 2) | Treatment | Fast Day | No | 07:30 | 07:00 - 07:59 | Morning      | 37,8 | 125 | 175,8 | 175,8 | 18,95 | 609,60 | 175,59 |
| 2019/05/22 | CH2205 | Male | Three y/o | Treatment (Wk 2) | Treatment | Fast Day | No | 07:35 | 07:00 - 07:59 | Morning      | 37,5 | 101 | 74,4  | 74,4  | 18,65 | 594,59 | 145,55 |
| 2019/05/22 | CH2206 | Male | Three y/o | Treatment (Wk 2) | Treatment | Fast Day | No | 07:35 | 07:00 - 07:59 | Morning      | 37,9 | 135 | 191,6 | 191,6 | 19,05 | 614,84 | 178,61 |
| 2019/05/22 | CH2205 | Male | Three y/o | Treatment (Wk 2) | Treatment | Fast Day | No | 07:40 | 07:00 - 07:59 | Morning      | 37,5 | 68  | 44,0  | 44,0  | 18,65 | 564,71 | 127,37 |
| 2019/05/22 | CH2206 | Male | Three y/o | Treatment (Wk 2) | Treatment | Fast Day | No | 07:40 | 07:00 - 07:59 | Morning      | 37,8 | 110 | 138,2 | 138,2 | 18,95 | 600,69 | 167,15 |
| 2019/05/22 | CH2205 | Male | Three y/o | Treatment (Wk 2) | Treatment | Fast Day | No | 07:45 | 07:00 - 07:59 | Morning      | 37,6 | 106 | 33,6  | 33,6  | 18,75 | 598,06 | 118,09 |
| 2019/05/22 | CH2206 | Male | Three y/o | Treatment (Wk 2) | Treatment | Fast Day | No | 07:45 | 07:00 - 07:59 | Morning      | 37,8 | 64  | 174,6 | 174,6 | 18,95 | 559,88 | 175,34 |
| 2019/05/22 | CH2205 | Male | Three y/o | Treatment (Wk 2) | Treatment | Fast Day | No | 07:50 | 07:00 - 07:59 | Morning      | 37,5 | 50  | 268,4 | 268,4 | 18,65 | 539,52 | 190,49 |
| 2019/05/22 | CH2206 | Male | Three y/o | Treatment (Wk 2) | Treatment | Fast Day | No | 07:50 | 07:00 - 07:59 | Morning      | 37,7 | 134 | 179,4 | 179,4 | 18,85 | 614,33 | 176,30 |
| 2019/05/22 | CH2205 | Male | Three y/o | Treatment (Wk 2) | Treatment | Fast Day | No | 07:55 | 07:00 - 07:59 | Morning      | 37,5 | 117 | 118,6 | 118,6 | 18,65 | 605,02 | 161,80 |
| 2019/05/22 | CH2206 | Male | Three y/o | Treatment (Wk 2) | Treatment | Fast Day | No | 07:55 | 07:00 - 07:59 | Morning      | 37,7 | 118 | 146,2 | 146,2 | 18,85 | 605,61 | 169,12 |
| 2019/05/22 | CH2205 | Male | Three y/o | Treatment (Wk 2) | Treatment | Fast Day | No | 08:00 | 08:00 - 08:59 | Late Morning | 37,5 |     | 67,8  | 67,8  | 18,65 |        | 142,33 |
| 2019/05/22 | CH2206 | Male | Three y/o | Treatment (Wk 2) | Treatment | Fast Day | No | 08:00 | 08:00 - 08:59 | Late Morning | 37,7 | 114 | 139,8 | 139,8 | 18,85 | 603,20 | 167,55 |
| 2019/05/22 | CH2205 | Male | Three y/o | Treatment (Wk 2) | Treatment | Fast Day | No | 08:05 | 08:00 - 08:59 | Late Morning | 37,4 | 68  | 23,6  | 23,6  | 18,55 | 564,71 | 105,97 |
| 2019/05/22 | CH2206 | Male | Three y/o | Treatment (Wk 2) | Treatment | Fast Day | No | 08:05 | 08:00 - 08:59 | Late Morning | 37,8 | 129 | 152,0 | 152,0 | 18,95 | 611,75 | 170,48 |
| 2019/05/22 | CH2205 | Male | Three y/o | Treatment (Wk 2) | Treatment | Fast Day | No | 08:10 | 08:00 - 08:59 | Late Morning | 37,4 | 94  | 37,0  | 37,0  | 18,55 | 589,37 | 121,40 |
| 2019/05/22 | CH2206 | Male | Three y/o | Treatment (Wk 2) | Treatment | Fast Day | No | 08:10 | 08:00 - 08:59 | Late Morning | 37,7 | 132 | 225,6 | 225,6 | 18,85 | 613,32 | 184,36 |
| 2019/05/22 | CH2205 | Male | Three y/o | Treatment (Wk 2) | Treatment | Fast Day | No | 08:15 | 08:00 - 08:59 | Late Morning | 37,5 | 128 | 97,4  | 97,4  | 18,65 | 611,22 | 154,93 |
| 2019/05/22 | CH2206 | Male | Three y/o | Treatment (Wk 2) | Treatment | Fast Day | No | 08:15 | 08:00 - 08:59 | Late Morning | 37,5 | 84  | 129,2 | 129,2 | 18,65 | 581,01 | 164,79 |
| 2019/05/22 | CH2205 | Male | Three y/o | Treatment (Wk 2) | Treatment | Fast Day | No | 08:20 | 08:00 - 08:59 | Late Morning | 37,5 | 140 | 28,2  | 28,2  | 18,65 | 617,28 | 112,07 |
| 2019/05/22 | CH2206 | Male | Three y/o | Treatment (Wk 2) | Treatment | Fast Day | No | 08:20 | 08:00 - 08:59 | Late Morning | 37,4 | 128 | 105,0 | 105,0 | 18,55 | 611,22 | 157,55 |
| 2019/05/22 | CH2205 | Male | Three y/o | Treatment (Wk 2) | Treatment | Fast Day | No | 08:25 | 08:00 - 08:59 | Late Morning | 37,4 | 72  | 24,2  | 24,2  | 18,55 | 569,20 | 106,83 |
| 2019/05/22 | CH2206 | Male | Three y/o | Treatment (Wk 2) | Treatment | Fast Day | No | 08:25 | 08:00 - 08:59 | Late Morning | 37,5 | 58  | 58,6  | 58,6  | 18,65 | 551,90 | 137,28 |
| 2019/05/22 | CH2205 | Male | Three y/o | Treatment (Wk 2) | Treatment | Fast Day | No | 08:30 | 08:00 - 08:59 | Late Morning | 37,3 | 97  | 78,0  | 78,0  | 18,46 | 591,66 | 147,20 |
| 2019/05/22 | CH2206 | Male | Three y/o | Treatment (Wk 2) | Treatment | Fast Day | No | 08:30 | 08:00 - 08:59 | Late Morning | 37,5 |     | 57,4  | 57,4  | 18,65 |        | 136,56 |
| 2019/05/22 | CH2205 | Male | Three y/o | Treatment (Wk 2) | Treatment | Fast Day | No | 08:35 | 08:00 - 08:59 | Late Morning | 37,5 | 125 | 172,4 | 172,4 | 18,65 | 609,60 | 174,90 |
| 2019/05/22 | CH2206 | Male | Three y/o | Treatment (Wk 2) | Treatment | Fast Day | No | 08:35 | 08:00 - 08:59 | Late Morning | 37,7 | 128 | 107,8 | 107,8 | 18,85 | 611,22 | 158,46 |
| 2019/05/22 | CH2205 | Male | Three y/o | Treatment (Wk 2) | Treatment | Fast Day | No | 08:40 | 08:00 - 08:59 | Late Morning | 37,6 |     | 273,6 | 273,6 | 18,75 |        | 191,16 |
| 2019/05/22 | CH2206 | Male | Three y/o | Treatment (Wk 2) | Treatment | Fast Day | No | 08:40 | 08:00 - 08:59 | Late Morning | 37,7 | 120 | 181,0 | 181,0 | 18,85 | 606,78 | 176,61 |
| 2019/05/22 | CH2205 | Male | Three y/o | Treatment (Wk 2) | Treatment | Fast Day | No | 08:45 | 08:00 - 08:59 | Late Morning | 37,6 | 123 | 194,2 | 194,2 | 18,75 | 608,49 | 179,08 |
| 2019/05/22 | CH2206 | Male | Three y/o | Treatment (Wk 2) | Treatment | Fast Day | No | 08:45 | 08:00 - 08:59 | Late Morning | 37,7 | 114 | 167,8 | 167,8 | 18,85 | 603,20 | 173,95 |
| 2019/05/22 | CH2205 | Male | Three y/o | Treatment (Wk 2) | Treatment | Fast Day | No | 08:50 | 08:00 - 08:59 | Late Morning | 37,7 | 63  | 90,0  | 90,0  | 18,85 | 558,62 | 152,17 |
| 2019/05/22 | CH2206 | Male | Three y/o | Treatment (Wk 2) | Treatment | Fast Day | No | 08:50 | 08:00 - 08:59 | Late Morning | 37,7 | 180 | 96,0  | 96,0  | 18,85 | 633,61 | 154,42 |
| 2019/05/22 | CH2205 | Male | Three y/o | Treatment (Wk 2) | Treatment | Fast Day | No | 08:55 | 08:00 - 08:59 | Late Morning | 37,7 | 134 | 32,8  | 32,8  | 18,85 | 614,33 | 117,26 |
| 2019/05/22 | CH2206 | Male | Three y/o | Treatment (Wk 2) | Treatment | Fast Day | No | 08:55 | 08:00 - 08:59 | Late Morning | 37,7 | 109 | 114,2 | 114,2 | 18,85 | 600,04 | 160,48 |
| 2019/05/22 | CH2205 | Male | Three y/o | Treatment (Wk 2) | Treatment | Fast Day | No | 09:00 | 09:00 - 09:59 | Late Morning | 37,8 | 113 | 29,2  | 29,2  | 18,95 | 602,58 | 113,27 |
| 2019/05/22 | CH2206 | Male | Three y/o | Treatment (Wk 2) | Treatment | Fast Day | No | 09:00 | 09:00 - 09:59 | Late Morning | 37,7 | 109 | 17,6  | 17,6  | 18,85 | 600,04 | 95,95  |
| 2019/05/22 | CH2205 | Male | Three y/o | Treatment (Wk 2) | Treatment | Fast Day | No | 09:05 | 09:00 - 09:59 | Late Morning | 37,7 | 84  | 17,2  | 17,2  | 18,85 | 581,01 | 95,17  |
| 2019/05/22 | CH2206 | Male | Three y/o | Treatment (Wk 2) | Treatment | Fast Day | No | 09:05 | 09:00 - 09:59 | Late Morning | 37,7 | 72  | 38,0  | 38,0  | 18,85 | 569,20 | 122,32 |
| 2019/05/22 | CH2205 | Male | Three y/o | Treatment (Wk 2) | Treatment | Fast Day | No | 09:10 | 09:00 - 09:59 | Late Morning | 37,9 |     | 235,6 | 235,6 | 19,05 |        | 185,89 |
| 2019/05/22 | CH2206 | Male | Three y/o | Treatment (Wk 2) | Treatment | Fast Day | No | 09:10 | 09:00 - 09:59 | Late Morning | 37,9 |     | 263,4 | 263,4 | 19,05 |        | 189,82 |
| 2019/05/22 | CH2205 | Male | Three y/o | Treatment (Wk 2) | Treatment | Fast Day | No | 09:15 | 09:00 - 09:59 | Late Morning | 38,0 | 89  | 81,0  | 81,0  | 19,15 | 585,33 | 148,51 |
| 2019/05/22 | CH2206 | Male | Three y/o | Treatment (Wk 2) | Treatment | Fast Day | No | 09:15 | 09:00 - 09:59 | Late Morning | 37,9 | 113 | 270,4 | 270,4 | 19,05 | 602,58 | 190,75 |
| 2019/05/22 | CH2205 | Male | Three y/o | Treatment (Wk 2) | Treatment | Fast Day | No | 09:20 | 09:00 - 09:59 | Late Morning | 37,9 | 125 | 11,4  | 11,4  | 19,05 | 609,60 | 81,19  |
| 2019/05/22 | CH2206 | Male | Three y/o | Treatment (Wk 2) | Treatment | Fast Day | No | 09:20 | 09:00 - 09:59 | Late Morning | 37,9 | 120 | 310,4 | 310,4 | 19,05 | 606,78 | 195,63 |
| 2019/05/22 | CH2205 | Male | Three y/o | Treatment (Wk 2) | Treatment | Fast Day | No | 09:25 | 09:00 - 09:59 | Late Morning | 37,9 | 64  | 20,4  | 20,4  | 19,05 | 559,88 | 100,99 |
| 2019/05/22 | CH2206 | Male | Three y/o | Treatment (Wk 2) | Treatment | Fast Day | No | 09:25 | 09:00 - 09:59 | Late Morning | 37,9 | 51  | 188,6 | 188,6 | 19,05 | 541,20 | 178,05 |
| 2019/05/22 | CH2205 | Male | Three y/o | Treatment (Wk 2) | Treatment | Fast Day | No | 09:30 | 09:00 - 09:59 | Late Morning | 38,0 | 83  | 12,4  | 12,4  | 19,15 | 580,11 | 84,04  |
| 2019/05/22 | CH2206 | Male | Three y/o | Treatment (Wk 2) | Treatment | Fast Day | No | 09:30 | 09:00 - 09:59 | Late Morning | 37,9 | 113 | 320,2 | 320,2 | 19,05 | 602,58 | 196,73 |
| 2019/05/22 | CH2205 | Male | Three y/o | Treatment (Wk 2) | Treatment | Fast Day | No | 09:35 | 09:00 - 09:59 | Late Morning | 38,0 | 61  | 11,6  | 11,6  | 19,15 | 556,01 | 81,78  |
| 2019/05/22 | CH2206 | Male | Three y/o | Treatment (Wk 2) | Treatment | Fast Day | No | 09:35 | 09:00 - 09:59 | Late Morning | 37,9 | 128 | 235,8 | 235,8 | 19,05 | 611,22 | 185,92 |
| 2019/05/22 | CH2205 | Male | Three y/o | Treatment (Wk 2) | Treatment | Fast Day | No | 09:40 | 09:00 - 09:59 | Late Morning | 38,0 |     | 12,6  | 12,6  | 19,15 |        | 84,59  |
| 2019/05/22 | CH2206 | Male | Three y/o | Treatment (Wk 2) | Treatment | Fast Day | No | 09:40 | 09:00 - 09:59 | Late Morning | 37,8 | 111 | 380,6 | 380,6 | 18,95 | 601,33 | 202,85 |
| 2019/05/22 | CH2205 | Male | Three y/o | Treatment (Wk 2) | Treatment | Fast Day | No | 09:45 | 09:00 - 09:59 | Late Morning | 38,0 | 92  | 48,8  | 48,8  | 19,15 | 587,78 | 130,95 |



|            |        |      |           |                  |           |          |    |       |               |              |      |     |       |       |       |        |        |
|------------|--------|------|-----------|------------------|-----------|----------|----|-------|---------------|--------------|------|-----|-------|-------|-------|--------|--------|
| 2019/05/22 | CH2206 | Male | Three y/o | Treatment (Wk 2) | Treatment | Fast Day | No | 09:45 | 09:00 - 09:59 | Late Morning | 37,8 | 99  | 186,4 | 186,4 | 18,95 | 593,14 | 177,64 |
| 2019/05/22 | CH2205 | Male | Three y/o | Treatment (Wk 2) | Treatment | Fast Day | No | 09:50 | 09:00 - 09:59 | Late Morning | 38,0 |     | 71,8  | 71,8  | 19,15 |        | 144,32 |
| 2019/05/22 | CH2206 | Male | Three y/o | Treatment (Wk 2) | Treatment | Fast Day | No | 09:50 | 09:00 - 09:59 | Late Morning | 37,8 | 119 | 95,4  | 95,4  | 18,95 | 606,20 | 154,20 |
| 2019/05/22 | CH2205 | Male | Three y/o | Treatment (Wk 2) | Treatment | Fast Day | No | 09:55 | 09:00 - 09:59 | Late Morning | 37,9 | 64  | 11,4  | 11,4  | 19,05 | 559,88 | 81,19  |
| 2019/05/22 | CH2206 | Male | Three y/o | Treatment (Wk 2) | Treatment | Fast Day | No | 09:55 | 09:00 - 09:59 | Late Morning | 37,7 | 109 | 69,8  | 69,8  | 18,85 | 600,04 | 143,34 |
| 2019/05/22 | CH2205 | Male | Three y/o | Treatment (Wk 2) | Treatment | Fast Day | No | 10:00 | 10:00 - 10:59 | Late Morning | 37,7 | 54  | 16,4  | 16,4  | 18,85 | 545,99 | 93,55  |
| 2019/05/22 | CH2206 | Male | Three y/o | Treatment (Wk 2) | Treatment | Fast Day | No | 10:00 | 10:00 - 10:59 | Late Morning | 37,8 | 96  | 187,2 | 187,2 | 18,95 | 590,91 | 177,79 |
| 2019/05/22 | CH2205 | Male | Three y/o | Treatment (Wk 2) | Treatment | Fast Day | No | 10:05 | 10:00 - 10:59 | Late Morning | 37,7 |     | 22,2  | 22,2  | 18,85 |        | 103,88 |
| 2019/05/22 | CH2206 | Male | Three y/o | Treatment (Wk 2) | Treatment | Fast Day | No | 10:05 | 10:00 - 10:59 | Late Morning | 37,8 |     | 70,8  | 70,8  | 18,95 |        | 143,83 |
| 2019/05/22 | CH2205 | Male | Three y/o | Treatment (Wk 2) | Treatment | Fast Day | No | 10:10 | 10:00 - 10:59 | Late Morning | 37,7 | 62  | 17,2  | 17,2  | 18,85 | 557,33 | 95,17  |
| 2019/05/22 | CH2206 | Male | Three y/o | Treatment (Wk 2) | Treatment | Fast Day | No | 10:10 | 10:00 - 10:59 | Late Morning | 37,8 | 78  | 96,4  | 96,4  | 18,95 | 575,38 | 154,57 |
| 2019/05/22 | CH2205 | Male | Three y/o | Treatment (Wk 2) | Treatment | Fast Day | No | 10:15 | 10:00 - 10:59 | Late Morning | 37,6 | 57  | 20,4  | 20,4  | 18,75 | 550,47 | 100,99 |
| 2019/05/22 | CH2206 | Male | Three y/o | Treatment (Wk 2) | Treatment | Fast Day | No | 10:15 | 10:00 - 10:59 | Late Morning | 37,8 | 56  | 156,0 | 156,0 | 18,95 | 549,01 | 171,39 |
| 2019/05/22 | CH2205 | Male | Three y/o | Treatment (Wk 2) | Treatment | Fast Day | No | 10:20 | 10:00 - 10:59 | Late Morning | 37,6 | 88  | 31,6  | 31,6  | 18,75 | 584,49 | 115,98 |
| 2019/05/22 | CH2206 | Male | Three y/o | Treatment (Wk 2) | Treatment | Fast Day | No | 10:20 | 10:00 - 10:59 | Late Morning | 37,8 | 106 | 103,8 | 103,8 | 18,95 | 598,06 | 157,14 |
| 2019/05/22 | CH2205 | Male | Three y/o | Treatment (Wk 2) | Treatment | Fast Day | No | 10:25 | 10:00 - 10:59 | Late Morning | 37,6 | 60  | 30,2  | 30,2  | 18,75 | 554,67 | 114,42 |
| 2019/05/22 | CH2206 | Male | Three y/o | Treatment (Wk 2) | Treatment | Fast Day | No | 10:25 | 10:00 - 10:59 | Late Morning | 37,8 | 94  | 29,8  | 29,8  | 18,95 | 589,37 | 113,97 |
| 2019/05/22 | CH2205 | Male | Three y/o | Treatment (Wk 2) | Treatment | Fast Day | No | 10:30 | 10:00 - 10:59 | Late Morning | 37,6 |     | 29,2  | 29,2  | 18,75 |        | 113,27 |
| 2019/05/22 | CH2206 | Male | Three y/o | Treatment (Wk 2) | Treatment | Fast Day | No | 10:30 | 10:00 - 10:59 | Late Morning | 37,7 | 110 | 21,8  | 21,8  | 18,85 | 600,69 | 103,26 |
| 2019/05/22 | CH2205 | Male | Three y/o | Treatment (Wk 2) | Treatment | Fast Day | No | 10:35 | 10:00 - 10:59 | Late Morning | 37,5 | 53  | 2,6   | 2,6   | 18,65 | 544,43 | 31,57  |
| 2019/05/22 | CH2206 | Male | Three y/o | Treatment (Wk 2) | Treatment | Fast Day | No | 10:35 | 10:00 - 10:59 | Late Morning | 37,7 | 63  | 4,2   | 4,2   | 18,85 | 558,62 | 47,57  |
| 2019/05/22 | CH2205 | Male | Three y/o | Treatment (Wk 2) | Treatment | Fast Day | No | 10:40 | 10:00 - 10:59 | Late Morning | 37,4 | 49  | 7,2   | 7,2   | 18,55 | 537,80 | 65,66  |
| 2019/05/22 | CH2206 | Male | Three y/o | Treatment (Wk 2) | Treatment | Fast Day | No | 10:40 | 10:00 - 10:59 | Late Morning | 37,7 | 49  | 9,2   | 9,2   | 18,85 | 537,80 | 73,94  |
| 2019/05/22 | CH2205 | Male | Three y/o | Treatment (Wk 2) | Treatment | Fast Day | No | 10:45 | 10:00 - 10:59 | Late Morning | 37,4 | 48  | 8,4   | 8,4   | 18,55 | 536,04 | 70,86  |
| 2019/05/22 | CH2206 | Male | Three y/o | Treatment (Wk 2) | Treatment | Fast Day | No | 10:45 | 10:00 - 10:59 | Late Morning | 37,7 | 59  | 31,6  | 31,6  | 18,85 | 553,30 | 115,98 |
| 2019/05/22 | CH2205 | Male | Three y/o | Treatment (Wk 2) | Treatment | Fast Day | No | 10:50 | 10:00 - 10:59 | Late Morning | 37,4 | 54  | 6,6   | 6,6   | 18,55 | 545,99 | 62,73  |
| 2019/05/22 | CH2206 | Male | Three y/o | Treatment (Wk 2) | Treatment | Fast Day | No | 10:50 | 10:00 - 10:59 | Late Morning | 37,7 | 62  | 39,2  | 39,2  | 18,85 | 557,33 | 123,39 |
| 2019/05/22 | CH2205 | Male | Three y/o | Treatment (Wk 2) | Treatment | Fast Day | No | 10:55 | 10:00 - 10:59 | Late Morning | 37,3 | 52  | 7,8   | 7,8   | 18,46 | 542,83 | 68,36  |
| 2019/05/22 | CH2206 | Male | Three y/o | Treatment (Wk 2) | Treatment | Fast Day | No | 10:55 | 10:00 - 10:59 | Late Morning | 37,7 | 45  | 24,6  | 24,6  | 18,85 | 530,47 | 107,39 |
| 2019/05/22 | CH2205 | Male | Three y/o | Treatment (Wk 2) | Treatment | Fast Day | No | 11:00 | 11:00 - 11:59 | Late Morning | 37,3 | 51  | 11,0  | 11,0  | 18,46 | 541,20 | 79,98  |
| 2019/05/22 | CH2206 | Male | Three y/o | Treatment (Wk 2) | Treatment | Fast Day | No | 11:00 | 11:00 - 11:59 | Late Morning | 37,6 | 47  | 20,0  | 20,0  | 18,75 | 534,23 | 100,31 |
| 2019/05/22 | CH2205 | Male | Three y/o | Treatment (Wk 2) | Treatment | Fast Day | No | 11:05 | 11:00 - 11:59 | Late Morning | 37,3 | 52  | 11,0  | 11,0  | 18,46 | 542,83 | 79,98  |
| 2019/05/22 | CH2206 | Male | Three y/o | Treatment (Wk 2) | Treatment | Fast Day | No | 11:05 | 11:00 - 11:59 | Late Morning | 37,5 | 50  | 8,4   | 8,4   | 18,65 | 539,52 | 70,86  |
| 2019/05/22 | CH2205 | Male | Three y/o | Treatment (Wk 2) | Treatment | Fast Day | No | 11:10 | 11:00 - 11:59 | Late Morning | 37,4 | 54  | 4,6   | 4,6   | 18,55 | 545,99 | 50,61  |
| 2019/05/22 | CH2206 | Male | Three y/o | Treatment (Wk 2) | Treatment | Fast Day | No | 11:10 | 11:00 - 11:59 | Late Morning | 37,5 | 44  | 19,6  | 19,6  | 18,65 | 528,51 | 99,63  |
| 2019/05/22 | CH2205 | Male | Three y/o | Treatment (Wk 2) | Treatment | Fast Day | No | 11:15 | 11:00 - 11:59 | Late Morning | 37,5 |     | 248,8 | 248,8 | 18,65 |        | 187,81 |
| 2019/05/22 | CH2206 | Male | Three y/o | Treatment (Wk 2) | Treatment | Fast Day | No | 11:15 | 11:00 - 11:59 | Late Morning | 37,5 | 90  | 44,2  | 44,2  | 18,65 | 586,16 | 127,53 |
| 2019/05/22 | CH2205 | Male | Three y/o | Treatment (Wk 2) | Treatment | Fast Day | No | 11:20 | 11:00 - 11:59 | Late Morning | 37,5 | 158 | 50,0  | 50,0  | 18,65 | 625,26 | 131,79 |
| 2019/05/22 | CH2206 | Male | Three y/o | Treatment (Wk 2) | Treatment | Fast Day | No | 11:20 | 11:00 - 11:59 | Late Morning | 37,5 | 112 | 104,2 | 104,2 | 18,65 | 601,96 | 157,28 |
| 2019/05/22 | CH2205 | Male | Three y/o | Treatment (Wk 2) | Treatment | Fast Day | No | 11:25 | 11:00 - 11:59 | Late Morning | 37,5 |     | 35,2  | 35,2  | 18,65 |        | 119,69 |
| 2019/05/22 | CH2206 | Male | Three y/o | Treatment (Wk 2) | Treatment | Fast Day | No | 11:25 | 11:00 - 11:59 | Late Morning | 37,4 | 103 | 105,8 | 105,8 | 18,55 | 596,00 | 157,81 |
| 2019/05/22 | CH2205 | Male | Three y/o | Treatment (Wk 2) | Treatment | Fast Day | No | 11:30 | 11:00 - 11:59 | Late Morning | 37,3 | 108 | 83,4  | 83,4  | 18,46 | 599,39 | 149,52 |
| 2019/05/22 | CH2206 | Male | Three y/o | Treatment (Wk 2) | Treatment | Fast Day | No | 11:30 | 11:00 - 11:59 | Late Morning | 37,3 | 95  | 66,4  | 66,4  | 18,46 | 590,14 | 141,61 |
| 2019/05/22 | CH2205 | Male | Three y/o | Treatment (Wk 2) | Treatment | Fast Day | No | 11:35 | 11:00 - 11:59 | Late Morning | 37,4 | 107 | 15,6  | 15,6  | 18,55 | 598,73 | 91,85  |
| 2019/05/22 | CH2206 | Male | Three y/o | Treatment (Wk 2) | Treatment | Fast Day | No | 11:35 | 11:00 - 11:59 | Late Morning | 37,4 | 88  | 112,0 | 112,0 | 18,55 | 584,49 | 159,80 |
| 2019/05/22 | CH2205 | Male | Three y/o | Treatment (Wk 2) | Treatment | Fast Day | No | 11:40 | 11:00 - 11:59 | Late Morning | 37,4 | 71  | 10,0  | 10,0  | 18,55 | 568,10 | 76,76  |
| 2019/05/22 | CH2206 | Male | Three y/o | Treatment (Wk 2) | Treatment | Fast Day | No | 11:40 | 11:00 - 11:59 | Late Morning | 37,4 | 51  | 104,4 | 104,4 | 18,55 | 541,20 | 157,35 |
| 2019/05/22 | CH2205 | Male | Three y/o | Treatment (Wk 2) | Treatment | Fast Day | No | 11:45 | 11:00 - 11:59 | Late Morning | 37,5 | 63  | 6,4   | 6,4   | 18,65 | 558,62 | 61,70  |
| 2019/05/22 | CH2206 | Male | Three y/o | Treatment (Wk 2) | Treatment | Fast Day | No | 11:45 | 11:00 - 11:59 | Late Morning | 37,4 | 45  | 67,6  | 67,6  | 18,55 | 530,47 | 142,23 |
| 2019/05/22 | CH2205 | Male | Three y/o | Treatment (Wk 2) | Treatment | Fast Day | No | 11:50 | 11:00 - 11:59 | Late Morning | 37,5 | 62  | 55,2  | 55,2  | 18,65 | 557,33 | 135,21 |
| 2019/05/22 | CH2206 | Male | Three y/o | Treatment (Wk 2) | Treatment | Fast Day | No | 11:50 | 11:00 - 11:59 | Late Morning | 37,5 | 98  | 31,4  | 31,4  | 18,65 | 592,41 | 115,76 |
| 2019/05/22 | CH2205 | Male | Three y/o | Treatment (Wk 2) | Treatment | Fast Day | No | 11:55 | 11:00 - 11:59 | Late Morning | 37,7 | 77  | 39,4  | 39,4  | 18,85 | 574,39 | 123,57 |
| 2019/05/22 | CH2206 | Male | Three y/o | Treatment (Wk 2) | Treatment | Fast Day | No | 11:55 | 11:00 - 11:59 | Late Morning | 37,4 | 45  | 28,6  | 28,6  | 18,55 | 530,47 | 112,56 |
| 2019/05/22 | CH2205 | Male | Three y/o | Treatment (Wk 2) | Treatment | Fast Day | No | 12:00 | 12:00 - 12:59 | Afternoon    | 37,7 | 51  | 199,6 | 199,6 | 18,85 | 541,20 | 180,05 |
| 2019/05/22 | CH2206 | Male | Three y/o | Treatment (Wk 2) | Treatment | Fast Day | No | 12:00 | 12:00 - 12:59 | Afternoon    | 37,4 | 94  | 107,6 | 107,6 | 18,55 | 589,37 | 158,40 |
| 2019/05/22 | CH2205 | Male | Three y/o | Treatment (Wk 2) | Treatment | Fast Day | No | 12:05 | 12:00 - 12:59 | Afternoon    | 37,7 | 83  | 24,6  | 24,6  | 18,85 | 580,11 | 107,39 |
| 2019/05/22 | CH2206 | Male | Three y/o | Treatment (Wk 2) | Treatment | Fast Day | No | 12:05 | 12:00 - 12:59 | Afternoon    | 37,5 | 115 | 130,2 | 130,2 | 18,65 | 603,82 | 165,06 |
| 2019/05/22 | CH2205 | Male | Three y/o | Treatment (Wk 2) | Treatment | Fast Day | No | 12:10 | 12:00 - 12:59 | Afternoon    | 37,6 | 76  | 15,6  | 15,6  | 18,85 | 573,39 | 91,85  |
| 2019/05/22 | CH2206 | Male | Three y/o | Treatment (Wk 2) | Treatment | Fast Day | No | 12:10 | 12:00 - 12:59 | Afternoon    | 37,7 | 112 | 153,2 | 153,2 | 18,85 | 601,96 | 170,76 |
| 2019/05/22 | CH2205 | Male | Three y/o | Treatment (Wk 2) | Treatment | Fast Day | No | 12:15 | 12:00 - 12:59 | Afternoon    | 37,7 | 46  | 17,6  | 17,6  | 18,85 | 532,38 | 95,95  |
| 2019/05/22 | CH2206 | Male | Three y/o | Treatment (Wk 2) | Treatment | Fast Day | No | 12:15 | 12:00 - 12:59 | Afternoon    | 37,7 | 102 | 170,2 | 170,2 | 18,85 | 595,30 | 174,45 |
| 2019/05/22 | CH2205 | Male | Three y/o | Treatment (Wk 2) | Treatment | Fast Day | No | 12:20 | 12:00 - 12:59 | Afternoon    | 37,9 | 72  | 82,0  | 82,0  | 19,05 | 569,20 | 148,93 |
| 2019/05/22 | CH2206 | Male | Three y/o | Treatment (Wk 2) | Treatment | Fast Day | No | 12:20 | 12:00 - 12:59 | Afternoon    | 37,7 |     | 134,6 | 134,6 | 18,85 |        | 166,22 |
| 2019/05/22 | CH2205 | Male | Three y/o | Treatment (Wk 2) | Treatment | Fast Day | No | 12:25 | 12:00 - 12:59 | Afternoon    | 37,9 |     | 38,4  | 38,4  | 19,05 | 557,33 | 122,68 |
| 2019/05/22 | CH2206 | Male | Three y/o | Treatment (Wk 2) | Treatment | Fast Day | No | 12:25 | 12:00 - 12:59 | Afternoon    | 37,7 | 112 | 85,6  | 85,6  | 18,85 | 601,96 | 150,43 |
| 2019/05/22 | CH2205 | Male | Three y/o | Treatment (Wk 2) | Treatment | Fast Day | No | 12:30 | 12:00 - 12:59 | Afternoon    | 37,7 | 74  | 30,6  | 30,6  | 18,85 | 571,33 | 114,87 |
| 2019/05/22 | CH2206 | Male | Three y/o | Treatment (Wk 2) | Treatment | Fast Day | No | 12:30 | 12:00 - 12:59 | Afternoon    | 37,8 |     | 43,4  | 43,4  | 18,95 |        | 126,90 |
| 2019/05/22 | CH2205 | Male | Three y/o | Treatment (Wk 2) | Treatment | Fast Day | No | 12:35 | 12:00 - 12:59 | Afternoon    | 37,7 | 55  | 35,4  | 35,4  | 18,85 | 547,52 | 119,88 |
| 2019/05/22 | CH2206 | Male | Three y/o | Treatment (Wk 2) | Treatment | Fast Day | No | 12:35 | 12:00 - 12:59 | Afternoon    | 37,8 | 97  | 12,4  | 12,4  | 18,95 | 591,66 | 84,04  |
| 2019/05/22 | CH2205 | Male | Three y/o | Treatment (Wk 2) | Treatment | Fast Day | No | 12:40 | 12:00 - 12:59 | Afternoon    | 37,7 | 41  | 35,6  | 35,6  | 18,85 | 522,29 | 120,08 |



|            |        |      |           |                  |           |          |    |       |               |           |      |     |       |       |       |        |        |
|------------|--------|------|-----------|------------------|-----------|----------|----|-------|---------------|-----------|------|-----|-------|-------|-------|--------|--------|
| 2019/05/22 | CH2206 | Male | Three y/o | Treatment (Wk 2) | Treatment | Fast Day | No | 12:40 | 12:00 - 12:59 | Afternoon | 37,7 | 55  | 7,4   | 7,4   | 18,85 | 547,52 | 66,59  |
| 2019/05/22 | CH2205 | Male | Three y/o | Treatment (Wk 2) | Treatment | Fast Day | No | 12:45 | 12:00 - 12:59 | Afternoon | 37,7 | 58  | 22,4  | 22,4  | 18,85 | 551,90 | 104,19 |
| 2019/05/22 | CH2206 | Male | Three y/o | Treatment (Wk 2) | Treatment | Fast Day | No | 12:45 | 12:00 - 12:59 | Afternoon | 37,7 | 51  | 8,4   | 8,4   | 18,85 | 541,20 | 70,86  |
| 2019/05/22 | CH2205 | Male | Three y/o | Treatment (Wk 2) | Treatment | Fast Day | No | 12:50 | 12:00 - 12:59 | Afternoon | 37,7 | 47  | 28,4  | 28,4  | 18,85 | 534,23 | 112,31 |
| 2019/05/22 | CH2206 | Male | Three y/o | Treatment (Wk 2) | Treatment | Fast Day | No | 12:50 | 12:00 - 12:59 | Afternoon | 37,8 | 51  | 7,0   | 7,0   | 18,95 | 541,20 | 64,72  |
| 2019/05/22 | CH2205 | Male | Three y/o | Treatment (Wk 2) | Treatment | Fast Day | No | 12:55 | 12:00 - 12:59 | Afternoon | 37,7 | 65  | 28,6  | 28,6  | 18,85 | 561,12 | 112,56 |
| 2019/05/22 | CH2206 | Male | Three y/o | Treatment (Wk 2) | Treatment | Fast Day | No | 12:55 | 12:00 - 12:59 | Afternoon | 37,8 | 49  | 4,2   | 4,2   | 18,95 | 537,80 | 47,57  |
| 2019/05/22 | CH2205 | Male | Three y/o | Treatment (Wk 2) | Treatment | Fast Day | No | 13:00 | 13:00 - 13:59 | Afternoon | 37,7 | 60  | 26,4  | 26,4  | 18,85 | 554,67 | 109,81 |
| 2019/05/22 | CH2206 | Male | Three y/o | Treatment (Wk 2) | Treatment | Fast Day | No | 13:00 | 13:00 - 13:59 | Afternoon | 37,8 | 41  | 7,6   | 7,6   | 18,95 | 522,29 | 67,49  |
| 2019/05/22 | CH2205 | Male | Three y/o | Treatment (Wk 2) | Treatment | Fast Day | No | 13:05 | 13:00 - 13:59 | Afternoon | 37,7 | 50  | 26,2  | 26,2  | 18,85 | 539,52 | 109,55 |
| 2019/05/22 | CH2206 | Male | Three y/o | Treatment (Wk 2) | Treatment | Fast Day | No | 13:05 | 13:00 - 13:59 | Afternoon | 37,8 | 76  | 15,6  | 15,6  | 18,95 | 573,39 | 91,85  |
| 2019/05/22 | CH2205 | Male | Three y/o | Treatment (Wk 2) | Treatment | Fast Day | No | 13:10 | 13:00 - 13:59 | Afternoon | 37,7 | 54  | 12,4  | 12,4  | 18,85 | 545,99 | 84,04  |
| 2019/05/22 | CH2206 | Male | Three y/o | Treatment (Wk 2) | Treatment | Fast Day | No | 13:10 | 13:00 - 13:59 | Afternoon | 37,8 | 64  | 58,4  | 58,4  | 18,95 | 559,88 | 137,16 |
| 2019/05/22 | CH2205 | Male | Three y/o | Treatment (Wk 2) | Treatment | Fast Day | No | 13:15 | 13:00 - 13:59 | Afternoon | 37,9 | 60  | 74,8  | 74,8  | 19,05 | 554,67 | 145,74 |
| 2019/05/22 | CH2206 | Male | Three y/o | Treatment (Wk 2) | Treatment | Fast Day | No | 13:15 | 13:00 - 13:59 | Afternoon | 37,8 | 46  | 53,6  | 53,6  | 18,95 | 532,38 | 134,19 |
| 2019/05/22 | CH2205 | Male | Three y/o | Treatment (Wk 2) | Treatment | Fast Day | No | 13:20 | 13:00 - 13:59 | Afternoon | 37,7 | 141 | 88,8  | 88,8  | 18,85 | 617,75 | 151,71 |
| 2019/05/22 | CH2206 | Male | Three y/o | Treatment (Wk 2) | Treatment | Fast Day | No | 13:20 | 13:00 - 13:59 | Afternoon | 37,8 | 52  | 55,4  | 55,4  | 18,95 | 542,83 | 135,33 |
| 2019/05/22 | CH2205 | Male | Three y/o | Treatment (Wk 2) | Treatment | Fast Day | No | 13:25 | 13:00 - 13:59 | Afternoon | 37,7 |     | 43,0  | 43,0  | 18,85 |        | 126,58 |
| 2019/05/22 | CH2206 | Male | Three y/o | Treatment (Wk 2) | Treatment | Fast Day | No | 13:25 | 13:00 - 13:59 | Afternoon | 37,7 | 101 | 94,4  | 94,4  | 18,85 | 594,59 | 153,84 |
| 2019/05/22 | CH2205 | Male | Three y/o | Treatment (Wk 2) | Treatment | Fast Day | No | 13:30 | 13:00 - 13:59 | Afternoon | 37,7 | 57  | 17,4  | 17,4  | 18,85 | 550,47 | 95,56  |
| 2019/05/22 | CH2206 | Male | Three y/o | Treatment (Wk 2) | Treatment | Fast Day | No | 13:30 | 13:00 - 13:59 | Afternoon | 37,7 | 104 | 112,6 | 112,6 | 18,85 | 596,69 | 159,98 |
| 2019/05/22 | CH2205 | Male | Three y/o | Treatment (Wk 2) | Treatment | Fast Day | No | 13:35 | 13:00 - 13:59 | Afternoon | 37,7 |     | 95,6  | 95,6  | 18,85 |        | 154,28 |
| 2019/05/22 | CH2206 | Male | Three y/o | Treatment (Wk 2) | Treatment | Fast Day | No | 13:35 | 13:00 - 13:59 | Afternoon | 37,7 | 103 | 275,8 | 275,8 | 18,85 | 596,00 | 191,45 |
| 2019/05/22 | CH2205 | Male | Three y/o | Treatment (Wk 2) | Treatment | Fast Day | No | 13:40 | 13:00 - 13:59 | Afternoon | 37,7 |     | 26,4  | 26,4  | 18,85 |        | 109,81 |
| 2019/05/22 | CH2206 | Male | Three y/o | Treatment (Wk 2) | Treatment | Fast Day | No | 13:40 | 13:00 - 13:59 | Afternoon | 37,7 | 121 | 111,0 | 111,0 | 18,85 | 607,35 | 159,48 |
| 2019/05/22 | CH2205 | Male | Three y/o | Treatment (Wk 2) | Treatment | Fast Day | No | 13:45 | 13:00 - 13:59 | Afternoon | 37,9 |     | 80,8  | 80,8  | 19,05 |        | 148,42 |
| 2019/05/22 | CH2206 | Male | Three y/o | Treatment (Wk 2) | Treatment | Fast Day | No | 13:45 | 13:00 - 13:59 | Afternoon | 37,8 |     | 191,0 | 191,0 | 18,95 |        | 178,50 |
| 2019/05/22 | CH2205 | Male | Three y/o | Treatment (Wk 2) | Treatment | Fast Day | No | 13:50 | 13:00 - 13:59 | Afternoon | 37,7 |     | 53,2  | 53,2  | 18,85 |        | 133,93 |
| 2019/05/22 | CH2206 | Male | Three y/o | Treatment (Wk 2) | Treatment | Fast Day | No | 13:50 | 13:00 - 13:59 | Afternoon | 37,8 | 112 | 128,8 | 128,8 | 18,95 | 601,96 | 164,68 |
| 2019/05/22 | CH2205 | Male | Three y/o | Treatment (Wk 2) | Treatment | Fast Day | No | 13:55 | 13:00 - 13:59 | Afternoon | 37,7 | 182 | 56,6  | 56,6  | 18,85 | 634,31 | 136,07 |
| 2019/05/22 | CH2206 | Male | Three y/o | Treatment (Wk 2) | Treatment | Fast Day | No | 13:55 | 13:00 - 13:59 | Afternoon | 37,8 | 77  | 33,0  | 33,0  | 18,95 | 574,39 | 117,47 |
| 2019/05/22 | CH2205 | Male | Three y/o | Treatment (Wk 2) | Treatment | Fast Day | No | 14:00 | 14:00 - 14:59 | Afternoon | 37,7 | 154 | 75,2  | 75,2  | 18,85 | 623,58 | 145,93 |
| 2019/05/22 | CH2206 | Male | Three y/o | Treatment (Wk 2) | Treatment | Fast Day | No | 14:00 | 14:00 - 14:59 | Afternoon | 37,8 |     | 42,8  | 42,8  | 18,95 |        | 126,42 |
| 2019/05/22 | CH2205 | Male | Three y/o | Treatment (Wk 2) | Treatment | Fast Day | No | 14:05 | 14:00 - 14:59 | Afternoon | 37,7 | 72  | 103,0 | 103,0 | 18,85 | 569,20 | 156,87 |
| 2019/05/22 | CH2206 | Male | Three y/o | Treatment (Wk 2) | Treatment | Fast Day | No | 14:05 | 14:00 - 14:59 | Afternoon | 37,7 |     | 49,0  | 49,0  | 18,85 |        | 131,09 |
| 2019/05/22 | CH2205 | Male | Three y/o | Treatment (Wk 2) | Treatment | Fast Day | No | 14:10 | 14:00 - 14:59 | Afternoon | 37,7 | 194 | 95,4  | 95,4  | 18,85 | 638,30 | 154,20 |
| 2019/05/22 | CH2206 | Male | Three y/o | Treatment (Wk 2) | Treatment | Fast Day | No | 14:10 | 14:00 - 14:59 | Afternoon | 37,7 | 51  | 38,6  | 38,6  | 18,85 | 541,20 | 122,86 |
| 2019/05/22 | CH2205 | Male | Three y/o | Treatment (Wk 2) | Treatment | Fast Day | No | 14:15 | 14:00 - 14:59 | Afternoon | 37,9 | 80  | 19,2  | 19,2  | 19,05 | 577,31 | 98,92  |
| 2019/05/22 | CH2206 | Male | Three y/o | Treatment (Wk 2) | Treatment | Fast Day | No | 14:15 | 14:00 - 14:59 | Afternoon | 37,7 | 125 | 233,4 | 233,4 | 18,85 | 609,60 | 185,56 |
| 2019/05/22 | CH2205 | Male | Three y/o | Treatment (Wk 2) | Treatment | Fast Day | No | 14:20 | 14:00 - 14:59 | Afternoon | 37,9 |     | 37,0  | 37,0  | 19,05 |        | 121,40 |
| 2019/05/22 | CH2206 | Male | Three y/o | Treatment (Wk 2) | Treatment | Fast Day | No | 14:20 | 14:00 - 14:59 | Afternoon | 37,8 | 90  | 278,0 | 278,0 | 18,95 | 586,16 | 191,73 |
| 2019/05/22 | CH2205 | Male | Three y/o | Treatment (Wk 2) | Treatment | Fast Day | No | 14:25 | 14:00 - 14:59 | Afternoon | 37,9 | 62  | 8,2   | 8,2   | 19,05 | 557,33 | 70,05  |
| 2019/05/22 | CH2206 | Male | Three y/o | Treatment (Wk 2) | Treatment | Fast Day | No | 14:25 | 14:00 - 14:59 | Afternoon | 37,8 |     | 111,8 | 111,8 | 18,95 |        | 159,74 |
| 2019/05/22 | CH2205 | Male | Three y/o | Treatment (Wk 2) | Treatment | Fast Day | No | 14:30 | 14:00 - 14:59 | Afternoon | 37,9 |     | 57,0  | 57,0  | 19,05 |        | 136,32 |
| 2019/05/22 | CH2206 | Male | Three y/o | Treatment (Wk 2) | Treatment | Fast Day | No | 14:30 | 14:00 - 14:59 | Afternoon | 37,8 | 49  | 154,6 | 154,6 | 18,95 | 537,80 | 171,08 |
| 2019/05/22 | CH2205 | Male | Three y/o | Treatment (Wk 2) | Treatment | Fast Day | No | 14:35 | 14:00 - 14:59 | Afternoon | 38,0 | 118 | 70,4  | 70,4  | 19,15 | 605,61 | 143,64 |
| 2019/05/22 | CH2206 | Male | Three y/o | Treatment (Wk 2) | Treatment | Fast Day | No | 14:35 | 14:00 - 14:59 | Afternoon | 37,8 | 105 | 54,0  | 54,0  | 18,95 | 597,38 | 134,45 |
| 2019/05/22 | CH2205 | Male | Three y/o | Treatment (Wk 2) | Treatment | Fast Day | No | 14:40 | 14:00 - 14:59 | Afternoon | 38,1 |     | 82,2  | 82,2  | 19,26 |        | 149,02 |
| 2019/05/22 | CH2206 | Male | Three y/o | Treatment (Wk 2) | Treatment | Fast Day | No | 14:40 | 14:00 - 14:59 | Afternoon | 37,8 | 111 | 133,0 | 133,0 | 18,95 | 601,33 | 165,80 |
| 2019/05/22 | CH2205 | Male | Three y/o | Treatment (Wk 2) | Treatment | Fast Day | No | 14:45 | 14:00 - 14:59 | Afternoon | 38,1 | 90  | 264,8 | 264,8 | 19,26 | 586,16 | 190,01 |
| 2019/05/22 | CH2206 | Male | Three y/o | Treatment (Wk 2) | Treatment | Fast Day | No | 14:45 | 14:00 - 14:59 | Afternoon | 37,9 | 118 | 161,2 | 161,2 | 19,05 | 605,61 | 172,54 |
| 2019/05/22 | CH2205 | Male | Three y/o | Treatment (Wk 2) | Treatment | Fast Day | No | 14:50 | 14:00 - 14:59 | Afternoon | 38,1 | 120 | 86,4  | 86,4  | 19,26 | 606,78 | 150,75 |
| 2019/05/22 | CH2206 | Male | Three y/o | Treatment (Wk 2) | Treatment | Fast Day | No | 14:50 | 14:00 - 14:59 | Afternoon | 37,9 | 113 | 43,2  | 43,2  | 19,05 | 602,58 | 126,74 |
| 2019/05/22 | CH2205 | Male | Three y/o | Treatment (Wk 2) | Treatment | Fast Day | No | 14:55 | 14:00 - 14:59 | Afternoon | 38,1 | 65  | 100,2 | 100,2 | 19,26 | 561,12 | 155,91 |
| 2019/05/22 | CH2206 | Male | Three y/o | Treatment (Wk 2) | Treatment | Fast Day | No | 14:55 | 14:00 - 14:59 | Afternoon | 37,9 | 119 | 92,8  | 92,8  | 19,05 | 606,20 | 153,24 |
| 2019/05/22 | CH2205 | Male | Three y/o | Treatment (Wk 2) | Treatment | Fast Day | No | 15:00 | 15:00 - 15:59 | Afternoon | 38,1 | 58  | 142,2 | 142,2 | 19,26 | 551,90 | 168,15 |
| 2019/05/22 | CH2206 | Male | Three y/o | Treatment (Wk 2) | Treatment | Fast Day | No | 15:00 | 15:00 - 15:59 | Afternoon | 37,9 | 69  | 156,8 | 156,8 | 19,05 | 565,86 | 171,57 |
| 2019/05/22 | CH2205 | Male | Three y/o | Treatment (Wk 2) | Treatment | Fast Day | No | 15:05 | 15:00 - 15:59 | Afternoon | 38,0 | 99  | 31,0  | 31,0  | 19,26 | 593,14 | 115,32 |
| 2019/05/22 | CH2206 | Male | Three y/o | Treatment (Wk 2) | Treatment | Fast Day | No | 15:05 | 15:00 - 15:59 | Afternoon | 38,0 | 96  | 232,2 | 232,2 | 19,15 | 590,91 | 185,38 |
| 2019/05/22 | CH2205 | Male | Three y/o | Treatment (Wk 2) | Treatment | Fast Day | No | 15:10 | 15:00 - 15:59 | Afternoon | 38,1 |     | 141,2 | 141,2 | 19,26 |        | 167,90 |
| 2019/05/22 | CH2206 | Male | Three y/o | Treatment (Wk 2) | Treatment | Fast Day | No | 15:10 | 15:00 - 15:59 | Afternoon | 38,0 | 105 | 185,0 | 185,0 | 19,15 | 597,38 | 177,38 |
| 2019/05/22 | CH2205 | Male | Three y/o | Treatment (Wk 2) | Treatment | Fast Day | No | 15:15 | 15:00 - 15:59 | Afternoon | 38,1 | 103 | 204,2 | 204,2 | 19,26 | 596,00 | 180,85 |
| 2019/05/22 | CH2206 | Male | Three y/o | Treatment (Wk 2) | Treatment | Fast Day | No | 15:15 | 15:00 - 15:59 | Afternoon | 38,0 | 103 | 65,6  | 65,6  | 19,15 | 596,00 | 141,19 |
| 2019/05/22 | CH2205 | Male | Three y/o | Treatment (Wk 2) | Treatment | Fast Day | No | 15:20 | 15:00 - 15:59 | Afternoon | 38,1 | 109 | 74,0  | 74,0  | 19,26 | 600,04 | 145,37 |
| 2019/05/22 | CH2206 | Male | Three y/o | Treatment (Wk 2) | Treatment | Fast Day | No | 15:20 | 15:00 - 15:59 | Afternoon | 38,0 |     | 184,4 | 184,4 | 19,15 |        | 177,26 |
| 2019/05/22 | CH2205 | Male | Three y/o | Treatment (Wk 2) | Treatment | Fast Day | No | 15:25 | 15:00 - 15:59 | Afternoon | 38,1 | 59  | 46,6  | 46,6  | 19,26 | 553,30 | 129,35 |
| 2019/05/22 | CH2206 | Male | Three y/o | Treatment (Wk 2) | Treatment | Fast Day | No | 15:25 | 15:00 - 15:59 | Afternoon | 38,0 | 113 | 208,0 | 208,0 | 19,15 | 602,58 | 181,50 |
| 2019/05/22 | CH2205 | Male | Three y/o | Treatment (Wk 2) | Treatment | Fast Day | No | 15:30 | 15:00 - 15:59 | Afternoon | 38,1 | 77  | 99,6  | 99,6  | 19,26 | 574,39 | 155,70 |
| 2019/05/22 | CH2206 | Male | Three y/o | Treatment (Wk 2) | Treatment | Fast Day | No | 15:30 | 15:00 - 15:59 | Afternoon | 38,1 | 123 | 283,6 | 283,6 | 19,26 | 608,49 | 192,43 |
| 2019/05/22 | CH2205 | Male | Three y/o | Treatment (Wk 2) | Treatment | Fast Day | No | 15:35 | 15:00 - 15:59 | Afternoon | 38,1 | 154 | 106,0 | 106,0 | 19,26 | 623,58 | 157,88 |



|            |        |      |           |                  |           |          |    |       |               |           |      |     |       |       |       |        |        |
|------------|--------|------|-----------|------------------|-----------|----------|----|-------|---------------|-----------|------|-----|-------|-------|-------|--------|--------|
| 2019/05/22 | CH2206 | Male | Three y/o | Treatment (Wk 2) | Treatment | Fast Day | No | 15:35 | 15:00 - 15:59 | Afternoon | 38,1 | 106 | 150,2 | 150,2 | 19,26 | 598,06 | 170,06 |
| 2019/05/22 | CH2205 | Male | Three y/o | Treatment (Wk 2) | Treatment | Fast Day | No | 15:40 | 15:00 - 15:59 | Afternoon | 38,1 | 162 | 34,6  | 34,6  | 19,26 | 626,88 | 119,10 |
| 2019/05/22 | CH2206 | Male | Three y/o | Treatment (Wk 2) | Treatment | Fast Day | No | 15:40 | 15:00 - 15:59 | Afternoon | 38,1 | 109 | 281,8 | 281,8 | 19,26 | 600,04 | 192,21 |
| 2019/05/22 | CH2205 | Male | Three y/o | Treatment (Wk 2) | Treatment | Fast Day | No | 15:45 | 15:00 - 15:59 | Afternoon | 38,1 | 61  | 21,6  | 21,6  | 19,26 | 556,01 | 102,94 |
| 2019/05/22 | CH2206 | Male | Three y/o | Treatment (Wk 2) | Treatment | Fast Day | No | 15:45 | 15:00 - 15:59 | Afternoon | 38,1 | 99  | 164,6 | 164,6 | 19,26 | 593,14 | 173,27 |
| 2019/05/22 | CH2205 | Male | Three y/o | Treatment (Wk 2) | Treatment | Fast Day | No | 15:50 | 15:00 - 15:59 | Afternoon | 38,1 | 55  | 17,4  | 17,4  | 19,26 | 547,52 | 95,56  |
| 2019/05/22 | CH2206 | Male | Three y/o | Treatment (Wk 2) | Treatment | Fast Day | No | 15:50 | 15:00 - 15:59 | Afternoon | 38,1 | 126 | 98,6  | 98,6  | 19,26 | 610,14 | 155,35 |
| 2019/05/22 | CH2205 | Male | Three y/o | Treatment (Wk 2) | Treatment | Fast Day | No | 15:55 | 15:00 - 15:59 | Afternoon | 38,2 |     | 55,6  | 55,6  | 19,36 |        | 135,46 |
| 2019/05/22 | CH2206 | Male | Three y/o | Treatment (Wk 2) | Treatment | Fast Day | No | 15:55 | 15:00 - 15:59 | Afternoon | 38,2 |     | 226,6 | 226,6 | 19,36 |        | 184,52 |
| 2019/05/22 | CH2205 | Male | Three y/o | Treatment (Wk 2) | Treatment | Fast Day | No | 16:00 | 16:00 - 16:59 | Evening   | 38,2 | 43  | 133,8 | 133,8 | 19,36 | 526,50 | 166,01 |
| 2019/05/22 | CH2206 | Male | Three y/o | Treatment (Wk 2) | Treatment | Fast Day | No | 16:00 | 16:00 - 16:59 | Evening   | 38,2 | 60  | 163,0 | 163,0 | 19,36 | 554,67 | 172,93 |
| 2019/05/22 | CH2205 | Male | Three y/o | Treatment (Wk 2) | Treatment | Fast Day | No | 16:05 | 16:00 - 16:59 | Evening   | 38,2 | 73  | 131,8 | 131,8 | 19,36 | 570,27 | 165,49 |
| 2019/05/22 | CH2206 | Male | Three y/o | Treatment (Wk 2) | Treatment | Fast Day | No | 16:05 | 16:00 - 16:59 | Evening   | 38,3 | 138 | 213,8 | 213,8 | 19,46 | 616,31 | 182,47 |
| 2019/05/22 | CH2205 | Male | Three y/o | Treatment (Wk 2) | Treatment | Fast Day | No | 16:10 | 16:00 - 16:59 | Evening   | 38,1 | 71  | 139,2 | 139,2 | 19,26 | 568,10 | 167,40 |
| 2019/05/22 | CH2206 | Male | Three y/o | Treatment (Wk 2) | Treatment | Fast Day | No | 16:10 | 16:00 - 16:59 | Evening   | 38,3 | 145 | 69,4  | 69,4  | 19,46 | 619,62 | 143,14 |
| 2019/05/22 | CH2205 | Male | Three y/o | Treatment (Wk 2) | Treatment | Fast Day | No | 16:15 | 16:00 - 16:59 | Evening   | 38,3 | 111 | 57,4  | 57,4  | 19,46 | 601,33 | 136,56 |
| 2019/05/22 | CH2206 | Male | Three y/o | Treatment (Wk 2) | Treatment | Fast Day | No | 16:15 | 16:00 - 16:59 | Evening   | 38,3 | 71  | 85,0  | 85,0  | 19,46 | 568,10 | 150,18 |
| 2019/05/22 | CH2205 | Male | Three y/o | Treatment (Wk 2) | Treatment | Fast Day | No | 16:20 | 16:00 - 16:59 | Evening   | 38,2 | 185 | 29,2  | 29,2  | 19,36 | 635,34 | 113,27 |
| 2019/05/22 | CH2206 | Male | Three y/o | Treatment (Wk 2) | Treatment | Fast Day | No | 16:20 | 16:00 - 16:59 | Evening   | 38,2 | 80  | 32,0  | 32,0  | 19,36 | 577,31 | 116,41 |
| 2019/05/22 | CH2205 | Male | Three y/o | Treatment (Wk 2) | Treatment | Fast Day | No | 16:25 | 16:00 - 16:59 | Evening   | 38,1 | 56  | 28,8  | 28,8  | 19,26 | 549,01 | 112,79 |
| 2019/05/22 | CH2206 | Male | Three y/o | Treatment (Wk 2) | Treatment | Fast Day | No | 16:25 | 16:00 - 16:59 | Evening   | 38,2 |     | 319,0 | 319,0 | 19,36 |        | 196,59 |
| 2019/05/22 | CH2205 | Male | Three y/o | Treatment (Wk 2) | Treatment | Fast Day | No | 16:30 | 16:00 - 16:59 | Evening   | 38,1 | 102 | 288,4 | 288,4 | 19,26 | 595,30 | 193,03 |
| 2019/05/22 | CH2206 | Male | Three y/o | Treatment (Wk 2) | Treatment | Fast Day | No | 16:30 | 16:00 - 16:59 | Evening   | 38,3 | 124 | 49,0  | 49,0  | 19,46 | 609,04 | 131,09 |
| 2019/05/22 | CH2205 | Male | Three y/o | Treatment (Wk 2) | Treatment | Fast Day | No | 16:35 | 16:00 - 16:59 | Evening   | 38,2 | 167 | 86,6  | 86,6  | 19,36 | 628,84 | 150,83 |
| 2019/05/22 | CH2206 | Male | Three y/o | Treatment (Wk 2) | Treatment | Fast Day | No | 16:35 | 16:00 - 16:59 | Evening   | 38,3 | 58  | 41,4  | 41,4  | 19,46 | 551,90 | 125,27 |
| 2019/05/22 | CH2205 | Male | Three y/o | Treatment (Wk 2) | Treatment | Fast Day | No | 16:40 | 16:00 - 16:59 | Evening   | 38,1 |     | 32,6  | 32,6  | 19,26 |        | 117,05 |
| 2019/05/22 | CH2206 | Male | Three y/o | Treatment (Wk 2) | Treatment | Fast Day | No | 16:40 | 16:00 - 16:59 | Evening   | 38,2 | 55  | 57,2  | 57,2  | 19,36 | 547,52 | 136,44 |
| 2019/05/22 | CH2205 | Male | Three y/o | Treatment (Wk 2) | Treatment | Fast Day | No | 16:45 | 16:00 - 16:59 | Evening   | 38,1 |     | 23,2  | 23,2  | 19,26 |        | 105,39 |
| 2019/05/22 | CH2206 | Male | Three y/o | Treatment (Wk 2) | Treatment | Fast Day | No | 16:45 | 16:00 - 16:59 | Evening   | 38,0 | 46  | 53,2  | 53,2  | 19,15 | 532,38 | 133,93 |
| 2019/05/22 | CH2205 | Male | Three y/o | Treatment (Wk 2) | Treatment | Fast Day | No | 16:50 | 16:00 - 16:59 | Evening   | 38,1 | 91  | 113,6 | 113,6 | 19,26 | 586,98 | 160,29 |
| 2019/05/22 | CH2206 | Male | Three y/o | Treatment (Wk 2) | Treatment | Fast Day | No | 16:50 | 16:00 - 16:59 | Evening   | 37,9 | 125 | 161,2 | 161,2 | 19,05 | 609,60 | 172,54 |
| 2019/05/22 | CH2205 | Male | Three y/o | Treatment (Wk 2) | Treatment | Fast Day | No | 16:55 | 16:00 - 16:59 | Evening   | 38,0 |     | 28,6  | 28,6  | 19,15 |        | 112,56 |
| 2019/05/22 | CH2206 | Male | Three y/o | Treatment (Wk 2) | Treatment | Fast Day | No | 16:55 | 16:00 - 16:59 | Evening   | 38,1 | 109 | 97,0  | 97,0  | 19,26 | 600,04 | 154,78 |
| 2019/05/22 | CH2205 | Male | Three y/o | Treatment (Wk 2) | Treatment | Fast Day | No | 17:00 | 17:00 - 17:59 | Evening   | 37,9 | 47  | 22,4  | 22,4  | 19,05 | 534,23 | 104,19 |
| 2019/05/22 | CH2206 | Male | Three y/o | Treatment (Wk 2) | Treatment | Fast Day | No | 17:00 | 17:00 - 17:59 | Evening   | 38,1 | 98  | 64,2  | 64,2  | 19,26 | 592,41 | 140,44 |
| 2019/05/22 | CH2205 | Male | Three y/o | Treatment (Wk 2) | Treatment | Fast Day | No | 17:05 | 17:00 - 17:59 | Evening   | 37,9 | 60  | 9,4   | 9,4   | 19,05 | 554,67 | 74,66  |
| 2019/05/22 | CH2206 | Male | Three y/o | Treatment (Wk 2) | Treatment | Fast Day | No | 17:05 | 17:00 - 17:59 | Evening   | 38,1 | 99  | 133,2 | 133,2 | 19,26 | 593,14 | 165,86 |
| 2019/05/22 | CH2205 | Male | Three y/o | Treatment (Wk 2) | Treatment | Fast Day | No | 17:10 | 17:00 - 17:59 | Evening   | 38,0 |     | 30,8  | 30,8  | 19,15 |        | 115,10 |
| 2019/05/22 | CH2206 | Male | Three y/o | Treatment (Wk 2) | Treatment | Fast Day | No | 17:10 | 17:00 - 17:59 | Evening   | 38,1 | 107 | 207,2 | 207,2 | 19,26 | 598,73 | 181,36 |
| 2019/05/22 | CH2205 | Male | Three y/o | Treatment (Wk 2) | Treatment | Fast Day | No | 17:15 | 17:00 - 17:59 | Evening   | 38,0 | 117 | 32,6  | 32,6  | 19,15 | 605,02 | 117,05 |
| 2019/05/22 | CH2206 | Male | Three y/o | Treatment (Wk 2) | Treatment | Fast Day | No | 17:15 | 17:00 - 17:59 | Evening   | 38,2 | 154 | 30,8  | 30,8  | 19,36 | 623,58 | 115,10 |
| 2019/05/22 | CH2205 | Male | Three y/o | Treatment (Wk 2) | Treatment | Fast Day | No | 17:20 | 17:00 - 17:59 | Evening   | 38,0 |     | 26,0  | 26,0  | 19,15 |        | 109,29 |
| 2019/05/22 | CH2206 | Male | Three y/o | Treatment (Wk 2) | Treatment | Fast Day | No | 17:20 | 17:00 - 17:59 | Evening   | 38,2 | 88  | 49,0  | 49,0  | 19,36 | 584,49 | 131,09 |
| 2019/05/22 | CH2205 | Male | Three y/o | Treatment (Wk 2) | Treatment | Fast Day | No | 17:25 | 17:00 - 17:59 | Evening   | 38,0 | 43  | 21,0  | 21,0  | 19,15 | 526,50 | 101,98 |
| 2019/05/22 | CH2206 | Male | Three y/o | Treatment (Wk 2) | Treatment | Fast Day | No | 17:25 | 17:00 - 17:59 | Evening   | 38,1 | 52  | 48,8  | 48,8  | 19,26 | 542,83 | 130,95 |
| 2019/05/22 | CH2205 | Male | Three y/o | Treatment (Wk 2) | Treatment | Fast Day | No | 17:30 | 17:00 - 17:59 | Evening   | 38,0 | 38  | 6,4   | 6,4   | 19,15 | 515,48 | 61,70  |
| 2019/05/22 | CH2206 | Male | Three y/o | Treatment (Wk 2) | Treatment | Fast Day | No | 17:30 | 17:00 - 17:59 | Evening   | 37,9 | 51  | 41,4  | 41,4  | 19,05 | 541,20 | 125,27 |
| 2019/05/22 | CH2205 | Male | Three y/o | Treatment (Wk 2) | Treatment | Fast Day | No | 17:35 | 17:00 - 17:59 | Evening   | 38,0 | 41  | 8,0   | 8,0   | 19,15 | 522,29 | 69,22  |
| 2019/05/22 | CH2206 | Male | Three y/o | Treatment (Wk 2) | Treatment | Fast Day | No | 17:35 | 17:00 - 17:59 | Evening   | 37,9 | 49  | 54,2  | 54,2  | 19,05 | 537,80 | 134,57 |
| 2019/05/22 | CH2205 | Male | Three y/o | Treatment (Wk 2) | Treatment | Fast Day | No | 17:40 | 17:00 - 17:59 | Evening   | 37,9 | 59  | 61,4  | 61,4  | 19,05 | 553,30 | 138,89 |
| 2019/05/22 | CH2206 | Male | Three y/o | Treatment (Wk 2) | Treatment | Fast Day | No | 17:40 | 17:00 - 17:59 | Evening   | 37,9 | 42  | 62,8  | 62,8  | 19,05 | 524,42 | 139,67 |
| 2019/05/22 | CH2205 | Male | Three y/o | Treatment (Wk 2) | Treatment | Fast Day | No | 17:45 | 17:00 - 17:59 | Evening   | 37,9 |     | 20,0  | 20,0  | 19,05 |        | 100,31 |
| 2019/05/22 | CH2206 | Male | Three y/o | Treatment (Wk 2) | Treatment | Fast Day | No | 17:45 | 17:00 - 17:59 | Evening   | 37,8 |     | 50,4  | 50,4  | 18,95 |        | 132,06 |
| 2019/05/22 | CH2205 | Male | Three y/o | Treatment (Wk 2) | Treatment | Fast Day | No | 17:50 | 17:00 - 17:59 | Evening   | 37,9 | 85  | 11,2  | 11,2  | 19,05 | 581,90 | 80,59  |
| 2019/05/22 | CH2206 | Male | Three y/o | Treatment (Wk 2) | Treatment | Fast Day | No | 17:50 | 17:00 - 17:59 | Evening   | 37,7 | 79  | 13,4  | 13,4  | 18,85 | 576,36 | 86,68  |
| 2019/05/22 | CH2205 | Male | Three y/o | Treatment (Wk 2) | Treatment | Fast Day | No | 17:55 | 17:00 - 17:59 | Evening   | 37,7 | 42  | 3,2   | 3,2   | 18,85 | 524,42 | 38,49  |
| 2019/05/22 | CH2206 | Male | Three y/o | Treatment (Wk 2) | Treatment | Fast Day | No | 17:55 | 17:00 - 17:59 | Evening   | 37,5 | 50  | 4,8   | 4,8   | 18,65 | 539,52 | 52,04  |
| 2019/05/22 | CH2205 | Male | Three y/o | Treatment (Wk 2) | Treatment | Fast Day | No | 18:00 | 18:00 - 18:59 | Evening   | 37,5 | 43  | 6,8   | 6,8   | 18,85 | 526,50 | 63,74  |
| 2019/05/22 | CH2206 | Male | Three y/o | Treatment (Wk 2) | Treatment | Fast Day | No | 18:00 | 18:00 - 18:59 | Evening   | 37,7 | 47  | 5,0   | 5,0   | 18,85 | 534,23 | 53,41  |
| 2019/05/22 | CH2205 | Male | Three y/o | Treatment (Wk 2) | Treatment | Fast Day | No | 18:05 | 18:00 - 18:59 | Evening   | 37,7 | 51  | 8,8   | 8,8   | 18,85 | 541,20 | 72,43  |
| 2019/05/22 | CH2206 | Male | Three y/o | Treatment (Wk 2) | Treatment | Fast Day | No | 18:05 | 18:00 - 18:59 | Evening   | 37,8 | 41  | 4,6   | 4,6   | 18,95 | 522,29 | 50,61  |
| 2019/05/22 | CH2205 | Male | Three y/o | Treatment (Wk 2) | Treatment | Fast Day | No | 18:10 | 18:00 - 18:59 | Evening   | 37,6 | 52  | 5,4   | 5,4   | 18,75 | 542,83 | 55,99  |
| 2019/05/22 | CH2206 | Male | Three y/o | Treatment (Wk 2) | Treatment | Fast Day | No | 18:10 | 18:00 - 18:59 | Evening   | 37,8 | 46  | 5,0   | 5,0   | 18,95 | 532,38 | 53,41  |
| 2019/05/22 | CH2205 | Male | Three y/o | Treatment (Wk 2) | Treatment | Fast Day | No | 18:15 | 18:00 - 18:59 | Evening   | 37,5 | 47  | 8,0   | 8,0   | 18,65 | 534,23 | 69,22  |
| 2019/05/22 | CH2206 | Male | Three y/o | Treatment (Wk 2) | Treatment | Fast Day | No | 18:15 | 18:00 - 18:59 | Evening   | 37,8 | 82  | 12,4  | 12,4  | 18,95 | 579,19 | 84,04  |
| 2019/05/22 | CH2205 | Male | Three y/o | Treatment (Wk 2) | Treatment | Fast Day | No | 18:20 | 18:00 - 18:59 | Evening   | 37,5 | 62  | 10,8  | 10,8  | 18,65 | 557,33 | 79,36  |
| 2019/05/22 | CH2206 | Male | Three y/o | Treatment (Wk 2) | Treatment | Fast Day | No | 18:20 | 18:00 - 18:59 | Evening   | 37,8 | 53  | 12,8  | 12,8  | 18,95 | 544,43 | 85,12  |
| 2019/05/22 | CH2205 | Male | Three y/o | Treatment (Wk 2) | Treatment | Fast Day | No | 18:25 | 18:00 - 18:59 | Evening   | 37,5 | 110 | 13,0  | 13,0  | 18,65 | 600,69 | 85,65  |
| 2019/05/22 | CH2206 | Male | Three y/o | Treatment (Wk 2) | Treatment | Fast Day | No | 18:25 | 18:00 - 18:59 | Evening   | 37,8 | 50  | 28,2  | 28,2  | 18,95 | 539,52 | 112,07 |
| 2019/05/22 | CH2205 | Male | Three y/o | Treatment (Wk 2) | Treatment | Fast Day | No | 18:30 | 18:00 - 18:59 | Evening   | 37,5 | 51  | 22,8  | 22,8  | 18,65 | 541,20 | 104,79 |



|            |        |      |           |                  |           |          |    |       |               |         |      |     |      |      |       |        |        |
|------------|--------|------|-----------|------------------|-----------|----------|----|-------|---------------|---------|------|-----|------|------|-------|--------|--------|
| 2019/05/22 | CH2206 | Male | Three y/o | Treatment (Wk 2) | Treatment | Fast Day | No | 18:30 | 18:00 - 18:59 | Evening | 37,8 | 45  | 41,2 | 41,2 | 18,95 | 530,47 | 125,11 |
| 2019/05/22 | CH2205 | Male | Three y/o | Treatment (Wk 2) | Treatment | Fast Day | No | 18:35 | 18:00 - 18:59 | Evening | 37,5 | 44  | 24,0 | 24,0 | 18,65 | 528,51 | 106,55 |
| 2019/05/22 | CH2206 | Male | Three y/o | Treatment (Wk 2) | Treatment | Fast Day | No | 18:35 | 18:00 - 18:59 | Evening | 37,8 | 43  | 44,6 | 44,6 | 18,95 | 526,50 | 127,84 |
| 2019/05/22 | CH2205 | Male | Three y/o | Treatment (Wk 2) | Treatment | Fast Day | No | 18:40 | 18:00 - 18:59 | Evening | 37,5 | 59  | 28,4 | 28,4 | 18,65 | 553,30 | 112,31 |
| 2019/05/22 | CH2206 | Male | Three y/o | Treatment (Wk 2) | Treatment | Fast Day | No | 18:40 | 18:00 - 18:59 | Evening | 37,8 | 80  | 64,0 | 64,0 | 18,95 | 577,31 | 140,33 |
| 2019/05/22 | CH2205 | Male | Three y/o | Treatment (Wk 2) | Treatment | Fast Day | No | 18:45 | 18:00 - 18:59 | Evening | 37,5 | 44  | 13,4 | 13,4 | 18,65 | 528,51 | 86,68  |
| 2019/05/22 | CH2206 | Male | Three y/o | Treatment (Wk 2) | Treatment | Fast Day | No | 18:45 | 18:00 - 18:59 | Evening | 37,7 | 54  | 37,0 | 37,0 | 18,85 | 545,99 | 121,40 |
| 2019/05/22 | CH2205 | Male | Three y/o | Treatment (Wk 2) | Treatment | Fast Day | No | 18:50 | 18:00 - 18:59 | Evening | 37,4 | 79  | 28,4 | 28,4 | 18,55 | 576,36 | 112,31 |
| 2019/05/22 | CH2206 | Male | Three y/o | Treatment (Wk 2) | Treatment | Fast Day | No | 18:50 | 18:00 - 18:59 | Evening | 37,6 | 78  | 48,2 | 48,2 | 18,75 | 575,38 | 130,52 |
| 2019/05/22 | CH2205 | Male | Three y/o | Treatment (Wk 2) | Treatment | Fast Day | No | 18:55 | 18:00 - 18:59 | Evening | 37,4 | 54  | 28,8 | 28,8 | 18,55 | 545,99 | 112,79 |
| 2019/05/22 | CH2206 | Male | Three y/o | Treatment (Wk 2) | Treatment | Fast Day | No | 18:55 | 18:00 - 18:59 | Evening | 37,7 | 46  | 64,0 | 64,0 | 18,85 | 532,38 | 140,33 |
| 2019/05/22 | CH2205 | Male | Three y/o | Treatment (Wk 2) | Treatment | Fast Day | No | 19:00 | 19:00 - 19:59 | Evening | 37,3 | 44  | 24,4 | 24,4 | 18,46 | 528,51 | 107,11 |
| 2019/05/22 | CH2206 | Male | Three y/o | Treatment (Wk 2) | Treatment | Fast Day | No | 19:00 | 19:00 - 19:59 | Evening | 37,7 | 43  | 71,0 | 71,0 | 18,85 | 526,50 | 143,93 |
| 2019/05/22 | CH2205 | Male | Three y/o | Treatment (Wk 2) | Treatment | Fast Day | No | 19:05 | 19:00 - 19:59 | Evening | 37,5 |     | 18,8 | 18,8 | 18,65 |        | 98,20  |
| 2019/05/22 | CH2206 | Male | Three y/o | Treatment (Wk 2) | Treatment | Fast Day | No | 19:05 | 19:00 - 19:59 | Evening | 37,5 | 47  | 62,6 | 62,6 | 18,65 | 534,23 | 139,56 |
| 2019/05/22 | CH2205 | Male | Three y/o | Treatment (Wk 2) | Treatment | Fast Day | No | 19:10 | 19:00 - 19:59 | Evening | 37,5 |     | 20,6 | 20,6 | 18,65 |        | 101,32 |
| 2019/05/22 | CH2206 | Male | Three y/o | Treatment (Wk 2) | Treatment | Fast Day | No | 19:10 | 19:00 - 19:59 | Evening | 37,4 | 49  | 62,0 | 62,0 | 18,55 | 537,80 | 139,23 |
| 2019/05/22 | CH2205 | Male | Three y/o | Treatment (Wk 2) | Treatment | Fast Day | No | 19:15 | 19:00 - 19:59 | Evening | 37,4 |     | 25,0 | 25,0 | 18,55 |        | 107,94 |
| 2019/05/22 | CH2206 | Male | Three y/o | Treatment (Wk 2) | Treatment | Fast Day | No | 19:15 | 19:00 - 19:59 | Evening | 37,4 | 64  | 60,6 | 60,6 | 18,55 | 559,88 | 138,44 |
| 2019/05/22 | CH2205 | Male | Three y/o | Treatment (Wk 2) | Treatment | Fast Day | No | 19:20 | 19:00 - 19:59 | Evening | 37,4 | 58  | 26,4 | 26,4 | 18,55 | 551,90 | 109,81 |
| 2019/05/22 | CH2206 | Male | Three y/o | Treatment (Wk 2) | Treatment | Fast Day | No | 19:20 | 19:00 - 19:59 | Evening | 37,4 | 52  | 60,6 | 60,6 | 18,55 | 542,83 | 138,44 |
| 2019/05/22 | CH2205 | Male | Three y/o | Treatment (Wk 2) | Treatment | Fast Day | No | 19:25 | 19:00 - 19:59 | Evening | 37,4 |     | 22,2 | 22,2 | 18,55 |        | 103,88 |
| 2019/05/22 | CH2206 | Male | Three y/o | Treatment (Wk 2) | Treatment | Fast Day | No | 19:25 | 19:00 - 19:59 | Evening | 37,4 | 43  | 63,4 | 63,4 | 18,55 | 526,50 | 140,00 |
| 2019/05/22 | CH2205 | Male | Three y/o | Treatment (Wk 2) | Treatment | Fast Day | No | 19:30 | 19:00 - 19:59 | Evening | 37,4 | 39  | 22,4 | 22,4 | 18,55 | 517,82 | 104,19 |
| 2019/05/22 | CH2206 | Male | Three y/o | Treatment (Wk 2) | Treatment | Fast Day | No | 19:30 | 19:00 - 19:59 | Evening | 37,4 | 55  | 55,4 | 55,4 | 18,55 | 547,52 | 135,33 |
| 2019/05/22 | CH2205 | Male | Three y/o | Treatment (Wk 2) | Treatment | Fast Day | No | 19:35 | 19:00 - 19:59 | Evening | 37,4 |     | 21,6 | 21,6 | 18,55 |        | 102,94 |
| 2019/05/22 | CH2206 | Male | Three y/o | Treatment (Wk 2) | Treatment | Fast Day | No | 19:35 | 19:00 - 19:59 | Evening | 37,4 | 41  | 58,2 | 58,2 | 18,55 | 522,29 | 137,04 |
| 2019/05/22 | CH2205 | Male | Three y/o | Treatment (Wk 2) | Treatment | Fast Day | No | 19:40 | 19:00 - 19:59 | Evening | 37,4 |     | 23,8 | 23,8 | 18,55 |        | 106,26 |
| 2019/05/22 | CH2206 | Male | Three y/o | Treatment (Wk 2) | Treatment | Fast Day | No | 19:40 | 19:00 - 19:59 | Evening | 37,4 | 40  | 58,8 | 58,8 | 18,55 | 520,09 | 137,39 |
| 2019/05/22 | CH2205 | Male | Three y/o | Treatment (Wk 2) | Treatment | Fast Day | No | 19:45 | 19:00 - 19:59 | Evening | 37,4 | 48  | 23,8 | 23,8 | 18,55 | 536,04 | 106,26 |
| 2019/05/22 | CH2206 | Male | Three y/o | Treatment (Wk 2) | Treatment | Fast Day | No | 19:45 | 19:00 - 19:59 | Evening | 37,4 | 40  | 58,8 | 58,8 | 18,55 | 520,09 | 137,39 |
| 2019/05/22 | CH2205 | Male | Three y/o | Treatment (Wk 2) | Treatment | Fast Day | No | 19:50 | 19:00 - 19:59 | Evening | 37,4 |     | 24,6 | 24,6 | 18,55 |        | 107,39 |
| 2019/05/22 | CH2206 | Male | Three y/o | Treatment (Wk 2) | Treatment | Fast Day | No | 19:50 | 19:00 - 19:59 | Evening | 37,4 | 41  | 46,4 | 46,4 | 18,55 | 522,29 | 129,21 |
| 2019/05/22 | CH2205 | Male | Three y/o | Treatment (Wk 2) | Treatment | Fast Day | No | 19:55 | 19:00 - 19:59 | Evening | 37,4 |     | 27,0 | 27,0 | 18,55 |        | 110,58 |
| 2019/05/22 | CH2206 | Male | Three y/o | Treatment (Wk 2) | Treatment | Fast Day | No | 19:55 | 19:00 - 19:59 | Evening | 37,4 | 46  | 55,4 | 55,4 | 18,55 | 532,38 | 135,33 |
| 2019/05/22 | CH2205 | Male | Three y/o | Treatment (Wk 2) | Treatment | Fast Day | No | 20:00 | 20:00 - 20:59 | Night   | 37,5 | 140 | 17,6 | 17,6 | 18,65 | 617,28 | 95,95  |
| 2019/05/22 | CH2206 | Male | Three y/o | Treatment (Wk 2) | Treatment | Fast Day | No | 20:00 | 20:00 - 20:59 | Night   | 37,4 | 75  | 62,4 | 62,4 | 18,55 | 572,36 | 139,45 |
| 2019/05/22 | CH2205 | Male | Three y/o | Treatment (Wk 2) | Treatment | Fast Day | No | 20:05 | 20:00 - 20:59 | Night   | 37,5 | 39  | 16,0 | 16,0 | 18,65 | 517,82 | 92,71  |
| 2019/05/22 | CH2206 | Male | Three y/o | Treatment (Wk 2) | Treatment | Fast Day | No | 20:05 | 20:00 - 20:59 | Night   | 37,3 | 43  | 64,6 | 64,6 | 18,46 | 526,50 | 140,65 |
| 2019/05/22 | CH2205 | Male | Three y/o | Treatment (Wk 2) | Treatment | Fast Day | No | 20:10 | 20:00 - 20:59 | Night   | 37,5 | 38  | 17,2 | 17,2 | 18,65 | 515,48 | 95,17  |
| 2019/05/22 | CH2206 | Male | Three y/o | Treatment (Wk 2) | Treatment | Fast Day | No | 20:10 | 20:00 - 20:59 | Night   | 37,3 | 45  | 62,2 | 62,2 | 18,46 | 530,47 | 139,34 |
| 2019/05/22 | CH2205 | Male | Three y/o | Treatment (Wk 2) | Treatment | Fast Day | No | 20:15 | 20:00 - 20:59 | Night   | 37,5 | 43  | 21,2 | 21,2 | 18,65 | 526,50 | 102,31 |
| 2019/05/22 | CH2206 | Male | Three y/o | Treatment (Wk 2) | Treatment | Fast Day | No | 20:15 | 20:00 - 20:59 | Night   | 37,3 | 43  | 61,2 | 61,2 | 18,46 | 526,50 | 138,78 |
| 2019/05/22 | CH2205 | Male | Three y/o | Treatment (Wk 2) | Treatment | Fast Day | No | 20:20 | 20:00 - 20:59 | Night   | 37,5 | 123 | 13,6 | 13,6 | 18,65 | 608,49 | 87,18  |
| 2019/05/22 | CH2206 | Male | Three y/o | Treatment (Wk 2) | Treatment | Fast Day | No | 20:20 | 20:00 - 20:59 | Night   | 37,4 | 50  | 66,8 | 66,8 | 18,55 | 539,52 | 141,81 |
| 2019/05/22 | CH2205 | Male | Three y/o | Treatment (Wk 2) | Treatment | Fast Day | No | 20:25 | 20:00 - 20:59 | Night   | 37,6 | 44  | 21,4 | 21,4 | 18,75 | 528,51 | 102,63 |
| 2019/05/22 | CH2206 | Male | Three y/o | Treatment (Wk 2) | Treatment | Fast Day | No | 20:25 | 20:00 - 20:59 | Night   | 37,4 | 46  | 63,6 | 63,6 | 18,55 | 532,38 | 140,11 |
| 2019/05/22 | CH2205 | Male | Three y/o | Treatment (Wk 2) | Treatment | Fast Day | No | 20:30 | 20:00 - 20:59 | Night   | 37,6 | 81  | 18,4 | 18,4 | 18,75 | 578,26 | 97,47  |
| 2019/05/22 | CH2206 | Male | Three y/o | Treatment (Wk 2) | Treatment | Fast Day | No | 20:30 | 20:00 - 20:59 | Night   | 37,4 | 43  | 65,4 | 65,4 | 18,55 | 526,50 | 141,08 |
| 2019/05/22 | CH2205 | Male | Three y/o | Treatment (Wk 2) | Treatment | Fast Day | No | 20:35 | 20:00 - 20:59 | Night   | 37,5 | 54  | 20,8 | 20,8 | 18,65 | 545,99 | 101,65 |
| 2019/05/22 | CH2206 | Male | Three y/o | Treatment (Wk 2) | Treatment | Fast Day | No | 20:35 | 20:00 - 20:59 | Night   | 37,4 | 45  | 69,2 | 69,2 | 18,55 | 530,47 | 143,04 |
| 2019/05/22 | CH2205 | Male | Three y/o | Treatment (Wk 2) | Treatment | Fast Day | No | 20:40 | 20:00 - 20:59 | Night   | 37,5 | 52  | 25,4 | 25,4 | 18,65 | 542,83 | 108,49 |
| 2019/05/22 | CH2206 | Male | Three y/o | Treatment (Wk 2) | Treatment | Fast Day | No | 20:40 | 20:00 - 20:59 | Night   | 37,4 | 41  | 61,4 | 61,4 | 18,55 | 522,29 | 138,89 |
| 2019/05/22 | CH2205 | Male | Three y/o | Treatment (Wk 2) | Treatment | Fast Day | No | 20:45 | 20:00 - 20:59 | Night   | 37,5 | 42  | 27,8 | 27,8 | 18,65 | 524,42 | 111,58 |
| 2019/05/22 | CH2206 | Male | Three y/o | Treatment (Wk 2) | Treatment | Fast Day | No | 20:45 | 20:00 - 20:59 | Night   | 37,4 | 57  | 67,0 | 67,0 | 18,55 | 550,47 | 141,92 |
| 2019/05/22 | CH2205 | Male | Three y/o | Treatment (Wk 2) | Treatment | Fast Day | No | 20:50 | 20:00 - 20:59 | Night   | 37,5 | 52  | 25,6 | 25,6 | 18,65 | 542,83 | 108,76 |
| 2019/05/22 | CH2206 | Male | Three y/o | Treatment (Wk 2) | Treatment | Fast Day | No | 20:50 | 20:00 - 20:59 | Night   | 37,4 | 44  | 67,2 | 67,2 | 18,55 | 528,51 | 142,02 |
| 2019/05/22 | CH2205 | Male | Three y/o | Treatment (Wk 2) | Treatment | Fast Day | No | 20:55 | 20:00 - 20:59 | Night   | 37,5 | 42  | 22,2 | 22,2 | 18,65 | 524,42 | 103,88 |
| 2019/05/22 | CH2206 | Male | Three y/o | Treatment (Wk 2) | Treatment | Fast Day | No | 20:55 | 20:00 - 20:59 | Night   | 37,4 | 48  | 65,4 | 65,4 | 18,55 | 536,04 | 141,08 |
| 2019/05/22 | CH2205 | Male | Three y/o | Treatment (Wk 2) | Treatment | Fast Day | No | 21:00 | 21:00 - 21:59 | Night   | 37,5 | 46  | 24,8 | 24,8 | 18,65 | 532,38 | 107,67 |
| 2019/05/22 | CH2206 | Male | Three y/o | Treatment (Wk 2) | Treatment | Fast Day | No | 21:00 | 21:00 - 21:59 | Night   | 37,4 | 44  | 58,0 | 58,0 | 18,55 | 528,51 | 136,92 |
| 2019/05/22 | CH2205 | Male | Three y/o | Treatment (Wk 2) | Treatment | Fast Day | No | 21:05 | 21:00 - 21:59 | Night   | 37,5 | 77  | 19,6 | 19,6 | 18,65 | 574,39 | 99,63  |
| 2019/05/22 | CH2206 | Male | Three y/o | Treatment (Wk 2) | Treatment | Fast Day | No | 21:05 | 21:00 - 21:59 | Night   | 37,4 | 50  | 52,6 | 52,6 | 18,55 | 539,52 | 133,54 |
| 2019/05/22 | CH2205 | Male | Three y/o | Treatment (Wk 2) | Treatment | Fast Day | No | 21:10 | 21:00 - 21:59 | Night   | 37,5 | 93  | 26,6 | 26,6 | 18,65 | 588,58 | 110,07 |
| 2019/05/22 | CH2206 | Male | Three y/o | Treatment (Wk 2) | Treatment | Fast Day | No | 21:10 | 21:00 - 21:59 | Night   | 37,4 | 82  | 44,8 | 44,8 | 18,55 | 579,19 | 127,99 |
| 2019/05/22 | CH2205 | Male | Three y/o | Treatment (Wk 2) | Treatment | Fast Day | No | 21:15 | 21:00 - 21:59 | Night   | 37,5 | 42  | 24,6 | 24,6 | 18,65 | 524,42 | 107,39 |
| 2019/05/22 | CH2206 | Male | Three y/o | Treatment (Wk 2) | Treatment | Fast Day | No | 21:15 | 21:00 - 21:59 | Night   | 37,3 | 93  | 40,6 | 40,6 | 18,46 | 588,58 | 124,60 |
| 2019/05/22 | CH2205 | Male | Three y/o | Treatment (Wk 2) | Treatment | Fast Day | No | 21:20 | 21:00 - 21:59 | Night   | 37,4 | 37  | 30,6 | 30,6 | 18,55 | 513,06 | 114,87 |
| 2019/05/22 | CH2206 | Male | Three y/o | Treatment (Wk 2) | Treatment | Fast Day | No | 21:20 | 21:00 - 21:59 | Night   | 37,3 | 48  | 26,0 | 26,0 | 18,46 | 536,04 | 109,29 |
| 2019/05/22 | CH2205 | Male | Three y/o | Treatment (Wk 2) | Treatment | Fast Day | No | 21:25 | 21:00 - 21:59 | Night   | 37,4 | 52  | 24,4 | 24,4 | 18,55 | 542,83 | 107,11 |



|   |            |        |      |           |                  |           |          |    |       |               |               |      |     |      |      |       |        |        |
|---|------------|--------|------|-----------|------------------|-----------|----------|----|-------|---------------|---------------|------|-----|------|------|-------|--------|--------|
|   | 2019/05/22 | CH2206 | Male | Three y/o | Treatment (Wk 2) | Treatment | Fast Day | No | 21:25 | 21:00 - 21:59 | Night         | 37,3 | 44  | 20,4 | 20,4 | 18,46 | 528,51 | 100,99 |
|   | 2019/05/22 | CH2205 | Male | Three y/o | Treatment (Wk 2) | Treatment | Fast Day | No | 21:30 | 21:00 - 21:59 | Night         | 37,4 | 57  | 26,8 | 26,8 | 18,55 | 550,47 | 110,33 |
|   | 2019/05/22 | CH2206 | Male | Three y/o | Treatment (Wk 2) | Treatment | Fast Day | No | 21:30 | 21:00 - 21:59 | Night         | 37,3 | 72  | 16,6 | 16,6 | 18,46 | 569,20 | 93,96  |
|   | 2019/05/22 | CH2205 | Male | Three y/o | Treatment (Wk 2) | Treatment | Fast Day | No | 21:35 | 21:00 - 21:59 | Night         | 37,4 | 79  | 26,4 | 26,4 | 18,55 | 576,36 | 109,81 |
|   | 2019/05/22 | CH2206 | Male | Three y/o | Treatment (Wk 2) | Treatment | Fast Day | No | 21:35 | 21:00 - 21:59 | Night         | 37,3 | 45  | 17,8 | 17,8 | 18,46 | 530,47 | 96,34  |
|   | 2019/05/22 | CH2205 | Male | Three y/o | Treatment (Wk 2) | Treatment | Fast Day | No | 21:40 | 21:00 - 21:59 | Night         | 37,3 | 34  | 28,4 | 28,4 | 18,46 | 505,29 | 112,31 |
|   | 2019/05/22 | CH2206 | Male | Three y/o | Treatment (Wk 2) | Treatment | Fast Day | No | 21:40 | 21:00 - 21:59 | Night         | 37,3 | 52  | 13,6 | 13,6 | 18,46 | 542,83 | 87,18  |
|   | 2019/05/22 | CH2205 | Male | Three y/o | Treatment (Wk 2) | Treatment | Fast Day | No | 21:45 | 21:00 - 21:59 | Night         | 37,3 | 42  | 28,8 | 28,8 | 18,46 | 524,42 | 112,79 |
|   | 2019/05/22 | CH2206 | Male | Three y/o | Treatment (Wk 2) | Treatment | Fast Day | No | 21:45 | 21:00 - 21:59 | Night         | 37,3 | 78  | 4,2  | 4,2  | 18,46 | 575,38 | 47,57  |
|   | 2019/05/22 | CH2205 | Male | Three y/o | Treatment (Wk 2) | Treatment | Fast Day | No | 21:50 | 21:00 - 21:59 | Night         | 37,3 | 37  | 24,6 | 24,6 | 18,46 | 513,06 | 107,39 |
|   | 2019/05/22 | CH2206 | Male | Three y/o | Treatment (Wk 2) | Treatment | Fast Day | No | 21:50 | 21:00 - 21:59 | Night         | 37,3 | 47  | 14,6 | 14,6 | 18,46 | 534,23 | 89,59  |
|   | 2019/05/22 | CH2205 | Male | Three y/o | Treatment (Wk 2) | Treatment | Fast Day | No | 21:55 | 21:00 - 21:59 | Night         | 37,3 | 41  | 26,2 | 26,2 | 18,46 | 522,29 | 109,55 |
|   | 2019/05/22 | CH2206 | Male | Three y/o | Treatment (Wk 2) | Treatment | Fast Day | No | 21:55 | 21:00 - 21:59 | Night         | 37,3 | 43  | 23,2 | 23,2 | 18,46 | 526,50 | 105,39 |
|   | 2019/05/22 | CH2205 | Male | Three y/o | Treatment (Wk 2) | Treatment | Fast Day | No | 22:00 | 22:00 - 22:59 | Night         | 37,3 | 36  | 26,0 | 26,0 | 18,46 | 510,56 | 109,29 |
|   | 2019/05/22 | CH2206 | Male | Three y/o | Treatment (Wk 2) | Treatment | Fast Day | No | 22:00 | 22:00 - 22:59 | Night         | 37,3 | 55  | 27,8 | 27,8 | 18,46 | 547,52 | 111,58 |
|   | 2019/05/22 | CH2205 | Male | Three y/o | Treatment (Wk 2) | Treatment | Fast Day | No | 22:05 | 22:00 - 22:59 | Night         | 37,3 | 79  | 55,4 | 55,4 | 18,46 | 576,36 | 135,33 |
|   | 2019/05/22 | CH2206 | Male | Three y/o | Treatment (Wk 2) | Treatment | Fast Day | No | 22:05 | 22:00 - 22:59 | Night         | 37,3 | 46  | 28,8 | 28,8 | 18,46 | 532,38 | 112,79 |
|   | 2019/05/22 | CH2205 | Male | Three y/o | Treatment (Wk 2) | Treatment | Fast Day | No | 22:10 | 22:00 - 22:59 | Night         | 37,3 | 44  | 5,4  | 5,4  | 18,46 | 528,51 | 55,99  |
|   | 2019/05/22 | CH2206 | Male | Three y/o | Treatment (Wk 2) | Treatment | Fast Day | No | 22:10 | 22:00 - 22:59 | Night         | 37,4 | 71  | 50,2 | 50,2 | 18,55 | 568,10 | 131,92 |
|   | 2019/05/22 | CH2205 | Male | Three y/o | Treatment (Wk 2) | Treatment | Fast Day | No | 22:15 | 22:00 - 22:59 | Night         | 37,3 | 43  | 7,4  | 7,4  | 18,46 | 526,50 | 66,59  |
|   | 2019/05/22 | CH2206 | Male | Three y/o | Treatment (Wk 2) | Treatment | Fast Day | No | 22:15 | 22:00 - 22:59 | Night         | 37,4 | 45  | 47,8 | 47,8 | 18,55 | 530,47 | 130,23 |
|   | 2019/05/22 | CH2205 | Male | Three y/o | Treatment (Wk 2) | Treatment | Fast Day | No | 22:20 | 22:00 - 22:59 | Night         | 37,3 | 45  | 9,4  | 9,4  | 18,46 | 530,47 | 74,66  |
|   | 2019/05/22 | CH2206 | Male | Three y/o | Treatment (Wk 2) | Treatment | Fast Day | No | 22:20 | 22:00 - 22:59 | Night         | 37,4 | 43  | 50,0 | 50,0 | 18,55 | 526,50 | 131,79 |
|   | 2019/05/22 | CH2205 | Male | Three y/o | Treatment (Wk 2) | Treatment | Fast Day | No | 22:25 | 22:00 - 22:59 | Night         | 37,3 | 85  | 6,2  | 6,2  | 18,46 | 581,90 | 60,63  |
|   | 2019/05/22 | CH2206 | Male | Three y/o | Treatment (Wk 2) | Treatment | Fast Day | No | 22:25 | 22:00 - 22:59 | Night         | 37,4 | 42  | 55,6 | 55,6 | 18,55 | 524,42 | 135,46 |
|   | 2019/05/22 | CH2205 | Male | Three y/o | Treatment (Wk 2) | Treatment | Fast Day | No | 22:30 | 22:00 - 22:59 | Night         | 37,3 | 38  | 8,4  | 8,4  | 18,46 | 515,48 | 70,86  |
|   | 2019/05/22 | CH2206 | Male | Three y/o | Treatment (Wk 2) | Treatment | Fast Day | No | 22:30 | 22:00 - 22:59 | Night         | 37,4 | 44  | 51,4 | 51,4 | 18,55 | 528,51 | 132,74 |
|   | 2019/05/22 | CH2205 | Male | Three y/o | Treatment (Wk 2) | Treatment | Fast Day | No | 22:35 | 22:00 - 22:59 | Night         | 37,3 | 49  | 12,6 | 12,6 | 18,46 | 537,80 | 84,59  |
|   | 2019/05/22 | CH2206 | Male | Three y/o | Treatment (Wk 2) | Treatment | Fast Day | No | 22:35 | 22:00 - 22:59 | Night         | 37,4 | 71  | 46,8 | 46,8 | 18,55 | 568,10 | 129,50 |
|   | 2019/05/22 | CH2205 | Male | Three y/o | Treatment (Wk 2) | Treatment | Fast Day | No | 22:40 | 22:00 - 22:59 | Night         | 37,3 | 36  | 15,6 | 15,6 | 18,46 | 510,56 | 91,85  |
|   | 2019/05/22 | CH2206 | Male | Three y/o | Treatment (Wk 2) | Treatment | Fast Day | No | 22:40 | 22:00 - 22:59 | Night         | 37,4 | 48  | 44,2 | 44,2 | 18,55 | 536,04 | 127,53 |
|   | 2019/05/22 | CH2205 | Male | Three y/o | Treatment (Wk 2) | Treatment | Fast Day | No | 22:45 | 22:00 - 22:59 | Night         | 37,3 | 51  | 11,4 | 11,4 | 18,46 | 541,20 | 81,19  |
|   | 2019/05/22 | CH2206 | Male | Three y/o | Treatment (Wk 2) | Treatment | Fast Day | No | 22:45 | 22:00 - 22:59 | Night         | 37,4 | 51  | 41,8 | 41,8 | 18,55 | 541,20 | 125,60 |
|   | 2019/05/22 | CH2205 | Male | Three y/o | Treatment (Wk 2) | Treatment | Fast Day | No | 22:50 | 22:00 - 22:59 | Night         | 37,3 | 54  | 11,4 | 11,4 | 18,46 | 545,99 | 81,19  |
|   | 2019/05/22 | CH2206 | Male | Three y/o | Treatment (Wk 2) | Treatment | Fast Day | No | 22:50 | 22:00 - 22:59 | Night         | 37,4 | 50  | 43,8 | 43,8 | 18,55 | 539,52 | 127,22 |
|   | 2019/05/22 | CH2205 | Male | Three y/o | Treatment (Wk 2) | Treatment | Fast Day | No | 22:55 | 22:00 - 22:59 | Night         | 37,3 | 46  | 15,6 | 15,6 | 18,46 | 532,38 | 91,85  |
|   | 2019/05/22 | CH2206 | Male | Three y/o | Treatment (Wk 2) | Treatment | Fast Day | No | 22:55 | 22:00 - 22:59 | Night         | 37,4 | 45  | 46,2 | 46,2 | 18,55 | 530,47 | 129,06 |
|   | 2019/05/22 | CH2205 | Male | Three y/o | Treatment (Wk 2) | Treatment | Fast Day | No | 23:00 | 23:00 - 23:59 | Night         | 37,3 | 39  | 17,2 | 17,2 | 18,46 | 517,82 | 95,17  |
|   | 2019/05/22 | CH2206 | Male | Three y/o | Treatment (Wk 2) | Treatment | Fast Day | No | 23:00 | 23:00 - 23:59 | Night         | 37,4 | 43  | 46,2 | 46,2 | 18,55 | 526,50 | 129,06 |
|   | 2019/05/22 | CH2205 | Male | Three y/o | Treatment (Wk 2) | Treatment | Fast Day | No | 23:05 | 23:00 - 23:59 | Night         | 37,3 | 41  | 15,0 | 15,0 | 18,46 | 522,29 | 90,51  |
|   | 2019/05/22 | CH2206 | Male | Three y/o | Treatment (Wk 2) | Treatment | Fast Day | No | 23:05 | 23:00 - 23:59 | Night         | 37,4 | 38  | 46,2 | 46,2 | 18,55 | 515,48 | 129,06 |
|   | 2019/05/22 | CH2205 | Male | Three y/o | Treatment (Wk 2) | Treatment | Fast Day | No | 23:10 | 23:00 - 23:59 | Night         | 37,3 | 45  | 14,0 | 14,0 | 18,46 | 530,47 | 88,17  |
|   | 2019/05/22 | CH2206 | Male | Three y/o | Treatment (Wk 2) | Treatment | Fast Day | No | 23:10 | 23:00 - 23:59 | Night         | 37,4 | 95  | 43,2 | 43,2 | 18,55 | 590,14 | 126,74 |
|   | 2019/05/22 | CH2205 | Male | Three y/o | Treatment (Wk 2) | Treatment | Fast Day | No | 23:15 | 23:00 - 23:59 | Night         | 37,3 | 46  | 16,2 | 16,2 | 18,46 | 532,38 | 93,13  |
|   | 2019/05/22 | CH2206 | Male | Three y/o | Treatment (Wk 2) | Treatment | Fast Day | No | 23:15 | 23:00 - 23:59 | Night         | 37,4 | 48  | 38,6 | 38,6 | 18,55 | 536,04 | 122,86 |
|   | 2019/05/22 | CH2205 | Male | Three y/o | Treatment (Wk 2) | Treatment | Fast Day | No | 23:20 | 23:00 - 23:59 | Night         | 37,4 | 98  | 31,0 | 31,0 | 18,55 | 592,41 | 115,32 |
|   | 2019/05/22 | CH2206 | Male | Three y/o | Treatment (Wk 2) | Treatment | Fast Day | No | 23:20 | 23:00 - 23:59 | Night         | 37,4 | 113 | 32,2 | 32,2 | 18,55 | 602,58 | 116,63 |
|   | 2019/05/22 | CH2205 | Male | Three y/o | Treatment (Wk 2) | Treatment | Fast Day | No | 23:25 | 23:00 - 23:59 | Night         | 37,3 | 41  | 41,0 | 41,0 | 18,46 | 541,00 | 124,94 |
|   | 2019/05/22 | CH2206 | Male | Three y/o | Treatment (Wk 2) | Treatment | Fast Day | No | 23:25 | 23:00 - 23:59 | Night         | 37,4 | 115 | 57,2 | 57,2 | 18,55 | 603,82 | 136,44 |
|   | 2019/05/22 | CH2205 | Male | Three y/o | Treatment (Wk 2) | Treatment | Fast Day | No | 23:30 | 23:00 - 23:59 | Night         | 37,4 | 103 | 30,8 | 30,8 | 18,55 | 596,00 | 115,10 |
|   | 2019/05/22 | CH2206 | Male | Three y/o | Treatment (Wk 2) | Treatment | Fast Day | No | 23:30 | 23:00 - 23:59 | Night         | 37,3 | 129 | 44,6 | 44,6 | 18,46 | 611,75 | 127,84 |
|   | 2019/05/22 | CH2205 | Male | Three y/o | Treatment (Wk 2) | Treatment | Fast Day | No | 23:35 | 23:00 - 23:59 | Night         | 37,4 | 45  | 30,2 | 30,2 | 18,55 | 530,47 | 114,42 |
|   | 2019/05/22 | CH2206 | Male | Three y/o | Treatment (Wk 2) | Treatment | Fast Day | No | 23:35 | 23:00 - 23:59 | Night         | 37,3 | 47  | 64,6 | 64,6 | 18,46 | 534,23 | 140,65 |
|   | 2019/05/22 | CH2205 | Male | Three y/o | Treatment (Wk 2) | Treatment | Fast Day | No | 23:40 | 23:00 - 23:59 | Night         | 37,4 | 42  | 27,8 | 27,8 | 18,55 | 524,42 | 111,58 |
|   | 2019/05/22 | CH2206 | Male | Three y/o | Treatment (Wk 2) | Treatment | Fast Day | No | 23:40 | 23:00 - 23:59 | Night         | 36,9 | 49  | 63,4 | 63,4 | 18,06 | 537,80 | 140,00 |
|   | 2019/05/22 | CH2205 | Male | Three y/o | Treatment (Wk 2) | Treatment | Fast Day | No | 23:45 | 23:00 - 23:59 | Night         | 37,4 | 35  | 22,8 | 22,8 | 18,55 | 507,97 | 104,79 |
|   | 2019/05/22 | CH2206 | Male | Three y/o | Treatment (Wk 2) | Treatment | Fast Day | No | 23:45 | 23:00 - 23:59 | Night         | 36,9 | 44  | 59,8 | 59,8 | 18,06 | 528,51 | 137,98 |
|   | 2019/05/22 | CH2205 | Male | Three y/o | Treatment (Wk 2) | Treatment | Fast Day | No | 23:50 | 23:00 - 23:59 | Night         | 37,4 | 50  | 14,4 | 14,4 | 18,55 | 539,52 | 89,12  |
|   | 2019/05/22 | CH2206 | Male | Three y/o | Treatment (Wk 2) | Treatment | Fast Day | No | 23:50 | 23:00 - 23:59 | Night         | 37,2 | 47  | 62,2 | 62,2 | 18,36 | 534,23 | 139,34 |
|   | 2019/05/22 | CH2205 | Male | Three y/o | Treatment (Wk 2) | Treatment | Fast Day | No | 23:55 | 23:00 - 23:59 | Night         | 37,3 | 47  | 19,2 | 19,2 | 18,46 | 534,23 | 98,92  |
|   | 2019/05/22 | CH2206 | Male | Three y/o | Treatment (Wk 2) | Treatment | Fast Day | No | 23:55 | 23:00 - 23:59 | Night         | 37,2 | 48  | 51,8 | 51,8 | 18,36 | 536,04 | 133,01 |
| 9 | 2019/05/23 | CH2205 | Male | Three y/o | Treatment (Wk 2) | Treatment | Feed Day | No | 00:00 | 00:00 - 00:59 | Early Morning | 37,4 | 58  | 26,0 | 26,0 | 18,55 | 551,90 | 109,29 |
|   | 2019/05/23 | CH2206 | Male | Three y/o | Treatment (Wk 2) | Treatment | Feed Day | No | 00:00 | 00:00 - 00:59 | Early Morning | 37,2 | 152 | 60,2 | 60,2 | 18,36 | 622,73 | 138,21 |
|   | 2019/05/23 | CH2205 | Male | Three y/o | Treatment (Wk 2) | Treatment | Feed Day | No | 00:05 | 00:00 - 00:59 | Early Morning | 37,2 | 58  | 25,0 | 25,0 | 18,36 | 551,90 | 107,94 |
|   | 2019/05/23 | CH2206 | Male | Three y/o | Treatment (Wk 2) | Treatment | Feed Day | No | 00:05 | 00:00 - 00:59 | Early Morning | 37,2 | 46  | 51,4 | 51,4 | 18,36 | 532,38 | 132,74 |
|   | 2019/05/23 | CH2205 | Male | Three y/o | Treatment (Wk 2) | Treatment | Feed Day | No | 00:10 | 00:00 - 00:59 | Early Morning | 37,2 | 42  | 23,8 | 23,8 | 18,36 | 524,42 | 106,26 |
|   | 2019/05/23 | CH2206 | Male | Three y/o | Treatment (Wk 2) | Treatment | Feed Day | No | 00:10 | 00:00 - 00:59 | Early Morning | 37,2 | 49  | 59,4 | 59,4 | 18,36 | 537,80 | 137,75 |
|   | 2019/05/23 | CH2205 | Male | Three y/o | Treatment (Wk 2) | Treatment | Feed Day | No | 00:15 | 00:00 - 00:59 | Early Morning | 37,1 | 88  | 25,0 | 25,0 | 18,26 | 584,49 | 107,94 |
|   | 2019/05/23 | CH2206 | Male | Three y/o | Treatment (Wk 2) | Treatment | Feed Day | No | 00:15 | 00:00 - 00:59 | Early Morning | 37,2 | 83  | 58,4 | 58,4 | 18,36 | 580,11 | 137,16 |
|   | 2019/05/23 | CH2205 | Male | Three y/o | Treatment (Wk 2) | Treatment | Feed Day | No | 00:20 | 00:00 - 00:59 | Early Morning | 37,1 | 56  | 24,2 | 24,2 | 18,26 | 549,01 | 106,83 |



|            |        |      |           |                  |           |          |    |       |               |               |      |     |       |       |       |        |        |
|------------|--------|------|-----------|------------------|-----------|----------|----|-------|---------------|---------------|------|-----|-------|-------|-------|--------|--------|
| 2019/05/23 | CH2206 | Male | Three y/o | Treatment (Wk 2) | Treatment | Feed Day | No | 00:20 | 00:00 - 00:59 | Early Morning | 37,2 | 51  | 61,8  | 61,8  | 18,36 | 541,20 | 139,12 |
| 2019/05/23 | CH2205 | Male | Three y/o | Treatment (Wk 2) | Treatment | Feed Day | No | 00:25 | 00:00 - 00:59 | Early Morning | 37,1 | 43  | 23,6  | 23,6  | 18,26 | 526,50 | 105,97 |
| 2019/05/23 | CH2206 | Male | Three y/o | Treatment (Wk 2) | Treatment | Feed Day | No | 00:25 | 00:00 - 00:59 | Early Morning | 37,2 | 46  | 48,6  | 48,6  | 18,36 | 532,38 | 130,81 |
| 2019/05/23 | CH2205 | Male | Three y/o | Treatment (Wk 2) | Treatment | Feed Day | No | 00:30 | 00:00 - 00:59 | Early Morning | 37,1 | 64  | 25,2  | 25,2  | 18,26 | 559,88 | 108,22 |
| 2019/05/23 | CH2206 | Male | Three y/o | Treatment (Wk 2) | Treatment | Feed Day | No | 00:30 | 00:00 - 00:59 | Early Morning | 37,2 | 48  | 48,4  | 48,4  | 18,36 | 536,04 | 130,66 |
| 2019/05/23 | CH2205 | Male | Three y/o | Treatment (Wk 2) | Treatment | Feed Day | No | 00:35 | 00:00 - 00:59 | Early Morning | 37,2 |     | 29,0  | 29,0  | 18,36 |        | 113,03 |
| 2019/05/23 | CH2206 | Male | Three y/o | Treatment (Wk 2) | Treatment | Feed Day | No | 00:35 | 00:00 - 00:59 | Early Morning | 37,1 | 51  | 57,2  | 57,2  | 18,26 | 541,20 | 136,44 |
| 2019/05/23 | CH2205 | Male | Three y/o | Treatment (Wk 2) | Treatment | Feed Day | No | 00:40 | 00:00 - 00:59 | Early Morning | 37,2 | 35  | 24,2  | 24,2  | 18,36 | 507,97 | 106,83 |
| 2019/05/23 | CH2206 | Male | Three y/o | Treatment (Wk 2) | Treatment | Feed Day | No | 00:40 | 00:00 - 00:59 | Early Morning | 37,1 | 50  | 59,4  | 59,4  | 18,26 | 539,52 | 137,75 |
| 2019/05/23 | CH2205 | Male | Three y/o | Treatment (Wk 2) | Treatment | Feed Day | No | 00:45 | 00:00 - 00:59 | Early Morning | 37,2 | 71  | 29,4  | 29,4  | 18,36 | 568,10 | 113,50 |
| 2019/05/23 | CH2206 | Male | Three y/o | Treatment (Wk 2) | Treatment | Feed Day | No | 00:45 | 00:00 - 00:59 | Early Morning | 37,1 | 56  | 53,4  | 53,4  | 18,26 | 549,01 | 134,06 |
| 2019/05/23 | CH2205 | Male | Three y/o | Treatment (Wk 2) | Treatment | Feed Day | No | 00:50 | 00:00 - 00:59 | Early Morning | 37,2 | 36  | 24,2  | 24,2  | 18,36 | 510,56 | 106,83 |
| 2019/05/23 | CH2206 | Male | Three y/o | Treatment (Wk 2) | Treatment | Feed Day | No | 00:50 | 00:00 - 00:59 | Early Morning | 37,1 | 82  | 51,6  | 51,6  | 18,26 | 579,19 | 132,87 |
| 2019/05/23 | CH2205 | Male | Three y/o | Treatment (Wk 2) | Treatment | Feed Day | No | 00:55 | 00:00 - 00:59 | Early Morning | 37,2 | 43  | 26,2  | 26,2  | 18,36 | 526,50 | 109,55 |
| 2019/05/23 | CH2206 | Male | Three y/o | Treatment (Wk 2) | Treatment | Feed Day | No | 00:55 | 00:00 - 00:59 | Early Morning | 37,1 | 53  | 56,8  | 56,8  | 18,26 | 544,43 | 136,20 |
| 2019/05/23 | CH2205 | Male | Three y/o | Treatment (Wk 2) | Treatment | Feed Day | No | 01:00 | 01:00 - 01:59 | Early Morning | 37,2 | 44  | 26,6  | 26,6  | 18,36 | 528,51 | 110,07 |
| 2019/05/23 | CH2206 | Male | Three y/o | Treatment (Wk 2) | Treatment | Feed Day | No | 01:00 | 01:00 - 01:59 | Early Morning | 37,1 | 86  | 21,0  | 21,0  | 18,26 | 582,77 | 101,98 |
| 2019/05/23 | CH2205 | Male | Three y/o | Treatment (Wk 2) | Treatment | Feed Day | No | 01:05 | 01:00 - 01:59 | Early Morning | 37,2 | 63  | 26,8  | 26,8  | 18,36 | 558,62 | 110,33 |
| 2019/05/23 | CH2206 | Male | Three y/o | Treatment (Wk 2) | Treatment | Feed Day | No | 01:05 | 01:00 - 01:59 | Early Morning | 37,1 | 73  | 7,4   | 7,4   | 18,26 | 570,27 | 66,59  |
| 2019/05/23 | CH2205 | Male | Three y/o | Treatment (Wk 2) | Treatment | Feed Day | No | 01:10 | 01:00 - 01:59 | Early Morning | 37,2 | 58  | 27,6  | 27,6  | 18,36 | 551,90 | 111,33 |
| 2019/05/23 | CH2206 | Male | Three y/o | Treatment (Wk 2) | Treatment | Feed Day | No | 01:10 | 01:00 - 01:59 | Early Morning | 37,2 | 42  | 15,4  | 15,4  | 18,36 | 524,42 | 91,41  |
| 2019/05/23 | CH2205 | Male | Three y/o | Treatment (Wk 2) | Treatment | Feed Day | No | 01:15 | 01:00 - 01:59 | Early Morning | 37,2 | 55  | 25,8  | 25,8  | 18,36 | 547,52 | 109,02 |
| 2019/05/23 | CH2206 | Male | Three y/o | Treatment (Wk 2) | Treatment | Feed Day | No | 01:15 | 01:00 - 01:59 | Early Morning | 37,2 | 46  | 16,2  | 16,2  | 18,36 | 532,38 | 93,13  |
| 2019/05/23 | CH2205 | Male | Three y/o | Treatment (Wk 2) | Treatment | Feed Day | No | 01:20 | 01:00 - 01:59 | Early Morning | 37,3 | 57  | 28,0  | 28,0  | 18,46 | 550,47 | 111,83 |
| 2019/05/23 | CH2206 | Male | Three y/o | Treatment (Wk 2) | Treatment | Feed Day | No | 01:20 | 01:00 - 01:59 | Early Morning | 37,2 | 50  | 12,4  | 12,4  | 18,36 | 539,52 | 84,04  |
| 2019/05/23 | CH2205 | Male | Three y/o | Treatment (Wk 2) | Treatment | Feed Day | No | 01:25 | 01:00 - 01:59 | Early Morning | 37,3 | 54  | 28,0  | 28,0  | 18,46 | 545,99 | 111,83 |
| 2019/05/23 | CH2206 | Male | Three y/o | Treatment (Wk 2) | Treatment | Feed Day | No | 01:25 | 01:00 - 01:59 | Early Morning | 37,2 | 90  | 6,2   | 6,2   | 18,36 | 586,16 | 60,63  |
| 2019/05/23 | CH2205 | Male | Three y/o | Treatment (Wk 2) | Treatment | Feed Day | No | 01:30 | 01:00 - 01:59 | Early Morning | 37,3 |     | 27,6  | 27,6  | 18,46 |        | 111,33 |
| 2019/05/23 | CH2206 | Male | Three y/o | Treatment (Wk 2) | Treatment | Feed Day | No | 01:30 | 01:00 - 01:59 | Early Morning | 37,2 | 45  | 6,2   | 6,2   | 18,36 | 530,47 | 60,63  |
| 2019/05/23 | CH2205 | Male | Three y/o | Treatment (Wk 2) | Treatment | Feed Day | No | 01:35 | 01:00 - 01:59 | Early Morning | 37,4 |     | 21,8  | 21,8  | 18,55 |        | 103,26 |
| 2019/05/23 | CH2206 | Male | Three y/o | Treatment (Wk 2) | Treatment | Feed Day | No | 01:35 | 01:00 - 01:59 | Early Morning | 37,2 | 78  | 11,6  | 11,6  | 18,36 | 575,38 | 81,78  |
| 2019/05/23 | CH2205 | Male | Three y/o | Treatment (Wk 2) | Treatment | Feed Day | No | 01:40 | 01:00 - 01:59 | Early Morning | 37,4 | 39  | 15,4  | 15,4  | 18,55 | 517,82 | 91,41  |
| 2019/05/23 | CH2206 | Male | Three y/o | Treatment (Wk 2) | Treatment | Feed Day | No | 01:40 | 01:00 - 01:59 | Early Morning | 37,2 | 86  | 25,6  | 25,6  | 18,36 | 582,77 | 108,76 |
| 2019/05/23 | CH2205 | Male | Three y/o | Treatment (Wk 2) | Treatment | Feed Day | No | 01:45 | 01:00 - 01:59 | Early Morning | 37,4 | 44  | 7,8   | 7,8   | 18,55 | 528,51 | 68,36  |
| 2019/05/23 | CH2206 | Male | Three y/o | Treatment (Wk 2) | Treatment | Feed Day | No | 01:45 | 01:00 - 01:59 | Early Morning | 37,2 | 84  | 30,2  | 30,2  | 18,36 | 581,01 | 114,42 |
| 2019/05/23 | CH2205 | Male | Three y/o | Treatment (Wk 2) | Treatment | Feed Day | No | 01:50 | 01:00 - 01:59 | Early Morning | 37,3 | 67  | 10,6  | 10,6  | 18,46 | 563,53 | 78,73  |
| 2019/05/23 | CH2206 | Male | Three y/o | Treatment (Wk 2) | Treatment | Feed Day | No | 01:50 | 01:00 - 01:59 | Early Morning | 37,2 | 42  | 30,6  | 30,6  | 18,36 | 524,42 | 114,87 |
| 2019/05/23 | CH2205 | Male | Three y/o | Treatment (Wk 2) | Treatment | Feed Day | No | 01:55 | 01:00 - 01:59 | Early Morning | 37,3 | 40  | 8,0   | 8,0   | 18,46 | 520,09 | 69,22  |
| 2019/05/23 | CH2206 | Male | Three y/o | Treatment (Wk 2) | Treatment | Feed Day | No | 01:55 | 01:00 - 01:59 | Early Morning | 37,2 | 42  | 36,0  | 36,0  | 18,36 | 524,42 | 120,46 |
| 2019/05/23 | CH2205 | Male | Three y/o | Treatment (Wk 2) | Treatment | Feed Day | No | 02:00 | 02:00 - 02:59 | Early Morning | 37,3 |     | 8,8   | 8,8   | 18,46 |        | 72,43  |
| 2019/05/23 | CH2206 | Male | Three y/o | Treatment (Wk 2) | Treatment | Feed Day | No | 02:00 | 02:00 - 02:59 | Early Morning | 37,2 | 46  | 40,0  | 40,0  | 18,36 | 532,38 | 124,09 |
| 2019/05/23 | CH2205 | Male | Three y/o | Treatment (Wk 2) | Treatment | Feed Day | No | 02:05 | 02:00 - 02:59 | Early Morning | 37,3 |     | 5,6   | 5,6   | 18,46 |        | 57,21  |
| 2019/05/23 | CH2206 | Male | Three y/o | Treatment (Wk 2) | Treatment | Feed Day | No | 02:05 | 02:00 - 02:59 | Early Morning | 37,2 | 49  | 39,8  | 39,8  | 18,36 | 537,80 | 123,91 |
| 2019/05/23 | CH2205 | Male | Three y/o | Treatment (Wk 2) | Treatment | Feed Day | No | 02:10 | 02:00 - 02:59 | Early Morning | 37,3 |     | 7,2   | 7,2   | 18,46 |        | 65,66  |
| 2019/05/23 | CH2206 | Male | Three y/o | Treatment (Wk 2) | Treatment | Feed Day | No | 02:10 | 02:00 - 02:59 | Early Morning | 37,2 | 47  | 34,8  | 34,8  | 18,36 | 534,23 | 119,29 |
| 2019/05/23 | CH2205 | Male | Three y/o | Treatment (Wk 2) | Treatment | Feed Day | No | 02:15 | 02:00 - 02:59 | Early Morning | 37,3 | 83  | 4,8   | 4,8   | 18,46 | 580,11 | 52,04  |
| 2019/05/23 | CH2206 | Male | Three y/o | Treatment (Wk 2) | Treatment | Feed Day | No | 02:15 | 02:00 - 02:59 | Early Morning | 37,2 | 128 | 59,4  | 59,4  | 18,36 | 611,22 | 137,75 |
| 2019/05/23 | CH2205 | Male | Three y/o | Treatment (Wk 2) | Treatment | Feed Day | No | 02:20 | 02:00 - 02:59 | Early Morning | 37,3 | 68  | 20,2  | 20,2  | 18,46 | 564,71 | 100,65 |
| 2019/05/23 | CH2206 | Male | Three y/o | Treatment (Wk 2) | Treatment | Feed Day | No | 02:20 | 02:00 - 02:59 | Early Morning | 37,1 | 88  | 61,6  | 61,6  | 18,26 | 584,49 | 139,00 |
| 2019/05/23 | CH2205 | Male | Three y/o | Treatment (Wk 2) | Treatment | Feed Day | No | 02:25 | 02:00 - 02:59 | Early Morning | 37,4 | 147 | 39,0  | 39,0  | 18,55 | 620,52 | 123,22 |
| 2019/05/23 | CH2206 | Male | Three y/o | Treatment (Wk 2) | Treatment | Feed Day | No | 02:25 | 02:00 - 02:59 | Early Morning | 37,2 | 108 | 97,4  | 97,4  | 18,36 | 599,39 | 154,93 |
| 2019/05/23 | CH2205 | Male | Three y/o | Treatment (Wk 2) | Treatment | Feed Day | No | 02:30 | 02:00 - 02:59 | Early Morning | 37,4 |     | 26,4  | 26,4  | 18,55 |        | 109,81 |
| 2019/05/23 | CH2206 | Male | Three y/o | Treatment (Wk 2) | Treatment | Feed Day | No | 02:30 | 02:00 - 02:59 | Early Morning | 37,2 |     | 123,6 | 123,6 | 18,36 |        | 163,24 |
| 2019/05/23 | CH2205 | Male | Three y/o | Treatment (Wk 2) | Treatment | Feed Day | No | 02:35 | 02:00 - 02:59 | Early Morning | 37,3 | 123 | 73,0  | 73,0  | 18,46 | 608,49 | 144,89 |
| 2019/05/23 | CH2206 | Male | Three y/o | Treatment (Wk 2) | Treatment | Feed Day | No | 02:35 | 02:00 - 02:59 | Early Morning | 37,2 | 114 | 253,2 | 253,2 | 18,36 | 603,20 | 188,43 |
| 2019/05/23 | CH2205 | Male | Three y/o | Treatment (Wk 2) | Treatment | Feed Day | No | 02:40 | 02:00 - 02:59 | Early Morning | 37,4 | 51  | 95,8  | 95,8  | 18,55 | 541,20 | 154,35 |
| 2019/05/23 | CH2206 | Male | Three y/o | Treatment (Wk 2) | Treatment | Feed Day | No | 02:40 | 02:00 - 02:59 | Early Morning | 37,3 | 121 | 78,6  | 78,6  | 18,46 | 607,35 | 147,46 |
| 2019/05/23 | CH2205 | Male | Three y/o | Treatment (Wk 2) | Treatment | Feed Day | No | 02:45 | 02:00 - 02:59 | Early Morning | 37,4 | 52  | 15,0  | 15,0  | 18,55 | 542,83 | 90,51  |
| 2019/05/23 | CH2206 | Male | Three y/o | Treatment (Wk 2) | Treatment | Feed Day | No | 02:45 | 02:00 - 02:59 | Early Morning | 37,3 | 112 | 115,4 | 115,4 | 18,46 | 601,96 | 160,84 |
| 2019/05/23 | CH2205 | Male | Three y/o | Treatment (Wk 2) | Treatment | Feed Day | No | 02:50 | 02:00 - 02:59 | Early Morning | 37,3 | 100 | 48,8  | 48,8  | 18,46 | 593,87 | 130,95 |
| 2019/05/23 | CH2206 | Male | Three y/o | Treatment (Wk 2) | Treatment | Feed Day | No | 02:50 | 02:00 - 02:59 | Early Morning | 37,4 | 101 | 209,0 | 209,0 | 18,55 | 594,59 | 181,67 |
| 2019/05/23 | CH2205 | Male | Three y/o | Treatment (Wk 2) | Treatment | Feed Day | No | 02:55 | 02:00 - 02:59 | Early Morning | 37,4 | 118 | 109,8 | 109,8 | 18,55 | 605,61 | 159,11 |
| 2019/05/23 | CH2206 | Male | Three y/o | Treatment (Wk 2) | Treatment | Feed Day | No | 02:55 | 02:00 - 02:59 | Early Morning | 37,5 | 126 | 145,6 | 145,6 | 18,65 | 610,14 | 168,97 |
| 2019/05/23 | CH2205 | Male | Three y/o | Treatment (Wk 2) | Treatment | Feed Day | No | 03:00 | 03:00 - 03:59 | Early Morning | 37,4 | 114 | 67,0  | 67,0  | 18,55 | 603,20 | 141,92 |
| 2019/05/23 | CH2206 | Male | Three y/o | Treatment (Wk 2) | Treatment | Feed Day | No | 03:00 | 03:00 - 03:59 | Early Morning | 37,8 | 124 | 26,6  | 26,6  | 18,95 | 609,04 | 110,07 |
| 2019/05/23 | CH2205 | Male | Three y/o | Treatment (Wk 2) | Treatment | Feed Day | No | 03:05 | 03:00 - 03:59 | Early Morning | 37,5 | 61  | 97,8  | 97,8  | 18,65 | 556,01 | 155,07 |
| 2019/05/23 | CH2206 | Male | Three y/o | Treatment (Wk 2) | Treatment | Feed Day | No | 03:05 | 03:00 - 03:59 | Early Morning | 37,8 | 94  | 127,4 | 127,4 | 18,95 | 589,37 | 164,30 |
| 2019/05/23 | CH2205 | Male | Three y/o | Treatment (Wk 2) | Treatment | Feed Day | No | 03:10 | 03:00 - 03:59 | Early Morning | 37,5 | 63  | 18,4  | 18,4  | 18,65 | 558,62 | 97,47  |
| 2019/05/23 | CH2206 | Male | Three y/o | Treatment (Wk 2) | Treatment | Feed Day | No | 03:10 | 03:00 - 03:59 | Early Morning | 37,8 | 128 | 85,8  | 85,8  | 18,95 | 611,22 | 150,51 |
| 2019/05/23 | CH2205 | Male | Three y/o | Treatment (Wk 2) | Treatment | Feed Day | No | 03:15 | 03:00 - 03:59 | Early Morning | 37,5 | 86  | 148,8 | 148,8 | 18,65 | 582,77 | 169,74 |



|            |        |      |           |                  |           |          |    |       |               |               |      |     |        |       |       |        |        |
|------------|--------|------|-----------|------------------|-----------|----------|----|-------|---------------|---------------|------|-----|--------|-------|-------|--------|--------|
| 2019/05/23 | CH2206 | Male | Three y/o | Treatment (Wk 2) | Treatment | Feed Day | No | 03:15 | 03:00 - 03:59 | Early Morning | 37,4 | 108 | 171,8  | 171,8 | 18,55 | 599,39 | 174,78 |
| 2019/05/23 | CH2205 | Male | Three y/o | Treatment (Wk 2) | Treatment | Feed Day | No | 03:20 | 03:00 - 03:59 | Early Morning | 37,5 | 108 | 1170,8 |       | 18,65 | 599,39 |        |
| 2019/05/23 | CH2206 | Male | Three y/o | Treatment (Wk 2) | Treatment | Feed Day | No | 03:20 | 03:00 - 03:59 | Early Morning | 37,4 |     | 108,6  | 108,6 | 18,55 |        | 158,72 |
| 2019/05/23 | CH2205 | Male | Three y/o | Treatment (Wk 2) | Treatment | Feed Day | No | 03:25 | 03:00 - 03:59 | Early Morning | 37,7 | 55  | 324,4  | 324,4 | 18,85 | 547,52 | 197,19 |
| 2019/05/23 | CH2206 | Male | Three y/o | Treatment (Wk 2) | Treatment | Feed Day | No | 03:25 | 03:00 - 03:59 | Early Morning | 37,5 | 105 | 199,0  | 199,0 | 18,65 | 597,38 | 179,94 |
| 2019/05/23 | CH2205 | Male | Three y/o | Treatment (Wk 2) | Treatment | Feed Day | No | 03:30 | 03:00 - 03:59 | Early Morning | 37,7 | 83  | 144,2  | 144,2 | 18,85 | 580,11 | 168,64 |
| 2019/05/23 | CH2206 | Male | Three y/o | Treatment (Wk 2) | Treatment | Feed Day | No | 03:30 | 03:00 - 03:59 | Early Morning | 37,7 | 128 | 113,2  | 113,2 | 18,85 | 611,22 | 160,17 |
| 2019/05/23 | CH2205 | Male | Three y/o | Treatment (Wk 2) | Treatment | Feed Day | No | 03:35 | 03:00 - 03:59 | Early Morning | 37,4 | 124 | 51,2   | 51,2  | 18,55 | 609,04 | 132,61 |
| 2019/05/23 | CH2206 | Male | Three y/o | Treatment (Wk 2) | Treatment | Feed Day | No | 03:35 | 03:00 - 03:59 | Early Morning | 37,5 | 145 | 113,6  | 113,6 | 18,65 | 619,62 | 160,29 |
| 2019/05/23 | CH2205 | Male | Three y/o | Treatment (Wk 2) | Treatment | Feed Day | No | 03:40 | 03:00 - 03:59 | Early Morning | 37,5 | 94  | 256,8  | 256,8 | 18,65 | 589,37 | 188,93 |
| 2019/05/23 | CH2206 | Male | Three y/o | Treatment (Wk 2) | Treatment | Feed Day | No | 03:40 | 03:00 - 03:59 | Early Morning | 37,8 | 98  | 297,6  | 297,6 | 18,95 | 592,41 | 194,14 |
| 2019/05/23 | CH2205 | Male | Three y/o | Treatment (Wk 2) | Treatment | Feed Day | No | 03:45 | 03:00 - 03:59 | Early Morning | 37,5 |     | 94,2   | 94,2  | 18,65 |        | 153,76 |
| 2019/05/23 | CH2206 | Male | Three y/o | Treatment (Wk 2) | Treatment | Feed Day | No | 03:45 | 03:00 - 03:59 | Early Morning | 37,8 | 106 | 31,8   | 31,8  | 18,95 | 598,06 | 116,20 |
| 2019/05/23 | CH2205 | Male | Three y/o | Treatment (Wk 2) | Treatment | Feed Day | No | 03:50 | 03:00 - 03:59 | Early Morning | 37,4 | 44  | 33,4   | 33,4  | 18,55 | 528,51 | 117,88 |
| 2019/05/23 | CH2206 | Male | Three y/o | Treatment (Wk 2) | Treatment | Feed Day | No | 03:50 | 03:00 - 03:59 | Early Morning | 37,5 | 52  | 53,0   | 53,0  | 18,65 | 542,83 | 133,80 |
| 2019/05/23 | CH2205 | Male | Three y/o | Treatment (Wk 2) | Treatment | Feed Day | No | 03:55 | 03:00 - 03:59 | Early Morning | 37,3 | 64  | 35,2   | 35,2  | 18,46 | 559,88 | 119,69 |
| 2019/05/23 | CH2206 | Male | Three y/o | Treatment (Wk 2) | Treatment | Feed Day | No | 03:55 | 03:00 - 03:59 | Early Morning | 37,1 | 71  | 55,2   | 55,2  | 18,26 | 568,10 | 135,21 |
| 2019/05/23 | CH2205 | Male | Three y/o | Treatment (Wk 2) | Treatment | Feed Day | No | 04:00 | 04:00 - 04:59 | Morning       | 37,4 |     | 26,8   | 26,8  | 18,55 |        | 110,33 |
| 2019/05/23 | CH2206 | Male | Three y/o | Treatment (Wk 2) | Treatment | Feed Day | No | 04:00 | 04:00 - 04:59 | Morning       | 37,0 | 56  | 40,4   | 40,4  | 18,16 | 549,01 | 124,43 |
| 2019/05/23 | CH2205 | Male | Three y/o | Treatment (Wk 2) | Treatment | Feed Day | No | 04:05 | 04:00 - 04:59 | Morning       | 37,4 | 70  | 23,4   | 23,4  | 18,55 | 566,99 | 105,68 |
| 2019/05/23 | CH2206 | Male | Three y/o | Treatment (Wk 2) | Treatment | Feed Day | No | 04:05 | 04:00 - 04:59 | Morning       | 37,1 | 50  | 43,2   | 43,2  | 18,26 | 539,52 | 126,74 |
| 2019/05/23 | CH2205 | Male | Three y/o | Treatment (Wk 2) | Treatment | Feed Day | No | 04:10 | 04:00 - 04:59 | Morning       | 37,5 | 66  | 27,2   | 27,2  | 18,65 | 562,34 | 110,83 |
| 2019/05/23 | CH2206 | Male | Three y/o | Treatment (Wk 2) | Treatment | Feed Day | No | 04:10 | 04:00 - 04:59 | Morning       | 37,1 | 46  | 43,2   | 43,2  | 18,26 | 532,38 | 126,74 |
| 2019/05/23 | CH2205 | Male | Three y/o | Treatment (Wk 2) | Treatment | Feed Day | No | 04:15 | 04:00 - 04:59 | Morning       | 37,5 | 43  | 19,2   | 19,2  | 18,65 | 526,50 | 98,92  |
| 2019/05/23 | CH2206 | Male | Three y/o | Treatment (Wk 2) | Treatment | Feed Day | No | 04:15 | 04:00 - 04:59 | Morning       | 37,2 | 70  | 45,8   | 45,8  | 18,36 | 566,99 | 128,76 |
| 2019/05/23 | CH2205 | Male | Three y/o | Treatment (Wk 2) | Treatment | Feed Day | No | 04:20 | 04:00 - 04:59 | Morning       | 37,5 | 49  | 20,0   | 20,0  | 18,65 | 537,80 | 100,31 |
| 2019/05/23 | CH2206 | Male | Three y/o | Treatment (Wk 2) | Treatment | Feed Day | No | 04:20 | 04:00 - 04:59 | Morning       | 37,2 | 44  | 41,0   | 41,0  | 18,36 | 528,51 | 124,94 |
| 2019/05/23 | CH2205 | Male | Three y/o | Treatment (Wk 2) | Treatment | Feed Day | No | 04:25 | 04:00 - 04:59 | Morning       | 37,4 | 91  | 20,8   | 20,8  | 18,55 | 586,98 | 101,65 |
| 2019/05/23 | CH2206 | Male | Three y/o | Treatment (Wk 2) | Treatment | Feed Day | No | 04:25 | 04:00 - 04:59 | Morning       | 37,2 | 48  | 38,8   | 38,8  | 18,36 | 536,04 | 123,04 |
| 2019/05/23 | CH2205 | Male | Three y/o | Treatment (Wk 2) | Treatment | Feed Day | No | 04:30 | 04:00 - 04:59 | Morning       | 37,4 | 48  | 23,6   | 23,6  | 18,55 | 536,04 | 105,97 |
| 2019/05/23 | CH2206 | Male | Three y/o | Treatment (Wk 2) | Treatment | Feed Day | No | 04:30 | 04:00 - 04:59 | Morning       | 37,2 | 60  | 39,8   | 39,8  | 18,36 | 554,67 | 123,91 |
| 2019/05/23 | CH2205 | Male | Three y/o | Treatment (Wk 2) | Treatment | Feed Day | No | 04:35 | 04:00 - 04:59 | Morning       | 37,4 |     | 12,8   | 12,8  | 18,55 |        | 85,12  |
| 2019/05/23 | CH2206 | Male | Three y/o | Treatment (Wk 2) | Treatment | Feed Day | No | 04:35 | 04:00 - 04:59 | Morning       | 37,1 | 82  | 17,2   | 17,2  | 18,26 | 579,19 | 95,17  |
| 2019/05/23 | CH2205 | Male | Three y/o | Treatment (Wk 2) | Treatment | Feed Day | No | 04:40 | 04:00 - 04:59 | Morning       | 37,4 | 47  | 9,0    | 9,0   | 18,55 | 534,23 | 73,19  |
| 2019/05/23 | CH2206 | Male | Three y/o | Treatment (Wk 2) | Treatment | Feed Day | No | 04:40 | 04:00 - 04:59 | Morning       | 37,0 | 79  | 13,6   | 13,6  | 18,16 | 576,36 | 87,18  |
| 2019/05/23 | CH2205 | Male | Three y/o | Treatment (Wk 2) | Treatment | Feed Day | No | 04:45 | 04:00 - 04:59 | Morning       | 37,4 | 68  | 8,0    | 8,0   | 18,55 | 564,71 | 69,22  |
| 2019/05/23 | CH2206 | Male | Three y/o | Treatment (Wk 2) | Treatment | Feed Day | No | 04:45 | 04:00 - 04:59 | Morning       | 37,1 | 62  | 16,2   | 16,2  | 18,26 | 557,33 | 93,13  |
| 2019/05/23 | CH2205 | Male | Three y/o | Treatment (Wk 2) | Treatment | Feed Day | No | 04:50 | 04:00 - 04:59 | Morning       | 37,3 | 62  | 4,8    | 4,8   | 18,46 | 557,33 | 52,04  |
| 2019/05/23 | CH2206 | Male | Three y/o | Treatment (Wk 2) | Treatment | Feed Day | No | 04:50 | 04:00 - 04:59 | Morning       | 37,1 | 80  | 17,4   | 17,4  | 18,26 | 577,31 | 95,56  |
| 2019/05/23 | CH2205 | Male | Three y/o | Treatment (Wk 2) | Treatment | Feed Day | No | 04:55 | 04:00 - 04:59 | Morning       | 37,2 | 61  | 10,0   | 10,0  | 18,36 | 556,01 | 76,76  |
| 2019/05/23 | CH2206 | Male | Three y/o | Treatment (Wk 2) | Treatment | Feed Day | No | 04:55 | 04:00 - 04:59 | Morning       | 37,1 | 82  | 18,0   | 18,0  | 18,26 | 579,19 | 96,72  |
| 2019/05/23 | CH2205 | Male | Three y/o | Treatment (Wk 2) | Treatment | Feed Day | No | 05:00 | 05:00 - 05:59 | Morning       | 37,1 | 51  | 10,0   | 10,0  | 18,26 | 541,20 | 76,76  |
| 2019/05/23 | CH2206 | Male | Three y/o | Treatment (Wk 2) | Treatment | Feed Day | No | 05:00 | 05:00 - 05:59 | Morning       | 37,1 | 65  | 33,0   | 33,0  | 18,26 | 561,12 | 117,47 |
| 2019/05/23 | CH2205 | Male | Three y/o | Treatment (Wk 2) | Treatment | Feed Day | No | 05:05 | 05:00 - 05:59 | Morning       | 37,0 | 52  | 5,8    | 5,8   | 18,16 | 542,83 | 58,39  |
| 2019/05/23 | CH2206 | Male | Three y/o | Treatment (Wk 2) | Treatment | Feed Day | No | 05:05 | 05:00 - 05:59 | Morning       | 37,1 | 42  | 5,8    | 5,8   | 18,26 | 524,42 | 58,39  |
| 2019/05/23 | CH2205 | Male | Three y/o | Treatment (Wk 2) | Treatment | Feed Day | No | 05:10 | 05:00 - 05:59 | Morning       | 37,1 | 41  | 5,4    | 5,4   | 18,26 | 522,29 | 55,99  |
| 2019/05/23 | CH2206 | Male | Three y/o | Treatment (Wk 2) | Treatment | Feed Day | No | 05:10 | 05:00 - 05:59 | Morning       | 37,1 | 45  | 21,8   | 21,8  | 18,26 | 530,47 | 103,26 |
| 2019/05/23 | CH2205 | Male | Three y/o | Treatment (Wk 2) | Treatment | Feed Day | No | 05:15 | 05:00 - 05:59 | Morning       | 37,0 | 80  | 6,4    | 6,4   | 18,16 | 577,31 | 61,70  |
| 2019/05/23 | CH2206 | Male | Three y/o | Treatment (Wk 2) | Treatment | Feed Day | No | 05:15 | 05:00 - 05:59 | Morning       | 37,1 | 43  | 24,8   | 24,8  | 18,26 | 526,50 | 107,67 |
| 2019/05/23 | CH2205 | Male | Three y/o | Treatment (Wk 2) | Treatment | Feed Day | No | 05:20 | 05:00 - 05:59 | Morning       | 36,8 | 50  | 5,4    | 5,4   | 17,96 | 539,52 | 55,99  |
| 2019/05/23 | CH2206 | Male | Three y/o | Treatment (Wk 2) | Treatment | Feed Day | No | 05:20 | 05:00 - 05:59 | Morning       | 37,1 | 51  | 28,2   | 28,2  | 18,26 | 541,20 | 112,07 |
| 2019/05/23 | CH2205 | Male | Three y/o | Treatment (Wk 2) | Treatment | Feed Day | No | 05:25 | 05:00 - 05:59 | Morning       | 36,7 | 63  | 9,2    | 9,2   | 17,87 | 558,62 | 73,94  |
| 2019/05/23 | CH2206 | Male | Three y/o | Treatment (Wk 2) | Treatment | Feed Day | No | 05:25 | 05:00 - 05:59 | Morning       | 37,1 | 40  | 35,6   | 35,6  | 18,26 | 520,09 | 120,08 |
| 2019/05/23 | CH2205 | Male | Three y/o | Treatment (Wk 2) | Treatment | Feed Day | No | 05:30 | 05:00 - 05:59 | Morning       | 36,8 | 56  | 27,6   | 27,6  | 17,96 | 549,01 | 111,33 |
| 2019/05/23 | CH2206 | Male | Three y/o | Treatment (Wk 2) | Treatment | Feed Day | No | 05:30 | 05:00 - 05:59 | Morning       | 37,1 | 54  | 62,8   | 62,8  | 18,26 | 545,99 | 139,67 |
| 2019/05/23 | CH2205 | Male | Three y/o | Treatment (Wk 2) | Treatment | Feed Day | No | 05:35 | 05:00 - 05:59 | Morning       | 37,1 | 84  | 24,8   | 24,8  | 18,26 | 581,01 | 107,67 |
| 2019/05/23 | CH2206 | Male | Three y/o | Treatment (Wk 2) | Treatment | Feed Day | No | 05:35 | 05:00 - 05:59 | Morning       | 37,0 | 42  | 62,0   | 62,0  | 18,16 | 524,42 | 139,23 |
| 2019/05/23 | CH2205 | Male | Three y/o | Treatment (Wk 2) | Treatment | Feed Day | No | 05:40 | 05:00 - 05:59 | Morning       | 37,1 | 72  | 26,2   | 26,2  | 18,26 | 569,20 | 109,55 |
| 2019/05/23 | CH2206 | Male | Three y/o | Treatment (Wk 2) | Treatment | Feed Day | No | 05:40 | 05:00 - 05:59 | Morning       | 37,0 | 45  | 58,2   | 58,2  | 18,16 | 530,47 | 137,04 |
| 2019/05/23 | CH2205 | Male | Three y/o | Treatment (Wk 2) | Treatment | Feed Day | No | 05:45 | 05:00 - 05:59 | Morning       | 37,1 | 84  | 23,6   | 23,6  | 18,26 | 581,01 | 105,97 |
| 2019/05/23 | CH2206 | Male | Three y/o | Treatment (Wk 2) | Treatment | Feed Day | No | 05:45 | 05:00 - 05:59 | Morning       | 37,1 | 60  | 63,2   | 63,2  | 18,26 | 554,67 | 139,89 |
| 2019/05/23 | CH2205 | Male | Three y/o | Treatment (Wk 2) | Treatment | Feed Day | No | 05:50 | 05:00 - 05:59 | Morning       | 37,1 | 78  | 24,0   | 24,0  | 18,26 | 575,38 | 106,55 |
| 2019/05/23 | CH2206 | Male | Three y/o | Treatment (Wk 2) | Treatment | Feed Day | No | 05:50 | 05:00 - 05:59 | Morning       | 37,1 | 41  | 62,8   | 62,8  | 18,26 | 522,29 | 139,67 |
| 2019/05/23 | CH2205 | Male | Three y/o | Treatment (Wk 2) | Treatment | Feed Day | No | 05:55 | 05:00 - 05:59 | Morning       | 37,1 | 72  | 21,8   | 21,8  | 18,26 | 569,20 | 103,26 |
| 2019/05/23 | CH2206 | Male | Three y/o | Treatment (Wk 2) | Treatment | Feed Day | No | 05:55 | 05:00 - 05:59 | Morning       | 37,1 | 67  | 63,8   | 63,8  | 18,26 | 563,53 | 140,22 |
| 2019/05/23 | CH2205 | Male | Three y/o | Treatment (Wk 2) | Treatment | Feed Day | No | 06:00 | 06:00 - 06:59 | Morning       | 37,1 |     | 23,0   | 23,0  | 18,26 |        | 105,09 |
| 2019/05/23 | CH2206 | Male | Three y/o | Treatment (Wk 2) | Treatment | Feed Day | No | 06:00 | 06:00 - 06:59 | Morning       | 37,1 | 73  | 64,0   | 64,0  | 18,26 | 570,27 | 140,33 |
| 2019/05/23 | CH2205 | Male | Three y/o | Treatment (Wk 2) | Treatment | Feed Day | No | 06:05 | 06:00 - 06:59 | Morning       | 37,1 | 82  | 28,0   | 28,0  | 18,26 | 579,19 | 111,83 |
| 2019/05/23 | CH2206 | Male | Three y/o | Treatment (Wk 2) | Treatment | Feed Day | No | 06:05 | 06:00 - 06:59 | Morning       | 37,2 | 54  | 66,4   | 66,4  | 18,36 | 545,99 | 141,61 |
| 2019/05/23 | CH2205 | Male | Three y/o | Treatment (Wk 2) | Treatment | Feed Day | No | 06:10 | 06:00 - 06:59 | Morning       | 37,1 |     | 25,2   | 25,2  | 18,26 |        | 108,22 |



|            |        |      |           |                  |           |          |    |       |               |              |      |     |       |       |       |        |        |
|------------|--------|------|-----------|------------------|-----------|----------|----|-------|---------------|--------------|------|-----|-------|-------|-------|--------|--------|
| 2019/05/23 | CH2206 | Male | Three y/o | Treatment (Wk 2) | Treatment | Feed Day | No | 06:10 | 06:00 - 06:59 | Morning      | 37,2 | 85  | 57,2  | 57,2  | 18,36 | 581,90 | 136,44 |
| 2019/05/23 | CH2205 | Male | Three y/o | Treatment (Wk 2) | Treatment | Feed Day | No | 06:15 | 06:00 - 06:59 | Morning      | 37,2 |     | 32,2  | 32,2  | 18,36 |        | 116,63 |
| 2019/05/23 | CH2206 | Male | Three y/o | Treatment (Wk 2) | Treatment | Feed Day | No | 06:15 | 06:00 - 06:59 | Morning      | 37,3 |     | 112,0 | 112,0 | 18,46 |        | 159,80 |
| 2019/05/23 | CH2205 | Male | Three y/o | Treatment (Wk 2) | Treatment | Feed Day | No | 06:20 | 06:00 - 06:59 | Morning      | 37,2 | 132 | 38,6  | 38,6  | 18,36 | 613,32 | 122,86 |
| 2019/05/23 | CH2206 | Male | Three y/o | Treatment (Wk 2) | Treatment | Feed Day | No | 06:20 | 06:00 - 06:59 | Morning      | 37,3 | 115 | 106,2 | 106,2 | 18,46 | 603,82 | 157,94 |
| 2019/05/23 | CH2205 | Male | Three y/o | Treatment (Wk 2) | Treatment | Feed Day | No | 06:25 | 06:00 - 06:59 | Morning      | 37,2 | 91  | 135,6 | 135,6 | 18,36 | 586,98 | 166,48 |
| 2019/05/23 | CH2206 | Male | Three y/o | Treatment (Wk 2) | Treatment | Feed Day | No | 06:25 | 06:00 - 06:59 | Morning      | 37,4 | 128 | 80,0  | 80,0  | 18,55 | 611,22 | 148,08 |
| 2019/05/23 | CH2205 | Male | Three y/o | Treatment (Wk 2) | Treatment | Feed Day | No | 06:30 | 06:00 - 06:59 | Morning      | 37,3 | 124 | 53,0  | 53,0  | 18,46 | 609,04 | 133,80 |
| 2019/05/23 | CH2206 | Male | Three y/o | Treatment (Wk 2) | Treatment | Feed Day | No | 06:30 | 06:00 - 06:59 | Morning      | 37,5 |     | 226,0 | 226,0 | 18,65 |        | 184,42 |
| 2019/05/23 | CH2205 | Male | Three y/o | Treatment (Wk 2) | Treatment | Feed Day | No | 06:35 | 06:00 - 06:59 | Morning      | 37,3 | 103 | 59,2  | 59,2  | 18,46 | 596,00 | 137,63 |
| 2019/05/23 | CH2206 | Male | Three y/o | Treatment (Wk 2) | Treatment | Feed Day | No | 06:35 | 06:00 - 06:59 | Morning      | 37,5 | 119 | 80,2  | 80,2  | 18,65 | 606,20 | 148,16 |
| 2019/05/23 | CH2205 | Male | Three y/o | Treatment (Wk 2) | Treatment | Feed Day | No | 06:40 | 06:00 - 06:59 | Morning      | 37,4 |     | 67,6  | 67,6  | 18,55 |        | 142,23 |
| 2019/05/23 | CH2206 | Male | Three y/o | Treatment (Wk 2) | Treatment | Feed Day | No | 06:40 | 06:00 - 06:59 | Morning      | 37,7 | 99  | 79,8  | 79,8  | 18,85 | 593,14 | 147,99 |
| 2019/05/23 | CH2205 | Male | Three y/o | Treatment (Wk 2) | Treatment | Feed Day | No | 06:45 | 06:00 - 06:59 | Morning      | 37,4 | 111 | 93,4  | 93,4  | 18,55 | 601,33 | 153,46 |
| 2019/05/23 | CH2206 | Male | Three y/o | Treatment (Wk 2) | Treatment | Feed Day | No | 06:45 | 06:00 - 06:59 | Morning      | 37,5 | 50  | 70,4  | 70,4  | 18,65 | 539,52 | 143,64 |
| 2019/05/23 | CH2205 | Male | Three y/o | Treatment (Wk 2) | Treatment | Feed Day | No | 06:50 | 06:00 - 06:59 | Morning      | 37,4 | 50  | 38,4  | 38,4  | 18,55 | 539,52 | 122,68 |
| 2019/05/23 | CH2206 | Male | Three y/o | Treatment (Wk 2) | Treatment | Feed Day | No | 06:50 | 06:00 - 06:59 | Morning      | 37,5 | 128 | 123,6 | 123,6 | 18,65 | 611,22 | 163,24 |
| 2019/05/23 | CH2205 | Male | Three y/o | Treatment (Wk 2) | Treatment | Feed Day | No | 06:55 | 06:00 - 06:59 | Morning      | 37,5 | 40  | 253,8 | 253,8 | 18,65 | 520,09 | 188,51 |
| 2019/05/23 | CH2206 | Male | Three y/o | Treatment (Wk 2) | Treatment | Feed Day | No | 06:55 | 06:00 - 06:59 | Morning      | 37,7 | 138 | 142,0 | 142,0 | 18,85 | 616,31 | 168,10 |
| 2019/05/23 | CH2205 | Male | Three y/o | Treatment (Wk 2) | Treatment | Feed Day | No | 07:00 | 07:00 - 07:59 | Morning      | 37,5 | 124 | 47,2  | 47,2  | 18,65 | 609,04 | 129,80 |
| 2019/05/23 | CH2206 | Male | Three y/o | Treatment (Wk 2) | Treatment | Feed Day | No | 07:00 | 07:00 - 07:59 | Morning      | 37,8 | 140 | 79,6  | 79,6  | 18,95 | 617,28 | 147,90 |
| 2019/05/23 | CH2205 | Male | Three y/o | Treatment (Wk 2) | Treatment | Feed Day | No | 07:05 | 07:00 - 07:59 | Morning      | 37,6 |     | 304,8 | 304,8 | 18,75 |        | 194,98 |
| 2019/05/23 | CH2206 | Male | Three y/o | Treatment (Wk 2) | Treatment | Feed Day | No | 07:05 | 07:00 - 07:59 | Morning      | 37,8 | 118 | 196,0 | 196,0 | 18,95 | 605,61 | 179,41 |
| 2019/05/23 | CH2205 | Male | Three y/o | Treatment (Wk 2) | Treatment | Feed Day | No | 07:10 | 07:00 - 07:59 | Morning      | 37,6 | 119 | 84,0  | 84,0  | 18,75 | 606,20 | 149,77 |
| 2019/05/23 | CH2206 | Male | Three y/o | Treatment (Wk 2) | Treatment | Feed Day | No | 07:10 | 07:00 - 07:59 | Morning      | 37,8 | 134 | 151,2 | 151,2 | 18,95 | 614,33 | 170,30 |
| 2019/05/23 | CH2205 | Male | Three y/o | Treatment (Wk 2) | Treatment | Feed Day | No | 07:15 | 07:00 - 07:59 | Morning      | 37,8 | 98  | 55,0  | 55,0  | 18,75 | 592,41 | 135,08 |
| 2019/05/23 | CH2206 | Male | Three y/o | Treatment (Wk 2) | Treatment | Feed Day | No | 07:15 | 07:00 - 07:59 | Morning      | 37,8 | 119 | 223,8 | 223,8 | 18,95 | 606,20 | 184,08 |
| 2019/05/23 | CH2205 | Male | Three y/o | Treatment (Wk 2) | Treatment | Feed Day | No | 07:20 | 07:00 - 07:59 | Morning      | 37,6 | 99  | 117,8 | 117,8 | 18,75 | 593,14 | 161,56 |
| 2019/05/23 | CH2206 | Male | Three y/o | Treatment (Wk 2) | Treatment | Feed Day | No | 07:20 | 07:00 - 07:59 | Morning      | 37,8 | 124 | 100,6 | 100,6 | 18,95 | 609,04 | 156,05 |
| 2019/05/23 | CH2205 | Male | Three y/o | Treatment (Wk 2) | Treatment | Feed Day | No | 07:25 | 07:00 - 07:59 | Morning      | 37,7 | 99  | 120,2 | 120,2 | 18,85 | 593,14 | 162,27 |
| 2019/05/23 | CH2206 | Male | Three y/o | Treatment (Wk 2) | Treatment | Feed Day | No | 07:25 | 07:00 - 07:59 | Morning      | 37,8 | 135 | 140,0 | 140,0 | 18,95 | 614,84 | 167,60 |
| 2019/05/23 | CH2205 | Male | Three y/o | Treatment (Wk 2) | Treatment | Feed Day | No | 07:30 | 07:00 - 07:59 | Morning      | 37,7 | 103 | 130,0 | 130,0 | 18,85 | 596,00 | 165,01 |
| 2019/05/23 | CH2206 | Male | Three y/o | Treatment (Wk 2) | Treatment | Feed Day | No | 07:30 | 07:00 - 07:59 | Morning      | 37,8 | 118 | 75,2  | 75,2  | 18,95 | 605,61 | 145,93 |
| 2019/05/23 | CH2205 | Male | Three y/o | Treatment (Wk 2) | Treatment | Feed Day | No | 07:35 | 07:00 - 07:59 | Morning      | 37,7 | 106 | 96,0  | 96,0  | 18,85 | 598,06 | 154,42 |
| 2019/05/23 | CH2206 | Male | Three y/o | Treatment (Wk 2) | Treatment | Feed Day | No | 07:35 | 07:00 - 07:59 | Morning      | 37,9 |     | 80,0  | 80,0  | 19,05 |        | 148,08 |
| 2019/05/23 | CH2205 | Male | Three y/o | Treatment (Wk 2) | Treatment | Feed Day | No | 07:40 | 07:00 - 07:59 | Morning      | 37,9 | 79  | 54,0  | 54,0  | 19,05 | 576,36 | 134,45 |
| 2019/05/23 | CH2206 | Male | Three y/o | Treatment (Wk 2) | Treatment | Feed Day | No | 07:40 | 07:00 - 07:59 | Morning      | 38,1 |     | 336,2 | 336,2 | 19,26 |        | 198,45 |
| 2019/05/23 | CH2205 | Male | Three y/o | Treatment (Wk 2) | Treatment | Feed Day | No | 07:45 | 07:00 - 07:59 | Morning      | 37,9 |     | 52,8  | 52,8  | 19,05 |        | 133,67 |
| 2019/05/23 | CH2206 | Male | Three y/o | Treatment (Wk 2) | Treatment | Feed Day | No | 07:45 | 07:00 - 07:59 | Morning      | 38,0 | 126 | 141,4 | 141,4 | 19,15 | 610,14 | 167,95 |
| 2019/05/23 | CH2205 | Male | Three y/o | Treatment (Wk 2) | Treatment | Feed Day | No | 07:50 | 07:00 - 07:59 | Morning      | 37,7 | 108 | 153,8 | 153,8 | 18,85 | 599,39 | 170,89 |
| 2019/05/23 | CH2206 | Male | Three y/o | Treatment (Wk 2) | Treatment | Feed Day | No | 07:50 | 07:00 - 07:59 | Morning      | 37,9 | 131 | 250,8 | 250,8 | 19,05 | 612,80 | 188,09 |
| 2019/05/23 | CH2205 | Male | Three y/o | Treatment (Wk 2) | Treatment | Feed Day | No | 07:55 | 07:00 - 07:59 | Morning      | 37,6 | 110 | 57,0  | 57,0  | 18,75 | 600,69 | 136,32 |
| 2019/05/23 | CH2206 | Male | Three y/o | Treatment (Wk 2) | Treatment | Feed Day | No | 07:55 | 07:00 - 07:59 | Morning      | 37,9 |     | 281,8 | 281,8 | 19,05 |        | 192,21 |
| 2019/05/23 | CH2205 | Male | Three y/o | Treatment (Wk 2) | Treatment | Feed Day | No | 08:00 | 08:00 - 08:59 | Late Morning | 37,6 |     | 114,2 | 114,2 | 18,75 |        | 160,48 |
| 2019/05/23 | CH2206 | Male | Three y/o | Treatment (Wk 2) | Treatment | Feed Day | No | 08:00 | 08:00 - 08:59 | Late Morning | 38,0 | 111 | 104,2 | 104,2 | 19,15 | 601,33 | 157,28 |
| 2019/05/23 | CH2205 | Male | Three y/o | Treatment (Wk 2) | Treatment | Feed Day | No | 08:05 | 08:00 - 08:59 | Late Morning | 37,6 | 56  | 167,8 | 167,8 | 18,75 | 549,01 | 173,95 |
| 2019/05/23 | CH2206 | Male | Three y/o | Treatment (Wk 2) | Treatment | Feed Day | No | 08:05 | 08:00 - 08:59 | Late Morning | 37,9 | 114 | 110,2 | 110,2 | 19,05 | 603,20 | 159,23 |
| 2019/05/23 | CH2205 | Male | Three y/o | Treatment (Wk 2) | Treatment | Feed Day | No | 08:10 | 08:00 - 08:59 | Late Morning | 37,6 | 53  | 93,8  | 93,8  | 18,75 | 544,43 | 153,61 |
| 2019/05/23 | CH2206 | Male | Three y/o | Treatment (Wk 2) | Treatment | Feed Day | No | 08:10 | 08:00 - 08:59 | Late Morning | 37,9 | 58  | 61,6  | 61,6  | 19,05 | 551,90 | 139,00 |
| 2019/05/23 | CH2205 | Male | Three y/o | Treatment (Wk 2) | Treatment | Feed Day | No | 08:15 | 08:00 - 08:59 | Late Morning | 37,6 | 100 | 20,8  | 20,8  | 18,75 | 593,87 | 101,65 |
| 2019/05/23 | CH2206 | Male | Three y/o | Treatment (Wk 2) | Treatment | Feed Day | No | 08:15 | 08:00 - 08:59 | Late Morning | 37,9 | 132 | 112,4 | 112,4 | 19,05 | 613,32 | 159,92 |
| 2019/05/23 | CH2205 | Male | Three y/o | Treatment (Wk 2) | Treatment | Feed Day | No | 08:20 | 08:00 - 08:59 | Late Morning | 37,4 |     | 5,0   | 5,0   | 18,55 |        | 53,41  |
| 2019/05/23 | CH2206 | Male | Three y/o | Treatment (Wk 2) | Treatment | Feed Day | No | 08:20 | 08:00 - 08:59 | Late Morning | 37,8 | 182 | 252,8 | 252,8 | 18,95 | 634,31 | 188,37 |
| 2019/05/23 | CH2205 | Male | Three y/o | Treatment (Wk 2) | Treatment | Feed Day | No | 08:25 | 08:00 - 08:59 | Late Morning | 37,4 | 92  | 123,0 | 123,0 | 18,55 | 587,78 | 163,07 |
| 2019/05/23 | CH2206 | Male | Three y/o | Treatment (Wk 2) | Treatment | Feed Day | No | 08:25 | 08:00 - 08:59 | Late Morning | 37,8 | 119 | 123,0 | 123,0 | 18,95 | 606,20 | 163,07 |
| 2019/05/23 | CH2205 | Male | Three y/o | Treatment (Wk 2) | Treatment | Feed Day | No | 08:30 | 08:00 - 08:59 | Late Morning | 37,4 | 147 | 130,2 | 130,2 | 18,55 | 620,52 | 165,06 |
| 2019/05/23 | CH2206 | Male | Three y/o | Treatment (Wk 2) | Treatment | Feed Day | No | 08:30 | 08:00 - 08:59 | Late Morning | 37,8 | 125 | 112,6 | 112,6 | 18,95 | 609,60 | 159,98 |
| 2019/05/23 | CH2205 | Male | Three y/o | Treatment (Wk 2) | Treatment | Feed Day | No | 08:35 | 08:00 - 08:59 | Late Morning | 37,4 | 54  | 103,4 | 103,4 | 18,55 | 545,99 | 157,01 |
| 2019/05/23 | CH2206 | Male | Three y/o | Treatment (Wk 2) | Treatment | Feed Day | No | 08:35 | 08:00 - 08:59 | Late Morning | 37,8 | 137 | 190,6 | 190,6 | 18,95 | 615,83 | 178,43 |
| 2019/05/23 | CH2205 | Male | Three y/o | Treatment (Wk 2) | Treatment | Feed Day | No | 08:40 | 08:00 - 08:59 | Late Morning | 37,4 |     | 27,4  | 27,4  | 18,55 |        | 111,09 |
| 2019/05/23 | CH2206 | Male | Three y/o | Treatment (Wk 2) | Treatment | Feed Day | No | 08:40 | 08:00 - 08:59 | Late Morning | 37,8 |     | 163,2 | 163,2 | 18,95 |        | 172,97 |
| 2019/05/23 | CH2205 | Male | Three y/o | Treatment (Wk 2) | Treatment | Feed Day | No | 08:45 | 08:00 - 08:59 | Late Morning | 37,5 | 76  | 22,8  | 22,8  | 18,65 | 573,39 | 104,79 |
| 2019/05/23 | CH2206 | Male | Three y/o | Treatment (Wk 2) | Treatment | Feed Day | No | 08:45 | 08:00 - 08:59 | Late Morning | 37,8 | 123 | 196,4 | 196,4 | 18,95 | 608,49 | 179,48 |
| 2019/05/23 | CH2205 | Male | Three y/o | Treatment (Wk 2) | Treatment | Feed Day | No | 08:50 | 08:00 - 08:59 | Late Morning | 37,7 | 66  | 31,4  | 31,4  | 18,85 | 562,34 | 115,76 |
| 2019/05/23 | CH2206 | Male | Three y/o | Treatment (Wk 2) | Treatment | Feed Day | No | 08:50 | 08:00 - 08:59 | Late Morning | 37,8 | 109 | 220,8 | 220,8 | 18,95 | 600,04 | 183,60 |
| 2019/05/23 | CH2205 | Male | Three y/o | Treatment (Wk 2) | Treatment | Feed Day | No | 08:55 | 08:00 - 08:59 | Late Morning | 37,6 | 73  | 30,8  | 30,8  | 18,75 | 570,27 | 115,10 |
| 2019/05/23 | CH2206 | Male | Three y/o | Treatment (Wk 2) | Treatment | Feed Day | No | 08:55 | 08:00 - 08:59 | Late Morning | 37,8 | 105 | 174,2 | 174,2 | 18,95 | 597,38 | 175,26 |
| 2019/05/23 | CH2205 | Male | Three y/o | Treatment (Wk 2) | Treatment | Feed Day | No | 09:00 | 09:00 - 09:59 | Late Morning | 37,5 |     | 83,0  | 83,0  | 18,65 |        | 149,36 |
| 2019/05/23 | CH2206 | Male | Three y/o | Treatment (Wk 2) | Treatment | Feed Day | No | 09:00 | 09:00 - 09:59 | Late Morning | 37,8 | 100 | 234,4 | 234,4 | 18,95 | 593,87 | 185,71 |
| 2019/05/23 | CH2205 | Male | Three y/o | Treatment (Wk 2) | Treatment | Feed Day | No | 09:05 | 09:00 - 09:59 | Late Morning | 37,5 |     | 69,8  | 69,8  | 18,65 |        | 143,34 |



|            |        |      |           |                  |           |          |     |       |               |              |      |     |       |       |       |        |        |
|------------|--------|------|-----------|------------------|-----------|----------|-----|-------|---------------|--------------|------|-----|-------|-------|-------|--------|--------|
| 2019/05/23 | CH2206 | Male | Three y/o | Treatment (Wk 2) | Treatment | Feed Day | No  | 09:05 | 09:00 - 09:59 | Late Morning | 37,8 | 118 | 180,4 | 180,4 | 18,95 | 605,61 | 176,49 |
| 2019/05/23 | CH2205 | Male | Three y/o | Treatment (Wk 2) | Treatment | Feed Day | No  | 09:10 | 09:00 - 09:59 | Late Morning | 37,5 | 128 | 114,8 | 114,8 | 18,65 | 611,22 | 160,66 |
| 2019/05/23 | CH2206 | Male | Three y/o | Treatment (Wk 2) | Treatment | Feed Day | No  | 09:10 | 09:00 - 09:59 | Late Morning | 37,8 | 86  | 62,2  | 62,2  | 18,95 | 582,77 | 139,34 |
| 2019/05/23 | CH2205 | Male | Three y/o | Treatment (Wk 2) | Treatment | Feed Day | No  | 09:15 | 09:00 - 09:59 | Late Morning | 37,5 | 129 | 115,6 | 115,6 | 18,65 | 611,75 | 160,90 |
| 2019/05/23 | CH2206 | Male | Three y/o | Treatment (Wk 2) | Treatment | Feed Day | No  | 09:15 | 09:00 - 09:59 | Late Morning | 37,5 | 94  | 53,6  | 53,6  | 18,65 | 589,37 | 134,19 |
| 2019/05/23 | CH2205 | Male | Three y/o | Treatment (Wk 2) | Treatment | Feed Day | No  | 09:20 | 09:00 - 09:59 | Late Morning | 37,5 | 70  | 6,2   | 6,2   | 18,65 | 566,99 | 60,63  |
| 2019/05/23 | CH2206 | Male | Three y/o | Treatment (Wk 2) | Treatment | Feed Day | No  | 09:20 | 09:00 - 09:59 | Late Morning | 37,7 | 88  | 36,0  | 36,0  | 18,85 | 584,49 | 120,46 |
| 2019/05/23 | CH2205 | Male | Three y/o | Treatment (Wk 2) | Treatment | Feed Day | No  | 09:25 | 09:00 - 09:59 | Late Morning | 37,6 | 55  | 10,6  | 10,6  | 18,75 | 547,52 | 78,73  |
| 2019/05/23 | CH2206 | Male | Three y/o | Treatment (Wk 2) | Treatment | Feed Day | No  | 09:25 | 09:00 - 09:59 | Late Morning | 37,5 | 68  | 45,4  | 45,4  | 18,65 | 564,71 | 128,45 |
| 2019/05/23 | CH2205 | Male | Three y/o | Treatment (Wk 2) | Treatment | Feed Day | No  | 09:30 | 09:00 - 09:59 | Late Morning | 37,7 | 49  | 12,2  | 12,2  | 18,85 | 537,80 | 83,49  |
| 2019/05/23 | CH2206 | Male | Three y/o | Treatment (Wk 2) | Treatment | Feed Day | No  | 09:30 | 09:00 - 09:59 | Late Morning | 37,4 | 52  | 100,0 | 100,0 | 18,55 | 542,83 | 155,84 |
| 2019/05/23 | CH2205 | Male | Three y/o | Treatment (Wk 2) | Treatment | Feed Day | No  | 09:35 | 09:00 - 09:59 | Late Morning | 37,9 | 102 | 12,0  | 12,0  | 19,05 | 595,30 | 82,93  |
| 2019/05/23 | CH2206 | Male | Three y/o | Treatment (Wk 2) | Treatment | Feed Day | No  | 09:35 | 09:00 - 09:59 | Late Morning | 37,5 | 104 | 72,0  | 72,0  | 18,65 | 596,69 | 144,42 |
| 2019/05/23 | CH2205 | Male | Three y/o | Treatment (Wk 2) | Treatment | Feed Day | No  | 09:40 | 09:00 - 09:59 | Late Morning | 37,9 | 92  | 25,0  | 25,0  | 19,05 | 587,78 | 107,94 |
| 2019/05/23 | CH2206 | Male | Three y/o | Treatment (Wk 2) | Treatment | Feed Day | No  | 09:40 | 09:00 - 09:59 | Late Morning | 37,5 | 74  | 30,4  | 30,4  | 18,65 | 571,33 | 114,65 |
| 2019/05/23 | CH2205 | Male | Three y/o | Treatment (Wk 2) | Treatment | Feed Day | No  | 09:45 | 09:00 - 09:59 | Late Morning | 37,7 | 65  | 19,2  | 19,2  | 18,85 | 561,12 | 98,92  |
| 2019/05/23 | CH2206 | Male | Three y/o | Treatment (Wk 2) | Treatment | Feed Day | No  | 09:45 | 09:00 - 09:59 | Late Morning | 37,5 | 58  | 27,8  | 27,8  | 18,65 | 551,90 | 111,58 |
| 2019/05/23 | CH2205 | Male | Three y/o | Treatment (Wk 2) | Treatment | Feed Day | No  | 09:50 | 09:00 - 09:59 | Late Morning | 37,7 | 67  | 49,8  | 49,8  | 18,85 | 563,53 | 131,65 |
| 2019/05/23 | CH2206 | Male | Three y/o | Treatment (Wk 2) | Treatment | Feed Day | No  | 09:50 | 09:00 - 09:59 | Late Morning | 37,7 | 48  | 24,4  | 24,4  | 18,85 | 536,04 | 107,11 |
| 2019/05/23 | CH2205 | Male | Three y/o | Treatment (Wk 2) | Treatment | Feed Day | No  | 09:55 | 09:00 - 09:59 | Late Morning | 37,7 |     | 15,8  | 15,8  | 18,85 |        | 92,28  |
| 2019/05/23 | CH2206 | Male | Three y/o | Treatment (Wk 2) | Treatment | Feed Day | No  | 09:55 | 09:00 - 09:59 | Late Morning | 37,5 | 70  | 21,6  | 21,6  | 18,65 | 566,99 | 102,94 |
| 2019/05/23 | CH2205 | Male | Three y/o | Treatment (Wk 2) | Treatment | Feed Day | No  | 10:00 | 10:00 - 10:59 | Late Morning | 37,6 |     | 17,6  | 17,6  | 18,75 |        | 95,95  |
| 2019/05/23 | CH2206 | Male | Three y/o | Treatment (Wk 2) | Treatment | Feed Day | No  | 10:00 | 10:00 - 10:59 | Late Morning | 37,6 | 63  | 21,2  | 21,2  | 18,75 | 558,62 | 102,31 |
| 2019/05/23 | CH2205 | Male | Three y/o | Treatment (Wk 2) | Treatment | Feed Day | No  | 10:05 | 10:00 - 10:59 | Late Morning | 37,5 |     | 15,4  | 15,4  | 18,65 |        | 91,41  |
| 2019/05/23 | CH2206 | Male | Three y/o | Treatment (Wk 2) | Treatment | Feed Day | No  | 10:05 | 10:00 - 10:59 | Late Morning | 37,5 | 44  | 32,4  | 32,4  | 18,65 | 528,51 | 116,84 |
| 2019/05/23 | CH2205 | Male | Three y/o | Treatment (Wk 2) | Treatment | Feed Day | No  | 10:10 | 10:00 - 10:59 | Late Morning | 37,5 |     | 19,4  | 19,4  | 18,65 |        | 99,28  |
| 2019/05/23 | CH2206 | Male | Three y/o | Treatment (Wk 2) | Treatment | Feed Day | No  | 10:10 | 10:00 - 10:59 | Late Morning | 37,5 | 54  | 38,2  | 38,2  | 18,65 | 545,99 | 122,50 |
| 2019/05/23 | CH2205 | Male | Three y/o | Treatment (Wk 2) | Treatment | Feed Day | No  | 10:15 | 10:00 - 10:59 | Late Morning | 37,3 | 52  | 31,6  | 31,6  | 18,46 | 542,83 | 115,98 |
| 2019/05/23 | CH2206 | Male | Three y/o | Treatment (Wk 2) | Treatment | Feed Day | No  | 10:15 | 10:00 - 10:59 | Late Morning | 37,5 | 110 | 50,6  | 50,6  | 18,65 | 600,69 | 132,20 |
| 2019/05/23 | CH2205 | Male | Three y/o | Treatment (Wk 2) | Treatment | Feed Day | No  | 10:20 | 10:00 - 10:59 | Late Morning | 37,4 | 44  | 29,2  | 29,2  | 18,55 | 528,51 | 113,27 |
| 2019/05/23 | CH2206 | Male | Three y/o | Treatment (Wk 2) | Treatment | Feed Day | No  | 10:20 | 10:00 - 10:59 | Late Morning | 37,3 | 42  | 35,6  | 35,6  | 18,46 | 524,42 | 120,08 |
| 2019/05/23 | CH2205 | Male | Three y/o | Treatment (Wk 2) | Treatment | Feed Day | No  | 10:25 | 10:00 - 10:59 | Late Morning | 37,5 | 38  | 23,0  | 23,0  | 18,65 | 515,48 | 105,09 |
| 2019/05/23 | CH2206 | Male | Three y/o | Treatment (Wk 2) | Treatment | Feed Day | No  | 10:25 | 10:00 - 10:59 | Late Morning | 37,0 | 47  | 40,0  | 40,0  | 18,16 | 534,23 | 124,09 |
| 2019/05/23 | CH2205 | Male | Three y/o | Treatment (Wk 2) | Treatment | Feed Day | Yes | 10:30 | 10:00 - 10:59 | Late Morning | 37,5 | 49  | 19,6  | 19,6  | 18,65 | 537,80 | 99,63  |
| 2019/05/23 | CH2206 | Male | Three y/o | Treatment (Wk 2) | Treatment | Feed Day | Yes | 10:30 | 10:00 - 10:59 | Late Morning | 37,0 | 88  | 57,6  | 57,6  | 18,16 | 584,49 | 136,68 |
| 2019/05/23 | CH2205 | Male | Three y/o | Treatment (Wk 2) | Treatment | Feed Day | Yes | 10:35 | 10:00 - 10:59 | Late Morning | 37,6 | 50  | 41,8  | 41,8  | 18,75 | 539,52 | 125,60 |
| 2019/05/23 | CH2206 | Male | Three y/o | Treatment (Wk 2) | Treatment | Feed Day | Yes | 10:35 | 10:00 - 10:59 | Late Morning | 37,0 | 80  | 53,4  | 53,4  | 18,16 | 577,31 | 134,06 |
| 2019/05/23 | CH2205 | Male | Three y/o | Treatment (Wk 2) | Treatment | Feed Day | Yes | 10:40 | 10:00 - 10:59 | Late Morning | 37,6 | 38  | 54,0  | 54,0  | 18,75 | 515,48 | 134,45 |
| 2019/05/23 | CH2206 | Male | Three y/o | Treatment (Wk 2) | Treatment | Feed Day | Yes | 10:40 | 10:00 - 10:59 | Late Morning | 37,0 | 90  | 81,6  | 81,6  | 18,16 | 586,16 | 148,76 |
| 2019/05/23 | CH2205 | Male | Three y/o | Treatment (Wk 2) | Treatment | Feed Day | Yes | 10:45 | 10:00 - 10:59 | Late Morning | 37,6 | 94  | 18,4  | 18,4  | 18,75 | 589,37 | 97,47  |
| 2019/05/23 | CH2206 | Male | Three y/o | Treatment (Wk 2) | Treatment | Feed Day | Yes | 10:45 | 10:00 - 10:59 | Late Morning | 37,1 | 89  | 43,0  | 43,0  | 18,26 | 585,33 | 126,58 |
| 2019/05/23 | CH2205 | Male | Three y/o | Treatment (Wk 2) | Treatment | Feed Day | Yes | 10:50 | 10:00 - 10:59 | Late Morning | 37,6 | 79  | 68,2  | 68,2  | 18,75 | 576,36 | 142,53 |
| 2019/05/23 | CH2206 | Male | Three y/o | Treatment (Wk 2) | Treatment | Feed Day | Yes | 10:50 | 10:00 - 10:59 | Late Morning | 37,2 | 108 | 133,8 | 133,8 | 18,36 | 599,39 | 166,01 |
| 2019/05/23 | CH2205 | Male | Three y/o | Treatment (Wk 2) | Treatment | Feed Day | Yes | 10:55 | 10:00 - 10:59 | Late Morning | 37,7 | 87  | 167,6 | 167,6 | 18,85 | 583,64 | 173,91 |
| 2019/05/23 | CH2206 | Male | Three y/o | Treatment (Wk 2) | Treatment | Feed Day | Yes | 10:55 | 10:00 - 10:59 | Late Morning | 37,4 |     | 126,6 | 126,6 | 18,55 |        | 164,08 |
| 2019/05/23 | CH2205 | Male | Three y/o | Treatment (Wk 2) | Treatment | Feed Day | Yes | 11:00 | 11:00 - 11:59 | Late Morning | 37,9 |     | 122,0 | 122,0 | 19,05 |        | 162,79 |
| 2019/05/23 | CH2206 | Male | Three y/o | Treatment (Wk 2) | Treatment | Feed Day | Yes | 11:00 | 11:00 - 11:59 | Late Morning | 37,5 | 97  | 295,6 | 295,6 | 18,65 | 591,66 | 193,90 |
| 2019/05/23 | CH2205 | Male | Three y/o | Treatment (Wk 2) | Treatment | Feed Day | Yes | 11:05 | 11:00 - 11:59 | Late Morning | 38,0 | 113 | 234,6 | 234,6 | 19,15 | 602,58 | 185,74 |
| 2019/05/23 | CH2206 | Male | Three y/o | Treatment (Wk 2) | Treatment | Feed Day | Yes | 11:05 | 11:00 - 11:59 | Late Morning | 37,7 | 118 | 302,8 | 302,8 | 18,85 | 605,61 | 194,75 |
| 2019/05/23 | CH2205 | Male | Three y/o | Treatment (Wk 2) | Treatment | Feed Day | Yes | 11:10 | 11:00 - 11:59 | Late Morning | 38,0 | 148 | 154,0 | 154,0 | 19,15 | 620,97 | 170,94 |
| 2019/05/23 | CH2206 | Male | Three y/o | Treatment (Wk 2) | Treatment | Feed Day | Yes | 11:10 | 11:00 - 11:59 | Late Morning | 37,7 | 40  | 82,6  | 82,6  | 18,85 | 520,09 | 149,19 |
| 2019/05/23 | CH2205 | Male | Three y/o | Treatment (Wk 2) | Treatment | Feed Day | Yes | 11:15 | 11:00 - 11:59 | Late Morning | 38,0 |     | 247,8 | 247,8 | 19,15 |        | 187,67 |
| 2019/05/23 | CH2206 | Male | Three y/o | Treatment (Wk 2) | Treatment | Feed Day | Yes | 11:15 | 11:00 - 11:59 | Late Morning | 37,8 | 150 | 179,0 | 179,0 | 18,95 | 621,86 | 176,22 |
| 2019/05/23 | CH2205 | Male | Three y/o | Treatment (Wk 2) | Treatment | Feed Day | Yes | 11:20 | 11:00 - 11:59 | Late Morning | 38,0 | 96  | 22,0  | 22,0  | 19,15 | 590,91 | 103,57 |
| 2019/05/23 | CH2206 | Male | Three y/o | Treatment (Wk 2) | Treatment | Feed Day | Yes | 11:20 | 11:00 - 11:59 | Late Morning | 37,9 | 99  | 35,2  | 35,2  | 19,05 | 593,14 | 119,69 |
| 2019/05/23 | CH2205 | Male | Three y/o | Treatment (Wk 2) | Treatment | Feed Day | Yes | 11:25 | 11:00 - 11:59 | Late Morning | 37,7 | 80  | 14,8  | 14,8  | 18,85 | 577,31 | 90,05  |
| 2019/05/23 | CH2206 | Male | Three y/o | Treatment (Wk 2) | Treatment | Feed Day | Yes | 11:25 | 11:00 - 11:59 | Late Morning | 37,8 | 83  | 25,6  | 25,6  | 18,95 | 580,11 | 108,76 |
| 2019/05/23 | CH2205 | Male | Three y/o | Treatment (Wk 2) | Treatment | Feed Day | No  | 11:30 | 11:00 - 11:59 | Late Morning | 37,5 |     | 33,6  | 33,6  | 18,65 |        | 118,09 |
| 2019/05/23 | CH2206 | Male | Three y/o | Treatment (Wk 2) | Treatment | Feed Day | No  | 11:30 | 11:00 - 11:59 | Late Morning | 37,7 | 109 | 49,8  | 49,8  | 18,85 | 600,04 | 131,65 |
| 2019/05/23 | CH2205 | Male | Three y/o | Treatment (Wk 2) | Treatment | Feed Day | No  | 11:35 | 11:00 - 11:59 | Late Morning | 37,7 | 103 | 166,4 | 166,4 | 18,85 | 596,00 | 173,66 |
| 2019/05/23 | CH2206 | Male | Three y/o | Treatment (Wk 2) | Treatment | Feed Day | No  | 11:35 | 11:00 - 11:59 | Late Morning | 37,7 | 94  | 21,4  | 21,4  | 18,85 | 589,37 | 102,63 |
| 2019/05/23 | CH2205 | Male | Three y/o | Treatment (Wk 2) | Treatment | Feed Day | No  | 11:40 | 11:00 - 11:59 | Late Morning | 37,9 | 177 | 43,0  | 43,0  | 19,05 | 632,55 | 126,58 |
| 2019/05/23 | CH2206 | Male | Three y/o | Treatment (Wk 2) | Treatment | Feed Day | No  | 11:40 | 11:00 - 11:59 | Late Morning | 37,7 | 78  | 29,6  | 29,6  | 18,85 | 575,38 | 113,73 |
| 2019/05/23 | CH2205 | Male | Three y/o | Treatment (Wk 2) | Treatment | Feed Day | No  | 11:45 | 11:00 - 11:59 | Late Morning | 37,9 | 98  | 59,2  | 59,2  | 19,05 | 592,41 | 137,63 |
| 2019/05/23 | CH2206 | Male | Three y/o | Treatment (Wk 2) | Treatment | Feed Day | No  | 11:45 | 11:00 - 11:59 | Late Morning | 37,7 | 46  | 33,8  | 33,8  | 18,85 | 532,38 | 118,29 |
| 2019/05/23 | CH2205 | Male | Three y/o | Treatment (Wk 2) | Treatment | Feed Day | No  | 11:50 | 11:00 - 11:59 | Late Morning | 38,0 | 121 | 56,8  | 56,8  | 19,15 | 607,35 | 136,20 |
| 2019/05/23 | CH2206 | Male | Three y/o | Treatment (Wk 2) | Treatment | Feed Day | No  | 11:50 | 11:00 - 11:59 | Late Morning | 37,8 | 88  | 30,6  | 30,6  | 18,95 | 584,49 | 114,87 |
| 2019/05/23 | CH2205 | Male | Three y/o | Treatment (Wk 2) | Treatment | Feed Day | No  | 11:55 | 11:00 - 11:59 | Late Morning | 38,1 | 98  | 68,2  | 68,2  | 19,26 | 592,41 | 142,53 |
| 2019/05/23 | CH2206 | Male | Three y/o | Treatment (Wk 2) | Treatment | Feed Day | No  | 11:55 | 11:00 - 11:59 | Late Morning | 37,8 | 51  | 15,0  | 15,0  | 18,95 | 541,20 | 90,51  |
| 2019/05/23 | CH2205 | Male | Three y/o | Treatment (Wk 2) | Treatment | Feed Day | No  | 12:00 | 12:00 - 12:59 | Afternoon    | 38,1 | 75  | 14,2  | 14,2  | 19,26 | 572,36 | 88,65  |



|            |        |      |           |                  |           |          |    |       |               |           |      |     |      |      |       |        |        |
|------------|--------|------|-----------|------------------|-----------|----------|----|-------|---------------|-----------|------|-----|------|------|-------|--------|--------|
| 2019/05/23 | CH2206 | Male | Three y/o | Treatment (Wk 2) | Treatment | Feed Day | No | 12:00 | 12:00 - 12:59 | Afternoon | 37,8 | 54  | 5,0  | 5,0  | 18,95 | 545,99 | 53,41  |
| 2019/05/23 | CH2205 | Male | Three y/o | Treatment (Wk 2) | Treatment | Feed Day | No | 12:05 | 12:00 - 12:59 | Afternoon | 37,7 |     | 22,4 | 22,4 | 18,85 |        | 104,19 |
| 2019/05/23 | CH2206 | Male | Three y/o | Treatment (Wk 2) | Treatment | Feed Day | No | 12:05 | 12:00 - 12:59 | Afternoon | 37,9 | 63  | 14,6 | 14,6 | 19,05 | 558,62 | 89,59  |
| 2019/05/23 | CH2205 | Male | Three y/o | Treatment (Wk 2) | Treatment | Feed Day | No | 12:10 | 12:00 - 12:59 | Afternoon | 37,7 | 62  | 10,0 | 10,0 | 18,85 | 557,33 | 76,76  |
| 2019/05/23 | CH2206 | Male | Three y/o | Treatment (Wk 2) | Treatment | Feed Day | No | 12:10 | 12:00 - 12:59 | Afternoon | 37,9 |     | 7,8  | 7,8  | 19,05 | 577,31 | 68,36  |
| 2019/05/23 | CH2205 | Male | Three y/o | Treatment (Wk 2) | Treatment | Feed Day | No | 12:15 | 12:00 - 12:59 | Afternoon | 37,9 | 134 | 21,0 | 21,0 | 19,05 | 614,33 | 101,98 |
| 2019/05/23 | CH2206 | Male | Three y/o | Treatment (Wk 2) | Treatment | Feed Day | No | 12:15 | 12:00 - 12:59 | Afternoon | 37,9 | 76  | 37,0 | 37,0 | 19,05 | 573,39 | 121,40 |
| 2019/05/23 | CH2205 | Male | Three y/o | Treatment (Wk 2) | Treatment | Feed Day | No | 12:20 | 12:00 - 12:59 | Afternoon | 37,9 | 53  | 16,6 | 16,6 | 19,05 | 544,43 | 93,96  |
| 2019/05/23 | CH2206 | Male | Three y/o | Treatment (Wk 2) | Treatment | Feed Day | No | 12:20 | 12:00 - 12:59 | Afternoon | 37,9 | 71  | 35,0 | 35,0 | 19,05 | 568,10 | 119,49 |
| 2019/05/23 | CH2205 | Male | Three y/o | Treatment (Wk 2) | Treatment | Feed Day | No | 12:25 | 12:00 - 12:59 | Afternoon | 37,9 | 65  | 6,0  | 6,0  | 19,05 | 561,12 | 59,53  |
| 2019/05/23 | CH2206 | Male | Three y/o | Treatment (Wk 2) | Treatment | Feed Day | No | 12:25 | 12:00 - 12:59 | Afternoon | 38,0 | 65  | 38,0 | 38,0 | 19,15 | 561,12 | 122,32 |
| 2019/05/23 | CH2205 | Male | Three y/o | Treatment (Wk 2) | Treatment | Feed Day | No | 12:30 | 12:00 - 12:59 | Afternoon | 37,9 | 65  | 14,8 | 14,8 | 19,05 | 561,12 | 90,05  |
| 2019/05/23 | CH2206 | Male | Three y/o | Treatment (Wk 2) | Treatment | Feed Day | No | 12:30 | 12:00 - 12:59 | Afternoon | 38,0 | 63  | 28,4 | 28,4 | 19,15 | 558,62 | 112,31 |
| 2019/05/23 | CH2205 | Male | Three y/o | Treatment (Wk 2) | Treatment | Feed Day | No | 12:35 | 12:00 - 12:59 | Afternoon | 37,9 | 57  | 22,8 | 22,8 | 19,05 | 550,47 | 104,79 |
| 2019/05/23 | CH2206 | Male | Three y/o | Treatment (Wk 2) | Treatment | Feed Day | No | 12:35 | 12:00 - 12:59 | Afternoon | 38,0 | 46  | 19,8 | 19,8 | 19,15 | 532,38 | 99,97  |
| 2019/05/23 | CH2205 | Male | Three y/o | Treatment (Wk 2) | Treatment | Feed Day | No | 12:40 | 12:00 - 12:59 | Afternoon | 37,9 | 59  | 25,0 | 25,0 | 19,05 | 553,30 | 107,94 |
| 2019/05/23 | CH2206 | Male | Three y/o | Treatment (Wk 2) | Treatment | Feed Day | No | 12:40 | 12:00 - 12:59 | Afternoon | 38,0 | 64  | 20,4 | 20,4 | 19,15 | 559,88 | 100,99 |
| 2019/05/23 | CH2205 | Male | Three y/o | Treatment (Wk 2) | Treatment | Feed Day | No | 12:45 | 12:00 - 12:59 | Afternoon | 37,9 | 68  | 22,6 | 22,6 | 19,05 | 564,71 | 104,49 |
| 2019/05/23 | CH2206 | Male | Three y/o | Treatment (Wk 2) | Treatment | Feed Day | No | 12:45 | 12:00 - 12:59 | Afternoon | 38,0 | 90  | 26,6 | 26,6 | 19,15 | 586,16 | 110,07 |
| 2019/05/23 | CH2205 | Male | Three y/o | Treatment (Wk 2) | Treatment | Feed Day | No | 12:50 | 12:00 - 12:59 | Afternoon | 37,9 | 62  | 17,0 | 17,0 | 19,05 | 557,33 | 94,77  |
| 2019/05/23 | CH2206 | Male | Three y/o | Treatment (Wk 2) | Treatment | Feed Day | No | 12:50 | 12:00 - 12:59 | Afternoon | 38,1 | 89  | 85,4 | 85,4 | 19,26 | 585,33 | 150,35 |
| 2019/05/23 | CH2205 | Male | Three y/o | Treatment (Wk 2) | Treatment | Feed Day | No | 12:55 | 12:00 - 12:59 | Afternoon | 37,7 |     | 23,0 | 23,0 | 18,85 |        | 105,09 |
| 2019/05/23 | CH2206 | Male | Three y/o | Treatment (Wk 2) | Treatment | Feed Day | No | 12:55 | 12:00 - 12:59 | Afternoon | 38,1 | 69  | 45,4 | 45,4 | 19,26 | 565,86 | 128,45 |
| 2019/05/23 | CH2205 | Male | Three y/o | Treatment (Wk 2) | Treatment | Feed Day | No | 13:00 | 13:00 - 13:59 | Afternoon | 37,7 | 50  | 22,0 | 22,0 | 18,85 | 539,52 | 103,57 |
| 2019/05/23 | CH2206 | Male | Three y/o | Treatment (Wk 2) | Treatment | Feed Day | No | 13:00 | 13:00 - 13:59 | Afternoon | 38,1 | 48  | 50,6 | 50,6 | 19,26 | 536,04 | 132,20 |
| 2019/05/23 | CH2205 | Male | Three y/o | Treatment (Wk 2) | Treatment | Feed Day | No | 13:05 | 13:00 - 13:59 | Afternoon | 37,9 | 64  | 17,8 | 17,8 | 19,05 | 559,88 | 96,34  |
| 2019/05/23 | CH2206 | Male | Three y/o | Treatment (Wk 2) | Treatment | Feed Day | No | 13:05 | 13:00 - 13:59 | Afternoon | 38,1 | 91  | 27,0 | 27,0 | 19,26 | 586,98 | 110,58 |
| 2019/05/23 | CH2205 | Male | Three y/o | Treatment (Wk 2) | Treatment | Feed Day | No | 13:10 | 13:00 - 13:59 | Afternoon | 37,9 | 60  | 4,6  | 4,6  | 19,05 | 554,67 | 50,61  |
| 2019/05/23 | CH2206 | Male | Three y/o | Treatment (Wk 2) | Treatment | Feed Day | No | 13:10 | 13:00 - 13:59 | Afternoon | 38,1 | 76  | 34,6 | 34,6 | 19,26 | 573,39 | 119,10 |
| 2019/05/23 | CH2205 | Male | Three y/o | Treatment (Wk 2) | Treatment | Feed Day | No | 13:15 | 13:00 - 13:59 | Afternoon | 37,9 | 67  | 14,6 | 14,6 | 19,05 | 563,53 | 89,59  |
| 2019/05/23 | CH2206 | Male | Three y/o | Treatment (Wk 2) | Treatment | Feed Day | No | 13:15 | 13:00 - 13:59 | Afternoon | 38,1 | 88  | 33,0 | 33,0 | 19,26 | 584,49 | 117,47 |
| 2019/05/23 | CH2205 | Male | Three y/o | Treatment (Wk 2) | Treatment | Feed Day | No | 13:20 | 13:00 - 13:59 | Afternoon | 37,9 | 84  | 19,2 | 19,2 | 19,05 | 581,01 | 98,92  |
| 2019/05/23 | CH2206 | Male | Three y/o | Treatment (Wk 2) | Treatment | Feed Day | No | 13:20 | 13:00 - 13:59 | Afternoon | 38,1 | 84  | 31,0 | 31,0 | 19,26 | 581,01 | 115,32 |
| 2019/05/23 | CH2205 | Male | Three y/o | Treatment (Wk 2) | Treatment | Feed Day | No | 13:25 | 13:00 - 13:59 | Afternoon | 37,9 | 83  | 22,6 | 22,6 | 19,05 | 580,11 | 104,49 |
| 2019/05/23 | CH2206 | Male | Three y/o | Treatment (Wk 2) | Treatment | Feed Day | No | 13:25 | 13:00 - 13:59 | Afternoon | 38,1 | 47  | 31,8 | 31,8 | 19,26 | 534,23 | 116,20 |
| 2019/05/23 | CH2205 | Male | Three y/o | Treatment (Wk 2) | Treatment | Feed Day | No | 13:30 | 13:00 - 13:59 | Afternoon | 38,0 | 70  | 26,8 | 26,8 | 19,15 | 566,99 | 110,33 |
| 2019/05/23 | CH2206 | Male | Three y/o | Treatment (Wk 2) | Treatment | Feed Day | No | 13:30 | 13:00 - 13:59 | Afternoon | 38,0 | 83  | 34,6 | 34,6 | 19,15 | 580,11 | 119,10 |
| 2019/05/23 | CH2205 | Male | Three y/o | Treatment (Wk 2) | Treatment | Feed Day | No | 13:35 | 13:00 - 13:59 | Afternoon | 38,0 | 60  | 27,8 | 27,8 | 19,15 | 554,67 | 111,58 |
| 2019/05/23 | CH2206 | Male | Three y/o | Treatment (Wk 2) | Treatment | Feed Day | No | 13:35 | 13:00 - 13:59 | Afternoon | 38,0 | 47  | 29,0 | 29,0 | 19,15 | 534,23 | 113,03 |
| 2019/05/23 | CH2205 | Male | Three y/o | Treatment (Wk 2) | Treatment | Feed Day | No | 13:40 | 13:00 - 13:59 | Afternoon | 38,0 | 59  | 27,4 | 27,4 | 19,15 | 553,30 | 111,09 |
| 2019/05/23 | CH2206 | Male | Three y/o | Treatment (Wk 2) | Treatment | Feed Day | No | 13:40 | 13:00 - 13:59 | Afternoon | 38,0 | 57  | 29,2 | 29,2 | 19,15 | 550,47 | 113,27 |
| 2019/05/23 | CH2205 | Male | Three y/o | Treatment (Wk 2) | Treatment | Feed Day | No | 13:45 | 13:00 - 13:59 | Afternoon | 38,0 | 64  | 27,2 | 27,2 | 19,15 | 559,88 | 110,83 |
| 2019/05/23 | CH2206 | Male | Three y/o | Treatment (Wk 2) | Treatment | Feed Day | No | 13:45 | 13:00 - 13:59 | Afternoon | 38,0 | 82  | 39,8 | 39,8 | 19,15 | 579,19 | 123,91 |
| 2019/05/23 | CH2205 | Male | Three y/o | Treatment (Wk 2) | Treatment | Feed Day | No | 13:50 | 13:00 - 13:59 | Afternoon | 38,0 | 57  | 24,6 | 24,6 | 19,15 | 550,47 | 107,39 |
| 2019/05/23 | CH2206 | Male | Three y/o | Treatment (Wk 2) | Treatment | Feed Day | No | 13:50 | 13:00 - 13:59 | Afternoon | 37,9 | 82  | 36,6 | 36,6 | 19,05 | 579,19 | 121,03 |
| 2019/05/23 | CH2205 | Male | Three y/o | Treatment (Wk 2) | Treatment | Feed Day | No | 13:55 | 13:00 - 13:59 | Afternoon | 38,0 | 70  | 25,4 | 25,4 | 19,15 | 566,99 | 108,49 |
| 2019/05/23 | CH2206 | Male | Three y/o | Treatment (Wk 2) | Treatment | Feed Day | No | 13:55 | 13:00 - 13:59 | Afternoon | 37,9 | 50  | 37,8 | 37,8 | 19,05 | 539,52 | 122,14 |
| 2019/05/23 | CH2205 | Male | Three y/o | Treatment (Wk 2) | Treatment | Feed Day | No | 14:00 | 14:00 - 14:59 | Afternoon | 38,0 | 57  | 21,8 | 21,8 | 19,15 | 550,47 | 103,26 |
| 2019/05/23 | CH2206 | Male | Three y/o | Treatment (Wk 2) | Treatment | Feed Day | No | 14:00 | 14:00 - 14:59 | Afternoon | 37,9 | 52  | 34,4 | 34,4 | 19,05 | 542,83 | 118,90 |
| 2019/05/23 | CH2205 | Male | Three y/o | Treatment (Wk 2) | Treatment | Feed Day | No | 14:05 | 14:00 - 14:59 | Afternoon | 38,1 |     | 13,4 | 13,4 | 19,26 |        | 86,68  |
| 2019/05/23 | CH2206 | Male | Three y/o | Treatment (Wk 2) | Treatment | Feed Day | No | 14:05 | 14:00 - 14:59 | Afternoon | 37,9 | 113 | 57,4 | 57,4 | 19,05 | 602,58 | 136,56 |
| 2019/05/23 | CH2205 | Male | Three y/o | Treatment (Wk 2) | Treatment | Feed Day | No | 14:10 | 14:00 - 14:59 | Afternoon | 38,1 | 60  | 5,0  | 5,0  | 19,26 | 554,67 | 53,41  |
| 2019/05/23 | CH2206 | Male | Three y/o | Treatment (Wk 2) | Treatment | Feed Day | No | 14:10 | 14:00 - 14:59 | Afternoon | 37,9 | 71  | 54,6 | 54,6 | 19,05 | 568,10 | 134,83 |
| 2019/05/23 | CH2205 | Male | Three y/o | Treatment (Wk 2) | Treatment | Feed Day | No | 14:15 | 14:00 - 14:59 | Afternoon | 38,1 | 57  | 10,6 | 10,6 | 19,26 | 550,47 | 78,73  |
| 2019/05/23 | CH2206 | Male | Three y/o | Treatment (Wk 2) | Treatment | Feed Day | No | 14:15 | 14:00 - 14:59 | Afternoon | 37,9 | 80  | 41,2 | 41,2 | 19,05 | 577,31 | 125,11 |
| 2019/05/23 | CH2205 | Male | Three y/o | Treatment (Wk 2) | Treatment | Feed Day | No | 14:20 | 14:00 - 14:59 | Afternoon | 38,1 | 57  | 17,0 | 17,0 | 19,26 | 550,47 | 94,77  |
| 2019/05/23 | CH2206 | Male | Three y/o | Treatment (Wk 2) | Treatment | Feed Day | No | 14:20 | 14:00 - 14:59 | Afternoon | 37,9 | 74  | 47,6 | 47,6 | 19,05 | 571,33 | 130,09 |
| 2019/05/23 | CH2205 | Male | Three y/o | Treatment (Wk 2) | Treatment | Feed Day | No | 14:25 | 14:00 - 14:59 | Afternoon | 38,0 | 50  | 4,4  | 4,4  | 19,15 | 539,52 | 49,12  |
| 2019/05/23 | CH2206 | Male | Three y/o | Treatment (Wk 2) | Treatment | Feed Day | No | 14:25 | 14:00 - 14:59 | Afternoon | 37,9 | 86  | 68,6 | 68,6 | 19,05 | 582,77 | 142,74 |
| 2019/05/23 | CH2205 | Male | Three y/o | Treatment (Wk 2) | Treatment | Feed Day | No | 14:30 | 14:00 - 14:59 | Afternoon | 38,0 | 82  | 1,4  | 1,4  | 19,15 | 579,19 | 11,07  |
| 2019/05/23 | CH2206 | Male | Three y/o | Treatment (Wk 2) | Treatment | Feed Day | No | 14:30 | 14:00 - 14:59 | Afternoon | 37,9 | 84  | 37,8 | 37,8 | 19,05 | 581,01 | 122,14 |
| 2019/05/23 | CH2205 | Male | Three y/o | Treatment (Wk 2) | Treatment | Feed Day | No | 14:35 | 14:00 - 14:59 | Afternoon | 38,0 | 99  | 3,6  | 3,6  | 19,15 | 593,14 | 42,42  |
| 2019/05/23 | CH2206 | Male | Three y/o | Treatment (Wk 2) | Treatment | Feed Day | No | 14:35 | 14:00 - 14:59 | Afternoon | 37,9 | 70  | 14,0 | 14,0 | 19,05 | 566,99 | 88,17  |
| 2019/05/23 | CH2205 | Male | Three y/o | Treatment (Wk 2) | Treatment | Feed Day | No | 14:40 | 14:00 - 14:59 | Afternoon | 38,0 | 56  | 3,4  | 3,4  | 19,15 | 549,01 | 40,51  |
| 2019/05/23 | CH2206 | Male | Three y/o | Treatment (Wk 2) | Treatment | Feed Day | No | 14:40 | 14:00 - 14:59 | Afternoon | 37,9 | 72  | 8,6  | 8,6  | 19,05 | 569,20 | 71,66  |
| 2019/05/23 | CH2205 | Male | Three y/o | Treatment (Wk 2) | Treatment | Feed Day | No | 14:45 | 14:00 - 14:59 | Afternoon | 38,0 | 65  | 35,0 | 35,0 | 19,15 | 561,12 | 119,49 |
| 2019/05/23 | CH2206 | Male | Three y/o | Treatment (Wk 2) | Treatment | Feed Day | No | 14:45 | 14:00 - 14:59 | Afternoon | 37,9 | 78  | 7,8  | 7,8  | 19,05 | 575,38 | 68,36  |
| 2019/05/23 | CH2205 | Male | Three y/o | Treatment (Wk 2) | Treatment | Feed Day | No | 14:50 | 14:00 - 14:59 | Afternoon | 37,9 | 197 | 17,2 | 17,2 | 19,05 | 639,25 | 95,17  |
| 2019/05/23 | CH2206 | Male | Three y/o | Treatment (Wk 2) | Treatment | Feed Day | No | 14:50 | 14:00 - 14:59 | Afternoon | 37,9 | 90  | 20,6 | 20,6 | 19,05 | 586,16 | 101,32 |
| 2019/05/23 | CH2205 | Male | Three y/o | Treatment (Wk 2) | Treatment | Feed Day | No | 14:55 | 14:00 - 14:59 | Afternoon | 37,9 | 72  | 24,8 | 24,8 | 19,05 | 569,20 | 107,67 |



|            |        |      |           |                  |           |          |    |       |               |           |      |     |       |       |       |        |        |
|------------|--------|------|-----------|------------------|-----------|----------|----|-------|---------------|-----------|------|-----|-------|-------|-------|--------|--------|
| 2019/05/23 | CH2206 | Male | Three y/o | Treatment (Wk 2) | Treatment | Feed Day | No | 14:55 | 14:00 - 14:59 | Afternoon | 38,0 | 46  | 8,2   | 8,2   | 19,15 | 532,38 | 70,05  |
| 2019/05/23 | CH2205 | Male | Three y/o | Treatment (Wk 2) | Treatment | Feed Day | No | 15:00 | 15:00 - 15:59 | Afternoon | 37,9 | 60  | 21,6  | 21,6  | 19,05 | 554,67 | 102,94 |
| 2019/05/23 | CH2206 | Male | Three y/o | Treatment (Wk 2) | Treatment | Feed Day | No | 15:00 | 15:00 - 15:59 | Afternoon | 38,0 | 81  | 3,8   | 3,8   | 19,15 | 578,26 | 44,22  |
| 2019/05/23 | CH2205 | Male | Three y/o | Treatment (Wk 2) | Treatment | Feed Day | No | 15:05 | 15:00 - 15:59 | Afternoon | 38,0 | 62  | 23,2  | 23,2  | 19,15 | 557,33 | 105,39 |
| 2019/05/23 | CH2206 | Male | Three y/o | Treatment (Wk 2) | Treatment | Feed Day | No | 15:05 | 15:00 - 15:59 | Afternoon | 38,0 | 65  | 3,4   | 3,4   | 19,15 | 561,12 | 40,51  |
| 2019/05/23 | CH2205 | Male | Three y/o | Treatment (Wk 2) | Treatment | Feed Day | No | 15:10 | 15:00 - 15:59 | Afternoon | 38,0 | 83  | 23,8  | 23,8  | 19,15 | 580,11 | 106,26 |
| 2019/05/23 | CH2206 | Male | Three y/o | Treatment (Wk 2) | Treatment | Feed Day | No | 15:10 | 15:00 - 15:59 | Afternoon | 38,0 | 46  | 15,8  | 15,8  | 19,15 | 532,38 | 92,28  |
| 2019/05/23 | CH2205 | Male | Three y/o | Treatment (Wk 2) | Treatment | Feed Day | No | 15:15 | 15:00 - 15:59 | Afternoon | 38,0 | 61  | 23,6  | 23,6  | 19,15 | 556,01 | 105,97 |
| 2019/05/23 | CH2206 | Male | Three y/o | Treatment (Wk 2) | Treatment | Feed Day | No | 15:15 | 15:00 - 15:59 | Afternoon | 38,1 | 86  | 32,6  | 32,6  | 19,26 | 582,77 | 117,05 |
| 2019/05/23 | CH2205 | Male | Three y/o | Treatment (Wk 2) | Treatment | Feed Day | No | 15:20 | 15:00 - 15:59 | Afternoon | 38,0 | 63  | 26,0  | 26,0  | 19,15 | 558,62 | 109,29 |
| 2019/05/23 | CH2206 | Male | Three y/o | Treatment (Wk 2) | Treatment | Feed Day | No | 15:20 | 15:00 - 15:59 | Afternoon | 38,1 | 89  | 26,6  | 26,6  | 19,26 | 585,33 | 110,07 |
| 2019/05/23 | CH2205 | Male | Three y/o | Treatment (Wk 2) | Treatment | Feed Day | No | 15:25 | 15:00 - 15:59 | Afternoon | 38,0 | 63  | 42,2  | 42,2  | 19,15 | 558,62 | 125,93 |
| 2019/05/23 | CH2206 | Male | Three y/o | Treatment (Wk 2) | Treatment | Feed Day | No | 15:25 | 15:00 - 15:59 | Afternoon | 38,1 | 78  | 23,8  | 23,8  | 19,26 | 575,38 | 106,26 |
| 2019/05/23 | CH2205 | Male | Three y/o | Treatment (Wk 2) | Treatment | Feed Day | No | 15:30 | 15:00 - 15:59 | Afternoon | 38,0 | 73  | 18,0  | 18,0  | 19,15 | 570,27 | 96,72  |
| 2019/05/23 | CH2206 | Male | Three y/o | Treatment (Wk 2) | Treatment | Feed Day | No | 15:30 | 15:00 - 15:59 | Afternoon | 38,1 | 86  | 15,8  | 15,8  | 19,26 | 582,77 | 92,28  |
| 2019/05/23 | CH2205 | Male | Three y/o | Treatment (Wk 2) | Treatment | Feed Day | No | 15:35 | 15:00 - 15:59 | Afternoon | 38,0 |     | 15,0  | 15,0  | 19,15 |        | 90,51  |
| 2019/05/23 | CH2206 | Male | Three y/o | Treatment (Wk 2) | Treatment | Feed Day | No | 15:35 | 15:00 - 15:59 | Afternoon | 38,1 | 64  | 16,0  | 16,0  | 19,26 | 559,88 | 92,71  |
| 2019/05/23 | CH2205 | Male | Three y/o | Treatment (Wk 2) | Treatment | Feed Day | No | 15:40 | 15:00 - 15:59 | Afternoon | 38,0 | 61  | 3,6   | 3,6   | 19,15 | 556,01 | 42,42  |
| 2019/05/23 | CH2206 | Male | Three y/o | Treatment (Wk 2) | Treatment | Feed Day | No | 15:40 | 15:00 - 15:59 | Afternoon | 38,1 | 55  | 35,2  | 35,2  | 19,26 | 547,52 | 119,69 |
| 2019/05/23 | CH2205 | Male | Three y/o | Treatment (Wk 2) | Treatment | Feed Day | No | 15:45 | 15:00 - 15:59 | Afternoon | 38,0 | 92  | 5,6   | 5,6   | 19,15 | 587,78 | 57,21  |
| 2019/05/23 | CH2206 | Male | Three y/o | Treatment (Wk 2) | Treatment | Feed Day | No | 15:45 | 15:00 - 15:59 | Afternoon | 38,0 | 82  | 37,8  | 37,8  | 19,15 | 579,19 | 122,14 |
| 2019/05/23 | CH2205 | Male | Three y/o | Treatment (Wk 2) | Treatment | Feed Day | No | 15:50 | 15:00 - 15:59 | Afternoon | 38,0 | 64  | 90,4  | 90,4  | 19,15 | 559,88 | 152,33 |
| 2019/05/23 | CH2206 | Male | Three y/o | Treatment (Wk 2) | Treatment | Feed Day | No | 15:50 | 15:00 - 15:59 | Afternoon | 38,0 | 82  | 48,0  | 48,0  | 19,15 | 579,19 | 130,38 |
| 2019/05/23 | CH2205 | Male | Three y/o | Treatment (Wk 2) | Treatment | Feed Day | No | 15:55 | 15:00 - 15:59 | Afternoon | 38,0 | 102 | 29,8  | 29,8  | 19,15 | 595,30 | 113,97 |
| 2019/05/23 | CH2206 | Male | Three y/o | Treatment (Wk 2) | Treatment | Feed Day | No | 15:55 | 15:00 - 15:59 | Afternoon | 38,0 | 103 | 65,8  | 65,8  | 19,15 | 596,00 | 141,29 |
| 2019/05/23 | CH2205 | Male | Three y/o | Treatment (Wk 2) | Treatment | Feed Day | No | 16:00 | 16:00 - 16:59 | Evening   | 38,0 |     | 17,4  | 17,4  | 19,15 |        | 95,56  |
| 2019/05/23 | CH2206 | Male | Three y/o | Treatment (Wk 2) | Treatment | Feed Day | No | 16:00 | 16:00 - 16:59 | Evening   | 38,0 | 105 | 44,2  | 44,2  | 19,15 | 597,38 | 127,53 |
| 2019/05/23 | CH2205 | Male | Three y/o | Treatment (Wk 2) | Treatment | Feed Day | No | 16:05 | 16:00 - 16:59 | Evening   | 37,7 | 91  | 17,4  | 17,4  | 18,85 | 586,98 | 95,56  |
| 2019/05/23 | CH2206 | Male | Three y/o | Treatment (Wk 2) | Treatment | Feed Day | No | 16:05 | 16:00 - 16:59 | Evening   | 38,0 | 111 | 55,0  | 55,0  | 19,15 | 601,33 | 135,08 |
| 2019/05/23 | CH2205 | Male | Three y/o | Treatment (Wk 2) | Treatment | Feed Day | No | 16:10 | 16:00 - 16:59 | Evening   | 37,7 | 93  | 40,4  | 40,4  | 18,85 | 588,58 | 124,43 |
| 2019/05/23 | CH2206 | Male | Three y/o | Treatment (Wk 2) | Treatment | Feed Day | No | 16:10 | 16:00 - 16:59 | Evening   | 37,9 | 103 | 64,6  | 64,6  | 19,05 | 596,00 | 140,65 |
| 2019/05/23 | CH2205 | Male | Three y/o | Treatment (Wk 2) | Treatment | Feed Day | No | 16:15 | 16:00 - 16:59 | Evening   | 37,7 | 79  | 17,6  | 17,6  | 18,85 | 576,36 | 95,95  |
| 2019/05/23 | CH2206 | Male | Three y/o | Treatment (Wk 2) | Treatment | Feed Day | No | 16:15 | 16:00 - 16:59 | Evening   | 37,9 | 126 | 53,2  | 53,2  | 19,05 | 610,14 | 133,93 |
| 2019/05/23 | CH2205 | Male | Three y/o | Treatment (Wk 2) | Treatment | Feed Day | No | 16:20 | 16:00 - 16:59 | Evening   | 37,9 | 94  | 78,2  | 78,2  | 19,05 | 589,37 | 147,28 |
| 2019/05/23 | CH2206 | Male | Three y/o | Treatment (Wk 2) | Treatment | Feed Day | No | 16:20 | 16:00 - 16:59 | Evening   | 37,9 | 47  | 8,6   | 8,6   | 19,05 | 534,23 | 71,66  |
| 2019/05/23 | CH2205 | Male | Three y/o | Treatment (Wk 2) | Treatment | Feed Day | No | 16:25 | 16:00 - 16:59 | Evening   | 38,0 | 98  | 49,6  | 49,6  | 19,15 | 592,41 | 131,51 |
| 2019/05/23 | CH2206 | Male | Three y/o | Treatment (Wk 2) | Treatment | Feed Day | No | 16:25 | 16:00 - 16:59 | Evening   | 37,9 | 80  | 14,8  | 14,8  | 19,05 | 577,31 | 90,05  |
| 2019/05/23 | CH2205 | Male | Three y/o | Treatment (Wk 2) | Treatment | Feed Day | No | 16:30 | 16:00 - 16:59 | Evening   | 37,9 | 167 | 30,0  | 30,0  | 19,05 | 628,84 | 114,20 |
| 2019/05/23 | CH2206 | Male | Three y/o | Treatment (Wk 2) | Treatment | Feed Day | No | 16:30 | 16:00 - 16:59 | Evening   | 37,9 | 92  | 95,8  | 95,8  | 19,05 | 587,78 | 154,35 |
| 2019/05/23 | CH2205 | Male | Three y/o | Treatment (Wk 2) | Treatment | Feed Day | No | 16:35 | 16:00 - 16:59 | Evening   | 38,0 | 91  | 25,6  | 25,6  | 19,15 | 586,98 | 108,76 |
| 2019/05/23 | CH2206 | Male | Three y/o | Treatment (Wk 2) | Treatment | Feed Day | No | 16:35 | 16:00 - 16:59 | Evening   | 37,9 | 84  | 30,8  | 30,8  | 19,05 | 581,01 | 115,10 |
| 2019/05/23 | CH2205 | Male | Three y/o | Treatment (Wk 2) | Treatment | Feed Day | No | 16:40 | 16:00 - 16:59 | Evening   | 38,0 | 77  | 18,0  | 18,0  | 19,15 | 574,39 | 96,72  |
| 2019/05/23 | CH2206 | Male | Three y/o | Treatment (Wk 2) | Treatment | Feed Day | No | 16:40 | 16:00 - 16:59 | Evening   | 37,8 | 79  | 34,0  | 34,0  | 18,95 | 576,36 | 118,49 |
| 2019/05/23 | CH2205 | Male | Three y/o | Treatment (Wk 2) | Treatment | Feed Day | No | 16:45 | 16:00 - 16:59 | Evening   | 38,1 | 60  | 21,0  | 21,0  | 19,26 | 554,67 | 101,98 |
| 2019/05/23 | CH2206 | Male | Three y/o | Treatment (Wk 2) | Treatment | Feed Day | No | 16:45 | 16:00 - 16:59 | Evening   | 37,8 | 90  | 30,8  | 30,8  | 18,95 | 586,16 | 115,10 |
| 2019/05/23 | CH2205 | Male | Three y/o | Treatment (Wk 2) | Treatment | Feed Day | No | 16:50 | 16:00 - 16:59 | Evening   | 38,2 | 56  | 18,6  | 18,6  | 19,36 | 549,01 | 97,84  |
| 2019/05/23 | CH2206 | Male | Three y/o | Treatment (Wk 2) | Treatment | Feed Day | No | 16:50 | 16:00 - 16:59 | Evening   | 37,7 | 73  | 36,0  | 36,0  | 18,85 | 570,27 | 120,46 |
| 2019/05/23 | CH2205 | Male | Three y/o | Treatment (Wk 2) | Treatment | Feed Day | No | 16:55 | 16:00 - 16:59 | Evening   | 38,2 | 65  | 20,0  | 20,0  | 19,36 | 561,12 | 100,31 |
| 2019/05/23 | CH2206 | Male | Three y/o | Treatment (Wk 2) | Treatment | Feed Day | No | 16:55 | 16:00 - 16:59 | Evening   | 37,8 | 53  | 38,0  | 38,0  | 18,95 | 544,43 | 122,32 |
| 2019/05/23 | CH2205 | Male | Three y/o | Treatment (Wk 2) | Treatment | Feed Day | No | 17:00 | 17:00 - 17:59 | Evening   | 38,2 | 47  | 19,2  | 19,2  | 19,36 | 534,23 | 98,92  |
| 2019/05/23 | CH2206 | Male | Three y/o | Treatment (Wk 2) | Treatment | Feed Day | No | 17:00 | 17:00 - 17:59 | Evening   | 37,8 | 50  | 46,0  | 46,0  | 18,95 | 539,52 | 128,91 |
| 2019/05/23 | CH2205 | Male | Three y/o | Treatment (Wk 2) | Treatment | Feed Day | No | 17:05 | 17:00 - 17:59 | Evening   | 38,2 | 49  | 16,8  | 16,8  | 19,36 | 537,80 | 94,37  |
| 2019/05/23 | CH2206 | Male | Three y/o | Treatment (Wk 2) | Treatment | Feed Day | No | 17:05 | 17:00 - 17:59 | Evening   | 37,8 | 84  | 40,2  | 40,2  | 18,95 | 581,01 | 124,26 |
| 2019/05/23 | CH2205 | Male | Three y/o | Treatment (Wk 2) | Treatment | Feed Day | No | 17:10 | 17:00 - 17:59 | Evening   | 38,2 | 71  | 21,8  | 21,8  | 19,36 | 568,10 | 103,26 |
| 2019/05/23 | CH2206 | Male | Three y/o | Treatment (Wk 2) | Treatment | Feed Day | No | 17:10 | 17:00 - 17:59 | Evening   | 37,7 | 88  | 36,0  | 36,0  | 18,85 | 584,49 | 120,46 |
| 2019/05/23 | CH2205 | Male | Three y/o | Treatment (Wk 2) | Treatment | Feed Day | No | 17:15 | 17:00 - 17:59 | Evening   | 38,1 | 62  | 16,0  | 16,0  | 19,26 | 557,33 | 92,71  |
| 2019/05/23 | CH2206 | Male | Three y/o | Treatment (Wk 2) | Treatment | Feed Day | No | 17:15 | 17:00 - 17:59 | Evening   | 37,5 | 49  | 38,8  | 38,8  | 18,65 | 537,80 | 123,04 |
| 2019/05/23 | CH2205 | Male | Three y/o | Treatment (Wk 2) | Treatment | Feed Day | No | 17:20 | 17:00 - 17:59 | Evening   | 38,1 | 77  | 15,2  | 15,2  | 19,26 | 574,39 | 90,96  |
| 2019/05/23 | CH2206 | Male | Three y/o | Treatment (Wk 2) | Treatment | Feed Day | No | 17:20 | 17:00 - 17:59 | Evening   | 37,4 | 83  | 46,8  | 46,8  | 18,55 | 580,11 | 129,50 |
| 2019/05/23 | CH2205 | Male | Three y/o | Treatment (Wk 2) | Treatment | Feed Day | No | 17:25 | 17:00 - 17:59 | Evening   | 38,1 | 100 | 29,0  | 29,0  | 19,26 | 593,87 | 113,03 |
| 2019/05/23 | CH2206 | Male | Three y/o | Treatment (Wk 2) | Treatment | Feed Day | No | 17:25 | 17:00 - 17:59 | Evening   | 37,4 | 90  | 27,2  | 27,2  | 18,55 | 586,16 | 110,83 |
| 2019/05/23 | CH2205 | Male | Three y/o | Treatment (Wk 2) | Treatment | Feed Day | No | 17:30 | 17:00 - 17:59 | Evening   | 38,1 |     | 28,6  | 28,6  | 19,26 |        | 112,56 |
| 2019/05/23 | CH2206 | Male | Three y/o | Treatment (Wk 2) | Treatment | Feed Day | No | 17:30 | 17:00 - 17:59 | Evening   | 37,3 | 92  | 44,2  | 44,2  | 18,46 | 587,78 | 127,53 |
| 2019/05/23 | CH2205 | Male | Three y/o | Treatment (Wk 2) | Treatment | Feed Day | No | 17:35 | 17:00 - 17:59 | Evening   | 38,0 |     | 47,4  | 47,4  | 19,15 |        | 129,94 |
| 2019/05/23 | CH2206 | Male | Three y/o | Treatment (Wk 2) | Treatment | Feed Day | No | 17:35 | 17:00 - 17:59 | Evening   | 37,3 | 86  | 43,6  | 43,6  | 18,46 | 582,77 | 127,06 |
| 2019/05/23 | CH2205 | Male | Three y/o | Treatment (Wk 2) | Treatment | Feed Day | No | 17:40 | 17:00 - 17:59 | Evening   | 37,9 |     | 205,0 | 205,0 | 19,05 |        | 180,99 |
| 2019/05/23 | CH2206 | Male | Three y/o | Treatment (Wk 2) | Treatment | Feed Day | No | 17:40 | 17:00 - 17:59 | Evening   | 37,4 | 93  | 49,4  | 49,4  | 18,55 | 588,58 | 131,37 |
| 2019/05/23 | CH2205 | Male | Three y/o | Treatment (Wk 2) | Treatment | Feed Day | No | 17:45 | 17:00 - 17:59 | Evening   | 37,9 | 103 | 190,4 | 190,4 | 19,05 | 596,00 | 178,39 |
| 2019/05/23 | CH2206 | Male | Three y/o | Treatment (Wk 2) | Treatment | Feed Day | No | 17:45 | 17:00 - 17:59 | Evening   | 37,5 | 128 | 135,0 | 135,0 | 18,65 | 611,22 | 166,33 |
| 2019/05/23 | CH2205 | Male | Three y/o | Treatment (Wk 2) | Treatment | Feed Day | No | 17:50 | 17:00 - 17:59 | Evening   | 37,7 |     | 41,0  | 41,0  | 18,85 |        | 124,94 |



|            |        |      |           |                  |           |          |    |       |               |         |      |     |       |       |       |        |        |
|------------|--------|------|-----------|------------------|-----------|----------|----|-------|---------------|---------|------|-----|-------|-------|-------|--------|--------|
| 2019/05/23 | CH2206 | Male | Three y/o | Treatment (Wk 2) | Treatment | Feed Day | No | 17:50 | 17:00 - 17:59 | Evening | 37,5 | 43  | 40,4  | 40,4  | 18,65 | 526,50 | 124,43 |
| 2019/05/23 | CH2205 | Male | Three y/o | Treatment (Wk 2) | Treatment | Feed Day | No | 17:55 | 17:00 - 17:59 | Evening | 37,7 | 46  | 27,4  | 27,4  | 18,85 | 532,38 | 111,09 |
| 2019/05/23 | CH2206 | Male | Three y/o | Treatment (Wk 2) | Treatment | Feed Day | No | 17:55 | 17:00 - 17:59 | Evening | 37,3 | 85  | 63,0  | 63,0  | 18,46 | 581,90 | 139,78 |
| 2019/05/23 | CH2205 | Male | Three y/o | Treatment (Wk 2) | Treatment | Feed Day | No | 18:00 | 18:00 - 18:59 | Evening | 37,7 | 94  | 35,4  | 35,4  | 18,85 | 589,37 | 119,88 |
| 2019/05/23 | CH2206 | Male | Three y/o | Treatment (Wk 2) | Treatment | Feed Day | No | 18:00 | 18:00 - 18:59 | Evening | 37,4 | 125 | 205,4 | 205,4 | 18,55 | 609,60 | 181,06 |
| 2019/05/23 | CH2205 | Male | Three y/o | Treatment (Wk 2) | Treatment | Feed Day | No | 18:05 | 18:00 - 18:59 | Evening | 37,7 |     | 34,4  | 34,4  | 18,85 |        | 118,90 |
| 2019/05/23 | CH2206 | Male | Three y/o | Treatment (Wk 2) | Treatment | Feed Day | No | 18:05 | 18:00 - 18:59 | Evening | 37,4 | 118 | 93,2  | 93,2  | 18,55 | 605,61 | 153,39 |
| 2019/05/23 | CH2205 | Male | Three y/o | Treatment (Wk 2) | Treatment | Feed Day | No | 18:10 | 18:00 - 18:59 | Evening | 37,7 | 45  | 28,6  | 28,6  | 18,85 | 530,47 | 112,56 |
| 2019/05/23 | CH2206 | Male | Three y/o | Treatment (Wk 2) | Treatment | Feed Day | No | 18:10 | 18:00 - 18:59 | Evening | 37,4 | 94  | 98,4  | 98,4  | 18,55 | 589,37 | 155,28 |
| 2019/05/23 | CH2205 | Male | Three y/o | Treatment (Wk 2) | Treatment | Feed Day | No | 18:15 | 18:00 - 18:59 | Evening | 37,6 | 81  | 34,8  | 34,8  | 18,75 | 578,26 | 119,29 |
| 2019/05/23 | CH2206 | Male | Three y/o | Treatment (Wk 2) | Treatment | Feed Day | No | 18:15 | 18:00 - 18:59 | Evening | 37,5 | 113 | 71,0  | 71,0  | 18,65 | 602,58 | 143,93 |
| 2019/05/23 | CH2205 | Male | Three y/o | Treatment (Wk 2) | Treatment | Feed Day | No | 18:20 | 18:00 - 18:59 | Evening | 37,5 | 46  | 20,2  | 20,2  | 18,65 | 532,38 | 100,65 |
| 2019/05/23 | CH2206 | Male | Three y/o | Treatment (Wk 2) | Treatment | Feed Day | No | 18:20 | 18:00 - 18:59 | Evening | 37,1 | 68  | 53,6  | 53,6  | 18,26 | 564,71 | 134,19 |
| 2019/05/23 | CH2205 | Male | Three y/o | Treatment (Wk 2) | Treatment | Feed Day | No | 18:25 | 18:00 - 18:59 | Evening | 37,4 | 65  | 25,4  | 25,4  | 18,55 | 561,12 | 108,49 |
| 2019/05/23 | CH2206 | Male | Three y/o | Treatment (Wk 2) | Treatment | Feed Day | No | 18:25 | 18:00 - 18:59 | Evening | 36,5 | 87  | 60,4  | 60,4  | 17,67 | 583,64 | 138,32 |
| 2019/05/23 | CH2205 | Male | Three y/o | Treatment (Wk 2) | Treatment | Feed Day | No | 18:30 | 18:00 - 18:59 | Evening | 37,3 | 67  | 30,6  | 30,6  | 18,46 | 563,53 | 114,87 |
| 2019/05/23 | CH2206 | Male | Three y/o | Treatment (Wk 2) | Treatment | Feed Day | No | 18:30 | 18:00 - 18:59 | Evening | 36,6 | 79  | 51,2  | 51,2  | 17,77 | 576,36 | 132,61 |
| 2019/05/23 | CH2205 | Male | Three y/o | Treatment (Wk 2) | Treatment | Feed Day | No | 18:35 | 18:00 - 18:59 | Evening | 37,2 | 73  | 34,2  | 34,2  | 18,36 | 570,27 | 118,70 |
| 2019/05/23 | CH2206 | Male | Three y/o | Treatment (Wk 2) | Treatment | Feed Day | No | 18:35 | 18:00 - 18:59 | Evening | 37,1 | 63  | 44,8  | 44,8  | 18,26 | 558,62 | 127,99 |
| 2019/05/23 | CH2205 | Male | Three y/o | Treatment (Wk 2) | Treatment | Feed Day | No | 18:40 | 18:00 - 18:59 | Evening | 37,1 | 49  | 31,0  | 31,0  | 18,26 | 537,80 | 115,32 |
| 2019/05/23 | CH2206 | Male | Three y/o | Treatment (Wk 2) | Treatment | Feed Day | No | 18:40 | 18:00 - 18:59 | Evening | 37,3 | 55  | 47,4  | 47,4  | 18,46 | 547,52 | 129,94 |
| 2019/05/23 | CH2205 | Male | Three y/o | Treatment (Wk 2) | Treatment | Feed Day | No | 18:45 | 18:00 - 18:59 | Evening | 37,1 | 101 | 21,4  | 21,4  | 18,26 | 594,59 | 102,63 |
| 2019/05/23 | CH2206 | Male | Three y/o | Treatment (Wk 2) | Treatment | Feed Day | No | 18:45 | 18:00 - 18:59 | Evening | 37,5 | 86  | 52,6  | 52,6  | 18,65 | 582,77 | 133,54 |
| 2019/05/23 | CH2205 | Male | Three y/o | Treatment (Wk 2) | Treatment | Feed Day | No | 18:50 | 18:00 - 18:59 | Evening | 37,5 | 87  | 11,0  | 11,0  | 18,65 | 583,64 | 79,98  |
| 2019/05/23 | CH2206 | Male | Three y/o | Treatment (Wk 2) | Treatment | Feed Day | No | 18:50 | 18:00 - 18:59 | Evening | 37,5 | 89  | 59,0  | 59,0  | 18,65 | 585,33 | 137,51 |
| 2019/05/23 | CH2205 | Male | Three y/o | Treatment (Wk 2) | Treatment | Feed Day | No | 18:55 | 18:00 - 18:59 | Evening | 37,5 | 58  | 7,6   | 7,6   | 18,65 | 551,90 | 67,49  |
| 2019/05/23 | CH2206 | Male | Three y/o | Treatment (Wk 2) | Treatment | Feed Day | No | 18:55 | 18:00 - 18:59 | Evening | 37,7 | 45  | 64,4  | 64,4  | 18,85 | 530,47 | 140,55 |
| 2019/05/23 | CH2205 | Male | Three y/o | Treatment (Wk 2) | Treatment | Feed Day | No | 19:00 | 19:00 - 19:59 | Evening | 37,5 | 54  | 7,2   | 7,2   | 18,65 | 545,99 | 65,66  |
| 2019/05/23 | CH2206 | Male | Three y/o | Treatment (Wk 2) | Treatment | Feed Day | No | 19:00 | 19:00 - 19:59 | Evening | 37,7 | 86  | 50,8  | 50,8  | 18,85 | 582,77 | 132,33 |
| 2019/05/23 | CH2205 | Male | Three y/o | Treatment (Wk 2) | Treatment | Feed Day | No | 19:05 | 19:00 - 19:59 | Evening | 37,3 | 92  | 46,0  | 46,0  | 18,46 | 587,78 | 128,91 |
| 2019/05/23 | CH2206 | Male | Three y/o | Treatment (Wk 2) | Treatment | Feed Day | No | 19:05 | 19:00 - 19:59 | Evening | 37,7 | 86  | 60,8  | 60,8  | 18,85 | 582,77 | 138,55 |
| 2019/05/23 | CH2205 | Male | Three y/o | Treatment (Wk 2) | Treatment | Feed Day | No | 19:10 | 19:00 - 19:59 | Evening | 37,9 | 90  | 24,6  | 24,6  | 19,05 | 586,16 | 107,39 |
| 2019/05/23 | CH2206 | Male | Three y/o | Treatment (Wk 2) | Treatment | Feed Day | No | 19:10 | 19:00 - 19:59 | Evening | 37,5 | 92  | 63,6  | 63,6  | 18,65 | 587,78 | 140,11 |
| 2019/05/23 | CH2205 | Male | Three y/o | Treatment (Wk 2) | Treatment | Feed Day | No | 19:15 | 19:00 - 19:59 | Evening | 37,9 |     | 30,0  | 30,0  | 19,05 |        | 114,20 |
| 2019/05/23 | CH2206 | Male | Three y/o | Treatment (Wk 2) | Treatment | Feed Day | No | 19:15 | 19:00 - 19:59 | Evening | 37,3 | 91  | 59,4  | 59,4  | 18,46 | 586,98 | 137,75 |
| 2019/05/23 | CH2205 | Male | Three y/o | Treatment (Wk 2) | Treatment | Feed Day | No | 19:20 | 19:00 - 19:59 | Evening | 37,7 |     | 28,4  | 28,4  | 18,85 |        | 112,31 |
| 2019/05/23 | CH2206 | Male | Three y/o | Treatment (Wk 2) | Treatment | Feed Day | No | 19:20 | 19:00 - 19:59 | Evening | 37,0 | 83  | 63,8  | 63,8  | 18,16 | 580,11 | 140,22 |
| 2019/05/23 | CH2205 | Male | Three y/o | Treatment (Wk 2) | Treatment | Feed Day | No | 19:25 | 19:00 - 19:59 | Evening | 37,7 | 68  | 26,4  | 26,4  | 18,85 | 564,71 | 109,81 |
| 2019/05/23 | CH2206 | Male | Three y/o | Treatment (Wk 2) | Treatment | Feed Day | No | 19:25 | 19:00 - 19:59 | Evening | 36,6 | 44  | 57,8  | 57,8  | 17,77 | 528,51 | 136,80 |
| 2019/05/23 | CH2205 | Male | Three y/o | Treatment (Wk 2) | Treatment | Feed Day | No | 19:30 | 19:00 - 19:59 | Evening | 37,7 | 84  | 23,4  | 23,4  | 18,85 | 581,01 | 105,68 |
| 2019/05/23 | CH2206 | Male | Three y/o | Treatment (Wk 2) | Treatment | Feed Day | No | 19:30 | 19:00 - 19:59 | Evening | 36,3 | 84  | 61,4  | 61,4  | 17,48 | 581,01 | 138,89 |
| 2019/05/23 | CH2205 | Male | Three y/o | Treatment (Wk 2) | Treatment | Feed Day | No | 19:35 | 19:00 - 19:59 | Evening | 37,6 | 47  | 22,4  | 22,4  | 18,75 | 534,23 | 104,19 |
| 2019/05/23 | CH2206 | Male | Three y/o | Treatment (Wk 2) | Treatment | Feed Day | No | 19:35 | 19:00 - 19:59 | Evening | 36,1 |     | 54,0  | 54,0  | 17,29 |        | 134,45 |
| 2019/05/23 | CH2205 | Male | Three y/o | Treatment (Wk 2) | Treatment | Feed Day | No | 19:40 | 19:00 - 19:59 | Evening | 37,6 | 71  | 26,2  | 26,2  | 18,75 | 568,10 | 109,55 |
| 2019/05/23 | CH2206 | Male | Three y/o | Treatment (Wk 2) | Treatment | Feed Day | No | 19:40 | 19:00 - 19:59 | Evening | 35,9 | 46  | 63,0  | 63,0  | 17,09 | 532,38 | 139,78 |
| 2019/05/23 | CH2205 | Male | Three y/o | Treatment (Wk 2) | Treatment | Feed Day | No | 19:45 | 19:00 - 19:59 | Evening | 37,6 | 45  | 22,4  | 22,4  | 18,75 | 530,47 | 104,19 |
| 2019/05/23 | CH2206 | Male | Three y/o | Treatment (Wk 2) | Treatment | Feed Day | No | 19:45 | 19:00 - 19:59 | Evening | 35,6 | 84  | 60,0  | 60,0  | 16,81 | 581,01 | 138,09 |
| 2019/05/23 | CH2205 | Male | Three y/o | Treatment (Wk 2) | Treatment | Feed Day | No | 19:50 | 19:00 - 19:59 | Evening | 37,7 | 72  | 20,8  | 20,8  | 18,85 | 569,20 | 101,65 |
| 2019/05/23 | CH2206 | Male | Three y/o | Treatment (Wk 2) | Treatment | Feed Day | No | 19:50 | 19:00 - 19:59 | Evening | 35,4 | 83  | 49,6  | 49,6  | 16,62 | 580,11 | 131,51 |
| 2019/05/23 | CH2205 | Male | Three y/o | Treatment (Wk 2) | Treatment | Feed Day | No | 19:55 | 19:00 - 19:59 | Evening | 37,6 | 84  | 30,6  | 30,6  | 18,75 | 581,01 | 114,87 |
| 2019/05/23 | CH2206 | Male | Three y/o | Treatment (Wk 2) | Treatment | Feed Day | No | 19:55 | 19:00 - 19:59 | Evening | 35,3 | 45  | 46,2  | 46,2  | 16,53 | 530,47 | 129,06 |
| 2019/05/23 | CH2205 | Male | Three y/o | Treatment (Wk 2) | Treatment | Feed Day | No | 20:00 | 20:00 - 20:59 | Night   | 37,6 | 85  | 25,8  | 25,8  | 18,75 | 581,90 | 109,02 |
| 2019/05/23 | CH2206 | Male | Three y/o | Treatment (Wk 2) | Treatment | Feed Day | No | 20:00 | 20:00 - 20:59 | Night   | 35,4 | 88  | 51,4  | 51,4  | 16,62 | 584,49 | 132,74 |
| 2019/05/23 | CH2205 | Male | Three y/o | Treatment (Wk 2) | Treatment | Feed Day | No | 20:05 | 20:00 - 20:59 | Night   | 37,5 | 90  | 26,2  | 26,2  | 18,65 | 586,16 | 109,55 |
| 2019/05/23 | CH2206 | Male | Three y/o | Treatment (Wk 2) | Treatment | Feed Day | No | 20:05 | 20:00 - 20:59 | Night   | 35,4 | 84  | 49,8  | 49,8  | 16,62 | 581,01 | 131,65 |
| 2019/05/23 | CH2205 | Male | Three y/o | Treatment (Wk 2) | Treatment | Feed Day | No | 20:10 | 20:00 - 20:59 | Night   | 37,5 | 49  | 22,0  | 22,0  | 18,65 | 537,80 | 103,57 |
| 2019/05/23 | CH2206 | Male | Three y/o | Treatment (Wk 2) | Treatment | Feed Day | No | 20:10 | 20:00 - 20:59 | Night   | 35,5 | 90  | 49,0  | 49,0  | 16,72 | 586,16 | 131,09 |
| 2019/05/23 | CH2205 | Male | Three y/o | Treatment (Wk 2) | Treatment | Feed Day | No | 20:15 | 20:00 - 20:59 | Night   | 37,5 | 60  | 20,6  | 20,6  | 18,65 | 554,67 | 101,32 |
| 2019/05/23 | CH2206 | Male | Three y/o | Treatment (Wk 2) | Treatment | Feed Day | No | 20:15 | 20:00 - 20:59 | Night   | 35,6 |     | 103,8 | 103,8 | 16,81 | 587,78 | 157,14 |
| 2019/05/23 | CH2205 | Male | Three y/o | Treatment (Wk 2) | Treatment | Feed Day | No | 20:20 | 20:00 - 20:59 | Night   | 37,6 | 102 | 73,2  | 73,2  | 18,75 | 595,30 | 144,99 |
| 2019/05/23 | CH2206 | Male | Three y/o | Treatment (Wk 2) | Treatment | Feed Day | No | 20:20 | 20:00 - 20:59 | Night   | 36,3 | 65  | 48,4  | 48,4  | 17,48 | 561,12 | 130,66 |
| 2019/05/23 | CH2205 | Male | Three y/o | Treatment (Wk 2) | Treatment | Feed Day | No | 20:25 | 20:00 - 20:59 | Night   | 37,5 | 150 | 20,6  | 20,6  | 18,65 | 621,86 | 101,32 |
| 2019/05/23 | CH2206 | Male | Three y/o | Treatment (Wk 2) | Treatment | Feed Day | No | 20:25 | 20:00 - 20:59 | Night   | 36,3 | 47  | 51,0  | 51,0  | 17,48 | 534,23 | 132,47 |
| 2019/05/23 | CH2205 | Male | Three y/o | Treatment (Wk 2) | Treatment | Feed Day | No | 20:30 | 20:00 - 20:59 | Night   | 37,6 |     | 15,6  | 15,6  | 18,75 |        | 91,85  |
| 2019/05/23 | CH2206 | Male | Three y/o | Treatment (Wk 2) | Treatment | Feed Day | No | 20:30 | 20:00 - 20:59 | Night   | 36,5 | 44  | 47,4  | 47,4  | 17,67 | 528,51 | 129,94 |
| 2019/05/23 | CH2205 | Male | Three y/o | Treatment (Wk 2) | Treatment | Feed Day | No | 20:35 | 20:00 - 20:59 | Night   | 37,6 | 94  | 6,6   | 6,6   | 18,75 | 589,37 | 62,73  |
| 2019/05/23 | CH2206 | Male | Three y/o | Treatment (Wk 2) | Treatment | Feed Day | No | 20:35 | 20:00 - 20:59 | Night   | 36,8 | 90  | 45,6  | 45,6  | 17,96 | 586,16 | 128,61 |
| 2019/05/23 | CH2205 | Male | Three y/o | Treatment (Wk 2) | Treatment | Feed Day | No | 20:40 | 20:00 - 20:59 | Night   | 37,5 | 84  | 2,2   | 2,2   | 18,65 | 581,01 | 26,02  |
| 2019/05/23 | CH2206 | Male | Three y/o | Treatment (Wk 2) | Treatment | Feed Day | No | 20:40 | 20:00 - 20:59 | Night   | 36,9 | 83  | 41,0  | 41,0  | 18,06 | 580,11 | 124,94 |
| 2019/05/23 | CH2205 | Male | Three y/o | Treatment (Wk 2) | Treatment | Feed Day | No | 20:45 | 20:00 - 20:59 | Night   | 37,4 | 82  | 4,2   | 4,2   | 18,55 | 579,19 | 47,57  |



|            |        |      |           |                  |           |          |    |       |               |       |      |     |      |      |       |        |        |
|------------|--------|------|-----------|------------------|-----------|----------|----|-------|---------------|-------|------|-----|------|------|-------|--------|--------|
| 2019/05/23 | CH2206 | Male | Three y/o | Treatment (Wk 2) | Treatment | Feed Day | No | 20:45 | 20:00 - 20:59 | Night | 37,0 | 94  | 37,8 | 37,8 | 18,16 | 589,37 | 122,14 |
| 2019/05/23 | CH2205 | Male | Three y/o | Treatment (Wk 2) | Treatment | Feed Day | No | 20:50 | 20:00 - 20:59 | Night | 37,4 | 55  | 5,2  | 5,2  | 18,55 | 547,52 | 54,72  |
| 2019/05/23 | CH2206 | Male | Three y/o | Treatment (Wk 2) | Treatment | Feed Day | No | 20:50 | 20:00 - 20:59 | Night | 37,1 | 63  | 34,8 | 34,8 | 18,26 | 558,62 | 119,29 |
| 2019/05/23 | CH2205 | Male | Three y/o | Treatment (Wk 2) | Treatment | Feed Day | No | 20:55 | 20:00 - 20:59 | Night | 37,5 | 60  | 5,0  | 5,0  | 18,65 | 554,67 | 53,41  |
| 2019/05/23 | CH2206 | Male | Three y/o | Treatment (Wk 2) | Treatment | Feed Day | No | 20:55 | 20:00 - 20:59 | Night | 37,2 | 48  | 39,8 | 39,8 | 18,36 | 536,04 | 123,91 |
| 2019/05/23 | CH2205 | Male | Three y/o | Treatment (Wk 2) | Treatment | Feed Day | No | 21:00 | 21:00 - 21:59 | Night | 37,5 | 62  | 6,4  | 6,4  | 18,65 | 557,33 | 61,70  |
| 2019/05/23 | CH2206 | Male | Three y/o | Treatment (Wk 2) | Treatment | Feed Day | No | 21:00 | 21:00 - 21:59 | Night | 37,2 | 92  | 38,8 | 38,8 | 18,36 | 587,78 | 123,04 |
| 2019/05/23 | CH2205 | Male | Three y/o | Treatment (Wk 2) | Treatment | Feed Day | No | 21:05 | 21:00 - 21:59 | Night | 37,6 | 92  | 9,0  | 9,0  | 18,75 | 587,78 | 73,19  |
| 2019/05/23 | CH2206 | Male | Three y/o | Treatment (Wk 2) | Treatment | Feed Day | No | 21:05 | 21:00 - 21:59 | Night | 37,3 | 43  | 25,4 | 25,4 | 18,46 | 526,50 | 108,49 |
| 2019/05/23 | CH2205 | Male | Three y/o | Treatment (Wk 2) | Treatment | Feed Day | No | 21:10 | 21:00 - 21:59 | Night | 37,6 | 55  | 4,4  | 4,4  | 18,75 | 547,52 | 49,12  |
| 2019/05/23 | CH2206 | Male | Three y/o | Treatment (Wk 2) | Treatment | Feed Day | No | 21:10 | 21:00 - 21:59 | Night | 37,4 | 82  | 31,4 | 31,4 | 18,55 | 579,19 | 115,76 |
| 2019/05/23 | CH2205 | Male | Three y/o | Treatment (Wk 2) | Treatment | Feed Day | No | 21:15 | 21:00 - 21:59 | Night | 37,6 | 79  | 5,2  | 5,2  | 18,75 | 576,36 | 54,72  |
| 2019/05/23 | CH2206 | Male | Three y/o | Treatment (Wk 2) | Treatment | Feed Day | No | 21:15 | 21:00 - 21:59 | Night | 37,7 | 86  | 42,4 | 42,4 | 18,85 | 582,77 | 126,10 |
| 2019/05/23 | CH2205 | Male | Three y/o | Treatment (Wk 2) | Treatment | Feed Day | No | 21:20 | 21:00 - 21:59 | Night | 37,7 | 48  | 4,8  | 4,8  | 18,85 | 536,04 | 52,04  |
| 2019/05/23 | CH2206 | Male | Three y/o | Treatment (Wk 2) | Treatment | Feed Day | No | 21:20 | 21:00 - 21:59 | Night | 37,7 | 79  | 37,0 | 37,0 | 18,85 | 576,36 | 121,40 |
| 2019/05/23 | CH2205 | Male | Three y/o | Treatment (Wk 2) | Treatment | Feed Day | No | 21:25 | 21:00 - 21:59 | Night | 37,7 | 83  | 7,2  | 7,2  | 18,85 | 580,11 | 65,66  |
| 2019/05/23 | CH2206 | Male | Three y/o | Treatment (Wk 2) | Treatment | Feed Day | No | 21:25 | 21:00 - 21:59 | Night | 37,8 | 76  | 35,2 | 35,2 | 18,95 | 573,39 | 119,69 |
| 2019/05/23 | CH2205 | Male | Three y/o | Treatment (Wk 2) | Treatment | Feed Day | No | 21:30 | 21:00 - 21:59 | Night | 37,7 | 55  | 8,8  | 8,8  | 18,85 | 547,52 | 72,43  |
| 2019/05/23 | CH2206 | Male | Three y/o | Treatment (Wk 2) | Treatment | Feed Day | No | 21:30 | 21:00 - 21:59 | Night | 37,8 | 44  | 40,6 | 40,6 | 18,95 | 528,51 | 124,60 |
| 2019/05/23 | CH2205 | Male | Three y/o | Treatment (Wk 2) | Treatment | Feed Day | No | 21:35 | 21:00 - 21:59 | Night | 37,7 |     | 6,0  | 6,0  | 18,85 |        | 59,53  |
| 2019/05/23 | CH2206 | Male | Three y/o | Treatment (Wk 2) | Treatment | Feed Day | No | 21:35 | 21:00 - 21:59 | Night | 37,8 | 67  | 37,8 | 37,8 | 18,95 | 563,53 | 122,14 |
| 2019/05/23 | CH2205 | Male | Three y/o | Treatment (Wk 2) | Treatment | Feed Day | No | 21:40 | 21:00 - 21:59 | Night | 37,7 | 50  | 2,4  | 2,4  | 18,85 | 539,52 | 28,91  |
| 2019/05/23 | CH2206 | Male | Three y/o | Treatment (Wk 2) | Treatment | Feed Day | No | 21:40 | 21:00 - 21:59 | Night | 37,8 | 90  | 41,6 | 41,6 | 18,95 | 586,16 | 125,44 |
| 2019/05/23 | CH2205 | Male | Three y/o | Treatment (Wk 2) | Treatment | Feed Day | No | 21:45 | 21:00 - 21:59 | Night | 37,7 | 95  | 6,8  | 6,8  | 18,85 | 590,14 | 63,74  |
| 2019/05/23 | CH2206 | Male | Three y/o | Treatment (Wk 2) | Treatment | Feed Day | No | 21:45 | 21:00 - 21:59 | Night | 37,9 | 71  | 40,2 | 40,2 | 19,05 | 568,10 | 124,26 |
| 2019/05/23 | CH2205 | Male | Three y/o | Treatment (Wk 2) | Treatment | Feed Day | No | 21:50 | 21:00 - 21:59 | Night | 37,7 | 59  | 5,6  | 5,6  | 18,85 | 553,30 | 57,21  |
| 2019/05/23 | CH2206 | Male | Three y/o | Treatment (Wk 2) | Treatment | Feed Day | No | 21:50 | 21:00 - 21:59 | Night | 37,9 | 75  | 39,2 | 39,2 | 19,05 | 572,36 | 123,39 |
| 2019/05/23 | CH2205 | Male | Three y/o | Treatment (Wk 2) | Treatment | Feed Day | No | 21:55 | 21:00 - 21:59 | Night | 37,7 | 83  | 7,8  | 7,8  | 18,85 | 580,11 | 68,36  |
| 2019/05/23 | CH2206 | Male | Three y/o | Treatment (Wk 2) | Treatment | Feed Day | No | 21:55 | 21:00 - 21:59 | Night | 37,9 | 73  | 27,0 | 27,0 | 19,05 | 570,27 | 110,58 |
| 2019/05/23 | CH2205 | Male | Three y/o | Treatment (Wk 2) | Treatment | Feed Day | No | 22:00 | 22:00 - 22:59 | Night | 37,7 | 51  | 2,4  | 2,4  | 18,85 | 541,20 | 28,91  |
| 2019/05/23 | CH2206 | Male | Three y/o | Treatment (Wk 2) | Treatment | Feed Day | No | 22:00 | 22:00 - 22:59 | Night | 37,9 | 126 | 1,6  | 1,6  | 19,05 | 610,14 | 15,48  |
| 2019/05/23 | CH2205 | Male | Three y/o | Treatment (Wk 2) | Treatment | Feed Day | No | 22:05 | 22:00 - 22:59 | Night | 37,9 | 83  | 7,2  | 7,2  | 19,05 | 580,11 | 65,66  |
| 2019/05/23 | CH2206 | Male | Three y/o | Treatment (Wk 2) | Treatment | Feed Day | No | 22:05 | 22:00 - 22:59 | Night | 37,8 | 66  | 5,4  | 5,4  | 18,95 | 562,34 | 55,99  |
| 2019/05/23 | CH2205 | Male | Three y/o | Treatment (Wk 2) | Treatment | Feed Day | No | 22:10 | 22:00 - 22:59 | Night | 38,0 | 54  | 10,0 | 10,0 | 19,15 | 545,99 | 76,76  |
| 2019/05/23 | CH2206 | Male | Three y/o | Treatment (Wk 2) | Treatment | Feed Day | No | 22:10 | 22:00 - 22:59 | Night | 37,8 | 93  | 17,2 | 17,2 | 18,95 | 588,58 | 95,17  |
| 2019/05/23 | CH2205 | Male | Three y/o | Treatment (Wk 2) | Treatment | Feed Day | No | 22:15 | 22:00 - 22:59 | Night | 38,0 | 84  | 25,6 | 25,6 | 19,15 | 581,01 | 108,76 |
| 2019/05/23 | CH2206 | Male | Three y/o | Treatment (Wk 2) | Treatment | Feed Day | No | 22:15 | 22:00 - 22:59 | Night | 37,8 | 86  | 47,0 | 47,0 | 18,95 | 582,77 | 129,65 |
| 2019/05/23 | CH2205 | Male | Three y/o | Treatment (Wk 2) | Treatment | Feed Day | No | 22:20 | 22:00 - 22:59 | Night | 38,0 | 50  | 22,6 | 22,6 | 19,15 | 539,52 | 104,49 |
| 2019/05/23 | CH2206 | Male | Three y/o | Treatment (Wk 2) | Treatment | Feed Day | No | 22:20 | 22:00 - 22:59 | Night | 37,8 | 56  | 46,2 | 46,2 | 18,95 | 549,01 | 129,06 |
| 2019/05/23 | CH2205 | Male | Three y/o | Treatment (Wk 2) | Treatment | Feed Day | No | 22:25 | 22:00 - 22:59 | Night | 38,0 | 56  | 19,4 | 19,4 | 19,15 | 549,01 | 99,28  |
| 2019/05/23 | CH2206 | Male | Three y/o | Treatment (Wk 2) | Treatment | Feed Day | No | 22:25 | 22:00 - 22:59 | Night | 37,8 | 55  | 39,8 | 39,8 | 18,95 | 547,52 | 123,91 |
| 2019/05/23 | CH2205 | Male | Three y/o | Treatment (Wk 2) | Treatment | Feed Day | No | 22:30 | 22:00 - 22:59 | Night | 38,0 | 48  | 25,6 | 25,6 | 19,15 | 536,04 | 108,76 |
| 2019/05/23 | CH2206 | Male | Three y/o | Treatment (Wk 2) | Treatment | Feed Day | No | 22:30 | 22:00 - 22:59 | Night | 37,8 | 40  | 40,4 | 40,4 | 18,95 | 520,09 | 124,43 |
| 2019/05/23 | CH2205 | Male | Three y/o | Treatment (Wk 2) | Treatment | Feed Day | No | 22:35 | 22:00 - 22:59 | Night | 38,0 | 54  | 28,4 | 28,4 | 19,15 | 545,99 | 112,31 |
| 2019/05/23 | CH2206 | Male | Three y/o | Treatment (Wk 2) | Treatment | Feed Day | No | 22:35 | 22:00 - 22:59 | Night | 37,8 | 65  | 40,8 | 40,8 | 18,95 | 561,12 | 124,77 |
| 2019/05/23 | CH2205 | Male | Three y/o | Treatment (Wk 2) | Treatment | Feed Day | No | 22:40 | 22:00 - 22:59 | Night | 37,9 |     | 26,4 | 26,4 | 19,05 |        | 109,81 |
| 2019/05/23 | CH2206 | Male | Three y/o | Treatment (Wk 2) | Treatment | Feed Day | No | 22:40 | 22:00 - 22:59 | Night | 37,8 | 49  | 29,6 | 29,6 | 18,95 | 537,80 | 113,73 |
| 2019/05/23 | CH2205 | Male | Three y/o | Treatment (Wk 2) | Treatment | Feed Day | No | 22:45 | 22:00 - 22:59 | Night | 37,9 | 87  | 20,0 | 20,0 | 19,05 | 583,64 | 100,31 |
| 2019/05/23 | CH2206 | Male | Three y/o | Treatment (Wk 2) | Treatment | Feed Day | No | 22:45 | 22:00 - 22:59 | Night | 37,9 | 40  | 9,2  | 9,2  | 19,05 | 520,09 | 73,94  |
| 2019/05/23 | CH2205 | Male | Three y/o | Treatment (Wk 2) | Treatment | Feed Day | No | 22:50 | 22:00 - 22:59 | Night | 37,7 | 94  | 20,4 | 20,4 | 18,85 | 589,37 | 100,99 |
| 2019/05/23 | CH2206 | Male | Three y/o | Treatment (Wk 2) | Treatment | Feed Day | No | 22:50 | 22:00 - 22:59 | Night | 37,9 | 58  | 11,6 | 11,6 | 19,05 | 551,90 | 81,78  |
| 2019/05/23 | CH2205 | Male | Three y/o | Treatment (Wk 2) | Treatment | Feed Day | No | 22:55 | 22:00 - 22:59 | Night | 37,7 | 52  | 24,8 | 24,8 | 18,85 | 542,83 | 107,67 |
| 2019/05/23 | CH2206 | Male | Three y/o | Treatment (Wk 2) | Treatment | Feed Day | No | 22:55 | 22:00 - 22:59 | Night | 38,0 | 58  | 13,4 | 13,4 | 19,15 | 551,90 | 86,68  |
| 2019/05/23 | CH2205 | Male | Three y/o | Treatment (Wk 2) | Treatment | Feed Day | No | 23:00 | 23:00 - 23:59 | Night | 37,7 | 86  | 21,4 | 21,4 | 18,85 | 582,77 | 102,63 |
| 2019/05/23 | CH2206 | Male | Three y/o | Treatment (Wk 2) | Treatment | Feed Day | No | 23:00 | 23:00 - 23:59 | Night | 38,0 | 99  | 14,8 | 14,8 | 19,15 | 593,14 | 90,05  |
| 2019/05/23 | CH2205 | Male | Three y/o | Treatment (Wk 2) | Treatment | Feed Day | No | 23:05 | 23:00 - 23:59 | Night | 37,6 | 59  | 21,2 | 21,2 | 18,75 | 553,30 | 102,31 |
| 2019/05/23 | CH2206 | Male | Three y/o | Treatment (Wk 2) | Treatment | Feed Day | No | 23:05 | 23:00 - 23:59 | Night | 38,0 | 46  | 17,6 | 17,6 | 19,15 | 532,38 | 95,95  |
| 2019/05/23 | CH2205 | Male | Three y/o | Treatment (Wk 2) | Treatment | Feed Day | No | 23:10 | 23:00 - 23:59 | Night | 37,7 | 47  | 21,4 | 21,4 | 18,85 | 534,23 | 102,63 |
| 2019/05/23 | CH2206 | Male | Three y/o | Treatment (Wk 2) | Treatment | Feed Day | No | 23:10 | 23:00 - 23:59 | Night | 38,0 | 52  | 19,4 | 19,4 | 19,15 | 542,83 | 99,28  |
| 2019/05/23 | CH2205 | Male | Three y/o | Treatment (Wk 2) | Treatment | Feed Day | No | 23:15 | 23:00 - 23:59 | Night | 37,7 | 92  | 26,4 | 26,4 | 18,85 | 587,78 | 109,81 |
| 2019/05/23 | CH2206 | Male | Three y/o | Treatment (Wk 2) | Treatment | Feed Day | No | 23:15 | 23:00 - 23:59 | Night | 38,0 | 43  | 21,6 | 21,6 | 19,15 | 526,50 | 102,94 |
| 2019/05/23 | CH2205 | Male | Three y/o | Treatment (Wk 2) | Treatment | Feed Day | No | 23:20 | 23:00 - 23:59 | Night | 37,7 | 55  | 24,0 | 24,0 | 18,85 | 547,52 | 106,55 |
| 2019/05/23 | CH2206 | Male | Three y/o | Treatment (Wk 2) | Treatment | Feed Day | No | 23:20 | 23:00 - 23:59 | Night | 38,0 | 53  | 13,6 | 13,6 | 19,15 | 544,43 | 87,18  |
| 2019/05/23 | CH2205 | Male | Three y/o | Treatment (Wk 2) | Treatment | Feed Day | No | 23:25 | 23:00 - 23:59 | Night | 37,7 | 55  | 28,8 | 28,8 | 18,85 | 547,52 | 112,79 |
| 2019/05/23 | CH2206 | Male | Three y/o | Treatment (Wk 2) | Treatment | Feed Day | No | 23:25 | 23:00 - 23:59 | Night | 38,0 |     | 6,2  | 6,2  | 19,15 |        | 60,63  |
| 2019/05/23 | CH2205 | Male | Three y/o | Treatment (Wk 2) | Treatment | Feed Day | No | 23:30 | 23:00 - 23:59 | Night | 37,7 | 85  | 27,0 | 27,0 | 18,85 | 581,90 | 110,58 |
| 2019/05/23 | CH2206 | Male | Three y/o | Treatment (Wk 2) | Treatment | Feed Day | No | 23:30 | 23:00 - 23:59 | Night | 38,0 | 65  | 6,0  | 6,0  | 19,15 | 561,12 | 59,53  |
| 2019/05/23 | CH2205 | Male | Three y/o | Treatment (Wk 2) | Treatment | Feed Day | No | 23:35 | 23:00 - 23:59 | Night | 37,8 | 60  | 26,4 | 26,4 | 18,95 | 554,67 | 109,81 |
| 2019/05/23 | CH2206 | Male | Three y/o | Treatment (Wk 2) | Treatment | Feed Day | No | 23:35 | 23:00 - 23:59 | Night | 38,0 | 73  | 5,2  | 5,2  | 19,15 | 570,27 | 54,72  |
| 2019/05/23 | CH2205 | Male | Three y/o | Treatment (Wk 2) | Treatment | Feed Day | No | 23:40 | 23:00 - 23:59 | Night | 37,8 | 79  | 29,0 | 29,0 | 18,95 | 576,36 | 113,03 |



|    |            |        |      |           |                  |           |          |    |       |               |               |      |     |       |       |       |        |        |
|----|------------|--------|------|-----------|------------------|-----------|----------|----|-------|---------------|---------------|------|-----|-------|-------|-------|--------|--------|
|    | 2019/05/23 | CH2206 | Male | Three y/o | Treatment (Wk 2) | Treatment | Feed Day | No | 23:40 | 23:00 - 23:59 | Night         | 38,0 | 60  | 4,8   | 4,8   | 19,15 | 554,67 | 52,04  |
|    | 2019/05/23 | CH2205 | Male | Three y/o | Treatment (Wk 2) | Treatment | Feed Day | No | 23:45 | 23:00 - 23:59 | Night         | 37,9 | 77  | 28,2  | 28,2  | 19,05 | 574,39 | 112,07 |
|    | 2019/05/23 | CH2206 | Male | Three y/o | Treatment (Wk 2) | Treatment | Feed Day | No | 23:45 | 23:00 - 23:59 | Night         | 38,0 | 69  | 4,4   | 4,4   | 19,15 | 565,86 | 49,12  |
|    | 2019/05/23 | CH2205 | Male | Three y/o | Treatment (Wk 2) | Treatment | Feed Day | No | 23:50 | 23:00 - 23:59 | Night         | 37,8 | 59  | 22,2  | 22,2  | 18,95 | 553,30 | 103,88 |
|    | 2019/05/23 | CH2206 | Male | Three y/o | Treatment (Wk 2) | Treatment | Feed Day | No | 23:50 | 23:00 - 23:59 | Night         | 38,0 | 75  | 1,8   | 1,8   | 19,15 | 572,36 | 19,38  |
|    | 2019/05/23 | CH2205 | Male | Three y/o | Treatment (Wk 2) | Treatment | Feed Day | No | 23:55 | 23:00 - 23:59 | Night         | 37,7 | 96  | 12,0  | 12,0  | 18,85 | 590,91 | 82,93  |
|    | 2019/05/23 | CH2206 | Male | Three y/o | Treatment (Wk 2) | Treatment | Feed Day | No | 23:55 | 23:00 - 23:59 | Night         | 38,0 | 59  | 10,2  | 10,2  | 19,15 | 553,30 | 77,43  |
| 10 | 2019/05/24 | CH2205 | Male | Three y/o | Treatment (Wk 2) | Treatment | Feed Day | No | 00:00 | 00:00 - 00:59 | Early Morning | 37,7 | 85  | 7,2   | 7,2   | 18,85 | 581,90 | 65,66  |
|    | 2019/05/24 | CH2206 | Male | Three y/o | Treatment (Wk 2) | Treatment | Feed Day | No | 00:00 | 00:00 - 00:59 | Early Morning | 37,9 | 74  | 7,6   | 7,6   | 19,05 | 571,33 | 67,49  |
|    | 2019/05/24 | CH2205 | Male | Three y/o | Treatment (Wk 2) | Treatment | Feed Day | No | 00:05 | 00:00 - 00:59 | Early Morning | 37,6 | 94  | 6,0   | 6,0   | 18,75 | 589,37 | 59,53  |
|    | 2019/05/24 | CH2206 | Male | Three y/o | Treatment (Wk 2) | Treatment | Feed Day | No | 00:05 | 00:00 - 00:59 | Early Morning | 37,9 | 51  | 11,2  | 11,2  | 19,05 | 541,20 | 80,59  |
|    | 2019/05/24 | CH2205 | Male | Three y/o | Treatment (Wk 2) | Treatment | Feed Day | No | 00:10 | 00:00 - 00:59 | Early Morning | 37,6 | 82  | 11,2  | 11,2  | 18,75 | 579,19 | 80,59  |
|    | 2019/05/24 | CH2206 | Male | Three y/o | Treatment (Wk 2) | Treatment | Feed Day | No | 00:10 | 00:00 - 00:59 | Early Morning | 37,9 | 56  | 43,4  | 43,4  | 19,05 | 549,01 | 126,90 |
|    | 2019/05/24 | CH2205 | Male | Three y/o | Treatment (Wk 2) | Treatment | Feed Day | No | 00:15 | 00:00 - 00:59 | Early Morning | 37,6 | 53  | 8,0   | 8,0   | 18,75 | 544,43 | 69,22  |
|    | 2019/05/24 | CH2206 | Male | Three y/o | Treatment (Wk 2) | Treatment | Feed Day | No | 00:15 | 00:00 - 00:59 | Early Morning | 37,9 | 82  | 53,8  | 53,8  | 19,05 | 579,19 | 134,32 |
|    | 2019/05/24 | CH2205 | Male | Three y/o | Treatment (Wk 2) | Treatment | Feed Day | No | 00:20 | 00:00 - 00:59 | Early Morning | 37,6 | 49  | 13,0  | 13,0  | 18,75 | 537,80 | 85,65  |
|    | 2019/05/24 | CH2206 | Male | Three y/o | Treatment (Wk 2) | Treatment | Feed Day | No | 00:20 | 00:00 - 00:59 | Early Morning | 37,8 | 54  | 59,6  | 59,6  | 18,95 | 545,99 | 137,86 |
|    | 2019/05/24 | CH2205 | Male | Three y/o | Treatment (Wk 2) | Treatment | Feed Day | No | 00:25 | 00:00 - 00:59 | Early Morning | 37,6 | 37  | 14,2  | 14,2  | 18,75 | 513,06 | 88,65  |
|    | 2019/05/24 | CH2206 | Male | Three y/o | Treatment (Wk 2) | Treatment | Feed Day | No | 00:25 | 00:00 - 00:59 | Early Morning | 37,8 | 56  | 57,0  | 57,0  | 18,95 | 549,01 | 136,32 |
|    | 2019/05/24 | CH2205 | Male | Three y/o | Treatment (Wk 2) | Treatment | Feed Day | No | 00:30 | 00:00 - 00:59 | Early Morning | 37,6 | 90  | 15,8  | 15,8  | 18,75 | 586,16 | 92,28  |
|    | 2019/05/24 | CH2206 | Male | Three y/o | Treatment (Wk 2) | Treatment | Feed Day | No | 00:30 | 00:00 - 00:59 | Early Morning | 37,8 | 47  | 58,2  | 58,2  | 18,95 | 534,23 | 137,04 |
|    | 2019/05/24 | CH2205 | Male | Three y/o | Treatment (Wk 2) | Treatment | Feed Day | No | 00:35 | 00:00 - 00:59 | Early Morning | 37,6 | 107 | 10,8  | 10,8  | 18,75 | 598,73 | 79,36  |
|    | 2019/05/24 | CH2206 | Male | Three y/o | Treatment (Wk 2) | Treatment | Feed Day | No | 00:35 | 00:00 - 00:59 | Early Morning | 37,8 | 101 | 56,0  | 56,0  | 18,95 | 594,59 | 135,70 |
|    | 2019/05/24 | CH2205 | Male | Three y/o | Treatment (Wk 2) | Treatment | Feed Day | No | 00:40 | 00:00 - 00:59 | Early Morning | 37,6 | 88  | 14,4  | 14,4  | 18,75 | 584,49 | 89,12  |
|    | 2019/05/24 | CH2206 | Male | Three y/o | Treatment (Wk 2) | Treatment | Feed Day | No | 00:40 | 00:00 - 00:59 | Early Morning | 37,8 | 64  | 56,8  | 56,8  | 18,95 | 559,88 | 136,20 |
|    | 2019/05/24 | CH2205 | Male | Three y/o | Treatment (Wk 2) | Treatment | Feed Day | No | 00:45 | 00:00 - 00:59 | Early Morning | 37,6 | 52  | 14,8  | 14,8  | 18,75 | 542,83 | 90,05  |
|    | 2019/05/24 | CH2206 | Male | Three y/o | Treatment (Wk 2) | Treatment | Feed Day | No | 00:45 | 00:00 - 00:59 | Early Morning | 37,8 | 84  | 57,4  | 57,4  | 18,95 | 581,01 | 136,56 |
|    | 2019/05/24 | CH2205 | Male | Three y/o | Treatment (Wk 2) | Treatment | Feed Day | No | 00:50 | 00:00 - 00:59 | Early Morning | 37,6 | 79  | 11,6  | 11,6  | 18,75 | 576,36 | 81,78  |
|    | 2019/05/24 | CH2206 | Male | Three y/o | Treatment (Wk 2) | Treatment | Feed Day | No | 00:50 | 00:00 - 00:59 | Early Morning | 37,8 | 76  | 56,8  | 56,8  | 18,95 | 573,39 | 136,20 |
|    | 2019/05/24 | CH2205 | Male | Three y/o | Treatment (Wk 2) | Treatment | Feed Day | No | 00:55 | 00:00 - 00:59 | Early Morning | 37,6 | 78  | 12,6  | 12,6  | 18,75 | 575,38 | 84,59  |
|    | 2019/05/24 | CH2206 | Male | Three y/o | Treatment (Wk 2) | Treatment | Feed Day | No | 00:55 | 00:00 - 00:59 | Early Morning | 37,8 | 79  | 50,4  | 50,4  | 18,95 | 576,36 | 132,06 |
|    | 2019/05/24 | CH2205 | Male | Three y/o | Treatment (Wk 2) | Treatment | Feed Day | No | 01:00 | 01:00 - 01:59 | Early Morning | 37,6 | 49  | 10,6  | 10,6  | 18,75 | 537,80 | 78,73  |
|    | 2019/05/24 | CH2206 | Male | Three y/o | Treatment (Wk 2) | Treatment | Feed Day | No | 01:00 | 01:00 - 01:59 | Early Morning | 37,7 | 63  | 51,6  | 51,6  | 18,85 | 558,62 | 132,87 |
|    | 2019/05/24 | CH2205 | Male | Three y/o | Treatment (Wk 2) | Treatment | Feed Day | No | 01:05 | 01:00 - 01:59 | Early Morning | 37,6 | 43  | 11,6  | 11,6  | 18,75 | 526,50 | 81,78  |
|    | 2019/05/24 | CH2206 | Male | Three y/o | Treatment (Wk 2) | Treatment | Feed Day | No | 01:05 | 01:00 - 01:59 | Early Morning | 37,7 | 86  | 55,2  | 55,2  | 18,85 | 582,77 | 135,21 |
|    | 2019/05/24 | CH2205 | Male | Three y/o | Treatment (Wk 2) | Treatment | Feed Day | No | 01:10 | 01:00 - 01:59 | Early Morning | 37,6 | 88  | 10,2  | 10,2  | 18,75 | 584,49 | 77,43  |
|    | 2019/05/24 | CH2206 | Male | Three y/o | Treatment (Wk 2) | Treatment | Feed Day | No | 01:10 | 01:00 - 01:59 | Early Morning | 37,7 | 85  | 54,0  | 54,0  | 18,85 | 581,90 | 134,45 |
|    | 2019/05/24 | CH2205 | Male | Three y/o | Treatment (Wk 2) | Treatment | Feed Day | No | 01:15 | 01:00 - 01:59 | Early Morning | 37,6 | 91  | 11,0  | 11,0  | 18,75 | 586,98 | 79,98  |
|    | 2019/05/24 | CH2206 | Male | Three y/o | Treatment (Wk 2) | Treatment | Feed Day | No | 01:15 | 01:00 - 01:59 | Early Morning | 37,7 | 43  | 51,8  | 51,8  | 18,85 | 526,50 | 133,01 |
|    | 2019/05/24 | CH2205 | Male | Three y/o | Treatment (Wk 2) | Treatment | Feed Day | No | 01:20 | 01:00 - 01:59 | Early Morning | 37,6 | 74  | 19,4  | 19,4  | 18,75 | 571,33 | 99,28  |
|    | 2019/05/24 | CH2206 | Male | Three y/o | Treatment (Wk 2) | Treatment | Feed Day | No | 01:20 | 01:00 - 01:59 | Early Morning | 37,7 | 87  | 32,2  | 32,2  | 18,85 | 583,64 | 116,63 |
|    | 2019/05/24 | CH2205 | Male | Three y/o | Treatment (Wk 2) | Treatment | Feed Day | No | 01:25 | 01:00 - 01:59 | Early Morning | 37,6 | 120 | 4,8   | 4,8   | 18,75 | 606,78 | 52,04  |
|    | 2019/05/24 | CH2206 | Male | Three y/o | Treatment (Wk 2) | Treatment | Feed Day | No | 01:25 | 01:00 - 01:59 | Early Morning | 37,7 | 93  | 11,0  | 11,0  | 18,85 | 588,58 | 79,98  |
|    | 2019/05/24 | CH2205 | Male | Three y/o | Treatment (Wk 2) | Treatment | Feed Day | No | 01:30 | 01:00 - 01:59 | Early Morning | 37,5 | 70  | 3,2   | 3,2   | 18,65 | 566,99 | 38,49  |
|    | 2019/05/24 | CH2206 | Male | Three y/o | Treatment (Wk 2) | Treatment | Feed Day | No | 01:30 | 01:00 - 01:59 | Early Morning | 37,5 | 84  | 6,6   | 6,6   | 18,65 | 581,01 | 62,73  |
|    | 2019/05/24 | CH2205 | Male | Three y/o | Treatment (Wk 2) | Treatment | Feed Day | No | 01:35 | 01:00 - 01:59 | Early Morning | 37,5 |     | 3,0   | 3,0   | 18,65 |        | 36,34  |
|    | 2019/05/24 | CH2206 | Male | Three y/o | Treatment (Wk 2) | Treatment | Feed Day | No | 01:35 | 01:00 - 01:59 | Early Morning | 37,4 | 82  | 10,0  | 10,0  | 18,55 | 579,19 | 76,76  |
|    | 2019/05/24 | CH2205 | Male | Three y/o | Treatment (Wk 2) | Treatment | Feed Day | No | 01:40 | 01:00 - 01:59 | Early Morning | 37,5 |     | 3,0   | 3,0   | 18,65 |        | 36,34  |
|    | 2019/05/24 | CH2206 | Male | Three y/o | Treatment (Wk 2) | Treatment | Feed Day | No | 01:40 | 01:00 - 01:59 | Early Morning | 37,3 | 53  | 5,6   | 5,6   | 18,46 | 544,43 | 57,21  |
|    | 2019/05/24 | CH2205 | Male | Three y/o | Treatment (Wk 2) | Treatment | Feed Day | No | 01:45 | 01:00 - 01:59 | Early Morning | 37,5 |     | 15,6  | 15,6  | 18,65 |        | 91,85  |
|    | 2019/05/24 | CH2206 | Male | Three y/o | Treatment (Wk 2) | Treatment | Feed Day | No | 01:45 | 01:00 - 01:59 | Early Morning | 37,3 | 44  | 74,0  | 74,0  | 18,46 | 528,51 | 145,37 |
|    | 2019/05/24 | CH2205 | Male | Three y/o | Treatment (Wk 2) | Treatment | Feed Day | No | 01:50 | 01:00 - 01:59 | Early Morning | 37,5 | 88  | 35,4  | 35,4  | 18,65 | 584,49 | 119,88 |
|    | 2019/05/24 | CH2206 | Male | Three y/o | Treatment (Wk 2) | Treatment | Feed Day | No | 01:50 | 01:00 - 01:59 | Early Morning | 37,4 | 134 | 111,2 | 111,2 | 18,55 | 614,33 | 159,55 |
|    | 2019/05/24 | CH2205 | Male | Three y/o | Treatment (Wk 2) | Treatment | Feed Day | No | 01:55 | 01:00 - 01:59 | Early Morning | 37,5 | 56  | 28,6  | 28,6  | 18,65 | 549,01 | 112,56 |
|    | 2019/05/24 | CH2206 | Male | Three y/o | Treatment (Wk 2) | Treatment | Feed Day | No | 01:55 | 01:00 - 01:59 | Early Morning | 37,4 | 46  | 226,0 | 226,0 | 18,55 | 532,38 | 184,42 |
|    | 2019/05/24 | CH2205 | Male | Three y/o | Treatment (Wk 2) | Treatment | Feed Day | No | 02:00 | 02:00 - 02:59 | Early Morning | 37,4 | 54  | 26,8  | 26,8  | 18,55 | 545,99 | 110,33 |
|    | 2019/05/24 | CH2206 | Male | Three y/o | Treatment (Wk 2) | Treatment | Feed Day | No | 02:00 | 02:00 - 02:59 | Early Morning | 37,4 | 134 | 49,8  | 49,8  | 18,55 | 614,33 | 131,65 |
|    | 2019/05/24 | CH2205 | Male | Three y/o | Treatment (Wk 2) | Treatment | Feed Day | No | 02:05 | 02:00 - 02:59 | Early Morning | 37,4 | 86  | 23,8  | 23,8  | 18,55 | 582,77 | 106,26 |
|    | 2019/05/24 | CH2206 | Male | Three y/o | Treatment (Wk 2) | Treatment | Feed Day | No | 02:05 | 02:00 - 02:59 | Early Morning | 37,4 | 107 | 62,2  | 62,2  | 18,55 | 598,73 | 139,34 |
|    | 2019/05/24 | CH2205 | Male | Three y/o | Treatment (Wk 2) | Treatment | Feed Day | No | 02:10 | 02:00 - 02:59 | Early Morning | 37,5 | 54  | 26,2  | 26,2  | 18,65 | 545,99 | 109,55 |
|    | 2019/05/24 | CH2206 | Male | Three y/o | Treatment (Wk 2) | Treatment | Feed Day | No | 02:10 | 02:00 - 02:59 | Early Morning | 37,1 | 44  | 65,0  | 65,0  | 18,26 | 528,51 | 140,87 |
|    | 2019/05/24 | CH2205 | Male | Three y/o | Treatment (Wk 2) | Treatment | Feed Day | No | 02:15 | 02:00 - 02:59 | Early Morning | 37,5 | 73  | 21,4  | 21,4  | 18,65 | 570,27 | 102,63 |
|    | 2019/05/24 | CH2206 | Male | Three y/o | Treatment (Wk 2) | Treatment | Feed Day | No | 02:15 | 02:00 - 02:59 | Early Morning | 36,9 | 84  | 60,2  | 60,2  | 18,06 | 581,01 | 138,21 |
|    | 2019/05/24 | CH2205 | Male | Three y/o | Treatment (Wk 2) | Treatment | Feed Day | No | 02:20 | 02:00 - 02:59 | Early Morning | 37,5 | 58  | 24,0  | 24,0  | 18,65 | 551,90 | 106,55 |
|    | 2019/05/24 | CH2206 | Male | Three y/o | Treatment (Wk 2) | Treatment | Feed Day | No | 02:20 | 02:00 - 02:59 | Early Morning | 36,9 | 56  | 47,8  | 47,8  | 18,06 | 549,01 | 130,23 |
|    | 2019/05/24 | CH2205 | Male | Three y/o | Treatment (Wk 2) | Treatment | Feed Day | No | 02:25 | 02:00 - 02:59 | Early Morning | 37,5 | 55  | 19,6  | 19,6  | 18,65 | 547,52 | 99,63  |
|    | 2019/05/24 | CH2206 | Male | Three y/o | Treatment (Wk 2) | Treatment | Feed Day | No | 02:25 | 02:00 - 02:59 | Early Morning | 36,9 | 48  | 33,4  | 33,4  | 18,06 | 536,04 | 117,88 |
|    | 2019/05/24 | CH2205 | Male | Three y/o | Treatment (Wk 2) | Treatment | Feed Day | No | 02:30 | 02:00 - 02:59 | Early Morning | 37,5 | 42  | 25,2  | 25,2  | 18,65 | 524,42 | 108,22 |
|    | 2019/05/24 | CH2206 | Male | Three y/o | Treatment (Wk 2) | Treatment | Feed Day | No | 02:30 | 02:00 - 02:59 | Early Morning | 37,0 | 83  | 34,6  | 34,6  | 18,16 | 580,11 | 119,10 |
|    | 2019/05/24 | CH2205 | Male | Three y/o | Treatment (Wk 2) | Treatment | Feed Day | No | 02:35 | 02:00 - 02:59 | Early Morning | 37,5 | 55  | 22,4  | 22,4  | 18,65 | 547,52 | 104,19 |



|            |        |      |           |                  |           |          |    |       |               |               |      |     |       |       |       |        |        |
|------------|--------|------|-----------|------------------|-----------|----------|----|-------|---------------|---------------|------|-----|-------|-------|-------|--------|--------|
| 2019/05/24 | CH2206 | Male | Three y/o | Treatment (Wk 2) | Treatment | Feed Day | No | 02:35 | 02:00 - 02:59 | Early Morning | 37,1 | 45  | 29,4  | 29,4  | 18,26 | 530,47 | 113,50 |
| 2019/05/24 | CH2205 | Male | Three y/o | Treatment (Wk 2) | Treatment | Feed Day | No | 02:40 | 02:00 - 02:59 | Early Morning | 37,5 | 54  | 26,8  | 26,8  | 18,65 | 545,99 | 110,33 |
| 2019/05/24 | CH2206 | Male | Three y/o | Treatment (Wk 2) | Treatment | Feed Day | No | 02:40 | 02:00 - 02:59 | Early Morning | 37,2 | 79  | 26,8  | 26,8  | 18,36 | 576,36 | 110,33 |
| 2019/05/24 | CH2205 | Male | Three y/o | Treatment (Wk 2) | Treatment | Feed Day | No | 02:45 | 02:00 - 02:59 | Early Morning | 37,5 | 52  | 15,0  | 15,0  | 18,65 | 542,83 | 90,51  |
| 2019/05/24 | CH2206 | Male | Three y/o | Treatment (Wk 2) | Treatment | Feed Day | No | 02:45 | 02:00 - 02:59 | Early Morning | 37,3 | 78  | 9,0   | 9,0   | 18,46 | 575,38 | 73,19  |
| 2019/05/24 | CH2205 | Male | Three y/o | Treatment (Wk 2) | Treatment | Feed Day | No | 02:50 | 02:00 - 02:59 | Early Morning | 37,5 | 59  | 17,8  | 17,8  | 18,65 | 553,30 | 96,34  |
| 2019/05/24 | CH2206 | Male | Three y/o | Treatment (Wk 2) | Treatment | Feed Day | No | 02:50 | 02:00 - 02:59 | Early Morning | 37,3 | 83  | 2,0   | 2,0   | 18,46 | 580,11 | 22,86  |
| 2019/05/24 | CH2205 | Male | Three y/o | Treatment (Wk 2) | Treatment | Feed Day | No | 02:55 | 02:00 - 02:59 | Early Morning | 37,5 | 83  | 18,2  | 18,2  | 18,65 | 580,11 | 97,10  |
| 2019/05/24 | CH2206 | Male | Three y/o | Treatment (Wk 2) | Treatment | Feed Day | No | 02:55 | 02:00 - 02:59 | Early Morning | 37,3 | 59  | 3,4   | 3,4   | 18,46 | 553,30 | 40,51  |
| 2019/05/24 | CH2205 | Male | Three y/o | Treatment (Wk 2) | Treatment | Feed Day | No | 03:00 | 03:00 - 03:59 | Early Morning | 37,5 | 60  | 13,8  | 13,8  | 18,65 | 554,67 | 87,68  |
| 2019/05/24 | CH2206 | Male | Three y/o | Treatment (Wk 2) | Treatment | Feed Day | No | 03:00 | 03:00 - 03:59 | Early Morning | 37,3 | 42  | 4,2   | 4,2   | 18,46 | 524,42 | 47,57  |
| 2019/05/24 | CH2205 | Male | Three y/o | Treatment (Wk 2) | Treatment | Feed Day | No | 03:05 | 03:00 - 03:59 | Early Morning | 37,5 | 98  | 15,4  | 15,4  | 18,65 | 592,41 | 91,41  |
| 2019/05/24 | CH2206 | Male | Three y/o | Treatment (Wk 2) | Treatment | Feed Day | No | 03:05 | 03:00 - 03:59 | Early Morning | 37,3 | 100 | 6,0   | 6,0   | 18,46 | 593,87 | 59,53  |
| 2019/05/24 | CH2205 | Male | Three y/o | Treatment (Wk 2) | Treatment | Feed Day | No | 03:10 | 03:00 - 03:59 | Early Morning | 37,5 | 84  | 11,2  | 11,2  | 18,65 | 581,01 | 80,59  |
| 2019/05/24 | CH2206 | Male | Three y/o | Treatment (Wk 2) | Treatment | Feed Day | No | 03:10 | 03:00 - 03:59 | Early Morning | 37,3 | 66  | 4,2   | 4,2   | 18,46 | 562,34 | 47,57  |
| 2019/05/24 | CH2205 | Male | Three y/o | Treatment (Wk 2) | Treatment | Feed Day | No | 03:15 | 03:00 - 03:59 | Early Morning | 37,5 | 49  | 9,4   | 9,4   | 18,65 | 537,80 | 74,66  |
| 2019/05/24 | CH2206 | Male | Three y/o | Treatment (Wk 2) | Treatment | Feed Day | No | 03:15 | 03:00 - 03:59 | Early Morning | 37,3 | 48  | 30,4  | 30,4  | 18,46 | 536,04 | 114,65 |
| 2019/05/24 | CH2205 | Male | Three y/o | Treatment (Wk 2) | Treatment | Feed Day | No | 03:20 | 03:00 - 03:59 | Early Morning | 37,6 | 86  | 6,6   | 6,6   | 18,75 | 582,77 | 62,73  |
| 2019/05/24 | CH2206 | Male | Three y/o | Treatment (Wk 2) | Treatment | Feed Day | No | 03:20 | 03:00 - 03:59 | Early Morning | 37,3 | 92  | 66,8  | 66,8  | 18,46 | 587,78 | 141,81 |
| 2019/05/24 | CH2205 | Male | Three y/o | Treatment (Wk 2) | Treatment | Feed Day | No | 03:25 | 03:00 - 03:59 | Early Morning | 37,5 | 84  | 9,4   | 9,4   | 18,65 | 581,01 | 74,66  |
| 2019/05/24 | CH2206 | Male | Three y/o | Treatment (Wk 2) | Treatment | Feed Day | No | 03:25 | 03:00 - 03:59 | Early Morning | 37,3 | 71  | 60,8  | 60,8  | 18,46 | 568,10 | 138,55 |
| 2019/05/24 | CH2205 | Male | Three y/o | Treatment (Wk 2) | Treatment | Feed Day | No | 03:30 | 03:00 - 03:59 | Early Morning | 37,5 | 83  | 10,0  | 10,0  | 18,65 | 580,11 | 76,76  |
| 2019/05/24 | CH2206 | Male | Three y/o | Treatment (Wk 2) | Treatment | Feed Day | No | 03:30 | 03:00 - 03:59 | Early Morning | 37,3 | 86  | 66,4  | 66,4  | 18,46 | 582,77 | 141,61 |
| 2019/05/24 | CH2205 | Male | Three y/o | Treatment (Wk 2) | Treatment | Feed Day | No | 03:35 | 03:00 - 03:59 | Early Morning | 37,5 | 83  | 8,4   | 8,4   | 18,65 | 580,11 | 70,86  |
| 2019/05/24 | CH2206 | Male | Three y/o | Treatment (Wk 2) | Treatment | Feed Day | No | 03:35 | 03:00 - 03:59 | Early Morning | 37,3 | 65  | 61,0  | 61,0  | 18,46 | 561,12 | 138,67 |
| 2019/05/24 | CH2205 | Male | Three y/o | Treatment (Wk 2) | Treatment | Feed Day | No | 03:40 | 03:00 - 03:59 | Early Morning | 37,5 | 40  | 10,4  | 10,4  | 18,65 | 520,09 | 78,08  |
| 2019/05/24 | CH2206 | Male | Three y/o | Treatment (Wk 2) | Treatment | Feed Day | No | 03:40 | 03:00 - 03:59 | Early Morning | 37,4 | 44  | 62,6  | 62,6  | 18,55 | 528,51 | 139,56 |
| 2019/05/24 | CH2205 | Male | Three y/o | Treatment (Wk 2) | Treatment | Feed Day | No | 03:45 | 03:00 - 03:59 | Early Morning | 37,5 | 53  | 7,4   | 7,4   | 18,65 | 544,43 | 66,59  |
| 2019/05/24 | CH2206 | Male | Three y/o | Treatment (Wk 2) | Treatment | Feed Day | No | 03:45 | 03:00 - 03:59 | Early Morning | 37,4 | 86  | 63,6  | 63,6  | 18,55 | 582,77 | 140,11 |
| 2019/05/24 | CH2205 | Male | Three y/o | Treatment (Wk 2) | Treatment | Feed Day | No | 03:50 | 03:00 - 03:59 | Early Morning | 37,5 | 90  | 6,6   | 6,6   | 18,65 | 586,16 | 62,73  |
| 2019/05/24 | CH2206 | Male | Three y/o | Treatment (Wk 2) | Treatment | Feed Day | No | 03:50 | 03:00 - 03:59 | Early Morning | 37,4 | 52  | 64,6  | 64,6  | 18,55 | 542,83 | 140,65 |
| 2019/05/24 | CH2205 | Male | Three y/o | Treatment (Wk 2) | Treatment | Feed Day | No | 03:55 | 03:00 - 03:59 | Early Morning | 37,5 | 97  | 7,6   | 7,6   | 18,65 | 591,66 | 67,49  |
| 2019/05/24 | CH2206 | Male | Three y/o | Treatment (Wk 2) | Treatment | Feed Day | No | 03:55 | 03:00 - 03:59 | Early Morning | 37,4 | 81  | 62,8  | 62,8  | 18,55 | 578,26 | 139,67 |
| 2019/05/24 | CH2205 | Male | Three y/o | Treatment (Wk 2) | Treatment | Feed Day | No | 04:00 | 04:00 - 04:59 | Morning       | 37,6 | 52  | 9,6   | 9,6   | 18,75 | 542,83 | 75,37  |
| 2019/05/24 | CH2206 | Male | Three y/o | Treatment (Wk 2) | Treatment | Feed Day | No | 04:00 | 04:00 - 04:59 | Morning       | 37,4 | 56  | 65,8  | 65,8  | 18,55 | 549,01 | 141,29 |
| 2019/05/24 | CH2205 | Male | Three y/o | Treatment (Wk 2) | Treatment | Feed Day | No | 04:05 | 04:00 - 04:59 | Morning       | 37,6 | 58  | 14,0  | 14,0  | 18,75 | 551,90 | 88,17  |
| 2019/05/24 | CH2206 | Male | Three y/o | Treatment (Wk 2) | Treatment | Feed Day | No | 04:05 | 04:00 - 04:59 | Morning       | 37,4 | 92  | 63,4  | 63,4  | 18,55 | 587,78 | 140,00 |
| 2019/05/24 | CH2205 | Male | Three y/o | Treatment (Wk 2) | Treatment | Feed Day | No | 04:10 | 04:00 - 04:59 | Morning       | 37,6 | 86  | 15,4  | 15,4  | 18,75 | 582,77 | 91,41  |
| 2019/05/24 | CH2206 | Male | Three y/o | Treatment (Wk 2) | Treatment | Feed Day | No | 04:10 | 04:00 - 04:59 | Morning       | 37,5 | 82  | 60,8  | 60,8  | 18,65 | 579,19 | 138,55 |
| 2019/05/24 | CH2205 | Male | Three y/o | Treatment (Wk 2) | Treatment | Feed Day | No | 04:15 | 04:00 - 04:59 | Morning       | 37,6 | 57  | 13,4  | 13,4  | 18,75 | 550,47 | 86,68  |
| 2019/05/24 | CH2206 | Male | Three y/o | Treatment (Wk 2) | Treatment | Feed Day | No | 04:15 | 04:00 - 04:59 | Morning       | 37,5 | 52  | 61,2  | 61,2  | 18,65 | 542,83 | 138,78 |
| 2019/05/24 | CH2205 | Male | Three y/o | Treatment (Wk 2) | Treatment | Feed Day | No | 04:20 | 04:00 - 04:59 | Morning       | 37,7 | 63  | 8,6   | 8,6   | 18,85 | 558,62 | 71,66  |
| 2019/05/24 | CH2206 | Male | Three y/o | Treatment (Wk 2) | Treatment | Feed Day | No | 04:20 | 04:00 - 04:59 | Morning       | 37,7 | 44  | 62,6  | 62,6  | 18,85 | 528,51 | 139,56 |
| 2019/05/24 | CH2205 | Male | Three y/o | Treatment (Wk 2) | Treatment | Feed Day | No | 04:25 | 04:00 - 04:59 | Morning       | 37,7 | 52  | 10,8  | 10,8  | 18,85 | 542,83 | 79,36  |
| 2019/05/24 | CH2206 | Male | Three y/o | Treatment (Wk 2) | Treatment | Feed Day | No | 04:25 | 04:00 - 04:59 | Morning       | 37,7 | 76  | 65,0  | 65,0  | 18,85 | 573,39 | 140,87 |
| 2019/05/24 | CH2205 | Male | Three y/o | Treatment (Wk 2) | Treatment | Feed Day | No | 04:30 | 04:00 - 04:59 | Morning       | 37,7 | 48  | 8,0   | 8,0   | 18,85 | 536,04 | 69,22  |
| 2019/05/24 | CH2206 | Male | Three y/o | Treatment (Wk 2) | Treatment | Feed Day | No | 04:30 | 04:00 - 04:59 | Morning       | 37,7 | 52  | 63,8  | 63,8  | 18,85 | 542,83 | 140,22 |
| 2019/05/24 | CH2205 | Male | Three y/o | Treatment (Wk 2) | Treatment | Feed Day | No | 04:35 | 04:00 - 04:59 | Morning       | 37,7 | 50  | 29,6  | 29,6  | 18,85 | 539,52 | 113,73 |
| 2019/05/24 | CH2206 | Male | Three y/o | Treatment (Wk 2) | Treatment | Feed Day | No | 04:35 | 04:00 - 04:59 | Morning       | 37,5 | 86  | 29,4  | 29,4  | 18,65 | 582,77 | 113,50 |
| 2019/05/24 | CH2205 | Male | Three y/o | Treatment (Wk 2) | Treatment | Feed Day | No | 04:40 | 04:00 - 04:59 | Morning       | 37,7 | 156 | 160,6 | 160,6 | 18,85 | 624,43 | 172,41 |
| 2019/05/24 | CH2206 | Male | Three y/o | Treatment (Wk 2) | Treatment | Feed Day | No | 04:40 | 04:00 - 04:59 | Morning       | 37,5 | 46  | 6,2   | 6,2   | 18,65 | 532,38 | 60,63  |
| 2019/05/24 | CH2205 | Male | Three y/o | Treatment (Wk 2) | Treatment | Feed Day | No | 04:45 | 04:00 - 04:59 | Morning       | 37,6 | 67  | 141,6 | 141,6 | 18,75 | 563,53 | 168,00 |
| 2019/05/24 | CH2206 | Male | Three y/o | Treatment (Wk 2) | Treatment | Feed Day | No | 04:45 | 04:00 - 04:59 | Morning       | 37,4 | 68  | 23,4  | 23,4  | 18,55 | 564,71 | 105,68 |
| 2019/05/24 | CH2205 | Male | Three y/o | Treatment (Wk 2) | Treatment | Feed Day | No | 04:50 | 04:00 - 04:59 | Morning       | 37,5 | 132 | 148,4 | 148,4 | 18,65 | 613,32 | 169,64 |
| 2019/05/24 | CH2206 | Male | Three y/o | Treatment (Wk 2) | Treatment | Feed Day | No | 04:50 | 04:00 - 04:59 | Morning       | 37,4 | 76  | 110,8 | 110,8 | 18,55 | 573,39 | 159,42 |
| 2019/05/24 | CH2205 | Male | Three y/o | Treatment (Wk 2) | Treatment | Feed Day | No | 04:55 | 04:00 - 04:59 | Morning       | 37,5 |     | 37,0  | 37,0  | 18,65 |        | 121,40 |
| 2019/05/24 | CH2206 | Male | Three y/o | Treatment (Wk 2) | Treatment | Feed Day | No | 04:55 | 04:00 - 04:59 | Morning       | 37,4 | 110 | 30,2  | 30,2  | 18,55 | 600,69 | 114,42 |
| 2019/05/24 | CH2205 | Male | Three y/o | Treatment (Wk 2) | Treatment | Feed Day | No | 05:00 | 05:00 - 05:59 | Morning       | 37,5 |     | 124,0 | 124,0 | 18,65 |        | 163,35 |
| 2019/05/24 | CH2206 | Male | Three y/o | Treatment (Wk 2) | Treatment | Feed Day | No | 05:00 | 05:00 - 05:59 | Morning       | 37,5 | 108 | 308,0 | 308,0 | 18,65 | 599,39 | 195,35 |
| 2019/05/24 | CH2205 | Male | Three y/o | Treatment (Wk 2) | Treatment | Feed Day | No | 05:05 | 05:00 - 05:59 | Morning       | 37,6 | 141 | 88,2  | 88,2  | 18,75 | 617,75 | 151,47 |
| 2019/05/24 | CH2206 | Male | Three y/o | Treatment (Wk 2) | Treatment | Feed Day | No | 05:05 | 05:00 - 05:59 | Morning       | 37,5 | 125 | 87,8  | 87,8  | 18,65 | 609,60 | 151,31 |
| 2019/05/24 | CH2205 | Male | Three y/o | Treatment (Wk 2) | Treatment | Feed Day | No | 05:10 | 05:00 - 05:59 | Morning       | 37,5 | 81  | 31,8  | 31,8  | 18,65 | 578,26 | 116,20 |
| 2019/05/24 | CH2206 | Male | Three y/o | Treatment (Wk 2) | Treatment | Feed Day | No | 05:10 | 05:00 - 05:59 | Morning       | 37,4 | 141 | 182,8 | 182,8 | 18,55 | 617,75 | 176,96 |
| 2019/05/24 | CH2205 | Male | Three y/o | Treatment (Wk 2) | Treatment | Feed Day | No | 05:15 | 05:00 - 05:59 | Morning       | 37,4 | 99  | 102,2 | 102,2 | 18,55 | 593,14 | 156,60 |
| 2019/05/24 | CH2206 | Male | Three y/o | Treatment (Wk 2) | Treatment | Feed Day | No | 05:15 | 05:00 - 05:59 | Morning       | 37,4 | 134 | 83,2  | 83,2  | 18,55 | 614,33 | 149,44 |
| 2019/05/24 | CH2205 | Male | Three y/o | Treatment (Wk 2) | Treatment | Feed Day | No | 05:20 | 05:00 - 05:59 | Morning       | 37,5 | 96  | 34,8  | 34,8  | 18,65 | 590,91 | 119,29 |
| 2019/05/24 | CH2206 | Male | Three y/o | Treatment (Wk 2) | Treatment | Feed Day | No | 05:20 | 05:00 - 05:59 | Morning       | 37,4 |     | 91,4  | 91,4  | 18,55 |        | 152,71 |
| 2019/05/24 | CH2205 | Male | Three y/o | Treatment (Wk 2) | Treatment | Feed Day | No | 05:25 | 05:00 - 05:59 | Morning       | 37,5 | 108 | 34,4  | 34,4  | 18,65 | 599,39 | 118,90 |
| 2019/05/24 | CH2206 | Male | Three y/o | Treatment (Wk 2) | Treatment | Feed Day | No | 05:25 | 05:00 - 05:59 | Morning       | 37,4 | 119 | 45,2  | 45,2  | 18,55 | 606,20 | 128,30 |
| 2019/05/24 | CH2205 | Male | Three y/o | Treatment (Wk 2) | Treatment | Feed Day | No | 05:30 | 05:00 - 05:59 | Morning       | 37,2 | 55  | 28,8  | 28,8  | 18,36 | 547,52 | 112,79 |



|            |        |      |           |                  |           |          |    |       |               |              |      |     |       |       |       |        |        |
|------------|--------|------|-----------|------------------|-----------|----------|----|-------|---------------|--------------|------|-----|-------|-------|-------|--------|--------|
| 2019/05/24 | CH2206 | Male | Three y/o | Treatment (Wk 2) | Treatment | Feed Day | No | 05:30 | 05:00 - 05:59 | Morning      | 37,3 | 98  | 52,4  | 52,4  | 18,46 | 592,41 | 133,41 |
| 2019/05/24 | CH2205 | Male | Three y/o | Treatment (Wk 2) | Treatment | Feed Day | No | 05:35 | 05:00 - 05:59 | Morning      | 36,8 | 41  | 30,2  | 30,2  | 17,96 | 522,29 | 114,42 |
| 2019/05/24 | CH2206 | Male | Three y/o | Treatment (Wk 2) | Treatment | Feed Day | No | 05:35 | 05:00 - 05:59 | Morning      | 36,9 | 67  | 53,2  | 53,2  | 18,06 | 563,53 | 133,93 |
| 2019/05/24 | CH2205 | Male | Three y/o | Treatment (Wk 2) | Treatment | Feed Day | No | 05:40 | 05:00 - 05:59 | Morning      | 36,8 |     | 24,8  | 24,8  | 17,96 |        | 107,67 |
| 2019/05/24 | CH2206 | Male | Three y/o | Treatment (Wk 2) | Treatment | Feed Day | No | 05:40 | 05:00 - 05:59 | Morning      | 36,7 | 90  | 60,6  | 60,6  | 17,87 | 586,16 | 138,44 |
| 2019/05/24 | CH2205 | Male | Three y/o | Treatment (Wk 2) | Treatment | Feed Day | No | 05:45 | 05:00 - 05:59 | Morning      | 36,8 | 86  | 24,6  | 24,6  | 17,96 | 582,77 | 107,39 |
| 2019/05/24 | CH2206 | Male | Three y/o | Treatment (Wk 2) | Treatment | Feed Day | No | 05:45 | 05:00 - 05:59 | Morning      | 36,6 | 44  | 59,8  | 59,8  | 17,77 | 528,51 | 137,98 |
| 2019/05/24 | CH2205 | Male | Three y/o | Treatment (Wk 2) | Treatment | Feed Day | No | 05:50 | 05:00 - 05:59 | Morning      | 37,0 | 54  | 13,6  | 13,6  | 18,16 | 545,99 | 87,18  |
| 2019/05/24 | CH2206 | Male | Three y/o | Treatment (Wk 2) | Treatment | Feed Day | No | 05:50 | 05:00 - 05:59 | Morning      | 36,8 | 49  | 57,8  | 57,8  | 17,96 | 537,80 | 136,80 |
| 2019/05/24 | CH2205 | Male | Three y/o | Treatment (Wk 2) | Treatment | Feed Day | No | 05:55 | 05:00 - 05:59 | Morning      | 37,0 | 53  | 17,2  | 17,2  | 18,16 | 544,43 | 95,17  |
| 2019/05/24 | CH2206 | Male | Three y/o | Treatment (Wk 2) | Treatment | Feed Day | No | 05:55 | 05:00 - 05:59 | Morning      | 37,0 | 84  | 54,8  | 54,8  | 18,16 | 581,01 | 134,96 |
| 2019/05/24 | CH2205 | Male | Three y/o | Treatment (Wk 2) | Treatment | Feed Day | No | 06:00 | 06:00 - 06:59 | Morning      | 37,1 | 57  | 16,6  | 16,6  | 18,26 | 550,47 | 93,96  |
| 2019/05/24 | CH2206 | Male | Three y/o | Treatment (Wk 2) | Treatment | Feed Day | No | 06:00 | 06:00 - 06:59 | Morning      | 37,3 | 54  | 54,4  | 54,4  | 18,46 | 545,99 | 134,70 |
| 2019/05/24 | CH2205 | Male | Three y/o | Treatment (Wk 2) | Treatment | Feed Day | No | 06:05 | 06:00 - 06:59 | Morning      | 37,2 | 61  | 4,2   | 4,2   | 18,36 | 556,01 | 47,57  |
| 2019/05/24 | CH2206 | Male | Three y/o | Treatment (Wk 2) | Treatment | Feed Day | No | 06:05 | 06:00 - 06:59 | Morning      | 37,4 | 69  | 54,8  | 54,8  | 18,55 | 565,86 | 134,96 |
| 2019/05/24 | CH2205 | Male | Three y/o | Treatment (Wk 2) | Treatment | Feed Day | No | 06:10 | 06:00 - 06:59 | Morning      | 37,3 | 50  | 4,8   | 4,8   | 18,46 | 539,52 | 52,04  |
| 2019/05/24 | CH2206 | Male | Three y/o | Treatment (Wk 2) | Treatment | Feed Day | No | 06:10 | 06:00 - 06:59 | Morning      | 37,3 | 59  | 65,2  | 65,2  | 18,46 | 553,30 | 140,97 |
| 2019/05/24 | CH2205 | Male | Three y/o | Treatment (Wk 2) | Treatment | Feed Day | No | 06:15 | 06:00 - 06:59 | Morning      | 37,3 | 80  | 5,4   | 5,4   | 18,46 | 577,31 | 55,99  |
| 2019/05/24 | CH2206 | Male | Three y/o | Treatment (Wk 2) | Treatment | Feed Day | No | 06:15 | 06:00 - 06:59 | Morning      | 37,3 | 83  | 52,4  | 52,4  | 18,46 | 580,11 | 133,41 |
| 2019/05/24 | CH2205 | Male | Three y/o | Treatment (Wk 2) | Treatment | Feed Day | No | 06:20 | 06:00 - 06:59 | Morning      | 37,3 | 60  | 23,8  | 23,8  | 18,46 | 554,67 | 106,26 |
| 2019/05/24 | CH2206 | Male | Three y/o | Treatment (Wk 2) | Treatment | Feed Day | No | 06:20 | 06:00 - 06:59 | Morning      | 37,3 | 71  | 59,2  | 59,2  | 18,46 | 568,10 | 137,63 |
| 2019/05/24 | CH2205 | Male | Three y/o | Treatment (Wk 2) | Treatment | Feed Day | No | 06:25 | 06:00 - 06:59 | Morning      | 37,4 | 68  | 28,2  | 28,2  | 18,55 | 564,71 | 112,07 |
| 2019/05/24 | CH2206 | Male | Three y/o | Treatment (Wk 2) | Treatment | Feed Day | No | 06:25 | 06:00 - 06:59 | Morning      | 37,3 | 81  | 57,8  | 57,8  | 18,46 | 578,26 | 136,80 |
| 2019/05/24 | CH2205 | Male | Three y/o | Treatment (Wk 2) | Treatment | Feed Day | No | 06:30 | 06:00 - 06:59 | Morning      | 37,3 |     | 21,8  | 21,8  | 18,46 |        | 103,26 |
| 2019/05/24 | CH2206 | Male | Three y/o | Treatment (Wk 2) | Treatment | Feed Day | No | 06:30 | 06:00 - 06:59 | Morning      | 37,4 | 109 | 131,0 | 131,0 | 18,55 | 600,04 | 165,27 |
| 2019/05/24 | CH2205 | Male | Three y/o | Treatment (Wk 2) | Treatment | Feed Day | No | 06:35 | 06:00 - 06:59 | Morning      | 37,3 | 62  | 32,8  | 32,8  | 18,46 | 557,33 | 117,26 |
| 2019/05/24 | CH2206 | Male | Three y/o | Treatment (Wk 2) | Treatment | Feed Day | No | 06:35 | 06:00 - 06:59 | Morning      | 37,5 | 132 | 116,8 | 116,8 | 18,65 | 613,32 | 161,26 |
| 2019/05/24 | CH2205 | Male | Three y/o | Treatment (Wk 2) | Treatment | Feed Day | No | 06:40 | 06:00 - 06:59 | Morning      | 37,3 | 141 | 38,0  | 38,0  | 18,46 | 617,75 | 122,32 |
| 2019/05/24 | CH2206 | Male | Three y/o | Treatment (Wk 2) | Treatment | Feed Day | No | 06:40 | 06:00 - 06:59 | Morning      | 37,5 | 118 | 105,0 | 105,0 | 18,65 | 605,61 | 157,55 |
| 2019/05/24 | CH2205 | Male | Three y/o | Treatment (Wk 2) | Treatment | Feed Day | No | 06:45 | 06:00 - 06:59 | Morning      | 37,3 | 108 | 52,4  | 52,4  | 18,46 | 599,39 | 133,41 |
| 2019/05/24 | CH2206 | Male | Three y/o | Treatment (Wk 2) | Treatment | Feed Day | No | 06:45 | 06:00 - 06:59 | Morning      | 37,5 | 129 | 179,0 | 179,0 | 18,65 | 611,75 | 176,22 |
| 2019/05/24 | CH2205 | Male | Three y/o | Treatment (Wk 2) | Treatment | Feed Day | No | 06:50 | 06:00 - 06:59 | Morning      | 37,2 | 92  | 312,0 | 312,0 | 18,36 | 587,78 | 195,81 |
| 2019/05/24 | CH2206 | Male | Three y/o | Treatment (Wk 2) | Treatment | Feed Day | No | 06:50 | 06:00 - 06:59 | Morning      | 37,5 | 169 | 597,0 | 597,0 | 18,65 | 629,60 | 218,87 |
| 2019/05/24 | CH2205 | Male | Three y/o | Treatment (Wk 2) | Treatment | Feed Day | No | 06:55 | 06:00 - 06:59 | Morning      | 37,3 | 100 | 134,4 | 134,4 | 18,46 | 593,87 | 166,17 |
| 2019/05/24 | CH2206 | Male | Three y/o | Treatment (Wk 2) | Treatment | Feed Day | No | 06:55 | 06:00 - 06:59 | Morning      | 37,5 | 111 | 189,0 | 189,0 | 18,65 | 601,33 | 178,13 |
| 2019/05/24 | CH2205 | Male | Three y/o | Treatment (Wk 2) | Treatment | Feed Day | No | 07:00 | 07:00 - 07:59 | Morning      | 37,4 | 46  | 48,0  | 48,0  | 18,55 | 532,38 | 130,38 |
| 2019/05/24 | CH2206 | Male | Three y/o | Treatment (Wk 2) | Treatment | Feed Day | No | 07:00 | 07:00 - 07:59 | Morning      | 37,7 | 88  | 52,6  | 52,6  | 18,85 | 584,49 | 133,54 |
| 2019/05/24 | CH2205 | Male | Three y/o | Treatment (Wk 2) | Treatment | Feed Day | No | 07:05 | 07:00 - 07:59 | Morning      | 37,4 | 82  | 54,6  | 54,6  | 18,55 | 579,19 | 134,83 |
| 2019/05/24 | CH2206 | Male | Three y/o | Treatment (Wk 2) | Treatment | Feed Day | No | 07:05 | 07:00 - 07:59 | Morning      | 37,7 | 124 | 244,0 | 244,0 | 18,85 | 609,04 | 187,12 |
| 2019/05/24 | CH2205 | Male | Three y/o | Treatment (Wk 2) | Treatment | Feed Day | No | 07:10 | 07:00 - 07:59 | Morning      | 37,5 | 124 | 71,2  | 71,2  | 18,65 | 609,04 | 144,03 |
| 2019/05/24 | CH2206 | Male | Three y/o | Treatment (Wk 2) | Treatment | Feed Day | No | 07:10 | 07:00 - 07:59 | Morning      | 37,7 | 113 | 97,2  | 97,2  | 18,85 | 602,58 | 154,85 |
| 2019/05/24 | CH2205 | Male | Three y/o | Treatment (Wk 2) | Treatment | Feed Day | No | 07:15 | 07:00 - 07:59 | Morning      | 37,5 |     | 54,2  | 54,2  | 18,65 |        | 134,57 |
| 2019/05/24 | CH2206 | Male | Three y/o | Treatment (Wk 2) | Treatment | Feed Day | No | 07:15 | 07:00 - 07:59 | Morning      | 37,8 | 126 | 52,6  | 52,6  | 18,95 | 610,14 | 133,54 |
| 2019/05/24 | CH2205 | Male | Three y/o | Treatment (Wk 2) | Treatment | Feed Day | No | 07:20 | 07:00 - 07:59 | Morning      | 37,5 | 103 | 29,0  | 29,0  | 18,65 | 596,00 | 113,03 |
| 2019/05/24 | CH2206 | Male | Three y/o | Treatment (Wk 2) | Treatment | Feed Day | No | 07:20 | 07:00 - 07:59 | Morning      | 37,7 | 108 | 105,4 | 105,4 | 18,85 | 599,39 | 157,68 |
| 2019/05/24 | CH2205 | Male | Three y/o | Treatment (Wk 2) | Treatment | Feed Day | No | 07:25 | 07:00 - 07:59 | Morning      | 37,4 |     | 73,0  | 73,0  | 18,55 |        | 144,89 |
| 2019/05/24 | CH2206 | Male | Three y/o | Treatment (Wk 2) | Treatment | Feed Day | No | 07:25 | 07:00 - 07:59 | Morning      | 37,7 | 120 | 51,6  | 51,6  | 18,85 | 606,78 | 132,87 |
| 2019/05/24 | CH2205 | Male | Three y/o | Treatment (Wk 2) | Treatment | Feed Day | No | 07:30 | 07:00 - 07:59 | Morning      | 37,5 |     | 127,6 | 127,6 | 18,65 |        | 164,35 |
| 2019/05/24 | CH2206 | Male | Three y/o | Treatment (Wk 2) | Treatment | Feed Day | No | 07:30 | 07:00 - 07:59 | Morning      | 37,7 | 107 | 65,0  | 65,0  | 18,85 | 598,73 | 140,87 |
| 2019/05/24 | CH2205 | Male | Three y/o | Treatment (Wk 2) | Treatment | Feed Day | No | 07:35 | 07:00 - 07:59 | Morning      | 37,7 | 62  | 154,6 | 154,6 | 18,85 | 557,33 | 171,08 |
| 2019/05/24 | CH2206 | Male | Three y/o | Treatment (Wk 2) | Treatment | Feed Day | No | 07:35 | 07:00 - 07:59 | Morning      | 37,6 | 108 | 125,8 | 125,8 | 18,75 | 599,39 | 163,86 |
| 2019/05/24 | CH2205 | Male | Three y/o | Treatment (Wk 2) | Treatment | Feed Day | No | 07:40 | 07:00 - 07:59 | Morning      | 37,7 | 119 | 32,0  | 32,0  | 18,85 | 606,20 | 116,41 |
| 2019/05/24 | CH2206 | Male | Three y/o | Treatment (Wk 2) | Treatment | Feed Day | No | 07:40 | 07:00 - 07:59 | Morning      | 37,7 | 154 | 208,8 | 208,8 | 18,85 | 623,58 | 181,63 |
| 2019/05/24 | CH2205 | Male | Three y/o | Treatment (Wk 2) | Treatment | Feed Day | No | 07:45 | 07:00 - 07:59 | Morning      | 37,7 | 194 | 123,6 | 123,6 | 18,85 | 638,30 | 163,24 |
| 2019/05/24 | CH2206 | Male | Three y/o | Treatment (Wk 2) | Treatment | Feed Day | No | 07:45 | 07:00 - 07:59 | Morning      | 37,8 | 118 | 159,4 | 159,4 | 18,95 | 605,61 | 172,15 |
| 2019/05/24 | CH2205 | Male | Three y/o | Treatment (Wk 2) | Treatment | Feed Day | No | 07:50 | 07:00 - 07:59 | Morning      | 37,7 | 109 | 115,8 | 115,8 | 18,85 | 600,04 | 160,96 |
| 2019/05/24 | CH2206 | Male | Three y/o | Treatment (Wk 2) | Treatment | Feed Day | No | 07:50 | 07:00 - 07:59 | Morning      | 37,8 | 118 | 114,6 | 114,6 | 18,95 | 605,61 | 160,60 |
| 2019/05/24 | CH2205 | Male | Three y/o | Treatment (Wk 2) | Treatment | Feed Day | No | 07:55 | 07:00 - 07:59 | Morning      | 37,6 | 46  | 90,0  | 90,0  | 18,75 | 532,38 | 152,17 |
| 2019/05/24 | CH2206 | Male | Three y/o | Treatment (Wk 2) | Treatment | Feed Day | No | 07:55 | 07:00 - 07:59 | Morning      | 37,7 | 64  | 148,4 | 148,4 | 18,85 | 559,88 | 169,64 |
| 2019/05/24 | CH2205 | Male | Three y/o | Treatment (Wk 2) | Treatment | Feed Day | No | 08:00 | 08:00 - 08:59 | Late Morning | 37,6 | 100 | 40,8  | 40,8  | 18,75 | 593,87 | 124,77 |
| 2019/05/24 | CH2206 | Male | Three y/o | Treatment (Wk 2) | Treatment | Feed Day | No | 08:00 | 08:00 - 08:59 | Late Morning | 37,7 |     | 127,6 | 127,6 | 18,85 |        | 164,35 |
| 2019/05/24 | CH2205 | Male | Three y/o | Treatment (Wk 2) | Treatment | Feed Day | No | 08:05 | 08:00 - 08:59 | Late Morning | 37,7 |     | 45,2  | 45,2  | 18,85 |        | 128,30 |
| 2019/05/24 | CH2206 | Male | Three y/o | Treatment (Wk 2) | Treatment | Feed Day | No | 08:05 | 08:00 - 08:59 | Late Morning | 37,7 | 106 | 398,6 | 398,6 | 18,85 | 598,06 | 204,49 |
| 2019/05/24 | CH2205 | Male | Three y/o | Treatment (Wk 2) | Treatment | Feed Day | No | 08:10 | 08:00 - 08:59 | Late Morning | 37,6 | 95  | 100,4 | 100,4 | 18,75 | 590,14 | 155,98 |
| 2019/05/24 | CH2206 | Male | Three y/o | Treatment (Wk 2) | Treatment | Feed Day | No | 08:10 | 08:00 - 08:59 | Late Morning | 37,7 | 113 | 258,4 | 258,4 | 18,85 | 602,58 | 189,15 |
| 2019/05/24 | CH2205 | Male | Three y/o | Treatment (Wk 2) | Treatment | Feed Day | No | 08:15 | 08:00 - 08:59 | Late Morning | 37,6 |     | 126,6 | 126,6 | 18,75 |        | 164,08 |
| 2019/05/24 | CH2206 | Male | Three y/o | Treatment (Wk 2) | Treatment | Feed Day | No | 08:15 | 08:00 - 08:59 | Late Morning | 37,7 | 123 | 118,0 | 118,0 | 18,85 | 608,49 | 161,62 |
| 2019/05/24 | CH2205 | Male | Three y/o | Treatment (Wk 2) | Treatment | Feed Day | No | 08:20 | 08:00 - 08:59 | Late Morning | 37,6 | 110 | 23,4  | 23,4  | 18,75 | 600,69 | 105,68 |
| 2019/05/24 | CH2206 | Male | Three y/o | Treatment (Wk 2) | Treatment | Feed Day | No | 08:20 | 08:00 - 08:59 | Late Morning | 37,7 | 123 | 193,6 | 193,6 | 18,85 | 608,49 | 178,97 |
| 2019/05/24 | CH2205 | Male | Three y/o | Treatment (Wk 2) | Treatment | Feed Day | No | 08:25 | 08:00 - 08:59 | Late Morning | 37,5 | 73  | 28,2  | 28,2  | 18,65 | 570,27 | 112,07 |



|            |        |      |           |                  |           |          |     |       |               |              |      |     |       |       |       |        |        |
|------------|--------|------|-----------|------------------|-----------|----------|-----|-------|---------------|--------------|------|-----|-------|-------|-------|--------|--------|
| 2019/05/24 | CH2206 | Male | Three y/o | Treatment (Wk 2) | Treatment | Feed Day | No  | 08:25 | 08:00 - 08:59 | Late Morning | 37,7 | 117 | 197,8 | 197,8 | 18,85 | 605,02 | 179,73 |
| 2019/05/24 | CH2205 | Male | Three y/o | Treatment (Wk 2) | Treatment | Feed Day | No  | 08:30 | 08:00 - 08:59 | Late Morning | 37,7 | 89  | 19,0  | 19,0  | 18,85 | 585,33 | 98,56  |
| 2019/05/24 | CH2206 | Male | Three y/o | Treatment (Wk 2) | Treatment | Feed Day | No  | 08:30 | 08:00 - 08:59 | Late Morning | 37,7 | 131 | 211,4 | 211,4 | 18,85 | 612,80 | 182,07 |
| 2019/05/24 | CH2205 | Male | Three y/o | Treatment (Wk 2) | Treatment | Feed Day | No  | 08:35 | 08:00 - 08:59 | Late Morning | 37,9 | 66  | 26,6  | 26,6  | 19,05 | 562,34 | 110,07 |
| 2019/05/24 | CH2206 | Male | Three y/o | Treatment (Wk 2) | Treatment | Feed Day | No  | 08:35 | 08:00 - 08:59 | Late Morning | 37,7 | 61  | 103,6 | 103,6 | 18,85 | 556,01 | 157,08 |
| 2019/05/24 | CH2205 | Male | Three y/o | Treatment (Wk 2) | Treatment | Feed Day | No  | 08:40 | 08:00 - 08:59 | Late Morning | 37,9 | 66  | 52,4  | 52,4  | 19,05 | 562,34 | 133,41 |
| 2019/05/24 | CH2206 | Male | Three y/o | Treatment (Wk 2) | Treatment | Feed Day | No  | 08:40 | 08:00 - 08:59 | Late Morning | 37,7 | 112 | 76,2  | 76,2  | 18,85 | 601,96 | 146,38 |
| 2019/05/24 | CH2205 | Male | Three y/o | Treatment (Wk 2) | Treatment | Feed Day | No  | 08:45 | 08:00 - 08:59 | Late Morning | 37,7 | 123 | 67,4  | 67,4  | 18,85 | 608,49 | 142,12 |
| 2019/05/24 | CH2206 | Male | Three y/o | Treatment (Wk 2) | Treatment | Feed Day | No  | 08:45 | 08:00 - 08:59 | Late Morning | 37,7 | 124 | 338,6 | 338,6 | 18,85 | 609,04 | 198,70 |
| 2019/05/24 | CH2205 | Male | Three y/o | Treatment (Wk 2) | Treatment | Feed Day | No  | 08:50 | 08:00 - 08:59 | Late Morning | 37,7 | 76  | 39,0  | 39,0  | 18,85 | 573,39 | 123,22 |
| 2019/05/24 | CH2206 | Male | Three y/o | Treatment (Wk 2) | Treatment | Feed Day | No  | 08:50 | 08:00 - 08:59 | Late Morning | 37,7 | 98  | 140,2 | 140,2 | 18,85 | 592,41 | 167,65 |
| 2019/05/24 | CH2205 | Male | Three y/o | Treatment (Wk 2) | Treatment | Feed Day | No  | 08:55 | 08:00 - 08:59 | Late Morning | 37,5 | 74  | 33,4  | 33,4  | 18,65 | 571,33 | 117,88 |
| 2019/05/24 | CH2206 | Male | Three y/o | Treatment (Wk 2) | Treatment | Feed Day | No  | 08:55 | 08:00 - 08:59 | Late Morning | 37,7 | 106 | 141,6 | 141,6 | 18,85 | 598,06 | 168,00 |
| 2019/05/24 | CH2205 | Male | Three y/o | Treatment (Wk 2) | Treatment | Feed Day | No  | 09:00 | 09:00 - 09:59 | Late Morning | 37,2 | 84  | 32,8  | 32,8  | 18,36 | 581,01 | 117,26 |
| 2019/05/24 | CH2206 | Male | Three y/o | Treatment (Wk 2) | Treatment | Feed Day | No  | 09:00 | 09:00 - 09:59 | Late Morning | 37,7 | 115 | 136,6 | 136,6 | 18,85 | 603,82 | 166,74 |
| 2019/05/24 | CH2205 | Male | Three y/o | Treatment (Wk 2) | Treatment | Feed Day | No  | 09:05 | 09:00 - 09:59 | Late Morning | 36,8 | 135 | 25,2  | 25,2  | 17,96 | 614,84 | 108,22 |
| 2019/05/24 | CH2206 | Male | Three y/o | Treatment (Wk 2) | Treatment | Feed Day | No  | 09:05 | 09:00 - 09:59 | Late Morning | 37,7 | 119 | 81,2  | 81,2  | 18,85 | 606,20 | 148,59 |
| 2019/05/24 | CH2205 | Male | Three y/o | Treatment (Wk 2) | Treatment | Feed Day | No  | 09:10 | 09:00 - 09:59 | Late Morning | 37,1 | 102 | 35,0  | 35,0  | 18,26 | 595,30 | 119,49 |
| 2019/05/24 | CH2206 | Male | Three y/o | Treatment (Wk 2) | Treatment | Feed Day | No  | 09:10 | 09:00 - 09:59 | Late Morning | 37,9 | 156 | 129,0 | 129,0 | 19,05 | 624,43 | 164,74 |
| 2019/05/24 | CH2205 | Male | Three y/o | Treatment (Wk 2) | Treatment | Feed Day | No  | 09:15 | 09:00 - 09:59 | Late Morning | 37,1 | 165 | 41,0  | 41,0  | 18,26 | 628,06 | 124,94 |
| 2019/05/24 | CH2206 | Male | Three y/o | Treatment (Wk 2) | Treatment | Feed Day | No  | 09:15 | 09:00 - 09:59 | Late Morning | 38,0 | 115 | 26,8  | 26,8  | 19,15 | 603,82 | 110,33 |
| 2019/05/24 | CH2205 | Male | Three y/o | Treatment (Wk 2) | Treatment | Feed Day | No  | 09:20 | 09:00 - 09:59 | Late Morning | 37,3 | 188 | 35,0  | 35,0  | 18,46 | 636,34 | 119,49 |
| 2019/05/24 | CH2206 | Male | Three y/o | Treatment (Wk 2) | Treatment | Feed Day | No  | 09:20 | 09:00 - 09:59 | Late Morning | 37,9 | 117 | 175,2 | 175,2 | 19,05 | 605,02 | 175,47 |
| 2019/05/24 | CH2205 | Male | Three y/o | Treatment (Wk 2) | Treatment | Feed Day | No  | 09:25 | 09:00 - 09:59 | Late Morning | 37,3 | 94  | 34,6  | 34,6  | 18,46 | 589,37 | 119,10 |
| 2019/05/24 | CH2206 | Male | Three y/o | Treatment (Wk 2) | Treatment | Feed Day | No  | 09:25 | 09:00 - 09:59 | Late Morning | 37,9 | 114 | 200,4 | 200,4 | 19,05 | 603,20 | 180,19 |
| 2019/05/24 | CH2205 | Male | Three y/o | Treatment (Wk 2) | Treatment | Feed Day | No  | 09:30 | 09:00 - 09:59 | Late Morning | 37,2 |     | 21,2  | 21,2  | 18,36 |        | 102,31 |
| 2019/05/24 | CH2206 | Male | Three y/o | Treatment (Wk 2) | Treatment | Feed Day | No  | 09:30 | 09:00 - 09:59 | Late Morning | 37,8 | 106 | 19,2  | 19,2  | 18,95 | 598,06 | 98,92  |
| 2019/05/24 | CH2205 | Male | Three y/o | Treatment (Wk 2) | Treatment | Feed Day | No  | 09:35 | 09:00 - 09:59 | Late Morning | 37,0 | 88  | 11,4  | 11,4  | 18,16 | 584,49 | 81,19  |
| 2019/05/24 | CH2206 | Male | Three y/o | Treatment (Wk 2) | Treatment | Feed Day | No  | 09:35 | 09:00 - 09:59 | Late Morning | 37,9 | 106 | 206,6 | 206,6 | 19,05 | 598,06 | 181,26 |
| 2019/05/24 | CH2205 | Male | Three y/o | Treatment (Wk 2) | Treatment | Feed Day | No  | 09:40 | 09:00 - 09:59 | Late Morning | 37,1 | 61  | 22,0  | 22,0  | 18,26 | 556,01 | 103,57 |
| 2019/05/24 | CH2206 | Male | Three y/o | Treatment (Wk 2) | Treatment | Feed Day | No  | 09:40 | 09:00 - 09:59 | Late Morning | 37,9 | 106 | 48,6  | 48,6  | 19,05 | 598,06 | 130,81 |
| 2019/05/24 | CH2205 | Male | Three y/o | Treatment (Wk 2) | Treatment | Feed Day | No  | 09:45 | 09:00 - 09:59 | Late Morning | 37,1 | 197 | 16,6  | 16,6  | 18,26 | 639,25 | 93,96  |
| 2019/05/24 | CH2206 | Male | Three y/o | Treatment (Wk 2) | Treatment | Feed Day | No  | 09:45 | 09:00 - 09:59 | Late Morning | 37,9 | 121 | 109,8 | 109,8 | 19,05 | 607,35 | 159,11 |
| 2019/05/24 | CH2205 | Male | Three y/o | Treatment (Wk 2) | Treatment | Feed Day | No  | 09:50 | 09:00 - 09:59 | Late Morning | 37,2 | 148 | 15,6  | 15,6  | 18,36 | 620,97 | 91,85  |
| 2019/05/24 | CH2206 | Male | Three y/o | Treatment (Wk 2) | Treatment | Feed Day | No  | 09:50 | 09:00 - 09:59 | Late Morning | 37,8 | 124 | 84,4  | 84,4  | 18,95 | 609,04 | 149,94 |
| 2019/05/24 | CH2205 | Male | Three y/o | Treatment (Wk 2) | Treatment | Feed Day | No  | 09:55 | 09:00 - 09:59 | Late Morning | 37,3 | 148 | 8,8   | 8,8   | 18,46 | 620,97 | 72,43  |
| 2019/05/24 | CH2206 | Male | Three y/o | Treatment (Wk 2) | Treatment | Feed Day | No  | 09:55 | 09:00 - 09:59 | Late Morning | 37,8 | 73  | 30,0  | 30,0  | 18,95 | 570,27 | 114,20 |
| 2019/05/24 | CH2205 | Male | Three y/o | Treatment (Wk 2) | Treatment | Feed Day | No  | 10:00 | 10:00 - 10:59 | Late Morning | 37,5 | 41  | 10,4  | 10,4  | 18,65 | 522,29 | 78,08  |
| 2019/05/24 | CH2206 | Male | Three y/o | Treatment (Wk 2) | Treatment | Feed Day | No  | 10:00 | 10:00 - 10:59 | Late Morning | 37,7 | 65  | 33,2  | 33,2  | 18,85 | 561,12 | 117,68 |
| 2019/05/24 | CH2205 | Male | Three y/o | Treatment (Wk 2) | Treatment | Feed Day | No  | 10:05 | 10:00 - 10:59 | Late Morning | 37,4 | 61  | 9,6   | 9,6   | 18,55 | 556,01 | 75,37  |
| 2019/05/24 | CH2206 | Male | Three y/o | Treatment (Wk 2) | Treatment | Feed Day | No  | 10:05 | 10:00 - 10:59 | Late Morning | 37,5 | 45  | 31,2  | 31,2  | 18,65 | 530,47 | 115,54 |
| 2019/05/24 | CH2205 | Male | Three y/o | Treatment (Wk 2) | Treatment | Feed Day | No  | 10:10 | 10:00 - 10:59 | Late Morning | 37,3 | 67  | 5,6   | 5,6   | 18,46 | 563,53 | 57,21  |
| 2019/05/24 | CH2206 | Male | Three y/o | Treatment (Wk 2) | Treatment | Feed Day | No  | 10:10 | 10:00 - 10:59 | Late Morning | 37,6 | 59  | 54,2  | 54,2  | 18,75 | 553,30 | 134,57 |
| 2019/05/24 | CH2205 | Male | Three y/o | Treatment (Wk 2) | Treatment | Feed Day | No  | 10:15 | 10:00 - 10:59 | Late Morning | 37,3 | 58  | 3,6   | 3,6   | 18,46 | 551,90 | 42,42  |
| 2019/05/24 | CH2206 | Male | Three y/o | Treatment (Wk 2) | Treatment | Feed Day | No  | 10:15 | 10:00 - 10:59 | Late Morning | 37,7 | 58  | 31,6  | 31,6  | 18,85 | 551,90 | 115,98 |
| 2019/05/24 | CH2205 | Male | Three y/o | Treatment (Wk 2) | Treatment | Feed Day | No  | 10:20 | 10:00 - 10:59 | Late Morning | 37,3 | 67  | 9,4   | 9,4   | 18,46 | 563,53 | 74,66  |
| 2019/05/24 | CH2206 | Male | Three y/o | Treatment (Wk 2) | Treatment | Feed Day | No  | 10:20 | 10:00 - 10:59 | Late Morning | 37,7 | 74  | 38,0  | 38,0  | 18,85 | 571,33 | 122,32 |
| 2019/05/24 | CH2205 | Male | Three y/o | Treatment (Wk 2) | Treatment | Feed Day | No  | 10:25 | 10:00 - 10:59 | Late Morning | 37,3 | 87  | 2,6   | 2,6   | 18,46 | 583,64 | 31,57  |
| 2019/05/24 | CH2206 | Male | Three y/o | Treatment (Wk 2) | Treatment | Feed Day | No  | 10:25 | 10:00 - 10:59 | Late Morning | 37,5 | 61  | 41,8  | 41,8  | 18,65 | 556,01 | 125,60 |
| 2019/05/24 | CH2205 | Male | Three y/o | Treatment (Wk 2) | Treatment | Feed Day | Yes | 10:30 | 10:00 - 10:59 | Late Morning | 37,3 | 51  | 5,4   | 5,4   | 18,46 | 541,20 | 55,99  |
| 2019/05/24 | CH2206 | Male | Three y/o | Treatment (Wk 2) | Treatment | Feed Day | Yes | 10:30 | 10:00 - 10:59 | Late Morning | 37,5 | 69  | 10,4  | 10,4  | 18,65 | 565,86 | 78,08  |
| 2019/05/24 | CH2205 | Male | Three y/o | Treatment (Wk 2) | Treatment | Feed Day | Yes | 10:35 | 10:00 - 10:59 | Late Morning | 37,3 | 55  | 6,8   | 6,8   | 18,46 | 547,52 | 63,74  |
| 2019/05/24 | CH2206 | Male | Three y/o | Treatment (Wk 2) | Treatment | Feed Day | Yes | 10:35 | 10:00 - 10:59 | Late Morning | 37,5 | 65  | 16,8  | 16,8  | 18,65 | 561,12 | 94,37  |
| 2019/05/24 | CH2205 | Male | Three y/o | Treatment (Wk 2) | Treatment | Feed Day | Yes | 10:40 | 10:00 - 10:59 | Late Morning | 37,3 | 64  | 7,0   | 7,0   | 18,46 | 559,88 | 64,72  |
| 2019/05/24 | CH2206 | Male | Three y/o | Treatment (Wk 2) | Treatment | Feed Day | Yes | 10:40 | 10:00 - 10:59 | Late Morning | 37,5 | 55  | 25,4  | 25,4  | 18,65 | 547,52 | 108,49 |
| 2019/05/24 | CH2205 | Male | Three y/o | Treatment (Wk 2) | Treatment | Feed Day | Yes | 10:45 | 10:00 - 10:59 | Late Morning | 37,3 | 65  | 16,0  | 16,0  | 18,46 | 561,12 | 92,71  |
| 2019/05/24 | CH2206 | Male | Three y/o | Treatment (Wk 2) | Treatment | Feed Day | Yes | 10:45 | 10:00 - 10:59 | Late Morning | 37,5 | 128 | 38,2  | 38,2  | 18,65 | 611,22 | 122,50 |
| 2019/05/24 | CH2205 | Male | Three y/o | Treatment (Wk 2) | Treatment | Feed Day | Yes | 10:50 | 10:00 - 10:59 | Late Morning | 37,4 |     | 96,8  | 96,8  | 18,55 |        | 154,71 |
| 2019/05/24 | CH2206 | Male | Three y/o | Treatment (Wk 2) | Treatment | Feed Day | Yes | 10:50 | 10:00 - 10:59 | Late Morning | 37,6 | 126 | 93,6  | 93,6  | 18,75 | 610,14 | 153,54 |
| 2019/05/24 | CH2205 | Male | Three y/o | Treatment (Wk 2) | Treatment | Feed Day | Yes | 10:55 | 10:00 - 10:59 | Late Morning | 37,4 | 141 | 441,0 | 441,0 | 18,55 | 617,75 | 208,08 |
| 2019/05/24 | CH2206 | Male | Three y/o | Treatment (Wk 2) | Treatment | Feed Day | Yes | 10:55 | 10:00 - 10:59 | Late Morning | 37,5 | 102 | 83,2  | 83,2  | 18,65 | 595,30 | 149,44 |
| 2019/05/24 | CH2205 | Male | Three y/o | Treatment (Wk 2) | Treatment | Feed Day | Yes | 11:00 | 11:00 - 11:59 | Late Morning | 37,7 | 49  | 35,8  | 35,8  | 18,85 | 537,80 | 120,27 |
| 2019/05/24 | CH2206 | Male | Three y/o | Treatment (Wk 2) | Treatment | Feed Day | Yes | 11:00 | 11:00 - 11:59 | Late Morning | 37,5 | 102 | 155,2 | 155,2 | 18,65 | 595,30 | 171,21 |
| 2019/05/24 | CH2205 | Male | Three y/o | Treatment (Wk 2) | Treatment | Feed Day | Yes | 11:05 | 11:00 - 11:59 | Late Morning | 37,7 |     | 19,0  | 19,0  | 18,85 |        | 98,56  |
| 2019/05/24 | CH2206 | Male | Three y/o | Treatment (Wk 2) | Treatment | Feed Day | Yes | 11:05 | 11:00 - 11:59 | Late Morning | 37,5 | 121 | 300,4 | 300,4 | 18,65 | 607,35 | 194,47 |
| 2019/05/24 | CH2205 | Male | Three y/o | Treatment (Wk 2) | Treatment | Feed Day | Yes | 11:10 | 11:00 - 11:59 | Late Morning | 37,9 | 78  | 59,4  | 59,4  | 19,05 | 575,38 | 137,75 |
| 2019/05/24 | CH2206 | Male | Three y/o | Treatment (Wk 2) | Treatment | Feed Day | Yes | 11:10 | 11:00 - 11:59 | Late Morning | 37,7 | 132 | 249,8 | 249,8 | 18,85 | 613,32 | 187,95 |
| 2019/05/24 | CH2205 | Male | Three y/o | Treatment (Wk 2) | Treatment | Feed Day | Yes | 11:15 | 11:00 - 11:59 | Late Morning | 37,7 | 110 | 113,8 | 113,8 | 18,85 | 600,69 | 160,35 |
| 2019/05/24 | CH2206 | Male | Three y/o | Treatment (Wk 2) | Treatment | Feed Day | Yes | 11:15 | 11:00 - 11:59 | Late Morning | 37,7 | 104 | 192,8 | 192,8 | 18,85 | 596,69 | 178,83 |
| 2019/05/24 | CH2205 | Male | Three y/o | Treatment (Wk 2) | Treatment | Feed Day | Yes | 11:20 | 11:00 - 11:59 | Late Morning | 37,7 | 96  | 202,2 | 202,2 | 18,85 | 590,91 | 180,50 |



|            |        |      |           |                  |           |          |     |       |               |              |      |     |       |       |       |        |        |
|------------|--------|------|-----------|------------------|-----------|----------|-----|-------|---------------|--------------|------|-----|-------|-------|-------|--------|--------|
| 2019/05/24 | CH2206 | Male | Three y/o | Treatment (Wk 2) | Treatment | Feed Day | Yes | 11:20 | 11:00 - 11:59 | Late Morning | 37,7 | 115 | 163,2 | 163,2 | 18,85 | 603,82 | 172,97 |
| 2019/05/24 | CH2205 | Male | Three y/o | Treatment (Wk 2) | Treatment | Feed Day | Yes | 11:25 | 11:00 - 11:59 | Late Morning | 37,7 | 109 | 53,8  | 53,8  | 18,85 | 600,04 | 134,32 |
| 2019/05/24 | CH2206 | Male | Three y/o | Treatment (Wk 2) | Treatment | Feed Day | Yes | 11:25 | 11:00 - 11:59 | Late Morning | 37,7 | 114 | 271,4 | 271,4 | 18,85 | 603,20 | 190,88 |
| 2019/05/24 | CH2205 | Male | Three y/o | Treatment (Wk 2) | Treatment | Feed Day | No  | 11:30 | 11:00 - 11:59 | Late Morning | 37,7 | 112 | 44,0  | 44,0  | 18,85 | 601,96 | 127,37 |
| 2019/05/24 | CH2206 | Male | Three y/o | Treatment (Wk 2) | Treatment | Feed Day | No  | 11:30 | 11:00 - 11:59 | Late Morning | 37,8 | 111 | 65,2  | 65,2  | 18,95 | 601,33 | 140,97 |
| 2019/05/24 | CH2205 | Male | Three y/o | Treatment (Wk 2) | Treatment | Feed Day | No  | 11:35 | 11:00 - 11:59 | Late Morning | 37,6 | 76  | 24,8  | 24,8  | 18,75 | 573,39 | 107,67 |
| 2019/05/24 | CH2206 | Male | Three y/o | Treatment (Wk 2) | Treatment | Feed Day | No  | 11:35 | 11:00 - 11:59 | Late Morning | 37,8 | 162 | 64,8  | 64,8  | 18,95 | 626,88 | 140,76 |
| 2019/05/24 | CH2205 | Male | Three y/o | Treatment (Wk 2) | Treatment | Feed Day | No  | 11:40 | 11:00 - 11:59 | Late Morning | 37,5 | 73  | 28,8  | 28,8  | 18,65 | 570,27 | 112,79 |
| 2019/05/24 | CH2206 | Male | Three y/o | Treatment (Wk 2) | Treatment | Feed Day | No  | 11:40 | 11:00 - 11:59 | Late Morning | 37,7 |     | 52,0  | 52,0  | 18,85 |        | 133,14 |
| 2019/05/24 | CH2205 | Male | Three y/o | Treatment (Wk 2) | Treatment | Feed Day | No  | 11:45 | 11:00 - 11:59 | Late Morning | 37,5 | 90  | 22,2  | 22,2  | 18,65 | 586,16 | 103,88 |
| 2019/05/24 | CH2206 | Male | Three y/o | Treatment (Wk 2) | Treatment | Feed Day | No  | 11:45 | 11:00 - 11:59 | Late Morning | 37,7 | 102 | 79,6  | 79,6  | 18,85 | 595,30 | 147,90 |
| 2019/05/24 | CH2205 | Male | Three y/o | Treatment (Wk 2) | Treatment | Feed Day | No  | 11:50 | 11:00 - 11:59 | Late Morning | 37,6 |     | 32,4  | 32,4  | 18,75 |        | 116,84 |
| 2019/05/24 | CH2206 | Male | Three y/o | Treatment (Wk 2) | Treatment | Feed Day | No  | 11:50 | 11:00 - 11:59 | Late Morning | 37,8 | 120 | 57,0  | 57,0  | 18,95 | 606,78 | 136,32 |
| 2019/05/24 | CH2205 | Male | Three y/o | Treatment (Wk 2) | Treatment | Feed Day | No  | 11:55 | 11:00 - 11:59 | Late Morning | 37,9 | 84  | 32,8  | 32,8  | 19,05 | 581,01 | 117,26 |
| 2019/05/24 | CH2206 | Male | Three y/o | Treatment (Wk 2) | Treatment | Feed Day | No  | 11:55 | 11:00 - 11:59 | Late Morning | 37,8 | 131 | 86,2  | 86,2  | 18,95 | 612,80 | 150,67 |
| 2019/05/24 | CH2205 | Male | Three y/o | Treatment (Wk 2) | Treatment | Feed Day | No  | 12:00 | 12:00 - 12:59 | Afternoon    | 38,0 | 100 | 23,2  | 23,2  | 19,15 | 593,87 | 105,39 |
| 2019/05/24 | CH2206 | Male | Three y/o | Treatment (Wk 2) | Treatment | Feed Day | No  | 12:00 | 12:00 - 12:59 | Afternoon    | 37,9 | 105 | 31,2  | 31,2  | 19,05 | 597,38 | 115,54 |
| 2019/05/24 | CH2205 | Male | Three y/o | Treatment (Wk 2) | Treatment | Feed Day | No  | 12:05 | 12:00 - 12:59 | Afternoon    | 38,0 | 90  | 43,0  | 43,0  | 19,15 | 586,16 | 126,58 |
| 2019/05/24 | CH2206 | Male | Three y/o | Treatment (Wk 2) | Treatment | Feed Day | No  | 12:05 | 12:00 - 12:59 | Afternoon    | 37,9 | 177 | 43,2  | 43,2  | 19,05 | 632,55 | 126,74 |
| 2019/05/24 | CH2205 | Male | Three y/o | Treatment (Wk 2) | Treatment | Feed Day | No  | 12:10 | 12:00 - 12:59 | Afternoon    | 38,0 | 72  | 15,4  | 15,4  | 19,15 | 569,20 | 91,41  |
| 2019/05/24 | CH2206 | Male | Three y/o | Treatment (Wk 2) | Treatment | Feed Day | No  | 12:10 | 12:00 - 12:59 | Afternoon    | 37,9 | 120 | 42,2  | 42,2  | 19,05 | 606,78 | 125,93 |
| 2019/05/24 | CH2205 | Male | Three y/o | Treatment (Wk 2) | Treatment | Feed Day | No  | 12:15 | 12:00 - 12:59 | Afternoon    | 38,1 | 67  | 17,2  | 17,2  | 19,26 | 563,53 | 95,17  |
| 2019/05/24 | CH2206 | Male | Three y/o | Treatment (Wk 2) | Treatment | Feed Day | No  | 12:15 | 12:00 - 12:59 | Afternoon    | 38,0 | 147 | 53,2  | 53,2  | 19,15 | 620,52 | 133,93 |
| 2019/05/24 | CH2205 | Male | Three y/o | Treatment (Wk 2) | Treatment | Feed Day | No  | 12:20 | 12:00 - 12:59 | Afternoon    | 38,1 | 99  | 284,6 | 284,6 | 19,26 | 593,14 | 192,56 |
| 2019/05/24 | CH2206 | Male | Three y/o | Treatment (Wk 2) | Treatment | Feed Day | No  | 12:20 | 12:00 - 12:59 | Afternoon    | 38,0 | 167 | 194,6 | 194,6 | 19,15 | 628,84 | 179,16 |
| 2019/05/24 | CH2205 | Male | Three y/o | Treatment (Wk 2) | Treatment | Feed Day | No  | 12:25 | 12:00 - 12:59 | Afternoon    | 38,1 | 79  | 88,4  | 88,4  | 19,26 | 576,36 | 151,55 |
| 2019/05/24 | CH2206 | Male | Three y/o | Treatment (Wk 2) | Treatment | Feed Day | No  | 12:25 | 12:00 - 12:59 | Afternoon    | 38,1 | 124 | 159,8 | 159,8 | 19,26 | 609,04 | 172,24 |
| 2019/05/24 | CH2205 | Male | Three y/o | Treatment (Wk 2) | Treatment | Feed Day | No  | 12:30 | 12:00 - 12:59 | Afternoon    | 38,0 | 99  | 56,8  | 56,8  | 19,15 | 593,14 | 136,20 |
| 2019/05/24 | CH2206 | Male | Three y/o | Treatment (Wk 2) | Treatment | Feed Day | No  | 12:30 | 12:00 - 12:59 | Afternoon    | 38,2 |     | 82,0  | 82,0  | 19,36 |        | 148,93 |
| 2019/05/24 | CH2205 | Male | Three y/o | Treatment (Wk 2) | Treatment | Feed Day | No  | 12:35 | 12:00 - 12:59 | Afternoon    | 38,0 | 50  | 13,0  | 13,0  | 19,15 | 539,52 | 85,65  |
| 2019/05/24 | CH2206 | Male | Three y/o | Treatment (Wk 2) | Treatment | Feed Day | No  | 12:35 | 12:00 - 12:59 | Afternoon    | 38,2 | 112 | 51,0  | 51,0  | 19,36 | 601,96 | 132,47 |
| 2019/05/24 | CH2205 | Male | Three y/o | Treatment (Wk 2) | Treatment | Feed Day | No  | 12:40 | 12:00 - 12:59 | Afternoon    | 38,0 | 46  | 16,2  | 16,2  | 19,15 | 532,38 | 93,13  |
| 2019/05/24 | CH2206 | Male | Three y/o | Treatment (Wk 2) | Treatment | Feed Day | No  | 12:40 | 12:00 - 12:59 | Afternoon    | 38,3 | 111 | 14,8  | 14,8  | 19,46 | 601,33 | 90,05  |
| 2019/05/24 | CH2205 | Male | Three y/o | Treatment (Wk 2) | Treatment | Feed Day | No  | 12:45 | 12:00 - 12:59 | Afternoon    | 38,0 | 53  | 12,0  | 12,0  | 19,15 | 544,43 | 82,93  |
| 2019/05/24 | CH2206 | Male | Three y/o | Treatment (Wk 2) | Treatment | Feed Day | No  | 12:45 | 12:00 - 12:59 | Afternoon    | 38,3 | 150 | 75,8  | 75,8  | 19,46 | 621,86 | 146,20 |
| 2019/05/24 | CH2205 | Male | Three y/o | Treatment (Wk 2) | Treatment | Feed Day | No  | 12:50 | 12:00 - 12:59 | Afternoon    | 38,0 | 58  | 16,2  | 16,2  | 19,15 | 551,90 | 93,13  |
| 2019/05/24 | CH2206 | Male | Three y/o | Treatment (Wk 2) | Treatment | Feed Day | No  | 12:50 | 12:00 - 12:59 | Afternoon    | 38,3 | 87  | 29,2  | 29,2  | 19,46 | 583,64 | 113,27 |
| 2019/05/24 | CH2205 | Male | Three y/o | Treatment (Wk 2) | Treatment | Feed Day | No  | 12:55 | 12:00 - 12:59 | Afternoon    | 38,0 | 43  | 14,8  | 14,8  | 19,15 | 526,50 | 90,05  |
| 2019/05/24 | CH2206 | Male | Three y/o | Treatment (Wk 2) | Treatment | Feed Day | No  | 12:55 | 12:00 - 12:59 | Afternoon    | 38,3 | 112 | 16,8  | 16,8  | 19,46 | 601,96 | 94,37  |
| 2019/05/24 | CH2205 | Male | Three y/o | Treatment (Wk 2) | Treatment | Feed Day | No  | 13:00 | 13:00 - 13:59 | Afternoon    | 38,0 | 59  | 12,8  | 12,8  | 19,15 | 553,30 | 85,12  |
| 2019/05/24 | CH2206 | Male | Three y/o | Treatment (Wk 2) | Treatment | Feed Day | No  | 13:00 | 13:00 - 13:59 | Afternoon    | 38,3 | 88  | 11,0  | 11,0  | 19,46 | 584,49 | 79,98  |
| 2019/05/24 | CH2205 | Male | Three y/o | Treatment (Wk 2) | Treatment | Feed Day | No  | 13:05 | 13:00 - 13:59 | Afternoon    | 38,0 | 64  | 12,6  | 12,6  | 19,15 | 559,88 | 84,59  |
| 2019/05/24 | CH2206 | Male | Three y/o | Treatment (Wk 2) | Treatment | Feed Day | No  | 13:05 | 13:00 - 13:59 | Afternoon    | 38,3 | 75  | 16,6  | 16,6  | 19,46 | 572,36 | 93,96  |
| 2019/05/24 | CH2205 | Male | Three y/o | Treatment (Wk 2) | Treatment | Feed Day | No  | 13:10 | 13:00 - 13:59 | Afternoon    | 37,9 | 50  | 11,8  | 11,8  | 19,05 | 539,52 | 82,36  |
| 2019/05/24 | CH2206 | Male | Three y/o | Treatment (Wk 2) | Treatment | Feed Day | No  | 13:10 | 13:00 - 13:59 | Afternoon    | 38,3 | 70  | 14,6  | 14,6  | 19,46 | 566,99 | 89,59  |
| 2019/05/24 | CH2205 | Male | Three y/o | Treatment (Wk 2) | Treatment | Feed Day | No  | 13:15 | 13:00 - 13:59 | Afternoon    | 37,9 | 43  | 17,0  | 17,0  | 19,05 | 526,50 | 94,77  |
| 2019/05/24 | CH2206 | Male | Three y/o | Treatment (Wk 2) | Treatment | Feed Day | No  | 13:15 | 13:00 - 13:59 | Afternoon    | 38,3 | 67  | 12,0  | 12,0  | 19,46 | 563,53 | 82,93  |
| 2019/05/24 | CH2205 | Male | Three y/o | Treatment (Wk 2) | Treatment | Feed Day | No  | 13:20 | 13:00 - 13:59 | Afternoon    | 37,9 | 86  | 28,0  | 28,0  | 19,05 | 582,77 | 111,83 |
| 2019/05/24 | CH2206 | Male | Three y/o | Treatment (Wk 2) | Treatment | Feed Day | No  | 13:20 | 13:00 - 13:59 | Afternoon    | 38,3 | 152 | 39,8  | 39,8  | 19,46 | 622,73 | 123,91 |
| 2019/05/24 | CH2205 | Male | Three y/o | Treatment (Wk 2) | Treatment | Feed Day | No  | 13:25 | 13:00 - 13:59 | Afternoon    | 37,7 | 43  | 21,2  | 21,2  | 18,85 | 526,50 | 102,31 |
| 2019/05/24 | CH2206 | Male | Three y/o | Treatment (Wk 2) | Treatment | Feed Day | No  | 13:25 | 13:00 - 13:59 | Afternoon    | 38,2 | 46  | 30,0  | 30,0  | 19,36 | 532,38 | 114,20 |
| 2019/05/24 | CH2205 | Male | Three y/o | Treatment (Wk 2) | Treatment | Feed Day | No  | 13:30 | 13:00 - 13:59 | Afternoon    | 37,7 | 49  | 50,2  | 50,2  | 18,85 | 537,80 | 131,92 |
| 2019/05/24 | CH2206 | Male | Three y/o | Treatment (Wk 2) | Treatment | Feed Day | No  | 13:30 | 13:00 - 13:59 | Afternoon    | 38,1 | 60  | 9,0   | 9,0   | 19,26 | 554,67 | 73,19  |
| 2019/05/24 | CH2205 | Male | Three y/o | Treatment (Wk 2) | Treatment | Feed Day | No  | 13:35 | 13:00 - 13:59 | Afternoon    | 37,7 | 77  | 255,4 | 255,4 | 18,85 | 574,39 | 188,73 |
| 2019/05/24 | CH2206 | Male | Three y/o | Treatment (Wk 2) | Treatment | Feed Day | No  | 13:35 | 13:00 - 13:59 | Afternoon    | 38,1 | 61  | 84,8  | 84,8  | 19,26 | 556,01 | 150,10 |
| 2019/05/24 | CH2205 | Male | Three y/o | Treatment (Wk 2) | Treatment | Feed Day | No  | 13:40 | 13:00 - 13:59 | Afternoon    | 37,7 | 182 | 40,8  | 40,8  | 18,85 | 634,31 | 124,77 |
| 2019/05/24 | CH2206 | Male | Three y/o | Treatment (Wk 2) | Treatment | Feed Day | No  | 13:40 | 13:00 - 13:59 | Afternoon    | 38,1 | 123 | 33,2  | 33,2  | 19,26 | 608,49 | 117,68 |
| 2019/05/24 | CH2205 | Male | Three y/o | Treatment (Wk 2) | Treatment | Feed Day | No  | 13:45 | 13:00 - 13:59 | Afternoon    | 37,7 |     | 56,6  | 56,6  | 18,85 |        | 136,07 |
| 2019/05/24 | CH2206 | Male | Three y/o | Treatment (Wk 2) | Treatment | Feed Day | No  | 13:45 | 13:00 - 13:59 | Afternoon    | 38,1 | 90  | 95,2  | 95,2  | 19,26 | 586,16 | 154,13 |
| 2019/05/24 | CH2205 | Male | Three y/o | Treatment (Wk 2) | Treatment | Feed Day | No  | 13:50 | 13:00 - 13:59 | Afternoon    | 37,9 | 121 | 135,8 | 135,8 | 19,05 | 607,35 | 166,53 |
| 2019/05/24 | CH2206 | Male | Three y/o | Treatment (Wk 2) | Treatment | Feed Day | No  | 13:50 | 13:00 - 13:59 | Afternoon    | 38,0 | 112 | 54,8  | 54,8  | 19,15 | 601,96 | 134,96 |
| 2019/05/24 | CH2205 | Male | Three y/o | Treatment (Wk 2) | Treatment | Feed Day | No  | 13:55 | 13:00 - 13:59 | Afternoon    | 37,9 | 93  | 73,8  | 73,8  | 19,05 | 588,58 | 145,27 |
| 2019/05/24 | CH2206 | Male | Three y/o | Treatment (Wk 2) | Treatment | Feed Day | No  | 13:55 | 13:00 - 13:59 | Afternoon    | 38,0 | 118 | 64,4  | 64,4  | 19,15 | 605,61 | 140,55 |
| 2019/05/24 | CH2205 | Male | Three y/o | Treatment (Wk 2) | Treatment | Feed Day | No  | 14:00 | 14:00 - 14:59 | Afternoon    | 37,9 | 162 | 716,0 | 716,0 | 19,05 | 626,88 | 225,36 |
| 2019/05/24 | CH2206 | Male | Three y/o | Treatment (Wk 2) | Treatment | Feed Day | No  | 14:00 | 14:00 - 14:59 | Afternoon    | 38,0 | 134 | 60,4  | 60,4  | 19,15 | 614,33 | 138,32 |
| 2019/05/24 | CH2205 | Male | Three y/o | Treatment (Wk 2) | Treatment | Feed Day | No  | 14:05 | 14:00 - 14:59 | Afternoon    | 38,6 | 101 | 62,4  | 62,4  | 19,76 | 594,59 | 139,45 |
| 2019/05/24 | CH2206 | Male | Three y/o | Treatment (Wk 2) | Treatment | Feed Day | No  | 14:05 | 14:00 - 14:59 | Afternoon    | 38,0 |     | 132,2 | 132,2 | 19,15 |        | 165,59 |
| 2019/05/24 | CH2205 | Male | Three y/o | Treatment (Wk 2) | Treatment | Feed Day | No  | 14:10 | 14:00 - 14:59 | Afternoon    | 38,5 |     | 37,2  | 37,2  | 19,66 |        | 121,59 |
| 2019/05/24 | CH2206 | Male | Three y/o | Treatment (Wk 2) | Treatment | Feed Day | No  | 14:10 | 14:00 - 14:59 | Afternoon    | 38,1 | 185 | 238,4 | 238,4 | 19,26 | 635,34 | 186,30 |
| 2019/05/24 | CH2205 | Male | Three y/o | Treatment (Wk 2) | Treatment | Feed Day | No  | 14:15 | 14:00 - 14:59 | Afternoon    | 38,4 |     | 31,2  | 31,2  | 19,56 |        | 115,54 |



|            |        |      |           |                  |           |          |    |       |               |           |      |     |       |       |       |        |        |
|------------|--------|------|-----------|------------------|-----------|----------|----|-------|---------------|-----------|------|-----|-------|-------|-------|--------|--------|
| 2019/05/24 | CH2206 | Male | Three y/o | Treatment (Wk 2) | Treatment | Feed Day | No | 14:15 | 14:00 - 14:59 | Afternoon | 38,1 | 103 | 195,0 | 195,0 | 19,26 | 596,00 | 179,23 |
| 2019/05/24 | CH2205 | Male | Three y/o | Treatment (Wk 2) | Treatment | Feed Day | No | 14:20 | 14:00 - 14:59 | Afternoon | 38,3 | 90  | 62,4  | 62,4  | 19,46 | 586,16 | 139,45 |
| 2019/05/24 | CH2206 | Male | Three y/o | Treatment (Wk 2) | Treatment | Feed Day | No | 14:20 | 14:00 - 14:59 | Afternoon | 38,1 | 134 | 131,8 | 131,8 | 19,26 | 614,33 | 165,49 |
| 2019/05/24 | CH2205 | Male | Three y/o | Treatment (Wk 2) | Treatment | Feed Day | No | 14:25 | 14:00 - 14:59 | Afternoon | 38,4 | 65  | 56,4  | 56,4  | 19,56 | 561,12 | 135,95 |
| 2019/05/24 | CH2206 | Male | Three y/o | Treatment (Wk 2) | Treatment | Feed Day | No | 14:25 | 14:00 - 14:59 | Afternoon | 38,1 | 131 | 71,4  | 71,4  | 19,26 | 612,80 | 144,12 |
| 2019/05/24 | CH2205 | Male | Three y/o | Treatment (Wk 2) | Treatment | Feed Day | No | 14:30 | 14:00 - 14:59 | Afternoon | 38,3 |     | 30,4  | 30,4  | 19,46 |        | 114,65 |
| 2019/05/24 | CH2206 | Male | Three y/o | Treatment (Wk 2) | Treatment | Feed Day | No | 14:30 | 14:00 - 14:59 | Afternoon | 38,1 | 71  | 58,6  | 58,6  | 19,26 | 568,10 | 137,28 |
| 2019/05/24 | CH2205 | Male | Three y/o | Treatment (Wk 2) | Treatment | Feed Day | No | 14:35 | 14:00 - 14:59 | Afternoon | 38,3 | 95  | 39,6  | 39,6  | 19,46 | 590,14 | 123,74 |
| 2019/05/24 | CH2206 | Male | Three y/o | Treatment (Wk 2) | Treatment | Feed Day | No | 14:35 | 14:00 - 14:59 | Afternoon | 38,1 | 70  | 33,4  | 33,4  | 19,26 | 566,99 | 117,88 |
| 2019/05/24 | CH2205 | Male | Three y/o | Treatment (Wk 2) | Treatment | Feed Day | No | 14:40 | 14:00 - 14:59 | Afternoon | 38,3 | 64  | 26,8  | 26,8  | 19,46 | 559,88 | 110,33 |
| 2019/05/24 | CH2206 | Male | Three y/o | Treatment (Wk 2) | Treatment | Feed Day | No | 14:40 | 14:00 - 14:59 | Afternoon | 38,1 | 67  | 56,4  | 56,4  | 19,26 | 563,53 | 135,95 |
| 2019/05/24 | CH2205 | Male | Three y/o | Treatment (Wk 2) | Treatment | Feed Day | No | 14:45 | 14:00 - 14:59 | Afternoon | 38,3 | 81  | 11,8  | 11,8  | 19,46 | 578,26 | 82,36  |
| 2019/05/24 | CH2206 | Male | Three y/o | Treatment (Wk 2) | Treatment | Feed Day | No | 14:45 | 14:00 - 14:59 | Afternoon | 38,1 | 52  | 37,8  | 37,8  | 19,26 | 542,83 | 122,14 |
| 2019/05/24 | CH2205 | Male | Three y/o | Treatment (Wk 2) | Treatment | Feed Day | No | 14:50 | 14:00 - 14:59 | Afternoon | 38,3 | 65  | 2,2   | 2,2   | 19,46 | 561,12 | 26,02  |
| 2019/05/24 | CH2206 | Male | Three y/o | Treatment (Wk 2) | Treatment | Feed Day | No | 14:50 | 14:00 - 14:59 | Afternoon | 38,1 | 45  | 40,0  | 40,0  | 19,26 | 530,47 | 124,09 |
| 2019/05/24 | CH2205 | Male | Three y/o | Treatment (Wk 2) | Treatment | Feed Day | No | 14:55 | 14:00 - 14:59 | Afternoon | 38,3 | 49  | 11,6  | 11,6  | 19,46 | 537,80 | 81,78  |
| 2019/05/24 | CH2206 | Male | Three y/o | Treatment (Wk 2) | Treatment | Feed Day | No | 14:55 | 14:00 - 14:59 | Afternoon | 38,1 | 71  | 39,4  | 39,4  | 19,26 | 568,10 | 123,57 |
| 2019/05/24 | CH2205 | Male | Three y/o | Treatment (Wk 2) | Treatment | Feed Day | No | 15:00 | 15:00 - 15:59 | Afternoon | 38,3 | 68  | 14,8  | 14,8  | 19,46 | 564,71 | 90,05  |
| 2019/05/24 | CH2206 | Male | Three y/o | Treatment (Wk 2) | Treatment | Feed Day | No | 15:00 | 15:00 - 15:59 | Afternoon | 38,1 | 75  | 40,6  | 40,6  | 19,26 | 572,36 | 124,60 |
| 2019/05/24 | CH2205 | Male | Three y/o | Treatment (Wk 2) | Treatment | Feed Day | No | 15:05 | 15:00 - 15:59 | Afternoon | 38,3 | 55  | 28,0  | 28,0  | 19,46 | 547,52 | 111,83 |
| 2019/05/24 | CH2206 | Male | Three y/o | Treatment (Wk 2) | Treatment | Feed Day | No | 15:05 | 15:00 - 15:59 | Afternoon | 38,0 | 51  | 41,6  | 41,6  | 19,15 | 541,20 | 125,44 |
| 2019/05/24 | CH2205 | Male | Three y/o | Treatment (Wk 2) | Treatment | Feed Day | No | 15:10 | 15:00 - 15:59 | Afternoon | 38,3 | 41  | 26,2  | 26,2  | 19,46 | 522,29 | 109,55 |
| 2019/05/24 | CH2206 | Male | Three y/o | Treatment (Wk 2) | Treatment | Feed Day | No | 15:10 | 15:00 - 15:59 | Afternoon | 38,0 | 45  | 42,0  | 42,0  | 19,15 | 530,47 | 125,77 |
| 2019/05/24 | CH2205 | Male | Three y/o | Treatment (Wk 2) | Treatment | Feed Day | No | 15:15 | 15:00 - 15:59 | Afternoon | 38,2 | 52  | 24,6  | 24,6  | 19,36 | 542,83 | 107,39 |
| 2019/05/24 | CH2206 | Male | Three y/o | Treatment (Wk 2) | Treatment | Feed Day | No | 15:15 | 15:00 - 15:59 | Afternoon | 38,0 | 74  | 32,2  | 32,2  | 19,15 | 571,33 | 116,63 |
| 2019/05/24 | CH2205 | Male | Three y/o | Treatment (Wk 2) | Treatment | Feed Day | No | 15:20 | 15:00 - 15:59 | Afternoon | 38,2 | 46  | 26,6  | 26,6  | 19,36 | 532,38 | 110,07 |
| 2019/05/24 | CH2206 | Male | Three y/o | Treatment (Wk 2) | Treatment | Feed Day | No | 15:20 | 15:00 - 15:59 | Afternoon | 38,0 | 56  | 31,2  | 31,2  | 19,15 | 549,01 | 115,54 |
| 2019/05/24 | CH2205 | Male | Three y/o | Treatment (Wk 2) | Treatment | Feed Day | No | 15:25 | 15:00 - 15:59 | Afternoon | 38,2 | 61  | 71,8  | 71,8  | 19,36 | 556,01 | 144,32 |
| 2019/05/24 | CH2206 | Male | Three y/o | Treatment (Wk 2) | Treatment | Feed Day | No | 15:25 | 15:00 - 15:59 | Afternoon | 37,9 | 48  | 26,6  | 26,6  | 19,05 | 536,04 | 110,07 |
| 2019/05/24 | CH2205 | Male | Three y/o | Treatment (Wk 2) | Treatment | Feed Day | No | 15:30 | 15:00 - 15:59 | Afternoon | 38,1 | 90  | 107,0 | 107,0 | 19,26 | 586,16 | 158,20 |
| 2019/05/24 | CH2206 | Male | Three y/o | Treatment (Wk 2) | Treatment | Feed Day | No | 15:30 | 15:00 - 15:59 | Afternoon | 37,9 | 80  | 17,8  | 17,8  | 19,05 | 577,31 | 96,34  |
| 2019/05/24 | CH2205 | Male | Three y/o | Treatment (Wk 2) | Treatment | Feed Day | No | 15:35 | 15:00 - 15:59 | Afternoon | 38,1 | 74  | 49,0  | 49,0  | 19,26 | 571,33 | 131,09 |
| 2019/05/24 | CH2206 | Male | Three y/o | Treatment (Wk 2) | Treatment | Feed Day | No | 15:35 | 15:00 - 15:59 | Afternoon | 37,9 | 53  | 38,4  | 38,4  | 19,05 | 544,43 | 122,68 |
| 2019/05/24 | CH2205 | Male | Three y/o | Treatment (Wk 2) | Treatment | Feed Day | No | 15:40 | 15:00 - 15:59 | Afternoon | 38,1 |     | 63,0  | 63,0  | 19,26 |        | 139,78 |
| 2019/05/24 | CH2206 | Male | Three y/o | Treatment (Wk 2) | Treatment | Feed Day | No | 15:40 | 15:00 - 15:59 | Afternoon | 37,8 | 114 | 177,4 | 177,4 | 18,95 | 603,20 | 175,90 |
| 2019/05/24 | CH2205 | Male | Three y/o | Treatment (Wk 2) | Treatment | Feed Day | No | 15:45 | 15:00 - 15:59 | Afternoon | 38,1 | 98  | 75,6  | 75,6  | 19,26 | 592,41 | 146,11 |
| 2019/05/24 | CH2206 | Male | Three y/o | Treatment (Wk 2) | Treatment | Feed Day | No | 15:45 | 15:00 - 15:59 | Afternoon | 37,8 | 47  | 86,8  | 86,8  | 18,95 | 534,23 | 150,91 |
| 2019/05/24 | CH2205 | Male | Three y/o | Treatment (Wk 2) | Treatment | Feed Day | No | 15:50 | 15:00 - 15:59 | Afternoon | 38,1 | 78  | 34,4  | 34,4  | 19,26 | 575,38 | 118,90 |
| 2019/05/24 | CH2206 | Male | Three y/o | Treatment (Wk 2) | Treatment | Feed Day | No | 15:50 | 15:00 - 15:59 | Afternoon | 37,9 | 61  | 125,6 | 125,6 | 19,05 | 556,01 | 163,80 |
| 2019/05/24 | CH2205 | Male | Three y/o | Treatment (Wk 2) | Treatment | Feed Day | No | 15:55 | 15:00 - 15:59 | Afternoon | 38,1 |     | 32,6  | 32,6  | 19,26 |        | 117,05 |
| 2019/05/24 | CH2206 | Male | Three y/o | Treatment (Wk 2) | Treatment | Feed Day | No | 15:55 | 15:00 - 15:59 | Afternoon | 38,0 | 73  | 38,8  | 38,8  | 19,15 | 570,27 | 123,04 |
| 2019/05/24 | CH2205 | Male | Three y/o | Treatment (Wk 2) | Treatment | Feed Day | No | 16:00 | 16:00 - 16:59 | Evening   | 37,7 | 115 | 37,0  | 37,0  | 18,85 | 603,82 | 121,40 |
| 2019/05/24 | CH2206 | Male | Three y/o | Treatment (Wk 2) | Treatment | Feed Day | No | 16:00 | 16:00 - 16:59 | Evening   | 38,0 | 76  | 170,6 | 170,6 | 19,15 | 573,39 | 174,53 |
| 2019/05/24 | CH2205 | Male | Three y/o | Treatment (Wk 2) | Treatment | Feed Day | No | 16:05 | 16:00 - 16:59 | Evening   | 37,9 | 78  | 105,4 | 105,4 | 19,05 | 575,38 | 157,68 |
| 2019/05/24 | CH2206 | Male | Three y/o | Treatment (Wk 2) | Treatment | Feed Day | No | 16:05 | 16:00 - 16:59 | Evening   | 38,1 | 110 | 26,0  | 26,0  | 19,26 | 600,69 | 109,29 |
| 2019/05/24 | CH2205 | Male | Three y/o | Treatment (Wk 2) | Treatment | Feed Day | No | 16:10 | 16:00 - 16:59 | Evening   | 38,0 |     | 111,0 | 111,0 | 19,15 |        | 159,48 |
| 2019/05/24 | CH2206 | Male | Three y/o | Treatment (Wk 2) | Treatment | Feed Day | No | 16:10 | 16:00 - 16:59 | Evening   | 38,1 | 61  | 23,0  | 23,0  | 19,26 | 556,01 | 105,09 |
| 2019/05/24 | CH2205 | Male | Three y/o | Treatment (Wk 2) | Treatment | Feed Day | No | 16:15 | 16:00 - 16:59 | Evening   | 38,0 | 137 | 136,6 | 136,6 | 19,15 | 615,83 | 166,74 |
| 2019/05/24 | CH2206 | Male | Three y/o | Treatment (Wk 2) | Treatment | Feed Day | No | 16:15 | 16:00 - 16:59 | Evening   | 38,1 | 60  | 27,0  | 27,0  | 19,26 | 554,67 | 110,58 |
| 2019/05/24 | CH2205 | Male | Three y/o | Treatment (Wk 2) | Treatment | Feed Day | No | 16:20 | 16:00 - 16:59 | Evening   | 38,0 | 180 | 121,4 | 121,4 | 19,15 | 633,61 | 162,61 |
| 2019/05/24 | CH2206 | Male | Three y/o | Treatment (Wk 2) | Treatment | Feed Day | No | 16:20 | 16:00 - 16:59 | Evening   | 38,1 | 62  | 21,0  | 21,0  | 19,26 | 557,33 | 101,98 |
| 2019/05/24 | CH2205 | Male | Three y/o | Treatment (Wk 2) | Treatment | Feed Day | No | 16:25 | 16:00 - 16:59 | Evening   | 38,1 | 108 | 198,2 | 198,2 | 19,26 | 599,39 | 179,80 |
| 2019/05/24 | CH2206 | Male | Three y/o | Treatment (Wk 2) | Treatment | Feed Day | No | 16:25 | 16:00 - 16:59 | Evening   | 38,1 | 59  | 22,6  | 22,6  | 19,26 | 553,30 | 104,49 |
| 2019/05/24 | CH2205 | Male | Three y/o | Treatment (Wk 2) | Treatment | Feed Day | No | 16:30 | 16:00 - 16:59 | Evening   | 38,1 | 185 | 146,4 | 146,4 | 19,26 | 635,34 | 169,17 |
| 2019/05/24 | CH2206 | Male | Three y/o | Treatment (Wk 2) | Treatment | Feed Day | No | 16:30 | 16:00 - 16:59 | Evening   | 38,1 | 48  | 41,6  | 41,6  | 19,26 | 536,04 | 125,44 |
| 2019/05/24 | CH2205 | Male | Three y/o | Treatment (Wk 2) | Treatment | Feed Day | No | 16:35 | 16:00 - 16:59 | Evening   | 38,1 | 74  | 22,2  | 22,2  | 19,26 | 571,33 | 103,88 |
| 2019/05/24 | CH2206 | Male | Three y/o | Treatment (Wk 2) | Treatment | Feed Day | No | 16:35 | 16:00 - 16:59 | Evening   | 38,0 | 48  | 26,6  | 26,6  | 19,15 | 536,04 | 110,07 |
| 2019/05/24 | CH2205 | Male | Three y/o | Treatment (Wk 2) | Treatment | Feed Day | No | 16:40 | 16:00 - 16:59 | Evening   | 38,1 |     | 18,2  | 18,2  | 19,26 |        | 97,10  |
| 2019/05/24 | CH2206 | Male | Three y/o | Treatment (Wk 2) | Treatment | Feed Day | No | 16:40 | 16:00 - 16:59 | Evening   | 38,0 | 54  | 40,8  | 40,8  | 19,15 | 545,99 | 124,77 |
| 2019/05/24 | CH2205 | Male | Three y/o | Treatment (Wk 2) | Treatment | Feed Day | No | 16:45 | 16:00 - 16:59 | Evening   | 37,9 |     | 30,4  | 30,4  | 19,05 |        | 114,65 |
| 2019/05/24 | CH2206 | Male | Three y/o | Treatment (Wk 2) | Treatment | Feed Day | No | 16:45 | 16:00 - 16:59 | Evening   | 37,9 | 70  | 53,4  | 53,4  | 19,05 | 566,99 | 134,06 |
| 2019/05/24 | CH2205 | Male | Three y/o | Treatment (Wk 2) | Treatment | Feed Day | No | 16:50 | 16:00 - 16:59 | Evening   | 37,9 |     | 32,2  | 32,2  | 19,05 |        | 116,63 |
| 2019/05/24 | CH2206 | Male | Three y/o | Treatment (Wk 2) | Treatment | Feed Day | No | 16:50 | 16:00 - 16:59 | Evening   | 37,9 | 40  | 43,6  | 43,6  | 19,05 | 520,09 | 127,06 |
| 2019/05/24 | CH2205 | Male | Three y/o | Treatment (Wk 2) | Treatment | Feed Day | No | 16:55 | 16:00 - 16:59 | Evening   | 37,9 | 68  | 25,0  | 25,0  | 19,05 | 564,71 | 107,94 |
| 2019/05/24 | CH2206 | Male | Three y/o | Treatment (Wk 2) | Treatment | Feed Day | No | 16:55 | 16:00 - 16:59 | Evening   | 37,8 | 75  | 41,0  | 41,0  | 18,95 | 572,36 | 124,94 |
| 2019/05/24 | CH2205 | Male | Three y/o | Treatment (Wk 2) | Treatment | Feed Day | No | 17:00 | 17:00 - 17:59 | Evening   | 37,9 |     | 37,0  | 37,0  | 19,05 |        | 121,40 |
| 2019/05/24 | CH2206 | Male | Three y/o | Treatment (Wk 2) | Treatment | Feed Day | No | 17:00 | 17:00 - 17:59 | Evening   | 37,8 | 44  | 104,0 | 104,0 | 18,95 | 528,51 | 157,21 |
| 2019/05/24 | CH2205 | Male | Three y/o | Treatment (Wk 2) | Treatment | Feed Day | No | 17:05 | 17:00 - 17:59 | Evening   | 37,7 | 104 | 27,2  | 27,2  | 18,85 | 596,69 | 110,83 |
| 2019/05/24 | CH2206 | Male | Three y/o | Treatment (Wk 2) | Treatment | Feed Day | No | 17:05 | 17:00 - 17:59 | Evening   | 37,8 | 103 | 58,4  | 58,4  | 18,95 | 596,00 | 137,16 |
| 2019/05/24 | CH2205 | Male | Three y/o | Treatment (Wk 2) | Treatment | Feed Day | No | 17:10 | 17:00 - 17:59 | Evening   | 37,7 | 90  | 31,6  | 31,6  | 18,85 | 586,16 | 115,98 |



|            |        |      |           |                  |           |          |    |       |               |         |      |     |       |       |       |        |        |
|------------|--------|------|-----------|------------------|-----------|----------|----|-------|---------------|---------|------|-----|-------|-------|-------|--------|--------|
| 2019/05/24 | CH2206 | Male | Three y/o | Treatment (Wk 2) | Treatment | Feed Day | No | 17:10 | 17:00 - 17:59 | Evening | 37,8 | 48  | 54,6  | 54,6  | 18,95 | 536,04 | 134,83 |
| 2019/05/24 | CH2205 | Male | Three y/o | Treatment (Wk 2) | Treatment | Feed Day | No | 17:15 | 17:00 - 17:59 | Evening | 37,9 |     | 26,6  | 26,6  | 19,05 |        | 110,07 |
| 2019/05/24 | CH2206 | Male | Three y/o | Treatment (Wk 2) | Treatment | Feed Day | No | 17:15 | 17:00 - 17:59 | Evening | 37,7 | 47  | 48,8  | 48,8  | 18,85 | 534,23 | 130,95 |
| 2019/05/24 | CH2205 | Male | Three y/o | Treatment (Wk 2) | Treatment | Feed Day | No | 17:20 | 17:00 - 17:59 | Evening | 37,9 | 61  | 7,8   | 7,8   | 19,05 | 556,01 | 68,36  |
| 2019/05/24 | CH2206 | Male | Three y/o | Treatment (Wk 2) | Treatment | Feed Day | No | 17:20 | 17:00 - 17:59 | Evening | 37,7 | 47  | 64,6  | 64,6  | 18,85 | 534,23 | 140,65 |
| 2019/05/24 | CH2205 | Male | Three y/o | Treatment (Wk 2) | Treatment | Feed Day | No | 17:25 | 17:00 - 17:59 | Evening | 37,9 | 68  | 9,0   | 9,0   | 19,05 | 564,71 | 73,19  |
| 2019/05/24 | CH2206 | Male | Three y/o | Treatment (Wk 2) | Treatment | Feed Day | No | 17:25 | 17:00 - 17:59 | Evening | 37,5 | 88  | 63,8  | 63,8  | 18,65 | 584,49 | 140,22 |
| 2019/05/24 | CH2205 | Male | Three y/o | Treatment (Wk 2) | Treatment | Feed Day | No | 17:30 | 17:00 - 17:59 | Evening | 37,9 | 61  | 8,0   | 8,0   | 19,05 | 556,01 | 69,22  |
| 2019/05/24 | CH2206 | Male | Three y/o | Treatment (Wk 2) | Treatment | Feed Day | No | 17:30 | 17:00 - 17:59 | Evening | 37,7 | 42  | 63,0  | 63,0  | 18,85 | 524,42 | 139,78 |
| 2019/05/24 | CH2205 | Male | Three y/o | Treatment (Wk 2) | Treatment | Feed Day | No | 17:35 | 17:00 - 17:59 | Evening | 37,9 | 56  | 6,0   | 6,0   | 19,05 | 549,01 | 59,53  |
| 2019/05/24 | CH2206 | Male | Three y/o | Treatment (Wk 2) | Treatment | Feed Day | No | 17:35 | 17:00 - 17:59 | Evening | 37,5 | 41  | 58,0  | 58,0  | 18,65 | 522,29 | 136,92 |
| 2019/05/24 | CH2205 | Male | Three y/o | Treatment (Wk 2) | Treatment | Feed Day | No | 17:40 | 17:00 - 17:59 | Evening | 37,9 | 66  | 13,4  | 13,4  | 19,05 | 562,34 | 86,68  |
| 2019/05/24 | CH2206 | Male | Three y/o | Treatment (Wk 2) | Treatment | Feed Day | No | 17:40 | 17:00 - 17:59 | Evening | 37,4 | 46  | 58,2  | 58,2  | 18,55 | 532,38 | 137,04 |
| 2019/05/24 | CH2205 | Male | Three y/o | Treatment (Wk 2) | Treatment | Feed Day | No | 17:45 | 17:00 - 17:59 | Evening | 37,9 |     | 29,4  | 29,4  | 19,05 |        | 113,50 |
| 2019/05/24 | CH2206 | Male | Three y/o | Treatment (Wk 2) | Treatment | Feed Day | No | 17:45 | 17:00 - 17:59 | Evening | 37,5 | 102 | 156,8 | 156,8 | 18,65 | 595,30 | 171,57 |
| 2019/05/24 | CH2205 | Male | Three y/o | Treatment (Wk 2) | Treatment | Feed Day | No | 17:50 | 17:00 - 17:59 | Evening | 37,9 | 87  | 29,0  | 29,0  | 19,05 | 583,64 | 113,03 |
| 2019/05/24 | CH2206 | Male | Three y/o | Treatment (Wk 2) | Treatment | Feed Day | No | 17:50 | 17:00 - 17:59 | Evening | 37,7 | 119 | 99,4  | 99,4  | 18,85 | 606,20 | 155,63 |
| 2019/05/24 | CH2205 | Male | Three y/o | Treatment (Wk 2) | Treatment | Feed Day | No | 17:55 | 17:00 - 17:59 | Evening | 37,9 |     | 34,0  | 34,0  | 19,05 |        | 118,49 |
| 2019/05/24 | CH2206 | Male | Three y/o | Treatment (Wk 2) | Treatment | Feed Day | No | 17:55 | 17:00 - 17:59 | Evening | 37,8 | 112 | 110,0 | 110,0 | 18,95 | 601,96 | 159,17 |
| 2019/05/24 | CH2205 | Male | Three y/o | Treatment (Wk 2) | Treatment | Feed Day | No | 18:00 | 18:00 - 18:59 | Evening | 37,9 |     | 27,8  | 27,8  | 19,05 |        | 111,58 |
| 2019/05/24 | CH2206 | Male | Three y/o | Treatment (Wk 2) | Treatment | Feed Day | No | 18:00 | 18:00 - 18:59 | Evening | 37,9 | 108 | 59,6  | 59,6  | 19,05 | 599,39 | 137,86 |
| 2019/05/24 | CH2205 | Male | Three y/o | Treatment (Wk 2) | Treatment | Feed Day | No | 18:05 | 18:00 - 18:59 | Evening | 37,6 | 188 | 36,2  | 36,2  | 18,75 | 636,34 | 120,65 |
| 2019/05/24 | CH2206 | Male | Three y/o | Treatment (Wk 2) | Treatment | Feed Day | No | 18:05 | 18:00 - 18:59 | Evening | 37,9 | 125 | 55,2  | 55,2  | 19,05 | 609,60 | 135,21 |
| 2019/05/24 | CH2205 | Male | Three y/o | Treatment (Wk 2) | Treatment | Feed Day | No | 18:10 | 18:00 - 18:59 | Evening | 37,5 |     | 27,4  | 27,4  | 18,65 |        | 111,09 |
| 2019/05/24 | CH2206 | Male | Three y/o | Treatment (Wk 2) | Treatment | Feed Day | No | 18:10 | 18:00 - 18:59 | Evening | 37,8 | 49  | 59,6  | 59,6  | 18,95 | 537,80 | 137,86 |
| 2019/05/24 | CH2205 | Male | Three y/o | Treatment (Wk 2) | Treatment | Feed Day | No | 18:15 | 18:00 - 18:59 | Evening | 37,5 |     | 27,6  | 27,6  | 18,65 |        | 111,33 |
| 2019/05/24 | CH2206 | Male | Three y/o | Treatment (Wk 2) | Treatment | Feed Day | No | 18:15 | 18:00 - 18:59 | Evening | 37,5 | 46  | 57,8  | 57,8  | 18,65 | 532,38 | 136,80 |
| 2019/05/24 | CH2205 | Male | Three y/o | Treatment (Wk 2) | Treatment | Feed Day | No | 18:20 | 18:00 - 18:59 | Evening | 37,7 |     | 23,0  | 23,0  | 18,85 |        | 105,09 |
| 2019/05/24 | CH2206 | Male | Three y/o | Treatment (Wk 2) | Treatment | Feed Day | No | 18:20 | 18:00 - 18:59 | Evening | 37,7 | 49  | 52,4  | 52,4  | 18,85 | 537,80 | 133,41 |
| 2019/05/24 | CH2205 | Male | Three y/o | Treatment (Wk 2) | Treatment | Feed Day | No | 18:25 | 18:00 - 18:59 | Evening | 37,7 |     | 32,6  | 32,6  | 18,85 |        | 117,05 |
| 2019/05/24 | CH2206 | Male | Three y/o | Treatment (Wk 2) | Treatment | Feed Day | No | 18:25 | 18:00 - 18:59 | Evening | 37,7 | 49  | 40,6  | 40,6  | 18,85 | 537,80 | 124,60 |
| 2019/05/24 | CH2205 | Male | Three y/o | Treatment (Wk 2) | Treatment | Feed Day | No | 18:30 | 18:00 - 18:59 | Evening | 37,7 | 81  | 38,2  | 38,2  | 18,85 | 578,26 | 122,50 |
| 2019/05/24 | CH2206 | Male | Three y/o | Treatment (Wk 2) | Treatment | Feed Day | No | 18:30 | 18:00 - 18:59 | Evening | 37,8 | 46  | 42,6  | 42,6  | 18,95 | 532,38 | 126,26 |
| 2019/05/24 | CH2205 | Male | Three y/o | Treatment (Wk 2) | Treatment | Feed Day | No | 18:35 | 18:00 - 18:59 | Evening | 37,6 | 131 | 34,0  | 34,0  | 18,75 | 612,80 | 118,49 |
| 2019/05/24 | CH2206 | Male | Three y/o | Treatment (Wk 2) | Treatment | Feed Day | No | 18:35 | 18:00 - 18:59 | Evening | 37,8 | 44  | 43,6  | 43,6  | 18,95 | 528,51 | 127,06 |
| 2019/05/24 | CH2205 | Male | Three y/o | Treatment (Wk 2) | Treatment | Feed Day | No | 18:40 | 18:00 - 18:59 | Evening | 37,6 | 65  | 30,0  | 30,0  | 18,75 | 561,12 | 114,20 |
| 2019/05/24 | CH2206 | Male | Three y/o | Treatment (Wk 2) | Treatment | Feed Day | No | 18:40 | 18:00 - 18:59 | Evening | 37,8 | 51  | 45,4  | 45,4  | 18,95 | 541,20 | 128,45 |
| 2019/05/24 | CH2205 | Male | Three y/o | Treatment (Wk 2) | Treatment | Feed Day | No | 18:45 | 18:00 - 18:59 | Evening | 37,6 |     | 26,2  | 26,2  | 18,75 |        | 109,55 |
| 2019/05/24 | CH2206 | Male | Three y/o | Treatment (Wk 2) | Treatment | Feed Day | No | 18:45 | 18:00 - 18:59 | Evening | 37,7 | 46  | 42,0  | 42,0  | 18,85 | 532,38 | 125,77 |
| 2019/05/24 | CH2205 | Male | Three y/o | Treatment (Wk 2) | Treatment | Feed Day | No | 18:50 | 18:00 - 18:59 | Evening | 37,4 |     | 24,2  | 24,2  | 18,55 |        | 106,83 |
| 2019/05/24 | CH2206 | Male | Three y/o | Treatment (Wk 2) | Treatment | Feed Day | No | 18:50 | 18:00 - 18:59 | Evening | 37,7 | 43  | 37,0  | 37,0  | 18,85 | 526,50 | 121,40 |
| 2019/05/24 | CH2205 | Male | Three y/o | Treatment (Wk 2) | Treatment | Feed Day | No | 18:55 | 18:00 - 18:59 | Evening | 37,6 |     | 21,2  | 21,2  | 18,75 |        | 102,31 |
| 2019/05/24 | CH2206 | Male | Three y/o | Treatment (Wk 2) | Treatment | Feed Day | No | 18:55 | 18:00 - 18:59 | Evening | 37,7 | 45  | 22,8  | 22,8  | 18,85 | 530,47 | 104,79 |
| 2019/05/24 | CH2205 | Male | Three y/o | Treatment (Wk 2) | Treatment | Feed Day | No | 19:00 | 19:00 - 19:59 | Evening | 37,6 |     | 20,4  | 20,4  | 18,75 |        | 100,99 |
| 2019/05/24 | CH2206 | Male | Three y/o | Treatment (Wk 2) | Treatment | Feed Day | No | 19:00 | 19:00 - 19:59 | Evening | 37,7 | 46  | 36,4  | 36,4  | 18,85 | 532,38 | 120,84 |
| 2019/05/24 | CH2205 | Male | Three y/o | Treatment (Wk 2) | Treatment | Feed Day | No | 19:05 | 19:00 - 19:59 | Evening | 37,6 |     | 21,4  | 21,4  | 18,75 |        | 102,63 |
| 2019/05/24 | CH2206 | Male | Three y/o | Treatment (Wk 2) | Treatment | Feed Day | No | 19:05 | 19:00 - 19:59 | Evening | 37,7 | 62  | 37,2  | 37,2  | 18,85 | 557,33 | 121,59 |
| 2019/05/24 | CH2205 | Male | Three y/o | Treatment (Wk 2) | Treatment | Feed Day | No | 19:10 | 19:00 - 19:59 | Evening | 37,6 |     | 24,6  | 24,6  | 18,75 |        | 107,39 |
| 2019/05/24 | CH2206 | Male | Three y/o | Treatment (Wk 2) | Treatment | Feed Day | No | 19:10 | 19:00 - 19:59 | Evening | 37,5 | 49  | 38,0  | 38,0  | 18,65 | 537,80 | 122,32 |
| 2019/05/24 | CH2205 | Male | Three y/o | Treatment (Wk 2) | Treatment | Feed Day | No | 19:15 | 19:00 - 19:59 | Evening | 37,7 |     | 25,0  | 25,0  | 18,85 |        | 107,94 |
| 2019/05/24 | CH2206 | Male | Three y/o | Treatment (Wk 2) | Treatment | Feed Day | No | 19:15 | 19:00 - 19:59 | Evening | 37,5 | 75  | 50,2  | 50,2  | 18,65 | 572,36 | 131,92 |
| 2019/05/24 | CH2205 | Male | Three y/o | Treatment (Wk 2) | Treatment | Feed Day | No | 19:20 | 19:00 - 19:59 | Evening | 37,7 | 94  | 20,4  | 20,4  | 18,85 | 589,37 | 100,99 |
| 2019/05/24 | CH2206 | Male | Three y/o | Treatment (Wk 2) | Treatment | Feed Day | No | 19:20 | 19:00 - 19:59 | Evening | 37,7 | 48  | 43,0  | 43,0  | 18,85 | 536,04 | 126,58 |
| 2019/05/24 | CH2205 | Male | Three y/o | Treatment (Wk 2) | Treatment | Feed Day | No | 19:25 | 19:00 - 19:59 | Evening | 37,7 | 89  | 12,8  | 12,8  | 18,85 | 585,33 | 85,12  |
| 2019/05/24 | CH2206 | Male | Three y/o | Treatment (Wk 2) | Treatment | Feed Day | No | 19:25 | 19:00 - 19:59 | Evening | 37,7 | 48  | 49,0  | 49,0  | 18,85 | 536,04 | 131,09 |
| 2019/05/24 | CH2205 | Male | Three y/o | Treatment (Wk 2) | Treatment | Feed Day | No | 19:30 | 19:00 - 19:59 | Evening | 37,7 | 61  | 20,2  | 20,2  | 18,85 | 556,01 | 100,65 |
| 2019/05/24 | CH2206 | Male | Three y/o | Treatment (Wk 2) | Treatment | Feed Day | No | 19:30 | 19:00 - 19:59 | Evening | 37,7 | 50  | 44,4  | 44,4  | 18,85 | 539,52 | 127,69 |
| 2019/05/24 | CH2205 | Male | Three y/o | Treatment (Wk 2) | Treatment | Feed Day | No | 19:35 | 19:00 - 19:59 | Evening | 37,6 | 60  | 20,8  | 20,8  | 18,85 | 554,67 | 101,65 |
| 2019/05/24 | CH2206 | Male | Three y/o | Treatment (Wk 2) | Treatment | Feed Day | No | 19:35 | 19:00 - 19:59 | Evening | 37,7 | 42  | 44,8  | 44,8  | 18,85 | 524,42 | 127,99 |
| 2019/05/24 | CH2205 | Male | Three y/o | Treatment (Wk 2) | Treatment | Feed Day | No | 19:40 | 19:00 - 19:59 | Evening | 37,7 | 86  | 15,6  | 15,6  | 18,85 | 582,77 | 91,85  |
| 2019/05/24 | CH2206 | Male | Three y/o | Treatment (Wk 2) | Treatment | Feed Day | No | 19:40 | 19:00 - 19:59 | Evening | 37,7 | 45  | 44,2  | 44,2  | 18,85 | 530,47 | 127,53 |
| 2019/05/24 | CH2205 | Male | Three y/o | Treatment (Wk 2) | Treatment | Feed Day | No | 19:45 | 19:00 - 19:59 | Evening | 37,7 | 82  | 16,0  | 16,0  | 18,85 | 579,19 | 92,71  |
| 2019/05/24 | CH2206 | Male | Three y/o | Treatment (Wk 2) | Treatment | Feed Day | No | 19:45 | 19:00 - 19:59 | Evening | 37,7 | 70  | 44,4  | 44,4  | 18,85 | 566,99 | 127,69 |
| 2019/05/24 | CH2205 | Male | Three y/o | Treatment (Wk 2) | Treatment | Feed Day | No | 19:50 | 19:00 - 19:59 | Evening | 37,7 |     | 31,8  | 31,8  | 18,85 |        | 116,20 |
| 2019/05/24 | CH2206 | Male | Three y/o | Treatment (Wk 2) | Treatment | Feed Day | No | 19:50 | 19:00 - 19:59 | Evening | 37,7 | 54  | 49,0  | 49,0  | 18,85 | 545,99 | 131,09 |
| 2019/05/24 | CH2205 | Male | Three y/o | Treatment (Wk 2) | Treatment | Feed Day | No | 19:55 | 19:00 - 19:59 | Evening | 37,7 |     | 26,8  | 26,8  | 18,85 |        | 110,33 |
| 2019/05/24 | CH2206 | Male | Three y/o | Treatment (Wk 2) | Treatment | Feed Day | No | 19:55 | 19:00 - 19:59 | Evening | 37,7 | 69  | 43,8  | 43,8  | 18,85 | 565,86 | 127,22 |
| 2019/05/24 | CH2205 | Male | Three y/o | Treatment (Wk 2) | Treatment | Feed Day | No | 20:00 | 20:00 - 20:59 | Night   | 37,7 |     | 23,2  | 23,2  | 18,85 |        | 105,39 |
| 2019/05/24 | CH2206 | Male | Three y/o | Treatment (Wk 2) | Treatment | Feed Day | No | 20:00 | 20:00 - 20:59 | Night   | 37,7 | 43  | 33,4  | 33,4  | 18,85 | 526,50 | 117,88 |
| 2019/05/24 | CH2205 | Male | Three y/o | Treatment (Wk 2) | Treatment | Feed Day | No | 20:05 | 20:00 - 20:59 | Night   | 37,8 | 92  | 21,8  | 21,8  | 18,95 | 587,78 | 103,26 |



|            |        |      |           |                  |           |          |    |       |               |       |      |     |      |      |       |        |        |
|------------|--------|------|-----------|------------------|-----------|----------|----|-------|---------------|-------|------|-----|------|------|-------|--------|--------|
| 2019/05/24 | CH2206 | Male | Three y/o | Treatment (Wk 2) | Treatment | Feed Day | No | 20:05 | 20:00 - 20:59 | Night | 37,7 | 44  | 26,4 | 26,4 | 18,85 | 528,51 | 109,81 |
| 2019/05/24 | CH2205 | Male | Three y/o | Treatment (Wk 2) | Treatment | Feed Day | No | 20:10 | 20:00 - 20:59 | Night | 37,7 | 57  | 23,2 | 23,2 | 18,85 | 550,47 | 105,39 |
| 2019/05/24 | CH2206 | Male | Three y/o | Treatment (Wk 2) | Treatment | Feed Day | No | 20:10 | 20:00 - 20:59 | Night | 37,7 | 43  | 22,0 | 22,0 | 18,85 | 526,50 | 103,57 |
| 2019/05/24 | CH2205 | Male | Three y/o | Treatment (Wk 2) | Treatment | Feed Day | No | 20:15 | 20:00 - 20:59 | Night | 37,7 |     | 22,2 | 22,2 | 18,85 |        | 103,88 |
| 2019/05/24 | CH2206 | Male | Three y/o | Treatment (Wk 2) | Treatment | Feed Day | No | 20:15 | 20:00 - 20:59 | Night | 37,7 | 50  | 8,8  | 8,8  | 18,85 | 539,52 | 72,43  |
| 2019/05/24 | CH2205 | Male | Three y/o | Treatment (Wk 2) | Treatment | Feed Day | No | 20:20 | 20:00 - 20:59 | Night | 37,6 | 94  | 21,4 | 21,4 | 18,75 | 589,37 | 102,63 |
| 2019/05/24 | CH2206 | Male | Three y/o | Treatment (Wk 2) | Treatment | Feed Day | No | 20:20 | 20:00 - 20:59 | Night | 37,7 | 43  | 14,2 | 14,2 | 18,85 | 526,50 | 88,65  |
| 2019/05/24 | CH2205 | Male | Three y/o | Treatment (Wk 2) | Treatment | Feed Day | No | 20:25 | 20:00 - 20:59 | Night | 37,6 |     | 22,4 | 22,4 | 18,75 |        | 104,19 |
| 2019/05/24 | CH2206 | Male | Three y/o | Treatment (Wk 2) | Treatment | Feed Day | No | 20:25 | 20:00 - 20:59 | Night | 37,6 | 41  | 13,8 | 13,8 | 18,75 | 522,29 | 87,68  |
| 2019/05/24 | CH2205 | Male | Three y/o | Treatment (Wk 2) | Treatment | Feed Day | No | 20:30 | 20:00 - 20:59 | Night | 37,6 | 90  | 20,0 | 20,0 | 18,75 | 586,16 | 100,31 |
| 2019/05/24 | CH2206 | Male | Three y/o | Treatment (Wk 2) | Treatment | Feed Day | No | 20:30 | 20:00 - 20:59 | Night | 37,5 | 65  | 16,6 | 16,6 | 18,65 | 561,12 | 93,96  |
| 2019/05/24 | CH2205 | Male | Three y/o | Treatment (Wk 2) | Treatment | Feed Day | No | 20:35 | 20:00 - 20:59 | Night | 37,6 | 62  | 24,0 | 24,0 | 18,75 | 557,33 | 106,55 |
| 2019/05/24 | CH2206 | Male | Three y/o | Treatment (Wk 2) | Treatment | Feed Day | No | 20:35 | 20:00 - 20:59 | Night | 37,5 | 44  | 18,0 | 18,0 | 18,65 | 528,51 | 96,72  |
| 2019/05/24 | CH2205 | Male | Three y/o | Treatment (Wk 2) | Treatment | Feed Day | No | 20:40 | 20:00 - 20:59 | Night | 37,5 | 88  | 23,0 | 23,0 | 18,65 | 584,49 | 105,09 |
| 2019/05/24 | CH2206 | Male | Three y/o | Treatment (Wk 2) | Treatment | Feed Day | No | 20:40 | 20:00 - 20:59 | Night | 37,5 | 43  | 17,8 | 17,8 | 18,65 | 526,50 | 96,34  |
| 2019/05/24 | CH2205 | Male | Three y/o | Treatment (Wk 2) | Treatment | Feed Day | No | 20:45 | 20:00 - 20:59 | Night | 37,5 | 82  | 25,2 | 25,2 | 18,65 | 579,19 | 108,22 |
| 2019/05/24 | CH2206 | Male | Three y/o | Treatment (Wk 2) | Treatment | Feed Day | No | 20:45 | 20:00 - 20:59 | Night | 37,5 | 52  | 19,4 | 19,4 | 18,65 | 542,83 | 99,28  |
| 2019/05/24 | CH2205 | Male | Three y/o | Treatment (Wk 2) | Treatment | Feed Day | No | 20:50 | 20:00 - 20:59 | Night | 37,5 | 63  | 19,2 | 19,2 | 18,65 | 558,62 | 98,92  |
| 2019/05/24 | CH2206 | Male | Three y/o | Treatment (Wk 2) | Treatment | Feed Day | No | 20:50 | 20:00 - 20:59 | Night | 37,5 | 49  | 18,6 | 18,6 | 18,65 | 537,80 | 97,84  |
| 2019/05/24 | CH2205 | Male | Three y/o | Treatment (Wk 2) | Treatment | Feed Day | No | 20:55 | 20:00 - 20:59 | Night | 37,5 | 71  | 18,8 | 18,8 | 18,65 | 568,10 | 98,20  |
| 2019/05/24 | CH2206 | Male | Three y/o | Treatment (Wk 2) | Treatment | Feed Day | No | 20:55 | 20:00 - 20:59 | Night | 37,5 | 39  | 16,4 | 16,4 | 18,65 | 517,82 | 93,55  |
| 2019/05/24 | CH2205 | Male | Three y/o | Treatment (Wk 2) | Treatment | Feed Day | No | 21:00 | 21:00 - 21:59 | Night | 37,7 | 69  | 18,6 | 18,6 | 18,85 | 565,86 | 97,84  |
| 2019/05/24 | CH2206 | Male | Three y/o | Treatment (Wk 2) | Treatment | Feed Day | No | 21:00 | 21:00 - 21:59 | Night | 37,5 | 40  | 19,6 | 19,6 | 18,65 | 520,09 | 99,63  |
| 2019/05/24 | CH2205 | Male | Three y/o | Treatment (Wk 2) | Treatment | Feed Day | No | 21:05 | 21:00 - 21:59 | Night | 37,7 | 72  | 15,8 | 15,8 | 18,85 | 569,20 | 92,28  |
| 2019/05/24 | CH2206 | Male | Three y/o | Treatment (Wk 2) | Treatment | Feed Day | No | 21:05 | 21:00 - 21:59 | Night | 37,5 | 56  | 21,6 | 21,6 | 18,65 | 549,01 | 102,94 |
| 2019/05/24 | CH2205 | Male | Three y/o | Treatment (Wk 2) | Treatment | Feed Day | No | 21:10 | 21:00 - 21:59 | Night | 37,7 | 51  | 19,2 | 19,2 | 18,85 | 541,20 | 98,92  |
| 2019/05/24 | CH2206 | Male | Three y/o | Treatment (Wk 2) | Treatment | Feed Day | No | 21:10 | 21:00 - 21:59 | Night | 37,5 | 42  | 25,8 | 25,8 | 18,65 | 524,42 | 109,02 |
| 2019/05/24 | CH2205 | Male | Three y/o | Treatment (Wk 2) | Treatment | Feed Day | No | 21:15 | 21:00 - 21:59 | Night | 37,9 | 97  | 59,8 | 59,8 | 19,05 | 591,66 | 137,98 |
| 2019/05/24 | CH2206 | Male | Three y/o | Treatment (Wk 2) | Treatment | Feed Day | No | 21:15 | 21:00 - 21:59 | Night | 37,5 | 48  | 49,8 | 49,8 | 18,65 | 536,04 | 131,65 |
| 2019/05/24 | CH2205 | Male | Three y/o | Treatment (Wk 2) | Treatment | Feed Day | No | 21:20 | 21:00 - 21:59 | Night | 37,8 | 104 | 18,8 | 18,8 | 18,95 | 596,69 | 98,20  |
| 2019/05/24 | CH2206 | Male | Three y/o | Treatment (Wk 2) | Treatment | Feed Day | No | 21:20 | 21:00 - 21:59 | Night | 37,5 | 43  | 59,0 | 59,0 | 18,65 | 526,50 | 137,51 |
| 2019/05/24 | CH2205 | Male | Three y/o | Treatment (Wk 2) | Treatment | Feed Day | No | 21:25 | 21:00 - 21:59 | Night | 37,7 | 64  | 23,8 | 23,8 | 18,85 | 559,88 | 106,26 |
| 2019/05/24 | CH2206 | Male | Three y/o | Treatment (Wk 2) | Treatment | Feed Day | No | 21:25 | 21:00 - 21:59 | Night | 37,4 | 60  | 60,8 | 60,8 | 18,55 | 554,67 | 138,55 |
| 2019/05/24 | CH2205 | Male | Three y/o | Treatment (Wk 2) | Treatment | Feed Day | No | 21:30 | 21:00 - 21:59 | Night | 37,6 | 98  | 20,4 | 20,4 | 18,75 | 592,41 | 100,99 |
| 2019/05/24 | CH2206 | Male | Three y/o | Treatment (Wk 2) | Treatment | Feed Day | No | 21:30 | 21:00 - 21:59 | Night | 37,5 |     | 63,8 | 63,8 | 18,65 |        | 140,22 |
| 2019/05/24 | CH2205 | Male | Three y/o | Treatment (Wk 2) | Treatment | Feed Day | No | 21:35 | 21:00 - 21:59 | Night | 37,6 | 51  | 24,2 | 24,2 | 18,75 | 541,20 | 106,83 |
| 2019/05/24 | CH2206 | Male | Three y/o | Treatment (Wk 2) | Treatment | Feed Day | No | 21:35 | 21:00 - 21:59 | Night | 37,5 | 65  | 60,2 | 60,2 | 18,65 | 561,12 | 138,21 |
| 2019/05/24 | CH2205 | Male | Three y/o | Treatment (Wk 2) | Treatment | Feed Day | No | 21:40 | 21:00 - 21:59 | Night | 37,6 | 86  | 22,8 | 22,8 | 18,75 | 582,77 | 104,79 |
| 2019/05/24 | CH2206 | Male | Three y/o | Treatment (Wk 2) | Treatment | Feed Day | No | 21:40 | 21:00 - 21:59 | Night | 37,5 | 39  | 60,0 | 60,0 | 18,65 | 517,82 | 138,09 |
| 2019/05/24 | CH2205 | Male | Three y/o | Treatment (Wk 2) | Treatment | Feed Day | No | 21:45 | 21:00 - 21:59 | Night | 37,5 | 60  | 21,6 | 21,6 | 18,65 | 554,67 | 102,94 |
| 2019/05/24 | CH2206 | Male | Three y/o | Treatment (Wk 2) | Treatment | Feed Day | No | 21:45 | 21:00 - 21:59 | Night | 37,5 | 40  | 67,6 | 67,6 | 18,65 | 520,09 | 142,23 |
| 2019/05/24 | CH2205 | Male | Three y/o | Treatment (Wk 2) | Treatment | Feed Day | No | 21:50 | 21:00 - 21:59 | Night | 37,5 | 91  | 5,4  | 5,4  | 18,65 | 586,98 | 55,99  |
| 2019/05/24 | CH2206 | Male | Three y/o | Treatment (Wk 2) | Treatment | Feed Day | No | 21:50 | 21:00 - 21:59 | Night | 37,5 | 63  | 55,0 | 55,0 | 18,65 | 558,62 | 135,08 |
| 2019/05/24 | CH2205 | Male | Three y/o | Treatment (Wk 2) | Treatment | Feed Day | No | 21:55 | 21:00 - 21:59 | Night | 37,6 | 57  | 3,2  | 3,2  | 18,75 | 550,47 | 38,49  |
| 2019/05/24 | CH2206 | Male | Three y/o | Treatment (Wk 2) | Treatment | Feed Day | No | 21:55 | 21:00 - 21:59 | Night | 37,5 | 43  | 65,4 | 65,4 | 18,65 | 526,50 | 141,08 |
| 2019/05/24 | CH2205 | Male | Three y/o | Treatment (Wk 2) | Treatment | Feed Day | No | 22:00 | 22:00 - 22:59 | Night | 37,6 | 80  | 9,6  | 9,6  | 18,75 | 577,31 | 75,37  |
| 2019/05/24 | CH2206 | Male | Three y/o | Treatment (Wk 2) | Treatment | Feed Day | No | 22:00 | 22:00 - 22:59 | Night | 37,5 | 46  | 64,8 | 64,8 | 18,65 | 532,38 | 140,76 |
| 2019/05/24 | CH2205 | Male | Three y/o | Treatment (Wk 2) | Treatment | Feed Day | No | 22:05 | 22:00 - 22:59 | Night | 37,7 |     | 5,0  | 5,0  | 18,85 |        | 53,41  |
| 2019/05/24 | CH2206 | Male | Three y/o | Treatment (Wk 2) | Treatment | Feed Day | No | 22:05 | 22:00 - 22:59 | Night | 37,5 | 42  | 66,6 | 66,6 | 18,65 | 524,42 | 141,71 |
| 2019/05/24 | CH2205 | Male | Three y/o | Treatment (Wk 2) | Treatment | Feed Day | No | 22:10 | 22:00 - 22:59 | Night | 37,7 | 96  | 6,0  | 6,0  | 18,85 | 590,91 | 59,53  |
| 2019/05/24 | CH2206 | Male | Three y/o | Treatment (Wk 2) | Treatment | Feed Day | No | 22:10 | 22:00 - 22:59 | Night | 37,5 | 44  | 63,2 | 63,2 | 18,65 | 528,51 | 139,89 |
| 2019/05/24 | CH2205 | Male | Three y/o | Treatment (Wk 2) | Treatment | Feed Day | No | 22:15 | 22:00 - 22:59 | Night | 37,9 | 92  | 4,2  | 4,2  | 19,05 | 587,78 | 47,57  |
| 2019/05/24 | CH2206 | Male | Three y/o | Treatment (Wk 2) | Treatment | Feed Day | No | 22:15 | 22:00 - 22:59 | Night | 37,4 | 40  | 50,8 | 50,8 | 18,55 | 520,09 | 132,33 |
| 2019/05/24 | CH2205 | Male | Three y/o | Treatment (Wk 2) | Treatment | Feed Day | No | 22:20 | 22:00 - 22:59 | Night | 37,9 | 98  | 7,8  | 7,8  | 19,05 | 592,41 | 68,36  |
| 2019/05/24 | CH2206 | Male | Three y/o | Treatment (Wk 2) | Treatment | Feed Day | No | 22:20 | 22:00 - 22:59 | Night | 37,4 | 60  | 36,8 | 36,8 | 18,55 | 554,67 | 121,22 |
| 2019/05/24 | CH2205 | Male | Three y/o | Treatment (Wk 2) | Treatment | Feed Day | No | 22:25 | 22:00 - 22:59 | Night | 37,7 | 84  | 4,4  | 4,4  | 18,85 | 581,01 | 49,12  |
| 2019/05/24 | CH2206 | Male | Three y/o | Treatment (Wk 2) | Treatment | Feed Day | No | 22:25 | 22:00 - 22:59 | Night | 37,4 | 45  | 29,2 | 29,2 | 18,55 | 530,47 | 113,27 |
| 2019/05/24 | CH2205 | Male | Three y/o | Treatment (Wk 2) | Treatment | Feed Day | No | 22:30 | 22:00 - 22:59 | Night | 37,7 | 82  | 12,2 | 12,2 | 18,85 | 579,19 | 83,49  |
| 2019/05/24 | CH2206 | Male | Three y/o | Treatment (Wk 2) | Treatment | Feed Day | No | 22:30 | 22:00 - 22:59 | Night | 37,3 | 47  | 28,4 | 28,4 | 18,46 | 534,23 | 112,31 |
| 2019/05/24 | CH2205 | Male | Three y/o | Treatment (Wk 2) | Treatment | Feed Day | No | 22:35 | 22:00 - 22:59 | Night | 37,7 | 62  | 10,2 | 10,2 | 18,85 | 557,33 | 77,43  |
| 2019/05/24 | CH2206 | Male | Three y/o | Treatment (Wk 2) | Treatment | Feed Day | No | 22:35 | 22:00 - 22:59 | Night | 37,2 | 47  | 33,8 | 33,8 | 18,36 | 534,23 | 118,29 |
| 2019/05/24 | CH2205 | Male | Three y/o | Treatment (Wk 2) | Treatment | Feed Day | No | 22:40 | 22:00 - 22:59 | Night | 37,9 | 70  | 4,8  | 4,8  | 19,05 | 566,99 | 52,04  |
| 2019/05/24 | CH2206 | Male | Three y/o | Treatment (Wk 2) | Treatment | Feed Day | No | 22:40 | 22:00 - 22:59 | Night | 37,2 | 90  | 26,4 | 26,4 | 18,36 | 586,16 | 109,81 |
| 2019/05/24 | CH2205 | Male | Three y/o | Treatment (Wk 2) | Treatment | Feed Day | No | 22:45 | 22:00 - 22:59 | Night | 37,9 | 71  | 4,4  | 4,4  | 19,05 | 568,10 | 49,12  |
| 2019/05/24 | CH2206 | Male | Three y/o | Treatment (Wk 2) | Treatment | Feed Day | No | 22:45 | 22:00 - 22:59 | Night | 37,1 | 49  | 43,4 | 43,4 | 18,26 | 537,80 | 126,90 |
| 2019/05/24 | CH2205 | Male | Three y/o | Treatment (Wk 2) | Treatment | Feed Day | No | 22:50 | 22:00 - 22:59 | Night | 37,9 | 83  | 7,4  | 7,4  | 19,05 | 580,11 | 66,59  |
| 2019/05/24 | CH2206 | Male | Three y/o | Treatment (Wk 2) | Treatment | Feed Day | No | 22:50 | 22:00 - 22:59 | Night | 37,1 | 92  | 46,0 | 46,0 | 18,26 | 587,78 | 128,91 |
| 2019/05/24 | CH2205 | Male | Three y/o | Treatment (Wk 2) | Treatment | Feed Day | No | 22:55 | 22:00 - 22:59 | Night | 38,0 | 76  | 9,6  | 9,6  | 19,15 | 573,39 | 75,37  |
| 2019/05/24 | CH2206 | Male | Three y/o | Treatment (Wk 2) | Treatment | Feed Day | No | 22:55 | 22:00 - 22:59 | Night | 37,1 | 45  | 37,0 | 37,0 | 18,26 | 530,47 | 121,40 |
| 2019/05/24 | CH2205 | Male | Three y/o | Treatment (Wk 2) | Treatment | Feed Day | No | 23:00 | 23:00 - 23:59 | Night | 38,0 | 66  | 10,4 | 10,4 | 19,15 | 562,34 | 78,08  |



|    |            |        |      |           |                  |           |          |    |       |               |               |      |     |      |      |       |        |        |
|----|------------|--------|------|-----------|------------------|-----------|----------|----|-------|---------------|---------------|------|-----|------|------|-------|--------|--------|
|    | 2019/05/24 | CH2206 | Male | Three y/o | Treatment (Wk 2) | Treatment | Feed Day | No | 23:00 | 23:00 - 23:59 | Night         | 37,2 | 48  | 28,4 | 28,4 | 18,36 | 536,04 | 112,31 |
|    | 2019/05/24 | CH2205 | Male | Three y/o | Treatment (Wk 2) | Treatment | Feed Day | No | 23:05 | 23:00 - 23:59 | Night         | 38,0 | 87  | 16,0 | 16,0 | 19,15 | 583,64 | 92,71  |
|    | 2019/05/24 | CH2206 | Male | Three y/o | Treatment (Wk 2) | Treatment | Feed Day | No | 23:05 | 23:00 - 23:59 | Night         | 37,1 | 55  | 46,0 | 46,0 | 18,26 | 547,52 | 128,91 |
|    | 2019/05/24 | CH2205 | Male | Three y/o | Treatment (Wk 2) | Treatment | Feed Day | No | 23:10 | 23:00 - 23:59 | Night         | 37,9 | 70  | 13,2 | 13,2 | 19,05 | 566,99 | 86,17  |
|    | 2019/05/24 | CH2206 | Male | Three y/o | Treatment (Wk 2) | Treatment | Feed Day | No | 23:10 | 23:00 - 23:59 | Night         | 37,1 | 48  | 37,6 | 37,6 | 18,26 | 536,04 | 121,96 |
|    | 2019/05/24 | CH2205 | Male | Three y/o | Treatment (Wk 2) | Treatment | Feed Day | No | 23:15 | 23:00 - 23:59 | Night         | 37,9 | 78  | 14,2 | 14,2 | 19,05 | 575,38 | 88,65  |
|    | 2019/05/24 | CH2206 | Male | Three y/o | Treatment (Wk 2) | Treatment | Feed Day | No | 23:15 | 23:00 - 23:59 | Night         | 37,1 | 45  | 24,2 | 24,2 | 18,26 | 530,47 | 106,83 |
|    | 2019/05/24 | CH2205 | Male | Three y/o | Treatment (Wk 2) | Treatment | Feed Day | No | 23:20 | 23:00 - 23:59 | Night         | 37,7 | 67  | 17,0 | 17,0 | 18,85 | 563,53 | 94,77  |
|    | 2019/05/24 | CH2206 | Male | Three y/o | Treatment (Wk 2) | Treatment | Feed Day | No | 23:20 | 23:00 - 23:59 | Night         | 37,1 |     | 19,2 | 19,2 | 18,26 |        | 98,92  |
|    | 2019/05/24 | CH2205 | Male | Three y/o | Treatment (Wk 2) | Treatment | Feed Day | No | 23:25 | 23:00 - 23:59 | Night         | 37,7 | 87  | 11,0 | 11,0 | 18,85 | 583,64 | 79,98  |
|    | 2019/05/24 | CH2206 | Male | Three y/o | Treatment (Wk 2) | Treatment | Feed Day | No | 23:25 | 23:00 - 23:59 | Night         | 37,0 | 73  | 22,2 | 22,2 | 18,16 | 570,27 | 103,88 |
|    | 2019/05/24 | CH2205 | Male | Three y/o | Treatment (Wk 2) | Treatment | Feed Day | No | 23:30 | 23:00 - 23:59 | Night         | 37,7 | 63  | 13,8 | 13,8 | 18,85 | 558,62 | 87,68  |
|    | 2019/05/24 | CH2206 | Male | Three y/o | Treatment (Wk 2) | Treatment | Feed Day | No | 23:30 | 23:00 - 23:59 | Night         | 37,0 | 44  | 21,2 | 21,2 | 18,16 | 528,51 | 102,31 |
|    | 2019/05/24 | CH2205 | Male | Three y/o | Treatment (Wk 2) | Treatment | Feed Day | No | 23:35 | 23:00 - 23:59 | Night         | 37,7 | 65  | 13,2 | 13,2 | 18,85 | 561,12 | 86,17  |
|    | 2019/05/24 | CH2206 | Male | Three y/o | Treatment (Wk 2) | Treatment | Feed Day | No | 23:35 | 23:00 - 23:59 | Night         | 37,0 | 53  | 19,0 | 19,0 | 18,16 | 544,43 | 98,56  |
|    | 2019/05/24 | CH2205 | Male | Three y/o | Treatment (Wk 2) | Treatment | Feed Day | No | 23:40 | 23:00 - 23:59 | Night         | 37,7 | 64  | 14,4 | 14,4 | 18,85 | 559,88 | 89,12  |
|    | 2019/05/24 | CH2206 | Male | Three y/o | Treatment (Wk 2) | Treatment | Feed Day | No | 23:40 | 23:00 - 23:59 | Night         | 36,9 | 81  | 19,2 | 19,2 | 18,06 | 578,26 | 98,92  |
|    | 2019/05/24 | CH2205 | Male | Three y/o | Treatment (Wk 2) | Treatment | Feed Day | No | 23:45 | 23:00 - 23:59 | Night         | 37,7 | 80  | 13,8 | 13,8 | 18,85 | 577,31 | 87,68  |
|    | 2019/05/24 | CH2206 | Male | Three y/o | Treatment (Wk 2) | Treatment | Feed Day | No | 23:45 | 23:00 - 23:59 | Night         | 36,9 | 50  | 19,4 | 19,4 | 18,06 | 539,52 | 99,28  |
|    | 2019/05/24 | CH2205 | Male | Three y/o | Treatment (Wk 2) | Treatment | Feed Day | No | 23:50 | 23:00 - 23:59 | Night         | 37,7 | 77  | 15,6 | 15,6 | 18,85 | 574,39 | 91,85  |
|    | 2019/05/24 | CH2206 | Male | Three y/o | Treatment (Wk 2) | Treatment | Feed Day | No | 23:50 | 23:00 - 23:59 | Night         | 36,9 | 50  | 17,0 | 17,0 | 18,06 | 539,52 | 94,77  |
|    | 2019/05/24 | CH2205 | Male | Three y/o | Treatment (Wk 2) | Treatment | Feed Day | No | 23:55 | 23:00 - 23:59 | Night         | 37,7 | 69  | 13,6 | 13,6 | 18,85 | 565,86 | 87,18  |
|    | 2019/05/24 | CH2206 | Male | Three y/o | Treatment (Wk 2) | Treatment | Feed Day | No | 23:55 | 23:00 - 23:59 | Night         | 36,9 | 48  | 16,8 | 16,8 | 18,06 | 536,04 | 94,37  |
| 11 | 2019/05/25 | CH2205 | Male | Three y/o | Treatment (Wk 2) | Treatment | Fast Day | No | 00:00 | 00:00 - 00:59 | Early Morning | 37,7 | 63  | 14,2 | 14,2 | 18,85 | 558,62 | 88,65  |
|    | 2019/05/25 | CH2206 | Male | Three y/o | Treatment (Wk 2) | Treatment | Fast Day | No | 00:00 | 00:00 - 00:59 | Early Morning | 36,9 | 43  | 21,0 | 21,0 | 18,06 | 526,50 | 101,98 |
|    | 2019/05/25 | CH2205 | Male | Three y/o | Treatment (Wk 2) | Treatment | Fast Day | No | 00:05 | 00:00 - 00:59 | Early Morning | 37,7 | 67  | 17,4 | 17,4 | 18,85 | 563,53 | 95,56  |
|    | 2019/05/25 | CH2206 | Male | Three y/o | Treatment (Wk 2) | Treatment | Fast Day | No | 00:05 | 00:00 - 00:59 | Early Morning | 37,0 | 145 | 11,0 | 11,0 | 18,16 | 619,62 | 79,98  |
|    | 2019/05/25 | CH2205 | Male | Three y/o | Treatment (Wk 2) | Treatment | Fast Day | No | 00:10 | 00:00 - 00:59 | Early Morning | 37,7 | 69  | 20,8 | 20,8 | 18,85 | 565,86 | 101,65 |
|    | 2019/05/25 | CH2206 | Male | Three y/o | Treatment (Wk 2) | Treatment | Fast Day | No | 00:10 | 00:00 - 00:59 | Early Morning | 36,9 | 49  | 5,4  | 5,4  | 18,06 | 537,80 | 55,99  |
|    | 2019/05/25 | CH2205 | Male | Three y/o | Treatment (Wk 2) | Treatment | Fast Day | No | 00:15 | 00:00 - 00:59 | Early Morning | 37,7 | 72  | 21,0 | 21,0 | 18,85 | 569,20 | 101,98 |
|    | 2019/05/25 | CH2206 | Male | Three y/o | Treatment (Wk 2) | Treatment | Fast Day | No | 00:15 | 00:00 - 00:59 | Early Morning | 36,9 | 46  | 13,2 | 13,2 | 18,06 | 532,38 | 86,17  |
|    | 2019/05/25 | CH2205 | Male | Three y/o | Treatment (Wk 2) | Treatment | Fast Day | No | 00:20 | 00:00 - 00:59 | Early Morning | 37,7 | 70  | 17,2 | 17,2 | 18,85 | 566,99 | 95,17  |
|    | 2019/05/25 | CH2206 | Male | Three y/o | Treatment (Wk 2) | Treatment | Fast Day | No | 00:20 | 00:00 - 00:59 | Early Morning | 36,9 | 42  | 22,2 | 22,2 | 18,06 | 524,42 | 103,88 |
|    | 2019/05/25 | CH2205 | Male | Three y/o | Treatment (Wk 2) | Treatment | Fast Day | No | 00:25 | 00:00 - 00:59 | Early Morning | 37,7 | 61  | 17,6 | 17,6 | 18,85 | 556,01 | 95,95  |
|    | 2019/05/25 | CH2206 | Male | Three y/o | Treatment (Wk 2) | Treatment | Fast Day | No | 00:25 | 00:00 - 00:59 | Early Morning | 36,9 | 55  | 28,6 | 28,6 | 18,06 | 547,52 | 112,56 |
|    | 2019/05/25 | CH2205 | Male | Three y/o | Treatment (Wk 2) | Treatment | Fast Day | No | 00:30 | 00:00 - 00:59 | Early Morning | 37,7 | 65  | 16,0 | 16,0 | 18,85 | 561,12 | 92,71  |
|    | 2019/05/25 | CH2206 | Male | Three y/o | Treatment (Wk 2) | Treatment | Fast Day | No | 00:30 | 00:00 - 00:59 | Early Morning | 37,0 | 40  | 36,8 | 36,8 | 18,16 | 520,09 | 121,22 |
|    | 2019/05/25 | CH2205 | Male | Three y/o | Treatment (Wk 2) | Treatment | Fast Day | No | 00:35 | 00:00 - 00:59 | Early Morning | 37,8 | 71  | 18,4 | 18,4 | 18,95 | 568,10 | 97,47  |
|    | 2019/05/25 | CH2206 | Male | Three y/o | Treatment (Wk 2) | Treatment | Fast Day | No | 00:35 | 00:00 - 00:59 | Early Morning | 37,0 | 44  | 39,6 | 39,6 | 18,16 | 528,51 | 123,74 |
|    | 2019/05/25 | CH2205 | Male | Three y/o | Treatment (Wk 2) | Treatment | Fast Day | No | 00:40 | 00:00 - 00:59 | Early Morning | 37,9 | 88  | 22,4 | 22,4 | 19,05 | 584,49 | 104,19 |
|    | 2019/05/25 | CH2206 | Male | Three y/o | Treatment (Wk 2) | Treatment | Fast Day | No | 00:40 | 00:00 - 00:59 | Early Morning | 37,0 | 55  | 32,8 | 32,8 | 18,16 | 547,52 | 117,26 |
|    | 2019/05/25 | CH2205 | Male | Three y/o | Treatment (Wk 2) | Treatment | Fast Day | No | 00:45 | 00:00 - 00:59 | Early Morning | 37,9 | 67  | 21,6 | 21,6 | 19,05 | 563,53 | 102,94 |
|    | 2019/05/25 | CH2206 | Male | Three y/o | Treatment (Wk 2) | Treatment | Fast Day | No | 00:45 | 00:00 - 00:59 | Early Morning | 37,0 | 63  | 36,4 | 36,4 | 18,16 | 558,62 | 120,84 |
|    | 2019/05/25 | CH2205 | Male | Three y/o | Treatment (Wk 2) | Treatment | Fast Day | No | 00:50 | 00:00 - 00:59 | Early Morning | 37,9 | 61  | 19,6 | 19,6 | 19,05 | 556,01 | 99,63  |
|    | 2019/05/25 | CH2206 | Male | Three y/o | Treatment (Wk 2) | Treatment | Fast Day | No | 00:50 | 00:00 - 00:59 | Early Morning | 37,1 | 43  | 23,2 | 23,2 | 18,26 | 526,50 | 105,39 |
|    | 2019/05/25 | CH2205 | Male | Three y/o | Treatment (Wk 2) | Treatment | Fast Day | No | 00:55 | 00:00 - 00:59 | Early Morning | 37,9 | 60  | 15,6 | 15,6 | 19,05 | 554,67 | 91,85  |
|    | 2019/05/25 | CH2206 | Male | Three y/o | Treatment (Wk 2) | Treatment | Fast Day | No | 00:55 | 00:00 - 00:59 | Early Morning | 37,1 | 47  | 11,0 | 11,0 | 18,26 | 534,23 | 79,98  |
|    | 2019/05/25 | CH2205 | Male | Three y/o | Treatment (Wk 2) | Treatment | Fast Day | No | 01:00 | 01:00 - 01:59 | Early Morning | 37,9 | 63  | 15,6 | 15,6 | 19,05 | 558,62 | 91,85  |
|    | 2019/05/25 | CH2206 | Male | Three y/o | Treatment (Wk 2) | Treatment | Fast Day | No | 01:00 | 01:00 - 01:59 | Early Morning | 37,0 | 47  | 10,6 | 10,6 | 18,16 | 534,23 | 78,73  |
|    | 2019/05/25 | CH2205 | Male | Three y/o | Treatment (Wk 2) | Treatment | Fast Day | No | 01:05 | 01:00 - 01:59 | Early Morning | 37,9 | 89  | 35,8 | 35,8 | 19,05 | 585,33 | 120,27 |
|    | 2019/05/25 | CH2206 | Male | Three y/o | Treatment (Wk 2) | Treatment | Fast Day | No | 01:05 | 01:00 - 01:59 | Early Morning | 36,9 | 71  | 20,8 | 20,8 | 18,06 | 568,10 | 101,65 |
|    | 2019/05/25 | CH2205 | Male | Three y/o | Treatment (Wk 2) | Treatment | Fast Day | No | 01:10 | 01:00 - 01:59 | Early Morning | 37,9 | 97  | 21,0 | 21,0 | 19,05 | 591,66 | 101,98 |
|    | 2019/05/25 | CH2206 | Male | Three y/o | Treatment (Wk 2) | Treatment | Fast Day | No | 01:10 | 01:00 - 01:59 | Early Morning | 36,9 | 88  | 47,4 | 47,4 | 18,06 | 584,49 | 129,94 |
|    | 2019/05/25 | CH2205 | Male | Three y/o | Treatment (Wk 2) | Treatment | Fast Day | No | 01:15 | 01:00 - 01:59 | Early Morning | 37,9 |     | 24,8 | 24,8 | 18,85 |        | 107,67 |
|    | 2019/05/25 | CH2206 | Male | Three y/o | Treatment (Wk 2) | Treatment | Fast Day | No | 01:15 | 01:00 - 01:59 | Early Morning | 36,9 | 80  | 58,4 | 58,4 | 18,06 | 577,31 | 137,16 |
|    | 2019/05/25 | CH2205 | Male | Three y/o | Treatment (Wk 2) | Treatment | Fast Day | No | 01:20 | 01:00 - 01:59 | Early Morning | 37,6 | 75  | 22,8 | 22,8 | 18,75 | 572,36 | 104,79 |
|    | 2019/05/25 | CH2206 | Male | Three y/o | Treatment (Wk 2) | Treatment | Fast Day | No | 01:20 | 01:00 - 01:59 | Early Morning | 36,9 | 43  | 57,8 | 57,8 | 18,06 | 526,50 | 136,80 |
|    | 2019/05/25 | CH2205 | Male | Three y/o | Treatment (Wk 2) | Treatment | Fast Day | No | 01:25 | 01:00 - 01:59 | Early Morning | 37,5 |     | 21,8 | 21,8 | 18,65 |        | 103,26 |
|    | 2019/05/25 | CH2206 | Male | Three y/o | Treatment (Wk 2) | Treatment | Fast Day | No | 01:25 | 01:00 - 01:59 | Early Morning | 37,0 | 70  | 62,4 | 62,4 | 18,16 | 566,99 | 139,45 |
|    | 2019/05/25 | CH2205 | Male | Three y/o | Treatment (Wk 2) | Treatment | Fast Day | No | 01:30 | 01:00 - 01:59 | Early Morning | 37,5 | 95  | 21,4 | 21,4 | 18,65 | 590,14 | 102,63 |
|    | 2019/05/25 | CH2206 | Male | Three y/o | Treatment (Wk 2) | Treatment | Fast Day | No | 01:30 | 01:00 - 01:59 | Early Morning | 37,2 | 73  | 65,4 | 65,4 | 18,36 | 570,27 | 141,08 |
|    | 2019/05/25 | CH2205 | Male | Three y/o | Treatment (Wk 2) | Treatment | Fast Day | No | 01:35 | 01:00 - 01:59 | Early Morning | 37,5 | 55  | 22,0 | 22,0 | 18,65 | 547,52 | 103,57 |
|    | 2019/05/25 | CH2206 | Male | Three y/o | Treatment (Wk 2) | Treatment | Fast Day | No | 01:35 | 01:00 - 01:59 | Early Morning | 37,2 | 60  | 61,6 | 61,6 | 18,36 | 554,67 | 139,00 |
|    | 2019/05/25 | CH2205 | Male | Three y/o | Treatment (Wk 2) | Treatment | Fast Day | No | 01:40 | 01:00 - 01:59 | Early Morning | 37,4 | 93  | 18,4 | 18,4 | 18,55 | 588,58 | 97,47  |
|    | 2019/05/25 | CH2206 | Male | Three y/o | Treatment (Wk 2) | Treatment | Fast Day | No | 01:40 | 01:00 - 01:59 | Early Morning | 37,3 | 41  | 58,6 | 58,6 | 18,46 | 522,29 | 137,28 |
|    | 2019/05/25 | CH2205 | Male | Three y/o | Treatment (Wk 2) | Treatment | Fast Day | No | 01:45 | 01:00 - 01:59 | Early Morning | 37,4 | 84  | 29,4 | 29,4 | 18,55 | 581,01 | 113,50 |
|    | 2019/05/25 | CH2206 | Male | Three y/o | Treatment (Wk 2) | Treatment | Fast Day | No | 01:45 | 01:00 - 01:59 | Early Morning | 37,3 | 90  | 52,6 | 52,6 | 18,46 | 586,16 | 133,54 |
|    | 2019/05/25 | CH2205 | Male | Three y/o | Treatment (Wk 2) | Treatment | Fast Day | No | 01:50 | 01:00 - 01:59 | Early Morning | 37,4 | 111 | 24,2 | 24,2 | 18,55 | 601,33 | 106,83 |
|    | 2019/05/25 | CH2206 | Male | Three y/o | Treatment (Wk 2) | Treatment | Fast Day | No | 01:50 | 01:00 - 01:59 | Early Morning | 37,3 | 48  | 57,2 | 57,2 | 18,46 | 536,04 | 136,44 |
|    | 2019/05/25 | CH2205 | Male | Three y/o | Treatment (Wk 2) | Treatment | Fast Day | No | 01:55 | 01:00 - 01:59 | Early Morning | 37,4 |     | 24,4 | 24,4 | 18,55 |        | 107,11 |



|            |        |      |           |                  |           |          |    |       |               |               |      |     |       |       |       |        |        |
|------------|--------|------|-----------|------------------|-----------|----------|----|-------|---------------|---------------|------|-----|-------|-------|-------|--------|--------|
| 2019/05/25 | CH2206 | Male | Three y/o | Treatment (Wk 2) | Treatment | Fast Day | No | 01:55 | 01:00 - 01:59 | Early Morning | 37,3 | 68  | 54,2  | 54,2  | 18,46 | 564,71 | 134,57 |
| 2019/05/25 | CH2205 | Male | Three y/o | Treatment (Wk 2) | Treatment | Fast Day | No | 02:00 | 02:00 - 02:59 | Early Morning | 37,4 | 88  | 24,6  | 24,6  | 18,55 | 584,49 | 107,39 |
| 2019/05/25 | CH2206 | Male | Three y/o | Treatment (Wk 2) | Treatment | Fast Day | No | 02:00 | 02:00 - 02:59 | Early Morning | 37,3 | 123 | 39,4  | 39,4  | 18,46 | 608,49 | 123,57 |
| 2019/05/25 | CH2205 | Male | Three y/o | Treatment (Wk 2) | Treatment | Fast Day | No | 02:05 | 02:00 - 02:59 | Early Morning | 37,4 |     | 17,2  | 17,2  | 18,55 |        | 95,17  |
| 2019/05/25 | CH2206 | Male | Three y/o | Treatment (Wk 2) | Treatment | Fast Day | No | 02:05 | 02:00 - 02:59 | Early Morning | 37,4 | 78  | 40,0  | 40,0  | 18,55 | 575,38 | 124,09 |
| 2019/05/25 | CH2205 | Male | Three y/o | Treatment (Wk 2) | Treatment | Fast Day | No | 02:10 | 02:00 - 02:59 | Early Morning | 37,4 | 89  | 19,0  | 19,0  | 18,55 | 585,33 | 98,56  |
| 2019/05/25 | CH2206 | Male | Three y/o | Treatment (Wk 2) | Treatment | Fast Day | No | 02:10 | 02:00 - 02:59 | Early Morning | 37,4 | 66  | 41,2  | 41,2  | 18,55 | 562,34 | 125,11 |
| 2019/05/25 | CH2205 | Male | Three y/o | Treatment (Wk 2) | Treatment | Fast Day | No | 02:15 | 02:00 - 02:59 | Early Morning | 37,3 |     | 21,4  | 21,4  | 18,46 |        | 102,63 |
| 2019/05/25 | CH2206 | Male | Three y/o | Treatment (Wk 2) | Treatment | Fast Day | No | 02:15 | 02:00 - 02:59 | Early Morning | 37,4 | 44  | 42,4  | 42,4  | 18,55 | 528,51 | 126,10 |
| 2019/05/25 | CH2205 | Male | Three y/o | Treatment (Wk 2) | Treatment | Fast Day | No | 02:20 | 02:00 - 02:59 | Early Morning | 37,3 |     | 21,6  | 21,6  | 18,46 |        | 102,94 |
| 2019/05/25 | CH2206 | Male | Three y/o | Treatment (Wk 2) | Treatment | Fast Day | No | 02:20 | 02:00 - 02:59 | Early Morning | 37,4 | 53  | 60,0  | 60,0  | 18,55 | 544,43 | 138,09 |
| 2019/05/25 | CH2205 | Male | Three y/o | Treatment (Wk 2) | Treatment | Fast Day | No | 02:25 | 02:00 - 02:59 | Early Morning | 37,3 | 124 | 41,0  | 41,0  | 18,46 | 609,04 | 124,94 |
| 2019/05/25 | CH2206 | Male | Three y/o | Treatment (Wk 2) | Treatment | Fast Day | No | 02:25 | 02:00 - 02:59 | Early Morning | 37,4 | 47  | 58,6  | 58,6  | 18,55 | 534,23 | 137,28 |
| 2019/05/25 | CH2205 | Male | Three y/o | Treatment (Wk 2) | Treatment | Fast Day | No | 02:30 | 02:00 - 02:59 | Early Morning | 37,1 |     | 15,0  | 15,0  | 18,26 |        | 90,51  |
| 2019/05/25 | CH2206 | Male | Three y/o | Treatment (Wk 2) | Treatment | Fast Day | No | 02:30 | 02:00 - 02:59 | Early Morning | 37,4 |     | 32,8  | 32,8  | 18,55 |        | 117,26 |
| 2019/05/25 | CH2205 | Male | Three y/o | Treatment (Wk 2) | Treatment | Fast Day | No | 02:35 | 02:00 - 02:59 | Early Morning | 37,0 | 75  | 26,2  | 26,2  | 18,16 | 572,36 | 109,55 |
| 2019/05/25 | CH2206 | Male | Three y/o | Treatment (Wk 2) | Treatment | Fast Day | No | 02:35 | 02:00 - 02:59 | Early Morning | 37,4 | 103 | 55,4  | 55,4  | 18,55 | 596,00 | 135,33 |
| 2019/05/25 | CH2205 | Male | Three y/o | Treatment (Wk 2) | Treatment | Fast Day | No | 02:40 | 02:00 - 02:59 | Early Morning | 37,1 | 49  | 27,0  | 27,0  | 18,26 | 537,80 | 110,58 |
| 2019/05/25 | CH2206 | Male | Three y/o | Treatment (Wk 2) | Treatment | Fast Day | No | 02:40 | 02:00 - 02:59 | Early Morning | 37,1 |     | 50,8  | 50,8  | 18,26 |        | 132,33 |
| 2019/05/25 | CH2205 | Male | Three y/o | Treatment (Wk 2) | Treatment | Fast Day | No | 02:45 | 02:00 - 02:59 | Early Morning | 37,3 | 60  | 34,0  | 34,0  | 18,46 | 554,67 | 118,49 |
| 2019/05/25 | CH2206 | Male | Three y/o | Treatment (Wk 2) | Treatment | Fast Day | No | 02:45 | 02:00 - 02:59 | Early Morning | 37,0 | 49  | 54,8  | 54,8  | 18,16 | 537,80 | 134,96 |
| 2019/05/25 | CH2205 | Male | Three y/o | Treatment (Wk 2) | Treatment | Fast Day | No | 02:50 | 02:00 - 02:59 | Early Morning | 37,3 | 78  | 32,2  | 32,2  | 18,46 | 575,38 | 116,63 |
| 2019/05/25 | CH2206 | Male | Three y/o | Treatment (Wk 2) | Treatment | Fast Day | No | 02:50 | 02:00 - 02:59 | Early Morning | 37,3 | 49  | 54,8  | 54,8  | 18,46 | 537,80 | 134,96 |
| 2019/05/25 | CH2205 | Male | Three y/o | Treatment (Wk 2) | Treatment | Fast Day | No | 02:55 | 02:00 - 02:59 | Early Morning | 37,3 | 57  | 30,8  | 30,8  | 18,46 | 550,47 | 115,10 |
| 2019/05/25 | CH2206 | Male | Three y/o | Treatment (Wk 2) | Treatment | Fast Day | No | 02:55 | 02:00 - 02:59 | Early Morning | 37,2 | 42  | 55,6  | 55,6  | 18,36 | 524,42 | 135,46 |
| 2019/05/25 | CH2205 | Male | Three y/o | Treatment (Wk 2) | Treatment | Fast Day | No | 03:00 | 03:00 - 03:59 | Early Morning | 37,0 | 80  | 30,6  | 30,6  | 18,46 | 577,31 | 114,87 |
| 2019/05/25 | CH2206 | Male | Three y/o | Treatment (Wk 2) | Treatment | Fast Day | No | 03:00 | 03:00 - 03:59 | Early Morning | 37,2 | 46  | 59,6  | 59,6  | 18,36 | 532,38 | 137,86 |
| 2019/05/25 | CH2205 | Male | Three y/o | Treatment (Wk 2) | Treatment | Fast Day | No | 03:05 | 03:00 - 03:59 | Early Morning | 37,3 | 98  | 24,4  | 24,4  | 18,46 | 592,41 | 107,11 |
| 2019/05/25 | CH2206 | Male | Three y/o | Treatment (Wk 2) | Treatment | Fast Day | No | 03:05 | 03:00 - 03:59 | Early Morning | 37,2 | 90  | 69,8  | 69,8  | 18,36 | 586,16 | 143,34 |
| 2019/05/25 | CH2205 | Male | Three y/o | Treatment (Wk 2) | Treatment | Fast Day | No | 03:10 | 03:00 - 03:59 | Early Morning | 37,3 | 59  | 23,0  | 23,0  | 18,46 | 553,30 | 105,09 |
| 2019/05/25 | CH2206 | Male | Three y/o | Treatment (Wk 2) | Treatment | Fast Day | No | 03:10 | 03:00 - 03:59 | Early Morning | 37,2 | 86  | 61,8  | 61,8  | 18,36 | 582,77 | 139,12 |
| 2019/05/25 | CH2205 | Male | Three y/o | Treatment (Wk 2) | Treatment | Fast Day | No | 03:15 | 03:00 - 03:59 | Early Morning | 37,4 | 62  | 21,6  | 21,6  | 18,55 | 557,33 | 102,94 |
| 2019/05/25 | CH2206 | Male | Three y/o | Treatment (Wk 2) | Treatment | Fast Day | No | 03:15 | 03:00 - 03:59 | Early Morning | 37,1 | 143 | 45,8  | 45,8  | 18,26 | 618,69 | 128,76 |
| 2019/05/25 | CH2205 | Male | Three y/o | Treatment (Wk 2) | Treatment | Fast Day | No | 03:20 | 03:00 - 03:59 | Early Morning | 37,4 | 66  | 21,2  | 21,2  | 18,55 | 562,34 | 102,31 |
| 2019/05/25 | CH2206 | Male | Three y/o | Treatment (Wk 2) | Treatment | Fast Day | No | 03:20 | 03:00 - 03:59 | Early Morning | 37,3 | 51  | 55,6  | 55,6  | 18,46 | 541,20 | 135,46 |
| 2019/05/25 | CH2205 | Male | Three y/o | Treatment (Wk 2) | Treatment | Fast Day | No | 03:25 | 03:00 - 03:59 | Early Morning | 37,5 | 55  | 22,6  | 22,6  | 18,65 | 547,52 | 104,49 |
| 2019/05/25 | CH2206 | Male | Three y/o | Treatment (Wk 2) | Treatment | Fast Day | No | 03:25 | 03:00 - 03:59 | Early Morning | 37,3 | 43  | 55,0  | 55,0  | 18,46 | 526,50 | 135,08 |
| 2019/05/25 | CH2205 | Male | Three y/o | Treatment (Wk 2) | Treatment | Fast Day | No | 03:30 | 03:00 - 03:59 | Early Morning | 37,5 | 65  | 18,4  | 18,4  | 18,65 | 561,12 | 97,47  |
| 2019/05/25 | CH2206 | Male | Three y/o | Treatment (Wk 2) | Treatment | Fast Day | No | 03:30 | 03:00 - 03:59 | Early Morning | 37,2 | 125 | 62,4  | 62,4  | 18,36 | 609,60 | 139,45 |
| 2019/05/25 | CH2205 | Male | Three y/o | Treatment (Wk 2) | Treatment | Fast Day | No | 03:35 | 03:00 - 03:59 | Early Morning | 37,6 | 110 | 126,0 | 126,0 | 18,75 | 600,69 | 163,91 |
| 2019/05/25 | CH2206 | Male | Three y/o | Treatment (Wk 2) | Treatment | Fast Day | No | 03:35 | 03:00 - 03:59 | Early Morning | 37,3 | 53  | 130,6 | 130,6 | 18,46 | 544,43 | 165,17 |
| 2019/05/25 | CH2205 | Male | Three y/o | Treatment (Wk 2) | Treatment | Fast Day | No | 03:40 | 03:00 - 03:59 | Early Morning | 37,4 |     | 35,8  | 35,8  | 18,55 |        | 120,27 |
| 2019/05/25 | CH2206 | Male | Three y/o | Treatment (Wk 2) | Treatment | Fast Day | No | 03:40 | 03:00 - 03:59 | Early Morning | 37,2 | 169 | 83,8  | 83,8  | 18,36 | 629,60 | 149,69 |
| 2019/05/25 | CH2205 | Male | Three y/o | Treatment (Wk 2) | Treatment | Fast Day | No | 03:45 | 03:00 - 03:59 | Early Morning | 37,4 |     | 30,6  | 30,6  | 18,55 |        | 114,87 |
| 2019/05/25 | CH2206 | Male | Three y/o | Treatment (Wk 2) | Treatment | Fast Day | No | 03:45 | 03:00 - 03:59 | Early Morning | 37,3 | 132 | 141,6 | 141,6 | 18,46 | 613,32 | 168,00 |
| 2019/05/25 | CH2205 | Male | Three y/o | Treatment (Wk 2) | Treatment | Fast Day | No | 03:50 | 03:00 - 03:59 | Early Morning | 37,4 |     | 83,4  | 83,4  | 18,55 |        | 149,52 |
| 2019/05/25 | CH2206 | Male | Three y/o | Treatment (Wk 2) | Treatment | Fast Day | No | 03:50 | 03:00 - 03:59 | Early Morning | 37,4 | 129 | 434,6 | 434,6 | 18,55 | 611,75 | 207,56 |
| 2019/05/25 | CH2205 | Male | Three y/o | Treatment (Wk 2) | Treatment | Fast Day | No | 03:55 | 03:00 - 03:59 | Early Morning | 37,3 | 59  | 219,4 | 219,4 | 18,46 | 553,30 | 183,38 |
| 2019/05/25 | CH2206 | Male | Three y/o | Treatment (Wk 2) | Treatment | Fast Day | No | 03:55 | 03:00 - 03:59 | Early Morning | 37,4 | 141 | 102,0 | 102,0 | 18,55 | 617,75 | 156,53 |
| 2019/05/25 | CH2205 | Male | Three y/o | Treatment (Wk 2) | Treatment | Fast Day | No | 04:00 | 04:00 - 04:59 | Morning       | 37,4 | 117 | 229,0 | 229,0 | 18,55 | 605,02 | 184,89 |
| 2019/05/25 | CH2206 | Male | Three y/o | Treatment (Wk 2) | Treatment | Fast Day | No | 04:00 | 04:00 - 04:59 | Morning       | 37,5 | 121 | 91,0  | 91,0  | 18,65 | 607,35 | 152,56 |
| 2019/05/25 | CH2205 | Male | Three y/o | Treatment (Wk 2) | Treatment | Fast Day | No | 04:05 | 04:00 - 04:59 | Morning       | 37,5 | 78  | 79,4  | 79,4  | 18,65 | 575,38 | 147,81 |
| 2019/05/25 | CH2206 | Male | Three y/o | Treatment (Wk 2) | Treatment | Fast Day | No | 04:05 | 04:00 - 04:59 | Morning       | 37,5 | 109 | 119,2 | 119,2 | 18,65 | 600,04 | 161,97 |
| 2019/05/25 | CH2205 | Male | Three y/o | Treatment (Wk 2) | Treatment | Fast Day | No | 04:10 | 04:00 - 04:59 | Morning       | 37,5 | 65  | 18,0  | 18,0  | 18,65 | 561,12 | 96,72  |
| 2019/05/25 | CH2206 | Male | Three y/o | Treatment (Wk 2) | Treatment | Fast Day | No | 04:10 | 04:00 - 04:59 | Morning       | 37,7 | 99  | 49,6  | 49,6  | 18,85 | 593,14 | 131,51 |
| 2019/05/25 | CH2205 | Male | Three y/o | Treatment (Wk 2) | Treatment | Fast Day | No | 04:15 | 04:00 - 04:59 | Morning       | 37,3 | 80  | 12,8  | 12,8  | 18,46 | 577,31 | 85,12  |
| 2019/05/25 | CH2206 | Male | Three y/o | Treatment (Wk 2) | Treatment | Fast Day | No | 04:15 | 04:00 - 04:59 | Morning       | 37,4 | 87  | 36,2  | 36,2  | 18,55 | 583,64 | 120,65 |
| 2019/05/25 | CH2205 | Male | Three y/o | Treatment (Wk 2) | Treatment | Fast Day | No | 04:20 | 04:00 - 04:59 | Morning       | 37,1 | 59  | 11,0  | 11,0  | 18,26 | 553,30 | 79,98  |
| 2019/05/25 | CH2206 | Male | Three y/o | Treatment (Wk 2) | Treatment | Fast Day | No | 04:20 | 04:00 - 04:59 | Morning       | 37,3 | 48  | 36,4  | 36,4  | 18,46 | 536,04 | 120,84 |
| 2019/05/25 | CH2205 | Male | Three y/o | Treatment (Wk 2) | Treatment | Fast Day | No | 04:25 | 04:00 - 04:59 | Morning       | 36,8 | 75  | 9,2   | 9,2   | 17,96 | 572,36 | 73,94  |
| 2019/05/25 | CH2206 | Male | Three y/o | Treatment (Wk 2) | Treatment | Fast Day | No | 04:25 | 04:00 - 04:59 | Morning       | 37,1 | 69  | 32,6  | 32,6  | 18,26 | 565,86 | 117,05 |
| 2019/05/25 | CH2205 | Male | Three y/o | Treatment (Wk 2) | Treatment | Fast Day | No | 04:30 | 04:00 - 04:59 | Morning       | 36,8 |     | 6,6   | 6,6   | 17,96 |        | 62,73  |
| 2019/05/25 | CH2206 | Male | Three y/o | Treatment (Wk 2) | Treatment | Fast Day | No | 04:30 | 04:00 - 04:59 | Morning       | 37,0 | 48  | 28,6  | 28,6  | 18,16 | 536,04 | 112,56 |
| 2019/05/25 | CH2205 | Male | Three y/o | Treatment (Wk 2) | Treatment | Fast Day | No | 04:35 | 04:00 - 04:59 | Morning       | 36,8 |     | 9,2   | 9,2   | 17,96 |        | 73,94  |
| 2019/05/25 | CH2206 | Male | Three y/o | Treatment (Wk 2) | Treatment | Fast Day | No | 04:35 | 04:00 - 04:59 | Morning       | 37,0 | 55  | 64,2  | 64,2  | 18,16 | 547,52 | 140,44 |
| 2019/05/25 | CH2205 | Male | Three y/o | Treatment (Wk 2) | Treatment | Fast Day | No | 04:40 | 04:00 - 04:59 | Morning       | 37,1 |     | 6,2   | 6,2   | 18,26 |        | 60,63  |
| 2019/05/25 | CH2206 | Male | Three y/o | Treatment (Wk 2) | Treatment | Fast Day | No | 04:40 | 04:00 - 04:59 | Morning       | 37,2 | 51  | 65,8  | 65,8  | 18,36 | 541,20 | 141,29 |
| 2019/05/25 | CH2205 | Male | Three y/o | Treatment (Wk 2) | Treatment | Fast Day | No | 04:45 | 04:00 - 04:59 | Morning       | 37,2 | 87  | 6,4   | 6,4   | 18,36 | 583,64 | 61,70  |
| 2019/05/25 | CH2206 | Male | Three y/o | Treatment (Wk 2) | Treatment | Fast Day | No | 04:45 | 04:00 - 04:59 | Morning       | 37,3 | 54  | 65,6  | 65,6  | 18,46 | 545,99 | 141,19 |
| 2019/05/25 | CH2205 | Male | Three y/o | Treatment (Wk 2) | Treatment | Fast Day | No | 04:50 | 04:00 - 04:59 | Morning       | 37,4 |     | 2,4   | 2,4   | 18,55 |        | 28,91  |



|            |        |      |           |                  |           |          |    |       |               |         |      |     |       |       |       |        |        |
|------------|--------|------|-----------|------------------|-----------|----------|----|-------|---------------|---------|------|-----|-------|-------|-------|--------|--------|
| 2019/05/25 | CH2206 | Male | Three y/o | Treatment (Wk 2) | Treatment | Fast Day | No | 04:50 | 04:00 - 04:59 | Morning | 37,3 | 74  | 60,2  | 60,2  | 18,46 | 571,33 | 138,21 |
| 2019/05/25 | CH2205 | Male | Three y/o | Treatment (Wk 2) | Treatment | Fast Day | No | 04:55 | 04:00 - 04:59 | Morning | 37,5 |     | 7,6   | 7,6   | 18,65 |        | 67,49  |
| 2019/05/25 | CH2206 | Male | Three y/o | Treatment (Wk 2) | Treatment | Fast Day | No | 04:55 | 04:00 - 04:59 | Morning | 37,3 | 49  | 57,2  | 57,2  | 18,46 | 537,80 | 136,44 |
| 2019/05/25 | CH2205 | Male | Three y/o | Treatment (Wk 2) | Treatment | Fast Day | No | 05:00 | 05:00 - 05:59 | Morning | 37,5 | 64  | 2,0   | 2,0   | 18,65 | 559,88 | 22,86  |
| 2019/05/25 | CH2206 | Male | Three y/o | Treatment (Wk 2) | Treatment | Fast Day | No | 05:00 | 05:00 - 05:59 | Morning | 37,2 | 59  | 55,0  | 55,0  | 18,36 | 553,30 | 135,08 |
| 2019/05/25 | CH2205 | Male | Three y/o | Treatment (Wk 2) | Treatment | Fast Day | No | 05:05 | 05:00 - 05:59 | Morning | 37,5 | 93  | 5,2   | 5,2   | 18,65 | 588,58 | 54,72  |
| 2019/05/25 | CH2206 | Male | Three y/o | Treatment (Wk 2) | Treatment | Fast Day | No | 05:05 | 05:00 - 05:59 | Morning | 37,2 | 75  | 66,4  | 66,4  | 18,36 | 572,36 | 141,61 |
| 2019/05/25 | CH2205 | Male | Three y/o | Treatment (Wk 2) | Treatment | Fast Day | No | 05:10 | 05:00 - 05:59 | Morning | 37,6 | 62  | 4,6   | 4,6   | 18,75 | 557,33 | 50,61  |
| 2019/05/25 | CH2206 | Male | Three y/o | Treatment (Wk 2) | Treatment | Fast Day | No | 05:10 | 05:00 - 05:59 | Morning | 37,2 | 43  | 64,6  | 64,6  | 18,36 | 526,50 | 140,65 |
| 2019/05/25 | CH2205 | Male | Three y/o | Treatment (Wk 2) | Treatment | Fast Day | No | 05:15 | 05:00 - 05:59 | Morning | 37,6 | 41  | 6,4   | 6,4   | 18,75 | 522,29 | 61,70  |
| 2019/05/25 | CH2206 | Male | Three y/o | Treatment (Wk 2) | Treatment | Fast Day | No | 05:15 | 05:00 - 05:59 | Morning | 37,2 | 41  | 62,4  | 62,4  | 18,36 | 522,29 | 139,45 |
| 2019/05/25 | CH2205 | Male | Three y/o | Treatment (Wk 2) | Treatment | Fast Day | No | 05:20 | 05:00 - 05:59 | Morning | 37,6 | 91  | 8,0   | 8,0   | 18,75 | 586,98 | 69,22  |
| 2019/05/25 | CH2206 | Male | Three y/o | Treatment (Wk 2) | Treatment | Fast Day | No | 05:20 | 05:00 - 05:59 | Morning | 37,3 | 59  | 66,2  | 66,2  | 18,46 | 553,30 | 141,50 |
| 2019/05/25 | CH2205 | Male | Three y/o | Treatment (Wk 2) | Treatment | Fast Day | No | 05:25 | 05:00 - 05:59 | Morning | 37,6 | 82  | 5,0   | 5,0   | 18,75 | 579,19 | 53,41  |
| 2019/05/25 | CH2206 | Male | Three y/o | Treatment (Wk 2) | Treatment | Fast Day | No | 05:25 | 05:00 - 05:59 | Morning | 37,3 | 56  | 60,2  | 60,2  | 18,46 | 549,01 | 138,21 |
| 2019/05/25 | CH2205 | Male | Three y/o | Treatment (Wk 2) | Treatment | Fast Day | No | 05:30 | 05:00 - 05:59 | Morning | 37,6 | 70  | 4,4   | 4,4   | 18,75 | 566,99 | 49,12  |
| 2019/05/25 | CH2206 | Male | Three y/o | Treatment (Wk 2) | Treatment | Fast Day | No | 05:30 | 05:00 - 05:59 | Morning | 37,3 | 42  | 61,0  | 61,0  | 18,46 | 524,42 | 138,67 |
| 2019/05/25 | CH2205 | Male | Three y/o | Treatment (Wk 2) | Treatment | Fast Day | No | 05:35 | 05:00 - 05:59 | Morning | 37,6 | 88  | 7,6   | 7,6   | 18,75 | 584,49 | 67,49  |
| 2019/05/25 | CH2206 | Male | Three y/o | Treatment (Wk 2) | Treatment | Fast Day | No | 05:35 | 05:00 - 05:59 | Morning | 37,3 | 42  | 62,8  | 62,8  | 18,46 | 524,42 | 139,67 |
| 2019/05/25 | CH2205 | Male | Three y/o | Treatment (Wk 2) | Treatment | Fast Day | No | 05:40 | 05:00 - 05:59 | Morning | 37,6 | 66  | 4,2   | 4,2   | 18,75 | 562,34 | 47,57  |
| 2019/05/25 | CH2206 | Male | Three y/o | Treatment (Wk 2) | Treatment | Fast Day | No | 05:40 | 05:00 - 05:59 | Morning | 37,3 | 95  | 68,0  | 68,0  | 18,46 | 590,14 | 142,43 |
| 2019/05/25 | CH2205 | Male | Three y/o | Treatment (Wk 2) | Treatment | Fast Day | No | 05:45 | 05:00 - 05:59 | Morning | 37,6 | 59  | 2,2   | 2,2   | 18,75 | 553,30 | 26,02  |
| 2019/05/25 | CH2206 | Male | Three y/o | Treatment (Wk 2) | Treatment | Fast Day | No | 05:45 | 05:00 - 05:59 | Morning | 37,3 | 90  | 52,4  | 52,4  | 18,46 | 586,16 | 133,41 |
| 2019/05/25 | CH2205 | Male | Three y/o | Treatment (Wk 2) | Treatment | Fast Day | No | 05:50 | 05:00 - 05:59 | Morning | 37,6 | 56  | 4,8   | 4,8   | 18,75 | 549,01 | 52,04  |
| 2019/05/25 | CH2206 | Male | Three y/o | Treatment (Wk 2) | Treatment | Fast Day | No | 05:50 | 05:00 - 05:59 | Morning | 37,3 | 47  | 58,4  | 58,4  | 18,46 | 534,23 | 137,16 |
| 2019/05/25 | CH2205 | Male | Three y/o | Treatment (Wk 2) | Treatment | Fast Day | No | 05:55 | 05:00 - 05:59 | Morning | 37,7 | 59  | 3,4   | 3,4   | 18,85 | 553,30 | 40,51  |
| 2019/05/25 | CH2206 | Male | Three y/o | Treatment (Wk 2) | Treatment | Fast Day | No | 05:55 | 05:00 - 05:59 | Morning | 37,2 | 52  | 58,6  | 58,6  | 18,36 | 542,83 | 137,28 |
| 2019/05/25 | CH2205 | Male | Three y/o | Treatment (Wk 2) | Treatment | Fast Day | No | 06:00 | 06:00 - 06:59 | Morning | 37,7 | 90  | 40,2  | 40,2  | 18,85 | 586,16 | 124,26 |
| 2019/05/25 | CH2206 | Male | Three y/o | Treatment (Wk 2) | Treatment | Fast Day | No | 06:00 | 06:00 - 06:59 | Morning | 37,2 | 38  | 57,6  | 57,6  | 18,36 | 515,48 | 136,68 |
| 2019/05/25 | CH2205 | Male | Three y/o | Treatment (Wk 2) | Treatment | Fast Day | No | 06:05 | 06:00 - 06:59 | Morning | 37,7 | 56  | 5,8   | 5,8   | 18,85 | 549,01 | 58,39  |
| 2019/05/25 | CH2206 | Male | Three y/o | Treatment (Wk 2) | Treatment | Fast Day | No | 06:05 | 06:00 - 06:59 | Morning | 37,1 | 45  | 62,0  | 62,0  | 18,26 | 530,47 | 139,23 |
| 2019/05/25 | CH2205 | Male | Three y/o | Treatment (Wk 2) | Treatment | Fast Day | No | 06:10 | 06:00 - 06:59 | Morning | 37,7 | 65  | 1,6   | 1,6   | 18,85 | 561,12 | 15,48  |
| 2019/05/25 | CH2206 | Male | Three y/o | Treatment (Wk 2) | Treatment | Fast Day | No | 06:10 | 06:00 - 06:59 | Morning | 37,0 | 41  | 62,8  | 62,8  | 18,16 | 522,29 | 139,67 |
| 2019/05/25 | CH2205 | Male | Three y/o | Treatment (Wk 2) | Treatment | Fast Day | No | 06:15 | 06:00 - 06:59 | Morning | 37,7 | 93  | 45,8  | 45,8  | 18,85 | 588,58 | 128,76 |
| 2019/05/25 | CH2206 | Male | Three y/o | Treatment (Wk 2) | Treatment | Fast Day | No | 06:15 | 06:00 - 06:59 | Morning | 36,9 | 63  | 129,2 | 129,2 | 18,06 | 558,62 | 164,79 |
| 2019/05/25 | CH2205 | Male | Three y/o | Treatment (Wk 2) | Treatment | Fast Day | No | 06:20 | 06:00 - 06:59 | Morning | 37,7 | 123 | 117,6 | 117,6 | 18,85 | 608,49 | 161,50 |
| 2019/05/25 | CH2206 | Male | Three y/o | Treatment (Wk 2) | Treatment | Fast Day | No | 06:20 | 06:00 - 06:59 | Morning | 37,0 | 123 | 169,6 | 169,6 | 18,16 | 608,49 | 174,32 |
| 2019/05/25 | CH2205 | Male | Three y/o | Treatment (Wk 2) | Treatment | Fast Day | No | 06:25 | 06:00 - 06:59 | Morning | 37,6 | 60  | 135,2 | 135,2 | 18,75 | 554,67 | 166,38 |
| 2019/05/25 | CH2206 | Male | Three y/o | Treatment (Wk 2) | Treatment | Fast Day | No | 06:25 | 06:00 - 06:59 | Morning | 37,1 | 125 | 115,8 | 115,8 | 18,26 | 609,60 | 160,96 |
| 2019/05/25 | CH2205 | Male | Three y/o | Treatment (Wk 2) | Treatment | Fast Day | No | 06:30 | 06:00 - 06:59 | Morning | 37,4 |     | 26,4  | 26,4  | 18,55 |        | 109,81 |
| 2019/05/25 | CH2206 | Male | Three y/o | Treatment (Wk 2) | Treatment | Fast Day | No | 06:30 | 06:00 - 06:59 | Morning | 37,2 | 141 | 138,2 | 138,2 | 18,36 | 617,75 | 167,15 |
| 2019/05/25 | CH2205 | Male | Three y/o | Treatment (Wk 2) | Treatment | Fast Day | No | 06:35 | 06:00 - 06:59 | Morning | 37,3 | 73  | 29,2  | 29,2  | 18,46 | 570,27 | 113,27 |
| 2019/05/25 | CH2206 | Male | Three y/o | Treatment (Wk 2) | Treatment | Fast Day | No | 06:35 | 06:00 - 06:59 | Morning | 37,3 | 182 | 169,2 | 169,2 | 18,46 | 634,31 | 174,24 |
| 2019/05/25 | CH2205 | Male | Three y/o | Treatment (Wk 2) | Treatment | Fast Day | No | 06:40 | 06:00 - 06:59 | Morning | 37,2 |     | 32,6  | 32,6  | 18,36 |        | 117,05 |
| 2019/05/25 | CH2206 | Male | Three y/o | Treatment (Wk 2) | Treatment | Fast Day | No | 06:40 | 06:00 - 06:59 | Morning | 37,4 | 188 | 237,2 | 237,2 | 18,55 | 636,34 | 186,13 |
| 2019/05/25 | CH2205 | Male | Three y/o | Treatment (Wk 2) | Treatment | Fast Day | No | 06:45 | 06:00 - 06:59 | Morning | 37,3 | 121 | 82,0  | 82,0  | 18,46 | 607,35 | 148,93 |
| 2019/05/25 | CH2206 | Male | Three y/o | Treatment (Wk 2) | Treatment | Fast Day | No | 06:45 | 06:00 - 06:59 | Morning | 37,6 | 125 | 115,0 | 115,0 | 18,75 | 609,60 | 160,72 |
| 2019/05/25 | CH2205 | Male | Three y/o | Treatment (Wk 2) | Treatment | Fast Day | No | 06:50 | 06:00 - 06:59 | Morning | 37,4 | 81  | 70,4  | 70,4  | 18,55 | 578,26 | 143,64 |
| 2019/05/25 | CH2206 | Male | Three y/o | Treatment (Wk 2) | Treatment | Fast Day | No | 06:50 | 06:00 - 06:59 | Morning | 37,8 | 140 | 265,6 | 265,6 | 18,95 | 617,28 | 190,12 |
| 2019/05/25 | CH2205 | Male | Three y/o | Treatment (Wk 2) | Treatment | Fast Day | No | 06:55 | 06:00 - 06:59 | Morning | 37,3 | 90  | 86,6  | 86,6  | 18,46 | 586,16 | 150,83 |
| 2019/05/25 | CH2206 | Male | Three y/o | Treatment (Wk 2) | Treatment | Fast Day | No | 06:55 | 06:00 - 06:59 | Morning | 37,8 | 135 | 144,6 | 144,6 | 18,95 | 614,84 | 168,73 |
| 2019/05/25 | CH2205 | Male | Three y/o | Treatment (Wk 2) | Treatment | Fast Day | No | 07:00 | 07:00 - 07:59 | Morning | 37,4 | 141 | 29,6  | 29,6  | 18,55 | 617,75 | 113,73 |
| 2019/05/25 | CH2206 | Male | Three y/o | Treatment (Wk 2) | Treatment | Fast Day | No | 07:00 | 07:00 - 07:59 | Morning | 37,8 | 119 | 334,4 | 334,4 | 18,95 | 606,20 | 198,26 |
| 2019/05/25 | CH2205 | Male | Three y/o | Treatment (Wk 2) | Treatment | Fast Day | No | 07:05 | 07:00 - 07:59 | Morning | 37,4 | 108 | 86,6  | 86,6  | 18,55 | 599,39 | 150,83 |
| 2019/05/25 | CH2206 | Male | Three y/o | Treatment (Wk 2) | Treatment | Fast Day | No | 07:05 | 07:00 - 07:59 | Morning | 37,8 | 71  | 108,2 | 108,2 | 18,95 | 568,10 | 158,59 |
| 2019/05/25 | CH2205 | Male | Three y/o | Treatment (Wk 2) | Treatment | Fast Day | No | 07:10 | 07:00 - 07:59 | Morning | 37,4 |     | 97,2  | 97,2  | 18,55 |        | 154,85 |
| 2019/05/25 | CH2206 | Male | Three y/o | Treatment (Wk 2) | Treatment | Fast Day | No | 07:10 | 07:00 - 07:59 | Morning | 37,8 | 145 | 163,4 | 163,4 | 18,95 | 619,62 | 173,02 |
| 2019/05/25 | CH2205 | Male | Three y/o | Treatment (Wk 2) | Treatment | Fast Day | No | 07:15 | 07:00 - 07:59 | Morning | 37,5 | 83  | 56,4  | 56,4  | 18,65 | 580,11 | 135,95 |
| 2019/05/25 | CH2206 | Male | Three y/o | Treatment (Wk 2) | Treatment | Fast Day | No | 07:15 | 07:00 - 07:59 | Morning | 37,8 | 135 | 80,6  | 80,6  | 18,95 | 614,84 | 148,34 |
| 2019/05/25 | CH2205 | Male | Three y/o | Treatment (Wk 2) | Treatment | Fast Day | No | 07:20 | 07:00 - 07:59 | Morning | 37,5 | 106 | 26,8  | 26,8  | 18,65 | 598,06 | 110,33 |
| 2019/05/25 | CH2206 | Male | Three y/o | Treatment (Wk 2) | Treatment | Fast Day | No | 07:20 | 07:00 - 07:59 | Morning | 37,8 | 121 | 148,2 | 148,2 | 18,95 | 607,35 | 169,59 |
| 2019/05/25 | CH2205 | Male | Three y/o | Treatment (Wk 2) | Treatment | Fast Day | No | 07:25 | 07:00 - 07:59 | Morning | 37,4 | 108 | 33,2  | 33,2  | 18,55 | 599,39 | 117,68 |
| 2019/05/25 | CH2206 | Male | Three y/o | Treatment (Wk 2) | Treatment | Fast Day | No | 07:25 | 07:00 - 07:59 | Morning | 37,8 | 120 | 195,8 | 195,8 | 18,95 | 606,78 | 179,37 |
| 2019/05/25 | CH2205 | Male | Three y/o | Treatment (Wk 2) | Treatment | Fast Day | No | 07:30 | 07:00 - 07:59 | Morning | 37,3 | 108 | 37,4  | 37,4  | 18,46 | 599,39 | 121,77 |
| 2019/05/25 | CH2206 | Male | Three y/o | Treatment (Wk 2) | Treatment | Fast Day | No | 07:30 | 07:00 - 07:59 | Morning | 37,8 | 63  | 196,4 | 196,4 | 18,95 | 558,62 | 179,48 |
| 2019/05/25 | CH2205 | Male | Three y/o | Treatment (Wk 2) | Treatment | Fast Day | No | 07:35 | 07:00 - 07:59 | Morning | 37,4 | 125 | 77,2  | 77,2  | 18,55 | 609,60 | 146,84 |
| 2019/05/25 | CH2206 | Male | Three y/o | Treatment (Wk 2) | Treatment | Fast Day | No | 07:35 | 07:00 - 07:59 | Morning | 37,9 | 115 | 134,0 | 134,0 | 19,05 | 603,82 | 166,07 |
| 2019/05/25 | CH2205 | Male | Three y/o | Treatment (Wk 2) | Treatment | Fast Day | No | 07:40 | 07:00 - 07:59 | Morning | 37,4 | 101 | 226,0 | 226,0 | 18,55 | 594,59 | 184,42 |
| 2019/05/25 | CH2206 | Male | Three y/o | Treatment (Wk 2) | Treatment | Fast Day | No | 07:40 | 07:00 - 07:59 | Morning | 37,9 | 60  | 38,6  | 38,6  | 19,05 | 554,67 | 122,86 |
| 2019/05/25 | CH2205 | Male | Three y/o | Treatment (Wk 2) | Treatment | Fast Day | No | 07:45 | 07:00 - 07:59 | Morning | 37,5 | 114 | 64,0  | 64,0  | 18,65 | 603,20 | 140,33 |



|            |        |      |           |                  |           |          |    |       |               |              |      |     |       |       |       |        |        |
|------------|--------|------|-----------|------------------|-----------|----------|----|-------|---------------|--------------|------|-----|-------|-------|-------|--------|--------|
| 2019/05/25 | CH2206 | Male | Three y/o | Treatment (Wk 2) | Treatment | Fast Day | No | 07:45 | 07:00 - 07:59 | Morning      | 37,9 | 126 | 172,6 | 172,6 | 19,05 | 610,14 | 174,94 |
| 2019/05/25 | CH2205 | Male | Three y/o | Treatment (Wk 2) | Treatment | Fast Day | No | 07:50 | 07:00 - 07:59 | Morning      | 37,4 | 108 | 105,6 | 105,6 | 18,55 | 599,39 | 157,74 |
| 2019/05/25 | CH2206 | Male | Three y/o | Treatment (Wk 2) | Treatment | Fast Day | No | 07:50 | 07:00 - 07:59 | Morning      | 37,9 | 125 | 180,2 | 180,2 | 19,05 | 609,60 | 176,45 |
| 2019/05/25 | CH2205 | Male | Three y/o | Treatment (Wk 2) | Treatment | Fast Day | No | 07:55 | 07:00 - 07:59 | Morning      | 37,5 | 68  | 122,6 | 122,6 | 18,65 | 564,71 | 162,96 |
| 2019/05/25 | CH2206 | Male | Three y/o | Treatment (Wk 2) | Treatment | Fast Day | No | 07:55 | 07:00 - 07:59 | Morning      | 37,9 | 109 | 73,8  | 73,8  | 19,05 | 600,04 | 145,27 |
| 2019/05/25 | CH2205 | Male | Three y/o | Treatment (Wk 2) | Treatment | Fast Day | No | 08:00 | 08:00 - 08:59 | Late Morning | 37,5 |     | 79,6  | 79,6  | 18,65 |        | 147,90 |
| 2019/05/25 | CH2206 | Male | Three y/o | Treatment (Wk 2) | Treatment | Fast Day | No | 08:00 | 08:00 - 08:59 | Late Morning | 37,9 | 115 | 121,2 | 121,2 | 19,05 | 603,82 | 162,56 |
| 2019/05/25 | CH2205 | Male | Three y/o | Treatment (Wk 2) | Treatment | Fast Day | No | 08:05 | 08:00 - 08:59 | Late Morning | 37,5 | 74  | 18,6  | 18,6  | 18,65 | 571,33 | 97,84  |
| 2019/05/25 | CH2206 | Male | Three y/o | Treatment (Wk 2) | Treatment | Fast Day | No | 08:05 | 08:00 - 08:59 | Late Morning | 37,9 | 128 | 151,0 | 151,0 | 19,05 | 611,22 | 170,25 |
| 2019/05/25 | CH2205 | Male | Three y/o | Treatment (Wk 2) | Treatment | Fast Day | No | 08:10 | 08:00 - 08:59 | Late Morning | 37,4 | 71  | 17,6  | 17,6  | 18,55 | 568,10 | 95,95  |
| 2019/05/25 | CH2206 | Male | Three y/o | Treatment (Wk 2) | Treatment | Fast Day | No | 08:10 | 08:00 - 08:59 | Late Morning | 37,9 | 126 | 101,8 | 101,8 | 19,05 | 610,14 | 156,47 |
| 2019/05/25 | CH2205 | Male | Three y/o | Treatment (Wk 2) | Treatment | Fast Day | No | 08:15 | 08:00 - 08:59 | Late Morning | 37,2 | 62  | 8,4   | 8,4   | 18,36 | 557,33 | 70,86  |
| 2019/05/25 | CH2206 | Male | Three y/o | Treatment (Wk 2) | Treatment | Fast Day | No | 08:15 | 08:00 - 08:59 | Late Morning | 37,9 | 110 | 133,6 | 133,6 | 19,05 | 600,69 | 165,96 |
| 2019/05/25 | CH2205 | Male | Three y/o | Treatment (Wk 2) | Treatment | Fast Day | No | 08:20 | 08:00 - 08:59 | Late Morning | 37,2 | 63  | 8,0   | 8,0   | 18,36 | 558,62 | 69,22  |
| 2019/05/25 | CH2206 | Male | Three y/o | Treatment (Wk 2) | Treatment | Fast Day | No | 08:20 | 08:00 - 08:59 | Late Morning | 37,9 | 129 | 235,4 | 235,4 | 19,05 | 611,75 | 185,86 |
| 2019/05/25 | CH2205 | Male | Three y/o | Treatment (Wk 2) | Treatment | Fast Day | No | 08:25 | 08:00 - 08:59 | Late Morning | 37,3 | 69  | 6,6   | 6,6   | 18,46 | 565,86 | 62,73  |
| 2019/05/25 | CH2206 | Male | Three y/o | Treatment (Wk 2) | Treatment | Fast Day | No | 08:25 | 08:00 - 08:59 | Late Morning | 37,9 | 121 | 240,2 | 240,2 | 19,05 | 607,35 | 186,57 |
| 2019/05/25 | CH2205 | Male | Three y/o | Treatment (Wk 2) | Treatment | Fast Day | No | 08:30 | 08:00 - 08:59 | Late Morning | 37,3 | 61  | 60,8  | 60,8  | 18,46 | 556,01 | 138,55 |
| 2019/05/25 | CH2206 | Male | Three y/o | Treatment (Wk 2) | Treatment | Fast Day | No | 08:30 | 08:00 - 08:59 | Late Morning | 37,9 | 129 | 180,8 | 180,8 | 19,05 | 611,75 | 176,57 |
| 2019/05/25 | CH2205 | Male | Three y/o | Treatment (Wk 2) | Treatment | Fast Day | No | 08:35 | 08:00 - 08:59 | Late Morning | 37,3 | 98  | 30,8  | 30,8  | 18,46 | 592,41 | 115,10 |
| 2019/05/25 | CH2206 | Male | Three y/o | Treatment (Wk 2) | Treatment | Fast Day | No | 08:35 | 08:00 - 08:59 | Late Morning | 37,9 | 118 | 166,6 | 166,6 | 19,05 | 605,61 | 173,70 |
| 2019/05/25 | CH2205 | Male | Three y/o | Treatment (Wk 2) | Treatment | Fast Day | No | 08:40 | 08:00 - 08:59 | Late Morning | 37,3 | 143 | 49,8  | 49,8  | 18,46 | 618,69 | 131,65 |
| 2019/05/25 | CH2206 | Male | Three y/o | Treatment (Wk 2) | Treatment | Fast Day | No | 08:40 | 08:00 - 08:59 | Late Morning | 37,9 | 160 | 55,2  | 55,2  | 19,05 | 626,07 | 135,21 |
| 2019/05/25 | CH2205 | Male | Three y/o | Treatment (Wk 2) | Treatment | Fast Day | No | 08:45 | 08:00 - 08:59 | Late Morning | 37,4 | 113 | 31,4  | 31,4  | 18,55 | 602,58 | 115,76 |
| 2019/05/25 | CH2206 | Male | Three y/o | Treatment (Wk 2) | Treatment | Fast Day | No | 08:45 | 08:00 - 08:59 | Late Morning | 38,0 | 97  | 131,8 | 131,8 | 19,15 | 591,66 | 165,49 |
| 2019/05/25 | CH2205 | Male | Three y/o | Treatment (Wk 2) | Treatment | Fast Day | No | 08:50 | 08:00 - 08:59 | Late Morning | 37,2 | 51  | 9,8   | 9,8   | 18,36 | 541,20 | 76,07  |
| 2019/05/25 | CH2206 | Male | Three y/o | Treatment (Wk 2) | Treatment | Fast Day | No | 08:50 | 08:00 - 08:59 | Late Morning | 37,9 | 107 | 283,0 | 283,0 | 19,05 | 598,73 | 192,36 |
| 2019/05/25 | CH2205 | Male | Three y/o | Treatment (Wk 2) | Treatment | Fast Day | No | 08:55 | 08:00 - 08:59 | Late Morning | 37,4 | 79  | 115,8 | 115,8 | 18,55 | 576,36 | 160,96 |
| 2019/05/25 | CH2206 | Male | Three y/o | Treatment (Wk 2) | Treatment | Fast Day | No | 08:55 | 08:00 - 08:59 | Late Morning | 37,9 | 108 | 117,6 | 117,6 | 19,05 | 599,39 | 161,50 |
| 2019/05/25 | CH2205 | Male | Three y/o | Treatment (Wk 2) | Treatment | Fast Day | No | 09:00 | 09:00 - 09:59 | Late Morning | 37,4 | 101 | 56,6  | 56,6  | 18,55 | 594,59 | 136,07 |
| 2019/05/25 | CH2206 | Male | Three y/o | Treatment (Wk 2) | Treatment | Fast Day | No | 09:00 | 09:00 - 09:59 | Late Morning | 37,9 | 103 | 40,0  | 40,0  | 19,05 | 596,00 | 124,09 |
| 2019/05/25 | CH2205 | Male | Three y/o | Treatment (Wk 2) | Treatment | Fast Day | No | 09:05 | 09:00 - 09:59 | Late Morning | 37,4 | 114 | 34,8  | 34,8  | 18,55 | 603,20 | 119,29 |
| 2019/05/25 | CH2206 | Male | Three y/o | Treatment (Wk 2) | Treatment | Fast Day | No | 09:05 | 09:00 - 09:59 | Late Morning | 37,9 | 53  | 226,0 | 226,0 | 19,05 | 544,43 | 184,42 |
| 2019/05/25 | CH2205 | Male | Three y/o | Treatment (Wk 2) | Treatment | Fast Day | No | 09:10 | 09:00 - 09:59 | Late Morning | 37,4 | 68  | 14,4  | 14,4  | 18,55 | 564,71 | 89,12  |
| 2019/05/25 | CH2206 | Male | Three y/o | Treatment (Wk 2) | Treatment | Fast Day | No | 09:10 | 09:00 - 09:59 | Late Morning | 37,9 | 108 | 5,2   | 5,2   | 19,05 | 599,39 | 54,72  |
| 2019/05/25 | CH2205 | Male | Three y/o | Treatment (Wk 2) | Treatment | Fast Day | No | 09:15 | 09:00 - 09:59 | Late Morning | 37,5 | 73  | 15,2  | 15,2  | 18,65 | 570,27 | 90,96  |
| 2019/05/25 | CH2206 | Male | Three y/o | Treatment (Wk 2) | Treatment | Fast Day | No | 09:15 | 09:00 - 09:59 | Late Morning | 37,9 | 59  | 6,2   | 6,2   | 19,05 | 553,30 | 60,63  |
| 2019/05/25 | CH2205 | Male | Three y/o | Treatment (Wk 2) | Treatment | Fast Day | No | 09:20 | 09:00 - 09:59 | Late Morning | 37,5 | 109 | 14,4  | 14,4  | 18,65 | 600,04 | 89,12  |
| 2019/05/25 | CH2206 | Male | Three y/o | Treatment (Wk 2) | Treatment | Fast Day | No | 09:20 | 09:00 - 09:59 | Late Morning | 37,9 | 49  | 6,0   | 6,0   | 19,05 | 537,80 | 59,53  |
| 2019/05/25 | CH2205 | Male | Three y/o | Treatment (Wk 2) | Treatment | Fast Day | No | 09:25 | 09:00 - 09:59 | Late Morning | 37,6 | 55  | 16,6  | 16,6  | 18,75 | 547,52 | 93,96  |
| 2019/05/25 | CH2206 | Male | Three y/o | Treatment (Wk 2) | Treatment | Fast Day | No | 09:25 | 09:00 - 09:59 | Late Morning | 37,8 | 50  | 234,2 | 234,2 | 18,95 | 539,52 | 185,68 |
| 2019/05/25 | CH2205 | Male | Three y/o | Treatment (Wk 2) | Treatment | Fast Day | No | 09:30 | 09:00 - 09:59 | Late Morning | 37,6 | 59  | 30,2  | 30,2  | 18,75 | 553,30 | 114,42 |
| 2019/05/25 | CH2206 | Male | Three y/o | Treatment (Wk 2) | Treatment | Fast Day | No | 09:30 | 09:00 - 09:59 | Late Morning | 37,8 |     | 79,4  | 79,4  | 18,95 |        | 147,81 |
| 2019/05/25 | CH2205 | Male | Three y/o | Treatment (Wk 2) | Treatment | Fast Day | No | 09:35 | 09:00 - 09:59 | Late Morning | 37,5 | 69  | 27,4  | 27,4  | 18,65 | 565,86 | 111,09 |
| 2019/05/25 | CH2206 | Male | Three y/o | Treatment (Wk 2) | Treatment | Fast Day | No | 09:35 | 09:00 - 09:59 | Late Morning | 37,8 |     | 833,4 |       | 18,95 |        |        |
| 2019/05/25 | CH2205 | Male | Three y/o | Treatment (Wk 2) | Treatment | Fast Day | No | 09:40 | 09:00 - 09:59 | Late Morning | 37,5 | 45  | 19,4  | 19,4  | 18,65 | 530,47 | 99,28  |
| 2019/05/25 | CH2206 | Male | Three y/o | Treatment (Wk 2) | Treatment | Fast Day | No | 09:40 | 09:00 - 09:59 | Late Morning | 37,9 | 107 | 91,0  | 91,0  | 19,05 | 598,73 | 152,56 |
| 2019/05/25 | CH2205 | Male | Three y/o | Treatment (Wk 2) | Treatment | Fast Day | No | 09:45 | 09:00 - 09:59 | Late Morning | 37,5 | 188 | 17,2  | 17,2  | 18,65 | 636,34 | 95,17  |
| 2019/05/25 | CH2206 | Male | Three y/o | Treatment (Wk 2) | Treatment | Fast Day | No | 09:45 | 09:00 - 09:59 | Late Morning | 37,9 | 121 | 92,8  | 92,8  | 19,05 | 607,35 | 153,24 |
| 2019/05/25 | CH2205 | Male | Three y/o | Treatment (Wk 2) | Treatment | Fast Day | No | 09:50 | 09:00 - 09:59 | Late Morning | 37,6 | 50  | 4,0   | 4,0   | 18,75 | 539,52 | 45,94  |
| 2019/05/25 | CH2206 | Male | Three y/o | Treatment (Wk 2) | Treatment | Fast Day | No | 09:50 | 09:00 - 09:59 | Late Morning | 37,9 | 110 | 71,6  | 71,6  | 19,05 | 600,69 | 144,22 |
| 2019/05/25 | CH2205 | Male | Three y/o | Treatment (Wk 2) | Treatment | Fast Day | No | 09:55 | 09:00 - 09:59 | Late Morning | 37,6 | 55  | 9,8   | 9,8   | 18,75 | 547,52 | 76,07  |
| 2019/05/25 | CH2206 | Male | Three y/o | Treatment (Wk 2) | Treatment | Fast Day | No | 09:55 | 09:00 - 09:59 | Late Morning | 37,9 |     | 127,0 | 127,0 | 19,05 |        | 164,19 |
| 2019/05/25 | CH2205 | Male | Three y/o | Treatment (Wk 2) | Treatment | Fast Day | No | 10:00 | 10:00 - 10:59 | Late Morning | 37,7 | 98  | 14,6  | 14,6  | 18,85 | 592,41 | 89,59  |
| 2019/05/25 | CH2206 | Male | Three y/o | Treatment (Wk 2) | Treatment | Fast Day | No | 10:00 | 10:00 - 10:59 | Late Morning | 37,9 | 86  | 6,2   | 6,2   | 19,05 | 582,77 | 60,63  |
| 2019/05/25 | CH2205 | Male | Three y/o | Treatment (Wk 2) | Treatment | Fast Day | No | 10:05 | 10:00 - 10:59 | Late Morning | 37,7 | 56  | 13,8  | 13,8  | 18,85 | 549,01 | 87,68  |
| 2019/05/25 | CH2206 | Male | Three y/o | Treatment (Wk 2) | Treatment | Fast Day | No | 10:05 | 10:00 - 10:59 | Late Morning | 37,9 | 67  | 5,8   | 5,8   | 19,05 | 563,53 | 58,39  |
| 2019/05/25 | CH2205 | Male | Three y/o | Treatment (Wk 2) | Treatment | Fast Day | No | 10:10 | 10:00 - 10:59 | Late Morning | 37,7 |     | 22,6  | 22,6  | 18,85 |        | 104,49 |
| 2019/05/25 | CH2206 | Male | Three y/o | Treatment (Wk 2) | Treatment | Fast Day | No | 10:10 | 10:00 - 10:59 | Late Morning | 37,9 | 66  | 5,6   | 5,6   | 19,05 | 562,34 | 57,21  |
| 2019/05/25 | CH2205 | Male | Three y/o | Treatment (Wk 2) | Treatment | Fast Day | No | 10:15 | 10:00 - 10:59 | Late Morning | 37,6 | 92  | 3,8   | 3,8   | 18,75 | 587,78 | 44,22  |
| 2019/05/25 | CH2206 | Male | Three y/o | Treatment (Wk 2) | Treatment | Fast Day | No | 10:15 | 10:00 - 10:59 | Late Morning | 37,9 | 68  | 28,0  | 28,0  | 19,05 | 564,71 | 111,83 |
| 2019/05/25 | CH2205 | Male | Three y/o | Treatment (Wk 2) | Treatment | Fast Day | No | 10:20 | 10:00 - 10:59 | Late Morning | 37,6 | 52  | 5,8   | 5,8   | 18,75 | 542,83 | 58,39  |
| 2019/05/25 | CH2206 | Male | Three y/o | Treatment (Wk 2) | Treatment | Fast Day | No | 10:20 | 10:00 - 10:59 | Late Morning | 37,8 | 45  | 53,0  | 53,0  | 18,95 | 530,47 | 133,80 |
| 2019/05/25 | CH2205 | Male | Three y/o | Treatment (Wk 2) | Treatment | Fast Day | No | 10:25 | 10:00 - 10:59 | Late Morning | 37,6 | 72  | 3,0   | 3,0   | 18,75 | 569,20 | 36,34  |
| 2019/05/25 | CH2206 | Male | Three y/o | Treatment (Wk 2) | Treatment | Fast Day | No | 10:25 | 10:00 - 10:59 | Late Morning | 37,8 | 50  | 40,4  | 40,4  | 18,95 | 539,52 | 124,43 |
| 2019/05/25 | CH2205 | Male | Three y/o | Treatment (Wk 2) | Treatment | Fast Day | No | 10:30 | 10:00 - 10:59 | Late Morning | 37,6 | 46  | 4,2   | 4,2   | 18,75 | 532,38 | 47,57  |
| 2019/05/25 | CH2206 | Male | Three y/o | Treatment (Wk 2) | Treatment | Fast Day | No | 10:30 | 10:00 - 10:59 | Late Morning | 37,8 | 76  | 21,6  | 21,6  | 18,95 | 573,39 | 102,94 |
| 2019/05/25 | CH2205 | Male | Three y/o | Treatment (Wk 2) | Treatment | Fast Day | No | 10:35 | 10:00 - 10:59 | Late Morning | 37,6 | 81  | 8,4   | 8,4   | 18,75 | 578,26 | 70,86  |
| 2019/05/25 | CH2206 | Male | Three y/o | Treatment (Wk 2) | Treatment | Fast Day | No | 10:35 | 10:00 - 10:59 | Late Morning | 37,8 | 47  | 23,4  | 23,4  | 18,95 | 534,23 | 105,68 |
| 2019/05/25 | CH2205 | Male | Three y/o | Treatment (Wk 2) | Treatment | Fast Day | No | 10:40 | 10:00 - 10:59 | Late Morning | 37,5 |     | 25,0  | 25,0  | 18,65 |        | 107,94 |



|            |        |      |           |                  |           |          |    |       |               |              |      |     |       |       |       |        |        |
|------------|--------|------|-----------|------------------|-----------|----------|----|-------|---------------|--------------|------|-----|-------|-------|-------|--------|--------|
| 2019/05/25 | CH2206 | Male | Three y/o | Treatment (Wk 2) | Treatment | Fast Day | No | 10:40 | 10:00 - 10:59 | Late Morning | 37,8 | 55  | 48,6  | 48,6  | 18,95 | 547,52 | 130,81 |
| 2019/05/25 | CH2205 | Male | Three y/o | Treatment (Wk 2) | Treatment | Fast Day | No | 10:45 | 10:00 - 10:59 | Late Morning | 37,5 | 50  | 15,2  | 15,2  | 18,65 | 539,52 | 90,96  |
| 2019/05/25 | CH2206 | Male | Three y/o | Treatment (Wk 2) | Treatment | Fast Day | No | 10:45 | 10:00 - 10:59 | Late Morning | 37,8 | 48  | 40,4  | 40,4  | 18,95 | 536,04 | 124,43 |
| 2019/05/25 | CH2205 | Male | Three y/o | Treatment (Wk 2) | Treatment | Fast Day | No | 10:50 | 10:00 - 10:59 | Late Morning | 37,5 |     | 82,2  | 82,2  | 18,65 |        | 149,02 |
| 2019/05/25 | CH2206 | Male | Three y/o | Treatment (Wk 2) | Treatment | Fast Day | No | 10:50 | 10:00 - 10:59 | Late Morning | 37,8 | 154 | 124,6 | 124,6 | 18,95 | 623,58 | 163,52 |
| 2019/05/25 | CH2205 | Male | Three y/o | Treatment (Wk 2) | Treatment | Fast Day | No | 10:55 | 10:00 - 10:59 | Late Morning | 37,5 |     | 48,2  | 48,2  | 18,65 |        | 130,52 |
| 2019/05/25 | CH2206 | Male | Three y/o | Treatment (Wk 2) | Treatment | Fast Day | No | 10:55 | 10:00 - 10:59 | Late Morning | 37,8 |     | 157,6 | 157,6 | 18,95 |        | 171,75 |
| 2019/05/25 | CH2205 | Male | Three y/o | Treatment (Wk 2) | Treatment | Fast Day | No | 11:00 | 11:00 - 11:59 | Late Morning | 37,4 | 150 | 67,0  | 67,0  | 18,55 | 621,86 | 141,92 |
| 2019/05/25 | CH2206 | Male | Three y/o | Treatment (Wk 2) | Treatment | Fast Day | No | 11:00 | 11:00 - 11:59 | Late Morning | 37,7 | 102 | 201,2 | 201,2 | 18,85 | 595,30 | 180,33 |
| 2019/05/25 | CH2205 | Male | Three y/o | Treatment (Wk 2) | Treatment | Fast Day | No | 11:05 | 11:00 - 11:59 | Late Morning | 37,4 | 37  | 58,2  | 58,2  | 18,55 | 513,06 | 137,04 |
| 2019/05/25 | CH2206 | Male | Three y/o | Treatment (Wk 2) | Treatment | Fast Day | No | 11:05 | 11:00 - 11:59 | Late Morning | 37,8 | 103 | 112,8 | 112,8 | 18,95 | 596,00 | 160,05 |
| 2019/05/25 | CH2205 | Male | Three y/o | Treatment (Wk 2) | Treatment | Fast Day | No | 11:10 | 11:00 - 11:59 | Late Morning | 37,6 | 98  | 72,8  | 72,8  | 18,75 | 592,41 | 144,80 |
| 2019/05/25 | CH2206 | Male | Three y/o | Treatment (Wk 2) | Treatment | Fast Day | No | 11:10 | 11:00 - 11:59 | Late Morning | 37,8 | 120 | 91,6  | 91,6  | 18,95 | 606,78 | 152,79 |
| 2019/05/25 | CH2205 | Male | Three y/o | Treatment (Wk 2) | Treatment | Fast Day | No | 11:15 | 11:00 - 11:59 | Late Morning | 37,6 |     | 30,4  | 30,4  | 18,75 |        | 114,65 |
| 2019/05/25 | CH2206 | Male | Three y/o | Treatment (Wk 2) | Treatment | Fast Day | No | 11:15 | 11:00 - 11:59 | Late Morning | 37,8 | 103 | 27,4  | 27,4  | 18,95 | 596,00 | 111,09 |
| 2019/05/25 | CH2205 | Male | Three y/o | Treatment (Wk 2) | Treatment | Fast Day | No | 11:20 | 11:00 - 11:59 | Late Morning | 37,5 | 106 | 90,4  | 90,4  | 18,65 | 598,06 | 152,33 |
| 2019/05/25 | CH2206 | Male | Three y/o | Treatment (Wk 2) | Treatment | Fast Day | No | 11:20 | 11:00 - 11:59 | Late Morning | 37,8 | 71  | 35,2  | 35,2  | 18,95 | 568,10 | 119,69 |
| 2019/05/25 | CH2205 | Male | Three y/o | Treatment (Wk 2) | Treatment | Fast Day | No | 11:25 | 11:00 - 11:59 | Late Morning | 37,6 |     | 37,0  | 37,0  | 18,75 |        | 121,40 |
| 2019/05/25 | CH2206 | Male | Three y/o | Treatment (Wk 2) | Treatment | Fast Day | No | 11:25 | 11:00 - 11:59 | Late Morning | 37,8 | 78  | 57,0  | 57,0  | 18,95 | 575,38 | 136,32 |
| 2019/05/25 | CH2205 | Male | Three y/o | Treatment (Wk 2) | Treatment | Fast Day | No | 11:30 | 11:00 - 11:59 | Late Morning | 37,6 |     | 126,8 | 126,8 | 18,75 |        | 164,13 |
| 2019/05/25 | CH2206 | Male | Three y/o | Treatment (Wk 2) | Treatment | Fast Day | No | 11:30 | 11:00 - 11:59 | Late Morning | 37,9 | 98  | 38,6  | 38,6  | 19,05 | 592,41 | 122,86 |
| 2019/05/25 | CH2205 | Male | Three y/o | Treatment (Wk 2) | Treatment | Fast Day | No | 11:35 | 11:00 - 11:59 | Late Morning | 37,7 | 80  | 75,4  | 75,4  | 18,85 | 577,31 | 146,02 |
| 2019/05/25 | CH2206 | Male | Three y/o | Treatment (Wk 2) | Treatment | Fast Day | No | 11:35 | 11:00 - 11:59 | Late Morning | 37,9 | 88  | 110,8 | 110,8 | 19,05 | 584,49 | 159,42 |
| 2019/05/25 | CH2205 | Male | Three y/o | Treatment (Wk 2) | Treatment | Fast Day | No | 11:40 | 11:00 - 11:59 | Late Morning | 37,7 | 59  | 20,8  | 20,8  | 18,85 | 553,30 | 101,65 |
| 2019/05/25 | CH2206 | Male | Three y/o | Treatment (Wk 2) | Treatment | Fast Day | No | 11:40 | 11:00 - 11:59 | Late Morning | 37,9 | 106 | 131,8 | 131,8 | 19,05 | 598,06 | 165,49 |
| 2019/05/25 | CH2205 | Male | Three y/o | Treatment (Wk 2) | Treatment | Fast Day | No | 11:45 | 11:00 - 11:59 | Late Morning | 37,7 | 43  | 18,4  | 18,4  | 18,85 | 526,50 | 97,47  |
| 2019/05/25 | CH2206 | Male | Three y/o | Treatment (Wk 2) | Treatment | Fast Day | No | 11:45 | 11:00 - 11:59 | Late Morning | 37,9 | 94  | 613,2 | 613,2 | 19,05 | 589,37 | 219,82 |
| 2019/05/25 | CH2205 | Male | Three y/o | Treatment (Wk 2) | Treatment | Fast Day | No | 11:50 | 11:00 - 11:59 | Late Morning | 37,9 | 138 | 297,8 | 297,8 | 19,05 | 616,31 | 194,16 |
| 2019/05/25 | CH2206 | Male | Three y/o | Treatment (Wk 2) | Treatment | Fast Day | No | 11:50 | 11:00 - 11:59 | Late Morning | 38,0 |     | 28,8  | 28,8  | 19,15 |        | 112,79 |
| 2019/05/25 | CH2205 | Male | Three y/o | Treatment (Wk 2) | Treatment | Fast Day | No | 11:55 | 11:00 - 11:59 | Late Morning | 37,9 | 57  | 10,2  | 10,2  | 19,05 | 550,47 | 77,43  |
| 2019/05/25 | CH2206 | Male | Three y/o | Treatment (Wk 2) | Treatment | Fast Day | No | 11:55 | 11:00 - 11:59 | Late Morning | 38,0 | 59  | 34,0  | 34,0  | 19,15 | 553,30 | 118,49 |
| 2019/05/25 | CH2205 | Male | Three y/o | Treatment (Wk 2) | Treatment | Fast Day | No | 12:00 | 12:00 - 12:59 | Afternoon    | 37,9 | 48  | 4,4   | 4,4   | 19,05 | 536,04 | 49,12  |
| 2019/05/25 | CH2206 | Male | Three y/o | Treatment (Wk 2) | Treatment | Fast Day | No | 12:00 | 12:00 - 12:59 | Afternoon    | 38,0 | 81  | 48,4  | 48,4  | 19,15 | 578,26 | 130,66 |
| 2019/05/25 | CH2205 | Male | Three y/o | Treatment (Wk 2) | Treatment | Fast Day | No | 12:05 | 12:00 - 12:59 | Afternoon    | 37,9 | 63  | 8,8   | 8,8   | 19,05 | 558,62 | 72,43  |
| 2019/05/25 | CH2206 | Male | Three y/o | Treatment (Wk 2) | Treatment | Fast Day | No | 12:05 | 12:00 - 12:59 | Afternoon    | 38,0 | 50  | 60,0  | 60,0  | 19,15 | 539,52 | 138,09 |
| 2019/05/25 | CH2205 | Male | Three y/o | Treatment (Wk 2) | Treatment | Fast Day | No | 12:10 | 12:00 - 12:59 | Afternoon    | 37,8 | 42  | 7,4   | 7,4   | 18,95 | 524,42 | 66,59  |
| 2019/05/25 | CH2206 | Male | Three y/o | Treatment (Wk 2) | Treatment | Fast Day | No | 12:10 | 12:00 - 12:59 | Afternoon    | 38,0 | 68  | 60,0  | 60,0  | 19,15 | 564,71 | 138,09 |
| 2019/05/25 | CH2205 | Male | Three y/o | Treatment (Wk 2) | Treatment | Fast Day | No | 12:15 | 12:00 - 12:59 | Afternoon    | 37,7 | 46  | 6,4   | 6,4   | 18,85 | 532,38 | 61,70  |
| 2019/05/25 | CH2206 | Male | Three y/o | Treatment (Wk 2) | Treatment | Fast Day | No | 12:15 | 12:00 - 12:59 | Afternoon    | 38,0 | 47  | 57,8  | 57,8  | 19,15 | 534,23 | 136,80 |
| 2019/05/25 | CH2205 | Male | Three y/o | Treatment (Wk 2) | Treatment | Fast Day | No | 12:20 | 12:00 - 12:59 | Afternoon    | 37,7 | 79  | 14,2  | 14,2  | 18,85 | 576,36 | 88,65  |
| 2019/05/25 | CH2206 | Male | Three y/o | Treatment (Wk 2) | Treatment | Fast Day | No | 12:20 | 12:00 - 12:59 | Afternoon    | 38,0 | 79  | 67,0  | 67,0  | 19,15 | 576,36 | 141,92 |
| 2019/05/25 | CH2205 | Male | Three y/o | Treatment (Wk 2) | Treatment | Fast Day | No | 12:25 | 12:00 - 12:59 | Afternoon    | 37,7 | 45  | 10,2  | 10,2  | 18,85 | 530,47 | 77,43  |
| 2019/05/25 | CH2206 | Male | Three y/o | Treatment (Wk 2) | Treatment | Fast Day | No | 12:25 | 12:00 - 12:59 | Afternoon    | 38,0 | 50  | 67,2  | 67,2  | 19,15 | 539,52 | 142,02 |
| 2019/05/25 | CH2205 | Male | Three y/o | Treatment (Wk 2) | Treatment | Fast Day | No | 12:30 | 12:00 - 12:59 | Afternoon    | 37,7 | 49  | 2,0   | 2,0   | 18,85 | 537,80 | 22,86  |
| 2019/05/25 | CH2206 | Male | Three y/o | Treatment (Wk 2) | Treatment | Fast Day | No | 12:30 | 12:00 - 12:59 | Afternoon    | 38,0 | 46  | 59,4  | 59,4  | 19,15 | 532,38 | 137,75 |
| 2019/05/25 | CH2205 | Male | Three y/o | Treatment (Wk 2) | Treatment | Fast Day | No | 12:35 | 12:00 - 12:59 | Afternoon    | 37,7 | 38  | 66,4  | 66,4  | 18,85 | 515,48 | 141,61 |
| 2019/05/25 | CH2206 | Male | Three y/o | Treatment (Wk 2) | Treatment | Fast Day | No | 12:35 | 12:00 - 12:59 | Afternoon    | 37,9 | 45  | 64,6  | 64,6  | 19,05 | 530,47 | 140,65 |
| 2019/05/25 | CH2205 | Male | Three y/o | Treatment (Wk 2) | Treatment | Fast Day | No | 12:40 | 12:00 - 12:59 | Afternoon    | 37,7 | 44  | 19,2  | 19,2  | 18,85 | 528,51 | 98,92  |
| 2019/05/25 | CH2206 | Male | Three y/o | Treatment (Wk 2) | Treatment | Fast Day | No | 12:40 | 12:00 - 12:59 | Afternoon    | 37,9 | 39  | 67,2  | 67,2  | 19,05 | 517,82 | 142,02 |
| 2019/05/25 | CH2205 | Male | Three y/o | Treatment (Wk 2) | Treatment | Fast Day | No | 12:45 | 12:00 - 12:59 | Afternoon    | 37,7 | 53  | 15,8  | 15,8  | 18,85 | 544,43 | 92,28  |
| 2019/05/25 | CH2206 | Male | Three y/o | Treatment (Wk 2) | Treatment | Fast Day | No | 12:45 | 12:00 - 12:59 | Afternoon    | 37,9 | 46  | 65,0  | 65,0  | 19,05 | 532,38 | 140,87 |
| 2019/05/25 | CH2205 | Male | Three y/o | Treatment (Wk 2) | Treatment | Fast Day | No | 12:50 | 12:00 - 12:59 | Afternoon    | 37,7 | 55  | 22,4  | 22,4  | 18,85 | 547,52 | 104,19 |
| 2019/05/25 | CH2206 | Male | Three y/o | Treatment (Wk 2) | Treatment | Fast Day | No | 12:50 | 12:00 - 12:59 | Afternoon    | 37,9 | 42  | 61,4  | 61,4  | 19,05 | 524,42 | 138,89 |
| 2019/05/25 | CH2205 | Male | Three y/o | Treatment (Wk 2) | Treatment | Fast Day | No | 12:55 | 12:00 - 12:59 | Afternoon    | 37,6 | 46  | 27,6  | 27,6  | 18,75 | 532,38 | 111,33 |
| 2019/05/25 | CH2206 | Male | Three y/o | Treatment (Wk 2) | Treatment | Fast Day | No | 12:55 | 12:00 - 12:59 | Afternoon    | 37,8 | 43  | 70,2  | 70,2  | 18,95 | 526,50 | 143,54 |
| 2019/05/25 | CH2205 | Male | Three y/o | Treatment (Wk 2) | Treatment | Fast Day | No | 13:00 | 13:00 - 13:59 | Afternoon    | 37,6 | 46  | 28,0  | 28,0  | 18,75 | 532,38 | 111,83 |
| 2019/05/25 | CH2206 | Male | Three y/o | Treatment (Wk 2) | Treatment | Fast Day | No | 13:00 | 13:00 - 13:59 | Afternoon    | 37,8 | 40  | 65,8  | 65,8  | 18,95 | 520,09 | 141,29 |
| 2019/05/25 | CH2205 | Male | Three y/o | Treatment (Wk 2) | Treatment | Fast Day | No | 13:05 | 13:00 - 13:59 | Afternoon    | 37,6 | 46  | 26,0  | 26,0  | 18,75 | 532,38 | 109,29 |
| 2019/05/25 | CH2206 | Male | Three y/o | Treatment (Wk 2) | Treatment | Fast Day | No | 13:05 | 13:00 - 13:59 | Afternoon    | 37,7 | 42  | 66,6  | 66,6  | 18,85 | 524,42 | 141,71 |
| 2019/05/25 | CH2205 | Male | Three y/o | Treatment (Wk 2) | Treatment | Fast Day | No | 13:10 | 13:00 - 13:59 | Afternoon    | 37,6 | 45  | 11,2  | 11,2  | 18,75 | 530,47 | 80,59  |
| 2019/05/25 | CH2206 | Male | Three y/o | Treatment (Wk 2) | Treatment | Fast Day | No | 13:10 | 13:00 - 13:59 | Afternoon    | 37,7 | 44  | 54,6  | 54,6  | 18,85 | 528,51 | 134,83 |
| 2019/05/25 | CH2205 | Male | Three y/o | Treatment (Wk 2) | Treatment | Fast Day | No | 13:15 | 13:00 - 13:59 | Afternoon    | 37,5 | 51  | 6,2   | 6,2   | 18,65 | 541,20 | 60,63  |
| 2019/05/25 | CH2206 | Male | Three y/o | Treatment (Wk 2) | Treatment | Fast Day | No | 13:15 | 13:00 - 13:59 | Afternoon    | 37,7 | 53  | 49,0  | 49,0  | 18,85 | 544,43 | 131,09 |
| 2019/05/25 | CH2205 | Male | Three y/o | Treatment (Wk 2) | Treatment | Fast Day | No | 13:20 | 13:00 - 13:59 | Afternoon    | 37,5 | 41  | 4,8   | 4,8   | 18,65 | 522,29 | 52,04  |
| 2019/05/25 | CH2206 | Male | Three y/o | Treatment (Wk 2) | Treatment | Fast Day | No | 13:20 | 13:00 - 13:59 | Afternoon    | 37,7 | 53  | 47,2  | 47,2  | 18,85 | 544,43 | 129,80 |
| 2019/05/25 | CH2205 | Male | Three y/o | Treatment (Wk 2) | Treatment | Fast Day | No | 13:25 | 13:00 - 13:59 | Afternoon    | 37,5 | 58  | 44,6  | 44,6  | 18,65 | 551,90 | 127,84 |
| 2019/05/25 | CH2206 | Male | Three y/o | Treatment (Wk 2) | Treatment | Fast Day | No | 13:25 | 13:00 - 13:59 | Afternoon    | 37,7 |     | 217,4 | 217,4 | 18,85 |        | 183,06 |
| 2019/05/25 | CH2205 | Male | Three y/o | Treatment (Wk 2) | Treatment | Fast Day | No | 13:30 | 13:00 - 13:59 | Afternoon    | 37,5 |     | 37,4  | 37,4  | 18,65 |        | 121,77 |
| 2019/05/25 | CH2206 | Male | Three y/o | Treatment (Wk 2) | Treatment | Fast Day | No | 13:30 | 13:00 - 13:59 | Afternoon    | 37,7 | 95  | 30,4  | 30,4  | 18,85 | 590,14 | 114,65 |
| 2019/05/25 | CH2205 | Male | Three y/o | Treatment (Wk 2) | Treatment | Fast Day | No | 13:35 | 13:00 - 13:59 | Afternoon    | 37,5 |     | 177,0 | 177,0 | 18,65 |        | 175,82 |



|            |        |      |           |                  |           |          |    |       |               |           |      |     |       |       |       |        |        |
|------------|--------|------|-----------|------------------|-----------|----------|----|-------|---------------|-----------|------|-----|-------|-------|-------|--------|--------|
| 2019/05/25 | CH2206 | Male | Three y/o | Treatment (Wk 2) | Treatment | Fast Day | No | 13:35 | 13:00 - 13:59 | Afternoon | 37,7 | 70  | 39,0  | 39,0  | 18,85 | 566,99 | 123,22 |
| 2019/05/25 | CH2205 | Male | Three y/o | Treatment (Wk 2) | Treatment | Fast Day | No | 13:40 | 13:00 - 13:59 | Afternoon | 37,5 | 92  | 178,4 | 178,4 | 18,65 | 587,78 | 176,10 |
| 2019/05/25 | CH2206 | Male | Three y/o | Treatment (Wk 2) | Treatment | Fast Day | No | 13:40 | 13:00 - 13:59 | Afternoon | 37,7 | 87  | 121,0 | 121,0 | 18,85 | 583,64 | 162,50 |
| 2019/05/25 | CH2205 | Male | Three y/o | Treatment (Wk 2) | Treatment | Fast Day | No | 13:45 | 13:00 - 13:59 | Afternoon | 37,5 | 69  | 77,6  | 77,6  | 18,65 | 565,86 | 147,02 |
| 2019/05/25 | CH2206 | Male | Three y/o | Treatment (Wk 2) | Treatment | Fast Day | No | 13:45 | 13:00 - 13:59 | Afternoon | 37,7 | 79  | 81,8  | 81,8  | 18,85 | 576,36 | 148,85 |
| 2019/05/25 | CH2205 | Male | Three y/o | Treatment (Wk 2) | Treatment | Fast Day | No | 13:50 | 13:00 - 13:59 | Afternoon | 37,6 |     | 44,2  | 44,2  | 18,75 |        | 127,53 |
| 2019/05/25 | CH2206 | Male | Three y/o | Treatment (Wk 2) | Treatment | Fast Day | No | 13:50 | 13:00 - 13:59 | Afternoon | 37,7 | 104 | 51,4  | 51,4  | 18,85 | 596,69 | 132,74 |
| 2019/05/25 | CH2205 | Male | Three y/o | Treatment (Wk 2) | Treatment | Fast Day | No | 13:55 | 13:00 - 13:59 | Afternoon | 37,6 | 135 | 38,2  | 38,2  | 18,75 | 614,84 | 122,50 |
| 2019/05/25 | CH2206 | Male | Three y/o | Treatment (Wk 2) | Treatment | Fast Day | No | 13:55 | 13:00 - 13:59 | Afternoon | 37,7 | 73  | 32,0  | 32,0  | 18,85 | 570,27 | 116,41 |
| 2019/05/25 | CH2205 | Male | Three y/o | Treatment (Wk 2) | Treatment | Fast Day | No | 14:00 | 14:00 - 14:59 | Afternoon | 37,6 |     | 31,2  | 31,2  | 18,75 |        | 115,54 |
| 2019/05/25 | CH2206 | Male | Three y/o | Treatment (Wk 2) | Treatment | Fast Day | No | 14:00 | 14:00 - 14:59 | Afternoon | 37,7 | 43  | 38,6  | 38,6  | 18,85 | 526,50 | 122,86 |
| 2019/05/25 | CH2205 | Male | Three y/o | Treatment (Wk 2) | Treatment | Fast Day | No | 14:05 | 14:00 - 14:59 | Afternoon | 37,7 |     | 122,8 | 122,8 | 18,85 |        | 163,01 |
| 2019/05/25 | CH2206 | Male | Three y/o | Treatment (Wk 2) | Treatment | Fast Day | No | 14:05 | 14:00 - 14:59 | Afternoon | 37,7 |     | 98,2  | 98,2  | 18,85 |        | 155,21 |
| 2019/05/25 | CH2205 | Male | Three y/o | Treatment (Wk 2) | Treatment | Fast Day | No | 14:10 | 14:00 - 14:59 | Afternoon | 37,9 | 131 | 38,2  | 38,2  | 19,05 | 612,80 | 122,50 |
| 2019/05/25 | CH2206 | Male | Three y/o | Treatment (Wk 2) | Treatment | Fast Day | No | 14:10 | 14:00 - 14:59 | Afternoon | 37,8 | 95  | 119,2 | 119,2 | 18,95 | 590,14 | 161,97 |
| 2019/05/25 | CH2205 | Male | Three y/o | Treatment (Wk 2) | Treatment | Fast Day | No | 14:15 | 14:00 - 14:59 | Afternoon | 37,9 | 70  | 60,8  | 60,8  | 19,05 | 566,99 | 138,55 |
| 2019/05/25 | CH2206 | Male | Three y/o | Treatment (Wk 2) | Treatment | Fast Day | No | 14:15 | 14:00 - 14:59 | Afternoon | 37,8 | 117 | 163,2 | 163,2 | 18,95 | 605,02 | 172,97 |
| 2019/05/25 | CH2205 | Male | Three y/o | Treatment (Wk 2) | Treatment | Fast Day | No | 14:20 | 14:00 - 14:59 | Afternoon | 38,0 | 64  | 13,8  | 13,8  | 19,15 | 559,88 | 87,68  |
| 2019/05/25 | CH2206 | Male | Three y/o | Treatment (Wk 2) | Treatment | Fast Day | No | 14:20 | 14:00 - 14:59 | Afternoon | 37,9 | 92  | 221,4 | 221,4 | 19,05 | 587,78 | 183,70 |
| 2019/05/25 | CH2205 | Male | Three y/o | Treatment (Wk 2) | Treatment | Fast Day | No | 14:25 | 14:00 - 14:59 | Afternoon | 38,0 | 69  | 23,8  | 23,8  | 19,15 | 565,86 | 106,26 |
| 2019/05/25 | CH2206 | Male | Three y/o | Treatment (Wk 2) | Treatment | Fast Day | No | 14:25 | 14:00 - 14:59 | Afternoon | 37,9 | 104 | 62,0  | 62,0  | 19,05 | 596,69 | 139,23 |
| 2019/05/25 | CH2205 | Male | Three y/o | Treatment (Wk 2) | Treatment | Fast Day | No | 14:30 | 14:00 - 14:59 | Afternoon | 37,7 | 94  | 8,4   | 8,4   | 18,85 | 589,37 | 70,86  |
| 2019/05/25 | CH2206 | Male | Three y/o | Treatment (Wk 2) | Treatment | Fast Day | No | 14:30 | 14:00 - 14:59 | Afternoon | 37,8 | 59  | 63,0  | 63,0  | 18,95 | 553,30 | 139,78 |
| 2019/05/25 | CH2205 | Male | Three y/o | Treatment (Wk 2) | Treatment | Fast Day | No | 14:35 | 14:00 - 14:59 | Afternoon | 37,9 | 48  | 9,6   | 9,6   | 19,05 | 536,04 | 75,37  |
| 2019/05/25 | CH2206 | Male | Three y/o | Treatment (Wk 2) | Treatment | Fast Day | No | 14:35 | 14:00 - 14:59 | Afternoon | 37,9 | 55  | 61,0  | 61,0  | 19,05 | 547,52 | 138,67 |
| 2019/05/25 | CH2205 | Male | Three y/o | Treatment (Wk 2) | Treatment | Fast Day | No | 14:40 | 14:00 - 14:59 | Afternoon | 37,9 | 42  | 9,4   | 9,4   | 19,05 | 524,42 | 74,66  |
| 2019/05/25 | CH2206 | Male | Three y/o | Treatment (Wk 2) | Treatment | Fast Day | No | 14:40 | 14:00 - 14:59 | Afternoon | 37,9 | 53  | 60,6  | 60,6  | 19,05 | 544,43 | 138,44 |
| 2019/05/25 | CH2205 | Male | Three y/o | Treatment (Wk 2) | Treatment | Fast Day | No | 14:45 | 14:00 - 14:59 | Afternoon | 37,9 |     | 12,0  | 12,0  | 19,05 |        | 82,93  |
| 2019/05/25 | CH2206 | Male | Three y/o | Treatment (Wk 2) | Treatment | Fast Day | No | 14:45 | 14:00 - 14:59 | Afternoon | 37,9 | 45  | 55,2  | 55,2  | 19,05 | 530,47 | 135,21 |
| 2019/05/25 | CH2205 | Male | Three y/o | Treatment (Wk 2) | Treatment | Fast Day | No | 14:50 | 14:00 - 14:59 | Afternoon | 37,9 |     | 36,6  | 36,6  | 19,05 |        | 121,03 |
| 2019/05/25 | CH2206 | Male | Three y/o | Treatment (Wk 2) | Treatment | Fast Day | No | 14:50 | 14:00 - 14:59 | Afternoon | 37,9 | 67  | 53,2  | 53,2  | 19,05 | 563,53 | 133,93 |
| 2019/05/25 | CH2205 | Male | Three y/o | Treatment (Wk 2) | Treatment | Fast Day | No | 14:55 | 14:00 - 14:59 | Afternoon | 37,9 | 47  | 30,8  | 30,8  | 19,05 | 534,23 | 115,10 |
| 2019/05/25 | CH2206 | Male | Three y/o | Treatment (Wk 2) | Treatment | Fast Day | No | 14:55 | 14:00 - 14:59 | Afternoon | 37,9 | 83  | 48,8  | 48,8  | 19,05 | 580,11 | 130,95 |
| 2019/05/25 | CH2205 | Male | Three y/o | Treatment (Wk 2) | Treatment | Fast Day | No | 15:00 | 15:00 - 15:59 | Afternoon | 37,9 | 49  | 35,8  | 35,8  | 19,05 | 537,80 | 120,27 |
| 2019/05/25 | CH2206 | Male | Three y/o | Treatment (Wk 2) | Treatment | Fast Day | No | 15:00 | 15:00 - 15:59 | Afternoon | 37,9 | 44  | 51,0  | 51,0  | 19,05 | 528,51 | 132,47 |
| 2019/05/25 | CH2205 | Male | Three y/o | Treatment (Wk 2) | Treatment | Fast Day | No | 15:05 | 15:00 - 15:59 | Afternoon | 37,8 | 53  | 27,8  | 27,8  | 18,95 | 544,43 | 111,58 |
| 2019/05/25 | CH2206 | Male | Three y/o | Treatment (Wk 2) | Treatment | Fast Day | No | 15:05 | 15:00 - 15:59 | Afternoon | 37,8 | 49  | 47,6  | 47,6  | 18,95 | 537,80 | 130,09 |
| 2019/05/25 | CH2205 | Male | Three y/o | Treatment (Wk 2) | Treatment | Fast Day | No | 15:10 | 15:00 - 15:59 | Afternoon | 37,8 |     | 37,6  | 37,6  | 18,95 |        | 121,96 |
| 2019/05/25 | CH2206 | Male | Three y/o | Treatment (Wk 2) | Treatment | Fast Day | No | 15:10 | 15:00 - 15:59 | Afternoon | 37,8 | 197 | 198,0 | 198,0 | 18,95 | 639,25 | 179,77 |
| 2019/05/25 | CH2205 | Male | Three y/o | Treatment (Wk 2) | Treatment | Fast Day | No | 15:15 | 15:00 - 15:59 | Afternoon | 37,7 | 81  | 15,6  | 15,6  | 18,85 | 578,26 | 91,85  |
| 2019/05/25 | CH2206 | Male | Three y/o | Treatment (Wk 2) | Treatment | Fast Day | No | 15:15 | 15:00 - 15:59 | Afternoon | 37,8 | 96  | 137,2 | 137,2 | 18,95 | 590,91 | 166,89 |
| 2019/05/25 | CH2205 | Male | Three y/o | Treatment (Wk 2) | Treatment | Fast Day | No | 15:20 | 15:00 - 15:59 | Afternoon | 37,7 | 51  | 14,8  | 14,8  | 18,85 | 541,20 | 90,05  |
| 2019/05/25 | CH2206 | Male | Three y/o | Treatment (Wk 2) | Treatment | Fast Day | No | 15:20 | 15:00 - 15:59 | Afternoon | 37,8 |     | 84,0  | 84,0  | 18,95 |        | 149,77 |
| 2019/05/25 | CH2205 | Male | Three y/o | Treatment (Wk 2) | Treatment | Fast Day | No | 15:25 | 15:00 - 15:59 | Afternoon | 37,7 | 88  | 171,0 | 171,0 | 18,85 | 584,49 | 174,61 |
| 2019/05/25 | CH2206 | Male | Three y/o | Treatment (Wk 2) | Treatment | Fast Day | No | 15:25 | 15:00 - 15:59 | Afternoon | 37,9 | 106 | 94,0  | 94,0  | 19,05 | 598,06 | 153,69 |
| 2019/05/25 | CH2205 | Male | Three y/o | Treatment (Wk 2) | Treatment | Fast Day | No | 15:30 | 15:00 - 15:59 | Afternoon | 37,7 | 108 | 64,4  | 64,4  | 18,85 | 599,39 | 140,55 |
| 2019/05/25 | CH2206 | Male | Three y/o | Treatment (Wk 2) | Treatment | Fast Day | No | 15:30 | 15:00 - 15:59 | Afternoon | 37,9 | 118 | 76,8  | 76,8  | 19,05 | 605,61 | 146,66 |
| 2019/05/25 | CH2205 | Male | Three y/o | Treatment (Wk 2) | Treatment | Fast Day | No | 15:35 | 15:00 - 15:59 | Afternoon | 37,6 |     | 31,0  | 31,0  | 18,75 |        | 115,32 |
| 2019/05/25 | CH2206 | Male | Three y/o | Treatment (Wk 2) | Treatment | Fast Day | No | 15:35 | 15:00 - 15:59 | Afternoon | 37,9 | 92  | 95,2  | 95,2  | 19,05 | 587,78 | 154,13 |
| 2019/05/25 | CH2205 | Male | Three y/o | Treatment (Wk 2) | Treatment | Fast Day | No | 15:40 | 15:00 - 15:59 | Afternoon | 37,6 | 104 | 399,4 | 399,4 | 18,75 | 596,69 | 204,56 |
| 2019/05/25 | CH2206 | Male | Three y/o | Treatment (Wk 2) | Treatment | Fast Day | No | 15:40 | 15:00 - 15:59 | Afternoon | 38,0 | 104 | 64,0  | 64,0  | 19,15 | 596,69 | 140,33 |
| 2019/05/25 | CH2205 | Male | Three y/o | Treatment (Wk 2) | Treatment | Fast Day | No | 15:45 | 15:00 - 15:59 | Afternoon | 37,7 | 89  | 6,4   | 6,4   | 18,85 | 585,33 | 61,70  |
| 2019/05/25 | CH2206 | Male | Three y/o | Treatment (Wk 2) | Treatment | Fast Day | No | 15:45 | 15:00 - 15:59 | Afternoon | 38,0 | 65  | 63,0  | 63,0  | 19,15 | 561,12 | 139,78 |
| 2019/05/25 | CH2205 | Male | Three y/o | Treatment (Wk 2) | Treatment | Fast Day | No | 15:50 | 15:00 - 15:59 | Afternoon | 37,7 |     | 27,4  | 27,4  | 18,85 |        | 111,09 |
| 2019/05/25 | CH2206 | Male | Three y/o | Treatment (Wk 2) | Treatment | Fast Day | No | 15:50 | 15:00 - 15:59 | Afternoon | 38,0 | 99  | 40,8  | 40,8  | 19,15 | 593,14 | 124,77 |
| 2019/05/25 | CH2205 | Male | Three y/o | Treatment (Wk 2) | Treatment | Fast Day | No | 15:55 | 15:00 - 15:59 | Afternoon | 37,9 | 61  | 2,4   | 2,4   | 19,05 | 556,01 | 28,91  |
| 2019/05/25 | CH2206 | Male | Three y/o | Treatment (Wk 2) | Treatment | Fast Day | No | 15:55 | 15:00 - 15:59 | Afternoon | 38,0 | 68  | 53,8  | 53,8  | 19,15 | 564,71 | 134,32 |
| 2019/05/25 | CH2205 | Male | Three y/o | Treatment (Wk 2) | Treatment | Fast Day | No | 16:00 | 16:00 - 16:59 | Evening   | 37,9 | 53  | 5,0   | 5,0   | 19,05 | 544,43 | 53,41  |
| 2019/05/25 | CH2206 | Male | Three y/o | Treatment (Wk 2) | Treatment | Fast Day | No | 16:00 | 16:00 - 16:59 | Evening   | 38,0 | 43  | 51,8  | 51,8  | 19,15 | 526,50 | 133,01 |
| 2019/05/25 | CH2205 | Male | Three y/o | Treatment (Wk 2) | Treatment | Fast Day | No | 16:05 | 16:00 - 16:59 | Evening   | 38,0 | 56  | 3,6   | 3,6   | 19,15 | 549,01 | 42,42  |
| 2019/05/25 | CH2206 | Male | Three y/o | Treatment (Wk 2) | Treatment | Fast Day | No | 16:05 | 16:00 - 16:59 | Evening   | 38,0 | 57  | 49,0  | 49,0  | 19,15 | 550,47 | 131,09 |
| 2019/05/25 | CH2205 | Male | Three y/o | Treatment (Wk 2) | Treatment | Fast Day | No | 16:10 | 16:00 - 16:59 | Evening   | 38,0 | 46  | 10,2  | 10,2  | 19,15 | 532,38 | 77,43  |
| 2019/05/25 | CH2206 | Male | Three y/o | Treatment (Wk 2) | Treatment | Fast Day | No | 16:10 | 16:00 - 16:59 | Evening   | 38,0 | 46  | 43,0  | 43,0  | 19,15 | 532,38 | 126,58 |
| 2019/05/25 | CH2205 | Male | Three y/o | Treatment (Wk 2) | Treatment | Fast Day | No | 16:15 | 16:00 - 16:59 | Evening   | 38,0 | 46  | 2,4   | 2,4   | 19,15 | 532,38 | 28,91  |
| 2019/05/25 | CH2206 | Male | Three y/o | Treatment (Wk 2) | Treatment | Fast Day | No | 16:15 | 16:00 - 16:59 | Evening   | 38,0 | 51  | 41,8  | 41,8  | 19,15 | 541,20 | 125,60 |
| 2019/05/25 | CH2205 | Male | Three y/o | Treatment (Wk 2) | Treatment | Fast Day | No | 16:20 | 16:00 - 16:59 | Evening   | 38,0 | 68  | 8,4   | 8,4   | 19,15 | 564,71 | 70,86  |
| 2019/05/25 | CH2206 | Male | Three y/o | Treatment (Wk 2) | Treatment | Fast Day | No | 16:20 | 16:00 - 16:59 | Evening   | 37,9 | 41  | 37,2  | 37,2  | 19,05 | 522,29 | 121,59 |
| 2019/05/25 | CH2205 | Male | Three y/o | Treatment (Wk 2) | Treatment | Fast Day | No | 16:25 | 16:00 - 16:59 | Evening   | 38,1 | 48  | 8,2   | 8,2   | 19,26 | 536,04 | 70,05  |
| 2019/05/25 | CH2206 | Male | Three y/o | Treatment (Wk 2) | Treatment | Fast Day | No | 16:25 | 16:00 - 16:59 | Evening   | 37,8 | 56  | 43,8  | 43,8  | 18,95 | 549,01 | 127,22 |
| 2019/05/25 | CH2205 | Male | Three y/o | Treatment (Wk 2) | Treatment | Fast Day | No | 16:30 | 16:00 - 16:59 | Evening   | 38,1 | 45  | 9,0   | 9,0   | 19,26 | 530,47 | 73,19  |



|            |        |      |           |                  |           |          |    |       |               |         |      |     |       |       |       |        |        |
|------------|--------|------|-----------|------------------|-----------|----------|----|-------|---------------|---------|------|-----|-------|-------|-------|--------|--------|
| 2019/05/25 | CH2206 | Male | Three y/o | Treatment (Wk 2) | Treatment | Fast Day | No | 16:30 | 16:00 - 16:59 | Evening | 37,9 | 39  | 32,8  | 32,8  | 19,05 | 517,82 | 117,26 |
| 2019/05/25 | CH2205 | Male | Three y/o | Treatment (Wk 2) | Treatment | Fast Day | No | 16:35 | 16:00 - 16:59 | Evening | 38,1 | 51  | 3,4   | 3,4   | 19,26 | 541,20 | 40,51  |
| 2019/05/25 | CH2206 | Male | Three y/o | Treatment (Wk 2) | Treatment | Fast Day | No | 16:35 | 16:00 - 16:59 | Evening | 37,9 | 45  | 35,8  | 35,8  | 19,05 | 530,47 | 120,27 |
| 2019/05/25 | CH2205 | Male | Three y/o | Treatment (Wk 2) | Treatment | Fast Day | No | 16:40 | 16:00 - 16:59 | Evening | 38,1 | 38  | 6,6   | 6,6   | 19,26 | 515,48 | 62,73  |
| 2019/05/25 | CH2206 | Male | Three y/o | Treatment (Wk 2) | Treatment | Fast Day | No | 16:40 | 16:00 - 16:59 | Evening | 37,8 | 46  | 23,8  | 23,8  | 18,95 | 532,38 | 106,26 |
| 2019/05/25 | CH2205 | Male | Three y/o | Treatment (Wk 2) | Treatment | Fast Day | No | 16:45 | 16:00 - 16:59 | Evening | 38,0 | 68  | 4,8   | 4,8   | 19,15 | 564,71 | 52,04  |
| 2019/05/25 | CH2206 | Male | Three y/o | Treatment (Wk 2) | Treatment | Fast Day | No | 16:45 | 16:00 - 16:59 | Evening | 37,7 | 49  | 10,0  | 10,0  | 18,85 | 537,80 | 76,76  |
| 2019/05/25 | CH2205 | Male | Three y/o | Treatment (Wk 2) | Treatment | Fast Day | No | 16:50 | 16:00 - 16:59 | Evening | 38,0 | 70  | 4,6   | 4,6   | 19,15 | 566,99 | 50,61  |
| 2019/05/25 | CH2206 | Male | Three y/o | Treatment (Wk 2) | Treatment | Fast Day | No | 16:50 | 16:00 - 16:59 | Evening | 37,7 | 39  | 23,4  | 23,4  | 18,85 | 517,82 | 105,68 |
| 2019/05/25 | CH2205 | Male | Three y/o | Treatment (Wk 2) | Treatment | Fast Day | No | 16:55 | 16:00 - 16:59 | Evening | 38,0 | 63  | 17,0  | 17,0  | 19,15 | 558,62 | 94,77  |
| 2019/05/25 | CH2206 | Male | Three y/o | Treatment (Wk 2) | Treatment | Fast Day | No | 16:55 | 16:00 - 16:59 | Evening | 37,7 | 44  | 29,4  | 29,4  | 18,85 | 528,51 | 113,50 |
| 2019/05/25 | CH2205 | Male | Three y/o | Treatment (Wk 2) | Treatment | Fast Day | No | 17:00 | 17:00 - 17:59 | Evening | 38,0 |     | 26,2  | 26,2  | 19,15 |        | 109,55 |
| 2019/05/25 | CH2206 | Male | Three y/o | Treatment (Wk 2) | Treatment | Fast Day | No | 17:00 | 17:00 - 17:59 | Evening | 37,7 | 43  | 29,8  | 29,8  | 18,85 | 526,50 | 113,97 |
| 2019/05/25 | CH2205 | Male | Three y/o | Treatment (Wk 2) | Treatment | Fast Day | No | 17:05 | 17:00 - 17:59 | Evening | 37,9 |     | 24,8  | 24,8  | 19,05 |        | 107,67 |
| 2019/05/25 | CH2206 | Male | Three y/o | Treatment (Wk 2) | Treatment | Fast Day | No | 17:05 | 17:00 - 17:59 | Evening | 37,5 | 41  | 68,6  | 68,6  | 18,65 | 522,29 | 142,74 |
| 2019/05/25 | CH2205 | Male | Three y/o | Treatment (Wk 2) | Treatment | Fast Day | No | 17:10 | 17:00 - 17:59 | Evening | 37,9 | 89  | 55,2  | 55,2  | 19,05 | 585,33 | 135,21 |
| 2019/05/25 | CH2206 | Male | Three y/o | Treatment (Wk 2) | Treatment | Fast Day | No | 17:10 | 17:00 - 17:59 | Evening | 37,5 | 99  | 116,0 | 116,0 | 18,65 | 593,14 | 161,02 |
| 2019/05/25 | CH2205 | Male | Three y/o | Treatment (Wk 2) | Treatment | Fast Day | No | 17:15 | 17:00 - 17:59 | Evening | 37,8 |     | 65,4  | 65,4  | 18,95 |        | 141,08 |
| 2019/05/25 | CH2206 | Male | Three y/o | Treatment (Wk 2) | Treatment | Fast Day | No | 17:15 | 17:00 - 17:59 | Evening | 37,7 | 115 | 85,4  | 85,4  | 18,85 | 603,82 | 150,35 |
| 2019/05/25 | CH2205 | Male | Three y/o | Treatment (Wk 2) | Treatment | Fast Day | No | 17:20 | 17:00 - 17:59 | Evening | 37,7 | 66  | 45,4  | 45,4  | 18,85 | 562,34 | 128,45 |
| 2019/05/25 | CH2206 | Male | Three y/o | Treatment (Wk 2) | Treatment | Fast Day | No | 17:20 | 17:00 - 17:59 | Evening | 37,8 | 162 | 53,8  | 53,8  | 18,95 | 626,88 | 134,32 |
| 2019/05/25 | CH2205 | Male | Three y/o | Treatment (Wk 2) | Treatment | Fast Day | No | 17:25 | 17:00 - 17:59 | Evening | 37,6 | 78  | 44,6  | 44,6  | 18,75 | 575,38 | 127,84 |
| 2019/05/25 | CH2206 | Male | Three y/o | Treatment (Wk 2) | Treatment | Fast Day | No | 17:25 | 17:00 - 17:59 | Evening | 37,9 |     | 82,0  | 82,0  | 19,05 |        | 148,93 |
| 2019/05/25 | CH2205 | Male | Three y/o | Treatment (Wk 2) | Treatment | Fast Day | No | 17:30 | 17:00 - 17:59 | Evening | 37,6 |     | 24,0  | 24,0  | 18,75 |        | 106,55 |
| 2019/05/25 | CH2206 | Male | Three y/o | Treatment (Wk 2) | Treatment | Fast Day | No | 17:30 | 17:00 - 17:59 | Evening | 37,9 | 180 | 364,6 | 364,6 | 19,05 | 633,61 | 201,33 |
| 2019/05/25 | CH2205 | Male | Three y/o | Treatment (Wk 2) | Treatment | Fast Day | No | 17:35 | 17:00 - 17:59 | Evening | 37,5 | 150 | 102,4 | 102,4 | 18,65 | 621,86 | 156,67 |
| 2019/05/25 | CH2206 | Male | Three y/o | Treatment (Wk 2) | Treatment | Fast Day | No | 17:35 | 17:00 - 17:59 | Evening | 38,1 | 95  | 41,2  | 41,2  | 19,26 | 590,14 | 125,11 |
| 2019/05/25 | CH2205 | Male | Three y/o | Treatment (Wk 2) | Treatment | Fast Day | No | 17:40 | 17:00 - 17:59 | Evening | 37,7 |     | 301,6 | 301,6 | 18,85 |        | 194,61 |
| 2019/05/25 | CH2206 | Male | Three y/o | Treatment (Wk 2) | Treatment | Fast Day | No | 17:40 | 17:00 - 17:59 | Evening | 38,1 | 61  | 24,8  | 24,8  | 19,26 | 556,01 | 107,67 |
| 2019/05/25 | CH2205 | Male | Three y/o | Treatment (Wk 2) | Treatment | Fast Day | No | 17:45 | 17:00 - 17:59 | Evening | 37,9 | 147 | 72,0  | 72,0  | 19,05 | 620,52 | 144,42 |
| 2019/05/25 | CH2206 | Male | Three y/o | Treatment (Wk 2) | Treatment | Fast Day | No | 17:45 | 17:00 - 17:59 | Evening | 38,1 | 79  | 297,0 | 297,0 | 19,26 | 576,36 | 194,07 |
| 2019/05/25 | CH2205 | Male | Three y/o | Treatment (Wk 2) | Treatment | Fast Day | No | 17:50 | 17:00 - 17:59 | Evening | 38,0 | 97  | 44,8  | 44,8  | 19,15 | 591,66 | 127,99 |
| 2019/05/25 | CH2206 | Male | Three y/o | Treatment (Wk 2) | Treatment | Fast Day | No | 17:50 | 17:00 - 17:59 | Evening | 38,1 | 96  | 55,2  | 55,2  | 19,26 | 590,91 | 135,21 |
| 2019/05/25 | CH2205 | Male | Three y/o | Treatment (Wk 2) | Treatment | Fast Day | No | 17:55 | 17:00 - 17:59 | Evening | 38,1 | 104 | 62,4  | 62,4  | 19,26 | 596,69 | 139,45 |
| 2019/05/25 | CH2206 | Male | Three y/o | Treatment (Wk 2) | Treatment | Fast Day | No | 17:55 | 17:00 - 17:59 | Evening | 38,1 | 90  | 56,8  | 56,8  | 19,26 | 586,16 | 136,20 |
| 2019/05/25 | CH2205 | Male | Three y/o | Treatment (Wk 2) | Treatment | Fast Day | No | 18:00 | 18:00 - 18:59 | Evening | 38,0 |     | 25,2  | 25,2  | 19,15 |        | 108,22 |
| 2019/05/25 | CH2206 | Male | Three y/o | Treatment (Wk 2) | Treatment | Fast Day | No | 18:00 | 18:00 - 18:59 | Evening | 38,0 | 45  | 85,2  | 85,2  | 19,15 | 530,47 | 150,27 |
| 2019/05/25 | CH2205 | Male | Three y/o | Treatment (Wk 2) | Treatment | Fast Day | No | 18:05 | 18:00 - 18:59 | Evening | 37,9 | 48  | 41,8  | 41,8  | 19,05 | 536,04 | 125,60 |
| 2019/05/25 | CH2206 | Male | Three y/o | Treatment (Wk 2) | Treatment | Fast Day | No | 18:05 | 18:00 - 18:59 | Evening | 37,9 | 95  | 65,2  | 65,2  | 19,05 | 590,14 | 140,97 |
| 2019/05/25 | CH2205 | Male | Three y/o | Treatment (Wk 2) | Treatment | Fast Day | No | 18:10 | 18:00 - 18:59 | Evening | 37,9 | 67  | 26,6  | 26,6  | 19,05 | 563,53 | 110,07 |
| 2019/05/25 | CH2206 | Male | Three y/o | Treatment (Wk 2) | Treatment | Fast Day | No | 18:10 | 18:00 - 18:59 | Evening | 37,8 | 41  | 63,6  | 63,6  | 18,95 | 522,29 | 140,11 |
| 2019/05/25 | CH2205 | Male | Three y/o | Treatment (Wk 2) | Treatment | Fast Day | No | 18:15 | 18:00 - 18:59 | Evening | 38,0 | 70  | 76,6  | 76,6  | 19,15 | 566,99 | 146,57 |
| 2019/05/25 | CH2206 | Male | Three y/o | Treatment (Wk 2) | Treatment | Fast Day | No | 18:15 | 18:00 - 18:59 | Evening | 37,7 | 54  | 63,4  | 63,4  | 18,85 | 545,99 | 140,00 |
| 2019/05/25 | CH2205 | Male | Three y/o | Treatment (Wk 2) | Treatment | Fast Day | No | 18:20 | 18:00 - 18:59 | Evening | 37,9 | 48  | 35,2  | 35,2  | 19,05 | 536,04 | 119,69 |
| 2019/05/25 | CH2206 | Male | Three y/o | Treatment (Wk 2) | Treatment | Fast Day | No | 18:20 | 18:00 - 18:59 | Evening | 37,7 | 49  | 57,4  | 57,4  | 18,85 | 537,80 | 136,56 |
| 2019/05/25 | CH2205 | Male | Three y/o | Treatment (Wk 2) | Treatment | Fast Day | No | 18:25 | 18:00 - 18:59 | Evening | 38,0 | 46  | 27,2  | 27,2  | 19,15 | 532,38 | 110,83 |
| 2019/05/25 | CH2206 | Male | Three y/o | Treatment (Wk 2) | Treatment | Fast Day | No | 18:25 | 18:00 - 18:59 | Evening | 37,8 | 45  | 60,4  | 60,4  | 18,95 | 530,47 | 138,32 |
| 2019/05/25 | CH2205 | Male | Three y/o | Treatment (Wk 2) | Treatment | Fast Day | No | 18:30 | 18:00 - 18:59 | Evening | 38,0 | 58  | 17,8  | 17,8  | 19,15 | 551,90 | 96,34  |
| 2019/05/25 | CH2206 | Male | Three y/o | Treatment (Wk 2) | Treatment | Fast Day | No | 18:30 | 18:00 - 18:59 | Evening | 37,8 | 48  | 57,6  | 57,6  | 18,95 | 536,04 | 136,68 |
| 2019/05/25 | CH2205 | Male | Three y/o | Treatment (Wk 2) | Treatment | Fast Day | No | 18:35 | 18:00 - 18:59 | Evening | 38,0 | 51  | 18,4  | 18,4  | 19,15 | 541,20 | 97,47  |
| 2019/05/25 | CH2206 | Male | Three y/o | Treatment (Wk 2) | Treatment | Fast Day | No | 18:35 | 18:00 - 18:59 | Evening | 37,9 | 46  | 59,6  | 59,6  | 19,05 | 532,38 | 137,86 |
| 2019/05/25 | CH2205 | Male | Three y/o | Treatment (Wk 2) | Treatment | Fast Day | No | 18:40 | 18:00 - 18:59 | Evening | 38,0 | 46  | 12,4  | 12,4  | 19,15 | 532,38 | 84,04  |
| 2019/05/25 | CH2206 | Male | Three y/o | Treatment (Wk 2) | Treatment | Fast Day | No | 18:40 | 18:00 - 18:59 | Evening | 37,9 | 49  | 59,8  | 59,8  | 19,05 | 537,80 | 137,98 |
| 2019/05/25 | CH2205 | Male | Three y/o | Treatment (Wk 2) | Treatment | Fast Day | No | 18:45 | 18:00 - 18:59 | Evening | 38,0 | 43  | 12,0  | 12,0  | 19,15 | 526,50 | 82,93  |
| 2019/05/25 | CH2206 | Male | Three y/o | Treatment (Wk 2) | Treatment | Fast Day | No | 18:45 | 18:00 - 18:59 | Evening | 37,9 | 49  | 61,6  | 61,6  | 19,05 | 537,80 | 139,00 |
| 2019/05/25 | CH2205 | Male | Three y/o | Treatment (Wk 2) | Treatment | Fast Day | No | 18:50 | 18:00 - 18:59 | Evening | 38,0 | 40  | 16,0  | 16,0  | 19,15 | 520,09 | 92,71  |
| 2019/05/25 | CH2206 | Male | Three y/o | Treatment (Wk 2) | Treatment | Fast Day | No | 18:50 | 18:00 - 18:59 | Evening | 37,9 | 47  | 62,0  | 62,0  | 19,05 | 534,23 | 139,23 |
| 2019/05/25 | CH2205 | Male | Three y/o | Treatment (Wk 2) | Treatment | Fast Day | No | 18:55 | 18:00 - 18:59 | Evening | 38,0 | 66  | 8,4   | 8,4   | 19,15 | 562,34 | 70,86  |
| 2019/05/25 | CH2206 | Male | Three y/o | Treatment (Wk 2) | Treatment | Fast Day | No | 18:55 | 18:00 - 18:59 | Evening | 37,8 | 60  | 60,6  | 60,6  | 18,95 | 554,67 | 138,44 |
| 2019/05/25 | CH2205 | Male | Three y/o | Treatment (Wk 2) | Treatment | Fast Day | No | 19:00 | 19:00 - 19:59 | Evening | 38,0 | 60  | 15,0  | 15,0  | 19,15 | 554,67 | 90,51  |
| 2019/05/25 | CH2206 | Male | Three y/o | Treatment (Wk 2) | Treatment | Fast Day | No | 19:00 | 19:00 - 19:59 | Evening | 37,8 | 76  | 62,0  | 62,0  | 18,95 | 573,39 | 139,23 |
| 2019/05/25 | CH2205 | Male | Three y/o | Treatment (Wk 2) | Treatment | Fast Day | No | 19:05 | 19:00 - 19:59 | Evening | 38,0 | 76  | 16,2  | 16,2  | 19,15 | 573,39 | 93,13  |
| 2019/05/25 | CH2206 | Male | Three y/o | Treatment (Wk 2) | Treatment | Fast Day | No | 19:05 | 19:00 - 19:59 | Evening | 37,8 | 42  | 61,2  | 61,2  | 18,95 | 524,42 | 138,78 |
| 2019/05/25 | CH2205 | Male | Three y/o | Treatment (Wk 2) | Treatment | Fast Day | No | 19:10 | 19:00 - 19:59 | Evening | 38,0 | 35  | 13,0  | 13,0  | 19,15 | 507,97 | 85,65  |
| 2019/05/25 | CH2206 | Male | Three y/o | Treatment (Wk 2) | Treatment | Fast Day | No | 19:10 | 19:00 - 19:59 | Evening | 37,8 | 51  | 56,0  | 56,0  | 18,95 | 541,20 | 135,70 |
| 2019/05/25 | CH2205 | Male | Three y/o | Treatment (Wk 2) | Treatment | Fast Day | No | 19:15 | 19:00 - 19:59 | Evening | 37,9 | 60  | 17,8  | 17,8  | 19,05 | 554,67 | 96,34  |
| 2019/05/25 | CH2206 | Male | Three y/o | Treatment (Wk 2) | Treatment | Fast Day | No | 19:15 | 19:00 - 19:59 | Evening | 37,7 | 44  | 62,8  | 62,8  | 18,85 | 528,51 | 139,67 |
| 2019/05/25 | CH2205 | Male | Three y/o | Treatment (Wk 2) | Treatment | Fast Day | No | 19:20 | 19:00 - 19:59 | Evening | 37,9 | 48  | 16,0  | 16,0  | 19,05 | 536,04 | 92,71  |
| 2019/05/25 | CH2206 | Male | Three y/o | Treatment (Wk 2) | Treatment | Fast Day | No | 19:20 | 19:00 - 19:59 | Evening | 37,4 | 45  | 58,8  | 58,8  | 18,55 | 530,47 | 137,39 |
| 2019/05/25 | CH2205 | Male | Three y/o | Treatment (Wk 2) | Treatment | Fast Day | No | 19:25 | 19:00 - 19:59 | Evening | 37,9 | 44  | 13,6  | 13,6  | 19,05 | 528,51 | 87,18  |



|            |        |      |           |                  |           |          |    |       |               |         |      |    |      |      |       |        |        |
|------------|--------|------|-----------|------------------|-----------|----------|----|-------|---------------|---------|------|----|------|------|-------|--------|--------|
| 2019/05/25 | CH2206 | Male | Three y/o | Treatment (Wk 2) | Treatment | Fast Day | No | 19:25 | 19:00 - 19:59 | Evening | 37,4 | 41 | 60,0 | 60,0 | 18,55 | 522,29 | 138,09 |
| 2019/05/25 | CH2205 | Male | Three y/o | Treatment (Wk 2) | Treatment | Fast Day | No | 19:30 | 19:00 - 19:59 | Evening | 37,9 | 42 | 14,0 | 14,0 | 19,05 | 524,42 | 88,17  |
| 2019/05/25 | CH2206 | Male | Three y/o | Treatment (Wk 2) | Treatment | Fast Day | No | 19:30 | 19:00 - 19:59 | Evening | 37,4 | 45 | 59,8 | 59,8 | 18,55 | 530,47 | 137,98 |
| 2019/05/25 | CH2205 | Male | Three y/o | Treatment (Wk 2) | Treatment | Fast Day | No | 19:35 | 19:00 - 19:59 | Evening | 37,9 | 46 | 20,0 | 20,0 | 19,05 | 532,38 | 100,31 |
| 2019/05/25 | CH2206 | Male | Three y/o | Treatment (Wk 2) | Treatment | Fast Day | No | 19:35 | 19:00 - 19:59 | Evening | 37,5 | 39 | 58,0 | 58,0 | 18,65 | 517,82 | 136,92 |
| 2019/05/25 | CH2205 | Male | Three y/o | Treatment (Wk 2) | Treatment | Fast Day | No | 19:40 | 19:00 - 19:59 | Evening | 37,8 | 47 | 26,8 | 26,8 | 18,95 | 534,23 | 110,33 |
| 2019/05/25 | CH2206 | Male | Three y/o | Treatment (Wk 2) | Treatment | Fast Day | No | 19:40 | 19:00 - 19:59 | Evening | 37,5 |    | 58,6 | 58,6 | 18,65 |        | 137,28 |
| 2019/05/25 | CH2205 | Male | Three y/o | Treatment (Wk 2) | Treatment | Fast Day | No | 19:45 | 19:00 - 19:59 | Evening | 37,7 | 50 | 27,2 | 27,2 | 18,85 | 539,52 | 110,83 |
| 2019/05/25 | CH2206 | Male | Three y/o | Treatment (Wk 2) | Treatment | Fast Day | No | 19:45 | 19:00 - 19:59 | Evening | 37,7 | 44 | 59,0 | 59,0 | 18,85 | 528,51 | 137,51 |
| 2019/05/25 | CH2205 | Male | Three y/o | Treatment (Wk 2) | Treatment | Fast Day | No | 19:50 | 19:00 - 19:59 | Evening | 37,7 | 50 | 22,6 | 22,6 | 18,85 | 539,52 | 104,49 |
| 2019/05/25 | CH2206 | Male | Three y/o | Treatment (Wk 2) | Treatment | Fast Day | No | 19:50 | 19:00 - 19:59 | Evening | 37,7 | 39 | 54,0 | 54,0 | 18,85 | 517,82 | 134,45 |
| 2019/05/25 | CH2205 | Male | Three y/o | Treatment (Wk 2) | Treatment | Fast Day | No | 19:55 | 19:00 - 19:59 | Evening | 37,7 | 68 | 23,2 | 23,2 | 18,85 | 564,71 | 105,39 |
| 2019/05/25 | CH2206 | Male | Three y/o | Treatment (Wk 2) | Treatment | Fast Day | No | 19:55 | 19:00 - 19:59 | Evening | 37,7 | 94 | 46,8 | 46,8 | 18,85 | 589,37 | 129,50 |
| 2019/05/25 | CH2205 | Male | Three y/o | Treatment (Wk 2) | Treatment | Fast Day | No | 20:00 | 20:00 - 20:59 | Night   | 37,7 | 36 | 22,2 | 22,2 | 18,85 | 510,56 | 103,88 |
| 2019/05/25 | CH2206 | Male | Three y/o | Treatment (Wk 2) | Treatment | Fast Day | No | 20:00 | 20:00 - 20:59 | Night   | 37,7 | 41 | 54,8 | 54,8 | 18,85 | 522,29 | 134,96 |
| 2019/05/25 | CH2205 | Male | Three y/o | Treatment (Wk 2) | Treatment | Fast Day | No | 20:05 | 20:00 - 20:59 | Night   | 37,7 | 43 | 20,8 | 20,8 | 18,85 | 526,50 | 101,65 |
| 2019/05/25 | CH2206 | Male | Three y/o | Treatment (Wk 2) | Treatment | Fast Day | No | 20:05 | 20:00 - 20:59 | Night   | 37,7 | 48 | 55,8 | 55,8 | 18,85 | 536,04 | 135,58 |
| 2019/05/25 | CH2205 | Male | Three y/o | Treatment (Wk 2) | Treatment | Fast Day | No | 20:10 | 20:00 - 20:59 | Night   | 37,7 | 44 | 23,2 | 23,2 | 18,85 | 528,51 | 105,39 |
| 2019/05/25 | CH2206 | Male | Three y/o | Treatment (Wk 2) | Treatment | Fast Day | No | 20:10 | 20:00 - 20:59 | Night   | 37,7 | 39 | 47,6 | 47,6 | 18,85 | 517,82 | 130,09 |
| 2019/05/25 | CH2205 | Male | Three y/o | Treatment (Wk 2) | Treatment | Fast Day | No | 20:15 | 20:00 - 20:59 | Night   | 37,6 | 43 | 18,2 | 18,2 | 18,75 | 526,50 | 97,10  |
| 2019/05/25 | CH2206 | Male | Three y/o | Treatment (Wk 2) | Treatment | Fast Day | No | 20:15 | 20:00 - 20:59 | Night   | 37,7 | 47 | 46,4 | 46,4 | 18,85 | 534,23 | 129,21 |
| 2019/05/25 | CH2205 | Male | Three y/o | Treatment (Wk 2) | Treatment | Fast Day | No | 20:20 | 20:00 - 20:59 | Night   | 37,6 | 51 | 20,0 | 20,0 | 18,75 | 541,20 | 100,31 |
| 2019/05/25 | CH2206 | Male | Three y/o | Treatment (Wk 2) | Treatment | Fast Day | No | 20:20 | 20:00 - 20:59 | Night   | 37,7 | 49 | 45,2 | 45,2 | 18,85 | 537,80 | 128,30 |
| 2019/05/25 | CH2205 | Male | Three y/o | Treatment (Wk 2) | Treatment | Fast Day | No | 20:25 | 20:00 - 20:59 | Night   | 37,6 | 64 | 18,8 | 18,8 | 18,75 | 559,88 | 98,20  |
| 2019/05/25 | CH2206 | Male | Three y/o | Treatment (Wk 2) | Treatment | Fast Day | No | 20:25 | 20:00 - 20:59 | Night   | 37,7 | 42 | 50,0 | 50,0 | 18,85 | 524,42 | 131,79 |
| 2019/05/25 | CH2205 | Male | Three y/o | Treatment (Wk 2) | Treatment | Fast Day | No | 20:30 | 20:00 - 20:59 | Night   | 37,6 | 41 | 17,6 | 17,6 | 18,75 | 522,29 | 95,95  |
| 2019/05/25 | CH2206 | Male | Three y/o | Treatment (Wk 2) | Treatment | Fast Day | No | 20:30 | 20:00 - 20:59 | Night   | 37,7 | 63 | 44,8 | 44,8 | 18,85 | 558,62 | 127,99 |
| 2019/05/25 | CH2205 | Male | Three y/o | Treatment (Wk 2) | Treatment | Fast Day | No | 20:35 | 20:00 - 20:59 | Night   | 37,6 | 49 | 22,2 | 22,2 | 18,75 | 537,80 | 103,88 |
| 2019/05/25 | CH2206 | Male | Three y/o | Treatment (Wk 2) | Treatment | Fast Day | No | 20:35 | 20:00 - 20:59 | Night   | 37,5 | 45 | 40,8 | 40,8 | 18,65 | 530,47 | 124,77 |
| 2019/05/25 | CH2205 | Male | Three y/o | Treatment (Wk 2) | Treatment | Fast Day | No | 20:40 | 20:00 - 20:59 | Night   | 37,6 | 61 | 15,4 | 15,4 | 18,75 | 556,01 | 91,41  |
| 2019/05/25 | CH2206 | Male | Three y/o | Treatment (Wk 2) | Treatment | Fast Day | No | 20:40 | 20:00 - 20:59 | Night   | 37,5 | 42 | 42,4 | 42,4 | 18,65 | 524,42 | 126,10 |
| 2019/05/25 | CH2205 | Male | Three y/o | Treatment (Wk 2) | Treatment | Fast Day | No | 20:45 | 20:00 - 20:59 | Night   | 37,5 | 50 | 14,4 | 14,4 | 18,65 | 539,52 | 89,12  |
| 2019/05/25 | CH2206 | Male | Three y/o | Treatment (Wk 2) | Treatment | Fast Day | No | 20:45 | 20:00 - 20:59 | Night   | 37,5 | 36 | 46,0 | 46,0 | 18,65 | 510,56 | 128,91 |
| 2019/05/25 | CH2205 | Male | Three y/o | Treatment (Wk 2) | Treatment | Fast Day | No | 20:50 | 20:00 - 20:59 | Night   | 37,5 | 49 | 17,0 | 17,0 | 18,65 | 537,80 | 94,77  |
| 2019/05/25 | CH2206 | Male | Three y/o | Treatment (Wk 2) | Treatment | Fast Day | No | 20:50 | 20:00 - 20:59 | Night   | 37,5 | 48 | 40,2 | 40,2 | 18,65 | 536,04 | 124,26 |
| 2019/05/25 | CH2205 | Male | Three y/o | Treatment (Wk 2) | Treatment | Fast Day | No | 20:55 | 20:00 - 20:59 | Night   | 37,5 | 47 | 25,2 | 25,2 | 18,65 | 534,23 | 108,22 |
| 2019/05/25 | CH2206 | Male | Three y/o | Treatment (Wk 2) | Treatment | Fast Day | No | 20:55 | 20:00 - 20:59 | Night   | 37,4 |    | 44,0 | 44,0 | 18,55 |        | 127,37 |
| 2019/05/25 | CH2205 | Male | Three y/o | Treatment (Wk 2) | Treatment | Fast Day | No | 21:00 | 21:00 - 21:59 | Night   | 37,6 | 87 | 40,0 | 40,0 | 18,75 | 583,64 | 124,09 |
| 2019/05/25 | CH2206 | Male | Three y/o | Treatment (Wk 2) | Treatment | Fast Day | No | 21:00 | 21:00 - 21:59 | Night   | 37,4 | 42 | 55,8 | 55,8 | 18,55 | 524,42 | 135,58 |
| 2019/05/25 | CH2205 | Male | Three y/o | Treatment (Wk 2) | Treatment | Fast Day | No | 21:05 | 21:00 - 21:59 | Night   | 37,5 |    | 29,0 | 29,0 | 18,65 |        | 113,03 |
| 2019/05/25 | CH2206 | Male | Three y/o | Treatment (Wk 2) | Treatment | Fast Day | No | 21:05 | 21:00 - 21:59 | Night   | 37,4 | 63 | 64,2 | 64,2 | 18,55 | 558,62 | 140,44 |
| 2019/05/25 | CH2205 | Male | Three y/o | Treatment (Wk 2) | Treatment | Fast Day | No | 21:10 | 21:00 - 21:59 | Night   | 37,4 |    | 31,0 | 31,0 | 18,55 |        | 115,32 |
| 2019/05/25 | CH2206 | Male | Three y/o | Treatment (Wk 2) | Treatment | Fast Day | No | 21:10 | 21:00 - 21:59 | Night   | 37,4 | 49 | 61,2 | 61,2 | 18,55 | 537,80 | 138,78 |
| 2019/05/25 | CH2205 | Male | Three y/o | Treatment (Wk 2) | Treatment | Fast Day | No | 21:15 | 21:00 - 21:59 | Night   | 37,4 |    | 32,2 | 32,2 | 18,55 |        | 116,63 |
| 2019/05/25 | CH2206 | Male | Three y/o | Treatment (Wk 2) | Treatment | Fast Day | No | 21:15 | 21:00 - 21:59 | Night   | 37,4 | 42 | 40,6 | 40,6 | 18,55 | 524,42 | 124,60 |
| 2019/05/25 | CH2205 | Male | Three y/o | Treatment (Wk 2) | Treatment | Fast Day | No | 21:20 | 21:00 - 21:59 | Night   | 37,4 | 55 | 29,2 | 29,2 | 18,55 | 547,52 | 113,27 |
| 2019/05/25 | CH2206 | Male | Three y/o | Treatment (Wk 2) | Treatment | Fast Day | No | 21:20 | 21:00 - 21:59 | Night   | 37,4 | 42 | 34,2 | 34,2 | 18,55 | 524,42 | 118,70 |
| 2019/05/25 | CH2205 | Male | Three y/o | Treatment (Wk 2) | Treatment | Fast Day | No | 21:25 | 21:00 - 21:59 | Night   | 37,4 |    | 27,0 | 27,0 | 18,55 |        | 110,58 |
| 2019/05/25 | CH2206 | Male | Three y/o | Treatment (Wk 2) | Treatment | Fast Day | No | 21:25 | 21:00 - 21:59 | Night   | 37,4 | 38 | 40,0 | 40,0 | 18,55 | 515,48 | 124,09 |
| 2019/05/25 | CH2205 | Male | Three y/o | Treatment (Wk 2) | Treatment | Fast Day | No | 21:30 | 21:00 - 21:59 | Night   | 37,4 |    | 30,8 | 30,8 | 18,55 |        | 115,10 |
| 2019/05/25 | CH2206 | Male | Three y/o | Treatment (Wk 2) | Treatment | Fast Day | No | 21:30 | 21:00 - 21:59 | Night   | 37,4 | 43 | 37,6 | 37,6 | 18,55 | 526,50 | 121,96 |
| 2019/05/25 | CH2205 | Male | Three y/o | Treatment (Wk 2) | Treatment | Fast Day | No | 21:35 | 21:00 - 21:59 | Night   | 37,4 |    | 30,0 | 30,0 | 18,55 |        | 114,20 |
| 2019/05/25 | CH2206 | Male | Three y/o | Treatment (Wk 2) | Treatment | Fast Day | No | 21:35 | 21:00 - 21:59 | Night   | 37,4 | 47 | 37,4 | 37,4 | 18,55 | 534,23 | 121,77 |
| 2019/05/25 | CH2205 | Male | Three y/o | Treatment (Wk 2) | Treatment | Fast Day | No | 21:40 | 21:00 - 21:59 | Night   | 37,3 | 47 | 24,8 | 24,8 | 18,46 | 534,23 | 107,67 |
| 2019/05/25 | CH2206 | Male | Three y/o | Treatment (Wk 2) | Treatment | Fast Day | No | 21:40 | 21:00 - 21:59 | Night   | 37,4 | 57 | 40,4 | 40,4 | 18,55 | 550,47 | 124,43 |
| 2019/05/25 | CH2205 | Male | Three y/o | Treatment (Wk 2) | Treatment | Fast Day | No | 21:45 | 21:00 - 21:59 | Night   | 37,3 | 48 | 23,4 | 23,4 | 18,46 | 536,04 | 105,68 |
| 2019/05/25 | CH2206 | Male | Three y/o | Treatment (Wk 2) | Treatment | Fast Day | No | 21:45 | 21:00 - 21:59 | Night   | 37,3 | 45 | 34,4 | 34,4 | 18,46 | 530,47 | 118,90 |
| 2019/05/25 | CH2205 | Male | Three y/o | Treatment (Wk 2) | Treatment | Fast Day | No | 21:50 | 21:00 - 21:59 | Night   | 37,4 | 44 | 26,2 | 26,2 | 18,46 | 528,51 | 109,55 |
| 2019/05/25 | CH2206 | Male | Three y/o | Treatment (Wk 2) | Treatment | Fast Day | No | 21:50 | 21:00 - 21:59 | Night   | 37,4 | 43 | 36,4 | 36,4 | 18,55 | 526,50 | 120,84 |
| 2019/05/25 | CH2205 | Male | Three y/o | Treatment (Wk 2) | Treatment | Fast Day | No | 21:55 | 21:00 - 21:59 | Night   | 37,3 | 80 | 35,2 | 35,2 | 18,46 | 577,31 | 119,69 |
| 2019/05/25 | CH2206 | Male | Three y/o | Treatment (Wk 2) | Treatment | Fast Day | No | 21:55 | 21:00 - 21:59 | Night   | 37,4 | 55 | 37,4 | 37,4 | 18,55 | 547,52 | 121,77 |
| 2019/05/25 | CH2205 | Male | Three y/o | Treatment (Wk 2) | Treatment | Fast Day | No | 22:00 | 22:00 - 22:59 | Night   | 37,3 | 50 | 31,4 | 31,4 | 18,46 | 539,52 | 115,76 |
| 2019/05/25 | CH2206 | Male | Three y/o | Treatment (Wk 2) | Treatment | Fast Day | No | 22:00 | 22:00 - 22:59 | Night   | 37,4 | 46 | 36,0 | 36,0 | 18,55 | 532,38 | 120,46 |
| 2019/05/25 | CH2205 | Male | Three y/o | Treatment (Wk 2) | Treatment | Fast Day | No | 22:05 | 22:00 - 22:59 | Night   | 37,4 | 41 | 25,2 | 25,2 | 18,55 | 522,29 | 108,22 |
| 2019/05/25 | CH2206 | Male | Three y/o | Treatment (Wk 2) | Treatment | Fast Day | No | 22:05 | 22:00 - 22:59 | Night   | 37,4 | 44 | 32,0 | 32,0 | 18,55 | 528,51 | 116,41 |
| 2019/05/25 | CH2205 | Male | Three y/o | Treatment (Wk 2) | Treatment | Fast Day | No | 22:10 | 22:00 - 22:59 | Night   | 37,3 | 79 | 30,6 | 30,6 | 18,46 | 576,36 | 114,87 |
| 2019/05/25 | CH2206 | Male | Three y/o | Treatment (Wk 2) | Treatment | Fast Day | No | 22:10 | 22:00 - 22:59 | Night   | 37,4 | 54 | 33,2 | 33,2 | 18,55 | 545,99 | 117,68 |
| 2019/05/25 | CH2205 | Male | Three y/o | Treatment (Wk 2) | Treatment | Fast Day | No | 22:15 | 22:00 - 22:59 | Night   | 37,3 | 47 | 27,8 | 27,8 | 18,46 | 534,23 | 111,58 |
| 2019/05/25 | CH2206 | Male | Three y/o | Treatment (Wk 2) | Treatment | Fast Day | No | 22:15 | 22:00 - 22:59 | Night   | 37,4 | 59 | 35,2 | 35,2 | 18,55 | 553,30 | 119,69 |
| 2019/05/25 | CH2205 | Male | Three y/o | Treatment (Wk 2) | Treatment | Fast Day | No | 22:20 | 22:00 - 22:59 | Night   | 37,3 | 48 | 26,8 | 26,8 | 18,46 | 536,04 | 110,33 |



|    |            |        |      |           |                  |           |          |    |       |               |               |      |     |      |      |       |        |        |
|----|------------|--------|------|-----------|------------------|-----------|----------|----|-------|---------------|---------------|------|-----|------|------|-------|--------|--------|
|    | 2019/05/25 | CH2206 | Male | Three y/o | Treatment (Wk 2) | Treatment | Fast Day | No | 22:20 | 22:00 - 22:59 | Night         | 37,4 | 49  | 27,4 | 27,4 | 18,55 | 537,80 | 111,09 |
|    | 2019/05/25 | CH2205 | Male | Three y/o | Treatment (Wk 2) | Treatment | Fast Day | No | 22:25 | 22:00 - 22:59 | Night         | 37,3 | 48  | 32,8 | 32,8 | 18,46 | 536,04 | 117,26 |
|    | 2019/05/25 | CH2206 | Male | Three y/o | Treatment (Wk 2) | Treatment | Fast Day | No | 22:25 | 22:00 - 22:59 | Night         | 37,4 | 48  | 18,8 | 18,8 | 18,55 | 536,04 | 98,20  |
|    | 2019/05/25 | CH2205 | Male | Three y/o | Treatment (Wk 2) | Treatment | Fast Day | No | 22:30 | 22:00 - 22:59 | Night         | 37,3 |     | 34,8 | 34,8 | 18,46 |        | 119,29 |
|    | 2019/05/25 | CH2206 | Male | Three y/o | Treatment (Wk 2) | Treatment | Fast Day | No | 22:30 | 22:00 - 22:59 | Night         | 37,4 | 43  | 30,6 | 30,6 | 18,55 | 526,50 | 114,87 |
|    | 2019/05/25 | CH2205 | Male | Three y/o | Treatment (Wk 2) | Treatment | Fast Day | No | 22:35 | 22:00 - 22:59 | Night         | 37,2 |     | 30,8 | 30,8 | 18,36 |        | 115,10 |
|    | 2019/05/25 | CH2206 | Male | Three y/o | Treatment (Wk 2) | Treatment | Fast Day | No | 22:35 | 22:00 - 22:59 | Night         | 37,4 | 48  | 27,0 | 27,0 | 18,55 | 536,04 | 110,58 |
|    | 2019/05/25 | CH2205 | Male | Three y/o | Treatment (Wk 2) | Treatment | Fast Day | No | 22:40 | 22:00 - 22:59 | Night         | 37,1 |     | 26,6 | 26,6 | 18,26 |        | 110,07 |
|    | 2019/05/25 | CH2206 | Male | Three y/o | Treatment (Wk 2) | Treatment | Fast Day | No | 22:40 | 22:00 - 22:59 | Night         | 37,4 | 45  | 21,6 | 21,6 | 18,55 | 530,47 | 102,94 |
|    | 2019/05/25 | CH2205 | Male | Three y/o | Treatment (Wk 2) | Treatment | Fast Day | No | 22:45 | 22:00 - 22:59 | Night         | 37,2 |     | 25,4 | 25,4 | 18,36 |        | 108,49 |
|    | 2019/05/25 | CH2206 | Male | Three y/o | Treatment (Wk 2) | Treatment | Fast Day | No | 22:45 | 22:00 - 22:59 | Night         | 37,4 | 68  | 24,8 | 24,8 | 18,55 | 564,71 | 107,67 |
|    | 2019/05/25 | CH2205 | Male | Three y/o | Treatment (Wk 2) | Treatment | Fast Day | No | 22:50 | 22:00 - 22:59 | Night         | 37,3 |     | 24,4 | 24,4 | 18,46 |        | 107,11 |
|    | 2019/05/25 | CH2206 | Male | Three y/o | Treatment (Wk 2) | Treatment | Fast Day | No | 22:50 | 22:00 - 22:59 | Night         | 37,4 | 49  | 22,2 | 22,2 | 18,55 | 537,80 | 103,88 |
|    | 2019/05/25 | CH2205 | Male | Three y/o | Treatment (Wk 2) | Treatment | Fast Day | No | 22:55 | 22:00 - 22:59 | Night         | 37,4 | 51  | 10,6 | 10,6 | 18,55 | 541,20 | 78,73  |
|    | 2019/05/25 | CH2206 | Male | Three y/o | Treatment (Wk 2) | Treatment | Fast Day | No | 22:55 | 22:00 - 22:59 | Night         | 37,4 | 45  | 33,4 | 33,4 | 18,55 | 530,47 | 117,88 |
|    | 2019/05/25 | CH2205 | Male | Three y/o | Treatment (Wk 2) | Treatment | Fast Day | No | 23:00 | 23:00 - 23:59 | Night         | 37,4 | 50  | 11,8 | 11,8 | 18,55 | 539,52 | 82,36  |
|    | 2019/05/25 | CH2206 | Male | Three y/o | Treatment (Wk 2) | Treatment | Fast Day | No | 23:00 | 23:00 - 23:59 | Night         | 37,4 | 40  | 31,4 | 31,4 | 18,55 | 520,09 | 115,76 |
|    | 2019/05/25 | CH2205 | Male | Three y/o | Treatment (Wk 2) | Treatment | Fast Day | No | 23:05 | 23:00 - 23:59 | Night         | 37,4 | 46  | 10,2 | 10,2 | 18,55 | 532,38 | 77,43  |
|    | 2019/05/25 | CH2206 | Male | Three y/o | Treatment (Wk 2) | Treatment | Fast Day | No | 23:05 | 23:00 - 23:59 | Night         | 37,4 | 46  | 18,0 | 18,0 | 18,55 | 532,38 | 96,72  |
|    | 2019/05/25 | CH2205 | Male | Three y/o | Treatment (Wk 2) | Treatment | Fast Day | No | 23:10 | 23:00 - 23:59 | Night         | 37,4 | 48  | 15,0 | 15,0 | 18,55 | 536,04 | 90,51  |
|    | 2019/05/25 | CH2206 | Male | Three y/o | Treatment (Wk 2) | Treatment | Fast Day | No | 23:10 | 23:00 - 23:59 | Night         | 37,4 | 44  | 14,6 | 14,6 | 18,55 | 528,51 | 89,59  |
|    | 2019/05/25 | CH2205 | Male | Three y/o | Treatment (Wk 2) | Treatment | Fast Day | No | 23:15 | 23:00 - 23:59 | Night         | 37,4 | 50  | 16,0 | 16,0 | 18,55 | 539,52 | 92,71  |
|    | 2019/05/25 | CH2206 | Male | Three y/o | Treatment (Wk 2) | Treatment | Fast Day | No | 23:15 | 23:00 - 23:59 | Night         | 37,4 | 42  | 19,0 | 19,0 | 18,55 | 524,42 | 98,56  |
|    | 2019/05/25 | CH2205 | Male | Three y/o | Treatment (Wk 2) | Treatment | Fast Day | No | 23:20 | 23:00 - 23:59 | Night         | 37,4 | 39  | 12,6 | 12,6 | 18,55 | 517,82 | 84,59  |
|    | 2019/05/25 | CH2206 | Male | Three y/o | Treatment (Wk 2) | Treatment | Fast Day | No | 23:20 | 23:00 - 23:59 | Night         | 37,4 | 44  | 18,4 | 18,4 | 18,55 | 528,51 | 97,47  |
|    | 2019/05/25 | CH2205 | Male | Three y/o | Treatment (Wk 2) | Treatment | Fast Day | No | 23:25 | 23:00 - 23:59 | Night         | 37,4 | 55  | 5,0  | 5,0  | 18,55 | 547,52 | 53,41  |
|    | 2019/05/25 | CH2206 | Male | Three y/o | Treatment (Wk 2) | Treatment | Fast Day | No | 23:25 | 23:00 - 23:59 | Night         | 37,4 | 43  | 20,2 | 20,2 | 18,55 | 526,50 | 100,65 |
|    | 2019/05/25 | CH2205 | Male | Three y/o | Treatment (Wk 2) | Treatment | Fast Day | No | 23:30 | 23:00 - 23:59 | Night         | 37,4 | 56  | 8,0  | 8,0  | 18,55 | 549,01 | 69,22  |
|    | 2019/05/25 | CH2206 | Male | Three y/o | Treatment (Wk 2) | Treatment | Fast Day | No | 23:30 | 23:00 - 23:59 | Night         | 37,4 | 37  | 18,2 | 18,2 | 18,55 | 513,06 | 97,10  |
|    | 2019/05/25 | CH2205 | Male | Three y/o | Treatment (Wk 2) | Treatment | Fast Day | No | 23:35 | 23:00 - 23:59 | Night         | 37,4 | 80  | 8,0  | 8,0  | 18,55 | 577,31 | 69,22  |
|    | 2019/05/25 | CH2206 | Male | Three y/o | Treatment (Wk 2) | Treatment | Fast Day | No | 23:35 | 23:00 - 23:59 | Night         | 37,4 | 63  | 19,6 | 19,6 | 18,55 | 558,62 | 99,63  |
|    | 2019/05/25 | CH2205 | Male | Three y/o | Treatment (Wk 2) | Treatment | Fast Day | No | 23:40 | 23:00 - 23:59 | Night         | 37,4 | 46  | 12,6 | 12,6 | 18,55 | 532,38 | 84,59  |
|    | 2019/05/25 | CH2206 | Male | Three y/o | Treatment (Wk 2) | Treatment | Fast Day | No | 23:40 | 23:00 - 23:59 | Night         | 37,4 | 44  | 18,6 | 18,6 | 18,55 | 528,51 | 97,84  |
|    | 2019/05/25 | CH2205 | Male | Three y/o | Treatment (Wk 2) | Treatment | Fast Day | No | 23:45 | 23:00 - 23:59 | Night         | 37,4 | 65  | 6,4  | 6,4  | 18,55 | 561,12 | 61,70  |
|    | 2019/05/25 | CH2206 | Male | Three y/o | Treatment (Wk 2) | Treatment | Fast Day | No | 23:45 | 23:00 - 23:59 | Night         | 37,4 | 51  | 20,6 | 20,6 | 18,55 | 541,20 | 101,32 |
|    | 2019/05/25 | CH2205 | Male | Three y/o | Treatment (Wk 2) | Treatment | Fast Day | No | 23:50 | 23:00 - 23:59 | Night         | 37,4 | 62  | 11,0 | 11,0 | 18,55 | 557,33 | 79,98  |
|    | 2019/05/25 | CH2206 | Male | Three y/o | Treatment (Wk 2) | Treatment | Fast Day | No | 23:50 | 23:00 - 23:59 | Night         | 37,4 | 45  | 21,0 | 21,0 | 18,55 | 530,47 | 101,98 |
|    | 2019/05/25 | CH2205 | Male | Three y/o | Treatment (Wk 2) | Treatment | Fast Day | No | 23:55 | 23:00 - 23:59 | Night         | 37,4 | 40  | 10,4 | 10,4 | 18,55 | 520,09 | 78,08  |
|    | 2019/05/25 | CH2206 | Male | Three y/o | Treatment (Wk 2) | Treatment | Fast Day | No | 23:55 | 23:00 - 23:59 | Night         | 37,4 | 49  | 9,4  | 9,4  | 18,55 | 537,80 | 74,66  |
| 12 | 2019/05/26 | CH2205 | Male | Three y/o | Treatment (Wk 2) | Treatment | Fast Day | No | 00:00 | 00:00 - 00:59 | Early Morning | 37,4 | 64  | 9,2  | 9,2  | 18,55 | 559,88 | 73,94  |
|    | 2019/05/26 | CH2206 | Male | Three y/o | Treatment (Wk 2) | Treatment | Fast Day | No | 00:00 | 00:00 - 00:59 | Early Morning | 37,4 | 42  | 20,4 | 20,4 | 18,55 | 524,42 | 100,99 |
|    | 2019/05/26 | CH2205 | Male | Three y/o | Treatment (Wk 2) | Treatment | Fast Day | No | 00:05 | 00:00 - 00:59 | Early Morning | 37,3 | 43  | 11,2 | 11,2 | 18,46 | 526,50 | 80,59  |
|    | 2019/05/26 | CH2206 | Male | Three y/o | Treatment (Wk 2) | Treatment | Fast Day | No | 00:05 | 00:00 - 00:59 | Early Morning | 37,4 | 55  | 18,4 | 18,4 | 18,55 | 547,52 | 97,47  |
|    | 2019/05/26 | CH2205 | Male | Three y/o | Treatment (Wk 2) | Treatment | Fast Day | No | 00:10 | 00:00 - 00:59 | Early Morning | 37,3 | 41  | 9,4  | 9,4  | 18,46 | 522,29 | 74,66  |
|    | 2019/05/26 | CH2206 | Male | Three y/o | Treatment (Wk 2) | Treatment | Fast Day | No | 00:10 | 00:00 - 00:59 | Early Morning | 37,3 | 46  | 17,2 | 17,2 | 18,46 | 532,38 | 95,17  |
|    | 2019/05/26 | CH2205 | Male | Three y/o | Treatment (Wk 2) | Treatment | Fast Day | No | 00:15 | 00:00 - 00:59 | Early Morning | 37,4 | 38  | 16,4 | 16,4 | 18,55 | 515,48 | 93,55  |
|    | 2019/05/26 | CH2206 | Male | Three y/o | Treatment (Wk 2) | Treatment | Fast Day | No | 00:15 | 00:00 - 00:59 | Early Morning | 37,2 | 48  | 18,6 | 18,6 | 18,36 | 536,04 | 97,84  |
|    | 2019/05/26 | CH2205 | Male | Three y/o | Treatment (Wk 2) | Treatment | Fast Day | No | 00:20 | 00:00 - 00:59 | Early Morning | 37,5 |     | 12,4 | 12,4 | 18,65 |        | 84,04  |
|    | 2019/05/26 | CH2206 | Male | Three y/o | Treatment (Wk 2) | Treatment | Fast Day | No | 00:20 | 00:00 - 00:59 | Early Morning | 37,1 | 43  | 24,0 | 24,0 | 18,26 | 526,50 | 106,55 |
|    | 2019/05/26 | CH2205 | Male | Three y/o | Treatment (Wk 2) | Treatment | Fast Day | No | 00:25 | 00:00 - 00:59 | Early Morning | 37,5 | 63  | 17,2 | 17,2 | 18,65 | 558,62 | 95,17  |
|    | 2019/05/26 | CH2206 | Male | Three y/o | Treatment (Wk 2) | Treatment | Fast Day | No | 00:25 | 00:00 - 00:59 | Early Morning | 37,1 | 100 | 21,4 | 21,4 | 18,26 | 593,87 | 102,63 |
|    | 2019/05/26 | CH2205 | Male | Three y/o | Treatment (Wk 2) | Treatment | Fast Day | No | 00:30 | 00:00 - 00:59 | Early Morning | 37,5 | 50  | 15,2 | 15,2 | 18,65 | 539,52 | 90,96  |
|    | 2019/05/26 | CH2206 | Male | Three y/o | Treatment (Wk 2) | Treatment | Fast Day | No | 00:30 | 00:00 - 00:59 | Early Morning | 37,1 | 51  | 15,8 | 15,8 | 18,26 | 541,20 | 92,28  |
|    | 2019/05/26 | CH2205 | Male | Three y/o | Treatment (Wk 2) | Treatment | Fast Day | No | 00:35 | 00:00 - 00:59 | Early Morning | 37,5 | 46  | 15,0 | 15,0 | 18,65 | 532,38 | 90,51  |
|    | 2019/05/26 | CH2206 | Male | Three y/o | Treatment (Wk 2) | Treatment | Fast Day | No | 00:35 | 00:00 - 00:59 | Early Morning | 37,1 | 67  | 12,6 | 12,6 | 18,26 | 563,53 | 84,59  |
|    | 2019/05/26 | CH2205 | Male | Three y/o | Treatment (Wk 2) | Treatment | Fast Day | No | 00:40 | 00:00 - 00:59 | Early Morning | 37,5 | 36  | 10,2 | 10,2 | 18,65 | 510,56 | 77,43  |
|    | 2019/05/26 | CH2206 | Male | Three y/o | Treatment (Wk 2) | Treatment | Fast Day | No | 00:40 | 00:00 - 00:59 | Early Morning | 37,2 | 78  | 11,8 | 11,8 | 18,36 | 575,38 | 82,36  |
|    | 2019/05/26 | CH2205 | Male | Three y/o | Treatment (Wk 2) | Treatment | Fast Day | No | 00:45 | 00:00 - 00:59 | Early Morning | 37,5 | 63  | 13,0 | 13,0 | 18,65 | 558,62 | 85,65  |
|    | 2019/05/26 | CH2206 | Male | Three y/o | Treatment (Wk 2) | Treatment | Fast Day | No | 00:45 | 00:00 - 00:59 | Early Morning | 37,2 | 55  | 7,4  | 7,4  | 18,36 | 547,52 | 66,59  |
|    | 2019/05/26 | CH2205 | Male | Three y/o | Treatment (Wk 2) | Treatment | Fast Day | No | 00:50 | 00:00 - 00:59 | Early Morning | 37,4 | 39  | 13,0 | 13,0 | 18,55 | 517,82 | 85,65  |
|    | 2019/05/26 | CH2206 | Male | Three y/o | Treatment (Wk 2) | Treatment | Fast Day | No | 00:50 | 00:00 - 00:59 | Early Morning | 37,2 | 80  | 14,4 | 14,4 | 18,36 | 577,31 | 89,12  |
|    | 2019/05/26 | CH2205 | Male | Three y/o | Treatment (Wk 2) | Treatment | Fast Day | No | 00:55 | 00:00 - 00:59 | Early Morning | 37,4 | 82  | 11,6 | 11,6 | 18,55 | 579,19 | 81,78  |
|    | 2019/05/26 | CH2206 | Male | Three y/o | Treatment (Wk 2) | Treatment | Fast Day | No | 00:55 | 00:00 - 00:59 | Early Morning | 37,2 | 57  | 7,8  | 7,8  | 18,36 | 550,47 | 68,36  |
|    | 2019/05/26 | CH2205 | Male | Three y/o | Treatment (Wk 2) | Treatment | Fast Day | No | 01:00 | 01:00 - 01:59 | Early Morning | 37,4 |     | 13,0 | 13,0 | 18,55 |        | 85,65  |
|    | 2019/05/26 | CH2206 | Male | Three y/o | Treatment (Wk 2) | Treatment | Fast Day | No | 01:00 | 01:00 - 01:59 | Early Morning | 37,1 | 79  | 42,2 | 42,2 | 18,26 | 576,36 | 125,93 |
|    | 2019/05/26 | CH2205 | Male | Three y/o | Treatment (Wk 2) | Treatment | Fast Day | No | 01:05 | 01:00 - 01:59 | Early Morning | 37,3 | 101 | 21,4 | 21,4 | 18,46 | 594,59 | 102,63 |
|    | 2019/05/26 | CH2206 | Male | Three y/o | Treatment (Wk 2) | Treatment | Fast Day | No | 01:05 | 01:00 - 01:59 | Early Morning | 37,2 | 82  | 63,4 | 63,4 | 18,36 | 579,19 | 140,00 |
|    | 2019/05/26 | CH2205 | Male | Three y/o | Treatment (Wk 2) | Treatment | Fast Day | No | 01:10 | 01:00 - 01:59 | Early Morning | 37,3 | 81  | 24,8 | 24,8 | 18,46 | 578,26 | 107,67 |
|    | 2019/05/26 | CH2206 | Male | Three y/o | Treatment (Wk 2) | Treatment | Fast Day | No | 01:10 | 01:00 - 01:59 | Early Morning | 37,2 | 39  | 62,0 | 62,0 | 18,36 | 517,82 | 139,23 |
|    | 2019/05/26 | CH2205 | Male | Three y/o | Treatment (Wk 2) | Treatment | Fast Day | No | 01:15 | 01:00 - 01:59 | Early Morning | 37,3 |     | 16,6 | 16,6 | 18,46 |        | 93,96  |



|            |        |      |           |                  |           |          |    |       |               |               |      |     |       |       |       |        |        |
|------------|--------|------|-----------|------------------|-----------|----------|----|-------|---------------|---------------|------|-----|-------|-------|-------|--------|--------|
| 2019/05/26 | CH2206 | Male | Three y/o | Treatment (Wk 2) | Treatment | Fast Day | No | 01:15 | 01:00 - 01:59 | Early Morning | 37,2 | 40  | 65,8  | 65,8  | 18,36 | 520,09 | 141,29 |
| 2019/05/26 | CH2205 | Male | Three y/o | Treatment (Wk 2) | Treatment | Fast Day | No | 01:20 | 01:00 - 01:59 | Early Morning | 37,3 |     | 10,0  | 10,0  | 18,46 |        | 76,76  |
| 2019/05/26 | CH2206 | Male | Three y/o | Treatment (Wk 2) | Treatment | Fast Day | No | 01:20 | 01:00 - 01:59 | Early Morning | 37,3 | 79  | 62,6  | 62,6  | 18,46 | 576,36 | 139,56 |
| 2019/05/26 | CH2205 | Male | Three y/o | Treatment (Wk 2) | Treatment | Fast Day | No | 01:25 | 01:00 - 01:59 | Early Morning | 37,3 |     | 15,2  | 15,2  | 18,46 |        | 90,96  |
| 2019/05/26 | CH2206 | Male | Three y/o | Treatment (Wk 2) | Treatment | Fast Day | No | 01:25 | 01:00 - 01:59 | Early Morning | 37,3 | 128 | 64,2  | 64,2  | 18,46 | 611,22 | 140,44 |
| 2019/05/26 | CH2205 | Male | Three y/o | Treatment (Wk 2) | Treatment | Fast Day | No | 01:30 | 01:00 - 01:59 | Early Morning | 37,3 |     | 8,0   | 8,0   | 18,46 |        | 69,22  |
| 2019/05/26 | CH2206 | Male | Three y/o | Treatment (Wk 2) | Treatment | Fast Day | No | 01:30 | 01:00 - 01:59 | Early Morning | 37,4 | 68  | 3,4   | 3,4   | 18,55 | 564,71 | 40,51  |
| 2019/05/26 | CH2205 | Male | Three y/o | Treatment (Wk 2) | Treatment | Fast Day | No | 01:35 | 01:00 - 01:59 | Early Morning | 37,3 | 76  | 8,8   | 8,8   | 18,46 | 573,39 | 72,43  |
| 2019/05/26 | CH2206 | Male | Three y/o | Treatment (Wk 2) | Treatment | Fast Day | No | 01:35 | 01:00 - 01:59 | Early Morning | 37,3 | 48  | 8,8   | 8,8   | 18,46 | 536,04 | 72,43  |
| 2019/05/26 | CH2205 | Male | Three y/o | Treatment (Wk 2) | Treatment | Fast Day | No | 01:40 | 01:00 - 01:59 | Early Morning | 37,3 |     | 10,0  | 10,0  | 18,46 |        | 76,76  |
| 2019/05/26 | CH2206 | Male | Three y/o | Treatment (Wk 2) | Treatment | Fast Day | No | 01:40 | 01:00 - 01:59 | Early Morning | 37,3 | 54  | 7,2   | 7,2   | 18,46 | 545,99 | 65,66  |
| 2019/05/26 | CH2205 | Male | Three y/o | Treatment (Wk 2) | Treatment | Fast Day | No | 01:45 | 01:00 - 01:59 | Early Morning | 37,3 | 32  | 9,8   | 9,8   | 18,46 | 499,63 | 76,07  |
| 2019/05/26 | CH2206 | Male | Three y/o | Treatment (Wk 2) | Treatment | Fast Day | No | 01:45 | 01:00 - 01:59 | Early Morning | 37,3 | 44  | 4,8   | 4,8   | 18,46 | 528,51 | 52,04  |
| 2019/05/26 | CH2205 | Male | Three y/o | Treatment (Wk 2) | Treatment | Fast Day | No | 01:50 | 01:00 - 01:59 | Early Morning | 37,3 | 65  | 4,0   | 4,0   | 18,46 | 561,12 | 45,94  |
| 2019/05/26 | CH2206 | Male | Three y/o | Treatment (Wk 2) | Treatment | Fast Day | No | 01:50 | 01:00 - 01:59 | Early Morning | 37,3 | 46  | 8,6   | 8,6   | 18,46 | 532,38 | 71,66  |
| 2019/05/26 | CH2205 | Male | Three y/o | Treatment (Wk 2) | Treatment | Fast Day | No | 01:55 | 01:00 - 01:59 | Early Morning | 37,3 | 51  | 6,0   | 6,0   | 18,46 | 541,20 | 59,53  |
| 2019/05/26 | CH2206 | Male | Three y/o | Treatment (Wk 2) | Treatment | Fast Day | No | 01:55 | 01:00 - 01:59 | Early Morning | 37,3 | 33  | 23,8  | 23,8  | 18,46 | 502,51 | 106,26 |
| 2019/05/26 | CH2205 | Male | Three y/o | Treatment (Wk 2) | Treatment | Fast Day | No | 02:00 | 02:00 - 02:59 | Early Morning | 37,3 |     | 12,4  | 12,4  | 18,46 |        | 84,04  |
| 2019/05/26 | CH2206 | Male | Three y/o | Treatment (Wk 2) | Treatment | Fast Day | No | 02:00 | 02:00 - 02:59 | Early Morning | 37,3 | 53  | 24,2  | 24,2  | 18,46 | 544,43 | 106,83 |
| 2019/05/26 | CH2205 | Male | Three y/o | Treatment (Wk 2) | Treatment | Fast Day | No | 02:05 | 02:00 - 02:59 | Early Morning | 37,3 |     | 7,6   | 7,6   | 18,46 |        | 67,49  |
| 2019/05/26 | CH2206 | Male | Three y/o | Treatment (Wk 2) | Treatment | Fast Day | No | 02:05 | 02:00 - 02:59 | Early Morning | 37,3 | 41  | 25,8  | 25,8  | 18,46 | 522,29 | 109,02 |
| 2019/05/26 | CH2205 | Male | Three y/o | Treatment (Wk 2) | Treatment | Fast Day | No | 02:10 | 02:00 - 02:59 | Early Morning | 37,3 |     | 7,6   | 7,6   | 18,46 |        | 67,49  |
| 2019/05/26 | CH2206 | Male | Three y/o | Treatment (Wk 2) | Treatment | Fast Day | No | 02:10 | 02:00 - 02:59 | Early Morning | 37,3 | 39  | 27,6  | 27,6  | 18,46 | 517,82 | 111,33 |
| 2019/05/26 | CH2205 | Male | Three y/o | Treatment (Wk 2) | Treatment | Fast Day | No | 02:15 | 02:00 - 02:59 | Early Morning | 37,3 | 58  | 8,4   | 8,4   | 18,46 | 551,90 | 70,86  |
| 2019/05/26 | CH2206 | Male | Three y/o | Treatment (Wk 2) | Treatment | Fast Day | No | 02:15 | 02:00 - 02:59 | Early Morning | 37,3 | 76  | 39,8  | 39,8  | 18,46 | 573,39 | 123,91 |
| 2019/05/26 | CH2205 | Male | Three y/o | Treatment (Wk 2) | Treatment | Fast Day | No | 02:20 | 02:00 - 02:59 | Early Morning | 37,3 | 62  | 10,8  | 10,8  | 18,46 | 557,33 | 79,36  |
| 2019/05/26 | CH2206 | Male | Three y/o | Treatment (Wk 2) | Treatment | Fast Day | No | 02:20 | 02:00 - 02:59 | Early Morning | 37,3 | 49  | 51,0  | 51,0  | 18,46 | 537,80 | 132,47 |
| 2019/05/26 | CH2205 | Male | Three y/o | Treatment (Wk 2) | Treatment | Fast Day | No | 02:25 | 02:00 - 02:59 | Early Morning | 37,3 | 53  | 62,0  | 62,0  | 18,46 | 544,43 | 139,23 |
| 2019/05/26 | CH2206 | Male | Three y/o | Treatment (Wk 2) | Treatment | Fast Day | No | 02:25 | 02:00 - 02:59 | Early Morning | 37,4 | 79  | 59,2  | 59,2  | 18,55 | 576,36 | 137,63 |
| 2019/05/26 | CH2205 | Male | Three y/o | Treatment (Wk 2) | Treatment | Fast Day | No | 02:30 | 02:00 - 02:59 | Early Morning | 37,4 | 117 | 92,8  | 92,8  | 18,55 | 605,02 | 153,24 |
| 2019/05/26 | CH2206 | Male | Three y/o | Treatment (Wk 2) | Treatment | Fast Day | No | 02:30 | 02:00 - 02:59 | Early Morning | 37,3 | 128 | 68,8  | 68,8  | 18,46 | 611,22 | 142,84 |
| 2019/05/26 | CH2205 | Male | Three y/o | Treatment (Wk 2) | Treatment | Fast Day | No | 02:35 | 02:00 - 02:59 | Early Morning | 37,3 | 75  | 164,8 | 164,8 | 18,46 | 572,36 | 173,32 |
| 2019/05/26 | CH2206 | Male | Three y/o | Treatment (Wk 2) | Treatment | Fast Day | No | 02:35 | 02:00 - 02:59 | Early Morning | 37,3 | 105 | 92,8  | 92,8  | 18,46 | 597,38 | 153,24 |
| 2019/05/26 | CH2205 | Male | Three y/o | Treatment (Wk 2) | Treatment | Fast Day | No | 02:40 | 02:00 - 02:59 | Early Morning | 37,3 | 120 | 79,2  | 79,2  | 18,46 | 606,78 | 147,73 |
| 2019/05/26 | CH2206 | Male | Three y/o | Treatment (Wk 2) | Treatment | Fast Day | No | 02:40 | 02:00 - 02:59 | Early Morning | 37,4 | 148 | 253,2 | 253,2 | 18,55 | 620,97 | 188,43 |
| 2019/05/26 | CH2205 | Male | Three y/o | Treatment (Wk 2) | Treatment | Fast Day | No | 02:45 | 02:00 - 02:59 | Early Morning | 37,4 |     | 178,8 | 178,8 | 18,55 |        | 176,18 |
| 2019/05/26 | CH2206 | Male | Three y/o | Treatment (Wk 2) | Treatment | Fast Day | No | 02:45 | 02:00 - 02:59 | Early Morning | 37,4 | 110 | 152,2 | 152,2 | 18,55 | 600,69 | 170,53 |
| 2019/05/26 | CH2205 | Male | Three y/o | Treatment (Wk 2) | Treatment | Fast Day | No | 02:50 | 02:00 - 02:59 | Early Morning | 37,4 |     | 210,0 | 210,0 | 18,55 |        | 181,84 |
| 2019/05/26 | CH2206 | Male | Three y/o | Treatment (Wk 2) | Treatment | Fast Day | No | 02:50 | 02:00 - 02:59 | Early Morning | 37,5 | 160 | 56,2  | 56,2  | 18,65 | 626,07 | 135,83 |
| 2019/05/26 | CH2205 | Male | Three y/o | Treatment (Wk 2) | Treatment | Fast Day | No | 02:55 | 02:00 - 02:59 | Early Morning | 37,5 | 86  | 28,2  | 28,2  | 18,65 | 582,77 | 112,07 |
| 2019/05/26 | CH2206 | Male | Three y/o | Treatment (Wk 2) | Treatment | Fast Day | No | 02:55 | 02:00 - 02:59 | Early Morning | 37,4 | 96  | 54,2  | 54,2  | 18,55 | 590,91 | 134,57 |
| 2019/05/26 | CH2205 | Male | Three y/o | Treatment (Wk 2) | Treatment | Fast Day | No | 03:00 | 03:00 - 03:59 | Early Morning | 37,4 |     | 67,6  | 67,6  | 18,55 |        | 142,23 |
| 2019/05/26 | CH2206 | Male | Three y/o | Treatment (Wk 2) | Treatment | Fast Day | No | 03:00 | 03:00 - 03:59 | Early Morning | 37,4 | 69  | 67,8  | 67,8  | 18,55 | 565,86 | 142,33 |
| 2019/05/26 | CH2205 | Male | Three y/o | Treatment (Wk 2) | Treatment | Fast Day | No | 03:05 | 03:00 - 03:59 | Early Morning | 37,6 | 95  | 25,6  | 25,6  | 18,75 | 590,14 | 108,76 |
| 2019/05/26 | CH2206 | Male | Three y/o | Treatment (Wk 2) | Treatment | Fast Day | No | 03:05 | 03:00 - 03:59 | Early Morning | 37,2 | 71  | 61,6  | 61,6  | 18,36 | 568,10 | 139,00 |
| 2019/05/26 | CH2205 | Male | Three y/o | Treatment (Wk 2) | Treatment | Fast Day | No | 03:10 | 03:00 - 03:59 | Early Morning | 37,2 | 143 | 26,8  | 26,8  | 18,36 | 618,69 | 110,33 |
| 2019/05/26 | CH2206 | Male | Three y/o | Treatment (Wk 2) | Treatment | Fast Day | No | 03:10 | 03:00 - 03:59 | Early Morning | 37,1 | 60  | 52,6  | 52,6  | 18,26 | 554,67 | 133,54 |
| 2019/05/26 | CH2205 | Male | Three y/o | Treatment (Wk 2) | Treatment | Fast Day | No | 03:15 | 03:00 - 03:59 | Early Morning | 37,1 | 42  | 27,6  | 27,6  | 18,26 | 524,42 | 111,33 |
| 2019/05/26 | CH2206 | Male | Three y/o | Treatment (Wk 2) | Treatment | Fast Day | No | 03:15 | 03:00 - 03:59 | Early Morning | 37,1 | 68  | 41,0  | 41,0  | 18,26 | 564,71 | 124,94 |
| 2019/05/26 | CH2205 | Male | Three y/o | Treatment (Wk 2) | Treatment | Fast Day | No | 03:20 | 03:00 - 03:59 | Early Morning | 37,2 |     | 6,0   | 6,0   | 18,36 |        | 59,53  |
| 2019/05/26 | CH2206 | Male | Three y/o | Treatment (Wk 2) | Treatment | Fast Day | No | 03:20 | 03:00 - 03:59 | Early Morning | 37,1 | 70  | 52,2  | 52,2  | 18,26 | 566,99 | 133,27 |
| 2019/05/26 | CH2205 | Male | Three y/o | Treatment (Wk 2) | Treatment | Fast Day | No | 03:25 | 03:00 - 03:59 | Early Morning | 37,1 | 50  | 8,4   | 8,4   | 18,26 | 539,52 | 70,86  |
| 2019/05/26 | CH2206 | Male | Three y/o | Treatment (Wk 2) | Treatment | Fast Day | No | 03:25 | 03:00 - 03:59 | Early Morning | 37,0 | 46  | 54,6  | 54,6  | 18,16 | 532,38 | 134,83 |
| 2019/05/26 | CH2205 | Male | Three y/o | Treatment (Wk 2) | Treatment | Fast Day | No | 03:30 | 03:00 - 03:59 | Early Morning | 37,1 | 43  | 7,4   | 7,4   | 18,26 | 526,50 | 66,59  |
| 2019/05/26 | CH2206 | Male | Three y/o | Treatment (Wk 2) | Treatment | Fast Day | No | 03:30 | 03:00 - 03:59 | Early Morning | 37,0 | 51  | 56,8  | 56,8  | 18,16 | 541,20 | 136,20 |
| 2019/05/26 | CH2205 | Male | Three y/o | Treatment (Wk 2) | Treatment | Fast Day | No | 03:35 | 03:00 - 03:59 | Early Morning | 37,1 | 60  | 7,0   | 7,0   | 18,26 | 554,67 | 64,72  |
| 2019/05/26 | CH2206 | Male | Three y/o | Treatment (Wk 2) | Treatment | Fast Day | No | 03:35 | 03:00 - 03:59 | Early Morning | 37,0 | 77  | 41,8  | 41,8  | 18,16 | 574,39 | 125,60 |
| 2019/05/26 | CH2205 | Male | Three y/o | Treatment (Wk 2) | Treatment | Fast Day | No | 03:40 | 03:00 - 03:59 | Early Morning | 37,2 | 64  | 4,4   | 4,4   | 18,36 | 559,88 | 49,12  |
| 2019/05/26 | CH2206 | Male | Three y/o | Treatment (Wk 2) | Treatment | Fast Day | No | 03:40 | 03:00 - 03:59 | Early Morning | 37,0 | 43  | 43,4  | 43,4  | 18,16 | 526,50 | 126,90 |
| 2019/05/26 | CH2205 | Male | Three y/o | Treatment (Wk 2) | Treatment | Fast Day | No | 03:45 | 03:00 - 03:59 | Early Morning | 37,2 | 50  | 3,6   | 3,6   | 18,36 | 539,52 | 42,42  |
| 2019/05/26 | CH2206 | Male | Three y/o | Treatment (Wk 2) | Treatment | Fast Day | No | 03:45 | 03:00 - 03:59 | Early Morning | 37,0 | 42  | 47,0  | 47,0  | 18,16 | 524,42 | 129,65 |
| 2019/05/26 | CH2205 | Male | Three y/o | Treatment (Wk 2) | Treatment | Fast Day | No | 03:50 | 03:00 - 03:59 | Early Morning | 37,2 | 45  | 1,2   | 1,2   | 18,36 | 530,47 | 5,99   |
| 2019/05/26 | CH2206 | Male | Three y/o | Treatment (Wk 2) | Treatment | Fast Day | No | 03:50 | 03:00 - 03:59 | Early Morning | 37,0 | 57  | 43,0  | 43,0  | 18,16 | 550,47 | 126,58 |
| 2019/05/26 | CH2205 | Male | Three y/o | Treatment (Wk 2) | Treatment | Fast Day | No | 03:55 | 03:00 - 03:59 | Early Morning | 37,2 | 43  | 3,0   | 3,0   | 18,36 | 526,50 | 36,34  |
| 2019/05/26 | CH2206 | Male | Three y/o | Treatment (Wk 2) | Treatment | Fast Day | No | 03:55 | 03:00 - 03:59 | Early Morning | 37,1 | 47  | 43,2  | 43,2  | 18,26 | 534,23 | 126,74 |
| 2019/05/26 | CH2205 | Male | Three y/o | Treatment (Wk 2) | Treatment | Fast Day | No | 04:00 | 04:00 - 04:59 | Morning       | 37,2 | 42  | 3,8   | 3,8   | 18,36 | 524,42 | 44,22  |
| 2019/05/26 | CH2206 | Male | Three y/o | Treatment (Wk 2) | Treatment | Fast Day | No | 04:00 | 04:00 - 04:59 | Morning       | 37,1 | 49  | 38,0  | 38,0  | 18,26 | 537,80 | 122,32 |
| 2019/05/26 | CH2205 | Male | Three y/o | Treatment (Wk 2) | Treatment | Fast Day | No | 04:05 | 04:00 - 04:59 | Morning       | 37,2 | 47  | 3,4   | 3,4   | 18,36 | 534,23 | 40,51  |
| 2019/05/26 | CH2206 | Male | Three y/o | Treatment (Wk 2) | Treatment | Fast Day | No | 04:05 | 04:00 - 04:59 | Morning       | 37,1 | 49  | 11,6  | 11,6  | 18,26 | 537,80 | 81,78  |
| 2019/05/26 | CH2205 | Male | Three y/o | Treatment (Wk 2) | Treatment | Fast Day | No | 04:10 | 04:00 - 04:59 | Morning       | 37,2 | 46  | 3,8   | 3,8   | 18,36 | 532,38 | 44,22  |



|            |        |      |           |                  |           |          |    |       |               |         |      |     |        |       |       |        |        |
|------------|--------|------|-----------|------------------|-----------|----------|----|-------|---------------|---------|------|-----|--------|-------|-------|--------|--------|
| 2019/05/26 | CH2206 | Male | Three y/o | Treatment (Wk 2) | Treatment | Fast Day | No | 04:10 | 04:00 - 04:59 | Morning | 37,1 | 47  | 7,6    | 7,6   | 18,26 | 534,23 | 67,49  |
| 2019/05/26 | CH2205 | Male | Three y/o | Treatment (Wk 2) | Treatment | Fast Day | No | 04:15 | 04:00 - 04:59 | Morning | 37,2 | 72  | 1,2    | 1,2   | 18,36 | 569,20 | 5,99   |
| 2019/05/26 | CH2206 | Male | Three y/o | Treatment (Wk 2) | Treatment | Fast Day | No | 04:15 | 04:00 - 04:59 | Morning | 37,1 | 51  | 7,8    | 7,8   | 18,26 | 541,20 | 68,36  |
| 2019/05/26 | CH2205 | Male | Three y/o | Treatment (Wk 2) | Treatment | Fast Day | No | 04:20 | 04:00 - 04:59 | Morning | 37,2 | 45  | 4,2    | 4,2   | 18,36 | 530,47 | 47,57  |
| 2019/05/26 | CH2206 | Male | Three y/o | Treatment (Wk 2) | Treatment | Fast Day | No | 04:20 | 04:00 - 04:59 | Morning | 37,1 | 75  | 7,6    | 7,6   | 18,26 | 572,36 | 67,49  |
| 2019/05/26 | CH2205 | Male | Three y/o | Treatment (Wk 2) | Treatment | Fast Day | No | 04:25 | 04:00 - 04:59 | Morning | 37,2 | 45  | 4,0    | 4,0   | 18,36 | 530,47 | 45,94  |
| 2019/05/26 | CH2206 | Male | Three y/o | Treatment (Wk 2) | Treatment | Fast Day | No | 04:25 | 04:00 - 04:59 | Morning | 37,1 | 77  | 1,6    | 1,6   | 18,26 | 574,39 | 15,48  |
| 2019/05/26 | CH2205 | Male | Three y/o | Treatment (Wk 2) | Treatment | Fast Day | No | 04:30 | 04:00 - 04:59 | Morning | 37,2 | 35  | 2,4    | 2,4   | 18,36 | 507,97 | 28,91  |
| 2019/05/26 | CH2206 | Male | Three y/o | Treatment (Wk 2) | Treatment | Fast Day | No | 04:30 | 04:00 - 04:59 | Morning | 37,1 | 45  | 21,0   | 21,0  | 18,26 | 530,47 | 101,98 |
| 2019/05/26 | CH2205 | Male | Three y/o | Treatment (Wk 2) | Treatment | Fast Day | No | 04:35 | 04:00 - 04:59 | Morning | 37,2 | 42  | 4,2    | 4,2   | 18,36 | 524,42 | 47,57  |
| 2019/05/26 | CH2206 | Male | Three y/o | Treatment (Wk 2) | Treatment | Fast Day | No | 04:35 | 04:00 - 04:59 | Morning | 37,1 | 68  | 16,2   | 16,2  | 18,26 | 564,71 | 93,13  |
| 2019/05/26 | CH2205 | Male | Three y/o | Treatment (Wk 2) | Treatment | Fast Day | No | 04:40 | 04:00 - 04:59 | Morning | 37,2 | 37  | 3,8    | 3,8   | 18,36 | 513,06 | 44,22  |
| 2019/05/26 | CH2206 | Male | Three y/o | Treatment (Wk 2) | Treatment | Fast Day | No | 04:40 | 04:00 - 04:59 | Morning | 37,1 | 42  | 17,6   | 17,6  | 18,26 | 524,42 | 95,95  |
| 2019/05/26 | CH2205 | Male | Three y/o | Treatment (Wk 2) | Treatment | Fast Day | No | 04:45 | 04:00 - 04:59 | Morning | 37,2 | 42  | 8,6    | 8,6   | 18,36 | 524,42 | 71,66  |
| 2019/05/26 | CH2206 | Male | Three y/o | Treatment (Wk 2) | Treatment | Fast Day | No | 04:45 | 04:00 - 04:59 | Morning | 37,1 | 43  | 45,0   | 45,0  | 18,26 | 526,50 | 128,15 |
| 2019/05/26 | CH2205 | Male | Three y/o | Treatment (Wk 2) | Treatment | Fast Day | No | 04:50 | 04:00 - 04:59 | Morning | 37,2 | 45  | 12,4   | 12,4  | 18,36 | 530,47 | 84,04  |
| 2019/05/26 | CH2206 | Male | Three y/o | Treatment (Wk 2) | Treatment | Fast Day | No | 04:50 | 04:00 - 04:59 | Morning | 37,2 | 73  | 63,6   | 63,6  | 18,36 | 570,27 | 140,11 |
| 2019/05/26 | CH2205 | Male | Three y/o | Treatment (Wk 2) | Treatment | Fast Day | No | 04:55 | 04:00 - 04:59 | Morning | 37,3 | 43  | 10,2   | 10,2  | 18,46 | 526,50 | 77,43  |
| 2019/05/26 | CH2206 | Male | Three y/o | Treatment (Wk 2) | Treatment | Fast Day | No | 04:55 | 04:00 - 04:59 | Morning | 37,2 | 48  | 63,6   | 63,6  | 18,36 | 536,04 | 140,11 |
| 2019/05/26 | CH2205 | Male | Three y/o | Treatment (Wk 2) | Treatment | Fast Day | No | 05:00 | 05:00 - 05:59 | Morning | 37,3 | 57  | 10,0   | 10,0  | 18,46 | 550,47 | 76,76  |
| 2019/05/26 | CH2206 | Male | Three y/o | Treatment (Wk 2) | Treatment | Fast Day | No | 05:00 | 05:00 - 05:59 | Morning | 37,2 | 48  | 70,0   | 70,0  | 18,36 | 536,04 | 143,44 |
| 2019/05/26 | CH2205 | Male | Three y/o | Treatment (Wk 2) | Treatment | Fast Day | No | 05:05 | 05:00 - 05:59 | Morning | 37,2 | 41  | 3,8    | 3,8   | 18,36 | 522,29 | 44,22  |
| 2019/05/26 | CH2206 | Male | Three y/o | Treatment (Wk 2) | Treatment | Fast Day | No | 05:05 | 05:00 - 05:59 | Morning | 37,2 | 47  | 71,4   | 71,4  | 18,36 | 534,23 | 144,12 |
| 2019/05/26 | CH2205 | Male | Three y/o | Treatment (Wk 2) | Treatment | Fast Day | No | 05:10 | 05:00 - 05:59 | Morning | 37,2 | 50  | 7,2    | 7,2   | 18,36 | 539,52 | 65,66  |
| 2019/05/26 | CH2206 | Male | Three y/o | Treatment (Wk 2) | Treatment | Fast Day | No | 05:10 | 05:00 - 05:59 | Morning | 37,2 | 43  | 64,4   | 64,4  | 18,36 | 526,50 | 140,55 |
| 2019/05/26 | CH2205 | Male | Three y/o | Treatment (Wk 2) | Treatment | Fast Day | No | 05:15 | 05:00 - 05:59 | Morning | 37,1 | 37  | 8,6    | 8,6   | 18,26 | 513,06 | 71,66  |
| 2019/05/26 | CH2206 | Male | Three y/o | Treatment (Wk 2) | Treatment | Fast Day | No | 05:15 | 05:00 - 05:59 | Morning | 37,2 | 92  | 56,2   | 56,2  | 18,36 | 587,78 | 135,83 |
| 2019/05/26 | CH2205 | Male | Three y/o | Treatment (Wk 2) | Treatment | Fast Day | No | 05:20 | 05:00 - 05:59 | Morning | 37,1 | 71  | 15,2   | 15,2  | 18,26 | 568,10 | 90,96  |
| 2019/05/26 | CH2206 | Male | Three y/o | Treatment (Wk 2) | Treatment | Fast Day | No | 05:20 | 05:00 - 05:59 | Morning | 37,2 |     | 51,0   | 51,0  | 18,36 |        | 132,47 |
| 2019/05/26 | CH2205 | Male | Three y/o | Treatment (Wk 2) | Treatment | Fast Day | No | 05:25 | 05:00 - 05:59 | Morning | 37,2 | 73  | 28,0   | 28,0  | 18,36 | 570,27 | 111,83 |
| 2019/05/26 | CH2206 | Male | Three y/o | Treatment (Wk 2) | Treatment | Fast Day | No | 05:25 | 05:00 - 05:59 | Morning | 37,1 | 77  | 60,2   | 60,2  | 18,26 | 574,39 | 138,21 |
| 2019/05/26 | CH2205 | Male | Three y/o | Treatment (Wk 2) | Treatment | Fast Day | No | 05:30 | 05:00 - 05:59 | Morning | 37,2 | 67  | 23,4   | 23,4  | 18,36 | 563,53 | 105,68 |
| 2019/05/26 | CH2206 | Male | Three y/o | Treatment (Wk 2) | Treatment | Fast Day | No | 05:30 | 05:00 - 05:59 | Morning | 37,1 | 70  | 49,6   | 49,6  | 18,26 | 566,99 | 131,51 |
| 2019/05/26 | CH2205 | Male | Three y/o | Treatment (Wk 2) | Treatment | Fast Day | No | 05:35 | 05:00 - 05:59 | Morning | 37,2 |     | 58,8   | 58,8  | 18,36 |        | 137,39 |
| 2019/05/26 | CH2206 | Male | Three y/o | Treatment (Wk 2) | Treatment | Fast Day | No | 05:35 | 05:00 - 05:59 | Morning | 37,2 | 120 | 138,0  | 138,0 | 18,36 | 606,78 | 167,10 |
| 2019/05/26 | CH2205 | Male | Three y/o | Treatment (Wk 2) | Treatment | Fast Day | No | 05:40 | 05:00 - 05:59 | Morning | 37,2 | 107 | 63,8   | 63,8  | 18,36 | 598,73 | 140,22 |
| 2019/05/26 | CH2206 | Male | Three y/o | Treatment (Wk 2) | Treatment | Fast Day | No | 05:40 | 05:00 - 05:59 | Morning | 37,2 | 134 | 135,8  | 135,8 | 18,36 | 614,33 | 166,53 |
| 2019/05/26 | CH2205 | Male | Three y/o | Treatment (Wk 2) | Treatment | Fast Day | No | 05:45 | 05:00 - 05:59 | Morning | 37,2 | 128 | 295,0  | 295,0 | 18,36 | 611,22 | 193,83 |
| 2019/05/26 | CH2206 | Male | Three y/o | Treatment (Wk 2) | Treatment | Fast Day | No | 05:45 | 05:00 - 05:59 | Morning | 37,3 | 119 | 508,2  | 508,2 | 18,46 | 606,20 | 213,13 |
| 2019/05/26 | CH2205 | Male | Three y/o | Treatment (Wk 2) | Treatment | Fast Day | No | 05:50 | 05:00 - 05:59 | Morning | 37,2 |     | 105,8  | 105,8 | 18,36 |        | 157,81 |
| 2019/05/26 | CH2206 | Male | Three y/o | Treatment (Wk 2) | Treatment | Fast Day | No | 05:50 | 05:00 - 05:59 | Morning | 37,4 | 174 | 457,2  | 457,2 | 18,55 | 631,46 | 209,36 |
| 2019/05/26 | CH2205 | Male | Three y/o | Treatment (Wk 2) | Treatment | Fast Day | No | 05:55 | 05:00 - 05:59 | Morning | 37,3 | 101 | 48,0   | 48,0  | 18,46 | 594,59 | 130,38 |
| 2019/05/26 | CH2206 | Male | Three y/o | Treatment (Wk 2) | Treatment | Fast Day | No | 05:55 | 05:00 - 05:59 | Morning | 37,7 | 113 | 91,0   | 91,0  | 18,85 | 602,58 | 152,56 |
| 2019/05/26 | CH2205 | Male | Three y/o | Treatment (Wk 2) | Treatment | Fast Day | No | 06:00 | 06:00 - 06:59 | Morning | 37,4 |     | 186,8  | 186,8 | 18,55 |        | 177,72 |
| 2019/05/26 | CH2206 | Male | Three y/o | Treatment (Wk 2) | Treatment | Fast Day | No | 06:00 | 06:00 - 06:59 | Morning | 37,8 | 131 | 231,2  | 231,2 | 18,95 | 612,80 | 185,22 |
| 2019/05/26 | CH2205 | Male | Three y/o | Treatment (Wk 2) | Treatment | Fast Day | No | 06:05 | 06:00 - 06:59 | Morning | 37,7 |     | 21,2   | 21,2  | 18,85 |        | 102,31 |
| 2019/05/26 | CH2206 | Male | Three y/o | Treatment (Wk 2) | Treatment | Fast Day | No | 06:05 | 06:00 - 06:59 | Morning | 37,8 |     | 46,2   | 46,2  | 18,95 |        | 129,06 |
| 2019/05/26 | CH2205 | Male | Three y/o | Treatment (Wk 2) | Treatment | Fast Day | No | 06:10 | 06:00 - 06:59 | Morning | 37,4 |     | 34,8   | 34,8  | 18,55 |        | 119,29 |
| 2019/05/26 | CH2206 | Male | Three y/o | Treatment (Wk 2) | Treatment | Fast Day | No | 06:10 | 06:00 - 06:59 | Morning | 37,5 | 53  | 56,2   | 56,2  | 18,65 | 544,43 | 135,83 |
| 2019/05/26 | CH2205 | Male | Three y/o | Treatment (Wk 2) | Treatment | Fast Day | No | 06:15 | 06:00 - 06:59 | Morning | 37,4 |     | 31,6   | 31,6  | 18,55 |        | 115,98 |
| 2019/05/26 | CH2206 | Male | Three y/o | Treatment (Wk 2) | Treatment | Fast Day | No | 06:15 | 06:00 - 06:59 | Morning | 37,3 | 123 | 32,8   | 32,8  | 18,46 | 608,49 | 117,26 |
| 2019/05/26 | CH2205 | Male | Three y/o | Treatment (Wk 2) | Treatment | Fast Day | No | 06:20 | 06:00 - 06:59 | Morning | 37,3 | 102 | 29,6   | 29,6  | 18,46 | 595,30 | 113,73 |
| 2019/05/26 | CH2206 | Male | Three y/o | Treatment (Wk 2) | Treatment | Fast Day | No | 06:20 | 06:00 - 06:59 | Morning | 37,5 | 118 | 158,2  | 158,2 | 18,65 | 605,61 | 171,88 |
| 2019/05/26 | CH2205 | Male | Three y/o | Treatment (Wk 2) | Treatment | Fast Day | No | 06:25 | 06:00 - 06:59 | Morning | 37,2 | 90  | 37,0   | 37,0  | 18,36 | 586,16 | 121,40 |
| 2019/05/26 | CH2206 | Male | Three y/o | Treatment (Wk 2) | Treatment | Fast Day | No | 06:25 | 06:00 - 06:59 | Morning | 37,7 | 128 | 77,2   | 77,2  | 18,85 | 611,22 | 146,84 |
| 2019/05/26 | CH2205 | Male | Three y/o | Treatment (Wk 2) | Treatment | Fast Day | No | 06:30 | 06:00 - 06:59 | Morning | 37,4 | 169 | 26,2   | 26,2  | 18,55 | 629,60 | 109,55 |
| 2019/05/26 | CH2206 | Male | Three y/o | Treatment (Wk 2) | Treatment | Fast Day | No | 06:30 | 06:00 - 06:59 | Morning | 37,7 | 112 | 167,8  | 167,8 | 18,85 | 601,96 | 173,95 |
| 2019/05/26 | CH2205 | Male | Three y/o | Treatment (Wk 2) | Treatment | Fast Day | No | 06:35 | 06:00 - 06:59 | Morning | 37,3 | 75  | 47,4   | 47,4  | 18,46 | 572,36 | 129,94 |
| 2019/05/26 | CH2206 | Male | Three y/o | Treatment (Wk 2) | Treatment | Fast Day | No | 06:35 | 06:00 - 06:59 | Morning | 37,8 | 121 | 41,4   | 41,4  | 18,95 | 607,35 | 125,27 |
| 2019/05/26 | CH2205 | Male | Three y/o | Treatment (Wk 2) | Treatment | Fast Day | No | 06:40 | 06:00 - 06:59 | Morning | 37,2 | 84  | 63,4   | 63,4  | 18,36 | 581,01 | 140,00 |
| 2019/05/26 | CH2206 | Male | Three y/o | Treatment (Wk 2) | Treatment | Fast Day | No | 06:40 | 06:00 - 06:59 | Morning | 37,8 | 117 | 81,4   | 81,4  | 18,95 | 605,02 | 148,68 |
| 2019/05/26 | CH2205 | Male | Three y/o | Treatment (Wk 2) | Treatment | Fast Day | No | 06:45 | 06:00 - 06:59 | Morning | 37,3 | 90  | 1064,0 |       | 18,46 | 586,16 |        |
| 2019/05/26 | CH2206 | Male | Three y/o | Treatment (Wk 2) | Treatment | Fast Day | No | 06:45 | 06:00 - 06:59 | Morning | 37,8 | 131 | 107,2  | 107,2 | 18,95 | 612,80 | 158,27 |
| 2019/05/26 | CH2205 | Male | Three y/o | Treatment (Wk 2) | Treatment | Fast Day | No | 06:50 | 06:00 - 06:59 | Morning | 37,5 | 121 | 279,0  | 279,0 | 18,65 | 607,35 | 191,86 |
| 2019/05/26 | CH2206 | Male | Three y/o | Treatment (Wk 2) | Treatment | Fast Day | No | 06:50 | 06:00 - 06:59 | Morning | 37,8 | 123 | 226,2  | 226,2 | 18,95 | 608,49 | 184,45 |
| 2019/05/26 | CH2205 | Male | Three y/o | Treatment (Wk 2) | Treatment | Fast Day | No | 06:55 | 06:00 - 06:59 | Morning | 37,5 | 120 | 112,2  | 112,2 | 18,65 | 606,78 | 159,86 |
| 2019/05/26 | CH2206 | Male | Three y/o | Treatment (Wk 2) | Treatment | Fast Day | No | 06:55 | 06:00 - 06:59 | Morning | 37,8 | 95  | 341,8  | 341,8 | 18,95 | 590,14 | 199,04 |
| 2019/05/26 | CH2205 | Male | Three y/o | Treatment (Wk 2) | Treatment | Fast Day | No | 07:00 | 07:00 - 07:59 | Morning | 37,5 | 99  | 78,8   | 78,8  | 18,65 | 593,14 | 147,55 |
| 2019/05/26 | CH2206 | Male | Three y/o | Treatment (Wk 2) | Treatment | Fast Day | No | 07:00 | 07:00 - 07:59 | Morning | 37,9 | 103 | 112,8  | 112,8 | 19,05 | 596,00 | 160,05 |
| 2019/05/26 | CH2205 | Male | Three y/o | Treatment (Wk 2) | Treatment | Fast Day | No | 07:05 | 07:00 - 07:59 | Morning | 37,5 | 113 | 153,2  | 153,2 | 18,65 | 602,58 | 170,76 |



|            |        |      |           |                  |           |          |    |       |               |              |      |     |       |       |       |        |        |
|------------|--------|------|-----------|------------------|-----------|----------|----|-------|---------------|--------------|------|-----|-------|-------|-------|--------|--------|
| 2019/05/26 | CH2206 | Male | Three y/o | Treatment (Wk 2) | Treatment | Fast Day | No | 07:05 | 07:00 - 07:59 | Morning      | 37,9 | 108 | 157,0 | 157,0 | 19,05 | 599,39 | 171,62 |
| 2019/05/26 | CH2205 | Male | Three y/o | Treatment (Wk 2) | Treatment | Fast Day | No | 07:10 | 07:00 - 07:59 | Morning      | 37,6 | 119 | 154,8 | 154,8 | 18,75 | 606,20 | 171,12 |
| 2019/05/26 | CH2206 | Male | Three y/o | Treatment (Wk 2) | Treatment | Fast Day | No | 07:10 | 07:00 - 07:59 | Morning      | 37,9 | 112 | 38,2  | 38,2  | 19,05 | 601,96 | 122,50 |
| 2019/05/26 | CH2205 | Male | Three y/o | Treatment (Wk 2) | Treatment | Fast Day | No | 07:15 | 07:00 - 07:59 | Morning      | 37,6 | 99  | 44,4  | 44,4  | 18,75 | 593,14 | 127,69 |
| 2019/05/26 | CH2206 | Male | Three y/o | Treatment (Wk 2) | Treatment | Fast Day | No | 07:15 | 07:00 - 07:59 | Morning      | 37,9 | 60  | 81,6  | 81,6  | 19,05 | 554,67 | 148,76 |
| 2019/05/26 | CH2205 | Male | Three y/o | Treatment (Wk 2) | Treatment | Fast Day | No | 07:20 | 07:00 - 07:59 | Morning      | 37,6 |     | 20,8  | 20,8  | 18,75 |        | 101,65 |
| 2019/05/26 | CH2206 | Male | Three y/o | Treatment (Wk 2) | Treatment | Fast Day | No | 07:20 | 07:00 - 07:59 | Morning      | 37,9 | 129 | 184,6 | 184,6 | 19,05 | 611,75 | 177,30 |
| 2019/05/26 | CH2205 | Male | Three y/o | Treatment (Wk 2) | Treatment | Fast Day | No | 07:25 | 07:00 - 07:59 | Morning      | 37,5 | 68  | 66,2  | 66,2  | 18,65 | 564,71 | 141,50 |
| 2019/05/26 | CH2206 | Male | Three y/o | Treatment (Wk 2) | Treatment | Fast Day | No | 07:25 | 07:00 - 07:59 | Morning      | 37,9 | 107 | 102,6 | 102,6 | 19,05 | 598,73 | 156,74 |
| 2019/05/26 | CH2205 | Male | Three y/o | Treatment (Wk 2) | Treatment | Fast Day | No | 07:30 | 07:00 - 07:59 | Morning      | 37,6 |     | 121,6 | 121,6 | 18,75 |        | 162,67 |
| 2019/05/26 | CH2206 | Male | Three y/o | Treatment (Wk 2) | Treatment | Fast Day | No | 07:30 | 07:00 - 07:59 | Morning      | 37,9 | 104 | 84,2  | 84,2  | 19,05 | 596,69 | 149,85 |
| 2019/05/26 | CH2205 | Male | Three y/o | Treatment (Wk 2) | Treatment | Fast Day | No | 07:35 | 07:00 - 07:59 | Morning      | 37,6 | 123 | 130,8 | 130,8 | 18,75 | 608,49 | 165,22 |
| 2019/05/26 | CH2206 | Male | Three y/o | Treatment (Wk 2) | Treatment | Fast Day | No | 07:35 | 07:00 - 07:59 | Morning      | 37,8 | 115 | 66,8  | 66,8  | 18,95 | 603,82 | 141,81 |
| 2019/05/26 | CH2205 | Male | Three y/o | Treatment (Wk 2) | Treatment | Fast Day | No | 07:40 | 07:00 - 07:59 | Morning      | 37,7 | 73  | 31,0  | 31,0  | 18,85 | 570,27 | 115,32 |
| 2019/05/26 | CH2206 | Male | Three y/o | Treatment (Wk 2) | Treatment | Fast Day | No | 07:40 | 07:00 - 07:59 | Morning      | 37,9 | 97  | 123,0 | 123,0 | 19,05 | 591,66 | 163,07 |
| 2019/05/26 | CH2205 | Male | Three y/o | Treatment (Wk 2) | Treatment | Fast Day | No | 07:45 | 07:00 - 07:59 | Morning      | 37,7 | 106 | 214,6 | 214,6 | 18,85 | 598,06 | 182,60 |
| 2019/05/26 | CH2206 | Male | Three y/o | Treatment (Wk 2) | Treatment | Fast Day | No | 07:45 | 07:00 - 07:59 | Morning      | 37,9 | 129 | 110,0 | 110,0 | 19,05 | 611,75 | 159,17 |
| 2019/05/26 | CH2205 | Male | Three y/o | Treatment (Wk 2) | Treatment | Fast Day | No | 07:50 | 07:00 - 07:59 | Morning      | 37,7 |     | 91,2  | 91,2  | 18,85 |        | 152,63 |
| 2019/05/26 | CH2206 | Male | Three y/o | Treatment (Wk 2) | Treatment | Fast Day | No | 07:50 | 07:00 - 07:59 | Morning      | 37,9 |     | 160,0 | 160,0 | 19,05 |        | 172,28 |
| 2019/05/26 | CH2205 | Male | Three y/o | Treatment (Wk 2) | Treatment | Fast Day | No | 07:55 | 07:00 - 07:59 | Morning      | 37,7 | 106 | 34,0  | 34,0  | 18,85 | 598,06 | 118,49 |
| 2019/05/26 | CH2206 | Male | Three y/o | Treatment (Wk 2) | Treatment | Fast Day | No | 07:55 | 07:00 - 07:59 | Morning      | 37,9 |     | 135,6 | 135,6 | 19,05 |        | 166,48 |
| 2019/05/26 | CH2205 | Male | Three y/o | Treatment (Wk 2) | Treatment | Fast Day | No | 08:00 | 08:00 - 08:59 | Late Morning | 37,6 | 49  | 23,4  | 23,4  | 18,75 | 537,80 | 105,68 |
| 2019/05/26 | CH2206 | Male | Three y/o | Treatment (Wk 2) | Treatment | Fast Day | No | 08:00 | 08:00 - 08:59 | Late Morning | 37,9 | 128 | 152,6 | 152,6 | 19,05 | 611,22 | 170,62 |
| 2019/05/26 | CH2205 | Male | Three y/o | Treatment (Wk 2) | Treatment | Fast Day | No | 08:05 | 08:00 - 08:59 | Late Morning | 37,5 |     | 51,6  | 51,6  | 18,65 |        | 132,87 |
| 2019/05/26 | CH2206 | Male | Three y/o | Treatment (Wk 2) | Treatment | Fast Day | No | 08:05 | 08:00 - 08:59 | Late Morning | 37,9 | 118 | 216,8 | 216,8 | 19,05 | 605,61 | 182,96 |
| 2019/05/26 | CH2205 | Male | Three y/o | Treatment (Wk 2) | Treatment | Fast Day | No | 08:10 | 08:00 - 08:59 | Late Morning | 37,5 | 97  | 157,2 | 157,2 | 18,65 | 591,66 | 171,66 |
| 2019/05/26 | CH2206 | Male | Three y/o | Treatment (Wk 2) | Treatment | Fast Day | No | 08:10 | 08:00 - 08:59 | Late Morning | 37,9 | 112 | 68,2  | 68,2  | 19,05 | 601,96 | 142,53 |
| 2019/05/26 | CH2205 | Male | Three y/o | Treatment (Wk 2) | Treatment | Fast Day | No | 08:15 | 08:00 - 08:59 | Late Morning | 37,5 | 114 | 159,6 | 159,6 | 18,65 | 603,20 | 172,19 |
| 2019/05/26 | CH2206 | Male | Three y/o | Treatment (Wk 2) | Treatment | Fast Day | No | 08:15 | 08:00 - 08:59 | Late Morning | 37,9 | 105 | 121,2 | 121,2 | 19,05 | 597,38 | 162,56 |
| 2019/05/26 | CH2205 | Male | Three y/o | Treatment (Wk 2) | Treatment | Fast Day | No | 08:20 | 08:00 - 08:59 | Late Morning | 37,5 | 44  | 200,2 | 200,2 | 18,65 | 528,51 | 180,15 |
| 2019/05/26 | CH2206 | Male | Three y/o | Treatment (Wk 2) | Treatment | Fast Day | No | 08:20 | 08:00 - 08:59 | Late Morning | 37,8 | 165 | 204,2 | 204,2 | 18,95 | 628,06 | 180,85 |
| 2019/05/26 | CH2205 | Male | Three y/o | Treatment (Wk 2) | Treatment | Fast Day | No | 08:25 | 08:00 - 08:59 | Late Morning | 37,5 | 112 | 76,2  | 76,2  | 18,65 | 601,96 | 146,38 |
| 2019/05/26 | CH2206 | Male | Three y/o | Treatment (Wk 2) | Treatment | Fast Day | No | 08:25 | 08:00 - 08:59 | Late Morning | 37,8 | 56  | 166,8 | 166,8 | 18,95 | 549,01 | 173,74 |
| 2019/05/26 | CH2205 | Male | Three y/o | Treatment (Wk 2) | Treatment | Fast Day | No | 08:30 | 08:00 - 08:59 | Late Morning | 37,6 | 86  | 66,0  | 66,0  | 18,75 | 582,77 | 141,40 |
| 2019/05/26 | CH2206 | Male | Three y/o | Treatment (Wk 2) | Treatment | Fast Day | No | 08:30 | 08:00 - 08:59 | Late Morning | 37,8 |     | 107,4 | 107,4 | 18,95 |        | 158,33 |
| 2019/05/26 | CH2205 | Male | Three y/o | Treatment (Wk 2) | Treatment | Fast Day | No | 08:35 | 08:00 - 08:59 | Late Morning | 37,6 | 105 | 84,8  | 84,8  | 18,75 | 597,38 | 150,10 |
| 2019/05/26 | CH2206 | Male | Three y/o | Treatment (Wk 2) | Treatment | Fast Day | No | 08:35 | 08:00 - 08:59 | Late Morning | 37,9 | 93  | 171,6 | 171,6 | 19,05 | 588,58 | 174,74 |
| 2019/05/26 | CH2205 | Male | Three y/o | Treatment (Wk 2) | Treatment | Fast Day | No | 08:40 | 08:00 - 08:59 | Late Morning | 37,5 | 76  | 28,6  | 28,6  | 18,65 | 573,39 | 112,56 |
| 2019/05/26 | CH2206 | Male | Three y/o | Treatment (Wk 2) | Treatment | Fast Day | No | 08:40 | 08:00 - 08:59 | Late Morning | 37,9 | 162 | 70,6  | 70,6  | 19,05 | 626,88 | 143,73 |
| 2019/05/26 | CH2205 | Male | Three y/o | Treatment (Wk 2) | Treatment | Fast Day | No | 08:45 | 08:00 - 08:59 | Late Morning | 37,5 |     | 26,6  | 26,6  | 18,65 |        | 110,07 |
| 2019/05/26 | CH2206 | Male | Three y/o | Treatment (Wk 2) | Treatment | Fast Day | No | 08:45 | 08:00 - 08:59 | Late Morning | 37,8 | 120 | 146,6 | 146,6 | 18,95 | 606,78 | 169,21 |
| 2019/05/26 | CH2205 | Male | Three y/o | Treatment (Wk 2) | Treatment | Fast Day | No | 08:50 | 08:00 - 08:59 | Late Morning | 37,4 |     | 28,8  | 28,8  | 18,55 |        | 112,79 |
| 2019/05/26 | CH2206 | Male | Three y/o | Treatment (Wk 2) | Treatment | Fast Day | No | 08:50 | 08:00 - 08:59 | Late Morning | 37,8 | 96  | 104,0 | 104,0 | 18,95 | 590,91 | 157,21 |
| 2019/05/26 | CH2205 | Male | Three y/o | Treatment (Wk 2) | Treatment | Fast Day | No | 08:55 | 08:00 - 08:59 | Late Morning | 37,3 |     | 285,8 | 285,8 | 18,46 |        | 192,71 |
| 2019/05/26 | CH2206 | Male | Three y/o | Treatment (Wk 2) | Treatment | Fast Day | No | 08:55 | 08:00 - 08:59 | Late Morning | 37,8 | 102 | 69,2  | 69,2  | 18,95 | 595,30 | 143,04 |
| 2019/05/26 | CH2205 | Male | Three y/o | Treatment (Wk 2) | Treatment | Fast Day | No | 09:00 | 09:00 - 09:59 | Late Morning | 37,4 |     | 35,2  | 35,2  | 18,55 |        | 119,69 |
| 2019/05/26 | CH2206 | Male | Three y/o | Treatment (Wk 2) | Treatment | Fast Day | No | 09:00 | 09:00 - 09:59 | Late Morning | 37,9 | 105 | 75,2  | 75,2  | 19,05 | 597,38 | 145,93 |
| 2019/05/26 | CH2205 | Male | Three y/o | Treatment (Wk 2) | Treatment | Fast Day | No | 09:05 | 09:00 - 09:59 | Late Morning | 37,6 | 154 | 32,6  | 32,6  | 18,75 | 623,58 | 117,05 |
| 2019/05/26 | CH2206 | Male | Three y/o | Treatment (Wk 2) | Treatment | Fast Day | No | 09:05 | 09:00 - 09:59 | Late Morning | 37,9 | 111 | 127,0 | 127,0 | 19,05 | 601,33 | 164,19 |
| 2019/05/26 | CH2205 | Male | Three y/o | Treatment (Wk 2) | Treatment | Fast Day | No | 09:10 | 09:00 - 09:59 | Late Morning | 37,6 | 88  | 58,4  | 58,4  | 18,75 | 584,49 | 137,16 |
| 2019/05/26 | CH2206 | Male | Three y/o | Treatment (Wk 2) | Treatment | Fast Day | No | 09:10 | 09:00 - 09:59 | Late Morning | 37,9 | 110 | 151,4 | 151,4 | 19,05 | 600,69 | 170,34 |
| 2019/05/26 | CH2205 | Male | Three y/o | Treatment (Wk 2) | Treatment | Fast Day | No | 09:15 | 09:00 - 09:59 | Late Morning | 37,4 | 108 | 226,0 | 226,0 | 18,55 | 599,39 | 184,42 |
| 2019/05/26 | CH2206 | Male | Three y/o | Treatment (Wk 2) | Treatment | Fast Day | No | 09:15 | 09:00 - 09:59 | Late Morning | 37,8 | 92  | 250,4 | 250,4 | 18,95 | 587,78 | 188,04 |
| 2019/05/26 | CH2205 | Male | Three y/o | Treatment (Wk 2) | Treatment | Fast Day | No | 09:20 | 09:00 - 09:59 | Late Morning | 37,4 |     | 104,0 | 104,0 | 18,55 |        | 157,21 |
| 2019/05/26 | CH2206 | Male | Three y/o | Treatment (Wk 2) | Treatment | Fast Day | No | 09:20 | 09:00 - 09:59 | Late Morning | 37,8 | 124 | 300,2 | 300,2 | 18,95 | 609,04 | 194,44 |
| 2019/05/26 | CH2205 | Male | Three y/o | Treatment (Wk 2) | Treatment | Fast Day | No | 09:25 | 09:00 - 09:59 | Late Morning | 37,5 |     | 79,4  | 79,4  | 18,65 |        | 147,81 |
| 2019/05/26 | CH2206 | Male | Three y/o | Treatment (Wk 2) | Treatment | Fast Day | No | 09:25 | 09:00 - 09:59 | Late Morning | 37,8 | 104 | 139,0 | 139,0 | 18,95 | 596,69 | 167,35 |
| 2019/05/26 | CH2205 | Male | Three y/o | Treatment (Wk 2) | Treatment | Fast Day | No | 09:30 | 09:00 - 09:59 | Late Morning | 37,4 | 68  | 21,2  | 21,2  | 18,55 | 564,71 | 102,31 |
| 2019/05/26 | CH2206 | Male | Three y/o | Treatment (Wk 2) | Treatment | Fast Day | No | 09:30 | 09:00 - 09:59 | Late Morning | 37,9 | 110 | 154,6 | 154,6 | 19,05 | 600,69 | 171,08 |
| 2019/05/26 | CH2205 | Male | Three y/o | Treatment (Wk 2) | Treatment | Fast Day | No | 09:35 | 09:00 - 09:59 | Late Morning | 37,5 | 124 | 199,2 | 199,2 | 18,65 | 609,04 | 179,98 |
| 2019/05/26 | CH2206 | Male | Three y/o | Treatment (Wk 2) | Treatment | Fast Day | No | 09:35 | 09:00 - 09:59 | Late Morning | 37,9 | 118 | 154,0 | 154,0 | 19,05 | 605,61 | 170,94 |
| 2019/05/26 | CH2205 | Male | Three y/o | Treatment (Wk 2) | Treatment | Fast Day | No | 09:40 | 09:00 - 09:59 | Late Morning | 37,5 | 147 | 10,0  | 10,0  | 18,65 | 620,52 | 76,76  |
| 2019/05/26 | CH2206 | Male | Three y/o | Treatment (Wk 2) | Treatment | Fast Day | No | 09:40 | 09:00 - 09:59 | Late Morning | 37,9 | 84  | 35,0  | 35,0  | 19,05 | 581,01 | 119,49 |
| 2019/05/26 | CH2205 | Male | Three y/o | Treatment (Wk 2) | Treatment | Fast Day | No | 09:45 | 09:00 - 09:59 | Late Morning | 37,6 | 63  | 18,6  | 18,6  | 18,75 | 558,62 | 97,84  |
| 2019/05/26 | CH2206 | Male | Three y/o | Treatment (Wk 2) | Treatment | Fast Day | No | 09:45 | 09:00 - 09:59 | Late Morning | 37,8 | 50  | 37,0  | 37,0  | 18,95 | 539,52 | 121,40 |
| 2019/05/26 | CH2205 | Male | Three y/o | Treatment (Wk 2) | Treatment | Fast Day | No | 09:50 | 09:00 - 09:59 | Late Morning | 37,6 | 66  | 23,4  | 23,4  | 18,75 | 562,34 | 105,68 |
| 2019/05/26 | CH2206 | Male | Three y/o | Treatment (Wk 2) | Treatment | Fast Day | No | 09:50 | 09:00 - 09:59 | Late Morning | 37,8 | 90  | 18,4  | 18,4  | 18,95 | 586,16 | 97,47  |
| 2019/05/26 | CH2205 | Male | Three y/o | Treatment (Wk 2) | Treatment | Fast Day | No | 09:55 | 09:00 - 09:59 | Late Morning | 37,6 | 49  | 21,4  | 21,4  | 18,75 | 537,80 | 102,63 |
| 2019/05/26 | CH2206 | Male | Three y/o | Treatment (Wk 2) | Treatment | Fast Day | No | 09:55 | 09:00 - 09:59 | Late Morning | 37,8 | 60  | 17,0  | 17,0  | 18,95 | 554,67 | 94,77  |
| 2019/05/26 | CH2205 | Male | Three y/o | Treatment (Wk 2) | Treatment | Fast Day | No | 10:00 | 10:00 - 10:59 | Late Morning | 37,6 | 49  | 23,6  | 23,6  | 18,75 | 537,80 | 105,97 |



|            |        |      |           |                  |           |          |    |       |               |              |      |     |       |       |       |        |        |
|------------|--------|------|-----------|------------------|-----------|----------|----|-------|---------------|--------------|------|-----|-------|-------|-------|--------|--------|
| 2019/05/26 | CH2206 | Male | Three y/o | Treatment (Wk 2) | Treatment | Fast Day | No | 10:00 | 10:00 - 10:59 | Late Morning | 37,8 | 47  | 24,0  | 24,0  | 18,95 | 534,23 | 106,55 |
| 2019/05/26 | CH2205 | Male | Three y/o | Treatment (Wk 2) | Treatment | Fast Day | No | 10:05 | 10:00 - 10:59 | Late Morning | 37,6 | 63  | 22,2  | 22,2  | 18,75 | 558,62 | 103,88 |
| 2019/05/26 | CH2206 | Male | Three y/o | Treatment (Wk 2) | Treatment | Fast Day | No | 10:05 | 10:00 - 10:59 | Late Morning | 37,9 | 57  | 15,4  | 15,4  | 19,05 | 550,47 | 91,41  |
| 2019/05/26 | CH2205 | Male | Three y/o | Treatment (Wk 2) | Treatment | Fast Day | No | 10:10 | 10:00 - 10:59 | Late Morning | 37,6 | 61  | 24,0  | 24,0  | 18,75 | 556,01 | 106,55 |
| 2019/05/26 | CH2206 | Male | Three y/o | Treatment (Wk 2) | Treatment | Fast Day | No | 10:10 | 10:00 - 10:59 | Late Morning | 37,9 | 63  | 10,6  | 10,6  | 19,05 | 558,62 | 78,73  |
| 2019/05/26 | CH2205 | Male | Three y/o | Treatment (Wk 2) | Treatment | Fast Day | No | 10:15 | 10:00 - 10:59 | Late Morning | 37,6 | 42  | 24,0  | 24,0  | 18,75 | 524,42 | 106,55 |
| 2019/05/26 | CH2206 | Male | Three y/o | Treatment (Wk 2) | Treatment | Fast Day | No | 10:15 | 10:00 - 10:59 | Late Morning | 37,8 | 47  | 12,0  | 12,0  | 18,95 | 534,23 | 82,93  |
| 2019/05/26 | CH2205 | Male | Three y/o | Treatment (Wk 2) | Treatment | Fast Day | No | 10:20 | 10:00 - 10:59 | Late Morning | 37,6 | 65  | 17,0  | 17,0  | 18,75 | 561,12 | 94,77  |
| 2019/05/26 | CH2206 | Male | Three y/o | Treatment (Wk 2) | Treatment | Fast Day | No | 10:20 | 10:00 - 10:59 | Late Morning | 37,8 | 43  | 15,0  | 15,0  | 18,95 | 526,50 | 90,51  |
| 2019/05/26 | CH2205 | Male | Three y/o | Treatment (Wk 2) | Treatment | Fast Day | No | 10:25 | 10:00 - 10:59 | Late Morning | 37,5 | 48  | 12,8  | 12,8  | 18,65 | 536,04 | 85,12  |
| 2019/05/26 | CH2206 | Male | Three y/o | Treatment (Wk 2) | Treatment | Fast Day | No | 10:25 | 10:00 - 10:59 | Late Morning | 37,8 | 58  | 25,4  | 25,4  | 18,95 | 551,90 | 108,49 |
| 2019/05/26 | CH2205 | Male | Three y/o | Treatment (Wk 2) | Treatment | Fast Day | No | 10:30 | 10:00 - 10:59 | Late Morning | 37,4 | 53  | 20,6  | 20,6  | 18,55 | 544,43 | 101,32 |
| 2019/05/26 | CH2206 | Male | Three y/o | Treatment (Wk 2) | Treatment | Fast Day | No | 10:30 | 10:00 - 10:59 | Late Morning | 37,8 | 83  | 75,2  | 75,2  | 18,95 | 580,11 | 145,93 |
| 2019/05/26 | CH2205 | Male | Three y/o | Treatment (Wk 2) | Treatment | Fast Day | No | 10:35 | 10:00 - 10:59 | Late Morning | 37,4 |     | 36,8  | 36,8  | 18,55 |        | 121,22 |
| 2019/05/26 | CH2206 | Male | Three y/o | Treatment (Wk 2) | Treatment | Fast Day | No | 10:35 | 10:00 - 10:59 | Late Morning | 37,8 | 100 | 87,4  | 87,4  | 18,95 | 593,87 | 151,15 |
| 2019/05/26 | CH2205 | Male | Three y/o | Treatment (Wk 2) | Treatment | Fast Day | No | 10:40 | 10:00 - 10:59 | Late Morning | 37,4 |     | 9,2   | 9,2   | 18,55 |        | 73,94  |
| 2019/05/26 | CH2206 | Male | Three y/o | Treatment (Wk 2) | Treatment | Fast Day | No | 10:40 | 10:00 - 10:59 | Late Morning | 37,8 | 113 | 42,4  | 42,4  | 18,95 | 602,58 | 126,10 |
| 2019/05/26 | CH2205 | Male | Three y/o | Treatment (Wk 2) | Treatment | Fast Day | No | 10:45 | 10:00 - 10:59 | Late Morning | 37,3 | 77  | 3,4   | 3,4   | 18,46 | 574,39 | 40,51  |
| 2019/05/26 | CH2206 | Male | Three y/o | Treatment (Wk 2) | Treatment | Fast Day | No | 10:45 | 10:00 - 10:59 | Late Morning | 37,7 | 141 | 177,2 | 177,2 | 18,85 | 617,75 | 175,86 |
| 2019/05/26 | CH2205 | Male | Three y/o | Treatment (Wk 2) | Treatment | Fast Day | No | 10:50 | 10:00 - 10:59 | Late Morning | 37,3 | 65  | 12,0  | 12,0  | 18,46 | 561,12 | 82,93  |
| 2019/05/26 | CH2206 | Male | Three y/o | Treatment (Wk 2) | Treatment | Fast Day | No | 10:50 | 10:00 - 10:59 | Late Morning | 37,7 | 90  | 107,8 | 107,8 | 18,85 | 586,16 | 158,46 |
| 2019/05/26 | CH2205 | Male | Three y/o | Treatment (Wk 2) | Treatment | Fast Day | No | 10:55 | 10:00 - 10:59 | Late Morning | 37,4 | 42  | 3,2   | 3,2   | 18,55 | 524,42 | 38,49  |
| 2019/05/26 | CH2206 | Male | Three y/o | Treatment (Wk 2) | Treatment | Fast Day | No | 10:55 | 10:00 - 10:59 | Late Morning | 37,7 | 120 | 77,2  | 77,2  | 18,85 | 606,78 | 146,84 |
| 2019/05/26 | CH2205 | Male | Three y/o | Treatment (Wk 2) | Treatment | Fast Day | No | 11:00 | 11:00 - 11:59 | Late Morning | 37,4 | 52  | 37,0  | 37,0  | 18,55 | 542,83 | 121,40 |
| 2019/05/26 | CH2206 | Male | Three y/o | Treatment (Wk 2) | Treatment | Fast Day | No | 11:00 | 11:00 - 11:59 | Late Morning | 37,8 |     | 413,8 | 413,8 | 18,95 |        | 205,82 |
| 2019/05/26 | CH2205 | Male | Three y/o | Treatment (Wk 2) | Treatment | Fast Day | No | 11:05 | 11:00 - 11:59 | Late Morning | 37,4 | 78  | 137,4 | 137,4 | 18,55 | 575,38 | 166,94 |
| 2019/05/26 | CH2206 | Male | Three y/o | Treatment (Wk 2) | Treatment | Fast Day | No | 11:05 | 11:00 - 11:59 | Late Morning | 37,9 | 118 | 408,8 | 408,8 | 19,05 | 605,61 | 205,39 |
| 2019/05/26 | CH2205 | Male | Three y/o | Treatment (Wk 2) | Treatment | Fast Day | No | 11:10 | 11:00 - 11:59 | Late Morning | 37,5 | 172 | 378,8 | 378,8 | 18,65 | 630,73 | 202,68 |
| 2019/05/26 | CH2206 | Male | Three y/o | Treatment (Wk 2) | Treatment | Fast Day | No | 11:10 | 11:00 - 11:59 | Late Morning | 38,0 |     | 32,0  | 32,0  | 19,15 |        | 116,41 |
| 2019/05/26 | CH2205 | Male | Three y/o | Treatment (Wk 2) | Treatment | Fast Day | No | 11:15 | 11:00 - 11:59 | Late Morning | 37,6 | 75  | 18,0  | 18,0  | 18,75 | 572,36 | 96,72  |
| 2019/05/26 | CH2206 | Male | Three y/o | Treatment (Wk 2) | Treatment | Fast Day | No | 11:15 | 11:00 - 11:59 | Late Morning | 38,0 | 84  | 36,6  | 36,6  | 19,15 | 581,01 | 121,03 |
| 2019/05/26 | CH2205 | Male | Three y/o | Treatment (Wk 2) | Treatment | Fast Day | No | 11:20 | 11:00 - 11:59 | Late Morning | 37,7 |     | 34,4  | 34,4  | 18,85 |        | 118,90 |
| 2019/05/26 | CH2206 | Male | Three y/o | Treatment (Wk 2) | Treatment | Fast Day | No | 11:20 | 11:00 - 11:59 | Late Morning | 37,9 | 93  | 25,6  | 25,6  | 19,05 | 588,58 | 108,76 |
| 2019/05/26 | CH2205 | Male | Three y/o | Treatment (Wk 2) | Treatment | Fast Day | No | 11:25 | 11:00 - 11:59 | Late Morning | 37,7 |     | 35,2  | 35,2  | 18,85 |        | 119,69 |
| 2019/05/26 | CH2206 | Male | Three y/o | Treatment (Wk 2) | Treatment | Fast Day | No | 11:25 | 11:00 - 11:59 | Late Morning | 37,9 | 138 | 85,4  | 85,4  | 19,05 | 616,31 | 150,35 |
| 2019/05/26 | CH2205 | Male | Three y/o | Treatment (Wk 2) | Treatment | Fast Day | No | 11:30 | 11:00 - 11:59 | Late Morning | 37,7 |     | 119,2 | 119,2 | 18,85 |        | 161,97 |
| 2019/05/26 | CH2206 | Male | Three y/o | Treatment (Wk 2) | Treatment | Fast Day | No | 11:30 | 11:00 - 11:59 | Late Morning | 37,9 | 80  | 123,0 | 123,0 | 19,05 | 577,31 | 163,07 |
| 2019/05/26 | CH2205 | Male | Three y/o | Treatment (Wk 2) | Treatment | Fast Day | No | 11:35 | 11:00 - 11:59 | Late Morning | 37,7 |     | 158,6 | 158,6 | 18,85 |        | 171,97 |
| 2019/05/26 | CH2206 | Male | Three y/o | Treatment (Wk 2) | Treatment | Fast Day | No | 11:35 | 11:00 - 11:59 | Late Morning | 38,0 | 92  | 51,8  | 51,8  | 19,15 | 587,78 | 133,01 |
| 2019/05/26 | CH2205 | Male | Three y/o | Treatment (Wk 2) | Treatment | Fast Day | No | 11:40 | 11:00 - 11:59 | Late Morning | 38,0 | 80  | 53,2  | 53,2  | 19,15 | 577,31 | 133,93 |
| 2019/05/26 | CH2206 | Male | Three y/o | Treatment (Wk 2) | Treatment | Fast Day | No | 11:40 | 11:00 - 11:59 | Late Morning | 38,0 |     | 15,6  | 15,6  | 19,15 |        | 91,85  |
| 2019/05/26 | CH2205 | Male | Three y/o | Treatment (Wk 2) | Treatment | Fast Day | No | 11:45 | 11:00 - 11:59 | Late Morning | 38,0 | 76  | 12,4  | 12,4  | 19,15 | 573,39 | 84,04  |
| 2019/05/26 | CH2206 | Male | Three y/o | Treatment (Wk 2) | Treatment | Fast Day | No | 11:45 | 11:00 - 11:59 | Late Morning | 38,0 | 105 | 36,2  | 36,2  | 19,15 | 597,38 | 120,65 |
| 2019/05/26 | CH2205 | Male | Three y/o | Treatment (Wk 2) | Treatment | Fast Day | No | 11:50 | 11:00 - 11:59 | Late Morning | 38,1 |     | 20,8  | 20,8  | 19,26 |        | 101,65 |
| 2019/05/26 | CH2206 | Male | Three y/o | Treatment (Wk 2) | Treatment | Fast Day | No | 11:50 | 11:00 - 11:59 | Late Morning | 37,9 | 96  | 181,0 | 181,0 | 19,05 | 590,91 | 176,61 |
| 2019/05/26 | CH2205 | Male | Three y/o | Treatment (Wk 2) | Treatment | Fast Day | No | 11:55 | 11:00 - 11:59 | Late Morning | 38,1 | 60  | 5,2   | 5,2   | 19,26 | 554,67 | 54,72  |
| 2019/05/26 | CH2206 | Male | Three y/o | Treatment (Wk 2) | Treatment | Fast Day | No | 11:55 | 11:00 - 11:59 | Late Morning | 37,9 | 56  | 62,8  | 62,8  | 19,05 | 549,01 | 139,67 |
| 2019/05/26 | CH2205 | Male | Three y/o | Treatment (Wk 2) | Treatment | Fast Day | No | 12:00 | 12:00 - 12:59 | Afternoon    | 38,1 | 54  | 24,6  | 24,6  | 19,26 | 545,99 | 107,39 |
| 2019/05/26 | CH2206 | Male | Three y/o | Treatment (Wk 2) | Treatment | Fast Day | No | 12:00 | 12:00 - 12:59 | Afternoon    | 37,9 | 62  | 54,0  | 54,0  | 19,05 | 557,33 | 134,45 |
| 2019/05/26 | CH2205 | Male | Three y/o | Treatment (Wk 2) | Treatment | Fast Day | No | 12:05 | 12:00 - 12:59 | Afternoon    | 38,0 | 55  | 8,6   | 8,6   | 19,15 | 547,52 | 71,66  |
| 2019/05/26 | CH2206 | Male | Three y/o | Treatment (Wk 2) | Treatment | Fast Day | No | 12:05 | 12:00 - 12:59 | Afternoon    | 37,9 | 52  | 63,2  | 63,2  | 19,05 | 542,83 | 139,89 |
| 2019/05/26 | CH2205 | Male | Three y/o | Treatment (Wk 2) | Treatment | Fast Day | No | 12:10 | 12:00 - 12:59 | Afternoon    | 38,0 | 57  | 4,4   | 4,4   | 19,15 | 550,47 | 49,12  |
| 2019/05/26 | CH2206 | Male | Three y/o | Treatment (Wk 2) | Treatment | Fast Day | No | 12:10 | 12:00 - 12:59 | Afternoon    | 37,9 | 62  | 74,0  | 74,0  | 19,05 | 557,33 | 145,37 |
| 2019/05/26 | CH2205 | Male | Three y/o | Treatment (Wk 2) | Treatment | Fast Day | No | 12:15 | 12:00 - 12:59 | Afternoon    | 38,0 | 47  | 7,4   | 7,4   | 19,15 | 534,23 | 66,59  |
| 2019/05/26 | CH2206 | Male | Three y/o | Treatment (Wk 2) | Treatment | Fast Day | No | 12:15 | 12:00 - 12:59 | Afternoon    | 37,9 | 46  | 66,4  | 66,4  | 19,05 | 532,38 | 141,61 |
| 2019/05/26 | CH2205 | Male | Three y/o | Treatment (Wk 2) | Treatment | Fast Day | No | 12:20 | 12:00 - 12:59 | Afternoon    | 38,0 | 47  | 36,0  | 36,0  | 19,15 | 534,23 | 120,46 |
| 2019/05/26 | CH2206 | Male | Three y/o | Treatment (Wk 2) | Treatment | Fast Day | No | 12:20 | 12:00 - 12:59 | Afternoon    | 37,9 | 48  | 66,2  | 66,2  | 19,05 | 536,04 | 141,50 |
| 2019/05/26 | CH2205 | Male | Three y/o | Treatment (Wk 2) | Treatment | Fast Day | No | 12:25 | 12:00 - 12:59 | Afternoon    | 37,9 | 46  | 31,0  | 31,0  | 19,05 | 532,38 | 115,32 |
| 2019/05/26 | CH2206 | Male | Three y/o | Treatment (Wk 2) | Treatment | Fast Day | No | 12:25 | 12:00 - 12:59 | Afternoon    | 37,9 | 47  | 65,6  | 65,6  | 19,05 | 534,23 | 141,19 |
| 2019/05/26 | CH2205 | Male | Three y/o | Treatment (Wk 2) | Treatment | Fast Day | No | 12:30 | 12:00 - 12:59 | Afternoon    | 37,9 | 51  | 26,4  | 26,4  | 19,05 | 541,20 | 109,81 |
| 2019/05/26 | CH2206 | Male | Three y/o | Treatment (Wk 2) | Treatment | Fast Day | No | 12:30 | 12:00 - 12:59 | Afternoon    | 37,8 | 46  | 59,4  | 59,4  | 18,95 | 532,38 | 137,75 |
| 2019/05/26 | CH2205 | Male | Three y/o | Treatment (Wk 2) | Treatment | Fast Day | No | 12:35 | 12:00 - 12:59 | Afternoon    | 37,9 |     | 29,0  | 29,0  | 19,05 |        | 113,03 |
| 2019/05/26 | CH2206 | Male | Three y/o | Treatment (Wk 2) | Treatment | Fast Day | No | 12:35 | 12:00 - 12:59 | Afternoon    | 37,8 | 49  | 57,6  | 57,6  | 18,95 | 537,80 | 136,68 |
| 2019/05/26 | CH2205 | Male | Three y/o | Treatment (Wk 2) | Treatment | Fast Day | No | 12:40 | 12:00 - 12:59 | Afternoon    | 37,7 | 37  | 28,0  | 28,0  | 18,85 | 513,06 | 111,83 |
| 2019/05/26 | CH2206 | Male | Three y/o | Treatment (Wk 2) | Treatment | Fast Day | No | 12:40 | 12:00 - 12:59 | Afternoon    | 37,8 | 47  | 62,2  | 62,2  | 18,95 | 534,23 | 139,34 |
| 2019/05/26 | CH2205 | Male | Three y/o | Treatment (Wk 2) | Treatment | Fast Day | No | 12:45 | 12:00 - 12:59 | Afternoon    | 37,7 | 47  | 29,2  | 29,2  | 18,85 | 534,23 | 113,27 |
| 2019/05/26 | CH2206 | Male | Three y/o | Treatment (Wk 2) | Treatment | Fast Day | No | 12:45 | 12:00 - 12:59 | Afternoon    | 37,8 | 43  | 61,2  | 61,2  | 18,95 | 526,50 | 138,78 |
| 2019/05/26 | CH2205 | Male | Three y/o | Treatment (Wk 2) | Treatment | Fast Day | No | 12:50 | 12:00 - 12:59 | Afternoon    | 37,6 | 44  | 47,2  | 47,2  | 18,75 | 528,51 | 129,80 |
| 2019/05/26 | CH2206 | Male | Three y/o | Treatment (Wk 2) | Treatment | Fast Day | No | 12:50 | 12:00 - 12:59 | Afternoon    | 37,8 | 48  | 57,2  | 57,2  | 18,95 | 536,04 | 136,44 |
| 2019/05/26 | CH2205 | Male | Three y/o | Treatment (Wk 2) | Treatment | Fast Day | No | 12:55 | 12:00 - 12:59 | Afternoon    | 37,5 | 49  | 17,0  | 17,0  | 18,65 | 537,80 | 94,77  |



|            |        |      |           |                  |           |          |    |       |               |           |      |     |       |       |       |        |        |
|------------|--------|------|-----------|------------------|-----------|----------|----|-------|---------------|-----------|------|-----|-------|-------|-------|--------|--------|
| 2019/05/26 | CH2206 | Male | Three y/o | Treatment (Wk 2) | Treatment | Fast Day | No | 12:55 | 12:00 - 12:59 | Afternoon | 37,8 | 47  | 45,2  | 45,2  | 18,95 | 534,23 | 128,30 |
| 2019/05/26 | CH2205 | Male | Three y/o | Treatment (Wk 2) | Treatment | Fast Day | No | 13:00 | 13:00 - 13:59 | Afternoon | 37,6 | 61  | 23,6  | 23,6  | 18,75 | 556,01 | 105,97 |
| 2019/05/26 | CH2206 | Male | Three y/o | Treatment (Wk 2) | Treatment | Fast Day | No | 13:00 | 13:00 - 13:59 | Afternoon | 37,7 | 79  | 97,6  | 97,6  | 18,85 | 576,36 | 155,00 |
| 2019/05/26 | CH2205 | Male | Three y/o | Treatment (Wk 2) | Treatment | Fast Day | No | 13:05 | 13:00 - 13:59 | Afternoon | 37,6 |     | 27,0  | 27,0  | 18,75 |        | 110,58 |
| 2019/05/26 | CH2206 | Male | Three y/o | Treatment (Wk 2) | Treatment | Fast Day | No | 13:05 | 13:00 - 13:59 | Afternoon | 37,8 | 103 | 196,4 | 196,4 | 18,95 | 596,00 | 179,48 |
| 2019/05/26 | CH2205 | Male | Three y/o | Treatment (Wk 2) | Treatment | Fast Day | No | 13:10 | 13:00 - 13:59 | Afternoon | 37,6 | 64  | 31,8  | 31,8  | 18,75 | 559,88 | 116,20 |
| 2019/05/26 | CH2206 | Male | Three y/o | Treatment (Wk 2) | Treatment | Fast Day | No | 13:10 | 13:00 - 13:59 | Afternoon | 37,8 |     | 79,2  | 79,2  | 18,95 |        | 147,73 |
| 2019/05/26 | CH2205 | Male | Three y/o | Treatment (Wk 2) | Treatment | Fast Day | No | 13:15 | 13:00 - 13:59 | Afternoon | 37,6 |     | 42,8  | 42,8  | 18,75 |        | 126,42 |
| 2019/05/26 | CH2206 | Male | Three y/o | Treatment (Wk 2) | Treatment | Fast Day | No | 13:15 | 13:00 - 13:59 | Afternoon | 37,7 | 94  | 19,6  | 19,6  | 18,85 | 589,37 | 99,63  |
| 2019/05/26 | CH2205 | Male | Three y/o | Treatment (Wk 2) | Treatment | Fast Day | No | 13:20 | 13:00 - 13:59 | Afternoon | 37,6 |     | 13,8  | 13,8  | 18,75 |        | 87,68  |
| 2019/05/26 | CH2206 | Male | Three y/o | Treatment (Wk 2) | Treatment | Fast Day | No | 13:20 | 13:00 - 13:59 | Afternoon | 37,7 | 47  | 14,4  | 14,4  | 18,85 | 534,23 | 89,12  |
| 2019/05/26 | CH2205 | Male | Three y/o | Treatment (Wk 2) | Treatment | Fast Day | No | 13:25 | 13:00 - 13:59 | Afternoon | 37,5 | 42  | 10,4  | 10,4  | 18,65 | 524,42 | 78,08  |
| 2019/05/26 | CH2206 | Male | Three y/o | Treatment (Wk 2) | Treatment | Fast Day | No | 13:25 | 13:00 - 13:59 | Afternoon | 37,7 | 46  | 30,6  | 30,6  | 18,85 | 532,38 | 114,87 |
| 2019/05/26 | CH2205 | Male | Three y/o | Treatment (Wk 2) | Treatment | Fast Day | No | 13:30 | 13:00 - 13:59 | Afternoon | 37,5 | 55  | 83,8  | 83,8  | 18,65 | 547,52 | 149,69 |
| 2019/05/26 | CH2206 | Male | Three y/o | Treatment (Wk 2) | Treatment | Fast Day | No | 13:30 | 13:00 - 13:59 | Afternoon | 37,7 | 70  | 44,0  | 44,0  | 18,85 | 566,99 | 127,37 |
| 2019/05/26 | CH2205 | Male | Three y/o | Treatment (Wk 2) | Treatment | Fast Day | No | 13:35 | 13:00 - 13:59 | Afternoon | 37,6 | 72  | 62,2  | 62,2  | 18,75 | 569,20 | 139,34 |
| 2019/05/26 | CH2206 | Male | Three y/o | Treatment (Wk 2) | Treatment | Fast Day | No | 13:35 | 13:00 - 13:59 | Afternoon | 37,7 | 98  | 270,8 | 270,8 | 18,85 | 592,41 | 190,80 |
| 2019/05/26 | CH2205 | Male | Three y/o | Treatment (Wk 2) | Treatment | Fast Day | No | 13:40 | 13:00 - 13:59 | Afternoon | 37,6 | 44  | 26,6  | 26,6  | 18,75 | 528,51 | 110,07 |
| 2019/05/26 | CH2206 | Male | Three y/o | Treatment (Wk 2) | Treatment | Fast Day | No | 13:40 | 13:00 - 13:59 | Afternoon | 37,8 | 104 | 139,8 | 139,8 | 18,95 | 596,69 | 167,55 |
| 2019/05/26 | CH2205 | Male | Three y/o | Treatment (Wk 2) | Treatment | Fast Day | No | 13:45 | 13:00 - 13:59 | Afternoon | 37,6 |     | 15,0  | 15,0  | 18,75 |        | 90,51  |
| 2019/05/26 | CH2206 | Male | Three y/o | Treatment (Wk 2) | Treatment | Fast Day | No | 13:45 | 13:00 - 13:59 | Afternoon | 37,7 | 72  | 51,0  | 51,0  | 18,85 | 569,20 | 132,47 |
| 2019/05/26 | CH2205 | Male | Three y/o | Treatment (Wk 2) | Treatment | Fast Day | No | 13:50 | 13:00 - 13:59 | Afternoon | 37,6 | 65  | 13,8  | 13,8  | 18,75 | 561,12 | 87,68  |
| 2019/05/26 | CH2206 | Male | Three y/o | Treatment (Wk 2) | Treatment | Fast Day | No | 13:50 | 13:00 - 13:59 | Afternoon | 37,8 | 52  | 42,8  | 42,8  | 18,95 | 542,83 | 126,42 |
| 2019/05/26 | CH2205 | Male | Three y/o | Treatment (Wk 2) | Treatment | Fast Day | No | 13:55 | 13:00 - 13:59 | Afternoon | 37,6 |     | 16,0  | 16,0  | 18,75 |        | 92,71  |
| 2019/05/26 | CH2206 | Male | Three y/o | Treatment (Wk 2) | Treatment | Fast Day | No | 13:55 | 13:00 - 13:59 | Afternoon | 37,7 | 49  | 51,6  | 51,6  | 18,85 | 537,80 | 132,87 |
| 2019/05/26 | CH2205 | Male | Three y/o | Treatment (Wk 2) | Treatment | Fast Day | No | 14:00 | 14:00 - 14:59 | Afternoon | 37,7 | 58  | 41,4  | 41,4  | 18,85 | 551,90 | 125,27 |
| 2019/05/26 | CH2206 | Male | Three y/o | Treatment (Wk 2) | Treatment | Fast Day | No | 14:00 | 14:00 - 14:59 | Afternoon | 37,8 | 48  | 24,2  | 24,2  | 18,95 | 536,04 | 106,83 |
| 2019/05/26 | CH2205 | Male | Three y/o | Treatment (Wk 2) | Treatment | Fast Day | No | 14:05 | 14:00 - 14:59 | Afternoon | 37,7 | 79  | 149,2 | 149,2 | 18,85 | 576,36 | 169,83 |
| 2019/05/26 | CH2206 | Male | Three y/o | Treatment (Wk 2) | Treatment | Fast Day | No | 14:05 | 14:00 - 14:59 | Afternoon | 37,7 | 52  | 67,6  | 67,6  | 18,85 | 542,83 | 142,23 |
| 2019/05/26 | CH2205 | Male | Three y/o | Treatment (Wk 2) | Treatment | Fast Day | No | 14:10 | 14:00 - 14:59 | Afternoon | 37,7 | 64  | 6,8   | 6,8   | 18,85 | 559,88 | 63,74  |
| 2019/05/26 | CH2206 | Male | Three y/o | Treatment (Wk 2) | Treatment | Fast Day | No | 14:10 | 14:00 - 14:59 | Afternoon | 37,8 | 65  | 60,8  | 60,8  | 18,95 | 561,12 | 138,55 |
| 2019/05/26 | CH2205 | Male | Three y/o | Treatment (Wk 2) | Treatment | Fast Day | No | 14:15 | 14:00 - 14:59 | Afternoon | 37,7 | 62  | 8,6   | 8,6   | 18,85 | 557,33 | 71,66  |
| 2019/05/26 | CH2206 | Male | Three y/o | Treatment (Wk 2) | Treatment | Fast Day | No | 14:15 | 14:00 - 14:59 | Afternoon | 37,8 | 109 | 176,8 | 176,8 | 18,95 | 600,04 | 175,78 |
| 2019/05/26 | CH2205 | Male | Three y/o | Treatment (Wk 2) | Treatment | Fast Day | No | 14:20 | 14:00 - 14:59 | Afternoon | 37,7 |     | 37,8  | 37,8  | 18,85 |        | 122,14 |
| 2019/05/26 | CH2206 | Male | Three y/o | Treatment (Wk 2) | Treatment | Fast Day | No | 14:20 | 14:00 - 14:59 | Afternoon | 37,8 |     | 59,4  | 59,4  | 18,95 |        | 137,75 |
| 2019/05/26 | CH2205 | Male | Three y/o | Treatment (Wk 2) | Treatment | Fast Day | No | 14:25 | 14:00 - 14:59 | Afternoon | 37,9 |     | 22,4  | 22,4  | 19,05 |        | 104,19 |
| 2019/05/26 | CH2206 | Male | Three y/o | Treatment (Wk 2) | Treatment | Fast Day | No | 14:25 | 14:00 - 14:59 | Afternoon | 37,9 | 100 | 170,4 | 170,4 | 19,05 | 593,87 | 174,49 |
| 2019/05/26 | CH2205 | Male | Three y/o | Treatment (Wk 2) | Treatment | Fast Day | No | 14:30 | 14:00 - 14:59 | Afternoon | 37,9 | 68  | 61,8  | 61,8  | 19,05 | 564,71 | 139,12 |
| 2019/05/26 | CH2206 | Male | Three y/o | Treatment (Wk 2) | Treatment | Fast Day | No | 14:30 | 14:00 - 14:59 | Afternoon | 37,9 | 95  | 100,6 | 100,6 | 19,05 | 590,14 | 156,05 |
| 2019/05/26 | CH2205 | Male | Three y/o | Treatment (Wk 2) | Treatment | Fast Day | No | 14:35 | 14:00 - 14:59 | Afternoon | 37,9 | 65  | 67,2  | 67,2  | 19,05 | 561,12 | 142,02 |
| 2019/05/26 | CH2206 | Male | Three y/o | Treatment (Wk 2) | Treatment | Fast Day | No | 14:35 | 14:00 - 14:59 | Afternoon | 37,9 | 76  | 35,8  | 35,8  | 19,05 | 573,39 | 120,27 |
| 2019/05/26 | CH2205 | Male | Three y/o | Treatment (Wk 2) | Treatment | Fast Day | No | 14:40 | 14:00 - 14:59 | Afternoon | 37,9 | 93  | 29,0  | 29,0  | 19,05 | 588,58 | 113,03 |
| 2019/05/26 | CH2206 | Male | Three y/o | Treatment (Wk 2) | Treatment | Fast Day | No | 14:40 | 14:00 - 14:59 | Afternoon | 37,9 |     | 180,2 | 180,2 | 19,05 |        | 176,45 |
| 2019/05/26 | CH2205 | Male | Three y/o | Treatment (Wk 2) | Treatment | Fast Day | No | 14:45 | 14:00 - 14:59 | Afternoon | 38,0 | 63  | 31,8  | 31,8  | 19,15 | 558,62 | 116,20 |
| 2019/05/26 | CH2206 | Male | Three y/o | Treatment (Wk 2) | Treatment | Fast Day | No | 14:45 | 14:00 - 14:59 | Afternoon | 38,0 | 93  | 95,2  | 95,2  | 19,15 | 588,58 | 154,13 |
| 2019/05/26 | CH2205 | Male | Three y/o | Treatment (Wk 2) | Treatment | Fast Day | No | 14:50 | 14:00 - 14:59 | Afternoon | 38,0 | 56  | 10,0  | 10,0  | 19,15 | 549,01 | 76,76  |
| 2019/05/26 | CH2206 | Male | Three y/o | Treatment (Wk 2) | Treatment | Fast Day | No | 14:50 | 14:00 - 14:59 | Afternoon | 38,0 | 128 | 50,2  | 50,2  | 19,15 | 611,22 | 131,92 |
| 2019/05/26 | CH2205 | Male | Three y/o | Treatment (Wk 2) | Treatment | Fast Day | No | 14:55 | 14:00 - 14:59 | Afternoon | 38,0 | 86  | 221,4 | 221,4 | 19,15 | 582,77 | 183,70 |
| 2019/05/26 | CH2206 | Male | Three y/o | Treatment (Wk 2) | Treatment | Fast Day | No | 14:55 | 14:00 - 14:59 | Afternoon | 38,0 | 80  | 199,2 | 199,2 | 19,15 | 577,31 | 179,98 |
| 2019/05/26 | CH2205 | Male | Three y/o | Treatment (Wk 2) | Treatment | Fast Day | No | 15:00 | 15:00 - 15:59 | Afternoon | 38,1 | 72  | 6,2   | 6,2   | 19,26 | 569,20 | 60,63  |
| 2019/05/26 | CH2206 | Male | Three y/o | Treatment (Wk 2) | Treatment | Fast Day | No | 15:00 | 15:00 - 15:59 | Afternoon | 38,1 | 96  | 132,2 | 132,2 | 19,26 | 590,91 | 165,59 |
| 2019/05/26 | CH2205 | Male | Three y/o | Treatment (Wk 2) | Treatment | Fast Day | No | 15:05 | 15:00 - 15:59 | Afternoon | 38,1 | 58  | 202,2 | 202,2 | 19,26 | 551,90 | 180,50 |
| 2019/05/26 | CH2206 | Male | Three y/o | Treatment (Wk 2) | Treatment | Fast Day | No | 15:05 | 15:00 - 15:59 | Afternoon | 38,1 | 100 | 190,4 | 190,4 | 19,26 | 593,87 | 178,39 |
| 2019/05/26 | CH2205 | Male | Three y/o | Treatment (Wk 2) | Treatment | Fast Day | No | 15:10 | 15:00 - 15:59 | Afternoon | 38,1 | 73  | 31,8  | 31,8  | 19,26 | 570,27 | 116,20 |
| 2019/05/26 | CH2206 | Male | Three y/o | Treatment (Wk 2) | Treatment | Fast Day | No | 15:10 | 15:00 - 15:59 | Afternoon | 38,1 | 89  | 62,6  | 62,6  | 19,26 | 585,33 | 139,56 |
| 2019/05/26 | CH2205 | Male | Three y/o | Treatment (Wk 2) | Treatment | Fast Day | No | 15:15 | 15:00 - 15:59 | Afternoon | 38,1 | 59  | 41,4  | 41,4  | 19,26 | 553,30 | 125,27 |
| 2019/05/26 | CH2206 | Male | Three y/o | Treatment (Wk 2) | Treatment | Fast Day | No | 15:15 | 15:00 - 15:59 | Afternoon | 38,2 | 110 | 113,2 | 113,2 | 19,36 | 600,69 | 160,17 |
| 2019/05/26 | CH2205 | Male | Three y/o | Treatment (Wk 2) | Treatment | Fast Day | No | 15:20 | 15:00 - 15:59 | Afternoon | 38,2 | 88  | 198,8 | 198,8 | 19,26 | 584,49 | 179,91 |
| 2019/05/26 | CH2206 | Male | Three y/o | Treatment (Wk 2) | Treatment | Fast Day | No | 15:20 | 15:00 - 15:59 | Afternoon | 38,2 | 103 | 222,8 | 222,8 | 19,36 | 596,00 | 183,92 |
| 2019/05/26 | CH2205 | Male | Three y/o | Treatment (Wk 2) | Treatment | Fast Day | No | 15:25 | 15:00 - 15:59 | Afternoon | 38,2 | 115 | 211,4 | 211,4 | 19,36 | 603,82 | 182,07 |
| 2019/05/26 | CH2206 | Male | Three y/o | Treatment (Wk 2) | Treatment | Fast Day | No | 15:25 | 15:00 - 15:59 | Afternoon | 38,3 | 156 | 217,4 | 217,4 | 19,46 | 624,43 | 183,06 |
| 2019/05/26 | CH2205 | Male | Three y/o | Treatment (Wk 2) | Treatment | Fast Day | No | 15:30 | 15:00 - 15:59 | Afternoon | 38,2 |     | 67,4  | 67,4  | 19,36 |        | 142,12 |
| 2019/05/26 | CH2206 | Male | Three y/o | Treatment (Wk 2) | Treatment | Fast Day | No | 15:30 | 15:00 - 15:59 | Afternoon | 38,4 | 92  | 107,0 | 107,0 | 19,56 | 587,78 | 158,20 |
| 2019/05/26 | CH2205 | Male | Three y/o | Treatment (Wk 2) | Treatment | Fast Day | No | 15:35 | 15:00 - 15:59 | Afternoon | 38,3 | 126 | 258,0 | 258,0 | 19,46 | 610,14 | 189,09 |
| 2019/05/26 | CH2206 | Male | Three y/o | Treatment (Wk 2) | Treatment | Fast Day | No | 15:35 | 15:00 - 15:59 | Afternoon | 38,4 | 174 | 181,8 | 181,8 | 19,56 | 631,46 | 176,76 |
| 2019/05/26 | CH2205 | Male | Three y/o | Treatment (Wk 2) | Treatment | Fast Day | No | 15:40 | 15:00 - 15:59 | Afternoon | 38,5 | 72  | 20,2  | 20,2  | 19,66 | 569,20 | 100,65 |
| 2019/05/26 | CH2206 | Male | Three y/o | Treatment (Wk 2) | Treatment | Fast Day | No | 15:40 | 15:00 - 15:59 | Afternoon | 38,6 | 119 | 117,4 | 117,4 | 19,76 | 606,20 | 161,44 |
| 2019/05/26 | CH2205 | Male | Three y/o | Treatment (Wk 2) | Treatment | Fast Day | No | 15:45 | 15:00 - 15:59 | Afternoon | 38,5 | 56  | 26,8  | 26,8  | 19,66 | 549,01 | 110,33 |
| 2019/05/26 | CH2206 | Male | Three y/o | Treatment (Wk 2) | Treatment | Fast Day | No | 15:45 | 15:00 - 15:59 | Afternoon | 38,6 | 91  | 343,2 | 343,2 | 19,76 | 586,98 | 199,18 |
| 2019/05/26 | CH2205 | Male | Three y/o | Treatment (Wk 2) | Treatment | Fast Day | No | 15:50 | 15:00 - 15:59 | Afternoon | 38,5 | 53  | 31,8  | 31,8  | 19,66 | 544,43 | 116,20 |



|            |        |      |           |                  |           |          |    |       |               |           |      |     |       |       |       |        |        |
|------------|--------|------|-----------|------------------|-----------|----------|----|-------|---------------|-----------|------|-----|-------|-------|-------|--------|--------|
| 2019/05/26 | CH2206 | Male | Three y/o | Treatment (Wk 2) | Treatment | Fast Day | No | 15:50 | 15:00 - 15:59 | Afternoon | 38,6 | 103 | 78,2  | 78,2  | 19,76 | 596,00 | 147,28 |
| 2019/05/26 | CH2205 | Male | Three y/o | Treatment (Wk 2) | Treatment | Fast Day | No | 15:55 | 15:00 - 15:59 | Afternoon | 38,5 | 50  | 58,6  | 58,6  | 19,66 | 539,52 | 137,28 |
| 2019/05/26 | CH2206 | Male | Three y/o | Treatment (Wk 2) | Treatment | Fast Day | No | 15:55 | 15:00 - 15:59 | Afternoon | 38,6 | 66  | 241,2 | 241,2 | 19,76 | 562,34 | 186,72 |
| 2019/05/26 | CH2205 | Male | Three y/o | Treatment (Wk 2) | Treatment | Fast Day | No | 16:00 | 16:00 - 16:59 | Evening   | 38,5 | 64  | 24,2  | 24,2  | 19,66 | 559,88 | 106,83 |
| 2019/05/26 | CH2206 | Male | Three y/o | Treatment (Wk 2) | Treatment | Fast Day | No | 16:00 | 16:00 - 16:59 | Evening   | 38,6 | 97  | 178,2 | 178,2 | 19,76 | 591,66 | 176,06 |
| 2019/05/26 | CH2205 | Male | Three y/o | Treatment (Wk 2) | Treatment | Fast Day | No | 16:05 | 16:00 - 16:59 | Evening   | 38,5 | 70  | 20,2  | 20,2  | 19,66 | 566,99 | 100,65 |
| 2019/05/26 | CH2206 | Male | Three y/o | Treatment (Wk 2) | Treatment | Fast Day | No | 16:05 | 16:00 - 16:59 | Evening   | 38,6 | 92  | 38,0  | 38,0  | 19,76 | 587,78 | 122,32 |
| 2019/05/26 | CH2205 | Male | Three y/o | Treatment (Wk 2) | Treatment | Fast Day | No | 16:10 | 16:00 - 16:59 | Evening   | 38,5 | 61  | 23,2  | 23,2  | 19,66 | 556,01 | 105,39 |
| 2019/05/26 | CH2206 | Male | Three y/o | Treatment (Wk 2) | Treatment | Fast Day | No | 16:10 | 16:00 - 16:59 | Evening   | 38,4 | 67  | 126,2 | 126,2 | 19,56 | 563,53 | 163,97 |
| 2019/05/26 | CH2205 | Male | Three y/o | Treatment (Wk 2) | Treatment | Fast Day | No | 16:15 | 16:00 - 16:59 | Evening   | 38,5 | 54  | 24,2  | 24,2  | 19,66 | 545,99 | 106,83 |
| 2019/05/26 | CH2206 | Male | Three y/o | Treatment (Wk 2) | Treatment | Fast Day | No | 16:15 | 16:00 - 16:59 | Evening   | 38,4 | 85  | 29,2  | 29,2  | 19,56 | 581,90 | 113,27 |
| 2019/05/26 | CH2205 | Male | Three y/o | Treatment (Wk 2) | Treatment | Fast Day | No | 16:20 | 16:00 - 16:59 | Evening   | 38,5 | 45  | 25,6  | 25,6  | 19,66 | 530,47 | 108,76 |
| 2019/05/26 | CH2206 | Male | Three y/o | Treatment (Wk 2) | Treatment | Fast Day | No | 16:20 | 16:00 - 16:59 | Evening   | 38,4 | 48  | 36,6  | 36,6  | 19,56 | 536,04 | 121,03 |
| 2019/05/26 | CH2205 | Male | Three y/o | Treatment (Wk 2) | Treatment | Fast Day | No | 16:25 | 16:00 - 16:59 | Evening   | 38,4 | 55  | 28,2  | 28,2  | 19,56 | 547,52 | 112,07 |
| 2019/05/26 | CH2206 | Male | Three y/o | Treatment (Wk 2) | Treatment | Fast Day | No | 16:25 | 16:00 - 16:59 | Evening   | 38,4 | 45  | 32,0  | 32,0  | 19,56 | 530,47 | 116,41 |
| 2019/05/26 | CH2205 | Male | Three y/o | Treatment (Wk 2) | Treatment | Fast Day | No | 16:30 | 16:00 - 16:59 | Evening   | 38,4 | 45  | 25,0  | 25,0  | 19,56 | 530,47 | 107,94 |
| 2019/05/26 | CH2206 | Male | Three y/o | Treatment (Wk 2) | Treatment | Fast Day | No | 16:30 | 16:00 - 16:59 | Evening   | 38,3 | 46  | 34,2  | 34,2  | 19,46 | 532,38 | 118,70 |
| 2019/05/26 | CH2205 | Male | Three y/o | Treatment (Wk 2) | Treatment | Fast Day | No | 16:35 | 16:00 - 16:59 | Evening   | 38,3 | 45  | 25,8  | 25,8  | 19,46 | 530,47 | 109,02 |
| 2019/05/26 | CH2206 | Male | Three y/o | Treatment (Wk 2) | Treatment | Fast Day | No | 16:35 | 16:00 - 16:59 | Evening   | 38,3 | 51  | 44,6  | 44,6  | 19,46 | 541,20 | 127,84 |
| 2019/05/26 | CH2205 | Male | Three y/o | Treatment (Wk 2) | Treatment | Fast Day | No | 16:40 | 16:00 - 16:59 | Evening   | 38,3 | 82  | 34,0  | 34,0  | 19,46 | 579,19 | 118,49 |
| 2019/05/26 | CH2206 | Male | Three y/o | Treatment (Wk 2) | Treatment | Fast Day | No | 16:40 | 16:00 - 16:59 | Evening   | 38,3 | 86  | 161,2 | 161,2 | 19,46 | 582,77 | 172,54 |
| 2019/05/26 | CH2205 | Male | Three y/o | Treatment (Wk 2) | Treatment | Fast Day | No | 16:45 | 16:00 - 16:59 | Evening   | 38,3 | 99  | 251,0 | 251,0 | 19,46 | 593,14 | 188,12 |
| 2019/05/26 | CH2206 | Male | Three y/o | Treatment (Wk 2) | Treatment | Fast Day | No | 16:45 | 16:00 - 16:59 | Evening   | 38,3 | 80  | 56,6  | 56,6  | 19,46 | 577,31 | 136,07 |
| 2019/05/26 | CH2205 | Male | Three y/o | Treatment (Wk 2) | Treatment | Fast Day | No | 16:50 | 16:00 - 16:59 | Evening   | 38,3 | 84  | 25,4  | 25,4  | 19,46 | 581,01 | 108,49 |
| 2019/05/26 | CH2206 | Male | Three y/o | Treatment (Wk 2) | Treatment | Fast Day | No | 16:50 | 16:00 - 16:59 | Evening   | 38,3 | 45  | 70,4  | 70,4  | 19,46 | 530,47 | 143,64 |
| 2019/05/26 | CH2205 | Male | Three y/o | Treatment (Wk 2) | Treatment | Fast Day | No | 16:55 | 16:00 - 16:59 | Evening   | 38,2 | 125 | 53,8  | 53,8  | 19,36 | 609,60 | 134,32 |
| 2019/05/26 | CH2206 | Male | Three y/o | Treatment (Wk 2) | Treatment | Fast Day | No | 16:55 | 16:00 - 16:59 | Evening   | 38,3 | 64  | 29,6  | 29,6  | 19,46 | 559,88 | 113,73 |
| 2019/05/26 | CH2205 | Male | Three y/o | Treatment (Wk 2) | Treatment | Fast Day | No | 17:00 | 17:00 - 17:59 | Evening   | 38,2 | 53  | 50,2  | 50,2  | 19,36 | 544,43 | 131,92 |
| 2019/05/26 | CH2206 | Male | Three y/o | Treatment (Wk 2) | Treatment | Fast Day | No | 17:00 | 17:00 - 17:59 | Evening   | 38,3 | 46  | 23,4  | 23,4  | 19,46 | 532,38 | 105,68 |
| 2019/05/26 | CH2205 | Male | Three y/o | Treatment (Wk 2) | Treatment | Fast Day | No | 17:05 | 17:00 - 17:59 | Evening   | 38,2 | 39  | 23,6  | 23,6  | 19,36 | 517,82 | 105,97 |
| 2019/05/26 | CH2206 | Male | Three y/o | Treatment (Wk 2) | Treatment | Fast Day | No | 17:05 | 17:00 - 17:59 | Evening   | 38,2 | 45  | 26,4  | 26,4  | 19,36 | 530,47 | 109,81 |
| 2019/05/26 | CH2205 | Male | Three y/o | Treatment (Wk 2) | Treatment | Fast Day | No | 17:10 | 17:00 - 17:59 | Evening   | 38,1 | 41  | 20,6  | 20,6  | 19,26 | 522,29 | 101,32 |
| 2019/05/26 | CH2206 | Male | Three y/o | Treatment (Wk 2) | Treatment | Fast Day | No | 17:10 | 17:00 - 17:59 | Evening   | 38,2 | 72  | 26,4  | 26,4  | 19,36 | 569,20 | 109,81 |
| 2019/05/26 | CH2205 | Male | Three y/o | Treatment (Wk 2) | Treatment | Fast Day | No | 17:15 | 17:00 - 17:59 | Evening   | 38,0 | 54  | 22,8  | 22,8  | 19,15 | 545,99 | 104,79 |
| 2019/05/26 | CH2206 | Male | Three y/o | Treatment (Wk 2) | Treatment | Fast Day | No | 17:15 | 17:00 - 17:59 | Evening   | 38,2 | 49  | 33,2  | 33,2  | 19,36 | 537,80 | 117,68 |
| 2019/05/26 | CH2205 | Male | Three y/o | Treatment (Wk 2) | Treatment | Fast Day | No | 17:20 | 17:00 - 17:59 | Evening   | 38,0 | 56  | 24,2  | 24,2  | 19,15 | 549,01 | 106,83 |
| 2019/05/26 | CH2206 | Male | Three y/o | Treatment (Wk 2) | Treatment | Fast Day | No | 17:20 | 17:00 - 17:59 | Evening   | 38,1 | 67  | 22,6  | 22,6  | 19,26 | 563,53 | 104,49 |
| 2019/05/26 | CH2205 | Male | Three y/o | Treatment (Wk 2) | Treatment | Fast Day | No | 17:25 | 17:00 - 17:59 | Evening   | 38,0 | 65  | 4,8   | 4,8   | 19,15 | 561,12 | 52,04  |
| 2019/05/26 | CH2206 | Male | Three y/o | Treatment (Wk 2) | Treatment | Fast Day | No | 17:25 | 17:00 - 17:59 | Evening   | 38,1 | 45  | 13,2  | 13,2  | 19,26 | 530,47 | 86,17  |
| 2019/05/26 | CH2205 | Male | Three y/o | Treatment (Wk 2) | Treatment | Fast Day | No | 17:30 | 17:00 - 17:59 | Evening   | 38,1 | 47  | 4,8   | 4,8   | 19,26 | 534,23 | 52,04  |
| 2019/05/26 | CH2206 | Male | Three y/o | Treatment (Wk 2) | Treatment | Fast Day | No | 17:30 | 17:00 - 17:59 | Evening   | 37,9 | 50  | 29,0  | 29,0  | 19,05 | 539,52 | 113,03 |
| 2019/05/26 | CH2205 | Male | Three y/o | Treatment (Wk 2) | Treatment | Fast Day | No | 17:35 | 17:00 - 17:59 | Evening   | 38,0 | 54  | 14,0  | 14,0  | 19,15 | 545,99 | 88,17  |
| 2019/05/26 | CH2206 | Male | Three y/o | Treatment (Wk 2) | Treatment | Fast Day | No | 17:35 | 17:00 - 17:59 | Evening   | 37,8 | 42  | 36,2  | 36,2  | 18,95 | 524,42 | 120,65 |
| 2019/05/26 | CH2205 | Male | Three y/o | Treatment (Wk 2) | Treatment | Fast Day | No | 17:40 | 17:00 - 17:59 | Evening   | 38,0 | 47  | 29,6  | 29,6  | 19,15 | 534,23 | 113,73 |
| 2019/05/26 | CH2206 | Male | Three y/o | Treatment (Wk 2) | Treatment | Fast Day | No | 17:40 | 17:00 - 17:59 | Evening   | 37,7 | 44  | 31,8  | 31,8  | 18,85 | 528,51 | 116,20 |
| 2019/05/26 | CH2205 | Male | Three y/o | Treatment (Wk 2) | Treatment | Fast Day | No | 17:45 | 17:00 - 17:59 | Evening   | 38,0 | 45  | 28,6  | 28,6  | 19,15 | 530,47 | 112,56 |
| 2019/05/26 | CH2206 | Male | Three y/o | Treatment (Wk 2) | Treatment | Fast Day | No | 17:45 | 17:00 - 17:59 | Evening   | 37,7 | 42  | 25,8  | 25,8  | 18,85 | 524,42 | 109,02 |
| 2019/05/26 | CH2205 | Male | Three y/o | Treatment (Wk 2) | Treatment | Fast Day | No | 17:50 | 17:00 - 17:59 | Evening   | 38,0 | 49  | 20,6  | 20,6  | 19,15 | 537,80 | 101,32 |
| 2019/05/26 | CH2206 | Male | Three y/o | Treatment (Wk 2) | Treatment | Fast Day | No | 17:50 | 17:00 - 17:59 | Evening   | 37,7 | 47  | 36,2  | 36,2  | 18,85 | 534,23 | 120,65 |
| 2019/05/26 | CH2205 | Male | Three y/o | Treatment (Wk 2) | Treatment | Fast Day | No | 17:55 | 17:00 - 17:59 | Evening   | 37,9 | 169 | 6,6   | 6,6   | 19,05 | 629,60 | 62,73  |
| 2019/05/26 | CH2206 | Male | Three y/o | Treatment (Wk 2) | Treatment | Fast Day | No | 17:55 | 17:00 - 17:59 | Evening   | 37,8 | 39  | 38,8  | 38,8  | 18,95 | 517,82 | 123,04 |
| 2019/05/26 | CH2205 | Male | Three y/o | Treatment (Wk 2) | Treatment | Fast Day | No | 18:00 | 18:00 - 18:59 | Evening   | 37,9 |     | 8,8   | 8,8   | 19,05 |        | 72,43  |
| 2019/05/26 | CH2206 | Male | Three y/o | Treatment (Wk 2) | Treatment | Fast Day | No | 18:00 | 18:00 - 18:59 | Evening   | 37,8 | 42  | 41,4  | 41,4  | 18,95 | 524,42 | 125,27 |
| 2019/05/26 | CH2205 | Male | Three y/o | Treatment (Wk 2) | Treatment | Fast Day | No | 18:05 | 18:00 - 18:59 | Evening   | 37,9 | 39  | 17,0  | 17,0  | 19,05 | 517,82 | 94,77  |
| 2019/05/26 | CH2206 | Male | Three y/o | Treatment (Wk 2) | Treatment | Fast Day | No | 18:05 | 18:00 - 18:59 | Evening   | 37,8 | 44  | 36,4  | 36,4  | 18,95 | 528,51 | 120,84 |
| 2019/05/26 | CH2205 | Male | Three y/o | Treatment (Wk 2) | Treatment | Fast Day | No | 18:10 | 18:00 - 18:59 | Evening   | 37,7 | 43  | 10,6  | 10,6  | 18,85 | 526,50 | 78,73  |
| 2019/05/26 | CH2206 | Male | Three y/o | Treatment (Wk 2) | Treatment | Fast Day | No | 18:10 | 18:00 - 18:59 | Evening   | 37,8 | 46  | 36,0  | 36,0  | 18,95 | 532,38 | 120,46 |
| 2019/05/26 | CH2205 | Male | Three y/o | Treatment (Wk 2) | Treatment | Fast Day | No | 18:15 | 18:00 - 18:59 | Evening   | 37,6 | 47  | 13,8  | 13,8  | 18,75 | 534,23 | 87,68  |
| 2019/05/26 | CH2206 | Male | Three y/o | Treatment (Wk 2) | Treatment | Fast Day | No | 18:15 | 18:00 - 18:59 | Evening   | 37,8 | 48  | 49,0  | 49,0  | 18,95 | 536,04 | 131,09 |
| 2019/05/26 | CH2205 | Male | Three y/o | Treatment (Wk 2) | Treatment | Fast Day | No | 18:20 | 18:00 - 18:59 | Evening   | 37,6 | 41  | 12,4  | 12,4  | 18,75 | 522,29 | 84,04  |
| 2019/05/26 | CH2206 | Male | Three y/o | Treatment (Wk 2) | Treatment | Fast Day | No | 18:20 | 18:00 - 18:59 | Evening   | 37,8 | 45  | 41,0  | 41,0  | 18,95 | 530,47 | 124,94 |
| 2019/05/26 | CH2205 | Male | Three y/o | Treatment (Wk 2) | Treatment | Fast Day | No | 18:25 | 18:00 - 18:59 | Evening   | 37,5 | 69  | 11,4  | 11,4  | 18,65 | 565,86 | 81,19  |
| 2019/05/26 | CH2206 | Male | Three y/o | Treatment (Wk 2) | Treatment | Fast Day | No | 18:25 | 18:00 - 18:59 | Evening   | 37,7 | 50  | 46,2  | 46,2  | 18,85 | 539,52 | 129,06 |
| 2019/05/26 | CH2205 | Male | Three y/o | Treatment (Wk 2) | Treatment | Fast Day | No | 18:30 | 18:00 - 18:59 | Evening   | 37,5 | 41  | 9,8   | 9,8   | 18,65 | 522,29 | 76,07  |
| 2019/05/26 | CH2206 | Male | Three y/o | Treatment (Wk 2) | Treatment | Fast Day | No | 18:30 | 18:00 - 18:59 | Evening   | 37,7 | 40  | 54,0  | 54,0  | 18,85 | 520,09 | 134,45 |
| 2019/05/26 | CH2205 | Male | Three y/o | Treatment (Wk 2) | Treatment | Fast Day | No | 18:35 | 18:00 - 18:59 | Evening   | 37,4 | 52  | 14,8  | 14,8  | 18,55 | 542,83 | 90,05  |
| 2019/05/26 | CH2206 | Male | Three y/o | Treatment (Wk 2) | Treatment | Fast Day | No | 18:35 | 18:00 - 18:59 | Evening   | 37,7 | 33  | 58,0  | 58,0  | 18,85 | 502,51 | 136,92 |
| 2019/05/26 | CH2205 | Male | Three y/o | Treatment (Wk 2) | Treatment | Fast Day | No | 18:40 | 18:00 - 18:59 | Evening   | 37,4 | 32  | 11,2  | 11,2  | 18,55 | 499,63 | 80,59  |
| 2019/05/26 | CH2206 | Male | Three y/o | Treatment (Wk 2) | Treatment | Fast Day | No | 18:40 | 18:00 - 18:59 | Evening   | 37,5 | 44  | 59,4  | 59,4  | 18,65 | 528,51 | 137,75 |
| 2019/05/26 | CH2205 | Male | Three y/o | Treatment (Wk 2) | Treatment | Fast Day | No | 18:45 | 18:00 - 18:59 | Evening   | 37,3 |     | 11,2  | 11,2  | 18,46 |        | 80,59  |



|            |        |      |           |                  |           |          |    |       |               |         |      |    |      |      |       |        |        |
|------------|--------|------|-----------|------------------|-----------|----------|----|-------|---------------|---------|------|----|------|------|-------|--------|--------|
| 2019/05/26 | CH2206 | Male | Three y/o | Treatment (Wk 2) | Treatment | Fast Day | No | 18:45 | 18:00 - 18:59 | Evening | 37,5 | 45 | 56,8 | 56,8 | 18,65 | 530,47 | 136,20 |
| 2019/05/26 | CH2205 | Male | Three y/o | Treatment (Wk 2) | Treatment | Fast Day | No | 18:50 | 18:00 - 18:59 | Evening | 37,4 | 43 | 5,8  | 5,8  | 18,55 | 526,50 | 58,39  |
| 2019/05/26 | CH2206 | Male | Three y/o | Treatment (Wk 2) | Treatment | Fast Day | No | 18:50 | 18:00 - 18:59 | Evening | 37,7 | 39 | 55,8 | 55,8 | 18,85 | 517,82 | 135,58 |
| 2019/05/26 | CH2205 | Male | Three y/o | Treatment (Wk 2) | Treatment | Fast Day | No | 18:55 | 18:00 - 18:59 | Evening | 37,5 |    | 10,6 | 10,6 | 18,65 |        | 78,73  |
| 2019/05/26 | CH2206 | Male | Three y/o | Treatment (Wk 2) | Treatment | Fast Day | No | 18:55 | 18:00 - 18:59 | Evening | 37,6 | 49 | 59,4 | 59,4 | 18,75 | 537,80 | 137,75 |
| 2019/05/26 | CH2205 | Male | Three y/o | Treatment (Wk 2) | Treatment | Fast Day | No | 19:00 | 19:00 - 19:59 | Evening | 37,5 | 65 | 6,8  | 6,8  | 18,65 | 561,12 | 63,74  |
| 2019/05/26 | CH2206 | Male | Three y/o | Treatment (Wk 2) | Treatment | Fast Day | No | 19:00 | 19:00 - 19:59 | Evening | 37,7 | 78 | 61,0 | 61,0 | 18,85 | 575,38 | 138,67 |
| 2019/05/26 | CH2205 | Male | Three y/o | Treatment (Wk 2) | Treatment | Fast Day | No | 19:05 | 19:00 - 19:59 | Evening | 37,5 | 60 | 10,6 | 10,6 | 18,65 | 554,67 | 78,73  |
| 2019/05/26 | CH2206 | Male | Three y/o | Treatment (Wk 2) | Treatment | Fast Day | No | 19:05 | 19:00 - 19:59 | Evening | 37,7 | 39 | 65,6 | 65,6 | 18,85 | 517,82 | 141,19 |
| 2019/05/26 | CH2205 | Male | Three y/o | Treatment (Wk 2) | Treatment | Fast Day | No | 19:10 | 19:00 - 19:59 | Evening | 37,5 |    | 14,2 | 14,2 | 18,65 |        | 88,65  |
| 2019/05/26 | CH2206 | Male | Three y/o | Treatment (Wk 2) | Treatment | Fast Day | No | 19:10 | 19:00 - 19:59 | Evening | 37,7 | 48 | 66,6 | 66,6 | 18,85 | 536,04 | 141,71 |
| 2019/05/26 | CH2205 | Male | Three y/o | Treatment (Wk 2) | Treatment | Fast Day | No | 19:15 | 19:00 - 19:59 | Evening | 37,5 | 50 | 11,2 | 11,2 | 18,65 | 539,52 | 80,59  |
| 2019/05/26 | CH2206 | Male | Three y/o | Treatment (Wk 2) | Treatment | Fast Day | No | 19:15 | 19:00 - 19:59 | Evening | 37,7 | 75 | 64,8 | 64,8 | 18,85 | 572,36 | 140,76 |
| 2019/05/26 | CH2205 | Male | Three y/o | Treatment (Wk 2) | Treatment | Fast Day | No | 19:20 | 19:00 - 19:59 | Evening | 37,5 |    | 11,0 | 11,0 | 18,65 |        | 79,98  |
| 2019/05/26 | CH2206 | Male | Three y/o | Treatment (Wk 2) | Treatment | Fast Day | No | 19:20 | 19:00 - 19:59 | Evening | 37,7 | 49 | 62,8 | 62,8 | 18,85 | 537,80 | 139,67 |
| 2019/05/26 | CH2205 | Male | Three y/o | Treatment (Wk 2) | Treatment | Fast Day | No | 19:25 | 19:00 - 19:59 | Evening | 37,5 | 39 | 6,8  | 6,8  | 18,65 | 517,82 | 63,74  |
| 2019/05/26 | CH2206 | Male | Three y/o | Treatment (Wk 2) | Treatment | Fast Day | No | 19:25 | 19:00 - 19:59 | Evening | 37,7 | 41 | 63,4 | 63,4 | 18,85 | 522,29 | 140,00 |
| 2019/05/26 | CH2205 | Male | Three y/o | Treatment (Wk 2) | Treatment | Fast Day | No | 19:30 | 19:00 - 19:59 | Evening | 37,5 | 40 | 6,8  | 6,8  | 18,65 | 520,09 | 63,74  |
| 2019/05/26 | CH2206 | Male | Three y/o | Treatment (Wk 2) | Treatment | Fast Day | No | 19:30 | 19:00 - 19:59 | Evening | 37,7 | 48 | 69,4 | 69,4 | 18,85 | 536,04 | 143,14 |
| 2019/05/26 | CH2205 | Male | Three y/o | Treatment (Wk 2) | Treatment | Fast Day | No | 19:35 | 19:00 - 19:59 | Evening | 37,5 | 57 | 10,6 | 10,6 | 18,65 | 550,47 | 78,73  |
| 2019/05/26 | CH2206 | Male | Three y/o | Treatment (Wk 2) | Treatment | Fast Day | No | 19:35 | 19:00 - 19:59 | Evening | 37,7 | 48 | 63,6 | 63,6 | 18,85 | 536,04 | 140,11 |
| 2019/05/26 | CH2205 | Male | Three y/o | Treatment (Wk 2) | Treatment | Fast Day | No | 19:40 | 19:00 - 19:59 | Evening | 37,4 | 42 | 9,8  | 9,8  | 18,55 | 524,42 | 76,07  |
| 2019/05/26 | CH2206 | Male | Three y/o | Treatment (Wk 2) | Treatment | Fast Day | No | 19:40 | 19:00 - 19:59 | Evening | 37,7 | 41 | 64,4 | 64,4 | 18,85 | 522,29 | 140,55 |
| 2019/05/26 | CH2205 | Male | Three y/o | Treatment (Wk 2) | Treatment | Fast Day | No | 19:45 | 19:00 - 19:59 | Evening | 37,4 | 45 | 7,4  | 7,4  | 18,55 | 530,47 | 66,59  |
| 2019/05/26 | CH2206 | Male | Three y/o | Treatment (Wk 2) | Treatment | Fast Day | No | 19:45 | 19:00 - 19:59 | Evening | 37,7 | 51 | 64,6 | 64,6 | 18,85 | 541,20 | 140,65 |
| 2019/05/26 | CH2205 | Male | Three y/o | Treatment (Wk 2) | Treatment | Fast Day | No | 19:50 | 19:00 - 19:59 | Evening | 37,4 |    | 17,2 | 17,2 | 18,55 |        | 95,17  |
| 2019/05/26 | CH2206 | Male | Three y/o | Treatment (Wk 2) | Treatment | Fast Day | No | 19:50 | 19:00 - 19:59 | Evening | 37,7 | 48 | 63,0 | 63,0 | 18,85 | 536,04 | 139,78 |
| 2019/05/26 | CH2205 | Male | Three y/o | Treatment (Wk 2) | Treatment | Fast Day | No | 19:55 | 19:00 - 19:59 | Evening | 37,4 |    | 21,0 | 21,0 | 18,55 |        | 101,98 |
| 2019/05/26 | CH2206 | Male | Three y/o | Treatment (Wk 2) | Treatment | Fast Day | No | 19:55 | 19:00 - 19:59 | Evening | 37,7 | 42 | 65,2 | 65,2 | 18,85 | 524,42 | 140,97 |
| 2019/05/26 | CH2205 | Male | Three y/o | Treatment (Wk 2) | Treatment | Fast Day | No | 20:00 | 20:00 - 20:59 | Night   | 37,4 |    | 23,4 | 23,4 | 18,55 |        | 105,68 |
| 2019/05/26 | CH2206 | Male | Three y/o | Treatment (Wk 2) | Treatment | Fast Day | No | 20:00 | 20:00 - 20:59 | Night   | 37,7 | 41 | 56,6 | 56,6 | 18,85 | 522,29 | 136,07 |
| 2019/05/26 | CH2205 | Male | Three y/o | Treatment (Wk 2) | Treatment | Fast Day | No | 20:05 | 20:00 - 20:59 | Night   | 37,4 | 43 | 25,4 | 25,4 | 18,55 | 526,50 | 108,49 |
| 2019/05/26 | CH2206 | Male | Three y/o | Treatment (Wk 2) | Treatment | Fast Day | No | 20:05 | 20:00 - 20:59 | Night   | 37,7 | 83 | 34,0 | 34,0 | 18,85 | 580,11 | 118,49 |
| 2019/05/26 | CH2205 | Male | Three y/o | Treatment (Wk 2) | Treatment | Fast Day | No | 20:10 | 20:00 - 20:59 | Night   | 37,5 | 42 | 26,6 | 26,6 | 18,65 | 524,42 | 110,07 |
| 2019/05/26 | CH2206 | Male | Three y/o | Treatment (Wk 2) | Treatment | Fast Day | No | 20:10 | 20:00 - 20:59 | Night   | 37,5 | 43 | 29,6 | 29,6 | 18,65 | 526,50 | 113,73 |
| 2019/05/26 | CH2205 | Male | Three y/o | Treatment (Wk 2) | Treatment | Fast Day | No | 20:15 | 20:00 - 20:59 | Night   | 37,5 | 44 | 25,4 | 25,4 | 18,65 | 528,51 | 108,49 |
| 2019/05/26 | CH2206 | Male | Three y/o | Treatment (Wk 2) | Treatment | Fast Day | No | 20:15 | 20:00 - 20:59 | Night   | 37,2 | 44 | 43,4 | 43,4 | 18,36 | 528,51 | 126,90 |
| 2019/05/26 | CH2205 | Male | Three y/o | Treatment (Wk 2) | Treatment | Fast Day | No | 20:20 | 20:00 - 20:59 | Night   | 37,5 | 43 | 29,6 | 29,6 | 18,65 | 526,50 | 113,73 |
| 2019/05/26 | CH2206 | Male | Three y/o | Treatment (Wk 2) | Treatment | Fast Day | No | 20:20 | 20:00 - 20:59 | Night   | 37,0 | 48 | 52,0 | 52,0 | 18,16 | 536,04 | 133,14 |
| 2019/05/26 | CH2205 | Male | Three y/o | Treatment (Wk 2) | Treatment | Fast Day | No | 20:25 | 20:00 - 20:59 | Night   | 37,6 | 47 | 28,8 | 28,8 | 18,75 | 534,23 | 112,79 |
| 2019/05/26 | CH2206 | Male | Three y/o | Treatment (Wk 2) | Treatment | Fast Day | No | 20:25 | 20:00 - 20:59 | Night   | 37,0 | 43 | 48,0 | 48,0 | 18,16 | 526,50 | 130,38 |
| 2019/05/26 | CH2205 | Male | Three y/o | Treatment (Wk 2) | Treatment | Fast Day | No | 20:30 | 20:00 - 20:59 | Night   | 37,6 | 39 | 27,8 | 27,8 | 18,75 | 517,82 | 111,58 |
| 2019/05/26 | CH2206 | Male | Three y/o | Treatment (Wk 2) | Treatment | Fast Day | No | 20:30 | 20:00 - 20:59 | Night   | 37,1 | 44 | 44,8 | 44,8 | 18,26 | 528,51 | 127,99 |
| 2019/05/26 | CH2205 | Male | Three y/o | Treatment (Wk 2) | Treatment | Fast Day | No | 20:35 | 20:00 - 20:59 | Night   | 37,6 | 50 | 21,2 | 21,2 | 18,75 | 539,52 | 102,31 |
| 2019/05/26 | CH2206 | Male | Three y/o | Treatment (Wk 2) | Treatment | Fast Day | No | 20:35 | 20:00 - 20:59 | Night   | 37,1 | 43 | 40,2 | 40,2 | 18,26 | 526,50 | 124,26 |
| 2019/05/26 | CH2205 | Male | Three y/o | Treatment (Wk 2) | Treatment | Fast Day | No | 20:40 | 20:00 - 20:59 | Night   | 37,6 | 43 | 17,0 | 17,0 | 18,75 | 526,50 | 94,77  |
| 2019/05/26 | CH2206 | Male | Three y/o | Treatment (Wk 2) | Treatment | Fast Day | No | 20:40 | 20:00 - 20:59 | Night   | 37,2 | 49 | 29,4 | 29,4 | 18,36 | 537,80 | 113,50 |
| 2019/05/26 | CH2205 | Male | Three y/o | Treatment (Wk 2) | Treatment | Fast Day | No | 20:45 | 20:00 - 20:59 | Night   | 37,6 | 61 | 20,8 | 20,8 | 18,75 | 556,01 | 101,65 |
| 2019/05/26 | CH2206 | Male | Three y/o | Treatment (Wk 2) | Treatment | Fast Day | No | 20:45 | 20:00 - 20:59 | Night   | 37,3 | 49 | 11,0 | 11,0 | 18,46 | 537,80 | 79,98  |
| 2019/05/26 | CH2205 | Male | Three y/o | Treatment (Wk 2) | Treatment | Fast Day | No | 20:50 | 20:00 - 20:59 | Night   | 37,7 | 46 | 15,6 | 15,6 | 18,85 | 532,38 | 91,85  |
| 2019/05/26 | CH2206 | Male | Three y/o | Treatment (Wk 2) | Treatment | Fast Day | No | 20:50 | 20:00 - 20:59 | Night   | 37,4 | 39 | 13,6 | 13,6 | 18,55 | 517,82 | 87,18  |
| 2019/05/26 | CH2205 | Male | Three y/o | Treatment (Wk 2) | Treatment | Fast Day | No | 20:55 | 20:00 - 20:59 | Night   | 37,7 | 68 | 19,8 | 19,8 | 18,85 | 564,71 | 99,97  |
| 2019/05/26 | CH2206 | Male | Three y/o | Treatment (Wk 2) | Treatment | Fast Day | No | 20:55 | 20:00 - 20:59 | Night   | 37,4 | 81 | 8,8  | 8,8  | 18,55 | 578,26 | 72,43  |
| 2019/05/26 | CH2205 | Male | Three y/o | Treatment (Wk 2) | Treatment | Fast Day | No | 21:00 | 21:00 - 21:59 | Night   | 37,7 | 47 | 19,4 | 19,4 | 18,85 | 534,23 | 99,28  |
| 2019/05/26 | CH2206 | Male | Three y/o | Treatment (Wk 2) | Treatment | Fast Day | No | 21:00 | 21:00 - 21:59 | Night   | 37,5 | 84 | 6,4  | 6,4  | 18,65 | 581,01 | 61,70  |
| 2019/05/26 | CH2205 | Male | Three y/o | Treatment (Wk 2) | Treatment | Fast Day | No | 21:05 | 21:00 - 21:59 | Night   | 37,7 | 44 | 21,0 | 21,0 | 18,85 | 528,51 | 101,98 |
| 2019/05/26 | CH2206 | Male | Three y/o | Treatment (Wk 2) | Treatment | Fast Day | No | 21:05 | 21:00 - 21:59 | Night   | 37,5 | 41 | 6,0  | 6,0  | 18,65 | 522,29 | 59,53  |
| 2019/05/26 | CH2205 | Male | Three y/o | Treatment (Wk 2) | Treatment | Fast Day | No | 21:10 | 21:00 - 21:59 | Night   | 37,7 | 65 | 22,0 | 22,0 | 18,85 | 561,12 | 103,57 |
| 2019/05/26 | CH2206 | Male | Three y/o | Treatment (Wk 2) | Treatment | Fast Day | No | 21:10 | 21:00 - 21:59 | Night   | 37,7 | 94 | 9,6  | 9,6  | 18,85 | 589,37 | 75,37  |
| 2019/05/26 | CH2205 | Male | Three y/o | Treatment (Wk 2) | Treatment | Fast Day | No | 21:15 | 21:00 - 21:59 | Night   | 37,7 | 40 | 28,0 | 28,0 | 18,85 | 520,09 | 111,83 |
| 2019/05/26 | CH2206 | Male | Three y/o | Treatment (Wk 2) | Treatment | Fast Day | No | 21:15 | 21:00 - 21:59 | Night   | 37,7 | 47 | 14,2 | 14,2 | 18,85 | 534,23 | 88,65  |
| 2019/05/26 | CH2205 | Male | Three y/o | Treatment (Wk 2) | Treatment | Fast Day | No | 21:20 | 21:00 - 21:59 | Night   | 37,7 | 47 | 29,8 | 29,8 | 18,85 | 534,23 | 113,97 |
| 2019/05/26 | CH2206 | Male | Three y/o | Treatment (Wk 2) | Treatment | Fast Day | No | 21:20 | 21:00 - 21:59 | Night   | 37,7 | 43 | 9,2  | 9,2  | 18,85 | 526,50 | 73,94  |
| 2019/05/26 | CH2205 | Male | Three y/o | Treatment (Wk 2) | Treatment | Fast Day | No | 21:25 | 21:00 - 21:59 | Night   | 37,7 |    | 32,6 | 32,6 | 18,85 |        | 117,05 |
| 2019/05/26 | CH2206 | Male | Three y/o | Treatment (Wk 2) | Treatment | Fast Day | No | 21:25 | 21:00 - 21:59 | Night   | 37,7 | 48 | 17,2 | 17,2 | 18,85 | 536,04 | 95,17  |
| 2019/05/26 | CH2205 | Male | Three y/o | Treatment (Wk 2) | Treatment | Fast Day | No | 21:30 | 21:00 - 21:59 | Night   | 37,7 | 46 | 26,8 | 26,8 | 18,85 | 532,38 | 110,33 |
| 2019/05/26 | CH2206 | Male | Three y/o | Treatment (Wk 2) | Treatment | Fast Day | No | 21:30 | 21:00 - 21:59 | Night   | 37,7 | 53 | 22,8 | 22,8 | 18,85 | 544,43 | 104,79 |
| 2019/05/26 | CH2205 | Male | Three y/o | Treatment (Wk 2) | Treatment | Fast Day | No | 21:35 | 21:00 - 21:59 | Night   | 37,7 | 46 | 25,6 | 25,6 | 18,85 | 532,38 | 108,76 |
| 2019/05/26 | CH2206 | Male | Three y/o | Treatment (Wk 2) | Treatment | Fast Day | No | 21:35 | 21:00 - 21:59 | Night   | 37,7 | 41 | 9,8  | 9,8  | 18,85 | 522,29 | 76,07  |
| 2019/05/26 | CH2205 | Male | Three y/o | Treatment (Wk 2) | Treatment | Fast Day | No | 21:40 | 21:00 - 21:59 | Night   | 37,7 |    | 27,0 | 27,0 | 18,85 |        | 110,58 |



|    |            |        |      |           |                  |           |          |    |       |               |               |      |     |       |       |       |        |        |
|----|------------|--------|------|-----------|------------------|-----------|----------|----|-------|---------------|---------------|------|-----|-------|-------|-------|--------|--------|
|    | 2019/05/26 | CH2206 | Male | Three y/o | Treatment (Wk 2) | Treatment | Fast Day | No | 21:40 | 21:00 - 21:59 | Night         | 37,7 | 59  | 23,6  | 23,6  | 18,85 | 553,30 | 105,97 |
|    | 2019/05/26 | CH2205 | Male | Three y/o | Treatment (Wk 2) | Treatment | Fast Day | No | 21:45 | 21:00 - 21:59 | Night         | 37,6 | 44  | 28,6  | 28,6  | 18,75 | 528,51 | 112,56 |
|    | 2019/05/26 | CH2206 | Male | Three y/o | Treatment (Wk 2) | Treatment | Fast Day | No | 21:45 | 21:00 - 21:59 | Night         | 37,7 | 47  | 25,8  | 25,8  | 18,85 | 534,23 | 109,02 |
|    | 2019/05/26 | CH2205 | Male | Three y/o | Treatment (Wk 2) | Treatment | Fast Day | No | 21:50 | 21:00 - 21:59 | Night         | 37,6 | 41  | 23,8  | 23,8  | 18,75 | 522,29 | 106,26 |
|    | 2019/05/26 | CH2206 | Male | Three y/o | Treatment (Wk 2) | Treatment | Fast Day | No | 21:50 | 21:00 - 21:59 | Night         | 37,7 | 76  | 26,6  | 26,6  | 18,85 | 573,39 | 110,07 |
|    | 2019/05/26 | CH2205 | Male | Three y/o | Treatment (Wk 2) | Treatment | Fast Day | No | 21:55 | 21:00 - 21:59 | Night         | 37,7 | 42  | 20,2  | 20,2  | 18,85 | 524,42 | 100,65 |
|    | 2019/05/26 | CH2206 | Male | Three y/o | Treatment (Wk 2) | Treatment | Fast Day | No | 21:55 | 21:00 - 21:59 | Night         | 37,7 | 47  | 26,0  | 26,0  | 18,85 | 534,23 | 109,29 |
|    | 2019/05/26 | CH2205 | Male | Three y/o | Treatment (Wk 2) | Treatment | Fast Day | No | 22:00 | 22:00 - 22:59 | Night         | 37,7 | 62  | 24,4  | 24,4  | 18,85 | 557,33 | 107,11 |
|    | 2019/05/26 | CH2206 | Male | Three y/o | Treatment (Wk 2) | Treatment | Fast Day | No | 22:00 | 22:00 - 22:59 | Night         | 37,7 | 84  | 25,6  | 25,6  | 18,85 | 581,01 | 108,76 |
|    | 2019/05/26 | CH2205 | Male | Three y/o | Treatment (Wk 2) | Treatment | Fast Day | No | 22:05 | 22:00 - 22:59 | Night         | 37,7 | 51  | 24,8  | 24,8  | 18,85 | 541,20 | 107,67 |
|    | 2019/05/26 | CH2206 | Male | Three y/o | Treatment (Wk 2) | Treatment | Fast Day | No | 22:05 | 22:00 - 22:59 | Night         | 37,7 | 49  | 21,8  | 21,8  | 18,85 | 537,80 | 103,26 |
|    | 2019/05/26 | CH2205 | Male | Three y/o | Treatment (Wk 2) | Treatment | Fast Day | No | 22:10 | 22:00 - 22:59 | Night         | 37,7 | 64  | 23,6  | 23,6  | 18,85 | 559,88 | 105,97 |
|    | 2019/05/26 | CH2206 | Male | Three y/o | Treatment (Wk 2) | Treatment | Fast Day | No | 22:10 | 22:00 - 22:59 | Night         | 37,7 | 56  | 22,6  | 22,6  | 18,85 | 549,01 | 104,49 |
|    | 2019/05/26 | CH2205 | Male | Three y/o | Treatment (Wk 2) | Treatment | Fast Day | No | 22:15 | 22:00 - 22:59 | Night         | 37,7 | 61  | 12,4  | 12,4  | 18,85 | 556,01 | 84,04  |
|    | 2019/05/26 | CH2206 | Male | Three y/o | Treatment (Wk 2) | Treatment | Fast Day | No | 22:15 | 22:00 - 22:59 | Night         | 37,7 | 68  | 41,2  | 41,2  | 18,85 | 564,71 | 125,11 |
|    | 2019/05/26 | CH2205 | Male | Three y/o | Treatment (Wk 2) | Treatment | Fast Day | No | 22:20 | 22:00 - 22:59 | Night         | 37,7 | 40  | 2,4   | 2,4   | 18,85 | 520,09 | 28,91  |
|    | 2019/05/26 | CH2206 | Male | Three y/o | Treatment (Wk 2) | Treatment | Fast Day | No | 22:20 | 22:00 - 22:59 | Night         | 37,7 | 69  | 45,8  | 45,8  | 18,85 | 565,86 | 128,76 |
|    | 2019/05/26 | CH2205 | Male | Three y/o | Treatment (Wk 2) | Treatment | Fast Day | No | 22:25 | 22:00 - 22:59 | Night         | 37,7 | 45  | 6,6   | 6,6   | 18,85 | 530,47 | 62,73  |
|    | 2019/05/26 | CH2206 | Male | Three y/o | Treatment (Wk 2) | Treatment | Fast Day | No | 22:25 | 22:00 - 22:59 | Night         | 37,5 | 57  | 39,6  | 39,6  | 18,65 | 550,47 | 123,74 |
|    | 2019/05/26 | CH2205 | Male | Three y/o | Treatment (Wk 2) | Treatment | Fast Day | No | 22:30 | 22:00 - 22:59 | Night         | 37,7 | 57  | 5,4   | 5,4   | 18,85 | 550,47 | 55,99  |
|    | 2019/05/26 | CH2206 | Male | Three y/o | Treatment (Wk 2) | Treatment | Fast Day | No | 22:30 | 22:00 - 22:59 | Night         | 37,5 | 49  | 43,0  | 43,0  | 18,65 | 537,80 | 126,58 |
|    | 2019/05/26 | CH2205 | Male | Three y/o | Treatment (Wk 2) | Treatment | Fast Day | No | 22:35 | 22:00 - 22:59 | Night         | 37,7 | 39  | 3,0   | 3,0   | 18,85 | 517,82 | 36,34  |
|    | 2019/05/26 | CH2206 | Male | Three y/o | Treatment (Wk 2) | Treatment | Fast Day | No | 22:35 | 22:00 - 22:59 | Night         | 37,5 | 47  | 47,2  | 47,2  | 18,65 | 534,23 | 129,80 |
|    | 2019/05/26 | CH2205 | Male | Three y/o | Treatment (Wk 2) | Treatment | Fast Day | No | 22:40 | 22:00 - 22:59 | Night         | 37,7 | 45  | 25,4  | 25,4  | 18,85 | 530,47 | 108,49 |
|    | 2019/05/26 | CH2206 | Male | Three y/o | Treatment (Wk 2) | Treatment | Fast Day | No | 22:40 | 22:00 - 22:59 | Night         | 37,5 | 46  | 42,6  | 42,6  | 18,65 | 532,38 | 126,26 |
|    | 2019/05/26 | CH2205 | Male | Three y/o | Treatment (Wk 2) | Treatment | Fast Day | No | 22:45 | 22:00 - 22:59 | Night         | 37,6 | 45  | 63,8  | 63,8  | 18,75 | 530,47 | 140,22 |
|    | 2019/05/26 | CH2206 | Male | Three y/o | Treatment (Wk 2) | Treatment | Fast Day | No | 22:45 | 22:00 - 22:59 | Night         | 37,5 | 77  | 54,2  | 54,2  | 18,65 | 574,39 | 134,57 |
|    | 2019/05/26 | CH2205 | Male | Three y/o | Treatment (Wk 2) | Treatment | Fast Day | No | 22:50 | 22:00 - 22:59 | Night         | 37,6 | 53  | 34,6  | 34,6  | 18,75 | 544,43 | 119,10 |
|    | 2019/05/26 | CH2206 | Male | Three y/o | Treatment (Wk 2) | Treatment | Fast Day | No | 22:50 | 22:00 - 22:59 | Night         | 37,5 | 80  | 59,8  | 59,8  | 18,65 | 577,31 | 137,98 |
|    | 2019/05/26 | CH2205 | Male | Three y/o | Treatment (Wk 2) | Treatment | Fast Day | No | 22:55 | 22:00 - 22:59 | Night         | 37,5 |     | 33,2  | 33,2  | 18,65 |        | 117,68 |
|    | 2019/05/26 | CH2206 | Male | Three y/o | Treatment (Wk 2) | Treatment | Fast Day | No | 22:55 | 22:00 - 22:59 | Night         | 37,5 | 45  | 58,8  | 58,8  | 18,65 | 530,47 | 137,39 |
|    | 2019/05/26 | CH2205 | Male | Three y/o | Treatment (Wk 2) | Treatment | Fast Day | No | 23:00 | 23:00 - 23:59 | Night         | 37,4 |     | 35,0  | 35,0  | 18,55 |        | 119,49 |
|    | 2019/05/26 | CH2206 | Male | Three y/o | Treatment (Wk 2) | Treatment | Fast Day | No | 23:00 | 23:00 - 23:59 | Night         | 37,5 | 44  | 56,6  | 56,6  | 18,65 | 528,51 | 136,07 |
|    | 2019/05/26 | CH2205 | Male | Three y/o | Treatment (Wk 2) | Treatment | Fast Day | No | 23:05 | 23:00 - 23:59 | Night         | 37,4 |     | 33,2  | 33,2  | 18,55 |        | 117,68 |
|    | 2019/05/26 | CH2206 | Male | Three y/o | Treatment (Wk 2) | Treatment | Fast Day | No | 23:05 | 23:00 - 23:59 | Night         | 37,5 | 46  | 59,8  | 59,8  | 18,65 | 532,38 | 137,98 |
|    | 2019/05/26 | CH2205 | Male | Three y/o | Treatment (Wk 2) | Treatment | Fast Day | No | 23:10 | 23:00 - 23:59 | Night         | 37,4 |     | 37,0  | 37,0  | 18,55 |        | 121,40 |
|    | 2019/05/26 | CH2206 | Male | Three y/o | Treatment (Wk 2) | Treatment | Fast Day | No | 23:10 | 23:00 - 23:59 | Night         | 37,5 | 37  | 57,4  | 57,4  | 18,65 | 513,06 | 136,56 |
|    | 2019/05/26 | CH2205 | Male | Three y/o | Treatment (Wk 2) | Treatment | Fast Day | No | 23:15 | 23:00 - 23:59 | Night         | 37,4 |     | 34,6  | 34,6  | 18,55 |        | 119,10 |
|    | 2019/05/26 | CH2206 | Male | Three y/o | Treatment (Wk 2) | Treatment | Fast Day | No | 23:15 | 23:00 - 23:59 | Night         | 37,4 | 46  | 55,2  | 55,2  | 18,55 | 532,38 | 135,21 |
|    | 2019/05/26 | CH2205 | Male | Three y/o | Treatment (Wk 2) | Treatment | Fast Day | No | 23:20 | 23:00 - 23:59 | Night         | 37,4 |     | 30,2  | 30,2  | 18,55 |        | 114,42 |
|    | 2019/05/26 | CH2206 | Male | Three y/o | Treatment (Wk 2) | Treatment | Fast Day | No | 23:20 | 23:00 - 23:59 | Night         | 37,4 | 51  | 56,6  | 56,6  | 18,55 | 541,20 | 136,07 |
|    | 2019/05/26 | CH2205 | Male | Three y/o | Treatment (Wk 2) | Treatment | Fast Day | No | 23:25 | 23:00 - 23:59 | Night         | 37,4 |     | 30,4  | 30,4  | 18,55 |        | 114,65 |
|    | 2019/05/26 | CH2206 | Male | Three y/o | Treatment (Wk 2) | Treatment | Fast Day | No | 23:25 | 23:00 - 23:59 | Night         | 37,4 | 48  | 61,4  | 61,4  | 18,55 | 536,04 | 138,89 |
|    | 2019/05/26 | CH2205 | Male | Three y/o | Treatment (Wk 2) | Treatment | Fast Day | No | 23:30 | 23:00 - 23:59 | Night         | 37,4 | 53  | 19,4  | 19,4  | 18,55 | 544,43 | 99,28  |
|    | 2019/05/26 | CH2206 | Male | Three y/o | Treatment (Wk 2) | Treatment | Fast Day | No | 23:30 | 23:00 - 23:59 | Night         | 37,4 | 48  | 58,0  | 58,0  | 18,55 | 536,04 | 136,92 |
|    | 2019/05/26 | CH2205 | Male | Three y/o | Treatment (Wk 2) | Treatment | Fast Day | No | 23:35 | 23:00 - 23:59 | Night         | 37,4 | 49  | 16,6  | 16,6  | 18,55 | 537,80 | 93,96  |
|    | 2019/05/26 | CH2206 | Male | Three y/o | Treatment (Wk 2) | Treatment | Fast Day | No | 23:35 | 23:00 - 23:59 | Night         | 37,4 | 44  | 57,6  | 57,6  | 18,55 | 528,51 | 136,68 |
|    | 2019/05/26 | CH2205 | Male | Three y/o | Treatment (Wk 2) | Treatment | Fast Day | No | 23:40 | 23:00 - 23:59 | Night         | 37,4 | 50  | 20,8  | 20,8  | 18,55 | 539,52 | 101,65 |
|    | 2019/05/26 | CH2206 | Male | Three y/o | Treatment (Wk 2) | Treatment | Fast Day | No | 23:40 | 23:00 - 23:59 | Night         | 37,4 | 40  | 50,2  | 50,2  | 18,55 | 520,09 | 131,92 |
|    | 2019/05/26 | CH2205 | Male | Three y/o | Treatment (Wk 2) | Treatment | Fast Day | No | 23:45 | 23:00 - 23:59 | Night         | 37,4 | 45  | 20,0  | 20,0  | 18,55 | 530,47 | 100,31 |
|    | 2019/05/26 | CH2206 | Male | Three y/o | Treatment (Wk 2) | Treatment | Fast Day | No | 23:45 | 23:00 - 23:59 | Night         | 37,4 | 75  | 50,6  | 50,6  | 18,55 | 572,36 | 132,20 |
|    | 2019/05/26 | CH2205 | Male | Three y/o | Treatment (Wk 2) | Treatment | Fast Day | No | 23:50 | 23:00 - 23:59 | Night         | 37,4 | 44  | 22,0  | 22,0  | 18,55 | 528,51 | 103,57 |
|    | 2019/05/26 | CH2206 | Male | Three y/o | Treatment (Wk 2) | Treatment | Fast Day | No | 23:50 | 23:00 - 23:59 | Night         | 37,4 | 46  | 51,8  | 51,8  | 18,55 | 532,38 | 133,01 |
|    | 2019/05/26 | CH2205 | Male | Three y/o | Treatment (Wk 2) | Treatment | Fast Day | No | 23:55 | 23:00 - 23:59 | Night         | 37,4 | 48  | 22,6  | 22,6  | 18,55 | 536,04 | 104,49 |
|    | 2019/05/26 | CH2206 | Male | Three y/o | Treatment (Wk 2) | Treatment | Fast Day | No | 23:55 | 23:00 - 23:59 | Night         | 37,4 | 51  | 59,2  | 59,2  | 18,55 | 541,20 | 137,63 |
| 13 | 2019/05/27 | CH2205 | Male | Three y/o | Treatment (Wk 2) | Treatment | Feed Day | No | 00:00 | 00:00 - 00:59 | Early Morning | 37,4 | 53  | 24,2  | 24,2  | 18,55 | 544,43 | 106,83 |
|    | 2019/05/27 | CH2206 | Male | Three y/o | Treatment (Wk 2) | Treatment | Feed Day | No | 00:00 | 00:00 - 00:59 | Early Morning | 37,4 | 63  | 62,6  | 62,6  | 18,55 | 558,62 | 139,56 |
|    | 2019/05/27 | CH2205 | Male | Three y/o | Treatment (Wk 2) | Treatment | Feed Day | No | 00:05 | 00:00 - 00:59 | Early Morning | 37,4 | 46  | 19,8  | 19,8  | 18,55 | 532,38 | 99,97  |
|    | 2019/05/27 | CH2206 | Male | Three y/o | Treatment (Wk 2) | Treatment | Feed Day | No | 00:05 | 00:00 - 00:59 | Early Morning | 37,4 | 51  | 45,2  | 45,2  | 18,55 | 541,20 | 128,30 |
|    | 2019/05/27 | CH2205 | Male | Three y/o | Treatment (Wk 2) | Treatment | Feed Day | No | 00:10 | 00:00 - 00:59 | Early Morning | 37,5 | 67  | 20,6  | 20,6  | 18,65 | 563,53 | 101,32 |
|    | 2019/05/27 | CH2206 | Male | Three y/o | Treatment (Wk 2) | Treatment | Feed Day | No | 00:10 | 00:00 - 00:59 | Early Morning | 37,4 | 41  | 41,4  | 41,4  | 18,55 | 522,29 | 125,27 |
|    | 2019/05/27 | CH2205 | Male | Three y/o | Treatment (Wk 2) | Treatment | Feed Day | No | 00:15 | 00:00 - 00:59 | Early Morning | 37,5 | 45  | 22,2  | 22,2  | 18,65 | 530,47 | 103,88 |
|    | 2019/05/27 | CH2206 | Male | Three y/o | Treatment (Wk 2) | Treatment | Feed Day | No | 00:15 | 00:00 - 00:59 | Early Morning | 37,4 | 89  | 34,6  | 34,6  | 18,55 | 585,33 | 119,10 |
|    | 2019/05/27 | CH2205 | Male | Three y/o | Treatment (Wk 2) | Treatment | Feed Day | No | 00:20 | 00:00 - 00:59 | Early Morning | 37,5 | 45  | 19,8  | 19,8  | 18,65 | 530,47 | 99,97  |
|    | 2019/05/27 | CH2206 | Male | Three y/o | Treatment (Wk 2) | Treatment | Feed Day | No | 00:20 | 00:00 - 00:59 | Early Morning | 37,4 | 43  | 37,4  | 37,4  | 18,55 | 526,50 | 121,77 |
|    | 2019/05/27 | CH2205 | Male | Three y/o | Treatment (Wk 2) | Treatment | Feed Day | No | 00:25 | 00:00 - 00:59 | Early Morning | 37,5 | 46  | 31,6  | 31,6  | 18,65 | 532,38 | 115,98 |
|    | 2019/05/27 | CH2206 | Male | Three y/o | Treatment (Wk 2) | Treatment | Feed Day | No | 00:25 | 00:00 - 00:59 | Early Morning | 37,4 | 44  | 70,2  | 70,2  | 18,55 | 528,51 | 143,54 |
|    | 2019/05/27 | CH2205 | Male | Three y/o | Treatment (Wk 2) | Treatment | Feed Day | No | 00:30 | 00:00 - 00:59 | Early Morning | 37,5 | 123 | 59,0  | 59,0  | 18,65 | 608,49 | 137,51 |
|    | 2019/05/27 | CH2206 | Male | Three y/o | Treatment (Wk 2) | Treatment | Feed Day | No | 00:30 | 00:00 - 00:59 | Early Morning | 37,5 | 135 | 79,8  | 79,8  | 18,65 | 614,84 | 147,99 |
|    | 2019/05/27 | CH2205 | Male | Three y/o | Treatment (Wk 2) | Treatment | Feed Day | No | 00:35 | 00:00 - 00:59 | Early Morning | 37,5 | 54  | 121,6 | 121,6 | 18,65 | 545,99 | 162,67 |



|            |        |      |           |                  |           |          |    |       |               |               |      |     |       |       |       |        |        |
|------------|--------|------|-----------|------------------|-----------|----------|----|-------|---------------|---------------|------|-----|-------|-------|-------|--------|--------|
| 2019/05/27 | CH2206 | Male | Three y/o | Treatment (Wk 2) | Treatment | Feed Day | No | 00:35 | 00:00 - 00:59 | Early Morning | 37,5 | 129 | 71,6  | 71,6  | 18,65 | 611,75 | 144,22 |
| 2019/05/27 | CH2205 | Male | Three y/o | Treatment (Wk 2) | Treatment | Feed Day | No | 00:40 | 00:00 - 00:59 | Early Morning | 37,5 | 72  | 45,6  | 45,6  | 18,65 | 569,20 | 128,61 |
| 2019/05/27 | CH2206 | Male | Three y/o | Treatment (Wk 2) | Treatment | Feed Day | No | 00:40 | 00:00 - 00:59 | Early Morning | 37,5 | 97  | 45,4  | 45,4  | 18,65 | 591,66 | 128,45 |
| 2019/05/27 | CH2205 | Male | Three y/o | Treatment (Wk 2) | Treatment | Feed Day | No | 00:45 | 00:00 - 00:59 | Early Morning | 37,4 | 73  | 24,2  | 24,2  | 18,55 | 570,27 | 106,83 |
| 2019/05/27 | CH2206 | Male | Three y/o | Treatment (Wk 2) | Treatment | Feed Day | No | 00:45 | 00:00 - 00:59 | Early Morning | 37,5 | 112 | 28,2  | 28,2  | 18,65 | 601,96 | 112,07 |
| 2019/05/27 | CH2205 | Male | Three y/o | Treatment (Wk 2) | Treatment | Feed Day | No | 00:50 | 00:00 - 00:59 | Early Morning | 37,4 |     | 11,8  | 11,8  | 18,55 |        | 82,36  |
| 2019/05/27 | CH2206 | Male | Three y/o | Treatment (Wk 2) | Treatment | Feed Day | No | 00:50 | 00:00 - 00:59 | Early Morning | 37,4 | 45  | 59,8  | 59,8  | 18,55 | 530,47 | 137,98 |
| 2019/05/27 | CH2205 | Male | Three y/o | Treatment (Wk 2) | Treatment | Feed Day | No | 00:55 | 00:00 - 00:59 | Early Morning | 37,4 | 160 | 22,8  | 22,8  | 18,55 | 626,07 | 104,79 |
| 2019/05/27 | CH2206 | Male | Three y/o | Treatment (Wk 2) | Treatment | Feed Day | No | 00:55 | 00:00 - 00:59 | Early Morning | 37,3 | 60  | 60,2  | 60,2  | 18,46 | 554,67 | 138,21 |
| 2019/05/27 | CH2205 | Male | Three y/o | Treatment (Wk 2) | Treatment | Feed Day | No | 01:00 | 01:00 - 01:59 | Early Morning | 37,5 |     | 25,2  | 25,2  | 18,65 |        | 108,22 |
| 2019/05/27 | CH2206 | Male | Three y/o | Treatment (Wk 2) | Treatment | Feed Day | No | 01:00 | 01:00 - 01:59 | Early Morning | 37,2 | 55  | 62,6  | 62,6  | 18,36 | 547,52 | 139,56 |
| 2019/05/27 | CH2205 | Male | Three y/o | Treatment (Wk 2) | Treatment | Feed Day | No | 01:05 | 01:00 - 01:59 | Early Morning | 37,3 | 101 | 17,8  | 17,8  | 18,46 | 594,59 | 96,34  |
| 2019/05/27 | CH2206 | Male | Three y/o | Treatment (Wk 2) | Treatment | Feed Day | No | 01:05 | 01:00 - 01:59 | Early Morning | 37,2 |     | 80,2  | 80,2  | 18,36 |        | 148,16 |
| 2019/05/27 | CH2205 | Male | Three y/o | Treatment (Wk 2) | Treatment | Feed Day | No | 01:10 | 01:00 - 01:59 | Early Morning | 37,3 | 45  | 21,2  | 21,2  | 18,46 | 530,47 | 102,31 |
| 2019/05/27 | CH2206 | Male | Three y/o | Treatment (Wk 2) | Treatment | Feed Day | No | 01:10 | 01:00 - 01:59 | Early Morning | 37,3 | 79  | 56,2  | 56,2  | 18,46 | 576,36 | 135,83 |
| 2019/05/27 | CH2205 | Male | Three y/o | Treatment (Wk 2) | Treatment | Feed Day | No | 01:15 | 01:00 - 01:59 | Early Morning | 37,3 | 45  | 16,0  | 16,0  | 18,46 | 530,47 | 92,71  |
| 2019/05/27 | CH2206 | Male | Three y/o | Treatment (Wk 2) | Treatment | Feed Day | No | 01:15 | 01:00 - 01:59 | Early Morning | 37,2 | 47  | 59,0  | 59,0  | 18,36 | 534,23 | 137,51 |
| 2019/05/27 | CH2205 | Male | Three y/o | Treatment (Wk 2) | Treatment | Feed Day | No | 01:20 | 01:00 - 01:59 | Early Morning | 37,4 | 41  | 11,6  | 11,6  | 18,55 | 522,29 | 81,78  |
| 2019/05/27 | CH2206 | Male | Three y/o | Treatment (Wk 2) | Treatment | Feed Day | No | 01:20 | 01:00 - 01:59 | Early Morning | 37,3 | 51  | 46,4  | 46,4  | 18,46 | 541,20 | 129,21 |
| 2019/05/27 | CH2205 | Male | Three y/o | Treatment (Wk 2) | Treatment | Feed Day | No | 01:25 | 01:00 - 01:59 | Early Morning | 37,4 |     | 140,0 | 140,0 | 18,55 |        | 167,60 |
| 2019/05/27 | CH2206 | Male | Three y/o | Treatment (Wk 2) | Treatment | Feed Day | No | 01:25 | 01:00 - 01:59 | Early Morning | 37,3 | 107 | 112,4 | 112,4 | 18,46 | 598,73 | 159,92 |
| 2019/05/27 | CH2205 | Male | Three y/o | Treatment (Wk 2) | Treatment | Feed Day | No | 01:30 | 01:00 - 01:59 | Early Morning | 37,5 |     | 191,8 | 191,8 | 18,65 |        | 178,65 |
| 2019/05/27 | CH2206 | Male | Three y/o | Treatment (Wk 2) | Treatment | Feed Day | No | 01:30 | 01:00 - 01:59 | Early Morning | 37,4 | 98  | 170,6 | 170,6 | 18,55 | 592,41 | 174,53 |
| 2019/05/27 | CH2205 | Male | Three y/o | Treatment (Wk 2) | Treatment | Feed Day | No | 01:35 | 01:00 - 01:59 | Early Morning | 37,4 | 177 | 78,4  | 78,4  | 18,55 | 632,55 | 147,37 |
| 2019/05/27 | CH2206 | Male | Three y/o | Treatment (Wk 2) | Treatment | Feed Day | No | 01:35 | 01:00 - 01:59 | Early Morning | 37,4 | 111 | 49,0  | 49,0  | 18,55 | 601,33 | 131,09 |
| 2019/05/27 | CH2205 | Male | Three y/o | Treatment (Wk 2) | Treatment | Feed Day | No | 01:40 | 01:00 - 01:59 | Early Morning | 37,5 | 104 | 24,2  | 24,2  | 18,65 | 596,69 | 106,83 |
| 2019/05/27 | CH2206 | Male | Three y/o | Treatment (Wk 2) | Treatment | Feed Day | No | 01:40 | 01:00 - 01:59 | Early Morning | 37,3 | 49  | 44,2  | 44,2  | 18,46 | 537,80 | 127,53 |
| 2019/05/27 | CH2205 | Male | Three y/o | Treatment (Wk 2) | Treatment | Feed Day | No | 01:45 | 01:00 - 01:59 | Early Morning | 37,3 | 72  | 39,4  | 39,4  | 18,46 | 569,20 | 123,57 |
| 2019/05/27 | CH2206 | Male | Three y/o | Treatment (Wk 2) | Treatment | Feed Day | No | 01:45 | 01:00 - 01:59 | Early Morning | 37,1 | 104 | 113,8 | 113,8 | 18,26 | 596,69 | 160,35 |
| 2019/05/27 | CH2205 | Male | Three y/o | Treatment (Wk 2) | Treatment | Feed Day | No | 01:50 | 01:00 - 01:59 | Early Morning | 37,5 | 54  | 111,6 | 111,6 | 18,65 | 545,99 | 159,67 |
| 2019/05/27 | CH2206 | Male | Three y/o | Treatment (Wk 2) | Treatment | Feed Day | No | 01:50 | 01:00 - 01:59 | Early Morning | 37,1 | 50  | 104,2 | 104,2 | 18,26 | 539,52 | 157,28 |
| 2019/05/27 | CH2205 | Male | Three y/o | Treatment (Wk 2) | Treatment | Feed Day | No | 01:55 | 01:00 - 01:59 | Early Morning | 37,6 | 103 | 49,8  | 49,8  | 18,75 | 596,00 | 131,65 |
| 2019/05/27 | CH2206 | Male | Three y/o | Treatment (Wk 2) | Treatment | Feed Day | No | 01:55 | 01:00 - 01:59 | Early Morning | 37,3 | 124 | 285,2 | 285,2 | 18,46 | 609,04 | 192,63 |
| 2019/05/27 | CH2205 | Male | Three y/o | Treatment (Wk 2) | Treatment | Feed Day | No | 02:00 | 02:00 - 02:59 | Early Morning | 37,7 |     | 102,6 | 102,6 | 18,85 |        | 156,74 |
| 2019/05/27 | CH2206 | Male | Three y/o | Treatment (Wk 2) | Treatment | Feed Day | No | 02:00 | 02:00 - 02:59 | Early Morning | 37,5 | 109 | 222,6 | 222,6 | 18,65 | 600,04 | 183,89 |
| 2019/05/27 | CH2205 | Male | Three y/o | Treatment (Wk 2) | Treatment | Feed Day | No | 02:05 | 02:00 - 02:59 | Early Morning | 37,7 | 64  | 20,4  | 20,4  | 18,85 | 559,88 | 100,99 |
| 2019/05/27 | CH2206 | Male | Three y/o | Treatment (Wk 2) | Treatment | Feed Day | No | 02:05 | 02:00 - 02:59 | Early Morning | 37,7 | 83  | 43,2  | 43,2  | 18,85 | 580,11 | 126,74 |
| 2019/05/27 | CH2205 | Male | Three y/o | Treatment (Wk 2) | Treatment | Feed Day | No | 02:10 | 02:00 - 02:59 | Early Morning | 37,6 | 57  | 31,2  | 31,2  | 18,75 | 550,47 | 115,54 |
| 2019/05/27 | CH2206 | Male | Three y/o | Treatment (Wk 2) | Treatment | Feed Day | No | 02:10 | 02:00 - 02:59 | Early Morning | 37,5 | 55  | 56,2  | 56,2  | 18,65 | 547,52 | 135,83 |
| 2019/05/27 | CH2205 | Male | Three y/o | Treatment (Wk 2) | Treatment | Feed Day | No | 02:15 | 02:00 - 02:59 | Early Morning | 37,6 | 45  | 20,0  | 20,0  | 18,75 | 530,47 | 100,31 |
| 2019/05/27 | CH2206 | Male | Three y/o | Treatment (Wk 2) | Treatment | Feed Day | No | 02:15 | 02:00 - 02:59 | Early Morning | 37,3 | 43  | 57,8  | 57,8  | 18,46 | 526,50 | 136,80 |
| 2019/05/27 | CH2205 | Male | Three y/o | Treatment (Wk 2) | Treatment | Feed Day | No | 02:20 | 02:00 - 02:59 | Early Morning | 37,6 | 42  | 34,8  | 34,8  | 18,75 | 524,42 | 119,29 |
| 2019/05/27 | CH2206 | Male | Three y/o | Treatment (Wk 2) | Treatment | Feed Day | No | 02:20 | 02:00 - 02:59 | Early Morning | 37,5 | 50  | 60,4  | 60,4  | 18,65 | 539,52 | 138,32 |
| 2019/05/27 | CH2205 | Male | Three y/o | Treatment (Wk 2) | Treatment | Feed Day | No | 02:25 | 02:00 - 02:59 | Early Morning | 37,7 | 51  | 32,4  | 32,4  | 18,85 | 541,20 | 116,84 |
| 2019/05/27 | CH2206 | Male | Three y/o | Treatment (Wk 2) | Treatment | Feed Day | No | 02:25 | 02:00 - 02:59 | Early Morning | 37,5 | 43  | 50,6  | 50,6  | 18,65 | 526,50 | 132,20 |
| 2019/05/27 | CH2205 | Male | Three y/o | Treatment (Wk 2) | Treatment | Feed Day | No | 02:30 | 02:00 - 02:59 | Early Morning | 37,7 |     | 23,8  | 23,8  | 18,85 |        | 106,26 |
| 2019/05/27 | CH2206 | Male | Three y/o | Treatment (Wk 2) | Treatment | Feed Day | No | 02:30 | 02:00 - 02:59 | Early Morning | 37,3 | 44  | 54,0  | 54,0  | 18,46 | 528,51 | 134,45 |
| 2019/05/27 | CH2205 | Male | Three y/o | Treatment (Wk 2) | Treatment | Feed Day | No | 02:35 | 02:00 - 02:59 | Early Morning | 37,7 |     | 143,0 | 143,0 | 18,85 |        | 168,34 |
| 2019/05/27 | CH2206 | Male | Three y/o | Treatment (Wk 2) | Treatment | Feed Day | No | 02:35 | 02:00 - 02:59 | Early Morning | 37,4 | 111 | 36,4  | 36,4  | 18,55 | 601,33 | 120,84 |
| 2019/05/27 | CH2205 | Male | Three y/o | Treatment (Wk 2) | Treatment | Feed Day | No | 02:40 | 02:00 - 02:59 | Early Morning | 37,7 |     | 80,0  | 80,0  | 18,85 |        | 148,08 |
| 2019/05/27 | CH2206 | Male | Three y/o | Treatment (Wk 2) | Treatment | Feed Day | No | 02:40 | 02:00 - 02:59 | Early Morning | 37,4 | 56  | 55,0  | 55,0  | 18,55 | 549,01 | 135,08 |
| 2019/05/27 | CH2205 | Male | Three y/o | Treatment (Wk 2) | Treatment | Feed Day | No | 02:45 | 02:00 - 02:59 | Early Morning | 37,5 |     | 19,4  | 19,4  | 18,65 |        | 99,28  |
| 2019/05/27 | CH2206 | Male | Three y/o | Treatment (Wk 2) | Treatment | Feed Day | No | 02:45 | 02:00 - 02:59 | Early Morning | 37,3 | 51  | 57,6  | 57,6  | 18,46 | 541,20 | 136,68 |
| 2019/05/27 | CH2205 | Male | Three y/o | Treatment (Wk 2) | Treatment | Feed Day | No | 02:50 | 02:00 - 02:59 | Early Morning | 37,4 | 83  | 17,8  | 17,8  | 18,55 | 580,11 | 96,34  |
| 2019/05/27 | CH2206 | Male | Three y/o | Treatment (Wk 2) | Treatment | Feed Day | No | 02:50 | 02:00 - 02:59 | Early Morning | 37,2 | 68  | 53,0  | 53,0  | 18,36 | 564,71 | 133,80 |
| 2019/05/27 | CH2205 | Male | Three y/o | Treatment (Wk 2) | Treatment | Feed Day | No | 02:55 | 02:00 - 02:59 | Early Morning | 37,4 | 41  | 23,8  | 23,8  | 18,55 | 522,29 | 106,26 |
| 2019/05/27 | CH2206 | Male | Three y/o | Treatment (Wk 2) | Treatment | Feed Day | No | 02:55 | 02:00 - 02:59 | Early Morning | 37,3 | 48  | 54,8  | 54,8  | 18,46 | 536,04 | 134,96 |
| 2019/05/27 | CH2205 | Male | Three y/o | Treatment (Wk 2) | Treatment | Feed Day | No | 03:00 | 03:00 - 03:59 | Early Morning | 37,4 | 44  | 24,0  | 24,0  | 18,55 | 528,51 | 106,55 |
| 2019/05/27 | CH2206 | Male | Three y/o | Treatment (Wk 2) | Treatment | Feed Day | No | 03:00 | 03:00 - 03:59 | Early Morning | 37,3 | 47  | 48,8  | 48,8  | 18,46 | 534,23 | 130,95 |
| 2019/05/27 | CH2205 | Male | Three y/o | Treatment (Wk 2) | Treatment | Feed Day | No | 03:05 | 03:00 - 03:59 | Early Morning | 37,5 | 53  | 24,2  | 24,2  | 18,65 | 544,43 | 106,83 |
| 2019/05/27 | CH2206 | Male | Three y/o | Treatment (Wk 2) | Treatment | Feed Day | No | 03:05 | 03:00 - 03:59 | Early Morning | 37,3 | 45  | 44,0  | 44,0  | 18,46 | 530,47 | 127,37 |
| 2019/05/27 | CH2205 | Male | Three y/o | Treatment (Wk 2) | Treatment | Feed Day | No | 03:10 | 03:00 - 03:59 | Early Morning | 37,5 | 42  | 24,8  | 24,8  | 18,65 | 524,42 | 107,67 |
| 2019/05/27 | CH2206 | Male | Three y/o | Treatment (Wk 2) | Treatment | Feed Day | No | 03:10 | 03:00 - 03:59 | Early Morning | 37,4 | 69  | 41,0  | 41,0  | 18,55 | 565,86 | 124,94 |
| 2019/05/27 | CH2205 | Male | Three y/o | Treatment (Wk 2) | Treatment | Feed Day | No | 03:15 | 03:00 - 03:59 | Early Morning | 37,6 | 53  | 25,2  | 25,2  | 18,75 | 544,43 | 108,22 |
| 2019/05/27 | CH2206 | Male | Three y/o | Treatment (Wk 2) | Treatment | Feed Day | No | 03:15 | 03:00 - 03:59 | Early Morning | 37,4 | 45  | 48,2  | 48,2  | 18,55 | 530,47 | 130,52 |
| 2019/05/27 | CH2205 | Male | Three y/o | Treatment (Wk 2) | Treatment | Feed Day | No | 03:20 | 03:00 - 03:59 | Early Morning | 37,6 | 42  | 15,8  | 15,8  | 18,75 | 524,42 | 92,28  |
| 2019/05/27 | CH2206 | Male | Three y/o | Treatment (Wk 2) | Treatment | Feed Day | No | 03:20 | 03:00 - 03:59 | Early Morning | 37,4 | 68  | 53,4  | 53,4  | 18,55 | 564,71 | 134,06 |
| 2019/05/27 | CH2205 | Male | Three y/o | Treatment (Wk 2) | Treatment | Feed Day | No | 03:25 | 03:00 - 03:59 | Early Morning | 37,6 | 68  | 14,8  | 14,8  | 18,75 | 564,71 | 90,05  |
| 2019/05/27 | CH2206 | Male | Three y/o | Treatment (Wk 2) | Treatment | Feed Day | No | 03:25 | 03:00 - 03:59 | Early Morning | 37,4 | 50  | 54,6  | 54,6  | 18,55 | 539,52 | 134,83 |
| 2019/05/27 | CH2205 | Male | Three y/o | Treatment (Wk 2) | Treatment | Feed Day | No | 03:30 | 03:00 - 03:59 | Early Morning | 37,6 | 42  | 17,6  | 17,6  | 18,75 | 524,42 | 95,95  |



|            |        |      |           |                  |           |          |    |       |               |               |      |     |       |       |       |        |        |
|------------|--------|------|-----------|------------------|-----------|----------|----|-------|---------------|---------------|------|-----|-------|-------|-------|--------|--------|
| 2019/05/27 | CH2206 | Male | Three y/o | Treatment (Wk 2) | Treatment | Feed Day | No | 03:30 | 03:00 - 03:59 | Early Morning | 37,5 | 43  | 54,8  | 54,8  | 18,65 | 526,50 | 134,96 |
| 2019/05/27 | CH2205 | Male | Three y/o | Treatment (Wk 2) | Treatment | Feed Day | No | 03:35 | 03:00 - 03:59 | Early Morning | 37,6 | 53  | 16,4  | 16,4  | 18,75 | 544,43 | 93,55  |
| 2019/05/27 | CH2206 | Male | Three y/o | Treatment (Wk 2) | Treatment | Feed Day | No | 03:35 | 03:00 - 03:59 | Early Morning | 37,5 | 43  | 49,2  | 49,2  | 18,65 | 526,50 | 131,23 |
| 2019/05/27 | CH2205 | Male | Three y/o | Treatment (Wk 2) | Treatment | Feed Day | No | 03:40 | 03:00 - 03:59 | Early Morning | 37,6 | 38  | 16,2  | 16,2  | 18,75 | 515,48 | 93,13  |
| 2019/05/27 | CH2206 | Male | Three y/o | Treatment (Wk 2) | Treatment | Feed Day | No | 03:40 | 03:00 - 03:59 | Early Morning | 37,5 |     | 12,2  | 12,2  | 18,65 |        | 83,49  |
| 2019/05/27 | CH2205 | Male | Three y/o | Treatment (Wk 2) | Treatment | Feed Day | No | 03:45 | 03:00 - 03:59 | Early Morning | 37,6 | 41  | 18,4  | 18,4  | 18,75 | 522,29 | 97,47  |
| 2019/05/27 | CH2206 | Male | Three y/o | Treatment (Wk 2) | Treatment | Feed Day | No | 03:45 | 03:00 - 03:59 | Early Morning | 37,5 | 55  | 34,8  | 34,8  | 18,65 | 547,52 | 119,29 |
| 2019/05/27 | CH2205 | Male | Three y/o | Treatment (Wk 2) | Treatment | Feed Day | No | 03:50 | 03:00 - 03:59 | Early Morning | 37,5 | 114 | 18,2  | 18,2  | 18,65 | 603,20 | 97,10  |
| 2019/05/27 | CH2206 | Male | Three y/o | Treatment (Wk 2) | Treatment | Feed Day | No | 03:50 | 03:00 - 03:59 | Early Morning | 37,5 | 43  | 47,0  | 47,0  | 18,65 | 526,50 | 129,65 |
| 2019/05/27 | CH2205 | Male | Three y/o | Treatment (Wk 2) | Treatment | Feed Day | No | 03:55 | 03:00 - 03:59 | Early Morning | 37,5 |     | 16,0  | 16,0  | 18,65 |        | 92,71  |
| 2019/05/27 | CH2206 | Male | Three y/o | Treatment (Wk 2) | Treatment | Feed Day | No | 03:55 | 03:00 - 03:59 | Early Morning | 37,5 | 43  | 47,0  | 47,0  | 18,65 | 526,50 | 129,65 |
| 2019/05/27 | CH2205 | Male | Three y/o | Treatment (Wk 2) | Treatment | Feed Day | No | 04:00 | 04:00 - 04:59 | Morning       | 37,4 |     | 21,2  | 21,2  | 18,55 |        | 102,31 |
| 2019/05/27 | CH2206 | Male | Three y/o | Treatment (Wk 2) | Treatment | Feed Day | No | 04:00 | 04:00 - 04:59 | Morning       | 37,5 | 43  | 11,4  | 11,4  | 18,65 | 526,50 | 81,19  |
| 2019/05/27 | CH2205 | Male | Three y/o | Treatment (Wk 2) | Treatment | Feed Day | No | 04:05 | 04:00 - 04:59 | Morning       | 37,5 | 86  | 22,4  | 22,4  | 18,65 | 582,77 | 104,19 |
| 2019/05/27 | CH2206 | Male | Three y/o | Treatment (Wk 2) | Treatment | Feed Day | No | 04:05 | 04:00 - 04:59 | Morning       | 37,5 | 47  | 6,6   | 6,6   | 18,65 | 534,23 | 62,73  |
| 2019/05/27 | CH2205 | Male | Three y/o | Treatment (Wk 2) | Treatment | Feed Day | No | 04:10 | 04:00 - 04:59 | Morning       | 37,4 | 49  | 24,0  | 24,0  | 18,55 | 537,80 | 106,55 |
| 2019/05/27 | CH2206 | Male | Three y/o | Treatment (Wk 2) | Treatment | Feed Day | No | 04:10 | 04:00 - 04:59 | Morning       | 37,5 | 42  | 14,0  | 14,0  | 18,65 | 524,42 | 88,17  |
| 2019/05/27 | CH2205 | Male | Three y/o | Treatment (Wk 2) | Treatment | Feed Day | No | 04:15 | 04:00 - 04:59 | Morning       | 37,4 | 152 | 16,2  | 16,2  | 18,55 | 622,73 | 93,13  |
| 2019/05/27 | CH2206 | Male | Three y/o | Treatment (Wk 2) | Treatment | Feed Day | No | 04:15 | 04:00 - 04:59 | Morning       | 37,5 | 111 | 63,0  | 63,0  | 18,65 | 601,33 | 139,78 |
| 2019/05/27 | CH2205 | Male | Three y/o | Treatment (Wk 2) | Treatment | Feed Day | No | 04:20 | 04:00 - 04:59 | Morning       | 37,5 | 80  | 10,0  | 10,0  | 18,65 | 577,31 | 76,76  |
| 2019/05/27 | CH2206 | Male | Three y/o | Treatment (Wk 2) | Treatment | Feed Day | No | 04:20 | 04:00 - 04:59 | Morning       | 37,4 | 55  | 66,4  | 66,4  | 18,55 | 547,52 | 141,61 |
| 2019/05/27 | CH2205 | Male | Three y/o | Treatment (Wk 2) | Treatment | Feed Day | No | 04:25 | 04:00 - 04:59 | Morning       | 37,5 | 48  | 10,6  | 10,6  | 18,65 | 536,04 | 78,73  |
| 2019/05/27 | CH2206 | Male | Three y/o | Treatment (Wk 2) | Treatment | Feed Day | No | 04:25 | 04:00 - 04:59 | Morning       | 37,3 | 47  | 53,4  | 53,4  | 18,46 | 534,23 | 134,06 |
| 2019/05/27 | CH2205 | Male | Three y/o | Treatment (Wk 2) | Treatment | Feed Day | No | 04:30 | 04:00 - 04:59 | Morning       | 37,5 | 51  | 7,2   | 7,2   | 18,65 | 541,20 | 65,66  |
| 2019/05/27 | CH2206 | Male | Three y/o | Treatment (Wk 2) | Treatment | Feed Day | No | 04:30 | 04:00 - 04:59 | Morning       | 37,4 | 40  | 48,0  | 48,0  | 18,55 | 520,09 | 130,38 |
| 2019/05/27 | CH2205 | Male | Three y/o | Treatment (Wk 2) | Treatment | Feed Day | No | 04:35 | 04:00 - 04:59 | Morning       | 37,5 | 59  | 8,4   | 8,4   | 18,65 | 553,30 | 70,86  |
| 2019/05/27 | CH2206 | Male | Three y/o | Treatment (Wk 2) | Treatment | Feed Day | No | 04:35 | 04:00 - 04:59 | Morning       | 37,4 | 39  | 48,6  | 48,6  | 18,55 | 517,82 | 130,81 |
| 2019/05/27 | CH2205 | Male | Three y/o | Treatment (Wk 2) | Treatment | Feed Day | No | 04:40 | 04:00 - 04:59 | Morning       | 37,5 | 61  | 16,4  | 16,4  | 18,65 | 556,01 | 93,55  |
| 2019/05/27 | CH2206 | Male | Three y/o | Treatment (Wk 2) | Treatment | Feed Day | No | 04:40 | 04:00 - 04:59 | Morning       | 37,4 | 58  | 54,0  | 54,0  | 18,55 | 551,90 | 134,45 |
| 2019/05/27 | CH2205 | Male | Three y/o | Treatment (Wk 2) | Treatment | Feed Day | No | 04:45 | 04:00 - 04:59 | Morning       | 37,5 | 56  | 19,4  | 19,4  | 18,65 | 549,01 | 99,28  |
| 2019/05/27 | CH2206 | Male | Three y/o | Treatment (Wk 2) | Treatment | Feed Day | No | 04:45 | 04:00 - 04:59 | Morning       | 37,4 | 41  | 59,8  | 59,8  | 18,55 | 522,29 | 137,98 |
| 2019/05/27 | CH2205 | Male | Three y/o | Treatment (Wk 2) | Treatment | Feed Day | No | 04:50 | 04:00 - 04:59 | Morning       | 37,5 | 48  | 15,2  | 15,2  | 18,65 | 536,04 | 90,96  |
| 2019/05/27 | CH2206 | Male | Three y/o | Treatment (Wk 2) | Treatment | Feed Day | No | 04:50 | 04:00 - 04:59 | Morning       | 37,4 | 48  | 65,0  | 65,0  | 18,55 | 536,04 | 140,87 |
| 2019/05/27 | CH2205 | Male | Three y/o | Treatment (Wk 2) | Treatment | Feed Day | No | 04:55 | 04:00 - 04:59 | Morning       | 37,4 | 46  | 14,6  | 14,6  | 18,55 | 532,38 | 89,59  |
| 2019/05/27 | CH2206 | Male | Three y/o | Treatment (Wk 2) | Treatment | Feed Day | No | 04:55 | 04:00 - 04:59 | Morning       | 37,3 | 46  | 61,8  | 61,8  | 18,46 | 532,38 | 139,12 |
| 2019/05/27 | CH2205 | Male | Three y/o | Treatment (Wk 2) | Treatment | Feed Day | No | 05:00 | 05:00 - 05:59 | Morning       | 37,4 | 41  | 14,0  | 14,0  | 18,55 | 522,29 | 88,17  |
| 2019/05/27 | CH2206 | Male | Three y/o | Treatment (Wk 2) | Treatment | Feed Day | No | 05:00 | 05:00 - 05:59 | Morning       | 37,3 | 40  | 64,0  | 64,0  | 18,46 | 520,09 | 140,33 |
| 2019/05/27 | CH2205 | Male | Three y/o | Treatment (Wk 2) | Treatment | Feed Day | No | 05:05 | 05:00 - 05:59 | Morning       | 37,4 | 42  | 8,4   | 8,4   | 18,55 | 524,42 | 70,86  |
| 2019/05/27 | CH2206 | Male | Three y/o | Treatment (Wk 2) | Treatment | Feed Day | No | 05:05 | 05:00 - 05:59 | Morning       | 37,3 | 36  | 62,2  | 62,2  | 18,46 | 510,56 | 139,34 |
| 2019/05/27 | CH2205 | Male | Three y/o | Treatment (Wk 2) | Treatment | Feed Day | No | 05:10 | 05:00 - 05:59 | Morning       | 37,4 | 45  | 9,6   | 9,6   | 18,55 | 530,47 | 75,37  |
| 2019/05/27 | CH2206 | Male | Three y/o | Treatment (Wk 2) | Treatment | Feed Day | No | 05:10 | 05:00 - 05:59 | Morning       | 37,2 | 78  | 52,4  | 52,4  | 18,36 | 575,38 | 133,41 |
| 2019/05/27 | CH2205 | Male | Three y/o | Treatment (Wk 2) | Treatment | Feed Day | No | 05:15 | 05:00 - 05:59 | Morning       | 37,4 | 41  | 12,2  | 12,2  | 18,55 | 522,29 | 83,49  |
| 2019/05/27 | CH2206 | Male | Three y/o | Treatment (Wk 2) | Treatment | Feed Day | No | 05:15 | 05:00 - 05:59 | Morning       | 37,2 | 46  | 58,0  | 58,0  | 18,36 | 532,38 | 136,92 |
| 2019/05/27 | CH2205 | Male | Three y/o | Treatment (Wk 2) | Treatment | Feed Day | No | 05:20 | 05:00 - 05:59 | Morning       | 37,4 | 47  | 10,6  | 10,6  | 18,55 | 534,23 | 78,73  |
| 2019/05/27 | CH2206 | Male | Three y/o | Treatment (Wk 2) | Treatment | Feed Day | No | 05:20 | 05:00 - 05:59 | Morning       | 37,2 | 94  | 60,8  | 60,8  | 18,36 | 589,37 | 138,55 |
| 2019/05/27 | CH2205 | Male | Three y/o | Treatment (Wk 2) | Treatment | Feed Day | No | 05:25 | 05:00 - 05:59 | Morning       | 37,3 | 44  | 11,2  | 11,2  | 18,46 | 528,51 | 80,59  |
| 2019/05/27 | CH2206 | Male | Three y/o | Treatment (Wk 2) | Treatment | Feed Day | No | 05:25 | 05:00 - 05:59 | Morning       | 37,2 | 56  | 62,4  | 62,4  | 18,36 | 549,01 | 139,45 |
| 2019/05/27 | CH2205 | Male | Three y/o | Treatment (Wk 2) | Treatment | Feed Day | No | 05:30 | 05:00 - 05:59 | Morning       | 37,3 | 69  | 9,8   | 9,8   | 18,46 | 565,86 | 76,07  |
| 2019/05/27 | CH2206 | Male | Three y/o | Treatment (Wk 2) | Treatment | Feed Day | No | 05:30 | 05:00 - 05:59 | Morning       | 37,2 | 44  | 66,0  | 66,0  | 18,36 | 528,51 | 141,40 |
| 2019/05/27 | CH2205 | Male | Three y/o | Treatment (Wk 2) | Treatment | Feed Day | No | 05:35 | 05:00 - 05:59 | Morning       | 37,3 | 39  | 16,6  | 16,6  | 18,46 | 517,82 | 93,96  |
| 2019/05/27 | CH2206 | Male | Three y/o | Treatment (Wk 2) | Treatment | Feed Day | No | 05:35 | 05:00 - 05:59 | Morning       | 37,2 | 41  | 59,6  | 59,6  | 18,36 | 522,29 | 137,86 |
| 2019/05/27 | CH2205 | Male | Three y/o | Treatment (Wk 2) | Treatment | Feed Day | No | 05:40 | 05:00 - 05:59 | Morning       | 37,3 | 41  | 10,8  | 10,8  | 18,46 | 522,29 | 79,36  |
| 2019/05/27 | CH2206 | Male | Three y/o | Treatment (Wk 2) | Treatment | Feed Day | No | 05:40 | 05:00 - 05:59 | Morning       | 37,2 | 95  | 67,8  | 67,8  | 18,36 | 590,14 | 142,33 |
| 2019/05/27 | CH2205 | Male | Three y/o | Treatment (Wk 2) | Treatment | Feed Day | No | 05:45 | 05:00 - 05:59 | Morning       | 37,3 | 101 | 18,2  | 18,2  | 18,46 | 594,59 | 97,10  |
| 2019/05/27 | CH2206 | Male | Three y/o | Treatment (Wk 2) | Treatment | Feed Day | No | 05:45 | 05:00 - 05:59 | Morning       | 37,2 | 45  | 46,2  | 46,2  | 18,36 | 530,47 | 129,06 |
| 2019/05/27 | CH2205 | Male | Three y/o | Treatment (Wk 2) | Treatment | Feed Day | No | 05:50 | 05:00 - 05:59 | Morning       | 37,3 | 87  | 23,6  | 23,6  | 18,46 | 583,64 | 105,97 |
| 2019/05/27 | CH2206 | Male | Three y/o | Treatment (Wk 2) | Treatment | Feed Day | No | 05:50 | 05:00 - 05:59 | Morning       | 37,1 | 40  | 45,6  | 45,6  | 18,26 | 520,09 | 128,61 |
| 2019/05/27 | CH2205 | Male | Three y/o | Treatment (Wk 2) | Treatment | Feed Day | No | 05:55 | 05:00 - 05:59 | Morning       | 37,2 | 112 | 33,4  | 33,4  | 18,36 | 601,96 | 117,88 |
| 2019/05/27 | CH2206 | Male | Three y/o | Treatment (Wk 2) | Treatment | Feed Day | No | 05:55 | 05:00 - 05:59 | Morning       | 37,1 | 138 | 36,4  | 36,4  | 18,26 | 616,31 | 120,84 |
| 2019/05/27 | CH2205 | Male | Three y/o | Treatment (Wk 2) | Treatment | Feed Day | No | 06:00 | 06:00 - 06:59 | Morning       | 37,2 | 47  | 163,0 | 163,0 | 18,36 | 534,23 | 172,93 |
| 2019/05/27 | CH2206 | Male | Three y/o | Treatment (Wk 2) | Treatment | Feed Day | No | 06:00 | 06:00 - 06:59 | Morning       | 37,2 | 125 | 140,8 | 140,8 | 18,36 | 609,60 | 167,80 |
| 2019/05/27 | CH2205 | Male | Three y/o | Treatment (Wk 2) | Treatment | Feed Day | No | 06:05 | 06:00 - 06:59 | Morning       | 37,2 | 85  | 69,4  | 69,4  | 18,36 | 581,90 | 143,14 |
| 2019/05/27 | CH2206 | Male | Three y/o | Treatment (Wk 2) | Treatment | Feed Day | No | 06:05 | 06:00 - 06:59 | Morning       | 37,3 | 194 | 251,8 | 251,8 | 18,46 | 638,30 | 188,23 |
| 2019/05/27 | CH2205 | Male | Three y/o | Treatment (Wk 2) | Treatment | Feed Day | No | 06:10 | 06:00 - 06:59 | Morning       | 37,2 | 98  | 25,0  | 25,0  | 18,36 | 592,41 | 107,94 |
| 2019/05/27 | CH2206 | Male | Three y/o | Treatment (Wk 2) | Treatment | Feed Day | No | 06:10 | 06:00 - 06:59 | Morning       | 37,4 |     | 88,4  | 88,4  | 18,55 |        | 151,55 |
| 2019/05/27 | CH2205 | Male | Three y/o | Treatment (Wk 2) | Treatment | Feed Day | No | 06:15 | 06:00 - 06:59 | Morning       | 37,2 |     | 13,8  | 13,8  | 18,36 |        | 87,68  |
| 2019/05/27 | CH2206 | Male | Three y/o | Treatment (Wk 2) | Treatment | Feed Day | No | 06:15 | 06:00 - 06:59 | Morning       | 37,5 |     | 273,2 | 273,2 | 18,65 |        | 191,11 |
| 2019/05/27 | CH2205 | Male | Three y/o | Treatment (Wk 2) | Treatment | Feed Day | No | 06:20 | 06:00 - 06:59 | Morning       | 37,1 | 65  | 19,6  | 19,6  | 18,26 | 561,12 | 99,63  |
| 2019/05/27 | CH2206 | Male | Three y/o | Treatment (Wk 2) | Treatment | Feed Day | No | 06:20 | 06:00 - 06:59 | Morning       | 37,7 | 126 | 160,8 | 160,8 | 18,85 | 610,14 | 172,46 |
| 2019/05/27 | CH2205 | Male | Three y/o | Treatment (Wk 2) | Treatment | Feed Day | No | 06:25 | 06:00 - 06:59 | Morning       | 37,0 | 52  | 36,6  | 36,6  | 18,16 | 542,83 | 121,03 |



|            |        |      |           |                  |           |          |     |       |               |              |      |     |       |       |       |        |        |
|------------|--------|------|-----------|------------------|-----------|----------|-----|-------|---------------|--------------|------|-----|-------|-------|-------|--------|--------|
| 2019/05/27 | CH2206 | Male | Three y/o | Treatment (Wk 2) | Treatment | Feed Day | No  | 06:25 | 06:00 - 06:59 | Morning      | 37,8 | 67  | 68,8  | 68,8  | 18,95 | 563,53 | 142,84 |
| 2019/05/27 | CH2205 | Male | Three y/o | Treatment (Wk 2) | Treatment | Feed Day | No  | 06:30 | 06:00 - 06:59 | Morning      | 37,2 |     | 185,2 | 185,2 | 18,36 |        | 177,42 |
| 2019/05/27 | CH2206 | Male | Three y/o | Treatment (Wk 2) | Treatment | Feed Day | No  | 06:30 | 06:00 - 06:59 | Morning      | 37,9 | 115 | 201,8 | 201,8 | 19,05 | 603,82 | 180,43 |
| 2019/05/27 | CH2205 | Male | Three y/o | Treatment (Wk 2) | Treatment | Feed Day | No  | 06:35 | 06:00 - 06:59 | Morning      | 37,3 | 109 | 157,8 | 157,8 | 18,46 | 600,04 | 171,79 |
| 2019/05/27 | CH2206 | Male | Three y/o | Treatment (Wk 2) | Treatment | Feed Day | No  | 06:35 | 06:00 - 06:59 | Morning      | 37,9 | 66  | 163,4 | 163,4 | 19,05 | 562,34 | 173,02 |
| 2019/05/27 | CH2205 | Male | Three y/o | Treatment (Wk 2) | Treatment | Feed Day | No  | 06:40 | 06:00 - 06:59 | Morning      | 37,3 |     | 198,0 | 198,0 | 18,46 |        | 179,77 |
| 2019/05/27 | CH2206 | Male | Three y/o | Treatment (Wk 2) | Treatment | Feed Day | No  | 06:40 | 06:00 - 06:59 | Morning      | 37,9 |     | 342,2 | 342,2 | 19,05 |        | 199,08 |
| 2019/05/27 | CH2205 | Male | Three y/o | Treatment (Wk 2) | Treatment | Feed Day | No  | 06:45 | 06:00 - 06:59 | Morning      | 37,5 | 90  | 121,6 | 121,6 | 18,65 | 586,16 | 162,67 |
| 2019/05/27 | CH2206 | Male | Three y/o | Treatment (Wk 2) | Treatment | Feed Day | No  | 06:45 | 06:00 - 06:59 | Morning      | 38,0 | 112 | 55,0  | 55,0  | 19,15 | 601,96 | 135,08 |
| 2019/05/27 | CH2205 | Male | Three y/o | Treatment (Wk 2) | Treatment | Feed Day | No  | 06:50 | 06:00 - 06:59 | Morning      | 37,4 | 101 | 54,2  | 54,2  | 18,55 | 594,59 | 134,57 |
| 2019/05/27 | CH2206 | Male | Three y/o | Treatment (Wk 2) | Treatment | Feed Day | No  | 06:50 | 06:00 - 06:59 | Morning      | 38,0 | 138 | 131,8 | 131,8 | 19,15 | 616,31 | 165,49 |
| 2019/05/27 | CH2205 | Male | Three y/o | Treatment (Wk 2) | Treatment | Feed Day | No  | 06:55 | 06:00 - 06:59 | Morning      | 37,6 | 115 | 48,0  | 48,0  | 18,75 | 603,82 | 130,38 |
| 2019/05/27 | CH2206 | Male | Three y/o | Treatment (Wk 2) | Treatment | Feed Day | No  | 06:55 | 06:00 - 06:59 | Morning      | 38,0 | 113 | 82,4  | 82,4  | 19,15 | 602,58 | 149,10 |
| 2019/05/27 | CH2205 | Male | Three y/o | Treatment (Wk 2) | Treatment | Feed Day | No  | 07:00 | 07:00 - 07:59 | Morning      | 37,6 | 79  | 224,2 | 224,2 | 18,75 | 576,36 | 184,14 |
| 2019/05/27 | CH2206 | Male | Three y/o | Treatment (Wk 2) | Treatment | Feed Day | No  | 07:00 | 07:00 - 07:59 | Morning      | 37,9 |     | 68,4  | 68,4  | 19,05 | 588,58 | 142,64 |
| 2019/05/27 | CH2205 | Male | Three y/o | Treatment (Wk 2) | Treatment | Feed Day | No  | 07:05 | 07:00 - 07:59 | Morning      | 37,7 | 93  | 166,6 | 166,6 | 18,85 | 630,73 | 173,70 |
| 2019/05/27 | CH2206 | Male | Three y/o | Treatment (Wk 2) | Treatment | Feed Day | No  | 07:05 | 07:00 - 07:59 | Morning      | 38,0 | 95  | 124,0 | 124,0 | 19,15 | 590,14 | 163,35 |
| 2019/05/27 | CH2205 | Male | Three y/o | Treatment (Wk 2) | Treatment | Feed Day | No  | 07:10 | 07:00 - 07:59 | Morning      | 37,9 | 80  | 16,0  | 16,0  | 19,05 | 577,31 | 92,71  |
| 2019/05/27 | CH2206 | Male | Three y/o | Treatment (Wk 2) | Treatment | Feed Day | No  | 07:10 | 07:00 - 07:59 | Morning      | 37,9 | 126 | 129,6 | 129,6 | 19,05 | 610,14 | 164,90 |
| 2019/05/27 | CH2205 | Male | Three y/o | Treatment (Wk 2) | Treatment | Feed Day | No  | 07:15 | 07:00 - 07:59 | Morning      | 38,0 | 47  | 21,4  | 21,4  | 19,15 | 534,23 | 102,63 |
| 2019/05/27 | CH2206 | Male | Three y/o | Treatment (Wk 2) | Treatment | Feed Day | No  | 07:15 | 07:00 - 07:59 | Morning      | 38,0 | 113 | 131,4 | 131,4 | 19,15 | 602,58 | 165,38 |
| 2019/05/27 | CH2205 | Male | Three y/o | Treatment (Wk 2) | Treatment | Feed Day | No  | 07:20 | 07:00 - 07:59 | Morning      | 37,9 | 46  | 14,0  | 14,0  | 19,05 | 532,38 | 88,17  |
| 2019/05/27 | CH2206 | Male | Three y/o | Treatment (Wk 2) | Treatment | Feed Day | No  | 07:20 | 07:00 - 07:59 | Morning      | 37,8 | 79  | 28,4  | 28,4  | 18,95 | 576,36 | 112,31 |
| 2019/05/27 | CH2205 | Male | Three y/o | Treatment (Wk 2) | Treatment | Feed Day | No  | 07:25 | 07:00 - 07:59 | Morning      | 37,9 | 57  | 55,4  | 55,4  | 19,05 | 550,47 | 135,33 |
| 2019/05/27 | CH2206 | Male | Three y/o | Treatment (Wk 2) | Treatment | Feed Day | No  | 07:25 | 07:00 - 07:59 | Morning      | 37,8 | 55  | 255,4 | 255,4 | 18,95 | 547,52 | 188,73 |
| 2019/05/27 | CH2205 | Male | Three y/o | Treatment (Wk 2) | Treatment | Feed Day | No  | 07:30 | 07:00 - 07:59 | Morning      | 37,7 | 131 | 451,2 | 451,2 | 18,85 | 612,80 | 208,89 |
| 2019/05/27 | CH2206 | Male | Three y/o | Treatment (Wk 2) | Treatment | Feed Day | No  | 07:30 | 07:00 - 07:59 | Morning      | 37,9 | 131 | 200,6 | 200,6 | 19,05 | 612,80 | 180,22 |
| 2019/05/27 | CH2205 | Male | Three y/o | Treatment (Wk 2) | Treatment | Feed Day | No  | 07:35 | 07:00 - 07:59 | Morning      | 38,1 | 104 | 131,4 | 131,4 | 19,26 | 596,69 | 165,38 |
| 2019/05/27 | CH2206 | Male | Three y/o | Treatment (Wk 2) | Treatment | Feed Day | No  | 07:35 | 07:00 - 07:59 | Morning      | 37,9 | 79  | 101,2 | 101,2 | 19,05 | 576,36 | 156,26 |
| 2019/05/27 | CH2205 | Male | Three y/o | Treatment (Wk 2) | Treatment | Feed Day | No  | 07:40 | 07:00 - 07:59 | Morning      | 38,1 | 86  | 32,2  | 32,2  | 19,26 | 582,77 | 116,63 |
| 2019/05/27 | CH2206 | Male | Three y/o | Treatment (Wk 2) | Treatment | Feed Day | No  | 07:40 | 07:00 - 07:59 | Morning      | 38,0 |     | 127,2 | 127,2 | 19,15 |        | 164,24 |
| 2019/05/27 | CH2205 | Male | Three y/o | Treatment (Wk 2) | Treatment | Feed Day | No  | 07:45 | 07:00 - 07:59 | Morning      | 38,0 | 85  | 314,4 | 314,4 | 19,15 | 581,90 | 196,08 |
| 2019/05/27 | CH2206 | Male | Three y/o | Treatment (Wk 2) | Treatment | Feed Day | No  | 07:45 | 07:00 - 07:59 | Morning      | 38,0 |     | 160,4 | 160,4 | 19,15 |        | 172,37 |
| 2019/05/27 | CH2205 | Male | Three y/o | Treatment (Wk 2) | Treatment | Feed Day | No  | 07:50 | 07:00 - 07:59 | Morning      | 38,0 | 98  | 90,8  | 90,8  | 19,15 | 592,41 | 152,48 |
| 2019/05/27 | CH2206 | Male | Three y/o | Treatment (Wk 2) | Treatment | Feed Day | No  | 07:50 | 07:00 - 07:59 | Morning      | 38,0 | 109 | 82,8  | 82,8  | 19,15 | 600,04 | 149,27 |
| 2019/05/27 | CH2205 | Male | Three y/o | Treatment (Wk 2) | Treatment | Feed Day | No  | 07:55 | 07:00 - 07:59 | Morning      | 38,0 | 70  | 23,0  | 23,0  | 19,15 | 566,99 | 105,09 |
| 2019/05/27 | CH2206 | Male | Three y/o | Treatment (Wk 2) | Treatment | Feed Day | No  | 07:55 | 07:00 - 07:59 | Morning      | 38,0 | 114 | 209,6 | 209,6 | 19,15 | 603,20 | 181,77 |
| 2019/05/27 | CH2205 | Male | Three y/o | Treatment (Wk 2) | Treatment | Feed Day | No  | 08:00 | 08:00 - 08:59 | Late Morning | 38,0 | 60  | 87,0  | 87,0  | 19,15 | 554,67 | 150,99 |
| 2019/05/27 | CH2206 | Male | Three y/o | Treatment (Wk 2) | Treatment | Feed Day | No  | 08:00 | 08:00 - 08:59 | Late Morning | 38,0 | 104 | 266,2 | 266,2 | 19,15 | 596,69 | 190,20 |
| 2019/05/27 | CH2205 | Male | Three y/o | Treatment (Wk 2) | Treatment | Feed Day | No  | 08:05 | 08:00 - 08:59 | Late Morning | 38,0 |     | 81,0  | 81,0  | 19,15 |        | 148,51 |
| 2019/05/27 | CH2206 | Male | Three y/o | Treatment (Wk 2) | Treatment | Feed Day | No  | 08:05 | 08:00 - 08:59 | Late Morning | 38,0 | 109 | 204,6 | 204,6 | 19,15 | 600,04 | 180,92 |
| 2019/05/27 | CH2205 | Male | Three y/o | Treatment (Wk 2) | Treatment | Feed Day | No  | 08:10 | 08:00 - 08:59 | Late Morning | 38,0 | 172 | 212,2 | 212,2 | 19,15 | 630,73 | 182,20 |
| 2019/05/27 | CH2206 | Male | Three y/o | Treatment (Wk 2) | Treatment | Feed Day | No  | 08:10 | 08:00 - 08:59 | Late Morning | 38,0 | 126 | 474,8 | 474,8 | 19,15 | 610,14 | 210,71 |
| 2019/05/27 | CH2205 | Male | Three y/o | Treatment (Wk 2) | Treatment | Feed Day | No  | 08:15 | 08:00 - 08:59 | Late Morning | 38,0 |     | 130,2 | 130,2 | 19,15 |        | 165,06 |
| 2019/05/27 | CH2206 | Male | Three y/o | Treatment (Wk 2) | Treatment | Feed Day | No  | 08:15 | 08:00 - 08:59 | Late Morning | 38,0 | 110 | 149,0 | 149,0 | 19,15 | 600,69 | 169,78 |
| 2019/05/27 | CH2205 | Male | Three y/o | Treatment (Wk 2) | Treatment | Feed Day | No  | 08:20 | 08:00 - 08:59 | Late Morning | 38,0 | 123 | 252,0 | 252,0 | 19,15 | 608,49 | 188,26 |
| 2019/05/27 | CH2206 | Male | Three y/o | Treatment (Wk 2) | Treatment | Feed Day | No  | 08:20 | 08:00 - 08:59 | Late Morning | 38,0 | 126 | 459,0 | 459,0 | 19,15 | 610,14 | 209,50 |
| 2019/05/27 | CH2205 | Male | Three y/o | Treatment (Wk 2) | Treatment | Feed Day | No  | 08:25 | 08:00 - 08:59 | Late Morning | 38,0 | 30  | 86,8  | 86,8  | 19,15 | 493,51 | 150,91 |
| 2019/05/27 | CH2206 | Male | Three y/o | Treatment (Wk 2) | Treatment | Feed Day | No  | 08:25 | 08:00 - 08:59 | Late Morning | 38,0 | 114 | 324,2 | 324,2 | 19,15 | 603,20 | 197,17 |
| 2019/05/27 | CH2205 | Male | Three y/o | Treatment (Wk 2) | Treatment | Feed Day | Yes | 08:30 | 08:00 - 08:59 | Late Morning | 38,0 | 102 | 517,8 | 517,8 | 19,15 | 595,30 | 213,79 |
| 2019/05/27 | CH2206 | Male | Three y/o | Treatment (Wk 2) | Treatment | Feed Day | Yes | 08:30 | 08:00 - 08:59 | Late Morning | 38,0 |     | 167,0 | 167,0 | 19,15 |        | 173,78 |
| 2019/05/27 | CH2205 | Male | Three y/o | Treatment (Wk 2) | Treatment | Feed Day | Yes | 08:35 | 08:00 - 08:59 | Late Morning | 38,0 | 118 | 231,8 | 231,8 | 19,15 | 605,61 | 185,31 |
| 2019/05/27 | CH2206 | Male | Three y/o | Treatment (Wk 2) | Treatment | Feed Day | Yes | 08:35 | 08:00 - 08:59 | Late Morning | 38,1 | 141 | 125,4 | 125,4 | 19,26 | 617,75 | 163,75 |
| 2019/05/27 | CH2205 | Male | Three y/o | Treatment (Wk 2) | Treatment | Feed Day | Yes | 08:40 | 08:00 - 08:59 | Late Morning | 38,1 |     | 263,8 | 263,8 | 19,26 |        | 189,88 |
| 2019/05/27 | CH2206 | Male | Three y/o | Treatment (Wk 2) | Treatment | Feed Day | Yes | 08:40 | 08:00 - 08:59 | Late Morning | 38,2 | 124 | 211,8 | 211,8 | 19,36 | 609,04 | 182,14 |
| 2019/05/27 | CH2205 | Male | Three y/o | Treatment (Wk 2) | Treatment | Feed Day | Yes | 08:45 | 08:00 - 08:59 | Late Morning | 38,1 | 105 | 225,4 | 225,4 | 19,26 | 597,38 | 184,33 |
| 2019/05/27 | CH2206 | Male | Three y/o | Treatment (Wk 2) | Treatment | Feed Day | Yes | 08:45 | 08:00 - 08:59 | Late Morning | 38,2 | 121 | 126,8 | 126,8 | 19,36 | 607,35 | 164,13 |
| 2019/05/27 | CH2205 | Male | Three y/o | Treatment (Wk 2) | Treatment | Feed Day | Yes | 08:50 | 08:00 - 08:59 | Late Morning | 38,1 | 110 | 94,4  | 94,4  | 19,26 | 600,69 | 153,84 |
| 2019/05/27 | CH2206 | Male | Three y/o | Treatment (Wk 2) | Treatment | Feed Day | Yes | 08:50 | 08:00 - 08:59 | Late Morning | 38,2 | 188 | 262,8 | 262,8 | 19,36 | 636,34 | 189,74 |
| 2019/05/27 | CH2205 | Male | Three y/o | Treatment (Wk 2) | Treatment | Feed Day | Yes | 08:55 | 08:00 - 08:59 | Late Morning | 38,2 |     | 246,6 | 246,6 | 19,36 |        | 187,50 |
| 2019/05/27 | CH2206 | Male | Three y/o | Treatment (Wk 2) | Treatment | Feed Day | Yes | 08:55 | 08:00 - 08:59 | Late Morning | 38,2 | 185 | 291,6 | 291,6 | 19,36 | 635,34 | 193,42 |
| 2019/05/27 | CH2205 | Male | Three y/o | Treatment (Wk 2) | Treatment | Feed Day | Yes | 09:00 | 09:00 - 09:59 | Late Morning | 38,2 | 106 | 155,8 | 155,8 | 19,36 | 598,06 | 171,35 |
| 2019/05/27 | CH2206 | Male | Three y/o | Treatment (Wk 2) | Treatment | Feed Day | Yes | 09:00 | 09:00 - 09:59 | Late Morning | 38,3 |     | 160,2 | 160,2 | 19,46 |        | 172,32 |
| 2019/05/27 | CH2205 | Male | Three y/o | Treatment (Wk 2) | Treatment | Feed Day | Yes | 09:05 | 09:00 - 09:59 | Late Morning | 38,3 |     | 59,4  | 59,4  | 19,46 |        | 137,75 |
| 2019/05/27 | CH2206 | Male | Three y/o | Treatment (Wk 2) | Treatment | Feed Day | Yes | 09:05 | 09:00 - 09:59 | Late Morning | 38,3 | 165 | 35,8  | 35,8  | 19,46 | 628,06 | 120,27 |
| 2019/05/27 | CH2205 | Male | Three y/o | Treatment (Wk 2) | Treatment | Feed Day | Yes | 09:10 | 09:00 - 09:59 | Late Morning | 38,0 | 81  | 25,8  | 25,8  | 19,15 | 578,26 | 109,02 |
| 2019/05/27 | CH2206 | Male | Three y/o | Treatment (Wk 2) | Treatment | Feed Day | Yes | 09:10 | 09:00 - 09:59 | Late Morning | 38,0 | 156 | 61,2  | 61,2  | 19,15 | 624,43 | 138,78 |
| 2019/05/27 | CH2205 | Male | Three y/o | Treatment (Wk 2) | Treatment | Feed Day | Yes | 09:15 | 09:00 - 09:59 | Late Morning | 37,7 |     | 16,2  | 16,2  | 18,85 |        | 93,13  |
| 2019/05/27 | CH2206 | Male | Three y/o | Treatment (Wk 2) | Treatment | Feed Day | Yes | 09:15 | 09:00 - 09:59 | Late Morning | 37,9 |     | 33,4  | 33,4  | 19,05 |        | 117,88 |
| 2019/05/27 | CH2205 | Male | Three y/o | Treatment (Wk 2) | Treatment | Feed Day | Yes | 09:20 | 09:00 - 09:59 | Late Morning | 37,4 |     | 17,2  | 17,2  | 18,55 |        | 95,17  |



|            |        |      |           |                  |           |          |     |       |               |              |      |     |       |       |       |        |        |
|------------|--------|------|-----------|------------------|-----------|----------|-----|-------|---------------|--------------|------|-----|-------|-------|-------|--------|--------|
| 2019/05/27 | CH2206 | Male | Three y/o | Treatment (Wk 2) | Treatment | Feed Day | Yes | 09:20 | 09:00 - 09:59 | Late Morning | 37,8 | 150 | 188,8 | 188,8 | 18,95 | 621,86 | 178,09 |
| 2019/05/27 | CH2205 | Male | Three y/o | Treatment (Wk 2) | Treatment | Feed Day | Yes | 09:25 | 09:00 - 09:59 | Late Morning | 37,6 | 51  | 33,8  | 33,8  | 18,75 | 541,20 | 118,29 |
| 2019/05/27 | CH2206 | Male | Three y/o | Treatment (Wk 2) | Treatment | Feed Day | Yes | 09:25 | 09:00 - 09:59 | Late Morning | 38,0 |     | 110,2 | 110,2 | 19,15 |        | 159,23 |
| 2019/05/27 | CH2205 | Male | Three y/o | Treatment (Wk 2) | Treatment | Feed Day | No  | 09:30 | 09:00 - 09:59 | Late Morning | 37,7 | 105 | 69,2  | 69,2  | 18,85 | 597,38 | 143,04 |
| 2019/05/27 | CH2206 | Male | Three y/o | Treatment (Wk 2) | Treatment | Feed Day | No  | 09:30 | 09:00 - 09:59 | Late Morning | 38,1 | 118 | 85,4  | 85,4  | 19,26 | 605,61 | 150,35 |
| 2019/05/27 | CH2205 | Male | Three y/o | Treatment (Wk 2) | Treatment | Feed Day | No  | 09:35 | 09:00 - 09:59 | Late Morning | 37,9 |     | 87,0  | 87,0  | 19,05 |        | 150,99 |
| 2019/05/27 | CH2206 | Male | Three y/o | Treatment (Wk 2) | Treatment | Feed Day | No  | 09:35 | 09:00 - 09:59 | Late Morning | 38,1 |     | 72,6  | 72,6  | 19,26 |        | 144,70 |
| 2019/05/27 | CH2205 | Male | Three y/o | Treatment (Wk 2) | Treatment | Feed Day | No  | 09:40 | 09:00 - 09:59 | Late Morning | 37,9 | 107 | 82,6  | 82,6  | 19,05 | 598,73 | 149,19 |
| 2019/05/27 | CH2206 | Male | Three y/o | Treatment (Wk 2) | Treatment | Feed Day | No  | 09:40 | 09:00 - 09:59 | Late Morning | 38,1 | 108 | 126,4 | 126,4 | 19,26 | 599,39 | 164,02 |
| 2019/05/27 | CH2205 | Male | Three y/o | Treatment (Wk 2) | Treatment | Feed Day | No  | 09:45 | 09:00 - 09:59 | Late Morning | 37,9 | 103 | 84,0  | 84,0  | 19,05 | 596,00 | 149,77 |
| 2019/05/27 | CH2206 | Male | Three y/o | Treatment (Wk 2) | Treatment | Feed Day | No  | 09:45 | 09:00 - 09:59 | Late Morning | 38,1 | 124 | 171,2 | 171,2 | 19,26 | 609,04 | 174,65 |
| 2019/05/27 | CH2205 | Male | Three y/o | Treatment (Wk 2) | Treatment | Feed Day | No  | 09:50 | 09:00 - 09:59 | Late Morning | 37,9 |     | 22,2  | 22,2  | 19,05 |        | 103,88 |
| 2019/05/27 | CH2206 | Male | Three y/o | Treatment (Wk 2) | Treatment | Feed Day | No  | 09:50 | 09:00 - 09:59 | Late Morning | 38,2 | 123 | 227,8 | 227,8 | 19,36 | 608,49 | 184,70 |
| 2019/05/27 | CH2205 | Male | Three y/o | Treatment (Wk 2) | Treatment | Feed Day | No  | 09:55 | 09:00 - 09:59 | Late Morning | 37,9 | 121 | 31,4  | 31,4  | 19,05 | 607,35 | 115,76 |
| 2019/05/27 | CH2206 | Male | Three y/o | Treatment (Wk 2) | Treatment | Feed Day | No  | 09:55 | 09:00 - 09:59 | Late Morning | 38,2 | 103 | 35,0  | 35,0  | 19,36 | 596,00 | 119,49 |
| 2019/05/27 | CH2205 | Male | Three y/o | Treatment (Wk 2) | Treatment | Feed Day | No  | 10:00 | 10:00 - 10:59 | Late Morning | 37,9 | 96  | 118,0 | 118,0 | 19,05 | 590,91 | 161,62 |
| 2019/05/27 | CH2206 | Male | Three y/o | Treatment (Wk 2) | Treatment | Feed Day | No  | 10:00 | 10:00 - 10:59 | Late Morning | 38,2 | 131 | 202,8 | 202,8 | 19,36 | 612,80 | 180,61 |
| 2019/05/27 | CH2205 | Male | Three y/o | Treatment (Wk 2) | Treatment | Feed Day | No  | 10:05 | 10:00 - 10:59 | Late Morning | 37,9 |     | 54,2  | 54,2  | 19,05 |        | 134,57 |
| 2019/05/27 | CH2206 | Male | Three y/o | Treatment (Wk 2) | Treatment | Feed Day | No  | 10:05 | 10:00 - 10:59 | Late Morning | 38,2 | 150 | 359,6 | 359,6 | 19,36 | 621,86 | 200,84 |
| 2019/05/27 | CH2205 | Male | Three y/o | Treatment (Wk 2) | Treatment | Feed Day | No  | 10:10 | 10:00 - 10:59 | Late Morning | 37,7 | 66  | 83,2  | 83,2  | 18,85 | 562,34 | 149,44 |
| 2019/05/27 | CH2206 | Male | Three y/o | Treatment (Wk 2) | Treatment | Feed Day | No  | 10:10 | 10:00 - 10:59 | Late Morning | 38,1 | 132 | 134,6 | 134,6 | 19,26 | 613,32 | 166,22 |
| 2019/05/27 | CH2205 | Male | Three y/o | Treatment (Wk 2) | Treatment | Feed Day | No  | 10:15 | 10:00 - 10:59 | Late Morning | 37,9 | 71  | 28,4  | 28,4  | 19,05 | 568,10 | 112,31 |
| 2019/05/27 | CH2206 | Male | Three y/o | Treatment (Wk 2) | Treatment | Feed Day | No  | 10:15 | 10:00 - 10:59 | Late Morning | 38,1 | 135 | 136,4 | 136,4 | 19,26 | 614,84 | 166,69 |
| 2019/05/27 | CH2205 | Male | Three y/o | Treatment (Wk 2) | Treatment | Feed Day | No  | 10:20 | 10:00 - 10:59 | Late Morning | 37,9 | 90  | 29,6  | 29,6  | 19,05 | 586,16 | 113,73 |
| 2019/05/27 | CH2206 | Male | Three y/o | Treatment (Wk 2) | Treatment | Feed Day | No  | 10:20 | 10:00 - 10:59 | Late Morning | 38,1 | 125 | 105,2 | 105,2 | 19,26 | 609,60 | 157,61 |
| 2019/05/27 | CH2205 | Male | Three y/o | Treatment (Wk 2) | Treatment | Feed Day | No  | 10:25 | 10:00 - 10:59 | Late Morning | 37,5 | 87  | 28,6  | 28,6  | 18,65 | 583,64 | 112,56 |
| 2019/05/27 | CH2206 | Male | Three y/o | Treatment (Wk 2) | Treatment | Feed Day | No  | 10:25 | 10:00 - 10:59 | Late Morning | 38,1 | 96  | 48,6  | 48,6  | 19,26 | 590,91 | 130,81 |
| 2019/05/27 | CH2205 | Male | Three y/o | Treatment (Wk 2) | Treatment | Feed Day | No  | 10:30 | 10:00 - 10:59 | Late Morning | 37,3 | 117 | 37,6  | 37,6  | 18,46 | 605,02 | 121,96 |
| 2019/05/27 | CH2206 | Male | Three y/o | Treatment (Wk 2) | Treatment | Feed Day | No  | 10:30 | 10:00 - 10:59 | Late Morning | 38,1 | 90  | 27,2  | 27,2  | 19,26 | 586,16 | 110,83 |
| 2019/05/27 | CH2205 | Male | Three y/o | Treatment (Wk 2) | Treatment | Feed Day | No  | 10:35 | 10:00 - 10:59 | Late Morning | 37,3 |     | 45,6  | 45,6  | 18,46 |        | 128,61 |
| 2019/05/27 | CH2206 | Male | Three y/o | Treatment (Wk 2) | Treatment | Feed Day | No  | 10:35 | 10:00 - 10:59 | Late Morning | 37,9 | 103 | 156,2 | 156,2 | 19,05 | 596,00 | 171,44 |
| 2019/05/27 | CH2205 | Male | Three y/o | Treatment (Wk 2) | Treatment | Feed Day | No  | 10:40 | 10:00 - 10:59 | Late Morning | 37,2 |     | 27,2  | 27,2  | 18,36 |        | 110,83 |
| 2019/05/27 | CH2206 | Male | Three y/o | Treatment (Wk 2) | Treatment | Feed Day | No  | 10:40 | 10:00 - 10:59 | Late Morning | 37,9 | 123 | 61,6  | 61,6  | 19,05 | 608,49 | 139,00 |
| 2019/05/27 | CH2205 | Male | Three y/o | Treatment (Wk 2) | Treatment | Feed Day | No  | 10:45 | 10:00 - 10:59 | Late Morning | 37,3 |     | 27,8  | 27,8  | 18,46 |        | 111,58 |
| 2019/05/27 | CH2206 | Male | Three y/o | Treatment (Wk 2) | Treatment | Feed Day | No  | 10:45 | 10:00 - 10:59 | Late Morning | 38,0 | 89  | 19,0  | 19,0  | 19,15 | 585,33 | 98,56  |
| 2019/05/27 | CH2205 | Male | Three y/o | Treatment (Wk 2) | Treatment | Feed Day | No  | 10:50 | 10:00 - 10:59 | Late Morning | 37,3 |     | 27,6  | 27,6  | 18,46 |        | 111,33 |
| 2019/05/27 | CH2206 | Male | Three y/o | Treatment (Wk 2) | Treatment | Feed Day | No  | 10:50 | 10:00 - 10:59 | Late Morning | 38,0 | 76  | 18,2  | 18,2  | 19,15 | 573,39 | 97,10  |
| 2019/05/27 | CH2205 | Male | Three y/o | Treatment (Wk 2) | Treatment | Feed Day | No  | 10:55 | 10:00 - 10:59 | Late Morning | 37,4 | 69  | 14,6  | 14,6  | 18,55 | 565,86 | 89,59  |
| 2019/05/27 | CH2206 | Male | Three y/o | Treatment (Wk 2) | Treatment | Feed Day | No  | 10:55 | 10:00 - 10:59 | Late Morning | 38,0 | 86  | 2,8   | 2,8   | 19,15 | 582,77 | 34,04  |
| 2019/05/27 | CH2205 | Male | Three y/o | Treatment (Wk 2) | Treatment | Feed Day | No  | 11:00 | 11:00 - 11:59 | Late Morning | 37,5 | 77  | 10,2  | 10,2  | 18,65 | 574,39 | 77,43  |
| 2019/05/27 | CH2206 | Male | Three y/o | Treatment (Wk 2) | Treatment | Feed Day | No  | 11:00 | 11:00 - 11:59 | Late Morning | 38,0 | 95  | 6,8   | 6,8   | 19,15 | 590,14 | 63,74  |
| 2019/05/27 | CH2205 | Male | Three y/o | Treatment (Wk 2) | Treatment | Feed Day | No  | 11:05 | 11:00 - 11:59 | Late Morning | 37,5 | 69  | 11,2  | 11,2  | 18,65 | 565,86 | 80,59  |
| 2019/05/27 | CH2206 | Male | Three y/o | Treatment (Wk 2) | Treatment | Feed Day | No  | 11:05 | 11:00 - 11:59 | Late Morning | 38,0 | 63  | 4,4   | 4,4   | 19,15 | 558,62 | 49,12  |
| 2019/05/27 | CH2205 | Male | Three y/o | Treatment (Wk 2) | Treatment | Feed Day | No  | 11:10 | 11:00 - 11:59 | Late Morning | 37,6 | 62  | 11,2  | 11,2  | 18,75 | 557,33 | 80,59  |
| 2019/05/27 | CH2206 | Male | Three y/o | Treatment (Wk 2) | Treatment | Feed Day | No  | 11:10 | 11:00 - 11:59 | Late Morning | 38,0 | 92  | 5,0   | 5,0   | 19,15 | 587,78 | 53,41  |
| 2019/05/27 | CH2205 | Male | Three y/o | Treatment (Wk 2) | Treatment | Feed Day | No  | 11:15 | 11:00 - 11:59 | Late Morning | 37,6 | 64  | 16,0  | 16,0  | 18,75 | 559,88 | 92,71  |
| 2019/05/27 | CH2206 | Male | Three y/o | Treatment (Wk 2) | Treatment | Feed Day | No  | 11:15 | 11:00 - 11:59 | Late Morning | 38,0 | 84  | 4,2   | 4,2   | 19,15 | 581,01 | 47,57  |
| 2019/05/27 | CH2205 | Male | Three y/o | Treatment (Wk 2) | Treatment | Feed Day | No  | 11:20 | 11:00 - 11:59 | Late Morning | 37,6 | 68  | 27,0  | 27,0  | 18,75 | 564,71 | 110,58 |
| 2019/05/27 | CH2206 | Male | Three y/o | Treatment (Wk 2) | Treatment | Feed Day | No  | 11:20 | 11:00 - 11:59 | Late Morning | 38,0 | 74  | 23,8  | 23,8  | 19,15 | 571,33 | 106,26 |
| 2019/05/27 | CH2205 | Male | Three y/o | Treatment (Wk 2) | Treatment | Feed Day | No  | 11:25 | 11:00 - 11:59 | Late Morning | 37,6 |     | 31,2  | 31,2  | 18,75 |        | 115,54 |
| 2019/05/27 | CH2206 | Male | Three y/o | Treatment (Wk 2) | Treatment | Feed Day | No  | 11:25 | 11:00 - 11:59 | Late Morning | 38,0 | 83  | 49,0  | 49,0  | 19,15 | 580,11 | 131,09 |
| 2019/05/27 | CH2205 | Male | Three y/o | Treatment (Wk 2) | Treatment | Feed Day | No  | 11:30 | 11:00 - 11:59 | Late Morning | 37,6 | 145 | 92,0  | 92,0  | 18,75 | 619,62 | 152,94 |
| 2019/05/27 | CH2206 | Male | Three y/o | Treatment (Wk 2) | Treatment | Feed Day | No  | 11:30 | 11:00 - 11:59 | Late Morning | 37,9 |     | 64,0  | 64,0  | 19,05 |        | 140,33 |
| 2019/05/27 | CH2205 | Male | Three y/o | Treatment (Wk 2) | Treatment | Feed Day | No  | 11:35 | 11:00 - 11:59 | Late Morning | 37,5 | 92  | 43,8  | 43,8  | 18,65 | 587,78 | 127,22 |
| 2019/05/27 | CH2206 | Male | Three y/o | Treatment (Wk 2) | Treatment | Feed Day | No  | 11:35 | 11:00 - 11:59 | Late Morning | 37,9 | 92  | 44,2  | 44,2  | 19,05 | 587,78 | 127,53 |
| 2019/05/27 | CH2205 | Male | Three y/o | Treatment (Wk 2) | Treatment | Feed Day | No  | 11:40 | 11:00 - 11:59 | Late Morning | 37,6 | 120 | 59,6  | 59,6  | 18,75 | 606,78 | 137,86 |
| 2019/05/27 | CH2206 | Male | Three y/o | Treatment (Wk 2) | Treatment | Feed Day | No  | 11:40 | 11:00 - 11:59 | Late Morning | 37,8 | 84  | 47,2  | 47,2  | 18,95 | 581,01 | 129,80 |
| 2019/05/27 | CH2205 | Male | Three y/o | Treatment (Wk 2) | Treatment | Feed Day | No  | 11:45 | 11:00 - 11:59 | Late Morning | 37,6 | 62  | 31,4  | 31,4  | 18,75 | 557,33 | 115,76 |
| 2019/05/27 | CH2206 | Male | Three y/o | Treatment (Wk 2) | Treatment | Feed Day | No  | 11:45 | 11:00 - 11:59 | Late Morning | 37,7 | 79  | 46,8  | 46,8  | 18,85 | 576,36 | 129,50 |
| 2019/05/27 | CH2205 | Male | Three y/o | Treatment (Wk 2) | Treatment | Feed Day | No  | 11:50 | 11:00 - 11:59 | Late Morning | 37,6 |     | 34,0  | 34,0  | 18,75 |        | 118,49 |
| 2019/05/27 | CH2206 | Male | Three y/o | Treatment (Wk 2) | Treatment | Feed Day | No  | 11:50 | 11:00 - 11:59 | Late Morning | 37,7 | 48  | 47,8  | 47,8  | 18,85 | 536,04 | 130,23 |
| 2019/05/27 | CH2205 | Male | Three y/o | Treatment (Wk 2) | Treatment | Feed Day | No  | 11:55 | 11:00 - 11:59 | Late Morning | 37,5 |     | 28,0  | 28,0  | 18,65 |        | 111,83 |
| 2019/05/27 | CH2206 | Male | Three y/o | Treatment (Wk 2) | Treatment | Feed Day | No  | 11:55 | 11:00 - 11:59 | Late Morning | 37,6 | 97  | 39,2  | 39,2  | 18,75 | 591,66 | 123,39 |
| 2019/05/27 | CH2205 | Male | Three y/o | Treatment (Wk 2) | Treatment | Feed Day | No  | 12:00 | 12:00 - 12:59 | Afternoon    | 37,3 | 65  | 24,8  | 24,8  | 18,46 | 561,12 | 107,67 |
| 2019/05/27 | CH2206 | Male | Three y/o | Treatment (Wk 2) | Treatment | Feed Day | No  | 12:00 | 12:00 - 12:59 | Afternoon    | 37,7 | 47  | 64,2  | 64,2  | 18,85 | 534,23 | 140,44 |
| 2019/05/27 | CH2205 | Male | Three y/o | Treatment (Wk 2) | Treatment | Feed Day | No  | 12:05 | 12:00 - 12:59 | Afternoon    | 37,3 | 172 | 33,8  | 33,8  | 18,46 | 630,73 | 118,29 |
| 2019/05/27 | CH2206 | Male | Three y/o | Treatment (Wk 2) | Treatment | Feed Day | No  | 12:05 | 12:00 - 12:59 | Afternoon    | 37,7 | 50  | 60,8  | 60,8  | 18,85 | 539,52 | 138,55 |
| 2019/05/27 | CH2205 | Male | Three y/o | Treatment (Wk 2) | Treatment | Feed Day | No  | 12:10 | 12:00 - 12:59 | Afternoon    | 37,2 |     | 24,6  | 24,6  | 18,36 |        | 107,39 |
| 2019/05/27 | CH2206 | Male | Three y/o | Treatment (Wk 2) | Treatment | Feed Day | No  | 12:10 | 12:00 - 12:59 | Afternoon    | 37,5 | 82  | 62,8  | 62,8  | 18,65 | 579,19 | 139,67 |
| 2019/05/27 | CH2205 | Male | Three y/o | Treatment (Wk 2) | Treatment | Feed Day | No  | 12:15 | 12:00 - 12:59 | Afternoon    | 37,2 | 61  | 20,8  | 20,8  | 18,36 | 556,01 | 101,65 |



|            |        |      |           |                  |           |          |    |       |               |           |      |     |       |       |       |        |        |
|------------|--------|------|-----------|------------------|-----------|----------|----|-------|---------------|-----------|------|-----|-------|-------|-------|--------|--------|
| 2019/05/27 | CH2206 | Male | Three y/o | Treatment (Wk 2) | Treatment | Feed Day | No | 12:15 | 12:00 - 12:59 | Afternoon | 37,5 | 88  | 58,8  | 58,8  | 18,65 | 584,49 | 137,39 |
| 2019/05/27 | CH2205 | Male | Three y/o | Treatment (Wk 2) | Treatment | Feed Day | No | 12:20 | 12:00 - 12:59 | Afternoon | 37,3 | 93  | 22,4  | 22,4  | 18,46 | 588,58 | 104,19 |
| 2019/05/27 | CH2206 | Male | Three y/o | Treatment (Wk 2) | Treatment | Feed Day | No | 12:20 | 12:00 - 12:59 | Afternoon | 37,4 | 66  | 55,6  | 55,6  | 18,55 | 562,34 | 135,46 |
| 2019/05/27 | CH2205 | Male | Three y/o | Treatment (Wk 2) | Treatment | Feed Day | No | 12:25 | 12:00 - 12:59 | Afternoon | 37,4 | 92  | 17,6  | 17,6  | 18,55 | 587,78 | 95,95  |
| 2019/05/27 | CH2206 | Male | Three y/o | Treatment (Wk 2) | Treatment | Feed Day | No | 12:25 | 12:00 - 12:59 | Afternoon | 37,3 | 84  | 3,0   | 3,0   | 18,46 | 581,01 | 36,34  |
| 2019/05/27 | CH2205 | Male | Three y/o | Treatment (Wk 2) | Treatment | Feed Day | No | 12:30 | 12:00 - 12:59 | Afternoon | 37,5 | 50  | 24,8  | 24,8  | 18,65 | 539,52 | 107,67 |
| 2019/05/27 | CH2206 | Male | Three y/o | Treatment (Wk 2) | Treatment | Feed Day | No | 12:30 | 12:00 - 12:59 | Afternoon | 37,4 | 76  | 6,2   | 6,2   | 18,55 | 573,39 | 60,63  |
| 2019/05/27 | CH2205 | Male | Three y/o | Treatment (Wk 2) | Treatment | Feed Day | No | 12:35 | 12:00 - 12:59 | Afternoon | 37,5 | 55  | 20,2  | 20,2  | 18,65 | 547,52 | 100,65 |
| 2019/05/27 | CH2206 | Male | Three y/o | Treatment (Wk 2) | Treatment | Feed Day | No | 12:35 | 12:00 - 12:59 | Afternoon | 37,5 | 90  | 33,0  | 33,0  | 18,65 | 586,16 | 117,47 |
| 2019/05/27 | CH2205 | Male | Three y/o | Treatment (Wk 2) | Treatment | Feed Day | No | 12:40 | 12:00 - 12:59 | Afternoon | 37,5 | 60  | 21,4  | 21,4  | 18,65 | 554,67 | 102,63 |
| 2019/05/27 | CH2206 | Male | Three y/o | Treatment (Wk 2) | Treatment | Feed Day | No | 12:40 | 12:00 - 12:59 | Afternoon | 37,7 | 92  | 36,8  | 36,8  | 18,85 | 587,78 | 121,22 |
| 2019/05/27 | CH2205 | Male | Three y/o | Treatment (Wk 2) | Treatment | Feed Day | No | 12:45 | 12:00 - 12:59 | Afternoon | 37,6 | 88  | 9,0   | 9,0   | 18,75 | 584,49 | 73,19  |
| 2019/05/27 | CH2206 | Male | Three y/o | Treatment (Wk 2) | Treatment | Feed Day | No | 12:45 | 12:00 - 12:59 | Afternoon | 37,8 | 84  | 30,2  | 30,2  | 18,95 | 581,01 | 114,42 |
| 2019/05/27 | CH2205 | Male | Three y/o | Treatment (Wk 2) | Treatment | Feed Day | No | 12:50 | 12:00 - 12:59 | Afternoon | 37,7 | 60  | 11,2  | 11,2  | 18,85 | 554,67 | 80,59  |
| 2019/05/27 | CH2206 | Male | Three y/o | Treatment (Wk 2) | Treatment | Feed Day | No | 12:50 | 12:00 - 12:59 | Afternoon | 37,8 | 105 | 33,0  | 33,0  | 18,95 | 597,38 | 117,47 |
| 2019/05/27 | CH2205 | Male | Three y/o | Treatment (Wk 2) | Treatment | Feed Day | No | 12:55 | 12:00 - 12:59 | Afternoon | 37,7 | 95  | 11,6  | 11,6  | 18,85 | 590,14 | 81,78  |
| 2019/05/27 | CH2206 | Male | Three y/o | Treatment (Wk 2) | Treatment | Feed Day | No | 12:55 | 12:00 - 12:59 | Afternoon | 37,8 |     | 70,4  | 70,4  | 18,95 |        | 143,64 |
| 2019/05/27 | CH2205 | Male | Three y/o | Treatment (Wk 2) | Treatment | Feed Day | No | 13:00 | 13:00 - 13:59 | Afternoon | 37,7 | 70  | 4,8   | 4,8   | 18,85 | 566,99 | 52,04  |
| 2019/05/27 | CH2206 | Male | Three y/o | Treatment (Wk 2) | Treatment | Feed Day | No | 13:00 | 13:00 - 13:59 | Afternoon | 37,8 | 84  | 22,6  | 22,6  | 18,95 | 581,01 | 104,49 |
| 2019/05/27 | CH2205 | Male | Three y/o | Treatment (Wk 2) | Treatment | Feed Day | No | 13:05 | 13:00 - 13:59 | Afternoon | 37,8 | 68  | 4,0   | 4,0   | 18,95 | 564,71 | 45,94  |
| 2019/05/27 | CH2206 | Male | Three y/o | Treatment (Wk 2) | Treatment | Feed Day | No | 13:05 | 13:00 - 13:59 | Afternoon | 37,8 | 83  | 21,8  | 21,8  | 18,95 | 580,11 | 103,26 |
| 2019/05/27 | CH2205 | Male | Three y/o | Treatment (Wk 2) | Treatment | Feed Day | No | 13:10 | 13:00 - 13:59 | Afternoon | 37,9 | 95  | 16,4  | 16,4  | 19,05 | 590,14 | 93,55  |
| 2019/05/27 | CH2206 | Male | Three y/o | Treatment (Wk 2) | Treatment | Feed Day | No | 13:10 | 13:00 - 13:59 | Afternoon | 37,5 | 47  | 22,0  | 22,0  | 18,65 | 534,23 | 103,57 |
| 2019/05/27 | CH2205 | Male | Three y/o | Treatment (Wk 2) | Treatment | Feed Day | No | 13:15 | 13:00 - 13:59 | Afternoon | 37,7 | 177 | 34,0  | 34,0  | 18,85 | 632,55 | 118,49 |
| 2019/05/27 | CH2206 | Male | Three y/o | Treatment (Wk 2) | Treatment | Feed Day | No | 13:15 | 13:00 - 13:59 | Afternoon | 37,5 | 98  | 14,8  | 14,8  | 18,65 | 592,41 | 90,05  |
| 2019/05/27 | CH2205 | Male | Three y/o | Treatment (Wk 2) | Treatment | Feed Day | No | 13:20 | 13:00 - 13:59 | Afternoon | 37,7 | 67  | 19,8  | 19,8  | 18,85 | 563,53 | 99,97  |
| 2019/05/27 | CH2206 | Male | Three y/o | Treatment (Wk 2) | Treatment | Feed Day | No | 13:20 | 13:00 - 13:59 | Afternoon | 37,5 | 81  | 30,2  | 30,2  | 18,65 | 578,26 | 114,42 |
| 2019/05/27 | CH2205 | Male | Three y/o | Treatment (Wk 2) | Treatment | Feed Day | No | 13:25 | 13:00 - 13:59 | Afternoon | 37,6 | 85  | 12,8  | 12,8  | 18,75 | 581,90 | 85,12  |
| 2019/05/27 | CH2206 | Male | Three y/o | Treatment (Wk 2) | Treatment | Feed Day | No | 13:25 | 13:00 - 13:59 | Afternoon | 37,7 | 73  | 34,4  | 34,4  | 18,85 | 570,27 | 118,90 |
| 2019/05/27 | CH2205 | Male | Three y/o | Treatment (Wk 2) | Treatment | Feed Day | No | 13:30 | 13:00 - 13:59 | Afternoon | 37,6 | 68  | 12,0  | 12,0  | 18,75 | 564,71 | 82,93  |
| 2019/05/27 | CH2206 | Male | Three y/o | Treatment (Wk 2) | Treatment | Feed Day | No | 13:30 | 13:00 - 13:59 | Afternoon | 37,8 | 86  | 33,6  | 33,6  | 18,95 | 582,77 | 118,09 |
| 2019/05/27 | CH2205 | Male | Three y/o | Treatment (Wk 2) | Treatment | Feed Day | No | 13:35 | 13:00 - 13:59 | Afternoon | 37,6 | 66  | 13,2  | 13,2  | 18,75 | 562,34 | 86,17  |
| 2019/05/27 | CH2206 | Male | Three y/o | Treatment (Wk 2) | Treatment | Feed Day | No | 13:35 | 13:00 - 13:59 | Afternoon | 37,9 | 93  | 31,2  | 31,2  | 19,05 | 588,58 | 115,54 |
| 2019/05/27 | CH2205 | Male | Three y/o | Treatment (Wk 2) | Treatment | Feed Day | No | 13:40 | 13:00 - 13:59 | Afternoon | 37,6 | 70  | 11,4  | 11,4  | 18,75 | 566,99 | 81,19  |
| 2019/05/27 | CH2206 | Male | Three y/o | Treatment (Wk 2) | Treatment | Feed Day | No | 13:40 | 13:00 - 13:59 | Afternoon | 37,9 | 76  | 27,2  | 27,2  | 19,05 | 573,39 | 110,83 |
| 2019/05/27 | CH2205 | Male | Three y/o | Treatment (Wk 2) | Treatment | Feed Day | No | 13:45 | 13:00 - 13:59 | Afternoon | 37,6 | 77  | 6,8   | 6,8   | 18,75 | 574,39 | 63,74  |
| 2019/05/27 | CH2206 | Male | Three y/o | Treatment (Wk 2) | Treatment | Feed Day | No | 13:45 | 13:00 - 13:59 | Afternoon | 37,9 | 80  | 9,4   | 9,4   | 19,05 | 577,31 | 74,66  |
| 2019/05/27 | CH2205 | Male | Three y/o | Treatment (Wk 2) | Treatment | Feed Day | No | 13:50 | 13:00 - 13:59 | Afternoon | 37,7 | 63  | 3,2   | 3,2   | 18,85 | 558,62 | 38,49  |
| 2019/05/27 | CH2206 | Male | Three y/o | Treatment (Wk 2) | Treatment | Feed Day | No | 13:50 | 13:00 - 13:59 | Afternoon | 37,9 | 47  | 11,8  | 11,8  | 19,05 | 534,23 | 82,36  |
| 2019/05/27 | CH2205 | Male | Three y/o | Treatment (Wk 2) | Treatment | Feed Day | No | 13:55 | 13:00 - 13:59 | Afternoon | 37,7 | 88  | 5,2   | 5,2   | 18,85 | 584,49 | 54,72  |
| 2019/05/27 | CH2206 | Male | Three y/o | Treatment (Wk 2) | Treatment | Feed Day | No | 13:55 | 13:00 - 13:59 | Afternoon | 37,9 | 94  | 18,4  | 18,4  | 19,05 | 589,37 | 97,47  |
| 2019/05/27 | CH2205 | Male | Three y/o | Treatment (Wk 2) | Treatment | Feed Day | No | 14:00 | 14:00 - 14:59 | Afternoon | 37,7 | 113 | 23,6  | 23,6  | 18,85 | 602,58 | 105,97 |
| 2019/05/27 | CH2206 | Male | Three y/o | Treatment (Wk 2) | Treatment | Feed Day | No | 14:00 | 14:00 - 14:59 | Afternoon | 37,9 | 51  | 52,6  | 52,6  | 19,05 | 541,20 | 133,54 |
| 2019/05/27 | CH2205 | Male | Three y/o | Treatment (Wk 2) | Treatment | Feed Day | No | 14:05 | 14:00 - 14:59 | Afternoon | 37,6 | 53  | 21,6  | 21,6  | 18,75 | 544,43 | 102,94 |
| 2019/05/27 | CH2206 | Male | Three y/o | Treatment (Wk 2) | Treatment | Feed Day | No | 14:05 | 14:00 - 14:59 | Afternoon | 38,0 |     | 75,0  | 75,0  | 19,15 |        | 145,83 |
| 2019/05/27 | CH2205 | Male | Three y/o | Treatment (Wk 2) | Treatment | Feed Day | No | 14:10 | 14:00 - 14:59 | Afternoon | 37,6 | 172 | 121,4 | 121,4 | 18,75 | 630,73 | 162,61 |
| 2019/05/27 | CH2206 | Male | Three y/o | Treatment (Wk 2) | Treatment | Feed Day | No | 14:10 | 14:00 - 14:59 | Afternoon | 38,0 |     | 117,8 | 117,8 | 19,15 |        | 161,56 |
| 2019/05/27 | CH2205 | Male | Three y/o | Treatment (Wk 2) | Treatment | Feed Day | No | 14:15 | 14:00 - 14:59 | Afternoon | 37,6 | 104 | 42,4  | 42,4  | 18,75 | 596,69 | 126,10 |
| 2019/05/27 | CH2206 | Male | Three y/o | Treatment (Wk 2) | Treatment | Feed Day | No | 14:15 | 14:00 - 14:59 | Afternoon | 38,0 | 103 | 17,2  | 17,2  | 19,15 | 596,00 | 95,17  |
| 2019/05/27 | CH2205 | Male | Three y/o | Treatment (Wk 2) | Treatment | Feed Day | No | 14:20 | 14:00 - 14:59 | Afternoon | 37,6 | 70  | 32,2  | 32,2  | 18,75 | 566,99 | 116,63 |
| 2019/05/27 | CH2206 | Male | Three y/o | Treatment (Wk 2) | Treatment | Feed Day | No | 14:20 | 14:00 - 14:59 | Afternoon | 38,0 | 91  | 23,4  | 23,4  | 19,15 | 586,98 | 105,68 |
| 2019/05/27 | CH2205 | Male | Three y/o | Treatment (Wk 2) | Treatment | Feed Day | No | 14:25 | 14:00 - 14:59 | Afternoon | 37,7 | 63  | 13,2  | 13,2  | 18,85 | 558,62 | 86,17  |
| 2019/05/27 | CH2206 | Male | Three y/o | Treatment (Wk 2) | Treatment | Feed Day | No | 14:25 | 14:00 - 14:59 | Afternoon | 38,0 | 90  | 14,4  | 14,4  | 19,15 | 586,16 | 89,12  |
| 2019/05/27 | CH2205 | Male | Three y/o | Treatment (Wk 2) | Treatment | Feed Day | No | 14:30 | 14:00 - 14:59 | Afternoon | 37,9 |     | 3,6   | 3,6   | 19,05 |        | 42,42  |
| 2019/05/27 | CH2206 | Male | Three y/o | Treatment (Wk 2) | Treatment | Feed Day | No | 14:30 | 14:00 - 14:59 | Afternoon | 38,0 | 107 | 4,0   | 4,0   | 19,15 | 598,73 | 45,94  |
| 2019/05/27 | CH2205 | Male | Three y/o | Treatment (Wk 2) | Treatment | Feed Day | No | 14:35 | 14:00 - 14:59 | Afternoon | 37,9 | 95  | 79,4  | 79,4  | 19,05 | 590,14 | 147,81 |
| 2019/05/27 | CH2206 | Male | Three y/o | Treatment (Wk 2) | Treatment | Feed Day | No | 14:35 | 14:00 - 14:59 | Afternoon | 38,1 | 96  | 3,4   | 3,4   | 19,26 | 590,91 | 40,51  |
| 2019/05/27 | CH2205 | Male | Three y/o | Treatment (Wk 2) | Treatment | Feed Day | No | 14:40 | 14:00 - 14:59 | Afternoon | 37,9 | 65  | 5,0   | 5,0   | 19,05 | 561,12 | 53,41  |
| 2019/05/27 | CH2206 | Male | Three y/o | Treatment (Wk 2) | Treatment | Feed Day | No | 14:40 | 14:00 - 14:59 | Afternoon | 38,1 | 98  | 5,8   | 5,8   | 19,26 | 592,41 | 58,39  |
| 2019/05/27 | CH2205 | Male | Three y/o | Treatment (Wk 2) | Treatment | Feed Day | No | 14:45 | 14:00 - 14:59 | Afternoon | 37,9 | 72  | 6,8   | 6,8   | 19,05 | 569,20 | 63,74  |
| 2019/05/27 | CH2206 | Male | Three y/o | Treatment (Wk 2) | Treatment | Feed Day | No | 14:45 | 14:00 - 14:59 | Afternoon | 38,1 | 109 | 35,2  | 35,2  | 19,26 | 600,04 | 119,69 |
| 2019/05/27 | CH2205 | Male | Three y/o | Treatment (Wk 2) | Treatment | Feed Day | No | 14:50 | 14:00 - 14:59 | Afternoon | 38,0 | 90  | 4,0   | 4,0   | 19,15 | 586,16 | 45,94  |
| 2019/05/27 | CH2206 | Male | Three y/o | Treatment (Wk 2) | Treatment | Feed Day | No | 14:50 | 14:00 - 14:59 | Afternoon | 38,1 | 71  | 40,0  | 40,0  | 19,26 | 568,10 | 124,09 |
| 2019/05/27 | CH2205 | Male | Three y/o | Treatment (Wk 2) | Treatment | Feed Day | No | 14:55 | 14:00 - 14:59 | Afternoon | 38,0 | 53  | 5,4   | 5,4   | 19,15 | 544,43 | 55,99  |
| 2019/05/27 | CH2206 | Male | Three y/o | Treatment (Wk 2) | Treatment | Feed Day | No | 14:55 | 14:00 - 14:59 | Afternoon | 38,1 | 80  | 45,0  | 45,0  | 19,26 | 577,31 | 128,15 |
| 2019/05/27 | CH2205 | Male | Three y/o | Treatment (Wk 2) | Treatment | Feed Day | No | 15:00 | 15:00 - 15:59 | Afternoon | 38,0 | 49  | 5,2   | 5,2   | 19,15 | 537,80 | 54,72  |
| 2019/05/27 | CH2206 | Male | Three y/o | Treatment (Wk 2) | Treatment | Feed Day | No | 15:00 | 15:00 - 15:59 | Afternoon | 38,1 | 76  | 53,2  | 53,2  | 19,26 | 573,39 | 133,93 |
| 2019/05/27 | CH2205 | Male | Three y/o | Treatment (Wk 2) | Treatment | Feed Day | No | 15:05 | 15:00 - 15:59 | Afternoon | 38,0 | 66  | 7,8   | 7,8   | 19,15 | 562,34 | 68,36  |
| 2019/05/27 | CH2206 | Male | Three y/o | Treatment (Wk 2) | Treatment | Feed Day | No | 15:05 | 15:00 - 15:59 | Afternoon | 38,1 | 63  | 49,8  | 49,8  | 19,26 | 558,62 | 131,65 |
| 2019/05/27 | CH2205 | Male | Three y/o | Treatment (Wk 2) | Treatment | Feed Day | No | 15:10 | 15:00 - 15:59 | Afternoon | 38,0 | 69  | 4,0   | 4,0   | 19,15 | 565,86 | 45,94  |



|            |        |      |           |                  |           |          |    |       |               |           |      |     |       |       |       |        |        |
|------------|--------|------|-----------|------------------|-----------|----------|----|-------|---------------|-----------|------|-----|-------|-------|-------|--------|--------|
| 2019/05/27 | CH2206 | Male | Three y/o | Treatment (Wk 2) | Treatment | Feed Day | No | 15:10 | 15:00 - 15:59 | Afternoon | 38,2 | 77  | 48,6  | 48,6  | 19,36 | 574,39 | 130,81 |
| 2019/05/27 | CH2205 | Male | Three y/o | Treatment (Wk 2) | Treatment | Feed Day | No | 15:15 | 15:00 - 15:59 | Afternoon | 38,0 | 72  | 4,4   | 4,4   | 19,15 | 569,20 | 49,12  |
| 2019/05/27 | CH2206 | Male | Three y/o | Treatment (Wk 2) | Treatment | Feed Day | No | 15:15 | 15:00 - 15:59 | Afternoon | 38,2 | 92  | 36,6  | 36,6  | 19,36 | 587,78 | 121,03 |
| 2019/05/27 | CH2205 | Male | Three y/o | Treatment (Wk 2) | Treatment | Feed Day | No | 15:20 | 15:00 - 15:59 | Afternoon | 38,0 | 62  | 4,2   | 4,2   | 19,15 | 557,33 | 47,57  |
| 2019/05/27 | CH2206 | Male | Three y/o | Treatment (Wk 2) | Treatment | Feed Day | No | 15:20 | 15:00 - 15:59 | Afternoon | 38,2 | 97  | 42,6  | 42,6  | 19,36 | 591,66 | 126,26 |
| 2019/05/27 | CH2205 | Male | Three y/o | Treatment (Wk 2) | Treatment | Feed Day | No | 15:25 | 15:00 - 15:59 | Afternoon | 38,0 | 56  | 2,4   | 2,4   | 19,15 | 549,01 | 28,91  |
| 2019/05/27 | CH2206 | Male | Three y/o | Treatment (Wk 2) | Treatment | Feed Day | No | 15:25 | 15:00 - 15:59 | Afternoon | 38,2 | 94  | 48,2  | 48,2  | 19,36 | 589,37 | 130,52 |
| 2019/05/27 | CH2205 | Male | Three y/o | Treatment (Wk 2) | Treatment | Feed Day | No | 15:30 | 15:00 - 15:59 | Afternoon | 38,0 | 83  | 6,2   | 6,2   | 19,15 | 580,11 | 60,63  |
| 2019/05/27 | CH2206 | Male | Three y/o | Treatment (Wk 2) | Treatment | Feed Day | No | 15:30 | 15:00 - 15:59 | Afternoon | 38,2 |     | 55,0  | 55,0  | 19,36 |        | 135,08 |
| 2019/05/27 | CH2205 | Male | Three y/o | Treatment (Wk 2) | Treatment | Feed Day | No | 15:35 | 15:00 - 15:59 | Afternoon | 38,0 | 60  | 2,2   | 2,2   | 19,15 | 554,67 | 26,02  |
| 2019/05/27 | CH2206 | Male | Three y/o | Treatment (Wk 2) | Treatment | Feed Day | No | 15:35 | 15:00 - 15:59 | Afternoon | 38,2 | 86  | 54,8  | 54,8  | 19,36 | 582,77 | 134,96 |
| 2019/05/27 | CH2205 | Male | Three y/o | Treatment (Wk 2) | Treatment | Feed Day | No | 15:40 | 15:00 - 15:59 | Afternoon | 38,0 | 82  | 108,6 | 108,6 | 19,15 | 579,19 | 158,72 |
| 2019/05/27 | CH2206 | Male | Three y/o | Treatment (Wk 2) | Treatment | Feed Day | No | 15:40 | 15:00 - 15:59 | Afternoon | 38,2 | 104 | 138,6 | 138,6 | 19,36 | 596,69 | 167,25 |
| 2019/05/27 | CH2205 | Male | Three y/o | Treatment (Wk 2) | Treatment | Feed Day | No | 15:45 | 15:00 - 15:59 | Afternoon | 38,0 | 91  | 27,2  | 27,2  | 19,15 | 586,98 | 110,83 |
| 2019/05/27 | CH2206 | Male | Three y/o | Treatment (Wk 2) | Treatment | Feed Day | No | 15:45 | 15:00 - 15:59 | Afternoon | 38,2 | 174 | 78,2  | 78,2  | 19,36 | 631,46 | 147,28 |
| 2019/05/27 | CH2205 | Male | Three y/o | Treatment (Wk 2) | Treatment | Feed Day | No | 15:50 | 15:00 - 15:59 | Afternoon | 37,9 | 91  | 35,2  | 35,2  | 19,05 | 586,98 | 119,69 |
| 2019/05/27 | CH2206 | Male | Three y/o | Treatment (Wk 2) | Treatment | Feed Day | No | 15:50 | 15:00 - 15:59 | Afternoon | 38,2 | 113 | 37,4  | 37,4  | 19,36 | 602,58 | 121,77 |
| 2019/05/27 | CH2205 | Male | Three y/o | Treatment (Wk 2) | Treatment | Feed Day | No | 15:55 | 15:00 - 15:59 | Afternoon | 37,9 |     | 46,8  | 46,8  | 19,05 |        | 129,50 |
| 2019/05/27 | CH2206 | Male | Three y/o | Treatment (Wk 2) | Treatment | Feed Day | No | 15:55 | 15:00 - 15:59 | Afternoon | 38,2 | 90  | 44,0  | 44,0  | 19,36 | 586,16 | 127,37 |
| 2019/05/27 | CH2205 | Male | Three y/o | Treatment (Wk 2) | Treatment | Feed Day | No | 16:00 | 16:00 - 16:59 | Evening   | 37,8 | 110 | 3,6   | 3,6   | 18,95 | 600,69 | 42,42  |
| 2019/05/27 | CH2206 | Male | Three y/o | Treatment (Wk 2) | Treatment | Feed Day | No | 16:00 | 16:00 - 16:59 | Evening   | 38,1 | 84  | 46,6  | 46,6  | 19,26 | 581,01 | 129,35 |
| 2019/05/27 | CH2205 | Male | Three y/o | Treatment (Wk 2) | Treatment | Feed Day | No | 16:05 | 16:00 - 16:59 | Evening   | 37,9 | 62  | 13,6  | 13,6  | 19,05 | 557,33 | 87,18  |
| 2019/05/27 | CH2206 | Male | Three y/o | Treatment (Wk 2) | Treatment | Feed Day | No | 16:05 | 16:00 - 16:59 | Evening   | 38,1 | 50  | 41,6  | 41,6  | 19,26 | 539,52 | 125,44 |
| 2019/05/27 | CH2205 | Male | Three y/o | Treatment (Wk 2) | Treatment | Feed Day | No | 16:10 | 16:00 - 16:59 | Evening   | 37,8 | 100 | 94,4  | 94,4  | 18,95 | 593,87 | 153,84 |
| 2019/05/27 | CH2206 | Male | Three y/o | Treatment (Wk 2) | Treatment | Feed Day | No | 16:10 | 16:00 - 16:59 | Evening   | 38,1 | 63  | 59,0  | 59,0  | 19,26 | 558,62 | 137,51 |
| 2019/05/27 | CH2205 | Male | Three y/o | Treatment (Wk 2) | Treatment | Feed Day | No | 16:15 | 16:00 - 16:59 | Evening   | 37,9 | 72  | 20,6  | 20,6  | 19,05 | 569,20 | 101,32 |
| 2019/05/27 | CH2206 | Male | Three y/o | Treatment (Wk 2) | Treatment | Feed Day | No | 16:15 | 16:00 - 16:59 | Evening   | 38,1 | 90  | 7,2   | 7,2   | 19,26 | 586,16 | 65,66  |
| 2019/05/27 | CH2205 | Male | Three y/o | Treatment (Wk 2) | Treatment | Feed Day | No | 16:20 | 16:00 - 16:59 | Evening   | 37,9 |     | 19,4  | 19,4  | 19,05 |        | 99,28  |
| 2019/05/27 | CH2206 | Male | Three y/o | Treatment (Wk 2) | Treatment | Feed Day | No | 16:20 | 16:00 - 16:59 | Evening   | 38,0 | 74  | 15,2  | 15,2  | 19,15 | 571,33 | 90,96  |
| 2019/05/27 | CH2205 | Male | Three y/o | Treatment (Wk 2) | Treatment | Feed Day | No | 16:25 | 16:00 - 16:59 | Evening   | 37,8 |     | 40,2  | 40,2  | 18,95 |        | 124,26 |
| 2019/05/27 | CH2206 | Male | Three y/o | Treatment (Wk 2) | Treatment | Feed Day | No | 16:25 | 16:00 - 16:59 | Evening   | 38,0 | 87  | 29,2  | 29,2  | 19,15 | 583,64 | 113,27 |
| 2019/05/27 | CH2205 | Male | Three y/o | Treatment (Wk 2) | Treatment | Feed Day | No | 16:30 | 16:00 - 16:59 | Evening   | 37,7 | 60  | 62,8  | 62,8  | 18,85 | 554,67 | 139,67 |
| 2019/05/27 | CH2206 | Male | Three y/o | Treatment (Wk 2) | Treatment | Feed Day | No | 16:30 | 16:00 - 16:59 | Evening   | 38,0 | 147 | 264,4 | 264,4 | 19,15 | 620,52 | 189,96 |
| 2019/05/27 | CH2205 | Male | Three y/o | Treatment (Wk 2) | Treatment | Feed Day | No | 16:35 | 16:00 - 16:59 | Evening   | 37,7 | 83  | 26,0  | 26,0  | 18,85 | 580,11 | 109,29 |
| 2019/05/27 | CH2206 | Male | Three y/o | Treatment (Wk 2) | Treatment | Feed Day | No | 16:35 | 16:00 - 16:59 | Evening   | 38,1 | 104 | 49,4  | 49,4  | 19,26 | 596,69 | 131,37 |
| 2019/05/27 | CH2205 | Male | Three y/o | Treatment (Wk 2) | Treatment | Feed Day | No | 16:40 | 16:00 - 16:59 | Evening   | 37,7 |     | 190,8 | 190,8 | 18,85 |        | 178,46 |
| 2019/05/27 | CH2206 | Male | Three y/o | Treatment (Wk 2) | Treatment | Feed Day | No | 16:40 | 16:00 - 16:59 | Evening   | 38,1 | 123 | 144,8 | 144,8 | 19,26 | 608,49 | 168,78 |
| 2019/05/27 | CH2205 | Male | Three y/o | Treatment (Wk 2) | Treatment | Feed Day | No | 16:45 | 16:00 - 16:59 | Evening   | 37,9 |     | 14,2  | 14,2  | 19,05 |        | 88,65  |
| 2019/05/27 | CH2206 | Male | Three y/o | Treatment (Wk 2) | Treatment | Feed Day | No | 16:45 | 16:00 - 16:59 | Evening   | 38,0 |     | 53,2  | 53,2  | 19,15 |        | 133,93 |
| 2019/05/27 | CH2205 | Male | Three y/o | Treatment (Wk 2) | Treatment | Feed Day | No | 16:50 | 16:00 - 16:59 | Evening   | 37,9 | 148 | 40,8  | 40,8  | 19,05 | 620,97 | 124,77 |
| 2019/05/27 | CH2206 | Male | Three y/o | Treatment (Wk 2) | Treatment | Feed Day | No | 16:50 | 16:00 - 16:59 | Evening   | 38,0 |     | 184,2 | 184,2 | 19,15 |        | 177,23 |
| 2019/05/27 | CH2205 | Male | Three y/o | Treatment (Wk 2) | Treatment | Feed Day | No | 16:55 | 16:00 - 16:59 | Evening   | 38,0 | 65  | 153,6 | 153,6 | 19,15 | 561,12 | 170,85 |
| 2019/05/27 | CH2206 | Male | Three y/o | Treatment (Wk 2) | Treatment | Feed Day | No | 16:55 | 16:00 - 16:59 | Evening   | 38,1 | 92  | 122,0 | 122,0 | 19,26 | 587,78 | 162,79 |
| 2019/05/27 | CH2205 | Male | Three y/o | Treatment (Wk 2) | Treatment | Feed Day | No | 17:00 | 17:00 - 17:59 | Evening   | 38,2 | 44  | 70,2  | 70,2  | 19,36 | 528,51 | 143,54 |
| 2019/05/27 | CH2206 | Male | Three y/o | Treatment (Wk 2) | Treatment | Feed Day | No | 17:00 | 17:00 - 17:59 | Evening   | 38,3 | 64  | 157,2 | 157,2 | 19,46 | 559,88 | 171,66 |
| 2019/05/27 | CH2205 | Male | Three y/o | Treatment (Wk 2) | Treatment | Feed Day | No | 17:05 | 17:00 - 17:59 | Evening   | 38,4 | 101 | 58,2  | 58,2  | 19,56 | 594,59 | 137,04 |
| 2019/05/27 | CH2206 | Male | Three y/o | Treatment (Wk 2) | Treatment | Feed Day | No | 17:05 | 17:00 - 17:59 | Evening   | 38,2 | 97  | 10,0  | 10,0  | 19,36 | 591,66 | 76,76  |
| 2019/05/27 | CH2205 | Male | Three y/o | Treatment (Wk 2) | Treatment | Feed Day | No | 17:10 | 17:00 - 17:59 | Evening   | 38,3 | 119 | 123,8 | 123,8 | 19,46 | 606,20 | 163,30 |
| 2019/05/27 | CH2206 | Male | Three y/o | Treatment (Wk 2) | Treatment | Feed Day | No | 17:10 | 17:00 - 17:59 | Evening   | 38,2 | 95  | 154,2 | 154,2 | 19,36 | 590,14 | 170,99 |
| 2019/05/27 | CH2205 | Male | Three y/o | Treatment (Wk 2) | Treatment | Feed Day | No | 17:15 | 17:00 - 17:59 | Evening   | 38,4 |     | 185,2 | 185,2 | 19,56 |        | 177,42 |
| 2019/05/27 | CH2206 | Male | Three y/o | Treatment (Wk 2) | Treatment | Feed Day | No | 17:15 | 17:00 - 17:59 | Evening   | 38,2 |     | 99,8  | 99,8  | 19,36 |        | 155,77 |
| 2019/05/27 | CH2205 | Male | Three y/o | Treatment (Wk 2) | Treatment | Feed Day | No | 17:20 | 17:00 - 17:59 | Evening   | 38,4 | 85  | 27,8  | 27,8  | 19,56 | 581,90 | 111,58 |
| 2019/05/27 | CH2206 | Male | Three y/o | Treatment (Wk 2) | Treatment | Feed Day | No | 17:20 | 17:00 - 17:59 | Evening   | 38,4 | 129 | 110,4 | 110,4 | 19,56 | 611,75 | 159,30 |
| 2019/05/27 | CH2205 | Male | Three y/o | Treatment (Wk 2) | Treatment | Feed Day | No | 17:25 | 17:00 - 17:59 | Evening   | 38,4 |     | 37,2  | 37,2  | 19,56 |        | 121,59 |
| 2019/05/27 | CH2206 | Male | Three y/o | Treatment (Wk 2) | Treatment | Feed Day | No | 17:25 | 17:00 - 17:59 | Evening   | 38,3 | 92  | 7,6   | 7,6   | 19,46 | 587,78 | 67,49  |
| 2019/05/27 | CH2205 | Male | Three y/o | Treatment (Wk 2) | Treatment | Feed Day | No | 17:30 | 17:00 - 17:59 | Evening   | 38,2 | 103 | 27,8  | 27,8  | 19,36 | 596,00 | 111,58 |
| 2019/05/27 | CH2206 | Male | Three y/o | Treatment (Wk 2) | Treatment | Feed Day | No | 17:30 | 17:00 - 17:59 | Evening   | 38,0 | 93  | 39,8  | 39,8  | 19,15 | 588,58 | 123,91 |
| 2019/05/27 | CH2205 | Male | Three y/o | Treatment (Wk 2) | Treatment | Feed Day | No | 17:35 | 17:00 - 17:59 | Evening   | 38,2 |     | 24,0  | 24,0  | 19,36 |        | 106,55 |
| 2019/05/27 | CH2206 | Male | Three y/o | Treatment (Wk 2) | Treatment | Feed Day | No | 17:35 | 17:00 - 17:59 | Evening   | 38,0 | 98  | 7,2   | 7,2   | 19,15 | 592,41 | 65,66  |
| 2019/05/27 | CH2205 | Male | Three y/o | Treatment (Wk 2) | Treatment | Feed Day | No | 17:40 | 17:00 - 17:59 | Evening   | 38,2 | 119 | 52,6  | 52,6  | 19,36 | 606,20 | 133,54 |
| 2019/05/27 | CH2206 | Male | Three y/o | Treatment (Wk 2) | Treatment | Feed Day | No | 17:40 | 17:00 - 17:59 | Evening   | 38,1 | 53  | 57,8  | 57,8  | 19,26 | 544,43 | 136,80 |
| 2019/05/27 | CH2205 | Male | Three y/o | Treatment (Wk 2) | Treatment | Feed Day | No | 17:45 | 17:00 - 17:59 | Evening   | 38,2 | 99  | 12,2  | 12,2  | 19,36 | 593,14 | 83,49  |
| 2019/05/27 | CH2206 | Male | Three y/o | Treatment (Wk 2) | Treatment | Feed Day | No | 17:45 | 17:00 - 17:59 | Evening   | 38,1 | 92  | 36,2  | 36,2  | 19,26 | 587,78 | 120,65 |
| 2019/05/27 | CH2205 | Male | Three y/o | Treatment (Wk 2) | Treatment | Feed Day | No | 17:50 | 17:00 - 17:59 | Evening   | 38,0 |     | 25,6  | 25,6  | 19,15 |        | 108,76 |
| 2019/05/27 | CH2206 | Male | Three y/o | Treatment (Wk 2) | Treatment | Feed Day | No | 17:50 | 17:00 - 17:59 | Evening   | 38,0 | 83  | 42,0  | 42,0  | 19,15 | 580,11 | 125,77 |
| 2019/05/27 | CH2205 | Male | Three y/o | Treatment (Wk 2) | Treatment | Feed Day | No | 17:55 | 17:00 - 17:59 | Evening   | 37,9 |     | 21,8  | 21,8  | 19,05 |        | 103,26 |
| 2019/05/27 | CH2206 | Male | Three y/o | Treatment (Wk 2) | Treatment | Feed Day | No | 17:55 | 17:00 - 17:59 | Evening   | 37,9 | 69  | 27,0  | 27,0  | 19,05 | 565,86 | 110,58 |
| 2019/05/27 | CH2205 | Male | Three y/o | Treatment (Wk 2) | Treatment | Feed Day | No | 18:00 | 18:00 - 18:59 | Evening   | 37,9 | 140 | 27,6  | 27,6  | 19,05 | 617,28 | 111,33 |
| 2019/05/27 | CH2206 | Male | Three y/o | Treatment (Wk 2) | Treatment | Feed Day | No | 18:00 | 18:00 - 18:59 | Evening   | 37,8 | 94  | 29,0  | 29,0  | 18,95 | 589,37 | 113,03 |
| 2019/05/27 | CH2205 | Male | Three y/o | Treatment (Wk 2) | Treatment | Feed Day | No | 18:05 | 18:00 - 18:59 | Evening   | 37,7 | 80  | 26,2  | 26,2  | 18,85 | 577,31 | 109,55 |



|            |        |      |           |                  |           |          |    |       |               |         |      |     |       |       |       |        |        |
|------------|--------|------|-----------|------------------|-----------|----------|----|-------|---------------|---------|------|-----|-------|-------|-------|--------|--------|
| 2019/05/27 | CH2206 | Male | Three y/o | Treatment (Wk 2) | Treatment | Feed Day | No | 18:05 | 18:00 - 18:59 | Evening | 37,8 | 99  | 21,4  | 21,4  | 18,95 | 593,14 | 102,63 |
| 2019/05/27 | CH2205 | Male | Three y/o | Treatment (Wk 2) | Treatment | Feed Day | No | 18:10 | 18:00 - 18:59 | Evening | 37,8 | 86  | 21,0  | 21,0  | 18,95 | 582,77 | 101,98 |
| 2019/05/27 | CH2206 | Male | Three y/o | Treatment (Wk 2) | Treatment | Feed Day | No | 18:10 | 18:00 - 18:59 | Evening | 37,7 | 99  | 18,4  | 18,4  | 18,85 | 593,14 | 97,47  |
| 2019/05/27 | CH2205 | Male | Three y/o | Treatment (Wk 2) | Treatment | Feed Day | No | 18:15 | 18:00 - 18:59 | Evening | 38,1 | 74  | 22,4  | 22,4  | 19,26 | 571,33 | 104,19 |
| 2019/05/27 | CH2206 | Male | Three y/o | Treatment (Wk 2) | Treatment | Feed Day | No | 18:15 | 18:00 - 18:59 | Evening | 37,5 | 94  | 15,0  | 15,0  | 18,65 | 589,37 | 90,51  |
| 2019/05/27 | CH2205 | Male | Three y/o | Treatment (Wk 2) | Treatment | Feed Day | No | 18:20 | 18:00 - 18:59 | Evening | 38,2 | 87  | 22,4  | 22,4  | 19,36 | 583,64 | 104,19 |
| 2019/05/27 | CH2206 | Male | Three y/o | Treatment (Wk 2) | Treatment | Feed Day | No | 18:20 | 18:00 - 18:59 | Evening | 37,5 | 97  | 24,2  | 24,2  | 18,65 | 591,66 | 106,83 |
| 2019/05/27 | CH2205 | Male | Three y/o | Treatment (Wk 2) | Treatment | Feed Day | No | 18:25 | 18:00 - 18:59 | Evening | 38,2 | 73  | 22,8  | 22,8  | 19,36 | 570,27 | 104,79 |
| 2019/05/27 | CH2206 | Male | Three y/o | Treatment (Wk 2) | Treatment | Feed Day | No | 18:25 | 18:00 - 18:59 | Evening | 37,5 | 89  | 28,6  | 28,6  | 18,65 | 585,33 | 112,56 |
| 2019/05/27 | CH2205 | Male | Three y/o | Treatment (Wk 2) | Treatment | Feed Day | No | 18:30 | 18:00 - 18:59 | Evening | 38,2 | 72  | 20,6  | 20,6  | 19,36 | 569,20 | 101,32 |
| 2019/05/27 | CH2206 | Male | Three y/o | Treatment (Wk 2) | Treatment | Feed Day | No | 18:30 | 18:00 - 18:59 | Evening | 37,7 | 128 | 107,4 | 107,4 | 18,85 | 611,22 | 158,33 |
| 2019/05/27 | CH2205 | Male | Three y/o | Treatment (Wk 2) | Treatment | Feed Day | No | 18:35 | 18:00 - 18:59 | Evening | 38,3 | 90  | 18,2  | 18,2  | 19,46 | 586,16 | 97,10  |
| 2019/05/27 | CH2206 | Male | Three y/o | Treatment (Wk 2) | Treatment | Feed Day | No | 18:35 | 18:00 - 18:59 | Evening | 37,9 | 84  | 17,2  | 17,2  | 19,05 | 581,01 | 95,17  |
| 2019/05/27 | CH2205 | Male | Three y/o | Treatment (Wk 2) | Treatment | Feed Day | No | 18:40 | 18:00 - 18:59 | Evening | 38,3 | 68  | 23,6  | 23,6  | 19,46 | 564,71 | 105,97 |
| 2019/05/27 | CH2206 | Male | Three y/o | Treatment (Wk 2) | Treatment | Feed Day | No | 18:40 | 18:00 - 18:59 | Evening | 37,9 | 80  | 19,6  | 19,6  | 19,05 | 577,31 | 99,63  |
| 2019/05/27 | CH2205 | Male | Three y/o | Treatment (Wk 2) | Treatment | Feed Day | No | 18:45 | 18:00 - 18:59 | Evening | 38,3 | 68  | 16,8  | 16,8  | 19,46 | 564,71 | 94,37  |
| 2019/05/27 | CH2206 | Male | Three y/o | Treatment (Wk 2) | Treatment | Feed Day | No | 18:45 | 18:00 - 18:59 | Evening | 37,9 | 77  | 16,2  | 16,2  | 19,05 | 574,39 | 93,13  |
| 2019/05/27 | CH2205 | Male | Three y/o | Treatment (Wk 2) | Treatment | Feed Day | No | 18:50 | 18:00 - 18:59 | Evening | 38,3 | 73  | 16,2  | 16,2  | 19,46 | 570,27 | 93,13  |
| 2019/05/27 | CH2206 | Male | Three y/o | Treatment (Wk 2) | Treatment | Feed Day | No | 18:50 | 18:00 - 18:59 | Evening | 38,0 | 67  | 23,4  | 23,4  | 19,15 | 563,53 | 105,68 |
| 2019/05/27 | CH2205 | Male | Three y/o | Treatment (Wk 2) | Treatment | Feed Day | No | 18:55 | 18:00 - 18:59 | Evening | 38,3 | 66  | 19,6  | 19,6  | 19,46 | 562,34 | 99,63  |
| 2019/05/27 | CH2206 | Male | Three y/o | Treatment (Wk 2) | Treatment | Feed Day | No | 18:55 | 18:00 - 18:59 | Evening | 38,0 | 77  | 28,2  | 28,2  | 19,15 | 574,39 | 112,07 |
| 2019/05/27 | CH2205 | Male | Three y/o | Treatment (Wk 2) | Treatment | Feed Day | No | 19:00 | 19:00 - 19:59 | Evening | 38,3 | 77  | 18,8  | 18,8  | 19,46 | 574,39 | 98,20  |
| 2019/05/27 | CH2206 | Male | Three y/o | Treatment (Wk 2) | Treatment | Feed Day | No | 19:00 | 19:00 - 19:59 | Evening | 38,0 | 83  | 33,0  | 33,0  | 19,15 | 580,11 | 117,47 |
| 2019/05/27 | CH2205 | Male | Three y/o | Treatment (Wk 2) | Treatment | Feed Day | No | 19:05 | 19:00 - 19:59 | Evening | 38,3 | 63  | 19,4  | 19,4  | 19,46 | 558,62 | 99,28  |
| 2019/05/27 | CH2206 | Male | Three y/o | Treatment (Wk 2) | Treatment | Feed Day | No | 19:05 | 19:00 - 19:59 | Evening | 38,1 | 79  | 27,8  | 27,8  | 19,26 | 576,36 | 111,58 |
| 2019/05/27 | CH2205 | Male | Three y/o | Treatment (Wk 2) | Treatment | Feed Day | No | 19:10 | 19:00 - 19:59 | Evening | 38,3 | 54  | 20,4  | 20,4  | 19,46 | 545,99 | 100,99 |
| 2019/05/27 | CH2206 | Male | Three y/o | Treatment (Wk 2) | Treatment | Feed Day | No | 19:10 | 19:00 - 19:59 | Evening | 38,1 | 67  | 26,0  | 26,0  | 19,26 | 563,53 | 109,29 |
| 2019/05/27 | CH2205 | Male | Three y/o | Treatment (Wk 2) | Treatment | Feed Day | No | 19:15 | 19:00 - 19:59 | Evening | 38,3 | 83  | 20,0  | 20,0  | 19,46 | 580,11 | 100,31 |
| 2019/05/27 | CH2206 | Male | Three y/o | Treatment (Wk 2) | Treatment | Feed Day | No | 19:15 | 19:00 - 19:59 | Evening | 38,1 | 78  | 24,8  | 24,8  | 19,26 | 575,38 | 107,67 |
| 2019/05/27 | CH2205 | Male | Three y/o | Treatment (Wk 2) | Treatment | Feed Day | No | 19:20 | 19:00 - 19:59 | Evening | 38,2 | 78  | 16,4  | 16,4  | 19,36 | 575,38 | 93,55  |
| 2019/05/27 | CH2206 | Male | Three y/o | Treatment (Wk 2) | Treatment | Feed Day | No | 19:20 | 19:00 - 19:59 | Evening | 38,1 | 94  | 12,6  | 12,6  | 19,26 | 589,37 | 84,59  |
| 2019/05/27 | CH2205 | Male | Three y/o | Treatment (Wk 2) | Treatment | Feed Day | No | 19:25 | 19:00 - 19:59 | Evening | 38,2 | 62  | 16,4  | 16,4  | 19,36 | 557,33 | 93,55  |
| 2019/05/27 | CH2206 | Male | Three y/o | Treatment (Wk 2) | Treatment | Feed Day | No | 19:25 | 19:00 - 19:59 | Evening | 38,1 | 148 | 13,0  | 13,0  | 19,26 | 620,97 | 85,65  |
| 2019/05/27 | CH2205 | Male | Three y/o | Treatment (Wk 2) | Treatment | Feed Day | No | 19:30 | 19:00 - 19:59 | Evening | 38,2 | 75  | 20,0  | 20,0  | 19,36 | 572,36 | 100,31 |
| 2019/05/27 | CH2206 | Male | Three y/o | Treatment (Wk 2) | Treatment | Feed Day | No | 19:30 | 19:00 - 19:59 | Evening | 38,1 | 80  | 6,8   | 6,8   | 19,26 | 577,31 | 63,74  |
| 2019/05/27 | CH2205 | Male | Three y/o | Treatment (Wk 2) | Treatment | Feed Day | No | 19:35 | 19:00 - 19:59 | Evening | 38,2 | 40  | 24,0  | 24,0  | 19,36 | 520,09 | 106,55 |
| 2019/05/27 | CH2206 | Male | Three y/o | Treatment (Wk 2) | Treatment | Feed Day | No | 19:35 | 19:00 - 19:59 | Evening | 38,1 | 78  | 4,6   | 4,6   | 19,26 | 575,38 | 50,61  |
| 2019/05/27 | CH2205 | Male | Three y/o | Treatment (Wk 2) | Treatment | Feed Day | No | 19:40 | 19:00 - 19:59 | Evening | 38,2 |     | 24,0  | 24,0  | 19,36 |        | 106,55 |
| 2019/05/27 | CH2206 | Male | Three y/o | Treatment (Wk 2) | Treatment | Feed Day | No | 19:40 | 19:00 - 19:59 | Evening | 38,1 | 64  | 3,6   | 3,6   | 19,26 | 559,88 | 42,42  |
| 2019/05/27 | CH2205 | Male | Three y/o | Treatment (Wk 2) | Treatment | Feed Day | No | 19:45 | 19:00 - 19:59 | Evening | 38,2 | 57  | 20,8  | 20,8  | 19,36 | 550,47 | 101,65 |
| 2019/05/27 | CH2206 | Male | Three y/o | Treatment (Wk 2) | Treatment | Feed Day | No | 19:45 | 19:00 - 19:59 | Evening | 38,1 | 78  | 8,0   | 8,0   | 19,26 | 575,38 | 69,22  |
| 2019/05/27 | CH2205 | Male | Three y/o | Treatment (Wk 2) | Treatment | Feed Day | No | 19:50 | 19:00 - 19:59 | Evening | 38,1 | 51  | 19,6  | 19,6  | 19,26 | 541,20 | 99,63  |
| 2019/05/27 | CH2206 | Male | Three y/o | Treatment (Wk 2) | Treatment | Feed Day | No | 19:50 | 19:00 - 19:59 | Evening | 38,1 | 69  | 7,2   | 7,2   | 19,26 | 565,86 | 65,66  |
| 2019/05/27 | CH2205 | Male | Three y/o | Treatment (Wk 2) | Treatment | Feed Day | No | 19:55 | 19:00 - 19:59 | Evening | 38,1 | 93  | 20,4  | 20,4  | 19,26 | 588,58 | 100,99 |
| 2019/05/27 | CH2206 | Male | Three y/o | Treatment (Wk 2) | Treatment | Feed Day | No | 19:55 | 19:00 - 19:59 | Evening | 38,1 | 75  | 3,8   | 3,8   | 19,26 | 572,36 | 44,22  |
| 2019/05/27 | CH2205 | Male | Three y/o | Treatment (Wk 2) | Treatment | Feed Day | No | 20:00 | 20:00 - 20:59 | Night   | 38,1 |     | 6,4   | 6,4   | 19,26 |        | 61,70  |
| 2019/05/27 | CH2206 | Male | Three y/o | Treatment (Wk 2) | Treatment | Feed Day | No | 20:00 | 20:00 - 20:59 | Night   | 38,1 | 86  | 3,6   | 3,6   | 19,26 | 582,77 | 42,42  |
| 2019/05/27 | CH2205 | Male | Three y/o | Treatment (Wk 2) | Treatment | Feed Day | No | 20:05 | 20:00 - 20:59 | Night   | 38,1 | 61  | 3,2   | 3,2   | 19,26 | 556,01 | 38,49  |
| 2019/05/27 | CH2206 | Male | Three y/o | Treatment (Wk 2) | Treatment | Feed Day | No | 20:05 | 20:00 - 20:59 | Night   | 38,0 | 75  | 14,0  | 14,0  | 19,15 | 572,36 | 88,17  |
| 2019/05/27 | CH2205 | Male | Three y/o | Treatment (Wk 2) | Treatment | Feed Day | No | 20:10 | 20:00 - 20:59 | Night   | 38,1 | 46  | 5,2   | 5,2   | 19,26 | 532,38 | 54,72  |
| 2019/05/27 | CH2206 | Male | Three y/o | Treatment (Wk 2) | Treatment | Feed Day | No | 20:10 | 20:00 - 20:59 | Night   | 38,0 | 74  | 15,4  | 15,4  | 19,15 | 571,33 | 91,41  |
| 2019/05/27 | CH2205 | Male | Three y/o | Treatment (Wk 2) | Treatment | Feed Day | No | 20:15 | 20:00 - 20:59 | Night   | 38,1 | 92  | 7,0   | 7,0   | 19,26 | 587,78 | 64,72  |
| 2019/05/27 | CH2206 | Male | Three y/o | Treatment (Wk 2) | Treatment | Feed Day | No | 20:15 | 20:00 - 20:59 | Night   | 38,0 | 86  | 10,2  | 10,2  | 19,15 | 582,77 | 77,43  |
| 2019/05/27 | CH2205 | Male | Three y/o | Treatment (Wk 2) | Treatment | Feed Day | No | 20:20 | 20:00 - 20:59 | Night   | 38,1 | 85  | 2,8   | 2,8   | 19,26 | 581,90 | 34,04  |
| 2019/05/27 | CH2206 | Male | Three y/o | Treatment (Wk 2) | Treatment | Feed Day | No | 20:20 | 20:00 - 20:59 | Night   | 38,0 | 86  | 10,2  | 10,2  | 19,15 | 582,77 | 77,43  |
| 2019/05/27 | CH2205 | Male | Three y/o | Treatment (Wk 2) | Treatment | Feed Day | No | 20:25 | 20:00 - 20:59 | Night   | 38,1 | 65  | 5,2   | 5,2   | 19,26 | 561,12 | 54,72  |
| 2019/05/27 | CH2206 | Male | Three y/o | Treatment (Wk 2) | Treatment | Feed Day | No | 20:25 | 20:00 - 20:59 | Night   | 38,0 | 48  | 8,0   | 8,0   | 19,15 | 536,04 | 69,22  |
| 2019/05/27 | CH2205 | Male | Three y/o | Treatment (Wk 2) | Treatment | Feed Day | No | 20:30 | 20:00 - 20:59 | Night   | 38,1 | 41  | 5,0   | 5,0   | 19,26 | 522,29 | 53,41  |
| 2019/05/27 | CH2206 | Male | Three y/o | Treatment (Wk 2) | Treatment | Feed Day | No | 20:30 | 20:00 - 20:59 | Night   | 38,0 | 75  | 11,8  | 11,8  | 19,15 | 572,36 | 82,36  |
| 2019/05/27 | CH2205 | Male | Three y/o | Treatment (Wk 2) | Treatment | Feed Day | No | 20:35 | 20:00 - 20:59 | Night   | 38,1 | 39  | 3,6   | 3,6   | 19,26 | 517,82 | 42,42  |
| 2019/05/27 | CH2206 | Male | Three y/o | Treatment (Wk 2) | Treatment | Feed Day | No | 20:35 | 20:00 - 20:59 | Night   | 38,0 | 85  | 10,0  | 10,0  | 19,15 | 581,90 | 76,76  |
| 2019/05/27 | CH2205 | Male | Three y/o | Treatment (Wk 2) | Treatment | Feed Day | No | 20:40 | 20:00 - 20:59 | Night   | 38,1 | 44  | 3,2   | 3,2   | 19,26 | 528,51 | 38,49  |
| 2019/05/27 | CH2206 | Male | Three y/o | Treatment (Wk 2) | Treatment | Feed Day | No | 20:40 | 20:00 - 20:59 | Night   | 38,0 | 75  | 8,6   | 8,6   | 19,15 | 572,36 | 71,66  |
| 2019/05/27 | CH2205 | Male | Three y/o | Treatment (Wk 2) | Treatment | Feed Day | No | 20:45 | 20:00 - 20:59 | Night   | 38,1 | 54  | 4,2   | 4,2   | 19,26 | 545,99 | 47,57  |
| 2019/05/27 | CH2206 | Male | Three y/o | Treatment (Wk 2) | Treatment | Feed Day | No | 20:45 | 20:00 - 20:59 | Night   | 38,0 | 84  | 4,2   | 4,2   | 19,15 | 581,01 | 47,57  |
| 2019/05/27 | CH2205 | Male | Three y/o | Treatment (Wk 2) | Treatment | Feed Day | No | 20:50 | 20:00 - 20:59 | Night   | 38,1 | 62  | 5,6   | 5,6   | 19,26 | 557,33 | 57,21  |
| 2019/05/27 | CH2206 | Male | Three y/o | Treatment (Wk 2) | Treatment | Feed Day | No | 20:50 | 20:00 - 20:59 | Night   | 38,0 | 59  | 7,2   | 7,2   | 19,15 | 553,30 | 65,66  |
| 2019/05/27 | CH2205 | Male | Three y/o | Treatment (Wk 2) | Treatment | Feed Day | No | 20:55 | 20:00 - 20:59 | Night   | 38,1 | 41  | 6,0   | 6,0   | 19,26 | 522,29 | 59,53  |
| 2019/05/27 | CH2206 | Male | Three y/o | Treatment (Wk 2) | Treatment | Feed Day | No | 20:55 | 20:00 - 20:59 | Night   | 37,9 | 85  | 8,8   | 8,8   | 19,05 | 581,90 | 72,43  |
| 2019/05/27 | CH2205 | Male | Three y/o | Treatment (Wk 2) | Treatment | Feed Day | No | 21:00 | 21:00 - 21:59 | Night   | 38,1 | 73  | 6,0   | 6,0   | 19,26 | 570,27 | 59,53  |



|            |        |      |           |                  |           |          |    |       |               |       |      |     |      |      |       |        |        |
|------------|--------|------|-----------|------------------|-----------|----------|----|-------|---------------|-------|------|-----|------|------|-------|--------|--------|
| 2019/05/27 | CH2206 | Male | Three y/o | Treatment (Wk 2) | Treatment | Feed Day | No | 21:00 | 21:00 - 21:59 | Night | 37,9 | 68  | 6,0  | 6,0  | 19,05 | 564,71 | 59,53  |
| 2019/05/27 | CH2205 | Male | Three y/o | Treatment (Wk 2) | Treatment | Feed Day | No | 21:05 | 21:00 - 21:59 | Night | 38,1 | 48  | 4,4  | 4,4  | 19,26 | 536,04 | 49,12  |
| 2019/05/27 | CH2206 | Male | Three y/o | Treatment (Wk 2) | Treatment | Feed Day | No | 21:05 | 21:00 - 21:59 | Night | 37,9 | 59  | 3,4  | 3,4  | 19,05 | 553,30 | 40,51  |
| 2019/05/27 | CH2205 | Male | Three y/o | Treatment (Wk 2) | Treatment | Feed Day | No | 21:10 | 21:00 - 21:59 | Night | 38,1 | 74  | 24,2 | 24,2 | 19,26 | 571,33 | 106,83 |
| 2019/05/27 | CH2206 | Male | Three y/o | Treatment (Wk 2) | Treatment | Feed Day | No | 21:10 | 21:00 - 21:59 | Night | 37,9 | 59  | 15,6 | 15,6 | 19,05 | 553,30 | 91,85  |
| 2019/05/27 | CH2205 | Male | Three y/o | Treatment (Wk 2) | Treatment | Feed Day | No | 21:15 | 21:00 - 21:59 | Night | 38,1 |     | 30,2 | 30,2 | 19,26 |        | 114,42 |
| 2019/05/27 | CH2206 | Male | Three y/o | Treatment (Wk 2) | Treatment | Feed Day | No | 21:15 | 21:00 - 21:59 | Night | 38,0 | 100 | 63,4 | 63,4 | 19,15 | 593,87 | 140,00 |
| 2019/05/27 | CH2205 | Male | Three y/o | Treatment (Wk 2) | Treatment | Feed Day | No | 21:20 | 21:00 - 21:59 | Night | 38,0 | 145 | 19,2 | 19,2 | 19,15 | 619,62 | 98,92  |
| 2019/05/27 | CH2206 | Male | Three y/o | Treatment (Wk 2) | Treatment | Feed Day | No | 21:20 | 21:00 - 21:59 | Night | 37,8 | 105 | 55,0 | 55,0 | 18,95 | 597,38 | 135,08 |
| 2019/05/27 | CH2205 | Male | Three y/o | Treatment (Wk 2) | Treatment | Feed Day | No | 21:25 | 21:00 - 21:59 | Night | 37,9 | 94  | 14,8 | 14,8 | 19,05 | 589,37 | 90,05  |
| 2019/05/27 | CH2206 | Male | Three y/o | Treatment (Wk 2) | Treatment | Feed Day | No | 21:25 | 21:00 - 21:59 | Night | 37,8 | 92  | 25,8 | 25,8 | 18,95 | 587,78 | 109,02 |
| 2019/05/27 | CH2205 | Male | Three y/o | Treatment (Wk 2) | Treatment | Feed Day | No | 21:30 | 21:00 - 21:59 | Night | 37,7 | 45  | 16,4 | 16,4 | 18,85 | 530,47 | 93,55  |
| 2019/05/27 | CH2206 | Male | Three y/o | Treatment (Wk 2) | Treatment | Feed Day | No | 21:30 | 21:00 - 21:59 | Night | 37,8 | 71  | 25,6 | 25,6 | 18,95 | 568,10 | 108,76 |
| 2019/05/27 | CH2205 | Male | Three y/o | Treatment (Wk 2) | Treatment | Feed Day | No | 21:35 | 21:00 - 21:59 | Night | 37,6 | 59  | 17,6 | 17,6 | 18,75 | 553,30 | 95,95  |
| 2019/05/27 | CH2206 | Male | Three y/o | Treatment (Wk 2) | Treatment | Feed Day | No | 21:35 | 21:00 - 21:59 | Night | 37,8 |     | 30,4 | 30,4 | 18,95 | 562,34 | 114,65 |
| 2019/05/27 | CH2205 | Male | Three y/o | Treatment (Wk 2) | Treatment | Feed Day | No | 21:40 | 21:00 - 21:59 | Night | 37,6 | 58  | 21,4 | 21,4 | 18,75 | 551,90 | 102,63 |
| 2019/05/27 | CH2206 | Male | Three y/o | Treatment (Wk 2) | Treatment | Feed Day | No | 21:40 | 21:00 - 21:59 | Night | 37,8 | 66  | 24,4 | 24,4 | 18,95 | 562,34 | 107,11 |
| 2019/05/27 | CH2205 | Male | Three y/o | Treatment (Wk 2) | Treatment | Feed Day | No | 21:45 | 21:00 - 21:59 | Night | 37,6 | 65  | 17,8 | 17,8 | 18,75 | 561,12 | 96,34  |
| 2019/05/27 | CH2206 | Male | Three y/o | Treatment (Wk 2) | Treatment | Feed Day | No | 21:45 | 21:00 - 21:59 | Night | 37,8 | 83  | 12,0 | 12,0 | 18,95 | 580,11 | 82,93  |
| 2019/05/27 | CH2205 | Male | Three y/o | Treatment (Wk 2) | Treatment | Feed Day | No | 21:50 | 21:00 - 21:59 | Night | 37,6 | 84  | 26,0 | 26,0 | 18,75 | 581,01 | 109,29 |
| 2019/05/27 | CH2206 | Male | Three y/o | Treatment (Wk 2) | Treatment | Feed Day | No | 21:50 | 21:00 - 21:59 | Night | 37,8 | 103 | 10,0 | 10,0 | 18,95 | 596,00 | 76,76  |
| 2019/05/27 | CH2205 | Male | Three y/o | Treatment (Wk 2) | Treatment | Feed Day | No | 21:55 | 21:00 - 21:59 | Night | 37,5 | 74  | 27,0 | 27,0 | 18,65 | 571,33 | 110,58 |
| 2019/05/27 | CH2206 | Male | Three y/o | Treatment (Wk 2) | Treatment | Feed Day | No | 21:55 | 21:00 - 21:59 | Night | 37,8 | 89  | 20,6 | 20,6 | 18,95 | 585,33 | 101,32 |
| 2019/05/27 | CH2205 | Male | Three y/o | Treatment (Wk 2) | Treatment | Feed Day | No | 22:00 | 22:00 - 22:59 | Night | 37,4 | 72  | 22,4 | 22,4 | 18,55 | 569,20 | 104,19 |
| 2019/05/27 | CH2206 | Male | Three y/o | Treatment (Wk 2) | Treatment | Feed Day | No | 22:00 | 22:00 - 22:59 | Night | 37,8 | 90  | 20,6 | 20,6 | 18,95 | 586,16 | 101,32 |
| 2019/05/27 | CH2205 | Male | Three y/o | Treatment (Wk 2) | Treatment | Feed Day | No | 22:05 | 22:00 - 22:59 | Night | 37,3 | 54  | 17,2 | 17,2 | 18,46 | 545,99 | 95,17  |
| 2019/05/27 | CH2206 | Male | Three y/o | Treatment (Wk 2) | Treatment | Feed Day | No | 22:05 | 22:00 - 22:59 | Night | 37,8 | 97  | 18,8 | 18,8 | 18,95 | 591,66 | 98,20  |
| 2019/05/27 | CH2205 | Male | Three y/o | Treatment (Wk 2) | Treatment | Feed Day | No | 22:10 | 22:00 - 22:59 | Night | 37,3 | 109 | 30,4 | 30,4 | 18,46 | 600,04 | 114,65 |
| 2019/05/27 | CH2206 | Male | Three y/o | Treatment (Wk 2) | Treatment | Feed Day | No | 22:10 | 22:00 - 22:59 | Night | 37,8 | 86  | 14,8 | 14,8 | 18,95 | 582,77 | 90,05  |
| 2019/05/27 | CH2205 | Male | Three y/o | Treatment (Wk 2) | Treatment | Feed Day | No | 22:15 | 22:00 - 22:59 | Night | 37,4 |     | 31,2 | 31,2 | 18,55 |        | 115,54 |
| 2019/05/27 | CH2206 | Male | Three y/o | Treatment (Wk 2) | Treatment | Feed Day | No | 22:15 | 22:00 - 22:59 | Night | 37,8 | 81  | 7,4  | 7,4  | 18,95 | 578,26 | 66,59  |
| 2019/05/27 | CH2205 | Male | Three y/o | Treatment (Wk 2) | Treatment | Feed Day | No | 22:20 | 22:00 - 22:59 | Night | 37,3 | 154 | 33,4 | 33,4 | 18,46 | 623,58 | 117,88 |
| 2019/05/27 | CH2206 | Male | Three y/o | Treatment (Wk 2) | Treatment | Feed Day | No | 22:20 | 22:00 - 22:59 | Night | 37,8 | 52  | 7,0  | 7,0  | 18,95 | 542,83 | 64,72  |
| 2019/05/27 | CH2205 | Male | Three y/o | Treatment (Wk 2) | Treatment | Feed Day | No | 22:25 | 22:00 - 22:59 | Night | 37,4 |     | 33,6 | 33,6 | 18,55 |        | 118,09 |
| 2019/05/27 | CH2206 | Male | Three y/o | Treatment (Wk 2) | Treatment | Feed Day | No | 22:25 | 22:00 - 22:59 | Night | 37,8 | 76  | 8,2  | 8,2  | 18,95 | 573,39 | 70,05  |
| 2019/05/27 | CH2205 | Male | Three y/o | Treatment (Wk 2) | Treatment | Feed Day | No | 22:30 | 22:00 - 22:59 | Night | 37,5 | 77  | 27,4 | 27,4 | 18,65 | 574,39 | 111,09 |
| 2019/05/27 | CH2206 | Male | Three y/o | Treatment (Wk 2) | Treatment | Feed Day | No | 22:30 | 22:00 - 22:59 | Night | 37,7 | 82  | 7,4  | 7,4  | 18,85 | 579,19 | 66,59  |
| 2019/05/27 | CH2205 | Male | Three y/o | Treatment (Wk 2) | Treatment | Feed Day | No | 22:35 | 22:00 - 22:59 | Night | 37,7 | 92  | 30,0 | 30,0 | 18,85 | 587,78 | 114,20 |
| 2019/05/27 | CH2206 | Male | Three y/o | Treatment (Wk 2) | Treatment | Feed Day | No | 22:35 | 22:00 - 22:59 | Night | 37,7 | 46  | 15,0 | 15,0 | 18,85 | 532,38 | 90,51  |
| 2019/05/27 | CH2205 | Male | Three y/o | Treatment (Wk 2) | Treatment | Feed Day | No | 22:40 | 22:00 - 22:59 | Night | 37,7 | 54  | 28,0 | 28,0 | 18,85 | 545,99 | 111,83 |
| 2019/05/27 | CH2206 | Male | Three y/o | Treatment (Wk 2) | Treatment | Feed Day | No | 22:40 | 22:00 - 22:59 | Night | 37,5 | 88  | 13,0 | 13,0 | 18,65 | 584,49 | 85,65  |
| 2019/05/27 | CH2205 | Male | Three y/o | Treatment (Wk 2) | Treatment | Feed Day | No | 22:45 | 22:00 - 22:59 | Night | 37,9 | 58  | 24,6 | 24,6 | 19,05 | 551,90 | 107,39 |
| 2019/05/27 | CH2206 | Male | Three y/o | Treatment (Wk 2) | Treatment | Feed Day | No | 22:45 | 22:00 - 22:59 | Night | 37,7 | 90  | 7,4  | 7,4  | 18,85 | 586,16 | 66,59  |
| 2019/05/27 | CH2205 | Male | Three y/o | Treatment (Wk 2) | Treatment | Feed Day | No | 22:50 | 22:00 - 22:59 | Night | 37,9 | 92  | 28,6 | 28,6 | 19,05 | 587,78 | 112,56 |
| 2019/05/27 | CH2206 | Male | Three y/o | Treatment (Wk 2) | Treatment | Feed Day | No | 22:50 | 22:00 - 22:59 | Night | 37,7 | 80  | 6,8  | 6,8  | 18,85 | 577,31 | 63,74  |
| 2019/05/27 | CH2205 | Male | Three y/o | Treatment (Wk 2) | Treatment | Feed Day | No | 22:55 | 22:00 - 22:59 | Night | 37,9 | 60  | 22,8 | 22,8 | 19,05 | 554,67 | 104,79 |
| 2019/05/27 | CH2206 | Male | Three y/o | Treatment (Wk 2) | Treatment | Feed Day | No | 22:55 | 22:00 - 22:59 | Night | 37,7 | 79  | 8,2  | 8,2  | 18,85 | 576,36 | 70,05  |
| 2019/05/27 | CH2205 | Male | Three y/o | Treatment (Wk 2) | Treatment | Feed Day | No | 23:00 | 23:00 - 23:59 | Night | 38,0 | 62  | 25,4 | 25,4 | 19,15 | 557,33 | 108,49 |
| 2019/05/27 | CH2206 | Male | Three y/o | Treatment (Wk 2) | Treatment | Feed Day | No | 23:00 | 23:00 - 23:59 | Night | 37,7 | 46  | 2,8  | 2,8  | 18,85 | 532,38 | 34,04  |
| 2019/05/27 | CH2205 | Male | Three y/o | Treatment (Wk 2) | Treatment | Feed Day | No | 23:05 | 23:00 - 23:59 | Night | 38,0 | 54  | 27,4 | 27,4 | 19,15 | 545,99 | 111,09 |
| 2019/05/27 | CH2206 | Male | Three y/o | Treatment (Wk 2) | Treatment | Feed Day | No | 23:05 | 23:00 - 23:59 | Night | 37,7 | 92  | 5,4  | 5,4  | 18,85 | 587,78 | 55,99  |
| 2019/05/27 | CH2205 | Male | Three y/o | Treatment (Wk 2) | Treatment | Feed Day | No | 23:10 | 23:00 - 23:59 | Night | 38,0 | 60  | 24,6 | 24,6 | 19,15 | 554,67 | 107,39 |
| 2019/05/27 | CH2206 | Male | Three y/o | Treatment (Wk 2) | Treatment | Feed Day | No | 23:10 | 23:00 - 23:59 | Night | 37,7 | 69  | 4,4  | 4,4  | 18,85 | 565,86 | 49,12  |
| 2019/05/27 | CH2205 | Male | Three y/o | Treatment (Wk 2) | Treatment | Feed Day | No | 23:15 | 23:00 - 23:59 | Night | 38,0 | 50  | 29,8 | 29,8 | 19,15 | 539,52 | 113,97 |
| 2019/05/27 | CH2206 | Male | Three y/o | Treatment (Wk 2) | Treatment | Feed Day | No | 23:15 | 23:00 - 23:59 | Night | 37,7 | 66  | 7,2  | 7,2  | 18,85 | 562,34 | 65,66  |
| 2019/05/27 | CH2205 | Male | Three y/o | Treatment (Wk 2) | Treatment | Feed Day | No | 23:20 | 23:00 - 23:59 | Night | 38,0 | 61  | 24,6 | 24,6 | 19,15 | 556,01 | 107,39 |
| 2019/05/27 | CH2206 | Male | Three y/o | Treatment (Wk 2) | Treatment | Feed Day | No | 23:20 | 23:00 - 23:59 | Night | 37,7 | 44  | 18,8 | 18,8 | 18,85 | 528,51 | 98,20  |
| 2019/05/27 | CH2205 | Male | Three y/o | Treatment (Wk 2) | Treatment | Feed Day | No | 23:25 | 23:00 - 23:59 | Night | 38,0 | 81  | 24,4 | 24,4 | 19,15 | 578,26 | 107,11 |
| 2019/05/27 | CH2206 | Male | Three y/o | Treatment (Wk 2) | Treatment | Feed Day | No | 23:25 | 23:00 - 23:59 | Night | 37,7 | 104 | 25,2 | 25,2 | 18,85 | 596,69 | 108,22 |
| 2019/05/27 | CH2205 | Male | Three y/o | Treatment (Wk 2) | Treatment | Feed Day | No | 23:30 | 23:00 - 23:59 | Night | 38,0 | 84  | 23,2 | 23,2 | 19,15 | 581,01 | 105,39 |
| 2019/05/27 | CH2206 | Male | Three y/o | Treatment (Wk 2) | Treatment | Feed Day | No | 23:30 | 23:00 - 23:59 | Night | 37,7 | 62  | 22,0 | 22,0 | 18,85 | 557,33 | 103,57 |
| 2019/05/27 | CH2205 | Male | Three y/o | Treatment (Wk 2) | Treatment | Feed Day | No | 23:35 | 23:00 - 23:59 | Night | 38,0 | 53  | 23,2 | 23,2 | 19,15 | 544,43 | 105,39 |
| 2019/05/27 | CH2206 | Male | Three y/o | Treatment (Wk 2) | Treatment | Feed Day | No | 23:35 | 23:00 - 23:59 | Night | 37,7 | 98  | 10,0 | 10,0 | 18,85 | 592,41 | 76,76  |
| 2019/05/27 | CH2205 | Male | Three y/o | Treatment (Wk 2) | Treatment | Feed Day | No | 23:40 | 23:00 - 23:59 | Night | 38,1 | 69  | 22,6 | 22,6 | 19,26 | 565,86 | 104,49 |
| 2019/05/27 | CH2206 | Male | Three y/o | Treatment (Wk 2) | Treatment | Feed Day | No | 23:40 | 23:00 - 23:59 | Night | 37,7 |     | 18,8 | 18,8 | 18,85 |        | 98,20  |
| 2019/05/27 | CH2205 | Male | Three y/o | Treatment (Wk 2) | Treatment | Feed Day | No | 23:45 | 23:00 - 23:59 | Night | 38,1 | 64  | 27,2 | 27,2 | 19,26 | 559,88 | 110,83 |
| 2019/05/27 | CH2206 | Male | Three y/o | Treatment (Wk 2) | Treatment | Feed Day | No | 23:45 | 23:00 - 23:59 | Night | 37,7 | 78  | 30,2 | 30,2 | 18,85 | 575,38 | 114,42 |
| 2019/05/27 | CH2205 | Male | Three y/o | Treatment (Wk 2) | Treatment | Feed Day | No | 23:50 | 23:00 - 23:59 | Night | 38,1 | 84  | 22,0 | 22,0 | 19,26 | 581,01 | 103,57 |
| 2019/05/27 | CH2206 | Male | Three y/o | Treatment (Wk 2) | Treatment | Feed Day | No | 23:50 | 23:00 - 23:59 | Night | 37,5 | 89  | 18,4 | 18,4 | 18,65 | 585,33 | 97,47  |
| 2019/05/27 | CH2205 | Male | Three y/o | Treatment (Wk 2) | Treatment | Feed Day | No | 23:55 | 23:00 - 23:59 | Night | 38,1 | 80  | 27,6 | 27,6 | 19,26 | 577,31 | 111,33 |



|    | 2019/05/27 | CH2206 | Male | Three y/o | Treatment (Wk 2) | Treatment | Feed Day | No | 23:55 | 23:00 - 23:59 | Night         | 37,5 | 84  | 14,8 | 14,8 | 18,65 | 581,01 | 90,05  |
|----|------------|--------|------|-----------|------------------|-----------|----------|----|-------|---------------|---------------|------|-----|------|------|-------|--------|--------|
| 14 | 2019/05/28 | CH2205 | Male | Three y/o | Treatment (Wk 2) | Treatment | Feed Day | No | 00:00 | 00:00 - 00:59 | Early Morning | 38,1 | 70  | 22,8 | 22,8 | 19,26 | 566,99 | 104,79 |
|    | 2019/05/28 | CH2206 | Male | Three y/o | Treatment (Wk 2) | Treatment | Feed Day | No | 00:00 | 00:00 - 00:59 | Early Morning | 37,5 | 90  | 15,0 | 15,0 | 18,65 | 586,16 | 90,51  |
|    | 2019/05/28 | CH2205 | Male | Three y/o | Treatment (Wk 2) | Treatment | Feed Day | No | 00:05 | 00:00 - 00:59 | Early Morning | 38,1 | 57  | 22,6 | 22,6 | 19,26 | 550,47 | 104,49 |
|    | 2019/05/28 | CH2206 | Male | Three y/o | Treatment (Wk 2) | Treatment | Feed Day | No | 00:05 | 00:00 - 00:59 | Early Morning | 37,5 | 91  | 6,0  | 6,0  | 18,65 | 586,98 | 59,53  |
|    | 2019/05/28 | CH2205 | Male | Three y/o | Treatment (Wk 2) | Treatment | Feed Day | No | 00:10 | 00:00 - 00:59 | Early Morning | 38,0 | 83  | 20,2 | 20,2 | 19,15 | 580,11 | 100,65 |
|    | 2019/05/28 | CH2206 | Male | Three y/o | Treatment (Wk 2) | Treatment | Feed Day | No | 00:10 | 00:00 - 00:59 | Early Morning | 37,5 | 113 | 7,4  | 7,4  | 18,65 | 602,58 | 66,59  |
|    | 2019/05/28 | CH2205 | Male | Three y/o | Treatment (Wk 2) | Treatment | Feed Day | No | 00:15 | 00:00 - 00:59 | Early Morning | 38,0 | 69  | 18,6 | 18,6 | 19,15 | 565,86 | 97,84  |
|    | 2019/05/28 | CH2206 | Male | Three y/o | Treatment (Wk 2) | Treatment | Feed Day | No | 00:15 | 00:00 - 00:59 | Early Morning | 37,6 | 43  | 8,2  | 8,2  | 18,75 | 526,50 | 70,05  |
|    | 2019/05/28 | CH2205 | Male | Three y/o | Treatment (Wk 2) | Treatment | Feed Day | No | 00:20 | 00:00 - 00:59 | Early Morning | 38,0 | 78  | 15,4 | 15,4 | 19,15 | 575,38 | 91,41  |
|    | 2019/05/28 | CH2206 | Male | Three y/o | Treatment (Wk 2) | Treatment | Feed Day | No | 00:20 | 00:00 - 00:59 | Early Morning | 37,6 | 61  | 7,4  | 7,4  | 18,75 | 556,01 | 66,59  |
|    | 2019/05/28 | CH2205 | Male | Three y/o | Treatment (Wk 2) | Treatment | Feed Day | No | 00:25 | 00:00 - 00:59 | Early Morning | 38,0 | 80  | 13,6 | 13,6 | 19,15 | 577,31 | 87,18  |
|    | 2019/05/28 | CH2206 | Male | Three y/o | Treatment (Wk 2) | Treatment | Feed Day | No | 00:25 | 00:00 - 00:59 | Early Morning | 37,6 | 92  | 12,6 | 12,6 | 18,75 | 587,78 | 84,59  |
|    | 2019/05/28 | CH2205 | Male | Three y/o | Treatment (Wk 2) | Treatment | Feed Day | No | 00:30 | 00:00 - 00:59 | Early Morning | 38,0 | 56  | 11,8 | 11,8 | 19,15 | 549,01 | 82,36  |
|    | 2019/05/28 | CH2206 | Male | Three y/o | Treatment (Wk 2) | Treatment | Feed Day | No | 00:30 | 00:00 - 00:59 | Early Morning | 37,7 | 81  | 12,8 | 12,8 | 18,85 | 578,26 | 85,12  |
|    | 2019/05/28 | CH2205 | Male | Three y/o | Treatment (Wk 2) | Treatment | Feed Day | No | 00:35 | 00:00 - 00:59 | Early Morning | 38,0 | 66  | 16,4 | 16,4 | 19,15 | 562,34 | 93,55  |
|    | 2019/05/28 | CH2206 | Male | Three y/o | Treatment (Wk 2) | Treatment | Feed Day | No | 00:35 | 00:00 - 00:59 | Early Morning | 37,7 | 76  | 14,4 | 14,4 | 18,85 | 573,39 | 89,12  |
|    | 2019/05/28 | CH2205 | Male | Three y/o | Treatment (Wk 2) | Treatment | Feed Day | No | 00:40 | 00:00 - 00:59 | Early Morning | 38,0 | 51  | 10,4 | 10,4 | 19,15 | 541,20 | 78,08  |
|    | 2019/05/28 | CH2206 | Male | Three y/o | Treatment (Wk 2) | Treatment | Feed Day | No | 00:40 | 00:00 - 00:59 | Early Morning | 37,7 | 79  | 24,0 | 24,0 | 18,85 | 576,36 | 106,55 |
|    | 2019/05/28 | CH2205 | Male | Three y/o | Treatment (Wk 2) | Treatment | Feed Day | No | 00:45 | 00:00 - 00:59 | Early Morning | 38,0 | 47  | 15,4 | 15,4 | 19,15 | 534,23 | 91,41  |
|    | 2019/05/28 | CH2206 | Male | Three y/o | Treatment (Wk 2) | Treatment | Feed Day | No | 00:45 | 00:00 - 00:59 | Early Morning | 37,5 | 86  | 31,8 | 31,8 | 18,65 | 582,77 | 116,20 |
|    | 2019/05/28 | CH2205 | Male | Three y/o | Treatment (Wk 2) | Treatment | Feed Day | No | 00:50 | 00:00 - 00:59 | Early Morning | 38,0 | 67  | 10,2 | 10,2 | 19,15 | 563,53 | 77,43  |
|    | 2019/05/28 | CH2206 | Male | Three y/o | Treatment (Wk 2) | Treatment | Feed Day | No | 00:50 | 00:00 - 00:59 | Early Morning | 37,5 | 49  | 15,8 | 15,8 | 18,65 | 537,80 | 92,28  |
|    | 2019/05/28 | CH2205 | Male | Three y/o | Treatment (Wk 2) | Treatment | Feed Day | No | 00:55 | 00:00 - 00:59 | Early Morning | 38,1 | 61  | 7,0  | 7,0  | 19,26 | 556,01 | 64,72  |
|    | 2019/05/28 | CH2206 | Male | Three y/o | Treatment (Wk 2) | Treatment | Feed Day | No | 00:55 | 00:00 - 00:59 | Early Morning | 37,7 | 99  | 13,0 | 13,0 | 18,85 | 593,14 | 85,65  |
|    | 2019/05/28 | CH2205 | Male | Three y/o | Treatment (Wk 2) | Treatment | Feed Day | No | 01:00 | 01:00 - 01:59 | Early Morning | 38,1 | 64  | 9,0  | 9,0  | 19,26 | 559,88 | 73,19  |
|    | 2019/05/28 | CH2206 | Male | Three y/o | Treatment (Wk 2) | Treatment | Feed Day | No | 01:00 | 01:00 - 01:59 | Early Morning | 37,7 | 55  | 7,8  | 7,8  | 18,85 | 547,52 | 68,36  |
|    | 2019/05/28 | CH2205 | Male | Three y/o | Treatment (Wk 2) | Treatment | Feed Day | No | 01:05 | 01:00 - 01:59 | Early Morning | 38,0 | 81  | 10,6 | 10,6 | 19,15 | 578,26 | 78,73  |
|    | 2019/05/28 | CH2206 | Male | Three y/o | Treatment (Wk 2) | Treatment | Feed Day | No | 01:05 | 01:00 - 01:59 | Early Morning | 37,7 | 60  | 6,8  | 6,8  | 18,85 | 554,67 | 63,74  |
|    | 2019/05/28 | CH2205 | Male | Three y/o | Treatment (Wk 2) | Treatment | Feed Day | No | 01:10 | 01:00 - 01:59 | Early Morning | 38,0 | 82  | 29,4 | 29,4 | 19,15 | 579,19 | 113,50 |
|    | 2019/05/28 | CH2206 | Male | Three y/o | Treatment (Wk 2) | Treatment | Feed Day | No | 01:10 | 01:00 - 01:59 | Early Morning | 37,7 | 71  | 30,2 | 30,2 | 18,85 | 568,10 | 114,42 |
|    | 2019/05/28 | CH2205 | Male | Three y/o | Treatment (Wk 2) | Treatment | Feed Day | No | 01:15 | 01:00 - 01:59 | Early Morning | 38,0 | 60  | 16,6 | 16,6 | 19,15 | 554,67 | 93,96  |
|    | 2019/05/28 | CH2206 | Male | Three y/o | Treatment (Wk 2) | Treatment | Feed Day | No | 01:15 | 01:00 - 01:59 | Early Morning | 37,5 | 60  | 11,6 | 11,6 | 18,65 | 554,67 | 81,78  |
|    | 2019/05/28 | CH2205 | Male | Three y/o | Treatment (Wk 2) | Treatment | Feed Day | No | 01:20 | 01:00 - 01:59 | Early Morning | 37,9 | 54  | 16,0 | 16,0 | 19,05 | 545,99 | 92,71  |
|    | 2019/05/28 | CH2206 | Male | Three y/o | Treatment (Wk 2) | Treatment | Feed Day | No | 01:20 | 01:00 - 01:59 | Early Morning | 37,5 | 47  | 12,8 | 12,8 | 18,65 | 534,23 | 85,12  |
|    | 2019/05/28 | CH2205 | Male | Three y/o | Treatment (Wk 2) | Treatment | Feed Day | No | 01:25 | 01:00 - 01:59 | Early Morning | 37,9 | 60  | 19,2 | 19,2 | 19,05 | 554,67 | 98,92  |
|    | 2019/05/28 | CH2206 | Male | Three y/o | Treatment (Wk 2) | Treatment | Feed Day | No | 01:25 | 01:00 - 01:59 | Early Morning | 37,4 | 68  | 17,8 | 17,8 | 18,55 | 564,71 | 96,34  |
|    | 2019/05/28 | CH2205 | Male | Three y/o | Treatment (Wk 2) | Treatment | Feed Day | No | 01:30 | 01:00 - 01:59 | Early Morning | 38,0 | 74  | 17,8 | 17,8 | 19,15 | 571,33 | 96,34  |
|    | 2019/05/28 | CH2206 | Male | Three y/o | Treatment (Wk 2) | Treatment | Feed Day | No | 01:30 | 01:00 - 01:59 | Early Morning | 37,4 | 60  | 16,2 | 16,2 | 18,55 | 554,67 | 93,13  |
|    | 2019/05/28 | CH2205 | Male | Three y/o | Treatment (Wk 2) | Treatment | Feed Day | No | 01:35 | 01:00 - 01:59 | Early Morning | 38,0 | 63  | 21,4 | 21,4 | 19,15 | 558,62 | 102,63 |
|    | 2019/05/28 | CH2206 | Male | Three y/o | Treatment (Wk 2) | Treatment | Feed Day | No | 01:35 | 01:00 - 01:59 | Early Morning | 37,5 | 67  | 6,6  | 6,6  | 18,65 | 563,53 | 62,73  |
|    | 2019/05/28 | CH2205 | Male | Three y/o | Treatment (Wk 2) | Treatment | Feed Day | No | 01:40 | 01:00 - 01:59 | Early Morning | 38,0 | 55  | 27,0 | 27,0 | 19,15 | 547,52 | 110,58 |
|    | 2019/05/28 | CH2206 | Male | Three y/o | Treatment (Wk 2) | Treatment | Feed Day | No | 01:40 | 01:00 - 01:59 | Early Morning | 37,5 | 46  | 3,4  | 3,4  | 18,65 | 532,38 | 40,51  |
|    | 2019/05/28 | CH2205 | Male | Three y/o | Treatment (Wk 2) | Treatment | Feed Day | No | 01:45 | 01:00 - 01:59 | Early Morning | 38,0 | 49  | 24,6 | 24,6 | 19,15 | 537,80 | 107,39 |
|    | 2019/05/28 | CH2206 | Male | Three y/o | Treatment (Wk 2) | Treatment | Feed Day | No | 01:45 | 01:00 - 01:59 | Early Morning | 37,5 | 44  | 45,6 | 45,6 | 18,65 | 528,51 | 128,61 |
|    | 2019/05/28 | CH2205 | Male | Three y/o | Treatment (Wk 2) | Treatment | Feed Day | No | 01:50 | 01:00 - 01:59 | Early Morning | 37,9 | 89  | 18,0 | 18,0 | 19,05 | 585,33 | 96,72  |
|    | 2019/05/28 | CH2206 | Male | Three y/o | Treatment (Wk 2) | Treatment | Feed Day | No | 01:50 | 01:00 - 01:59 | Early Morning | 37,4 | 56  | 4,4  | 4,4  | 18,55 | 549,01 | 49,12  |
|    | 2019/05/28 | CH2205 | Male | Three y/o | Treatment (Wk 2) | Treatment | Feed Day | No | 01:55 | 01:00 - 01:59 | Early Morning | 37,8 | 42  | 16,6 | 16,6 | 18,95 | 524,42 | 93,96  |
|    | 2019/05/28 | CH2206 | Male | Three y/o | Treatment (Wk 2) | Treatment | Feed Day | No | 01:55 | 01:00 - 01:59 | Early Morning | 37,3 | 62  | 35,2 | 35,2 | 18,46 | 557,33 | 119,69 |
|    | 2019/05/28 | CH2205 | Male | Three y/o | Treatment (Wk 2) | Treatment | Feed Day | No | 02:00 | 02:00 - 02:59 | Early Morning | 37,7 | 53  | 15,4 | 15,4 | 18,85 | 544,43 | 91,41  |
|    | 2019/05/28 | CH2206 | Male | Three y/o | Treatment (Wk 2) | Treatment | Feed Day | No | 02:00 | 02:00 - 02:59 | Early Morning | 37,4 | 45  | 33,8 | 33,8 | 18,55 | 530,47 | 118,29 |
|    | 2019/05/28 | CH2205 | Male | Three y/o | Treatment (Wk 2) | Treatment | Feed Day | No | 02:05 | 02:00 - 02:59 | Early Morning | 37,7 | 84  | 19,0 | 19,0 | 18,85 | 581,01 | 98,56  |
|    | 2019/05/28 | CH2206 | Male | Three y/o | Treatment (Wk 2) | Treatment | Feed Day | No | 02:05 | 02:00 - 02:59 | Early Morning | 37,4 | 57  | 51,6 | 51,6 | 18,55 | 550,47 | 132,87 |
|    | 2019/05/28 | CH2205 | Male | Three y/o | Treatment (Wk 2) | Treatment | Feed Day | No | 02:10 | 02:00 - 02:59 | Early Morning | 37,7 | 46  | 25,8 | 25,8 | 18,85 | 532,38 | 109,02 |
|    | 2019/05/28 | CH2206 | Male | Three y/o | Treatment (Wk 2) | Treatment | Feed Day | No | 02:10 | 02:00 - 02:59 | Early Morning | 37,4 | 45  | 58,0 | 58,0 | 18,55 | 530,47 | 136,92 |
|    | 2019/05/28 | CH2205 | Male | Three y/o | Treatment (Wk 2) | Treatment | Feed Day | No | 02:15 | 02:00 - 02:59 | Early Morning | 37,5 | 42  | 26,6 | 26,6 | 18,65 | 524,42 | 110,07 |
|    | 2019/05/28 | CH2206 | Male | Three y/o | Treatment (Wk 2) | Treatment | Feed Day | No | 02:15 | 02:00 - 02:59 | Early Morning | 37,4 | 83  | 57,8 | 57,8 | 18,55 | 580,11 | 136,80 |
|    | 2019/05/28 | CH2205 | Male | Three y/o | Treatment (Wk 2) | Treatment | Feed Day | No | 02:20 | 02:00 - 02:59 | Early Morning | 37,5 | 49  | 22,0 | 22,0 | 18,65 | 537,80 | 103,57 |
|    | 2019/05/28 | CH2206 | Male | Three y/o | Treatment (Wk 2) | Treatment | Feed Day | No | 02:20 | 02:00 - 02:59 | Early Morning | 37,5 | 50  | 56,4 | 56,4 | 18,65 | 539,52 | 135,95 |
|    | 2019/05/28 | CH2205 | Male | Three y/o | Treatment (Wk 2) | Treatment | Feed Day | No | 02:25 | 02:00 - 02:59 | Early Morning | 37,4 | 44  | 28,0 | 28,0 | 18,55 | 528,51 | 111,83 |
|    | 2019/05/28 | CH2206 | Male | Three y/o | Treatment (Wk 2) | Treatment | Feed Day | No | 02:25 | 02:00 - 02:59 | Early Morning | 37,5 | 47  | 55,2 | 55,2 | 18,65 | 534,23 | 135,21 |
|    | 2019/05/28 | CH2205 | Male | Three y/o | Treatment (Wk 2) | Treatment | Feed Day | No | 02:30 | 02:00 - 02:59 | Early Morning | 37,4 | 58  | 4,2  | 4,2  | 18,55 | 551,90 | 47,57  |
|    | 2019/05/28 | CH2206 | Male | Three y/o | Treatment (Wk 2) | Treatment | Feed Day | No | 02:30 | 02:00 - 02:59 | Early Morning | 37,5 | 42  | 57,6 | 57,6 | 18,65 | 524,42 | 136,68 |
|    | 2019/05/28 | CH2205 | Male | Three y/o | Treatment (Wk 2) | Treatment | Feed Day | No | 02:35 | 02:00 - 02:59 | Early Morning | 37,4 | 54  | 9,4  | 9,4  | 18,55 | 545,99 | 74,66  |
|    | 2019/05/28 | CH2206 | Male | Three y/o | Treatment (Wk 2) | Treatment | Feed Day | No | 02:35 | 02:00 - 02:59 | Early Morning | 37,5 | 70  | 56,0 | 56,0 | 18,65 | 566,99 | 135,70 |
|    | 2019/05/28 | CH2205 | Male | Three y/o | Treatment (Wk 2) | Treatment | Feed Day | No | 02:40 | 02:00 - 02:59 | Early Morning | 37,5 | 51  | 13,6 | 13,6 | 18,65 | 541,20 | 87,18  |
|    | 2019/05/28 | CH2206 | Male | Three y/o | Treatment (Wk 2) | Treatment | Feed Day | No | 02:40 | 02:00 - 02:59 | Early Morning | 37,5 | 70  | 55,4 | 55,4 | 18,65 | 566,99 | 135,33 |
|    | 2019/05/28 | CH2205 | Male | Three y/o | Treatment (Wk 2) | Treatment | Feed Day | No | 02:45 | 02:00 - 02:59 | Early Morning | 37,5 | 61  | 11,4 | 11,4 | 18,65 | 556,01 | 81,19  |
|    | 2019/05/28 | CH2206 | Male | Three y/o | Treatment (Wk 2) | Treatment | Feed Day | No | 02:45 | 02:00 - 02:59 | Early Morning | 37,6 | 52  | 54,2 | 54,2 | 18,75 | 542,83 | 134,57 |
|    | 2019/05/28 | CH2205 | Male | Three y/o | Treatment (Wk 2) | Treatment | Feed Day | No | 02:50 | 02:00 - 02:59 | Early Morning |      |     |      |      |       |        |        |



|            |        |      |           |                  |           |          |    |       |               |               |      |     |       |       |       |        |        |
|------------|--------|------|-----------|------------------|-----------|----------|----|-------|---------------|---------------|------|-----|-------|-------|-------|--------|--------|
| 2019/05/28 | CH2206 | Male | Three y/o | Treatment (Wk 2) | Treatment | Feed Day | No | 02:50 | 02:00 - 02:59 | Early Morning | 37,6 | 50  | 58,2  | 58,2  | 18,75 | 539,52 | 137,04 |
| 2019/05/28 | CH2205 | Male | Three y/o | Treatment (Wk 2) | Treatment | Feed Day | No | 02:55 | 02:00 - 02:59 | Early Morning | 37,6 | 86  | 14,0  | 14,0  | 18,75 | 582,77 | 88,17  |
| 2019/05/28 | CH2206 | Male | Three y/o | Treatment (Wk 2) | Treatment | Feed Day | No | 02:55 | 02:00 - 02:59 | Early Morning | 37,6 | 51  | 57,2  | 57,2  | 18,75 | 541,20 | 136,44 |
| 2019/05/28 | CH2205 | Male | Three y/o | Treatment (Wk 2) | Treatment | Feed Day | No | 03:00 | 03:00 - 03:59 | Early Morning | 37,6 | 95  | 4,6   | 4,6   | 18,75 | 590,14 | 50,61  |
| 2019/05/28 | CH2206 | Male | Three y/o | Treatment (Wk 2) | Treatment | Feed Day | No | 03:00 | 03:00 - 03:59 | Early Morning | 37,5 | 47  | 55,4  | 55,4  | 18,65 | 534,23 | 135,33 |
| 2019/05/28 | CH2205 | Male | Three y/o | Treatment (Wk 2) | Treatment | Feed Day | No | 03:05 | 03:00 - 03:59 | Early Morning | 37,6 | 154 | 16,2  | 16,2  | 18,75 | 623,58 | 93,13  |
| 2019/05/28 | CH2206 | Male | Three y/o | Treatment (Wk 2) | Treatment | Feed Day | No | 03:05 | 03:00 - 03:59 | Early Morning | 37,5 | 92  | 54,4  | 54,4  | 18,65 | 587,78 | 134,70 |
| 2019/05/28 | CH2205 | Male | Three y/o | Treatment (Wk 2) | Treatment | Feed Day | No | 03:10 | 03:00 - 03:59 | Early Morning | 37,6 | 54  | 15,0  | 15,0  | 18,75 | 545,99 | 90,51  |
| 2019/05/28 | CH2206 | Male | Three y/o | Treatment (Wk 2) | Treatment | Feed Day | No | 03:10 | 03:00 - 03:59 | Early Morning | 37,5 | 61  | 52,4  | 52,4  | 18,65 | 556,01 | 133,41 |
| 2019/05/28 | CH2205 | Male | Three y/o | Treatment (Wk 2) | Treatment | Feed Day | No | 03:15 | 03:00 - 03:59 | Early Morning | 37,6 | 48  | 16,6  | 16,6  | 18,75 | 536,04 | 93,96  |
| 2019/05/28 | CH2206 | Male | Three y/o | Treatment (Wk 2) | Treatment | Feed Day | No | 03:15 | 03:00 - 03:59 | Early Morning | 37,5 | 41  | 54,6  | 54,6  | 18,65 | 522,29 | 134,83 |
| 2019/05/28 | CH2205 | Male | Three y/o | Treatment (Wk 2) | Treatment | Feed Day | No | 03:20 | 03:00 - 03:59 | Early Morning | 37,6 | 98  | 18,8  | 18,8  | 18,75 | 592,41 | 98,20  |
| 2019/05/28 | CH2206 | Male | Three y/o | Treatment (Wk 2) | Treatment | Feed Day | No | 03:20 | 03:00 - 03:59 | Early Morning | 37,5 | 50  | 53,6  | 53,6  | 18,65 | 539,52 | 134,19 |
| 2019/05/28 | CH2205 | Male | Three y/o | Treatment (Wk 2) | Treatment | Feed Day | No | 03:25 | 03:00 - 03:59 | Early Morning | 37,7 | 52  | 14,8  | 14,8  | 18,85 | 542,83 | 90,05  |
| 2019/05/28 | CH2206 | Male | Three y/o | Treatment (Wk 2) | Treatment | Feed Day | No | 03:25 | 03:00 - 03:59 | Early Morning | 37,5 | 44  | 51,6  | 51,6  | 18,65 | 528,51 | 132,87 |
| 2019/05/28 | CH2205 | Male | Three y/o | Treatment (Wk 2) | Treatment | Feed Day | No | 03:30 | 03:00 - 03:59 | Early Morning | 37,6 | 84  | 12,6  | 12,6  | 18,75 | 581,01 | 84,59  |
| 2019/05/28 | CH2206 | Male | Three y/o | Treatment (Wk 2) | Treatment | Feed Day | No | 03:30 | 03:00 - 03:59 | Early Morning | 37,4 | 46  | 49,6  | 49,6  | 18,55 | 532,38 | 131,51 |
| 2019/05/28 | CH2205 | Male | Three y/o | Treatment (Wk 2) | Treatment | Feed Day | No | 03:35 | 03:00 - 03:59 | Early Morning | 37,6 | 44  | 11,8  | 11,8  | 18,75 | 528,51 | 82,36  |
| 2019/05/28 | CH2206 | Male | Three y/o | Treatment (Wk 2) | Treatment | Feed Day | No | 03:35 | 03:00 - 03:59 | Early Morning | 37,4 | 82  | 49,8  | 49,8  | 18,55 | 579,19 | 131,65 |
| 2019/05/28 | CH2205 | Male | Three y/o | Treatment (Wk 2) | Treatment | Feed Day | No | 03:40 | 03:00 - 03:59 | Early Morning | 37,7 | 71  | 6,2   | 6,2   | 18,85 | 568,10 | 60,63  |
| 2019/05/28 | CH2206 | Male | Three y/o | Treatment (Wk 2) | Treatment | Feed Day | No | 03:40 | 03:00 - 03:59 | Early Morning | 37,4 | 41  | 51,8  | 51,8  | 18,55 | 522,29 | 133,01 |
| 2019/05/28 | CH2205 | Male | Three y/o | Treatment (Wk 2) | Treatment | Feed Day | No | 03:45 | 03:00 - 03:59 | Early Morning | 37,7 | 45  | 6,0   | 6,0   | 18,85 | 530,47 | 59,53  |
| 2019/05/28 | CH2206 | Male | Three y/o | Treatment (Wk 2) | Treatment | Feed Day | No | 03:45 | 03:00 - 03:59 | Early Morning | 37,4 | 52  | 52,8  | 52,8  | 18,55 | 542,83 | 133,67 |
| 2019/05/28 | CH2205 | Male | Three y/o | Treatment (Wk 2) | Treatment | Feed Day | No | 03:50 | 03:00 - 03:59 | Early Morning | 37,6 | 45  | 7,8   | 7,8   | 18,75 | 530,47 | 68,36  |
| 2019/05/28 | CH2206 | Male | Three y/o | Treatment (Wk 2) | Treatment | Feed Day | No | 03:50 | 03:00 - 03:59 | Early Morning | 37,4 | 42  | 54,4  | 54,4  | 18,55 | 524,42 | 134,70 |
| 2019/05/28 | CH2205 | Male | Three y/o | Treatment (Wk 2) | Treatment | Feed Day | No | 03:55 | 03:00 - 03:59 | Early Morning | 37,6 | 79  | 12,8  | 12,8  | 18,75 | 576,36 | 85,12  |
| 2019/05/28 | CH2206 | Male | Three y/o | Treatment (Wk 2) | Treatment | Feed Day | No | 03:55 | 03:00 - 03:59 | Early Morning | 37,4 | 56  | 57,2  | 57,2  | 18,55 | 549,01 | 136,44 |
| 2019/05/28 | CH2205 | Male | Three y/o | Treatment (Wk 2) | Treatment | Feed Day | No | 04:00 | 04:00 - 04:59 | Morning       | 37,6 | 54  | 13,2  | 13,2  | 18,75 | 545,99 | 86,17  |
| 2019/05/28 | CH2206 | Male | Three y/o | Treatment (Wk 2) | Treatment | Feed Day | No | 04:00 | 04:00 - 04:59 | Morning       | 37,3 | 42  | 58,2  | 58,2  | 18,46 | 524,42 | 137,04 |
| 2019/05/28 | CH2205 | Male | Three y/o | Treatment (Wk 2) | Treatment | Feed Day | No | 04:05 | 04:00 - 04:59 | Morning       | 37,6 | 68  | 10,4  | 10,4  | 18,75 | 564,71 | 78,08  |
| 2019/05/28 | CH2206 | Male | Three y/o | Treatment (Wk 2) | Treatment | Feed Day | No | 04:05 | 04:00 - 04:59 | Morning       | 37,3 | 45  | 59,8  | 59,8  | 18,46 | 530,47 | 137,98 |
| 2019/05/28 | CH2205 | Male | Three y/o | Treatment (Wk 2) | Treatment | Feed Day | No | 04:10 | 04:00 - 04:59 | Morning       | 37,6 | 55  | 46,0  | 46,0  | 18,75 | 547,52 | 128,91 |
| 2019/05/28 | CH2206 | Male | Three y/o | Treatment (Wk 2) | Treatment | Feed Day | No | 04:10 | 04:00 - 04:59 | Morning       | 37,2 | 45  | 62,2  | 62,2  | 18,36 | 530,47 | 139,34 |
| 2019/05/28 | CH2205 | Male | Three y/o | Treatment (Wk 2) | Treatment | Feed Day | No | 04:15 | 04:00 - 04:59 | Morning       | 37,6 | 78  | 6,2   | 6,2   | 18,75 | 575,38 | 60,63  |
| 2019/05/28 | CH2206 | Male | Three y/o | Treatment (Wk 2) | Treatment | Feed Day | No | 04:15 | 04:00 - 04:59 | Morning       | 37,1 | 49  | 63,0  | 63,0  | 18,26 | 537,80 | 139,78 |
| 2019/05/28 | CH2205 | Male | Three y/o | Treatment (Wk 2) | Treatment | Feed Day | No | 04:20 | 04:00 - 04:59 | Morning       | 37,6 | 48  | 13,4  | 13,4  | 18,75 | 536,04 | 86,68  |
| 2019/05/28 | CH2206 | Male | Three y/o | Treatment (Wk 2) | Treatment | Feed Day | No | 04:20 | 04:00 - 04:59 | Morning       | 37,0 | 49  | 55,8  | 55,8  | 18,16 | 537,80 | 135,58 |
| 2019/05/28 | CH2205 | Male | Three y/o | Treatment (Wk 2) | Treatment | Feed Day | No | 04:25 | 04:00 - 04:59 | Morning       | 37,6 | 49  | 15,0  | 15,0  | 18,75 | 537,80 | 90,51  |
| 2019/05/28 | CH2206 | Male | Three y/o | Treatment (Wk 2) | Treatment | Feed Day | No | 04:25 | 04:00 - 04:59 | Morning       | 36,9 | 50  | 59,0  | 59,0  | 18,06 | 539,52 | 137,51 |
| 2019/05/28 | CH2205 | Male | Three y/o | Treatment (Wk 2) | Treatment | Feed Day | No | 04:30 | 04:00 - 04:59 | Morning       | 37,6 | 86  | 12,6  | 12,6  | 18,75 | 582,77 | 84,59  |
| 2019/05/28 | CH2206 | Male | Three y/o | Treatment (Wk 2) | Treatment | Feed Day | No | 04:30 | 04:00 - 04:59 | Morning       | 36,8 | 46  | 61,4  | 61,4  | 17,96 | 532,38 | 138,89 |
| 2019/05/28 | CH2205 | Male | Three y/o | Treatment (Wk 2) | Treatment | Feed Day | No | 04:35 | 04:00 - 04:59 | Morning       | 37,6 |     | 15,0  | 15,0  | 18,75 |        | 90,51  |
| 2019/05/28 | CH2206 | Male | Three y/o | Treatment (Wk 2) | Treatment | Feed Day | No | 04:35 | 04:00 - 04:59 | Morning       | 36,8 | 78  | 41,6  | 41,6  | 17,96 | 575,38 | 125,44 |
| 2019/05/28 | CH2205 | Male | Three y/o | Treatment (Wk 2) | Treatment | Feed Day | No | 04:40 | 04:00 - 04:59 | Morning       | 37,6 | 83  | 10,4  | 10,4  | 18,75 | 580,11 | 78,08  |
| 2019/05/28 | CH2206 | Male | Three y/o | Treatment (Wk 2) | Treatment | Feed Day | No | 04:40 | 04:00 - 04:59 | Morning       | 37,0 | 83  | 10,6  | 10,6  | 18,16 | 580,11 | 78,73  |
| 2019/05/28 | CH2205 | Male | Three y/o | Treatment (Wk 2) | Treatment | Feed Day | No | 04:45 | 04:00 - 04:59 | Morning       | 37,5 | 43  | 6,0   | 6,0   | 18,65 | 526,50 | 59,53  |
| 2019/05/28 | CH2206 | Male | Three y/o | Treatment (Wk 2) | Treatment | Feed Day | No | 04:45 | 04:00 - 04:59 | Morning       | 36,9 | 45  | 10,0  | 10,0  | 18,06 | 530,47 | 76,76  |
| 2019/05/28 | CH2205 | Male | Three y/o | Treatment (Wk 2) | Treatment | Feed Day | No | 04:50 | 04:00 - 04:59 | Morning       | 37,5 | 43  | 2,8   | 2,8   | 18,65 | 526,50 | 34,04  |
| 2019/05/28 | CH2206 | Male | Three y/o | Treatment (Wk 2) | Treatment | Feed Day | No | 04:50 | 04:00 - 04:59 | Morning       | 37,0 | 42  | 18,6  | 18,6  | 18,16 | 524,42 | 97,84  |
| 2019/05/28 | CH2205 | Male | Three y/o | Treatment (Wk 2) | Treatment | Feed Day | No | 04:55 | 04:00 - 04:59 | Morning       | 37,5 | 41  | 6,6   | 6,6   | 18,65 | 522,29 | 62,73  |
| 2019/05/28 | CH2206 | Male | Three y/o | Treatment (Wk 2) | Treatment | Feed Day | No | 04:55 | 04:00 - 04:59 | Morning       | 37,1 |     | 10,6  | 10,6  | 18,26 |        | 78,73  |
| 2019/05/28 | CH2205 | Male | Three y/o | Treatment (Wk 2) | Treatment | Feed Day | No | 05:00 | 05:00 - 05:59 | Morning       | 37,5 | 80  | 6,0   | 6,0   | 18,65 | 577,31 | 59,53  |
| 2019/05/28 | CH2206 | Male | Three y/o | Treatment (Wk 2) | Treatment | Feed Day | No | 05:00 | 05:00 - 05:59 | Morning       | 37,1 | 45  | 3,0   | 3,0   | 18,26 | 530,47 | 36,34  |
| 2019/05/28 | CH2205 | Male | Three y/o | Treatment (Wk 2) | Treatment | Feed Day | No | 05:05 | 05:00 - 05:59 | Morning       | 37,5 |     | 6,6   | 6,6   | 18,65 |        | 62,73  |
| 2019/05/28 | CH2206 | Male | Three y/o | Treatment (Wk 2) | Treatment | Feed Day | No | 05:05 | 05:00 - 05:59 | Morning       | 37,1 | 62  | 16,8  | 16,8  | 18,26 | 557,33 | 94,37  |
| 2019/05/28 | CH2205 | Male | Three y/o | Treatment (Wk 2) | Treatment | Feed Day | No | 05:10 | 05:00 - 05:59 | Morning       | 37,5 | 50  | 40,6  | 40,6  | 18,65 | 539,52 | 124,60 |
| 2019/05/28 | CH2206 | Male | Three y/o | Treatment (Wk 2) | Treatment | Feed Day | No | 05:10 | 05:00 - 05:59 | Morning       | 37,1 | 39  | 42,2  | 42,2  | 18,26 | 517,82 | 125,93 |
| 2019/05/28 | CH2205 | Male | Three y/o | Treatment (Wk 2) | Treatment | Feed Day | No | 05:15 | 05:00 - 05:59 | Morning       | 37,5 | 118 | 75,0  | 75,0  | 18,65 | 605,61 | 145,83 |
| 2019/05/28 | CH2206 | Male | Three y/o | Treatment (Wk 2) | Treatment | Feed Day | No | 05:15 | 05:00 - 05:59 | Morning       | 37,2 | 134 | 72,8  | 72,8  | 18,36 | 614,33 | 144,80 |
| 2019/05/28 | CH2205 | Male | Three y/o | Treatment (Wk 2) | Treatment | Feed Day | No | 05:20 | 05:00 - 05:59 | Morning       | 37,4 | 98  | 62,2  | 62,2  | 18,55 | 592,41 | 139,34 |
| 2019/05/28 | CH2206 | Male | Three y/o | Treatment (Wk 2) | Treatment | Feed Day | No | 05:20 | 05:00 - 05:59 | Morning       | 37,2 |     | 99,2  | 99,2  | 18,36 |        | 155,56 |
| 2019/05/28 | CH2205 | Male | Three y/o | Treatment (Wk 2) | Treatment | Feed Day | No | 05:25 | 05:00 - 05:59 | Morning       | 37,3 | 86  | 72,8  | 72,8  | 18,46 | 582,77 | 144,80 |
| 2019/05/28 | CH2206 | Male | Three y/o | Treatment (Wk 2) | Treatment | Feed Day | No | 05:25 | 05:00 - 05:59 | Morning       | 37,2 | 126 | 125,0 | 125,0 | 18,36 | 610,14 | 163,63 |
| 2019/05/28 | CH2205 | Male | Three y/o | Treatment (Wk 2) | Treatment | Feed Day | No | 05:30 | 05:00 - 05:59 | Morning       | 37,3 | 94  | 35,4  | 35,4  | 18,46 | 589,37 | 119,88 |
| 2019/05/28 | CH2206 | Male | Three y/o | Treatment (Wk 2) | Treatment | Feed Day | No | 05:30 | 05:00 - 05:59 | Morning       | 37,2 | 126 | 270,0 | 270,0 | 18,36 | 610,14 | 190,70 |
| 2019/05/28 | CH2205 | Male | Three y/o | Treatment (Wk 2) | Treatment | Feed Day | No | 05:35 | 05:00 - 05:59 | Morning       | 37,3 | 82  | 136,6 | 136,6 | 18,46 | 579,19 | 166,74 |
| 2019/05/28 | CH2206 | Male | Three y/o | Treatment (Wk 2) | Treatment | Feed Day | No | 05:35 | 05:00 - 05:59 | Morning       | 37,2 | 63  | 105,2 | 105,2 | 18,36 | 558,62 | 157,61 |
| 2019/05/28 | CH2205 | Male | Three y/o | Treatment (Wk 2) | Treatment | Feed Day | No | 05:40 | 05:00 - 05:59 | Morning       | 37,3 | 108 | 136,6 | 136,6 | 18,46 | 599,39 | 166,74 |
| 2019/05/28 | CH2206 | Male | Three y/o | Treatment (Wk 2) | Treatment | Feed Day | No | 05:40 | 05:00 - 05:59 | Morning       | 37,4 |     | 115,0 | 115,0 | 18,55 |        | 160,72 |
| 2019/05/28 | CH2205 | Male | Three y/o | Treatment (Wk 2) | Treatment | Feed Day | No | 05:45 | 05:00 - 05:59 | Morning       | 37,3 | 51  | 48,4  | 48,4  | 18,46 | 541,20 | 130,66 |



|            |        |      |           |                  |           |          |    |       |               |              |      |     |       |       |       |        |
|------------|--------|------|-----------|------------------|-----------|----------|----|-------|---------------|--------------|------|-----|-------|-------|-------|--------|
| 2019/05/28 | CH2206 | Male | Three y/o | Treatment (Wk 2) | Treatment | Feed Day | No | 05:45 | 05:00 - 05:59 | Morning      | 37,4 |     | 154,2 | 154,2 | 18,55 | 170,99 |
| 2019/05/28 | CH2205 | Male | Three y/o | Treatment (Wk 2) | Treatment | Feed Day | No | 05:50 | 05:00 - 05:59 | Morning      | 37,5 | 102 | 34,8  | 34,8  | 18,65 | 595,30 |
| 2019/05/28 | CH2206 | Male | Three y/o | Treatment (Wk 2) | Treatment | Feed Day | No | 05:50 | 05:00 - 05:59 | Morning      | 37,5 | 125 | 163,2 | 163,2 | 18,65 | 609,60 |
| 2019/05/28 | CH2205 | Male | Three y/o | Treatment (Wk 2) | Treatment | Feed Day | No | 05:55 | 05:00 - 05:59 | Morning      | 37,4 | 76  | 9,0   | 9,0   | 18,55 | 573,39 |
| 2019/05/28 | CH2206 | Male | Three y/o | Treatment (Wk 2) | Treatment | Feed Day | No | 05:55 | 05:00 - 05:59 | Morning      | 37,5 | 152 | 54,4  | 54,4  | 18,65 | 622,73 |
| 2019/05/28 | CH2205 | Male | Three y/o | Treatment (Wk 2) | Treatment | Feed Day | No | 06:00 | 06:00 - 06:59 | Morning      | 37,2 | 67  | 8,6   | 8,6   | 18,36 | 563,53 |
| 2019/05/28 | CH2206 | Male | Three y/o | Treatment (Wk 2) | Treatment | Feed Day | No | 06:00 | 06:00 - 06:59 | Morning      | 37,4 | 188 | 67,8  | 67,8  | 18,55 | 636,34 |
| 2019/05/28 | CH2205 | Male | Three y/o | Treatment (Wk 2) | Treatment | Feed Day | No | 06:05 | 06:00 - 06:59 | Morning      | 37,2 | 47  | 4,6   | 4,6   | 18,36 | 534,23 |
| 2019/05/28 | CH2206 | Male | Three y/o | Treatment (Wk 2) | Treatment | Feed Day | No | 06:05 | 06:00 - 06:59 | Morning      | 37,2 | 82  | 66,0  | 66,0  | 18,36 | 579,19 |
| 2019/05/28 | CH2205 | Male | Three y/o | Treatment (Wk 2) | Treatment | Feed Day | No | 06:10 | 06:00 - 06:59 | Morning      | 37,1 | 73  | 6,4   | 6,4   | 18,26 | 570,27 |
| 2019/05/28 | CH2206 | Male | Three y/o | Treatment (Wk 2) | Treatment | Feed Day | No | 06:10 | 06:00 - 06:59 | Morning      | 37,0 | 114 | 137,6 | 137,6 | 18,16 | 603,20 |
| 2019/05/28 | CH2205 | Male | Three y/o | Treatment (Wk 2) | Treatment | Feed Day | No | 06:15 | 06:00 - 06:59 | Morning      | 37,1 | 61  | 8,2   | 8,2   | 18,26 | 556,01 |
| 2019/05/28 | CH2206 | Male | Three y/o | Treatment (Wk 2) | Treatment | Feed Day | No | 06:15 | 06:00 - 06:59 | Morning      | 37,3 | 177 | 228,2 | 228,2 | 18,46 | 632,55 |
| 2019/05/28 | CH2205 | Male | Three y/o | Treatment (Wk 2) | Treatment | Feed Day | No | 06:20 | 06:00 - 06:59 | Morning      | 37,2 | 82  | 18,4  | 18,4  | 18,36 | 579,19 |
| 2019/05/28 | CH2206 | Male | Three y/o | Treatment (Wk 2) | Treatment | Feed Day | No | 06:20 | 06:00 - 06:59 | Morning      | 37,4 | 141 | 146,4 | 146,4 | 18,55 | 617,75 |
| 2019/05/28 | CH2205 | Male | Three y/o | Treatment (Wk 2) | Treatment | Feed Day | No | 06:25 | 06:00 - 06:59 | Morning      | 37,1 | 69  | 23,8  | 23,8  | 18,26 | 565,86 |
| 2019/05/28 | CH2206 | Male | Three y/o | Treatment (Wk 2) | Treatment | Feed Day | No | 06:25 | 06:00 - 06:59 | Morning      | 37,4 | 121 | 216,4 | 216,4 | 18,55 | 607,35 |
| 2019/05/28 | CH2205 | Male | Three y/o | Treatment (Wk 2) | Treatment | Feed Day | No | 06:30 | 06:00 - 06:59 | Morning      | 37,1 | 72  | 10,0  | 10,0  | 18,26 | 569,20 |
| 2019/05/28 | CH2206 | Male | Three y/o | Treatment (Wk 2) | Treatment | Feed Day | No | 06:30 | 06:00 - 06:59 | Morning      | 37,4 | 85  | 62,4  | 62,4  | 18,55 | 581,90 |
| 2019/05/28 | CH2205 | Male | Three y/o | Treatment (Wk 2) | Treatment | Feed Day | No | 06:35 | 06:00 - 06:59 | Morning      | 37,1 | 70  | 12,6  | 12,6  | 18,26 | 566,99 |
| 2019/05/28 | CH2206 | Male | Three y/o | Treatment (Wk 2) | Treatment | Feed Day | No | 06:35 | 06:00 - 06:59 | Morning      | 37,1 | 137 | 38,6  | 38,6  | 18,26 | 615,83 |
| 2019/05/28 | CH2205 | Male | Three y/o | Treatment (Wk 2) | Treatment | Feed Day | No | 06:40 | 06:00 - 06:59 | Morning      | 37,1 | 58  | 16,8  | 16,8  | 18,26 | 551,90 |
| 2019/05/28 | CH2206 | Male | Three y/o | Treatment (Wk 2) | Treatment | Feed Day | No | 06:40 | 06:00 - 06:59 | Morning      | 37,0 | 126 | 150,2 | 150,2 | 18,16 | 610,14 |
| 2019/05/28 | CH2205 | Male | Three y/o | Treatment (Wk 2) | Treatment | Feed Day | No | 06:45 | 06:00 - 06:59 | Morning      | 37,0 |     | 76,0  | 76,0  | 18,16 | 146,29 |
| 2019/05/28 | CH2206 | Male | Three y/o | Treatment (Wk 2) | Treatment | Feed Day | No | 06:45 | 06:00 - 06:59 | Morning      | 37,2 | 131 | 423,6 | 423,6 | 18,36 | 612,80 |
| 2019/05/28 | CH2205 | Male | Three y/o | Treatment (Wk 2) | Treatment | Feed Day | No | 06:50 | 06:00 - 06:59 | Morning      | 37,2 | 112 | 58,6  | 58,6  | 18,36 | 601,96 |
| 2019/05/28 | CH2206 | Male | Three y/o | Treatment (Wk 2) | Treatment | Feed Day | No | 06:50 | 06:00 - 06:59 | Morning      | 37,3 | 118 | 154,8 | 154,8 | 18,46 | 605,61 |
| 2019/05/28 | CH2205 | Male | Three y/o | Treatment (Wk 2) | Treatment | Feed Day | No | 06:55 | 06:00 - 06:59 | Morning      | 37,2 | 145 | 89,6  | 89,6  | 18,36 | 619,62 |
| 2019/05/28 | CH2206 | Male | Three y/o | Treatment (Wk 2) | Treatment | Feed Day | No | 06:55 | 06:00 - 06:59 | Morning      | 37,5 | 126 | 48,0  | 48,0  | 18,65 | 610,14 |
| 2019/05/28 | CH2205 | Male | Three y/o | Treatment (Wk 2) | Treatment | Feed Day | No | 07:00 | 07:00 - 07:59 | Morning      | 37,3 |     | 249,2 | 249,2 | 18,46 | 187,87 |
| 2019/05/28 | CH2206 | Male | Three y/o | Treatment (Wk 2) | Treatment | Feed Day | No | 07:00 | 07:00 - 07:59 | Morning      | 37,5 | 148 | 256,2 | 256,2 | 18,65 | 620,97 |
| 2019/05/28 | CH2205 | Male | Three y/o | Treatment (Wk 2) | Treatment | Feed Day | No | 07:05 | 07:00 - 07:59 | Morning      | 37,3 |     | 207,8 | 207,8 | 18,46 | 181,47 |
| 2019/05/28 | CH2206 | Male | Three y/o | Treatment (Wk 2) | Treatment | Feed Day | No | 07:05 | 07:00 - 07:59 | Morning      | 37,7 | 128 | 113,6 | 113,6 | 18,85 | 611,22 |
| 2019/05/28 | CH2205 | Male | Three y/o | Treatment (Wk 2) | Treatment | Feed Day | No | 07:10 | 07:00 - 07:59 | Morning      | 37,4 | 148 | 184,4 | 184,4 | 18,55 | 620,97 |
| 2019/05/28 | CH2206 | Male | Three y/o | Treatment (Wk 2) | Treatment | Feed Day | No | 07:10 | 07:00 - 07:59 | Morning      | 37,7 | 119 | 194,6 | 194,6 | 18,85 | 606,20 |
| 2019/05/28 | CH2205 | Male | Three y/o | Treatment (Wk 2) | Treatment | Feed Day | No | 07:15 | 07:00 - 07:59 | Morning      | 37,5 | 98  | 314,2 | 314,2 | 18,65 | 592,41 |
| 2019/05/28 | CH2206 | Male | Three y/o | Treatment (Wk 2) | Treatment | Feed Day | No | 07:15 | 07:00 - 07:59 | Morning      | 37,8 | 107 | 256,0 | 256,0 | 18,95 | 598,73 |
| 2019/05/28 | CH2205 | Male | Three y/o | Treatment (Wk 2) | Treatment | Feed Day | No | 07:20 | 07:00 - 07:59 | Morning      | 37,6 | 49  | 50,6  | 50,6  | 18,75 | 537,80 |
| 2019/05/28 | CH2206 | Male | Three y/o | Treatment (Wk 2) | Treatment | Feed Day | No | 07:20 | 07:00 - 07:59 | Morning      | 37,8 | 119 | 88,0  | 88,0  | 18,95 | 606,20 |
| 2019/05/28 | CH2205 | Male | Three y/o | Treatment (Wk 2) | Treatment | Feed Day | No | 07:25 | 07:00 - 07:59 | Morning      | 37,6 |     | 74,6  | 74,6  | 18,75 | 145,65 |
| 2019/05/28 | CH2206 | Male | Three y/o | Treatment (Wk 2) | Treatment | Feed Day | No | 07:25 | 07:00 - 07:59 | Morning      | 37,9 | 105 | 105,0 | 105,0 | 19,05 | 597,38 |
| 2019/05/28 | CH2205 | Male | Three y/o | Treatment (Wk 2) | Treatment | Feed Day | No | 07:30 | 07:00 - 07:59 | Morning      | 37,5 | 90  | 45,6  | 45,6  | 18,65 | 586,16 |
| 2019/05/28 | CH2206 | Male | Three y/o | Treatment (Wk 2) | Treatment | Feed Day | No | 07:30 | 07:00 - 07:59 | Morning      | 37,9 | 53  | 85,8  | 85,8  | 19,05 | 544,43 |
| 2019/05/28 | CH2205 | Male | Three y/o | Treatment (Wk 2) | Treatment | Feed Day | No | 07:35 | 07:00 - 07:59 | Morning      | 37,5 | 102 | 185,4 | 185,4 | 18,65 | 595,30 |
| 2019/05/28 | CH2206 | Male | Three y/o | Treatment (Wk 2) | Treatment | Feed Day | No | 07:35 | 07:00 - 07:59 | Morning      | 37,9 | 111 | 71,2  | 71,2  | 19,05 | 601,33 |
| 2019/05/28 | CH2205 | Male | Three y/o | Treatment (Wk 2) | Treatment | Feed Day | No | 07:40 | 07:00 - 07:59 | Morning      | 37,5 |     | 57,2  | 57,2  | 18,65 | 136,44 |
| 2019/05/28 | CH2206 | Male | Three y/o | Treatment (Wk 2) | Treatment | Feed Day | No | 07:40 | 07:00 - 07:59 | Morning      | 37,9 |     | 368,6 | 368,6 | 19,05 | 201,71 |
| 2019/05/28 | CH2205 | Male | Three y/o | Treatment (Wk 2) | Treatment | Feed Day | No | 07:45 | 07:00 - 07:59 | Morning      | 37,6 | 111 | 256,6 | 256,6 | 18,75 | 601,33 |
| 2019/05/28 | CH2206 | Male | Three y/o | Treatment (Wk 2) | Treatment | Feed Day | No | 07:45 | 07:00 - 07:59 | Morning      | 37,9 | 103 | 186,2 | 186,2 | 19,05 | 596,00 |
| 2019/05/28 | CH2205 | Male | Three y/o | Treatment (Wk 2) | Treatment | Feed Day | No | 07:50 | 07:00 - 07:59 | Morning      | 37,7 | 87  | 15,0  | 15,0  | 18,85 | 583,64 |
| 2019/05/28 | CH2206 | Male | Three y/o | Treatment (Wk 2) | Treatment | Feed Day | No | 07:50 | 07:00 - 07:59 | Morning      | 37,9 | 94  | 71,0  | 71,0  | 19,05 | 589,37 |
| 2019/05/28 | CH2205 | Male | Three y/o | Treatment (Wk 2) | Treatment | Feed Day | No | 07:55 | 07:00 - 07:59 | Morning      | 37,7 | 56  | 82,6  | 82,6  | 18,85 | 549,01 |
| 2019/05/28 | CH2206 | Male | Three y/o | Treatment (Wk 2) | Treatment | Feed Day | No | 07:55 | 07:00 - 07:59 | Morning      | 37,9 | 128 | 165,2 | 165,2 | 19,05 | 611,22 |
| 2019/05/28 | CH2205 | Male | Three y/o | Treatment (Wk 2) | Treatment | Feed Day | No | 08:00 | 08:00 - 08:59 | Late Morning | 37,7 |     | 82,2  | 82,2  | 18,85 | 149,02 |
| 2019/05/28 | CH2206 | Male | Three y/o | Treatment (Wk 2) | Treatment | Feed Day | No | 08:00 | 08:00 - 08:59 | Late Morning | 37,9 | 98  | 90,2  | 90,2  | 19,05 | 592,41 |
| 2019/05/28 | CH2205 | Male | Three y/o | Treatment (Wk 2) | Treatment | Feed Day | No | 08:05 | 08:00 - 08:59 | Late Morning | 37,7 | 51  | 142,6 | 142,6 | 18,85 | 541,20 |
| 2019/05/28 | CH2206 | Male | Three y/o | Treatment (Wk 2) | Treatment | Feed Day | No | 08:05 | 08:00 - 08:59 | Late Morning | 37,9 | 124 | 192,4 | 192,4 | 19,05 | 609,04 |
| 2019/05/28 | CH2205 | Male | Three y/o | Treatment (Wk 2) | Treatment | Feed Day | No | 08:10 | 08:00 - 08:59 | Late Morning | 37,7 | 121 | 456,8 | 456,8 | 18,85 | 607,35 |
| 2019/05/28 | CH2206 | Male | Three y/o | Treatment (Wk 2) | Treatment | Feed Day | No | 08:10 | 08:00 - 08:59 | Late Morning | 37,9 | 165 | 114,4 | 114,4 | 19,05 | 628,06 |
| 2019/05/28 | CH2205 | Male | Three y/o | Treatment (Wk 2) | Treatment | Feed Day | No | 08:15 | 08:00 - 08:59 | Late Morning | 37,6 | 106 | 140,2 | 140,2 | 18,75 | 598,06 |
| 2019/05/28 | CH2206 | Male | Three y/o | Treatment (Wk 2) | Treatment | Feed Day | No | 08:15 | 08:00 - 08:59 | Late Morning | 37,9 | 104 | 100,8 | 100,8 | 19,05 | 596,69 |
| 2019/05/28 | CH2205 | Male | Three y/o | Treatment (Wk 2) | Treatment | Feed Day | No | 08:20 | 08:00 - 08:59 | Late Morning | 37,7 | 71  | 143,2 | 143,2 | 18,85 | 568,10 |
| 2019/05/28 | CH2206 | Male | Three y/o | Treatment (Wk 2) | Treatment | Feed Day | No | 08:20 | 08:00 - 08:59 | Late Morning | 37,9 | 112 | 102,6 | 102,6 | 19,05 | 601,96 |
| 2019/05/28 | CH2205 | Male | Three y/o | Treatment (Wk 2) | Treatment | Feed Day | No | 08:25 | 08:00 - 08:59 | Late Morning | 37,7 | 143 | 516,2 | 516,2 | 18,85 | 618,69 |
| 2019/05/28 | CH2206 | Male | Three y/o | Treatment (Wk 2) | Treatment | Feed Day | No | 08:25 | 08:00 - 08:59 | Late Morning | 37,8 | 110 | 328,6 | 328,6 | 18,95 | 600,69 |
| 2019/05/28 | CH2205 | Male | Three y/o | Treatment (Wk 2) | Treatment | Feed Day | No | 08:30 | 08:00 - 08:59 | Late Morning | 38,5 | 103 | 428,6 | 428,6 | 19,66 | 596,00 |
| 2019/05/28 | CH2206 | Male | Three y/o | Treatment (Wk 2) | Treatment | Feed Day | No | 08:30 | 08:00 - 08:59 | Late Morning | 38,4 | 129 | 59,0  | 59,0  | 19,56 | 611,75 |
| 2019/05/28 | CH2205 | Male | Three y/o | Treatment (Wk 2) | Treatment | Feed Day | No | 08:35 | 08:00 - 08:59 | Late Morning | 39,0 |     | 223,6 | 223,6 | 20,18 | 184,05 |
| 2019/05/28 | CH2206 | Male | Three y/o | Treatment (Wk 2) | Treatment | Feed Day | No | 08:35 | 08:00 - 08:59 | Late Morning | 38,3 | 71  | 110,0 | 110,0 | 19,46 | 568,10 |
| 2019/05/28 | CH2205 | Male | Three y/o | Treatment (Wk 2) | Treatment | Feed Day | No | 08:40 | 08:00 - 08:59 | Late Morning | 39,0 |     | 84,6  | 84,6  | 20,18 | 150,02 |



|            |        |      |           |                  |           |          |     |       |               |              |      |     |       |       |       |        |        |
|------------|--------|------|-----------|------------------|-----------|----------|-----|-------|---------------|--------------|------|-----|-------|-------|-------|--------|--------|
| 2019/05/28 | CH2206 | Male | Three y/o | Treatment (Wk 2) | Treatment | Feed Day | No  | 08:40 | 08:00 - 08:59 | Late Morning | 38,4 |     | 56,4  | 56,4  | 19,56 |        | 135,95 |
| 2019/05/28 | CH2205 | Male | Three y/o | Treatment (Wk 2) | Treatment | Feed Day | No  | 08:45 | 08:00 - 08:59 | Late Morning | 39,0 | 134 | 90,2  | 90,2  | 20,18 | 614,33 | 152,25 |
| 2019/05/28 | CH2206 | Male | Three y/o | Treatment (Wk 2) | Treatment | Feed Day | No  | 08:45 | 08:00 - 08:59 | Late Morning | 38,4 | 57  | 151,0 | 151,0 | 19,56 | 550,47 | 170,25 |
| 2019/05/28 | CH2205 | Male | Three y/o | Treatment (Wk 2) | Treatment | Feed Day | No  | 08:50 | 08:00 - 08:59 | Late Morning | 39,0 | 141 | 413,0 | 413,0 | 20,18 | 617,75 | 205,75 |
| 2019/05/28 | CH2206 | Male | Three y/o | Treatment (Wk 2) | Treatment | Feed Day | No  | 08:50 | 08:00 - 08:59 | Late Morning | 38,3 | 125 | 61,6  | 61,6  | 19,46 | 609,60 | 139,00 |
| 2019/05/28 | CH2205 | Male | Three y/o | Treatment (Wk 2) | Treatment | Feed Day | No  | 08:55 | 08:00 - 08:59 | Late Morning | 38,9 | 123 | 139,8 | 139,8 | 20,07 | 608,49 | 167,55 |
| 2019/05/28 | CH2206 | Male | Three y/o | Treatment (Wk 2) | Treatment | Feed Day | No  | 08:55 | 08:00 - 08:59 | Late Morning | 38,2 |     | 35,4  | 35,4  | 19,36 |        | 119,88 |
| 2019/05/28 | CH2205 | Male | Three y/o | Treatment (Wk 2) | Treatment | Feed Day | No  | 09:00 | 09:00 - 09:59 | Late Morning | 38,8 | 104 | 427,2 | 427,2 | 19,97 | 596,69 | 206,95 |
| 2019/05/28 | CH2206 | Male | Three y/o | Treatment (Wk 2) | Treatment | Feed Day | No  | 09:00 | 09:00 - 09:59 | Late Morning | 38,1 | 46  | 69,0  | 69,0  | 19,26 | 532,38 | 142,94 |
| 2019/05/28 | CH2205 | Male | Three y/o | Treatment (Wk 2) | Treatment | Feed Day | No  | 09:05 | 09:00 - 09:59 | Late Morning | 38,7 |     | 288,2 | 288,2 | 19,87 |        | 193,00 |
| 2019/05/28 | CH2206 | Male | Three y/o | Treatment (Wk 2) | Treatment | Feed Day | No  | 09:05 | 09:00 - 09:59 | Late Morning | 38,0 |     | 156,0 | 156,0 | 19,15 |        | 171,39 |
| 2019/05/28 | CH2205 | Male | Three y/o | Treatment (Wk 2) | Treatment | Feed Day | No  | 09:10 | 09:00 - 09:59 | Late Morning | 38,5 | 129 | 119,8 | 119,8 | 19,66 | 611,75 | 162,15 |
| 2019/05/28 | CH2206 | Male | Three y/o | Treatment (Wk 2) | Treatment | Feed Day | No  | 09:10 | 09:00 - 09:59 | Late Morning | 38,0 | 104 | 48,0  | 48,0  | 19,15 | 596,69 | 130,38 |
| 2019/05/28 | CH2205 | Male | Three y/o | Treatment (Wk 2) | Treatment | Feed Day | No  | 09:15 | 09:00 - 09:59 | Late Morning | 38,5 |     | 201,4 | 201,4 | 19,66 |        | 180,36 |
| 2019/05/28 | CH2206 | Male | Three y/o | Treatment (Wk 2) | Treatment | Feed Day | No  | 09:15 | 09:00 - 09:59 | Late Morning | 37,9 | 124 | 44,6  | 44,6  | 19,05 | 609,04 | 127,84 |
| 2019/05/28 | CH2205 | Male | Three y/o | Treatment (Wk 2) | Treatment | Feed Day | No  | 09:20 | 09:00 - 09:59 | Late Morning | 38,5 | 134 | 471,6 | 471,6 | 19,66 | 614,33 | 210,47 |
| 2019/05/28 | CH2206 | Male | Three y/o | Treatment (Wk 2) | Treatment | Feed Day | No  | 09:20 | 09:00 - 09:59 | Late Morning | 37,7 | 129 | 231,8 | 231,8 | 18,85 | 611,75 | 185,31 |
| 2019/05/28 | CH2205 | Male | Three y/o | Treatment (Wk 2) | Treatment | Feed Day | No  | 09:25 | 09:00 - 09:59 | Late Morning | 38,9 | 115 | 17,4  | 17,4  | 20,07 | 603,82 | 95,56  |
| 2019/05/28 | CH2206 | Male | Three y/o | Treatment (Wk 2) | Treatment | Feed Day | No  | 09:25 | 09:00 - 09:59 | Late Morning | 38,4 | 104 | 145,2 | 145,2 | 19,56 | 596,69 | 168,88 |
| 2019/05/28 | CH2205 | Male | Three y/o | Treatment (Wk 2) | Treatment | Feed Day | No  | 09:30 | 09:00 - 09:59 | Late Morning | 38,8 | 79  | 4,4   | 4,4   | 19,97 | 576,36 | 49,12  |
| 2019/05/28 | CH2206 | Male | Three y/o | Treatment (Wk 2) | Treatment | Feed Day | No  | 09:30 | 09:00 - 09:59 | Late Morning | 38,4 |     | 379,4 | 379,4 | 19,56 |        | 202,74 |
| 2019/05/28 | CH2205 | Male | Three y/o | Treatment (Wk 2) | Treatment | Feed Day | No  | 09:35 | 09:00 - 09:59 | Late Morning | 38,7 | 86  | 18,2  | 18,2  | 19,87 | 582,77 | 97,10  |
| 2019/05/28 | CH2206 | Male | Three y/o | Treatment (Wk 2) | Treatment | Feed Day | No  | 09:35 | 09:00 - 09:59 | Late Morning | 38,3 | 93  | 23,6  | 23,6  | 19,46 | 588,58 | 105,97 |
| 2019/05/28 | CH2205 | Male | Three y/o | Treatment (Wk 2) | Treatment | Feed Day | No  | 09:40 | 09:00 - 09:59 | Late Morning | 38,5 | 98  | 27,8  | 27,8  | 19,66 | 592,41 | 111,58 |
| 2019/05/28 | CH2206 | Male | Three y/o | Treatment (Wk 2) | Treatment | Feed Day | No  | 09:40 | 09:00 - 09:59 | Late Morning | 38,3 | 82  | 29,2  | 29,2  | 19,46 | 579,19 | 113,27 |
| 2019/05/28 | CH2205 | Male | Three y/o | Treatment (Wk 2) | Treatment | Feed Day | No  | 09:45 | 09:00 - 09:59 | Late Morning | 38,5 |     | 23,2  | 23,2  | 19,66 |        | 105,39 |
| 2019/05/28 | CH2206 | Male | Three y/o | Treatment (Wk 2) | Treatment | Feed Day | No  | 09:45 | 09:00 - 09:59 | Late Morning | 38,2 | 115 | 37,2  | 37,2  | 19,36 | 603,82 | 121,59 |
| 2019/05/28 | CH2205 | Male | Three y/o | Treatment (Wk 2) | Treatment | Feed Day | No  | 09:50 | 09:00 - 09:59 | Late Morning | 38,4 | 67  | 31,2  | 31,2  | 19,56 | 563,53 | 115,54 |
| 2019/05/28 | CH2206 | Male | Three y/o | Treatment (Wk 2) | Treatment | Feed Day | No  | 09:50 | 09:00 - 09:59 | Late Morning | 38,1 | 118 | 50,0  | 50,0  | 19,26 | 605,61 | 131,79 |
| 2019/05/28 | CH2205 | Male | Three y/o | Treatment (Wk 2) | Treatment | Feed Day | No  | 09:55 | 09:00 - 09:59 | Late Morning | 38,1 |     | 27,2  | 27,2  | 19,26 |        | 110,83 |
| 2019/05/28 | CH2206 | Male | Three y/o | Treatment (Wk 2) | Treatment | Feed Day | No  | 09:55 | 09:00 - 09:59 | Late Morning | 37,9 | 48  | 50,4  | 50,4  | 19,05 | 536,04 | 132,06 |
| 2019/05/28 | CH2205 | Male | Three y/o | Treatment (Wk 2) | Treatment | Feed Day | No  | 10:00 | 10:00 - 10:59 | Late Morning | 38,0 | 91  | 64,2  | 64,2  | 19,15 | 586,98 | 140,44 |
| 2019/05/28 | CH2206 | Male | Three y/o | Treatment (Wk 2) | Treatment | Feed Day | No  | 10:00 | 10:00 - 10:59 | Late Morning | 37,7 | 83  | 58,6  | 58,6  | 18,85 | 580,11 | 137,28 |
| 2019/05/28 | CH2205 | Male | Three y/o | Treatment (Wk 2) | Treatment | Feed Day | No  | 10:05 | 10:00 - 10:59 | Late Morning | 37,9 | 107 | 88,2  | 88,2  | 19,05 | 598,73 | 151,47 |
| 2019/05/28 | CH2206 | Male | Three y/o | Treatment (Wk 2) | Treatment | Feed Day | No  | 10:05 | 10:00 - 10:59 | Late Morning | 37,7 | 103 | 90,4  | 90,4  | 18,85 | 596,00 | 152,33 |
| 2019/05/28 | CH2205 | Male | Three y/o | Treatment (Wk 2) | Treatment | Feed Day | No  | 10:10 | 10:00 - 10:59 | Late Morning | 37,9 | 61  | 61,8  | 61,8  | 19,05 | 556,01 | 139,12 |
| 2019/05/28 | CH2206 | Male | Three y/o | Treatment (Wk 2) | Treatment | Feed Day | No  | 10:10 | 10:00 - 10:59 | Late Morning | 37,8 | 106 | 128,2 | 128,2 | 18,95 | 598,06 | 164,52 |
| 2019/05/28 | CH2205 | Male | Three y/o | Treatment (Wk 2) | Treatment | Feed Day | No  | 10:15 | 10:00 - 10:59 | Late Morning | 37,9 | 147 | 135,6 | 135,6 | 19,05 | 620,52 | 166,48 |
| 2019/05/28 | CH2206 | Male | Three y/o | Treatment (Wk 2) | Treatment | Feed Day | No  | 10:15 | 10:00 - 10:59 | Late Morning | 37,8 | 104 | 108,0 | 108,0 | 18,95 | 596,69 | 158,53 |
| 2019/05/28 | CH2205 | Male | Three y/o | Treatment (Wk 2) | Treatment | Feed Day | No  | 10:20 | 10:00 - 10:59 | Late Morning | 37,9 |     | 67,8  | 67,8  | 19,05 |        | 142,33 |
| 2019/05/28 | CH2206 | Male | Three y/o | Treatment (Wk 2) | Treatment | Feed Day | No  | 10:20 | 10:00 - 10:59 | Late Morning | 37,8 | 191 | 292,8 | 292,8 | 18,95 | 637,33 | 193,56 |
| 2019/05/28 | CH2205 | Male | Three y/o | Treatment (Wk 2) | Treatment | Feed Day | No  | 10:25 | 10:00 - 10:59 | Late Morning | 37,9 | 147 | 87,6  | 87,6  | 19,05 | 620,52 | 151,23 |
| 2019/05/28 | CH2206 | Male | Three y/o | Treatment (Wk 2) | Treatment | Feed Day | No  | 10:25 | 10:00 - 10:59 | Late Morning | 37,8 | 123 | 351,6 | 351,6 | 18,95 | 608,49 | 200,04 |
| 2019/05/28 | CH2205 | Male | Three y/o | Treatment (Wk 2) | Treatment | Feed Day | Yes | 10:30 | 10:00 - 10:59 | Late Morning | 37,7 | 77  | 190,8 | 190,8 | 18,85 | 574,39 | 178,46 |
| 2019/05/28 | CH2206 | Male | Three y/o | Treatment (Wk 2) | Treatment | Feed Day | Yes | 10:30 | 10:00 - 10:59 | Late Morning | 37,9 | 140 | 51,0  | 51,0  | 19,05 | 617,28 | 132,47 |
| 2019/05/28 | CH2205 | Male | Three y/o | Treatment (Wk 2) | Treatment | Feed Day | Yes | 10:35 | 10:00 - 10:59 | Late Morning | 37,7 | 89  | 19,2  | 19,2  | 18,85 | 585,33 | 98,92  |
| 2019/05/28 | CH2206 | Male | Three y/o | Treatment (Wk 2) | Treatment | Feed Day | Yes | 10:35 | 10:00 - 10:59 | Late Morning | 37,9 | 83  | 46,4  | 46,4  | 19,05 | 580,11 | 129,21 |
| 2019/05/28 | CH2205 | Male | Three y/o | Treatment (Wk 2) | Treatment | Feed Day | Yes | 10:40 | 10:00 - 10:59 | Late Morning | 37,7 |     | 47,6  | 47,6  | 18,85 |        | 130,09 |
| 2019/05/28 | CH2206 | Male | Three y/o | Treatment (Wk 2) | Treatment | Feed Day | Yes | 10:40 | 10:00 - 10:59 | Late Morning | 37,8 | 92  | 139,6 | 139,6 | 18,95 | 587,78 | 167,50 |
| 2019/05/28 | CH2205 | Male | Three y/o | Treatment (Wk 2) | Treatment | Feed Day | Yes | 10:45 | 10:00 - 10:59 | Late Morning | 37,7 |     | 25,2  | 25,2  | 18,85 |        | 108,22 |
| 2019/05/28 | CH2206 | Male | Three y/o | Treatment (Wk 2) | Treatment | Feed Day | Yes | 10:45 | 10:00 - 10:59 | Late Morning | 37,9 | 111 | 157,4 | 157,4 | 19,05 | 601,33 | 171,71 |
| 2019/05/28 | CH2205 | Male | Three y/o | Treatment (Wk 2) | Treatment | Feed Day | Yes | 10:50 | 10:00 - 10:59 | Late Morning | 37,7 | 112 | 51,4  | 51,4  | 18,85 | 601,96 | 132,74 |
| 2019/05/28 | CH2206 | Male | Three y/o | Treatment (Wk 2) | Treatment | Feed Day | Yes | 10:50 | 10:00 - 10:59 | Late Morning | 37,9 | 107 | 49,0  | 49,0  | 19,05 | 598,73 | 131,09 |
| 2019/05/28 | CH2205 | Male | Three y/o | Treatment (Wk 2) | Treatment | Feed Day | Yes | 10:55 | 10:00 - 10:59 | Late Morning | 37,7 | 94  | 84,6  | 84,6  | 18,85 | 589,37 | 150,02 |
| 2019/05/28 | CH2206 | Male | Three y/o | Treatment (Wk 2) | Treatment | Feed Day | Yes | 10:55 | 10:00 - 10:59 | Late Morning | 37,9 | 115 | 378,4 | 378,4 | 19,05 | 603,82 | 202,64 |
| 2019/05/28 | CH2205 | Male | Three y/o | Treatment (Wk 2) | Treatment | Feed Day | Yes | 11:00 | 11:00 - 11:59 | Late Morning | 37,9 | 150 | 110,6 | 110,6 | 19,05 | 621,86 | 159,36 |
| 2019/05/28 | CH2206 | Male | Three y/o | Treatment (Wk 2) | Treatment | Feed Day | Yes | 11:00 | 11:00 - 11:59 | Late Morning | 37,9 | 112 | 157,0 | 157,0 | 19,05 | 601,96 | 171,62 |
| 2019/05/28 | CH2205 | Male | Three y/o | Treatment (Wk 2) | Treatment | Feed Day | Yes | 11:05 | 11:00 - 11:59 | Late Morning | 38,0 | 80  | 23,4  | 23,4  | 19,15 | 577,31 | 105,68 |
| 2019/05/28 | CH2206 | Male | Three y/o | Treatment (Wk 2) | Treatment | Feed Day | Yes | 11:05 | 11:00 - 11:59 | Late Morning | 38,0 | 124 | 118,4 | 118,4 | 19,15 | 609,04 | 161,74 |
| 2019/05/28 | CH2205 | Male | Three y/o | Treatment (Wk 2) | Treatment | Feed Day | Yes | 11:10 | 11:00 - 11:59 | Late Morning | 38,0 | 45  | 20,0  | 20,0  | 19,15 | 530,47 | 100,31 |
| 2019/05/28 | CH2206 | Male | Three y/o | Treatment (Wk 2) | Treatment | Feed Day | Yes | 11:10 | 11:00 - 11:59 | Late Morning | 38,0 | 118 | 202,8 | 202,8 | 19,15 | 605,61 | 180,61 |
| 2019/05/28 | CH2205 | Male | Three y/o | Treatment (Wk 2) | Treatment | Feed Day | Yes | 11:15 | 11:00 - 11:59 | Late Morning | 37,7 | 138 | 100,4 | 100,4 | 18,85 | 616,31 | 155,98 |
| 2019/05/28 | CH2206 | Male | Three y/o | Treatment (Wk 2) | Treatment | Feed Day | Yes | 11:15 | 11:00 - 11:59 | Late Morning | 38,0 | 145 | 191,6 | 191,6 | 19,15 | 619,62 | 178,61 |
| 2019/05/28 | CH2205 | Male | Three y/o | Treatment (Wk 2) | Treatment | Feed Day | Yes | 11:20 | 11:00 - 11:59 | Late Morning | 37,9 | 85  | 13,8  | 13,8  | 19,05 | 581,90 | 87,68  |
| 2019/05/28 | CH2206 | Male | Three y/o | Treatment (Wk 2) | Treatment | Feed Day | Yes | 11:20 | 11:00 - 11:59 | Late Morning | 38,1 | 124 | 64,2  | 64,2  | 19,26 | 609,04 | 140,44 |
| 2019/05/28 | CH2205 | Male | Three y/o | Treatment (Wk 2) | Treatment | Feed Day | Yes | 11:25 | 11:00 - 11:59 | Late Morning | 37,7 | 88  | 18,4  | 18,4  | 18,85 | 584,49 | 97,47  |
| 2019/05/28 | CH2206 | Male | Three y/o | Treatment (Wk 2) | Treatment | Feed Day | Yes | 11:25 | 11:00 - 11:59 | Late Morning | 38,0 | 60  | 40,0  | 40,0  | 19,15 | 554,67 | 124,09 |
| 2019/05/28 | CH2205 | Male | Three y/o | Treatment (Wk 2) | Treatment | Feed Day | No  | 11:30 | 11:00 - 11:59 | Late Morning | 37,5 |     | 14,0  | 14,0  | 18,65 |        | 88,17  |
| 2019/05/28 | CH2206 | Male | Three y/o | Treatment (Wk 2) | Treatment | Feed Day | No  | 11:30 | 11:00 - 11:59 | Late Morning | 38,0 | 70  | 27,6  | 27,6  | 19,15 | 566,99 | 111,33 |
| 2019/05/28 | CH2205 | Male | Three y/o | Treatment (Wk 2) | Treatment | Feed Day | No  | 11:35 | 11:00 - 11:59 | Late Morning | 37,6 | 57  | 13,8  | 13,8  | 18,75 | 550,47 | 87,68  |



|            |        |      |           |                  |           |          |    |       |               |              |      |     |       |       |       |        |        |
|------------|--------|------|-----------|------------------|-----------|----------|----|-------|---------------|--------------|------|-----|-------|-------|-------|--------|--------|
| 2019/05/28 | CH2206 | Male | Three y/o | Treatment (Wk 2) | Treatment | Feed Day | No | 11:35 | 11:00 - 11:59 | Late Morning | 37,9 | 51  | 29,4  | 29,4  | 19,05 | 541,20 | 113,50 |
| 2019/05/28 | CH2205 | Male | Three y/o | Treatment (Wk 2) | Treatment | Feed Day | No | 11:40 | 11:00 - 11:59 | Late Morning | 37,7 | 60  | 13,2  | 13,2  | 18,85 | 554,67 | 86,17  |
| 2019/05/28 | CH2206 | Male | Three y/o | Treatment (Wk 2) | Treatment | Feed Day | No | 11:40 | 11:00 - 11:59 | Late Morning | 37,9 | 46  | 46,2  | 46,2  | 19,05 | 532,38 | 129,06 |
| 2019/05/28 | CH2205 | Male | Three y/o | Treatment (Wk 2) | Treatment | Feed Day | No | 11:45 | 11:00 - 11:59 | Late Morning | 37,7 |     | 85,6  | 85,6  | 18,85 |        | 150,43 |
| 2019/05/28 | CH2206 | Male | Three y/o | Treatment (Wk 2) | Treatment | Feed Day | No | 11:45 | 11:00 - 11:59 | Late Morning | 37,9 | 48  | 242,4 | 242,4 | 19,05 | 536,04 | 186,89 |
| 2019/05/28 | CH2205 | Male | Three y/o | Treatment (Wk 2) | Treatment | Feed Day | No | 11:50 | 11:00 - 11:59 | Late Morning | 37,8 | 119 | 190,0 | 190,0 | 18,95 | 606,20 | 178,31 |
| 2019/05/28 | CH2206 | Male | Three y/o | Treatment (Wk 2) | Treatment | Feed Day | No | 11:50 | 11:00 - 11:59 | Late Morning | 37,9 |     | 74,8  | 74,8  | 19,05 |        | 145,74 |
| 2019/05/28 | CH2205 | Male | Three y/o | Treatment (Wk 2) | Treatment | Feed Day | No | 11:55 | 11:00 - 11:59 | Late Morning | 37,7 | 100 | 57,4  | 57,4  | 18,85 | 593,87 | 136,56 |
| 2019/05/28 | CH2206 | Male | Three y/o | Treatment (Wk 2) | Treatment | Feed Day | No | 11:55 | 11:00 - 11:59 | Late Morning | 37,9 | 111 | 263,6 | 263,6 | 19,05 | 601,33 | 189,85 |
| 2019/05/28 | CH2205 | Male | Three y/o | Treatment (Wk 2) | Treatment | Feed Day | No | 12:00 | 12:00 - 12:59 | Afternoon    | 37,9 |     | 124,2 | 124,2 | 19,05 |        | 163,41 |
| 2019/05/28 | CH2206 | Male | Three y/o | Treatment (Wk 2) | Treatment | Feed Day | No | 12:00 | 12:00 - 12:59 | Afternoon    | 37,9 | 125 | 121,8 | 121,8 | 19,05 | 609,60 | 162,73 |
| 2019/05/28 | CH2205 | Male | Three y/o | Treatment (Wk 2) | Treatment | Feed Day | No | 12:05 | 12:00 - 12:59 | Afternoon    | 37,9 | 110 | 42,6  | 42,6  | 19,05 | 600,69 | 126,26 |
| 2019/05/28 | CH2206 | Male | Three y/o | Treatment (Wk 2) | Treatment | Feed Day | No | 12:05 | 12:00 - 12:59 | Afternoon    | 38,0 | 162 | 85,6  | 85,6  | 19,15 | 626,88 | 150,43 |
| 2019/05/28 | CH2205 | Male | Three y/o | Treatment (Wk 2) | Treatment | Feed Day | No | 12:10 | 12:00 - 12:59 | Afternoon    | 37,5 |     | 23,6  | 23,6  | 18,65 |        | 105,97 |
| 2019/05/28 | CH2206 | Male | Three y/o | Treatment (Wk 2) | Treatment | Feed Day | No | 12:10 | 12:00 - 12:59 | Afternoon    | 37,8 | 119 | 57,0  | 57,0  | 18,95 | 606,20 | 136,32 |
| 2019/05/28 | CH2205 | Male | Three y/o | Treatment (Wk 2) | Treatment | Feed Day | No | 12:15 | 12:00 - 12:59 | Afternoon    | 37,4 | 90  | 43,4  | 43,4  | 18,55 | 586,16 | 126,90 |
| 2019/05/28 | CH2206 | Male | Three y/o | Treatment (Wk 2) | Treatment | Feed Day | No | 12:15 | 12:00 - 12:59 | Afternoon    | 37,7 | 124 | 85,4  | 85,4  | 18,85 | 609,04 | 150,35 |
| 2019/05/28 | CH2205 | Male | Three y/o | Treatment (Wk 2) | Treatment | Feed Day | No | 12:20 | 12:00 - 12:59 | Afternoon    | 37,5 | 44  | 177,0 | 177,0 | 18,65 | 528,51 | 175,82 |
| 2019/05/28 | CH2206 | Male | Three y/o | Treatment (Wk 2) | Treatment | Feed Day | No | 12:20 | 12:00 - 12:59 | Afternoon    | 37,5 | 180 | 97,4  | 97,4  | 18,65 | 633,61 | 154,93 |
| 2019/05/28 | CH2205 | Male | Three y/o | Treatment (Wk 2) | Treatment | Feed Day | No | 12:25 | 12:00 - 12:59 | Afternoon    | 37,6 | 132 | 165,6 | 165,6 | 18,75 | 613,32 | 173,49 |
| 2019/05/28 | CH2206 | Male | Three y/o | Treatment (Wk 2) | Treatment | Feed Day | No | 12:25 | 12:00 - 12:59 | Afternoon    | 37,7 | 126 | 142,4 | 142,4 | 18,85 | 610,14 | 168,20 |
| 2019/05/28 | CH2205 | Male | Three y/o | Treatment (Wk 2) | Treatment | Feed Day | No | 12:30 | 12:00 - 12:59 | Afternoon    | 37,6 | 119 | 221,6 | 221,6 | 18,75 | 606,20 | 183,73 |
| 2019/05/28 | CH2206 | Male | Three y/o | Treatment (Wk 2) | Treatment | Feed Day | No | 12:30 | 12:00 - 12:59 | Afternoon    | 37,7 | 158 | 83,6  | 83,6  | 18,85 | 625,26 | 149,61 |
| 2019/05/28 | CH2205 | Male | Three y/o | Treatment (Wk 2) | Treatment | Feed Day | No | 12:35 | 12:00 - 12:59 | Afternoon    | 37,7 | 58  | 393,2 | 393,2 | 18,85 | 551,90 | 204,01 |
| 2019/05/28 | CH2206 | Male | Three y/o | Treatment (Wk 2) | Treatment | Feed Day | No | 12:35 | 12:00 - 12:59 | Afternoon    | 37,8 | 141 | 118,2 | 118,2 | 18,95 | 617,75 | 161,68 |
| 2019/05/28 | CH2205 | Male | Three y/o | Treatment (Wk 2) | Treatment | Feed Day | No | 12:40 | 12:00 - 12:59 | Afternoon    | 37,7 | 94  | 39,6  | 39,6  | 18,85 | 589,37 | 123,74 |
| 2019/05/28 | CH2206 | Male | Three y/o | Treatment (Wk 2) | Treatment | Feed Day | No | 12:40 | 12:00 - 12:59 | Afternoon    | 37,9 | 123 | 190,6 | 190,6 | 19,05 | 608,49 | 178,43 |
| 2019/05/28 | CH2205 | Male | Three y/o | Treatment (Wk 2) | Treatment | Feed Day | No | 12:45 | 12:00 - 12:59 | Afternoon    | 37,9 | 115 | 34,0  | 34,0  | 19,05 | 603,82 | 118,49 |
| 2019/05/28 | CH2206 | Male | Three y/o | Treatment (Wk 2) | Treatment | Feed Day | No | 12:45 | 12:00 - 12:59 | Afternoon    | 37,9 | 63  | 258,2 | 258,2 | 19,05 | 558,62 | 189,12 |
| 2019/05/28 | CH2205 | Male | Three y/o | Treatment (Wk 2) | Treatment | Feed Day | No | 12:50 | 12:00 - 12:59 | Afternoon    | 37,9 | 93  | 199,2 | 199,2 | 19,05 | 588,58 | 179,98 |
| 2019/05/28 | CH2206 | Male | Three y/o | Treatment (Wk 2) | Treatment | Feed Day | No | 12:50 | 12:00 - 12:59 | Afternoon    | 37,9 | 119 | 211,0 | 211,0 | 19,05 | 606,20 | 182,00 |
| 2019/05/28 | CH2205 | Male | Three y/o | Treatment (Wk 2) | Treatment | Feed Day | No | 12:55 | 12:00 - 12:59 | Afternoon    | 37,9 | 106 | 110,0 | 110,0 | 19,05 | 598,06 | 159,17 |
| 2019/05/28 | CH2206 | Male | Three y/o | Treatment (Wk 2) | Treatment | Feed Day | No | 12:55 | 12:00 - 12:59 | Afternoon    | 37,9 | 132 | 295,2 | 295,2 | 19,05 | 613,32 | 193,85 |
| 2019/05/28 | CH2205 | Male | Three y/o | Treatment (Wk 2) | Treatment | Feed Day | No | 13:00 | 13:00 - 13:59 | Afternoon    | 37,9 | 89  | 28,4  | 28,4  | 19,05 | 585,33 | 112,31 |
| 2019/05/28 | CH2206 | Male | Three y/o | Treatment (Wk 2) | Treatment | Feed Day | No | 13:00 | 13:00 - 13:59 | Afternoon    | 37,9 | 131 | 27,6  | 27,6  | 19,05 | 612,80 | 111,33 |
| 2019/05/28 | CH2205 | Male | Three y/o | Treatment (Wk 2) | Treatment | Feed Day | No | 13:05 | 13:00 - 13:59 | Afternoon    | 38,0 | 80  | 60,0  | 60,0  | 19,15 | 577,31 | 138,09 |
| 2019/05/28 | CH2206 | Male | Three y/o | Treatment (Wk 2) | Treatment | Feed Day | No | 13:05 | 13:00 - 13:59 | Afternoon    | 38,0 | 110 | 22,0  | 22,0  | 19,15 | 600,69 | 103,57 |
| 2019/05/28 | CH2205 | Male | Three y/o | Treatment (Wk 2) | Treatment | Feed Day | No | 13:10 | 13:00 - 13:59 | Afternoon    | 38,0 | 85  | 108,8 | 108,8 | 19,15 | 581,90 | 158,79 |
| 2019/05/28 | CH2206 | Male | Three y/o | Treatment (Wk 2) | Treatment | Feed Day | No | 13:10 | 13:00 - 13:59 | Afternoon    | 37,9 | 108 | 32,2  | 32,2  | 19,05 | 599,39 | 116,63 |
| 2019/05/28 | CH2205 | Male | Three y/o | Treatment (Wk 2) | Treatment | Feed Day | No | 13:15 | 13:00 - 13:59 | Afternoon    | 37,9 | 145 | 21,2  | 21,2  | 19,05 | 619,62 | 102,31 |
| 2019/05/28 | CH2206 | Male | Three y/o | Treatment (Wk 2) | Treatment | Feed Day | No | 13:15 | 13:00 - 13:59 | Afternoon    | 37,9 | 102 | 53,2  | 53,2  | 19,05 | 595,30 | 133,93 |
| 2019/05/28 | CH2205 | Male | Three y/o | Treatment (Wk 2) | Treatment | Feed Day | No | 13:20 | 13:00 - 13:59 | Afternoon    | 37,9 | 80  | 7,0   | 7,0   | 19,05 | 577,31 | 64,72  |
| 2019/05/28 | CH2206 | Male | Three y/o | Treatment (Wk 2) | Treatment | Feed Day | No | 13:20 | 13:00 - 13:59 | Afternoon    | 37,9 | 98  | 24,8  | 24,8  | 19,05 | 592,41 | 107,67 |
| 2019/05/28 | CH2205 | Male | Three y/o | Treatment (Wk 2) | Treatment | Feed Day | No | 13:25 | 13:00 - 13:59 | Afternoon    | 37,9 |     | 8,6   | 8,6   | 19,05 |        | 71,66  |
| 2019/05/28 | CH2206 | Male | Three y/o | Treatment (Wk 2) | Treatment | Feed Day | No | 13:25 | 13:00 - 13:59 | Afternoon    | 37,9 | 109 | 14,0  | 14,0  | 19,05 | 600,04 | 88,17  |
| 2019/05/28 | CH2205 | Male | Three y/o | Treatment (Wk 2) | Treatment | Feed Day | No | 13:30 | 13:00 - 13:59 | Afternoon    | 37,9 |     | 17,0  | 17,0  | 19,05 |        | 94,77  |
| 2019/05/28 | CH2206 | Male | Three y/o | Treatment (Wk 2) | Treatment | Feed Day | No | 13:30 | 13:00 - 13:59 | Afternoon    | 37,9 | 89  | 24,4  | 24,4  | 19,05 | 585,33 | 107,11 |
| 2019/05/28 | CH2205 | Male | Three y/o | Treatment (Wk 2) | Treatment | Feed Day | No | 13:35 | 13:00 - 13:59 | Afternoon    | 37,9 |     | 49,2  | 49,2  | 19,05 |        | 131,23 |
| 2019/05/28 | CH2206 | Male | Three y/o | Treatment (Wk 2) | Treatment | Feed Day | No | 13:35 | 13:00 - 13:59 | Afternoon    | 37,9 | 86  | 49,6  | 49,6  | 19,05 | 582,77 | 131,51 |
| 2019/05/28 | CH2205 | Male | Three y/o | Treatment (Wk 2) | Treatment | Feed Day | No | 13:40 | 13:00 - 13:59 | Afternoon    | 37,9 | 53  | 46,8  | 46,8  | 19,05 | 544,43 | 129,50 |
| 2019/05/28 | CH2206 | Male | Three y/o | Treatment (Wk 2) | Treatment | Feed Day | No | 13:40 | 13:00 - 13:59 | Afternoon    | 38,0 | 115 | 70,0  | 70,0  | 19,15 | 603,82 | 143,44 |
| 2019/05/28 | CH2205 | Male | Three y/o | Treatment (Wk 2) | Treatment | Feed Day | No | 13:45 | 13:00 - 13:59 | Afternoon    | 37,9 |     | 44,6  | 44,6  | 19,05 |        | 127,84 |
| 2019/05/28 | CH2206 | Male | Three y/o | Treatment (Wk 2) | Treatment | Feed Day | No | 13:45 | 13:00 - 13:59 | Afternoon    | 38,0 | 123 | 43,6  | 43,6  | 19,15 | 608,49 | 127,06 |
| 2019/05/28 | CH2205 | Male | Three y/o | Treatment (Wk 2) | Treatment | Feed Day | No | 13:50 | 13:00 - 13:59 | Afternoon    | 37,8 | 56  | 23,8  | 23,8  | 18,95 | 549,01 | 106,26 |
| 2019/05/28 | CH2206 | Male | Three y/o | Treatment (Wk 2) | Treatment | Feed Day | No | 13:50 | 13:00 - 13:59 | Afternoon    | 37,9 | 112 | 113,4 | 113,4 | 19,05 | 601,96 | 160,23 |
| 2019/05/28 | CH2205 | Male | Three y/o | Treatment (Wk 2) | Treatment | Feed Day | No | 13:55 | 13:00 - 13:59 | Afternoon    | 37,7 |     | 13,6  | 13,6  | 18,85 |        | 87,18  |
| 2019/05/28 | CH2206 | Male | Three y/o | Treatment (Wk 2) | Treatment | Feed Day | No | 13:55 | 13:00 - 13:59 | Afternoon    | 37,9 |     | 49,4  | 49,4  | 19,05 |        | 131,37 |
| 2019/05/28 | CH2205 | Male | Three y/o | Treatment (Wk 2) | Treatment | Feed Day | No | 14:00 | 14:00 - 14:59 | Afternoon    | 37,9 | 80  | 313,2 | 313,2 | 19,05 | 577,31 | 195,94 |
| 2019/05/28 | CH2206 | Male | Three y/o | Treatment (Wk 2) | Treatment | Feed Day | No | 14:00 | 14:00 - 14:59 | Afternoon    | 37,9 | 177 | 21,8  | 21,8  | 19,05 | 632,55 | 103,26 |
| 2019/05/28 | CH2205 | Male | Three y/o | Treatment (Wk 2) | Treatment | Feed Day | No | 14:05 | 14:00 - 14:59 | Afternoon    | 38,0 | 143 | 8,8   | 8,8   | 19,15 | 618,69 | 72,43  |
| 2019/05/28 | CH2206 | Male | Three y/o | Treatment (Wk 2) | Treatment | Feed Day | No | 14:05 | 14:00 - 14:59 | Afternoon    | 37,9 | 119 | 21,2  | 21,2  | 19,05 | 606,20 | 102,31 |
| 2019/05/28 | CH2205 | Male | Three y/o | Treatment (Wk 2) | Treatment | Feed Day | No | 14:10 | 14:00 - 14:59 | Afternoon    | 38,0 | 59  | 3,2   | 3,2   | 19,15 | 553,30 | 38,49  |
| 2019/05/28 | CH2206 | Male | Three y/o | Treatment (Wk 2) | Treatment | Feed Day | No | 14:10 | 14:00 - 14:59 | Afternoon    | 37,9 | 95  | 13,0  | 13,0  | 19,05 | 590,14 | 85,65  |
| 2019/05/28 | CH2205 | Male | Three y/o | Treatment (Wk 2) | Treatment | Feed Day | No | 14:15 | 14:00 - 14:59 | Afternoon    | 38,1 | 84  | 4,0   | 4,0   | 19,26 | 581,01 | 45,94  |
| 2019/05/28 | CH2206 | Male | Three y/o | Treatment (Wk 2) | Treatment | Feed Day | No | 14:15 | 14:00 - 14:59 | Afternoon    | 37,9 | 110 | 5,4   | 5,4   | 19,05 | 600,69 | 55,99  |
| 2019/05/28 | CH2205 | Male | Three y/o | Treatment (Wk 2) | Treatment | Feed Day | No | 14:20 | 14:00 - 14:59 | Afternoon    | 38,1 | 78  | 7,0   | 7,0   | 19,26 | 575,38 | 64,72  |
| 2019/05/28 | CH2206 | Male | Three y/o | Treatment (Wk 2) | Treatment | Feed Day | No | 14:20 | 14:00 - 14:59 | Afternoon    | 37,9 | 84  | 4,0   | 4,0   | 19,05 | 581,01 | 45,94  |
| 2019/05/28 | CH2205 | Male | Three y/o | Treatment (Wk 2) | Treatment | Feed Day | No | 14:25 | 14:00 - 14:59 | Afternoon    | 38,1 | 80  | 13,8  | 13,8  | 19,26 | 577,31 | 87,68  |
| 2019/05/28 | CH2206 | Male | Three y/o | Treatment (Wk 2) | Treatment | Feed Day | No | 14:25 | 14:00 - 14:59 | Afternoon    | 38,0 | 49  | 10,0  | 10,0  | 19,15 | 537,80 | 76,76  |
| 2019/05/28 | CH2205 | Male | Three y/o | Treatment (Wk 2) | Treatment | Feed Day | No | 14:30 | 14:00 - 14:59 | Afternoon    | 38,1 | 63  | 17,2  | 17,2  | 19,26 | 558,62 | 95,17  |



Dataset S1: LOGGER

|            |        |      |           |                  |           |          |    |       |               |           |      |     |       |       |       |        |        |
|------------|--------|------|-----------|------------------|-----------|----------|----|-------|---------------|-----------|------|-----|-------|-------|-------|--------|--------|
| 2019/05/28 | CH2206 | Male | Three y/o | Treatment (Wk 2) | Treatment | Feed Day | No | 14:30 | 14:00 - 14:59 | Afternoon | 38,0 | 88  | 18,4  | 18,4  | 19,15 | 584,49 | 97,47  |
| 2019/05/28 | CH2205 | Male | Three y/o | Treatment (Wk 2) | Treatment | Feed Day | No | 14:35 | 14:00 - 14:59 | Afternoon | 38,1 | 64  | 17,8  | 17,8  | 19,26 | 559,88 | 96,34  |
| 2019/05/28 | CH2206 | Male | Three y/o | Treatment (Wk 2) | Treatment | Feed Day | No | 14:35 | 14:00 - 14:59 | Afternoon | 38,0 | 74  | 11,2  | 11,2  | 19,15 | 571,33 | 80,59  |
| 2019/05/28 | CH2205 | Male | Three y/o | Treatment (Wk 2) | Treatment | Feed Day | No | 14:40 | 14:00 - 14:59 | Afternoon | 38,1 | 114 | 7,8   | 7,8   | 19,26 | 603,20 | 68,36  |
| 2019/05/28 | CH2206 | Male | Three y/o | Treatment (Wk 2) | Treatment | Feed Day | No | 14:40 | 14:00 - 14:59 | Afternoon | 38,0 | 105 | 7,0   | 7,0   | 19,15 | 597,38 | 64,72  |
| 2019/05/28 | CH2205 | Male | Three y/o | Treatment (Wk 2) | Treatment | Feed Day | No | 14:45 | 14:00 - 14:59 | Afternoon | 38,1 | 66  | 2,8   | 2,8   | 19,26 | 562,34 | 34,04  |
| 2019/05/28 | CH2206 | Male | Three y/o | Treatment (Wk 2) | Treatment | Feed Day | No | 14:45 | 14:00 - 14:59 | Afternoon | 38,0 | 108 | 7,2   | 7,2   | 19,15 | 599,39 | 65,66  |
| 2019/05/28 | CH2205 | Male | Three y/o | Treatment (Wk 2) | Treatment | Feed Day | No | 14:50 | 14:00 - 14:59 | Afternoon | 38,1 | 67  | 6,2   | 6,2   | 19,26 | 563,53 | 60,63  |
| 2019/05/28 | CH2206 | Male | Three y/o | Treatment (Wk 2) | Treatment | Feed Day | No | 14:50 | 14:00 - 14:59 | Afternoon | 38,0 | 106 | 16,8  | 16,8  | 19,15 | 598,06 | 94,37  |
| 2019/05/28 | CH2205 | Male | Three y/o | Treatment (Wk 2) | Treatment | Feed Day | No | 14:55 | 14:00 - 14:59 | Afternoon | 38,1 | 84  | 2,0   | 2,0   | 19,26 | 581,01 | 22,86  |
| 2019/05/28 | CH2206 | Male | Three y/o | Treatment (Wk 2) | Treatment | Feed Day | No | 14:55 | 14:00 - 14:59 | Afternoon | 38,0 | 106 | 42,4  | 42,4  | 19,15 | 598,06 | 126,10 |
| 2019/05/28 | CH2205 | Male | Three y/o | Treatment (Wk 2) | Treatment | Feed Day | No | 15:00 | 15:00 - 15:59 | Afternoon | 38,1 | 83  | 6,2   | 6,2   | 19,26 | 580,11 | 60,63  |
| 2019/05/28 | CH2206 | Male | Three y/o | Treatment (Wk 2) | Treatment | Feed Day | No | 15:00 | 15:00 - 15:59 | Afternoon | 38,0 | 76  | 48,6  | 48,6  | 19,15 | 573,39 | 130,81 |
| 2019/05/28 | CH2205 | Male | Three y/o | Treatment (Wk 2) | Treatment | Feed Day | No | 15:05 | 15:00 - 15:59 | Afternoon | 38,1 | 48  | 2,6   | 2,6   | 19,26 | 536,04 | 31,57  |
| 2019/05/28 | CH2206 | Male | Three y/o | Treatment (Wk 2) | Treatment | Feed Day | No | 15:05 | 15:00 - 15:59 | Afternoon | 37,9 | 99  | 35,8  | 35,8  | 19,05 | 593,14 | 120,27 |
| 2019/05/28 | CH2205 | Male | Three y/o | Treatment (Wk 2) | Treatment | Feed Day | No | 15:10 | 15:00 - 15:59 | Afternoon | 38,1 |     | 25,0  | 25,0  | 19,26 |        | 107,94 |
| 2019/05/28 | CH2206 | Male | Three y/o | Treatment (Wk 2) | Treatment | Feed Day | No | 15:10 | 15:00 - 15:59 | Afternoon | 37,9 | 137 | 27,2  | 27,2  | 19,05 | 615,83 | 110,83 |
| 2019/05/28 | CH2205 | Male | Three y/o | Treatment (Wk 2) | Treatment | Feed Day | No | 15:15 | 15:00 - 15:59 | Afternoon | 38,1 | 108 | 38,6  | 38,6  | 19,26 | 599,39 | 122,86 |
| 2019/05/28 | CH2206 | Male | Three y/o | Treatment (Wk 2) | Treatment | Feed Day | No | 15:15 | 15:00 - 15:59 | Afternoon | 37,9 | 132 | 50,0  | 50,0  | 19,05 | 613,32 | 131,79 |
| 2019/05/28 | CH2205 | Male | Three y/o | Treatment (Wk 2) | Treatment | Feed Day | No | 15:20 | 15:00 - 15:59 | Afternoon | 38,0 | 114 | 26,4  | 26,4  | 19,15 | 603,20 | 109,81 |
| 2019/05/28 | CH2206 | Male | Three y/o | Treatment (Wk 2) | Treatment | Feed Day | No | 15:20 | 15:00 - 15:59 | Afternoon | 37,9 | 121 | 115,2 | 115,2 | 19,05 | 607,35 | 160,78 |
| 2019/05/28 | CH2205 | Male | Three y/o | Treatment (Wk 2) | Treatment | Feed Day | No | 15:25 | 15:00 - 15:59 | Afternoon | 37,9 | 76  | 22,4  | 22,4  | 19,05 | 573,39 | 104,19 |
| 2019/05/28 | CH2206 | Male | Three y/o | Treatment (Wk 2) | Treatment | Feed Day | No | 15:25 | 15:00 - 15:59 | Afternoon | 37,9 | 124 | 189,6 | 189,6 | 19,05 | 609,04 | 178,24 |
| 2019/05/28 | CH2205 | Male | Three y/o | Treatment (Wk 2) | Treatment | Feed Day | No | 15:30 | 15:00 - 15:59 | Afternoon | 37,9 |     | 34,2  | 34,2  | 19,05 |        | 118,70 |
| 2019/05/28 | CH2206 | Male | Three y/o | Treatment (Wk 2) | Treatment | Feed Day | No | 15:30 | 15:00 - 15:59 | Afternoon | 37,9 | 120 | 72,8  | 72,8  | 19,05 | 606,78 | 144,80 |
| 2019/05/28 | CH2205 | Male | Three y/o | Treatment (Wk 2) | Treatment | Feed Day | No | 15:35 | 15:00 - 15:59 | Afternoon | 37,7 |     | 29,4  | 29,4  | 18,85 |        | 113,50 |
| 2019/05/28 | CH2206 | Male | Three y/o | Treatment (Wk 2) | Treatment | Feed Day | No | 15:35 | 15:00 - 15:59 | Afternoon | 37,9 | 131 | 111,0 | 111,0 | 19,05 | 612,80 | 159,48 |
| 2019/05/28 | CH2205 | Male | Three y/o | Treatment (Wk 2) | Treatment | Feed Day | No | 15:40 | 15:00 - 15:59 | Afternoon | 37,6 | 83  | 22,2  | 22,2  | 18,75 | 580,11 | 103,88 |
| 2019/05/28 | CH2206 | Male | Three y/o | Treatment (Wk 2) | Treatment | Feed Day | No | 15:40 | 15:00 - 15:59 | Afternoon | 38,0 | 124 | 158,2 | 158,2 | 19,15 | 609,04 | 171,88 |
| 2019/05/28 | CH2205 | Male | Three y/o | Treatment (Wk 2) | Treatment | Feed Day | No | 15:45 | 15:00 - 15:59 | Afternoon | 37,6 | 93  | 991,2 |       | 18,75 | 588,58 |        |
| 2019/05/28 | CH2206 | Male | Three y/o | Treatment (Wk 2) | Treatment | Feed Day | No | 15:45 | 15:00 - 15:59 | Afternoon | 38,0 | 143 | 119,6 | 119,6 | 19,15 | 618,69 | 162,09 |
| 2019/05/28 | CH2205 | Male | Three y/o | Treatment (Wk 2) | Treatment | Feed Day | No | 15:50 | 15:00 - 15:59 | Afternoon | 37,9 | 88  | 10,6  | 10,6  | 19,05 | 584,49 | 78,73  |
| 2019/05/28 | CH2206 | Male | Three y/o | Treatment (Wk 2) | Treatment | Feed Day | No | 15:50 | 15:00 - 15:59 | Afternoon | 38,2 | 119 | 28,6  | 28,6  | 19,36 | 606,20 | 112,56 |
| 2019/05/28 | CH2205 | Male | Three y/o | Treatment (Wk 2) | Treatment | Feed Day | No | 15:55 | 15:00 - 15:59 | Afternoon | 38,0 |     | 23,2  | 23,2  | 19,15 |        | 105,39 |
| 2019/05/28 | CH2206 | Male | Three y/o | Treatment (Wk 2) | Treatment | Feed Day | No | 15:55 | 15:00 - 15:59 | Afternoon | 38,2 |     | 57,4  | 57,4  | 19,36 |        | 136,56 |
| 2019/05/28 | CH2205 | Male | Three y/o | Treatment (Wk 2) | Treatment | Feed Day | No | 16:00 | 16:00 - 16:59 | Evening   | 37,7 |     | 26,0  | 26,0  | 18,85 |        | 109,29 |
| 2019/05/28 | CH2206 | Male | Three y/o | Treatment (Wk 2) | Treatment | Feed Day | No | 16:00 | 16:00 - 16:59 | Evening   | 38,2 | 140 | 90,6  | 90,6  | 19,36 | 617,28 | 152,40 |
| 2019/05/28 | CH2205 | Male | Three y/o | Treatment (Wk 2) | Treatment | Feed Day | No | 16:05 | 16:00 - 16:59 | Evening   | 37,6 | 77  | 15,4  | 15,4  | 18,75 | 574,39 | 91,41  |
| 2019/05/28 | CH2206 | Male | Three y/o | Treatment (Wk 2) | Treatment | Feed Day | No | 16:05 | 16:00 - 16:59 | Evening   | 38,2 | 101 | 12,6  | 12,6  | 19,36 | 594,59 | 84,59  |
| 2019/05/28 | CH2205 | Male | Three y/o | Treatment (Wk 2) | Treatment | Feed Day | No | 16:10 | 16:00 - 16:59 | Evening   | 37,7 | 97  | 88,8  | 88,8  | 18,85 | 591,66 | 151,71 |
| 2019/05/28 | CH2206 | Male | Three y/o | Treatment (Wk 2) | Treatment | Feed Day | No | 16:10 | 16:00 - 16:59 | Evening   | 38,2 |     | 88,2  | 88,2  | 19,36 |        | 151,47 |
| 2019/05/28 | CH2205 | Male | Three y/o | Treatment (Wk 2) | Treatment | Feed Day | No | 16:15 | 16:00 - 16:59 | Evening   | 37,9 | 103 | 25,2  | 25,2  | 19,05 | 596,00 | 108,22 |
| 2019/05/28 | CH2206 | Male | Three y/o | Treatment (Wk 2) | Treatment | Feed Day | No | 16:15 | 16:00 - 16:59 | Evening   | 38,2 | 165 | 43,8  | 43,8  | 19,36 | 628,06 | 127,22 |
| 2019/05/28 | CH2205 | Male | Three y/o | Treatment (Wk 2) | Treatment | Feed Day | No | 16:20 | 16:00 - 16:59 | Evening   | 37,9 | 88  | 21,0  | 21,0  | 19,05 | 584,49 | 101,98 |
| 2019/05/28 | CH2206 | Male | Three y/o | Treatment (Wk 2) | Treatment | Feed Day | No | 16:20 | 16:00 - 16:59 | Evening   | 38,1 | 129 | 136,0 | 136,0 | 19,26 | 611,75 | 166,59 |
| 2019/05/28 | CH2205 | Male | Three y/o | Treatment (Wk 2) | Treatment | Feed Day | No | 16:25 | 16:00 - 16:59 | Evening   | 37,9 | 79  | 11,6  | 11,6  | 19,05 | 576,36 | 81,78  |
| 2019/05/28 | CH2206 | Male | Three y/o | Treatment (Wk 2) | Treatment | Feed Day | No | 16:25 | 16:00 - 16:59 | Evening   | 38,2 | 59  | 152,6 | 152,6 | 19,36 | 553,30 | 170,62 |
| 2019/05/28 | CH2205 | Male | Three y/o | Treatment (Wk 2) | Treatment | Feed Day | No | 16:30 | 16:00 - 16:59 | Evening   | 38,0 | 67  | 20,4  | 20,4  | 19,15 | 563,53 | 100,99 |
| 2019/05/28 | CH2206 | Male | Three y/o | Treatment (Wk 2) | Treatment | Feed Day | No | 16:30 | 16:00 - 16:59 | Evening   | 38,1 | 112 | 51,4  | 51,4  | 19,26 | 601,96 | 132,74 |
| 2019/05/28 | CH2205 | Male | Three y/o | Treatment (Wk 2) | Treatment | Feed Day | No | 16:35 | 16:00 - 16:59 | Evening   | 38,0 |     | 28,2  | 28,2  | 19,15 |        | 112,07 |
| 2019/05/28 | CH2206 | Male | Three y/o | Treatment (Wk 2) | Treatment | Feed Day | No | 16:35 | 16:00 - 16:59 | Evening   | 38,1 | 72  | 27,0  | 27,0  | 19,26 | 569,20 | 110,58 |
| 2019/05/28 | CH2205 | Male | Three y/o | Treatment (Wk 2) | Treatment | Feed Day | No | 16:40 | 16:00 - 16:59 | Evening   | 37,9 | 111 | 24,4  | 24,4  | 19,05 | 601,33 | 107,11 |
| 2019/05/28 | CH2206 | Male | Three y/o | Treatment (Wk 2) | Treatment | Feed Day | No | 16:40 | 16:00 - 16:59 | Evening   | 38,2 | 94  | 25,2  | 25,2  | 19,36 | 589,37 | 108,22 |
| 2019/05/28 | CH2205 | Male | Three y/o | Treatment (Wk 2) | Treatment | Feed Day | No | 16:45 | 16:00 - 16:59 | Evening   | 37,9 | 74  | 15,0  | 15,0  | 19,05 | 571,33 | 90,51  |
| 2019/05/28 | CH2206 | Male | Three y/o | Treatment (Wk 2) | Treatment | Feed Day | No | 16:45 | 16:00 - 16:59 | Evening   | 38,2 | 112 | 27,0  | 27,0  | 19,36 | 601,96 | 110,58 |
| 2019/05/28 | CH2205 | Male | Three y/o | Treatment (Wk 2) | Treatment | Feed Day | No | 16:50 | 16:00 - 16:59 | Evening   | 38,0 | 82  | 18,4  | 18,4  | 19,15 | 579,19 | 97,47  |
| 2019/05/28 | CH2206 | Male | Three y/o | Treatment (Wk 2) | Treatment | Feed Day | No | 16:50 | 16:00 - 16:59 | Evening   | 38,2 | 111 | 41,6  | 41,6  | 19,36 | 601,33 | 125,44 |
| 2019/05/28 | CH2205 | Male | Three y/o | Treatment (Wk 2) | Treatment | Feed Day | No | 16:55 | 16:00 - 16:59 | Evening   | 38,0 | 94  | 19,2  | 19,2  | 19,15 | 589,37 | 98,92  |
| 2019/05/28 | CH2206 | Male | Three y/o | Treatment (Wk 2) | Treatment | Feed Day | No | 16:55 | 16:00 - 16:59 | Evening   | 38,2 | 108 | 47,0  | 47,0  | 19,36 | 599,39 | 129,65 |
| 2019/05/28 | CH2205 | Male | Three y/o | Treatment (Wk 2) | Treatment | Feed Day | No | 17:00 | 17:00 - 17:59 | Evening   | 38,1 | 92  | 18,4  | 18,4  | 19,26 | 587,78 | 97,47  |
| 2019/05/28 | CH2206 | Male | Three y/o | Treatment (Wk 2) | Treatment | Feed Day | No | 17:00 | 17:00 - 17:59 | Evening   | 38,1 | 101 | 43,6  | 43,6  | 19,26 | 594,59 | 127,06 |
| 2019/05/28 | CH2205 | Male | Three y/o | Treatment (Wk 2) | Treatment | Feed Day | No | 17:05 | 17:00 - 17:59 | Evening   | 38,1 | 78  | 17,4  | 17,4  | 19,26 | 575,38 | 95,56  |
| 2019/05/28 | CH2206 | Male | Three y/o | Treatment (Wk 2) | Treatment | Feed Day | No | 17:05 | 17:00 - 17:59 | Evening   | 38,0 | 119 | 11,6  | 11,6  | 19,15 | 606,20 | 81,78  |
| 2019/05/28 | CH2205 | Male | Three y/o | Treatment (Wk 2) | Treatment | Feed Day | No | 17:10 | 17:00 - 17:59 | Evening   | 38,1 | 76  | 17,8  | 17,8  | 19,26 | 573,39 | 96,34  |
| 2019/05/28 | CH2206 | Male | Three y/o | Treatment (Wk 2) | Treatment | Feed Day | No | 17:10 | 17:00 - 17:59 | Evening   | 38,0 | 115 | 22,6  | 22,6  | 19,15 | 603,82 | 104,49 |
| 2019/05/28 | CH2205 | Male | Three y/o | Treatment (Wk 2) | Treatment | Feed Day | No | 17:15 | 17:00 - 17:59 | Evening   | 38,2 | 56  | 29,2  | 29,2  | 19,36 | 549,01 | 113,27 |
| 2019/05/28 | CH2206 | Male | Three y/o | Treatment (Wk 2) | Treatment | Feed Day | No | 17:15 | 17:00 - 17:59 | Evening   | 38,0 | 98  | 44,8  | 44,8  | 19,15 | 592,41 | 127,99 |
| 2019/05/28 | CH2205 | Male | Three y/o | Treatment (Wk 2) | Treatment | Feed Day | No | 17:20 | 17:00 - 17:59 | Evening   | 38,2 | 89  | 22,8  | 22,8  | 19,36 | 585,33 | 104,79 |
| 2019/05/28 | CH2206 | Male | Three y/o | Treatment (Wk 2) | Treatment | Feed Day | No | 17:20 | 17:00 - 17:59 | Evening   | 37,9 | 96  | 56,6  | 56,6  | 19,05 | 590,91 | 136,07 |
| 2019/05/28 | CH2205 | Male | Three y/o | Treatment (Wk 2) | Treatment | Feed Day | No | 17:25 | 17:00 - 17:59 | Evening   | 38,2 | 101 | 26,2  | 26,2  | 19,36 | 594,59 | 109,55 |



|            |        |      |           |                  |           |          |    |       |               |         |      |     |       |       |       |        |        |
|------------|--------|------|-----------|------------------|-----------|----------|----|-------|---------------|---------|------|-----|-------|-------|-------|--------|--------|
| 2019/05/28 | CH2206 | Male | Three y/o | Treatment (Wk 2) | Treatment | Feed Day | No | 17:25 | 17:00 - 17:59 | Evening | 37,8 | 98  | 51,4  | 51,4  | 18,95 | 592,41 | 132,74 |
| 2019/05/28 | CH2205 | Male | Three y/o | Treatment (Wk 2) | Treatment | Feed Day | No | 17:30 | 17:00 - 17:59 | Evening | 38,2 | 120 | 57,2  | 57,2  | 19,36 | 606,78 | 136,44 |
| 2019/05/28 | CH2206 | Male | Three y/o | Treatment (Wk 2) | Treatment | Feed Day | No | 17:30 | 17:00 - 17:59 | Evening | 37,7 |     | 21,0  | 21,0  | 18,85 |        | 101,98 |
| 2019/05/28 | CH2205 | Male | Three y/o | Treatment (Wk 2) | Treatment | Feed Day | No | 17:35 | 17:00 - 17:59 | Evening | 38,0 | 129 | 51,6  | 51,6  | 19,15 | 611,75 | 132,87 |
| 2019/05/28 | CH2206 | Male | Three y/o | Treatment (Wk 2) | Treatment | Feed Day | No | 17:35 | 17:00 - 17:59 | Evening | 37,8 | 113 | 26,6  | 26,6  | 18,95 | 602,58 | 110,07 |
| 2019/05/28 | CH2205 | Male | Three y/o | Treatment (Wk 2) | Treatment | Feed Day | No | 17:40 | 17:00 - 17:59 | Evening | 38,0 | 105 | 46,0  | 46,0  | 19,15 | 597,38 | 128,91 |
| 2019/05/28 | CH2206 | Male | Three y/o | Treatment (Wk 2) | Treatment | Feed Day | No | 17:40 | 17:00 - 17:59 | Evening | 37,8 |     | 131,4 | 131,4 | 18,95 |        | 165,38 |
| 2019/05/28 | CH2205 | Male | Three y/o | Treatment (Wk 2) | Treatment | Feed Day | No | 17:45 | 17:00 - 17:59 | Evening | 38,1 | 128 | 263,2 | 263,2 | 19,26 | 611,22 | 189,80 |
| 2019/05/28 | CH2206 | Male | Three y/o | Treatment (Wk 2) | Treatment | Feed Day | No | 17:45 | 17:00 - 17:59 | Evening | 37,8 | 158 | 48,2  | 48,2  | 18,95 | 625,26 | 130,52 |
| 2019/05/28 | CH2205 | Male | Three y/o | Treatment (Wk 2) | Treatment | Feed Day | No | 17:50 | 17:00 - 17:59 | Evening | 38,3 | 109 | 80,2  | 80,2  | 19,46 | 600,04 | 148,16 |
| 2019/05/28 | CH2206 | Male | Three y/o | Treatment (Wk 2) | Treatment | Feed Day | No | 17:50 | 17:00 - 17:59 | Evening | 37,8 | 84  | 44,4  | 44,4  | 18,95 | 581,01 | 127,69 |
| 2019/05/28 | CH2205 | Male | Three y/o | Treatment (Wk 2) | Treatment | Feed Day | No | 17:55 | 17:00 - 17:59 | Evening | 38,4 |     | 87,8  | 87,8  | 19,56 |        | 151,31 |
| 2019/05/28 | CH2206 | Male | Three y/o | Treatment (Wk 2) | Treatment | Feed Day | No | 17:55 | 17:00 - 17:59 | Evening | 37,8 | 120 | 46,6  | 46,6  | 18,95 | 606,78 | 129,35 |
| 2019/05/28 | CH2205 | Male | Three y/o | Treatment (Wk 2) | Treatment | Feed Day | No | 18:00 | 18:00 - 18:59 | Evening | 38,3 | 135 | 39,8  | 39,8  | 19,46 | 614,84 | 123,91 |
| 2019/05/28 | CH2206 | Male | Three y/o | Treatment (Wk 2) | Treatment | Feed Day | No | 18:00 | 18:00 - 18:59 | Evening | 37,7 | 94  | 49,4  | 49,4  | 18,85 | 589,37 | 131,37 |
| 2019/05/28 | CH2205 | Male | Three y/o | Treatment (Wk 2) | Treatment | Feed Day | No | 18:05 | 18:00 - 18:59 | Evening | 38,3 | 135 | 54,6  | 54,6  | 19,46 | 614,84 | 134,83 |
| 2019/05/28 | CH2206 | Male | Three y/o | Treatment (Wk 2) | Treatment | Feed Day | No | 18:05 | 18:00 - 18:59 | Evening | 37,5 | 67  | 51,0  | 51,0  | 18,65 | 563,53 | 132,47 |
| 2019/05/28 | CH2205 | Male | Three y/o | Treatment (Wk 2) | Treatment | Feed Day | No | 18:10 | 18:00 - 18:59 | Evening | 38,3 | 129 | 107,8 | 107,8 | 19,46 | 611,75 | 158,46 |
| 2019/05/28 | CH2206 | Male | Three y/o | Treatment (Wk 2) | Treatment | Feed Day | No | 18:10 | 18:00 - 18:59 | Evening | 37,5 | 104 | 55,8  | 55,8  | 18,65 | 596,69 | 135,58 |
| 2019/05/28 | CH2205 | Male | Three y/o | Treatment (Wk 2) | Treatment | Feed Day | No | 18:15 | 18:00 - 18:59 | Evening | 38,2 | 124 | 29,8  | 29,8  | 19,36 | 609,04 | 113,97 |
| 2019/05/28 | CH2206 | Male | Three y/o | Treatment (Wk 2) | Treatment | Feed Day | No | 18:15 | 18:00 - 18:59 | Evening | 37,4 | 82  | 50,2  | 50,2  | 18,55 | 579,19 | 131,92 |
| 2019/05/28 | CH2205 | Male | Three y/o | Treatment (Wk 2) | Treatment | Feed Day | No | 18:20 | 18:00 - 18:59 | Evening | 38,2 |     | 150,8 | 150,8 | 19,36 |        | 170,20 |
| 2019/05/28 | CH2206 | Male | Three y/o | Treatment (Wk 2) | Treatment | Feed Day | No | 18:20 | 18:00 - 18:59 | Evening | 37,4 | 94  | 42,0  | 42,0  | 18,55 | 589,37 | 125,77 |
| 2019/05/28 | CH2205 | Male | Three y/o | Treatment (Wk 2) | Treatment | Feed Day | No | 18:25 | 18:00 - 18:59 | Evening | 38,3 | 84  | 256,4 | 256,4 | 19,46 | 581,01 | 188,87 |
| 2019/05/28 | CH2206 | Male | Three y/o | Treatment (Wk 2) | Treatment | Feed Day | No | 18:25 | 18:00 - 18:59 | Evening | 37,5 |     | 46,2  | 46,2  | 18,65 |        | 129,06 |
| 2019/05/28 | CH2205 | Male | Three y/o | Treatment (Wk 2) | Treatment | Feed Day | No | 18:30 | 18:00 - 18:59 | Evening | 38,3 | 68  | 125,0 | 125,0 | 19,46 | 564,71 | 163,63 |
| 2019/05/28 | CH2206 | Male | Three y/o | Treatment (Wk 2) | Treatment | Feed Day | No | 18:30 | 18:00 - 18:59 | Evening | 37,4 | 165 | 49,0  | 49,0  | 18,55 | 628,06 | 131,09 |
| 2019/05/28 | CH2205 | Male | Three y/o | Treatment (Wk 2) | Treatment | Feed Day | No | 18:35 | 18:00 - 18:59 | Evening | 38,2 | 172 | 170,6 | 170,6 | 19,36 | 630,73 | 174,53 |
| 2019/05/28 | CH2206 | Male | Three y/o | Treatment (Wk 2) | Treatment | Feed Day | No | 18:35 | 18:00 - 18:59 | Evening | 37,5 | 98  | 46,6  | 46,6  | 18,65 | 592,41 | 129,35 |
| 2019/05/28 | CH2205 | Male | Three y/o | Treatment (Wk 2) | Treatment | Feed Day | No | 18:40 | 18:00 - 18:59 | Evening | 38,2 | 44  | 30,6  | 30,6  | 19,36 | 528,51 | 114,87 |
| 2019/05/28 | CH2206 | Male | Three y/o | Treatment (Wk 2) | Treatment | Feed Day | No | 18:40 | 18:00 - 18:59 | Evening | 37,4 | 90  | 44,8  | 44,8  | 18,55 | 586,16 | 127,99 |
| 2019/05/28 | CH2205 | Male | Three y/o | Treatment (Wk 2) | Treatment | Feed Day | No | 18:45 | 18:00 - 18:59 | Evening | 38,1 | 123 | 22,0  | 22,0  | 19,26 | 608,49 | 103,57 |
| 2019/05/28 | CH2206 | Male | Three y/o | Treatment (Wk 2) | Treatment | Feed Day | No | 18:45 | 18:00 - 18:59 | Evening | 37,4 | 90  | 53,0  | 53,0  | 18,55 | 586,16 | 133,80 |
| 2019/05/28 | CH2205 | Male | Three y/o | Treatment (Wk 2) | Treatment | Feed Day | No | 18:50 | 18:00 - 18:59 | Evening | 37,9 | 77  | 20,6  | 20,6  | 19,05 | 574,39 | 101,32 |
| 2019/05/28 | CH2206 | Male | Three y/o | Treatment (Wk 2) | Treatment | Feed Day | No | 18:50 | 18:00 - 18:59 | Evening | 37,3 | 65  | 58,6  | 58,6  | 18,46 | 561,12 | 137,28 |
| 2019/05/28 | CH2205 | Male | Three y/o | Treatment (Wk 2) | Treatment | Feed Day | No | 18:55 | 18:00 - 18:59 | Evening | 37,7 |     | 19,6  | 19,6  | 18,85 |        | 99,63  |
| 2019/05/28 | CH2206 | Male | Three y/o | Treatment (Wk 2) | Treatment | Feed Day | No | 18:55 | 18:00 - 18:59 | Evening | 37,5 | 106 | 56,0  | 56,0  | 18,65 | 598,06 | 135,70 |
| 2019/05/28 | CH2205 | Male | Three y/o | Treatment (Wk 2) | Treatment | Feed Day | No | 19:00 | 19:00 - 19:59 | Evening | 37,6 | 84  | 17,0  | 17,0  | 18,75 | 581,01 | 94,77  |
| 2019/05/28 | CH2206 | Male | Three y/o | Treatment (Wk 2) | Treatment | Feed Day | No | 19:00 | 19:00 - 19:59 | Evening | 37,4 | 80  | 40,4  | 40,4  | 18,55 | 577,31 | 124,43 |
| 2019/05/28 | CH2205 | Male | Three y/o | Treatment (Wk 2) | Treatment | Feed Day | No | 19:05 | 19:00 - 19:59 | Evening | 37,7 | 82  | 17,0  | 17,0  | 18,85 | 579,19 | 94,77  |
| 2019/05/28 | CH2206 | Male | Three y/o | Treatment (Wk 2) | Treatment | Feed Day | No | 19:05 | 19:00 - 19:59 | Evening | 37,4 | 89  | 46,6  | 46,6  | 18,55 | 585,33 | 129,35 |
| 2019/05/28 | CH2205 | Male | Three y/o | Treatment (Wk 2) | Treatment | Feed Day | No | 19:10 | 19:00 - 19:59 | Evening | 38,0 |     | 37,4  | 37,4  | 19,15 |        | 121,77 |
| 2019/05/28 | CH2206 | Male | Three y/o | Treatment (Wk 2) | Treatment | Feed Day | No | 19:10 | 19:00 - 19:59 | Evening | 37,2 | 92  | 52,8  | 52,8  | 18,36 | 587,78 | 133,67 |
| 2019/05/28 | CH2205 | Male | Three y/o | Treatment (Wk 2) | Treatment | Feed Day | No | 19:15 | 19:00 - 19:59 | Evening | 38,0 |     | 30,8  | 30,8  | 19,15 |        | 115,10 |
| 2019/05/28 | CH2206 | Male | Three y/o | Treatment (Wk 2) | Treatment | Feed Day | No | 19:15 | 19:00 - 19:59 | Evening | 37,1 | 96  | 44,2  | 44,2  | 18,26 | 590,91 | 127,53 |
| 2019/05/28 | CH2205 | Male | Three y/o | Treatment (Wk 2) | Treatment | Feed Day | No | 19:20 | 19:00 - 19:59 | Evening | 38,0 |     | 34,2  | 34,2  | 19,15 |        | 118,70 |
| 2019/05/28 | CH2206 | Male | Three y/o | Treatment (Wk 2) | Treatment | Feed Day | No | 19:20 | 19:00 - 19:59 | Evening | 37,2 | 75  | 38,4  | 38,4  | 18,36 | 572,36 | 122,68 |
| 2019/05/28 | CH2205 | Male | Three y/o | Treatment (Wk 2) | Treatment | Feed Day | No | 19:25 | 19:00 - 19:59 | Evening | 38,0 |     | 36,0  | 36,0  | 19,15 |        | 120,46 |
| 2019/05/28 | CH2206 | Male | Three y/o | Treatment (Wk 2) | Treatment | Feed Day | No | 19:25 | 19:00 - 19:59 | Evening | 37,2 | 94  | 25,2  | 25,2  | 18,36 | 589,37 | 108,22 |
| 2019/05/28 | CH2205 | Male | Three y/o | Treatment (Wk 2) | Treatment | Feed Day | No | 19:30 | 19:00 - 19:59 | Evening | 37,7 |     | 25,6  | 25,6  | 18,85 |        | 108,76 |
| 2019/05/28 | CH2206 | Male | Three y/o | Treatment (Wk 2) | Treatment | Feed Day | No | 19:30 | 19:00 - 19:59 | Evening | 37,0 | 89  | 10,0  | 10,0  | 18,16 | 585,33 | 76,76  |
| 2019/05/28 | CH2205 | Male | Three y/o | Treatment (Wk 2) | Treatment | Feed Day | No | 19:35 | 19:00 - 19:59 | Evening | 37,7 |     | 27,6  | 27,6  | 18,85 |        | 111,33 |
| 2019/05/28 | CH2206 | Male | Three y/o | Treatment (Wk 2) | Treatment | Feed Day | No | 19:35 | 19:00 - 19:59 | Evening | 37,0 | 66  | 9,8   | 9,8   | 18,16 | 562,34 | 76,07  |
| 2019/05/28 | CH2205 | Male | Three y/o | Treatment (Wk 2) | Treatment | Feed Day | No | 19:40 | 19:00 - 19:59 | Evening | 37,7 | 82  | 24,2  | 24,2  | 18,85 | 579,19 | 106,83 |
| 2019/05/28 | CH2206 | Male | Three y/o | Treatment (Wk 2) | Treatment | Feed Day | No | 19:40 | 19:00 - 19:59 | Evening | 37,2 | 72  | 15,8  | 15,8  | 18,36 | 569,20 | 92,28  |
| 2019/05/28 | CH2205 | Male | Three y/o | Treatment (Wk 2) | Treatment | Feed Day | No | 19:45 | 19:00 - 19:59 | Evening | 37,9 | 64  | 17,4  | 17,4  | 19,05 | 559,88 | 95,56  |
| 2019/05/28 | CH2206 | Male | Three y/o | Treatment (Wk 2) | Treatment | Feed Day | No | 19:45 | 19:00 - 19:59 | Evening | 37,3 | 74  | 12,8  | 12,8  | 18,46 | 571,33 | 85,12  |
| 2019/05/28 | CH2205 | Male | Three y/o | Treatment (Wk 2) | Treatment | Feed Day | No | 19:50 | 19:00 - 19:59 | Evening | 38,0 | 75  | 23,6  | 23,6  | 19,15 | 572,36 | 105,97 |
| 2019/05/28 | CH2206 | Male | Three y/o | Treatment (Wk 2) | Treatment | Feed Day | No | 19:50 | 19:00 - 19:59 | Evening | 37,5 | 177 | 19,4  | 19,4  | 18,65 | 632,55 | 99,28  |
| 2019/05/28 | CH2205 | Male | Three y/o | Treatment (Wk 2) | Treatment | Feed Day | No | 19:55 | 19:00 - 19:59 | Evening | 38,0 | 86  | 21,6  | 21,6  | 19,15 | 582,77 | 102,94 |
| 2019/05/28 | CH2206 | Male | Three y/o | Treatment (Wk 2) | Treatment | Feed Day | No | 19:55 | 19:00 - 19:59 | Evening | 37,5 | 94  | 22,6  | 22,6  | 18,65 | 589,37 | 104,49 |
| 2019/05/28 | CH2205 | Male | Three y/o | Treatment (Wk 2) | Treatment | Feed Day | No | 20:00 | 20:00 - 20:59 | Night   | 38,0 | 100 | 31,2  | 31,2  | 19,15 | 593,87 | 115,54 |
| 2019/05/28 | CH2206 | Male | Three y/o | Treatment (Wk 2) | Treatment | Feed Day | No | 20:00 | 20:00 - 20:59 | Night   | 37,5 | 85  | 25,8  | 25,8  | 18,65 | 581,90 | 109,02 |
| 2019/05/28 | CH2205 | Male | Three y/o | Treatment (Wk 2) | Treatment | Feed Day | No | 20:05 | 20:00 - 20:59 | Night   | 38,0 | 182 | 33,4  | 33,4  | 19,15 | 634,31 | 117,88 |
| 2019/05/28 | CH2206 | Male | Three y/o | Treatment (Wk 2) | Treatment | Feed Day | No | 20:05 | 20:00 - 20:59 | Night   | 37,4 | 45  | 6,4   | 6,4   | 18,55 | 530,47 | 61,70  |
| 2019/05/28 | CH2205 | Male | Three y/o | Treatment (Wk 2) | Treatment | Feed Day | No | 20:10 | 20:00 - 20:59 | Night   | 37,9 |     | 30,4  | 30,4  | 19,05 |        | 114,65 |
| 2019/05/28 | CH2206 | Male | Three y/o | Treatment (Wk 2) | Treatment | Feed Day | No | 20:10 | 20:00 - 20:59 | Night   | 36,9 | 85  | 9,6   | 9,6   | 18,06 | 581,90 | 75,37  |
| 2019/05/28 | CH2205 | Male | Three y/o | Treatment (Wk 2) | Treatment | Feed Day | No | 20:15 | 20:00 - 20:59 | Night   | 37,6 |     | 25,6  | 25,6  | 18,75 |        | 108,76 |
| 2019/05/28 | CH2206 | Male | Three y/o | Treatment (Wk 2) | Treatment | Feed Day | No | 20:15 | 20:00 - 20:59 | Night   | 36,2 | 62  | 14,0  | 14,0  | 17,38 | 557,33 | 88,17  |
| 2019/05/28 | CH2205 | Male | Three y/o | Treatment (Wk 2) | Treatment | Feed Day | No | 20:20 | 20:00 - 20:59 | Night   | 37,8 | 111 | 33,4  | 33,4  | 18,95 | 601,33 | 117,88 |



|            |        |      |           |                  |           |          |    |       |               |       |      |     |      |      |       |        |        |
|------------|--------|------|-----------|------------------|-----------|----------|----|-------|---------------|-------|------|-----|------|------|-------|--------|--------|
| 2019/05/28 | CH2206 | Male | Three y/o | Treatment (Wk 2) | Treatment | Feed Day | No | 20:20 | 20:00 - 20:59 | Night | 35,6 | 95  | 14,2 | 14,2 | 16,81 | 590,14 | 88,65  |
| 2019/05/28 | CH2205 | Male | Three y/o | Treatment (Wk 2) | Treatment | Feed Day | No | 20:25 | 20:00 - 20:59 | Night | 37,9 |     | 20,6 | 20,6 | 19,05 |        | 101,32 |
| 2019/05/28 | CH2206 | Male | Three y/o | Treatment (Wk 2) | Treatment | Feed Day | No | 20:25 | 20:00 - 20:59 | Night | 35,7 | 99  | 39,0 | 39,0 | 16,90 | 593,14 | 123,22 |
| 2019/05/28 | CH2205 | Male | Three y/o | Treatment (Wk 2) | Treatment | Feed Day | No | 20:30 | 20:00 - 20:59 | Night | 37,9 | 65  | 4,6  | 4,6  | 19,05 | 561,12 | 50,61  |
| 2019/05/28 | CH2206 | Male | Three y/o | Treatment (Wk 2) | Treatment | Feed Day | No | 20:30 | 20:00 - 20:59 | Night | 36,1 | 74  | 31,8 | 31,8 | 17,29 | 571,33 | 116,20 |
| 2019/05/28 | CH2205 | Male | Three y/o | Treatment (Wk 2) | Treatment | Feed Day | No | 20:35 | 20:00 - 20:59 | Night | 37,7 | 86  | 22,8 | 22,8 | 18,85 | 582,77 | 104,79 |
| 2019/05/28 | CH2206 | Male | Three y/o | Treatment (Wk 2) | Treatment | Feed Day | No | 20:35 | 20:00 - 20:59 | Night | 36,3 | 62  | 32,2 | 32,2 | 17,48 | 557,33 | 116,63 |
| 2019/05/28 | CH2205 | Male | Three y/o | Treatment (Wk 2) | Treatment | Feed Day | No | 20:40 | 20:00 - 20:59 | Night | 37,7 | 68  | 5,6  | 5,6  | 18,85 | 564,71 | 57,21  |
| 2019/05/28 | CH2206 | Male | Three y/o | Treatment (Wk 2) | Treatment | Feed Day | No | 20:40 | 20:00 - 20:59 | Night | 36,5 | 58  | 46,6 | 46,6 | 17,67 | 551,90 | 129,35 |
| 2019/05/28 | CH2205 | Male | Three y/o | Treatment (Wk 2) | Treatment | Feed Day | No | 20:45 | 20:00 - 20:59 | Night | 37,7 | 100 | 6,4  | 6,4  | 18,85 | 593,87 | 61,70  |
| 2019/05/28 | CH2206 | Male | Three y/o | Treatment (Wk 2) | Treatment | Feed Day | No | 20:45 | 20:00 - 20:59 | Night | 36,6 | 124 | 37,0 | 37,0 | 17,77 | 609,04 | 121,40 |
| 2019/05/28 | CH2205 | Male | Three y/o | Treatment (Wk 2) | Treatment | Feed Day | No | 20:50 | 20:00 - 20:59 | Night | 37,6 | 67  | 6,8  | 6,8  | 18,75 | 563,53 | 63,74  |
| 2019/05/28 | CH2206 | Male | Three y/o | Treatment (Wk 2) | Treatment | Feed Day | No | 20:50 | 20:00 - 20:59 | Night | 36,9 | 54  | 48,2 | 48,2 | 18,06 | 545,99 | 130,52 |
| 2019/05/28 | CH2205 | Male | Three y/o | Treatment (Wk 2) | Treatment | Feed Day | No | 20:55 | 20:00 - 20:59 | Night | 37,6 | 94  | 10,0 | 10,0 | 18,75 | 589,37 | 76,76  |
| 2019/05/28 | CH2206 | Male | Three y/o | Treatment (Wk 2) | Treatment | Feed Day | No | 20:55 | 20:00 - 20:59 | Night | 37,0 | 61  | 45,4 | 45,4 | 18,16 | 556,01 | 128,45 |
| 2019/05/28 | CH2205 | Male | Three y/o | Treatment (Wk 2) | Treatment | Feed Day | No | 21:00 | 21:00 - 21:59 | Night | 37,5 | 64  | 5,6  | 5,6  | 18,65 | 559,88 | 57,21  |
| 2019/05/28 | CH2206 | Male | Three y/o | Treatment (Wk 2) | Treatment | Feed Day | No | 21:00 | 21:00 - 21:59 | Night | 37,0 | 50  | 39,0 | 39,0 | 18,16 | 539,52 | 123,22 |
| 2019/05/28 | CH2205 | Male | Three y/o | Treatment (Wk 2) | Treatment | Feed Day | No | 21:05 | 21:00 - 21:59 | Night | 37,4 | 106 | 19,2 | 19,2 | 18,55 | 598,06 | 98,92  |
| 2019/05/28 | CH2206 | Male | Three y/o | Treatment (Wk 2) | Treatment | Feed Day | No | 21:05 | 21:00 - 21:59 | Night | 37,2 | 97  | 27,6 | 27,6 | 18,36 | 591,66 | 111,33 |
| 2019/05/28 | CH2205 | Male | Three y/o | Treatment (Wk 2) | Treatment | Feed Day | No | 21:10 | 21:00 - 21:59 | Night | 37,3 | 114 | 13,0 | 13,0 | 18,46 | 603,20 | 85,65  |
| 2019/05/28 | CH2206 | Male | Three y/o | Treatment (Wk 2) | Treatment | Feed Day | No | 21:10 | 21:00 - 21:59 | Night | 37,3 | 92  | 47,2 | 47,2 | 18,46 | 587,78 | 129,80 |
| 2019/05/28 | CH2205 | Male | Three y/o | Treatment (Wk 2) | Treatment | Feed Day | No | 21:15 | 21:00 - 21:59 | Night | 37,4 | 66  | 3,8  | 3,8  | 18,55 | 562,34 | 44,22  |
| 2019/05/28 | CH2206 | Male | Three y/o | Treatment (Wk 2) | Treatment | Feed Day | No | 21:15 | 21:00 - 21:59 | Night | 37,3 | 73  | 46,6 | 46,6 | 18,46 | 570,27 | 129,35 |
| 2019/05/28 | CH2205 | Male | Three y/o | Treatment (Wk 2) | Treatment | Feed Day | No | 21:20 | 21:00 - 21:59 | Night | 37,5 | 96  | 5,2  | 5,2  | 18,65 | 590,91 | 54,72  |
| 2019/05/28 | CH2206 | Male | Three y/o | Treatment (Wk 2) | Treatment | Feed Day | No | 21:20 | 21:00 - 21:59 | Night | 37,3 | 101 | 40,8 | 40,8 | 18,46 | 594,59 | 124,77 |
| 2019/05/28 | CH2205 | Male | Three y/o | Treatment (Wk 2) | Treatment | Feed Day | No | 21:25 | 21:00 - 21:59 | Night | 37,7 | 45  | 9,2  | 9,2  | 18,85 | 530,47 | 73,94  |
| 2019/05/28 | CH2206 | Male | Three y/o | Treatment (Wk 2) | Treatment | Feed Day | No | 21:25 | 21:00 - 21:59 | Night | 37,3 | 44  | 27,4 | 27,4 | 18,46 | 528,51 | 111,09 |
| 2019/05/28 | CH2205 | Male | Three y/o | Treatment (Wk 2) | Treatment | Feed Day | No | 21:30 | 21:00 - 21:59 | Night | 37,7 | 62  | 5,2  | 5,2  | 18,85 | 557,33 | 54,72  |
| 2019/05/28 | CH2206 | Male | Three y/o | Treatment (Wk 2) | Treatment | Feed Day | No | 21:30 | 21:00 - 21:59 | Night | 37,1 | 100 | 12,6 | 12,6 | 18,26 | 593,87 | 84,59  |
| 2019/05/28 | CH2205 | Male | Three y/o | Treatment (Wk 2) | Treatment | Feed Day | No | 21:35 | 21:00 - 21:59 | Night | 37,6 | 51  | 11,4 | 11,4 | 18,75 | 541,20 | 81,19  |
| 2019/05/28 | CH2206 | Male | Three y/o | Treatment (Wk 2) | Treatment | Feed Day | No | 21:35 | 21:00 - 21:59 | Night | 37,1 | 90  | 20,0 | 20,0 | 18,26 | 586,16 | 100,31 |
| 2019/05/28 | CH2205 | Male | Three y/o | Treatment (Wk 2) | Treatment | Feed Day | No | 21:40 | 21:00 - 21:59 | Night | 37,6 | 98  | 30,8 | 30,8 | 18,75 | 592,41 | 115,10 |
| 2019/05/28 | CH2206 | Male | Three y/o | Treatment (Wk 2) | Treatment | Feed Day | No | 21:40 | 21:00 - 21:59 | Night | 37,2 | 143 | 21,4 | 21,4 | 18,36 | 618,69 | 102,63 |
| 2019/05/28 | CH2205 | Male | Three y/o | Treatment (Wk 2) | Treatment | Feed Day | No | 21:45 | 21:00 - 21:59 | Night | 37,6 | 107 | 35,6 | 35,6 | 18,75 | 598,73 | 120,08 |
| 2019/05/28 | CH2206 | Male | Three y/o | Treatment (Wk 2) | Treatment | Feed Day | No | 21:45 | 21:00 - 21:59 | Night | 37,3 | 62  | 30,6 | 30,6 | 18,46 | 557,33 | 114,87 |
| 2019/05/28 | CH2205 | Male | Three y/o | Treatment (Wk 2) | Treatment | Feed Day | No | 21:50 | 21:00 - 21:59 | Night | 37,7 |     | 23,0 | 23,0 | 18,85 |        | 105,09 |
| 2019/05/28 | CH2206 | Male | Three y/o | Treatment (Wk 2) | Treatment | Feed Day | No | 21:50 | 21:00 - 21:59 | Night | 37,5 | 46  | 56,2 | 56,2 | 18,65 | 532,38 | 135,83 |
| 2019/05/28 | CH2205 | Male | Three y/o | Treatment (Wk 2) | Treatment | Feed Day | No | 21:55 | 21:00 - 21:59 | Night | 37,7 |     | 26,4 | 26,4 | 18,85 |        | 109,81 |
| 2019/05/28 | CH2206 | Male | Three y/o | Treatment (Wk 2) | Treatment | Feed Day | No | 21:55 | 21:00 - 21:59 | Night | 37,7 | 58  | 55,8 | 55,8 | 18,85 | 551,90 | 135,58 |
| 2019/05/28 | CH2205 | Male | Three y/o | Treatment (Wk 2) | Treatment | Feed Day | No | 22:00 | 22:00 - 22:59 | Night | 37,7 |     | 24,4 | 24,4 | 18,85 |        | 107,11 |
| 2019/05/28 | CH2206 | Male | Three y/o | Treatment (Wk 2) | Treatment | Feed Day | No | 22:00 | 22:00 - 22:59 | Night | 37,7 | 62  | 56,2 | 56,2 | 18,85 | 557,33 | 135,83 |
| 2019/05/28 | CH2205 | Male | Three y/o | Treatment (Wk 2) | Treatment | Feed Day | No | 22:05 | 22:00 - 22:59 | Night | 37,7 | 129 | 21,0 | 21,0 | 18,85 | 611,75 | 101,98 |
| 2019/05/28 | CH2206 | Male | Three y/o | Treatment (Wk 2) | Treatment | Feed Day | No | 22:05 | 22:00 - 22:59 | Night | 37,8 | 88  | 50,4 | 50,4 | 18,95 | 584,49 | 132,06 |
| 2019/05/28 | CH2205 | Male | Three y/o | Treatment (Wk 2) | Treatment | Feed Day | No | 22:10 | 22:00 - 22:59 | Night | 37,6 | 80  | 25,6 | 25,6 | 18,75 | 577,31 | 108,76 |
| 2019/05/28 | CH2206 | Male | Three y/o | Treatment (Wk 2) | Treatment | Feed Day | No | 22:10 | 22:00 - 22:59 | Night | 37,7 | 185 | 49,6 | 49,6 | 18,85 | 635,34 | 131,51 |
| 2019/05/28 | CH2205 | Male | Three y/o | Treatment (Wk 2) | Treatment | Feed Day | No | 22:15 | 22:00 - 22:59 | Night | 37,6 |     | 22,4 | 22,4 | 18,75 |        | 104,19 |
| 2019/05/28 | CH2206 | Male | Three y/o | Treatment (Wk 2) | Treatment | Feed Day | No | 22:15 | 22:00 - 22:59 | Night | 37,8 | 95  | 51,0 | 51,0 | 18,95 | 590,14 | 132,47 |
| 2019/05/28 | CH2205 | Male | Three y/o | Treatment (Wk 2) | Treatment | Feed Day | No | 22:20 | 22:00 - 22:59 | Night | 37,5 |     | 20,4 | 20,4 | 18,65 |        | 100,99 |
| 2019/05/28 | CH2206 | Male | Three y/o | Treatment (Wk 2) | Treatment | Feed Day | No | 22:20 | 22:00 - 22:59 | Night | 37,8 | 56  | 54,0 | 54,0 | 18,95 | 549,01 | 134,45 |
| 2019/05/28 | CH2205 | Male | Three y/o | Treatment (Wk 2) | Treatment | Feed Day | No | 22:25 | 22:00 - 22:59 | Night | 37,5 | 150 | 22,0 | 22,0 | 18,65 | 621,86 | 103,57 |
| 2019/05/28 | CH2206 | Male | Three y/o | Treatment (Wk 2) | Treatment | Feed Day | No | 22:25 | 22:00 - 22:59 | Night | 37,8 | 68  | 52,6 | 52,6 | 18,95 | 564,71 | 133,54 |
| 2019/05/28 | CH2205 | Male | Three y/o | Treatment (Wk 2) | Treatment | Feed Day | No | 22:30 | 22:00 - 22:59 | Night | 37,5 | 118 | 20,0 | 20,0 | 18,65 | 605,61 | 100,31 |
| 2019/05/28 | CH2206 | Male | Three y/o | Treatment (Wk 2) | Treatment | Feed Day | No | 22:30 | 22:00 - 22:59 | Night | 37,8 | 93  | 55,6 | 55,6 | 18,95 | 588,58 | 135,46 |
| 2019/05/28 | CH2205 | Male | Three y/o | Treatment (Wk 2) | Treatment | Feed Day | No | 22:35 | 22:00 - 22:59 | Night | 37,4 |     | 21,0 | 21,0 | 18,55 |        | 101,98 |
| 2019/05/28 | CH2206 | Male | Three y/o | Treatment (Wk 2) | Treatment | Feed Day | No | 22:35 | 22:00 - 22:59 | Night | 37,8 | 64  | 52,4 | 52,4 | 18,95 | 559,88 | 133,41 |
| 2019/05/28 | CH2205 | Male | Three y/o | Treatment (Wk 2) | Treatment | Feed Day | No | 22:40 | 22:00 - 22:59 | Night | 37,4 |     | 20,0 | 20,0 | 18,55 |        | 100,31 |
| 2019/05/28 | CH2206 | Male | Three y/o | Treatment (Wk 2) | Treatment | Feed Day | No | 22:40 | 22:00 - 22:59 | Night | 37,8 | 86  | 49,6 | 49,6 | 18,95 | 582,77 | 131,51 |
| 2019/05/28 | CH2205 | Male | Three y/o | Treatment (Wk 2) | Treatment | Feed Day | No | 22:45 | 22:00 - 22:59 | Night | 37,4 |     | 56,6 | 56,6 | 18,55 |        | 136,07 |
| 2019/05/28 | CH2206 | Male | Three y/o | Treatment (Wk 2) | Treatment | Feed Day | No | 22:45 | 22:00 - 22:59 | Night | 37,8 | 92  | 43,2 | 43,2 | 18,95 | 587,78 | 126,74 |
| 2019/05/28 | CH2205 | Male | Three y/o | Treatment (Wk 2) | Treatment | Feed Day | No | 22:50 | 22:00 - 22:59 | Night | 37,3 | 46  | 28,8 | 28,8 | 18,46 | 532,38 | 112,79 |
| 2019/05/28 | CH2206 | Male | Three y/o | Treatment (Wk 2) | Treatment | Feed Day | No | 22:50 | 22:00 - 22:59 | Night | 37,8 | 89  | 32,6 | 32,6 | 18,95 | 585,33 | 117,05 |
| 2019/05/28 | CH2205 | Male | Three y/o | Treatment (Wk 2) | Treatment | Feed Day | No | 22:55 | 22:00 - 22:59 | Night | 37,1 |     | 27,4 | 27,4 | 18,26 |        | 111,09 |
| 2019/05/28 | CH2206 | Male | Three y/o | Treatment (Wk 2) | Treatment | Feed Day | No | 22:55 | 22:00 - 22:59 | Night | 37,6 | 94  | 34,2 | 34,2 | 18,75 | 589,37 | 118,70 |
| 2019/05/28 | CH2205 | Male | Three y/o | Treatment (Wk 2) | Treatment | Feed Day | No | 23:00 | 23:00 - 23:59 | Night | 37,1 | 93  | 5,4  | 5,4  | 18,26 | 588,58 | 55,99  |
| 2019/05/28 | CH2206 | Male | Three y/o | Treatment (Wk 2) | Treatment | Feed Day | No | 23:00 | 23:00 - 23:59 | Night | 37,5 | 46  | 32,4 | 32,4 | 18,65 | 532,38 | 116,84 |
| 2019/05/28 | CH2205 | Male | Three y/o | Treatment (Wk 2) | Treatment | Feed Day | No | 23:05 | 23:00 - 23:59 | Night | 37,3 |     | 4,8  | 4,8  | 18,46 |        | 52,04  |
| 2019/05/28 | CH2206 | Male | Three y/o | Treatment (Wk 2) | Treatment | Feed Day | No | 23:05 | 23:00 - 23:59 | Night | 37,4 | 93  | 38,2 | 38,2 | 18,55 | 588,58 | 122,50 |
| 2019/05/28 | CH2205 | Male | Three y/o | Treatment (Wk 2) | Treatment | Feed Day | No | 23:10 | 23:00 - 23:59 | Night | 37,4 | 63  | 4,2  | 4,2  | 18,55 | 558,62 | 47,57  |
| 2019/05/28 | CH2206 | Male | Three y/o | Treatment (Wk 2) | Treatment | Feed Day | No | 23:10 | 23:00 - 23:59 | Night | 37,4 | 76  | 33,6 | 33,6 | 18,55 | 573,39 | 118,09 |
| 2019/05/28 | CH2205 | Male | Three y/o | Treatment (Wk 2) | Treatment | Feed Day | No | 23:15 | 23:00 - 23:59 | Night | 37,5 | 45  | 5,2  | 5,2  | 18,65 | 530,47 | 54,72  |



|               |        |      |           |                  |           |          |    |       |               |               |      |     |      |      |       |        |        |
|---------------|--------|------|-----------|------------------|-----------|----------|----|-------|---------------|---------------|------|-----|------|------|-------|--------|--------|
| 2019/05/28    | CH2206 | Male | Three y/o | Treatment (Wk 2) | Treatment | Feed Day | No | 23:15 | 23:00 - 23:59 | Night         | 37,4 | 100 | 36,4 | 36,4 | 18,55 | 593,87 | 120,84 |
| 2019/05/28    | CH2205 | Male | Three y/o | Treatment (Wk 2) | Treatment | Feed Day | No | 23:20 | 23:00 - 23:59 | Night         | 37,6 | 60  | 10,8 | 10,8 | 18,75 | 554,67 | 79,36  |
| 2019/05/28    | CH2206 | Male | Three y/o | Treatment (Wk 2) | Treatment | Feed Day | No | 23:20 | 23:00 - 23:59 | Night         | 37,4 | 47  | 31,8 | 31,8 | 18,55 | 534,23 | 116,20 |
| 2019/05/28    | CH2205 | Male | Three y/o | Treatment (Wk 2) | Treatment | Feed Day | No | 23:25 | 23:00 - 23:59 | Night         | 37,6 |     | 24,2 | 24,2 | 18,75 |        | 106,83 |
| 2019/05/28    | CH2206 | Male | Three y/o | Treatment (Wk 2) | Treatment | Feed Day | No | 23:25 | 23:00 - 23:59 | Night         | 37,5 | 95  | 2,4  | 2,4  | 18,65 | 590,14 | 28,91  |
| 2019/05/28    | CH2205 | Male | Three y/o | Treatment (Wk 2) | Treatment | Feed Day | No | 23:30 | 23:00 - 23:59 | Night         | 37,4 | 45  | 19,2 | 19,2 | 18,55 | 530,47 | 98,92  |
| 2019/05/28    | CH2206 | Male | Three y/o | Treatment (Wk 2) | Treatment | Feed Day | No | 23:30 | 23:00 - 23:59 | Night         | 37,5 | 109 | 5,8  | 5,8  | 18,65 | 600,04 | 58,39  |
| 2019/05/28    | CH2205 | Male | Three y/o | Treatment (Wk 2) | Treatment | Feed Day | No | 23:35 | 23:00 - 23:59 | Night         | 37,4 | 65  | 25,0 | 25,0 | 18,55 | 561,12 | 107,94 |
| 2019/05/28    | CH2206 | Male | Three y/o | Treatment (Wk 2) | Treatment | Feed Day | No | 23:35 | 23:00 - 23:59 | Night         | 37,4 | 86  | 11,4 | 11,4 | 18,55 | 582,77 | 81,19  |
| 2019/05/28    | CH2205 | Male | Three y/o | Treatment (Wk 2) | Treatment | Feed Day | No | 23:40 | 23:00 - 23:59 | Night         | 37,6 | 59  | 24,8 | 24,8 | 18,75 | 553,30 | 107,67 |
| 2019/05/28    | CH2206 | Male | Three y/o | Treatment (Wk 2) | Treatment | Feed Day | No | 23:40 | 23:00 - 23:59 | Night         | 37,5 | 84  | 19,2 | 19,2 | 18,65 | 581,01 | 98,92  |
| 2019/05/28    | CH2205 | Male | Three y/o | Treatment (Wk 2) | Treatment | Feed Day | No | 23:45 | 23:00 - 23:59 | Night         | 37,6 | 69  | 22,8 | 22,8 | 18,75 | 565,86 | 104,79 |
| 2019/05/28    | CH2206 | Male | Three y/o | Treatment (Wk 2) | Treatment | Feed Day | No | 23:45 | 23:00 - 23:59 | Night         | 37,7 | 64  | 24,2 | 24,2 | 18,85 | 559,88 | 106,83 |
| 2019/05/28    | CH2205 | Male | Three y/o | Treatment (Wk 2) | Treatment | Feed Day | No | 23:50 | 23:00 - 23:59 | Night         | 37,6 | 56  | 26,8 | 26,8 | 18,75 | 549,01 | 110,33 |
| 2019/05/28    | CH2206 | Male | Three y/o | Treatment (Wk 2) | Treatment | Feed Day | No | 23:50 | 23:00 - 23:59 | Night         | 37,7 | 79  | 43,2 | 43,2 | 18,85 | 576,36 | 126,74 |
| 2019/05/28    | CH2205 | Male | Three y/o | Treatment (Wk 2) | Treatment | Feed Day | No | 23:55 | 23:00 - 23:59 | Night         | 37,6 | 55  | 24,8 | 24,8 | 18,75 | 547,52 | 107,67 |
| 2019/05/28    | CH2206 | Male | Three y/o | Treatment (Wk 2) | Treatment | Feed Day | No | 23:55 | 23:00 - 23:59 | Night         | 37,8 | 97  | 38,4 | 38,4 | 18,95 | 591,66 | 122,68 |
| 15 2019/05/29 | CH2205 | Male | Three y/o | Treatment (Wk 3) | Treatment | Fast Day | No | 00:00 | 00:00 - 00:59 | Early Morning | 37,6 | 48  | 21,4 | 21,4 | 18,75 | 536,04 | 102,63 |
| 2019/05/29    | CH2206 | Male | Three y/o | Treatment (Wk 3) | Treatment | Fast Day | No | 00:00 | 00:00 - 00:59 | Early Morning | 37,8 | 73  | 40,8 | 40,8 | 18,95 | 570,27 | 124,77 |
| 2019/05/29    | CH2205 | Male | Three y/o | Treatment (Wk 3) | Treatment | Fast Day | No | 00:05 | 00:00 - 00:59 | Early Morning | 37,6 | 71  | 23,0 | 23,0 | 18,75 | 568,10 | 105,09 |
| 2019/05/29    | CH2206 | Male | Three y/o | Treatment (Wk 3) | Treatment | Fast Day | No | 00:05 | 00:00 - 00:59 | Early Morning | 37,8 | 71  | 58,6 | 58,6 | 18,95 | 568,10 | 137,28 |
| 2019/05/29    | CH2205 | Male | Three y/o | Treatment (Wk 3) | Treatment | Fast Day | No | 00:10 | 00:00 - 00:59 | Early Morning | 37,6 | 65  | 26,6 | 26,6 | 18,75 | 561,12 | 110,07 |
| 2019/05/29    | CH2206 | Male | Three y/o | Treatment (Wk 3) | Treatment | Fast Day | No | 00:10 | 00:00 - 00:59 | Early Morning | 37,8 | 47  | 57,4 | 57,4 | 18,95 | 534,23 | 136,56 |
| 2019/05/29    | CH2205 | Male | Three y/o | Treatment (Wk 3) | Treatment | Fast Day | No | 00:15 | 00:00 - 00:59 | Early Morning | 37,7 | 78  | 20,8 | 20,8 | 18,85 | 575,38 | 101,65 |
| 2019/05/29    | CH2206 | Male | Three y/o | Treatment (Wk 3) | Treatment | Fast Day | No | 00:15 | 00:00 - 00:59 | Early Morning | 37,8 | 53  | 57,8 | 57,8 | 18,95 | 544,43 | 136,80 |
| 2019/05/29    | CH2205 | Male | Three y/o | Treatment (Wk 3) | Treatment | Fast Day | No | 00:20 | 00:00 - 00:59 | Early Morning | 37,7 | 54  | 27,4 | 27,4 | 18,85 | 545,99 | 111,09 |
| 2019/05/29    | CH2206 | Male | Three y/o | Treatment (Wk 3) | Treatment | Fast Day | No | 00:20 | 00:00 - 00:59 | Early Morning | 37,8 | 86  | 61,0 | 61,0 | 18,95 | 582,77 | 138,67 |
| 2019/05/29    | CH2205 | Male | Three y/o | Treatment (Wk 3) | Treatment | Fast Day | No | 00:25 | 00:00 - 00:59 | Early Morning | 37,7 | 44  | 25,0 | 25,0 | 18,85 | 528,51 | 107,94 |
| 2019/05/29    | CH2206 | Male | Three y/o | Treatment (Wk 3) | Treatment | Fast Day | No | 00:25 | 00:00 - 00:59 | Early Morning | 37,8 | 76  | 59,8 | 59,8 | 18,95 | 573,39 | 137,98 |
| 2019/05/29    | CH2205 | Male | Three y/o | Treatment (Wk 3) | Treatment | Fast Day | No | 00:30 | 00:00 - 00:59 | Early Morning | 37,7 | 51  | 23,8 | 23,8 | 18,85 | 541,20 | 106,26 |
| 2019/05/29    | CH2206 | Male | Three y/o | Treatment (Wk 3) | Treatment | Fast Day | No | 00:30 | 00:00 - 00:59 | Early Morning | 37,9 | 59  | 54,0 | 54,0 | 19,05 | 553,30 | 134,45 |
| 2019/05/29    | CH2205 | Male | Three y/o | Treatment (Wk 3) | Treatment | Fast Day | No | 00:35 | 00:00 - 00:59 | Early Morning | 37,7 | 44  | 24,0 | 24,0 | 18,85 | 528,51 | 106,55 |
| 2019/05/29    | CH2206 | Male | Three y/o | Treatment (Wk 3) | Treatment | Fast Day | No | 00:35 | 00:00 - 00:59 | Early Morning | 37,9 | 50  | 60,0 | 60,0 | 19,05 | 539,52 | 138,09 |
| 2019/05/29    | CH2205 | Male | Three y/o | Treatment (Wk 3) | Treatment | Fast Day | No | 00:40 | 00:00 - 00:59 | Early Morning | 37,7 | 57  | 26,8 | 26,8 | 18,85 | 550,47 | 110,33 |
| 2019/05/29    | CH2206 | Male | Three y/o | Treatment (Wk 3) | Treatment | Fast Day | No | 00:40 | 00:00 - 00:59 | Early Morning | 37,8 | 86  | 50,2 | 50,2 | 18,95 | 582,77 | 131,92 |
| 2019/05/29    | CH2205 | Male | Three y/o | Treatment (Wk 3) | Treatment | Fast Day | No | 00:45 | 00:00 - 00:59 | Early Morning | 37,9 |     | 17,0 | 17,0 | 19,05 |        | 94,77  |
| 2019/05/29    | CH2206 | Male | Three y/o | Treatment (Wk 3) | Treatment | Fast Day | No | 00:45 | 00:00 - 00:59 | Early Morning | 37,8 |     | 23,2 | 23,2 | 18,95 |        | 105,39 |
| 2019/05/29    | CH2205 | Male | Three y/o | Treatment (Wk 3) | Treatment | Fast Day | No | 00:50 | 00:00 - 00:59 | Early Morning | 37,9 | 59  | 5,4  | 5,4  | 19,05 | 553,30 | 55,99  |
| 2019/05/29    | CH2206 | Male | Three y/o | Treatment (Wk 3) | Treatment | Fast Day | No | 00:50 | 00:00 - 00:59 | Early Morning | 37,8 | 90  | 20,4 | 20,4 | 18,95 | 586,16 | 100,99 |
| 2019/05/29    | CH2205 | Male | Three y/o | Treatment (Wk 3) | Treatment | Fast Day | No | 00:55 | 00:00 - 00:59 | Early Morning | 37,9 | 62  | 6,0  | 6,0  | 19,05 | 557,33 | 59,53  |
| 2019/05/29    | CH2206 | Male | Three y/o | Treatment (Wk 3) | Treatment | Fast Day | No | 00:55 | 00:00 - 00:59 | Early Morning | 37,8 | 86  | 21,0 | 21,0 | 18,95 | 582,77 | 101,98 |
| 2019/05/29    | CH2205 | Male | Three y/o | Treatment (Wk 3) | Treatment | Fast Day | No | 01:00 | 01:00 - 01:59 | Early Morning | 37,9 | 57  | 10,6 | 10,6 | 19,05 | 550,47 | 78,73  |
| 2019/05/29    | CH2206 | Male | Three y/o | Treatment (Wk 3) | Treatment | Fast Day | No | 01:00 | 01:00 - 01:59 | Early Morning | 37,8 | 45  | 6,8  | 6,8  | 18,95 | 530,47 | 63,74  |
| 2019/05/29    | CH2205 | Male | Three y/o | Treatment (Wk 3) | Treatment | Fast Day | No | 01:05 | 01:00 - 01:59 | Early Morning | 37,9 | 90  | 15,2 | 15,2 | 19,05 | 586,16 | 90,96  |
| 2019/05/29    | CH2206 | Male | Three y/o | Treatment (Wk 3) | Treatment | Fast Day | No | 01:05 | 01:00 - 01:59 | Early Morning | 37,8 | 85  | 11,4 | 11,4 | 18,95 | 581,90 | 81,19  |
| 2019/05/29    | CH2205 | Male | Three y/o | Treatment (Wk 3) | Treatment | Fast Day | No | 01:10 | 01:00 - 01:59 | Early Morning | 37,9 | 46  | 12,8 | 12,8 | 19,05 | 532,38 | 85,12  |
| 2019/05/29    | CH2206 | Male | Three y/o | Treatment (Wk 3) | Treatment | Fast Day | No | 01:10 | 01:00 - 01:59 | Early Morning | 37,8 | 62  | 12,0 | 12,0 | 18,95 | 557,33 | 82,93  |
| 2019/05/29    | CH2205 | Male | Three y/o | Treatment (Wk 3) | Treatment | Fast Day | No | 01:15 | 01:00 - 01:59 | Early Morning | 37,9 | 72  | 22,8 | 22,8 | 19,05 | 569,20 | 104,79 |
| 2019/05/29    | CH2206 | Male | Three y/o | Treatment (Wk 3) | Treatment | Fast Day | No | 01:15 | 01:00 - 01:59 | Early Morning | 37,8 | 56  | 9,6  | 9,6  | 18,95 | 549,01 | 75,37  |
| 2019/05/29    | CH2205 | Male | Three y/o | Treatment (Wk 3) | Treatment | Fast Day | No | 01:20 | 01:00 - 01:59 | Early Morning | 37,7 | 55  | 18,8 | 18,8 | 18,85 | 547,52 | 98,20  |
| 2019/05/29    | CH2206 | Male | Three y/o | Treatment (Wk 3) | Treatment | Fast Day | No | 01:20 | 01:00 - 01:59 | Early Morning | 37,8 | 42  | 11,0 | 11,0 | 18,95 | 524,42 | 79,98  |
| 2019/05/29    | CH2205 | Male | Three y/o | Treatment (Wk 3) | Treatment | Fast Day | No | 01:25 | 01:00 - 01:59 | Early Morning | 37,7 | 55  | 20,2 | 20,2 | 18,85 | 547,52 | 100,65 |
| 2019/05/29    | CH2206 | Male | Three y/o | Treatment (Wk 3) | Treatment | Fast Day | No | 01:25 | 01:00 - 01:59 | Early Morning | 37,8 | 61  | 6,4  | 6,4  | 18,95 | 556,01 | 61,70  |
| 2019/05/29    | CH2205 | Male | Three y/o | Treatment (Wk 3) | Treatment | Fast Day | No | 01:30 | 01:00 - 01:59 | Early Morning | 37,6 | 51  | 20,8 | 20,8 | 18,75 | 541,20 | 101,65 |
| 2019/05/29    | CH2206 | Male | Three y/o | Treatment (Wk 3) | Treatment | Fast Day | No | 01:30 | 01:00 - 01:59 | Early Morning | 37,8 | 78  | 9,6  | 9,6  | 18,95 | 575,38 | 75,37  |
| 2019/05/29    | CH2205 | Male | Three y/o | Treatment (Wk 3) | Treatment | Fast Day | No | 01:35 | 01:00 - 01:59 | Early Morning | 37,6 | 82  | 18,0 | 18,0 | 18,75 | 579,19 | 96,72  |
| 2019/05/29    | CH2206 | Male | Three y/o | Treatment (Wk 3) | Treatment | Fast Day | No | 01:35 | 01:00 - 01:59 | Early Morning | 37,8 | 45  | 3,8  | 3,8  | 18,95 | 530,47 | 44,22  |
| 2019/05/29    | CH2205 | Male | Three y/o | Treatment (Wk 3) | Treatment | Fast Day | No | 01:40 | 01:00 - 01:59 | Early Morning | 37,6 | 53  | 15,8 | 15,8 | 18,75 | 544,43 | 92,28  |
| 2019/05/29    | CH2206 | Male | Three y/o | Treatment (Wk 3) | Treatment | Fast Day | No | 01:40 | 01:00 - 01:59 | Early Morning | 37,8 | 50  | 5,4  | 5,4  | 18,95 | 539,52 | 55,99  |
| 2019/05/29    | CH2205 | Male | Three y/o | Treatment (Wk 3) | Treatment | Fast Day | No | 01:45 | 01:00 - 01:59 | Early Morning | 37,7 | 62  | 11,6 | 11,6 | 18,85 | 557,33 | 81,78  |
| 2019/05/29    | CH2206 | Male | Three y/o | Treatment (Wk 3) | Treatment | Fast Day | No | 01:45 | 01:00 - 01:59 | Early Morning | 37,8 | 64  | 7,2  | 7,2  | 18,95 | 559,88 | 65,66  |
| 2019/05/29    | CH2205 | Male | Three y/o | Treatment (Wk 3) | Treatment | Fast Day | No | 01:50 | 01:00 - 01:59 | Early Morning | 37,7 | 94  | 13,8 | 13,8 | 18,85 | 589,37 | 87,68  |
| 2019/05/29    | CH2206 | Male | Three y/o | Treatment (Wk 3) | Treatment | Fast Day | No | 01:50 | 01:00 - 01:59 | Early Morning | 37,8 | 82  | 11,8 | 11,8 | 18,95 | 579,19 | 82,36  |
| 2019/05/29    | CH2205 | Male | Three y/o | Treatment (Wk 3) | Treatment | Fast Day | No | 01:55 | 01:00 - 01:59 | Early Morning | 37,7 | 52  | 18,0 | 18,0 | 18,85 | 542,83 | 96,72  |
| 2019/05/29    | CH2206 | Male | Three y/o | Treatment (Wk 3) | Treatment | Fast Day | No | 01:55 | 01:00 - 01:59 | Early Morning | 37,9 | 73  | 16,4 | 16,4 | 19,05 | 570,27 | 93,55  |
| 2019/05/29    | CH2205 | Male | Three y/o | Treatment (Wk 3) | Treatment | Fast Day | No | 02:00 | 02:00 - 02:59 | Early Morning | 37,7 | 61  | 14,4 | 14,4 | 18,85 | 556,01 | 89,12  |
| 2019/05/29    | CH2206 | Male | Three y/o | Treatment (Wk 3) | Treatment | Fast Day | No | 02:00 | 02:00 - 02:59 | Early Morning | 37,9 | 72  | 15,2 | 15,2 | 19,05 | 569,20 | 90,96  |
| 2019/05/29    | CH2205 | Male | Three y/o | Treatment (Wk 3) | Treatment | Fast Day | No | 02:05 | 02:00 - 02:59 | Early Morning | 37,7 | 53  | 13,2 | 13,2 | 18,85 | 544,43 | 86,17  |
| 2019/05/29    | CH2206 | Male | Three y/o | Treatment (Wk 3) | Treatment | Fast Day | No | 02:05 | 02:00 - 02:59 | Early Morning | 37,9 | 62  | 17,4 | 17,4 | 19,05 | 557,33 | 95,56  |
| 2019/05/29    | CH2205 | Male | Three y/o | Treatment (Wk 3) | Treatment | Fast Day | No | 02:10 | 02:00 - 02:59 | Early Morning | 37,7 | 60  | 7,0  | 7,0  | 18,85 | 554,67 | 64,72  |



|            |        |      |           |                  |           |          |    |       |               |               |      |     |       |       |       |        |        |
|------------|--------|------|-----------|------------------|-----------|----------|----|-------|---------------|---------------|------|-----|-------|-------|-------|--------|--------|
| 2019/05/29 | CH2206 | Male | Three y/o | Treatment (Wk 3) | Treatment | Fast Day | No | 02:10 | 02:00 - 02:59 | Early Morning | 37,9 | 44  | 15,4  | 15,4  | 19,05 | 528,51 | 91,41  |
| 2019/05/29 | CH2205 | Male | Three y/o | Treatment (Wk 3) | Treatment | Fast Day | No | 02:15 | 02:00 - 02:59 | Early Morning | 37,7 | 96  | 7,0   | 7,0   | 18,85 | 590,91 | 64,72  |
| 2019/05/29 | CH2206 | Male | Three y/o | Treatment (Wk 3) | Treatment | Fast Day | No | 02:15 | 02:00 - 02:59 | Early Morning | 37,9 | 42  | 19,8  | 19,8  | 19,05 | 524,42 | 99,97  |
| 2019/05/29 | CH2205 | Male | Three y/o | Treatment (Wk 3) | Treatment | Fast Day | No | 02:20 | 02:00 - 02:59 | Early Morning | 37,7 | 99  | 14,0  | 14,0  | 18,85 | 593,14 | 88,17  |
| 2019/05/29 | CH2206 | Male | Three y/o | Treatment (Wk 3) | Treatment | Fast Day | No | 02:20 | 02:00 - 02:59 | Early Morning | 37,9 | 86  | 26,2  | 26,2  | 19,05 | 582,77 | 109,55 |
| 2019/05/29 | CH2205 | Male | Three y/o | Treatment (Wk 3) | Treatment | Fast Day | No | 02:25 | 02:00 - 02:59 | Early Morning | 37,8 | 53  | 16,8  | 16,8  | 18,95 | 544,43 | 94,37  |
| 2019/05/29 | CH2206 | Male | Three y/o | Treatment (Wk 3) | Treatment | Fast Day | No | 02:25 | 02:00 - 02:59 | Early Morning | 37,9 | 89  | 21,8  | 21,8  | 19,05 | 585,33 | 103,26 |
| 2019/05/29 | CH2205 | Male | Three y/o | Treatment (Wk 3) | Treatment | Fast Day | No | 02:30 | 02:00 - 02:59 | Early Morning | 37,7 | 48  | 18,4  | 18,4  | 18,85 | 536,04 | 97,47  |
| 2019/05/29 | CH2206 | Male | Three y/o | Treatment (Wk 3) | Treatment | Fast Day | No | 02:30 | 02:00 - 02:59 | Early Morning | 37,9 | 108 | 18,6  | 18,6  | 19,05 | 599,39 | 97,84  |
| 2019/05/29 | CH2205 | Male | Three y/o | Treatment (Wk 3) | Treatment | Fast Day | No | 02:35 | 02:00 - 02:59 | Early Morning | 37,7 | 60  | 18,0  | 18,0  | 18,85 | 554,67 | 96,72  |
| 2019/05/29 | CH2206 | Male | Three y/o | Treatment (Wk 3) | Treatment | Fast Day | No | 02:35 | 02:00 - 02:59 | Early Morning | 37,9 | 52  | 16,4  | 16,4  | 19,05 | 542,83 | 93,55  |
| 2019/05/29 | CH2205 | Male | Three y/o | Treatment (Wk 3) | Treatment | Fast Day | No | 02:40 | 02:00 - 02:59 | Early Morning | 37,7 | 80  | 14,0  | 14,0  | 18,85 | 577,31 | 88,17  |
| 2019/05/29 | CH2206 | Male | Three y/o | Treatment (Wk 3) | Treatment | Fast Day | No | 02:40 | 02:00 - 02:59 | Early Morning | 37,9 |     | 65,2  | 65,2  | 19,05 |        | 140,97 |
| 2019/05/29 | CH2205 | Male | Three y/o | Treatment (Wk 3) | Treatment | Fast Day | No | 02:45 | 02:00 - 02:59 | Early Morning | 37,7 | 97  | 12,6  | 12,6  | 18,85 | 591,66 | 84,59  |
| 2019/05/29 | CH2206 | Male | Three y/o | Treatment (Wk 3) | Treatment | Fast Day | No | 02:45 | 02:00 - 02:59 | Early Morning | 37,8 | 49  | 68,0  | 68,0  | 18,95 | 537,80 | 142,43 |
| 2019/05/29 | CH2205 | Male | Three y/o | Treatment (Wk 3) | Treatment | Fast Day | No | 02:50 | 02:00 - 02:59 | Early Morning | 37,6 | 88  | 15,6  | 15,6  | 18,75 | 584,49 | 91,85  |
| 2019/05/29 | CH2206 | Male | Three y/o | Treatment (Wk 3) | Treatment | Fast Day | No | 02:50 | 02:00 - 02:59 | Early Morning | 37,8 | 80  | 67,2  | 67,2  | 18,95 | 577,31 | 142,02 |
| 2019/05/29 | CH2205 | Male | Three y/o | Treatment (Wk 3) | Treatment | Fast Day | No | 02:55 | 02:00 - 02:59 | Early Morning | 37,6 | 65  | 10,0  | 10,0  | 18,75 | 561,12 | 76,76  |
| 2019/05/29 | CH2206 | Male | Three y/o | Treatment (Wk 3) | Treatment | Fast Day | No | 02:55 | 02:00 - 02:59 | Early Morning | 37,8 | 50  | 66,0  | 66,0  | 18,95 | 539,52 | 141,40 |
| 2019/05/29 | CH2205 | Male | Three y/o | Treatment (Wk 3) | Treatment | Fast Day | No | 03:00 | 03:00 - 03:59 | Early Morning | 37,6 | 63  | 17,6  | 17,6  | 18,75 | 558,62 | 95,95  |
| 2019/05/29 | CH2206 | Male | Three y/o | Treatment (Wk 3) | Treatment | Fast Day | No | 03:00 | 03:00 - 03:59 | Early Morning | 37,8 | 51  | 65,4  | 65,4  | 18,95 | 541,20 | 141,08 |
| 2019/05/29 | CH2205 | Male | Three y/o | Treatment (Wk 3) | Treatment | Fast Day | No | 03:05 | 03:00 - 03:59 | Early Morning | 37,7 | 42  | 14,2  | 14,2  | 18,85 | 524,42 | 88,65  |
| 2019/05/29 | CH2206 | Male | Three y/o | Treatment (Wk 3) | Treatment | Fast Day | No | 03:05 | 03:00 - 03:59 | Early Morning | 37,8 | 86  | 68,2  | 68,2  | 18,95 | 582,77 | 142,53 |
| 2019/05/29 | CH2205 | Male | Three y/o | Treatment (Wk 3) | Treatment | Fast Day | No | 03:10 | 03:00 - 03:59 | Early Morning | 37,6 | 63  | 14,0  | 14,0  | 18,75 | 558,62 | 88,17  |
| 2019/05/29 | CH2206 | Male | Three y/o | Treatment (Wk 3) | Treatment | Fast Day | No | 03:10 | 03:00 - 03:59 | Early Morning | 37,8 | 47  | 65,2  | 65,2  | 18,95 | 534,23 | 140,97 |
| 2019/05/29 | CH2205 | Male | Three y/o | Treatment (Wk 3) | Treatment | Fast Day | No | 03:15 | 03:00 - 03:59 | Early Morning | 37,6 |     | 28,6  | 28,6  | 18,75 |        | 112,56 |
| 2019/05/29 | CH2206 | Male | Three y/o | Treatment (Wk 3) | Treatment | Fast Day | No | 03:15 | 03:00 - 03:59 | Early Morning | 37,8 | 129 | 19,8  | 19,8  | 18,95 | 611,75 | 99,97  |
| 2019/05/29 | CH2205 | Male | Three y/o | Treatment (Wk 3) | Treatment | Fast Day | No | 03:20 | 03:00 - 03:59 | Early Morning | 37,5 | 115 | 27,8  | 27,8  | 18,65 | 603,82 | 111,58 |
| 2019/05/29 | CH2206 | Male | Three y/o | Treatment (Wk 3) | Treatment | Fast Day | No | 03:20 | 03:00 - 03:59 | Early Morning | 37,7 | 89  | 11,6  | 11,6  | 18,85 | 585,33 | 81,78  |
| 2019/05/29 | CH2205 | Male | Three y/o | Treatment (Wk 3) | Treatment | Fast Day | No | 03:25 | 03:00 - 03:59 | Early Morning | 37,5 | 72  | 24,0  | 24,0  | 18,65 | 569,20 | 106,55 |
| 2019/05/29 | CH2206 | Male | Three y/o | Treatment (Wk 3) | Treatment | Fast Day | No | 03:25 | 03:00 - 03:59 | Early Morning | 37,7 | 49  | 11,2  | 11,2  | 18,85 | 537,80 | 80,59  |
| 2019/05/29 | CH2205 | Male | Three y/o | Treatment (Wk 3) | Treatment | Fast Day | No | 03:30 | 03:00 - 03:59 | Early Morning | 37,6 | 60  | 51,4  | 51,4  | 18,75 | 554,67 | 132,74 |
| 2019/05/29 | CH2206 | Male | Three y/o | Treatment (Wk 3) | Treatment | Fast Day | No | 03:30 | 03:00 - 03:59 | Early Morning | 37,7 | 82  | 17,8  | 17,8  | 18,85 | 579,19 | 96,34  |
| 2019/05/29 | CH2205 | Male | Three y/o | Treatment (Wk 3) | Treatment | Fast Day | No | 03:35 | 03:00 - 03:59 | Early Morning | 37,5 | 49  | 31,0  | 31,0  | 18,65 | 537,80 | 115,32 |
| 2019/05/29 | CH2206 | Male | Three y/o | Treatment (Wk 3) | Treatment | Fast Day | No | 03:35 | 03:00 - 03:59 | Early Morning | 37,5 | 63  | 28,6  | 28,6  | 18,65 | 558,62 | 112,56 |
| 2019/05/29 | CH2205 | Male | Three y/o | Treatment (Wk 3) | Treatment | Fast Day | No | 03:40 | 03:00 - 03:59 | Early Morning | 37,5 | 59  | 28,6  | 28,6  | 18,65 | 553,30 | 112,56 |
| 2019/05/29 | CH2206 | Male | Three y/o | Treatment (Wk 3) | Treatment | Fast Day | No | 03:40 | 03:00 - 03:59 | Early Morning | 37,5 | 51  | 30,2  | 30,2  | 18,65 | 541,20 | 114,42 |
| 2019/05/29 | CH2205 | Male | Three y/o | Treatment (Wk 3) | Treatment | Fast Day | No | 03:45 | 03:00 - 03:59 | Early Morning | 37,6 | 82  | 22,2  | 22,2  | 18,75 | 579,19 | 103,88 |
| 2019/05/29 | CH2206 | Male | Three y/o | Treatment (Wk 3) | Treatment | Fast Day | No | 03:45 | 03:00 - 03:59 | Early Morning | 37,4 | 54  | 14,4  | 14,4  | 18,55 | 545,99 | 89,12  |
| 2019/05/29 | CH2205 | Male | Three y/o | Treatment (Wk 3) | Treatment | Fast Day | No | 03:50 | 03:00 - 03:59 | Early Morning | 37,6 | 79  | 22,2  | 22,2  | 18,75 | 576,36 | 103,88 |
| 2019/05/29 | CH2206 | Male | Three y/o | Treatment (Wk 3) | Treatment | Fast Day | No | 03:50 | 03:00 - 03:59 | Early Morning | 37,4 | 80  | 11,0  | 11,0  | 18,55 | 577,31 | 79,98  |
| 2019/05/29 | CH2205 | Male | Three y/o | Treatment (Wk 3) | Treatment | Fast Day | No | 03:55 | 03:00 - 03:59 | Early Morning | 37,6 | 44  | 17,2  | 17,2  | 18,75 | 528,51 | 95,17  |
| 2019/05/29 | CH2206 | Male | Three y/o | Treatment (Wk 3) | Treatment | Fast Day | No | 03:55 | 03:00 - 03:59 | Early Morning | 37,4 | 56  | 15,4  | 15,4  | 18,55 | 549,01 | 91,41  |
| 2019/05/29 | CH2205 | Male | Three y/o | Treatment (Wk 3) | Treatment | Fast Day | No | 04:00 | 04:00 - 04:59 | Morning       | 37,6 | 50  | 18,2  | 18,2  | 18,75 | 539,52 | 97,10  |
| 2019/05/29 | CH2206 | Male | Three y/o | Treatment (Wk 3) | Treatment | Fast Day | No | 04:00 | 04:00 - 04:59 | Morning       | 37,4 | 88  | 11,8  | 11,8  | 18,55 | 584,49 | 82,36  |
| 2019/05/29 | CH2205 | Male | Three y/o | Treatment (Wk 3) | Treatment | Fast Day | No | 04:05 | 04:00 - 04:59 | Morning       | 37,6 | 83  | 18,8  | 18,8  | 18,75 | 580,11 | 98,20  |
| 2019/05/29 | CH2206 | Male | Three y/o | Treatment (Wk 3) | Treatment | Fast Day | No | 04:05 | 04:00 - 04:59 | Morning       | 37,4 | 50  | 23,8  | 23,8  | 18,55 | 539,52 | 106,26 |
| 2019/05/29 | CH2205 | Male | Three y/o | Treatment (Wk 3) | Treatment | Fast Day | No | 04:10 | 04:00 - 04:59 | Morning       | 37,6 | 41  | 17,6  | 17,6  | 18,75 | 522,29 | 95,95  |
| 2019/05/29 | CH2206 | Male | Three y/o | Treatment (Wk 3) | Treatment | Fast Day | No | 04:10 | 04:00 - 04:59 | Morning       | 37,5 | 54  | 20,4  | 20,4  | 18,65 | 545,99 | 100,99 |
| 2019/05/29 | CH2205 | Male | Three y/o | Treatment (Wk 3) | Treatment | Fast Day | No | 04:15 | 04:00 - 04:59 | Morning       | 37,6 | 41  | 19,8  | 19,8  | 18,75 | 522,29 | 99,97  |
| 2019/05/29 | CH2206 | Male | Three y/o | Treatment (Wk 3) | Treatment | Fast Day | No | 04:15 | 04:00 - 04:59 | Morning       | 37,4 | 44  | 23,4  | 23,4  | 18,55 | 528,51 | 105,68 |
| 2019/05/29 | CH2205 | Male | Three y/o | Treatment (Wk 3) | Treatment | Fast Day | No | 04:20 | 04:00 - 04:59 | Morning       | 37,6 | 53  | 18,0  | 18,0  | 18,75 | 544,43 | 96,72  |
| 2019/05/29 | CH2206 | Male | Three y/o | Treatment (Wk 3) | Treatment | Fast Day | No | 04:20 | 04:00 - 04:59 | Morning       | 37,4 | 52  | 26,6  | 26,6  | 18,55 | 542,83 | 110,07 |
| 2019/05/29 | CH2205 | Male | Three y/o | Treatment (Wk 3) | Treatment | Fast Day | No | 04:25 | 04:00 - 04:59 | Morning       | 37,6 | 46  | 21,8  | 21,8  | 18,75 | 532,38 | 103,26 |
| 2019/05/29 | CH2206 | Male | Three y/o | Treatment (Wk 3) | Treatment | Fast Day | No | 04:25 | 04:00 - 04:59 | Morning       | 37,4 | 45  | 14,8  | 14,8  | 18,55 | 530,47 | 90,05  |
| 2019/05/29 | CH2205 | Male | Three y/o | Treatment (Wk 3) | Treatment | Fast Day | No | 04:30 | 04:00 - 04:59 | Morning       | 37,6 | 48  | 19,4  | 19,4  | 18,75 | 536,04 | 99,28  |
| 2019/05/29 | CH2206 | Male | Three y/o | Treatment (Wk 3) | Treatment | Fast Day | No | 04:30 | 04:00 - 04:59 | Morning       | 37,5 | 119 | 59,0  | 59,0  | 18,65 | 606,20 | 137,51 |
| 2019/05/29 | CH2205 | Male | Three y/o | Treatment (Wk 3) | Treatment | Fast Day | No | 04:35 | 04:00 - 04:59 | Morning       | 37,6 | 135 | 21,4  | 21,4  | 18,75 | 614,84 | 102,63 |
| 2019/05/29 | CH2206 | Male | Three y/o | Treatment (Wk 3) | Treatment | Fast Day | No | 04:35 | 04:00 - 04:59 | Morning       | 37,5 | 143 | 52,0  | 52,0  | 18,65 | 618,69 | 133,14 |
| 2019/05/29 | CH2205 | Male | Three y/o | Treatment (Wk 3) | Treatment | Fast Day | No | 04:40 | 04:00 - 04:59 | Morning       | 37,4 | 44  | 36,0  | 36,0  | 18,55 | 528,51 | 120,46 |
| 2019/05/29 | CH2206 | Male | Three y/o | Treatment (Wk 3) | Treatment | Fast Day | No | 04:40 | 04:00 - 04:59 | Morning       | 37,5 | 138 | 40,8  | 40,8  | 18,65 | 616,31 | 124,77 |
| 2019/05/29 | CH2205 | Male | Three y/o | Treatment (Wk 3) | Treatment | Fast Day | No | 04:45 | 04:00 - 04:59 | Morning       | 37,4 | 138 | 42,4  | 42,4  | 18,55 | 616,31 | 126,10 |
| 2019/05/29 | CH2206 | Male | Three y/o | Treatment (Wk 3) | Treatment | Fast Day | No | 04:45 | 04:00 - 04:59 | Morning       | 37,3 | 103 | 57,6  | 57,6  | 18,46 | 596,00 | 136,68 |
| 2019/05/29 | CH2205 | Male | Three y/o | Treatment (Wk 3) | Treatment | Fast Day | No | 04:50 | 04:00 - 04:59 | Morning       | 37,3 | 104 | 23,2  | 23,2  | 18,46 | 596,69 | 105,39 |
| 2019/05/29 | CH2206 | Male | Three y/o | Treatment (Wk 3) | Treatment | Fast Day | No | 04:50 | 04:00 - 04:59 | Morning       | 37,3 | 156 | 58,4  | 58,4  | 18,46 | 624,43 | 137,16 |
| 2019/05/29 | CH2205 | Male | Three y/o | Treatment (Wk 3) | Treatment | Fast Day | No | 04:55 | 04:00 - 04:59 | Morning       | 37,4 | 135 | 69,2  | 69,2  | 18,55 | 614,84 | 143,04 |
| 2019/05/29 | CH2206 | Male | Three y/o | Treatment (Wk 3) | Treatment | Fast Day | No | 04:55 | 04:00 - 04:59 | Morning       | 37,3 | 135 | 90,2  | 90,2  | 18,46 | 614,84 | 152,25 |
| 2019/05/29 | CH2205 | Male | Three y/o | Treatment (Wk 3) | Treatment | Fast Day | No | 05:00 | 05:00 - 05:59 | Morning       | 37,4 | 61  | 32,0  | 32,0  | 18,55 | 556,01 | 116,41 |
| 2019/05/29 | CH2206 | Male | Three y/o | Treatment (Wk 3) | Treatment | Fast Day | No | 05:00 | 05:00 - 05:59 | Morning       | 37,3 | 128 | 35,0  | 35,0  | 18,46 | 611,22 | 119,49 |
| 2019/05/29 | CH2205 | Male | Three y/o | Treatment (Wk 3) | Treatment | Fast Day | No | 05:05 | 05:00 - 05:59 | Morning       | 37,2 | 63  | 189,8 | 189,8 | 18,36 | 558,62 | 178,28 |



|            |        |      |           |                  |           |          |    |       |               |              |      |     |       |       |       |        |
|------------|--------|------|-----------|------------------|-----------|----------|----|-------|---------------|--------------|------|-----|-------|-------|-------|--------|
| 2019/05/29 | CH2206 | Male | Three y/o | Treatment (Wk 3) | Treatment | Fast Day | No | 05:05 | 05:00 - 05:59 | Morning      | 37,3 |     | 93,4  | 93,4  | 18,46 | 153,46 |
| 2019/05/29 | CH2205 | Male | Three y/o | Treatment (Wk 3) | Treatment | Fast Day | No | 05:10 | 05:00 - 05:59 | Morning      | 37,3 | 147 | 70,6  | 70,6  | 18,46 | 620,52 |
| 2019/05/29 | CH2206 | Male | Three y/o | Treatment (Wk 3) | Treatment | Fast Day | No | 05:10 | 05:00 - 05:59 | Morning      | 37,2 | 131 | 68,8  | 68,8  | 18,36 | 612,80 |
| 2019/05/29 | CH2205 | Male | Three y/o | Treatment (Wk 3) | Treatment | Fast Day | No | 05:15 | 05:00 - 05:59 | Morning      | 37,3 | 188 | 14,4  | 14,4  | 18,46 | 636,34 |
| 2019/05/29 | CH2206 | Male | Three y/o | Treatment (Wk 3) | Treatment | Fast Day | No | 05:15 | 05:00 - 05:59 | Morning      | 37,0 | 84  | 59,4  | 59,4  | 18,16 | 581,01 |
| 2019/05/29 | CH2205 | Male | Three y/o | Treatment (Wk 3) | Treatment | Fast Day | No | 05:20 | 05:00 - 05:59 | Morning      | 37,2 | 77  | 25,8  | 25,8  | 18,36 | 574,39 |
| 2019/05/29 | CH2206 | Male | Three y/o | Treatment (Wk 3) | Treatment | Fast Day | No | 05:20 | 05:00 - 05:59 | Morning      | 36,6 | 50  | 59,0  | 59,0  | 17,77 | 539,52 |
| 2019/05/29 | CH2205 | Male | Three y/o | Treatment (Wk 3) | Treatment | Fast Day | No | 05:25 | 05:00 - 05:59 | Morning      | 36,8 | 63  | 20,6  | 20,6  | 17,96 | 558,62 |
| 2019/05/29 | CH2206 | Male | Three y/o | Treatment (Wk 3) | Treatment | Fast Day | No | 05:25 | 05:00 - 05:59 | Morning      | 36,5 | 87  | 55,0  | 55,0  | 17,67 | 583,64 |
| 2019/05/29 | CH2205 | Male | Three y/o | Treatment (Wk 3) | Treatment | Fast Day | No | 05:30 | 05:00 - 05:59 | Morning      | 36,6 | 44  | 21,4  | 21,4  | 17,77 | 528,51 |
| 2019/05/29 | CH2206 | Male | Three y/o | Treatment (Wk 3) | Treatment | Fast Day | No | 05:30 | 05:00 - 05:59 | Morning      | 36,5 | 45  | 50,8  | 50,8  | 17,67 | 530,47 |
| 2019/05/29 | CH2205 | Male | Three y/o | Treatment (Wk 3) | Treatment | Fast Day | No | 05:35 | 05:00 - 05:59 | Morning      | 36,5 | 46  | 18,0  | 18,0  | 17,67 | 532,38 |
| 2019/05/29 | CH2206 | Male | Three y/o | Treatment (Wk 3) | Treatment | Fast Day | No | 05:35 | 05:00 - 05:59 | Morning      | 36,8 | 63  | 48,8  | 48,8  | 17,96 | 558,62 |
| 2019/05/29 | CH2205 | Male | Three y/o | Treatment (Wk 3) | Treatment | Fast Day | No | 05:40 | 05:00 - 05:59 | Morning      | 36,5 | 46  | 17,0  | 17,0  | 17,67 | 532,38 |
| 2019/05/29 | CH2206 | Male | Three y/o | Treatment (Wk 3) | Treatment | Fast Day | No | 05:40 | 05:00 - 05:59 | Morning      | 37,0 | 47  | 50,4  | 50,4  | 18,16 | 534,23 |
| 2019/05/29 | CH2205 | Male | Three y/o | Treatment (Wk 3) | Treatment | Fast Day | No | 05:45 | 05:00 - 05:59 | Morning      | 36,5 | 58  | 17,4  | 17,4  | 17,67 | 551,90 |
| 2019/05/29 | CH2206 | Male | Three y/o | Treatment (Wk 3) | Treatment | Fast Day | No | 05:45 | 05:00 - 05:59 | Morning      | 37,0 | 74  | 65,8  | 65,8  | 18,16 | 571,33 |
| 2019/05/29 | CH2205 | Male | Three y/o | Treatment (Wk 3) | Treatment | Fast Day | No | 05:50 | 05:00 - 05:59 | Morning      | 36,5 | 78  | 20,4  | 20,4  | 17,67 | 575,38 |
| 2019/05/29 | CH2206 | Male | Three y/o | Treatment (Wk 3) | Treatment | Fast Day | No | 05:50 | 05:00 - 05:59 | Morning      | 36,9 | 82  | 65,6  | 65,6  | 18,06 | 579,19 |
| 2019/05/29 | CH2205 | Male | Three y/o | Treatment (Wk 3) | Treatment | Fast Day | No | 05:55 | 05:00 - 05:59 | Morning      | 36,5 | 49  | 16,2  | 16,2  | 17,67 | 537,80 |
| 2019/05/29 | CH2206 | Male | Three y/o | Treatment (Wk 3) | Treatment | Fast Day | No | 05:55 | 05:00 - 05:59 | Morning      | 36,8 | 94  | 62,6  | 62,6  | 17,96 | 589,37 |
| 2019/05/29 | CH2205 | Male | Three y/o | Treatment (Wk 3) | Treatment | Fast Day | No | 06:00 | 06:00 - 06:59 | Morning      | 36,5 | 44  | 15,0  | 15,0  | 17,67 | 528,51 |
| 2019/05/29 | CH2206 | Male | Three y/o | Treatment (Wk 3) | Treatment | Fast Day | No | 06:00 | 06:00 - 06:59 | Morning      | 36,6 | 83  | 65,0  | 65,0  | 17,77 | 580,11 |
| 2019/05/29 | CH2205 | Male | Three y/o | Treatment (Wk 3) | Treatment | Fast Day | No | 06:05 | 06:00 - 06:59 | Morning      | 36,5 | 46  | 16,4  | 16,4  | 17,67 | 532,38 |
| 2019/05/29 | CH2206 | Male | Three y/o | Treatment (Wk 3) | Treatment | Fast Day | No | 06:05 | 06:00 - 06:59 | Morning      | 36,6 | 49  | 57,6  | 57,6  | 17,77 | 537,80 |
| 2019/05/29 | CH2205 | Male | Three y/o | Treatment (Wk 3) | Treatment | Fast Day | No | 06:10 | 06:00 - 06:59 | Morning      | 36,5 | 58  | 12,2  | 12,2  | 17,67 | 551,90 |
| 2019/05/29 | CH2206 | Male | Three y/o | Treatment (Wk 3) | Treatment | Fast Day | No | 06:10 | 06:00 - 06:59 | Morning      | 36,6 | 55  | 64,4  | 64,4  | 17,77 | 547,52 |
| 2019/05/29 | CH2205 | Male | Three y/o | Treatment (Wk 3) | Treatment | Fast Day | No | 06:15 | 06:00 - 06:59 | Morning      | 36,5 | 39  | 11,0  | 11,0  | 17,67 | 517,82 |
| 2019/05/29 | CH2206 | Male | Three y/o | Treatment (Wk 3) | Treatment | Fast Day | No | 06:15 | 06:00 - 06:59 | Morning      | 36,6 | 85  | 62,6  | 62,6  | 17,77 | 581,90 |
| 2019/05/29 | CH2205 | Male | Three y/o | Treatment (Wk 3) | Treatment | Fast Day | No | 06:20 | 06:00 - 06:59 | Morning      | 36,6 | 51  | 16,0  | 16,0  | 17,77 | 541,20 |
| 2019/05/29 | CH2206 | Male | Three y/o | Treatment (Wk 3) | Treatment | Fast Day | No | 06:20 | 06:00 - 06:59 | Morning      | 36,6 | 38  | 65,4  | 65,4  | 17,77 | 515,48 |
| 2019/05/29 | CH2205 | Male | Three y/o | Treatment (Wk 3) | Treatment | Fast Day | No | 06:25 | 06:00 - 06:59 | Morning      | 36,6 | 44  | 13,4  | 13,4  | 17,77 | 528,51 |
| 2019/05/29 | CH2206 | Male | Three y/o | Treatment (Wk 3) | Treatment | Fast Day | No | 06:25 | 06:00 - 06:59 | Morning      | 36,6 | 67  | 67,0  | 67,0  | 17,77 | 563,53 |
| 2019/05/29 | CH2205 | Male | Three y/o | Treatment (Wk 3) | Treatment | Fast Day | No | 06:30 | 06:00 - 06:59 | Morning      | 36,7 | 80  | 16,8  | 16,8  | 17,87 | 577,31 |
| 2019/05/29 | CH2206 | Male | Three y/o | Treatment (Wk 3) | Treatment | Fast Day | No | 06:30 | 06:00 - 06:59 | Morning      | 36,6 | 82  | 54,6  | 54,6  | 17,77 | 579,19 |
| 2019/05/29 | CH2205 | Male | Three y/o | Treatment (Wk 3) | Treatment | Fast Day | No | 06:35 | 06:00 - 06:59 | Morning      | 36,7 | 47  | 16,6  | 16,6  | 17,87 | 534,23 |
| 2019/05/29 | CH2206 | Male | Three y/o | Treatment (Wk 3) | Treatment | Fast Day | No | 06:35 | 06:00 - 06:59 | Morning      | 36,8 | 52  | 53,6  | 53,6  | 17,96 | 542,83 |
| 2019/05/29 | CH2205 | Male | Three y/o | Treatment (Wk 3) | Treatment | Fast Day | No | 06:40 | 06:00 - 06:59 | Morning      | 36,6 | 44  | 16,2  | 16,2  | 17,77 | 528,51 |
| 2019/05/29 | CH2206 | Male | Three y/o | Treatment (Wk 3) | Treatment | Fast Day | No | 06:40 | 06:00 - 06:59 | Morning      | 36,8 | 42  | 60,6  | 60,6  | 17,96 | 524,42 |
| 2019/05/29 | CH2205 | Male | Three y/o | Treatment (Wk 3) | Treatment | Fast Day | No | 06:45 | 06:00 - 06:59 | Morning      | 36,5 | 50  | 34,4  | 34,4  | 17,67 | 539,52 |
| 2019/05/29 | CH2206 | Male | Three y/o | Treatment (Wk 3) | Treatment | Fast Day | No | 06:45 | 06:00 - 06:59 | Morning      | 36,7 | 50  | 62,4  | 62,4  | 17,87 | 539,52 |
| 2019/05/29 | CH2205 | Male | Three y/o | Treatment (Wk 3) | Treatment | Fast Day | No | 06:50 | 06:00 - 06:59 | Morning      | 36,8 | 129 | 151,2 | 151,2 | 17,96 | 611,75 |
| 2019/05/29 | CH2206 | Male | Three y/o | Treatment (Wk 3) | Treatment | Fast Day | No | 06:50 | 06:00 - 06:59 | Morning      | 36,9 |     | 76,4  | 76,4  | 18,06 | 146,48 |
| 2019/05/29 | CH2205 | Male | Three y/o | Treatment (Wk 3) | Treatment | Fast Day | No | 06:55 | 06:00 - 06:59 | Morning      | 37,1 | 132 | 193,8 | 193,8 | 18,26 | 613,32 |
| 2019/05/29 | CH2206 | Male | Three y/o | Treatment (Wk 3) | Treatment | Fast Day | No | 06:55 | 06:00 - 06:59 | Morning      | 37,0 | 123 | 99,0  | 99,0  | 18,16 | 608,49 |
| 2019/05/29 | CH2205 | Male | Three y/o | Treatment (Wk 3) | Treatment | Fast Day | No | 07:00 | 07:00 - 07:59 | Morning      | 37,1 | 135 | 60,6  | 60,6  | 18,26 | 614,84 |
| 2019/05/29 | CH2206 | Male | Three y/o | Treatment (Wk 3) | Treatment | Fast Day | No | 07:00 | 07:00 - 07:59 | Morning      | 37,1 |     | 112,0 | 112,0 | 18,26 | 159,80 |
| 2019/05/29 | CH2205 | Male | Three y/o | Treatment (Wk 3) | Treatment | Fast Day | No | 07:05 | 07:00 - 07:59 | Morning      | 37,1 | 104 | 101,4 | 101,4 | 18,26 | 596,69 |
| 2019/05/29 | CH2206 | Male | Three y/o | Treatment (Wk 3) | Treatment | Fast Day | No | 07:05 | 07:00 - 07:59 | Morning      | 37,2 |     | 202,6 | 202,6 | 18,36 | 180,57 |
| 2019/05/29 | CH2205 | Male | Three y/o | Treatment (Wk 3) | Treatment | Fast Day | No | 07:10 | 07:00 - 07:59 | Morning      | 37,2 |     | 272,2 | 272,2 | 18,36 | 190,98 |
| 2019/05/29 | CH2206 | Male | Three y/o | Treatment (Wk 3) | Treatment | Fast Day | No | 07:10 | 07:00 - 07:59 | Morning      | 37,3 | 114 | 94,2  | 94,2  | 18,46 | 603,20 |
| 2019/05/29 | CH2205 | Male | Three y/o | Treatment (Wk 3) | Treatment | Fast Day | No | 07:15 | 07:00 - 07:59 | Morning      | 37,3 | 57  | 172,2 | 172,2 | 18,46 | 550,47 |
| 2019/05/29 | CH2206 | Male | Three y/o | Treatment (Wk 3) | Treatment | Fast Day | No | 07:15 | 07:00 - 07:59 | Morning      | 37,3 | 154 | 133,2 | 133,2 | 18,46 | 623,58 |
| 2019/05/29 | CH2205 | Male | Three y/o | Treatment (Wk 3) | Treatment | Fast Day | No | 07:20 | 07:00 - 07:59 | Morning      | 37,4 |     | 121,6 | 121,6 | 18,55 | 162,67 |
| 2019/05/29 | CH2206 | Male | Three y/o | Treatment (Wk 3) | Treatment | Fast Day | No | 07:20 | 07:00 - 07:59 | Morning      | 37,5 | 60  | 223,8 | 223,8 | 18,65 | 554,67 |
| 2019/05/29 | CH2205 | Male | Three y/o | Treatment (Wk 3) | Treatment | Fast Day | No | 07:25 | 07:00 - 07:59 | Morning      | 37,4 | 111 | 73,4  | 73,4  | 18,55 | 601,33 |
| 2019/05/29 | CH2206 | Male | Three y/o | Treatment (Wk 3) | Treatment | Fast Day | No | 07:25 | 07:00 - 07:59 | Morning      | 37,5 | 141 | 98,2  | 98,2  | 18,65 | 617,75 |
| 2019/05/29 | CH2205 | Male | Three y/o | Treatment (Wk 3) | Treatment | Fast Day | No | 07:30 | 07:00 - 07:59 | Morning      | 37,4 | 83  | 225,2 | 225,2 | 18,55 | 580,11 |
| 2019/05/29 | CH2206 | Male | Three y/o | Treatment (Wk 3) | Treatment | Fast Day | No | 07:30 | 07:00 - 07:59 | Morning      | 37,5 | 78  | 104,0 | 104,0 | 18,65 | 575,38 |
| 2019/05/29 | CH2205 | Male | Three y/o | Treatment (Wk 3) | Treatment | Fast Day | No | 07:35 | 07:00 - 07:59 | Morning      | 37,4 |     | 63,4  | 63,4  | 18,55 | 140,00 |
| 2019/05/29 | CH2206 | Male | Three y/o | Treatment (Wk 3) | Treatment | Fast Day | No | 07:35 | 07:00 - 07:59 | Morning      | 37,7 | 128 | 95,8  | 95,8  | 18,85 | 611,22 |
| 2019/05/29 | CH2205 | Male | Three y/o | Treatment (Wk 3) | Treatment | Fast Day | No | 07:40 | 07:00 - 07:59 | Morning      | 37,5 |     | 61,4  | 61,4  | 18,65 | 138,89 |
| 2019/05/29 | CH2206 | Male | Three y/o | Treatment (Wk 3) | Treatment | Fast Day | No | 07:40 | 07:00 - 07:59 | Morning      | 37,7 | 137 | 89,4  | 89,4  | 18,85 | 615,83 |
| 2019/05/29 | CH2205 | Male | Three y/o | Treatment (Wk 3) | Treatment | Fast Day | No | 07:45 | 07:00 - 07:59 | Morning      | 37,4 | 86  | 34,0  | 34,0  | 18,55 | 582,77 |
| 2019/05/29 | CH2206 | Male | Three y/o | Treatment (Wk 3) | Treatment | Fast Day | No | 07:45 | 07:00 - 07:59 | Morning      | 37,5 | 128 | 61,8  | 61,8  | 18,65 | 611,22 |
| 2019/05/29 | CH2205 | Male | Three y/o | Treatment (Wk 3) | Treatment | Fast Day | No | 07:50 | 07:00 - 07:59 | Morning      | 37,4 | 141 | 149,6 | 149,6 | 18,55 | 617,75 |
| 2019/05/29 | CH2206 | Male | Three y/o | Treatment (Wk 3) | Treatment | Fast Day | No | 07:50 | 07:00 - 07:59 | Morning      | 37,7 | 107 | 63,4  | 63,4  | 18,85 | 598,73 |
| 2019/05/29 | CH2205 | Male | Three y/o | Treatment (Wk 3) | Treatment | Fast Day | No | 07:55 | 07:00 - 07:59 | Morning      | 37,4 | 106 | 59,8  | 59,8  | 18,55 | 598,06 |
| 2019/05/29 | CH2206 | Male | Three y/o | Treatment (Wk 3) | Treatment | Fast Day | No | 07:55 | 07:00 - 07:59 | Morning      | 37,7 | 129 | 59,6  | 59,6  | 18,85 | 611,75 |
| 2019/05/29 | CH2205 | Male | Three y/o | Treatment (Wk 3) | Treatment | Fast Day | No | 08:00 | 08:00 - 08:59 | Late Morning | 37,5 | 36  | 52,0  | 52,0  | 18,65 | 510,56 |



|            |        |      |           |                  |           |          |    |       |               |              |      |     |       |       |       |        |        |
|------------|--------|------|-----------|------------------|-----------|----------|----|-------|---------------|--------------|------|-----|-------|-------|-------|--------|--------|
| 2019/05/29 | CH2206 | Male | Three y/o | Treatment (Wk 3) | Treatment | Fast Day | No | 08:00 | 08:00 - 08:59 | Late Morning | 37,7 | 106 | 137,0 | 137,0 | 18,85 | 598,06 | 166,84 |
| 2019/05/29 | CH2205 | Male | Three y/o | Treatment (Wk 3) | Treatment | Fast Day | No | 08:05 | 08:00 - 08:59 | Late Morning | 37,5 | 117 | 82,6  | 82,6  | 18,65 | 605,02 | 149,19 |
| 2019/05/29 | CH2206 | Male | Three y/o | Treatment (Wk 3) | Treatment | Fast Day | No | 08:05 | 08:00 - 08:59 | Late Morning | 37,7 | 123 | 227,6 | 227,6 | 18,85 | 608,49 | 184,67 |
| 2019/05/29 | CH2205 | Male | Three y/o | Treatment (Wk 3) | Treatment | Fast Day | No | 08:10 | 08:00 - 08:59 | Late Morning | 37,5 | 188 | 128,6 | 128,6 | 18,65 | 636,34 | 164,63 |
| 2019/05/29 | CH2206 | Male | Three y/o | Treatment (Wk 3) | Treatment | Fast Day | No | 08:10 | 08:00 - 08:59 | Late Morning | 37,7 | 108 | 148,4 | 148,4 | 18,85 | 599,39 | 169,64 |
| 2019/05/29 | CH2205 | Male | Three y/o | Treatment (Wk 3) | Treatment | Fast Day | No | 08:15 | 08:00 - 08:59 | Late Morning | 37,5 | 52  | 285,8 | 285,8 | 18,65 | 542,83 | 192,71 |
| 2019/05/29 | CH2206 | Male | Three y/o | Treatment (Wk 3) | Treatment | Fast Day | No | 08:15 | 08:00 - 08:59 | Late Morning | 37,7 | 113 | 147,2 | 147,2 | 18,85 | 602,58 | 169,36 |
| 2019/05/29 | CH2205 | Male | Three y/o | Treatment (Wk 3) | Treatment | Fast Day | No | 08:20 | 08:00 - 08:59 | Late Morning | 37,5 |     | 165,0 | 165,0 | 18,65 |        | 173,36 |
| 2019/05/29 | CH2206 | Male | Three y/o | Treatment (Wk 3) | Treatment | Fast Day | No | 08:20 | 08:00 - 08:59 | Late Morning | 37,7 | 98  | 235,4 | 235,4 | 18,85 | 592,41 | 185,86 |
| 2019/05/29 | CH2205 | Male | Three y/o | Treatment (Wk 3) | Treatment | Fast Day | No | 08:25 | 08:00 - 08:59 | Late Morning | 37,6 | 182 | 64,8  | 64,8  | 18,75 | 634,31 | 140,76 |
| 2019/05/29 | CH2206 | Male | Three y/o | Treatment (Wk 3) | Treatment | Fast Day | No | 08:25 | 08:00 - 08:59 | Late Morning | 37,7 | 109 | 102,6 | 102,6 | 18,85 | 600,04 | 156,74 |
| 2019/05/29 | CH2205 | Male | Three y/o | Treatment (Wk 3) | Treatment | Fast Day | No | 08:30 | 08:00 - 08:59 | Late Morning | 37,6 | 120 | 46,8  | 46,8  | 18,75 | 606,78 | 129,50 |
| 2019/05/29 | CH2206 | Male | Three y/o | Treatment (Wk 3) | Treatment | Fast Day | No | 08:30 | 08:00 - 08:59 | Late Morning | 37,7 | 182 | 51,0  | 51,0  | 18,85 | 634,31 | 132,47 |
| 2019/05/29 | CH2205 | Male | Three y/o | Treatment (Wk 3) | Treatment | Fast Day | No | 08:35 | 08:00 - 08:59 | Late Morning | 37,5 | 85  | 165,2 | 165,2 | 18,65 | 581,90 | 173,40 |
| 2019/05/29 | CH2206 | Male | Three y/o | Treatment (Wk 3) | Treatment | Fast Day | No | 08:35 | 08:00 - 08:59 | Late Morning | 37,7 | 156 | 141,6 | 141,6 | 18,85 | 624,43 | 168,00 |
| 2019/05/29 | CH2205 | Male | Three y/o | Treatment (Wk 3) | Treatment | Fast Day | No | 08:40 | 08:00 - 08:59 | Late Morning | 37,7 | 82  | 362,0 | 362,0 | 18,85 | 579,19 | 201,07 |
| 2019/05/29 | CH2206 | Male | Three y/o | Treatment (Wk 3) | Treatment | Fast Day | No | 08:40 | 08:00 - 08:59 | Late Morning | 37,7 | 126 | 356,4 | 356,4 | 18,85 | 610,14 | 200,52 |
| 2019/05/29 | CH2205 | Male | Three y/o | Treatment (Wk 3) | Treatment | Fast Day | No | 08:45 | 08:00 - 08:59 | Late Morning | 37,6 |     | 166,2 | 166,2 | 18,75 |        | 173,61 |
| 2019/05/29 | CH2206 | Male | Three y/o | Treatment (Wk 3) | Treatment | Fast Day | No | 08:45 | 08:00 - 08:59 | Late Morning | 37,7 | 143 | 102,2 | 102,2 | 18,85 | 618,69 | 156,60 |
| 2019/05/29 | CH2205 | Male | Three y/o | Treatment (Wk 3) | Treatment | Fast Day | No | 08:50 | 08:00 - 08:59 | Late Morning | 37,6 | 89  | 171,6 | 171,6 | 18,75 | 585,33 | 174,74 |
| 2019/05/29 | CH2206 | Male | Three y/o | Treatment (Wk 3) | Treatment | Fast Day | No | 08:50 | 08:00 - 08:59 | Late Morning | 37,8 | 128 | 101,4 | 101,4 | 18,95 | 611,22 | 156,33 |
| 2019/05/29 | CH2205 | Male | Three y/o | Treatment (Wk 3) | Treatment | Fast Day | No | 08:55 | 08:00 - 08:59 | Late Morning | 37,6 | 172 | 45,4  | 45,4  | 18,75 | 630,73 | 128,45 |
| 2019/05/29 | CH2206 | Male | Three y/o | Treatment (Wk 3) | Treatment | Fast Day | No | 08:55 | 08:00 - 08:59 | Late Morning | 37,8 | 109 | 124,8 | 124,8 | 18,95 | 600,04 | 163,58 |
| 2019/05/29 | CH2205 | Male | Three y/o | Treatment (Wk 3) | Treatment | Fast Day | No | 09:00 | 09:00 - 09:59 | Late Morning | 37,6 | 180 | 34,2  | 34,2  | 18,75 | 633,61 | 118,70 |
| 2019/05/29 | CH2206 | Male | Three y/o | Treatment (Wk 3) | Treatment | Fast Day | No | 09:00 | 09:00 - 09:59 | Late Morning | 37,8 |     | 282,0 | 282,0 | 18,95 |        | 192,23 |
| 2019/05/29 | CH2205 | Male | Three y/o | Treatment (Wk 3) | Treatment | Fast Day | No | 09:05 | 09:00 - 09:59 | Late Morning | 37,6 | 76  | 111,6 | 111,6 | 18,75 | 573,39 | 159,67 |
| 2019/05/29 | CH2206 | Male | Three y/o | Treatment (Wk 3) | Treatment | Fast Day | No | 09:05 | 09:00 - 09:59 | Late Morning | 37,7 | 134 | 178,8 | 178,8 | 18,85 | 614,33 | 176,18 |
| 2019/05/29 | CH2205 | Male | Three y/o | Treatment (Wk 3) | Treatment | Fast Day | No | 09:10 | 09:00 - 09:59 | Late Morning | 37,7 | 102 | 99,0  | 99,0  | 18,85 | 595,30 | 155,49 |
| 2019/05/29 | CH2206 | Male | Three y/o | Treatment (Wk 3) | Treatment | Fast Day | No | 09:10 | 09:00 - 09:59 | Late Morning | 37,8 | 90  | 157,4 | 157,4 | 18,95 | 586,16 | 171,71 |
| 2019/05/29 | CH2205 | Male | Three y/o | Treatment (Wk 3) | Treatment | Fast Day | No | 09:15 | 09:00 - 09:59 | Late Morning | 37,7 | 117 | 75,2  | 75,2  | 18,85 | 605,02 | 145,93 |
| 2019/05/29 | CH2206 | Male | Three y/o | Treatment (Wk 3) | Treatment | Fast Day | No | 09:15 | 09:00 - 09:59 | Late Morning | 37,7 | 129 | 84,4  | 84,4  | 18,85 | 611,75 | 149,94 |
| 2019/05/29 | CH2205 | Male | Three y/o | Treatment (Wk 3) | Treatment | Fast Day | No | 09:20 | 09:00 - 09:59 | Late Morning | 37,6 | 92  | 115,4 | 115,4 | 18,75 | 587,78 | 160,84 |
| 2019/05/29 | CH2206 | Male | Three y/o | Treatment (Wk 3) | Treatment | Fast Day | No | 09:20 | 09:00 - 09:59 | Late Morning | 37,8 |     | 152,0 | 152,0 | 18,95 |        | 170,48 |
| 2019/05/29 | CH2205 | Male | Three y/o | Treatment (Wk 3) | Treatment | Fast Day | No | 09:25 | 09:00 - 09:59 | Late Morning | 37,7 | 63  | 137,0 | 137,0 | 18,85 | 558,62 | 166,84 |
| 2019/05/29 | CH2206 | Male | Three y/o | Treatment (Wk 3) | Treatment | Fast Day | No | 09:25 | 09:00 - 09:59 | Late Morning | 38,0 |     | 145,4 | 145,4 | 19,15 |        | 168,93 |
| 2019/05/29 | CH2205 | Male | Three y/o | Treatment (Wk 3) | Treatment | Fast Day | No | 09:30 | 09:00 - 09:59 | Late Morning | 38,1 | 160 | 39,2  | 39,2  | 19,26 | 626,07 | 123,39 |
| 2019/05/29 | CH2206 | Male | Three y/o | Treatment (Wk 3) | Treatment | Fast Day | No | 09:30 | 09:00 - 09:59 | Late Morning | 38,0 | 49  | 36,0  | 36,0  | 19,15 | 537,80 | 120,46 |
| 2019/05/29 | CH2205 | Male | Three y/o | Treatment (Wk 3) | Treatment | Fast Day | No | 09:35 | 09:00 - 09:59 | Late Morning | 38,1 | 55  | 63,0  | 63,0  | 19,26 | 547,52 | 139,78 |
| 2019/05/29 | CH2206 | Male | Three y/o | Treatment (Wk 3) | Treatment | Fast Day | No | 09:35 | 09:00 - 09:59 | Late Morning | 37,9 | 40  | 165,8 | 165,8 | 19,05 | 520,09 | 173,53 |
| 2019/05/29 | CH2205 | Male | Three y/o | Treatment (Wk 3) | Treatment | Fast Day | No | 09:40 | 09:00 - 09:59 | Late Morning | 38,0 | 73  | 15,4  | 15,4  | 19,15 | 570,27 | 91,41  |
| 2019/05/29 | CH2206 | Male | Three y/o | Treatment (Wk 3) | Treatment | Fast Day | No | 09:40 | 09:00 - 09:59 | Late Morning | 37,9 | 121 | 251,6 | 251,6 | 19,05 | 607,35 | 188,21 |
| 2019/05/29 | CH2205 | Male | Three y/o | Treatment (Wk 3) | Treatment | Fast Day | No | 09:45 | 09:00 - 09:59 | Late Morning | 38,2 | 110 | 15,6  | 15,6  | 19,36 | 600,69 | 91,85  |
| 2019/05/29 | CH2206 | Male | Three y/o | Treatment (Wk 3) | Treatment | Fast Day | No | 09:45 | 09:00 - 09:59 | Late Morning | 37,9 | 117 | 33,4  | 33,4  | 19,05 | 605,02 | 117,88 |
| 2019/05/29 | CH2205 | Male | Three y/o | Treatment (Wk 3) | Treatment | Fast Day | No | 09:50 | 09:00 - 09:59 | Late Morning | 38,1 |     | 91,0  | 91,0  | 19,26 |        | 152,56 |
| 2019/05/29 | CH2206 | Male | Three y/o | Treatment (Wk 3) | Treatment | Fast Day | No | 09:50 | 09:00 - 09:59 | Late Morning | 37,8 | 158 | 107,2 | 107,2 | 18,95 | 625,26 | 158,27 |
| 2019/05/29 | CH2205 | Male | Three y/o | Treatment (Wk 3) | Treatment | Fast Day | No | 09:55 | 09:00 - 09:59 | Late Morning | 38,1 | 70  | 145,4 | 145,4 | 19,26 | 566,99 | 168,93 |
| 2019/05/29 | CH2206 | Male | Three y/o | Treatment (Wk 3) | Treatment | Fast Day | No | 09:55 | 09:00 - 09:59 | Late Morning | 37,9 | 117 | 191,4 | 191,4 | 19,05 | 605,02 | 178,57 |
| 2019/05/29 | CH2205 | Male | Three y/o | Treatment (Wk 3) | Treatment | Fast Day | No | 10:00 | 10:00 - 10:59 | Late Morning | 38,1 | 94  | 50,8  | 50,8  | 19,26 | 589,37 | 132,33 |
| 2019/05/29 | CH2206 | Male | Three y/o | Treatment (Wk 3) | Treatment | Fast Day | No | 10:00 | 10:00 - 10:59 | Late Morning | 37,9 | 118 | 96,8  | 96,8  | 19,05 | 605,61 | 154,71 |
| 2019/05/29 | CH2205 | Male | Three y/o | Treatment (Wk 3) | Treatment | Fast Day | No | 10:05 | 10:00 - 10:59 | Late Morning | 38,0 | 72  | 17,0  | 17,0  | 19,15 | 569,20 | 94,77  |
| 2019/05/29 | CH2206 | Male | Three y/o | Treatment (Wk 3) | Treatment | Fast Day | No | 10:05 | 10:00 - 10:59 | Late Morning | 37,9 | 120 | 81,2  | 81,2  | 19,05 | 606,78 | 148,59 |
| 2019/05/29 | CH2205 | Male | Three y/o | Treatment (Wk 3) | Treatment | Fast Day | No | 10:10 | 10:00 - 10:59 | Late Morning | 38,0 | 60  | 66,8  | 66,8  | 19,15 | 554,67 | 141,81 |
| 2019/05/29 | CH2206 | Male | Three y/o | Treatment (Wk 3) | Treatment | Fast Day | No | 10:10 | 10:00 - 10:59 | Late Morning | 37,9 | 140 | 151,0 | 151,0 | 19,05 | 617,28 | 170,25 |
| 2019/05/29 | CH2205 | Male | Three y/o | Treatment (Wk 3) | Treatment | Fast Day | No | 10:15 | 10:00 - 10:59 | Late Morning | 38,1 | 48  | 257,0 | 257,0 | 19,26 | 536,04 | 188,95 |
| 2019/05/29 | CH2206 | Male | Three y/o | Treatment (Wk 3) | Treatment | Fast Day | No | 10:15 | 10:00 - 10:59 | Late Morning | 37,9 | 138 | 37,4  | 37,4  | 19,05 | 616,31 | 121,77 |
| 2019/05/29 | CH2205 | Male | Three y/o | Treatment (Wk 3) | Treatment | Fast Day | No | 10:20 | 10:00 - 10:59 | Late Morning | 38,0 | 88  | 72,4  | 72,4  | 19,15 | 584,49 | 144,61 |
| 2019/05/29 | CH2206 | Male | Three y/o | Treatment (Wk 3) | Treatment | Fast Day | No | 10:20 | 10:00 - 10:59 | Late Morning | 37,9 | 89  | 25,8  | 25,8  | 19,05 | 585,33 | 109,02 |
| 2019/05/29 | CH2205 | Male | Three y/o | Treatment (Wk 3) | Treatment | Fast Day | No | 10:25 | 10:00 - 10:59 | Late Morning | 37,9 | 67  | 32,8  | 32,8  | 19,05 | 563,53 | 117,26 |
| 2019/05/29 | CH2206 | Male | Three y/o | Treatment (Wk 3) | Treatment | Fast Day | No | 10:25 | 10:00 - 10:59 | Late Morning | 37,9 | 65  | 19,0  | 19,0  | 19,05 | 561,12 | 98,56  |
| 2019/05/29 | CH2205 | Male | Three y/o | Treatment (Wk 3) | Treatment | Fast Day | No | 10:30 | 10:00 - 10:59 | Late Morning | 38,0 | 60  | 76,6  | 76,6  | 19,15 | 554,67 | 146,57 |
| 2019/05/29 | CH2206 | Male | Three y/o | Treatment (Wk 3) | Treatment | Fast Day | No | 10:30 | 10:00 - 10:59 | Late Morning | 37,9 | 69  | 19,0  | 19,0  | 19,05 | 565,86 | 98,56  |
| 2019/05/29 | CH2205 | Male | Three y/o | Treatment (Wk 3) | Treatment | Fast Day | No | 10:35 | 10:00 - 10:59 | Late Morning | 38,0 | 99  | 52,0  | 52,0  | 19,15 | 593,14 | 133,14 |
| 2019/05/29 | CH2206 | Male | Three y/o | Treatment (Wk 3) | Treatment | Fast Day | No | 10:35 | 10:00 - 10:59 | Late Morning | 37,8 | 73  | 41,0  | 41,0  | 18,95 | 570,27 | 124,94 |
| 2019/05/29 | CH2205 | Male | Three y/o | Treatment (Wk 3) | Treatment | Fast Day | No | 10:40 | 10:00 - 10:59 | Late Morning | 38,0 | 60  | 3,6   | 3,6   | 19,15 | 554,67 | 42,42  |
| 2019/05/29 | CH2206 | Male | Three y/o | Treatment (Wk 3) | Treatment | Fast Day | No | 10:40 | 10:00 - 10:59 | Late Morning | 37,9 | 51  | 22,8  | 22,8  | 19,05 | 541,20 | 104,79 |
| 2019/05/29 | CH2205 | Male | Three y/o | Treatment (Wk 3) | Treatment | Fast Day | No | 10:45 | 10:00 - 10:59 | Late Morning | 38,0 | 68  | 3,4   | 3,4   | 19,15 | 564,71 | 40,51  |
| 2019/05/29 | CH2206 | Male | Three y/o | Treatment (Wk 3) | Treatment | Fast Day | No | 10:45 | 10:00 - 10:59 | Late Morning | 37,8 | 48  | 31,4  | 31,4  | 18,95 | 536,04 | 115,76 |
| 2019/05/29 | CH2205 | Male | Three y/o | Treatment (Wk 3) | Treatment | Fast Day | No | 10:50 | 10:00 - 10:59 | Late Morning | 38,0 | 58  | 12,2  | 12,2  | 19,15 | 551,90 | 83,49  |
| 2019/05/29 | CH2206 | Male | Three y/o | Treatment (Wk 3) | Treatment | Fast Day | No | 10:50 | 10:00 - 10:59 | Late Morning | 37,8 | 42  | 21,4  | 21,4  | 18,95 | 524,42 | 102,63 |
| 2019/05/29 | CH2205 | Male | Three y/o | Treatment (Wk 3) | Treatment | Fast Day | No | 10:55 | 10:00 - 10:59 | Late Morning | 37,9 | 53  | 3,8   | 3,8   | 19,05 | 544,43 | 44,22  |



|            |        |      |           |                  |           |          |    |       |               |              |      |     |       |       |       |        |        |
|------------|--------|------|-----------|------------------|-----------|----------|----|-------|---------------|--------------|------|-----|-------|-------|-------|--------|--------|
| 2019/05/29 | CH2206 | Male | Three y/o | Treatment (Wk 3) | Treatment | Fast Day | No | 10:55 | 10:00 - 10:59 | Late Morning | 37,8 | 43  | 25,2  | 25,2  | 18,95 | 526,50 | 108,22 |
| 2019/05/29 | CH2205 | Male | Three y/o | Treatment (Wk 3) | Treatment | Fast Day | No | 11:00 | 11:00 - 11:59 | Late Morning | 37,9 |     | 24,4  | 24,4  | 19,05 |        | 107,11 |
| 2019/05/29 | CH2206 | Male | Three y/o | Treatment (Wk 3) | Treatment | Fast Day | No | 11:00 | 11:00 - 11:59 | Late Morning | 37,8 | 42  | 45,0  | 45,0  | 18,95 | 524,42 | 128,15 |
| 2019/05/29 | CH2205 | Male | Three y/o | Treatment (Wk 3) | Treatment | Fast Day | No | 11:05 | 11:00 - 11:59 | Late Morning | 38,0 | 73  | 5,0   | 5,0   | 19,15 | 570,27 | 53,41  |
| 2019/05/29 | CH2206 | Male | Three y/o | Treatment (Wk 3) | Treatment | Fast Day | No | 11:05 | 11:00 - 11:59 | Late Morning | 37,8 | 84  | 38,6  | 38,6  | 18,95 | 581,01 | 122,86 |
| 2019/05/29 | CH2205 | Male | Three y/o | Treatment (Wk 3) | Treatment | Fast Day | No | 11:10 | 11:00 - 11:59 | Late Morning | 37,9 | 63  | 5,4   | 5,4   | 19,05 | 558,62 | 55,99  |
| 2019/05/29 | CH2206 | Male | Three y/o | Treatment (Wk 3) | Treatment | Fast Day | No | 11:10 | 11:00 - 11:59 | Late Morning | 37,7 | 42  | 28,6  | 28,6  | 18,85 | 524,42 | 112,56 |
| 2019/05/29 | CH2205 | Male | Three y/o | Treatment (Wk 3) | Treatment | Fast Day | No | 11:15 | 11:00 - 11:59 | Late Morning | 37,9 | 66  | 9,0   | 9,0   | 19,05 | 562,34 | 73,19  |
| 2019/05/29 | CH2206 | Male | Three y/o | Treatment (Wk 3) | Treatment | Fast Day | No | 11:15 | 11:00 - 11:59 | Late Morning | 37,7 | 88  | 31,6  | 31,6  | 18,85 | 584,49 | 115,98 |
| 2019/05/29 | CH2205 | Male | Three y/o | Treatment (Wk 3) | Treatment | Fast Day | No | 11:20 | 11:00 - 11:59 | Late Morning | 37,9 | 46  | 7,0   | 7,0   | 19,05 | 532,38 | 64,72  |
| 2019/05/29 | CH2206 | Male | Three y/o | Treatment (Wk 3) | Treatment | Fast Day | No | 11:20 | 11:00 - 11:59 | Late Morning | 37,7 | 47  | 32,4  | 32,4  | 18,85 | 534,23 | 116,84 |
| 2019/05/29 | CH2205 | Male | Three y/o | Treatment (Wk 3) | Treatment | Fast Day | No | 11:25 | 11:00 - 11:59 | Late Morning | 37,8 | 66  | 14,2  | 14,2  | 18,95 | 562,34 | 88,65  |
| 2019/05/29 | CH2206 | Male | Three y/o | Treatment (Wk 3) | Treatment | Fast Day | No | 11:25 | 11:00 - 11:59 | Late Morning | 37,7 | 83  | 29,0  | 29,0  | 18,85 | 580,11 | 113,03 |
| 2019/05/29 | CH2205 | Male | Three y/o | Treatment (Wk 3) | Treatment | Fast Day | No | 11:30 | 11:00 - 11:59 | Late Morning | 37,7 | 49  | 9,8   | 9,8   | 18,85 | 537,80 | 76,07  |
| 2019/05/29 | CH2206 | Male | Three y/o | Treatment (Wk 3) | Treatment | Fast Day | No | 11:30 | 11:00 - 11:59 | Late Morning | 37,6 | 94  | 31,2  | 31,2  | 18,75 | 589,37 | 115,54 |
| 2019/05/29 | CH2205 | Male | Three y/o | Treatment (Wk 3) | Treatment | Fast Day | No | 11:35 | 11:00 - 11:59 | Late Morning | 37,7 | 50  | 6,8   | 6,8   | 18,85 | 539,52 | 63,74  |
| 2019/05/29 | CH2206 | Male | Three y/o | Treatment (Wk 3) | Treatment | Fast Day | No | 11:35 | 11:00 - 11:59 | Late Morning | 37,7 | 72  | 43,6  | 43,6  | 18,85 | 569,20 | 127,06 |
| 2019/05/29 | CH2205 | Male | Three y/o | Treatment (Wk 3) | Treatment | Fast Day | No | 11:40 | 11:00 - 11:59 | Late Morning | 37,7 | 53  | 6,6   | 6,6   | 18,85 | 544,43 | 62,73  |
| 2019/05/29 | CH2206 | Male | Three y/o | Treatment (Wk 3) | Treatment | Fast Day | No | 11:40 | 11:00 - 11:59 | Late Morning | 37,7 | 70  | 26,6  | 26,6  | 18,85 | 566,99 | 110,07 |
| 2019/05/29 | CH2205 | Male | Three y/o | Treatment (Wk 3) | Treatment | Fast Day | No | 11:45 | 11:00 - 11:59 | Late Morning | 37,7 | 83  | 16,0  | 16,0  | 18,85 | 580,11 | 92,71  |
| 2019/05/29 | CH2206 | Male | Three y/o | Treatment (Wk 3) | Treatment | Fast Day | No | 11:45 | 11:00 - 11:59 | Late Morning | 37,7 | 78  | 19,0  | 19,0  | 18,85 | 575,38 | 98,56  |
| 2019/05/29 | CH2205 | Male | Three y/o | Treatment (Wk 3) | Treatment | Fast Day | No | 11:50 | 11:00 - 11:59 | Late Morning | 37,7 | 53  | 18,4  | 18,4  | 18,85 | 544,43 | 97,47  |
| 2019/05/29 | CH2206 | Male | Three y/o | Treatment (Wk 3) | Treatment | Fast Day | No | 11:50 | 11:00 - 11:59 | Late Morning | 37,5 | 46  | 21,0  | 21,0  | 18,65 | 532,38 | 101,98 |
| 2019/05/29 | CH2205 | Male | Three y/o | Treatment (Wk 3) | Treatment | Fast Day | No | 11:55 | 11:00 - 11:59 | Late Morning | 37,7 | 64  | 23,8  | 23,8  | 18,85 | 559,88 | 106,26 |
| 2019/05/29 | CH2206 | Male | Three y/o | Treatment (Wk 3) | Treatment | Fast Day | No | 11:55 | 11:00 - 11:59 | Late Morning | 37,5 | 45  | 20,2  | 20,2  | 18,65 | 530,47 | 100,65 |
| 2019/05/29 | CH2205 | Male | Three y/o | Treatment (Wk 3) | Treatment | Fast Day | No | 12:00 | 12:00 - 12:59 | Afternoon    | 37,7 | 52  | 23,6  | 23,6  | 18,85 | 542,83 | 105,97 |
| 2019/05/29 | CH2206 | Male | Three y/o | Treatment (Wk 3) | Treatment | Fast Day | No | 12:00 | 12:00 - 12:59 | Afternoon    | 37,5 | 49  | 38,8  | 38,8  | 18,65 | 537,80 | 123,04 |
| 2019/05/29 | CH2205 | Male | Three y/o | Treatment (Wk 3) | Treatment | Fast Day | No | 12:05 | 12:00 - 12:59 | Afternoon    | 37,7 | 53  | 23,6  | 23,6  | 18,85 | 544,43 | 105,97 |
| 2019/05/29 | CH2206 | Male | Three y/o | Treatment (Wk 3) | Treatment | Fast Day | No | 12:05 | 12:00 - 12:59 | Afternoon    | 37,5 | 94  | 28,2  | 28,2  | 18,65 | 589,37 | 112,07 |
| 2019/05/29 | CH2205 | Male | Three y/o | Treatment (Wk 3) | Treatment | Fast Day | No | 12:10 | 12:00 - 12:59 | Afternoon    | 37,7 | 61  | 25,4  | 25,4  | 18,85 | 556,01 | 108,49 |
| 2019/05/29 | CH2206 | Male | Three y/o | Treatment (Wk 3) | Treatment | Fast Day | No | 12:10 | 12:00 - 12:59 | Afternoon    | 37,5 | 45  | 29,6  | 29,6  | 18,65 | 530,47 | 113,73 |
| 2019/05/29 | CH2205 | Male | Three y/o | Treatment (Wk 3) | Treatment | Fast Day | No | 12:15 | 12:00 - 12:59 | Afternoon    | 37,7 | 53  | 21,4  | 21,4  | 18,85 | 544,43 | 102,63 |
| 2019/05/29 | CH2206 | Male | Three y/o | Treatment (Wk 3) | Treatment | Fast Day | No | 12:15 | 12:00 - 12:59 | Afternoon    | 37,5 | 48  | 16,8  | 16,8  | 18,65 | 536,04 | 94,37  |
| 2019/05/29 | CH2205 | Male | Three y/o | Treatment (Wk 3) | Treatment | Fast Day | No | 12:20 | 12:00 - 12:59 | Afternoon    | 37,7 | 69  | 5,6   | 5,6   | 18,85 | 565,86 | 57,21  |
| 2019/05/29 | CH2206 | Male | Three y/o | Treatment (Wk 3) | Treatment | Fast Day | No | 12:20 | 12:00 - 12:59 | Afternoon    | 37,5 | 79  | 6,8   | 6,8   | 18,65 | 576,36 | 63,74  |
| 2019/05/29 | CH2205 | Male | Three y/o | Treatment (Wk 3) | Treatment | Fast Day | No | 12:25 | 12:00 - 12:59 | Afternoon    | 37,7 | 47  | 6,4   | 6,4   | 18,85 | 534,23 | 61,70  |
| 2019/05/29 | CH2206 | Male | Three y/o | Treatment (Wk 3) | Treatment | Fast Day | No | 12:25 | 12:00 - 12:59 | Afternoon    | 37,5 | 41  | 20,2  | 20,2  | 18,65 | 522,29 | 100,65 |
| 2019/05/29 | CH2205 | Male | Three y/o | Treatment (Wk 3) | Treatment | Fast Day | No | 12:30 | 12:00 - 12:59 | Afternoon    | 37,7 | 42  | 8,2   | 8,2   | 18,85 | 524,42 | 70,05  |
| 2019/05/29 | CH2206 | Male | Three y/o | Treatment (Wk 3) | Treatment | Fast Day | No | 12:30 | 12:00 - 12:59 | Afternoon    | 37,5 | 87  | 19,8  | 19,8  | 18,65 | 583,64 | 99,97  |
| 2019/05/29 | CH2205 | Male | Three y/o | Treatment (Wk 3) | Treatment | Fast Day | No | 12:35 | 12:00 - 12:59 | Afternoon    | 37,7 | 51  | 6,4   | 6,4   | 18,85 | 541,20 | 61,70  |
| 2019/05/29 | CH2206 | Male | Three y/o | Treatment (Wk 3) | Treatment | Fast Day | No | 12:35 | 12:00 - 12:59 | Afternoon    | 37,5 | 67  | 25,4  | 25,4  | 18,65 | 563,53 | 108,49 |
| 2019/05/29 | CH2205 | Male | Three y/o | Treatment (Wk 3) | Treatment | Fast Day | No | 12:40 | 12:00 - 12:59 | Afternoon    | 37,7 | 42  | 12,0  | 12,0  | 18,85 | 524,42 | 82,93  |
| 2019/05/29 | CH2206 | Male | Three y/o | Treatment (Wk 3) | Treatment | Fast Day | No | 12:40 | 12:00 - 12:59 | Afternoon    | 37,5 | 68  | 20,8  | 20,8  | 18,65 | 564,71 | 101,65 |
| 2019/05/29 | CH2205 | Male | Three y/o | Treatment (Wk 3) | Treatment | Fast Day | No | 12:45 | 12:00 - 12:59 | Afternoon    | 37,7 | 162 | 27,2  | 27,2  | 18,85 | 626,88 | 110,83 |
| 2019/05/29 | CH2206 | Male | Three y/o | Treatment (Wk 3) | Treatment | Fast Day | No | 12:45 | 12:00 - 12:59 | Afternoon    | 37,5 | 60  | 18,0  | 18,0  | 18,65 | 554,67 | 96,72  |
| 2019/05/29 | CH2205 | Male | Three y/o | Treatment (Wk 3) | Treatment | Fast Day | No | 12:50 | 12:00 - 12:59 | Afternoon    | 37,7 | 49  | 12,8  | 12,8  | 18,85 | 537,80 | 85,12  |
| 2019/05/29 | CH2206 | Male | Three y/o | Treatment (Wk 3) | Treatment | Fast Day | No | 12:50 | 12:00 - 12:59 | Afternoon    | 37,5 | 54  | 28,8  | 28,8  | 18,65 | 545,99 | 112,79 |
| 2019/05/29 | CH2205 | Male | Three y/o | Treatment (Wk 3) | Treatment | Fast Day | No | 12:55 | 12:00 - 12:59 | Afternoon    | 37,6 | 78  | 87,4  | 87,4  | 18,75 | 575,38 | 151,15 |
| 2019/05/29 | CH2206 | Male | Three y/o | Treatment (Wk 3) | Treatment | Fast Day | No | 12:55 | 12:00 - 12:59 | Afternoon    | 37,5 | 148 | 125,8 | 125,8 | 18,65 | 620,97 | 163,86 |
| 2019/05/29 | CH2205 | Male | Three y/o | Treatment (Wk 3) | Treatment | Fast Day | No | 13:00 | 13:00 - 13:59 | Afternoon    | 37,6 | 90  | 210,4 | 210,4 | 18,75 | 586,16 | 181,90 |
| 2019/05/29 | CH2206 | Male | Three y/o | Treatment (Wk 3) | Treatment | Fast Day | No | 13:00 | 13:00 - 13:59 | Afternoon    | 37,5 | 118 | 109,2 | 109,2 | 18,65 | 605,61 | 158,91 |
| 2019/05/29 | CH2205 | Male | Three y/o | Treatment (Wk 3) | Treatment | Fast Day | No | 13:05 | 13:00 - 13:59 | Afternoon    | 37,7 | 47  | 147,4 | 147,4 | 18,85 |        | 169,40 |
| 2019/05/29 | CH2206 | Male | Three y/o | Treatment (Wk 3) | Treatment | Fast Day | No | 13:05 | 13:00 - 13:59 | Afternoon    | 37,7 |     | 112,8 | 112,8 | 18,85 |        | 160,05 |
| 2019/05/29 | CH2205 | Male | Three y/o | Treatment (Wk 3) | Treatment | Fast Day | No | 13:10 | 13:00 - 13:59 | Afternoon    | 37,7 | 70  | 80,6  | 80,6  | 18,85 | 566,99 | 148,34 |
| 2019/05/29 | CH2206 | Male | Three y/o | Treatment (Wk 3) | Treatment | Fast Day | No | 13:10 | 13:00 - 13:59 | Afternoon    | 37,7 | 126 | 170,4 | 170,4 | 18,85 | 610,14 | 174,49 |
| 2019/05/29 | CH2205 | Male | Three y/o | Treatment (Wk 3) | Treatment | Fast Day | No | 13:15 | 13:00 - 13:59 | Afternoon    | 37,7 | 165 | 202,8 | 202,8 | 18,85 | 628,06 | 180,61 |
| 2019/05/29 | CH2206 | Male | Three y/o | Treatment (Wk 3) | Treatment | Fast Day | No | 13:15 | 13:00 - 13:59 | Afternoon    | 37,7 | 110 | 133,6 | 133,6 | 18,85 | 600,69 | 165,96 |
| 2019/05/29 | CH2205 | Male | Three y/o | Treatment (Wk 3) | Treatment | Fast Day | No | 13:20 | 13:00 - 13:59 | Afternoon    | 37,9 | 49  | 311,6 | 311,6 | 19,05 | 537,80 | 195,76 |
| 2019/05/29 | CH2206 | Male | Three y/o | Treatment (Wk 3) | Treatment | Fast Day | No | 13:20 | 13:00 - 13:59 | Afternoon    | 37,8 | 135 | 29,2  | 29,2  | 18,95 | 614,84 | 113,27 |
| 2019/05/29 | CH2205 | Male | Three y/o | Treatment (Wk 3) | Treatment | Fast Day | No | 13:25 | 13:00 - 13:59 | Afternoon    | 37,9 | 91  | 118,2 | 118,2 | 19,05 | 586,98 | 161,68 |
| 2019/05/29 | CH2206 | Male | Three y/o | Treatment (Wk 3) | Treatment | Fast Day | No | 13:25 | 13:00 - 13:59 | Afternoon    | 37,8 | 106 | 243,0 | 243,0 | 18,95 | 598,06 | 186,98 |
| 2019/05/29 | CH2205 | Male | Three y/o | Treatment (Wk 3) | Treatment | Fast Day | No | 13:30 | 13:00 - 13:59 | Afternoon    | 38,0 | 129 | 297,6 | 297,6 | 19,15 | 611,75 | 194,14 |
| 2019/05/29 | CH2206 | Male | Three y/o | Treatment (Wk 3) | Treatment | Fast Day | No | 13:30 | 13:00 - 13:59 | Afternoon    | 37,8 | 110 | 191,8 | 191,8 | 18,95 | 600,69 | 178,65 |
| 2019/05/29 | CH2205 | Male | Three y/o | Treatment (Wk 3) | Treatment | Fast Day | No | 13:35 | 13:00 - 13:59 | Afternoon    | 38,1 |     | 123,0 | 123,0 | 19,26 |        | 163,07 |
| 2019/05/29 | CH2206 | Male | Three y/o | Treatment (Wk 3) | Treatment | Fast Day | No | 13:35 | 13:00 - 13:59 | Afternoon    | 37,9 | 154 | 354,2 | 354,2 | 19,05 | 623,58 | 200,30 |
| 2019/05/29 | CH2205 | Male | Three y/o | Treatment (Wk 3) | Treatment | Fast Day | No | 13:40 | 13:00 - 13:59 | Afternoon    | 38,1 | 47  | 259,8 | 259,8 | 19,26 | 534,23 | 189,34 |
| 2019/05/29 | CH2206 | Male | Three y/o | Treatment (Wk 3) | Treatment | Fast Day | No | 13:40 | 13:00 - 13:59 | Afternoon    | 37,9 | 123 | 119,0 | 119,0 | 19,05 | 608,49 | 161,92 |
| 2019/05/29 | CH2205 | Male | Three y/o | Treatment (Wk 3) | Treatment | Fast Day | No | 13:45 | 13:00 - 13:59 | Afternoon    | 38,1 | 82  | 88,8  | 88,8  | 19,26 | 579,19 | 151,71 |
| 2019/05/29 | CH2206 | Male | Three y/o | Treatment (Wk 3) | Treatment | Fast Day | No | 13:45 | 13:00 - 13:59 | Afternoon    | 37,9 |     | 52,0  | 52,0  | 19,05 |        | 133,14 |
| 2019/05/29 | CH2205 | Male | Three y/o | Treatment (Wk 3) | Treatment | Fast Day | No | 13:50 | 13:00 - 13:59 | Afternoon    | 38,1 | 99  | 164,4 | 164,4 | 19,26 | 593,14 | 173,23 |



|            |        |      |           |                  |           |          |    |       |               |           |      |     |       |       |       |        |
|------------|--------|------|-----------|------------------|-----------|----------|----|-------|---------------|-----------|------|-----|-------|-------|-------|--------|
| 2019/05/29 | CH2206 | Male | Three y/o | Treatment (Wk 3) | Treatment | Fast Day | No | 13:50 | 13:00 - 13:59 | Afternoon | 37,9 |     | 104,6 | 104,6 | 19,05 | 157,41 |
| 2019/05/29 | CH2205 | Male | Three y/o | Treatment (Wk 3) | Treatment | Fast Day | No | 13:55 | 13:00 - 13:59 | Afternoon | 38,2 | 165 | 127,0 | 127,0 | 19,36 | 628,06 |
| 2019/05/29 | CH2206 | Male | Three y/o | Treatment (Wk 3) | Treatment | Fast Day | No | 13:55 | 13:00 - 13:59 | Afternoon | 38,0 | 121 | 138,6 | 138,6 | 19,15 | 607,35 |
| 2019/05/29 | CH2205 | Male | Three y/o | Treatment (Wk 3) | Treatment | Fast Day | No | 14:00 | 14:00 - 14:59 | Afternoon | 38,2 | 107 | 186,6 | 186,6 | 19,36 | 598,73 |
| 2019/05/29 | CH2206 | Male | Three y/o | Treatment (Wk 3) | Treatment | Fast Day | No | 14:00 | 14:00 - 14:59 | Afternoon | 38,0 | 126 | 77,4  | 77,4  | 19,15 | 610,14 |
| 2019/05/29 | CH2205 | Male | Three y/o | Treatment (Wk 3) | Treatment | Fast Day | No | 14:05 | 14:00 - 14:59 | Afternoon | 38,2 | 131 | 84,0  | 84,0  | 19,36 | 612,80 |
| 2019/05/29 | CH2206 | Male | Three y/o | Treatment (Wk 3) | Treatment | Fast Day | No | 14:05 | 14:00 - 14:59 | Afternoon | 38,0 | 102 | 311,8 | 311,8 | 19,15 | 595,30 |
| 2019/05/29 | CH2205 | Male | Three y/o | Treatment (Wk 3) | Treatment | Fast Day | No | 14:10 | 14:00 - 14:59 | Afternoon | 38,2 | 132 | 77,6  | 77,6  | 19,36 | 613,32 |
| 2019/05/29 | CH2206 | Male | Three y/o | Treatment (Wk 3) | Treatment | Fast Day | No | 14:10 | 14:00 - 14:59 | Afternoon | 38,0 |     | 166,0 | 166,0 | 19,15 | 173,57 |
| 2019/05/29 | CH2205 | Male | Three y/o | Treatment (Wk 3) | Treatment | Fast Day | No | 14:15 | 14:00 - 14:59 | Afternoon | 38,2 | 52  | 230,0 | 230,0 | 19,36 | 542,83 |
| 2019/05/29 | CH2206 | Male | Three y/o | Treatment (Wk 3) | Treatment | Fast Day | No | 14:15 | 14:00 - 14:59 | Afternoon | 38,1 | 131 | 103,8 | 103,8 | 19,26 | 612,80 |
| 2019/05/29 | CH2205 | Male | Three y/o | Treatment (Wk 3) | Treatment | Fast Day | No | 14:20 | 14:00 - 14:59 | Afternoon | 38,2 | 73  | 76,2  | 76,2  | 19,36 | 570,27 |
| 2019/05/29 | CH2206 | Male | Three y/o | Treatment (Wk 3) | Treatment | Fast Day | No | 14:20 | 14:00 - 14:59 | Afternoon | 38,1 |     | 122,0 | 122,0 | 19,26 | 162,79 |
| 2019/05/29 | CH2205 | Male | Three y/o | Treatment (Wk 3) | Treatment | Fast Day | No | 14:25 | 14:00 - 14:59 | Afternoon | 38,2 | 97  | 141,0 | 141,0 | 19,36 | 591,66 |
| 2019/05/29 | CH2206 | Male | Three y/o | Treatment (Wk 3) | Treatment | Fast Day | No | 14:25 | 14:00 - 14:59 | Afternoon | 38,1 | 108 | 145,2 | 145,2 | 19,26 | 599,39 |
| 2019/05/29 | CH2205 | Male | Three y/o | Treatment (Wk 3) | Treatment | Fast Day | No | 14:30 | 14:00 - 14:59 | Afternoon | 38,2 | 124 | 52,8  | 52,8  | 19,36 | 609,04 |
| 2019/05/29 | CH2206 | Male | Three y/o | Treatment (Wk 3) | Treatment | Fast Day | No | 14:30 | 14:00 - 14:59 | Afternoon | 38,1 | 114 | 142,6 | 142,6 | 19,26 | 603,20 |
| 2019/05/29 | CH2205 | Male | Three y/o | Treatment (Wk 3) | Treatment | Fast Day | No | 14:35 | 14:00 - 14:59 | Afternoon | 38,2 | 41  | 400,6 | 400,6 | 19,36 | 522,29 |
| 2019/05/29 | CH2206 | Male | Three y/o | Treatment (Wk 3) | Treatment | Fast Day | No | 14:35 | 14:00 - 14:59 | Afternoon | 38,2 | 105 | 309,2 | 309,2 | 19,36 | 597,38 |
| 2019/05/29 | CH2205 | Male | Three y/o | Treatment (Wk 3) | Treatment | Fast Day | No | 14:40 | 14:00 - 14:59 | Afternoon | 38,7 | 137 | 112,2 | 112,2 | 19,87 | 615,83 |
| 2019/05/29 | CH2206 | Male | Three y/o | Treatment (Wk 3) | Treatment | Fast Day | No | 14:40 | 14:00 - 14:59 | Afternoon | 38,2 | 114 | 82,6  | 82,6  | 19,36 | 603,20 |
| 2019/05/29 | CH2205 | Male | Three y/o | Treatment (Wk 3) | Treatment | Fast Day | No | 14:45 | 14:00 - 14:59 | Afternoon | 38,5 | 160 | 25,4  | 25,4  | 19,66 | 626,07 |
| 2019/05/29 | CH2206 | Male | Three y/o | Treatment (Wk 3) | Treatment | Fast Day | No | 14:45 | 14:00 - 14:59 | Afternoon | 38,3 | 114 | 90,6  | 90,6  | 19,46 | 603,20 |
| 2019/05/29 | CH2205 | Male | Three y/o | Treatment (Wk 3) | Treatment | Fast Day | No | 14:50 | 14:00 - 14:59 | Afternoon | 38,8 | 115 | 39,6  | 39,6  | 19,97 | 603,82 |
| 2019/05/29 | CH2206 | Male | Three y/o | Treatment (Wk 3) | Treatment | Fast Day | No | 14:50 | 14:00 - 14:59 | Afternoon | 38,3 |     | 196,6 | 196,6 | 19,46 | 179,52 |
| 2019/05/29 | CH2205 | Male | Three y/o | Treatment (Wk 3) | Treatment | Fast Day | No | 14:55 | 14:00 - 14:59 | Afternoon | 38,8 | 156 | 2,2   | 2,2   | 19,97 | 624,43 |
| 2019/05/29 | CH2206 | Male | Three y/o | Treatment (Wk 3) | Treatment | Fast Day | No | 14:55 | 14:00 - 14:59 | Afternoon | 38,3 | 58  | 175,8 | 175,8 | 19,46 | 551,90 |
| 2019/05/29 | CH2205 | Male | Three y/o | Treatment (Wk 3) | Treatment | Fast Day | No | 15:00 | 15:00 - 15:59 | Afternoon | 38,8 |     | 352,4 | 352,4 | 19,97 | 200,12 |
| 2019/05/29 | CH2206 | Male | Three y/o | Treatment (Wk 3) | Treatment | Fast Day | No | 15:00 | 15:00 - 15:59 | Afternoon | 38,3 | 113 | 167,8 | 167,8 | 19,46 | 602,58 |
| 2019/05/29 | CH2205 | Male | Three y/o | Treatment (Wk 3) | Treatment | Fast Day | No | 15:05 | 15:00 - 15:59 | Afternoon | 39,0 |     | 135,2 | 135,2 | 20,18 | 166,38 |
| 2019/05/29 | CH2206 | Male | Three y/o | Treatment (Wk 3) | Treatment | Fast Day | No | 15:05 | 15:00 - 15:59 | Afternoon | 38,3 | 119 | 132,0 | 132,0 | 19,46 | 606,20 |
| 2019/05/29 | CH2205 | Male | Three y/o | Treatment (Wk 3) | Treatment | Fast Day | No | 15:10 | 15:00 - 15:59 | Afternoon | 38,9 |     | 128,2 | 128,2 | 20,07 | 164,52 |
| 2019/05/29 | CH2206 | Male | Three y/o | Treatment (Wk 3) | Treatment | Fast Day | No | 15:10 | 15:00 - 15:59 | Afternoon | 38,3 | 117 | 151,0 | 151,0 | 19,46 | 605,02 |
| 2019/05/29 | CH2205 | Male | Three y/o | Treatment (Wk 3) | Treatment | Fast Day | No | 15:15 | 15:00 - 15:59 | Afternoon | 39,0 |     | 65,0  | 65,0  | 20,18 | 140,87 |
| 2019/05/29 | CH2206 | Male | Three y/o | Treatment (Wk 3) | Treatment | Fast Day | No | 15:15 | 15:00 - 15:59 | Afternoon | 38,3 | 135 | 118,2 | 118,2 | 19,46 | 614,84 |
| 2019/05/29 | CH2205 | Male | Three y/o | Treatment (Wk 3) | Treatment | Fast Day | No | 15:20 | 15:00 - 15:59 | Afternoon | 38,9 | 96  | 32,0  | 32,0  | 20,07 | 590,91 |
| 2019/05/29 | CH2206 | Male | Three y/o | Treatment (Wk 3) | Treatment | Fast Day | No | 15:20 | 15:00 - 15:59 | Afternoon | 38,4 | 86  | 31,4  | 31,4  | 19,56 | 582,77 |
| 2019/05/29 | CH2205 | Male | Three y/o | Treatment (Wk 3) | Treatment | Fast Day | No | 15:25 | 15:00 - 15:59 | Afternoon | 38,9 | 48  | 29,4  | 29,4  | 20,07 | 536,04 |
| 2019/05/29 | CH2206 | Male | Three y/o | Treatment (Wk 3) | Treatment | Fast Day | No | 15:25 | 15:00 - 15:59 | Afternoon | 38,3 | 73  | 9,2   | 9,2   | 19,46 | 570,27 |
| 2019/05/29 | CH2205 | Male | Three y/o | Treatment (Wk 3) | Treatment | Fast Day | No | 15:30 | 15:00 - 15:59 | Afternoon | 38,9 | 77  | 29,0  | 29,0  | 20,07 | 574,39 |
| 2019/05/29 | CH2206 | Male | Three y/o | Treatment (Wk 3) | Treatment | Fast Day | No | 15:30 | 15:00 - 15:59 | Afternoon | 38,3 | 60  | 18,4  | 18,4  | 19,46 | 554,67 |
| 2019/05/29 | CH2205 | Male | Three y/o | Treatment (Wk 3) | Treatment | Fast Day | No | 15:35 | 15:00 - 15:59 | Afternoon | 38,8 | 73  | 30,6  | 30,6  | 19,97 | 570,27 |
| 2019/05/29 | CH2206 | Male | Three y/o | Treatment (Wk 3) | Treatment | Fast Day | No | 15:35 | 15:00 - 15:59 | Afternoon | 38,3 | 53  | 16,4  | 16,4  | 19,46 | 544,43 |
| 2019/05/29 | CH2205 | Male | Three y/o | Treatment (Wk 3) | Treatment | Fast Day | No | 15:40 | 15:00 - 15:59 | Afternoon | 38,8 | 57  | 32,0  | 32,0  | 19,97 | 550,47 |
| 2019/05/29 | CH2206 | Male | Three y/o | Treatment (Wk 3) | Treatment | Fast Day | No | 15:40 | 15:00 - 15:59 | Afternoon | 38,3 | 52  | 43,6  | 43,6  | 19,46 | 542,83 |
| 2019/05/29 | CH2205 | Male | Three y/o | Treatment (Wk 3) | Treatment | Fast Day | No | 15:45 | 15:00 - 15:59 | Afternoon | 38,7 |     | 77,8  | 77,8  | 19,87 | 147,11 |
| 2019/05/29 | CH2206 | Male | Three y/o | Treatment (Wk 3) | Treatment | Fast Day | No | 15:45 | 15:00 - 15:59 | Afternoon | 38,3 | 49  | 178,6 | 178,6 | 19,46 | 537,80 |
| 2019/05/29 | CH2205 | Male | Three y/o | Treatment (Wk 3) | Treatment | Fast Day | No | 15:50 | 15:00 - 15:59 | Afternoon | 38,4 |     | 20,6  | 20,6  | 19,56 | 101,32 |
| 2019/05/29 | CH2206 | Male | Three y/o | Treatment (Wk 3) | Treatment | Fast Day | No | 15:50 | 15:00 - 15:59 | Afternoon | 38,3 | 62  | 244,4 | 244,4 | 19,46 | 557,33 |
| 2019/05/29 | CH2205 | Male | Three y/o | Treatment (Wk 3) | Treatment | Fast Day | No | 15:55 | 15:00 - 15:59 | Afternoon | 38,3 | 74  | 48,2  | 48,2  | 19,46 | 571,33 |
| 2019/05/29 | CH2206 | Male | Three y/o | Treatment (Wk 3) | Treatment | Fast Day | No | 15:55 | 15:00 - 15:59 | Afternoon | 38,2 | 180 | 299,2 | 299,2 | 19,36 | 633,61 |
| 2019/05/29 | CH2205 | Male | Three y/o | Treatment (Wk 3) | Treatment | Fast Day | No | 16:00 | 16:00 - 16:59 | Evening   | 38,4 | 46  | 108,8 | 108,8 | 19,56 | 532,38 |
| 2019/05/29 | CH2206 | Male | Three y/o | Treatment (Wk 3) | Treatment | Fast Day | No | 16:00 | 16:00 - 16:59 | Evening   | 38,3 | 128 | 62,4  | 62,4  | 19,46 | 611,22 |
| 2019/05/29 | CH2205 | Male | Three y/o | Treatment (Wk 3) | Treatment | Fast Day | No | 16:05 | 16:00 - 16:59 | Evening   | 38,4 |     | 324,6 | 324,6 | 19,56 | 197,21 |
| 2019/05/29 | CH2206 | Male | Three y/o | Treatment (Wk 3) | Treatment | Fast Day | No | 16:05 | 16:00 - 16:59 | Evening   | 38,3 | 154 | 112,8 | 112,8 | 19,46 | 623,58 |
| 2019/05/29 | CH2205 | Male | Three y/o | Treatment (Wk 3) | Treatment | Fast Day | No | 16:10 | 16:00 - 16:59 | Evening   | 38,7 | 105 | 34,6  | 34,6  | 19,87 | 597,38 |
| 2019/05/29 | CH2206 | Male | Three y/o | Treatment (Wk 3) | Treatment | Fast Day | No | 16:10 | 16:00 - 16:59 | Evening   | 38,4 | 118 | 146,6 | 146,6 | 19,56 | 605,61 |
| 2019/05/29 | CH2205 | Male | Three y/o | Treatment (Wk 3) | Treatment | Fast Day | No | 16:15 | 16:00 - 16:59 | Evening   | 38,6 |     | 103,2 | 103,2 | 19,76 | 156,94 |
| 2019/05/29 | CH2206 | Male | Three y/o | Treatment (Wk 3) | Treatment | Fast Day | No | 16:15 | 16:00 - 16:59 | Evening   | 38,4 |     | 202,2 | 202,2 | 19,56 | 180,50 |
| 2019/05/29 | CH2205 | Male | Three y/o | Treatment (Wk 3) | Treatment | Fast Day | No | 16:20 | 16:00 - 16:59 | Evening   | 38,5 | 67  | 24,0  | 24,0  | 19,66 | 563,53 |
| 2019/05/29 | CH2206 | Male | Three y/o | Treatment (Wk 3) | Treatment | Fast Day | No | 16:20 | 16:00 - 16:59 | Evening   | 38,4 | 114 | 78,6  | 78,6  | 19,56 | 603,20 |
| 2019/05/29 | CH2205 | Male | Three y/o | Treatment (Wk 3) | Treatment | Fast Day | No | 16:25 | 16:00 - 16:59 | Evening   | 38,5 | 154 | 38,2  | 38,2  | 19,66 | 623,58 |
| 2019/05/29 | CH2206 | Male | Three y/o | Treatment (Wk 3) | Treatment | Fast Day | No | 16:25 | 16:00 - 16:59 | Evening   | 38,3 | 51  | 46,2  | 46,2  | 19,46 | 541,20 |
| 2019/05/29 | CH2205 | Male | Three y/o | Treatment (Wk 3) | Treatment | Fast Day | No | 16:30 | 16:00 - 16:59 | Evening   | 38,3 |     | 36,2  | 36,2  | 19,46 | 120,65 |
| 2019/05/29 | CH2206 | Male | Three y/o | Treatment (Wk 3) | Treatment | Fast Day | No | 16:30 | 16:00 - 16:59 | Evening   | 38,2 | 99  | 45,8  | 45,8  | 19,36 | 593,14 |
| 2019/05/29 | CH2205 | Male | Three y/o | Treatment (Wk 3) | Treatment | Fast Day | No | 16:35 | 16:00 - 16:59 | Evening   | 38,3 |     | 31,0  | 31,0  | 19,46 | 115,32 |
| 2019/05/29 | CH2206 | Male | Three y/o | Treatment (Wk 3) | Treatment | Fast Day | No | 16:35 | 16:00 - 16:59 | Evening   | 38,1 | 78  | 47,2  | 47,2  | 19,26 | 575,38 |
| 2019/05/29 | CH2205 | Male | Three y/o | Treatment (Wk 3) | Treatment | Fast Day | No | 16:40 | 16:00 - 16:59 | Evening   | 38,2 | 60  | 29,8  | 29,8  | 19,36 | 554,67 |
| 2019/05/29 | CH2206 | Male | Three y/o | Treatment (Wk 3) | Treatment | Fast Day | No | 16:40 | 16:00 - 16:59 | Evening   | 38,0 | 44  | 39,6  | 39,6  | 19,15 | 528,51 |
| 2019/05/29 | CH2205 | Male | Three y/o | Treatment (Wk 3) | Treatment | Fast Day | No | 16:45 | 16:00 - 16:59 | Evening   | 38,2 |     | 33,0  | 33,0  | 19,36 | 117,47 |



|            |        |      |           |                  |           |          |    |       |               |         |      |     |       |       |       |        |        |
|------------|--------|------|-----------|------------------|-----------|----------|----|-------|---------------|---------|------|-----|-------|-------|-------|--------|--------|
| 2019/05/29 | CH2206 | Male | Three y/o | Treatment (Wk 3) | Treatment | Fast Day | No | 16:45 | 16:00 - 16:59 | Evening | 37,9 | 52  | 34,6  | 34,6  | 19,05 | 542,83 | 119,10 |
| 2019/05/29 | CH2205 | Male | Three y/o | Treatment (Wk 3) | Treatment | Fast Day | No | 16:50 | 16:00 - 16:59 | Evening | 38,1 |     | 26,2  | 26,2  | 19,26 |        | 109,55 |
| 2019/05/29 | CH2206 | Male | Three y/o | Treatment (Wk 3) | Treatment | Fast Day | No | 16:50 | 16:00 - 16:59 | Evening | 37,8 | 94  | 63,4  | 63,4  | 18,95 | 589,37 | 140,00 |
| 2019/05/29 | CH2205 | Male | Three y/o | Treatment (Wk 3) | Treatment | Fast Day | No | 16:55 | 16:00 - 16:59 | Evening | 38,0 | 75  | 141,2 | 141,2 | 19,15 | 572,36 | 167,90 |
| 2019/05/29 | CH2206 | Male | Three y/o | Treatment (Wk 3) | Treatment | Fast Day | No | 16:55 | 16:00 - 16:59 | Evening | 38,0 | 121 | 103,2 | 103,2 | 19,15 | 607,35 | 156,94 |
| 2019/05/29 | CH2205 | Male | Three y/o | Treatment (Wk 3) | Treatment | Fast Day | No | 17:00 | 17:00 - 17:59 | Evening | 37,9 |     | 215,6 | 215,6 | 19,05 |        | 182,76 |
| 2019/05/29 | CH2206 | Male | Three y/o | Treatment (Wk 3) | Treatment | Fast Day | No | 17:00 | 17:00 - 17:59 | Evening | 38,1 | 98  | 175,0 | 175,0 | 19,26 | 592,41 | 175,43 |
| 2019/05/29 | CH2205 | Male | Three y/o | Treatment (Wk 3) | Treatment | Fast Day | No | 17:05 | 17:00 - 17:59 | Evening | 37,9 | 74  | 36,0  | 36,0  | 19,05 | 571,33 | 120,46 |
| 2019/05/29 | CH2206 | Male | Three y/o | Treatment (Wk 3) | Treatment | Fast Day | No | 17:05 | 17:00 - 17:59 | Evening | 38,1 |     | 106,2 | 106,2 | 19,26 |        | 157,94 |
| 2019/05/29 | CH2205 | Male | Three y/o | Treatment (Wk 3) | Treatment | Fast Day | No | 17:10 | 17:00 - 17:59 | Evening | 37,9 |     | 51,2  | 51,2  | 19,05 |        | 132,61 |
| 2019/05/29 | CH2206 | Male | Three y/o | Treatment (Wk 3) | Treatment | Fast Day | No | 17:10 | 17:00 - 17:59 | Evening | 38,2 |     | 108,2 | 108,2 | 19,36 |        | 158,59 |
| 2019/05/29 | CH2205 | Male | Three y/o | Treatment (Wk 3) | Treatment | Fast Day | No | 17:15 | 17:00 - 17:59 | Evening | 38,0 | 98  | 128,4 | 128,4 | 19,15 | 592,41 | 164,57 |
| 2019/05/29 | CH2206 | Male | Three y/o | Treatment (Wk 3) | Treatment | Fast Day | No | 17:15 | 17:00 - 17:59 | Evening | 38,2 | 128 | 76,4  | 76,4  | 19,36 | 611,22 | 146,48 |
| 2019/05/29 | CH2205 | Male | Three y/o | Treatment (Wk 3) | Treatment | Fast Day | No | 17:20 | 17:00 - 17:59 | Evening | 38,0 |     | 31,4  | 31,4  | 19,15 |        | 115,76 |
| 2019/05/29 | CH2206 | Male | Three y/o | Treatment (Wk 3) | Treatment | Fast Day | No | 17:20 | 17:00 - 17:59 | Evening | 38,2 | 50  | 54,2  | 54,2  | 19,36 | 539,52 | 134,57 |
| 2019/05/29 | CH2205 | Male | Three y/o | Treatment (Wk 3) | Treatment | Fast Day | No | 17:25 | 17:00 - 17:59 | Evening | 37,9 |     | 31,6  | 31,6  | 19,05 |        | 115,98 |
| 2019/05/29 | CH2206 | Male | Three y/o | Treatment (Wk 3) | Treatment | Fast Day | No | 17:25 | 17:00 - 17:59 | Evening | 38,0 | 87  | 100,8 | 100,8 | 19,15 | 583,64 | 156,12 |
| 2019/05/29 | CH2205 | Male | Three y/o | Treatment (Wk 3) | Treatment | Fast Day | No | 17:30 | 17:00 - 17:59 | Evening | 38,0 | 78  | 26,8  | 26,8  | 19,15 | 575,38 | 110,33 |
| 2019/05/29 | CH2206 | Male | Three y/o | Treatment (Wk 3) | Treatment | Fast Day | No | 17:30 | 17:00 - 17:59 | Evening | 38,1 |     | 59,0  | 59,0  | 19,26 |        | 137,51 |
| 2019/05/29 | CH2205 | Male | Three y/o | Treatment (Wk 3) | Treatment | Fast Day | No | 17:35 | 17:00 - 17:59 | Evening | 38,0 | 46  | 13,2  | 13,2  | 19,15 | 532,38 | 86,17  |
| 2019/05/29 | CH2206 | Male | Three y/o | Treatment (Wk 3) | Treatment | Fast Day | No | 17:35 | 17:00 - 17:59 | Evening | 38,1 | 46  | 63,4  | 63,4  | 19,26 | 532,38 | 140,00 |
| 2019/05/29 | CH2205 | Male | Three y/o | Treatment (Wk 3) | Treatment | Fast Day | No | 17:40 | 17:00 - 17:59 | Evening | 37,9 |     | 2,0   | 2,0   | 19,05 |        | 22,86  |
| 2019/05/29 | CH2206 | Male | Three y/o | Treatment (Wk 3) | Treatment | Fast Day | No | 17:40 | 17:00 - 17:59 | Evening | 38,0 | 80  | 60,0  | 60,0  | 19,15 | 577,31 | 138,09 |
| 2019/05/29 | CH2205 | Male | Three y/o | Treatment (Wk 3) | Treatment | Fast Day | No | 17:45 | 17:00 - 17:59 | Evening | 38,0 | 59  | 5,4   | 5,4   | 19,15 | 553,30 | 55,99  |
| 2019/05/29 | CH2206 | Male | Three y/o | Treatment (Wk 3) | Treatment | Fast Day | No | 17:45 | 17:00 - 17:59 | Evening | 37,9 | 152 | 63,6  | 63,6  | 19,05 | 622,73 | 140,11 |
| 2019/05/29 | CH2205 | Male | Three y/o | Treatment (Wk 3) | Treatment | Fast Day | No | 17:50 | 17:00 - 17:59 | Evening | 38,1 |     | 6,2   | 6,2   | 19,26 |        | 60,63  |
| 2019/05/29 | CH2206 | Male | Three y/o | Treatment (Wk 3) | Treatment | Fast Day | No | 17:50 | 17:00 - 17:59 | Evening | 37,7 | 51  | 53,0  | 53,0  | 18,85 | 541,20 | 133,80 |
| 2019/05/29 | CH2205 | Male | Three y/o | Treatment (Wk 3) | Treatment | Fast Day | No | 17:55 | 17:00 - 17:59 | Evening | 38,1 | 44  | 3,6   | 3,6   | 19,26 | 528,51 | 42,42  |
| 2019/05/29 | CH2206 | Male | Three y/o | Treatment (Wk 3) | Treatment | Fast Day | No | 17:55 | 17:00 - 17:59 | Evening | 37,5 | 45  | 57,6  | 57,6  | 18,65 | 530,47 | 136,68 |
| 2019/05/29 | CH2205 | Male | Three y/o | Treatment (Wk 3) | Treatment | Fast Day | No | 18:00 | 18:00 - 18:59 | Evening | 38,1 | 42  | 2,2   | 2,2   | 19,26 | 524,42 | 26,02  |
| 2019/05/29 | CH2206 | Male | Three y/o | Treatment (Wk 3) | Treatment | Fast Day | No | 18:00 | 18:00 - 18:59 | Evening | 37,4 | 148 | 49,8  | 49,8  | 18,55 | 620,97 | 131,65 |
| 2019/05/29 | CH2205 | Male | Three y/o | Treatment (Wk 3) | Treatment | Fast Day | No | 18:05 | 18:00 - 18:59 | Evening | 38,1 | 61  | 2,2   | 2,2   | 19,26 | 556,01 | 26,02  |
| 2019/05/29 | CH2206 | Male | Three y/o | Treatment (Wk 3) | Treatment | Fast Day | No | 18:05 | 18:00 - 18:59 | Evening | 37,4 | 92  | 54,0  | 54,0  | 18,55 | 587,78 | 134,45 |
| 2019/05/29 | CH2205 | Male | Three y/o | Treatment (Wk 3) | Treatment | Fast Day | No | 18:10 | 18:00 - 18:59 | Evening | 38,1 | 38  | 5,6   | 5,6   | 19,26 | 515,48 | 57,21  |
| 2019/05/29 | CH2206 | Male | Three y/o | Treatment (Wk 3) | Treatment | Fast Day | No | 18:10 | 18:00 - 18:59 | Evening | 37,4 | 46  | 46,2  | 46,2  | 18,55 | 532,38 | 129,06 |
| 2019/05/29 | CH2205 | Male | Three y/o | Treatment (Wk 3) | Treatment | Fast Day | No | 18:15 | 18:00 - 18:59 | Evening | 38,1 | 169 | 16,0  | 16,0  | 19,26 | 629,60 | 92,71  |
| 2019/05/29 | CH2206 | Male | Three y/o | Treatment (Wk 3) | Treatment | Fast Day | No | 18:15 | 18:00 - 18:59 | Evening | 37,3 | 47  | 36,0  | 36,0  | 18,46 | 534,23 | 120,46 |
| 2019/05/29 | CH2205 | Male | Three y/o | Treatment (Wk 3) | Treatment | Fast Day | No | 18:20 | 18:00 - 18:59 | Evening | 37,9 |     | 23,4  | 23,4  | 19,05 |        | 105,68 |
| 2019/05/29 | CH2206 | Male | Three y/o | Treatment (Wk 3) | Treatment | Fast Day | No | 18:20 | 18:00 - 18:59 | Evening | 37,3 | 50  | 45,8  | 45,8  | 18,46 | 539,52 | 128,76 |
| 2019/05/29 | CH2205 | Male | Three y/o | Treatment (Wk 3) | Treatment | Fast Day | No | 18:25 | 18:00 - 18:59 | Evening | 37,9 | 41  | 21,6  | 21,6  | 19,05 | 522,29 | 102,94 |
| 2019/05/29 | CH2206 | Male | Three y/o | Treatment (Wk 3) | Treatment | Fast Day | No | 18:25 | 18:00 - 18:59 | Evening | 37,2 | 39  | 43,0  | 43,0  | 18,36 | 517,82 | 126,58 |
| 2019/05/29 | CH2205 | Male | Three y/o | Treatment (Wk 3) | Treatment | Fast Day | No | 18:30 | 18:00 - 18:59 | Evening | 37,9 | 41  | 27,0  | 27,0  | 19,05 | 522,29 | 110,58 |
| 2019/05/29 | CH2206 | Male | Three y/o | Treatment (Wk 3) | Treatment | Fast Day | No | 18:30 | 18:00 - 18:59 | Evening | 37,2 | 50  | 37,0  | 37,0  | 18,36 | 539,52 | 121,40 |
| 2019/05/29 | CH2205 | Male | Three y/o | Treatment (Wk 3) | Treatment | Fast Day | No | 18:35 | 18:00 - 18:59 | Evening | 37,9 | 40  | 25,6  | 25,6  | 19,05 | 520,09 | 108,76 |
| 2019/05/29 | CH2206 | Male | Three y/o | Treatment (Wk 3) | Treatment | Fast Day | No | 18:35 | 18:00 - 18:59 | Evening | 37,3 | 42  | 39,2  | 39,2  | 18,46 | 524,42 | 123,39 |
| 2019/05/29 | CH2205 | Male | Three y/o | Treatment (Wk 3) | Treatment | Fast Day | No | 18:40 | 18:00 - 18:59 | Evening | 37,9 | 45  | 20,4  | 20,4  | 19,05 | 530,47 | 100,99 |
| 2019/05/29 | CH2206 | Male | Three y/o | Treatment (Wk 3) | Treatment | Fast Day | No | 18:40 | 18:00 - 18:59 | Evening | 37,4 | 53  | 37,0  | 37,0  | 18,55 | 544,43 | 121,40 |
| 2019/05/29 | CH2205 | Male | Three y/o | Treatment (Wk 3) | Treatment | Fast Day | No | 18:45 | 18:00 - 18:59 | Evening | 37,9 | 50  | 22,8  | 22,8  | 19,05 | 539,52 | 104,79 |
| 2019/05/29 | CH2206 | Male | Three y/o | Treatment (Wk 3) | Treatment | Fast Day | No | 18:45 | 18:00 - 18:59 | Evening | 37,5 | 48  | 43,8  | 43,8  | 18,65 | 536,04 | 127,22 |
| 2019/05/29 | CH2205 | Male | Three y/o | Treatment (Wk 3) | Treatment | Fast Day | No | 18:50 | 18:00 - 18:59 | Evening | 37,7 | 44  | 14,8  | 14,8  | 18,85 | 528,51 | 90,05  |
| 2019/05/29 | CH2206 | Male | Three y/o | Treatment (Wk 3) | Treatment | Fast Day | No | 18:50 | 18:00 - 18:59 | Evening | 37,5 | 80  | 38,8  | 38,8  | 18,65 | 577,31 | 123,04 |
| 2019/05/29 | CH2205 | Male | Three y/o | Treatment (Wk 3) | Treatment | Fast Day | No | 18:55 | 18:00 - 18:59 | Evening | 37,6 | 47  | 14,2  | 14,2  | 18,75 | 534,23 | 88,65  |
| 2019/05/29 | CH2206 | Male | Three y/o | Treatment (Wk 3) | Treatment | Fast Day | No | 18:55 | 18:00 - 18:59 | Evening | 37,5 | 52  | 40,8  | 40,8  | 18,65 | 542,83 | 124,77 |
| 2019/05/29 | CH2205 | Male | Three y/o | Treatment (Wk 3) | Treatment | Fast Day | No | 19:00 | 19:00 - 19:59 | Evening | 37,6 | 39  | 14,0  | 14,0  | 18,75 | 517,82 | 88,17  |
| 2019/05/29 | CH2206 | Male | Three y/o | Treatment (Wk 3) | Treatment | Fast Day | No | 19:00 | 19:00 - 19:59 | Evening | 37,4 | 40  | 40,4  | 40,4  | 18,55 | 520,09 | 124,43 |
| 2019/05/29 | CH2205 | Male | Three y/o | Treatment (Wk 3) | Treatment | Fast Day | No | 19:05 | 19:00 - 19:59 | Evening | 37,6 | 41  | 14,8  | 14,8  | 18,75 | 522,29 | 90,05  |
| 2019/05/29 | CH2206 | Male | Three y/o | Treatment (Wk 3) | Treatment | Fast Day | No | 19:05 | 19:00 - 19:59 | Evening | 37,4 | 47  | 39,2  | 39,2  | 18,55 | 534,23 | 123,39 |
| 2019/05/29 | CH2205 | Male | Three y/o | Treatment (Wk 3) | Treatment | Fast Day | No | 19:10 | 19:00 - 19:59 | Evening | 37,5 | 42  | 18,4  | 18,4  | 18,65 | 524,42 | 97,47  |
| 2019/05/29 | CH2206 | Male | Three y/o | Treatment (Wk 3) | Treatment | Fast Day | No | 19:10 | 19:00 - 19:59 | Evening | 37,4 | 49  | 38,2  | 38,2  | 18,55 | 537,80 | 122,50 |
| 2019/05/29 | CH2205 | Male | Three y/o | Treatment (Wk 3) | Treatment | Fast Day | No | 19:15 | 19:00 - 19:59 | Evening | 37,5 | 49  | 14,8  | 14,8  | 18,65 | 537,80 | 90,05  |
| 2019/05/29 | CH2206 | Male | Three y/o | Treatment (Wk 3) | Treatment | Fast Day | No | 19:15 | 19:00 - 19:59 | Evening | 37,4 | 42  | 45,0  | 45,0  | 18,55 | 524,42 | 128,15 |
| 2019/05/29 | CH2205 | Male | Three y/o | Treatment (Wk 3) | Treatment | Fast Day | No | 19:20 | 19:00 - 19:59 | Evening | 37,5 | 47  | 9,2   | 9,2   | 18,65 | 534,23 | 73,94  |
| 2019/05/29 | CH2206 | Male | Three y/o | Treatment (Wk 3) | Treatment | Fast Day | No | 19:20 | 19:00 - 19:59 | Evening | 37,4 | 41  | 50,4  | 50,4  | 18,55 | 522,29 | 132,06 |
| 2019/05/29 | CH2205 | Male | Three y/o | Treatment (Wk 3) | Treatment | Fast Day | No | 19:25 | 19:00 - 19:59 | Evening | 37,5 | 60  | 21,0  | 21,0  | 18,65 | 554,67 | 101,98 |
| 2019/05/29 | CH2206 | Male | Three y/o | Treatment (Wk 3) | Treatment | Fast Day | No | 19:25 | 19:00 - 19:59 | Evening | 37,4 | 50  | 48,2  | 48,2  | 18,55 | 539,52 | 130,52 |
| 2019/05/29 | CH2205 | Male | Three y/o | Treatment (Wk 3) | Treatment | Fast Day | No | 19:30 | 19:00 - 19:59 | Evening | 37,6 | 42  | 18,6  | 18,6  | 18,75 | 524,42 | 97,84  |
| 2019/05/29 | CH2206 | Male | Three y/o | Treatment (Wk 3) | Treatment | Fast Day | No | 19:30 | 19:00 - 19:59 | Evening | 37,4 | 43  | 47,2  | 47,2  | 18,55 | 526,50 | 129,80 |
| 2019/05/29 | CH2205 | Male | Three y/o | Treatment (Wk 3) | Treatment | Fast Day | No | 19:35 | 19:00 - 19:59 | Evening | 37,6 | 50  | 22,8  | 22,8  | 18,75 | 539,52 | 104,79 |
| 2019/05/29 | CH2206 | Male | Three y/o | Treatment (Wk 3) | Treatment | Fast Day | No | 19:35 | 19:00 - 19:59 | Evening | 37,4 | 52  | 45,4  | 45,4  | 18,55 | 542,83 | 128,45 |
| 2019/05/29 | CH2205 | Male | Three y/o | Treatment (Wk 3) | Treatment | Fast Day | No | 19:40 | 19:00 - 19:59 | Evening | 37,7 | 52  | 22,4  | 22,4  | 18,85 | 542,83 | 104,19 |



|            |        |      |           |                  |           |          |    |       |               |         |      |    |      |      |       |        |        |
|------------|--------|------|-----------|------------------|-----------|----------|----|-------|---------------|---------|------|----|------|------|-------|--------|--------|
| 2019/05/29 | CH2206 | Male | Three y/o | Treatment (Wk 3) | Treatment | Fast Day | No | 19:40 | 19:00 - 19:59 | Evening | 37,4 | 38 | 52,0 | 52,0 | 18,55 | 515,48 | 133,14 |
| 2019/05/29 | CH2205 | Male | Three y/o | Treatment (Wk 3) | Treatment | Fast Day | No | 19:45 | 19:00 - 19:59 | Evening | 37,6 | 47 | 18,2 | 18,2 | 18,75 | 534,23 | 97,10  |
| 2019/05/29 | CH2206 | Male | Three y/o | Treatment (Wk 3) | Treatment | Fast Day | No | 19:45 | 19:00 - 19:59 | Evening | 37,4 | 43 | 48,8 | 48,8 | 18,55 | 526,50 | 130,95 |
| 2019/05/29 | CH2205 | Male | Three y/o | Treatment (Wk 3) | Treatment | Fast Day | No | 19:50 | 19:00 - 19:59 | Evening | 37,6 | 41 | 16,8 | 16,8 | 18,75 | 522,29 | 94,37  |
| 2019/05/29 | CH2206 | Male | Three y/o | Treatment (Wk 3) | Treatment | Fast Day | No | 19:50 | 19:00 - 19:59 | Evening | 37,3 | 68 | 45,6 | 45,6 | 18,46 | 564,71 | 128,61 |
| 2019/05/29 | CH2205 | Male | Three y/o | Treatment (Wk 3) | Treatment | Fast Day | No | 19:55 | 19:00 - 19:59 | Evening | 37,6 | 69 | 18,2 | 18,2 | 18,75 | 565,86 | 97,10  |
| 2019/05/29 | CH2206 | Male | Three y/o | Treatment (Wk 3) | Treatment | Fast Day | No | 19:55 | 19:00 - 19:59 | Evening | 37,4 | 50 | 46,8 | 46,8 | 18,55 | 539,52 | 129,50 |
| 2019/05/29 | CH2205 | Male | Three y/o | Treatment (Wk 3) | Treatment | Fast Day | No | 20:00 | 20:00 - 20:59 | Night   | 37,6 | 60 | 19,6 | 19,6 | 18,75 | 554,67 | 99,63  |
| 2019/05/29 | CH2206 | Male | Three y/o | Treatment (Wk 3) | Treatment | Fast Day | No | 20:00 | 20:00 - 20:59 | Night   | 37,3 | 41 | 47,0 | 47,0 | 18,46 | 522,29 | 129,65 |
| 2019/05/29 | CH2205 | Male | Three y/o | Treatment (Wk 3) | Treatment | Fast Day | No | 20:05 | 20:00 - 20:59 | Night   | 37,6 | 42 | 21,8 | 21,8 | 18,75 | 524,42 | 103,26 |
| 2019/05/29 | CH2206 | Male | Three y/o | Treatment (Wk 3) | Treatment | Fast Day | No | 20:05 | 20:00 - 20:59 | Night   | 37,3 | 42 | 44,8 | 44,8 | 18,46 | 524,42 | 127,99 |
| 2019/05/29 | CH2205 | Male | Three y/o | Treatment (Wk 3) | Treatment | Fast Day | No | 20:10 | 20:00 - 20:59 | Night   | 37,6 | 53 | 16,8 | 16,8 | 18,75 | 544,43 | 94,37  |
| 2019/05/29 | CH2206 | Male | Three y/o | Treatment (Wk 3) | Treatment | Fast Day | No | 20:10 | 20:00 - 20:59 | Night   | 37,3 | 44 | 45,8 | 45,8 | 18,46 | 528,51 | 128,76 |
| 2019/05/29 | CH2205 | Male | Three y/o | Treatment (Wk 3) | Treatment | Fast Day | No | 20:15 | 20:00 - 20:59 | Night   | 37,5 | 74 | 23,6 | 23,6 | 18,65 | 571,33 | 105,97 |
| 2019/05/29 | CH2206 | Male | Three y/o | Treatment (Wk 3) | Treatment | Fast Day | No | 20:15 | 20:00 - 20:59 | Night   | 37,3 | 45 | 47,8 | 47,8 | 18,46 | 530,47 | 130,23 |
| 2019/05/29 | CH2205 | Male | Three y/o | Treatment (Wk 3) | Treatment | Fast Day | No | 20:20 | 20:00 - 20:59 | Night   | 37,5 | 38 | 17,6 | 17,6 | 18,65 | 515,48 | 95,95  |
| 2019/05/29 | CH2206 | Male | Three y/o | Treatment (Wk 3) | Treatment | Fast Day | No | 20:20 | 20:00 - 20:59 | Night   | 37,3 | 35 | 47,4 | 47,4 | 18,46 | 507,97 | 129,94 |
| 2019/05/29 | CH2205 | Male | Three y/o | Treatment (Wk 3) | Treatment | Fast Day | No | 20:25 | 20:00 - 20:59 | Night   | 37,5 | 56 | 20,4 | 20,4 | 18,65 | 549,01 | 100,99 |
| 2019/05/29 | CH2206 | Male | Three y/o | Treatment (Wk 3) | Treatment | Fast Day | No | 20:25 | 20:00 - 20:59 | Night   | 37,3 | 46 | 48,2 | 48,2 | 18,46 | 532,38 | 130,52 |
| 2019/05/29 | CH2205 | Male | Three y/o | Treatment (Wk 3) | Treatment | Fast Day | No | 20:30 | 20:00 - 20:59 | Night   | 37,5 | 40 | 17,2 | 17,2 | 18,65 | 520,09 | 95,17  |
| 2019/05/29 | CH2206 | Male | Three y/o | Treatment (Wk 3) | Treatment | Fast Day | No | 20:30 | 20:00 - 20:59 | Night   | 37,2 | 46 | 46,4 | 46,4 | 18,36 | 532,38 | 129,21 |
| 2019/05/29 | CH2205 | Male | Three y/o | Treatment (Wk 3) | Treatment | Fast Day | No | 20:35 | 20:00 - 20:59 | Night   | 37,5 | 55 | 22,2 | 22,2 | 18,65 | 547,52 | 103,88 |
| 2019/05/29 | CH2206 | Male | Three y/o | Treatment (Wk 3) | Treatment | Fast Day | No | 20:35 | 20:00 - 20:59 | Night   | 37,2 | 39 | 48,2 | 48,2 | 18,36 | 517,82 | 130,52 |
| 2019/05/29 | CH2205 | Male | Three y/o | Treatment (Wk 3) | Treatment | Fast Day | No | 20:40 | 20:00 - 20:59 | Night   | 37,5 | 39 | 22,6 | 22,6 | 18,65 | 517,82 | 104,49 |
| 2019/05/29 | CH2206 | Male | Three y/o | Treatment (Wk 3) | Treatment | Fast Day | No | 20:40 | 20:00 - 20:59 | Night   | 37,2 | 46 | 43,0 | 43,0 | 18,36 | 532,38 | 126,58 |
| 2019/05/29 | CH2205 | Male | Three y/o | Treatment (Wk 3) | Treatment | Fast Day | No | 20:45 | 20:00 - 20:59 | Night   | 37,5 | 40 | 24,0 | 24,0 | 18,65 | 520,09 | 106,55 |
| 2019/05/29 | CH2206 | Male | Three y/o | Treatment (Wk 3) | Treatment | Fast Day | No | 20:45 | 20:00 - 20:59 | Night   | 37,2 | 37 | 44,2 | 44,2 | 18,36 | 513,06 | 127,53 |
| 2019/05/29 | CH2205 | Male | Three y/o | Treatment (Wk 3) | Treatment | Fast Day | No | 20:50 | 20:00 - 20:59 | Night   | 37,5 | 43 | 24,8 | 24,8 | 18,65 | 526,50 | 107,67 |
| 2019/05/29 | CH2206 | Male | Three y/o | Treatment (Wk 3) | Treatment | Fast Day | No | 20:50 | 20:00 - 20:59 | Night   | 37,1 | 45 | 36,6 | 36,6 | 18,26 | 530,47 | 121,03 |
| 2019/05/29 | CH2205 | Male | Three y/o | Treatment (Wk 3) | Treatment | Fast Day | No | 20:55 | 20:00 - 20:59 | Night   | 37,4 | 56 | 12,8 | 12,8 | 18,55 | 549,01 | 85,12  |
| 2019/05/29 | CH2206 | Male | Three y/o | Treatment (Wk 3) | Treatment | Fast Day | No | 20:55 | 20:00 - 20:59 | Night   | 37,1 | 46 | 41,6 | 41,6 | 18,26 | 532,38 | 125,44 |
| 2019/05/29 | CH2205 | Male | Three y/o | Treatment (Wk 3) | Treatment | Fast Day | No | 21:00 | 21:00 - 21:59 | Night   | 37,4 |    | 6,0  | 6,0  | 18,55 |        | 59,53  |
| 2019/05/29 | CH2206 | Male | Three y/o | Treatment (Wk 3) | Treatment | Fast Day | No | 21:00 | 21:00 - 21:59 | Night   | 37,1 | 43 | 39,4 | 39,4 | 18,26 | 526,50 | 123,57 |
| 2019/05/29 | CH2205 | Male | Three y/o | Treatment (Wk 3) | Treatment | Fast Day | No | 21:05 | 21:00 - 21:59 | Night   | 37,4 |    | 7,2  | 7,2  | 18,55 |        | 65,66  |
| 2019/05/29 | CH2206 | Male | Three y/o | Treatment (Wk 3) | Treatment | Fast Day | No | 21:05 | 21:00 - 21:59 | Night   | 37,2 | 43 | 67,0 | 67,0 | 18,36 | 526,50 | 141,92 |
| 2019/05/29 | CH2205 | Male | Three y/o | Treatment (Wk 3) | Treatment | Fast Day | No | 21:10 | 21:00 - 21:59 | Night   | 37,3 |    | 8,2  | 8,2  | 18,46 |        | 70,05  |
| 2019/05/29 | CH2206 | Male | Three y/o | Treatment (Wk 3) | Treatment | Fast Day | No | 21:10 | 21:00 - 21:59 | Night   | 37,2 | 39 | 66,0 | 66,0 | 18,36 | 517,82 | 141,40 |
| 2019/05/29 | CH2205 | Male | Three y/o | Treatment (Wk 3) | Treatment | Fast Day | No | 21:15 | 21:00 - 21:59 | Night   | 37,3 |    | 8,2  | 8,2  | 18,46 |        | 70,05  |
| 2019/05/29 | CH2206 | Male | Three y/o | Treatment (Wk 3) | Treatment | Fast Day | No | 21:15 | 21:00 - 21:59 | Night   | 37,2 | 46 | 63,0 | 63,0 | 18,36 | 532,38 | 139,78 |
| 2019/05/29 | CH2205 | Male | Three y/o | Treatment (Wk 3) | Treatment | Fast Day | No | 21:20 | 21:00 - 21:59 | Night   | 37,3 | 62 | 7,0  | 7,0  | 18,46 | 557,33 | 64,72  |
| 2019/05/29 | CH2206 | Male | Three y/o | Treatment (Wk 3) | Treatment | Fast Day | No | 21:20 | 21:00 - 21:59 | Night   | 37,2 | 47 | 67,8 | 67,8 | 18,36 | 534,23 | 142,33 |
| 2019/05/29 | CH2205 | Male | Three y/o | Treatment (Wk 3) | Treatment | Fast Day | No | 21:25 | 21:00 - 21:59 | Night   | 37,3 |    | 9,0  | 9,0  | 18,46 |        | 73,19  |
| 2019/05/29 | CH2206 | Male | Three y/o | Treatment (Wk 3) | Treatment | Fast Day | No | 21:25 | 21:00 - 21:59 | Night   | 37,3 | 41 | 67,8 | 67,8 | 18,46 | 522,29 | 142,33 |
| 2019/05/29 | CH2205 | Male | Three y/o | Treatment (Wk 3) | Treatment | Fast Day | No | 21:30 | 21:00 - 21:59 | Night   | 37,3 |    | 7,0  | 7,0  | 18,46 |        | 64,72  |
| 2019/05/29 | CH2206 | Male | Three y/o | Treatment (Wk 3) | Treatment | Fast Day | No | 21:30 | 21:00 - 21:59 | Night   | 37,3 | 67 | 64,4 | 64,4 | 18,46 | 563,53 | 140,55 |
| 2019/05/29 | CH2205 | Male | Three y/o | Treatment (Wk 3) | Treatment | Fast Day | No | 21:35 | 21:00 - 21:59 | Night   | 37,3 |    | 10,6 | 10,6 | 18,46 |        | 78,73  |
| 2019/05/29 | CH2206 | Male | Three y/o | Treatment (Wk 3) | Treatment | Fast Day | No | 21:35 | 21:00 - 21:59 | Night   | 37,3 | 39 | 61,2 | 61,2 | 18,46 | 517,82 | 138,78 |
| 2019/05/29 | CH2205 | Male | Three y/o | Treatment (Wk 3) | Treatment | Fast Day | No | 21:40 | 21:00 - 21:59 | Night   | 37,3 |    | 11,4 | 11,4 | 18,46 |        | 81,19  |
| 2019/05/29 | CH2206 | Male | Three y/o | Treatment (Wk 3) | Treatment | Fast Day | No | 21:40 | 21:00 - 21:59 | Night   | 37,3 | 48 | 64,6 | 64,6 | 18,46 | 536,04 | 140,65 |
| 2019/05/29 | CH2205 | Male | Three y/o | Treatment (Wk 3) | Treatment | Fast Day | No | 21:45 | 21:00 - 21:59 | Night   | 37,3 |    | 11,4 | 11,4 | 18,46 |        | 81,19  |
| 2019/05/29 | CH2206 | Male | Three y/o | Treatment (Wk 3) | Treatment | Fast Day | No | 21:45 | 21:00 - 21:59 | Night   | 37,3 | 44 | 56,8 | 56,8 | 18,46 | 528,51 | 136,20 |
| 2019/05/29 | CH2205 | Male | Three y/o | Treatment (Wk 3) | Treatment | Fast Day | No | 21:50 | 21:00 - 21:59 | Night   | 37,3 |    | 10,4 | 10,4 | 18,46 |        | 78,08  |
| 2019/05/29 | CH2206 | Male | Three y/o | Treatment (Wk 3) | Treatment | Fast Day | No | 21:50 | 21:00 - 21:59 | Night   | 37,3 | 44 | 66,4 | 66,4 | 18,46 | 528,51 | 141,61 |
| 2019/05/29 | CH2205 | Male | Three y/o | Treatment (Wk 3) | Treatment | Fast Day | No | 21:55 | 21:00 - 21:59 | Night   | 37,3 |    | 12,6 | 12,6 | 18,46 |        | 84,59  |
| 2019/05/29 | CH2206 | Male | Three y/o | Treatment (Wk 3) | Treatment | Fast Day | No | 21:55 | 21:00 - 21:59 | Night   | 37,4 | 41 | 64,6 | 64,6 | 18,55 | 522,29 | 140,65 |
| 2019/05/29 | CH2205 | Male | Three y/o | Treatment (Wk 3) | Treatment | Fast Day | No | 22:00 | 22:00 - 22:59 | Night   | 37,3 | 40 | 8,8  | 8,8  | 18,46 | 520,09 | 72,43  |
| 2019/05/29 | CH2206 | Male | Three y/o | Treatment (Wk 3) | Treatment | Fast Day | No | 22:00 | 22:00 - 22:59 | Night   | 37,4 | 51 | 61,4 | 61,4 | 18,55 | 541,20 | 138,89 |
| 2019/05/29 | CH2205 | Male | Three y/o | Treatment (Wk 3) | Treatment | Fast Day | No | 22:05 | 22:00 - 22:59 | Night   | 37,3 |    | 5,8  | 5,8  | 18,46 |        | 58,39  |
| 2019/05/29 | CH2206 | Male | Three y/o | Treatment (Wk 3) | Treatment | Fast Day | No | 22:05 | 22:00 - 22:59 | Night   | 37,4 | 49 | 63,4 | 63,4 | 18,55 | 537,80 | 140,00 |
| 2019/05/29 | CH2205 | Male | Three y/o | Treatment (Wk 3) | Treatment | Fast Day | No | 22:10 | 22:00 - 22:59 | Night   | 37,3 | 75 | 3,8  | 3,8  | 18,46 | 572,36 | 44,22  |
| 2019/05/29 | CH2206 | Male | Three y/o | Treatment (Wk 3) | Treatment | Fast Day | No | 22:10 | 22:00 - 22:59 | Night   | 37,4 | 35 | 69,0 | 69,0 | 18,55 | 507,97 | 142,94 |
| 2019/05/29 | CH2205 | Male | Three y/o | Treatment (Wk 3) | Treatment | Fast Day | No | 22:15 | 22:00 - 22:59 | Night   | 37,3 | 45 | 5,8  | 5,8  | 18,46 | 530,47 | 58,39  |
| 2019/05/29 | CH2206 | Male | Three y/o | Treatment (Wk 3) | Treatment | Fast Day | No | 22:15 | 22:00 - 22:59 | Night   | 37,4 | 47 | 68,2 | 68,2 | 18,55 | 534,23 | 142,53 |
| 2019/05/29 | CH2205 | Male | Three y/o | Treatment (Wk 3) | Treatment | Fast Day | No | 22:20 | 22:00 - 22:59 | Night   | 37,2 | 76 | 5,4  | 5,4  | 18,36 | 573,39 | 55,99  |
| 2019/05/29 | CH2206 | Male | Three y/o | Treatment (Wk 3) | Treatment | Fast Day | No | 22:20 | 22:00 - 22:59 | Night   | 37,3 | 46 | 66,6 | 66,6 | 18,46 | 532,38 | 141,71 |
| 2019/05/29 | CH2205 | Male | Three y/o | Treatment (Wk 3) | Treatment | Fast Day | No | 22:25 | 22:00 - 22:59 | Night   | 37,3 |    | 5,4  | 5,4  | 18,46 |        | 55,99  |
| 2019/05/29 | CH2206 | Male | Three y/o | Treatment (Wk 3) | Treatment | Fast Day | No | 22:25 | 22:00 - 22:59 | Night   | 37,3 | 41 | 49,0 | 49,0 | 18,46 | 522,29 | 131,09 |
| 2019/05/29 | CH2205 | Male | Three y/o | Treatment (Wk 3) | Treatment | Fast Day | No | 22:30 | 22:00 - 22:59 | Night   | 37,3 | 51 | 11,2 | 11,2 | 18,46 | 541,20 | 80,59  |
| 2019/05/29 | CH2206 | Male | Three y/o | Treatment (Wk 3) | Treatment | Fast Day | No | 22:30 | 22:00 - 22:59 | Night   | 37,3 | 41 | 57,6 | 57,6 | 18,46 | 522,29 | 136,68 |
| 2019/05/29 | CH2205 | Male | Three y/o | Treatment (Wk 3) | Treatment | Fast Day | No | 22:35 | 22:00 - 22:59 | Night   | 37,3 | 45 | 5,4  | 5,4  | 18,46 | 530,47 | 55,99  |



|    |            |        |      |           |                  |           |          |    |       |               |               |      |     |      |      |       |        |        |
|----|------------|--------|------|-----------|------------------|-----------|----------|----|-------|---------------|---------------|------|-----|------|------|-------|--------|--------|
|    | 2019/05/29 | CH2206 | Male | Three y/o | Treatment (Wk 3) | Treatment | Fast Day | No | 22:35 | 22:00 - 22:59 | Night         | 37,2 | 47  | 63,6 | 63,6 | 18,36 | 534,23 | 140,11 |
|    | 2019/05/29 | CH2205 | Male | Three y/o | Treatment (Wk 3) | Treatment | Fast Day | No | 22:40 | 22:00 - 22:59 | Night         | 37,3 | 38  | 7,8  | 7,8  | 18,46 | 515,48 | 68,36  |
|    | 2019/05/29 | CH2206 | Male | Three y/o | Treatment (Wk 3) | Treatment | Fast Day | No | 22:40 | 22:00 - 22:59 | Night         | 37,1 | 39  | 61,4 | 61,4 | 18,26 | 517,82 | 138,89 |
|    | 2019/05/29 | CH2205 | Male | Three y/o | Treatment (Wk 3) | Treatment | Fast Day | No | 22:45 | 22:00 - 22:59 | Night         | 37,2 | 41  | 8,2  | 8,2  | 18,36 | 522,29 | 70,05  |
|    | 2019/05/29 | CH2206 | Male | Three y/o | Treatment (Wk 3) | Treatment | Fast Day | No | 22:45 | 22:00 - 22:59 | Night         | 37,0 | 47  | 58,2 | 58,2 | 18,16 | 534,23 | 137,04 |
|    | 2019/05/29 | CH2205 | Male | Three y/o | Treatment (Wk 3) | Treatment | Fast Day | No | 22:50 | 22:00 - 22:59 | Night         | 37,2 | 44  | 18,4 | 18,4 | 18,36 | 528,51 | 97,47  |
|    | 2019/05/29 | CH2206 | Male | Three y/o | Treatment (Wk 3) | Treatment | Fast Day | No | 22:50 | 22:00 - 22:59 | Night         | 36,9 | 36  | 58,4 | 58,4 | 18,06 | 510,56 | 137,16 |
|    | 2019/05/29 | CH2205 | Male | Three y/o | Treatment (Wk 3) | Treatment | Fast Day | No | 22:55 | 22:00 - 22:59 | Night         | 37,3 | 42  | 21,6 | 21,6 | 18,46 | 524,42 | 102,94 |
|    | 2019/05/29 | CH2206 | Male | Three y/o | Treatment (Wk 3) | Treatment | Fast Day | No | 22:55 | 22:00 - 22:59 | Night         | 36,9 | 44  | 58,8 | 58,8 | 18,06 | 528,51 | 137,39 |
|    | 2019/05/29 | CH2205 | Male | Three y/o | Treatment (Wk 3) | Treatment | Fast Day | No | 23:00 | 23:00 - 23:59 | Night         | 37,2 | 76  | 23,0 | 23,0 | 18,36 | 573,39 | 105,09 |
|    | 2019/05/29 | CH2206 | Male | Three y/o | Treatment (Wk 3) | Treatment | Fast Day | No | 23:00 | 23:00 - 23:59 | Night         | 36,8 | 48  | 61,8 | 61,8 | 17,96 | 536,04 | 139,12 |
|    | 2019/05/29 | CH2205 | Male | Three y/o | Treatment (Wk 3) | Treatment | Fast Day | No | 23:05 | 23:00 - 23:59 | Night         | 37,3 | 38  | 22,8 | 22,8 | 18,46 | 515,48 | 104,79 |
|    | 2019/05/29 | CH2206 | Male | Three y/o | Treatment (Wk 3) | Treatment | Fast Day | No | 23:05 | 23:00 - 23:59 | Night         | 36,8 | 45  | 57,4 | 57,4 | 17,96 | 530,47 | 136,56 |
|    | 2019/05/29 | CH2205 | Male | Three y/o | Treatment (Wk 3) | Treatment | Fast Day | No | 23:10 | 23:00 - 23:59 | Night         | 37,3 | 42  | 21,0 | 21,0 | 18,46 | 524,42 | 101,98 |
|    | 2019/05/29 | CH2206 | Male | Three y/o | Treatment (Wk 3) | Treatment | Fast Day | No | 23:10 | 23:00 - 23:59 | Night         | 36,9 | 44  | 59,6 | 59,6 | 18,06 | 528,51 | 137,86 |
|    | 2019/05/29 | CH2205 | Male | Three y/o | Treatment (Wk 3) | Treatment | Fast Day | No | 23:15 | 23:00 - 23:59 | Night         | 37,3 | 71  | 19,4 | 19,4 | 18,46 | 568,10 | 99,28  |
|    | 2019/05/29 | CH2206 | Male | Three y/o | Treatment (Wk 3) | Treatment | Fast Day | No | 23:15 | 23:00 - 23:59 | Night         | 37,0 | 38  | 59,4 | 59,4 | 18,16 | 515,48 | 137,75 |
|    | 2019/05/29 | CH2205 | Male | Three y/o | Treatment (Wk 3) | Treatment | Fast Day | No | 23:20 | 23:00 - 23:59 | Night         | 37,3 | 46  | 20,0 | 20,0 | 18,46 | 532,38 | 100,31 |
|    | 2019/05/29 | CH2206 | Male | Three y/o | Treatment (Wk 3) | Treatment | Fast Day | No | 23:20 | 23:00 - 23:59 | Night         | 36,9 | 44  | 58,8 | 58,8 | 18,06 | 528,51 | 137,39 |
|    | 2019/05/29 | CH2205 | Male | Three y/o | Treatment (Wk 3) | Treatment | Fast Day | No | 23:25 | 23:00 - 23:59 | Night         | 37,4 | 65  | 18,2 | 18,2 | 18,55 | 561,12 | 97,10  |
|    | 2019/05/29 | CH2206 | Male | Three y/o | Treatment (Wk 3) | Treatment | Fast Day | No | 23:25 | 23:00 - 23:59 | Night         | 36,9 | 50  | 64,8 | 64,8 | 18,06 | 539,52 | 140,76 |
|    | 2019/05/29 | CH2205 | Male | Three y/o | Treatment (Wk 3) | Treatment | Fast Day | No | 23:30 | 23:00 - 23:59 | Night         | 37,4 | 50  | 14,0 | 14,0 | 18,55 | 539,52 | 88,17  |
|    | 2019/05/29 | CH2206 | Male | Three y/o | Treatment (Wk 3) | Treatment | Fast Day | No | 23:30 | 23:00 - 23:59 | Night         | 36,8 | 41  | 57,0 | 57,0 | 17,96 | 522,29 | 136,32 |
|    | 2019/05/29 | CH2205 | Male | Three y/o | Treatment (Wk 3) | Treatment | Fast Day | No | 23:35 | 23:00 - 23:59 | Night         | 37,4 | 41  | 15,8 | 15,8 | 18,55 | 522,29 | 92,28  |
|    | 2019/05/29 | CH2206 | Male | Three y/o | Treatment (Wk 3) | Treatment | Fast Day | No | 23:35 | 23:00 - 23:59 | Night         | 36,8 | 40  | 56,2 | 56,2 | 17,96 | 520,09 | 135,83 |
|    | 2019/05/29 | CH2205 | Male | Three y/o | Treatment (Wk 3) | Treatment | Fast Day | No | 23:40 | 23:00 - 23:59 | Night         | 37,3 | 39  | 13,6 | 13,6 | 18,46 | 517,82 | 87,18  |
|    | 2019/05/29 | CH2206 | Male | Three y/o | Treatment (Wk 3) | Treatment | Fast Day | No | 23:40 | 23:00 - 23:59 | Night         | 36,6 | 43  | 65,6 | 65,6 | 17,77 | 526,50 | 141,19 |
|    | 2019/05/29 | CH2205 | Male | Three y/o | Treatment (Wk 3) | Treatment | Fast Day | No | 23:45 | 23:00 - 23:59 | Night         | 37,3 | 51  | 11,2 | 11,2 | 18,46 | 541,20 | 80,59  |
|    | 2019/05/29 | CH2206 | Male | Three y/o | Treatment (Wk 3) | Treatment | Fast Day | No | 23:45 | 23:00 - 23:59 | Night         | 36,6 | 102 | 18,2 | 18,2 | 17,77 | 595,30 | 97,10  |
|    | 2019/05/29 | CH2205 | Male | Three y/o | Treatment (Wk 3) | Treatment | Fast Day | No | 23:50 | 23:00 - 23:59 | Night         | 37,3 | 41  | 21,4 | 21,4 | 18,46 | 522,29 | 102,63 |
|    | 2019/05/29 | CH2206 | Male | Three y/o | Treatment (Wk 3) | Treatment | Fast Day | No | 23:50 | 23:00 - 23:59 | Night         | 36,8 | 40  | 9,6  | 9,6  | 17,96 | 520,09 | 75,37  |
|    | 2019/05/29 | CH2205 | Male | Three y/o | Treatment (Wk 3) | Treatment | Fast Day | No | 23:55 | 23:00 - 23:59 | Night         | 37,3 | 40  | 18,8 | 18,8 | 18,46 | 520,09 | 98,20  |
|    | 2019/05/29 | CH2206 | Male | Three y/o | Treatment (Wk 3) | Treatment | Fast Day | No | 23:55 | 23:00 - 23:59 | Night         | 36,9 | 42  | 12,8 | 12,8 | 18,06 | 524,42 | 85,12  |
| 16 | 2019/05/30 | CH2205 | Male | Three y/o | Treatment (Wk 3) | Treatment | Feed Day | No | 00:00 | 00:00 - 00:59 | Early Morning | 37,3 | 53  | 20,2 | 20,2 | 18,46 | 544,43 | 100,65 |
|    | 2019/05/30 | CH2206 | Male | Three y/o | Treatment (Wk 3) | Treatment | Feed Day | No | 00:00 | 00:00 - 00:59 | Early Morning | 37,0 | 61  | 25,2 | 25,2 | 18,16 | 556,01 | 108,22 |
|    | 2019/05/30 | CH2205 | Male | Three y/o | Treatment (Wk 3) | Treatment | Feed Day | No | 00:05 | 00:00 - 00:59 | Early Morning | 37,3 | 44  | 15,2 | 15,2 | 18,46 | 528,51 | 90,96  |
|    | 2019/05/30 | CH2206 | Male | Three y/o | Treatment (Wk 3) | Treatment | Feed Day | No | 00:05 | 00:00 - 00:59 | Early Morning | 37,0 | 76  | 25,6 | 25,6 | 18,16 | 573,39 | 108,76 |
|    | 2019/05/30 | CH2205 | Male | Three y/o | Treatment (Wk 3) | Treatment | Feed Day | No | 00:10 | 00:00 - 00:59 | Early Morning | 37,3 | 51  | 11,6 | 11,6 | 18,46 | 541,20 | 81,78  |
|    | 2019/05/30 | CH2206 | Male | Three y/o | Treatment (Wk 3) | Treatment | Feed Day | No | 00:10 | 00:00 - 00:59 | Early Morning | 37,1 | 70  | 16,0 | 16,0 | 18,26 | 566,99 | 92,71  |
|    | 2019/05/30 | CH2205 | Male | Three y/o | Treatment (Wk 3) | Treatment | Feed Day | No | 00:15 | 00:00 - 00:59 | Early Morning | 37,3 | 51  | 13,2 | 13,2 | 18,46 | 541,20 | 86,17  |
|    | 2019/05/30 | CH2206 | Male | Three y/o | Treatment (Wk 3) | Treatment | Feed Day | No | 00:15 | 00:00 - 00:59 | Early Morning | 37,1 | 45  | 5,6  | 5,6  | 18,26 | 530,47 | 57,21  |
|    | 2019/05/30 | CH2205 | Male | Three y/o | Treatment (Wk 3) | Treatment | Feed Day | No | 00:20 | 00:00 - 00:59 | Early Morning | 37,2 | 44  | 8,8  | 8,8  | 18,36 | 528,51 | 72,43  |
|    | 2019/05/30 | CH2206 | Male | Three y/o | Treatment (Wk 3) | Treatment | Feed Day | No | 00:20 | 00:00 - 00:59 | Early Morning | 37,3 | 44  | 3,6  | 3,6  | 18,46 | 528,51 | 42,42  |
|    | 2019/05/30 | CH2205 | Male | Three y/o | Treatment (Wk 3) | Treatment | Feed Day | No | 00:25 | 00:00 - 00:59 | Early Morning | 37,2 | 137 | 40,6 | 40,6 | 18,36 | 615,83 | 124,60 |
|    | 2019/05/30 | CH2206 | Male | Three y/o | Treatment (Wk 3) | Treatment | Feed Day | No | 00:25 | 00:00 - 00:59 | Early Morning | 37,3 | 169 | 15,0 | 15,0 | 18,46 | 629,60 | 90,51  |
|    | 2019/05/30 | CH2205 | Male | Three y/o | Treatment (Wk 3) | Treatment | Feed Day | No | 00:30 | 00:00 - 00:59 | Early Morning | 37,3 |     | 22,2 | 22,2 | 18,46 |        | 103,88 |
|    | 2019/05/30 | CH2206 | Male | Three y/o | Treatment (Wk 3) | Treatment | Feed Day | No | 00:30 | 00:00 - 00:59 | Early Morning | 37,3 | 48  | 26,2 | 26,2 | 18,46 | 536,04 | 109,55 |
|    | 2019/05/30 | CH2205 | Male | Three y/o | Treatment (Wk 3) | Treatment | Feed Day | No | 00:35 | 00:00 - 00:59 | Early Morning | 37,3 |     | 18,0 | 18,0 | 18,46 |        | 96,72  |
|    | 2019/05/30 | CH2206 | Male | Three y/o | Treatment (Wk 3) | Treatment | Feed Day | No | 00:35 | 00:00 - 00:59 | Early Morning | 37,3 | 49  | 28,6 | 28,6 | 18,46 | 537,80 | 112,56 |
|    | 2019/05/30 | CH2205 | Male | Three y/o | Treatment (Wk 3) | Treatment | Feed Day | No | 00:40 | 00:00 - 00:59 | Early Morning | 37,3 |     | 27,6 | 27,6 | 18,46 |        | 111,33 |
|    | 2019/05/30 | CH2206 | Male | Three y/o | Treatment (Wk 3) | Treatment | Feed Day | No | 00:40 | 00:00 - 00:59 | Early Morning | 37,3 | 57  | 30,6 | 30,6 | 18,46 | 550,47 | 114,87 |
|    | 2019/05/30 | CH2205 | Male | Three y/o | Treatment (Wk 3) | Treatment | Feed Day | No | 00:45 | 00:00 - 00:59 | Early Morning | 37,2 |     | 25,2 | 25,2 | 18,36 |        | 108,22 |
|    | 2019/05/30 | CH2206 | Male | Three y/o | Treatment (Wk 3) | Treatment | Feed Day | No | 00:45 | 00:00 - 00:59 | Early Morning | 37,3 | 46  | 27,0 | 27,0 | 18,46 | 532,38 | 110,58 |
|    | 2019/05/30 | CH2205 | Male | Three y/o | Treatment (Wk 3) | Treatment | Feed Day | No | 00:50 | 00:00 - 00:59 | Early Morning | 37,2 |     | 21,6 | 21,6 | 18,36 |        | 102,94 |
|    | 2019/05/30 | CH2206 | Male | Three y/o | Treatment (Wk 3) | Treatment | Feed Day | No | 00:50 | 00:00 - 00:59 | Early Morning | 37,3 | 39  | 19,4 | 19,4 | 18,46 | 517,82 | 99,28  |
|    | 2019/05/30 | CH2205 | Male | Three y/o | Treatment (Wk 3) | Treatment | Feed Day | No | 00:55 | 00:00 - 00:59 | Early Morning | 37,2 |     | 20,0 | 20,0 | 18,36 |        | 100,31 |
|    | 2019/05/30 | CH2206 | Male | Three y/o | Treatment (Wk 3) | Treatment | Feed Day | No | 00:55 | 00:00 - 00:59 | Early Morning | 37,3 | 47  | 9,0  | 9,0  | 18,46 | 534,23 | 73,19  |
|    | 2019/05/30 | CH2205 | Male | Three y/o | Treatment (Wk 3) | Treatment | Feed Day | No | 01:00 | 01:00 - 01:59 | Early Morning | 37,2 | 50  | 22,4 | 22,4 | 18,36 | 539,52 | 104,19 |
|    | 2019/05/30 | CH2206 | Male | Three y/o | Treatment (Wk 3) | Treatment | Feed Day | No | 01:   |               |               |      |     |      |      |       |        |        |



|            |        |      |           |                  |           |          |    |       |               |               |      |     |       |       |       |        |        |
|------------|--------|------|-----------|------------------|-----------|----------|----|-------|---------------|---------------|------|-----|-------|-------|-------|--------|--------|
| 2019/05/30 | CH2206 | Male | Three y/o | Treatment (Wk 3) | Treatment | Feed Day | No | 01:30 | 01:00 - 01:59 | Early Morning | 37,3 | 49  | 65,2  | 65,2  | 18,46 | 537,80 | 140,97 |
| 2019/05/30 | CH2205 | Male | Three y/o | Treatment (Wk 3) | Treatment | Feed Day | No | 01:35 | 01:00 - 01:59 | Early Morning | 37,2 |     | 15,0  | 15,0  | 18,36 |        | 90,51  |
| 2019/05/30 | CH2206 | Male | Three y/o | Treatment (Wk 3) | Treatment | Feed Day | No | 01:35 | 01:00 - 01:59 | Early Morning | 37,3 |     | 65,2  | 65,2  | 18,46 |        | 140,97 |
| 2019/05/30 | CH2205 | Male | Three y/o | Treatment (Wk 3) | Treatment | Feed Day | No | 01:40 | 01:00 - 01:59 | Early Morning | 37,3 | 48  | 3,8   | 3,8   | 18,46 | 536,04 | 44,22  |
| 2019/05/30 | CH2206 | Male | Three y/o | Treatment (Wk 3) | Treatment | Feed Day | No | 01:40 | 01:00 - 01:59 | Early Morning | 37,3 | 42  | 61,8  | 61,8  | 18,46 | 524,42 | 139,12 |
| 2019/05/30 | CH2205 | Male | Three y/o | Treatment (Wk 3) | Treatment | Feed Day | No | 01:45 | 01:00 - 01:59 | Early Morning | 37,3 | 57  | 5,0   | 5,0   | 18,46 | 550,47 | 53,41  |
| 2019/05/30 | CH2206 | Male | Three y/o | Treatment (Wk 3) | Treatment | Feed Day | No | 01:45 | 01:00 - 01:59 | Early Morning | 37,3 | 40  | 52,0  | 52,0  | 18,46 | 520,09 | 133,14 |
| 2019/05/30 | CH2205 | Male | Three y/o | Treatment (Wk 3) | Treatment | Feed Day | No | 01:50 | 01:00 - 01:59 | Early Morning | 37,2 | 51  | 6,8   | 6,8   | 18,36 | 541,20 | 63,74  |
| 2019/05/30 | CH2206 | Male | Three y/o | Treatment (Wk 3) | Treatment | Feed Day | No | 01:50 | 01:00 - 01:59 | Early Morning | 37,3 | 57  | 59,4  | 59,4  | 18,46 | 550,47 | 137,75 |
| 2019/05/30 | CH2205 | Male | Three y/o | Treatment (Wk 3) | Treatment | Feed Day | No | 01:55 | 01:00 - 01:59 | Early Morning | 37,2 |     | 6,2   | 6,2   | 18,36 |        | 60,63  |
| 2019/05/30 | CH2206 | Male | Three y/o | Treatment (Wk 3) | Treatment | Feed Day | No | 01:55 | 01:00 - 01:59 | Early Morning | 37,3 | 64  | 58,8  | 58,8  | 18,46 | 559,88 | 137,39 |
| 2019/05/30 | CH2205 | Male | Three y/o | Treatment (Wk 3) | Treatment | Feed Day | No | 02:00 | 02:00 - 02:59 | Early Morning | 37,2 | 50  | 4,8   | 4,8   | 18,36 | 539,52 | 52,04  |
| 2019/05/30 | CH2206 | Male | Three y/o | Treatment (Wk 3) | Treatment | Feed Day | No | 02:00 | 02:00 - 02:59 | Early Morning | 37,3 | 40  | 57,6  | 57,6  | 18,46 | 520,09 | 136,68 |
| 2019/05/30 | CH2205 | Male | Three y/o | Treatment (Wk 3) | Treatment | Feed Day | No | 02:05 | 02:00 - 02:59 | Early Morning | 37,2 | 55  | 88,6  | 88,6  | 18,36 | 547,52 | 151,63 |
| 2019/05/30 | CH2206 | Male | Three y/o | Treatment (Wk 3) | Treatment | Feed Day | No | 02:05 | 02:00 - 02:59 | Early Morning | 37,2 | 51  | 57,0  | 57,0  | 18,36 | 541,20 | 136,32 |
| 2019/05/30 | CH2205 | Male | Three y/o | Treatment (Wk 3) | Treatment | Feed Day | No | 02:10 | 02:00 - 02:59 | Early Morning | 37,2 | 42  | 8,6   | 8,6   | 18,36 | 524,42 | 71,66  |
| 2019/05/30 | CH2206 | Male | Three y/o | Treatment (Wk 3) | Treatment | Feed Day | No | 02:10 | 02:00 - 02:59 | Early Morning | 37,2 | 63  | 67,4  | 67,4  | 18,36 | 558,62 | 142,12 |
| 2019/05/30 | CH2205 | Male | Three y/o | Treatment (Wk 3) | Treatment | Feed Day | No | 02:15 | 02:00 - 02:59 | Early Morning | 37,2 | 44  | 10,0  | 10,0  | 18,36 | 528,51 | 76,76  |
| 2019/05/30 | CH2206 | Male | Three y/o | Treatment (Wk 3) | Treatment | Feed Day | No | 02:15 | 02:00 - 02:59 | Early Morning | 37,3 | 48  | 60,6  | 60,6  | 18,46 | 536,04 | 138,44 |
| 2019/05/30 | CH2205 | Male | Three y/o | Treatment (Wk 3) | Treatment | Feed Day | No | 02:20 | 02:00 - 02:59 | Early Morning | 37,2 | 43  | 15,8  | 15,8  | 18,36 | 526,50 | 92,28  |
| 2019/05/30 | CH2206 | Male | Three y/o | Treatment (Wk 3) | Treatment | Feed Day | No | 02:20 | 02:00 - 02:59 | Early Morning | 37,3 | 36  | 66,4  | 66,4  | 18,46 | 510,56 | 141,61 |
| 2019/05/30 | CH2205 | Male | Three y/o | Treatment (Wk 3) | Treatment | Feed Day | No | 02:25 | 02:00 - 02:59 | Early Morning | 37,2 | 38  | 12,0  | 12,0  | 18,36 | 515,48 | 82,93  |
| 2019/05/30 | CH2206 | Male | Three y/o | Treatment (Wk 3) | Treatment | Feed Day | No | 02:25 | 02:00 - 02:59 | Early Morning | 37,3 | 38  | 65,2  | 65,2  | 18,46 | 515,48 | 140,97 |
| 2019/05/30 | CH2205 | Male | Three y/o | Treatment (Wk 3) | Treatment | Feed Day | No | 02:30 | 02:00 - 02:59 | Early Morning | 37,2 | 52  | 10,8  | 10,8  | 18,36 | 542,83 | 79,36  |
| 2019/05/30 | CH2206 | Male | Three y/o | Treatment (Wk 3) | Treatment | Feed Day | No | 02:30 | 02:00 - 02:59 | Early Morning | 37,3 | 48  | 64,0  | 64,0  | 18,46 | 536,04 | 140,33 |
| 2019/05/30 | CH2205 | Male | Three y/o | Treatment (Wk 3) | Treatment | Feed Day | No | 02:35 | 02:00 - 02:59 | Early Morning | 37,2 | 45  | 12,0  | 12,0  | 18,36 | 530,47 | 82,93  |
| 2019/05/30 | CH2206 | Male | Three y/o | Treatment (Wk 3) | Treatment | Feed Day | No | 02:35 | 02:00 - 02:59 | Early Morning | 37,3 | 77  | 64,8  | 64,8  | 18,46 | 574,39 | 140,76 |
| 2019/05/30 | CH2205 | Male | Three y/o | Treatment (Wk 3) | Treatment | Feed Day | No | 02:40 | 02:00 - 02:59 | Early Morning | 37,2 | 51  | 15,0  | 15,0  | 18,36 | 541,20 | 90,51  |
| 2019/05/30 | CH2206 | Male | Three y/o | Treatment (Wk 3) | Treatment | Feed Day | No | 02:40 | 02:00 - 02:59 | Early Morning | 37,3 | 52  | 59,2  | 59,2  | 18,46 | 542,83 | 137,63 |
| 2019/05/30 | CH2205 | Male | Three y/o | Treatment (Wk 3) | Treatment | Feed Day | No | 02:45 | 02:00 - 02:59 | Early Morning | 37,2 | 47  | 15,0  | 15,0  | 18,36 | 534,23 | 90,51  |
| 2019/05/30 | CH2206 | Male | Three y/o | Treatment (Wk 3) | Treatment | Feed Day | No | 02:45 | 02:00 - 02:59 | Early Morning | 37,2 | 44  | 55,2  | 55,2  | 18,36 | 528,51 | 135,21 |
| 2019/05/30 | CH2205 | Male | Three y/o | Treatment (Wk 3) | Treatment | Feed Day | No | 02:50 | 02:00 - 02:59 | Early Morning | 37,2 | 44  | 18,2  | 18,2  | 18,36 | 528,51 | 97,10  |
| 2019/05/30 | CH2206 | Male | Three y/o | Treatment (Wk 3) | Treatment | Feed Day | No | 02:50 | 02:00 - 02:59 | Early Morning | 37,2 | 48  | 52,6  | 52,6  | 18,36 | 536,04 | 133,54 |
| 2019/05/30 | CH2205 | Male | Three y/o | Treatment (Wk 3) | Treatment | Feed Day | No | 02:55 | 02:00 - 02:59 | Early Morning | 37,2 | 63  | 21,0  | 21,0  | 18,36 | 558,62 | 101,98 |
| 2019/05/30 | CH2206 | Male | Three y/o | Treatment (Wk 3) | Treatment | Feed Day | No | 02:55 | 02:00 - 02:59 | Early Morning | 37,2 | 44  | 51,0  | 51,0  | 18,36 | 528,51 | 132,47 |
| 2019/05/30 | CH2205 | Male | Three y/o | Treatment (Wk 3) | Treatment | Feed Day | No | 03:00 | 03:00 - 03:59 | Early Morning | 37,2 | 54  | 16,0  | 16,0  | 18,36 | 545,99 | 92,71  |
| 2019/05/30 | CH2206 | Male | Three y/o | Treatment (Wk 3) | Treatment | Feed Day | No | 03:00 | 03:00 - 03:59 | Early Morning | 37,1 | 51  | 54,4  | 54,4  | 18,26 | 541,20 | 134,70 |
| 2019/05/30 | CH2205 | Male | Three y/o | Treatment (Wk 3) | Treatment | Feed Day | No | 03:05 | 03:00 - 03:59 | Early Morning | 37,1 | 48  | 21,8  | 21,8  | 18,26 | 536,04 | 103,26 |
| 2019/05/30 | CH2206 | Male | Three y/o | Treatment (Wk 3) | Treatment | Feed Day | No | 03:05 | 03:00 - 03:59 | Early Morning | 37,0 | 46  | 27,4  | 27,4  | 18,16 | 532,38 | 111,09 |
| 2019/05/30 | CH2205 | Male | Three y/o | Treatment (Wk 3) | Treatment | Feed Day | No | 03:10 | 03:00 - 03:59 | Early Morning | 37,2 | 76  | 16,0  | 16,0  | 18,36 | 573,39 | 92,71  |
| 2019/05/30 | CH2206 | Male | Three y/o | Treatment (Wk 3) | Treatment | Feed Day | No | 03:10 | 03:00 - 03:59 | Early Morning | 37,0 | 46  | 28,4  | 28,4  | 18,16 | 532,38 | 112,31 |
| 2019/05/30 | CH2205 | Male | Three y/o | Treatment (Wk 3) | Treatment | Feed Day | No | 03:15 | 03:00 - 03:59 | Early Morning | 37,2 | 41  | 18,8  | 18,8  | 18,36 | 522,29 | 98,20  |
| 2019/05/30 | CH2206 | Male | Three y/o | Treatment (Wk 3) | Treatment | Feed Day | No | 03:15 | 03:00 - 03:59 | Early Morning | 37,0 | 44  | 27,4  | 27,4  | 18,16 | 528,51 | 111,09 |
| 2019/05/30 | CH2205 | Male | Three y/o | Treatment (Wk 3) | Treatment | Feed Day | No | 03:20 | 03:00 - 03:59 | Early Morning | 37,1 | 78  | 22,6  | 22,6  | 18,26 | 575,38 | 104,49 |
| 2019/05/30 | CH2206 | Male | Three y/o | Treatment (Wk 3) | Treatment | Feed Day | No | 03:20 | 03:00 - 03:59 | Early Morning | 37,1 | 131 | 91,4  | 91,4  | 18,26 | 612,80 | 152,71 |
| 2019/05/30 | CH2205 | Male | Three y/o | Treatment (Wk 3) | Treatment | Feed Day | No | 03:25 | 03:00 - 03:59 | Early Morning | 37,2 | 62  | 31,8  | 31,8  | 18,36 | 557,33 | 116,20 |
| 2019/05/30 | CH2206 | Male | Three y/o | Treatment (Wk 3) | Treatment | Feed Day | No | 03:25 | 03:00 - 03:59 | Early Morning | 37,2 | 121 | 92,6  | 92,6  | 18,36 | 607,35 | 153,16 |
| 2019/05/30 | CH2205 | Male | Three y/o | Treatment (Wk 3) | Treatment | Feed Day | No | 03:30 | 03:00 - 03:59 | Early Morning | 37,2 |     | 54,8  | 54,8  | 18,36 |        | 134,96 |
| 2019/05/30 | CH2206 | Male | Three y/o | Treatment (Wk 3) | Treatment | Feed Day | No | 03:30 | 03:00 - 03:59 | Early Morning | 37,1 | 104 | 108,2 | 108,2 | 18,26 | 596,69 | 158,59 |
| 2019/05/30 | CH2205 | Male | Three y/o | Treatment (Wk 3) | Treatment | Feed Day | No | 03:35 | 03:00 - 03:59 | Early Morning | 37,2 | 129 | 109,8 | 109,8 | 18,36 | 611,75 | 159,11 |
| 2019/05/30 | CH2206 | Male | Three y/o | Treatment (Wk 3) | Treatment | Feed Day | No | 03:35 | 03:00 - 03:59 | Early Morning | 37,1 | 126 | 129,4 | 129,4 | 18,26 | 610,14 | 164,84 |
| 2019/05/30 | CH2205 | Male | Three y/o | Treatment (Wk 3) | Treatment | Feed Day | No | 03:40 | 03:00 - 03:59 | Early Morning | 37,2 | 60  | 102,2 | 102,2 | 18,36 | 554,67 | 156,60 |
| 2019/05/30 | CH2206 | Male | Three y/o | Treatment (Wk 3) | Treatment | Feed Day | No | 03:40 | 03:00 - 03:59 | Early Morning | 37,3 | 125 | 53,2  | 53,2  | 18,46 | 609,60 | 133,93 |
| 2019/05/30 | CH2205 | Male | Three y/o | Treatment (Wk 3) | Treatment | Feed Day | No | 03:45 | 03:00 - 03:59 | Early Morning | 37,3 | 107 | 123,6 | 123,6 | 18,46 | 598,73 | 163,24 |
| 2019/05/30 | CH2206 | Male | Three y/o | Treatment (Wk 3) | Treatment | Feed Day | No | 03:45 | 03:00 - 03:59 | Early Morning | 37,3 | 118 | 32,4  | 32,4  | 18,46 | 605,61 | 116,84 |
| 2019/05/30 | CH2205 | Male | Three y/o | Treatment (Wk 3) | Treatment | Feed Day | No | 03:50 | 03:00 - 03:59 | Early Morning | 37,1 | 81  | 96,2  | 96,2  | 18,26 | 578,26 | 154,49 |
| 2019/05/30 | CH2206 | Male | Three y/o | Treatment (Wk 3) | Treatment | Feed Day | No | 03:50 | 03:00 - 03:59 | Early Morning | 37,3 | 115 | 91,2  | 91,2  | 18,46 | 603,82 | 152,63 |
| 2019/05/30 | CH2205 | Male | Three y/o | Treatment (Wk 3) | Treatment | Feed Day | No | 03:55 | 03:00 - 03:59 | Early Morning | 37,2 | 90  | 90,0  | 90,0  | 18,36 | 586,16 | 152,17 |
| 2019/05/30 | CH2206 | Male | Three y/o | Treatment (Wk 3) | Treatment | Feed Day | No | 03:55 | 03:00 - 03:59 | Early Morning | 37,4 | 119 | 62,8  | 62,8  | 18,55 | 606,20 | 139,67 |
| 2019/05/30 | CH2205 | Male | Three y/o | Treatment (Wk 3) | Treatment | Feed Day | No | 04:00 | 04:00 - 04:59 | Morning       | 37,3 | 110 | 129,8 | 129,8 | 18,46 | 600,69 | 164,95 |
| 2019/05/30 | CH2206 | Male | Three y/o | Treatment (Wk 3) | Treatment | Feed Day | No | 04:00 | 04:00 - 04:59 | Morning       | 37,4 | 135 | 111,6 | 111,6 | 18,55 | 614,84 | 159,67 |
| 2019/05/30 | CH2205 | Male | Three y/o | Treatment (Wk 3) | Treatment | Feed Day | No | 04:05 | 04:00 - 04:59 | Morning       | 37,4 | 76  | 19,6  | 19,6  | 18,55 | 573,39 | 99,63  |
| 2019/05/30 | CH2206 | Male | Three y/o | Treatment (Wk 3) | Treatment | Feed Day | No | 04:05 | 04:00 - 04:59 | Morning       | 37,7 | 112 | 101,2 | 101,2 | 18,85 | 601,96 | 156,26 |
| 2019/05/30 | CH2205 | Male | Three y/o | Treatment (Wk 3) | Treatment | Feed Day | No | 04:10 | 04:00 - 04:59 | Morning       | 37,4 | 119 | 225,2 | 225,2 | 18,55 | 606,20 | 184,30 |
| 2019/05/30 | CH2206 | Male | Three y/o | Treatment (Wk 3) | Treatment | Feed Day | No | 04:10 | 04:00 - 04:59 | Morning       | 37,7 | 118 | 54,6  | 54,6  | 18,85 | 605,61 | 134,83 |
| 2019/05/30 | CH2205 | Male | Three y/o | Treatment (Wk 3) | Treatment | Feed Day | No | 04:15 | 04:00 - 04:59 | Morning       | 37,4 | 52  | 36,2  | 36,2  | 18,55 | 542,83 | 120,65 |
| 2019/05/30 | CH2206 | Male | Three y/o | Treatment (Wk 3) | Treatment | Feed Day | No | 04:15 | 04:00 - 04:59 | Morning       | 37,7 | 98  | 146,6 | 146,6 | 18,85 | 592,41 | 169,21 |
| 2019/05/30 | CH2205 | Male | Three y/o | Treatment (Wk 3) | Treatment | Feed Day | No | 04:20 | 04:00 - 04:59 | Morning       | 37,3 | 73  | 13,2  | 13,2  | 18,46 | 570,27 | 86,17  |
| 2019/05/30 | CH2206 | Male | Three y/o | Treatment (Wk 3) | Treatment | Feed Day | No | 04:20 | 04:00 - 04:59 | Morning       | 37,5 | 92  | 73,8  | 73,8  | 18,65 | 587,78 | 145,27 |
| 2019/05/30 | CH2205 | Male | Three y/o | Treatment (Wk 3) | Treatment | Feed Day | No | 04:25 | 04:00 - 04:59 | Morning       | 37,1 | 47  | 10,8  | 10,8  | 18,26 | 534,23 | 79,36  |



|            |        |      |           |                  |           |          |    |       |               |         |      |     |       |       |       |        |        |
|------------|--------|------|-----------|------------------|-----------|----------|----|-------|---------------|---------|------|-----|-------|-------|-------|--------|--------|
| 2019/05/30 | CH2206 | Male | Three y/o | Treatment (Wk 3) | Treatment | Feed Day | No | 04:25 | 04:00 - 04:59 | Morning | 37,2 | 82  | 67,4  | 67,4  | 18,36 | 579,19 | 142,12 |
| 2019/05/30 | CH2205 | Male | Three y/o | Treatment (Wk 3) | Treatment | Feed Day | No | 04:30 | 04:00 - 04:59 | Morning | 37,1 | 48  | 8,8   | 8,8   | 18,26 | 536,04 | 72,43  |
| 2019/05/30 | CH2206 | Male | Three y/o | Treatment (Wk 3) | Treatment | Feed Day | No | 04:30 | 04:00 - 04:59 | Morning | 37,1 | 53  | 45,8  | 45,8  | 18,26 | 544,43 | 128,76 |
| 2019/05/30 | CH2205 | Male | Three y/o | Treatment (Wk 3) | Treatment | Feed Day | No | 04:35 | 04:00 - 04:59 | Morning | 37,1 | 49  | 11,6  | 11,6  | 18,26 | 537,80 | 81,78  |
| 2019/05/30 | CH2206 | Male | Three y/o | Treatment (Wk 3) | Treatment | Feed Day | No | 04:35 | 04:00 - 04:59 | Morning | 37,3 | 47  | 54,8  | 54,8  | 18,46 | 534,23 | 134,96 |
| 2019/05/30 | CH2205 | Male | Three y/o | Treatment (Wk 3) | Treatment | Feed Day | No | 04:40 | 04:00 - 04:59 | Morning | 37,2 | 51  | 12,8  | 12,8  | 18,36 | 541,20 | 85,12  |
| 2019/05/30 | CH2206 | Male | Three y/o | Treatment (Wk 3) | Treatment | Feed Day | No | 04:40 | 04:00 - 04:59 | Morning | 37,2 | 46  | 14,8  | 14,8  | 18,36 | 532,38 | 90,05  |
| 2019/05/30 | CH2205 | Male | Three y/o | Treatment (Wk 3) | Treatment | Feed Day | No | 04:45 | 04:00 - 04:59 | Morning | 37,2 | 40  | 11,2  | 11,2  | 18,36 | 520,09 | 80,59  |
| 2019/05/30 | CH2206 | Male | Three y/o | Treatment (Wk 3) | Treatment | Feed Day | No | 04:45 | 04:00 - 04:59 | Morning | 37,2 | 46  | 8,6   | 8,6   | 18,36 | 532,38 | 71,66  |
| 2019/05/30 | CH2205 | Male | Three y/o | Treatment (Wk 3) | Treatment | Feed Day | No | 04:50 | 04:00 - 04:59 | Morning | 37,2 | 44  | 8,4   | 8,4   | 18,36 | 528,51 | 70,86  |
| 2019/05/30 | CH2206 | Male | Three y/o | Treatment (Wk 3) | Treatment | Feed Day | No | 04:50 | 04:00 - 04:59 | Morning | 37,3 | 46  | 12,8  | 12,8  | 18,46 | 532,38 | 85,12  |
| 2019/05/30 | CH2205 | Male | Three y/o | Treatment (Wk 3) | Treatment | Feed Day | No | 04:55 | 04:00 - 04:59 | Morning | 37,3 | 38  | 10,0  | 10,0  | 18,46 | 515,48 | 76,76  |
| 2019/05/30 | CH2206 | Male | Three y/o | Treatment (Wk 3) | Treatment | Feed Day | No | 04:55 | 04:00 - 04:59 | Morning | 37,3 | 46  | 13,6  | 13,6  | 18,46 | 532,38 | 87,18  |
| 2019/05/30 | CH2205 | Male | Three y/o | Treatment (Wk 3) | Treatment | Feed Day | No | 05:00 | 05:00 - 05:59 | Morning | 37,3 | 51  | 8,0   | 8,0   | 18,46 | 541,20 | 69,22  |
| 2019/05/30 | CH2206 | Male | Three y/o | Treatment (Wk 3) | Treatment | Feed Day | No | 05:00 | 05:00 - 05:59 | Morning | 37,3 | 52  | 15,0  | 15,0  | 18,46 | 542,83 | 90,51  |
| 2019/05/30 | CH2205 | Male | Three y/o | Treatment (Wk 3) | Treatment | Feed Day | No | 05:05 | 05:00 - 05:59 | Morning | 37,3 | 48  | 11,2  | 11,2  | 18,46 | 536,04 | 80,59  |
| 2019/05/30 | CH2206 | Male | Three y/o | Treatment (Wk 3) | Treatment | Feed Day | No | 05:05 | 05:00 - 05:59 | Morning | 37,3 | 43  | 14,4  | 14,4  | 18,46 | 526,50 | 89,12  |
| 2019/05/30 | CH2205 | Male | Three y/o | Treatment (Wk 3) | Treatment | Feed Day | No | 05:10 | 05:00 - 05:59 | Morning | 37,3 | 147 | 9,8   | 9,8   | 18,46 | 620,52 | 76,07  |
| 2019/05/30 | CH2206 | Male | Three y/o | Treatment (Wk 3) | Treatment | Feed Day | No | 05:10 | 05:00 - 05:59 | Morning | 37,3 | 50  | 19,0  | 19,0  | 18,46 | 539,52 | 98,56  |
| 2019/05/30 | CH2205 | Male | Three y/o | Treatment (Wk 3) | Treatment | Feed Day | No | 05:15 | 05:00 - 05:59 | Morning | 37,2 | 36  | 7,8   | 7,8   | 18,36 | 510,56 | 68,36  |
| 2019/05/30 | CH2206 | Male | Three y/o | Treatment (Wk 3) | Treatment | Feed Day | No | 05:15 | 05:00 - 05:59 | Morning | 37,2 | 55  | 16,2  | 16,2  | 18,46 | 547,52 | 93,13  |
| 2019/05/30 | CH2205 | Male | Three y/o | Treatment (Wk 3) | Treatment | Feed Day | No | 05:20 | 05:00 - 05:59 | Morning | 37,2 | 46  | 9,0   | 9,0   | 18,36 | 532,38 | 73,19  |
| 2019/05/30 | CH2206 | Male | Three y/o | Treatment (Wk 3) | Treatment | Feed Day | No | 05:20 | 05:00 - 05:59 | Morning | 37,3 | 46  | 17,2  | 17,2  | 18,46 | 532,38 | 95,17  |
| 2019/05/30 | CH2205 | Male | Three y/o | Treatment (Wk 3) | Treatment | Feed Day | No | 05:25 | 05:00 - 05:59 | Morning | 37,2 | 67  | 8,0   | 8,0   | 18,36 | 563,53 | 69,22  |
| 2019/05/30 | CH2206 | Male | Three y/o | Treatment (Wk 3) | Treatment | Feed Day | No | 05:25 | 05:00 - 05:59 | Morning | 37,3 | 67  | 23,4  | 23,4  | 18,46 | 563,53 | 105,68 |
| 2019/05/30 | CH2205 | Male | Three y/o | Treatment (Wk 3) | Treatment | Feed Day | No | 05:30 | 05:00 - 05:59 | Morning | 37,1 | 79  | 7,6   | 7,6   | 18,26 | 576,36 | 67,49  |
| 2019/05/30 | CH2206 | Male | Three y/o | Treatment (Wk 3) | Treatment | Feed Day | No | 05:30 | 05:00 - 05:59 | Morning | 37,2 | 34  | 25,6  | 25,6  | 18,36 | 505,29 | 108,76 |
| 2019/05/30 | CH2205 | Male | Three y/o | Treatment (Wk 3) | Treatment | Feed Day | No | 05:35 | 05:00 - 05:59 | Morning | 37,2 | 43  | 7,2   | 7,2   | 18,36 | 526,50 | 65,66  |
| 2019/05/30 | CH2206 | Male | Three y/o | Treatment (Wk 3) | Treatment | Feed Day | No | 05:35 | 05:00 - 05:59 | Morning | 37,2 | 52  | 30,8  | 30,8  | 18,36 | 542,83 | 115,10 |
| 2019/05/30 | CH2205 | Male | Three y/o | Treatment (Wk 3) | Treatment | Feed Day | No | 05:40 | 05:00 - 05:59 | Morning | 37,2 | 57  | 5,0   | 5,0   | 18,36 | 550,47 | 53,41  |
| 2019/05/30 | CH2206 | Male | Three y/o | Treatment (Wk 3) | Treatment | Feed Day | No | 05:40 | 05:00 - 05:59 | Morning | 37,1 | 88  | 12,6  | 12,6  | 18,26 | 584,49 | 84,59  |
| 2019/05/30 | CH2205 | Male | Three y/o | Treatment (Wk 3) | Treatment | Feed Day | No | 05:45 | 05:00 - 05:59 | Morning | 37,2 | 112 | 28,8  | 28,8  | 18,36 | 601,96 | 112,79 |
| 2019/05/30 | CH2206 | Male | Three y/o | Treatment (Wk 3) | Treatment | Feed Day | No | 05:45 | 05:00 - 05:59 | Morning | 37,0 | 94  | 67,2  | 67,2  | 18,16 | 589,37 | 142,02 |
| 2019/05/30 | CH2205 | Male | Three y/o | Treatment (Wk 3) | Treatment | Feed Day | No | 05:50 | 05:00 - 05:59 | Morning | 37,1 | 43  | 15,2  | 15,2  | 18,26 | 526,50 | 90,96  |
| 2019/05/30 | CH2206 | Male | Three y/o | Treatment (Wk 3) | Treatment | Feed Day | No | 05:50 | 05:00 - 05:59 | Morning | 37,0 | 50  | 63,8  | 63,8  | 18,16 | 539,52 | 140,22 |
| 2019/05/30 | CH2205 | Male | Three y/o | Treatment (Wk 3) | Treatment | Feed Day | No | 05:55 | 05:00 - 05:59 | Morning | 37,0 | 47  | 16,4  | 16,4  | 18,16 | 534,23 | 93,55  |
| 2019/05/30 | CH2206 | Male | Three y/o | Treatment (Wk 3) | Treatment | Feed Day | No | 05:55 | 05:00 - 05:59 | Morning | 37,1 | 73  | 66,0  | 66,0  | 18,26 | 570,27 | 141,40 |
| 2019/05/30 | CH2205 | Male | Three y/o | Treatment (Wk 3) | Treatment | Feed Day | No | 06:00 | 06:00 - 06:59 | Morning | 37,0 | 41  | 21,4  | 21,4  | 18,16 | 522,29 | 102,63 |
| 2019/05/30 | CH2206 | Male | Three y/o | Treatment (Wk 3) | Treatment | Feed Day | No | 06:00 | 06:00 - 06:59 | Morning | 37,1 | 48  | 65,2  | 65,2  | 18,26 | 536,04 | 140,97 |
| 2019/05/30 | CH2205 | Male | Three y/o | Treatment (Wk 3) | Treatment | Feed Day | No | 06:05 | 06:00 - 06:59 | Morning | 37,0 |     | 28,2  | 28,2  | 18,16 |        | 112,07 |
| 2019/05/30 | CH2206 | Male | Three y/o | Treatment (Wk 3) | Treatment | Feed Day | No | 06:05 | 06:00 - 06:59 | Morning | 37,1 | 128 | 46,8  | 46,8  | 18,26 | 611,22 | 129,50 |
| 2019/05/30 | CH2205 | Male | Three y/o | Treatment (Wk 3) | Treatment | Feed Day | No | 06:10 | 06:00 - 06:59 | Morning | 37,0 |     | 107,8 | 107,8 | 18,16 |        | 158,46 |
| 2019/05/30 | CH2206 | Male | Three y/o | Treatment (Wk 3) | Treatment | Feed Day | No | 06:10 | 06:00 - 06:59 | Morning | 37,2 | 97  | 109,4 | 109,4 | 18,36 | 591,66 | 158,98 |
| 2019/05/30 | CH2205 | Male | Three y/o | Treatment (Wk 3) | Treatment | Feed Day | No | 06:15 | 06:00 - 06:59 | Morning | 37,0 | 123 | 79,8  | 79,8  | 18,16 | 608,49 | 147,99 |
| 2019/05/30 | CH2206 | Male | Three y/o | Treatment (Wk 3) | Treatment | Feed Day | No | 06:15 | 06:00 - 06:59 | Morning | 37,2 | 117 | 73,8  | 73,8  | 18,36 | 605,02 | 145,27 |
| 2019/05/30 | CH2205 | Male | Three y/o | Treatment (Wk 3) | Treatment | Feed Day | No | 06:20 | 06:00 - 06:59 | Morning | 37,1 | 55  | 94,8  | 94,8  | 18,26 | 547,52 | 153,98 |
| 2019/05/30 | CH2206 | Male | Three y/o | Treatment (Wk 3) | Treatment | Feed Day | No | 06:20 | 06:00 - 06:59 | Morning | 37,3 | 107 | 142,8 | 142,8 | 18,46 | 598,73 | 168,29 |
| 2019/05/30 | CH2205 | Male | Three y/o | Treatment (Wk 3) | Treatment | Feed Day | No | 06:25 | 06:00 - 06:59 | Morning | 37,1 |     | 153,2 | 153,2 | 18,26 |        | 170,76 |
| 2019/05/30 | CH2206 | Male | Three y/o | Treatment (Wk 3) | Treatment | Feed Day | No | 06:25 | 06:00 - 06:59 | Morning | 37,4 | 61  | 109,4 | 109,4 | 18,55 | 556,01 | 158,98 |
| 2019/05/30 | CH2205 | Male | Three y/o | Treatment (Wk 3) | Treatment | Feed Day | No | 06:30 | 06:00 - 06:59 | Morning | 37,2 | 98  | 192,6 | 192,6 | 18,36 | 592,41 | 178,79 |
| 2019/05/30 | CH2206 | Male | Three y/o | Treatment (Wk 3) | Treatment | Feed Day | No | 06:30 | 06:00 - 06:59 | Morning | 37,5 | 108 | 77,0  | 77,0  | 18,65 | 599,39 | 146,75 |
| 2019/05/30 | CH2205 | Male | Three y/o | Treatment (Wk 3) | Treatment | Feed Day | No | 06:35 | 06:00 - 06:59 | Morning | 37,4 | 101 | 57,8  | 57,8  | 18,55 | 594,59 | 136,80 |
| 2019/05/30 | CH2206 | Male | Three y/o | Treatment (Wk 3) | Treatment | Feed Day | No | 06:35 | 06:00 - 06:59 | Morning | 37,8 | 120 | 16,6  | 16,6  | 18,95 | 606,78 | 93,96  |
| 2019/05/30 | CH2205 | Male | Three y/o | Treatment (Wk 3) | Treatment | Feed Day | No | 06:40 | 06:00 - 06:59 | Morning | 37,4 | 99  | 110,6 | 110,6 | 18,55 | 593,14 | 159,36 |
| 2019/05/30 | CH2206 | Male | Three y/o | Treatment (Wk 3) | Treatment | Feed Day | No | 06:40 | 06:00 - 06:59 | Morning | 37,7 | 124 | 112,6 | 112,6 | 18,85 | 609,04 | 159,98 |
| 2019/05/30 | CH2205 | Male | Three y/o | Treatment (Wk 3) | Treatment | Feed Day | No | 06:45 | 06:00 - 06:59 | Morning | 37,5 | 124 | 470,0 | 470,0 | 18,65 | 609,04 | 210,34 |
| 2019/05/30 | CH2206 | Male | Three y/o | Treatment (Wk 3) | Treatment | Feed Day | No | 06:45 | 06:00 - 06:59 | Morning | 37,7 | 128 | 74,0  | 74,0  | 18,85 | 611,22 | 145,37 |
| 2019/05/30 | CH2205 | Male | Three y/o | Treatment (Wk 3) | Treatment | Feed Day | No | 06:50 | 06:00 - 06:59 | Morning | 37,6 |     | 107,4 | 107,4 | 18,75 |        | 158,33 |
| 2019/05/30 | CH2206 | Male | Three y/o | Treatment (Wk 3) | Treatment | Feed Day | No | 06:50 | 06:00 - 06:59 | Morning | 37,9 | 137 | 289,0 | 289,0 | 19,05 | 615,83 | 193,10 |
| 2019/05/30 | CH2205 | Male | Three y/o | Treatment (Wk 3) | Treatment | Feed Day | No | 06:55 | 06:00 - 06:59 | Morning | 37,9 | 92  | 20,4  | 20,4  | 19,05 | 587,78 | 100,99 |
| 2019/05/30 | CH2206 | Male | Three y/o | Treatment (Wk 3) | Treatment | Feed Day | No | 06:55 | 06:00 - 06:59 | Morning | 37,9 | 119 | 359,6 | 359,6 | 19,05 | 606,20 | 200,84 |
| 2019/05/30 | CH2205 | Male | Three y/o | Treatment (Wk 3) | Treatment | Feed Day | No | 07:00 | 07:00 - 07:59 | Morning | 37,9 | 83  | 167,6 | 167,6 | 19,05 | 580,11 | 173,91 |
| 2019/05/30 | CH2206 | Male | Three y/o | Treatment (Wk 3) | Treatment | Feed Day | No | 07:00 | 07:00 - 07:59 | Morning | 37,9 | 117 | 121,2 | 121,2 | 19,05 | 605,02 | 162,56 |
| 2019/05/30 | CH2205 | Male | Three y/o | Treatment (Wk 3) | Treatment | Feed Day | No | 07:05 | 07:00 - 07:59 | Morning | 37,7 | 40  | 220,6 | 220,6 | 18,85 | 520,09 | 183,57 |
| 2019/05/30 | CH2206 | Male | Three y/o | Treatment (Wk 3) | Treatment | Feed Day | No | 07:05 | 07:00 - 07:59 | Morning | 37,9 | 121 | 170,0 | 170,0 | 19,05 | 607,35 | 174,41 |
| 2019/05/30 | CH2205 | Male | Three y/o | Treatment (Wk 3) | Treatment | Feed Day | No | 07:10 | 07:00 - 07:59 | Morning | 37,7 | 135 | 138,2 | 138,2 | 18,85 | 614,84 | 167,15 |
| 2019/05/30 | CH2206 | Male | Three y/o | Treatment (Wk 3) | Treatment | Feed Day | No | 07:10 | 07:00 - 07:59 | Morning | 37,9 | 107 | 176,0 | 176,0 | 19,05 | 598,73 | 175,63 |
| 2019/05/30 | CH2205 | Male | Three y/o | Treatment (Wk 3) | Treatment | Feed Day | No | 07:15 | 07:00 - 07:59 | Morning | 37,7 | 119 | 256,2 | 256,2 | 18,85 | 606,20 | 188,84 |
| 2019/05/30 | CH2206 | Male | Three y/o | Treatment (Wk 3) | Treatment | Feed Day | No | 07:15 | 07:00 - 07:59 | Morning | 37,9 | 143 | 119,4 | 119,4 | 19,05 | 618,69 | 162,03 |
| 2019/05/30 | CH2205 | Male | Three y/o | Treatment (Wk 3) | Treatment | Feed Day | No | 07:20 | 07:00 - 07:59 | Morning | 37,7 |     | 328,0 | 328,0 | 18,85 |        | 197,58 |



|            |        |      |           |                  |           |          |    |       |               |              |      |     |       |       |       |        |        |
|------------|--------|------|-----------|------------------|-----------|----------|----|-------|---------------|--------------|------|-----|-------|-------|-------|--------|--------|
| 2019/05/30 | CH2206 | Male | Three y/o | Treatment (Wk 3) | Treatment | Feed Day | No | 07:20 | 07:00 - 07:59 | Morning      | 37,8 | 107 | 182,2 | 182,2 | 18,95 | 598,73 | 176,84 |
| 2019/05/30 | CH2205 | Male | Three y/o | Treatment (Wk 3) | Treatment | Feed Day | No | 07:25 | 07:00 - 07:59 | Morning      | 37,7 | 125 | 392,0 | 392,0 | 18,85 | 609,60 | 203,90 |
| 2019/05/30 | CH2206 | Male | Three y/o | Treatment (Wk 3) | Treatment | Feed Day | No | 07:25 | 07:00 - 07:59 | Morning      | 37,8 | 141 | 132,0 | 132,0 | 18,95 | 617,75 | 165,54 |
| 2019/05/30 | CH2205 | Male | Three y/o | Treatment (Wk 3) | Treatment | Feed Day | No | 07:30 | 07:00 - 07:59 | Morning      | 37,9 |     | 153,8 | 153,8 | 19,05 |        | 170,89 |
| 2019/05/30 | CH2206 | Male | Three y/o | Treatment (Wk 3) | Treatment | Feed Day | No | 07:30 | 07:00 - 07:59 | Morning      | 37,9 | 118 | 122,4 | 122,4 | 19,05 | 605,61 | 162,90 |
| 2019/05/30 | CH2205 | Male | Three y/o | Treatment (Wk 3) | Treatment | Feed Day | No | 07:35 | 07:00 - 07:59 | Morning      | 37,9 | 78  | 34,8  | 34,8  | 19,05 | 575,38 | 119,29 |
| 2019/05/30 | CH2206 | Male | Three y/o | Treatment (Wk 3) | Treatment | Feed Day | No | 07:35 | 07:00 - 07:59 | Morning      | 37,9 | 126 | 138,6 | 138,6 | 19,05 | 610,14 | 167,25 |
| 2019/05/30 | CH2205 | Male | Three y/o | Treatment (Wk 3) | Treatment | Feed Day | No | 07:40 | 07:00 - 07:59 | Morning      | 37,9 |     | 244,6 | 244,6 | 19,05 |        | 187,21 |
| 2019/05/30 | CH2206 | Male | Three y/o | Treatment (Wk 3) | Treatment | Feed Day | No | 07:40 | 07:00 - 07:59 | Morning      | 37,9 | 99  | 168,8 | 168,8 | 19,05 | 593,14 | 174,16 |
| 2019/05/30 | CH2205 | Male | Three y/o | Treatment (Wk 3) | Treatment | Feed Day | No | 07:45 | 07:00 - 07:59 | Morning      | 37,9 | 150 | 193,0 | 193,0 | 19,05 | 621,86 | 178,87 |
| 2019/05/30 | CH2206 | Male | Three y/o | Treatment (Wk 3) | Treatment | Feed Day | No | 07:45 | 07:00 - 07:59 | Morning      | 37,9 | 57  | 119,0 | 119,0 | 19,05 | 550,47 | 161,92 |
| 2019/05/30 | CH2205 | Male | Three y/o | Treatment (Wk 3) | Treatment | Feed Day | No | 07:50 | 07:00 - 07:59 | Morning      | 37,9 | 64  | 38,6  | 38,6  | 19,05 | 559,88 | 122,86 |
| 2019/05/30 | CH2206 | Male | Three y/o | Treatment (Wk 3) | Treatment | Feed Day | No | 07:50 | 07:00 - 07:59 | Morning      | 38,0 | 169 | 75,2  | 75,2  | 19,15 | 629,60 | 145,93 |
| 2019/05/30 | CH2205 | Male | Three y/o | Treatment (Wk 3) | Treatment | Feed Day | No | 07:55 | 07:00 - 07:59 | Morning      | 37,9 | 61  | 123,6 | 123,6 | 19,05 | 556,01 | 163,24 |
| 2019/05/30 | CH2206 | Male | Three y/o | Treatment (Wk 3) | Treatment | Feed Day | No | 07:55 | 07:00 - 07:59 | Morning      | 38,0 | 106 | 187,2 | 187,2 | 19,15 | 598,06 | 177,79 |
| 2019/05/30 | CH2205 | Male | Three y/o | Treatment (Wk 3) | Treatment | Feed Day | No | 08:00 | 08:00 - 08:59 | Late Morning | 37,9 | 138 | 76,0  | 76,0  | 19,05 | 616,31 | 146,29 |
| 2019/05/30 | CH2206 | Male | Three y/o | Treatment (Wk 3) | Treatment | Feed Day | No | 08:00 | 08:00 - 08:59 | Late Morning | 37,9 | 123 | 272,6 | 272,6 | 19,05 | 608,49 | 191,04 |
| 2019/05/30 | CH2205 | Male | Three y/o | Treatment (Wk 3) | Treatment | Feed Day | No | 08:05 | 08:00 - 08:59 | Late Morning | 37,9 |     | 35,4  | 35,4  | 19,05 |        | 119,88 |
| 2019/05/30 | CH2206 | Male | Three y/o | Treatment (Wk 3) | Treatment | Feed Day | No | 08:05 | 08:00 - 08:59 | Late Morning | 37,9 | 115 | 104,6 | 104,6 | 19,05 | 603,82 | 157,41 |
| 2019/05/30 | CH2205 | Male | Three y/o | Treatment (Wk 3) | Treatment | Feed Day | No | 08:10 | 08:00 - 08:59 | Late Morning | 37,6 |     | 85,0  | 85,0  | 18,75 |        | 150,18 |
| 2019/05/30 | CH2206 | Male | Three y/o | Treatment (Wk 3) | Treatment | Feed Day | No | 08:10 | 08:00 - 08:59 | Late Morning | 37,9 |     | 158,0 | 158,0 | 19,05 |        | 171,84 |
| 2019/05/30 | CH2205 | Male | Three y/o | Treatment (Wk 3) | Treatment | Feed Day | No | 08:15 | 08:00 - 08:59 | Late Morning | 37,4 | 119 | 37,4  | 37,4  | 18,55 | 606,20 | 121,77 |
| 2019/05/30 | CH2206 | Male | Three y/o | Treatment (Wk 3) | Treatment | Feed Day | No | 08:15 | 08:00 - 08:59 | Late Morning | 37,8 | 126 | 68,2  | 68,2  | 18,95 | 610,14 | 142,53 |
| 2019/05/30 | CH2205 | Male | Three y/o | Treatment (Wk 3) | Treatment | Feed Day | No | 08:20 | 08:00 - 08:59 | Late Morning | 37,5 |     | 105,2 | 105,2 | 18,65 |        | 157,61 |
| 2019/05/30 | CH2206 | Male | Three y/o | Treatment (Wk 3) | Treatment | Feed Day | No | 08:20 | 08:00 - 08:59 | Late Morning | 37,8 | 112 | 102,2 | 102,2 | 18,95 | 601,96 | 156,60 |
| 2019/05/30 | CH2205 | Male | Three y/o | Treatment (Wk 3) | Treatment | Feed Day | No | 08:25 | 08:00 - 08:59 | Late Morning | 37,5 | 137 | 181,0 | 181,0 | 18,65 | 615,83 | 176,61 |
| 2019/05/30 | CH2206 | Male | Three y/o | Treatment (Wk 3) | Treatment | Feed Day | No | 08:25 | 08:00 - 08:59 | Late Morning | 37,8 |     | 247,0 | 247,0 | 18,95 |        | 187,55 |
| 2019/05/30 | CH2205 | Male | Three y/o | Treatment (Wk 3) | Treatment | Feed Day | No | 08:30 | 08:00 - 08:59 | Late Morning | 37,7 | 131 | 165,6 | 165,6 | 18,85 | 612,80 | 173,49 |
| 2019/05/30 | CH2206 | Male | Three y/o | Treatment (Wk 3) | Treatment | Feed Day | No | 08:30 | 08:00 - 08:59 | Late Morning | 37,9 | 115 | 196,0 | 196,0 | 19,05 | 603,82 | 179,41 |
| 2019/05/30 | CH2205 | Male | Three y/o | Treatment (Wk 3) | Treatment | Feed Day | No | 08:35 | 08:00 - 08:59 | Late Morning | 37,8 | 197 | 179,0 | 179,0 | 18,95 | 639,25 | 176,22 |
| 2019/05/30 | CH2206 | Male | Three y/o | Treatment (Wk 3) | Treatment | Feed Day | No | 08:35 | 08:00 - 08:59 | Late Morning | 37,9 | 112 | 178,4 | 178,4 | 19,05 | 601,96 | 176,10 |
| 2019/05/30 | CH2205 | Male | Three y/o | Treatment (Wk 3) | Treatment | Feed Day | No | 08:40 | 08:00 - 08:59 | Late Morning | 37,9 |     | 225,2 | 225,2 | 19,05 |        | 184,30 |
| 2019/05/30 | CH2206 | Male | Three y/o | Treatment (Wk 3) | Treatment | Feed Day | No | 08:40 | 08:00 - 08:59 | Late Morning | 37,9 | 135 | 334,6 | 334,6 | 19,05 | 614,84 | 198,28 |
| 2019/05/30 | CH2205 | Male | Three y/o | Treatment (Wk 3) | Treatment | Feed Day | No | 08:45 | 08:00 - 08:59 | Late Morning | 38,0 | 67  | 92,6  | 92,6  | 19,15 | 563,53 | 153,16 |
| 2019/05/30 | CH2206 | Male | Three y/o | Treatment (Wk 3) | Treatment | Feed Day | No | 08:45 | 08:00 - 08:59 | Late Morning | 38,0 |     | 102,6 | 102,6 | 19,15 |        | 156,74 |
| 2019/05/30 | CH2205 | Male | Three y/o | Treatment (Wk 3) | Treatment | Feed Day | No | 08:50 | 08:00 - 08:59 | Late Morning | 37,9 | 72  | 21,4  | 21,4  | 19,05 | 569,20 | 102,63 |
| 2019/05/30 | CH2206 | Male | Three y/o | Treatment (Wk 3) | Treatment | Feed Day | No | 08:50 | 08:00 - 08:59 | Late Morning | 38,0 | 99  | 355,4 | 355,4 | 19,15 | 593,14 | 200,42 |
| 2019/05/30 | CH2205 | Male | Three y/o | Treatment (Wk 3) | Treatment | Feed Day | No | 08:55 | 08:00 - 08:59 | Late Morning | 37,9 | 74  | 39,6  | 39,6  | 19,05 | 571,33 | 123,74 |
| 2019/05/30 | CH2206 | Male | Three y/o | Treatment (Wk 3) | Treatment | Feed Day | No | 08:55 | 08:00 - 08:59 | Late Morning | 37,9 | 156 | 46,2  | 46,2  | 19,05 | 624,43 | 129,06 |
| 2019/05/30 | CH2205 | Male | Three y/o | Treatment (Wk 3) | Treatment | Feed Day | No | 09:00 | 09:00 - 09:59 | Late Morning | 37,9 | 49  | 68,4  | 68,4  | 19,05 | 537,80 | 142,64 |
| 2019/05/30 | CH2206 | Male | Three y/o | Treatment (Wk 3) | Treatment | Feed Day | No | 09:00 | 09:00 - 09:59 | Late Morning | 37,9 | 106 | 102,8 | 102,8 | 19,05 | 598,06 | 156,81 |
| 2019/05/30 | CH2205 | Male | Three y/o | Treatment (Wk 3) | Treatment | Feed Day | No | 09:05 | 09:00 - 09:59 | Late Morning | 37,7 | 77  | 12,6  | 12,6  | 18,85 | 574,39 | 84,59  |
| 2019/05/30 | CH2206 | Male | Three y/o | Treatment (Wk 3) | Treatment | Feed Day | No | 09:05 | 09:00 - 09:59 | Late Morning | 37,8 |     | 242,6 | 242,6 | 18,95 |        | 186,92 |
| 2019/05/30 | CH2205 | Male | Three y/o | Treatment (Wk 3) | Treatment | Feed Day | No | 09:10 | 09:00 - 09:59 | Late Morning | 37,7 | 160 | 73,0  | 73,0  | 18,85 | 626,07 | 144,89 |
| 2019/05/30 | CH2206 | Male | Three y/o | Treatment (Wk 3) | Treatment | Feed Day | No | 09:10 | 09:00 - 09:59 | Late Morning | 37,8 | 57  | 68,2  | 68,2  | 18,95 | 550,47 | 142,53 |
| 2019/05/30 | CH2205 | Male | Three y/o | Treatment (Wk 3) | Treatment | Feed Day | No | 09:15 | 09:00 - 09:59 | Late Morning | 37,7 | 160 | 42,4  | 42,4  | 18,85 | 626,07 | 126,10 |
| 2019/05/30 | CH2206 | Male | Three y/o | Treatment (Wk 3) | Treatment | Feed Day | No | 09:15 | 09:00 - 09:59 | Late Morning | 37,9 | 93  | 167,4 | 167,4 | 19,05 | 588,58 | 173,87 |
| 2019/05/30 | CH2205 | Male | Three y/o | Treatment (Wk 3) | Treatment | Feed Day | No | 09:20 | 09:00 - 09:59 | Late Morning | 37,9 |     | 92,8  | 92,8  | 19,05 |        | 153,24 |
| 2019/05/30 | CH2206 | Male | Three y/o | Treatment (Wk 3) | Treatment | Feed Day | No | 09:20 | 09:00 - 09:59 | Late Morning | 37,9 | 112 | 198,4 | 198,4 | 19,05 | 601,96 | 179,84 |
| 2019/05/30 | CH2205 | Male | Three y/o | Treatment (Wk 3) | Treatment | Feed Day | No | 09:25 | 09:00 - 09:59 | Late Morning | 38,0 | 72  | 98,4  | 98,4  | 19,15 | 569,20 | 155,28 |
| 2019/05/30 | CH2206 | Male | Three y/o | Treatment (Wk 3) | Treatment | Feed Day | No | 09:25 | 09:00 - 09:59 | Late Morning | 37,9 | 117 | 48,6  | 48,6  | 19,05 | 605,02 | 130,81 |
| 2019/05/30 | CH2205 | Male | Three y/o | Treatment (Wk 3) | Treatment | Feed Day | No | 09:30 | 09:00 - 09:59 | Late Morning | 38,0 |     | 23,8  | 23,8  | 19,15 |        | 106,26 |
| 2019/05/30 | CH2206 | Male | Three y/o | Treatment (Wk 3) | Treatment | Feed Day | No | 09:30 | 09:00 - 09:59 | Late Morning | 38,0 | 110 | 99,8  | 99,8  | 19,15 | 600,69 | 155,77 |
| 2019/05/30 | CH2205 | Male | Three y/o | Treatment (Wk 3) | Treatment | Feed Day | No | 09:35 | 09:00 - 09:59 | Late Morning | 38,0 | 110 | 71,0  | 71,0  | 19,15 | 600,69 | 143,93 |
| 2019/05/30 | CH2206 | Male | Three y/o | Treatment (Wk 3) | Treatment | Feed Day | No | 09:35 | 09:00 - 09:59 | Late Morning | 38,0 | 61  | 114,6 | 114,6 | 19,15 | 556,01 | 160,60 |
| 2019/05/30 | CH2205 | Male | Three y/o | Treatment (Wk 3) | Treatment | Feed Day | No | 09:40 | 09:00 - 09:59 | Late Morning | 38,0 | 107 | 26,6  | 26,6  | 19,15 | 598,73 | 110,07 |
| 2019/05/30 | CH2206 | Male | Three y/o | Treatment (Wk 3) | Treatment | Feed Day | No | 09:40 | 09:00 - 09:59 | Late Morning | 38,0 | 197 | 54,8  | 54,8  | 19,15 | 639,25 | 134,96 |
| 2019/05/30 | CH2205 | Male | Three y/o | Treatment (Wk 3) | Treatment | Feed Day | No | 09:45 | 09:00 - 09:59 | Late Morning | 37,9 | 68  | 16,6  | 16,6  | 19,05 | 564,71 | 93,96  |
| 2019/05/30 | CH2206 | Male | Three y/o | Treatment (Wk 3) | Treatment | Feed Day | No | 09:45 | 09:00 - 09:59 | Late Morning | 37,9 |     | 117,6 | 117,6 | 19,05 |        | 161,50 |
| 2019/05/30 | CH2205 | Male | Three y/o | Treatment (Wk 3) | Treatment | Feed Day | No | 09:50 | 09:00 - 09:59 | Late Morning | 37,9 | 65  | 73,6  | 73,6  | 19,05 | 561,12 | 145,18 |
| 2019/05/30 | CH2206 | Male | Three y/o | Treatment (Wk 3) | Treatment | Feed Day | No | 09:50 | 09:00 - 09:59 | Late Morning | 37,9 | 112 | 103,2 | 103,2 | 19,05 | 601,96 | 156,94 |
| 2019/05/30 | CH2205 | Male | Three y/o | Treatment (Wk 3) | Treatment | Feed Day | No | 09:55 | 09:00 - 09:59 | Late Morning | 37,9 | 67  | 7,8   | 7,8   | 19,05 | 563,53 | 68,36  |
| 2019/05/30 | CH2206 | Male | Three y/o | Treatment (Wk 3) | Treatment | Feed Day | No | 09:55 | 09:00 - 09:59 | Late Morning | 37,9 | 92  | 96,8  | 96,8  | 19,05 | 587,78 | 154,71 |
| 2019/05/30 | CH2205 | Male | Three y/o | Treatment (Wk 3) | Treatment | Feed Day | No | 10:00 | 10:00 - 10:59 | Late Morning | 37,9 | 51  | 16,4  | 16,4  | 19,05 | 541,20 | 93,55  |
| 2019/05/30 | CH2206 | Male | Three y/o | Treatment (Wk 3) | Treatment | Feed Day | No | 10:00 | 10:00 - 10:59 | Late Morning | 37,9 | 141 | 30,4  | 30,4  | 19,05 | 617,75 | 114,65 |
| 2019/05/30 | CH2205 | Male | Three y/o | Treatment (Wk 3) | Treatment | Feed Day | No | 10:05 | 10:00 - 10:59 | Late Morning | 37,9 | 54  | 11,4  | 11,4  | 19,05 | 545,99 | 81,19  |
| 2019/05/30 | CH2206 | Male | Three y/o | Treatment (Wk 3) | Treatment | Feed Day | No | 10:05 | 10:00 - 10:59 | Late Morning | 37,8 | 67  | 35,0  | 35,0  | 18,95 | 563,53 | 119,49 |
| 2019/05/30 | CH2205 | Male | Three y/o | Treatment (Wk 3) | Treatment | Feed Day | No | 10:10 | 10:00 - 10:59 | Late Morning | 37,9 | 64  | 12,2  | 12,2  | 19,05 | 559,88 | 83,49  |
| 2019/05/30 | CH2206 | Male | Three y/o | Treatment (Wk 3) | Treatment | Feed Day | No | 10:10 | 10:00 - 10:59 | Late Morning | 37,8 | 73  | 106,6 | 106,6 | 18,95 | 570,27 | 158,07 |
| 2019/05/30 | CH2205 | Male | Three y/o | Treatment (Wk 3) | Treatment | Feed Day | No | 10:15 | 10:00 - 10:59 | Late Morning | 37,9 | 62  | 43,2  | 43,2  | 19,05 | 557,33 | 126,74 |



|            |        |      |           |                  |           |          |    |       |               |              |      |     |       |       |       |        |        |
|------------|--------|------|-----------|------------------|-----------|----------|----|-------|---------------|--------------|------|-----|-------|-------|-------|--------|--------|
| 2019/05/30 | CH2206 | Male | Three y/o | Treatment (Wk 3) | Treatment | Feed Day | No | 10:15 | 10:00 - 10:59 | Late Morning | 37,8 | 110 | 207,8 | 207,8 | 18,95 | 600,69 | 181,47 |
| 2019/05/30 | CH2205 | Male | Three y/o | Treatment (Wk 3) | Treatment | Feed Day | No | 10:20 | 10:00 - 10:59 | Late Morning | 37,9 | 61  | 19,6  | 19,6  | 19,05 | 556,01 | 99,63  |
| 2019/05/30 | CH2206 | Male | Three y/o | Treatment (Wk 3) | Treatment | Feed Day | No | 10:20 | 10:00 - 10:59 | Late Morning | 37,8 | 55  | 31,4  | 31,4  | 18,95 | 547,52 | 115,76 |
| 2019/05/30 | CH2205 | Male | Three y/o | Treatment (Wk 3) | Treatment | Feed Day | No | 10:25 | 10:00 - 10:59 | Late Morning | 37,7 | 51  | 11,8  | 11,8  | 18,85 | 541,20 | 82,36  |
| 2019/05/30 | CH2206 | Male | Three y/o | Treatment (Wk 3) | Treatment | Feed Day | No | 10:25 | 10:00 - 10:59 | Late Morning | 37,9 | 64  | 27,0  | 27,0  | 19,05 | 559,88 | 110,58 |
| 2019/05/30 | CH2205 | Male | Three y/o | Treatment (Wk 3) | Treatment | Feed Day | No | 10:30 | 10:00 - 10:59 | Late Morning | 37,7 | 50  | 19,4  | 19,4  | 18,85 | 539,52 | 99,28  |
| 2019/05/30 | CH2206 | Male | Three y/o | Treatment (Wk 3) | Treatment | Feed Day | No | 10:30 | 10:00 - 10:59 | Late Morning | 37,9 | 59  | 32,8  | 32,8  | 19,05 | 553,30 | 117,26 |
| 2019/05/30 | CH2205 | Male | Three y/o | Treatment (Wk 3) | Treatment | Feed Day | No | 10:35 | 10:00 - 10:59 | Late Morning | 37,9 |     | 70,6  | 70,6  | 19,05 |        | 143,73 |
| 2019/05/30 | CH2206 | Male | Three y/o | Treatment (Wk 3) | Treatment | Feed Day | No | 10:35 | 10:00 - 10:59 | Late Morning | 37,9 | 59  | 34,4  | 34,4  | 19,05 | 553,30 | 118,90 |
| 2019/05/30 | CH2205 | Male | Three y/o | Treatment (Wk 3) | Treatment | Feed Day | No | 10:40 | 10:00 - 10:59 | Late Morning | 37,9 | 56  | 25,8  | 25,8  | 19,05 | 549,01 | 109,02 |
| 2019/05/30 | CH2206 | Male | Three y/o | Treatment (Wk 3) | Treatment | Feed Day | No | 10:40 | 10:00 - 10:59 | Late Morning | 37,9 | 115 | 139,2 | 139,2 | 19,05 | 603,82 | 167,40 |
| 2019/05/30 | CH2205 | Male | Three y/o | Treatment (Wk 3) | Treatment | Feed Day | No | 10:45 | 10:00 - 10:59 | Late Morning | 37,7 | 97  | 60,8  | 60,8  | 18,85 | 591,66 | 138,55 |
| 2019/05/30 | CH2206 | Male | Three y/o | Treatment (Wk 3) | Treatment | Feed Day | No | 10:45 | 10:00 - 10:59 | Late Morning | 38,0 |     | 110,6 | 110,6 | 19,15 |        | 159,36 |
| 2019/05/30 | CH2205 | Male | Three y/o | Treatment (Wk 3) | Treatment | Feed Day | No | 10:50 | 10:00 - 10:59 | Late Morning | 37,9 | 169 | 29,6  | 29,6  | 19,05 | 629,60 | 113,73 |
| 2019/05/30 | CH2206 | Male | Three y/o | Treatment (Wk 3) | Treatment | Feed Day | No | 10:50 | 10:00 - 10:59 | Late Morning | 37,9 | 70  | 49,8  | 49,8  | 19,05 | 566,99 | 131,65 |
| 2019/05/30 | CH2205 | Male | Three y/o | Treatment (Wk 3) | Treatment | Feed Day | No | 10:55 | 10:00 - 10:59 | Late Morning | 37,9 | 63  | 6,4   | 6,4   | 19,05 | 558,62 | 61,70  |
| 2019/05/30 | CH2206 | Male | Three y/o | Treatment (Wk 3) | Treatment | Feed Day | No | 10:55 | 10:00 - 10:59 | Late Morning | 37,9 | 115 | 55,4  | 55,4  | 19,05 | 603,82 | 135,33 |
| 2019/05/30 | CH2205 | Male | Three y/o | Treatment (Wk 3) | Treatment | Feed Day | No | 11:00 | 11:00 - 11:59 | Late Morning | 37,9 | 80  | 17,4  | 17,4  | 19,05 | 577,31 | 95,56  |
| 2019/05/30 | CH2206 | Male | Three y/o | Treatment (Wk 3) | Treatment | Feed Day | No | 11:00 | 11:00 - 11:59 | Late Morning | 37,9 | 113 | 273,2 | 273,2 | 19,05 | 602,58 | 191,11 |
| 2019/05/30 | CH2205 | Male | Three y/o | Treatment (Wk 3) | Treatment | Feed Day | No | 11:05 | 11:00 - 11:59 | Late Morning | 37,8 | 61  | 39,6  | 39,6  | 18,95 | 556,01 | 123,74 |
| 2019/05/30 | CH2206 | Male | Three y/o | Treatment (Wk 3) | Treatment | Feed Day | No | 11:05 | 11:00 - 11:59 | Late Morning | 37,9 | 53  | 97,0  | 97,0  | 19,05 | 544,43 | 154,78 |
| 2019/05/30 | CH2205 | Male | Three y/o | Treatment (Wk 3) | Treatment | Feed Day | No | 11:10 | 11:00 - 11:59 | Late Morning | 37,7 | 88  | 51,2  | 51,2  | 18,85 | 584,49 | 132,61 |
| 2019/05/30 | CH2206 | Male | Three y/o | Treatment (Wk 3) | Treatment | Feed Day | No | 11:10 | 11:00 - 11:59 | Late Morning | 37,9 | 31  | 104,8 | 104,8 | 19,05 | 496,63 | 157,48 |
| 2019/05/30 | CH2205 | Male | Three y/o | Treatment (Wk 3) | Treatment | Feed Day | No | 11:15 | 11:00 - 11:59 | Late Morning | 37,6 |     | 322,8 | 322,8 | 18,75 |        | 197,01 |
| 2019/05/30 | CH2206 | Male | Three y/o | Treatment (Wk 3) | Treatment | Feed Day | No | 11:15 | 11:00 - 11:59 | Late Morning | 37,9 | 119 | 99,8  | 99,8  | 19,05 | 606,20 | 155,77 |
| 2019/05/30 | CH2205 | Male | Three y/o | Treatment (Wk 3) | Treatment | Feed Day | No | 11:20 | 11:00 - 11:59 | Late Morning | 37,7 | 109 | 11,6  | 11,6  | 18,85 | 600,04 | 81,78  |
| 2019/05/30 | CH2206 | Male | Three y/o | Treatment (Wk 3) | Treatment | Feed Day | No | 11:20 | 11:00 - 11:59 | Late Morning | 38,0 | 99  | 64,6  | 64,6  | 19,15 | 593,14 | 140,65 |
| 2019/05/30 | CH2205 | Male | Three y/o | Treatment (Wk 3) | Treatment | Feed Day | No | 11:25 | 11:00 - 11:59 | Late Morning | 37,6 | 60  | 23,4  | 23,4  | 18,75 | 554,67 | 105,68 |
| 2019/05/30 | CH2206 | Male | Three y/o | Treatment (Wk 3) | Treatment | Feed Day | No | 11:25 | 11:00 - 11:59 | Late Morning | 37,9 | 70  | 5,2   | 5,2   | 19,05 | 566,99 | 54,72  |
| 2019/05/30 | CH2205 | Male | Three y/o | Treatment (Wk 3) | Treatment | Feed Day | No | 11:30 | 11:00 - 11:59 | Late Morning | 37,6 | 57  | 9,2   | 9,2   | 18,75 | 550,47 | 73,94  |
| 2019/05/30 | CH2206 | Male | Three y/o | Treatment (Wk 3) | Treatment | Feed Day | No | 11:30 | 11:00 - 11:59 | Late Morning | 37,9 | 64  | 7,4   | 7,4   | 19,05 | 559,88 | 66,59  |
| 2019/05/30 | CH2205 | Male | Three y/o | Treatment (Wk 3) | Treatment | Feed Day | No | 11:35 | 11:00 - 11:59 | Late Morning | 37,7 | 83  | 23,2  | 23,2  | 18,85 | 580,11 | 105,39 |
| 2019/05/30 | CH2206 | Male | Three y/o | Treatment (Wk 3) | Treatment | Feed Day | No | 11:35 | 11:00 - 11:59 | Late Morning | 37,9 | 121 | 37,2  | 37,2  | 19,05 | 607,35 | 121,59 |
| 2019/05/30 | CH2205 | Male | Three y/o | Treatment (Wk 3) | Treatment | Feed Day | No | 11:40 | 11:00 - 11:59 | Late Morning | 37,8 | 58  | 7,0   | 7,0   | 18,95 | 551,90 | 64,72  |
| 2019/05/30 | CH2206 | Male | Three y/o | Treatment (Wk 3) | Treatment | Feed Day | No | 11:40 | 11:00 - 11:59 | Late Morning | 38,1 | 64  | 51,6  | 51,6  | 19,26 | 559,88 | 132,87 |
| 2019/05/30 | CH2205 | Male | Three y/o | Treatment (Wk 3) | Treatment | Feed Day | No | 11:45 | 11:00 - 11:59 | Late Morning | 37,9 | 55  | 7,0   | 7,0   | 19,05 | 547,52 | 64,72  |
| 2019/05/30 | CH2206 | Male | Three y/o | Treatment (Wk 3) | Treatment | Feed Day | No | 11:45 | 11:00 - 11:59 | Late Morning | 38,0 | 52  | 48,8  | 48,8  | 19,15 | 542,83 | 130,95 |
| 2019/05/30 | CH2205 | Male | Three y/o | Treatment (Wk 3) | Treatment | Feed Day | No | 11:50 | 11:00 - 11:59 | Late Morning | 37,9 | 46  | 6,0   | 6,0   | 19,05 | 532,38 | 59,53  |
| 2019/05/30 | CH2206 | Male | Three y/o | Treatment (Wk 3) | Treatment | Feed Day | No | 11:50 | 11:00 - 11:59 | Late Morning | 37,9 | 54  | 55,2  | 55,2  | 19,05 | 545,99 | 135,21 |
| 2019/05/30 | CH2205 | Male | Three y/o | Treatment (Wk 3) | Treatment | Feed Day | No | 11:55 | 11:00 - 11:59 | Late Morning | 37,9 | 55  | 5,0   | 5,0   | 19,05 | 547,52 | 53,41  |
| 2019/05/30 | CH2206 | Male | Three y/o | Treatment (Wk 3) | Treatment | Feed Day | No | 11:55 | 11:00 - 11:59 | Late Morning | 37,9 | 66  | 43,8  | 43,8  | 19,05 | 562,34 | 127,22 |
| 2019/05/30 | CH2205 | Male | Three y/o | Treatment (Wk 3) | Treatment | Feed Day | No | 12:00 | 12:00 - 12:59 | Afternoon    | 37,9 | 56  | 2,8   | 2,8   | 19,05 | 549,01 | 34,04  |
| 2019/05/30 | CH2206 | Male | Three y/o | Treatment (Wk 3) | Treatment | Feed Day | No | 12:00 | 12:00 - 12:59 | Afternoon    | 37,9 | 63  | 49,2  | 49,2  | 19,05 | 558,62 | 131,23 |
| 2019/05/30 | CH2205 | Male | Three y/o | Treatment (Wk 3) | Treatment | Feed Day | No | 12:05 | 12:00 - 12:59 | Afternoon    | 37,7 | 55  | 3,6   | 3,6   | 18,85 | 547,52 | 42,42  |
| 2019/05/30 | CH2206 | Male | Three y/o | Treatment (Wk 3) | Treatment | Feed Day | No | 12:05 | 12:00 - 12:59 | Afternoon    | 37,8 |     | 91,4  | 91,4  | 18,95 |        | 152,71 |
| 2019/05/30 | CH2205 | Male | Three y/o | Treatment (Wk 3) | Treatment | Feed Day | No | 12:10 | 12:00 - 12:59 | Afternoon    | 37,7 | 48  | 4,0   | 4,0   | 18,85 | 536,04 | 45,94  |
| 2019/05/30 | CH2206 | Male | Three y/o | Treatment (Wk 3) | Treatment | Feed Day | No | 12:10 | 12:00 - 12:59 | Afternoon    | 37,8 | 49  | 45,0  | 45,0  | 18,95 | 537,80 | 128,15 |
| 2019/05/30 | CH2205 | Male | Three y/o | Treatment (Wk 3) | Treatment | Feed Day | No | 12:15 | 12:00 - 12:59 | Afternoon    | 37,7 | 51  | 4,6   | 4,6   | 18,85 | 541,20 | 50,61  |
| 2019/05/30 | CH2206 | Male | Three y/o | Treatment (Wk 3) | Treatment | Feed Day | No | 12:15 | 12:00 - 12:59 | Afternoon    | 37,8 | 50  | 54,6  | 54,6  | 18,95 | 539,52 | 134,83 |
| 2019/05/30 | CH2205 | Male | Three y/o | Treatment (Wk 3) | Treatment | Feed Day | No | 12:20 | 12:00 - 12:59 | Afternoon    | 37,6 | 63  | 1,6   | 1,6   | 18,75 | 558,62 | 15,48  |
| 2019/05/30 | CH2206 | Male | Three y/o | Treatment (Wk 3) | Treatment | Feed Day | No | 12:20 | 12:00 - 12:59 | Afternoon    | 37,8 | 79  | 44,2  | 44,2  | 18,95 | 576,36 | 127,53 |
| 2019/05/30 | CH2205 | Male | Three y/o | Treatment (Wk 3) | Treatment | Feed Day | No | 12:25 | 12:00 - 12:59 | Afternoon    | 37,6 | 55  | 7,6   | 7,6   | 18,75 | 547,52 | 67,49  |
| 2019/05/30 | CH2206 | Male | Three y/o | Treatment (Wk 3) | Treatment | Feed Day | No | 12:25 | 12:00 - 12:59 | Afternoon    | 37,7 | 53  | 47,2  | 47,2  | 18,85 | 544,43 | 129,80 |
| 2019/05/30 | CH2205 | Male | Three y/o | Treatment (Wk 3) | Treatment | Feed Day | No | 12:30 | 12:00 - 12:59 | Afternoon    | 37,6 | 52  | 4,8   | 4,8   | 18,75 | 542,83 | 52,04  |
| 2019/05/30 | CH2206 | Male | Three y/o | Treatment (Wk 3) | Treatment | Feed Day | No | 12:30 | 12:00 - 12:59 | Afternoon    | 37,7 | 53  | 46,2  | 46,2  | 18,85 | 544,43 | 129,06 |
| 2019/05/30 | CH2205 | Male | Three y/o | Treatment (Wk 3) | Treatment | Feed Day | No | 12:35 | 12:00 - 12:59 | Afternoon    | 37,6 | 78  | 123,8 | 123,8 | 18,75 | 575,38 | 163,30 |
| 2019/05/30 | CH2206 | Male | Three y/o | Treatment (Wk 3) | Treatment | Feed Day | No | 12:35 | 12:00 - 12:59 | Afternoon    | 37,7 | 52  | 42,8  | 42,8  | 18,85 | 542,83 | 126,42 |
| 2019/05/30 | CH2205 | Male | Three y/o | Treatment (Wk 3) | Treatment | Feed Day | No | 12:40 | 12:00 - 12:59 | Afternoon    | 37,6 |     | 41,4  | 41,4  | 18,75 |        | 125,27 |
| 2019/05/30 | CH2206 | Male | Three y/o | Treatment (Wk 3) | Treatment | Feed Day | No | 12:40 | 12:00 - 12:59 | Afternoon    | 37,7 | 90  | 40,2  | 40,2  | 18,85 | 586,16 | 124,26 |
| 2019/05/30 | CH2205 | Male | Three y/o | Treatment (Wk 3) | Treatment | Feed Day | No | 12:45 | 12:00 - 12:59 | Afternoon    | 37,6 | 68  | 13,4  | 13,4  | 18,75 | 564,71 | 86,68  |
| 2019/05/30 | CH2206 | Male | Three y/o | Treatment (Wk 3) | Treatment | Feed Day | No | 12:45 | 12:00 - 12:59 | Afternoon    | 37,7 | 71  | 53,4  | 53,4  | 18,85 | 568,10 | 134,06 |
| 2019/05/30 | CH2205 | Male | Three y/o | Treatment (Wk 3) | Treatment | Feed Day | No | 12:50 | 12:00 - 12:59 | Afternoon    | 37,6 | 51  | 5,2   | 5,2   | 18,75 | 541,20 | 54,72  |
| 2019/05/30 | CH2206 | Male | Three y/o | Treatment (Wk 3) | Treatment | Feed Day | No | 12:50 | 12:00 - 12:59 | Afternoon    | 37,5 | 44  | 59,0  | 59,0  | 18,65 | 528,51 | 137,51 |
| 2019/05/30 | CH2205 | Male | Three y/o | Treatment (Wk 3) | Treatment | Feed Day | No | 12:55 | 12:00 - 12:59 | Afternoon    | 37,6 | 47  | 4,6   | 4,6   | 18,75 | 534,23 | 50,61  |
| 2019/05/30 | CH2206 | Male | Three y/o | Treatment (Wk 3) | Treatment | Feed Day | No | 12:55 | 12:00 - 12:59 | Afternoon    | 37,4 | 49  | 51,6  | 51,6  | 18,55 | 537,80 | 132,87 |
| 2019/05/30 | CH2205 | Male | Three y/o | Treatment (Wk 3) | Treatment | Feed Day | No | 13:00 | 13:00 - 13:59 | Afternoon    | 37,5 | 46  | 4,2   | 4,2   | 18,65 | 532,38 | 47,57  |
| 2019/05/30 | CH2206 | Male | Three y/o | Treatment (Wk 3) | Treatment | Feed Day | No | 13:00 | 13:00 - 13:59 | Afternoon    | 37,4 | 54  | 59,0  | 59,0  | 18,55 | 545,99 | 137,51 |
| 2019/05/30 | CH2205 | Male | Three y/o | Treatment (Wk 3) | Treatment | Feed Day | No | 13:05 | 13:00 - 13:59 | Afternoon    | 37,5 | 62  | 3,0   | 3,0   | 18,65 | 557,33 | 36,34  |
| 2019/05/30 | CH2206 | Male | Three y/o | Treatment (Wk 3) | Treatment | Feed Day | No | 13:05 | 13:00 - 13:59 | Afternoon    | 37,4 | 39  | 70,6  | 70,6  | 18,55 | 517,82 | 143,73 |
| 2019/05/30 | CH2205 | Male | Three y/o | Treatment (Wk 3) | Treatment | Feed Day | No | 13:10 | 13:00 - 13:59 | Afternoon    | 37,5 | 63  | 17,2  | 17,2  | 18,65 | 558,62 | 95,17  |



|            |        |      |           |                  |           |          |     |       |               |           |      |     |       |       |       |        |        |
|------------|--------|------|-----------|------------------|-----------|----------|-----|-------|---------------|-----------|------|-----|-------|-------|-------|--------|--------|
| 2019/05/30 | CH2206 | Male | Three y/o | Treatment (Wk 3) | Treatment | Feed Day | No  | 13:10 | 13:00 - 13:59 | Afternoon | 37,4 | 40  | 53,2  | 53,2  | 18,55 | 520,09 | 133,93 |
| 2019/05/30 | CH2205 | Male | Three y/o | Treatment (Wk 3) | Treatment | Feed Day | No  | 13:15 | 13:00 - 13:59 | Afternoon | 37,5 |     | 11,4  | 11,4  | 18,65 |        | 81,19  |
| 2019/05/30 | CH2206 | Male | Three y/o | Treatment (Wk 3) | Treatment | Feed Day | No  | 13:15 | 13:00 - 13:59 | Afternoon | 37,4 | 96  | 45,2  | 45,2  | 18,55 | 590,91 | 128,30 |
| 2019/05/30 | CH2205 | Male | Three y/o | Treatment (Wk 3) | Treatment | Feed Day | No  | 13:20 | 13:00 - 13:59 | Afternoon | 37,5 | 42  | 107,6 | 107,6 | 18,65 | 524,42 | 158,40 |
| 2019/05/30 | CH2206 | Male | Three y/o | Treatment (Wk 3) | Treatment | Feed Day | No  | 13:20 | 13:00 - 13:59 | Afternoon | 37,5 | 141 | 46,8  | 46,8  | 18,65 | 617,75 | 129,50 |
| 2019/05/30 | CH2205 | Male | Three y/o | Treatment (Wk 3) | Treatment | Feed Day | No  | 13:25 | 13:00 - 13:59 | Afternoon | 37,5 | 104 | 195,2 | 195,2 | 18,65 | 596,69 | 179,26 |
| 2019/05/30 | CH2206 | Male | Three y/o | Treatment (Wk 3) | Treatment | Feed Day | No  | 13:25 | 13:00 - 13:59 | Afternoon | 37,4 | 102 | 119,0 | 119,0 | 18,55 | 595,30 | 161,92 |
| 2019/05/30 | CH2205 | Male | Three y/o | Treatment (Wk 3) | Treatment | Feed Day | No  | 13:30 | 13:00 - 13:59 | Afternoon | 37,5 |     | 70,6  | 70,6  | 18,65 |        | 143,73 |
| 2019/05/30 | CH2206 | Male | Three y/o | Treatment (Wk 3) | Treatment | Feed Day | No  | 13:30 | 13:00 - 13:59 | Afternoon | 37,4 | 106 | 164,0 | 164,0 | 18,55 | 598,06 | 173,15 |
| 2019/05/30 | CH2205 | Male | Three y/o | Treatment (Wk 3) | Treatment | Feed Day | No  | 13:35 | 13:00 - 13:59 | Afternoon | 37,5 | 98  | 173,4 | 173,4 | 18,65 | 592,41 | 175,10 |
| 2019/05/30 | CH2206 | Male | Three y/o | Treatment (Wk 3) | Treatment | Feed Day | No  | 13:35 | 13:00 - 13:59 | Afternoon | 37,5 | 111 | 225,6 | 225,6 | 18,65 | 601,33 | 184,36 |
| 2019/05/30 | CH2205 | Male | Three y/o | Treatment (Wk 3) | Treatment | Feed Day | No  | 13:40 | 13:00 - 13:59 | Afternoon | 37,5 | 51  | 26,4  | 26,4  | 18,65 | 541,20 | 109,81 |
| 2019/05/30 | CH2206 | Male | Three y/o | Treatment (Wk 3) | Treatment | Feed Day | No  | 13:40 | 13:00 - 13:59 | Afternoon | 37,5 | 117 | 120,2 | 120,2 | 18,65 | 605,02 | 162,27 |
| 2019/05/30 | CH2205 | Male | Three y/o | Treatment (Wk 3) | Treatment | Feed Day | No  | 13:45 | 13:00 - 13:59 | Afternoon | 37,6 | 105 | 45,6  | 45,6  | 18,75 | 597,38 | 128,61 |
| 2019/05/30 | CH2206 | Male | Three y/o | Treatment (Wk 3) | Treatment | Feed Day | No  | 13:45 | 13:00 - 13:59 | Afternoon | 37,5 |     | 82,0  | 82,0  | 18,65 |        | 148,93 |
| 2019/05/30 | CH2205 | Male | Three y/o | Treatment (Wk 3) | Treatment | Feed Day | No  | 13:50 | 13:00 - 13:59 | Afternoon | 37,6 | 100 | 106,8 | 106,8 | 18,75 | 593,87 | 158,14 |
| 2019/05/30 | CH2206 | Male | Three y/o | Treatment (Wk 3) | Treatment | Feed Day | No  | 13:50 | 13:00 - 13:59 | Afternoon | 37,7 | 114 | 106,8 | 106,8 | 18,85 | 603,20 | 158,14 |
| 2019/05/30 | CH2205 | Male | Three y/o | Treatment (Wk 3) | Treatment | Feed Day | No  | 13:55 | 13:00 - 13:59 | Afternoon | 37,6 | 93  | 67,0  | 67,0  | 18,75 | 588,58 | 141,92 |
| 2019/05/30 | CH2206 | Male | Three y/o | Treatment (Wk 3) | Treatment | Feed Day | No  | 13:55 | 13:00 - 13:59 | Afternoon | 37,7 | 145 | 193,4 | 193,4 | 18,85 | 619,62 | 178,94 |
| 2019/05/30 | CH2205 | Male | Three y/o | Treatment (Wk 3) | Treatment | Feed Day | No  | 14:00 | 14:00 - 14:59 | Afternoon | 37,6 | 80  | 151,6 | 151,6 | 18,75 | 577,31 | 170,39 |
| 2019/05/30 | CH2206 | Male | Three y/o | Treatment (Wk 3) | Treatment | Feed Day | No  | 14:00 | 14:00 - 14:59 | Afternoon | 37,7 | 45  | 21,4  | 21,4  | 18,85 | 530,47 | 102,63 |
| 2019/05/30 | CH2205 | Male | Three y/o | Treatment (Wk 3) | Treatment | Feed Day | No  | 14:05 | 14:00 - 14:59 | Afternoon | 37,7 | 41  | 284,4 | 284,4 | 18,85 | 522,29 | 192,53 |
| 2019/05/30 | CH2206 | Male | Three y/o | Treatment (Wk 3) | Treatment | Feed Day | No  | 14:05 | 14:00 - 14:59 | Afternoon | 37,8 | 92  | 164,0 | 164,0 | 18,95 | 587,78 | 173,15 |
| 2019/05/30 | CH2205 | Male | Three y/o | Treatment (Wk 3) | Treatment | Feed Day | No  | 14:10 | 14:00 - 14:59 | Afternoon | 37,7 |     | 38,2  | 38,2  | 18,85 |        | 122,50 |
| 2019/05/30 | CH2206 | Male | Three y/o | Treatment (Wk 3) | Treatment | Feed Day | No  | 14:10 | 14:00 - 14:59 | Afternoon | 37,8 | 100 | 14,2  | 14,2  | 18,95 | 593,87 | 88,65  |
| 2019/05/30 | CH2205 | Male | Three y/o | Treatment (Wk 3) | Treatment | Feed Day | No  | 14:15 | 14:00 - 14:59 | Afternoon | 37,7 | 52  | 23,4  | 23,4  | 18,85 | 542,83 | 105,68 |
| 2019/05/30 | CH2206 | Male | Three y/o | Treatment (Wk 3) | Treatment | Feed Day | No  | 14:15 | 14:00 - 14:59 | Afternoon | 37,8 | 50  | 22,2  | 22,2  | 18,95 | 539,52 | 103,88 |
| 2019/05/30 | CH2205 | Male | Three y/o | Treatment (Wk 3) | Treatment | Feed Day | No  | 14:20 | 14:00 - 14:59 | Afternoon | 37,8 | 45  | 25,4  | 25,4  | 18,95 | 530,47 | 108,49 |
| 2019/05/30 | CH2206 | Male | Three y/o | Treatment (Wk 3) | Treatment | Feed Day | No  | 14:20 | 14:00 - 14:59 | Afternoon | 37,8 | 48  | 27,0  | 27,0  | 18,95 | 536,04 | 110,58 |
| 2019/05/30 | CH2205 | Male | Three y/o | Treatment (Wk 3) | Treatment | Feed Day | No  | 14:25 | 14:00 - 14:59 | Afternoon | 37,9 | 52  | 26,4  | 26,4  | 19,05 | 542,83 | 109,81 |
| 2019/05/30 | CH2206 | Male | Three y/o | Treatment (Wk 3) | Treatment | Feed Day | No  | 14:25 | 14:00 - 14:59 | Afternoon | 37,8 | 67  | 24,8  | 24,8  | 18,95 | 563,53 | 107,67 |
| 2019/05/30 | CH2205 | Male | Three y/o | Treatment (Wk 3) | Treatment | Feed Day | No  | 14:30 | 14:00 - 14:59 | Afternoon | 37,9 | 45  | 17,2  | 17,2  | 19,05 | 530,47 | 95,17  |
| 2019/05/30 | CH2206 | Male | Three y/o | Treatment (Wk 3) | Treatment | Feed Day | No  | 14:30 | 14:00 - 14:59 | Afternoon | 37,8 | 48  | 24,8  | 24,8  | 18,95 | 536,04 | 107,67 |
| 2019/05/30 | CH2205 | Male | Three y/o | Treatment (Wk 3) | Treatment | Feed Day | No  | 14:35 | 14:00 - 14:59 | Afternoon | 37,9 | 49  | 125,8 | 125,8 | 19,05 | 537,80 | 163,86 |
| 2019/05/30 | CH2206 | Male | Three y/o | Treatment (Wk 3) | Treatment | Feed Day | No  | 14:35 | 14:00 - 14:59 | Afternoon | 37,8 | 83  | 91,6  | 91,6  | 18,95 | 580,11 | 152,79 |
| 2019/05/30 | CH2205 | Male | Three y/o | Treatment (Wk 3) | Treatment | Feed Day | No  | 14:40 | 14:00 - 14:59 | Afternoon | 37,9 | 99  | 54,2  | 54,2  | 19,05 | 593,14 | 134,57 |
| 2019/05/30 | CH2206 | Male | Three y/o | Treatment (Wk 3) | Treatment | Feed Day | No  | 14:40 | 14:00 - 14:59 | Afternoon | 37,8 | 119 | 178,0 | 178,0 | 18,95 | 606,20 | 176,02 |
| 2019/05/30 | CH2205 | Male | Three y/o | Treatment (Wk 3) | Treatment | Feed Day | No  | 14:45 | 14:00 - 14:59 | Afternoon | 37,7 | 160 | 122,6 | 122,6 | 18,85 | 626,07 | 162,96 |
| 2019/05/30 | CH2206 | Male | Three y/o | Treatment (Wk 3) | Treatment | Feed Day | No  | 14:45 | 14:00 - 14:59 | Afternoon | 37,8 | 113 | 140,4 | 140,4 | 18,95 | 602,58 | 167,70 |
| 2019/05/30 | CH2205 | Male | Three y/o | Treatment (Wk 3) | Treatment | Feed Day | No  | 14:50 | 14:00 - 14:59 | Afternoon | 37,7 | 51  | 252,8 | 252,8 | 18,85 | 541,20 | 188,37 |
| 2019/05/30 | CH2206 | Male | Three y/o | Treatment (Wk 3) | Treatment | Feed Day | No  | 14:50 | 14:00 - 14:59 | Afternoon | 37,8 |     | 104,2 | 104,2 | 18,95 |        | 157,28 |
| 2019/05/30 | CH2205 | Male | Three y/o | Treatment (Wk 3) | Treatment | Feed Day | No  | 14:55 | 14:00 - 14:59 | Afternoon | 37,7 | 105 | 96,0  | 96,0  | 18,85 | 597,38 | 154,42 |
| 2019/05/30 | CH2206 | Male | Three y/o | Treatment (Wk 3) | Treatment | Feed Day | No  | 14:55 | 14:00 - 14:59 | Afternoon | 37,8 | 125 | 104,4 | 104,4 | 18,95 | 609,60 | 157,35 |
| 2019/05/30 | CH2205 | Male | Three y/o | Treatment (Wk 3) | Treatment | Feed Day | No  | 15:00 | 15:00 - 15:59 | Afternoon | 37,9 | 119 | 138,8 | 138,8 | 19,05 | 606,20 | 167,30 |
| 2019/05/30 | CH2206 | Male | Three y/o | Treatment (Wk 3) | Treatment | Feed Day | No  | 15:00 | 15:00 - 15:59 | Afternoon | 37,9 | 140 | 117,2 | 117,2 | 19,05 | 617,28 | 161,38 |
| 2019/05/30 | CH2205 | Male | Three y/o | Treatment (Wk 3) | Treatment | Feed Day | No  | 15:05 | 15:00 - 15:59 | Afternoon | 37,9 | 61  | 48,4  | 48,4  | 19,05 | 556,01 | 130,66 |
| 2019/05/30 | CH2206 | Male | Three y/o | Treatment (Wk 3) | Treatment | Feed Day | No  | 15:05 | 15:00 - 15:59 | Afternoon | 37,9 |     | 134,6 | 134,6 | 19,05 |        | 166,22 |
| 2019/05/30 | CH2205 | Male | Three y/o | Treatment (Wk 3) | Treatment | Feed Day | No  | 15:10 | 15:00 - 15:59 | Afternoon | 37,9 | 98  | 34,0  | 34,0  | 19,05 | 592,41 | 118,49 |
| 2019/05/30 | CH2206 | Male | Three y/o | Treatment (Wk 3) | Treatment | Feed Day | No  | 15:10 | 15:00 - 15:59 | Afternoon | 37,9 | 165 | 113,4 | 113,4 | 19,05 | 628,06 | 160,23 |
| 2019/05/30 | CH2205 | Male | Three y/o | Treatment (Wk 3) | Treatment | Feed Day | No  | 15:15 | 15:00 - 15:59 | Afternoon | 37,9 | 50  | 6,4   | 6,4   | 19,05 | 539,52 | 61,70  |
| 2019/05/30 | CH2206 | Male | Three y/o | Treatment (Wk 3) | Treatment | Feed Day | No  | 15:15 | 15:00 - 15:59 | Afternoon | 38,0 | 113 | 238,0 | 238,0 | 19,15 | 602,58 | 186,25 |
| 2019/05/30 | CH2205 | Male | Three y/o | Treatment (Wk 3) | Treatment | Feed Day | No  | 15:20 | 15:00 - 15:59 | Afternoon | 37,9 | 48  | 7,0   | 7,0   | 19,05 | 536,04 | 64,72  |
| 2019/05/30 | CH2206 | Male | Three y/o | Treatment (Wk 3) | Treatment | Feed Day | No  | 15:20 | 15:00 - 15:59 | Afternoon | 38,0 | 115 | 126,6 | 126,6 | 19,15 | 603,82 | 164,08 |
| 2019/05/30 | CH2205 | Male | Three y/o | Treatment (Wk 3) | Treatment | Feed Day | No  | 15:25 | 15:00 - 15:59 | Afternoon | 38,0 | 60  | 25,8  | 25,8  | 19,15 | 554,67 | 109,02 |
| 2019/05/30 | CH2206 | Male | Three y/o | Treatment (Wk 3) | Treatment | Feed Day | No  | 15:25 | 15:00 - 15:59 | Afternoon | 38,0 | 96  | 155,0 | 155,0 | 19,15 | 590,91 | 171,17 |
| 2019/05/30 | CH2205 | Male | Three y/o | Treatment (Wk 3) | Treatment | Feed Day | Yes | 15:30 | 15:00 - 15:59 | Afternoon | 38,0 | 51  | 21,4  | 21,4  | 19,15 | 541,20 | 102,63 |
| 2019/05/30 | CH2206 | Male | Three y/o | Treatment (Wk 3) | Treatment | Feed Day | Yes | 15:30 | 15:00 - 15:59 | Afternoon | 38,0 | 92  | 104,6 | 104,6 | 19,15 | 587,78 | 157,41 |
| 2019/05/30 | CH2205 | Male | Three y/o | Treatment (Wk 3) | Treatment | Feed Day | Yes | 15:35 | 15:00 - 15:59 | Afternoon | 38,0 | 63  | 16,6  | 16,6  | 19,15 | 558,62 | 93,96  |
| 2019/05/30 | CH2206 | Male | Three y/o | Treatment (Wk 3) | Treatment | Feed Day | Yes | 15:35 | 15:00 - 15:59 | Afternoon | 38,0 | 96  | 124,6 | 124,6 | 19,15 | 590,91 | 163,52 |
| 2019/05/30 | CH2205 | Male | Three y/o | Treatment (Wk 3) | Treatment | Feed Day | Yes | 15:40 | 15:00 - 15:59 | Afternoon | 38,0 | 52  | 24,0  | 24,0  | 19,15 | 542,83 | 106,55 |
| 2019/05/30 | CH2206 | Male | Three y/o | Treatment (Wk 3) | Treatment | Feed Day | Yes | 15:40 | 15:00 - 15:59 | Afternoon | 38,0 | 55  | 17,8  | 17,8  | 19,15 | 547,52 | 96,34  |
| 2019/05/30 | CH2205 | Male | Three y/o | Treatment (Wk 3) | Treatment | Feed Day | Yes | 15:45 | 15:00 - 15:59 | Afternoon | 38,0 |     | 47,6  | 47,6  | 19,15 |        | 130,09 |
| 2019/05/30 | CH2206 | Male | Three y/o | Treatment (Wk 3) | Treatment | Feed Day | Yes | 15:45 | 15:00 - 15:59 | Afternoon | 38,0 | 103 | 278,8 | 278,8 | 19,15 | 596,00 | 191,83 |
| 2019/05/30 | CH2205 | Male | Three y/o | Treatment (Wk 3) | Treatment | Feed Day | Yes | 15:50 | 15:00 - 15:59 | Afternoon | 38,0 | 98  | 60,4  | 60,4  | 19,15 | 592,41 | 138,32 |
| 2019/05/30 | CH2206 | Male | Three y/o | Treatment (Wk 3) | Treatment | Feed Day | Yes | 15:50 | 15:00 - 15:59 | Afternoon | 38,1 | 110 | 154,0 | 154,0 | 19,26 | 600,69 | 170,94 |
| 2019/05/30 | CH2205 | Male | Three y/o | Treatment (Wk 3) | Treatment | Feed Day | Yes | 15:55 | 15:00 - 15:59 | Afternoon | 37,9 | 68  | 52,6  | 52,6  | 19,05 | 564,71 | 133,54 |
| 2019/05/30 | CH2206 | Male | Three y/o | Treatment (Wk 3) | Treatment | Feed Day | Yes | 15:55 | 15:00 - 15:59 | Afternoon | 38,1 | 117 | 109,8 | 109,8 | 19,26 | 605,02 | 159,11 |
| 2019/05/30 | CH2205 | Male | Three y/o | Treatment (Wk 3) | Treatment | Feed Day | Yes | 16:00 | 16:00 - 16:59 | Evening   | 38,1 | 48  | 33,8  | 33,8  | 19,26 | 536,04 | 118,29 |
| 2019/05/30 | CH2206 | Male | Three y/o | Treatment (Wk 3) | Treatment | Feed Day | Yes | 16:00 | 16:00 - 16:59 | Evening   | 38,2 | 117 | 102,0 | 102,0 | 19,36 | 605,02 | 156,53 |
| 2019/05/30 | CH2205 | Male | Three y/o | Treatment (Wk 3) | Treatment | Feed Day | Yes | 16:05 | 16:00 - 16:59 | Evening   | 37,9 | 113 | 80,2  | 80,2  | 19,05 | 602,58 | 148,16 |



|            |        |      |           |                  |           |          |     |       |               |         |      |     |       |       |       |        |
|------------|--------|------|-----------|------------------|-----------|----------|-----|-------|---------------|---------|------|-----|-------|-------|-------|--------|
| 2019/05/30 | CH2206 | Male | Three y/o | Treatment (Wk 3) | Treatment | Feed Day | Yes | 16:05 | 16:00 - 16:59 | Evening | 38,2 |     | 40,6  | 40,6  | 19,36 | 124,60 |
| 2019/05/30 | CH2205 | Male | Three y/o | Treatment (Wk 3) | Treatment | Feed Day | Yes | 16:10 | 16:00 - 16:59 | Evening | 37,7 | 70  | 25,2  | 25,2  | 18,85 | 108,22 |
| 2019/05/30 | CH2206 | Male | Three y/o | Treatment (Wk 3) | Treatment | Feed Day | Yes | 16:10 | 16:00 - 16:59 | Evening | 38,1 | 99  | 116,6 | 116,6 | 19,26 | 566,99 |
| 2019/05/30 | CH2205 | Male | Three y/o | Treatment (Wk 3) | Treatment | Feed Day | Yes | 16:15 | 16:00 - 16:59 | Evening | 37,7 |     | 57,6  | 57,6  | 18,85 | 593,14 |
| 2019/05/30 | CH2206 | Male | Three y/o | Treatment (Wk 3) | Treatment | Feed Day | Yes | 16:15 | 16:00 - 16:59 | Evening | 38,1 | 56  | 99,2  | 99,2  | 19,26 | 136,68 |
| 2019/05/30 | CH2205 | Male | Three y/o | Treatment (Wk 3) | Treatment | Feed Day | Yes | 16:20 | 16:00 - 16:59 | Evening | 37,9 | 91  | 36,0  | 36,0  | 19,05 | 549,01 |
| 2019/05/30 | CH2206 | Male | Three y/o | Treatment (Wk 3) | Treatment | Feed Day | Yes | 16:20 | 16:00 - 16:59 | Evening | 38,1 |     | 54,0  | 54,0  | 19,26 | 586,98 |
| 2019/05/30 | CH2205 | Male | Three y/o | Treatment (Wk 3) | Treatment | Feed Day | Yes | 16:25 | 16:00 - 16:59 | Evening | 37,9 |     | 27,8  | 27,8  | 19,05 | 134,45 |
| 2019/05/30 | CH2206 | Male | Three y/o | Treatment (Wk 3) | Treatment | Feed Day | Yes | 16:25 | 16:00 - 16:59 | Evening | 38,1 | 88  | 39,4  | 39,4  | 19,26 | 111,58 |
| 2019/05/30 | CH2205 | Male | Three y/o | Treatment (Wk 3) | Treatment | Feed Day | No  | 16:30 | 16:00 - 16:59 | Evening | 37,9 | 158 | 25,2  | 25,2  | 19,05 | 584,49 |
| 2019/05/30 | CH2206 | Male | Three y/o | Treatment (Wk 3) | Treatment | Feed Day | No  | 16:30 | 16:00 - 16:59 | Evening | 38,0 | 106 | 53,6  | 53,6  | 19,15 | 123,57 |
| 2019/05/30 | CH2205 | Male | Three y/o | Treatment (Wk 3) | Treatment | Feed Day | No  | 16:35 | 16:00 - 16:59 | Evening | 38,0 |     | 25,0  | 25,0  | 19,05 | 625,26 |
| 2019/05/30 | CH2206 | Male | Three y/o | Treatment (Wk 3) | Treatment | Feed Day | No  | 16:35 | 16:00 - 16:59 | Evening | 38,1 | 77  | 44,2  | 44,2  | 19,15 | 598,06 |
| 2019/05/30 | CH2205 | Male | Three y/o | Treatment (Wk 3) | Treatment | Feed Day | No  | 16:40 | 16:00 - 16:59 | Evening | 37,9 | 68  | 11,4  | 11,4  | 19,26 | 574,39 |
| 2019/05/30 | CH2206 | Male | Three y/o | Treatment (Wk 3) | Treatment | Feed Day | No  | 16:40 | 16:00 - 16:59 | Evening | 38,0 | 88  | 58,0  | 58,0  | 19,05 | 127,53 |
| 2019/05/30 | CH2205 | Male | Three y/o | Treatment (Wk 3) | Treatment | Feed Day | No  | 16:45 | 16:00 - 16:59 | Evening | 37,7 | 63  | 21,2  | 21,2  | 19,26 | 564,71 |
| 2019/05/30 | CH2206 | Male | Three y/o | Treatment (Wk 3) | Treatment | Feed Day | No  | 16:45 | 16:00 - 16:59 | Evening | 38,0 | 75  | 28,0  | 28,0  | 19,15 | 81,19  |
| 2019/05/30 | CH2205 | Male | Three y/o | Treatment (Wk 3) | Treatment | Feed Day | No  | 16:50 | 16:00 - 16:59 | Evening | 37,7 | 58  | 20,8  | 20,8  | 19,26 | 584,49 |
| 2019/05/30 | CH2206 | Male | Three y/o | Treatment (Wk 3) | Treatment | Feed Day | No  | 16:50 | 16:00 - 16:59 | Evening | 38,1 | 79  | 47,6  | 47,6  | 19,15 | 136,92 |
| 2019/05/30 | CH2205 | Male | Three y/o | Treatment (Wk 3) | Treatment | Feed Day | No  | 16:55 | 16:00 - 16:59 | Evening | 37,7 | 72  | 19,2  | 19,2  | 19,05 | 558,62 |
| 2019/05/30 | CH2206 | Male | Three y/o | Treatment (Wk 3) | Treatment | Feed Day | No  | 16:55 | 16:00 - 16:59 | Evening | 38,0 | 94  | 25,6  | 25,6  | 19,26 | 102,31 |
| 2019/05/30 | CH2205 | Male | Three y/o | Treatment (Wk 3) | Treatment | Feed Day | No  | 17:00 | 17:00 - 17:59 | Evening | 37,7 |     | 18,6  | 18,6  | 19,15 | 572,36 |
| 2019/05/30 | CH2206 | Male | Three y/o | Treatment (Wk 3) | Treatment | Feed Day | No  | 17:00 | 17:00 - 17:59 | Evening | 37,9 | 46  | 18,4  | 18,4  | 19,05 | 111,83 |
| 2019/05/30 | CH2205 | Male | Three y/o | Treatment (Wk 3) | Treatment | Feed Day | No  | 17:05 | 17:00 - 17:59 | Evening | 37,8 | 68  | 16,0  | 16,0  | 19,26 | 551,90 |
| 2019/05/30 | CH2206 | Male | Three y/o | Treatment (Wk 3) | Treatment | Feed Day | No  | 17:05 | 17:00 - 17:59 | Evening | 37,8 | 91  | 11,4  | 11,4  | 19,05 | 101,65 |
| 2019/05/30 | CH2205 | Male | Three y/o | Treatment (Wk 3) | Treatment | Feed Day | No  | 17:10 | 17:00 - 17:59 | Evening | 37,9 | 73  | 14,4  | 14,4  | 19,26 | 576,36 |
| 2019/05/30 | CH2206 | Male | Three y/o | Treatment (Wk 3) | Treatment | Feed Day | No  | 17:10 | 17:00 - 17:59 | Evening | 37,8 | 117 | 32,0  | 32,0  | 19,05 | 130,09 |
| 2019/05/30 | CH2205 | Male | Three y/o | Treatment (Wk 3) | Treatment | Feed Day | No  | 17:15 | 17:00 - 17:59 | Evening | 37,9 | 172 | 19,2  | 19,2  | 19,26 | 569,20 |
| 2019/05/30 | CH2206 | Male | Three y/o | Treatment (Wk 3) | Treatment | Feed Day | No  | 17:15 | 17:00 - 17:59 | Evening | 37,8 | 65  | 27,0  | 27,0  | 19,15 | 589,37 |
| 2019/05/30 | CH2205 | Male | Three y/o | Treatment (Wk 3) | Treatment | Feed Day | No  | 17:20 | 17:00 - 17:59 | Evening | 37,9 | 124 | 19,2  | 19,2  | 19,05 | 108,76 |
| 2019/05/30 | CH2206 | Male | Three y/o | Treatment (Wk 3) | Treatment | Feed Day | No  | 17:20 | 17:00 - 17:59 | Evening | 37,7 | 102 | 13,0  | 13,0  | 19,26 | 97,84  |
| 2019/05/30 | CH2205 | Male | Three y/o | Treatment (Wk 3) | Treatment | Feed Day | No  | 17:25 | 17:00 - 17:59 | Evening | 37,9 |     | 18,0  | 18,0  | 19,05 | 532,38 |
| 2019/05/30 | CH2206 | Male | Three y/o | Treatment (Wk 3) | Treatment | Feed Day | No  | 17:25 | 17:00 - 17:59 | Evening | 37,8 | 49  | 13,6  | 13,6  | 19,26 | 532,38 |
| 2019/05/30 | CH2205 | Male | Three y/o | Treatment (Wk 3) | Treatment | Feed Day | No  | 17:30 | 17:00 - 17:59 | Evening | 37,9 | 66  | 25,4  | 25,4  | 19,05 | 97,47  |
| 2019/05/30 | CH2206 | Male | Three y/o | Treatment (Wk 3) | Treatment | Feed Day | No  | 17:30 | 17:00 - 17:59 | Evening | 37,8 | 47  | 28,6  | 28,6  | 19,26 | 532,38 |
| 2019/05/30 | CH2205 | Male | Three y/o | Treatment (Wk 3) | Treatment | Feed Day | No  | 17:35 | 17:00 - 17:59 | Evening | 37,9 |     | 55,2  | 55,2  | 19,05 | 576,36 |
| 2019/05/30 | CH2206 | Male | Three y/o | Treatment (Wk 3) | Treatment | Feed Day | No  | 17:35 | 17:00 - 17:59 | Evening | 37,8 | 94  | 40,6  | 40,6  | 19,26 | 130,09 |
| 2019/05/30 | CH2205 | Male | Three y/o | Treatment (Wk 3) | Treatment | Feed Day | No  | 17:40 | 17:00 - 17:59 | Evening | 37,9 | 86  | 73,2  | 73,2  | 19,05 | 537,80 |
| 2019/05/30 | CH2206 | Male | Three y/o | Treatment (Wk 3) | Treatment | Feed Day | No  | 17:40 | 17:00 - 17:59 | Evening | 37,8 | 104 | 94,6  | 94,6  | 19,26 | 562,34 |
| 2019/05/30 | CH2205 | Male | Three y/o | Treatment (Wk 3) | Treatment | Feed Day | No  | 17:45 | 17:00 - 17:59 | Evening | 37,9 | 143 | 134,0 | 134,0 | 19,05 | 108,49 |
| 2019/05/30 | CH2206 | Male | Three y/o | Treatment (Wk 3) | Treatment | Feed Day | No  | 17:45 | 17:00 - 17:59 | Evening | 37,9 | 53  | 282,0 | 282,0 | 19,26 | 512,56 |
| 2019/05/30 | CH2205 | Male | Three y/o | Treatment (Wk 3) | Treatment | Feed Day | No  | 17:50 | 17:00 - 17:59 | Evening | 37,9 | 119 | 384,0 | 384,0 | 19,15 | 135,21 |
| 2019/05/30 | CH2206 | Male | Three y/o | Treatment (Wk 3) | Treatment | Feed Day | No  | 17:50 | 17:00 - 17:59 | Evening | 38,0 |     | 381,6 | 381,6 | 19,05 | 589,37 |
| 2019/05/30 | CH2205 | Male | Three y/o | Treatment (Wk 3) | Treatment | Feed Day | No  | 17:55 | 17:00 - 17:59 | Evening | 37,9 | 36  | 425,4 | 425,4 | 19,26 | 582,77 |
| 2019/05/30 | CH2206 | Male | Three y/o | Treatment (Wk 3) | Treatment | Feed Day | No  | 17:55 | 17:00 - 17:59 | Evening | 38,0 | 119 | 86,4  | 86,4  | 19,05 | 144,99 |
| 2019/05/30 | CH2205 | Male | Three y/o | Treatment (Wk 3) | Treatment | Feed Day | No  | 18:00 | 18:00 - 18:59 | Evening | 38,0 | 124 | 39,8  | 39,8  | 19,26 | 596,69 |
| 2019/05/30 | CH2206 | Male | Three y/o | Treatment (Wk 3) | Treatment | Feed Day | No  | 18:00 | 18:00 - 18:59 | Evening | 38,3 | 167 | 48,4  | 48,4  | 19,05 | 618,69 |
| 2019/05/30 | CH2205 | Male | Three y/o | Treatment (Wk 3) | Treatment | Feed Day | No  | 18:05 | 18:00 - 18:59 | Evening | 37,9 | 65  | 30,6  | 30,6  | 19,26 | 544,43 |
| 2019/05/30 | CH2206 | Male | Three y/o | Treatment (Wk 3) | Treatment | Feed Day | No  | 18:05 | 18:00 - 18:59 | Evening | 38,3 | 90  | 31,8  | 31,8  | 19,05 | 606,20 |
| 2019/05/30 | CH2205 | Male | Three y/o | Treatment (Wk 3) | Treatment | Feed Day | No  | 18:10 | 18:00 - 18:59 | Evening | 37,7 | 74  | 31,0  | 31,0  | 19,26 | 203,17 |
| 2019/05/30 | CH2206 | Male | Three y/o | Treatment (Wk 3) | Treatment | Feed Day | No  | 18:10 | 18:00 - 18:59 | Evening | 38,3 | 119 | 48,6  | 48,6  | 19,15 | 202,94 |
| 2019/05/30 | CH2205 | Male | Three y/o | Treatment (Wk 3) | Treatment | Feed Day | No  | 18:15 | 18:00 - 18:59 | Evening | 38,0 | 53  | 31,2  | 31,2  | 19,05 | 510,56 |
| 2019/05/30 | CH2206 | Male | Three y/o | Treatment (Wk 3) | Treatment | Feed Day | No  | 18:15 | 18:00 - 18:59 | Evening | 38,1 | 88  | 48,8  | 48,8  | 19,26 | 606,20 |
| 2019/05/30 | CH2205 | Male | Three y/o | Treatment (Wk 3) | Treatment | Feed Day | No  | 18:20 | 18:00 - 18:59 | Evening | 38,0 | 85  | 34,4  | 34,4  | 19,46 | 130,81 |
| 2019/05/30 | CH2206 | Male | Three y/o | Treatment (Wk 3) | Treatment | Feed Day | No  | 18:20 | 18:00 - 18:59 | Evening | 38,2 | 90  | 43,0  | 43,0  | 19,15 | 544,43 |
| 2019/05/30 | CH2205 | Male | Three y/o | Treatment (Wk 3) | Treatment | Feed Day | No  | 18:25 | 18:00 - 18:59 | Evening | 38,1 | 71  | 30,8  | 30,8  | 19,26 | 584,49 |
| 2019/05/30 | CH2206 | Male | Three y/o | Treatment (Wk 3) | Treatment | Feed Day | No  | 18:25 | 18:00 - 18:59 | Evening | 38,2 | 88  | 42,4  | 42,4  | 19,05 | 130,95 |
| 2019/05/30 | CH2205 | Male | Three y/o | Treatment (Wk 3) | Treatment | Feed Day | No  | 18:30 | 18:00 - 18:59 | Evening | 38,1 | 68  | 30,0  | 30,0  | 19,26 | 581,90 |
| 2019/05/30 | CH2206 | Male | Three y/o | Treatment (Wk 3) | Treatment | Feed Day | No  | 18:30 | 18:00 - 18:59 | Evening | 38,2 | 65  | 43,6  | 43,6  | 19,36 | 586,16 |
| 2019/05/30 | CH2205 | Male | Three y/o | Treatment (Wk 3) | Treatment | Feed Day | No  | 18:35 | 18:00 - 18:59 | Evening | 38,2 | 86  | 33,8  | 33,8  | 19,46 | 126,58 |
| 2019/05/30 | CH2206 | Male | Three y/o | Treatment (Wk 3) | Treatment | Feed Day | No  | 18:35 | 18:00 - 18:59 | Evening | 38,3 | 79  | 48,2  | 48,2  | 19,36 | 571,33 |
| 2019/05/30 | CH2205 | Male | Three y/o | Treatment (Wk 3) | Treatment | Feed Day | No  | 18:40 | 18:00 - 18:59 | Evening | 38,2 | 64  | 24,6  | 24,6  | 19,05 | 571,33 |
| 2019/05/30 | CH2206 | Male | Three y/o | Treatment (Wk 3) | Treatment | Feed Day | No  | 18:40 | 18:00 - 18:59 | Evening | 38,3 | 76  | 46,6  | 46,6  | 19,26 | 576,36 |
| 2019/05/30 | CH2205 | Male | Three y/o | Treatment (Wk 3) | Treatment | Feed Day | No  | 18:45 | 18:00 - 18:59 | Evening | 38,2 | 91  | 23,8  | 23,8  | 19,46 | 130,52 |
| 2019/05/30 | CH2206 | Male | Three y/o | Treatment (Wk 3) | Treatment | Feed Day | No  | 18:45 | 18:00 - 18:59 | Evening | 38,3 | 68  | 50,0  | 50,0  | 19,36 | 559,88 |
| 2019/05/30 | CH2205 | Male | Three y/o | Treatment (Wk 3) | Treatment | Feed Day | No  | 18:50 | 18:00 - 18:59 | Evening | 38,2 | 68  | 31,2  | 31,2  | 19,46 | 573,39 |
| 2019/05/30 | CH2206 | Male | Three y/o | Treatment (Wk 3) | Treatment | Feed Day | No  | 18:50 | 18:00 - 18:59 | Evening | 38,3 | 77  | 47,6  | 47,6  | 19,36 | 564,71 |
| 2019/05/30 | CH2205 | Male | Three y/o | Treatment (Wk 3) | Treatment | Feed Day | No  | 18:55 | 18:00 - 18:59 | Evening | 38,2 | 89  | 31,2  | 31,2  | 19,46 | 126,10 |
| 2019/05/30 | CH2206 | Male | Three y/o | Treatment (Wk 3) | Treatment | Feed Day | No  | 18:55 | 18:00 - 18:59 | Evening | 38,3 | 85  | 47,2  | 47,2  | 19,36 | 584,49 |
| 2019/05/30 | CH2205 | Male | Three y/o | Treatment (Wk 3) | Treatment | Feed Day | No  | 19:00 | 19:00 - 19:59 | Evening | 38,2 | 62  | 31,4  | 31,4  | 19,46 | 586,98 |



|            |        |      |           |                  |           |          |    |       |               |         |      |      |      |      |       |        |        |
|------------|--------|------|-----------|------------------|-----------|----------|----|-------|---------------|---------|------|------|------|------|-------|--------|--------|
| 2019/05/30 | CH2206 | Male | Three y/o | Treatment (Wk 3) | Treatment | Feed Day | No | 19:00 | 19:00 - 19:59 | Evening | 38,3 | 72   | 46,4 | 46,4 | 19,46 | 569,20 | 129,21 |
| 2019/05/30 | CH2205 | Male | Three y/o | Treatment (Wk 3) | Treatment | Feed Day | No | 19:05 | 19:00 - 19:59 | Evening | 38,2 | 87   | 31,2 | 31,2 | 19,36 | 583,64 | 115,54 |
| 2019/05/30 | CH2206 | Male | Three y/o | Treatment (Wk 3) | Treatment | Feed Day | No | 19:05 | 19:00 - 19:59 | Evening | 38,3 | 85   | 52,4 | 52,4 | 19,46 | 581,90 | 133,41 |
| 2019/05/30 | CH2205 | Male | Three y/o | Treatment (Wk 3) | Treatment | Feed Day | No | 19:10 | 19:00 - 19:59 | Evening | 38,2 |      | 29,2 | 29,2 | 19,36 |        | 113,27 |
| 2019/05/30 | CH2206 | Male | Three y/o | Treatment (Wk 3) | Treatment | Feed Day | No | 19:10 | 19:00 - 19:59 | Evening | 38,3 | 50   | 43,6 | 43,6 | 19,46 | 539,52 | 127,06 |
| 2019/05/30 | CH2205 | Male | Three y/o | Treatment (Wk 3) | Treatment | Feed Day | No | 19:15 | 19:00 - 19:59 | Evening | 38,1 | 97   | 26,8 | 26,8 | 19,26 | 591,66 | 110,33 |
| 2019/05/30 | CH2206 | Male | Three y/o | Treatment (Wk 3) | Treatment | Feed Day | No | 19:15 | 19:00 - 19:59 | Evening | 38,2 | 82   | 51,0 | 51,0 | 19,36 | 579,19 | 132,47 |
| 2019/05/30 | CH2205 | Male | Three y/o | Treatment (Wk 3) | Treatment | Feed Day | No | 19:20 | 19:00 - 19:59 | Evening | 38,1 | 62   | 27,8 | 27,8 | 19,26 | 557,33 | 111,58 |
| 2019/05/30 | CH2206 | Male | Three y/o | Treatment (Wk 3) | Treatment | Feed Day | No | 19:20 | 19:00 - 19:59 | Evening | 38,2 | 74   | 26,8 | 26,8 | 19,36 | 571,33 | 110,33 |
| 2019/05/30 | CH2205 | Male | Three y/o | Treatment (Wk 3) | Treatment | Feed Day | No | 19:25 | 19:00 - 19:59 | Evening | 38,0 | 120  | 18,2 | 18,2 | 19,15 | 606,78 | 97,10  |
| 2019/05/30 | CH2206 | Male | Three y/o | Treatment (Wk 3) | Treatment | Feed Day | No | 19:25 | 19:00 - 19:59 | Evening | 38,2 | 46   | 43,4 | 43,4 | 19,36 | 532,38 | 126,90 |
| 2019/05/30 | CH2205 | Male | Three y/o | Treatment (Wk 3) | Treatment | Feed Day | No | 19:30 | 19:00 - 19:59 | Evening | 38,0 | 50   | 5,8  | 5,8  | 19,15 | 539,52 | 58,39  |
| 2019/05/30 | CH2206 | Male | Three y/o | Treatment (Wk 3) | Treatment | Feed Day | No | 19:30 | 19:00 - 19:59 | Evening | 38,2 | 73   | 39,8 | 39,8 | 19,36 | 570,27 | 123,91 |
| 2019/05/30 | CH2205 | Male | Three y/o | Treatment (Wk 3) | Treatment | Feed Day | No | 19:35 | 19:00 - 19:59 | Evening | 37,9 | 62   | 7,2  | 7,2  | 19,05 | 557,33 | 65,66  |
| 2019/05/30 | CH2206 | Male | Three y/o | Treatment (Wk 3) | Treatment | Feed Day | No | 19:35 | 19:00 - 19:59 | Evening | 38,2 | 91   | 25,0 | 25,0 | 19,36 | 586,98 | 107,94 |
| 2019/05/30 | CH2205 | Male | Three y/o | Treatment (Wk 3) | Treatment | Feed Day | No | 19:40 | 19:00 - 19:59 | Evening | 37,7 | 68   | 6,4  | 6,4  | 18,85 | 564,71 | 61,70  |
| 2019/05/30 | CH2206 | Male | Three y/o | Treatment (Wk 3) | Treatment | Feed Day | No | 19:40 | 19:00 - 19:59 | Evening | 38,2 | 73   | 37,0 | 37,0 | 19,36 | 570,27 | 121,40 |
| 2019/05/30 | CH2205 | Male | Three y/o | Treatment (Wk 3) | Treatment | Feed Day | No | 19:45 | 19:00 - 19:59 | Evening | 37,6 | 65   | 5,6  | 5,6  | 18,75 | 561,12 | 57,21  |
| 2019/05/30 | CH2206 | Male | Three y/o | Treatment (Wk 3) | Treatment | Feed Day | No | 19:45 | 19:00 - 19:59 | Evening | 38,1 | 76   | 26,4 | 26,4 | 19,26 | 573,39 | 109,81 |
| 2019/05/30 | CH2205 | Male | Three y/o | Treatment (Wk 3) | Treatment | Feed Day | No | 19:50 | 19:00 - 19:59 | Evening | 37,6 | 57   | 1,8  | 1,8  | 18,75 | 550,47 | 19,38  |
| 2019/05/30 | CH2206 | Male | Three y/o | Treatment (Wk 3) | Treatment | Feed Day | No | 19:50 | 19:00 - 19:59 | Evening | 38,1 | 96   | 27,2 | 27,2 | 19,26 | 590,91 | 110,83 |
| 2019/05/30 | CH2205 | Male | Three y/o | Treatment (Wk 3) | Treatment | Feed Day | No | 19:55 | 19:00 - 19:59 | Evening | 37,6 | 47   | 6,8  | 6,8  | 18,75 | 534,23 | 63,74  |
| 2019/05/30 | CH2206 | Male | Three y/o | Treatment (Wk 3) | Treatment | Feed Day | No | 19:55 | 19:00 - 19:59 | Evening | 38,1 | 69   | 26,4 | 26,4 | 19,26 | 565,86 | 109,81 |
| 2019/05/30 | CH2205 | Male | Three y/o | Treatment (Wk 3) | Treatment | Feed Day | No | 20:00 | 20:00 - 20:59 | Night   | 37,6 | 62   | 6,8  | 6,8  | 18,75 | 557,33 | 63,74  |
| 2019/05/30 | CH2206 | Male | Three y/o | Treatment (Wk 3) | Treatment | Feed Day | No | 20:00 | 20:00 - 20:59 | Night   | 38,1 | 48   | 25,6 | 25,6 | 19,26 | 536,04 | 108,76 |
| 2019/05/30 | CH2205 | Male | Three y/o | Treatment (Wk 3) | Treatment | Feed Day | No | 20:05 | 20:00 - 20:59 | Night   | 37,5 | 57   | 4,8  | 4,8  | 18,65 | 550,47 | 52,04  |
| 2019/05/30 | CH2206 | Male | Three y/o | Treatment (Wk 3) | Treatment | Feed Day | No | 20:05 | 20:00 - 20:59 | Night   | 38,2 | 77   | 24,4 | 24,4 | 19,36 | 574,39 | 107,11 |
| 2019/05/30 | CH2205 | Male | Three y/o | Treatment (Wk 3) | Treatment | Feed Day | No | 20:10 | 20:00 - 20:59 | Night   | 37,6 | 48   | 4,2  | 4,2  | 18,75 | 536,04 | 47,57  |
| 2019/05/30 | CH2206 | Male | Three y/o | Treatment (Wk 3) | Treatment | Feed Day | No | 20:10 | 20:00 - 20:59 | Night   | 38,2 | 80   | 24,8 | 24,8 | 19,36 | 577,31 | 107,67 |
| 2019/05/30 | CH2205 | Male | Three y/o | Treatment (Wk 3) | Treatment | Feed Day | No | 20:15 | 20:00 - 20:59 | Night   | 37,6 | 110  | 5,0  | 5,0  | 18,75 | 600,69 | 53,41  |
| 2019/05/30 | CH2206 | Male | Three y/o | Treatment (Wk 3) | Treatment | Feed Day | No | 20:15 | 20:00 - 20:59 | Night   | 38,3 | 73   | 25,2 | 25,2 | 19,46 | 570,27 | 108,22 |
| 2019/05/30 | CH2205 | Male | Three y/o | Treatment (Wk 3) | Treatment | Feed Day | No | 20:20 | 20:00 - 20:59 | Night   | 37,9 | 95   | 12,8 | 12,8 | 19,05 | 590,14 | 85,12  |
| 2019/05/30 | CH2206 | Male | Three y/o | Treatment (Wk 3) | Treatment | Feed Day | No | 20:20 | 20:00 - 20:59 | Night   | 38,2 | 69   | 22,8 | 22,8 | 19,36 | 565,86 | 104,79 |
| 2019/05/30 | CH2205 | Male | Three y/o | Treatment (Wk 3) | Treatment | Feed Day | No | 20:25 | 20:00 - 20:59 | Night   | 38,1 | 86   | 9,4  | 9,4  | 19,26 | 582,77 | 74,66  |
| 2019/05/30 | CH2206 | Male | Three y/o | Treatment (Wk 3) | Treatment | Feed Day | No | 20:25 | 20:00 - 20:59 | Night   | 38,2 | 92   | 22,4 | 22,4 | 19,36 | 587,78 | 104,19 |
| 2019/05/30 | CH2205 | Male | Three y/o | Treatment (Wk 3) | Treatment | Feed Day | No | 20:30 | 20:00 - 20:59 | Night   | 38,1 | 69   | 4,6  | 4,6  | 19,26 | 565,86 | 50,61  |
| 2019/05/30 | CH2206 | Male | Three y/o | Treatment (Wk 3) | Treatment | Feed Day | No | 20:30 | 20:00 - 20:59 | Night   | 38,2 | 46   | 23,6 | 23,6 | 19,36 | 532,38 | 105,97 |
| 2019/05/30 | CH2205 | Male | Three y/o | Treatment (Wk 3) | Treatment | Feed Day | No | 20:35 | 20:00 - 20:59 | Night   | 38,2 | 81   | 6,2  | 6,2  | 19,36 | 578,26 | 60,63  |
| 2019/05/30 | CH2206 | Male | Three y/o | Treatment (Wk 3) | Treatment | Feed Day | No | 20:35 | 20:00 - 20:59 | Night   | 38,2 | 73   | 27,8 | 27,8 | 19,36 | 570,27 | 111,58 |
| 2019/05/30 | CH2205 | Male | Three y/o | Treatment (Wk 3) | Treatment | Feed Day | No | 20:40 | 20:00 - 20:59 | Night   | 38,2 | 59   | 6,6  | 6,6  | 19,36 | 553,30 | 62,73  |
| 2019/05/30 | CH2206 | Male | Three y/o | Treatment (Wk 3) | Treatment | Feed Day | No | 20:40 | 20:00 - 20:59 | Night   | 38,2 | 59   | 19,8 | 19,8 | 19,36 | 553,30 | 99,97  |
| 2019/05/30 | CH2205 | Male | Three y/o | Treatment (Wk 3) | Treatment | Feed Day | No | 20:45 | 20:00 - 20:59 | Night   | 38,2 | 73   | 10,6 | 10,6 | 19,36 | 570,27 | 78,73  |
| 2019/05/30 | CH2206 | Male | Three y/o | Treatment (Wk 3) | Treatment | Feed Day | No | 20:45 | 20:00 - 20:59 | Night   | 110  | 28,4 | 28,4 |      | 19,26 | 600,69 | 112,31 |
| 2019/05/30 | CH2205 | Male | Three y/o | Treatment (Wk 3) | Treatment | Feed Day | No | 20:50 | 20:00 - 20:59 | Night   | 38,3 | 103  | 21,0 | 21,0 | 19,46 | 596,00 | 101,98 |
| 2019/05/30 | CH2206 | Male | Three y/o | Treatment (Wk 3) | Treatment | Feed Day | No | 20:50 | 20:00 - 20:59 | Night   | 38,1 | 98   | 19,2 | 19,2 | 19,26 | 592,41 | 98,92  |
| 2019/05/30 | CH2205 | Male | Three y/o | Treatment (Wk 3) | Treatment | Feed Day | No | 20:55 | 20:00 - 20:59 | Night   | 38,2 | 97   | 22,8 | 22,8 | 19,36 | 591,66 | 104,79 |
| 2019/05/30 | CH2206 | Male | Three y/o | Treatment (Wk 3) | Treatment | Feed Day | No | 20:55 | 20:00 - 20:59 | Night   | 38,0 | 69   | 44,6 | 44,6 | 19,15 | 565,86 | 127,84 |
| 2019/05/30 | CH2205 | Male | Three y/o | Treatment (Wk 3) | Treatment | Feed Day | No | 21:00 | 21:00 - 21:59 | Night   | 38,2 | 101  | 27,4 | 27,4 | 19,36 | 594,59 | 111,09 |
| 2019/05/30 | CH2206 | Male | Three y/o | Treatment (Wk 3) | Treatment | Feed Day | No | 21:00 | 21:00 - 21:59 | Night   | 38,0 | 107  | 13,2 | 13,2 | 19,15 | 598,73 | 86,17  |
| 2019/05/30 | CH2205 | Male | Three y/o | Treatment (Wk 3) | Treatment | Feed Day | No | 21:05 | 21:00 - 21:59 | Night   | 38,2 | 47   | 17,0 | 17,0 | 19,36 | 534,23 | 94,77  |
| 2019/05/30 | CH2206 | Male | Three y/o | Treatment (Wk 3) | Treatment | Feed Day | No | 21:05 | 21:00 - 21:59 | Night   | 38,0 | 89   | 37,2 | 37,2 | 19,15 | 585,33 | 121,59 |
| 2019/05/30 | CH2205 | Male | Three y/o | Treatment (Wk 3) | Treatment | Feed Day | No | 21:10 | 21:00 - 21:59 | Night   | 38,1 | 92   | 20,2 | 20,2 | 19,26 | 587,78 | 100,65 |
| 2019/05/30 | CH2206 | Male | Three y/o | Treatment (Wk 3) | Treatment | Feed Day | No | 21:10 | 21:00 - 21:59 | Night   | 37,9 | 92   | 40,4 | 40,4 | 19,05 | 587,78 | 124,43 |
| 2019/05/30 | CH2205 | Male | Three y/o | Treatment (Wk 3) | Treatment | Feed Day | No | 21:15 | 21:00 - 21:59 | Night   | 38,1 | 105  | 22,6 | 22,6 | 19,26 | 597,38 | 104,49 |
| 2019/05/30 | CH2206 | Male | Three y/o | Treatment (Wk 3) | Treatment | Feed Day | No | 21:15 | 21:00 - 21:59 | Night   | 38,0 | 46   | 37,6 | 37,6 | 19,15 | 532,38 | 121,96 |
| 2019/05/30 | CH2205 | Male | Three y/o | Treatment (Wk 3) | Treatment | Feed Day | No | 21:20 | 21:00 - 21:59 | Night   | 38,1 | 63   | 21,0 | 21,0 | 19,26 | 558,62 | 101,98 |
| 2019/05/30 | CH2206 | Male | Three y/o | Treatment (Wk 3) | Treatment | Feed Day | No | 21:20 | 21:00 - 21:59 | Night   | 38,0 | 93   | 32,2 | 32,2 | 19,15 | 588,58 | 116,63 |
| 2019/05/30 | CH2205 | Male | Three y/o | Treatment (Wk 3) | Treatment | Feed Day | No | 21:25 | 21:00 - 21:59 | Night   | 38,1 | 51   | 20,0 | 20,0 | 19,26 | 541,20 | 100,31 |
| 2019/05/30 | CH2206 | Male | Three y/o | Treatment (Wk 3) | Treatment | Feed Day | No | 21:25 | 21:00 - 21:59 | Night   | 38,0 | 65   | 35,6 | 35,6 | 19,15 | 561,12 | 120,08 |
| 2019/05/30 | CH2205 | Male | Three y/o | Treatment (Wk 3) | Treatment | Feed Day | No | 21:30 | 21:00 - 21:59 | Night   | 38,0 | 66   | 16,8 | 16,8 | 19,15 | 562,34 | 94,37  |
| 2019/05/30 | CH2206 | Male | Three y/o | Treatment (Wk 3) | Treatment | Feed Day | No | 21:30 | 21:00 - 21:59 | Night   | 38,0 | 46   | 34,6 | 34,6 | 19,15 | 532,38 | 119,10 |
| 2019/05/30 | CH2205 | Male | Three y/o | Treatment (Wk 3) | Treatment | Feed Day | No | 21:35 | 21:00 - 21:59 | Night   | 38,0 | 110  | 23,4 | 23,4 | 19,15 | 600,69 | 105,68 |
| 2019/05/30 | CH2206 | Male | Three y/o | Treatment (Wk 3) | Treatment | Feed Day | No | 21:35 | 21:00 - 21:59 | Night   | 38,1 | 46   | 24,8 | 24,8 | 19,26 | 532,38 | 107,67 |
| 2019/05/30 | CH2205 | Male | Three y/o | Treatment (Wk 3) | Treatment | Feed Day | No | 21:40 | 21:00 - 21:59 | Night   | 38,0 | 95   | 26,4 | 26,4 | 19,15 | 590,14 | 109,81 |
| 2019/05/30 | CH2206 | Male | Three y/o | Treatment (Wk 3) | Treatment | Feed Day | No | 21:40 | 21:00 - 21:59 | Night   | 38,1 | 92   | 27,6 | 27,6 | 19,26 | 587,78 | 111,33 |
| 2019/05/30 | CH2205 | Male | Three y/o | Treatment (Wk 3) | Treatment | Feed Day | No | 21:45 | 21:00 - 21:59 | Night   | 38,0 | 70   | 28,0 | 28,0 | 19,15 | 566,99 | 111,83 |
| 2019/05/30 | CH2206 | Male | Three y/o | Treatment (Wk 3) | Treatment | Feed Day | No | 21:45 | 21:00 - 21:59 | Night   | 38,1 | 52   | 23,4 | 23,4 | 19,26 | 542,83 | 105,68 |
| 2019/05/30 | CH2205 | Male | Three y/o | Treatment (Wk 3) | Treatment | Feed Day | No | 21:50 | 21:00 - 21:59 | Night   | 38,0 | 108  | 12,2 | 12,2 | 19,15 | 599,39 | 83,49  |
| 2019/05/30 | CH2206 | Male | Three y/o | Treatment (Wk 3) | Treatment | Feed Day | No | 21:50 | 21:00 - 21:59 | Night   | 38,1 | 71   | 28,8 | 28,8 | 19,26 | 568,10 | 112,79 |
| 2019/05/30 | CH2205 | Male | Three y/o | Treatment (Wk 3) | Treatment | Feed Day | No | 21:55 | 21:00 - 21:59 | Night   | 38,0 | 47   | 25,4 | 25,4 | 19,15 | 534,23 | 108,49 |



|    |            |        |      |           |                  |           |          |    |       |               |               |      |     |      |      |       |        |        |
|----|------------|--------|------|-----------|------------------|-----------|----------|----|-------|---------------|---------------|------|-----|------|------|-------|--------|--------|
|    | 2019/05/30 | CH2206 | Male | Three y/o | Treatment (Wk 3) | Treatment | Feed Day | No | 21:55 | 21:00 - 21:59 | Night         | 38,1 | 73  | 41,6 | 41,6 | 19,26 | 570,27 | 125,44 |
|    | 2019/05/30 | CH2205 | Male | Three y/o | Treatment (Wk 3) | Treatment | Feed Day | No | 22:00 | 22:00 - 22:59 | Night         | 37,9 | 53  | 25,2 | 25,2 | 19,05 | 544,43 | 108,22 |
|    | 2019/05/30 | CH2206 | Male | Three y/o | Treatment (Wk 3) | Treatment | Feed Day | No | 22:00 | 22:00 - 22:59 | Night         | 38,1 | 45  | 30,0 | 30,0 | 19,26 | 530,47 | 114,20 |
|    | 2019/05/30 | CH2205 | Male | Three y/o | Treatment (Wk 3) | Treatment | Feed Day | No | 22:05 | 22:00 - 22:59 | Night         | 37,6 | 71  | 20,4 | 20,4 | 18,75 | 568,10 | 100,99 |
|    | 2019/05/30 | CH2206 | Male | Three y/o | Treatment (Wk 3) | Treatment | Feed Day | No | 22:05 | 22:00 - 22:59 | Night         | 38,1 | 96  | 24,6 | 24,6 | 19,26 | 590,91 | 107,39 |
|    | 2019/05/30 | CH2205 | Male | Three y/o | Treatment (Wk 3) | Treatment | Feed Day | No | 22:10 | 22:00 - 22:59 | Night         | 37,4 |     | 22,4 |      | 18,55 |        | 104,19 |
|    | 2019/05/30 | CH2206 | Male | Three y/o | Treatment (Wk 3) | Treatment | Feed Day | No | 22:10 | 22:00 - 22:59 | Night         | 38,1 | 95  | 28,8 | 28,8 | 19,26 | 590,14 | 112,79 |
|    | 2019/05/30 | CH2205 | Male | Three y/o | Treatment (Wk 3) | Treatment | Feed Day | No | 22:15 | 22:00 - 22:59 | Night         | 37,4 | 92  | 17,8 | 17,8 | 18,55 | 587,78 | 96,34  |
|    | 2019/05/30 | CH2206 | Male | Three y/o | Treatment (Wk 3) | Treatment | Feed Day | No | 22:15 | 22:00 - 22:59 | Night         | 38,0 | 90  | 27,0 | 27,0 | 19,15 | 586,16 | 110,58 |
|    | 2019/05/30 | CH2205 | Male | Three y/o | Treatment (Wk 3) | Treatment | Feed Day | No | 22:20 | 22:00 - 22:59 | Night         | 37,3 | 73  | 20,6 | 20,6 | 18,46 | 570,27 | 101,32 |
|    | 2019/05/30 | CH2206 | Male | Three y/o | Treatment (Wk 3) | Treatment | Feed Day | No | 22:20 | 22:00 - 22:59 | Night         | 38,0 | 67  | 28,0 | 28,0 | 19,15 | 563,53 | 111,83 |
|    | 2019/05/30 | CH2205 | Male | Three y/o | Treatment (Wk 3) | Treatment | Feed Day | No | 22:25 | 22:00 - 22:59 | Night         | 37,3 | 69  | 9,4  | 9,4  | 18,46 | 565,86 | 74,66  |
|    | 2019/05/30 | CH2206 | Male | Three y/o | Treatment (Wk 3) | Treatment | Feed Day | No | 22:25 | 22:00 - 22:59 | Night         | 38,0 | 103 | 29,4 | 29,4 | 19,15 | 596,00 | 113,50 |
|    | 2019/05/30 | CH2205 | Male | Three y/o | Treatment (Wk 3) | Treatment | Feed Day | No | 22:30 | 22:00 - 22:59 | Night         | 37,6 | 73  | 10,0 | 10,0 | 18,75 | 570,27 | 76,76  |
|    | 2019/05/30 | CH2206 | Male | Three y/o | Treatment (Wk 3) | Treatment | Feed Day | No | 22:30 | 22:00 - 22:59 | Night         | 38,0 | 71  | 25,8 | 25,8 | 19,15 | 568,10 | 109,02 |
|    | 2019/05/30 | CH2205 | Male | Three y/o | Treatment (Wk 3) | Treatment | Feed Day | No | 22:35 | 22:00 - 22:59 | Night         | 37,7 | 48  | 13,2 | 13,2 | 18,85 | 536,04 | 86,17  |
|    | 2019/05/30 | CH2206 | Male | Three y/o | Treatment (Wk 3) | Treatment | Feed Day | No | 22:35 | 22:00 - 22:59 | Night         | 38,0 | 53  | 26,8 | 26,8 | 19,15 | 544,43 | 110,33 |
|    | 2019/05/30 | CH2205 | Male | Three y/o | Treatment (Wk 3) | Treatment | Feed Day | No | 22:40 | 22:00 - 22:59 | Night         | 37,9 | 46  | 11,0 | 11,0 | 19,05 | 532,38 | 79,98  |
|    | 2019/05/30 | CH2206 | Male | Three y/o | Treatment (Wk 3) | Treatment | Feed Day | No | 22:40 | 22:00 - 22:59 | Night         | 38,0 | 98  | 35,4 | 35,4 | 19,15 | 592,41 | 119,88 |
|    | 2019/05/30 | CH2205 | Male | Three y/o | Treatment (Wk 3) | Treatment | Feed Day | No | 22:45 | 22:00 - 22:59 | Night         | 38,0 | 103 | 13,6 | 13,6 | 19,15 | 596,00 | 87,18  |
|    | 2019/05/30 | CH2206 | Male | Three y/o | Treatment (Wk 3) | Treatment | Feed Day | No | 22:45 | 22:00 - 22:59 | Night         | 38,0 | 76  | 26,0 | 26,0 | 19,15 | 573,39 | 109,29 |
|    | 2019/05/30 | CH2205 | Male | Three y/o | Treatment (Wk 3) | Treatment | Feed Day | No | 22:50 | 22:00 - 22:59 | Night         | 38,0 | 68  | 8,0  | 8,0  | 19,15 | 564,71 | 69,22  |
|    | 2019/05/30 | CH2206 | Male | Three y/o | Treatment (Wk 3) | Treatment | Feed Day | No | 22:50 | 22:00 - 22:59 | Night         | 37,9 | 94  | 31,0 | 31,0 | 19,05 | 589,37 | 115,32 |
|    | 2019/05/30 | CH2205 | Male | Three y/o | Treatment (Wk 3) | Treatment | Feed Day | No | 22:55 | 22:00 - 22:59 | Night         | 38,1 | 68  | 7,4  | 7,4  | 19,26 | 564,71 | 66,59  |
|    | 2019/05/30 | CH2206 | Male | Three y/o | Treatment (Wk 3) | Treatment | Feed Day | No | 22:55 | 22:00 - 22:59 | Night         | 37,9 | 92  | 26,0 | 26,0 | 19,05 | 587,78 | 109,29 |
|    | 2019/05/30 | CH2205 | Male | Three y/o | Treatment (Wk 3) | Treatment | Feed Day | No | 23:00 | 23:00 - 23:59 | Night         | 38,1 | 48  | 6,2  | 6,2  | 19,26 | 536,04 | 60,63  |
|    | 2019/05/30 | CH2206 | Male | Three y/o | Treatment (Wk 3) | Treatment | Feed Day | No | 23:00 | 23:00 - 23:59 | Night         | 37,9 | 46  | 22,4 | 22,4 | 19,05 | 532,38 | 104,19 |
|    | 2019/05/30 | CH2205 | Male | Three y/o | Treatment (Wk 3) | Treatment | Feed Day | No | 23:05 | 23:00 - 23:59 | Night         | 38,1 | 102 | 9,2  | 9,2  | 19,26 | 595,30 | 73,94  |
|    | 2019/05/30 | CH2206 | Male | Three y/o | Treatment (Wk 3) | Treatment | Feed Day | No | 23:05 | 23:00 - 23:59 | Night         | 37,9 | 74  | 18,4 | 18,4 | 19,05 | 571,33 | 97,47  |
|    | 2019/05/30 | CH2205 | Male | Three y/o | Treatment (Wk 3) | Treatment | Feed Day | No | 23:10 | 23:00 - 23:59 | Night         | 38,1 | 79  | 9,2  | 9,2  | 19,26 | 576,36 | 73,94  |
|    | 2019/05/30 | CH2206 | Male | Three y/o | Treatment (Wk 3) | Treatment | Feed Day | No | 23:10 | 23:00 - 23:59 | Night         | 37,8 | 96  | 10,0 | 10,0 | 18,95 | 590,91 | 76,76  |
|    | 2019/05/30 | CH2205 | Male | Three y/o | Treatment (Wk 3) | Treatment | Feed Day | No | 23:15 | 23:00 - 23:59 | Night         | 38,1 | 102 | 9,4  | 9,4  | 19,26 | 595,30 | 74,66  |
|    | 2019/05/30 | CH2206 | Male | Three y/o | Treatment (Wk 3) | Treatment | Feed Day | No | 23:15 | 23:00 - 23:59 | Night         | 37,8 | 63  | 33,2 | 33,2 | 18,95 | 558,62 | 117,68 |
|    | 2019/05/30 | CH2205 | Male | Three y/o | Treatment (Wk 3) | Treatment | Feed Day | No | 23:20 | 23:00 - 23:59 | Night         | 38,1 | 49  | 4,8  | 4,8  | 19,26 | 537,80 | 52,04  |
|    | 2019/05/30 | CH2206 | Male | Three y/o | Treatment (Wk 3) | Treatment | Feed Day | No | 23:20 | 23:00 - 23:59 | Night         | 37,7 | 73  | 33,4 | 33,4 | 18,85 | 570,27 | 117,88 |
|    | 2019/05/30 | CH2205 | Male | Three y/o | Treatment (Wk 3) | Treatment | Feed Day | No | 23:25 | 23:00 - 23:59 | Night         | 38,1 | 68  | 7,8  | 7,8  | 19,26 | 564,71 | 68,36  |
|    | 2019/05/30 | CH2206 | Male | Three y/o | Treatment (Wk 3) | Treatment | Feed Day | No | 23:25 | 23:00 - 23:59 | Night         | 37,7 | 97  | 33,4 | 33,4 | 18,85 | 591,66 | 117,88 |
|    | 2019/05/30 | CH2205 | Male | Three y/o | Treatment (Wk 3) | Treatment | Feed Day | No | 23:30 | 23:00 - 23:59 | Night         | 38,1 | 113 | 2,8  | 2,8  | 19,26 | 602,58 | 34,04  |
|    | 2019/05/30 | CH2206 | Male | Three y/o | Treatment (Wk 3) | Treatment | Feed Day | No | 23:30 | 23:00 - 23:59 | Night         | 37,8 | 54  | 16,6 | 16,6 | 18,95 | 545,99 | 93,96  |
|    | 2019/05/30 | CH2205 | Male | Three y/o | Treatment (Wk 3) | Treatment | Feed Day | No | 23:35 | 23:00 - 23:59 | Night         | 38,1 | 74  | 8,8  | 8,8  | 19,26 | 571,33 | 72,43  |
|    | 2019/05/30 | CH2206 | Male | Three y/o | Treatment (Wk 3) | Treatment | Feed Day | No | 23:35 | 23:00 - 23:59 | Night         | 37,8 | 41  | 6,0  | 6,0  | 18,95 | 522,29 | 59,53  |
|    | 2019/05/30 | CH2205 | Male | Three y/o | Treatment (Wk 3) | Treatment | Feed Day | No | 23:40 | 23:00 - 23:59 | Night         | 38,1 | 71  | 2,0  | 2,0  | 19,26 | 568,10 | 22,86  |
|    | 2019/05/30 | CH2206 | Male | Three y/o | Treatment (Wk 3) | Treatment | Feed Day | No | 23:40 | 23:00 - 23:59 | Night         | 37,8 | 54  | 37,2 | 37,2 | 18,95 | 545,99 | 121,59 |
|    | 2019/05/30 | CH2205 | Male | Three y/o | Treatment (Wk 3) | Treatment | Feed Day | No | 23:45 | 23:00 - 23:59 | Night         | 38,1 | 70  | 7,0  | 7,0  | 19,26 | 566,99 | 64,72  |
|    | 2019/05/30 | CH2206 | Male | Three y/o | Treatment (Wk 3) | Treatment | Feed Day | No | 23:45 | 23:00 - 23:59 | Night         | 37,8 | 93  | 39,0 | 39,0 | 18,95 | 588,58 | 123,22 |
|    | 2019/05/30 | CH2205 | Male | Three y/o | Treatment (Wk 3) | Treatment | Feed Day | No | 23:50 | 23:00 - 23:59 | Night         | 38,1 | 107 | 7,6  | 7,6  | 19,26 | 598,73 | 67,49  |
|    | 2019/05/30 | CH2206 | Male | Three y/o | Treatment (Wk 3) | Treatment | Feed Day | No | 23:50 | 23:00 - 23:59 | Night         | 37,8 | 98  | 32,4 | 32,4 | 18,95 | 592,41 | 116,84 |
|    | 2019/05/30 | CH2205 | Male | Three y/o | Treatment (Wk 3) | Treatment | Feed Day | No | 23:55 | 23:00 - 23:59 | Night         | 38,1 | 84  | 3,2  | 3,2  | 19,26 | 581,01 | 38,49  |
|    | 2019/05/30 | CH2206 | Male | Three y/o | Treatment (Wk 3) | Treatment | Feed Day | No | 23:55 | 23:00 - 23:59 | Night         | 37,8 | 85  | 36,0 | 36,0 | 18,95 | 581,90 | 120,46 |
| 17 | 2019/05/31 | CH2205 | Male | Three y/o | Treatment (Wk 3) | Treatment | Feed Day | No | 00:00 | 00:00 - 00:59 | Early Morning | 38,1 | 112 | 24,0 | 24,0 | 19,26 | 601,96 | 106,55 |
|    | 2019/05/31 | CH2206 | Male | Three y/o | Treatment (Wk 3) | Treatment | Feed Day | No | 00:00 | 00:00 - 00:59 | Early Morning | 37,8 | 98  | 34,8 | 34,8 | 18,95 | 592,41 | 119,29 |
|    | 2019/05/31 | CH2205 | Male | Three y/o | Treatment (Wk 3) | Treatment | Feed Day | No | 00:05 | 00:00 - 00:59 | Early Morning | 38,1 | 107 | 25,4 | 25,4 | 19,26 | 598,73 | 108,49 |
|    | 2019/05/31 | CH2206 | Male | Three y/o | Treatment (Wk 3) | Treatment | Feed Day | No | 00:05 | 00:00 - 00:59 | Early Morning | 37,8 | 92  | 31,8 | 31,8 | 18,95 | 587,78 | 116,20 |
|    | 2019/05/31 | CH2205 | Male | Three y/o | Treatment (Wk 3) | Treatment | Feed Day | No | 00:10 | 00:00 - 00:59 | Early Morning | 37,9 | 60  | 21,2 | 21,2 | 19,05 | 554,67 | 102,31 |
|    | 2019/05/31 | CH2206 | Male | Three y/o | Treatment (Wk 3) | Treatment | Feed Day | No | 00:10 | 00:00 - 00:59 | Early Morning | 37,9 | 60  | 32,0 | 32,0 | 19,05 | 554,67 | 116,41 |
|    | 2019/05/31 | CH2205 | Male | Three y/o | Treatment (Wk 3) | Treatment | Feed Day | No | 00:15 | 00:00 - 00:59 | Early Morning | 37,7 | 99  | 23,4 | 23,4 | 18,85 | 593,14 | 105,68 |
|    | 2019/05/31 | CH2206 | Male | Three y/o | Treatment (Wk 3) | Treatment | Feed Day | No | 00:15 | 00:00 - 00:59 | Early Morning | 37,8 |     | 30,0 | 30,0 | 18,95 |        | 114,20 |
|    | 2019/05/31 | CH2205 | Male | Three y/o | Treatment (Wk 3) | Treatment | Feed Day | No | 00:20 | 00:00 - 00:59 | Early Morning | 37,6 | 90  | 25,0 | 25,0 | 18,75 | 586,16 | 107,94 |
|    | 2019/05/31 | CH2206 | Male | Three y/o | Treatment (Wk 3) | Treatment | Feed Day | No | 00:20 | 00:00 - 00:59 | Early Morning | 37,8 | 90  | 11,8 | 11,8 | 18,95 | 586,16 | 82,36  |
|    | 2019/05/31 | CH2205 | Male | Three y/o | Treatment (Wk 3) | Treatment | Feed Day | No | 00:25 | 00:00 - 00:59 | Early Morning | 37,6 | 45  | 25,4 | 25,4 | 18,75 | 530,47 | 108,49 |
|    | 2019/05/31 | CH2206 | Male | Three y/o | Treatment (Wk 3) | Treatment | Feed Day | No | 00:25 | 00:00 - 00:59 | Early Morning | 37,8 | 84  | 2,2  | 2,2  | 18,95 | 581,01 | 26,02  |
|    | 2019/05/31 | CH2205 | Male | Three y/o | Treatment (Wk 3) | Treatment | Feed Day | No | 00:30 | 00:00 - 00:59 | Early Morning | 37,6 | 83  | 19,8 | 19,8 | 18,75 | 580,11 | 99,97  |
|    | 2019/05/31 | CH2206 | Male | Three y/o | Treatment (Wk 3) | Treatment | Feed Day | No | 00:30 | 00:00 - 00:59 | Early Morning | 37,8 | 51  | 2,2  | 2,2  | 18,95 | 541,20 | 26,02  |
|    | 2019/05/31 | CH2205 | Male | Three y/o | Treatment (Wk 3) | Treatment | Feed Day | No | 00:35 | 00:00 - 00:59 | Early Morning | 37,9 | 79  | 19,4 | 19,4 | 19,05 | 576,36 | 99,28  |
|    | 2019/05/31 | CH2206 | Male | Three y/o | Treatment (Wk 3) | Treatment | Feed Day | No | 00:35 | 00:00 - 00:59 | Early Morning | 37,8 | 46  | 15,4 | 15,4 | 18,95 | 532,38 | 91,41  |
|    | 2019/05/31 | CH2205 | Male | Three y/o | Treatment (Wk 3) | Treatment | Feed Day | No | 00:40 | 00:00 - 00:59 | Early Morning | 38,0 | 62  | 21,4 | 21,4 | 19,15 | 557,33 | 102,63 |
|    | 2019/05/31 | CH2206 | Male | Three y/o | Treatment (Wk 3) | Treatment | Feed Day | No | 00:40 | 00:00 - 00:59 | Early Morning | 37,8 | 86  | 18,4 | 18,4 | 18,95 | 582,77 | 97,47  |
|    | 2019/05/31 | CH2205 | Male | Three y/o | Treatment (Wk 3) | Treatment | Feed Day | No | 00:45 | 00:00 - 00:59 | Early Morning | 38,0 | 50  | 18,8 | 18,8 | 19,15 | 539,52 | 98,20  |
|    | 2019/05/31 | CH2206 | Male | Three y/o | Treatment (Wk 3) | Treatment | Feed Day | No | 00:45 | 00:00 - 00:59 | Early Morning | 37,8 | 85  | 9,4  | 9,4  | 18,95 | 581,90 | 74,66  |
|    | 2019/05/31 | CH2205 | Male | Three y/o | Treatment (Wk 3) | Treatment | Feed Day | No | 00:50 | 00:00 - 00:59 | Early Morning | 38,0 | 82  | 23,2 | 23,2 | 19,15 | 579,19 | 105,39 |



|            |        |      |           |                  |           |          |    |       |               |               |      |     |       |       |       |        |        |
|------------|--------|------|-----------|------------------|-----------|----------|----|-------|---------------|---------------|------|-----|-------|-------|-------|--------|--------|
| 2019/05/31 | CH2206 | Male | Three y/o | Treatment (Wk 3) | Treatment | Feed Day | No | 00:50 | 00:00 - 00:59 | Early Morning | 37,8 | 90  | 9,8   | 9,8   | 18,95 | 586,16 | 76,07  |
| 2019/05/31 | CH2205 | Male | Three y/o | Treatment (Wk 3) | Treatment | Feed Day | No | 00:55 | 00:00 - 00:59 | Early Morning | 38,1 | 99  | 21,4  | 21,4  | 19,26 | 593,14 | 102,63 |
| 2019/05/31 | CH2206 | Male | Three y/o | Treatment (Wk 3) | Treatment | Feed Day | No | 00:55 | 00:00 - 00:59 | Early Morning | 37,7 | 43  | 11,4  | 11,4  | 18,85 | 526,50 | 81,19  |
| 2019/05/31 | CH2205 | Male | Three y/o | Treatment (Wk 3) | Treatment | Feed Day | No | 01:00 | 01:00 - 01:59 | Early Morning | 38,0 | 100 | 22,8  | 22,8  | 19,15 | 593,87 | 104,79 |
| 2019/05/31 | CH2206 | Male | Three y/o | Treatment (Wk 3) | Treatment | Feed Day | No | 01:00 | 01:00 - 01:59 | Early Morning | 37,7 | 105 | 27,6  | 27,6  | 18,85 | 597,38 | 111,33 |
| 2019/05/31 | CH2205 | Male | Three y/o | Treatment (Wk 3) | Treatment | Feed Day | No | 01:05 | 01:00 - 01:59 | Early Morning | 38,0 | 57  | 19,0  | 19,0  | 19,15 | 550,47 | 98,56  |
| 2019/05/31 | CH2206 | Male | Three y/o | Treatment (Wk 3) | Treatment | Feed Day | No | 01:05 | 01:00 - 01:59 | Early Morning | 37,7 | 73  | 24,2  | 24,2  | 18,85 | 570,27 | 106,83 |
| 2019/05/31 | CH2205 | Male | Three y/o | Treatment (Wk 3) | Treatment | Feed Day | No | 01:10 | 01:00 - 01:59 | Early Morning | 38,0 | 101 | 25,8  | 25,8  | 19,15 | 594,59 | 109,02 |
| 2019/05/31 | CH2206 | Male | Three y/o | Treatment (Wk 3) | Treatment | Feed Day | No | 01:10 | 01:00 - 01:59 | Early Morning | 37,7 | 55  | 29,4  | 29,4  | 18,85 | 547,52 | 113,50 |
| 2019/05/31 | CH2205 | Male | Three y/o | Treatment (Wk 3) | Treatment | Feed Day | No | 01:15 | 01:00 - 01:59 | Early Morning | 38,0 | 135 | 27,4  | 27,4  | 19,15 | 614,84 | 111,09 |
| 2019/05/31 | CH2206 | Male | Three y/o | Treatment (Wk 3) | Treatment | Feed Day | No | 01:15 | 01:00 - 01:59 | Early Morning | 37,8 | 119 | 102,6 | 102,6 | 18,95 | 606,20 | 156,74 |
| 2019/05/31 | CH2205 | Male | Three y/o | Treatment (Wk 3) | Treatment | Feed Day | No | 01:20 | 01:00 - 01:59 | Early Morning | 37,6 | 101 | 29,4  | 29,4  | 18,75 | 594,59 | 113,50 |
| 2019/05/31 | CH2206 | Male | Three y/o | Treatment (Wk 3) | Treatment | Feed Day | No | 01:20 | 01:00 - 01:59 | Early Morning | 37,8 | 90  | 41,8  | 41,8  | 18,95 | 586,16 | 125,60 |
| 2019/05/31 | CH2205 | Male | Three y/o | Treatment (Wk 3) | Treatment | Feed Day | No | 01:25 | 01:00 - 01:59 | Early Morning | 37,9 | 48  | 17,2  | 17,2  | 19,05 | 536,04 | 95,17  |
| 2019/05/31 | CH2206 | Male | Three y/o | Treatment (Wk 3) | Treatment | Feed Day | No | 01:25 | 01:00 - 01:59 | Early Morning | 37,8 | 86  | 40,6  | 40,6  | 18,95 | 582,77 | 124,60 |
| 2019/05/31 | CH2205 | Male | Three y/o | Treatment (Wk 3) | Treatment | Feed Day | No | 01:30 | 01:00 - 01:59 | Early Morning | 37,9 |     | 22,0  | 22,0  | 19,05 |        | 103,57 |
| 2019/05/31 | CH2206 | Male | Three y/o | Treatment (Wk 3) | Treatment | Feed Day | No | 01:30 | 01:00 - 01:59 | Early Morning | 37,8 | 62  | 39,2  | 39,2  | 18,95 | 557,33 | 123,39 |
| 2019/05/31 | CH2205 | Male | Three y/o | Treatment (Wk 3) | Treatment | Feed Day | No | 01:35 | 01:00 - 01:59 | Early Morning | 37,9 | 45  | 18,6  | 18,6  | 19,05 | 530,47 | 97,84  |
| 2019/05/31 | CH2206 | Male | Three y/o | Treatment (Wk 3) | Treatment | Feed Day | No | 01:35 | 01:00 - 01:59 | Early Morning | 37,8 | 92  | 44,0  | 44,0  | 18,95 | 587,78 | 127,37 |
| 2019/05/31 | CH2205 | Male | Three y/o | Treatment (Wk 3) | Treatment | Feed Day | No | 01:40 | 01:00 - 01:59 | Early Morning | 37,9 |     | 19,8  | 19,8  | 19,05 |        | 99,97  |
| 2019/05/31 | CH2206 | Male | Three y/o | Treatment (Wk 3) | Treatment | Feed Day | No | 01:40 | 01:00 - 01:59 | Early Morning | 37,8 | 94  | 29,4  | 29,4  | 18,95 | 589,37 | 113,50 |
| 2019/05/31 | CH2205 | Male | Three y/o | Treatment (Wk 3) | Treatment | Feed Day | No | 01:45 | 01:00 - 01:59 | Early Morning | 37,9 | 72  | 15,2  | 15,2  | 19,05 | 569,20 | 90,96  |
| 2019/05/31 | CH2206 | Male | Three y/o | Treatment (Wk 3) | Treatment | Feed Day | No | 01:45 | 01:00 - 01:59 | Early Morning | 37,8 | 93  | 33,2  | 33,2  | 18,95 | 588,58 | 117,68 |
| 2019/05/31 | CH2205 | Male | Three y/o | Treatment (Wk 3) | Treatment | Feed Day | No | 01:50 | 01:00 - 01:59 | Early Morning | 37,9 | 78  | 15,0  | 15,0  | 19,05 | 575,38 | 90,51  |
| 2019/05/31 | CH2206 | Male | Three y/o | Treatment (Wk 3) | Treatment | Feed Day | No | 01:50 | 01:00 - 01:59 | Early Morning | 37,7 | 88  | 34,0  | 34,0  | 18,85 | 584,49 | 118,49 |
| 2019/05/31 | CH2205 | Male | Three y/o | Treatment (Wk 3) | Treatment | Feed Day | No | 01:55 | 01:00 - 01:59 | Early Morning | 37,9 | 72  | 15,4  | 15,4  | 19,05 | 569,20 | 91,41  |
| 2019/05/31 | CH2206 | Male | Three y/o | Treatment (Wk 3) | Treatment | Feed Day | No | 01:55 | 01:00 - 01:59 | Early Morning | 37,8 | 98  | 33,4  | 33,4  | 18,95 | 592,41 | 117,88 |
| 2019/05/31 | CH2205 | Male | Three y/o | Treatment (Wk 3) | Treatment | Feed Day | No | 02:00 | 02:00 - 02:59 | Early Morning | 37,9 | 64  | 17,2  | 17,2  | 19,05 | 559,88 | 95,17  |
| 2019/05/31 | CH2206 | Male | Three y/o | Treatment (Wk 3) | Treatment | Feed Day | No | 02:00 | 02:00 - 02:59 | Early Morning | 37,8 | 94  | 37,0  | 37,0  | 18,95 | 589,37 | 121,40 |
| 2019/05/31 | CH2205 | Male | Three y/o | Treatment (Wk 3) | Treatment | Feed Day | No | 02:05 | 02:00 - 02:59 | Early Morning | 37,9 | 48  | 19,6  | 19,6  | 19,05 | 536,04 | 99,63  |
| 2019/05/31 | CH2206 | Male | Three y/o | Treatment (Wk 3) | Treatment | Feed Day | No | 02:05 | 02:00 - 02:59 | Early Morning | 37,8 | 90  | 37,6  | 37,6  | 18,95 | 586,16 | 121,96 |
| 2019/05/31 | CH2205 | Male | Three y/o | Treatment (Wk 3) | Treatment | Feed Day | No | 02:10 | 02:00 - 02:59 | Early Morning | 38,0 |     | 18,2  | 18,2  | 19,15 |        | 97,10  |
| 2019/05/31 | CH2206 | Male | Three y/o | Treatment (Wk 3) | Treatment | Feed Day | No | 02:10 | 02:00 - 02:59 | Early Morning | 37,8 | 58  | 25,6  | 25,6  | 18,95 | 551,90 | 108,76 |
| 2019/05/31 | CH2205 | Male | Three y/o | Treatment (Wk 3) | Treatment | Feed Day | No | 02:15 | 02:00 - 02:59 | Early Morning | 38,0 | 134 | 22,0  | 22,0  | 19,15 | 614,33 | 103,57 |
| 2019/05/31 | CH2206 | Male | Three y/o | Treatment (Wk 3) | Treatment | Feed Day | No | 02:15 | 02:00 - 02:59 | Early Morning | 37,7 | 95  | 29,6  | 29,6  | 18,85 | 590,14 | 113,73 |
| 2019/05/31 | CH2205 | Male | Three y/o | Treatment (Wk 3) | Treatment | Feed Day | No | 02:20 | 02:00 - 02:59 | Early Morning | 37,9 | 66  | 27,0  | 27,0  | 19,05 | 562,34 | 110,58 |
| 2019/05/31 | CH2206 | Male | Three y/o | Treatment (Wk 3) | Treatment | Feed Day | No | 02:20 | 02:00 - 02:59 | Early Morning | 37,7 | 58  | 39,6  | 39,6  | 18,85 | 551,90 | 123,74 |
| 2019/05/31 | CH2205 | Male | Three y/o | Treatment (Wk 3) | Treatment | Feed Day | No | 02:25 | 02:00 - 02:59 | Early Morning | 38,0 | 49  | 21,4  | 21,4  | 19,15 | 537,80 | 102,63 |
| 2019/05/31 | CH2206 | Male | Three y/o | Treatment (Wk 3) | Treatment | Feed Day | No | 02:25 | 02:00 - 02:59 | Early Morning | 37,5 | 59  | 44,6  | 44,6  | 18,65 | 553,30 | 127,84 |
| 2019/05/31 | CH2205 | Male | Three y/o | Treatment (Wk 3) | Treatment | Feed Day | No | 02:30 | 02:00 - 02:59 | Early Morning | 38,0 | 103 | 22,2  | 22,2  | 19,15 | 596,00 | 103,88 |
| 2019/05/31 | CH2206 | Male | Three y/o | Treatment (Wk 3) | Treatment | Feed Day | No | 02:30 | 02:00 - 02:59 | Early Morning | 37,5 | 92  | 46,0  | 46,0  | 18,65 | 587,78 | 128,91 |
| 2019/05/31 | CH2205 | Male | Three y/o | Treatment (Wk 3) | Treatment | Feed Day | No | 02:35 | 02:00 - 02:59 | Early Morning | 38,0 | 42  | 25,4  | 25,4  | 19,15 | 524,42 | 108,49 |
| 2019/05/31 | CH2206 | Male | Three y/o | Treatment (Wk 3) | Treatment | Feed Day | No | 02:35 | 02:00 - 02:59 | Early Morning | 37,5 | 90  | 48,4  | 48,4  | 18,65 | 586,16 | 130,66 |
| 2019/05/31 | CH2205 | Male | Three y/o | Treatment (Wk 3) | Treatment | Feed Day | No | 02:40 | 02:00 - 02:59 | Early Morning | 38,0 | 129 | 26,6  | 26,6  | 19,15 | 611,75 | 110,07 |
| 2019/05/31 | CH2206 | Male | Three y/o | Treatment (Wk 3) | Treatment | Feed Day | No | 02:40 | 02:00 - 02:59 | Early Morning | 37,5 | 197 | 49,8  | 49,8  | 18,65 | 639,25 | 131,65 |
| 2019/05/31 | CH2205 | Male | Three y/o | Treatment (Wk 3) | Treatment | Feed Day | No | 02:45 | 02:00 - 02:59 | Early Morning | 38,0 | 94  | 23,8  | 23,8  | 19,15 | 589,37 | 106,26 |
| 2019/05/31 | CH2206 | Male | Three y/o | Treatment (Wk 3) | Treatment | Feed Day | No | 02:45 | 02:00 - 02:59 | Early Morning | 37,4 | 68  | 46,4  | 46,4  | 18,55 | 564,71 | 129,21 |
| 2019/05/31 | CH2205 | Male | Three y/o | Treatment (Wk 3) | Treatment | Feed Day | No | 02:50 | 02:00 - 02:59 | Early Morning | 38,0 | 87  | 26,2  | 26,2  | 19,15 | 583,64 | 109,55 |
| 2019/05/31 | CH2206 | Male | Three y/o | Treatment (Wk 3) | Treatment | Feed Day | No | 02:50 | 02:00 - 02:59 | Early Morning | 37,4 | 47  | 48,0  | 48,0  | 18,55 | 534,23 | 130,38 |
| 2019/05/31 | CH2205 | Male | Three y/o | Treatment (Wk 3) | Treatment | Feed Day | No | 02:55 | 02:00 - 02:59 | Early Morning | 38,0 | 91  | 27,8  | 27,8  | 19,15 | 586,98 | 111,58 |
| 2019/05/31 | CH2206 | Male | Three y/o | Treatment (Wk 3) | Treatment | Feed Day | No | 02:55 | 02:00 - 02:59 | Early Morning | 37,3 | 92  | 47,0  | 47,0  | 18,46 | 587,78 | 129,65 |
| 2019/05/31 | CH2205 | Male | Three y/o | Treatment (Wk 3) | Treatment | Feed Day | No | 03:00 | 03:00 - 03:59 | Early Morning | 37,9 | 63  | 30,0  | 30,0  | 19,05 | 558,62 | 114,20 |
| 2019/05/31 | CH2206 | Male | Three y/o | Treatment (Wk 3) | Treatment | Feed Day | No | 03:00 | 03:00 - 03:59 | Early Morning | 37,3 | 90  | 46,2  | 46,2  | 18,46 | 586,16 | 129,06 |
| 2019/05/31 | CH2205 | Male | Three y/o | Treatment (Wk 3) | Treatment | Feed Day | No | 03:05 | 03:00 - 03:59 | Early Morning | 37,9 | 92  | 25,4  | 25,4  | 19,05 | 587,78 | 108,49 |
| 2019/05/31 | CH2206 | Male | Three y/o | Treatment (Wk 3) | Treatment | Feed Day | No | 03:05 | 03:00 - 03:59 | Early Morning | 37,3 | 67  | 51,4  | 51,4  | 18,46 | 563,53 | 132,74 |
| 2019/05/31 | CH2205 | Male | Three y/o | Treatment (Wk 3) | Treatment | Feed Day | No | 03:10 | 03:00 - 03:59 | Early Morning | 37,9 | 65  | 25,2  | 25,2  | 19,05 | 561,12 | 108,22 |
| 2019/05/31 | CH2206 | Male | Three y/o | Treatment (Wk 3) | Treatment | Feed Day | No | 03:10 | 03:00 - 03:59 | Early Morning | 37,3 | 80  | 51,6  | 51,6  | 18,46 | 577,31 | 132,87 |
| 2019/05/31 | CH2205 | Male | Three y/o | Treatment (Wk 3) | Treatment | Feed Day | No | 03:15 | 03:00 - 03:59 | Early Morning | 37,9 | 114 | 18,6  | 18,6  | 19,05 | 603,20 | 97,84  |
| 2019/05/31 | CH2206 | Male | Three y/o | Treatment (Wk 3) | Treatment | Feed Day | No | 03:15 | 03:00 - 03:59 | Early Morning | 37,3 | 91  | 45,2  | 45,2  | 18,46 | 586,98 | 128,30 |
| 2019/05/31 | CH2205 | Male | Three y/o | Treatment (Wk 3) | Treatment | Feed Day | No | 03:20 | 03:00 - 03:59 | Early Morning | 37,9 | 46  | 21,8  | 21,8  | 19,05 | 532,38 | 103,26 |
| 2019/05/31 | CH2206 | Male | Three y/o | Treatment (Wk 3) | Treatment | Feed Day | No | 03:20 | 03:00 - 03:59 | Early Morning | 37,2 | 86  | 48,4  | 48,4  | 18,36 | 582,77 | 130,66 |
| 2019/05/31 | CH2205 | Male | Three y/o | Treatment (Wk 3) | Treatment | Feed Day | No | 03:25 | 03:00 - 03:59 | Early Morning | 37,9 | 67  | 19,8  | 19,8  | 19,05 | 563,53 | 99,97  |
| 2019/05/31 | CH2206 | Male | Three y/o | Treatment (Wk 3) | Treatment | Feed Day | No | 03:25 | 03:00 - 03:59 | Early Morning | 37,2 | 77  | 48,8  | 48,8  | 18,36 | 574,39 | 130,95 |
| 2019/05/31 | CH2205 | Male | Three y/o | Treatment (Wk 3) | Treatment | Feed Day | No | 03:30 | 03:00 - 03:59 | Early Morning | 37,9 | 95  | 17,6  | 17,6  | 19,05 | 590,14 | 95,95  |
| 2019/05/31 | CH2206 | Male | Three y/o | Treatment (Wk 3) | Treatment | Feed Day | No | 03:30 | 03:00 - 03:59 | Early Morning | 37,2 | 56  | 30,4  | 30,4  | 18,36 | 549,01 | 114,65 |
| 2019/05/31 | CH2205 | Male | Three y/o | Treatment (Wk 3) | Treatment | Feed Day | No | 03:35 | 03:00 - 03:59 | Early Morning | 37,9 | 92  | 20,4  | 20,4  | 19,05 | 587,78 | 100,99 |
| 2019/05/31 | CH2206 | Male | Three y/o | Treatment (Wk 3) | Treatment | Feed Day | No | 03:35 | 03:00 - 03:59 | Early Morning | 37,3 | 55  | 21,8  | 21,8  | 18,46 | 547,52 | 103,26 |
| 2019/05/31 | CH2205 | Male | Three y/o | Treatment (Wk 3) | Treatment | Feed Day | No | 03:40 | 03:00 - 03:59 | Early Morning | 37,9 | 55  | 17,4  | 17,4  | 19,05 | 547,52 | 95,56  |
| 2019/05/31 | CH2206 | Male | Three y/o | Treatment (Wk 3) | Treatment | Feed Day | No | 03:40 | 03:00 - 03:59 | Early Morning | 37,4 | 90  | 18,6  | 18,6  | 18,55 | 586,16 | 97,84  |
| 2019/05/31 | CH2205 | Male | Three y/o | Treatment (Wk 3) | Treatment | Feed Day | No | 03:45 | 03:00 - 03:59 | Early Morning | 37,9 | 45  | 10,6  | 10,6  | 19,05 | 530,47 | 78,73  |



|            |        |      |           |                  |           |          |    |       |               |               |      |     |       |       |       |        |        |
|------------|--------|------|-----------|------------------|-----------|----------|----|-------|---------------|---------------|------|-----|-------|-------|-------|--------|--------|
| 2019/05/31 | CH2206 | Male | Three y/o | Treatment (Wk 3) | Treatment | Feed Day | No | 03:45 | 03:00 - 03:59 | Early Morning | 37,5 | 44  | 32,8  | 32,8  | 18,65 | 528,51 | 117,26 |
| 2019/05/31 | CH2205 | Male | Three y/o | Treatment (Wk 3) | Treatment | Feed Day | No | 03:50 | 03:00 - 03:59 | Early Morning | 37,9 | 98  | 9,2   | 9,2   | 19,05 | 592,41 | 73,94  |
| 2019/05/31 | CH2206 | Male | Three y/o | Treatment (Wk 3) | Treatment | Feed Day | No | 03:50 | 03:00 - 03:59 | Early Morning | 37,5 | 98  | 41,4  | 41,4  | 18,65 | 592,41 | 125,27 |
| 2019/05/31 | CH2205 | Male | Three y/o | Treatment (Wk 3) | Treatment | Feed Day | No | 03:55 | 03:00 - 03:59 | Early Morning | 37,9 | 66  | 12,4  | 12,4  | 19,05 | 562,34 | 84,04  |
| 2019/05/31 | CH2206 | Male | Three y/o | Treatment (Wk 3) | Treatment | Feed Day | No | 03:55 | 03:00 - 03:59 | Early Morning | 37,4 | 82  | 43,2  | 43,2  | 18,55 | 579,19 | 126,74 |
| 2019/05/31 | CH2205 | Male | Three y/o | Treatment (Wk 3) | Treatment | Feed Day | No | 04:00 | 04:00 - 04:59 | Morning       | 37,9 | 103 | 18,6  | 18,6  | 19,05 | 596,00 | 97,84  |
| 2019/05/31 | CH2206 | Male | Three y/o | Treatment (Wk 3) | Treatment | Feed Day | No | 04:00 | 04:00 - 04:59 | Morning       | 37,5 | 90  | 49,0  | 49,0  | 18,65 | 586,16 | 131,09 |
| 2019/05/31 | CH2205 | Male | Three y/o | Treatment (Wk 3) | Treatment | Feed Day | No | 04:05 | 04:00 - 04:59 | Morning       | 37,9 | 88  | 23,2  | 23,2  | 19,05 | 584,49 | 105,39 |
| 2019/05/31 | CH2206 | Male | Three y/o | Treatment (Wk 3) | Treatment | Feed Day | No | 04:05 | 04:00 - 04:59 | Morning       | 37,5 | 76  | 25,2  | 25,2  | 18,65 | 573,39 | 108,22 |
| 2019/05/31 | CH2205 | Male | Three y/o | Treatment (Wk 3) | Treatment | Feed Day | No | 04:10 | 04:00 - 04:59 | Morning       | 37,9 | 46  | 20,0  | 20,0  | 19,05 | 532,38 | 100,31 |
| 2019/05/31 | CH2206 | Male | Three y/o | Treatment (Wk 3) | Treatment | Feed Day | No | 04:10 | 04:00 - 04:59 | Morning       | 37,5 | 93  | 18,6  | 18,6  | 18,65 | 588,58 | 97,84  |
| 2019/05/31 | CH2205 | Male | Three y/o | Treatment (Wk 3) | Treatment | Feed Day | No | 04:15 | 04:00 - 04:59 | Morning       | 37,9 | 63  | 20,6  | 20,6  | 19,05 | 558,62 | 101,32 |
| 2019/05/31 | CH2206 | Male | Three y/o | Treatment (Wk 3) | Treatment | Feed Day | No | 04:15 | 04:00 - 04:59 | Morning       | 37,4 | 44  | 18,4  | 18,4  | 18,55 | 528,51 | 97,47  |
| 2019/05/31 | CH2205 | Male | Three y/o | Treatment (Wk 3) | Treatment | Feed Day | No | 04:20 | 04:00 - 04:59 | Morning       | 37,8 | 71  | 22,8  | 22,8  | 18,95 | 568,10 | 104,79 |
| 2019/05/31 | CH2206 | Male | Three y/o | Treatment (Wk 3) | Treatment | Feed Day | No | 04:20 | 04:00 - 04:59 | Morning       | 37,3 | 86  | 20,2  | 20,2  | 18,46 | 582,77 | 100,65 |
| 2019/05/31 | CH2205 | Male | Three y/o | Treatment (Wk 3) | Treatment | Feed Day | No | 04:25 | 04:00 - 04:59 | Morning       | 37,9 | 92  | 22,4  | 22,4  | 19,05 | 587,78 | 104,19 |
| 2019/05/31 | CH2206 | Male | Three y/o | Treatment (Wk 3) | Treatment | Feed Day | No | 04:25 | 04:00 - 04:59 | Morning       | 37,3 | 89  | 12,4  | 12,4  | 18,46 | 585,33 | 84,04  |
| 2019/05/31 | CH2205 | Male | Three y/o | Treatment (Wk 3) | Treatment | Feed Day | No | 04:30 | 04:00 - 04:59 | Morning       | 37,9 | 106 | 26,6  | 26,6  | 19,05 | 598,06 | 110,07 |
| 2019/05/31 | CH2206 | Male | Three y/o | Treatment (Wk 3) | Treatment | Feed Day | No | 04:30 | 04:00 - 04:59 | Morning       | 37,2 | 78  | 9,0   | 9,0   | 18,36 | 575,38 | 73,19  |
| 2019/05/31 | CH2205 | Male | Three y/o | Treatment (Wk 3) | Treatment | Feed Day | No | 04:35 | 04:00 - 04:59 | Morning       | 37,7 | 68  | 6,6   | 6,6   | 18,85 | 564,71 | 62,73  |
| 2019/05/31 | CH2206 | Male | Three y/o | Treatment (Wk 3) | Treatment | Feed Day | No | 04:35 | 04:00 - 04:59 | Morning       | 37,0 | 91  | 7,4   | 7,4   | 18,16 | 586,98 | 66,59  |
| 2019/05/31 | CH2205 | Male | Three y/o | Treatment (Wk 3) | Treatment | Feed Day | No | 04:40 | 04:00 - 04:59 | Morning       | 37,6 | 44  | 4,0   | 4,0   | 18,75 | 528,51 | 45,94  |
| 2019/05/31 | CH2206 | Male | Three y/o | Treatment (Wk 3) | Treatment | Feed Day | No | 04:40 | 04:00 - 04:59 | Morning       | 37,0 | 96  | 12,0  | 12,0  | 18,16 | 590,91 | 82,93  |
| 2019/05/31 | CH2205 | Male | Three y/o | Treatment (Wk 3) | Treatment | Feed Day | No | 04:45 | 04:00 - 04:59 | Morning       | 37,5 | 65  | 3,0   | 3,0   | 18,65 | 561,12 | 36,34  |
| 2019/05/31 | CH2206 | Male | Three y/o | Treatment (Wk 3) | Treatment | Feed Day | No | 04:45 | 04:00 - 04:59 | Morning       | 37,0 | 69  | 18,0  | 18,0  | 18,16 | 565,86 | 96,72  |
| 2019/05/31 | CH2205 | Male | Three y/o | Treatment (Wk 3) | Treatment | Feed Day | No | 04:50 | 04:00 - 04:59 | Morning       | 37,5 | 83  | 4,2   | 4,2   | 18,65 | 580,11 | 47,57  |
| 2019/05/31 | CH2206 | Male | Three y/o | Treatment (Wk 3) | Treatment | Feed Day | No | 04:50 | 04:00 - 04:59 | Morning       | 37,1 | 49  | 10,4  | 10,4  | 18,26 | 537,80 | 78,08  |
| 2019/05/31 | CH2205 | Male | Three y/o | Treatment (Wk 3) | Treatment | Feed Day | No | 04:55 | 04:00 - 04:59 | Morning       | 37,4 | 45  | 6,6   | 6,6   | 18,55 | 530,47 | 62,73  |
| 2019/05/31 | CH2206 | Male | Three y/o | Treatment (Wk 3) | Treatment | Feed Day | No | 04:55 | 04:00 - 04:59 | Morning       | 37,1 | 48  | 5,4   | 5,4   | 18,26 | 536,04 | 55,99  |
| 2019/05/31 | CH2205 | Male | Three y/o | Treatment (Wk 3) | Treatment | Feed Day | No | 05:00 | 05:00 - 05:59 | Morning       | 37,4 | 49  | 3,0   | 3,0   | 18,55 | 537,80 | 36,34  |
| 2019/05/31 | CH2206 | Male | Three y/o | Treatment (Wk 3) | Treatment | Feed Day | No | 05:00 | 05:00 - 05:59 | Morning       | 37,1 | 42  | 6,0   | 6,0   | 18,26 | 524,42 | 59,53  |
| 2019/05/31 | CH2205 | Male | Three y/o | Treatment (Wk 3) | Treatment | Feed Day | No | 05:05 | 05:00 - 05:59 | Morning       | 37,5 | 57  | 9,8   | 9,8   | 18,65 | 550,47 | 76,07  |
| 2019/05/31 | CH2206 | Male | Three y/o | Treatment (Wk 3) | Treatment | Feed Day | No | 05:05 | 05:00 - 05:59 | Morning       | 37,1 | 88  | 14,6  | 14,6  | 18,26 | 584,49 | 89,59  |
| 2019/05/31 | CH2205 | Male | Three y/o | Treatment (Wk 3) | Treatment | Feed Day | No | 05:10 | 05:00 - 05:59 | Morning       | 37,5 | 49  | 3,8   | 3,8   | 18,65 | 537,80 | 44,22  |
| 2019/05/31 | CH2206 | Male | Three y/o | Treatment (Wk 3) | Treatment | Feed Day | No | 05:10 | 05:00 - 05:59 | Morning       | 37,1 | 103 | 16,4  | 16,4  | 18,26 | 596,00 | 93,55  |
| 2019/05/31 | CH2205 | Male | Three y/o | Treatment (Wk 3) | Treatment | Feed Day | No | 05:15 | 05:00 - 05:59 | Morning       | 37,6 | 57  | 11,4  | 11,4  | 18,75 | 550,47 | 81,19  |
| 2019/05/31 | CH2206 | Male | Three y/o | Treatment (Wk 3) | Treatment | Feed Day | No | 05:15 | 05:00 - 05:59 | Morning       | 37,1 | 49  | 18,2  | 18,2  | 18,26 | 537,80 | 97,10  |
| 2019/05/31 | CH2205 | Male | Three y/o | Treatment (Wk 3) | Treatment | Feed Day | No | 05:20 | 05:00 - 05:59 | Morning       | 37,6 | 88  | 12,4  | 12,4  | 18,75 | 584,49 | 84,04  |
| 2019/05/31 | CH2206 | Male | Three y/o | Treatment (Wk 3) | Treatment | Feed Day | No | 05:20 | 05:00 - 05:59 | Morning       | 37,2 | 76  | 24,6  | 24,6  | 18,36 | 573,39 | 107,39 |
| 2019/05/31 | CH2205 | Male | Three y/o | Treatment (Wk 3) | Treatment | Feed Day | No | 05:25 | 05:00 - 05:59 | Morning       | 37,7 | 74  | 9,2   | 9,2   | 18,85 | 571,33 | 73,94  |
| 2019/05/31 | CH2206 | Male | Three y/o | Treatment (Wk 3) | Treatment | Feed Day | No | 05:25 | 05:00 - 05:59 | Morning       | 37,2 | 98  | 10,6  | 10,6  | 18,36 | 592,41 | 78,73  |
| 2019/05/31 | CH2205 | Male | Three y/o | Treatment (Wk 3) | Treatment | Feed Day | No | 05:30 | 05:00 - 05:59 | Morning       | 37,7 | 34  | 7,8   | 7,8   | 18,85 | 505,29 | 68,36  |
| 2019/05/31 | CH2206 | Male | Three y/o | Treatment (Wk 3) | Treatment | Feed Day | No | 05:30 | 05:00 - 05:59 | Morning       | 37,2 | 49  | 21,2  | 21,2  | 18,36 | 537,80 | 102,31 |
| 2019/05/31 | CH2205 | Male | Three y/o | Treatment (Wk 3) | Treatment | Feed Day | No | 05:35 | 05:00 - 05:59 | Morning       | 37,7 | 94  | 5,0   | 5,0   | 18,85 | 589,37 | 53,41  |
| 2019/05/31 | CH2206 | Male | Three y/o | Treatment (Wk 3) | Treatment | Feed Day | No | 05:35 | 05:00 - 05:59 | Morning       | 37,3 | 88  | 5,0   | 5,0   | 18,46 | 584,49 | 53,41  |
| 2019/05/31 | CH2205 | Male | Three y/o | Treatment (Wk 3) | Treatment | Feed Day | No | 05:40 | 05:00 - 05:59 | Morning       | 37,7 | 53  | 11,4  | 11,4  | 18,85 | 544,43 | 81,19  |
| 2019/05/31 | CH2206 | Male | Three y/o | Treatment (Wk 3) | Treatment | Feed Day | No | 05:40 | 05:00 - 05:59 | Morning       | 37,2 | 98  | 9,2   | 9,2   | 18,36 | 592,41 | 73,94  |
| 2019/05/31 | CH2205 | Male | Three y/o | Treatment (Wk 3) | Treatment | Feed Day | No | 05:45 | 05:00 - 05:59 | Morning       | 37,7 | 132 | 193,4 | 193,4 | 18,85 | 613,32 | 178,94 |
| 2019/05/31 | CH2206 | Male | Three y/o | Treatment (Wk 3) | Treatment | Feed Day | No | 05:45 | 05:00 - 05:59 | Morning       | 37,1 |     | 46,0  | 46,0  | 18,26 |        | 128,91 |
| 2019/05/31 | CH2205 | Male | Three y/o | Treatment (Wk 3) | Treatment | Feed Day | No | 05:50 | 05:00 - 05:59 | Morning       | 37,6 | 118 | 21,8  | 21,8  | 18,75 | 605,61 | 103,26 |
| 2019/05/31 | CH2206 | Male | Three y/o | Treatment (Wk 3) | Treatment | Feed Day | No | 05:50 | 05:00 - 05:59 | Morning       | 37,2 |     | 18,0  | 18,0  | 18,36 |        | 96,72  |
| 2019/05/31 | CH2205 | Male | Three y/o | Treatment (Wk 3) | Treatment | Feed Day | No | 05:55 | 05:00 - 05:59 | Morning       | 37,4 | 60  | 20,6  | 20,6  | 18,55 | 554,67 | 101,32 |
| 2019/05/31 | CH2206 | Male | Three y/o | Treatment (Wk 3) | Treatment | Feed Day | No | 05:55 | 05:00 - 05:59 | Morning       | 37,2 | 76  | 40,6  | 40,6  | 18,36 | 573,39 | 124,60 |
| 2019/05/31 | CH2205 | Male | Three y/o | Treatment (Wk 3) | Treatment | Feed Day | No | 06:00 | 06:00 - 06:59 | Morning       | 37,3 | 74  | 22,6  | 22,6  | 18,46 | 571,33 | 104,49 |
| 2019/05/31 | CH2206 | Male | Three y/o | Treatment (Wk 3) | Treatment | Feed Day | No | 06:00 | 06:00 - 06:59 | Morning       | 37,3 | 140 | 102,2 | 102,2 | 18,46 | 617,28 | 156,60 |
| 2019/05/31 | CH2205 | Male | Three y/o | Treatment (Wk 3) | Treatment | Feed Day | No | 06:05 | 06:00 - 06:59 | Morning       | 37,3 | 84  | 19,2  | 19,2  | 18,46 | 581,01 | 98,92  |
| 2019/05/31 | CH2206 | Male | Three y/o | Treatment (Wk 3) | Treatment | Feed Day | No | 06:05 | 06:00 - 06:59 | Morning       | 37,4 | 124 | 124,0 | 124,0 | 18,55 | 609,04 | 163,35 |
| 2019/05/31 | CH2205 | Male | Three y/o | Treatment (Wk 3) | Treatment | Feed Day | No | 06:10 | 06:00 - 06:59 | Morning       | 37,4 | 60  | 27,6  | 27,6  | 18,55 | 554,67 | 111,33 |
| 2019/05/31 | CH2206 | Male | Three y/o | Treatment (Wk 3) | Treatment | Feed Day | No | 06:10 | 06:00 - 06:59 | Morning       | 37,3 | 90  | 21,8  | 21,8  | 18,46 | 586,16 | 103,26 |
| 2019/05/31 | CH2205 | Male | Three y/o | Treatment (Wk 3) | Treatment | Feed Day | No | 06:15 | 06:00 - 06:59 | Morning       | 37,4 |     | 87,8  | 87,8  | 18,55 |        | 151,31 |
| 2019/05/31 | CH2206 | Male | Three y/o | Treatment (Wk 3) | Treatment | Feed Day | No | 06:15 | 06:00 - 06:59 | Morning       | 37,1 | 121 | 37,4  | 37,4  | 18,26 | 607,35 | 121,77 |
| 2019/05/31 | CH2205 | Male | Three y/o | Treatment (Wk 3) | Treatment | Feed Day | No | 06:20 | 06:00 - 06:59 | Morning       | 37,4 |     | 32,0  | 32,0  | 18,55 |        | 116,41 |
| 2019/05/31 | CH2206 | Male | Three y/o | Treatment (Wk 3) | Treatment | Feed Day | No | 06:20 | 06:00 - 06:59 | Morning       | 37,3 | 91  | 46,6  | 46,6  | 18,46 | 586,98 | 129,35 |
| 2019/05/31 | CH2205 | Male | Three y/o | Treatment (Wk 3) | Treatment | Feed Day | No | 06:25 | 06:00 - 06:59 | Morning       | 37,4 | 117 | 46,8  | 46,8  | 18,55 | 605,02 | 129,50 |
| 2019/05/31 | CH2206 | Male | Three y/o | Treatment (Wk 3) | Treatment | Feed Day | No | 06:25 | 06:00 - 06:59 | Morning       | 37,3 | 148 | 34,2  | 34,2  | 18,46 | 620,97 | 118,70 |
| 2019/05/31 | CH2205 | Male | Three y/o | Treatment (Wk 3) | Treatment | Feed Day | No | 06:30 | 06:00 - 06:59 | Morning       | 37,3 |     | 34,8  | 34,8  | 18,46 |        | 119,29 |
| 2019/05/31 | CH2206 | Male | Three y/o | Treatment (Wk 3) | Treatment | Feed Day | No | 06:30 | 06:00 - 06:59 | Morning       | 37,3 | 107 | 47,6  | 47,6  | 18,46 | 598,73 | 130,09 |
| 2019/05/31 | CH2205 | Male | Three y/o | Treatment (Wk 3) | Treatment | Feed Day | No | 06:35 | 06:00 - 06:59 | Morning       | 37,3 | 78  | 36,2  | 36,2  | 18,46 | 575,38 | 120,65 |
| 2019/05/31 | CH2206 | Male | Three y/o | Treatment (Wk 3) | Treatment | Feed Day | No | 06:35 | 06:00 - 06:59 | Morning       | 37,3 | 119 | 100,8 | 100,8 | 18,46 | 606,20 | 156,12 |
| 2019/05/31 | CH2205 | Male | Three y/o | Treatment (Wk 3) | Treatment | Feed Day | No | 06:40 | 06:00 - 06:59 | Morning       | 37,3 | 135 | 40,8  | 40,8  | 18,46 | 614,84 | 124,77 |



|            |        |      |           |                  |           |          |    |       |               |              |      |     |       |       |       |        |        |
|------------|--------|------|-----------|------------------|-----------|----------|----|-------|---------------|--------------|------|-----|-------|-------|-------|--------|--------|
| 2019/05/31 | CH2206 | Male | Three y/o | Treatment (Wk 3) | Treatment | Feed Day | No | 06:40 | 06:00 - 06:59 | Morning      | 37,4 | 119 | 83,4  | 83,4  | 18,55 | 606,20 | 149,52 |
| 2019/05/31 | CH2205 | Male | Three y/o | Treatment (Wk 3) | Treatment | Feed Day | No | 06:45 | 06:00 - 06:59 | Morning      | 37,1 |     | 37,6  | 37,6  | 18,26 |        | 121,96 |
| 2019/05/31 | CH2206 | Male | Three y/o | Treatment (Wk 3) | Treatment | Feed Day | No | 06:45 | 06:00 - 06:59 | Morning      | 37,4 |     | 36,8  | 36,8  | 18,55 | 601,33 | 121,22 |
| 2019/05/31 | CH2205 | Male | Three y/o | Treatment (Wk 3) | Treatment | Feed Day | No | 06:50 | 06:00 - 06:59 | Morning      | 37,1 |     | 14,6  | 14,6  | 18,26 |        | 89,59  |
| 2019/05/31 | CH2206 | Male | Three y/o | Treatment (Wk 3) | Treatment | Feed Day | No | 06:50 | 06:00 - 06:59 | Morning      | 37,4 | 107 | 221,0 | 221,0 | 18,55 | 598,73 | 183,63 |
| 2019/05/31 | CH2205 | Male | Three y/o | Treatment (Wk 3) | Treatment | Feed Day | No | 06:55 | 06:00 - 06:59 | Morning      | 37,1 | 79  | 25,6  | 25,6  | 18,26 | 576,36 | 108,76 |
| 2019/05/31 | CH2206 | Male | Three y/o | Treatment (Wk 3) | Treatment | Feed Day | No | 06:55 | 06:00 - 06:59 | Morning      | 37,4 | 182 | 49,4  | 49,4  | 18,55 | 634,31 | 131,37 |
| 2019/05/31 | CH2205 | Male | Three y/o | Treatment (Wk 3) | Treatment | Feed Day | No | 07:00 | 07:00 - 07:59 | Morning      | 37,1 | 89  | 57,0  | 57,0  | 18,26 | 585,33 | 136,32 |
| 2019/05/31 | CH2206 | Male | Three y/o | Treatment (Wk 3) | Treatment | Feed Day | No | 07:00 | 07:00 - 07:59 | Morning      | 37,5 | 140 | 339,2 | 339,2 | 18,65 | 617,28 | 198,77 |
| 2019/05/31 | CH2205 | Male | Three y/o | Treatment (Wk 3) | Treatment | Feed Day | No | 07:05 | 07:00 - 07:59 | Morning      | 37,2 |     | 99,2  | 99,2  | 18,36 |        | 155,56 |
| 2019/05/31 | CH2206 | Male | Three y/o | Treatment (Wk 3) | Treatment | Feed Day | No | 07:05 | 07:00 - 07:59 | Morning      | 37,5 | 135 | 264,4 | 264,4 | 18,65 | 614,84 | 189,96 |
| 2019/05/31 | CH2205 | Male | Three y/o | Treatment (Wk 3) | Treatment | Feed Day | No | 07:10 | 07:00 - 07:59 | Morning      | 37,3 | 54  | 115,6 | 115,6 | 18,46 | 545,99 | 160,90 |
| 2019/05/31 | CH2206 | Male | Three y/o | Treatment (Wk 3) | Treatment | Feed Day | No | 07:10 | 07:00 - 07:59 | Morning      | 37,5 | 120 | 107,0 | 107,0 | 18,65 | 606,78 | 158,20 |
| 2019/05/31 | CH2205 | Male | Three y/o | Treatment (Wk 3) | Treatment | Feed Day | No | 07:15 | 07:00 - 07:59 | Morning      | 37,3 | 86  | 81,2  | 81,2  | 18,46 | 582,77 | 148,59 |
| 2019/05/31 | CH2206 | Male | Three y/o | Treatment (Wk 3) | Treatment | Feed Day | No | 07:15 | 07:00 - 07:59 | Morning      | 37,5 | 113 | 210,0 | 210,0 | 18,65 | 602,58 | 181,84 |
| 2019/05/31 | CH2205 | Male | Three y/o | Treatment (Wk 3) | Treatment | Feed Day | No | 07:20 | 07:00 - 07:59 | Morning      | 37,3 | 93  | 53,8  | 53,8  | 18,46 | 588,58 | 134,32 |
| 2019/05/31 | CH2206 | Male | Three y/o | Treatment (Wk 3) | Treatment | Feed Day | No | 07:20 | 07:00 - 07:59 | Morning      | 37,7 | 126 | 271,4 | 271,4 | 18,85 | 610,14 | 190,88 |
| 2019/05/31 | CH2205 | Male | Three y/o | Treatment (Wk 3) | Treatment | Feed Day | No | 07:25 | 07:00 - 07:59 | Morning      | 37,4 | 118 | 134,4 | 134,4 | 18,55 | 605,61 | 166,17 |
| 2019/05/31 | CH2206 | Male | Three y/o | Treatment (Wk 3) | Treatment | Feed Day | No | 07:25 | 07:00 - 07:59 | Morning      | 37,7 | 129 | 128,4 | 128,4 | 18,85 | 611,75 | 164,57 |
| 2019/05/31 | CH2205 | Male | Three y/o | Treatment (Wk 3) | Treatment | Feed Day | No | 07:30 | 07:00 - 07:59 | Morning      | 37,4 | 120 | 121,0 | 121,0 | 18,55 | 606,78 | 162,50 |
| 2019/05/31 | CH2206 | Male | Three y/o | Treatment (Wk 3) | Treatment | Feed Day | No | 07:30 | 07:00 - 07:59 | Morning      | 37,7 | 147 | 61,4  | 61,4  | 18,85 | 620,52 | 138,89 |
| 2019/05/31 | CH2205 | Male | Three y/o | Treatment (Wk 3) | Treatment | Feed Day | No | 07:35 | 07:00 - 07:59 | Morning      | 37,5 | 123 | 226,2 | 226,2 | 18,65 | 608,49 | 184,45 |
| 2019/05/31 | CH2206 | Male | Three y/o | Treatment (Wk 3) | Treatment | Feed Day | No | 07:35 | 07:00 - 07:59 | Morning      | 37,7 |     | 84,2  | 84,2  | 18,85 |        | 149,85 |
| 2019/05/31 | CH2205 | Male | Three y/o | Treatment (Wk 3) | Treatment | Feed Day | No | 07:40 | 07:00 - 07:59 | Morning      | 37,5 | 101 | 29,6  | 29,6  | 18,65 | 594,59 | 113,73 |
| 2019/05/31 | CH2206 | Male | Three y/o | Treatment (Wk 3) | Treatment | Feed Day | No | 07:40 | 07:00 - 07:59 | Morning      | 37,7 |     | 224,8 | 224,8 | 18,85 |        | 184,23 |
| 2019/05/31 | CH2205 | Male | Three y/o | Treatment (Wk 3) | Treatment | Feed Day | No | 07:45 | 07:00 - 07:59 | Morning      | 37,4 | 65  | 16,0  | 16,0  | 18,55 | 561,12 | 92,71  |
| 2019/05/31 | CH2206 | Male | Three y/o | Treatment (Wk 3) | Treatment | Feed Day | No | 07:45 | 07:00 - 07:59 | Morning      | 37,7 | 107 | 57,0  | 57,0  | 18,85 | 598,73 | 136,32 |
| 2019/05/31 | CH2205 | Male | Three y/o | Treatment (Wk 3) | Treatment | Feed Day | No | 07:50 | 07:00 - 07:59 | Morning      | 37,4 | 62  | 22,6  | 22,6  | 18,55 | 557,33 | 104,49 |
| 2019/05/31 | CH2206 | Male | Three y/o | Treatment (Wk 3) | Treatment | Feed Day | No | 07:50 | 07:00 - 07:59 | Morning      | 37,7 | 121 | 119,2 | 119,2 | 18,85 | 607,35 | 161,97 |
| 2019/05/31 | CH2205 | Male | Three y/o | Treatment (Wk 3) | Treatment | Feed Day | No | 07:55 | 07:00 - 07:59 | Morning      | 37,3 | 169 | 35,0  | 35,0  | 18,46 | 629,60 | 119,49 |
| 2019/05/31 | CH2206 | Male | Three y/o | Treatment (Wk 3) | Treatment | Feed Day | No | 07:55 | 07:00 - 07:59 | Morning      | 37,8 | 117 | 224,4 | 224,4 | 18,95 | 605,02 | 184,17 |
| 2019/05/31 | CH2205 | Male | Three y/o | Treatment (Wk 3) | Treatment | Feed Day | No | 08:00 | 08:00 - 08:59 | Late Morning | 37,4 | 93  | 29,4  | 29,4  | 18,55 | 588,58 | 113,50 |
| 2019/05/31 | CH2206 | Male | Three y/o | Treatment (Wk 3) | Treatment | Feed Day | No | 08:00 | 08:00 - 08:59 | Late Morning | 37,7 | 125 | 206,6 | 206,6 | 18,85 | 609,60 | 181,26 |
| 2019/05/31 | CH2205 | Male | Three y/o | Treatment (Wk 3) | Treatment | Feed Day | No | 08:05 | 08:00 - 08:59 | Late Morning | 37,4 | 69  | 24,8  | 24,8  | 18,55 | 565,86 | 107,67 |
| 2019/05/31 | CH2206 | Male | Three y/o | Treatment (Wk 3) | Treatment | Feed Day | No | 08:05 | 08:00 - 08:59 | Late Morning | 37,7 |     | 66,6  | 66,6  | 18,85 |        | 141,71 |
| 2019/05/31 | CH2205 | Male | Three y/o | Treatment (Wk 3) | Treatment | Feed Day | No | 08:10 | 08:00 - 08:59 | Late Morning | 37,3 | 85  | 24,6  | 24,6  | 18,46 | 581,90 | 107,39 |
| 2019/05/31 | CH2206 | Male | Three y/o | Treatment (Wk 3) | Treatment | Feed Day | No | 08:10 | 08:00 - 08:59 | Late Morning | 37,7 | 83  | 127,4 | 127,4 | 18,85 | 580,11 | 164,30 |
| 2019/05/31 | CH2205 | Male | Three y/o | Treatment (Wk 3) | Treatment | Feed Day | No | 08:15 | 08:00 - 08:59 | Late Morning | 37,2 | 76  | 30,4  | 30,4  | 18,36 | 573,39 | 114,65 |
| 2019/05/31 | CH2206 | Male | Three y/o | Treatment (Wk 3) | Treatment | Feed Day | No | 08:15 | 08:00 - 08:59 | Late Morning | 37,7 | 115 | 148,0 | 148,0 | 18,85 | 603,82 | 169,55 |
| 2019/05/31 | CH2205 | Male | Three y/o | Treatment (Wk 3) | Treatment | Feed Day | No | 08:20 | 08:00 - 08:59 | Late Morning | 37,1 |     | 89,8  | 89,8  | 18,26 |        | 152,10 |
| 2019/05/31 | CH2206 | Male | Three y/o | Treatment (Wk 3) | Treatment | Feed Day | No | 08:20 | 08:00 - 08:59 | Late Morning | 37,7 |     | 431,2 | 431,2 | 18,85 |        | 207,28 |
| 2019/05/31 | CH2205 | Male | Three y/o | Treatment (Wk 3) | Treatment | Feed Day | No | 08:25 | 08:00 - 08:59 | Late Morning | 37,2 | 102 | 240,6 | 240,6 | 18,36 | 595,30 | 186,63 |
| 2019/05/31 | CH2206 | Male | Three y/o | Treatment (Wk 3) | Treatment | Feed Day | No | 08:25 | 08:00 - 08:59 | Late Morning | 37,7 |     | 145,2 | 145,2 | 18,85 |        | 168,88 |
| 2019/05/31 | CH2205 | Male | Three y/o | Treatment (Wk 3) | Treatment | Feed Day | No | 08:30 | 08:00 - 08:59 | Late Morning | 37,3 | 154 | 175,4 | 175,4 | 18,46 | 623,58 | 175,51 |
| 2019/05/31 | CH2206 | Male | Three y/o | Treatment (Wk 3) | Treatment | Feed Day | No | 08:30 | 08:00 - 08:59 | Late Morning | 37,7 | 107 | 167,6 | 167,6 | 18,85 | 598,73 | 173,91 |
| 2019/05/31 | CH2205 | Male | Three y/o | Treatment (Wk 3) | Treatment | Feed Day | No | 08:35 | 08:00 - 08:59 | Late Morning | 37,3 | 114 | 173,4 | 173,4 | 18,46 | 603,20 | 175,10 |
| 2019/05/31 | CH2206 | Male | Three y/o | Treatment (Wk 3) | Treatment | Feed Day | No | 08:35 | 08:00 - 08:59 | Late Morning | 37,8 | 124 | 138,8 | 138,8 | 18,95 | 609,04 | 167,30 |
| 2019/05/31 | CH2205 | Male | Three y/o | Treatment (Wk 3) | Treatment | Feed Day | No | 08:40 | 08:00 - 08:59 | Late Morning | 37,4 | 89  | 130,8 | 130,8 | 18,55 | 585,33 | 165,22 |
| 2019/05/31 | CH2206 | Male | Three y/o | Treatment (Wk 3) | Treatment | Feed Day | No | 08:40 | 08:00 - 08:59 | Late Morning | 37,7 |     | 76,2  | 76,2  | 18,85 |        | 146,38 |
| 2019/05/31 | CH2205 | Male | Three y/o | Treatment (Wk 3) | Treatment | Feed Day | No | 08:45 | 08:00 - 08:59 | Late Morning | 37,3 | 66  | 18,0  | 18,0  | 18,46 | 562,34 | 96,72  |
| 2019/05/31 | CH2206 | Male | Three y/o | Treatment (Wk 3) | Treatment | Feed Day | No | 08:45 | 08:00 - 08:59 | Late Morning | 37,7 | 89  | 63,0  | 63,0  | 18,85 | 585,33 | 139,78 |
| 2019/05/31 | CH2205 | Male | Three y/o | Treatment (Wk 3) | Treatment | Feed Day | No | 08:50 | 08:00 - 08:59 | Late Morning | 37,2 |     | 20,4  | 20,4  | 18,36 |        | 100,99 |
| 2019/05/31 | CH2206 | Male | Three y/o | Treatment (Wk 3) | Treatment | Feed Day | No | 08:50 | 08:00 - 08:59 | Late Morning | 37,7 | 86  | 154,2 | 154,2 | 18,85 | 582,77 | 170,99 |
| 2019/05/31 | CH2205 | Male | Three y/o | Treatment (Wk 3) | Treatment | Feed Day | No | 08:55 | 08:00 - 08:59 | Late Morning | 37,1 |     | 61,2  | 61,2  | 18,26 |        | 138,78 |
| 2019/05/31 | CH2206 | Male | Three y/o | Treatment (Wk 3) | Treatment | Feed Day | No | 08:55 | 08:00 - 08:59 | Late Morning | 37,7 | 109 | 90,8  | 90,8  | 18,85 | 600,04 | 152,48 |
| 2019/05/31 | CH2205 | Male | Three y/o | Treatment (Wk 3) | Treatment | Feed Day | No | 09:00 | 09:00 - 09:59 | Late Morning | 37,2 | 121 | 16,2  | 16,2  | 18,36 | 607,35 | 93,13  |
| 2019/05/31 | CH2206 | Male | Three y/o | Treatment (Wk 3) | Treatment | Feed Day | No | 09:00 | 09:00 - 09:59 | Late Morning | 37,7 | 107 | 217,0 | 217,0 | 18,85 | 598,73 | 182,99 |
| 2019/05/31 | CH2205 | Male | Three y/o | Treatment (Wk 3) | Treatment | Feed Day | No | 09:05 | 09:00 - 09:59 | Late Morning | 37,3 | 91  | 88,8  | 88,8  | 18,46 | 586,98 | 151,71 |
| 2019/05/31 | CH2206 | Male | Three y/o | Treatment (Wk 3) | Treatment | Feed Day | No | 09:05 | 09:00 - 09:59 | Late Morning | 37,7 | 107 | 81,8  | 81,8  | 18,85 | 598,73 | 148,85 |
| 2019/05/31 | CH2205 | Male | Three y/o | Treatment (Wk 3) | Treatment | Feed Day | No | 09:10 | 09:00 - 09:59 | Late Morning | 37,4 | 95  | 21,6  | 21,6  | 18,55 | 590,14 | 102,94 |
| 2019/05/31 | CH2206 | Male | Three y/o | Treatment (Wk 3) | Treatment | Feed Day | No | 09:10 | 09:00 - 09:59 | Late Morning | 37,7 | 158 | 45,0  | 45,0  | 18,85 | 625,26 | 128,15 |
| 2019/05/31 | CH2205 | Male | Three y/o | Treatment (Wk 3) | Treatment | Feed Day | No | 09:15 | 09:00 - 09:59 | Late Morning | 37,4 | 107 | 233,2 | 233,2 | 18,55 | 598,73 | 185,53 |
| 2019/05/31 | CH2206 | Male | Three y/o | Treatment (Wk 3) | Treatment | Feed Day | No | 09:15 | 09:00 - 09:59 | Late Morning | 37,7 | 105 | 71,6  | 71,6  | 18,85 | 597,38 | 144,22 |
| 2019/05/31 | CH2205 | Male | Three y/o | Treatment (Wk 3) | Treatment | Feed Day | No | 09:20 | 09:00 - 09:59 | Late Morning | 37,4 | 78  | 24,4  | 24,4  | 18,55 | 575,38 | 107,11 |
| 2019/05/31 | CH2206 | Male | Three y/o | Treatment (Wk 3) | Treatment | Feed Day | No | 09:20 | 09:00 - 09:59 | Late Morning | 37,7 | 106 | 250,4 | 250,4 | 18,85 | 598,06 | 188,04 |
| 2019/05/31 | CH2205 | Male | Three y/o | Treatment (Wk 3) | Treatment | Feed Day | No | 09:25 | 09:00 - 09:59 | Late Morning | 37,4 | 56  | 24,2  | 24,2  | 18,55 | 549,01 | 106,83 |
| 2019/05/31 | CH2206 | Male | Three y/o | Treatment (Wk 3) | Treatment | Feed Day | No | 09:25 | 09:00 - 09:59 | Late Morning | 37,7 | 90  | 31,8  | 31,8  | 18,85 | 586,16 | 116,20 |
| 2019/05/31 | CH2205 | Male | Three y/o | Treatment (Wk 3) | Treatment | Feed Day | No | 09:30 | 09:00 - 09:59 | Late Morning | 37,5 | 64  | 33,4  | 33,4  | 18,65 | 559,88 | 117,88 |
| 2019/05/31 | CH2206 | Male | Three y/o | Treatment (Wk 3) | Treatment | Feed Day | No | 09:30 | 09:00 - 09:59 | Late Morning | 37,5 | 73  | 82,2  | 82,2  | 18,65 | 570,27 | 149,02 |
| 2019/05/31 | CH2205 | Male | Three y/o | Treatment (Wk 3) | Treatment | Feed Day | No | 09:35 | 09:00 - 09:59 | Late Morning | 37,4 | 90  | 18,2  | 18,2  | 18,55 | 586,16 | 97,10  |



|            |        |      |           |                  |           |          |     |       |               |              |      |     |       |       |       |        |        |
|------------|--------|------|-----------|------------------|-----------|----------|-----|-------|---------------|--------------|------|-----|-------|-------|-------|--------|--------|
| 2019/05/31 | CH2206 | Male | Three y/o | Treatment (Wk 3) | Treatment | Feed Day | No  | 09:35 | 09:00 - 09:59 | Late Morning | 37,5 | 135 | 312,8 | 312,8 | 18,65 | 614,84 | 195,90 |
| 2019/05/31 | CH2205 | Male | Three y/o | Treatment (Wk 3) | Treatment | Feed Day | No  | 09:40 | 09:00 - 09:59 | Late Morning | 37,4 | 60  | 13,2  | 13,2  | 18,55 | 554,67 | 86,17  |
| 2019/05/31 | CH2206 | Male | Three y/o | Treatment (Wk 3) | Treatment | Feed Day | No  | 09:40 | 09:00 - 09:59 | Late Morning | 37,7 |     | 158,2 | 158,2 | 18,85 |        | 171,88 |
| 2019/05/31 | CH2205 | Male | Three y/o | Treatment (Wk 3) | Treatment | Feed Day | No  | 09:45 | 09:00 - 09:59 | Late Morning | 37,4 |     | 30,4  | 30,4  | 18,55 |        | 114,65 |
| 2019/05/31 | CH2206 | Male | Three y/o | Treatment (Wk 3) | Treatment | Feed Day | No  | 09:45 | 09:00 - 09:59 | Late Morning | 37,8 | 105 | 62,4  | 62,4  | 18,95 | 597,38 | 139,45 |
| 2019/05/31 | CH2205 | Male | Three y/o | Treatment (Wk 3) | Treatment | Feed Day | No  | 09:50 | 09:00 - 09:59 | Late Morning | 37,4 | 87  | 24,2  | 24,2  | 18,55 | 583,64 | 106,83 |
| 2019/05/31 | CH2206 | Male | Three y/o | Treatment (Wk 3) | Treatment | Feed Day | No  | 09:50 | 09:00 - 09:59 | Late Morning | 37,9 | 74  | 30,8  | 30,8  | 19,05 | 571,33 | 115,10 |
| 2019/05/31 | CH2205 | Male | Three y/o | Treatment (Wk 3) | Treatment | Feed Day | No  | 09:55 | 09:00 - 09:59 | Late Morning | 37,4 |     | 23,2  | 23,2  | 18,55 |        | 105,39 |
| 2019/05/31 | CH2206 | Male | Three y/o | Treatment (Wk 3) | Treatment | Feed Day | No  | 09:55 | 09:00 - 09:59 | Late Morning | 37,9 | 92  | 113,0 | 113,0 | 19,05 | 587,78 | 160,11 |
| 2019/05/31 | CH2205 | Male | Three y/o | Treatment (Wk 3) | Treatment | Feed Day | No  | 10:00 | 10:00 - 10:59 | Late Morning | 37,3 | 128 | 25,8  | 25,8  | 18,46 | 611,22 | 109,02 |
| 2019/05/31 | CH2206 | Male | Three y/o | Treatment (Wk 3) | Treatment | Feed Day | No  | 10:00 | 10:00 - 10:59 | Late Morning | 37,9 | 106 | 233,4 | 233,4 | 19,05 | 598,06 | 185,56 |
| 2019/05/31 | CH2205 | Male | Three y/o | Treatment (Wk 3) | Treatment | Feed Day | No  | 10:05 | 10:00 - 10:59 | Late Morning | 37,3 |     | 21,8  | 21,8  | 18,46 |        | 103,26 |
| 2019/05/31 | CH2206 | Male | Three y/o | Treatment (Wk 3) | Treatment | Feed Day | No  | 10:05 | 10:00 - 10:59 | Late Morning | 37,8 |     | 30,2  | 30,2  | 18,95 |        | 114,42 |
| 2019/05/31 | CH2205 | Male | Three y/o | Treatment (Wk 3) | Treatment | Feed Day | No  | 10:10 | 10:00 - 10:59 | Late Morning | 37,2 | 138 | 102,0 | 102,0 | 18,36 | 616,31 | 156,53 |
| 2019/05/31 | CH2206 | Male | Three y/o | Treatment (Wk 3) | Treatment | Feed Day | No  | 10:10 | 10:00 - 10:59 | Late Morning | 37,7 | 108 | 100,0 | 100,0 | 18,85 | 599,39 | 155,84 |
| 2019/05/31 | CH2205 | Male | Three y/o | Treatment (Wk 3) | Treatment | Feed Day | No  | 10:15 | 10:00 - 10:59 | Late Morning | 37,3 | 70  | 284,8 | 284,8 | 18,46 | 566,99 | 192,58 |
| 2019/05/31 | CH2206 | Male | Three y/o | Treatment (Wk 3) | Treatment | Feed Day | No  | 10:15 | 10:00 - 10:59 | Late Morning | 37,7 | 191 | 24,6  | 24,6  | 18,85 | 637,33 | 107,39 |
| 2019/05/31 | CH2205 | Male | Three y/o | Treatment (Wk 3) | Treatment | Feed Day | No  | 10:20 | 10:00 - 10:59 | Late Morning | 37,4 | 105 | 241,2 | 241,2 | 18,55 | 597,38 | 186,72 |
| 2019/05/31 | CH2206 | Male | Three y/o | Treatment (Wk 3) | Treatment | Feed Day | No  | 10:20 | 10:00 - 10:59 | Late Morning | 37,7 |     | 88,4  | 88,4  | 18,85 |        | 151,55 |
| 2019/05/31 | CH2205 | Male | Three y/o | Treatment (Wk 3) | Treatment | Feed Day | No  | 10:25 | 10:00 - 10:59 | Late Morning | 37,4 | 118 | 53,0  | 53,0  | 18,55 | 605,61 | 133,80 |
| 2019/05/31 | CH2206 | Male | Three y/o | Treatment (Wk 3) | Treatment | Feed Day | No  | 10:25 | 10:00 - 10:59 | Late Morning | 37,7 | 90  | 19,2  | 19,2  | 18,85 | 586,16 | 98,92  |
| 2019/05/31 | CH2205 | Male | Three y/o | Treatment (Wk 3) | Treatment | Feed Day | Yes | 10:30 | 10:00 - 10:59 | Late Morning | 37,5 | 67  | 52,4  | 52,4  | 18,65 | 563,53 | 133,41 |
| 2019/05/31 | CH2206 | Male | Three y/o | Treatment (Wk 3) | Treatment | Feed Day | Yes | 10:30 | 10:00 - 10:59 | Late Morning | 37,7 | 103 | 45,6  | 45,6  | 18,85 | 596,00 | 128,61 |
| 2019/05/31 | CH2205 | Male | Three y/o | Treatment (Wk 3) | Treatment | Feed Day | Yes | 10:35 | 10:00 - 10:59 | Late Morning | 37,5 |     | 97,6  | 97,6  | 18,65 |        | 155,00 |
| 2019/05/31 | CH2206 | Male | Three y/o | Treatment (Wk 3) | Treatment | Feed Day | Yes | 10:35 | 10:00 - 10:59 | Late Morning | 37,7 | 45  | 114,8 | 114,8 | 18,85 | 530,47 | 160,66 |
| 2019/05/31 | CH2205 | Male | Three y/o | Treatment (Wk 3) | Treatment | Feed Day | Yes | 10:40 | 10:00 - 10:59 | Late Morning | 37,7 | 147 | 103,0 | 103,0 | 18,85 | 620,52 | 156,87 |
| 2019/05/31 | CH2206 | Male | Three y/o | Treatment (Wk 3) | Treatment | Feed Day | Yes | 10:40 | 10:00 - 10:59 | Late Morning | 37,7 | 180 | 70,2  | 70,2  | 18,85 | 633,61 | 143,54 |
| 2019/05/31 | CH2205 | Male | Three y/o | Treatment (Wk 3) | Treatment | Feed Day | Yes | 10:45 | 10:00 - 10:59 | Late Morning | 37,7 | 120 | 511,0 | 511,0 | 18,85 | 606,78 | 213,32 |
| 2019/05/31 | CH2206 | Male | Three y/o | Treatment (Wk 3) | Treatment | Feed Day | Yes | 10:45 | 10:00 - 10:59 | Late Morning | 37,9 | 158 | 227,8 | 227,8 | 19,05 | 625,26 | 184,70 |
| 2019/05/31 | CH2205 | Male | Three y/o | Treatment (Wk 3) | Treatment | Feed Day | Yes | 10:50 | 10:00 - 10:59 | Late Morning | 37,7 | 58  | 182,0 | 182,0 | 18,85 | 551,90 | 176,80 |
| 2019/05/31 | CH2206 | Male | Three y/o | Treatment (Wk 3) | Treatment | Feed Day | Yes | 10:50 | 10:00 - 10:59 | Late Morning | 38,0 | 197 | 384,8 | 384,8 | 19,15 | 639,25 | 203,24 |
| 2019/05/31 | CH2205 | Male | Three y/o | Treatment (Wk 3) | Treatment | Feed Day | Yes | 10:55 | 10:00 - 10:59 | Late Morning | 37,9 |     | 166,6 | 166,6 | 19,05 |        | 173,70 |
| 2019/05/31 | CH2206 | Male | Three y/o | Treatment (Wk 3) | Treatment | Feed Day | Yes | 10:55 | 10:00 - 10:59 | Late Morning | 38,2 |     | 196,6 | 196,6 | 19,36 |        | 179,52 |
| 2019/05/31 | CH2205 | Male | Three y/o | Treatment (Wk 3) | Treatment | Feed Day | Yes | 11:00 | 11:00 - 11:59 | Late Morning | 37,9 | 119 | 85,4  | 85,4  | 19,05 | 606,20 | 150,35 |
| 2019/05/31 | CH2206 | Male | Three y/o | Treatment (Wk 3) | Treatment | Feed Day | Yes | 11:00 | 11:00 - 11:59 | Late Morning | 38,2 | 117 | 498,4 | 498,4 | 19,36 | 605,02 | 212,43 |
| 2019/05/31 | CH2205 | Male | Three y/o | Treatment (Wk 3) | Treatment | Feed Day | Yes | 11:05 | 11:00 - 11:59 | Late Morning | 37,9 |     | 188,8 | 188,8 | 19,05 |        | 178,09 |
| 2019/05/31 | CH2206 | Male | Three y/o | Treatment (Wk 3) | Treatment | Feed Day | Yes | 11:05 | 11:00 - 11:59 | Late Morning | 38,2 |     | 289,2 | 289,2 | 19,36 |        | 193,12 |
| 2019/05/31 | CH2205 | Male | Three y/o | Treatment (Wk 3) | Treatment | Feed Day | Yes | 11:10 | 11:00 - 11:59 | Late Morning | 38,0 | 88  | 22,6  | 22,6  | 19,15 | 584,49 | 104,49 |
| 2019/05/31 | CH2206 | Male | Three y/o | Treatment (Wk 3) | Treatment | Feed Day | Yes | 11:10 | 11:00 - 11:59 | Late Morning | 38,7 | 150 | 103,2 | 103,2 | 19,87 | 621,86 | 156,94 |
| 2019/05/31 | CH2205 | Male | Three y/o | Treatment (Wk 3) | Treatment | Feed Day | Yes | 11:15 | 11:00 - 11:59 | Late Morning | 37,9 | 100 | 54,0  | 54,0  | 19,05 | 593,87 | 134,45 |
| 2019/05/31 | CH2206 | Male | Three y/o | Treatment (Wk 3) | Treatment | Feed Day | Yes | 11:15 | 11:00 - 11:59 | Late Morning | 38,6 | 152 | 97,8  | 97,8  | 19,76 | 622,73 | 155,07 |
| 2019/05/31 | CH2205 | Male | Three y/o | Treatment (Wk 3) | Treatment | Feed Day | Yes | 11:20 | 11:00 - 11:59 | Late Morning | 37,9 | 92  | 42,2  | 42,2  | 19,05 | 587,78 | 125,93 |
| 2019/05/31 | CH2206 | Male | Three y/o | Treatment (Wk 3) | Treatment | Feed Day | Yes | 11:20 | 11:00 - 11:59 | Late Morning | 38,4 | 88  | 52,0  | 52,0  | 19,56 | 584,49 | 133,14 |
| 2019/05/31 | CH2205 | Male | Three y/o | Treatment (Wk 3) | Treatment | Feed Day | Yes | 11:25 | 11:00 - 11:59 | Late Morning | 37,9 | 95  | 51,4  | 51,4  | 19,05 | 590,14 | 132,74 |
| 2019/05/31 | CH2206 | Male | Three y/o | Treatment (Wk 3) | Treatment | Feed Day | Yes | 11:25 | 11:00 - 11:59 | Late Morning | 38,3 | 126 | 50,4  | 50,4  | 19,46 | 610,14 | 132,06 |
| 2019/05/31 | CH2205 | Male | Three y/o | Treatment (Wk 3) | Treatment | Feed Day | No  | 11:30 | 11:00 - 11:59 | Late Morning | 37,9 | 80  | 24,2  | 24,2  | 19,05 | 577,31 | 106,83 |
| 2019/05/31 | CH2206 | Male | Three y/o | Treatment (Wk 3) | Treatment | Feed Day | No  | 11:30 | 11:00 - 11:59 | Late Morning | 38,3 | 135 | 65,6  | 65,6  | 19,46 | 614,84 | 141,19 |
| 2019/05/31 | CH2205 | Male | Three y/o | Treatment (Wk 3) | Treatment | Feed Day | No  | 11:35 | 11:00 - 11:59 | Late Morning | 37,7 |     | 23,2  | 23,2  | 18,85 |        | 105,39 |
| 2019/05/31 | CH2206 | Male | Three y/o | Treatment (Wk 3) | Treatment | Feed Day | No  | 11:35 | 11:00 - 11:59 | Late Morning | 38,3 | 123 | 75,8  | 75,8  | 19,46 | 608,49 | 146,20 |
| 2019/05/31 | CH2205 | Male | Three y/o | Treatment (Wk 3) | Treatment | Feed Day | No  | 11:40 | 11:00 - 11:59 | Late Morning | 37,6 |     | 143,6 | 143,6 | 18,75 |        | 168,49 |
| 2019/05/31 | CH2206 | Male | Three y/o | Treatment (Wk 3) | Treatment | Feed Day | No  | 11:40 | 11:00 - 11:59 | Late Morning | 38,3 |     | 311,4 | 311,4 | 19,46 |        | 195,74 |
| 2019/05/31 | CH2205 | Male | Three y/o | Treatment (Wk 3) | Treatment | Feed Day | No  | 11:45 | 11:00 - 11:59 | Late Morning | 37,8 |     | 56,2  | 56,2  | 18,95 |        | 135,83 |
| 2019/05/31 | CH2206 | Male | Three y/o | Treatment (Wk 3) | Treatment | Feed Day | No  | 11:45 | 11:00 - 11:59 | Late Morning | 38,3 |     | 32,6  | 32,6  | 19,46 |        | 117,05 |
| 2019/05/31 | CH2205 | Male | Three y/o | Treatment (Wk 3) | Treatment | Feed Day | No  | 11:50 | 11:00 - 11:59 | Late Morning | 37,5 |     | 63,0  | 63,0  | 18,65 |        | 139,78 |
| 2019/05/31 | CH2206 | Male | Three y/o | Treatment (Wk 3) | Treatment | Feed Day | No  | 11:50 | 11:00 - 11:59 | Late Morning | 38,0 | 114 | 123,2 | 123,2 | 19,15 | 603,20 | 163,13 |
| 2019/05/31 | CH2205 | Male | Three y/o | Treatment (Wk 3) | Treatment | Feed Day | No  | 11:55 | 11:00 - 11:59 | Late Morning | 37,5 | 102 | 99,0  | 99,0  | 18,65 | 595,30 | 155,49 |
| 2019/05/31 | CH2206 | Male | Three y/o | Treatment (Wk 3) | Treatment | Feed Day | No  | 11:55 | 11:00 - 11:59 | Late Morning | 38,0 | 137 | 211,4 | 211,4 | 19,15 | 615,83 | 182,07 |
| 2019/05/31 | CH2205 | Male | Three y/o | Treatment (Wk 3) | Treatment | Feed Day | No  | 12:00 | 12:00 - 12:59 | Afternoon    | 37,6 | 84  | 169,4 | 169,4 | 18,75 | 581,01 | 174,28 |
| 2019/05/31 | CH2206 | Male | Three y/o | Treatment (Wk 3) | Treatment | Feed Day | No  | 12:00 | 12:00 - 12:59 | Afternoon    | 38,1 | 118 | 62,6  | 62,6  | 19,26 | 605,61 | 139,56 |
| 2019/05/31 | CH2205 | Male | Three y/o | Treatment (Wk 3) | Treatment | Feed Day | No  | 12:05 | 12:00 - 12:59 | Afternoon    | 37,6 | 92  | 155,2 | 155,2 | 18,75 | 587,78 | 171,21 |
| 2019/05/31 | CH2206 | Male | Three y/o | Treatment (Wk 3) | Treatment | Feed Day | No  | 12:05 | 12:00 - 12:59 | Afternoon    | 38,1 | 172 | 103,0 | 103,0 | 19,26 | 630,73 | 156,87 |
| 2019/05/31 | CH2205 | Male | Three y/o | Treatment (Wk 3) | Treatment | Feed Day | No  | 12:10 | 12:00 - 12:59 | Afternoon    | 37,6 |     | 67,6  | 67,6  | 18,75 |        | 142,23 |
| 2019/05/31 | CH2206 | Male | Three y/o | Treatment (Wk 3) | Treatment | Feed Day | No  | 12:10 | 12:00 - 12:59 | Afternoon    | 38,1 | 128 | 257,6 | 257,6 | 19,26 | 611,22 | 189,04 |
| 2019/05/31 | CH2205 | Male | Three y/o | Treatment (Wk 3) | Treatment | Feed Day | No  | 12:15 | 12:00 - 12:59 | Afternoon    | 37,6 |     | 35,4  | 35,4  | 18,75 |        | 119,88 |
| 2019/05/31 | CH2206 | Male | Three y/o | Treatment (Wk 3) | Treatment | Feed Day | No  | 12:15 | 12:00 - 12:59 | Afternoon    | 38,2 | 143 | 21,8  | 21,8  | 19,36 | 618,69 | 103,26 |
| 2019/05/31 | CH2205 | Male | Three y/o | Treatment (Wk 3) | Treatment | Feed Day | No  | 12:20 | 12:00 - 12:59 | Afternoon    | 37,6 | 88  | 89,0  | 89,0  | 18,75 | 584,49 | 151,78 |
| 2019/05/31 | CH2206 | Male | Three y/o | Treatment (Wk 3) | Treatment | Feed Day | No  | 12:20 | 12:00 - 12:59 | Afternoon    | 38,1 | 124 | 54,0  | 54,0  | 19,26 | 609,04 | 134,45 |
| 2019/05/31 | CH2205 | Male | Three y/o | Treatment (Wk 3) | Treatment | Feed Day | No  | 12:25 | 12:00 - 12:59 | Afternoon    | 37,7 | 92  | 99,4  | 99,4  | 18,85 | 587,78 | 155,63 |
| 2019/05/31 | CH2206 | Male | Three y/o | Treatment (Wk 3) | Treatment | Feed Day | No  | 12:25 | 12:00 - 12:59 | Afternoon    | 38,1 |     | 116,6 | 116,6 | 19,26 |        | 161,20 |
| 2019/05/31 | CH2205 | Male | Three y/o | Treatment (Wk 3) | Treatment | Feed Day | No  | 12:30 | 12:00 - 12:59 | Afternoon    | 37,6 |     | 34,8  | 34,8  | 18,75 |        | 119,29 |



|            |        |      |           |                  |           |          |    |       |               |           |      |     |       |       |       |        |        |
|------------|--------|------|-----------|------------------|-----------|----------|----|-------|---------------|-----------|------|-----|-------|-------|-------|--------|--------|
| 2019/05/31 | CH2206 | Male | Three y/o | Treatment (Wk 3) | Treatment | Feed Day | No | 12:30 | 12:00 - 12:59 | Afternoon | 38,0 | 49  | 33,0  | 33,0  | 19,15 | 537,80 | 117,47 |
| 2019/05/31 | CH2205 | Male | Three y/o | Treatment (Wk 3) | Treatment | Feed Day | No | 12:35 | 12:00 - 12:59 | Afternoon | 37,5 | 90  | 33,8  | 33,8  | 18,65 | 586,16 | 118,29 |
| 2019/05/31 | CH2206 | Male | Three y/o | Treatment (Wk 3) | Treatment | Feed Day | No | 12:35 | 12:00 - 12:59 | Afternoon | 37,9 | 109 | 25,4  | 25,4  | 19,05 | 600,04 | 108,49 |
| 2019/05/31 | CH2205 | Male | Three y/o | Treatment (Wk 3) | Treatment | Feed Day | No | 12:40 | 12:00 - 12:59 | Afternoon | 37,4 |     | 22,0  | 22,0  | 18,55 |        | 103,57 |
| 2019/05/31 | CH2206 | Male | Three y/o | Treatment (Wk 3) | Treatment | Feed Day | No | 12:40 | 12:00 - 12:59 | Afternoon | 37,8 | 74  | 15,6  | 15,6  | 18,95 | 571,33 | 91,85  |
| 2019/05/31 | CH2205 | Male | Three y/o | Treatment (Wk 3) | Treatment | Feed Day | No | 12:45 | 12:00 - 12:59 | Afternoon | 37,5 | 70  | 18,8  | 18,8  | 18,65 | 566,99 | 98,20  |
| 2019/05/31 | CH2206 | Male | Three y/o | Treatment (Wk 3) | Treatment | Feed Day | No | 12:45 | 12:00 - 12:59 | Afternoon | 37,7 | 76  | 13,8  | 13,8  | 18,85 | 573,39 | 87,68  |
| 2019/05/31 | CH2205 | Male | Three y/o | Treatment (Wk 3) | Treatment | Feed Day | No | 12:50 | 12:00 - 12:59 | Afternoon | 37,5 | 61  | 18,4  | 18,4  | 18,65 | 556,01 | 97,47  |
| 2019/05/31 | CH2206 | Male | Three y/o | Treatment (Wk 3) | Treatment | Feed Day | No | 12:50 | 12:00 - 12:59 | Afternoon | 37,7 | 89  | 12,2  | 12,2  | 18,85 | 585,33 | 83,49  |
| 2019/05/31 | CH2205 | Male | Three y/o | Treatment (Wk 3) | Treatment | Feed Day | No | 12:55 | 12:00 - 12:59 | Afternoon | 37,6 | 62  | 17,6  | 17,6  | 18,75 | 557,33 | 95,95  |
| 2019/05/31 | CH2206 | Male | Three y/o | Treatment (Wk 3) | Treatment | Feed Day | No | 12:55 | 12:00 - 12:59 | Afternoon | 37,7 | 88  | 15,2  | 15,2  | 18,85 | 584,49 | 90,96  |
| 2019/05/31 | CH2205 | Male | Three y/o | Treatment (Wk 3) | Treatment | Feed Day | No | 13:00 | 13:00 - 13:59 | Afternoon | 37,6 | 48  | 17,8  | 17,8  | 18,75 | 536,04 | 96,34  |
| 2019/05/31 | CH2206 | Male | Three y/o | Treatment (Wk 3) | Treatment | Feed Day | No | 13:00 | 13:00 - 13:59 | Afternoon | 37,5 | 80  | 38,0  | 38,0  | 18,65 | 577,31 | 122,32 |
| 2019/05/31 | CH2205 | Male | Three y/o | Treatment (Wk 3) | Treatment | Feed Day | No | 13:05 | 13:00 - 13:59 | Afternoon | 37,6 | 145 | 185,2 | 185,2 | 18,75 | 619,62 | 177,42 |
| 2019/05/31 | CH2206 | Male | Three y/o | Treatment (Wk 3) | Treatment | Feed Day | No | 13:05 | 13:00 - 13:59 | Afternoon | 37,5 | 135 | 31,4  | 31,4  | 18,65 | 614,84 | 115,76 |
| 2019/05/31 | CH2205 | Male | Three y/o | Treatment (Wk 3) | Treatment | Feed Day | No | 13:10 | 13:00 - 13:59 | Afternoon | 37,6 | 111 | 71,0  | 71,0  | 18,75 | 601,33 | 143,93 |
| 2019/05/31 | CH2206 | Male | Three y/o | Treatment (Wk 3) | Treatment | Feed Day | No | 13:10 | 13:00 - 13:59 | Afternoon | 37,5 | 98  | 28,8  | 28,8  | 18,65 | 592,41 | 112,79 |
| 2019/05/31 | CH2205 | Male | Three y/o | Treatment (Wk 3) | Treatment | Feed Day | No | 13:15 | 13:00 - 13:59 | Afternoon | 37,6 | 108 | 45,2  | 45,2  | 18,75 | 599,39 | 128,30 |
| 2019/05/31 | CH2206 | Male | Three y/o | Treatment (Wk 3) | Treatment | Feed Day | No | 13:15 | 13:00 - 13:59 | Afternoon | 37,4 |     | 43,2  | 43,2  | 18,55 |        | 126,74 |
| 2019/05/31 | CH2205 | Male | Three y/o | Treatment (Wk 3) | Treatment | Feed Day | No | 13:20 | 13:00 - 13:59 | Afternoon | 37,6 | 35  | 32,8  | 32,8  | 18,75 | 507,97 | 117,26 |
| 2019/05/31 | CH2206 | Male | Three y/o | Treatment (Wk 3) | Treatment | Feed Day | No | 13:20 | 13:00 - 13:59 | Afternoon | 37,5 | 120 | 64,4  | 64,4  | 18,65 | 606,78 | 140,55 |
| 2019/05/31 | CH2205 | Male | Three y/o | Treatment (Wk 3) | Treatment | Feed Day | No | 13:25 | 13:00 - 13:59 | Afternoon | 37,6 | 87  | 30,6  | 30,6  | 18,75 | 583,64 | 114,87 |
| 2019/05/31 | CH2206 | Male | Three y/o | Treatment (Wk 3) | Treatment | Feed Day | No | 13:25 | 13:00 - 13:59 | Afternoon | 37,8 | 119 | 45,2  | 45,2  | 18,95 | 606,20 | 128,30 |
| 2019/05/31 | CH2205 | Male | Three y/o | Treatment (Wk 3) | Treatment | Feed Day | No | 13:30 | 13:00 - 13:59 | Afternoon | 37,6 |     | 249,6 | 249,6 | 18,75 |        | 187,92 |
| 2019/05/31 | CH2206 | Male | Three y/o | Treatment (Wk 3) | Treatment | Feed Day | No | 13:30 | 13:00 - 13:59 | Afternoon | 37,8 | 150 | 66,8  | 66,8  | 18,95 | 621,86 | 141,81 |
| 2019/05/31 | CH2205 | Male | Three y/o | Treatment (Wk 3) | Treatment | Feed Day | No | 13:35 | 13:00 - 13:59 | Afternoon | 37,7 | 86  | 93,8  | 93,8  | 18,85 | 582,77 | 153,61 |
| 2019/05/31 | CH2206 | Male | Three y/o | Treatment (Wk 3) | Treatment | Feed Day | No | 13:35 | 13:00 - 13:59 | Afternoon | 37,8 | 107 | 21,0  | 21,0  | 18,95 | 598,73 | 101,98 |
| 2019/05/31 | CH2205 | Male | Three y/o | Treatment (Wk 3) | Treatment | Feed Day | No | 13:40 | 13:00 - 13:59 | Afternoon | 37,7 | 75  | 24,0  | 24,0  | 18,85 | 572,36 | 106,55 |
| 2019/05/31 | CH2206 | Male | Three y/o | Treatment (Wk 3) | Treatment | Feed Day | No | 13:40 | 13:00 - 13:59 | Afternoon | 38,0 | 88  | 40,8  | 40,8  | 19,15 | 584,49 | 124,77 |
| 2019/05/31 | CH2205 | Male | Three y/o | Treatment (Wk 3) | Treatment | Feed Day | No | 13:45 | 13:00 - 13:59 | Afternoon | 37,8 | 197 | 24,2  | 24,2  | 18,95 | 639,25 | 106,83 |
| 2019/05/31 | CH2206 | Male | Three y/o | Treatment (Wk 3) | Treatment | Feed Day | No | 13:45 | 13:00 - 13:59 | Afternoon | 37,9 | 143 | 159,6 | 159,6 | 19,05 | 618,69 | 172,19 |
| 2019/05/31 | CH2205 | Male | Three y/o | Treatment (Wk 3) | Treatment | Feed Day | No | 13:50 | 13:00 - 13:59 | Afternoon | 38,0 |     | 27,0  | 27,0  | 19,15 |        | 110,58 |
| 2019/05/31 | CH2206 | Male | Three y/o | Treatment (Wk 3) | Treatment | Feed Day | No | 13:50 | 13:00 - 13:59 | Afternoon | 38,0 | 91  | 6,0   | 6,0   | 19,15 | 586,98 | 59,53  |
| 2019/05/31 | CH2205 | Male | Three y/o | Treatment (Wk 3) | Treatment | Feed Day | No | 13:55 | 13:00 - 13:59 | Afternoon | 38,0 |     | 10,0  | 10,0  | 19,15 |        | 76,76  |
| 2019/05/31 | CH2206 | Male | Three y/o | Treatment (Wk 3) | Treatment | Feed Day | No | 13:55 | 13:00 - 13:59 | Afternoon | 37,9 | 91  | 5,8   | 5,8   | 19,05 | 586,98 | 58,39  |
| 2019/05/31 | CH2205 | Male | Three y/o | Treatment (Wk 3) | Treatment | Feed Day | No | 14:00 | 14:00 - 14:59 | Afternoon | 38,0 | 72  | 8,4   | 8,4   | 19,15 | 569,20 | 70,86  |
| 2019/05/31 | CH2206 | Male | Three y/o | Treatment (Wk 3) | Treatment | Feed Day | No | 14:00 | 14:00 - 14:59 | Afternoon | 37,9 | 97  | 24,6  | 24,6  | 19,05 | 591,66 | 107,39 |
| 2019/05/31 | CH2205 | Male | Three y/o | Treatment (Wk 3) | Treatment | Feed Day | No | 14:05 | 14:00 - 14:59 | Afternoon | 38,1 | 62  | 3,4   | 3,4   | 19,26 | 557,33 | 40,51  |
| 2019/05/31 | CH2206 | Male | Three y/o | Treatment (Wk 3) | Treatment | Feed Day | No | 14:05 | 14:00 - 14:59 | Afternoon | 37,9 | 93  | 32,8  | 32,8  | 19,05 | 588,58 | 117,26 |
| 2019/05/31 | CH2205 | Male | Three y/o | Treatment (Wk 3) | Treatment | Feed Day | No | 14:10 | 14:00 - 14:59 | Afternoon | 38,1 |     | 45,8  | 45,8  | 19,26 |        | 128,76 |
| 2019/05/31 | CH2206 | Male | Three y/o | Treatment (Wk 3) | Treatment | Feed Day | No | 14:10 | 14:00 - 14:59 | Afternoon | 37,9 | 99  | 27,4  | 27,4  | 19,05 | 593,14 | 111,09 |
| 2019/05/31 | CH2205 | Male | Three y/o | Treatment (Wk 3) | Treatment | Feed Day | No | 14:15 | 14:00 - 14:59 | Afternoon | 38,0 | 134 | 66,0  | 66,0  | 19,15 | 614,33 | 141,40 |
| 2019/05/31 | CH2206 | Male | Three y/o | Treatment (Wk 3) | Treatment | Feed Day | No | 14:15 | 14:00 - 14:59 | Afternoon | 37,9 | 105 | 27,8  | 27,8  | 19,05 | 597,38 | 111,58 |
| 2019/05/31 | CH2205 | Male | Three y/o | Treatment (Wk 3) | Treatment | Feed Day | No | 14:20 | 14:00 - 14:59 | Afternoon | 37,9 | 105 | 55,4  | 55,4  | 19,05 | 597,38 | 135,33 |
| 2019/05/31 | CH2206 | Male | Three y/o | Treatment (Wk 3) | Treatment | Feed Day | No | 14:20 | 14:00 - 14:59 | Afternoon | 38,0 | 126 | 43,8  | 43,8  | 19,15 | 610,14 | 127,22 |
| 2019/05/31 | CH2205 | Male | Three y/o | Treatment (Wk 3) | Treatment | Feed Day | No | 14:25 | 14:00 - 14:59 | Afternoon | 37,9 | 94  | 32,8  | 32,8  | 19,05 | 589,37 | 117,26 |
| 2019/05/31 | CH2206 | Male | Three y/o | Treatment (Wk 3) | Treatment | Feed Day | No | 14:25 | 14:00 - 14:59 | Afternoon | 38,0 | 114 | 5,4   | 5,4   | 19,15 | 603,20 | 55,99  |
| 2019/05/31 | CH2205 | Male | Three y/o | Treatment (Wk 3) | Treatment | Feed Day | No | 14:30 | 14:00 - 14:59 | Afternoon | 37,9 | 86  | 10,8  | 10,8  | 19,05 | 582,77 | 79,36  |
| 2019/05/31 | CH2206 | Male | Three y/o | Treatment (Wk 3) | Treatment | Feed Day | No | 14:30 | 14:00 - 14:59 | Afternoon | 38,0 | 92  | 2,4   | 2,4   | 19,15 | 587,78 | 28,91  |
| 2019/05/31 | CH2205 | Male | Three y/o | Treatment (Wk 3) | Treatment | Feed Day | No | 14:35 | 14:00 - 14:59 | Afternoon | 38,0 | 68  | 6,8   | 6,8   | 19,15 | 564,71 | 63,74  |
| 2019/05/31 | CH2206 | Male | Three y/o | Treatment (Wk 3) | Treatment | Feed Day | No | 14:35 | 14:00 - 14:59 | Afternoon | 38,0 | 92  | 9,0   | 9,0   | 19,15 | 587,78 | 73,19  |
| 2019/05/31 | CH2205 | Male | Three y/o | Treatment (Wk 3) | Treatment | Feed Day | No | 14:40 | 14:00 - 14:59 | Afternoon | 38,0 | 98  | 106,6 | 106,6 | 19,15 | 592,41 | 158,07 |
| 2019/05/31 | CH2206 | Male | Three y/o | Treatment (Wk 3) | Treatment | Feed Day | No | 14:40 | 14:00 - 14:59 | Afternoon | 38,0 | 135 | 33,4  | 33,4  | 19,15 | 614,84 | 117,88 |
| 2019/05/31 | CH2205 | Male | Three y/o | Treatment (Wk 3) | Treatment | Feed Day | No | 14:45 | 14:00 - 14:59 | Afternoon | 38,0 | 125 | 6,0   | 6,0   | 19,15 | 609,60 | 59,53  |
| 2019/05/31 | CH2206 | Male | Three y/o | Treatment (Wk 3) | Treatment | Feed Day | No | 14:45 | 14:00 - 14:59 | Afternoon | 38,0 | 125 | 143,6 | 143,6 | 19,15 | 609,60 | 168,49 |
| 2019/05/31 | CH2205 | Male | Three y/o | Treatment (Wk 3) | Treatment | Feed Day | No | 14:50 | 14:00 - 14:59 | Afternoon | 38,0 | 88  | 7,6   | 7,6   | 19,15 | 584,49 | 67,49  |
| 2019/05/31 | CH2206 | Male | Three y/o | Treatment (Wk 3) | Treatment | Feed Day | No | 14:50 | 14:00 - 14:59 | Afternoon | 38,0 |     | 77,8  | 77,8  | 19,15 |        | 147,11 |
| 2019/05/31 | CH2205 | Male | Three y/o | Treatment (Wk 3) | Treatment | Feed Day | No | 14:55 | 14:00 - 14:59 | Afternoon | 38,0 | 152 | 21,0  | 21,0  | 19,15 | 622,73 | 101,98 |
| 2019/05/31 | CH2206 | Male | Three y/o | Treatment (Wk 3) | Treatment | Feed Day | No | 14:55 | 14:00 - 14:59 | Afternoon | 38,0 | 94  | 33,2  | 33,2  | 19,15 | 589,37 | 117,68 |
| 2019/05/31 | CH2205 | Male | Three y/o | Treatment (Wk 3) | Treatment | Feed Day | No | 15:00 | 15:00 - 15:59 | Afternoon | 38,0 |     | 10,6  | 10,6  | 19,15 |        | 78,73  |
| 2019/05/31 | CH2206 | Male | Three y/o | Treatment (Wk 3) | Treatment | Feed Day | No | 15:00 | 15:00 - 15:59 | Afternoon | 37,9 | 94  | 50,4  | 50,4  | 19,05 | 589,37 | 132,06 |
| 2019/05/31 | CH2205 | Male | Three y/o | Treatment (Wk 3) | Treatment | Feed Day | No | 15:05 | 15:00 - 15:59 | Afternoon | 38,0 | 65  | 6,0   | 6,0   | 19,15 | 561,12 | 59,53  |
| 2019/05/31 | CH2206 | Male | Three y/o | Treatment (Wk 3) | Treatment | Feed Day | No | 15:05 | 15:00 - 15:59 | Afternoon | 38,0 | 180 | 44,6  | 44,6  | 19,15 | 633,61 | 127,84 |
| 2019/05/31 | CH2205 | Male | Three y/o | Treatment (Wk 3) | Treatment | Feed Day | No | 15:10 | 15:00 - 15:59 | Afternoon | 38,1 | 80  | 4,8   | 4,8   | 19,26 | 577,31 | 52,04  |
| 2019/05/31 | CH2206 | Male | Three y/o | Treatment (Wk 3) | Treatment | Feed Day | No | 15:10 | 15:00 - 15:59 | Afternoon | 38,0 | 69  | 53,2  | 53,2  | 19,15 | 565,86 | 133,93 |
| 2019/05/31 | CH2205 | Male | Three y/o | Treatment (Wk 3) | Treatment | Feed Day | No | 15:15 | 15:00 - 15:59 | Afternoon | 38,1 | 62  | 8,0   | 8,0   | 19,26 | 557,33 | 69,22  |
| 2019/05/31 | CH2206 | Male | Three y/o | Treatment (Wk 3) | Treatment | Feed Day | No | 15:15 | 15:00 - 15:59 | Afternoon | 38,0 | 86  | 53,6  | 53,6  | 19,15 | 582,77 | 134,19 |
| 2019/05/31 | CH2205 | Male | Three y/o | Treatment (Wk 3) | Treatment | Feed Day | No | 15:20 | 15:00 - 15:59 | Afternoon | 38,2 | 53  | 9,0   | 9,0   | 19,36 | 544,43 | 73,19  |
| 2019/05/31 | CH2206 | Male | Three y/o | Treatment (Wk 3) | Treatment | Feed Day | No | 15:20 | 15:00 - 15:59 | Afternoon | 38,0 | 93  | 52,8  | 52,8  | 19,15 | 588,58 | 133,67 |
| 2019/05/31 | CH2205 | Male | Three y/o | Treatment (Wk 3) | Treatment | Feed Day | No | 15:25 | 15:00 - 15:59 | Afternoon | 38,2 | 99  | 5,4   | 5,4   | 19,36 | 593,14 | 55,99  |



|            |        |      |           |                  |           |          |    |       |               |           |      |     |       |       |       |        |        |
|------------|--------|------|-----------|------------------|-----------|----------|----|-------|---------------|-----------|------|-----|-------|-------|-------|--------|--------|
| 2019/05/31 | CH2206 | Male | Three y/o | Treatment (Wk 3) | Treatment | Feed Day | No | 15:25 | 15:00 - 15:59 | Afternoon | 38,1 | 100 | 52,4  | 52,4  | 19,26 | 593,87 | 133,41 |
| 2019/05/31 | CH2205 | Male | Three y/o | Treatment (Wk 3) | Treatment | Feed Day | No | 15:30 | 15:00 - 15:59 | Afternoon | 38,2 | 102 | 26,2  | 26,2  | 19,36 | 595,30 | 109,55 |
| 2019/05/31 | CH2206 | Male | Three y/o | Treatment (Wk 3) | Treatment | Feed Day | No | 15:30 | 15:00 - 15:59 | Afternoon | 38,1 | 92  | 45,2  | 45,2  | 19,26 | 587,78 | 128,30 |
| 2019/05/31 | CH2205 | Male | Three y/o | Treatment (Wk 3) | Treatment | Feed Day | No | 15:35 | 15:00 - 15:59 | Afternoon | 38,2 | 91  | 9,8   | 9,8   | 19,36 | 586,98 | 76,07  |
| 2019/05/31 | CH2206 | Male | Three y/o | Treatment (Wk 3) | Treatment | Feed Day | No | 15:35 | 15:00 - 15:59 | Afternoon | 38,1 | 113 | 23,6  | 23,6  | 19,26 | 602,58 | 105,97 |
| 2019/05/31 | CH2205 | Male | Three y/o | Treatment (Wk 3) | Treatment | Feed Day | No | 15:40 | 15:00 - 15:59 | Afternoon | 38,1 |     | 17,2  | 17,2  | 19,26 |        | 95,17  |
| 2019/05/31 | CH2206 | Male | Three y/o | Treatment (Wk 3) | Treatment | Feed Day | No | 15:40 | 15:00 - 15:59 | Afternoon | 38,1 | 51  | 47,0  | 47,0  | 19,26 | 541,20 | 129,65 |
| 2019/05/31 | CH2205 | Male | Three y/o | Treatment (Wk 3) | Treatment | Feed Day | No | 15:45 | 15:00 - 15:59 | Afternoon | 38,0 | 105 | 237,6 | 237,6 | 19,15 | 597,38 | 186,19 |
| 2019/05/31 | CH2206 | Male | Three y/o | Treatment (Wk 3) | Treatment | Feed Day | No | 15:45 | 15:00 - 15:59 | Afternoon | 38,1 | 99  | 87,8  | 87,8  | 19,26 | 593,14 | 151,31 |
| 2019/05/31 | CH2205 | Male | Three y/o | Treatment (Wk 3) | Treatment | Feed Day | No | 15:50 | 15:00 - 15:59 | Afternoon | 38,0 | 65  | 79,2  | 79,2  | 19,15 | 561,12 | 147,73 |
| 2019/05/31 | CH2206 | Male | Three y/o | Treatment (Wk 3) | Treatment | Feed Day | No | 15:50 | 15:00 - 15:59 | Afternoon | 38,4 | 114 | 44,0  | 44,0  | 19,56 | 603,20 | 127,37 |
| 2019/05/31 | CH2205 | Male | Three y/o | Treatment (Wk 3) | Treatment | Feed Day | No | 15:55 | 15:00 - 15:59 | Afternoon | 38,0 | 83  | 13,6  | 13,6  | 19,15 | 580,11 | 87,18  |
| 2019/05/31 | CH2206 | Male | Three y/o | Treatment (Wk 3) | Treatment | Feed Day | No | 15:55 | 15:00 - 15:59 | Afternoon | 38,4 | 135 | 67,2  | 67,2  | 19,56 | 614,84 | 142,02 |
| 2019/05/31 | CH2205 | Male | Three y/o | Treatment (Wk 3) | Treatment | Feed Day | No | 16:00 | 16:00 - 16:59 | Evening   | 38,1 | 79  | 13,0  | 13,0  | 19,26 | 576,36 | 85,65  |
| 2019/05/31 | CH2206 | Male | Three y/o | Treatment (Wk 3) | Treatment | Feed Day | No | 16:00 | 16:00 - 16:59 | Evening   | 38,3 | 51  | 109,6 | 109,6 | 19,46 | 541,20 | 159,04 |
| 2019/05/31 | CH2205 | Male | Three y/o | Treatment (Wk 3) | Treatment | Feed Day | No | 16:05 | 16:00 - 16:59 | Evening   | 38,1 | 84  | 12,6  | 12,6  | 19,26 | 581,01 | 84,59  |
| 2019/05/31 | CH2206 | Male | Three y/o | Treatment (Wk 3) | Treatment | Feed Day | No | 16:05 | 16:00 - 16:59 | Evening   | 38,4 | 145 | 331,0 | 331,0 | 19,56 | 619,62 | 197,90 |
| 2019/05/31 | CH2205 | Male | Three y/o | Treatment (Wk 3) | Treatment | Feed Day | No | 16:10 | 16:00 - 16:59 | Evening   | 38,2 | 125 | 16,2  | 16,2  | 19,36 | 609,60 | 93,13  |
| 2019/05/31 | CH2206 | Male | Three y/o | Treatment (Wk 3) | Treatment | Feed Day | No | 16:10 | 16:00 - 16:59 | Evening   | 38,8 |     | 30,0  | 30,0  | 19,97 |        | 114,20 |
| 2019/05/31 | CH2205 | Male | Three y/o | Treatment (Wk 3) | Treatment | Feed Day | No | 16:15 | 16:00 - 16:59 | Evening   | 38,2 | 80  | 17,6  | 17,6  | 19,36 | 577,31 | 95,95  |
| 2019/05/31 | CH2206 | Male | Three y/o | Treatment (Wk 3) | Treatment | Feed Day | No | 16:15 | 16:00 - 16:59 | Evening   | 38,8 | 118 | 42,0  | 42,0  | 19,97 | 605,61 | 125,77 |
| 2019/05/31 | CH2205 | Male | Three y/o | Treatment (Wk 3) | Treatment | Feed Day | No | 16:20 | 16:00 - 16:59 | Evening   | 38,3 | 69  | 18,0  | 18,0  | 19,46 | 565,86 | 96,72  |
| 2019/05/31 | CH2206 | Male | Three y/o | Treatment (Wk 3) | Treatment | Feed Day | No | 16:20 | 16:00 - 16:59 | Evening   | 38,7 | 120 | 39,2  | 39,2  | 19,87 | 606,78 | 123,39 |
| 2019/05/31 | CH2205 | Male | Three y/o | Treatment (Wk 3) | Treatment | Feed Day | No | 16:25 | 16:00 - 16:59 | Evening   | 38,3 | 54  | 26,4  | 26,4  | 19,46 | 545,99 | 109,81 |
| 2019/05/31 | CH2206 | Male | Three y/o | Treatment (Wk 3) | Treatment | Feed Day | No | 16:25 | 16:00 - 16:59 | Evening   | 38,7 | 123 | 49,8  | 49,8  | 19,87 | 608,49 | 131,65 |
| 2019/05/31 | CH2205 | Male | Three y/o | Treatment (Wk 3) | Treatment | Feed Day | No | 16:30 | 16:00 - 16:59 | Evening   | 38,3 | 79  | 25,8  | 25,8  | 19,46 | 576,36 | 109,02 |
| 2019/05/31 | CH2206 | Male | Three y/o | Treatment (Wk 3) | Treatment | Feed Day | No | 16:30 | 16:00 - 16:59 | Evening   | 38,7 | 111 | 48,4  | 48,4  | 19,87 | 601,33 | 130,66 |
| 2019/05/31 | CH2205 | Male | Three y/o | Treatment (Wk 3) | Treatment | Feed Day | No | 16:35 | 16:00 - 16:59 | Evening   | 38,3 | 88  | 26,2  | 26,2  | 19,46 | 584,49 | 109,55 |
| 2019/05/31 | CH2206 | Male | Three y/o | Treatment (Wk 3) | Treatment | Feed Day | No | 16:35 | 16:00 - 16:59 | Evening   | 38,6 | 108 | 49,8  | 49,8  | 19,76 | 599,39 | 131,65 |
| 2019/05/31 | CH2205 | Male | Three y/o | Treatment (Wk 3) | Treatment | Feed Day | No | 16:40 | 16:00 - 16:59 | Evening   | 38,3 | 88  | 24,8  | 24,8  | 19,46 | 584,49 | 107,67 |
| 2019/05/31 | CH2206 | Male | Three y/o | Treatment (Wk 3) | Treatment | Feed Day | No | 16:40 | 16:00 - 16:59 | Evening   | 38,6 | 55  | 48,0  | 48,0  | 19,76 | 547,52 | 130,38 |
| 2019/05/31 | CH2205 | Male | Three y/o | Treatment (Wk 3) | Treatment | Feed Day | No | 16:45 | 16:00 - 16:59 | Evening   | 38,3 | 91  | 20,0  | 20,0  | 19,46 | 586,98 | 100,31 |
| 2019/05/31 | CH2206 | Male | Three y/o | Treatment (Wk 3) | Treatment | Feed Day | No | 16:45 | 16:00 - 16:59 | Evening   | 38,6 | 111 | 53,4  | 53,4  | 19,76 | 601,33 | 134,06 |
| 2019/05/31 | CH2205 | Male | Three y/o | Treatment (Wk 3) | Treatment | Feed Day | No | 16:50 | 16:00 - 16:59 | Evening   | 38,4 | 55  | 22,6  | 22,6  | 19,56 | 547,52 | 104,49 |
| 2019/05/31 | CH2206 | Male | Three y/o | Treatment (Wk 3) | Treatment | Feed Day | No | 16:50 | 16:00 - 16:59 | Evening   | 38,6 | 99  | 51,8  | 51,8  | 19,76 | 593,14 | 133,01 |
| 2019/05/31 | CH2205 | Male | Three y/o | Treatment (Wk 3) | Treatment | Feed Day | No | 16:55 | 16:00 - 16:59 | Evening   | 38,4 | 93  | 24,4  | 24,4  | 19,56 | 588,58 | 107,11 |
| 2019/05/31 | CH2206 | Male | Three y/o | Treatment (Wk 3) | Treatment | Feed Day | No | 16:55 | 16:00 - 16:59 | Evening   | 38,6 | 99  | 57,2  | 57,2  | 19,76 | 593,14 | 136,44 |
| 2019/05/31 | CH2205 | Male | Three y/o | Treatment (Wk 3) | Treatment | Feed Day | No | 17:00 | 17:00 - 17:59 | Evening   | 38,3 | 92  | 24,2  | 24,2  | 19,46 | 587,78 | 106,83 |
| 2019/05/31 | CH2206 | Male | Three y/o | Treatment (Wk 3) | Treatment | Feed Day | No | 17:00 | 17:00 - 17:59 | Evening   | 38,6 | 110 | 56,4  | 56,4  | 19,76 | 600,69 | 135,95 |
| 2019/05/31 | CH2205 | Male | Three y/o | Treatment (Wk 3) | Treatment | Feed Day | No | 17:05 | 17:00 - 17:59 | Evening   | 38,3 | 46  | 23,8  | 23,8  | 19,46 | 532,38 | 106,26 |
| 2019/05/31 | CH2206 | Male | Three y/o | Treatment (Wk 3) | Treatment | Feed Day | No | 17:05 | 17:00 - 17:59 | Evening   | 38,5 | 103 | 55,4  | 55,4  | 19,66 | 596,00 | 135,33 |
| 2019/05/31 | CH2205 | Male | Three y/o | Treatment (Wk 3) | Treatment | Feed Day | No | 17:10 | 17:00 - 17:59 | Evening   | 38,3 | 87  | 21,6  | 21,6  | 19,46 | 583,64 | 102,94 |
| 2019/05/31 | CH2206 | Male | Three y/o | Treatment (Wk 3) | Treatment | Feed Day | No | 17:10 | 17:00 - 17:59 | Evening   | 38,4 | 99  | 49,6  | 49,6  | 19,56 | 593,14 | 131,51 |
| 2019/05/31 | CH2205 | Male | Three y/o | Treatment (Wk 3) | Treatment | Feed Day | No | 17:15 | 17:00 - 17:59 | Evening   | 38,3 | 91  | 20,4  | 20,4  | 19,46 | 586,98 | 100,99 |
| 2019/05/31 | CH2206 | Male | Three y/o | Treatment (Wk 3) | Treatment | Feed Day | No | 17:15 | 17:00 - 17:59 | Evening   | 38,4 | 88  | 58,2  | 58,2  | 19,56 | 584,49 | 137,04 |
| 2019/05/31 | CH2205 | Male | Three y/o | Treatment (Wk 3) | Treatment | Feed Day | No | 17:20 | 17:00 - 17:59 | Evening   | 38,3 | 93  | 17,0  | 17,0  | 19,46 | 588,58 | 94,77  |
| 2019/05/31 | CH2206 | Male | Three y/o | Treatment (Wk 3) | Treatment | Feed Day | No | 17:20 | 17:00 - 17:59 | Evening   | 38,4 | 108 | 59,2  | 59,2  | 19,56 | 599,39 | 137,63 |
| 2019/05/31 | CH2205 | Male | Three y/o | Treatment (Wk 3) | Treatment | Feed Day | No | 17:25 | 17:00 - 17:59 | Evening   | 38,3 | 112 | 29,8  | 29,8  | 19,46 | 601,96 | 113,97 |
| 2019/05/31 | CH2206 | Male | Three y/o | Treatment (Wk 3) | Treatment | Feed Day | No | 17:25 | 17:00 - 17:59 | Evening   | 38,4 | 106 | 54,6  | 54,6  | 19,56 | 598,06 | 134,83 |
| 2019/05/31 | CH2205 | Male | Three y/o | Treatment (Wk 3) | Treatment | Feed Day | No | 17:30 | 17:00 - 17:59 | Evening   | 38,1 |     | 25,6  | 25,6  | 19,26 |        | 108,76 |
| 2019/05/31 | CH2206 | Male | Three y/o | Treatment (Wk 3) | Treatment | Feed Day | No | 17:30 | 17:00 - 17:59 | Evening   | 38,3 | 111 | 29,2  | 29,2  | 19,46 | 601,33 | 113,27 |
| 2019/05/31 | CH2205 | Male | Three y/o | Treatment (Wk 3) | Treatment | Feed Day | No | 17:35 | 17:00 - 17:59 | Evening   | 38,0 | 78  | 21,0  | 21,0  | 19,15 | 575,38 | 101,98 |
| 2019/05/31 | CH2206 | Male | Three y/o | Treatment (Wk 3) | Treatment | Feed Day | No | 17:35 | 17:00 - 17:59 | Evening   | 38,2 | 90  | 47,8  | 47,8  | 19,36 | 586,16 | 130,23 |
| 2019/05/31 | CH2205 | Male | Three y/o | Treatment (Wk 3) | Treatment | Feed Day | No | 17:40 | 17:00 - 17:59 | Evening   | 37,9 | 94  | 21,2  | 21,2  | 19,05 | 589,37 | 102,31 |
| 2019/05/31 | CH2206 | Male | Three y/o | Treatment (Wk 3) | Treatment | Feed Day | No | 17:40 | 17:00 - 17:59 | Evening   | 38,1 | 126 | 16,8  | 16,8  | 19,26 | 610,14 | 94,37  |
| 2019/05/31 | CH2205 | Male | Three y/o | Treatment (Wk 3) | Treatment | Feed Day | No | 17:45 | 17:00 - 17:59 | Evening   | 37,9 | 82  | 18,8  | 18,8  | 19,05 | 579,19 | 98,20  |
| 2019/05/31 | CH2206 | Male | Three y/o | Treatment (Wk 3) | Treatment | Feed Day | No | 17:45 | 17:00 - 17:59 | Evening   | 38,1 | 92  | 11,4  | 11,4  | 19,26 | 587,78 | 81,19  |
| 2019/05/31 | CH2205 | Male | Three y/o | Treatment (Wk 3) | Treatment | Feed Day | No | 17:50 | 17:00 - 17:59 | Evening   | 38,0 | 47  | 24,8  | 24,8  | 19,15 | 534,23 | 107,67 |
| 2019/05/31 | CH2206 | Male | Three y/o | Treatment (Wk 3) | Treatment | Feed Day | No | 17:50 | 17:00 - 17:59 | Evening   | 38,0 | 46  | 19,8  | 19,8  | 19,15 | 532,38 | 99,97  |
| 2019/05/31 | CH2205 | Male | Three y/o | Treatment (Wk 3) | Treatment | Feed Day | No | 17:55 | 17:00 - 17:59 | Evening   | 38,0 | 69  | 24,6  | 24,6  | 19,15 | 565,86 | 107,39 |
| 2019/05/31 | CH2206 | Male | Three y/o | Treatment (Wk 3) | Treatment | Feed Day | No | 17:55 | 17:00 - 17:59 | Evening   | 37,9 | 94  | 29,4  | 29,4  | 19,05 | 589,37 | 113,50 |
| 2019/05/31 | CH2205 | Male | Three y/o | Treatment (Wk 3) | Treatment | Feed Day | No | 18:00 | 18:00 - 18:59 | Evening   | 38,1 | 81  | 26,8  | 26,8  | 19,26 | 578,26 | 110,33 |
| 2019/05/31 | CH2206 | Male | Three y/o | Treatment (Wk 3) | Treatment | Feed Day | No | 18:00 | 18:00 - 18:59 | Evening   | 37,9 | 94  | 17,8  | 17,8  | 19,05 | 589,37 | 96,34  |
| 2019/05/31 | CH2205 | Male | Three y/o | Treatment (Wk 3) | Treatment | Feed Day | No | 18:05 | 18:00 - 18:59 | Evening   | 38,1 | 37  | 20,6  | 20,6  | 19,26 | 513,06 | 101,32 |
| 2019/05/31 | CH2206 | Male | Three y/o | Treatment (Wk 3) | Treatment | Feed Day | No | 18:05 | 18:00 - 18:59 | Evening   | 37,8 | 85  | 39,0  | 39,0  | 18,95 | 581,90 | 123,22 |
| 2019/05/31 | CH2205 | Male | Three y/o | Treatment (Wk 3) | Treatment | Feed Day | No | 18:10 | 18:00 - 18:59 | Evening   | 38,1 | 88  | 25,2  | 25,2  | 19,26 | 584,49 | 108,22 |
| 2019/05/31 | CH2206 | Male | Three y/o | Treatment (Wk 3) | Treatment | Feed Day | No | 18:10 | 18:00 - 18:59 | Evening   | 37,9 | 92  | 37,6  | 37,6  | 19,05 | 587,78 | 121,96 |
| 2019/05/31 | CH2205 | Male | Three y/o | Treatment (Wk 3) | Treatment | Feed Day | No | 18:15 | 18:00 - 18:59 | Evening   | 38,1 | 65  | 22,4  | 22,4  | 19,26 | 561,12 | 104,19 |
| 2019/05/31 | CH2206 | Male | Three y/o | Treatment (Wk 3) | Treatment | Feed Day | No | 18:15 | 18:00 - 18:59 | Evening   | 37,9 | 92  | 34,2  | 34,2  | 19,05 | 587,78 | 118,70 |
| 2019/05/31 | CH2205 | Male | Three y/o | Treatment (Wk 3) | Treatment | Feed Day | No | 18:20 | 18:00 - 18:59 | Evening   | 38,2 | 69  | 22,6  | 22,6  | 19,36 | 565,86 | 104,49 |



|            |        |      |           |                  |           |          |    |       |               |         |      |     |      |      |       |        |        |
|------------|--------|------|-----------|------------------|-----------|----------|----|-------|---------------|---------|------|-----|------|------|-------|--------|--------|
| 2019/05/31 | CH2206 | Male | Three y/o | Treatment (Wk 3) | Treatment | Feed Day | No | 18:20 | 18:00 - 18:59 | Evening | 37,9 | 68  | 28,2 | 28,2 | 19,05 | 564,71 | 112,07 |
| 2019/05/31 | CH2205 | Male | Three y/o | Treatment (Wk 3) | Treatment | Feed Day | No | 18:25 | 18:00 - 18:59 | Evening | 38,2 | 86  | 25,4 | 25,4 | 19,36 | 582,77 | 108,49 |
| 2019/05/31 | CH2206 | Male | Three y/o | Treatment (Wk 3) | Treatment | Feed Day | No | 18:25 | 18:00 - 18:59 | Evening | 37,9 | 76  | 31,8 | 31,8 | 19,05 | 573,39 | 116,20 |
| 2019/05/31 | CH2205 | Male | Three y/o | Treatment (Wk 3) | Treatment | Feed Day | No | 18:30 | 18:00 - 18:59 | Evening | 38,2 | 71  | 25,6 | 25,6 | 19,36 | 568,10 | 108,76 |
| 2019/05/31 | CH2206 | Male | Three y/o | Treatment (Wk 3) | Treatment | Feed Day | No | 18:30 | 18:00 - 18:59 | Evening | 37,9 | 81  | 31,4 | 31,4 | 19,05 | 578,26 | 115,76 |
| 2019/05/31 | CH2205 | Male | Three y/o | Treatment (Wk 3) | Treatment | Feed Day | No | 18:35 | 18:00 - 18:59 | Evening | 38,2 | 95  | 22,0 | 22,0 | 19,36 | 590,14 | 103,57 |
| 2019/05/31 | CH2206 | Male | Three y/o | Treatment (Wk 3) | Treatment | Feed Day | No | 18:35 | 18:00 - 18:59 | Evening | 37,8 | 63  | 33,6 | 33,6 | 18,95 | 558,62 | 118,09 |
| 2019/05/31 | CH2205 | Male | Three y/o | Treatment (Wk 3) | Treatment | Feed Day | No | 18:40 | 18:00 - 18:59 | Evening | 38,2 | 83  | 22,6 | 22,6 | 19,36 | 580,11 | 104,49 |
| 2019/05/31 | CH2206 | Male | Three y/o | Treatment (Wk 3) | Treatment | Feed Day | No | 18:40 | 18:00 - 18:59 | Evening | 37,8 | 95  | 41,4 | 41,4 | 18,95 | 590,14 | 125,27 |
| 2019/05/31 | CH2205 | Male | Three y/o | Treatment (Wk 3) | Treatment | Feed Day | No | 18:45 | 18:00 - 18:59 | Evening | 38,2 | 41  | 22,4 | 22,4 | 19,36 | 522,29 | 104,19 |
| 2019/05/31 | CH2206 | Male | Three y/o | Treatment (Wk 3) | Treatment | Feed Day | No | 18:45 | 18:00 - 18:59 | Evening | 37,8 | 90  | 36,0 | 36,0 | 18,95 | 586,16 | 120,46 |
| 2019/05/31 | CH2205 | Male | Three y/o | Treatment (Wk 3) | Treatment | Feed Day | No | 18:50 | 18:00 - 18:59 | Evening | 38,2 | 67  | 22,2 | 22,2 | 19,36 | 563,53 | 103,88 |
| 2019/05/31 | CH2206 | Male | Three y/o | Treatment (Wk 3) | Treatment | Feed Day | No | 18:50 | 18:00 - 18:59 | Evening | 37,8 | 97  | 24,4 | 24,4 | 18,95 | 591,66 | 107,11 |
| 2019/05/31 | CH2205 | Male | Three y/o | Treatment (Wk 3) | Treatment | Feed Day | No | 18:55 | 18:00 - 18:59 | Evening | 38,2 | 67  | 17,8 | 17,8 | 19,36 | 563,53 | 96,34  |
| 2019/05/31 | CH2206 | Male | Three y/o | Treatment (Wk 3) | Treatment | Feed Day | No | 18:55 | 18:00 - 18:59 | Evening | 37,8 | 76  | 4,4  | 4,4  | 18,95 | 573,39 | 49,12  |
| 2019/05/31 | CH2205 | Male | Three y/o | Treatment (Wk 3) | Treatment | Feed Day | No | 19:00 | 19:00 - 19:59 | Evening | 38,2 | 66  | 15,4 | 15,4 | 19,36 | 562,34 | 91,41  |
| 2019/05/31 | CH2206 | Male | Three y/o | Treatment (Wk 3) | Treatment | Feed Day | No | 19:00 | 19:00 - 19:59 | Evening | 37,7 | 76  | 6,6  | 6,6  | 18,85 | 573,39 | 62,73  |
| 2019/05/31 | CH2205 | Male | Three y/o | Treatment (Wk 3) | Treatment | Feed Day | No | 19:05 | 19:00 - 19:59 | Evening | 38,2 | 62  | 17,6 | 17,6 | 19,36 | 557,33 | 95,95  |
| 2019/05/31 | CH2206 | Male | Three y/o | Treatment (Wk 3) | Treatment | Feed Day | No | 19:05 | 19:00 - 19:59 | Evening | 37,7 | 100 | 14,0 | 14,0 | 18,85 | 593,87 | 88,17  |
| 2019/05/31 | CH2205 | Male | Three y/o | Treatment (Wk 3) | Treatment | Feed Day | No | 19:10 | 19:00 - 19:59 | Evening | 38,2 | 51  | 20,6 | 20,6 | 19,36 | 541,20 | 101,32 |
| 2019/05/31 | CH2206 | Male | Three y/o | Treatment (Wk 3) | Treatment | Feed Day | No | 19:10 | 19:00 - 19:59 | Evening | 37,7 | 92  | 4,8  | 4,8  | 18,85 | 587,78 | 52,04  |
| 2019/05/31 | CH2205 | Male | Three y/o | Treatment (Wk 3) | Treatment | Feed Day | No | 19:15 | 19:00 - 19:59 | Evening | 38,2 | 83  | 19,0 | 19,0 | 19,36 | 580,11 | 98,56  |
| 2019/05/31 | CH2206 | Male | Three y/o | Treatment (Wk 3) | Treatment | Feed Day | No | 19:15 | 19:00 - 19:59 | Evening | 37,7 | 185 | 3,8  | 3,8  | 18,85 | 635,34 | 44,22  |
| 2019/05/31 | CH2205 | Male | Three y/o | Treatment (Wk 3) | Treatment | Feed Day | No | 19:20 | 19:00 - 19:59 | Evening | 38,2 | 61  | 22,8 | 22,8 | 19,36 | 556,01 | 104,79 |
| 2019/05/31 | CH2206 | Male | Three y/o | Treatment (Wk 3) | Treatment | Feed Day | No | 19:20 | 19:00 - 19:59 | Evening | 37,7 | 92  | 7,2  | 7,2  | 18,85 | 587,78 | 65,66  |
| 2019/05/31 | CH2205 | Male | Three y/o | Treatment (Wk 3) | Treatment | Feed Day | No | 19:25 | 19:00 - 19:59 | Evening | 38,2 | 70  | 19,0 | 19,0 | 19,36 | 566,99 | 98,56  |
| 2019/05/31 | CH2206 | Male | Three y/o | Treatment (Wk 3) | Treatment | Feed Day | No | 19:25 | 19:00 - 19:59 | Evening | 37,7 | 96  | 28,2 | 28,2 | 18,85 | 590,91 | 112,07 |
| 2019/05/31 | CH2205 | Male | Three y/o | Treatment (Wk 3) | Treatment | Feed Day | No | 19:30 | 19:00 - 19:59 | Evening | 38,2 | 55  | 19,0 | 19,0 | 19,36 | 547,52 | 98,56  |
| 2019/05/31 | CH2206 | Male | Three y/o | Treatment (Wk 3) | Treatment | Feed Day | No | 19:30 | 19:00 - 19:59 | Evening | 37,8 | 54  | 49,6 | 49,6 | 18,95 | 545,99 | 131,51 |
| 2019/05/31 | CH2205 | Male | Three y/o | Treatment (Wk 3) | Treatment | Feed Day | No | 19:35 | 19:00 - 19:59 | Evening | 38,2 | 88  | 15,0 | 15,0 | 19,36 | 584,49 | 90,51  |
| 2019/05/31 | CH2206 | Male | Three y/o | Treatment (Wk 3) | Treatment | Feed Day | No | 19:35 | 19:00 - 19:59 | Evening | 37,8 | 47  | 47,2 | 47,2 | 18,95 | 534,23 | 129,80 |
| 2019/05/31 | CH2205 | Male | Three y/o | Treatment (Wk 3) | Treatment | Feed Day | No | 19:40 | 19:00 - 19:59 | Evening | 38,2 | 51  | 19,4 | 19,4 | 19,36 | 541,20 | 99,28  |
| 2019/05/31 | CH2206 | Male | Three y/o | Treatment (Wk 3) | Treatment | Feed Day | No | 19:40 | 19:00 - 19:59 | Evening | 37,8 |     | 42,4 | 42,4 | 18,95 |        | 126,10 |
| 2019/05/31 | CH2205 | Male | Three y/o | Treatment (Wk 3) | Treatment | Feed Day | No | 19:45 | 19:00 - 19:59 | Evening | 38,2 | 90  | 20,4 | 20,4 | 19,36 | 586,16 | 100,99 |
| 2019/05/31 | CH2206 | Male | Three y/o | Treatment (Wk 3) | Treatment | Feed Day | No | 19:45 | 19:00 - 19:59 | Evening | 37,8 | 92  | 35,2 | 35,2 | 18,95 | 587,78 | 119,69 |
| 2019/05/31 | CH2205 | Male | Three y/o | Treatment (Wk 3) | Treatment | Feed Day | No | 19:50 | 19:00 - 19:59 | Evening | 38,3 | 54  | 24,4 | 24,4 | 19,46 | 545,99 | 107,11 |
| 2019/05/31 | CH2206 | Male | Three y/o | Treatment (Wk 3) | Treatment | Feed Day | No | 19:50 | 19:00 - 19:59 | Evening | 37,8 | 92  | 20,0 | 20,0 | 18,95 | 587,78 | 100,31 |
| 2019/05/31 | CH2205 | Male | Three y/o | Treatment (Wk 3) | Treatment | Feed Day | No | 19:55 | 19:00 - 19:59 | Evening | 38,3 | 96  | 22,2 | 22,2 | 19,46 | 590,91 | 103,88 |
| 2019/05/31 | CH2206 | Male | Three y/o | Treatment (Wk 3) | Treatment | Feed Day | No | 19:55 | 19:00 - 19:59 | Evening | 37,7 | 84  | 43,0 | 43,0 | 18,85 | 581,01 | 126,58 |
| 2019/05/31 | CH2205 | Male | Three y/o | Treatment (Wk 3) | Treatment | Feed Day | No | 20:00 | 20:00 - 20:59 | Night   | 38,2 | 126 | 77,0 | 77,0 | 19,36 | 610,14 | 146,75 |
| 2019/05/31 | CH2206 | Male | Three y/o | Treatment (Wk 3) | Treatment | Feed Day | No | 20:00 | 20:00 - 20:59 | Night   | 37,8 | 100 | 11,8 | 11,8 | 18,95 | 593,87 | 82,36  |
| 2019/05/31 | CH2205 | Male | Three y/o | Treatment (Wk 3) | Treatment | Feed Day | No | 20:05 | 20:00 - 20:59 | Night   | 38,1 | 111 | 25,0 | 25,0 | 19,26 | 601,33 | 107,94 |
| 2019/05/31 | CH2206 | Male | Three y/o | Treatment (Wk 3) | Treatment | Feed Day | No | 20:05 | 20:00 - 20:59 | Night   | 37,8 | 97  | 37,4 | 37,4 | 18,95 | 591,66 | 121,77 |
| 2019/05/31 | CH2205 | Male | Three y/o | Treatment (Wk 3) | Treatment | Feed Day | No | 20:10 | 20:00 - 20:59 | Night   | 37,9 | 46  | 28,0 | 28,0 | 19,05 | 532,38 | 111,83 |
| 2019/05/31 | CH2206 | Male | Three y/o | Treatment (Wk 3) | Treatment | Feed Day | No | 20:10 | 20:00 - 20:59 | Night   | 37,8 | 85  | 38,8 | 38,8 | 18,95 | 581,90 | 123,04 |
| 2019/05/31 | CH2205 | Male | Three y/o | Treatment (Wk 3) | Treatment | Feed Day | No | 20:15 | 20:00 - 20:59 | Night   | 37,7 | 88  | 23,6 | 23,6 | 18,85 | 584,49 | 105,97 |
| 2019/05/31 | CH2206 | Male | Three y/o | Treatment (Wk 3) | Treatment | Feed Day | No | 20:15 | 20:00 - 20:59 | Night   | 37,7 | 86  | 36,0 | 36,0 | 18,85 | 582,77 | 120,46 |
| 2019/05/31 | CH2205 | Male | Three y/o | Treatment (Wk 3) | Treatment | Feed Day | No | 20:20 | 20:00 - 20:59 | Night   | 37,6 | 90  | 24,8 | 24,8 | 18,75 | 586,16 | 107,67 |
| 2019/05/31 | CH2206 | Male | Three y/o | Treatment (Wk 3) | Treatment | Feed Day | No | 20:20 | 20:00 - 20:59 | Night   | 37,7 | 84  | 33,2 | 33,2 | 18,85 | 581,01 | 117,68 |
| 2019/05/31 | CH2205 | Male | Three y/o | Treatment (Wk 3) | Treatment | Feed Day | No | 20:25 | 20:00 - 20:59 | Night   | 37,5 | 84  | 23,2 | 23,2 | 18,65 | 581,01 | 105,39 |
| 2019/05/31 | CH2206 | Male | Three y/o | Treatment (Wk 3) | Treatment | Feed Day | No | 20:25 | 20:00 - 20:59 | Night   | 37,7 | 86  | 35,2 | 35,2 | 18,85 | 582,77 | 119,69 |
| 2019/05/31 | CH2205 | Male | Three y/o | Treatment (Wk 3) | Treatment | Feed Day | No | 20:30 | 20:00 - 20:59 | Night   | 37,5 | 95  | 31,6 | 31,6 | 18,65 | 590,14 | 115,98 |
| 2019/05/31 | CH2206 | Male | Three y/o | Treatment (Wk 3) | Treatment | Feed Day | No | 20:30 | 20:00 - 20:59 | Night   | 37,8 | 56  | 34,2 | 34,2 | 18,95 | 549,01 | 118,70 |
| 2019/05/31 | CH2205 | Male | Three y/o | Treatment (Wk 3) | Treatment | Feed Day | No | 20:35 | 20:00 - 20:59 | Night   | 37,4 | 96  | 27,4 | 27,4 | 18,55 | 590,91 | 111,09 |
| 2019/05/31 | CH2206 | Male | Three y/o | Treatment (Wk 3) | Treatment | Feed Day | No | 20:35 | 20:00 - 20:59 | Night   | 37,7 | 45  | 39,2 | 39,2 | 18,85 | 530,47 | 123,39 |
| 2019/05/31 | CH2205 | Male | Three y/o | Treatment (Wk 3) | Treatment | Feed Day | No | 20:40 | 20:00 - 20:59 | Night   | 37,4 | 66  | 31,2 | 31,2 | 18,55 | 562,34 | 115,54 |
| 2019/05/31 | CH2206 | Male | Three y/o | Treatment (Wk 3) | Treatment | Feed Day | No | 20:40 | 20:00 - 20:59 | Night   | 37,7 | 60  | 35,4 | 35,4 | 18,85 | 554,67 | 119,88 |
| 2019/05/31 | CH2205 | Male | Three y/o | Treatment (Wk 3) | Treatment | Feed Day | No | 20:45 | 20:00 - 20:59 | Night   | 37,6 | 95  | 29,4 | 29,4 | 18,75 | 590,14 | 113,50 |
| 2019/05/31 | CH2206 | Male | Three y/o | Treatment (Wk 3) | Treatment | Feed Day | No | 20:45 | 20:00 - 20:59 | Night   | 37,7 | 51  | 37,0 | 37,0 | 18,85 | 541,20 | 121,40 |
| 2019/05/31 | CH2205 | Male | Three y/o | Treatment (Wk 3) | Treatment | Feed Day | No | 20:50 | 20:00 - 20:59 | Night   | 37,9 | 92  | 27,4 | 27,4 | 19,05 | 587,78 | 111,09 |
| 2019/05/31 | CH2206 | Male | Three y/o | Treatment (Wk 3) | Treatment | Feed Day | No | 20:50 | 20:00 - 20:59 | Night   | 37,7 | 88  | 32,6 | 32,6 | 18,85 | 584,49 | 117,05 |
| 2019/05/31 | CH2205 | Male | Three y/o | Treatment (Wk 3) | Treatment | Feed Day | No | 20:55 | 20:00 - 20:59 | Night   | 37,9 | 46  | 26,6 | 26,6 | 19,05 | 532,38 | 110,07 |
| 2019/05/31 | CH2206 | Male | Three y/o | Treatment (Wk 3) | Treatment | Feed Day | No | 20:55 | 20:00 - 20:59 | Night   | 37,7 | 40  | 32,0 | 32,0 | 18,85 | 520,09 | 116,41 |
| 2019/05/31 | CH2205 | Male | Three y/o | Treatment (Wk 3) | Treatment | Feed Day | No | 21:00 | 21:00 - 21:59 | Night   | 37,9 | 94  | 19,2 | 19,2 | 19,05 | 589,37 | 98,92  |
| 2019/05/31 | CH2206 | Male | Three y/o | Treatment (Wk 3) | Treatment | Feed Day | No | 21:00 | 21:00 - 21:59 | Night   | 37,7 | 50  | 30,2 | 30,2 | 18,85 | 539,52 | 114,42 |
| 2019/05/31 | CH2205 | Male | Three y/o | Treatment (Wk 3) | Treatment | Feed Day | No | 21:05 | 21:00 - 21:59 | Night   | 37,9 | 58  | 27,2 | 27,2 | 19,05 | 551,90 | 110,83 |
| 2019/05/31 | CH2206 | Male | Three y/o | Treatment (Wk 3) | Treatment | Feed Day | No | 21:05 | 21:00 - 21:59 | Night   | 37,7 | 51  | 27,6 | 27,6 | 18,85 | 541,20 | 111,33 |
| 2019/05/31 | CH2205 | Male | Three y/o | Treatment (Wk 3) | Treatment | Feed Day | No | 21:10 | 21:00 - 21:59 | Night   | 37,9 | 68  | 12,4 | 12,4 | 19,05 | 564,71 | 84,04  |
| 2019/05/31 | CH2206 | Male | Three y/o | Treatment (Wk 3) | Treatment | Feed Day | No | 21:10 | 21:00 - 21:59 | Night   | 37,7 | 70  | 41,6 | 41,6 | 18,85 | 566,99 | 125,44 |
| 2019/05/31 | CH2205 | Male | Three y/o | Treatment (Wk 3) | Treatment | Feed Day | No | 21:15 | 21:00 - 21:59 | Night   | 37,7 | 67  | 5,4  | 5,4  | 18,85 | 563,53 | 55,99  |



|    |            |        |      |           |                  |           |          |    |       |               |               |      |     |      |      |       |        |        |
|----|------------|--------|------|-----------|------------------|-----------|----------|----|-------|---------------|---------------|------|-----|------|------|-------|--------|--------|
|    | 2019/05/31 | CH2206 | Male | Three y/o | Treatment (Wk 3) | Treatment | Feed Day | No | 21:15 | 21:00 - 21:59 | Night         | 37,7 | 44  | 41,0 | 41,0 | 18,85 | 528,51 | 124,94 |
|    | 2019/05/31 | CH2205 | Male | Three y/o | Treatment (Wk 3) | Treatment | Feed Day | No | 21:20 | 21:00 - 21:59 | Night         | 37,5 | 94  | 6,8  | 6,8  | 18,65 | 589,37 | 63,74  |
|    | 2019/05/31 | CH2206 | Male | Three y/o | Treatment (Wk 3) | Treatment | Feed Day | No | 21:20 | 21:00 - 21:59 | Night         | 37,7 | 52  | 46,8 | 46,8 | 18,85 | 542,83 | 129,50 |
|    | 2019/05/31 | CH2205 | Male | Three y/o | Treatment (Wk 3) | Treatment | Feed Day | No | 21:25 | 21:00 - 21:59 | Night         | 37,5 | 46  | 7,0  | 7,0  | 18,65 | 532,38 | 64,72  |
|    | 2019/05/31 | CH2206 | Male | Three y/o | Treatment (Wk 3) | Treatment | Feed Day | No | 21:25 | 21:00 - 21:59 | Night         | 37,8 | 45  | 46,2 | 46,2 | 18,95 | 530,47 | 129,06 |
|    | 2019/05/31 | CH2205 | Male | Three y/o | Treatment (Wk 3) | Treatment | Feed Day | No | 21:30 | 21:00 - 21:59 | Night         | 37,4 | 73  | 4,0  | 4,0  | 18,55 | 570,27 | 45,94  |
|    | 2019/05/31 | CH2206 | Male | Three y/o | Treatment (Wk 3) | Treatment | Feed Day | No | 21:30 | 21:00 - 21:59 | Night         | 37,8 | 81  | 44,4 | 44,4 | 18,95 | 578,26 | 127,69 |
|    | 2019/05/31 | CH2205 | Male | Three y/o | Treatment (Wk 3) | Treatment | Feed Day | No | 21:35 | 21:00 - 21:59 | Night         | 37,3 | 110 | 5,4  | 5,4  | 18,46 | 600,69 | 55,99  |
|    | 2019/05/31 | CH2206 | Male | Three y/o | Treatment (Wk 3) | Treatment | Feed Day | No | 21:35 | 21:00 - 21:59 | Night         | 37,8 | 88  | 49,6 | 49,6 | 18,95 | 584,49 | 131,51 |
|    | 2019/05/31 | CH2205 | Male | Three y/o | Treatment (Wk 3) | Treatment | Feed Day | No | 21:40 | 21:00 - 21:59 | Night         | 37,2 | 90  | 1,8  | 1,8  | 18,36 | 586,16 | 19,38  |
|    | 2019/05/31 | CH2206 | Male | Three y/o | Treatment (Wk 3) | Treatment | Feed Day | No | 21:40 | 21:00 - 21:59 | Night         | 37,8 | 87  | 45,8 | 45,8 | 18,95 | 583,64 | 128,76 |
|    | 2019/05/31 | CH2205 | Male | Three y/o | Treatment (Wk 3) | Treatment | Feed Day | No | 21:45 | 21:00 - 21:59 | Night         | 37,3 | 74  | 2,6  | 2,6  | 18,46 | 571,33 | 31,57  |
|    | 2019/05/31 | CH2206 | Male | Three y/o | Treatment (Wk 3) | Treatment | Feed Day | No | 21:45 | 21:00 - 21:59 | Night         | 37,8 | 90  | 46,4 | 46,4 | 18,95 | 586,16 | 129,21 |
|    | 2019/05/31 | CH2205 | Male | Three y/o | Treatment (Wk 3) | Treatment | Feed Day | No | 21:50 | 21:00 - 21:59 | Night         | 37,3 | 84  | 6,6  | 6,6  | 18,46 | 581,01 | 62,73  |
|    | 2019/05/31 | CH2206 | Male | Three y/o | Treatment (Wk 3) | Treatment | Feed Day | No | 21:50 | 21:00 - 21:59 | Night         | 37,8 | 85  | 41,4 | 41,4 | 18,95 | 581,90 | 125,27 |
|    | 2019/05/31 | CH2205 | Male | Three y/o | Treatment (Wk 3) | Treatment | Feed Day | No | 21:55 | 21:00 - 21:59 | Night         | 37,3 | 88  | 5,4  | 5,4  | 18,46 | 584,49 | 55,99  |
|    | 2019/05/31 | CH2206 | Male | Three y/o | Treatment (Wk 3) | Treatment | Feed Day | No | 21:55 | 21:00 - 21:59 | Night         | 37,8 | 88  | 44,8 | 44,8 | 18,95 | 584,49 | 127,99 |
|    | 2019/05/31 | CH2205 | Male | Three y/o | Treatment (Wk 3) | Treatment | Feed Day | No | 22:00 | 22:00 - 22:59 | Night         | 37,2 | 48  | 4,8  | 4,8  | 18,36 | 536,04 | 52,04  |
|    | 2019/05/31 | CH2206 | Male | Three y/o | Treatment (Wk 3) | Treatment | Feed Day | No | 22:00 | 22:00 - 22:59 | Night         | 37,8 | 67  | 42,8 | 42,8 | 18,95 | 563,53 | 126,42 |
|    | 2019/05/31 | CH2205 | Male | Three y/o | Treatment (Wk 3) | Treatment | Feed Day | No | 22:05 | 22:00 - 22:59 | Night         | 37,2 | 86  | 2,2  | 2,2  | 18,36 | 582,77 | 26,02  |
|    | 2019/05/31 | CH2206 | Male | Three y/o | Treatment (Wk 3) | Treatment | Feed Day | No | 22:05 | 22:00 - 22:59 | Night         | 37,8 | 61  | 44,0 | 44,0 | 18,95 | 556,01 | 127,37 |
|    | 2019/05/31 | CH2205 | Male | Three y/o | Treatment (Wk 3) | Treatment | Feed Day | No | 22:10 | 22:00 - 22:59 | Night         | 37,1 | 88  | 8,4  | 8,4  | 18,26 | 584,49 | 70,86  |
|    | 2019/05/31 | CH2206 | Male | Three y/o | Treatment (Wk 3) | Treatment | Feed Day | No | 22:10 | 22:00 - 22:59 | Night         | 37,8 | 72  | 46,4 | 46,4 | 18,95 | 569,20 | 129,21 |
|    | 2019/05/31 | CH2205 | Male | Three y/o | Treatment (Wk 3) | Treatment | Feed Day | No | 22:15 | 22:00 - 22:59 | Night         | 37,1 | 88  | 6,6  | 6,6  | 18,26 | 584,49 | 62,73  |
|    | 2019/05/31 | CH2206 | Male | Three y/o | Treatment (Wk 3) | Treatment | Feed Day | No | 22:15 | 22:00 - 22:59 | Night         | 37,8 | 84  | 47,0 | 47,0 | 18,95 | 581,01 | 129,65 |
|    | 2019/05/31 | CH2205 | Male | Three y/o | Treatment (Wk 3) | Treatment | Feed Day | No | 22:20 | 22:00 - 22:59 | Night         | 37,1 | 73  | 3,2  | 3,2  | 18,26 | 570,27 | 38,49  |
|    | 2019/05/31 | CH2206 | Male | Three y/o | Treatment (Wk 3) | Treatment | Feed Day | No | 22:20 | 22:00 - 22:59 | Night         | 37,8 | 44  | 44,0 | 44,0 | 18,95 | 528,51 | 127,37 |
|    | 2019/05/31 | CH2205 | Male | Three y/o | Treatment (Wk 3) | Treatment | Feed Day | No | 22:25 | 22:00 - 22:59 | Night         | 37,0 | 72  | 4,2  | 4,2  | 18,16 | 569,20 | 47,57  |
|    | 2019/05/31 | CH2206 | Male | Three y/o | Treatment (Wk 3) | Treatment | Feed Day | No | 22:25 | 22:00 - 22:59 | Night         | 37,8 | 47  | 47,8 | 47,8 | 18,95 | 534,23 | 130,23 |
|    | 2019/05/31 | CH2205 | Male | Three y/o | Treatment (Wk 3) | Treatment | Feed Day | No | 22:30 | 22:00 - 22:59 | Night         | 37,0 | 39  | 4,8  | 4,8  | 18,16 | 517,82 | 52,04  |
|    | 2019/05/31 | CH2206 | Male | Three y/o | Treatment (Wk 3) | Treatment | Feed Day | No | 22:30 | 22:00 - 22:59 | Night         | 37,8 | 43  | 42,0 | 42,0 | 18,95 | 526,50 | 125,77 |
|    | 2019/05/31 | CH2205 | Male | Three y/o | Treatment (Wk 3) | Treatment | Feed Day | No | 22:35 | 22:00 - 22:59 | Night         | 37,0 | 92  | 3,8  | 3,8  | 18,16 | 587,78 | 44,22  |
|    | 2019/05/31 | CH2206 | Male | Three y/o | Treatment (Wk 3) | Treatment | Feed Day | No | 22:35 | 22:00 - 22:59 | Night         | 37,8 | 45  | 41,6 | 41,6 | 18,95 | 530,47 | 125,44 |
|    | 2019/05/31 | CH2205 | Male | Three y/o | Treatment (Wk 3) | Treatment | Feed Day | No | 22:40 | 22:00 - 22:59 | Night         | 37,0 | 77  | 4,4  | 4,4  | 18,16 | 574,39 | 49,12  |
|    | 2019/05/31 | CH2206 | Male | Three y/o | Treatment (Wk 3) | Treatment | Feed Day | No | 22:40 | 22:00 - 22:59 | Night         | 37,8 | 44  | 41,0 | 41,0 | 18,95 | 528,51 | 124,94 |
|    | 2019/05/31 | CH2205 | Male | Three y/o | Treatment (Wk 3) | Treatment | Feed Day | No | 22:45 | 22:00 - 22:59 | Night         | 37,0 | 79  | 2,4  | 2,4  | 18,16 | 576,36 | 28,91  |
|    | 2019/05/31 | CH2206 | Male | Three y/o | Treatment (Wk 3) | Treatment | Feed Day | No | 22:45 | 22:00 - 22:59 | Night         | 37,8 | 82  | 50,2 | 50,2 | 18,95 | 579,19 | 131,92 |
|    | 2019/05/31 | CH2205 | Male | Three y/o | Treatment (Wk 3) | Treatment | Feed Day | No | 22:50 | 22:00 - 22:59 | Night         | 37,0 | 51  | 3,0  | 3,0  | 18,16 | 541,20 | 36,34  |
|    | 2019/05/31 | CH2206 | Male | Three y/o | Treatment (Wk 3) | Treatment | Feed Day | No | 22:50 | 22:00 - 22:59 | Night         | 37,8 | 70  | 43,4 | 43,4 | 18,95 | 566,99 | 126,90 |
|    | 2019/05/31 | CH2205 | Male | Three y/o | Treatment (Wk 3) | Treatment | Feed Day | No | 22:55 | 22:00 - 22:59 | Night         | 37,0 | 68  | 3,2  | 3,2  | 18,16 | 564,71 | 38,49  |
|    | 2019/05/31 | CH2206 | Male | Three y/o | Treatment (Wk 3) | Treatment | Feed Day | No | 22:55 | 22:00 - 22:59 | Night         | 37,8 | 88  | 41,4 | 41,4 | 18,95 | 584,49 | 125,27 |
|    | 2019/05/31 | CH2205 | Male | Three y/o | Treatment (Wk 3) | Treatment | Feed Day | No | 23:00 | 23:00 - 23:59 | Night         | 37,0 | 49  | 4,4  | 4,4  | 18,16 | 537,80 | 49,12  |
|    | 2019/05/31 | CH2206 | Male | Three y/o | Treatment (Wk 3) | Treatment | Feed Day | No | 23:00 | 23:00 - 23:59 | Night         | 37,8 | 86  | 48,8 | 48,8 | 18,95 | 582,77 | 130,95 |
|    | 2019/05/31 | CH2205 | Male | Three y/o | Treatment (Wk 3) | Treatment | Feed Day | No | 23:05 | 23:00 - 23:59 | Night         | 37,0 | 88  | 21,4 | 21,4 | 18,16 | 584,49 | 102,63 |
|    | 2019/05/31 | CH2206 | Male | Three y/o | Treatment (Wk 3) | Treatment | Feed Day | No | 23:05 | 23:00 - 23:59 | Night         | 37,8 | 99  | 18,6 | 18,6 | 18,95 | 593,14 | 97,84  |
|    | 2019/05/31 | CH2205 | Male | Three y/o | Treatment (Wk 3) | Treatment | Feed Day | No | 23:10 | 23:00 - 23:59 | Night         | 37,2 | 93  | 14,2 | 14,2 | 18,36 | 588,58 | 88,65  |
|    | 2019/05/31 | CH2206 | Male | Three y/o | Treatment (Wk 3) | Treatment | Feed Day | No | 23:10 | 23:00 - 23:59 | Night         | 37,8 | 103 | 12,6 | 12,6 | 18,95 | 596,00 | 84,59  |
|    | 2019/05/31 | CH2205 | Male | Three y/o | Treatment (Wk 3) | Treatment | Feed Day | No | 23:15 | 23:00 - 23:59 | Night         | 37,2 | 54  | 10,2 | 10,2 | 18,36 | 545,99 | 77,43  |
|    | 2019/05/31 | CH2206 | Male | Three y/o | Treatment (Wk 3) | Treatment | Feed Day | No | 23:15 | 23:00 - 23:59 | Night         | 37,7 | 89  | 30,6 | 30,6 | 18,85 | 585,33 | 114,87 |
|    | 2019/05/31 | CH2205 | Male | Three y/o | Treatment (Wk 3) | Treatment | Feed Day | No | 23:20 | 23:00 - 23:59 | Night         | 37,2 | 93  | 13,8 | 13,8 | 18,36 | 588,58 | 87,68  |
|    | 2019/05/31 | CH2206 | Male | Three y/o | Treatment (Wk 3) | Treatment | Feed Day | No | 23:20 | 23:00 - 23:59 | Night         | 37,5 | 90  | 32,6 | 32,6 | 18,65 | 586,16 | 117,05 |
|    | 2019/05/31 | CH2205 | Male | Three y/o | Treatment (Wk 3) | Treatment | Feed Day | No | 23:25 | 23:00 - 23:59 | Night         | 37,2 | 84  | 7,4  | 7,4  | 18,36 | 581,01 | 66,59  |
|    | 2019/05/31 | CH2206 | Male | Three y/o | Treatment (Wk 3) | Treatment | Feed Day | No | 23:25 | 23:00 - 23:59 | Night         | 37,5 | 94  | 37,0 | 37,0 | 18,65 | 589,37 | 121,40 |
|    | 2019/05/31 | CH2205 | Male | Three y/o | Treatment (Wk 3) | Treatment | Feed Day | No | 23:30 | 23:00 - 23:59 | Night         | 37,2 | 65  | 7,2  | 7,2  | 18,36 | 561,12 | 65,66  |
|    | 2019/05/31 | CH2206 | Male | Three y/o | Treatment (Wk 3) | Treatment | Feed Day | No | 23:30 | 23:00 - 23:59 | Night         | 37,5 | 67  | 37,4 | 37,4 | 18,65 | 563,53 | 121,77 |
|    | 2019/05/31 | CH2205 | Male | Three y/o | Treatment (Wk 3) | Treatment | Feed Day | No | 23:35 | 23:00 - 23:59 | Night         | 37,2 | 88  | 7,4  | 7,4  | 18,36 | 584,49 | 66,59  |
|    | 2019/05/31 | CH2206 | Male | Three y/o | Treatment (Wk 3) | Treatment | Feed Day | No | 23:35 | 23:00 - 23:59 | Night         | 37,5 | 86  | 41,6 | 41,6 | 18,65 | 582,77 | 125,44 |
|    | 2019/05/31 | CH2205 | Male | Three y/o | Treatment (Wk 3) | Treatment | Feed Day | No | 23:40 | 23:00 - 23:59 | Night         | 37,2 | 65  | 8,0  | 8,0  | 18,36 | 561,12 | 69,22  |
|    | 2019/05/31 | CH2206 | Male | Three y/o | Treatment (Wk 3) | Treatment | Feed Day | No | 23:40 | 23:00 - 23:59 | Night         | 37,5 | 73  | 40,4 | 40,4 | 18,65 | 570,27 | 124,43 |
|    | 2019/05/31 | CH2205 | Male | Three y/o | Treatment (Wk 3) | Treatment | Feed Day | No | 23:45 | 23:00 - 23:59 | Night         | 37,3 | 49  | 12,4 | 12,4 | 18,46 | 537,80 | 84,04  |
|    | 2019/05/31 | CH2206 | Male | Three y/o | Treatment (Wk 3) | Treatment | Feed Day | No | 23:45 | 23:00 - 23:59 | Night         | 37,5 | 94  | 39,8 | 39,8 | 18,65 | 589,37 | 123,91 |
|    | 2019/05/31 | CH2205 | Male | Three y/o | Treatment (Wk 3) | Treatment | Feed Day | No | 23:50 | 23:00 - 23:59 | Night         | 37,3 | 45  | 3,4  | 3,4  | 18,46 | 530,47 | 40,51  |
|    | 2019/05/31 | CH2206 | Male | Three y/o | Treatment (Wk 3) | Treatment | Feed Day | No | 23:50 | 23:00 - 23:59 | Night         | 37,5 | 70  | 50,0 | 50,0 | 18,65 | 566,99 | 131,79 |
|    | 2019/05/31 | CH2205 | Male | Three y/o | Treatment (Wk 3) | Treatment | Feed Day | No | 23:55 | 23:00 - 23:59 | Night         | 37,3 | 57  | 12,6 | 12,6 | 18,46 | 550,47 | 84,59  |
|    | 2019/05/31 | CH2206 | Male | Three y/o | Treatment (Wk 3) | Treatment | Feed Day | No | 23:55 | 23:00 - 23:59 | Night         | 37,5 | 43  | 64,8 | 64,8 | 18,65 | 526,50 | 140,76 |
| 18 | 2019/06/01 | CH2205 | Male | Three y/o | Treatment (Wk 3) | Treatment | Feed Day | No | 00:00 | 00:00 - 00:59 | Early Morning | 37,3 | 54  | 18,2 | 18,2 | 18,46 | 545,99 | 97,10  |
|    | 2019/06/01 | CH2206 | Male | Three y/o | Treatment (Wk 3) | Treatment | Feed Day | No | 00:00 | 00:00 - 00:59 | Early Morning | 37,5 | 83  | 63,8 | 63,8 | 18,65 | 580,11 | 140,22 |
|    | 2019/06/01 | CH2205 | Male | Three y/o | Treatment (Wk 3) | Treatment | Feed Day | No | 00:05 | 00:00 - 00:59 | Early Morning | 37,4 | 134 | 26,6 | 26,6 | 18,55 | 614,33 | 110,07 |
|    | 2019/06/01 | CH2206 | Male | Three y/o | Treatment (Wk 3) | Treatment | Feed Day | No | 00:05 | 00:00 - 00:59 | Early Morning | 37,4 | 90  | 53,6 | 53,6 | 18,55 | 586,16 | 134,19 |
|    | 2019/06/01 | CH2205 | Male | Three y/o | Treatment (Wk 3) | Treatment | Feed Day | No | 00:10 | 00:00 - 00:59 | Early Morning | 37,4 |     | 15,4 | 15,4 | 18,55 |        | 91,41  |



|            |        |      |           |                  |           |          |    |       |               |               |      |     |       |       |       |        |        |
|------------|--------|------|-----------|------------------|-----------|----------|----|-------|---------------|---------------|------|-----|-------|-------|-------|--------|--------|
| 2019/06/01 | CH2206 | Male | Three y/o | Treatment (Wk 3) | Treatment | Feed Day | No | 00:10 | 00:00 - 00:59 | Early Morning | 37,4 | 88  | 57,8  | 57,8  | 18,55 | 584,49 | 136,80 |
| 2019/06/01 | CH2205 | Male | Three y/o | Treatment (Wk 3) | Treatment | Feed Day | No | 00:15 | 00:00 - 00:59 | Early Morning | 37,3 | 101 | 13,4  | 13,4  | 18,46 | 594,59 | 86,68  |
| 2019/06/01 | CH2206 | Male | Three y/o | Treatment (Wk 3) | Treatment | Feed Day | No | 00:15 | 00:00 - 00:59 | Early Morning | 37,5 | 54  | 54,6  | 54,6  | 18,65 | 545,99 | 134,83 |
| 2019/06/01 | CH2205 | Male | Three y/o | Treatment (Wk 3) | Treatment | Feed Day | No | 00:20 | 00:00 - 00:59 | Early Morning | 37,3 | 101 | 9,2   | 9,2   | 18,46 | 594,59 | 73,94  |
| 2019/06/01 | CH2206 | Male | Three y/o | Treatment (Wk 3) | Treatment | Feed Day | No | 00:20 | 00:00 - 00:59 | Early Morning | 37,5 | 62  | 50,6  | 50,6  | 18,65 | 557,33 | 132,20 |
| 2019/06/01 | CH2205 | Male | Three y/o | Treatment (Wk 3) | Treatment | Feed Day | No | 00:25 | 00:00 - 00:59 | Early Morning | 37,3 |     | 123,8 | 123,8 | 18,46 |        | 163,30 |
| 2019/06/01 | CH2206 | Male | Three y/o | Treatment (Wk 3) | Treatment | Feed Day | No | 00:25 | 00:00 - 00:59 | Early Morning | 37,7 |     | 43,6  | 43,6  | 18,85 |        | 127,06 |
| 2019/06/01 | CH2205 | Male | Three y/o | Treatment (Wk 3) | Treatment | Feed Day | No | 00:30 | 00:00 - 00:59 | Early Morning | 37,4 | 80  | 49,8  | 49,8  | 18,55 | 577,31 | 131,65 |
| 2019/06/01 | CH2206 | Male | Three y/o | Treatment (Wk 3) | Treatment | Feed Day | No | 00:30 | 00:00 - 00:59 | Early Morning | 37,7 | 119 | 5,0   | 5,0   | 18,85 | 606,20 | 53,41  |
| 2019/06/01 | CH2205 | Male | Three y/o | Treatment (Wk 3) | Treatment | Feed Day | No | 00:35 | 00:00 - 00:59 | Early Morning | 37,3 | 60  | 9,2   | 9,2   | 18,46 | 554,67 | 73,94  |
| 2019/06/01 | CH2206 | Male | Three y/o | Treatment (Wk 3) | Treatment | Feed Day | No | 00:35 | 00:00 - 00:59 | Early Morning | 37,5 | 92  | 12,6  | 12,6  | 18,65 | 587,78 | 84,59  |
| 2019/06/01 | CH2205 | Male | Three y/o | Treatment (Wk 3) | Treatment | Feed Day | No | 00:40 | 00:00 - 00:59 | Early Morning | 37,3 | 55  | 4,6   | 4,6   | 18,46 | 547,52 | 50,61  |
| 2019/06/01 | CH2206 | Male | Three y/o | Treatment (Wk 3) | Treatment | Feed Day | No | 00:40 | 00:00 - 00:59 | Early Morning | 37,4 | 51  | 22,4  | 22,4  | 18,55 | 541,20 | 104,19 |
| 2019/06/01 | CH2205 | Male | Three y/o | Treatment (Wk 3) | Treatment | Feed Day | No | 00:45 | 00:00 - 00:59 | Early Morning | 37,4 | 54  | 3,2   | 3,2   | 18,55 | 545,99 | 38,49  |
| 2019/06/01 | CH2206 | Male | Three y/o | Treatment (Wk 3) | Treatment | Feed Day | No | 00:45 | 00:00 - 00:59 | Early Morning | 37,4 | 44  | 28,0  | 28,0  | 18,55 | 528,51 | 111,83 |
| 2019/06/01 | CH2205 | Male | Three y/o | Treatment (Wk 3) | Treatment | Feed Day | No | 00:50 | 00:00 - 00:59 | Early Morning | 37,4 | 91  | 4,2   | 4,2   | 18,55 | 586,98 | 47,57  |
| 2019/06/01 | CH2206 | Male | Three y/o | Treatment (Wk 3) | Treatment | Feed Day | No | 00:50 | 00:00 - 00:59 | Early Morning | 37,4 | 45  | 33,8  | 33,8  | 18,55 | 530,47 | 118,29 |
| 2019/06/01 | CH2205 | Male | Three y/o | Treatment (Wk 3) | Treatment | Feed Day | No | 00:55 | 00:00 - 00:59 | Early Morning | 37,4 | 91  | 4,0   | 4,0   | 18,55 | 586,98 | 45,94  |
| 2019/06/01 | CH2206 | Male | Three y/o | Treatment (Wk 3) | Treatment | Feed Day | No | 00:55 | 00:00 - 00:59 | Early Morning | 37,4 | 72  | 5,0   | 5,0   | 18,55 | 569,20 | 53,41  |
| 2019/06/01 | CH2205 | Male | Three y/o | Treatment (Wk 3) | Treatment | Feed Day | No | 01:00 | 01:00 - 01:59 | Early Morning | 37,5 | 71  | 6,8   | 6,8   | 18,65 | 568,10 | 63,74  |
| 2019/06/01 | CH2206 | Male | Three y/o | Treatment (Wk 3) | Treatment | Feed Day | No | 01:00 | 01:00 - 01:59 | Early Morning | 37,5 | 45  | 12,6  | 12,6  | 18,65 | 530,47 | 84,59  |
| 2019/06/01 | CH2205 | Male | Three y/o | Treatment (Wk 3) | Treatment | Feed Day | No | 01:05 | 01:00 - 01:59 | Early Morning | 37,5 | 59  | 8,6   | 8,6   | 18,65 | 553,30 | 71,66  |
| 2019/06/01 | CH2206 | Male | Three y/o | Treatment (Wk 3) | Treatment | Feed Day | No | 01:05 | 01:00 - 01:59 | Early Morning | 37,5 | 45  | 11,0  | 11,0  | 18,65 | 530,47 | 79,98  |
| 2019/06/01 | CH2205 | Male | Three y/o | Treatment (Wk 3) | Treatment | Feed Day | No | 01:10 | 01:00 - 01:59 | Early Morning | 37,5 | 103 | 6,0   | 6,0   | 18,65 | 596,00 | 59,53  |
| 2019/06/01 | CH2206 | Male | Three y/o | Treatment (Wk 3) | Treatment | Feed Day | No | 01:10 | 01:00 - 01:59 | Early Morning | 37,5 | 88  | 9,8   | 9,8   | 18,65 | 584,49 | 76,07  |
| 2019/06/01 | CH2205 | Male | Three y/o | Treatment (Wk 3) | Treatment | Feed Day | No | 01:15 | 01:00 - 01:59 | Early Morning | 37,5 | 62  | 8,6   | 8,6   | 18,65 | 557,33 | 71,66  |
| 2019/06/01 | CH2206 | Male | Three y/o | Treatment (Wk 3) | Treatment | Feed Day | No | 01:15 | 01:00 - 01:59 | Early Morning | 37,5 | 46  | 3,0   | 3,0   | 18,65 | 532,38 | 36,34  |
| 2019/06/01 | CH2205 | Male | Three y/o | Treatment (Wk 3) | Treatment | Feed Day | No | 01:20 | 01:00 - 01:59 | Early Morning | 37,6 | 59  | 6,6   | 6,6   | 18,75 | 553,30 | 62,73  |
| 2019/06/01 | CH2206 | Male | Three y/o | Treatment (Wk 3) | Treatment | Feed Day | No | 01:20 | 01:00 - 01:59 | Early Morning | 37,5 | 40  | 6,4   | 6,4   | 18,65 | 520,09 | 61,70  |
| 2019/06/01 | CH2205 | Male | Three y/o | Treatment (Wk 3) | Treatment | Feed Day | No | 01:25 | 01:00 - 01:59 | Early Morning | 37,6 | 93  | 5,8   | 5,8   | 18,75 | 588,58 | 58,39  |
| 2019/06/01 | CH2206 | Male | Three y/o | Treatment (Wk 3) | Treatment | Feed Day | No | 01:25 | 01:00 - 01:59 | Early Morning | 37,6 | 93  | 5,2   | 5,2   | 18,75 | 588,58 | 54,72  |
| 2019/06/01 | CH2205 | Male | Three y/o | Treatment (Wk 3) | Treatment | Feed Day | No | 01:30 | 01:00 - 01:59 | Early Morning | 37,6 | 63  | 5,4   | 5,4   | 18,75 | 558,62 | 55,99  |
| 2019/06/01 | CH2206 | Male | Three y/o | Treatment (Wk 3) | Treatment | Feed Day | No | 01:30 | 01:00 - 01:59 | Early Morning | 37,5 | 53  | 10,0  | 10,0  | 18,65 | 544,43 | 76,76  |
| 2019/06/01 | CH2205 | Male | Three y/o | Treatment (Wk 3) | Treatment | Feed Day | No | 01:35 | 01:00 - 01:59 | Early Morning | 37,6 | 52  | 4,4   | 4,4   | 18,75 | 542,83 | 49,12  |
| 2019/06/01 | CH2206 | Male | Three y/o | Treatment (Wk 3) | Treatment | Feed Day | No | 01:35 | 01:00 - 01:59 | Early Morning | 37,5 | 86  | 1,4   | 1,4   | 18,65 | 582,77 | 11,07  |
| 2019/06/01 | CH2205 | Male | Three y/o | Treatment (Wk 3) | Treatment | Feed Day | No | 01:40 | 01:00 - 01:59 | Early Morning | 37,6 | 53  | 8,0   | 8,0   | 18,75 | 544,43 | 69,22  |
| 2019/06/01 | CH2206 | Male | Three y/o | Treatment (Wk 3) | Treatment | Feed Day | No | 01:40 | 01:00 - 01:59 | Early Morning | 37,5 | 91  | 2,0   | 2,0   | 18,65 | 586,98 | 22,86  |
| 2019/06/01 | CH2205 | Male | Three y/o | Treatment (Wk 3) | Treatment | Feed Day | No | 01:45 | 01:00 - 01:59 | Early Morning | 37,6 | 65  | 6,2   | 6,2   | 18,75 | 561,12 | 60,63  |
| 2019/06/01 | CH2206 | Male | Three y/o | Treatment (Wk 3) | Treatment | Feed Day | No | 01:45 | 01:00 - 01:59 | Early Morning | 37,5 | 93  | 5,8   | 5,8   | 18,65 | 588,58 | 58,39  |
| 2019/06/01 | CH2205 | Male | Three y/o | Treatment (Wk 3) | Treatment | Feed Day | No | 01:50 | 01:00 - 01:59 | Early Morning | 37,6 | 92  | 5,8   | 5,8   | 18,75 | 587,78 | 58,39  |
| 2019/06/01 | CH2206 | Male | Three y/o | Treatment (Wk 3) | Treatment | Feed Day | No | 01:50 | 01:00 - 01:59 | Early Morning | 37,5 | 79  | 1,8   | 1,8   | 18,65 | 576,36 | 19,38  |
| 2019/06/01 | CH2205 | Male | Three y/o | Treatment (Wk 3) | Treatment | Feed Day | No | 01:55 | 01:00 - 01:59 | Early Morning | 37,6 | 94  | 8,6   | 8,6   | 18,75 | 589,37 | 71,66  |
| 2019/06/01 | CH2206 | Male | Three y/o | Treatment (Wk 3) | Treatment | Feed Day | No | 01:55 | 01:00 - 01:59 | Early Morning | 37,5 | 52  | 3,6   | 3,6   | 18,65 | 542,83 | 42,42  |
| 2019/06/01 | CH2205 | Male | Three y/o | Treatment (Wk 3) | Treatment | Feed Day | No | 02:00 | 02:00 - 02:59 | Early Morning | 37,6 | 66  | 10,8  | 10,8  | 18,75 | 562,34 | 79,36  |
| 2019/06/01 | CH2206 | Male | Three y/o | Treatment (Wk 3) | Treatment | Feed Day | No | 02:00 | 02:00 - 02:59 | Early Morning | 37,5 | 94  | 5,6   | 5,6   | 18,65 | 589,37 | 57,21  |
| 2019/06/01 | CH2205 | Male | Three y/o | Treatment (Wk 3) | Treatment | Feed Day | No | 02:05 | 02:00 - 02:59 | Early Morning | 37,6 | 53  | 6,6   | 6,6   | 18,75 | 544,43 | 62,73  |
| 2019/06/01 | CH2206 | Male | Three y/o | Treatment (Wk 3) | Treatment | Feed Day | No | 02:05 | 02:00 - 02:59 | Early Morning | 37,5 | 88  | 8,6   | 8,6   | 18,65 | 584,49 | 71,66  |
| 2019/06/01 | CH2205 | Male | Three y/o | Treatment (Wk 3) | Treatment | Feed Day | No | 02:10 | 02:00 - 02:59 | Early Morning | 37,6 | 91  | 8,4   | 8,4   | 18,75 | 586,98 | 70,86  |
| 2019/06/01 | CH2206 | Male | Three y/o | Treatment (Wk 3) | Treatment | Feed Day | No | 02:10 | 02:00 - 02:59 | Early Morning | 37,5 | 80  | 4,4   | 4,4   | 18,65 | 577,31 | 49,12  |
| 2019/06/01 | CH2205 | Male | Three y/o | Treatment (Wk 3) | Treatment | Feed Day | No | 02:15 | 02:00 - 02:59 | Early Morning | 37,6 | 46  | 5,2   | 5,2   | 18,75 | 532,38 | 54,72  |
| 2019/06/01 | CH2206 | Male | Three y/o | Treatment (Wk 3) | Treatment | Feed Day | No | 02:15 | 02:00 - 02:59 | Early Morning | 37,5 | 60  | 8,8   | 8,8   | 18,65 | 554,67 | 72,43  |
| 2019/06/01 | CH2205 | Male | Three y/o | Treatment (Wk 3) | Treatment | Feed Day | No | 02:20 | 02:00 - 02:59 | Early Morning | 37,6 | 88  | 5,4   | 5,4   | 18,75 | 584,49 | 55,99  |
| 2019/06/01 | CH2206 | Male | Three y/o | Treatment (Wk 3) | Treatment | Feed Day | No | 02:20 | 02:00 - 02:59 | Early Morning | 37,5 | 88  | 6,4   | 6,4   | 18,65 | 584,49 | 61,70  |
| 2019/06/01 | CH2205 | Male | Three y/o | Treatment (Wk 3) | Treatment | Feed Day | No | 02:25 | 02:00 - 02:59 | Early Morning | 37,6 | 78  | 5,0   | 5,0   | 18,75 | 575,38 | 53,41  |
| 2019/06/01 | CH2206 | Male | Three y/o | Treatment (Wk 3) | Treatment | Feed Day | No | 02:25 | 02:00 - 02:59 | Early Morning | 37,5 | 53  | 4,8   | 4,8   | 18,65 | 544,43 | 52,04  |
| 2019/06/01 | CH2205 | Male | Three y/o | Treatment (Wk 3) | Treatment | Feed Day | No | 02:30 | 02:00 - 02:59 | Early Morning | 37,6 | 61  | 5,2   | 5,2   | 18,75 | 556,01 | 54,72  |
| 2019/06/01 | CH2206 | Male | Three y/o | Treatment (Wk 3) | Treatment | Feed Day | No | 02:30 | 02:00 - 02:59 | Early Morning | 37,5 | 42  | 3,0   | 3,0   | 18,65 | 524,42 | 36,34  |
| 2019/06/01 | CH2205 | Male | Three y/o | Treatment (Wk 3) | Treatment | Feed Day | No | 02:35 | 02:00 - 02:59 | Early Morning | 37,6 | 55  | 1,8   | 1,8   | 18,75 | 547,52 | 19,38  |
| 2019/06/01 | CH2206 | Male | Three y/o | Treatment (Wk 3) | Treatment | Feed Day | No | 02:35 | 02:00 - 02:59 | Early Morning | 37,5 | 49  | 7,4   | 7,4   | 18,65 | 537,80 | 66,59  |
| 2019/06/01 | CH2205 | Male | Three y/o | Treatment (Wk 3) | Treatment | Feed Day | No | 02:40 | 02:00 - 02:59 | Early Morning | 37,6 | 57  | 1,0   | 1,0   | 18,75 | 550,47 | 0,00   |
| 2019/06/01 | CH2206 | Male | Three y/o | Treatment (Wk 3) | Treatment | Feed Day | No | 02:40 | 02:00 - 02:59 | Early Morning | 37,5 | 59  | 3,0   | 3,0   | 18,65 | 553,30 | 36,34  |
| 2019/06/01 | CH2205 | Male | Three y/o | Treatment (Wk 3) | Treatment | Feed Day | No | 02:45 | 02:00 - 02:59 | Early Morning | 37,5 | 46  | 4,0   | 4,0   | 18,65 | 532,38 | 45,94  |
| 2019/06/01 | CH2206 | Male | Three y/o | Treatment (Wk 3) | Treatment | Feed Day | No | 02:45 | 02:00 - 02:59 | Early Morning | 37,5 | 57  | 9,4   | 9,4   | 18,65 | 550,47 | 74,66  |
| 2019/06/01 | CH2205 | Male | Three y/o | Treatment (Wk 3) | Treatment | Feed Day | No | 02:50 | 02:00 - 02:59 | Early Morning | 37,6 | 45  | 4,0   | 4,0   | 18,75 | 530,47 | 45,94  |
| 2019/06/01 | CH2206 | Male | Three y/o | Treatment (Wk 3) | Treatment | Feed Day | No | 02:50 | 02:00 - 02:59 | Early Morning | 37,5 | 108 | 14,8  | 14,8  | 18,65 | 599,39 | 90,05  |
| 2019/06/01 | CH2205 | Male | Three y/o | Treatment (Wk 3) | Treatment | Feed Day | No | 02:55 | 02:00 - 02:59 | Early Morning | 37,6 | 59  | 4,6   | 4,6   | 18,75 | 553,30 | 50,61  |
| 2019/06/01 | CH2206 | Male | Three y/o | Treatment (Wk 3) | Treatment | Feed Day | No | 02:55 | 02:00 - 02:59 | Early Morning | 37,5 | 86  | 11,2  | 11,2  | 18,65 | 582,77 | 80,59  |
| 2019/06/01 | CH2205 | Male | Three y/o | Treatment (Wk 3) | Treatment | Feed Day | No | 03:00 | 03:00 - 03:59 | Early Morning | 37,6 | 61  | 2,8   | 2,8   | 18,75 | 556,01 | 34,04  |
| 2019/06/01 | CH2206 | Male | Three y/o | Treatment (Wk 3) | Treatment | Feed Day | No | 03:00 | 03:00 - 03:59 | Early Morning | 37,4 | 87  | 8,2   | 8,2   | 18,55 | 583,64 | 70,05  |
| 2019/06/01 | CH2205 | Male | Three y/o | Treatment (Wk 3) | Treatment | Feed Day | No | 03:05 | 03:00 - 03:59 | Early Morning | 37,6 | 72  | 3,0   | 3,0   | 18,75 | 569,20 | 36,34  |



|            |        |      |           |                  |           |          |    |       |               |               |      |     |       |       |       |        |        |
|------------|--------|------|-----------|------------------|-----------|----------|----|-------|---------------|---------------|------|-----|-------|-------|-------|--------|--------|
| 2019/06/01 | CH2206 | Male | Three y/o | Treatment (Wk 3) | Treatment | Feed Day | No | 03:05 | 03:00 - 03:59 | Early Morning | 37,3 | 43  | 8,4   | 8,4   | 18,46 | 526,50 | 70,86  |
| 2019/06/01 | CH2205 | Male | Three y/o | Treatment (Wk 3) | Treatment | Feed Day | No | 03:10 | 03:00 - 03:59 | Early Morning | 37,6 | 52  | 3,0   | 3,0   | 18,75 | 542,83 | 36,34  |
| 2019/06/01 | CH2206 | Male | Three y/o | Treatment (Wk 3) | Treatment | Feed Day | No | 03:10 | 03:00 - 03:59 | Early Morning | 37,2 | 44  | 21,2  | 21,2  | 18,36 | 528,51 | 102,31 |
| 2019/06/01 | CH2205 | Male | Three y/o | Treatment (Wk 3) | Treatment | Feed Day | No | 03:15 | 03:00 - 03:59 | Early Morning | 37,6 | 77  | 7,4   | 7,4   | 18,75 | 574,39 | 66,59  |
| 2019/06/01 | CH2206 | Male | Three y/o | Treatment (Wk 3) | Treatment | Feed Day | No | 03:15 | 03:00 - 03:59 | Early Morning | 37,2 | 86  | 11,4  | 11,4  | 18,36 | 582,77 | 81,19  |
| 2019/06/01 | CH2205 | Male | Three y/o | Treatment (Wk 3) | Treatment | Feed Day | No | 03:20 | 03:00 - 03:59 | Early Morning | 37,6 | 98  | 3,8   | 3,8   | 18,75 | 592,41 | 44,22  |
| 2019/06/01 | CH2206 | Male | Three y/o | Treatment (Wk 3) | Treatment | Feed Day | No | 03:20 | 03:00 - 03:59 | Early Morning | 37,2 | 67  | 10,8  | 10,8  | 18,36 | 563,53 | 79,36  |
| 2019/06/01 | CH2205 | Male | Three y/o | Treatment (Wk 3) | Treatment | Feed Day | No | 03:25 | 03:00 - 03:59 | Early Morning | 37,6 | 54  | 5,8   | 5,8   | 18,75 | 545,99 | 58,39  |
| 2019/06/01 | CH2206 | Male | Three y/o | Treatment (Wk 3) | Treatment | Feed Day | No | 03:25 | 03:00 - 03:59 | Early Morning | 37,3 | 75  | 12,0  | 12,0  | 18,46 | 572,36 | 82,93  |
| 2019/06/01 | CH2205 | Male | Three y/o | Treatment (Wk 3) | Treatment | Feed Day | No | 03:30 | 03:00 - 03:59 | Early Morning | 37,6 | 69  | 3,4   | 3,4   | 18,75 | 565,86 | 40,51  |
| 2019/06/01 | CH2206 | Male | Three y/o | Treatment (Wk 3) | Treatment | Feed Day | No | 03:30 | 03:00 - 03:59 | Early Morning | 37,3 | 44  | 32,4  | 32,4  | 18,46 | 528,51 | 116,84 |
| 2019/06/01 | CH2205 | Male | Three y/o | Treatment (Wk 3) | Treatment | Feed Day | No | 03:35 | 03:00 - 03:59 | Early Morning | 37,6 | 52  | 3,0   | 3,0   | 18,75 | 542,83 | 36,34  |
| 2019/06/01 | CH2206 | Male | Three y/o | Treatment (Wk 3) | Treatment | Feed Day | No | 03:35 | 03:00 - 03:59 | Early Morning | 37,3 | 79  | 51,6  | 51,6  | 18,46 | 576,36 | 132,87 |
| 2019/06/01 | CH2205 | Male | Three y/o | Treatment (Wk 3) | Treatment | Feed Day | No | 03:40 | 03:00 - 03:59 | Early Morning | 37,6 | 51  | 4,8   | 4,8   | 18,75 | 541,20 | 52,04  |
| 2019/06/01 | CH2206 | Male | Three y/o | Treatment (Wk 3) | Treatment | Feed Day | No | 03:40 | 03:00 - 03:59 | Early Morning | 37,3 | 48  | 60,0  | 60,0  | 18,46 | 536,04 | 138,09 |
| 2019/06/01 | CH2205 | Male | Three y/o | Treatment (Wk 3) | Treatment | Feed Day | No | 03:45 | 03:00 - 03:59 | Early Morning | 37,6 | 121 | 6,8   | 6,8   | 18,75 | 607,35 | 63,74  |
| 2019/06/01 | CH2206 | Male | Three y/o | Treatment (Wk 3) | Treatment | Feed Day | No | 03:45 | 03:00 - 03:59 | Early Morning | 37,4 | 46  | 60,6  | 60,6  | 18,55 | 532,38 | 138,44 |
| 2019/06/01 | CH2205 | Male | Three y/o | Treatment (Wk 3) | Treatment | Feed Day | No | 03:50 | 03:00 - 03:59 | Early Morning | 37,6 | 82  | 3,0   | 3,0   | 18,75 | 579,19 | 36,34  |
| 2019/06/01 | CH2206 | Male | Three y/o | Treatment (Wk 3) | Treatment | Feed Day | No | 03:50 | 03:00 - 03:59 | Early Morning | 37,4 | 42  | 32,0  | 32,0  | 18,55 | 524,42 | 116,41 |
| 2019/06/01 | CH2205 | Male | Three y/o | Treatment (Wk 3) | Treatment | Feed Day | No | 03:55 | 03:00 - 03:59 | Early Morning | 37,6 | 55  | 29,0  | 29,0  | 18,75 | 547,52 | 113,03 |
| 2019/06/01 | CH2206 | Male | Three y/o | Treatment (Wk 3) | Treatment | Feed Day | No | 03:55 | 03:00 - 03:59 | Early Morning | 37,5 | 120 | 34,8  | 34,8  | 18,65 | 606,78 | 119,29 |
| 2019/06/01 | CH2205 | Male | Three y/o | Treatment (Wk 3) | Treatment | Feed Day | No | 04:00 | 04:00 - 04:59 | Morning       | 37,6 |     | 8,0   | 8,0   | 18,75 |        | 69,22  |
| 2019/06/01 | CH2206 | Male | Three y/o | Treatment (Wk 3) | Treatment | Feed Day | No | 04:00 | 04:00 - 04:59 | Morning       | 37,5 | 118 | 103,4 | 103,4 | 18,65 | 605,61 | 157,01 |
| 2019/06/01 | CH2205 | Male | Three y/o | Treatment (Wk 3) | Treatment | Feed Day | No | 04:05 | 04:00 - 04:59 | Morning       | 37,5 | 92  | 14,4  | 14,4  | 18,65 | 587,78 | 89,12  |
| 2019/06/01 | CH2206 | Male | Three y/o | Treatment (Wk 3) | Treatment | Feed Day | No | 04:05 | 04:00 - 04:59 | Morning       | 37,5 | 140 | 291,6 | 291,6 | 18,65 | 617,28 | 193,42 |
| 2019/06/01 | CH2205 | Male | Three y/o | Treatment (Wk 3) | Treatment | Feed Day | No | 04:10 | 04:00 - 04:59 | Morning       | 37,5 | 54  | 11,6  | 11,6  | 18,65 | 545,99 | 81,78  |
| 2019/06/01 | CH2206 | Male | Three y/o | Treatment (Wk 3) | Treatment | Feed Day | No | 04:10 | 04:00 - 04:59 | Morning       | 37,4 | 75  | 19,0  | 19,0  | 18,55 | 572,36 | 98,56  |
| 2019/06/01 | CH2205 | Male | Three y/o | Treatment (Wk 3) | Treatment | Feed Day | No | 04:15 | 04:00 - 04:59 | Morning       | 37,5 | 90  | 12,6  | 12,6  | 18,65 | 586,16 | 84,59  |
| 2019/06/01 | CH2206 | Male | Three y/o | Treatment (Wk 3) | Treatment | Feed Day | No | 04:15 | 04:00 - 04:59 | Morning       | 37,1 | 46  | 18,4  | 18,4  | 18,26 | 532,38 | 97,47  |
| 2019/06/01 | CH2205 | Male | Three y/o | Treatment (Wk 3) | Treatment | Feed Day | No | 04:20 | 04:00 - 04:59 | Morning       | 37,5 | 45  | 11,8  | 11,8  | 18,65 | 530,47 | 82,36  |
| 2019/06/01 | CH2206 | Male | Three y/o | Treatment (Wk 3) | Treatment | Feed Day | No | 04:20 | 04:00 - 04:59 | Morning       | 36,8 | 86  | 18,0  | 18,0  | 17,96 | 582,77 | 96,72  |
| 2019/06/01 | CH2205 | Male | Three y/o | Treatment (Wk 3) | Treatment | Feed Day | No | 04:25 | 04:00 - 04:59 | Morning       | 37,5 | 76  | 9,2   | 9,2   | 18,65 | 573,39 | 73,94  |
| 2019/06/01 | CH2206 | Male | Three y/o | Treatment (Wk 3) | Treatment | Feed Day | No | 04:25 | 04:00 - 04:59 | Morning       | 36,6 | 66  | 9,8   | 9,8   | 17,77 | 562,34 | 76,07  |
| 2019/06/01 | CH2205 | Male | Three y/o | Treatment (Wk 3) | Treatment | Feed Day | No | 04:30 | 04:00 - 04:59 | Morning       | 37,5 | 77  | 62,2  | 62,2  | 18,65 | 574,39 | 139,34 |
| 2019/06/01 | CH2206 | Male | Three y/o | Treatment (Wk 3) | Treatment | Feed Day | No | 04:30 | 04:00 - 04:59 | Morning       | 36,3 | 85  | 19,4  | 19,4  | 17,48 | 581,90 | 99,28  |
| 2019/06/01 | CH2205 | Male | Three y/o | Treatment (Wk 3) | Treatment | Feed Day | No | 04:35 | 04:00 - 04:59 | Morning       | 37,5 | 76  | 19,6  | 19,6  | 18,65 | 573,39 | 99,63  |
| 2019/06/01 | CH2206 | Male | Three y/o | Treatment (Wk 3) | Treatment | Feed Day | No | 04:35 | 04:00 - 04:59 | Morning       | 36,4 | 50  | 13,0  | 13,0  | 17,57 | 539,52 | 85,65  |
| 2019/06/01 | CH2205 | Male | Three y/o | Treatment (Wk 3) | Treatment | Feed Day | No | 04:40 | 04:00 - 04:59 | Morning       | 37,4 | 86  | 15,6  | 15,6  | 18,55 | 582,77 | 91,85  |
| 2019/06/01 | CH2206 | Male | Three y/o | Treatment (Wk 3) | Treatment | Feed Day | No | 04:40 | 04:00 - 04:59 | Morning       | 36,8 | 44  | 47,4  | 47,4  | 17,96 | 528,51 | 129,94 |
| 2019/06/01 | CH2205 | Male | Three y/o | Treatment (Wk 3) | Treatment | Feed Day | No | 04:45 | 04:00 - 04:59 | Morning       | 37,3 | 86  | 13,2  | 13,2  | 18,46 | 582,77 | 86,17  |
| 2019/06/01 | CH2206 | Male | Three y/o | Treatment (Wk 3) | Treatment | Feed Day | No | 04:45 | 04:00 - 04:59 | Morning       | 36,9 | 80  | 47,2  | 47,2  | 18,06 | 577,31 | 129,80 |
| 2019/06/01 | CH2205 | Male | Three y/o | Treatment (Wk 3) | Treatment | Feed Day | No | 04:50 | 04:00 - 04:59 | Morning       | 37,3 | 46  | 14,8  | 14,8  | 18,46 | 532,38 | 90,05  |
| 2019/06/01 | CH2206 | Male | Three y/o | Treatment (Wk 3) | Treatment | Feed Day | No | 04:50 | 04:00 - 04:59 | Morning       | 37,0 | 44  | 46,0  | 46,0  | 18,16 | 528,51 | 128,91 |
| 2019/06/01 | CH2205 | Male | Three y/o | Treatment (Wk 3) | Treatment | Feed Day | No | 04:55 | 04:00 - 04:59 | Morning       | 37,2 | 49  | 14,4  | 14,4  | 18,36 | 537,80 | 89,12  |
| 2019/06/01 | CH2206 | Male | Three y/o | Treatment (Wk 3) | Treatment | Feed Day | No | 04:55 | 04:00 - 04:59 | Morning       | 37,0 | 42  | 43,6  | 43,6  | 18,16 | 524,42 | 127,06 |
| 2019/06/01 | CH2205 | Male | Three y/o | Treatment (Wk 3) | Treatment | Feed Day | No | 05:00 | 05:00 - 05:59 | Morning       | 37,2 | 73  | 23,0  | 23,0  | 18,36 | 570,27 | 105,09 |
| 2019/06/01 | CH2206 | Male | Three y/o | Treatment (Wk 3) | Treatment | Feed Day | No | 05:00 | 05:00 - 05:59 | Morning       | 37,0 | 42  | 49,0  | 49,0  | 18,16 | 524,42 | 131,09 |
| 2019/06/01 | CH2205 | Male | Three y/o | Treatment (Wk 3) | Treatment | Feed Day | No | 05:05 | 05:00 - 05:59 | Morning       | 37,2 | 90  | 16,4  | 16,4  | 18,36 | 586,16 | 93,55  |
| 2019/06/01 | CH2206 | Male | Three y/o | Treatment (Wk 3) | Treatment | Feed Day | No | 05:05 | 05:00 - 05:59 | Morning       | 37,1 | 48  | 45,8  | 45,8  | 18,26 | 536,04 | 128,76 |
| 2019/06/01 | CH2205 | Male | Three y/o | Treatment (Wk 3) | Treatment | Feed Day | No | 05:10 | 05:00 - 05:59 | Morning       | 37,2 | 156 | 19,4  | 19,4  | 18,36 | 624,43 | 99,28  |
| 2019/06/01 | CH2206 | Male | Three y/o | Treatment (Wk 3) | Treatment | Feed Day | No | 05:10 | 05:00 - 05:59 | Morning       | 37,1 | 88  | 44,2  | 44,2  | 18,26 | 584,49 | 127,53 |
| 2019/06/01 | CH2205 | Male | Three y/o | Treatment (Wk 3) | Treatment | Feed Day | No | 05:15 | 05:00 - 05:59 | Morning       | 37,2 | 85  | 15,8  | 15,8  | 18,36 | 581,90 | 92,28  |
| 2019/06/01 | CH2206 | Male | Three y/o | Treatment (Wk 3) | Treatment | Feed Day | No | 05:15 | 05:00 - 05:59 | Morning       | 37,2 | 52  | 47,8  | 47,8  | 18,36 | 542,83 | 130,23 |
| 2019/06/01 | CH2205 | Male | Three y/o | Treatment (Wk 3) | Treatment | Feed Day | No | 05:20 | 05:00 - 05:59 | Morning       | 37,2 | 84  | 5,2   | 5,2   | 18,36 | 581,01 | 54,72  |
| 2019/06/01 | CH2206 | Male | Three y/o | Treatment (Wk 3) | Treatment | Feed Day | No | 05:20 | 05:00 - 05:59 | Morning       | 37,2 | 82  | 43,8  | 43,8  | 18,36 | 579,19 | 127,22 |
| 2019/06/01 | CH2205 | Male | Three y/o | Treatment (Wk 3) | Treatment | Feed Day | No | 05:25 | 05:00 - 05:59 | Morning       | 37,2 | 41  | 4,4   | 4,4   | 18,36 | 522,29 | 49,12  |
| 2019/06/01 | CH2206 | Male | Three y/o | Treatment (Wk 3) | Treatment | Feed Day | No | 05:25 | 05:00 - 05:59 | Morning       | 37,2 | 62  | 46,0  | 46,0  | 18,36 | 557,33 | 128,91 |
| 2019/06/01 | CH2205 | Male | Three y/o | Treatment (Wk 3) | Treatment | Feed Day | No | 05:30 | 05:00 - 05:59 | Morning       | 37,3 | 51  | 5,6   | 5,6   | 18,46 | 541,20 | 57,21  |
| 2019/06/01 | CH2206 | Male | Three y/o | Treatment (Wk 3) | Treatment | Feed Day | No | 05:30 | 05:00 - 05:59 | Morning       | 37,1 | 84  | 47,6  | 47,6  | 18,26 | 581,01 | 130,09 |
| 2019/06/01 | CH2205 | Male | Three y/o | Treatment (Wk 3) | Treatment | Feed Day | No | 05:35 | 05:00 - 05:59 | Morning       | 37,3 | 46  | 3,8   | 3,8   | 18,46 | 532,38 | 44,22  |
| 2019/06/01 | CH2206 | Male | Three y/o | Treatment (Wk 3) | Treatment | Feed Day | No | 05:35 | 05:00 - 05:59 | Morning       | 37,2 | 57  | 48,0  | 48,0  | 18,36 | 550,47 | 130,38 |
| 2019/06/01 | CH2205 | Male | Three y/o | Treatment (Wk 3) | Treatment | Feed Day | No | 05:40 | 05:00 - 05:59 | Morning       | 37,4 | 56  | 3,6   | 3,6   | 18,55 | 549,01 | 42,42  |
| 2019/06/01 | CH2206 | Male | Three y/o | Treatment (Wk 3) | Treatment | Feed Day | No | 05:40 | 05:00 - 05:59 | Morning       | 37,1 | 48  | 47,8  | 47,8  | 18,26 | 536,04 | 130,23 |
| 2019/06/01 | CH2205 | Male | Three y/o | Treatment (Wk 3) | Treatment | Feed Day | No | 05:45 | 05:00 - 05:59 | Morning       | 37,4 | 44  | 32,0  | 32,0  | 18,55 | 528,51 | 116,41 |
| 2019/06/01 | CH2206 | Male | Three y/o | Treatment (Wk 3) | Treatment | Feed Day | No | 05:45 | 05:00 - 05:59 | Morning       | 37,1 |     | 38,4  | 38,4  | 18,26 | 522,68 | 122,68 |
| 2019/06/01 | CH2205 | Male | Three y/o | Treatment (Wk 3) | Treatment | Feed Day | No | 05:50 | 05:00 - 05:59 | Morning       | 37,4 |     | 23,0  | 23,0  | 18,55 |        | 105,09 |
| 2019/06/01 | CH2206 | Male | Three y/o | Treatment (Wk 3) | Treatment | Feed Day | No | 05:50 | 05:00 - 05:59 | Morning       | 37,2 | 89  | 14,4  | 14,4  | 18,36 | 585,33 | 89,12  |
| 2019/06/01 | CH2205 | Male | Three y/o | Treatment (Wk 3) | Treatment | Feed Day | No | 05:55 | 05:00 - 05:59 | Morning       | 37,1 |     | 24,8  | 24,8  | 18,26 |        | 107,67 |
| 2019/06/01 | CH2206 | Male | Three y/o | Treatment (Wk 3) | Treatment | Feed Day | No | 05:55 | 05:00 - 05:59 | Morning       | 37,0 | 126 | 34,0  | 34,0  | 18,16 | 610,14 | 118,49 |
| 2019/06/01 | CH2205 | Male | Three y/o | Treatment (Wk 3) | Treatment | Feed Day | No | 06:00 | 06:00 - 06:59 | Morning       | 36,9 |     | 25,6  | 25,6  | 18,06 |        | 108,76 |



|            |        |      |           |                  |           |          |    |       |               |              |      |     |       |       |       |        |        |
|------------|--------|------|-----------|------------------|-----------|----------|----|-------|---------------|--------------|------|-----|-------|-------|-------|--------|--------|
| 2019/06/01 | CH2206 | Male | Three y/o | Treatment (Wk 3) | Treatment | Feed Day | No | 06:00 | 06:00 - 06:59 | Morning      | 37,1 | 118 | 169,4 | 169,4 | 18,26 | 605,61 | 174,28 |
| 2019/06/01 | CH2205 | Male | Three y/o | Treatment (Wk 3) | Treatment | Feed Day | No | 06:05 | 06:00 - 06:59 | Morning      | 36,8 |     | 27,0  | 27,0  | 17,96 |        | 110,58 |
| 2019/06/01 | CH2206 | Male | Three y/o | Treatment (Wk 3) | Treatment | Feed Day | No | 06:05 | 06:00 - 06:59 | Morning      | 37,2 | 103 | 89,2  | 89,2  | 18,36 | 596,00 | 151,86 |
| 2019/06/01 | CH2205 | Male | Three y/o | Treatment (Wk 3) | Treatment | Feed Day | No | 06:10 | 06:00 - 06:59 | Morning      | 37,0 | 103 | 267,6 | 267,6 | 18,16 | 596,00 | 190,38 |
| 2019/06/01 | CH2206 | Male | Three y/o | Treatment (Wk 3) | Treatment | Feed Day | No | 06:10 | 06:00 - 06:59 | Morning      | 37,3 |     | 142,8 | 142,8 | 18,46 |        | 168,29 |
| 2019/06/01 | CH2205 | Male | Three y/o | Treatment (Wk 3) | Treatment | Feed Day | No | 06:15 | 06:00 - 06:59 | Morning      | 37,1 | 98  | 55,8  | 55,8  | 18,26 | 592,41 | 135,58 |
| 2019/06/01 | CH2206 | Male | Three y/o | Treatment (Wk 3) | Treatment | Feed Day | No | 06:15 | 06:00 - 06:59 | Morning      | 37,4 | 108 | 74,8  | 74,8  | 18,55 | 599,39 | 145,74 |
| 2019/06/01 | CH2205 | Male | Three y/o | Treatment (Wk 3) | Treatment | Feed Day | No | 06:20 | 06:00 - 06:59 | Morning      | 37,0 |     | 21,0  | 21,0  | 18,16 |        | 101,98 |
| 2019/06/01 | CH2206 | Male | Three y/o | Treatment (Wk 3) | Treatment | Feed Day | No | 06:20 | 06:00 - 06:59 | Morning      | 37,4 | 100 | 61,2  | 61,2  | 18,55 | 593,87 | 138,78 |
| 2019/06/01 | CH2205 | Male | Three y/o | Treatment (Wk 3) | Treatment | Feed Day | No | 06:25 | 06:00 - 06:59 | Morning      | 36,9 |     | 16,6  | 16,6  | 18,06 |        | 93,96  |
| 2019/06/01 | CH2206 | Male | Three y/o | Treatment (Wk 3) | Treatment | Feed Day | No | 06:25 | 06:00 - 06:59 | Morning      | 37,4 | 131 | 110,6 | 110,6 | 18,55 | 612,80 | 159,36 |
| 2019/06/01 | CH2205 | Male | Three y/o | Treatment (Wk 3) | Treatment | Feed Day | No | 06:30 | 06:00 - 06:59 | Morning      | 37,0 |     | 17,6  | 17,6  | 18,16 |        | 95,95  |
| 2019/06/01 | CH2206 | Male | Three y/o | Treatment (Wk 3) | Treatment | Feed Day | No | 06:30 | 06:00 - 06:59 | Morning      | 37,4 | 85  | 26,4  | 26,4  | 18,55 | 581,90 | 109,81 |
| 2019/06/01 | CH2205 | Male | Three y/o | Treatment (Wk 3) | Treatment | Feed Day | No | 06:35 | 06:00 - 06:59 | Morning      | 37,1 | 64  | 31,4  | 31,4  | 18,26 | 559,88 | 115,76 |
| 2019/06/01 | CH2206 | Male | Three y/o | Treatment (Wk 3) | Treatment | Feed Day | No | 06:35 | 06:00 - 06:59 | Morning      | 37,3 | 109 | 72,6  | 72,6  | 18,46 | 600,04 | 144,70 |
| 2019/06/01 | CH2205 | Male | Three y/o | Treatment (Wk 3) | Treatment | Feed Day | No | 06:40 | 06:00 - 06:59 | Morning      | 37,3 | 102 | 121,8 | 121,8 | 18,46 | 595,30 | 162,73 |
| 2019/06/01 | CH2206 | Male | Three y/o | Treatment (Wk 3) | Treatment | Feed Day | No | 06:40 | 06:00 - 06:59 | Morning      | 37,5 | 120 | 94,0  | 94,0  | 18,65 | 606,78 | 153,69 |
| 2019/06/01 | CH2205 | Male | Three y/o | Treatment (Wk 3) | Treatment | Feed Day | No | 06:45 | 06:00 - 06:59 | Morning      | 37,4 | 114 | 845,0 |       | 18,55 | 603,20 |        |
| 2019/06/01 | CH2206 | Male | Three y/o | Treatment (Wk 3) | Treatment | Feed Day | No | 06:45 | 06:00 - 06:59 | Morning      | 37,7 | 119 | 76,8  | 76,8  | 18,85 | 606,20 | 146,66 |
| 2019/06/01 | CH2205 | Male | Three y/o | Treatment (Wk 3) | Treatment | Feed Day | No | 06:50 | 06:00 - 06:59 | Morning      | 37,4 | 101 | 133,8 | 133,8 | 18,55 | 594,59 | 166,01 |
| 2019/06/01 | CH2206 | Male | Three y/o | Treatment (Wk 3) | Treatment | Feed Day | No | 06:50 | 06:00 - 06:59 | Morning      | 37,8 | 98  | 62,8  | 62,8  | 18,95 | 592,41 | 139,67 |
| 2019/06/01 | CH2205 | Male | Three y/o | Treatment (Wk 3) | Treatment | Feed Day | No | 06:55 | 06:00 - 06:59 | Morning      | 37,4 |     | 21,6  | 21,6  | 18,55 |        | 102,94 |
| 2019/06/01 | CH2206 | Male | Three y/o | Treatment (Wk 3) | Treatment | Feed Day | No | 06:55 | 06:00 - 06:59 | Morning      | 37,9 | 110 | 85,4  | 85,4  | 19,05 | 600,69 | 150,35 |
| 2019/06/01 | CH2205 | Male | Three y/o | Treatment (Wk 3) | Treatment | Feed Day | No | 07:00 | 07:00 - 07:59 | Morning      | 37,1 | 134 | 147,4 | 147,4 | 18,26 | 614,33 | 169,40 |
| 2019/06/01 | CH2206 | Male | Three y/o | Treatment (Wk 3) | Treatment | Feed Day | No | 07:00 | 07:00 - 07:59 | Morning      | 37,8 | 124 | 171,6 | 171,6 | 18,95 | 609,04 | 174,74 |
| 2019/06/01 | CH2205 | Male | Three y/o | Treatment (Wk 3) | Treatment | Feed Day | No | 07:05 | 07:00 - 07:59 | Morning      | 37,3 | 55  | 165,2 | 165,2 | 18,46 | 547,52 | 173,40 |
| 2019/06/01 | CH2206 | Male | Three y/o | Treatment (Wk 3) | Treatment | Feed Day | No | 07:05 | 07:00 - 07:59 | Morning      | 37,8 | 188 | 223,8 | 223,8 | 18,95 | 636,34 | 184,08 |
| 2019/06/01 | CH2205 | Male | Three y/o | Treatment (Wk 3) | Treatment | Feed Day | No | 07:10 | 07:00 - 07:59 | Morning      | 37,2 |     | 80,6  | 80,6  | 18,36 |        | 148,34 |
| 2019/06/01 | CH2206 | Male | Three y/o | Treatment (Wk 3) | Treatment | Feed Day | No | 07:10 | 07:00 - 07:59 | Morning      | 37,8 | 128 | 141,4 | 141,4 | 18,95 | 611,22 | 167,95 |
| 2019/06/01 | CH2205 | Male | Three y/o | Treatment (Wk 3) | Treatment | Feed Day | No | 07:15 | 07:00 - 07:59 | Morning      | 37,3 | 84  | 124,4 | 124,4 | 18,46 | 581,01 | 163,47 |
| 2019/06/01 | CH2206 | Male | Three y/o | Treatment (Wk 3) | Treatment | Feed Day | No | 07:15 | 07:00 - 07:59 | Morning      | 37,8 |     | 172,8 | 172,8 | 18,95 |        | 174,98 |
| 2019/06/01 | CH2205 | Male | Three y/o | Treatment (Wk 3) | Treatment | Feed Day | No | 07:20 | 07:00 - 07:59 | Morning      | 37,4 | 102 | 232,0 | 232,0 | 18,55 | 595,30 | 185,35 |
| 2019/06/01 | CH2206 | Male | Three y/o | Treatment (Wk 3) | Treatment | Feed Day | No | 07:20 | 07:00 - 07:59 | Morning      | 37,8 | 129 | 10,0  | 10,0  | 18,95 | 611,75 | 76,76  |
| 2019/06/01 | CH2205 | Male | Three y/o | Treatment (Wk 3) | Treatment | Feed Day | No | 07:25 | 07:00 - 07:59 | Morning      | 37,6 | 82  | 61,6  | 61,6  | 18,75 | 579,19 | 139,00 |
| 2019/06/01 | CH2206 | Male | Three y/o | Treatment (Wk 3) | Treatment | Feed Day | No | 07:25 | 07:00 - 07:59 | Morning      | 37,8 | 101 | 168,2 | 168,2 | 18,95 | 594,59 | 174,03 |
| 2019/06/01 | CH2205 | Male | Three y/o | Treatment (Wk 3) | Treatment | Feed Day | No | 07:30 | 07:00 - 07:59 | Morning      | 37,7 | 191 | 24,2  | 24,2  | 18,85 | 637,33 | 106,83 |
| 2019/06/01 | CH2206 | Male | Three y/o | Treatment (Wk 3) | Treatment | Feed Day | No | 07:30 | 07:00 - 07:59 | Morning      | 38,1 |     | 71,8  | 71,8  | 19,26 |        | 144,32 |
| 2019/06/01 | CH2205 | Male | Three y/o | Treatment (Wk 3) | Treatment | Feed Day | No | 07:35 | 07:00 - 07:59 | Morning      | 37,7 | 78  | 31,6  | 31,6  | 18,85 | 575,38 | 115,98 |
| 2019/06/01 | CH2206 | Male | Three y/o | Treatment (Wk 3) | Treatment | Feed Day | No | 07:35 | 07:00 - 07:59 | Morning      | 38,0 | 145 | 101,8 | 101,8 | 19,15 | 619,62 | 156,47 |
| 2019/06/01 | CH2205 | Male | Three y/o | Treatment (Wk 3) | Treatment | Feed Day | No | 07:40 | 07:00 - 07:59 | Morning      | 37,6 | 134 | 88,8  | 88,8  | 18,75 | 614,33 | 151,71 |
| 2019/06/01 | CH2206 | Male | Three y/o | Treatment (Wk 3) | Treatment | Feed Day | No | 07:40 | 07:00 - 07:59 | Morning      | 38,2 | 154 | 121,6 | 121,6 | 19,36 | 623,58 | 162,67 |
| 2019/06/01 | CH2205 | Male | Three y/o | Treatment (Wk 3) | Treatment | Feed Day | No | 07:45 | 07:00 - 07:59 | Morning      | 37,6 | 96  | 85,8  | 85,8  | 18,75 | 590,91 | 150,51 |
| 2019/06/01 | CH2206 | Male | Three y/o | Treatment (Wk 3) | Treatment | Feed Day | No | 07:45 | 07:00 - 07:59 | Morning      | 38,2 | 65  | 172,6 | 172,6 | 19,36 | 561,12 | 174,94 |
| 2019/06/01 | CH2205 | Male | Three y/o | Treatment (Wk 3) | Treatment | Feed Day | No | 07:50 | 07:00 - 07:59 | Morning      | 37,6 |     | 216,4 | 216,4 | 18,75 |        | 182,89 |
| 2019/06/01 | CH2206 | Male | Three y/o | Treatment (Wk 3) | Treatment | Feed Day | No | 07:50 | 07:00 - 07:59 | Morning      | 38,1 | 103 | 277,4 | 277,4 | 19,26 | 596,00 | 191,65 |
| 2019/06/01 | CH2205 | Male | Three y/o | Treatment (Wk 3) | Treatment | Feed Day | No | 07:55 | 07:00 - 07:59 | Morning      | 37,5 | 156 | 41,8  | 41,8  | 18,65 | 624,43 | 125,60 |
| 2019/06/01 | CH2206 | Male | Three y/o | Treatment (Wk 3) | Treatment | Feed Day | No | 07:55 | 07:00 - 07:59 | Morning      | 38,0 |     | 83,0  | 83,0  | 19,15 |        | 149,36 |
| 2019/06/01 | CH2205 | Male | Three y/o | Treatment (Wk 3) | Treatment | Feed Day | No | 08:00 | 08:00 - 08:59 | Late Morning | 37,5 | 177 | 200,2 | 200,2 | 18,65 | 632,55 | 180,15 |
| 2019/06/01 | CH2206 | Male | Three y/o | Treatment (Wk 3) | Treatment | Feed Day | No | 08:00 | 08:00 - 08:59 | Late Morning | 37,9 |     | 318,4 | 318,4 | 19,05 |        | 196,53 |
| 2019/06/01 | CH2205 | Male | Three y/o | Treatment (Wk 3) | Treatment | Feed Day | No | 08:05 | 08:00 - 08:59 | Late Morning | 37,4 | 95  | 98,4  | 98,4  | 18,55 | 590,14 | 155,28 |
| 2019/06/01 | CH2206 | Male | Three y/o | Treatment (Wk 3) | Treatment | Feed Day | No | 08:05 | 08:00 - 08:59 | Late Morning | 38,0 | 91  | 14,6  | 14,6  | 19,15 | 586,98 | 89,59  |
| 2019/06/01 | CH2205 | Male | Three y/o | Treatment (Wk 3) | Treatment | Feed Day | No | 08:10 | 08:00 - 08:59 | Late Morning | 37,1 | 197 | 47,6  | 47,6  | 18,26 | 639,25 | 130,09 |
| 2019/06/01 | CH2206 | Male | Three y/o | Treatment (Wk 3) | Treatment | Feed Day | No | 08:10 | 08:00 - 08:59 | Late Morning | 37,8 | 101 | 80,4  | 80,4  | 18,95 | 594,59 | 148,25 |
| 2019/06/01 | CH2205 | Male | Three y/o | Treatment (Wk 3) | Treatment | Feed Day | No | 08:15 | 08:00 - 08:59 | Late Morning | 37,9 | 77  | 68,8  | 68,8  | 19,05 | 574,39 | 142,84 |
| 2019/06/01 | CH2206 | Male | Three y/o | Treatment (Wk 3) | Treatment | Feed Day | No | 08:15 | 08:00 - 08:59 | Late Morning | 38,0 | 141 | 128,0 | 128,0 | 19,15 | 617,75 | 164,46 |
| 2019/06/01 | CH2205 | Male | Three y/o | Treatment (Wk 3) | Treatment | Feed Day | No | 08:20 | 08:00 - 08:59 | Late Morning | 37,6 | 110 | 15,2  | 15,2  | 18,75 | 600,69 | 90,96  |
| 2019/06/01 | CH2206 | Male | Three y/o | Treatment (Wk 3) | Treatment | Feed Day | No | 08:20 | 08:00 - 08:59 | Late Morning | 37,9 | 92  | 24,4  | 24,4  | 19,05 | 587,78 | 107,11 |
| 2019/06/01 | CH2205 | Male | Three y/o | Treatment (Wk 3) | Treatment | Feed Day | No | 08:25 | 08:00 - 08:59 | Late Morning | 37,4 | 64  | 18,2  | 18,2  | 18,55 | 559,88 | 97,10  |
| 2019/06/01 | CH2206 | Male | Three y/o | Treatment (Wk 3) | Treatment | Feed Day | No | 08:25 | 08:00 - 08:59 | Late Morning | 37,5 | 79  | 30,6  | 30,6  | 18,65 | 576,36 | 114,87 |
| 2019/06/01 | CH2205 | Male | Three y/o | Treatment (Wk 3) | Treatment | Feed Day | No | 08:30 | 08:00 - 08:59 | Late Morning | 37,2 | 108 | 20,8  | 20,8  | 18,36 | 599,39 | 101,65 |
| 2019/06/01 | CH2206 | Male | Three y/o | Treatment (Wk 3) | Treatment | Feed Day | No | 08:30 | 08:00 - 08:59 | Late Morning | 37,3 | 75  | 50,4  | 50,4  | 18,46 | 572,36 | 132,06 |
| 2019/06/01 | CH2205 | Male | Three y/o | Treatment (Wk 3) | Treatment | Feed Day | No | 08:35 | 08:00 - 08:59 | Late Morning | 37,1 | 154 | 198,0 | 198,0 | 18,26 | 623,58 | 179,77 |
| 2019/06/01 | CH2206 | Male | Three y/o | Treatment (Wk 3) | Treatment | Feed Day | No | 08:35 | 08:00 - 08:59 | Late Morning | 37,3 | 62  | 70,8  | 70,8  | 18,46 | 557,33 | 143,83 |
| 2019/06/01 | CH2205 | Male | Three y/o | Treatment (Wk 3) | Treatment | Feed Day | No | 08:40 | 08:00 - 08:59 | Late Morning | 37,3 |     | 264,4 | 264,4 | 18,46 |        | 189,96 |
| 2019/06/01 | CH2206 | Male | Three y/o | Treatment (Wk 3) | Treatment | Feed Day | No | 08:40 | 08:00 - 08:59 | Late Morning | 37,4 | 115 | 167,2 | 167,2 | 18,55 | 603,82 | 173,82 |
| 2019/06/01 | CH2205 | Male | Three y/o | Treatment (Wk 3) | Treatment | Feed Day | No | 08:45 | 08:00 - 08:59 | Late Morning | 37,5 | 145 | 71,2  | 71,2  | 18,65 | 619,62 | 144,03 |
| 2019/06/01 | CH2206 | Male | Three y/o | Treatment (Wk 3) | Treatment | Feed Day | No | 08:45 | 08:00 - 08:59 | Late Morning | 37,5 | 169 | 42,8  | 42,8  | 18,65 | 629,60 | 126,42 |
| 2019/06/01 | CH2205 | Male | Three y/o | Treatment (Wk 3) | Treatment | Feed Day | No | 08:50 | 08:00 - 08:59 | Late Morning | 37,6 | 121 | 98,4  | 98,4  | 18,75 | 607,35 | 155,28 |
| 2019/06/01 | CH2206 | Male | Three y/o | Treatment (Wk 3) | Treatment | Feed Day | No | 08:50 | 08:00 - 08:59 | Late Morning | 37,5 | 120 | 159,6 | 159,6 | 18,65 | 606,78 | 172,19 |
| 2019/06/01 | CH2205 | Male | Three y/o | Treatment (Wk 3) | Treatment | Feed Day | No | 08:55 | 08:00 - 08:59 | Late Morning | 37,9 | 194 | 24,2  | 24,2  | 19,05 | 638,30 | 106,83 |



|            |        |      |           |                  |           |          |     |       |               |              |      |     |       |       |       |        |        |
|------------|--------|------|-----------|------------------|-----------|----------|-----|-------|---------------|--------------|------|-----|-------|-------|-------|--------|--------|
| 2019/06/01 | CH2206 | Male | Three y/o | Treatment (Wk 3) | Treatment | Feed Day | No  | 08:55 | 08:00 - 08:59 | Late Morning | 37,6 | 123 | 158,2 | 158,2 | 18,75 | 608,49 | 171,88 |
| 2019/06/01 | CH2205 | Male | Three y/o | Treatment (Wk 3) | Treatment | Feed Day | No  | 09:00 | 09:00 - 09:59 | Late Morning | 37,6 | 68  | 8,2   | 8,2   | 18,75 | 564,71 | 70,05  |
| 2019/06/01 | CH2206 | Male | Three y/o | Treatment (Wk 3) | Treatment | Feed Day | No  | 09:00 | 09:00 - 09:59 | Late Morning | 37,7 | 132 | 82,0  | 82,0  | 18,85 | 613,32 | 148,93 |
| 2019/06/01 | CH2205 | Male | Three y/o | Treatment (Wk 3) | Treatment | Feed Day | No  | 09:05 | 09:00 - 09:59 | Late Morning | 37,7 | 57  | 3,2   | 3,2   | 18,85 | 550,47 | 38,49  |
| 2019/06/01 | CH2206 | Male | Three y/o | Treatment (Wk 3) | Treatment | Feed Day | No  | 09:05 | 09:00 - 09:59 | Late Morning | 37,7 | 112 | 174,6 | 174,6 | 18,85 | 601,96 | 175,34 |
| 2019/06/01 | CH2205 | Male | Three y/o | Treatment (Wk 3) | Treatment | Feed Day | No  | 09:10 | 09:00 - 09:59 | Late Morning | 37,7 | 48  | 4,4   | 4,4   | 18,85 | 536,04 | 49,12  |
| 2019/06/01 | CH2206 | Male | Three y/o | Treatment (Wk 3) | Treatment | Feed Day | No  | 09:10 | 09:00 - 09:59 | Late Morning | 37,7 | 109 | 65,6  | 65,6  | 18,85 | 600,04 | 141,19 |
| 2019/06/01 | CH2205 | Male | Three y/o | Treatment (Wk 3) | Treatment | Feed Day | No  | 09:15 | 09:00 - 09:59 | Late Morning | 37,7 | 67  | 6,2   | 6,2   | 18,85 | 563,53 | 60,63  |
| 2019/06/01 | CH2206 | Male | Three y/o | Treatment (Wk 3) | Treatment | Feed Day | No  | 09:15 | 09:00 - 09:59 | Late Morning | 37,5 | 79  | 29,8  | 29,8  | 18,65 | 576,36 | 113,97 |
| 2019/06/01 | CH2205 | Male | Three y/o | Treatment (Wk 3) | Treatment | Feed Day | No  | 09:20 | 09:00 - 09:59 | Late Morning | 37,7 | 85  | 9,2   | 9,2   | 18,85 | 581,90 | 73,94  |
| 2019/06/01 | CH2206 | Male | Three y/o | Treatment (Wk 3) | Treatment | Feed Day | No  | 09:20 | 09:00 - 09:59 | Late Morning | 37,7 | 81  | 22,8  | 22,8  | 18,85 | 578,26 | 104,79 |
| 2019/06/01 | CH2205 | Male | Three y/o | Treatment (Wk 3) | Treatment | Feed Day | No  | 09:25 | 09:00 - 09:59 | Late Morning | 37,6 | 46  | 5,0   | 5,0   | 18,75 | 532,38 | 53,41  |
| 2019/06/01 | CH2206 | Male | Three y/o | Treatment (Wk 3) | Treatment | Feed Day | No  | 09:25 | 09:00 - 09:59 | Late Morning | 37,7 | 74  | 24,6  | 24,6  | 18,85 | 571,33 | 107,39 |
| 2019/06/01 | CH2205 | Male | Three y/o | Treatment (Wk 3) | Treatment | Feed Day | No  | 09:30 | 09:00 - 09:59 | Late Morning | 37,6 | 47  | 7,4   | 7,4   | 18,75 | 534,23 | 66,59  |
| 2019/06/01 | CH2206 | Male | Three y/o | Treatment (Wk 3) | Treatment | Feed Day | No  | 09:30 | 09:00 - 09:59 | Late Morning | 37,7 | 60  | 25,0  | 25,0  | 18,85 | 554,67 | 107,94 |
| 2019/06/01 | CH2205 | Male | Three y/o | Treatment (Wk 3) | Treatment | Feed Day | No  | 09:35 | 09:00 - 09:59 | Late Morning | 37,6 | 73  | 10,4  | 10,4  | 18,75 | 570,27 | 78,08  |
| 2019/06/01 | CH2206 | Male | Three y/o | Treatment (Wk 3) | Treatment | Feed Day | No  | 09:35 | 09:00 - 09:59 | Late Morning | 37,8 | 52  | 24,4  | 24,4  | 18,95 | 542,83 | 107,11 |
| 2019/06/01 | CH2205 | Male | Three y/o | Treatment (Wk 3) | Treatment | Feed Day | No  | 09:40 | 09:00 - 09:59 | Late Morning | 37,6 | 52  | 10,6  | 10,6  | 18,75 | 542,83 | 78,73  |
| 2019/06/01 | CH2206 | Male | Three y/o | Treatment (Wk 3) | Treatment | Feed Day | No  | 09:40 | 09:00 - 09:59 | Late Morning | 37,8 | 80  | 26,0  | 26,0  | 18,95 | 577,31 | 109,29 |
| 2019/06/01 | CH2205 | Male | Three y/o | Treatment (Wk 3) | Treatment | Feed Day | No  | 09:45 | 09:00 - 09:59 | Late Morning | 37,6 | 44  | 13,2  | 13,2  | 18,75 | 528,51 | 86,17  |
| 2019/06/01 | CH2206 | Male | Three y/o | Treatment (Wk 3) | Treatment | Feed Day | No  | 09:45 | 09:00 - 09:59 | Late Morning | 37,8 | 54  | 44,2  | 44,2  | 18,95 | 545,99 | 127,53 |
| 2019/06/01 | CH2205 | Male | Three y/o | Treatment (Wk 3) | Treatment | Feed Day | No  | 09:50 | 09:00 - 09:59 | Late Morning | 37,6 | 72  | 47,8  | 47,8  | 18,75 | 569,20 | 130,23 |
| 2019/06/01 | CH2206 | Male | Three y/o | Treatment (Wk 3) | Treatment | Feed Day | No  | 09:50 | 09:00 - 09:59 | Late Morning | 37,8 | 45  | 41,4  | 41,4  | 18,95 | 530,47 | 125,27 |
| 2019/06/01 | CH2205 | Male | Three y/o | Treatment (Wk 3) | Treatment | Feed Day | No  | 09:55 | 09:00 - 09:59 | Late Morning | 37,6 |     | 7,0   | 7,0   | 18,75 |        | 64,72  |
| 2019/06/01 | CH2206 | Male | Three y/o | Treatment (Wk 3) | Treatment | Feed Day | No  | 09:55 | 09:00 - 09:59 | Late Morning | 37,8 | 73  | 47,0  | 47,0  | 18,95 | 570,27 | 129,65 |
| 2019/06/01 | CH2205 | Male | Three y/o | Treatment (Wk 3) | Treatment | Feed Day | No  | 10:00 | 10:00 - 10:59 | Late Morning | 37,4 |     | 5,6   | 5,6   | 18,55 |        | 57,21  |
| 2019/06/01 | CH2206 | Male | Three y/o | Treatment (Wk 3) | Treatment | Feed Day | No  | 10:00 | 10:00 - 10:59 | Late Morning | 37,7 | 51  | 42,2  | 42,2  | 18,85 | 541,20 | 125,93 |
| 2019/06/01 | CH2205 | Male | Three y/o | Treatment (Wk 3) | Treatment | Feed Day | No  | 10:05 | 10:00 - 10:59 | Late Morning | 37,3 |     | 4,4   | 4,4   | 18,46 |        | 49,12  |
| 2019/06/01 | CH2206 | Male | Three y/o | Treatment (Wk 3) | Treatment | Feed Day | No  | 10:05 | 10:00 - 10:59 | Late Morning | 37,4 | 79  | 45,2  | 45,2  | 18,55 | 576,36 | 128,30 |
| 2019/06/01 | CH2205 | Male | Three y/o | Treatment (Wk 3) | Treatment | Feed Day | No  | 10:10 | 10:00 - 10:59 | Late Morning | 37,3 | 46  | 4,8   | 4,8   | 18,46 | 532,38 | 52,04  |
| 2019/06/01 | CH2206 | Male | Three y/o | Treatment (Wk 3) | Treatment | Feed Day | No  | 10:10 | 10:00 - 10:59 | Late Morning | 37,3 | 50  | 47,8  | 47,8  | 18,46 | 539,52 | 130,23 |
| 2019/06/01 | CH2205 | Male | Three y/o | Treatment (Wk 3) | Treatment | Feed Day | No  | 10:15 | 10:00 - 10:59 | Late Morning | 37,3 | 65  | 11,0  | 11,0  | 18,46 | 561,12 | 79,98  |
| 2019/06/01 | CH2206 | Male | Three y/o | Treatment (Wk 3) | Treatment | Feed Day | No  | 10:15 | 10:00 - 10:59 | Late Morning | 37,2 | 55  | 41,6  | 41,6  | 18,36 | 547,52 | 125,44 |
| 2019/06/01 | CH2205 | Male | Three y/o | Treatment (Wk 3) | Treatment | Feed Day | No  | 10:20 | 10:00 - 10:59 | Late Morning | 37,4 | 51  | 14,6  | 14,6  | 18,55 | 541,20 | 89,59  |
| 2019/06/01 | CH2206 | Male | Three y/o | Treatment (Wk 3) | Treatment | Feed Day | No  | 10:20 | 10:00 - 10:59 | Late Morning | 37,2 | 77  | 30,6  | 30,6  | 18,36 | 574,39 | 114,87 |
| 2019/06/01 | CH2205 | Male | Three y/o | Treatment (Wk 3) | Treatment | Feed Day | No  | 10:25 | 10:00 - 10:59 | Late Morning | 37,4 | 45  | 15,2  | 15,2  | 18,55 | 530,47 | 90,96  |
| 2019/06/01 | CH2206 | Male | Three y/o | Treatment (Wk 3) | Treatment | Feed Day | No  | 10:25 | 10:00 - 10:59 | Late Morning | 37,2 | 49  | 44,6  | 44,6  | 18,36 | 537,80 | 127,84 |
| 2019/06/01 | CH2205 | Male | Three y/o | Treatment (Wk 3) | Treatment | Feed Day | Yes | 10:30 | 10:00 - 10:59 | Late Morning | 37,4 | 42  | 8,6   | 8,6   | 18,55 | 524,42 | 71,66  |
| 2019/06/01 | CH2206 | Male | Three y/o | Treatment (Wk 3) | Treatment | Feed Day | Yes | 10:30 | 10:00 - 10:59 | Late Morning | 37,3 | 70  | 122,6 | 122,6 | 18,46 | 566,99 | 162,96 |
| 2019/06/01 | CH2205 | Male | Three y/o | Treatment (Wk 3) | Treatment | Feed Day | Yes | 10:35 | 10:00 - 10:59 | Late Morning | 37,4 | 83  | 6,2   | 6,2   | 18,55 | 580,11 | 60,63  |
| 2019/06/01 | CH2206 | Male | Three y/o | Treatment (Wk 3) | Treatment | Feed Day | Yes | 10:35 | 10:00 - 10:59 | Late Morning | 37,3 | 68  | 43,6  | 43,6  | 18,46 | 564,71 | 127,06 |
| 2019/06/01 | CH2205 | Male | Three y/o | Treatment (Wk 3) | Treatment | Feed Day | Yes | 10:40 | 10:00 - 10:59 | Late Morning | 37,5 | 46  | 1,4   | 1,4   | 18,65 | 532,38 | 11,07  |
| 2019/06/01 | CH2206 | Male | Three y/o | Treatment (Wk 3) | Treatment | Feed Day | Yes | 10:40 | 10:00 - 10:59 | Late Morning | 37,3 | 49  | 9,8   | 9,8   | 18,46 | 537,80 | 76,07  |
| 2019/06/01 | CH2205 | Male | Three y/o | Treatment (Wk 3) | Treatment | Feed Day | Yes | 10:45 | 10:00 - 10:59 | Late Morning | 37,3 | 102 | 30,6  | 30,6  | 18,46 | 595,30 | 114,87 |
| 2019/06/01 | CH2206 | Male | Three y/o | Treatment (Wk 3) | Treatment | Feed Day | Yes | 10:45 | 10:00 - 10:59 | Late Morning | 37,3 | 86  | 2,6   | 2,6   | 18,46 | 582,77 | 31,57  |
| 2019/06/01 | CH2205 | Male | Three y/o | Treatment (Wk 3) | Treatment | Feed Day | Yes | 10:50 | 10:00 - 10:59 | Late Morning | 37,3 | 45  | 2,8   | 2,8   | 18,46 | 530,47 | 34,04  |
| 2019/06/01 | CH2206 | Male | Three y/o | Treatment (Wk 3) | Treatment | Feed Day | Yes | 10:50 | 10:00 - 10:59 | Late Morning | 37,4 | 43  | 5,0   | 5,0   | 18,55 | 526,50 | 53,41  |
| 2019/06/01 | CH2205 | Male | Three y/o | Treatment (Wk 3) | Treatment | Feed Day | Yes | 10:55 | 10:00 - 10:59 | Late Morning | 37,3 | 45  | 7,2   | 7,2   | 18,46 | 530,47 | 65,66  |
| 2019/06/01 | CH2206 | Male | Three y/o | Treatment (Wk 3) | Treatment | Feed Day | Yes | 10:55 | 10:00 - 10:59 | Late Morning | 37,4 | 43  | 24,4  | 24,4  | 18,55 | 526,50 | 107,11 |
| 2019/06/01 | CH2205 | Male | Three y/o | Treatment (Wk 3) | Treatment | Feed Day | Yes | 11:00 | 11:00 - 11:59 | Late Morning | 37,3 | 81  | 60,2  | 60,2  | 18,46 | 578,26 | 138,21 |
| 2019/06/01 | CH2206 | Male | Three y/o | Treatment (Wk 3) | Treatment | Feed Day | Yes | 11:00 | 11:00 - 11:59 | Late Morning | 37,4 | 117 | 32,0  | 32,0  | 18,55 | 605,02 | 116,41 |
| 2019/06/01 | CH2205 | Male | Three y/o | Treatment (Wk 3) | Treatment | Feed Day | Yes | 11:05 | 11:00 - 11:59 | Late Morning | 37,3 |     | 33,6  | 33,6  | 18,46 |        | 118,09 |
| 2019/06/01 | CH2206 | Male | Three y/o | Treatment (Wk 3) | Treatment | Feed Day | Yes | 11:05 | 11:00 - 11:59 | Late Morning | 37,4 | 118 | 151,0 | 151,0 | 18,55 | 605,61 | 170,25 |
| 2019/06/01 | CH2205 | Male | Three y/o | Treatment (Wk 3) | Treatment | Feed Day | Yes | 11:10 | 11:00 - 11:59 | Late Morning | 37,3 |     | 123,4 | 123,4 | 18,46 |        | 163,18 |
| 2019/06/01 | CH2206 | Male | Three y/o | Treatment (Wk 3) | Treatment | Feed Day | Yes | 11:10 | 11:00 - 11:59 | Late Morning | 37,5 | 64  | 230,6 | 230,6 | 18,65 | 559,88 | 185,13 |
| 2019/06/01 | CH2205 | Male | Three y/o | Treatment (Wk 3) | Treatment | Feed Day | Yes | 11:15 | 11:00 - 11:59 | Late Morning | 37,7 |     | 151,6 | 151,6 | 18,85 |        | 170,39 |
| 2019/06/01 | CH2206 | Male | Three y/o | Treatment (Wk 3) | Treatment | Feed Day | Yes | 11:15 | 11:00 - 11:59 | Late Morning | 37,5 | 106 | 365,6 | 365,6 | 18,65 | 598,06 | 201,42 |
| 2019/06/01 | CH2205 | Male | Three y/o | Treatment (Wk 3) | Treatment | Feed Day | Yes | 11:20 | 11:00 - 11:59 | Late Morning | 37,7 | 120 | 168,2 | 168,2 | 18,85 | 606,78 | 174,03 |
| 2019/06/01 | CH2206 | Male | Three y/o | Treatment (Wk 3) | Treatment | Feed Day | Yes | 11:20 | 11:00 - 11:59 | Late Morning | 37,7 | 113 | 160,0 | 160,0 | 18,85 | 602,58 | 172,28 |
| 2019/06/01 | CH2205 | Male | Three y/o | Treatment (Wk 3) | Treatment | Feed Day | Yes | 11:25 | 11:00 - 11:59 | Late Morning | 37,8 | 73  | 61,2  | 61,2  | 18,95 | 570,27 | 138,78 |
| 2019/06/01 | CH2206 | Male | Three y/o | Treatment (Wk 3) | Treatment | Feed Day | Yes | 11:25 | 11:00 - 11:59 | Late Morning | 37,7 | 132 | 241,0 | 241,0 | 18,85 | 613,32 | 186,69 |
| 2019/06/01 | CH2205 | Male | Three y/o | Treatment (Wk 3) | Treatment | Feed Day | No  | 11:30 | 11:00 - 11:59 | Late Morning | 37,9 |     | 137,4 | 137,4 | 19,05 |        | 166,94 |
| 2019/06/01 | CH2206 | Male | Three y/o | Treatment (Wk 3) | Treatment | Feed Day | No  | 11:30 | 11:00 - 11:59 | Late Morning | 37,8 | 137 | 107,8 | 107,8 | 18,95 | 615,83 | 158,46 |
| 2019/06/01 | CH2205 | Male | Three y/o | Treatment (Wk 3) | Treatment | Feed Day | No  | 11:35 | 11:00 - 11:59 | Late Morning | 38,0 | 100 | 12,6  | 12,6  | 19,15 | 593,87 | 84,59  |
| 2019/06/01 | CH2206 | Male | Three y/o | Treatment (Wk 3) | Treatment | Feed Day | No  | 11:35 | 11:00 - 11:59 | Late Morning | 37,8 | 180 | 77,6  | 77,6  | 18,95 | 633,61 | 147,02 |
| 2019/06/01 | CH2205 | Male | Three y/o | Treatment (Wk 3) | Treatment | Feed Day | No  | 11:40 | 11:00 - 11:59 | Late Morning | 38,0 |     | 41,6  | 41,6  | 19,15 |        | 125,44 |
| 2019/06/01 | CH2206 | Male | Three y/o | Treatment (Wk 3) | Treatment | Feed Day | No  | 11:40 | 11:00 - 11:59 | Late Morning | 37,8 | 114 | 264,2 | 264,2 | 18,95 | 603,20 | 189,93 |
| 2019/06/01 | CH2205 | Male | Three y/o | Treatment (Wk 3) | Treatment | Feed Day | No  | 11:45 | 11:00 - 11:59 | Late Morning | 38,0 | 111 | 116,8 | 116,8 | 19,15 | 601,33 | 161,26 |
| 2019/06/01 | CH2206 | Male | Three y/o | Treatment (Wk 3) | Treatment | Feed Day | No  | 11:45 | 11:00 - 11:59 | Late Morning | 37,8 | 107 | 79,0  | 79,0  | 18,95 | 598,73 | 147,64 |
| 2019/06/01 | CH2205 | Male | Three y/o | Treatment (Wk 3) | Treatment | Feed Day | No  | 11:50 | 11:00 - 11:59 | Late Morning | 38,0 | 71  | 19,8  | 19,8  | 19,15 | 568,10 | 99,97  |



|            |        |      |           |                  |           |          |    |       |               |              |      |     |       |       |       |        |        |
|------------|--------|------|-----------|------------------|-----------|----------|----|-------|---------------|--------------|------|-----|-------|-------|-------|--------|--------|
| 2019/06/01 | CH2206 | Male | Three y/o | Treatment (Wk 3) | Treatment | Feed Day | No | 11:50 | 11:00 - 11:59 | Late Morning | 37,8 | 115 | 103,2 | 103,2 | 18,95 | 603,82 | 156,94 |
| 2019/06/01 | CH2205 | Male | Three y/o | Treatment (Wk 3) | Treatment | Feed Day | No | 11:55 | 11:00 - 11:59 | Late Morning | 38,0 | 71  | 21,6  | 21,6  | 19,15 | 568,10 | 102,94 |
| 2019/06/01 | CH2206 | Male | Three y/o | Treatment (Wk 3) | Treatment | Feed Day | No | 11:55 | 11:00 - 11:59 | Late Morning | 37,8 | 106 | 61,0  | 61,0  | 18,95 | 598,06 | 138,67 |
| 2019/06/01 | CH2205 | Male | Three y/o | Treatment (Wk 3) | Treatment | Feed Day | No | 12:00 | 12:00 - 12:59 | Afternoon    | 38,0 | 147 | 643,4 | 643,4 | 19,15 | 620,52 | 221,54 |
| 2019/06/01 | CH2206 | Male | Three y/o | Treatment (Wk 3) | Treatment | Feed Day | No | 12:00 | 12:00 - 12:59 | Afternoon    | 37,9 | 172 | 26,8  | 26,8  | 19,05 | 630,73 | 110,33 |
| 2019/06/01 | CH2205 | Male | Three y/o | Treatment (Wk 3) | Treatment | Feed Day | No | 12:05 | 12:00 - 12:59 | Afternoon    | 38,2 |     | 92,8  | 92,8  | 19,36 |        | 153,24 |
| 2019/06/01 | CH2206 | Male | Three y/o | Treatment (Wk 3) | Treatment | Feed Day | No | 12:05 | 12:00 - 12:59 | Afternoon    | 38,0 | 119 | 41,2  | 41,2  | 19,15 |        | 606,20 |
| 2019/06/01 | CH2205 | Male | Three y/o | Treatment (Wk 3) | Treatment | Feed Day | No | 12:10 | 12:00 - 12:59 | Afternoon    | 38,2 | 99  | 32,8  | 32,8  | 19,36 |        | 593,14 |
| 2019/06/01 | CH2206 | Male | Three y/o | Treatment (Wk 3) | Treatment | Feed Day | No | 12:10 | 12:00 - 12:59 | Afternoon    | 37,8 | 174 | 31,4  | 31,4  | 18,95 |        | 631,46 |
| 2019/06/01 | CH2205 | Male | Three y/o | Treatment (Wk 3) | Treatment | Feed Day | No | 12:15 | 12:00 - 12:59 | Afternoon    | 38,5 |     | 61,4  | 61,4  | 19,66 |        | 138,89 |
| 2019/06/01 | CH2206 | Male | Three y/o | Treatment (Wk 3) | Treatment | Feed Day | No | 12:15 | 12:00 - 12:59 | Afternoon    | 37,8 | 121 | 33,0  | 33,0  | 18,95 |        | 607,35 |
| 2019/06/01 | CH2205 | Male | Three y/o | Treatment (Wk 3) | Treatment | Feed Day | No | 12:20 | 12:00 - 12:59 | Afternoon    | 38,7 |     | 36,8  | 36,8  | 19,87 |        | 121,22 |
| 2019/06/01 | CH2206 | Male | Three y/o | Treatment (Wk 3) | Treatment | Feed Day | No | 12:20 | 12:00 - 12:59 | Afternoon    | 37,8 | 119 | 44,8  | 44,8  | 18,95 |        | 606,20 |
| 2019/06/01 | CH2205 | Male | Three y/o | Treatment (Wk 3) | Treatment | Feed Day | No | 12:25 | 12:00 - 12:59 | Afternoon    | 38,4 | 112 | 21,2  | 21,2  | 19,56 |        | 601,96 |
| 2019/06/01 | CH2206 | Male | Three y/o | Treatment (Wk 3) | Treatment | Feed Day | No | 12:25 | 12:00 - 12:59 | Afternoon    | 37,8 | 194 | 19,2  | 19,2  | 18,95 |        | 638,30 |
| 2019/06/01 | CH2205 | Male | Three y/o | Treatment (Wk 3) | Treatment | Feed Day | No | 12:30 | 12:00 - 12:59 | Afternoon    | 38,3 | 120 | 25,0  | 25,0  | 19,46 |        | 606,78 |
| 2019/06/01 | CH2206 | Male | Three y/o | Treatment (Wk 3) | Treatment | Feed Day | No | 12:30 | 12:00 - 12:59 | Afternoon    | 37,8 |     | 24,8  | 24,8  | 18,95 |        | 107,67 |
| 2019/06/01 | CH2205 | Male | Three y/o | Treatment (Wk 3) | Treatment | Feed Day | No | 12:35 | 12:00 - 12:59 | Afternoon    | 38,1 | 148 | 52,8  | 52,8  | 19,26 |        | 620,97 |
| 2019/06/01 | CH2206 | Male | Three y/o | Treatment (Wk 3) | Treatment | Feed Day | No | 12:35 | 12:00 - 12:59 | Afternoon    | 37,7 | 156 | 99,4  | 99,4  | 18,85 |        | 624,43 |
| 2019/06/01 | CH2205 | Male | Three y/o | Treatment (Wk 3) | Treatment | Feed Day | No | 12:40 | 12:00 - 12:59 | Afternoon    | 38,2 | 108 | 25,6  | 25,6  | 19,36 |        | 599,39 |
| 2019/06/01 | CH2206 | Male | Three y/o | Treatment (Wk 3) | Treatment | Feed Day | No | 12:40 | 12:00 - 12:59 | Afternoon    | 37,7 | 123 | 32,2  | 32,2  | 18,85 |        | 608,49 |
| 2019/06/01 | CH2205 | Male | Three y/o | Treatment (Wk 3) | Treatment | Feed Day | No | 12:45 | 12:00 - 12:59 | Afternoon    | 38,2 | 152 | 63,6  | 63,6  | 19,36 |        | 622,73 |
| 2019/06/01 | CH2206 | Male | Three y/o | Treatment (Wk 3) | Treatment | Feed Day | No | 12:45 | 12:00 - 12:59 | Afternoon    | 37,7 | 102 | 19,4  | 19,4  | 18,85 |        | 595,30 |
| 2019/06/01 | CH2205 | Male | Three y/o | Treatment (Wk 3) | Treatment | Feed Day | No | 12:50 | 12:00 - 12:59 | Afternoon    | 38,3 |     | 30,6  | 30,6  | 19,46 |        | 114,87 |
| 2019/06/01 | CH2206 | Male | Three y/o | Treatment (Wk 3) | Treatment | Feed Day | No | 12:50 | 12:00 - 12:59 | Afternoon    | 37,7 | 103 | 23,6  | 23,6  | 18,85 |        | 596,00 |
| 2019/06/01 | CH2205 | Male | Three y/o | Treatment (Wk 3) | Treatment | Feed Day | No | 12:55 | 12:00 - 12:59 | Afternoon    | 37,7 | 98  | 31,2  | 31,2  | 18,85 |        | 592,41 |
| 2019/06/01 | CH2206 | Male | Three y/o | Treatment (Wk 3) | Treatment | Feed Day | No | 12:55 | 12:00 - 12:59 | Afternoon    | 37,7 |     | 27,4  | 27,4  | 18,85 |        | 111,09 |
| 2019/06/01 | CH2205 | Male | Three y/o | Treatment (Wk 3) | Treatment | Feed Day | No | 13:00 | 13:00 - 13:59 | Afternoon    | 37,7 | 100 | 24,0  | 24,0  | 18,85 |        | 593,87 |
| 2019/06/01 | CH2206 | Male | Three y/o | Treatment (Wk 3) | Treatment | Feed Day | No | 13:00 | 13:00 - 13:59 | Afternoon    | 37,7 | 118 | 22,4  | 22,4  | 18,85 |        | 605,61 |
| 2019/06/01 | CH2205 | Male | Three y/o | Treatment (Wk 3) | Treatment | Feed Day | No | 13:05 | 13:00 - 13:59 | Afternoon    | 37,9 |     | 9,6   | 9,6   | 19,05 |        | 75,37  |
| 2019/06/01 | CH2206 | Male | Three y/o | Treatment (Wk 3) | Treatment | Feed Day | No | 13:05 | 13:00 - 13:59 | Afternoon    | 37,8 | 124 | 47,0  | 47,0  | 18,95 |        | 609,04 |
| 2019/06/01 | CH2205 | Male | Three y/o | Treatment (Wk 3) | Treatment | Feed Day | No | 13:10 | 13:00 - 13:59 | Afternoon    | 37,9 | 101 | 28,8  | 28,8  | 19,05 |        | 594,59 |
| 2019/06/01 | CH2206 | Male | Three y/o | Treatment (Wk 3) | Treatment | Feed Day | No | 13:10 | 13:00 - 13:59 | Afternoon    | 37,7 | 150 | 122,8 | 122,8 | 18,85 |        | 621,86 |
| 2019/06/01 | CH2205 | Male | Three y/o | Treatment (Wk 3) | Treatment | Feed Day | No | 13:15 | 13:00 - 13:59 | Afternoon    | 37,6 |     | 95,4  | 95,4  | 18,75 |        | 154,20 |
| 2019/06/01 | CH2206 | Male | Three y/o | Treatment (Wk 3) | Treatment | Feed Day | No | 13:15 | 13:00 - 13:59 | Afternoon    | 37,3 |     | 27,6  | 27,6  | 18,46 |        | 111,33 |
| 2019/06/01 | CH2205 | Male | Three y/o | Treatment (Wk 3) | Treatment | Feed Day | No | 13:20 | 13:00 - 13:59 | Afternoon    | 37,6 | 102 | 37,6  | 37,6  | 18,75 |        | 595,30 |
| 2019/06/01 | CH2206 | Male | Three y/o | Treatment (Wk 3) | Treatment | Feed Day | No | 13:20 | 13:00 - 13:59 | Afternoon    | 37,5 | 112 | 32,4  | 32,4  | 18,65 |        | 601,96 |
| 2019/06/01 | CH2205 | Male | Three y/o | Treatment (Wk 3) | Treatment | Feed Day | No | 13:25 | 13:00 - 13:59 | Afternoon    | 38,1 |     | 48,2  | 48,2  | 19,26 |        | 130,52 |
| 2019/06/01 | CH2206 | Male | Three y/o | Treatment (Wk 3) | Treatment | Feed Day | No | 13:25 | 13:00 - 13:59 | Afternoon    | 37,3 | 112 | 111,4 | 111,4 | 18,46 |        | 601,96 |
| 2019/06/01 | CH2205 | Male | Three y/o | Treatment (Wk 3) | Treatment | Feed Day | No | 13:30 | 13:00 - 13:59 | Afternoon    | 37,9 | 109 | 57,0  | 57,0  | 19,05 |        | 600,04 |
| 2019/06/01 | CH2206 | Male | Three y/o | Treatment (Wk 3) | Treatment | Feed Day | No | 13:30 | 13:00 - 13:59 | Afternoon    | 37,4 | 99  | 30,0  | 30,0  | 18,55 |        | 593,14 |
| 2019/06/01 | CH2205 | Male | Three y/o | Treatment (Wk 3) | Treatment | Feed Day | No | 13:35 | 13:00 - 13:59 | Afternoon    | 38,1 |     | 22,8  | 22,8  | 19,26 |        | 104,79 |
| 2019/06/01 | CH2206 | Male | Three y/o | Treatment (Wk 3) | Treatment | Feed Day | No | 13:35 | 13:00 - 13:59 | Afternoon    | 37,7 | 124 | 30,6  | 30,6  | 18,85 |        | 609,04 |
| 2019/06/01 | CH2205 | Male | Three y/o | Treatment (Wk 3) | Treatment | Feed Day | No | 13:40 | 13:00 - 13:59 | Afternoon    | 38,0 | 160 | 34,4  | 34,4  | 19,15 |        | 626,07 |
| 2019/06/01 | CH2206 | Male | Three y/o | Treatment (Wk 3) | Treatment | Feed Day | No | 13:40 | 13:00 - 13:59 | Afternoon    | 37,8 | 172 | 36,6  | 36,6  | 18,95 |        | 630,73 |
| 2019/06/01 | CH2205 | Male | Three y/o | Treatment (Wk 3) | Treatment | Feed Day | No | 13:45 | 13:00 - 13:59 | Afternoon    | 38,0 |     | 6,4   | 6,4   | 19,15 |        | 61,70  |
| 2019/06/01 | CH2206 | Male | Three y/o | Treatment (Wk 3) | Treatment | Feed Day | No | 13:45 | 13:00 - 13:59 | Afternoon    | 38,0 |     | 66,6  | 66,6  | 19,15 |        | 141,71 |
| 2019/06/01 | CH2205 | Male | Three y/o | Treatment (Wk 3) | Treatment | Feed Day | No | 13:50 | 13:00 - 13:59 | Afternoon    | 37,7 | 108 | 29,8  | 29,8  | 18,85 |        | 599,39 |
| 2019/06/01 | CH2206 | Male | Three y/o | Treatment (Wk 3) | Treatment | Feed Day | No | 13:50 | 13:00 - 13:59 | Afternoon    | 37,9 | 115 | 22,4  | 22,4  | 19,05 |        | 603,82 |
| 2019/06/01 | CH2205 | Male | Three y/o | Treatment (Wk 3) | Treatment | Feed Day | No | 13:55 | 13:00 - 13:59 | Afternoon    | 37,6 | 182 | 40,6  | 40,6  | 18,75 |        | 634,31 |
| 2019/06/01 | CH2206 | Male | Three y/o | Treatment (Wk 3) | Treatment | Feed Day | No | 13:55 | 13:00 - 13:59 | Afternoon    | 37,9 | 92  | 38,8  | 38,8  | 19,05 |        | 587,78 |
| 2019/06/01 | CH2205 | Male | Three y/o | Treatment (Wk 3) | Treatment | Feed Day | No | 14:00 | 14:00 - 14:59 | Afternoon    | 37,6 | 112 | 55,6  | 55,6  | 18,75 |        | 601,96 |
| 2019/06/01 | CH2206 | Male | Three y/o | Treatment (Wk 3) | Treatment | Feed Day | No | 14:00 | 14:00 - 14:59 | Afternoon    | 37,9 | 103 | 32,8  | 32,8  | 19,05 |        | 596,00 |
| 2019/06/01 | CH2205 | Male | Three y/o | Treatment (Wk 3) | Treatment | Feed Day | No | 14:05 | 14:00 - 14:59 | Afternoon    | 37,4 | 106 | 19,0  | 19,0  | 18,55 |        | 598,06 |
| 2019/06/01 | CH2206 | Male | Three y/o | Treatment (Wk 3) | Treatment | Feed Day | No | 14:05 | 14:00 - 14:59 | Afternoon    | 38,0 | 114 | 25,0  | 25,0  | 19,15 |        | 603,20 |
| 2019/06/01 | CH2205 | Male | Three y/o | Treatment (Wk 3) | Treatment | Feed Day | No | 14:10 | 14:00 - 14:59 | Afternoon    | 37,6 | 111 | 16,2  | 16,2  | 18,75 |        | 601,33 |
| 2019/06/01 | CH2206 | Male | Three y/o | Treatment (Wk 3) | Treatment | Feed Day | No | 14:10 | 14:00 - 14:59 | Afternoon    | 38,1 | 128 | 41,0  | 41,0  | 19,26 |        | 611,22 |
| 2019/06/01 | CH2205 | Male | Three y/o | Treatment (Wk 3) | Treatment | Feed Day | No | 14:15 | 14:00 - 14:59 | Afternoon    | 37,9 | 76  | 3,6   | 3,6   | 19,05 |        | 573,39 |
| 2019/06/01 | CH2206 | Male | Three y/o | Treatment (Wk 3) | Treatment | Feed Day | No | 14:15 | 14:00 - 14:59 | Afternoon    | 38,1 | 107 | 50,4  | 50,4  | 19,26 |        | 598,73 |
| 2019/06/01 | CH2205 | Male | Three y/o | Treatment (Wk 3) | Treatment | Feed Day | No | 14:20 | 14:00 - 14:59 | Afternoon    | 38,0 | 83  | 2,8   | 2,8   | 19,15 |        | 580,11 |
| 2019/06/01 | CH2206 | Male | Three y/o | Treatment (Wk 3) | Treatment | Feed Day | No | 14:20 | 14:00 - 14:59 | Afternoon    | 38,1 | 97  | 47,0  | 47,0  | 19,26 |        | 591,66 |
| 2019/06/01 | CH2205 | Male | Three y/o | Treatment (Wk 3) | Treatment | Feed Day | No | 14:25 | 14:00 - 14:59 | Afternoon    | 38,1 | 84  | 3,8   | 3,8   | 19,26 |        | 581,01 |
| 2019/06/01 | CH2206 | Male | Three y/o | Treatment (Wk 3) | Treatment | Feed Day | No | 14:25 | 14:00 - 14:59 | Afternoon    | 38,1 | 95  | 45,4  | 45,4  | 19,26 |        | 590,14 |
| 2019/06/01 | CH2205 | Male | Three y/o | Treatment (Wk 3) | Treatment | Feed Day | No | 14:30 | 14:00 - 14:59 | Afternoon    | 38,2 | 84  | 5,4   | 5,4   | 19,36 |        | 581,01 |
| 2019/06/01 | CH2206 | Male | Three y/o | Treatment (Wk 3) | Treatment | Feed Day | No | 14:30 | 14:00 - 14:59 | Afternoon    | 38,2 | 88  | 51,0  | 51,0  | 19,36 |        | 584,49 |
| 2019/06/01 | CH2205 | Male | Three y/o | Treatment (Wk 3) | Treatment | Feed Day | No | 14:35 | 14:00 - 14:59 | Afternoon    | 38,2 | 98  | 4,4   | 4,4   | 19,36 |        | 592,41 |
| 2019/06/01 | CH2206 | Male | Three y/o | Treatment (Wk 3) | Treatment | Feed Day | No | 14:35 | 14:00 - 14:59 | Afternoon    | 38,2 | 80  | 51,4  | 51,4  | 19,36 |        | 577,31 |
| 2019/06/01 | CH2205 | Male | Three y/o | Treatment (Wk 3) | Treatment | Feed Day | No | 14:40 | 14:00 - 14:59 | Afternoon    | 38,2 | 92  | 3,8   | 3,8   | 19,36 |        | 587,78 |
| 2019/06/01 | CH2206 | Male | Three y/o | Treatment (Wk 3) | Treatment | Feed Day | No | 14:40 | 14:00 - 14:59 | Afternoon    | 38,2 | 105 | 46,8  | 46,8  | 19,36 |        | 597,38 |
| 2019/06/01 | CH2205 | Male | Three y/o | Treatment (Wk 3) | Treatment | Feed Day | No | 14:45 | 14:00 - 14:59 | Afternoon    | 38,3 | 90  | 2,8   | 2,8   | 19,46 |        | 586,16 |



|            |        |      |           |                  |           |          |    |       |               |           |      |     |       |       |       |        |        |
|------------|--------|------|-----------|------------------|-----------|----------|----|-------|---------------|-----------|------|-----|-------|-------|-------|--------|--------|
| 2019/06/01 | CH2206 | Male | Three y/o | Treatment (Wk 3) | Treatment | Feed Day | No | 14:45 | 14:00 - 14:59 | Afternoon | 38,2 | 110 | 48,4  | 48,4  | 19,36 | 600,69 | 130,66 |
| 2019/06/01 | CH2205 | Male | Three y/o | Treatment (Wk 3) | Treatment | Feed Day | No | 14:50 | 14:00 - 14:59 | Afternoon | 38,3 | 82  | 6,2   | 6,2   | 19,46 | 579,19 | 60,63  |
| 2019/06/01 | CH2206 | Male | Three y/o | Treatment (Wk 3) | Treatment | Feed Day | No | 14:50 | 14:00 - 14:59 | Afternoon | 38,3 | 89  | 46,2  | 46,2  | 19,46 | 585,33 | 129,06 |
| 2019/06/01 | CH2205 | Male | Three y/o | Treatment (Wk 3) | Treatment | Feed Day | No | 14:55 | 14:00 - 14:59 | Afternoon | 38,2 | 79  | 16,2  | 16,2  | 19,36 | 576,36 | 93,13  |
| 2019/06/01 | CH2206 | Male | Three y/o | Treatment (Wk 3) | Treatment | Feed Day | No | 14:55 | 14:00 - 14:59 | Afternoon | 38,3 | 112 | 48,2  | 48,2  | 19,46 | 601,96 | 130,52 |
| 2019/06/01 | CH2205 | Male | Three y/o | Treatment (Wk 3) | Treatment | Feed Day | No | 15:00 | 15:00 - 15:59 | Afternoon | 38,2 | 197 | 32,4  | 32,4  | 19,36 | 639,25 | 116,84 |
| 2019/06/01 | CH2206 | Male | Three y/o | Treatment (Wk 3) | Treatment | Feed Day | No | 15:00 | 15:00 - 15:59 | Afternoon | 38,2 | 93  | 49,2  | 49,2  | 19,36 | 588,58 | 131,23 |
| 2019/06/01 | CH2205 | Male | Three y/o | Treatment (Wk 3) | Treatment | Feed Day | No | 15:05 | 15:00 - 15:59 | Afternoon | 38,2 |     | 43,0  | 43,0  | 19,36 |        | 126,58 |
| 2019/06/01 | CH2206 | Male | Three y/o | Treatment (Wk 3) | Treatment | Feed Day | No | 15:05 | 15:00 - 15:59 | Afternoon | 38,2 | 115 | 33,8  | 33,8  | 19,36 | 603,82 | 118,29 |
| 2019/06/01 | CH2205 | Male | Three y/o | Treatment (Wk 3) | Treatment | Feed Day | No | 15:10 | 15:00 - 15:59 | Afternoon | 38,0 |     | 32,8  | 32,8  | 19,15 |        | 117,26 |
| 2019/06/01 | CH2206 | Male | Three y/o | Treatment (Wk 3) | Treatment | Feed Day | No | 15:10 | 15:00 - 15:59 | Afternoon | 38,2 | 105 | 32,0  | 32,0  | 19,36 | 597,38 | 116,41 |
| 2019/06/01 | CH2205 | Male | Three y/o | Treatment (Wk 3) | Treatment | Feed Day | No | 15:15 | 15:00 - 15:59 | Afternoon | 37,6 | 111 | 70,4  | 70,4  | 18,75 | 601,33 | 143,64 |
| 2019/06/01 | CH2206 | Male | Three y/o | Treatment (Wk 3) | Treatment | Feed Day | No | 15:15 | 15:00 - 15:59 | Afternoon | 38,2 | 107 | 35,4  | 35,4  | 19,36 | 598,73 | 119,88 |
| 2019/06/01 | CH2205 | Male | Three y/o | Treatment (Wk 3) | Treatment | Feed Day | No | 15:20 | 15:00 - 15:59 | Afternoon | 37,4 | 114 | 70,0  | 70,0  | 18,55 | 603,20 | 143,44 |
| 2019/06/01 | CH2206 | Male | Three y/o | Treatment (Wk 3) | Treatment | Feed Day | No | 15:20 | 15:00 - 15:59 | Afternoon | 38,2 | 108 | 190,2 | 190,2 | 19,36 | 599,39 | 178,35 |
| 2019/06/01 | CH2205 | Male | Three y/o | Treatment (Wk 3) | Treatment | Feed Day | No | 15:25 | 15:00 - 15:59 | Afternoon | 37,6 | 56  | 65,2  | 65,2  | 18,75 | 549,01 | 140,97 |
| 2019/06/01 | CH2206 | Male | Three y/o | Treatment (Wk 3) | Treatment | Feed Day | No | 15:25 | 15:00 - 15:59 | Afternoon | 38,1 |     | 19,2  | 19,2  | 19,26 |        | 98,92  |
| 2019/06/01 | CH2205 | Male | Three y/o | Treatment (Wk 3) | Treatment | Feed Day | No | 15:30 | 15:00 - 15:59 | Afternoon | 37,7 |     | 19,4  | 19,4  | 18,85 |        | 99,28  |
| 2019/06/01 | CH2206 | Male | Three y/o | Treatment (Wk 3) | Treatment | Feed Day | No | 15:30 | 15:00 - 15:59 | Afternoon | 38,0 | 107 | 30,6  | 30,6  | 19,15 | 598,73 | 114,87 |
| 2019/06/01 | CH2205 | Male | Three y/o | Treatment (Wk 3) | Treatment | Feed Day | No | 15:35 | 15:00 - 15:59 | Afternoon | 38,0 | 100 | 69,4  | 69,4  | 19,15 | 593,87 | 143,14 |
| 2019/06/01 | CH2206 | Male | Three y/o | Treatment (Wk 3) | Treatment | Feed Day | No | 15:35 | 15:00 - 15:59 | Afternoon | 37,7 | 111 | 20,6  | 20,6  | 18,85 | 601,33 | 101,32 |
| 2019/06/01 | CH2205 | Male | Three y/o | Treatment (Wk 3) | Treatment | Feed Day | No | 15:40 | 15:00 - 15:59 | Afternoon | 38,0 |     | 53,0  | 53,0  | 19,15 |        | 133,80 |
| 2019/06/01 | CH2206 | Male | Three y/o | Treatment (Wk 3) | Treatment | Feed Day | No | 15:40 | 15:00 - 15:59 | Afternoon | 37,7 | 99  | 20,0  | 20,0  | 18,85 | 593,14 | 100,31 |
| 2019/06/01 | CH2205 | Male | Three y/o | Treatment (Wk 3) | Treatment | Feed Day | No | 15:45 | 15:00 - 15:59 | Afternoon | 37,9 | 96  | 85,6  | 85,6  | 19,05 | 590,91 | 150,43 |
| 2019/06/01 | CH2206 | Male | Three y/o | Treatment (Wk 3) | Treatment | Feed Day | No | 15:45 | 15:00 - 15:59 | Afternoon | 37,8 | 112 | 51,0  | 51,0  | 18,95 | 601,96 | 132,47 |
| 2019/06/01 | CH2205 | Male | Three y/o | Treatment (Wk 3) | Treatment | Feed Day | No | 15:50 | 15:00 - 15:59 | Afternoon | 38,0 | 180 | 75,2  | 75,2  | 19,15 | 633,61 | 145,93 |
| 2019/06/01 | CH2206 | Male | Three y/o | Treatment (Wk 3) | Treatment | Feed Day | No | 15:50 | 15:00 - 15:59 | Afternoon | 37,7 | 104 | 49,0  | 49,0  | 18,85 | 596,69 | 131,09 |
| 2019/06/01 | CH2205 | Male | Three y/o | Treatment (Wk 3) | Treatment | Feed Day | No | 15:55 | 15:00 - 15:59 | Afternoon | 38,2 | 70  | 78,2  | 78,2  | 19,36 | 566,99 | 147,28 |
| 2019/06/01 | CH2206 | Male | Three y/o | Treatment (Wk 3) | Treatment | Feed Day | No | 15:55 | 15:00 - 15:59 | Afternoon | 37,5 | 88  | 46,4  | 46,4  | 18,65 | 584,49 | 129,21 |
| 2019/06/01 | CH2205 | Male | Three y/o | Treatment (Wk 3) | Treatment | Feed Day | No | 16:00 | 16:00 - 16:59 | Evening   | 38,1 | 47  | 32,2  | 32,2  | 19,26 | 534,23 | 116,63 |
| 2019/06/01 | CH2206 | Male | Three y/o | Treatment (Wk 3) | Treatment | Feed Day | No | 16:00 | 16:00 - 16:59 | Evening   | 37,7 | 121 | 129,6 | 129,6 | 18,85 | 607,35 | 164,90 |
| 2019/06/01 | CH2205 | Male | Three y/o | Treatment (Wk 3) | Treatment | Feed Day | No | 16:05 | 16:00 - 16:59 | Evening   | 38,3 |     | 10,2  | 10,2  | 19,46 |        | 77,43  |
| 2019/06/01 | CH2206 | Male | Three y/o | Treatment (Wk 3) | Treatment | Feed Day | No | 16:05 | 16:00 - 16:59 | Evening   | 37,8 | 106 | 21,4  | 21,4  | 18,95 | 598,06 | 102,63 |
| 2019/06/01 | CH2205 | Male | Three y/o | Treatment (Wk 3) | Treatment | Feed Day | No | 16:10 | 16:00 - 16:59 | Evening   | 38,4 | 91  | 16,2  | 16,2  | 19,56 | 586,98 | 93,13  |
| 2019/06/01 | CH2206 | Male | Three y/o | Treatment (Wk 3) | Treatment | Feed Day | No | 16:10 | 16:00 - 16:59 | Evening   | 37,8 | 89  | 28,4  | 28,4  | 18,95 | 585,33 | 112,31 |
| 2019/06/01 | CH2205 | Male | Three y/o | Treatment (Wk 3) | Treatment | Feed Day | No | 16:15 | 16:00 - 16:59 | Evening   | 38,4 |     | 11,6  | 11,6  | 19,56 |        | 81,78  |
| 2019/06/01 | CH2206 | Male | Three y/o | Treatment (Wk 3) | Treatment | Feed Day | No | 16:15 | 16:00 - 16:59 | Evening   | 37,9 | 87  | 48,2  | 48,2  | 19,05 | 583,64 | 130,52 |
| 2019/06/01 | CH2205 | Male | Three y/o | Treatment (Wk 3) | Treatment | Feed Day | No | 16:20 | 16:00 - 16:59 | Evening   | 38,3 | 108 | 18,2  | 18,2  | 19,46 | 599,39 | 97,10  |
| 2019/06/01 | CH2206 | Male | Three y/o | Treatment (Wk 3) | Treatment | Feed Day | No | 16:20 | 16:00 - 16:59 | Evening   | 37,9 | 77  | 50,8  | 50,8  | 19,05 | 574,39 | 132,33 |
| 2019/06/01 | CH2205 | Male | Three y/o | Treatment (Wk 3) | Treatment | Feed Day | No | 16:25 | 16:00 - 16:59 | Evening   | 38,3 | 81  | 22,4  | 22,4  | 19,46 | 578,26 | 104,19 |
| 2019/06/01 | CH2206 | Male | Three y/o | Treatment (Wk 3) | Treatment | Feed Day | No | 16:25 | 16:00 - 16:59 | Evening   | 38,0 | 87  | 48,8  | 48,8  | 19,15 | 583,64 | 130,95 |
| 2019/06/01 | CH2205 | Male | Three y/o | Treatment (Wk 3) | Treatment | Feed Day | No | 16:30 | 16:00 - 16:59 | Evening   | 38,4 | 86  | 31,2  | 31,2  | 19,56 | 582,77 | 115,54 |
| 2019/06/01 | CH2206 | Male | Three y/o | Treatment (Wk 3) | Treatment | Feed Day | No | 16:30 | 16:00 - 16:59 | Evening   | 38,1 | 84  | 50,0  | 50,0  | 19,26 | 581,01 | 131,79 |
| 2019/06/01 | CH2205 | Male | Three y/o | Treatment (Wk 3) | Treatment | Feed Day | No | 16:35 | 16:00 - 16:59 | Evening   | 38,4 | 73  | 22,6  | 22,6  | 19,56 | 570,27 | 104,49 |
| 2019/06/01 | CH2206 | Male | Three y/o | Treatment (Wk 3) | Treatment | Feed Day | No | 16:35 | 16:00 - 16:59 | Evening   | 38,1 | 67  | 49,8  | 49,8  | 19,26 | 563,53 | 131,65 |
| 2019/06/01 | CH2205 | Male | Three y/o | Treatment (Wk 3) | Treatment | Feed Day | No | 16:40 | 16:00 - 16:59 | Evening   | 38,4 | 70  | 276,0 | 276,0 | 19,56 | 566,99 | 191,47 |
| 2019/06/01 | CH2206 | Male | Three y/o | Treatment (Wk 3) | Treatment | Feed Day | No | 16:40 | 16:00 - 16:59 | Evening   | 38,1 | 94  | 34,8  | 34,8  | 19,26 | 589,37 | 119,29 |
| 2019/06/01 | CH2205 | Male | Three y/o | Treatment (Wk 3) | Treatment | Feed Day | No | 16:45 | 16:00 - 16:59 | Evening   | 38,4 | 41  | 33,6  | 33,6  | 19,56 | 522,29 | 118,09 |
| 2019/06/01 | CH2206 | Male | Three y/o | Treatment (Wk 3) | Treatment | Feed Day | No | 16:45 | 16:00 - 16:59 | Evening   | 38,2 | 82  | 51,2  | 51,2  | 19,36 | 579,19 | 132,61 |
| 2019/06/01 | CH2205 | Male | Three y/o | Treatment (Wk 3) | Treatment | Feed Day | No | 16:50 | 16:00 - 16:59 | Evening   | 38,3 | 83  | 29,0  | 29,0  | 19,46 | 580,11 | 113,03 |
| 2019/06/01 | CH2206 | Male | Three y/o | Treatment (Wk 3) | Treatment | Feed Day | No | 16:50 | 16:00 - 16:59 | Evening   | 38,2 | 83  | 41,8  | 41,8  | 19,36 | 580,11 | 125,60 |
| 2019/06/01 | CH2205 | Male | Three y/o | Treatment (Wk 3) | Treatment | Feed Day | No | 16:55 | 16:00 - 16:59 | Evening   | 38,3 | 64  | 21,0  | 21,0  | 19,46 | 559,88 | 101,98 |
| 2019/06/01 | CH2206 | Male | Three y/o | Treatment (Wk 3) | Treatment | Feed Day | No | 16:55 | 16:00 - 16:59 | Evening   | 38,2 | 47  | 50,8  | 50,8  | 19,36 | 534,23 | 132,33 |
| 2019/06/01 | CH2205 | Male | Three y/o | Treatment (Wk 3) | Treatment | Feed Day | No | 17:00 | 17:00 - 17:59 | Evening   | 38,3 | 81  | 23,4  | 23,4  | 19,46 | 578,26 | 105,68 |
| 2019/06/01 | CH2206 | Male | Three y/o | Treatment (Wk 3) | Treatment | Feed Day | No | 17:00 | 17:00 - 17:59 | Evening   | 38,2 | 92  | 51,4  | 51,4  | 19,36 | 587,78 | 132,74 |
| 2019/06/01 | CH2205 | Male | Three y/o | Treatment (Wk 3) | Treatment | Feed Day | No | 17:05 | 17:00 - 17:59 | Evening   | 38,3 | 83  | 18,4  | 18,4  | 19,46 | 580,11 | 97,47  |
| 2019/06/01 | CH2206 | Male | Three y/o | Treatment (Wk 3) | Treatment | Feed Day | No | 17:05 | 17:00 - 17:59 | Evening   | 38,1 | 94  | 54,4  | 54,4  | 19,26 | 589,37 | 134,70 |
| 2019/06/01 | CH2205 | Male | Three y/o | Treatment (Wk 3) | Treatment | Feed Day | No | 17:10 | 17:00 - 17:59 | Evening   | 37,3 | 72  | 4,8   | 4,8   | 19,46 | 569,20 | 52,04  |
| 2019/06/01 | CH2206 | Male | Three y/o | Treatment (Wk 3) | Treatment | Feed Day | No | 17:10 | 17:00 - 17:59 | Evening   | 38,1 | 60  | 51,2  | 51,2  | 19,26 | 554,67 | 132,61 |
| 2019/06/01 | CH2205 | Male | Three y/o | Treatment (Wk 3) | Treatment | Feed Day | No | 17:15 | 17:00 - 17:59 | Evening   | 38,3 | 92  | 6,0   | 6,0   | 19,46 | 587,78 | 59,53  |
| 2019/06/01 | CH2206 | Male | Three y/o | Treatment (Wk 3) | Treatment | Feed Day | No | 17:15 | 17:00 - 17:59 | Evening   | 38,1 | 76  | 52,4  | 52,4  | 19,26 | 573,39 | 133,41 |
| 2019/06/01 | CH2205 | Male | Three y/o | Treatment (Wk 3) | Treatment | Feed Day | No | 17:20 | 17:00 - 17:59 | Evening   | 38,3 | 76  | 20,0  | 20,0  | 19,46 | 573,39 | 100,31 |
| 2019/06/01 | CH2206 | Male | Three y/o | Treatment (Wk 3) | Treatment | Feed Day | No | 17:20 | 17:00 - 17:59 | Evening   | 38,1 | 68  | 34,8  | 34,8  | 19,26 | 564,71 | 119,29 |
| 2019/06/01 | CH2205 | Male | Three y/o | Treatment (Wk 3) | Treatment | Feed Day | No | 17:25 | 17:00 - 17:59 | Evening   | 38,3 | 101 | 51,4  | 51,4  | 19,46 | 594,59 | 132,74 |
| 2019/06/01 | CH2206 | Male | Three y/o | Treatment (Wk 3) | Treatment | Feed Day | No | 17:25 | 17:00 - 17:59 | Evening   | 38,1 | 88  | 15,0  | 15,0  | 19,26 | 584,49 | 90,51  |
| 2019/06/01 | CH2205 | Male | Three y/o | Treatment (Wk 3) | Treatment | Feed Day | No | 17:30 | 17:00 - 17:59 | Evening   | 38,3 |     | 24,0  | 24,0  | 19,46 |        | 106,55 |
| 2019/06/01 | CH2206 | Male | Three y/o | Treatment (Wk 3) | Treatment | Feed Day | No | 17:30 | 17:00 - 17:59 | Evening   | 38,1 | 86  | 25,0  | 25,0  | 19,26 | 582,77 | 107,94 |
| 2019/06/01 | CH2205 | Male | Three y/o | Treatment (Wk 3) | Treatment | Feed Day | No | 17:35 | 17:00 - 17:59 | Evening   | 38,2 |     | 13,8  | 13,8  | 19,36 |        | 87,68  |
| 2019/06/01 | CH2206 | Male | Three y/o | Treatment (Wk 3) | Treatment | Feed Day | No | 17:35 | 17:00 - 17:59 | Evening   | 38,0 | 94  | 13,0  | 13,0  | 19,15 | 589,37 | 85,65  |
| 2019/06/01 | CH2205 | Male | Three y/o | Treatment (Wk 3) | Treatment | Feed Day | No | 17:40 | 17:00 - 17:59 | Evening   | 38,2 | 75  | 22,2  | 22,2  | 19,36 | 572,36 | 103,88 |



|            |        |      |           |                  |           |          |    |       |               |         |      |     |      |      |       |        |        |
|------------|--------|------|-----------|------------------|-----------|----------|----|-------|---------------|---------|------|-----|------|------|-------|--------|--------|
| 2019/06/01 | CH2206 | Male | Three y/o | Treatment (Wk 3) | Treatment | Feed Day | No | 17:40 | 17:00 - 17:59 | Evening | 38,0 | 126 | 33,8 | 33,8 | 19,15 | 610,14 | 118,29 |
| 2019/06/01 | CH2205 | Male | Three y/o | Treatment (Wk 3) | Treatment | Feed Day | No | 17:45 | 17:00 - 17:59 | Evening | 38,2 | 96  | 35,8 | 35,8 | 19,36 | 590,91 | 120,27 |
| 2019/06/01 | CH2206 | Male | Three y/o | Treatment (Wk 3) | Treatment | Feed Day | No | 17:45 | 17:00 - 17:59 | Evening | 37,9 | 113 | 20,8 | 20,8 | 19,05 | 602,58 | 101,65 |
| 2019/06/01 | CH2205 | Male | Three y/o | Treatment (Wk 3) | Treatment | Feed Day | No | 17:50 | 17:00 - 17:59 | Evening | 38,2 |     | 8,4  | 8,4  | 19,36 |        | 70,86  |
| 2019/06/01 | CH2206 | Male | Three y/o | Treatment (Wk 3) | Treatment | Feed Day | No | 17:50 | 17:00 - 17:59 | Evening | 37,9 |     | 23,4 | 23,4 | 19,05 |        | 105,68 |
| 2019/06/01 | CH2205 | Male | Three y/o | Treatment (Wk 3) | Treatment | Feed Day | No | 17:55 | 17:00 - 17:59 | Evening | 38,2 | 58  | 5,0  | 5,0  | 19,36 | 551,90 | 53,41  |
| 2019/06/01 | CH2206 | Male | Three y/o | Treatment (Wk 3) | Treatment | Feed Day | No | 17:55 | 17:00 - 17:59 | Evening | 37,9 | 58  | 14,4 | 14,4 | 19,05 | 551,90 | 89,12  |
| 2019/06/01 | CH2205 | Male | Three y/o | Treatment (Wk 3) | Treatment | Feed Day | No | 18:00 | 18:00 - 18:59 | Evening | 38,2 | 85  | 3,6  | 3,6  | 19,36 | 581,90 | 42,42  |
| 2019/06/01 | CH2206 | Male | Three y/o | Treatment (Wk 3) | Treatment | Feed Day | No | 18:00 | 18:00 - 18:59 | Evening | 37,8 | 83  | 15,0 | 15,0 | 18,95 | 580,11 | 90,51  |
| 2019/06/01 | CH2205 | Male | Three y/o | Treatment (Wk 3) | Treatment | Feed Day | No | 18:05 | 18:00 - 18:59 | Evening | 38,2 | 84  | 5,8  | 5,8  | 19,36 | 581,01 | 58,39  |
| 2019/06/01 | CH2206 | Male | Three y/o | Treatment (Wk 3) | Treatment | Feed Day | No | 18:05 | 18:00 - 18:59 | Evening | 37,8 |     | 22,0 | 22,0 | 18,95 |        | 103,57 |
| 2019/06/01 | CH2205 | Male | Three y/o | Treatment (Wk 3) | Treatment | Feed Day | No | 18:10 | 18:00 - 18:59 | Evening | 38,2 | 52  | 1,8  | 1,8  | 19,36 | 542,83 | 19,38  |
| 2019/06/01 | CH2206 | Male | Three y/o | Treatment (Wk 3) | Treatment | Feed Day | No | 18:10 | 18:00 - 18:59 | Evening | 37,8 | 99  | 20,6 | 20,6 | 18,95 | 593,14 | 101,32 |
| 2019/06/01 | CH2205 | Male | Three y/o | Treatment (Wk 3) | Treatment | Feed Day | No | 18:15 | 18:00 - 18:59 | Evening | 38,2 | 88  | 3,0  | 3,0  | 19,36 | 584,49 | 36,34  |
| 2019/06/01 | CH2206 | Male | Three y/o | Treatment (Wk 3) | Treatment | Feed Day | No | 18:15 | 18:00 - 18:59 | Evening | 37,8 | 70  | 10,6 | 10,6 | 18,95 | 566,99 | 78,73  |
| 2019/06/01 | CH2205 | Male | Three y/o | Treatment (Wk 3) | Treatment | Feed Day | No | 18:20 | 18:00 - 18:59 | Evening | 38,2 | 92  | 4,0  | 4,0  | 19,36 | 587,78 | 45,94  |
| 2019/06/01 | CH2206 | Male | Three y/o | Treatment (Wk 3) | Treatment | Feed Day | No | 18:20 | 18:00 - 18:59 | Evening | 37,8 | 52  | 17,4 | 17,4 | 18,95 | 542,83 | 95,56  |
| 2019/06/01 | CH2205 | Male | Three y/o | Treatment (Wk 3) | Treatment | Feed Day | No | 18:25 | 18:00 - 18:59 | Evening | 38,2 | 70  | 3,0  | 3,0  | 19,36 | 566,99 | 36,34  |
| 2019/06/01 | CH2206 | Male | Three y/o | Treatment (Wk 3) | Treatment | Feed Day | No | 18:25 | 18:00 - 18:59 | Evening | 37,8 | 64  | 28,8 | 28,8 | 18,95 | 559,88 | 112,79 |
| 2019/06/01 | CH2205 | Male | Three y/o | Treatment (Wk 3) | Treatment | Feed Day | No | 18:30 | 18:00 - 18:59 | Evening | 38,2 | 45  | 4,2  | 4,2  | 19,36 | 530,47 | 47,57  |
| 2019/06/01 | CH2206 | Male | Three y/o | Treatment (Wk 3) | Treatment | Feed Day | No | 18:30 | 18:00 - 18:59 | Evening | 37,7 | 52  | 31,0 | 31,0 | 18,85 | 542,83 | 115,32 |
| 2019/06/01 | CH2205 | Male | Three y/o | Treatment (Wk 3) | Treatment | Feed Day | No | 18:35 | 18:00 - 18:59 | Evening | 38,2 | 53  | 6,0  | 6,0  | 19,36 | 544,43 | 59,53  |
| 2019/06/01 | CH2206 | Male | Three y/o | Treatment (Wk 3) | Treatment | Feed Day | No | 18:35 | 18:00 - 18:59 | Evening | 37,7 | 44  | 42,0 | 42,0 | 18,85 | 528,51 | 125,77 |
| 2019/06/01 | CH2205 | Male | Three y/o | Treatment (Wk 3) | Treatment | Feed Day | No | 18:40 | 18:00 - 18:59 | Evening | 38,2 | 39  | 6,0  | 6,0  | 19,36 | 517,82 | 59,53  |
| 2019/06/01 | CH2206 | Male | Three y/o | Treatment (Wk 3) | Treatment | Feed Day | No | 18:40 | 18:00 - 18:59 | Evening | 37,7 | 49  | 46,4 | 46,4 | 18,85 | 537,80 | 129,21 |
| 2019/06/01 | CH2205 | Male | Three y/o | Treatment (Wk 3) | Treatment | Feed Day | No | 18:45 | 18:00 - 18:59 | Evening | 38,2 | 100 | 5,4  | 5,4  | 19,36 | 593,87 | 55,99  |
| 2019/06/01 | CH2206 | Male | Three y/o | Treatment (Wk 3) | Treatment | Feed Day | No | 18:45 | 18:00 - 18:59 | Evening | 37,7 | 49  | 43,8 | 43,8 | 18,85 | 537,80 | 127,22 |
| 2019/06/01 | CH2205 | Male | Three y/o | Treatment (Wk 3) | Treatment | Feed Day | No | 18:50 | 18:00 - 18:59 | Evening | 38,2 | 47  | 6,8  | 6,8  | 19,36 | 534,23 | 63,74  |
| 2019/06/01 | CH2206 | Male | Three y/o | Treatment (Wk 3) | Treatment | Feed Day | No | 18:50 | 18:00 - 18:59 | Evening | 37,7 | 48  | 49,2 | 49,2 | 18,85 | 536,04 | 131,23 |
| 2019/06/01 | CH2205 | Male | Three y/o | Treatment (Wk 3) | Treatment | Feed Day | No | 18:55 | 18:00 - 18:59 | Evening | 38,1 | 79  | 3,0  | 3,0  | 19,26 | 576,36 | 36,34  |
| 2019/06/01 | CH2206 | Male | Three y/o | Treatment (Wk 3) | Treatment | Feed Day | No | 18:55 | 18:00 - 18:59 | Evening | 37,7 | 56  | 31,4 | 31,4 | 18,85 | 549,01 | 115,76 |
| 2019/06/01 | CH2205 | Male | Three y/o | Treatment (Wk 3) | Treatment | Feed Day | No | 19:00 | 19:00 - 19:59 | Evening | 38,1 | 71  | 2,0  | 2,0  | 19,26 | 568,10 | 22,86  |
| 2019/06/01 | CH2206 | Male | Three y/o | Treatment (Wk 3) | Treatment | Feed Day | No | 19:00 | 19:00 - 19:59 | Evening | 37,7 | 83  | 28,4 | 28,4 | 18,85 | 580,11 | 112,31 |
| 2019/06/01 | CH2205 | Male | Three y/o | Treatment (Wk 3) | Treatment | Feed Day | No | 19:05 | 19:00 - 19:59 | Evening | 38,2 | 70  | 4,2  | 4,2  | 19,36 | 566,99 | 47,57  |
| 2019/06/01 | CH2206 | Male | Three y/o | Treatment (Wk 3) | Treatment | Feed Day | No | 19:05 | 19:00 - 19:59 | Evening | 37,5 | 84  | 29,4 | 29,4 | 18,65 | 581,01 | 113,50 |
| 2019/06/01 | CH2205 | Male | Three y/o | Treatment (Wk 3) | Treatment | Feed Day | No | 19:10 | 19:00 - 19:59 | Evening | 38,1 | 40  | 3,8  | 3,8  | 19,26 | 520,09 | 44,22  |
| 2019/06/01 | CH2206 | Male | Three y/o | Treatment (Wk 3) | Treatment | Feed Day | No | 19:10 | 19:00 - 19:59 | Evening | 37,5 | 91  | 33,0 | 33,0 | 18,65 | 586,98 | 117,47 |
| 2019/06/01 | CH2205 | Male | Three y/o | Treatment (Wk 3) | Treatment | Feed Day | No | 19:15 | 19:00 - 19:59 | Evening | 38,1 | 64  | 7,2  | 7,2  | 19,26 | 559,88 | 65,66  |
| 2019/06/01 | CH2206 | Male | Three y/o | Treatment (Wk 3) | Treatment | Feed Day | No | 19:15 | 19:00 - 19:59 | Evening | 37,7 | 41  | 30,0 | 30,0 | 18,85 | 522,29 | 114,20 |
| 2019/06/01 | CH2205 | Male | Three y/o | Treatment (Wk 3) | Treatment | Feed Day | No | 19:20 | 19:00 - 19:59 | Evening | 38,1 | 59  | 7,4  | 7,4  | 19,26 | 553,30 | 66,59  |
| 2019/06/01 | CH2206 | Male | Three y/o | Treatment (Wk 3) | Treatment | Feed Day | No | 19:20 | 19:00 - 19:59 | Evening | 37,8 | 93  | 31,6 | 31,6 | 18,95 | 588,58 | 115,98 |
| 2019/06/01 | CH2205 | Male | Three y/o | Treatment (Wk 3) | Treatment | Feed Day | No | 19:25 | 19:00 - 19:59 | Evening | 38,1 | 60  | 12,0 | 12,0 | 19,26 | 554,67 | 82,93  |
| 2019/06/01 | CH2206 | Male | Three y/o | Treatment (Wk 3) | Treatment | Feed Day | No | 19:25 | 19:00 - 19:59 | Evening | 37,8 | 71  | 34,0 | 34,0 | 18,95 | 568,10 | 118,49 |
| 2019/06/01 | CH2205 | Male | Three y/o | Treatment (Wk 3) | Treatment | Feed Day | No | 19:30 | 19:00 - 19:59 | Evening | 38,1 | 93  | 12,0 | 12,0 | 19,26 | 588,58 | 82,93  |
| 2019/06/01 | CH2206 | Male | Three y/o | Treatment (Wk 3) | Treatment | Feed Day | No | 19:30 | 19:00 - 19:59 | Evening | 37,8 | 48  | 24,2 | 24,2 | 18,95 | 536,04 | 106,83 |
| 2019/06/01 | CH2205 | Male | Three y/o | Treatment (Wk 3) | Treatment | Feed Day | No | 19:35 | 19:00 - 19:59 | Evening | 38,1 | 47  | 7,4  | 7,4  | 19,26 | 534,23 | 66,59  |
| 2019/06/01 | CH2206 | Male | Three y/o | Treatment (Wk 3) | Treatment | Feed Day | No | 19:35 | 19:00 - 19:59 | Evening | 37,8 | 88  | 12,8 | 12,8 | 18,95 | 584,49 | 85,12  |
| 2019/06/01 | CH2205 | Male | Three y/o | Treatment (Wk 3) | Treatment | Feed Day | No | 19:40 | 19:00 - 19:59 | Evening | 38,0 | 194 | 13,4 | 13,4 | 19,15 | 638,30 | 86,68  |
| 2019/06/01 | CH2206 | Male | Three y/o | Treatment (Wk 3) | Treatment | Feed Day | No | 19:40 | 19:00 - 19:59 | Evening | 37,8 | 109 | 20,0 | 20,0 | 18,95 | 600,04 | 100,31 |
| 2019/06/01 | CH2205 | Male | Three y/o | Treatment (Wk 3) | Treatment | Feed Day | No | 19:45 | 19:00 - 19:59 | Evening | 38,0 | 64  | 2,4  | 2,4  | 19,15 | 559,88 | 28,91  |
| 2019/06/01 | CH2206 | Male | Three y/o | Treatment (Wk 3) | Treatment | Feed Day | No | 19:45 | 19:00 - 19:59 | Evening | 37,8 | 69  | 33,6 | 33,6 | 18,95 | 565,86 | 118,09 |
| 2019/06/01 | CH2205 | Male | Three y/o | Treatment (Wk 3) | Treatment | Feed Day | No | 19:50 | 19:00 - 19:59 | Evening | 38,0 | 64  | 7,4  | 7,4  | 19,15 | 559,88 | 66,59  |
| 2019/06/01 | CH2206 | Male | Three y/o | Treatment (Wk 3) | Treatment | Feed Day | No | 19:50 | 19:00 - 19:59 | Evening | 37,9 | 60  | 32,8 | 32,8 | 19,05 | 554,67 | 117,26 |
| 2019/06/01 | CH2205 | Male | Three y/o | Treatment (Wk 3) | Treatment | Feed Day | No | 19:55 | 19:00 - 19:59 | Evening | 38,0 | 42  | 5,4  | 5,4  | 19,15 | 524,42 | 55,99  |
| 2019/06/01 | CH2206 | Male | Three y/o | Treatment (Wk 3) | Treatment | Feed Day | No | 19:55 | 19:00 - 19:59 | Evening | 37,9 | 45  | 27,8 | 27,8 | 19,05 | 530,47 | 111,58 |
| 2019/06/01 | CH2205 | Male | Three y/o | Treatment (Wk 3) | Treatment | Feed Day | No | 20:00 | 20:00 - 20:59 | Night   | 38,0 | 55  | 1,8  | 1,8  | 19,15 | 547,52 | 19,38  |
| 2019/06/01 | CH2206 | Male | Three y/o | Treatment (Wk 3) | Treatment | Feed Day | No | 20:00 | 20:00 - 20:59 | Night   | 37,9 | 62  | 38,6 | 38,6 | 19,05 | 557,33 | 122,86 |
| 2019/06/01 | CH2205 | Male | Three y/o | Treatment (Wk 3) | Treatment | Feed Day | No | 20:05 | 20:00 - 20:59 | Night   | 38,0 | 87  | 12,0 | 12,0 | 19,15 | 583,64 | 82,93  |
| 2019/06/01 | CH2206 | Male | Three y/o | Treatment (Wk 3) | Treatment | Feed Day | No | 20:05 | 20:00 - 20:59 | Night   | 37,9 | 47  | 44,2 | 44,2 | 19,05 | 534,23 | 127,53 |
| 2019/06/01 | CH2205 | Male | Three y/o | Treatment (Wk 3) | Treatment | Feed Day | No | 20:10 | 20:00 - 20:59 | Night   | 38,0 |     | 12,4 | 12,4 | 19,15 |        | 84,04  |
| 2019/06/01 | CH2206 | Male | Three y/o | Treatment (Wk 3) | Treatment | Feed Day | No | 20:10 | 20:00 - 20:59 | Night   | 37,9 | 46  | 48,0 | 48,0 | 19,05 | 532,38 | 130,38 |
| 2019/06/01 | CH2205 | Male | Three y/o | Treatment (Wk 3) | Treatment | Feed Day | No | 20:15 | 20:00 - 20:59 | Night   | 37,9 |     | 17,4 | 17,4 | 19,05 |        | 95,56  |
| 2019/06/01 | CH2206 | Male | Three y/o | Treatment (Wk 3) | Treatment | Feed Day | No | 20:15 | 20:00 - 20:59 | Night   | 37,9 | 88  | 51,4 | 51,4 | 19,05 | 584,49 | 132,74 |
| 2019/06/01 | CH2205 | Male | Three y/o | Treatment (Wk 3) | Treatment | Feed Day | No | 20:20 | 20:00 - 20:59 | Night   | 37,9 | 59  | 15,2 | 15,2 | 19,05 | 553,30 | 90,96  |
| 2019/06/01 | CH2206 | Male | Three y/o | Treatment (Wk 3) | Treatment | Feed Day | No | 20:20 | 20:00 - 20:59 | Night   | 37,9 | 59  | 45,4 | 45,4 | 19,05 | 553,30 | 128,45 |
| 2019/06/01 | CH2205 | Male | Three y/o | Treatment (Wk 3) | Treatment | Feed Day | No | 20:25 | 20:00 - 20:59 | Night   | 37,9 | 156 | 12,2 | 12,2 | 19,05 | 624,43 | 83,49  |
| 2019/06/01 | CH2206 | Male | Three y/o | Treatment (Wk 3) | Treatment | Feed Day | No | 20:25 | 20:00 - 20:59 | Night   | 37,9 | 60  | 35,0 | 35,0 | 19,05 | 554,67 | 119,49 |
| 2019/06/01 | CH2205 | Male | Three y/o | Treatment (Wk 3) | Treatment | Feed Day | No | 20:30 | 20:00 - 20:59 | Night   | 37,9 | 97  | 12,6 | 12,6 | 19,05 | 591,66 | 84,59  |
| 2019/06/01 | CH2206 | Male | Three y/o | Treatment (Wk 3) | Treatment | Feed Day | No | 20:30 | 20:00 - 20:59 | Night   | 37,8 | 85  | 44,8 | 44,8 | 18,95 | 581,90 | 127,99 |
| 2019/06/01 | CH2205 | Male | Three y/o | Treatment (Wk 3) | Treatment | Feed Day | No | 20:35 | 20:00 - 20:59 | Night   | 37,7 | 98  | 12,6 | 12,6 | 18,85 | 592,41 | 84,59  |



|            |        |      |           |                  |           |          |    |       |               |       |      |     |      |      |       |        |        |
|------------|--------|------|-----------|------------------|-----------|----------|----|-------|---------------|-------|------|-----|------|------|-------|--------|--------|
| 2019/06/01 | CH2206 | Male | Three y/o | Treatment (Wk 3) | Treatment | Feed Day | No | 20:35 | 20:00 - 20:59 | Night | 37,8 | 67  | 46,4 | 46,4 | 18,95 | 563,53 | 129,21 |
| 2019/06/01 | CH2205 | Male | Three y/o | Treatment (Wk 3) | Treatment | Feed Day | No | 20:40 | 20:00 - 20:59 | Night | 37,7 | 89  | 12,8 | 12,8 | 18,85 | 585,33 | 85,12  |
| 2019/06/01 | CH2206 | Male | Three y/o | Treatment (Wk 3) | Treatment | Feed Day | No | 20:40 | 20:00 - 20:59 | Night | 37,8 | 64  | 48,0 | 48,0 | 18,95 | 559,88 | 130,38 |
| 2019/06/01 | CH2205 | Male | Three y/o | Treatment (Wk 3) | Treatment | Feed Day | No | 20:45 | 20:00 - 20:59 | Night | 37,7 | 91  | 7,2  | 7,2  | 18,85 | 586,98 | 65,66  |
| 2019/06/01 | CH2206 | Male | Three y/o | Treatment (Wk 3) | Treatment | Feed Day | No | 20:45 | 20:00 - 20:59 | Night | 37,8 | 71  | 41,2 | 41,2 | 18,95 | 568,10 | 125,11 |
| 2019/06/01 | CH2205 | Male | Three y/o | Treatment (Wk 3) | Treatment | Feed Day | No | 20:50 | 20:00 - 20:59 | Night | 37,7 | 48  | 9,2  | 9,2  | 18,85 | 536,04 | 73,94  |
| 2019/06/01 | CH2206 | Male | Three y/o | Treatment (Wk 3) | Treatment | Feed Day | No | 20:50 | 20:00 - 20:59 | Night | 37,8 | 89  | 54,2 | 54,2 | 18,95 | 585,33 | 134,57 |
| 2019/06/01 | CH2205 | Male | Three y/o | Treatment (Wk 3) | Treatment | Feed Day | No | 20:55 | 20:00 - 20:59 | Night | 37,9 | 63  | 14,2 | 14,2 | 19,05 | 558,62 | 88,65  |
| 2019/06/01 | CH2206 | Male | Three y/o | Treatment (Wk 3) | Treatment | Feed Day | No | 20:55 | 20:00 - 20:59 | Night | 37,8 | 88  | 40,4 | 40,4 | 18,95 | 584,49 | 124,43 |
| 2019/06/01 | CH2205 | Male | Three y/o | Treatment (Wk 3) | Treatment | Feed Day | No | 21:00 | 21:00 - 21:59 | Night | 38,0 | 162 | 9,8  | 9,8  | 19,15 | 626,88 | 76,07  |
| 2019/06/01 | CH2206 | Male | Three y/o | Treatment (Wk 3) | Treatment | Feed Day | No | 21:00 | 21:00 - 21:59 | Night | 37,9 | 58  | 36,6 | 36,6 | 19,05 | 551,90 | 121,03 |
| 2019/06/01 | CH2205 | Male | Three y/o | Treatment (Wk 3) | Treatment | Feed Day | No | 21:05 | 21:00 - 21:59 | Night | 38,0 | 97  | 12,6 | 12,6 | 19,15 | 591,66 | 84,59  |
| 2019/06/01 | CH2206 | Male | Three y/o | Treatment (Wk 3) | Treatment | Feed Day | No | 21:05 | 21:00 - 21:59 | Night | 37,9 | 80  | 39,4 | 39,4 | 19,05 | 577,31 | 123,57 |
| 2019/06/01 | CH2205 | Male | Three y/o | Treatment (Wk 3) | Treatment | Feed Day | No | 21:10 | 21:00 - 21:59 | Night | 38,1 | 95  | 9,6  | 9,6  | 19,26 | 590,14 | 75,37  |
| 2019/06/01 | CH2206 | Male | Three y/o | Treatment (Wk 3) | Treatment | Feed Day | No | 21:10 | 21:00 - 21:59 | Night | 37,9 | 45  | 33,8 | 33,8 | 19,05 | 530,47 | 118,29 |
| 2019/06/01 | CH2205 | Male | Three y/o | Treatment (Wk 3) | Treatment | Feed Day | No | 21:15 | 21:00 - 21:59 | Night | 38,1 | 92  | 5,8  | 5,8  | 19,26 | 587,78 | 58,39  |
| 2019/06/01 | CH2206 | Male | Three y/o | Treatment (Wk 3) | Treatment | Feed Day | No | 21:15 | 21:00 - 21:59 | Night | 37,8 | 89  | 44,6 | 44,6 | 18,95 | 585,33 | 127,84 |
| 2019/06/01 | CH2205 | Male | Three y/o | Treatment (Wk 3) | Treatment | Feed Day | No | 21:20 | 21:00 - 21:59 | Night | 38,1 | 53  | 6,0  | 6,0  | 19,26 | 544,43 | 59,53  |
| 2019/06/01 | CH2206 | Male | Three y/o | Treatment (Wk 3) | Treatment | Feed Day | No | 21:20 | 21:00 - 21:59 | Night | 37,8 |     | 49,4 | 49,4 | 18,95 |        | 131,37 |
| 2019/06/01 | CH2205 | Male | Three y/o | Treatment (Wk 3) | Treatment | Feed Day | No | 21:25 | 21:00 - 21:59 | Night | 38,1 | 91  | 16,6 | 16,6 | 19,26 | 586,98 | 93,96  |
| 2019/06/01 | CH2206 | Male | Three y/o | Treatment (Wk 3) | Treatment | Feed Day | No | 21:25 | 21:00 - 21:59 | Night | 37,8 | 66  | 24,6 | 24,6 | 18,95 | 562,34 | 107,39 |
| 2019/06/01 | CH2205 | Male | Three y/o | Treatment (Wk 3) | Treatment | Feed Day | No | 21:30 | 21:00 - 21:59 | Night | 38,1 | 52  | 13,0 | 13,0 | 19,26 | 542,83 | 85,65  |
| 2019/06/01 | CH2206 | Male | Three y/o | Treatment (Wk 3) | Treatment | Feed Day | No | 21:30 | 21:00 - 21:59 | Night | 37,7 | 46  | 24,6 | 24,6 | 18,85 | 532,38 | 107,39 |
| 2019/06/01 | CH2205 | Male | Three y/o | Treatment (Wk 3) | Treatment | Feed Day | No | 21:35 | 21:00 - 21:59 | Night | 38,1 | 68  | 17,0 | 17,0 | 19,26 | 564,71 | 94,77  |
| 2019/06/01 | CH2206 | Male | Three y/o | Treatment (Wk 3) | Treatment | Feed Day | No | 21:35 | 21:00 - 21:59 | Night | 37,8 | 69  | 32,6 | 32,6 | 18,95 | 565,86 | 117,05 |
| 2019/06/01 | CH2205 | Male | Three y/o | Treatment (Wk 3) | Treatment | Feed Day | No | 21:40 | 21:00 - 21:59 | Night | 38,1 | 94  | 14,0 | 14,0 | 19,26 | 589,37 | 88,17  |
| 2019/06/01 | CH2206 | Male | Three y/o | Treatment (Wk 3) | Treatment | Feed Day | No | 21:40 | 21:00 - 21:59 | Night | 37,8 |     | 36,6 | 36,6 | 18,95 |        | 121,03 |
| 2019/06/01 | CH2205 | Male | Three y/o | Treatment (Wk 3) | Treatment | Feed Day | No | 21:45 | 21:00 - 21:59 | Night | 38,1 | 70  | 18,6 | 18,6 | 19,26 | 566,99 | 97,84  |
| 2019/06/01 | CH2206 | Male | Three y/o | Treatment (Wk 3) | Treatment | Feed Day | No | 21:45 | 21:00 - 21:59 | Night | 37,8 | 48  | 46,0 | 46,0 | 18,95 | 536,04 | 128,91 |
| 2019/06/01 | CH2205 | Male | Three y/o | Treatment (Wk 3) | Treatment | Feed Day | No | 21:50 | 21:00 - 21:59 | Night | 38,1 | 91  | 18,6 | 18,6 | 19,26 | 586,98 | 97,84  |
| 2019/06/01 | CH2206 | Male | Three y/o | Treatment (Wk 3) | Treatment | Feed Day | No | 21:50 | 21:00 - 21:59 | Night | 37,8 | 97  | 42,6 | 42,6 | 18,95 | 591,66 | 126,26 |
| 2019/06/01 | CH2205 | Male | Three y/o | Treatment (Wk 3) | Treatment | Feed Day | No | 21:55 | 21:00 - 21:59 | Night | 38,1 | 88  | 14,0 | 14,0 | 19,26 | 584,49 | 88,17  |
| 2019/06/01 | CH2206 | Male | Three y/o | Treatment (Wk 3) | Treatment | Feed Day | No | 21:55 | 21:00 - 21:59 | Night | 37,8 | 92  | 24,6 | 24,6 | 18,95 | 587,78 | 107,39 |
| 2019/06/01 | CH2205 | Male | Three y/o | Treatment (Wk 3) | Treatment | Feed Day | No | 22:00 | 22:00 - 22:59 | Night | 38,1 | 74  | 16,0 | 16,0 | 19,26 | 571,33 | 92,71  |
| 2019/06/01 | CH2206 | Male | Three y/o | Treatment (Wk 3) | Treatment | Feed Day | No | 22:00 | 22:00 - 22:59 | Night | 37,8 | 90  | 32,6 | 32,6 | 18,95 | 586,16 | 117,05 |
| 2019/06/01 | CH2205 | Male | Three y/o | Treatment (Wk 3) | Treatment | Feed Day | No | 22:05 | 22:00 - 22:59 | Night | 38,1 | 86  | 13,4 | 13,4 | 19,26 | 582,77 | 86,68  |
| 2019/06/01 | CH2206 | Male | Three y/o | Treatment (Wk 3) | Treatment | Feed Day | No | 22:05 | 22:00 - 22:59 | Night | 37,7 | 90  | 29,0 | 29,0 | 18,85 | 586,16 | 113,03 |
| 2019/06/01 | CH2205 | Male | Three y/o | Treatment (Wk 3) | Treatment | Feed Day | No | 22:10 | 22:00 - 22:59 | Night | 38,1 | 129 | 5,6  | 5,6  | 19,26 | 611,75 | 57,21  |
| 2019/06/01 | CH2206 | Male | Three y/o | Treatment (Wk 3) | Treatment | Feed Day | No | 22:10 | 22:00 - 22:59 | Night | 37,7 | 94  | 31,4 | 31,4 | 18,85 | 589,37 | 115,76 |
| 2019/06/01 | CH2205 | Male | Three y/o | Treatment (Wk 3) | Treatment | Feed Day | No | 22:15 | 22:00 - 22:59 | Night | 38,0 |     | 9,2  | 9,2  | 19,15 |        | 73,94  |
| 2019/06/01 | CH2206 | Male | Three y/o | Treatment (Wk 3) | Treatment | Feed Day | No | 22:15 | 22:00 - 22:59 | Night | 37,8 | 90  | 28,6 | 28,6 | 18,95 | 586,16 | 112,56 |
| 2019/06/01 | CH2205 | Male | Three y/o | Treatment (Wk 3) | Treatment | Feed Day | No | 22:20 | 22:00 - 22:59 | Night | 37,9 | 90  | 9,4  | 9,4  | 19,05 | 586,16 | 74,66  |
| 2019/06/01 | CH2206 | Male | Three y/o | Treatment (Wk 3) | Treatment | Feed Day | No | 22:20 | 22:00 - 22:59 | Night | 37,8 | 46  | 29,2 | 29,2 | 18,95 | 532,38 | 113,27 |
| 2019/06/01 | CH2205 | Male | Three y/o | Treatment (Wk 3) | Treatment | Feed Day | No | 22:25 | 22:00 - 22:59 | Night | 37,9 | 67  | 12,6 | 12,6 | 19,05 | 563,53 | 84,59  |
| 2019/06/01 | CH2206 | Male | Three y/o | Treatment (Wk 3) | Treatment | Feed Day | No | 22:25 | 22:00 - 22:59 | Night | 37,8 | 45  | 28,6 | 28,6 | 18,95 | 530,47 | 112,56 |
| 2019/06/01 | CH2205 | Male | Three y/o | Treatment (Wk 3) | Treatment | Feed Day | No | 22:30 | 22:00 - 22:59 | Night | 37,9 | 85  | 12,8 | 12,8 | 19,05 | 581,90 | 85,12  |
| 2019/06/01 | CH2206 | Male | Three y/o | Treatment (Wk 3) | Treatment | Feed Day | No | 22:30 | 22:00 - 22:59 | Night | 37,8 | 95  | 25,0 | 25,0 | 18,95 | 590,14 | 107,94 |
| 2019/06/01 | CH2205 | Male | Three y/o | Treatment (Wk 3) | Treatment | Feed Day | No | 22:35 | 22:00 - 22:59 | Night | 37,9 | 57  | 7,4  | 7,4  | 19,05 | 550,47 | 66,59  |
| 2019/06/01 | CH2206 | Male | Three y/o | Treatment (Wk 3) | Treatment | Feed Day | No | 22:35 | 22:00 - 22:59 | Night | 37,8 | 52  | 24,0 | 24,0 | 18,95 | 542,83 | 106,55 |
| 2019/06/01 | CH2205 | Male | Three y/o | Treatment (Wk 3) | Treatment | Feed Day | No | 22:40 | 22:00 - 22:59 | Night | 37,9 | 84  | 18,0 | 18,0 | 19,05 | 581,01 | 96,72  |
| 2019/06/01 | CH2206 | Male | Three y/o | Treatment (Wk 3) | Treatment | Feed Day | No | 22:40 | 22:00 - 22:59 | Night | 37,8 | 88  | 24,2 | 24,2 | 18,95 | 584,49 | 106,83 |
| 2019/06/01 | CH2205 | Male | Three y/o | Treatment (Wk 3) | Treatment | Feed Day | No | 22:45 | 22:00 - 22:59 | Night | 37,9 | 53  | 4,0  | 4,0  | 19,05 | 544,43 | 45,94  |
| 2019/06/01 | CH2206 | Male | Three y/o | Treatment (Wk 3) | Treatment | Feed Day | No | 22:45 | 22:00 - 22:59 | Night | 37,8 | 95  | 24,8 | 24,8 | 18,95 | 590,14 | 107,67 |
| 2019/06/01 | CH2205 | Male | Three y/o | Treatment (Wk 3) | Treatment | Feed Day | No | 22:50 | 22:00 - 22:59 | Night | 38,0 | 98  | 4,4  | 4,4  | 19,15 | 592,41 | 49,12  |
| 2019/06/01 | CH2206 | Male | Three y/o | Treatment (Wk 3) | Treatment | Feed Day | No | 22:50 | 22:00 - 22:59 | Night | 37,8 | 90  | 22,0 | 22,0 | 18,95 | 586,16 | 103,57 |
| 2019/06/01 | CH2205 | Male | Three y/o | Treatment (Wk 3) | Treatment | Feed Day | No | 22:55 | 22:00 - 22:59 | Night | 38,0 | 71  | 5,0  | 5,0  | 19,15 | 568,10 | 53,41  |
| 2019/06/01 | CH2206 | Male | Three y/o | Treatment (Wk 3) | Treatment | Feed Day | No | 22:55 | 22:00 - 22:59 | Night | 38,0 | 47  | 17,6 | 17,6 | 19,15 | 534,23 | 95,95  |
| 2019/06/01 | CH2205 | Male | Three y/o | Treatment (Wk 3) | Treatment | Feed Day | No | 23:00 | 23:00 - 23:59 | Night | 38,0 | 88  | 12,6 | 12,6 | 19,15 | 584,49 | 84,59  |
| 2019/06/01 | CH2206 | Male | Three y/o | Treatment (Wk 3) | Treatment | Feed Day | No | 23:00 | 23:00 - 23:59 | Night | 38,0 | 92  | 14,8 | 14,8 | 19,15 | 587,78 | 90,05  |
| 2019/06/01 | CH2205 | Male | Three y/o | Treatment (Wk 3) | Treatment | Feed Day | No | 23:05 | 23:00 - 23:59 | Night | 38,0 | 84  | 2,6  | 2,6  | 19,15 | 581,01 | 31,57  |
| 2019/06/01 | CH2206 | Male | Three y/o | Treatment (Wk 3) | Treatment | Feed Day | No | 23:05 | 23:00 - 23:59 | Night | 37,9 | 49  | 15,2 | 15,2 | 19,05 | 537,80 | 90,96  |
| 2019/06/01 | CH2205 | Male | Three y/o | Treatment (Wk 3) | Treatment | Feed Day | No | 23:10 | 23:00 - 23:59 | Night | 37,9 | 77  | 3,8  | 3,8  | 19,05 | 574,39 | 44,22  |
| 2019/06/01 | CH2206 | Male | Three y/o | Treatment (Wk 3) | Treatment | Feed Day | No | 23:10 | 23:00 - 23:59 | Night | 37,9 | 88  | 22,8 | 22,8 | 19,05 | 584,49 | 104,79 |
| 2019/06/01 | CH2205 | Male | Three y/o | Treatment (Wk 3) | Treatment | Feed Day | No | 23:15 | 23:00 - 23:59 | Night | 38,0 | 48  | 13,8 | 13,8 | 19,15 | 536,04 | 87,68  |
| 2019/06/01 | CH2206 | Male | Three y/o | Treatment (Wk 3) | Treatment | Feed Day | No | 23:15 | 23:00 - 23:59 | Night | 37,9 |     | 38,2 | 38,2 | 19,05 |        | 122,50 |
| 2019/06/01 | CH2205 | Male | Three y/o | Treatment (Wk 3) | Treatment | Feed Day | No | 23:20 | 23:00 - 23:59 | Night | 37,9 | 89  | 15,2 | 15,2 | 19,05 | 585,33 | 90,96  |
| 2019/06/01 | CH2206 | Male | Three y/o | Treatment (Wk 3) | Treatment | Feed Day | No | 23:20 | 23:00 - 23:59 | Night | 37,8 | 108 | 41,6 | 41,6 | 18,95 | 599,39 | 125,44 |
| 2019/06/01 | CH2205 | Male | Three y/o | Treatment (Wk 3) | Treatment | Feed Day | No | 23:25 | 23:00 - 23:59 | Night | 37,9 | 60  | 17,6 | 17,6 | 19,05 | 554,67 | 95,95  |
| 2019/06/01 | CH2206 | Male | Three y/o | Treatment (Wk 3) | Treatment | Feed Day | No | 23:25 | 23:00 - 23:59 | Night | 37,6 | 82  | 35,8 | 35,8 | 18,75 | 579,19 | 120,27 |
| 2019/06/01 | CH2205 | Male | Three y/o | Treatment (Wk 3) | Treatment | Feed Day | No | 23:30 | 23:00 - 23:59 | Night | 37,7 | 95  | 16,4 | 16,4 | 18,85 | 590,14 | 93,55  |



|    |            |        |      |           |                  |           |          |    |       |               |               |      |     |      |      |       |        |        |
|----|------------|--------|------|-----------|------------------|-----------|----------|----|-------|---------------|---------------|------|-----|------|------|-------|--------|--------|
|    | 2019/06/01 | CH2206 | Male | Three y/o | Treatment (Wk 3) | Treatment | Feed Day | No | 23:30 | 23:00 - 23:59 | Night         | 37,8 | 94  | 38,4 | 38,4 | 18,95 | 589,37 | 122,68 |
|    | 2019/06/01 | CH2205 | Male | Three y/o | Treatment (Wk 3) | Treatment | Feed Day | No | 23:35 | 23:00 - 23:59 | Night         | 37,6 | 45  | 13,6 | 13,6 | 18,75 | 530,47 | 87,18  |
|    | 2019/06/01 | CH2206 | Male | Three y/o | Treatment (Wk 3) | Treatment | Feed Day | No | 23:35 | 23:00 - 23:59 | Night         | 38,0 | 92  | 49,8 | 49,8 | 19,15 | 587,78 | 131,65 |
|    | 2019/06/01 | CH2205 | Male | Three y/o | Treatment (Wk 3) | Treatment | Feed Day | No | 23:40 | 23:00 - 23:59 | Night         | 37,6 | 94  | 12,8 | 12,8 | 18,75 | 589,37 | 85,12  |
|    | 2019/06/01 | CH2206 | Male | Three y/o | Treatment (Wk 3) | Treatment | Feed Day | No | 23:40 | 23:00 - 23:59 | Night         | 38,1 | 97  | 48,0 | 48,0 | 19,26 | 591,66 | 130,38 |
|    | 2019/06/01 | CH2205 | Male | Three y/o | Treatment (Wk 3) | Treatment | Feed Day | No | 23:45 | 23:00 - 23:59 | Night         | 37,5 | 48  | 13,2 | 13,2 | 18,65 | 536,04 | 86,17  |
|    | 2019/06/01 | CH2206 | Male | Three y/o | Treatment (Wk 3) | Treatment | Feed Day | No | 23:45 | 23:00 - 23:59 | Night         | 38,2 | 57  | 40,4 | 40,4 | 19,36 | 550,47 | 124,43 |
|    | 2019/06/01 | CH2205 | Male | Three y/o | Treatment (Wk 3) | Treatment | Feed Day | No | 23:50 | 23:00 - 23:59 | Night         | 37,5 | 96  | 15,4 | 15,4 | 18,65 | 590,91 | 91,41  |
|    | 2019/06/01 | CH2206 | Male | Three y/o | Treatment (Wk 3) | Treatment | Feed Day | No | 23:50 | 23:00 - 23:59 | Night         | 38,3 | 90  | 45,8 | 45,8 | 19,46 | 586,16 | 128,76 |
|    | 2019/06/01 | CH2205 | Male | Three y/o | Treatment (Wk 3) | Treatment | Feed Day | No | 23:55 | 23:00 - 23:59 | Night         | 37,4 | 56  | 20,2 | 20,2 | 18,55 | 549,01 | 100,65 |
|    | 2019/06/01 | CH2206 | Male | Three y/o | Treatment (Wk 3) | Treatment | Feed Day | No | 23:55 | 23:00 - 23:59 | Night         | 38,3 | 94  | 49,0 | 49,0 | 19,46 | 589,37 | 131,09 |
| 19 | 2019/06/02 | CH2205 | Male | Three y/o | Treatment (Wk 3) | Treatment | Fast Day | No | 00:00 | 00:00 - 00:59 | Early Morning | 37,4 | 58  | 14,8 | 14,8 | 18,55 | 551,90 | 90,05  |
|    | 2019/06/02 | CH2206 | Male | Three y/o | Treatment (Wk 3) | Treatment | Fast Day | No | 00:00 | 00:00 - 00:59 | Early Morning | 38,4 | 60  | 53,0 | 53,0 | 19,56 | 554,67 | 133,80 |
|    | 2019/06/02 | CH2205 | Male | Three y/o | Treatment (Wk 3) | Treatment | Fast Day | No | 00:05 | 00:00 - 00:59 | Early Morning | 37,4 | 44  | 18,0 | 18,0 | 18,55 | 528,51 | 96,72  |
|    | 2019/06/02 | CH2206 | Male | Three y/o | Treatment (Wk 3) | Treatment | Fast Day | No | 00:05 | 00:00 - 00:59 | Early Morning | 38,4 |     | 53,6 | 53,6 | 19,56 |        | 134,19 |
|    | 2019/06/02 | CH2205 | Male | Three y/o | Treatment (Wk 3) | Treatment | Fast Day | No | 00:10 | 00:00 - 00:59 | Early Morning | 37,3 | 64  | 7,8  | 7,8  | 18,46 | 559,88 | 68,36  |
|    | 2019/06/02 | CH2206 | Male | Three y/o | Treatment (Wk 3) | Treatment | Fast Day | No | 00:10 | 00:00 - 00:59 | Early Morning | 38,6 | 88  | 53,0 | 53,0 | 19,76 | 584,49 | 133,80 |
|    | 2019/06/02 | CH2205 | Male | Three y/o | Treatment (Wk 3) | Treatment | Fast Day | No | 00:15 | 00:00 - 00:59 | Early Morning | 37,6 | 99  | 10,0 | 10,0 | 18,75 | 593,14 | 76,76  |
|    | 2019/06/02 | CH2206 | Male | Three y/o | Treatment (Wk 3) | Treatment | Fast Day | No | 00:15 | 00:00 - 00:59 | Early Morning | 38,6 | 49  | 52,2 | 52,2 | 19,76 | 537,80 | 133,27 |
|    | 2019/06/02 | CH2205 | Male | Three y/o | Treatment (Wk 3) | Treatment | Fast Day | No | 00:20 | 00:00 - 00:59 | Early Morning | 37,6 |     | 44,2 | 44,2 | 18,75 |        | 127,53 |
|    | 2019/06/02 | CH2206 | Male | Three y/o | Treatment (Wk 3) | Treatment | Fast Day | No | 00:20 | 00:00 - 00:59 | Early Morning | 38,7 |     | 22,2 | 22,2 | 19,87 |        | 103,88 |
|    | 2019/06/02 | CH2205 | Male | Three y/o | Treatment (Wk 3) | Treatment | Fast Day | No | 00:25 | 00:00 - 00:59 | Early Morning | 37,9 | 180 | 23,8 | 23,8 | 19,05 | 633,61 | 106,26 |
|    | 2019/06/02 | CH2206 | Male | Three y/o | Treatment (Wk 3) | Treatment | Fast Day | No | 00:25 | 00:00 - 00:59 | Early Morning | 38,9 | 143 | 16,0 | 16,0 | 20,07 | 618,69 | 92,71  |
|    | 2019/06/02 | CH2205 | Male | Three y/o | Treatment (Wk 3) | Treatment | Fast Day | No | 00:30 | 00:00 - 00:59 | Early Morning | 37,9 | 53  | 22,8 | 22,8 | 19,05 | 544,43 | 104,79 |
|    | 2019/06/02 | CH2206 | Male | Three y/o | Treatment (Wk 3) | Treatment | Fast Day | No | 00:30 | 00:00 - 00:59 | Early Morning | 38,9 | 102 | 10,8 | 10,8 | 20,07 | 595,30 | 79,36  |
|    | 2019/06/02 | CH2205 | Male | Three y/o | Treatment (Wk 3) | Treatment | Fast Day | No | 00:35 | 00:00 - 00:59 | Early Morning | 37,7 | 62  | 22,4 | 22,4 | 18,85 | 557,33 | 104,19 |
|    | 2019/06/02 | CH2206 | Male | Three y/o | Treatment (Wk 3) | Treatment | Fast Day | No | 00:35 | 00:00 - 00:59 | Early Morning | 38,7 | 86  | 19,2 | 19,2 | 19,87 | 582,77 | 98,92  |
|    | 2019/06/02 | CH2205 | Male | Three y/o | Treatment (Wk 3) | Treatment | Fast Day | No | 00:40 | 00:00 - 00:59 | Early Morning | 37,7 | 82  | 8,6  | 8,6  | 18,85 | 579,19 | 71,66  |
|    | 2019/06/02 | CH2206 | Male | Three y/o | Treatment (Wk 3) | Treatment | Fast Day | No | 00:40 | 00:00 - 00:59 | Early Morning | 38,4 | 102 | 27,0 | 27,0 | 19,56 | 595,30 | 110,58 |
|    | 2019/06/02 | CH2205 | Male | Three y/o | Treatment (Wk 3) | Treatment | Fast Day | No | 00:45 | 00:00 - 00:59 | Early Morning | 37,6 | 89  | 7,2  | 7,2  | 18,75 | 585,33 | 65,66  |
|    | 2019/06/02 | CH2206 | Male | Three y/o | Treatment (Wk 3) | Treatment | Fast Day | No | 00:45 | 00:00 - 00:59 | Early Morning | 38,4 | 50  | 35,0 | 35,0 | 19,56 | 539,52 | 119,49 |
|    | 2019/06/02 | CH2205 | Male | Three y/o | Treatment (Wk 3) | Treatment | Fast Day | No | 00:50 | 00:00 - 00:59 | Early Morning | 37,6 | 61  | 35,4 | 35,4 | 18,75 | 556,01 | 119,88 |
|    | 2019/06/02 | CH2206 | Male | Three y/o | Treatment (Wk 3) | Treatment | Fast Day | No | 00:50 | 00:00 - 00:59 | Early Morning | 38,5 | 93  | 44,2 | 44,2 | 19,66 | 588,58 | 127,53 |
|    | 2019/06/02 | CH2205 | Male | Three y/o | Treatment (Wk 3) | Treatment | Fast Day | No | 00:55 | 00:00 - 00:59 | Early Morning | 37,9 |     | 13,0 | 13,0 | 19,05 |        | 85,65  |
|    | 2019/06/02 | CH2206 | Male | Three y/o | Treatment (Wk 3) | Treatment | Fast Day | No | 00:55 | 00:00 - 00:59 | Early Morning | 38,6 | 100 | 35,8 | 35,8 | 19,76 | 593,87 | 120,27 |
|    | 2019/06/02 | CH2205 | Male | Three y/o | Treatment (Wk 3) | Treatment | Fast Day | No | 01:00 | 01:00 - 01:59 | Early Morning | 37,9 |     | 19,2 | 19,2 | 19,05 |        | 98,92  |
|    | 2019/06/02 | CH2206 | Male | Three y/o | Treatment (Wk 3) | Treatment | Fast Day | No | 01:00 | 01:00 - 01:59 | Early Morning | 38,6 | 81  | 16,6 | 16,6 | 19,76 | 578,26 | 93,96  |
|    | 2019/06/02 | CH2205 | Male | Three y/o | Treatment (Wk 3) | Treatment | Fast Day | No | 01:05 | 01:00 - 01:59 | Early Morning | 37,9 |     | 17,2 | 17,2 | 19,05 |        | 95,17  |
|    | 2019/06/02 | CH2206 | Male | Three y/o | Treatment (Wk 3) | Treatment | Fast Day | No | 01:05 | 01:00 - 01:59 | Early Morning | 38,6 | 45  | 12,6 | 12,6 | 19,76 | 530,47 | 84,59  |
|    | 2019/06/02 | CH2205 | Male | Three y/o | Treatment (Wk 3) | Treatment | Fast Day | No | 01:10 | 01:00 - 01:59 | Early Morning | 37,9 |     | 16,0 | 16,0 | 19,05 |        | 92,71  |
|    | 2019/06/02 | CH2206 | Male | Three y/o | Treatment (Wk 3) | Treatment | Fast Day | No | 01:10 | 01:00 - 01:59 | Early Morning | 38,7 | 93  | 7,6  | 7,6  | 19,87 | 588,58 | 67,49  |
|    | 2019/06/02 | CH2205 | Male | Three y/o | Treatment (Wk 3) | Treatment | Fast Day | No | 01:15 | 01:00 - 01:59 | Early Morning | 37,9 | 94  | 15,2 | 15,2 | 19,05 | 589,37 | 90,96  |
|    | 2019/06/02 | CH2206 | Male | Three y/o | Treatment (Wk 3) | Treatment | Fast Day | No | 01:15 | 01:00 - 01:59 | Early Morning | 38,7 | 96  | 10,8 | 10,8 | 19,87 | 590,91 | 79,36  |
|    | 2019/06/02 | CH2205 | Male | Three y/o | Treatment (Wk 3) | Treatment | Fast Day | No | 01:20 | 01:00 - 01:59 | Early Morning | 37,9 |     | 14,4 | 14,4 | 19,05 |        | 89,12  |
|    | 2019/06/02 | CH2206 | Male | Three y/o | Treatment (Wk 3) | Treatment | Fast Day | No | 01:20 | 01:00 - 01:59 | Early Morning | 38,8 | 46  | 17,4 | 17,4 | 19,97 | 532,38 | 95,56  |
|    | 2019/06/02 | CH2205 | Male | Three y/o | Treatment (Wk 3) | Treatment | Fast Day | No | 01:25 | 01:00 - 01:59 | Early Morning | 37,8 |     | 15,4 | 15,4 | 18,95 |        | 91,41  |
|    | 2019/06/02 | CH2206 | Male | Three y/o | Treatment (Wk 3) | Treatment | Fast Day | No | 01:25 | 01:00 - 01:59 | Early Morning | 38,9 | 80  | 10,0 | 10,0 | 20,07 | 577,31 | 76,76  |
|    | 2019/06/02 | CH2205 | Male | Three y/o | Treatment (Wk 3) | Treatment | Fast Day | No | 01:30 | 01:00 - 01:59 | Early Morning | 37,9 | 66  | 14,6 | 14,6 | 19,05 | 562,34 | 89,59  |
|    | 2019/06/02 | CH2206 | Male | Three y/o | Treatment (Wk 3) | Treatment | Fast Day | No | 01:30 | 01:00 - 01:59 | Early Morning | 38,9 | 98  | 3,4  | 3,4  | 20,07 | 592,41 | 40,51  |
|    | 2019/06/02 | CH2205 | Male | Three y/o | Treatment (Wk 3) | Treatment | Fast Day | No | 01:35 | 01:00 - 01:59 | Early Morning | 37,9 | 70  | 16,0 | 16,0 | 19,05 | 566,99 | 92,71  |
|    | 2019/06/02 | CH2206 | Male | Three y/o | Treatment (Wk 3) | Treatment | Fast Day | No | 01:35 | 01:00 - 01:59 | Early Morning | 38,9 | 70  | 3,4  | 3,4  | 20,07 | 566,99 | 40,51  |
|    | 2019/06/02 | CH2205 | Male | Three y/o | Treatment (Wk 3) | Treatment | Fast Day | No | 01:40 | 01:00 - 01:59 | Early Morning | 37,9 | 72  | 16,8 | 16,8 | 19,05 | 569,20 | 94,37  |
|    | 2019/06/02 | CH2206 | Male | Three y/o | Treatment (Wk 3) | Treatment | Fast Day | No | 01:40 | 01:00 - 01:59 | Early Morning | 39,0 | 42  | 3,4  | 3,4  | 20,18 | 524,42 | 40,51  |
|    | 2019/06/02 | CH2205 | Male | Three y/o | Treatment (Wk 3) | Treatment | Fast Day | No | 01:45 | 01:00 - 01:59 | Early Morning | 38,0 | 50  | 13,2 | 13,2 | 19,15 | 539,52 | 86,17  |
|    | 2019/06/02 | CH2206 | Male | Three y/o | Treatment (Wk 3) | Treatment | Fast Day | No | 01:45 | 01:00 - 01:59 | Early Morning | 39,0 | 102 | 34,6 | 34,6 | 20,18 | 595,30 | 119,10 |
|    | 2019/06/02 | CH2205 | Male | Three y/o | Treatment (Wk 3) | Treatment | Fast Day | No | 01:50 | 01:00 - 01:59 | Early Morning | 38,0 |     | 8,2  | 8,2  | 19,15 |        | 70,05  |
|    | 2019/06/02 | CH2206 | Male | Three y/o | Treatment (Wk 3) | Treatment | Fast Day | No | 01:50 | 01:00 - 01:59 | Early Morning | 39,1 | 49  | 28,8 | 28,8 | 20,28 | 537,80 | 112,79 |
|    | 2019/06/02 | CH2205 | Male | Three y/o | Treatment (Wk 3) | Treatment | Fast Day | No | 01:55 | 01:00 - 01:59 | Early Morning | 38,0 | 55  | 7,8  | 7,8  | 19,15 | 547,52 | 68,36  |
|    | 2019/06/02 | CH2206 | Male | Three y/o | Treatment (Wk 3) | Treatment | Fast Day | No | 01:55 | 01:00 - 01:59 | Early Morning | 38,9 | 47  | 39,2 | 39,2 | 20,07 | 534,23 | 123,39 |
|    | 2019/06/02 | CH2205 | Male | Three y/o | Treatment (Wk 3) | Treatment | Fast Day | No | 02:00 | 02:00 - 02:59 | Early Morning | 38,0 | 53  | 14,6 | 14,6 | 19,15 | 544,43 | 89,59  |
|    | 2019/06/02 | CH2206 | Male | Three y/o | Treatment (Wk 3) | Treatment | Fast Day | No | 02:00 | 02:00 - 02:59 | Early Morning | 39,0 | 47  | 34,2 | 34,2 | 20,18 | 534,23 | 118,70 |
|    | 2019/06/02 | CH2205 | Male | Three y/o | Treatment (Wk 3) | Treatment | Fast Day | No | 02:05 | 02:00 - 02:59 | Early Morning | 38,0 | 70  | 10,0 | 10,0 | 19,15 | 566,99 | 76,76  |
|    | 2019/06/02 | CH2206 | Male | Three y/o | Treatment (Wk 3) | Treatment | Fast Day | No | 02:05 | 02:00 - 02:59 | Early Morning | 39,1 | 89  | 28,4 | 28,4 | 20,28 | 585,33 | 112,31 |
|    | 2019/06/02 | CH2205 | Male | Three y/o | Treatment (Wk 3) | Treatment | Fast Day | No | 02:10 | 02:00 - 02:59 | Early Morning | 37,9 | 82  | 11,2 | 11,2 | 19,05 | 579,19 | 80,59  |
|    | 2019/06/02 | CH2206 | Male | Three y/o | Treatment (Wk 3) | Treatment | Fast Day | No | 02:10 | 02:00 - 02:59 | Early Morning | 39,1 | 101 | 39,8 | 39,8 | 20,28 | 594,59 | 123,91 |
|    | 2019/06/02 | CH2205 | Male | Three y/o | Treatment (Wk 3) | Treatment | Fast Day | No | 02:15 | 02:00 - 02:59 | Early Morning | 37,7 | 47  | 5,0  | 5,0  | 18,85 | 534,23 | 53,41  |
|    | 2019/06/02 | CH2206 | Male | Three y/o | Treatment (Wk 3) | Treatment | Fast Day | No | 02:15 | 02:00 - 02:59 | Early Morning | 39,2 | 92  | 45,8 | 45,8 | 20,38 | 587,78 | 128,76 |
|    | 2019/06/02 | CH2205 | Male | Three y/o | Treatment (Wk 3) | Treatment | Fast Day | No | 02:20 | 02:00 - 02:59 | Early Morning | 37,6 | 53  | 3,8  | 3,8  | 18,75 | 544,43 | 44,22  |
|    | 2019/06/02 | CH2206 | Male | Three y/o | Treatment (Wk 3) | Treatment | Fast Day | No | 02:20 | 02:00 - 02:59 | Early Morning | 39,4 | 94  | 42,0 | 42,0 | 20,59 | 589,37 | 125,77 |
|    | 2019/06/02 | CH2205 | Male | Three y/o | Treatment (Wk 3) | Treatment | Fast Day | No | 02:25 | 02:00 - 02:59 | Early Morning | 37,6 | 180 | 8,0  | 8,0  | 18,75 | 633,61 | 69,22  |



|            |        |      |           |                  |           |          |    |       |               |               |      |     |       |       |       |        |        |
|------------|--------|------|-----------|------------------|-----------|----------|----|-------|---------------|---------------|------|-----|-------|-------|-------|--------|--------|
| 2019/06/02 | CH2206 | Male | Three y/o | Treatment (Wk 3) | Treatment | Fast Day | No | 02:25 | 02:00 - 02:59 | Early Morning | 39,4 | 105 | 43,6  | 43,6  | 20,59 | 597,38 | 127,06 |
| 2019/06/02 | CH2205 | Male | Three y/o | Treatment (Wk 3) | Treatment | Fast Day | No | 02:30 | 02:00 - 02:59 | Early Morning | 37,6 | 92  | 7,8   | 7,8   | 18,75 | 587,78 | 68,36  |
| 2019/06/02 | CH2206 | Male | Three y/o | Treatment (Wk 3) | Treatment | Fast Day | No | 02:30 | 02:00 - 02:59 | Early Morning | 39,4 | 70  | 35,8  | 35,8  | 20,59 | 566,99 | 120,27 |
| 2019/06/02 | CH2205 | Male | Three y/o | Treatment (Wk 3) | Treatment | Fast Day | No | 02:35 | 02:00 - 02:59 | Early Morning | 37,7 | 64  | 5,2   | 5,2   | 18,85 | 559,88 | 54,72  |
| 2019/06/02 | CH2206 | Male | Three y/o | Treatment (Wk 3) | Treatment | Fast Day | No | 02:35 | 02:00 - 02:59 | Early Morning | 39,4 | 95  | 35,4  | 35,4  | 20,59 | 590,14 | 119,88 |
| 2019/06/02 | CH2205 | Male | Three y/o | Treatment (Wk 3) | Treatment | Fast Day | No | 02:40 | 02:00 - 02:59 | Early Morning | 37,7 | 45  | 6,4   | 6,4   | 18,85 | 530,47 | 61,70  |
| 2019/06/02 | CH2206 | Male | Three y/o | Treatment (Wk 3) | Treatment | Fast Day | No | 02:40 | 02:00 - 02:59 | Early Morning | 39,4 | 98  | 41,2  | 41,2  | 20,59 | 592,41 | 125,11 |
| 2019/06/02 | CH2205 | Male | Three y/o | Treatment (Wk 3) | Treatment | Fast Day | No | 02:45 | 02:00 - 02:59 | Early Morning | 37,7 | 62  | 8,0   | 8,0   | 18,85 | 557,33 | 69,22  |
| 2019/06/02 | CH2206 | Male | Three y/o | Treatment (Wk 3) | Treatment | Fast Day | No | 02:45 | 02:00 - 02:59 | Early Morning | 39,4 | 93  | 40,8  | 40,8  | 20,59 | 588,58 | 124,77 |
| 2019/06/02 | CH2205 | Male | Three y/o | Treatment (Wk 3) | Treatment | Fast Day | No | 02:50 | 02:00 - 02:59 | Early Morning | 37,7 | 47  | 9,4   | 9,4   | 18,85 | 534,23 | 74,66  |
| 2019/06/02 | CH2206 | Male | Three y/o | Treatment (Wk 3) | Treatment | Fast Day | No | 02:50 | 02:00 - 02:59 | Early Morning | 39,4 | 94  | 36,0  | 36,0  | 20,59 | 589,37 | 120,46 |
| 2019/06/02 | CH2205 | Male | Three y/o | Treatment (Wk 3) | Treatment | Fast Day | No | 02:55 | 02:00 - 02:59 | Early Morning | 37,6 | 75  | 13,6  | 13,6  | 18,75 | 572,36 | 87,18  |
| 2019/06/02 | CH2206 | Male | Three y/o | Treatment (Wk 3) | Treatment | Fast Day | No | 02:55 | 02:00 - 02:59 | Early Morning | 39,4 | 101 | 56,0  | 56,0  | 20,59 | 594,59 | 135,70 |
| 2019/06/02 | CH2205 | Male | Three y/o | Treatment (Wk 3) | Treatment | Fast Day | No | 03:00 | 03:00 - 03:59 | Early Morning | 37,7 | 132 | 7,4   | 7,4   | 18,85 | 613,32 | 66,59  |
| 2019/06/02 | CH2206 | Male | Three y/o | Treatment (Wk 3) | Treatment | Fast Day | No | 03:00 | 03:00 - 03:59 | Early Morning | 39,4 | 79  | 60,8  | 60,8  | 20,59 | 576,36 | 138,55 |
| 2019/06/02 | CH2205 | Male | Three y/o | Treatment (Wk 3) | Treatment | Fast Day | No | 03:05 | 03:00 - 03:59 | Early Morning | 37,6 |     | 10,8  | 10,8  | 18,75 |        | 79,36  |
| 2019/06/02 | CH2206 | Male | Three y/o | Treatment (Wk 3) | Treatment | Fast Day | No | 03:05 | 03:00 - 03:59 | Early Morning | 39,5 | 83  | 57,4  | 57,4  | 20,70 | 580,11 | 136,56 |
| 2019/06/02 | CH2205 | Male | Three y/o | Treatment (Wk 3) | Treatment | Fast Day | No | 03:10 | 03:00 - 03:59 | Early Morning | 37,6 | 105 | 115,4 | 115,4 | 18,75 | 597,38 | 160,84 |
| 2019/06/02 | CH2206 | Male | Three y/o | Treatment (Wk 3) | Treatment | Fast Day | No | 03:10 | 03:00 - 03:59 | Early Morning | 39,5 | 102 | 56,8  | 56,8  | 20,70 | 595,30 | 136,20 |
| 2019/06/02 | CH2205 | Male | Three y/o | Treatment (Wk 3) | Treatment | Fast Day | No | 03:15 | 03:00 - 03:59 | Early Morning | 37,5 |     | 62,4  | 62,4  | 18,65 |        | 139,45 |
| 2019/06/02 | CH2206 | Male | Three y/o | Treatment (Wk 3) | Treatment | Fast Day | No | 03:15 | 03:00 - 03:59 | Early Morning | 39,4 | 57  | 56,2  | 56,2  | 20,70 | 550,47 | 135,83 |
| 2019/06/02 | CH2205 | Male | Three y/o | Treatment (Wk 3) | Treatment | Fast Day | No | 03:20 | 03:00 - 03:59 | Early Morning | 37,3 | 98  | 23,2  | 23,2  | 18,46 | 592,41 | 105,39 |
| 2019/06/02 | CH2206 | Male | Three y/o | Treatment (Wk 3) | Treatment | Fast Day | No | 03:20 | 03:00 - 03:59 | Early Morning | 39,5 | 47  | 55,2  | 55,2  | 20,70 | 534,23 | 135,21 |
| 2019/06/02 | CH2205 | Male | Three y/o | Treatment (Wk 3) | Treatment | Fast Day | No | 03:25 | 03:00 - 03:59 | Early Morning | 37,4 | 94  | 22,2  | 22,2  | 18,55 | 589,37 | 103,88 |
| 2019/06/02 | CH2206 | Male | Three y/o | Treatment (Wk 3) | Treatment | Fast Day | No | 03:25 | 03:00 - 03:59 | Early Morning | 39,5 | 98  | 63,0  | 63,0  | 20,70 | 592,41 | 139,78 |
| 2019/06/02 | CH2205 | Male | Three y/o | Treatment (Wk 3) | Treatment | Fast Day | No | 03:30 | 03:00 - 03:59 | Early Morning | 37,3 |     | 50,2  | 50,2  | 18,46 |        | 131,92 |
| 2019/06/02 | CH2206 | Male | Three y/o | Treatment (Wk 3) | Treatment | Fast Day | No | 03:30 | 03:00 - 03:59 | Early Morning | 39,5 | 103 | 59,0  | 59,0  | 20,70 | 596,00 | 137,51 |
| 2019/06/02 | CH2205 | Male | Three y/o | Treatment (Wk 3) | Treatment | Fast Day | No | 03:35 | 03:00 - 03:59 | Early Morning | 37,3 |     | 29,8  | 29,8  | 18,46 |        | 113,97 |
| 2019/06/02 | CH2206 | Male | Three y/o | Treatment (Wk 3) | Treatment | Fast Day | No | 03:35 | 03:00 - 03:59 | Early Morning | 39,5 | 96  | 57,4  | 57,4  | 20,70 | 590,91 | 136,56 |
| 2019/06/02 | CH2205 | Male | Three y/o | Treatment (Wk 3) | Treatment | Fast Day | No | 03:40 | 03:00 - 03:59 | Early Morning | 38,0 |     | 30,8  | 30,8  | 19,15 |        | 115,10 |
| 2019/06/02 | CH2206 | Male | Three y/o | Treatment (Wk 3) | Treatment | Fast Day | No | 03:40 | 03:00 - 03:59 | Early Morning | 39,5 | 67  | 58,0  | 58,0  | 20,70 | 563,53 | 136,92 |
| 2019/06/02 | CH2205 | Male | Three y/o | Treatment (Wk 3) | Treatment | Fast Day | No | 03:45 | 03:00 - 03:59 | Early Morning | 38,0 | 197 | 42,2  | 42,2  | 19,15 | 639,25 | 125,93 |
| 2019/06/02 | CH2206 | Male | Three y/o | Treatment (Wk 3) | Treatment | Fast Day | No | 03:45 | 03:00 - 03:59 | Early Morning | 39,4 | 45  | 54,2  | 54,2  | 20,59 | 530,47 | 134,57 |
| 2019/06/02 | CH2205 | Male | Three y/o | Treatment (Wk 3) | Treatment | Fast Day | No | 03:50 | 03:00 - 03:59 | Early Morning | 37,9 |     | 60,4  | 60,4  | 19,05 |        | 138,32 |
| 2019/06/02 | CH2206 | Male | Three y/o | Treatment (Wk 3) | Treatment | Fast Day | No | 03:50 | 03:00 - 03:59 | Early Morning | 39,4 | 115 | 57,2  | 57,2  | 20,59 | 603,82 | 136,44 |
| 2019/06/02 | CH2205 | Male | Three y/o | Treatment (Wk 3) | Treatment | Fast Day | No | 03:55 | 03:00 - 03:59 | Early Morning | 36,2 | 114 | 30,4  | 30,4  | 17,38 | 603,20 | 114,65 |
| 2019/06/02 | CH2206 | Male | Three y/o | Treatment (Wk 3) | Treatment | Fast Day | No | 03:55 | 03:00 - 03:59 | Early Morning | 39,4 | 95  | 55,6  | 55,6  | 20,59 | 590,14 | 135,46 |
| 2019/06/02 | CH2205 | Male | Three y/o | Treatment (Wk 3) | Treatment | Fast Day | No | 04:00 | 04:00 - 04:59 | Morning       | 36,6 |     | 61,4  | 61,4  | 17,77 |        | 636,34 |
| 2019/06/02 | CH2206 | Male | Three y/o | Treatment (Wk 3) | Treatment | Fast Day | No | 04:00 | 04:00 - 04:59 | Morning       | 39,4 | 156 | 14,0  | 14,0  | 20,59 | 624,43 | 88,17  |
| 2019/06/02 | CH2205 | Male | Three y/o | Treatment (Wk 3) | Treatment | Fast Day | No | 04:05 | 04:00 - 04:59 | Morning       | 36,8 | 111 | 25,8  | 25,8  | 17,96 | 601,33 | 109,02 |
| 2019/06/02 | CH2206 | Male | Three y/o | Treatment (Wk 3) | Treatment | Fast Day | No | 04:05 | 04:00 - 04:59 | Morning       | 39,5 | 148 | 26,6  | 26,6  | 20,70 | 620,97 | 110,07 |
| 2019/06/02 | CH2205 | Male | Three y/o | Treatment (Wk 3) | Treatment | Fast Day | No | 04:10 | 04:00 - 04:59 | Morning       | 37,0 | 131 | 20,4  | 20,4  | 18,16 | 612,80 | 100,99 |
| 2019/06/02 | CH2206 | Male | Three y/o | Treatment (Wk 3) | Treatment | Fast Day | No | 04:10 | 04:00 - 04:59 | Morning       | 39,4 | 156 | 83,6  | 83,6  | 20,59 | 624,43 | 149,61 |
| 2019/06/02 | CH2205 | Male | Three y/o | Treatment (Wk 3) | Treatment | Fast Day | No | 04:15 | 04:00 - 04:59 | Morning       | 37,0 |     | 23,2  | 23,2  | 18,16 |        | 105,39 |
| 2019/06/02 | CH2206 | Male | Three y/o | Treatment (Wk 3) | Treatment | Fast Day | No | 04:15 | 04:00 - 04:59 | Morning       | 39,2 | 143 | 47,8  | 47,8  | 20,38 | 618,69 | 130,23 |
| 2019/06/02 | CH2205 | Male | Three y/o | Treatment (Wk 3) | Treatment | Fast Day | No | 04:20 | 04:00 - 04:59 | Morning       | 37,1 | 89  | 19,4  | 19,4  | 18,26 | 585,33 | 99,28  |
| 2019/06/02 | CH2206 | Male | Three y/o | Treatment (Wk 3) | Treatment | Fast Day | No | 04:20 | 04:00 - 04:59 | Morning       | 39,0 | 138 | 28,4  | 28,4  | 20,18 | 616,31 | 112,31 |
| 2019/06/02 | CH2205 | Male | Three y/o | Treatment (Wk 3) | Treatment | Fast Day | No | 04:25 | 04:00 - 04:59 | Morning       | 37,3 | 131 | 26,6  | 26,6  | 18,46 | 612,80 | 110,07 |
| 2019/06/02 | CH2206 | Male | Three y/o | Treatment (Wk 3) | Treatment | Fast Day | No | 04:25 | 04:00 - 04:59 | Morning       | 38,8 | 73  | 42,0  | 42,0  | 19,97 | 570,27 | 125,77 |
| 2019/06/02 | CH2205 | Male | Three y/o | Treatment (Wk 3) | Treatment | Fast Day | No | 04:30 | 04:00 - 04:59 | Morning       | 37,4 |     | 27,0  | 27,0  | 18,55 |        | 110,58 |
| 2019/06/02 | CH2206 | Male | Three y/o | Treatment (Wk 3) | Treatment | Fast Day | No | 04:30 | 04:00 - 04:59 | Morning       | 38,4 | 117 | 47,4  | 47,4  | 19,56 | 605,02 | 129,94 |
| 2019/06/02 | CH2205 | Male | Three y/o | Treatment (Wk 3) | Treatment | Fast Day | No | 04:35 | 04:00 - 04:59 | Morning       | 37,5 |     | 25,2  | 25,2  | 18,65 |        | 108,22 |
| 2019/06/02 | CH2206 | Male | Three y/o | Treatment (Wk 3) | Treatment | Fast Day | No | 04:35 | 04:00 - 04:59 | Morning       | 38,4 | 140 | 57,6  | 57,6  | 19,56 | 617,28 | 136,68 |
| 2019/06/02 | CH2205 | Male | Three y/o | Treatment (Wk 3) | Treatment | Fast Day | No | 04:40 | 04:00 - 04:59 | Morning       | 37,7 | 191 | 26,0  | 26,0  | 18,85 | 637,33 | 109,29 |
| 2019/06/02 | CH2206 | Male | Three y/o | Treatment (Wk 3) | Treatment | Fast Day | No | 04:40 | 04:00 - 04:59 | Morning       | 38,3 | 107 | 20,0  | 20,0  | 19,46 | 598,73 | 100,31 |
| 2019/06/02 | CH2205 | Male | Three y/o | Treatment (Wk 3) | Treatment | Fast Day | No | 04:45 | 04:00 - 04:59 | Morning       | 37,7 |     | 9,4   | 9,4   | 18,85 |        | 74,66  |
| 2019/06/02 | CH2206 | Male | Three y/o | Treatment (Wk 3) | Treatment | Fast Day | No | 04:45 | 04:00 - 04:59 | Morning       | 38,1 | 110 | 23,6  | 23,6  | 19,26 | 600,69 | 105,97 |
| 2019/06/02 | CH2205 | Male | Three y/o | Treatment (Wk 3) | Treatment | Fast Day | No | 04:50 | 04:00 - 04:59 | Morning       | 37,6 | 79  | 18,6  | 18,6  | 18,75 | 576,36 | 97,84  |
| 2019/06/02 | CH2206 | Male | Three y/o | Treatment (Wk 3) | Treatment | Fast Day | No | 04:50 | 04:00 - 04:59 | Morning       | 38,1 | 97  | 26,6  | 26,6  | 19,26 | 591,66 | 110,07 |
| 2019/06/02 | CH2205 | Male | Three y/o | Treatment (Wk 3) | Treatment | Fast Day | No | 04:55 | 04:00 - 04:59 | Morning       | 37,5 |     | 21,0  | 21,0  | 18,65 |        | 101,98 |
| 2019/06/02 | CH2206 | Male | Three y/o | Treatment (Wk 3) | Treatment | Fast Day | No | 04:55 | 04:00 - 04:59 | Morning       | 38,2 | 100 | 37,2  | 37,2  | 19,36 | 593,87 | 121,59 |
| 2019/06/02 | CH2205 | Male | Three y/o | Treatment (Wk 3) | Treatment | Fast Day | No | 05:00 | 05:00 - 05:59 | Morning       | 37,5 | 88  | 35,0  | 35,0  | 18,65 | 584,49 | 119,49 |
| 2019/06/02 | CH2206 | Male | Three y/o | Treatment (Wk 3) | Treatment | Fast Day | No | 05:00 | 05:00 - 05:59 | Morning       | 38,0 | 114 | 43,0  | 43,0  | 19,15 | 603,20 | 126,58 |
| 2019/06/02 | CH2205 | Male | Three y/o | Treatment (Wk 3) | Treatment | Fast Day | No | 05:05 | 05:00 - 05:59 | Morning       | 37,6 |     | 10,0  | 10,0  | 18,75 |        | 76,76  |
| 2019/06/02 | CH2206 | Male | Three y/o | Treatment (Wk 3) | Treatment | Fast Day | No | 05:05 | 05:00 - 05:59 | Morning       | 37,9 | 68  | 32,0  | 32,0  | 19,05 | 564,71 | 116,41 |
| 2019/06/02 | CH2205 | Male | Three y/o | Treatment (Wk 3) | Treatment | Fast Day | No | 05:10 | 05:00 - 05:59 | Morning       | 37,6 | 106 | 12,6  | 12,6  | 18,75 | 598,06 | 84,59  |
| 2019/06/02 | CH2206 | Male | Three y/o | Treatment (Wk 3) | Treatment | Fast Day | No | 05:10 | 05:00 - 05:59 | Morning       | 37,7 | 48  | 30,4  | 30,4  | 18,85 | 536,04 | 114,65 |
| 2019/06/02 | CH2205 | Male | Three y/o | Treatment (Wk 3) | Treatment | Fast Day | No | 05:15 | 05:00 - 05:59 | Morning       | 37,6 |     | 12,4  | 12,4  | 18,75 |        | 84,04  |
| 2019/06/02 | CH2206 | Male | Three y/o | Treatment (Wk 3) | Treatment | Fast Day | No | 05:15 | 05:00 - 05:59 | Morning       | 37,5 | 96  | 28,2  | 28,2  | 18,65 | 590,91 | 112,07 |
| 2019/06/02 | CH2205 | Male | Three y/o | Treatment (Wk 3) | Treatment | Fast Day | No | 05:20 | 05:00 - 05:59 | Morning       | 37,6 | 141 | 15,4  | 15,4  | 18,75 | 617,75 | 91,41  |



|            |        |      |           |                  |           |          |    |       |               |              |      |     |       |       |       |        |        |
|------------|--------|------|-----------|------------------|-----------|----------|----|-------|---------------|--------------|------|-----|-------|-------|-------|--------|--------|
| 2019/06/02 | CH2206 | Male | Three y/o | Treatment (Wk 3) | Treatment | Fast Day | No | 05:20 | 05:00 - 05:59 | Morning      | 37,7 | 106 | 29,4  | 29,4  | 18,85 | 598,06 | 113,50 |
| 2019/06/02 | CH2205 | Male | Three y/o | Treatment (Wk 3) | Treatment | Fast Day | No | 05:25 | 05:00 - 05:59 | Morning      | 37,6 | 182 | 15,8  | 15,8  | 18,75 | 634,31 | 92,28  |
| 2019/06/02 | CH2206 | Male | Three y/o | Treatment (Wk 3) | Treatment | Fast Day | No | 05:25 | 05:00 - 05:59 | Morning      | 37,8 | 82  | 29,8  | 29,8  | 18,95 | 579,19 | 113,97 |
| 2019/06/02 | CH2205 | Male | Three y/o | Treatment (Wk 3) | Treatment | Fast Day | No | 05:30 | 05:00 - 05:59 | Morning      | 37,6 |     | 14,8  | 14,8  | 18,75 |        | 90,05  |
| 2019/06/02 | CH2206 | Male | Three y/o | Treatment (Wk 3) | Treatment | Fast Day | No | 05:30 | 05:00 - 05:59 | Morning      | 37,9 | 95  | 27,6  | 27,6  | 19,05 | 590,14 | 111,33 |
| 2019/06/02 | CH2205 | Male | Three y/o | Treatment (Wk 3) | Treatment | Fast Day | No | 05:35 | 05:00 - 05:59 | Morning      | 37,6 |     | 14,8  | 14,8  | 18,75 |        | 90,05  |
| 2019/06/02 | CH2206 | Male | Three y/o | Treatment (Wk 3) | Treatment | Fast Day | No | 05:35 | 05:00 - 05:59 | Morning      | 37,9 | 92  | 22,8  | 22,8  | 19,05 | 587,78 | 104,79 |
| 2019/06/02 | CH2205 | Male | Three y/o | Treatment (Wk 3) | Treatment | Fast Day | No | 05:40 | 05:00 - 05:59 | Morning      | 37,6 |     | 6,2   | 6,2   | 18,75 |        | 60,63  |
| 2019/06/02 | CH2206 | Male | Three y/o | Treatment (Wk 3) | Treatment | Fast Day | No | 05:40 | 05:00 - 05:59 | Morning      | 37,9 | 55  | 6,0   | 6,0   | 19,05 | 547,52 | 59,53  |
| 2019/06/02 | CH2205 | Male | Three y/o | Treatment (Wk 3) | Treatment | Fast Day | No | 05:45 | 05:00 - 05:59 | Morning      | 37,6 | 90  | 10,6  | 10,6  | 18,75 | 586,16 | 78,73  |
| 2019/06/02 | CH2206 | Male | Three y/o | Treatment (Wk 3) | Treatment | Fast Day | No | 05:45 | 05:00 - 05:59 | Morning      | 37,8 | 57  | 12,4  | 12,4  | 18,95 | 550,47 | 84,04  |
| 2019/06/02 | CH2205 | Male | Three y/o | Treatment (Wk 3) | Treatment | Fast Day | No | 05:50 | 05:00 - 05:59 | Morning      | 37,7 | 70  | 5,4   | 5,4   | 18,85 | 566,99 | 55,99  |
| 2019/06/02 | CH2206 | Male | Three y/o | Treatment (Wk 3) | Treatment | Fast Day | No | 05:50 | 05:00 - 05:59 | Morning      | 37,8 | 94  | 22,8  | 22,8  | 18,95 | 589,37 | 104,79 |
| 2019/06/02 | CH2205 | Male | Three y/o | Treatment (Wk 3) | Treatment | Fast Day | No | 05:55 | 05:00 - 05:59 | Morning      | 37,6 | 70  | 4,4   | 4,4   | 18,75 | 566,99 | 49,12  |
| 2019/06/02 | CH2206 | Male | Three y/o | Treatment (Wk 3) | Treatment | Fast Day | No | 05:55 | 05:00 - 05:59 | Morning      | 37,7 | 48  | 32,6  | 32,6  | 18,85 | 536,04 | 117,05 |
| 2019/06/02 | CH2205 | Male | Three y/o | Treatment (Wk 3) | Treatment | Fast Day | No | 06:00 | 06:00 - 06:59 | Morning      | 37,5 | 88  | 3,0   | 3,0   | 18,65 | 584,49 | 36,34  |
| 2019/06/02 | CH2206 | Male | Three y/o | Treatment (Wk 3) | Treatment | Fast Day | No | 06:00 | 06:00 - 06:59 | Morning      | 37,8 | 51  | 27,6  | 27,6  | 18,95 | 541,20 | 111,33 |
| 2019/06/02 | CH2205 | Male | Three y/o | Treatment (Wk 3) | Treatment | Fast Day | No | 06:05 | 06:00 - 06:59 | Morning      | 37,5 | 59  | 5,2   | 5,2   | 18,65 | 553,30 | 54,72  |
| 2019/06/02 | CH2206 | Male | Three y/o | Treatment (Wk 3) | Treatment | Fast Day | No | 06:05 | 06:00 - 06:59 | Morning      | 37,8 | 97  | 9,2   | 9,2   | 18,95 | 591,66 | 73,94  |
| 2019/06/02 | CH2205 | Male | Three y/o | Treatment (Wk 3) | Treatment | Fast Day | No | 06:10 | 06:00 - 06:59 | Morning      | 37,5 | 59  | 4,2   | 4,2   | 18,65 | 553,30 | 47,57  |
| 2019/06/02 | CH2206 | Male | Three y/o | Treatment (Wk 3) | Treatment | Fast Day | No | 06:10 | 06:00 - 06:59 | Morning      | 37,8 | 58  | 7,2   | 7,2   | 18,95 | 551,90 | 65,66  |
| 2019/06/02 | CH2205 | Male | Three y/o | Treatment (Wk 3) | Treatment | Fast Day | No | 06:15 | 06:00 - 06:59 | Morning      | 37,4 | 41  | 17,8  | 17,8  | 18,55 | 522,29 | 96,34  |
| 2019/06/02 | CH2206 | Male | Three y/o | Treatment (Wk 3) | Treatment | Fast Day | No | 06:15 | 06:00 - 06:59 | Morning      | 37,7 | 85  | 3,8   | 3,8   | 18,85 | 581,90 | 44,22  |
| 2019/06/02 | CH2205 | Male | Three y/o | Treatment (Wk 3) | Treatment | Fast Day | No | 06:20 | 06:00 - 06:59 | Morning      | 37,3 | 41  | 12,8  | 12,8  | 18,46 | 522,29 | 85,12  |
| 2019/06/02 | CH2206 | Male | Three y/o | Treatment (Wk 3) | Treatment | Fast Day | No | 06:20 | 06:00 - 06:59 | Morning      | 37,5 | 46  | 23,6  | 23,6  | 18,65 | 532,38 | 105,97 |
| 2019/06/02 | CH2205 | Male | Three y/o | Treatment (Wk 3) | Treatment | Fast Day | No | 06:25 | 06:00 - 06:59 | Morning      | 37,3 | 49  | 20,8  | 20,8  | 18,46 | 537,80 | 101,65 |
| 2019/06/02 | CH2206 | Male | Three y/o | Treatment (Wk 3) | Treatment | Fast Day | No | 06:25 | 06:00 - 06:59 | Morning      | 37,5 | 51  | 35,4  | 35,4  | 18,65 | 541,20 | 119,88 |
| 2019/06/02 | CH2205 | Male | Three y/o | Treatment (Wk 3) | Treatment | Fast Day | No | 06:30 | 06:00 - 06:59 | Morning      | 37,2 | 66  | 18,4  | 18,4  | 18,36 | 562,34 | 97,47  |
| 2019/06/02 | CH2206 | Male | Three y/o | Treatment (Wk 3) | Treatment | Fast Day | No | 06:30 | 06:00 - 06:59 | Morning      | 37,7 | 91  | 35,2  | 35,2  | 18,85 | 586,98 | 119,69 |
| 2019/06/02 | CH2205 | Male | Three y/o | Treatment (Wk 3) | Treatment | Fast Day | No | 06:35 | 06:00 - 06:59 | Morning      | 37,2 | 54  | 15,6  | 15,6  | 18,36 | 545,99 | 91,85  |
| 2019/06/02 | CH2206 | Male | Three y/o | Treatment (Wk 3) | Treatment | Fast Day | No | 06:35 | 06:00 - 06:59 | Morning      | 37,8 | 56  | 39,2  | 39,2  | 18,95 | 549,01 | 123,39 |
| 2019/06/02 | CH2205 | Male | Three y/o | Treatment (Wk 3) | Treatment | Fast Day | No | 06:40 | 06:00 - 06:59 | Morning      | 37,3 | 52  | 20,8  | 20,8  | 18,46 | 542,83 | 101,65 |
| 2019/06/02 | CH2206 | Male | Three y/o | Treatment (Wk 3) | Treatment | Fast Day | No | 06:40 | 06:00 - 06:59 | Morning      | 37,8 | 113 | 13,8  | 13,8  | 18,95 | 602,58 | 87,68  |
| 2019/06/02 | CH2205 | Male | Three y/o | Treatment (Wk 3) | Treatment | Fast Day | No | 06:45 | 06:00 - 06:59 | Morning      | 37,3 |     | 24,8  | 24,8  | 18,46 |        | 107,67 |
| 2019/06/02 | CH2206 | Male | Three y/o | Treatment (Wk 3) | Treatment | Fast Day | No | 06:45 | 06:00 - 06:59 | Morning      | 37,8 | 49  | 6,8   | 6,8   | 18,95 | 537,80 | 63,74  |
| 2019/06/02 | CH2205 | Male | Three y/o | Treatment (Wk 3) | Treatment | Fast Day | No | 06:50 | 06:00 - 06:59 | Morning      | 37,3 |     | 22,6  | 22,6  | 18,46 |        | 104,49 |
| 2019/06/02 | CH2206 | Male | Three y/o | Treatment (Wk 3) | Treatment | Fast Day | No | 06:50 | 06:00 - 06:59 | Morning      | 37,5 | 131 | 119,8 | 119,8 | 18,65 | 612,80 | 162,15 |
| 2019/06/02 | CH2205 | Male | Three y/o | Treatment (Wk 3) | Treatment | Fast Day | No | 06:55 | 06:00 - 06:59 | Morning      | 37,3 | 99  | 45,4  | 45,4  | 18,46 | 593,14 | 128,45 |
| 2019/06/02 | CH2206 | Male | Three y/o | Treatment (Wk 3) | Treatment | Fast Day | No | 06:55 | 06:00 - 06:59 | Morning      | 37,5 | 126 | 91,2  | 91,2  | 18,65 | 610,14 | 152,63 |
| 2019/06/02 | CH2205 | Male | Three y/o | Treatment (Wk 3) | Treatment | Fast Day | No | 07:00 | 07:00 - 07:59 | Morning      | 37,4 |     | 201,8 | 201,8 | 18,55 |        | 180,43 |
| 2019/06/02 | CH2206 | Male | Three y/o | Treatment (Wk 3) | Treatment | Fast Day | No | 07:00 | 07:00 - 07:59 | Morning      | 37,5 | 67  | 63,4  | 63,4  | 18,65 | 563,53 | 140,00 |
| 2019/06/02 | CH2205 | Male | Three y/o | Treatment (Wk 3) | Treatment | Fast Day | No | 07:05 | 07:00 - 07:59 | Morning      | 37,4 | 129 | 113,6 | 113,6 | 18,55 | 611,75 | 160,29 |
| 2019/06/02 | CH2206 | Male | Three y/o | Treatment (Wk 3) | Treatment | Fast Day | No | 07:05 | 07:00 - 07:59 | Morning      | 37,5 | 182 | 221,6 | 221,6 | 18,65 | 634,31 | 183,73 |
| 2019/06/02 | CH2205 | Male | Three y/o | Treatment (Wk 3) | Treatment | Fast Day | No | 07:10 | 07:00 - 07:59 | Morning      | 37,4 |     | 92,0  | 92,0  | 18,55 |        | 152,94 |
| 2019/06/02 | CH2206 | Male | Three y/o | Treatment (Wk 3) | Treatment | Fast Day | No | 07:10 | 07:00 - 07:59 | Morning      | 37,5 | 140 | 138,8 | 138,8 | 18,65 | 617,28 | 167,30 |
| 2019/06/02 | CH2205 | Male | Three y/o | Treatment (Wk 3) | Treatment | Fast Day | No | 07:15 | 07:00 - 07:59 | Morning      | 37,4 | 60  | 93,8  | 93,8  | 18,55 | 554,67 | 153,61 |
| 2019/06/02 | CH2206 | Male | Three y/o | Treatment (Wk 3) | Treatment | Fast Day | No | 07:15 | 07:00 - 07:59 | Morning      | 37,7 | 120 | 204,8 | 204,8 | 18,85 | 606,78 | 180,95 |
| 2019/06/02 | CH2205 | Male | Three y/o | Treatment (Wk 3) | Treatment | Fast Day | No | 07:20 | 07:00 - 07:59 | Morning      | 37,4 | 89  | 20,0  | 20,0  | 18,55 | 585,33 | 100,31 |
| 2019/06/02 | CH2206 | Male | Three y/o | Treatment (Wk 3) | Treatment | Fast Day | No | 07:20 | 07:00 - 07:59 | Morning      | 37,7 | 123 | 60,8  | 60,8  | 18,85 | 608,49 | 138,55 |
| 2019/06/02 | CH2205 | Male | Three y/o | Treatment (Wk 3) | Treatment | Fast Day | No | 07:25 | 07:00 - 07:59 | Morning      | 37,4 | 90  | 40,2  | 40,2  | 18,55 | 586,16 | 124,26 |
| 2019/06/02 | CH2206 | Male | Three y/o | Treatment (Wk 3) | Treatment | Fast Day | No | 07:25 | 07:00 - 07:59 | Morning      | 37,8 | 128 | 46,6  | 46,6  | 18,95 | 611,22 | 129,35 |
| 2019/06/02 | CH2205 | Male | Three y/o | Treatment (Wk 3) | Treatment | Fast Day | No | 07:30 | 07:00 - 07:59 | Morning      | 37,5 | 80  | 10,6  | 10,6  | 18,65 | 577,31 | 78,73  |
| 2019/06/02 | CH2206 | Male | Three y/o | Treatment (Wk 3) | Treatment | Fast Day | No | 07:30 | 07:00 - 07:59 | Morning      | 37,8 | 118 | 53,6  | 53,6  | 18,95 | 605,61 | 134,19 |
| 2019/06/02 | CH2205 | Male | Three y/o | Treatment (Wk 3) | Treatment | Fast Day | No | 07:35 | 07:00 - 07:59 | Morning      | 37,5 |     | 12,4  | 12,4  | 18,65 |        | 84,04  |
| 2019/06/02 | CH2206 | Male | Three y/o | Treatment (Wk 3) | Treatment | Fast Day | No | 07:35 | 07:00 - 07:59 | Morning      | 37,8 | 103 | 115,4 | 115,4 | 18,95 | 596,00 | 160,84 |
| 2019/06/02 | CH2205 | Male | Three y/o | Treatment (Wk 3) | Treatment | Fast Day | No | 07:40 | 07:00 - 07:59 | Morning      | 37,4 | 76  | 98,2  | 98,2  | 18,55 | 573,39 | 155,21 |
| 2019/06/02 | CH2206 | Male | Three y/o | Treatment (Wk 3) | Treatment | Fast Day | No | 07:40 | 07:00 - 07:59 | Morning      | 37,9 | 126 | 23,2  | 23,2  | 19,05 | 610,14 | 105,39 |
| 2019/06/02 | CH2205 | Male | Three y/o | Treatment (Wk 3) | Treatment | Fast Day | No | 07:45 | 07:00 - 07:59 | Morning      | 37,4 |     | 98,2  | 98,2  | 18,55 |        | 155,21 |
| 2019/06/02 | CH2206 | Male | Three y/o | Treatment (Wk 3) | Treatment | Fast Day | No | 07:45 | 07:00 - 07:59 | Morning      | 37,8 | 68  | 163,4 | 163,4 | 18,95 | 564,71 | 173,02 |
| 2019/06/02 | CH2205 | Male | Three y/o | Treatment (Wk 3) | Treatment | Fast Day | No | 07:50 | 07:00 - 07:59 | Morning      | 37,5 |     | 113,0 | 113,0 | 18,65 |        | 160,11 |
| 2019/06/02 | CH2206 | Male | Three y/o | Treatment (Wk 3) | Treatment | Fast Day | No | 07:50 | 07:00 - 07:59 | Morning      | 37,9 | 113 | 73,4  | 73,4  | 19,05 | 602,58 | 145,08 |
| 2019/06/02 | CH2205 | Male | Three y/o | Treatment (Wk 3) | Treatment | Fast Day | No | 07:55 | 07:00 - 07:59 | Morning      | 37,5 | 120 | 65,8  | 65,8  | 18,65 | 606,78 | 141,29 |
| 2019/06/02 | CH2206 | Male | Three y/o | Treatment (Wk 3) | Treatment | Fast Day | No | 07:55 | 07:00 - 07:59 | Morning      | 37,9 | 105 | 55,2  | 55,2  | 19,05 | 597,38 | 135,21 |
| 2019/06/02 | CH2205 | Male | Three y/o | Treatment (Wk 3) | Treatment | Fast Day | No | 08:00 | 08:00 - 08:59 | Late Morning | 37,5 |     | 67,0  | 67,0  | 18,65 |        | 141,92 |
| 2019/06/02 | CH2206 | Male | Three y/o | Treatment (Wk 3) | Treatment | Fast Day | No | 08:00 | 08:00 - 08:59 | Late Morning | 37,8 | 112 | 128,4 | 128,4 | 18,95 | 601,96 | 164,57 |
| 2019/06/02 | CH2205 | Male | Three y/o | Treatment (Wk 3) | Treatment | Fast Day | No | 08:05 | 08:00 - 08:59 | Late Morning | 37,5 | 55  | 93,8  | 93,8  | 18,65 | 547,52 | 153,61 |
| 2019/06/02 | CH2206 | Male | Three y/o | Treatment (Wk 3) | Treatment | Fast Day | No | 08:05 | 08:00 - 08:59 | Late Morning | 37,8 | 111 | 166,6 | 166,6 | 18,95 | 601,33 | 173,70 |
| 2019/06/02 | CH2205 | Male | Three y/o | Treatment (Wk 3) | Treatment | Fast Day | No | 08:10 | 08:00 - 08:59 | Late Morning | 37,5 | 119 | 22,8  | 22,8  | 18,65 | 606,20 | 104,79 |
| 2019/06/02 | CH2206 | Male | Three y/o | Treatment (Wk 3) | Treatment | Fast Day | No | 08:10 | 08:00 - 08:59 | Late Morning | 37,8 | 132 | 100,8 | 100,8 | 18,95 | 613,32 | 156,12 |
| 2019/06/02 | CH2205 | Male | Three y/o | Treatment (Wk 3) | Treatment | Fast Day | No | 08:15 | 08:00 - 08:59 | Late Morning | 37,6 |     | 17,2  | 17,2  | 18,75 |        | 95,17  |



|            |        |      |           |                  |           |          |    |       |               |              |      |     |       |       |       |        |        |
|------------|--------|------|-----------|------------------|-----------|----------|----|-------|---------------|--------------|------|-----|-------|-------|-------|--------|--------|
| 2019/06/02 | CH2206 | Male | Three y/o | Treatment (Wk 3) | Treatment | Fast Day | No | 08:15 | 08:00 - 08:59 | Late Morning | 37,9 | 117 | 118,8 | 118,8 | 19,05 | 605,02 | 161,86 |
| 2019/06/02 | CH2205 | Male | Three y/o | Treatment (Wk 3) | Treatment | Fast Day | No | 08:20 | 08:00 - 08:59 | Late Morning | 37,5 | 118 | 125,6 | 125,6 | 18,65 | 605,61 | 163,80 |
| 2019/06/02 | CH2206 | Male | Three y/o | Treatment (Wk 3) | Treatment | Fast Day | No | 08:20 | 08:00 - 08:59 | Late Morning | 37,9 |     | 46,8  | 46,8  | 19,05 |        | 129,50 |
| 2019/06/02 | CH2205 | Male | Three y/o | Treatment (Wk 3) | Treatment | Fast Day | No | 08:25 | 08:00 - 08:59 | Late Morning | 37,6 | 78  | 74,6  | 74,6  | 18,75 | 575,38 | 145,65 |
| 2019/06/02 | CH2206 | Male | Three y/o | Treatment (Wk 3) | Treatment | Fast Day | No | 08:25 | 08:00 - 08:59 | Late Morning | 37,9 | 121 | 193,8 | 193,8 | 19,05 | 607,35 | 179,01 |
| 2019/06/02 | CH2205 | Male | Three y/o | Treatment (Wk 3) | Treatment | Fast Day | No | 08:30 | 08:00 - 08:59 | Late Morning | 37,6 | 78  | 17,2  | 17,2  | 18,75 | 575,38 | 95,17  |
| 2019/06/02 | CH2206 | Male | Three y/o | Treatment (Wk 3) | Treatment | Fast Day | No | 08:30 | 08:00 - 08:59 | Late Morning | 37,9 | 141 | 96,6  | 96,6  | 19,05 | 617,75 | 154,64 |
| 2019/06/02 | CH2205 | Male | Three y/o | Treatment (Wk 3) | Treatment | Fast Day | No | 08:35 | 08:00 - 08:59 | Late Morning | 37,5 | 107 | 6,4   | 6,4   | 18,65 | 598,73 | 61,70  |
| 2019/06/02 | CH2206 | Male | Three y/o | Treatment (Wk 3) | Treatment | Fast Day | No | 08:35 | 08:00 - 08:59 | Late Morning | 37,9 | 105 | 112,8 | 112,8 | 19,05 | 597,38 | 160,05 |
| 2019/06/02 | CH2205 | Male | Three y/o | Treatment (Wk 3) | Treatment | Fast Day | No | 08:40 | 08:00 - 08:59 | Late Morning | 37,5 |     | 11,8  | 11,8  | 18,65 |        | 82,36  |
| 2019/06/02 | CH2206 | Male | Three y/o | Treatment (Wk 3) | Treatment | Fast Day | No | 08:40 | 08:00 - 08:59 | Late Morning | 37,9 | 185 | 83,4  | 83,4  | 19,05 | 635,34 | 149,52 |
| 2019/06/02 | CH2205 | Male | Three y/o | Treatment (Wk 3) | Treatment | Fast Day | No | 08:45 | 08:00 - 08:59 | Late Morning | 37,5 | 120 | 10,6  | 10,6  | 18,65 | 606,78 | 78,73  |
| 2019/06/02 | CH2206 | Male | Three y/o | Treatment (Wk 3) | Treatment | Fast Day | No | 08:45 | 08:00 - 08:59 | Late Morning | 37,9 | 103 | 106,6 | 106,6 | 19,05 | 596,00 | 158,07 |
| 2019/06/02 | CH2205 | Male | Three y/o | Treatment (Wk 3) | Treatment | Fast Day | No | 08:50 | 08:00 - 08:59 | Late Morning | 37,3 | 60  | 5,6   | 5,6   | 18,46 | 554,67 | 57,21  |
| 2019/06/02 | CH2206 | Male | Three y/o | Treatment (Wk 3) | Treatment | Fast Day | No | 08:50 | 08:00 - 08:59 | Late Morning | 37,9 | 105 | 12,4  | 12,4  | 19,05 | 597,38 | 84,04  |
| 2019/06/02 | CH2205 | Male | Three y/o | Treatment (Wk 3) | Treatment | Fast Day | No | 08:55 | 08:00 - 08:59 | Late Morning | 37,2 | 58  | 9,2   | 9,2   | 18,36 | 551,90 | 73,94  |
| 2019/06/02 | CH2206 | Male | Three y/o | Treatment (Wk 3) | Treatment | Fast Day | No | 08:55 | 08:00 - 08:59 | Late Morning | 37,8 | 107 | 114,4 | 114,4 | 18,95 | 598,73 | 160,54 |
| 2019/06/02 | CH2205 | Male | Three y/o | Treatment (Wk 3) | Treatment | Fast Day | No | 09:00 | 09:00 - 09:59 | Late Morning | 37,2 |     | 8,4   | 8,4   | 18,36 |        | 70,86  |
| 2019/06/02 | CH2206 | Male | Three y/o | Treatment (Wk 3) | Treatment | Fast Day | No | 09:00 | 09:00 - 09:59 | Late Morning | 37,9 |     | 90,2  | 90,2  | 19,05 |        | 152,25 |
| 2019/06/02 | CH2205 | Male | Three y/o | Treatment (Wk 3) | Treatment | Fast Day | No | 09:05 | 09:00 - 09:59 | Late Morning | 37,1 | 121 | 2,6   | 2,6   | 18,26 | 607,35 | 31,57  |
| 2019/06/02 | CH2206 | Male | Three y/o | Treatment (Wk 3) | Treatment | Fast Day | No | 09:05 | 09:00 - 09:59 | Late Morning | 37,9 | 134 | 216,0 | 216,0 | 19,05 | 614,33 | 182,83 |
| 2019/06/02 | CH2205 | Male | Three y/o | Treatment (Wk 3) | Treatment | Fast Day | No | 09:10 | 09:00 - 09:59 | Late Morning | 36,9 | 53  | 23,4  | 23,4  | 18,06 | 544,43 | 105,68 |
| 2019/06/02 | CH2206 | Male | Three y/o | Treatment (Wk 3) | Treatment | Fast Day | No | 09:10 | 09:00 - 09:59 | Late Morning | 37,9 |     | 282,8 | 282,8 | 19,05 |        | 192,33 |
| 2019/06/02 | CH2205 | Male | Three y/o | Treatment (Wk 3) | Treatment | Fast Day | No | 09:15 | 09:00 - 09:59 | Late Morning | 36,7 | 54  | 15,4  | 15,4  | 17,87 | 545,99 | 91,41  |
| 2019/06/02 | CH2206 | Male | Three y/o | Treatment (Wk 3) | Treatment | Fast Day | No | 09:15 | 09:00 - 09:59 | Late Morning | 37,9 | 107 | 239,6 | 239,6 | 19,05 | 598,73 | 186,48 |
| 2019/06/02 | CH2205 | Male | Three y/o | Treatment (Wk 3) | Treatment | Fast Day | No | 09:20 | 09:00 - 09:59 | Late Morning | 36,7 | 167 | 7,6   | 7,6   | 17,87 | 628,84 | 67,49  |
| 2019/06/02 | CH2206 | Male | Three y/o | Treatment (Wk 3) | Treatment | Fast Day | No | 09:20 | 09:00 - 09:59 | Late Morning | 37,9 | 113 | 183,0 | 183,0 | 19,05 | 602,58 | 177,00 |
| 2019/06/02 | CH2205 | Male | Three y/o | Treatment (Wk 3) | Treatment | Fast Day | No | 09:25 | 09:00 - 09:59 | Late Morning | 37,0 |     | 13,0  | 13,0  | 18,16 |        | 85,65  |
| 2019/06/02 | CH2206 | Male | Three y/o | Treatment (Wk 3) | Treatment | Fast Day | No | 09:25 | 09:00 - 09:59 | Late Morning | 37,9 | 103 | 97,6  | 97,6  | 19,05 | 596,00 | 155,00 |
| 2019/06/02 | CH2205 | Male | Three y/o | Treatment (Wk 3) | Treatment | Fast Day | No | 09:30 | 09:00 - 09:59 | Late Morning | 37,0 |     | 9,0   | 9,0   | 18,16 |        | 73,19  |
| 2019/06/02 | CH2206 | Male | Three y/o | Treatment (Wk 3) | Treatment | Fast Day | No | 09:30 | 09:00 - 09:59 | Late Morning | 37,9 | 75  | 35,2  | 35,2  | 19,05 | 572,36 | 119,69 |
| 2019/06/02 | CH2205 | Male | Three y/o | Treatment (Wk 3) | Treatment | Fast Day | No | 09:35 | 09:00 - 09:59 | Late Morning | 37,1 |     | 5,8   | 5,8   | 18,26 |        | 58,39  |
| 2019/06/02 | CH2206 | Male | Three y/o | Treatment (Wk 3) | Treatment | Fast Day | No | 09:35 | 09:00 - 09:59 | Late Morning | 37,7 | 47  | 37,4  | 37,4  | 18,85 | 534,23 | 121,77 |
| 2019/06/02 | CH2205 | Male | Three y/o | Treatment (Wk 3) | Treatment | Fast Day | No | 09:40 | 09:00 - 09:59 | Late Morning | 37,0 |     | 4,0   | 4,0   | 18,16 |        | 45,94  |
| 2019/06/02 | CH2206 | Male | Three y/o | Treatment (Wk 3) | Treatment | Fast Day | No | 09:40 | 09:00 - 09:59 | Late Morning | 37,5 | 48  | 36,0  | 36,0  | 18,65 | 536,04 | 120,46 |
| 2019/06/02 | CH2205 | Male | Three y/o | Treatment (Wk 3) | Treatment | Fast Day | No | 09:45 | 09:00 - 09:59 | Late Morning | 37,0 | 49  | 11,0  | 11,0  | 18,16 | 537,80 | 79,98  |
| 2019/06/02 | CH2206 | Male | Three y/o | Treatment (Wk 3) | Treatment | Fast Day | No | 09:45 | 09:00 - 09:59 | Late Morning | 37,4 | 59  | 44,8  | 44,8  | 18,55 | 553,30 | 127,99 |
| 2019/06/02 | CH2205 | Male | Three y/o | Treatment (Wk 3) | Treatment | Fast Day | No | 09:50 | 09:00 - 09:59 | Late Morning | 37,0 | 73  | 3,2   | 3,2   | 18,16 | 570,27 | 38,49  |
| 2019/06/02 | CH2206 | Male | Three y/o | Treatment (Wk 3) | Treatment | Fast Day | No | 09:50 | 09:00 - 09:59 | Late Morning | 37,3 | 68  | 49,0  | 49,0  | 18,46 | 564,71 | 131,09 |
| 2019/06/02 | CH2205 | Male | Three y/o | Treatment (Wk 3) | Treatment | Fast Day | No | 09:55 | 09:00 - 09:59 | Late Morning | 37,0 | 54  | 10,2  | 10,2  | 18,16 | 545,99 | 77,43  |
| 2019/06/02 | CH2206 | Male | Three y/o | Treatment (Wk 3) | Treatment | Fast Day | No | 09:55 | 09:00 - 09:59 | Late Morning | 37,4 | 43  | 43,6  | 43,6  | 18,55 | 526,50 | 127,06 |
| 2019/06/02 | CH2205 | Male | Three y/o | Treatment (Wk 3) | Treatment | Fast Day | No | 10:00 | 10:00 - 10:59 | Late Morning | 36,8 | 76  | 6,0   | 6,0   | 17,96 | 573,39 | 59,53  |
| 2019/06/02 | CH2206 | Male | Three y/o | Treatment (Wk 3) | Treatment | Fast Day | No | 10:00 | 10:00 - 10:59 | Late Morning | 37,3 | 55  | 46,8  | 46,8  | 18,46 | 547,52 | 129,50 |
| 2019/06/02 | CH2205 | Male | Three y/o | Treatment (Wk 3) | Treatment | Fast Day | No | 10:05 | 10:00 - 10:59 | Late Morning | 36,8 | 90  | 6,2   | 6,2   | 17,96 | 586,16 | 60,63  |
| 2019/06/02 | CH2206 | Male | Three y/o | Treatment (Wk 3) | Treatment | Fast Day | No | 10:05 | 10:00 - 10:59 | Late Morning | 37,4 | 49  | 53,2  | 53,2  | 18,55 | 537,80 | 133,93 |
| 2019/06/02 | CH2205 | Male | Three y/o | Treatment (Wk 3) | Treatment | Fast Day | No | 10:10 | 10:00 - 10:59 | Late Morning | 37,0 | 46  | 7,6   | 7,6   | 18,16 | 532,38 | 67,49  |
| 2019/06/02 | CH2206 | Male | Three y/o | Treatment (Wk 3) | Treatment | Fast Day | No | 10:10 | 10:00 - 10:59 | Late Morning | 37,4 | 57  | 43,0  | 43,0  | 18,55 | 550,47 | 126,58 |
| 2019/06/02 | CH2205 | Male | Three y/o | Treatment (Wk 3) | Treatment | Fast Day | No | 10:15 | 10:00 - 10:59 | Late Morning | 37,0 | 118 | 4,8   | 4,8   | 18,16 | 605,61 | 52,04  |
| 2019/06/02 | CH2206 | Male | Three y/o | Treatment (Wk 3) | Treatment | Fast Day | No | 10:15 | 10:00 - 10:59 | Late Morning | 37,4 | 48  | 48,8  | 48,8  | 18,55 | 536,04 | 130,95 |
| 2019/06/02 | CH2205 | Male | Three y/o | Treatment (Wk 3) | Treatment | Fast Day | No | 10:20 | 10:00 - 10:59 | Late Morning | 37,1 | 74  | 8,8   | 8,8   | 18,26 | 571,33 | 72,43  |
| 2019/06/02 | CH2206 | Male | Three y/o | Treatment (Wk 3) | Treatment | Fast Day | No | 10:20 | 10:00 - 10:59 | Late Morning | 37,4 | 45  | 49,6  | 49,6  | 18,55 | 530,47 | 131,51 |
| 2019/06/02 | CH2205 | Male | Three y/o | Treatment (Wk 3) | Treatment | Fast Day | No | 10:25 | 10:00 - 10:59 | Late Morning | 37,1 | 113 | 8,2   | 8,2   | 18,26 | 602,58 | 70,05  |
| 2019/06/02 | CH2206 | Male | Three y/o | Treatment (Wk 3) | Treatment | Fast Day | No | 10:25 | 10:00 - 10:59 | Late Morning | 37,4 | 86  | 228,6 | 228,6 | 18,55 | 582,77 | 184,82 |
| 2019/06/02 | CH2205 | Male | Three y/o | Treatment (Wk 3) | Treatment | Fast Day | No | 10:30 | 10:00 - 10:59 | Late Morning | 37,2 |     | 5,4   | 5,4   | 18,36 |        | 55,99  |
| 2019/06/02 | CH2206 | Male | Three y/o | Treatment (Wk 3) | Treatment | Fast Day | No | 10:30 | 10:00 - 10:59 | Late Morning | 37,5 | 108 | 76,8  | 76,8  | 18,65 | 599,39 | 146,66 |
| 2019/06/02 | CH2205 | Male | Three y/o | Treatment (Wk 3) | Treatment | Fast Day | No | 10:35 | 10:00 - 10:59 | Late Morning | 37,2 |     | 5,4   | 5,4   | 18,36 |        | 55,99  |
| 2019/06/02 | CH2206 | Male | Three y/o | Treatment (Wk 3) | Treatment | Fast Day | No | 10:35 | 10:00 - 10:59 | Late Morning | 37,5 | 162 | 53,0  | 53,0  | 18,65 | 626,88 | 133,80 |
| 2019/06/02 | CH2205 | Male | Three y/o | Treatment (Wk 3) | Treatment | Fast Day | No | 10:40 | 10:00 - 10:59 | Late Morning | 37,2 | 57  | 6,8   | 6,8   | 18,36 | 550,47 | 63,74  |
| 2019/06/02 | CH2206 | Male | Three y/o | Treatment (Wk 3) | Treatment | Fast Day | No | 10:40 | 10:00 - 10:59 | Late Morning | 37,4 |     | 30,8  | 30,8  | 18,55 |        | 115,10 |
| 2019/06/02 | CH2205 | Male | Three y/o | Treatment (Wk 3) | Treatment | Fast Day | No | 10:45 | 10:00 - 10:59 | Late Morning | 37,2 | 72  | 5,4   | 5,4   | 18,36 | 569,20 | 55,99  |
| 2019/06/02 | CH2206 | Male | Three y/o | Treatment (Wk 3) | Treatment | Fast Day | No | 10:45 | 10:00 - 10:59 | Late Morning | 37,5 | 124 | 30,4  | 30,4  | 18,65 | 609,04 | 114,65 |
| 2019/06/02 | CH2205 | Male | Three y/o | Treatment (Wk 3) | Treatment | Fast Day | No | 10:50 | 10:00 - 10:59 | Late Morning | 37,3 | 62  | 15,6  | 15,6  | 18,46 | 557,33 | 91,85  |
| 2019/06/02 | CH2206 | Male | Three y/o | Treatment (Wk 3) | Treatment | Fast Day | No | 10:50 | 10:00 - 10:59 | Late Morning | 37,5 | 94  | 47,8  | 47,8  | 18,65 | 589,37 | 130,23 |
| 2019/06/02 | CH2205 | Male | Three y/o | Treatment (Wk 3) | Treatment | Fast Day | No | 10:55 | 10:00 - 10:59 | Late Morning | 37,3 | 111 | 114,4 | 114,4 | 18,46 | 601,33 | 160,54 |
| 2019/06/02 | CH2206 | Male | Three y/o | Treatment (Wk 3) | Treatment | Fast Day | No | 10:55 | 10:00 - 10:59 | Late Morning | 37,6 | 126 | 61,0  | 61,0  | 18,75 | 610,14 | 138,67 |
| 2019/06/02 | CH2205 | Male | Three y/o | Treatment (Wk 3) | Treatment | Fast Day | No | 11:00 | 11:00 - 11:59 | Late Morning | 37,4 | 113 | 67,4  | 67,4  | 18,55 | 602,58 | 142,12 |
| 2019/06/02 | CH2206 | Male | Three y/o | Treatment (Wk 3) | Treatment | Fast Day | No | 11:00 | 11:00 - 11:59 | Late Morning | 37,7 | 124 | 54,0  | 54,0  | 18,85 | 609,04 | 134,45 |
| 2019/06/02 | CH2205 | Male | Three y/o | Treatment (Wk 3) | Treatment | Fast Day | No | 11:05 | 11:00 - 11:59 | Late Morning | 37,4 | 98  | 39,6  | 39,6  | 18,55 | 592,41 | 123,74 |
| 2019/06/02 | CH2206 | Male | Three y/o | Treatment (Wk 3) | Treatment | Fast Day | No | 11:05 | 11:00 - 11:59 | Late Morning | 37,7 | 113 | 335,4 | 335,4 | 18,85 | 602,58 | 198,37 |
| 2019/06/02 | CH2205 | Male | Three y/o | Treatment (Wk 3) | Treatment | Fast Day | No | 11:10 | 11:00 - 11:59 | Late Morning | 37,5 | 76  | 25,2  | 25,2  | 18,65 | 573,39 | 108,22 |



|            |        |      |           |                  |           |          |    |       |               |              |      |     |       |       |       |        |        |
|------------|--------|------|-----------|------------------|-----------|----------|----|-------|---------------|--------------|------|-----|-------|-------|-------|--------|--------|
| 2019/06/02 | CH2206 | Male | Three y/o | Treatment (Wk 3) | Treatment | Fast Day | No | 11:10 | 11:00 - 11:59 | Late Morning | 37,8 | 121 | 127,8 | 127,8 | 18,95 | 607,35 | 164,41 |
| 2019/06/02 | CH2205 | Male | Three y/o | Treatment (Wk 3) | Treatment | Fast Day | No | 11:15 | 11:00 - 11:59 | Late Morning | 37,5 | 67  | 68,8  | 68,8  | 18,65 | 563,53 | 142,84 |
| 2019/06/02 | CH2206 | Male | Three y/o | Treatment (Wk 3) | Treatment | Fast Day | No | 11:15 | 11:00 - 11:59 | Late Morning | 37,8 |     | 55,8  | 55,8  | 18,95 |        | 135,58 |
| 2019/06/02 | CH2205 | Male | Three y/o | Treatment (Wk 3) | Treatment | Fast Day | No | 11:20 | 11:00 - 11:59 | Late Morning | 37,5 | 75  | 133,4 | 133,4 | 18,65 | 572,36 | 165,91 |
| 2019/06/02 | CH2206 | Male | Three y/o | Treatment (Wk 3) | Treatment | Fast Day | No | 11:20 | 11:00 - 11:59 | Late Morning | 37,8 | 106 | 92,6  | 92,6  | 18,95 | 598,06 | 153,16 |
| 2019/06/02 | CH2205 | Male | Three y/o | Treatment (Wk 3) | Treatment | Fast Day | No | 11:25 | 11:00 - 11:59 | Late Morning | 37,6 |     | 26,6  | 26,6  | 18,75 |        | 110,07 |
| 2019/06/02 | CH2206 | Male | Three y/o | Treatment (Wk 3) | Treatment | Fast Day | No | 11:25 | 11:00 - 11:59 | Late Morning | 37,8 |     | 25,2  | 25,2  | 18,95 |        | 108,22 |
| 2019/06/02 | CH2205 | Male | Three y/o | Treatment (Wk 3) | Treatment | Fast Day | No | 11:30 | 11:00 - 11:59 | Late Morning | 37,6 |     | 14,2  | 14,2  | 18,75 |        | 88,65  |
| 2019/06/02 | CH2206 | Male | Three y/o | Treatment (Wk 3) | Treatment | Fast Day | No | 11:30 | 11:00 - 11:59 | Late Morning | 37,9 | 108 | 26,4  | 26,4  | 19,05 | 599,39 | 109,81 |
| 2019/06/02 | CH2205 | Male | Three y/o | Treatment (Wk 3) | Treatment | Fast Day | No | 11:35 | 11:00 - 11:59 | Late Morning | 37,7 | 63  | 15,2  | 15,2  | 18,85 | 558,62 | 90,96  |
| 2019/06/02 | CH2206 | Male | Three y/o | Treatment (Wk 3) | Treatment | Fast Day | No | 11:35 | 11:00 - 11:59 | Late Morning | 37,8 | 45  | 51,4  | 51,4  | 18,95 | 530,47 | 132,74 |
| 2019/06/02 | CH2205 | Male | Three y/o | Treatment (Wk 3) | Treatment | Fast Day | No | 11:40 | 11:00 - 11:59 | Late Morning | 37,6 | 79  | 16,6  | 16,6  | 18,75 | 576,36 | 93,96  |
| 2019/06/02 | CH2206 | Male | Three y/o | Treatment (Wk 3) | Treatment | Fast Day | No | 11:40 | 11:00 - 11:59 | Late Morning | 37,8 | 69  | 51,4  | 51,4  | 18,95 | 565,86 | 132,74 |
| 2019/06/02 | CH2205 | Male | Three y/o | Treatment (Wk 3) | Treatment | Fast Day | No | 11:45 | 11:00 - 11:59 | Late Morning | 37,7 | 71  | 12,2  | 12,2  | 18,85 | 568,10 | 83,49  |
| 2019/06/02 | CH2206 | Male | Three y/o | Treatment (Wk 3) | Treatment | Fast Day | No | 11:45 | 11:00 - 11:59 | Late Morning | 37,8 |     | 163,6 | 163,6 | 18,95 |        | 173,06 |
| 2019/06/02 | CH2205 | Male | Three y/o | Treatment (Wk 3) | Treatment | Fast Day | No | 11:50 | 11:00 - 11:59 | Late Morning | 37,9 | 62  | 347,8 | 347,8 | 19,05 | 557,33 | 199,65 |
| 2019/06/02 | CH2206 | Male | Three y/o | Treatment (Wk 3) | Treatment | Fast Day | No | 11:50 | 11:00 - 11:59 | Late Morning | 37,8 | 123 | 16,4  | 16,4  | 18,95 | 608,49 | 93,55  |
| 2019/06/02 | CH2205 | Male | Three y/o | Treatment (Wk 3) | Treatment | Fast Day | No | 11:55 | 11:00 - 11:59 | Late Morning | 37,9 | 160 | 54,8  | 54,8  | 19,05 | 626,07 | 134,96 |
| 2019/06/02 | CH2206 | Male | Three y/o | Treatment (Wk 3) | Treatment | Fast Day | No | 11:55 | 11:00 - 11:59 | Late Morning | 37,8 | 101 | 22,0  | 22,0  | 18,95 | 594,59 | 103,57 |
| 2019/06/02 | CH2205 | Male | Three y/o | Treatment (Wk 3) | Treatment | Fast Day | No | 12:00 | 12:00 - 12:59 | Afternoon    | 37,9 | 65  | 5,6   | 5,6   | 19,05 | 561,12 | 57,21  |
| 2019/06/02 | CH2206 | Male | Three y/o | Treatment (Wk 3) | Treatment | Fast Day | No | 12:00 | 12:00 - 12:59 | Afternoon    | 37,8 | 138 | 32,6  | 32,6  | 18,95 | 616,31 | 117,05 |
| 2019/06/02 | CH2205 | Male | Three y/o | Treatment (Wk 3) | Treatment | Fast Day | No | 12:05 | 12:00 - 12:59 | Afternoon    | 38,0 | 76  | 23,8  | 23,8  | 19,15 | 573,39 | 106,26 |
| 2019/06/02 | CH2206 | Male | Three y/o | Treatment (Wk 3) | Treatment | Fast Day | No | 12:05 | 12:00 - 12:59 | Afternoon    | 37,7 | 79  | 49,6  | 49,6  | 18,85 | 576,36 | 131,51 |
| 2019/06/02 | CH2205 | Male | Three y/o | Treatment (Wk 3) | Treatment | Fast Day | No | 12:10 | 12:00 - 12:59 | Afternoon    | 38,0 | 75  | 29,2  | 29,2  | 19,15 | 572,36 | 113,27 |
| 2019/06/02 | CH2206 | Male | Three y/o | Treatment (Wk 3) | Treatment | Fast Day | No | 12:10 | 12:00 - 12:59 | Afternoon    | 37,6 | 110 | 20,4  | 20,4  | 18,75 | 600,69 | 100,99 |
| 2019/06/02 | CH2205 | Male | Three y/o | Treatment (Wk 3) | Treatment | Fast Day | No | 12:15 | 12:00 - 12:59 | Afternoon    | 37,9 | 70  | 9,8   | 9,8   | 19,05 | 566,99 | 76,07  |
| 2019/06/02 | CH2206 | Male | Three y/o | Treatment (Wk 3) | Treatment | Fast Day | No | 12:15 | 12:00 - 12:59 | Afternoon    | 37,7 | 105 | 30,8  | 30,8  | 18,85 | 597,38 | 115,10 |
| 2019/06/02 | CH2205 | Male | Three y/o | Treatment (Wk 3) | Treatment | Fast Day | No | 12:20 | 12:00 - 12:59 | Afternoon    | 37,9 | 78  | 3,6   | 3,6   | 19,05 | 575,38 | 42,42  |
| 2019/06/02 | CH2206 | Male | Three y/o | Treatment (Wk 3) | Treatment | Fast Day | No | 12:20 | 12:00 - 12:59 | Afternoon    | 37,7 | 73  | 39,4  | 39,4  | 18,85 | 570,27 | 123,57 |
| 2019/06/02 | CH2205 | Male | Three y/o | Treatment (Wk 3) | Treatment | Fast Day | No | 12:25 | 12:00 - 12:59 | Afternoon    | 37,9 | 70  | 4,8   | 4,8   | 19,05 | 566,99 | 52,04  |
| 2019/06/02 | CH2206 | Male | Three y/o | Treatment (Wk 3) | Treatment | Fast Day | No | 12:25 | 12:00 - 12:59 | Afternoon    | 37,7 | 73  | 39,6  | 39,6  | 18,85 | 570,27 | 123,74 |
| 2019/06/02 | CH2205 | Male | Three y/o | Treatment (Wk 3) | Treatment | Fast Day | No | 12:30 | 12:00 - 12:59 | Afternoon    | 37,9 | 49  | 6,4   | 6,4   | 19,05 | 537,80 | 61,70  |
| 2019/06/02 | CH2206 | Male | Three y/o | Treatment (Wk 3) | Treatment | Fast Day | No | 12:30 | 12:00 - 12:59 | Afternoon    | 37,7 | 72  | 37,6  | 37,6  | 18,85 | 569,20 | 121,96 |
| 2019/06/02 | CH2205 | Male | Three y/o | Treatment (Wk 3) | Treatment | Fast Day | No | 12:35 | 12:00 - 12:59 | Afternoon    | 37,9 | 83  | 7,6   | 7,6   | 19,05 | 580,11 | 67,49  |
| 2019/06/02 | CH2206 | Male | Three y/o | Treatment (Wk 3) | Treatment | Fast Day | No | 12:35 | 12:00 - 12:59 | Afternoon    | 37,8 | 43  | 41,4  | 41,4  | 18,95 | 526,50 | 125,27 |
| 2019/06/02 | CH2205 | Male | Three y/o | Treatment (Wk 3) | Treatment | Fast Day | No | 12:40 | 12:00 - 12:59 | Afternoon    | 37,9 | 74  | 21,6  | 21,6  | 19,05 | 571,33 | 102,94 |
| 2019/06/02 | CH2206 | Male | Three y/o | Treatment (Wk 3) | Treatment | Fast Day | No | 12:40 | 12:00 - 12:59 | Afternoon    | 37,8 | 42  | 39,4  | 39,4  | 18,95 | 524,42 | 123,57 |
| 2019/06/02 | CH2205 | Male | Three y/o | Treatment (Wk 3) | Treatment | Fast Day | No | 12:45 | 12:00 - 12:59 | Afternoon    | 37,9 | 90  | 32,0  | 32,0  | 19,05 | 586,16 | 116,41 |
| 2019/06/02 | CH2206 | Male | Three y/o | Treatment (Wk 3) | Treatment | Fast Day | No | 12:45 | 12:00 - 12:59 | Afternoon    | 37,7 | 67  | 38,0  | 38,0  | 18,85 | 563,53 | 122,32 |
| 2019/06/02 | CH2205 | Male | Three y/o | Treatment (Wk 3) | Treatment | Fast Day | No | 12:50 | 12:00 - 12:59 | Afternoon    | 37,7 | 50  | 22,0  | 22,0  | 18,85 | 539,52 | 103,57 |
| 2019/06/02 | CH2206 | Male | Three y/o | Treatment (Wk 3) | Treatment | Fast Day | No | 12:50 | 12:00 - 12:59 | Afternoon    | 37,7 | 57  | 42,6  | 42,6  | 18,85 | 550,47 | 126,26 |
| 2019/06/02 | CH2205 | Male | Three y/o | Treatment (Wk 3) | Treatment | Fast Day | No | 12:55 | 12:00 - 12:59 | Afternoon    | 37,7 | 64  | 25,2  | 25,2  | 18,85 | 559,88 | 108,22 |
| 2019/06/02 | CH2206 | Male | Three y/o | Treatment (Wk 3) | Treatment | Fast Day | No | 12:55 | 12:00 - 12:59 | Afternoon    | 37,7 | 57  | 42,0  | 42,0  | 18,85 | 550,47 | 125,77 |
| 2019/06/02 | CH2205 | Male | Three y/o | Treatment (Wk 3) | Treatment | Fast Day | No | 13:00 | 13:00 - 13:59 | Afternoon    | 37,7 | 56  | 23,8  | 23,8  | 18,85 | 549,01 | 106,26 |
| 2019/06/02 | CH2206 | Male | Three y/o | Treatment (Wk 3) | Treatment | Fast Day | No | 13:00 | 13:00 - 13:59 | Afternoon    | 37,7 | 51  | 43,4  | 43,4  | 18,85 | 541,20 | 126,90 |
| 2019/06/02 | CH2205 | Male | Three y/o | Treatment (Wk 3) | Treatment | Fast Day | No | 13:05 | 13:00 - 13:59 | Afternoon    | 37,7 | 67  | 26,4  | 26,4  | 18,85 | 563,53 | 109,81 |
| 2019/06/02 | CH2206 | Male | Three y/o | Treatment (Wk 3) | Treatment | Fast Day | No | 13:05 | 13:00 - 13:59 | Afternoon    | 37,6 | 50  | 45,0  | 45,0  | 18,75 | 539,52 | 128,15 |
| 2019/06/02 | CH2205 | Male | Three y/o | Treatment (Wk 3) | Treatment | Fast Day | No | 13:10 | 13:00 - 13:59 | Afternoon    | 37,7 | 50  | 24,8  | 24,8  | 18,85 | 539,52 | 107,67 |
| 2019/06/02 | CH2206 | Male | Three y/o | Treatment (Wk 3) | Treatment | Fast Day | No | 13:10 | 13:00 - 13:59 | Afternoon    | 37,5 | 44  | 40,4  | 40,4  | 18,65 | 528,51 | 124,43 |
| 2019/06/02 | CH2205 | Male | Three y/o | Treatment (Wk 3) | Treatment | Fast Day | No | 13:15 | 13:00 - 13:59 | Afternoon    | 37,7 | 63  | 21,6  | 21,6  | 18,85 | 558,62 | 102,94 |
| 2019/06/02 | CH2206 | Male | Three y/o | Treatment (Wk 3) | Treatment | Fast Day | No | 13:15 | 13:00 - 13:59 | Afternoon    | 37,5 | 84  | 28,6  | 28,6  | 18,65 | 581,01 | 112,56 |
| 2019/06/02 | CH2205 | Male | Three y/o | Treatment (Wk 3) | Treatment | Fast Day | No | 13:20 | 13:00 - 13:59 | Afternoon    | 37,7 | 64  | 20,4  | 20,4  | 18,85 | 559,88 | 100,99 |
| 2019/06/02 | CH2206 | Male | Three y/o | Treatment (Wk 3) | Treatment | Fast Day | No | 13:20 | 13:00 - 13:59 | Afternoon    | 37,5 | 78  | 16,6  | 16,6  | 18,65 | 575,38 | 93,96  |
| 2019/06/02 | CH2205 | Male | Three y/o | Treatment (Wk 3) | Treatment | Fast Day | No | 13:25 | 13:00 - 13:59 | Afternoon    | 37,7 | 50  | 20,8  | 20,8  | 18,85 | 539,52 | 101,65 |
| 2019/06/02 | CH2206 | Male | Three y/o | Treatment (Wk 3) | Treatment | Fast Day | No | 13:25 | 13:00 - 13:59 | Afternoon    | 37,4 | 86  | 37,4  | 37,4  | 18,55 | 582,77 | 121,77 |
| 2019/06/02 | CH2205 | Male | Three y/o | Treatment (Wk 3) | Treatment | Fast Day | No | 13:30 | 13:00 - 13:59 | Afternoon    | 37,9 | 49  | 22,8  | 22,8  | 19,05 | 537,80 | 104,79 |
| 2019/06/02 | CH2206 | Male | Three y/o | Treatment (Wk 3) | Treatment | Fast Day | No | 13:30 | 13:00 - 13:59 | Afternoon    | 37,3 | 94  | 46,4  | 46,4  | 18,46 | 589,37 | 129,21 |
| 2019/06/02 | CH2205 | Male | Three y/o | Treatment (Wk 3) | Treatment | Fast Day | No | 13:35 | 13:00 - 13:59 | Afternoon    | 37,4 | 45  | 42,4  | 42,4  | 18,95 | 530,47 | 126,10 |
| 2019/06/02 | CH2206 | Male | Three y/o | Treatment (Wk 3) | Treatment | Fast Day | No | 13:35 | 13:00 - 13:59 | Afternoon    | 37,3 | 56  | 38,2  | 38,2  | 18,46 | 549,01 | 122,50 |
| 2019/06/02 | CH2205 | Male | Three y/o | Treatment (Wk 3) | Treatment | Fast Day | No | 13:40 | 13:00 - 13:59 | Afternoon    | 37,9 | 70  | 4,6   | 4,6   | 19,05 | 566,99 | 50,61  |
| 2019/06/02 | CH2206 | Male | Three y/o | Treatment (Wk 3) | Treatment | Fast Day | No | 13:40 | 13:00 - 13:59 | Afternoon    | 37,4 | 65  | 29,2  | 29,2  | 18,55 | 561,12 | 113,27 |
| 2019/06/02 | CH2205 | Male | Three y/o | Treatment (Wk 3) | Treatment | Fast Day | No | 13:45 | 13:00 - 13:59 | Afternoon    | 37,9 | 194 | 15,0  | 15,0  | 19,05 | 638,30 | 90,51  |
| 2019/06/02 | CH2206 | Male | Three y/o | Treatment (Wk 3) | Treatment | Fast Day | No | 13:45 | 13:00 - 13:59 | Afternoon    | 37,4 | 64  | 40,8  | 40,8  | 18,55 | 559,88 | 124,77 |
| 2019/06/02 | CH2205 | Male | Three y/o | Treatment (Wk 3) | Treatment | Fast Day | No | 13:50 | 13:00 - 13:59 | Afternoon    | 37,9 | 74  | 9,6   | 9,6   | 19,05 | 571,33 | 75,37  |
| 2019/06/02 | CH2206 | Male | Three y/o | Treatment (Wk 3) | Treatment | Fast Day | No | 13:50 | 13:00 - 13:59 | Afternoon    | 37,4 | 52  | 52,2  | 52,2  | 18,55 | 542,83 | 133,27 |
| 2019/06/02 | CH2205 | Male | Three y/o | Treatment (Wk 3) | Treatment | Fast Day | No | 13:55 | 13:00 - 13:59 | Afternoon    | 37,9 | 86  | 46,2  | 46,2  | 19,05 | 582,77 | 129,06 |
| 2019/06/02 | CH2206 | Male | Three y/o | Treatment (Wk 3) | Treatment | Fast Day | No | 13:55 | 13:00 - 13:59 | Afternoon    | 37,4 | 78  | 27,2  | 27,2  | 18,55 | 575,38 | 110,83 |
| 2019/06/02 | CH2205 | Male | Three y/o | Treatment (Wk 3) | Treatment | Fast Day | No | 14:00 | 14:00 - 14:59 | Afternoon    | 37,9 | 84  | 10,0  | 10,0  | 19,05 | 581,01 | 76,76  |
| 2019/06/02 | CH2206 | Male | Three y/o | Treatment (Wk 3) | Treatment | Fast Day | No | 14:00 | 14:00 - 14:59 | Afternoon    | 37,4 | 43  | 21,0  | 21,0  | 18,55 | 526,50 | 101,98 |
| 2019/06/02 | CH2205 | Male | Three y/o | Treatment (Wk 3) | Treatment | Fast Day | No | 14:05 | 14:00 - 14:59 | Afternoon    | 37,9 | 99  | 16,2  | 16,2  | 19,05 | 593,14 | 93,13  |



|            |        |      |           |                  |           |          |    |       |               |           |      |     |       |       |       |        |        |
|------------|--------|------|-----------|------------------|-----------|----------|----|-------|---------------|-----------|------|-----|-------|-------|-------|--------|--------|
| 2019/06/02 | CH2206 | Male | Three y/o | Treatment (Wk 3) | Treatment | Fast Day | No | 14:05 | 14:00 - 14:59 | Afternoon | 37,4 | 83  | 22,8  | 22,8  | 18,55 | 580,11 | 104,79 |
| 2019/06/02 | CH2205 | Male | Three y/o | Treatment (Wk 3) | Treatment | Fast Day | No | 14:10 | 14:00 - 14:59 | Afternoon | 37,9 | 76  | 19,6  | 19,6  | 19,05 | 573,39 | 99,63  |
| 2019/06/02 | CH2206 | Male | Three y/o | Treatment (Wk 3) | Treatment | Fast Day | No | 14:10 | 14:00 - 14:59 | Afternoon | 37,4 | 65  | 38,4  | 38,4  | 18,55 | 561,12 | 122,68 |
| 2019/06/02 | CH2205 | Male | Three y/o | Treatment (Wk 3) | Treatment | Fast Day | No | 14:15 | 14:00 - 14:59 | Afternoon | 37,9 | 67  | 22,6  | 22,6  | 19,05 | 563,53 | 104,49 |
| 2019/06/02 | CH2206 | Male | Three y/o | Treatment (Wk 3) | Treatment | Fast Day | No | 14:15 | 14:00 - 14:59 | Afternoon | 37,4 | 49  | 38,8  | 38,8  | 18,55 | 537,80 | 123,04 |
| 2019/06/02 | CH2205 | Male | Three y/o | Treatment (Wk 3) | Treatment | Fast Day | No | 14:20 | 14:00 - 14:59 | Afternoon | 37,9 | 83  | 23,8  | 23,8  | 19,05 | 580,11 | 106,26 |
| 2019/06/02 | CH2206 | Male | Three y/o | Treatment (Wk 3) | Treatment | Fast Day | No | 14:20 | 14:00 - 14:59 | Afternoon | 37,4 | 45  | 32,0  | 32,0  | 18,55 | 530,47 | 116,41 |
| 2019/06/02 | CH2205 | Male | Three y/o | Treatment (Wk 3) | Treatment | Fast Day | No | 14:25 | 14:00 - 14:59 | Afternoon | 37,9 | 75  | 22,8  | 22,8  | 19,05 | 572,36 | 104,79 |
| 2019/06/02 | CH2206 | Male | Three y/o | Treatment (Wk 3) | Treatment | Fast Day | No | 14:25 | 14:00 - 14:59 | Afternoon | 37,4 | 55  | 36,2  | 36,2  | 18,55 | 547,52 | 120,65 |
| 2019/06/02 | CH2205 | Male | Three y/o | Treatment (Wk 3) | Treatment | Fast Day | No | 14:30 | 14:00 - 14:59 | Afternoon | 37,9 | 49  | 24,2  | 24,2  | 19,05 | 537,80 | 106,83 |
| 2019/06/02 | CH2206 | Male | Three y/o | Treatment (Wk 3) | Treatment | Fast Day | No | 14:30 | 14:00 - 14:59 | Afternoon | 37,4 | 45  | 40,8  | 40,8  | 18,55 | 530,47 | 124,77 |
| 2019/06/02 | CH2205 | Male | Three y/o | Treatment (Wk 3) | Treatment | Fast Day | No | 14:35 | 14:00 - 14:59 | Afternoon | 37,9 | 55  | 77,0  | 77,0  | 19,05 | 547,52 | 146,75 |
| 2019/06/02 | CH2206 | Male | Three y/o | Treatment (Wk 3) | Treatment | Fast Day | No | 14:35 | 14:00 - 14:59 | Afternoon | 37,4 | 123 | 73,2  | 73,2  | 18,55 | 608,49 | 144,99 |
| 2019/06/02 | CH2205 | Male | Three y/o | Treatment (Wk 3) | Treatment | Fast Day | No | 14:40 | 14:00 - 14:59 | Afternoon | 37,9 | 140 | 37,2  | 37,2  | 19,05 | 617,28 | 121,59 |
| 2019/06/02 | CH2206 | Male | Three y/o | Treatment (Wk 3) | Treatment | Fast Day | No | 14:40 | 14:00 - 14:59 | Afternoon | 37,4 | 53  | 43,6  | 43,6  | 18,55 | 544,43 | 127,06 |
| 2019/06/02 | CH2205 | Male | Three y/o | Treatment (Wk 3) | Treatment | Fast Day | No | 14:45 | 14:00 - 14:59 | Afternoon | 37,9 | 79  | 19,0  | 19,0  | 19,05 | 576,36 | 98,56  |
| 2019/06/02 | CH2206 | Male | Three y/o | Treatment (Wk 3) | Treatment | Fast Day | No | 14:45 | 14:00 - 14:59 | Afternoon | 37,4 | 102 | 53,2  | 53,2  | 18,55 | 595,30 | 133,93 |
| 2019/06/02 | CH2205 | Male | Three y/o | Treatment (Wk 3) | Treatment | Fast Day | No | 14:50 | 14:00 - 14:59 | Afternoon | 37,9 | 124 | 37,4  | 37,4  | 19,05 | 609,04 | 121,77 |
| 2019/06/02 | CH2206 | Male | Three y/o | Treatment (Wk 3) | Treatment | Fast Day | No | 14:50 | 14:00 - 14:59 | Afternoon | 37,4 | 93  | 49,2  | 49,2  | 18,55 | 588,58 | 131,23 |
| 2019/06/02 | CH2205 | Male | Three y/o | Treatment (Wk 3) | Treatment | Fast Day | No | 14:55 | 14:00 - 14:59 | Afternoon | 37,9 | 60  | 33,4  | 33,4  | 19,05 | 554,67 | 117,88 |
| 2019/06/02 | CH2206 | Male | Three y/o | Treatment (Wk 3) | Treatment | Fast Day | No | 14:55 | 14:00 - 14:59 | Afternoon | 37,5 | 88  | 44,4  | 44,4  | 18,65 | 584,49 | 127,69 |
| 2019/06/02 | CH2205 | Male | Three y/o | Treatment (Wk 3) | Treatment | Fast Day | No | 15:00 | 15:00 - 15:59 | Afternoon | 37,9 | 107 | 125,0 | 125,0 | 19,05 | 598,73 | 163,63 |
| 2019/06/02 | CH2206 | Male | Three y/o | Treatment (Wk 3) | Treatment | Fast Day | No | 15:00 | 15:00 - 15:59 | Afternoon | 37,5 | 137 | 41,0  | 41,0  | 18,65 | 615,83 | 124,94 |
| 2019/06/02 | CH2205 | Male | Three y/o | Treatment (Wk 3) | Treatment | Fast Day | No | 15:05 | 15:00 - 15:59 | Afternoon | 37,9 | 92  | 37,2  | 37,2  | 19,05 | 587,78 | 121,59 |
| 2019/06/02 | CH2206 | Male | Three y/o | Treatment (Wk 3) | Treatment | Fast Day | No | 15:05 | 15:00 - 15:59 | Afternoon | 37,5 | 62  | 51,6  | 51,6  | 18,65 | 557,33 | 132,87 |
| 2019/06/02 | CH2205 | Male | Three y/o | Treatment (Wk 3) | Treatment | Fast Day | No | 15:10 | 15:00 - 15:59 | Afternoon | 38,0 | 70  | 107,4 | 107,4 | 19,15 | 566,99 | 158,33 |
| 2019/06/02 | CH2206 | Male | Three y/o | Treatment (Wk 3) | Treatment | Fast Day | No | 15:10 | 15:00 - 15:59 | Afternoon | 37,7 | 94  | 60,6  | 60,6  | 18,85 | 589,37 | 138,44 |
| 2019/06/02 | CH2205 | Male | Three y/o | Treatment (Wk 3) | Treatment | Fast Day | No | 15:15 | 15:00 - 15:59 | Afternoon | 38,1 | 87  | 83,8  | 83,8  | 19,26 | 583,64 | 149,69 |
| 2019/06/02 | CH2206 | Male | Three y/o | Treatment (Wk 3) | Treatment | Fast Day | No | 15:15 | 15:00 - 15:59 | Afternoon | 37,8 | 78  | 492,8 | 492,8 | 18,95 | 575,38 | 212,03 |
| 2019/06/02 | CH2205 | Male | Three y/o | Treatment (Wk 3) | Treatment | Fast Day | No | 15:20 | 15:00 - 15:59 | Afternoon | 38,2 | 83  | 21,8  | 21,8  | 19,36 | 580,11 | 103,26 |
| 2019/06/02 | CH2206 | Male | Three y/o | Treatment (Wk 3) | Treatment | Fast Day | No | 15:20 | 15:00 - 15:59 | Afternoon | 38,0 | 112 | 168,0 | 168,0 | 19,15 | 601,96 | 173,99 |
| 2019/06/02 | CH2205 | Male | Three y/o | Treatment (Wk 3) | Treatment | Fast Day | No | 15:25 | 15:00 - 15:59 | Afternoon | 38,2 | 98  | 131,0 | 131,0 | 19,36 | 592,41 | 165,27 |
| 2019/06/02 | CH2206 | Male | Three y/o | Treatment (Wk 3) | Treatment | Fast Day | No | 15:25 | 15:00 - 15:59 | Afternoon | 38,0 | 134 | 152,6 | 152,6 | 19,15 | 614,33 | 170,62 |
| 2019/06/02 | CH2205 | Male | Three y/o | Treatment (Wk 3) | Treatment | Fast Day | No | 15:30 | 15:00 - 15:59 | Afternoon | 38,3 | 106 | 45,2  | 45,2  | 19,46 | 598,06 | 128,30 |
| 2019/06/02 | CH2206 | Male | Three y/o | Treatment (Wk 3) | Treatment | Fast Day | No | 15:30 | 15:00 - 15:59 | Afternoon | 38,0 | 107 | 49,4  | 49,4  | 19,15 | 598,73 | 131,37 |
| 2019/06/02 | CH2205 | Male | Three y/o | Treatment (Wk 3) | Treatment | Fast Day | No | 15:35 | 15:00 - 15:59 | Afternoon | 38,2 |     | 16,2  | 16,2  | 19,36 |        | 93,13  |
| 2019/06/02 | CH2206 | Male | Three y/o | Treatment (Wk 3) | Treatment | Fast Day | No | 15:35 | 15:00 - 15:59 | Afternoon | 38,0 | 59  | 75,6  | 75,6  | 19,15 | 553,30 | 146,11 |
| 2019/06/02 | CH2205 | Male | Three y/o | Treatment (Wk 3) | Treatment | Fast Day | No | 15:40 | 15:00 - 15:59 | Afternoon | 38,2 | 63  | 14,0  | 14,0  | 19,36 | 558,62 | 88,17  |
| 2019/06/02 | CH2206 | Male | Three y/o | Treatment (Wk 3) | Treatment | Fast Day | No | 15:40 | 15:00 - 15:59 | Afternoon | 38,1 | 102 | 59,2  | 59,2  | 19,26 | 595,30 | 137,63 |
| 2019/06/02 | CH2205 | Male | Three y/o | Treatment (Wk 3) | Treatment | Fast Day | No | 15:45 | 15:00 - 15:59 | Afternoon | 38,2 | 66  | 8,0   | 8,0   | 19,36 | 562,34 | 69,22  |
| 2019/06/02 | CH2206 | Male | Three y/o | Treatment (Wk 3) | Treatment | Fast Day | No | 15:45 | 15:00 - 15:59 | Afternoon | 38,1 |     | 11,6  | 11,6  | 19,26 |        | 81,78  |
| 2019/06/02 | CH2205 | Male | Three y/o | Treatment (Wk 3) | Treatment | Fast Day | No | 15:50 | 15:00 - 15:59 | Afternoon | 38,2 | 119 | 6,6   | 6,6   | 19,36 | 606,20 | 62,73  |
| 2019/06/02 | CH2206 | Male | Three y/o | Treatment (Wk 3) | Treatment | Fast Day | No | 15:50 | 15:00 - 15:59 | Afternoon | 38,1 | 188 | 81,6  | 81,6  | 19,26 | 636,34 | 148,76 |
| 2019/06/02 | CH2205 | Male | Three y/o | Treatment (Wk 3) | Treatment | Fast Day | No | 15:55 | 15:00 - 15:59 | Afternoon | 38,2 | 86  | 65,4  | 65,4  | 19,36 | 582,77 | 141,08 |
| 2019/06/02 | CH2206 | Male | Three y/o | Treatment (Wk 3) | Treatment | Fast Day | No | 15:55 | 15:00 - 15:59 | Afternoon | 38,0 |     | 106,6 | 106,6 | 19,15 |        | 158,07 |
| 2019/06/02 | CH2205 | Male | Three y/o | Treatment (Wk 3) | Treatment | Fast Day | No | 16:00 | 16:00 - 16:59 | Evening   | 38,2 | 63  | 15,8  | 15,8  | 19,36 | 558,62 | 92,28  |
| 2019/06/02 | CH2206 | Male | Three y/o | Treatment (Wk 3) | Treatment | Fast Day | No | 16:00 | 16:00 - 16:59 | Evening   | 38,1 | 101 | 122,6 | 122,6 | 19,26 | 594,59 | 162,96 |
| 2019/06/02 | CH2205 | Male | Three y/o | Treatment (Wk 3) | Treatment | Fast Day | No | 16:05 | 16:00 - 16:59 | Evening   | 38,2 | 128 | 68,0  | 68,0  | 19,36 | 611,22 | 142,43 |
| 2019/06/02 | CH2206 | Male | Three y/o | Treatment (Wk 3) | Treatment | Fast Day | No | 16:05 | 16:00 - 16:59 | Evening   | 38,2 | 73  | 7,2   | 7,2   | 19,36 | 570,27 | 65,66  |
| 2019/06/02 | CH2205 | Male | Three y/o | Treatment (Wk 3) | Treatment | Fast Day | No | 16:10 | 16:00 - 16:59 | Evening   | 38,2 | 70  | 4,8   | 4,8   | 19,36 | 566,99 | 52,04  |
| 2019/06/02 | CH2206 | Male | Three y/o | Treatment (Wk 3) | Treatment | Fast Day | No | 16:10 | 16:00 - 16:59 | Evening   | 38,2 | 61  | 4,4   | 4,4   | 19,36 | 556,01 | 49,12  |
| 2019/06/02 | CH2205 | Male | Three y/o | Treatment (Wk 3) | Treatment | Fast Day | No | 16:15 | 16:00 - 16:59 | Evening   | 38,2 |     | 15,0  | 15,0  | 19,36 |        | 90,51  |
| 2019/06/02 | CH2206 | Male | Three y/o | Treatment (Wk 3) | Treatment | Fast Day | No | 16:15 | 16:00 - 16:59 | Evening   | 38,2 | 54  | 3,8   | 3,8   | 19,36 | 545,99 | 44,22  |
| 2019/06/02 | CH2205 | Male | Three y/o | Treatment (Wk 3) | Treatment | Fast Day | No | 16:20 | 16:00 - 16:59 | Evening   | 38,2 | 83  | 29,4  | 29,4  | 19,36 | 580,11 | 113,50 |
| 2019/06/02 | CH2206 | Male | Three y/o | Treatment (Wk 3) | Treatment | Fast Day | No | 16:20 | 16:00 - 16:59 | Evening   | 38,2 | 98  | 23,8  | 23,8  | 19,36 | 592,41 | 106,26 |
| 2019/06/02 | CH2205 | Male | Three y/o | Treatment (Wk 3) | Treatment | Fast Day | No | 16:25 | 16:00 - 16:59 | Evening   | 38,2 |     | 28,6  | 28,6  | 19,36 |        | 112,56 |
| 2019/06/02 | CH2206 | Male | Three y/o | Treatment (Wk 3) | Treatment | Fast Day | No | 16:25 | 16:00 - 16:59 | Evening   | 38,1 | 46  | 23,0  | 23,0  | 19,26 | 532,38 | 105,09 |
| 2019/06/02 | CH2205 | Male | Three y/o | Treatment (Wk 3) | Treatment | Fast Day | No | 16:30 | 16:00 - 16:59 | Evening   | 38,1 | 74  | 15,6  | 15,6  | 19,26 | 571,33 | 91,85  |
| 2019/06/02 | CH2206 | Male | Three y/o | Treatment (Wk 3) | Treatment | Fast Day | No | 16:30 | 16:00 - 16:59 | Evening   | 38,1 | 42  | 18,0  | 18,0  | 19,26 | 524,42 | 96,72  |
| 2019/06/02 | CH2205 | Male | Three y/o | Treatment (Wk 3) | Treatment | Fast Day | No | 16:35 | 16:00 - 16:59 | Evening   | 38,1 |     | 10,6  | 10,6  | 19,26 |        | 78,73  |
| 2019/06/02 | CH2206 | Male | Three y/o | Treatment (Wk 3) | Treatment | Fast Day | No | 16:35 | 16:00 - 16:59 | Evening   | 38,0 | 44  | 14,4  | 14,4  | 19,15 | 528,51 | 89,12  |
| 2019/06/02 | CH2205 | Male | Three y/o | Treatment (Wk 3) | Treatment | Fast Day | No | 16:40 | 16:00 - 16:59 | Evening   | 38,0 |     | 13,8  | 13,8  | 19,15 |        | 87,68  |
| 2019/06/02 | CH2206 | Male | Three y/o | Treatment (Wk 3) | Treatment | Fast Day | No | 16:40 | 16:00 - 16:59 | Evening   | 37,9 | 45  | 8,2   | 8,2   | 19,05 | 530,47 | 70,05  |
| 2019/06/02 | CH2205 | Male | Three y/o | Treatment (Wk 3) | Treatment | Fast Day | No | 16:45 | 16:00 - 16:59 | Evening   | 38,0 |     | 11,0  | 11,0  | 19,15 |        | 79,98  |
| 2019/06/02 | CH2206 | Male | Three y/o | Treatment (Wk 3) | Treatment | Fast Day | No | 16:45 | 16:00 - 16:59 | Evening   | 37,8 | 89  | 17,2  | 17,2  | 18,95 | 585,33 | 95,17  |
| 2019/06/02 | CH2205 | Male | Three y/o | Treatment (Wk 3) | Treatment | Fast Day | No | 16:50 | 16:00 - 16:59 | Evening   | 37,9 |     | 12,6  | 12,6  | 19,05 |        | 84,59  |
| 2019/06/02 | CH2206 | Male | Three y/o | Treatment (Wk 3) | Treatment | Fast Day | No | 16:50 | 16:00 - 16:59 | Evening   | 37,7 | 46  | 20,8  | 20,8  | 18,85 | 532,38 | 101,65 |
| 2019/06/02 | CH2205 | Male | Three y/o | Treatment (Wk 3) | Treatment | Fast Day | No | 16:55 | 16:00 - 16:59 | Evening   | 37,9 |     | 16,8  | 16,8  | 19,05 |        | 94,37  |
| 2019/06/02 | CH2206 | Male | Three y/o | Treatment (Wk 3) | Treatment | Fast Day | No | 16:55 | 16:00 - 16:59 | Evening   | 37,7 | 46  | 42,2  | 42,2  | 18,85 | 532,38 | 125,93 |
| 2019/06/02 | CH2205 | Male | Three y/o | Treatment (Wk 3) | Treatment | Fast Day | No | 17:00 | 17:00 - 17:59 | Evening   | 37,9 |     | 16,4  | 16,4  | 19,05 |        | 93,55  |



|            |        |      |           |                  |           |          |    |       |               |         |      |     |       |       |       |        |        |
|------------|--------|------|-----------|------------------|-----------|----------|----|-------|---------------|---------|------|-----|-------|-------|-------|--------|--------|
| 2019/06/02 | CH2206 | Male | Three y/o | Treatment (Wk 3) | Treatment | Fast Day | No | 17:00 | 17:00 - 17:59 | Evening | 37,7 | 78  | 45,8  | 45,8  | 18,85 | 575,38 | 128,76 |
| 2019/06/02 | CH2205 | Male | Three y/o | Treatment (Wk 3) | Treatment | Fast Day | No | 17:05 | 17:00 - 17:59 | Evening | 37,9 |     | 20,2  | 20,2  | 19,05 |        | 100,65 |
| 2019/06/02 | CH2206 | Male | Three y/o | Treatment (Wk 3) | Treatment | Fast Day | No | 17:05 | 17:00 - 17:59 | Evening | 37,7 | 44  | 14,0  | 14,0  | 18,85 | 528,51 | 88,17  |
| 2019/06/02 | CH2205 | Male | Three y/o | Treatment (Wk 3) | Treatment | Fast Day | No | 17:10 | 17:00 - 17:59 | Evening | 37,9 |     | 19,4  | 19,4  | 19,05 |        | 99,28  |
| 2019/06/02 | CH2206 | Male | Three y/o | Treatment (Wk 3) | Treatment | Fast Day | No | 17:10 | 17:00 - 17:59 | Evening | 37,7 | 47  | 22,0  | 22,0  | 18,85 | 534,23 | 103,57 |
| 2019/06/02 | CH2205 | Male | Three y/o | Treatment (Wk 3) | Treatment | Fast Day | No | 17:15 | 17:00 - 17:59 | Evening | 37,9 | 125 | 16,4  | 16,4  | 19,05 | 609,60 | 93,55  |
| 2019/06/02 | CH2206 | Male | Three y/o | Treatment (Wk 3) | Treatment | Fast Day | No | 17:15 | 17:00 - 17:59 | Evening | 37,5 | 46  | 17,4  | 17,4  | 18,65 | 532,38 | 95,56  |
| 2019/06/02 | CH2205 | Male | Three y/o | Treatment (Wk 3) | Treatment | Fast Day | No | 17:20 | 17:00 - 17:59 | Evening | 37,9 | 119 | 19,2  | 19,2  | 19,05 | 606,20 | 98,92  |
| 2019/06/02 | CH2206 | Male | Three y/o | Treatment (Wk 3) | Treatment | Fast Day | No | 17:20 | 17:00 - 17:59 | Evening | 37,5 | 66  | 38,2  | 38,2  | 18,65 | 562,34 | 122,50 |
| 2019/06/02 | CH2205 | Male | Three y/o | Treatment (Wk 3) | Treatment | Fast Day | No | 17:25 | 17:00 - 17:59 | Evening | 37,9 |     | 16,0  | 16,0  | 19,05 |        | 92,71  |
| 2019/06/02 | CH2206 | Male | Three y/o | Treatment (Wk 3) | Treatment | Fast Day | No | 17:25 | 17:00 - 17:59 | Evening | 37,7 | 38  | 21,0  | 21,0  | 18,85 | 515,48 | 101,98 |
| 2019/06/02 | CH2205 | Male | Three y/o | Treatment (Wk 3) | Treatment | Fast Day | No | 17:30 | 17:00 - 17:59 | Evening | 37,9 |     | 16,8  | 16,8  | 19,05 |        | 94,37  |
| 2019/06/02 | CH2206 | Male | Three y/o | Treatment (Wk 3) | Treatment | Fast Day | No | 17:30 | 17:00 - 17:59 | Evening | 37,5 | 47  | 10,8  | 10,8  | 18,65 | 534,23 | 79,36  |
| 2019/06/02 | CH2205 | Male | Three y/o | Treatment (Wk 3) | Treatment | Fast Day | No | 17:35 | 17:00 - 17:59 | Evening | 37,9 |     | 21,0  | 21,0  | 19,05 |        | 101,98 |
| 2019/06/02 | CH2206 | Male | Three y/o | Treatment (Wk 3) | Treatment | Fast Day | No | 17:35 | 17:00 - 17:59 | Evening | 37,6 | 121 | 46,2  | 46,2  | 18,75 | 607,35 | 129,06 |
| 2019/06/02 | CH2205 | Male | Three y/o | Treatment (Wk 3) | Treatment | Fast Day | No | 17:40 | 17:00 - 17:59 | Evening | 37,7 | 86  | 24,6  | 24,6  | 18,85 | 582,77 | 107,39 |
| 2019/06/02 | CH2206 | Male | Three y/o | Treatment (Wk 3) | Treatment | Fast Day | No | 17:40 | 17:00 - 17:59 | Evening | 37,7 | 172 | 28,8  | 28,8  | 18,85 | 630,73 | 112,79 |
| 2019/06/02 | CH2205 | Male | Three y/o | Treatment (Wk 3) | Treatment | Fast Day | No | 17:45 | 17:00 - 17:59 | Evening | 37,9 | 103 | 26,4  | 26,4  | 19,05 | 596,00 | 109,81 |
| 2019/06/02 | CH2206 | Male | Three y/o | Treatment (Wk 3) | Treatment | Fast Day | No | 17:45 | 17:00 - 17:59 | Evening | 37,8 | 112 | 32,8  | 32,8  | 18,95 | 601,96 | 117,26 |
| 2019/06/02 | CH2205 | Male | Three y/o | Treatment (Wk 3) | Treatment | Fast Day | No | 17:50 | 17:00 - 17:59 | Evening | 37,9 | 82  | 49,0  | 49,0  | 19,05 | 579,19 | 131,09 |
| 2019/06/02 | CH2206 | Male | Three y/o | Treatment (Wk 3) | Treatment | Fast Day | No | 17:50 | 17:00 - 17:59 | Evening | 37,8 | 102 | 281,8 | 281,8 | 18,95 | 595,30 | 192,21 |
| 2019/06/02 | CH2205 | Male | Three y/o | Treatment (Wk 3) | Treatment | Fast Day | No | 17:55 | 17:00 - 17:59 | Evening | 37,9 |     | 42,4  | 42,4  | 19,05 |        | 126,10 |
| 2019/06/02 | CH2206 | Male | Three y/o | Treatment (Wk 3) | Treatment | Fast Day | No | 17:55 | 17:00 - 17:59 | Evening | 37,8 | 80  | 7,6   | 7,6   | 18,95 | 577,31 | 67,49  |
| 2019/06/02 | CH2205 | Male | Three y/o | Treatment (Wk 3) | Treatment | Fast Day | No | 18:00 | 18:00 - 18:59 | Evening | 37,7 |     | 20,4  | 20,4  | 18,85 |        | 100,99 |
| 2019/06/02 | CH2206 | Male | Three y/o | Treatment (Wk 3) | Treatment | Fast Day | No | 18:00 | 18:00 - 18:59 | Evening | 37,7 | 73  | 27,6  | 27,6  | 18,85 | 570,27 | 111,33 |
| 2019/06/02 | CH2205 | Male | Three y/o | Treatment (Wk 3) | Treatment | Fast Day | No | 18:05 | 18:00 - 18:59 | Evening | 37,7 | 60  | 19,2  | 19,2  | 18,85 | 554,67 | 98,92  |
| 2019/06/02 | CH2206 | Male | Three y/o | Treatment (Wk 3) | Treatment | Fast Day | No | 18:05 | 18:00 - 18:59 | Evening | 37,5 | 57  | 32,2  | 32,2  | 18,65 | 550,47 | 116,63 |
| 2019/06/02 | CH2205 | Male | Three y/o | Treatment (Wk 3) | Treatment | Fast Day | No | 18:10 | 18:00 - 18:59 | Evening | 37,7 | 43  | 14,2  | 14,2  | 18,85 | 526,50 | 88,65  |
| 2019/06/02 | CH2206 | Male | Three y/o | Treatment (Wk 3) | Treatment | Fast Day | No | 18:10 | 18:00 - 18:59 | Evening | 37,7 | 54  | 47,2  | 47,2  | 18,85 | 545,99 | 129,80 |
| 2019/06/02 | CH2205 | Male | Three y/o | Treatment (Wk 3) | Treatment | Fast Day | No | 18:15 | 18:00 - 18:59 | Evening | 37,7 | 56  | 15,4  | 15,4  | 18,85 | 549,01 | 91,41  |
| 2019/06/02 | CH2206 | Male | Three y/o | Treatment (Wk 3) | Treatment | Fast Day | No | 18:15 | 18:00 - 18:59 | Evening | 37,7 | 60  | 45,0  | 45,0  | 18,85 | 554,67 | 128,15 |
| 2019/06/02 | CH2205 | Male | Three y/o | Treatment (Wk 3) | Treatment | Fast Day | No | 18:20 | 18:00 - 18:59 | Evening | 37,9 | 47  | 19,4  | 19,4  | 19,05 | 534,23 | 99,28  |
| 2019/06/02 | CH2206 | Male | Three y/o | Treatment (Wk 3) | Treatment | Fast Day | No | 18:20 | 18:00 - 18:59 | Evening | 37,7 | 73  | 35,2  | 35,2  | 18,85 | 570,27 | 119,69 |
| 2019/06/02 | CH2205 | Male | Three y/o | Treatment (Wk 3) | Treatment | Fast Day | No | 18:25 | 18:00 - 18:59 | Evening | 37,9 | 70  | 20,0  | 20,0  | 19,05 | 566,99 | 100,31 |
| 2019/06/02 | CH2206 | Male | Three y/o | Treatment (Wk 3) | Treatment | Fast Day | No | 18:25 | 18:00 - 18:59 | Evening | 37,5 |     | 36,2  | 36,2  | 18,65 |        | 120,65 |
| 2019/06/02 | CH2205 | Male | Three y/o | Treatment (Wk 3) | Treatment | Fast Day | No | 18:30 | 18:00 - 18:59 | Evening | 37,9 | 54  | 21,4  | 21,4  | 19,05 | 545,99 | 102,63 |
| 2019/06/02 | CH2206 | Male | Three y/o | Treatment (Wk 3) | Treatment | Fast Day | No | 18:30 | 18:00 - 18:59 | Evening | 37,5 | 73  | 23,6  | 23,6  | 18,65 | 570,27 | 105,97 |
| 2019/06/02 | CH2205 | Male | Three y/o | Treatment (Wk 3) | Treatment | Fast Day | No | 18:35 | 18:00 - 18:59 | Evening | 37,9 | 83  | 20,8  | 20,8  | 19,05 | 580,11 | 101,65 |
| 2019/06/02 | CH2206 | Male | Three y/o | Treatment (Wk 3) | Treatment | Fast Day | No | 18:35 | 18:00 - 18:59 | Evening | 37,7 | 74  | 36,4  | 36,4  | 18,85 | 571,33 | 120,84 |
| 2019/06/02 | CH2205 | Male | Three y/o | Treatment (Wk 3) | Treatment | Fast Day | No | 18:40 | 18:00 - 18:59 | Evening | 37,7 | 77  | 18,4  | 18,4  | 18,85 | 574,39 | 97,47  |
| 2019/06/02 | CH2206 | Male | Three y/o | Treatment (Wk 3) | Treatment | Fast Day | No | 18:40 | 18:00 - 18:59 | Evening | 37,5 | 78  | 16,4  | 16,4  | 18,65 | 575,38 | 93,55  |
| 2019/06/02 | CH2205 | Male | Three y/o | Treatment (Wk 3) | Treatment | Fast Day | No | 18:45 | 18:00 - 18:59 | Evening | 37,7 | 86  | 16,2  | 16,2  | 18,85 | 582,77 | 93,13  |
| 2019/06/02 | CH2206 | Male | Three y/o | Treatment (Wk 3) | Treatment | Fast Day | No | 18:45 | 18:00 - 18:59 | Evening | 37,4 | 79  | 9,2   | 9,2   | 18,55 | 576,36 | 73,94  |
| 2019/06/02 | CH2205 | Male | Three y/o | Treatment (Wk 3) | Treatment | Fast Day | No | 18:50 | 18:00 - 18:59 | Evening | 37,7 | 82  | 14,8  | 14,8  | 18,85 | 579,19 | 90,05  |
| 2019/06/02 | CH2206 | Male | Three y/o | Treatment (Wk 3) | Treatment | Fast Day | No | 18:50 | 18:00 - 18:59 | Evening | 37,4 | 112 | 4,0   | 4,0   | 18,55 | 601,96 | 45,94  |
| 2019/06/02 | CH2205 | Male | Three y/o | Treatment (Wk 3) | Treatment | Fast Day | No | 18:55 | 18:00 - 18:59 | Evening | 37,7 | 64  | 15,4  | 15,4  | 18,85 | 559,88 | 91,41  |
| 2019/06/02 | CH2206 | Male | Three y/o | Treatment (Wk 3) | Treatment | Fast Day | No | 18:55 | 18:00 - 18:59 | Evening | 37,3 | 81  | 11,4  | 11,4  | 18,46 | 578,26 | 81,19  |
| 2019/06/02 | CH2205 | Male | Three y/o | Treatment (Wk 3) | Treatment | Fast Day | No | 19:00 | 19:00 - 19:59 | Evening | 37,7 | 82  | 16,0  | 16,0  | 18,85 | 579,19 | 92,71  |
| 2019/06/02 | CH2206 | Male | Three y/o | Treatment (Wk 3) | Treatment | Fast Day | No | 19:00 | 19:00 - 19:59 | Evening | 37,3 | 60  | 10,6  | 10,6  | 18,46 | 554,67 | 78,73  |
| 2019/06/02 | CH2205 | Male | Three y/o | Treatment (Wk 3) | Treatment | Fast Day | No | 19:05 | 19:00 - 19:59 | Evening | 37,7 | 79  | 20,2  | 20,2  | 18,85 | 576,36 | 100,65 |
| 2019/06/02 | CH2206 | Male | Three y/o | Treatment (Wk 3) | Treatment | Fast Day | No | 19:05 | 19:00 - 19:59 | Evening | 37,3 | 47  | 11,8  | 11,8  | 18,46 | 534,23 | 82,36  |
| 2019/06/02 | CH2205 | Male | Three y/o | Treatment (Wk 3) | Treatment | Fast Day | No | 19:10 | 19:00 - 19:59 | Evening | 37,6 | 70  | 14,8  | 14,8  | 18,75 | 566,99 | 90,05  |
| 2019/06/02 | CH2206 | Male | Three y/o | Treatment (Wk 3) | Treatment | Fast Day | No | 19:10 | 19:00 - 19:59 | Evening | 37,3 | 47  | 3,6   | 3,6   | 18,46 | 534,23 | 42,42  |
| 2019/06/02 | CH2205 | Male | Three y/o | Treatment (Wk 3) | Treatment | Fast Day | No | 19:15 | 19:00 - 19:59 | Evening | 37,6 | 66  | 17,4  | 17,4  | 18,75 | 562,34 | 95,56  |
| 2019/06/02 | CH2206 | Male | Three y/o | Treatment (Wk 3) | Treatment | Fast Day | No | 19:15 | 19:00 - 19:59 | Evening | 37,4 | 43  | 5,8   | 5,8   | 18,55 | 526,50 | 58,39  |
| 2019/06/02 | CH2205 | Male | Three y/o | Treatment (Wk 3) | Treatment | Fast Day | No | 19:20 | 19:00 - 19:59 | Evening | 37,6 | 85  | 18,2  | 18,2  | 18,75 | 581,90 | 97,10  |
| 2019/06/02 | CH2206 | Male | Three y/o | Treatment (Wk 3) | Treatment | Fast Day | No | 19:20 | 19:00 - 19:59 | Evening | 37,4 | 41  | 15,2  | 15,2  | 18,55 | 522,29 | 90,96  |
| 2019/06/02 | CH2205 | Male | Three y/o | Treatment (Wk 3) | Treatment | Fast Day | No | 19:25 | 19:00 - 19:59 | Evening | 37,6 | 80  | 20,0  | 20,0  | 18,75 | 577,31 | 100,31 |
| 2019/06/02 | CH2206 | Male | Three y/o | Treatment (Wk 3) | Treatment | Fast Day | No | 19:25 | 19:00 - 19:59 | Evening | 37,5 | 75  | 15,2  | 15,2  | 18,65 | 572,36 | 90,96  |
| 2019/06/02 | CH2205 | Male | Three y/o | Treatment (Wk 3) | Treatment | Fast Day | No | 19:30 | 19:00 - 19:59 | Evening | 37,6 | 50  | 20,0  | 20,0  | 18,75 | 539,52 | 100,31 |
| 2019/06/02 | CH2206 | Male | Three y/o | Treatment (Wk 3) | Treatment | Fast Day | No | 19:30 | 19:00 - 19:59 | Evening | 37,5 | 46  | 23,2  | 23,2  | 18,65 | 532,38 | 105,39 |
| 2019/06/02 | CH2205 | Male | Three y/o | Treatment (Wk 3) | Treatment | Fast Day | No | 19:35 | 19:00 - 19:59 | Evening | 37,6 | 46  | 20,2  | 20,2  | 18,75 | 532,38 | 100,65 |
| 2019/06/02 | CH2206 | Male | Three y/o | Treatment (Wk 3) | Treatment | Fast Day | No | 19:35 | 19:00 - 19:59 | Evening | 37,5 | 81  | 17,6  | 17,6  | 18,65 | 578,26 | 95,95  |
| 2019/06/02 | CH2205 | Male | Three y/o | Treatment (Wk 3) | Treatment | Fast Day | No | 19:40 | 19:00 - 19:59 | Evening | 37,6 | 59  | 18,4  | 18,4  | 18,75 | 553,30 | 97,47  |
| 2019/06/02 | CH2206 | Male | Three y/o | Treatment (Wk 3) | Treatment | Fast Day | No | 19:40 | 19:00 - 19:59 | Evening | 37,6 | 40  | 16,2  | 16,2  | 18,75 | 520,09 | 93,13  |
| 2019/06/02 | CH2205 | Male | Three y/o | Treatment (Wk 3) | Treatment | Fast Day | No | 19:45 | 19:00 - 19:59 | Evening | 37,6 | 73  | 18,4  | 18,4  | 18,75 | 570,27 | 97,47  |
| 2019/06/02 | CH2206 | Male | Three y/o | Treatment (Wk 3) | Treatment | Fast Day | No | 19:45 | 19:00 - 19:59 | Evening | 37,6 | 77  | 26,2  | 26,2  | 18,75 | 574,39 | 109,55 |
| 2019/06/02 | CH2205 | Male | Three y/o | Treatment (Wk 3) | Treatment | Fast Day | No | 19:50 | 19:00 - 19:59 | Evening | 37,6 | 78  | 20,4  | 20,4  | 18,75 | 575,38 | 100,99 |
| 2019/06/02 | CH2206 | Male | Three y/o | Treatment (Wk 3) | Treatment | Fast Day | No | 19:50 | 19:00 - 19:59 | Evening | 37,6 | 74  | 27,2  | 27,2  | 18,75 | 571,33 | 110,83 |
| 2019/06/02 | CH2205 | Male | Three y/o | Treatment (Wk 3) | Treatment | Fast Day | No | 19:55 | 19:00 - 19:59 | Evening | 37,6 | 52  | 16,2  | 16,2  | 18,75 | 542,83 | 93,13  |



|            |        |      |           |                  |           |          |    |       |               |         |      |     |      |      |       |        |        |
|------------|--------|------|-----------|------------------|-----------|----------|----|-------|---------------|---------|------|-----|------|------|-------|--------|--------|
| 2019/06/02 | CH2206 | Male | Three y/o | Treatment (Wk 3) | Treatment | Fast Day | No | 19:55 | 19:00 - 19:59 | Evening | 37,6 | 50  | 40,8 | 40,8 | 18,75 | 539,52 | 124,77 |
| 2019/06/02 | CH2205 | Male | Three y/o | Treatment (Wk 3) | Treatment | Fast Day | No | 20:00 | 20:00 - 20:59 | Night   | 37,6 | 56  | 7,6  | 7,6  | 18,75 | 549,01 | 67,49  |
| 2019/06/02 | CH2206 | Male | Three y/o | Treatment (Wk 3) | Treatment | Fast Day | No | 20:00 | 20:00 - 20:59 | Night   | 37,5 | 46  | 41,0 | 41,0 | 18,65 | 532,38 | 124,94 |
| 2019/06/02 | CH2205 | Male | Three y/o | Treatment (Wk 3) | Treatment | Fast Day | No | 20:05 | 20:00 - 20:59 | Night   | 37,6 | 47  | 5,8  | 5,8  | 18,75 | 534,23 | 58,39  |
| 2019/06/02 | CH2206 | Male | Three y/o | Treatment (Wk 3) | Treatment | Fast Day | No | 20:05 | 20:00 - 20:59 | Night   | 37,5 | 52  | 35,2 | 35,2 | 18,65 | 542,83 | 119,69 |
| 2019/06/02 | CH2205 | Male | Three y/o | Treatment (Wk 3) | Treatment | Fast Day | No | 20:10 | 20:00 - 20:59 | Night   | 37,5 | 53  | 2,8  | 2,8  | 18,85 | 544,43 | 34,04  |
| 2019/06/02 | CH2206 | Male | Three y/o | Treatment (Wk 3) | Treatment | Fast Day | No | 20:10 | 20:00 - 20:59 | Night   | 37,5 | 45  | 42,4 | 42,4 | 18,65 | 530,47 | 126,10 |
| 2019/06/02 | CH2205 | Male | Three y/o | Treatment (Wk 3) | Treatment | Fast Day | No | 20:15 | 20:00 - 20:59 | Night   | 37,7 | 76  | 4,0  | 4,0  | 18,85 | 573,39 | 45,94  |
| 2019/06/02 | CH2206 | Male | Three y/o | Treatment (Wk 3) | Treatment | Fast Day | No | 20:15 | 20:00 - 20:59 | Night   | 37,5 | 47  | 33,6 | 33,6 | 18,65 | 534,23 | 118,09 |
| 2019/06/02 | CH2205 | Male | Three y/o | Treatment (Wk 3) | Treatment | Fast Day | No | 20:20 | 20:00 - 20:59 | Night   | 37,6 | 45  | 4,4  | 4,4  | 18,75 | 530,47 | 49,12  |
| 2019/06/02 | CH2206 | Male | Three y/o | Treatment (Wk 3) | Treatment | Fast Day | No | 20:20 | 20:00 - 20:59 | Night   | 37,5 | 47  | 37,8 | 37,8 | 18,65 | 534,23 | 122,14 |
| 2019/06/02 | CH2205 | Male | Three y/o | Treatment (Wk 3) | Treatment | Fast Day | No | 20:25 | 20:00 - 20:59 | Night   | 37,6 | 44  | 3,2  | 3,2  | 18,75 | 528,51 | 38,49  |
| 2019/06/02 | CH2206 | Male | Three y/o | Treatment (Wk 3) | Treatment | Fast Day | No | 20:25 | 20:00 - 20:59 | Night   | 37,4 | 58  | 36,0 | 36,0 | 18,55 | 551,90 | 120,46 |
| 2019/06/02 | CH2205 | Male | Three y/o | Treatment (Wk 3) | Treatment | Fast Day | No | 20:30 | 20:00 - 20:59 | Night   | 37,6 | 54  | 7,0  | 7,0  | 18,75 | 545,99 | 64,72  |
| 2019/06/02 | CH2206 | Male | Three y/o | Treatment (Wk 3) | Treatment | Fast Day | No | 20:30 | 20:00 - 20:59 | Night   | 37,4 | 50  | 32,2 | 32,2 | 18,55 | 539,52 | 116,63 |
| 2019/06/02 | CH2205 | Male | Three y/o | Treatment (Wk 3) | Treatment | Fast Day | No | 20:35 | 20:00 - 20:59 | Night   | 37,7 | 57  | 9,4  | 9,4  | 18,85 | 550,47 | 74,66  |
| 2019/06/02 | CH2206 | Male | Three y/o | Treatment (Wk 3) | Treatment | Fast Day | No | 20:35 | 20:00 - 20:59 | Night   | 37,4 | 78  | 15,4 | 15,4 | 18,55 | 575,38 | 91,41  |
| 2019/06/02 | CH2205 | Male | Three y/o | Treatment (Wk 3) | Treatment | Fast Day | No | 20:40 | 20:00 - 20:59 | Night   | 37,6 | 49  | 8,4  | 8,4  | 18,75 | 537,80 | 70,86  |
| 2019/06/02 | CH2206 | Male | Three y/o | Treatment (Wk 3) | Treatment | Fast Day | No | 20:40 | 20:00 - 20:59 | Night   | 37,4 | 72  | 15,4 | 15,4 | 18,55 | 569,20 | 91,41  |
| 2019/06/02 | CH2205 | Male | Three y/o | Treatment (Wk 3) | Treatment | Fast Day | No | 20:45 | 20:00 - 20:59 | Night   | 37,7 | 84  | 8,2  | 8,2  | 18,85 | 581,01 | 70,05  |
| 2019/06/02 | CH2206 | Male | Three y/o | Treatment (Wk 3) | Treatment | Fast Day | No | 20:45 | 20:00 - 20:59 | Night   | 37,5 | 90  | 26,8 | 26,8 | 18,65 | 586,16 | 110,33 |
| 2019/06/02 | CH2205 | Male | Three y/o | Treatment (Wk 3) | Treatment | Fast Day | No | 20:50 | 20:00 - 20:59 | Night   | 37,7 | 48  | 6,4  | 6,4  | 18,85 | 536,04 | 61,70  |
| 2019/06/02 | CH2206 | Male | Three y/o | Treatment (Wk 3) | Treatment | Fast Day | No | 20:50 | 20:00 - 20:59 | Night   | 37,4 | 83  | 27,4 | 27,4 | 18,55 | 580,11 | 111,09 |
| 2019/06/02 | CH2205 | Male | Three y/o | Treatment (Wk 3) | Treatment | Fast Day | No | 20:55 | 20:00 - 20:59 | Night   | 37,7 | 45  | 6,4  | 6,4  | 18,85 | 530,47 | 61,70  |
| 2019/06/02 | CH2206 | Male | Three y/o | Treatment (Wk 3) | Treatment | Fast Day | No | 20:55 | 20:00 - 20:59 | Night   | 37,4 | 81  | 27,0 | 27,0 | 18,55 | 578,26 | 110,58 |
| 2019/06/02 | CH2205 | Male | Three y/o | Treatment (Wk 3) | Treatment | Fast Day | No | 21:00 | 21:00 - 21:59 | Night   | 37,7 | 86  | 7,8  | 7,8  | 18,85 | 582,77 | 68,36  |
| 2019/06/02 | CH2206 | Male | Three y/o | Treatment (Wk 3) | Treatment | Fast Day | No | 21:00 | 21:00 - 21:59 | Night   | 37,4 | 76  | 14,0 | 14,0 | 18,55 | 573,39 | 88,17  |
| 2019/06/02 | CH2205 | Male | Three y/o | Treatment (Wk 3) | Treatment | Fast Day | No | 21:05 | 21:00 - 21:59 | Night   | 37,7 | 46  | 3,6  | 3,6  | 18,85 | 532,38 | 42,42  |
| 2019/06/02 | CH2206 | Male | Three y/o | Treatment (Wk 3) | Treatment | Fast Day | No | 21:05 | 21:00 - 21:59 | Night   | 37,4 | 49  | 8,4  | 8,4  | 18,55 | 537,80 | 70,86  |
| 2019/06/02 | CH2205 | Male | Three y/o | Treatment (Wk 3) | Treatment | Fast Day | No | 21:10 | 21:00 - 21:59 | Night   | 37,7 | 82  | 6,4  | 6,4  | 18,85 | 579,19 | 61,70  |
| 2019/06/02 | CH2206 | Male | Three y/o | Treatment (Wk 3) | Treatment | Fast Day | No | 21:10 | 21:00 - 21:59 | Night   | 37,3 | 42  | 10,6 | 10,6 | 18,46 | 524,42 | 78,73  |
| 2019/06/02 | CH2205 | Male | Three y/o | Treatment (Wk 3) | Treatment | Fast Day | No | 21:15 | 21:00 - 21:59 | Night   | 37,7 | 54  | 3,8  | 3,8  | 18,85 | 545,99 | 44,22  |
| 2019/06/02 | CH2206 | Male | Three y/o | Treatment (Wk 3) | Treatment | Fast Day | No | 21:15 | 21:00 - 21:59 | Night   | 37,3 | 48  | 6,4  | 6,4  | 18,46 | 536,04 | 61,70  |
| 2019/06/02 | CH2205 | Male | Three y/o | Treatment (Wk 3) | Treatment | Fast Day | No | 21:20 | 21:00 - 21:59 | Night   | 37,6 | 39  | 2,6  | 2,6  | 18,75 | 517,82 | 31,57  |
| 2019/06/02 | CH2206 | Male | Three y/o | Treatment (Wk 3) | Treatment | Fast Day | No | 21:20 | 21:00 - 21:59 | Night   | 37,3 |     | 8,2  | 8,2  | 18,46 |        | 70,05  |
| 2019/06/02 | CH2205 | Male | Three y/o | Treatment (Wk 3) | Treatment | Fast Day | No | 21:25 | 21:00 - 21:59 | Night   | 37,6 | 74  | 8,0  | 8,0  | 18,75 | 571,33 | 69,22  |
| 2019/06/02 | CH2206 | Male | Three y/o | Treatment (Wk 3) | Treatment | Fast Day | No | 21:25 | 21:00 - 21:59 | Night   | 37,3 | 73  | 16,0 | 16,0 | 18,46 | 570,27 | 92,71  |
| 2019/06/02 | CH2205 | Male | Three y/o | Treatment (Wk 3) | Treatment | Fast Day | No | 21:30 | 21:00 - 21:59 | Night   | 37,6 | 54  | 8,8  | 8,8  | 18,75 | 545,99 | 72,43  |
| 2019/06/02 | CH2206 | Male | Three y/o | Treatment (Wk 3) | Treatment | Fast Day | No | 21:30 | 21:00 - 21:59 | Night   | 37,3 | 53  | 19,4 | 19,4 | 18,46 | 544,43 | 99,28  |
| 2019/06/02 | CH2205 | Male | Three y/o | Treatment (Wk 3) | Treatment | Fast Day | No | 21:35 | 21:00 - 21:59 | Night   | 37,6 | 45  | 9,6  | 9,6  | 18,75 | 530,47 | 75,37  |
| 2019/06/02 | CH2206 | Male | Three y/o | Treatment (Wk 3) | Treatment | Fast Day | No | 21:35 | 21:00 - 21:59 | Night   | 37,3 | 44  | 21,6 | 21,6 | 18,46 | 528,51 | 102,94 |
| 2019/06/02 | CH2205 | Male | Three y/o | Treatment (Wk 3) | Treatment | Fast Day | No | 21:40 | 21:00 - 21:59 | Night   | 37,5 | 86  | 8,0  | 8,0  | 18,65 | 582,77 | 69,22  |
| 2019/06/02 | CH2206 | Male | Three y/o | Treatment (Wk 3) | Treatment | Fast Day | No | 21:40 | 21:00 - 21:59 | Night   | 37,3 | 39  | 23,0 | 23,0 | 18,46 | 517,82 | 105,09 |
| 2019/06/02 | CH2205 | Male | Three y/o | Treatment (Wk 3) | Treatment | Fast Day | No | 21:45 | 21:00 - 21:59 | Night   | 37,5 | 38  | 4,8  | 4,8  | 18,65 | 515,48 | 52,04  |
| 2019/06/02 | CH2206 | Male | Three y/o | Treatment (Wk 3) | Treatment | Fast Day | No | 21:45 | 21:00 - 21:59 | Night   | 37,3 | 77  | 25,8 | 25,8 | 18,46 | 574,39 | 109,02 |
| 2019/06/02 | CH2205 | Male | Three y/o | Treatment (Wk 3) | Treatment | Fast Day | No | 21:50 | 21:00 - 21:59 | Night   | 37,6 | 103 | 6,8  | 6,8  | 18,75 | 596,00 | 63,74  |
| 2019/06/02 | CH2206 | Male | Three y/o | Treatment (Wk 3) | Treatment | Fast Day | No | 21:50 | 21:00 - 21:59 | Night   | 37,3 | 98  | 32,4 | 32,4 | 18,46 | 592,41 | 116,84 |
| 2019/06/02 | CH2205 | Male | Three y/o | Treatment (Wk 3) | Treatment | Fast Day | No | 21:55 | 21:00 - 21:59 | Night   | 37,6 | 45  | 5,4  | 5,4  | 18,75 | 530,47 | 55,99  |
| 2019/06/02 | CH2206 | Male | Three y/o | Treatment (Wk 3) | Treatment | Fast Day | No | 21:55 | 21:00 - 21:59 | Night   | 37,4 | 52  | 38,4 | 38,4 | 18,55 | 542,83 | 122,68 |
| 2019/06/02 | CH2205 | Male | Three y/o | Treatment (Wk 3) | Treatment | Fast Day | No | 22:00 | 22:00 - 22:59 | Night   | 37,6 | 55  | 6,2  | 6,2  | 18,75 | 547,52 | 60,63  |
| 2019/06/02 | CH2206 | Male | Three y/o | Treatment (Wk 3) | Treatment | Fast Day | No | 22:00 | 22:00 - 22:59 | Night   | 37,4 | 73  | 44,8 | 44,8 | 18,55 | 570,27 | 127,99 |
| 2019/06/02 | CH2205 | Male | Three y/o | Treatment (Wk 3) | Treatment | Fast Day | No | 22:05 | 22:00 - 22:59 | Night   | 37,6 | 76  | 13,2 | 13,2 | 18,75 | 573,39 | 86,17  |
| 2019/06/02 | CH2206 | Male | Three y/o | Treatment (Wk 3) | Treatment | Fast Day | No | 22:05 | 22:00 - 22:59 | Night   | 37,4 | 50  | 20,8 | 20,8 | 18,55 | 539,52 | 101,65 |
| 2019/06/02 | CH2205 | Male | Three y/o | Treatment (Wk 3) | Treatment | Fast Day | No | 22:10 | 22:00 - 22:59 | Night   | 37,5 | 56  | 19,4 | 19,4 | 18,65 | 549,01 | 99,28  |
| 2019/06/02 | CH2206 | Male | Three y/o | Treatment (Wk 3) | Treatment | Fast Day | No | 22:10 | 22:00 - 22:59 | Night   | 37,4 | 50  | 21,4 | 21,4 | 18,55 | 539,52 | 102,63 |
| 2019/06/02 | CH2205 | Male | Three y/o | Treatment (Wk 3) | Treatment | Fast Day | No | 22:15 | 22:00 - 22:59 | Night   | 37,5 |     | 13,4 | 13,4 | 18,65 |        | 86,68  |
| 2019/06/02 | CH2206 | Male | Three y/o | Treatment (Wk 3) | Treatment | Fast Day | No | 22:15 | 22:00 - 22:59 | Night   | 37,4 | 84  | 20,8 | 20,8 | 18,55 | 581,01 | 101,65 |
| 2019/06/02 | CH2205 | Male | Three y/o | Treatment (Wk 3) | Treatment | Fast Day | No | 22:20 | 22:00 - 22:59 | Night   | 37,4 | 106 | 11,6 | 11,6 | 18,55 | 598,06 | 81,78  |
| 2019/06/02 | CH2206 | Male | Three y/o | Treatment (Wk 3) | Treatment | Fast Day | No | 22:20 | 22:00 - 22:59 | Night   | 37,4 | 42  | 14,2 | 14,2 | 18,55 | 524,42 | 88,65  |
| 2019/06/02 | CH2205 | Male | Three y/o | Treatment (Wk 3) | Treatment | Fast Day | No | 22:25 | 22:00 - 22:59 | Night   | 37,4 |     | 14,6 | 14,6 | 18,55 |        | 89,59  |
| 2019/06/02 | CH2206 | Male | Three y/o | Treatment (Wk 3) | Treatment | Fast Day | No | 22:25 | 22:00 - 22:59 | Night   | 37,4 | 43  | 9,8  | 9,8  | 18,55 | 526,50 | 76,07  |
| 2019/06/02 | CH2205 | Male | Three y/o | Treatment (Wk 3) | Treatment | Fast Day | No | 22:30 | 22:00 - 22:59 | Night   | 37,4 |     | 14,4 | 14,4 | 18,55 |        | 89,12  |
| 2019/06/02 | CH2206 | Male | Three y/o | Treatment (Wk 3) | Treatment | Fast Day | No | 22:30 | 22:00 - 22:59 | Night   | 37,4 | 50  | 8,6  | 8,6  | 18,55 | 539,52 | 71,66  |
| 2019/06/02 | CH2205 | Male | Three y/o | Treatment (Wk 3) | Treatment | Fast Day | No | 22:35 | 22:00 - 22:59 | Night   | 37,4 | 77  | 17,4 | 17,4 | 18,55 | 574,39 | 95,56  |
| 2019/06/02 | CH2206 | Male | Three y/o | Treatment (Wk 3) | Treatment | Fast Day | No | 22:35 | 22:00 - 22:59 | Night   | 37,3 | 47  | 18,6 | 18,6 | 18,46 | 534,23 | 97,84  |
| 2019/06/02 | CH2205 | Male | Three y/o | Treatment (Wk 3) | Treatment | Fast Day | No | 22:40 | 22:00 - 22:59 | Night   | 37,5 |     | 12,8 | 12,8 | 18,65 |        | 85,12  |
| 2019/06/02 | CH2206 | Male | Three y/o | Treatment (Wk 3) | Treatment | Fast Day | No | 22:40 | 22:00 - 22:59 | Night   | 37,3 | 48  | 28,0 | 28,0 | 18,46 | 536,04 | 111,83 |
| 2019/06/02 | CH2205 | Male | Three y/o | Treatment (Wk 3) | Treatment | Fast Day | No | 22:45 | 22:00 - 22:59 | Night   | 37,5 | 59  | 16,0 | 16,0 | 18,65 | 553,30 | 92,71  |
| 2019/06/02 | CH2206 | Male | Three y/o | Treatment (Wk 3) | Treatment | Fast Day | No | 22:45 | 22:00 - 22:59 | Night   | 37,3 | 42  | 19,6 | 19,6 | 18,46 | 524,42 | 99,63  |
| 2019/06/02 | CH2205 | Male | Three y/o | Treatment (Wk 3) | Treatment | Fast Day | No | 22:50 | 22:00 - 22:59 | Night   | 37,5 |     | 16,8 | 16,8 | 18,65 |        | 94,37  |



|    |            |        |      |           |                  |           |          |    |       |               |               |      |     |      |      |       |        |        |
|----|------------|--------|------|-----------|------------------|-----------|----------|----|-------|---------------|---------------|------|-----|------|------|-------|--------|--------|
|    | 2019/06/02 | CH2206 | Male | Three y/o | Treatment (Wk 3) | Treatment | Fast Day | No | 22:50 | 22:00 - 22:59 | Night         | 37,3 | 72  | 37,4 | 37,4 | 18,46 | 569,20 | 121,77 |
|    | 2019/06/02 | CH2205 | Male | Three y/o | Treatment (Wk 3) | Treatment | Fast Day | No | 22:55 | 22:00 - 22:59 | Night         | 37,5 |     | 12,4 | 12,4 | 18,65 |        | 84,04  |
|    | 2019/06/02 | CH2206 | Male | Three y/o | Treatment (Wk 3) | Treatment | Fast Day | No | 22:55 | 22:00 - 22:59 | Night         | 37,4 | 79  | 51,2 | 51,2 | 18,55 | 576,36 | 132,61 |
|    | 2019/06/02 | CH2205 | Male | Three y/o | Treatment (Wk 3) | Treatment | Fast Day | No | 23:00 | 23:00 - 23:59 | Night         | 37,5 | 82  | 15,8 | 15,8 | 18,65 | 579,19 | 92,28  |
|    | 2019/06/02 | CH2206 | Male | Three y/o | Treatment (Wk 3) | Treatment | Fast Day | No | 23:00 | 23:00 - 23:59 | Night         | 37,4 | 72  | 50,2 | 50,2 | 18,55 | 569,20 | 131,92 |
|    | 2019/06/02 | CH2205 | Male | Three y/o | Treatment (Wk 3) | Treatment | Fast Day | No | 23:05 | 23:00 - 23:59 | Night         | 37,5 |     | 17,6 | 17,6 | 18,65 |        | 95,95  |
|    | 2019/06/02 | CH2206 | Male | Three y/o | Treatment (Wk 3) | Treatment | Fast Day | No | 23:05 | 23:00 - 23:59 | Night         | 37,4 | 43  | 51,2 | 51,2 | 18,55 | 526,50 | 132,61 |
|    | 2019/06/02 | CH2205 | Male | Three y/o | Treatment (Wk 3) | Treatment | Fast Day | No | 23:10 | 23:00 - 23:59 | Night         | 37,4 |     | 18,0 | 18,0 | 18,55 |        | 96,72  |
|    | 2019/06/02 | CH2206 | Male | Three y/o | Treatment (Wk 3) | Treatment | Fast Day | No | 23:10 | 23:00 - 23:59 | Night         | 37,4 | 49  | 49,8 | 49,8 | 18,55 | 537,80 | 131,65 |
|    | 2019/06/02 | CH2205 | Male | Three y/o | Treatment (Wk 3) | Treatment | Fast Day | No | 23:15 | 23:00 - 23:59 | Night         | 37,5 |     | 17,2 | 17,2 | 18,65 |        | 95,17  |
|    | 2019/06/02 | CH2206 | Male | Three y/o | Treatment (Wk 3) | Treatment | Fast Day | No | 23:15 | 23:00 - 23:59 | Night         | 37,4 | 82  | 49,4 | 49,4 | 18,55 | 579,19 | 131,37 |
|    | 2019/06/02 | CH2205 | Male | Three y/o | Treatment (Wk 3) | Treatment | Fast Day | No | 23:20 | 23:00 - 23:59 | Night         | 37,5 |     | 22,6 | 22,6 | 18,65 |        | 104,49 |
|    | 2019/06/02 | CH2206 | Male | Three y/o | Treatment (Wk 3) | Treatment | Fast Day | No | 23:20 | 23:00 - 23:59 | Night         | 37,4 | 45  | 50,0 | 50,0 | 18,55 | 530,47 | 131,79 |
|    | 2019/06/02 | CH2205 | Male | Three y/o | Treatment (Wk 3) | Treatment | Fast Day | No | 23:25 | 23:00 - 23:59 | Night         | 37,5 | 96  | 18,0 | 18,0 | 18,65 | 590,91 | 96,72  |
|    | 2019/06/02 | CH2206 | Male | Three y/o | Treatment (Wk 3) | Treatment | Fast Day | No | 23:25 | 23:00 - 23:59 | Night         | 37,4 | 47  | 42,2 | 42,2 | 18,55 | 534,23 | 125,93 |
|    | 2019/06/02 | CH2205 | Male | Three y/o | Treatment (Wk 3) | Treatment | Fast Day | No | 23:30 | 23:00 - 23:59 | Night         | 37,4 | 52  | 14,2 | 14,2 | 18,55 | 542,83 | 88,65  |
|    | 2019/06/02 | CH2206 | Male | Three y/o | Treatment (Wk 3) | Treatment | Fast Day | No | 23:30 | 23:00 - 23:59 | Night         | 37,4 | 53  | 39,4 | 39,4 | 18,55 | 544,43 | 123,57 |
|    | 2019/06/02 | CH2205 | Male | Three y/o | Treatment (Wk 3) | Treatment | Fast Day | No | 23:35 | 23:00 - 23:59 | Night         | 37,4 | 48  | 21,0 | 21,0 | 18,55 | 536,04 | 101,98 |
|    | 2019/06/02 | CH2206 | Male | Three y/o | Treatment (Wk 3) | Treatment | Fast Day | No | 23:35 | 23:00 - 23:59 | Night         | 37,4 | 42  | 43,6 | 43,6 | 18,55 | 524,42 | 127,06 |
|    | 2019/06/02 | CH2205 | Male | Three y/o | Treatment (Wk 3) | Treatment | Fast Day | No | 23:40 | 23:00 - 23:59 | Night         | 37,3 | 84  | 17,2 | 17,2 | 18,46 | 581,01 | 95,17  |
|    | 2019/06/02 | CH2206 | Male | Three y/o | Treatment (Wk 3) | Treatment | Fast Day | No | 23:40 | 23:00 - 23:59 | Night         | 37,4 | 49  | 44,8 | 44,8 | 18,55 | 537,80 | 127,99 |
|    | 2019/06/02 | CH2205 | Male | Three y/o | Treatment (Wk 3) | Treatment | Fast Day | No | 23:45 | 23:00 - 23:59 | Night         | 37,3 | 61  | 21,2 | 21,2 | 18,46 | 556,01 | 102,31 |
|    | 2019/06/02 | CH2206 | Male | Three y/o | Treatment (Wk 3) | Treatment | Fast Day | No | 23:45 | 23:00 - 23:59 | Night         | 37,3 | 44  | 48,0 | 48,0 | 18,46 | 528,51 | 130,38 |
|    | 2019/06/02 | CH2205 | Male | Three y/o | Treatment (Wk 3) | Treatment | Fast Day | No | 23:50 | 23:00 - 23:59 | Night         | 37,3 | 70  | 14,6 | 14,6 | 18,46 | 566,99 | 89,59  |
|    | 2019/06/02 | CH2206 | Male | Three y/o | Treatment (Wk 3) | Treatment | Fast Day | No | 23:50 | 23:00 - 23:59 | Night         | 37,3 |     | 50,2 | 50,2 | 18,46 |        | 131,92 |
|    | 2019/06/02 | CH2205 | Male | Three y/o | Treatment (Wk 3) | Treatment | Fast Day | No | 23:55 | 23:00 - 23:59 | Night         | 37,2 | 50  | 19,2 | 19,2 | 18,36 | 539,52 | 98,92  |
|    | 2019/06/02 | CH2206 | Male | Three y/o | Treatment (Wk 3) | Treatment | Fast Day | No | 23:55 | 23:00 - 23:59 | Night         | 37,3 | 48  | 47,2 | 47,2 | 18,46 | 536,04 | 129,80 |
| 20 | 2019/06/03 | CH2205 | Male | Three y/o | Treatment (Wk 3) | Treatment | Feed Day | No | 00:00 | 00:00 - 00:59 | Early Morning | 37,2 | 42  | 16,6 | 16,6 | 18,36 | 524,42 | 93,96  |
|    | 2019/06/03 | CH2206 | Male | Three y/o | Treatment (Wk 3) | Treatment | Feed Day | No | 00:00 | 00:00 - 00:59 | Early Morning | 37,3 | 49  | 46,0 | 46,0 | 18,46 | 537,80 | 128,91 |
|    | 2019/06/03 | CH2205 | Male | Three y/o | Treatment (Wk 3) | Treatment | Feed Day | No | 00:05 | 00:00 - 00:59 | Early Morning | 37,2 | 45  | 18,6 | 18,6 | 18,36 | 530,47 | 97,84  |
|    | 2019/06/03 | CH2206 | Male | Three y/o | Treatment (Wk 3) | Treatment | Feed Day | No | 00:05 | 00:00 - 00:59 | Early Morning | 37,3 | 74  | 49,6 | 49,6 | 18,46 | 571,33 | 131,51 |
|    | 2019/06/03 | CH2205 | Male | Three y/o | Treatment (Wk 3) | Treatment | Feed Day | No | 00:10 | 00:00 - 00:59 | Early Morning | 37,2 | 78  | 13,2 | 13,2 | 18,36 | 575,38 | 86,17  |
|    | 2019/06/03 | CH2206 | Male | Three y/o | Treatment (Wk 3) | Treatment | Feed Day | No | 00:10 | 00:00 - 00:59 | Early Morning | 37,3 | 50  | 47,2 | 47,2 | 18,46 | 539,52 | 129,80 |
|    | 2019/06/03 | CH2205 | Male | Three y/o | Treatment (Wk 3) | Treatment | Feed Day | No | 00:15 | 00:00 - 00:59 | Early Morning | 37,2 | 75  | 16,2 | 16,2 | 18,36 | 572,36 | 93,13  |
|    | 2019/06/03 | CH2206 | Male | Three y/o | Treatment (Wk 3) | Treatment | Feed Day | No | 00:15 | 00:00 - 00:59 | Early Morning | 37,3 | 75  | 47,0 | 47,0 | 18,46 | 572,36 | 129,65 |
|    | 2019/06/03 | CH2205 | Male | Three y/o | Treatment (Wk 3) | Treatment | Feed Day | No | 00:20 | 00:00 - 00:59 | Early Morning | 37,2 | 41  | 21,6 | 21,6 | 18,36 | 522,29 | 102,94 |
|    | 2019/06/03 | CH2206 | Male | Three y/o | Treatment (Wk 3) | Treatment | Feed Day | No | 00:20 | 00:00 - 00:59 | Early Morning | 37,2 | 55  | 48,8 | 48,8 | 18,36 | 547,52 | 130,95 |
|    | 2019/06/03 | CH2205 | Male | Three y/o | Treatment (Wk 3) | Treatment | Feed Day | No | 00:25 | 00:00 - 00:59 | Early Morning | 37,2 | 40  | 19,2 | 19,2 | 18,36 | 520,09 | 98,92  |
|    | 2019/06/03 | CH2206 | Male | Three y/o | Treatment (Wk 3) | Treatment | Feed Day | No | 00:25 | 00:00 - 00:59 | Early Morning | 37,2 | 106 | 34,0 | 34,0 | 18,36 | 598,06 | 118,49 |
|    | 2019/06/03 | CH2205 | Male | Three y/o | Treatment (Wk 3) | Treatment | Feed Day | No | 00:30 | 00:00 - 00:59 | Early Morning | 37,1 | 82  | 9,4  | 9,4  | 18,26 | 579,19 | 74,66  |
|    | 2019/06/03 | CH2206 | Male | Three y/o | Treatment (Wk 3) | Treatment | Feed Day | No | 00:30 | 00:00 - 00:59 | Early Morning | 37,1 | 48  | 37,0 | 37,0 | 18,26 | 536,04 | 121,40 |
|    | 2019/06/03 | CH2205 | Male | Three y/o | Treatment (Wk 3) | Treatment | Feed Day | No | 00:35 | 00:00 - 00:59 | Early Morning | 37,1 | 58  | 17,6 | 17,6 | 18,26 | 551,90 | 95,95  |
|    | 2019/06/03 | CH2206 | Male | Three y/o | Treatment (Wk 3) | Treatment | Feed Day | No | 00:35 | 00:00 - 00:59 | Early Morning | 37,1 | 48  | 57,6 | 57,6 | 18,26 | 536,04 | 136,68 |
|    | 2019/06/03 | CH2205 | Male | Three y/o | Treatment (Wk 3) | Treatment | Feed Day | No | 00:40 | 00:00 - 00:59 | Early Morning | 37,1 | 49  | 20,4 | 20,4 | 18,26 | 537,80 | 100,99 |
|    | 2019/06/03 | CH2206 | Male | Three y/o | Treatment (Wk 3) | Treatment | Feed Day | No | 00:40 | 00:00 - 00:59 | Early Morning | 37,1 | 49  | 45,6 | 45,6 | 18,26 | 537,80 | 128,61 |
|    | 2019/06/03 | CH2205 | Male | Three y/o | Treatment (Wk 3) | Treatment | Feed Day | No | 00:45 | 00:00 - 00:59 | Early Morning | 37,1 | 50  | 18,0 | 18,0 | 18,26 | 539,52 | 96,72  |
|    | 2019/06/03 | CH2206 | Male | Three y/o | Treatment (Wk 3) | Treatment | Feed Day | No | 00:45 | 00:00 - 00:59 | Early Morning | 37,1 | 52  | 48,8 | 48,8 | 18,26 | 542,83 | 130,95 |
|    | 2019/06/03 | CH2205 | Male | Three y/o | Treatment (Wk 3) | Treatment | Feed Day | No | 00:50 | 00:00 - 00:59 | Early Morning | 37,1 | 45  | 14,2 | 14,2 | 18,26 | 530,47 | 88,65  |
|    | 2019/06/03 | CH2206 | Male | Three y/o | Treatment (Wk 3) | Treatment | Feed Day | No | 00:50 | 00:00 - 00:59 | Early Morning | 37,0 | 70  | 46,6 | 46,6 | 18,16 | 566,99 | 129,35 |
|    | 2019/06/03 | CH2205 | Male | Three y/o | Treatment (Wk 3) | Treatment | Feed Day | No | 00:55 | 00:00 - 00:59 | Early Morning | 37,0 | 61  | 15,4 | 15,4 | 18,16 | 556,01 | 91,41  |
|    | 2019/06/03 | CH2206 | Male | Three y/o | Treatment (Wk 3) | Treatment | Feed Day | No | 00:55 | 00:00 - 00:59 | Early Morning | 37,0 | 52  | 46,4 | 46,4 | 18,16 | 542,83 | 129,21 |
|    | 2019/06/03 | CH2205 | Male | Three y/o | Treatment (Wk 3) | Treatment | Feed Day | No | 01:00 | 01:00 - 01:59 | Early Morning | 37,0 | 48  | 12,0 | 12,0 | 18,16 | 536,04 | 82,93  |
|    | 2019/06/03 | CH2206 | Male | Three y/o | Treatment (Wk 3) | Treatment | Feed Day | No | 01:00 | 01:00 - 01:59 | Early Morning | 37,0 | 55  | 47,2 | 47,2 | 18,16 | 547,52 | 129,80 |
|    | 2019/06/03 | CH2205 | Male | Three y/o | Treatment (Wk 3) | Treatment | Feed Day | No | 01:05 | 01:00 - 01:59 | Early Morning | 37,0 | 51  | 13,4 | 13,4 | 18,16 | 541,20 | 86,68  |
|    | 2019/06/03 | CH2206 | Male | Three y/o | Treatment (Wk 3) | Treatment | Feed Day | No | 01:05 | 01:00 - 01:59 | Early Morning | 37,0 | 50  | 47,0 | 47,0 | 18,16 | 539,52 | 129,65 |
|    | 2019/06/03 | CH2205 | Male | Three y/o | Treatment (Wk 3) | Treatment | Feed Day | No | 01:10 | 01:00 - 01:59 | Early Morning | 37,0 |     | 23,4 | 23,4 | 18,16 |        | 105,68 |
|    | 2019/06/03 | CH2206 | Male | Three y/o | Treatment (Wk 3) | Treatment | Feed Day | No | 01:10 | 01:00 - 01:59 | Early Morning | 37,0 | 60  | 17,0 | 17,0 | 18,16 | 554,67 | 94,77  |
|    | 2019/06/03 | CH2205 | Male | Three y/o | Treatment (Wk 3) | Treatment | Feed Day | No | 01:15 | 01:00 - 01:59 | Early Morning | 37,1 | 73  | 11,6 | 11,6 | 18,26 | 570,27 | 81,78  |
|    | 2019/06/03 | CH2206 | Male | Three y/o | Treatment (Wk 3) | Treatment | Feed Day | No | 01:15 | 01:00 - 01:59 | Early Morning | 37,2 | 182 | 11,6 | 11,6 | 18,36 | 634,31 | 81,78  |
|    | 2019/06/03 | CH2205 | Male | Three y/o | Treatment (Wk 3) | Treatment | Feed Day | No | 01:20 | 01:00 - 01:59 | Early Morning | 37,2 | 86  | 9,8  | 9,8  | 18,26 | 582,77 | 76,07  |
|    | 2019/06/03 | CH2206 | Male | Three y/o | Treatment (Wk 3) | Treatment | Feed Day | No | 01:20 | 01:00 - 01:59 | Early Morning | 37,2 |     | 13,0 | 13,0 | 18,36 |        | 85,65  |
|    | 2019/06/03 | CH2205 | Male | Three y/o | Treatment (Wk 3) | Treatment | Feed Day | No | 01:25 | 01:00 - 01:59 | Early Morning | 37,1 | 94  | 12,8 | 12,8 | 18,26 | 589,37 | 85,12  |
|    | 2019/06/03 | CH2206 | Male | Three y/o | Treatment (Wk 3) | Treatment | Feed Day | No | 01:25 | 01:00 - 01:59 | Early Morning | 37,3 | 48  | 7,2  | 7,2  | 18,46 | 536,04 | 65,66  |
|    | 2019/06/03 | CH2205 | Male | Three y/o | Treatment (Wk 3) | Treatment | Feed Day | No | 01:30 | 01:00 - 01:59 | Early Morning | 37,2 | 44  | 16,2 | 16,2 | 18,36 | 528,51 | 93,13  |
|    | 2019/06/03 | CH2206 | Male | Three y/o | Treatment (Wk 3) | Treatment | Feed Day | No | 01:30 | 01:00 - 01:59 | Early Morning | 37,2 | 51  | 4,2  | 4,2  | 18,36 | 541,20 | 47,57  |
|    | 2019/06/03 | CH2205 | Male | Three y/o | Treatment (Wk 3) | Treatment | Feed Day | No | 01:35 | 01:00 - 01:59 | Early Morning | 37,2 | 39  | 16,0 | 16,0 | 18,36 | 517,82 | 92,71  |
|    | 2019/06/03 | CH2206 | Male | Three y/o | Treatment (Wk 3) | Treatment | Feed Day | No | 01:35 | 01:00 - 01:59 | Early Morning | 37,2 | 71  | 25,0 | 25,0 | 18,36 | 568,10 | 107,94 |
|    | 2019/06/03 | CH2205 | Male | Three y/o | Treatment (Wk 3) | Treatment | Feed Day | No | 01:40 | 01:00 - 01:59 | Early Morning | 37,2 | 68  | 19,2 | 19,2 | 18,36 | 564,71 | 98,92  |
|    | 2019/06/03 | CH2206 | Male | Three y/o | Treatment (Wk 3) | Treatment | Feed Day | No | 01:40 | 01:00 - 01:59 | Early Morning | 37,3 | 73  | 39,2 | 39,2 | 18,46 | 570,27 | 123,39 |
|    | 2019/06/03 | CH2205 | Male | Three y/o | Treatment (Wk 3) | Treatment | Feed Day | No | 01:45 | 01:00 - 01:59 | Early Morning | 37,2 | 58  | 17,4 | 17,4 | 18,36 | 551,90 | 95,56  |



|            |        |      |           |                  |           |          |    |       |               |               |      |     |       |       |       |        |        |
|------------|--------|------|-----------|------------------|-----------|----------|----|-------|---------------|---------------|------|-----|-------|-------|-------|--------|--------|
| 2019/06/03 | CH2206 | Male | Three y/o | Treatment (Wk 3) | Treatment | Feed Day | No | 01:45 | 01:00 - 01:59 | Early Morning | 37,2 | 44  | 37,8  | 37,8  | 18,36 | 528,51 | 122,14 |
| 2019/06/03 | CH2205 | Male | Three y/o | Treatment (Wk 3) | Treatment | Feed Day | No | 01:50 | 01:00 - 01:59 | Early Morning | 37,3 | 47  | 22,0  | 22,0  | 18,46 | 534,23 | 103,57 |
| 2019/06/03 | CH2206 | Male | Three y/o | Treatment (Wk 3) | Treatment | Feed Day | No | 01:50 | 01:00 - 01:59 | Early Morning | 37,2 | 61  | 43,0  | 43,0  | 18,36 | 556,01 | 126,58 |
| 2019/06/03 | CH2205 | Male | Three y/o | Treatment (Wk 3) | Treatment | Feed Day | No | 01:55 | 01:00 - 01:59 | Early Morning | 37,3 | 49  | 18,6  | 18,6  | 18,46 | 537,80 | 97,84  |
| 2019/06/03 | CH2206 | Male | Three y/o | Treatment (Wk 3) | Treatment | Feed Day | No | 01:55 | 01:00 - 01:59 | Early Morning | 37,1 | 94  | 46,8  | 46,8  | 18,26 | 589,37 | 129,50 |
| 2019/06/03 | CH2205 | Male | Three y/o | Treatment (Wk 3) | Treatment | Feed Day | No | 02:00 | 02:00 - 02:59 | Early Morning | 37,3 | 55  | 19,8  | 19,8  | 18,46 | 547,52 | 99,97  |
| 2019/06/03 | CH2206 | Male | Three y/o | Treatment (Wk 3) | Treatment | Feed Day | No | 02:00 | 02:00 - 02:59 | Early Morning | 37,2 | 50  | 45,8  | 45,8  | 18,36 | 539,52 | 128,76 |
| 2019/06/03 | CH2205 | Male | Three y/o | Treatment (Wk 3) | Treatment | Feed Day | No | 02:05 | 02:00 - 02:59 | Early Morning | 37,3 | 57  | 18,8  | 18,8  | 18,46 | 550,47 | 98,20  |
| 2019/06/03 | CH2206 | Male | Three y/o | Treatment (Wk 3) | Treatment | Feed Day | No | 02:05 | 02:00 - 02:59 | Early Morning | 37,2 | 77  | 44,4  | 44,4  | 18,36 | 574,39 | 127,69 |
| 2019/06/03 | CH2205 | Male | Three y/o | Treatment (Wk 3) | Treatment | Feed Day | No | 02:10 | 02:00 - 02:59 | Early Morning | 37,3 | 55  | 20,8  | 20,8  | 18,46 | 547,52 | 101,65 |
| 2019/06/03 | CH2206 | Male | Three y/o | Treatment (Wk 3) | Treatment | Feed Day | No | 02:10 | 02:00 - 02:59 | Early Morning | 37,2 | 54  | 36,4  | 36,4  | 18,36 | 545,99 | 120,84 |
| 2019/06/03 | CH2205 | Male | Three y/o | Treatment (Wk 3) | Treatment | Feed Day | No | 02:15 | 02:00 - 02:59 | Early Morning | 37,3 | 83  | 20,8  | 20,8  | 18,46 | 580,11 | 101,65 |
| 2019/06/03 | CH2206 | Male | Three y/o | Treatment (Wk 3) | Treatment | Feed Day | No | 02:15 | 02:00 - 02:59 | Early Morning | 37,2 | 47  | 41,4  | 41,4  | 18,36 | 534,23 | 125,27 |
| 2019/06/03 | CH2205 | Male | Three y/o | Treatment (Wk 3) | Treatment | Feed Day | No | 02:20 | 02:00 - 02:59 | Early Morning | 37,3 | 60  | 19,0  | 19,0  | 18,46 | 554,67 | 98,56  |
| 2019/06/03 | CH2206 | Male | Three y/o | Treatment (Wk 3) | Treatment | Feed Day | No | 02:20 | 02:00 - 02:59 | Early Morning | 37,2 | 51  | 31,2  | 31,2  | 18,36 | 541,20 | 115,54 |
| 2019/06/03 | CH2205 | Male | Three y/o | Treatment (Wk 3) | Treatment | Feed Day | No | 02:25 | 02:00 - 02:59 | Early Morning | 37,3 | 44  | 16,2  | 16,2  | 18,46 | 528,51 | 93,13  |
| 2019/06/03 | CH2206 | Male | Three y/o | Treatment (Wk 3) | Treatment | Feed Day | No | 02:25 | 02:00 - 02:59 | Early Morning | 37,2 | 43  | 17,8  | 17,8  | 18,36 | 526,50 | 96,34  |
| 2019/06/03 | CH2205 | Male | Three y/o | Treatment (Wk 3) | Treatment | Feed Day | No | 02:30 | 02:00 - 02:59 | Early Morning | 37,2 | 57  | 10,8  | 10,8  | 18,36 | 550,47 | 79,36  |
| 2019/06/03 | CH2206 | Male | Three y/o | Treatment (Wk 3) | Treatment | Feed Day | No | 02:30 | 02:00 - 02:59 | Early Morning | 37,2 | 51  | 12,0  | 12,0  | 18,36 | 541,20 | 82,93  |
| 2019/06/03 | CH2205 | Male | Three y/o | Treatment (Wk 3) | Treatment | Feed Day | No | 02:35 | 02:00 - 02:59 | Early Morning | 37,2 | 81  | 10,6  | 10,6  | 18,36 | 578,26 | 78,73  |
| 2019/06/03 | CH2206 | Male | Three y/o | Treatment (Wk 3) | Treatment | Feed Day | No | 02:35 | 02:00 - 02:59 | Early Morning | 37,2 | 54  | 39,6  | 39,6  | 18,36 | 545,99 | 123,74 |
| 2019/06/03 | CH2205 | Male | Three y/o | Treatment (Wk 3) | Treatment | Feed Day | No | 02:40 | 02:00 - 02:59 | Early Morning | 37,2 | 47  | 75,8  | 75,8  | 18,36 | 534,23 | 146,20 |
| 2019/06/03 | CH2206 | Male | Three y/o | Treatment (Wk 3) | Treatment | Feed Day | No | 02:40 | 02:00 - 02:59 | Early Morning | 37,2 | 52  | 36,0  | 36,0  | 18,36 | 542,83 | 120,46 |
| 2019/06/03 | CH2205 | Male | Three y/o | Treatment (Wk 3) | Treatment | Feed Day | No | 02:45 | 02:00 - 02:59 | Early Morning | 37,2 | 48  | 12,6  | 12,6  | 18,36 | 536,04 | 84,59  |
| 2019/06/03 | CH2206 | Male | Three y/o | Treatment (Wk 3) | Treatment | Feed Day | No | 02:45 | 02:00 - 02:59 | Early Morning | 37,2 | 44  | 34,0  | 34,0  | 18,36 | 528,51 | 118,49 |
| 2019/06/03 | CH2205 | Male | Three y/o | Treatment (Wk 3) | Treatment | Feed Day | No | 02:50 | 02:00 - 02:59 | Early Morning | 37,3 | 88  | 20,4  | 20,4  | 18,46 | 584,49 | 100,99 |
| 2019/06/03 | CH2206 | Male | Three y/o | Treatment (Wk 3) | Treatment | Feed Day | No | 02:50 | 02:00 - 02:59 | Early Morning | 37,3 | 81  | 44,4  | 44,4  | 18,46 | 578,26 | 127,69 |
| 2019/06/03 | CH2205 | Male | Three y/o | Treatment (Wk 3) | Treatment | Feed Day | No | 02:55 | 02:00 - 02:59 | Early Morning | 37,3 | 77  | 23,2  | 23,2  | 18,46 | 574,39 | 105,39 |
| 2019/06/03 | CH2206 | Male | Three y/o | Treatment (Wk 3) | Treatment | Feed Day | No | 02:55 | 02:00 - 02:59 | Early Morning | 37,3 | 53  | 46,2  | 46,2  | 18,46 | 544,43 | 129,06 |
| 2019/06/03 | CH2205 | Male | Three y/o | Treatment (Wk 3) | Treatment | Feed Day | No | 03:00 | 03:00 - 03:59 | Early Morning | 37,2 | 50  | 27,2  | 27,2  | 18,36 | 539,52 | 110,83 |
| 2019/06/03 | CH2206 | Male | Three y/o | Treatment (Wk 3) | Treatment | Feed Day | No | 03:00 | 03:00 - 03:59 | Early Morning | 37,3 | 70  | 30,6  | 30,6  | 18,46 | 566,99 | 114,87 |
| 2019/06/03 | CH2205 | Male | Three y/o | Treatment (Wk 3) | Treatment | Feed Day | No | 03:05 | 03:00 - 03:59 | Early Morning | 37,2 | 59  | 21,8  | 21,8  | 18,36 | 553,30 | 103,26 |
| 2019/06/03 | CH2206 | Male | Three y/o | Treatment (Wk 3) | Treatment | Feed Day | No | 03:05 | 03:00 - 03:59 | Early Morning | 37,3 | 74  | 26,2  | 26,2  | 18,46 | 571,33 | 109,55 |
| 2019/06/03 | CH2205 | Male | Three y/o | Treatment (Wk 3) | Treatment | Feed Day | No | 03:10 | 03:00 - 03:59 | Early Morning | 37,2 | 45  | 23,0  | 23,0  | 18,36 | 530,47 | 105,09 |
| 2019/06/03 | CH2206 | Male | Three y/o | Treatment (Wk 3) | Treatment | Feed Day | No | 03:10 | 03:00 - 03:59 | Early Morning | 37,3 | 61  | 33,2  | 33,2  | 18,46 | 556,01 | 117,68 |
| 2019/06/03 | CH2205 | Male | Three y/o | Treatment (Wk 3) | Treatment | Feed Day | No | 03:15 | 03:00 - 03:59 | Early Morning | 37,2 | 65  | 28,8  | 28,8  | 18,36 | 561,12 | 112,79 |
| 2019/06/03 | CH2206 | Male | Three y/o | Treatment (Wk 3) | Treatment | Feed Day | No | 03:15 | 03:00 - 03:59 | Early Morning | 37,3 | 44  | 24,2  | 24,2  | 18,46 | 528,51 | 106,83 |
| 2019/06/03 | CH2205 | Male | Three y/o | Treatment (Wk 3) | Treatment | Feed Day | No | 03:20 | 03:00 - 03:59 | Early Morning | 37,3 | 103 | 33,8  | 33,8  | 18,46 | 596,00 | 118,29 |
| 2019/06/03 | CH2206 | Male | Three y/o | Treatment (Wk 3) | Treatment | Feed Day | No | 03:20 | 03:00 - 03:59 | Early Morning | 37,4 | 135 | 58,4  | 58,4  | 18,55 | 614,84 | 137,16 |
| 2019/06/03 | CH2205 | Male | Three y/o | Treatment (Wk 3) | Treatment | Feed Day | No | 03:25 | 03:00 - 03:59 | Early Morning | 37,2 |     | 46,8  | 46,8  | 18,36 | 529,50 | 129,50 |
| 2019/06/03 | CH2206 | Male | Three y/o | Treatment (Wk 3) | Treatment | Feed Day | No | 03:25 | 03:00 - 03:59 | Early Morning | 37,4 | 120 | 19,6  | 19,6  | 18,55 | 606,78 | 99,63  |
| 2019/06/03 | CH2205 | Male | Three y/o | Treatment (Wk 3) | Treatment | Feed Day | No | 03:30 | 03:00 - 03:59 | Early Morning | 37,3 |     | 131,8 | 131,8 | 18,46 | 565,49 | 165,49 |
| 2019/06/03 | CH2206 | Male | Three y/o | Treatment (Wk 3) | Treatment | Feed Day | No | 03:30 | 03:00 - 03:59 | Early Morning | 37,4 | 103 | 38,0  | 38,0  | 18,55 | 596,00 | 122,32 |
| 2019/06/03 | CH2205 | Male | Three y/o | Treatment (Wk 3) | Treatment | Feed Day | No | 03:35 | 03:00 - 03:59 | Early Morning | 37,2 | 111 | 32,2  | 32,2  | 18,36 | 601,33 | 116,63 |
| 2019/06/03 | CH2206 | Male | Three y/o | Treatment (Wk 3) | Treatment | Feed Day | No | 03:35 | 03:00 - 03:59 | Early Morning | 37,4 | 131 | 93,8  | 93,8  | 18,55 | 612,80 | 153,61 |
| 2019/06/03 | CH2205 | Male | Three y/o | Treatment (Wk 3) | Treatment | Feed Day | No | 03:40 | 03:00 - 03:59 | Early Morning | 37,4 | 114 | 81,2  | 81,2  | 18,55 | 603,20 | 148,59 |
| 2019/06/03 | CH2206 | Male | Three y/o | Treatment (Wk 3) | Treatment | Feed Day | No | 03:40 | 03:00 - 03:59 | Early Morning | 37,5 | 102 | 64,0  | 64,0  | 18,65 | 595,30 | 140,33 |
| 2019/06/03 | CH2205 | Male | Three y/o | Treatment (Wk 3) | Treatment | Feed Day | No | 03:45 | 03:00 - 03:59 | Early Morning | 37,3 | 94  | 53,6  | 53,6  | 18,46 | 589,37 | 134,19 |
| 2019/06/03 | CH2206 | Male | Three y/o | Treatment (Wk 3) | Treatment | Feed Day | No | 03:45 | 03:00 - 03:59 | Early Morning | 37,5 | 147 | 135,2 | 135,2 | 18,65 | 620,52 | 166,38 |
| 2019/06/03 | CH2205 | Male | Three y/o | Treatment (Wk 3) | Treatment | Feed Day | No | 03:50 | 03:00 - 03:59 | Early Morning | 37,4 | 58  | 19,4  | 19,4  | 18,55 | 551,90 | 99,28  |
| 2019/06/03 | CH2206 | Male | Three y/o | Treatment (Wk 3) | Treatment | Feed Day | No | 03:50 | 03:00 - 03:59 | Early Morning | 37,7 | 128 | 189,2 | 189,2 | 18,85 | 611,22 | 178,17 |
| 2019/06/03 | CH2205 | Male | Three y/o | Treatment (Wk 3) | Treatment | Feed Day | No | 03:55 | 03:00 - 03:59 | Early Morning | 37,4 | 115 | 40,0  | 40,0  | 18,55 | 603,82 | 124,09 |
| 2019/06/03 | CH2206 | Male | Three y/o | Treatment (Wk 3) | Treatment | Feed Day | No | 03:55 | 03:00 - 03:59 | Early Morning | 37,7 | 101 | 79,0  | 79,0  | 18,85 | 594,59 | 147,64 |
| 2019/06/03 | CH2205 | Male | Three y/o | Treatment (Wk 3) | Treatment | Feed Day | No | 04:00 | 04:00 - 04:59 | Morning       | 37,5 | 105 | 102,6 | 102,6 | 18,65 | 597,38 | 156,74 |
| 2019/06/03 | CH2206 | Male | Three y/o | Treatment (Wk 3) | Treatment | Feed Day | No | 04:00 | 04:00 - 04:59 | Morning       | 37,9 | 134 | 76,8  | 76,8  | 19,05 | 614,33 | 146,66 |
| 2019/06/03 | CH2205 | Male | Three y/o | Treatment (Wk 3) | Treatment | Feed Day | No | 04:05 | 04:00 - 04:59 | Morning       | 37,6 | 102 | 22,2  | 22,2  | 18,75 | 595,30 | 103,88 |
| 2019/06/03 | CH2206 | Male | Three y/o | Treatment (Wk 3) | Treatment | Feed Day | No | 04:05 | 04:00 - 04:59 | Morning       | 37,9 | 117 | 190,2 | 190,2 | 19,05 | 605,02 | 178,35 |
| 2019/06/03 | CH2205 | Male | Three y/o | Treatment (Wk 3) | Treatment | Feed Day | No | 04:10 | 04:00 - 04:59 | Morning       | 37,6 |     | 43,4  | 43,4  | 18,75 | 526,90 |        |
| 2019/06/03 | CH2206 | Male | Three y/o | Treatment (Wk 3) | Treatment | Feed Day | No | 04:10 | 04:00 - 04:59 | Morning       | 37,9 | 74  | 60,0  | 60,0  | 19,05 | 571,33 | 138,09 |
| 2019/06/03 | CH2205 | Male | Three y/o | Treatment (Wk 3) | Treatment | Feed Day | No | 04:15 | 04:00 - 04:59 | Morning       | 37,6 |     | 17,6  | 17,6  | 18,75 | 595,95 |        |
| 2019/06/03 | CH2206 | Male | Three y/o | Treatment (Wk 3) | Treatment | Feed Day | No | 04:15 | 04:00 - 04:59 | Morning       | 37,8 | 113 | 28,0  | 28,0  | 18,95 | 602,58 | 111,83 |
| 2019/06/03 | CH2205 | Male | Three y/o | Treatment (Wk 3) | Treatment | Feed Day | No | 04:20 | 04:00 - 04:59 | Morning       | 37,4 | 120 | 205,2 | 205,2 | 18,55 | 606,78 | 181,02 |
| 2019/06/03 | CH2206 | Male | Three y/o | Treatment (Wk 3) | Treatment | Feed Day | No | 04:20 | 04:00 - 04:59 | Morning       | 37,7 | 98  | 184,4 | 184,4 | 18,85 | 592,41 | 177,26 |
| 2019/06/03 | CH2205 | Male | Three y/o | Treatment (Wk 3) | Treatment | Feed Day | No | 04:25 | 04:00 - 04:59 | Morning       | 37,5 | 96  | 15,4  | 15,4  | 18,65 | 590,91 | 91,41  |
| 2019/06/03 | CH2206 | Male | Three y/o | Treatment (Wk 3) | Treatment | Feed Day | No | 04:25 | 04:00 - 04:59 | Morning       | 37,8 | 131 | 331,8 | 331,8 | 18,95 | 612,80 | 197,99 |
| 2019/06/03 | CH2205 | Male | Three y/o | Treatment (Wk 3) | Treatment | Feed Day | No | 04:30 | 04:00 - 04:59 | Morning       | 37,3 | 65  | 70,4  | 70,4  | 18,46 | 561,12 | 143,64 |
| 2019/06/03 | CH2206 | Male | Three y/o | Treatment (Wk 3) | Treatment | Feed Day | No | 04:30 | 04:00 - 04:59 | Morning       | 37,8 | 92  | 96,8  | 96,8  | 18,95 | 587,78 | 154,71 |
| 2019/06/03 | CH2205 | Male | Three y/o | Treatment (Wk 3) | Treatment | Feed Day | No | 04:35 | 04:00 - 04:59 | Morning       | 37,4 | 94  | 74,0  | 74,0  | 18,55 | 589,37 | 145,37 |
| 2019/06/03 | CH2206 | Male | Three y/o | Treatment (Wk 3) | Treatment | Feed Day | No | 04:35 | 04:00 - 04:59 | Morning       | 37,8 | 113 | 346,4 | 346,4 | 18,95 | 602,58 | 199,51 |
| 2019/06/03 | CH2205 | Male | Three y/o | Treatment (Wk 3) | Treatment | Feed Day | No | 04:40 | 04:00 - 04:59 | Morning       | 37,6 | 128 | 159,0 | 159,0 | 18,75 | 611,22 | 172,06 |



|            |        |      |           |                  |           |          |    |       |               |         |      |     |       |       |       |        |        |
|------------|--------|------|-----------|------------------|-----------|----------|----|-------|---------------|---------|------|-----|-------|-------|-------|--------|--------|
| 2019/06/03 | CH2206 | Male | Three y/o | Treatment (Wk 3) | Treatment | Feed Day | No | 04:40 | 04:00 - 04:59 | Morning | 37,9 | 109 | 273,0 | 273,0 | 19,05 | 600,04 | 191,09 |
| 2019/06/03 | CH2205 | Male | Three y/o | Treatment (Wk 3) | Treatment | Feed Day | No | 04:45 | 04:00 - 04:59 | Morning | 37,7 | 124 | 170,6 | 170,6 | 18,85 | 609,04 | 174,53 |
| 2019/06/03 | CH2206 | Male | Three y/o | Treatment (Wk 3) | Treatment | Feed Day | No | 04:45 | 04:00 - 04:59 | Morning | 37,9 |     | 182,6 | 182,6 | 19,05 |        | 176,92 |
| 2019/06/03 | CH2205 | Male | Three y/o | Treatment (Wk 3) | Treatment | Feed Day | No | 04:50 | 04:00 - 04:59 | Morning | 37,7 |     | 28,4  | 28,4  | 18,85 |        | 112,31 |
| 2019/06/03 | CH2206 | Male | Three y/o | Treatment (Wk 3) | Treatment | Feed Day | No | 04:50 | 04:00 - 04:59 | Morning | 37,9 |     | 138,6 | 138,6 | 19,05 |        | 167,25 |
| 2019/06/03 | CH2205 | Male | Three y/o | Treatment (Wk 3) | Treatment | Feed Day | No | 04:55 | 04:00 - 04:59 | Morning | 37,7 | 158 | 25,0  | 25,0  | 18,85 | 625,26 | 107,94 |
| 2019/06/03 | CH2206 | Male | Three y/o | Treatment (Wk 3) | Treatment | Feed Day | No | 04:55 | 04:00 - 04:59 | Morning | 37,7 | 135 | 40,4  | 40,4  | 18,85 | 614,84 | 124,43 |
| 2019/06/03 | CH2205 | Male | Three y/o | Treatment (Wk 3) | Treatment | Feed Day | No | 05:00 | 05:00 - 05:59 | Morning | 37,4 |     | 18,0  | 18,0  | 18,55 |        | 96,72  |
| 2019/06/03 | CH2206 | Male | Three y/o | Treatment (Wk 3) | Treatment | Feed Day | No | 05:00 | 05:00 - 05:59 | Morning | 37,2 | 76  | 23,0  | 23,0  | 18,36 | 573,39 | 105,09 |
| 2019/06/03 | CH2205 | Male | Three y/o | Treatment (Wk 3) | Treatment | Feed Day | No | 05:05 | 05:00 - 05:59 | Morning | 37,1 | 58  | 15,8  | 15,8  | 18,26 | 551,90 | 92,28  |
| 2019/06/03 | CH2206 | Male | Three y/o | Treatment (Wk 3) | Treatment | Feed Day | No | 05:05 | 05:00 - 05:59 | Morning | 36,9 | 43  | 29,4  | 29,4  | 18,06 | 526,50 | 113,50 |
| 2019/06/03 | CH2205 | Male | Three y/o | Treatment (Wk 3) | Treatment | Feed Day | No | 05:10 | 05:00 - 05:59 | Morning | 36,7 | 78  | 52,2  | 52,2  | 17,87 | 575,38 | 133,27 |
| 2019/06/03 | CH2206 | Male | Three y/o | Treatment (Wk 3) | Treatment | Feed Day | No | 05:10 | 05:00 - 05:59 | Morning | 36,8 | 45  | 28,4  | 28,4  | 17,96 | 530,47 | 112,31 |
| 2019/06/03 | CH2205 | Male | Three y/o | Treatment (Wk 3) | Treatment | Feed Day | No | 05:15 | 05:00 - 05:59 | Morning | 36,5 |     | 23,8  | 23,8  | 17,67 |        | 106,26 |
| 2019/06/03 | CH2206 | Male | Three y/o | Treatment (Wk 3) | Treatment | Feed Day | No | 05:15 | 05:00 - 05:59 | Morning | 37,1 | 49  | 38,8  | 38,8  | 18,26 | 537,80 | 123,04 |
| 2019/06/03 | CH2205 | Male | Three y/o | Treatment (Wk 3) | Treatment | Feed Day | No | 05:20 | 05:00 - 05:59 | Morning | 36,7 | 54  | 13,8  | 13,8  | 17,87 | 545,99 | 87,68  |
| 2019/06/03 | CH2206 | Male | Three y/o | Treatment (Wk 3) | Treatment | Feed Day | No | 05:20 | 05:00 - 05:59 | Morning | 37,1 | 66  | 43,8  | 43,8  | 18,26 | 562,34 | 127,22 |
| 2019/06/03 | CH2205 | Male | Three y/o | Treatment (Wk 3) | Treatment | Feed Day | No | 05:25 | 05:00 - 05:59 | Morning | 36,7 | 51  | 16,6  | 16,6  | 17,87 | 541,20 | 93,96  |
| 2019/06/03 | CH2206 | Male | Three y/o | Treatment (Wk 3) | Treatment | Feed Day | No | 05:25 | 05:00 - 05:59 | Morning | 37,2 | 74  | 53,0  | 53,0  | 18,36 | 571,33 | 133,80 |
| 2019/06/03 | CH2205 | Male | Three y/o | Treatment (Wk 3) | Treatment | Feed Day | No | 05:30 | 05:00 - 05:59 | Morning | 36,6 | 84  | 15,2  | 15,2  | 17,77 | 581,01 | 90,96  |
| 2019/06/03 | CH2206 | Male | Three y/o | Treatment (Wk 3) | Treatment | Feed Day | No | 05:30 | 05:00 - 05:59 | Morning | 37,2 | 45  | 41,2  | 41,2  | 18,36 | 530,47 | 125,11 |
| 2019/06/03 | CH2205 | Male | Three y/o | Treatment (Wk 3) | Treatment | Feed Day | No | 05:35 | 05:00 - 05:59 | Morning | 36,5 | 44  | 16,2  | 16,2  | 17,67 | 528,51 | 93,13  |
| 2019/06/03 | CH2206 | Male | Three y/o | Treatment (Wk 3) | Treatment | Feed Day | No | 05:35 | 05:00 - 05:59 | Morning | 37,2 | 48  | 45,8  | 45,8  | 18,36 | 536,04 | 128,76 |
| 2019/06/03 | CH2205 | Male | Three y/o | Treatment (Wk 3) | Treatment | Feed Day | No | 05:40 | 05:00 - 05:59 | Morning | 36,5 | 51  | 13,8  | 13,8  | 17,67 | 541,20 | 87,68  |
| 2019/06/03 | CH2206 | Male | Three y/o | Treatment (Wk 3) | Treatment | Feed Day | No | 05:40 | 05:00 - 05:59 | Morning | 37,2 | 70  | 52,4  | 52,4  | 18,36 | 566,99 | 133,41 |
| 2019/06/03 | CH2205 | Male | Three y/o | Treatment (Wk 3) | Treatment | Feed Day | No | 05:45 | 05:00 - 05:59 | Morning | 36,5 | 73  | 14,0  | 14,0  | 17,67 | 570,27 | 88,17  |
| 2019/06/03 | CH2206 | Male | Three y/o | Treatment (Wk 3) | Treatment | Feed Day | No | 05:45 | 05:00 - 05:59 | Morning | 37,1 | 56  | 49,6  | 49,6  | 18,26 | 549,01 | 131,51 |
| 2019/06/03 | CH2205 | Male | Three y/o | Treatment (Wk 3) | Treatment | Feed Day | No | 05:50 | 05:00 - 05:59 | Morning | 36,5 | 50  | 26,0  | 26,0  | 17,67 | 539,52 | 109,29 |
| 2019/06/03 | CH2206 | Male | Three y/o | Treatment (Wk 3) | Treatment | Feed Day | No | 05:50 | 05:00 - 05:59 | Morning | 37,1 | 51  | 40,0  | 40,0  | 18,26 | 541,20 | 124,09 |
| 2019/06/03 | CH2205 | Male | Three y/o | Treatment (Wk 3) | Treatment | Feed Day | No | 05:55 | 05:00 - 05:59 | Morning | 36,8 | 96  | 16,0  | 16,0  | 17,96 | 590,91 | 92,71  |
| 2019/06/03 | CH2206 | Male | Three y/o | Treatment (Wk 3) | Treatment | Feed Day | No | 05:55 | 05:00 - 05:59 | Morning | 37,2 | 88  | 27,6  | 27,6  | 18,36 | 584,49 | 111,33 |
| 2019/06/03 | CH2205 | Male | Three y/o | Treatment (Wk 3) | Treatment | Feed Day | No | 06:00 | 06:00 - 06:59 | Morning | 36,8 | 76  | 13,6  | 13,6  | 17,96 | 573,39 | 87,18  |
| 2019/06/03 | CH2206 | Male | Three y/o | Treatment (Wk 3) | Treatment | Feed Day | No | 06:00 | 06:00 - 06:59 | Morning | 37,1 | 79  | 33,0  | 33,0  | 18,26 | 576,36 | 117,47 |
| 2019/06/03 | CH2205 | Male | Three y/o | Treatment (Wk 3) | Treatment | Feed Day | No | 06:05 | 06:00 - 06:59 | Morning | 36,8 | 43  | 15,8  | 15,8  | 17,96 | 526,50 | 92,28  |
| 2019/06/03 | CH2206 | Male | Three y/o | Treatment (Wk 3) | Treatment | Feed Day | No | 06:05 | 06:00 - 06:59 | Morning | 37,1 | 82  | 41,8  | 41,8  | 18,26 | 579,19 | 125,60 |
| 2019/06/03 | CH2205 | Male | Three y/o | Treatment (Wk 3) | Treatment | Feed Day | No | 06:10 | 06:00 - 06:59 | Morning | 37,0 | 53  | 12,2  | 12,2  | 18,16 | 544,43 | 83,49  |
| 2019/06/03 | CH2206 | Male | Three y/o | Treatment (Wk 3) | Treatment | Feed Day | No | 06:10 | 06:00 - 06:59 | Morning | 37,1 | 44  | 43,8  | 43,8  | 18,26 | 528,51 | 127,22 |
| 2019/06/03 | CH2205 | Male | Three y/o | Treatment (Wk 3) | Treatment | Feed Day | No | 06:15 | 06:00 - 06:59 | Morning | 37,1 | 185 | 9,4   | 9,4   | 18,26 | 635,34 | 74,66  |
| 2019/06/03 | CH2206 | Male | Three y/o | Treatment (Wk 3) | Treatment | Feed Day | No | 06:15 | 06:00 - 06:59 | Morning | 37,1 | 85  | 45,4  | 45,4  | 18,26 | 581,90 | 128,45 |
| 2019/06/03 | CH2205 | Male | Three y/o | Treatment (Wk 3) | Treatment | Feed Day | No | 06:20 | 06:00 - 06:59 | Morning | 37,1 | 58  | 20,2  | 20,2  | 18,26 | 551,90 | 100,65 |
| 2019/06/03 | CH2206 | Male | Three y/o | Treatment (Wk 3) | Treatment | Feed Day | No | 06:20 | 06:00 - 06:59 | Morning | 37,1 | 77  | 46,2  | 46,2  | 18,26 | 574,39 | 129,06 |
| 2019/06/03 | CH2205 | Male | Three y/o | Treatment (Wk 3) | Treatment | Feed Day | No | 06:25 | 06:00 - 06:59 | Morning | 37,2 | 63  | 13,8  | 13,8  | 18,36 | 558,62 | 87,68  |
| 2019/06/03 | CH2206 | Male | Three y/o | Treatment (Wk 3) | Treatment | Feed Day | No | 06:25 | 06:00 - 06:59 | Morning | 37,0 | 40  | 43,0  | 43,0  | 18,16 | 520,09 | 126,58 |
| 2019/06/03 | CH2205 | Male | Three y/o | Treatment (Wk 3) | Treatment | Feed Day | No | 06:30 | 06:00 - 06:59 | Morning | 37,2 | 85  | 11,2  | 11,2  | 18,36 | 581,90 | 80,59  |
| 2019/06/03 | CH2206 | Male | Three y/o | Treatment (Wk 3) | Treatment | Feed Day | No | 06:30 | 06:00 - 06:59 | Morning | 37,0 | 47  | 38,8  | 38,8  | 18,16 | 534,23 | 123,04 |
| 2019/06/03 | CH2205 | Male | Three y/o | Treatment (Wk 3) | Treatment | Feed Day | No | 06:35 | 06:00 - 06:59 | Morning | 37,2 | 63  | 20,6  | 20,6  | 18,36 | 558,62 | 101,32 |
| 2019/06/03 | CH2206 | Male | Three y/o | Treatment (Wk 3) | Treatment | Feed Day | No | 06:35 | 06:00 - 06:59 | Morning | 37,1 | 47  | 26,6  | 26,6  | 18,26 | 534,23 | 110,07 |
| 2019/06/03 | CH2205 | Male | Three y/o | Treatment (Wk 3) | Treatment | Feed Day | No | 06:40 | 06:00 - 06:59 | Morning | 37,2 | 78  | 34,0  | 34,0  | 18,36 | 575,38 | 118,49 |
| 2019/06/03 | CH2206 | Male | Three y/o | Treatment (Wk 3) | Treatment | Feed Day | No | 06:40 | 06:00 - 06:59 | Morning | 37,1 | 84  | 32,6  | 32,6  | 18,26 | 581,01 | 117,05 |
| 2019/06/03 | CH2205 | Male | Three y/o | Treatment (Wk 3) | Treatment | Feed Day | No | 06:45 | 06:00 - 06:59 | Morning | 37,3 | 110 | 100,0 | 100,0 | 18,46 | 600,69 | 155,84 |
| 2019/06/03 | CH2206 | Male | Three y/o | Treatment (Wk 3) | Treatment | Feed Day | No | 06:45 | 06:00 - 06:59 | Morning | 37,2 | 138 | 85,0  | 85,0  | 18,36 | 616,31 | 150,18 |
| 2019/06/03 | CH2205 | Male | Three y/o | Treatment (Wk 3) | Treatment | Feed Day | No | 06:50 | 06:00 - 06:59 | Morning | 37,3 | 104 | 123,2 | 123,2 | 18,46 | 596,69 | 163,13 |
| 2019/06/03 | CH2206 | Male | Three y/o | Treatment (Wk 3) | Treatment | Feed Day | No | 06:50 | 06:00 - 06:59 | Morning | 37,3 | 138 | 137,4 | 137,4 | 18,46 | 616,31 | 166,94 |
| 2019/06/03 | CH2205 | Male | Three y/o | Treatment (Wk 3) | Treatment | Feed Day | No | 06:55 | 06:00 - 06:59 | Morning | 37,3 |     | 30,0  | 30,0  | 18,46 |        | 114,20 |
| 2019/06/03 | CH2206 | Male | Three y/o | Treatment (Wk 3) | Treatment | Feed Day | No | 06:55 | 06:00 - 06:59 | Morning | 37,3 | 169 | 108,4 | 108,4 | 18,46 | 629,60 | 158,66 |
| 2019/06/03 | CH2205 | Male | Three y/o | Treatment (Wk 3) | Treatment | Feed Day | No | 07:00 | 07:00 - 07:59 | Morning | 37,4 | 172 | 14,6  | 14,6  | 18,55 | 630,73 | 89,59  |
| 2019/06/03 | CH2206 | Male | Three y/o | Treatment (Wk 3) | Treatment | Feed Day | No | 07:00 | 07:00 - 07:59 | Morning | 37,7 | 167 | 96,4  | 96,4  | 18,85 | 628,84 | 154,57 |
| 2019/06/03 | CH2205 | Male | Three y/o | Treatment (Wk 3) | Treatment | Feed Day | No | 07:05 | 07:00 - 07:59 | Morning | 37,5 | 119 | 24,8  | 24,8  | 18,65 | 606,20 | 107,67 |
| 2019/06/03 | CH2206 | Male | Three y/o | Treatment (Wk 3) | Treatment | Feed Day | No | 07:05 | 07:00 - 07:59 | Morning | 37,7 | 131 | 185,2 | 185,2 | 18,85 | 612,80 | 177,42 |
| 2019/06/03 | CH2205 | Male | Three y/o | Treatment (Wk 3) | Treatment | Feed Day | No | 07:10 | 07:00 - 07:59 | Morning | 37,5 | 106 | 57,0  | 57,0  | 18,65 | 598,06 | 136,32 |
| 2019/06/03 | CH2206 | Male | Three y/o | Treatment (Wk 3) | Treatment | Feed Day | No | 07:10 | 07:00 - 07:59 | Morning | 37,8 |     | 206,0 | 206,0 | 18,95 |        | 181,16 |
| 2019/06/03 | CH2205 | Male | Three y/o | Treatment (Wk 3) | Treatment | Feed Day | No | 07:15 | 07:00 - 07:59 | Morning | 37,6 | 154 | 215,2 | 215,2 | 18,75 | 623,58 | 182,70 |
| 2019/06/03 | CH2206 | Male | Three y/o | Treatment (Wk 3) | Treatment | Feed Day | No | 07:15 | 07:00 - 07:59 | Morning | 37,9 | 138 | 224,4 | 224,4 | 19,05 | 616,31 | 184,17 |
| 2019/06/03 | CH2205 | Male | Three y/o | Treatment (Wk 3) | Treatment | Feed Day | No | 07:20 | 07:00 - 07:59 | Morning | 38,1 | 141 | 171,4 | 171,4 | 19,26 | 617,75 | 174,70 |
| 2019/06/03 | CH2206 | Male | Three y/o | Treatment (Wk 3) | Treatment | Feed Day | No | 07:20 | 07:00 - 07:59 | Morning | 38,0 | 128 | 144,6 | 144,6 | 19,15 | 611,22 | 168,73 |
| 2019/06/03 | CH2205 | Male | Three y/o | Treatment (Wk 3) | Treatment | Feed Day | No | 07:25 | 07:00 - 07:59 | Morning | 38,2 | 104 | 51,4  | 51,4  | 19,36 | 596,69 | 132,74 |
| 2019/06/03 | CH2206 | Male | Three y/o | Treatment (Wk 3) | Treatment | Feed Day | No | 07:25 | 07:00 - 07:59 | Morning | 38,0 | 137 | 636,0 | 636,0 | 19,15 | 615,83 | 221,13 |
| 2019/06/03 | CH2205 | Male | Three y/o | Treatment (Wk 3) | Treatment | Feed Day | No | 07:30 | 07:00 - 07:59 | Morning | 38,2 | 98  | 48,2  | 48,2  | 19,36 | 592,41 | 130,52 |
| 2019/06/03 | CH2206 | Male | Three y/o | Treatment (Wk 3) | Treatment | Feed Day | No | 07:30 | 07:00 - 07:59 | Morning | 38,2 | 111 | 224,8 | 224,8 | 19,36 | 601,33 | 184,23 |
| 2019/06/03 | CH2205 | Male | Three y/o | Treatment (Wk 3) | Treatment | Feed Day | No | 07:35 | 07:00 - 07:59 | Morning | 38,2 | 91  | 16,2  | 16,2  | 19,36 | 586,98 | 93,13  |



|            |        |      |           |                  |           |          |    |       |               |              |      |     |       |       |       |        |        |
|------------|--------|------|-----------|------------------|-----------|----------|----|-------|---------------|--------------|------|-----|-------|-------|-------|--------|--------|
| 2019/06/03 | CH2206 | Male | Three y/o | Treatment (Wk 3) | Treatment | Feed Day | No | 07:35 | 07:00 - 07:59 | Morning      | 38,1 | 128 | 191,4 | 191,4 | 19,26 | 611,22 | 178,57 |
| 2019/06/03 | CH2205 | Male | Three y/o | Treatment (Wk 3) | Treatment | Feed Day | No | 07:40 | 07:00 - 07:59 | Morning      | 38,0 | 115 | 19,2  | 19,2  | 19,15 | 603,82 | 98,92  |
| 2019/06/03 | CH2206 | Male | Three y/o | Treatment (Wk 3) | Treatment | Feed Day | No | 07:40 | 07:00 - 07:59 | Morning      | 38,1 | 113 | 64,6  | 64,6  | 19,26 | 602,58 | 140,65 |
| 2019/06/03 | CH2205 | Male | Three y/o | Treatment (Wk 3) | Treatment | Feed Day | No | 07:45 | 07:00 - 07:59 | Morning      | 38,0 | 120 | 26,0  | 26,0  | 19,15 | 606,78 | 109,29 |
| 2019/06/03 | CH2206 | Male | Three y/o | Treatment (Wk 3) | Treatment | Feed Day | No | 07:45 | 07:00 - 07:59 | Morning      | 38,1 | 117 | 301,4 | 301,4 | 19,26 | 605,02 | 194,59 |
| 2019/06/03 | CH2205 | Male | Three y/o | Treatment (Wk 3) | Treatment | Feed Day | No | 07:50 | 07:00 - 07:59 | Morning      | 37,7 | 79  | 183,0 | 183,0 | 18,85 | 576,36 | 177,00 |
| 2019/06/03 | CH2206 | Male | Three y/o | Treatment (Wk 3) | Treatment | Feed Day | No | 07:50 | 07:00 - 07:59 | Morning      | 38,0 | 117 | 120,6 | 120,6 | 19,15 | 605,02 | 162,38 |
| 2019/06/03 | CH2205 | Male | Three y/o | Treatment (Wk 3) | Treatment | Feed Day | No | 07:55 | 07:00 - 07:59 | Morning      | 37,9 | 129 | 194,4 | 194,4 | 19,05 | 611,75 | 179,12 |
| 2019/06/03 | CH2206 | Male | Three y/o | Treatment (Wk 3) | Treatment | Feed Day | No | 07:55 | 07:00 - 07:59 | Morning      | 38,0 | 185 | 108,4 | 108,4 | 19,15 | 635,34 | 158,66 |
| 2019/06/03 | CH2205 | Male | Three y/o | Treatment (Wk 3) | Treatment | Feed Day | No | 08:00 | 08:00 - 08:59 | Late Morning | 37,9 | 99  | 77,6  | 77,6  | 19,05 | 593,14 | 147,02 |
| 2019/06/03 | CH2206 | Male | Three y/o | Treatment (Wk 3) | Treatment | Feed Day | No | 08:00 | 08:00 - 08:59 | Late Morning | 38,0 | 76  | 137,0 | 137,0 | 19,15 | 573,39 | 166,84 |
| 2019/06/03 | CH2205 | Male | Three y/o | Treatment (Wk 3) | Treatment | Feed Day | No | 08:05 | 08:00 - 08:59 | Late Morning | 37,6 | 98  | 81,0  | 81,0  | 18,75 | 592,41 | 148,51 |
| 2019/06/03 | CH2206 | Male | Three y/o | Treatment (Wk 3) | Treatment | Feed Day | No | 08:05 | 08:00 - 08:59 | Late Morning | 37,9 | 99  | 35,0  | 35,0  | 19,05 | 593,14 | 119,49 |
| 2019/06/03 | CH2205 | Male | Three y/o | Treatment (Wk 3) | Treatment | Feed Day | No | 08:10 | 08:00 - 08:59 | Late Morning | 37,7 | 102 | 125,6 | 125,6 | 18,85 | 595,30 | 163,80 |
| 2019/06/03 | CH2206 | Male | Three y/o | Treatment (Wk 3) | Treatment | Feed Day | No | 08:10 | 08:00 - 08:59 | Late Morning | 37,9 | 117 | 121,8 | 121,8 | 19,05 | 605,02 | 162,73 |
| 2019/06/03 | CH2205 | Male | Three y/o | Treatment (Wk 3) | Treatment | Feed Day | No | 08:15 | 08:00 - 08:59 | Late Morning | 37,5 |     | 27,6  | 27,6  | 18,65 |        | 111,33 |
| 2019/06/03 | CH2206 | Male | Three y/o | Treatment (Wk 3) | Treatment | Feed Day | No | 08:15 | 08:00 - 08:59 | Late Morning | 37,9 |     | 60,6  | 60,6  | 19,05 | 611,22 | 138,44 |
| 2019/06/03 | CH2205 | Male | Three y/o | Treatment (Wk 3) | Treatment | Feed Day | No | 08:20 | 08:00 - 08:59 | Late Morning | 37,6 | 103 | 20,6  | 20,6  | 18,75 | 596,00 | 101,32 |
| 2019/06/03 | CH2206 | Male | Three y/o | Treatment (Wk 3) | Treatment | Feed Day | No | 08:20 | 08:00 - 08:59 | Late Morning | 37,9 |     | 130,0 | 130,0 | 19,05 |        | 165,01 |
| 2019/06/03 | CH2205 | Male | Three y/o | Treatment (Wk 3) | Treatment | Feed Day | No | 08:25 | 08:00 - 08:59 | Late Morning | 37,5 |     | 10,4  | 10,4  | 18,65 |        | 78,08  |
| 2019/06/03 | CH2206 | Male | Three y/o | Treatment (Wk 3) | Treatment | Feed Day | No | 08:25 | 08:00 - 08:59 | Late Morning | 37,9 | 117 | 41,0  | 41,0  | 19,05 | 605,02 | 124,94 |
| 2019/06/03 | CH2205 | Male | Three y/o | Treatment (Wk 3) | Treatment | Feed Day | No | 08:30 | 08:00 - 08:59 | Late Morning | 37,6 |     | 3,6   | 3,6   | 18,75 |        | 42,42  |
| 2019/06/03 | CH2206 | Male | Three y/o | Treatment (Wk 3) | Treatment | Feed Day | No | 08:30 | 08:00 - 08:59 | Late Morning | 37,7 | 86  | 39,6  | 39,6  | 18,85 | 582,77 | 123,74 |
| 2019/06/03 | CH2205 | Male | Three y/o | Treatment (Wk 3) | Treatment | Feed Day | No | 08:35 | 08:00 - 08:59 | Late Morning | 37,5 |     | 12,2  | 12,2  | 18,65 |        | 83,49  |
| 2019/06/03 | CH2206 | Male | Three y/o | Treatment (Wk 3) | Treatment | Feed Day | No | 08:35 | 08:00 - 08:59 | Late Morning | 37,7 |     | 47,0  | 47,0  | 18,85 |        | 129,65 |
| 2019/06/03 | CH2205 | Male | Three y/o | Treatment (Wk 3) | Treatment | Feed Day | No | 08:40 | 08:00 - 08:59 | Late Morning | 37,4 |     | 21,4  | 21,4  | 18,55 |        | 102,63 |
| 2019/06/03 | CH2206 | Male | Three y/o | Treatment (Wk 3) | Treatment | Feed Day | No | 08:40 | 08:00 - 08:59 | Late Morning | 37,4 | 104 | 167,6 | 167,6 | 18,55 | 596,69 | 173,91 |
| 2019/06/03 | CH2205 | Male | Three y/o | Treatment (Wk 3) | Treatment | Feed Day | No | 08:45 | 08:00 - 08:59 | Late Morning | 37,3 | 54  | 22,2  | 22,2  | 18,46 | 545,99 | 103,88 |
| 2019/06/03 | CH2206 | Male | Three y/o | Treatment (Wk 3) | Treatment | Feed Day | No | 08:45 | 08:00 - 08:59 | Late Morning | 37,4 | 125 | 48,2  | 48,2  | 18,55 | 609,60 | 130,52 |
| 2019/06/03 | CH2205 | Male | Three y/o | Treatment (Wk 3) | Treatment | Feed Day | No | 08:50 | 08:00 - 08:59 | Late Morning | 37,2 | 58  | 22,6  | 22,6  | 18,36 | 551,90 | 104,49 |
| 2019/06/03 | CH2206 | Male | Three y/o | Treatment (Wk 3) | Treatment | Feed Day | No | 08:50 | 08:00 - 08:59 | Late Morning | 37,3 | 74  | 31,2  | 31,2  | 18,46 | 571,33 | 115,54 |
| 2019/06/03 | CH2205 | Male | Three y/o | Treatment (Wk 3) | Treatment | Feed Day | No | 08:55 | 08:00 - 08:59 | Late Morning | 37,1 | 58  | 22,2  | 22,2  | 18,26 | 551,90 | 103,88 |
| 2019/06/03 | CH2206 | Male | Three y/o | Treatment (Wk 3) | Treatment | Feed Day | No | 08:55 | 08:00 - 08:59 | Late Morning | 37,1 | 79  | 36,2  | 36,2  | 18,26 | 576,36 | 120,65 |
| 2019/06/03 | CH2205 | Male | Three y/o | Treatment (Wk 3) | Treatment | Feed Day | No | 09:00 | 09:00 - 09:59 | Late Morning | 37,1 | 74  | 23,0  | 23,0  | 18,26 | 571,33 | 105,09 |
| 2019/06/03 | CH2206 | Male | Three y/o | Treatment (Wk 3) | Treatment | Feed Day | No | 09:00 | 09:00 - 09:59 | Late Morning | 37,0 | 52  | 46,8  | 46,8  | 18,16 | 542,83 | 129,50 |
| 2019/06/03 | CH2205 | Male | Three y/o | Treatment (Wk 3) | Treatment | Feed Day | No | 09:05 | 09:00 - 09:59 | Late Morning | 37,1 | 49  | 19,0  | 19,0  | 18,26 | 537,80 | 98,56  |
| 2019/06/03 | CH2206 | Male | Three y/o | Treatment (Wk 3) | Treatment | Feed Day | No | 09:05 | 09:00 - 09:59 | Late Morning | 37,0 | 68  | 47,4  | 47,4  | 18,16 | 564,71 | 129,94 |
| 2019/06/03 | CH2205 | Male | Three y/o | Treatment (Wk 3) | Treatment | Feed Day | No | 09:10 | 09:00 - 09:59 | Late Morning | 37,1 | 57  | 17,4  | 17,4  | 18,26 | 550,47 | 95,56  |
| 2019/06/03 | CH2206 | Male | Three y/o | Treatment (Wk 3) | Treatment | Feed Day | No | 09:10 | 09:00 - 09:59 | Late Morning | 37,2 | 74  | 40,0  | 40,0  | 18,36 | 571,33 | 124,09 |
| 2019/06/03 | CH2205 | Male | Three y/o | Treatment (Wk 3) | Treatment | Feed Day | No | 09:15 | 09:00 - 09:59 | Late Morning | 37,1 | 57  | 16,2  | 16,2  | 18,26 | 550,47 | 93,13  |
| 2019/06/03 | CH2206 | Male | Three y/o | Treatment (Wk 3) | Treatment | Feed Day | No | 09:15 | 09:00 - 09:59 | Late Morning | 37,4 | 59  | 47,2  | 47,2  | 18,55 | 553,30 | 129,80 |
| 2019/06/03 | CH2205 | Male | Three y/o | Treatment (Wk 3) | Treatment | Feed Day | No | 09:20 | 09:00 - 09:59 | Late Morning | 37,1 | 45  | 11,2  | 11,2  | 18,26 | 530,47 | 80,59  |
| 2019/06/03 | CH2206 | Male | Three y/o | Treatment (Wk 3) | Treatment | Feed Day | No | 09:20 | 09:00 - 09:59 | Late Morning | 37,5 | 44  | 53,2  | 53,2  | 18,65 | 528,51 | 133,93 |
| 2019/06/03 | CH2205 | Male | Three y/o | Treatment (Wk 3) | Treatment | Feed Day | No | 09:25 | 09:00 - 09:59 | Late Morning | 37,1 | 43  | 12,8  | 12,8  | 18,26 | 526,50 | 85,12  |
| 2019/06/03 | CH2206 | Male | Three y/o | Treatment (Wk 3) | Treatment | Feed Day | No | 09:25 | 09:00 - 09:59 | Late Morning | 37,5 | 56  | 35,2  | 35,2  | 18,65 | 549,01 | 119,69 |
| 2019/06/03 | CH2205 | Male | Three y/o | Treatment (Wk 3) | Treatment | Feed Day | No | 09:30 | 09:00 - 09:59 | Late Morning | 37,1 | 60  | 1,0   | 1,0   | 18,26 | 554,67 | 0,00   |
| 2019/06/03 | CH2206 | Male | Three y/o | Treatment (Wk 3) | Treatment | Feed Day | No | 09:30 | 09:00 - 09:59 | Late Morning | 37,7 | 78  | 37,4  | 37,4  | 18,85 | 575,38 | 121,77 |
| 2019/06/03 | CH2205 | Male | Three y/o | Treatment (Wk 3) | Treatment | Feed Day | No | 09:35 | 09:00 - 09:59 | Late Morning | 37,1 | 60  | 3,4   | 3,4   | 18,26 | 554,67 | 40,51  |
| 2019/06/03 | CH2206 | Male | Three y/o | Treatment (Wk 3) | Treatment | Feed Day | No | 09:35 | 09:00 - 09:59 | Late Morning | 37,7 | 82  | 36,2  | 36,2  | 18,85 | 579,19 | 120,65 |
| 2019/06/03 | CH2205 | Male | Three y/o | Treatment (Wk 3) | Treatment | Feed Day | No | 09:40 | 09:00 - 09:59 | Late Morning | 37,1 | 43  | 6,0   | 6,0   | 18,26 | 526,50 | 59,53  |
| 2019/06/03 | CH2206 | Male | Three y/o | Treatment (Wk 3) | Treatment | Feed Day | No | 09:40 | 09:00 - 09:59 | Late Morning | 37,5 | 54  | 47,6  | 47,6  | 18,65 | 545,99 | 130,09 |
| 2019/06/03 | CH2205 | Male | Three y/o | Treatment (Wk 3) | Treatment | Feed Day | No | 09:45 | 09:00 - 09:59 | Late Morning | 37,1 | 45  | 7,4   | 7,4   | 18,26 | 530,47 | 66,59  |
| 2019/06/03 | CH2206 | Male | Three y/o | Treatment (Wk 3) | Treatment | Feed Day | No | 09:45 | 09:00 - 09:59 | Late Morning | 37,4 | 45  | 23,2  | 23,2  | 18,55 | 530,47 | 105,39 |
| 2019/06/03 | CH2205 | Male | Three y/o | Treatment (Wk 3) | Treatment | Feed Day | No | 09:50 | 09:00 - 09:59 | Late Morning | 37,1 | 96  | 18,2  | 18,2  | 18,26 | 590,91 | 97,10  |
| 2019/06/03 | CH2206 | Male | Three y/o | Treatment (Wk 3) | Treatment | Feed Day | No | 09:50 | 09:00 - 09:59 | Late Morning | 37,3 | 105 | 135,2 | 135,2 | 18,46 | 597,38 | 166,38 |
| 2019/06/03 | CH2205 | Male | Three y/o | Treatment (Wk 3) | Treatment | Feed Day | No | 09:55 | 09:00 - 09:59 | Late Morning | 37,1 | 165 | 17,8  | 17,8  | 18,26 | 628,06 | 96,34  |
| 2019/06/03 | CH2206 | Male | Three y/o | Treatment (Wk 3) | Treatment | Feed Day | No | 09:55 | 09:00 - 09:59 | Late Morning | 37,3 | 99  | 83,6  | 83,6  | 18,46 | 593,14 | 149,61 |
| 2019/06/03 | CH2205 | Male | Three y/o | Treatment (Wk 3) | Treatment | Feed Day | No | 10:00 | 10:00 - 10:59 | Late Morning | 37,1 | 83  | 38,4  | 38,4  | 18,26 | 580,11 | 122,68 |
| 2019/06/03 | CH2206 | Male | Three y/o | Treatment (Wk 3) | Treatment | Feed Day | No | 10:00 | 10:00 - 10:59 | Late Morning | 37,4 | 103 | 46,6  | 46,6  | 18,55 | 596,00 | 129,35 |
| 2019/06/03 | CH2205 | Male | Three y/o | Treatment (Wk 3) | Treatment | Feed Day | No | 10:05 | 10:00 - 10:59 | Late Morning | 37,2 | 42  | 245,8 | 245,8 | 18,36 | 524,42 | 187,38 |
| 2019/06/03 | CH2206 | Male | Three y/o | Treatment (Wk 3) | Treatment | Feed Day | No | 10:05 | 10:00 - 10:59 | Late Morning | 37,4 | 111 | 127,8 | 127,8 | 18,55 | 601,33 | 164,41 |
| 2019/06/03 | CH2205 | Male | Three y/o | Treatment (Wk 3) | Treatment | Feed Day | No | 10:10 | 10:00 - 10:59 | Late Morning | 37,3 | 104 | 13,0  | 13,0  | 18,46 | 596,69 | 85,65  |
| 2019/06/03 | CH2206 | Male | Three y/o | Treatment (Wk 3) | Treatment | Feed Day | No | 10:10 | 10:00 - 10:59 | Late Morning | 37,5 |     | 112,2 | 112,2 | 18,65 |        | 159,86 |
| 2019/06/03 | CH2205 | Male | Three y/o | Treatment (Wk 3) | Treatment | Feed Day | No | 10:15 | 10:00 - 10:59 | Late Morning | 37,4 | 94  | 19,2  | 19,2  | 18,55 | 589,37 | 98,92  |
| 2019/06/03 | CH2206 | Male | Three y/o | Treatment (Wk 3) | Treatment | Feed Day | No | 10:15 | 10:00 - 10:59 | Late Morning | 37,5 | 100 | 32,8  | 32,8  | 18,65 | 593,87 | 117,26 |
| 2019/06/03 | CH2205 | Male | Three y/o | Treatment (Wk 3) | Treatment | Feed Day | No | 10:20 | 10:00 - 10:59 | Late Morning | 37,4 |     | 45,0  | 45,0  | 18,55 |        | 128,15 |
| 2019/06/03 | CH2206 | Male | Three y/o | Treatment (Wk 3) | Treatment | Feed Day | No | 10:20 | 10:00 - 10:59 | Late Morning | 37,5 | 73  | 46,0  | 46,0  | 18,65 | 570,27 | 128,91 |
| 2019/06/03 | CH2205 | Male | Three y/o | Treatment (Wk 3) | Treatment | Feed Day | No | 10:25 | 10:00 - 10:59 | Late Morning | 37,3 |     | 46,6  | 46,6  | 18,46 |        | 129,35 |
| 2019/06/03 | CH2206 | Male | Three y/o | Treatment (Wk 3) | Treatment | Feed Day | No | 10:25 | 10:00 - 10:59 | Late Morning | 37,7 | 103 | 96,8  | 96,8  | 18,85 | 596,00 | 154,71 |
| 2019/06/03 | CH2205 | Male | Three y/o | Treatment (Wk 3) | Treatment | Feed Day | No | 10:30 | 10:00 - 10:59 | Late Morning | 37,4 | 92  | 15,6  | 15,6  | 18,55 | 587,78 | 91,85  |



|            |        |      |           |                  |           |          |    |       |               |              |      |     |       |       |       |        |        |
|------------|--------|------|-----------|------------------|-----------|----------|----|-------|---------------|--------------|------|-----|-------|-------|-------|--------|--------|
| 2019/06/03 | CH2206 | Male | Three y/o | Treatment (Wk 3) | Treatment | Feed Day | No | 10:30 | 10:00 - 10:59 | Late Morning | 37,7 | 106 | 35,6  | 35,6  | 18,85 | 598,06 | 120,08 |
| 2019/06/03 | CH2205 | Male | Three y/o | Treatment (Wk 3) | Treatment | Feed Day | No | 10:35 | 10:00 - 10:59 | Late Morning | 37,4 | 57  | 20,0  | 20,0  | 18,55 | 550,47 | 100,31 |
| 2019/06/03 | CH2206 | Male | Three y/o | Treatment (Wk 3) | Treatment | Feed Day | No | 10:35 | 10:00 - 10:59 | Late Morning | 37,5 | 61  | 40,2  | 40,2  | 18,65 | 556,01 | 124,26 |
| 2019/06/03 | CH2205 | Male | Three y/o | Treatment (Wk 3) | Treatment | Feed Day | No | 10:40 | 10:00 - 10:59 | Late Morning | 37,4 | 55  | 15,0  | 15,0  | 18,55 | 547,52 | 90,51  |
| 2019/06/03 | CH2206 | Male | Three y/o | Treatment (Wk 3) | Treatment | Feed Day | No | 10:40 | 10:00 - 10:59 | Late Morning | 37,7 | 55  | 40,8  | 40,8  | 18,85 | 547,52 | 124,77 |
| 2019/06/03 | CH2205 | Male | Three y/o | Treatment (Wk 3) | Treatment | Feed Day | No | 10:45 | 10:00 - 10:59 | Late Morning | 37,5 | 57  | 12,8  | 12,8  | 18,65 | 550,47 | 85,12  |
| 2019/06/03 | CH2206 | Male | Three y/o | Treatment (Wk 3) | Treatment | Feed Day | No | 10:45 | 10:00 - 10:59 | Late Morning | 37,7 | 97  | 34,0  | 34,0  | 18,85 | 591,66 | 118,49 |
| 2019/06/03 | CH2205 | Male | Three y/o | Treatment (Wk 3) | Treatment | Feed Day | No | 10:50 | 10:00 - 10:59 | Late Morning | 37,5 |     | 109,2 | 109,2 | 18,65 |        | 158,91 |
| 2019/06/03 | CH2206 | Male | Three y/o | Treatment (Wk 3) | Treatment | Feed Day | No | 10:50 | 10:00 - 10:59 | Late Morning | 37,7 |     | 437,8 | 437,8 | 18,85 |        | 207,82 |
| 2019/06/03 | CH2205 | Male | Three y/o | Treatment (Wk 3) | Treatment | Feed Day | No | 10:55 | 10:00 - 10:59 | Late Morning | 37,7 | 89  | 15,8  | 15,8  | 18,85 | 585,33 | 92,28  |
| 2019/06/03 | CH2206 | Male | Three y/o | Treatment (Wk 3) | Treatment | Feed Day | No | 10:55 | 10:00 - 10:59 | Late Morning | 37,7 |     | 34,2  | 34,2  | 18,85 |        | 118,70 |
| 2019/06/03 | CH2205 | Male | Three y/o | Treatment (Wk 3) | Treatment | Feed Day | No | 11:00 | 11:00 - 11:59 | Late Morning | 37,6 | 92  | 27,4  | 27,4  | 18,75 | 587,78 | 111,09 |
| 2019/06/03 | CH2206 | Male | Three y/o | Treatment (Wk 3) | Treatment | Feed Day | No | 11:00 | 11:00 - 11:59 | Late Morning | 37,8 | 98  | 114,4 | 114,4 | 18,95 | 592,41 | 160,54 |
| 2019/06/03 | CH2205 | Male | Three y/o | Treatment (Wk 3) | Treatment | Feed Day | No | 11:05 | 11:00 - 11:59 | Late Morning | 37,6 |     | 175,2 | 175,2 | 18,75 |        | 175,47 |
| 2019/06/03 | CH2206 | Male | Three y/o | Treatment (Wk 3) | Treatment | Feed Day | No | 11:05 | 11:00 - 11:59 | Late Morning | 37,7 | 160 | 102,4 | 102,4 | 18,85 | 626,07 | 156,67 |
| 2019/06/03 | CH2205 | Male | Three y/o | Treatment (Wk 3) | Treatment | Feed Day | No | 11:10 | 11:00 - 11:59 | Late Morning | 37,7 | 73  | 13,4  | 13,4  | 18,85 | 570,27 | 86,68  |
| 2019/06/03 | CH2206 | Male | Three y/o | Treatment (Wk 3) | Treatment | Feed Day | No | 11:10 | 11:00 - 11:59 | Late Morning | 37,8 | 135 | 371,4 | 371,4 | 18,95 | 614,84 | 201,98 |
| 2019/06/03 | CH2205 | Male | Three y/o | Treatment (Wk 3) | Treatment | Feed Day | No | 11:15 | 11:00 - 11:59 | Late Morning | 37,7 | 55  | 68,8  | 68,8  | 18,85 | 547,52 | 142,84 |
| 2019/06/03 | CH2206 | Male | Three y/o | Treatment (Wk 3) | Treatment | Feed Day | No | 11:15 | 11:00 - 11:59 | Late Morning | 37,9 | 129 | 36,0  | 36,0  | 19,05 | 611,75 | 120,46 |
| 2019/06/03 | CH2205 | Male | Three y/o | Treatment (Wk 3) | Treatment | Feed Day | No | 11:20 | 11:00 - 11:59 | Late Morning | 37,7 | 60  | 40,0  | 40,0  | 18,85 | 554,67 | 124,09 |
| 2019/06/03 | CH2206 | Male | Three y/o | Treatment (Wk 3) | Treatment | Feed Day | No | 11:20 | 11:00 - 11:59 | Late Morning | 37,8 | 77  | 49,2  | 49,2  | 18,95 | 574,39 | 131,23 |
| 2019/06/03 | CH2205 | Male | Three y/o | Treatment (Wk 3) | Treatment | Feed Day | No | 11:25 | 11:00 - 11:59 | Late Morning | 37,7 | 57  | 9,4   | 9,4   | 18,85 | 550,47 | 74,66  |
| 2019/06/03 | CH2206 | Male | Three y/o | Treatment (Wk 3) | Treatment | Feed Day | No | 11:25 | 11:00 - 11:59 | Late Morning | 37,8 | 66  | 46,8  | 46,8  | 18,95 | 562,34 | 129,50 |
| 2019/06/03 | CH2205 | Male | Three y/o | Treatment (Wk 3) | Treatment | Feed Day | No | 11:30 | 11:00 - 11:59 | Late Morning | 37,7 | 92  | 14,4  | 14,4  | 18,85 | 587,78 | 89,12  |
| 2019/06/03 | CH2206 | Male | Three y/o | Treatment (Wk 3) | Treatment | Feed Day | No | 11:30 | 11:00 - 11:59 | Late Morning | 37,8 | 98  | 43,8  | 43,8  | 18,95 | 592,41 | 127,22 |
| 2019/06/03 | CH2205 | Male | Three y/o | Treatment (Wk 3) | Treatment | Feed Day | No | 11:35 | 11:00 - 11:59 | Late Morning | 37,7 | 51  | 16,6  | 16,6  | 18,85 | 541,20 | 93,96  |
| 2019/06/03 | CH2206 | Male | Three y/o | Treatment (Wk 3) | Treatment | Feed Day | No | 11:35 | 11:00 - 11:59 | Late Morning | 37,8 | 52  | 396,0 | 396,0 | 18,95 | 542,83 | 204,26 |
| 2019/06/03 | CH2205 | Male | Three y/o | Treatment (Wk 3) | Treatment | Feed Day | No | 11:40 | 11:00 - 11:59 | Late Morning | 38,0 | 185 | 17,6  | 17,6  | 19,15 | 635,34 | 95,95  |
| 2019/06/03 | CH2206 | Male | Three y/o | Treatment (Wk 3) | Treatment | Feed Day | No | 11:40 | 11:00 - 11:59 | Late Morning | 37,9 | 118 | 15,8  | 15,8  | 19,05 | 605,61 | 92,28  |
| 2019/06/03 | CH2205 | Male | Three y/o | Treatment (Wk 3) | Treatment | Feed Day | No | 11:45 | 11:00 - 11:59 | Late Morning | 38,0 | 77  | 10,6  | 10,6  | 19,15 | 574,39 | 78,73  |
| 2019/06/03 | CH2206 | Male | Three y/o | Treatment (Wk 3) | Treatment | Feed Day | No | 11:45 | 11:00 - 11:59 | Late Morning | 37,9 | 103 | 24,8  | 24,8  | 19,05 | 596,00 | 107,67 |
| 2019/06/03 | CH2205 | Male | Three y/o | Treatment (Wk 3) | Treatment | Feed Day | No | 11:50 | 11:00 - 11:59 | Late Morning | 38,0 | 84  | 36,0  | 36,0  | 19,15 | 581,01 | 120,46 |
| 2019/06/03 | CH2206 | Male | Three y/o | Treatment (Wk 3) | Treatment | Feed Day | No | 11:50 | 11:00 - 11:59 | Late Morning | 37,9 | 65  | 6,0   | 6,0   | 19,05 | 561,12 | 59,53  |
| 2019/06/03 | CH2205 | Male | Three y/o | Treatment (Wk 3) | Treatment | Feed Day | No | 11:55 | 11:00 - 11:59 | Late Morning | 38,0 | 69  | 60,8  | 60,8  | 19,15 | 565,86 | 138,55 |
| 2019/06/03 | CH2206 | Male | Three y/o | Treatment (Wk 3) | Treatment | Feed Day | No | 11:55 | 11:00 - 11:59 | Late Morning | 37,8 | 42  | 8,8   | 8,8   | 18,95 | 524,42 | 72,43  |
| 2019/06/03 | CH2205 | Male | Three y/o | Treatment (Wk 3) | Treatment | Feed Day | No | 12:00 | 12:00 - 12:59 | Afternoon    | 38,1 | 90  | 38,8  | 38,8  | 19,26 | 586,16 | 123,04 |
| 2019/06/03 | CH2206 | Male | Three y/o | Treatment (Wk 3) | Treatment | Feed Day | No | 12:00 | 12:00 - 12:59 | Afternoon    | 37,8 | 109 | 93,4  | 93,4  | 18,95 | 600,04 | 153,46 |
| 2019/06/03 | CH2205 | Male | Three y/o | Treatment (Wk 3) | Treatment | Feed Day | No | 12:05 | 12:00 - 12:59 | Afternoon    | 38,0 |     | 48,6  | 48,6  | 19,15 |        | 130,81 |
| 2019/06/03 | CH2206 | Male | Three y/o | Treatment (Wk 3) | Treatment | Feed Day | No | 12:05 | 12:00 - 12:59 | Afternoon    | 37,9 | 110 | 60,6  | 60,6  | 19,05 | 600,69 | 138,44 |
| 2019/06/03 | CH2205 | Male | Three y/o | Treatment (Wk 3) | Treatment | Feed Day | No | 12:10 | 12:00 - 12:59 | Afternoon    | 38,0 | 57  | 49,2  | 49,2  | 19,15 | 550,47 | 131,23 |
| 2019/06/03 | CH2206 | Male | Three y/o | Treatment (Wk 3) | Treatment | Feed Day | No | 12:10 | 12:00 - 12:59 | Afternoon    | 37,9 | 128 | 113,0 | 113,0 | 19,05 | 611,22 | 160,11 |
| 2019/06/03 | CH2205 | Male | Three y/o | Treatment (Wk 3) | Treatment | Feed Day | No | 12:15 | 12:00 - 12:59 | Afternoon    | 38,0 | 91  | 27,6  | 27,6  | 19,15 | 586,98 | 111,33 |
| 2019/06/03 | CH2206 | Male | Three y/o | Treatment (Wk 3) | Treatment | Feed Day | No | 12:15 | 12:00 - 12:59 | Afternoon    | 37,9 | 67  | 49,0  | 49,0  | 19,05 | 563,53 | 131,09 |
| 2019/06/03 | CH2205 | Male | Three y/o | Treatment (Wk 3) | Treatment | Feed Day | No | 12:20 | 12:00 - 12:59 | Afternoon    | 37,9 | 55  | 24,8  | 24,8  | 19,05 | 547,52 | 107,67 |
| 2019/06/03 | CH2206 | Male | Three y/o | Treatment (Wk 3) | Treatment | Feed Day | No | 12:20 | 12:00 - 12:59 | Afternoon    | 37,8 | 69  | 50,8  | 50,8  | 18,95 | 565,86 | 132,33 |
| 2019/06/03 | CH2205 | Male | Three y/o | Treatment (Wk 3) | Treatment | Feed Day | No | 12:25 | 12:00 - 12:59 | Afternoon    | 37,9 | 58  | 23,8  | 23,8  | 19,05 | 551,90 | 106,26 |
| 2019/06/03 | CH2206 | Male | Three y/o | Treatment (Wk 3) | Treatment | Feed Day | No | 12:25 | 12:00 - 12:59 | Afternoon    | 37,8 | 79  | 49,8  | 49,8  | 18,95 | 576,36 | 131,65 |
| 2019/06/03 | CH2205 | Male | Three y/o | Treatment (Wk 3) | Treatment | Feed Day | No | 12:30 | 12:00 - 12:59 | Afternoon    | 37,9 | 59  | 25,6  | 25,6  | 19,05 | 553,30 | 108,76 |
| 2019/06/03 | CH2206 | Male | Three y/o | Treatment (Wk 3) | Treatment | Feed Day | No | 12:30 | 12:00 - 12:59 | Afternoon    | 37,8 | 75  | 47,6  | 47,6  | 18,95 | 572,36 | 130,09 |
| 2019/06/03 | CH2205 | Male | Three y/o | Treatment (Wk 3) | Treatment | Feed Day | No | 12:35 | 12:00 - 12:59 | Afternoon    | 37,9 | 45  | 27,6  | 27,6  | 19,05 | 530,47 | 111,33 |
| 2019/06/03 | CH2206 | Male | Three y/o | Treatment (Wk 3) | Treatment | Feed Day | No | 12:35 | 12:00 - 12:59 | Afternoon    | 37,8 | 73  | 48,0  | 48,0  | 18,95 | 570,27 | 130,38 |
| 2019/06/03 | CH2205 | Male | Three y/o | Treatment (Wk 3) | Treatment | Feed Day | No | 12:40 | 12:00 - 12:59 | Afternoon    | 37,9 | 68  | 23,6  | 23,6  | 19,05 | 564,71 | 105,97 |
| 2019/06/03 | CH2206 | Male | Three y/o | Treatment (Wk 3) | Treatment | Feed Day | No | 12:40 | 12:00 - 12:59 | Afternoon    | 37,8 | 60  | 49,8  | 49,8  | 18,95 | 554,67 | 131,65 |
| 2019/06/03 | CH2205 | Male | Three y/o | Treatment (Wk 3) | Treatment | Feed Day | No | 12:45 | 12:00 - 12:59 | Afternoon    | 37,8 | 58  | 30,0  | 30,0  | 18,95 | 551,90 | 114,20 |
| 2019/06/03 | CH2206 | Male | Three y/o | Treatment (Wk 3) | Treatment | Feed Day | No | 12:45 | 12:00 - 12:59 | Afternoon    | 37,8 | 86  | 48,2  | 48,2  | 18,95 | 582,77 | 130,52 |
| 2019/06/03 | CH2205 | Male | Three y/o | Treatment (Wk 3) | Treatment | Feed Day | No | 12:50 | 12:00 - 12:59 | Afternoon    | 37,7 | 50  | 176,8 | 176,8 | 18,85 | 539,52 | 175,78 |
| 2019/06/03 | CH2206 | Male | Three y/o | Treatment (Wk 3) | Treatment | Feed Day | No | 12:50 | 12:00 - 12:59 | Afternoon    | 37,8 | 81  | 37,2  | 37,2  | 18,95 | 578,26 | 121,59 |
| 2019/06/03 | CH2205 | Male | Three y/o | Treatment (Wk 3) | Treatment | Feed Day | No | 12:55 | 12:00 - 12:59 | Afternoon    | 37,9 |     | 149,0 | 149,0 | 19,05 |        | 169,78 |
| 2019/06/03 | CH2206 | Male | Three y/o | Treatment (Wk 3) | Treatment | Feed Day | No | 12:55 | 12:00 - 12:59 | Afternoon    | 37,8 |     | 48,0  | 48,0  | 18,95 |        | 130,38 |
| 2019/06/03 | CH2205 | Male | Three y/o | Treatment (Wk 3) | Treatment | Feed Day | No | 13:00 | 13:00 - 13:59 | Afternoon    | 37,9 | 101 | 40,4  | 40,4  | 19,05 | 594,59 | 124,43 |
| 2019/06/03 | CH2206 | Male | Three y/o | Treatment (Wk 3) | Treatment | Feed Day | No | 13:00 | 13:00 - 13:59 | Afternoon    | 37,8 | 106 | 26,0  | 26,0  | 18,95 | 598,06 | 109,29 |
| 2019/06/03 | CH2205 | Male | Three y/o | Treatment (Wk 3) | Treatment | Feed Day | No | 13:05 | 13:00 - 13:59 | Afternoon    | 37,9 | 76  | 5,8   | 5,8   | 19,05 | 573,39 | 58,39  |
| 2019/06/03 | CH2206 | Male | Three y/o | Treatment (Wk 3) | Treatment | Feed Day | No | 13:05 | 13:00 - 13:59 | Afternoon    | 37,8 | 71  | 68,0  | 68,0  | 18,95 | 568,10 | 142,43 |
| 2019/06/03 | CH2205 | Male | Three y/o | Treatment (Wk 3) | Treatment | Feed Day | No | 13:10 | 13:00 - 13:59 | Afternoon    | 37,9 | 78  | 12,8  | 12,8  | 19,05 | 575,38 | 85,12  |
| 2019/06/03 | CH2206 | Male | Three y/o | Treatment (Wk 3) | Treatment | Feed Day | No | 13:10 | 13:00 - 13:59 | Afternoon    | 37,8 | 96  | 20,2  | 20,2  | 18,95 | 590,91 | 100,65 |
| 2019/06/03 | CH2205 | Male | Three y/o | Treatment (Wk 3) | Treatment | Feed Day | No | 13:15 | 13:00 - 13:59 | Afternoon    | 37,9 | 51  | 160,0 | 160,0 | 19,05 | 541,20 | 172,28 |
| 2019/06/03 | CH2206 | Male | Three y/o | Treatment (Wk 3) | Treatment | Feed Day | No | 13:15 | 13:00 - 13:59 | Afternoon    | 37,8 | 43  | 60,0  | 60,0  | 18,95 | 526,50 | 138,09 |
| 2019/06/03 | CH2205 | Male | Three y/o | Treatment (Wk 3) | Treatment | Feed Day | No | 13:20 | 13:00 - 13:59 | Afternoon    | 37,9 |     | 16,4  | 16,4  | 19,05 |        | 93,55  |
| 2019/06/03 | CH2206 | Male | Three y/o | Treatment (Wk 3) | Treatment | Feed Day | No | 13:20 | 13:00 - 13:59 | Afternoon    | 37,8 | 113 | 73,6  | 73,6  | 18,95 | 602,58 | 145,18 |
| 2019/06/03 | CH2205 | Male | Three y/o | Treatment (Wk 3) | Treatment | Feed Day | No | 13:25 | 13:00 - 13:59 | Afternoon    | 37,7 | 61  | 6,8   | 6,8   | 18,85 | 556,01 | 63,74  |



|            |        |      |           |                  |           |          |     |       |               |           |      |     |       |       |       |        |        |
|------------|--------|------|-----------|------------------|-----------|----------|-----|-------|---------------|-----------|------|-----|-------|-------|-------|--------|--------|
| 2019/06/03 | CH2206 | Male | Three y/o | Treatment (Wk 3) | Treatment | Feed Day | No  | 13:25 | 13:00 - 13:59 | Afternoon | 37,8 |     | 160,8 | 160,8 | 18,95 |        | 172,46 |
| 2019/06/03 | CH2205 | Male | Three y/o | Treatment (Wk 3) | Treatment | Feed Day | No  | 13:30 | 13:00 - 13:59 | Afternoon | 37,7 | 62  | 3,4   | 3,4   | 18,85 | 557,33 | 40,51  |
| 2019/06/03 | CH2206 | Male | Three y/o | Treatment (Wk 3) | Treatment | Feed Day | No  | 13:30 | 13:00 - 13:59 | Afternoon | 37,9 |     | 140,6 | 140,6 | 19,05 |        | 167,75 |
| 2019/06/03 | CH2205 | Male | Three y/o | Treatment (Wk 3) | Treatment | Feed Day | No  | 13:35 | 13:00 - 13:59 | Afternoon | 37,7 | 53  | 6,0   | 6,0   | 18,85 | 544,43 | 59,53  |
| 2019/06/03 | CH2206 | Male | Three y/o | Treatment (Wk 3) | Treatment | Feed Day | No  | 13:35 | 13:00 - 13:59 | Afternoon | 37,9 | 197 | 138,2 | 138,2 | 19,05 | 639,25 | 167,15 |
| 2019/06/03 | CH2205 | Male | Three y/o | Treatment (Wk 3) | Treatment | Feed Day | No  | 13:40 | 13:00 - 13:59 | Afternoon | 37,7 | 57  | 14,8  | 14,8  | 18,85 | 550,47 | 90,05  |
| 2019/06/03 | CH2206 | Male | Three y/o | Treatment (Wk 3) | Treatment | Feed Day | No  | 13:40 | 13:00 - 13:59 | Afternoon | 37,9 | 118 | 71,4  | 71,4  | 19,05 | 605,61 | 144,12 |
| 2019/06/03 | CH2205 | Male | Three y/o | Treatment (Wk 3) | Treatment | Feed Day | No  | 13:45 | 13:00 - 13:59 | Afternoon | 37,7 | 61  | 18,4  | 18,4  | 18,85 | 556,01 | 97,47  |
| 2019/06/03 | CH2206 | Male | Three y/o | Treatment (Wk 3) | Treatment | Feed Day | No  | 13:45 | 13:00 - 13:59 | Afternoon | 37,9 | 70  | 42,4  | 42,4  | 19,05 | 566,99 | 126,10 |
| 2019/06/03 | CH2205 | Male | Three y/o | Treatment (Wk 3) | Treatment | Feed Day | No  | 13:50 | 13:00 - 13:59 | Afternoon | 37,7 | 45  | 16,4  | 16,4  | 18,85 | 530,47 | 93,55  |
| 2019/06/03 | CH2206 | Male | Three y/o | Treatment (Wk 3) | Treatment | Feed Day | No  | 13:50 | 13:00 - 13:59 | Afternoon | 37,9 | 54  | 38,4  | 38,4  | 19,05 | 545,99 | 122,68 |
| 2019/06/03 | CH2205 | Male | Three y/o | Treatment (Wk 3) | Treatment | Feed Day | No  | 13:55 | 13:00 - 13:59 | Afternoon | 37,7 |     | 18,4  | 18,4  | 18,85 |        | 97,47  |
| 2019/06/03 | CH2206 | Male | Three y/o | Treatment (Wk 3) | Treatment | Feed Day | No  | 13:55 | 13:00 - 13:59 | Afternoon | 37,9 | 67  | 37,0  | 37,0  | 19,05 | 563,53 | 121,40 |
| 2019/06/03 | CH2205 | Male | Three y/o | Treatment (Wk 3) | Treatment | Feed Day | No  | 14:00 | 14:00 - 14:59 | Afternoon | 37,6 | 59  | 10,8  | 10,8  | 18,75 | 553,30 | 79,36  |
| 2019/06/03 | CH2206 | Male | Three y/o | Treatment (Wk 3) | Treatment | Feed Day | No  | 14:00 | 14:00 - 14:59 | Afternoon | 37,9 | 98  | 120,2 | 120,2 | 19,05 | 592,41 | 162,27 |
| 2019/06/03 | CH2205 | Male | Three y/o | Treatment (Wk 3) | Treatment | Feed Day | No  | 14:05 | 14:00 - 14:59 | Afternoon | 37,6 | 76  | 17,6  | 17,6  | 18,75 | 573,39 | 95,95  |
| 2019/06/03 | CH2206 | Male | Three y/o | Treatment (Wk 3) | Treatment | Feed Day | No  | 14:05 | 14:00 - 14:59 | Afternoon | 37,9 |     | 59,6  | 59,6  | 19,05 |        | 137,86 |
| 2019/06/03 | CH2205 | Male | Three y/o | Treatment (Wk 3) | Treatment | Feed Day | No  | 14:10 | 14:00 - 14:59 | Afternoon | 37,6 | 64  | 18,4  | 18,4  | 18,75 | 559,88 | 97,47  |
| 2019/06/03 | CH2206 | Male | Three y/o | Treatment (Wk 3) | Treatment | Feed Day | No  | 14:10 | 14:00 - 14:59 | Afternoon | 37,9 | 62  | 41,8  | 41,8  | 19,05 | 557,33 | 125,60 |
| 2019/06/03 | CH2205 | Male | Three y/o | Treatment (Wk 3) | Treatment | Feed Day | No  | 14:15 | 14:00 - 14:59 | Afternoon | 37,6 | 62  | 22,6  | 22,6  | 18,75 | 557,33 | 104,49 |
| 2019/06/03 | CH2206 | Male | Three y/o | Treatment (Wk 3) | Treatment | Feed Day | No  | 14:15 | 14:00 - 14:59 | Afternoon | 37,8 | 56  | 38,8  | 38,8  | 18,95 | 549,01 | 123,04 |
| 2019/06/03 | CH2205 | Male | Three y/o | Treatment (Wk 3) | Treatment | Feed Day | No  | 14:20 | 14:00 - 14:59 | Afternoon | 37,6 | 49  | 17,0  | 17,0  | 18,75 | 537,80 | 94,77  |
| 2019/06/03 | CH2206 | Male | Three y/o | Treatment (Wk 3) | Treatment | Feed Day | No  | 14:20 | 14:00 - 14:59 | Afternoon | 37,8 | 49  | 39,2  | 39,2  | 18,95 | 537,80 | 123,39 |
| 2019/06/03 | CH2205 | Male | Three y/o | Treatment (Wk 3) | Treatment | Feed Day | No  | 14:25 | 14:00 - 14:59 | Afternoon | 37,5 | 64  | 17,4  | 17,4  | 18,65 | 559,88 | 95,56  |
| 2019/06/03 | CH2206 | Male | Three y/o | Treatment (Wk 3) | Treatment | Feed Day | No  | 14:25 | 14:00 - 14:59 | Afternoon | 37,8 | 51  | 33,4  | 33,4  | 18,95 | 541,20 | 117,88 |
| 2019/06/03 | CH2205 | Male | Three y/o | Treatment (Wk 3) | Treatment | Feed Day | No  | 14:30 | 14:00 - 14:59 | Afternoon | 37,5 | 135 | 40,2  | 40,2  | 18,65 | 614,84 | 124,26 |
| 2019/06/03 | CH2206 | Male | Three y/o | Treatment (Wk 3) | Treatment | Feed Day | No  | 14:30 | 14:00 - 14:59 | Afternoon | 37,8 | 62  | 146,6 | 146,6 | 18,95 | 557,33 | 169,21 |
| 2019/06/03 | CH2205 | Male | Three y/o | Treatment (Wk 3) | Treatment | Feed Day | No  | 14:35 | 14:00 - 14:59 | Afternoon | 37,5 | 101 | 287,2 | 287,2 | 18,65 | 594,59 | 192,88 |
| 2019/06/03 | CH2206 | Male | Three y/o | Treatment (Wk 3) | Treatment | Feed Day | No  | 14:35 | 14:00 - 14:59 | Afternoon | 37,9 | 106 | 130,4 | 130,4 | 19,05 | 598,06 | 165,11 |
| 2019/06/03 | CH2205 | Male | Three y/o | Treatment (Wk 3) | Treatment | Feed Day | No  | 14:40 | 14:00 - 14:59 | Afternoon | 37,5 | 137 | 3,2   | 3,2   | 18,65 | 615,83 | 38,49  |
| 2019/06/03 | CH2206 | Male | Three y/o | Treatment (Wk 3) | Treatment | Feed Day | No  | 14:40 | 14:00 - 14:59 | Afternoon | 37,9 | 113 | 94,8  | 94,8  | 19,05 | 602,58 | 153,98 |
| 2019/06/03 | CH2205 | Male | Three y/o | Treatment (Wk 3) | Treatment | Feed Day | No  | 14:45 | 14:00 - 14:59 | Afternoon | 37,5 | 90  | 44,2  | 44,2  | 18,65 | 586,16 | 127,53 |
| 2019/06/03 | CH2206 | Male | Three y/o | Treatment (Wk 3) | Treatment | Feed Day | No  | 14:45 | 14:00 - 14:59 | Afternoon | 37,9 | 98  | 43,6  | 43,6  | 19,05 | 592,41 | 127,06 |
| 2019/06/03 | CH2205 | Male | Three y/o | Treatment (Wk 3) | Treatment | Feed Day | No  | 14:50 | 14:00 - 14:59 | Afternoon | 37,5 | 79  | 8,0   | 8,0   | 18,65 | 576,36 | 69,22  |
| 2019/06/03 | CH2206 | Male | Three y/o | Treatment (Wk 3) | Treatment | Feed Day | No  | 14:50 | 14:00 - 14:59 | Afternoon | 37,8 | 48  | 35,8  | 35,8  | 18,95 | 536,04 | 120,27 |
| 2019/06/03 | CH2205 | Male | Three y/o | Treatment (Wk 3) | Treatment | Feed Day | No  | 14:55 | 14:00 - 14:59 | Afternoon | 37,6 | 41  | 119,6 | 119,6 | 18,75 | 522,29 | 162,09 |
| 2019/06/03 | CH2206 | Male | Three y/o | Treatment (Wk 3) | Treatment | Feed Day | No  | 14:55 | 14:00 - 14:59 | Afternoon | 37,9 | 43  | 69,4  | 69,4  | 19,05 | 526,50 | 143,14 |
| 2019/06/03 | CH2205 | Male | Three y/o | Treatment (Wk 3) | Treatment | Feed Day | No  | 15:00 | 15:00 - 15:59 | Afternoon | 37,6 | 97  | 93,2  | 93,2  | 18,75 | 591,66 | 153,39 |
| 2019/06/03 | CH2206 | Male | Three y/o | Treatment (Wk 3) | Treatment | Feed Day | No  | 15:00 | 15:00 - 15:59 | Afternoon | 37,9 | 97  | 83,0  | 83,0  | 19,05 | 591,66 | 149,36 |
| 2019/06/03 | CH2205 | Male | Three y/o | Treatment (Wk 3) | Treatment | Feed Day | No  | 15:05 | 15:00 - 15:59 | Afternoon | 37,7 | 106 | 131,0 | 131,0 | 18,85 | 598,06 | 165,27 |
| 2019/06/03 | CH2206 | Male | Three y/o | Treatment (Wk 3) | Treatment | Feed Day | No  | 15:05 | 15:00 - 15:59 | Afternoon | 37,9 |     | 64,6  | 64,6  | 19,05 |        | 140,65 |
| 2019/06/03 | CH2205 | Male | Three y/o | Treatment (Wk 3) | Treatment | Feed Day | No  | 15:10 | 15:00 - 15:59 | Afternoon | 37,7 |     | 93,8  | 93,8  | 18,85 |        | 153,61 |
| 2019/06/03 | CH2206 | Male | Three y/o | Treatment (Wk 3) | Treatment | Feed Day | No  | 15:10 | 15:00 - 15:59 | Afternoon | 37,9 | 129 | 207,8 | 207,8 | 19,05 | 611,75 | 181,47 |
| 2019/06/03 | CH2205 | Male | Three y/o | Treatment (Wk 3) | Treatment | Feed Day | No  | 15:15 | 15:00 - 15:59 | Afternoon | 37,7 | 73  | 21,4  | 21,4  | 18,85 | 570,27 | 102,63 |
| 2019/06/03 | CH2206 | Male | Three y/o | Treatment (Wk 3) | Treatment | Feed Day | No  | 15:15 | 15:00 - 15:59 | Afternoon | 38,0 | 194 | 238,0 | 238,0 | 19,15 | 638,30 | 186,25 |
| 2019/06/03 | CH2205 | Male | Three y/o | Treatment (Wk 3) | Treatment | Feed Day | No  | 15:20 | 15:00 - 15:59 | Afternoon | 37,9 | 76  | 164,6 | 164,6 | 19,05 | 573,39 | 173,27 |
| 2019/06/03 | CH2206 | Male | Three y/o | Treatment (Wk 3) | Treatment | Feed Day | No  | 15:20 | 15:00 - 15:59 | Afternoon | 38,1 | 113 | 250,8 | 250,8 | 19,26 | 602,58 | 188,09 |
| 2019/06/03 | CH2205 | Male | Three y/o | Treatment (Wk 3) | Treatment | Feed Day | No  | 15:25 | 15:00 - 15:59 | Afternoon | 38,1 | 63  | 27,2  | 27,2  | 19,26 | 558,62 | 110,83 |
| 2019/06/03 | CH2206 | Male | Three y/o | Treatment (Wk 3) | Treatment | Feed Day | No  | 15:25 | 15:00 - 15:59 | Afternoon | 38,2 | 137 | 39,4  | 39,4  | 19,36 | 615,83 | 123,57 |
| 2019/06/03 | CH2205 | Male | Three y/o | Treatment (Wk 3) | Treatment | Feed Day | Yes | 15:30 | 15:00 - 15:59 | Afternoon | 38,1 | 137 | 288,2 | 288,2 | 19,26 | 615,83 | 193,00 |
| 2019/06/03 | CH2206 | Male | Three y/o | Treatment (Wk 3) | Treatment | Feed Day | Yes | 15:30 | 15:00 - 15:59 | Afternoon | 38,1 | 126 | 94,8  | 94,8  | 19,26 | 610,14 | 153,98 |
| 2019/06/03 | CH2205 | Male | Three y/o | Treatment (Wk 3) | Treatment | Feed Day | Yes | 15:35 | 15:00 - 15:59 | Afternoon | 38,2 |     | 136,8 | 136,8 | 19,36 |        | 166,79 |
| 2019/06/03 | CH2206 | Male | Three y/o | Treatment (Wk 3) | Treatment | Feed Day | Yes | 15:35 | 15:00 - 15:59 | Afternoon | 38,2 | 98  | 125,6 | 125,6 | 19,36 | 592,41 | 163,80 |
| 2019/06/03 | CH2205 | Male | Three y/o | Treatment (Wk 3) | Treatment | Feed Day | Yes | 15:40 | 15:00 - 15:59 | Afternoon | 38,3 | 121 | 89,0  | 89,0  | 19,46 | 607,35 | 151,78 |
| 2019/06/03 | CH2206 | Male | Three y/o | Treatment (Wk 3) | Treatment | Feed Day | Yes | 15:40 | 15:00 - 15:59 | Afternoon | 38,2 | 158 | 89,2  | 89,2  | 19,36 | 625,26 | 151,86 |
| 2019/06/03 | CH2205 | Male | Three y/o | Treatment (Wk 3) | Treatment | Feed Day | Yes | 15:45 | 15:00 - 15:59 | Afternoon | 38,4 | 103 | 55,6  | 55,6  | 19,56 | 596,00 | 135,46 |
| 2019/06/03 | CH2206 | Male | Three y/o | Treatment (Wk 3) | Treatment | Feed Day | Yes | 15:45 | 15:00 - 15:59 | Afternoon | 38,2 | 112 | 248,6 | 248,6 | 19,36 | 601,96 | 187,78 |
| 2019/06/03 | CH2205 | Male | Three y/o | Treatment (Wk 3) | Treatment | Feed Day | Yes | 15:50 | 15:00 - 15:59 | Afternoon | 38,4 | 64  | 12,0  | 12,0  | 19,56 | 559,88 | 82,93  |
| 2019/06/03 | CH2206 | Male | Three y/o | Treatment (Wk 3) | Treatment | Feed Day | Yes | 15:50 | 15:00 - 15:59 | Afternoon | 38,2 |     | 41,2  | 41,2  | 19,36 |        | 125,11 |
| 2019/06/03 | CH2205 | Male | Three y/o | Treatment (Wk 3) | Treatment | Feed Day | Yes | 15:55 | 15:00 - 15:59 | Afternoon | 38,3 | 58  | 18,6  | 18,6  | 19,46 | 551,90 | 97,84  |
| 2019/06/03 | CH2206 | Male | Three y/o | Treatment (Wk 3) | Treatment | Feed Day | Yes | 15:55 | 15:00 - 15:59 | Afternoon | 38,2 | 81  | 36,6  | 36,6  | 19,36 | 578,26 | 121,03 |
| 2019/06/03 | CH2205 | Male | Three y/o | Treatment (Wk 3) | Treatment | Feed Day | Yes | 16:00 | 16:00 - 16:59 | Evening   | 38,3 | 60  | 12,2  | 12,2  | 19,46 | 554,67 | 83,49  |
| 2019/06/03 | CH2206 | Male | Three y/o | Treatment (Wk 3) | Treatment | Feed Day | Yes | 16:00 | 16:00 - 16:59 | Evening   | 38,2 | 93  | 66,4  | 66,4  | 19,36 | 588,58 | 141,61 |
| 2019/06/03 | CH2205 | Male | Three y/o | Treatment (Wk 3) | Treatment | Feed Day | Yes | 16:05 | 16:00 - 16:59 | Evening   | 38,3 | 52  | 12,0  | 12,0  | 19,46 | 542,83 | 82,93  |
| 2019/06/03 | CH2206 | Male | Three y/o | Treatment (Wk 3) | Treatment | Feed Day | Yes | 16:05 | 16:00 - 16:59 | Evening   | 38,2 | 96  | 247,0 | 247,0 | 19,36 | 590,91 | 187,55 |
| 2019/06/03 | CH2205 | Male | Three y/o | Treatment (Wk 3) | Treatment | Feed Day | Yes | 16:10 | 16:00 - 16:59 | Evening   | 38,3 | 98  | 50,2  | 50,2  | 19,46 | 592,41 | 131,92 |
| 2019/06/03 | CH2206 | Male | Three y/o | Treatment (Wk 3) | Treatment | Feed Day | Yes | 16:10 | 16:00 - 16:59 | Evening   | 38,2 | 124 | 308,2 | 308,2 | 19,36 | 609,04 | 195,37 |
| 2019/06/03 | CH2205 | Male | Three y/o | Treatment (Wk 3) | Treatment | Feed Day | Yes | 16:15 | 16:00 - 16:59 | Evening   | 38,3 | 60  | 152,0 | 152,0 | 19,46 | 554,67 | 170,48 |
| 2019/06/03 | CH2206 | Male | Three y/o | Treatment (Wk 3) | Treatment | Feed Day | Yes | 16:15 | 16:00 - 16:59 | Evening   | 38,3 | 106 | 81,2  | 81,2  | 19,46 | 598,06 | 148,59 |
| 2019/06/03 | CH2205 | Male | Three y/o | Treatment (Wk 3) | Treatment | Feed Day | Yes | 16:20 | 16:00 - 16:59 | Evening   | 38,3 | 64  | 5,8   | 5,8   | 19,46 | 559,88 | 58,39  |



|            |        |      |           |                  |           |          |     |       |               |         |      |     |       |       |       |        |        |
|------------|--------|------|-----------|------------------|-----------|----------|-----|-------|---------------|---------|------|-----|-------|-------|-------|--------|--------|
| 2019/06/03 | CH2206 | Male | Three y/o | Treatment (Wk 3) | Treatment | Feed Day | Yes | 16:20 | 16:00 - 16:59 | Evening | 38,3 | 117 | 109,6 | 109,6 | 19,46 | 605,02 | 159,04 |
| 2019/06/03 | CH2205 | Male | Three y/o | Treatment (Wk 3) | Treatment | Feed Day | Yes | 16:25 | 16:00 - 16:59 | Evening | 38,3 | 96  | 197,8 | 197,8 | 19,46 | 590,91 | 179,73 |
| 2019/06/03 | CH2206 | Male | Three y/o | Treatment (Wk 3) | Treatment | Feed Day | Yes | 16:25 | 16:00 - 16:59 | Evening | 38,3 | 132 | 133,4 | 133,4 | 19,46 | 613,32 | 165,91 |
| 2019/06/03 | CH2205 | Male | Three y/o | Treatment (Wk 3) | Treatment | Feed Day | No  | 16:30 | 16:00 - 16:59 | Evening | 38,4 |     | 47,8  | 47,8  | 19,56 |        | 130,23 |
| 2019/06/03 | CH2206 | Male | Three y/o | Treatment (Wk 3) | Treatment | Feed Day | No  | 16:30 | 16:00 - 16:59 | Evening | 38,4 | 96  | 22,2  | 22,2  | 19,56 | 590,91 | 103,88 |
| 2019/06/03 | CH2205 | Male | Three y/o | Treatment (Wk 3) | Treatment | Feed Day | No  | 16:35 | 16:00 - 16:59 | Evening | 38,2 | 88  | 40,0  | 40,0  | 19,36 | 584,49 | 124,09 |
| 2019/06/03 | CH2206 | Male | Three y/o | Treatment (Wk 3) | Treatment | Feed Day | No  | 16:35 | 16:00 - 16:59 | Evening | 38,2 | 107 | 60,2  | 60,2  | 19,36 | 598,73 | 138,21 |
| 2019/06/03 | CH2205 | Male | Three y/o | Treatment (Wk 3) | Treatment | Feed Day | No  | 16:40 | 16:00 - 16:59 | Evening | 38,0 | 125 | 24,0  | 24,0  | 19,15 | 609,60 | 106,55 |
| 2019/06/03 | CH2206 | Male | Three y/o | Treatment (Wk 3) | Treatment | Feed Day | No  | 16:40 | 16:00 - 16:59 | Evening | 38,1 | 117 | 136,8 | 136,8 | 19,26 | 605,02 | 166,79 |
| 2019/06/03 | CH2205 | Male | Three y/o | Treatment (Wk 3) | Treatment | Feed Day | No  | 16:45 | 16:00 - 16:59 | Evening | 37,9 | 86  | 68,4  | 68,4  | 19,05 | 582,77 | 142,64 |
| 2019/06/03 | CH2206 | Male | Three y/o | Treatment (Wk 3) | Treatment | Feed Day | No  | 16:45 | 16:00 - 16:59 | Evening | 38,1 | 113 | 115,4 | 115,4 | 19,26 | 602,58 | 160,84 |
| 2019/06/03 | CH2205 | Male | Three y/o | Treatment (Wk 3) | Treatment | Feed Day | No  | 16:50 | 16:00 - 16:59 | Evening | 38,0 | 101 | 67,6  | 67,6  | 19,15 | 594,59 | 142,23 |
| 2019/06/03 | CH2206 | Male | Three y/o | Treatment (Wk 3) | Treatment | Feed Day | No  | 16:50 | 16:00 - 16:59 | Evening | 38,1 | 118 | 58,2  | 58,2  | 19,26 | 605,61 | 137,04 |
| 2019/06/03 | CH2205 | Male | Three y/o | Treatment (Wk 3) | Treatment | Feed Day | No  | 16:55 | 16:00 - 16:59 | Evening | 38,1 | 104 | 23,8  | 23,8  | 19,26 | 596,69 | 106,26 |
| 2019/06/03 | CH2206 | Male | Three y/o | Treatment (Wk 3) | Treatment | Feed Day | No  | 16:55 | 16:00 - 16:59 | Evening | 38,2 | 121 | 11,2  | 11,2  | 19,36 | 607,35 | 80,59  |
| 2019/06/03 | CH2205 | Male | Three y/o | Treatment (Wk 3) | Treatment | Feed Day | No  | 17:00 | 17:00 - 17:59 | Evening | 38,0 |     | 45,6  | 45,6  | 19,15 |        | 128,61 |
| 2019/06/03 | CH2206 | Male | Three y/o | Treatment (Wk 3) | Treatment | Feed Day | No  | 17:00 | 17:00 - 17:59 | Evening | 38,2 |     | 116,6 | 116,6 | 19,36 |        | 161,20 |
| 2019/06/03 | CH2205 | Male | Three y/o | Treatment (Wk 3) | Treatment | Feed Day | No  | 17:05 | 17:00 - 17:59 | Evening | 38,1 | 135 | 21,4  | 21,4  | 19,26 | 614,84 | 102,63 |
| 2019/06/03 | CH2206 | Male | Three y/o | Treatment (Wk 3) | Treatment | Feed Day | No  | 17:05 | 17:00 - 17:59 | Evening | 38,2 | 120 | 52,0  | 52,0  | 19,36 | 606,78 | 133,14 |
| 2019/06/03 | CH2205 | Male | Three y/o | Treatment (Wk 3) | Treatment | Feed Day | No  | 17:10 | 17:00 - 17:59 | Evening | 38,0 |     | 19,2  | 19,2  | 19,15 |        | 98,92  |
| 2019/06/03 | CH2206 | Male | Three y/o | Treatment (Wk 3) | Treatment | Feed Day | No  | 17:10 | 17:00 - 17:59 | Evening | 38,3 | 132 | 155,8 | 155,8 | 19,46 | 613,32 | 171,35 |
| 2019/06/03 | CH2205 | Male | Three y/o | Treatment (Wk 3) | Treatment | Feed Day | No  | 17:15 | 17:00 - 17:59 | Evening | 38,0 | 137 | 20,4  | 20,4  | 19,15 | 615,83 | 100,99 |
| 2019/06/03 | CH2206 | Male | Three y/o | Treatment (Wk 3) | Treatment | Feed Day | No  | 17:15 | 17:00 - 17:59 | Evening | 38,3 | 158 | 33,6  | 33,6  | 19,46 | 625,26 | 118,09 |
| 2019/06/03 | CH2205 | Male | Three y/o | Treatment (Wk 3) | Treatment | Feed Day | No  | 17:20 | 17:00 - 17:59 | Evening | 37,9 | 110 | 2,0   | 2,0   | 19,05 | 600,69 | 22,86  |
| 2019/06/03 | CH2206 | Male | Three y/o | Treatment (Wk 3) | Treatment | Feed Day | No  | 17:20 | 17:00 - 17:59 | Evening | 38,3 | 124 | 25,6  | 25,6  | 19,46 | 609,04 | 108,76 |
| 2019/06/03 | CH2205 | Male | Three y/o | Treatment (Wk 3) | Treatment | Feed Day | No  | 17:25 | 17:00 - 17:59 | Evening | 37,9 | 114 | 4,0   | 4,0   | 19,05 | 603,20 | 45,94  |
| 2019/06/03 | CH2206 | Male | Three y/o | Treatment (Wk 3) | Treatment | Feed Day | No  | 17:25 | 17:00 - 17:59 | Evening | 38,2 | 84  | 31,8  | 31,8  | 19,36 | 581,01 | 116,20 |
| 2019/06/03 | CH2205 | Male | Three y/o | Treatment (Wk 3) | Treatment | Feed Day | No  | 17:30 | 17:00 - 17:59 | Evening | 37,9 | 124 | 5,6   | 5,6   | 19,05 | 609,04 | 57,21  |
| 2019/06/03 | CH2206 | Male | Three y/o | Treatment (Wk 3) | Treatment | Feed Day | No  | 17:30 | 17:00 - 17:59 | Evening | 38,1 | 86  | 36,6  | 36,6  | 19,26 | 582,77 | 121,03 |
| 2019/06/03 | CH2205 | Male | Three y/o | Treatment (Wk 3) | Treatment | Feed Day | No  | 17:35 | 17:00 - 17:59 | Evening | 37,9 | 138 | 9,0   | 9,0   | 19,05 | 616,31 | 73,19  |
| 2019/06/03 | CH2206 | Male | Three y/o | Treatment (Wk 3) | Treatment | Feed Day | No  | 17:35 | 17:00 - 17:59 | Evening | 38,0 | 101 | 25,6  | 25,6  | 19,15 | 594,59 | 108,76 |
| 2019/06/03 | CH2205 | Male | Three y/o | Treatment (Wk 3) | Treatment | Feed Day | No  | 17:40 | 17:00 - 17:59 | Evening | 37,9 |     | 35,8  | 35,8  | 19,05 |        | 120,27 |
| 2019/06/03 | CH2206 | Male | Three y/o | Treatment (Wk 3) | Treatment | Feed Day | No  | 17:40 | 17:00 - 17:59 | Evening | 38,0 | 65  | 44,4  | 44,4  | 19,15 | 561,12 | 127,69 |
| 2019/06/03 | CH2205 | Male | Three y/o | Treatment (Wk 3) | Treatment | Feed Day | No  | 17:45 | 17:00 - 17:59 | Evening | 37,9 | 95  | 9,8   | 9,8   | 19,05 | 590,14 | 76,07  |
| 2019/06/03 | CH2206 | Male | Three y/o | Treatment (Wk 3) | Treatment | Feed Day | No  | 17:45 | 17:00 - 17:59 | Evening | 38,0 | 88  | 43,0  | 43,0  | 19,15 | 584,49 | 126,58 |
| 2019/06/03 | CH2205 | Male | Three y/o | Treatment (Wk 3) | Treatment | Feed Day | No  | 17:50 | 17:00 - 17:59 | Evening | 37,9 |     | 3,6   | 3,6   | 19,05 |        | 42,42  |
| 2019/06/03 | CH2206 | Male | Three y/o | Treatment (Wk 3) | Treatment | Feed Day | No  | 17:50 | 17:00 - 17:59 | Evening | 38,0 | 86  | 52,0  | 52,0  | 19,15 | 582,77 | 133,14 |
| 2019/06/03 | CH2205 | Male | Three y/o | Treatment (Wk 3) | Treatment | Feed Day | No  | 17:55 | 17:00 - 17:59 | Evening | 37,7 | 117 | 9,4   | 9,4   | 18,85 | 605,02 | 74,66  |
| 2019/06/03 | CH2206 | Male | Three y/o | Treatment (Wk 3) | Treatment | Feed Day | No  | 17:55 | 17:00 - 17:59 | Evening | 38,0 | 88  | 114,4 | 114,4 | 19,15 | 584,49 | 160,54 |
| 2019/06/03 | CH2205 | Male | Three y/o | Treatment (Wk 3) | Treatment | Feed Day | No  | 18:00 | 18:00 - 18:59 | Evening | 37,9 |     | 172,0 | 172,0 | 19,05 |        | 174,82 |
| 2019/06/03 | CH2206 | Male | Three y/o | Treatment (Wk 3) | Treatment | Feed Day | No  | 18:00 | 18:00 - 18:59 | Evening | 38,1 | 141 | 99,4  | 99,4  | 19,26 | 617,75 | 155,63 |
| 2019/06/03 | CH2205 | Male | Three y/o | Treatment (Wk 3) | Treatment | Feed Day | No  | 18:05 | 18:00 - 18:59 | Evening | 37,9 | 112 | 18,6  | 18,6  | 19,05 | 601,96 | 97,84  |
| 2019/06/03 | CH2206 | Male | Three y/o | Treatment (Wk 3) | Treatment | Feed Day | No  | 18:05 | 18:00 - 18:59 | Evening | 38,1 | 54  | 23,0  | 23,0  | 19,26 | 545,99 | 105,09 |
| 2019/06/03 | CH2205 | Male | Three y/o | Treatment (Wk 3) | Treatment | Feed Day | No  | 18:10 | 18:00 - 18:59 | Evening | 37,7 | 84  | 13,8  | 13,8  | 18,85 | 581,01 | 87,68  |
| 2019/06/03 | CH2206 | Male | Three y/o | Treatment (Wk 3) | Treatment | Feed Day | No  | 18:10 | 18:00 - 18:59 | Evening | 38,0 | 91  | 19,8  | 19,8  | 19,15 | 586,98 | 99,97  |
| 2019/06/03 | CH2205 | Male | Three y/o | Treatment (Wk 3) | Treatment | Feed Day | No  | 18:15 | 18:00 - 18:59 | Evening | 37,7 | 86  | 20,4  | 20,4  | 18,85 | 582,77 | 100,99 |
| 2019/06/03 | CH2206 | Male | Three y/o | Treatment (Wk 3) | Treatment | Feed Day | No  | 18:15 | 18:00 - 18:59 | Evening | 37,9 | 92  | 11,8  | 11,8  | 19,05 | 587,78 | 82,36  |
| 2019/06/03 | CH2205 | Male | Three y/o | Treatment (Wk 3) | Treatment | Feed Day | No  | 18:20 | 18:00 - 18:59 | Evening | 37,7 | 91  | 21,4  | 21,4  | 18,85 | 586,98 | 102,63 |
| 2019/06/03 | CH2206 | Male | Three y/o | Treatment (Wk 3) | Treatment | Feed Day | No  | 18:20 | 18:00 - 18:59 | Evening | 37,9 | 46  | 38,8  | 38,8  | 19,05 | 532,38 | 123,04 |
| 2019/06/03 | CH2205 | Male | Three y/o | Treatment (Wk 3) | Treatment | Feed Day | No  | 18:25 | 18:00 - 18:59 | Evening | 37,7 | 56  | 17,8  | 17,8  | 18,85 | 549,01 | 96,34  |
| 2019/06/03 | CH2206 | Male | Three y/o | Treatment (Wk 3) | Treatment | Feed Day | No  | 18:25 | 18:00 - 18:59 | Evening | 37,9 | 93  | 53,6  | 53,6  | 19,05 | 588,58 | 134,19 |
| 2019/06/03 | CH2205 | Male | Three y/o | Treatment (Wk 3) | Treatment | Feed Day | No  | 18:30 | 18:00 - 18:59 | Evening | 37,7 | 67  | 17,2  | 17,2  | 18,85 | 563,53 | 95,17  |
| 2019/06/03 | CH2206 | Male | Three y/o | Treatment (Wk 3) | Treatment | Feed Day | No  | 18:30 | 18:00 - 18:59 | Evening | 38,0 | 147 | 45,2  | 45,2  | 19,15 | 620,52 | 128,30 |
| 2019/06/03 | CH2205 | Male | Three y/o | Treatment (Wk 3) | Treatment | Feed Day | No  | 18:35 | 18:00 - 18:59 | Evening | 37,7 | 92  | 12,0  | 12,0  | 18,85 | 587,78 | 82,93  |
| 2019/06/03 | CH2206 | Male | Three y/o | Treatment (Wk 3) | Treatment | Feed Day | No  | 18:35 | 18:00 - 18:59 | Evening | 38,0 | 94  | 45,2  | 45,2  | 19,15 | 589,37 | 128,30 |
| 2019/06/03 | CH2205 | Male | Three y/o | Treatment (Wk 3) | Treatment | Feed Day | No  | 18:40 | 18:00 - 18:59 | Evening | 37,6 | 60  | 10,8  | 10,8  | 18,75 | 554,67 | 79,36  |
| 2019/06/03 | CH2206 | Male | Three y/o | Treatment (Wk 3) | Treatment | Feed Day | No  | 18:40 | 18:00 - 18:59 | Evening | 38,0 | 112 | 9,2   | 9,2   | 19,15 | 601,96 | 73,94  |
| 2019/06/03 | CH2205 | Male | Three y/o | Treatment (Wk 3) | Treatment | Feed Day | No  | 18:45 | 18:00 - 18:59 | Evening | 37,5 | 66  | 8,8   | 8,8   | 18,65 | 562,34 | 72,43  |
| 2019/06/03 | CH2206 | Male | Three y/o | Treatment (Wk 3) | Treatment | Feed Day | No  | 18:45 | 18:00 - 18:59 | Evening | 38,0 | 101 | 6,2   | 6,2   | 19,15 | 594,59 | 60,63  |
| 2019/06/03 | CH2205 | Male | Three y/o | Treatment (Wk 3) | Treatment | Feed Day | No  | 18:50 | 18:00 - 18:59 | Evening | 37,7 | 86  | 8,6   | 8,6   | 18,85 | 582,77 | 71,66  |
| 2019/06/03 | CH2206 | Male | Three y/o | Treatment (Wk 3) | Treatment | Feed Day | No  | 18:50 | 18:00 - 18:59 | Evening | 37,9 | 79  | 24,6  | 24,6  | 19,05 | 576,36 | 107,39 |
| 2019/06/03 | CH2205 | Male | Three y/o | Treatment (Wk 3) | Treatment | Feed Day | No  | 18:55 | 18:00 - 18:59 | Evening | 37,7 |     | 5,8   | 5,8   | 18,85 |        | 58,39  |
| 2019/06/03 | CH2206 | Male | Three y/o | Treatment (Wk 3) | Treatment | Feed Day | No  | 18:55 | 18:00 - 18:59 | Evening | 37,9 | 95  | 21,8  | 21,8  | 19,05 | 590,14 | 103,26 |
| 2019/06/03 | CH2205 | Male | Three y/o | Treatment (Wk 3) | Treatment | Feed Day | No  | 19:00 | 19:00 - 19:59 | Evening | 37,8 | 120 | 10,0  | 10,0  | 18,95 | 606,78 | 76,76  |
| 2019/06/03 | CH2206 | Male | Three y/o | Treatment (Wk 3) | Treatment | Feed Day | No  | 19:00 | 19:00 - 19:59 | Evening | 38,0 | 88  | 14,2  | 14,2  | 19,15 | 584,49 | 88,65  |
| 2019/06/03 | CH2205 | Male | Three y/o | Treatment (Wk 3) | Treatment | Feed Day | No  | 19:05 | 19:00 - 19:59 | Evening | 37,7 | 66  | 8,4   | 8,4   | 18,85 | 562,34 | 70,86  |
| 2019/06/03 | CH2206 | Male | Three y/o | Treatment (Wk 3) | Treatment | Feed Day | No  | 19:05 | 19:00 - 19:59 | Evening | 38,0 | 94  | 10,6  | 10,6  | 19,15 | 589,37 | 78,73  |
| 2019/06/03 | CH2205 | Male | Three y/o | Treatment (Wk 3) | Treatment | Feed Day | No  | 19:10 | 19:00 - 19:59 | Evening | 37,7 | 70  | 7,4   | 7,4   | 18,85 | 566,99 | 66,59  |
| 2019/06/03 | CH2206 | Male | Three y/o | Treatment (Wk 3) | Treatment | Feed Day | No  | 19:10 | 19:00 - 19:59 | Evening | 38,0 | 100 | 9,0   | 9,0   | 19,15 | 593,87 | 73,19  |
| 2019/06/03 | CH2205 | Male | Three y/o | Treatment (Wk 3) | Treatment | Feed Day | No  | 19:15 | 19:00 - 19:59 | Evening | 37,7 | 85  | 10,0  | 10,0  | 18,85 | 581,90 | 76,76  |



|            |        |      |           |                  |           |          |    |       |               |         |      |     |      |      |       |        |        |
|------------|--------|------|-----------|------------------|-----------|----------|----|-------|---------------|---------|------|-----|------|------|-------|--------|--------|
| 2019/06/03 | CH2206 | Male | Three y/o | Treatment (Wk 3) | Treatment | Feed Day | No | 19:15 | 19:00 - 19:59 | Evening | 38,0 | 94  | 11,8 | 11,8 | 19,15 | 589,37 | 82,36  |
| 2019/06/03 | CH2205 | Male | Three y/o | Treatment (Wk 3) | Treatment | Feed Day | No | 19:20 | 19:00 - 19:59 | Evening | 37,7 | 76  | 7,8  | 7,8  | 18,85 | 573,39 | 68,36  |
| 2019/06/03 | CH2206 | Male | Three y/o | Treatment (Wk 3) | Treatment | Feed Day | No | 19:20 | 19:00 - 19:59 | Evening | 38,0 | 86  | 18,4 | 18,4 | 19,15 | 582,77 | 97,47  |
| 2019/06/03 | CH2205 | Male | Three y/o | Treatment (Wk 3) | Treatment | Feed Day | No | 19:25 | 19:00 - 19:59 | Evening | 37,7 | 62  | 5,0  | 5,0  | 18,85 | 557,33 | 53,41  |
| 2019/06/03 | CH2206 | Male | Three y/o | Treatment (Wk 3) | Treatment | Feed Day | No | 19:25 | 19:00 - 19:59 | Evening | 38,0 | 88  | 4,4  | 4,4  | 19,15 | 584,49 | 49,12  |
| 2019/06/03 | CH2205 | Male | Three y/o | Treatment (Wk 3) | Treatment | Feed Day | No | 19:30 | 19:00 - 19:59 | Evening | 37,7 | 58  | 13,6 | 13,6 | 18,85 | 551,90 | 87,18  |
| 2019/06/03 | CH2206 | Male | Three y/o | Treatment (Wk 3) | Treatment | Feed Day | No | 19:30 | 19:00 - 19:59 | Evening | 38,0 | 49  | 9,0  | 9,0  | 19,15 | 537,80 | 73,19  |
| 2019/06/03 | CH2205 | Male | Three y/o | Treatment (Wk 3) | Treatment | Feed Day | No | 19:35 | 19:00 - 19:59 | Evening | 37,7 | 74  | 12,0 | 12,0 | 18,85 | 571,33 | 82,93  |
| 2019/06/03 | CH2206 | Male | Three y/o | Treatment (Wk 3) | Treatment | Feed Day | No | 19:35 | 19:00 - 19:59 | Evening | 37,9 | 98  | 4,6  | 4,6  | 19,05 | 592,41 | 50,61  |
| 2019/06/03 | CH2205 | Male | Three y/o | Treatment (Wk 3) | Treatment | Feed Day | No | 19:40 | 19:00 - 19:59 | Evening | 37,9 | 94  | 10,2 | 10,2 | 19,05 | 589,37 | 77,43  |
| 2019/06/03 | CH2206 | Male | Three y/o | Treatment (Wk 3) | Treatment | Feed Day | No | 19:40 | 19:00 - 19:59 | Evening | 37,9 | 112 | 28,8 | 28,8 | 19,05 | 601,96 | 112,79 |
| 2019/06/03 | CH2205 | Male | Three y/o | Treatment (Wk 3) | Treatment | Feed Day | No | 19:45 | 19:00 - 19:59 | Evening | 38,0 | 51  | 14,0 | 14,0 | 19,15 | 541,20 | 88,17  |
| 2019/06/03 | CH2206 | Male | Three y/o | Treatment (Wk 3) | Treatment | Feed Day | No | 19:45 | 19:00 - 19:59 | Evening | 37,9 | 102 | 17,6 | 17,6 | 19,05 | 595,30 | 95,95  |
| 2019/06/03 | CH2205 | Male | Three y/o | Treatment (Wk 3) | Treatment | Feed Day | No | 19:50 | 19:00 - 19:59 | Evening | 38,0 | 121 | 3,6  | 3,6  | 19,15 | 607,35 | 42,42  |
| 2019/06/03 | CH2206 | Male | Three y/o | Treatment (Wk 3) | Treatment | Feed Day | No | 19:50 | 19:00 - 19:59 | Evening | 37,9 | 99  | 10,4 | 10,4 | 19,05 | 593,14 | 78,08  |
| 2019/06/03 | CH2205 | Male | Three y/o | Treatment (Wk 3) | Treatment | Feed Day | No | 19:55 | 19:00 - 19:59 | Evening | 38,1 | 78  | 1,6  | 1,6  | 19,26 | 575,38 | 15,48  |
| 2019/06/03 | CH2206 | Male | Three y/o | Treatment (Wk 3) | Treatment | Feed Day | No | 19:55 | 19:00 - 19:59 | Evening | 37,8 | 101 | 12,8 | 12,8 | 18,95 | 594,59 | 85,12  |
| 2019/06/03 | CH2205 | Male | Three y/o | Treatment (Wk 3) | Treatment | Feed Day | No | 20:00 | 20:00 - 20:59 | Night   | 38,1 | 67  | 6,2  | 6,2  | 19,26 | 563,53 | 60,63  |
| 2019/06/03 | CH2206 | Male | Three y/o | Treatment (Wk 3) | Treatment | Feed Day | No | 20:00 | 20:00 - 20:59 | Night   | 37,7 | 79  | 3,2  | 3,2  | 18,85 | 576,36 | 38,49  |
| 2019/06/03 | CH2205 | Male | Three y/o | Treatment (Wk 3) | Treatment | Feed Day | No | 20:05 | 20:00 - 20:59 | Night   | 38,1 | 92  | 5,8  | 5,8  | 19,26 | 587,78 | 58,39  |
| 2019/06/03 | CH2206 | Male | Three y/o | Treatment (Wk 3) | Treatment | Feed Day | No | 20:05 | 20:00 - 20:59 | Night   | 37,5 | 94  | 8,8  | 8,8  | 18,65 | 589,37 | 72,43  |
| 2019/06/03 | CH2205 | Male | Three y/o | Treatment (Wk 3) | Treatment | Feed Day | No | 20:10 | 20:00 - 20:59 | Night   | 38,1 | 60  | 5,2  | 5,2  | 19,26 | 554,67 | 54,72  |
| 2019/06/03 | CH2206 | Male | Three y/o | Treatment (Wk 3) | Treatment | Feed Day | No | 20:10 | 20:00 - 20:59 | Night   | 37,4 | 100 | 15,6 | 15,6 | 18,55 | 593,87 | 91,85  |
| 2019/06/03 | CH2205 | Male | Three y/o | Treatment (Wk 3) | Treatment | Feed Day | No | 20:15 | 20:00 - 20:59 | Night   | 38,1 | 46  | 7,0  | 7,0  | 19,26 | 532,38 | 64,72  |
| 2019/06/03 | CH2206 | Male | Three y/o | Treatment (Wk 3) | Treatment | Feed Day | No | 20:15 | 20:00 - 20:59 | Night   | 37,5 | 89  | 49,4 | 49,4 | 18,65 | 585,33 | 131,37 |
| 2019/06/03 | CH2205 | Male | Three y/o | Treatment (Wk 3) | Treatment | Feed Day | No | 20:20 | 20:00 - 20:59 | Night   | 38,1 | 82  | 4,6  | 4,6  | 19,26 | 579,19 | 50,61  |
| 2019/06/03 | CH2206 | Male | Three y/o | Treatment (Wk 3) | Treatment | Feed Day | No | 20:20 | 20:00 - 20:59 | Night   | 37,7 | 93  | 44,0 | 44,0 | 18,85 | 588,58 | 127,37 |
| 2019/06/03 | CH2205 | Male | Three y/o | Treatment (Wk 3) | Treatment | Feed Day | No | 20:25 | 20:00 - 20:59 | Night   | 38,1 | 60  | 3,4  | 3,4  | 19,26 | 554,67 | 40,51  |
| 2019/06/03 | CH2206 | Male | Three y/o | Treatment (Wk 3) | Treatment | Feed Day | No | 20:25 | 20:00 - 20:59 | Night   | 37,7 | 78  | 42,6 | 42,6 | 18,85 | 575,38 | 126,26 |
| 2019/06/03 | CH2205 | Male | Three y/o | Treatment (Wk 3) | Treatment | Feed Day | No | 20:30 | 20:00 - 20:59 | Night   | 38,1 | 53  | 5,4  | 5,4  | 19,26 | 544,43 | 55,99  |
| 2019/06/03 | CH2206 | Male | Three y/o | Treatment (Wk 3) | Treatment | Feed Day | No | 20:30 | 20:00 - 20:59 | Night   | 37,8 | 92  | 41,4 | 41,4 | 18,95 | 587,78 | 125,27 |
| 2019/06/03 | CH2205 | Male | Three y/o | Treatment (Wk 3) | Treatment | Feed Day | No | 20:35 | 20:00 - 20:59 | Night   | 38,1 | 75  | 4,4  | 4,4  | 19,26 | 572,36 | 49,12  |
| 2019/06/03 | CH2206 | Male | Three y/o | Treatment (Wk 3) | Treatment | Feed Day | No | 20:35 | 20:00 - 20:59 | Night   | 37,8 | 92  | 22,4 | 22,4 | 18,95 | 587,78 | 104,19 |
| 2019/06/03 | CH2205 | Male | Three y/o | Treatment (Wk 3) | Treatment | Feed Day | No | 20:40 | 20:00 - 20:59 | Night   | 38,1 | 61  | 10,0 | 10,0 | 19,26 | 556,01 | 76,76  |
| 2019/06/03 | CH2206 | Male | Three y/o | Treatment (Wk 3) | Treatment | Feed Day | No | 20:40 | 20:00 - 20:59 | Night   | 38,0 | 115 | 30,0 | 30,0 | 19,15 | 603,82 | 114,20 |
| 2019/06/03 | CH2205 | Male | Three y/o | Treatment (Wk 3) | Treatment | Feed Day | No | 20:45 | 20:00 - 20:59 | Night   | 38,1 | 93  | 7,2  | 7,2  | 19,26 | 588,58 | 65,66  |
| 2019/06/03 | CH2206 | Male | Three y/o | Treatment (Wk 3) | Treatment | Feed Day | No | 20:45 | 20:00 - 20:59 | Night   | 38,1 | 87  | 27,4 | 27,4 | 19,26 | 583,64 | 111,09 |
| 2019/06/03 | CH2205 | Male | Three y/o | Treatment (Wk 3) | Treatment | Feed Day | No | 20:50 | 20:00 - 20:59 | Night   | 38,1 | 87  | 15,8 | 15,8 | 19,26 | 583,64 | 92,28  |
| 2019/06/03 | CH2206 | Male | Three y/o | Treatment (Wk 3) | Treatment | Feed Day | No | 20:50 | 20:00 - 20:59 | Night   | 38,1 | 67  | 30,2 | 30,2 | 19,26 | 563,53 | 114,42 |
| 2019/06/03 | CH2205 | Male | Three y/o | Treatment (Wk 3) | Treatment | Feed Day | No | 20:55 | 20:00 - 20:59 | Night   | 38,1 | 92  | 8,6  | 8,6  | 19,26 | 587,78 | 71,66  |
| 2019/06/03 | CH2206 | Male | Three y/o | Treatment (Wk 3) | Treatment | Feed Day | No | 20:55 | 20:00 - 20:59 | Night   | 38,1 | 96  | 27,4 | 27,4 | 19,26 | 590,91 | 111,09 |
| 2019/06/03 | CH2205 | Male | Three y/o | Treatment (Wk 3) | Treatment | Feed Day | No | 21:00 | 21:00 - 21:59 | Night   | 38,1 | 96  | 9,0  | 9,0  | 19,26 | 590,91 | 73,19  |
| 2019/06/03 | CH2206 | Male | Three y/o | Treatment (Wk 3) | Treatment | Feed Day | No | 21:00 | 21:00 - 21:59 | Night   | 38,2 | 76  | 27,2 | 27,2 | 19,36 | 573,39 | 110,83 |
| 2019/06/03 | CH2205 | Male | Three y/o | Treatment (Wk 3) | Treatment | Feed Day | No | 21:05 | 21:00 - 21:59 | Night   | 38,1 | 118 | 6,8  | 6,8  | 19,26 | 605,61 | 63,74  |
| 2019/06/03 | CH2206 | Male | Three y/o | Treatment (Wk 3) | Treatment | Feed Day | No | 21:05 | 21:00 - 21:59 | Night   | 38,2 | 94  | 22,0 | 22,0 | 19,36 | 589,37 | 103,57 |
| 2019/06/03 | CH2205 | Male | Three y/o | Treatment (Wk 3) | Treatment | Feed Day | No | 21:10 | 21:00 - 21:59 | Night   | 38,1 | 94  | 12,2 | 12,2 | 19,26 | 589,37 | 83,49  |
| 2019/06/03 | CH2206 | Male | Three y/o | Treatment (Wk 3) | Treatment | Feed Day | No | 21:10 | 21:00 - 21:59 | Night   | 38,2 | 84  | 24,0 | 24,0 | 19,36 | 581,01 | 106,55 |
| 2019/06/03 | CH2205 | Male | Three y/o | Treatment (Wk 3) | Treatment | Feed Day | No | 21:15 | 21:00 - 21:59 | Night   | 38,1 | 73  | 7,6  | 7,6  | 19,26 | 570,27 | 67,49  |
| 2019/06/03 | CH2206 | Male | Three y/o | Treatment (Wk 3) | Treatment | Feed Day | No | 21:15 | 21:00 - 21:59 | Night   | 38,2 | 78  | 23,2 | 23,2 | 19,36 | 575,38 | 105,39 |
| 2019/06/03 | CH2205 | Male | Three y/o | Treatment (Wk 3) | Treatment | Feed Day | No | 21:20 | 21:00 - 21:59 | Night   | 38,1 | 62  | 9,0  | 9,0  | 19,26 | 557,33 | 73,19  |
| 2019/06/03 | CH2206 | Male | Three y/o | Treatment (Wk 3) | Treatment | Feed Day | No | 21:20 | 21:00 - 21:59 | Night   | 38,2 | 99  | 17,0 | 17,0 | 19,36 | 593,14 | 94,77  |
| 2019/06/03 | CH2205 | Male | Three y/o | Treatment (Wk 3) | Treatment | Feed Day | No | 21:25 | 21:00 - 21:59 | Night   | 38,1 | 79  | 8,2  | 8,2  | 19,26 | 576,36 | 70,05  |
| 2019/06/03 | CH2206 | Male | Three y/o | Treatment (Wk 3) | Treatment | Feed Day | No | 21:25 | 21:00 - 21:59 | Night   | 38,2 | 75  | 17,0 | 17,0 | 19,36 | 572,36 | 94,77  |
| 2019/06/03 | CH2205 | Male | Three y/o | Treatment (Wk 3) | Treatment | Feed Day | No | 21:30 | 21:00 - 21:59 | Night   | 38,1 | 97  | 8,6  | 8,6  | 19,26 | 591,66 | 71,66  |
| 2019/06/03 | CH2206 | Male | Three y/o | Treatment (Wk 3) | Treatment | Feed Day | No | 21:30 | 21:00 - 21:59 | Night   | 38,2 | 90  | 16,8 | 16,8 | 19,36 | 586,16 | 94,37  |
| 2019/06/03 | CH2205 | Male | Three y/o | Treatment (Wk 3) | Treatment | Feed Day | No | 21:35 | 21:00 - 21:59 | Night   | 38,1 | 83  | 6,0  | 6,0  | 19,26 | 580,11 | 59,53  |
| 2019/06/03 | CH2206 | Male | Three y/o | Treatment (Wk 3) | Treatment | Feed Day | No | 21:35 | 21:00 - 21:59 | Night   | 38,2 | 92  | 20,2 | 20,2 | 19,36 | 587,78 | 100,65 |
| 2019/06/03 | CH2205 | Male | Three y/o | Treatment (Wk 3) | Treatment | Feed Day | No | 21:40 | 21:00 - 21:59 | Night   | 38,0 | 58  | 4,6  | 4,6  | 19,15 | 551,90 | 50,61  |
| 2019/06/03 | CH2206 | Male | Three y/o | Treatment (Wk 3) | Treatment | Feed Day | No | 21:40 | 21:00 - 21:59 | Night   | 38,2 | 87  | 21,6 | 21,6 | 19,36 | 583,64 | 102,94 |
| 2019/06/03 | CH2205 | Male | Three y/o | Treatment (Wk 3) | Treatment | Feed Day | No | 21:45 | 21:00 - 21:59 | Night   | 38,0 | 53  | 8,8  | 8,8  | 19,15 | 544,43 | 72,43  |
| 2019/06/03 | CH2206 | Male | Three y/o | Treatment (Wk 3) | Treatment | Feed Day | No | 21:45 | 21:00 - 21:59 | Night   | 38,2 | 76  | 19,2 | 19,2 | 19,36 | 573,39 | 98,92  |
| 2019/06/03 | CH2205 | Male | Three y/o | Treatment (Wk 3) | Treatment | Feed Day | No | 21:50 | 21:00 - 21:59 | Night   | 38,0 | 74  | 7,4  | 7,4  | 19,15 | 571,33 | 66,59  |
| 2019/06/03 | CH2206 | Male | Three y/o | Treatment (Wk 3) | Treatment | Feed Day | No | 21:50 | 21:00 - 21:59 | Night   | 38,1 |     | 15,6 | 15,6 | 19,26 |        | 91,85  |
| 2019/06/03 | CH2205 | Male | Three y/o | Treatment (Wk 3) | Treatment | Feed Day | No | 21:55 | 21:00 - 21:59 | Night   | 37,9 | 52  | 2,8  | 2,8  | 19,05 | 542,83 | 34,04  |
| 2019/06/03 | CH2206 | Male | Three y/o | Treatment (Wk 3) | Treatment | Feed Day | No | 21:55 | 21:00 - 21:59 | Night   | 38,1 | 91  | 36,4 | 36,4 | 19,26 | 586,98 | 120,84 |
| 2019/06/03 | CH2205 | Male | Three y/o | Treatment (Wk 3) | Treatment | Feed Day | No | 22:00 | 22:00 - 22:59 | Night   | 38,0 | 100 | 4,6  | 4,6  | 19,15 | 593,87 | 50,61  |
| 2019/06/03 | CH2206 | Male | Three y/o | Treatment (Wk 3) | Treatment | Feed Day | No | 22:00 | 22:00 - 22:59 | Night   | 38,1 | 105 | 32,0 | 32,0 | 19,26 | 597,38 | 116,41 |
| 2019/06/03 | CH2205 | Male | Three y/o | Treatment (Wk 3) | Treatment | Feed Day | No | 22:05 | 22:00 - 22:59 | Night   | 38,0 | 80  | 3,4  | 3,4  | 19,15 | 577,31 | 40,51  |
| 2019/06/03 | CH2206 | Male | Three y/o | Treatment (Wk 3) | Treatment | Feed Day | No | 22:05 | 22:00 - 22:59 | Night   | 38,1 | 62  | 35,0 | 35,0 | 19,26 | 557,33 | 119,49 |
| 2019/06/03 | CH2205 | Male | Three y/o | Treatment (Wk 3) | Treatment | Feed Day | No | 22:10 | 22:00 - 22:59 | Night   | 38,0 | 75  | 3,2  | 3,2  | 19,15 | 572,36 | 38,49  |



|    |            |        |      |           |                  |           |          |    |       |               |               |      |     |      |      |       |        |        |
|----|------------|--------|------|-----------|------------------|-----------|----------|----|-------|---------------|---------------|------|-----|------|------|-------|--------|--------|
|    | 2019/06/03 | CH2206 | Male | Three y/o | Treatment (Wk 3) | Treatment | Feed Day | No | 22:10 | 22:00 - 22:59 | Night         | 38,1 | 94  | 38,2 | 38,2 | 19,26 | 589,37 | 122,50 |
|    | 2019/06/03 | CH2205 | Male | Three y/o | Treatment (Wk 3) | Treatment | Feed Day | No | 22:15 | 22:00 - 22:59 | Night         | 38,0 | 90  | 1,8  | 1,8  | 19,15 | 586,16 | 19,38  |
|    | 2019/06/03 | CH2206 | Male | Three y/o | Treatment (Wk 3) | Treatment | Feed Day | No | 22:15 | 22:00 - 22:59 | Night         | 38,1 | 96  | 35,4 | 35,4 | 19,26 | 590,91 | 119,88 |
|    | 2019/06/03 | CH2205 | Male | Three y/o | Treatment (Wk 3) | Treatment | Feed Day | No | 22:20 | 22:00 - 22:59 | Night         | 38,0 | 81  | 7,6  | 7,6  | 19,15 | 578,26 | 67,49  |
|    | 2019/06/03 | CH2206 | Male | Three y/o | Treatment (Wk 3) | Treatment | Feed Day | No | 22:20 | 22:00 - 22:59 | Night         | 38,1 | 47  | 35,8 | 35,8 | 19,26 | 534,23 | 120,27 |
|    | 2019/06/03 | CH2205 | Male | Three y/o | Treatment (Wk 3) | Treatment | Feed Day | No | 22:25 | 22:00 - 22:59 | Night         | 38,0 | 94  | 4,0  | 4,0  | 19,15 | 589,37 | 45,94  |
|    | 2019/06/03 | CH2206 | Male | Three y/o | Treatment (Wk 3) | Treatment | Feed Day | No | 22:25 | 22:00 - 22:59 | Night         | 38,2 | 104 | 36,0 | 36,0 | 19,36 | 596,69 | 120,46 |
|    | 2019/06/03 | CH2205 | Male | Three y/o | Treatment (Wk 3) | Treatment | Feed Day | No | 22:30 | 22:00 - 22:59 | Night         | 38,0 | 92  | 3,6  | 3,6  | 19,15 | 587,78 | 42,42  |
|    | 2019/06/03 | CH2206 | Male | Three y/o | Treatment (Wk 3) | Treatment | Feed Day | No | 22:30 | 22:00 - 22:59 | Night         | 38,2 | 94  | 36,8 | 36,8 | 19,36 | 589,37 | 121,22 |
|    | 2019/06/03 | CH2205 | Male | Three y/o | Treatment (Wk 3) | Treatment | Feed Day | No | 22:35 | 22:00 - 22:59 | Night         | 38,0 | 99  | 3,6  | 3,6  | 19,15 | 593,14 | 42,42  |
|    | 2019/06/03 | CH2206 | Male | Three y/o | Treatment (Wk 3) | Treatment | Feed Day | No | 22:35 | 22:00 - 22:59 | Night         | 38,2 | 87  | 35,4 | 35,4 | 19,36 | 583,64 | 119,88 |
|    | 2019/06/03 | CH2205 | Male | Three y/o | Treatment (Wk 3) | Treatment | Feed Day | No | 22:40 | 22:00 - 22:59 | Night         | 38,0 | 95  | 3,6  | 3,6  | 19,15 | 590,14 | 42,42  |
|    | 2019/06/03 | CH2206 | Male | Three y/o | Treatment (Wk 3) | Treatment | Feed Day | No | 22:40 | 22:00 - 22:59 | Night         | 38,2 | 88  | 52,8 | 52,8 | 19,36 | 584,49 | 133,67 |
|    | 2019/06/03 | CH2205 | Male | Three y/o | Treatment (Wk 3) | Treatment | Feed Day | No | 22:45 | 22:00 - 22:59 | Night         | 38,0 | 80  | 10,0 | 10,0 | 19,15 | 577,31 | 76,76  |
|    | 2019/06/03 | CH2206 | Male | Three y/o | Treatment (Wk 3) | Treatment | Feed Day | No | 22:45 | 22:00 - 22:59 | Night         | 38,1 | 90  | 43,8 | 43,8 | 19,26 | 586,16 | 127,22 |
|    | 2019/06/03 | CH2205 | Male | Three y/o | Treatment (Wk 3) | Treatment | Feed Day | No | 22:50 | 22:00 - 22:59 | Night         | 38,0 | 86  | 12,8 | 12,8 | 19,15 | 582,77 | 85,12  |
|    | 2019/06/03 | CH2206 | Male | Three y/o | Treatment (Wk 3) | Treatment | Feed Day | No | 22:50 | 22:00 - 22:59 | Night         | 38,1 | 92  | 46,8 | 46,8 | 19,26 | 587,78 | 129,50 |
|    | 2019/06/03 | CH2205 | Male | Three y/o | Treatment (Wk 3) | Treatment | Feed Day | No | 22:55 | 22:00 - 22:59 | Night         | 38,0 | 81  | 8,4  | 8,4  | 19,15 | 578,26 | 70,86  |
|    | 2019/06/03 | CH2206 | Male | Three y/o | Treatment (Wk 3) | Treatment | Feed Day | No | 22:55 | 22:00 - 22:59 | Night         | 38,1 | 124 | 54,6 | 54,6 | 19,26 | 609,04 | 134,83 |
|    | 2019/06/03 | CH2205 | Male | Three y/o | Treatment (Wk 3) | Treatment | Feed Day | No | 23:00 | 23:00 - 23:59 | Night         | 38,0 | 91  | 8,0  | 8,0  | 19,15 | 586,98 | 69,22  |
|    | 2019/06/03 | CH2206 | Male | Three y/o | Treatment (Wk 3) | Treatment | Feed Day | No | 23:00 | 23:00 - 23:59 | Night         | 38,1 | 48  | 40,2 | 40,2 | 19,26 | 536,04 | 124,26 |
|    | 2019/06/03 | CH2205 | Male | Three y/o | Treatment (Wk 3) | Treatment | Feed Day | No | 23:05 | 23:00 - 23:59 | Night         | 38,0 | 99  | 10,2 | 10,2 | 19,15 | 593,14 | 77,43  |
|    | 2019/06/03 | CH2206 | Male | Three y/o | Treatment (Wk 3) | Treatment | Feed Day | No | 23:05 | 23:00 - 23:59 | Night         | 38,1 | 88  | 39,8 | 39,8 | 19,26 | 584,49 | 123,91 |
|    | 2019/06/03 | CH2205 | Male | Three y/o | Treatment (Wk 3) | Treatment | Feed Day | No | 23:10 | 23:00 - 23:59 | Night         | 38,0 | 93  | 8,2  | 8,2  | 19,15 | 588,58 | 70,05  |
|    | 2019/06/03 | CH2206 | Male | Three y/o | Treatment (Wk 3) | Treatment | Feed Day | No | 23:10 | 23:00 - 23:59 | Night         | 38,0 | 49  | 49,6 | 49,6 | 19,15 | 537,80 | 131,51 |
|    | 2019/06/03 | CH2205 | Male | Three y/o | Treatment (Wk 3) | Treatment | Feed Day | No | 23:15 | 23:00 - 23:59 | Night         | 38,0 | 95  | 12,6 | 12,6 | 19,15 | 590,14 | 84,59  |
|    | 2019/06/03 | CH2206 | Male | Three y/o | Treatment (Wk 3) | Treatment | Feed Day | No | 23:15 | 23:00 - 23:59 | Night         | 38,0 | 102 | 36,4 | 36,4 | 19,15 | 595,30 | 120,84 |
|    | 2019/06/03 | CH2205 | Male | Three y/o | Treatment (Wk 3) | Treatment | Feed Day | No | 23:20 | 23:00 - 23:59 | Night         | 37,9 | 60  | 18,4 | 18,4 | 19,05 | 554,67 | 97,47  |
|    | 2019/06/03 | CH2206 | Male | Three y/o | Treatment (Wk 3) | Treatment | Feed Day | No | 23:20 | 23:00 - 23:59 | Night         | 38,0 | 83  | 40,8 | 40,8 | 19,15 | 580,11 | 124,77 |
|    | 2019/06/03 | CH2205 | Male | Three y/o | Treatment (Wk 3) | Treatment | Feed Day | No | 23:25 | 23:00 - 23:59 | Night         | 37,9 | 65  | 30,0 | 30,0 | 19,05 | 561,12 | 114,20 |
|    | 2019/06/03 | CH2206 | Male | Three y/o | Treatment (Wk 3) | Treatment | Feed Day | No | 23:25 | 23:00 - 23:59 | Night         | 38,0 | 82  | 39,0 | 39,0 | 19,15 | 579,19 | 123,22 |
|    | 2019/06/03 | CH2205 | Male | Three y/o | Treatment (Wk 3) | Treatment | Feed Day | No | 23:30 | 23:00 - 23:59 | Night         | 37,9 | 70  | 27,6 | 27,6 | 19,05 | 566,99 | 111,33 |
|    | 2019/06/03 | CH2206 | Male | Three y/o | Treatment (Wk 3) | Treatment | Feed Day | No | 23:30 | 23:00 - 23:59 | Night         | 38,0 | 95  | 38,6 | 38,6 | 19,15 | 590,14 | 122,86 |
|    | 2019/06/03 | CH2205 | Male | Three y/o | Treatment (Wk 3) | Treatment | Feed Day | No | 23:35 | 23:00 - 23:59 | Night         | 37,9 | 55  | 24,6 | 24,6 | 19,05 | 547,52 | 107,39 |
|    | 2019/06/03 | CH2206 | Male | Three y/o | Treatment (Wk 3) | Treatment | Feed Day | No | 23:35 | 23:00 - 23:59 | Night         | 38,0 | 86  | 38,8 | 38,8 | 19,15 | 582,77 | 123,04 |
|    | 2019/06/03 | CH2205 | Male | Three y/o | Treatment (Wk 3) | Treatment | Feed Day | No | 23:40 | 23:00 - 23:59 | Night         | 38,0 | 73  | 22,8 | 22,8 | 19,15 | 570,27 | 104,79 |
|    | 2019/06/03 | CH2206 | Male | Three y/o | Treatment (Wk 3) | Treatment | Feed Day | No | 23:40 | 23:00 - 23:59 | Night         | 38,0 | 66  | 41,6 | 41,6 | 19,15 | 562,34 | 125,44 |
|    | 2019/06/03 | CH2205 | Male | Three y/o | Treatment (Wk 3) | Treatment | Feed Day | No | 23:45 | 23:00 - 23:59 | Night         | 38,0 | 70  | 26,8 | 26,8 | 19,15 | 566,99 | 110,33 |
|    | 2019/06/03 | CH2206 | Male | Three y/o | Treatment (Wk 3) | Treatment | Feed Day | No | 23:45 | 23:00 - 23:59 | Night         | 38,0 | 88  | 36,6 | 36,6 | 19,15 | 584,49 | 121,03 |
|    | 2019/06/03 | CH2205 | Male | Three y/o | Treatment (Wk 3) | Treatment | Feed Day | No | 23:50 | 23:00 - 23:59 | Night         | 38,0 | 82  | 17,4 | 17,4 | 19,15 | 579,19 | 95,56  |
|    | 2019/06/03 | CH2206 | Male | Three y/o | Treatment (Wk 3) | Treatment | Feed Day | No | 23:50 | 23:00 - 23:59 | Night         | 38,0 | 93  | 36,4 | 36,4 | 19,15 | 588,58 | 120,84 |
|    | 2019/06/03 | CH2205 | Male | Three y/o | Treatment (Wk 3) | Treatment | Feed Day | No | 23:55 | 23:00 - 23:59 | Night         | 38,0 | 95  | 17,8 | 17,8 | 19,15 | 590,14 | 96,34  |
|    | 2019/06/03 | CH2206 | Male | Three y/o | Treatment (Wk 3) | Treatment | Feed Day | No | 23:55 | 23:00 - 23:59 | Night         | 38,0 | 50  | 36,2 | 36,2 | 19,15 | 539,52 | 120,65 |
| 21 | 2019/06/04 | CH2205 | Male | Three y/o | Treatment (Wk 3) | Treatment | Feed Day | No | 00:00 | 00:00 - 00:59 | Early Morning | 37,9 | 95  | 21,0 | 21,0 | 19,05 | 590,14 | 101,98 |
|    | 2019/06/04 | CH2206 | Male | Three y/o | Treatment (Wk 3) | Treatment | Feed Day | No | 00:00 | 00:00 - 00:59 | Early Morning | 37,9 | 84  | 29,0 | 29,0 | 19,05 | 581,01 | 113,03 |
|    | 2019/06/04 | CH2205 | Male | Three y/o | Treatment (Wk 3) | Treatment | Feed Day | No | 00:05 | 00:00 - 00:59 | Early Morning | 37,9 | 92  | 22,0 | 22,0 | 19,05 | 587,78 | 103,57 |
|    | 2019/06/04 | CH2206 | Male | Three y/o | Treatment (Wk 3) | Treatment | Feed Day | No | 00:05 | 00:00 - 00:59 | Early Morning | 37,9 | 48  | 41,2 | 41,2 | 19,05 | 536,04 | 125,11 |
|    | 2019/06/04 | CH2205 | Male | Three y/o | Treatment (Wk 3) | Treatment | Feed Day | No | 00:10 | 00:00 - 00:59 | Early Morning | 37,9 | 89  | 20,2 | 20,2 | 19,05 | 585,33 | 100,65 |
|    | 2019/06/04 | CH2206 | Male | Three y/o | Treatment (Wk 3) | Treatment | Feed Day | No | 00:10 | 00:00 - 00:59 | Early Morning | 37,8 | 84  | 40,0 | 40,0 | 18,95 | 581,01 | 124,09 |
|    | 2019/06/04 | CH2205 | Male | Three y/o | Treatment (Wk 3) | Treatment | Feed Day | No | 00:15 | 00:00 - 00:59 | Early Morning | 37,9 | 45  | 27,0 | 27,0 | 19,05 | 530,47 | 110,58 |
|    | 2019/06/04 | CH2206 | Male | Three y/o | Treatment (Wk 3) | Treatment | Feed Day | No | 00:15 | 00:00 - 00:59 | Early Morning | 37,8 | 97  | 35,4 | 35,4 | 18,95 | 591,66 | 119,88 |
|    | 2019/06/04 | CH2205 | Male | Three y/o | Treatment (Wk 3) | Treatment | Feed Day | No | 00:20 | 00:00 - 00:59 | Early Morning | 37,7 | 82  | 17,8 | 17,8 | 18,85 | 579,19 | 96,34  |
|    | 2019/06/04 | CH2206 | Male | Three y/o | Treatment (Wk 3) | Treatment | Feed Day | No | 00:20 | 00:00 - 00:59 | Early Morning | 37,8 | 67  | 34,2 | 34,2 | 18,95 | 563,53 | 118,70 |
|    | 2019/06/04 | CH2205 | Male | Three y/o | Treatment (Wk 3) | Treatment | Feed Day | No | 00:25 | 00:00 - 00:59 | Early Morning | 37,7 | 92  | 10,4 | 10,4 | 18,85 | 587,78 | 78,08  |
|    | 2019/06/04 | CH2206 | Male | Three y/o | Treatment (Wk 3) | Treatment | Feed Day | No | 00:25 | 00:00 - 00:59 | Early Morning | 37,8 | 85  | 40,0 | 40,0 | 18,95 | 581,90 | 124,09 |
|    | 2019/06/04 | CH2205 | Male | Three y/o | Treatment (Wk 3) | Treatment | Feed Day | No | 00:30 | 00:00 - 00:59 | Early Morning | 37,7 | 96  | 19,6 | 19,6 | 18,85 | 590,91 | 99,63  |
|    | 2019/06/04 | CH2206 | Male | Three y/o | Treatment (Wk 3) | Treatment | Feed Day | No | 00:30 | 00:00 - 00:59 | Early Morning | 37,8 | 75  | 40,2 | 40,2 | 18,95 | 572,36 | 124,26 |
|    | 2019/06/04 | CH2205 | Male | Three y/o | Treatment (Wk 3) | Treatment | Feed Day | No | 00:35 | 00:00 - 00:59 | Early Morning | 37,7 | 85  | 15,8 | 15,8 | 18,85 | 581,90 | 92,28  |
|    | 2019/06/04 | CH2206 | Male | Three y/o | Treatment (Wk 3) | Treatment | Feed Day | No | 00:35 | 00:00 - 00:59 | Early Morning | 37,8 | 90  | 33,6 | 33,6 | 18,95 | 586,16 | 118,09 |
|    | 2019/06/04 | CH2205 | Male | Three y/o | Treatment (Wk 3) | Treatment | Feed Day | No | 00:40 | 00:00 - 00:59 | Early Morning | 37,7 | 97  | 6,4  | 6,4  | 18,85 | 591,66 | 61,70  |
|    | 2019/06/04 | CH2206 | Male | Three y/o | Treatment (Wk 3) | Treatment | Feed Day | No | 00:40 | 00:00 - 00:59 | Early Morning | 37,8 | 88  | 33,2 | 33,2 | 18,95 | 584,49 | 117,68 |
|    | 2019/06/04 | CH2205 | Male | Three y/o | Treatment (Wk 3) | Treatment | Feed Day | No | 00:45 | 00:00 - 00:59 | Early Morning | 37,7 | 94  | 11,6 | 11,6 | 18,85 | 589,37 | 81,78  |
|    | 2019/06/04 | CH2206 | Male | Three y/o | Treatment (Wk 3) | Treatment | Feed Day | No | 00:45 | 00:00 - 00:59 | Early Morning | 37,8 | 94  | 39,4 | 39,4 | 18,95 | 589,37 | 123,57 |
|    | 2019/06/04 | CH2205 | Male | Three y/o | Treatment (Wk 3) | Treatment | Feed Day | No | 00:50 | 00:00 - 00:59 | Early Morning | 37,7 | 50  | 11,8 | 11,8 | 18,85 | 539,52 | 82,36  |
|    | 2019/06/04 | CH2206 | Male | Three y/o | Treatment (Wk 3) | Treatment | Feed Day | No | 00:50 | 00:00 - 00:59 | Early Morning | 37,8 | 50  | 50,0 | 50,0 | 18,95 | 539,52 | 131,79 |
|    | 2019/06/04 | CH2205 | Male | Three y/o | Treatment (Wk 3) | Treatment | Feed Day | No | 00:55 | 00:00 - 00:59 | Early Morning | 37,8 | 63  | 11,6 | 11,6 | 18,95 | 558,62 | 81,78  |
|    | 2019/06/04 | CH2206 | Male | Three y/o | Treatment (Wk 3) | Treatment | Feed Day | No | 00:55 | 00:00 - 00:59 | Early Morning | 37,8 | 88  | 50,0 | 50,0 | 18,95 | 584,49 | 131,79 |
|    | 2019/06/04 | CH2205 | Male | Three y/o | Treatment (Wk 3) | Treatment | Feed Day | No | 01:00 | 01:00 - 01:59 | Early Morning | 37,9 | 96  | 9,2  | 9,2  | 19,05 | 590,91 | 73,94  |
|    | 2019/06/04 | CH2206 | Male | Three y/o | Treatment (Wk 3) | Treatment | Feed Day | No | 01:00 | 01:00 - 01:59 | Early Morning | 37,9 | 70  | 50,2 | 50,2 | 19,05 | 566,99 | 131,92 |
|    | 2019/06/04 | CH2205 | Male | Three y/o | Treatment (Wk 3) | Treatment | Feed Day | No | 01    |               |               |      |     |      |      |       |        |        |



|            |        |      |           |                  |           |          |    |       |               |               |      |     |      |      |       |        |        |
|------------|--------|------|-----------|------------------|-----------|----------|----|-------|---------------|---------------|------|-----|------|------|-------|--------|--------|
| 2019/06/04 | CH2206 | Male | Three y/o | Treatment (Wk 3) | Treatment | Feed Day | No | 01:05 | 01:00 - 01:59 | Early Morning | 37,9 | 47  | 51,0 | 51,0 | 19,05 | 534,23 | 132,47 |
| 2019/06/04 | CH2205 | Male | Three y/o | Treatment (Wk 3) | Treatment | Feed Day | No | 01:10 | 01:00 - 01:59 | Early Morning | 37,9 | 92  | 7,2  | 7,2  | 19,05 | 587,78 | 65,66  |
| 2019/06/04 | CH2206 | Male | Three y/o | Treatment (Wk 3) | Treatment | Feed Day | No | 01:10 | 01:00 - 01:59 | Early Morning | 37,9 | 65  | 48,2 | 48,2 | 19,05 | 561,12 | 130,52 |
| 2019/06/04 | CH2205 | Male | Three y/o | Treatment (Wk 3) | Treatment | Feed Day | No | 01:15 | 01:00 - 01:59 | Early Morning | 37,9 | 89  | 3,6  | 3,6  | 19,05 | 585,33 | 42,42  |
| 2019/06/04 | CH2206 | Male | Three y/o | Treatment (Wk 3) | Treatment | Feed Day | No | 01:15 | 01:00 - 01:59 | Early Morning | 37,9 | 93  | 50,0 | 50,0 | 19,05 | 588,58 | 131,79 |
| 2019/06/04 | CH2205 | Male | Three y/o | Treatment (Wk 3) | Treatment | Feed Day | No | 01:20 | 01:00 - 01:59 | Early Morning | 37,7 | 47  | 1,4  | 1,4  | 18,85 | 534,23 | 11,07  |
| 2019/06/04 | CH2206 | Male | Three y/o | Treatment (Wk 3) | Treatment | Feed Day | No | 01:20 | 01:00 - 01:59 | Early Morning | 37,9 | 53  | 49,0 | 49,0 | 19,05 | 544,43 | 131,09 |
| 2019/06/04 | CH2205 | Male | Three y/o | Treatment (Wk 3) | Treatment | Feed Day | No | 01:25 | 01:00 - 01:59 | Early Morning | 37,6 | 112 | 8,8  | 8,8  | 18,75 | 601,96 | 72,43  |
| 2019/06/04 | CH2206 | Male | Three y/o | Treatment (Wk 3) | Treatment | Feed Day | No | 01:25 | 01:00 - 01:59 | Early Morning | 37,9 | 71  | 50,6 | 50,6 | 19,05 | 568,10 | 132,20 |
| 2019/06/04 | CH2205 | Male | Three y/o | Treatment (Wk 3) | Treatment | Feed Day | No | 01:30 | 01:00 - 01:59 | Early Morning | 37,6 | 73  | 7,4  | 7,4  | 18,75 | 570,27 | 66,59  |
| 2019/06/04 | CH2206 | Male | Three y/o | Treatment (Wk 3) | Treatment | Feed Day | No | 01:30 | 01:00 - 01:59 | Early Morning | 37,9 | 92  | 49,6 | 49,6 | 19,05 | 587,78 | 131,51 |
| 2019/06/04 | CH2205 | Male | Three y/o | Treatment (Wk 3) | Treatment | Feed Day | No | 01:35 | 01:00 - 01:59 | Early Morning | 37,6 | 106 | 9,2  | 9,2  | 18,75 | 598,06 | 73,94  |
| 2019/06/04 | CH2206 | Male | Three y/o | Treatment (Wk 3) | Treatment | Feed Day | No | 01:35 | 01:00 - 01:59 | Early Morning | 37,9 | 63  | 53,8 | 53,8 | 19,05 | 558,62 | 134,32 |
| 2019/06/04 | CH2205 | Male | Three y/o | Treatment (Wk 3) | Treatment | Feed Day | No | 01:40 | 01:00 - 01:59 | Early Morning | 37,6 | 63  | 6,6  | 6,6  | 18,75 | 558,62 | 62,73  |
| 2019/06/04 | CH2206 | Male | Three y/o | Treatment (Wk 3) | Treatment | Feed Day | No | 01:40 | 01:00 - 01:59 | Early Morning | 37,9 | 71  | 49,0 | 49,0 | 19,05 | 568,10 | 131,09 |
| 2019/06/04 | CH2205 | Male | Three y/o | Treatment (Wk 3) | Treatment | Feed Day | No | 01:45 | 01:00 - 01:59 | Early Morning | 37,6 | 94  | 2,2  | 2,2  | 18,75 | 589,37 | 26,02  |
| 2019/06/04 | CH2206 | Male | Three y/o | Treatment (Wk 3) | Treatment | Feed Day | No | 01:45 | 01:00 - 01:59 | Early Morning | 37,9 | 89  | 53,4 | 53,4 | 19,05 | 585,33 | 134,06 |
| 2019/06/04 | CH2205 | Male | Three y/o | Treatment (Wk 3) | Treatment | Feed Day | No | 01:50 | 01:00 - 01:59 | Early Morning | 37,6 | 63  | 2,2  | 2,2  | 18,75 | 558,62 | 26,02  |
| 2019/06/04 | CH2206 | Male | Three y/o | Treatment (Wk 3) | Treatment | Feed Day | No | 01:50 | 01:00 - 01:59 | Early Morning | 37,8 | 64  | 54,8 | 54,8 | 18,95 | 559,88 | 134,96 |
| 2019/06/04 | CH2205 | Male | Three y/o | Treatment (Wk 3) | Treatment | Feed Day | No | 01:55 | 01:00 - 01:59 | Early Morning | 37,6 | 79  | 6,4  | 6,4  | 18,75 | 576,36 | 61,70  |
| 2019/06/04 | CH2206 | Male | Three y/o | Treatment (Wk 3) | Treatment | Feed Day | No | 01:55 | 01:00 - 01:59 | Early Morning | 37,8 | 86  | 52,6 | 52,6 | 18,95 | 582,77 | 133,54 |
| 2019/06/04 | CH2205 | Male | Three y/o | Treatment (Wk 3) | Treatment | Feed Day | No | 02:00 | 02:00 - 02:59 | Early Morning | 37,6 | 91  | 6,0  | 6,0  | 18,75 | 586,98 | 59,53  |
| 2019/06/04 | CH2206 | Male | Three y/o | Treatment (Wk 3) | Treatment | Feed Day | No | 02:00 | 02:00 - 02:59 | Early Morning | 37,8 | 81  | 49,6 | 49,6 | 18,95 | 578,26 | 131,51 |
| 2019/06/04 | CH2205 | Male | Three y/o | Treatment (Wk 3) | Treatment | Feed Day | No | 02:05 | 02:00 - 02:59 | Early Morning | 37,5 | 100 | 9,2  | 9,2  | 18,65 | 593,87 | 73,94  |
| 2019/06/04 | CH2206 | Male | Three y/o | Treatment (Wk 3) | Treatment | Feed Day | No | 02:05 | 02:00 - 02:59 | Early Morning | 37,8 | 94  | 46,0 | 46,0 | 18,95 | 589,37 | 128,91 |
| 2019/06/04 | CH2205 | Male | Three y/o | Treatment (Wk 3) | Treatment | Feed Day | No | 02:10 | 02:00 - 02:59 | Early Morning | 37,5 | 73  | 4,2  | 4,2  | 18,65 | 570,27 | 47,57  |
| 2019/06/04 | CH2206 | Male | Three y/o | Treatment (Wk 3) | Treatment | Feed Day | No | 02:10 | 02:00 - 02:59 | Early Morning | 37,8 | 98  | 49,6 | 49,6 | 18,95 | 592,41 | 131,51 |
| 2019/06/04 | CH2205 | Male | Three y/o | Treatment (Wk 3) | Treatment | Feed Day | No | 02:15 | 02:00 - 02:59 | Early Morning | 37,6 | 94  | 5,2  | 5,2  | 18,75 | 589,37 | 54,72  |
| 2019/06/04 | CH2206 | Male | Three y/o | Treatment (Wk 3) | Treatment | Feed Day | No | 02:15 | 02:00 - 02:59 | Early Morning | 37,8 | 83  | 43,8 | 43,8 | 18,95 | 580,11 | 127,22 |
| 2019/06/04 | CH2205 | Male | Three y/o | Treatment (Wk 3) | Treatment | Feed Day | No | 02:20 | 02:00 - 02:59 | Early Morning | 37,6 | 92  | 10,0 | 10,0 | 18,75 | 587,78 | 76,76  |
| 2019/06/04 | CH2206 | Male | Three y/o | Treatment (Wk 3) | Treatment | Feed Day | No | 02:20 | 02:00 - 02:59 | Early Morning | 37,7 | 107 | 52,4 | 52,4 | 18,85 | 598,73 | 133,41 |
| 2019/06/04 | CH2205 | Male | Three y/o | Treatment (Wk 3) | Treatment | Feed Day | No | 02:25 | 02:00 - 02:59 | Early Morning | 37,6 | 88  | 5,0  | 5,0  | 18,75 | 584,49 | 53,41  |
| 2019/06/04 | CH2206 | Male | Three y/o | Treatment (Wk 3) | Treatment | Feed Day | No | 02:25 | 02:00 - 02:59 | Early Morning | 37,7 | 83  | 48,4 | 48,4 | 18,85 | 580,11 | 130,66 |
| 2019/06/04 | CH2205 | Male | Three y/o | Treatment (Wk 3) | Treatment | Feed Day | No | 02:30 | 02:00 - 02:59 | Early Morning | 37,5 | 78  | 9,6  | 9,6  | 18,65 | 575,38 | 75,37  |
| 2019/06/04 | CH2206 | Male | Three y/o | Treatment (Wk 3) | Treatment | Feed Day | No | 02:30 | 02:00 - 02:59 | Early Morning | 37,7 | 75  | 49,4 | 49,4 | 18,85 | 572,36 | 131,37 |
| 2019/06/04 | CH2205 | Male | Three y/o | Treatment (Wk 3) | Treatment | Feed Day | No | 02:35 | 02:00 - 02:59 | Early Morning | 37,5 |     | 16,6 | 16,6 | 18,65 |        | 93,96  |
| 2019/06/04 | CH2206 | Male | Three y/o | Treatment (Wk 3) | Treatment | Feed Day | No | 02:35 | 02:00 - 02:59 | Early Morning | 37,7 | 92  | 48,2 | 48,2 | 18,85 | 587,78 | 130,52 |
| 2019/06/04 | CH2205 | Male | Three y/o | Treatment (Wk 3) | Treatment | Feed Day | No | 02:40 | 02:00 - 02:59 | Early Morning | 37,5 | 101 | 5,0  | 5,0  | 18,65 | 594,59 | 53,41  |
| 2019/06/04 | CH2206 | Male | Three y/o | Treatment (Wk 3) | Treatment | Feed Day | No | 02:40 | 02:00 - 02:59 | Early Morning | 37,5 | 102 | 25,4 | 25,4 | 18,65 | 595,30 | 108,49 |
| 2019/06/04 | CH2205 | Male | Three y/o | Treatment (Wk 3) | Treatment | Feed Day | No | 02:45 | 02:00 - 02:59 | Early Morning | 37,5 | 52  | 12,6 | 12,6 | 18,65 | 542,83 | 84,59  |
| 2019/06/04 | CH2206 | Male | Three y/o | Treatment (Wk 3) | Treatment | Feed Day | No | 02:45 | 02:00 - 02:59 | Early Morning | 37,4 | 47  | 23,2 | 23,2 | 18,55 | 534,23 | 105,39 |
| 2019/06/04 | CH2205 | Male | Three y/o | Treatment (Wk 3) | Treatment | Feed Day | No | 02:50 | 02:00 - 02:59 | Early Morning | 37,6 | 51  | 17,0 | 17,0 | 18,75 | 541,20 | 94,77  |
| 2019/06/04 | CH2206 | Male | Three y/o | Treatment (Wk 3) | Treatment | Feed Day | No | 02:50 | 02:00 - 02:59 | Early Morning | 37,3 | 98  | 29,4 | 29,4 | 18,46 | 592,41 | 113,50 |
| 2019/06/04 | CH2205 | Male | Three y/o | Treatment (Wk 3) | Treatment | Feed Day | No | 02:55 | 02:00 - 02:59 | Early Morning | 37,6 | 83  | 7,0  | 7,0  | 18,75 | 580,11 | 64,72  |
| 2019/06/04 | CH2206 | Male | Three y/o | Treatment (Wk 3) | Treatment | Feed Day | No | 02:55 | 02:00 - 02:59 | Early Morning | 37,3 | 89  | 54,2 | 54,2 | 18,46 | 585,33 | 134,57 |
| 2019/06/04 | CH2205 | Male | Three y/o | Treatment (Wk 3) | Treatment | Feed Day | No | 03:00 | 03:00 - 03:59 | Early Morning | 37,6 | 88  | 8,0  | 8,0  | 18,75 | 584,49 | 69,22  |
| 2019/06/04 | CH2206 | Male | Three y/o | Treatment (Wk 3) | Treatment | Feed Day | No | 03:00 | 03:00 - 03:59 | Early Morning | 37,4 | 98  | 56,2 | 56,2 | 18,55 | 592,41 | 135,83 |
| 2019/06/04 | CH2205 | Male | Three y/o | Treatment (Wk 3) | Treatment | Feed Day | No | 03:05 | 03:00 - 03:59 | Early Morning | 37,6 | 104 | 6,4  | 6,4  | 18,75 | 596,69 | 61,70  |
| 2019/06/04 | CH2206 | Male | Three y/o | Treatment (Wk 3) | Treatment | Feed Day | No | 03:05 | 03:00 - 03:59 | Early Morning | 37,5 | 46  | 57,2 | 57,2 | 18,65 | 532,38 | 136,44 |
| 2019/06/04 | CH2205 | Male | Three y/o | Treatment (Wk 3) | Treatment | Feed Day | No | 03:10 | 03:00 - 03:59 | Early Morning | 37,6 | 79  | 8,8  | 8,8  | 18,75 | 576,36 | 72,43  |
| 2019/06/04 | CH2206 | Male | Three y/o | Treatment (Wk 3) | Treatment | Feed Day | No | 03:10 | 03:00 - 03:59 | Early Morning | 37,5 | 84  | 58,8 | 58,8 | 18,65 | 581,01 | 137,39 |
| 2019/06/04 | CH2205 | Male | Three y/o | Treatment (Wk 3) | Treatment | Feed Day | No | 03:15 | 03:00 - 03:59 | Early Morning | 37,6 | 86  |      | 9,4  | 18,75 | 582,77 | 74,66  |
| 2019/06/04 | CH2206 | Male | Three y/o | Treatment (Wk 3) | Treatment | Feed Day | No | 03:15 | 03:00 - 03:59 | Early Morning | 37,6 | 88  | 57,2 | 57,2 | 18,75 | 584,49 | 136,44 |
| 2019/06/04 | CH2205 | Male | Three y/o | Treatment (Wk 3) | Treatment | Feed Day | No | 03:20 | 03:00 - 03:59 | Early Morning | 37,7 | 76  | 6,4  | 6,4  | 18,85 | 573,39 | 61,70  |
| 2019/06/04 | CH2206 | Male | Three y/o | Treatment (Wk 3) | Treatment | Feed Day | No | 03:20 | 03:00 - 03:59 | Early Morning | 37,6 | 95  | 60,8 | 60,8 | 18,75 | 590,14 | 138,55 |
| 2019/06/04 | CH2205 | Male | Three y/o | Treatment (Wk 3) | Treatment | Feed Day | No | 03:25 | 03:00 - 03:59 | Early Morning | 37,7 | 95  | 5,2  | 5,2  | 18,85 | 590,14 | 54,72  |
| 2019/06/04 | CH2206 | Male | Three y/o | Treatment (Wk 3) | Treatment | Feed Day | No | 03:25 | 03:00 - 03:59 | Early Morning | 37,7 | 84  | 56,4 | 56,4 | 18,85 | 581,01 | 135,95 |
| 2019/06/04 | CH2205 | Male | Three y/o | Treatment (Wk 3) | Treatment | Feed Day | No | 03:30 | 03:00 - 03:59 | Early Morning | 37,9 | 64  | 5,4  | 5,4  | 19,05 | 559,88 | 55,99  |
| 2019/06/04 | CH2206 | Male | Three y/o | Treatment (Wk 3) | Treatment | Feed Day | No | 03:30 | 03:00 - 03:59 | Early Morning | 37,7 | 81  | 57,4 | 57,4 | 18,85 | 578,26 | 136,56 |
| 2019/06/04 | CH2205 | Male | Three y/o | Treatment (Wk 3) | Treatment | Feed Day | No | 03:35 | 03:00 - 03:59 | Early Morning | 37,9 | 79  | 7,6  | 7,6  | 19,05 | 576,36 | 67,49  |
| 2019/06/04 | CH2206 | Male | Three y/o | Treatment (Wk 3) | Treatment | Feed Day | No | 03:35 | 03:00 - 03:59 | Early Morning | 37,7 | 92  | 56,8 | 56,8 | 18,85 | 587,78 | 136,20 |
| 2019/06/04 | CH2205 | Male | Three y/o | Treatment (Wk 3) | Treatment | Feed Day | No | 03:40 | 03:00 - 03:59 | Early Morning | 37,9 | 64  | 5,0  | 5,0  | 19,05 | 559,88 | 53,41  |
| 2019/06/04 | CH2206 | Male | Three y/o | Treatment (Wk 3) | Treatment | Feed Day | No | 03:40 | 03:00 - 03:59 | Early Morning | 37,7 | 65  | 50,0 | 50,0 | 18,85 | 561,12 | 131,79 |
| 2019/06/04 | CH2205 | Male | Three y/o | Treatment (Wk 3) | Treatment | Feed Day | No | 03:45 | 03:00 - 03:59 | Early Morning | 37,9 | 72  | 12,2 | 12,2 | 19,05 | 569,20 | 83,49  |
| 2019/06/04 | CH2206 | Male | Three y/o | Treatment (Wk 3) | Treatment | Feed Day | No | 03:45 | 03:00 - 03:59 | Early Morning | 37,6 | 92  | 55,8 | 55,8 | 18,75 | 587,78 | 135,58 |
| 2019/06/04 | CH2205 | Male | Three y/o | Treatment (Wk 3) | Treatment | Feed Day | No | 03:50 | 03:00 - 03:59 | Early Morning | 37,9 | 69  | 7,6  | 7,6  | 19,05 | 565,86 | 67,49  |
| 2019/06/04 | CH2206 | Male | Three y/o | Treatment (Wk 3) | Treatment | Feed Day | No | 03:50 | 03:00 - 03:59 | Early Morning | 37,6 | 76  | 45,8 | 45,8 | 18,75 | 573,39 | 128,76 |
| 2019/06/04 | CH2205 | Male | Three y/o | Treatment (Wk 3) | Treatment | Feed Day | No | 03:55 | 03:00 - 03:59 | Early Morning | 37,9 | 82  | 7,4  | 7,4  | 19,05 | 579,19 | 66,59  |
| 2019/06/04 | CH2206 | Male | Three y/o | Treatment (Wk 3) | Treatment | Feed Day | No | 03:55 | 03:00 - 03:59 | Early Morning | 37,7 | 150 | 37,4 | 37,4 | 18,85 | 621,86 | 121,77 |
| 2019/06/04 | CH2205 | Male | Three y/o | Treatment (Wk 3) | Treatment | Feed Day | No | 04:00 | 04:00 - 04:59 | Morning       | 37,9 | 89  | 12,0 | 12,0 | 19,05 | 585,33 | 82,93  |



|            |        |      |           |                  |           |          |    |       |               |         |      |     |       |       |       |        |        |
|------------|--------|------|-----------|------------------|-----------|----------|----|-------|---------------|---------|------|-----|-------|-------|-------|--------|--------|
| 2019/06/04 | CH2206 | Male | Three y/o | Treatment (Wk 3) | Treatment | Feed Day | No | 04:00 | 04:00 - 04:59 | Morning | 37,7 | 141 | 47,0  | 47,0  | 18,85 | 617,75 | 129,65 |
| 2019/06/04 | CH2205 | Male | Three y/o | Treatment (Wk 3) | Treatment | Feed Day | No | 04:05 | 04:00 - 04:59 | Morning | 37,7 |     | 20,4  | 20,4  | 18,85 |        | 100,99 |
| 2019/06/04 | CH2206 | Male | Three y/o | Treatment (Wk 3) | Treatment | Feed Day | No | 04:05 | 04:00 - 04:59 | Morning | 37,7 | 194 | 10,2  | 10,2  | 18,85 | 638,30 | 77,43  |
| 2019/06/04 | CH2205 | Male | Three y/o | Treatment (Wk 3) | Treatment | Feed Day | No | 04:10 | 04:00 - 04:59 | Morning | 37,7 |     | 13,2  | 13,2  | 18,85 |        | 86,17  |
| 2019/06/04 | CH2206 | Male | Three y/o | Treatment (Wk 3) | Treatment | Feed Day | No | 04:10 | 04:00 - 04:59 | Morning | 37,5 | 55  | 3,0   | 3,0   | 18,65 | 547,52 | 36,34  |
| 2019/06/04 | CH2205 | Male | Three y/o | Treatment (Wk 3) | Treatment | Feed Day | No | 04:15 | 04:00 - 04:59 | Morning | 37,7 | 63  | 14,6  | 14,6  | 18,85 | 558,62 | 89,59  |
| 2019/06/04 | CH2206 | Male | Three y/o | Treatment (Wk 3) | Treatment | Feed Day | No | 04:15 | 04:00 - 04:59 | Morning | 37,2 | 48  | 11,8  | 11,8  | 18,36 | 536,04 | 82,36  |
| 2019/06/04 | CH2205 | Male | Three y/o | Treatment (Wk 3) | Treatment | Feed Day | No | 04:20 | 04:00 - 04:59 | Morning | 37,7 | 91  | 9,8   | 9,8   | 18,85 | 586,98 | 76,07  |
| 2019/06/04 | CH2206 | Male | Three y/o | Treatment (Wk 3) | Treatment | Feed Day | No | 04:20 | 04:00 - 04:59 | Morning | 37,1 | 94  | 22,6  | 22,6  | 18,26 | 589,37 | 104,49 |
| 2019/06/04 | CH2205 | Male | Three y/o | Treatment (Wk 3) | Treatment | Feed Day | No | 04:25 | 04:00 - 04:59 | Morning | 37,7 | 85  | 18,6  | 18,6  | 18,85 | 581,90 | 97,84  |
| 2019/06/04 | CH2206 | Male | Three y/o | Treatment (Wk 3) | Treatment | Feed Day | No | 04:25 | 04:00 - 04:59 | Morning | 36,9 | 86  | 22,8  | 22,8  | 18,06 | 582,77 | 104,79 |
| 2019/06/04 | CH2205 | Male | Three y/o | Treatment (Wk 3) | Treatment | Feed Day | No | 04:30 | 04:00 - 04:59 | Morning | 37,7 |     | 18,6  | 18,6  | 18,85 |        | 97,84  |
| 2019/06/04 | CH2206 | Male | Three y/o | Treatment (Wk 3) | Treatment | Feed Day | No | 04:30 | 04:00 - 04:59 | Morning | 36,6 | 84  | 35,4  | 35,4  | 17,77 | 581,01 | 119,88 |
| 2019/06/04 | CH2205 | Male | Three y/o | Treatment (Wk 3) | Treatment | Feed Day | No | 04:35 | 04:00 - 04:59 | Morning | 37,7 | 56  | 14,4  | 14,4  | 18,85 | 549,01 | 89,12  |
| 2019/06/04 | CH2206 | Male | Three y/o | Treatment (Wk 3) | Treatment | Feed Day | No | 04:35 | 04:00 - 04:59 | Morning | 36,5 | 85  | 34,2  | 34,2  | 17,67 | 581,90 | 118,70 |
| 2019/06/04 | CH2205 | Male | Three y/o | Treatment (Wk 3) | Treatment | Feed Day | No | 04:40 | 04:00 - 04:59 | Morning | 37,7 | 92  | 14,2  | 14,2  | 18,85 | 587,78 | 88,65  |
| 2019/06/04 | CH2206 | Male | Three y/o | Treatment (Wk 3) | Treatment | Feed Day | No | 04:40 | 04:00 - 04:59 | Morning | 36,5 | 86  | 31,4  | 31,4  | 17,67 | 582,77 | 115,76 |
| 2019/06/04 | CH2205 | Male | Three y/o | Treatment (Wk 3) | Treatment | Feed Day | No | 04:45 | 04:00 - 04:59 | Morning | 37,7 | 86  | 21,2  | 21,2  | 18,85 | 582,77 | 102,31 |
| 2019/06/04 | CH2206 | Male | Three y/o | Treatment (Wk 3) | Treatment | Feed Day | No | 04:45 | 04:00 - 04:59 | Morning | 36,6 | 94  | 36,4  | 36,4  | 17,77 | 589,37 | 120,84 |
| 2019/06/04 | CH2205 | Male | Three y/o | Treatment (Wk 3) | Treatment | Feed Day | No | 04:50 | 04:00 - 04:59 | Morning | 37,7 | 71  | 23,8  | 23,8  | 18,85 | 568,10 | 106,26 |
| 2019/06/04 | CH2206 | Male | Three y/o | Treatment (Wk 3) | Treatment | Feed Day | No | 04:50 | 04:00 - 04:59 | Morning | 36,8 | 87  | 34,4  | 34,4  | 17,96 | 583,64 | 118,90 |
| 2019/06/04 | CH2205 | Male | Three y/o | Treatment (Wk 3) | Treatment | Feed Day | No | 04:55 | 04:00 - 04:59 | Morning | 37,7 | 53  | 20,8  | 20,8  | 18,85 | 544,43 | 101,65 |
| 2019/06/04 | CH2206 | Male | Three y/o | Treatment (Wk 3) | Treatment | Feed Day | No | 04:55 | 04:00 - 04:59 | Morning | 36,9 | 89  | 26,4  | 26,4  | 18,06 | 585,33 | 109,81 |
| 2019/06/04 | CH2205 | Male | Three y/o | Treatment (Wk 3) | Treatment | Feed Day | No | 05:00 | 05:00 - 05:59 | Morning | 37,7 | 86  | 3,0   | 3,0   | 18,85 | 582,77 | 36,34  |
| 2019/06/04 | CH2206 | Male | Three y/o | Treatment (Wk 3) | Treatment | Feed Day | No | 05:00 | 05:00 - 05:59 | Morning | 37,0 | 90  | 2,0   | 2,0   | 18,16 | 586,16 | 22,86  |
| 2019/06/04 | CH2205 | Male | Three y/o | Treatment (Wk 3) | Treatment | Feed Day | No | 05:05 | 05:00 - 05:59 | Morning | 37,7 | 73  | 12,0  | 12,0  | 18,85 | 570,27 | 82,93  |
| 2019/06/04 | CH2206 | Male | Three y/o | Treatment (Wk 3) | Treatment | Feed Day | No | 05:05 | 05:00 - 05:59 | Morning | 37,1 | 87  | 10,4  | 10,4  | 18,26 | 583,64 | 78,08  |
| 2019/06/04 | CH2205 | Male | Three y/o | Treatment (Wk 3) | Treatment | Feed Day | No | 05:10 | 05:00 - 05:59 | Morning | 37,6 | 88  | 12,6  | 12,6  | 18,75 | 584,49 | 84,59  |
| 2019/06/04 | CH2206 | Male | Three y/o | Treatment (Wk 3) | Treatment | Feed Day | No | 05:10 | 05:00 - 05:59 | Morning | 37,2 | 89  | 4,8   | 4,8   | 18,36 | 585,33 | 52,04  |
| 2019/06/04 | CH2205 | Male | Three y/o | Treatment (Wk 3) | Treatment | Feed Day | No | 05:15 | 05:00 - 05:59 | Morning | 37,7 | 46  | 19,6  | 19,6  | 18,85 | 532,38 | 99,63  |
| 2019/06/04 | CH2206 | Male | Three y/o | Treatment (Wk 3) | Treatment | Feed Day | No | 05:15 | 05:00 - 05:59 | Morning | 37,2 | 85  | 5,4   | 5,4   | 18,36 | 581,90 | 55,99  |
| 2019/06/04 | CH2205 | Male | Three y/o | Treatment (Wk 3) | Treatment | Feed Day | No | 05:20 | 05:00 - 05:59 | Morning | 37,6 | 57  | 15,2  | 15,2  | 18,75 | 550,47 | 90,96  |
| 2019/06/04 | CH2206 | Male | Three y/o | Treatment (Wk 3) | Treatment | Feed Day | No | 05:20 | 05:00 - 05:59 | Morning | 37,1 | 84  | 8,4   | 8,4   | 18,26 | 581,01 | 70,86  |
| 2019/06/04 | CH2205 | Male | Three y/o | Treatment (Wk 3) | Treatment | Feed Day | No | 05:25 | 05:00 - 05:59 | Morning | 37,6 | 88  | 21,4  | 21,4  | 18,75 | 584,49 | 102,63 |
| 2019/06/04 | CH2206 | Male | Three y/o | Treatment (Wk 3) | Treatment | Feed Day | No | 05:25 | 05:00 - 05:59 | Morning | 37,1 | 92  | 1,6   | 1,6   | 18,26 | 587,78 | 15,48  |
| 2019/06/04 | CH2205 | Male | Three y/o | Treatment (Wk 3) | Treatment | Feed Day | No | 05:30 | 05:00 - 05:59 | Morning | 37,5 | 90  | 19,2  | 19,2  | 18,65 | 586,16 | 98,92  |
| 2019/06/04 | CH2206 | Male | Three y/o | Treatment (Wk 3) | Treatment | Feed Day | No | 05:30 | 05:00 - 05:59 | Morning | 37,1 | 107 | 35,2  | 35,2  | 18,26 | 598,73 | 119,69 |
| 2019/06/04 | CH2205 | Male | Three y/o | Treatment (Wk 3) | Treatment | Feed Day | No | 05:35 | 05:00 - 05:59 | Morning | 37,5 | 61  | 19,4  | 19,4  | 18,65 | 556,01 | 99,28  |
| 2019/06/04 | CH2206 | Male | Three y/o | Treatment (Wk 3) | Treatment | Feed Day | No | 05:35 | 05:00 - 05:59 | Morning | 37,1 | 88  | 29,6  | 29,6  | 18,26 | 584,49 | 113,73 |
| 2019/06/04 | CH2205 | Male | Three y/o | Treatment (Wk 3) | Treatment | Feed Day | No | 05:40 | 05:00 - 05:59 | Morning | 37,6 | 90  | 23,0  | 23,0  | 18,75 | 586,16 | 105,09 |
| 2019/06/04 | CH2206 | Male | Three y/o | Treatment (Wk 3) | Treatment | Feed Day | No | 05:40 | 05:00 - 05:59 | Morning | 37,1 | 88  | 22,8  | 22,8  | 18,26 | 584,49 | 104,79 |
| 2019/06/04 | CH2205 | Male | Three y/o | Treatment (Wk 3) | Treatment | Feed Day | No | 05:45 | 05:00 - 05:59 | Morning | 37,6 | 45  | 27,6  | 27,6  | 18,75 | 530,47 | 111,33 |
| 2019/06/04 | CH2206 | Male | Three y/o | Treatment (Wk 3) | Treatment | Feed Day | No | 05:45 | 05:00 - 05:59 | Morning | 37,1 | 93  | 8,6   | 8,6   | 18,26 | 588,58 | 71,66  |
| 2019/06/04 | CH2205 | Male | Three y/o | Treatment (Wk 3) | Treatment | Feed Day | No | 05:50 | 05:00 - 05:59 | Morning | 37,6 | 48  | 40,6  | 40,6  | 18,75 | 536,04 | 124,60 |
| 2019/06/04 | CH2206 | Male | Three y/o | Treatment (Wk 3) | Treatment | Feed Day | No | 05:50 | 05:00 - 05:59 | Morning | 37,2 | 124 | 35,6  | 35,6  | 18,36 | 609,04 | 120,08 |
| 2019/06/04 | CH2205 | Male | Three y/o | Treatment (Wk 3) | Treatment | Feed Day | No | 05:55 | 05:00 - 05:59 | Morning | 37,6 |     | 71,8  | 71,8  | 18,75 |        | 144,32 |
| 2019/06/04 | CH2206 | Male | Three y/o | Treatment (Wk 3) | Treatment | Feed Day | No | 05:55 | 05:00 - 05:59 | Morning | 37,3 | 160 | 58,2  | 58,2  | 18,46 | 626,07 | 137,04 |
| 2019/06/04 | CH2205 | Male | Three y/o | Treatment (Wk 3) | Treatment | Feed Day | No | 06:00 | 06:00 - 06:59 | Morning | 37,6 | 150 | 136,4 | 136,4 | 18,75 | 621,86 | 166,69 |
| 2019/06/04 | CH2206 | Male | Three y/o | Treatment (Wk 3) | Treatment | Feed Day | No | 06:00 | 06:00 - 06:59 | Morning | 37,4 | 125 | 89,6  | 89,6  | 18,55 | 609,60 | 152,02 |
| 2019/06/04 | CH2205 | Male | Three y/o | Treatment (Wk 3) | Treatment | Feed Day | No | 06:05 | 06:00 - 06:59 | Morning | 37,5 | 90  | 41,8  | 41,8  | 18,65 | 586,16 | 125,60 |
| 2019/06/04 | CH2206 | Male | Three y/o | Treatment (Wk 3) | Treatment | Feed Day | No | 06:05 | 06:00 - 06:59 | Morning | 37,4 | 115 | 59,6  | 59,6  | 18,55 | 603,82 | 137,86 |
| 2019/06/04 | CH2205 | Male | Three y/o | Treatment (Wk 3) | Treatment | Feed Day | No | 06:10 | 06:00 - 06:59 | Morning | 37,4 | 132 | 23,8  | 23,8  | 18,55 | 613,32 | 106,26 |
| 2019/06/04 | CH2206 | Male | Three y/o | Treatment (Wk 3) | Treatment | Feed Day | No | 06:10 | 06:00 - 06:59 | Morning | 37,4 | 69  | 21,4  | 21,4  | 18,55 | 565,86 | 102,63 |
| 2019/06/04 | CH2205 | Male | Three y/o | Treatment (Wk 3) | Treatment | Feed Day | No | 06:15 | 06:00 - 06:59 | Morning | 37,3 |     | 22,0  | 22,0  | 18,46 |        | 103,57 |
| 2019/06/04 | CH2206 | Male | Three y/o | Treatment (Wk 3) | Treatment | Feed Day | No | 06:15 | 06:00 - 06:59 | Morning | 37,3 | 89  | 19,8  | 19,8  | 18,46 | 585,33 | 99,97  |
| 2019/06/04 | CH2205 | Male | Three y/o | Treatment (Wk 3) | Treatment | Feed Day | No | 06:20 | 06:00 - 06:59 | Morning | 37,3 | 57  | 18,0  | 18,0  | 18,46 | 550,47 | 96,72  |
| 2019/06/04 | CH2206 | Male | Three y/o | Treatment (Wk 3) | Treatment | Feed Day | No | 06:20 | 06:00 - 06:59 | Morning | 37,2 | 80  | 159,6 | 159,6 | 18,36 | 577,31 | 172,19 |
| 2019/06/04 | CH2205 | Male | Three y/o | Treatment (Wk 3) | Treatment | Feed Day | No | 06:25 | 06:00 - 06:59 | Morning | 37,2 | 102 | 16,2  | 16,2  | 18,36 | 595,30 | 93,13  |
| 2019/06/04 | CH2206 | Male | Three y/o | Treatment (Wk 3) | Treatment | Feed Day | No | 06:25 | 06:00 - 06:59 | Morning | 37,3 | 94  | 11,8  | 11,8  | 18,46 | 589,37 | 82,36  |
| 2019/06/04 | CH2205 | Male | Three y/o | Treatment (Wk 3) | Treatment | Feed Day | No | 06:30 | 06:00 - 06:59 | Morning | 37,3 | 77  | 15,2  | 15,2  | 18,46 | 574,39 | 90,96  |
| 2019/06/04 | CH2206 | Male | Three y/o | Treatment (Wk 3) | Treatment | Feed Day | No | 06:30 | 06:00 - 06:59 | Morning | 37,2 | 47  | 15,0  | 15,0  | 18,36 | 534,23 | 90,51  |
| 2019/06/04 | CH2205 | Male | Three y/o | Treatment (Wk 3) | Treatment | Feed Day | No | 06:35 | 06:00 - 06:59 | Morning | 37,3 | 57  | 18,8  | 18,8  | 18,46 | 550,47 | 98,20  |
| 2019/06/04 | CH2206 | Male | Three y/o | Treatment (Wk 3) | Treatment | Feed Day | No | 06:35 | 06:00 - 06:59 | Morning | 37,2 | 79  | 36,6  | 36,6  | 18,36 | 576,36 | 121,03 |
| 2019/06/04 | CH2205 | Male | Three y/o | Treatment (Wk 3) | Treatment | Feed Day | No | 06:40 | 06:00 - 06:59 | Morning | 37,3 | 70  | 20,8  | 20,8  | 18,46 | 566,99 | 101,65 |
| 2019/06/04 | CH2206 | Male | Three y/o | Treatment (Wk 3) | Treatment | Feed Day | No | 06:40 | 06:00 - 06:59 | Morning | 37,3 | 120 | 154,4 | 154,4 | 18,46 | 606,78 | 171,03 |
| 2019/06/04 | CH2205 | Male | Three y/o | Treatment (Wk 3) | Treatment | Feed Day | No | 06:45 | 06:00 - 06:59 | Morning | 37,4 | 99  | 16,4  | 16,4  | 18,55 | 593,14 | 93,55  |
| 2019/06/04 | CH2206 | Male | Three y/o | Treatment (Wk 3) | Treatment | Feed Day | No | 06:45 | 06:00 - 06:59 | Morning | 37,4 | 150 | 34,2  | 34,2  | 18,55 | 621,86 | 118,70 |
| 2019/06/04 | CH2205 | Male | Three y/o | Treatment (Wk 3) | Treatment | Feed Day | No | 06:50 | 06:00 - 06:59 | Morning | 37,5 | 103 | 27,8  | 27,8  | 18,65 | 596,00 | 111,58 |
| 2019/06/04 | CH2206 | Male | Three y/o | Treatment (Wk 3) | Treatment | Feed Day | No | 06:50 | 06:00 - 06:59 | Morning | 37,4 | 112 | 164,2 | 164,2 | 18,55 | 601,96 | 173,19 |
| 2019/06/04 | CH2205 | Male | Three y/o | Treatment (Wk 3) | Treatment | Feed Day | No | 06:55 | 06:00 - 06:59 | Morning | 37,4 | 94  | 61,2  | 61,2  | 18,55 | 589,37 | 138,78 |



|            |        |      |           |                  |           |          |    |       |               |              |      |     |       |       |       |        |        |
|------------|--------|------|-----------|------------------|-----------|----------|----|-------|---------------|--------------|------|-----|-------|-------|-------|--------|--------|
| 2019/06/04 | CH2206 | Male | Three y/o | Treatment (Wk 3) | Treatment | Feed Day | No | 06:55 | 06:00 - 06:59 | Morning      | 37,4 | 121 | 208,8 | 208,8 | 18,55 | 607,35 | 181,63 |
| 2019/06/04 | CH2205 | Male | Three y/o | Treatment (Wk 3) | Treatment | Feed Day | No | 07:00 | 07:00 - 07:59 | Morning      | 37,4 | 123 | 78,8  | 78,8  | 18,55 | 608,49 | 147,55 |
| 2019/06/04 | CH2206 | Male | Three y/o | Treatment (Wk 3) | Treatment | Feed Day | No | 07:00 | 07:00 - 07:59 | Morning      | 37,5 | 141 | 70,2  | 70,2  | 18,65 | 617,75 | 143,54 |
| 2019/06/04 | CH2205 | Male | Three y/o | Treatment (Wk 3) | Treatment | Feed Day | No | 07:05 | 07:00 - 07:59 | Morning      | 37,4 | 138 | 19,6  | 19,6  | 18,55 | 616,31 | 99,63  |
| 2019/06/04 | CH2206 | Male | Three y/o | Treatment (Wk 3) | Treatment | Feed Day | No | 07:05 | 07:00 - 07:59 | Morning      | 37,5 | 106 | 139,4 | 139,4 | 18,65 | 598,06 | 167,45 |
| 2019/06/04 | CH2205 | Male | Three y/o | Treatment (Wk 3) | Treatment | Feed Day | No | 07:10 | 07:00 - 07:59 | Morning      | 37,5 | 138 | 132,2 | 132,2 | 18,65 | 616,31 | 165,59 |
| 2019/06/04 | CH2206 | Male | Three y/o | Treatment (Wk 3) | Treatment | Feed Day | No | 07:10 | 07:00 - 07:59 | Morning      | 37,7 | 123 | 108,6 | 108,6 | 18,85 | 608,49 | 158,72 |
| 2019/06/04 | CH2205 | Male | Three y/o | Treatment (Wk 3) | Treatment | Feed Day | No | 07:15 | 07:00 - 07:59 | Morning      | 37,5 | 118 | 30,6  | 30,6  | 18,65 | 605,61 | 114,87 |
| 2019/06/04 | CH2206 | Male | Three y/o | Treatment (Wk 3) | Treatment | Feed Day | No | 07:15 | 07:00 - 07:59 | Morning      | 37,8 | 110 | 142,2 | 142,2 | 18,95 | 600,69 | 168,15 |
| 2019/06/04 | CH2205 | Male | Three y/o | Treatment (Wk 3) | Treatment | Feed Day | No | 07:20 | 07:00 - 07:59 | Morning      | 37,5 |     | 94,8  | 94,8  | 18,65 |        | 153,98 |
| 2019/06/04 | CH2206 | Male | Three y/o | Treatment (Wk 3) | Treatment | Feed Day | No | 07:20 | 07:00 - 07:59 | Morning      | 37,8 | 156 | 354,6 | 354,6 | 18,95 | 624,43 | 200,34 |
| 2019/06/04 | CH2205 | Male | Three y/o | Treatment (Wk 3) | Treatment | Feed Day | No | 07:25 | 07:00 - 07:59 | Morning      | 37,6 | 52  | 87,6  | 87,6  | 18,75 | 542,83 | 151,23 |
| 2019/06/04 | CH2206 | Male | Three y/o | Treatment (Wk 3) | Treatment | Feed Day | No | 07:25 | 07:00 - 07:59 | Morning      | 37,9 | 121 | 97,4  | 97,4  | 19,05 | 607,35 | 154,93 |
| 2019/06/04 | CH2205 | Male | Three y/o | Treatment (Wk 3) | Treatment | Feed Day | No | 07:30 | 07:00 - 07:59 | Morning      | 37,5 | 119 | 100,0 | 100,0 | 18,65 | 606,20 | 155,84 |
| 2019/06/04 | CH2206 | Male | Three y/o | Treatment (Wk 3) | Treatment | Feed Day | No | 07:30 | 07:00 - 07:59 | Morning      | 37,9 | 140 | 37,2  | 37,2  | 19,05 | 617,28 | 121,59 |
| 2019/06/04 | CH2205 | Male | Three y/o | Treatment (Wk 3) | Treatment | Feed Day | No | 07:35 | 07:00 - 07:59 | Morning      | 37,6 | 103 | 151,6 | 151,6 | 18,75 | 596,00 | 170,39 |
| 2019/06/04 | CH2206 | Male | Three y/o | Treatment (Wk 3) | Treatment | Feed Day | No | 07:35 | 07:00 - 07:59 | Morning      | 37,8 | 123 | 32,2  | 32,2  | 18,95 | 608,49 | 116,63 |
| 2019/06/04 | CH2205 | Male | Three y/o | Treatment (Wk 3) | Treatment | Feed Day | No | 07:40 | 07:00 - 07:59 | Morning      | 37,6 | 85  | 16,6  | 16,6  | 18,75 | 581,90 | 93,96  |
| 2019/06/04 | CH2206 | Male | Three y/o | Treatment (Wk 3) | Treatment | Feed Day | No | 07:40 | 07:00 - 07:59 | Morning      | 37,8 | 129 | 118,0 | 118,0 | 18,95 | 611,75 | 161,62 |
| 2019/06/04 | CH2205 | Male | Three y/o | Treatment (Wk 3) | Treatment | Feed Day | No | 07:45 | 07:00 - 07:59 | Morning      | 37,5 |     | 19,8  | 19,8  | 18,65 |        | 99,97  |
| 2019/06/04 | CH2206 | Male | Three y/o | Treatment (Wk 3) | Treatment | Feed Day | No | 07:45 | 07:00 - 07:59 | Morning      | 37,8 | 115 | 215,6 | 215,6 | 18,95 | 603,82 | 182,76 |
| 2019/06/04 | CH2205 | Male | Three y/o | Treatment (Wk 3) | Treatment | Feed Day | No | 07:50 | 07:00 - 07:59 | Morning      | 37,3 | 69  | 12,6  | 12,6  | 18,46 | 565,86 | 84,59  |
| 2019/06/04 | CH2206 | Male | Three y/o | Treatment (Wk 3) | Treatment | Feed Day | No | 07:50 | 07:00 - 07:59 | Morning      | 37,8 | 115 | 140,2 | 140,2 | 18,95 | 603,82 | 167,65 |
| 2019/06/04 | CH2205 | Male | Three y/o | Treatment (Wk 3) | Treatment | Feed Day | No | 07:55 | 07:00 - 07:59 | Morning      | 37,3 | 77  | 24,4  | 24,4  | 18,46 | 574,39 | 107,11 |
| 2019/06/04 | CH2206 | Male | Three y/o | Treatment (Wk 3) | Treatment | Feed Day | No | 07:55 | 07:00 - 07:59 | Morning      | 37,8 | 87  | 272,8 | 272,8 | 18,95 | 583,64 | 191,06 |
| 2019/06/04 | CH2205 | Male | Three y/o | Treatment (Wk 3) | Treatment | Feed Day | No | 08:00 | 08:00 - 08:59 | Late Morning | 37,4 | 124 | 119,0 | 119,0 | 18,55 | 609,04 | 161,92 |
| 2019/06/04 | CH2206 | Male | Three y/o | Treatment (Wk 3) | Treatment | Feed Day | No | 08:00 | 08:00 - 08:59 | Late Morning | 37,6 |     | 52,0  | 52,0  | 18,75 |        | 133,14 |
| 2019/06/04 | CH2205 | Male | Three y/o | Treatment (Wk 3) | Treatment | Feed Day | No | 08:05 | 08:00 - 08:59 | Late Morning | 37,5 | 98  | 24,8  | 24,8  | 18,65 | 592,41 | 107,67 |
| 2019/06/04 | CH2206 | Male | Three y/o | Treatment (Wk 3) | Treatment | Feed Day | No | 08:05 | 08:00 - 08:59 | Late Morning | 37,7 | 134 | 38,4  | 38,4  | 18,85 | 614,33 | 122,68 |
| 2019/06/04 | CH2205 | Male | Three y/o | Treatment (Wk 3) | Treatment | Feed Day | No | 08:10 | 08:00 - 08:59 | Late Morning | 37,5 | 114 | 18,4  | 18,4  | 18,65 | 603,20 | 97,47  |
| 2019/06/04 | CH2206 | Male | Three y/o | Treatment (Wk 3) | Treatment | Feed Day | No | 08:10 | 08:00 - 08:59 | Late Morning | 37,7 | 126 | 158,4 | 158,4 | 18,85 | 610,14 | 171,93 |
| 2019/06/04 | CH2205 | Male | Three y/o | Treatment (Wk 3) | Treatment | Feed Day | No | 08:15 | 08:00 - 08:59 | Late Morning | 37,5 | 103 | 7,0   | 7,0   | 18,65 | 596,00 | 64,72  |
| 2019/06/04 | CH2206 | Male | Three y/o | Treatment (Wk 3) | Treatment | Feed Day | No | 08:15 | 08:00 - 08:59 | Late Morning | 37,8 | 129 | 104,6 | 104,6 | 18,95 | 611,75 | 157,41 |
| 2019/06/04 | CH2205 | Male | Three y/o | Treatment (Wk 3) | Treatment | Feed Day | No | 08:20 | 08:00 - 08:59 | Late Morning | 37,4 | 102 | 4,2   | 4,2   | 18,55 | 595,30 | 47,57  |
| 2019/06/04 | CH2206 | Male | Three y/o | Treatment (Wk 3) | Treatment | Feed Day | No | 08:20 | 08:00 - 08:59 | Late Morning | 37,7 |     | 33,2  | 33,2  | 18,85 |        | 117,68 |
| 2019/06/04 | CH2205 | Male | Three y/o | Treatment (Wk 3) | Treatment | Feed Day | No | 08:25 | 08:00 - 08:59 | Late Morning | 37,2 | 103 | 6,8   | 6,8   | 18,36 | 596,00 | 63,74  |
| 2019/06/04 | CH2206 | Male | Three y/o | Treatment (Wk 3) | Treatment | Feed Day | No | 08:25 | 08:00 - 08:59 | Late Morning | 37,5 | 81  | 35,6  | 35,6  | 18,65 | 578,26 | 120,08 |
| 2019/06/04 | CH2205 | Male | Three y/o | Treatment (Wk 3) | Treatment | Feed Day | No | 08:30 | 08:00 - 08:59 | Late Morning | 37,1 | 60  | 13,8  | 13,8  | 18,26 | 554,67 | 87,68  |
| 2019/06/04 | CH2206 | Male | Three y/o | Treatment (Wk 3) | Treatment | Feed Day | No | 08:30 | 08:00 - 08:59 | Late Morning | 37,7 | 85  | 36,6  | 36,6  | 18,85 | 581,90 | 121,03 |
| 2019/06/04 | CH2205 | Male | Three y/o | Treatment (Wk 3) | Treatment | Feed Day | No | 08:35 | 08:00 - 08:59 | Late Morning | 37,0 | 67  | 14,0  | 14,0  | 18,16 | 563,53 | 88,17  |
| 2019/06/04 | CH2206 | Male | Three y/o | Treatment (Wk 3) | Treatment | Feed Day | No | 08:35 | 08:00 - 08:59 | Late Morning | 37,7 | 88  | 24,8  | 24,8  | 18,85 | 584,49 | 107,67 |
| 2019/06/04 | CH2205 | Male | Three y/o | Treatment (Wk 3) | Treatment | Feed Day | No | 08:40 | 08:00 - 08:59 | Late Morning | 36,8 | 56  | 15,6  | 15,6  | 17,96 | 549,01 | 91,85  |
| 2019/06/04 | CH2206 | Male | Three y/o | Treatment (Wk 3) | Treatment | Feed Day | No | 08:40 | 08:00 - 08:59 | Late Morning | 37,4 | 78  | 16,4  | 16,4  | 18,55 | 575,38 | 93,55  |
| 2019/06/04 | CH2205 | Male | Three y/o | Treatment (Wk 3) | Treatment | Feed Day | No | 08:45 | 08:00 - 08:59 | Late Morning | 36,7 | 59  | 6,2   | 6,2   | 17,87 | 553,30 | 60,63  |
| 2019/06/04 | CH2206 | Male | Three y/o | Treatment (Wk 3) | Treatment | Feed Day | No | 08:45 | 08:00 - 08:59 | Late Morning | 37,3 | 84  | 32,2  | 32,2  | 18,46 | 581,01 | 116,63 |
| 2019/06/04 | CH2205 | Male | Three y/o | Treatment (Wk 3) | Treatment | Feed Day | No | 08:50 | 08:00 - 08:59 | Late Morning | 37,0 | 154 | 9,0   | 9,0   | 18,16 | 623,58 | 73,19  |
| 2019/06/04 | CH2206 | Male | Three y/o | Treatment (Wk 3) | Treatment | Feed Day | No | 08:50 | 08:00 - 08:59 | Late Morning | 37,2 | 71  | 43,2  | 43,2  | 18,36 | 568,10 | 126,74 |
| 2019/06/04 | CH2205 | Male | Three y/o | Treatment (Wk 3) | Treatment | Feed Day | No | 08:55 | 08:00 - 08:59 | Late Morning | 37,1 |     | 24,0  | 24,0  | 18,26 |        | 106,55 |
| 2019/06/04 | CH2206 | Male | Three y/o | Treatment (Wk 3) | Treatment | Feed Day | No | 08:55 | 08:00 - 08:59 | Late Morning | 37,3 | 109 | 16,4  | 16,4  | 18,46 | 600,04 | 93,55  |
| 2019/06/04 | CH2205 | Male | Three y/o | Treatment (Wk 3) | Treatment | Feed Day | No | 09:00 | 09:00 - 09:59 | Late Morning | 37,1 | 42  | 128,2 | 128,2 | 18,26 | 524,42 | 164,52 |
| 2019/06/04 | CH2206 | Male | Three y/o | Treatment (Wk 3) | Treatment | Feed Day | No | 09:00 | 09:00 - 09:59 | Late Morning | 37,4 | 125 | 38,0  | 38,0  | 18,55 | 609,60 | 122,32 |
| 2019/06/04 | CH2205 | Male | Three y/o | Treatment (Wk 3) | Treatment | Feed Day | No | 09:05 | 09:00 - 09:59 | Late Morning | 37,1 |     | 127,8 | 127,8 | 18,26 |        | 164,41 |
| 2019/06/04 | CH2206 | Male | Three y/o | Treatment (Wk 3) | Treatment | Feed Day | No | 09:05 | 09:00 - 09:59 | Late Morning | 37,4 |     | 101,2 | 101,2 | 18,55 |        | 156,26 |
| 2019/06/04 | CH2205 | Male | Three y/o | Treatment (Wk 3) | Treatment | Feed Day | No | 09:10 | 09:00 - 09:59 | Late Morning | 37,3 |     | 27,2  | 27,2  | 18,46 |        | 110,83 |
| 2019/06/04 | CH2206 | Male | Three y/o | Treatment (Wk 3) | Treatment | Feed Day | No | 09:10 | 09:00 - 09:59 | Late Morning | 37,5 | 109 | 83,0  | 83,0  | 18,65 | 600,04 | 149,36 |
| 2019/06/04 | CH2205 | Male | Three y/o | Treatment (Wk 3) | Treatment | Feed Day | No | 09:15 | 09:00 - 09:59 | Late Morning | 37,4 | 95  | 37,8  | 37,8  | 18,55 | 590,14 | 122,14 |
| 2019/06/04 | CH2206 | Male | Three y/o | Treatment (Wk 3) | Treatment | Feed Day | No | 09:15 | 09:00 - 09:59 | Late Morning | 37,5 |     | 163,6 | 163,6 | 18,65 |        | 173,06 |
| 2019/06/04 | CH2205 | Male | Three y/o | Treatment (Wk 3) | Treatment | Feed Day | No | 09:20 | 09:00 - 09:59 | Late Morning | 37,4 | 111 | 155,6 | 155,6 | 18,55 | 601,33 | 171,30 |
| 2019/06/04 | CH2206 | Male | Three y/o | Treatment (Wk 3) | Treatment | Feed Day | No | 09:20 | 09:00 - 09:59 | Late Morning | 37,7 | 152 | 88,0  | 88,0  | 18,85 | 622,73 | 151,39 |
| 2019/06/04 | CH2205 | Male | Three y/o | Treatment (Wk 3) | Treatment | Feed Day | No | 09:25 | 09:00 - 09:59 | Late Morning | 37,5 | 113 | 18,0  | 18,0  | 18,65 | 602,58 | 96,72  |
| 2019/06/04 | CH2206 | Male | Three y/o | Treatment (Wk 3) | Treatment | Feed Day | No | 09:25 | 09:00 - 09:59 | Late Morning | 37,8 |     | 127,6 | 127,6 | 18,95 |        | 164,35 |
| 2019/06/04 | CH2205 | Male | Three y/o | Treatment (Wk 3) | Treatment | Feed Day | No | 09:30 | 09:00 - 09:59 | Late Morning | 37,4 |     | 9,0   | 9,0   | 18,55 |        | 73,19  |
| 2019/06/04 | CH2206 | Male | Three y/o | Treatment (Wk 3) | Treatment | Feed Day | No | 09:30 | 09:00 - 09:59 | Late Morning | 37,7 | 46  | 73,0  | 73,0  | 18,85 | 532,38 | 144,89 |
| 2019/06/04 | CH2205 | Male | Three y/o | Treatment (Wk 3) | Treatment | Feed Day | No | 09:35 | 09:00 - 09:59 | Late Morning | 37,3 |     | 49,0  | 49,0  | 18,46 |        | 131,09 |
| 2019/06/04 | CH2206 | Male | Three y/o | Treatment (Wk 3) | Treatment | Feed Day | No | 09:35 | 09:00 - 09:59 | Late Morning | 37,7 | 118 | 87,8  | 87,8  | 18,85 | 605,61 | 151,31 |
| 2019/06/04 | CH2205 | Male | Three y/o | Treatment (Wk 3) | Treatment | Feed Day | No | 09:40 | 09:00 - 09:59 | Late Morning | 37,3 | 77  | 25,2  | 25,2  | 18,46 | 574,39 | 108,22 |
| 2019/06/04 | CH2206 | Male | Three y/o | Treatment (Wk 3) | Treatment | Feed Day | No | 09:40 | 09:00 - 09:59 | Late Morning | 37,7 | 98  | 72,2  | 72,2  | 18,85 | 592,41 | 144,51 |
| 2019/06/04 | CH2205 | Male | Three y/o | Treatment (Wk 3) | Treatment | Feed Day | No | 09:45 | 09:00 - 09:59 | Late Morning | 37,3 | 197 | 24,4  | 24,4  | 18,46 | 639,25 | 107,11 |
| 2019/06/04 | CH2206 | Male | Three y/o | Treatment (Wk 3) | Treatment | Feed Day | No | 09:45 | 09:00 - 09:59 | Late Morning | 37,5 | 82  | 35,4  | 35,4  | 18,65 | 579,19 | 119,88 |
| 2019/06/04 | CH2205 | Male | Three y/o | Treatment (Wk 3) | Treatment | Feed Day | No | 09:50 | 09:00 - 09:59 | Late Morning | 37,2 | 73  | 19,4  | 19,4  | 18,36 | 570,27 | 99,28  |



|            |        |      |           |                  |           |          |     |       |               |              |      |     |       |       |       |        |        |
|------------|--------|------|-----------|------------------|-----------|----------|-----|-------|---------------|--------------|------|-----|-------|-------|-------|--------|--------|
| 2019/06/04 | CH2206 | Male | Three y/o | Treatment (Wk 3) | Treatment | Feed Day | No  | 09:50 | 09:00 - 09:59 | Late Morning | 37,5 | 81  | 43,6  | 43,6  | 18,65 | 578,26 | 127,06 |
| 2019/06/04 | CH2205 | Male | Three y/o | Treatment (Wk 3) | Treatment | Feed Day | No  | 09:55 | 09:00 - 09:59 | Late Morning | 37,1 |     | 28,8  | 28,8  | 18,26 |        | 112,79 |
| 2019/06/04 | CH2206 | Male | Three y/o | Treatment (Wk 3) | Treatment | Feed Day | No  | 09:55 | 09:00 - 09:59 | Late Morning | 37,7 | 83  | 47,2  | 47,2  | 18,85 | 580,11 | 129,80 |
| 2019/06/04 | CH2205 | Male | Three y/o | Treatment (Wk 3) | Treatment | Feed Day | No  | 10:00 | 10:00 - 10:59 | Late Morning | 37,2 | 93  | 23,6  | 23,6  | 18,36 | 588,58 | 105,97 |
| 2019/06/04 | CH2206 | Male | Three y/o | Treatment (Wk 3) | Treatment | Feed Day | No  | 10:00 | 10:00 - 10:59 | Late Morning | 37,7 | 73  | 46,2  | 46,2  | 18,85 | 570,27 | 129,06 |
| 2019/06/04 | CH2205 | Male | Three y/o | Treatment (Wk 3) | Treatment | Feed Day | No  | 10:05 | 10:00 - 10:59 | Late Morning | 37,2 |     | 25,0  | 25,0  | 18,36 |        | 107,94 |
| 2019/06/04 | CH2206 | Male | Three y/o | Treatment (Wk 3) | Treatment | Feed Day | No  | 10:05 | 10:00 - 10:59 | Late Morning | 37,7 | 74  | 51,2  | 51,2  | 18,85 | 571,33 | 132,61 |
| 2019/06/04 | CH2205 | Male | Three y/o | Treatment (Wk 3) | Treatment | Feed Day | No  | 10:10 | 10:00 - 10:59 | Late Morning | 37,1 | 75  | 20,4  | 20,4  | 18,26 | 572,36 | 100,99 |
| 2019/06/04 | CH2206 | Male | Three y/o | Treatment (Wk 3) | Treatment | Feed Day | No  | 10:10 | 10:00 - 10:59 | Late Morning | 37,7 | 61  | 45,8  | 45,8  | 18,85 | 556,01 | 128,76 |
| 2019/06/04 | CH2205 | Male | Three y/o | Treatment (Wk 3) | Treatment | Feed Day | No  | 10:15 | 10:00 - 10:59 | Late Morning | 37,1 | 56  | 17,0  | 17,0  | 18,26 | 549,01 | 94,77  |
| 2019/06/04 | CH2206 | Male | Three y/o | Treatment (Wk 3) | Treatment | Feed Day | No  | 10:15 | 10:00 - 10:59 | Late Morning | 37,7 | 89  | 47,4  | 47,4  | 18,85 | 585,33 | 129,94 |
| 2019/06/04 | CH2205 | Male | Three y/o | Treatment (Wk 3) | Treatment | Feed Day | No  | 10:20 | 10:00 - 10:59 | Late Morning | 37,0 | 58  | 24,4  | 24,4  | 18,16 | 551,90 | 107,11 |
| 2019/06/04 | CH2206 | Male | Three y/o | Treatment (Wk 3) | Treatment | Feed Day | No  | 10:20 | 10:00 - 10:59 | Late Morning | 37,6 | 85  | 46,2  | 46,2  | 18,75 | 581,90 | 129,06 |
| 2019/06/04 | CH2205 | Male | Three y/o | Treatment (Wk 3) | Treatment | Feed Day | No  | 10:25 | 10:00 - 10:59 | Late Morning | 37,0 | 150 | 25,8  | 25,8  | 18,16 | 621,86 | 109,02 |
| 2019/06/04 | CH2206 | Male | Three y/o | Treatment (Wk 3) | Treatment | Feed Day | No  | 10:25 | 10:00 - 10:59 | Late Morning | 37,5 | 89  | 49,8  | 49,8  | 18,65 | 585,33 | 131,65 |
| 2019/06/04 | CH2205 | Male | Three y/o | Treatment (Wk 3) | Treatment | Feed Day | Yes | 10:30 | 10:00 - 10:59 | Late Morning | 37,0 |     | 24,8  | 24,8  | 18,16 |        | 107,67 |
| 2019/06/04 | CH2206 | Male | Three y/o | Treatment (Wk 3) | Treatment | Feed Day | Yes | 10:30 | 10:00 - 10:59 | Late Morning | 37,5 | 88  | 53,4  | 53,4  | 18,65 | 584,49 | 134,06 |
| 2019/06/04 | CH2205 | Male | Three y/o | Treatment (Wk 3) | Treatment | Feed Day | Yes | 10:35 | 10:00 - 10:59 | Late Morning | 37,0 | 197 | 22,2  | 22,2  | 18,16 | 639,25 | 103,88 |
| 2019/06/04 | CH2206 | Male | Three y/o | Treatment (Wk 3) | Treatment | Feed Day | Yes | 10:35 | 10:00 - 10:59 | Late Morning | 37,5 |     | 28,6  | 28,6  | 18,65 |        | 112,56 |
| 2019/06/04 | CH2205 | Male | Three y/o | Treatment (Wk 3) | Treatment | Feed Day | Yes | 10:40 | 10:00 - 10:59 | Late Morning | 37,0 |     | 16,0  | 16,0  | 18,16 |        | 92,71  |
| 2019/06/04 | CH2206 | Male | Three y/o | Treatment (Wk 3) | Treatment | Feed Day | Yes | 10:40 | 10:00 - 10:59 | Late Morning | 37,4 | 90  | 101,2 | 101,2 | 18,55 | 586,16 | 156,26 |
| 2019/06/04 | CH2205 | Male | Three y/o | Treatment (Wk 3) | Treatment | Feed Day | Yes | 10:45 | 10:00 - 10:59 | Late Morning | 37,2 | 84  | 37,4  | 37,4  | 18,36 | 581,01 | 121,77 |
| 2019/06/04 | CH2206 | Male | Three y/o | Treatment (Wk 3) | Treatment | Feed Day | Yes | 10:45 | 10:00 - 10:59 | Late Morning | 37,4 |     | 146,0 | 146,0 | 18,55 |        | 169,07 |
| 2019/06/04 | CH2205 | Male | Three y/o | Treatment (Wk 3) | Treatment | Feed Day | Yes | 10:50 | 10:00 - 10:59 | Late Morning | 37,2 | 68  | 13,2  | 13,2  | 18,36 | 564,71 | 86,17  |
| 2019/06/04 | CH2206 | Male | Three y/o | Treatment (Wk 3) | Treatment | Feed Day | Yes | 10:50 | 10:00 - 10:59 | Late Morning | 37,4 | 108 | 90,8  | 90,8  | 18,55 | 599,39 | 152,48 |
| 2019/06/04 | CH2205 | Male | Three y/o | Treatment (Wk 3) | Treatment | Feed Day | Yes | 10:55 | 10:00 - 10:59 | Late Morning | 37,2 | 66  | 7,6   | 7,6   | 18,36 | 562,34 | 67,49  |
| 2019/06/04 | CH2206 | Male | Three y/o | Treatment (Wk 3) | Treatment | Feed Day | Yes | 10:55 | 10:00 - 10:59 | Late Morning | 37,4 | 103 | 19,8  | 19,8  | 18,55 | 596,00 | 99,97  |
| 2019/06/04 | CH2205 | Male | Three y/o | Treatment (Wk 3) | Treatment | Feed Day | Yes | 11:00 | 11:00 - 11:59 | Late Morning | 37,3 | 67  | 9,4   | 9,4   | 18,46 | 563,53 | 74,66  |
| 2019/06/04 | CH2206 | Male | Three y/o | Treatment (Wk 3) | Treatment | Feed Day | Yes | 11:00 | 11:00 - 11:59 | Late Morning | 37,4 | 105 | 514,0 | 514,0 | 18,55 | 597,38 | 213,53 |
| 2019/06/04 | CH2205 | Male | Three y/o | Treatment (Wk 3) | Treatment | Feed Day | Yes | 11:05 | 11:00 - 11:59 | Late Morning | 37,3 | 78  | 19,8  | 19,8  | 18,46 | 575,38 | 99,97  |
| 2019/06/04 | CH2206 | Male | Three y/o | Treatment (Wk 3) | Treatment | Feed Day | Yes | 11:05 | 11:00 - 11:59 | Late Morning | 37,5 | 88  | 44,6  | 44,6  | 18,65 | 584,49 | 127,84 |
| 2019/06/04 | CH2205 | Male | Three y/o | Treatment (Wk 3) | Treatment | Feed Day | Yes | 11:10 | 11:00 - 11:59 | Late Morning | 37,4 | 75  | 55,4  | 55,4  | 18,55 | 572,36 | 135,33 |
| 2019/06/04 | CH2206 | Male | Three y/o | Treatment (Wk 3) | Treatment | Feed Day | Yes | 11:10 | 11:00 - 11:59 | Late Morning | 37,5 | 72  | 46,8  | 46,8  | 18,65 | 569,20 | 129,50 |
| 2019/06/04 | CH2205 | Male | Three y/o | Treatment (Wk 3) | Treatment | Feed Day | Yes | 11:15 | 11:00 - 11:59 | Late Morning | 37,4 | 56  | 5,6   | 5,6   | 18,55 | 549,01 | 57,21  |
| 2019/06/04 | CH2206 | Male | Three y/o | Treatment (Wk 3) | Treatment | Feed Day | Yes | 11:15 | 11:00 - 11:59 | Late Morning | 37,5 | 63  | 59,0  | 59,0  | 18,65 | 558,62 | 137,51 |
| 2019/06/04 | CH2205 | Male | Three y/o | Treatment (Wk 3) | Treatment | Feed Day | Yes | 11:20 | 11:00 - 11:59 | Late Morning | 37,5 | 86  | 20,6  | 20,6  | 18,65 | 582,77 | 101,32 |
| 2019/06/04 | CH2206 | Male | Three y/o | Treatment (Wk 3) | Treatment | Feed Day | Yes | 11:20 | 11:00 - 11:59 | Late Morning | 37,5 | 131 | 12,6  | 12,6  | 18,65 | 612,80 | 84,59  |
| 2019/06/04 | CH2205 | Male | Three y/o | Treatment (Wk 3) | Treatment | Feed Day | Yes | 11:25 | 11:00 - 11:59 | Late Morning | 37,5 | 61  | 26,2  | 26,2  | 18,65 | 556,01 | 109,55 |
| 2019/06/04 | CH2206 | Male | Three y/o | Treatment (Wk 3) | Treatment | Feed Day | Yes | 11:25 | 11:00 - 11:59 | Late Morning | 37,5 | 99  | 41,8  | 41,8  | 18,65 | 593,14 | 125,60 |
| 2019/06/04 | CH2205 | Male | Three y/o | Treatment (Wk 3) | Treatment | Feed Day | No  | 11:30 | 11:00 - 11:59 | Late Morning | 37,6 | 141 | 29,6  | 29,6  | 18,75 | 617,75 | 113,73 |
| 2019/06/04 | CH2206 | Male | Three y/o | Treatment (Wk 3) | Treatment | Feed Day | No  | 11:30 | 11:00 - 11:59 | Late Morning | 37,7 | 114 | 25,4  | 25,4  | 18,85 | 603,20 | 108,49 |
| 2019/06/04 | CH2205 | Male | Three y/o | Treatment (Wk 3) | Treatment | Feed Day | No  | 11:35 | 11:00 - 11:59 | Late Morning | 37,7 |     | 16,4  | 16,4  | 18,85 |        | 93,55  |
| 2019/06/04 | CH2206 | Male | Three y/o | Treatment (Wk 3) | Treatment | Feed Day | No  | 11:35 | 11:00 - 11:59 | Late Morning | 37,8 | 101 | 11,2  | 11,2  | 18,95 | 594,59 | 80,59  |
| 2019/06/04 | CH2205 | Male | Three y/o | Treatment (Wk 3) | Treatment | Feed Day | No  | 11:40 | 11:00 - 11:59 | Late Morning | 37,5 | 169 | 19,2  | 19,2  | 18,65 | 629,60 | 98,92  |
| 2019/06/04 | CH2206 | Male | Three y/o | Treatment (Wk 3) | Treatment | Feed Day | No  | 11:40 | 11:00 - 11:59 | Late Morning | 37,5 | 150 | 19,4  | 19,4  | 18,65 | 621,86 | 99,28  |
| 2019/06/04 | CH2205 | Male | Three y/o | Treatment (Wk 3) | Treatment | Feed Day | No  | 11:45 | 11:00 - 11:59 | Late Morning | 37,4 | 118 | 20,6  | 20,6  | 18,55 | 605,61 | 101,32 |
| 2019/06/04 | CH2206 | Male | Three y/o | Treatment (Wk 3) | Treatment | Feed Day | No  | 11:45 | 11:00 - 11:59 | Late Morning | 37,4 | 94  | 126,2 | 126,2 | 18,55 | 589,37 | 163,97 |
| 2019/06/04 | CH2205 | Male | Three y/o | Treatment (Wk 3) | Treatment | Feed Day | No  | 11:50 | 11:00 - 11:59 | Late Morning | 37,4 |     | 47,6  | 47,6  | 18,55 |        | 130,09 |
| 2019/06/04 | CH2206 | Male | Three y/o | Treatment (Wk 3) | Treatment | Feed Day | No  | 11:50 | 11:00 - 11:59 | Late Morning | 37,4 | 102 | 81,2  | 81,2  | 18,55 | 595,30 | 148,59 |
| 2019/06/04 | CH2205 | Male | Three y/o | Treatment (Wk 3) | Treatment | Feed Day | No  | 11:55 | 11:00 - 11:59 | Late Morning | 37,4 | 105 | 219,4 | 219,4 | 18,55 | 597,38 | 183,38 |
| 2019/06/04 | CH2206 | Male | Three y/o | Treatment (Wk 3) | Treatment | Feed Day | No  | 11:55 | 11:00 - 11:59 | Late Morning | 37,5 | 128 | 22,4  | 22,4  | 18,65 | 611,22 | 104,19 |
| 2019/06/04 | CH2205 | Male | Three y/o | Treatment (Wk 3) | Treatment | Feed Day | No  | 12:00 | 12:00 - 12:59 | Afternoon    | 37,5 | 119 | 84,8  | 84,8  | 18,65 | 606,20 | 150,10 |
| 2019/06/04 | CH2206 | Male | Three y/o | Treatment (Wk 3) | Treatment | Feed Day | No  | 12:00 | 12:00 - 12:59 | Afternoon    | 37,5 |     | 111,8 | 111,8 | 18,65 |        | 159,74 |
| 2019/06/04 | CH2205 | Male | Three y/o | Treatment (Wk 3) | Treatment | Feed Day | No  | 12:05 | 12:00 - 12:59 | Afternoon    | 37,6 | 126 | 30,4  | 30,4  | 18,75 | 610,14 | 114,65 |
| 2019/06/04 | CH2206 | Male | Three y/o | Treatment (Wk 3) | Treatment | Feed Day | No  | 12:05 | 12:00 - 12:59 | Afternoon    | 37,5 | 109 | 52,6  | 52,6  | 18,65 | 600,04 | 133,54 |
| 2019/06/04 | CH2205 | Male | Three y/o | Treatment (Wk 3) | Treatment | Feed Day | No  | 12:10 | 12:00 - 12:59 | Afternoon    | 37,6 | 100 | 35,8  | 35,8  | 18,75 | 593,87 | 120,27 |
| 2019/06/04 | CH2206 | Male | Three y/o | Treatment (Wk 3) | Treatment | Feed Day | No  | 12:10 | 12:00 - 12:59 | Afternoon    | 37,5 | 88  | 36,8  | 36,8  | 18,65 | 584,49 | 121,22 |
| 2019/06/04 | CH2205 | Male | Three y/o | Treatment (Wk 3) | Treatment | Feed Day | No  | 12:15 | 12:00 - 12:59 | Afternoon    | 37,5 |     | 27,2  | 27,2  | 18,65 |        | 110,83 |
| 2019/06/04 | CH2206 | Male | Three y/o | Treatment (Wk 3) | Treatment | Feed Day | No  | 12:15 | 12:00 - 12:59 | Afternoon    | 37,5 | 77  | 34,2  | 34,2  | 18,65 | 574,39 | 118,70 |
| 2019/06/04 | CH2205 | Male | Three y/o | Treatment (Wk 3) | Treatment | Feed Day | No  | 12:20 | 12:00 - 12:59 | Afternoon    | 37,5 | 92  | 27,8  | 27,8  | 18,65 | 587,78 | 111,58 |
| 2019/06/04 | CH2206 | Male | Three y/o | Treatment (Wk 3) | Treatment | Feed Day | No  | 12:20 | 12:00 - 12:59 | Afternoon    | 37,4 | 86  | 48,2  | 48,2  | 18,55 | 582,77 | 130,52 |
| 2019/06/04 | CH2205 | Male | Three y/o | Treatment (Wk 3) | Treatment | Feed Day | No  | 12:25 | 12:00 - 12:59 | Afternoon    | 37,5 |     | 23,0  | 23,0  | 18,65 |        | 105,09 |
| 2019/06/04 | CH2206 | Male | Three y/o | Treatment (Wk 3) | Treatment | Feed Day | No  | 12:25 | 12:00 - 12:59 | Afternoon    | 37,4 | 76  | 47,8  | 47,8  | 18,55 | 573,39 | 130,23 |
| 2019/06/04 | CH2205 | Male | Three y/o | Treatment (Wk 3) | Treatment | Feed Day | No  | 12:30 | 12:00 - 12:59 | Afternoon    | 37,4 |     | 24,4  | 24,4  | 18,55 |        | 107,11 |
| 2019/06/04 | CH2206 | Male | Three y/o | Treatment (Wk 3) | Treatment | Feed Day | No  | 12:30 | 12:00 - 12:59 | Afternoon    | 37,4 | 54  | 35,8  | 35,8  | 18,55 | 545,99 | 120,27 |
| 2019/06/04 | CH2205 | Male | Three y/o | Treatment (Wk 3) | Treatment | Feed Day | No  | 12:35 | 12:00 - 12:59 | Afternoon    | 37,4 | 109 | 14,0  | 14,0  | 18,55 | 600,04 | 88,17  |
| 2019/06/04 | CH2206 | Male | Three y/o | Treatment (Wk 3) | Treatment | Feed Day | No  | 12:35 | 12:00 - 12:59 | Afternoon    | 37,5 | 101 | 44,4  | 44,4  | 18,65 | 594,59 | 127,69 |
| 2019/06/04 | CH2205 | Male | Three y/o | Treatment (Wk 3) | Treatment | Feed Day | No  | 12:40 | 12:00 - 12:59 | Afternoon    | 37,5 | 73  | 14,8  | 14,8  | 18,65 | 570,27 | 90,05  |
| 2019/06/04 | CH2206 | Male | Three y/o | Treatment (Wk 3) | Treatment | Feed Day | No  | 12:40 | 12:00 - 12:59 | Afternoon    | 37,5 | 96  | 55,2  | 55,2  | 18,65 | 590,91 | 135,21 |
| 2019/06/04 | CH2205 | Male | Three y/o | Treatment (Wk 3) | Treatment | Feed Day | No  | 12:45 | 12:00 - 12:59 | Afternoon    | 37,5 | 79  | 20,2  | 20,2  | 18,65 | 576,36 | 100,65 |



|            |        |      |           |                  |           |          |    |       |               |           |      |     |       |       |       |        |        |
|------------|--------|------|-----------|------------------|-----------|----------|----|-------|---------------|-----------|------|-----|-------|-------|-------|--------|--------|
| 2019/06/04 | CH2206 | Male | Three y/o | Treatment (Wk 3) | Treatment | Feed Day | No | 12:45 | 12:00 - 12:59 | Afternoon | 37,5 | 108 | 49,0  | 49,0  | 18,65 | 599,39 | 131,09 |
| 2019/06/04 | CH2205 | Male | Three y/o | Treatment (Wk 3) | Treatment | Feed Day | No | 12:50 | 12:00 - 12:59 | Afternoon | 37,6 | 69  | 25,8  | 25,8  | 18,75 | 565,86 | 109,02 |
| 2019/06/04 | CH2206 | Male | Three y/o | Treatment (Wk 3) | Treatment | Feed Day | No | 12:50 | 12:00 - 12:59 | Afternoon | 37,6 | 98  | 52,8  | 52,8  | 18,75 | 592,41 | 133,67 |
| 2019/06/04 | CH2205 | Male | Three y/o | Treatment (Wk 3) | Treatment | Feed Day | No | 12:55 | 12:00 - 12:59 | Afternoon | 37,6 | 91  | 22,2  | 22,2  | 18,75 | 586,98 | 103,88 |
| 2019/06/04 | CH2206 | Male | Three y/o | Treatment (Wk 3) | Treatment | Feed Day | No | 12:55 | 12:00 - 12:59 | Afternoon | 37,5 | 106 | 50,8  | 50,8  | 18,65 | 598,06 | 132,33 |
| 2019/06/04 | CH2205 | Male | Three y/o | Treatment (Wk 3) | Treatment | Feed Day | No | 13:00 | 13:00 - 13:59 | Afternoon | 37,6 | 82  | 21,6  | 21,6  | 18,75 | 579,19 | 102,94 |
| 2019/06/04 | CH2206 | Male | Three y/o | Treatment (Wk 3) | Treatment | Feed Day | No | 13:00 | 13:00 - 13:59 | Afternoon | 37,5 | 87  | 41,6  | 41,6  | 18,65 | 583,64 | 125,44 |
| 2019/06/04 | CH2205 | Male | Three y/o | Treatment (Wk 3) | Treatment | Feed Day | No | 13:05 | 13:00 - 13:59 | Afternoon | 37,6 | 99  | 21,0  | 21,0  | 18,75 | 593,14 | 101,98 |
| 2019/06/04 | CH2206 | Male | Three y/o | Treatment (Wk 3) | Treatment | Feed Day | No | 13:05 | 13:00 - 13:59 | Afternoon | 37,7 |     | 31,0  | 31,0  | 18,85 |        | 115,32 |
| 2019/06/04 | CH2205 | Male | Three y/o | Treatment (Wk 3) | Treatment | Feed Day | No | 13:10 | 13:00 - 13:59 | Afternoon | 37,7 |     | 19,4  | 19,4  | 18,85 |        | 99,28  |
| 2019/06/04 | CH2206 | Male | Three y/o | Treatment (Wk 3) | Treatment | Feed Day | No | 13:10 | 13:00 - 13:59 | Afternoon | 37,7 | 88  | 45,8  | 45,8  | 18,85 | 584,49 | 128,76 |
| 2019/06/04 | CH2205 | Male | Three y/o | Treatment (Wk 3) | Treatment | Feed Day | No | 13:15 | 13:00 - 13:59 | Afternoon | 37,7 | 65  | 15,2  | 15,2  | 18,85 | 561,12 | 90,96  |
| 2019/06/04 | CH2206 | Male | Three y/o | Treatment (Wk 3) | Treatment | Feed Day | No | 13:15 | 13:00 - 13:59 | Afternoon | 37,7 | 94  | 47,2  | 47,2  | 18,85 | 589,37 | 129,80 |
| 2019/06/04 | CH2205 | Male | Three y/o | Treatment (Wk 3) | Treatment | Feed Day | No | 13:20 | 13:00 - 13:59 | Afternoon | 37,8 | 67  | 16,0  | 16,0  | 18,95 | 563,53 | 92,71  |
| 2019/06/04 | CH2206 | Male | Three y/o | Treatment (Wk 3) | Treatment | Feed Day | No | 13:20 | 13:00 - 13:59 | Afternoon | 37,7 | 76  | 40,4  | 40,4  | 18,85 | 573,39 | 124,43 |
| 2019/06/04 | CH2205 | Male | Three y/o | Treatment (Wk 3) | Treatment | Feed Day | No | 13:25 | 13:00 - 13:59 | Afternoon | 37,9 | 76  | 18,8  | 18,8  | 19,05 | 573,39 | 98,20  |
| 2019/06/04 | CH2206 | Male | Three y/o | Treatment (Wk 3) | Treatment | Feed Day | No | 13:25 | 13:00 - 13:59 | Afternoon | 37,7 | 83  | 39,2  | 39,2  | 18,85 | 580,11 | 123,39 |
| 2019/06/04 | CH2205 | Male | Three y/o | Treatment (Wk 3) | Treatment | Feed Day | No | 13:30 | 13:00 - 13:59 | Afternoon | 37,9 | 84  | 16,8  | 16,8  | 19,05 | 581,01 | 94,37  |
| 2019/06/04 | CH2206 | Male | Three y/o | Treatment (Wk 3) | Treatment | Feed Day | No | 13:30 | 13:00 - 13:59 | Afternoon | 37,7 | 95  | 42,2  | 42,2  | 18,85 | 590,14 | 125,93 |
| 2019/06/04 | CH2205 | Male | Three y/o | Treatment (Wk 3) | Treatment | Feed Day | No | 13:35 | 13:00 - 13:59 | Afternoon | 37,9 | 72  | 13,6  | 13,6  | 19,05 | 569,20 | 87,18  |
| 2019/06/04 | CH2206 | Male | Three y/o | Treatment (Wk 3) | Treatment | Feed Day | No | 13:35 | 13:00 - 13:59 | Afternoon | 37,7 | 78  | 41,8  | 41,8  | 18,85 | 575,38 | 125,60 |
| 2019/06/04 | CH2205 | Male | Three y/o | Treatment (Wk 3) | Treatment | Feed Day | No | 13:40 | 13:00 - 13:59 | Afternoon | 37,9 | 65  | 17,0  | 17,0  | 19,05 | 561,12 | 94,77  |
| 2019/06/04 | CH2206 | Male | Three y/o | Treatment (Wk 3) | Treatment | Feed Day | No | 13:40 | 13:00 - 13:59 | Afternoon | 37,7 | 74  | 46,2  | 46,2  | 18,85 | 571,33 | 129,06 |
| 2019/06/04 | CH2205 | Male | Three y/o | Treatment (Wk 3) | Treatment | Feed Day | No | 13:45 | 13:00 - 13:59 | Afternoon | 37,9 | 100 | 15,4  | 15,4  | 19,05 | 593,87 | 91,41  |
| 2019/06/04 | CH2206 | Male | Three y/o | Treatment (Wk 3) | Treatment | Feed Day | No | 13:45 | 13:00 - 13:59 | Afternoon | 37,7 | 95  | 40,0  | 40,0  | 18,85 | 590,14 | 124,09 |
| 2019/06/04 | CH2205 | Male | Three y/o | Treatment (Wk 3) | Treatment | Feed Day | No | 13:50 | 13:00 - 13:59 | Afternoon | 37,9 | 74  | 10,4  | 10,4  | 19,05 | 571,33 | 78,08  |
| 2019/06/04 | CH2206 | Male | Three y/o | Treatment (Wk 3) | Treatment | Feed Day | No | 13:50 | 13:00 - 13:59 | Afternoon | 37,8 | 91  | 43,6  | 43,6  | 18,95 | 586,98 | 127,06 |
| 2019/06/04 | CH2205 | Male | Three y/o | Treatment (Wk 3) | Treatment | Feed Day | No | 13:55 | 13:00 - 13:59 | Afternoon | 38,0 | 67  | 2,2   | 2,2   | 19,15 | 563,53 | 26,02  |
| 2019/06/04 | CH2206 | Male | Three y/o | Treatment (Wk 3) | Treatment | Feed Day | No | 13:55 | 13:00 - 13:59 | Afternoon | 37,8 | 71  | 41,0  | 41,0  | 18,95 | 568,10 | 124,94 |
| 2019/06/04 | CH2205 | Male | Three y/o | Treatment (Wk 3) | Treatment | Feed Day | No | 14:00 | 14:00 - 14:59 | Afternoon | 38,0 | 63  | 10,8  | 10,8  | 19,15 | 558,62 | 79,36  |
| 2019/06/04 | CH2206 | Male | Three y/o | Treatment (Wk 3) | Treatment | Feed Day | No | 14:00 | 14:00 - 14:59 | Afternoon | 37,8 | 81  | 45,6  | 45,6  | 18,95 | 578,26 | 128,61 |
| 2019/06/04 | CH2205 | Male | Three y/o | Treatment (Wk 3) | Treatment | Feed Day | No | 14:05 | 14:00 - 14:59 | Afternoon | 38,0 | 77  | 10,2  | 10,2  | 19,15 | 574,39 | 77,43  |
| 2019/06/04 | CH2206 | Male | Three y/o | Treatment (Wk 3) | Treatment | Feed Day | No | 14:05 | 14:00 - 14:59 | Afternoon | 37,8 | 81  | 44,4  | 44,4  | 18,95 | 578,26 | 127,69 |
| 2019/06/04 | CH2205 | Male | Three y/o | Treatment (Wk 3) | Treatment | Feed Day | No | 14:10 | 14:00 - 14:59 | Afternoon | 38,0 | 73  | 15,8  | 15,8  | 19,15 | 570,27 | 92,28  |
| 2019/06/04 | CH2206 | Male | Three y/o | Treatment (Wk 3) | Treatment | Feed Day | No | 14:10 | 14:00 - 14:59 | Afternoon | 37,8 | 86  | 43,2  | 43,2  | 18,95 | 582,77 | 126,74 |
| 2019/06/04 | CH2205 | Male | Three y/o | Treatment (Wk 3) | Treatment | Feed Day | No | 14:15 | 14:00 - 14:59 | Afternoon | 38,1 | 80  | 15,8  | 15,8  | 19,26 | 577,31 | 92,28  |
| 2019/06/04 | CH2206 | Male | Three y/o | Treatment (Wk 3) | Treatment | Feed Day | No | 14:15 | 14:00 - 14:59 | Afternoon | 37,8 | 80  | 49,0  | 49,0  | 18,95 | 577,31 | 131,09 |
| 2019/06/04 | CH2205 | Male | Three y/o | Treatment (Wk 3) | Treatment | Feed Day | No | 14:20 | 14:00 - 14:59 | Afternoon | 38,1 | 68  | 16,0  | 16,0  | 19,26 | 564,71 | 92,71  |
| 2019/06/04 | CH2206 | Male | Three y/o | Treatment (Wk 3) | Treatment | Feed Day | No | 14:20 | 14:00 - 14:59 | Afternoon | 37,8 | 85  | 64,6  | 64,6  | 18,95 | 581,90 | 140,65 |
| 2019/06/04 | CH2205 | Male | Three y/o | Treatment (Wk 3) | Treatment | Feed Day | No | 14:25 | 14:00 - 14:59 | Afternoon | 38,1 | 82  | 13,6  | 13,6  | 19,26 | 579,19 | 87,18  |
| 2019/06/04 | CH2206 | Male | Three y/o | Treatment (Wk 3) | Treatment | Feed Day | No | 14:25 | 14:00 - 14:59 | Afternoon | 37,9 | 81  | 46,4  | 46,4  | 19,05 | 578,26 | 129,21 |
| 2019/06/04 | CH2205 | Male | Three y/o | Treatment (Wk 3) | Treatment | Feed Day | No | 14:30 | 14:00 - 14:59 | Afternoon | 38,1 | 57  | 16,8  | 16,8  | 19,26 | 550,47 | 94,37  |
| 2019/06/04 | CH2206 | Male | Three y/o | Treatment (Wk 3) | Treatment | Feed Day | No | 14:30 | 14:00 - 14:59 | Afternoon | 37,9 | 80  | 55,4  | 55,4  | 19,05 | 577,31 | 135,33 |
| 2019/06/04 | CH2205 | Male | Three y/o | Treatment (Wk 3) | Treatment | Feed Day | No | 14:35 | 14:00 - 14:59 | Afternoon | 38,1 | 60  | 12,0  | 12,0  | 19,26 | 554,67 | 82,93  |
| 2019/06/04 | CH2206 | Male | Three y/o | Treatment (Wk 3) | Treatment | Feed Day | No | 14:35 | 14:00 - 14:59 | Afternoon | 37,9 | 73  | 50,4  | 50,4  | 19,05 | 570,27 | 132,06 |
| 2019/06/04 | CH2205 | Male | Three y/o | Treatment (Wk 3) | Treatment | Feed Day | No | 14:40 | 14:00 - 14:59 | Afternoon | 38,1 | 174 | 12,8  | 12,8  | 19,26 | 631,46 | 85,12  |
| 2019/06/04 | CH2206 | Male | Three y/o | Treatment (Wk 3) | Treatment | Feed Day | No | 14:40 | 14:00 - 14:59 | Afternoon | 37,9 | 71  | 46,2  | 46,2  | 19,05 | 568,10 | 129,06 |
| 2019/06/04 | CH2205 | Male | Three y/o | Treatment (Wk 3) | Treatment | Feed Day | No | 14:45 | 14:00 - 14:59 | Afternoon | 38,1 | 76  | 17,0  | 17,0  | 19,26 | 573,39 | 94,77  |
| 2019/06/04 | CH2206 | Male | Three y/o | Treatment (Wk 3) | Treatment | Feed Day | No | 14:45 | 14:00 - 14:59 | Afternoon | 38,0 | 74  | 49,0  | 49,0  | 19,15 | 571,33 | 131,09 |
| 2019/06/04 | CH2205 | Male | Three y/o | Treatment (Wk 3) | Treatment | Feed Day | No | 14:50 | 14:00 - 14:59 | Afternoon | 38,1 | 61  | 20,2  | 20,2  | 19,26 | 556,01 | 100,65 |
| 2019/06/04 | CH2206 | Male | Three y/o | Treatment (Wk 3) | Treatment | Feed Day | No | 14:50 | 14:00 - 14:59 | Afternoon | 38,0 | 44  | 41,0  | 41,0  | 19,15 | 528,51 | 124,94 |
| 2019/06/04 | CH2205 | Male | Three y/o | Treatment (Wk 3) | Treatment | Feed Day | No | 14:55 | 14:00 - 14:59 | Afternoon | 38,1 | 86  | 16,6  | 16,6  | 19,26 | 582,77 | 93,96  |
| 2019/06/04 | CH2206 | Male | Three y/o | Treatment (Wk 3) | Treatment | Feed Day | No | 14:55 | 14:00 - 14:59 | Afternoon | 38,0 |     | 33,0  | 33,0  | 19,15 |        | 117,47 |
| 2019/06/04 | CH2205 | Male | Three y/o | Treatment (Wk 3) | Treatment | Feed Day | No | 15:00 | 15:00 - 15:59 | Afternoon | 38,1 | 60  | 18,4  | 18,4  | 19,26 | 554,67 | 97,47  |
| 2019/06/04 | CH2206 | Male | Three y/o | Treatment (Wk 3) | Treatment | Feed Day | No | 15:00 | 15:00 - 15:59 | Afternoon | 38,0 | 53  | 52,0  | 52,0  | 19,15 | 544,43 | 133,14 |
| 2019/06/04 | CH2205 | Male | Three y/o | Treatment (Wk 3) | Treatment | Feed Day | No | 15:05 | 15:00 - 15:59 | Afternoon | 38,0 | 64  | 17,4  | 17,4  | 19,15 | 559,88 | 95,56  |
| 2019/06/04 | CH2206 | Male | Three y/o | Treatment (Wk 3) | Treatment | Feed Day | No | 15:05 | 15:00 - 15:59 | Afternoon | 38,0 | 97  | 44,8  | 44,8  | 19,15 | 591,66 | 127,99 |
| 2019/06/04 | CH2205 | Male | Three y/o | Treatment (Wk 3) | Treatment | Feed Day | No | 15:10 | 15:00 - 15:59 | Afternoon | 38,1 | 68  | 16,0  | 16,0  | 19,26 | 564,71 | 92,71  |
| 2019/06/04 | CH2206 | Male | Three y/o | Treatment (Wk 3) | Treatment | Feed Day | No | 15:10 | 15:00 - 15:59 | Afternoon | 38,0 |     | 19,4  | 19,4  | 19,15 |        | 99,28  |
| 2019/06/04 | CH2205 | Male | Three y/o | Treatment (Wk 3) | Treatment | Feed Day | No | 15:15 | 15:00 - 15:59 | Afternoon | 38,0 | 180 | 42,0  | 42,0  | 19,15 | 633,61 | 125,77 |
| 2019/06/04 | CH2206 | Male | Three y/o | Treatment (Wk 3) | Treatment | Feed Day | No | 15:15 | 15:00 - 15:59 | Afternoon | 38,1 | 135 | 81,6  | 81,6  | 19,26 | 614,84 | 148,76 |
| 2019/06/04 | CH2205 | Male | Three y/o | Treatment (Wk 3) | Treatment | Feed Day | No | 15:20 | 15:00 - 15:59 | Afternoon | 38,0 | 140 | 91,2  | 91,2  | 19,15 | 617,28 | 152,63 |
| 2019/06/04 | CH2206 | Male | Three y/o | Treatment (Wk 3) | Treatment | Feed Day | No | 15:20 | 15:00 - 15:59 | Afternoon | 38,0 |     | 77,0  | 77,0  | 19,15 |        | 146,75 |
| 2019/06/04 | CH2205 | Male | Three y/o | Treatment (Wk 3) | Treatment | Feed Day | No | 15:25 | 15:00 - 15:59 | Afternoon | 38,0 | 104 | 16,0  | 16,0  | 19,15 | 596,69 | 92,71  |
| 2019/06/04 | CH2206 | Male | Three y/o | Treatment (Wk 3) | Treatment | Feed Day | No | 15:25 | 15:00 - 15:59 | Afternoon | 38,0 | 112 | 80,6  | 80,6  | 19,15 | 601,96 | 148,34 |
| 2019/06/04 | CH2205 | Male | Three y/o | Treatment (Wk 3) | Treatment | Feed Day | No | 15:30 | 15:00 - 15:59 | Afternoon | 38,0 | 72  | 60,2  | 60,2  | 19,15 | 569,20 | 138,21 |
| 2019/06/04 | CH2206 | Male | Three y/o | Treatment (Wk 3) | Treatment | Feed Day | No | 15:30 | 15:00 - 15:59 | Afternoon | 38,2 | 135 | 23,6  | 23,6  | 19,36 | 614,84 | 105,97 |
| 2019/06/04 | CH2205 | Male | Three y/o | Treatment (Wk 3) | Treatment | Feed Day | No | 15:35 | 15:00 - 15:59 | Afternoon | 38,0 | 54  | 185,0 | 185,0 | 19,15 | 545,99 | 177,38 |
| 2019/06/04 | CH2206 | Male | Three y/o | Treatment (Wk 3) | Treatment | Feed Day | No | 15:35 | 15:00 - 15:59 | Afternoon | 38,2 |     | 119,4 | 119,4 | 19,36 |        | 162,03 |
| 2019/06/04 | CH2205 | Male | Three y/o | Treatment (Wk 3) | Treatment | Feed Day | No | 15:40 | 15:00 - 15:59 | Afternoon | 38,0 | 51  | 12,8  | 12,8  | 19,15 | 541,20 | 85,12  |



|            |        |      |           |                  |           |          |    |       |               |           |      |      |      |      |       |        |        |
|------------|--------|------|-----------|------------------|-----------|----------|----|-------|---------------|-----------|------|------|------|------|-------|--------|--------|
| 2019/06/04 | CH2206 | Male | Three y/o | Treatment (Wk 3) | Treatment | Feed Day | No | 15:40 | 15:00 - 15:59 | Afternoon | 38,2 | 109  | 41,8 | 41,8 | 19,36 | 600,04 | 125,60 |
| 2019/06/04 | CH2205 | Male | Three y/o | Treatment (Wk 3) | Treatment | Feed Day | No | 15:45 | 15:00 - 15:59 | Afternoon | 38,1 | 77   | 16,8 | 16,8 | 19,26 | 574,39 | 94,37  |
| 2019/06/04 | CH2206 | Male | Three y/o | Treatment (Wk 3) | Treatment | Feed Day | No | 15:45 | 15:00 - 15:59 | Afternoon | 38,2 | 90   | 46,0 | 46,0 | 19,36 | 586,16 | 128,91 |
| 2019/06/04 | CH2205 | Male | Three y/o | Treatment (Wk 3) | Treatment | Feed Day | No | 15:50 | 15:00 - 15:59 | Afternoon | 38,1 | 70   | 9,4  | 9,4  | 19,26 | 566,99 | 74,66  |
| 2019/06/04 | CH2206 | Male | Three y/o | Treatment (Wk 3) | Treatment | Feed Day | No | 15:50 | 15:00 - 15:59 | Afternoon | 38,2 | 93   | 23,2 | 23,2 | 19,36 | 588,58 | 105,39 |
| 2019/06/04 | CH2205 | Male | Three y/o | Treatment (Wk 3) | Treatment | Feed Day | No | 15:55 | 15:00 - 15:59 | Afternoon | 38,1 | 72   | 6,4  | 6,4  | 19,26 | 569,20 | 61,70  |
| 2019/06/04 | CH2206 | Male | Three y/o | Treatment (Wk 3) | Treatment | Feed Day | No | 15:55 | 15:00 - 15:59 | Afternoon | 38,2 | 93   | 53,6 | 53,6 | 19,36 | 588,58 | 134,19 |
| 2019/06/04 | CH2205 | Male | Three y/o | Treatment (Wk 3) | Treatment | Feed Day | No | 16:00 | 16:00 - 16:59 | Evening   | 38,1 | 67   | 19,6 | 19,6 | 19,26 | 563,53 | 99,63  |
| 2019/06/04 | CH2206 | Male | Three y/o | Treatment (Wk 3) | Treatment | Feed Day | No | 16:00 | 16:00 - 16:59 | Evening   | 38,2 | 185  | 40,0 | 40,0 | 19,36 | 635,34 | 124,09 |
| 2019/06/04 | CH2205 | Male | Three y/o | Treatment (Wk 3) | Treatment | Feed Day | No | 16:05 | 16:00 - 16:59 | Evening   | 38,1 | 68   | 21,8 | 21,8 | 19,26 | 564,71 | 103,26 |
| 2019/06/04 | CH2206 | Male | Three y/o | Treatment (Wk 3) | Treatment | Feed Day | No | 16:05 | 16:00 - 16:59 | Evening   | 38,2 | 89   | 41,2 | 41,2 | 19,36 | 585,33 | 125,11 |
| 2019/06/04 | CH2205 | Male | Three y/o | Treatment (Wk 3) | Treatment | Feed Day | No | 16:10 | 16:00 - 16:59 | Evening   | 38,1 | 80   | 13,0 | 13,0 | 19,26 | 577,31 | 85,65  |
| 2019/06/04 | CH2206 | Male | Three y/o | Treatment (Wk 3) | Treatment | Feed Day | No | 16:10 | 16:00 - 16:59 | Evening   | 38,2 | 80   | 41,6 | 41,6 | 19,36 | 577,31 | 125,44 |
| 2019/06/04 | CH2205 | Male | Three y/o | Treatment (Wk 3) | Treatment | Feed Day | No | 16:15 | 16:00 - 16:59 | Evening   | 38,1 | 59   | 15,0 | 15,0 | 19,26 | 553,30 | 90,51  |
| 2019/06/04 | CH2206 | Male | Three y/o | Treatment (Wk 3) | Treatment | Feed Day | No | 16:15 | 16:00 - 16:59 | Evening   | 38,2 | 91   | 36,4 | 36,4 | 19,36 | 586,98 | 120,84 |
| 2019/06/04 | CH2205 | Male | Three y/o | Treatment (Wk 3) | Treatment | Feed Day | No | 16:20 | 16:00 - 16:59 | Evening   | 38,2 | 73   | 17,4 | 17,4 | 19,36 | 570,27 | 95,56  |
| 2019/06/04 | CH2206 | Male | Three y/o | Treatment (Wk 3) | Treatment | Feed Day | No | 16:20 | 16:00 - 16:59 | Evening   | 38,2 | 93   | 46,6 | 46,6 | 19,36 | 588,58 | 129,35 |
| 2019/06/04 | CH2205 | Male | Three y/o | Treatment (Wk 3) | Treatment | Feed Day | No | 16:25 | 16:00 - 16:59 | Evening   | 38,2 | 62   | 16,2 | 16,2 | 19,36 | 557,33 | 93,13  |
| 2019/06/04 | CH2206 | Male | Three y/o | Treatment (Wk 3) | Treatment | Feed Day | No | 16:25 | 16:00 - 16:59 | Evening   | 38,2 | 84   | 52,4 | 52,4 | 19,36 | 581,01 | 133,41 |
| 2019/06/04 | CH2205 | Male | Three y/o | Treatment (Wk 3) | Treatment | Feed Day | No | 16:30 | 16:00 - 16:59 | Evening   | 38,2 | 62   | 18,2 | 18,2 | 19,36 | 557,33 | 97,10  |
| 2019/06/04 | CH2206 | Male | Three y/o | Treatment (Wk 3) | Treatment | Feed Day | No | 16:30 | 16:00 - 16:59 | Evening   | 38,2 | 82   | 53,8 | 53,8 | 19,36 | 579,19 | 134,32 |
| 2019/06/04 | CH2205 | Male | Three y/o | Treatment (Wk 3) | Treatment | Feed Day | No | 16:35 | 16:00 - 16:59 | Evening   | 38,2 | 56   | 21,0 | 21,0 | 19,36 | 549,01 | 101,98 |
| 2019/06/04 | CH2206 | Male | Three y/o | Treatment (Wk 3) | Treatment | Feed Day | No | 16:35 | 16:00 - 16:59 | Evening   | 38,2 | 92   | 52,4 | 52,4 | 19,36 | 587,78 | 133,41 |
| 2019/06/04 | CH2205 | Male | Three y/o | Treatment (Wk 3) | Treatment | Feed Day | No | 16:40 | 16:00 - 16:59 | Evening   | 38,2 | 44   | 9,2  | 9,2  | 19,36 | 528,51 | 73,94  |
| 2019/06/04 | CH2206 | Male | Three y/o | Treatment (Wk 3) | Treatment | Feed Day | No | 16:40 | 16:00 - 16:59 | Evening   | 38,2 | 88   | 54,6 | 54,6 | 19,36 | 584,49 | 134,83 |
| 2019/06/04 | CH2205 | Male | Three y/o | Treatment (Wk 3) | Treatment | Feed Day | No | 16:45 | 16:00 - 16:59 | Evening   | 38,2 | 57   | 10,0 | 10,0 | 19,36 | 550,47 | 76,76  |
| 2019/06/04 | CH2206 | Male | Three y/o | Treatment (Wk 3) | Treatment | Feed Day | No | 16:45 | 16:00 - 16:59 | Evening   | 38,2 | 97   | 54,8 | 54,8 | 19,36 | 591,66 | 134,96 |
| 2019/06/04 | CH2205 | Male | Three y/o | Treatment (Wk 3) | Treatment | Feed Day | No | 16:50 | 16:00 - 16:59 | Evening   | 38,2 | 71   | 9,8  | 9,8  | 19,36 | 568,10 | 76,07  |
| 2019/06/04 | CH2206 | Male | Three y/o | Treatment (Wk 3) | Treatment | Feed Day | No | 16:50 | 16:00 - 16:59 | Evening   | 38,2 | 101  | 53,4 | 53,4 | 19,36 | 594,59 | 134,06 |
| 2019/06/04 | CH2205 | Male | Three y/o | Treatment (Wk 3) | Treatment | Feed Day | No | 16:55 | 16:00 - 16:59 | Evening   | 38,2 | 61   | 11,2 | 11,2 | 19,36 | 556,01 | 80,59  |
| 2019/06/04 | CH2206 | Male | Three y/o | Treatment (Wk 3) | Treatment | Feed Day | No | 16:55 | 16:00 - 16:59 | Evening   | 38,2 | 94   | 53,6 | 53,6 | 19,36 | 589,37 | 134,19 |
| 2019/06/04 | CH2205 | Male | Three y/o | Treatment (Wk 3) | Treatment | Feed Day | No | 17:00 | 17:00 - 17:59 | Evening   | 38,2 | 68   | 21,6 | 21,6 | 19,36 | 564,71 | 102,94 |
| 2019/06/04 | CH2206 | Male | Three y/o | Treatment (Wk 3) | Treatment | Feed Day | No | 17:00 | 17:00 - 17:59 | Evening   | 38,2 | 93   | 48,2 | 48,2 | 19,36 | 588,58 | 130,52 |
| 2019/06/04 | CH2205 | Male | Three y/o | Treatment (Wk 3) | Treatment | Feed Day | No | 17:05 | 17:00 - 17:59 | Evening   | 38,1 | 83   | 15,4 | 15,4 | 19,26 | 580,11 | 91,41  |
| 2019/06/04 | CH2206 | Male | Three y/o | Treatment (Wk 3) | Treatment | Feed Day | No | 17:05 | 17:00 - 17:59 | Evening   | 38,2 | 90   | 52,2 | 52,2 | 19,36 | 586,16 | 133,27 |
| 2019/06/04 | CH2205 | Male | Three y/o | Treatment (Wk 3) | Treatment | Feed Day | No | 17:10 | 17:00 - 17:59 | Evening   | 38,1 | 23,8 | 23,8 | 23,8 | 19,26 | 506,26 | 106,26 |
| 2019/06/04 | CH2206 | Male | Three y/o | Treatment (Wk 3) | Treatment | Feed Day | No | 17:10 | 17:00 - 17:59 | Evening   | 38,2 | 48   | 49,6 | 49,6 | 19,36 | 536,04 | 131,51 |
| 2019/06/04 | CH2205 | Male | Three y/o | Treatment (Wk 3) | Treatment | Feed Day | No | 17:15 | 17:00 - 17:59 | Evening   | 38,1 | 117  | 24,6 | 24,6 | 19,26 | 605,02 | 107,39 |
| 2019/06/04 | CH2206 | Male | Three y/o | Treatment (Wk 3) | Treatment | Feed Day | No | 17:15 | 17:00 - 17:59 | Evening   | 38,2 | 82   | 49,2 | 49,2 | 19,36 | 579,19 | 131,23 |
| 2019/06/04 | CH2205 | Male | Three y/o | Treatment (Wk 3) | Treatment | Feed Day | No | 17:20 | 17:00 - 17:59 | Evening   | 38,0 | 180  | 13,8 | 13,8 | 19,15 | 633,61 | 87,68  |
| 2019/06/04 | CH2206 | Male | Three y/o | Treatment (Wk 3) | Treatment | Feed Day | No | 17:20 | 17:00 - 17:59 | Evening   | 38,2 | 74   | 51,0 | 51,0 | 19,36 | 571,33 | 132,47 |
| 2019/06/04 | CH2205 | Male | Three y/o | Treatment (Wk 3) | Treatment | Feed Day | No | 17:25 | 17:00 - 17:59 | Evening   | 37,9 | 76   | 5,6  | 5,6  | 19,05 | 573,39 | 57,21  |
| 2019/06/04 | CH2206 | Male | Three y/o | Treatment (Wk 3) | Treatment | Feed Day | No | 17:25 | 17:00 - 17:59 | Evening   | 38,2 | 47   | 46,0 | 46,0 | 19,36 | 534,23 | 128,91 |
| 2019/06/04 | CH2205 | Male | Three y/o | Treatment (Wk 3) | Treatment | Feed Day | No | 17:30 | 17:00 - 17:59 | Evening   | 37,9 | 88   | 4,2  | 4,2  | 19,05 | 584,49 | 47,57  |
| 2019/06/04 | CH2206 | Male | Three y/o | Treatment (Wk 3) | Treatment | Feed Day | No | 17:30 | 17:00 - 17:59 | Evening   | 38,2 | 46   | 54,4 | 54,4 | 19,36 | 532,38 | 134,70 |
| 2019/06/04 | CH2205 | Male | Three y/o | Treatment (Wk 3) | Treatment | Feed Day | No | 17:35 | 17:00 - 17:59 | Evening   | 37,9 | 18,4 | 18,4 | 18,4 | 19,05 | 597,38 | 97,47  |
| 2019/06/04 | CH2206 | Male | Three y/o | Treatment (Wk 3) | Treatment | Feed Day | No | 17:35 | 17:00 - 17:59 | Evening   | 38,1 | 105  | 37,8 | 37,8 | 19,26 | 597,38 | 122,14 |
| 2019/06/04 | CH2205 | Male | Three y/o | Treatment (Wk 3) | Treatment | Feed Day | No | 17:40 | 17:00 - 17:59 | Evening   | 37,9 | 9,6  | 9,6  | 9,6  | 19,05 | 575,37 | 75,37  |
| 2019/06/04 | CH2206 | Male | Three y/o | Treatment (Wk 3) | Treatment | Feed Day | No | 17:40 | 17:00 - 17:59 | Evening   | 38,1 | 118  | 39,4 | 39,4 | 19,26 | 605,61 | 123,57 |
| 2019/06/04 | CH2205 | Male | Three y/o | Treatment (Wk 3) | Treatment | Feed Day | No | 17:45 | 17:00 - 17:59 | Evening   | 37,7 | 126  | 10,8 | 10,8 | 18,85 | 610,14 | 79,36  |
| 2019/06/04 | CH2206 | Male | Three y/o | Treatment (Wk 3) | Treatment | Feed Day | No | 17:45 | 17:00 - 17:59 | Evening   | 38,1 | 102  | 8,0  | 8,0  | 19,26 | 595,30 | 69,22  |
| 2019/06/04 | CH2205 | Male | Three y/o | Treatment (Wk 3) | Treatment | Feed Day | No | 17:50 | 17:00 - 17:59 | Evening   | 37,7 | 88   | 19,8 | 19,8 | 18,85 | 584,49 | 99,97  |
| 2019/06/04 | CH2206 | Male | Three y/o | Treatment (Wk 3) | Treatment | Feed Day | No | 17:50 | 17:00 - 17:59 | Evening   | 37,9 | 11,8 | 11,8 | 11,8 | 19,05 | 582,36 | 82,36  |
| 2019/06/04 | CH2205 | Male | Three y/o | Treatment (Wk 3) | Treatment | Feed Day | No | 17:55 | 17:00 - 17:59 | Evening   | 37,7 | 48   | 24,2 | 24,2 | 18,85 | 536,04 | 106,83 |
| 2019/06/04 | CH2206 | Male | Three y/o | Treatment (Wk 3) | Treatment | Feed Day | No | 17:55 | 17:00 - 17:59 | Evening   | 37,9 | 45   | 15,6 | 15,6 | 19,05 | 530,47 | 91,85  |
| 2019/06/04 | CH2205 | Male | Three y/o | Treatment (Wk 3) | Treatment | Feed Day | No | 18:00 | 18:00 - 18:59 | Evening   | 37,9 | 88   | 24,6 | 24,6 | 19,05 | 584,49 | 107,39 |
| 2019/06/04 | CH2206 | Male | Three y/o | Treatment (Wk 3) | Treatment | Feed Day | No | 18:00 | 18:00 - 18:59 | Evening   | 37,8 | 89   | 31,2 | 31,2 | 18,95 | 585,33 | 115,54 |
| 2019/06/04 | CH2205 | Male | Three y/o | Treatment (Wk 3) | Treatment | Feed Day | No | 18:05 | 18:00 - 18:59 | Evening   | 37,9 | 90   | 26,6 | 26,6 | 19,05 | 586,16 | 110,07 |
| 2019/06/04 | CH2206 | Male | Three y/o | Treatment (Wk 3) | Treatment | Feed Day | No | 18:05 | 18:00 - 18:59 | Evening   | 37,7 | 82   | 21,0 | 21,0 | 18,85 | 579,19 | 101,98 |
| 2019/06/04 | CH2205 | Male | Three y/o | Treatment (Wk 3) | Treatment | Feed Day | No | 18:10 | 18:00 - 18:59 | Evening   | 38,0 | 67   | 21,0 | 21,0 | 19,15 | 563,53 | 101,98 |
| 2019/06/04 | CH2206 | Male | Three y/o | Treatment (Wk 3) | Treatment | Feed Day | No | 18:10 | 18:00 - 18:59 | Evening   | 37,5 | 83   | 27,0 | 27,0 | 18,65 | 580,11 | 110,58 |
| 2019/06/04 | CH2205 | Male | Three y/o | Treatment (Wk 3) | Treatment | Feed Day | No | 18:15 | 18:00 - 18:59 | Evening   | 38,0 | 49   | 24,6 | 24,6 | 19,15 | 537,80 | 107,39 |
| 2019/06/04 | CH2206 | Male | Three y/o | Treatment (Wk 3) | Treatment | Feed Day | No | 18:15 | 18:00 - 18:59 | Evening   | 37,5 | 90   | 24,8 | 24,8 | 18,65 | 586,16 | 107,67 |
| 2019/06/04 | CH2205 | Male | Three y/o | Treatment (Wk 3) | Treatment | Feed Day | No | 18:20 | 18:00 - 18:59 | Evening   | 38,1 | 16,2 | 16,2 | 16,2 | 19,26 | 593,87 | 93,13  |
| 2019/06/04 | CH2206 | Male | Three y/o | Treatment (Wk 3) | Treatment | Feed Day | No | 18:20 | 18:00 - 18:59 | Evening   | 37,5 | 100  | 9,8  | 9,8  | 18,65 | 593,87 | 76,07  |
| 2019/06/04 | CH2205 | Male | Three y/o | Treatment (Wk 3) | Treatment | Feed Day | No | 18:25 | 18:00 - 18:59 | Evening   | 38,1 | 86   | 22,8 | 22,8 | 19,26 | 582,77 | 104,79 |
| 2019/06/04 | CH2206 | Male | Three y/o | Treatment (Wk 3) | Treatment | Feed Day | No | 18:25 | 18:00 - 18:59 | Evening   | 37,5 | 91   | 18,6 | 18,6 | 18,65 | 586,98 | 97,84  |
| 2019/06/04 | CH2205 | Male | Three y/o | Treatment (Wk 3) | Treatment | Feed Day | No | 18:30 | 18:00 - 18:59 | Evening   | 38,1 | 86   | 28,4 | 28,4 | 19,26 | 582,77 | 112,31 |
| 2019/06/04 | CH2206 | Male | Three y/o | Treatment (Wk 3) | Treatment | Feed Day | No | 18:30 | 18:00 - 18:59 | Evening   | 37,6 | 88   | 35,0 | 35,0 | 18,75 | 584,49 | 119,49 |
| 2019/06/04 | CH2205 | Male | Three y/o | Treatment (Wk 3) | Treatment | Feed Day | No | 18:35 | 18:00 - 18:59 | Evening   | 38,1 | 49   | 23,8 | 23,8 | 19,26 | 537,80 | 106,26 |



|            |        |      |           |                  |           |          |    |       |               |         |      |     |      |      |       |        |        |
|------------|--------|------|-----------|------------------|-----------|----------|----|-------|---------------|---------|------|-----|------|------|-------|--------|--------|
| 2019/06/04 | CH2206 | Male | Three y/o | Treatment (Wk 3) | Treatment | Feed Day | No | 18:35 | 18:00 - 18:59 | Evening | 37,7 | 92  | 36,4 | 36,4 | 18,85 | 587,78 | 120,84 |
| 2019/06/04 | CH2205 | Male | Three y/o | Treatment (Wk 3) | Treatment | Feed Day | No | 18:40 | 18:00 - 18:59 | Evening | 38,1 | 50  | 29,8 | 29,8 | 19,26 | 539,52 | 113,97 |
| 2019/06/04 | CH2206 | Male | Three y/o | Treatment (Wk 3) | Treatment | Feed Day | No | 18:40 | 18:00 - 18:59 | Evening | 37,7 | 102 | 51,2 | 51,2 | 18,85 | 595,30 | 132,61 |
| 2019/06/04 | CH2205 | Male | Three y/o | Treatment (Wk 3) | Treatment | Feed Day | No | 18:45 | 18:00 - 18:59 | Evening | 38,1 | 91  | 24,0 | 24,0 | 19,26 | 586,98 | 106,55 |
| 2019/06/04 | CH2206 | Male | Three y/o | Treatment (Wk 3) | Treatment | Feed Day | No | 18:45 | 18:00 - 18:59 | Evening | 37,7 | 92  | 59,0 | 59,0 | 18,85 | 587,78 | 137,51 |
| 2019/06/04 | CH2205 | Male | Three y/o | Treatment (Wk 3) | Treatment | Feed Day | No | 18:50 | 18:00 - 18:59 | Evening | 38,1 | 58  | 23,6 | 23,6 | 19,26 | 551,90 | 105,97 |
| 2019/06/04 | CH2206 | Male | Three y/o | Treatment (Wk 3) | Treatment | Feed Day | No | 18:50 | 18:00 - 18:59 | Evening | 37,5 | 82  | 52,6 | 52,6 | 18,65 | 579,19 | 133,54 |
| 2019/06/04 | CH2205 | Male | Three y/o | Treatment (Wk 3) | Treatment | Feed Day | No | 18:55 | 18:00 - 18:59 | Evening | 38,1 | 89  | 25,8 | 25,8 | 19,26 | 585,33 | 109,02 |
| 2019/06/04 | CH2206 | Male | Three y/o | Treatment (Wk 3) | Treatment | Feed Day | No | 18:55 | 18:00 - 18:59 | Evening | 37,8 | 72  | 63,6 | 63,6 | 18,95 | 569,20 | 140,11 |
| 2019/06/04 | CH2205 | Male | Three y/o | Treatment (Wk 3) | Treatment | Feed Day | No | 19:00 | 19:00 - 19:59 | Evening | 38,1 | 98  | 28,2 | 28,2 | 19,26 | 592,41 | 112,07 |
| 2019/06/04 | CH2206 | Male | Three y/o | Treatment (Wk 3) | Treatment | Feed Day | No | 19:00 | 19:00 - 19:59 | Evening | 37,9 | 48  | 61,2 | 61,2 | 19,05 | 536,04 | 138,78 |
| 2019/06/04 | CH2205 | Male | Three y/o | Treatment (Wk 3) | Treatment | Feed Day | No | 19:05 | 19:00 - 19:59 | Evening | 38,1 | 86  | 30,8 | 30,8 | 19,26 | 582,77 | 115,10 |
| 2019/06/04 | CH2206 | Male | Three y/o | Treatment (Wk 3) | Treatment | Feed Day | No | 19:05 | 19:00 - 19:59 | Evening | 37,9 | 90  | 62,0 | 62,0 | 19,05 | 586,16 | 139,23 |
| 2019/06/04 | CH2205 | Male | Three y/o | Treatment (Wk 3) | Treatment | Feed Day | No | 19:10 | 19:00 - 19:59 | Evening | 38,1 | 75  | 27,8 | 27,8 | 19,26 | 572,36 | 111,58 |
| 2019/06/04 | CH2206 | Male | Three y/o | Treatment (Wk 3) | Treatment | Feed Day | No | 19:10 | 19:00 - 19:59 | Evening | 37,9 | 95  | 65,6 | 65,6 | 19,05 | 590,14 | 141,19 |
| 2019/06/04 | CH2205 | Male | Three y/o | Treatment (Wk 3) | Treatment | Feed Day | No | 19:15 | 19:00 - 19:59 | Evening | 38,1 | 50  | 25,6 | 25,6 | 19,26 | 539,52 | 108,76 |
| 2019/06/04 | CH2206 | Male | Three y/o | Treatment (Wk 3) | Treatment | Feed Day | No | 19:15 | 19:00 - 19:59 | Evening | 37,9 | 76  | 66,8 | 66,8 | 19,05 | 573,39 | 141,81 |
| 2019/06/04 | CH2205 | Male | Three y/o | Treatment (Wk 3) | Treatment | Feed Day | No | 19:20 | 19:00 - 19:59 | Evening | 38,1 | 75  | 26,6 | 26,6 | 19,26 | 572,36 | 110,07 |
| 2019/06/04 | CH2206 | Male | Three y/o | Treatment (Wk 3) | Treatment | Feed Day | No | 19:20 | 19:00 - 19:59 | Evening | 37,9 | 93  | 60,4 | 60,4 | 19,05 | 588,58 | 138,32 |
| 2019/06/04 | CH2205 | Male | Three y/o | Treatment (Wk 3) | Treatment | Feed Day | No | 19:25 | 19:00 - 19:59 | Evening | 38,1 | 68  | 24,4 | 24,4 | 19,26 | 564,71 | 107,11 |
| 2019/06/04 | CH2206 | Male | Three y/o | Treatment (Wk 3) | Treatment | Feed Day | No | 19:25 | 19:00 - 19:59 | Evening | 37,9 | 91  | 64,8 | 64,8 | 19,05 | 586,98 | 140,76 |
| 2019/06/04 | CH2205 | Male | Three y/o | Treatment (Wk 3) | Treatment | Feed Day | No | 19:30 | 19:00 - 19:59 | Evening | 38,1 | 63  | 26,2 | 26,2 | 19,26 | 558,62 | 109,55 |
| 2019/06/04 | CH2206 | Male | Three y/o | Treatment (Wk 3) | Treatment | Feed Day | No | 19:30 | 19:00 - 19:59 | Evening | 37,9 | 61  | 57,6 | 57,6 | 19,05 | 556,01 | 136,68 |
| 2019/06/04 | CH2205 | Male | Three y/o | Treatment (Wk 3) | Treatment | Feed Day | No | 19:35 | 19:00 - 19:59 | Evening | 38,1 | 67  | 24,6 | 24,6 | 19,26 | 563,53 | 107,39 |
| 2019/06/04 | CH2206 | Male | Three y/o | Treatment (Wk 3) | Treatment | Feed Day | No | 19:35 | 19:00 - 19:59 | Evening | 37,9 | 54  | 65,6 | 65,6 | 19,05 | 545,99 | 141,19 |
| 2019/06/04 | CH2205 | Male | Three y/o | Treatment (Wk 3) | Treatment | Feed Day | No | 19:40 | 19:00 - 19:59 | Evening | 38,1 | 84  | 31,0 | 31,0 | 19,26 | 581,01 | 115,32 |
| 2019/06/04 | CH2206 | Male | Three y/o | Treatment (Wk 3) | Treatment | Feed Day | No | 19:40 | 19:00 - 19:59 | Evening | 37,9 | 89  | 66,8 | 66,8 | 19,05 | 585,33 | 141,81 |
| 2019/06/04 | CH2205 | Male | Three y/o | Treatment (Wk 3) | Treatment | Feed Day | No | 19:45 | 19:00 - 19:59 | Evening | 38,1 | 68  | 24,6 | 24,6 | 19,26 | 564,71 | 107,39 |
| 2019/06/04 | CH2206 | Male | Three y/o | Treatment (Wk 3) | Treatment | Feed Day | No | 19:45 | 19:00 - 19:59 | Evening | 37,9 | 92  | 68,4 | 68,4 | 19,05 | 587,78 | 142,64 |
| 2019/06/04 | CH2205 | Male | Three y/o | Treatment (Wk 3) | Treatment | Feed Day | No | 19:50 | 19:00 - 19:59 | Evening | 38,1 | 81  | 28,0 | 28,0 | 19,26 | 578,26 | 111,83 |
| 2019/06/04 | CH2206 | Male | Three y/o | Treatment (Wk 3) | Treatment | Feed Day | No | 19:50 | 19:00 - 19:59 | Evening | 37,9 | 49  | 56,6 | 56,6 | 19,05 | 537,80 | 136,07 |
| 2019/06/04 | CH2205 | Male | Three y/o | Treatment (Wk 3) | Treatment | Feed Day | No | 19:55 | 19:00 - 19:59 | Evening | 38,1 | 81  | 21,8 | 21,8 | 19,26 | 578,26 | 103,26 |
| 2019/06/04 | CH2206 | Male | Three y/o | Treatment (Wk 3) | Treatment | Feed Day | No | 19:55 | 19:00 - 19:59 | Evening | 37,9 | 46  | 56,8 | 56,8 | 19,05 | 532,38 | 136,20 |
| 2019/06/04 | CH2205 | Male | Three y/o | Treatment (Wk 3) | Treatment | Feed Day | No | 20:00 | 20:00 - 20:59 | Night   | 38,1 | 98  | 27,0 | 27,0 | 19,26 | 592,41 | 110,58 |
| 2019/06/04 | CH2206 | Male | Three y/o | Treatment (Wk 3) | Treatment | Feed Day | No | 20:00 | 20:00 - 20:59 | Night   | 37,9 | 72  | 61,4 | 61,4 | 19,05 | 569,20 | 138,89 |
| 2019/06/04 | CH2205 | Male | Three y/o | Treatment (Wk 3) | Treatment | Feed Day | No | 20:05 | 20:00 - 20:59 | Night   | 38,1 | 78  | 26,6 | 26,6 | 19,26 | 575,38 | 110,07 |
| 2019/06/04 | CH2206 | Male | Three y/o | Treatment (Wk 3) | Treatment | Feed Day | No | 20:05 | 20:00 - 20:59 | Night   | 37,9 | 83  | 59,4 | 59,4 | 19,05 | 580,11 | 137,75 |
| 2019/06/04 | CH2205 | Male | Three y/o | Treatment (Wk 3) | Treatment | Feed Day | No | 20:10 | 20:00 - 20:59 | Night   | 38,1 | 45  | 24,4 | 24,4 | 19,26 | 530,47 | 107,11 |
| 2019/06/04 | CH2206 | Male | Three y/o | Treatment (Wk 3) | Treatment | Feed Day | No | 20:10 | 20:00 - 20:59 | Night   | 37,9 | 93  | 54,2 | 54,2 | 19,05 | 588,58 | 134,57 |
| 2019/06/04 | CH2205 | Male | Three y/o | Treatment (Wk 3) | Treatment | Feed Day | No | 20:15 | 20:00 - 20:59 | Night   | 38,1 | 59  | 30,2 | 30,2 | 19,26 | 553,30 | 114,42 |
| 2019/06/04 | CH2206 | Male | Three y/o | Treatment (Wk 3) | Treatment | Feed Day | No | 20:15 | 20:00 - 20:59 | Night   | 37,9 | 95  | 56,4 | 56,4 | 19,05 | 590,14 | 135,95 |
| 2019/06/04 | CH2205 | Male | Three y/o | Treatment (Wk 3) | Treatment | Feed Day | No | 20:20 | 20:00 - 20:59 | Night   | 38,1 | 68  | 22,0 | 22,0 | 19,26 | 564,71 | 103,57 |
| 2019/06/04 | CH2206 | Male | Three y/o | Treatment (Wk 3) | Treatment | Feed Day | No | 20:20 | 20:00 - 20:59 | Night   | 37,9 | 87  | 60,0 | 60,0 | 19,05 | 583,64 | 138,09 |
| 2019/06/04 | CH2205 | Male | Three y/o | Treatment (Wk 3) | Treatment | Feed Day | No | 20:25 | 20:00 - 20:59 | Night   | 38,1 | 57  | 29,6 | 29,6 | 19,26 | 550,47 | 113,73 |
| 2019/06/04 | CH2206 | Male | Three y/o | Treatment (Wk 3) | Treatment | Feed Day | No | 20:25 | 20:00 - 20:59 | Night   | 37,9 | 78  | 61,8 | 61,8 | 19,05 | 575,38 | 139,12 |
| 2019/06/04 | CH2205 | Male | Three y/o | Treatment (Wk 3) | Treatment | Feed Day | No | 20:30 | 20:00 - 20:59 | Night   | 38,1 | 91  | 22,0 | 22,0 | 19,26 | 586,98 | 103,57 |
| 2019/06/04 | CH2206 | Male | Three y/o | Treatment (Wk 3) | Treatment | Feed Day | No | 20:30 | 20:00 - 20:59 | Night   | 37,9 | 47  | 57,8 | 57,8 | 19,05 | 534,23 | 136,80 |
| 2019/06/04 | CH2205 | Male | Three y/o | Treatment (Wk 3) | Treatment | Feed Day | No | 20:35 | 20:00 - 20:59 | Night   | 38,1 | 59  | 20,0 | 20,0 | 19,26 | 553,30 | 100,31 |
| 2019/06/04 | CH2206 | Male | Three y/o | Treatment (Wk 3) | Treatment | Feed Day | No | 20:35 | 20:00 - 20:59 | Night   | 37,9 | 70  | 59,4 | 59,4 | 19,05 | 566,99 | 137,75 |
| 2019/06/04 | CH2205 | Male | Three y/o | Treatment (Wk 3) | Treatment | Feed Day | No | 20:40 | 20:00 - 20:59 | Night   | 38,1 | 45  | 21,6 | 21,6 | 19,26 | 530,47 | 102,94 |
| 2019/06/04 | CH2206 | Male | Three y/o | Treatment (Wk 3) | Treatment | Feed Day | No | 20:40 | 20:00 - 20:59 | Night   | 37,9 | 107 | 46,6 | 46,6 | 19,05 | 598,73 | 129,35 |
| 2019/06/04 | CH2205 | Male | Three y/o | Treatment (Wk 3) | Treatment | Feed Day | No | 20:45 | 20:00 - 20:59 | Night   | 38,1 | 96  | 23,4 | 23,4 | 19,26 | 590,91 | 105,68 |
| 2019/06/04 | CH2206 | Male | Three y/o | Treatment (Wk 3) | Treatment | Feed Day | No | 20:45 | 20:00 - 20:59 | Night   | 37,9 | 89  | 44,0 | 44,0 | 19,05 | 585,33 | 127,37 |
| 2019/06/04 | CH2205 | Male | Three y/o | Treatment (Wk 3) | Treatment | Feed Day | No | 20:50 | 20:00 - 20:59 | Night   | 38,1 | 65  | 25,2 | 25,2 | 19,26 | 561,12 | 108,22 |
| 2019/06/04 | CH2206 | Male | Three y/o | Treatment (Wk 3) | Treatment | Feed Day | No | 20:50 | 20:00 - 20:59 | Night   | 37,8 | 46  | 48,4 | 48,4 | 18,95 | 532,38 | 130,66 |
| 2019/06/04 | CH2205 | Male | Three y/o | Treatment (Wk 3) | Treatment | Feed Day | No | 20:55 | 20:00 - 20:59 | Night   | 38,1 | 63  | 28,2 | 28,2 | 19,26 | 558,62 | 112,07 |
| 2019/06/04 | CH2206 | Male | Three y/o | Treatment (Wk 3) | Treatment | Feed Day | No | 20:55 | 20:00 - 20:59 | Night   | 37,8 | 62  | 48,6 | 48,6 | 18,95 | 557,33 | 130,81 |
| 2019/06/04 | CH2205 | Male | Three y/o | Treatment (Wk 3) | Treatment | Feed Day | No | 21:00 | 21:00 - 21:59 | Night   | 38,1 | 91  | 27,2 | 27,2 | 19,26 | 586,98 | 110,83 |
| 2019/06/04 | CH2206 | Male | Three y/o | Treatment (Wk 3) | Treatment | Feed Day | No | 21:00 | 21:00 - 21:59 | Night   | 37,8 | 89  | 41,4 | 41,4 | 18,95 | 585,33 | 125,27 |
| 2019/06/04 | CH2205 | Male | Three y/o | Treatment (Wk 3) | Treatment | Feed Day | No | 21:05 | 21:00 - 21:59 | Night   | 38,1 | 67  | 24,4 | 24,4 | 19,26 | 563,53 | 107,11 |
| 2019/06/04 | CH2206 | Male | Three y/o | Treatment (Wk 3) | Treatment | Feed Day | No | 21:05 | 21:00 - 21:59 | Night   | 37,8 | 90  | 43,8 | 43,8 | 18,95 | 586,16 | 127,22 |
| 2019/06/04 | CH2205 | Male | Three y/o | Treatment (Wk 3) | Treatment | Feed Day | No | 21:10 | 21:00 - 21:59 | Night   | 38,1 | 74  | 22,4 | 22,4 | 19,26 | 571,33 | 104,19 |
| 2019/06/04 | CH2206 | Male | Three y/o | Treatment (Wk 3) | Treatment | Feed Day | No | 21:10 | 21:00 - 21:59 | Night   | 37,8 | 94  | 40,8 | 40,8 | 18,95 | 589,37 | 124,77 |
| 2019/06/04 | CH2205 | Male | Three y/o | Treatment (Wk 3) | Treatment | Feed Day | No | 21:15 | 21:00 - 21:59 | Night   | 38,1 | 95  | 27,0 | 27,0 | 19,26 | 590,14 | 110,58 |
| 2019/06/04 | CH2206 | Male | Three y/o | Treatment (Wk 3) | Treatment | Feed Day | No | 21:15 | 21:00 - 21:59 | Night   | 37,7 | 66  | 45,4 | 45,4 | 18,85 | 562,34 | 128,45 |
| 2019/06/04 | CH2205 | Male | Three y/o | Treatment (Wk 3) | Treatment | Feed Day | No | 21:20 | 21:00 - 21:59 | Night   | 38,0 | 73  | 24,0 | 24,0 | 19,15 | 570,27 | 106,55 |
| 2019/06/04 | CH2206 | Male | Three y/o | Treatment (Wk 3) | Treatment | Feed Day | No | 21:20 | 21:00 - 21:59 | Night   | 37,7 | 102 | 37,6 | 37,6 | 18,85 | 595,30 | 121,96 |
| 2019/06/04 | CH2205 | Male | Three y/o | Treatment (Wk 3) | Treatment | Feed Day | No | 21:25 | 21:00 - 21:59 | Night   | 38,0 | 57  | 25,4 | 25,4 | 19,15 | 550,47 | 108,49 |
| 2019/06/04 | CH2206 | Male | Three y/o | Treatment (Wk 3) | Treatment | Feed Day | No | 21:25 | 21:00 - 21:59 | Night   | 37,7 | 96  | 27,8 | 27,8 | 18,85 | 590,91 | 111,58 |
| 2019/06/04 | CH2205 | Male | Three y/o | Treatment (Wk 3) | Treatment | Feed Day | No | 21:30 | 21:00 - 21:59 | Night   | 38,0 | 89  | 25,0 | 25,0 | 19,15 | 585,33 | 107,94 |



|               |        |      |           |                  |           |          |    |       |               |               |      |     |      |      |       |        |        |
|---------------|--------|------|-----------|------------------|-----------|----------|----|-------|---------------|---------------|------|-----|------|------|-------|--------|--------|
| 2019/06/04    | CH2206 | Male | Three y/o | Treatment (Wk 3) | Treatment | Feed Day | No | 21:30 | 21:00 - 21:59 | Night         | 37,7 | 65  | 22,0 | 22,0 | 18,85 | 561,12 | 103,57 |
| 2019/06/04    | CH2205 | Male | Three y/o | Treatment (Wk 3) | Treatment | Feed Day | No | 21:35 | 21:00 - 21:59 | Night         | 38,0 | 73  | 25,0 | 25,0 | 19,15 | 570,27 | 107,94 |
| 2019/06/04    | CH2206 | Male | Three y/o | Treatment (Wk 3) | Treatment | Feed Day | No | 21:35 | 21:00 - 21:59 | Night         | 37,6 | 55  | 27,8 | 27,8 | 18,75 | 547,52 | 111,58 |
| 2019/06/04    | CH2205 | Male | Three y/o | Treatment (Wk 3) | Treatment | Feed Day | No | 21:40 | 21:00 - 21:59 | Night         | 38,0 | 67  | 28,6 | 28,6 | 19,15 | 563,53 | 112,56 |
| 2019/06/04    | CH2206 | Male | Three y/o | Treatment (Wk 3) | Treatment | Feed Day | No | 21:40 | 21:00 - 21:59 | Night         | 37,5 | 103 | 44,2 | 44,2 | 18,65 | 596,00 | 127,53 |
| 2019/06/04    | CH2205 | Male | Three y/o | Treatment (Wk 3) | Treatment | Feed Day | No | 21:45 | 21:00 - 21:59 | Night         | 38,0 |     | 10,6 | 10,6 | 19,15 |        | 78,73  |
| 2019/06/04    | CH2206 | Male | Three y/o | Treatment (Wk 3) | Treatment | Feed Day | No | 21:45 | 21:00 - 21:59 | Night         | 37,5 | 92  | 16,4 | 16,4 | 18,65 | 587,78 | 93,55  |
| 2019/06/04    | CH2205 | Male | Three y/o | Treatment (Wk 3) | Treatment | Feed Day | No | 21:50 | 21:00 - 21:59 | Night         | 37,9 | 83  | 7,6  | 7,6  | 19,05 | 580,11 | 67,49  |
| 2019/06/04    | CH2206 | Male | Three y/o | Treatment (Wk 3) | Treatment | Feed Day | No | 21:50 | 21:00 - 21:59 | Night         | 37,5 | 114 | 18,2 | 18,2 | 18,65 | 603,20 | 97,10  |
| 2019/06/04    | CH2205 | Male | Three y/o | Treatment (Wk 3) | Treatment | Feed Day | No | 21:55 | 21:00 - 21:59 | Night         | 37,9 | 51  | 12,6 | 12,6 | 19,05 | 541,20 | 84,59  |
| 2019/06/04    | CH2206 | Male | Three y/o | Treatment (Wk 3) | Treatment | Feed Day | No | 21:55 | 21:00 - 21:59 | Night         | 37,5 | 81  | 20,2 | 20,2 | 18,65 | 578,26 | 100,65 |
| 2019/06/04    | CH2205 | Male | Three y/o | Treatment (Wk 3) | Treatment | Feed Day | No | 22:00 | 22:00 - 22:59 | Night         | 37,9 | 84  | 23,6 | 23,6 | 19,05 | 581,01 | 105,97 |
| 2019/06/04    | CH2206 | Male | Three y/o | Treatment (Wk 3) | Treatment | Feed Day | No | 22:00 | 22:00 - 22:59 | Night         | 37,4 |     | 5,8  | 5,8  | 18,55 |        | 58,39  |
| 2019/06/04    | CH2205 | Male | Three y/o | Treatment (Wk 3) | Treatment | Feed Day | No | 22:05 | 22:00 - 22:59 | Night         | 38,0 |     | 4,6  | 4,6  | 19,15 |        | 50,61  |
| 2019/06/04    | CH2206 | Male | Three y/o | Treatment (Wk 3) | Treatment | Feed Day | No | 22:05 | 22:00 - 22:59 | Night         | 37,3 | 85  | 8,2  | 8,2  | 18,46 | 581,90 | 70,05  |
| 2019/06/04    | CH2205 | Male | Three y/o | Treatment (Wk 3) | Treatment | Feed Day | No | 22:10 | 22:00 - 22:59 | Night         | 37,3 | 94  | 27,6 | 27,6 | 18,85 | 589,37 | 111,33 |
| 2019/06/04    | CH2206 | Male | Three y/o | Treatment (Wk 3) | Treatment | Feed Day | No | 22:10 | 22:00 - 22:59 | Night         | 37,3 | 89  | 20,0 | 20,0 | 18,46 | 585,33 | 100,31 |
| 2019/06/04    | CH2205 | Male | Three y/o | Treatment (Wk 3) | Treatment | Feed Day | No | 22:15 | 22:00 - 22:59 | Night         | 37,6 | 83  | 29,4 | 29,4 | 18,75 | 580,11 | 113,50 |
| 2019/06/04    | CH2206 | Male | Three y/o | Treatment (Wk 3) | Treatment | Feed Day | No | 22:15 | 22:00 - 22:59 | Night         | 37,3 | 92  | 51,0 | 51,0 | 18,46 | 587,78 | 132,47 |
| 2019/06/04    | CH2205 | Male | Three y/o | Treatment (Wk 3) | Treatment | Feed Day | No | 22:20 | 22:00 - 22:59 | Night         | 37,7 | 109 | 23,8 | 23,8 | 18,85 | 600,04 | 106,26 |
| 2019/06/04    | CH2206 | Male | Three y/o | Treatment (Wk 3) | Treatment | Feed Day | No | 22:20 | 22:00 - 22:59 | Night         | 37,3 | 85  | 58,0 | 58,0 | 18,46 | 581,90 | 136,92 |
| 2019/06/04    | CH2205 | Male | Three y/o | Treatment (Wk 3) | Treatment | Feed Day | No | 22:25 | 22:00 - 22:59 | Night         | 37,6 |     | 21,4 | 21,4 | 18,75 |        | 102,63 |
| 2019/06/04    | CH2206 | Male | Three y/o | Treatment (Wk 3) | Treatment | Feed Day | No | 22:25 | 22:00 - 22:59 | Night         | 37,5 | 82  | 58,4 | 58,4 | 18,65 | 579,19 | 137,16 |
| 2019/06/04    | CH2205 | Male | Three y/o | Treatment (Wk 3) | Treatment | Feed Day | No | 22:30 | 22:00 - 22:59 | Night         | 37,4 |     | 19,6 | 19,6 | 18,55 |        | 99,63  |
| 2019/06/04    | CH2206 | Male | Three y/o | Treatment (Wk 3) | Treatment | Feed Day | No | 22:30 | 22:00 - 22:59 | Night         | 37,6 | 85  | 58,2 | 58,2 | 18,75 | 581,90 | 137,04 |
| 2019/06/04    | CH2205 | Male | Three y/o | Treatment (Wk 3) | Treatment | Feed Day | No | 22:35 | 22:00 - 22:59 | Night         | 37,3 |     | 22,8 | 22,8 | 18,46 |        | 104,79 |
| 2019/06/04    | CH2206 | Male | Three y/o | Treatment (Wk 3) | Treatment | Feed Day | No | 22:35 | 22:00 - 22:59 | Night         | 37,7 | 84  | 57,0 | 57,0 | 18,85 | 581,01 | 136,32 |
| 2019/06/04    | CH2205 | Male | Three y/o | Treatment (Wk 3) | Treatment | Feed Day | No | 22:40 | 22:00 - 22:59 | Night         | 37,6 |     | 19,0 | 19,0 | 18,75 |        | 98,56  |
| 2019/06/04    | CH2206 | Male | Three y/o | Treatment (Wk 3) | Treatment | Feed Day | No | 22:40 | 22:00 - 22:59 | Night         | 37,7 | 70  | 58,4 | 58,4 | 18,85 | 566,99 | 137,16 |
| 2019/06/04    | CH2205 | Male | Three y/o | Treatment (Wk 3) | Treatment | Feed Day | No | 22:45 | 22:00 - 22:59 | Night         | 37,7 | 79  | 15,0 | 15,0 | 18,85 | 576,36 | 90,51  |
| 2019/06/04    | CH2206 | Male | Three y/o | Treatment (Wk 3) | Treatment | Feed Day | No | 22:45 | 22:00 - 22:59 | Night         | 37,8 | 108 | 58,4 | 58,4 | 18,95 | 599,39 | 137,16 |
| 2019/06/04    | CH2205 | Male | Three y/o | Treatment (Wk 3) | Treatment | Feed Day | No | 22:50 | 22:00 - 22:59 | Night         | 37,7 | 83  | 14,4 | 14,4 | 18,85 | 580,11 | 89,12  |
| 2019/06/04    | CH2206 | Male | Three y/o | Treatment (Wk 3) | Treatment | Feed Day | No | 22:50 | 22:00 - 22:59 | Night         | 37,8 | 54  | 56,8 | 56,8 | 18,95 | 545,99 | 136,20 |
| 2019/06/04    | CH2205 | Male | Three y/o | Treatment (Wk 3) | Treatment | Feed Day | No | 22:55 | 22:00 - 22:59 | Night         | 37,7 |     | 16,4 | 16,4 | 18,85 |        | 93,55  |
| 2019/06/04    | CH2206 | Male | Three y/o | Treatment (Wk 3) | Treatment | Feed Day | No | 22:55 | 22:00 - 22:59 | Night         | 37,8 | 87  | 58,4 | 58,4 | 18,95 | 583,64 | 137,16 |
| 2019/06/04    | CH2205 | Male | Three y/o | Treatment (Wk 3) | Treatment | Feed Day | No | 23:00 | 23:00 - 23:59 | Night         | 37,7 | 82  | 19,8 | 19,8 | 18,85 | 579,19 | 99,97  |
| 2019/06/04    | CH2206 | Male | Three y/o | Treatment (Wk 3) | Treatment | Feed Day | No | 23:00 | 23:00 - 23:59 | Night         | 37,8 | 82  | 57,0 | 57,0 | 18,95 | 579,19 | 136,32 |
| 2019/06/04    | CH2205 | Male | Three y/o | Treatment (Wk 3) | Treatment | Feed Day | No | 23:05 | 23:00 - 23:59 | Night         | 37,7 | 51  | 30,2 | 30,2 | 18,85 | 541,20 | 114,42 |
| 2019/06/04    | CH2206 | Male | Three y/o | Treatment (Wk 3) | Treatment | Feed Day | No | 23:05 | 23:00 - 23:59 | Night         | 37,8 | 78  | 56,4 | 56,4 | 18,95 | 575,38 | 135,95 |
| 2019/06/04    | CH2205 | Male | Three y/o | Treatment (Wk 3) | Treatment | Feed Day | No | 23:10 | 23:00 - 23:59 | Night         | 37,7 | 50  | 3,0  | 3,0  | 18,85 | 539,52 | 36,34  |
| 2019/06/04    | CH2206 | Male | Three y/o | Treatment (Wk 3) | Treatment | Feed Day | No | 23:10 | 23:00 - 23:59 | Night         | 37,8 | 97  | 55,6 | 55,6 | 18,95 | 591,66 | 135,46 |
| 2019/06/04    | CH2205 | Male | Three y/o | Treatment (Wk 3) | Treatment | Feed Day | No | 23:15 | 23:00 - 23:59 | Night         | 37,9 | 75  | 2,8  | 2,8  | 19,05 | 572,36 | 34,04  |
| 2019/06/04    | CH2206 | Male | Three y/o | Treatment (Wk 3) | Treatment | Feed Day | No | 23:15 | 23:00 - 23:59 | Night         | 37,8 | 59  | 58,6 | 58,6 | 18,95 | 553,30 | 137,28 |
| 2019/06/04    | CH2205 | Male | Three y/o | Treatment (Wk 3) | Treatment | Feed Day | No | 23:20 | 23:00 - 23:59 | Night         | 37,9 | 75  | 2,2  | 2,2  | 19,05 | 572,36 | 26,02  |
| 2019/06/04    | CH2206 | Male | Three y/o | Treatment (Wk 3) | Treatment | Feed Day | No | 23:20 | 23:00 - 23:59 | Night         | 37,9 | 84  | 57,4 | 57,4 | 19,05 | 581,01 | 136,56 |
| 2019/06/04    | CH2205 | Male | Three y/o | Treatment (Wk 3) | Treatment | Feed Day | No | 23:25 | 23:00 - 23:59 | Night         | 37,9 | 79  | 2,6  | 2,6  | 19,05 | 576,36 | 31,57  |
| 2019/06/04    | CH2206 | Male | Three y/o | Treatment (Wk 3) | Treatment | Feed Day | No | 23:25 | 23:00 - 23:59 | Night         | 37,9 | 86  | 60,6 | 60,6 | 19,05 | 582,77 | 138,44 |
| 2019/06/04    | CH2205 | Male | Three y/o | Treatment (Wk 3) | Treatment | Feed Day | No | 23:30 | 23:00 - 23:59 | Night         | 37,9 | 71  | 3,4  | 3,4  | 19,05 | 568,10 | 40,51  |
| 2019/06/04    | CH2206 | Male | Three y/o | Treatment (Wk 3) | Treatment | Feed Day | No | 23:30 | 23:00 - 23:59 | Night         | 37,9 | 98  | 57,2 | 57,2 | 19,05 | 592,41 | 136,44 |
| 2019/06/04    | CH2205 | Male | Three y/o | Treatment (Wk 3) | Treatment | Feed Day | No | 23:35 | 23:00 - 23:59 | Night         | 37,9 | 86  | 3,2  | 3,2  | 19,05 | 582,77 | 38,49  |
| 2019/06/04    | CH2206 | Male | Three y/o | Treatment (Wk 3) | Treatment | Feed Day | No | 23:35 | 23:00 - 23:59 | Night         | 37,9 | 84  | 41,4 | 41,4 | 19,05 | 581,01 | 125,27 |
| 2019/06/04    | CH2205 | Male | Three y/o | Treatment (Wk 3) | Treatment | Feed Day | No | 23:40 | 23:00 - 23:59 | Night         | 37,9 | 66  | 7,2  | 7,2  | 19,05 | 562,34 | 65,66  |
| 2019/06/04    | CH2206 | Male | Three y/o | Treatment (Wk 3) | Treatment | Feed Day | No | 23:40 | 23:00 - 23:59 | Night         | 37,9 | 81  | 43,4 | 43,4 | 19,05 | 578,26 | 126,90 |
| 2019/06/04    | CH2205 | Male | Three y/o | Treatment (Wk 3) | Treatment | Feed Day | No | 23:45 | 23:00 - 23:59 | Night         | 37,9 | 65  | 6,0  | 6,0  | 19,05 | 561,12 | 59,53  |
| 2019/06/04    | CH2206 | Male | Three y/o | Treatment (Wk 3) | Treatment | Feed Day | No | 23:45 | 23:00 - 23:59 | Night         | 37,9 | 66  | 41,8 | 41,8 | 19,05 | 562,34 | 125,60 |
| 2019/06/04    | CH2205 | Male | Three y/o | Treatment (Wk 3) | Treatment | Feed Day | No | 23:50 | 23:00 - 23:59 | Night         | 37,8 | 90  | 8,2  | 8,2  | 18,95 | 586,16 | 70,05  |
| 2019/06/04    | CH2206 | Male | Three y/o | Treatment (Wk 3) | Treatment | Feed Day | No | 23:50 | 23:00 - 23:59 | Night         | 37,8 | 102 | 53,8 | 53,8 | 18,95 | 595,30 | 134,32 |
| 2019/06/04    | CH2205 | Male | Three y/o | Treatment (Wk 3) | Treatment | Feed Day | No | 23:55 | 23:00 - 23:59 | Night         | 37,7 | 52  | 10,8 | 10,8 | 18,85 | 542,83 | 79,36  |
| 2019/06/04    | CH2206 | Male | Three y/o | Treatment (Wk 3) | Treatment | Feed Day | No | 23:55 | 23:00 - 23:59 | Night         | 37,8 | 51  | 41,4 | 41,4 | 18,95 | 541,20 | 125,27 |
| 22 2019/06/06 | CH2205 | Male | Three y/o | Control          | Control   | Feed Day | No | 00:00 | 00:00 - 00:59 | Early Morning | 37,7 | 81  | 9,8  | 9,8  | 18,85 | 578,26 | 76,07  |
| 2019/06/06    | CH2206 | Male | Three y/o | Control          | Control   | Feed Day | No | 00:00 | 00:00 - 00:59 | Early Morning | 37,8 | 76  | 39,8 | 39,8 | 18,95 | 573,39 | 123,91 |
| 2019/06/06    | CH2205 | Male | Three y/o | Control          | Control   | Feed Day | No | 00:05 | 00:00 - 00:59 | Early Morning | 37,7 | 69  | 10,8 | 10,8 | 18,85 | 565,86 | 79,36  |
| 2019/06/06    | CH2206 | Male | Three y/o | Control          | Control   | Feed Day | No | 00:05 | 00:00 - 00:59 | Early Morning | 37,7 | 88  | 40,6 | 40,6 | 18,85 | 584,49 | 124,60 |
| 2019/06/06    | CH2205 | Male | Three y/o | Control          | Control   | Feed Day | No | 00:10 | 00:00 - 00:59 | Early Morning | 37,7 | 83  | 18,4 | 18,4 | 18,85 | 580,11 | 97,47  |
| 2019/06/06    | CH2206 | Male | Three y/o | Control          | Control   | Feed Day | No | 00:10 | 00:00 - 00:59 | Early Morning | 37,7 | 90  | 36,6 | 36,6 | 18,85 | 586,16 | 121,03 |
| 2019/06/06    | CH2205 | Male | Three y/o | Control          | Control   | Feed Day | No | 00:15 | 00:00 - 00:59 | Early Morning | 37,7 | 105 | 15,0 | 15,0 | 18,85 | 597,38 | 90,51  |
| 2019/06/06    | CH2206 | Male | Three y/o | Control          | Control   | Feed Day | No | 00:15 | 00:00 - 00:59 | Early Morning | 37,7 | 44  | 28,6 | 28,6 | 18,85 | 528,51 | 112,56 |
| 2019/06/06    | CH2205 | Male | Three y/o | Control          | Control   | Feed Day | No | 00:20 | 00:00 - 00:59 | Early Morning | 37,6 | 86  | 15,2 | 15,2 | 18,75 | 582,77 | 90,96  |
| 2019/06/06    | CH2206 | Male | Three y/o | Control          | Control   | Feed Day | No | 00:20 | 00:00 - 00:59 | Early Morning | 37,7 | 52  | 29,8 | 29,8 | 18,85 | 542,83 | 113,97 |
| 2019/06/06    | CH2205 | Male | Three y/o | Control          | Control   | Feed Day | No | 00:25 | 00:00 - 00:59 | Early Morning | 37,6 | 43  | 16,8 | 16,8 | 18,75 | 526,50 | 94,37  |



|            |        |      |           |         |         |          |    |       |               |               |      |     |      |      |       |        |        |
|------------|--------|------|-----------|---------|---------|----------|----|-------|---------------|---------------|------|-----|------|------|-------|--------|--------|
| 2019/06/06 | CH2206 | Male | Three y/o | Control | Control | Feed Day | No | 00:25 | 00:00 - 00:59 | Early Morning | 37,5 | 63  | 32,2 | 32,2 | 18,65 | 558,62 | 116,63 |
| 2019/06/06 | CH2205 | Male | Three y/o | Control | Control | Feed Day | No | 00:30 | 00:00 - 00:59 | Early Morning | 37,6 | 73  | 13,6 | 13,6 | 18,75 | 570,27 | 87,18  |
| 2019/06/06 | CH2206 | Male | Three y/o | Control | Control | Feed Day | No | 00:30 | 00:00 - 00:59 | Early Morning | 37,5 | 54  | 31,0 | 31,0 | 18,65 | 545,99 | 115,32 |
| 2019/06/06 | CH2205 | Male | Three y/o | Control | Control | Feed Day | No | 00:35 | 00:00 - 00:59 | Early Morning | 37,6 | 46  | 18,0 | 18,0 | 18,75 | 532,38 | 96,72  |
| 2019/06/06 | CH2206 | Male | Three y/o | Control | Control | Feed Day | No | 00:35 | 00:00 - 00:59 | Early Morning | 37,5 | 92  | 26,2 | 26,2 | 18,65 | 587,78 | 109,55 |
| 2019/06/06 | CH2205 | Male | Three y/o | Control | Control | Feed Day | No | 00:40 | 00:00 - 00:59 | Early Morning | 37,6 | 96  | 15,2 | 15,2 | 18,75 | 590,91 | 90,96  |
| 2019/06/06 | CH2206 | Male | Three y/o | Control | Control | Feed Day | No | 00:40 | 00:00 - 00:59 | Early Morning | 37,5 | 50  | 30,4 | 30,4 | 18,65 | 539,52 | 114,65 |
| 2019/06/06 | CH2205 | Male | Three y/o | Control | Control | Feed Day | No | 00:45 | 00:00 - 00:59 | Early Morning | 37,7 | 46  | 16,4 | 16,4 | 18,85 | 532,38 | 93,55  |
| 2019/06/06 | CH2206 | Male | Three y/o | Control | Control | Feed Day | No | 00:45 | 00:00 - 00:59 | Early Morning | 37,5 | 102 | 14,8 | 14,8 | 18,65 | 595,30 | 90,05  |
| 2019/06/06 | CH2205 | Male | Three y/o | Control | Control | Feed Day | No | 00:50 | 00:00 - 00:59 | Early Morning | 37,7 | 75  | 16,8 | 16,8 | 18,85 | 572,36 | 94,37  |
| 2019/06/06 | CH2206 | Male | Three y/o | Control | Control | Feed Day | No | 00:50 | 00:00 - 00:59 | Early Morning | 37,5 | 48  | 24,2 | 24,2 | 18,65 | 536,04 | 106,83 |
| 2019/06/06 | CH2205 | Male | Three y/o | Control | Control | Feed Day | No | 00:55 | 00:00 - 00:59 | Early Morning | 37,7 | 90  | 18,6 | 18,6 | 18,85 | 586,16 | 97,84  |
| 2019/06/06 | CH2206 | Male | Three y/o | Control | Control | Feed Day | No | 00:55 | 00:00 - 00:59 | Early Morning | 37,4 | 87  | 25,4 | 25,4 | 18,55 | 583,64 | 108,49 |
| 2019/06/06 | CH2205 | Male | Three y/o | Control | Control | Feed Day | No | 01:00 | 01:00 - 01:59 | Early Morning | 37,7 | 100 | 18,4 | 18,4 | 18,85 | 593,87 | 97,47  |
| 2019/06/06 | CH2206 | Male | Three y/o | Control | Control | Feed Day | No | 01:00 | 01:00 - 01:59 | Early Morning | 37,4 | 89  | 27,6 | 27,6 | 18,55 | 585,33 | 111,33 |
| 2019/06/06 | CH2205 | Male | Three y/o | Control | Control | Feed Day | No | 01:05 | 01:00 - 01:59 | Early Morning | 37,7 | 43  | 20,0 | 20,0 | 18,85 | 526,50 | 100,31 |
| 2019/06/06 | CH2206 | Male | Three y/o | Control | Control | Feed Day | No | 01:05 | 01:00 - 01:59 | Early Morning | 37,4 | 92  | 24,6 | 24,6 | 18,55 | 587,78 | 107,39 |
| 2019/06/06 | CH2205 | Male | Three y/o | Control | Control | Feed Day | No | 01:10 | 01:00 - 01:59 | Early Morning | 37,7 | 45  | 24,8 | 24,8 | 18,85 | 530,47 | 107,67 |
| 2019/06/06 | CH2206 | Male | Three y/o | Control | Control | Feed Day | No | 01:10 | 01:00 - 01:59 | Early Morning | 37,3 | 74  | 29,0 | 29,0 | 18,46 | 571,33 | 113,03 |
| 2019/06/06 | CH2205 | Male | Three y/o | Control | Control | Feed Day | No | 01:15 | 01:00 - 01:59 | Early Morning | 37,7 | 55  | 15,6 | 15,6 | 18,85 | 547,52 | 91,85  |
| 2019/06/06 | CH2206 | Male | Three y/o | Control | Control | Feed Day | No | 01:15 | 01:00 - 01:59 | Early Morning | 37,2 | 82  | 26,6 | 26,6 | 18,36 | 579,19 | 110,07 |
| 2019/06/06 | CH2205 | Male | Three y/o | Control | Control | Feed Day | No | 01:20 | 01:00 - 01:59 | Early Morning | 37,6 | 89  | 22,0 | 22,0 | 18,75 | 585,33 | 103,57 |
| 2019/06/06 | CH2206 | Male | Three y/o | Control | Control | Feed Day | No | 01:20 | 01:00 - 01:59 | Early Morning | 37,1 | 73  | 24,6 | 24,6 | 18,26 | 570,27 | 107,39 |
| 2019/06/06 | CH2205 | Male | Three y/o | Control | Control | Feed Day | No | 01:25 | 01:00 - 01:59 | Early Morning | 37,6 | 92  | 19,2 | 19,2 | 18,75 | 587,78 | 98,92  |
| 2019/06/06 | CH2206 | Male | Three y/o | Control | Control | Feed Day | No | 01:25 | 01:00 - 01:59 | Early Morning | 37,1 | 85  | 24,4 | 24,4 | 18,26 | 581,90 | 107,11 |
| 2019/06/06 | CH2205 | Male | Three y/o | Control | Control | Feed Day | No | 01:30 | 01:00 - 01:59 | Early Morning | 37,6 | 68  | 17,4 | 17,4 | 18,75 | 564,71 | 95,56  |
| 2019/06/06 | CH2206 | Male | Three y/o | Control | Control | Feed Day | No | 01:30 | 01:00 - 01:59 | Early Morning | 37,1 | 91  | 14,4 | 14,4 | 18,26 | 586,98 | 89,12  |
| 2019/06/06 | CH2205 | Male | Three y/o | Control | Control | Feed Day | No | 01:35 | 01:00 - 01:59 | Early Morning | 37,6 | 70  | 17,8 | 17,8 | 18,75 | 566,99 | 96,34  |
| 2019/06/06 | CH2206 | Male | Three y/o | Control | Control | Feed Day | No | 01:35 | 01:00 - 01:59 | Early Morning | 37,1 | 96  | 15,8 | 15,8 | 18,26 | 590,91 | 92,28  |
| 2019/06/06 | CH2205 | Male | Three y/o | Control | Control | Feed Day | No | 01:40 | 01:00 - 01:59 | Early Morning | 37,6 | 78  | 14,8 | 14,8 | 18,75 | 575,38 | 90,05  |
| 2019/06/06 | CH2206 | Male | Three y/o | Control | Control | Feed Day | No | 01:40 | 01:00 - 01:59 | Early Morning | 37,0 | 90  | 25,0 | 25,0 | 18,16 | 586,16 | 107,94 |
| 2019/06/06 | CH2205 | Male | Three y/o | Control | Control | Feed Day | No | 01:45 | 01:00 - 01:59 | Early Morning | 37,6 | 45  | 15,0 | 15,0 | 18,75 | 530,47 | 90,51  |
| 2019/06/06 | CH2206 | Male | Three y/o | Control | Control | Feed Day | No | 01:45 | 01:00 - 01:59 | Early Morning | 37,1 | 51  | 16,0 | 16,0 | 18,26 | 541,20 | 92,71  |
| 2019/06/06 | CH2205 | Male | Three y/o | Control | Control | Feed Day | No | 01:50 | 01:00 - 01:59 | Early Morning | 37,7 | 59  | 20,4 | 20,4 | 18,85 | 553,30 | 100,99 |
| 2019/06/06 | CH2206 | Male | Three y/o | Control | Control | Feed Day | No | 01:50 | 01:00 - 01:59 | Early Morning | 37,2 | 48  | 20,4 | 20,4 | 18,36 | 536,04 | 100,99 |
| 2019/06/06 | CH2205 | Male | Three y/o | Control | Control | Feed Day | No | 01:55 | 01:00 - 01:59 | Early Morning | 37,7 | 89  | 35,8 | 35,8 | 18,85 | 585,33 | 120,27 |
| 2019/06/06 | CH2206 | Male | Three y/o | Control | Control | Feed Day | No | 01:55 | 01:00 - 01:59 | Early Morning | 37,3 | 46  | 45,4 | 45,4 | 18,46 | 532,38 | 128,45 |
| 2019/06/06 | CH2205 | Male | Three y/o | Control | Control | Feed Day | No | 02:00 | 02:00 - 02:59 | Early Morning | 37,7 | 83  | 18,0 | 18,0 | 18,85 | 580,11 | 96,72  |
| 2019/06/06 | CH2206 | Male | Three y/o | Control | Control | Feed Day | No | 02:00 | 02:00 - 02:59 | Early Morning | 37,3 | 102 | 17,4 | 17,4 | 18,46 | 595,30 | 95,56  |
| 2019/06/06 | CH2205 | Male | Three y/o | Control | Control | Feed Day | No | 02:05 | 02:00 - 02:59 | Early Morning | 37,6 | 83  | 18,6 | 18,6 | 18,75 | 580,11 | 97,84  |
| 2019/06/06 | CH2206 | Male | Three y/o | Control | Control | Feed Day | No | 02:05 | 02:00 - 02:59 | Early Morning | 37,2 | 82  | 50,2 | 50,2 | 18,36 | 579,19 | 131,92 |
| 2019/06/06 | CH2205 | Male | Three y/o | Control | Control | Feed Day | No | 02:10 | 02:00 - 02:59 | Early Morning | 37,6 | 72  | 15,6 | 15,6 | 18,75 | 569,20 | 91,85  |
| 2019/06/06 | CH2206 | Male | Three y/o | Control | Control | Feed Day | No | 02:10 | 02:00 - 02:59 | Early Morning | 37,2 | 84  | 40,8 | 40,8 | 18,36 | 581,01 | 124,77 |
| 2019/06/06 | CH2205 | Male | Three y/o | Control | Control | Feed Day | No | 02:15 | 02:00 - 02:59 | Early Morning | 37,5 | 69  | 15,8 | 15,8 | 18,65 | 565,86 | 92,28  |
| 2019/06/06 | CH2206 | Male | Three y/o | Control | Control | Feed Day | No | 02:15 | 02:00 - 02:59 | Early Morning | 37,3 | 82  | 51,6 | 51,6 | 18,46 | 579,19 | 132,87 |
| 2019/06/06 | CH2205 | Male | Three y/o | Control | Control | Feed Day | No | 02:20 | 02:00 - 02:59 | Early Morning | 37,5 | 76  | 19,8 | 19,8 | 18,65 | 573,39 | 99,97  |
| 2019/06/06 | CH2206 | Male | Three y/o | Control | Control | Feed Day | No | 02:20 | 02:00 - 02:59 | Early Morning | 37,3 | 91  | 40,6 | 40,6 | 18,46 | 586,98 | 124,60 |
| 2019/06/06 | CH2205 | Male | Three y/o | Control | Control | Feed Day | No | 02:25 | 02:00 - 02:59 | Early Morning | 37,5 |     | 28,2 | 28,2 | 18,65 |        | 112,07 |
| 2019/06/06 | CH2206 | Male | Three y/o | Control | Control | Feed Day | No | 02:25 | 02:00 - 02:59 | Early Morning | 37,4 | 94  | 21,2 | 21,2 | 18,55 | 589,37 | 102,31 |
| 2019/06/06 | CH2205 | Male | Three y/o | Control | Control | Feed Day | No | 02:30 | 02:00 - 02:59 | Early Morning | 37,5 |     | 23,0 | 23,0 | 18,65 |        | 105,09 |
| 2019/06/06 | CH2206 | Male | Three y/o | Control | Control | Feed Day | No | 02:30 | 02:00 - 02:59 | Early Morning | 37,4 | 62  | 22,6 | 22,6 | 18,55 | 557,33 | 104,49 |
| 2019/06/06 | CH2205 | Male | Three y/o | Control | Control | Feed Day | No | 02:35 | 02:00 - 02:59 | Early Morning | 37,4 | 101 | 10,6 | 10,6 | 18,55 | 594,59 | 78,73  |
| 2019/06/06 | CH2206 | Male | Three y/o | Control | Control | Feed Day | No | 02:35 | 02:00 - 02:59 | Early Morning | 37,3 | 66  | 15,4 | 15,4 | 18,46 | 562,34 | 91,41  |
| 2019/06/06 | CH2205 | Male | Three y/o | Control | Control | Feed Day | No | 02:40 | 02:00 - 02:59 | Early Morning | 37,4 | 68  | 10,6 | 10,6 | 18,55 | 564,71 | 78,73  |
| 2019/06/06 | CH2206 | Male | Three y/o | Control | Control | Feed Day | No | 02:40 | 02:00 - 02:59 | Early Morning | 37,3 | 48  | 33,4 | 33,4 | 18,46 | 536,04 | 117,88 |
| 2019/06/06 | CH2205 | Male | Three y/o | Control | Control | Feed Day | No | 02:45 | 02:00 - 02:59 | Early Morning | 37,5 | 63  | 4,0  | 4,0  | 18,65 | 558,62 | 45,94  |
| 2019/06/06 | CH2206 | Male | Three y/o | Control | Control | Feed Day | No | 02:45 | 02:00 - 02:59 | Early Morning | 37,3 | 88  | 30,4 | 30,4 | 18,46 | 584,49 | 114,65 |
| 2019/06/06 | CH2205 | Male | Three y/o | Control | Control | Feed Day | No | 02:50 | 02:00 - 02:59 | Early Morning | 37,5 | 90  | 16,8 | 16,8 | 18,65 | 586,16 | 94,37  |
| 2019/06/06 | CH2206 | Male | Three y/o | Control | Control | Feed Day | No | 02:50 | 02:00 - 02:59 | Early Morning | 37,3 | 50  | 2,8  | 2,8  | 18,46 | 539,52 | 34,04  |
| 2019/06/06 | CH2205 | Male | Three y/o | Control | Control | Feed Day | No | 02:55 | 02:00 - 02:59 | Early Morning | 37,6 | 102 | 9,6  | 9,6  | 18,75 | 595,30 | 75,37  |
| 2019/06/06 | CH2206 | Male | Three y/o | Control | Control | Feed Day | No | 02:55 | 02:00 - 02:59 | Early Morning | 37,3 | 92  | 3,0  | 3,0  | 18,46 | 587,78 | 36,34  |
| 2019/06/06 | CH2205 | Male | Three y/o | Control | Control | Feed Day | No | 03:00 | 03:00 - 03:59 | Early Morning | 37,6 |     | 6,8  | 6,8  | 18,75 |        | 63,74  |
| 2019/06/06 | CH2206 | Male | Three y/o | Control | Control | Feed Day | No | 03:00 | 03:00 - 03:59 | Early Morning | 37,3 | 56  | 36,8 | 36,8 | 18,46 | 549,01 | 121,22 |
| 2019/06/06 | CH2205 | Male | Three y/o | Control | Control | Feed Day | No | 03:05 | 03:00 - 03:59 | Early Morning | 37,6 | 128 | 7,2  | 7,2  | 18,75 | 611,22 | 65,66  |
| 2019/06/06 | CH2206 | Male | Three y/o | Control | Control | Feed Day | No | 03:05 | 03:00 - 03:59 | Early Morning | 37,4 | 58  | 43,0 | 43,0 | 18,55 | 551,90 | 126,58 |
| 2019/06/06 | CH2205 | Male | Three y/o | Control | Control | Feed Day | No | 03:10 | 03:00 - 03:59 | Early Morning | 37,5 |     | 6,0  | 6,0  | 18,65 |        | 59,53  |
| 2019/06/06 | CH2206 | Male | Three y/o | Control | Control | Feed Day | No | 03:10 | 03:00 - 03:59 | Early Morning | 37,4 | 52  | 34,2 | 34,2 | 18,55 | 542,83 | 118,70 |
| 2019/06/06 | CH2205 | Male | Three y/o | Control | Control | Feed Day | No | 03:15 | 03:00 - 03:59 | Early Morning | 37,5 |     | 6,8  | 6,8  | 18,65 |        | 63,74  |
| 2019/06/06 | CH2206 | Male | Three y/o | Control | Control | Feed Day | No | 03:15 | 03:00 - 03:59 | Early Morning | 37,3 | 90  | 30,2 | 30,2 | 18,46 | 586,16 | 114,42 |
| 2019/06/06 | CH2205 | Male | Three y/o | Control | Control | Feed Day | No | 03:20 | 03:00 - 03:59 | Early Morning | 37,5 |     | 5,6  | 5,6  | 18,65 |        | 57,21  |



|            |        |      |           |         |         |          |    |       |               |               |      |     |       |       |       |        |        |
|------------|--------|------|-----------|---------|---------|----------|----|-------|---------------|---------------|------|-----|-------|-------|-------|--------|--------|
| 2019/06/06 | CH2206 | Male | Three y/o | Control | Control | Feed Day | No | 03:20 | 03:00 - 03:59 | Early Morning | 37,3 | 90  | 28,6  | 28,6  | 18,46 | 586,16 | 112,56 |
| 2019/06/06 | CH2205 | Male | Three y/o | Control | Control | Feed Day | No | 03:25 | 03:00 - 03:59 | Early Morning | 37,5 |     | 10,4  | 10,4  | 18,65 |        | 78,08  |
| 2019/06/06 | CH2206 | Male | Three y/o | Control | Control | Feed Day | No | 03:25 | 03:00 - 03:59 | Early Morning | 37,3 | 88  | 42,8  | 42,8  | 18,46 | 584,49 | 126,42 |
| 2019/06/06 | CH2205 | Male | Three y/o | Control | Control | Feed Day | No | 03:30 | 03:00 - 03:59 | Early Morning | 37,5 |     | 5,0   | 5,0   | 18,65 |        | 53,41  |
| 2019/06/06 | CH2206 | Male | Three y/o | Control | Control | Feed Day | No | 03:30 | 03:00 - 03:59 | Early Morning | 37,4 | 68  | 41,8  | 41,8  | 18,55 | 564,71 | 125,60 |
| 2019/06/06 | CH2205 | Male | Three y/o | Control | Control | Feed Day | No | 03:35 | 03:00 - 03:59 | Early Morning | 37,5 | 67  | 6,0   | 6,0   | 18,65 | 563,53 | 59,53  |
| 2019/06/06 | CH2206 | Male | Three y/o | Control | Control | Feed Day | No | 03:35 | 03:00 - 03:59 | Early Morning | 37,4 | 45  | 36,0  | 36,0  | 18,55 | 530,47 | 120,46 |
| 2019/06/06 | CH2205 | Male | Three y/o | Control | Control | Feed Day | No | 03:40 | 03:00 - 03:59 | Early Morning | 37,5 | 92  | 6,2   | 6,2   | 18,65 | 587,78 | 60,63  |
| 2019/06/06 | CH2206 | Male | Three y/o | Control | Control | Feed Day | No | 03:40 | 03:00 - 03:59 | Early Morning | 37,4 | 73  | 31,0  | 31,0  | 18,55 | 570,27 | 115,32 |
| 2019/06/06 | CH2205 | Male | Three y/o | Control | Control | Feed Day | No | 03:45 | 03:00 - 03:59 | Early Morning | 37,6 | 63  | 8,8   | 8,8   | 18,75 | 558,62 | 72,43  |
| 2019/06/06 | CH2206 | Male | Three y/o | Control | Control | Feed Day | No | 03:45 | 03:00 - 03:59 | Early Morning | 37,4 | 62  | 35,8  | 35,8  | 18,55 | 557,33 | 120,27 |
| 2019/06/06 | CH2205 | Male | Three y/o | Control | Control | Feed Day | No | 03:50 | 03:00 - 03:59 | Early Morning | 37,6 | 62  | 14,6  | 14,6  | 18,75 | 557,33 | 89,59  |
| 2019/06/06 | CH2206 | Male | Three y/o | Control | Control | Feed Day | No | 03:50 | 03:00 - 03:59 | Early Morning | 37,4 | 70  | 32,4  | 32,4  | 18,55 | 566,99 | 116,84 |
| 2019/06/06 | CH2205 | Male | Three y/o | Control | Control | Feed Day | No | 03:55 | 03:00 - 03:59 | Early Morning | 37,6 | 86  | 12,6  | 12,6  | 18,75 | 582,77 | 84,59  |
| 2019/06/06 | CH2206 | Male | Three y/o | Control | Control | Feed Day | No | 03:55 | 03:00 - 03:59 | Early Morning | 37,4 | 68  | 43,0  | 43,0  | 18,55 | 564,71 | 126,58 |
| 2019/06/06 | CH2205 | Male | Three y/o | Control | Control | Feed Day | No | 04:00 | 04:00 - 04:59 | Morning       | 37,6 | 73  | 8,6   | 8,6   | 18,75 | 570,27 | 71,66  |
| 2019/06/06 | CH2206 | Male | Three y/o | Control | Control | Feed Day | No | 04:00 | 04:00 - 04:59 | Morning       | 37,4 | 138 | 18,8  | 18,8  | 18,55 | 616,31 | 98,20  |
| 2019/06/06 | CH2205 | Male | Three y/o | Control | Control | Feed Day | No | 04:05 | 04:00 - 04:59 | Morning       | 37,7 |     | 13,4  | 13,4  | 18,85 |        | 86,68  |
| 2019/06/06 | CH2206 | Male | Three y/o | Control | Control | Feed Day | No | 04:05 | 04:00 - 04:59 | Morning       | 37,5 | 117 | 167,8 | 167,8 | 18,65 | 605,02 | 173,95 |
| 2019/06/06 | CH2205 | Male | Three y/o | Control | Control | Feed Day | No | 04:10 | 04:00 - 04:59 | Morning       | 37,6 |     | 64,8  | 64,8  | 18,75 |        | 140,76 |
| 2019/06/06 | CH2206 | Male | Three y/o | Control | Control | Feed Day | No | 04:10 | 04:00 - 04:59 | Morning       | 37,5 | 117 | 47,4  | 47,4  | 18,65 | 605,02 | 129,94 |
| 2019/06/06 | CH2205 | Male | Three y/o | Control | Control | Feed Day | No | 04:15 | 04:00 - 04:59 | Morning       | 37,6 | 101 | 37,2  | 37,2  | 18,75 | 594,59 | 121,59 |
| 2019/06/06 | CH2206 | Male | Three y/o | Control | Control | Feed Day | No | 04:15 | 04:00 - 04:59 | Morning       | 37,5 | 143 | 71,8  | 71,8  | 18,65 | 618,69 | 144,32 |
| 2019/06/06 | CH2205 | Male | Three y/o | Control | Control | Feed Day | No | 04:20 | 04:00 - 04:59 | Morning       | 37,5 |     | 186,0 | 186,0 | 18,65 |        | 177,57 |
| 2019/06/06 | CH2206 | Male | Three y/o | Control | Control | Feed Day | No | 04:20 | 04:00 - 04:59 | Morning       | 37,5 | 125 | 51,6  | 51,6  | 18,65 | 609,60 | 132,87 |
| 2019/06/06 | CH2205 | Male | Three y/o | Control | Control | Feed Day | No | 04:25 | 04:00 - 04:59 | Morning       | 37,7 |     | 114,2 | 114,2 | 18,85 |        | 160,48 |
| 2019/06/06 | CH2206 | Male | Three y/o | Control | Control | Feed Day | No | 04:25 | 04:00 - 04:59 | Morning       | 37,5 | 143 | 100,2 | 100,2 | 18,65 | 618,69 | 155,91 |
| 2019/06/06 | CH2205 | Male | Three y/o | Control | Control | Feed Day | No | 04:30 | 04:00 - 04:59 | Morning       | 37,7 | 96  | 33,2  | 33,2  | 18,85 | 590,91 | 117,68 |
| 2019/06/06 | CH2206 | Male | Three y/o | Control | Control | Feed Day | No | 04:30 | 04:00 - 04:59 | Morning       | 37,7 | 111 | 211,6 | 211,6 | 18,85 | 601,33 | 182,10 |
| 2019/06/06 | CH2205 | Male | Three y/o | Control | Control | Feed Day | No | 04:35 | 04:00 - 04:59 | Morning       | 37,5 | 86  | 23,4  | 23,4  | 18,65 | 582,77 | 105,68 |
| 2019/06/06 | CH2206 | Male | Three y/o | Control | Control | Feed Day | No | 04:35 | 04:00 - 04:59 | Morning       | 37,4 |     | 2,0   | 2,0   | 18,55 |        | 22,86  |
| 2019/06/06 | CH2205 | Male | Three y/o | Control | Control | Feed Day | No | 04:40 | 04:00 - 04:59 | Morning       | 37,4 |     | 37,8  | 37,8  | 18,55 |        | 122,14 |
| 2019/06/06 | CH2206 | Male | Three y/o | Control | Control | Feed Day | No | 04:40 | 04:00 - 04:59 | Morning       | 37,1 | 96  | 34,2  | 34,2  | 18,26 | 590,91 | 118,70 |
| 2019/06/06 | CH2205 | Male | Three y/o | Control | Control | Feed Day | No | 04:45 | 04:00 - 04:59 | Morning       | 37,3 | 68  | 16,2  | 16,2  | 18,46 | 564,71 | 93,13  |
| 2019/06/06 | CH2206 | Male | Three y/o | Control | Control | Feed Day | No | 04:45 | 04:00 - 04:59 | Morning       | 37,2 | 111 | 16,2  | 16,2  | 18,36 | 601,33 | 93,13  |
| 2019/06/06 | CH2205 | Male | Three y/o | Control | Control | Feed Day | No | 04:50 | 04:00 - 04:59 | Morning       | 37,3 |     | 31,2  | 31,2  | 18,46 |        | 115,54 |
| 2019/06/06 | CH2206 | Male | Three y/o | Control | Control | Feed Day | No | 04:50 | 04:00 - 04:59 | Morning       | 37,1 | 63  | 12,4  | 12,4  | 18,26 | 558,62 | 84,04  |
| 2019/06/06 | CH2205 | Male | Three y/o | Control | Control | Feed Day | No | 04:55 | 04:00 - 04:59 | Morning       | 37,4 | 148 | 554,6 | 554,6 | 18,55 | 620,97 | 216,24 |
| 2019/06/06 | CH2206 | Male | Three y/o | Control | Control | Feed Day | No | 04:55 | 04:00 - 04:59 | Morning       | 37,0 | 79  | 12,6  | 12,6  | 18,16 | 576,36 | 84,59  |
| 2019/06/06 | CH2205 | Male | Three y/o | Control | Control | Feed Day | No | 05:00 | 05:00 - 05:59 | Morning       | 37,6 |     | 8,0   | 8,0   | 18,75 |        | 69,22  |
| 2019/06/06 | CH2206 | Male | Three y/o | Control | Control | Feed Day | No | 05:00 | 05:00 - 05:59 | Morning       | 37,0 | 77  | 18,0  | 18,0  | 18,16 | 574,39 | 96,72  |
| 2019/06/06 | CH2205 | Male | Three y/o | Control | Control | Feed Day | No | 05:05 | 05:00 - 05:59 | Morning       | 37,6 | 114 | 93,0  | 93,0  | 18,75 | 603,20 | 153,31 |
| 2019/06/06 | CH2206 | Male | Three y/o | Control | Control | Feed Day | No | 05:05 | 05:00 - 05:59 | Morning       | 37,1 | 191 | 69,2  | 69,2  | 18,26 | 637,33 | 143,04 |
| 2019/06/06 | CH2205 | Male | Three y/o | Control | Control | Feed Day | No | 05:10 | 05:00 - 05:59 | Morning       | 37,9 | 143 | 13,8  | 13,8  | 19,05 | 618,69 | 87,68  |
| 2019/06/06 | CH2206 | Male | Three y/o | Control | Control | Feed Day | No | 05:10 | 05:00 - 05:59 | Morning       | 37,4 | 148 | 87,2  | 87,2  | 18,55 | 620,97 | 151,07 |
| 2019/06/06 | CH2205 | Male | Three y/o | Control | Control | Feed Day | No | 05:15 | 05:00 - 05:59 | Morning       | 37,9 | 111 | 41,2  | 41,2  | 19,05 | 601,33 | 125,11 |
| 2019/06/06 | CH2206 | Male | Three y/o | Control | Control | Feed Day | No | 05:15 | 05:00 - 05:59 | Morning       | 37,4 | 46  | 11,4  | 11,4  | 18,55 | 532,38 | 81,19  |
| 2019/06/06 | CH2205 | Male | Three y/o | Control | Control | Feed Day | No | 05:20 | 05:00 - 05:59 | Morning       | 37,6 | 76  | 16,6  | 16,6  | 18,75 | 573,39 | 93,96  |
| 2019/06/06 | CH2206 | Male | Three y/o | Control | Control | Feed Day | No | 05:20 | 05:00 - 05:59 | Morning       | 37,2 | 77  | 34,0  | 34,0  | 18,36 | 574,39 | 118,49 |
| 2019/06/06 | CH2205 | Male | Three y/o | Control | Control | Feed Day | No | 05:25 | 05:00 - 05:59 | Morning       | 37,5 | 54  | 13,6  | 13,6  | 18,65 | 545,99 | 87,18  |
| 2019/06/06 | CH2206 | Male | Three y/o | Control | Control | Feed Day | No | 05:25 | 05:00 - 05:59 | Morning       | 37,1 | 68  | 46,8  | 46,8  | 18,26 | 564,71 | 129,50 |
| 2019/06/06 | CH2205 | Male | Three y/o | Control | Control | Feed Day | No | 05:30 | 05:00 - 05:59 | Morning       | 37,5 | 76  | 17,0  | 17,0  | 18,65 | 573,39 | 94,77  |
| 2019/06/06 | CH2206 | Male | Three y/o | Control | Control | Feed Day | No | 05:30 | 05:00 - 05:59 | Morning       | 37,2 | 77  | 47,4  | 47,4  | 18,36 | 574,39 | 129,94 |
| 2019/06/06 | CH2205 | Male | Three y/o | Control | Control | Feed Day | No | 05:35 | 05:00 - 05:59 | Morning       | 37,5 | 53  | 17,8  | 17,8  | 18,65 | 544,43 | 96,34  |
| 2019/06/06 | CH2206 | Male | Three y/o | Control | Control | Feed Day | No | 05:35 | 05:00 - 05:59 | Morning       | 37,3 | 79  | 46,6  | 46,6  | 18,46 | 576,36 | 129,35 |
| 2019/06/06 | CH2205 | Male | Three y/o | Control | Control | Feed Day | No | 05:40 | 05:00 - 05:59 | Morning       | 37,5 | 51  | 13,6  | 13,6  | 18,65 | 541,20 | 87,18  |
| 2019/06/06 | CH2206 | Male | Three y/o | Control | Control | Feed Day | No | 05:40 | 05:00 - 05:59 | Morning       | 37,5 | 86  | 43,6  | 43,6  | 18,65 | 582,77 | 127,06 |
| 2019/06/06 | CH2205 | Male | Three y/o | Control | Control | Feed Day | No | 05:45 | 05:00 - 05:59 | Morning       | 37,5 | 75  | 14,0  | 14,0  | 18,65 | 572,36 | 88,17  |
| 2019/06/06 | CH2206 | Male | Three y/o | Control | Control | Feed Day | No | 05:45 | 05:00 - 05:59 | Morning       | 37,5 | 67  | 42,0  | 42,0  | 18,65 | 563,53 | 125,77 |
| 2019/06/06 | CH2205 | Male | Three y/o | Control | Control | Feed Day | No | 05:50 | 05:00 - 05:59 | Morning       | 37,5 | 56  | 10,8  | 10,8  | 18,65 | 549,01 | 79,36  |
| 2019/06/06 | CH2206 | Male | Three y/o | Control | Control | Feed Day | No | 05:50 | 05:00 - 05:59 | Morning       | 37,5 | 85  | 45,4  | 45,4  | 18,65 | 581,90 | 128,45 |
| 2019/06/06 | CH2205 | Male | Three y/o | Control | Control | Feed Day | No | 05:55 | 05:00 - 05:59 | Morning       | 37,5 | 114 | 17,6  | 17,6  | 18,65 | 603,20 | 95,95  |
| 2019/06/06 | CH2206 | Male | Three y/o | Control | Control | Feed Day | No | 05:55 | 05:00 - 05:59 | Morning       | 37,5 | 125 | 16,4  | 16,4  | 18,65 | 609,60 | 93,55  |
| 2019/06/06 | CH2205 | Male | Three y/o | Control | Control | Feed Day | No | 06:00 | 06:00 - 06:59 | Morning       | 37,6 | 47  | 18,4  | 18,4  | 18,75 | 534,23 | 97,47  |
| 2019/06/06 | CH2206 | Male | Three y/o | Control | Control | Feed Day | No | 06:00 | 06:00 - 06:59 | Morning       | 37,5 | 76  | 9,2   | 9,2   | 18,65 | 573,39 | 73,94  |
| 2019/06/06 | CH2205 | Male | Three y/o | Control | Control | Feed Day | No | 06:05 | 06:00 - 06:59 | Morning       | 37,5 | 73  | 19,8  | 19,8  | 18,65 | 570,27 | 99,97  |
| 2019/06/06 | CH2206 | Male | Three y/o | Control | Control | Feed Day | No | 06:05 | 06:00 - 06:59 | Morning       | 37,4 | 92  | 30,2  | 30,2  | 18,55 | 587,78 | 114,42 |
| 2019/06/06 | CH2205 | Male | Three y/o | Control | Control | Feed Day | No | 06:10 | 06:00 - 06:59 | Morning       | 37,5 | 60  | 18,2  | 18,2  | 18,65 | 554,67 | 97,10  |
| 2019/06/06 | CH2206 | Male | Three y/o | Control | Control | Feed Day | No | 06:10 | 06:00 - 06:59 | Morning       | 37,3 | 69  | 46,0  | 46,0  | 18,46 | 565,86 | 128,91 |
| 2019/06/06 | CH2205 | Male | Three y/o | Control | Control | Feed Day | No | 06:15 | 06:00 - 06:59 | Morning       | 37,5 | 51  | 19,4  | 19,4  | 18,65 | 541,20 | 99,28  |



|            |        |      |           |         |         |          |     |       |               |              |      |     |       |       |       |        |        |
|------------|--------|------|-----------|---------|---------|----------|-----|-------|---------------|--------------|------|-----|-------|-------|-------|--------|--------|
| 2019/06/06 | CH2206 | Male | Three y/o | Control | Control | Feed Day | No  | 06:15 | 06:00 - 06:59 | Morning      | 37,3 | 79  | 41,2  | 41,2  | 18,46 | 576,36 | 125,11 |
| 2019/06/06 | CH2205 | Male | Three y/o | Control | Control | Feed Day | No  | 06:20 | 06:00 - 06:59 | Morning      | 37,5 |     | 23,8  | 23,8  | 18,65 |        | 106,26 |
| 2019/06/06 | CH2206 | Male | Three y/o | Control | Control | Feed Day | No  | 06:20 | 06:00 - 06:59 | Morning      | 37,4 | 131 | 138,0 | 138,0 | 18,55 | 612,80 | 167,10 |
| 2019/06/06 | CH2205 | Male | Three y/o | Control | Control | Feed Day | No  | 06:25 | 06:00 - 06:59 | Morning      | 37,5 | 77  | 24,6  | 24,6  | 18,65 | 574,39 | 107,39 |
| 2019/06/06 | CH2206 | Male | Three y/o | Control | Control | Feed Day | No  | 06:25 | 06:00 - 06:59 | Morning      | 37,5 | 131 | 121,6 | 121,6 | 18,65 | 612,80 | 162,67 |
| 2019/06/06 | CH2205 | Male | Three y/o | Control | Control | Feed Day | No  | 06:30 | 06:00 - 06:59 | Morning      | 37,3 | 65  | 19,4  | 19,4  | 18,46 | 561,12 | 99,28  |
| 2019/06/06 | CH2206 | Male | Three y/o | Control | Control | Feed Day | No  | 06:30 | 06:00 - 06:59 | Morning      | 37,5 | 98  | 244,2 | 244,2 | 18,65 | 592,41 | 187,15 |
| 2019/06/06 | CH2205 | Male | Three y/o | Control | Control | Feed Day | No  | 06:35 | 06:00 - 06:59 | Morning      | 37,4 | 106 | 111,8 | 111,8 | 18,55 | 598,06 | 159,74 |
| 2019/06/06 | CH2206 | Male | Three y/o | Control | Control | Feed Day | No  | 06:35 | 06:00 - 06:59 | Morning      | 37,7 | 118 | 134,6 | 134,6 | 18,85 | 605,61 | 166,22 |
| 2019/06/06 | CH2205 | Male | Three y/o | Control | Control | Feed Day | No  | 06:40 | 06:00 - 06:59 | Morning      | 37,5 | 80  | 30,0  | 30,0  | 18,65 | 577,31 | 114,20 |
| 2019/06/06 | CH2206 | Male | Three y/o | Control | Control | Feed Day | No  | 06:40 | 06:00 - 06:59 | Morning      | 37,7 | 107 | 80,6  | 80,6  | 18,85 | 598,73 | 148,34 |
| 2019/06/06 | CH2205 | Male | Three y/o | Control | Control | Feed Day | No  | 06:45 | 06:00 - 06:59 | Morning      | 37,6 | 104 | 366,2 | 366,2 | 18,75 | 596,69 | 201,48 |
| 2019/06/06 | CH2206 | Male | Three y/o | Control | Control | Feed Day | No  | 06:45 | 06:00 - 06:59 | Morning      | 37,8 | 115 | 47,0  | 47,0  | 18,95 | 603,82 | 129,65 |
| 2019/06/06 | CH2205 | Male | Three y/o | Control | Control | Feed Day | No  | 06:50 | 06:00 - 06:59 | Morning      | 37,7 | 111 | 76,6  | 76,6  | 18,85 | 601,33 | 146,57 |
| 2019/06/06 | CH2206 | Male | Three y/o | Control | Control | Feed Day | No  | 06:50 | 06:00 - 06:59 | Morning      | 37,9 | 99  | 60,4  | 60,4  | 19,05 | 593,14 | 138,32 |
| 2019/06/06 | CH2205 | Male | Three y/o | Control | Control | Feed Day | No  | 06:55 | 06:00 - 06:59 | Morning      | 37,9 | 148 | 66,4  | 66,4  | 19,05 | 620,97 | 141,61 |
| 2019/06/06 | CH2206 | Male | Three y/o | Control | Control | Feed Day | No  | 06:55 | 06:00 - 06:59 | Morning      | 38,0 | 191 | 166,6 | 166,6 | 19,15 | 637,33 | 173,70 |
| 2019/06/06 | CH2205 | Male | Three y/o | Control | Control | Feed Day | No  | 07:00 | 07:00 - 07:59 | Morning      | 38,1 | 67  | 61,2  | 61,2  | 19,26 | 563,53 | 138,78 |
| 2019/06/06 | CH2206 | Male | Three y/o | Control | Control | Feed Day | No  | 07:00 | 07:00 - 07:59 | Morning      | 38,1 | 115 | 81,4  | 81,4  | 19,26 | 603,82 | 148,68 |
| 2019/06/06 | CH2205 | Male | Three y/o | Control | Control | Feed Day | No  | 07:05 | 07:00 - 07:59 | Morning      | 38,2 | 140 | 392,0 | 392,0 | 19,36 | 617,28 | 203,90 |
| 2019/06/06 | CH2206 | Male | Three y/o | Control | Control | Feed Day | No  | 07:05 | 07:00 - 07:59 | Morning      | 38,0 | 112 | 60,8  | 60,8  | 19,15 | 601,96 | 138,55 |
| 2019/06/06 | CH2205 | Male | Three y/o | Control | Control | Feed Day | No  | 07:10 | 07:00 - 07:59 | Morning      | 38,2 | 108 | 221,2 | 221,2 | 19,36 | 599,39 | 183,67 |
| 2019/06/06 | CH2206 | Male | Three y/o | Control | Control | Feed Day | No  | 07:10 | 07:00 - 07:59 | Morning      | 38,1 | 84  | 46,0  | 46,0  | 19,26 | 581,01 | 128,91 |
| 2019/06/06 | CH2205 | Male | Three y/o | Control | Control | Feed Day | No  | 07:15 | 07:00 - 07:59 | Morning      | 38,2 |     | 60,8  | 60,8  | 19,36 |        | 138,55 |
| 2019/06/06 | CH2206 | Male | Three y/o | Control | Control | Feed Day | No  | 07:15 | 07:00 - 07:59 | Morning      | 38,1 | 154 | 109,4 | 109,4 | 19,26 | 623,58 | 158,98 |
| 2019/06/06 | CH2205 | Male | Three y/o | Control | Control | Feed Day | No  | 07:20 | 07:00 - 07:59 | Morning      | 38,2 |     | 172,4 | 172,4 | 19,36 |        | 174,90 |
| 2019/06/06 | CH2206 | Male | Three y/o | Control | Control | Feed Day | No  | 07:20 | 07:00 - 07:59 | Morning      | 38,1 | 123 | 81,2  | 81,2  | 19,26 | 608,49 | 148,59 |
| 2019/06/06 | CH2205 | Male | Three y/o | Control | Control | Feed Day | No  | 07:25 | 07:00 - 07:59 | Morning      | 38,2 |     | 109,0 | 109,0 | 19,36 |        | 158,85 |
| 2019/06/06 | CH2206 | Male | Three y/o | Control | Control | Feed Day | No  | 07:25 | 07:00 - 07:59 | Morning      | 38,1 |     | 571,6 | 571,6 | 19,26 |        | 217,32 |
| 2019/06/06 | CH2205 | Male | Three y/o | Control | Control | Feed Day | No  | 07:30 | 07:00 - 07:59 | Morning      | 38,3 |     | 26,6  | 26,6  | 19,46 |        | 110,07 |
| 2019/06/06 | CH2206 | Male | Three y/o | Control | Control | Feed Day | No  | 07:30 | 07:00 - 07:59 | Morning      | 38,1 |     | 166,8 | 166,8 | 19,26 |        | 173,74 |
| 2019/06/06 | CH2205 | Male | Three y/o | Control | Control | Feed Day | No  | 07:35 | 07:00 - 07:59 | Morning      | 38,2 | 38  | 167,4 | 167,4 | 19,36 | 515,48 | 173,87 |
| 2019/06/06 | CH2206 | Male | Three y/o | Control | Control | Feed Day | No  | 07:35 | 07:00 - 07:59 | Morning      | 38,1 | 107 | 294,6 | 294,6 | 19,26 | 598,73 | 193,78 |
| 2019/06/06 | CH2205 | Male | Three y/o | Control | Control | Feed Day | No  | 07:40 | 07:00 - 07:59 | Morning      | 38,2 | 128 | 118,6 | 118,6 | 19,36 | 611,22 | 161,80 |
| 2019/06/06 | CH2206 | Male | Three y/o | Control | Control | Feed Day | No  | 07:40 | 07:00 - 07:59 | Morning      | 38,1 | 115 | 243,2 | 243,2 | 19,26 | 603,82 | 187,01 |
| 2019/06/06 | CH2205 | Male | Three y/o | Control | Control | Feed Day | No  | 07:45 | 07:00 - 07:59 | Morning      | 38,2 |     | 29,0  | 29,0  | 19,36 |        | 113,03 |
| 2019/06/06 | CH2206 | Male | Three y/o | Control | Control | Feed Day | No  | 07:45 | 07:00 - 07:59 | Morning      | 38,1 | 121 | 165,8 | 165,8 | 19,26 | 607,35 | 173,53 |
| 2019/06/06 | CH2205 | Male | Three y/o | Control | Control | Feed Day | No  | 07:50 | 07:00 - 07:59 | Morning      | 38,1 |     | 187,0 | 187,0 | 19,26 |        | 177,76 |
| 2019/06/06 | CH2206 | Male | Three y/o | Control | Control | Feed Day | No  | 07:50 | 07:00 - 07:59 | Morning      | 38,1 | 106 | 188,6 | 188,6 | 19,26 | 598,06 | 178,05 |
| 2019/06/06 | CH2205 | Male | Three y/o | Control | Control | Feed Day | No  | 07:55 | 07:00 - 07:59 | Morning      | 38,1 | 117 | 121,0 | 121,0 | 19,26 | 605,02 | 162,50 |
| 2019/06/06 | CH2206 | Male | Three y/o | Control | Control | Feed Day | No  | 07:55 | 07:00 - 07:59 | Morning      | 38,2 | 91  | 66,0  | 66,0  | 19,36 | 586,98 | 141,40 |
| 2019/06/06 | CH2205 | Male | Three y/o | Control | Control | Feed Day | No  | 08:00 | 08:00 - 08:59 | Late Morning | 38,1 | 113 | 14,6  | 14,6  | 19,26 | 602,58 | 89,59  |
| 2019/06/06 | CH2206 | Male | Three y/o | Control | Control | Feed Day | No  | 08:00 | 08:00 - 08:59 | Late Morning | 38,1 | 112 | 54,2  | 54,2  | 19,26 | 601,96 | 134,57 |
| 2019/06/06 | CH2205 | Male | Three y/o | Control | Control | Feed Day | No  | 08:05 | 08:00 - 08:59 | Late Morning | 38,0 |     | 112,8 | 112,8 | 19,15 |        | 160,05 |
| 2019/06/06 | CH2206 | Male | Three y/o | Control | Control | Feed Day | No  | 08:05 | 08:00 - 08:59 | Late Morning | 38,0 |     | 161,4 | 161,4 | 19,15 |        | 172,59 |
| 2019/06/06 | CH2205 | Male | Three y/o | Control | Control | Feed Day | No  | 08:10 | 08:00 - 08:59 | Late Morning | 38,0 | 76  | 120,4 | 120,4 | 19,15 | 573,39 | 162,32 |
| 2019/06/06 | CH2206 | Male | Three y/o | Control | Control | Feed Day | No  | 08:10 | 08:00 - 08:59 | Late Morning | 38,0 | 109 | 73,0  | 73,0  | 19,15 | 600,04 | 144,89 |
| 2019/06/06 | CH2205 | Male | Three y/o | Control | Control | Feed Day | No  | 08:15 | 08:00 - 08:59 | Late Morning | 38,0 | 119 | 93,8  | 93,8  | 19,15 | 606,20 | 153,61 |
| 2019/06/06 | CH2206 | Male | Three y/o | Control | Control | Feed Day | No  | 08:15 | 08:00 - 08:59 | Late Morning | 38,0 | 106 | 182,6 | 182,6 | 19,15 | 598,06 | 176,92 |
| 2019/06/06 | CH2205 | Male | Three y/o | Control | Control | Feed Day | No  | 08:20 | 08:00 - 08:59 | Late Morning | 38,0 | 141 | 49,4  | 49,4  | 19,15 | 617,75 | 131,37 |
| 2019/06/06 | CH2206 | Male | Three y/o | Control | Control | Feed Day | No  | 08:20 | 08:00 - 08:59 | Late Morning | 38,0 | 114 | 261,2 | 261,2 | 19,15 | 603,20 | 189,53 |
| 2019/06/06 | CH2205 | Male | Three y/o | Control | Control | Feed Day | No  | 08:25 | 08:00 - 08:59 | Late Morning | 37,9 | 68  | 84,2  | 84,2  | 19,05 | 564,71 | 149,85 |
| 2019/06/06 | CH2206 | Male | Three y/o | Control | Control | Feed Day | No  | 08:25 | 08:00 - 08:59 | Late Morning | 38,0 | 137 | 235,4 | 235,4 | 19,15 | 615,83 | 185,86 |
| 2019/06/06 | CH2205 | Male | Three y/o | Control | Control | Feed Day | Yes | 08:30 | 08:00 - 08:59 | Late Morning | 38,0 | 119 | 134,8 | 134,8 | 19,15 | 606,20 | 166,28 |
| 2019/06/06 | CH2206 | Male | Three y/o | Control | Control | Feed Day | Yes | 08:30 | 08:00 - 08:59 | Late Morning | 38,0 | 123 | 114,0 | 114,0 | 19,15 | 608,49 | 160,42 |
| 2019/06/06 | CH2205 | Male | Three y/o | Control | Control | Feed Day | Yes | 08:35 | 08:00 - 08:59 | Late Morning | 38,0 |     | 139,0 | 139,0 | 19,15 |        | 167,35 |
| 2019/06/06 | CH2206 | Male | Three y/o | Control | Control | Feed Day | Yes | 08:35 | 08:00 - 08:59 | Late Morning | 38,1 | 129 | 175,0 | 175,0 | 19,26 | 611,75 | 175,43 |
| 2019/06/06 | CH2205 | Male | Three y/o | Control | Control | Feed Day | Yes | 08:40 | 08:00 - 08:59 | Late Morning | 38,2 |     | 276,2 | 276,2 | 19,36 |        | 191,50 |
| 2019/06/06 | CH2206 | Male | Three y/o | Control | Control | Feed Day | Yes | 08:40 | 08:00 - 08:59 | Late Morning | 38,2 | 120 | 142,0 | 142,0 | 19,36 | 606,78 | 168,10 |
| 2019/06/06 | CH2205 | Male | Three y/o | Control | Control | Feed Day | Yes | 08:45 | 08:00 - 08:59 | Late Morning | 38,3 | 69  | 60,2  | 60,2  | 19,46 | 565,86 | 138,21 |
| 2019/06/06 | CH2206 | Male | Three y/o | Control | Control | Feed Day | Yes | 08:45 | 08:00 - 08:59 | Late Morning | 38,2 |     | 121,6 | 121,6 | 19,36 |        | 162,67 |
| 2019/06/06 | CH2205 | Male | Three y/o | Control | Control | Feed Day | Yes | 08:50 | 08:00 - 08:59 | Late Morning | 38,3 | 110 | 169,6 | 169,6 | 19,46 | 600,69 | 174,32 |
| 2019/06/06 | CH2206 | Male | Three y/o | Control | Control | Feed Day | Yes | 08:50 | 08:00 - 08:59 | Late Morning | 38,2 | 132 | 290,8 | 290,8 | 19,36 | 613,32 | 193,32 |
| 2019/06/06 | CH2205 | Male | Three y/o | Control | Control | Feed Day | Yes | 08:55 | 08:00 - 08:59 | Late Morning | 38,3 | 141 | 16,4  | 16,4  | 19,46 | 617,75 | 93,55  |
| 2019/06/06 | CH2206 | Male | Three y/o | Control | Control | Feed Day | Yes | 08:55 | 08:00 - 08:59 | Late Morning | 38,2 |     | 136,6 | 136,6 | 19,36 |        | 166,74 |
| 2019/06/06 | CH2205 | Male | Three y/o | Control | Control | Feed Day | Yes | 09:00 | 09:00 - 09:59 | Late Morning | 38,2 |     | 30,8  | 30,8  | 19,36 |        | 115,10 |
| 2019/06/06 | CH2206 | Male | Three y/o | Control | Control | Feed Day | Yes | 09:00 | 09:00 - 09:59 | Late Morning | 38,2 | 112 | 50,8  | 50,8  | 19,36 | 601,96 | 132,33 |
| 2019/06/06 | CH2205 | Male | Three y/o | Control | Control | Feed Day | Yes | 09:05 | 09:00 - 09:59 | Late Morning | 38,1 |     | 24,2  | 24,2  | 19,26 |        | 106,83 |
| 2019/06/06 | CH2206 | Male | Three y/o | Control | Control | Feed Day | Yes | 09:05 | 09:00 - 09:59 | Late Morning | 38,2 | 147 | 180,8 | 180,8 | 19,36 | 620,52 | 176,57 |
| 2019/06/06 | CH2205 | Male | Three y/o | Control | Control | Feed Day | Yes | 09:10 | 09:00 - 09:59 | Late Morning | 38,0 | 167 | 123,2 | 123,2 | 19,15 | 628,84 | 163,13 |



|            |        |      |           |         |         |          |     |       |               |              |      |     |       |       |       |        |        |
|------------|--------|------|-----------|---------|---------|----------|-----|-------|---------------|--------------|------|-----|-------|-------|-------|--------|--------|
| 2019/06/06 | CH2206 | Male | Three y/o | Control | Control | Feed Day | Yes | 09:10 | 09:00 - 09:59 | Late Morning | 38,2 | 135 | 108,0 | 108,0 | 19,36 | 614,84 | 158,53 |
| 2019/06/06 | CH2205 | Male | Three y/o | Control | Control | Feed Day | Yes | 09:15 | 09:00 - 09:59 | Late Morning | 38,0 | 98  | 382,2 | 382,2 | 19,15 | 592,41 | 203,00 |
| 2019/06/06 | CH2206 | Male | Three y/o | Control | Control | Feed Day | Yes | 09:15 | 09:00 - 09:59 | Late Morning | 38,2 | 140 | 165,4 | 165,4 | 19,36 | 617,28 | 173,44 |
| 2019/06/06 | CH2205 | Male | Three y/o | Control | Control | Feed Day | Yes | 09:20 | 09:00 - 09:59 | Late Morning | 38,0 | 41  | 113,6 | 113,6 | 19,15 | 522,29 | 160,29 |
| 2019/06/06 | CH2206 | Male | Three y/o | Control | Control | Feed Day | Yes | 09:20 | 09:00 - 09:59 | Late Morning | 38,2 |     | 195,6 | 195,6 | 19,36 |        | 179,34 |
| 2019/06/06 | CH2205 | Male | Three y/o | Control | Control | Feed Day | Yes | 09:25 | 09:00 - 09:59 | Late Morning | 37,9 |     | 29,8  | 29,8  | 19,05 |        | 113,97 |
| 2019/06/06 | CH2206 | Male | Three y/o | Control | Control | Feed Day | Yes | 09:25 | 09:00 - 09:59 | Late Morning | 38,1 | 113 | 303,4 | 303,4 | 19,26 | 602,58 | 194,82 |
| 2019/06/06 | CH2205 | Male | Three y/o | Control | Control | Feed Day | No  | 09:30 | 09:00 - 09:59 | Late Morning | 38,2 |     | 39,4  | 39,4  | 19,36 |        | 123,57 |
| 2019/06/06 | CH2206 | Male | Three y/o | Control | Control | Feed Day | No  | 09:30 | 09:00 - 09:59 | Late Morning | 38,2 | 106 | 136,4 | 136,4 | 19,36 | 598,06 | 166,69 |
| 2019/06/06 | CH2205 | Male | Three y/o | Control | Control | Feed Day | No  | 09:35 | 09:00 - 09:59 | Late Morning | 38,0 |     | 81,4  | 81,4  | 19,15 |        | 148,68 |
| 2019/06/06 | CH2206 | Male | Three y/o | Control | Control | Feed Day | No  | 09:35 | 09:00 - 09:59 | Late Morning | 38,0 | 117 | 31,8  | 31,8  | 19,15 | 605,02 | 116,20 |
| 2019/06/06 | CH2205 | Male | Three y/o | Control | Control | Feed Day | No  | 09:40 | 09:00 - 09:59 | Late Morning | 38,0 | 114 | 58,0  | 58,0  | 19,15 | 603,20 | 136,92 |
| 2019/06/06 | CH2206 | Male | Three y/o | Control | Control | Feed Day | No  | 09:40 | 09:00 - 09:59 | Late Morning | 37,9 | 106 | 48,0  | 48,0  | 19,05 | 598,06 | 130,38 |
| 2019/06/06 | CH2205 | Male | Three y/o | Control | Control | Feed Day | No  | 09:45 | 09:00 - 09:59 | Late Morning | 38,0 | 128 | 17,2  | 17,2  | 19,15 | 611,22 | 95,17  |
| 2019/06/06 | CH2206 | Male | Three y/o | Control | Control | Feed Day | No  | 09:45 | 09:00 - 09:59 | Late Morning | 37,7 | 137 | 20,6  | 20,6  | 18,85 | 615,83 | 101,32 |
| 2019/06/06 | CH2205 | Male | Three y/o | Control | Control | Feed Day | No  | 09:50 | 09:00 - 09:59 | Late Morning | 37,9 | 162 | 14,8  | 14,8  | 19,05 | 626,88 | 90,05  |
| 2019/06/06 | CH2206 | Male | Three y/o | Control | Control | Feed Day | No  | 09:50 | 09:00 - 09:59 | Late Morning | 37,7 | 120 | 33,8  | 33,8  | 18,85 | 606,78 | 118,29 |
| 2019/06/06 | CH2205 | Male | Three y/o | Control | Control | Feed Day | No  | 09:55 | 09:00 - 09:59 | Late Morning | 37,9 | 131 | 32,6  | 32,6  | 19,05 | 612,80 | 117,05 |
| 2019/06/06 | CH2206 | Male | Three y/o | Control | Control | Feed Day | No  | 09:55 | 09:00 - 09:59 | Late Morning | 37,7 | 148 | 98,2  | 98,2  | 18,85 | 620,97 | 155,21 |
| 2019/06/06 | CH2205 | Male | Three y/o | Control | Control | Feed Day | No  | 10:00 | 10:00 - 10:59 | Late Morning | 37,5 |     | 73,4  | 73,4  | 18,65 |        | 145,08 |
| 2019/06/06 | CH2206 | Male | Three y/o | Control | Control | Feed Day | No  | 10:00 | 10:00 - 10:59 | Late Morning | 37,7 | 118 | 12,2  | 12,2  | 18,85 | 605,61 | 83,49  |
| 2019/06/06 | CH2205 | Male | Three y/o | Control | Control | Feed Day | No  | 10:05 | 10:00 - 10:59 | Late Morning | 37,4 | 112 | 76,4  | 76,4  | 18,55 | 601,96 | 146,48 |
| 2019/06/06 | CH2206 | Male | Three y/o | Control | Control | Feed Day | No  | 10:05 | 10:00 - 10:59 | Late Morning | 37,5 | 131 | 35,6  | 35,6  | 18,65 | 612,80 | 120,08 |
| 2019/06/06 | CH2205 | Male | Three y/o | Control | Control | Feed Day | No  | 10:10 | 10:00 - 10:59 | Late Morning | 37,7 | 109 | 26,6  | 26,6  | 18,85 | 600,04 | 110,07 |
| 2019/06/06 | CH2206 | Male | Three y/o | Control | Control | Feed Day | No  | 10:10 | 10:00 - 10:59 | Late Morning | 37,5 | 123 | 43,4  | 43,4  | 18,65 | 608,49 | 126,90 |
| 2019/06/06 | CH2205 | Male | Three y/o | Control | Control | Feed Day | No  | 10:15 | 10:00 - 10:59 | Late Morning | 37,9 |     | 92,0  | 92,0  | 19,05 |        | 152,94 |
| 2019/06/06 | CH2206 | Male | Three y/o | Control | Control | Feed Day | No  | 10:15 | 10:00 - 10:59 | Late Morning | 37,3 | 150 | 32,4  | 32,4  | 18,46 | 621,86 | 116,84 |
| 2019/06/06 | CH2205 | Male | Three y/o | Control | Control | Feed Day | No  | 10:20 | 10:00 - 10:59 | Late Morning | 37,6 |     | 52,8  | 52,8  | 18,75 |        | 133,67 |
| 2019/06/06 | CH2206 | Male | Three y/o | Control | Control | Feed Day | No  | 10:20 | 10:00 - 10:59 | Late Morning | 37,4 |     | 16,6  | 16,6  | 18,55 |        | 93,96  |
| 2019/06/06 | CH2205 | Male | Three y/o | Control | Control | Feed Day | No  | 10:25 | 10:00 - 10:59 | Late Morning | 37,3 |     | 105,8 | 105,8 | 18,46 |        | 157,81 |
| 2019/06/06 | CH2206 | Male | Three y/o | Control | Control | Feed Day | No  | 10:25 | 10:00 - 10:59 | Late Morning | 37,5 | 141 | 20,0  | 20,0  | 18,65 | 617,75 | 100,31 |
| 2019/06/06 | CH2205 | Male | Three y/o | Control | Control | Feed Day | No  | 10:30 | 10:00 - 10:59 | Late Morning | 37,4 |     | 37,6  | 37,6  | 18,55 |        | 121,96 |
| 2019/06/06 | CH2206 | Male | Three y/o | Control | Control | Feed Day | No  | 10:30 | 10:00 - 10:59 | Late Morning | 37,4 | 138 | 148,4 | 148,4 | 18,55 | 616,31 | 169,64 |
| 2019/06/06 | CH2205 | Male | Three y/o | Control | Control | Feed Day | No  | 10:35 | 10:00 - 10:59 | Late Morning | 37,5 | 123 | 62,2  | 62,2  | 18,65 | 608,49 | 139,34 |
| 2019/06/06 | CH2206 | Male | Three y/o | Control | Control | Feed Day | No  | 10:35 | 10:00 - 10:59 | Late Morning | 37,7 | 110 | 57,4  | 57,4  | 18,85 | 600,69 | 136,56 |
| 2019/06/06 | CH2205 | Male | Three y/o | Control | Control | Feed Day | No  | 10:40 | 10:00 - 10:59 | Late Morning | 37,7 |     | 20,8  | 20,8  | 18,85 |        | 101,65 |
| 2019/06/06 | CH2206 | Male | Three y/o | Control | Control | Feed Day | No  | 10:40 | 10:00 - 10:59 | Late Morning | 37,4 | 132 | 13,6  | 13,6  | 18,55 | 613,32 | 87,18  |
| 2019/06/06 | CH2205 | Male | Three y/o | Control | Control | Feed Day | No  | 10:45 | 10:00 - 10:59 | Late Morning | 37,7 | 112 | 9,8   | 9,8   | 18,85 | 601,96 | 76,07  |
| 2019/06/06 | CH2206 | Male | Three y/o | Control | Control | Feed Day | No  | 10:45 | 10:00 - 10:59 | Late Morning | 37,3 | 32  | 17,4  | 17,4  | 18,46 | 499,63 | 95,56  |
| 2019/06/06 | CH2205 | Male | Three y/o | Control | Control | Feed Day | No  | 10:50 | 10:00 - 10:59 | Late Morning | 37,7 | 177 | 40,2  | 40,2  | 18,85 | 632,55 | 124,26 |
| 2019/06/06 | CH2206 | Male | Three y/o | Control | Control | Feed Day | No  | 10:50 | 10:00 - 10:59 | Late Morning | 37,3 |     | 25,0  | 25,0  | 18,46 |        | 107,94 |
| 2019/06/06 | CH2205 | Male | Three y/o | Control | Control | Feed Day | No  | 10:55 | 10:00 - 10:59 | Late Morning | 37,7 | 106 | 34,4  | 34,4  | 18,85 | 598,06 | 118,90 |
| 2019/06/06 | CH2206 | Male | Three y/o | Control | Control | Feed Day | No  | 10:55 | 10:00 - 10:59 | Late Morning | 37,3 | 124 | 9,8   | 9,8   | 18,46 | 609,04 | 76,07  |
| 2019/06/06 | CH2205 | Male | Three y/o | Control | Control | Feed Day | No  | 11:00 | 11:00 - 11:59 | Late Morning | 37,7 | 97  | 6,2   | 6,2   | 18,85 | 591,66 | 60,63  |
| 2019/06/06 | CH2206 | Male | Three y/o | Control | Control | Feed Day | No  | 11:00 | 11:00 - 11:59 | Late Morning | 37,1 | 121 | 20,6  | 20,6  | 18,26 | 607,35 | 101,32 |
| 2019/06/06 | CH2205 | Male | Three y/o | Control | Control | Feed Day | No  | 11:05 | 11:00 - 11:59 | Late Morning | 37,9 | 94  | 11,8  | 11,8  | 19,05 | 589,37 | 82,36  |
| 2019/06/06 | CH2206 | Male | Three y/o | Control | Control | Feed Day | No  | 11:05 | 11:00 - 11:59 | Late Morning | 36,8 | 141 | 75,6  | 75,6  | 17,96 | 617,75 | 146,11 |
| 2019/06/06 | CH2205 | Male | Three y/o | Control | Control | Feed Day | No  | 11:10 | 11:00 - 11:59 | Late Morning | 37,9 | 100 | 9,6   | 9,6   | 19,05 | 593,87 | 75,37  |
| 2019/06/06 | CH2206 | Male | Three y/o | Control | Control | Feed Day | No  | 11:10 | 11:00 - 11:59 | Late Morning | 36,6 | 180 | 58,0  | 58,0  | 17,77 | 633,61 | 136,92 |
| 2019/06/06 | CH2205 | Male | Three y/o | Control | Control | Feed Day | No  | 11:15 | 11:00 - 11:59 | Late Morning | 37,9 | 106 | 7,2   | 7,2   | 19,05 | 598,06 | 65,66  |
| 2019/06/06 | CH2206 | Male | Three y/o | Control | Control | Feed Day | No  | 11:15 | 11:00 - 11:59 | Late Morning | 36,7 | 124 | 19,0  | 19,0  | 17,87 | 609,04 | 98,56  |
| 2019/06/06 | CH2205 | Male | Three y/o | Control | Control | Feed Day | No  | 11:20 | 11:00 - 11:59 | Late Morning | 38,0 | 108 | 4,0   | 4,0   | 19,15 | 599,39 | 45,94  |
| 2019/06/06 | CH2206 | Male | Three y/o | Control | Control | Feed Day | No  | 11:20 | 11:00 - 11:59 | Late Morning | 36,8 | 126 | 31,6  | 31,6  | 17,96 | 610,14 | 115,98 |
| 2019/06/06 | CH2205 | Male | Three y/o | Control | Control | Feed Day | No  | 11:25 | 11:00 - 11:59 | Late Morning | 38,1 | 100 | 18,4  | 18,4  | 19,26 | 593,87 | 97,47  |
| 2019/06/06 | CH2206 | Male | Three y/o | Control | Control | Feed Day | No  | 11:25 | 11:00 - 11:59 | Late Morning | 37,1 |     | 33,8  | 33,8  | 18,26 |        | 118,29 |
| 2019/06/06 | CH2205 | Male | Three y/o | Control | Control | Feed Day | No  | 11:30 | 11:00 - 11:59 | Late Morning | 38,1 | 111 | 46,6  | 46,6  | 19,26 | 601,33 | 129,35 |
| 2019/06/06 | CH2206 | Male | Three y/o | Control | Control | Feed Day | No  | 11:30 | 11:00 - 11:59 | Late Morning | 37,3 | 125 | 45,2  | 45,2  | 18,46 | 609,60 | 128,30 |
| 2019/06/06 | CH2205 | Male | Three y/o | Control | Control | Feed Day | No  | 11:35 | 11:00 - 11:59 | Late Morning | 38,0 | 111 | 39,6  | 39,6  | 19,15 | 601,33 | 123,74 |
| 2019/06/06 | CH2206 | Male | Three y/o | Control | Control | Feed Day | No  | 11:35 | 11:00 - 11:59 | Late Morning | 37,5 | 123 | 47,4  | 47,4  | 18,65 | 608,49 | 129,94 |
| 2019/06/06 | CH2205 | Male | Three y/o | Control | Control | Feed Day | No  | 11:40 | 11:00 - 11:59 | Late Morning | 37,9 | 131 | 25,4  | 25,4  | 19,05 | 612,80 | 108,49 |
| 2019/06/06 | CH2206 | Male | Three y/o | Control | Control | Feed Day | No  | 11:40 | 11:00 - 11:59 | Late Morning | 37,7 | 119 | 23,2  | 23,2  | 18,85 | 606,20 | 105,39 |
| 2019/06/06 | CH2205 | Male | Three y/o | Control | Control | Feed Day | No  | 11:45 | 11:00 - 11:59 | Late Morning | 37,7 | 115 | 45,4  | 45,4  | 18,85 | 603,82 | 128,45 |
| 2019/06/06 | CH2206 | Male | Three y/o | Control | Control | Feed Day | No  | 11:45 | 11:00 - 11:59 | Late Morning | 37,8 |     | 30,0  | 30,0  | 18,95 |        | 114,20 |
| 2019/06/06 | CH2205 | Male | Three y/o | Control | Control | Feed Day | No  | 11:50 | 11:00 - 11:59 | Late Morning | 37,9 | 128 | 48,6  | 48,6  | 19,05 | 611,22 | 130,81 |
| 2019/06/06 | CH2206 | Male | Three y/o | Control | Control | Feed Day | No  | 11:50 | 11:00 - 11:59 | Late Morning | 37,9 | 134 | 28,4  | 28,4  | 19,05 | 614,33 | 112,31 |
| 2019/06/06 | CH2205 | Male | Three y/o | Control | Control | Feed Day | No  | 11:55 | 11:00 - 11:59 | Late Morning | 37,0 | 43  | 72,4  | 72,4  | 18,16 | 526,50 | 144,61 |
| 2019/06/06 | CH2206 | Male | Three y/o | Control | Control | Feed Day | No  | 11:55 | 11:00 - 11:59 | Late Morning | 37,8 | 124 | 26,0  | 26,0  | 18,95 | 609,04 | 109,29 |
| 2019/06/06 | CH2205 | Male | Three y/o | Control | Control | Feed Day | No  | 12:00 | 12:00 - 12:59 | Afternoon    | 37,1 | 100 | 24,4  | 24,4  | 18,26 | 593,87 | 107,11 |
| 2019/06/06 | CH2206 | Male | Three y/o | Control | Control | Feed Day | No  | 12:00 | 12:00 - 12:59 | Afternoon    | 37,8 | 123 | 51,0  | 51,0  | 18,95 | 608,49 | 132,47 |
| 2019/06/06 | CH2205 | Male | Three y/o | Control | Control | Feed Day | No  | 12:05 | 12:00 - 12:59 | Afternoon    | 37,2 |     | 20,2  | 20,2  | 18,36 |        | 100,65 |



|            |        |      |           |         |         |          |    |       |               |           |      |     |       |       |       |        |        |
|------------|--------|------|-----------|---------|---------|----------|----|-------|---------------|-----------|------|-----|-------|-------|-------|--------|--------|
| 2019/06/06 | CH2206 | Male | Three y/o | Control | Control | Feed Day | No | 12:05 | 12:00 - 12:59 | Afternoon | 37,5 | 140 | 31,2  | 31,2  | 18,65 | 617,28 | 115,54 |
| 2019/06/06 | CH2205 | Male | Three y/o | Control | Control | Feed Day | No | 12:10 | 12:00 - 12:59 | Afternoon | 37,3 | 102 | 14,8  | 14,8  | 18,46 | 595,30 | 90,05  |
| 2019/06/06 | CH2206 | Male | Three y/o | Control | Control | Feed Day | No | 12:10 | 12:00 - 12:59 | Afternoon | 37,9 | 125 | 48,4  | 48,4  | 19,05 | 609,60 | 130,66 |
| 2019/06/06 | CH2205 | Male | Three y/o | Control | Control | Feed Day | No | 12:15 | 12:00 - 12:59 | Afternoon | 37,4 | 54  | 3,8   | 3,8   | 18,55 | 545,99 | 44,22  |
| 2019/06/06 | CH2206 | Male | Three y/o | Control | Control | Feed Day | No | 12:15 | 12:00 - 12:59 | Afternoon | 37,5 | 119 | 31,0  | 31,0  | 18,65 | 606,20 | 115,32 |
| 2019/06/06 | CH2205 | Male | Three y/o | Control | Control | Feed Day | No | 12:20 | 12:00 - 12:59 | Afternoon | 37,5 | 103 | 4,4   | 4,4   | 18,65 | 596,00 | 49,12  |
| 2019/06/06 | CH2206 | Male | Three y/o | Control | Control | Feed Day | No | 12:20 | 12:00 - 12:59 | Afternoon | 37,2 | 131 | 49,4  | 49,4  | 18,36 | 612,80 | 131,37 |
| 2019/06/06 | CH2205 | Male | Three y/o | Control | Control | Feed Day | No | 12:25 | 12:00 - 12:59 | Afternoon | 37,6 | 98  | 2,2   | 2,2   | 18,75 | 592,41 | 26,02  |
| 2019/06/06 | CH2206 | Male | Three y/o | Control | Control | Feed Day | No | 12:25 | 12:00 - 12:59 | Afternoon | 37,3 | 150 | 26,6  | 26,6  | 18,46 | 621,86 | 110,07 |
| 2019/06/06 | CH2205 | Male | Three y/o | Control | Control | Feed Day | No | 12:30 | 12:00 - 12:59 | Afternoon | 37,7 | 103 | 5,4   | 5,4   | 18,85 | 596,00 | 55,99  |
| 2019/06/06 | CH2206 | Male | Three y/o | Control | Control | Feed Day | No | 12:30 | 12:00 - 12:59 | Afternoon | 37,0 | 128 | 14,4  | 14,4  | 18,16 | 611,22 | 89,12  |
| 2019/06/06 | CH2205 | Male | Three y/o | Control | Control | Feed Day | No | 12:35 | 12:00 - 12:59 | Afternoon | 37,9 | 102 | 8,0   | 8,0   | 19,05 | 595,30 | 69,22  |
| 2019/06/06 | CH2206 | Male | Three y/o | Control | Control | Feed Day | No | 12:35 | 12:00 - 12:59 | Afternoon | 37,1 |     | 23,4  | 23,4  | 18,26 |        | 105,68 |
| 2019/06/06 | CH2205 | Male | Three y/o | Control | Control | Feed Day | No | 12:40 | 12:00 - 12:59 | Afternoon | 37,9 | 94  | 5,2   | 5,2   | 19,05 | 589,37 | 54,72  |
| 2019/06/06 | CH2206 | Male | Three y/o | Control | Control | Feed Day | No | 12:40 | 12:00 - 12:59 | Afternoon | 37,2 | 123 | 29,8  | 29,8  | 18,36 | 608,49 | 113,97 |
| 2019/06/06 | CH2205 | Male | Three y/o | Control | Control | Feed Day | No | 12:45 | 12:00 - 12:59 | Afternoon | 38,0 | 86  | 5,0   | 5,0   | 19,15 | 582,77 | 53,41  |
| 2019/06/06 | CH2206 | Male | Three y/o | Control | Control | Feed Day | No | 12:45 | 12:00 - 12:59 | Afternoon | 37,3 | 124 | 22,8  | 22,8  | 18,46 | 609,04 | 104,79 |
| 2019/06/06 | CH2205 | Male | Three y/o | Control | Control | Feed Day | No | 12:50 | 12:00 - 12:59 | Afternoon | 38,0 | 106 | 4,6   | 4,6   | 19,15 | 598,06 | 50,61  |
| 2019/06/06 | CH2206 | Male | Three y/o | Control | Control | Feed Day | No | 12:50 | 12:00 - 12:59 | Afternoon | 37,4 | 103 | 21,0  | 21,0  | 18,55 | 596,00 | 101,98 |
| 2019/06/06 | CH2205 | Male | Three y/o | Control | Control | Feed Day | No | 12:55 | 12:00 - 12:59 | Afternoon | 38,1 | 98  | 5,0   | 5,0   | 19,26 | 592,41 | 53,41  |
| 2019/06/06 | CH2206 | Male | Three y/o | Control | Control | Feed Day | No | 12:55 | 12:00 - 12:59 | Afternoon | 37,7 | 119 | 24,2  | 24,2  | 18,85 | 606,20 | 106,83 |
| 2019/06/06 | CH2205 | Male | Three y/o | Control | Control | Feed Day | No | 13:00 | 13:00 - 13:59 | Afternoon | 38,1 | 108 | 23,0  | 23,0  | 19,26 | 599,39 | 105,09 |
| 2019/06/06 | CH2206 | Male | Three y/o | Control | Control | Feed Day | No | 13:00 | 13:00 - 13:59 | Afternoon | 37,8 | 140 | 26,8  | 26,8  | 18,95 | 617,28 | 110,33 |
| 2019/06/06 | CH2205 | Male | Three y/o | Control | Control | Feed Day | No | 13:05 | 13:00 - 13:59 | Afternoon | 38,2 | 98  | 13,6  | 13,6  | 19,36 | 592,41 | 87,18  |
| 2019/06/06 | CH2206 | Male | Three y/o | Control | Control | Feed Day | No | 13:05 | 13:00 - 13:59 | Afternoon | 37,9 | 125 | 29,0  | 29,0  | 19,05 | 609,60 | 113,03 |
| 2019/06/06 | CH2205 | Male | Three y/o | Control | Control | Feed Day | No | 13:10 | 13:00 - 13:59 | Afternoon | 38,2 | 128 | 14,4  | 14,4  | 19,36 | 611,22 | 89,12  |
| 2019/06/06 | CH2206 | Male | Three y/o | Control | Control | Feed Day | No | 13:10 | 13:00 - 13:59 | Afternoon | 38,0 | 123 | 26,4  | 26,4  | 19,15 | 608,49 | 109,81 |
| 2019/06/06 | CH2205 | Male | Three y/o | Control | Control | Feed Day | No | 13:15 | 13:00 - 13:59 | Afternoon | 38,2 | 99  | 8,6   | 8,6   | 19,36 | 593,14 | 71,66  |
| 2019/06/06 | CH2206 | Male | Three y/o | Control | Control | Feed Day | No | 13:15 | 13:00 - 13:59 | Afternoon | 38,0 | 128 | 27,2  | 27,2  | 19,15 | 611,22 | 110,83 |
| 2019/06/06 | CH2205 | Male | Three y/o | Control | Control | Feed Day | No | 13:20 | 13:00 - 13:59 | Afternoon | 38,2 | 114 | 12,8  | 12,8  | 19,36 | 603,20 | 85,12  |
| 2019/06/06 | CH2206 | Male | Three y/o | Control | Control | Feed Day | No | 13:20 | 13:00 - 13:59 | Afternoon | 38,0 | 124 | 34,0  | 34,0  | 19,15 | 609,04 | 118,49 |
| 2019/06/06 | CH2205 | Male | Three y/o | Control | Control | Feed Day | No | 13:25 | 13:00 - 13:59 | Afternoon | 38,2 | 107 | 15,4  | 15,4  | 19,36 | 598,73 | 91,41  |
| 2019/06/06 | CH2206 | Male | Three y/o | Control | Control | Feed Day | No | 13:25 | 13:00 - 13:59 | Afternoon | 38,1 | 121 | 49,0  | 49,0  | 19,26 | 607,35 | 131,09 |
| 2019/06/06 | CH2205 | Male | Three y/o | Control | Control | Feed Day | No | 13:30 | 13:00 - 13:59 | Afternoon | 38,2 | 98  | 9,4   | 9,4   | 19,36 | 592,41 | 74,66  |
| 2019/06/06 | CH2206 | Male | Three y/o | Control | Control | Feed Day | No | 13:30 | 13:00 - 13:59 | Afternoon | 38,1 | 118 | 53,4  | 53,4  | 19,26 | 605,61 | 134,06 |
| 2019/06/06 | CH2205 | Male | Three y/o | Control | Control | Feed Day | No | 13:35 | 13:00 - 13:59 | Afternoon | 38,3 | 137 | 21,6  | 21,6  | 19,46 | 615,83 | 102,94 |
| 2019/06/06 | CH2206 | Male | Three y/o | Control | Control | Feed Day | No | 13:35 | 13:00 - 13:59 | Afternoon | 38,1 |     | 50,2  | 50,2  | 19,26 |        | 131,92 |
| 2019/06/06 | CH2205 | Male | Three y/o | Control | Control | Feed Day | No | 13:40 | 13:00 - 13:59 | Afternoon | 38,1 | 117 | 25,8  | 25,8  | 19,26 | 605,02 | 109,02 |
| 2019/06/06 | CH2206 | Male | Three y/o | Control | Control | Feed Day | No | 13:40 | 13:00 - 13:59 | Afternoon | 38,1 | 115 | 31,6  | 31,6  | 19,26 | 603,82 | 115,98 |
| 2019/06/06 | CH2205 | Male | Three y/o | Control | Control | Feed Day | No | 13:45 | 13:00 - 13:59 | Afternoon | 38,1 | 165 | 28,4  | 28,4  | 19,26 | 628,06 | 112,31 |
| 2019/06/06 | CH2206 | Male | Three y/o | Control | Control | Feed Day | No | 13:45 | 13:00 - 13:59 | Afternoon | 38,1 | 132 | 24,8  | 24,8  | 19,26 | 613,32 | 107,67 |
| 2019/06/06 | CH2205 | Male | Three y/o | Control | Control | Feed Day | No | 13:50 | 13:00 - 13:59 | Afternoon | 37,9 | 98  | 21,6  | 21,6  | 19,05 | 592,41 | 102,94 |
| 2019/06/06 | CH2206 | Male | Three y/o | Control | Control | Feed Day | No | 13:50 | 13:00 - 13:59 | Afternoon | 38,0 |     | 23,2  | 23,2  | 19,15 |        | 105,39 |
| 2019/06/06 | CH2205 | Male | Three y/o | Control | Control | Feed Day | No | 13:55 | 13:00 - 13:59 | Afternoon | 37,9 |     | 84,4  | 84,4  | 19,05 |        | 149,94 |
| 2019/06/06 | CH2206 | Male | Three y/o | Control | Control | Feed Day | No | 13:55 | 13:00 - 13:59 | Afternoon | 37,9 |     | 79,6  | 79,6  | 19,05 |        | 147,90 |
| 2019/06/06 | CH2205 | Male | Three y/o | Control | Control | Feed Day | No | 14:00 | 14:00 - 14:59 | Afternoon | 37,5 |     | 17,4  | 17,4  | 18,65 |        | 95,56  |
| 2019/06/06 | CH2206 | Male | Three y/o | Control | Control | Feed Day | No | 14:00 | 14:00 - 14:59 | Afternoon | 37,8 | 128 | 32,2  | 32,2  | 18,95 | 611,22 | 116,63 |
| 2019/06/06 | CH2205 | Male | Three y/o | Control | Control | Feed Day | No | 14:05 | 14:00 - 14:59 | Afternoon | 38,3 |     | 104,0 | 104,0 | 19,46 |        | 157,21 |
| 2019/06/06 | CH2206 | Male | Three y/o | Control | Control | Feed Day | No | 14:05 | 14:00 - 14:59 | Afternoon | 37,9 | 123 | 27,0  | 27,0  | 19,05 | 608,49 | 110,58 |
| 2019/06/06 | CH2205 | Male | Three y/o | Control | Control | Feed Day | No | 14:10 | 14:00 - 14:59 | Afternoon | 38,5 | 137 | 45,6  | 45,6  | 19,66 | 615,83 | 128,61 |
| 2019/06/06 | CH2206 | Male | Three y/o | Control | Control | Feed Day | No | 14:10 | 14:00 - 14:59 | Afternoon | 38,0 | 182 | 29,0  | 29,0  | 19,15 | 634,31 | 113,03 |
| 2019/06/06 | CH2205 | Male | Three y/o | Control | Control | Feed Day | No | 14:15 | 14:00 - 14:59 | Afternoon | 37,7 | 98  | 18,0  | 18,0  | 18,85 | 592,41 | 96,72  |
| 2019/06/06 | CH2206 | Male | Three y/o | Control | Control | Feed Day | No | 14:15 | 14:00 - 14:59 | Afternoon | 38,0 | 112 | 11,6  | 11,6  | 19,15 | 601,96 | 81,78  |
| 2019/06/06 | CH2205 | Male | Three y/o | Control | Control | Feed Day | No | 14:20 | 14:00 - 14:59 | Afternoon | 37,9 | 45  | 20,6  | 20,6  | 19,05 | 530,47 | 101,32 |
| 2019/06/06 | CH2206 | Male | Three y/o | Control | Control | Feed Day | No | 14:20 | 14:00 - 14:59 | Afternoon | 37,9 | 135 | 27,4  | 27,4  | 19,05 | 614,84 | 111,09 |
| 2019/06/06 | CH2205 | Male | Three y/o | Control | Control | Feed Day | No | 14:25 | 14:00 - 14:59 | Afternoon | 38,0 |     | 17,0  | 17,0  | 19,15 |        | 94,77  |
| 2019/06/06 | CH2206 | Male | Three y/o | Control | Control | Feed Day | No | 14:25 | 14:00 - 14:59 | Afternoon | 37,9 | 129 | 75,8  | 75,8  | 19,05 | 611,75 | 146,20 |
| 2019/06/06 | CH2205 | Male | Three y/o | Control | Control | Feed Day | No | 14:30 | 14:00 - 14:59 | Afternoon | 38,1 |     | 60,0  | 60,0  | 19,26 |        | 138,09 |
| 2019/06/06 | CH2206 | Male | Three y/o | Control | Control | Feed Day | No | 14:30 | 14:00 - 14:59 | Afternoon | 37,9 |     | 36,2  | 36,2  | 19,05 |        | 120,65 |
| 2019/06/06 | CH2205 | Male | Three y/o | Control | Control | Feed Day | No | 14:35 | 14:00 - 14:59 | Afternoon | 38,2 | 118 | 12,4  | 12,4  | 19,36 | 605,61 | 84,04  |
| 2019/06/06 | CH2206 | Male | Three y/o | Control | Control | Feed Day | No | 14:35 | 14:00 - 14:59 | Afternoon | 37,8 |     | 31,8  | 31,8  | 18,95 |        | 116,20 |
| 2019/06/06 | CH2205 | Male | Three y/o | Control | Control | Feed Day | No | 14:40 | 14:00 - 14:59 | Afternoon | 38,2 | 98  | 13,2  | 13,2  | 19,36 | 592,41 | 86,17  |
| 2019/06/06 | CH2206 | Male | Three y/o | Control | Control | Feed Day | No | 14:40 | 14:00 - 14:59 | Afternoon | 37,9 | 134 | 17,6  | 17,6  | 19,05 | 614,33 | 95,95  |
| 2019/06/06 | CH2205 | Male | Three y/o | Control | Control | Feed Day | No | 14:45 | 14:00 - 14:59 | Afternoon | 38,3 | 98  | 12,6  | 12,6  | 19,46 | 592,41 | 84,59  |
| 2019/06/06 | CH2206 | Male | Three y/o | Control | Control | Feed Day | No | 14:45 | 14:00 - 14:59 | Afternoon | 37,9 | 129 | 23,6  | 23,6  | 19,05 | 611,75 | 105,97 |
| 2019/06/06 | CH2205 | Male | Three y/o | Control | Control | Feed Day | No | 14:50 | 14:00 - 14:59 | Afternoon | 38,3 | 107 | 15,0  | 15,0  | 19,46 | 598,73 | 90,51  |
| 2019/06/06 | CH2206 | Male | Three y/o | Control | Control | Feed Day | No | 14:50 | 14:00 - 14:59 | Afternoon | 38,2 |     | 29,8  | 29,8  | 19,36 |        | 113,97 |
| 2019/06/06 | CH2205 | Male | Three y/o | Control | Control | Feed Day | No | 14:55 | 14:00 - 14:59 | Afternoon | 38,3 | 84  | 15,8  | 15,8  | 19,46 | 581,01 | 92,28  |
| 2019/06/06 | CH2206 | Male | Three y/o | Control | Control | Feed Day | No | 14:55 | 14:00 - 14:59 | Afternoon | 38,2 |     | 41,0  | 41,0  | 19,36 |        | 124,94 |
| 2019/06/06 | CH2205 | Male | Three y/o | Control | Control | Feed Day | No | 15:00 | 15:00 - 15:59 | Afternoon | 38,3 | 86  | 10,0  | 10,0  | 19,46 | 582,77 | 76,76  |



|            |        |      |           |         |         |          |    |       |               |           |      |     |      |      |       |        |        |
|------------|--------|------|-----------|---------|---------|----------|----|-------|---------------|-----------|------|-----|------|------|-------|--------|--------|
| 2019/06/06 | CH2206 | Male | Three y/o | Control | Control | Feed Day | No | 15:00 | 15:00 - 15:59 | Afternoon | 37,4 | 197 | 58,2 | 58,2 | 18,55 | 639,25 | 137,04 |
| 2019/06/06 | CH2205 | Male | Three y/o | Control | Control | Feed Day | No | 15:05 | 15:00 - 15:59 | Afternoon | 38,4 | 103 | 15,6 | 15,6 | 19,56 | 596,00 | 91,85  |
| 2019/06/06 | CH2206 | Male | Three y/o | Control | Control | Feed Day | No | 15:05 | 15:00 - 15:59 | Afternoon | 37,4 | 134 | 15,0 | 15,0 | 18,55 | 614,33 | 90,51  |
| 2019/06/06 | CH2205 | Male | Three y/o | Control | Control | Feed Day | No | 15:10 | 15:00 - 15:59 | Afternoon | 38,4 | 90  | 15,4 | 15,4 | 19,56 | 586,16 | 91,41  |
| 2019/06/06 | CH2206 | Male | Three y/o | Control | Control | Feed Day | No | 15:10 | 15:00 - 15:59 | Afternoon | 37,5 | 124 | 36,4 | 36,4 | 18,65 | 609,04 | 120,84 |
| 2019/06/06 | CH2205 | Male | Three y/o | Control | Control | Feed Day | No | 15:15 | 15:00 - 15:59 | Afternoon | 38,4 | 94  | 15,4 | 15,4 | 19,56 | 589,37 | 91,41  |
| 2019/06/06 | CH2206 | Male | Three y/o | Control | Control | Feed Day | No | 15:15 | 15:00 - 15:59 | Afternoon | 37,8 | 156 | 16,6 | 16,6 | 18,95 | 624,43 | 93,96  |
| 2019/06/06 | CH2205 | Male | Three y/o | Control | Control | Feed Day | No | 15:20 | 15:00 - 15:59 | Afternoon | 38,4 |     | 9,6  | 9,6  | 19,56 |        | 75,37  |
| 2019/06/06 | CH2206 | Male | Three y/o | Control | Control | Feed Day | No | 15:20 | 15:00 - 15:59 | Afternoon | 37,9 | 109 | 26,8 | 26,8 | 19,05 | 600,04 | 110,33 |
| 2019/06/06 | CH2205 | Male | Three y/o | Control | Control | Feed Day | No | 15:25 | 15:00 - 15:59 | Afternoon | 38,4 | 110 | 17,2 | 17,2 | 19,56 | 600,69 | 95,17  |
| 2019/06/06 | CH2206 | Male | Three y/o | Control | Control | Feed Day | No | 15:25 | 15:00 - 15:59 | Afternoon | 38,0 | 121 | 25,0 | 25,0 | 19,15 | 607,35 | 107,94 |
| 2019/06/06 | CH2205 | Male | Three y/o | Control | Control | Feed Day | No | 15:30 | 15:00 - 15:59 | Afternoon | 38,3 | 169 | 19,0 | 19,0 | 19,46 | 629,60 | 98,56  |
| 2019/06/06 | CH2206 | Male | Three y/o | Control | Control | Feed Day | No | 15:30 | 15:00 - 15:59 | Afternoon | 38,0 | 115 | 28,0 | 28,0 | 19,15 | 603,82 | 111,83 |
| 2019/06/06 | CH2205 | Male | Three y/o | Control | Control | Feed Day | No | 15:35 | 15:00 - 15:59 | Afternoon | 38,3 | 134 | 13,0 | 13,0 | 19,46 | 614,33 | 85,65  |
| 2019/06/06 | CH2206 | Male | Three y/o | Control | Control | Feed Day | No | 15:35 | 15:00 - 15:59 | Afternoon | 38,1 | 109 | 38,6 | 38,6 | 19,26 | 600,04 | 122,86 |
| 2019/06/06 | CH2205 | Male | Three y/o | Control | Control | Feed Day | No | 15:40 | 15:00 - 15:59 | Afternoon | 38,3 | 100 | 14,4 | 14,4 | 19,46 | 593,87 | 89,12  |
| 2019/06/06 | CH2206 | Male | Three y/o | Control | Control | Feed Day | No | 15:40 | 15:00 - 15:59 | Afternoon | 38,1 | 121 | 42,8 | 42,8 | 19,26 | 607,35 | 126,42 |
| 2019/06/06 | CH2205 | Male | Three y/o | Control | Control | Feed Day | No | 15:45 | 15:00 - 15:59 | Afternoon | 38,3 | 104 | 14,2 | 14,2 | 19,46 | 596,69 | 88,65  |
| 2019/06/06 | CH2206 | Male | Three y/o | Control | Control | Feed Day | No | 15:45 | 15:00 - 15:59 | Afternoon | 38,1 | 112 | 38,2 | 38,2 | 19,26 | 601,96 | 122,50 |
| 2019/06/06 | CH2205 | Male | Three y/o | Control | Control | Feed Day | No | 15:50 | 15:00 - 15:59 | Afternoon | 38,3 | 84  | 13,8 | 13,8 | 19,46 | 581,01 | 87,68  |
| 2019/06/06 | CH2206 | Male | Three y/o | Control | Control | Feed Day | No | 15:50 | 15:00 - 15:59 | Afternoon | 38,1 | 106 | 39,0 | 39,0 | 19,26 | 598,06 | 123,22 |
| 2019/06/06 | CH2205 | Male | Three y/o | Control | Control | Feed Day | No | 15:55 | 15:00 - 15:59 | Afternoon | 38,3 | 86  | 15,4 | 15,4 | 19,46 | 582,77 | 91,41  |
| 2019/06/06 | CH2206 | Male | Three y/o | Control | Control | Feed Day | No | 15:55 | 15:00 - 15:59 | Afternoon | 38,1 | 104 | 38,6 | 38,6 | 19,26 | 596,69 | 122,86 |
| 2019/06/06 | CH2205 | Male | Three y/o | Control | Control | Feed Day | No | 16:00 | 16:00 - 16:59 | Evening   | 38,3 | 103 | 13,4 | 13,4 | 19,46 | 596,00 | 86,68  |
| 2019/06/06 | CH2206 | Male | Three y/o | Control | Control | Feed Day | No | 16:00 | 16:00 - 16:59 | Evening   | 38,1 | 106 | 33,8 | 33,8 | 19,26 | 598,06 | 118,29 |
| 2019/06/06 | CH2205 | Male | Three y/o | Control | Control | Feed Day | No | 16:05 | 16:00 - 16:59 | Evening   | 38,4 | 84  | 19,8 | 19,8 | 19,56 | 581,01 | 99,97  |
| 2019/06/06 | CH2206 | Male | Three y/o | Control | Control | Feed Day | No | 16:05 | 16:00 - 16:59 | Evening   | 38,0 | 112 | 29,8 | 29,8 | 19,15 | 601,96 | 113,97 |
| 2019/06/06 | CH2205 | Male | Three y/o | Control | Control | Feed Day | No | 16:10 | 16:00 - 16:59 | Evening   | 38,4 | 101 | 30,6 | 30,6 | 19,56 | 594,59 | 114,87 |
| 2019/06/06 | CH2206 | Male | Three y/o | Control | Control | Feed Day | No | 16:10 | 16:00 - 16:59 | Evening   | 38,0 | 109 | 36,4 | 36,4 | 19,15 | 600,04 | 120,84 |
| 2019/06/06 | CH2205 | Male | Three y/o | Control | Control | Feed Day | No | 16:15 | 16:00 - 16:59 | Evening   | 38,4 | 182 | 29,2 | 29,2 | 19,56 | 634,31 | 113,27 |
| 2019/06/06 | CH2206 | Male | Three y/o | Control | Control | Feed Day | No | 16:15 | 16:00 - 16:59 | Evening   | 38,0 | 105 | 34,2 | 34,2 | 19,15 | 597,38 | 118,70 |
| 2019/06/06 | CH2205 | Male | Three y/o | Control | Control | Feed Day | No | 16:20 | 16:00 - 16:59 | Evening   | 38,3 | 98  | 7,6  | 7,6  | 19,46 | 592,41 | 67,49  |
| 2019/06/06 | CH2206 | Male | Three y/o | Control | Control | Feed Day | No | 16:20 | 16:00 - 16:59 | Evening   | 38,0 | 121 | 33,8 | 33,8 | 19,15 | 607,35 | 118,29 |
| 2019/06/06 | CH2205 | Male | Three y/o | Control | Control | Feed Day | No | 16:25 | 16:00 - 16:59 | Evening   | 38,2 | 111 | 4,0  | 4,0  | 19,36 | 601,33 | 45,94  |
| 2019/06/06 | CH2206 | Male | Three y/o | Control | Control | Feed Day | No | 16:25 | 16:00 - 16:59 | Evening   | 38,0 | 108 | 32,0 | 32,0 | 19,15 | 599,39 | 116,41 |
| 2019/06/06 | CH2205 | Male | Three y/o | Control | Control | Feed Day | No | 16:30 | 16:00 - 16:59 | Evening   | 38,2 | 98  | 2,6  | 2,6  | 19,36 | 592,41 | 31,57  |
| 2019/06/06 | CH2206 | Male | Three y/o | Control | Control | Feed Day | No | 16:30 | 16:00 - 16:59 | Evening   | 38,0 | 111 | 13,2 | 13,2 | 19,15 | 601,33 | 86,17  |
| 2019/06/06 | CH2205 | Male | Three y/o | Control | Control | Feed Day | No | 16:35 | 16:00 - 16:59 | Evening   | 38,3 | 94  | 12,2 | 12,2 | 19,46 | 589,37 | 83,49  |
| 2019/06/06 | CH2206 | Male | Three y/o | Control | Control | Feed Day | No | 16:35 | 16:00 - 16:59 | Evening   | 38,0 | 125 | 11,2 | 11,2 | 19,15 | 609,60 | 80,59  |
| 2019/06/06 | CH2205 | Male | Three y/o | Control | Control | Feed Day | No | 16:40 | 16:00 - 16:59 | Evening   | 38,3 | 106 | 10,8 | 10,8 | 19,46 | 598,06 | 79,36  |
| 2019/06/06 | CH2206 | Male | Three y/o | Control | Control | Feed Day | No | 16:40 | 16:00 - 16:59 | Evening   | 38,0 |     | 55,2 | 55,2 | 19,15 |        | 135,21 |
| 2019/06/06 | CH2205 | Male | Three y/o | Control | Control | Feed Day | No | 16:45 | 16:00 - 16:59 | Evening   | 38,4 | 103 | 15,0 | 15,0 | 19,56 | 596,00 | 90,51  |
| 2019/06/06 | CH2206 | Male | Three y/o | Control | Control | Feed Day | No | 16:45 | 16:00 - 16:59 | Evening   | 38,0 |     | 18,6 | 18,6 | 19,15 |        | 97,84  |
| 2019/06/06 | CH2205 | Male | Three y/o | Control | Control | Feed Day | No | 16:50 | 16:00 - 16:59 | Evening   | 38,4 | 105 | 14,6 | 14,6 | 19,56 | 597,38 | 89,59  |
| 2019/06/06 | CH2206 | Male | Three y/o | Control | Control | Feed Day | No | 16:50 | 16:00 - 16:59 | Evening   | 37,9 | 138 | 26,6 | 26,6 | 19,05 | 616,31 | 110,07 |
| 2019/06/06 | CH2205 | Male | Three y/o | Control | Control | Feed Day | No | 16:55 | 16:00 - 16:59 | Evening   | 38,4 | 123 | 23,6 | 23,6 | 19,56 | 608,49 | 105,97 |
| 2019/06/06 | CH2206 | Male | Three y/o | Control | Control | Feed Day | No | 16:55 | 16:00 - 16:59 | Evening   | 38,0 |     | 52,0 | 52,0 | 19,15 |        | 133,14 |
| 2019/06/06 | CH2205 | Male | Three y/o | Control | Control | Feed Day | No | 17:00 | 17:00 - 17:59 | Evening   | 38,4 | 162 | 24,8 | 24,8 | 19,56 | 626,88 | 107,67 |
| 2019/06/06 | CH2206 | Male | Three y/o | Control | Control | Feed Day | No | 17:00 | 17:00 - 17:59 | Evening   | 38,0 | 120 | 25,8 | 25,8 | 19,15 | 606,78 | 109,02 |
| 2019/06/06 | CH2205 | Male | Three y/o | Control | Control | Feed Day | No | 17:05 | 17:00 - 17:59 | Evening   | 38,3 | 93  | 13,0 | 13,0 | 19,46 | 588,58 | 85,65  |
| 2019/06/06 | CH2206 | Male | Three y/o | Control | Control | Feed Day | No | 17:05 | 17:00 - 17:59 | Evening   | 37,8 | 145 | 25,6 | 25,6 | 18,95 | 619,62 | 108,76 |
| 2019/06/06 | CH2205 | Male | Three y/o | Control | Control | Feed Day | No | 17:10 | 17:00 - 17:59 | Evening   | 38,3 | 74  | 16,8 | 16,8 | 19,46 | 571,33 | 94,37  |
| 2019/06/06 | CH2206 | Male | Three y/o | Control | Control | Feed Day | No | 17:10 | 17:00 - 17:59 | Evening   | 37,8 | 120 | 12,6 | 12,6 | 18,95 | 606,78 | 84,59  |
| 2019/06/06 | CH2205 | Male | Three y/o | Control | Control | Feed Day | No | 17:15 | 17:00 - 17:59 | Evening   | 38,3 | 156 | 28,8 | 28,8 | 19,46 | 624,43 | 112,79 |
| 2019/06/06 | CH2206 | Male | Three y/o | Control | Control | Feed Day | No | 17:15 | 17:00 - 17:59 | Evening   | 37,9 |     | 34,6 | 34,6 | 19,05 |        | 119,10 |
| 2019/06/06 | CH2205 | Male | Three y/o | Control | Control | Feed Day | No | 17:20 | 17:00 - 17:59 | Evening   | 38,4 |     | 24,6 | 24,6 | 19,56 |        | 107,39 |
| 2019/06/06 | CH2206 | Male | Three y/o | Control | Control | Feed Day | No | 17:20 | 17:00 - 17:59 | Evening   | 38,0 | 101 | 21,4 | 21,4 | 19,15 | 594,59 | 102,63 |
| 2019/06/06 | CH2205 | Male | Three y/o | Control | Control | Feed Day | No | 17:25 | 17:00 - 17:59 | Evening   | 38,3 |     | 22,0 | 22,0 | 19,46 |        | 103,57 |
| 2019/06/06 | CH2206 | Male | Three y/o | Control | Control | Feed Day | No | 17:25 | 17:00 - 17:59 | Evening   | 37,9 | 107 | 34,8 | 34,8 | 19,05 | 598,73 | 119,29 |
| 2019/06/06 | CH2205 | Male | Three y/o | Control | Control | Feed Day | No | 17:30 | 17:00 - 17:59 | Evening   | 38,3 | 98  | 9,8  | 9,8  | 19,46 | 592,41 | 76,07  |
| 2019/06/06 | CH2206 | Male | Three y/o | Control | Control | Feed Day | No | 17:30 | 17:00 - 17:59 | Evening   | 37,8 | 121 | 33,2 | 33,2 | 18,95 | 607,35 | 117,68 |
| 2019/06/06 | CH2205 | Male | Three y/o | Control | Control | Feed Day | No | 17:35 | 17:00 - 17:59 | Evening   | 38,3 | 81  | 8,0  | 8,0  | 19,46 | 578,26 | 69,22  |
| 2019/06/06 | CH2206 | Male | Three y/o | Control | Control | Feed Day | No | 17:35 | 17:00 - 17:59 | Evening   | 37,7 | 121 | 30,2 | 30,2 | 18,85 | 607,35 | 114,42 |
| 2019/06/06 | CH2205 | Male | Three y/o | Control | Control | Feed Day | No | 17:40 | 17:00 - 17:59 | Evening   | 38,3 | 76  | 13,8 | 13,8 | 19,46 | 573,39 | 87,68  |
| 2019/06/06 | CH2206 | Male | Three y/o | Control | Control | Feed Day | No | 17:40 | 17:00 - 17:59 | Evening   | 37,8 | 120 | 56,0 | 56,0 | 18,95 | 606,78 | 135,70 |
| 2019/06/06 | CH2205 | Male | Three y/o | Control | Control | Feed Day | No | 17:45 | 17:00 - 17:59 | Evening   | 38,3 | 104 | 14,6 | 14,6 | 19,46 | 596,69 | 89,59  |
| 2019/06/06 | CH2206 | Male | Three y/o | Control | Control | Feed Day | No | 17:45 | 17:00 - 17:59 | Evening   | 37,9 | 118 | 53,0 | 53,0 | 19,05 | 605,61 | 133,80 |
| 2019/06/06 | CH2205 | Male | Three y/o | Control | Control | Feed Day | No | 17:50 | 17:00 - 17:59 | Evening   | 38,3 | 100 | 13,2 | 13,2 | 19,46 | 593,87 | 86,17  |
| 2019/06/06 | CH2206 | Male | Three y/o | Control | Control | Feed Day | No | 17:50 | 17:00 - 17:59 | Evening   | 38,0 | 114 | 51,8 | 51,8 | 19,15 | 603,20 | 133,01 |
| 2019/06/06 | CH2205 | Male | Three y/o | Control | Control | Feed Day | No | 17:55 | 17:00 - 17:59 | Evening   | 38,3 | 85  | 7,8  | 7,8  | 19,46 | 581,90 | 68,36  |



|            |        |      |           |         |         |          |    |       |               |         |      |     |      |      |       |        |        |
|------------|--------|------|-----------|---------|---------|----------|----|-------|---------------|---------|------|-----|------|------|-------|--------|--------|
| 2019/06/06 | CH2206 | Male | Three y/o | Control | Control | Feed Day | No | 17:55 | 17:00 - 17:59 | Evening | 38,1 | 114 | 48,8 | 48,8 | 19,26 | 603,20 | 130,95 |
| 2019/06/06 | CH2205 | Male | Three y/o | Control | Control | Feed Day | No | 18:00 | 18:00 - 18:59 | Evening | 38,3 | 93  | 11,8 | 11,8 | 19,46 | 588,58 | 82,36  |
| 2019/06/06 | CH2206 | Male | Three y/o | Control | Control | Feed Day | No | 18:00 | 18:00 - 18:59 | Evening | 38,2 | 123 | 31,8 | 31,8 | 19,36 | 608,49 | 116,20 |
| 2019/06/06 | CH2205 | Male | Three y/o | Control | Control | Feed Day | No | 18:05 | 18:00 - 18:59 | Evening | 38,3 | 145 | 15,0 | 15,0 | 19,46 | 619,62 | 90,51  |
| 2019/06/06 | CH2206 | Male | Three y/o | Control | Control | Feed Day | No | 18:05 | 18:00 - 18:59 | Evening | 38,2 | 100 | 45,6 | 45,6 | 19,36 | 593,87 | 128,61 |
| 2019/06/06 | CH2205 | Male | Three y/o | Control | Control | Feed Day | No | 18:10 | 18:00 - 18:59 | Evening | 38,3 | 152 | 24,8 | 24,8 | 19,46 | 622,73 | 107,67 |
| 2019/06/06 | CH2206 | Male | Three y/o | Control | Control | Feed Day | No | 18:10 | 18:00 - 18:59 | Evening | 38,2 | 126 | 20,0 | 20,0 | 19,36 | 610,14 | 100,31 |
| 2019/06/06 | CH2205 | Male | Three y/o | Control | Control | Feed Day | No | 18:15 | 18:00 - 18:59 | Evening | 38,3 |     | 25,2 | 25,2 | 19,46 |        | 108,22 |
| 2019/06/06 | CH2206 | Male | Three y/o | Control | Control | Feed Day | No | 18:15 | 18:00 - 18:59 | Evening | 38,2 | 115 | 51,0 | 51,0 | 19,36 | 603,82 | 132,47 |
| 2019/06/06 | CH2205 | Male | Three y/o | Control | Control | Feed Day | No | 18:20 | 18:00 - 18:59 | Evening | 38,2 |     | 22,2 | 22,2 | 19,36 |        | 103,88 |
| 2019/06/06 | CH2206 | Male | Three y/o | Control | Control | Feed Day | No | 18:20 | 18:00 - 18:59 | Evening | 38,2 | 105 | 49,0 | 49,0 | 19,36 | 597,38 | 131,09 |
| 2019/06/06 | CH2205 | Male | Three y/o | Control | Control | Feed Day | No | 18:25 | 18:00 - 18:59 | Evening | 38,2 | 98  | 24,2 | 24,2 | 19,36 | 592,41 | 106,83 |
| 2019/06/06 | CH2206 | Male | Three y/o | Control | Control | Feed Day | No | 18:25 | 18:00 - 18:59 | Evening | 38,2 | 111 | 51,0 | 51,0 | 19,36 | 601,33 | 132,47 |
| 2019/06/06 | CH2205 | Male | Three y/o | Control | Control | Feed Day | No | 18:30 | 18:00 - 18:59 | Evening | 38,2 | 84  | 17,2 | 17,2 | 19,36 | 581,01 | 95,17  |
| 2019/06/06 | CH2206 | Male | Three y/o | Control | Control | Feed Day | No | 18:30 | 18:00 - 18:59 | Evening | 38,2 | 99  | 51,0 | 51,0 | 19,36 | 593,14 | 132,47 |
| 2019/06/06 | CH2205 | Male | Three y/o | Control | Control | Feed Day | No | 18:35 | 18:00 - 18:59 | Evening | 38,1 | 59  | 16,6 | 16,6 | 19,26 | 553,30 | 93,96  |
| 2019/06/06 | CH2206 | Male | Three y/o | Control | Control | Feed Day | No | 18:35 | 18:00 - 18:59 | Evening | 38,2 | 104 | 44,4 | 44,4 | 19,36 | 596,69 | 127,69 |
| 2019/06/06 | CH2205 | Male | Three y/o | Control | Control | Feed Day | No | 18:40 | 18:00 - 18:59 | Evening | 38,0 | 80  | 17,2 | 17,2 | 19,15 | 577,31 | 95,17  |
| 2019/06/06 | CH2206 | Male | Three y/o | Control | Control | Feed Day | No | 18:40 | 18:00 - 18:59 | Evening | 38,2 | 106 | 46,8 | 46,8 | 19,36 | 598,06 | 129,50 |
| 2019/06/06 | CH2205 | Male | Three y/o | Control | Control | Feed Day | No | 18:45 | 18:00 - 18:59 | Evening | 37,9 | 72  | 17,6 | 17,6 | 19,05 | 569,20 | 95,95  |
| 2019/06/06 | CH2206 | Male | Three y/o | Control | Control | Feed Day | No | 18:45 | 18:00 - 18:59 | Evening | 38,2 | 123 | 39,8 | 39,8 | 19,36 | 608,49 | 123,91 |
| 2019/06/06 | CH2205 | Male | Three y/o | Control | Control | Feed Day | No | 18:50 | 18:00 - 18:59 | Evening | 38,0 | 70  | 13,0 | 13,0 | 19,15 | 566,99 | 85,65  |
| 2019/06/06 | CH2206 | Male | Three y/o | Control | Control | Feed Day | No | 18:50 | 18:00 - 18:59 | Evening | 38,2 | 98  | 37,6 | 37,6 | 19,36 | 592,41 | 121,96 |
| 2019/06/06 | CH2205 | Male | Three y/o | Control | Control | Feed Day | No | 18:55 | 18:00 - 18:59 | Evening | 38,1 | 70  | 16,2 | 16,2 | 19,26 | 566,99 | 93,13  |
| 2019/06/06 | CH2206 | Male | Three y/o | Control | Control | Feed Day | No | 18:55 | 18:00 - 18:59 | Evening | 38,2 | 103 | 35,2 | 35,2 | 19,36 | 596,00 | 119,69 |
| 2019/06/06 | CH2205 | Male | Three y/o | Control | Control | Feed Day | No | 19:00 | 19:00 - 19:59 | Evening | 38,2 | 76  | 14,2 | 14,2 | 19,36 | 573,39 | 88,65  |
| 2019/06/06 | CH2206 | Male | Three y/o | Control | Control | Feed Day | No | 19:00 | 19:00 - 19:59 | Evening | 38,2 | 105 | 39,4 | 39,4 | 19,36 | 597,38 | 123,57 |
| 2019/06/06 | CH2205 | Male | Three y/o | Control | Control | Feed Day | No | 19:05 | 19:00 - 19:59 | Evening | 38,2 | 85  | 18,4 | 18,4 | 19,36 | 581,90 | 97,47  |
| 2019/06/06 | CH2206 | Male | Three y/o | Control | Control | Feed Day | No | 19:05 | 19:00 - 19:59 | Evening | 38,2 | 115 | 47,8 | 47,8 | 19,36 | 603,82 | 130,23 |
| 2019/06/06 | CH2205 | Male | Three y/o | Control | Control | Feed Day | No | 19:10 | 19:00 - 19:59 | Evening | 38,1 | 96  | 11,8 | 11,8 | 19,26 | 590,91 | 82,36  |
| 2019/06/06 | CH2206 | Male | Three y/o | Control | Control | Feed Day | No | 19:10 | 19:00 - 19:59 | Evening | 38,2 | 112 | 43,4 | 43,4 | 19,36 | 601,96 | 126,90 |
| 2019/06/06 | CH2205 | Male | Three y/o | Control | Control | Feed Day | No | 19:15 | 19:00 - 19:59 | Evening | 38,1 | 90  | 10,6 | 10,6 | 19,26 | 586,16 | 78,73  |
| 2019/06/06 | CH2206 | Male | Three y/o | Control | Control | Feed Day | No | 19:15 | 19:00 - 19:59 | Evening | 38,2 | 112 | 45,4 | 45,4 | 19,36 | 601,96 | 128,45 |
| 2019/06/06 | CH2205 | Male | Three y/o | Control | Control | Feed Day | No | 19:20 | 19:00 - 19:59 | Evening | 38,1 | 70  | 7,2  | 7,2  | 19,26 | 566,99 | 65,66  |
| 2019/06/06 | CH2206 | Male | Three y/o | Control | Control | Feed Day | No | 19:20 | 19:00 - 19:59 | Evening | 38,2 | 117 | 31,8 | 31,8 | 19,36 | 605,02 | 116,20 |
| 2019/06/06 | CH2205 | Male | Three y/o | Control | Control | Feed Day | No | 19:25 | 19:00 - 19:59 | Evening | 38,1 | 58  | 16,0 | 16,0 | 19,26 | 551,90 | 92,71  |
| 2019/06/06 | CH2206 | Male | Three y/o | Control | Control | Feed Day | No | 19:25 | 19:00 - 19:59 | Evening | 38,1 | 75  | 37,4 | 37,4 | 19,26 | 572,36 | 121,77 |
| 2019/06/06 | CH2205 | Male | Three y/o | Control | Control | Feed Day | No | 19:30 | 19:00 - 19:59 | Evening | 38,0 | 62  | 13,4 | 13,4 | 19,15 | 557,33 | 86,68  |
| 2019/06/06 | CH2206 | Male | Three y/o | Control | Control | Feed Day | No | 19:30 | 19:00 - 19:59 | Evening | 38,1 | 137 | 45,4 | 45,4 | 19,26 | 615,83 | 128,45 |
| 2019/06/06 | CH2205 | Male | Three y/o | Control | Control | Feed Day | No | 19:35 | 19:00 - 19:59 | Evening | 38,0 | 90  | 13,4 | 13,4 | 19,15 | 586,16 | 86,68  |
| 2019/06/06 | CH2206 | Male | Three y/o | Control | Control | Feed Day | No | 19:35 | 19:00 - 19:59 | Evening | 38,1 | 88  | 34,2 | 34,2 | 19,26 | 584,49 | 118,70 |
| 2019/06/06 | CH2205 | Male | Three y/o | Control | Control | Feed Day | No | 19:40 | 19:00 - 19:59 | Evening | 38,1 | 140 | 19,2 | 19,2 | 19,26 | 617,28 | 98,92  |
| 2019/06/06 | CH2206 | Male | Three y/o | Control | Control | Feed Day | No | 19:40 | 19:00 - 19:59 | Evening | 38,1 | 120 | 40,4 | 40,4 | 19,26 | 606,78 | 124,43 |
| 2019/06/06 | CH2205 | Male | Three y/o | Control | Control | Feed Day | No | 19:45 | 19:00 - 19:59 | Evening | 38,0 | 63  | 17,0 | 17,0 | 19,15 | 558,62 | 94,77  |
| 2019/06/06 | CH2206 | Male | Three y/o | Control | Control | Feed Day | No | 19:45 | 19:00 - 19:59 | Evening | 38,1 | 107 | 40,4 | 40,4 | 19,26 | 598,73 | 124,43 |
| 2019/06/06 | CH2205 | Male | Three y/o | Control | Control | Feed Day | No | 19:50 | 19:00 - 19:59 | Evening | 38,0 | 67  | 15,2 | 15,2 | 19,15 | 563,53 | 90,96  |
| 2019/06/06 | CH2206 | Male | Three y/o | Control | Control | Feed Day | No | 19:50 | 19:00 - 19:59 | Evening | 38,0 | 103 | 45,2 | 45,2 | 19,15 | 596,00 | 128,30 |
| 2019/06/06 | CH2205 | Male | Three y/o | Control | Control | Feed Day | No | 19:55 | 19:00 - 19:59 | Evening | 38,0 |     | 13,6 | 13,6 | 19,15 |        | 87,18  |
| 2019/06/06 | CH2206 | Male | Three y/o | Control | Control | Feed Day | No | 19:55 | 19:00 - 19:59 | Evening | 38,0 | 158 | 42,4 | 42,4 | 19,15 | 625,26 | 126,10 |
| 2019/06/06 | CH2205 | Male | Three y/o | Control | Control | Feed Day | No | 20:00 | 20:00 - 20:59 | Night   | 37,9 | 62  | 12,6 | 12,6 | 19,05 | 557,33 | 84,59  |
| 2019/06/06 | CH2206 | Male | Three y/o | Control | Control | Feed Day | No | 20:00 | 20:00 - 20:59 | Night   | 37,9 |     | 29,0 | 29,0 | 19,05 |        | 113,03 |
| 2019/06/06 | CH2205 | Male | Three y/o | Control | Control | Feed Day | No | 20:05 | 20:00 - 20:59 | Night   | 37,6 | 51  | 10,8 | 10,8 | 18,75 | 541,20 | 79,36  |
| 2019/06/06 | CH2206 | Male | Three y/o | Control | Control | Feed Day | No | 20:05 | 20:00 - 20:59 | Night   | 37,8 | 110 | 30,2 | 30,2 | 18,95 | 600,69 | 114,42 |
| 2019/06/06 | CH2205 | Male | Three y/o | Control | Control | Feed Day | No | 20:10 | 20:00 - 20:59 | Night   | 37,6 | 191 | 12,6 | 12,6 | 18,75 | 637,33 | 84,59  |
| 2019/06/06 | CH2206 | Male | Three y/o | Control | Control | Feed Day | No | 20:10 | 20:00 - 20:59 | Night   | 37,7 | 92  | 31,8 | 31,8 | 18,85 | 587,78 | 116,20 |
| 2019/06/06 | CH2205 | Male | Three y/o | Control | Control | Feed Day | No | 20:15 | 20:00 - 20:59 | Night   | 37,4 | 92  | 12,8 | 12,8 | 18,55 | 587,78 | 85,12  |
| 2019/06/06 | CH2206 | Male | Three y/o | Control | Control | Feed Day | No | 20:15 | 20:00 - 20:59 | Night   | 37,4 | 105 | 31,4 | 31,4 | 18,55 | 597,38 | 115,76 |
| 2019/06/06 | CH2205 | Male | Three y/o | Control | Control | Feed Day | No | 20:20 | 20:00 - 20:59 | Night   | 37,4 | 145 | 15,6 | 15,6 | 18,55 | 619,62 | 91,85  |
| 2019/06/06 | CH2206 | Male | Three y/o | Control | Control | Feed Day | No | 20:20 | 20:00 - 20:59 | Night   | 37,3 | 137 | 36,4 | 36,4 | 18,46 | 615,83 | 120,84 |
| 2019/06/06 | CH2205 | Male | Three y/o | Control | Control | Feed Day | No | 20:25 | 20:00 - 20:59 | Night   | 37,4 | 105 | 10,0 | 10,0 | 18,55 | 597,38 | 76,76  |
| 2019/06/06 | CH2206 | Male | Three y/o | Control | Control | Feed Day | No | 20:25 | 20:00 - 20:59 | Night   | 37,4 | 103 | 44,6 | 44,6 | 18,55 | 596,00 | 127,84 |
| 2019/06/06 | CH2205 | Male | Three y/o | Control | Control | Feed Day | No | 20:30 | 20:00 - 20:59 | Night   | 37,3 | 101 | 15,6 | 15,6 | 18,46 | 594,59 | 91,85  |
| 2019/06/06 | CH2206 | Male | Three y/o | Control | Control | Feed Day | No | 20:30 | 20:00 - 20:59 | Night   | 37,5 | 108 | 43,0 | 43,0 | 18,65 | 599,39 | 126,58 |
| 2019/06/06 | CH2205 | Male | Three y/o | Control | Control | Feed Day | No | 20:35 | 20:00 - 20:59 | Night   | 37,3 | 93  | 16,6 | 16,6 | 18,46 | 588,58 | 93,96  |
| 2019/06/06 | CH2206 | Male | Three y/o | Control | Control | Feed Day | No | 20:35 | 20:00 - 20:59 | Night   | 37,7 | 112 | 40,2 | 40,2 | 18,85 | 601,96 | 124,26 |
| 2019/06/06 | CH2205 | Male | Three y/o | Control | Control | Feed Day | No | 20:40 | 20:00 - 20:59 | Night   | 37,3 |     | 24,4 | 24,4 | 18,46 |        | 107,11 |
| 2019/06/06 | CH2206 | Male | Three y/o | Control | Control | Feed Day | No | 20:40 | 20:00 - 20:59 | Night   | 37,7 | 119 | 52,0 | 52,0 | 18,85 | 606,20 | 133,14 |
| 2019/06/06 | CH2205 | Male | Three y/o | Control | Control | Feed Day | No | 20:45 | 20:00 - 20:59 | Night   | 37,5 |     | 23,8 | 23,8 | 18,65 |        | 106,26 |
| 2019/06/06 | CH2206 | Male | Three y/o | Control | Control | Feed Day | No | 20:45 | 20:00 - 20:59 | Night   | 37,8 | 110 | 57,0 | 57,0 | 18,95 | 600,69 | 136,32 |
| 2019/06/06 | CH2205 | Male | Three y/o | Control | Control | Feed Day | No | 20:50 | 20:00 - 20:59 | Night   | 37,5 | 131 | 7,6  | 7,6  | 18,65 | 612,80 | 67,49  |



|            |        |      |           |         |         |          |    |       |               |       |      |     |       |       |       |        |        |
|------------|--------|------|-----------|---------|---------|----------|----|-------|---------------|-------|------|-----|-------|-------|-------|--------|--------|
| 2019/06/06 | CH2206 | Male | Three y/o | Control | Control | Feed Day | No | 20:50 | 20:00 - 20:59 | Night | 37,8 | 104 | 64,2  | 64,2  | 18,95 | 596,69 | 140,44 |
| 2019/06/06 | CH2205 | Male | Three y/o | Control | Control | Feed Day | No | 20:55 | 20:00 - 20:59 | Night | 37,7 | 88  | 4,8   | 4,8   | 18,85 | 584,49 | 52,04  |
| 2019/06/06 | CH2206 | Male | Three y/o | Control | Control | Feed Day | No | 20:55 | 20:00 - 20:59 | Night | 37,8 | 112 | 59,4  | 59,4  | 18,95 | 601,96 | 137,75 |
| 2019/06/06 | CH2205 | Male | Three y/o | Control | Control | Feed Day | No | 21:00 | 21:00 - 21:59 | Night | 37,7 | 100 | 19,0  | 19,0  | 18,85 | 593,87 | 98,56  |
| 2019/06/06 | CH2206 | Male | Three y/o | Control | Control | Feed Day | No | 21:00 | 21:00 - 21:59 | Night | 37,9 | 102 | 62,0  | 62,0  | 19,05 | 595,30 | 139,23 |
| 2019/06/06 | CH2205 | Male | Three y/o | Control | Control | Feed Day | No | 21:05 | 21:00 - 21:59 | Night | 37,7 | 88  | 19,4  | 19,4  | 18,85 | 584,49 | 99,28  |
| 2019/06/06 | CH2206 | Male | Three y/o | Control | Control | Feed Day | No | 21:05 | 21:00 - 21:59 | Night | 37,9 | 101 | 61,0  | 61,0  | 19,05 | 594,59 | 138,67 |
| 2019/06/06 | CH2205 | Male | Three y/o | Control | Control | Feed Day | No | 21:10 | 21:00 - 21:59 | Night | 37,7 | 77  | 11,8  | 11,8  | 18,85 | 574,39 | 82,36  |
| 2019/06/06 | CH2206 | Male | Three y/o | Control | Control | Feed Day | No | 21:10 | 21:00 - 21:59 | Night | 37,9 | 103 | 53,8  | 53,8  | 19,05 | 596,00 | 134,32 |
| 2019/06/06 | CH2205 | Male | Three y/o | Control | Control | Feed Day | No | 21:15 | 21:00 - 21:59 | Night | 37,7 | 66  | 8,2   | 8,2   | 18,85 | 562,34 | 70,05  |
| 2019/06/06 | CH2206 | Male | Three y/o | Control | Control | Feed Day | No | 21:15 | 21:00 - 21:59 | Night | 37,9 | 103 | 59,0  | 59,0  | 19,05 | 596,00 | 137,51 |
| 2019/06/06 | CH2205 | Male | Three y/o | Control | Control | Feed Day | No | 21:20 | 21:00 - 21:59 | Night | 37,8 | 101 | 4,6   | 4,6   | 18,95 | 594,59 | 50,61  |
| 2019/06/06 | CH2206 | Male | Three y/o | Control | Control | Feed Day | No | 21:20 | 21:00 - 21:59 | Night | 37,9 | 93  | 58,2  | 58,2  | 19,05 | 588,58 | 137,04 |
| 2019/06/06 | CH2205 | Male | Three y/o | Control | Control | Feed Day | No | 21:25 | 21:00 - 21:59 | Night | 37,9 | 92  | 16,6  | 16,6  | 19,05 | 587,78 | 93,96  |
| 2019/06/06 | CH2206 | Male | Three y/o | Control | Control | Feed Day | No | 21:25 | 21:00 - 21:59 | Night | 37,9 | 110 | 62,4  | 62,4  | 19,05 | 600,69 | 139,45 |
| 2019/06/06 | CH2205 | Male | Three y/o | Control | Control | Feed Day | No | 21:30 | 21:00 - 21:59 | Night | 38,0 | 78  | 20,6  | 20,6  | 19,15 | 575,38 | 101,32 |
| 2019/06/06 | CH2206 | Male | Three y/o | Control | Control | Feed Day | No | 21:30 | 21:00 - 21:59 | Night | 37,9 | 103 | 59,6  | 59,6  | 19,05 | 596,00 | 137,86 |
| 2019/06/06 | CH2205 | Male | Three y/o | Control | Control | Feed Day | No | 21:35 | 21:00 - 21:59 | Night | 38,0 | 86  | 20,6  | 20,6  | 19,15 | 582,77 | 101,32 |
| 2019/06/06 | CH2206 | Male | Three y/o | Control | Control | Feed Day | No | 21:35 | 21:00 - 21:59 | Night | 37,9 | 100 | 59,6  | 59,6  | 19,05 | 593,87 | 137,86 |
| 2019/06/06 | CH2205 | Male | Three y/o | Control | Control | Feed Day | No | 21:40 | 21:00 - 21:59 | Night | 38,0 | 72  | 18,4  | 18,4  | 19,15 | 569,20 | 97,47  |
| 2019/06/06 | CH2206 | Male | Three y/o | Control | Control | Feed Day | No | 21:40 | 21:00 - 21:59 | Night | 37,9 | 100 | 63,6  | 63,6  | 19,05 | 593,87 | 140,11 |
| 2019/06/06 | CH2205 | Male | Three y/o | Control | Control | Feed Day | No | 21:45 | 21:00 - 21:59 | Night | 38,1 | 64  | 16,0  | 16,0  | 19,26 | 559,88 | 92,71  |
| 2019/06/06 | CH2206 | Male | Three y/o | Control | Control | Feed Day | No | 21:45 | 21:00 - 21:59 | Night | 37,9 | 100 | 54,4  | 54,4  | 19,05 | 593,87 | 134,70 |
| 2019/06/06 | CH2205 | Male | Three y/o | Control | Control | Feed Day | No | 21:50 | 21:00 - 21:59 | Night | 38,1 | 125 | 22,6  | 22,6  | 19,26 | 609,60 | 104,49 |
| 2019/06/06 | CH2206 | Male | Three y/o | Control | Control | Feed Day | No | 21:50 | 21:00 - 21:59 | Night | 37,9 | 92  | 58,2  | 58,2  | 19,05 | 587,78 | 137,04 |
| 2019/06/06 | CH2205 | Male | Three y/o | Control | Control | Feed Day | No | 21:55 | 21:00 - 21:59 | Night | 38,0 | 89  | 22,6  | 22,6  | 19,15 | 585,33 | 104,49 |
| 2019/06/06 | CH2206 | Male | Three y/o | Control | Control | Feed Day | No | 21:55 | 21:00 - 21:59 | Night | 37,9 | 107 | 59,2  | 59,2  | 19,05 | 598,73 | 137,63 |
| 2019/06/06 | CH2205 | Male | Three y/o | Control | Control | Feed Day | No | 22:00 | 22:00 - 22:59 | Night | 38,0 | 110 | 25,4  | 25,4  | 19,15 | 600,69 | 108,49 |
| 2019/06/06 | CH2206 | Male | Three y/o | Control | Control | Feed Day | No | 22:00 | 22:00 - 22:59 | Night | 37,9 | 138 | 100,0 | 100,0 | 19,05 | 616,31 | 155,84 |
| 2019/06/06 | CH2205 | Male | Three y/o | Control | Control | Feed Day | No | 22:05 | 22:00 - 22:59 | Night | 37,9 |     | 25,8  | 25,8  | 19,05 |        | 109,02 |
| 2019/06/06 | CH2206 | Male | Three y/o | Control | Control | Feed Day | No | 22:05 | 22:00 - 22:59 | Night | 37,9 | 124 | 30,6  | 30,6  | 19,05 | 609,04 | 114,87 |
| 2019/06/06 | CH2205 | Male | Three y/o | Control | Control | Feed Day | No | 22:10 | 22:00 - 22:59 | Night | 37,7 |     | 32,0  | 32,0  | 18,85 |        | 116,41 |
| 2019/06/06 | CH2206 | Male | Three y/o | Control | Control | Feed Day | No | 22:10 | 22:00 - 22:59 | Night | 37,9 | 118 | 80,8  | 80,8  | 19,05 | 605,61 | 148,42 |
| 2019/06/06 | CH2205 | Male | Three y/o | Control | Control | Feed Day | No | 22:15 | 22:00 - 22:59 | Night | 37,7 | 141 | 57,0  | 57,0  | 18,85 | 617,75 | 136,32 |
| 2019/06/06 | CH2206 | Male | Three y/o | Control | Control | Feed Day | No | 22:15 | 22:00 - 22:59 | Night | 37,9 |     | 44,0  | 44,0  | 19,05 |        | 127,37 |
| 2019/06/06 | CH2205 | Male | Three y/o | Control | Control | Feed Day | No | 22:20 | 22:00 - 22:59 | Night | 37,7 | 110 | 23,8  | 23,8  | 18,85 | 600,69 | 106,26 |
| 2019/06/06 | CH2206 | Male | Three y/o | Control | Control | Feed Day | No | 22:20 | 22:00 - 22:59 | Night | 37,8 |     | 36,4  | 36,4  | 18,95 |        | 120,84 |
| 2019/06/06 | CH2205 | Male | Three y/o | Control | Control | Feed Day | No | 22:25 | 22:00 - 22:59 | Night | 37,8 | 117 | 63,2  | 63,2  | 18,95 | 605,02 | 139,89 |
| 2019/06/06 | CH2206 | Male | Three y/o | Control | Control | Feed Day | No | 22:25 | 22:00 - 22:59 | Night | 37,7 | 121 | 40,2  | 40,2  | 18,85 | 607,35 | 124,26 |
| 2019/06/06 | CH2205 | Male | Three y/o | Control | Control | Feed Day | No | 22:30 | 22:00 - 22:59 | Night | 37,7 | 148 | 16,8  | 16,8  | 18,85 | 620,97 | 94,37  |
| 2019/06/06 | CH2206 | Male | Three y/o | Control | Control | Feed Day | No | 22:30 | 22:00 - 22:59 | Night | 37,7 | 128 | 39,4  | 39,4  | 18,85 | 611,22 | 123,57 |
| 2019/06/06 | CH2205 | Male | Three y/o | Control | Control | Feed Day | No | 22:35 | 22:00 - 22:59 | Night | 37,5 |     | 20,6  | 20,6  | 18,65 |        | 101,32 |
| 2019/06/06 | CH2206 | Male | Three y/o | Control | Control | Feed Day | No | 22:35 | 22:00 - 22:59 | Night | 37,8 | 141 | 32,0  | 32,0  | 18,95 | 617,75 | 116,41 |
| 2019/06/06 | CH2205 | Male | Three y/o | Control | Control | Feed Day | No | 22:40 | 22:00 - 22:59 | Night | 37,4 | 121 | 5,0   | 5,0   | 18,55 | 607,35 | 53,41  |
| 2019/06/06 | CH2206 | Male | Three y/o | Control | Control | Feed Day | No | 22:40 | 22:00 - 22:59 | Night | 37,5 |     | 25,0  | 25,0  | 18,65 |        | 107,94 |
| 2019/06/06 | CH2205 | Male | Three y/o | Control | Control | Feed Day | No | 22:45 | 22:00 - 22:59 | Night | 37,3 | 66  | 9,2   | 9,2   | 18,46 | 562,34 | 73,94  |
| 2019/06/06 | CH2206 | Male | Three y/o | Control | Control | Feed Day | No | 22:45 | 22:00 - 22:59 | Night | 37,3 | 101 | 23,4  | 23,4  | 18,46 | 594,59 | 105,68 |
| 2019/06/06 | CH2205 | Male | Three y/o | Control | Control | Feed Day | No | 22:50 | 22:00 - 22:59 | Night | 37,6 | 76  | 20,2  | 20,2  | 18,75 | 573,39 | 100,65 |
| 2019/06/06 | CH2206 | Male | Three y/o | Control | Control | Feed Day | No | 22:50 | 22:00 - 22:59 | Night | 37,3 | 143 | 20,0  | 20,0  | 18,46 | 618,69 | 100,31 |
| 2019/06/06 | CH2205 | Male | Three y/o | Control | Control | Feed Day | No | 22:55 | 22:00 - 22:59 | Night | 37,6 | 98  | 50,8  | 50,8  | 18,75 | 592,41 | 132,33 |
| 2019/06/06 | CH2206 | Male | Three y/o | Control | Control | Feed Day | No | 22:55 | 22:00 - 22:59 | Night | 37,4 |     | 35,6  | 35,6  | 18,55 |        | 120,08 |
| 2019/06/06 | CH2205 | Male | Three y/o | Control | Control | Feed Day | No | 23:00 | 23:00 - 23:59 | Night | 37,9 |     | 17,0  | 17,0  | 19,05 |        | 94,77  |
| 2019/06/06 | CH2206 | Male | Three y/o | Control | Control | Feed Day | No | 23:00 | 23:00 - 23:59 | Night | 37,3 | 104 | 45,2  | 45,2  | 18,46 | 596,69 | 128,30 |
| 2019/06/06 | CH2205 | Male | Three y/o | Control | Control | Feed Day | No | 23:05 | 23:00 - 23:59 | Night | 37,9 | 140 | 17,4  | 17,4  | 19,05 | 617,28 | 95,56  |
| 2019/06/06 | CH2206 | Male | Three y/o | Control | Control | Feed Day | No | 23:05 | 23:00 - 23:59 | Night | 37,4 | 106 | 35,6  | 35,6  | 18,55 | 598,06 | 120,08 |
| 2019/06/06 | CH2205 | Male | Three y/o | Control | Control | Feed Day | No | 23:10 | 23:00 - 23:59 | Night | 37,9 | 102 | 5,2   | 5,2   | 19,05 | 595,30 | 54,72  |
| 2019/06/06 | CH2206 | Male | Three y/o | Control | Control | Feed Day | No | 23:10 | 23:00 - 23:59 | Night | 37,5 | 103 | 33,2  | 33,2  | 18,65 | 596,00 | 117,68 |
| 2019/06/06 | CH2205 | Male | Three y/o | Control | Control | Feed Day | No | 23:15 | 23:00 - 23:59 | Night | 38,0 | 98  | 10,0  | 10,0  | 19,15 | 592,41 | 76,76  |
| 2019/06/06 | CH2206 | Male | Three y/o | Control | Control | Feed Day | No | 23:15 | 23:00 - 23:59 | Night | 37,5 | 113 | 36,2  | 36,2  | 18,65 | 602,58 | 120,65 |
| 2019/06/06 | CH2205 | Male | Three y/o | Control | Control | Feed Day | No | 23:20 | 23:00 - 23:59 | Night | 37,9 | 69  | 9,4   | 9,4   | 19,05 | 565,86 | 74,66  |
| 2019/06/06 | CH2206 | Male | Three y/o | Control | Control | Feed Day | No | 23:20 | 23:00 - 23:59 | Night | 37,5 | 108 | 46,8  | 46,8  | 18,65 | 599,39 | 129,50 |
| 2019/06/06 | CH2205 | Male | Three y/o | Control | Control | Feed Day | No | 23:25 | 23:00 - 23:59 | Night | 37,7 | 65  | 11,0  | 11,0  | 18,85 | 561,12 | 79,98  |
| 2019/06/06 | CH2206 | Male | Three y/o | Control | Control | Feed Day | No | 23:25 | 23:00 - 23:59 | Night | 37,5 | 102 | 43,8  | 43,8  | 18,65 | 595,30 | 127,22 |
| 2019/06/06 | CH2205 | Male | Three y/o | Control | Control | Feed Day | No | 23:30 | 23:00 - 23:59 | Night | 37,7 | 55  | 7,0   | 7,0   | 18,85 | 547,52 | 64,72  |
| 2019/06/06 | CH2206 | Male | Three y/o | Control | Control | Feed Day | No | 23:30 | 23:00 - 23:59 | Night | 37,6 | 98  | 45,6  | 45,6  | 18,75 | 592,41 | 128,61 |
| 2019/06/06 | CH2205 | Male | Three y/o | Control | Control | Feed Day | No | 23:35 | 23:00 - 23:59 | Night | 37,7 | 73  | 10,0  | 10,0  | 18,85 | 570,27 | 76,76  |
| 2019/06/06 | CH2206 | Male | Three y/o | Control | Control | Feed Day | No | 23:35 | 23:00 - 23:59 | Night | 37,7 | 69  | 47,0  | 47,0  | 18,85 | 565,86 | 129,65 |
| 2019/06/06 | CH2205 | Male | Three y/o | Control | Control | Feed Day | No | 23:40 | 23:00 - 23:59 | Night | 37,6 | 90  | 4,8   | 4,8   | 18,75 | 586,16 | 52,04  |
| 2019/06/06 | CH2206 | Male | Three y/o | Control | Control | Feed Day | No | 23:40 | 23:00 - 23:59 | Night | 37,5 | 174 | 47,8  | 47,8  | 18,65 | 631,46 | 130,23 |
| 2019/06/06 | CH2205 | Male | Three y/o | Control | Control | Feed Day | No | 23:45 | 23:00 - 23:59 | Night | 37,7 | 71  | 4,8   | 4,8   | 18,85 | 568,10 | 52,04  |



|    |            |        |      |           |         |         |          |    |       |               |               |      |     |      |      |       |        |        |
|----|------------|--------|------|-----------|---------|---------|----------|----|-------|---------------|---------------|------|-----|------|------|-------|--------|--------|
|    | 2019/06/06 | CH2206 | Male | Three y/o | Control | Control | Feed Day | No | 23:45 | 23:00 - 23:59 | Night         | 37,5 | 92  | 49,2 | 49,2 | 18,65 | 587,78 | 131,23 |
|    | 2019/06/06 | CH2205 | Male | Three y/o | Control | Control | Feed Day | No | 23:50 | 23:00 - 23:59 | Night         | 37,9 | 96  | 11,4 | 11,4 | 19,05 | 590,91 | 81,19  |
|    | 2019/06/06 | CH2206 | Male | Three y/o | Control | Control | Feed Day | No | 23:50 | 23:00 - 23:59 | Night         | 37,5 | 80  | 39,8 | 39,8 | 18,65 | 577,31 | 123,91 |
|    | 2019/06/06 | CH2205 | Male | Three y/o | Control | Control | Feed Day | No | 23:55 | 23:00 - 23:59 | Night         | 37,9 | 51  | 6,6  | 6,6  | 19,05 | 541,20 | 62,73  |
|    | 2019/06/06 | CH2206 | Male | Three y/o | Control | Control | Feed Day | No | 23:55 | 23:00 - 23:59 | Night         | 37,5 | 93  | 45,6 | 45,6 | 18,65 | 588,58 | 128,61 |
| 23 | 2019/06/07 | CH2205 | Male | Three y/o | Control | Control | Feed Day | No | 00:00 | 00:00 - 00:59 | Early Morning | 37,9 | 69  | 8,6  | 8,6  | 19,05 | 565,86 | 71,66  |
|    | 2019/06/07 | CH2206 | Male | Three y/o | Control | Control | Feed Day | No | 00:00 | 00:00 - 00:59 | Early Morning | 37,5 | 73  | 55,0 | 55,0 | 18,65 | 570,27 | 135,08 |
|    | 2019/06/07 | CH2205 | Male | Three y/o | Control | Control | Feed Day | No | 00:05 | 00:00 - 00:59 | Early Morning | 37,9 | 89  | 10,2 | 10,2 | 19,05 | 585,33 | 77,43  |
|    | 2019/06/07 | CH2206 | Male | Three y/o | Control | Control | Feed Day | No | 00:05 | 00:00 - 00:59 | Early Morning | 37,5 | 76  | 44,4 | 44,4 | 18,65 | 573,39 | 127,69 |
|    | 2019/06/07 | CH2205 | Male | Three y/o | Control | Control | Feed Day | No | 00:10 | 00:00 - 00:59 | Early Morning | 37,9 | 84  | 13,0 | 13,0 | 19,05 | 581,01 | 85,65  |
|    | 2019/06/07 | CH2206 | Male | Three y/o | Control | Control | Feed Day | No | 00:10 | 00:00 - 00:59 | Early Morning | 37,5 | 53  | 37,2 | 37,2 | 18,65 | 544,43 | 121,59 |
|    | 2019/06/07 | CH2205 | Male | Three y/o | Control | Control | Feed Day | No | 00:15 | 00:00 - 00:59 | Early Morning | 37,9 | 98  | 8,2  | 8,2  | 19,05 | 592,41 | 70,05  |
|    | 2019/06/07 | CH2206 | Male | Three y/o | Control | Control | Feed Day | No | 00:15 | 00:00 - 00:59 | Early Morning | 37,5 | 77  | 30,2 | 30,2 | 18,65 | 574,39 | 114,42 |
|    | 2019/06/07 | CH2205 | Male | Three y/o | Control | Control | Feed Day | No | 00:20 | 00:00 - 00:59 | Early Morning | 37,9 | 98  | 13,8 | 13,8 | 19,05 | 592,41 | 87,68  |
|    | 2019/06/07 | CH2206 | Male | Three y/o | Control | Control | Feed Day | No | 00:20 | 00:00 - 00:59 | Early Morning | 37,5 | 88  | 40,8 | 40,8 | 18,65 | 584,49 | 124,77 |
|    | 2019/06/07 | CH2205 | Male | Three y/o | Control | Control | Feed Day | No | 00:25 | 00:00 - 00:59 | Early Morning | 37,9 | 106 | 13,6 | 13,6 | 19,05 | 598,06 | 87,18  |
|    | 2019/06/07 | CH2206 | Male | Three y/o | Control | Control | Feed Day | No | 00:25 | 00:00 - 00:59 | Early Morning | 37,5 | 100 | 40,4 | 40,4 | 18,65 | 593,87 | 124,43 |
|    | 2019/06/07 | CH2205 | Male | Three y/o | Control | Control | Feed Day | No | 00:30 | 00:00 - 00:59 | Early Morning | 37,7 | 68  | 13,0 | 13,0 | 18,85 | 564,71 | 85,65  |
|    | 2019/06/07 | CH2206 | Male | Three y/o | Control | Control | Feed Day | No | 00:30 | 00:00 - 00:59 | Early Morning | 37,5 | 84  | 33,2 | 33,2 | 18,65 | 581,01 | 117,68 |
|    | 2019/06/07 | CH2205 | Male | Three y/o | Control | Control | Feed Day | No | 00:35 | 00:00 - 00:59 | Early Morning | 37,6 | 88  | 15,6 | 15,6 | 18,75 | 584,49 | 91,85  |
|    | 2019/06/07 | CH2206 | Male | Three y/o | Control | Control | Feed Day | No | 00:35 | 00:00 - 00:59 | Early Morning | 37,4 | 90  | 38,8 | 38,8 | 18,55 | 586,16 | 123,04 |
|    | 2019/06/07 | CH2205 | Male | Three y/o | Control | Control | Feed Day | No | 00:40 | 00:00 - 00:59 | Early Morning | 37,6 | 100 | 12,8 | 12,8 | 18,75 | 593,87 | 85,12  |
|    | 2019/06/07 | CH2206 | Male | Three y/o | Control | Control | Feed Day | No | 00:40 | 00:00 - 00:59 | Early Morning | 37,5 | 103 | 31,8 | 31,8 | 18,65 | 596,00 | 116,20 |
|    | 2019/06/07 | CH2205 | Male | Three y/o | Control | Control | Feed Day | No | 00:45 | 00:00 - 00:59 | Early Morning | 37,5 | 79  | 10,8 | 10,8 | 18,65 | 576,36 | 79,36  |
|    | 2019/06/07 | CH2206 | Male | Three y/o | Control | Control | Feed Day | No | 00:45 | 00:00 - 00:59 | Early Morning | 37,7 | 104 | 20,8 | 20,8 | 18,85 | 596,69 | 101,65 |
|    | 2019/06/07 | CH2205 | Male | Three y/o | Control | Control | Feed Day | No | 00:50 | 00:00 - 00:59 | Early Morning | 37,5 | 94  | 15,8 | 15,8 | 18,65 | 589,37 | 92,28  |
|    | 2019/06/07 | CH2206 | Male | Three y/o | Control | Control | Feed Day | No | 00:50 | 00:00 - 00:59 | Early Morning | 37,7 | 94  | 13,8 | 13,8 | 18,85 | 589,37 | 87,68  |
|    | 2019/06/07 | CH2205 | Male | Three y/o | Control | Control | Feed Day | No | 00:55 | 00:00 - 00:59 | Early Morning | 37,4 | 68  | 10,2 | 10,2 | 18,55 | 564,71 | 77,43  |
|    | 2019/06/07 | CH2206 | Male | Three y/o | Control | Control | Feed Day | No | 00:55 | 00:00 - 00:59 | Early Morning | 37,7 | 98  | 22,8 | 22,8 | 18,85 | 592,41 | 104,79 |
|    | 2019/06/07 | CH2205 | Male | Three y/o | Control | Control | Feed Day | No | 01:00 | 01:00 - 01:59 | Early Morning | 37,3 | 90  | 10,0 | 10,0 | 18,46 | 586,16 | 76,76  |
|    | 2019/06/07 | CH2206 | Male | Three y/o | Control | Control | Feed Day | No | 01:00 | 01:00 - 01:59 | Early Morning | 37,4 | 97  | 51,6 | 51,6 | 18,55 | 591,66 | 132,87 |
|    | 2019/06/07 | CH2205 | Male | Three y/o | Control | Control | Feed Day | No | 01:05 | 01:00 - 01:59 | Early Morning | 37,2 |     | 7,2  | 7,2  | 18,36 |        | 65,66  |
|    | 2019/06/07 | CH2206 | Male | Three y/o | Control | Control | Feed Day | No | 01:05 | 01:00 - 01:59 | Early Morning | 37,5 | 94  | 50,8 | 50,8 | 18,65 | 589,37 | 132,33 |
|    | 2019/06/07 | CH2205 | Male | Three y/o | Control | Control | Feed Day | No | 01:10 | 01:00 - 01:59 | Early Morning | 37,2 | 74  | 5,4  | 5,4  | 18,36 | 571,33 | 55,99  |
|    | 2019/06/07 | CH2206 | Male | Three y/o | Control | Control | Feed Day | No | 01:10 | 01:00 - 01:59 | Early Morning | 37,5 | 102 | 49,8 | 49,8 | 18,65 | 595,30 | 131,65 |
|    | 2019/06/07 | CH2205 | Male | Three y/o | Control | Control | Feed Day | No | 01:15 | 01:00 - 01:59 | Early Morning | 37,2 | 72  | 6,4  | 6,4  | 18,36 | 569,20 | 61,70  |
|    | 2019/06/07 | CH2206 | Male | Three y/o | Control | Control | Feed Day | No | 01:15 | 01:00 - 01:59 | Early Morning | 37,4 | 98  | 49,8 | 49,8 | 18,55 | 592,41 | 131,65 |
|    | 2019/06/07 | CH2205 | Male | Three y/o | Control | Control | Feed Day | No | 01:20 | 01:00 - 01:59 | Early Morning | 37,2 | 75  | 6,6  | 6,6  | 18,36 | 572,36 | 62,73  |
|    | 2019/06/07 | CH2206 | Male | Three y/o | Control | Control | Feed Day | No | 01:20 | 01:00 - 01:59 | Early Morning | 37,4 | 78  | 52,8 | 52,8 | 18,55 | 575,38 | 133,67 |
|    | 2019/06/07 | CH2205 | Male | Three y/o | Control | Control | Feed Day | No | 01:25 | 01:00 - 01:59 | Early Morning | 37,2 | 93  | 4,4  | 4,4  | 18,36 | 588,58 | 49,12  |
|    | 2019/06/07 | CH2206 | Male | Three y/o | Control | Control | Feed Day | No | 01:25 | 01:00 - 01:59 | Early Morning | 37,5 | 93  | 45,8 | 45,8 | 18,65 | 588,58 | 128,76 |
|    | 2019/06/07 | CH2205 | Male | Three y/o | Control | Control | Feed Day | No | 01:30 | 01:00 - 01:59 | Early Morning | 37,2 | 74  | 2,0  | 2,0  | 18,36 | 571,33 | 22,86  |
|    | 2019/06/07 | CH2206 | Male | Three y/o | Control | Control | Feed Day | No | 01:30 | 01:00 - 01:59 | Early Morning | 37,4 | 94  | 40,0 | 40,0 | 18,55 | 589,37 | 124,09 |
|    | 2019/06/07 | CH2205 | Male | Three y/o | Control | Control | Feed Day | No | 01:35 | 01:00 - 01:59 | Early Morning | 37,5 | 94  | 3,0  | 3,0  | 18,65 | 589,37 | 36,34  |
|    | 2019/06/07 | CH2206 | Male | Three y/o | Control | Control | Feed Day | No | 01:35 | 01:00 - 01:59 | Early Morning | 37,7 | 150 | 81,6 | 81,6 | 18,85 | 621,86 | 148,76 |
|    | 2019/06/07 | CH2205 | Male | Three y/o | Control | Control | Feed Day | No | 01:40 | 01:00 - 01:59 | Early Morning | 37,5 |     | 2,4  | 2,4  | 18,65 |        | 28,91  |
|    | 2019/06/07 | CH2206 | Male | Three y/o | Control | Control | Feed Day | No | 01:40 | 01:00 - 01:59 | Early Morning | 37,8 | 93  | 10,4 | 10,4 | 18,95 | 588,58 | 78,08  |
|    | 2019/06/07 | CH2205 | Male | Three y/o | Control | Control | Feed Day | No | 01:45 | 01:00 - 01:59 | Early Morning | 37,6 | 95  | 11,0 | 11,0 | 18,75 | 590,14 | 79,98  |
|    | 2019/06/07 | CH2206 | Male | Three y/o | Control | Control | Feed Day | No | 01:45 | 01:00 - 01:59 | Early Morning | 37,5 | 100 | 18,0 | 18,0 | 18,65 | 593,87 | 96,72  |
|    | 2019/06/07 | CH2205 | Male | Three y/o | Control | Control | Feed Day | No | 01:50 | 01:00 - 01:59 | Early Morning | 37,7 | 135 | 16,8 | 16,8 | 18,85 | 614,84 | 94,37  |
|    | 2019/06/07 | CH2206 | Male | Three y/o | Control | Control | Feed Day | No | 01:50 | 01:00 - 01:59 | Early Morning | 37,5 | 100 | 16,8 | 16,8 | 18,65 | 593,87 | 94,37  |
|    | 2019/06/07 | CH2205 | Male | Three y/o | Control | Control | Feed Day | No | 01:55 | 01:00 - 01:59 | Early Morning | 37,8 | 111 | 46,2 | 46,2 | 18,95 | 601,33 | 129,06 |
|    | 2019/06/07 | CH2206 | Male | Three y/o | Control | Control | Feed Day | No | 01:55 | 01:00 - 01:59 | Early Morning | 37,6 |     | 7,6  | 7,6  | 18,75 |        | 67,49  |
|    | 2019/06/07 | CH2205 | Male | Three y/o | Control | Control | Feed Day | No | 02:00 | 02:00 - 02:59 | Early Morning | 37,7 | 98  | 4,2  | 4,2  | 18,85 | 592,41 | 47,57  |
|    | 2019/06/07 | CH2206 | Male | Three y/o | Control | Control | Feed Day | No | 02:00 | 02:00 - 02:59 | Early Morning | 37,7 | 96  | 9,4  | 9,4  | 18,85 | 590,91 | 74,66  |
|    | 2019/06/07 | CH2205 | Male | Three y/o | Control | Control | Feed Day | No | 02:05 | 02:00 - 02:59 | Early Morning | 37,6 | 63  | 4,6  | 4,6  | 18,75 | 558,62 | 50,61  |
|    | 2019/06/07 | CH2206 | Male | Three y/o | Control | Control | Feed Day | No | 02:05 | 02:00 - 02:59 | Early Morning | 37,7 | 97  | 12,2 | 12,2 | 18,85 | 591,66 | 83,49  |
|    | 2019/06/07 | CH2205 | Male | Three y/o | Control | Control | Feed Day | No | 02:10 | 02:00 - 02:59 | Early Morning | 37,5 | 86  | 6,6  | 6,6  | 18,65 | 582,77 | 62,73  |
|    | 2019/06/07 | CH2206 | Male | Three y/o | Control | Control | Feed Day | No | 02:10 | 02:00 - 02:59 | Early Morning | 37,7 | 95  | 3,8  | 3,8  | 18,85 | 590,14 | 44,22  |
|    | 2019/06/07 | CH2205 | Male | Three y/o | Control | Control | Feed Day | No | 02:15 | 02:00 - 02:59 | Early Morning | 37,5 | 71  | 8,0  | 8,0  | 18,65 | 568,10 | 69,22  |
|    | 2019/06/07 | CH2206 | Male | Three y/o | Control | Control | Feed Day | No | 02:15 | 02:00 - 02:59 | Early Morning | 37,7 | 94  | 4,8  | 4,8  | 18,85 | 589,37 | 52,04  |
|    | 2019/06/07 | CH2205 | Male | Three y/o | Control | Control | Feed Day | No | 02:20 | 02:00 - 02:59 | Early Morning | 37,6 | 97  | 7,0  | 7,0  | 18,75 | 591,66 | 64,72  |
|    | 2019/06/07 | CH2206 | Male | Three y/o | Control | Control | Feed Day | No | 02:20 | 02:00 - 02:59 | Early Morning | 37,8 | 90  | 1,6  | 1,6  | 18,95 | 586,16 | 15,48  |
|    | 2019/06/07 | CH2205 | Male | Three y/o | Control | Control | Feed Day | No | 02:25 | 02:00 - 02:59 | Early Morning | 37,7 | 98  | 5,8  | 5,8  | 18,85 | 592,41 | 58,39  |
|    | 2019/06/07 | CH2206 | Male | Three y/o | Control | Control | Feed Day | No | 02:25 | 02:00 - 02:59 | Early Morning | 37,8 | 96  | 4,8  | 4,8  | 18,95 | 590,91 | 52,04  |
|    | 2019/06/07 | CH2205 | Male | Three y/o | Control | Control | Feed Day | No | 02:30 | 02:00 - 02:59 | Early Morning | 37,9 | 76  | 2,6  | 2,6  | 19,05 | 573,39 | 31,57  |
|    | 2019/06/07 | CH2206 | Male | Three y/o | Control | Control | Feed Day | No | 02:30 | 02:00 - 02:59 | Early Morning | 37,8 | 92  | 3,8  | 3,8  | 18,95 | 587,78 | 44,22  |
|    | 2019/06/07 | CH2205 | Male | Three y/o | Control | Control | Feed Day | No | 02:35 | 02:00 - 02:59 | Early Morning | 38,0 | 100 | 3,2  | 3,2  | 19,15 | 593,87 | 38,49  |
|    | 2019/06/07 | CH2206 | Male | Three y/o | Control | Control | Feed Day | No | 02:35 | 02:00 - 02:59 | Early Morning | 37,8 | 94  | 5,6  | 5,6  | 18,95 | 589,37 | 57,21  |
|    | 2019/06/07 | CH2205 | Male | Three y/o | Control | Control | Feed Day | No | 02:40 | 02:00 - 02:59 | Early Morning | 38,0 | 95  | 3,8  | 3,8  | 19,15 | 590,14 | 44,22  |



|            |        |      |           |         |         |          |    |       |               |               |      |     |       |       |       |        |        |
|------------|--------|------|-----------|---------|---------|----------|----|-------|---------------|---------------|------|-----|-------|-------|-------|--------|--------|
| 2019/06/07 | CH2206 | Male | Three y/o | Control | Control | Feed Day | No | 02:40 | 02:00 - 02:59 | Early Morning | 37,7 | 97  | 9,2   | 9,2   | 18,85 | 591,66 | 73,94  |
| 2019/06/07 | CH2205 | Male | Three y/o | Control | Control | Feed Day | No | 02:45 | 02:00 - 02:59 | Early Morning | 38,0 | 94  | 4,0   | 4,0   | 19,15 | 589,37 | 45,94  |
| 2019/06/07 | CH2206 | Male | Three y/o | Control | Control | Feed Day | No | 02:45 | 02:00 - 02:59 | Early Morning | 37,8 | 107 | 23,6  | 23,6  | 18,95 | 598,73 | 105,97 |
| 2019/06/07 | CH2205 | Male | Three y/o | Control | Control | Feed Day | No | 02:50 | 02:00 - 02:59 | Early Morning | 38,0 | 78  | 2,6   | 2,6   | 19,15 | 575,38 | 31,57  |
| 2019/06/07 | CH2206 | Male | Three y/o | Control | Control | Feed Day | No | 02:50 | 02:00 - 02:59 | Early Morning | 37,5 | 101 | 30,4  | 30,4  | 18,65 | 594,59 | 114,65 |
| 2019/06/07 | CH2205 | Male | Three y/o | Control | Control | Feed Day | No | 02:55 | 02:00 - 02:59 | Early Morning | 38,0 | 97  | 6,4   | 6,4   | 19,15 | 591,66 | 61,70  |
| 2019/06/07 | CH2206 | Male | Three y/o | Control | Control | Feed Day | No | 02:55 | 02:00 - 02:59 | Early Morning | 37,5 | 95  | 20,4  | 20,4  | 18,65 | 590,14 | 100,99 |
| 2019/06/07 | CH2205 | Male | Three y/o | Control | Control | Feed Day | No | 03:00 | 03:00 - 03:59 | Early Morning | 38,1 | 84  | 3,8   | 3,8   | 19,26 | 581,01 | 44,22  |
| 2019/06/07 | CH2206 | Male | Three y/o | Control | Control | Feed Day | No | 03:00 | 03:00 - 03:59 | Early Morning | 37,5 | 88  | 14,6  | 14,6  | 18,65 | 584,49 | 89,59  |
| 2019/06/07 | CH2205 | Male | Three y/o | Control | Control | Feed Day | No | 03:05 | 03:00 - 03:59 | Early Morning | 38,1 | 54  | 6,2   | 6,2   | 19,26 | 545,99 | 60,63  |
| 2019/06/07 | CH2206 | Male | Three y/o | Control | Control | Feed Day | No | 03:05 | 03:00 - 03:59 | Early Morning | 37,4 | 88  | 28,4  | 28,4  | 18,55 | 584,49 | 112,31 |
| 2019/06/07 | CH2205 | Male | Three y/o | Control | Control | Feed Day | No | 03:10 | 03:00 - 03:59 | Early Morning | 38,1 | 81  | 6,2   | 6,2   | 19,26 | 578,26 | 60,63  |
| 2019/06/07 | CH2206 | Male | Three y/o | Control | Control | Feed Day | No | 03:10 | 03:00 - 03:59 | Early Morning | 37,5 | 88  | 42,6  | 42,6  | 18,65 | 584,49 | 126,26 |
| 2019/06/07 | CH2205 | Male | Three y/o | Control | Control | Feed Day | No | 03:15 | 03:00 - 03:59 | Early Morning | 38,1 | 88  | 3,4   | 3,4   | 19,26 | 584,49 | 40,51  |
| 2019/06/07 | CH2206 | Male | Three y/o | Control | Control | Feed Day | No | 03:15 | 03:00 - 03:59 | Early Morning | 37,5 | 98  | 43,8  | 43,8  | 18,65 | 592,41 | 127,22 |
| 2019/06/07 | CH2205 | Male | Three y/o | Control | Control | Feed Day | No | 03:20 | 03:00 - 03:59 | Early Morning | 38,1 | 90  | 7,6   | 7,6   | 19,26 | 586,16 | 67,49  |
| 2019/06/07 | CH2206 | Male | Three y/o | Control | Control | Feed Day | No | 03:20 | 03:00 - 03:59 | Early Morning | 37,5 | 79  | 44,0  | 44,0  | 18,65 | 576,36 | 127,37 |
| 2019/06/07 | CH2205 | Male | Three y/o | Control | Control | Feed Day | No | 03:25 | 03:00 - 03:59 | Early Morning | 38,1 | 55  | 3,6   | 3,6   | 19,26 | 547,52 | 42,42  |
| 2019/06/07 | CH2206 | Male | Three y/o | Control | Control | Feed Day | No | 03:25 | 03:00 - 03:59 | Early Morning | 37,5 | 96  | 43,4  | 43,4  | 18,65 | 590,91 | 126,90 |
| 2019/06/07 | CH2205 | Male | Three y/o | Control | Control | Feed Day | No | 03:30 | 03:00 - 03:59 | Early Morning | 38,1 | 56  | 5,0   | 5,0   | 19,26 | 549,01 | 53,41  |
| 2019/06/07 | CH2206 | Male | Three y/o | Control | Control | Feed Day | No | 03:30 | 03:00 - 03:59 | Early Morning | 37,5 | 80  | 43,6  | 43,6  | 18,65 | 577,31 | 127,06 |
| 2019/06/07 | CH2205 | Male | Three y/o | Control | Control | Feed Day | No | 03:35 | 03:00 - 03:59 | Early Morning | 38,1 | 82  | 8,0   | 8,0   | 19,26 | 579,19 | 69,22  |
| 2019/06/07 | CH2206 | Male | Three y/o | Control | Control | Feed Day | No | 03:35 | 03:00 - 03:59 | Early Morning | 37,5 | 92  | 46,6  | 46,6  | 18,65 | 587,78 | 129,35 |
| 2019/06/07 | CH2205 | Male | Three y/o | Control | Control | Feed Day | No | 03:40 | 03:00 - 03:59 | Early Morning | 38,2 | 71  | 13,8  | 13,8  | 19,36 | 568,10 | 87,68  |
| 2019/06/07 | CH2206 | Male | Three y/o | Control | Control | Feed Day | No | 03:40 | 03:00 - 03:59 | Early Morning | 37,5 | 84  | 45,6  | 45,6  | 18,65 | 581,01 | 128,61 |
| 2019/06/07 | CH2205 | Male | Three y/o | Control | Control | Feed Day | No | 03:45 | 03:00 - 03:59 | Early Morning | 38,2 | 94  | 8,0   | 8,0   | 19,36 | 589,37 | 69,22  |
| 2019/06/07 | CH2206 | Male | Three y/o | Control | Control | Feed Day | No | 03:45 | 03:00 - 03:59 | Early Morning | 37,7 | 90  | 47,8  | 47,8  | 18,85 | 586,16 | 130,23 |
| 2019/06/07 | CH2205 | Male | Three y/o | Control | Control | Feed Day | No | 03:50 | 03:00 - 03:59 | Early Morning | 38,2 | 54  | 11,2  | 11,2  | 19,36 | 545,99 | 80,59  |
| 2019/06/07 | CH2206 | Male | Three y/o | Control | Control | Feed Day | No | 03:50 | 03:00 - 03:59 | Early Morning | 37,7 | 111 | 44,6  | 44,6  | 18,85 | 601,33 | 127,84 |
| 2019/06/07 | CH2205 | Male | Three y/o | Control | Control | Feed Day | No | 03:55 | 03:00 - 03:59 | Early Morning | 38,2 | 80  | 13,4  | 13,4  | 19,36 | 577,31 | 86,68  |
| 2019/06/07 | CH2206 | Male | Three y/o | Control | Control | Feed Day | No | 03:55 | 03:00 - 03:59 | Early Morning | 37,7 | 83  | 49,0  | 49,0  | 18,85 | 580,11 | 131,09 |
| 2019/06/07 | CH2205 | Male | Three y/o | Control | Control | Feed Day | No | 04:00 | 04:00 - 04:59 | Morning       | 38,2 | 96  | 21,8  | 21,8  | 19,36 | 590,91 | 103,26 |
| 2019/06/07 | CH2206 | Male | Three y/o | Control | Control | Feed Day | No | 04:00 | 04:00 - 04:59 | Morning       | 37,7 | 90  | 24,6  | 24,6  | 18,85 | 586,16 | 107,39 |
| 2019/06/07 | CH2205 | Male | Three y/o | Control | Control | Feed Day | No | 04:05 | 04:00 - 04:59 | Morning       | 38,1 | 97  | 22,2  | 22,2  | 19,26 | 591,66 | 103,88 |
| 2019/06/07 | CH2206 | Male | Three y/o | Control | Control | Feed Day | No | 04:05 | 04:00 - 04:59 | Morning       | 37,5 | 88  | 28,8  | 28,8  | 18,65 | 584,49 | 112,79 |
| 2019/06/07 | CH2205 | Male | Three y/o | Control | Control | Feed Day | No | 04:10 | 04:00 - 04:59 | Morning       | 38,1 | 91  | 17,0  | 17,0  | 19,26 | 586,98 | 94,77  |
| 2019/06/07 | CH2206 | Male | Three y/o | Control | Control | Feed Day | No | 04:10 | 04:00 - 04:59 | Morning       | 37,5 | 51  | 20,6  | 20,6  | 18,65 | 541,20 | 101,32 |
| 2019/06/07 | CH2205 | Male | Three y/o | Control | Control | Feed Day | No | 04:15 | 04:00 - 04:59 | Morning       | 38,2 |     | 67,2  | 67,2  | 19,36 |        | 142,02 |
| 2019/06/07 | CH2206 | Male | Three y/o | Control | Control | Feed Day | No | 04:15 | 04:00 - 04:59 | Morning       | 37,5 |     | 22,0  | 22,0  | 18,65 |        | 103,57 |
| 2019/06/07 | CH2205 | Male | Three y/o | Control | Control | Feed Day | No | 04:20 | 04:00 - 04:59 | Morning       | 38,1 | 120 | 45,8  | 45,8  | 19,26 | 606,78 | 128,76 |
| 2019/06/07 | CH2206 | Male | Three y/o | Control | Control | Feed Day | No | 04:20 | 04:00 - 04:59 | Morning       | 37,6 | 91  | 23,8  | 23,8  | 18,75 | 586,98 | 106,26 |
| 2019/06/07 | CH2205 | Male | Three y/o | Control | Control | Feed Day | No | 04:25 | 04:00 - 04:59 | Morning       | 37,7 | 138 | 54,0  | 54,0  | 18,85 | 616,31 | 134,45 |
| 2019/06/07 | CH2206 | Male | Three y/o | Control | Control | Feed Day | No | 04:25 | 04:00 - 04:59 | Morning       | 37,7 | 98  | 23,6  | 23,6  | 18,85 | 592,41 | 105,97 |
| 2019/06/07 | CH2205 | Male | Three y/o | Control | Control | Feed Day | No | 04:30 | 04:00 - 04:59 | Morning       | 37,5 | 124 | 121,0 | 121,0 | 18,65 | 609,04 | 162,50 |
| 2019/06/07 | CH2206 | Male | Three y/o | Control | Control | Feed Day | No | 04:30 | 04:00 - 04:59 | Morning       | 37,7 | 115 | 10,6  | 10,6  | 18,85 | 603,82 | 78,73  |
| 2019/06/07 | CH2205 | Male | Three y/o | Control | Control | Feed Day | No | 04:35 | 04:00 - 04:59 | Morning       | 37,4 | 120 | 44,8  | 44,8  | 18,55 | 606,78 | 127,99 |
| 2019/06/07 | CH2206 | Male | Three y/o | Control | Control | Feed Day | No | 04:35 | 04:00 - 04:59 | Morning       | 37,7 | 80  | 3,8   | 3,8   | 18,85 | 577,31 | 44,22  |
| 2019/06/07 | CH2205 | Male | Three y/o | Control | Control | Feed Day | No | 04:40 | 04:00 - 04:59 | Morning       | 37,6 | 108 | 27,4  | 27,4  | 18,75 | 599,39 | 111,09 |
| 2019/06/07 | CH2206 | Male | Three y/o | Control | Control | Feed Day | No | 04:40 | 04:00 - 04:59 | Morning       | 37,7 | 89  | 19,2  | 19,2  | 18,85 | 585,33 | 98,92  |
| 2019/06/07 | CH2205 | Male | Three y/o | Control | Control | Feed Day | No | 04:45 | 04:00 - 04:59 | Morning       | 37,7 | 131 | 68,6  | 68,6  | 18,85 | 612,80 | 142,74 |
| 2019/06/07 | CH2206 | Male | Three y/o | Control | Control | Feed Day | No | 04:45 | 04:00 - 04:59 | Morning       | 37,7 | 84  | 29,4  | 29,4  | 18,85 | 581,01 | 113,50 |
| 2019/06/07 | CH2205 | Male | Three y/o | Control | Control | Feed Day | No | 04:50 | 04:00 - 04:59 | Morning       | 37,6 | 40  | 25,0  | 25,0  | 18,75 | 520,09 | 107,94 |
| 2019/06/07 | CH2206 | Male | Three y/o | Control | Control | Feed Day | No | 04:50 | 04:00 - 04:59 | Morning       | 37,7 | 97  | 15,0  | 15,0  | 18,85 | 591,66 | 90,51  |
| 2019/06/07 | CH2205 | Male | Three y/o | Control | Control | Feed Day | No | 04:55 | 04:00 - 04:59 | Morning       | 37,3 |     | 10,8  | 10,8  | 18,46 |        | 79,36  |
| 2019/06/07 | CH2206 | Male | Three y/o | Control | Control | Feed Day | No | 04:55 | 04:00 - 04:59 | Morning       | 37,7 | 87  | 11,0  | 11,0  | 18,85 | 583,64 | 79,98  |
| 2019/06/07 | CH2205 | Male | Three y/o | Control | Control | Feed Day | No | 05:00 | 05:00 - 05:59 | Morning       | 37,2 | 59  | 21,0  | 21,0  | 18,36 | 553,30 | 101,98 |
| 2019/06/07 | CH2206 | Male | Three y/o | Control | Control | Feed Day | No | 05:00 | 05:00 - 05:59 | Morning       | 37,7 | 108 | 42,0  | 42,0  | 18,85 | 599,39 | 125,77 |
| 2019/06/07 | CH2205 | Male | Three y/o | Control | Control | Feed Day | No | 05:05 | 05:00 - 05:59 | Morning       | 37,5 | 134 | 21,0  | 21,0  | 18,65 | 614,33 | 101,98 |
| 2019/06/07 | CH2206 | Male | Three y/o | Control | Control | Feed Day | No | 05:05 | 05:00 - 05:59 | Morning       | 37,7 | 165 | 45,0  | 45,0  | 18,85 | 628,06 | 128,15 |
| 2019/06/07 | CH2205 | Male | Three y/o | Control | Control | Feed Day | No | 05:10 | 05:00 - 05:59 | Morning       | 37,7 |     | 15,0  | 15,0  | 18,85 |        | 90,51  |
| 2019/06/07 | CH2206 | Male | Three y/o | Control | Control | Feed Day | No | 05:10 | 05:00 - 05:59 | Morning       | 37,7 | 92  | 12,6  | 12,6  | 18,85 | 587,78 | 84,59  |
| 2019/06/07 | CH2205 | Male | Three y/o | Control | Control | Feed Day | No | 05:15 | 05:00 - 05:59 | Morning       | 37,7 | 99  | 15,4  | 15,4  | 18,85 | 593,14 | 91,41  |
| 2019/06/07 | CH2206 | Male | Three y/o | Control | Control | Feed Day | No | 05:15 | 05:00 - 05:59 | Morning       | 37,4 | 121 | 46,8  | 46,8  | 18,55 | 607,35 | 129,50 |
| 2019/06/07 | CH2205 | Male | Three y/o | Control | Control | Feed Day | No | 05:20 | 05:00 - 05:59 | Morning       | 37,7 |     | 13,4  | 13,4  | 18,85 |        | 86,68  |
| 2019/06/07 | CH2206 | Male | Three y/o | Control | Control | Feed Day | No | 05:20 | 05:00 - 05:59 | Morning       | 37,3 | 96  | 22,6  | 22,6  | 18,46 | 590,91 | 104,49 |
| 2019/06/07 | CH2205 | Male | Three y/o | Control | Control | Feed Day | No | 05:25 | 05:00 - 05:59 | Morning       | 37,7 | 121 | 31,6  | 31,6  | 18,85 | 607,35 | 115,98 |
| 2019/06/07 | CH2206 | Male | Three y/o | Control | Control | Feed Day | No | 05:25 | 05:00 - 05:59 | Morning       | 37,3 | 69  | 24,4  | 24,4  | 18,46 | 565,86 | 107,11 |
| 2019/06/07 | CH2205 | Male | Three y/o | Control | Control | Feed Day | No | 05:30 | 05:00 - 05:59 | Morning       | 37,7 | 150 | 7,0   | 7,0   | 18,85 | 621,86 | 64,72  |
| 2019/06/07 | CH2206 | Male | Three y/o | Control | Control | Feed Day | No | 05:30 | 05:00 - 05:59 | Morning       | 37,3 | 97  | 9,2   | 9,2   | 18,46 | 591,66 | 73,94  |
| 2019/06/07 | CH2205 | Male | Three y/o | Control | Control | Feed Day | No | 05:35 | 05:00 - 05:59 | Morning       | 37,6 | 129 | 7,4   | 7,4   | 18,75 | 611,75 | 66,59  |



|            |        |      |           |         |         |          |    |       |               |              |      |     |       |       |       |        |
|------------|--------|------|-----------|---------|---------|----------|----|-------|---------------|--------------|------|-----|-------|-------|-------|--------|
| 2019/06/07 | CH2206 | Male | Three y/o | Control | Control | Feed Day | No | 05:35 | 05:00 - 05:59 | Morning      | 37,3 |     | 33,0  | 33,0  | 18,46 | 117,47 |
| 2019/06/07 | CH2205 | Male | Three y/o | Control | Control | Feed Day | No | 05:40 | 05:00 - 05:59 | Morning      | 37,6 | 117 | 13,8  | 13,8  | 18,75 | 605,02 |
| 2019/06/07 | CH2206 | Male | Three y/o | Control | Control | Feed Day | No | 05:40 | 05:00 - 05:59 | Morning      | 37,2 | 92  | 14,0  | 14,0  | 18,36 | 587,78 |
| 2019/06/07 | CH2205 | Male | Three y/o | Control | Control | Feed Day | No | 05:45 | 05:00 - 05:59 | Morning      | 37,7 | 141 | 27,4  | 27,4  | 18,85 | 617,75 |
| 2019/06/07 | CH2206 | Male | Three y/o | Control | Control | Feed Day | No | 05:45 | 05:00 - 05:59 | Morning      | 37,2 | 126 | 11,4  | 11,4  | 18,36 | 610,14 |
| 2019/06/07 | CH2205 | Male | Three y/o | Control | Control | Feed Day | No | 05:50 | 05:00 - 05:59 | Morning      | 37,5 |     | 20,8  | 20,8  | 18,65 | 101,65 |
| 2019/06/07 | CH2206 | Male | Three y/o | Control | Control | Feed Day | No | 05:50 | 05:00 - 05:59 | Morning      | 37,2 | 95  | 10,2  | 10,2  | 18,36 | 590,14 |
| 2019/06/07 | CH2205 | Male | Three y/o | Control | Control | Feed Day | No | 05:55 | 05:00 - 05:59 | Morning      | 37,4 |     | 27,8  | 27,8  | 18,55 | 111,58 |
| 2019/06/07 | CH2206 | Male | Three y/o | Control | Control | Feed Day | No | 05:55 | 05:00 - 05:59 | Morning      | 37,2 | 50  | 2,2   | 2,2   | 18,36 | 539,52 |
| 2019/06/07 | CH2205 | Male | Three y/o | Control | Control | Feed Day | No | 06:00 | 06:00 - 06:59 | Morning      | 37,4 | 147 | 26,4  | 26,4  | 18,55 | 620,52 |
| 2019/06/07 | CH2206 | Male | Three y/o | Control | Control | Feed Day | No | 06:00 | 06:00 - 06:59 | Morning      | 37,2 | 87  | 11,4  | 11,4  | 18,36 | 583,64 |
| 2019/06/07 | CH2205 | Male | Three y/o | Control | Control | Feed Day | No | 06:05 | 06:00 - 06:59 | Morning      | 37,4 |     | 21,2  | 21,2  | 18,55 | 102,31 |
| 2019/06/07 | CH2206 | Male | Three y/o | Control | Control | Feed Day | No | 06:05 | 06:00 - 06:59 | Morning      | 37,2 | 93  | 11,6  | 11,6  | 18,36 | 588,58 |
| 2019/06/07 | CH2205 | Male | Three y/o | Control | Control | Feed Day | No | 06:10 | 06:00 - 06:59 | Morning      | 37,3 |     | 24,6  | 24,6  | 18,46 | 107,39 |
| 2019/06/07 | CH2206 | Male | Three y/o | Control | Control | Feed Day | No | 06:10 | 06:00 - 06:59 | Morning      | 37,3 | 92  | 11,0  | 11,0  | 18,46 | 587,78 |
| 2019/06/07 | CH2205 | Male | Three y/o | Control | Control | Feed Day | No | 06:15 | 06:00 - 06:59 | Morning      | 37,4 | 94  | 25,4  | 25,4  | 18,55 | 589,37 |
| 2019/06/07 | CH2206 | Male | Three y/o | Control | Control | Feed Day | No | 06:15 | 06:00 - 06:59 | Morning      | 37,4 | 86  | 13,8  | 13,8  | 18,55 | 582,77 |
| 2019/06/07 | CH2205 | Male | Three y/o | Control | Control | Feed Day | No | 06:20 | 06:00 - 06:59 | Morning      | 37,4 | 73  | 10,4  | 10,4  | 18,55 | 570,27 |
| 2019/06/07 | CH2206 | Male | Three y/o | Control | Control | Feed Day | No | 06:20 | 06:00 - 06:59 | Morning      | 37,4 | 77  | 35,2  | 35,2  | 18,55 | 574,39 |
| 2019/06/07 | CH2205 | Male | Three y/o | Control | Control | Feed Day | No | 06:25 | 06:00 - 06:59 | Morning      | 37,4 | 156 | 4,0   | 4,0   | 18,55 | 624,43 |
| 2019/06/07 | CH2206 | Male | Three y/o | Control | Control | Feed Day | No | 06:25 | 06:00 - 06:59 | Morning      | 37,5 | 90  | 47,2  | 47,2  | 18,65 | 586,16 |
| 2019/06/07 | CH2205 | Male | Three y/o | Control | Control | Feed Day | No | 06:30 | 06:00 - 06:59 | Morning      | 37,4 | 95  | 4,4   | 4,4   | 18,55 | 590,14 |
| 2019/06/07 | CH2206 | Male | Three y/o | Control | Control | Feed Day | No | 06:30 | 06:00 - 06:59 | Morning      | 37,5 | 94  | 44,6  | 44,6  | 18,65 | 589,37 |
| 2019/06/07 | CH2205 | Male | Three y/o | Control | Control | Feed Day | No | 06:35 | 06:00 - 06:59 | Morning      | 37,4 | 55  | 2,8   | 2,8   | 18,55 | 547,52 |
| 2019/06/07 | CH2206 | Male | Three y/o | Control | Control | Feed Day | No | 06:35 | 06:00 - 06:59 | Morning      | 37,5 | 46  | 44,2  | 44,2  | 18,65 | 532,38 |
| 2019/06/07 | CH2205 | Male | Three y/o | Control | Control | Feed Day | No | 06:40 | 06:00 - 06:59 | Morning      | 37,5 | 119 | 3,6   | 3,6   | 18,65 | 606,20 |
| 2019/06/07 | CH2206 | Male | Three y/o | Control | Control | Feed Day | No | 06:40 | 06:00 - 06:59 | Morning      | 37,7 | 79  | 41,8  | 41,8  | 18,85 | 576,36 |
| 2019/06/07 | CH2205 | Male | Three y/o | Control | Control | Feed Day | No | 06:45 | 06:00 - 06:59 | Morning      | 37,5 | 59  | 8,4   | 8,4   | 18,65 | 553,30 |
| 2019/06/07 | CH2206 | Male | Three y/o | Control | Control | Feed Day | No | 06:45 | 06:00 - 06:59 | Morning      | 37,7 | 95  | 22,0  | 22,0  | 18,85 | 590,14 |
| 2019/06/07 | CH2205 | Male | Three y/o | Control | Control | Feed Day | No | 06:50 | 06:00 - 06:59 | Morning      | 37,5 | 71  | 7,6   | 7,6   | 18,65 | 568,10 |
| 2019/06/07 | CH2206 | Male | Three y/o | Control | Control | Feed Day | No | 06:50 | 06:00 - 06:59 | Morning      | 37,7 | 102 | 16,0  | 16,0  | 18,85 | 595,30 |
| 2019/06/07 | CH2205 | Male | Three y/o | Control | Control | Feed Day | No | 06:55 | 06:00 - 06:59 | Morning      | 37,6 |     | 100,6 | 100,6 | 18,75 | 156,05 |
| 2019/06/07 | CH2206 | Male | Three y/o | Control | Control | Feed Day | No | 06:55 | 06:00 - 06:59 | Morning      | 37,7 | 114 | 25,4  | 25,4  | 18,85 | 603,20 |
| 2019/06/07 | CH2205 | Male | Three y/o | Control | Control | Feed Day | No | 07:00 | 07:00 - 07:59 | Morning      | 37,7 | 117 | 18,2  | 18,2  | 18,85 | 605,02 |
| 2019/06/07 | CH2206 | Male | Three y/o | Control | Control | Feed Day | No | 07:00 | 07:00 - 07:59 | Morning      | 37,7 | 147 | 40,6  | 40,6  | 18,85 | 620,52 |
| 2019/06/07 | CH2205 | Male | Three y/o | Control | Control | Feed Day | No | 07:05 | 07:00 - 07:59 | Morning      | 37,4 | 121 | 71,2  | 71,2  | 18,55 | 607,35 |
| 2019/06/07 | CH2206 | Male | Three y/o | Control | Control | Feed Day | No | 07:05 | 07:00 - 07:59 | Morning      | 37,7 | 132 | 25,6  | 25,6  | 18,85 | 613,32 |
| 2019/06/07 | CH2205 | Male | Three y/o | Control | Control | Feed Day | No | 07:10 | 07:00 - 07:59 | Morning      | 37,4 | 106 | 50,0  | 50,0  | 18,55 | 598,06 |
| 2019/06/07 | CH2206 | Male | Three y/o | Control | Control | Feed Day | No | 07:10 | 07:00 - 07:59 | Morning      | 37,4 |     | 19,6  | 19,6  | 18,55 | 99,63  |
| 2019/06/07 | CH2205 | Male | Three y/o | Control | Control | Feed Day | No | 07:15 | 07:00 - 07:59 | Morning      | 37,2 | 188 | 18,0  | 18,0  | 18,36 | 636,34 |
| 2019/06/07 | CH2206 | Male | Three y/o | Control | Control | Feed Day | No | 07:15 | 07:00 - 07:59 | Morning      | 37,4 |     | 18,8  | 18,8  | 18,55 | 98,20  |
| 2019/06/07 | CH2205 | Male | Three y/o | Control | Control | Feed Day | No | 07:20 | 07:00 - 07:59 | Morning      | 37,0 | 119 | 72,6  | 72,6  | 18,16 | 606,20 |
| 2019/06/07 | CH2206 | Male | Three y/o | Control | Control | Feed Day | No | 07:20 | 07:00 - 07:59 | Morning      | 37,3 | 124 | 36,8  | 36,8  | 18,46 | 609,04 |
| 2019/06/07 | CH2205 | Male | Three y/o | Control | Control | Feed Day | No | 07:25 | 07:00 - 07:59 | Morning      | 37,1 | 119 | 82,4  | 82,4  | 18,26 | 606,20 |
| 2019/06/07 | CH2206 | Male | Three y/o | Control | Control | Feed Day | No | 07:25 | 07:00 - 07:59 | Morning      | 37,3 | 140 | 21,4  | 21,4  | 18,46 | 617,28 |
| 2019/06/07 | CH2205 | Male | Three y/o | Control | Control | Feed Day | No | 07:30 | 07:00 - 07:59 | Morning      | 37,5 | 143 | 26,6  | 26,6  | 18,65 | 618,69 |
| 2019/06/07 | CH2206 | Male | Three y/o | Control | Control | Feed Day | No | 07:30 | 07:00 - 07:59 | Morning      | 37,4 |     | 91,8  | 91,8  | 18,55 | 152,86 |
| 2019/06/07 | CH2205 | Male | Three y/o | Control | Control | Feed Day | No | 07:35 | 07:00 - 07:59 | Morning      | 37,6 | 118 | 78,4  | 78,4  | 18,75 | 605,61 |
| 2019/06/07 | CH2206 | Male | Three y/o | Control | Control | Feed Day | No | 07:35 | 07:00 - 07:59 | Morning      | 37,5 | 64  | 125,0 | 125,0 | 18,65 | 559,88 |
| 2019/06/07 | CH2205 | Male | Three y/o | Control | Control | Feed Day | No | 07:40 | 07:00 - 07:59 | Morning      | 37,4 | 131 | 23,2  | 23,2  | 18,55 | 612,80 |
| 2019/06/07 | CH2206 | Male | Three y/o | Control | Control | Feed Day | No | 07:40 | 07:00 - 07:59 | Morning      | 37,7 | 135 | 119,6 | 119,6 | 18,85 | 614,84 |
| 2019/06/07 | CH2205 | Male | Three y/o | Control | Control | Feed Day | No | 07:45 | 07:00 - 07:59 | Morning      | 37,6 | 111 | 193,4 | 193,4 | 18,75 | 601,33 |
| 2019/06/07 | CH2206 | Male | Three y/o | Control | Control | Feed Day | No | 07:45 | 07:00 - 07:59 | Morning      | 37,7 | 100 | 64,0  | 64,0  | 18,85 | 593,87 |
| 2019/06/07 | CH2205 | Male | Three y/o | Control | Control | Feed Day | No | 07:50 | 07:00 - 07:59 | Morning      | 37,5 | 103 | 43,4  | 43,4  | 18,65 | 596,00 |
| 2019/06/07 | CH2206 | Male | Three y/o | Control | Control | Feed Day | No | 07:50 | 07:00 - 07:59 | Morning      | 37,7 | 150 | 34,6  | 34,6  | 18,85 | 621,86 |
| 2019/06/07 | CH2205 | Male | Three y/o | Control | Control | Feed Day | No | 07:55 | 07:00 - 07:59 | Morning      | 37,5 | 150 | 16,6  | 16,6  | 18,65 | 621,86 |
| 2019/06/07 | CH2206 | Male | Three y/o | Control | Control | Feed Day | No | 07:55 | 07:00 - 07:59 | Morning      | 37,6 | 121 | 16,4  | 16,4  | 18,75 | 607,35 |
| 2019/06/07 | CH2205 | Male | Three y/o | Control | Control | Feed Day | No | 08:00 | 08:00 - 08:59 | Late Morning | 37,5 |     | 19,2  | 19,2  | 18,65 | 98,92  |
| 2019/06/07 | CH2206 | Male | Three y/o | Control | Control | Feed Day | No | 08:00 | 08:00 - 08:59 | Late Morning | 37,4 |     | 100,4 | 100,4 | 18,55 | 155,98 |
| 2019/06/07 | CH2205 | Male | Three y/o | Control | Control | Feed Day | No | 08:05 | 08:00 - 08:59 | Late Morning | 37,5 | 124 | 227,2 | 227,2 | 18,65 | 609,04 |
| 2019/06/07 | CH2206 | Male | Three y/o | Control | Control | Feed Day | No | 08:05 | 08:00 - 08:59 | Late Morning | 37,5 | 128 | 114,0 | 114,0 | 18,65 | 611,22 |
| 2019/06/07 | CH2205 | Male | Three y/o | Control | Control | Feed Day | No | 08:10 | 08:00 - 08:59 | Late Morning | 37,5 | 112 | 26,4  | 26,4  | 18,65 | 601,96 |
| 2019/06/07 | CH2206 | Male | Three y/o | Control | Control | Feed Day | No | 08:10 | 08:00 - 08:59 | Late Morning | 37,8 | 132 | 115,0 | 115,0 | 18,95 | 613,32 |
| 2019/06/07 | CH2205 | Male | Three y/o | Control | Control | Feed Day | No | 08:15 | 08:00 - 08:59 | Late Morning | 37,5 | 132 | 68,0  | 68,0  | 18,65 | 613,32 |
| 2019/06/07 | CH2206 | Male | Three y/o | Control | Control | Feed Day | No | 08:15 | 08:00 - 08:59 | Late Morning | 37,8 | 141 | 123,0 | 123,0 | 18,95 | 617,75 |
| 2019/06/07 | CH2205 | Male | Three y/o | Control | Control | Feed Day | No | 08:20 | 08:00 - 08:59 | Late Morning | 37,6 | 106 | 63,6  | 63,6  | 18,75 | 598,06 |
| 2019/06/07 | CH2206 | Male | Three y/o | Control | Control | Feed Day | No | 08:20 | 08:00 - 08:59 | Late Morning | 37,8 | 134 | 117,8 | 117,8 | 18,95 | 614,33 |
| 2019/06/07 | CH2205 | Male | Three y/o | Control | Control | Feed Day | No | 08:25 | 08:00 - 08:59 | Late Morning | 37,4 | 132 | 21,4  | 21,4  | 18,55 | 613,32 |
| 2019/06/07 | CH2206 | Male | Three y/o | Control | Control | Feed Day | No | 08:25 | 08:00 - 08:59 | Late Morning | 37,7 | 123 | 293,2 | 293,2 | 18,85 | 608,49 |
| 2019/06/07 | CH2205 | Male | Three y/o | Control | Control | Feed Day | No | 08:30 | 08:00 - 08:59 | Late Morning | 37,2 | 112 | 26,8  | 26,8  | 18,36 | 601,96 |



|            |        |      |           |         |         |          |     |       |               |              |      |     |       |       |       |        |        |
|------------|--------|------|-----------|---------|---------|----------|-----|-------|---------------|--------------|------|-----|-------|-------|-------|--------|--------|
| 2019/06/07 | CH2206 | Male | Three y/o | Control | Control | Feed Day | No  | 08:30 | 08:00 - 08:59 | Late Morning | 37,8 | 135 | 451,4 | 451,4 | 18,95 | 614,84 | 208,91 |
| 2019/06/07 | CH2205 | Male | Three y/o | Control | Control | Feed Day | No  | 08:35 | 08:00 - 08:59 | Late Morning | 37,4 | 124 | 39,4  | 39,4  | 18,55 | 609,04 | 123,57 |
| 2019/06/07 | CH2206 | Male | Three y/o | Control | Control | Feed Day | No  | 08:35 | 08:00 - 08:59 | Late Morning | 37,8 | 137 | 236,0 | 236,0 | 18,95 | 615,83 | 185,95 |
| 2019/06/07 | CH2205 | Male | Three y/o | Control | Control | Feed Day | No  | 08:40 | 08:00 - 08:59 | Late Morning | 37,1 | 109 | 29,8  | 29,8  | 18,26 | 600,04 | 113,97 |
| 2019/06/07 | CH2206 | Male | Three y/o | Control | Control | Feed Day | No  | 08:40 | 08:00 - 08:59 | Late Morning | 37,8 | 135 | 64,2  | 64,2  | 18,95 | 614,84 | 140,44 |
| 2019/06/07 | CH2205 | Male | Three y/o | Control | Control | Feed Day | No  | 08:45 | 08:00 - 08:59 | Late Morning | 37,2 | 106 | 37,4  | 37,4  | 18,36 | 598,06 | 121,77 |
| 2019/06/07 | CH2206 | Male | Three y/o | Control | Control | Feed Day | No  | 08:45 | 08:00 - 08:59 | Late Morning | 37,8 | 128 | 135,6 | 135,6 | 18,95 | 611,22 | 166,48 |
| 2019/06/07 | CH2205 | Male | Three y/o | Control | Control | Feed Day | No  | 08:50 | 08:00 - 08:59 | Late Morning | 37,5 | 141 | 52,6  | 52,6  | 18,65 | 617,75 | 133,54 |
| 2019/06/07 | CH2206 | Male | Three y/o | Control | Control | Feed Day | No  | 08:50 | 08:00 - 08:59 | Late Morning | 37,8 | 140 | 91,8  | 91,8  | 18,95 | 617,28 | 152,86 |
| 2019/06/07 | CH2205 | Male | Three y/o | Control | Control | Feed Day | No  | 08:55 | 08:00 - 08:59 | Late Morning | 37,5 | 120 | 35,2  | 35,2  | 18,65 | 606,78 | 119,69 |
| 2019/06/07 | CH2206 | Male | Three y/o | Control | Control | Feed Day | No  | 08:55 | 08:00 - 08:59 | Late Morning | 37,8 | 132 | 179,6 | 179,6 | 18,95 | 613,32 | 176,34 |
| 2019/06/07 | CH2205 | Male | Three y/o | Control | Control | Feed Day | No  | 09:00 | 09:00 - 09:59 | Late Morning | 37,5 | 160 | 149,4 | 149,4 | 18,65 | 626,07 | 169,88 |
| 2019/06/07 | CH2206 | Male | Three y/o | Control | Control | Feed Day | No  | 09:00 | 09:00 - 09:59 | Late Morning | 37,8 | 107 | 69,0  | 69,0  | 18,95 | 598,73 | 142,94 |
| 2019/06/07 | CH2205 | Male | Three y/o | Control | Control | Feed Day | No  | 09:05 | 09:00 - 09:59 | Late Morning | 37,5 | 68  | 13,4  | 13,4  | 18,65 | 564,71 | 86,68  |
| 2019/06/07 | CH2206 | Male | Three y/o | Control | Control | Feed Day | No  | 09:05 | 09:00 - 09:59 | Late Morning | 37,7 | 120 | 7,2   | 7,2   | 18,85 | 606,78 | 65,66  |
| 2019/06/07 | CH2205 | Male | Three y/o | Control | Control | Feed Day | No  | 09:10 | 09:00 - 09:59 | Late Morning | 37,5 | 100 | 24,2  | 24,2  | 18,65 | 593,87 | 106,83 |
| 2019/06/07 | CH2206 | Male | Three y/o | Control | Control | Feed Day | No  | 09:10 | 09:00 - 09:59 | Late Morning | 37,7 | 128 | 18,8  | 18,8  | 18,85 | 611,22 | 98,20  |
| 2019/06/07 | CH2205 | Male | Three y/o | Control | Control | Feed Day | No  | 09:15 | 09:00 - 09:59 | Late Morning | 37,4 |     | 24,8  | 24,8  | 18,55 |        | 107,67 |
| 2019/06/07 | CH2206 | Male | Three y/o | Control | Control | Feed Day | No  | 09:15 | 09:00 - 09:59 | Late Morning | 37,5 | 115 | 43,4  | 43,4  | 18,65 | 603,82 | 126,90 |
| 2019/06/07 | CH2205 | Male | Three y/o | Control | Control | Feed Day | No  | 09:20 | 09:00 - 09:59 | Late Morning | 37,4 |     | 27,6  | 27,6  | 18,55 |        | 111,33 |
| 2019/06/07 | CH2206 | Male | Three y/o | Control | Control | Feed Day | No  | 09:20 | 09:00 - 09:59 | Late Morning | 37,5 | 120 | 17,2  | 17,2  | 18,65 | 606,78 | 95,17  |
| 2019/06/07 | CH2205 | Male | Three y/o | Control | Control | Feed Day | No  | 09:25 | 09:00 - 09:59 | Late Morning | 37,5 | 118 | 73,8  | 73,8  | 18,65 | 605,61 | 145,27 |
| 2019/06/07 | CH2206 | Male | Three y/o | Control | Control | Feed Day | No  | 09:25 | 09:00 - 09:59 | Late Morning | 37,5 | 123 | 133,2 | 133,2 | 18,65 | 608,49 | 165,86 |
| 2019/06/07 | CH2205 | Male | Three y/o | Control | Control | Feed Day | No  | 09:30 | 09:00 - 09:59 | Late Morning | 37,7 |     | 65,6  | 65,6  | 18,85 |        | 141,19 |
| 2019/06/07 | CH2206 | Male | Three y/o | Control | Control | Feed Day | No  | 09:30 | 09:00 - 09:59 | Late Morning | 37,7 | 138 | 49,6  | 49,6  | 18,85 | 616,31 | 131,51 |
| 2019/06/07 | CH2205 | Male | Three y/o | Control | Control | Feed Day | No  | 09:35 | 09:00 - 09:59 | Late Morning | 37,4 | 114 | 11,8  | 11,8  | 18,55 | 603,20 | 82,36  |
| 2019/06/07 | CH2206 | Male | Three y/o | Control | Control | Feed Day | No  | 09:35 | 09:00 - 09:59 | Late Morning | 37,5 | 92  | 20,0  | 20,0  | 18,65 | 587,78 | 100,31 |
| 2019/06/07 | CH2205 | Male | Three y/o | Control | Control | Feed Day | No  | 09:40 | 09:00 - 09:59 | Late Morning | 37,5 |     | 7,8   | 7,8   | 18,65 |        | 68,36  |
| 2019/06/07 | CH2206 | Male | Three y/o | Control | Control | Feed Day | No  | 09:40 | 09:00 - 09:59 | Late Morning | 37,2 | 94  | 29,0  | 29,0  | 18,36 | 589,37 | 113,03 |
| 2019/06/07 | CH2205 | Male | Three y/o | Control | Control | Feed Day | No  | 09:45 | 09:00 - 09:59 | Late Morning | 37,5 |     | 4,0   | 4,0   | 18,65 |        | 45,94  |
| 2019/06/07 | CH2206 | Male | Three y/o | Control | Control | Feed Day | No  | 09:45 | 09:00 - 09:59 | Late Morning | 37,1 | 91  | 46,0  | 46,0  | 18,26 | 586,98 | 128,91 |
| 2019/06/07 | CH2205 | Male | Three y/o | Control | Control | Feed Day | No  | 09:50 | 09:00 - 09:59 | Late Morning | 37,3 | 92  | 9,0   | 9,0   | 18,46 | 587,78 | 73,19  |
| 2019/06/07 | CH2206 | Male | Three y/o | Control | Control | Feed Day | No  | 09:50 | 09:00 - 09:59 | Late Morning | 37,1 | 95  | 17,0  | 17,0  | 18,26 | 590,14 | 94,77  |
| 2019/06/07 | CH2205 | Male | Three y/o | Control | Control | Feed Day | No  | 09:55 | 09:00 - 09:59 | Late Morning | 37,3 | 80  | 9,2   | 9,2   | 18,46 | 577,31 | 73,94  |
| 2019/06/07 | CH2206 | Male | Three y/o | Control | Control | Feed Day | No  | 09:55 | 09:00 - 09:59 | Late Morning | 37,1 | 92  | 15,8  | 15,8  | 18,26 | 587,78 | 92,28  |
| 2019/06/07 | CH2205 | Male | Three y/o | Control | Control | Feed Day | No  | 10:00 | 10:00 - 10:59 | Late Morning | 37,3 |     | 36,4  | 36,4  | 18,46 |        | 120,84 |
| 2019/06/07 | CH2206 | Male | Three y/o | Control | Control | Feed Day | No  | 10:00 | 10:00 - 10:59 | Late Morning | 37,1 | 88  | 18,8  | 18,8  | 18,26 | 584,49 | 98,20  |
| 2019/06/07 | CH2205 | Male | Three y/o | Control | Control | Feed Day | No  | 10:05 | 10:00 - 10:59 | Late Morning | 37,4 | 125 | 98,0  | 98,0  | 18,55 | 609,60 | 155,14 |
| 2019/06/07 | CH2206 | Male | Three y/o | Control | Control | Feed Day | No  | 10:05 | 10:00 - 10:59 | Late Morning | 37,1 | 77  | 39,6  | 39,6  | 18,26 | 574,39 | 123,74 |
| 2019/06/07 | CH2205 | Male | Three y/o | Control | Control | Feed Day | No  | 10:10 | 10:00 - 10:59 | Late Morning | 37,3 | 71  | 1,6   | 1,6   | 18,46 | 568,10 | 15,48  |
| 2019/06/07 | CH2206 | Male | Three y/o | Control | Control | Feed Day | No  | 10:10 | 10:00 - 10:59 | Late Morning | 37,0 | 89  | 48,2  | 48,2  | 18,16 | 585,33 | 130,52 |
| 2019/06/07 | CH2205 | Male | Three y/o | Control | Control | Feed Day | No  | 10:15 | 10:00 - 10:59 | Late Morning | 37,3 | 70  | 4,6   | 4,6   | 18,46 | 566,99 | 50,61  |
| 2019/06/07 | CH2206 | Male | Three y/o | Control | Control | Feed Day | No  | 10:15 | 10:00 - 10:59 | Late Morning | 37,1 | 91  | 45,4  | 45,4  | 18,26 | 586,98 | 128,45 |
| 2019/06/07 | CH2205 | Male | Three y/o | Control | Control | Feed Day | No  | 10:20 | 10:00 - 10:59 | Late Morning | 37,3 | 70  | 15,0  | 15,0  | 18,46 | 566,99 | 90,51  |
| 2019/06/07 | CH2206 | Male | Three y/o | Control | Control | Feed Day | No  | 10:20 | 10:00 - 10:59 | Late Morning | 37,2 | 48  | 47,0  | 47,0  | 18,36 | 536,04 | 129,65 |
| 2019/06/07 | CH2205 | Male | Three y/o | Control | Control | Feed Day | No  | 10:25 | 10:00 - 10:59 | Late Morning | 37,3 | 71  | 9,4   | 9,4   | 18,46 | 568,10 | 74,66  |
| 2019/06/07 | CH2206 | Male | Three y/o | Control | Control | Feed Day | No  | 10:25 | 10:00 - 10:59 | Late Morning | 37,3 | 79  | 52,2  | 52,2  | 18,46 | 576,36 | 133,27 |
| 2019/06/07 | CH2205 | Male | Three y/o | Control | Control | Feed Day | Yes | 10:30 | 10:00 - 10:59 | Late Morning | 37,4 | 71  | 8,0   | 8,0   | 18,55 | 568,10 | 69,22  |
| 2019/06/07 | CH2206 | Male | Three y/o | Control | Control | Feed Day | Yes | 10:30 | 10:00 - 10:59 | Late Morning | 37,3 | 110 | 35,8  | 35,8  | 18,46 | 600,69 | 120,27 |
| 2019/06/07 | CH2205 | Male | Three y/o | Control | Control | Feed Day | Yes | 10:35 | 10:00 - 10:59 | Late Morning | 37,4 | 55  | 6,6   | 6,6   | 18,55 | 547,52 | 62,73  |
| 2019/06/07 | CH2206 | Male | Three y/o | Control | Control | Feed Day | Yes | 10:35 | 10:00 - 10:59 | Late Morning | 37,4 | 73  | 43,0  | 43,0  | 18,55 | 570,27 | 126,58 |
| 2019/06/07 | CH2205 | Male | Three y/o | Control | Control | Feed Day | Yes | 10:40 | 10:00 - 10:59 | Late Morning | 37,4 | 86  | 9,6   | 9,6   | 18,55 | 582,77 | 75,37  |
| 2019/06/07 | CH2206 | Male | Three y/o | Control | Control | Feed Day | Yes | 10:40 | 10:00 - 10:59 | Late Morning | 37,4 | 82  | 36,6  | 36,6  | 18,55 | 579,19 | 121,03 |
| 2019/06/07 | CH2205 | Male | Three y/o | Control | Control | Feed Day | Yes | 10:45 | 10:00 - 10:59 | Late Morning | 37,4 | 67  | 10,2  | 10,2  | 18,55 | 563,53 | 77,43  |
| 2019/06/07 | CH2206 | Male | Three y/o | Control | Control | Feed Day | Yes | 10:45 | 10:00 - 10:59 | Late Morning | 37,4 | 92  | 38,0  | 38,0  | 18,55 | 587,78 | 122,32 |
| 2019/06/07 | CH2205 | Male | Three y/o | Control | Control | Feed Day | Yes | 10:50 | 10:00 - 10:59 | Late Morning | 37,5 | 79  | 6,2   | 6,2   | 18,65 | 576,36 | 60,63  |
| 2019/06/07 | CH2206 | Male | Three y/o | Control | Control | Feed Day | Yes | 10:50 | 10:00 - 10:59 | Late Morning | 37,4 | 44  | 39,6  | 39,6  | 18,55 | 528,51 | 123,74 |
| 2019/06/07 | CH2205 | Male | Three y/o | Control | Control | Feed Day | Yes | 10:55 | 10:00 - 10:59 | Late Morning | 37,5 | 68  | 22,0  | 22,0  | 18,65 | 564,71 | 103,57 |
| 2019/06/07 | CH2206 | Male | Three y/o | Control | Control | Feed Day | Yes | 10:55 | 10:00 - 10:59 | Late Morning | 37,5 | 47  | 34,8  | 34,8  | 18,65 | 534,23 | 119,29 |
| 2019/06/07 | CH2205 | Male | Three y/o | Control | Control | Feed Day | Yes | 11:00 | 11:00 - 11:59 | Late Morning | 37,6 |     | 19,6  | 19,6  | 18,75 |        | 99,63  |
| 2019/06/07 | CH2206 | Male | Three y/o | Control | Control | Feed Day | Yes | 11:00 | 11:00 - 11:59 | Late Morning | 37,5 | 86  | 23,4  | 23,4  | 18,65 | 582,77 | 105,68 |
| 2019/06/07 | CH2205 | Male | Three y/o | Control | Control | Feed Day | Yes | 11:05 | 11:00 - 11:59 | Late Morning | 37,5 |     | 95,0  | 95,0  | 18,65 |        | 154,06 |
| 2019/06/07 | CH2206 | Male | Three y/o | Control | Control | Feed Day | Yes | 11:05 | 11:00 - 11:59 | Late Morning | 37,4 | 98  | 66,4  | 66,4  | 18,55 | 592,41 | 141,61 |
| 2019/06/07 | CH2205 | Male | Three y/o | Control | Control | Feed Day | Yes | 11:10 | 11:00 - 11:59 | Late Morning | 37,6 | 96  | 48,8  | 48,8  | 18,75 | 590,91 | 130,95 |
| 2019/06/07 | CH2206 | Male | Three y/o | Control | Control | Feed Day | Yes | 11:10 | 11:00 - 11:59 | Late Morning | 37,5 | 121 | 54,6  | 54,6  | 18,65 | 607,35 | 134,83 |
| 2019/06/07 | CH2205 | Male | Three y/o | Control | Control | Feed Day | Yes | 11:15 | 11:00 - 11:59 | Late Morning | 37,6 |     | 230,0 | 230,0 | 18,75 |        | 185,04 |
| 2019/06/07 | CH2206 | Male | Three y/o | Control | Control | Feed Day | Yes | 11:15 | 11:00 - 11:59 | Late Morning | 37,4 | 118 | 42,8  | 42,8  | 18,55 | 605,61 | 126,42 |
| 2019/06/07 | CH2205 | Male | Three y/o | Control | Control | Feed Day | Yes | 11:20 | 11:00 - 11:59 | Late Morning | 37,7 | 100 | 34,4  | 34,4  | 18,85 | 593,87 | 118,90 |
| 2019/06/07 | CH2206 | Male | Three y/o | Control | Control | Feed Day | Yes | 11:20 | 11:00 - 11:59 | Late Morning | 37,3 | 111 | 59,4  | 59,4  | 18,46 | 601,33 | 137,75 |
| 2019/06/07 | CH2205 | Male | Three y/o | Control | Control | Feed Day | Yes | 11:25 | 11:00 - 11:59 | Late Morning | 37,5 |     | 27,8  | 27,8  | 18,65 |        | 111,58 |



|            |        |      |           |         |         |          |     |       |               |              |      |     |       |       |       |        |        |
|------------|--------|------|-----------|---------|---------|----------|-----|-------|---------------|--------------|------|-----|-------|-------|-------|--------|--------|
| 2019/06/07 | CH2206 | Male | Three y/o | Control | Control | Feed Day | Yes | 11:25 | 11:00 - 11:59 | Late Morning | 37,4 | 111 | 44,0  | 44,0  | 18,55 | 601,33 | 127,37 |
| 2019/06/07 | CH2205 | Male | Three y/o | Control | Control | Feed Day | No  | 11:30 | 11:00 - 11:59 | Late Morning | 37,4 | 106 | 31,0  | 31,0  | 18,55 | 598,06 | 115,32 |
| 2019/06/07 | CH2206 | Male | Three y/o | Control | Control | Feed Day | No  | 11:30 | 11:00 - 11:59 | Late Morning | 37,5 |     | 51,2  | 51,2  | 18,65 |        | 132,61 |
| 2019/06/07 | CH2205 | Male | Three y/o | Control | Control | Feed Day | No  | 11:35 | 11:00 - 11:59 | Late Morning | 37,3 |     | 12,0  | 12,0  | 18,46 |        | 82,93  |
| 2019/06/07 | CH2206 | Male | Three y/o | Control | Control | Feed Day | No  | 11:35 | 11:00 - 11:59 | Late Morning | 37,7 | 177 | 64,2  | 64,2  | 18,85 | 632,55 | 140,44 |
| 2019/06/07 | CH2205 | Male | Three y/o | Control | Control | Feed Day | No  | 11:40 | 11:00 - 11:59 | Late Morning | 37,4 | 115 | 114,2 | 114,2 | 18,55 | 603,82 | 160,48 |
| 2019/06/07 | CH2206 | Male | Three y/o | Control | Control | Feed Day | No  | 11:40 | 11:00 - 11:59 | Late Morning | 37,7 | 110 | 33,0  | 33,0  | 18,85 | 600,69 | 117,47 |
| 2019/06/07 | CH2205 | Male | Three y/o | Control | Control | Feed Day | No  | 11:45 | 11:00 - 11:59 | Late Morning | 37,5 |     | 17,8  | 17,8  | 18,65 |        | 96,34  |
| 2019/06/07 | CH2206 | Male | Three y/o | Control | Control | Feed Day | No  | 11:45 | 11:00 - 11:59 | Late Morning | 37,5 | 94  | 31,8  | 31,8  | 18,65 | 589,37 | 116,20 |
| 2019/06/07 | CH2205 | Male | Three y/o | Control | Control | Feed Day | No  | 11:50 | 11:00 - 11:59 | Late Morning | 37,4 | 92  | 17,8  | 17,8  | 18,55 | 587,78 | 96,34  |
| 2019/06/07 | CH2206 | Male | Three y/o | Control | Control | Feed Day | No  | 11:50 | 11:00 - 11:59 | Late Morning | 37,5 | 98  | 28,0  | 28,0  | 18,65 | 592,41 | 111,83 |
| 2019/06/07 | CH2205 | Male | Three y/o | Control | Control | Feed Day | No  | 11:55 | 11:00 - 11:59 | Late Morning | 37,4 | 85  | 17,6  | 17,6  | 18,55 | 581,90 | 95,95  |
| 2019/06/07 | CH2206 | Male | Three y/o | Control | Control | Feed Day | No  | 11:55 | 11:00 - 11:59 | Late Morning | 37,5 |     | 34,2  | 34,2  | 18,65 |        | 118,70 |
| 2019/06/07 | CH2205 | Male | Three y/o | Control | Control | Feed Day | No  | 12:00 | 12:00 - 12:59 | Afternoon    | 37,4 | 55  | 18,6  | 18,6  | 18,55 | 547,52 | 97,84  |
| 2019/06/07 | CH2206 | Male | Three y/o | Control | Control | Feed Day | No  | 12:00 | 12:00 - 12:59 | Afternoon    | 37,7 | 95  | 28,8  | 28,8  | 18,85 | 590,14 | 112,79 |
| 2019/06/07 | CH2205 | Male | Three y/o | Control | Control | Feed Day | No  | 12:05 | 12:00 - 12:59 | Afternoon    | 37,6 | 72  | 17,0  | 17,0  | 18,75 | 569,20 | 94,77  |
| 2019/06/07 | CH2206 | Male | Three y/o | Control | Control | Feed Day | No  | 12:05 | 12:00 - 12:59 | Afternoon    | 37,7 | 86  | 46,4  | 46,4  | 18,85 | 582,77 | 129,21 |
| 2019/06/07 | CH2205 | Male | Three y/o | Control | Control | Feed Day | No  | 12:10 | 12:00 - 12:59 | Afternoon    | 37,6 | 87  | 16,4  | 16,4  | 18,75 | 583,64 | 93,55  |
| 2019/06/07 | CH2206 | Male | Three y/o | Control | Control | Feed Day | No  | 12:10 | 12:00 - 12:59 | Afternoon    | 37,7 | 103 | 3,4   | 3,4   | 18,85 | 596,00 | 40,51  |
| 2019/06/07 | CH2205 | Male | Three y/o | Control | Control | Feed Day | No  | 12:15 | 12:00 - 12:59 | Afternoon    | 37,7 | 52  | 14,2  | 14,2  | 18,85 | 542,83 | 88,65  |
| 2019/06/07 | CH2206 | Male | Three y/o | Control | Control | Feed Day | No  | 12:15 | 12:00 - 12:59 | Afternoon    | 37,7 | 91  | 6,0   | 6,0   | 18,85 | 586,98 | 59,53  |
| 2019/06/07 | CH2205 | Male | Three y/o | Control | Control | Feed Day | No  | 12:20 | 12:00 - 12:59 | Afternoon    | 37,9 | 64  | 37,8  | 37,8  | 19,05 | 559,88 | 122,14 |
| 2019/06/07 | CH2206 | Male | Three y/o | Control | Control | Feed Day | No  | 12:20 | 12:00 - 12:59 | Afternoon    | 37,7 | 80  | 7,0   | 7,0   | 18,85 | 577,31 | 64,72  |
| 2019/06/07 | CH2205 | Male | Three y/o | Control | Control | Feed Day | No  | 12:25 | 12:00 - 12:59 | Afternoon    | 37,9 | 79  | 94,8  | 94,8  | 19,05 | 576,36 | 153,98 |
| 2019/06/07 | CH2206 | Male | Three y/o | Control | Control | Feed Day | No  | 12:25 | 12:00 - 12:59 | Afternoon    | 37,7 |     | 36,6  | 36,6  | 18,85 |        | 121,03 |
| 2019/06/07 | CH2205 | Male | Three y/o | Control | Control | Feed Day | No  | 12:30 | 12:00 - 12:59 | Afternoon    | 37,7 | 140 | 21,6  | 21,6  | 18,85 | 617,28 | 102,94 |
| 2019/06/07 | CH2206 | Male | Three y/o | Control | Control | Feed Day | No  | 12:30 | 12:00 - 12:59 | Afternoon    | 37,5 | 110 | 46,2  | 46,2  | 18,65 | 600,69 | 129,06 |
| 2019/06/07 | CH2205 | Male | Three y/o | Control | Control | Feed Day | No  | 12:35 | 12:00 - 12:59 | Afternoon    | 37,6 | 111 | 63,0  | 63,0  | 18,75 | 601,33 | 139,78 |
| 2019/06/07 | CH2206 | Male | Three y/o | Control | Control | Feed Day | No  | 12:35 | 12:00 - 12:59 | Afternoon    | 37,7 | 121 | 29,0  | 29,0  | 18,85 | 607,35 | 113,03 |
| 2019/06/07 | CH2205 | Male | Three y/o | Control | Control | Feed Day | No  | 12:40 | 12:00 - 12:59 | Afternoon    | 37,6 | 92  | 42,6  | 42,6  | 18,75 | 587,78 | 126,26 |
| 2019/06/07 | CH2206 | Male | Three y/o | Control | Control | Feed Day | No  | 12:40 | 12:00 - 12:59 | Afternoon    | 37,5 |     | 16,6  | 16,6  | 18,65 |        | 93,96  |
| 2019/06/07 | CH2205 | Male | Three y/o | Control | Control | Feed Day | No  | 12:45 | 12:00 - 12:59 | Afternoon    | 37,7 | 134 | 43,8  | 43,8  | 18,85 | 614,33 | 127,22 |
| 2019/06/07 | CH2206 | Male | Three y/o | Control | Control | Feed Day | No  | 12:45 | 12:00 - 12:59 | Afternoon    | 37,5 |     | 17,8  | 17,8  | 18,65 |        | 96,34  |
| 2019/06/07 | CH2205 | Male | Three y/o | Control | Control | Feed Day | No  | 12:50 | 12:00 - 12:59 | Afternoon    | 37,7 | 129 | 55,6  | 55,6  | 18,85 | 611,75 | 135,46 |
| 2019/06/07 | CH2206 | Male | Three y/o | Control | Control | Feed Day | No  | 12:50 | 12:00 - 12:59 | Afternoon    | 37,7 |     | 34,2  | 34,2  | 18,85 |        | 118,70 |
| 2019/06/07 | CH2205 | Male | Three y/o | Control | Control | Feed Day | No  | 12:55 | 12:00 - 12:59 | Afternoon    | 37,7 | 83  | 20,6  | 20,6  | 18,85 | 580,11 | 101,32 |
| 2019/06/07 | CH2206 | Male | Three y/o | Control | Control | Feed Day | No  | 12:55 | 12:00 - 12:59 | Afternoon    | 37,5 | 98  | 47,4  | 47,4  | 18,65 | 592,41 | 129,94 |
| 2019/06/07 | CH2205 | Male | Three y/o | Control | Control | Feed Day | No  | 13:00 | 13:00 - 13:59 | Afternoon    | 37,6 | 72  | 26,6  | 26,6  | 18,75 | 569,20 | 110,07 |
| 2019/06/07 | CH2206 | Male | Three y/o | Control | Control | Feed Day | No  | 13:00 | 13:00 - 13:59 | Afternoon    | 37,5 | 86  | 45,0  | 45,0  | 18,65 | 582,77 | 128,15 |
| 2019/06/07 | CH2205 | Male | Three y/o | Control | Control | Feed Day | No  | 13:05 | 13:00 - 13:59 | Afternoon    | 37,7 | 70  | 16,6  | 16,6  | 18,85 | 566,99 | 93,96  |
| 2019/06/07 | CH2206 | Male | Three y/o | Control | Control | Feed Day | No  | 13:05 | 13:00 - 13:59 | Afternoon    | 37,7 | 45  | 46,0  | 46,0  | 18,85 | 530,47 | 128,91 |
| 2019/06/07 | CH2205 | Male | Three y/o | Control | Control | Feed Day | No  | 13:10 | 13:00 - 13:59 | Afternoon    | 37,7 | 72  | 13,6  | 13,6  | 18,85 | 569,20 | 87,18  |
| 2019/06/07 | CH2206 | Male | Three y/o | Control | Control | Feed Day | No  | 13:10 | 13:00 - 13:59 | Afternoon    | 37,7 | 108 | 43,6  | 43,6  | 18,85 | 599,39 | 127,06 |
| 2019/06/07 | CH2205 | Male | Three y/o | Control | Control | Feed Day | No  | 13:15 | 13:00 - 13:59 | Afternoon    | 37,7 | 90  | 17,0  | 17,0  | 18,85 | 586,16 | 94,77  |
| 2019/06/07 | CH2206 | Male | Three y/o | Control | Control | Feed Day | No  | 13:15 | 13:00 - 13:59 | Afternoon    | 37,7 | 90  | 47,6  | 47,6  | 18,85 | 586,16 | 130,09 |
| 2019/06/07 | CH2205 | Male | Three y/o | Control | Control | Feed Day | No  | 13:20 | 13:00 - 13:59 | Afternoon    | 37,9 | 111 | 13,2  | 13,2  | 19,05 | 601,33 | 86,17  |
| 2019/06/07 | CH2206 | Male | Three y/o | Control | Control | Feed Day | No  | 13:20 | 13:00 - 13:59 | Afternoon    | 37,7 | 90  | 49,0  | 49,0  | 18,85 | 586,16 | 131,09 |
| 2019/06/07 | CH2205 | Male | Three y/o | Control | Control | Feed Day | No  | 13:25 | 13:00 - 13:59 | Afternoon    | 37,9 | 62  | 21,6  | 21,6  | 19,05 | 557,33 | 102,94 |
| 2019/06/07 | CH2206 | Male | Three y/o | Control | Control | Feed Day | No  | 13:25 | 13:00 - 13:59 | Afternoon    | 37,8 | 67  | 44,8  | 44,8  | 18,95 | 563,53 | 127,99 |
| 2019/06/07 | CH2205 | Male | Three y/o | Control | Control | Feed Day | No  | 13:30 | 13:00 - 13:59 | Afternoon    | 37,9 | 60  | 18,4  | 18,4  | 19,05 | 554,67 | 97,47  |
| 2019/06/07 | CH2206 | Male | Three y/o | Control | Control | Feed Day | No  | 13:30 | 13:00 - 13:59 | Afternoon    | 37,8 | 96  | 47,8  | 47,8  | 18,95 | 590,91 | 130,23 |
| 2019/06/07 | CH2205 | Male | Three y/o | Control | Control | Feed Day | No  | 13:35 | 13:00 - 13:59 | Afternoon    | 37,9 | 70  | 12,4  | 12,4  | 19,05 | 566,99 | 84,04  |
| 2019/06/07 | CH2206 | Male | Three y/o | Control | Control | Feed Day | No  | 13:35 | 13:00 - 13:59 | Afternoon    | 37,8 | 90  | 52,6  | 52,6  | 18,95 | 586,16 | 133,54 |
| 2019/06/07 | CH2205 | Male | Three y/o | Control | Control | Feed Day | No  | 13:40 | 13:00 - 13:59 | Afternoon    | 37,9 | 81  | 17,0  | 17,0  | 19,05 | 578,26 | 94,77  |
| 2019/06/07 | CH2206 | Male | Three y/o | Control | Control | Feed Day | No  | 13:40 | 13:00 - 13:59 | Afternoon    | 37,8 | 71  | 48,0  | 48,0  | 18,95 | 568,10 | 130,38 |
| 2019/06/07 | CH2205 | Male | Three y/o | Control | Control | Feed Day | No  | 13:45 | 13:00 - 13:59 | Afternoon    | 37,9 | 77  | 15,6  | 15,6  | 19,05 | 574,39 | 91,85  |
| 2019/06/07 | CH2206 | Male | Three y/o | Control | Control | Feed Day | No  | 13:45 | 13:00 - 13:59 | Afternoon    | 37,8 | 76  | 52,4  | 52,4  | 18,95 | 573,39 | 133,41 |
| 2019/06/07 | CH2205 | Male | Three y/o | Control | Control | Feed Day | No  | 13:50 | 13:00 - 13:59 | Afternoon    | 38,0 | 79  | 21,2  | 21,2  | 19,15 | 576,36 | 102,31 |
| 2019/06/07 | CH2206 | Male | Three y/o | Control | Control | Feed Day | No  | 13:50 | 13:00 - 13:59 | Afternoon    | 37,8 | 90  | 50,4  | 50,4  | 18,95 | 586,16 | 132,06 |
| 2019/06/07 | CH2205 | Male | Three y/o | Control | Control | Feed Day | No  | 13:55 | 13:00 - 13:59 | Afternoon    | 38,0 | 94  | 19,0  | 19,0  | 19,15 | 589,37 | 98,56  |
| 2019/06/07 | CH2206 | Male | Three y/o | Control | Control | Feed Day | No  | 13:55 | 13:00 - 13:59 | Afternoon    | 37,8 | 98  | 48,8  | 48,8  | 18,95 | 592,41 | 130,95 |
| 2019/06/07 | CH2205 | Male | Three y/o | Control | Control | Feed Day | No  | 14:00 | 14:00 - 14:59 | Afternoon    | 38,0 | 74  | 16,8  | 16,8  | 19,15 | 571,33 | 94,37  |
| 2019/06/07 | CH2206 | Male | Three y/o | Control | Control | Feed Day | No  | 14:00 | 14:00 - 14:59 | Afternoon    | 37,8 | 94  | 54,8  | 54,8  | 18,95 | 589,37 | 134,96 |
| 2019/06/07 | CH2205 | Male | Three y/o | Control | Control | Feed Day | No  | 14:05 | 14:00 - 14:59 | Afternoon    | 38,0 | 65  | 19,4  | 19,4  | 19,15 | 561,12 | 99,28  |
| 2019/06/07 | CH2206 | Male | Three y/o | Control | Control | Feed Day | No  | 14:05 | 14:00 - 14:59 | Afternoon    | 37,8 | 48  | 48,6  | 48,6  | 18,95 | 536,04 | 130,81 |
| 2019/06/07 | CH2205 | Male | Three y/o | Control | Control | Feed Day | No  | 14:10 | 14:00 - 14:59 | Afternoon    | 38,1 | 70  | 24,8  | 24,8  | 19,26 | 566,99 | 107,67 |
| 2019/06/07 | CH2206 | Male | Three y/o | Control | Control | Feed Day | No  | 14:10 | 14:00 - 14:59 | Afternoon    | 37,8 | 87  | 43,8  | 43,8  | 18,95 | 583,64 | 127,22 |
| 2019/06/07 | CH2205 | Male | Three y/o | Control | Control | Feed Day | No  | 14:15 | 14:00 - 14:59 | Afternoon    | 38,1 | 83  | 20,8  | 20,8  | 19,26 | 580,11 | 101,65 |
| 2019/06/07 | CH2206 | Male | Three y/o | Control | Control | Feed Day | No  | 14:15 | 14:00 - 14:59 | Afternoon    | 37,8 | 76  | 46,4  | 46,4  | 18,95 | 573,39 | 129,21 |
| 2019/06/07 | CH2205 | Male | Three y/o | Control | Control | Feed Day | No  | 14:20 | 14:00 - 14:59 | Afternoon    | 38,1 | 85  | 16,0  | 16,0  | 19,26 | 581,90 | 92,71  |



|            |        |      |           |         |         |          |    |       |               |           |      |     |       |       |       |        |        |
|------------|--------|------|-----------|---------|---------|----------|----|-------|---------------|-----------|------|-----|-------|-------|-------|--------|--------|
| 2019/06/07 | CH2206 | Male | Three y/o | Control | Control | Feed Day | No | 14:20 | 14:00 - 14:59 | Afternoon | 37,8 | 79  | 43,6  | 43,6  | 18,95 | 576,36 | 127,06 |
| 2019/06/07 | CH2205 | Male | Three y/o | Control | Control | Feed Day | No | 14:25 | 14:00 - 14:59 | Afternoon | 38,1 | 167 | 9,6   | 9,6   | 19,26 | 628,84 | 75,37  |
| 2019/06/07 | CH2206 | Male | Three y/o | Control | Control | Feed Day | No | 14:25 | 14:00 - 14:59 | Afternoon | 37,8 | 104 | 67,4  | 67,4  | 18,95 | 596,69 | 142,12 |
| 2019/06/07 | CH2205 | Male | Three y/o | Control | Control | Feed Day | No | 14:30 | 14:00 - 14:59 | Afternoon | 38,1 |     | 10,2  | 10,2  | 19,26 |        | 77,43  |
| 2019/06/07 | CH2206 | Male | Three y/o | Control | Control | Feed Day | No | 14:30 | 14:00 - 14:59 | Afternoon | 37,8 | 125 | 112,6 | 112,6 | 18,95 | 609,60 | 159,98 |
| 2019/06/07 | CH2205 | Male | Three y/o | Control | Control | Feed Day | No | 14:35 | 14:00 - 14:59 | Afternoon | 38,0 | 94  | 41,6  | 41,6  | 19,15 | 589,37 | 125,44 |
| 2019/06/07 | CH2206 | Male | Three y/o | Control | Control | Feed Day | No | 14:35 | 14:00 - 14:59 | Afternoon | 37,9 | 126 | 29,2  | 29,2  | 19,05 | 610,14 | 113,27 |
| 2019/06/07 | CH2205 | Male | Three y/o | Control | Control | Feed Day | No | 14:40 | 14:00 - 14:59 | Afternoon | 38,0 | 90  | 10,0  | 10,0  | 19,15 | 586,16 | 76,76  |
| 2019/06/07 | CH2206 | Male | Three y/o | Control | Control | Feed Day | No | 14:40 | 14:00 - 14:59 | Afternoon | 37,9 |     | 39,0  | 39,0  | 19,05 |        | 123,22 |
| 2019/06/07 | CH2205 | Male | Three y/o | Control | Control | Feed Day | No | 14:45 | 14:00 - 14:59 | Afternoon | 38,1 | 73  | 23,4  | 23,4  | 19,26 | 570,27 | 105,68 |
| 2019/06/07 | CH2206 | Male | Three y/o | Control | Control | Feed Day | No | 14:45 | 14:00 - 14:59 | Afternoon | 37,9 | 101 | 41,4  | 41,4  | 19,05 | 594,59 | 125,27 |
| 2019/06/07 | CH2205 | Male | Three y/o | Control | Control | Feed Day | No | 14:50 | 14:00 - 14:59 | Afternoon | 38,0 | 172 | 17,6  | 17,6  | 19,15 | 630,73 | 95,95  |
| 2019/06/07 | CH2206 | Male | Three y/o | Control | Control | Feed Day | No | 14:50 | 14:00 - 14:59 | Afternoon | 37,9 | 79  | 43,8  | 43,8  | 19,05 | 576,36 | 127,22 |
| 2019/06/07 | CH2205 | Male | Three y/o | Control | Control | Feed Day | No | 14:55 | 14:00 - 14:59 | Afternoon | 38,1 | 138 | 14,2  | 14,2  | 19,26 | 616,31 | 88,65  |
| 2019/06/07 | CH2206 | Male | Three y/o | Control | Control | Feed Day | No | 14:55 | 14:00 - 14:59 | Afternoon | 37,9 | 92  | 51,0  | 51,0  | 19,05 | 587,78 | 132,47 |
| 2019/06/07 | CH2205 | Male | Three y/o | Control | Control | Feed Day | No | 15:00 | 15:00 - 15:59 | Afternoon | 38,1 | 68  | 37,4  | 37,4  | 19,26 | 564,71 | 121,77 |
| 2019/06/07 | CH2206 | Male | Three y/o | Control | Control | Feed Day | No | 15:00 | 15:00 - 15:59 | Afternoon | 38,0 | 88  | 38,8  | 38,8  | 19,15 | 584,49 | 123,04 |
| 2019/06/07 | CH2205 | Male | Three y/o | Control | Control | Feed Day | No | 15:05 | 15:00 - 15:59 | Afternoon | 38,1 |     | 13,8  | 13,8  | 19,26 |        | 87,68  |
| 2019/06/07 | CH2206 | Male | Three y/o | Control | Control | Feed Day | No | 15:05 | 15:00 - 15:59 | Afternoon | 38,0 | 92  | 39,2  | 39,2  | 19,15 | 587,78 | 123,39 |
| 2019/06/07 | CH2205 | Male | Three y/o | Control | Control | Feed Day | No | 15:10 | 15:00 - 15:59 | Afternoon | 38,1 | 66  | 10,4  | 10,4  | 19,26 | 562,34 | 78,08  |
| 2019/06/07 | CH2206 | Male | Three y/o | Control | Control | Feed Day | No | 15:10 | 15:00 - 15:59 | Afternoon | 38,0 | 92  | 49,8  | 49,8  | 19,15 | 587,78 | 131,65 |
| 2019/06/07 | CH2205 | Male | Three y/o | Control | Control | Feed Day | No | 15:15 | 15:00 - 15:59 | Afternoon | 38,1 | 87  | 12,2  | 12,2  | 19,26 | 583,64 | 83,49  |
| 2019/06/07 | CH2206 | Male | Three y/o | Control | Control | Feed Day | No | 15:15 | 15:00 - 15:59 | Afternoon | 38,0 | 78  | 46,6  | 46,6  | 19,15 | 575,38 | 129,35 |
| 2019/06/07 | CH2205 | Male | Three y/o | Control | Control | Feed Day | No | 15:20 | 15:00 - 15:59 | Afternoon | 38,2 | 74  | 17,8  | 17,8  | 19,36 | 571,33 | 96,34  |
| 2019/06/07 | CH2206 | Male | Three y/o | Control | Control | Feed Day | No | 15:20 | 15:00 - 15:59 | Afternoon | 38,1 | 57  | 53,4  | 53,4  | 19,26 | 550,47 | 134,06 |
| 2019/06/07 | CH2205 | Male | Three y/o | Control | Control | Feed Day | No | 15:25 | 15:00 - 15:59 | Afternoon | 38,2 | 63  | 14,8  | 14,8  | 19,36 | 558,62 | 90,05  |
| 2019/06/07 | CH2206 | Male | Three y/o | Control | Control | Feed Day | No | 15:25 | 15:00 - 15:59 | Afternoon | 38,1 | 98  | 53,6  | 53,6  | 19,26 | 592,41 | 134,19 |
| 2019/06/07 | CH2205 | Male | Three y/o | Control | Control | Feed Day | No | 15:30 | 15:00 - 15:59 | Afternoon | 38,2 | 98  | 25,8  | 25,8  | 19,36 | 592,41 | 109,02 |
| 2019/06/07 | CH2206 | Male | Three y/o | Control | Control | Feed Day | No | 15:30 | 15:00 - 15:59 | Afternoon | 38,1 | 94  | 52,6  | 52,6  | 19,26 | 589,37 | 133,54 |
| 2019/06/07 | CH2205 | Male | Three y/o | Control | Control | Feed Day | No | 15:35 | 15:00 - 15:59 | Afternoon | 38,2 |     | 23,4  | 23,4  | 19,36 |        | 105,68 |
| 2019/06/07 | CH2206 | Male | Three y/o | Control | Control | Feed Day | No | 15:35 | 15:00 - 15:59 | Afternoon | 38,2 | 104 | 52,6  | 52,6  | 19,36 | 596,69 | 133,54 |
| 2019/06/07 | CH2205 | Male | Three y/o | Control | Control | Feed Day | No | 15:40 | 15:00 - 15:59 | Afternoon | 38,1 | 70  | 23,8  | 23,8  | 19,26 | 566,99 | 106,26 |
| 2019/06/07 | CH2206 | Male | Three y/o | Control | Control | Feed Day | No | 15:40 | 15:00 - 15:59 | Afternoon | 38,2 | 102 | 37,4  | 37,4  | 19,36 | 595,30 | 121,77 |
| 2019/06/07 | CH2205 | Male | Three y/o | Control | Control | Feed Day | No | 15:45 | 15:00 - 15:59 | Afternoon | 38,0 |     | 17,2  | 17,2  | 19,15 |        | 95,17  |
| 2019/06/07 | CH2206 | Male | Three y/o | Control | Control | Feed Day | No | 15:45 | 15:00 - 15:59 | Afternoon | 38,1 | 40  | 36,8  | 36,8  | 19,26 | 520,09 | 121,22 |
| 2019/06/07 | CH2205 | Male | Three y/o | Control | Control | Feed Day | No | 15:50 | 15:00 - 15:59 | Afternoon | 37,9 | 60  | 7,6   | 7,6   | 19,05 | 554,67 | 67,49  |
| 2019/06/07 | CH2206 | Male | Three y/o | Control | Control | Feed Day | No | 15:50 | 15:00 - 15:59 | Afternoon | 38,1 | 132 | 61,8  | 61,8  | 19,26 | 613,32 | 139,12 |
| 2019/06/07 | CH2205 | Male | Three y/o | Control | Control | Feed Day | No | 15:55 | 15:00 - 15:59 | Afternoon | 38,0 |     | 7,4   | 7,4   | 19,15 |        | 66,59  |
| 2019/06/07 | CH2206 | Male | Three y/o | Control | Control | Feed Day | No | 15:55 | 15:00 - 15:59 | Afternoon | 38,1 | 96  | 30,0  | 30,0  | 19,26 | 590,91 | 114,20 |
| 2019/06/07 | CH2205 | Male | Three y/o | Control | Control | Feed Day | No | 16:00 | 16:00 - 16:59 | Evening   | 38,1 | 152 | 23,0  | 23,0  | 19,26 | 622,73 | 105,09 |
| 2019/06/07 | CH2206 | Male | Three y/o | Control | Control | Feed Day | No | 16:00 | 16:00 - 16:59 | Evening   | 38,0 | 83  | 29,0  | 29,0  | 19,15 | 580,11 | 113,03 |
| 2019/06/07 | CH2205 | Male | Three y/o | Control | Control | Feed Day | No | 16:05 | 16:00 - 16:59 | Evening   | 38,1 | 124 | 59,4  | 59,4  | 19,26 | 609,04 | 137,75 |
| 2019/06/07 | CH2206 | Male | Three y/o | Control | Control | Feed Day | No | 16:05 | 16:00 - 16:59 | Evening   | 38,0 |     | 32,0  | 32,0  | 19,15 |        | 116,41 |
| 2019/06/07 | CH2205 | Male | Three y/o | Control | Control | Feed Day | No | 16:10 | 16:00 - 16:59 | Evening   | 38,0 | 156 | 28,6  | 28,6  | 19,15 | 624,43 | 112,56 |
| 2019/06/07 | CH2206 | Male | Three y/o | Control | Control | Feed Day | No | 16:10 | 16:00 - 16:59 | Evening   | 38,0 |     | 85,2  | 85,2  | 19,15 |        | 150,27 |
| 2019/06/07 | CH2205 | Male | Three y/o | Control | Control | Feed Day | No | 16:15 | 16:00 - 16:59 | Evening   | 38,1 | 35  | 31,4  | 31,4  | 19,26 | 507,97 | 115,76 |
| 2019/06/07 | CH2206 | Male | Three y/o | Control | Control | Feed Day | No | 16:15 | 16:00 - 16:59 | Evening   | 38,0 | 124 | 39,2  | 39,2  | 19,15 | 609,04 | 123,39 |
| 2019/06/07 | CH2205 | Male | Three y/o | Control | Control | Feed Day | No | 16:20 | 16:00 - 16:59 | Evening   | 38,0 | 111 | 14,2  | 14,2  | 19,15 | 601,33 | 88,65  |
| 2019/06/07 | CH2206 | Male | Three y/o | Control | Control | Feed Day | No | 16:20 | 16:00 - 16:59 | Evening   | 38,0 | 125 | 202,4 | 202,4 | 19,15 | 609,60 | 180,54 |
| 2019/06/07 | CH2205 | Male | Three y/o | Control | Control | Feed Day | No | 16:25 | 16:00 - 16:59 | Evening   | 38,1 | 80  | 20,2  | 20,2  | 19,26 | 577,31 | 100,65 |
| 2019/06/07 | CH2206 | Male | Three y/o | Control | Control | Feed Day | No | 16:25 | 16:00 - 16:59 | Evening   | 38,1 | 32  | 181,2 | 181,2 | 19,26 | 499,63 | 176,65 |
| 2019/06/07 | CH2205 | Male | Three y/o | Control | Control | Feed Day | No | 16:30 | 16:00 - 16:59 | Evening   | 38,1 | 58  | 14,6  | 14,6  | 19,26 | 551,90 | 89,59  |
| 2019/06/07 | CH2206 | Male | Three y/o | Control | Control | Feed Day | No | 16:30 | 16:00 - 16:59 | Evening   | 38,0 | 97  | 27,2  | 27,2  | 19,15 | 591,66 | 110,83 |
| 2019/06/07 | CH2205 | Male | Three y/o | Control | Control | Feed Day | No | 16:35 | 16:00 - 16:59 | Evening   | 38,1 |     | 11,2  | 11,2  | 19,26 |        | 80,59  |
| 2019/06/07 | CH2206 | Male | Three y/o | Control | Control | Feed Day | No | 16:35 | 16:00 - 16:59 | Evening   | 37,9 | 88  | 23,6  | 23,6  | 19,05 | 584,49 | 105,97 |
| 2019/06/07 | CH2205 | Male | Three y/o | Control | Control | Feed Day | No | 16:40 | 16:00 - 16:59 | Evening   | 38,1 | 84  | 11,2  | 11,2  | 19,26 | 581,01 | 80,59  |
| 2019/06/07 | CH2206 | Male | Three y/o | Control | Control | Feed Day | No | 16:40 | 16:00 - 16:59 | Evening   | 37,9 | 90  | 17,4  | 17,4  | 19,05 | 586,16 | 95,56  |
| 2019/06/07 | CH2205 | Male | Three y/o | Control | Control | Feed Day | No | 16:45 | 16:00 - 16:59 | Evening   | 38,1 |     | 19,6  | 19,6  | 19,26 |        | 99,63  |
| 2019/06/07 | CH2206 | Male | Three y/o | Control | Control | Feed Day | No | 16:45 | 16:00 - 16:59 | Evening   | 37,9 | 88  | 20,0  | 20,0  | 19,05 | 584,49 | 100,31 |
| 2019/06/07 | CH2205 | Male | Three y/o | Control | Control | Feed Day | No | 16:50 | 16:00 - 16:59 | Evening   | 38,1 | 84  | 16,2  | 16,2  | 19,26 | 581,01 | 93,13  |
| 2019/06/07 | CH2206 | Male | Three y/o | Control | Control | Feed Day | No | 16:50 | 16:00 - 16:59 | Evening   | 37,9 | 147 | 9,4   | 9,4   | 19,05 | 620,52 | 74,66  |
| 2019/06/07 | CH2205 | Male | Three y/o | Control | Control | Feed Day | No | 16:55 | 16:00 - 16:59 | Evening   | 38,0 | 111 | 22,2  | 22,2  | 19,15 | 601,33 | 103,88 |
| 2019/06/07 | CH2206 | Male | Three y/o | Control | Control | Feed Day | No | 16:55 | 16:00 - 16:59 | Evening   | 37,8 | 83  | 18,8  | 18,8  | 18,95 | 580,11 | 98,20  |
| 2019/06/07 | CH2205 | Male | Three y/o | Control | Control | Feed Day | No | 17:00 | 17:00 - 17:59 | Evening   | 38,0 | 107 | 25,8  | 25,8  | 19,15 | 598,73 | 109,02 |
| 2019/06/07 | CH2206 | Male | Three y/o | Control | Control | Feed Day | No | 17:00 | 17:00 - 17:59 | Evening   | 37,9 |     | 35,4  | 35,4  | 19,05 |        | 119,88 |
| 2019/06/07 | CH2205 | Male | Three y/o | Control | Control | Feed Day | No | 17:05 | 17:00 - 17:59 | Evening   | 37,7 | 98  | 89,0  | 89,0  | 18,85 | 592,41 | 151,78 |
| 2019/06/07 | CH2206 | Male | Three y/o | Control | Control | Feed Day | No | 17:05 | 17:00 - 17:59 | Evening   | 37,8 | 101 | 36,0  | 36,0  | 18,95 | 594,59 | 120,46 |
| 2019/06/07 | CH2205 | Male | Three y/o | Control | Control | Feed Day | No | 17:10 | 17:00 - 17:59 | Evening   | 38,0 | 143 | 33,4  | 33,4  | 19,15 | 618,69 | 117,88 |
| 2019/06/07 | CH2206 | Male | Three y/o | Control | Control | Feed Day | No | 17:10 | 17:00 - 17:59 | Evening   | 37,9 | 150 | 96,6  | 96,6  | 19,05 | 621,86 | 154,64 |
| 2019/06/07 | CH2205 | Male | Three y/o | Control | Control | Feed Day | No | 17:15 | 17:00 - 17:59 | Evening   | 38,1 |     | 122,2 | 122,2 | 19,26 |        | 162,84 |



|            |        |      |           |         |         |          |    |       |               |         |      |     |      |      |       |        |        |
|------------|--------|------|-----------|---------|---------|----------|----|-------|---------------|---------|------|-----|------|------|-------|--------|--------|
| 2019/06/07 | CH2206 | Male | Three y/o | Control | Control | Feed Day | No | 17:15 | 17:00 - 17:59 | Evening | 37,9 | 177 | 67,6 | 67,6 | 19,05 | 632,55 | 142,23 |
| 2019/06/07 | CH2205 | Male | Three y/o | Control | Control | Feed Day | No | 17:20 | 17:00 - 17:59 | Evening | 38,1 | 119 | 69,4 | 69,4 | 19,26 | 606,20 | 143,14 |
| 2019/06/07 | CH2206 | Male | Three y/o | Control | Control | Feed Day | No | 17:20 | 17:00 - 17:59 | Evening | 37,9 | 120 | 55,2 | 55,2 | 19,05 | 606,78 | 135,21 |
| 2019/06/07 | CH2205 | Male | Three y/o | Control | Control | Feed Day | No | 17:25 | 17:00 - 17:59 | Evening | 38,1 | 124 | 19,8 | 19,8 | 19,26 | 609,04 | 99,97  |
| 2019/06/07 | CH2206 | Male | Three y/o | Control | Control | Feed Day | No | 17:25 | 17:00 - 17:59 | Evening | 37,9 | 119 | 11,4 | 11,4 | 19,05 | 606,20 | 81,19  |
| 2019/06/07 | CH2205 | Male | Three y/o | Control | Control | Feed Day | No | 17:30 | 17:00 - 17:59 | Evening | 38,2 | 67  | 21,4 | 21,4 | 19,36 | 563,53 | 102,63 |
| 2019/06/07 | CH2206 | Male | Three y/o | Control | Control | Feed Day | No | 17:30 | 17:00 - 17:59 | Evening | 37,8 | 94  | 7,2  | 7,2  | 18,95 | 589,37 | 65,66  |
| 2019/06/07 | CH2205 | Male | Three y/o | Control | Control | Feed Day | No | 17:35 | 17:00 - 17:59 | Evening | 38,1 |     | 13,0 | 13,0 | 19,26 |        | 85,65  |
| 2019/06/07 | CH2206 | Male | Three y/o | Control | Control | Feed Day | No | 17:35 | 17:00 - 17:59 | Evening | 37,7 | 90  | 7,0  | 7,0  | 18,85 | 586,16 | 64,72  |
| 2019/06/07 | CH2205 | Male | Three y/o | Control | Control | Feed Day | No | 17:40 | 17:00 - 17:59 | Evening | 38,0 | 115 | 12,6 | 12,6 | 19,15 | 603,82 | 84,59  |
| 2019/06/07 | CH2206 | Male | Three y/o | Control | Control | Feed Day | No | 17:40 | 17:00 - 17:59 | Evening | 37,5 | 70  | 13,4 | 13,4 | 18,65 | 566,99 | 86,68  |
| 2019/06/07 | CH2205 | Male | Three y/o | Control | Control | Feed Day | No | 17:45 | 17:00 - 17:59 | Evening | 38,0 |     | 8,2  | 8,2  | 19,15 |        | 70,05  |
| 2019/06/07 | CH2206 | Male | Three y/o | Control | Control | Feed Day | No | 17:45 | 17:00 - 17:59 | Evening | 37,4 | 91  | 53,0 | 53,0 | 18,55 | 586,98 | 133,80 |
| 2019/06/07 | CH2205 | Male | Three y/o | Control | Control | Feed Day | No | 17:50 | 17:00 - 17:59 | Evening | 38,1 | 52  | 10,6 | 10,6 | 19,26 | 542,83 | 78,73  |
| 2019/06/07 | CH2206 | Male | Three y/o | Control | Control | Feed Day | No | 17:50 | 17:00 - 17:59 | Evening | 37,4 | 73  | 56,6 | 56,6 | 18,55 | 570,27 | 136,07 |
| 2019/06/07 | CH2205 | Male | Three y/o | Control | Control | Feed Day | No | 17:55 | 17:00 - 17:59 | Evening | 38,1 | 54  | 11,6 | 11,6 | 19,26 | 545,99 | 81,78  |
| 2019/06/07 | CH2206 | Male | Three y/o | Control | Control | Feed Day | No | 17:55 | 17:00 - 17:59 | Evening | 37,5 | 82  | 56,8 | 56,8 | 18,65 | 579,19 | 136,20 |
| 2019/06/07 | CH2205 | Male | Three y/o | Control | Control | Feed Day | No | 18:00 | 18:00 - 18:59 | Evening | 38,2 | 78  | 8,0  | 8,0  | 19,36 | 575,38 | 69,22  |
| 2019/06/07 | CH2206 | Male | Three y/o | Control | Control | Feed Day | No | 18:00 | 18:00 - 18:59 | Evening | 37,5 | 92  | 57,2 | 57,2 | 18,65 | 587,78 | 136,44 |
| 2019/06/07 | CH2205 | Male | Three y/o | Control | Control | Feed Day | No | 18:05 | 18:00 - 18:59 | Evening | 38,2 | 73  | 11,4 | 11,4 | 19,36 | 570,27 | 81,19  |
| 2019/06/07 | CH2206 | Male | Three y/o | Control | Control | Feed Day | No | 18:05 | 18:00 - 18:59 | Evening | 37,5 | 88  | 62,0 | 62,0 | 18,65 | 584,49 | 139,23 |
| 2019/06/07 | CH2205 | Male | Three y/o | Control | Control | Feed Day | No | 18:10 | 18:00 - 18:59 | Evening | 38,2 | 73  | 8,2  | 8,2  | 19,36 | 570,27 | 70,05  |
| 2019/06/07 | CH2206 | Male | Three y/o | Control | Control | Feed Day | No | 18:10 | 18:00 - 18:59 | Evening | 37,6 | 48  | 52,8 | 52,8 | 18,75 | 536,04 | 133,67 |
| 2019/06/07 | CH2205 | Male | Three y/o | Control | Control | Feed Day | No | 18:15 | 18:00 - 18:59 | Evening | 38,2 | 60  | 5,8  | 5,8  | 19,36 | 554,67 | 58,39  |
| 2019/06/07 | CH2206 | Male | Three y/o | Control | Control | Feed Day | No | 18:15 | 18:00 - 18:59 | Evening | 37,7 | 94  | 57,6 | 57,6 | 18,85 | 589,37 | 136,68 |
| 2019/06/07 | CH2205 | Male | Three y/o | Control | Control | Feed Day | No | 18:20 | 18:00 - 18:59 | Evening | 38,2 | 97  | 7,6  | 7,6  | 19,36 | 591,66 | 67,49  |
| 2019/06/07 | CH2206 | Male | Three y/o | Control | Control | Feed Day | No | 18:20 | 18:00 - 18:59 | Evening | 37,7 | 89  | 53,0 | 53,0 | 18,85 | 585,33 | 133,80 |
| 2019/06/07 | CH2205 | Male | Three y/o | Control | Control | Feed Day | No | 18:25 | 18:00 - 18:59 | Evening | 38,2 | 61  | 5,8  | 5,8  | 19,36 | 556,01 | 58,39  |
| 2019/06/07 | CH2206 | Male | Three y/o | Control | Control | Feed Day | No | 18:25 | 18:00 - 18:59 | Evening | 37,7 | 94  | 58,8 | 58,8 | 18,85 | 589,37 | 137,39 |
| 2019/06/07 | CH2205 | Male | Three y/o | Control | Control | Feed Day | No | 18:30 | 18:00 - 18:59 | Evening | 38,2 | 70  | 6,0  | 6,0  | 19,36 | 566,99 | 59,53  |
| 2019/06/07 | CH2206 | Male | Three y/o | Control | Control | Feed Day | No | 18:30 | 18:00 - 18:59 | Evening | 37,7 | 82  | 57,0 | 57,0 | 18,85 | 579,19 | 136,32 |
| 2019/06/07 | CH2205 | Male | Three y/o | Control | Control | Feed Day | No | 18:35 | 18:00 - 18:59 | Evening | 38,2 | 90  | 11,8 | 11,8 | 19,36 | 586,16 | 82,36  |
| 2019/06/07 | CH2206 | Male | Three y/o | Control | Control | Feed Day | No | 18:35 | 18:00 - 18:59 | Evening | 37,7 | 78  | 54,2 | 54,2 | 18,85 | 575,38 | 134,57 |
| 2019/06/07 | CH2205 | Male | Three y/o | Control | Control | Feed Day | No | 18:40 | 18:00 - 18:59 | Evening | 38,1 | 95  | 7,4  | 7,4  | 19,26 | 590,14 | 66,59  |
| 2019/06/07 | CH2206 | Male | Three y/o | Control | Control | Feed Day | No | 18:40 | 18:00 - 18:59 | Evening | 37,7 | 92  | 51,8 | 51,8 | 18,85 | 587,78 | 133,01 |
| 2019/06/07 | CH2205 | Male | Three y/o | Control | Control | Feed Day | No | 18:45 | 18:00 - 18:59 | Evening | 38,1 | 58  | 3,6  | 3,6  | 19,26 | 551,90 | 42,42  |
| 2019/06/07 | CH2206 | Male | Three y/o | Control | Control | Feed Day | No | 18:45 | 18:00 - 18:59 | Evening | 37,8 | 86  | 49,2 | 49,2 | 18,95 | 582,77 | 131,23 |
| 2019/06/07 | CH2205 | Male | Three y/o | Control | Control | Feed Day | No | 18:50 | 18:00 - 18:59 | Evening | 38,1 | 55  | 7,0  | 7,0  | 19,26 | 547,52 | 64,72  |
| 2019/06/07 | CH2206 | Male | Three y/o | Control | Control | Feed Day | No | 18:50 | 18:00 - 18:59 | Evening | 37,8 | 63  | 35,4 | 35,4 | 18,95 | 558,62 | 119,88 |
| 2019/06/07 | CH2205 | Male | Three y/o | Control | Control | Feed Day | No | 18:55 | 18:00 - 18:59 | Evening | 38,1 | 88  | 10,8 | 10,8 | 19,26 | 584,49 | 79,36  |
| 2019/06/07 | CH2206 | Male | Three y/o | Control | Control | Feed Day | No | 18:55 | 18:00 - 18:59 | Evening | 37,8 | 92  | 9,6  | 9,6  | 18,95 | 587,78 | 75,37  |
| 2019/06/07 | CH2205 | Male | Three y/o | Control | Control | Feed Day | No | 19:00 | 19:00 - 19:59 | Evening | 38,1 | 87  | 11,6 | 11,6 | 19,26 | 583,64 | 81,78  |
| 2019/06/07 | CH2206 | Male | Three y/o | Control | Control | Feed Day | No | 19:00 | 19:00 - 19:59 | Evening | 37,8 | 94  | 7,4  | 7,4  | 18,95 | 589,37 | 66,59  |
| 2019/06/07 | CH2205 | Male | Three y/o | Control | Control | Feed Day | No | 19:05 | 19:00 - 19:59 | Evening | 38,1 | 53  | 9,0  | 9,0  | 19,26 | 544,43 | 73,19  |
| 2019/06/07 | CH2206 | Male | Three y/o | Control | Control | Feed Day | No | 19:05 | 19:00 - 19:59 | Evening | 37,8 | 47  | 5,4  | 5,4  | 18,95 | 534,23 | 55,99  |
| 2019/06/07 | CH2205 | Male | Three y/o | Control | Control | Feed Day | No | 19:10 | 19:00 - 19:59 | Evening | 38,1 | 86  | 9,6  | 9,6  | 19,26 | 582,77 | 75,37  |
| 2019/06/07 | CH2206 | Male | Three y/o | Control | Control | Feed Day | No | 19:10 | 19:00 - 19:59 | Evening | 37,8 | 88  | 6,8  | 6,8  | 18,95 | 584,49 | 63,74  |
| 2019/06/07 | CH2205 | Male | Three y/o | Control | Control | Feed Day | No | 19:15 | 19:00 - 19:59 | Evening | 38,1 | 42  | 4,8  | 4,8  | 19,26 | 524,42 | 52,04  |
| 2019/06/07 | CH2206 | Male | Three y/o | Control | Control | Feed Day | No | 19:15 | 19:00 - 19:59 | Evening | 37,8 | 91  | 8,6  | 8,6  | 18,95 | 586,98 | 71,66  |
| 2019/06/07 | CH2205 | Male | Three y/o | Control | Control | Feed Day | No | 19:20 | 19:00 - 19:59 | Evening | 38,1 | 54  | 8,0  | 8,0  | 19,26 | 545,99 | 69,22  |
| 2019/06/07 | CH2206 | Male | Three y/o | Control | Control | Feed Day | No | 19:20 | 19:00 - 19:59 | Evening | 37,8 | 98  | 34,4 | 34,4 | 18,95 | 592,41 | 118,90 |
| 2019/06/07 | CH2205 | Male | Three y/o | Control | Control | Feed Day | No | 19:25 | 19:00 - 19:59 | Evening | 38,1 | 92  | 3,6  | 3,6  | 19,26 | 587,78 | 42,42  |
| 2019/06/07 | CH2206 | Male | Three y/o | Control | Control | Feed Day | No | 19:25 | 19:00 - 19:59 | Evening | 37,8 | 80  | 42,0 | 42,0 | 18,95 | 577,31 | 125,77 |
| 2019/06/07 | CH2205 | Male | Three y/o | Control | Control | Feed Day | No | 19:30 | 19:00 - 19:59 | Evening | 38,0 | 52  | 3,8  | 3,8  | 19,15 | 542,83 | 44,22  |
| 2019/06/07 | CH2206 | Male | Three y/o | Control | Control | Feed Day | No | 19:30 | 19:00 - 19:59 | Evening | 37,8 | 92  | 27,8 | 27,8 | 18,95 | 587,78 | 111,58 |
| 2019/06/07 | CH2205 | Male | Three y/o | Control | Control | Feed Day | No | 19:35 | 19:00 - 19:59 | Evening | 38,0 | 56  | 5,2  | 5,2  | 19,15 | 549,01 | 54,72  |
| 2019/06/07 | CH2206 | Male | Three y/o | Control | Control | Feed Day | No | 19:35 | 19:00 - 19:59 | Evening | 37,8 | 76  | 20,6 | 20,6 | 18,95 | 573,39 | 101,32 |
| 2019/06/07 | CH2205 | Male | Three y/o | Control | Control | Feed Day | No | 19:40 | 19:00 - 19:59 | Evening | 38,0 | 79  | 6,6  | 6,6  | 19,15 | 576,36 | 62,73  |
| 2019/06/07 | CH2206 | Male | Three y/o | Control | Control | Feed Day | No | 19:40 | 19:00 - 19:59 | Evening | 37,8 | 46  | 13,6 | 13,6 | 18,95 | 532,38 | 87,18  |
| 2019/06/07 | CH2205 | Male | Three y/o | Control | Control | Feed Day | No | 19:45 | 19:00 - 19:59 | Evening | 38,0 | 50  | 7,2  | 7,2  | 19,15 | 539,52 | 65,66  |
| 2019/06/07 | CH2206 | Male | Three y/o | Control | Control | Feed Day | No | 19:45 | 19:00 - 19:59 | Evening | 37,8 | 42  | 16,8 | 16,8 | 18,95 | 524,42 | 94,37  |
| 2019/06/07 | CH2205 | Male | Three y/o | Control | Control | Feed Day | No | 19:50 | 19:00 - 19:59 | Evening | 38,0 | 106 | 8,6  | 8,6  | 19,15 | 598,06 | 71,66  |
| 2019/06/07 | CH2206 | Male | Three y/o | Control | Control | Feed Day | No | 19:50 | 19:00 - 19:59 | Evening | 37,8 | 44  | 20,0 | 20,0 | 18,95 | 528,51 | 100,31 |
| 2019/06/07 | CH2205 | Male | Three y/o | Control | Control | Feed Day | No | 19:55 | 19:00 - 19:59 | Evening | 37,9 | 89  | 2,8  | 2,8  | 19,05 | 585,33 | 34,04  |
| 2019/06/07 | CH2206 | Male | Three y/o | Control | Control | Feed Day | No | 19:55 | 19:00 - 19:59 | Evening | 37,8 | 78  | 27,6 | 27,6 | 18,95 | 575,38 | 111,33 |
| 2019/06/07 | CH2205 | Male | Three y/o | Control | Control | Feed Day | No | 20:00 | 20:00 - 20:59 | Night   | 37,7 | 64  | 7,2  | 7,2  | 18,85 | 559,88 | 65,66  |
| 2019/06/07 | CH2206 | Male | Three y/o | Control | Control | Feed Day | No | 20:00 | 20:00 - 20:59 | Night   | 37,8 | 92  | 25,0 | 25,0 | 18,95 | 587,78 | 107,94 |
| 2019/06/07 | CH2205 | Male | Three y/o | Control | Control | Feed Day | No | 20:05 | 20:00 - 20:59 | Night   | 37,7 | 110 | 3,2  | 3,2  | 18,85 | 600,69 | 38,49  |
| 2019/06/07 | CH2206 | Male | Three y/o | Control | Control | Feed Day | No | 20:05 | 20:00 - 20:59 | Night   | 37,8 | 94  | 29,6 | 29,6 | 18,95 | 589,37 | 113,73 |
| 2019/06/07 | CH2205 | Male | Three y/o | Control | Control | Feed Day | No | 20:10 | 20:00 - 20:59 | Night   | 37,6 | 60  | 1,8  | 1,8  | 18,75 | 554,67 | 19,38  |



|            |        |      |           |         |         |          |    |       |               |       |      |     |       |       |       |        |        |
|------------|--------|------|-----------|---------|---------|----------|----|-------|---------------|-------|------|-----|-------|-------|-------|--------|--------|
| 2019/06/07 | CH2206 | Male | Three y/o | Control | Control | Feed Day | No | 20:10 | 20:00 - 20:59 | Night | 37,8 | 92  | 27,6  | 27,6  | 18,95 | 587,78 | 111,33 |
| 2019/06/07 | CH2205 | Male | Three y/o | Control | Control | Feed Day | No | 20:15 | 20:00 - 20:59 | Night | 37,6 | 95  | 3,0   | 3,0   | 18,75 | 590,14 | 36,34  |
| 2019/06/07 | CH2206 | Male | Three y/o | Control | Control | Feed Day | No | 20:15 | 20:00 - 20:59 | Night | 37,8 | 62  | 19,0  | 19,0  | 18,95 | 557,33 | 98,56  |
| 2019/06/07 | CH2205 | Male | Three y/o | Control | Control | Feed Day | No | 20:20 | 20:00 - 20:59 | Night | 37,7 | 66  | 8,4   | 8,4   | 18,85 | 562,34 | 70,86  |
| 2019/06/07 | CH2206 | Male | Three y/o | Control | Control | Feed Day | No | 20:20 | 20:00 - 20:59 | Night | 37,7 | 83  | 25,0  | 25,0  | 18,85 | 580,11 | 107,94 |
| 2019/06/07 | CH2205 | Male | Three y/o | Control | Control | Feed Day | No | 20:25 | 20:00 - 20:59 | Night | 37,9 | 46  | 7,8   | 7,8   | 19,05 | 532,38 | 68,36  |
| 2019/06/07 | CH2206 | Male | Three y/o | Control | Control | Feed Day | No | 20:25 | 20:00 - 20:59 | Night | 37,7 | 93  | 27,4  | 27,4  | 18,85 | 588,58 | 111,09 |
| 2019/06/07 | CH2205 | Male | Three y/o | Control | Control | Feed Day | No | 20:30 | 20:00 - 20:59 | Night | 38,0 | 90  | 9,0   | 9,0   | 19,15 | 586,16 | 73,19  |
| 2019/06/07 | CH2206 | Male | Three y/o | Control | Control | Feed Day | No | 20:30 | 20:00 - 20:59 | Night | 37,7 | 94  | 34,4  | 34,4  | 18,85 | 589,37 | 118,90 |
| 2019/06/07 | CH2205 | Male | Three y/o | Control | Control | Feed Day | No | 20:35 | 20:00 - 20:59 | Night | 38,0 | 62  | 10,0  | 10,0  | 19,15 | 557,33 | 76,76  |
| 2019/06/07 | CH2206 | Male | Three y/o | Control | Control | Feed Day | No | 20:35 | 20:00 - 20:59 | Night | 37,7 | 90  | 25,2  | 25,2  | 18,85 | 586,16 | 108,22 |
| 2019/06/07 | CH2205 | Male | Three y/o | Control | Control | Feed Day | No | 20:40 | 20:00 - 20:59 | Night | 38,0 | 52  | 6,2   | 6,2   | 19,15 | 542,83 | 60,63  |
| 2019/06/07 | CH2206 | Male | Three y/o | Control | Control | Feed Day | No | 20:40 | 20:00 - 20:59 | Night | 37,7 | 92  | 27,4  | 27,4  | 18,85 | 587,78 | 111,09 |
| 2019/06/07 | CH2205 | Male | Three y/o | Control | Control | Feed Day | No | 20:45 | 20:00 - 20:59 | Night | 38,0 | 73  | 4,8   | 4,8   | 19,15 | 570,27 | 52,04  |
| 2019/06/07 | CH2206 | Male | Three y/o | Control | Control | Feed Day | No | 20:45 | 20:00 - 20:59 | Night | 37,7 | 57  | 24,0  | 24,0  | 18,85 | 550,47 | 106,55 |
| 2019/06/07 | CH2205 | Male | Three y/o | Control | Control | Feed Day | No | 20:50 | 20:00 - 20:59 | Night | 38,0 | 54  | 2,4   | 2,4   | 19,15 | 545,99 | 28,91  |
| 2019/06/07 | CH2206 | Male | Three y/o | Control | Control | Feed Day | No | 20:50 | 20:00 - 20:59 | Night | 37,7 | 67  | 21,2  | 21,2  | 18,85 | 563,53 | 102,31 |
| 2019/06/07 | CH2205 | Male | Three y/o | Control | Control | Feed Day | No | 20:55 | 20:00 - 20:59 | Night | 38,0 | 56  | 2,8   | 2,8   | 19,15 | 549,01 | 34,04  |
| 2019/06/07 | CH2206 | Male | Three y/o | Control | Control | Feed Day | No | 20:55 | 20:00 - 20:59 | Night | 37,8 | 67  | 23,6  | 23,6  | 18,95 | 563,53 | 105,97 |
| 2019/06/07 | CH2205 | Male | Three y/o | Control | Control | Feed Day | No | 21:00 | 21:00 - 21:59 | Night | 38,0 | 93  | 7,8   | 7,8   | 19,15 | 588,58 | 68,36  |
| 2019/06/07 | CH2206 | Male | Three y/o | Control | Control | Feed Day | No | 21:00 | 21:00 - 21:59 | Night | 37,8 | 90  | 21,6  | 21,6  | 18,95 | 586,16 | 102,94 |
| 2019/06/07 | CH2205 | Male | Three y/o | Control | Control | Feed Day | No | 21:05 | 21:00 - 21:59 | Night | 38,0 | 53  | 10,2  | 10,2  | 19,15 | 544,43 | 77,43  |
| 2019/06/07 | CH2206 | Male | Three y/o | Control | Control | Feed Day | No | 21:05 | 21:00 - 21:59 | Night | 37,8 | 50  | 18,2  | 18,2  | 18,95 | 539,52 | 97,10  |
| 2019/06/07 | CH2205 | Male | Three y/o | Control | Control | Feed Day | No | 21:10 | 21:00 - 21:59 | Night | 38,0 | 62  | 6,2   | 6,2   | 19,15 | 557,33 | 60,63  |
| 2019/06/07 | CH2206 | Male | Three y/o | Control | Control | Feed Day | No | 21:10 | 21:00 - 21:59 | Night | 37,8 | 86  | 13,0  | 13,0  | 18,95 | 582,77 | 85,65  |
| 2019/06/07 | CH2205 | Male | Three y/o | Control | Control | Feed Day | No | 21:15 | 21:00 - 21:59 | Night | 38,0 | 63  | 6,0   | 6,0   | 19,15 | 558,62 | 59,53  |
| 2019/06/07 | CH2206 | Male | Three y/o | Control | Control | Feed Day | No | 21:15 | 21:00 - 21:59 | Night | 37,8 | 91  | 11,0  | 11,0  | 18,95 | 586,98 | 79,98  |
| 2019/06/07 | CH2205 | Male | Three y/o | Control | Control | Feed Day | No | 21:20 | 21:00 - 21:59 | Night | 38,0 | 88  | 16,8  | 16,8  | 19,15 | 584,49 | 94,37  |
| 2019/06/07 | CH2206 | Male | Three y/o | Control | Control | Feed Day | No | 21:20 | 21:00 - 21:59 | Night | 37,8 | 74  | 15,0  | 15,0  | 18,95 | 571,33 | 90,51  |
| 2019/06/07 | CH2205 | Male | Three y/o | Control | Control | Feed Day | No | 21:25 | 21:00 - 21:59 | Night | 37,9 | 89  | 15,6  | 15,6  | 19,05 | 585,33 | 91,85  |
| 2019/06/07 | CH2206 | Male | Three y/o | Control | Control | Feed Day | No | 21:25 | 21:00 - 21:59 | Night | 37,8 | 65  | 13,8  | 13,8  | 18,95 | 561,12 | 87,68  |
| 2019/06/07 | CH2205 | Male | Three y/o | Control | Control | Feed Day | No | 21:30 | 21:00 - 21:59 | Night | 37,9 | 94  | 17,4  | 17,4  | 19,05 | 589,37 | 95,56  |
| 2019/06/07 | CH2206 | Male | Three y/o | Control | Control | Feed Day | No | 21:30 | 21:00 - 21:59 | Night | 37,8 | 94  | 13,6  | 13,6  | 18,95 | 589,37 | 87,18  |
| 2019/06/07 | CH2205 | Male | Three y/o | Control | Control | Feed Day | No | 21:35 | 21:00 - 21:59 | Night | 37,9 | 43  | 12,4  | 12,4  | 19,05 | 526,50 | 84,04  |
| 2019/06/07 | CH2206 | Male | Three y/o | Control | Control | Feed Day | No | 21:35 | 21:00 - 21:59 | Night | 37,7 | 53  | 32,4  | 32,4  | 18,85 | 544,43 | 116,84 |
| 2019/06/07 | CH2205 | Male | Three y/o | Control | Control | Feed Day | No | 21:40 | 21:00 - 21:59 | Night | 37,8 |     | 11,4  | 11,4  | 18,95 |        | 81,19  |
| 2019/06/07 | CH2206 | Male | Three y/o | Control | Control | Feed Day | No | 21:40 | 21:00 - 21:59 | Night | 37,8 | 47  | 17,4  | 17,4  | 18,95 | 534,23 | 95,56  |
| 2019/06/07 | CH2205 | Male | Three y/o | Control | Control | Feed Day | No | 21:45 | 21:00 - 21:59 | Night | 37,7 |     | 8,6   | 8,6   | 18,85 |        | 71,66  |
| 2019/06/07 | CH2206 | Male | Three y/o | Control | Control | Feed Day | No | 21:45 | 21:00 - 21:59 | Night | 37,7 | 93  | 33,8  | 33,8  | 18,85 | 588,58 | 118,29 |
| 2019/06/07 | CH2205 | Male | Three y/o | Control | Control | Feed Day | No | 21:50 | 21:00 - 21:59 | Night | 37,7 | 88  | 13,2  | 13,2  | 18,85 | 584,49 | 86,17  |
| 2019/06/07 | CH2206 | Male | Three y/o | Control | Control | Feed Day | No | 21:50 | 21:00 - 21:59 | Night | 37,5 | 85  | 33,2  | 33,2  | 18,65 | 581,90 | 117,68 |
| 2019/06/07 | CH2205 | Male | Three y/o | Control | Control | Feed Day | No | 21:55 | 21:00 - 21:59 | Night | 37,7 |     | 9,4   | 9,4   | 18,85 |        | 74,66  |
| 2019/06/07 | CH2206 | Male | Three y/o | Control | Control | Feed Day | No | 21:55 | 21:00 - 21:59 | Night | 37,5 | 49  | 22,4  | 22,4  | 18,65 | 537,80 | 104,19 |
| 2019/06/07 | CH2205 | Male | Three y/o | Control | Control | Feed Day | No | 22:00 | 22:00 - 22:59 | Night | 37,7 | 156 | 11,8  | 11,8  | 18,85 | 624,43 | 82,36  |
| 2019/06/07 | CH2206 | Male | Three y/o | Control | Control | Feed Day | No | 22:00 | 22:00 - 22:59 | Night | 37,7 | 135 | 23,4  | 23,4  | 18,85 | 614,84 | 105,68 |
| 2019/06/07 | CH2205 | Male | Three y/o | Control | Control | Feed Day | No | 22:05 | 22:00 - 22:59 | Night | 37,7 | 135 | 13,4  | 13,4  | 18,85 | 614,84 | 86,68  |
| 2019/06/07 | CH2206 | Male | Three y/o | Control | Control | Feed Day | No | 22:05 | 22:00 - 22:59 | Night | 37,5 | 49  | 23,4  | 23,4  | 18,65 | 537,80 | 105,68 |
| 2019/06/07 | CH2205 | Male | Three y/o | Control | Control | Feed Day | No | 22:10 | 22:00 - 22:59 | Night | 37,7 | 143 | 10,8  | 10,8  | 18,85 | 618,69 | 79,36  |
| 2019/06/07 | CH2206 | Male | Three y/o | Control | Control | Feed Day | No | 22:10 | 22:00 - 22:59 | Night | 37,5 | 90  | 25,0  | 25,0  | 18,65 | 586,16 | 107,94 |
| 2019/06/07 | CH2205 | Male | Three y/o | Control | Control | Feed Day | No | 22:15 | 22:00 - 22:59 | Night | 37,9 | 57  | 5,2   | 5,2   | 19,05 | 550,47 | 54,72  |
| 2019/06/07 | CH2206 | Male | Three y/o | Control | Control | Feed Day | No | 22:15 | 22:00 - 22:59 | Night | 37,5 | 88  | 15,0  | 15,0  | 18,65 | 584,49 | 90,51  |
| 2019/06/07 | CH2205 | Male | Three y/o | Control | Control | Feed Day | No | 22:20 | 22:00 - 22:59 | Night | 37,9 | 62  | 5,4   | 5,4   | 19,05 | 557,33 | 55,99  |
| 2019/06/07 | CH2206 | Male | Three y/o | Control | Control | Feed Day | No | 22:20 | 22:00 - 22:59 | Night | 37,5 | 93  | 9,8   | 9,8   | 18,65 | 588,58 | 76,07  |
| 2019/06/07 | CH2205 | Male | Three y/o | Control | Control | Feed Day | No | 22:25 | 22:00 - 22:59 | Night | 37,9 | 50  | 3,8   | 3,8   | 19,05 | 539,52 | 44,22  |
| 2019/06/07 | CH2206 | Male | Three y/o | Control | Control | Feed Day | No | 22:25 | 22:00 - 22:59 | Night | 37,5 | 70  | 26,8  | 26,8  | 18,65 | 566,99 | 110,33 |
| 2019/06/07 | CH2205 | Male | Three y/o | Control | Control | Feed Day | No | 22:30 | 22:00 - 22:59 | Night | 37,9 | 89  | 2,4   | 2,4   | 19,05 | 585,33 | 28,91  |
| 2019/06/07 | CH2206 | Male | Three y/o | Control | Control | Feed Day | No | 22:30 | 22:00 - 22:59 | Night | 37,5 | 64  | 22,8  | 22,8  | 18,65 | 559,88 | 104,79 |
| 2019/06/07 | CH2205 | Male | Three y/o | Control | Control | Feed Day | No | 22:35 | 22:00 - 22:59 | Night | 37,9 | 106 | 116,4 | 116,4 | 19,05 | 598,06 | 161,14 |
| 2019/06/07 | CH2206 | Male | Three y/o | Control | Control | Feed Day | No | 22:35 | 22:00 - 22:59 | Night | 37,7 |     | 23,8  | 23,8  | 18,85 |        | 106,26 |
| 2019/06/07 | CH2205 | Male | Three y/o | Control | Control | Feed Day | No | 22:40 | 22:00 - 22:59 | Night | 38,0 | 105 | 697,8 | 697,8 | 19,15 | 597,38 | 224,44 |
| 2019/06/07 | CH2206 | Male | Three y/o | Control | Control | Feed Day | No | 22:40 | 22:00 - 22:59 | Night | 37,8 | 120 | 73,6  | 73,6  | 18,95 | 606,78 | 145,18 |
| 2019/06/07 | CH2205 | Male | Three y/o | Control | Control | Feed Day | No | 22:45 | 22:00 - 22:59 | Night | 38,2 | 86  | 262,2 | 262,2 | 19,36 | 582,77 | 189,66 |
| 2019/06/07 | CH2206 | Male | Three y/o | Control | Control | Feed Day | No | 22:45 | 22:00 - 22:59 | Night | 37,8 | 134 | 27,2  | 27,2  | 18,95 | 614,33 | 110,83 |
| 2019/06/07 | CH2205 | Male | Three y/o | Control | Control | Feed Day | No | 22:50 | 22:00 - 22:59 | Night | 38,4 | 154 | 59,6  | 59,6  | 19,56 | 623,58 | 137,86 |
| 2019/06/07 | CH2206 | Male | Three y/o | Control | Control | Feed Day | No | 22:50 | 22:00 - 22:59 | Night | 37,9 | 128 | 201,4 | 201,4 | 19,05 | 611,22 | 180,36 |
| 2019/06/07 | CH2205 | Male | Three y/o | Control | Control | Feed Day | No | 22:55 | 22:00 - 22:59 | Night | 38,3 | 110 | 30,4  | 30,4  | 19,46 | 600,69 | 114,65 |
| 2019/06/07 | CH2206 | Male | Three y/o | Control | Control | Feed Day | No | 22:55 | 22:00 - 22:59 | Night | 37,7 | 86  | 12,2  | 12,2  | 18,85 | 582,77 | 83,49  |
| 2019/06/07 | CH2205 | Male | Three y/o | Control | Control | Feed Day | No | 23:00 | 23:00 - 23:59 | Night | 38,1 | 154 | 21,0  | 21,0  | 19,26 | 623,58 | 101,98 |
| 2019/06/07 | CH2206 | Male | Three y/o | Control | Control | Feed Day | No | 23:00 | 23:00 - 23:59 | Night | 37,2 | 65  | 13,4  | 13,4  | 18,36 | 561,12 | 86,68  |
| 2019/06/07 | CH2205 | Male | Three y/o | Control | Control | Feed Day | No | 23:05 | 23:00 - 23:59 | Night | 37,9 | 61  | 20,6  | 20,6  | 19,05 | 556,01 | 101,32 |



|    |            |        |      |           |         |         |          |    |       |               |               |      |     |      |      |       |        |        |
|----|------------|--------|------|-----------|---------|---------|----------|----|-------|---------------|---------------|------|-----|------|------|-------|--------|--------|
|    | 2019/06/07 | CH2206 | Male | Three y/o | Control | Control | Feed Day | No | 23:05 | 23:00 - 23:59 | Night         | 37,1 | 60  | 12,8 | 12,8 | 18,26 | 554,67 | 85,12  |
|    | 2019/06/07 | CH2205 | Male | Three y/o | Control | Control | Feed Day | No | 23:10 | 23:00 - 23:59 | Night         | 37,7 | 114 | 13,2 | 13,2 | 18,85 | 603,20 | 86,17  |
|    | 2019/06/07 | CH2206 | Male | Three y/o | Control | Control | Feed Day | No | 23:10 | 23:00 - 23:59 | Night         | 37,2 | 86  | 15,4 | 15,4 | 18,36 | 582,77 | 91,41  |
|    | 2019/06/07 | CH2205 | Male | Three y/o | Control | Control | Feed Day | No | 23:15 | 23:00 - 23:59 | Night         | 37,7 | 70  | 16,6 | 16,6 | 18,85 | 566,99 | 93,96  |
|    | 2019/06/07 | CH2206 | Male | Three y/o | Control | Control | Feed Day | No | 23:15 | 23:00 - 23:59 | Night         | 37,3 | 96  | 40,4 | 40,4 | 18,46 | 590,91 | 124,43 |
|    | 2019/06/07 | CH2205 | Male | Three y/o | Control | Control | Feed Day | No | 23:20 | 23:00 - 23:59 | Night         | 37,7 | 88  | 11,4 | 11,4 | 18,85 | 584,49 | 81,19  |
|    | 2019/06/07 | CH2206 | Male | Three y/o | Control | Control | Feed Day | No | 23:20 | 23:00 - 23:59 | Night         | 37,4 | 82  | 25,2 | 25,2 | 18,55 | 579,19 | 108,22 |
|    | 2019/06/07 | CH2205 | Male | Three y/o | Control | Control | Feed Day | No | 23:25 | 23:00 - 23:59 | Night         | 37,7 | 58  | 9,2  | 9,2  | 18,85 | 551,90 | 73,94  |
|    | 2019/06/07 | CH2206 | Male | Three y/o | Control | Control | Feed Day | No | 23:25 | 23:00 - 23:59 | Night         | 37,4 | 90  | 30,2 | 30,2 | 18,55 | 586,16 | 114,42 |
|    | 2019/06/07 | CH2205 | Male | Three y/o | Control | Control | Feed Day | No | 23:30 | 23:00 - 23:59 | Night         | 37,7 | 82  | 12,4 | 12,4 | 18,85 | 579,19 | 84,04  |
|    | 2019/06/07 | CH2206 | Male | Three y/o | Control | Control | Feed Day | No | 23:30 | 23:00 - 23:59 | Night         | 37,5 | 53  | 31,4 | 31,4 | 18,65 | 544,43 | 115,76 |
|    | 2019/06/07 | CH2205 | Male | Three y/o | Control | Control | Feed Day | No | 23:35 | 23:00 - 23:59 | Night         | 37,7 | 58  | 10,0 | 10,0 | 18,85 | 551,90 | 76,76  |
|    | 2019/06/07 | CH2206 | Male | Three y/o | Control | Control | Feed Day | No | 23:35 | 23:00 - 23:59 | Night         | 37,5 | 55  | 34,8 | 34,8 | 18,65 | 547,52 | 119,29 |
|    | 2019/06/07 | CH2205 | Male | Three y/o | Control | Control | Feed Day | No | 23:40 | 23:00 - 23:59 | Night         | 37,7 | 60  | 7,6  | 7,6  | 18,85 | 554,67 | 67,49  |
|    | 2019/06/07 | CH2206 | Male | Three y/o | Control | Control | Feed Day | No | 23:40 | 23:00 - 23:59 | Night         | 37,5 | 85  | 34,2 | 34,2 | 18,65 | 581,90 | 118,70 |
|    | 2019/06/07 | CH2205 | Male | Three y/o | Control | Control | Feed Day | No | 23:45 | 23:00 - 23:59 | Night         | 37,7 | 96  | 15,0 | 15,0 | 18,85 | 590,91 | 90,51  |
|    | 2019/06/07 | CH2206 | Male | Three y/o | Control | Control | Feed Day | No | 23:45 | 23:00 - 23:59 | Night         | 37,5 | 39  | 26,2 | 26,2 | 18,65 | 517,82 | 109,55 |
|    | 2019/06/07 | CH2205 | Male | Three y/o | Control | Control | Feed Day | No | 23:50 | 23:00 - 23:59 | Night         | 37,7 | 60  | 18,6 | 18,6 | 18,85 | 554,67 | 97,84  |
|    | 2019/06/07 | CH2206 | Male | Three y/o | Control | Control | Feed Day | No | 23:50 | 23:00 - 23:59 | Night         | 37,5 | 94  | 36,2 | 36,2 | 18,65 | 589,37 | 120,65 |
|    | 2019/06/07 | CH2205 | Male | Three y/o | Control | Control | Feed Day | No | 23:55 | 23:00 - 23:59 | Night         | 37,8 | 59  | 24,4 | 24,4 | 18,95 | 553,30 | 107,11 |
|    | 2019/06/07 | CH2206 | Male | Three y/o | Control | Control | Feed Day | No | 23:55 | 23:00 - 23:59 | Night         | 37,5 | 57  | 41,0 | 41,0 | 18,65 | 550,47 | 124,94 |
| 24 | 2019/06/08 | CH2205 | Male | Three y/o | Control | Control | Feed Day | No | 00:00 | 00:00 - 00:59 | Early Morning | 37,8 | 88  | 19,4 | 19,4 | 18,95 | 584,49 | 99,28  |
|    | 2019/06/08 | CH2206 | Male | Three y/o | Control | Control | Feed Day | No | 00:00 | 00:00 - 00:59 | Early Morning | 37,5 | 82  | 20,4 | 20,4 | 18,65 | 579,19 | 100,99 |
|    | 2019/06/08 | CH2205 | Male | Three y/o | Control | Control | Feed Day | No | 00:05 | 00:00 - 00:59 | Early Morning | 37,7 | 86  | 21,8 | 21,8 | 18,85 | 582,77 | 103,26 |
|    | 2019/06/08 | CH2206 | Male | Three y/o | Control | Control | Feed Day | No | 00:05 | 00:00 - 00:59 | Early Morning | 37,5 | 68  | 19,4 | 19,4 | 18,65 | 564,71 | 99,28  |
|    | 2019/06/08 | CH2205 | Male | Three y/o | Control | Control | Feed Day | No | 00:10 | 00:00 - 00:59 | Early Morning | 37,7 | 58  | 15,6 | 15,6 | 18,85 | 551,90 | 91,85  |
|    | 2019/06/08 | CH2206 | Male | Three y/o | Control | Control | Feed Day | No | 00:10 | 00:00 - 00:59 | Early Morning | 37,4 | 50  | 21,8 | 21,8 | 18,55 | 539,52 | 103,26 |
|    | 2019/06/08 | CH2205 | Male | Three y/o | Control | Control | Feed Day | No | 00:15 | 00:00 - 00:59 | Early Morning | 37,7 | 50  | 18,4 | 18,4 | 18,85 | 539,52 | 97,47  |
|    | 2019/06/08 | CH2206 | Male | Three y/o | Control | Control | Feed Day | No | 00:15 | 00:00 - 00:59 | Early Morning | 37,4 | 82  | 24,4 | 24,4 | 18,55 | 579,19 | 107,11 |
|    | 2019/06/08 | CH2205 | Male | Three y/o | Control | Control | Feed Day | No | 00:20 | 00:00 - 00:59 | Early Morning | 37,7 | 56  | 19,4 | 19,4 | 18,85 | 549,01 | 99,28  |
|    | 2019/06/08 | CH2206 | Male | Three y/o | Control | Control | Feed Day | No | 00:20 | 00:00 - 00:59 | Early Morning | 37,4 | 92  | 21,4 | 21,4 | 18,55 | 587,78 | 102,63 |
|    | 2019/06/08 | CH2205 | Male | Three y/o | Control | Control | Feed Day | No | 00:25 | 00:00 - 00:59 | Early Morning | 37,7 | 86  | 15,8 | 15,8 | 18,85 | 582,77 | 92,28  |
|    | 2019/06/08 | CH2206 | Male | Three y/o | Control | Control | Feed Day | No | 00:25 | 00:00 - 00:59 | Early Morning | 37,3 | 73  | 25,2 | 25,2 | 18,46 | 570,27 | 108,22 |
|    | 2019/06/08 | CH2205 | Male | Three y/o | Control | Control | Feed Day | No | 00:30 | 00:00 - 00:59 | Early Morning | 37,7 | 97  | 13,6 | 13,6 | 18,85 | 591,66 | 87,18  |
|    | 2019/06/08 | CH2206 | Male | Three y/o | Control | Control | Feed Day | No | 00:30 | 00:00 - 00:59 | Early Morning | 37,3 | 84  | 30,8 | 30,8 | 18,46 | 581,01 | 115,10 |
|    | 2019/06/08 | CH2205 | Male | Three y/o | Control | Control | Feed Day | No | 00:35 | 00:00 - 00:59 | Early Morning | 37,7 | 49  | 15,8 | 15,8 | 18,85 | 537,80 | 92,28  |
|    | 2019/06/08 | CH2206 | Male | Three y/o | Control | Control | Feed Day | No | 00:35 | 00:00 - 00:59 | Early Morning | 37,3 | 87  | 19,2 | 19,2 | 18,46 | 583,64 | 98,92  |
|    | 2019/06/08 | CH2205 | Male | Three y/o | Control | Control | Feed Day | No | 00:40 | 00:00 - 00:59 | Early Morning | 37,7 | 50  | 9,8  | 9,8  | 18,85 | 539,52 | 76,07  |
|    | 2019/06/08 | CH2206 | Male | Three y/o | Control | Control | Feed Day | No | 00:40 | 00:00 - 00:59 | Early Morning | 37,3 | 77  | 9,2  | 9,2  | 18,46 | 574,39 | 73,94  |
|    | 2019/06/08 | CH2205 | Male | Three y/o | Control | Control | Feed Day | No | 00:45 | 00:00 - 00:59 | Early Morning | 37,7 | 80  | 10,6 | 10,6 | 18,85 | 577,31 | 78,73  |
|    | 2019/06/08 | CH2206 | Male | Three y/o | Control | Control | Feed Day | No | 00:45 | 00:00 - 00:59 | Early Morning | 37,2 | 87  | 5,2  | 5,2  | 18,36 | 583,64 | 54,72  |
|    | 2019/06/08 | CH2205 | Male | Three y/o | Control | Control | Feed Day | No | 00:50 | 00:00 - 00:59 | Early Morning | 37,7 | 56  | 10,0 | 10,0 | 18,85 | 549,01 | 76,76  |
|    | 2019/06/08 | CH2206 | Male | Three y/o | Control | Control | Feed Day | No | 00:50 | 00:00 - 00:59 | Early Morning | 37,2 | 72  | 8,8  | 8,8  | 18,36 | 569,20 | 72,43  |
|    | 2019/06/08 | CH2205 | Male | Three y/o | Control | Control | Feed Day | No | 00:55 | 00:00 - 00:59 | Early Morning | 37,7 | 51  | 11,2 | 11,2 | 18,85 | 541,20 | 80,59  |
|    | 2019/06/08 | CH2206 | Male | Three y/o | Control | Control | Feed Day | No | 00:55 | 00:00 - 00:59 | Early Morning | 37,2 | 89  | 18,8 | 18,8 | 18,36 | 585,33 | 98,20  |
|    | 2019/06/08 | CH2205 | Male | Three y/o | Control | Control | Feed Day | No | 01:00 | 01:00 - 01:59 | Early Morning | 37,6 | 59  | 20,2 | 20,2 | 18,75 | 553,30 | 100,65 |
|    | 2019/06/08 | CH2206 | Male | Three y/o | Control | Control | Feed Day | No | 01:00 | 01:00 - 01:59 | Early Morning | 37,2 | 74  | 19,6 | 19,6 | 18,36 | 571,33 | 99,63  |
|    | 2019/06/08 | CH2205 | Male | Three y/o | Control | Control | Feed Day | No | 01:05 | 01:00 - 01:59 | Early Morning | 37,6 | 50  | 13,4 | 13,4 | 18,75 | 539,52 | 86,68  |
|    | 2019/06/08 | CH2206 | Male | Three y/o | Control | Control | Feed Day | No | 01:05 | 01:00 - 01:59 | Early Morning | 37,2 | 52  | 22,6 | 22,6 | 18,36 | 542,83 | 104,49 |
|    | 2019/06/08 | CH2205 | Male | Three y/o | Control | Control | Feed Day | No | 01:10 | 01:00 - 01:59 | Early Morning | 37,6 | 73  | 13,4 | 13,4 | 18,75 | 570,27 | 86,68  |
|    | 2019/06/08 | CH2206 | Male | Three y/o | Control | Control | Feed Day | No | 01:10 | 01:00 - 01:59 | Early Morning | 37,4 | 45  | 48,0 | 48,0 | 18,55 | 530,47 | 130,38 |
|    | 2019/06/08 | CH2205 | Male | Three y/o | Control | Control | Feed Day | No | 01:15 | 01:00 - 01:59 | Early Morning | 37,5 | 54  | 12,2 | 12,2 | 18,65 | 545,99 | 83,49  |
|    | 2019/06/08 | CH2206 | Male | Three y/o | Control | Control | Feed Day | No | 01:15 | 01:00 - 01:59 | Early Morning | 37,3 | 63  | 50,2 | 50,2 | 18,46 | 558,62 | 131,92 |
|    | 2019/06/08 | CH2205 | Male | Three y/o | Control | Control | Feed Day | No | 01:20 | 01:00 - 01:59 | Early Morning | 37,5 | 51  | 11,2 | 11,2 | 18,65 | 541,20 | 80,59  |
|    | 2019/06/08 | CH2206 | Male | Three y/o | Control | Control | Feed Day | No | 01:20 | 01:00 - 01:59 | Early Morning | 37,3 | 56  | 46,2 | 46,2 | 18,46 | 549,01 | 129,06 |
|    | 2019/06/08 | CH2205 | Male | Three y/o | Control | Control | Feed Day | No | 01:25 | 01:00 - 01:59 | Early Morning | 37,5 | 54  | 10,6 | 10,6 | 18,65 | 545,99 | 78,73  |
|    | 2019/06/08 | CH2206 | Male | Three y/o | Control | Control | Feed Day | No | 01:25 | 01:00 - 01:59 | Early Morning | 37,4 | 55  | 50,4 | 50,4 | 18,55 | 547,52 | 132,06 |
|    | 2019/06/08 | CH2205 | Male | Three y/o | Control | Control | Feed Day | No | 01:30 | 01:00 - 01:59 | Early Morning | 37,5 | 89  | 13,2 | 13,2 | 18,65 | 585,33 | 86,17  |
|    | 2019/06/08 | CH2206 | Male | Three y/o | Control | Control | Feed Day | No | 01:30 | 01:00 - 01:59 | Early Morning | 37,4 | 88  | 42,2 | 42,2 | 18,55 | 584,49 | 125,93 |
|    | 2019/06/08 | CH2205 | Male | Three y/o | Control | Control | Feed Day | No | 01:35 | 01:00 - 01:59 | Early Morning | 37,5 | 47  | 15,6 | 15,6 | 18,65 | 534,23 | 91,85  |
|    | 2019/06/08 | CH2206 | Male | Three y/o | Control | Control | Feed Day | No | 01:35 | 01:00 - 01:59 | Early Morning | 37,4 | 95  | 26,0 | 26,0 | 18,55 | 590,14 | 109,29 |
|    | 2019/06/08 | CH2205 | Male | Three y/o | Control | Control | Feed Day | No | 01:40 | 01:00 - 01:59 | Early Morning | 37,5 |     | 18,0 | 18,0 | 18,65 |        | 96,72  |
|    | 2019/06/08 | CH2206 | Male | Three y/o | Control | Control | Feed Day | No | 01:40 | 01:00 - 01:59 | Early Morning | 37,4 | 45  | 24,8 | 24,8 | 18,55 | 530,47 | 107,67 |
|    | 2019/06/08 | CH2205 | Male | Three y/o | Control | Control | Feed Day | No | 01:45 | 01:00 - 01:59 | Early Morning | 37,4 |     | 14,8 | 14,8 | 18,55 |        | 90,05  |
|    | 2019/06/08 | CH2206 | Male | Three y/o | Control | Control | Feed Day | No | 01:45 | 01:00 - 01:59 | Early Morning | 37,5 | 55  | 46,6 | 46,6 | 18,65 | 547,52 | 129,35 |
|    | 2019/06/08 | CH2205 | Male | Three y/o | Control | Control | Feed Day | No | 01:50 | 01:00 - 01:59 | Early Morning | 37,5 | 60  | 11,8 | 11,8 | 18,65 | 554,67 | 82,36  |
|    | 2019/06/08 | CH2206 | Male | Three y/o | Control | Control | Feed Day | No | 01:50 | 01:00 - 01:59 | Early Morning | 37,6 | 51  | 51,8 | 51,8 | 18,75 | 541,20 | 133,01 |
|    | 2019/06/08 | CH2205 | Male | Three y/o | Control | Control | Feed Day | No | 01:55 | 01:00 - 01:59 | Early Morning | 37,4 | 49  | 13,8 | 13,8 | 18,55 | 537,80 | 87,68  |
|    | 2019/06/08 | CH2206 | Male | Three y/o | Control | Control | Feed Day | No | 01:55 | 01:00 - 01:59 | Early Morning | 37,5 | 91  | 55,2 | 55,2 | 18,65 | 586,98 | 135,21 |
|    | 2019/06/08 | CH2205 | Male | Three y/o | Control | Control | Feed Day | No | 02:00 | 02:00 - 02:59 | Early Morning | 37,3 | 73  | 18,8 | 18,8 | 18,46 | 570,27 | 98,20  |



|            |        |      |           |         |         |          |    |       |               |               |      |     |      |      |       |        |        |
|------------|--------|------|-----------|---------|---------|----------|----|-------|---------------|---------------|------|-----|------|------|-------|--------|--------|
| 2019/06/08 | CH2206 | Male | Three y/o | Control | Control | Feed Day | No | 02:00 | 02:00 - 02:59 | Early Morning | 37,6 | 90  | 53,2 | 53,2 | 18,75 | 586,16 | 133,93 |
| 2019/06/08 | CH2205 | Male | Three y/o | Control | Control | Feed Day | No | 02:05 | 02:00 - 02:59 | Early Morning | 37,3 | 84  | 12,8 | 12,8 | 18,46 | 581,01 | 85,12  |
| 2019/06/08 | CH2206 | Male | Three y/o | Control | Control | Feed Day | No | 02:05 | 02:00 - 02:59 | Early Morning | 37,5 | 83  | 54,4 | 54,4 | 18,65 | 580,11 | 134,70 |
| 2019/06/08 | CH2205 | Male | Three y/o | Control | Control | Feed Day | No | 02:10 | 02:00 - 02:59 | Early Morning | 37,3 | 45  | 14,6 | 14,6 | 18,46 | 530,47 | 89,59  |
| 2019/06/08 | CH2206 | Male | Three y/o | Control | Control | Feed Day | No | 02:10 | 02:00 - 02:59 | Early Morning | 37,5 | 49  | 46,2 | 46,2 | 18,65 | 537,80 | 129,06 |
| 2019/06/08 | CH2205 | Male | Three y/o | Control | Control | Feed Day | No | 02:15 | 02:00 - 02:59 | Early Morning | 37,3 | 52  | 10,2 | 10,2 | 18,46 | 542,83 | 77,43  |
| 2019/06/08 | CH2206 | Male | Three y/o | Control | Control | Feed Day | No | 02:15 | 02:00 - 02:59 | Early Morning | 37,5 | 59  | 26,0 | 26,0 | 18,65 | 553,30 | 109,29 |
| 2019/06/08 | CH2205 | Male | Three y/o | Control | Control | Feed Day | No | 02:20 | 02:00 - 02:59 | Early Morning | 37,3 | 81  | 11,0 | 11,0 | 18,46 | 578,26 | 79,98  |
| 2019/06/08 | CH2206 | Male | Three y/o | Control | Control | Feed Day | No | 02:20 | 02:00 - 02:59 | Early Morning | 37,5 | 50  | 25,2 | 25,2 | 18,65 | 539,52 | 108,22 |
| 2019/06/08 | CH2205 | Male | Three y/o | Control | Control | Feed Day | No | 02:25 | 02:00 - 02:59 | Early Morning | 37,3 | 76  | 8,2  | 8,2  | 18,46 | 573,39 | 70,05  |
| 2019/06/08 | CH2206 | Male | Three y/o | Control | Control | Feed Day | No | 02:25 | 02:00 - 02:59 | Early Morning | 37,4 | 104 | 26,8 | 26,8 | 18,55 | 596,69 | 110,33 |
| 2019/06/08 | CH2205 | Male | Three y/o | Control | Control | Feed Day | No | 02:30 | 02:00 - 02:59 | Early Morning | 37,3 | 90  | 6,6  | 6,6  | 18,46 | 586,16 | 62,73  |
| 2019/06/08 | CH2206 | Male | Three y/o | Control | Control | Feed Day | No | 02:30 | 02:00 - 02:59 | Early Morning | 37,3 | 85  | 26,4 | 26,4 | 18,46 | 581,90 | 109,81 |
| 2019/06/08 | CH2205 | Male | Three y/o | Control | Control | Feed Day | No | 02:35 | 02:00 - 02:59 | Early Morning | 37,3 | 83  | 9,2  | 9,2  | 18,46 | 580,11 | 73,94  |
| 2019/06/08 | CH2206 | Male | Three y/o | Control | Control | Feed Day | No | 02:35 | 02:00 - 02:59 | Early Morning | 37,3 | 107 | 61,4 | 61,4 | 18,46 | 598,73 | 138,89 |
| 2019/06/08 | CH2205 | Male | Three y/o | Control | Control | Feed Day | No | 02:40 | 02:00 - 02:59 | Early Morning | 37,3 | 51  | 8,8  | 8,8  | 18,46 | 541,20 | 72,43  |
| 2019/06/08 | CH2206 | Male | Three y/o | Control | Control | Feed Day | No | 02:40 | 02:00 - 02:59 | Early Morning | 37,3 | 97  | 8,0  | 8,0  | 18,46 | 591,66 | 69,22  |
| 2019/06/08 | CH2205 | Male | Three y/o | Control | Control | Feed Day | No | 02:45 | 02:00 - 02:59 | Early Morning | 37,3 | 91  | 11,0 | 11,0 | 18,46 | 586,98 | 79,98  |
| 2019/06/08 | CH2206 | Male | Three y/o | Control | Control | Feed Day | No | 02:45 | 02:00 - 02:59 | Early Morning | 37,3 | 55  | 5,0  | 5,0  | 18,46 | 547,52 | 53,41  |
| 2019/06/08 | CH2205 | Male | Three y/o | Control | Control | Feed Day | No | 02:50 | 02:00 - 02:59 | Early Morning | 37,3 | 43  | 5,8  | 5,8  | 18,46 | 526,50 | 58,39  |
| 2019/06/08 | CH2206 | Male | Three y/o | Control | Control | Feed Day | No | 02:50 | 02:00 - 02:59 | Early Morning | 37,3 | 103 | 6,0  | 6,0  | 18,46 | 596,00 | 59,53  |
| 2019/06/08 | CH2205 | Male | Three y/o | Control | Control | Feed Day | No | 02:55 | 02:00 - 02:59 | Early Morning | 37,2 | 86  | 6,8  | 6,8  | 18,36 | 582,77 | 63,74  |
| 2019/06/08 | CH2206 | Male | Three y/o | Control | Control | Feed Day | No | 02:55 | 02:00 - 02:59 | Early Morning | 37,3 | 94  | 2,8  | 2,8  | 18,46 | 589,37 | 34,04  |
| 2019/06/08 | CH2205 | Male | Three y/o | Control | Control | Feed Day | No | 03:00 | 03:00 - 03:59 | Early Morning | 37,2 | 64  | 6,0  | 6,0  | 18,36 | 559,88 | 59,53  |
| 2019/06/08 | CH2206 | Male | Three y/o | Control | Control | Feed Day | No | 03:00 | 03:00 - 03:59 | Early Morning | 37,3 | 90  | 7,6  | 7,6  | 18,46 | 586,16 | 67,49  |
| 2019/06/08 | CH2205 | Male | Three y/o | Control | Control | Feed Day | No | 03:05 | 03:00 - 03:59 | Early Morning | 37,3 | 141 | 6,2  | 6,2  | 18,46 | 617,75 | 60,63  |
| 2019/06/08 | CH2206 | Male | Three y/o | Control | Control | Feed Day | No | 03:05 | 03:00 - 03:59 | Early Morning | 37,3 | 88  | 5,6  | 5,6  | 18,46 | 584,49 | 57,21  |
| 2019/06/08 | CH2205 | Male | Three y/o | Control | Control | Feed Day | No | 03:10 | 03:00 - 03:59 | Early Morning | 37,3 | 109 | 3,4  | 3,4  | 18,46 | 600,04 | 40,51  |
| 2019/06/08 | CH2206 | Male | Three y/o | Control | Control | Feed Day | No | 03:10 | 03:00 - 03:59 | Early Morning | 37,3 | 60  | 4,0  | 4,0  | 18,46 | 554,67 | 45,94  |
| 2019/06/08 | CH2205 | Male | Three y/o | Control | Control | Feed Day | No | 03:15 | 03:00 - 03:59 | Early Morning | 37,3 | 95  | 11,2 | 11,2 | 18,46 | 590,14 | 80,59  |
| 2019/06/08 | CH2206 | Male | Three y/o | Control | Control | Feed Day | No | 03:15 | 03:00 - 03:59 | Early Morning | 37,3 |     | 13,8 | 13,8 | 18,46 | 87,68  |        |
| 2019/06/08 | CH2205 | Male | Three y/o | Control | Control | Feed Day | No | 03:20 | 03:00 - 03:59 | Early Morning | 37,3 | 54  | 6,8  | 6,8  | 18,46 | 545,99 | 63,74  |
| 2019/06/08 | CH2206 | Male | Three y/o | Control | Control | Feed Day | No | 03:20 | 03:00 - 03:59 | Early Morning | 37,3 | 79  | 16,4 | 16,4 | 18,46 | 576,36 | 93,55  |
| 2019/06/08 | CH2205 | Male | Three y/o | Control | Control | Feed Day | No | 03:25 | 03:00 - 03:59 | Early Morning | 37,3 | 46  | 10,6 | 10,6 | 18,46 | 532,38 | 78,73  |
| 2019/06/08 | CH2206 | Male | Three y/o | Control | Control | Feed Day | No | 03:25 | 03:00 - 03:59 | Early Morning | 37,3 | 44  | 20,4 | 20,4 | 18,46 | 528,51 | 100,99 |
| 2019/06/08 | CH2205 | Male | Three y/o | Control | Control | Feed Day | No | 03:30 | 03:00 - 03:59 | Early Morning | 37,3 | 60  | 12,8 | 12,8 | 18,46 | 554,67 | 85,12  |
| 2019/06/08 | CH2206 | Male | Three y/o | Control | Control | Feed Day | No | 03:30 | 03:00 - 03:59 | Early Morning | 37,3 | 50  | 43,2 | 43,2 | 18,46 | 539,52 | 126,74 |
| 2019/06/08 | CH2205 | Male | Three y/o | Control | Control | Feed Day | No | 03:35 | 03:00 - 03:59 | Early Morning | 37,3 | 67  | 7,4  | 7,4  | 18,46 | 563,53 | 66,59  |
| 2019/06/08 | CH2206 | Male | Three y/o | Control | Control | Feed Day | No | 03:35 | 03:00 - 03:59 | Early Morning | 37,3 | 47  | 43,4 | 43,4 | 18,46 | 534,23 | 126,90 |
| 2019/06/08 | CH2205 | Male | Three y/o | Control | Control | Feed Day | No | 03:40 | 03:00 - 03:59 | Early Morning | 37,3 | 77  | 10,0 | 10,0 | 18,46 | 574,39 | 76,76  |
| 2019/06/08 | CH2206 | Male | Three y/o | Control | Control | Feed Day | No | 03:40 | 03:00 - 03:59 | Early Morning | 37,2 | 46  | 32,8 | 32,8 | 18,36 | 532,38 | 117,26 |
| 2019/06/08 | CH2205 | Male | Three y/o | Control | Control | Feed Day | No | 03:45 | 03:00 - 03:59 | Early Morning | 37,3 | 45  | 8,2  | 8,2  | 18,46 | 530,47 | 70,05  |
| 2019/06/08 | CH2206 | Male | Three y/o | Control | Control | Feed Day | No | 03:45 | 03:00 - 03:59 | Early Morning | 37,3 | 90  | 8,0  | 8,0  | 18,46 | 586,16 | 69,22  |
| 2019/06/08 | CH2205 | Male | Three y/o | Control | Control | Feed Day | No | 03:50 | 03:00 - 03:59 | Early Morning | 37,3 | 49  | 7,0  | 7,0  | 18,46 | 537,80 | 64,72  |
| 2019/06/08 | CH2206 | Male | Three y/o | Control | Control | Feed Day | No | 03:50 | 03:00 - 03:59 | Early Morning | 37,2 | 92  | 8,2  | 8,2  | 18,36 | 587,78 | 70,05  |
| 2019/06/08 | CH2205 | Male | Three y/o | Control | Control | Feed Day | No | 03:55 | 03:00 - 03:59 | Early Morning | 37,2 |     | 8,2  | 8,2  | 18,36 |        | 70,05  |
| 2019/06/08 | CH2206 | Male | Three y/o | Control | Control | Feed Day | No | 03:55 | 03:00 - 03:59 | Early Morning | 37,3 | 83  | 9,0  | 9,0  | 18,46 | 580,11 | 73,19  |
| 2019/06/08 | CH2205 | Male | Three y/o | Control | Control | Feed Day | No | 04:00 | 04:00 - 04:59 | Morning       | 37,2 | 47  | 7,6  | 7,6  | 18,36 | 534,23 | 67,49  |
| 2019/06/08 | CH2206 | Male | Three y/o | Control | Control | Feed Day | No | 04:00 | 04:00 - 04:59 | Morning       | 37,2 | 81  | 11,8 | 11,8 | 18,36 | 578,26 | 82,36  |
| 2019/06/08 | CH2205 | Male | Three y/o | Control | Control | Feed Day | No | 04:05 | 04:00 - 04:59 | Morning       | 37,2 | 49  | 41,4 | 41,4 | 18,36 | 537,80 | 125,27 |
| 2019/06/08 | CH2206 | Male | Three y/o | Control | Control | Feed Day | No | 04:05 | 04:00 - 04:59 | Morning       | 37,3 | 90  | 18,4 | 18,4 | 18,46 | 586,16 | 97,47  |
| 2019/06/08 | CH2205 | Male | Three y/o | Control | Control | Feed Day | No | 04:10 | 04:00 - 04:59 | Morning       | 37,3 |     | 19,2 | 19,2 | 18,46 |        | 98,92  |
| 2019/06/08 | CH2206 | Male | Three y/o | Control | Control | Feed Day | No | 04:10 | 04:00 - 04:59 | Morning       | 37,3 | 53  | 4,6  | 4,6  | 18,46 | 544,43 | 50,61  |
| 2019/06/08 | CH2205 | Male | Three y/o | Control | Control | Feed Day | No | 04:15 | 04:00 - 04:59 | Morning       | 37,3 | 58  | 9,4  | 9,4  | 18,46 | 551,90 | 74,66  |
| 2019/06/08 | CH2206 | Male | Three y/o | Control | Control | Feed Day | No | 04:15 | 04:00 - 04:59 | Morning       | 37,2 | 61  | 1,8  | 1,8  | 18,36 | 556,01 | 19,38  |
| 2019/06/08 | CH2205 | Male | Three y/o | Control | Control | Feed Day | No | 04:20 | 04:00 - 04:59 | Morning       | 37,2 |     | 9,8  | 9,8  | 18,36 |        | 76,07  |
| 2019/06/08 | CH2206 | Male | Three y/o | Control | Control | Feed Day | No | 04:20 | 04:00 - 04:59 | Morning       | 37,2 | 53  | 4,2  | 4,2  | 18,36 | 544,43 | 47,57  |
| 2019/06/08 | CH2205 | Male | Three y/o | Control | Control | Feed Day | No | 04:25 | 04:00 - 04:59 | Morning       | 37,2 | 100 | 9,6  | 9,6  | 18,36 | 593,87 | 75,37  |
| 2019/06/08 | CH2206 | Male | Three y/o | Control | Control | Feed Day | No | 04:25 | 04:00 - 04:59 | Morning       | 37,2 |     | 38,4 | 38,4 | 18,36 |        | 122,68 |
| 2019/06/08 | CH2205 | Male | Three y/o | Control | Control | Feed Day | No | 04:30 | 04:00 - 04:59 | Morning       | 37,2 | 54  | 12,8 | 12,8 | 18,36 | 545,99 | 85,12  |
| 2019/06/08 | CH2206 | Male | Three y/o | Control | Control | Feed Day | No | 04:30 | 04:00 - 04:59 | Morning       | 37,3 | 134 | 34,8 | 34,8 | 18,46 | 614,33 | 119,29 |
| 2019/06/08 | CH2205 | Male | Three y/o | Control | Control | Feed Day | No | 04:35 | 04:00 - 04:59 | Morning       | 37,1 | 128 | 13,8 | 13,8 | 18,26 | 611,22 | 87,68  |
| 2019/06/08 | CH2206 | Male | Three y/o | Control | Control | Feed Day | No | 04:35 | 04:00 - 04:59 | Morning       | 37,3 | 86  | 37,4 | 37,4 | 18,46 | 582,77 | 121,77 |
| 2019/06/08 | CH2205 | Male | Three y/o | Control | Control | Feed Day | No | 04:40 | 04:00 - 04:59 | Morning       | 37,2 | 53  | 15,6 | 15,6 | 18,36 | 544,43 | 91,85  |
| 2019/06/08 | CH2206 | Male | Three y/o | Control | Control | Feed Day | No | 04:40 | 04:00 - 04:59 | Morning       | 37,2 | 87  | 40,8 | 40,8 | 18,36 | 583,64 | 124,77 |
| 2019/06/08 | CH2205 | Male | Three y/o | Control | Control | Feed Day | No | 04:45 | 04:00 - 04:59 | Morning       | 37,2 | 47  | 10,8 | 10,8 | 18,36 | 534,23 | 79,36  |
| 2019/06/08 | CH2206 | Male | Three y/o | Control | Control | Feed Day | No | 04:45 | 04:00 - 04:59 | Morning       | 37,2 | 123 | 53,4 | 53,4 | 18,36 | 608,49 | 134,06 |
| 2019/06/08 | CH2205 | Male | Three y/o | Control | Control | Feed Day | No | 04:50 | 04:00 - 04:59 | Morning       | 37,2 | 45  | 59,4 | 59,4 | 18,36 | 530,47 | 137,75 |
| 2019/06/08 | CH2206 | Male | Three y/o | Control | Control | Feed Day | No | 04:50 | 04:00 - 04:59 | Morning       | 37,4 | 143 | 34,8 | 34,8 | 18,55 | 618,69 | 119,29 |
| 2019/06/08 | CH2205 | Male | Three y/o | Control | Control | Feed Day | No | 04:55 | 04:00 - 04:59 | Morning       | 37,3 | 125 | 93,2 | 93,2 | 18,46 | 609,60 | 153,39 |



|            |        |      |           |         |         |          |    |       |               |         |      |     |        |       |       |        |        |
|------------|--------|------|-----------|---------|---------|----------|----|-------|---------------|---------|------|-----|--------|-------|-------|--------|--------|
| 2019/06/08 | CH2206 | Male | Three y/o | Control | Control | Feed Day | No | 04:55 | 04:00 - 04:59 | Morning | 37,4 | 123 | 61,4   | 61,4  | 18,55 | 608,49 | 138,89 |
| 2019/06/08 | CH2205 | Male | Three y/o | Control | Control | Feed Day | No | 05:00 | 05:00 - 05:59 | Morning | 37,3 | 125 | 5,0    | 5,0   | 18,46 | 609,60 | 53,41  |
| 2019/06/08 | CH2206 | Male | Three y/o | Control | Control | Feed Day | No | 05:00 | 05:00 - 05:59 | Morning | 37,4 |     | 62,0   | 62,0  | 18,55 |        | 139,23 |
| 2019/06/08 | CH2205 | Male | Three y/o | Control | Control | Feed Day | No | 05:05 | 05:00 - 05:59 | Morning | 37,3 |     | 79,8   | 79,8  | 18,46 |        | 147,99 |
| 2019/06/08 | CH2206 | Male | Three y/o | Control | Control | Feed Day | No | 05:05 | 05:00 - 05:59 | Morning | 37,4 |     | 33,0   | 33,0  | 18,55 | 618,69 | 117,47 |
| 2019/06/08 | CH2205 | Male | Three y/o | Control | Control | Feed Day | No | 05:10 | 05:00 - 05:59 | Morning | 37,4 | 126 | 32,0   | 32,0  | 18,55 | 610,14 | 116,41 |
| 2019/06/08 | CH2206 | Male | Three y/o | Control | Control | Feed Day | No | 05:10 | 05:00 - 05:59 | Morning | 37,5 |     | 16,2   | 16,2  | 18,65 |        | 93,13  |
| 2019/06/08 | CH2205 | Male | Three y/o | Control | Control | Feed Day | No | 05:15 | 05:00 - 05:59 | Morning | 37,5 | 48  | 210,8  | 210,8 | 18,65 | 536,04 | 181,97 |
| 2019/06/08 | CH2206 | Male | Three y/o | Control | Control | Feed Day | No | 05:15 | 05:00 - 05:59 | Morning | 37,7 | 123 | 17,8   | 17,8  | 18,85 | 608,49 | 96,34  |
| 2019/06/08 | CH2205 | Male | Three y/o | Control | Control | Feed Day | No | 05:20 | 05:00 - 05:59 | Morning | 37,7 | 160 | 88,8   | 88,8  | 18,85 | 626,07 | 151,71 |
| 2019/06/08 | CH2206 | Male | Three y/o | Control | Control | Feed Day | No | 05:20 | 05:00 - 05:59 | Morning | 37,7 | 140 | 213,8  | 213,8 | 18,85 | 617,28 | 182,47 |
| 2019/06/08 | CH2205 | Male | Three y/o | Control | Control | Feed Day | No | 05:25 | 05:00 - 05:59 | Morning | 37,7 | 49  | 162,0  | 162,0 | 18,85 | 537,80 | 172,72 |
| 2019/06/08 | CH2206 | Male | Three y/o | Control | Control | Feed Day | No | 05:25 | 05:00 - 05:59 | Morning | 37,7 | 90  | 149,0  | 149,0 | 18,85 | 586,16 | 169,78 |
| 2019/06/08 | CH2205 | Male | Three y/o | Control | Control | Feed Day | No | 05:30 | 05:00 - 05:59 | Morning | 37,7 | 114 | 53,2   | 53,2  | 18,85 | 603,20 | 133,93 |
| 2019/06/08 | CH2206 | Male | Three y/o | Control | Control | Feed Day | No | 05:30 | 05:00 - 05:59 | Morning | 37,8 | 115 | 40,6   | 40,6  | 18,95 | 603,82 | 124,60 |
| 2019/06/08 | CH2205 | Male | Three y/o | Control | Control | Feed Day | No | 05:35 | 05:00 - 05:59 | Morning | 37,7 |     | 36,0   | 36,0  | 18,85 |        | 120,46 |
| 2019/06/08 | CH2206 | Male | Three y/o | Control | Control | Feed Day | No | 05:35 | 05:00 - 05:59 | Morning | 37,7 | 47  | 184,2  | 184,2 | 18,85 | 534,23 | 177,23 |
| 2019/06/08 | CH2205 | Male | Three y/o | Control | Control | Feed Day | No | 05:40 | 05:00 - 05:59 | Morning | 37,9 |     | 60,6   | 60,6  | 19,05 |        | 138,44 |
| 2019/06/08 | CH2206 | Male | Three y/o | Control | Control | Feed Day | No | 05:40 | 05:00 - 05:59 | Morning | 37,8 | 148 | 48,4   | 48,4  | 18,95 | 620,97 | 130,66 |
| 2019/06/08 | CH2205 | Male | Three y/o | Control | Control | Feed Day | No | 05:45 | 05:00 - 05:59 | Morning | 37,9 | 143 | 172,2  | 172,2 | 19,05 | 618,69 | 174,86 |
| 2019/06/08 | CH2206 | Male | Three y/o | Control | Control | Feed Day | No | 05:45 | 05:00 - 05:59 | Morning | 37,8 | 143 | 1417,6 |       | 18,95 | 618,69 |        |
| 2019/06/08 | CH2205 | Male | Three y/o | Control | Control | Feed Day | No | 05:50 | 05:00 - 05:59 | Morning | 37,9 | 126 | 78,4   | 78,4  | 19,05 | 610,14 | 147,37 |
| 2019/06/08 | CH2206 | Male | Three y/o | Control | Control | Feed Day | No | 05:50 | 05:00 - 05:59 | Morning | 37,8 | 101 | 27,0   | 27,0  | 18,95 | 594,59 | 110,58 |
| 2019/06/08 | CH2205 | Male | Three y/o | Control | Control | Feed Day | No | 05:55 | 05:00 - 05:59 | Morning | 37,9 | 137 | 16,8   | 16,8  | 19,05 | 615,83 | 94,37  |
| 2019/06/08 | CH2206 | Male | Three y/o | Control | Control | Feed Day | No | 05:55 | 05:00 - 05:59 | Morning | 37,4 | 57  | 21,2   | 21,2  | 18,55 | 550,47 | 102,31 |
| 2019/06/08 | CH2205 | Male | Three y/o | Control | Control | Feed Day | No | 06:00 | 06:00 - 06:59 | Morning | 37,5 |     | 23,2   | 23,2  | 18,65 |        | 105,39 |
| 2019/06/08 | CH2206 | Male | Three y/o | Control | Control | Feed Day | No | 06:00 | 06:00 - 06:59 | Morning | 37,1 | 68  | 20,2   | 20,2  | 18,26 | 564,71 | 100,65 |
| 2019/06/08 | CH2205 | Male | Three y/o | Control | Control | Feed Day | No | 06:05 | 06:00 - 06:59 | Morning | 37,4 |     | 19,0   | 19,0  | 18,55 |        | 98,56  |
| 2019/06/08 | CH2206 | Male | Three y/o | Control | Control | Feed Day | No | 06:05 | 06:00 - 06:59 | Morning | 37,0 | 100 | 32,6   | 32,6  | 18,16 | 593,87 | 117,05 |
| 2019/06/08 | CH2205 | Male | Three y/o | Control | Control | Feed Day | No | 06:10 | 06:00 - 06:59 | Morning | 37,3 | 73  | 16,0   | 16,0  | 18,46 | 570,27 | 92,71  |
| 2019/06/08 | CH2206 | Male | Three y/o | Control | Control | Feed Day | No | 06:10 | 06:00 - 06:59 | Morning | 36,9 | 50  | 6,6    | 6,6   | 18,06 | 539,52 | 62,73  |
| 2019/06/08 | CH2205 | Male | Three y/o | Control | Control | Feed Day | No | 06:15 | 06:00 - 06:59 | Morning | 37,2 | 105 | 30,6   | 30,6  | 18,36 | 597,38 | 114,87 |
| 2019/06/08 | CH2206 | Male | Three y/o | Control | Control | Feed Day | No | 06:15 | 06:00 - 06:59 | Morning | 36,9 |     | 13,6   | 13,6  | 18,06 |        | 87,18  |
| 2019/06/08 | CH2205 | Male | Three y/o | Control | Control | Feed Day | No | 06:20 | 06:00 - 06:59 | Morning | 37,3 | 141 | 31,8   | 31,8  | 18,46 | 617,75 | 116,20 |
| 2019/06/08 | CH2206 | Male | Three y/o | Control | Control | Feed Day | No | 06:20 | 06:00 - 06:59 | Morning | 37,0 | 84  | 12,4   | 12,4  | 18,16 | 581,01 | 84,04  |
| 2019/06/08 | CH2205 | Male | Three y/o | Control | Control | Feed Day | No | 06:25 | 06:00 - 06:59 | Morning | 37,2 | 78  | 10,0   | 10,0  | 18,36 | 575,38 | 76,76  |
| 2019/06/08 | CH2206 | Male | Three y/o | Control | Control | Feed Day | No | 06:25 | 06:00 - 06:59 | Morning | 37,0 | 57  | 3,4    | 3,4   | 18,16 | 550,47 | 40,51  |
| 2019/06/08 | CH2205 | Male | Three y/o | Control | Control | Feed Day | No | 06:30 | 06:00 - 06:59 | Morning | 37,1 | 69  | 15,6   | 15,6  | 18,26 | 565,86 | 91,85  |
| 2019/06/08 | CH2206 | Male | Three y/o | Control | Control | Feed Day | No | 06:30 | 06:00 - 06:59 | Morning | 36,9 | 83  | 24,2   | 24,2  | 18,06 | 580,11 | 106,83 |
| 2019/06/08 | CH2205 | Male | Three y/o | Control | Control | Feed Day | No | 06:35 | 06:00 - 06:59 | Morning | 37,0 | 90  | 12,0   | 12,0  | 18,16 | 586,16 | 82,93  |
| 2019/06/08 | CH2206 | Male | Three y/o | Control | Control | Feed Day | No | 06:35 | 06:00 - 06:59 | Morning | 36,7 | 82  | 28,4   | 28,4  | 17,87 | 579,19 | 112,31 |
| 2019/06/08 | CH2205 | Male | Three y/o | Control | Control | Feed Day | No | 06:40 | 06:00 - 06:59 | Morning | 37,0 | 64  | 23,0   | 23,0  | 18,16 | 559,88 | 105,09 |
| 2019/06/08 | CH2206 | Male | Three y/o | Control | Control | Feed Day | No | 06:40 | 06:00 - 06:59 | Morning | 36,8 | 82  | 25,4   | 25,4  | 17,96 | 579,19 | 108,49 |
| 2019/06/08 | CH2205 | Male | Three y/o | Control | Control | Feed Day | No | 06:45 | 06:00 - 06:59 | Morning | 37,0 | 68  | 25,2   | 25,2  | 18,16 | 564,71 | 108,22 |
| 2019/06/08 | CH2206 | Male | Three y/o | Control | Control | Feed Day | No | 06:45 | 06:00 - 06:59 | Morning | 36,9 | 100 | 19,0   | 19,0  | 18,06 | 593,87 | 98,56  |
| 2019/06/08 | CH2205 | Male | Three y/o | Control | Control | Feed Day | No | 06:50 | 06:00 - 06:59 | Morning | 37,0 |     | 74,0   | 74,0  | 18,16 |        | 145,37 |
| 2019/06/08 | CH2206 | Male | Three y/o | Control | Control | Feed Day | No | 06:50 | 06:00 - 06:59 | Morning | 37,0 | 44  | 124,6  | 124,6 | 18,16 | 528,51 | 163,52 |
| 2019/06/08 | CH2205 | Male | Three y/o | Control | Control | Feed Day | No | 06:55 | 06:00 - 06:59 | Morning | 37,2 | 156 | 620,4  | 620,4 | 18,36 | 624,43 | 220,24 |
| 2019/06/08 | CH2206 | Male | Three y/o | Control | Control | Feed Day | No | 06:55 | 06:00 - 06:59 | Morning | 37,2 | 111 | 69,0   | 69,0  | 18,36 | 601,33 | 142,94 |
| 2019/06/08 | CH2205 | Male | Three y/o | Control | Control | Feed Day | No | 07:00 | 07:00 - 07:59 | Morning | 37,4 | 99  | 60,6   | 60,6  | 18,55 | 593,14 | 138,44 |
| 2019/06/08 | CH2206 | Male | Three y/o | Control | Control | Feed Day | No | 07:00 | 07:00 - 07:59 | Morning | 37,4 | 128 | 129,4  | 129,4 | 18,55 | 611,22 | 164,84 |
| 2019/06/08 | CH2205 | Male | Three y/o | Control | Control | Feed Day | No | 07:05 | 07:00 - 07:59 | Morning | 37,4 | 59  | 639,0  | 639,0 | 18,55 | 553,30 | 221,29 |
| 2019/06/08 | CH2206 | Male | Three y/o | Control | Control | Feed Day | No | 07:05 | 07:00 - 07:59 | Morning | 37,5 | 128 | 82,4   | 82,4  | 18,65 | 611,22 | 149,10 |
| 2019/06/08 | CH2205 | Male | Three y/o | Control | Control | Feed Day | No | 07:10 | 07:00 - 07:59 | Morning | 38,0 |     | 265,2  | 265,2 | 19,15 |        | 190,06 |
| 2019/06/08 | CH2206 | Male | Three y/o | Control | Control | Feed Day | No | 07:10 | 07:00 - 07:59 | Morning | 37,7 | 131 | 202,4  | 202,4 | 18,85 | 612,80 | 180,54 |
| 2019/06/08 | CH2205 | Male | Three y/o | Control | Control | Feed Day | No | 07:15 | 07:00 - 07:59 | Morning | 38,2 | 110 | 134,8  | 134,8 | 19,36 | 600,69 | 166,28 |
| 2019/06/08 | CH2206 | Male | Three y/o | Control | Control | Feed Day | No | 07:15 | 07:00 - 07:59 | Morning | 37,9 | 156 | 204,2  | 204,2 | 19,05 | 624,43 | 180,85 |
| 2019/06/08 | CH2205 | Male | Three y/o | Control | Control | Feed Day | No | 07:20 | 07:00 - 07:59 | Morning | 38,5 | 108 | 446,8  | 446,8 | 19,66 | 599,39 | 208,54 |
| 2019/06/08 | CH2206 | Male | Three y/o | Control | Control | Feed Day | No | 07:20 | 07:00 - 07:59 | Morning | 38,0 | 120 | 130,2  | 130,2 | 19,15 | 606,78 | 165,06 |
| 2019/06/08 | CH2205 | Male | Three y/o | Control | Control | Feed Day | No | 07:25 | 07:00 - 07:59 | Morning | 38,8 | 78  | 127,8  | 127,8 | 19,97 | 575,38 | 164,41 |
| 2019/06/08 | CH2206 | Male | Three y/o | Control | Control | Feed Day | No | 07:25 | 07:00 - 07:59 | Morning | 38,0 |     | 89,0   | 89,0  | 19,15 |        | 151,78 |
| 2019/06/08 | CH2205 | Male | Three y/o | Control | Control | Feed Day | No | 07:30 | 07:00 - 07:59 | Morning | 38,7 | 162 | 407,0  | 407,0 | 19,87 | 626,88 | 205,23 |
| 2019/06/08 | CH2206 | Male | Three y/o | Control | Control | Feed Day | No | 07:30 | 07:00 - 07:59 | Morning | 38,1 | 125 | 271,0  | 271,0 | 19,26 | 609,60 | 190,83 |
| 2019/06/08 | CH2205 | Male | Three y/o | Control | Control | Feed Day | No | 07:35 | 07:00 - 07:59 | Morning | 38,7 | 53  | 303,6  | 303,6 | 19,87 | 544,43 | 194,84 |
| 2019/06/08 | CH2206 | Male | Three y/o | Control | Control | Feed Day | No | 07:35 | 07:00 - 07:59 | Morning | 38,1 |     | 33,6   | 33,6  | 19,26 |        | 118,09 |
| 2019/06/08 | CH2205 | Male | Three y/o | Control | Control | Feed Day | No | 07:40 | 07:00 - 07:59 | Morning | 38,5 |     | 269,0  | 269,0 | 19,66 |        | 190,57 |
| 2019/06/08 | CH2206 | Male | Three y/o | Control | Control | Feed Day | No | 07:40 | 07:00 - 07:59 | Morning | 38,1 | 141 | 128,4  | 128,4 | 19,26 | 617,75 | 164,57 |
| 2019/06/08 | CH2205 | Male | Three y/o | Control | Control | Feed Day | No | 07:45 | 07:00 - 07:59 | Morning | 38,5 |     | 83,0   | 83,0  | 19,66 |        | 149,36 |
| 2019/06/08 | CH2206 | Male | Three y/o | Control | Control | Feed Day | No | 07:45 | 07:00 - 07:59 | Morning | 38,1 | 134 | 54,4   | 54,4  | 19,26 | 614,33 | 134,70 |
| 2019/06/08 | CH2205 | Male | Three y/o | Control | Control | Feed Day | No | 07:50 | 07:00 - 07:59 | Morning | 38,3 | 160 | 417,8  | 417,8 | 19,46 | 626,07 | 206,16 |



|            |        |      |           |         |         |          |     |       |               |              |      |     |       |       |       |        |        |
|------------|--------|------|-----------|---------|---------|----------|-----|-------|---------------|--------------|------|-----|-------|-------|-------|--------|--------|
| 2019/06/08 | CH2206 | Male | Three y/o | Control | Control | Feed Day | No  | 07:50 | 07:00 - 07:59 | Morning      | 38,0 | 125 | 387,6 | 387,6 | 19,15 | 609,60 | 203,50 |
| 2019/06/08 | CH2205 | Male | Three y/o | Control | Control | Feed Day | No  | 07:55 | 07:00 - 07:59 | Morning      | 38,4 | 111 | 163,8 | 163,8 | 19,56 | 601,33 | 173,10 |
| 2019/06/08 | CH2206 | Male | Three y/o | Control | Control | Feed Day | No  | 07:55 | 07:00 - 07:59 | Morning      | 38,0 |     | 193,6 | 193,6 | 19,15 |        | 178,97 |
| 2019/06/08 | CH2205 | Male | Three y/o | Control | Control | Feed Day | No  | 08:00 | 08:00 - 08:59 | Late Morning | 38,2 | 119 | 89,4  | 89,4  | 19,36 | 606,20 | 151,94 |
| 2019/06/08 | CH2206 | Male | Three y/o | Control | Control | Feed Day | No  | 08:00 | 08:00 - 08:59 | Late Morning | 37,9 | 137 | 143,4 | 143,4 | 19,05 | 615,83 | 168,44 |
| 2019/06/08 | CH2205 | Male | Three y/o | Control | Control | Feed Day | No  | 08:05 | 08:00 - 08:59 | Late Morning | 38,3 |     | 48,0  | 48,0  | 19,46 |        | 130,38 |
| 2019/06/08 | CH2206 | Male | Three y/o | Control | Control | Feed Day | No  | 08:05 | 08:00 - 08:59 | Late Morning | 37,9 |     | 67,4  | 67,4  | 19,05 |        | 142,12 |
| 2019/06/08 | CH2205 | Male | Three y/o | Control | Control | Feed Day | No  | 08:10 | 08:00 - 08:59 | Late Morning | 38,1 |     | 84,2  | 84,2  | 19,26 |        | 149,85 |
| 2019/06/08 | CH2206 | Male | Three y/o | Control | Control | Feed Day | No  | 08:10 | 08:00 - 08:59 | Late Morning | 38,0 | 132 | 259,0 | 259,0 | 19,15 | 613,32 | 189,23 |
| 2019/06/08 | CH2205 | Male | Three y/o | Control | Control | Feed Day | No  | 08:15 | 08:00 - 08:59 | Late Morning | 38,1 | 59  | 158,2 | 158,2 | 19,26 | 553,30 | 171,88 |
| 2019/06/08 | CH2206 | Male | Three y/o | Control | Control | Feed Day | No  | 08:15 | 08:00 - 08:59 | Late Morning | 38,0 |     | 87,6  | 87,6  | 19,15 |        | 151,23 |
| 2019/06/08 | CH2205 | Male | Three y/o | Control | Control | Feed Day | No  | 08:20 | 08:00 - 08:59 | Late Morning | 38,1 | 104 | 142,4 | 142,4 | 19,26 | 596,69 | 168,20 |
| 2019/06/08 | CH2206 | Male | Three y/o | Control | Control | Feed Day | No  | 08:20 | 08:00 - 08:59 | Late Morning | 37,9 | 143 | 162,6 | 162,6 | 19,05 | 618,69 | 172,85 |
| 2019/06/08 | CH2205 | Male | Three y/o | Control | Control | Feed Day | No  | 08:25 | 08:00 - 08:59 | Late Morning | 38,1 | 86  | 49,8  | 49,8  | 19,26 | 582,77 | 131,65 |
| 2019/06/08 | CH2206 | Male | Three y/o | Control | Control | Feed Day | No  | 08:25 | 08:00 - 08:59 | Late Morning | 37,9 | 143 | 67,4  | 67,4  | 19,05 | 618,69 | 142,12 |
| 2019/06/08 | CH2205 | Male | Three y/o | Control | Control | Feed Day | No  | 08:30 | 08:00 - 08:59 | Late Morning | 38,1 | 162 | 320,0 | 320,0 | 19,26 | 626,88 | 196,70 |
| 2019/06/08 | CH2206 | Male | Three y/o | Control | Control | Feed Day | No  | 08:30 | 08:00 - 08:59 | Late Morning | 37,9 | 111 | 157,4 | 157,4 | 19,05 | 601,33 | 171,71 |
| 2019/06/08 | CH2205 | Male | Three y/o | Control | Control | Feed Day | No  | 08:35 | 08:00 - 08:59 | Late Morning | 38,0 | 126 | 158,4 | 158,4 | 19,15 | 610,14 | 171,93 |
| 2019/06/08 | CH2206 | Male | Three y/o | Control | Control | Feed Day | No  | 08:35 | 08:00 - 08:59 | Late Morning | 37,9 | 120 | 121,0 | 121,0 | 19,05 | 606,78 | 162,50 |
| 2019/06/08 | CH2205 | Male | Three y/o | Control | Control | Feed Day | No  | 08:40 | 08:00 - 08:59 | Late Morning | 38,0 | 115 | 118,8 | 118,8 | 19,15 | 603,82 | 161,86 |
| 2019/06/08 | CH2206 | Male | Three y/o | Control | Control | Feed Day | No  | 08:40 | 08:00 - 08:59 | Late Morning | 37,9 | 121 | 48,2  | 48,2  | 19,05 | 607,35 | 130,52 |
| 2019/06/08 | CH2205 | Male | Three y/o | Control | Control | Feed Day | No  | 08:45 | 08:00 - 08:59 | Late Morning | 38,0 | 152 | 12,6  | 12,6  | 19,15 | 622,73 | 84,59  |
| 2019/06/08 | CH2206 | Male | Three y/o | Control | Control | Feed Day | No  | 08:45 | 08:00 - 08:59 | Late Morning | 37,9 | 132 | 62,0  | 62,0  | 19,05 | 613,32 | 139,23 |
| 2019/06/08 | CH2205 | Male | Three y/o | Control | Control | Feed Day | No  | 08:50 | 08:00 - 08:59 | Late Morning | 37,9 | 64  | 22,4  | 22,4  | 19,05 | 559,88 | 104,19 |
| 2019/06/08 | CH2206 | Male | Three y/o | Control | Control | Feed Day | No  | 08:50 | 08:00 - 08:59 | Late Morning | 37,8 |     | 41,2  | 41,2  | 18,95 |        | 125,11 |
| 2019/06/08 | CH2205 | Male | Three y/o | Control | Control | Feed Day | No  | 08:55 | 08:00 - 08:59 | Late Morning | 37,7 | 74  | 30,4  | 30,4  | 18,85 | 571,33 | 114,65 |
| 2019/06/08 | CH2206 | Male | Three y/o | Control | Control | Feed Day | No  | 08:55 | 08:00 - 08:59 | Late Morning | 37,7 | 65  | 35,2  | 35,2  | 18,85 | 561,12 | 119,69 |
| 2019/06/08 | CH2205 | Male | Three y/o | Control | Control | Feed Day | No  | 09:00 | 09:00 - 09:59 | Late Morning | 37,6 |     | 23,6  | 23,6  | 18,75 |        | 105,97 |
| 2019/06/08 | CH2206 | Male | Three y/o | Control | Control | Feed Day | No  | 09:00 | 09:00 - 09:59 | Late Morning | 37,8 |     | 145,0 | 145,0 | 18,95 |        | 168,83 |
| 2019/06/08 | CH2205 | Male | Three y/o | Control | Control | Feed Day | No  | 09:05 | 09:00 - 09:59 | Late Morning | 37,6 |     | 28,4  | 28,4  | 18,75 |        | 112,31 |
| 2019/06/08 | CH2206 | Male | Three y/o | Control | Control | Feed Day | No  | 09:05 | 09:00 - 09:59 | Late Morning | 37,8 | 194 | 18,6  | 18,6  | 18,95 | 638,30 | 97,84  |
| 2019/06/08 | CH2205 | Male | Three y/o | Control | Control | Feed Day | No  | 09:10 | 09:00 - 09:59 | Late Morning | 37,6 | 90  | 18,6  | 18,6  | 18,75 | 586,16 | 97,84  |
| 2019/06/08 | CH2206 | Male | Three y/o | Control | Control | Feed Day | No  | 09:10 | 09:00 - 09:59 | Late Morning | 37,8 | 106 | 20,4  | 20,4  | 18,95 | 598,06 | 100,99 |
| 2019/06/08 | CH2205 | Male | Three y/o | Control | Control | Feed Day | No  | 09:15 | 09:00 - 09:59 | Late Morning | 37,5 | 99  | 17,6  | 17,6  | 18,65 | 593,14 | 95,95  |
| 2019/06/08 | CH2206 | Male | Three y/o | Control | Control | Feed Day | No  | 09:15 | 09:00 - 09:59 | Late Morning | 37,7 | 95  | 24,6  | 24,6  | 18,85 | 590,14 | 107,39 |
| 2019/06/08 | CH2205 | Male | Three y/o | Control | Control | Feed Day | No  | 09:20 | 09:00 - 09:59 | Late Morning | 37,6 | 90  | 48,8  | 48,8  | 18,75 | 586,16 | 130,95 |
| 2019/06/08 | CH2206 | Male | Three y/o | Control | Control | Feed Day | No  | 09:20 | 09:00 - 09:59 | Late Morning | 37,7 | 81  | 92,0  | 92,0  | 18,85 | 578,26 | 152,94 |
| 2019/06/08 | CH2205 | Male | Three y/o | Control | Control | Feed Day | No  | 09:25 | 09:00 - 09:59 | Late Morning | 37,6 | 46  | 16,6  | 16,6  | 18,75 | 532,38 | 93,96  |
| 2019/06/08 | CH2206 | Male | Three y/o | Control | Control | Feed Day | No  | 09:25 | 09:00 - 09:59 | Late Morning | 37,5 |     | 46,2  | 46,2  | 18,65 |        | 129,06 |
| 2019/06/08 | CH2205 | Male | Three y/o | Control | Control | Feed Day | No  | 09:30 | 09:00 - 09:59 | Late Morning | 37,6 | 113 | 27,4  | 27,4  | 18,75 | 602,58 | 111,09 |
| 2019/06/08 | CH2206 | Male | Three y/o | Control | Control | Feed Day | No  | 09:30 | 09:00 - 09:59 | Late Morning | 37,4 | 105 | 139,4 | 139,4 | 18,55 | 597,38 | 167,45 |
| 2019/06/08 | CH2205 | Male | Three y/o | Control | Control | Feed Day | No  | 09:35 | 09:00 - 09:59 | Late Morning | 37,6 |     | 120,2 | 120,2 | 18,75 |        | 162,27 |
| 2019/06/08 | CH2206 | Male | Three y/o | Control | Control | Feed Day | No  | 09:35 | 09:00 - 09:59 | Late Morning | 37,4 |     | 130,2 | 130,2 | 18,55 |        | 165,06 |
| 2019/06/08 | CH2205 | Male | Three y/o | Control | Control | Feed Day | No  | 09:40 | 09:00 - 09:59 | Late Morning | 37,9 |     | 41,2  | 41,2  | 19,05 |        | 125,11 |
| 2019/06/08 | CH2206 | Male | Three y/o | Control | Control | Feed Day | No  | 09:40 | 09:00 - 09:59 | Late Morning | 37,5 | 118 | 228,8 | 228,8 | 18,65 | 605,61 | 184,86 |
| 2019/06/08 | CH2205 | Male | Three y/o | Control | Control | Feed Day | No  | 09:45 | 09:00 - 09:59 | Late Morning | 37,7 | 73  | 16,6  | 16,6  | 18,85 | 570,27 | 93,96  |
| 2019/06/08 | CH2206 | Male | Three y/o | Control | Control | Feed Day | No  | 09:45 | 09:00 - 09:59 | Late Morning | 37,7 | 143 | 61,0  | 61,0  | 18,85 | 618,69 | 138,67 |
| 2019/06/08 | CH2205 | Male | Three y/o | Control | Control | Feed Day | No  | 09:50 | 09:00 - 09:59 | Late Morning | 37,7 | 54  | 8,0   | 8,0   | 18,85 | 545,99 | 69,22  |
| 2019/06/08 | CH2206 | Male | Three y/o | Control | Control | Feed Day | No  | 09:50 | 09:00 - 09:59 | Late Morning | 37,5 | 162 | 547,0 | 547,0 | 18,65 | 626,88 | 215,75 |
| 2019/06/08 | CH2205 | Male | Three y/o | Control | Control | Feed Day | No  | 09:55 | 09:00 - 09:59 | Late Morning | 37,7 | 74  | 11,4  | 11,4  | 18,85 | 571,33 | 81,19  |
| 2019/06/08 | CH2206 | Male | Three y/o | Control | Control | Feed Day | No  | 09:55 | 09:00 - 09:59 | Late Morning | 37,5 |     | 32,0  | 32,0  | 18,65 |        | 116,41 |
| 2019/06/08 | CH2205 | Male | Three y/o | Control | Control | Feed Day | No  | 10:00 | 10:00 - 10:59 | Late Morning | 37,6 | 62  | 13,0  | 13,0  | 18,75 | 557,33 | 85,65  |
| 2019/06/08 | CH2206 | Male | Three y/o | Control | Control | Feed Day | No  | 10:00 | 10:00 - 10:59 | Late Morning | 37,7 | 177 | 27,8  | 27,8  | 18,85 | 632,55 | 111,58 |
| 2019/06/08 | CH2205 | Male | Three y/o | Control | Control | Feed Day | No  | 10:05 | 10:00 - 10:59 | Late Morning | 37,6 | 125 | 10,8  | 10,8  | 18,75 | 609,60 | 79,36  |
| 2019/06/08 | CH2206 | Male | Three y/o | Control | Control | Feed Day | No  | 10:05 | 10:00 - 10:59 | Late Morning | 37,5 | 112 | 122,2 | 122,2 | 18,65 | 601,96 | 162,84 |
| 2019/06/08 | CH2205 | Male | Three y/o | Control | Control | Feed Day | No  | 10:10 | 10:00 - 10:59 | Late Morning | 37,6 | 77  | 18,6  | 18,6  | 18,75 | 574,39 | 97,84  |
| 2019/06/08 | CH2206 | Male | Three y/o | Control | Control | Feed Day | No  | 10:10 | 10:00 - 10:59 | Late Morning | 37,8 | 95  | 31,6  | 31,6  | 18,95 | 590,14 | 115,98 |
| 2019/06/08 | CH2205 | Male | Three y/o | Control | Control | Feed Day | No  | 10:15 | 10:00 - 10:59 | Late Morning | 37,6 | 81  | 80,2  | 80,2  | 18,75 | 578,26 | 148,16 |
| 2019/06/08 | CH2206 | Male | Three y/o | Control | Control | Feed Day | No  | 10:15 | 10:00 - 10:59 | Late Morning | 37,8 | 74  | 9,6   | 9,6   | 18,95 | 571,33 | 75,37  |
| 2019/06/08 | CH2205 | Male | Three y/o | Control | Control | Feed Day | No  | 10:20 | 10:00 - 10:59 | Late Morning | 37,6 | 115 | 11,2  | 11,2  | 18,75 | 603,82 | 80,59  |
| 2019/06/08 | CH2206 | Male | Three y/o | Control | Control | Feed Day | No  | 10:20 | 10:00 - 10:59 | Late Morning | 37,7 | 70  | 13,6  | 13,6  | 18,85 | 566,99 | 87,18  |
| 2019/06/08 | CH2205 | Male | Three y/o | Control | Control | Feed Day | No  | 10:25 | 10:00 - 10:59 | Late Morning | 37,6 | 81  | 8,6   | 8,6   | 18,75 | 578,26 | 71,66  |
| 2019/06/08 | CH2206 | Male | Three y/o | Control | Control | Feed Day | No  | 10:25 | 10:00 - 10:59 | Late Morning | 37,7 | 80  | 19,8  | 19,8  | 18,85 | 577,31 | 99,97  |
| 2019/06/08 | CH2205 | Male | Three y/o | Control | Control | Feed Day | Yes | 10:30 | 10:00 - 10:59 | Late Morning | 37,5 | 57  | 14,0  | 14,0  | 18,65 | 550,47 | 88,17  |
| 2019/06/08 | CH2206 | Male | Three y/o | Control | Control | Feed Day | Yes | 10:30 | 10:00 - 10:59 | Late Morning | 37,5 | 81  | 14,6  | 14,6  | 18,65 | 578,26 | 89,59  |
| 2019/06/08 | CH2205 | Male | Three y/o | Control | Control | Feed Day | Yes | 10:35 | 10:00 - 10:59 | Late Morning | 37,5 | 45  | 15,6  | 15,6  | 18,65 | 530,47 | 91,85  |
| 2019/06/08 | CH2206 | Male | Three y/o | Control | Control | Feed Day | Yes | 10:35 | 10:00 - 10:59 | Late Morning | 37,5 | 84  | 7,6   | 7,6   | 18,65 | 581,01 | 67,49  |
| 2019/06/08 | CH2205 | Male | Three y/o | Control | Control | Feed Day | Yes | 10:40 | 10:00 - 10:59 | Late Morning | 37,5 | 47  | 12,8  | 12,8  | 18,65 | 534,23 | 85,12  |
| 2019/06/08 | CH2206 | Male | Three y/o | Control | Control | Feed Day | Yes | 10:40 | 10:00 - 10:59 | Late Morning | 37,7 | 77  | 9,4   | 9,4   | 18,85 | 574,39 | 74,66  |
| 2019/06/08 | CH2205 | Male | Three y/o | Control | Control | Feed Day | Yes | 10:45 | 10:00 - 10:59 | Late Morning | 37,5 | 78  | 16,8  | 16,8  | 18,65 | 575,38 | 94,37  |



|            |        |      |           |         |         |          |     |       |               |              |      |     |       |       |       |        |        |
|------------|--------|------|-----------|---------|---------|----------|-----|-------|---------------|--------------|------|-----|-------|-------|-------|--------|--------|
| 2019/06/08 | CH2206 | Male | Three y/o | Control | Control | Feed Day | Yes | 10:45 | 10:00 - 10:59 | Late Morning | 37,7 | 107 | 35,2  | 35,2  | 18,85 | 598,73 | 119,69 |
| 2019/06/08 | CH2205 | Male | Three y/o | Control | Control | Feed Day | Yes | 10:50 | 10:00 - 10:59 | Late Morning | 37,5 | 101 | 76,4  | 76,4  | 18,65 | 594,59 | 146,48 |
| 2019/06/08 | CH2206 | Male | Three y/o | Control | Control | Feed Day | Yes | 10:50 | 10:00 - 10:59 | Late Morning | 37,8 | 131 | 48,2  | 48,2  | 18,95 | 612,80 | 130,52 |
| 2019/06/08 | CH2205 | Male | Three y/o | Control | Control | Feed Day | Yes | 10:55 | 10:00 - 10:59 | Late Morning | 37,3 | 180 | 71,6  | 71,6  | 18,46 | 633,61 | 144,22 |
| 2019/06/08 | CH2206 | Male | Three y/o | Control | Control | Feed Day | Yes | 10:55 | 10:00 - 10:59 | Late Morning | 37,8 | 134 | 28,8  | 28,8  | 18,95 | 614,33 | 112,79 |
| 2019/06/08 | CH2205 | Male | Three y/o | Control | Control | Feed Day | Yes | 11:00 | 11:00 - 11:59 | Late Morning | 37,3 | 89  | 79,8  | 79,8  | 18,46 | 585,33 | 147,99 |
| 2019/06/08 | CH2206 | Male | Three y/o | Control | Control | Feed Day | Yes | 11:00 | 11:00 - 11:59 | Late Morning | 37,8 | 119 | 176,0 | 176,0 | 18,95 | 606,20 | 175,63 |
| 2019/06/08 | CH2205 | Male | Three y/o | Control | Control | Feed Day | Yes | 11:05 | 11:00 - 11:59 | Late Morning | 37,4 | 117 | 19,4  | 19,4  | 18,55 | 605,02 | 99,28  |
| 2019/06/08 | CH2206 | Male | Three y/o | Control | Control | Feed Day | Yes | 11:05 | 11:00 - 11:59 | Late Morning | 37,9 | 109 | 119,4 | 119,4 | 19,05 | 600,04 | 162,03 |
| 2019/06/08 | CH2205 | Male | Three y/o | Control | Control | Feed Day | Yes | 11:10 | 11:00 - 11:59 | Late Morning | 37,5 |     | 43,0  | 43,0  | 18,65 |        | 126,58 |
| 2019/06/08 | CH2206 | Male | Three y/o | Control | Control | Feed Day | Yes | 11:10 | 11:00 - 11:59 | Late Morning | 37,9 | 129 | 91,6  | 91,6  | 19,05 | 611,75 | 152,79 |
| 2019/06/08 | CH2205 | Male | Three y/o | Control | Control | Feed Day | Yes | 11:15 | 11:00 - 11:59 | Late Morning | 37,6 | 74  | 48,4  | 48,4  | 18,75 | 571,33 | 130,66 |
| 2019/06/08 | CH2206 | Male | Three y/o | Control | Control | Feed Day | Yes | 11:15 | 11:00 - 11:59 | Late Morning | 37,8 | 82  | 32,0  | 32,0  | 18,95 | 579,19 | 116,41 |
| 2019/06/08 | CH2205 | Male | Three y/o | Control | Control | Feed Day | Yes | 11:20 | 11:00 - 11:59 | Late Morning | 37,6 | 50  | 7,6   | 7,6   | 18,75 | 539,52 | 67,49  |
| 2019/06/08 | CH2206 | Male | Three y/o | Control | Control | Feed Day | Yes | 11:20 | 11:00 - 11:59 | Late Morning | 37,8 | 88  | 44,0  | 44,0  | 18,95 | 584,49 | 127,37 |
| 2019/06/08 | CH2205 | Male | Three y/o | Control | Control | Feed Day | Yes | 11:25 | 11:00 - 11:59 | Late Morning | 37,6 | 74  | 24,6  | 24,6  | 18,75 | 571,33 | 107,39 |
| 2019/06/08 | CH2206 | Male | Three y/o | Control | Control | Feed Day | Yes | 11:25 | 11:00 - 11:59 | Late Morning | 37,8 | 67  | 47,4  | 47,4  | 18,95 | 563,53 | 129,94 |
| 2019/06/08 | CH2205 | Male | Three y/o | Control | Control | Feed Day | No  | 11:30 | 11:00 - 11:59 | Late Morning | 37,6 | 63  | 4,0   | 4,0   | 18,75 | 558,62 | 45,94  |
| 2019/06/08 | CH2206 | Male | Three y/o | Control | Control | Feed Day | No  | 11:30 | 11:00 - 11:59 | Late Morning | 37,8 | 52  | 51,0  | 51,0  | 18,95 | 542,83 | 132,47 |
| 2019/06/08 | CH2205 | Male | Three y/o | Control | Control | Feed Day | No  | 11:35 | 11:00 - 11:59 | Late Morning | 37,7 | 67  | 3,2   | 3,2   | 18,85 | 563,53 | 38,49  |
| 2019/06/08 | CH2206 | Male | Three y/o | Control | Control | Feed Day | No  | 11:35 | 11:00 - 11:59 | Late Morning | 37,8 | 71  | 53,8  | 53,8  | 18,95 | 568,10 | 134,32 |
| 2019/06/08 | CH2205 | Male | Three y/o | Control | Control | Feed Day | No  | 11:40 | 11:00 - 11:59 | Late Morning | 37,7 | 69  | 14,6  | 14,6  | 18,85 | 565,86 | 89,59  |
| 2019/06/08 | CH2206 | Male | Three y/o | Control | Control | Feed Day | No  | 11:40 | 11:00 - 11:59 | Late Morning | 37,8 | 46  | 47,0  | 47,0  | 18,95 | 532,38 | 129,65 |
| 2019/06/08 | CH2205 | Male | Three y/o | Control | Control | Feed Day | No  | 11:45 | 11:00 - 11:59 | Late Morning | 37,9 | 88  | 91,6  | 91,6  | 19,05 | 584,49 | 152,79 |
| 2019/06/08 | CH2206 | Male | Three y/o | Control | Control | Feed Day | No  | 11:45 | 11:00 - 11:59 | Late Morning | 37,8 | 125 | 213,0 | 213,0 | 18,95 | 609,60 | 182,34 |
| 2019/06/08 | CH2205 | Male | Three y/o | Control | Control | Feed Day | No  | 11:50 | 11:00 - 11:59 | Late Morning | 38,0 | 103 | 31,2  | 31,2  | 19,15 | 596,00 | 115,54 |
| 2019/06/08 | CH2206 | Male | Three y/o | Control | Control | Feed Day | No  | 11:50 | 11:00 - 11:59 | Late Morning | 37,9 | 100 | 14,0  | 14,0  | 19,05 | 593,87 | 88,17  |
| 2019/06/08 | CH2205 | Male | Three y/o | Control | Control | Feed Day | No  | 11:55 | 11:00 - 11:59 | Late Morning | 37,7 | 96  | 55,2  | 55,2  | 18,85 | 590,91 | 135,21 |
| 2019/06/08 | CH2206 | Male | Three y/o | Control | Control | Feed Day | No  | 11:55 | 11:00 - 11:59 | Late Morning | 37,7 | 105 | 120,0 | 120,0 | 18,85 | 597,38 | 162,21 |
| 2019/06/08 | CH2205 | Male | Three y/o | Control | Control | Feed Day | No  | 12:00 | 12:00 - 12:59 | Afternoon    | 37,8 |     | 55,0  | 55,0  | 18,95 |        | 135,08 |
| 2019/06/08 | CH2206 | Male | Three y/o | Control | Control | Feed Day | No  | 12:00 | 12:00 - 12:59 | Afternoon    | 37,7 |     | 51,0  | 51,0  | 18,85 |        | 132,47 |
| 2019/06/08 | CH2205 | Male | Three y/o | Control | Control | Feed Day | No  | 12:05 | 12:00 - 12:59 | Afternoon    | 37,9 | 102 | 236,8 | 236,8 | 19,05 | 595,30 | 186,07 |
| 2019/06/08 | CH2206 | Male | Three y/o | Control | Control | Feed Day | No  | 12:05 | 12:00 - 12:59 | Afternoon    | 37,7 | 90  | 28,4  | 28,4  | 18,85 | 586,16 | 112,31 |
| 2019/06/08 | CH2205 | Male | Three y/o | Control | Control | Feed Day | No  | 12:10 | 12:00 - 12:59 | Afternoon    | 37,9 | 120 | 44,4  | 44,4  | 19,05 | 606,78 | 127,69 |
| 2019/06/08 | CH2206 | Male | Three y/o | Control | Control | Feed Day | No  | 12:10 | 12:00 - 12:59 | Afternoon    | 37,8 | 99  | 65,6  | 65,6  | 18,95 | 593,14 | 141,19 |
| 2019/06/08 | CH2205 | Male | Three y/o | Control | Control | Feed Day | No  | 12:15 | 12:00 - 12:59 | Afternoon    | 37,7 |     | 20,0  | 20,0  | 18,85 |        | 100,31 |
| 2019/06/08 | CH2206 | Male | Three y/o | Control | Control | Feed Day | No  | 12:15 | 12:00 - 12:59 | Afternoon    | 37,8 | 90  | 42,6  | 42,6  | 18,95 | 586,16 | 126,26 |
| 2019/06/08 | CH2205 | Male | Three y/o | Control | Control | Feed Day | No  | 12:20 | 12:00 - 12:59 | Afternoon    | 37,7 | 65  | 13,4  | 13,4  | 18,85 | 561,12 | 86,68  |
| 2019/06/08 | CH2206 | Male | Three y/o | Control | Control | Feed Day | No  | 12:20 | 12:00 - 12:59 | Afternoon    | 37,8 | 129 | 31,8  | 31,8  | 18,95 | 611,75 | 116,20 |
| 2019/06/08 | CH2205 | Male | Three y/o | Control | Control | Feed Day | No  | 12:25 | 12:00 - 12:59 | Afternoon    | 37,7 | 65  | 2,4   | 2,4   | 18,85 | 561,12 | 28,91  |
| 2019/06/08 | CH2206 | Male | Three y/o | Control | Control | Feed Day | No  | 12:25 | 12:00 - 12:59 | Afternoon    | 37,8 | 87  | 44,6  | 44,6  | 18,95 | 583,64 | 127,84 |
| 2019/06/08 | CH2205 | Male | Three y/o | Control | Control | Feed Day | No  | 12:30 | 12:00 - 12:59 | Afternoon    | 37,6 | 69  | 7,0   | 7,0   | 18,75 | 565,86 | 64,72  |
| 2019/06/08 | CH2206 | Male | Three y/o | Control | Control | Feed Day | No  | 12:30 | 12:00 - 12:59 | Afternoon    | 37,8 | 100 | 55,6  | 55,6  | 18,95 | 593,87 | 135,46 |
| 2019/06/08 | CH2205 | Male | Three y/o | Control | Control | Feed Day | No  | 12:35 | 12:00 - 12:59 | Afternoon    | 37,7 | 58  | 13,0  | 13,0  | 18,85 | 551,90 | 85,65  |
| 2019/06/08 | CH2206 | Male | Three y/o | Control | Control | Feed Day | No  | 12:35 | 12:00 - 12:59 | Afternoon    | 37,8 | 92  | 60,2  | 60,2  | 18,95 | 587,78 | 138,21 |
| 2019/06/08 | CH2205 | Male | Three y/o | Control | Control | Feed Day | No  | 12:40 | 12:00 - 12:59 | Afternoon    | 37,7 | 77  | 21,0  | 21,0  | 18,85 | 574,39 | 101,98 |
| 2019/06/08 | CH2206 | Male | Three y/o | Control | Control | Feed Day | No  | 12:40 | 12:00 - 12:59 | Afternoon    | 37,8 | 85  | 55,4  | 55,4  | 18,95 | 581,90 | 135,33 |
| 2019/06/08 | CH2205 | Male | Three y/o | Control | Control | Feed Day | No  | 12:45 | 12:00 - 12:59 | Afternoon    | 37,7 | 113 | 18,4  | 18,4  | 18,85 | 602,58 | 97,47  |
| 2019/06/08 | CH2206 | Male | Three y/o | Control | Control | Feed Day | No  | 12:45 | 12:00 - 12:59 | Afternoon    | 37,8 | 98  | 47,4  | 47,4  | 18,95 | 592,41 | 129,94 |
| 2019/06/08 | CH2205 | Male | Three y/o | Control | Control | Feed Day | No  | 12:50 | 12:00 - 12:59 | Afternoon    | 37,6 | 82  | 10,4  | 10,4  | 18,75 | 579,19 | 78,08  |
| 2019/06/08 | CH2206 | Male | Three y/o | Control | Control | Feed Day | No  | 12:50 | 12:00 - 12:59 | Afternoon    | 37,8 | 94  | 52,4  | 52,4  | 18,95 | 589,37 | 133,41 |
| 2019/06/08 | CH2205 | Male | Three y/o | Control | Control | Feed Day | No  | 12:55 | 12:00 - 12:59 | Afternoon    | 37,6 | 77  | 6,6   | 6,6   | 18,75 | 574,39 | 62,73  |
| 2019/06/08 | CH2206 | Male | Three y/o | Control | Control | Feed Day | No  | 12:55 | 12:00 - 12:59 | Afternoon    | 37,8 | 92  | 46,6  | 46,6  | 18,95 | 587,78 | 129,35 |
| 2019/06/08 | CH2205 | Male | Three y/o | Control | Control | Feed Day | No  | 13:00 | 13:00 - 13:59 | Afternoon    | 37,7 | 76  | 5,6   | 5,6   | 18,85 | 573,39 | 57,21  |
| 2019/06/08 | CH2206 | Male | Three y/o | Control | Control | Feed Day | No  | 13:00 | 13:00 - 13:59 | Afternoon    | 37,9 | 81  | 50,6  | 50,6  | 19,05 | 578,26 | 132,20 |
| 2019/06/08 | CH2205 | Male | Three y/o | Control | Control | Feed Day | No  | 13:05 | 13:00 - 13:59 | Afternoon    | 37,7 | 73  | 2,2   | 2,2   | 18,85 | 570,27 | 26,02  |
| 2019/06/08 | CH2206 | Male | Three y/o | Control | Control | Feed Day | No  | 13:05 | 13:00 - 13:59 | Afternoon    | 37,8 | 70  | 44,8  | 44,8  | 18,95 | 566,99 | 127,99 |
| 2019/06/08 | CH2205 | Male | Three y/o | Control | Control | Feed Day | No  | 13:10 | 13:00 - 13:59 | Afternoon    | 37,7 | 80  | 19,2  | 19,2  | 18,85 | 577,31 | 98,92  |
| 2019/06/08 | CH2206 | Male | Three y/o | Control | Control | Feed Day | No  | 13:10 | 13:00 - 13:59 | Afternoon    | 37,8 | 89  | 50,4  | 50,4  | 18,95 | 585,33 | 132,06 |
| 2019/06/08 | CH2205 | Male | Three y/o | Control | Control | Feed Day | No  | 13:15 | 13:00 - 13:59 | Afternoon    | 37,7 | 67  | 21,8  | 21,8  | 18,85 | 563,53 | 103,26 |
| 2019/06/08 | CH2206 | Male | Three y/o | Control | Control | Feed Day | No  | 13:15 | 13:00 - 13:59 | Afternoon    | 37,8 |     | 37,4  | 37,4  | 18,95 |        | 121,77 |
| 2019/06/08 | CH2205 | Male | Three y/o | Control | Control | Feed Day | No  | 13:20 | 13:00 - 13:59 | Afternoon    | 37,7 | 73  | 17,0  | 17,0  | 18,85 | 570,27 | 94,77  |
| 2019/06/08 | CH2206 | Male | Three y/o | Control | Control | Feed Day | No  | 13:20 | 13:00 - 13:59 | Afternoon    | 37,8 | 98  | 42,4  | 42,4  | 18,95 | 592    |        |



|            |        |      |           |         |         |          |    |       |               |           |      |     |       |       |       |        |        |
|------------|--------|------|-----------|---------|---------|----------|----|-------|---------------|-----------|------|-----|-------|-------|-------|--------|--------|
| 2019/06/08 | CH2206 | Male | Three y/o | Control | Control | Feed Day | No | 13:40 | 13:00 - 13:59 | Afternoon | 37,8 | 92  | 48,8  | 48,8  | 18,95 | 587,78 | 130,95 |
| 2019/06/08 | CH2205 | Male | Three y/o | Control | Control | Feed Day | No | 13:45 | 13:00 - 13:59 | Afternoon | 37,9 | 70  | 18,4  | 18,4  | 19,05 | 566,99 | 97,47  |
| 2019/06/08 | CH2206 | Male | Three y/o | Control | Control | Feed Day | No | 13:45 | 13:00 - 13:59 | Afternoon | 37,8 | 75  | 50,6  | 50,6  | 18,95 | 572,36 | 132,20 |
| 2019/06/08 | CH2205 | Male | Three y/o | Control | Control | Feed Day | No | 13:50 | 13:00 - 13:59 | Afternoon | 38,0 | 54  | 10,2  | 10,2  | 19,15 | 545,99 | 77,43  |
| 2019/06/08 | CH2206 | Male | Three y/o | Control | Control | Feed Day | No | 13:50 | 13:00 - 13:59 | Afternoon | 37,8 | 91  | 48,0  | 48,0  | 18,95 | 586,98 | 130,38 |
| 2019/06/08 | CH2205 | Male | Three y/o | Control | Control | Feed Day | No | 13:55 | 13:00 - 13:59 | Afternoon | 38,0 | 56  | 9,2   | 9,2   | 19,15 | 549,01 | 73,94  |
| 2019/06/08 | CH2206 | Male | Three y/o | Control | Control | Feed Day | No | 13:55 | 13:00 - 13:59 | Afternoon | 37,8 | 72  | 50,6  | 50,6  | 18,95 | 569,20 | 132,20 |
| 2019/06/08 | CH2205 | Male | Three y/o | Control | Control | Feed Day | No | 14:00 | 14:00 - 14:59 | Afternoon | 38,0 | 70  | 14,0  | 14,0  | 19,15 | 566,99 | 88,17  |
| 2019/06/08 | CH2206 | Male | Three y/o | Control | Control | Feed Day | No | 14:00 | 14:00 - 14:59 | Afternoon | 37,8 | 93  | 52,2  | 52,2  | 18,95 | 588,58 | 133,27 |
| 2019/06/08 | CH2205 | Male | Three y/o | Control | Control | Feed Day | No | 14:05 | 14:00 - 14:59 | Afternoon | 38,0 | 82  | 6,2   | 6,2   | 19,15 | 579,19 | 60,63  |
| 2019/06/08 | CH2206 | Male | Three y/o | Control | Control | Feed Day | No | 14:05 | 14:00 - 14:59 | Afternoon | 37,8 | 103 | 54,6  | 54,6  | 18,95 | 596,00 | 134,83 |
| 2019/06/08 | CH2205 | Male | Three y/o | Control | Control | Feed Day | No | 14:10 | 14:00 - 14:59 | Afternoon | 38,0 | 77  | 5,4   | 5,4   | 19,15 | 574,39 | 55,99  |
| 2019/06/08 | CH2206 | Male | Three y/o | Control | Control | Feed Day | No | 14:10 | 14:00 - 14:59 | Afternoon | 37,8 | 97  | 53,2  | 53,2  | 18,95 | 591,66 | 133,93 |
| 2019/06/08 | CH2205 | Male | Three y/o | Control | Control | Feed Day | No | 14:15 | 14:00 - 14:59 | Afternoon | 38,1 | 62  | 4,2   | 4,2   | 19,26 | 557,33 | 47,57  |
| 2019/06/08 | CH2206 | Male | Three y/o | Control | Control | Feed Day | No | 14:15 | 14:00 - 14:59 | Afternoon | 37,9 | 103 | 50,2  | 50,2  | 19,05 | 596,00 | 131,92 |
| 2019/06/08 | CH2205 | Male | Three y/o | Control | Control | Feed Day | No | 14:20 | 14:00 - 14:59 | Afternoon | 38,1 |     | 9,8   | 9,8   | 19,26 |        | 76,07  |
| 2019/06/08 | CH2206 | Male | Three y/o | Control | Control | Feed Day | No | 14:20 | 14:00 - 14:59 | Afternoon | 37,9 | 95  | 55,4  | 55,4  | 19,05 | 590,14 | 135,33 |
| 2019/06/08 | CH2205 | Male | Three y/o | Control | Control | Feed Day | No | 14:25 | 14:00 - 14:59 | Afternoon | 38,1 | 74  | 16,8  | 16,8  | 19,26 | 571,33 | 94,37  |
| 2019/06/08 | CH2206 | Male | Three y/o | Control | Control | Feed Day | No | 14:25 | 14:00 - 14:59 | Afternoon | 37,9 | 71  | 49,6  | 49,6  | 19,05 | 568,10 | 131,51 |
| 2019/06/08 | CH2205 | Male | Three y/o | Control | Control | Feed Day | No | 14:30 | 14:00 - 14:59 | Afternoon | 38,1 | 62  | 13,4  | 13,4  | 19,26 | 557,33 | 86,68  |
| 2019/06/08 | CH2206 | Male | Three y/o | Control | Control | Feed Day | No | 14:30 | 14:00 - 14:59 | Afternoon | 37,9 | 92  | 30,8  | 30,8  | 19,05 | 587,78 | 115,10 |
| 2019/06/08 | CH2205 | Male | Three y/o | Control | Control | Feed Day | No | 14:35 | 14:00 - 14:59 | Afternoon | 38,1 | 68  | 13,2  | 13,2  | 19,26 | 564,71 | 86,17  |
| 2019/06/08 | CH2206 | Male | Three y/o | Control | Control | Feed Day | No | 14:35 | 14:00 - 14:59 | Afternoon | 37,9 | 105 | 15,6  | 15,6  | 19,05 | 597,38 | 91,85  |
| 2019/06/08 | CH2205 | Male | Three y/o | Control | Control | Feed Day | No | 14:40 | 14:00 - 14:59 | Afternoon | 38,1 | 73  | 27,2  | 27,2  | 19,26 | 570,27 | 110,83 |
| 2019/06/08 | CH2206 | Male | Three y/o | Control | Control | Feed Day | No | 14:40 | 14:00 - 14:59 | Afternoon | 37,9 | 94  | 12,4  | 12,4  | 19,05 | 589,37 | 84,04  |
| 2019/06/08 | CH2205 | Male | Three y/o | Control | Control | Feed Day | No | 14:45 | 14:00 - 14:59 | Afternoon | 38,1 | 75  | 26,0  | 26,0  | 19,26 | 572,36 | 109,29 |
| 2019/06/08 | CH2206 | Male | Three y/o | Control | Control | Feed Day | No | 14:45 | 14:00 - 14:59 | Afternoon | 37,9 | 78  | 18,2  | 18,2  | 19,05 | 575,38 | 97,10  |
| 2019/06/08 | CH2205 | Male | Three y/o | Control | Control | Feed Day | No | 14:50 | 14:00 - 14:59 | Afternoon | 38,1 | 59  | 42,8  | 42,8  | 19,26 | 553,30 | 126,42 |
| 2019/06/08 | CH2206 | Male | Three y/o | Control | Control | Feed Day | No | 14:50 | 14:00 - 14:59 | Afternoon | 37,9 | 96  | 18,0  | 18,0  | 19,05 | 590,91 | 96,72  |
| 2019/06/08 | CH2205 | Male | Three y/o | Control | Control | Feed Day | No | 14:55 | 14:00 - 14:59 | Afternoon | 38,2 | 84  | 20,8  | 20,8  | 19,36 | 581,01 | 101,65 |
| 2019/06/08 | CH2206 | Male | Three y/o | Control | Control | Feed Day | No | 14:55 | 14:00 - 14:59 | Afternoon | 37,9 | 90  | 19,2  | 19,2  | 19,05 | 586,16 | 98,92  |
| 2019/06/08 | CH2205 | Male | Three y/o | Control | Control | Feed Day | No | 15:00 | 15:00 - 15:59 | Afternoon | 38,2 | 82  | 74,6  | 74,6  | 19,36 | 579,19 | 145,65 |
| 2019/06/08 | CH2206 | Male | Three y/o | Control | Control | Feed Day | No | 15:00 | 15:00 - 15:59 | Afternoon | 37,9 | 88  | 32,4  | 32,4  | 19,05 | 584,49 | 116,84 |
| 2019/06/08 | CH2205 | Male | Three y/o | Control | Control | Feed Day | No | 15:05 | 15:00 - 15:59 | Afternoon | 38,1 | 140 | 21,8  | 21,8  | 19,26 | 617,28 | 103,26 |
| 2019/06/08 | CH2206 | Male | Three y/o | Control | Control | Feed Day | No | 15:05 | 15:00 - 15:59 | Afternoon | 38,0 | 92  | 41,8  | 41,8  | 19,15 | 587,78 | 125,60 |
| 2019/06/08 | CH2205 | Male | Three y/o | Control | Control | Feed Day | No | 15:10 | 15:00 - 15:59 | Afternoon | 38,1 |     | 71,2  | 71,2  | 19,26 |        | 144,03 |
| 2019/06/08 | CH2206 | Male | Three y/o | Control | Control | Feed Day | No | 15:10 | 15:00 - 15:59 | Afternoon | 38,0 | 103 | 22,2  | 22,2  | 19,15 | 596,00 | 103,88 |
| 2019/06/08 | CH2205 | Male | Three y/o | Control | Control | Feed Day | No | 15:15 | 15:00 - 15:59 | Afternoon | 38,1 | 194 | 71,6  | 71,6  | 19,26 | 638,30 | 144,22 |
| 2019/06/08 | CH2206 | Male | Three y/o | Control | Control | Feed Day | No | 15:15 | 15:00 - 15:59 | Afternoon | 37,9 | 110 | 44,8  | 44,8  | 19,05 | 600,69 | 127,99 |
| 2019/06/08 | CH2205 | Male | Three y/o | Control | Control | Feed Day | No | 15:20 | 15:00 - 15:59 | Afternoon | 38,1 | 106 | 47,6  | 47,6  | 19,26 | 598,06 | 130,09 |
| 2019/06/08 | CH2206 | Male | Three y/o | Control | Control | Feed Day | No | 15:20 | 15:00 - 15:59 | Afternoon | 37,9 | 110 | 145,4 | 145,4 | 19,05 | 600,69 | 168,93 |
| 2019/06/08 | CH2205 | Male | Three y/o | Control | Control | Feed Day | No | 15:25 | 15:00 - 15:59 | Afternoon | 38,1 | 167 | 104,0 | 104,0 | 19,26 | 628,84 | 157,21 |
| 2019/06/08 | CH2206 | Male | Three y/o | Control | Control | Feed Day | No | 15:25 | 15:00 - 15:59 | Afternoon | 37,9 | 117 | 131,4 | 131,4 | 19,05 | 605,02 | 165,38 |
| 2019/06/08 | CH2205 | Male | Three y/o | Control | Control | Feed Day | No | 15:30 | 15:00 - 15:59 | Afternoon | 38,1 |     | 24,8  | 24,8  | 19,26 |        | 107,67 |
| 2019/06/08 | CH2206 | Male | Three y/o | Control | Control | Feed Day | No | 15:30 | 15:00 - 15:59 | Afternoon | 37,9 |     | 18,6  | 18,6  | 19,05 |        | 97,84  |
| 2019/06/08 | CH2205 | Male | Three y/o | Control | Control | Feed Day | No | 15:35 | 15:00 - 15:59 | Afternoon | 38,1 |     | 8,8   | 8,8   | 19,26 |        | 72,43  |
| 2019/06/08 | CH2206 | Male | Three y/o | Control | Control | Feed Day | No | 15:35 | 15:00 - 15:59 | Afternoon | 37,9 | 90  | 94,0  | 94,0  | 19,05 | 586,16 | 153,69 |
| 2019/06/08 | CH2205 | Male | Three y/o | Control | Control | Feed Day | No | 15:40 | 15:00 - 15:59 | Afternoon | 38,2 | 88  | 18,2  | 18,2  | 19,36 | 584,49 | 97,10  |
| 2019/06/08 | CH2206 | Male | Three y/o | Control | Control | Feed Day | No | 15:40 | 15:00 - 15:59 | Afternoon | 38,0 | 124 | 47,0  | 47,0  | 19,15 | 609,04 | 129,65 |
| 2019/06/08 | CH2205 | Male | Three y/o | Control | Control | Feed Day | No | 15:45 | 15:00 - 15:59 | Afternoon | 38,1 | 75  | 18,2  | 18,2  | 19,26 | 572,36 | 97,10  |
| 2019/06/08 | CH2206 | Male | Three y/o | Control | Control | Feed Day | No | 15:45 | 15:00 - 15:59 | Afternoon | 38,0 | 180 | 47,0  | 47,0  | 19,15 | 633,61 | 129,65 |
| 2019/06/08 | CH2205 | Male | Three y/o | Control | Control | Feed Day | No | 15:50 | 15:00 - 15:59 | Afternoon | 38,2 | 88  | 16,0  | 16,0  | 19,36 | 584,49 | 92,71  |
| 2019/06/08 | CH2206 | Male | Three y/o | Control | Control | Feed Day | No | 15:50 | 15:00 - 15:59 | Afternoon | 38,0 | 92  | 63,8  | 63,8  | 19,15 | 587,78 | 140,22 |
| 2019/06/08 | CH2205 | Male | Three y/o | Control | Control | Feed Day | No | 15:55 | 15:00 - 15:59 | Afternoon | 38,2 | 82  | 15,4  | 15,4  | 19,36 | 579,19 | 91,41  |
| 2019/06/08 | CH2206 | Male | Three y/o | Control | Control | Feed Day | No | 15:55 | 15:00 - 15:59 | Afternoon | 38,1 |     | 282,0 | 282,0 | 19,26 |        | 192,23 |
| 2019/06/08 | CH2205 | Male | Three y/o | Control | Control | Feed Day | No | 16:00 | 16:00 - 16:59 | Evening   | 38,2 | 109 | 89,2  | 89,2  | 19,36 | 600,04 | 151,86 |
| 2019/06/08 | CH2206 | Male | Three y/o | Control | Control | Feed Day | No | 16:00 | 16:00 - 16:59 | Evening   | 38,1 | 82  | 50,2  | 50,2  | 19,26 | 579,19 | 131,92 |
| 2019/06/08 | CH2205 | Male | Three y/o | Control | Control | Feed Day | No | 16:05 | 16:00 - 16:59 | Evening   | 38,2 | 76  | 34,2  | 34,2  | 19,36 | 573,39 | 118,70 |
| 2019/06/08 | CH2206 | Male | Three y/o | Control | Control | Feed Day | No | 16:05 | 16:00 - 16:59 | Evening   | 38,1 | 102 | 153,2 | 153,2 | 19,26 | 595,30 | 170,76 |
| 2019/06/08 | CH2205 | Male | Three y/o | Control | Control | Feed Day | No | 16:10 | 16:00 - 16:59 | Evening   | 38,3 | 78  | 20,4  | 20,4  | 19,46 | 575,38 | 100,99 |
| 2019/06/08 | CH2206 | Male | Three y/o | Control | Control | Feed Day | No | 16:10 | 16:00 - 16:59 | Evening   | 38,2 | 140 | 46,2  | 46,2  | 19,36 | 617,28 | 129,06 |
| 2019/06/08 | CH2205 | Male | Three y/o | Control | Control | Feed Day | No | 16:15 | 16:00 - 16:59 | Evening   | 38,3 | 85  | 31,4  | 31,4  | 19,46 | 581,90 | 115,76 |
| 2019/06/08 | CH2206 | Male | Three y/o | Control | Control | Feed Day | No | 16:15 | 16:00 - 16:59 | Evening   | 38,2 | 92  | 22,0  | 22,0  | 19,36 | 587,78 | 103,57 |
| 2019/06/08 | CH2205 | Male | Three y/o | Control | Control | Feed Day | No | 16:20 | 16:00 - 16:59 | Evening   | 38,3 | 82  | 23,2  | 23,2  | 19,46 | 579,19 | 105,39 |
| 2019/06/08 | CH2206 | Male | Three y/o | Control | Control | Feed Day | No | 16:20 | 16:00 - 16:59 | Evening   | 38,2 | 92  | 33,2  | 33,2  | 19,36 | 587,78 | 117,68 |
| 2019/06/08 | CH2205 | Male | Three y/o | Control | Control | Feed Day | No | 16:25 | 16:00 - 16:59 | Evening   | 38,3 | 77  | 30,0  | 30,0  | 19,46 | 574,39 | 114,20 |
| 2019/06/08 | CH2206 | Male | Three y/o | Control | Control | Feed Day | No | 16:25 | 16:00 - 16:59 | Evening   | 38,2 | 86  | 30,2  | 30,2  | 19,36 | 582,77 | 114,42 |
| 2019/06/08 | CH2205 | Male | Three y/o | Control | Control | Feed Day | No | 16:30 | 16:00 - 16:59 | Evening   | 38,3 | 76  | 26,2  | 26,2  | 19,46 | 573,39 | 109,55 |
| 2019/06/08 | CH2206 | Male | Three y/o | Control | Control | Feed Day | No | 16:30 | 16:00 - 16:59 | Evening   | 38,2 | 82  | 19,2  | 19,2  | 19,36 | 579,19 | 98,92  |
| 2019/06/08 | CH2205 | Male | Three y/o | Control | Control | Feed Day | No | 16:35 | 16:00 - 16:59 | Evening   | 38,3 | 65  | 28,0  | 28,0  | 19,46 | 561,12 | 111,83 |



|            |        |      |           |         |         |          |    |       |               |         |      |     |       |       |       |        |        |
|------------|--------|------|-----------|---------|---------|----------|----|-------|---------------|---------|------|-----|-------|-------|-------|--------|--------|
| 2019/06/08 | CH2206 | Male | Three y/o | Control | Control | Feed Day | No | 16:35 | 16:00 - 16:59 | Evening | 38,1 | 86  | 15,6  | 15,6  | 19,26 | 582,77 | 91,85  |
| 2019/06/08 | CH2205 | Male | Three y/o | Control | Control | Feed Day | No | 16:40 | 16:00 - 16:59 | Evening | 38,3 | 60  | 20,6  | 20,6  | 19,46 | 554,67 | 101,32 |
| 2019/06/08 | CH2206 | Male | Three y/o | Control | Control | Feed Day | No | 16:40 | 16:00 - 16:59 | Evening | 38,0 | 85  | 43,2  | 43,2  | 19,15 | 581,90 | 126,74 |
| 2019/06/08 | CH2205 | Male | Three y/o | Control | Control | Feed Day | No | 16:45 | 16:00 - 16:59 | Evening | 38,3 |     | 16,8  | 16,8  | 19,46 |        | 94,37  |
| 2019/06/08 | CH2206 | Male | Three y/o | Control | Control | Feed Day | No | 16:45 | 16:00 - 16:59 | Evening | 38,0 |     | 35,6  | 35,6  | 19,15 |        | 120,08 |
| 2019/06/08 | CH2205 | Male | Three y/o | Control | Control | Feed Day | No | 16:50 | 16:00 - 16:59 | Evening | 38,3 |     | 18,0  | 18,0  | 19,46 |        | 96,72  |
| 2019/06/08 | CH2206 | Male | Three y/o | Control | Control | Feed Day | No | 16:50 | 16:00 - 16:59 | Evening | 38,1 | 87  | 12,2  | 12,2  | 19,26 | 583,64 | 83,49  |
| 2019/06/08 | CH2205 | Male | Three y/o | Control | Control | Feed Day | No | 16:55 | 16:00 - 16:59 | Evening | 38,2 | 87  | 13,0  | 13,0  | 19,36 | 583,64 | 85,65  |
| 2019/06/08 | CH2206 | Male | Three y/o | Control | Control | Feed Day | No | 16:55 | 16:00 - 16:59 | Evening | 38,1 | 87  | 7,4   | 7,4   | 19,26 | 583,64 | 66,59  |
| 2019/06/08 | CH2205 | Male | Three y/o | Control | Control | Feed Day | No | 17:00 | 17:00 - 17:59 | Evening | 38,2 |     | 10,4  | 10,4  | 19,36 |        | 78,08  |
| 2019/06/08 | CH2206 | Male | Three y/o | Control | Control | Feed Day | No | 17:00 | 17:00 - 17:59 | Evening | 38,0 | 90  | 17,2  | 17,2  | 19,15 | 586,16 | 95,17  |
| 2019/06/08 | CH2205 | Male | Three y/o | Control | Control | Feed Day | No | 17:05 | 17:00 - 17:59 | Evening | 38,2 |     | 11,6  | 11,6  | 19,36 |        | 81,78  |
| 2019/06/08 | CH2206 | Male | Three y/o | Control | Control | Feed Day | No | 17:05 | 17:00 - 17:59 | Evening | 38,0 | 86  | 18,2  | 18,2  | 19,15 | 582,77 | 97,10  |
| 2019/06/08 | CH2205 | Male | Three y/o | Control | Control | Feed Day | No | 17:10 | 17:00 - 17:59 | Evening | 38,1 | 65  | 18,2  | 18,2  | 19,26 | 561,12 | 97,10  |
| 2019/06/08 | CH2206 | Male | Three y/o | Control | Control | Feed Day | No | 17:10 | 17:00 - 17:59 | Evening | 38,0 | 77  | 20,2  | 20,2  | 19,15 | 574,39 | 100,65 |
| 2019/06/08 | CH2205 | Male | Three y/o | Control | Control | Feed Day | No | 17:15 | 17:00 - 17:59 | Evening | 38,2 | 113 | 162,0 | 162,0 | 19,36 | 602,58 | 172,72 |
| 2019/06/08 | CH2206 | Male | Three y/o | Control | Control | Feed Day | No | 17:15 | 17:00 - 17:59 | Evening | 37,9 | 98  | 36,6  | 36,6  | 19,05 | 592,41 | 121,03 |
| 2019/06/08 | CH2205 | Male | Three y/o | Control | Control | Feed Day | No | 17:20 | 17:00 - 17:59 | Evening | 38,1 | 115 | 71,4  | 71,4  | 19,26 | 603,82 | 144,12 |
| 2019/06/08 | CH2206 | Male | Three y/o | Control | Control | Feed Day | No | 17:20 | 17:00 - 17:59 | Evening | 37,9 | 104 | 17,2  | 17,2  | 19,05 | 596,69 | 95,17  |
| 2019/06/08 | CH2205 | Male | Three y/o | Control | Control | Feed Day | No | 17:25 | 17:00 - 17:59 | Evening | 38,1 | 106 | 20,6  | 20,6  | 19,26 | 598,06 | 101,32 |
| 2019/06/08 | CH2206 | Male | Three y/o | Control | Control | Feed Day | No | 17:25 | 17:00 - 17:59 | Evening | 37,9 | 123 | 31,2  | 31,2  | 19,05 | 608,49 | 115,54 |
| 2019/06/08 | CH2205 | Male | Three y/o | Control | Control | Feed Day | No | 17:30 | 17:00 - 17:59 | Evening | 38,0 | 92  | 9,2   | 9,2   | 19,15 | 587,78 | 73,94  |
| 2019/06/08 | CH2206 | Male | Three y/o | Control | Control | Feed Day | No | 17:30 | 17:00 - 17:59 | Evening | 38,0 | 79  | 38,2  | 38,2  | 19,15 | 576,36 | 122,50 |
| 2019/06/08 | CH2205 | Male | Three y/o | Control | Control | Feed Day | No | 17:35 | 17:00 - 17:59 | Evening | 37,9 | 126 | 16,0  | 16,0  | 19,05 | 610,14 | 92,71  |
| 2019/06/08 | CH2206 | Male | Three y/o | Control | Control | Feed Day | No | 17:35 | 17:00 - 17:59 | Evening | 38,0 | 85  | 40,4  | 40,4  | 19,15 | 581,90 | 124,43 |
| 2019/06/08 | CH2205 | Male | Three y/o | Control | Control | Feed Day | No | 17:40 | 17:00 - 17:59 | Evening | 38,0 | 107 | 15,4  | 15,4  | 19,15 | 598,73 | 91,41  |
| 2019/06/08 | CH2206 | Male | Three y/o | Control | Control | Feed Day | No | 17:40 | 17:00 - 17:59 | Evening | 38,0 | 45  | 41,2  | 41,2  | 19,15 | 530,47 | 125,11 |
| 2019/06/08 | CH2205 | Male | Three y/o | Control | Control | Feed Day | No | 17:45 | 17:00 - 17:59 | Evening | 38,0 | 90  | 14,8  | 14,8  | 19,15 | 586,16 | 90,05  |
| 2019/06/08 | CH2206 | Male | Three y/o | Control | Control | Feed Day | No | 17:45 | 17:00 - 17:59 | Evening | 38,0 | 87  | 32,0  | 32,0  | 19,15 | 583,64 | 116,41 |
| 2019/06/08 | CH2205 | Male | Three y/o | Control | Control | Feed Day | No | 17:50 | 17:00 - 17:59 | Evening | 38,0 | 102 | 20,4  | 20,4  | 19,15 | 595,30 | 100,99 |
| 2019/06/08 | CH2206 | Male | Three y/o | Control | Control | Feed Day | No | 17:50 | 17:00 - 17:59 | Evening | 37,9 | 86  | 22,0  | 22,0  | 19,05 | 582,77 | 103,57 |
| 2019/06/08 | CH2205 | Male | Three y/o | Control | Control | Feed Day | No | 17:55 | 17:00 - 17:59 | Evening | 38,0 | 86  | 5,4   | 5,4   | 19,15 | 582,77 | 55,99  |
| 2019/06/08 | CH2206 | Male | Three y/o | Control | Control | Feed Day | No | 17:55 | 17:00 - 17:59 | Evening | 37,9 | 82  | 27,8  | 27,8  | 19,05 | 579,19 | 111,58 |
| 2019/06/08 | CH2205 | Male | Three y/o | Control | Control | Feed Day | No | 18:00 | 18:00 - 18:59 | Evening | 38,0 | 65  | 7,2   | 7,2   | 19,15 | 561,12 | 65,66  |
| 2019/06/08 | CH2206 | Male | Three y/o | Control | Control | Feed Day | No | 18:00 | 18:00 - 18:59 | Evening | 37,9 | 85  | 18,2  | 18,2  | 19,05 | 581,90 | 97,10  |
| 2019/06/08 | CH2205 | Male | Three y/o | Control | Control | Feed Day | No | 18:05 | 18:00 - 18:59 | Evening | 38,1 | 60  | 3,6   | 3,6   | 19,26 | 554,67 | 42,42  |
| 2019/06/08 | CH2206 | Male | Three y/o | Control | Control | Feed Day | No | 18:05 | 18:00 - 18:59 | Evening | 37,9 | 86  | 31,8  | 31,8  | 19,05 | 582,77 | 116,20 |
| 2019/06/08 | CH2205 | Male | Three y/o | Control | Control | Feed Day | No | 18:10 | 18:00 - 18:59 | Evening | 38,1 | 92  | 6,2   | 6,2   | 19,26 | 587,78 | 60,63  |
| 2019/06/08 | CH2206 | Male | Three y/o | Control | Control | Feed Day | No | 18:10 | 18:00 - 18:59 | Evening | 38,0 | 92  | 48,2  | 48,2  | 19,15 | 587,78 | 130,52 |
| 2019/06/08 | CH2205 | Male | Three y/o | Control | Control | Feed Day | No | 18:15 | 18:00 - 18:59 | Evening | 38,1 | 89  | 2,8   | 2,8   | 19,26 | 585,33 | 34,04  |
| 2019/06/08 | CH2206 | Male | Three y/o | Control | Control | Feed Day | No | 18:15 | 18:00 - 18:59 | Evening | 38,0 | 109 | 56,6  | 56,6  | 19,15 | 600,04 | 136,07 |
| 2019/06/08 | CH2205 | Male | Three y/o | Control | Control | Feed Day | No | 18:20 | 18:00 - 18:59 | Evening | 38,2 | 80  | 3,4   | 3,4   | 19,36 | 577,31 | 40,51  |
| 2019/06/08 | CH2206 | Male | Three y/o | Control | Control | Feed Day | No | 18:20 | 18:00 - 18:59 | Evening | 38,0 | 96  | 53,2  | 53,2  | 19,15 | 590,91 | 133,93 |
| 2019/06/08 | CH2205 | Male | Three y/o | Control | Control | Feed Day | No | 18:25 | 18:00 - 18:59 | Evening | 38,2 | 84  | 3,8   | 3,8   | 19,36 | 581,01 | 44,22  |
| 2019/06/08 | CH2206 | Male | Three y/o | Control | Control | Feed Day | No | 18:25 | 18:00 - 18:59 | Evening | 38,0 | 97  | 57,2  | 57,2  | 19,15 | 591,66 | 136,44 |
| 2019/06/08 | CH2205 | Male | Three y/o | Control | Control | Feed Day | No | 18:30 | 18:00 - 18:59 | Evening | 38,2 | 84  | 4,0   | 4,0   | 19,36 | 581,01 | 45,94  |
| 2019/06/08 | CH2206 | Male | Three y/o | Control | Control | Feed Day | No | 18:30 | 18:00 - 18:59 | Evening | 38,0 | 88  | 52,2  | 52,2  | 19,15 | 584,49 | 133,27 |
| 2019/06/08 | CH2205 | Male | Three y/o | Control | Control | Feed Day | No | 18:35 | 18:00 - 18:59 | Evening | 38,2 | 78  | 4,6   | 4,6   | 19,36 | 575,38 | 50,61  |
| 2019/06/08 | CH2206 | Male | Three y/o | Control | Control | Feed Day | No | 18:35 | 18:00 - 18:59 | Evening | 38,0 | 169 | 58,8  | 58,8  | 19,15 | 629,60 | 137,39 |
| 2019/06/08 | CH2205 | Male | Three y/o | Control | Control | Feed Day | No | 18:40 | 18:00 - 18:59 | Evening | 38,2 | 93  | 10,8  | 10,8  | 19,36 | 588,58 | 79,36  |
| 2019/06/08 | CH2206 | Male | Three y/o | Control | Control | Feed Day | No | 18:40 | 18:00 - 18:59 | Evening | 38,0 | 76  | 57,8  | 57,8  | 19,15 | 573,39 | 136,80 |
| 2019/06/08 | CH2205 | Male | Three y/o | Control | Control | Feed Day | No | 18:45 | 18:00 - 18:59 | Evening | 38,2 | 51  | 10,8  | 10,8  | 19,36 | 541,20 | 79,36  |
| 2019/06/08 | CH2206 | Male | Three y/o | Control | Control | Feed Day | No | 18:45 | 18:00 - 18:59 | Evening | 37,9 | 47  | 50,2  | 50,2  | 19,05 | 534,23 | 131,92 |
| 2019/06/08 | CH2205 | Male | Three y/o | Control | Control | Feed Day | No | 18:50 | 18:00 - 18:59 | Evening | 38,2 | 52  | 13,4  | 13,4  | 19,36 | 542,83 | 86,68  |
| 2019/06/08 | CH2206 | Male | Three y/o | Control | Control | Feed Day | No | 18:50 | 18:00 - 18:59 | Evening | 38,0 | 98  | 50,8  | 50,8  | 19,15 | 592,41 | 132,33 |
| 2019/06/08 | CH2205 | Male | Three y/o | Control | Control | Feed Day | No | 18:55 | 18:00 - 18:59 | Evening | 38,2 | 76  | 8,0   | 8,0   | 19,36 | 573,39 | 69,22  |
| 2019/06/08 | CH2206 | Male | Three y/o | Control | Control | Feed Day | No | 18:55 | 18:00 - 18:59 | Evening | 37,9 | 67  | 48,8  | 48,8  | 19,05 | 563,53 | 130,95 |
| 2019/06/08 | CH2205 | Male | Three y/o | Control | Control | Feed Day | No | 19:00 | 19:00 - 19:59 | Evening | 38,2 | 86  | 11,6  | 11,6  | 19,36 | 582,77 | 81,78  |
| 2019/06/08 | CH2206 | Male | Three y/o | Control | Control | Feed Day | No | 19:00 | 19:00 - 19:59 | Evening | 37,9 | 60  | 46,6  | 46,6  | 19,05 | 554,67 | 129,35 |
| 2019/06/08 | CH2205 | Male | Three y/o | Control | Control | Feed Day | No | 19:05 | 19:00 - 19:59 | Evening | 38,2 | 85  | 15,0  | 15,0  | 19,36 | 581,90 | 90,51  |
| 2019/06/08 | CH2206 | Male | Three y/o | Control | Control | Feed Day | No | 19:05 | 19:00 - 19:59 | Evening | 37,9 | 86  | 52,2  | 52,2  | 19,05 | 582,77 | 133,27 |
| 2019/06/08 | CH2205 | Male | Three y/o | Control | Control | Feed Day | No | 19:10 | 19:00 - 19:59 | Evening | 38,2 | 60  | 9,4   | 9,4   | 19,36 | 554,67 | 74,66  |
| 2019/06/08 | CH2206 | Male | Three y/o | Control | Control | Feed Day | No | 19:10 | 19:00 - 19:59 | Evening | 37,9 | 72  | 50,2  | 50,2  | 19,05 | 569,20 | 131,92 |
| 2019/06/08 | CH2205 | Male | Three y/o | Control | Control | Feed Day | No | 19:15 | 19:00 - 19:59 | Evening | 38,2 | 94  | 12,4  | 12,4  | 19,36 | 589,37 | 84,04  |
| 2019/06/08 | CH2206 | Male | Three y/o | Control | Control | Feed Day | No | 19:15 | 19:00 - 19:59 | Evening | 37,9 | 92  | 51,4  | 51,4  | 19,05 | 587,78 | 132,74 |
| 2019/06/08 | CH2205 | Male | Three y/o | Control | Control | Feed Day | No | 19:20 | 19:00 - 19:59 | Evening | 38,2 | 67  | 7,8   | 7,8   | 19,36 | 563,53 | 68,36  |
| 2019/06/08 | CH2206 | Male | Three y/o | Control | Control | Feed Day | No | 19:20 | 19:00 - 19:59 | Evening | 37,8 | 89  | 52,8  | 52,8  | 18,95 | 585,33 | 133,67 |
| 2019/06/08 | CH2205 | Male | Three y/o | Control | Control | Feed Day | No | 19:25 | 19:00 - 19:59 | Evening | 38,2 | 78  | 2,8   | 2,8   | 19,36 | 575,38 | 34,04  |
| 2019/06/08 | CH2206 | Male | Three y/o | Control | Control | Feed Day | No | 19:25 | 19:00 - 19:59 | Evening | 37,9 | 85  | 53,8  | 53,8  | 19,05 | 581,90 | 134,32 |
| 2019/06/08 | CH2205 | Male | Three y/o | Control | Control | Feed Day | No | 19:30 | 19:00 - 19:59 | Evening | 38,2 | 78  | 5,0   | 5,0   | 19,36 | 575,38 | 53,41  |



|            |        |      |           |         |         |          |    |       |               |         |      |     |      |      |       |        |        |
|------------|--------|------|-----------|---------|---------|----------|----|-------|---------------|---------|------|-----|------|------|-------|--------|--------|
| 2019/06/08 | CH2206 | Male | Three y/o | Control | Control | Feed Day | No | 19:30 | 19:00 - 19:59 | Evening | 37,8 | 50  | 48,4 | 48,4 | 18,95 | 539,52 | 130,66 |
| 2019/06/08 | CH2205 | Male | Three y/o | Control | Control | Feed Day | No | 19:35 | 19:00 - 19:59 | Evening | 38,2 |     | 9,0  | 9,0  | 19,36 |        | 73,19  |
| 2019/06/08 | CH2206 | Male | Three y/o | Control | Control | Feed Day | No | 19:35 | 19:00 - 19:59 | Evening | 37,8 |     | 57,4 | 57,4 | 18,95 | 570,27 | 136,56 |
| 2019/06/08 | CH2205 | Male | Three y/o | Control | Control | Feed Day | No | 19:40 | 19:00 - 19:59 | Evening | 38,2 | 91  | 8,8  | 8,8  | 19,36 | 586,98 | 72,43  |
| 2019/06/08 | CH2206 | Male | Three y/o | Control | Control | Feed Day | No | 19:40 | 19:00 - 19:59 | Evening | 37,8 | 55  | 52,2 | 52,2 | 18,95 | 547,52 | 133,27 |
| 2019/06/08 | CH2205 | Male | Three y/o | Control | Control | Feed Day | No | 19:45 | 19:00 - 19:59 | Evening | 38,2 | 83  | 10,4 | 10,4 | 19,36 | 580,11 | 78,08  |
| 2019/06/08 | CH2206 | Male | Three y/o | Control | Control | Feed Day | No | 19:45 | 19:00 - 19:59 | Evening | 37,8 | 77  | 50,6 | 50,6 | 18,95 | 574,39 | 132,20 |
| 2019/06/08 | CH2205 | Male | Three y/o | Control | Control | Feed Day | No | 19:50 | 19:00 - 19:59 | Evening | 38,2 | 98  | 6,8  | 6,8  | 19,36 | 592,41 | 63,74  |
| 2019/06/08 | CH2206 | Male | Three y/o | Control | Control | Feed Day | No | 19:50 | 19:00 - 19:59 | Evening | 37,7 | 70  | 51,4 | 51,4 | 18,85 | 566,99 | 132,74 |
| 2019/06/08 | CH2205 | Male | Three y/o | Control | Control | Feed Day | No | 19:55 | 19:00 - 19:59 | Evening | 38,2 | 93  | 8,4  | 8,4  | 19,36 | 588,58 | 70,86  |
| 2019/06/08 | CH2206 | Male | Three y/o | Control | Control | Feed Day | No | 19:55 | 19:00 - 19:59 | Evening | 37,7 | 90  | 48,2 | 48,2 | 18,85 | 586,16 | 130,52 |
| 2019/06/08 | CH2205 | Male | Three y/o | Control | Control | Feed Day | No | 20:00 | 20:00 - 20:59 | Night   | 38,2 | 77  | 9,2  | 9,2  | 19,36 | 574,39 | 73,94  |
| 2019/06/08 | CH2206 | Male | Three y/o | Control | Control | Feed Day | No | 20:00 | 20:00 - 20:59 | Night   | 37,7 | 82  | 42,8 | 42,8 | 18,85 | 579,19 | 126,42 |
| 2019/06/08 | CH2205 | Male | Three y/o | Control | Control | Feed Day | No | 20:05 | 20:00 - 20:59 | Night   | 38,2 | 112 | 6,0  | 6,0  | 19,36 | 601,96 | 59,53  |
| 2019/06/08 | CH2206 | Male | Three y/o | Control | Control | Feed Day | No | 20:05 | 20:00 - 20:59 | Night   | 37,5 | 47  | 49,2 | 49,2 | 18,65 | 534,23 | 131,23 |
| 2019/06/08 | CH2205 | Male | Three y/o | Control | Control | Feed Day | No | 20:10 | 20:00 - 20:59 | Night   | 38,2 | 113 | 22,6 | 22,6 | 19,36 | 602,58 | 104,49 |
| 2019/06/08 | CH2206 | Male | Three y/o | Control | Control | Feed Day | No | 20:10 | 20:00 - 20:59 | Night   | 37,5 | 98  | 45,2 | 45,2 | 18,65 | 592,41 | 128,30 |
| 2019/06/08 | CH2205 | Male | Three y/o | Control | Control | Feed Day | No | 20:15 | 20:00 - 20:59 | Night   | 38,2 | 54  | 16,8 | 16,8 | 19,36 | 545,99 | 94,37  |
| 2019/06/08 | CH2206 | Male | Three y/o | Control | Control | Feed Day | No | 20:15 | 20:00 - 20:59 | Night   | 37,5 | 86  | 43,2 | 43,2 | 18,65 | 582,77 | 126,74 |
| 2019/06/08 | CH2205 | Male | Three y/o | Control | Control | Feed Day | No | 20:20 | 20:00 - 20:59 | Night   | 38,2 | 64  | 17,0 | 17,0 | 19,36 | 559,88 | 94,77  |
| 2019/06/08 | CH2206 | Male | Three y/o | Control | Control | Feed Day | No | 20:20 | 20:00 - 20:59 | Night   | 37,4 | 75  | 42,2 | 42,2 | 18,55 | 572,36 | 125,93 |
| 2019/06/08 | CH2205 | Male | Three y/o | Control | Control | Feed Day | No | 20:25 | 20:00 - 20:59 | Night   | 38,2 | 81  | 15,4 | 15,4 | 19,36 | 578,26 | 91,41  |
| 2019/06/08 | CH2206 | Male | Three y/o | Control | Control | Feed Day | No | 20:25 | 20:00 - 20:59 | Night   | 37,4 | 45  | 61,6 | 61,6 | 18,55 | 530,47 | 139,00 |
| 2019/06/08 | CH2205 | Male | Three y/o | Control | Control | Feed Day | No | 20:30 | 20:00 - 20:59 | Night   | 38,2 | 81  | 20,4 | 20,4 | 19,36 | 578,26 | 100,99 |
| 2019/06/08 | CH2206 | Male | Three y/o | Control | Control | Feed Day | No | 20:30 | 20:00 - 20:59 | Night   | 37,3 | 92  | 50,0 | 50,0 | 18,46 | 587,78 | 131,79 |
| 2019/06/08 | CH2205 | Male | Three y/o | Control | Control | Feed Day | No | 20:35 | 20:00 - 20:59 | Night   | 38,2 | 98  | 15,0 | 15,0 | 19,36 | 592,41 | 90,51  |
| 2019/06/08 | CH2206 | Male | Three y/o | Control | Control | Feed Day | No | 20:35 | 20:00 - 20:59 | Night   | 37,3 | 81  | 49,2 | 49,2 | 18,46 | 578,26 | 131,23 |
| 2019/06/08 | CH2205 | Male | Three y/o | Control | Control | Feed Day | No | 20:40 | 20:00 - 20:59 | Night   | 38,2 | 80  | 19,8 | 19,8 | 19,36 | 577,31 | 99,97  |
| 2019/06/08 | CH2206 | Male | Three y/o | Control | Control | Feed Day | No | 20:40 | 20:00 - 20:59 | Night   | 37,3 | 80  | 45,0 | 45,0 | 18,46 | 577,31 | 128,15 |
| 2019/06/08 | CH2205 | Male | Three y/o | Control | Control | Feed Day | No | 20:45 | 20:00 - 20:59 | Night   | 38,2 | 74  | 13,8 | 13,8 | 19,36 | 571,33 | 87,68  |
| 2019/06/08 | CH2206 | Male | Three y/o | Control | Control | Feed Day | No | 20:45 | 20:00 - 20:59 | Night   | 37,4 | 79  | 41,6 | 41,6 | 18,55 | 576,36 | 125,44 |
| 2019/06/08 | CH2205 | Male | Three y/o | Control | Control | Feed Day | No | 20:50 | 20:00 - 20:59 | Night   | 38,2 | 94  | 18,0 | 18,0 | 19,36 | 589,37 | 96,72  |
| 2019/06/08 | CH2206 | Male | Three y/o | Control | Control | Feed Day | No | 20:50 | 20:00 - 20:59 | Night   | 37,4 | 59  | 46,2 | 46,2 | 18,55 | 553,30 | 129,06 |
| 2019/06/08 | CH2205 | Male | Three y/o | Control | Control | Feed Day | No | 20:55 | 20:00 - 20:59 | Night   | 38,2 | 94  | 19,8 | 19,8 | 19,36 | 589,37 | 99,97  |
| 2019/06/08 | CH2206 | Male | Three y/o | Control | Control | Feed Day | No | 20:55 | 20:00 - 20:59 | Night   | 37,5 | 103 | 41,2 | 41,2 | 18,65 | 596,00 | 125,11 |
| 2019/06/08 | CH2205 | Male | Three y/o | Control | Control | Feed Day | No | 21:00 | 21:00 - 21:59 | Night   | 38,2 | 53  | 18,8 | 18,8 | 19,36 | 544,43 | 98,20  |
| 2019/06/08 | CH2206 | Male | Three y/o | Control | Control | Feed Day | No | 21:00 | 21:00 - 21:59 | Night   | 37,5 | 90  | 43,4 | 43,4 | 18,65 | 586,16 | 126,90 |
| 2019/06/08 | CH2205 | Male | Three y/o | Control | Control | Feed Day | No | 21:05 | 21:00 - 21:59 | Night   | 38,2 | 80  | 15,0 | 15,0 | 19,36 | 577,31 | 90,51  |
| 2019/06/08 | CH2206 | Male | Three y/o | Control | Control | Feed Day | No | 21:05 | 21:00 - 21:59 | Night   | 37,5 | 56  | 47,2 | 47,2 | 18,65 | 549,01 | 129,80 |
| 2019/06/08 | CH2205 | Male | Three y/o | Control | Control | Feed Day | No | 21:10 | 21:00 - 21:59 | Night   | 38,1 | 76  | 16,0 | 16,0 | 19,26 | 573,39 | 92,71  |
| 2019/06/08 | CH2206 | Male | Three y/o | Control | Control | Feed Day | No | 21:10 | 21:00 - 21:59 | Night   | 37,5 | 86  | 45,8 | 45,8 | 18,65 | 582,77 | 128,76 |
| 2019/06/08 | CH2205 | Male | Three y/o | Control | Control | Feed Day | No | 21:15 | 21:00 - 21:59 | Night   | 38,1 | 77  | 15,6 | 15,6 | 19,26 | 574,39 | 91,85  |
| 2019/06/08 | CH2206 | Male | Three y/o | Control | Control | Feed Day | No | 21:15 | 21:00 - 21:59 | Night   | 37,5 | 77  | 44,6 | 44,6 | 18,65 | 574,39 | 127,84 |
| 2019/06/08 | CH2205 | Male | Three y/o | Control | Control | Feed Day | No | 21:20 | 21:00 - 21:59 | Night   | 38,1 | 76  | 16,2 | 16,2 | 19,26 | 573,39 | 93,13  |
| 2019/06/08 | CH2206 | Male | Three y/o | Control | Control | Feed Day | No | 21:20 | 21:00 - 21:59 | Night   | 37,5 | 81  | 42,4 | 42,4 | 18,65 | 578,26 | 126,10 |
| 2019/06/08 | CH2205 | Male | Three y/o | Control | Control | Feed Day | No | 21:25 | 21:00 - 21:59 | Night   | 38,1 | 88  | 16,0 | 16,0 | 19,26 | 584,49 | 92,71  |
| 2019/06/08 | CH2206 | Male | Three y/o | Control | Control | Feed Day | No | 21:25 | 21:00 - 21:59 | Night   | 37,6 | 47  | 48,2 | 48,2 | 18,75 | 534,23 | 130,52 |
| 2019/06/08 | CH2205 | Male | Three y/o | Control | Control | Feed Day | No | 21:30 | 21:00 - 21:59 | Night   | 38,1 | 51  | 18,6 | 18,6 | 19,26 | 541,20 | 97,84  |
| 2019/06/08 | CH2206 | Male | Three y/o | Control | Control | Feed Day | No | 21:30 | 21:00 - 21:59 | Night   | 37,7 | 73  | 48,0 | 48,0 | 18,85 | 570,27 | 130,38 |
| 2019/06/08 | CH2205 | Male | Three y/o | Control | Control | Feed Day | No | 21:35 | 21:00 - 21:59 | Night   | 38,1 | 93  | 18,2 | 18,2 | 19,26 | 588,58 | 97,10  |
| 2019/06/08 | CH2206 | Male | Three y/o | Control | Control | Feed Day | No | 21:35 | 21:00 - 21:59 | Night   | 37,5 | 70  | 47,8 | 47,8 | 18,65 | 566,99 | 130,23 |
| 2019/06/08 | CH2205 | Male | Three y/o | Control | Control | Feed Day | No | 21:40 | 21:00 - 21:59 | Night   | 38,1 | 80  | 17,6 | 17,6 | 19,26 | 577,31 | 95,95  |
| 2019/06/08 | CH2206 | Male | Three y/o | Control | Control | Feed Day | No | 21:40 | 21:00 - 21:59 | Night   | 37,5 | 42  | 54,6 | 54,6 | 18,65 | 524,42 | 134,83 |
| 2019/06/08 | CH2205 | Male | Three y/o | Control | Control | Feed Day | No | 21:45 | 21:00 - 21:59 | Night   | 38,1 | 78  | 12,0 | 12,0 | 19,26 | 575,38 | 82,93  |
| 2019/06/08 | CH2206 | Male | Three y/o | Control | Control | Feed Day | No | 21:45 | 21:00 - 21:59 | Night   | 37,5 | 63  | 44,2 | 44,2 | 18,65 | 558,62 | 127,53 |
| 2019/06/08 | CH2205 | Male | Three y/o | Control | Control | Feed Day | No | 21:50 | 21:00 - 21:59 | Night   | 38,1 | 80  | 14,8 | 14,8 | 19,26 | 577,31 | 90,05  |
| 2019/06/08 | CH2206 | Male | Three y/o | Control | Control | Feed Day | No | 21:50 | 21:00 - 21:59 | Night   | 37,6 | 86  | 49,8 | 49,8 | 18,75 | 582,77 | 131,65 |
| 2019/06/08 | CH2205 | Male | Three y/o | Control | Control | Feed Day | No | 21:55 | 21:00 - 21:59 | Night   | 38,1 |     | 14,4 | 14,4 | 19,26 |        | 89,12  |
| 2019/06/08 | CH2206 | Male | Three y/o | Control | Control | Feed Day | No | 21:55 | 21:00 - 21:59 | Night   | 37,6 | 82  | 47,2 | 47,2 | 18,75 | 579,19 | 129,80 |
| 2019/06/08 | CH2205 | Male | Three y/o | Control | Control | Feed Day | No | 22:00 | 22:00 - 22:59 | Night   | 38,1 | 83  | 17,6 | 17,6 | 19,26 | 580,11 | 95,95  |
| 2019/06/08 | CH2206 | Male | Three y/o | Control | Control | Feed Day | No | 22:00 | 22:00 - 22:59 | Night   | 37,7 | 46  | 39,6 | 39,6 | 18,85 | 532,38 | 123,74 |
| 2019/06/08 | CH2205 | Male | Three y/o | Control | Control | Feed Day | No | 22:05 | 22:00 - 22:59 | Night   | 38,0 | 90  | 15,6 | 15,6 | 19,15 | 586,16 | 91,85  |
| 2019/06/08 | CH2206 | Male | Three y/o | Control | Control | Feed Day | No | 22:05 | 22:00 - 22:59 | Night   | 37,7 | 70  | 44,2 | 44,2 | 18,85 | 566,99 | 127,53 |
| 2019/06/08 | CH2205 | Male | Three y/o | Control | Control | Feed Day | No | 22:10 | 22:00 - 22:59 | Night   | 38,0 | 59  | 17,6 | 17,6 | 19,15 | 553,30 | 95,95  |
| 2019/06/08 | CH2206 | Male | Three y/o | Control | Control | Feed Day | No | 22:10 | 22:00 - 22:59 | Night   | 37,7 | 72  | 46,2 | 46,2 | 18,85 | 569,20 | 129,06 |
| 2019/06/08 | CH2205 | Male | Three y/o | Control | Control | Feed Day | No | 22:15 | 22:00 - 22:59 | Night   | 38,0 | 70  | 17,8 | 17,8 | 19,15 | 566,99 | 96,34  |
| 2019/06/08 | CH2206 | Male | Three y/o | Control | Control | Feed Day | No | 22:15 | 22:00 - 22:59 | Night   | 37,7 | 88  | 49,4 | 49,4 | 18,85 | 584,49 | 131,37 |
| 2019/06/08 | CH2205 | Male | Three y/o | Control | Control | Feed Day | No | 22:20 | 22:00 - 22:59 | Night   | 38,0 | 93  | 14,8 | 14,8 | 19,15 | 588,58 | 90,05  |
| 2019/06/08 | CH2206 | Male | Three y/o | Control | Control | Feed Day | No | 22:20 | 22:00 - 22:59 | Night   | 37,7 | 74  | 48,0 | 48,0 | 18,85 | 571,33 | 130,38 |
| 2019/06/08 | CH2205 | Male | Three y/o | Control | Control | Feed Day | No | 22:25 | 22:00 - 22:59 | Night   | 38,0 | 82  | 18,4 | 18,4 | 19,15 | 579,19 | 97,47  |



|    |            |        |      |           |         |         |          |    |       |               |               |      |     |      |      |       |        |        |
|----|------------|--------|------|-----------|---------|---------|----------|----|-------|---------------|---------------|------|-----|------|------|-------|--------|--------|
|    | 2019/06/08 | CH2206 | Male | Three y/o | Control | Control | Feed Day | No | 22:25 | 22:00 - 22:59 | Night         | 37,7 | 84  | 55,8 | 55,8 | 18,85 | 581,01 | 135,58 |
|    | 2019/06/08 | CH2205 | Male | Three y/o | Control | Control | Feed Day | No | 22:30 | 22:00 - 22:59 | Night         | 38,0 | 60  | 19,2 | 19,2 | 19,15 | 554,67 | 98,92  |
|    | 2019/06/08 | CH2206 | Male | Three y/o | Control | Control | Feed Day | No | 22:30 | 22:00 - 22:59 | Night         | 37,5 | 91  | 60,6 | 60,6 | 18,65 | 586,98 | 138,44 |
|    | 2019/06/08 | CH2205 | Male | Three y/o | Control | Control | Feed Day | No | 22:35 | 22:00 - 22:59 | Night         | 38,0 | 74  | 13,8 | 13,8 | 19,15 | 571,33 | 87,68  |
|    | 2019/06/08 | CH2206 | Male | Three y/o | Control | Control | Feed Day | No | 22:35 | 22:00 - 22:59 | Night         | 37,5 | 86  | 58,2 | 58,2 | 18,65 | 582,77 | 137,04 |
|    | 2019/06/08 | CH2205 | Male | Three y/o | Control | Control | Feed Day | No | 22:40 | 22:00 - 22:59 | Night         | 38,0 | 71  | 17,6 | 17,6 | 19,15 | 568,10 | 95,95  |
|    | 2019/06/08 | CH2206 | Male | Three y/o | Control | Control | Feed Day | No | 22:40 | 22:00 - 22:59 | Night         | 37,5 | 93  | 62,6 | 62,6 | 18,65 | 588,58 | 139,56 |
|    | 2019/06/08 | CH2205 | Male | Three y/o | Control | Control | Feed Day | No | 22:45 | 22:00 - 22:59 | Night         | 38,0 | 73  | 16,6 | 16,6 | 19,15 | 570,27 | 93,96  |
|    | 2019/06/08 | CH2206 | Male | Three y/o | Control | Control | Feed Day | No | 22:45 | 22:00 - 22:59 | Night         | 37,7 | 100 | 66,8 | 66,8 | 18,85 | 593,87 | 141,81 |
|    | 2019/06/08 | CH2205 | Male | Three y/o | Control | Control | Feed Day | No | 22:50 | 22:00 - 22:59 | Night         | 37,9 | 45  | 14,0 | 14,0 | 19,05 | 530,47 | 88,17  |
|    | 2019/06/08 | CH2206 | Male | Three y/o | Control | Control | Feed Day | No | 22:50 | 22:00 - 22:59 | Night         | 37,7 | 59  | 25,2 | 25,2 | 18,85 | 553,30 | 108,22 |
|    | 2019/06/08 | CH2205 | Male | Three y/o | Control | Control | Feed Day | No | 22:55 | 22:00 - 22:59 | Night         | 38,0 | 79  | 17,8 | 17,8 | 19,15 | 576,36 | 96,34  |
|    | 2019/06/08 | CH2206 | Male | Three y/o | Control | Control | Feed Day | No | 22:55 | 22:00 - 22:59 | Night         | 37,8 | 114 | 27,8 | 27,8 | 18,95 | 603,20 | 111,58 |
|    | 2019/06/08 | CH2205 | Male | Three y/o | Control | Control | Feed Day | No | 23:00 | 23:00 - 23:59 | Night         | 38,0 | 78  | 20,8 | 20,8 | 19,15 | 575,38 | 101,65 |
|    | 2019/06/08 | CH2206 | Male | Three y/o | Control | Control | Feed Day | No | 23:00 | 23:00 - 23:59 | Night         | 37,7 | 103 | 31,4 | 31,4 | 18,85 | 596,00 | 115,76 |
|    | 2019/06/08 | CH2205 | Male | Three y/o | Control | Control | Feed Day | No | 23:05 | 23:00 - 23:59 | Night         | 38,0 | 95  | 13,0 | 13,0 | 19,15 | 590,14 | 85,65  |
|    | 2019/06/08 | CH2206 | Male | Three y/o | Control | Control | Feed Day | No | 23:05 | 23:00 - 23:59 | Night         | 37,7 | 108 | 25,0 | 25,0 | 18,85 | 599,39 | 107,94 |
|    | 2019/06/08 | CH2205 | Male | Three y/o | Control | Control | Feed Day | No | 23:10 | 23:00 - 23:59 | Night         | 37,9 | 80  | 6,4  | 6,4  | 19,05 | 577,31 | 61,70  |
|    | 2019/06/08 | CH2206 | Male | Three y/o | Control | Control | Feed Day | No | 23:10 | 23:00 - 23:59 | Night         | 37,5 | 86  | 18,6 | 18,6 | 18,65 | 582,77 | 97,84  |
|    | 2019/06/08 | CH2205 | Male | Three y/o | Control | Control | Feed Day | No | 23:15 | 23:00 - 23:59 | Night         | 37,9 | 84  | 9,4  | 9,4  | 19,05 | 581,01 | 74,66  |
|    | 2019/06/08 | CH2206 | Male | Three y/o | Control | Control | Feed Day | No | 23:15 | 23:00 - 23:59 | Night         | 37,4 | 44  | 17,0 | 17,0 | 18,55 | 528,51 | 94,77  |
|    | 2019/06/08 | CH2205 | Male | Three y/o | Control | Control | Feed Day | No | 23:20 | 23:00 - 23:59 | Night         | 37,9 | 55  | 8,6  | 8,6  | 19,05 | 547,52 | 71,66  |
|    | 2019/06/08 | CH2206 | Male | Three y/o | Control | Control | Feed Day | No | 23:20 | 23:00 - 23:59 | Night         | 37,4 | 79  | 28,2 | 28,2 | 18,55 | 576,36 | 112,07 |
|    | 2019/06/08 | CH2205 | Male | Three y/o | Control | Control | Feed Day | No | 23:25 | 23:00 - 23:59 | Night         | 37,9 | 82  | 11,2 | 11,2 | 19,05 | 579,19 | 80,59  |
|    | 2019/06/08 | CH2206 | Male | Three y/o | Control | Control | Feed Day | No | 23:25 | 23:00 - 23:59 | Night         | 37,4 | 78  | 33,8 | 33,8 | 18,55 | 575,38 | 118,29 |
|    | 2019/06/08 | CH2205 | Male | Three y/o | Control | Control | Feed Day | No | 23:30 | 23:00 - 23:59 | Night         | 37,9 | 79  | 9,8  | 9,8  | 19,05 | 576,36 | 76,07  |
|    | 2019/06/08 | CH2206 | Male | Three y/o | Control | Control | Feed Day | No | 23:30 | 23:00 - 23:59 | Night         | 37,4 | 79  | 35,6 | 35,6 | 18,55 | 576,36 | 120,08 |
|    | 2019/06/08 | CH2205 | Male | Three y/o | Control | Control | Feed Day | No | 23:35 | 23:00 - 23:59 | Night         | 37,9 | 84  | 10,6 | 10,6 | 19,05 | 581,01 | 78,73  |
|    | 2019/06/08 | CH2206 | Male | Three y/o | Control | Control | Feed Day | No | 23:35 | 23:00 - 23:59 | Night         | 37,5 | 76  | 44,4 | 44,4 | 18,65 | 573,39 | 127,69 |
|    | 2019/06/08 | CH2205 | Male | Three y/o | Control | Control | Feed Day | No | 23:40 | 23:00 - 23:59 | Night         | 37,9 | 94  | 13,4 | 13,4 | 19,05 | 589,37 | 86,68  |
|    | 2019/06/08 | CH2206 | Male | Three y/o | Control | Control | Feed Day | No | 23:40 | 23:00 - 23:59 | Night         | 37,5 | 75  | 45,0 | 45,0 | 18,65 | 572,36 | 128,15 |
|    | 2019/06/08 | CH2205 | Male | Three y/o | Control | Control | Feed Day | No | 23:45 | 23:00 - 23:59 | Night         | 37,9 | 89  | 10,8 | 10,8 | 19,05 | 585,33 | 79,36  |
|    | 2019/06/08 | CH2206 | Male | Three y/o | Control | Control | Feed Day | No | 23:45 | 23:00 - 23:59 | Night         | 37,5 | 68  | 38,8 | 38,8 | 18,65 | 564,71 | 123,04 |
|    | 2019/06/08 | CH2205 | Male | Three y/o | Control | Control | Feed Day | No | 23:50 | 23:00 - 23:59 | Night         | 37,9 | 68  | 12,8 | 12,8 | 19,05 | 564,71 | 85,12  |
|    | 2019/06/08 | CH2206 | Male | Three y/o | Control | Control | Feed Day | No | 23:50 | 23:00 - 23:59 | Night         | 37,5 | 49  | 41,8 | 41,8 | 18,65 | 537,80 | 125,60 |
|    | 2019/06/08 | CH2205 | Male | Three y/o | Control | Control | Feed Day | No | 23:55 | 23:00 - 23:59 | Night         | 37,9 | 74  | 14,0 | 14,0 | 19,05 | 571,33 | 88,17  |
|    | 2019/06/08 | CH2206 | Male | Three y/o | Control | Control | Feed Day | No | 23:55 | 23:00 - 23:59 | Night         | 37,5 | 83  | 35,8 | 35,8 | 18,65 | 580,11 | 120,27 |
| 25 | 2019/06/09 | CH2205 | Male | Three y/o | Control | Control | Feed Day | No | 00:00 | 00:00 - 00:59 | Early Morning | 37,9 | 44  | 9,6  | 9,6  | 19,05 | 528,51 | 75,37  |
|    | 2019/06/09 | CH2206 | Male | Three y/o | Control | Control | Feed Day | No | 00:00 | 00:00 - 00:59 | Early Morning | 37,5 | 84  | 35,0 | 35,0 | 18,65 | 581,01 | 119,49 |
|    | 2019/06/09 | CH2205 | Male | Three y/o | Control | Control | Feed Day | No | 00:05 | 00:00 - 00:59 | Early Morning | 37,9 | 60  | 13,8 | 13,8 | 19,05 | 554,67 | 87,68  |
|    | 2019/06/09 | CH2206 | Male | Three y/o | Control | Control | Feed Day | No | 00:05 | 00:00 - 00:59 | Early Morning | 37,5 | 84  | 28,6 | 28,6 | 18,65 | 581,01 | 112,56 |
|    | 2019/06/09 | CH2205 | Male | Three y/o | Control | Control | Feed Day | No | 00:10 | 00:00 - 00:59 | Early Morning | 37,9 | 92  | 10,8 | 10,8 | 19,05 | 587,78 | 79,36  |
|    | 2019/06/09 | CH2206 | Male | Three y/o | Control | Control | Feed Day | No | 00:10 | 00:00 - 00:59 | Early Morning | 37,5 | 45  | 27,2 | 27,2 | 18,65 | 530,47 | 110,83 |
|    | 2019/06/09 | CH2205 | Male | Three y/o | Control | Control | Feed Day | No | 00:15 | 00:00 - 00:59 | Early Morning | 37,9 | 84  | 10,8 | 10,8 | 19,05 | 581,01 | 79,36  |
|    | 2019/06/09 | CH2206 | Male | Three y/o | Control | Control | Feed Day | No | 00:15 | 00:00 - 00:59 | Early Morning | 37,5 | 88  | 27,2 | 27,2 | 18,65 | 584,49 | 110,83 |
|    | 2019/06/09 | CH2205 | Male | Three y/o | Control | Control | Feed Day | No | 00:20 | 00:00 - 00:59 | Early Morning | 37,9 | 89  | 15,4 | 15,4 | 19,05 | 585,33 | 91,41  |
|    | 2019/06/09 | CH2206 | Male | Three y/o | Control | Control | Feed Day | No | 00:20 | 00:00 - 00:59 | Early Morning | 37,5 | 46  | 25,2 | 25,2 | 18,65 | 532,38 | 108,22 |
|    | 2019/06/09 | CH2205 | Male | Three y/o | Control | Control | Feed Day | No | 00:25 | 00:00 - 00:59 | Early Morning | 37,9 | 67  | 12,2 | 12,2 | 19,05 | 563,53 | 83,49  |
|    | 2019/06/09 | CH2206 | Male | Three y/o | Control | Control | Feed Day | No | 00:25 | 00:00 - 00:59 | Early Morning | 37,5 |     | 18,6 | 18,6 | 18,65 |        | 97,84  |
|    | 2019/06/09 | CH2205 | Male | Three y/o | Control | Control | Feed Day | No | 00:30 | 00:00 - 00:59 | Early Morning | 37,9 | 86  | 12,0 | 12,0 | 19,05 | 582,77 | 82,93  |
|    | 2019/06/09 | CH2206 | Male | Three y/o | Control | Control | Feed Day | No | 00:30 | 00:00 - 00:59 | Early Morning | 37,5 | 74  | 25,2 | 25,2 | 18,65 | 571,33 | 108,22 |
|    | 2019/06/09 | CH2205 | Male | Three y/o | Control | Control | Feed Day | No | 00:35 | 00:00 - 00:59 | Early Morning | 37,9 | 77  | 13,6 | 13,6 | 19,05 | 574,39 | 87,18  |
|    | 2019/06/09 | CH2206 | Male | Three y/o | Control | Control | Feed Day | No | 00:35 | 00:00 - 00:59 | Early Morning | 37,5 | 55  | 16,2 | 16,2 | 18,65 | 547,52 | 93,13  |
|    | 2019/06/09 | CH2205 | Male | Three y/o | Control | Control | Feed Day | No | 00:40 | 00:00 - 00:59 | Early Morning | 37,7 | 92  | 16,4 | 16,4 | 18,85 | 587,78 | 93,55  |
|    | 2019/06/09 | CH2206 | Male | Three y/o | Control | Control | Feed Day | No | 00:40 | 00:00 - 00:59 | Early Morning | 37,5 | 64  | 10,0 | 10,0 | 18,65 | 559,88 | 76,76  |
|    | 2019/06/09 | CH2205 | Male | Three y/o | Control | Control | Feed Day | No | 00:45 | 00:00 - 00:59 | Early Morning | 37,7 | 84  | 13,8 | 13,8 | 18,85 | 581,01 | 87,68  |
|    | 2019/06/09 | CH2206 | Male | Three y/o | Control | Control | Feed Day | No | 00:45 | 00:00 - 00:59 | Early Morning | 37,5 | 76  | 6,8  | 6,8  | 18,65 | 573,39 | 63,74  |
|    | 2019/06/09 | CH2205 | Male | Three y/o | Control | Control | Feed Day | No | 00:50 | 00:00 - 00:59 | Early Morning | 37,5 | 52  | 18,2 | 18,2 | 18,85 | 542,83 | 97,10  |
|    | 2019/06/09 | CH2206 | Male | Three y/o | Control | Control | Feed Day | No | 00:50 | 00:00 - 00:59 | Early Morning | 37,4 | 40  | 14,8 | 14,8 | 18,55 | 520,09 | 90,05  |
|    | 2019/06/09 | CH2205 | Male | Three y/o | Control | Control | Feed Day | No | 00:55 | 00:00 - 00:59 | Early Morning | 37,7 | 72  | 15,4 | 15,4 | 18,85 | 569,20 | 91,41  |
|    | 2019/06/09 | CH2206 | Male | Three y/o | Control | Control | Feed Day | No | 00:55 | 00:00 - 00:59 | Early Morning | 37,5 | 143 | 30,0 | 30,0 | 18,65 | 618,69 | 114,20 |
|    | 2019/06/09 | CH2205 | Male | Three y/o | Control | Control | Feed Day | No | 01:00 | 01:00 - 01:59 | Early Morning | 37,7 | 83  | 16,2 | 16,2 | 18,85 | 580,11 | 93,13  |
|    | 2019/06/09 | CH2206 | Male | Three y/o | Control | Control | Feed Day | No | 01:00 | 01:00 - 01:59 | Early Morning | 37,4 | 113 | 6,4  | 6,4  | 18,55 | 602,58 | 61,70  |
|    | 2019/06/09 | CH2205 | Male | Three y/o | Control | Control | Feed Day | No | 01:05 | 01:00 - 01:59 | Early Morning | 37,7 | 73  | 16,4 | 16,4 | 18,85 | 570,27 | 93,55  |
|    | 2019/06/09 | CH2206 | Male | Three y/o | Control | Control | Feed Day | No | 01:05 | 01:00 - 01:59 | Early Morning | 37,3 | 64  | 13,6 | 13,6 | 18,46 | 559,88 | 87,18  |
|    | 2019/06/09 | CH2205 | Male | Three y/o | Control | Control | Feed Day | No | 01:10 | 01:00 - 01:59 | Early Morning | 37,7 | 55  | 20,0 | 20,0 | 18,85 | 547,52 | 100,31 |
|    | 2019/06/09 | CH2206 | Male | Three y/o | Control | Control | Feed Day | No | 01:10 | 01:00 - 01:59 | Early Morning | 37,3 | 80  | 18,4 | 18,4 | 18,46 | 577,31 | 97,47  |
|    | 2019/06/09 | CH2205 | Male | Three y/o | Control | Control | Feed Day | No | 01:15 | 01:00 - 01:59 | Early Morning | 37,7 | 61  | 18,4 | 18,4 | 18,85 | 556,01 | 97,47  |
|    | 2019/06/09 | CH2206 | Male | Three y/o | Control | Control | Feed Day | No | 01:15 | 01:00 - 01:59 | Early Morning | 37,3 | 78  | 18,8 | 18,8 | 18,46 | 575,38 | 98,20  |
|    | 2019/06/09 | CH2205 | Male | Three y/o | Control | Control | Feed Day | No | 01:20 | 01:00 - 01:59 | Early Morning | 37,7 | 46  | 17,8 | 17,8 | 18,85 | 532,38 | 96,34  |



|            |        |      |           |         |         |          |    |       |               |               |      |     |       |       |       |        |        |
|------------|--------|------|-----------|---------|---------|----------|----|-------|---------------|---------------|------|-----|-------|-------|-------|--------|--------|
| 2019/06/09 | CH2206 | Male | Three y/o | Control | Control | Feed Day | No | 01:20 | 01:00 - 01:59 | Early Morning | 37,3 | 79  | 21,4  | 21,4  | 18,46 | 576,36 | 102,63 |
| 2019/06/09 | CH2205 | Male | Three y/o | Control | Control | Feed Day | No | 01:25 | 01:00 - 01:59 | Early Morning | 37,7 | 80  | 15,8  | 15,8  | 18,85 | 577,31 | 92,28  |
| 2019/06/09 | CH2206 | Male | Three y/o | Control | Control | Feed Day | No | 01:25 | 01:00 - 01:59 | Early Morning | 37,2 | 84  | 25,2  | 25,2  | 18,36 | 581,01 | 108,22 |
| 2019/06/09 | CH2205 | Male | Three y/o | Control | Control | Feed Day | No | 01:30 | 01:00 - 01:59 | Early Morning | 37,7 | 165 | 35,8  | 35,8  | 18,85 | 628,06 | 120,27 |
| 2019/06/09 | CH2206 | Male | Three y/o | Control | Control | Feed Day | No | 01:30 | 01:00 - 01:59 | Early Morning | 37,2 | 76  | 30,4  | 30,4  | 18,36 | 573,39 | 114,65 |
| 2019/06/09 | CH2205 | Male | Three y/o | Control | Control | Feed Day | No | 01:35 | 01:00 - 01:59 | Early Morning | 37,9 | 117 | 33,6  | 33,6  | 19,05 | 605,02 | 118,09 |
| 2019/06/09 | CH2206 | Male | Three y/o | Control | Control | Feed Day | No | 01:35 | 01:00 - 01:59 | Early Morning | 37,2 | 76  | 53,8  | 53,8  | 18,36 | 573,39 | 134,32 |
| 2019/06/09 | CH2205 | Male | Three y/o | Control | Control | Feed Day | No | 01:40 | 01:00 - 01:59 | Early Morning | 37,7 |     | 47,6  | 47,6  | 18,85 |        | 130,09 |
| 2019/06/09 | CH2206 | Male | Three y/o | Control | Control | Feed Day | No | 01:40 | 01:00 - 01:59 | Early Morning | 37,3 | 128 | 103,8 | 103,8 | 18,46 | 611,22 | 157,14 |
| 2019/06/09 | CH2205 | Male | Three y/o | Control | Control | Feed Day | No | 01:45 | 01:00 - 01:59 | Early Morning | 37,6 | 103 | 31,6  | 31,6  | 18,75 | 596,00 | 115,98 |
| 2019/06/09 | CH2206 | Male | Three y/o | Control | Control | Feed Day | No | 01:45 | 01:00 - 01:59 | Early Morning | 37,3 | 106 | 123,2 | 123,2 | 18,46 | 598,06 | 163,13 |
| 2019/06/09 | CH2205 | Male | Three y/o | Control | Control | Feed Day | No | 01:50 | 01:00 - 01:59 | Early Morning | 37,6 | 70  | 33,0  | 33,0  | 18,75 | 566,99 | 117,47 |
| 2019/06/09 | CH2206 | Male | Three y/o | Control | Control | Feed Day | No | 01:50 | 01:00 - 01:59 | Early Morning | 37,3 |     | 75,6  | 75,6  | 18,46 |        | 146,11 |
| 2019/06/09 | CH2205 | Male | Three y/o | Control | Control | Feed Day | No | 01:55 | 01:00 - 01:59 | Early Morning | 37,6 |     | 50,2  | 50,2  | 18,75 |        | 131,92 |
| 2019/06/09 | CH2206 | Male | Three y/o | Control | Control | Feed Day | No | 01:55 | 01:00 - 01:59 | Early Morning | 37,3 |     | 9,2   | 9,2   | 18,46 | 591,66 | 73,94  |
| 2019/06/09 | CH2205 | Male | Three y/o | Control | Control | Feed Day | No | 02:00 | 02:00 - 02:59 | Early Morning | 37,5 |     | 19,4  | 19,4  | 18,65 |        | 99,28  |
| 2019/06/09 | CH2206 | Male | Three y/o | Control | Control | Feed Day | No | 02:00 | 02:00 - 02:59 | Early Morning | 37,0 | 92  | 18,0  | 18,0  | 18,16 | 587,78 | 96,72  |
| 2019/06/09 | CH2205 | Male | Three y/o | Control | Control | Feed Day | No | 02:05 | 02:00 - 02:59 | Early Morning | 37,6 |     | 56,4  | 56,4  | 18,75 |        | 135,95 |
| 2019/06/09 | CH2206 | Male | Three y/o | Control | Control | Feed Day | No | 02:05 | 02:00 - 02:59 | Early Morning | 36,9 | 94  | 93,0  | 93,0  | 18,06 | 589,37 | 153,31 |
| 2019/06/09 | CH2205 | Male | Three y/o | Control | Control | Feed Day | No | 02:10 | 02:00 - 02:59 | Early Morning | 37,6 | 95  | 35,0  | 35,0  | 18,75 | 590,14 | 119,49 |
| 2019/06/09 | CH2206 | Male | Three y/o | Control | Control | Feed Day | No | 02:10 | 02:00 - 02:59 | Early Morning | 37,2 | 115 | 49,6  | 49,6  | 18,36 | 603,82 | 131,51 |
| 2019/06/09 | CH2205 | Male | Three y/o | Control | Control | Feed Day | No | 02:15 | 02:00 - 02:59 | Early Morning | 37,5 |     | 49,4  | 49,4  | 18,65 |        | 131,37 |
| 2019/06/09 | CH2206 | Male | Three y/o | Control | Control | Feed Day | No | 02:15 | 02:00 - 02:59 | Early Morning | 37,1 | 70  | 16,8  | 16,8  | 18,26 | 566,99 | 94,37  |
| 2019/06/09 | CH2205 | Male | Three y/o | Control | Control | Feed Day | No | 02:20 | 02:00 - 02:59 | Early Morning | 37,6 | 132 | 42,0  | 42,0  | 18,75 | 613,32 | 125,77 |
| 2019/06/09 | CH2206 | Male | Three y/o | Control | Control | Feed Day | No | 02:20 | 02:00 - 02:59 | Early Morning | 37,1 | 86  | 27,2  | 27,2  | 18,26 | 582,77 | 110,83 |
| 2019/06/09 | CH2205 | Male | Three y/o | Control | Control | Feed Day | No | 02:25 | 02:00 - 02:59 | Early Morning | 37,0 | 160 | 271,2 | 271,2 | 18,75 | 626,07 | 190,85 |
| 2019/06/09 | CH2206 | Male | Three y/o | Control | Control | Feed Day | No | 02:25 | 02:00 - 02:59 | Early Morning | 37,3 | 105 | 219,6 | 219,6 | 18,46 | 597,38 | 183,41 |
| 2019/06/09 | CH2205 | Male | Three y/o | Control | Control | Feed Day | No | 02:30 | 02:00 - 02:59 | Early Morning | 37,7 | 121 | 10,8  | 10,8  | 18,85 | 607,35 | 79,36  |
| 2019/06/09 | CH2206 | Male | Three y/o | Control | Control | Feed Day | No | 02:30 | 02:00 - 02:59 | Early Morning | 37,3 | 102 | 15,8  | 15,8  | 18,46 | 595,30 | 92,28  |
| 2019/06/09 | CH2205 | Male | Three y/o | Control | Control | Feed Day | No | 02:35 | 02:00 - 02:59 | Early Morning | 37,6 | 69  | 10,8  | 10,8  | 18,75 | 565,86 | 79,36  |
| 2019/06/09 | CH2206 | Male | Three y/o | Control | Control | Feed Day | No | 02:35 | 02:00 - 02:59 | Early Morning | 37,4 |     | 131,2 | 131,2 | 18,55 |        | 165,33 |
| 2019/06/09 | CH2205 | Male | Three y/o | Control | Control | Feed Day | No | 02:40 | 02:00 - 02:59 | Early Morning | 37,5 | 126 | 11,6  | 11,6  | 18,65 | 610,14 | 81,78  |
| 2019/06/09 | CH2206 | Male | Three y/o | Control | Control | Feed Day | No | 02:40 | 02:00 - 02:59 | Early Morning | 37,4 | 110 | 31,2  | 31,2  | 18,55 | 600,69 | 115,54 |
| 2019/06/09 | CH2205 | Male | Three y/o | Control | Control | Feed Day | No | 02:45 | 02:00 - 02:59 | Early Morning | 37,6 | 100 | 8,8   | 8,8   | 18,75 | 593,87 | 72,43  |
| 2019/06/09 | CH2206 | Male | Three y/o | Control | Control | Feed Day | No | 02:45 | 02:00 - 02:59 | Early Morning | 37,4 | 70  | 32,6  | 32,6  | 18,55 | 566,99 | 117,05 |
| 2019/06/09 | CH2205 | Male | Three y/o | Control | Control | Feed Day | No | 02:50 | 02:00 - 02:59 | Early Morning | 37,6 | 66  | 10,2  | 10,2  | 18,75 | 562,34 | 77,43  |
| 2019/06/09 | CH2206 | Male | Three y/o | Control | Control | Feed Day | No | 02:50 | 02:00 - 02:59 | Early Morning | 37,5 | 79  | 22,8  | 22,8  | 18,65 | 576,36 | 104,79 |
| 2019/06/09 | CH2205 | Male | Three y/o | Control | Control | Feed Day | No | 02:55 | 02:00 - 02:59 | Early Morning | 37,6 | 92  | 14,2  | 14,2  | 18,75 | 587,78 | 88,65  |
| 2019/06/09 | CH2206 | Male | Three y/o | Control | Control | Feed Day | No | 02:55 | 02:00 - 02:59 | Early Morning | 37,4 | 111 | 10,4  | 10,4  | 18,55 | 601,33 | 78,08  |
| 2019/06/09 | CH2205 | Male | Three y/o | Control | Control | Feed Day | No | 03:00 | 03:00 - 03:59 | Early Morning | 37,6 | 81  | 12,2  | 12,2  | 18,75 | 578,26 | 83,49  |
| 2019/06/09 | CH2206 | Male | Three y/o | Control | Control | Feed Day | No | 03:00 | 03:00 - 03:59 | Early Morning | 37,3 | 44  | 5,4   | 5,4   | 18,46 | 528,51 | 55,99  |
| 2019/06/09 | CH2205 | Male | Three y/o | Control | Control | Feed Day | No | 03:05 | 03:00 - 03:59 | Early Morning | 37,5 | 82  | 11,4  | 11,4  | 18,65 | 579,19 | 81,19  |
| 2019/06/09 | CH2206 | Male | Three y/o | Control | Control | Feed Day | No | 03:05 | 03:00 - 03:59 | Early Morning | 37,2 | 73  | 9,8   | 9,8   | 18,36 | 570,27 | 76,07  |
| 2019/06/09 | CH2205 | Male | Three y/o | Control | Control | Feed Day | No | 03:10 | 03:00 - 03:59 | Early Morning | 37,5 | 101 | 8,4   | 8,4   | 18,65 | 594,59 | 70,86  |
| 2019/06/09 | CH2206 | Male | Three y/o | Control | Control | Feed Day | No | 03:10 | 03:00 - 03:59 | Early Morning | 37,2 | 77  | 7,4   | 7,4   | 18,36 | 574,39 | 66,59  |
| 2019/06/09 | CH2205 | Male | Three y/o | Control | Control | Feed Day | No | 03:15 | 03:00 - 03:59 | Early Morning | 37,5 | 67  | 12,0  | 12,0  | 18,65 | 563,53 | 82,93  |
| 2019/06/09 | CH2206 | Male | Three y/o | Control | Control | Feed Day | No | 03:15 | 03:00 - 03:59 | Early Morning | 37,2 | 57  | 4,8   | 4,8   | 18,36 | 550,47 | 52,04  |
| 2019/06/09 | CH2205 | Male | Three y/o | Control | Control | Feed Day | No | 03:20 | 03:00 - 03:59 | Early Morning | 37,4 | 61  | 11,0  | 11,0  | 18,55 | 556,01 | 79,98  |
| 2019/06/09 | CH2206 | Male | Three y/o | Control | Control | Feed Day | No | 03:20 | 03:00 - 03:59 | Early Morning | 37,2 | 79  | 6,8   | 6,8   | 18,36 | 576,36 | 63,74  |
| 2019/06/09 | CH2205 | Male | Three y/o | Control | Control | Feed Day | No | 03:25 | 03:00 - 03:59 | Early Morning | 37,4 | 69  | 6,4   | 6,4   | 18,55 | 565,86 | 61,70  |
| 2019/06/09 | CH2206 | Male | Three y/o | Control | Control | Feed Day | No | 03:25 | 03:00 - 03:59 | Early Morning | 37,1 | 51  | 26,2  | 26,2  | 18,26 | 541,20 | 109,55 |
| 2019/06/09 | CH2205 | Male | Three y/o | Control | Control | Feed Day | No | 03:30 | 03:00 - 03:59 | Early Morning | 37,4 | 85  | 4,6   | 4,6   | 18,55 | 581,90 | 50,61  |
| 2019/06/09 | CH2206 | Male | Three y/o | Control | Control | Feed Day | No | 03:30 | 03:00 - 03:59 | Early Morning | 37,1 | 42  | 21,2  | 21,2  | 18,26 | 524,42 | 102,31 |
| 2019/06/09 | CH2205 | Male | Three y/o | Control | Control | Feed Day | No | 03:35 | 03:00 - 03:59 | Early Morning | 37,3 | 80  | 4,4   | 4,4   | 18,46 | 577,31 | 49,12  |
| 2019/06/09 | CH2206 | Male | Three y/o | Control | Control | Feed Day | No | 03:35 | 03:00 - 03:59 | Early Morning | 37,1 | 76  | 29,6  | 29,6  | 18,26 | 573,39 | 113,73 |
| 2019/06/09 | CH2205 | Male | Three y/o | Control | Control | Feed Day | No | 03:40 | 03:00 - 03:59 | Early Morning | 37,4 | 64  | 3,4   | 3,4   | 18,55 | 559,88 | 40,51  |
| 2019/06/09 | CH2206 | Male | Three y/o | Control | Control | Feed Day | No | 03:40 | 03:00 - 03:59 | Early Morning | 37,1 | 63  | 29,6  | 29,6  | 18,26 | 558,62 | 113,73 |
| 2019/06/09 | CH2205 | Male | Three y/o | Control | Control | Feed Day | No | 03:45 | 03:00 - 03:59 | Early Morning | 37,4 | 84  | 15,8  | 15,8  | 18,55 | 581,01 | 92,28  |
| 2019/06/09 | CH2206 | Male | Three y/o | Control | Control | Feed Day | No | 03:45 | 03:00 - 03:59 | Early Morning | 37,1 | 42  | 32,2  | 32,2  | 18,26 | 524,42 | 116,63 |
| 2019/06/09 | CH2205 | Male | Three y/o | Control | Control | Feed Day | No | 03:50 | 03:00 - 03:59 | Early Morning | 37,4 | 82  | 11,8  | 11,8  | 18,55 | 579,19 | 82,36  |
| 2019/06/09 | CH2206 | Male | Three y/o | Control | Control | Feed Day | No | 03:50 | 03:00 - 03:59 | Early Morning | 37,1 | 56  | 29,2  | 29,2  | 18,26 | 549,01 | 113,27 |
| 2019/06/09 | CH2205 | Male | Three y/o | Control | Control | Feed Day | No | 03:55 | 03:00 - 03:59 | Early Morning | 37,4 | 125 | 20,8  | 20,8  | 18,55 | 609,60 | 101,65 |
| 2019/06/09 | CH2206 | Male | Three y/o | Control | Control | Feed Day | No | 03:55 | 03:00 - 03:59 | Early Morning | 37,1 | 78  | 35,0  | 35,0  | 18,26 | 575,38 | 119,49 |
| 2019/06/09 | CH2205 | Male | Three y/o | Control | Control | Feed Day | No | 04:00 | 04:00 - 04:59 | Morning       | 37,4 | 57  | 24,4  | 24,4  | 18,55 | 550,47 | 107,11 |
| 2019/06/09 | CH2206 | Male | Three y/o | Control | Control | Feed Day | No | 04:00 | 04:00 - 04:59 | Morning       | 37,2 | 71  | 33,0  | 33,0  | 18,36 | 568,10 | 117,47 |
| 2019/06/09 | CH2205 | Male | Three y/o | Control | Control | Feed Day | No | 04:05 | 04:00 - 04:59 | Morning       | 37,4 | 46  | 20,2  | 20,2  | 18,55 | 532,38 | 100,65 |
| 2019/06/09 | CH2206 | Male | Three y/o | Control | Control | Feed Day | No | 04:05 | 04:00 - 04:59 | Morning       | 37,2 | 54  | 41,0  | 41,0  | 18,36 | 545,99 | 124,94 |
| 2019/06/09 | CH2205 | Male | Three y/o | Control | Control | Feed Day | No | 04:10 | 04:00 - 04:59 | Morning       | 37,4 | 77  | 15,2  | 15,2  | 18,55 | 574,39 | 90,96  |
| 2019/06/09 | CH2206 | Male | Three y/o | Control | Control | Feed Day | No | 04:10 | 04:00 - 04:59 | Morning       | 37,2 | 36  | 45,4  | 45,4  | 18,36 | 510,56 | 128,45 |
| 2019/06/09 | CH2205 | Male | Three y/o | Control | Control | Feed Day | No | 04:15 | 04:00 - 04:59 | Morning       | 37,4 | 94  | 17,4  | 17,4  | 18,55 | 589,37 | 95,56  |



|            |        |      |           |         |         |          |    |       |               |         |      |     |       |       |       |        |        |
|------------|--------|------|-----------|---------|---------|----------|----|-------|---------------|---------|------|-----|-------|-------|-------|--------|--------|
| 2019/06/09 | CH2206 | Male | Three y/o | Control | Control | Feed Day | No | 04:15 | 04:00 - 04:59 | Morning | 37,2 | 72  | 47,4  | 47,4  | 18,36 | 569,20 | 129,94 |
| 2019/06/09 | CH2205 | Male | Three y/o | Control | Control | Feed Day | No | 04:20 | 04:00 - 04:59 | Morning | 37,4 | 46  | 14,6  | 14,6  | 18,55 | 532,38 | 89,59  |
| 2019/06/09 | CH2206 | Male | Three y/o | Control | Control | Feed Day | No | 04:20 | 04:00 - 04:59 | Morning | 37,2 | 46  | 44,2  | 44,2  | 18,36 | 532,38 | 127,53 |
| 2019/06/09 | CH2205 | Male | Three y/o | Control | Control | Feed Day | No | 04:25 | 04:00 - 04:59 | Morning | 37,4 |     | 14,0  | 14,0  | 18,55 |        | 88,17  |
| 2019/06/09 | CH2206 | Male | Three y/o | Control | Control | Feed Day | No | 04:25 | 04:00 - 04:59 | Morning | 37,1 | 49  | 42,4  | 42,4  | 18,26 | 537,80 | 126,10 |
| 2019/06/09 | CH2205 | Male | Three y/o | Control | Control | Feed Day | No | 04:30 | 04:00 - 04:59 | Morning | 37,4 | 92  | 17,2  | 17,2  | 18,55 | 587,78 | 95,17  |
| 2019/06/09 | CH2206 | Male | Three y/o | Control | Control | Feed Day | No | 04:30 | 04:00 - 04:59 | Morning | 37,2 | 49  | 44,4  | 44,4  | 18,36 | 537,80 | 127,69 |
| 2019/06/09 | CH2205 | Male | Three y/o | Control | Control | Feed Day | No | 04:35 | 04:00 - 04:59 | Morning | 37,3 |     | 8,6   | 8,6   | 18,46 |        | 71,66  |
| 2019/06/09 | CH2206 | Male | Three y/o | Control | Control | Feed Day | No | 04:35 | 04:00 - 04:59 | Morning | 37,3 | 63  | 50,6  | 50,6  | 18,46 | 558,62 | 132,20 |
| 2019/06/09 | CH2205 | Male | Three y/o | Control | Control | Feed Day | No | 04:40 | 04:00 - 04:59 | Morning | 37,3 |     | 7,2   | 7,2   | 18,46 |        | 65,66  |
| 2019/06/09 | CH2206 | Male | Three y/o | Control | Control | Feed Day | No | 04:40 | 04:00 - 04:59 | Morning | 37,2 | 52  | 47,0  | 47,0  | 18,36 | 542,83 | 129,65 |
| 2019/06/09 | CH2205 | Male | Three y/o | Control | Control | Feed Day | No | 04:45 | 04:00 - 04:59 | Morning | 37,3 | 88  | 10,6  | 10,6  | 18,46 | 584,49 | 78,73  |
| 2019/06/09 | CH2206 | Male | Three y/o | Control | Control | Feed Day | No | 04:45 | 04:00 - 04:59 | Morning | 37,2 | 78  | 37,0  | 37,0  | 18,36 | 575,38 | 121,40 |
| 2019/06/09 | CH2205 | Male | Three y/o | Control | Control | Feed Day | No | 04:50 | 04:00 - 04:59 | Morning | 37,2 | 68  | 8,0   | 8,0   | 18,36 | 564,71 | 69,22  |
| 2019/06/09 | CH2206 | Male | Three y/o | Control | Control | Feed Day | No | 04:50 | 04:00 - 04:59 | Morning | 37,2 | 45  | 38,2  | 38,2  | 18,36 | 530,47 | 122,50 |
| 2019/06/09 | CH2205 | Male | Three y/o | Control | Control | Feed Day | No | 04:55 | 04:00 - 04:59 | Morning | 37,2 | 69  | 6,2   | 6,2   | 18,36 | 565,86 | 60,63  |
| 2019/06/09 | CH2206 | Male | Three y/o | Control | Control | Feed Day | No | 04:55 | 04:00 - 04:59 | Morning | 37,2 | 48  | 42,2  | 42,2  | 18,36 | 536,04 | 125,93 |
| 2019/06/09 | CH2205 | Male | Three y/o | Control | Control | Feed Day | No | 05:00 | 05:00 - 05:59 | Morning | 37,2 | 78  | 30,0  | 30,0  | 18,36 | 575,38 | 114,20 |
| 2019/06/09 | CH2206 | Male | Three y/o | Control | Control | Feed Day | No | 05:00 | 05:00 - 05:59 | Morning | 37,2 | 50  | 99,0  | 99,0  | 18,36 | 539,52 | 155,49 |
| 2019/06/09 | CH2205 | Male | Three y/o | Control | Control | Feed Day | No | 05:05 | 05:00 - 05:59 | Morning | 37,2 | 82  | 9,4   | 9,4   | 18,36 | 579,19 | 74,66  |
| 2019/06/09 | CH2206 | Male | Three y/o | Control | Control | Feed Day | No | 05:05 | 05:00 - 05:59 | Morning | 37,2 | 48  | 38,8  | 38,8  | 18,36 | 536,04 | 123,04 |
| 2019/06/09 | CH2205 | Male | Three y/o | Control | Control | Feed Day | No | 05:10 | 05:00 - 05:59 | Morning | 37,1 |     | 10,2  | 10,2  | 18,26 |        | 77,43  |
| 2019/06/09 | CH2206 | Male | Three y/o | Control | Control | Feed Day | No | 05:10 | 05:00 - 05:59 | Morning | 37,2 | 98  | 55,4  | 55,4  | 18,36 | 592,41 | 135,33 |
| 2019/06/09 | CH2205 | Male | Three y/o | Control | Control | Feed Day | No | 05:15 | 05:00 - 05:59 | Morning | 37,1 |     | 13,8  | 13,8  | 18,26 |        | 87,68  |
| 2019/06/09 | CH2206 | Male | Three y/o | Control | Control | Feed Day | No | 05:15 | 05:00 - 05:59 | Morning | 37,1 | 85  | 39,4  | 39,4  | 18,26 | 581,90 | 123,57 |
| 2019/06/09 | CH2205 | Male | Three y/o | Control | Control | Feed Day | No | 05:20 | 05:00 - 05:59 | Morning | 37,0 |     | 11,6  | 11,6  | 18,16 |        | 81,78  |
| 2019/06/09 | CH2206 | Male | Three y/o | Control | Control | Feed Day | No | 05:20 | 05:00 - 05:59 | Morning | 37,1 | 47  | 35,4  | 35,4  | 18,26 | 534,23 | 119,88 |
| 2019/06/09 | CH2205 | Male | Three y/o | Control | Control | Feed Day | No | 05:25 | 05:00 - 05:59 | Morning | 37,0 | 174 | 12,8  | 12,8  | 18,16 | 631,46 | 85,12  |
| 2019/06/09 | CH2206 | Male | Three y/o | Control | Control | Feed Day | No | 05:25 | 05:00 - 05:59 | Morning | 37,1 | 44  | 13,0  | 13,0  | 18,26 | 528,51 | 85,65  |
| 2019/06/09 | CH2205 | Male | Three y/o | Control | Control | Feed Day | No | 05:30 | 05:00 - 05:59 | Morning | 37,1 | 65  | 7,6   | 7,6   | 18,26 | 561,12 | 67,49  |
| 2019/06/09 | CH2206 | Male | Three y/o | Control | Control | Feed Day | No | 05:30 | 05:00 - 05:59 | Morning | 37,1 | 53  | 4,8   | 4,8   | 18,26 | 544,43 | 52,04  |
| 2019/06/09 | CH2205 | Male | Three y/o | Control | Control | Feed Day | No | 05:35 | 05:00 - 05:59 | Morning | 37,1 | 56  | 6,8   | 6,8   | 18,26 | 549,01 | 63,74  |
| 2019/06/09 | CH2206 | Male | Three y/o | Control | Control | Feed Day | No | 05:35 | 05:00 - 05:59 | Morning | 37,0 | 42  | 22,8  | 22,8  | 18,16 | 524,42 | 104,79 |
| 2019/06/09 | CH2205 | Male | Three y/o | Control | Control | Feed Day | No | 05:40 | 05:00 - 05:59 | Morning | 37,1 | 134 | 14,0  | 14,0  | 18,26 | 614,33 | 88,17  |
| 2019/06/09 | CH2206 | Male | Three y/o | Control | Control | Feed Day | No | 05:40 | 05:00 - 05:59 | Morning | 37,0 | 67  | 22,0  | 22,0  | 18,16 | 563,53 | 103,57 |
| 2019/06/09 | CH2205 | Male | Three y/o | Control | Control | Feed Day | No | 05:45 | 05:00 - 05:59 | Morning | 37,1 | 88  | 18,0  | 18,0  | 18,26 | 584,49 | 96,72  |
| 2019/06/09 | CH2206 | Male | Three y/o | Control | Control | Feed Day | No | 05:45 | 05:00 - 05:59 | Morning | 37,0 | 47  | 24,4  | 24,4  | 18,16 | 534,23 | 107,11 |
| 2019/06/09 | CH2205 | Male | Three y/o | Control | Control | Feed Day | No | 05:50 | 05:00 - 05:59 | Morning | 37,1 | 84  | 14,2  | 14,2  | 18,26 | 581,01 | 88,65  |
| 2019/06/09 | CH2206 | Male | Three y/o | Control | Control | Feed Day | No | 05:50 | 05:00 - 05:59 | Morning | 37,0 |     | 23,2  | 23,2  | 18,16 |        | 105,39 |
| 2019/06/09 | CH2205 | Male | Three y/o | Control | Control | Feed Day | No | 05:55 | 05:00 - 05:59 | Morning | 37,1 |     | 16,8  | 16,8  | 18,26 |        | 94,37  |
| 2019/06/09 | CH2206 | Male | Three y/o | Control | Control | Feed Day | No | 05:55 | 05:00 - 05:59 | Morning | 37,0 | 42  | 16,2  | 16,2  | 18,16 | 524,42 | 93,13  |
| 2019/06/09 | CH2205 | Male | Three y/o | Control | Control | Feed Day | No | 06:00 | 06:00 - 06:59 | Morning | 37,1 | 90  | 5,2   | 5,2   | 18,26 | 586,16 | 54,72  |
| 2019/06/09 | CH2206 | Male | Three y/o | Control | Control | Feed Day | No | 06:00 | 06:00 - 06:59 | Morning | 37,0 | 50  | 13,6  | 13,6  | 18,16 | 539,52 | 87,18  |
| 2019/06/09 | CH2205 | Male | Three y/o | Control | Control | Feed Day | No | 06:05 | 06:00 - 06:59 | Morning | 37,1 | 59  | 8,4   | 8,4   | 18,26 | 553,30 | 70,86  |
| 2019/06/09 | CH2206 | Male | Three y/o | Control | Control | Feed Day | No | 06:05 | 06:00 - 06:59 | Morning | 37,1 | 89  | 16,0  | 16,0  | 18,26 | 585,33 | 92,71  |
| 2019/06/09 | CH2205 | Male | Three y/o | Control | Control | Feed Day | No | 06:10 | 06:00 - 06:59 | Morning | 37,1 | 48  | 9,4   | 9,4   | 18,26 | 536,04 | 74,66  |
| 2019/06/09 | CH2206 | Male | Three y/o | Control | Control | Feed Day | No | 06:10 | 06:00 - 06:59 | Morning | 37,1 | 51  | 14,2  | 14,2  | 18,26 | 541,20 | 88,65  |
| 2019/06/09 | CH2205 | Male | Three y/o | Control | Control | Feed Day | No | 06:15 | 06:00 - 06:59 | Morning | 37,1 | 49  | 44,0  | 44,0  | 18,26 | 537,80 | 127,37 |
| 2019/06/09 | CH2206 | Male | Three y/o | Control | Control | Feed Day | No | 06:15 | 06:00 - 06:59 | Morning | 37,1 | 56  | 18,6  | 18,6  | 18,26 | 549,01 | 97,84  |
| 2019/06/09 | CH2205 | Male | Three y/o | Control | Control | Feed Day | No | 06:20 | 06:00 - 06:59 | Morning | 37,1 |     | 16,6  | 16,6  | 18,26 |        | 93,96  |
| 2019/06/09 | CH2206 | Male | Three y/o | Control | Control | Feed Day | No | 06:20 | 06:00 - 06:59 | Morning | 37,2 |     | 203,8 | 203,8 | 18,36 |        | 180,78 |
| 2019/06/09 | CH2205 | Male | Three y/o | Control | Control | Feed Day | No | 06:25 | 06:00 - 06:59 | Morning | 37,1 | 119 | 204,8 | 204,8 | 18,26 | 606,20 | 180,95 |
| 2019/06/09 | CH2206 | Male | Three y/o | Control | Control | Feed Day | No | 06:25 | 06:00 - 06:59 | Morning | 37,4 | 114 | 45,2  | 45,2  | 18,55 | 603,20 | 128,30 |
| 2019/06/09 | CH2205 | Male | Three y/o | Control | Control | Feed Day | No | 06:30 | 06:00 - 06:59 | Morning | 37,2 | 147 | 30,4  | 30,4  | 18,36 | 620,52 | 114,65 |
| 2019/06/09 | CH2206 | Male | Three y/o | Control | Control | Feed Day | No | 06:30 | 06:00 - 06:59 | Morning | 37,4 | 97  | 74,0  | 74,0  | 18,55 | 591,66 | 145,37 |
| 2019/06/09 | CH2205 | Male | Three y/o | Control | Control | Feed Day | No | 06:35 | 06:00 - 06:59 | Morning | 37,2 | 137 | 50,8  | 50,8  | 18,36 | 615,83 | 132,33 |
| 2019/06/09 | CH2206 | Male | Three y/o | Control | Control | Feed Day | No | 06:35 | 06:00 - 06:59 | Morning | 37,4 | 105 | 51,6  | 51,6  | 18,55 | 597,38 | 132,87 |
| 2019/06/09 | CH2205 | Male | Three y/o | Control | Control | Feed Day | No | 06:40 | 06:00 - 06:59 | Morning | 37,3 | 100 | 145,6 | 145,6 | 18,46 | 593,87 | 168,97 |
| 2019/06/09 | CH2206 | Male | Three y/o | Control | Control | Feed Day | No | 06:40 | 06:00 - 06:59 | Morning | 37,4 | 98  | 32,2  | 32,2  | 18,55 | 592,41 | 116,63 |
| 2019/06/09 | CH2205 | Male | Three y/o | Control | Control | Feed Day | No | 06:45 | 06:00 - 06:59 | Morning | 37,3 | 123 | 81,8  | 81,8  | 18,46 | 608,49 | 148,85 |
| 2019/06/09 | CH2206 | Male | Three y/o | Control | Control | Feed Day | No | 06:45 | 06:00 - 06:59 | Morning | 37,4 |     | 14,2  | 14,2  | 18,55 |        | 88,65  |
| 2019/06/09 | CH2205 | Male | Three y/o | Control | Control | Feed Day | No | 06:50 | 06:00 - 06:59 | Morning | 37,4 |     | 26,4  | 26,4  | 18,55 |        | 109,81 |
| 2019/06/09 | CH2206 | Male | Three y/o | Control | Control | Feed Day | No | 06:50 | 06:00 - 06:59 | Morning | 37,4 | 60  | 6,2   | 6,2   | 18,55 | 554,67 | 60,63  |
| 2019/06/09 | CH2205 | Male | Three y/o | Control | Control | Feed Day | No | 06:55 | 06:00 - 06:59 | Morning | 37,4 | 115 | 39,6  | 39,6  | 18,55 | 603,82 | 123,74 |
| 2019/06/09 | CH2206 | Male | Three y/o | Control | Control | Feed Day | No | 06:55 | 06:00 - 06:59 | Morning | 37,2 |     | 30,2  | 30,2  | 18,36 |        | 114,42 |
| 2019/06/09 | CH2205 | Male | Three y/o | Control | Control | Feed Day | No | 07:00 | 07:00 - 07:59 | Morning | 37,4 |     | 58,0  | 58,0  | 18,55 |        | 136,92 |
| 2019/06/09 | CH2206 | Male | Three y/o | Control | Control | Feed Day | No | 07:00 | 07:00 - 07:59 | Morning | 37,3 |     | 115,0 | 115,0 | 18,46 |        | 160,72 |
| 2019/06/09 | CH2205 | Male | Three y/o | Control | Control | Feed Day | No | 07:05 | 07:00 - 07:59 | Morning | 37,4 | 138 | 25,2  | 25,2  | 18,55 | 616,31 | 108,22 |
| 2019/06/09 | CH2206 | Male | Three y/o | Control | Control | Feed Day | No | 07:05 | 07:00 - 07:59 | Morning | 37,3 | 125 | 230,2 | 230,2 | 18,46 | 609,60 | 185,07 |
| 2019/06/09 | CH2205 | Male | Three y/o | Control | Control | Feed Day | No | 07:10 | 07:00 - 07:59 | Morning | 37,5 | 67  | 68,4  | 68,4  | 18,65 | 563,53 | 142,64 |



|            |        |      |           |         |         |          |    |       |               |              |      |     |       |       |       |        |        |
|------------|--------|------|-----------|---------|---------|----------|----|-------|---------------|--------------|------|-----|-------|-------|-------|--------|--------|
| 2019/06/09 | CH2206 | Male | Three y/o | Control | Control | Feed Day | No | 07:10 | 07:00 - 07:59 | Morning      | 37,4 | 120 | 172,2 | 172,2 | 18,55 | 606,78 | 174,86 |
| 2019/06/09 | CH2205 | Male | Three y/o | Control | Control | Feed Day | No | 07:15 | 07:00 - 07:59 | Morning      | 37,6 | 115 | 46,0  | 46,0  | 18,75 | 603,82 | 128,91 |
| 2019/06/09 | CH2206 | Male | Three y/o | Control | Control | Feed Day | No | 07:15 | 07:00 - 07:59 | Morning      | 37,5 | 137 | 73,8  | 73,8  | 18,65 | 615,83 | 145,27 |
| 2019/06/09 | CH2205 | Male | Three y/o | Control | Control | Feed Day | No | 07:20 | 07:00 - 07:59 | Morning      | 37,6 |     | 75,2  | 75,2  | 18,75 |        | 145,93 |
| 2019/06/09 | CH2206 | Male | Three y/o | Control | Control | Feed Day | No | 07:20 | 07:00 - 07:59 | Morning      | 37,7 | 131 | 120,8 | 120,8 | 18,85 | 612,80 | 162,44 |
| 2019/06/09 | CH2205 | Male | Three y/o | Control | Control | Feed Day | No | 07:25 | 07:00 - 07:59 | Morning      | 37,6 | 123 | 116,6 | 116,6 | 18,75 | 608,49 | 161,20 |
| 2019/06/09 | CH2206 | Male | Three y/o | Control | Control | Feed Day | No | 07:25 | 07:00 - 07:59 | Morning      | 37,8 | 105 | 102,0 | 102,0 | 18,95 | 597,38 | 156,53 |
| 2019/06/09 | CH2205 | Male | Three y/o | Control | Control | Feed Day | No | 07:30 | 07:00 - 07:59 | Morning      | 37,6 | 105 | 193,4 | 193,4 | 18,75 | 597,38 | 178,94 |
| 2019/06/09 | CH2206 | Male | Three y/o | Control | Control | Feed Day | No | 07:30 | 07:00 - 07:59 | Morning      | 37,8 | 106 | 84,0  | 84,0  | 18,95 | 598,06 | 149,77 |
| 2019/06/09 | CH2205 | Male | Three y/o | Control | Control | Feed Day | No | 07:35 | 07:00 - 07:59 | Morning      | 37,7 | 121 | 217,2 | 217,2 | 18,85 | 607,35 | 183,02 |
| 2019/06/09 | CH2206 | Male | Three y/o | Control | Control | Feed Day | No | 07:35 | 07:00 - 07:59 | Morning      | 37,9 |     | 588,6 | 588,6 | 19,05 |        | 218,36 |
| 2019/06/09 | CH2205 | Male | Three y/o | Control | Control | Feed Day | No | 07:40 | 07:00 - 07:59 | Morning      | 38,0 | 120 | 117,0 | 117,0 | 19,15 | 606,78 | 161,32 |
| 2019/06/09 | CH2206 | Male | Three y/o | Control | Control | Feed Day | No | 07:40 | 07:00 - 07:59 | Morning      | 38,0 |     | 386,2 | 386,2 | 19,15 |        | 203,37 |
| 2019/06/09 | CH2205 | Male | Three y/o | Control | Control | Feed Day | No | 07:45 | 07:00 - 07:59 | Morning      | 38,1 | 103 | 149,4 | 149,4 | 19,26 | 596,00 | 169,88 |
| 2019/06/09 | CH2206 | Male | Three y/o | Control | Control | Feed Day | No | 07:45 | 07:00 - 07:59 | Morning      | 38,0 | 117 | 16,4  | 16,4  | 19,15 | 605,02 | 93,55  |
| 2019/06/09 | CH2205 | Male | Three y/o | Control | Control | Feed Day | No | 07:50 | 07:00 - 07:59 | Morning      | 38,1 | 98  | 110,4 | 110,4 | 19,26 | 592,41 | 159,30 |
| 2019/06/09 | CH2206 | Male | Three y/o | Control | Control | Feed Day | No | 07:50 | 07:00 - 07:59 | Morning      | 37,9 | 126 | 118,2 | 118,2 | 19,05 | 610,14 | 161,68 |
| 2019/06/09 | CH2205 | Male | Three y/o | Control | Control | Feed Day | No | 07:55 | 07:00 - 07:59 | Morning      | 38,1 | 103 | 39,8  | 39,8  | 19,26 | 596,00 | 123,91 |
| 2019/06/09 | CH2206 | Male | Three y/o | Control | Control | Feed Day | No | 07:55 | 07:00 - 07:59 | Morning      | 37,9 | 102 | 198,6 | 198,6 | 19,05 | 595,30 | 179,87 |
| 2019/06/09 | CH2205 | Male | Three y/o | Control | Control | Feed Day | No | 08:00 | 08:00 - 08:59 | Late Morning | 38,0 | 148 | 489,6 | 489,6 | 19,15 | 620,97 | 211,80 |
| 2019/06/09 | CH2206 | Male | Three y/o | Control | Control | Feed Day | No | 08:00 | 08:00 - 08:59 | Late Morning | 38,0 | 109 | 110,6 | 110,6 | 19,15 | 600,04 | 159,36 |
| 2019/06/09 | CH2205 | Male | Three y/o | Control | Control | Feed Day | No | 08:05 | 08:00 - 08:59 | Late Morning | 38,2 | 135 | 31,8  | 31,8  | 19,36 | 614,84 | 116,20 |
| 2019/06/09 | CH2206 | Male | Three y/o | Control | Control | Feed Day | No | 08:05 | 08:00 - 08:59 | Late Morning | 38,0 | 158 | 136,2 | 136,2 | 19,15 | 625,26 | 166,64 |
| 2019/06/09 | CH2205 | Male | Three y/o | Control | Control | Feed Day | No | 08:10 | 08:00 - 08:59 | Late Morning | 38,2 | 94  | 22,6  | 22,6  | 19,36 | 589,37 | 104,49 |
| 2019/06/09 | CH2206 | Male | Three y/o | Control | Control | Feed Day | No | 08:10 | 08:00 - 08:59 | Late Morning | 38,0 | 131 | 120,0 | 120,0 | 19,15 | 612,80 | 162,21 |
| 2019/06/09 | CH2205 | Male | Three y/o | Control | Control | Feed Day | No | 08:15 | 08:00 - 08:59 | Late Morning | 38,2 |     | 24,0  | 24,0  | 19,36 |        | 106,55 |
| 2019/06/09 | CH2206 | Male | Three y/o | Control | Control | Feed Day | No | 08:15 | 08:00 - 08:59 | Late Morning | 37,9 | 82  | 28,4  | 28,4  | 19,05 | 579,19 | 112,31 |
| 2019/06/09 | CH2205 | Male | Three y/o | Control | Control | Feed Day | No | 08:20 | 08:00 - 08:59 | Late Morning | 38,1 |     | 27,4  | 27,4  | 19,26 |        | 111,09 |
| 2019/06/09 | CH2206 | Male | Three y/o | Control | Control | Feed Day | No | 08:20 | 08:00 - 08:59 | Late Morning | 37,7 | 48  | 67,0  | 67,0  | 18,85 | 536,04 | 141,92 |
| 2019/06/09 | CH2205 | Male | Three y/o | Control | Control | Feed Day | No | 08:25 | 08:00 - 08:59 | Late Morning | 38,0 |     | 21,8  | 21,8  | 19,15 |        | 103,26 |
| 2019/06/09 | CH2206 | Male | Three y/o | Control | Control | Feed Day | No | 08:25 | 08:00 - 08:59 | Late Morning | 37,8 | 112 | 54,2  | 54,2  | 18,95 | 601,96 | 134,57 |
| 2019/06/09 | CH2205 | Male | Three y/o | Control | Control | Feed Day | No | 08:30 | 08:00 - 08:59 | Late Morning | 38,0 |     | 20,6  | 20,6  | 19,15 |        | 101,32 |
| 2019/06/09 | CH2206 | Male | Three y/o | Control | Control | Feed Day | No | 08:30 | 08:00 - 08:59 | Late Morning | 37,8 | 112 | 49,0  | 49,0  | 18,95 | 601,96 | 131,09 |
| 2019/06/09 | CH2205 | Male | Three y/o | Control | Control | Feed Day | No | 08:35 | 08:00 - 08:59 | Late Morning | 37,9 | 67  | 32,8  | 32,8  | 19,05 | 563,53 | 117,26 |
| 2019/06/09 | CH2206 | Male | Three y/o | Control | Control | Feed Day | No | 08:35 | 08:00 - 08:59 | Late Morning | 37,9 | 115 | 84,0  | 84,0  | 19,05 | 603,82 | 149,77 |
| 2019/06/09 | CH2205 | Male | Three y/o | Control | Control | Feed Day | No | 08:40 | 08:00 - 08:59 | Late Morning | 37,9 | 82  | 37,0  | 37,0  | 19,05 | 579,19 | 121,40 |
| 2019/06/09 | CH2206 | Male | Three y/o | Control | Control | Feed Day | No | 08:40 | 08:00 - 08:59 | Late Morning | 37,9 |     | 88,4  | 88,4  | 19,05 |        | 151,55 |
| 2019/06/09 | CH2205 | Male | Three y/o | Control | Control | Feed Day | No | 08:45 | 08:00 - 08:59 | Late Morning | 37,7 | 117 | 93,4  | 93,4  | 18,85 | 605,02 | 153,46 |
| 2019/06/09 | CH2206 | Male | Three y/o | Control | Control | Feed Day | No | 08:45 | 08:00 - 08:59 | Late Morning | 37,9 | 124 | 111,4 | 111,4 | 19,05 | 609,04 | 159,61 |
| 2019/06/09 | CH2205 | Male | Three y/o | Control | Control | Feed Day | No | 08:50 | 08:00 - 08:59 | Late Morning | 37,7 | 128 | 75,8  | 75,8  | 18,85 | 611,22 | 146,20 |
| 2019/06/09 | CH2206 | Male | Three y/o | Control | Control | Feed Day | No | 08:50 | 08:00 - 08:59 | Late Morning | 37,9 | 110 | 298,8 | 298,8 | 19,05 | 600,69 | 194,28 |
| 2019/06/09 | CH2205 | Male | Three y/o | Control | Control | Feed Day | No | 08:55 | 08:00 - 08:59 | Late Morning | 37,7 | 111 | 157,8 | 157,8 | 18,85 | 601,33 | 171,79 |
| 2019/06/09 | CH2206 | Male | Three y/o | Control | Control | Feed Day | No | 08:55 | 08:00 - 08:59 | Late Morning | 37,9 | 124 | 373,0 | 373,0 | 19,05 | 609,04 | 202,13 |
| 2019/06/09 | CH2205 | Male | Three y/o | Control | Control | Feed Day | No | 09:00 | 09:00 - 09:59 | Late Morning | 37,7 |     | 83,2  | 83,2  | 18,85 |        | 149,44 |
| 2019/06/09 | CH2206 | Male | Three y/o | Control | Control | Feed Day | No | 09:00 | 09:00 - 09:59 | Late Morning | 37,9 | 120 | 247,8 | 247,8 | 19,05 | 606,78 | 187,67 |
| 2019/06/09 | CH2205 | Male | Three y/o | Control | Control | Feed Day | No | 09:05 | 09:00 - 09:59 | Late Morning | 37,6 | 75  | 5,0   | 5,0   | 18,75 | 572,36 | 53,41  |
| 2019/06/09 | CH2206 | Male | Three y/o | Control | Control | Feed Day | No | 09:05 | 09:00 - 09:59 | Late Morning | 38,0 | 135 | 41,8  | 41,8  | 19,15 | 614,84 | 125,60 |
| 2019/06/09 | CH2205 | Male | Three y/o | Control | Control | Feed Day | No | 09:10 | 09:00 - 09:59 | Late Morning | 37,6 |     | 18,0  | 18,0  | 18,75 |        | 96,72  |
| 2019/06/09 | CH2206 | Male | Three y/o | Control | Control | Feed Day | No | 09:10 | 09:00 - 09:59 | Late Morning | 37,9 | 70  | 97,4  | 97,4  | 19,05 | 566,99 | 154,93 |
| 2019/06/09 | CH2205 | Male | Three y/o | Control | Control | Feed Day | No | 09:15 | 09:00 - 09:59 | Late Morning | 37,6 | 90  | 21,0  | 21,0  | 18,75 | 586,16 | 101,98 |
| 2019/06/09 | CH2206 | Male | Three y/o | Control | Control | Feed Day | No | 09:15 | 09:00 - 09:59 | Late Morning | 37,9 | 104 | 58,6  | 58,6  | 19,05 | 596,69 | 137,28 |
| 2019/06/09 | CH2205 | Male | Three y/o | Control | Control | Feed Day | No | 09:20 | 09:00 - 09:59 | Late Morning | 37,6 |     | 22,0  | 22,0  | 18,75 |        | 103,57 |
| 2019/06/09 | CH2206 | Male | Three y/o | Control | Control | Feed Day | No | 09:20 | 09:00 - 09:59 | Late Morning | 37,9 | 132 | 72,6  | 72,6  | 19,05 | 613,32 | 144,70 |
| 2019/06/09 | CH2205 | Male | Three y/o | Control | Control | Feed Day | No | 09:25 | 09:00 - 09:59 | Late Morning | 37,6 | 103 | 70,0  | 70,0  | 18,75 | 596,00 | 143,44 |
| 2019/06/09 | CH2206 | Male | Three y/o | Control | Control | Feed Day | No | 09:25 | 09:00 - 09:59 | Late Morning | 38,0 | 137 | 46,6  | 46,6  | 19,15 | 615,83 | 129,35 |
| 2019/06/09 | CH2205 | Male | Three y/o | Control | Control | Feed Day | No | 09:30 | 09:00 - 09:59 | Late Morning | 37,5 | 37  | 37,4  | 37,4  | 18,65 | 513,06 | 121,77 |
| 2019/06/09 | CH2206 | Male | Three y/o | Control | Control | Feed Day | No | 09:30 | 09:00 - 09:59 | Late Morning | 37,9 | 77  | 35,8  | 35,8  | 19,05 | 574,39 | 120,27 |
| 2019/06/09 | CH2205 | Male | Three y/o | Control | Control | Feed Day | No | 09:35 | 09:00 - 09:59 | Late Morning | 37,6 | 113 | 16,6  | 16,6  | 18,75 | 602,58 | 93,96  |
| 2019/06/09 | CH2206 | Male | Three y/o | Control | Control | Feed Day | No | 09:35 | 09:00 - 09:59 | Late Morning | 37,9 | 70  | 24,2  | 24,2  | 19,05 | 566,99 | 106,83 |
| 2019/06/09 | CH2205 | Male | Three y/o | Control | Control | Feed Day | No | 09:40 | 09:00 - 09:59 | Late Morning | 37,6 | 126 | 12,6  | 12,6  | 18,75 | 610,14 | 84,59  |
| 2019/06/09 | CH2206 | Male | Three y/o | Control | Control | Feed Day | No | 09:40 | 09:00 - 09:59 | Late Morning | 37,8 | 55  | 11,2  | 11,2  | 18,95 | 547,52 | 80,59  |
| 2019/06/09 | CH2205 | Male | Three y/o | Control | Control | Feed Day | No | 09:45 | 09:00 - 09:59 | Late Morning | 37,6 | 53  | 11,8  | 11,8  | 18,75 | 544,43 | 82,36  |
| 2019/06/09 | CH2206 | Male | Three y/o | Control | Control | Feed Day | No | 09:45 | 09:00 - 09:59 | Late Morning | 37,7 | 58  | 28,4  | 28,4  | 18,85 | 551,90 | 112,31 |
| 2019/06/09 | CH2205 | Male | Three y/o | Control | Control | Feed Day | No | 09:50 | 09:00 - 09:59 | Late Morning | 37,6 | 77  | 16,8  | 16,8  | 18,75 | 574,39 | 94,37  |
| 2019/06/09 | CH2206 | Male | Three y/o | Control | Control | Feed Day | No | 09:50 | 09:00 - 09:59 | Late Morning | 37,5 | 50  | 38,8  | 38,8  | 18,65 | 539,52 | 123,04 |
| 2019/06/09 | CH2205 | Male | Three y/o | Control | Control | Feed Day | No | 09:55 | 09:00 - 09:59 | Late Morning | 37,6 |     | 9,4   | 9,4   | 18,75 |        | 74,66  |
| 2019/06/09 | CH2206 | Male | Three y/o | Control | Control | Feed Day | No | 09:55 | 09:00 - 09:59 | Late Morning | 37,5 | 71  | 41,2  | 41,2  | 18,65 | 568,10 | 125,11 |
| 2019/06/09 | CH2205 | Male | Three y/o | Control | Control | Feed Day | No | 10:00 | 10:00 - 10:59 | Late Morning | 37,5 | 88  | 9,4   | 9,4   | 18,65 | 584,49 | 74,66  |
| 2019/06/09 | CH2206 | Male | Three y/o | Control | Control | Feed Day | No | 10:00 | 10:00 - 10:59 | Late Morning | 37,5 | 83  | 37,2  | 37,2  | 18,65 | 580,11 | 121,59 |
| 2019/06/09 | CH2205 | Male | Three y/o | Control | Control | Feed Day | No | 10:05 | 10:00 - 10:59 | Late Morning | 37,4 | 76  | 2,8   | 2,8   | 18,55 | 573,39 | 34,04  |



|            |        |      |           |         |         |          |     |       |               |              |      |     |       |       |       |        |        |
|------------|--------|------|-----------|---------|---------|----------|-----|-------|---------------|--------------|------|-----|-------|-------|-------|--------|--------|
| 2019/06/09 | CH2206 | Male | Three y/o | Control | Control | Feed Day | No  | 10:05 | 10:00 - 10:59 | Late Morning | 37,6 | 68  | 20,8  | 20,8  | 18,75 | 564,71 | 101,65 |
| 2019/06/09 | CH2205 | Male | Three y/o | Control | Control | Feed Day | No  | 10:10 | 10:00 - 10:59 | Late Morning | 37,4 | 63  | 6,2   | 6,2   | 18,55 | 558,62 | 60,63  |
| 2019/06/09 | CH2206 | Male | Three y/o | Control | Control | Feed Day | No  | 10:10 | 10:00 - 10:59 | Late Morning | 37,4 | 49  | 20,2  | 20,2  | 18,55 | 537,80 | 100,65 |
| 2019/06/09 | CH2205 | Male | Three y/o | Control | Control | Feed Day | No  | 10:15 | 10:00 - 10:59 | Late Morning | 37,4 | 57  | 4,6   | 4,6   | 18,55 | 550,47 | 50,61  |
| 2019/06/09 | CH2206 | Male | Three y/o | Control | Control | Feed Day | No  | 10:15 | 10:00 - 10:59 | Late Morning | 37,4 | 44  | 37,4  | 37,4  | 18,55 | 528,51 | 121,77 |
| 2019/06/09 | CH2205 | Male | Three y/o | Control | Control | Feed Day | No  | 10:20 | 10:00 - 10:59 | Late Morning | 37,4 | 60  | 6,2   | 6,2   | 18,55 | 554,67 | 60,63  |
| 2019/06/09 | CH2206 | Male | Three y/o | Control | Control | Feed Day | No  | 10:20 | 10:00 - 10:59 | Late Morning | 37,4 | 48  | 16,8  | 16,8  | 18,55 | 536,04 | 94,37  |
| 2019/06/09 | CH2205 | Male | Three y/o | Control | Control | Feed Day | No  | 10:25 | 10:00 - 10:59 | Late Morning | 37,4 | 65  | 22,4  | 22,4  | 18,55 | 561,12 | 104,19 |
| 2019/06/09 | CH2206 | Male | Three y/o | Control | Control | Feed Day | No  | 10:25 | 10:00 - 10:59 | Late Morning | 37,4 | 56  | 18,0  | 18,0  | 18,55 | 549,01 | 96,72  |
| 2019/06/09 | CH2205 | Male | Three y/o | Control | Control | Feed Day | Yes | 10:30 | 10:00 - 10:59 | Late Morning | 37,3 |     | 13,6  | 13,6  | 18,46 |        | 87,18  |
| 2019/06/09 | CH2206 | Male | Three y/o | Control | Control | Feed Day | Yes | 10:30 | 10:00 - 10:59 | Late Morning | 37,3 | 69  | 31,8  | 31,8  | 18,46 | 565,86 | 116,20 |
| 2019/06/09 | CH2205 | Male | Three y/o | Control | Control | Feed Day | Yes | 10:35 | 10:00 - 10:59 | Late Morning | 37,3 | 49  | 21,6  | 21,6  | 18,46 | 537,80 | 102,94 |
| 2019/06/09 | CH2206 | Male | Three y/o | Control | Control | Feed Day | Yes | 10:35 | 10:00 - 10:59 | Late Morning | 37,4 | 52  | 9,4   | 9,4   | 18,55 | 542,83 | 74,66  |
| 2019/06/09 | CH2205 | Male | Three y/o | Control | Control | Feed Day | Yes | 10:40 | 10:00 - 10:59 | Late Morning | 37,3 | 57  | 21,8  | 21,8  | 18,46 | 550,47 | 103,26 |
| 2019/06/09 | CH2206 | Male | Three y/o | Control | Control | Feed Day | Yes | 10:40 | 10:00 - 10:59 | Late Morning | 37,4 | 72  | 22,8  | 22,8  | 18,55 | 569,20 | 104,79 |
| 2019/06/09 | CH2205 | Male | Three y/o | Control | Control | Feed Day | Yes | 10:45 | 10:00 - 10:59 | Late Morning | 37,3 | 86  | 20,4  | 20,4  | 18,46 | 582,77 | 100,99 |
| 2019/06/09 | CH2206 | Male | Three y/o | Control | Control | Feed Day | Yes | 10:45 | 10:00 - 10:59 | Late Morning | 37,4 | 58  | 29,2  | 29,2  | 18,55 | 551,90 | 113,27 |
| 2019/06/09 | CH2205 | Male | Three y/o | Control | Control | Feed Day | Yes | 10:50 | 10:00 - 10:59 | Late Morning | 37,2 | 120 | 34,6  | 34,6  | 18,36 | 606,78 | 119,10 |
| 2019/06/09 | CH2206 | Male | Three y/o | Control | Control | Feed Day | Yes | 10:50 | 10:00 - 10:59 | Late Morning | 37,4 | 118 | 16,6  | 16,6  | 18,55 | 605,61 | 93,96  |
| 2019/06/09 | CH2205 | Male | Three y/o | Control | Control | Feed Day | Yes | 10:55 | 10:00 - 10:59 | Late Morning | 37,3 | 83  | 65,4  | 65,4  | 18,46 | 580,11 | 141,08 |
| 2019/06/09 | CH2206 | Male | Three y/o | Control | Control | Feed Day | Yes | 10:55 | 10:00 - 10:59 | Late Morning | 37,5 | 101 | 102,8 | 102,8 | 18,65 | 594,59 | 156,81 |
| 2019/06/09 | CH2205 | Male | Three y/o | Control | Control | Feed Day | Yes | 11:00 | 11:00 - 11:59 | Late Morning | 37,3 | 93  | 37,4  | 37,4  | 18,46 | 588,58 | 121,77 |
| 2019/06/09 | CH2206 | Male | Three y/o | Control | Control | Feed Day | Yes | 11:00 | 11:00 - 11:59 | Late Morning | 37,5 | 106 | 88,0  | 88,0  | 18,65 | 598,06 | 151,39 |
| 2019/06/09 | CH2205 | Male | Three y/o | Control | Control | Feed Day | Yes | 11:05 | 11:00 - 11:59 | Late Morning | 37,3 |     | 194,6 | 194,6 | 18,46 |        | 179,16 |
| 2019/06/09 | CH2206 | Male | Three y/o | Control | Control | Feed Day | Yes | 11:05 | 11:00 - 11:59 | Late Morning | 37,7 | 112 | 151,8 | 151,8 | 18,85 | 601,96 | 170,44 |
| 2019/06/09 | CH2205 | Male | Three y/o | Control | Control | Feed Day | Yes | 11:10 | 11:00 - 11:59 | Late Morning | 37,4 | 106 | 106,6 | 106,6 | 18,55 | 598,06 | 158,07 |
| 2019/06/09 | CH2206 | Male | Three y/o | Control | Control | Feed Day | Yes | 11:10 | 11:00 - 11:59 | Late Morning | 37,7 | 120 | 229,2 | 229,2 | 18,85 | 606,78 | 184,92 |
| 2019/06/09 | CH2205 | Male | Three y/o | Control | Control | Feed Day | Yes | 11:15 | 11:00 - 11:59 | Late Morning | 37,5 |     | 98,0  | 98,0  | 18,65 |        | 155,14 |
| 2019/06/09 | CH2206 | Male | Three y/o | Control | Control | Feed Day | Yes | 11:15 | 11:00 - 11:59 | Late Morning | 37,8 | 121 | 30,8  | 30,8  | 18,95 | 607,35 | 115,10 |
| 2019/06/09 | CH2205 | Male | Three y/o | Control | Control | Feed Day | Yes | 11:20 | 11:00 - 11:59 | Late Morning | 37,6 | 113 | 49,6  | 49,6  | 18,75 | 602,58 | 131,51 |
| 2019/06/09 | CH2206 | Male | Three y/o | Control | Control | Feed Day | Yes | 11:20 | 11:00 - 11:59 | Late Morning | 37,8 | 129 | 86,4  | 86,4  | 18,95 | 611,75 | 150,75 |
| 2019/06/09 | CH2205 | Male | Three y/o | Control | Control | Feed Day | Yes | 11:25 | 11:00 - 11:59 | Late Morning | 37,7 | 128 | 71,8  | 71,8  | 18,85 | 611,22 | 144,32 |
| 2019/06/09 | CH2206 | Male | Three y/o | Control | Control | Feed Day | Yes | 11:25 | 11:00 - 11:59 | Late Morning | 37,9 | 137 | 55,0  | 55,0  | 19,05 | 615,83 | 135,08 |
| 2019/06/09 | CH2205 | Male | Three y/o | Control | Control | Feed Day | No  | 11:30 | 11:00 - 11:59 | Late Morning | 37,9 | 156 | 195,0 | 195,0 | 19,05 | 624,43 | 179,23 |
| 2019/06/09 | CH2206 | Male | Three y/o | Control | Control | Feed Day | No  | 11:30 | 11:00 - 11:59 | Late Morning | 37,9 | 109 | 240,2 | 240,2 | 19,05 | 600,04 | 186,57 |
| 2019/06/09 | CH2205 | Male | Three y/o | Control | Control | Feed Day | No  | 11:35 | 11:00 - 11:59 | Late Morning | 37,9 | 96  | 41,0  | 41,0  | 19,05 | 590,91 | 124,94 |
| 2019/06/09 | CH2206 | Male | Three y/o | Control | Control | Feed Day | No  | 11:35 | 11:00 - 11:59 | Late Morning | 38,0 | 134 | 134,8 | 134,8 | 19,15 | 614,33 | 166,28 |
| 2019/06/09 | CH2205 | Male | Three y/o | Control | Control | Feed Day | No  | 11:40 | 11:00 - 11:59 | Late Morning | 38,0 | 143 | 77,6  | 77,6  | 19,15 | 618,69 | 147,02 |
| 2019/06/09 | CH2206 | Male | Three y/o | Control | Control | Feed Day | No  | 11:40 | 11:00 - 11:59 | Late Morning | 38,0 |     | 19,4  | 19,4  | 19,15 |        | 99,28  |
| 2019/06/09 | CH2205 | Male | Three y/o | Control | Control | Feed Day | No  | 11:45 | 11:00 - 11:59 | Late Morning | 38,1 | 126 | 16,0  | 16,0  | 19,26 | 610,14 | 92,71  |
| 2019/06/09 | CH2206 | Male | Three y/o | Control | Control | Feed Day | No  | 11:45 | 11:00 - 11:59 | Late Morning | 38,0 | 115 | 22,0  | 22,0  | 19,15 | 603,82 | 103,57 |
| 2019/06/09 | CH2205 | Male | Three y/o | Control | Control | Feed Day | No  | 11:50 | 11:00 - 11:59 | Late Morning | 38,2 | 121 | 31,0  | 31,0  | 19,36 | 607,35 | 115,32 |
| 2019/06/09 | CH2206 | Male | Three y/o | Control | Control | Feed Day | No  | 11:50 | 11:00 - 11:59 | Late Morning | 38,0 | 109 | 64,2  | 64,2  | 19,15 | 600,04 | 140,44 |
| 2019/06/09 | CH2205 | Male | Three y/o | Control | Control | Feed Day | No  | 11:55 | 11:00 - 11:59 | Late Morning | 38,2 | 124 | 109,2 | 109,2 | 19,36 | 609,04 | 158,91 |
| 2019/06/09 | CH2206 | Male | Three y/o | Control | Control | Feed Day | No  | 11:55 | 11:00 - 11:59 | Late Morning | 38,0 | 114 | 26,8  | 26,8  | 19,15 | 603,20 | 110,33 |
| 2019/06/09 | CH2205 | Male | Three y/o | Control | Control | Feed Day | No  | 12:00 | 12:00 - 12:59 | Afternoon    | 38,2 | 77  | 27,2  | 27,2  | 19,36 | 574,39 | 110,83 |
| 2019/06/09 | CH2206 | Male | Three y/o | Control | Control | Feed Day | No  | 12:00 | 12:00 - 12:59 | Afternoon    | 37,9 | 117 | 33,0  | 33,0  | 19,05 | 605,02 | 117,47 |
| 2019/06/09 | CH2205 | Male | Three y/o | Control | Control | Feed Day | No  | 12:05 | 12:00 - 12:59 | Afternoon    | 38,1 | 39  | 41,2  | 41,2  | 19,26 | 517,82 | 125,11 |
| 2019/06/09 | CH2206 | Male | Three y/o | Control | Control | Feed Day | No  | 12:05 | 12:00 - 12:59 | Afternoon    | 37,8 | 140 | 74,4  | 74,4  | 18,95 | 617,28 | 145,55 |
| 2019/06/09 | CH2205 | Male | Three y/o | Control | Control | Feed Day | No  | 12:10 | 12:00 - 12:59 | Afternoon    | 37,9 |     | 13,4  | 13,4  | 19,05 |        | 86,68  |
| 2019/06/09 | CH2206 | Male | Three y/o | Control | Control | Feed Day | No  | 12:10 | 12:00 - 12:59 | Afternoon    | 37,7 | 119 | 25,4  | 25,4  | 18,85 | 606,20 | 108,49 |
| 2019/06/09 | CH2205 | Male | Three y/o | Control | Control | Feed Day | No  | 12:15 | 12:00 - 12:59 | Afternoon    | 37,7 | 112 | 63,6  | 63,6  | 18,85 | 601,96 | 140,11 |
| 2019/06/09 | CH2206 | Male | Three y/o | Control | Control | Feed Day | No  | 12:15 | 12:00 - 12:59 | Afternoon    | 37,5 | 120 | 31,0  | 31,0  | 18,65 | 606,78 | 115,32 |
| 2019/06/09 | CH2205 | Male | Three y/o | Control | Control | Feed Day | No  | 12:20 | 12:00 - 12:59 | Afternoon    | 37,4 | 126 | 33,4  | 33,4  | 18,55 | 610,14 | 117,88 |
| 2019/06/09 | CH2206 | Male | Three y/o | Control | Control | Feed Day | No  | 12:20 | 12:00 - 12:59 | Afternoon    | 37,6 |     | 25,2  | 25,2  | 18,75 |        | 108,22 |
| 2019/06/09 | CH2205 | Male | Three y/o | Control | Control | Feed Day | No  | 12:25 | 12:00 - 12:59 | Afternoon    | 37,7 | 160 | 30,6  | 30,6  | 18,85 | 626,07 | 114,87 |
| 2019/06/09 | CH2206 | Male | Three y/o | Control | Control | Feed Day | No  | 12:25 | 12:00 - 12:59 | Afternoon    | 37,4 |     | 151,2 | 151,2 | 18,55 |        | 170,30 |
| 2019/06/09 | CH2205 | Male | Three y/o | Control | Control | Feed Day | No  | 12:30 | 12:00 - 12:59 | Afternoon    | 37,6 | 177 | 22,6  | 22,6  | 18,75 | 632,55 | 104,49 |
| 2019/06/09 | CH2206 | Male | Three y/o | Control | Control | Feed Day | No  | 12:30 | 12:00 - 12:59 | Afternoon    | 37,5 | 113 | 88,0  | 88,0  | 18,65 | 602,58 | 151,39 |
| 2019/06/09 | CH2205 | Male | Three y/o | Control | Control | Feed Day | No  | 12:35 | 12:00 - 12:59 | Afternoon    | 37,7 |     | 21,4  | 21,4  | 18,85 |        | 102,63 |
| 2019/06/09 | CH2206 | Male | Three y/o | Control | Control | Feed Day | No  | 12:35 | 12:00 - 12:59 | Afternoon    | 37,5 |     | 35,6  | 35,6  | 18,65 |        | 120,08 |
| 2019/06/09 | CH2205 | Male | Three y/o | Control | Control | Feed Day | No  | 12:40 | 12:00 - 12:59 | Afternoon    | 37,7 | 108 | 93,8  | 93,8  | 18,85 | 599,39 | 153,61 |
| 2019/06/09 | CH2206 | Male | Three y/o | Control | Control | Feed Day | No  | 12:40 | 12:00 - 12:59 | Afternoon    | 37,4 | 110 | 27,6  | 27,6  | 18,55 | 600,69 | 111,33 |
| 2019/06/09 | CH2205 | Male | Three y/o | Control | Control | Feed Day | No  | 12:45 | 12:00 - 12:59 | Afternoon    | 37,5 | 124 | 43,8  | 43,8  | 18,65 | 609,04 | 127,22 |
| 2019/06/09 | CH2206 | Male | Three y/o | Control | Control | Feed Day | No  | 12:45 | 12:00 - 12:59 | Afternoon    | 37,5 | 105 | 150,0 | 150,0 | 18,65 | 597,38 | 170,02 |
| 2019/06/09 | CH2205 | Male | Three y/o | Control | Control | Feed Day | No  | 12:50 | 12:00 - 12:59 | Afternoon    | 37,7 | 123 | 21,2  | 21,2  | 18,85 | 608,49 | 102,31 |
| 2019/06/09 | CH2206 | Male | Three y/o | Control | Control | Feed Day | No  | 12:50 | 12:00 - 12:59 | Afternoon    | 37,7 |     | 25,2  | 25,2  | 18,85 |        | 108,22 |
| 2019/06/09 | CH2205 | Male | Three y/o | Control | Control | Feed Day | No  | 12:55 | 12:00 - 12:59 | Afternoon    | 37,7 | 107 | 18,8  | 18,8  | 18,85 | 598,73 | 98,20  |
| 2019/06/09 | CH2206 | Male | Three y/o | Control | Control | Feed Day | No  | 12:55 | 12:00 - 12:59 | Afternoon    | 37,8 | 158 | 142,0 | 142,0 | 18,95 | 625,26 | 168,10 |
| 2019/06/09 | CH2205 | Male | Three y/o | Control | Control | Feed Day | No  | 13:00 | 13:00 - 13:59 | Afternoon    | 37,9 |     | 35,2  | 35,2  | 19,05 |        | 119,69 |



|            |        |      |           |         |         |          |    |       |               |           |      |     |       |       |       |        |
|------------|--------|------|-----------|---------|---------|----------|----|-------|---------------|-----------|------|-----|-------|-------|-------|--------|
| 2019/06/09 | CH2206 | Male | Three y/o | Control | Control | Feed Day | No | 13:00 | 13:00 - 13:59 | Afternoon | 38,1 |     | 65,0  | 65,0  | 19,26 | 140,87 |
| 2019/06/09 | CH2205 | Male | Three y/o | Control | Control | Feed Day | No | 13:05 | 13:00 - 13:59 | Afternoon | 37,9 |     | 46,6  | 46,6  | 19,05 | 129,35 |
| 2019/06/09 | CH2206 | Male | Three y/o | Control | Control | Feed Day | No | 13:05 | 13:00 - 13:59 | Afternoon | 38,1 | 112 | 32,2  | 32,2  | 19,26 | 116,63 |
| 2019/06/09 | CH2205 | Male | Three y/o | Control | Control | Feed Day | No | 13:10 | 13:00 - 13:59 | Afternoon | 37,5 | 165 | 16,8  | 16,8  | 18,65 | 94,37  |
| 2019/06/09 | CH2206 | Male | Three y/o | Control | Control | Feed Day | No | 13:10 | 13:00 - 13:59 | Afternoon | 38,2 | 125 | 59,0  | 59,0  | 19,36 | 137,51 |
| 2019/06/09 | CH2205 | Male | Three y/o | Control | Control | Feed Day | No | 13:15 | 13:00 - 13:59 | Afternoon | 37,3 | 99  | 17,6  | 17,6  | 18,46 | 95,95  |
| 2019/06/09 | CH2206 | Male | Three y/o | Control | Control | Feed Day | No | 13:15 | 13:00 - 13:59 | Afternoon | 37,7 | 125 | 28,4  | 28,4  | 18,85 | 112,31 |
| 2019/06/09 | CH2205 | Male | Three y/o | Control | Control | Feed Day | No | 13:20 | 13:00 - 13:59 | Afternoon | 37,6 | 105 | 8,8   | 8,8   | 18,75 | 72,43  |
| 2019/06/09 | CH2206 | Male | Three y/o | Control | Control | Feed Day | No | 13:20 | 13:00 - 13:59 | Afternoon | 37,3 | 119 | 19,6  | 19,6  | 18,46 | 99,63  |
| 2019/06/09 | CH2205 | Male | Three y/o | Control | Control | Feed Day | No | 13:25 | 13:00 - 13:59 | Afternoon | 37,6 | 180 | 21,2  | 21,2  | 18,75 | 102,31 |
| 2019/06/09 | CH2206 | Male | Three y/o | Control | Control | Feed Day | No | 13:25 | 13:00 - 13:59 | Afternoon | 37,4 |     | 33,6  | 33,6  | 18,55 | 118,09 |
| 2019/06/09 | CH2205 | Male | Three y/o | Control | Control | Feed Day | No | 13:30 | 13:00 - 13:59 | Afternoon | 37,7 | 103 | 46,2  | 46,2  | 18,85 | 129,06 |
| 2019/06/09 | CH2206 | Male | Three y/o | Control | Control | Feed Day | No | 13:30 | 13:00 - 13:59 | Afternoon | 37,7 | 120 | 35,4  | 35,4  | 18,85 | 119,88 |
| 2019/06/09 | CH2205 | Male | Three y/o | Control | Control | Feed Day | No | 13:35 | 13:00 - 13:59 | Afternoon | 37,9 | 100 | 58,6  | 58,6  | 19,05 | 137,28 |
| 2019/06/09 | CH2206 | Male | Three y/o | Control | Control | Feed Day | No | 13:35 | 13:00 - 13:59 | Afternoon | 37,8 | 119 | 40,4  | 40,4  | 18,95 | 124,43 |
| 2019/06/09 | CH2205 | Male | Three y/o | Control | Control | Feed Day | No | 13:40 | 13:00 - 13:59 | Afternoon | 37,6 | 106 | 19,8  | 19,8  | 18,75 | 99,97  |
| 2019/06/09 | CH2206 | Male | Three y/o | Control | Control | Feed Day | No | 13:40 | 13:00 - 13:59 | Afternoon | 37,9 |     | 50,6  | 50,6  | 19,05 | 132,20 |
| 2019/06/09 | CH2205 | Male | Three y/o | Control | Control | Feed Day | No | 13:45 | 13:00 - 13:59 | Afternoon | 37,7 | 121 | 31,6  | 31,6  | 18,85 | 115,98 |
| 2019/06/09 | CH2206 | Male | Three y/o | Control | Control | Feed Day | No | 13:45 | 13:00 - 13:59 | Afternoon | 38,1 | 182 | 20,6  | 20,6  | 19,26 | 101,32 |
| 2019/06/09 | CH2205 | Male | Three y/o | Control | Control | Feed Day | No | 13:50 | 13:00 - 13:59 | Afternoon | 37,9 |     | 35,6  | 35,6  | 19,05 | 120,08 |
| 2019/06/09 | CH2206 | Male | Three y/o | Control | Control | Feed Day | No | 13:50 | 13:00 - 13:59 | Afternoon | 38,1 | 134 | 42,8  | 42,8  | 19,26 | 126,42 |
| 2019/06/09 | CH2205 | Male | Three y/o | Control | Control | Feed Day | No | 13:55 | 13:00 - 13:59 | Afternoon | 37,6 | 109 | 106,2 | 106,2 | 18,75 | 157,94 |
| 2019/06/09 | CH2206 | Male | Three y/o | Control | Control | Feed Day | No | 13:55 | 13:00 - 13:59 | Afternoon | 37,9 | 138 | 92,8  | 92,8  | 19,05 | 153,24 |
| 2019/06/09 | CH2205 | Male | Three y/o | Control | Control | Feed Day | No | 14:00 | 14:00 - 14:59 | Afternoon | 37,9 | 101 | 18,4  | 18,4  | 19,05 | 97,47  |
| 2019/06/09 | CH2206 | Male | Three y/o | Control | Control | Feed Day | No | 14:00 | 14:00 - 14:59 | Afternoon | 37,8 | 118 | 21,2  | 21,2  | 18,95 | 102,31 |
| 2019/06/09 | CH2205 | Male | Three y/o | Control | Control | Feed Day | No | 14:05 | 14:00 - 14:59 | Afternoon | 37,9 | 115 | 15,8  | 15,8  | 19,05 | 92,28  |
| 2019/06/09 | CH2206 | Male | Three y/o | Control | Control | Feed Day | No | 14:05 | 14:00 - 14:59 | Afternoon | 37,8 | 89  | 142,6 | 142,6 | 18,95 | 168,24 |
| 2019/06/09 | CH2205 | Male | Three y/o | Control | Control | Feed Day | No | 14:10 | 14:00 - 14:59 | Afternoon | 38,0 | 110 | 14,2  | 14,2  | 19,15 | 88,65  |
| 2019/06/09 | CH2206 | Male | Three y/o | Control | Control | Feed Day | No | 14:10 | 14:00 - 14:59 | Afternoon | 37,9 | 100 | 32,8  | 32,8  | 19,05 | 117,26 |
| 2019/06/09 | CH2205 | Male | Three y/o | Control | Control | Feed Day | No | 14:15 | 14:00 - 14:59 | Afternoon | 38,0 | 95  | 17,6  | 17,6  | 19,15 | 95,95  |
| 2019/06/09 | CH2206 | Male | Three y/o | Control | Control | Feed Day | No | 14:15 | 14:00 - 14:59 | Afternoon | 37,9 | 111 | 52,6  | 52,6  | 19,05 | 133,54 |
| 2019/06/09 | CH2205 | Male | Three y/o | Control | Control | Feed Day | No | 14:20 | 14:00 - 14:59 | Afternoon | 38,1 | 100 | 7,4   | 7,4   | 19,26 | 66,59  |
| 2019/06/09 | CH2206 | Male | Three y/o | Control | Control | Feed Day | No | 14:20 | 14:00 - 14:59 | Afternoon | 37,9 | 92  | 45,2  | 45,2  | 19,05 | 128,30 |
| 2019/06/09 | CH2205 | Male | Three y/o | Control | Control | Feed Day | No | 14:25 | 14:00 - 14:59 | Afternoon | 38,1 | 90  | 4,6   | 4,6   | 19,26 | 50,61  |
| 2019/06/09 | CH2206 | Male | Three y/o | Control | Control | Feed Day | No | 14:25 | 14:00 - 14:59 | Afternoon | 38,0 | 97  | 46,2  | 46,2  | 19,15 | 129,06 |
| 2019/06/09 | CH2205 | Male | Three y/o | Control | Control | Feed Day | No | 14:30 | 14:00 - 14:59 | Afternoon | 38,1 | 97  | 8,2   | 8,2   | 19,26 | 70,05  |
| 2019/06/09 | CH2206 | Male | Three y/o | Control | Control | Feed Day | No | 14:30 | 14:00 - 14:59 | Afternoon | 38,0 | 100 | 46,6  | 46,6  | 19,15 | 129,35 |
| 2019/06/09 | CH2205 | Male | Three y/o | Control | Control | Feed Day | No | 14:35 | 14:00 - 14:59 | Afternoon | 38,2 | 106 | 8,4   | 8,4   | 19,36 | 70,86  |
| 2019/06/09 | CH2206 | Male | Three y/o | Control | Control | Feed Day | No | 14:35 | 14:00 - 14:59 | Afternoon | 38,0 | 102 | 43,0  | 43,0  | 19,15 | 126,58 |
| 2019/06/09 | CH2205 | Male | Three y/o | Control | Control | Feed Day | No | 14:40 | 14:00 - 14:59 | Afternoon | 38,2 | 109 | 28,4  | 28,4  | 19,36 | 112,31 |
| 2019/06/09 | CH2206 | Male | Three y/o | Control | Control | Feed Day | No | 14:40 | 14:00 - 14:59 | Afternoon | 38,1 | 102 | 107,2 | 107,2 | 19,26 | 158,27 |
| 2019/06/09 | CH2205 | Male | Three y/o | Control | Control | Feed Day | No | 14:45 | 14:00 - 14:59 | Afternoon | 38,2 | 120 | 64,8  | 64,8  | 19,36 | 140,76 |
| 2019/06/09 | CH2206 | Male | Three y/o | Control | Control | Feed Day | No | 14:45 | 14:00 - 14:59 | Afternoon | 38,0 | 106 | 30,6  | 30,6  | 19,15 | 114,87 |
| 2019/06/09 | CH2205 | Male | Three y/o | Control | Control | Feed Day | No | 14:50 | 14:00 - 14:59 | Afternoon | 38,2 | 113 | 38,6  | 38,6  | 19,36 | 122,86 |
| 2019/06/09 | CH2206 | Male | Three y/o | Control | Control | Feed Day | No | 14:50 | 14:00 - 14:59 | Afternoon | 37,9 | 117 | 18,4  | 18,4  | 19,05 | 97,47  |
| 2019/06/09 | CH2205 | Male | Three y/o | Control | Control | Feed Day | No | 14:55 | 14:00 - 14:59 | Afternoon | 38,0 | 117 | 16,2  | 16,2  | 19,15 | 93,13  |
| 2019/06/09 | CH2206 | Male | Three y/o | Control | Control | Feed Day | No | 14:55 | 14:00 - 14:59 | Afternoon | 37,8 |     | 17,0  | 17,0  | 18,95 | 94,77  |
| 2019/06/09 | CH2205 | Male | Three y/o | Control | Control | Feed Day | No | 15:00 | 15:00 - 15:59 | Afternoon | 37,7 |     | 29,8  | 29,8  | 18,85 | 113,97 |
| 2019/06/09 | CH2206 | Male | Three y/o | Control | Control | Feed Day | No | 15:00 | 15:00 - 15:59 | Afternoon | 37,9 | 98  | 19,0  | 19,0  | 19,05 | 98,56  |
| 2019/06/09 | CH2205 | Male | Three y/o | Control | Control | Feed Day | No | 15:05 | 15:00 - 15:59 | Afternoon | 37,5 |     | 21,2  | 21,2  | 18,65 | 102,31 |
| 2019/06/09 | CH2206 | Male | Three y/o | Control | Control | Feed Day | No | 15:05 | 15:00 - 15:59 | Afternoon | 37,7 | 118 | 16,6  | 16,6  | 18,85 | 93,96  |
| 2019/06/09 | CH2205 | Male | Three y/o | Control | Control | Feed Day | No | 15:10 | 15:00 - 15:59 | Afternoon | 37,5 |     | 34,0  | 34,0  | 18,65 | 118,49 |
| 2019/06/09 | CH2206 | Male | Three y/o | Control | Control | Feed Day | No | 15:10 | 15:00 - 15:59 | Afternoon | 37,7 | 87  | 48,4  | 48,4  | 18,85 | 130,66 |
| 2019/06/09 | CH2205 | Male | Three y/o | Control | Control | Feed Day | No | 15:15 | 15:00 - 15:59 | Afternoon | 37,7 | 110 | 8,4   | 8,4   | 18,85 | 70,86  |
| 2019/06/09 | CH2206 | Male | Three y/o | Control | Control | Feed Day | No | 15:15 | 15:00 - 15:59 | Afternoon | 37,8 | 83  | 40,8  | 40,8  | 18,95 | 124,77 |
| 2019/06/09 | CH2205 | Male | Three y/o | Control | Control | Feed Day | No | 15:20 | 15:00 - 15:59 | Afternoon | 37,7 | 77  | 4,6   | 4,6   | 18,85 | 50,61  |
| 2019/06/09 | CH2206 | Male | Three y/o | Control | Control | Feed Day | No | 15:20 | 15:00 - 15:59 | Afternoon | 37,8 | 123 | 26,8  | 26,8  | 18,95 | 110,33 |
| 2019/06/09 | CH2205 | Male | Three y/o | Control | Control | Feed Day | No | 15:25 | 15:00 - 15:59 | Afternoon | 37,9 | 103 | 4,4   | 4,4   | 19,05 | 99,00  |
| 2019/06/09 | CH2206 | Male | Three y/o | Control | Control | Feed Day | No | 15:25 | 15:00 - 15:59 | Afternoon | 37,9 | 92  | 37,4  | 37,4  | 19,05 | 121,77 |
| 2019/06/09 | CH2205 | Male | Three y/o | Control | Control | Feed Day | No | 15:30 | 15:00 - 15:59 | Afternoon | 38,0 | 95  | 4,0   | 4,0   | 19,15 | 45,94  |
| 2019/06/09 | CH2206 | Male | Three y/o | Control | Control | Feed Day | No | 15:30 | 15:00 - 15:59 | Afternoon | 38,0 | 84  | 41,4  | 41,4  | 19,15 | 125,27 |
| 2019/06/09 | CH2205 | Male | Three y/o | Control | Control | Feed Day | No | 15:35 | 15:00 - 15:59 | Afternoon | 38,1 | 91  | 4,6   | 4,6   | 19,26 | 50,61  |
| 2019/06/09 | CH2206 | Male | Three y/o | Control | Control | Feed Day | No | 15:35 | 15:00 - 15:59 | Afternoon | 38,0 | 83  | 40,0  | 40,0  | 19,15 | 124,09 |
| 2019/06/09 | CH2205 | Male | Three y/o | Control | Control | Feed Day | No | 15:40 | 15:00 - 15:59 | Afternoon | 38,1 | 82  | 6,0   | 6,0   | 19,26 | 59,53  |
| 2019/06/09 | CH2206 | Male | Three y/o | Control | Control | Feed Day | No | 15:40 | 15:00 - 15:59 | Afternoon | 38,1 | 96  | 39,6  | 39,6  | 19,26 | 123,74 |
| 2019/06/09 | CH2205 | Male | Three y/o | Control | Control | Feed Day | No | 15:45 | 15:00 - 15:59 | Afternoon | 38,2 | 80  | 4,6   | 4,6   | 19,36 | 50,61  |
| 2019/06/09 | CH2206 | Male | Three y/o | Control | Control | Feed Day | No | 15:45 | 15:00 - 15:59 | Afternoon | 38,1 | 90  | 42,2  | 42,2  | 19,26 | 125,93 |
| 2019/06/09 | CH2205 | Male | Three y/o | Control | Control | Feed Day | No | 15:50 | 15:00 - 15:59 | Afternoon | 38,2 | 83  | 5,6   | 5,6   | 19,36 | 57,21  |
| 2019/06/09 | CH2206 | Male | Three y/o | Control | Control | Feed Day | No | 15:50 | 15:00 - 15:59 | Afternoon | 38,1 | 78  | 43,6  | 43,6  | 19,26 | 127,06 |
| 2019/06/09 | CH2205 | Male | Three y/o | Control | Control | Feed Day | No | 15:55 | 15:00 - 15:59 | Afternoon | 38,2 | 97  | 11,0  | 11,0  | 19,36 | 79,98  |



|            |        |      |           |         |         |          |    |       |               |           |      |     |      |      |       |        |        |
|------------|--------|------|-----------|---------|---------|----------|----|-------|---------------|-----------|------|-----|------|------|-------|--------|--------|
| 2019/06/09 | CH2206 | Male | Three y/o | Control | Control | Feed Day | No | 15:55 | 15:00 - 15:59 | Afternoon | 38,1 | 86  | 40,0 | 40,0 | 19,26 | 582,77 | 124,09 |
| 2019/06/09 | CH2205 | Male | Three y/o | Control | Control | Feed Day | No | 16:00 | 16:00 - 16:59 | Evening   | 38,2 | 93  | 5,0  | 5,0  | 19,36 | 588,58 | 53,41  |
| 2019/06/09 | CH2206 | Male | Three y/o | Control | Control | Feed Day | No | 16:00 | 16:00 - 16:59 | Evening   | 38,1 | 87  | 36,8 | 36,8 | 19,26 | 583,64 | 121,22 |
| 2019/06/09 | CH2205 | Male | Three y/o | Control | Control | Feed Day | No | 16:05 | 16:00 - 16:59 | Evening   | 38,2 | 73  | 5,6  | 5,6  | 19,36 | 570,27 | 57,21  |
| 2019/06/09 | CH2206 | Male | Three y/o | Control | Control | Feed Day | No | 16:05 | 16:00 - 16:59 | Evening   | 38,1 | 89  | 37,4 | 37,4 | 19,26 | 585,33 | 121,77 |
| 2019/06/09 | CH2205 | Male | Three y/o | Control | Control | Feed Day | No | 16:10 | 16:00 - 16:59 | Evening   | 38,2 | 80  | 4,0  | 4,0  | 19,36 | 577,31 | 45,94  |
| 2019/06/09 | CH2206 | Male | Three y/o | Control | Control | Feed Day | No | 16:10 | 16:00 - 16:59 | Evening   | 38,2 | 98  | 43,8 | 43,8 | 19,36 | 592,41 | 127,22 |
| 2019/06/09 | CH2205 | Male | Three y/o | Control | Control | Feed Day | No | 16:15 | 16:00 - 16:59 | Evening   | 38,1 | 89  | 3,0  | 3,0  | 19,26 | 585,33 | 36,34  |
| 2019/06/09 | CH2206 | Male | Three y/o | Control | Control | Feed Day | No | 16:15 | 16:00 - 16:59 | Evening   | 38,1 | 76  | 43,6 | 43,6 | 19,26 | 573,39 | 127,06 |
| 2019/06/09 | CH2205 | Male | Three y/o | Control | Control | Feed Day | No | 16:20 | 16:00 - 16:59 | Evening   | 38,1 |     | 13,8 | 13,8 | 19,26 |        | 87,68  |
| 2019/06/09 | CH2206 | Male | Three y/o | Control | Control | Feed Day | No | 16:20 | 16:00 - 16:59 | Evening   | 38,1 | 115 | 45,4 | 45,4 | 19,26 | 603,82 | 128,45 |
| 2019/06/09 | CH2205 | Male | Three y/o | Control | Control | Feed Day | No | 16:25 | 16:00 - 16:59 | Evening   | 38,2 | 182 | 9,6  | 9,6  | 19,36 | 634,31 | 75,37  |
| 2019/06/09 | CH2206 | Male | Three y/o | Control | Control | Feed Day | No | 16:25 | 16:00 - 16:59 | Evening   | 38,1 | 112 | 41,0 | 41,0 | 19,26 | 601,96 | 124,94 |
| 2019/06/09 | CH2205 | Male | Three y/o | Control | Control | Feed Day | No | 16:30 | 16:00 - 16:59 | Evening   | 38,2 | 84  | 7,0  | 7,0  | 19,36 | 581,01 | 64,72  |
| 2019/06/09 | CH2206 | Male | Three y/o | Control | Control | Feed Day | No | 16:30 | 16:00 - 16:59 | Evening   | 38,1 | 45  | 52,0 | 52,0 | 19,26 | 530,47 | 133,14 |
| 2019/06/09 | CH2205 | Male | Three y/o | Control | Control | Feed Day | No | 16:35 | 16:00 - 16:59 | Evening   | 38,2 | 90  | 6,8  | 6,8  | 19,36 | 586,16 | 63,74  |
| 2019/06/09 | CH2206 | Male | Three y/o | Control | Control | Feed Day | No | 16:35 | 16:00 - 16:59 | Evening   | 38,1 | 132 | 49,2 | 49,2 | 19,26 | 613,32 | 131,23 |
| 2019/06/09 | CH2205 | Male | Three y/o | Control | Control | Feed Day | No | 16:40 | 16:00 - 16:59 | Evening   | 38,2 | 92  | 6,0  | 6,0  | 19,36 | 587,78 | 59,53  |
| 2019/06/09 | CH2206 | Male | Three y/o | Control | Control | Feed Day | No | 16:40 | 16:00 - 16:59 | Evening   | 38,1 | 80  | 47,6 | 47,6 | 19,26 | 577,31 | 130,09 |
| 2019/06/09 | CH2205 | Male | Three y/o | Control | Control | Feed Day | No | 16:45 | 16:00 - 16:59 | Evening   | 38,2 |     | 4,6  | 4,6  | 19,36 | 591,66 | 50,61  |
| 2019/06/09 | CH2206 | Male | Three y/o | Control | Control | Feed Day | No | 16:45 | 16:00 - 16:59 | Evening   | 38,1 | 115 | 48,6 | 48,6 | 19,26 | 603,82 | 130,81 |
| 2019/06/09 | CH2205 | Male | Three y/o | Control | Control | Feed Day | No | 16:50 | 16:00 - 16:59 | Evening   | 38,2 | 72  | 5,2  | 5,2  | 19,36 | 569,20 | 54,72  |
| 2019/06/09 | CH2206 | Male | Three y/o | Control | Control | Feed Day | No | 16:50 | 16:00 - 16:59 | Evening   | 38,1 | 88  | 46,2 | 46,2 | 19,26 | 584,49 | 129,06 |
| 2019/06/09 | CH2205 | Male | Three y/o | Control | Control | Feed Day | No | 16:55 | 16:00 - 16:59 | Evening   | 38,2 | 86  | 3,4  | 3,4  | 19,36 | 582,77 | 40,51  |
| 2019/06/09 | CH2206 | Male | Three y/o | Control | Control | Feed Day | No | 16:55 | 16:00 - 16:59 | Evening   | 38,1 | 80  | 50,6 | 50,6 | 19,26 | 577,31 | 132,20 |
| 2019/06/09 | CH2205 | Male | Three y/o | Control | Control | Feed Day | No | 17:00 | 17:00 - 17:59 | Evening   | 38,2 | 89  | 2,6  | 2,6  | 19,36 | 585,33 | 31,57  |
| 2019/06/09 | CH2206 | Male | Three y/o | Control | Control | Feed Day | No | 17:00 | 17:00 - 17:59 | Evening   | 38,1 | 107 | 48,8 | 48,8 | 19,26 | 598,73 | 130,95 |
| 2019/06/09 | CH2205 | Male | Three y/o | Control | Control | Feed Day | No | 17:05 | 17:00 - 17:59 | Evening   | 38,2 | 96  | 4,8  | 4,8  | 19,36 | 590,91 | 52,04  |
| 2019/06/09 | CH2206 | Male | Three y/o | Control | Control | Feed Day | No | 17:05 | 17:00 - 17:59 | Evening   | 38,0 | 80  | 49,4 | 49,4 | 19,15 | 577,31 | 131,37 |
| 2019/06/09 | CH2205 | Male | Three y/o | Control | Control | Feed Day | No | 17:10 | 17:00 - 17:59 | Evening   | 38,2 | 57  | 6,2  | 6,2  | 19,36 | 550,47 | 60,63  |
| 2019/06/09 | CH2206 | Male | Three y/o | Control | Control | Feed Day | No | 17:10 | 17:00 - 17:59 | Evening   | 38,0 | 88  | 47,8 | 47,8 | 19,15 | 584,49 | 130,23 |
| 2019/06/09 | CH2205 | Male | Three y/o | Control | Control | Feed Day | No | 17:15 | 17:00 - 17:59 | Evening   | 38,2 | 49  | 7,4  | 7,4  | 19,36 | 537,80 | 66,59  |
| 2019/06/09 | CH2206 | Male | Three y/o | Control | Control | Feed Day | No | 17:15 | 17:00 - 17:59 | Evening   | 38,0 | 92  | 48,2 | 48,2 | 19,15 | 587,78 | 130,52 |
| 2019/06/09 | CH2205 | Male | Three y/o | Control | Control | Feed Day | No | 17:20 | 17:00 - 17:59 | Evening   | 38,2 | 75  | 7,6  | 7,6  | 19,36 | 572,36 | 67,49  |
| 2019/06/09 | CH2206 | Male | Three y/o | Control | Control | Feed Day | No | 17:20 | 17:00 - 17:59 | Evening   | 38,0 |     | 34,2 | 34,2 | 19,15 |        | 118,70 |
| 2019/06/09 | CH2205 | Male | Three y/o | Control | Control | Feed Day | No | 17:25 | 17:00 - 17:59 | Evening   | 38,2 | 88  | 16,4 | 16,4 | 19,36 | 584,49 | 93,55  |
| 2019/06/09 | CH2206 | Male | Three y/o | Control | Control | Feed Day | No | 17:25 | 17:00 - 17:59 | Evening   | 38,0 | 49  | 31,8 | 31,8 | 19,15 | 537,80 | 116,20 |
| 2019/06/09 | CH2205 | Male | Three y/o | Control | Control | Feed Day | No | 17:30 | 17:00 - 17:59 | Evening   | 38,2 | 94  | 23,8 | 23,8 | 19,36 | 589,37 | 106,26 |
| 2019/06/09 | CH2206 | Male | Three y/o | Control | Control | Feed Day | No | 17:30 | 17:00 - 17:59 | Evening   | 37,9 | 83  | 40,4 | 40,4 | 19,05 | 580,11 | 124,43 |
| 2019/06/09 | CH2205 | Male | Three y/o | Control | Control | Feed Day | No | 17:35 | 17:00 - 17:59 | Evening   | 38,2 | 90  | 18,4 | 18,4 | 19,36 | 586,16 | 97,47  |
| 2019/06/09 | CH2206 | Male | Three y/o | Control | Control | Feed Day | No | 17:35 | 17:00 - 17:59 | Evening   | 37,8 | 94  | 42,4 | 42,4 | 18,95 | 589,37 | 126,10 |
| 2019/06/09 | CH2205 | Male | Three y/o | Control | Control | Feed Day | No | 17:40 | 17:00 - 17:59 | Evening   | 38,2 | 57  | 22,6 | 22,6 | 19,36 | 550,47 | 104,49 |
| 2019/06/09 | CH2206 | Male | Three y/o | Control | Control | Feed Day | No | 17:40 | 17:00 - 17:59 | Evening   | 37,8 | 46  | 44,6 | 44,6 | 18,95 | 532,38 | 127,84 |
| 2019/06/09 | CH2205 | Male | Three y/o | Control | Control | Feed Day | No | 17:45 | 17:00 - 17:59 | Evening   | 38,2 | 89  | 19,2 | 19,2 | 19,36 | 585,33 | 98,92  |
| 2019/06/09 | CH2206 | Male | Three y/o | Control | Control | Feed Day | No | 17:45 | 17:00 - 17:59 | Evening   | 37,7 | 86  | 44,2 | 44,2 | 18,85 | 582,77 | 127,53 |
| 2019/06/09 | CH2205 | Male | Three y/o | Control | Control | Feed Day | No | 17:50 | 17:00 - 17:59 | Evening   | 38,2 | 87  | 20,6 | 20,6 | 19,36 | 583,64 | 101,32 |
| 2019/06/09 | CH2206 | Male | Three y/o | Control | Control | Feed Day | No | 17:50 | 17:00 - 17:59 | Evening   | 37,7 |     | 47,0 | 47,0 | 18,85 |        | 129,65 |
| 2019/06/09 | CH2205 | Male | Three y/o | Control | Control | Feed Day | No | 17:55 | 17:00 - 17:59 | Evening   | 38,1 |     | 7,8  | 7,8  | 19,26 |        | 68,36  |
| 2019/06/09 | CH2206 | Male | Three y/o | Control | Control | Feed Day | No | 17:55 | 17:00 - 17:59 | Evening   | 37,8 | 93  | 54,4 | 54,4 | 18,95 | 588,58 | 134,70 |
| 2019/06/09 | CH2205 | Male | Three y/o | Control | Control | Feed Day | No | 18:00 | 18:00 - 18:59 | Evening   | 38,1 |     | 25,2 | 25,2 | 19,26 |        | 108,22 |
| 2019/06/09 | CH2206 | Male | Three y/o | Control | Control | Feed Day | No | 18:00 | 18:00 - 18:59 | Evening   | 37,9 | 91  | 49,6 | 49,6 | 19,05 | 586,98 | 131,51 |
| 2019/06/09 | CH2205 | Male | Three y/o | Control | Control | Feed Day | No | 18:05 | 18:00 - 18:59 | Evening   | 38,1 |     | 22,2 | 22,2 | 19,26 |        | 103,88 |
| 2019/06/09 | CH2206 | Male | Three y/o | Control | Control | Feed Day | No | 18:05 | 18:00 - 18:59 | Evening   | 37,9 |     | 27,2 | 27,2 | 19,05 |        | 110,83 |
| 2019/06/09 | CH2205 | Male | Three y/o | Control | Control | Feed Day | No | 18:10 | 18:00 - 18:59 | Evening   | 38,1 | 120 | 46,8 | 46,8 | 19,26 | 606,78 | 129,50 |
| 2019/06/09 | CH2206 | Male | Three y/o | Control | Control | Feed Day | No | 18:10 | 18:00 - 18:59 | Evening   | 37,9 | 92  | 26,6 | 26,6 | 19,05 | 587,78 | 110,07 |
| 2019/06/09 | CH2205 | Male | Three y/o | Control | Control | Feed Day | No | 18:15 | 18:00 - 18:59 | Evening   | 38,1 | 107 | 30,8 | 30,8 | 19,26 | 598,73 | 115,10 |
| 2019/06/09 | CH2206 | Male | Three y/o | Control | Control | Feed Day | No | 18:15 | 18:00 - 18:59 | Evening   | 37,7 | 45  | 28,0 | 28,0 | 18,85 | 530,47 | 111,83 |
| 2019/06/09 | CH2205 | Male | Three y/o | Control | Control | Feed Day | No | 18:20 | 18:00 - 18:59 | Evening   | 38,1 | 89  | 26,0 | 26,0 | 19,26 | 585,33 | 109,29 |
| 2019/06/09 | CH2206 | Male | Three y/o | Control | Control | Feed Day | No | 18:20 | 18:00 - 18:59 | Evening   | 37,7 | 87  | 44,0 | 44,0 | 18,85 | 583,64 | 127,37 |
| 2019/06/09 | CH2205 | Male | Three y/o | Control | Control | Feed Day | No | 18:25 | 18:00 - 18:59 | Evening   | 38,1 | 56  | 24,6 | 24,6 | 19,26 | 549,01 | 107,39 |
| 2019/06/09 | CH2206 | Male | Three y/o | Control | Control | Feed Day | No | 18:25 | 18:00 - 18:59 | Evening   | 37,8 | 83  | 44,0 | 44,0 | 18,95 | 580,11 | 127,37 |
| 2019/06/09 | CH2205 | Male | Three y/o | Control | Control | Feed Day | No | 18:30 | 18:00 - 18:59 | Evening   | 38,1 | 88  | 28,4 | 28,4 | 19,26 | 584,49 | 112,31 |
| 2019/06/09 | CH2206 | Male | Three y/o | Control | Control | Feed Day | No | 18:30 | 18:00 - 18:59 | Evening   | 37,8 | 92  | 40,4 | 40,4 | 18,95 | 587,78 | 124,43 |
| 2019/06/09 | CH2205 | Male | Three y/o | Control | Control | Feed Day | No | 18:35 | 18:00 - 18:59 | Evening   | 38,1 | 87  | 25,0 | 25,0 | 19,26 | 583,64 | 107,94 |
| 2019/06/09 | CH2206 | Male | Three y/o | Control | Control | Feed Day | No | 18:35 | 18:00 - 18:59 | Evening   | 37,8 | 86  | 39,8 | 39,8 | 18,95 | 582,77 | 123,91 |
| 2019/06/09 | CH2205 | Male | Three y/o | Control | Control | Feed Day | No | 18:40 | 18:00 - 18:59 | Evening   | 38,2 | 90  | 26,2 | 26,2 | 19,36 | 586,16 | 109,55 |
| 2019/06/09 | CH2206 | Male | Three y/o | Control | Control | Feed Day | No | 18:40 | 18:00 - 18:59 | Evening   | 37,9 | 78  | 41,2 | 41,2 | 19,05 | 575,38 | 125,11 |
| 2019/06/09 | CH2205 | Male | Three y/o | Control | Control | Feed Day | No | 18:45 | 18:00 - 18:59 | Evening   | 38,2 | 92  | 25,0 | 25,0 | 19,36 | 587,78 | 107,94 |
| 2019/06/09 | CH2206 | Male | Three y/o | Control | Control | Feed Day | No | 18:45 | 18:00 - 18:59 | Evening   | 37,9 | 85  | 40,0 | 40,0 | 19,05 | 581,90 | 124,09 |
| 2019/06/09 | CH2205 | Male | Three y/o | Control | Control | Feed Day | No | 18:50 | 18:00 - 18:59 | Evening   | 38,2 | 94  | 18,8 | 18,8 | 19,36 | 589,37 | 98,20  |



|            |        |      |           |         |         |          |    |       |               |         |      |     |      |      |       |        |        |
|------------|--------|------|-----------|---------|---------|----------|----|-------|---------------|---------|------|-----|------|------|-------|--------|--------|
| 2019/06/09 | CH2206 | Male | Three y/o | Control | Control | Feed Day | No | 18:50 | 18:00 - 18:59 | Evening | 37,9 | 86  | 40,6 | 40,6 | 19,05 | 582,77 | 124,60 |
| 2019/06/09 | CH2205 | Male | Three y/o | Control | Control | Feed Day | No | 18:55 | 18:00 - 18:59 | Evening | 38,2 | 92  | 19,2 | 19,2 | 19,36 | 587,78 | 98,92  |
| 2019/06/09 | CH2206 | Male | Three y/o | Control | Control | Feed Day | No | 18:55 | 18:00 - 18:59 | Evening | 38,0 | 88  | 36,8 | 36,8 | 19,15 | 584,49 | 121,22 |
| 2019/06/09 | CH2205 | Male | Three y/o | Control | Control | Feed Day | No | 19:00 | 19:00 - 19:59 | Evening | 38,2 | 89  | 23,0 | 23,0 | 19,36 | 585,33 | 105,09 |
| 2019/06/09 | CH2206 | Male | Three y/o | Control | Control | Feed Day | No | 19:00 | 19:00 - 19:59 | Evening | 38,0 | 80  | 41,6 | 41,6 | 19,15 | 577,31 | 125,44 |
| 2019/06/09 | CH2205 | Male | Three y/o | Control | Control | Feed Day | No | 19:05 | 19:00 - 19:59 | Evening | 38,1 | 76  | 25,6 | 25,6 | 19,26 | 573,39 | 108,76 |
| 2019/06/09 | CH2206 | Male | Three y/o | Control | Control | Feed Day | No | 19:05 | 19:00 - 19:59 | Evening | 38,0 | 80  | 41,8 | 41,8 | 19,15 | 577,31 | 125,60 |
| 2019/06/09 | CH2205 | Male | Three y/o | Control | Control | Feed Day | No | 19:10 | 19:00 - 19:59 | Evening | 38,1 | 93  | 27,2 | 27,2 | 19,26 | 588,58 | 110,83 |
| 2019/06/09 | CH2206 | Male | Three y/o | Control | Control | Feed Day | No | 19:10 | 19:00 - 19:59 | Evening | 38,0 | 43  | 45,0 | 45,0 | 19,15 | 526,50 | 128,15 |
| 2019/06/09 | CH2205 | Male | Three y/o | Control | Control | Feed Day | No | 19:15 | 19:00 - 19:59 | Evening | 38,1 | 53  | 25,4 | 25,4 | 19,26 | 544,43 | 108,49 |
| 2019/06/09 | CH2206 | Male | Three y/o | Control | Control | Feed Day | No | 19:15 | 19:00 - 19:59 | Evening | 38,0 | 86  | 45,4 | 45,4 | 19,15 | 582,77 | 128,45 |
| 2019/06/09 | CH2205 | Male | Three y/o | Control | Control | Feed Day | No | 19:20 | 19:00 - 19:59 | Evening | 38,1 | 94  | 23,6 | 23,6 | 19,26 | 589,37 | 105,97 |
| 2019/06/09 | CH2206 | Male | Three y/o | Control | Control | Feed Day | No | 19:20 | 19:00 - 19:59 | Evening | 38,1 | 40  | 46,8 | 46,8 | 19,26 | 520,09 | 129,50 |
| 2019/06/09 | CH2205 | Male | Three y/o | Control | Control | Feed Day | No | 19:25 | 19:00 - 19:59 | Evening | 38,1 | 72  | 23,8 | 23,8 | 19,26 | 569,20 | 106,26 |
| 2019/06/09 | CH2206 | Male | Three y/o | Control | Control | Feed Day | No | 19:25 | 19:00 - 19:59 | Evening | 38,1 | 79  | 50,2 | 50,2 | 19,26 | 576,36 | 131,92 |
| 2019/06/09 | CH2205 | Male | Three y/o | Control | Control | Feed Day | No | 19:30 | 19:00 - 19:59 | Evening | 38,1 | 100 | 27,0 | 27,0 | 19,26 | 593,87 | 110,58 |
| 2019/06/09 | CH2206 | Male | Three y/o | Control | Control | Feed Day | No | 19:30 | 19:00 - 19:59 | Evening | 38,1 | 76  | 47,6 | 47,6 | 19,26 | 573,39 | 130,09 |
| 2019/06/09 | CH2205 | Male | Three y/o | Control | Control | Feed Day | No | 19:35 | 19:00 - 19:59 | Evening | 38,1 | 85  | 19,8 | 19,8 | 19,26 | 581,90 | 99,97  |
| 2019/06/09 | CH2206 | Male | Three y/o | Control | Control | Feed Day | No | 19:35 | 19:00 - 19:59 | Evening | 38,1 | 80  | 45,4 | 45,4 | 19,26 | 577,31 | 128,45 |
| 2019/06/09 | CH2205 | Male | Three y/o | Control | Control | Feed Day | No | 19:40 | 19:00 - 19:59 | Evening | 38,1 | 128 | 15,2 | 15,2 | 19,26 | 611,22 | 90,96  |
| 2019/06/09 | CH2206 | Male | Three y/o | Control | Control | Feed Day | No | 19:40 | 19:00 - 19:59 | Evening | 38,1 | 70  | 46,6 | 46,6 | 19,26 | 566,99 | 129,35 |
| 2019/06/09 | CH2205 | Male | Three y/o | Control | Control | Feed Day | No | 19:45 | 19:00 - 19:59 | Evening | 38,0 |     | 19,2 | 19,2 | 19,15 |        | 98,92  |
| 2019/06/09 | CH2206 | Male | Three y/o | Control | Control | Feed Day | No | 19:45 | 19:00 - 19:59 | Evening | 38,1 | 71  | 42,8 | 42,8 | 19,26 | 568,10 | 126,42 |
| 2019/06/09 | CH2205 | Male | Three y/o | Control | Control | Feed Day | No | 19:50 | 19:00 - 19:59 | Evening | 37,9 |     | 12,0 | 12,0 | 19,05 |        | 82,93  |
| 2019/06/09 | CH2206 | Male | Three y/o | Control | Control | Feed Day | No | 19:50 | 19:00 - 19:59 | Evening | 38,1 | 78  | 44,8 | 44,8 | 19,26 | 575,38 | 127,99 |
| 2019/06/09 | CH2205 | Male | Three y/o | Control | Control | Feed Day | No | 19:55 | 19:00 - 19:59 | Evening | 37,9 | 172 | 14,8 | 14,8 | 19,05 | 630,73 | 90,05  |
| 2019/06/09 | CH2206 | Male | Three y/o | Control | Control | Feed Day | No | 19:55 | 19:00 - 19:59 | Evening | 38,2 | 76  | 43,8 | 43,8 | 19,36 | 573,39 | 127,22 |
| 2019/06/09 | CH2205 | Male | Three y/o | Control | Control | Feed Day | No | 20:00 | 20:00 - 20:59 | Night   | 37,9 |     | 15,4 | 15,4 | 19,05 |        | 91,41  |
| 2019/06/09 | CH2206 | Male | Three y/o | Control | Control | Feed Day | No | 20:00 | 20:00 - 20:59 | Night   | 38,2 | 103 | 43,0 | 43,0 | 19,36 | 596,00 | 126,58 |
| 2019/06/09 | CH2205 | Male | Three y/o | Control | Control | Feed Day | No | 20:05 | 20:00 - 20:59 | Night   | 37,9 | 131 | 18,6 | 18,6 | 19,05 | 612,80 | 97,84  |
| 2019/06/09 | CH2206 | Male | Three y/o | Control | Control | Feed Day | No | 20:05 | 20:00 - 20:59 | Night   | 38,2 | 80  | 49,8 | 49,8 | 19,36 | 577,31 | 131,65 |
| 2019/06/09 | CH2205 | Male | Three y/o | Control | Control | Feed Day | No | 20:10 | 20:00 - 20:59 | Night   | 37,8 | 188 | 18,6 | 18,6 | 18,95 | 636,34 | 97,84  |
| 2019/06/09 | CH2206 | Male | Three y/o | Control | Control | Feed Day | No | 20:10 | 20:00 - 20:59 | Night   | 38,2 | 87  | 47,6 | 47,6 | 19,36 | 583,64 | 130,09 |
| 2019/06/09 | CH2205 | Male | Three y/o | Control | Control | Feed Day | No | 20:15 | 20:00 - 20:59 | Night   | 37,7 | 102 | 19,2 | 19,2 | 18,85 | 595,30 | 98,92  |
| 2019/06/09 | CH2206 | Male | Three y/o | Control | Control | Feed Day | No | 20:15 | 20:00 - 20:59 | Night   | 38,2 | 83  | 43,4 | 43,4 | 19,36 | 580,11 | 126,90 |
| 2019/06/09 | CH2205 | Male | Three y/o | Control | Control | Feed Day | No | 20:20 | 20:00 - 20:59 | Night   | 37,7 |     | 10,4 | 10,4 | 18,85 |        | 78,08  |
| 2019/06/09 | CH2206 | Male | Three y/o | Control | Control | Feed Day | No | 20:20 | 20:00 - 20:59 | Night   | 38,2 | 70  | 47,2 | 47,2 | 19,36 | 566,99 | 129,80 |
| 2019/06/09 | CH2205 | Male | Three y/o | Control | Control | Feed Day | No | 20:25 | 20:00 - 20:59 | Night   | 37,9 | 91  | 8,0  | 8,0  | 19,05 | 586,98 | 69,22  |
| 2019/06/09 | CH2206 | Male | Three y/o | Control | Control | Feed Day | No | 20:25 | 20:00 - 20:59 | Night   | 38,2 | 42  | 43,8 | 43,8 | 19,36 | 524,42 | 127,22 |
| 2019/06/09 | CH2205 | Male | Three y/o | Control | Control | Feed Day | No | 20:30 | 20:00 - 20:59 | Night   | 37,9 | 84  | 8,8  | 8,8  | 19,05 | 581,01 | 72,43  |
| 2019/06/09 | CH2206 | Male | Three y/o | Control | Control | Feed Day | No | 20:30 | 20:00 - 20:59 | Night   | 38,2 | 85  | 48,0 | 48,0 | 19,36 | 581,90 | 130,38 |
| 2019/06/09 | CH2205 | Male | Three y/o | Control | Control | Feed Day | No | 20:35 | 20:00 - 20:59 | Night   | 38,0 | 97  | 3,4  | 3,4  | 19,15 | 591,66 | 40,51  |
| 2019/06/09 | CH2206 | Male | Three y/o | Control | Control | Feed Day | No | 20:35 | 20:00 - 20:59 | Night   | 38,2 | 95  | 46,4 | 46,4 | 19,36 | 590,14 | 129,21 |
| 2019/06/09 | CH2205 | Male | Three y/o | Control | Control | Feed Day | No | 20:40 | 20:00 - 20:59 | Night   | 38,0 | 89  | 3,6  | 3,6  | 19,15 | 585,33 | 42,42  |
| 2019/06/09 | CH2206 | Male | Three y/o | Control | Control | Feed Day | No | 20:40 | 20:00 - 20:59 | Night   | 38,2 | 75  | 49,6 | 49,6 | 19,36 | 572,36 | 131,51 |
| 2019/06/09 | CH2205 | Male | Three y/o | Control | Control | Feed Day | No | 20:45 | 20:00 - 20:59 | Night   | 38,0 | 100 | 11,4 | 11,4 | 19,15 | 593,87 | 81,19  |
| 2019/06/09 | CH2206 | Male | Three y/o | Control | Control | Feed Day | No | 20:45 | 20:00 - 20:59 | Night   | 38,2 | 79  | 47,0 | 47,0 | 19,36 | 576,36 | 129,65 |
| 2019/06/09 | CH2205 | Male | Three y/o | Control | Control | Feed Day | No | 20:50 | 20:00 - 20:59 | Night   | 38,0 | 93  | 13,6 | 13,6 | 19,15 | 588,58 | 87,18  |
| 2019/06/09 | CH2206 | Male | Three y/o | Control | Control | Feed Day | No | 20:50 | 20:00 - 20:59 | Night   | 38,1 | 86  | 46,4 | 46,4 | 19,26 | 582,77 | 129,21 |
| 2019/06/09 | CH2205 | Male | Three y/o | Control | Control | Feed Day | No | 20:55 | 20:00 - 20:59 | Night   | 38,0 | 101 | 12,0 | 12,0 | 19,15 | 594,59 | 82,93  |
| 2019/06/09 | CH2206 | Male | Three y/o | Control | Control | Feed Day | No | 20:55 | 20:00 - 20:59 | Night   | 38,1 | 44  | 45,0 | 45,0 | 19,26 | 528,51 | 128,15 |
| 2019/06/09 | CH2205 | Male | Three y/o | Control | Control | Feed Day | No | 21:00 | 21:00 - 21:59 | Night   | 38,0 | 124 | 26,0 | 26,0 | 19,15 | 609,04 | 109,29 |
| 2019/06/09 | CH2206 | Male | Three y/o | Control | Control | Feed Day | No | 21:00 | 21:00 - 21:59 | Night   | 38,1 | 72  | 49,2 | 49,2 | 19,26 | 569,20 | 131,23 |
| 2019/06/09 | CH2205 | Male | Three y/o | Control | Control | Feed Day | No | 21:05 | 21:00 - 21:59 | Night   | 38,1 | 107 | 18,0 | 18,0 | 19,26 | 598,73 | 96,72  |
| 2019/06/09 | CH2206 | Male | Three y/o | Control | Control | Feed Day | No | 21:05 | 21:00 - 21:59 | Night   | 38,1 | 79  | 50,6 | 50,6 | 19,26 | 576,36 | 132,20 |
| 2019/06/09 | CH2205 | Male | Three y/o | Control | Control | Feed Day | No | 21:10 | 21:00 - 21:59 | Night   | 38,0 | 81  | 19,2 | 19,2 | 19,15 | 578,26 | 98,92  |
| 2019/06/09 | CH2206 | Male | Three y/o | Control | Control | Feed Day | No | 21:10 | 21:00 - 21:59 | Night   | 38,1 | 49  | 51,2 | 51,2 | 19,26 | 537,80 | 132,61 |
| 2019/06/09 | CH2205 | Male | Three y/o | Control | Control | Feed Day | No | 21:15 | 21:00 - 21:59 | Night   | 38,0 | 94  | 10,8 | 10,8 | 19,15 | 589,37 | 79,36  |
| 2019/06/09 | CH2206 | Male | Three y/o | Control | Control | Feed Day | No | 21:15 | 21:00 - 21:59 | Night   | 38,1 | 46  | 43,8 | 43,8 | 19,26 | 532,38 | 127,22 |
| 2019/06/09 | CH2205 | Male | Three y/o | Control | Control | Feed Day | No | 21:20 | 21:00 - 21:59 | Night   | 38,0 | 75  | 11,6 | 11,6 | 19,15 | 572,36 | 81,78  |
| 2019/06/09 | CH2206 | Male | Three y/o | Control | Control | Feed Day | No | 21:20 | 21:00 - 21:59 | Night   | 38,1 | 86  | 47,6 | 47,6 | 19,26 | 582,77 | 130,09 |
| 2019/06/09 | CH2205 | Male | Three y/o | Control | Control | Feed Day | No | 21:25 | 21:00 - 21:59 | Night   | 38,0 | 98  | 10,6 | 10,6 | 19,15 | 592,41 | 78,73  |
| 2019/06/09 | CH2206 | Male | Three y/o | Control | Control | Feed Day | No | 21:25 | 21:00 - 21:59 | Night   | 38,1 | 68  | 51,2 | 51,2 | 19,26 | 564,71 | 132,61 |
| 2019/06/09 | CH2205 | Male | Three y/o | Control | Control | Feed Day | No | 21:30 | 21:00 - 21:59 | Night   | 38,0 | 112 | 20,8 | 20,8 | 19,15 | 601,96 | 101,65 |
| 2019/06/09 | CH2206 | Male | Three y/o | Control | Control | Feed Day | No | 21:30 | 21:00 - 21:59 | Night   | 38,1 | 83  | 49,0 | 49,0 | 19,26 | 580,11 | 131,09 |
| 2019/06/09 | CH2205 | Male | Three y/o | Control | Control | Feed Day | No | 21:35 | 21:00 - 21:59 | Night   | 38,0 | 99  | 19,6 | 19,6 | 19,15 | 593,14 | 99,63  |
| 2019/06/09 | CH2206 | Male | Three y/o | Control | Control | Feed Day | No | 21:35 | 21:00 - 21:59 | Night   | 38,1 | 88  | 44,8 | 44,8 | 19,26 | 584,49 | 127,99 |
| 2019/06/09 | CH2205 | Male | Three y/o | Control | Control | Feed Day | No | 21:40 | 21:00 - 21:59 | Night   | 38,0 | 103 | 11,6 | 11,6 | 19,15 | 596,00 | 81,78  |
| 2019/06/09 | CH2206 | Male | Three y/o | Control | Control | Feed Day | No | 21:40 | 21:00 - 21:59 | Night   | 38,1 | 63  | 46,6 | 46,6 | 19,26 | 558,62 | 129,35 |
| 2019/06/09 | CH2205 | Male | Three y/o | Control | Control | Feed Day | No | 21:45 | 21:00 - 21:59 | Night   | 38,0 | 96  | 9,0  | 9,0  | 19,15 | 590,91 | 73,19  |



|    |            |        |      |           |         |         |          |    |       |               |               |      |     |      |      |       |        |        |
|----|------------|--------|------|-----------|---------|---------|----------|----|-------|---------------|---------------|------|-----|------|------|-------|--------|--------|
|    | 2019/06/09 | CH2206 | Male | Three y/o | Control | Control | Feed Day | No | 21:45 | 21:00 - 21:59 | Night         | 38,1 | 88  | 45,2 | 45,2 | 19,26 | 584,49 | 128,30 |
|    | 2019/06/09 | CH2205 | Male | Three y/o | Control | Control | Feed Day | No | 21:50 | 21:00 - 21:59 | Night         | 38,0 | 90  | 5,8  | 5,8  | 19,15 | 586,16 | 58,39  |
|    | 2019/06/09 | CH2206 | Male | Three y/o | Control | Control | Feed Day | No | 21:50 | 21:00 - 21:59 | Night         | 38,1 | 45  | 45,8 | 45,8 | 19,26 | 530,47 | 128,76 |
|    | 2019/06/09 | CH2205 | Male | Three y/o | Control | Control | Feed Day | No | 21:55 | 21:00 - 21:59 | Night         | 38,0 | 81  | 3,4  | 3,4  | 19,15 | 578,26 | 40,51  |
|    | 2019/06/09 | CH2206 | Male | Three y/o | Control | Control | Feed Day | No | 21:55 | 21:00 - 21:59 | Night         | 38,1 | 87  | 49,6 | 49,6 | 19,26 | 583,64 | 131,51 |
|    | 2019/06/09 | CH2205 | Male | Three y/o | Control | Control | Feed Day | No | 22:00 | 22:00 - 22:59 | Night         | 38,0 | 94  | 3,0  | 3,0  | 19,15 | 589,37 | 36,34  |
|    | 2019/06/09 | CH2206 | Male | Three y/o | Control | Control | Feed Day | No | 22:00 | 22:00 - 22:59 | Night         | 38,1 | 43  | 43,0 | 43,0 | 19,26 | 526,50 | 126,58 |
|    | 2019/06/09 | CH2205 | Male | Three y/o | Control | Control | Feed Day | No | 22:05 | 22:00 - 22:59 | Night         | 38,0 | 75  | 3,8  | 3,8  | 19,15 | 572,36 | 44,22  |
|    | 2019/06/09 | CH2206 | Male | Three y/o | Control | Control | Feed Day | No | 22:05 | 22:00 - 22:59 | Night         | 38,1 | 83  | 45,8 | 45,8 | 19,26 | 580,11 | 128,76 |
|    | 2019/06/09 | CH2205 | Male | Three y/o | Control | Control | Feed Day | No | 22:10 | 22:00 - 22:59 | Night         | 38,0 | 92  | 5,2  | 5,2  | 19,15 | 587,78 | 54,72  |
|    | 2019/06/09 | CH2206 | Male | Three y/o | Control | Control | Feed Day | No | 22:10 | 22:00 - 22:59 | Night         | 38,1 | 83  | 47,2 | 47,2 | 19,26 | 580,11 | 129,80 |
|    | 2019/06/09 | CH2205 | Male | Three y/o | Control | Control | Feed Day | No | 22:15 | 22:00 - 22:59 | Night         | 38,0 | 92  | 6,4  | 6,4  | 19,15 | 587,78 | 61,70  |
|    | 2019/06/09 | CH2206 | Male | Three y/o | Control | Control | Feed Day | No | 22:15 | 22:00 - 22:59 | Night         | 38,1 | 94  | 47,6 | 47,6 | 19,26 | 589,37 | 130,09 |
|    | 2019/06/09 | CH2205 | Male | Three y/o | Control | Control | Feed Day | No | 22:20 | 22:00 - 22:59 | Night         | 38,0 | 96  | 4,4  | 4,4  | 19,15 | 590,91 | 49,12  |
|    | 2019/06/09 | CH2206 | Male | Three y/o | Control | Control | Feed Day | No | 22:20 | 22:00 - 22:59 | Night         | 38,1 | 84  | 46,6 | 46,6 | 19,26 | 581,01 | 129,35 |
|    | 2019/06/09 | CH2205 | Male | Three y/o | Control | Control | Feed Day | No | 22:25 | 22:00 - 22:59 | Night         | 38,0 | 98  | 5,8  | 5,8  | 19,15 | 592,41 | 58,39  |
|    | 2019/06/09 | CH2206 | Male | Three y/o | Control | Control | Feed Day | No | 22:25 | 22:00 - 22:59 | Night         | 38,1 | 95  | 49,2 | 49,2 | 19,26 | 590,14 | 131,23 |
|    | 2019/06/09 | CH2205 | Male | Three y/o | Control | Control | Feed Day | No | 22:30 | 22:00 - 22:59 | Night         | 38,0 | 93  | 3,0  | 3,0  | 19,15 | 588,58 | 36,34  |
|    | 2019/06/09 | CH2206 | Male | Three y/o | Control | Control | Feed Day | No | 22:30 | 22:00 - 22:59 | Night         | 38,0 | 82  | 42,8 | 42,8 | 19,15 | 579,19 | 126,42 |
|    | 2019/06/09 | CH2205 | Male | Three y/o | Control | Control | Feed Day | No | 22:35 | 22:00 - 22:59 | Night         | 38,0 | 65  | 2,0  | 2,0  | 19,15 | 561,12 | 22,86  |
|    | 2019/06/09 | CH2206 | Male | Three y/o | Control | Control | Feed Day | No | 22:35 | 22:00 - 22:59 | Night         | 38,0 | 56  | 56,4 | 56,4 | 19,15 | 549,01 | 135,95 |
|    | 2019/06/09 | CH2205 | Male | Three y/o | Control | Control | Feed Day | No | 22:40 | 22:00 - 22:59 | Night         | 38,0 | 103 | 5,8  | 5,8  | 19,15 | 596,00 | 58,39  |
|    | 2019/06/09 | CH2206 | Male | Three y/o | Control | Control | Feed Day | No | 22:40 | 22:00 - 22:59 | Night         | 38,0 | 90  | 53,2 | 53,2 | 19,15 | 586,16 | 133,93 |
|    | 2019/06/09 | CH2205 | Male | Three y/o | Control | Control | Feed Day | No | 22:45 | 22:00 - 22:59 | Night         | 37,9 | 68  | 7,0  | 7,0  | 19,05 | 564,71 | 64,72  |
|    | 2019/06/09 | CH2206 | Male | Three y/o | Control | Control | Feed Day | No | 22:45 | 22:00 - 22:59 | Night         | 38,0 | 86  | 54,8 | 54,8 | 19,15 | 582,77 | 134,96 |
|    | 2019/06/09 | CH2205 | Male | Three y/o | Control | Control | Feed Day | No | 22:50 | 22:00 - 22:59 | Night         | 37,9 | 73  | 3,8  | 3,8  | 19,05 | 570,27 | 44,22  |
|    | 2019/06/09 | CH2206 | Male | Three y/o | Control | Control | Feed Day | No | 22:50 | 22:00 - 22:59 | Night         | 38,0 | 66  | 57,6 | 57,6 | 19,15 | 562,34 | 136,68 |
|    | 2019/06/09 | CH2205 | Male | Three y/o | Control | Control | Feed Day | No | 22:55 | 22:00 - 22:59 | Night         | 37,9 | 47  | 4,4  | 4,4  | 19,05 | 534,23 | 49,12  |
|    | 2019/06/09 | CH2206 | Male | Three y/o | Control | Control | Feed Day | No | 22:55 | 22:00 - 22:59 | Night         | 38,0 | 80  | 55,2 | 55,2 | 19,15 | 577,31 | 135,21 |
|    | 2019/06/09 | CH2205 | Male | Three y/o | Control | Control | Feed Day | No | 23:00 | 23:00 - 23:59 | Night         | 37,9 | 91  | 5,6  | 5,6  | 19,05 | 586,98 | 57,21  |
|    | 2019/06/09 | CH2206 | Male | Three y/o | Control | Control | Feed Day | No | 23:00 | 23:00 - 23:59 | Night         | 38,0 | 43  | 55,2 | 55,2 | 19,15 | 526,50 | 135,21 |
|    | 2019/06/09 | CH2205 | Male | Three y/o | Control | Control | Feed Day | No | 23:05 | 23:00 - 23:59 | Night         | 37,9 | 94  | 3,4  | 3,4  | 19,05 | 589,37 | 40,51  |
|    | 2019/06/09 | CH2206 | Male | Three y/o | Control | Control | Feed Day | No | 23:05 | 23:00 - 23:59 | Night         | 38,0 | 44  | 54,0 | 54,0 | 19,15 | 528,51 | 134,45 |
|    | 2019/06/09 | CH2205 | Male | Three y/o | Control | Control | Feed Day | No | 23:10 | 23:00 - 23:59 | Night         | 37,7 | 97  | 9,8  | 9,8  | 18,85 | 591,66 | 76,07  |
|    | 2019/06/09 | CH2206 | Male | Three y/o | Control | Control | Feed Day | No | 23:10 | 23:00 - 23:59 | Night         | 38,0 | 68  | 50,0 | 50,0 | 19,15 | 564,71 | 131,79 |
|    | 2019/06/09 | CH2205 | Male | Three y/o | Control | Control | Feed Day | No | 23:15 | 23:00 - 23:59 | Night         | 37,9 | 75  | 31,6 | 31,6 | 19,05 | 572,36 | 115,98 |
|    | 2019/06/09 | CH2206 | Male | Three y/o | Control | Control | Feed Day | No | 23:15 | 23:00 - 23:59 | Night         | 38,0 | 86  | 55,2 | 55,2 | 19,15 | 582,77 | 135,21 |
|    | 2019/06/09 | CH2205 | Male | Three y/o | Control | Control | Feed Day | No | 23:20 | 23:00 - 23:59 | Night         | 37,7 | 63  | 7,8  | 7,8  | 18,85 | 558,62 | 68,36  |
|    | 2019/06/09 | CH2206 | Male | Three y/o | Control | Control | Feed Day | No | 23:20 | 23:00 - 23:59 | Night         | 38,0 | 68  | 56,0 | 56,0 | 19,15 | 564,71 | 135,70 |
|    | 2019/06/09 | CH2205 | Male | Three y/o | Control | Control | Feed Day | No | 23:25 | 23:00 - 23:59 | Night         | 37,6 | 124 | 12,2 | 12,2 | 18,75 | 609,04 | 83,49  |
|    | 2019/06/09 | CH2206 | Male | Three y/o | Control | Control | Feed Day | No | 23:25 | 23:00 - 23:59 | Night         | 38,0 | 90  | 53,0 | 53,0 | 19,15 | 586,16 | 133,80 |
|    | 2019/06/09 | CH2205 | Male | Three y/o | Control | Control | Feed Day | No | 23:30 | 23:00 - 23:59 | Night         | 37,6 |     | 22,8 | 22,8 | 18,75 |        | 104,79 |
|    | 2019/06/09 | CH2206 | Male | Three y/o | Control | Control | Feed Day | No | 23:30 | 23:00 - 23:59 | Night         | 38,0 | 72  | 51,2 | 51,2 | 19,15 | 569,20 | 132,61 |
|    | 2019/06/09 | CH2205 | Male | Three y/o | Control | Control | Feed Day | No | 23:35 | 23:00 - 23:59 | Night         | 37,7 | 91  | 9,8  | 9,8  | 18,85 | 586,98 | 76,07  |
|    | 2019/06/09 | CH2206 | Male | Three y/o | Control | Control | Feed Day | No | 23:35 | 23:00 - 23:59 | Night         | 38,0 | 45  | 56,6 | 56,6 | 19,15 | 530,47 | 136,07 |
|    | 2019/06/09 | CH2205 | Male | Three y/o | Control | Control | Feed Day | No | 23:40 | 23:00 - 23:59 | Night         | 37,6 | 69  | 10,6 | 10,6 | 18,75 | 565,86 | 78,73  |
|    | 2019/06/09 | CH2206 | Male | Three y/o | Control | Control | Feed Day | No | 23:40 | 23:00 - 23:59 | Night         | 38,0 | 52  | 53,4 | 53,4 | 19,15 | 542,83 | 134,06 |
|    | 2019/06/09 | CH2205 | Male | Three y/o | Control | Control | Feed Day | No | 23:45 | 23:00 - 23:59 | Night         | 37,6 | 92  | 9,0  | 9,0  | 18,75 | 587,78 | 73,19  |
|    | 2019/06/09 | CH2206 | Male | Three y/o | Control | Control | Feed Day | No | 23:45 | 23:00 - 23:59 | Night         | 38,0 | 75  | 51,6 | 51,6 | 19,15 | 572,36 | 132,87 |
|    | 2019/06/09 | CH2205 | Male | Three y/o | Control | Control | Feed Day | No | 23:50 | 23:00 - 23:59 | Night         | 37,7 | 68  | 10,0 | 10,0 | 18,85 | 564,71 | 76,76  |
|    | 2019/06/09 | CH2206 | Male | Three y/o | Control | Control | Feed Day | No | 23:50 | 23:00 - 23:59 | Night         | 38,0 | 86  | 56,2 | 56,2 | 19,15 | 582,77 | 135,83 |
|    | 2019/06/09 | CH2205 | Male | Three y/o | Control | Control | Feed Day | No | 23:55 | 23:00 - 23:59 | Night         | 37,7 | 67  | 9,4  | 9,4  | 18,85 | 563,53 | 74,66  |
|    | 2019/06/09 | CH2206 | Male | Three y/o | Control | Control | Feed Day | No | 23:55 | 23:00 - 23:59 | Night         | 38,0 | 89  | 58,6 | 58,6 | 19,15 | 585,33 | 137,28 |
| 26 | 2019/06/10 | CH2205 | Male | Three y/o | Control | Control | Fast Day | No | 00:00 | 00:00 - 00:59 | Early Morning | 37,7 | 60  | 9,2  | 9,2  | 18,85 | 554,67 | 73,94  |
|    | 2019/06/10 | CH2206 | Male | Three y/o | Control | Control | Fast Day | No | 00:00 | 00:00 - 00:59 | Early Morning | 37,9 | 76  | 62,2 | 62,2 | 19,05 | 573,39 | 139,34 |
|    | 2019/06/10 | CH2205 | Male | Three y/o | Control | Control | Fast Day | No | 00:05 | 00:00 - 00:59 | Early Morning | 37,7 | 94  | 15,4 | 15,4 | 18,85 | 589,37 | 91,41  |
|    | 2019/06/10 | CH2206 | Male | Three y/o | Control | Control | Fast Day | No | 00:05 | 00:00 - 00:59 | Early Morning | 37,9 | 88  | 58,2 | 58,2 | 19,05 | 584,49 | 137,04 |
|    | 2019/06/10 | CH2205 | Male | Three y/o | Control | Control | Fast Day | No | 00:10 | 00:00 - 00:59 | Early Morning | 37,7 | 91  | 7,0  | 7,0  | 18,85 | 586,98 | 64,72  |
|    | 2019/06/10 | CH2206 | Male | Three y/o | Control | Control | Fast Day | No | 00:10 | 00:00 - 00:59 | Early Morning | 37,9 |     | 62,2 | 62,2 | 19,05 |        | 139,34 |
|    | 2019/06/10 | CH2205 | Male | Three y/o | Control | Control | Fast Day | No | 00:15 | 00:00 - 00:59 | Early Morning | 37,8 | 86  | 7,6  | 7,6  | 18,95 | 582,77 | 67,49  |
|    | 2019/06/10 | CH2206 | Male | Three y/o | Control | Control | Fast Day | No | 00:15 | 00:00 - 00:59 | Early Morning | 37,9 | 74  | 48,8 | 48,8 | 19,05 | 571,33 | 130,95 |
|    | 2019/06/10 | CH2205 | Male | Three y/o | Control | Control | Fast Day | No | 00:20 | 00:00 - 00:59 | Early Morning | 37,8 | 90  | 21,2 | 21,2 | 18,95 | 586,16 | 102,31 |
|    | 2019/06/10 | CH2206 | Male | Three y/o | Control | Control | Fast Day | No | 00:20 | 00:00 - 00:59 | Early Morning | 37,9 | 94  | 49,2 | 49,2 | 19,05 | 589,37 | 131,23 |
|    | 2019/06/10 | CH2205 | Male | Three y/o | Control | Control | Fast Day | No | 00:25 | 00:00 - 00:59 | Early Morning | 37,8 |     | 16,0 | 16,0 | 18,95 |        | 92,71  |
|    | 2019/06/10 | CH2206 | Male | Three y/o | Control | Control | Fast Day | No | 00:25 | 00:00 - 00:59 | Early Morning | 37,9 | 88  | 50,0 | 50,0 | 19,05 | 584,49 | 131,79 |
|    | 2019/06/10 | CH2205 | Male | Three y/o | Control | Control | Fast Day | No | 00:30 | 00:00 - 00:59 | Early Morning | 37,7 | 114 | 12,2 | 12,2 | 18,85 | 603,20 | 83,49  |
|    | 2019/06/10 | CH2206 | Male | Three y/o | Control | Control | Fast Day | No | 00:30 | 00:00 - 00:59 | Early Morning | 37,8 | 119 | 51,0 | 51,0 | 18,95 | 606,20 | 132,47 |
|    | 2019/06/10 | CH2205 | Male | Three y/o | Control | Control | Fast Day | No | 00:35 | 00:00 - 00:59 | Early Morning | 37,6 |     | 14,4 | 14,4 | 18,75 |        | 89,12  |
|    | 2019/06/10 | CH2206 | Male | Three y/o | Control | Control | Fast Day | No | 00:35 | 00:00 - 00:59 | Early Morning | 37,8 | 85  | 52,0 | 52,0 | 18,95 | 581,90 | 133,14 |
|    | 2019/06/10 | CH2205 | Male | Three y/o | Control | Control | Fast Day | No | 00:40 | 00:00 - 00:59 | Early Morning | 37,6 |     | 15,4 | 15,4 | 18,75 |        | 91,41  |



|            |        |      |           |         |         |          |    |       |               |               |      |     |       |       |       |        |        |
|------------|--------|------|-----------|---------|---------|----------|----|-------|---------------|---------------|------|-----|-------|-------|-------|--------|--------|
| 2019/06/10 | CH2206 | Male | Three y/o | Control | Control | Fast Day | No | 00:40 | 00:00 - 00:59 | Early Morning | 37,7 | 98  | 54,4  | 54,4  | 18,85 | 592,41 | 134,70 |
| 2019/06/10 | CH2205 | Male | Three y/o | Control | Control | Fast Day | No | 00:45 | 00:00 - 00:59 | Early Morning | 37,6 | 118 | 11,0  | 11,0  | 18,75 | 605,61 | 79,98  |
| 2019/06/10 | CH2206 | Male | Three y/o | Control | Control | Fast Day | No | 00:45 | 00:00 - 00:59 | Early Morning | 37,7 | 89  | 50,0  | 50,0  | 18,85 | 585,33 | 131,79 |
| 2019/06/10 | CH2205 | Male | Three y/o | Control | Control | Fast Day | No | 00:50 | 00:00 - 00:59 | Early Morning | 37,5 |     | 12,2  | 12,2  | 18,65 |        | 83,49  |
| 2019/06/10 | CH2206 | Male | Three y/o | Control | Control | Fast Day | No | 00:50 | 00:00 - 00:59 | Early Morning | 37,5 | 84  | 44,8  | 44,8  | 18,65 | 581,01 | 127,99 |
| 2019/06/10 | CH2205 | Male | Three y/o | Control | Control | Fast Day | No | 00:55 | 00:00 - 00:59 | Early Morning | 37,6 |     | 9,0   | 9,0   | 18,75 |        | 73,19  |
| 2019/06/10 | CH2206 | Male | Three y/o | Control | Control | Fast Day | No | 00:55 | 00:00 - 00:59 | Early Morning | 37,5 | 85  | 52,8  | 52,8  | 18,65 | 581,90 | 133,67 |
| 2019/06/10 | CH2205 | Male | Three y/o | Control | Control | Fast Day | No | 01:00 | 01:00 - 01:59 | Early Morning | 37,6 | 93  | 17,0  | 17,0  | 18,75 | 588,58 | 94,77  |
| 2019/06/10 | CH2206 | Male | Three y/o | Control | Control | Fast Day | No | 01:00 | 01:00 - 01:59 | Early Morning | 37,5 | 83  | 48,0  | 48,0  | 18,65 | 580,11 | 130,38 |
| 2019/06/10 | CH2205 | Male | Three y/o | Control | Control | Fast Day | No | 01:05 | 01:00 - 01:59 | Early Morning | 37,5 | 137 | 10,0  | 10,0  | 18,65 | 615,83 | 76,76  |
| 2019/06/10 | CH2206 | Male | Three y/o | Control | Control | Fast Day | No | 01:05 | 01:00 - 01:59 | Early Morning | 37,5 | 56  | 51,8  | 51,8  | 18,65 | 549,01 | 133,01 |
| 2019/06/10 | CH2205 | Male | Three y/o | Control | Control | Fast Day | No | 01:10 | 01:00 - 01:59 | Early Morning | 37,6 | 88  | 6,6   | 6,6   | 18,75 | 584,49 | 62,73  |
| 2019/06/10 | CH2206 | Male | Three y/o | Control | Control | Fast Day | No | 01:10 | 01:00 - 01:59 | Early Morning | 37,5 | 46  | 45,8  | 45,8  | 18,65 | 532,38 | 128,76 |
| 2019/06/10 | CH2205 | Male | Three y/o | Control | Control | Fast Day | No | 01:15 | 01:00 - 01:59 | Early Morning | 37,7 | 54  | 8,6   | 8,6   | 18,85 | 545,99 | 71,66  |
| 2019/06/10 | CH2206 | Male | Three y/o | Control | Control | Fast Day | No | 01:15 | 01:00 - 01:59 | Early Morning | 37,5 | 69  | 53,4  | 53,4  | 18,65 | 565,86 | 134,06 |
| 2019/06/10 | CH2205 | Male | Three y/o | Control | Control | Fast Day | No | 01:20 | 01:00 - 01:59 | Early Morning | 37,6 | 89  | 8,4   | 8,4   | 18,75 | 585,33 | 70,86  |
| 2019/06/10 | CH2206 | Male | Three y/o | Control | Control | Fast Day | No | 01:20 | 01:00 - 01:59 | Early Morning | 37,7 | 48  | 48,8  | 48,8  | 18,85 | 536,04 | 130,95 |
| 2019/06/10 | CH2205 | Male | Three y/o | Control | Control | Fast Day | No | 01:25 | 01:00 - 01:59 | Early Morning | 37,6 | 69  | 9,2   | 9,2   | 18,75 | 565,86 | 73,94  |
| 2019/06/10 | CH2206 | Male | Three y/o | Control | Control | Fast Day | No | 01:25 | 01:00 - 01:59 | Early Morning | 37,7 | 98  | 51,0  | 51,0  | 18,85 | 592,41 | 132,47 |
| 2019/06/10 | CH2205 | Male | Three y/o | Control | Control | Fast Day | No | 01:30 | 01:00 - 01:59 | Early Morning | 37,6 | 84  | 8,0   | 8,0   | 18,75 | 581,01 | 69,22  |
| 2019/06/10 | CH2206 | Male | Three y/o | Control | Control | Fast Day | No | 01:30 | 01:00 - 01:59 | Early Morning | 37,7 | 70  | 45,8  | 45,8  | 18,85 | 566,99 | 128,76 |
| 2019/06/10 | CH2205 | Male | Three y/o | Control | Control | Fast Day | No | 01:35 | 01:00 - 01:59 | Early Morning | 37,6 | 89  | 8,2   | 8,2   | 18,75 | 585,33 | 70,05  |
| 2019/06/10 | CH2206 | Male | Three y/o | Control | Control | Fast Day | No | 01:35 | 01:00 - 01:59 | Early Morning | 37,7 | 86  | 47,8  | 47,8  | 18,85 | 582,77 | 130,23 |
| 2019/06/10 | CH2205 | Male | Three y/o | Control | Control | Fast Day | No | 01:40 | 01:00 - 01:59 | Early Morning | 37,7 | 94  | 12,4  | 12,4  | 18,85 | 589,37 | 84,04  |
| 2019/06/10 | CH2206 | Male | Three y/o | Control | Control | Fast Day | No | 01:40 | 01:00 - 01:59 | Early Morning | 37,7 | 94  | 50,6  | 50,6  | 18,85 | 589,37 | 132,20 |
| 2019/06/10 | CH2205 | Male | Three y/o | Control | Control | Fast Day | No | 01:45 | 01:00 - 01:59 | Early Morning | 37,7 | 90  | 10,8  | 10,8  | 18,85 | 586,16 | 79,36  |
| 2019/06/10 | CH2206 | Male | Three y/o | Control | Control | Fast Day | No | 01:45 | 01:00 - 01:59 | Early Morning | 37,7 | 56  | 48,4  | 48,4  | 18,85 | 549,01 | 130,66 |
| 2019/06/10 | CH2205 | Male | Three y/o | Control | Control | Fast Day | No | 01:50 | 01:00 - 01:59 | Early Morning | 37,7 | 90  | 9,6   | 9,6   | 18,85 | 586,16 | 75,37  |
| 2019/06/10 | CH2206 | Male | Three y/o | Control | Control | Fast Day | No | 01:50 | 01:00 - 01:59 | Early Morning | 37,7 | 79  | 48,8  | 48,8  | 18,85 | 576,36 | 130,95 |
| 2019/06/10 | CH2205 | Male | Three y/o | Control | Control | Fast Day | No | 01:55 | 01:00 - 01:59 | Early Morning | 37,7 | 100 | 6,6   | 6,6   | 18,85 | 593,87 | 62,73  |
| 2019/06/10 | CH2206 | Male | Three y/o | Control | Control | Fast Day | No | 01:55 | 01:00 - 01:59 | Early Morning | 37,7 |     | 32,4  | 32,4  | 18,85 |        | 116,84 |
| 2019/06/10 | CH2205 | Male | Three y/o | Control | Control | Fast Day | No | 02:00 | 02:00 - 02:59 | Early Morning | 37,7 | 72  | 95,6  | 95,6  | 18,85 | 569,20 | 154,28 |
| 2019/06/10 | CH2206 | Male | Three y/o | Control | Control | Fast Day | No | 02:00 | 02:00 - 02:59 | Early Morning | 37,8 | 123 | 34,4  | 34,4  | 18,95 | 608,49 | 118,90 |
| 2019/06/10 | CH2205 | Male | Three y/o | Control | Control | Fast Day | No | 02:05 | 02:00 - 02:59 | Early Morning | 37,8 | 119 | 57,6  | 57,6  | 18,95 | 606,20 | 136,68 |
| 2019/06/10 | CH2206 | Male | Three y/o | Control | Control | Fast Day | No | 02:05 | 02:00 - 02:59 | Early Morning | 37,8 | 125 | 37,6  | 37,6  | 18,95 | 609,60 | 121,96 |
| 2019/06/10 | CH2205 | Male | Three y/o | Control | Control | Fast Day | No | 02:10 | 02:00 - 02:59 | Early Morning | 37,7 | 119 | 15,4  | 15,4  | 18,85 | 606,20 | 91,41  |
| 2019/06/10 | CH2206 | Male | Three y/o | Control | Control | Fast Day | No | 02:10 | 02:00 - 02:59 | Early Morning | 37,7 | 115 | 58,0  | 58,0  | 18,85 | 603,82 | 136,92 |
| 2019/06/10 | CH2205 | Male | Three y/o | Control | Control | Fast Day | No | 02:15 | 02:00 - 02:59 | Early Morning | 37,6 | 68  | 15,2  | 15,2  | 18,75 | 564,71 | 90,96  |
| 2019/06/10 | CH2206 | Male | Three y/o | Control | Control | Fast Day | No | 02:15 | 02:00 - 02:59 | Early Morning | 37,7 | 131 | 29,4  | 29,4  | 18,85 | 612,80 | 113,50 |
| 2019/06/10 | CH2205 | Male | Three y/o | Control | Control | Fast Day | No | 02:20 | 02:00 - 02:59 | Early Morning | 37,3 | 103 | 27,4  | 27,4  | 18,46 | 596,00 | 111,09 |
| 2019/06/10 | CH2206 | Male | Three y/o | Control | Control | Fast Day | No | 02:20 | 02:00 - 02:59 | Early Morning | 37,5 | 110 | 61,0  | 61,0  | 18,65 | 600,69 | 138,67 |
| 2019/06/10 | CH2205 | Male | Three y/o | Control | Control | Fast Day | No | 02:25 | 02:00 - 02:59 | Early Morning | 37,2 | 121 | 84,4  | 84,4  | 18,36 | 607,35 | 149,94 |
| 2019/06/10 | CH2206 | Male | Three y/o | Control | Control | Fast Day | No | 02:25 | 02:00 - 02:59 | Early Morning | 37,5 | 115 | 26,0  | 26,0  | 18,65 | 603,82 | 109,29 |
| 2019/06/10 | CH2205 | Male | Three y/o | Control | Control | Fast Day | No | 02:30 | 02:00 - 02:59 | Early Morning | 37,4 | 160 | 21,0  | 21,0  | 18,55 | 626,07 | 101,98 |
| 2019/06/10 | CH2206 | Male | Three y/o | Control | Control | Fast Day | No | 02:30 | 02:00 - 02:59 | Early Morning | 37,4 | 108 | 59,4  | 59,4  | 18,55 | 599,39 | 137,75 |
| 2019/06/10 | CH2205 | Male | Three y/o | Control | Control | Fast Day | No | 02:35 | 02:00 - 02:59 | Early Morning | 37,0 | 121 | 37,6  | 37,6  | 18,16 | 607,35 | 121,96 |
| 2019/06/10 | CH2206 | Male | Three y/o | Control | Control | Fast Day | No | 02:35 | 02:00 - 02:59 | Early Morning | 37,4 | 131 | 33,2  | 33,2  | 18,55 | 612,80 | 117,68 |
| 2019/06/10 | CH2205 | Male | Three y/o | Control | Control | Fast Day | No | 02:40 | 02:00 - 02:59 | Early Morning | 36,5 | 197 | 52,4  | 52,4  | 17,67 | 639,25 | 133,41 |
| 2019/06/10 | CH2206 | Male | Three y/o | Control | Control | Fast Day | No | 02:40 | 02:00 - 02:59 | Early Morning | 37,3 | 100 | 42,2  | 42,2  | 18,46 | 593,87 | 125,93 |
| 2019/06/10 | CH2205 | Male | Three y/o | Control | Control | Fast Day | No | 02:45 | 02:00 - 02:59 | Early Morning | 36,6 | 33  | 97,8  | 97,8  | 17,77 | 502,51 | 155,07 |
| 2019/06/10 | CH2206 | Male | Three y/o | Control | Control | Fast Day | No | 02:45 | 02:00 - 02:59 | Early Morning | 37,3 | 123 | 92,0  | 92,0  | 18,46 | 608,49 | 152,94 |
| 2019/06/10 | CH2205 | Male | Three y/o | Control | Control | Fast Day | No | 02:50 | 02:00 - 02:59 | Early Morning | 37,1 |     | 34,8  | 34,8  | 18,26 |        | 119,29 |
| 2019/06/10 | CH2206 | Male | Three y/o | Control | Control | Fast Day | No | 02:50 | 02:00 - 02:59 | Early Morning | 37,4 | 120 | 34,8  | 34,8  | 18,55 | 606,78 | 119,29 |
| 2019/06/10 | CH2205 | Male | Three y/o | Control | Control | Fast Day | No | 02:55 | 02:00 - 02:59 | Early Morning | 37,2 | 134 | 20,8  | 20,8  | 18,36 | 614,33 | 101,65 |
| 2019/06/10 | CH2206 | Male | Three y/o | Control | Control | Fast Day | No | 02:55 | 02:00 - 02:59 | Early Morning | 37,4 |     | 167,6 | 167,6 | 18,55 |        | 173,91 |
| 2019/06/10 | CH2205 | Male | Three y/o | Control | Control | Fast Day | No | 03:00 | 03:00 - 03:59 | Early Morning | 37,1 |     | 27,0  | 27,0  | 18,26 |        | 110,58 |
| 2019/06/10 | CH2206 | Male | Three y/o | Control | Control | Fast Day | No | 03:00 | 03:00 - 03:59 | Early Morning | 37,5 | 120 | 86,6  | 86,6  | 18,65 | 606,78 | 150,83 |
| 2019/06/10 | CH2205 | Male | Three y/o | Control | Control | Fast Day | No | 03:05 | 03:00 - 03:59 | Early Morning | 37,1 | 138 | 28,0  | 28,0  | 18,26 | 616,31 | 111,83 |
| 2019/06/10 | CH2206 | Male | Three y/o | Control | Control | Fast Day | No | 03:05 | 03:00 - 03:59 | Early Morning | 37,5 | 92  | 16,4  | 16,4  | 18,65 | 587,78 | 93,55  |
| 2019/06/10 | CH2205 | Male | Three y/o | Control | Control | Fast Day | No | 03:10 | 03:00 - 03:59 | Early Morning | 37,1 | 77  | 26,6  | 26,6  | 18,26 | 574,39 | 110,07 |
| 2019/06/10 | CH2206 | Male | Three y/o | Control | Control | Fast Day | No | 03:10 | 03:00 - 03:59 | Early Morning | 37,2 | 74  | 25,8  | 25,8  | 18,36 | 571,33 | 109,02 |
| 2019/06/10 | CH2205 | Male | Three y/o | Control | Control | Fast Day | No | 03:15 | 03:00 - 03:59 | Early Morning | 37,3 |     | 27,6  | 27,6  | 18,46 |        | 111,33 |
| 2019/06/10 | CH2206 | Male | Three y/o | Control | Control | Fast Day | No | 03:15 | 03:00 - 03:59 | Early Morning | 37,1 | 88  | 15,4  | 15,4  | 18,26 | 584,49 | 91,41  |
| 2019/06/10 | CH2205 | Male | Three y/o | Control | Control | Fast Day | No | 03:20 | 03:00 - 03:59 | Early Morning | 37,3 |     | 25,2  | 25,2  | 18,46 |        | 108,22 |
| 2019/06/10 | CH2206 | Male | Three y/o | Control | Control | Fast Day | No | 03:20 | 03:00 - 03:59 | Early Morning | 37,2 | 88  | 13,6  | 13,6  | 18,36 | 584,49 | 87,18  |
| 2019/06/10 | CH2205 | Male | Three y/o | Control | Control | Fast Day | No | 03:25 | 03:00 - 03:59 | Early Morning | 37,4 |     | 18,2  | 18,2  | 18,55 |        | 97,10  |
| 2019/06/10 | CH2206 | Male | Three y/o | Control | Control | Fast Day | No | 03:25 | 03:00 - 03:59 | Early Morning | 37,3 | 70  | 16,6  | 16,6  | 18,46 | 566,99 | 93,96  |
| 2019/06/10 | CH2205 | Male | Three y/o | Control | Control | Fast Day | No | 03:30 | 03:00 - 03:59 | Early Morning | 37,5 | 91  | 20,8  | 20,8  | 18,65 | 586,98 | 101,65 |
| 2019/06/10 | CH2206 | Male | Three y/o | Control | Control | Fast Day | No | 03:30 | 03:00 - 03:59 | Early Morning | 37,3 | 83  | 17,6  | 17,6  | 18,46 | 580,11 | 95,95  |
| 2019/06/10 | CH2205 | Male | Three y/o | Control | Control | Fast Day | No | 03:35 | 03:00 - 03:59 | Early Morning | 37,6 | 78  | 21,0  | 21,0  | 18,75 | 575,38 | 101,98 |



|            |        |      |           |         |         |          |    |       |               |               |      |     |      |      |       |        |        |
|------------|--------|------|-----------|---------|---------|----------|----|-------|---------------|---------------|------|-----|------|------|-------|--------|--------|
| 2019/06/10 | CH2206 | Male | Three y/o | Control | Control | Fast Day | No | 03:35 | 03:00 - 03:59 | Early Morning | 37,3 | 75  | 20,6 | 20,6 | 18,46 | 572,36 | 101,32 |
| 2019/06/10 | CH2205 | Male | Three y/o | Control | Control | Fast Day | No | 03:40 | 03:00 - 03:59 | Early Morning | 37,6 | 63  | 15,8 | 15,8 | 18,75 | 558,62 | 92,28  |
| 2019/06/10 | CH2206 | Male | Three y/o | Control | Control | Fast Day | No | 03:40 | 03:00 - 03:59 | Early Morning | 37,4 | 84  | 23,6 | 23,6 | 18,55 | 581,01 | 105,97 |
| 2019/06/10 | CH2205 | Male | Three y/o | Control | Control | Fast Day | No | 03:45 | 03:00 - 03:59 | Early Morning | 37,6 | 76  | 15,4 | 15,4 | 18,75 | 573,39 | 91,41  |
| 2019/06/10 | CH2206 | Male | Three y/o | Control | Control | Fast Day | No | 03:45 | 03:00 - 03:59 | Early Morning | 37,4 | 52  | 25,4 | 25,4 | 18,55 | 542,83 | 108,49 |
| 2019/06/10 | CH2205 | Male | Three y/o | Control | Control | Fast Day | No | 03:50 | 03:00 - 03:59 | Early Morning | 37,6 | 79  | 20,8 | 20,8 | 18,75 | 576,36 | 101,65 |
| 2019/06/10 | CH2206 | Male | Three y/o | Control | Control | Fast Day | No | 03:50 | 03:00 - 03:59 | Early Morning | 37,5 | 88  | 38,6 | 38,6 | 18,65 | 584,49 | 122,86 |
| 2019/06/10 | CH2205 | Male | Three y/o | Control | Control | Fast Day | No | 03:55 | 03:00 - 03:59 | Early Morning | 37,6 | 79  | 21,4 | 21,4 | 18,75 | 576,36 | 102,63 |
| 2019/06/10 | CH2206 | Male | Three y/o | Control | Control | Fast Day | No | 03:55 | 03:00 - 03:59 | Early Morning | 37,5 | 68  | 43,4 | 43,4 | 18,65 | 564,71 | 126,90 |
| 2019/06/10 | CH2205 | Male | Three y/o | Control | Control | Fast Day | No | 04:00 | 04:00 - 04:59 | Morning       | 37,6 | 82  | 17,6 | 17,6 | 18,75 | 579,19 | 95,95  |
| 2019/06/10 | CH2206 | Male | Three y/o | Control | Control | Fast Day | No | 04:00 | 04:00 - 04:59 | Morning       | 37,5 | 66  | 40,6 | 40,6 | 18,65 | 562,34 | 124,60 |
| 2019/06/10 | CH2205 | Male | Three y/o | Control | Control | Fast Day | No | 04:05 | 04:00 - 04:59 | Morning       | 37,6 | 94  | 19,6 | 19,6 | 18,75 | 589,37 | 99,63  |
| 2019/06/10 | CH2206 | Male | Three y/o | Control | Control | Fast Day | No | 04:05 | 04:00 - 04:59 | Morning       | 37,5 | 88  | 47,8 | 47,8 | 18,65 | 584,49 | 130,23 |
| 2019/06/10 | CH2205 | Male | Three y/o | Control | Control | Fast Day | No | 04:10 | 04:00 - 04:59 | Morning       | 37,6 | 57  | 20,6 | 20,6 | 18,75 | 550,47 | 101,32 |
| 2019/06/10 | CH2206 | Male | Three y/o | Control | Control | Fast Day | No | 04:10 | 04:00 - 04:59 | Morning       | 37,5 | 84  | 49,8 | 49,8 | 18,65 | 581,01 | 131,65 |
| 2019/06/10 | CH2205 | Male | Three y/o | Control | Control | Fast Day | No | 04:15 | 04:00 - 04:59 | Morning       | 37,6 | 87  | 26,0 | 26,0 | 18,75 | 583,64 | 109,29 |
| 2019/06/10 | CH2206 | Male | Three y/o | Control | Control | Fast Day | No | 04:15 | 04:00 - 04:59 | Morning       | 37,5 | 80  | 51,8 | 51,8 | 18,65 | 577,31 | 133,01 |
| 2019/06/10 | CH2205 | Male | Three y/o | Control | Control | Fast Day | No | 04:20 | 04:00 - 04:59 | Morning       | 37,6 | 66  | 18,6 | 18,6 | 18,75 | 562,34 | 97,84  |
| 2019/06/10 | CH2206 | Male | Three y/o | Control | Control | Fast Day | No | 04:20 | 04:00 - 04:59 | Morning       | 37,5 | 47  | 46,0 | 46,0 | 18,65 | 534,23 | 128,91 |
| 2019/06/10 | CH2205 | Male | Three y/o | Control | Control | Fast Day | No | 04:25 | 04:00 - 04:59 | Morning       | 37,6 | 58  | 27,2 | 27,2 | 18,75 | 551,90 | 110,83 |
| 2019/06/10 | CH2206 | Male | Three y/o | Control | Control | Fast Day | No | 04:25 | 04:00 - 04:59 | Morning       | 37,5 | 87  | 35,8 | 35,8 | 18,65 | 583,64 | 120,27 |
| 2019/06/10 | CH2205 | Male | Three y/o | Control | Control | Fast Day | No | 04:30 | 04:00 - 04:59 | Morning       | 37,6 | 62  | 20,0 | 20,0 | 18,75 | 557,33 | 100,31 |
| 2019/06/10 | CH2206 | Male | Three y/o | Control | Control | Fast Day | No | 04:30 | 04:00 - 04:59 | Morning       | 37,5 | 55  | 28,8 | 28,8 | 18,65 | 547,52 | 112,79 |
| 2019/06/10 | CH2205 | Male | Three y/o | Control | Control | Fast Day | No | 04:35 | 04:00 - 04:59 | Morning       | 37,5 | 65  | 20,6 | 20,6 | 18,65 | 561,12 | 101,32 |
| 2019/06/10 | CH2206 | Male | Three y/o | Control | Control | Fast Day | No | 04:35 | 04:00 - 04:59 | Morning       | 37,5 | 49  | 25,8 | 25,8 | 18,65 | 537,80 | 109,02 |
| 2019/06/10 | CH2205 | Male | Three y/o | Control | Control | Fast Day | No | 04:40 | 04:00 - 04:59 | Morning       | 37,5 | 84  | 21,8 | 21,8 | 18,65 | 581,01 | 103,26 |
| 2019/06/10 | CH2206 | Male | Three y/o | Control | Control | Fast Day | No | 04:40 | 04:00 - 04:59 | Morning       | 37,4 | 86  | 26,2 | 26,2 | 18,55 | 582,77 | 109,55 |
| 2019/06/10 | CH2205 | Male | Three y/o | Control | Control | Fast Day | No | 04:45 | 04:00 - 04:59 | Morning       | 37,5 | 82  | 19,6 | 19,6 | 18,65 | 579,19 | 99,63  |
| 2019/06/10 | CH2206 | Male | Three y/o | Control | Control | Fast Day | No | 04:45 | 04:00 - 04:59 | Morning       | 37,4 | 90  | 29,8 | 29,8 | 18,55 | 586,16 | 113,97 |
| 2019/06/10 | CH2205 | Male | Three y/o | Control | Control | Fast Day | No | 04:50 | 04:00 - 04:59 | Morning       | 37,5 | 90  | 21,4 | 21,4 | 18,65 | 586,16 | 102,63 |
| 2019/06/10 | CH2206 | Male | Three y/o | Control | Control | Fast Day | No | 04:50 | 04:00 - 04:59 | Morning       | 37,4 | 106 | 17,8 | 17,8 | 18,55 | 598,06 | 96,34  |
| 2019/06/10 | CH2205 | Male | Three y/o | Control | Control | Fast Day | No | 04:55 | 04:00 - 04:59 | Morning       | 37,5 | 92  | 18,2 | 18,2 | 18,65 | 587,78 | 97,10  |
| 2019/06/10 | CH2206 | Male | Three y/o | Control | Control | Fast Day | No | 04:55 | 04:00 - 04:59 | Morning       | 37,4 | 72  | 25,4 | 25,4 | 18,55 | 569,20 | 108,49 |
| 2019/06/10 | CH2205 | Male | Three y/o | Control | Control | Fast Day | No | 05:00 | 05:00 - 05:59 | Morning       | 37,5 | 90  | 34,0 | 34,0 | 18,65 | 586,16 | 118,49 |
| 2019/06/10 | CH2206 | Male | Three y/o | Control | Control | Fast Day | No | 05:00 | 05:00 - 05:59 | Morning       | 37,4 | 68  | 22,0 | 22,0 | 18,55 | 564,71 | 103,57 |
| 2019/06/10 | CH2205 | Male | Three y/o | Control | Control | Fast Day | No | 05:05 | 05:00 - 05:59 | Morning       | 37,5 | 55  | 19,2 | 19,2 | 18,65 | 547,52 | 98,92  |
| 2019/06/10 | CH2206 | Male | Three y/o | Control | Control | Fast Day | No | 05:05 | 05:00 - 05:59 | Morning       | 37,4 | 55  | 18,2 | 18,2 | 18,55 | 547,52 | 97,10  |
| 2019/06/10 | CH2205 | Male | Three y/o | Control | Control | Fast Day | No | 05:10 | 05:00 - 05:59 | Morning       | 37,4 | 83  | 22,2 | 22,2 | 18,55 | 580,11 | 103,88 |
| 2019/06/10 | CH2206 | Male | Three y/o | Control | Control | Fast Day | No | 05:10 | 05:00 - 05:59 | Morning       | 37,4 | 81  | 41,8 | 41,8 | 18,55 | 578,26 | 125,60 |
| 2019/06/10 | CH2205 | Male | Three y/o | Control | Control | Fast Day | No | 05:15 | 05:00 - 05:59 | Morning       | 37,4 | 83  | 19,6 | 19,6 | 18,55 | 580,11 | 99,63  |
| 2019/06/10 | CH2206 | Male | Three y/o | Control | Control | Fast Day | No | 05:15 | 05:00 - 05:59 | Morning       | 37,4 | 42  | 47,0 | 47,0 | 18,55 | 524,42 | 129,65 |
| 2019/06/10 | CH2205 | Male | Three y/o | Control | Control | Fast Day | No | 05:20 | 05:00 - 05:59 | Morning       | 37,4 | 77  | 18,6 | 18,6 | 18,55 | 574,39 | 97,84  |
| 2019/06/10 | CH2206 | Male | Three y/o | Control | Control | Fast Day | No | 05:20 | 05:00 - 05:59 | Morning       | 37,4 | 71  | 44,0 | 44,0 | 18,55 | 568,10 | 127,37 |
| 2019/06/10 | CH2205 | Male | Three y/o | Control | Control | Fast Day | No | 05:25 | 05:00 - 05:59 | Morning       | 37,4 | 60  | 14,4 | 14,4 | 18,55 | 554,67 | 89,12  |
| 2019/06/10 | CH2206 | Male | Three y/o | Control | Control | Fast Day | No | 05:25 | 05:00 - 05:59 | Morning       | 37,4 | 60  | 40,6 | 40,6 | 18,55 | 554,67 | 124,60 |
| 2019/06/10 | CH2205 | Male | Three y/o | Control | Control | Fast Day | No | 05:30 | 05:00 - 05:59 | Morning       | 37,4 | 83  | 19,6 | 19,6 | 18,55 | 580,11 | 99,63  |
| 2019/06/10 | CH2206 | Male | Three y/o | Control | Control | Fast Day | No | 05:30 | 05:00 - 05:59 | Morning       | 37,5 | 84  | 46,4 | 46,4 | 18,65 | 581,01 | 129,21 |
| 2019/06/10 | CH2205 | Male | Three y/o | Control | Control | Fast Day | No | 05:35 | 05:00 - 05:59 | Morning       | 37,4 | 64  | 17,0 | 17,0 | 18,55 | 559,88 | 94,77  |
| 2019/06/10 | CH2206 | Male | Three y/o | Control | Control | Fast Day | No | 05:35 | 05:00 - 05:59 | Morning       | 37,4 | 59  | 45,6 | 45,6 | 18,55 | 553,30 | 128,61 |
| 2019/06/10 | CH2205 | Male | Three y/o | Control | Control | Fast Day | No | 05:40 | 05:00 - 05:59 | Morning       | 37,3 | 82  | 18,4 | 18,4 | 18,46 | 579,19 | 97,47  |
| 2019/06/10 | CH2206 | Male | Three y/o | Control | Control | Fast Day | No | 05:40 | 05:00 - 05:59 | Morning       | 37,5 | 53  | 40,0 | 40,0 | 18,65 | 544,43 | 124,09 |
| 2019/06/10 | CH2205 | Male | Three y/o | Control | Control | Fast Day | No | 05:45 | 05:00 - 05:59 | Morning       | 37,3 | 68  | 17,8 | 17,8 | 18,46 | 564,71 | 96,34  |
| 2019/06/10 | CH2206 | Male | Three y/o | Control | Control | Fast Day | No | 05:45 | 05:00 - 05:59 | Morning       | 37,5 | 70  | 45,2 | 45,2 | 18,65 | 566,99 | 128,30 |
| 2019/06/10 | CH2205 | Male | Three y/o | Control | Control | Fast Day | No | 05:50 | 05:00 - 05:59 | Morning       | 37,4 | 66  | 4,2  | 4,2  | 18,55 | 562,34 | 47,57  |
| 2019/06/10 | CH2206 | Male | Three y/o | Control | Control | Fast Day | No | 05:50 | 05:00 - 05:59 | Morning       | 37,4 | 63  | 47,4 | 47,4 | 18,55 | 558,62 | 129,94 |
| 2019/06/10 | CH2205 | Male | Three y/o | Control | Control | Fast Day | No | 05:55 | 05:00 - 05:59 | Morning       | 37,3 | 63  | 7,4  | 7,4  | 18,46 | 558,62 | 66,59  |
| 2019/06/10 | CH2206 | Male | Three y/o | Control | Control | Fast Day | No | 05:55 | 05:00 - 05:59 | Morning       | 37,4 | 74  | 41,4 | 41,4 | 18,55 | 571,33 | 125,27 |
| 2019/06/10 | CH2205 | Male | Three y/o | Control | Control | Fast Day | No | 06:00 | 06:00 - 06:59 | Morning       | 37,2 | 57  | 6,8  | 6,8  | 18,36 | 550,47 | 63,74  |
| 2019/06/10 | CH2206 | Male | Three y/o | Control | Control | Fast Day | No | 06:00 | 06:00 - 06:59 | Morning       | 37,4 | 57  | 49,6 | 49,6 | 18,55 | 550,47 | 131,51 |
| 2019/06/10 | CH2205 | Male | Three y/o | Control | Control | Fast Day | No | 06:05 | 06:00 - 06:59 | Morning       | 37,1 | 47  | 5,6  | 5,6  | 18,26 | 534,23 | 57,21  |
| 2019/06/10 | CH2206 | Male | Three y/o | Control | Control | Fast Day | No | 06:05 | 06:00 - 06:59 | Morning       | 37,3 | 56  | 47,8 | 47,8 | 18,46 | 549,01 | 130,23 |
| 2019/06/10 | CH2205 | Male | Three y/o | Control | Control | Fast Day | No | 06:10 | 06:00 - 06:59 | Morning       | 37,1 | 61  | 9,2  | 9,2  | 18,26 | 556,01 | 73,94  |
| 2019/06/10 | CH2206 | Male | Three y/o | Control | Control | Fast Day | No | 06:10 | 06:00 - 06:59 | Morning       | 37,3 | 83  | 36,6 | 36,6 | 18,46 | 580,11 | 121,03 |
| 2019/06/10 | CH2205 | Male | Three y/o | Control | Control | Fast Day | No | 06:15 | 06:00 - 06:59 | Morning       | 37,2 |     | 6,2  | 6,2  | 18,36 |        | 60,63  |
| 2019/06/10 | CH2206 | Male | Three y/o | Control | Control | Fast Day | No | 06:15 | 06:00 - 06:59 | Morning       | 37,3 | 72  | 6,0  | 6,0  | 18,46 | 569,20 | 59,53  |
| 2019/06/10 | CH2205 | Male | Three y/o | Control | Control | Fast Day | No | 06:20 | 06:00 - 06:59 | Morning       | 37,2 | 88  | 21,4 | 21,4 | 18,36 | 584,49 | 102,63 |
| 2019/06/10 | CH2206 | Male | Three y/o | Control | Control | Fast Day | No | 06:20 | 06:00 - 06:59 | Morning       | 37,3 | 52  | 7,0  | 7,0  | 18,46 | 542,83 | 64,72  |
| 2019/06/10 | CH2205 | Male | Three y/o | Control | Control | Fast Day | No | 06:25 | 06:00 - 06:59 | Morning       | 37,2 | 59  | 20,2 | 20,2 | 18,36 | 553,30 | 100,65 |
| 2019/06/10 | CH2206 | Male | Three y/o | Control | Control | Fast Day | No | 06:25 | 06:00 - 06:59 | Morning       | 37,2 | 104 | 23,6 | 23,6 | 18,36 | 596,69 | 105,97 |
| 2019/06/10 | CH2205 | Male | Three y/o | Control | Control | Fast Day | No | 06:30 | 06:00 - 06:59 | Morning       | 37,2 | 45  | 16,6 | 16,6 | 18,36 | 530,47 | 93,96  |



|            |        |      |           |         |         |          |    |       |               |              |      |     |       |       |       |        |        |
|------------|--------|------|-----------|---------|---------|----------|----|-------|---------------|--------------|------|-----|-------|-------|-------|--------|--------|
| 2019/06/10 | CH2206 | Male | Three y/o | Control | Control | Fast Day | No | 06:30 | 06:00 - 06:59 | Morning      | 37,2 | 53  | 22,2  | 22,2  | 18,36 | 544,43 | 103,88 |
| 2019/06/10 | CH2205 | Male | Three y/o | Control | Control | Fast Day | No | 06:35 | 06:00 - 06:59 | Morning      | 37,2 | 84  | 18,2  | 18,2  | 18,36 | 581,01 | 97,10  |
| 2019/06/10 | CH2206 | Male | Three y/o | Control | Control | Fast Day | No | 06:35 | 06:00 - 06:59 | Morning      | 37,2 | 79  | 22,8  | 22,8  | 18,36 | 576,36 | 104,79 |
| 2019/06/10 | CH2205 | Male | Three y/o | Control | Control | Fast Day | No | 06:40 | 06:00 - 06:59 | Morning      | 37,2 | 57  | 20,4  | 20,4  | 18,36 | 550,47 | 100,99 |
| 2019/06/10 | CH2206 | Male | Three y/o | Control | Control | Fast Day | No | 06:40 | 06:00 - 06:59 | Morning      | 37,2 | 55  | 19,8  | 19,8  | 18,36 | 547,52 | 99,97  |
| 2019/06/10 | CH2205 | Male | Three y/o | Control | Control | Fast Day | No | 06:45 | 06:00 - 06:59 | Morning      | 37,2 | 99  | 23,4  | 23,4  | 18,36 | 593,14 | 105,68 |
| 2019/06/10 | CH2206 | Male | Three y/o | Control | Control | Fast Day | No | 06:45 | 06:00 - 06:59 | Morning      | 37,3 | 111 | 40,4  | 40,4  | 18,46 | 601,33 | 124,43 |
| 2019/06/10 | CH2205 | Male | Three y/o | Control | Control | Fast Day | No | 06:50 | 06:00 - 06:59 | Morning      | 37,3 | 126 | 30,6  | 30,6  | 18,46 | 610,14 | 114,87 |
| 2019/06/10 | CH2206 | Male | Three y/o | Control | Control | Fast Day | No | 06:50 | 06:00 - 06:59 | Morning      | 37,3 | 135 | 60,2  | 60,2  | 18,46 | 614,84 | 138,21 |
| 2019/06/10 | CH2205 | Male | Three y/o | Control | Control | Fast Day | No | 06:55 | 06:00 - 06:59 | Morning      | 37,1 | 141 | 32,0  | 32,0  | 18,26 | 617,75 | 116,41 |
| 2019/06/10 | CH2206 | Male | Three y/o | Control | Control | Fast Day | No | 06:55 | 06:00 - 06:59 | Morning      | 37,3 |     | 32,0  | 32,0  | 18,46 |        | 116,41 |
| 2019/06/10 | CH2205 | Male | Three y/o | Control | Control | Fast Day | No | 07:00 | 07:00 - 07:59 | Morning      | 36,7 | 97  | 62,6  | 62,6  | 17,87 | 591,66 | 139,56 |
| 2019/06/10 | CH2206 | Male | Three y/o | Control | Control | Fast Day | No | 07:00 | 07:00 - 07:59 | Morning      | 37,1 | 112 | 20,0  | 20,0  | 18,26 | 601,96 | 100,31 |
| 2019/06/10 | CH2205 | Male | Three y/o | Control | Control | Fast Day | No | 07:05 | 07:00 - 07:59 | Morning      | 37,2 | 111 | 33,4  | 33,4  | 18,36 | 601,33 | 117,88 |
| 2019/06/10 | CH2206 | Male | Three y/o | Control | Control | Fast Day | No | 07:05 | 07:00 - 07:59 | Morning      | 37,0 | 114 | 33,4  | 33,4  | 18,16 | 603,20 | 117,88 |
| 2019/06/10 | CH2205 | Male | Three y/o | Control | Control | Fast Day | No | 07:10 | 07:00 - 07:59 | Morning      | 37,3 | 60  | 114,2 | 114,2 | 18,46 | 554,67 | 160,48 |
| 2019/06/10 | CH2206 | Male | Three y/o | Control | Control | Fast Day | No | 07:10 | 07:00 - 07:59 | Morning      | 36,9 | 104 | 33,8  | 33,8  | 18,06 | 596,69 | 118,29 |
| 2019/06/10 | CH2205 | Male | Three y/o | Control | Control | Fast Day | No | 07:15 | 07:00 - 07:59 | Morning      | 37,3 |     | 41,0  | 41,0  | 18,46 |        | 124,94 |
| 2019/06/10 | CH2206 | Male | Three y/o | Control | Control | Fast Day | No | 07:15 | 07:00 - 07:59 | Morning      | 36,8 | 98  | 42,8  | 42,8  | 17,96 | 592,41 | 126,42 |
| 2019/06/10 | CH2205 | Male | Three y/o | Control | Control | Fast Day | No | 07:20 | 07:00 - 07:59 | Morning      | 37,2 | 106 | 40,4  | 40,4  | 18,36 | 598,06 | 124,43 |
| 2019/06/10 | CH2206 | Male | Three y/o | Control | Control | Fast Day | No | 07:20 | 07:00 - 07:59 | Morning      | 36,7 |     | 41,4  | 41,4  | 17,87 |        | 125,27 |
| 2019/06/10 | CH2205 | Male | Three y/o | Control | Control | Fast Day | No | 07:25 | 07:00 - 07:59 | Morning      | 36,7 | 92  | 68,4  | 68,4  | 17,87 | 587,78 | 142,64 |
| 2019/06/10 | CH2206 | Male | Three y/o | Control | Control | Fast Day | No | 07:25 | 07:00 - 07:59 | Morning      | 36,9 | 135 | 65,4  | 65,4  | 18,06 | 614,84 | 141,08 |
| 2019/06/10 | CH2205 | Male | Three y/o | Control | Control | Fast Day | No | 07:30 | 07:00 - 07:59 | Morning      | 37,1 | 91  | 50,8  | 50,8  | 18,26 | 586,98 | 132,33 |
| 2019/06/10 | CH2206 | Male | Three y/o | Control | Control | Fast Day | No | 07:30 | 07:00 - 07:59 | Morning      | 37,2 | 141 | 127,6 | 127,6 | 18,36 | 617,75 | 164,35 |
| 2019/06/10 | CH2205 | Male | Three y/o | Control | Control | Fast Day | No | 07:35 | 07:00 - 07:59 | Morning      | 37,3 | 126 | 26,2  | 26,2  | 18,46 | 610,14 | 109,55 |
| 2019/06/10 | CH2206 | Male | Three y/o | Control | Control | Fast Day | No | 07:35 | 07:00 - 07:59 | Morning      | 37,3 | 118 | 169,8 | 169,8 | 18,46 | 605,61 | 174,37 |
| 2019/06/10 | CH2205 | Male | Three y/o | Control | Control | Fast Day | No | 07:40 | 07:00 - 07:59 | Morning      | 37,3 | 86  | 76,2  | 76,2  | 18,46 | 582,77 | 146,38 |
| 2019/06/10 | CH2206 | Male | Three y/o | Control | Control | Fast Day | No | 07:40 | 07:00 - 07:59 | Morning      | 37,2 | 111 | 200,8 | 200,8 | 18,36 | 601,33 | 180,26 |
| 2019/06/10 | CH2205 | Male | Three y/o | Control | Control | Fast Day | No | 07:45 | 07:00 - 07:59 | Morning      | 37,4 | 129 | 136,2 | 136,2 | 18,55 | 611,75 | 166,64 |
| 2019/06/10 | CH2206 | Male | Three y/o | Control | Control | Fast Day | No | 07:45 | 07:00 - 07:59 | Morning      | 37,4 | 125 | 136,2 | 136,2 | 18,55 | 609,60 | 166,64 |
| 2019/06/10 | CH2205 | Male | Three y/o | Control | Control | Fast Day | No | 07:50 | 07:00 - 07:59 | Morning      | 37,6 | 120 | 16,2  | 16,2  | 18,75 | 606,78 | 93,13  |
| 2019/06/10 | CH2206 | Male | Three y/o | Control | Control | Fast Day | No | 07:50 | 07:00 - 07:59 | Morning      | 37,7 | 71  | 233,6 | 233,6 | 18,85 | 568,10 | 185,59 |
| 2019/06/10 | CH2205 | Male | Three y/o | Control | Control | Fast Day | No | 07:55 | 07:00 - 07:59 | Morning      | 37,5 | 107 | 78,8  | 78,8  | 18,65 | 598,73 | 147,55 |
| 2019/06/10 | CH2206 | Male | Three y/o | Control | Control | Fast Day | No | 07:55 | 07:00 - 07:59 | Morning      | 37,8 | 135 | 80,2  | 80,2  | 18,95 | 614,84 | 148,16 |
| 2019/06/10 | CH2205 | Male | Three y/o | Control | Control | Fast Day | No | 08:00 | 08:00 - 08:59 | Late Morning | 37,5 | 56  | 94,2  | 94,2  | 18,65 | 549,01 | 153,76 |
| 2019/06/10 | CH2206 | Male | Three y/o | Control | Control | Fast Day | No | 08:00 | 08:00 - 08:59 | Late Morning | 37,8 | 118 | 45,4  | 45,4  | 18,95 | 605,61 | 128,45 |
| 2019/06/10 | CH2205 | Male | Three y/o | Control | Control | Fast Day | No | 08:05 | 08:00 - 08:59 | Late Morning | 37,5 | 90  | 18,6  | 18,6  | 18,65 | 586,16 | 97,84  |
| 2019/06/10 | CH2206 | Male | Three y/o | Control | Control | Fast Day | No | 08:05 | 08:00 - 08:59 | Late Morning | 37,8 | 126 | 85,6  | 85,6  | 18,95 | 610,14 | 150,43 |
| 2019/06/10 | CH2205 | Male | Three y/o | Control | Control | Fast Day | No | 08:10 | 08:00 - 08:59 | Late Morning | 37,6 |     | 65,8  | 65,8  | 18,75 |        | 141,29 |
| 2019/06/10 | CH2206 | Male | Three y/o | Control | Control | Fast Day | No | 08:10 | 08:00 - 08:59 | Late Morning | 37,7 | 94  | 42,8  | 42,8  | 18,85 | 589,37 | 126,42 |
| 2019/06/10 | CH2205 | Male | Three y/o | Control | Control | Fast Day | No | 08:15 | 08:00 - 08:59 | Late Morning | 37,5 |     | 16,0  | 16,0  | 18,65 |        | 92,71  |
| 2019/06/10 | CH2206 | Male | Three y/o | Control | Control | Fast Day | No | 08:15 | 08:00 - 08:59 | Late Morning | 37,7 |     | 38,8  | 38,8  | 18,85 |        | 123,04 |
| 2019/06/10 | CH2205 | Male | Three y/o | Control | Control | Fast Day | No | 08:20 | 08:00 - 08:59 | Late Morning | 37,4 |     | 14,4  | 14,4  | 18,55 |        | 89,12  |
| 2019/06/10 | CH2206 | Male | Three y/o | Control | Control | Fast Day | No | 08:20 | 08:00 - 08:59 | Late Morning | 37,5 | 81  | 31,4  | 31,4  | 18,65 | 578,26 | 115,76 |
| 2019/06/10 | CH2205 | Male | Three y/o | Control | Control | Fast Day | No | 08:25 | 08:00 - 08:59 | Late Morning | 37,3 |     | 36,4  | 36,4  | 18,46 |        | 120,84 |
| 2019/06/10 | CH2206 | Male | Three y/o | Control | Control | Fast Day | No | 08:25 | 08:00 - 08:59 | Late Morning | 37,7 | 145 | 40,8  | 40,8  | 18,85 | 619,62 | 124,77 |
| 2019/06/10 | CH2205 | Male | Three y/o | Control | Control | Fast Day | No | 08:30 | 08:00 - 08:59 | Late Morning | 37,3 | 54  | 25,6  | 25,6  | 18,46 | 545,99 | 108,76 |
| 2019/06/10 | CH2206 | Male | Three y/o | Control | Control | Fast Day | No | 08:30 | 08:00 - 08:59 | Late Morning | 37,5 |     | 61,2  | 61,2  | 18,65 |        | 138,78 |
| 2019/06/10 | CH2205 | Male | Three y/o | Control | Control | Fast Day | No | 08:35 | 08:00 - 08:59 | Late Morning | 37,3 | 103 | 29,0  | 29,0  | 18,46 | 596,00 | 113,03 |
| 2019/06/10 | CH2206 | Male | Three y/o | Control | Control | Fast Day | No | 08:35 | 08:00 - 08:59 | Late Morning | 37,7 |     | 23,8  | 23,8  | 18,85 |        | 106,26 |
| 2019/06/10 | CH2205 | Male | Three y/o | Control | Control | Fast Day | No | 08:40 | 08:00 - 08:59 | Late Morning | 37,3 |     | 42,2  | 42,2  | 18,46 |        | 125,93 |
| 2019/06/10 | CH2206 | Male | Three y/o | Control | Control | Fast Day | No | 08:40 | 08:00 - 08:59 | Late Morning | 37,8 | 88  | 35,4  | 35,4  | 18,95 | 584,49 | 119,88 |
| 2019/06/10 | CH2205 | Male | Three y/o | Control | Control | Fast Day | No | 08:45 | 08:00 - 08:59 | Late Morning | 37,3 | 98  | 22,6  | 22,6  | 18,46 | 592,41 | 104,49 |
| 2019/06/10 | CH2206 | Male | Three y/o | Control | Control | Fast Day | No | 08:45 | 08:00 - 08:59 | Late Morning | 37,7 | 126 | 159,6 | 159,6 | 18,85 | 610,14 | 172,19 |
| 2019/06/10 | CH2205 | Male | Three y/o | Control | Control | Fast Day | No | 08:50 | 08:00 - 08:59 | Late Morning | 37,6 |     | 332,2 | 332,2 | 18,75 |        | 198,03 |
| 2019/06/10 | CH2206 | Male | Three y/o | Control | Control | Fast Day | No | 08:50 | 08:00 - 08:59 | Late Morning | 37,9 |     | 45,0  | 45,0  | 19,05 |        | 128,15 |
| 2019/06/10 | CH2205 | Male | Three y/o | Control | Control | Fast Day | No | 08:55 | 08:00 - 08:59 | Late Morning | 37,6 | 79  | 13,8  | 13,8  | 18,75 | 576,36 | 87,68  |
| 2019/06/10 | CH2206 | Male | Three y/o | Control | Control | Fast Day | No | 08:55 | 08:00 - 08:59 | Late Morning | 37,8 | 79  | 26,4  | 26,4  | 18,95 | 576,36 | 109,81 |
| 2019/06/10 | CH2205 | Male | Three y/o | Control | Control | Fast Day | No | 09:00 | 09:00 - 09:59 | Late Morning | 37,5 | 76  | 19,8  | 19,8  | 18,65 | 573,39 | 99,97  |
| 2019/06/10 | CH2206 | Male | Three y/o | Control | Control | Fast Day | No | 09:00 | 09:00 - 09:59 | Late Morning | 37,7 |     | 38,4  | 38,4  | 18,85 |        | 122,68 |
| 2019/06/10 | CH2205 | Male | Three y/o | Control | Control | Fast Day | No | 09:05 | 09:00 - 09:59 | Late Morning | 37,5 | 78  | 15,4  | 15,4  | 18,65 | 575,38 | 91,41  |
| 2019/06/10 | CH2206 | Male | Three y/o | Control | Control | Fast Day | No | 09:05 | 09:00 - 09:59 | Late Morning | 37,7 | 75  | 46,2  | 46,2  | 18,85 | 572,36 | 129,06 |
| 2019/06/10 | CH2205 | Male | Three y/o | Control | Control | Fast Day | No | 09:10 | 09:00 - 09:59 | Late Morning | 37,5 | 62  | 14,8  | 14,8  | 18,65 | 557,33 | 90,05  |
| 2019/06/10 | CH2206 | Male | Three y/o | Control | Control | Fast Day | No | 09:10 | 09:00 - 09:59 | Late Morning | 37,7 | 44  | 47,4  | 47,4  | 18,85 | 528,51 | 129,94 |
| 2019/06/10 | CH2205 | Male | Three y/o | Control | Control | Fast Day | No | 09:15 | 09:00 - 09:59 | Late Morning | 37,5 | 78  | 17,8  | 17,8  | 18,65 | 575,38 | 96,34  |
| 2019/06/10 | CH2206 | Male | Three y/o | Control | Control | Fast Day | No | 09:15 | 09:00 - 09:59 | Late Morning | 37,8 | 76  | 51,0  | 51,0  | 18,95 | 573,39 | 132,47 |
| 2019/06/10 | CH2205 | Male | Three y/o | Control | Control | Fast Day | No | 09:20 | 09:00 - 09:59 | Late Morning | 37,6 | 92  | 11,8  | 11,8  | 18,75 | 587,78 | 82,36  |
| 2019/06/10 | CH2206 | Male | Three y/o | Control | Control | Fast Day | No | 09:20 | 09:00 - 09:59 | Late Morning | 37,7 | 71  | 38,4  | 38,4  | 18,85 | 568,10 | 122,68 |
| 2019/06/10 | CH2205 | Male | Three y/o | Control | Control | Fast Day | No | 09:25 | 09:00 - 09:59 | Late Morning | 37,5 | 62  | 12,8  | 12,8  | 18,65 | 557,33 | 85,12  |



|            |        |      |           |         |         |          |    |       |               |              |      |     |       |       |       |        |        |
|------------|--------|------|-----------|---------|---------|----------|----|-------|---------------|--------------|------|-----|-------|-------|-------|--------|--------|
| 2019/06/10 | CH2206 | Male | Three y/o | Control | Control | Fast Day | No | 09:25 | 09:00 - 09:59 | Late Morning | 37,7 |     | 69,2  | 69,2  | 18,85 |        | 143,04 |
| 2019/06/10 | CH2205 | Male | Three y/o | Control | Control | Fast Day | No | 09:30 | 09:00 - 09:59 | Late Morning | 37,5 | 167 | 37,8  | 37,8  | 18,65 | 628,84 | 122,14 |
| 2019/06/10 | CH2206 | Male | Three y/o | Control | Control | Fast Day | No | 09:30 | 09:00 - 09:59 | Late Morning | 37,8 | 131 | 42,0  | 42,0  | 18,95 | 612,80 | 125,77 |
| 2019/06/10 | CH2205 | Male | Three y/o | Control | Control | Fast Day | No | 09:35 | 09:00 - 09:59 | Late Morning | 37,6 | 105 | 8,2   | 8,2   | 18,75 | 597,38 | 70,05  |
| 2019/06/10 | CH2206 | Male | Three y/o | Control | Control | Fast Day | No | 09:35 | 09:00 - 09:59 | Late Morning | 37,8 | 114 | 84,2  | 84,2  | 18,95 | 603,20 | 149,85 |
| 2019/06/10 | CH2205 | Male | Three y/o | Control | Control | Fast Day | No | 09:40 | 09:00 - 09:59 | Late Morning | 37,5 | 90  | 7,6   | 7,6   | 18,65 | 586,16 | 67,49  |
| 2019/06/10 | CH2206 | Male | Three y/o | Control | Control | Fast Day | No | 09:40 | 09:00 - 09:59 | Late Morning | 37,7 | 107 | 51,0  | 51,0  | 18,85 | 598,73 | 132,47 |
| 2019/06/10 | CH2205 | Male | Three y/o | Control | Control | Fast Day | No | 09:45 | 09:00 - 09:59 | Late Morning | 37,5 | 55  | 10,4  | 10,4  | 18,65 | 547,52 | 78,08  |
| 2019/06/10 | CH2206 | Male | Three y/o | Control | Control | Fast Day | No | 09:45 | 09:00 - 09:59 | Late Morning | 37,7 | 73  | 46,0  | 46,0  | 18,85 | 570,27 | 128,91 |
| 2019/06/10 | CH2205 | Male | Three y/o | Control | Control | Fast Day | No | 09:50 | 09:00 - 09:59 | Late Morning | 37,5 | 59  | 8,8   | 8,8   | 18,65 | 553,30 | 72,43  |
| 2019/06/10 | CH2206 | Male | Three y/o | Control | Control | Fast Day | No | 09:50 | 09:00 - 09:59 | Late Morning | 37,7 | 71  | 48,2  | 48,2  | 18,85 | 568,10 | 130,52 |
| 2019/06/10 | CH2205 | Male | Three y/o | Control | Control | Fast Day | No | 09:55 | 09:00 - 09:59 | Late Morning | 37,6 | 66  | 6,8   | 6,8   | 18,75 | 562,34 | 63,74  |
| 2019/06/10 | CH2206 | Male | Three y/o | Control | Control | Fast Day | No | 09:55 | 09:00 - 09:59 | Late Morning | 37,7 | 58  | 48,2  | 48,2  | 18,85 | 551,90 | 130,52 |
| 2019/06/10 | CH2205 | Male | Three y/o | Control | Control | Fast Day | No | 10:00 | 10:00 - 10:59 | Late Morning | 37,6 |     | 33,2  | 33,2  | 18,75 |        | 117,68 |
| 2019/06/10 | CH2206 | Male | Three y/o | Control | Control | Fast Day | No | 10:00 | 10:00 - 10:59 | Late Morning | 37,7 | 64  | 20,8  | 20,8  | 18,85 | 559,88 | 101,65 |
| 2019/06/10 | CH2205 | Male | Three y/o | Control | Control | Fast Day | No | 10:05 | 10:00 - 10:59 | Late Morning | 37,6 | 112 | 20,8  | 20,8  | 18,75 | 601,96 | 101,65 |
| 2019/06/10 | CH2206 | Male | Three y/o | Control | Control | Fast Day | No | 10:05 | 10:00 - 10:59 | Late Morning | 37,7 | 119 | 90,2  | 90,2  | 18,85 | 606,20 | 152,25 |
| 2019/06/10 | CH2205 | Male | Three y/o | Control | Control | Fast Day | No | 10:10 | 10:00 - 10:59 | Late Morning | 37,6 | 115 | 60,4  | 60,4  | 18,75 | 603,82 | 138,32 |
| 2019/06/10 | CH2206 | Male | Three y/o | Control | Control | Fast Day | No | 10:10 | 10:00 - 10:59 | Late Morning | 37,8 | 110 | 127,0 | 127,0 | 18,95 | 600,69 | 164,19 |
| 2019/06/10 | CH2205 | Male | Three y/o | Control | Control | Fast Day | No | 10:15 | 10:00 - 10:59 | Late Morning | 37,6 | 73  | 10,2  | 10,2  | 18,75 | 570,27 | 77,43  |
| 2019/06/10 | CH2206 | Male | Three y/o | Control | Control | Fast Day | No | 10:15 | 10:00 - 10:59 | Late Morning | 37,8 |     | 37,8  | 37,8  | 18,95 |        | 122,14 |
| 2019/06/10 | CH2205 | Male | Three y/o | Control | Control | Fast Day | No | 10:20 | 10:00 - 10:59 | Late Morning | 37,3 | 103 | 257,4 | 257,4 | 18,46 | 596,00 | 189,01 |
| 2019/06/10 | CH2206 | Male | Three y/o | Control | Control | Fast Day | No | 10:20 | 10:00 - 10:59 | Late Morning | 37,7 | 112 | 140,0 | 140,0 | 18,85 | 601,96 | 167,60 |
| 2019/06/10 | CH2205 | Male | Three y/o | Control | Control | Fast Day | No | 10:25 | 10:00 - 10:59 | Late Morning | 37,4 | 128 | 14,4  | 14,4  | 18,55 | 611,22 | 89,12  |
| 2019/06/10 | CH2206 | Male | Three y/o | Control | Control | Fast Day | No | 10:25 | 10:00 - 10:59 | Late Morning | 37,8 | 108 | 321,0 | 321,0 | 18,95 | 599,39 | 196,81 |
| 2019/06/10 | CH2205 | Male | Three y/o | Control | Control | Fast Day | No | 10:30 | 10:00 - 10:59 | Late Morning | 37,4 | 78  | 2,6   | 2,6   | 18,55 | 575,38 | 31,57  |
| 2019/06/10 | CH2206 | Male | Three y/o | Control | Control | Fast Day | No | 10:30 | 10:00 - 10:59 | Late Morning | 37,8 | 115 | 64,4  | 64,4  | 18,95 | 603,82 | 140,55 |
| 2019/06/10 | CH2205 | Male | Three y/o | Control | Control | Fast Day | No | 10:35 | 10:00 - 10:59 | Late Morning | 37,4 | 70  | 6,4   | 6,4   | 18,55 | 566,99 | 61,70  |
| 2019/06/10 | CH2206 | Male | Three y/o | Control | Control | Fast Day | No | 10:35 | 10:00 - 10:59 | Late Morning | 37,8 | 74  | 41,0  | 41,0  | 18,95 | 571,33 | 124,94 |
| 2019/06/10 | CH2205 | Male | Three y/o | Control | Control | Fast Day | No | 10:40 | 10:00 - 10:59 | Late Morning | 37,5 | 104 | 24,8  | 24,8  | 18,65 | 596,69 | 107,67 |
| 2019/06/10 | CH2206 | Male | Three y/o | Control | Control | Fast Day | No | 10:40 | 10:00 - 10:59 | Late Morning | 37,8 |     | 22,4  | 22,4  | 18,95 |        | 104,19 |
| 2019/06/10 | CH2205 | Male | Three y/o | Control | Control | Fast Day | No | 10:45 | 10:00 - 10:59 | Late Morning | 37,5 | 78  | 15,6  | 15,6  | 18,65 | 575,38 | 91,85  |
| 2019/06/10 | CH2206 | Male | Three y/o | Control | Control | Fast Day | No | 10:45 | 10:00 - 10:59 | Late Morning | 37,8 | 49  | 45,6  | 45,6  | 18,95 | 537,80 | 128,61 |
| 2019/06/10 | CH2205 | Male | Three y/o | Control | Control | Fast Day | No | 10:50 | 10:00 - 10:59 | Late Morning | 37,5 | 57  | 20,0  | 20,0  | 18,65 | 550,47 | 100,31 |
| 2019/06/10 | CH2206 | Male | Three y/o | Control | Control | Fast Day | No | 10:50 | 10:00 - 10:59 | Late Morning | 37,8 |     | 43,4  | 43,4  | 18,95 |        | 126,90 |
| 2019/06/10 | CH2205 | Male | Three y/o | Control | Control | Fast Day | No | 10:55 | 10:00 - 10:59 | Late Morning | 37,6 | 117 | 151,8 | 151,8 | 18,75 | 605,02 | 170,44 |
| 2019/06/10 | CH2206 | Male | Three y/o | Control | Control | Fast Day | No | 10:55 | 10:00 - 10:59 | Late Morning | 37,8 | 86  | 16,6  | 16,6  | 18,95 | 582,77 | 93,96  |
| 2019/06/10 | CH2205 | Male | Three y/o | Control | Control | Fast Day | No | 11:00 | 11:00 - 11:59 | Late Morning | 37,6 | 79  | 19,6  | 19,6  | 18,75 | 576,36 | 99,63  |
| 2019/06/10 | CH2206 | Male | Three y/o | Control | Control | Fast Day | No | 11:00 | 11:00 - 11:59 | Late Morning | 37,8 | 113 | 11,6  | 11,6  | 18,95 | 602,58 | 81,78  |
| 2019/06/10 | CH2205 | Male | Three y/o | Control | Control | Fast Day | No | 11:05 | 11:00 - 11:59 | Late Morning | 37,6 | 73  | 23,8  | 23,8  | 18,75 | 570,27 | 106,26 |
| 2019/06/10 | CH2206 | Male | Three y/o | Control | Control | Fast Day | No | 11:05 | 11:00 - 11:59 | Late Morning | 37,8 |     | 12,2  | 12,2  | 18,95 |        | 83,49  |
| 2019/06/10 | CH2205 | Male | Three y/o | Control | Control | Fast Day | No | 11:10 | 11:00 - 11:59 | Late Morning | 37,7 | 69  | 21,2  | 21,2  | 18,85 | 565,86 | 102,31 |
| 2019/06/10 | CH2206 | Male | Three y/o | Control | Control | Fast Day | No | 11:10 | 11:00 - 11:59 | Late Morning | 37,7 |     | 21,6  | 21,6  | 18,85 |        | 102,94 |
| 2019/06/10 | CH2205 | Male | Three y/o | Control | Control | Fast Day | No | 11:15 | 11:00 - 11:59 | Late Morning | 37,7 | 80  | 16,0  | 16,0  | 18,85 | 577,31 | 92,71  |
| 2019/06/10 | CH2206 | Male | Three y/o | Control | Control | Fast Day | No | 11:15 | 11:00 - 11:59 | Late Morning | 37,7 | 84  | 25,4  | 25,4  | 18,85 | 581,01 | 108,49 |
| 2019/06/10 | CH2205 | Male | Three y/o | Control | Control | Fast Day | No | 11:20 | 11:00 - 11:59 | Late Morning | 37,7 |     | 18,0  | 18,0  | 18,85 |        | 96,72  |
| 2019/06/10 | CH2206 | Male | Three y/o | Control | Control | Fast Day | No | 11:20 | 11:00 - 11:59 | Late Morning | 37,7 |     | 75,4  | 75,4  | 18,85 |        | 146,02 |
| 2019/06/10 | CH2205 | Male | Three y/o | Control | Control | Fast Day | No | 11:25 | 11:00 - 11:59 | Late Morning | 37,7 | 73  | 57,6  | 57,6  | 18,85 | 570,27 | 136,68 |
| 2019/06/10 | CH2206 | Male | Three y/o | Control | Control | Fast Day | No | 11:25 | 11:00 - 11:59 | Late Morning | 37,7 | 182 | 48,2  | 48,2  | 18,85 | 634,31 | 130,52 |
| 2019/06/10 | CH2205 | Male | Three y/o | Control | Control | Fast Day | No | 11:30 | 11:00 - 11:59 | Late Morning | 37,7 |     | 73,0  | 73,0  | 18,85 |        | 144,89 |
| 2019/06/10 | CH2206 | Male | Three y/o | Control | Control | Fast Day | No | 11:30 | 11:00 - 11:59 | Late Morning | 37,7 | 73  | 44,6  | 44,6  | 18,85 | 570,27 | 127,84 |
| 2019/06/10 | CH2205 | Male | Three y/o | Control | Control | Fast Day | No | 11:35 | 11:00 - 11:59 | Late Morning | 37,7 |     | 49,8  | 49,8  | 18,85 |        | 131,65 |
| 2019/06/10 | CH2206 | Male | Three y/o | Control | Control | Fast Day | No | 11:35 | 11:00 - 11:59 | Late Morning | 37,8 |     | 67,0  | 67,0  | 18,95 |        | 141,92 |
| 2019/06/10 | CH2205 | Male | Three y/o | Control | Control | Fast Day | No | 11:40 | 11:00 - 11:59 | Late Morning | 37,7 | 79  | 48,6  | 48,6  | 18,85 | 576,36 | 130,81 |
| 2019/06/10 | CH2206 | Male | Three y/o | Control | Control | Fast Day | No | 11:40 | 11:00 - 11:59 | Late Morning | 37,8 | 100 | 137,0 | 137,0 | 18,95 | 593,87 | 166,84 |
| 2019/06/10 | CH2205 | Male | Three y/o | Control | Control | Fast Day | No | 11:45 | 11:00 - 11:59 | Late Morning | 38,0 | 135 | 21,2  | 21,2  | 19,15 | 614,84 | 102,31 |
| 2019/06/10 | CH2206 | Male | Three y/o | Control | Control | Fast Day | No | 11:45 | 11:00 - 11:59 | Late Morning | 37,8 |     | 135,2 | 135,2 | 18,95 |        | 166,38 |
| 2019/06/10 | CH2205 | Male | Three y/o | Control | Control | Fast Day | No | 11:50 | 11:00 - 11:59 | Late Morning | 38,0 | 63  | 15,0  | 15,0  | 19,15 | 558,62 | 90,51  |
| 2019/06/10 | CH2206 | Male | Three y/o | Control | Control | Fast Day | No | 11:50 | 11:00 - 11:59 | Late Morning | 37,8 | 83  | 23,2  | 23,2  | 18,95 | 580,11 | 105,39 |
| 2019/06/10 | CH2205 | Male | Three y/o | Control | Control | Fast Day | No | 11:55 | 11:00 - 11:59 | Late Morning | 38,0 | 76  | 14,2  | 14,2  | 19,15 | 573,39 | 88,65  |
| 2019/06/10 | CH2206 | Male | Three y/o | Control | Control | Fast Day | No | 11:55 | 11:00 - 11:59 | Late Morning | 37,8 | 69  | 30,2  | 30,2  | 18,95 | 565,86 | 114,42 |
| 2019/06/10 | CH2205 | Male | Three y/o | Control | Control | Fast Day | No | 12:00 | 12:00 - 12:59 | Afternoon    | 38,0 |     | 19,8  | 19,8  | 19,15 |        | 99,97  |
| 2019/06/10 | CH2206 | Male | Three y/o | Control | Control | Fast Day | No | 12:00 | 12:00 - 12:59 | Afternoon    | 37,8 | 101 | 11,4  | 11,4  | 18,95 | 594,59 | 81,19  |
| 2019/06/10 | CH2205 | Male | Three y/o | Control | Control | Fast Day | No | 12:05 | 12:00 - 12:59 | Afternoon    | 38,0 | 68  | 16,6  | 16,6  | 19,15 | 564,71 | 93,96  |
| 2019/06/10 | CH2206 | Male | Three y/o | Control | Control | Fast Day | No | 12:05 | 12:00 - 12:59 | Afternoon    | 37,8 | 77  | 22,4  | 22,4  | 18,95 | 574,39 | 104,19 |
| 2019/06/10 | CH2205 | Male | Three y/o | Control | Control | Fast Day | No | 12:10 | 12:00 - 12:59 | Afternoon    | 37,9 | 60  | 19,4  | 19,4  | 19,05 | 554,67 | 99,28  |
| 2019/06/10 | CH2206 | Male | Three y/o | Control | Control | Fast Day | No | 12:10 | 12:00 - 12:59 | Afternoon    | 37,7 | 56  | 41,6  | 41,6  | 18,85 | 549,01 | 125,44 |
| 2019/06/10 | CH2205 | Male | Three y/o | Control | Control | Fast Day | No | 12:15 | 12:00 - 12:59 | Afternoon    | 37,9 | 109 | 16,2  | 16,2  | 19,05 | 600,04 | 93,13  |
| 2019/06/10 | CH2206 | Male | Three y/o | Control | Control | Fast Day | No | 12:15 | 12:00 - 12:59 | Afternoon    | 37,7 | 66  | 45,2  | 45,2  | 18,85 | 562,34 | 128,30 |
| 2019/06/10 | CH2205 | Male | Three y/o | Control | Control | Fast Day | No | 12:20 | 12:00 - 12:59 | Afternoon    | 37,9 | 52  | 25,6  | 25,6  | 19,05 | 542,83 | 108,76 |



|            |        |      |           |         |         |          |    |       |               |           |      |     |      |      |       |        |        |
|------------|--------|------|-----------|---------|---------|----------|----|-------|---------------|-----------|------|-----|------|------|-------|--------|--------|
| 2019/06/10 | CH2206 | Male | Three y/o | Control | Control | Fast Day | No | 12:20 | 12:00 - 12:59 | Afternoon | 37,5 | 86  | 49,0 | 49,0 | 18,65 | 582,77 | 131,09 |
| 2019/06/10 | CH2205 | Male | Three y/o | Control | Control | Fast Day | No | 12:25 | 12:00 - 12:59 | Afternoon | 37,7 | 67  | 30,0 | 30,0 | 18,85 | 563,53 | 114,20 |
| 2019/06/10 | CH2206 | Male | Three y/o | Control | Control | Fast Day | No | 12:25 | 12:00 - 12:59 | Afternoon | 37,5 | 87  | 52,2 | 52,2 | 18,65 | 583,64 | 133,27 |
| 2019/06/10 | CH2205 | Male | Three y/o | Control | Control | Fast Day | No | 12:30 | 12:00 - 12:59 | Afternoon | 37,7 |     | 26,6 | 26,6 | 18,85 |        | 110,07 |
| 2019/06/10 | CH2206 | Male | Three y/o | Control | Control | Fast Day | No | 12:30 | 12:00 - 12:59 | Afternoon | 37,5 | 79  | 49,0 | 49,0 | 18,65 | 576,36 | 131,09 |
| 2019/06/10 | CH2205 | Male | Three y/o | Control | Control | Fast Day | No | 12:35 | 12:00 - 12:59 | Afternoon | 37,6 |     | 28,8 | 28,8 | 18,75 |        | 112,79 |
| 2019/06/10 | CH2206 | Male | Three y/o | Control | Control | Fast Day | No | 12:35 | 12:00 - 12:59 | Afternoon | 37,5 | 55  | 51,0 | 51,0 | 18,65 | 547,52 | 132,47 |
| 2019/06/10 | CH2205 | Male | Three y/o | Control | Control | Fast Day | No | 12:40 | 12:00 - 12:59 | Afternoon | 37,5 | 131 | 30,2 | 30,2 | 18,65 | 612,80 | 114,42 |
| 2019/06/10 | CH2206 | Male | Three y/o | Control | Control | Fast Day | No | 12:40 | 12:00 - 12:59 | Afternoon | 37,5 | 46  | 25,2 | 25,2 | 18,65 | 532,38 | 108,22 |
| 2019/06/10 | CH2205 | Male | Three y/o | Control | Control | Fast Day | No | 12:45 | 12:00 - 12:59 | Afternoon | 37,5 | 115 | 28,4 | 28,4 | 18,65 | 603,82 | 112,31 |
| 2019/06/10 | CH2206 | Male | Three y/o | Control | Control | Fast Day | No | 12:45 | 12:00 - 12:59 | Afternoon | 37,5 | 55  | 62,2 | 62,2 | 18,65 | 547,52 | 139,34 |
| 2019/06/10 | CH2205 | Male | Three y/o | Control | Control | Fast Day | No | 12:50 | 12:00 - 12:59 | Afternoon | 37,5 | 77  | 24,6 | 24,6 | 18,65 | 574,39 | 107,39 |
| 2019/06/10 | CH2206 | Male | Three y/o | Control | Control | Fast Day | No | 12:50 | 12:00 - 12:59 | Afternoon | 37,5 | 54  | 19,4 | 19,4 | 18,65 | 545,99 | 99,28  |
| 2019/06/10 | CH2205 | Male | Three y/o | Control | Control | Fast Day | No | 12:55 | 12:00 - 12:59 | Afternoon | 37,6 | 124 | 17,0 | 17,0 | 18,75 | 609,04 | 94,77  |
| 2019/06/10 | CH2206 | Male | Three y/o | Control | Control | Fast Day | No | 12:55 | 12:00 - 12:59 | Afternoon | 37,5 |     | 14,4 | 14,4 | 18,65 |        | 89,12  |
| 2019/06/10 | CH2205 | Male | Three y/o | Control | Control | Fast Day | No | 13:00 | 13:00 - 13:59 | Afternoon | 37,6 | 111 | 20,8 | 20,8 | 18,75 | 601,33 | 101,65 |
| 2019/06/10 | CH2206 | Male | Three y/o | Control | Control | Fast Day | No | 13:00 | 13:00 - 13:59 | Afternoon | 37,5 |     | 24,4 | 24,4 | 18,65 |        | 107,11 |
| 2019/06/10 | CH2205 | Male | Three y/o | Control | Control | Fast Day | No | 13:05 | 13:00 - 13:59 | Afternoon | 37,6 | 98  | 13,6 | 13,6 | 18,75 | 592,41 | 87,18  |
| 2019/06/10 | CH2206 | Male | Three y/o | Control | Control | Fast Day | No | 13:05 | 13:00 - 13:59 | Afternoon | 37,5 | 73  | 21,6 | 21,6 | 18,65 | 570,27 | 102,94 |
| 2019/06/10 | CH2205 | Male | Three y/o | Control | Control | Fast Day | No | 13:10 | 13:00 - 13:59 | Afternoon | 37,7 | 98  | 8,4  | 8,4  | 18,85 | 592,41 | 70,86  |
| 2019/06/10 | CH2206 | Male | Three y/o | Control | Control | Fast Day | No | 13:10 | 13:00 - 13:59 | Afternoon | 37,5 | 47  | 16,8 | 16,8 | 18,65 | 534,23 | 94,37  |
| 2019/06/10 | CH2205 | Male | Three y/o | Control | Control | Fast Day | No | 13:15 | 13:00 - 13:59 | Afternoon | 37,6 | 64  | 3,6  | 3,6  | 18,75 | 559,88 | 42,42  |
| 2019/06/10 | CH2206 | Male | Three y/o | Control | Control | Fast Day | No | 13:15 | 13:00 - 13:59 | Afternoon | 37,4 | 80  | 28,2 | 28,2 | 18,55 | 577,31 | 112,07 |
| 2019/06/10 | CH2205 | Male | Three y/o | Control | Control | Fast Day | No | 13:20 | 13:00 - 13:59 | Afternoon | 37,7 | 137 | 25,4 | 25,4 | 18,85 | 615,83 | 108,49 |
| 2019/06/10 | CH2206 | Male | Three y/o | Control | Control | Fast Day | No | 13:20 | 13:00 - 13:59 | Afternoon | 37,4 |     | 56,6 | 56,6 | 18,55 |        | 136,07 |
| 2019/06/10 | CH2205 | Male | Three y/o | Control | Control | Fast Day | No | 13:25 | 13:00 - 13:59 | Afternoon | 37,7 | 61  | 16,4 | 16,4 | 18,85 | 556,01 | 93,55  |
| 2019/06/10 | CH2206 | Male | Three y/o | Control | Control | Fast Day | No | 13:25 | 13:00 - 13:59 | Afternoon | 37,4 | 117 | 29,4 | 29,4 | 18,55 | 605,02 | 113,50 |
| 2019/06/10 | CH2205 | Male | Three y/o | Control | Control | Fast Day | No | 13:30 | 13:00 - 13:59 | Afternoon | 37,7 | 69  | 9,6  | 9,6  | 18,85 | 565,86 | 75,37  |
| 2019/06/10 | CH2206 | Male | Three y/o | Control | Control | Fast Day | No | 13:30 | 13:00 - 13:59 | Afternoon | 37,4 | 82  | 31,2 | 31,2 | 18,55 | 579,19 | 115,54 |
| 2019/06/10 | CH2205 | Male | Three y/o | Control | Control | Fast Day | No | 13:35 | 13:00 - 13:59 | Afternoon | 37,7 | 83  | 7,0  | 7,0  | 18,85 | 580,11 | 64,72  |
| 2019/06/10 | CH2206 | Male | Three y/o | Control | Control | Fast Day | No | 13:35 | 13:00 - 13:59 | Afternoon | 37,4 | 44  | 33,8 | 33,8 | 18,55 | 528,51 | 118,29 |
| 2019/06/10 | CH2205 | Male | Three y/o | Control | Control | Fast Day | No | 13:40 | 13:00 - 13:59 | Afternoon | 37,7 | 94  | 5,6  | 5,6  | 18,85 | 589,37 | 57,21  |
| 2019/06/10 | CH2206 | Male | Three y/o | Control | Control | Fast Day | No | 13:40 | 13:00 - 13:59 | Afternoon | 37,3 | 44  | 39,2 | 39,2 | 18,46 | 528,51 | 123,39 |
| 2019/06/10 | CH2205 | Male | Three y/o | Control | Control | Fast Day | No | 13:45 | 13:00 - 13:59 | Afternoon | 37,7 |     | 17,4 | 17,4 | 18,85 |        | 95,56  |
| 2019/06/10 | CH2206 | Male | Three y/o | Control | Control | Fast Day | No | 13:45 | 13:00 - 13:59 | Afternoon | 37,3 | 70  | 17,4 | 17,4 | 18,46 | 566,99 | 95,56  |
| 2019/06/10 | CH2205 | Male | Three y/o | Control | Control | Fast Day | No | 13:50 | 13:00 - 13:59 | Afternoon | 37,7 |     | 11,8 | 11,8 | 18,85 |        | 82,36  |
| 2019/06/10 | CH2206 | Male | Three y/o | Control | Control | Fast Day | No | 13:50 | 13:00 - 13:59 | Afternoon | 37,3 | 49  | 21,4 | 21,4 | 18,46 | 537,80 | 102,63 |
| 2019/06/10 | CH2205 | Male | Three y/o | Control | Control | Fast Day | No | 13:55 | 13:00 - 13:59 | Afternoon | 37,7 | 66  | 12,6 | 12,6 | 18,85 | 562,34 | 84,59  |
| 2019/06/10 | CH2206 | Male | Three y/o | Control | Control | Fast Day | No | 13:55 | 13:00 - 13:59 | Afternoon | 37,4 | 55  | 19,8 | 19,8 | 18,55 | 547,52 | 99,97  |
| 2019/06/10 | CH2205 | Male | Three y/o | Control | Control | Fast Day | No | 14:00 | 14:00 - 14:59 | Afternoon | 37,7 | 69  | 9,8  | 9,8  | 18,85 | 565,86 | 76,07  |
| 2019/06/10 | CH2206 | Male | Three y/o | Control | Control | Fast Day | No | 14:00 | 14:00 - 14:59 | Afternoon | 37,4 | 141 | 34,8 | 34,8 | 18,55 | 617,75 | 119,29 |
| 2019/06/10 | CH2205 | Male | Three y/o | Control | Control | Fast Day | No | 14:05 | 14:00 - 14:59 | Afternoon | 37,7 | 56  | 7,6  | 7,6  | 18,85 | 549,01 | 67,49  |
| 2019/06/10 | CH2206 | Male | Three y/o | Control | Control | Fast Day | No | 14:05 | 14:00 - 14:59 | Afternoon | 37,5 |     | 40,4 | 40,4 | 18,65 |        | 124,43 |
| 2019/06/10 | CH2205 | Male | Three y/o | Control | Control | Fast Day | No | 14:10 | 14:00 - 14:59 | Afternoon | 37,8 | 62  | 7,4  | 7,4  | 18,95 | 557,33 | 66,59  |
| 2019/06/10 | CH2206 | Male | Three y/o | Control | Control | Fast Day | No | 14:10 | 14:00 - 14:59 | Afternoon | 37,5 |     | 44,8 | 44,8 | 18,65 |        | 127,99 |
| 2019/06/10 | CH2205 | Male | Three y/o | Control | Control | Fast Day | No | 14:15 | 14:00 - 14:59 | Afternoon | 37,8 | 49  | 7,8  | 7,8  | 18,95 | 537,80 | 68,36  |
| 2019/06/10 | CH2206 | Male | Three y/o | Control | Control | Fast Day | No | 14:15 | 14:00 - 14:59 | Afternoon | 37,5 | 43  | 45,0 | 45,0 | 18,65 | 526,50 | 128,15 |
| 2019/06/10 | CH2205 | Male | Three y/o | Control | Control | Fast Day | No | 14:20 | 14:00 - 14:59 | Afternoon | 37,8 | 69  | 16,8 | 16,8 | 18,95 | 565,86 | 94,37  |
| 2019/06/10 | CH2206 | Male | Three y/o | Control | Control | Fast Day | No | 14:20 | 14:00 - 14:59 | Afternoon | 37,5 | 54  | 44,8 | 44,8 | 18,65 | 545,99 | 127,99 |
| 2019/06/10 | CH2205 | Male | Three y/o | Control | Control | Fast Day | No | 14:25 | 14:00 - 14:59 | Afternoon | 37,8 | 65  | 5,2  | 5,2  | 18,95 | 561,12 | 54,72  |
| 2019/06/10 | CH2206 | Male | Three y/o | Control | Control | Fast Day | No | 14:25 | 14:00 - 14:59 | Afternoon | 37,5 | 79  | 75,4 | 75,4 | 18,65 | 576,36 | 146,02 |
| 2019/06/10 | CH2205 | Male | Three y/o | Control | Control | Fast Day | No | 14:30 | 14:00 - 14:59 | Afternoon | 37,8 | 48  | 5,0  | 5,0  | 18,95 | 536,04 | 53,41  |
| 2019/06/10 | CH2206 | Male | Three y/o | Control | Control | Fast Day | No | 14:30 | 14:00 - 14:59 | Afternoon | 37,4 | 52  | 41,8 | 41,8 | 18,55 | 542,83 | 125,60 |
| 2019/06/10 | CH2205 | Male | Three y/o | Control | Control | Fast Day | No | 14:35 | 14:00 - 14:59 | Afternoon | 37,8 | 60  | 3,6  | 3,6  | 18,95 | 554,67 | 42,42  |
| 2019/06/10 | CH2206 | Male | Three y/o | Control | Control | Fast Day | No | 14:35 | 14:00 - 14:59 | Afternoon | 37,3 | 48  | 43,4 | 43,4 | 18,46 | 536,04 | 126,90 |
| 2019/06/10 | CH2205 | Male | Three y/o | Control | Control | Fast Day | No | 14:40 | 14:00 - 14:59 | Afternoon | 37,8 | 58  | 4,0  | 4,0  | 18,95 | 551,90 | 45,94  |
| 2019/06/10 | CH2206 | Male | Three y/o | Control | Control | Fast Day | No | 14:40 | 14:00 - 14:59 | Afternoon | 37,3 | 82  | 41,8 | 41,8 | 18,46 | 579,19 | 125,60 |
| 2019/06/10 | CH2205 | Male | Three y/o | Control | Control | Fast Day | No | 14:45 | 14:00 - 14:59 | Afternoon | 37,8 | 53  | 3,4  | 3,4  | 18,95 | 544,43 | 40,51  |
| 2019/06/10 | CH2206 | Male | Three y/o | Control | Control | Fast Day | No | 14:45 | 14:00 - 14:59 | Afternoon | 37,3 | 70  | 26,6 | 26,6 | 18,46 | 566,99 | 110,07 |
| 2019/06/10 | CH2205 | Male | Three y/o | Control | Control | Fast Day | No | 14:50 | 14:00 - 14:59 | Afternoon | 37,7 | 65  | 6,8  | 6,8  | 18,85 | 561,12 | 63,74  |
| 2019/06/10 | CH2206 | Male | Three y/o | Control | Control | Fast Day | No | 14:50 | 14:00 - 14:59 | Afternoon | 37,4 | 73  | 42,0 | 42,0 | 18,55 | 570,27 | 125,77 |
| 2019/06/10 | CH2205 | Male | Three y/o | Control | Control | Fast Day | No | 14:55 | 14:00 - 14:59 | Afternoon | 37,7 | 57  | 13,8 | 13,8 | 18,85 | 550,47 | 87,68  |
| 2019/06/10 | CH2206 | Male | Three y/o | Control | Control | Fast Day | No | 14:55 | 14:00 - 14:59 | Afternoon | 37,4 | 78  | 35,2 | 35,2 | 18,55 | 575,38 | 119,69 |
| 2019/06/10 | CH2205 | Male | Three y/o | Control | Control | Fast Day | No | 15:00 | 15:00 - 15:59 | Afternoon | 37,7 | 75  | 11,0 | 11,0 | 18,85 | 572,36 | 79,98  |
| 2019/06/10 | CH2206 | Male | Three y/o | Control | Control | Fast Day | No | 15:00 | 15:00 - 15:59 | Afternoon | 37,5 | 64  | 39,8 | 39,8 | 18,65 | 559,88 | 123,91 |
| 2019/06/10 | CH2205 | Male | Three y/o | Control | Control | Fast Day | No | 15:05 | 15:00 - 15:59 | Afternoon | 37,7 | 81  | 12,4 | 12,4 | 18,85 | 578,26 | 84,04  |
| 2019/06/10 | CH2206 | Male | Three y/o | Control | Control | Fast Day | No | 15:05 | 15:00 - 15:59 | Afternoon | 37,5 | 90  | 47,8 | 47,8 | 18,65 | 586,16 | 130,23 |
| 2019/06/10 | CH2205 | Male | Three y/o | Control | Control | Fast Day | No | 15:10 | 15:00 - 15:59 | Afternoon | 37,9 | 73  | 13,6 | 13,6 | 19,05 | 570,27 | 87,18  |
| 2019/06/10 | CH2206 | Male | Three y/o | Control | Control | Fast Day | No | 15:10 | 15:00 - 15:59 | Afternoon | 37,7 | 47  | 29,4 | 29,4 | 18,85 | 534,23 | 113,50 |
| 2019/06/10 | CH2205 | Male | Three y/o | Control | Control | Fast Day | No | 15:15 | 15:00 - 15:59 | Afternoon | 37,8 | 80  | 16,8 | 16,8 | 18,95 | 577,31 | 94,37  |



|            |        |      |           |         |         |          |    |       |               |           |      |     |       |       |       |        |        |
|------------|--------|------|-----------|---------|---------|----------|----|-------|---------------|-----------|------|-----|-------|-------|-------|--------|--------|
| 2019/06/10 | CH2206 | Male | Three y/o | Control | Control | Fast Day | No | 15:15 | 15:00 - 15:59 | Afternoon | 37,7 | 68  | 18,6  | 18,6  | 18,85 | 564,71 | 97,84  |
| 2019/06/10 | CH2205 | Male | Three y/o | Control | Control | Fast Day | No | 15:20 | 15:00 - 15:59 | Afternoon | 37,7 | 49  | 12,2  | 12,2  | 18,85 | 537,80 | 83,49  |
| 2019/06/10 | CH2206 | Male | Three y/o | Control | Control | Fast Day | No | 15:20 | 15:00 - 15:59 | Afternoon | 37,7 | 42  | 30,6  | 30,6  | 18,85 | 524,42 | 114,87 |
| 2019/06/10 | CH2205 | Male | Three y/o | Control | Control | Fast Day | No | 15:25 | 15:00 - 15:59 | Afternoon | 37,7 | 88  | 31,0  | 31,0  | 18,85 | 584,49 | 115,32 |
| 2019/06/10 | CH2206 | Male | Three y/o | Control | Control | Fast Day | No | 15:25 | 15:00 - 15:59 | Afternoon | 37,7 | 68  | 36,6  | 36,6  | 18,85 | 564,71 | 121,03 |
| 2019/06/10 | CH2205 | Male | Three y/o | Control | Control | Fast Day | No | 15:30 | 15:00 - 15:59 | Afternoon | 37,9 |     | 52,6  | 52,6  | 19,05 |        | 133,54 |
| 2019/06/10 | CH2206 | Male | Three y/o | Control | Control | Fast Day | No | 15:30 | 15:00 - 15:59 | Afternoon | 37,8 | 112 | 47,0  | 47,0  | 18,95 | 601,96 | 129,65 |
| 2019/06/10 | CH2205 | Male | Three y/o | Control | Control | Fast Day | No | 15:35 | 15:00 - 15:59 | Afternoon | 37,9 | 98  | 46,8  | 46,8  | 19,05 | 592,41 | 129,50 |
| 2019/06/10 | CH2206 | Male | Three y/o | Control | Control | Fast Day | No | 15:35 | 15:00 - 15:59 | Afternoon | 37,9 | 154 | 94,4  | 94,4  | 19,05 | 623,58 | 153,84 |
| 2019/06/10 | CH2205 | Male | Three y/o | Control | Control | Fast Day | No | 15:40 | 15:00 - 15:59 | Afternoon | 37,9 | 86  | 197,6 | 197,6 | 19,05 | 582,77 | 179,69 |
| 2019/06/10 | CH2206 | Male | Three y/o | Control | Control | Fast Day | No | 15:40 | 15:00 - 15:59 | Afternoon | 37,9 |     | 37,0  | 37,0  | 19,05 |        | 121,40 |
| 2019/06/10 | CH2205 | Male | Three y/o | Control | Control | Fast Day | No | 15:45 | 15:00 - 15:59 | Afternoon | 38,0 |     | 57,4  | 57,4  | 19,15 |        | 136,56 |
| 2019/06/10 | CH2206 | Male | Three y/o | Control | Control | Fast Day | No | 15:45 | 15:00 - 15:59 | Afternoon | 37,9 | 128 | 560,4 | 560,4 | 19,05 | 611,22 | 216,61 |
| 2019/06/10 | CH2205 | Male | Three y/o | Control | Control | Fast Day | No | 15:50 | 15:00 - 15:59 | Afternoon | 38,1 | 43  | 214,8 | 214,8 | 19,26 | 526,50 | 182,63 |
| 2019/06/10 | CH2206 | Male | Three y/o | Control | Control | Fast Day | No | 15:50 | 15:00 - 15:59 | Afternoon | 37,9 | 88  | 112,0 | 112,0 | 19,05 | 584,49 | 159,80 |
| 2019/06/10 | CH2205 | Male | Three y/o | Control | Control | Fast Day | No | 15:55 | 15:00 - 15:59 | Afternoon | 38,3 | 60  | 14,8  | 14,8  | 19,46 | 554,67 | 90,05  |
| 2019/06/10 | CH2206 | Male | Three y/o | Control | Control | Fast Day | No | 15:55 | 15:00 - 15:59 | Afternoon | 37,9 | 83  | 39,2  | 39,2  | 19,05 | 580,11 | 123,39 |
| 2019/06/10 | CH2205 | Male | Three y/o | Control | Control | Fast Day | No | 16:00 | 16:00 - 16:59 | Evening   | 38,2 | 65  | 12,2  | 12,2  | 19,36 | 561,12 | 83,49  |
| 2019/06/10 | CH2206 | Male | Three y/o | Control | Control | Fast Day | No | 16:00 | 16:00 - 16:59 | Evening   | 37,9 | 58  | 38,6  | 38,6  | 19,05 | 551,90 | 122,86 |
| 2019/06/10 | CH2205 | Male | Three y/o | Control | Control | Fast Day | No | 16:05 | 16:00 - 16:59 | Evening   | 38,3 | 67  | 3,4   | 3,4   | 19,46 | 563,53 | 40,51  |
| 2019/06/10 | CH2206 | Male | Three y/o | Control | Control | Fast Day | No | 16:05 | 16:00 - 16:59 | Evening   | 37,9 | 70  | 37,0  | 37,0  | 19,05 | 566,99 | 121,40 |
| 2019/06/10 | CH2205 | Male | Three y/o | Control | Control | Fast Day | No | 16:10 | 16:00 - 16:59 | Evening   | 38,2 |     | 19,4  | 19,4  | 19,36 |        | 99,28  |
| 2019/06/10 | CH2206 | Male | Three y/o | Control | Control | Fast Day | No | 16:10 | 16:00 - 16:59 | Evening   | 37,9 | 56  | 30,0  | 30,0  | 19,05 | 549,01 | 114,20 |
| 2019/06/10 | CH2205 | Male | Three y/o | Control | Control | Fast Day | No | 16:15 | 16:00 - 16:59 | Evening   | 38,2 | 99  | 46,6  | 46,6  | 19,36 | 593,14 | 129,35 |
| 2019/06/10 | CH2206 | Male | Three y/o | Control | Control | Fast Day | No | 16:15 | 16:00 - 16:59 | Evening   | 37,9 | 102 | 31,2  | 31,2  | 19,05 | 595,30 | 115,54 |
| 2019/06/10 | CH2205 | Male | Three y/o | Control | Control | Fast Day | No | 16:20 | 16:00 - 16:59 | Evening   | 38,1 | 84  | 16,2  | 16,2  | 19,26 | 581,01 | 93,13  |
| 2019/06/10 | CH2206 | Male | Three y/o | Control | Control | Fast Day | No | 16:20 | 16:00 - 16:59 | Evening   | 37,9 | 93  | 29,4  | 29,4  | 19,05 | 588,58 | 113,50 |
| 2019/06/10 | CH2205 | Male | Three y/o | Control | Control | Fast Day | No | 16:25 | 16:00 - 16:59 | Evening   | 38,1 |     | 143,6 | 143,6 | 19,26 |        | 168,49 |
| 2019/06/10 | CH2206 | Male | Three y/o | Control | Control | Fast Day | No | 16:25 | 16:00 - 16:59 | Evening   | 37,9 | 67  | 55,0  | 55,0  | 19,05 | 563,53 | 135,08 |
| 2019/06/10 | CH2205 | Male | Three y/o | Control | Control | Fast Day | No | 16:30 | 16:00 - 16:59 | Evening   | 38,2 | 158 | 43,4  | 43,4  | 19,36 | 625,26 | 126,90 |
| 2019/06/10 | CH2206 | Male | Three y/o | Control | Control | Fast Day | No | 16:30 | 16:00 - 16:59 | Evening   | 37,8 |     | 87,8  | 87,8  | 18,95 |        | 151,31 |
| 2019/06/10 | CH2205 | Male | Three y/o | Control | Control | Fast Day | No | 16:35 | 16:00 - 16:59 | Evening   | 38,2 | 70  | 6,0   | 6,0   | 19,36 | 566,99 | 59,53  |
| 2019/06/10 | CH2206 | Male | Three y/o | Control | Control | Fast Day | No | 16:35 | 16:00 - 16:59 | Evening   | 37,8 | 120 | 89,4  | 89,4  | 18,95 | 606,78 | 151,94 |
| 2019/06/10 | CH2205 | Male | Three y/o | Control | Control | Fast Day | No | 16:40 | 16:00 - 16:59 | Evening   | 38,2 | 55  | 4,2   | 4,2   | 19,36 | 547,52 | 47,57  |
| 2019/06/10 | CH2206 | Male | Three y/o | Control | Control | Fast Day | No | 16:40 | 16:00 - 16:59 | Evening   | 37,8 | 68  | 28,8  | 28,8  | 18,95 | 564,71 | 112,79 |
| 2019/06/10 | CH2205 | Male | Three y/o | Control | Control | Fast Day | No | 16:45 | 16:00 - 16:59 | Evening   | 38,2 | 47  | 7,4   | 7,4   | 19,36 | 534,23 | 66,59  |
| 2019/06/10 | CH2206 | Male | Three y/o | Control | Control | Fast Day | No | 16:45 | 16:00 - 16:59 | Evening   | 37,8 | 60  | 27,4  | 27,4  | 18,95 | 554,67 | 111,09 |
| 2019/06/10 | CH2205 | Male | Three y/o | Control | Control | Fast Day | No | 16:50 | 16:00 - 16:59 | Evening   | 38,2 | 63  | 7,0   | 7,0   | 19,36 | 558,62 | 64,72  |
| 2019/06/10 | CH2206 | Male | Three y/o | Control | Control | Fast Day | No | 16:50 | 16:00 - 16:59 | Evening   | 37,7 | 61  | 29,6  | 29,6  | 18,85 | 556,01 | 113,73 |
| 2019/06/10 | CH2205 | Male | Three y/o | Control | Control | Fast Day | No | 16:55 | 16:00 - 16:59 | Evening   | 38,2 | 67  | 4,0   | 4,0   | 19,36 | 563,53 | 45,94  |
| 2019/06/10 | CH2206 | Male | Three y/o | Control | Control | Fast Day | No | 16:55 | 16:00 - 16:59 | Evening   | 37,7 | 52  | 32,8  | 32,8  | 18,85 | 542,83 | 117,26 |
| 2019/06/10 | CH2205 | Male | Three y/o | Control | Control | Fast Day | No | 17:00 | 17:00 - 17:59 | Evening   | 38,2 | 53  | 6,0   | 6,0   | 19,36 | 544,43 | 59,53  |
| 2019/06/10 | CH2206 | Male | Three y/o | Control | Control | Fast Day | No | 17:00 | 17:00 - 17:59 | Evening   | 37,7 | 46  | 38,8  | 38,8  | 18,85 | 532,38 | 123,04 |
| 2019/06/10 | CH2205 | Male | Three y/o | Control | Control | Fast Day | No | 17:05 | 17:00 - 17:59 | Evening   | 38,2 | 63  | 5,0   | 5,0   | 19,36 | 558,62 | 53,41  |
| 2019/06/10 | CH2206 | Male | Three y/o | Control | Control | Fast Day | No | 17:05 | 17:00 - 17:59 | Evening   | 37,7 | 74  | 34,8  | 34,8  | 18,85 | 571,33 | 119,29 |
| 2019/06/10 | CH2205 | Male | Three y/o | Control | Control | Fast Day | No | 17:10 | 17:00 - 17:59 | Evening   | 38,2 |     | 21,6  | 21,6  | 19,36 |        | 102,94 |
| 2019/06/10 | CH2206 | Male | Three y/o | Control | Control | Fast Day | No | 17:10 | 17:00 - 17:59 | Evening   | 37,7 | 63  | 29,2  | 29,2  | 18,85 | 558,62 | 113,27 |
| 2019/06/10 | CH2205 | Male | Three y/o | Control | Control | Fast Day | No | 17:15 | 17:00 - 17:59 | Evening   | 38,1 |     | 6,8   | 6,8   | 19,26 |        | 63,74  |
| 2019/06/10 | CH2206 | Male | Three y/o | Control | Control | Fast Day | No | 17:15 | 17:00 - 17:59 | Evening   | 37,5 | 46  | 41,8  | 41,8  | 18,65 | 532,38 | 125,60 |
| 2019/06/10 | CH2205 | Male | Three y/o | Control | Control | Fast Day | No | 17:20 | 17:00 - 17:59 | Evening   | 38,1 | 112 | 25,2  | 25,2  | 19,26 | 601,96 | 108,22 |
| 2019/06/10 | CH2206 | Male | Three y/o | Control | Control | Fast Day | No | 17:20 | 17:00 - 17:59 | Evening   | 37,5 | 42  | 39,4  | 39,4  | 18,65 | 524,42 | 123,57 |
| 2019/06/10 | CH2205 | Male | Three y/o | Control | Control | Fast Day | No | 17:25 | 17:00 - 17:59 | Evening   | 38,0 |     | 12,0  | 12,0  | 19,15 |        | 82,93  |
| 2019/06/10 | CH2206 | Male | Three y/o | Control | Control | Fast Day | No | 17:25 | 17:00 - 17:59 | Evening   | 37,5 | 45  | 51,4  | 51,4  | 18,65 | 530,47 | 132,74 |
| 2019/06/10 | CH2205 | Male | Three y/o | Control | Control | Fast Day | No | 17:30 | 17:00 - 17:59 | Evening   | 38,0 |     | 30,6  | 30,6  | 19,15 |        | 114,87 |
| 2019/06/10 | CH2206 | Male | Three y/o | Control | Control | Fast Day | No | 17:30 | 17:00 - 17:59 | Evening   | 37,6 | 129 | 47,2  | 47,2  | 18,75 | 611,75 | 129,80 |
| 2019/06/10 | CH2205 | Male | Three y/o | Control | Control | Fast Day | No | 17:35 | 17:00 - 17:59 | Evening   | 38,0 | 90  | 17,6  | 17,6  | 19,15 | 586,16 | 95,95  |
| 2019/06/10 | CH2206 | Male | Three y/o | Control | Control | Fast Day | No | 17:35 | 17:00 - 17:59 | Evening   | 37,7 | 105 | 100,2 | 100,2 | 18,85 | 597,38 | 155,91 |
| 2019/06/10 | CH2205 | Male | Three y/o | Control | Control | Fast Day | No | 17:40 | 17:00 - 17:59 | Evening   | 37,9 | 106 | 337,2 | 337,2 | 19,05 | 598,06 | 198,56 |
| 2019/06/10 | CH2206 | Male | Three y/o | Control | Control | Fast Day | No | 17:40 | 17:00 - 17:59 | Evening   | 37,8 | 111 | 167,0 | 167,0 | 18,95 | 601,33 | 173,78 |
| 2019/06/10 | CH2205 | Male | Three y/o | Control | Control | Fast Day | No | 17:45 | 17:00 - 17:59 | Evening   | 38,0 | 115 | 41,4  | 41,4  | 19,15 | 603,82 | 125,27 |
| 2019/06/10 | CH2206 | Male | Three y/o | Control | Control | Fast Day | No | 17:45 | 17:00 - 17:59 | Evening   | 37,8 | 99  | 57,2  | 57,2  | 18,95 | 593,14 | 136,44 |
| 2019/06/10 | CH2205 | Male | Three y/o | Control | Control | Fast Day | No | 17:50 | 17:00 - 17:59 | Evening   | 38,0 |     | 19,4  | 19,4  | 19,15 |        | 99,28  |
| 2019/06/10 | CH2206 | Male | Three y/o | Control | Control | Fast Day | No | 17:50 | 17:00 - 17:59 | Evening   | 37,9 | 109 | 95,4  | 95,4  | 19,05 | 600,04 | 154,20 |
| 2019/06/10 | CH2205 | Male | Three y/o | Control | Control | Fast Day | No | 17:55 | 17:00 - 17:59 | Evening   | 38,1 | 121 | 60,4  | 60,4  | 19,26 | 607,35 | 138,32 |
| 2019/06/10 | CH2206 | Male | Three y/o | Control | Control | Fast Day | No | 17:55 | 17:00 - 17:59 | Evening   | 37,9 | 124 | 13,0  | 13,0  | 19,05 | 609,04 | 85,65  |
| 2019/06/10 | CH2205 | Male | Three y/o | Control | Control | Fast Day | No | 18:00 | 18:00 - 18:59 | Evening   | 38,1 |     | 7,6   | 7,6   | 19,26 |        | 67,49  |
| 2019/06/10 | CH2206 | Male | Three y/o | Control | Control | Fast Day | No | 18:00 | 18:00 - 18:59 | Evening   | 37,9 | 90  | 19,6  | 19,6  | 19,05 | 586,16 | 99,63  |
| 2019/06/10 | CH2205 | Male | Three y/o | Control | Control | Fast Day | No | 18:05 | 18:00 - 18:59 | Evening   | 38,1 |     | 13,8  | 13,8  | 19,26 |        | 87,68  |
| 2019/06/10 | CH2206 | Male | Three y/o | Control | Control | Fast Day | No | 18:05 | 18:00 - 18:59 | Evening   | 37,8 | 75  | 23,2  | 23,2  | 18,95 | 572,36 | 105,39 |
| 2019/06/10 | CH2205 | Male | Three y/o | Control | Control | Fast Day | No | 18:10 | 18:00 - 18:59 | Evening   | 38,1 |     | 12,2  | 12,2  | 19,26 |        | 83,49  |



|            |        |      |           |         |         |          |    |       |               |         |      |     |       |       |       |        |        |
|------------|--------|------|-----------|---------|---------|----------|----|-------|---------------|---------|------|-----|-------|-------|-------|--------|--------|
| 2019/06/10 | CH2206 | Male | Three y/o | Control | Control | Fast Day | No | 18:10 | 18:00 - 18:59 | Evening | 37,8 | 180 | 12,8  | 12,8  | 18,95 | 633,61 | 85,12  |
| 2019/06/10 | CH2205 | Male | Three y/o | Control | Control | Fast Day | No | 18:15 | 18:00 - 18:59 | Evening | 38,1 | 119 | 103,0 | 103,0 | 19,26 | 606,20 | 156,87 |
| 2019/06/10 | CH2206 | Male | Three y/o | Control | Control | Fast Day | No | 18:15 | 18:00 - 18:59 | Evening | 37,8 | 63  | 30,8  | 30,8  | 18,95 | 558,62 | 115,10 |
| 2019/06/10 | CH2205 | Male | Three y/o | Control | Control | Fast Day | No | 18:20 | 18:00 - 18:59 | Evening | 38,2 | 108 | 12,6  | 12,6  | 19,36 | 599,39 | 84,59  |
| 2019/06/10 | CH2206 | Male | Three y/o | Control | Control | Fast Day | No | 18:20 | 18:00 - 18:59 | Evening | 37,5 | 70  | 36,6  | 36,6  | 18,65 | 566,99 | 121,03 |
| 2019/06/10 | CH2205 | Male | Three y/o | Control | Control | Fast Day | No | 18:25 | 18:00 - 18:59 | Evening | 38,1 |     | 13,0  | 13,0  | 19,26 |        | 85,65  |
| 2019/06/10 | CH2206 | Male | Three y/o | Control | Control | Fast Day | No | 18:25 | 18:00 - 18:59 | Evening | 37,5 | 67  | 25,2  | 25,2  | 18,65 | 563,53 | 108,22 |
| 2019/06/10 | CH2205 | Male | Three y/o | Control | Control | Fast Day | No | 18:30 | 18:00 - 18:59 | Evening | 38,1 | 162 | 10,0  | 10,0  | 19,26 | 626,88 | 76,76  |
| 2019/06/10 | CH2206 | Male | Three y/o | Control | Control | Fast Day | No | 18:30 | 18:00 - 18:59 | Evening | 37,4 | 45  | 27,2  | 27,2  | 18,55 | 530,47 | 110,83 |
| 2019/06/10 | CH2205 | Male | Three y/o | Control | Control | Fast Day | No | 18:35 | 18:00 - 18:59 | Evening | 38,1 | 55  | 7,8   | 7,8   | 19,26 | 547,52 | 68,36  |
| 2019/06/10 | CH2206 | Male | Three y/o | Control | Control | Fast Day | No | 18:35 | 18:00 - 18:59 | Evening | 37,4 | 60  | 28,0  | 28,0  | 18,55 | 554,67 | 111,83 |
| 2019/06/10 | CH2205 | Male | Three y/o | Control | Control | Fast Day | No | 18:40 | 18:00 - 18:59 | Evening | 38,1 | 45  | 11,8  | 11,8  | 19,26 | 530,47 | 82,36  |
| 2019/06/10 | CH2206 | Male | Three y/o | Control | Control | Fast Day | No | 18:40 | 18:00 - 18:59 | Evening | 37,2 | 61  | 21,8  | 21,8  | 18,36 | 556,01 | 103,26 |
| 2019/06/10 | CH2205 | Male | Three y/o | Control | Control | Fast Day | No | 18:45 | 18:00 - 18:59 | Evening | 38,1 | 68  | 3,2   | 3,2   | 19,26 | 564,71 | 38,49  |
| 2019/06/10 | CH2206 | Male | Three y/o | Control | Control | Fast Day | No | 18:45 | 18:00 - 18:59 | Evening | 37,1 | 51  | 9,4   | 9,4   | 18,26 | 541,20 | 74,66  |
| 2019/06/10 | CH2205 | Male | Three y/o | Control | Control | Fast Day | No | 18:50 | 18:00 - 18:59 | Evening | 38,1 | 52  | 4,6   | 4,6   | 19,26 | 542,83 | 50,61  |
| 2019/06/10 | CH2206 | Male | Three y/o | Control | Control | Fast Day | No | 18:50 | 18:00 - 18:59 | Evening | 37,3 | 71  | 25,0  | 25,0  | 18,46 | 568,10 | 107,94 |
| 2019/06/10 | CH2205 | Male | Three y/o | Control | Control | Fast Day | No | 18:55 | 18:00 - 18:59 | Evening | 38,0 | 50  | 3,6   | 3,6   | 19,15 | 539,52 | 42,42  |
| 2019/06/10 | CH2206 | Male | Three y/o | Control | Control | Fast Day | No | 18:55 | 18:00 - 18:59 | Evening | 37,4 | 46  | 23,2  | 23,2  | 18,55 | 532,38 | 105,39 |
| 2019/06/10 | CH2205 | Male | Three y/o | Control | Control | Fast Day | No | 19:00 | 19:00 - 19:59 | Evening | 38,0 | 77  | 9,2   | 9,2   | 19,15 | 574,39 | 73,94  |
| 2019/06/10 | CH2206 | Male | Three y/o | Control | Control | Fast Day | No | 19:00 | 19:00 - 19:59 | Evening | 37,5 | 49  | 34,0  | 34,0  | 18,65 | 537,80 | 118,49 |
| 2019/06/10 | CH2205 | Male | Three y/o | Control | Control | Fast Day | No | 19:05 | 19:00 - 19:59 | Evening | 37,9 | 51  | 15,2  | 15,2  | 19,05 | 541,20 | 90,96  |
| 2019/06/10 | CH2206 | Male | Three y/o | Control | Control | Fast Day | No | 19:05 | 19:00 - 19:59 | Evening | 37,5 | 57  | 35,8  | 35,8  | 18,65 | 550,47 | 120,27 |
| 2019/06/10 | CH2205 | Male | Three y/o | Control | Control | Fast Day | No | 19:10 | 19:00 - 19:59 | Evening | 37,9 | 45  | 13,0  | 13,0  | 19,05 | 530,47 | 85,65  |
| 2019/06/10 | CH2206 | Male | Three y/o | Control | Control | Fast Day | No | 19:10 | 19:00 - 19:59 | Evening | 37,5 | 44  | 33,6  | 33,6  | 18,65 | 528,51 | 118,09 |
| 2019/06/10 | CH2205 | Male | Three y/o | Control | Control | Fast Day | No | 19:15 | 19:00 - 19:59 | Evening | 37,7 | 46  | 11,6  | 11,6  | 18,85 | 532,38 | 81,78  |
| 2019/06/10 | CH2206 | Male | Three y/o | Control | Control | Fast Day | No | 19:15 | 19:00 - 19:59 | Evening | 37,5 | 45  | 37,2  | 37,2  | 18,65 | 530,47 | 121,59 |
| 2019/06/10 | CH2205 | Male | Three y/o | Control | Control | Fast Day | No | 19:20 | 19:00 - 19:59 | Evening | 37,8 | 43  | 16,2  | 16,2  | 18,95 | 526,50 | 93,13  |
| 2019/06/10 | CH2206 | Male | Three y/o | Control | Control | Fast Day | No | 19:20 | 19:00 - 19:59 | Evening | 37,5 | 46  | 32,2  | 32,2  | 18,65 | 532,38 | 116,63 |
| 2019/06/10 | CH2205 | Male | Three y/o | Control | Control | Fast Day | No | 19:25 | 19:00 - 19:59 | Evening | 37,8 | 86  | 8,2   | 8,2   | 18,95 | 582,77 | 70,05  |
| 2019/06/10 | CH2206 | Male | Three y/o | Control | Control | Fast Day | No | 19:25 | 19:00 - 19:59 | Evening | 37,7 | 47  | 15,6  | 15,6  | 18,85 | 534,23 | 91,85  |
| 2019/06/10 | CH2205 | Male | Three y/o | Control | Control | Fast Day | No | 19:30 | 19:00 - 19:59 | Evening | 37,7 |     | 12,2  | 12,2  | 18,85 |        | 83,49  |
| 2019/06/10 | CH2206 | Male | Three y/o | Control | Control | Fast Day | No | 19:30 | 19:00 - 19:59 | Evening | 37,7 | 53  | 28,6  | 28,6  | 18,85 | 544,43 | 112,56 |
| 2019/06/10 | CH2205 | Male | Three y/o | Control | Control | Fast Day | No | 19:35 | 19:00 - 19:59 | Evening | 37,9 | 54  | 2,4   | 2,4   | 19,05 | 545,99 | 28,91  |
| 2019/06/10 | CH2206 | Male | Three y/o | Control | Control | Fast Day | No | 19:35 | 19:00 - 19:59 | Evening | 37,7 | 51  | 30,6  | 30,6  | 18,85 | 541,20 | 114,87 |
| 2019/06/10 | CH2205 | Male | Three y/o | Control | Control | Fast Day | No | 19:40 | 19:00 - 19:59 | Evening | 37,8 | 48  | 5,8   | 5,8   | 18,95 | 536,04 | 58,39  |
| 2019/06/10 | CH2206 | Male | Three y/o | Control | Control | Fast Day | No | 19:40 | 19:00 - 19:59 | Evening | 37,7 | 43  | 28,8  | 28,8  | 18,85 | 526,50 | 112,79 |
| 2019/06/10 | CH2205 | Male | Three y/o | Control | Control | Fast Day | No | 19:45 | 19:00 - 19:59 | Evening | 37,8 | 42  | 6,2   | 6,2   | 18,95 | 524,42 | 60,63  |
| 2019/06/10 | CH2206 | Male | Three y/o | Control | Control | Fast Day | No | 19:45 | 19:00 - 19:59 | Evening | 37,7 | 43  | 27,8  | 27,8  | 18,85 | 526,50 | 111,58 |
| 2019/06/10 | CH2205 | Male | Three y/o | Control | Control | Fast Day | No | 19:50 | 19:00 - 19:59 | Evening | 37,7 | 78  | 14,2  | 14,2  | 18,85 | 575,38 | 88,65  |
| 2019/06/10 | CH2206 | Male | Three y/o | Control | Control | Fast Day | No | 19:50 | 19:00 - 19:59 | Evening | 37,7 | 48  | 32,6  | 32,6  | 18,85 | 536,04 | 117,05 |
| 2019/06/10 | CH2205 | Male | Three y/o | Control | Control | Fast Day | No | 19:55 | 19:00 - 19:59 | Evening | 37,9 | 88  | 11,4  | 11,4  | 19,05 | 584,49 | 81,19  |
| 2019/06/10 | CH2206 | Male | Three y/o | Control | Control | Fast Day | No | 19:55 | 19:00 - 19:59 | Evening | 37,7 | 51  | 37,4  | 37,4  | 18,85 | 541,20 | 121,77 |
| 2019/06/10 | CH2205 | Male | Three y/o | Control | Control | Fast Day | No | 20:00 | 20:00 - 20:59 | Night   | 37,9 | 44  | 12,8  | 12,8  | 19,05 | 528,51 | 85,12  |
| 2019/06/10 | CH2206 | Male | Three y/o | Control | Control | Fast Day | No | 20:00 | 20:00 - 20:59 | Night   | 37,7 | 48  | 34,6  | 34,6  | 18,85 | 536,04 | 119,10 |
| 2019/06/10 | CH2205 | Male | Three y/o | Control | Control | Fast Day | No | 20:05 | 20:00 - 20:59 | Night   | 37,7 | 47  | 13,8  | 13,8  | 18,85 | 534,23 | 87,68  |
| 2019/06/10 | CH2206 | Male | Three y/o | Control | Control | Fast Day | No | 20:05 | 20:00 - 20:59 | Night   | 37,7 | 80  | 31,0  | 31,0  | 18,85 | 577,31 | 115,32 |
| 2019/06/10 | CH2205 | Male | Three y/o | Control | Control | Fast Day | No | 20:10 | 20:00 - 20:59 | Night   | 37,7 | 53  | 16,8  | 16,8  | 18,85 | 544,43 | 94,37  |
| 2019/06/10 | CH2206 | Male | Three y/o | Control | Control | Fast Day | No | 20:10 | 20:00 - 20:59 | Night   | 37,7 | 77  | 36,8  | 36,8  | 18,85 | 574,39 | 121,22 |
| 2019/06/10 | CH2205 | Male | Three y/o | Control | Control | Fast Day | No | 20:15 | 20:00 - 20:59 | Night   | 37,7 | 73  | 14,0  | 14,0  | 18,85 | 570,27 | 88,17  |
| 2019/06/10 | CH2206 | Male | Three y/o | Control | Control | Fast Day | No | 20:15 | 20:00 - 20:59 | Night   | 37,7 | 48  | 41,8  | 41,8  | 18,85 | 536,04 | 125,60 |
| 2019/06/10 | CH2205 | Male | Three y/o | Control | Control | Fast Day | No | 20:20 | 20:00 - 20:59 | Night   | 37,6 | 56  | 15,4  | 15,4  | 18,75 | 549,01 | 91,41  |
| 2019/06/10 | CH2206 | Male | Three y/o | Control | Control | Fast Day | No | 20:20 | 20:00 - 20:59 | Night   | 37,7 | 82  | 41,2  | 41,2  | 18,85 | 579,19 | 125,11 |
| 2019/06/10 | CH2205 | Male | Three y/o | Control | Control | Fast Day | No | 20:25 | 20:00 - 20:59 | Night   | 37,6 | 55  | 13,4  | 13,4  | 18,75 | 547,52 | 86,68  |
| 2019/06/10 | CH2206 | Male | Three y/o | Control | Control | Fast Day | No | 20:25 | 20:00 - 20:59 | Night   | 37,7 | 53  | 45,4  | 45,4  | 18,85 | 544,43 | 128,45 |
| 2019/06/10 | CH2205 | Male | Three y/o | Control | Control | Fast Day | No | 20:30 | 20:00 - 20:59 | Night   | 37,6 | 55  | 19,8  | 19,8  | 18,75 | 547,52 | 99,97  |
| 2019/06/10 | CH2206 | Male | Three y/o | Control | Control | Fast Day | No | 20:30 | 20:00 - 20:59 | Night   | 37,6 | 82  | 44,8  | 44,8  | 18,75 | 579,19 | 127,99 |
| 2019/06/10 | CH2205 | Male | Three y/o | Control | Control | Fast Day | No | 20:35 | 20:00 - 20:59 | Night   | 37,6 | 51  | 20,4  | 20,4  | 18,75 | 541,20 | 100,99 |
| 2019/06/10 | CH2206 | Male | Three y/o | Control | Control | Fast Day | No | 20:35 | 20:00 - 20:59 | Night   | 37,5 | 48  | 44,8  | 44,8  | 18,65 | 536,04 | 127,99 |
| 2019/06/10 | CH2205 | Male | Three y/o | Control | Control | Fast Day | No | 20:40 | 20:00 - 20:59 | Night   | 37,6 | 51  | 19,8  | 19,8  | 18,75 | 541,20 | 99,97  |
| 2019/06/10 | CH2206 | Male | Three y/o | Control | Control | Fast Day | No | 20:40 | 20:00 - 20:59 | Night   | 37,5 | 52  | 42,2  | 42,2  | 18,65 | 542,83 | 125,93 |
| 2019/06/10 | CH2205 | Male | Three y/o | Control | Control | Fast Day | No | 20:45 | 20:00 - 20:59 | Night   | 37,6 | 55  | 21,0  | 21,0  | 18,75 | 547,52 | 101,98 |
| 2019/06/10 | CH2206 | Male | Three y/o | Control | Control | Fast Day | No | 20:45 | 20:00 - 20:59 | Night   | 37,5 | 78  | 41,8  | 41,8  | 18,65 | 575,38 | 125,60 |
| 2019/06/10 | CH2205 | Male | Three y/o | Control | Control | Fast Day | No | 20:50 | 20:00 - 20:59 | Night   | 37,6 | 46  | 24,2  | 24,2  | 18,75 | 532,38 | 106,83 |
| 2019/06/10 | CH2206 | Male | Three y/o | Control | Control | Fast Day | No | 20:50 | 20:00 - 20:59 | Night   | 37,5 | 75  | 48,0  | 48,0  | 18,65 | 572,36 | 130,38 |
| 2019/06/10 | CH2205 | Male | Three y/o | Control | Control | Fast Day | No | 20:55 | 20:00 - 20:59 | Night   | 37,6 | 42  | 20,4  | 20,4  | 18,75 | 524,42 | 100,99 |
| 2019/06/10 | CH2206 | Male | Three y/o | Control | Control | Fast Day | No | 20:55 | 20:00 - 20:59 | Night   | 37,5 | 49  | 52,0  | 52,0  | 18,65 | 537,80 | 133,14 |
| 2019/06/10 | CH2205 | Male | Three y/o | Control | Control | Fast Day | No | 21:00 | 21:00 - 21:59 | Night   | 37,6 | 56  | 14,2  | 14,2  | 18,75 | 549,01 | 88,65  |
| 2019/06/10 | CH2206 | Male | Three y/o | Control | Control | Fast Day | No | 21:00 | 21:00 - 21:59 | Night   | 37,5 | 42  | 57,4  | 57,4  | 18,65 | 524,42 | 136,56 |
| 2019/06/10 | CH2205 | Male | Three y/o | Control | Control | Fast Day | No | 21:05 | 21:00 - 21:59 | Night   | 37,6 | 55  | 5,8   | 5,8   | 18,75 | 547,52 | 58,39  |



|               |        |      |           |         |         |          |    |       |               |               |      |     |       |       |       |        |        |
|---------------|--------|------|-----------|---------|---------|----------|----|-------|---------------|---------------|------|-----|-------|-------|-------|--------|--------|
| 2019/06/10    | CH2206 | Male | Three y/o | Control | Control | Fast Day | No | 21:05 | 21:00 - 21:59 | Night         | 37,5 | 54  | 56,6  | 56,6  | 18,65 | 545,99 | 136,07 |
| 2019/06/10    | CH2205 | Male | Three y/o | Control | Control | Fast Day | No | 21:10 | 21:00 - 21:59 | Night         | 37,6 | 48  | 6,6   | 6,6   | 18,75 | 536,04 | 62,73  |
| 2019/06/10    | CH2206 | Male | Three y/o | Control | Control | Fast Day | No | 21:10 | 21:00 - 21:59 | Night         | 37,4 | 44  | 62,4  | 62,4  | 18,55 | 528,51 | 139,45 |
| 2019/06/10    | CH2205 | Male | Three y/o | Control | Control | Fast Day | No | 21:15 | 21:00 - 21:59 | Night         | 37,7 | 92  | 11,4  | 11,4  | 18,85 | 587,78 | 81,19  |
| 2019/06/10    | CH2206 | Male | Three y/o | Control | Control | Fast Day | No | 21:15 | 21:00 - 21:59 | Night         | 37,4 | 56  | 58,8  | 58,8  | 18,55 | 549,01 | 137,39 |
| 2019/06/10    | CH2205 | Male | Three y/o | Control | Control | Fast Day | No | 21:20 | 21:00 - 21:59 | Night         | 37,7 | 48  | 6,4   | 6,4   | 18,85 | 536,04 | 61,70  |
| 2019/06/10    | CH2206 | Male | Three y/o | Control | Control | Fast Day | No | 21:20 | 21:00 - 21:59 | Night         | 37,4 | 51  | 63,8  | 63,8  | 18,55 | 541,20 | 140,22 |
| 2019/06/10    | CH2205 | Male | Three y/o | Control | Control | Fast Day | No | 21:25 | 21:00 - 21:59 | Night         | 37,7 | 60  | 7,6   | 7,6   | 18,85 | 554,67 | 67,49  |
| 2019/06/10    | CH2206 | Male | Three y/o | Control | Control | Fast Day | No | 21:25 | 21:00 - 21:59 | Night         | 37,4 | 76  | 65,2  | 65,2  | 18,55 | 573,39 | 140,97 |
| 2019/06/10    | CH2205 | Male | Three y/o | Control | Control | Fast Day | No | 21:30 | 21:00 - 21:59 | Night         | 37,7 | 58  | 15,4  | 15,4  | 18,85 | 551,90 | 91,41  |
| 2019/06/10    | CH2206 | Male | Three y/o | Control | Control | Fast Day | No | 21:30 | 21:00 - 21:59 | Night         | 37,4 | 54  | 61,4  | 61,4  | 18,55 | 545,99 | 138,89 |
| 2019/06/10    | CH2205 | Male | Three y/o | Control | Control | Fast Day | No | 21:35 | 21:00 - 21:59 | Night         | 37,7 | 143 | 25,6  | 25,6  | 18,85 | 618,69 | 108,76 |
| 2019/06/10    | CH2206 | Male | Three y/o | Control | Control | Fast Day | No | 21:35 | 21:00 - 21:59 | Night         | 37,4 | 76  | 62,2  | 62,2  | 18,55 | 573,39 | 139,34 |
| 2019/06/10    | CH2205 | Male | Three y/o | Control | Control | Fast Day | No | 21:40 | 21:00 - 21:59 | Night         | 37,6 | 89  | 26,2  | 26,2  | 18,75 | 585,33 | 109,55 |
| 2019/06/10    | CH2206 | Male | Three y/o | Control | Control | Fast Day | No | 21:40 | 21:00 - 21:59 | Night         | 37,4 | 49  | 49,8  | 49,8  | 18,55 | 537,80 | 131,65 |
| 2019/06/10    | CH2205 | Male | Three y/o | Control | Control | Fast Day | No | 21:45 | 21:00 - 21:59 | Night         | 37,6 |     | 112,6 | 112,6 | 18,75 |        | 159,98 |
| 2019/06/10    | CH2206 | Male | Three y/o | Control | Control | Fast Day | No | 21:45 | 21:00 - 21:59 | Night         | 37,5 | 43  | 36,0  | 36,0  | 18,65 | 526,50 | 120,46 |
| 2019/06/10    | CH2205 | Male | Three y/o | Control | Control | Fast Day | No | 21:50 | 21:00 - 21:59 | Night         | 37,5 | 55  | 4,2   | 4,2   | 18,65 | 547,52 | 47,57  |
| 2019/06/10    | CH2206 | Male | Three y/o | Control | Control | Fast Day | No | 21:50 | 21:00 - 21:59 | Night         | 37,5 | 46  | 38,6  | 38,6  | 18,65 | 532,38 | 122,86 |
| 2019/06/10    | CH2205 | Male | Three y/o | Control | Control | Fast Day | No | 21:55 | 21:00 - 21:59 | Night         | 37,5 | 51  | 4,8   | 4,8   | 18,65 | 541,20 | 52,04  |
| 2019/06/10    | CH2206 | Male | Three y/o | Control | Control | Fast Day | No | 21:55 | 21:00 - 21:59 | Night         | 37,5 | 43  | 39,2  | 39,2  | 18,65 | 526,50 | 123,39 |
| 2019/06/10    | CH2205 | Male | Three y/o | Control | Control | Fast Day | No | 22:00 | 22:00 - 22:59 | Night         | 37,5 | 54  | 8,0   | 8,0   | 18,65 | 545,99 | 69,22  |
| 2019/06/10    | CH2206 | Male | Three y/o | Control | Control | Fast Day | No | 22:00 | 22:00 - 22:59 | Night         | 37,5 | 46  | 40,4  | 40,4  | 18,65 | 532,38 | 124,43 |
| 2019/06/10    | CH2205 | Male | Three y/o | Control | Control | Fast Day | No | 22:05 | 22:00 - 22:59 | Night         | 37,5 | 54  | 20,6  | 20,6  | 18,65 | 545,99 | 101,32 |
| 2019/06/10    | CH2206 | Male | Three y/o | Control | Control | Fast Day | No | 22:05 | 22:00 - 22:59 | Night         | 37,5 | 78  | 43,4  | 43,4  | 18,65 | 575,38 | 126,90 |
| 2019/06/10    | CH2205 | Male | Three y/o | Control | Control | Fast Day | No | 22:10 | 22:00 - 22:59 | Night         | 37,5 | 69  | 7,4   | 7,4   | 18,65 | 565,86 | 66,59  |
| 2019/06/10    | CH2206 | Male | Three y/o | Control | Control | Fast Day | No | 22:10 | 22:00 - 22:59 | Night         | 37,5 | 75  | 37,8  | 37,8  | 18,65 | 572,36 | 122,14 |
| 2019/06/10    | CH2205 | Male | Three y/o | Control | Control | Fast Day | No | 22:15 | 22:00 - 22:59 | Night         | 37,5 | 52  | 10,2  | 10,2  | 18,65 | 542,83 | 77,43  |
| 2019/06/10    | CH2206 | Male | Three y/o | Control | Control | Fast Day | No | 22:15 | 22:00 - 22:59 | Night         | 37,5 | 50  | 39,2  | 39,2  | 18,65 | 539,52 | 123,39 |
| 2019/06/10    | CH2205 | Male | Three y/o | Control | Control | Fast Day | No | 22:20 | 22:00 - 22:59 | Night         | 37,6 | 55  | 8,2   | 8,2   | 18,75 | 547,52 | 70,05  |
| 2019/06/10    | CH2206 | Male | Three y/o | Control | Control | Fast Day | No | 22:20 | 22:00 - 22:59 | Night         | 37,5 | 51  | 42,2  | 42,2  | 18,65 | 541,20 | 125,93 |
| 2019/06/10    | CH2205 | Male | Three y/o | Control | Control | Fast Day | No | 22:25 | 22:00 - 22:59 | Night         | 37,5 | 88  | 12,4  | 12,4  | 18,65 | 584,49 | 84,04  |
| 2019/06/10    | CH2206 | Male | Three y/o | Control | Control | Fast Day | No | 22:25 | 22:00 - 22:59 | Night         | 37,5 | 48  | 39,2  | 39,2  | 18,65 | 536,04 | 123,39 |
| 2019/06/10    | CH2205 | Male | Three y/o | Control | Control | Fast Day | No | 22:30 | 22:00 - 22:59 | Night         | 37,5 | 80  | 11,2  | 11,2  | 18,65 | 577,31 | 80,59  |
| 2019/06/10    | CH2206 | Male | Three y/o | Control | Control | Fast Day | No | 22:30 | 22:00 - 22:59 | Night         | 37,5 | 55  | 39,2  | 39,2  | 18,65 | 547,52 | 123,39 |
| 2019/06/10    | CH2205 | Male | Three y/o | Control | Control | Fast Day | No | 22:35 | 22:00 - 22:59 | Night         | 37,6 | 78  | 9,4   | 9,4   | 18,75 | 575,38 | 74,66  |
| 2019/06/10    | CH2206 | Male | Three y/o | Control | Control | Fast Day | No | 22:35 | 22:00 - 22:59 | Night         | 37,5 | 48  | 40,6  | 40,6  | 18,65 | 536,04 | 124,60 |
| 2019/06/10    | CH2205 | Male | Three y/o | Control | Control | Fast Day | No | 22:40 | 22:00 - 22:59 | Night         | 37,6 | 88  | 7,6   | 7,6   | 18,75 | 584,49 | 67,49  |
| 2019/06/10    | CH2206 | Male | Three y/o | Control | Control | Fast Day | No | 22:40 | 22:00 - 22:59 | Night         | 37,5 | 53  | 39,0  | 39,0  | 18,65 | 544,43 | 123,22 |
| 2019/06/10    | CH2205 | Male | Three y/o | Control | Control | Fast Day | No | 22:45 | 22:00 - 22:59 | Night         | 37,6 | 47  | 3,6   | 3,6   | 18,75 | 534,23 | 42,42  |
| 2019/06/10    | CH2206 | Male | Three y/o | Control | Control | Fast Day | No | 22:45 | 22:00 - 22:59 | Night         | 37,5 | 43  | 44,6  | 44,6  | 18,65 | 526,50 | 127,84 |
| 2019/06/10    | CH2205 | Male | Three y/o | Control | Control | Fast Day | No | 22:50 | 22:00 - 22:59 | Night         | 37,6 | 48  | 7,0   | 7,0   | 18,75 | 536,04 | 64,72  |
| 2019/06/10    | CH2206 | Male | Three y/o | Control | Control | Fast Day | No | 22:50 | 22:00 - 22:59 | Night         | 37,5 | 67  | 41,8  | 41,8  | 18,65 | 563,53 | 125,60 |
| 2019/06/10    | CH2205 | Male | Three y/o | Control | Control | Fast Day | No | 22:55 | 22:00 - 22:59 | Night         | 37,6 | 48  | 2,6   | 2,6   | 18,75 | 536,04 | 31,57  |
| 2019/06/10    | CH2206 | Male | Three y/o | Control | Control | Fast Day | No | 22:55 | 22:00 - 22:59 | Night         | 37,5 | 67  | 37,6  | 37,6  | 18,65 | 563,53 | 121,96 |
| 2019/06/10    | CH2205 | Male | Three y/o | Control | Control | Fast Day | No | 23:00 | 23:00 - 23:59 | Night         | 37,6 | 70  | 5,6   | 5,6   | 18,75 | 566,99 | 57,21  |
| 2019/06/10    | CH2206 | Male | Three y/o | Control | Control | Fast Day | No | 23:00 | 23:00 - 23:59 | Night         | 37,5 | 68  | 43,8  | 43,8  | 18,65 | 564,71 | 127,22 |
| 2019/06/10    | CH2205 | Male | Three y/o | Control | Control | Fast Day | No | 23:05 | 23:00 - 23:59 | Night         | 37,5 | 77  | 2,8   | 2,8   | 18,65 | 574,39 | 34,04  |
| 2019/06/10    | CH2206 | Male | Three y/o | Control | Control | Fast Day | No | 23:05 | 23:00 - 23:59 | Night         | 37,5 | 43  | 42,6  | 42,6  | 18,65 | 526,50 | 126,26 |
| 2019/06/10    | CH2205 | Male | Three y/o | Control | Control | Fast Day | No | 23:10 | 23:00 - 23:59 | Night         | 37,5 | 48  | 1,0   | 1,0   | 18,65 | 536,04 | 0,00   |
| 2019/06/10    | CH2206 | Male | Three y/o | Control | Control | Fast Day | No | 23:10 | 23:00 - 23:59 | Night         | 37,5 | 42  | 46,4  | 46,4  | 18,65 | 524,42 | 129,21 |
| 2019/06/10    | CH2205 | Male | Three y/o | Control | Control | Fast Day | No | 23:15 | 23:00 - 23:59 | Night         | 37,5 | 48  | 5,2   | 5,2   | 18,65 | 536,04 | 54,72  |
| 2019/06/10    | CH2206 | Male | Three y/o | Control | Control | Fast Day | No | 23:15 | 23:00 - 23:59 | Night         | 37,5 | 45  | 38,6  | 38,6  | 18,65 | 530,47 | 122,86 |
| 2019/06/10    | CH2205 | Male | Three y/o | Control | Control | Fast Day | No | 23:20 | 23:00 - 23:59 | Night         | 37,5 | 59  | 14,6  | 14,6  | 18,65 | 553,30 | 89,59  |
| 2019/06/10    | CH2206 | Male | Three y/o | Control | Control | Fast Day | No | 23:20 | 23:00 - 23:59 | Night         | 37,5 | 55  | 38,4  | 38,4  | 18,65 | 547,52 | 122,68 |
| 2019/06/10    | CH2205 | Male | Three y/o | Control | Control | Fast Day | No | 23:25 | 23:00 - 23:59 | Night         | 37,5 | 49  | 8,8   | 8,8   | 18,65 | 537,80 | 72,43  |
| 2019/06/10    | CH2206 | Male | Three y/o | Control | Control | Fast Day | No | 23:25 | 23:00 - 23:59 | Night         | 37,7 | 62  | 49,8  | 49,8  | 18,85 | 557,33 | 131,65 |
| 2019/06/10    | CH2205 | Male | Three y/o | Control | Control | Fast Day | No | 23:30 | 23:00 - 23:59 | Night         | 37,5 | 50  | 9,8   | 9,8   | 18,65 | 539,52 | 76,07  |
| 2019/06/10    | CH2206 | Male | Three y/o | Control | Control | Fast Day | No | 23:30 | 23:00 - 23:59 | Night         | 37,7 | 46  | 53,6  | 53,6  | 18,85 | 532,38 | 134,19 |
| 2019/06/10    | CH2205 | Male | Three y/o | Control | Control | Fast Day | No | 23:35 | 23:00 - 23:59 | Night         | 37,5 | 55  | 22,6  | 22,6  | 18,65 | 547,52 | 104,49 |
| 2019/06/10    | CH2206 | Male | Three y/o | Control | Control | Fast Day | No | 23:35 | 23:00 - 23:59 | Night         | 37,7 | 50  | 51,2  | 51,2  | 18,85 | 539,52 | 132,61 |
| 2019/06/10    | CH2205 | Male | Three y/o | Control | Control | Fast Day | No | 23:40 | 23:00 - 23:59 | Night         | 37,5 | 66  | 16,0  | 16,0  | 18,65 | 562,34 | 92,71  |
| 2019/06/10    | CH2206 | Male | Three y/o | Control | Control | Fast Day | No | 23:40 | 23:00 - 23:59 | Night         | 37,7 | 55  | 53,8  | 53,8  | 18,85 | 547,52 | 134,32 |
| 2019/06/10    | CH2205 | Male | Three y/o | Control | Control | Fast Day | No | 23:45 | 23:00 - 23:59 | Night         | 37,5 | 63  | 14,2  | 14,2  | 18,65 | 558,62 | 88,65  |
| 2019/06/10    | CH2206 | Male | Three y/o | Control | Control | Fast Day | No | 23:45 | 23:00 - 23:59 | Night         | 37,7 | 40  | 56,8  | 56,8  | 18,85 | 520,09 | 136,20 |
| 2019/06/10    | CH2205 | Male | Three y/o | Control | Control | Fast Day | No | 23:50 | 23:00 - 23:59 | Night         | 37,5 | 65  | 15,8  | 15,8  | 18,65 | 561,12 | 92,28  |
| 2019/06/10    | CH2206 | Male | Three y/o | Control | Control | Fast Day | No | 23:50 | 23:00 - 23:59 | Night         | 37,7 | 59  | 45,2  | 45,2  | 18,85 | 553,30 | 128,30 |
| 2019/06/10    | CH2205 | Male | Three y/o | Control | Control | Fast Day | No | 23:55 | 23:00 - 23:59 | Night         | 37,4 | 50  | 27,4  | 27,4  | 18,55 | 539,52 | 111,09 |
| 2019/06/10    | CH2206 | Male | Three y/o | Control | Control | Fast Day | No | 23:55 | 23:00 - 23:59 | Night         | 37,7 | 71  | 50,4  | 50,4  | 18,85 | 568,10 | 132,06 |
| 27 2019/06/11 | CH2205 | Male | Three y/o | Control | Control | Feed Day | No | 00:00 | 00:00 - 00:59 | Early Morning | 37,4 | 88  | 13,8  | 13,8  | 18,55 | 584,49 | 87,68  |



|            |        |      |           |         |         |          |    |       |               |               |      |     |       |       |       |        |        |
|------------|--------|------|-----------|---------|---------|----------|----|-------|---------------|---------------|------|-----|-------|-------|-------|--------|--------|
| 2019/06/11 | CH2206 | Male | Three y/o | Control | Control | Feed Day | No | 00:00 | 00:00 - 00:59 | Early Morning | 37,6 | 71  | 47,2  | 47,2  | 18,75 | 568,10 | 129,80 |
| 2019/06/11 | CH2205 | Male | Three y/o | Control | Control | Feed Day | No | 00:05 | 00:00 - 00:59 | Early Morning | 37,4 | 58  | 12,0  | 12,0  | 18,55 | 551,90 | 82,93  |
| 2019/06/11 | CH2206 | Male | Three y/o | Control | Control | Feed Day | No | 00:05 | 00:00 - 00:59 | Early Morning | 37,5 | 51  | 48,6  | 48,6  | 18,65 | 541,20 | 130,81 |
| 2019/06/11 | CH2205 | Male | Three y/o | Control | Control | Feed Day | No | 00:10 | 00:00 - 00:59 | Early Morning | 37,4 | 69  | 17,8  | 17,8  | 18,55 | 565,86 | 96,34  |
| 2019/06/11 | CH2206 | Male | Three y/o | Control | Control | Feed Day | No | 00:10 | 00:00 - 00:59 | Early Morning | 37,5 | 86  | 51,6  | 51,6  | 18,65 | 582,77 | 132,87 |
| 2019/06/11 | CH2205 | Male | Three y/o | Control | Control | Feed Day | No | 00:15 | 00:00 - 00:59 | Early Morning | 37,4 | 103 | 5,2   | 5,2   | 18,55 | 596,00 | 54,72  |
| 2019/06/11 | CH2206 | Male | Three y/o | Control | Control | Feed Day | No | 00:15 | 00:00 - 00:59 | Early Morning | 37,5 | 54  | 52,2  | 52,2  | 18,65 | 545,99 | 133,27 |
| 2019/06/11 | CH2205 | Male | Three y/o | Control | Control | Feed Day | No | 00:20 | 00:00 - 00:59 | Early Morning | 37,4 | 85  | 4,4   | 4,4   | 18,55 | 581,90 | 49,12  |
| 2019/06/11 | CH2206 | Male | Three y/o | Control | Control | Feed Day | No | 00:20 | 00:00 - 00:59 | Early Morning | 37,5 | 50  | 50,8  | 50,8  | 18,65 | 539,52 | 132,33 |
| 2019/06/11 | CH2205 | Male | Three y/o | Control | Control | Feed Day | No | 00:25 | 00:00 - 00:59 | Early Morning | 37,5 | 69  | 6,2   | 6,2   | 18,65 | 565,86 | 60,63  |
| 2019/06/11 | CH2206 | Male | Three y/o | Control | Control | Feed Day | No | 00:25 | 00:00 - 00:59 | Early Morning | 37,5 | 64  | 53,6  | 53,6  | 18,65 | 559,88 | 134,19 |
| 2019/06/11 | CH2205 | Male | Three y/o | Control | Control | Feed Day | No | 00:30 | 00:00 - 00:59 | Early Morning | 37,5 | 82  | 3,0   | 3,0   | 18,65 | 579,19 | 36,34  |
| 2019/06/11 | CH2206 | Male | Three y/o | Control | Control | Feed Day | No | 00:30 | 00:00 - 00:59 | Early Morning | 37,5 | 49  | 46,8  | 46,8  | 18,65 | 537,80 | 129,50 |
| 2019/06/11 | CH2205 | Male | Three y/o | Control | Control | Feed Day | No | 00:35 | 00:00 - 00:59 | Early Morning | 37,5 | 83  | 5,0   | 5,0   | 18,65 | 580,11 | 53,41  |
| 2019/06/11 | CH2206 | Male | Three y/o | Control | Control | Feed Day | No | 00:35 | 00:00 - 00:59 | Early Morning | 37,5 | 78  | 49,4  | 49,4  | 18,65 | 575,38 | 131,37 |
| 2019/06/11 | CH2205 | Male | Three y/o | Control | Control | Feed Day | No | 00:40 | 00:00 - 00:59 | Early Morning | 37,5 | 46  | 3,2   | 3,2   | 18,65 | 532,38 | 38,49  |
| 2019/06/11 | CH2206 | Male | Three y/o | Control | Control | Feed Day | No | 00:40 | 00:00 - 00:59 | Early Morning | 37,5 | 106 | 76,8  | 76,8  | 18,65 | 598,06 | 146,66 |
| 2019/06/11 | CH2205 | Male | Three y/o | Control | Control | Feed Day | No | 00:45 | 00:00 - 00:59 | Early Morning | 37,6 | 97  | 10,0  | 10,0  | 18,75 | 591,66 | 76,76  |
| 2019/06/11 | CH2206 | Male | Three y/o | Control | Control | Feed Day | No | 00:45 | 00:00 - 00:59 | Early Morning | 37,7 | 104 | 28,6  | 28,6  | 18,85 | 596,69 | 112,56 |
| 2019/06/11 | CH2205 | Male | Three y/o | Control | Control | Feed Day | No | 00:50 | 00:00 - 00:59 | Early Morning | 37,6 | 52  | 12,2  | 12,2  | 18,75 | 542,83 | 83,49  |
| 2019/06/11 | CH2206 | Male | Three y/o | Control | Control | Feed Day | No | 00:50 | 00:00 - 00:59 | Early Morning | 37,7 | 46  | 32,2  | 32,2  | 18,85 | 532,38 | 116,63 |
| 2019/06/11 | CH2205 | Male | Three y/o | Control | Control | Feed Day | No | 00:55 | 00:00 - 00:59 | Early Morning | 37,6 | 49  | 5,0   | 5,0   | 18,75 | 537,80 | 53,41  |
| 2019/06/11 | CH2206 | Male | Three y/o | Control | Control | Feed Day | No | 00:55 | 00:00 - 00:59 | Early Morning | 37,4 | 47  | 38,6  | 38,6  | 18,55 | 534,23 | 122,86 |
| 2019/06/11 | CH2205 | Male | Three y/o | Control | Control | Feed Day | No | 01:00 | 01:00 - 01:59 | Early Morning | 37,6 | 52  | 3,4   | 3,4   | 18,75 | 542,83 | 40,51  |
| 2019/06/11 | CH2206 | Male | Three y/o | Control | Control | Feed Day | No | 01:00 | 01:00 - 01:59 | Early Morning | 37,3 | 99  | 48,0  | 48,0  | 18,46 | 593,14 | 130,38 |
| 2019/06/11 | CH2205 | Male | Three y/o | Control | Control | Feed Day | No | 01:05 | 01:00 - 01:59 | Early Morning | 37,6 | 47  | 9,2   | 9,2   | 18,75 | 534,23 | 73,94  |
| 2019/06/11 | CH2206 | Male | Three y/o | Control | Control | Feed Day | No | 01:05 | 01:00 - 01:59 | Early Morning | 37,4 | 79  | 40,8  | 40,8  | 18,55 | 576,36 | 124,77 |
| 2019/06/11 | CH2205 | Male | Three y/o | Control | Control | Feed Day | No | 01:10 | 01:00 - 01:59 | Early Morning | 37,6 | 46  | 10,6  | 10,6  | 18,75 | 532,38 | 78,73  |
| 2019/06/11 | CH2206 | Male | Three y/o | Control | Control | Feed Day | No | 01:10 | 01:00 - 01:59 | Early Morning | 37,4 | 59  | 38,8  | 38,8  | 18,55 | 553,30 | 123,04 |
| 2019/06/11 | CH2205 | Male | Three y/o | Control | Control | Feed Day | No | 01:15 | 01:00 - 01:59 | Early Morning | 37,6 | 65  | 5,2   | 5,2   | 18,75 | 561,12 | 54,72  |
| 2019/06/11 | CH2206 | Male | Three y/o | Control | Control | Feed Day | No | 01:15 | 01:00 - 01:59 | Early Morning | 37,4 | 46  | 37,4  | 37,4  | 18,55 | 532,38 | 121,77 |
| 2019/06/11 | CH2205 | Male | Three y/o | Control | Control | Feed Day | No | 01:20 | 01:00 - 01:59 | Early Morning | 37,6 | 44  | 6,8   | 6,8   | 18,75 | 528,51 | 63,74  |
| 2019/06/11 | CH2206 | Male | Three y/o | Control | Control | Feed Day | No | 01:20 | 01:00 - 01:59 | Early Morning | 37,4 | 80  | 43,6  | 43,6  | 18,55 | 577,31 | 127,06 |
| 2019/06/11 | CH2205 | Male | Three y/o | Control | Control | Feed Day | No | 01:25 | 01:00 - 01:59 | Early Morning | 37,5 | 47  | 8,6   | 8,6   | 18,65 | 534,23 | 71,66  |
| 2019/06/11 | CH2206 | Male | Three y/o | Control | Control | Feed Day | No | 01:25 | 01:00 - 01:59 | Early Morning | 37,4 | 69  | 39,6  | 39,6  | 18,55 | 565,86 | 123,74 |
| 2019/06/11 | CH2205 | Male | Three y/o | Control | Control | Feed Day | No | 01:30 | 01:00 - 01:59 | Early Morning | 37,5 | 50  | 4,8   | 4,8   | 18,65 | 539,52 | 52,04  |
| 2019/06/11 | CH2206 | Male | Three y/o | Control | Control | Feed Day | No | 01:30 | 01:00 - 01:59 | Early Morning | 37,4 | 48  | 39,4  | 39,4  | 18,55 | 536,04 | 123,57 |
| 2019/06/11 | CH2205 | Male | Three y/o | Control | Control | Feed Day | No | 01:35 | 01:00 - 01:59 | Early Morning | 37,5 | 71  | 9,0   | 9,0   | 18,65 | 568,10 | 73,19  |
| 2019/06/11 | CH2206 | Male | Three y/o | Control | Control | Feed Day | No | 01:35 | 01:00 - 01:59 | Early Morning | 37,4 | 80  | 45,6  | 45,6  | 18,55 | 577,31 | 128,61 |
| 2019/06/11 | CH2205 | Male | Three y/o | Control | Control | Feed Day | No | 01:40 | 01:00 - 01:59 | Early Morning | 37,5 | 87  | 12,6  | 12,6  | 18,65 | 583,64 | 84,59  |
| 2019/06/11 | CH2206 | Male | Three y/o | Control | Control | Feed Day | No | 01:40 | 01:00 - 01:59 | Early Morning | 37,4 | 56  | 44,8  | 44,8  | 18,55 | 549,01 | 127,99 |
| 2019/06/11 | CH2205 | Male | Three y/o | Control | Control | Feed Day | No | 01:45 | 01:00 - 01:59 | Early Morning | 37,5 | 85  | 9,2   | 9,2   | 18,65 | 581,90 | 73,94  |
| 2019/06/11 | CH2206 | Male | Three y/o | Control | Control | Feed Day | No | 01:45 | 01:00 - 01:59 | Early Morning | 37,4 | 40  | 46,4  | 46,4  | 18,55 | 520,09 | 129,21 |
| 2019/06/11 | CH2205 | Male | Three y/o | Control | Control | Feed Day | No | 01:50 | 01:00 - 01:59 | Early Morning | 37,5 | 50  | 9,2   | 9,2   | 18,65 | 539,52 | 73,94  |
| 2019/06/11 | CH2206 | Male | Three y/o | Control | Control | Feed Day | No | 01:50 | 01:00 - 01:59 | Early Morning | 37,4 | 45  | 46,0  | 46,0  | 18,55 | 530,47 | 128,91 |
| 2019/06/11 | CH2205 | Male | Three y/o | Control | Control | Feed Day | No | 01:55 | 01:00 - 01:59 | Early Morning | 37,5 | 46  | 29,6  | 29,6  | 18,65 | 532,38 | 113,73 |
| 2019/06/11 | CH2206 | Male | Three y/o | Control | Control | Feed Day | No | 01:55 | 01:00 - 01:59 | Early Morning | 37,4 |     | 26,8  | 26,8  | 18,55 |        | 110,33 |
| 2019/06/11 | CH2205 | Male | Three y/o | Control | Control | Feed Day | No | 02:00 | 02:00 - 02:59 | Early Morning | 37,6 |     | 93,6  | 93,6  | 18,75 |        | 153,54 |
| 2019/06/11 | CH2206 | Male | Three y/o | Control | Control | Feed Day | No | 02:00 | 02:00 - 02:59 | Early Morning | 37,5 | 124 | 350,8 | 350,8 | 18,65 | 609,04 | 199,96 |
| 2019/06/11 | CH2205 | Male | Three y/o | Control | Control | Feed Day | No | 02:05 | 02:00 - 02:59 | Early Morning | 37,6 | 59  | 38,2  | 38,2  | 18,75 | 553,30 | 122,50 |
| 2019/06/11 | CH2206 | Male | Three y/o | Control | Control | Feed Day | No | 02:05 | 02:00 - 02:59 | Early Morning | 37,7 | 108 | 45,2  | 45,2  | 18,85 | 599,39 | 128,30 |
| 2019/06/11 | CH2205 | Male | Three y/o | Control | Control | Feed Day | No | 02:10 | 02:00 - 02:59 | Early Morning | 37,4 | 109 | 29,4  | 29,4  | 18,55 | 600,04 | 113,50 |
| 2019/06/11 | CH2206 | Male | Three y/o | Control | Control | Feed Day | No | 02:10 | 02:00 - 02:59 | Early Morning | 37,5 | 132 | 41,2  | 41,2  | 18,65 | 613,32 | 125,11 |
| 2019/06/11 | CH2205 | Male | Three y/o | Control | Control | Feed Day | No | 02:15 | 02:00 - 02:59 | Early Morning | 37,5 |     | 38,2  | 38,2  | 18,65 |        | 122,50 |
| 2019/06/11 | CH2206 | Male | Three y/o | Control | Control | Feed Day | No | 02:15 | 02:00 - 02:59 | Early Morning | 37,5 | 98  | 77,6  | 77,6  | 18,65 | 592,41 | 147,02 |
| 2019/06/11 | CH2205 | Male | Three y/o | Control | Control | Feed Day | No | 02:20 | 02:00 - 02:59 | Early Morning | 37,6 | 83  | 39,0  | 39,0  | 18,75 | 580,11 | 123,22 |
| 2019/06/11 | CH2206 | Male | Three y/o | Control | Control | Feed Day | No | 02:20 | 02:00 - 02:59 | Early Morning | 37,7 | 113 | 97,2  | 97,2  | 18,85 | 602,58 | 154,85 |
| 2019/06/11 | CH2205 | Male | Three y/o | Control | Control | Feed Day | No | 02:25 | 02:00 - 02:59 | Early Morning | 37,6 | 113 | 8,6   | 8,6   | 18,75 | 602,58 | 71,66  |
| 2019/06/11 | CH2206 | Male | Three y/o | Control | Control | Feed Day | No | 02:25 | 02:00 - 02:59 | Early Morning | 37,7 | 94  | 78,4  | 78,4  | 18,85 | 589,37 | 147,37 |
| 2019/06/11 | CH2205 | Male | Three y/o | Control | Control | Feed Day | No | 02:30 | 02:00 - 02:59 | Early Morning | 37,6 | 61  | 43,2  | 43,2  | 18,75 | 556,01 | 126,74 |
| 2019/06/11 | CH2206 | Male | Three y/o | Control | Control | Feed Day | No | 02:30 | 02:00 - 02:59 | Early Morning | 37,5 | 54  | 147,2 | 147,2 | 18,65 | 545,99 | 169,36 |
| 2019/06/11 | CH2205 | Male | Three y/o | Control | Control | Feed Day | No | 02:35 | 02:00 - 02:59 | Early Morning | 37,6 | 113 | 63,0  | 63,0  | 18,75 | 602,58 | 139,78 |
| 2019/06/11 | CH2206 | Male | Three y/o | Control | Control | Feed Day | No | 02:35 | 02:00 - 02:59 | Early Morning | 37,7 | 112 | 185,6 | 185,6 | 18,85 | 601,96 | 177,49 |
| 2019/06/11 | CH2205 | Male | Three y/o | Control | Control | Feed Day | No | 02:40 | 02:00 - 02:59 | Early Morning | 37,5 | 123 | 190,0 | 190,0 | 18,65 | 608,49 | 178,31 |
| 2019/06/11 | CH2206 | Male | Three y/o | Control | Control | Feed Day | No | 02:40 | 02:00 - 02:59 | Early Morning | 37,7 | 107 | 195,2 | 195,2 | 18,85 | 598,73 | 179,26 |
| 2019/06/11 | CH2205 | Male | Three y/o | Control | Control | Feed Day | No | 02:45 | 02:00 - 02:59 | Early Morning | 37,7 | 118 | 88,2  | 88,2  | 18,85 | 605,61 | 151,47 |
| 2019/06/11 | CH2206 | Male | Three y/o | Control | Control | Feed Day | No | 02:45 | 02:00 - 02:59 | Early Morning | 37,8 | 117 | 37,6  | 37,6  | 18,95 | 605,02 | 121,96 |
| 2019/06/11 | CH2205 | Male | Three y/o | Control | Control | Feed Day | No | 02:50 | 02:00 - 02:59 | Early Morning | 37,7 |     | 6,8   | 6,8   | 18,85 |        | 63,74  |
| 2019/06/11 | CH2206 | Male | Three y/o | Control | Control | Feed Day | No | 02:50 | 02:00 - 02:59 | Early Morning | 37,8 | 118 | 249,6 | 249,6 | 18,95 | 605,61 | 187,92 |
| 2019/06/11 | CH2205 | Male | Three y/o | Control | Control | Feed Day | No | 02:55 | 02:00 - 02:59 | Early Morning | 37,5 | 89  | 9,2   | 9,2   | 18,65 | 585,33 | 73,94  |



|            |        |      |           |         |         |          |    |       |               |               |      |     |       |       |       |        |        |
|------------|--------|------|-----------|---------|---------|----------|----|-------|---------------|---------------|------|-----|-------|-------|-------|--------|--------|
| 2019/06/11 | CH2206 | Male | Three y/o | Control | Control | Feed Day | No | 02:55 | 02:00 - 02:59 | Early Morning | 37,8 | 78  | 13,2  | 13,2  | 18,95 | 575,38 | 86,17  |
| 2019/06/11 | CH2205 | Male | Three y/o | Control | Control | Feed Day | No | 03:00 | 03:00 - 03:59 | Early Morning | 37,5 | 112 | 73,0  | 73,0  | 18,65 | 601,96 | 144,89 |
| 2019/06/11 | CH2206 | Male | Three y/o | Control | Control | Feed Day | No | 03:00 | 03:00 - 03:59 | Early Morning | 37,8 | 123 | 69,4  | 69,4  | 18,95 | 608,49 | 143,14 |
| 2019/06/11 | CH2205 | Male | Three y/o | Control | Control | Feed Day | No | 03:05 | 03:00 - 03:59 | Early Morning | 37,6 | 119 | 71,0  | 71,0  | 18,75 | 606,20 | 143,93 |
| 2019/06/11 | CH2206 | Male | Three y/o | Control | Control | Feed Day | No | 03:05 | 03:00 - 03:59 | Early Morning | 37,8 | 124 | 118,4 | 118,4 | 18,95 | 609,04 | 161,74 |
| 2019/06/11 | CH2205 | Male | Three y/o | Control | Control | Feed Day | No | 03:10 | 03:00 - 03:59 | Early Morning | 37,6 | 94  | 7,2   | 7,2   | 18,75 | 589,37 | 65,66  |
| 2019/06/11 | CH2206 | Male | Three y/o | Control | Control | Feed Day | No | 03:10 | 03:00 - 03:59 | Early Morning | 37,7 | 86  | 32,4  | 32,4  | 18,85 | 582,77 | 116,84 |
| 2019/06/11 | CH2205 | Male | Three y/o | Control | Control | Feed Day | No | 03:15 | 03:00 - 03:59 | Early Morning | 37,4 | 82  | 11,0  | 11,0  | 18,55 | 579,19 | 79,98  |
| 2019/06/11 | CH2206 | Male | Three y/o | Control | Control | Feed Day | No | 03:15 | 03:00 - 03:59 | Early Morning | 37,5 | 80  | 51,4  | 51,4  | 18,65 | 577,31 | 132,74 |
| 2019/06/11 | CH2205 | Male | Three y/o | Control | Control | Feed Day | No | 03:20 | 03:00 - 03:59 | Early Morning | 37,5 | 137 | 7,2   | 7,2   | 18,65 | 615,83 | 65,66  |
| 2019/06/11 | CH2206 | Male | Three y/o | Control | Control | Feed Day | No | 03:20 | 03:00 - 03:59 | Early Morning | 37,4 | 48  | 50,0  | 50,0  | 18,55 | 536,04 | 131,79 |
| 2019/06/11 | CH2205 | Male | Three y/o | Control | Control | Feed Day | No | 03:25 | 03:00 - 03:59 | Early Morning | 37,5 |     | 8,4   | 8,4   | 18,65 |        | 70,86  |
| 2019/06/11 | CH2206 | Male | Three y/o | Control | Control | Feed Day | No | 03:25 | 03:00 - 03:59 | Early Morning | 37,3 | 50  | 48,4  | 48,4  | 18,46 | 539,52 | 130,66 |
| 2019/06/11 | CH2205 | Male | Three y/o | Control | Control | Feed Day | No | 03:30 | 03:00 - 03:59 | Early Morning | 37,5 | 64  | 6,2   | 6,2   | 18,65 | 559,88 | 60,63  |
| 2019/06/11 | CH2206 | Male | Three y/o | Control | Control | Feed Day | No | 03:30 | 03:00 - 03:59 | Early Morning | 37,3 | 71  | 49,2  | 49,2  | 18,46 | 568,10 | 131,23 |
| 2019/06/11 | CH2205 | Male | Three y/o | Control | Control | Feed Day | No | 03:35 | 03:00 - 03:59 | Early Morning | 37,4 | 62  | 16,2  | 16,2  | 18,55 | 557,33 | 93,13  |
| 2019/06/11 | CH2206 | Male | Three y/o | Control | Control | Feed Day | No | 03:35 | 03:00 - 03:59 | Early Morning | 37,2 | 47  | 50,6  | 50,6  | 18,36 | 534,23 | 132,20 |
| 2019/06/11 | CH2205 | Male | Three y/o | Control | Control | Feed Day | No | 03:40 | 03:00 - 03:59 | Early Morning | 37,3 | 58  | 10,4  | 10,4  | 18,46 | 551,90 | 78,08  |
| 2019/06/11 | CH2206 | Male | Three y/o | Control | Control | Feed Day | No | 03:40 | 03:00 - 03:59 | Early Morning | 37,2 | 45  | 50,0  | 50,0  | 18,36 | 530,47 | 131,79 |
| 2019/06/11 | CH2205 | Male | Three y/o | Control | Control | Feed Day | No | 03:45 | 03:00 - 03:59 | Early Morning | 37,2 | 53  | 7,8   | 7,8   | 18,36 | 544,43 | 68,36  |
| 2019/06/11 | CH2206 | Male | Three y/o | Control | Control | Feed Day | No | 03:45 | 03:00 - 03:59 | Early Morning | 37,2 | 75  | 50,6  | 50,6  | 18,36 | 572,36 | 132,20 |
| 2019/06/11 | CH2205 | Male | Three y/o | Control | Control | Feed Day | No | 03:50 | 03:00 - 03:59 | Early Morning | 37,2 | 67  | 9,2   | 9,2   | 18,36 | 563,53 | 73,94  |
| 2019/06/11 | CH2206 | Male | Three y/o | Control | Control | Feed Day | No | 03:50 | 03:00 - 03:59 | Early Morning | 37,2 | 73  | 51,6  | 51,6  | 18,36 | 570,27 | 132,87 |
| 2019/06/11 | CH2205 | Male | Three y/o | Control | Control | Feed Day | No | 03:55 | 03:00 - 03:59 | Early Morning | 37,2 | 128 | 9,8   | 9,8   | 18,36 | 611,22 | 76,07  |
| 2019/06/11 | CH2206 | Male | Three y/o | Control | Control | Feed Day | No | 03:55 | 03:00 - 03:59 | Early Morning | 37,3 | 70  | 48,0  | 48,0  | 18,46 | 566,99 | 130,38 |
| 2019/06/11 | CH2205 | Male | Three y/o | Control | Control | Feed Day | No | 04:00 | 04:00 - 04:59 | Morning       | 37,1 | 49  | 15,6  | 15,6  | 18,26 | 537,80 | 91,85  |
| 2019/06/11 | CH2206 | Male | Three y/o | Control | Control | Feed Day | No | 04:00 | 04:00 - 04:59 | Morning       | 37,3 | 50  | 44,4  | 44,4  | 18,46 | 539,52 | 127,69 |
| 2019/06/11 | CH2205 | Male | Three y/o | Control | Control | Feed Day | No | 04:05 | 04:00 - 04:59 | Morning       | 37,1 | 50  | 12,8  | 12,8  | 18,26 | 539,52 | 85,12  |
| 2019/06/11 | CH2206 | Male | Three y/o | Control | Control | Feed Day | No | 04:05 | 04:00 - 04:59 | Morning       | 37,3 | 74  | 29,4  | 29,4  | 18,46 | 571,33 | 113,50 |
| 2019/06/11 | CH2205 | Male | Three y/o | Control | Control | Feed Day | No | 04:10 | 04:00 - 04:59 | Morning       | 37,1 | 69  | 9,2   | 9,2   | 18,26 | 565,86 | 73,94  |
| 2019/06/11 | CH2206 | Male | Three y/o | Control | Control | Feed Day | No | 04:10 | 04:00 - 04:59 | Morning       | 37,4 | 52  | 51,2  | 51,2  | 18,55 | 542,83 | 132,61 |
| 2019/06/11 | CH2205 | Male | Three y/o | Control | Control | Feed Day | No | 04:15 | 04:00 - 04:59 | Morning       | 37,2 | 49  | 13,0  | 13,0  | 18,36 | 537,80 | 85,65  |
| 2019/06/11 | CH2206 | Male | Three y/o | Control | Control | Feed Day | No | 04:15 | 04:00 - 04:59 | Morning       | 37,2 | 52  | 49,2  | 49,2  | 18,36 | 542,83 | 131,23 |
| 2019/06/11 | CH2205 | Male | Three y/o | Control | Control | Feed Day | No | 04:20 | 04:00 - 04:59 | Morning       | 37,2 | 49  | 12,0  | 12,0  | 18,36 | 537,80 | 82,93  |
| 2019/06/11 | CH2206 | Male | Three y/o | Control | Control | Feed Day | No | 04:20 | 04:00 - 04:59 | Morning       | 37,1 | 46  | 54,2  | 54,2  | 18,26 | 532,38 | 134,57 |
| 2019/06/11 | CH2205 | Male | Three y/o | Control | Control | Feed Day | No | 04:25 | 04:00 - 04:59 | Morning       | 37,2 | 84  | 20,6  | 20,6  | 18,36 | 581,01 | 101,32 |
| 2019/06/11 | CH2206 | Male | Three y/o | Control | Control | Feed Day | No | 04:25 | 04:00 - 04:59 | Morning       | 37,1 | 48  | 51,4  | 51,4  | 18,26 | 536,04 | 132,74 |
| 2019/06/11 | CH2205 | Male | Three y/o | Control | Control | Feed Day | No | 04:30 | 04:00 - 04:59 | Morning       | 37,2 | 79  | 9,0   | 9,0   | 18,36 | 576,36 | 73,19  |
| 2019/06/11 | CH2206 | Male | Three y/o | Control | Control | Feed Day | No | 04:30 | 04:00 - 04:59 | Morning       | 37,2 | 46  | 38,4  | 38,4  | 18,36 | 532,38 | 122,68 |
| 2019/06/11 | CH2205 | Male | Three y/o | Control | Control | Feed Day | No | 04:35 | 04:00 - 04:59 | Morning       | 37,2 | 126 | 28,2  | 28,2  | 18,36 | 610,14 | 112,07 |
| 2019/06/11 | CH2206 | Male | Three y/o | Control | Control | Feed Day | No | 04:35 | 04:00 - 04:59 | Morning       | 37,2 |     | 32,4  | 32,4  | 18,36 |        | 116,84 |
| 2019/06/11 | CH2205 | Male | Three y/o | Control | Control | Feed Day | No | 04:40 | 04:00 - 04:59 | Morning       | 37,3 | 154 | 11,2  | 11,2  | 18,46 | 623,58 | 80,59  |
| 2019/06/11 | CH2206 | Male | Three y/o | Control | Control | Feed Day | No | 04:40 | 04:00 - 04:59 | Morning       | 37,3 |     | 32,6  | 32,6  | 18,46 |        | 117,05 |
| 2019/06/11 | CH2205 | Male | Three y/o | Control | Control | Feed Day | No | 04:45 | 04:00 - 04:59 | Morning       | 37,2 | 55  | 14,0  | 14,0  | 18,36 | 547,52 | 88,17  |
| 2019/06/11 | CH2206 | Male | Three y/o | Control | Control | Feed Day | No | 04:45 | 04:00 - 04:59 | Morning       | 37,1 | 46  | 34,0  | 34,0  | 18,26 | 532,38 | 118,49 |
| 2019/06/11 | CH2205 | Male | Three y/o | Control | Control | Feed Day | No | 04:50 | 04:00 - 04:59 | Morning       | 36,8 | 50  | 15,2  | 15,2  | 17,96 | 539,52 | 90,96  |
| 2019/06/11 | CH2206 | Male | Three y/o | Control | Control | Feed Day | No | 04:50 | 04:00 - 04:59 | Morning       | 37,1 | 45  | 33,4  | 33,4  | 18,26 | 530,47 | 117,88 |
| 2019/06/11 | CH2205 | Male | Three y/o | Control | Control | Feed Day | No | 04:55 | 04:00 - 04:59 | Morning       | 36,7 | 40  | 9,2   | 9,2   | 17,87 | 520,09 | 73,94  |
| 2019/06/11 | CH2206 | Male | Three y/o | Control | Control | Feed Day | No | 04:55 | 04:00 - 04:59 | Morning       | 37,1 | 51  | 47,8  | 47,8  | 18,26 | 541,20 | 130,23 |
| 2019/06/11 | CH2205 | Male | Three y/o | Control | Control | Feed Day | No | 05:00 | 05:00 - 05:59 | Morning       | 36,5 | 46  | 33,0  | 33,0  | 17,67 | 532,38 | 117,47 |
| 2019/06/11 | CH2206 | Male | Three y/o | Control | Control | Feed Day | No | 05:00 | 05:00 - 05:59 | Morning       | 37,1 | 39  | 60,0  | 60,0  | 18,26 | 517,82 | 138,09 |
| 2019/06/11 | CH2205 | Male | Three y/o | Control | Control | Feed Day | No | 05:05 | 05:00 - 05:59 | Morning       | 36,5 | 154 | 33,4  | 33,4  | 17,67 | 623,58 | 117,88 |
| 2019/06/11 | CH2206 | Male | Three y/o | Control | Control | Feed Day | No | 05:05 | 05:00 - 05:59 | Morning       | 37,1 | 124 | 28,6  | 28,6  | 18,26 | 609,04 | 112,56 |
| 2019/06/11 | CH2205 | Male | Three y/o | Control | Control | Feed Day | No | 05:10 | 05:00 - 05:59 | Morning       | 36,7 | 84  | 19,0  | 19,0  | 17,87 | 581,01 | 98,56  |
| 2019/06/11 | CH2206 | Male | Three y/o | Control | Control | Feed Day | No | 05:10 | 05:00 - 05:59 | Morning       | 37,1 | 60  | 29,2  | 29,2  | 18,26 | 554,67 | 113,27 |
| 2019/06/11 | CH2205 | Male | Three y/o | Control | Control | Feed Day | No | 05:15 | 05:00 - 05:59 | Morning       | 36,6 | 49  | 19,2  | 19,2  | 17,77 | 537,80 | 98,92  |
| 2019/06/11 | CH2206 | Male | Three y/o | Control | Control | Feed Day | No | 05:15 | 05:00 - 05:59 | Morning       | 37,1 | 54  | 34,2  | 34,2  | 18,26 | 545,99 | 118,70 |
| 2019/06/11 | CH2205 | Male | Three y/o | Control | Control | Feed Day | No | 05:20 | 05:00 - 05:59 | Morning       | 36,6 | 44  | 15,8  | 15,8  | 17,77 | 528,51 | 92,28  |
| 2019/06/11 | CH2206 | Male | Three y/o | Control | Control | Feed Day | No | 05:20 | 05:00 - 05:59 | Morning       | 37,1 | 73  | 33,8  | 33,8  | 18,26 | 570,27 | 118,29 |
| 2019/06/11 | CH2205 | Male | Three y/o | Control | Control | Feed Day | No | 05:25 | 05:00 - 05:59 | Morning       | 36,6 | 80  | 17,0  | 17,0  | 17,77 | 577,31 | 94,77  |
| 2019/06/11 | CH2206 | Male | Three y/o | Control | Control | Feed Day | No | 05:25 | 05:00 - 05:59 | Morning       | 37,1 | 49  | 35,0  | 35,0  | 18,26 | 537,80 | 119,49 |
| 2019/06/11 | CH2205 | Male | Three y/o | Control | Control | Feed Day | No | 05:30 | 05:00 - 05:59 | Morning       | 36,6 | 49  | 19,0  | 19,0  | 17,77 | 537,80 | 98,56  |
| 2019/06/11 | CH2206 | Male | Three y/o | Control | Control | Feed Day | No | 05:30 | 05:00 - 05:59 | Morning       | 37,1 | 66  | 36,4  | 36,4  | 18,26 | 562,34 | 120,84 |
| 2019/06/11 | CH2205 | Male | Three y/o | Control | Control | Feed Day | No | 05:35 | 05:00 - 05:59 | Morning       | 36,6 | 68  | 21,2  | 21,2  | 17,77 | 564,71 | 102,31 |
| 2019/06/11 | CH2206 | Male | Three y/o | Control | Control | Feed Day | No | 05:35 | 05:00 - 05:59 | Morning       | 37,1 | 75  | 38,8  | 38,8  | 18,26 | 572,36 | 123,04 |
| 2019/06/11 | CH2205 | Male | Three y/o | Control | Control | Feed Day | No | 05:40 | 05:00 - 05:59 | Morning       | 36,7 | 61  | 18,2  | 18,2  | 17,87 | 556,01 | 97,10  |
| 2019/06/11 | CH2206 | Male | Three y/o | Control | Control | Feed Day | No | 05:40 | 05:00 - 05:59 | Morning       | 37,1 | 76  | 36,0  | 36,0  | 18,26 | 573,39 | 120,46 |
| 2019/06/11 | CH2205 | Male | Three y/o | Control | Control | Feed Day | No | 05:45 | 05:00 - 05:59 | Morning       | 36,7 | 45  | 19,0  | 19,0  | 17,87 | 530,47 | 98,56  |
| 2019/06/11 | CH2206 | Male | Three y/o | Control | Control | Feed Day | No | 05:45 | 05:00 - 05:59 | Morning       | 37,1 | 75  | 43,6  | 43,6  | 18,26 | 572,36 | 127,06 |
| 2019/06/11 | CH2205 | Male | Three y/o | Control | Control | Feed Day | No | 05:50 | 05:00 - 05:59 | Morning       | 36,7 | 87  | 20,4  | 20,4  | 17,87 | 583,64 | 100,99 |



|            |        |      |           |         |         |          |    |       |               |              |      |     |       |       |       |        |        |
|------------|--------|------|-----------|---------|---------|----------|----|-------|---------------|--------------|------|-----|-------|-------|-------|--------|--------|
| 2019/06/11 | CH2206 | Male | Three y/o | Control | Control | Feed Day | No | 05:50 | 05:00 - 05:59 | Morning      | 37,1 | 73  | 37,0  | 37,0  | 18,26 | 570,27 | 121,40 |
| 2019/06/11 | CH2205 | Male | Three y/o | Control | Control | Feed Day | No | 05:55 | 05:00 - 05:59 | Morning      | 36,7 | 83  | 19,6  | 19,6  | 17,87 | 580,11 | 99,63  |
| 2019/06/11 | CH2206 | Male | Three y/o | Control | Control | Feed Day | No | 05:55 | 05:00 - 05:59 | Morning      | 37,1 | 38  | 32,8  | 32,8  | 18,26 | 515,48 | 117,26 |
| 2019/06/11 | CH2205 | Male | Three y/o | Control | Control | Feed Day | No | 06:00 | 06:00 - 06:59 | Morning      | 36,8 | 70  | 16,8  | 16,8  | 17,96 | 566,99 | 94,37  |
| 2019/06/11 | CH2206 | Male | Three y/o | Control | Control | Feed Day | No | 06:00 | 06:00 - 06:59 | Morning      | 37,2 | 75  | 50,6  | 50,6  | 18,36 | 572,36 | 132,20 |
| 2019/06/11 | CH2205 | Male | Three y/o | Control | Control | Feed Day | No | 06:05 | 06:00 - 06:59 | Morning      | 36,8 | 42  | 14,6  | 14,6  | 17,96 | 524,42 | 89,59  |
| 2019/06/11 | CH2206 | Male | Three y/o | Control | Control | Feed Day | No | 06:05 | 06:00 - 06:59 | Morning      | 37,2 | 51  | 51,6  | 51,6  | 18,36 | 541,20 | 132,87 |
| 2019/06/11 | CH2205 | Male | Three y/o | Control | Control | Feed Day | No | 06:10 | 06:00 - 06:59 | Morning      | 36,8 | 66  | 13,6  | 13,6  | 17,96 | 562,34 | 87,18  |
| 2019/06/11 | CH2206 | Male | Three y/o | Control | Control | Feed Day | No | 06:10 | 06:00 - 06:59 | Morning      | 37,2 | 78  | 50,6  | 50,6  | 18,36 | 575,38 | 132,20 |
| 2019/06/11 | CH2205 | Male | Three y/o | Control | Control | Feed Day | No | 06:15 | 06:00 - 06:59 | Morning      | 36,8 | 49  | 12,6  | 12,6  | 17,96 | 537,80 | 84,59  |
| 2019/06/11 | CH2206 | Male | Three y/o | Control | Control | Feed Day | No | 06:15 | 06:00 - 06:59 | Morning      | 37,2 |     | 41,8  | 41,8  | 18,36 |        | 125,60 |
| 2019/06/11 | CH2205 | Male | Three y/o | Control | Control | Feed Day | No | 06:20 | 06:00 - 06:59 | Morning      | 36,8 | 84  | 3,2   | 3,2   | 17,96 | 581,01 | 38,49  |
| 2019/06/11 | CH2206 | Male | Three y/o | Control | Control | Feed Day | No | 06:20 | 06:00 - 06:59 | Morning      | 37,2 | 77  | 42,0  | 42,0  | 18,36 | 574,39 | 125,77 |
| 2019/06/11 | CH2205 | Male | Three y/o | Control | Control | Feed Day | No | 06:25 | 06:00 - 06:59 | Morning      | 36,8 | 80  | 5,8   | 5,8   | 17,96 | 577,31 | 58,39  |
| 2019/06/11 | CH2206 | Male | Three y/o | Control | Control | Feed Day | No | 06:25 | 06:00 - 06:59 | Morning      | 37,2 | 46  | 41,4  | 41,4  | 18,36 | 532,38 | 125,27 |
| 2019/06/11 | CH2205 | Male | Three y/o | Control | Control | Feed Day | No | 06:30 | 06:00 - 06:59 | Morning      | 36,8 | 60  | 12,0  | 12,0  | 17,96 | 554,67 | 82,93  |
| 2019/06/11 | CH2206 | Male | Three y/o | Control | Control | Feed Day | No | 06:30 | 06:00 - 06:59 | Morning      | 37,2 | 45  | 48,4  | 48,4  | 18,36 | 530,47 | 130,66 |
| 2019/06/11 | CH2205 | Male | Three y/o | Control | Control | Feed Day | No | 06:35 | 06:00 - 06:59 | Morning      | 37,1 | 185 | 60,8  | 60,8  | 18,26 | 635,34 | 138,55 |
| 2019/06/11 | CH2206 | Male | Three y/o | Control | Control | Feed Day | No | 06:35 | 06:00 - 06:59 | Morning      | 37,2 | 140 | 55,8  | 55,8  | 18,36 | 617,28 | 135,58 |
| 2019/06/11 | CH2205 | Male | Three y/o | Control | Control | Feed Day | No | 06:40 | 06:00 - 06:59 | Morning      | 37,2 | 125 | 199,2 | 199,2 | 18,36 | 609,60 | 179,98 |
| 2019/06/11 | CH2206 | Male | Three y/o | Control | Control | Feed Day | No | 06:40 | 06:00 - 06:59 | Morning      | 37,3 | 92  | 83,2  | 83,2  | 18,46 | 587,78 | 149,44 |
| 2019/06/11 | CH2205 | Male | Three y/o | Control | Control | Feed Day | No | 06:45 | 06:00 - 06:59 | Morning      | 37,2 | 114 | 182,2 | 182,2 | 18,36 | 603,20 | 176,84 |
| 2019/06/11 | CH2206 | Male | Three y/o | Control | Control | Feed Day | No | 06:45 | 06:00 - 06:59 | Morning      | 37,4 | 188 | 54,4  | 54,4  | 18,55 | 636,34 | 134,70 |
| 2019/06/11 | CH2205 | Male | Three y/o | Control | Control | Feed Day | No | 06:50 | 06:00 - 06:59 | Morning      | 37,2 | 145 | 231,8 | 231,8 | 18,36 | 619,62 | 185,31 |
| 2019/06/11 | CH2206 | Male | Three y/o | Control | Control | Feed Day | No | 06:50 | 06:00 - 06:59 | Morning      | 37,4 | 145 | 160,4 | 160,4 | 18,55 | 619,62 | 172,37 |
| 2019/06/11 | CH2205 | Male | Three y/o | Control | Control | Feed Day | No | 06:55 | 06:00 - 06:59 | Morning      | 37,3 | 86  | 118,8 | 118,8 | 18,46 | 582,77 | 161,86 |
| 2019/06/11 | CH2206 | Male | Three y/o | Control | Control | Feed Day | No | 06:55 | 06:00 - 06:59 | Morning      | 37,5 | 169 | 147,2 | 147,2 | 18,65 | 629,60 | 169,36 |
| 2019/06/11 | CH2205 | Male | Three y/o | Control | Control | Feed Day | No | 07:00 | 07:00 - 07:59 | Morning      | 37,4 | 53  | 125,6 | 125,6 | 18,55 | 544,43 | 163,80 |
| 2019/06/11 | CH2206 | Male | Three y/o | Control | Control | Feed Day | No | 07:00 | 07:00 - 07:59 | Morning      | 37,5 | 115 | 221,8 | 221,8 | 18,65 | 603,82 | 183,76 |
| 2019/06/11 | CH2205 | Male | Three y/o | Control | Control | Feed Day | No | 07:05 | 07:00 - 07:59 | Morning      | 37,5 | 62  | 102,8 | 102,8 | 18,65 | 557,33 | 156,81 |
| 2019/06/11 | CH2206 | Male | Three y/o | Control | Control | Feed Day | No | 07:05 | 07:00 - 07:59 | Morning      | 37,7 | 137 | 81,2  | 81,2  | 18,85 | 615,83 | 148,59 |
| 2019/06/11 | CH2205 | Male | Three y/o | Control | Control | Feed Day | No | 07:10 | 07:00 - 07:59 | Morning      | 37,6 | 59  | 278,2 | 278,2 | 18,75 | 553,30 | 191,75 |
| 2019/06/11 | CH2206 | Male | Three y/o | Control | Control | Feed Day | No | 07:10 | 07:00 - 07:59 | Morning      | 37,8 | 148 | 131,0 | 131,0 | 18,95 | 620,97 | 165,27 |
| 2019/06/11 | CH2205 | Male | Three y/o | Control | Control | Feed Day | No | 07:15 | 07:00 - 07:59 | Morning      | 37,6 | 141 | 208,4 | 208,4 | 18,75 | 617,75 | 181,57 |
| 2019/06/11 | CH2206 | Male | Three y/o | Control | Control | Feed Day | No | 07:15 | 07:00 - 07:59 | Morning      | 37,8 | 93  | 120,2 | 120,2 | 18,95 | 588,58 | 162,27 |
| 2019/06/11 | CH2205 | Male | Three y/o | Control | Control | Feed Day | No | 07:20 | 07:00 - 07:59 | Morning      | 37,6 | 42  | 286,8 | 286,8 | 18,75 | 524,42 | 192,83 |
| 2019/06/11 | CH2206 | Male | Three y/o | Control | Control | Feed Day | No | 07:20 | 07:00 - 07:59 | Morning      | 37,8 | 124 | 145,2 | 145,2 | 18,95 | 609,04 | 168,88 |
| 2019/06/11 | CH2205 | Male | Three y/o | Control | Control | Feed Day | No | 07:25 | 07:00 - 07:59 | Morning      | 37,7 |     | 87,0  | 87,0  | 18,85 |        | 150,99 |
| 2019/06/11 | CH2206 | Male | Three y/o | Control | Control | Feed Day | No | 07:25 | 07:00 - 07:59 | Morning      | 37,9 | 113 | 123,6 | 123,6 | 19,05 | 602,58 | 163,24 |
| 2019/06/11 | CH2205 | Male | Three y/o | Control | Control | Feed Day | No | 07:30 | 07:00 - 07:59 | Morning      | 37,7 | 101 | 120,2 | 120,2 | 18,85 | 594,59 | 162,27 |
| 2019/06/11 | CH2206 | Male | Three y/o | Control | Control | Feed Day | No | 07:30 | 07:00 - 07:59 | Morning      | 37,9 | 103 | 56,8  | 56,8  | 19,05 | 596,00 | 136,20 |
| 2019/06/11 | CH2205 | Male | Three y/o | Control | Control | Feed Day | No | 07:35 | 07:00 - 07:59 | Morning      | 37,7 | 108 | 113,0 | 113,0 | 18,85 | 599,39 | 160,11 |
| 2019/06/11 | CH2206 | Male | Three y/o | Control | Control | Feed Day | No | 07:35 | 07:00 - 07:59 | Morning      | 38,0 | 105 | 70,2  | 70,2  | 19,15 | 597,38 | 143,54 |
| 2019/06/11 | CH2205 | Male | Three y/o | Control | Control | Feed Day | No | 07:40 | 07:00 - 07:59 | Morning      | 37,9 | 154 | 93,8  | 93,8  | 19,05 | 623,58 | 153,61 |
| 2019/06/11 | CH2206 | Male | Three y/o | Control | Control | Feed Day | No | 07:40 | 07:00 - 07:59 | Morning      | 37,9 | 80  | 60,6  | 60,6  | 19,05 | 577,31 | 138,44 |
| 2019/06/11 | CH2205 | Male | Three y/o | Control | Control | Feed Day | No | 07:45 | 07:00 - 07:59 | Morning      | 37,7 | 162 | 576,4 | 576,4 | 18,85 | 626,88 | 217,61 |
| 2019/06/11 | CH2206 | Male | Three y/o | Control | Control | Feed Day | No | 07:45 | 07:00 - 07:59 | Morning      | 37,9 | 115 | 87,4  | 87,4  | 19,05 | 603,82 | 151,15 |
| 2019/06/11 | CH2205 | Male | Three y/o | Control | Control | Feed Day | No | 07:50 | 07:00 - 07:59 | Morning      | 37,7 | 74  | 104,8 | 104,8 | 18,85 | 571,33 | 157,48 |
| 2019/06/11 | CH2206 | Male | Three y/o | Control | Control | Feed Day | No | 07:50 | 07:00 - 07:59 | Morning      | 37,8 | 90  | 96,0  | 96,0  | 18,95 | 586,16 | 154,42 |
| 2019/06/11 | CH2205 | Male | Three y/o | Control | Control | Feed Day | No | 07:55 | 07:00 - 07:59 | Morning      | 37,7 | 59  | 127,6 | 127,6 | 18,85 | 553,30 | 164,35 |
| 2019/06/11 | CH2206 | Male | Three y/o | Control | Control | Feed Day | No | 07:55 | 07:00 - 07:59 | Morning      | 37,8 | 107 | 46,2  | 46,2  | 18,95 | 598,73 | 129,06 |
| 2019/06/11 | CH2205 | Male | Three y/o | Control | Control | Feed Day | No | 08:00 | 08:00 - 08:59 | Late Morning | 37,7 | 120 | 142,8 | 142,8 | 18,85 | 606,78 | 168,29 |
| 2019/06/11 | CH2206 | Male | Three y/o | Control | Control | Feed Day | No | 08:00 | 08:00 - 08:59 | Late Morning | 37,8 | 99  | 64,0  | 64,0  | 18,95 | 593,14 | 140,33 |
| 2019/06/11 | CH2205 | Male | Three y/o | Control | Control | Feed Day | No | 08:05 | 08:00 - 08:59 | Late Morning | 37,9 | 85  | 14,8  | 14,8  | 19,05 | 581,90 | 90,05  |
| 2019/06/11 | CH2206 | Male | Three y/o | Control | Control | Feed Day | No | 08:05 | 08:00 - 08:59 | Late Morning | 38,0 | 100 | 26,2  | 26,2  | 19,15 | 593,87 | 109,55 |
| 2019/06/11 | CH2205 | Male | Three y/o | Control | Control | Feed Day | No | 08:10 | 08:00 - 08:59 | Late Morning | 37,7 |     | 12,4  | 12,4  | 18,85 |        | 84,04  |
| 2019/06/11 | CH2206 | Male | Three y/o | Control | Control | Feed Day | No | 08:10 | 08:00 - 08:59 | Late Morning | 37,9 | 89  | 9,4   | 9,4   | 19,05 | 585,33 | 74,66  |
| 2019/06/11 | CH2205 | Male | Three y/o | Control | Control | Feed Day | No | 08:15 | 08:00 - 08:59 | Late Morning | 37,6 | 65  | 8,2   | 8,2   | 18,75 | 561,12 | 70,05  |
| 2019/06/11 | CH2206 | Male | Three y/o | Control | Control | Feed Day | No | 08:15 | 08:00 - 08:59 | Late Morning | 37,5 | 52  | 66,6  | 66,6  | 18,65 | 542,83 | 141,71 |
| 2019/06/11 | CH2205 | Male | Three y/o | Control | Control | Feed Day | No | 08:20 | 08:00 - 08:59 | Late Morning | 37,5 |     | 6,8   | 6,8   | 18,65 |        | 63,74  |
| 2019/06/11 | CH2206 | Male | Three y/o | Control | Control | Feed Day | No | 08:20 | 08:00 - 08:59 | Late Morning | 37,4 | 79  | 99,4  | 99,4  | 18,55 | 576,36 | 155,63 |
| 2019/06/11 | CH2205 | Male | Three y/o | Control | Control | Feed Day | No | 08:25 | 08:00 - 08:59 | Late Morning | 37,4 |     | 39,2  | 39,2  | 18,55 |        | 123,39 |
| 2019/06/11 | CH2206 | Male | Three y/o | Control | Control | Feed Day | No | 08:25 | 08:00 - 08:59 | Late Morning | 37,7 | 121 | 257,2 | 257,2 | 18,85 | 607,35 | 188,98 |
| 2019/06/11 | CH2205 | Male | Three y/o | Control | Control | Feed Day | No | 08:30 | 08:00 - 08:59 | Late Morning | 37,5 | 39  | 48,0  | 48,0  | 18,65 | 517,82 | 130,38 |
| 2019/06/11 | CH2206 | Male | Three y/o | Control | Control | Feed Day | No | 08:30 | 08:00 - 08:59 | Late Morning | 37,8 | 124 | 92,8  | 92,8  | 18,95 | 609,04 | 153,24 |
| 2019/06/11 | CH2205 | Male | Three y/o | Control | Control | Feed Day | No | 08:35 | 08:00 - 08:59 | Late Morning | 37,4 | 83  | 248,8 | 248,8 | 18,55 | 580,11 | 187,81 |
| 2019/06/11 | CH2206 | Male | Three y/o | Control | Control | Feed Day | No | 08:35 | 08:00 - 08:59 | Late Morning | 37,8 | 140 | 111,0 | 111,0 | 18,95 | 617,28 | 159,48 |
| 2019/06/11 | CH2205 | Male | Three y/o | Control | Control | Feed Day | No | 08:40 | 08:00 - 08:59 | Late Morning | 37,5 | 101 | 20,0  | 20,0  | 18,65 | 594,59 | 100,31 |
| 2019/06/11 | CH2206 | Male | Three y/o | Control | Control | Feed Day | No | 08:40 | 08:00 - 08:59 | Late Morning | 37,9 | 102 | 313,0 | 313,0 | 19,05 | 595,30 | 195,92 |
| 2019/06/11 | CH2205 | Male | Three y/o | Control | Control | Feed Day | No | 08:45 | 08:00 - 08:59 | Late Morning | 37,5 | 115 | 95,8  | 95,8  | 18,65 | 603,82 | 154,35 |



|            |        |      |           |         |         |          |     |       |               |              |      |     |       |       |       |        |        |
|------------|--------|------|-----------|---------|---------|----------|-----|-------|---------------|--------------|------|-----|-------|-------|-------|--------|--------|
| 2019/06/11 | CH2206 | Male | Three y/o | Control | Control | Feed Day | No  | 08:45 | 08:00 - 08:59 | Late Morning | 37,9 | 70  | 44,8  | 44,8  | 19,05 | 566,99 | 127,99 |
| 2019/06/11 | CH2205 | Male | Three y/o | Control | Control | Feed Day | No  | 08:50 | 08:00 - 08:59 | Late Morning | 37,5 | 93  | 88,8  | 88,8  | 18,65 | 588,58 | 151,71 |
| 2019/06/11 | CH2206 | Male | Three y/o | Control | Control | Feed Day | No  | 08:50 | 08:00 - 08:59 | Late Morning | 37,8 | 117 | 23,8  | 23,8  | 18,95 | 605,02 | 106,26 |
| 2019/06/11 | CH2205 | Male | Three y/o | Control | Control | Feed Day | No  | 08:55 | 08:00 - 08:59 | Late Morning | 37,5 | 93  | 68,0  | 68,0  | 18,65 | 588,58 | 142,43 |
| 2019/06/11 | CH2206 | Male | Three y/o | Control | Control | Feed Day | No  | 08:55 | 08:00 - 08:59 | Late Morning | 37,8 | 103 | 61,0  | 61,0  | 18,95 | 596,00 | 138,67 |
| 2019/06/11 | CH2205 | Male | Three y/o | Control | Control | Feed Day | No  | 09:00 | 09:00 - 09:59 | Late Morning | 37,5 | 77  | 5,8   | 5,8   | 18,65 | 574,39 | 58,39  |
| 2019/06/11 | CH2206 | Male | Three y/o | Control | Control | Feed Day | No  | 09:00 | 09:00 - 09:59 | Late Morning | 37,8 | 79  | 28,6  | 28,6  | 18,95 | 576,36 | 112,56 |
| 2019/06/11 | CH2205 | Male | Three y/o | Control | Control | Feed Day | No  | 09:05 | 09:00 - 09:59 | Late Morning | 37,6 | 59  | 8,4   | 8,4   | 18,75 | 553,30 | 70,86  |
| 2019/06/11 | CH2206 | Male | Three y/o | Control | Control | Feed Day | No  | 09:05 | 09:00 - 09:59 | Late Morning | 37,8 | 76  | 49,8  | 49,8  | 18,95 | 573,39 | 131,65 |
| 2019/06/11 | CH2205 | Male | Three y/o | Control | Control | Feed Day | No  | 09:10 | 09:00 - 09:59 | Late Morning | 37,5 | 117 | 91,2  | 91,2  | 18,65 | 605,02 | 152,63 |
| 2019/06/11 | CH2206 | Male | Three y/o | Control | Control | Feed Day | No  | 09:10 | 09:00 - 09:59 | Late Morning | 37,8 | 82  | 56,6  | 56,6  | 18,95 | 579,19 | 136,07 |
| 2019/06/11 | CH2205 | Male | Three y/o | Control | Control | Feed Day | No  | 09:15 | 09:00 - 09:59 | Late Morning | 37,5 | 100 | 329,6 | 329,6 | 18,65 | 593,87 | 197,75 |
| 2019/06/11 | CH2206 | Male | Three y/o | Control | Control | Feed Day | No  | 09:15 | 09:00 - 09:59 | Late Morning | 37,9 | 98  | 24,4  | 24,4  | 19,05 | 592,41 | 107,11 |
| 2019/06/11 | CH2205 | Male | Three y/o | Control | Control | Feed Day | No  | 09:20 | 09:00 - 09:59 | Late Morning | 37,5 | 131 | 156,8 | 156,8 | 18,65 | 612,80 | 171,57 |
| 2019/06/11 | CH2206 | Male | Three y/o | Control | Control | Feed Day | No  | 09:20 | 09:00 - 09:59 | Late Morning | 37,8 | 128 | 108,2 | 108,2 | 18,95 | 611,22 | 158,59 |
| 2019/06/11 | CH2205 | Male | Three y/o | Control | Control | Feed Day | No  | 09:25 | 09:00 - 09:59 | Late Morning | 37,6 |     | 16,4  | 16,4  | 18,75 |        | 93,55  |
| 2019/06/11 | CH2206 | Male | Three y/o | Control | Control | Feed Day | No  | 09:25 | 09:00 - 09:59 | Late Morning | 37,9 | 104 | 26,2  | 26,2  | 19,05 | 596,69 | 109,55 |
| 2019/06/11 | CH2205 | Male | Three y/o | Control | Control | Feed Day | No  | 09:30 | 09:00 - 09:59 | Late Morning | 37,6 | 54  | 86,4  | 86,4  | 18,75 | 545,99 | 150,75 |
| 2019/06/11 | CH2206 | Male | Three y/o | Control | Control | Feed Day | No  | 09:30 | 09:00 - 09:59 | Late Morning | 37,9 | 101 | 90,8  | 90,8  | 19,05 | 594,59 | 152,48 |
| 2019/06/11 | CH2205 | Male | Three y/o | Control | Control | Feed Day | No  | 09:35 | 09:00 - 09:59 | Late Morning | 37,7 | 61  | 128,0 | 128,0 | 18,85 | 556,01 | 164,46 |
| 2019/06/11 | CH2206 | Male | Three y/o | Control | Control | Feed Day | No  | 09:35 | 09:00 - 09:59 | Late Morning | 37,9 | 78  | 84,4  | 84,4  | 19,05 | 575,38 | 149,94 |
| 2019/06/11 | CH2205 | Male | Three y/o | Control | Control | Feed Day | No  | 09:40 | 09:00 - 09:59 | Late Morning | 37,7 | 103 | 104,4 | 104,4 | 18,85 | 596,00 | 157,35 |
| 2019/06/11 | CH2206 | Male | Three y/o | Control | Control | Feed Day | No  | 09:40 | 09:00 - 09:59 | Late Morning | 37,9 | 102 | 24,8  | 24,8  | 19,05 | 595,30 | 107,67 |
| 2019/06/11 | CH2205 | Male | Three y/o | Control | Control | Feed Day | No  | 09:45 | 09:00 - 09:59 | Late Morning | 37,8 | 80  | 50,0  | 50,0  | 18,95 | 577,31 | 131,79 |
| 2019/06/11 | CH2206 | Male | Three y/o | Control | Control | Feed Day | No  | 09:45 | 09:00 - 09:59 | Late Morning | 37,8 | 80  | 39,6  | 39,6  | 18,95 | 577,31 | 123,74 |
| 2019/06/11 | CH2205 | Male | Three y/o | Control | Control | Feed Day | No  | 09:50 | 09:00 - 09:59 | Late Morning | 37,7 | 67  | 20,6  | 20,6  | 18,85 | 563,53 | 101,32 |
| 2019/06/11 | CH2206 | Male | Three y/o | Control | Control | Feed Day | No  | 09:50 | 09:00 - 09:59 | Late Morning | 37,8 | 56  | 32,6  | 32,6  | 18,95 | 549,01 | 117,05 |
| 2019/06/11 | CH2205 | Male | Three y/o | Control | Control | Feed Day | No  | 09:55 | 09:00 - 09:59 | Late Morning | 37,7 | 61  | 19,0  | 19,0  | 18,85 | 556,01 | 98,56  |
| 2019/06/11 | CH2206 | Male | Three y/o | Control | Control | Feed Day | No  | 09:55 | 09:00 - 09:59 | Late Morning | 37,8 | 62  | 59,4  | 59,4  | 18,95 | 557,33 | 137,75 |
| 2019/06/11 | CH2205 | Male | Three y/o | Control | Control | Feed Day | No  | 10:00 | 10:00 - 10:59 | Late Morning | 37,7 | 53  | 55,6  | 55,6  | 18,85 | 544,43 | 135,46 |
| 2019/06/11 | CH2206 | Male | Three y/o | Control | Control | Feed Day | No  | 10:00 | 10:00 - 10:59 | Late Morning | 37,9 | 119 | 28,2  | 28,2  | 19,05 | 606,20 | 112,07 |
| 2019/06/11 | CH2205 | Male | Three y/o | Control | Control | Feed Day | No  | 10:05 | 10:00 - 10:59 | Late Morning | 37,7 | 194 | 10,6  | 10,6  | 18,85 | 638,30 | 78,73  |
| 2019/06/11 | CH2206 | Male | Three y/o | Control | Control | Feed Day | No  | 10:05 | 10:00 - 10:59 | Late Morning | 38,0 | 94  | 36,0  | 36,0  | 19,15 | 589,37 | 120,46 |
| 2019/06/11 | CH2205 | Male | Three y/o | Control | Control | Feed Day | No  | 10:10 | 10:00 - 10:59 | Late Morning | 37,7 | 54  | 75,8  | 75,8  | 18,85 | 545,99 | 146,20 |
| 2019/06/11 | CH2206 | Male | Three y/o | Control | Control | Feed Day | No  | 10:10 | 10:00 - 10:59 | Late Morning | 37,9 | 71  | 46,0  | 46,0  | 19,05 | 568,10 | 128,91 |
| 2019/06/11 | CH2205 | Male | Three y/o | Control | Control | Feed Day | No  | 10:15 | 10:00 - 10:59 | Late Morning | 37,7 |     | 114,4 | 114,4 | 18,85 |        | 160,54 |
| 2019/06/11 | CH2206 | Male | Three y/o | Control | Control | Feed Day | No  | 10:15 | 10:00 - 10:59 | Late Morning | 38,0 | 86  | 35,2  | 35,2  | 19,15 | 582,77 | 119,69 |
| 2019/06/11 | CH2205 | Male | Three y/o | Control | Control | Feed Day | No  | 10:20 | 10:00 - 10:59 | Late Morning | 37,7 | 78  | 7,4   | 7,4   | 18,85 | 575,38 | 66,59  |
| 2019/06/11 | CH2206 | Male | Three y/o | Control | Control | Feed Day | No  | 10:20 | 10:00 - 10:59 | Late Morning | 38,0 | 83  | 25,2  | 25,2  | 19,15 | 580,11 | 108,22 |
| 2019/06/11 | CH2205 | Male | Three y/o | Control | Control | Feed Day | No  | 10:25 | 10:00 - 10:59 | Late Morning | 37,7 | 65  | 6,2   | 6,2   | 18,85 | 561,12 | 60,63  |
| 2019/06/11 | CH2206 | Male | Three y/o | Control | Control | Feed Day | No  | 10:25 | 10:00 - 10:59 | Late Morning | 38,0 | 50  | 51,4  | 51,4  | 19,15 | 539,52 | 132,74 |
| 2019/06/11 | CH2205 | Male | Three y/o | Control | Control | Feed Day | Yes | 10:30 | 10:00 - 10:59 | Late Morning | 37,7 | 87  | 6,0   | 6,0   | 18,85 | 583,64 | 59,53  |
| 2019/06/11 | CH2206 | Male | Three y/o | Control | Control | Feed Day | Yes | 10:30 | 10:00 - 10:59 | Late Morning | 38,0 | 57  | 46,6  | 46,6  | 19,15 | 550,47 | 129,35 |
| 2019/06/11 | CH2205 | Male | Three y/o | Control | Control | Feed Day | Yes | 10:35 | 10:00 - 10:59 | Late Morning | 37,6 | 57  | 5,6   | 5,6   | 18,75 | 550,47 | 57,21  |
| 2019/06/11 | CH2206 | Male | Three y/o | Control | Control | Feed Day | Yes | 10:35 | 10:00 - 10:59 | Late Morning | 37,9 | 76  | 53,4  | 53,4  | 19,05 | 573,39 | 134,06 |
| 2019/06/11 | CH2205 | Male | Three y/o | Control | Control | Feed Day | Yes | 10:40 | 10:00 - 10:59 | Late Morning | 37,6 | 49  | 1,8   | 1,8   | 18,75 | 537,80 | 19,38  |
| 2019/06/11 | CH2206 | Male | Three y/o | Control | Control | Feed Day | Yes | 10:40 | 10:00 - 10:59 | Late Morning | 37,9 | 48  | 50,6  | 50,6  | 19,05 | 536,04 | 132,20 |
| 2019/06/11 | CH2205 | Male | Three y/o | Control | Control | Feed Day | Yes | 10:45 | 10:00 - 10:59 | Late Morning | 37,6 | 65  | 4,0   | 4,0   | 18,75 | 561,12 | 45,94  |
| 2019/06/11 | CH2206 | Male | Three y/o | Control | Control | Feed Day | Yes | 10:45 | 10:00 - 10:59 | Late Morning | 37,8 | 46  | 53,0  | 53,0  | 18,95 | 532,38 | 133,80 |
| 2019/06/11 | CH2205 | Male | Three y/o | Control | Control | Feed Day | Yes | 10:50 | 10:00 - 10:59 | Late Morning | 37,5 | 67  | 6,2   | 6,2   | 18,65 | 563,53 | 60,63  |
| 2019/06/11 | CH2206 | Male | Three y/o | Control | Control | Feed Day | Yes | 10:50 | 10:00 - 10:59 | Late Morning | 37,8 | 40  | 50,2  | 50,2  | 18,95 | 520,09 | 131,92 |
| 2019/06/11 | CH2205 | Male | Three y/o | Control | Control | Feed Day | Yes | 10:55 | 10:00 - 10:59 | Late Morning | 37,5 | 59  | 5,8   | 5,8   | 18,65 | 553,30 | 58,39  |
| 2019/06/11 | CH2206 | Male | Three y/o | Control | Control | Feed Day | Yes | 10:55 | 10:00 - 10:59 | Late Morning | 37,7 | 73  | 49,6  | 49,6  | 18,85 | 570,27 | 131,51 |
| 2019/06/11 | CH2205 | Male | Three y/o | Control | Control | Feed Day | Yes | 11:00 | 11:00 - 11:59 | Late Morning | 37,5 | 66  | 21,0  | 21,0  | 18,65 | 562,34 | 101,98 |
| 2019/06/11 | CH2206 | Male | Three y/o | Control | Control | Feed Day | Yes | 11:00 | 11:00 - 11:59 | Late Morning | 37,7 | 40  | 49,4  | 49,4  | 18,85 | 520,09 | 131,37 |
| 2019/06/11 | CH2205 | Male | Three y/o | Control | Control | Feed Day | Yes | 11:05 | 11:00 - 11:59 | Late Morning | 37,4 | 65  | 20,0  | 20,0  | 18,55 | 561,12 | 100,31 |
| 2019/06/11 | CH2206 | Male | Three y/o | Control | Control | Feed Day | Yes | 11:05 | 11:00 - 11:59 | Late Morning | 37,5 | 82  | 48,8  | 48,8  | 18,65 | 579,19 | 130,95 |
| 2019/06/11 | CH2205 | Male | Three y/o | Control | Control | Feed Day | Yes | 11:10 | 11:00 - 11:59 | Late Morning | 37,4 | 66  | 24,0  | 24,0  | 18,55 | 562,34 | 106,55 |
| 2019/06/11 | CH2206 | Male | Three y/o | Control | Control | Feed Day | Yes | 11:10 | 11:00 - 11:59 | Late Morning | 37,5 | 48  | 47,0  | 47,0  | 18,65 | 536,04 | 129,65 |
| 2019/06/11 | CH2205 | Male | Three y/o | Control | Control | Feed Day | Yes | 11:15 | 11:00 - 11:59 | Late Morning | 37,4 | 52  | 19,0  | 19,0  | 18,55 | 542,83 | 98,56  |
| 2019/06/11 | CH2206 | Male | Three y/o | Control | Control | Feed Day | Yes | 11:15 | 11:00 - 11:59 | Late Morning | 37,5 | 64  | 80,4  | 80,4  | 18,65 | 559,88 | 148,25 |
| 2019/06/11 | CH2205 | Male | Three y/o | Control | Control | Feed Day | Yes | 11:20 | 11:00 - 11:59 | Late Morning | 37,3 | 84  | 28,8  | 28,8  | 18,46 | 581,01 | 112,79 |
| 2019/06/11 | CH2206 | Male | Three y/o | Control | Control | Feed Day | Yes | 11:20 | 11:00 - 11:59 | Late Morning | 37,4 | 93  | 40,8  | 40,8  | 18,55 | 588,58 | 124,77 |
| 2019/06/11 | CH2205 | Male | Three y/o | Control | Control | Feed Day | Yes | 11:25 | 11:00 - 11:59 | Late Morning | 37,2 | 103 | 18,8  | 18,8  | 18,36 | 596,00 | 98,20  |
| 2019/06/11 | CH2206 | Male | Three y/o | Control | Control | Feed Day | Yes | 11:25 | 11:00 - 11:59 | Late Morning | 37,3 | 99  | 47,2  | 47,2  | 18,46 | 593,14 | 129,80 |
| 2019/06/11 | CH2205 | Male | Three y/o | Control | Control | Feed Day | No  | 11:30 | 11:00 - 11:59 | Late Morning | 37,1 |     | 18,0  | 18,0  | 18,26 |        | 96,72  |
| 2019/06/11 | CH2206 | Male | Three y/o | Control | Control | Feed Day | No  | 11:30 | 11:00 - 11:59 | Late Morning | 37,3 | 112 | 37,6  | 37,6  | 18,46 | 601,96 | 121,96 |
| 2019/06/11 | CH2205 | Male | Three y/o | Control | Control | Feed Day | No  | 11:35 | 11:00 - 11:59 | Late Morning | 37,2 |     | 72,4  | 72,4  | 18,36 |        | 144,61 |
| 2019/06/11 | CH2206 | Male | Three y/o | Control | Control | Feed Day | No  | 11:35 | 11:00 - 11:59 | Late Morning | 37,3 | 134 | 37,8  | 37,8  | 18,46 | 614,33 | 122,14 |
| 2019/06/11 | CH2205 | Male | Three y/o | Control | Control | Feed Day | No  | 11:40 | 11:00 - 11:59 | Late Morning | 37,3 | 91  | 10,4  | 10,4  | 18,46 | 586,98 | 78,08  |



|            |        |      |           |         |         |          |    |       |               |              |      |     |      |      |       |        |        |
|------------|--------|------|-----------|---------|---------|----------|----|-------|---------------|--------------|------|-----|------|------|-------|--------|--------|
| 2019/06/11 | CH2206 | Male | Three y/o | Control | Control | Feed Day | No | 11:40 | 11:00 - 11:59 | Late Morning | 37,3 | 56  | 27,8 | 27,8 | 18,46 | 549,01 | 111,58 |
| 2019/06/11 | CH2205 | Male | Three y/o | Control | Control | Feed Day | No | 11:45 | 11:00 - 11:59 | Late Morning | 37,2 | 72  | 12,6 | 12,6 | 18,36 | 569,20 | 84,59  |
| 2019/06/11 | CH2206 | Male | Three y/o | Control | Control | Feed Day | No | 11:45 | 11:00 - 11:59 | Late Morning | 37,2 | 87  | 46,2 | 46,2 | 18,36 | 583,64 | 129,06 |
| 2019/06/11 | CH2205 | Male | Three y/o | Control | Control | Feed Day | No | 11:50 | 11:00 - 11:59 | Late Morning | 37,2 | 197 | 13,2 | 13,2 | 18,36 | 639,25 | 86,17  |
| 2019/06/11 | CH2206 | Male | Three y/o | Control | Control | Feed Day | No | 11:50 | 11:00 - 11:59 | Late Morning | 37,2 | 60  | 57,0 | 57,0 | 18,36 | 554,67 | 136,32 |
| 2019/06/11 | CH2205 | Male | Three y/o | Control | Control | Feed Day | No | 11:55 | 11:00 - 11:59 | Late Morning | 37,3 | 152 | 25,0 | 25,0 | 18,46 | 622,73 | 107,94 |
| 2019/06/11 | CH2206 | Male | Three y/o | Control | Control | Feed Day | No | 11:55 | 11:00 - 11:59 | Late Morning | 37,3 | 109 | 49,6 | 49,6 | 18,46 | 600,04 | 131,51 |
| 2019/06/11 | CH2205 | Male | Three y/o | Control | Control | Feed Day | No | 12:00 | 12:00 - 12:59 | Afternoon    | 37,3 |     | 27,2 | 27,2 | 18,46 |        | 110,83 |
| 2019/06/11 | CH2206 | Male | Three y/o | Control | Control | Feed Day | No | 12:00 | 12:00 - 12:59 | Afternoon    | 37,3 | 80  | 45,2 | 45,2 | 18,46 | 577,31 | 128,30 |
| 2019/06/11 | CH2205 | Male | Three y/o | Control | Control | Feed Day | No | 12:05 | 12:00 - 12:59 | Afternoon    | 37,3 | 191 | 27,6 | 27,6 | 18,46 | 637,33 | 111,33 |
| 2019/06/11 | CH2206 | Male | Three y/o | Control | Control | Feed Day | No | 12:05 | 12:00 - 12:59 | Afternoon    | 37,4 | 78  | 49,4 | 49,4 | 18,55 | 575,38 | 131,37 |
| 2019/06/11 | CH2205 | Male | Three y/o | Control | Control | Feed Day | No | 12:10 | 12:00 - 12:59 | Afternoon    | 37,2 |     | 18,4 | 18,4 | 18,36 |        | 97,47  |
| 2019/06/11 | CH2206 | Male | Three y/o | Control | Control | Feed Day | No | 12:10 | 12:00 - 12:59 | Afternoon    | 37,4 |     | 44,4 | 44,4 | 18,55 |        | 127,69 |
| 2019/06/11 | CH2205 | Male | Three y/o | Control | Control | Feed Day | No | 12:15 | 12:00 - 12:59 | Afternoon    | 37,3 | 64  | 12,8 | 12,8 | 18,46 | 559,88 | 85,12  |
| 2019/06/11 | CH2206 | Male | Three y/o | Control | Control | Feed Day | No | 12:15 | 12:00 - 12:59 | Afternoon    | 37,5 | 79  | 53,6 | 53,6 | 18,65 | 576,36 | 134,19 |
| 2019/06/11 | CH2205 | Male | Three y/o | Control | Control | Feed Day | No | 12:20 | 12:00 - 12:59 | Afternoon    | 37,3 |     | 38,4 | 38,4 | 18,46 |        | 122,68 |
| 2019/06/11 | CH2206 | Male | Three y/o | Control | Control | Feed Day | No | 12:20 | 12:00 - 12:59 | Afternoon    | 37,5 | 79  | 40,4 | 40,4 | 18,65 | 576,36 | 124,43 |
| 2019/06/11 | CH2205 | Male | Three y/o | Control | Control | Feed Day | No | 12:25 | 12:00 - 12:59 | Afternoon    | 37,4 |     | 24,8 | 24,8 | 18,55 |        | 107,67 |
| 2019/06/11 | CH2206 | Male | Three y/o | Control | Control | Feed Day | No | 12:25 | 12:00 - 12:59 | Afternoon    | 37,7 | 74  | 47,8 | 47,8 | 18,85 | 571,33 | 130,23 |
| 2019/06/11 | CH2205 | Male | Three y/o | Control | Control | Feed Day | No | 12:30 | 12:00 - 12:59 | Afternoon    | 37,4 | 87  | 21,6 | 21,6 | 18,55 | 583,64 | 102,94 |
| 2019/06/11 | CH2206 | Male | Three y/o | Control | Control | Feed Day | No | 12:30 | 12:00 - 12:59 | Afternoon    | 37,7 | 84  | 51,8 | 51,8 | 18,85 | 581,01 | 133,01 |
| 2019/06/11 | CH2205 | Male | Three y/o | Control | Control | Feed Day | No | 12:35 | 12:00 - 12:59 | Afternoon    | 37,4 | 72  | 23,0 | 23,0 | 18,55 | 569,20 | 105,09 |
| 2019/06/11 | CH2206 | Male | Three y/o | Control | Control | Feed Day | No | 12:35 | 12:00 - 12:59 | Afternoon    | 37,8 | 85  | 48,6 | 48,6 | 18,95 | 581,90 | 130,81 |
| 2019/06/11 | CH2205 | Male | Three y/o | Control | Control | Feed Day | No | 12:40 | 12:00 - 12:59 | Afternoon    | 37,4 |     | 21,6 | 21,6 | 18,55 |        | 102,94 |
| 2019/06/11 | CH2206 | Male | Three y/o | Control | Control | Feed Day | No | 12:40 | 12:00 - 12:59 | Afternoon    | 37,8 | 81  | 51,6 | 51,6 | 18,95 | 578,26 | 132,87 |
| 2019/06/11 | CH2205 | Male | Three y/o | Control | Control | Feed Day | No | 12:45 | 12:00 - 12:59 | Afternoon    | 37,5 | 88  | 22,4 | 22,4 | 18,65 | 584,49 | 104,19 |
| 2019/06/11 | CH2206 | Male | Three y/o | Control | Control | Feed Day | No | 12:45 | 12:00 - 12:59 | Afternoon    | 37,8 | 95  | 51,8 | 51,8 | 18,95 | 590,14 | 133,01 |
| 2019/06/11 | CH2205 | Male | Three y/o | Control | Control | Feed Day | No | 12:50 | 12:00 - 12:59 | Afternoon    | 37,5 | 90  | 13,8 | 13,8 | 18,65 | 586,16 | 87,68  |
| 2019/06/11 | CH2206 | Male | Three y/o | Control | Control | Feed Day | No | 12:50 | 12:00 - 12:59 | Afternoon    | 37,9 |     | 50,2 | 50,2 | 19,05 |        | 131,92 |
| 2019/06/11 | CH2205 | Male | Three y/o | Control | Control | Feed Day | No | 12:55 | 12:00 - 12:59 | Afternoon    | 37,5 | 70  | 10,2 | 10,2 | 18,65 | 566,99 | 77,43  |
| 2019/06/11 | CH2206 | Male | Three y/o | Control | Control | Feed Day | No | 12:55 | 12:00 - 12:59 | Afternoon    | 37,9 | 83  | 51,4 | 51,4 | 19,05 | 580,11 | 132,74 |
| 2019/06/11 | CH2205 | Male | Three y/o | Control | Control | Feed Day | No | 13:00 | 13:00 - 13:59 | Afternoon    | 37,5 | 54  | 10,2 | 10,2 | 18,65 | 545,99 | 77,43  |
| 2019/06/11 | CH2206 | Male | Three y/o | Control | Control | Feed Day | No | 13:00 | 13:00 - 13:59 | Afternoon    | 37,9 | 71  | 50,2 | 50,2 | 19,05 | 568,10 | 131,92 |
| 2019/06/11 | CH2205 | Male | Three y/o | Control | Control | Feed Day | No | 13:05 | 13:00 - 13:59 | Afternoon    | 37,5 | 75  | 14,0 | 14,0 | 18,65 | 572,36 | 88,17  |
| 2019/06/11 | CH2206 | Male | Three y/o | Control | Control | Feed Day | No | 13:05 | 13:00 - 13:59 | Afternoon    | 37,9 | 82  | 49,2 | 49,2 | 19,05 | 579,19 | 131,23 |
| 2019/06/11 | CH2205 | Male | Three y/o | Control | Control | Feed Day | No | 13:10 | 13:00 - 13:59 | Afternoon    | 37,5 | 77  | 16,8 | 16,8 | 18,65 | 574,39 | 94,37  |
| 2019/06/11 | CH2206 | Male | Three y/o | Control | Control | Feed Day | No | 13:10 | 13:00 - 13:59 | Afternoon    | 37,9 | 75  | 54,2 | 54,2 | 19,05 | 572,36 | 134,57 |
| 2019/06/11 | CH2205 | Male | Three y/o | Control | Control | Feed Day | No | 13:15 | 13:00 - 13:59 | Afternoon    | 37,6 | 67  | 20,4 | 20,4 | 18,75 | 563,53 | 100,99 |
| 2019/06/11 | CH2206 | Male | Three y/o | Control | Control | Feed Day | No | 13:15 | 13:00 - 13:59 | Afternoon    | 37,9 |     | 53,2 | 53,2 | 19,05 |        | 133,93 |
| 2019/06/11 | CH2205 | Male | Three y/o | Control | Control | Feed Day | No | 13:20 | 13:00 - 13:59 | Afternoon    | 37,6 | 67  | 22,4 | 22,4 | 18,75 | 563,53 | 104,19 |
| 2019/06/11 | CH2206 | Male | Three y/o | Control | Control | Feed Day | No | 13:20 | 13:00 - 13:59 | Afternoon    | 37,9 | 45  | 44,6 | 44,6 | 19,05 | 530,47 | 127,84 |
| 2019/06/11 | CH2205 | Male | Three y/o | Control | Control | Feed Day | No | 13:25 | 13:00 - 13:59 | Afternoon    | 37,6 | 88  | 16,4 | 16,4 | 18,75 | 584,49 | 93,55  |
| 2019/06/11 | CH2206 | Male | Three y/o | Control | Control | Feed Day | No | 13:25 | 13:00 - 13:59 | Afternoon    | 38,0 | 80  | 46,6 | 46,6 | 19,15 | 577,31 | 129,35 |
| 2019/06/11 | CH2205 | Male | Three y/o | Control | Control | Feed Day | No | 13:30 | 13:00 - 13:59 | Afternoon    | 37,6 | 90  | 15,6 | 15,6 | 18,75 | 586,16 | 91,85  |
| 2019/06/11 | CH2206 | Male | Three y/o | Control | Control | Feed Day | No | 13:30 | 13:00 - 13:59 | Afternoon    | 38,0 | 100 | 52,0 | 52,0 | 19,15 | 593,87 | 133,14 |
| 2019/06/11 | CH2205 | Male | Three y/o | Control | Control | Feed Day | No | 13:35 | 13:00 - 13:59 | Afternoon    | 37,7 | 72  | 13,0 | 13,0 | 18,85 | 569,20 | 85,65  |
| 2019/06/11 | CH2206 | Male | Three y/o | Control | Control | Feed Day | No | 13:35 | 13:00 - 13:59 | Afternoon    | 37,9 | 81  | 36,6 | 36,6 | 19,05 | 578,26 | 121,03 |
| 2019/06/11 | CH2205 | Male | Three y/o | Control | Control | Feed Day | No | 13:40 | 13:00 - 13:59 | Afternoon    | 37,7 | 67  | 13,8 | 13,8 | 18,85 | 563,53 | 87,68  |
| 2019/06/11 | CH2206 | Male | Three y/o | Control | Control | Feed Day | No | 13:40 | 13:00 - 13:59 | Afternoon    | 38,0 | 92  | 42,8 | 42,8 | 19,15 | 587,78 | 126,42 |
| 2019/06/11 | CH2205 | Male | Three y/o | Control | Control | Feed Day | No | 13:45 | 13:00 - 13:59 | Afternoon    | 37,7 | 71  | 17,4 | 17,4 | 18,85 | 568,10 | 95,56  |
| 2019/06/11 | CH2206 | Male | Three y/o | Control | Control | Feed Day | No | 13:45 | 13:00 - 13:59 | Afternoon    | 38,0 | 86  | 41,8 | 41,8 | 19,15 | 582,77 | 125,60 |
| 2019/06/11 | CH2205 | Male | Three y/o | Control | Control | Feed Day | No | 13:50 | 13:00 - 13:59 | Afternoon    | 37,7 | 57  | 12,0 | 12,0 | 18,85 | 550,47 | 82,93  |
| 2019/06/11 | CH2206 | Male | Three y/o | Control | Control | Feed Day | No | 13:50 | 13:00 - 13:59 | Afternoon    | 38,0 | 92  | 31,8 | 31,8 | 19,15 | 587,78 | 116,20 |
| 2019/06/11 | CH2205 | Male | Three y/o | Control | Control | Feed Day | No | 13:55 | 13:00 - 13:59 | Afternoon    | 37,7 | 92  | 18,2 | 18,2 | 18,85 | 587,78 | 97,10  |
| 2019/06/11 | CH2206 | Male | Three y/o | Control | Control | Feed Day | No | 13:55 | 13:00 - 13:59 | Afternoon    | 38,0 | 94  | 41,0 | 41,0 | 19,15 | 589,37 | 124,94 |
| 2019/06/11 | CH2205 | Male | Three y/o | Control | Control | Feed Day | No | 14:00 | 14:00 - 14:59 | Afternoon    | 37,7 | 86  | 13,8 | 13,8 | 18,85 | 582,77 | 87,68  |
| 2019/06/11 | CH2206 | Male | Three y/o | Control | Control | Feed Day | No | 14:00 | 14:00 - 14:59 | Afternoon    | 38,0 | 73  | 41,2 | 41,2 | 19,15 | 570,27 | 125,11 |
| 2019/06/11 | CH2205 | Male | Three y/o | Control | Control | Feed Day | No | 14:05 | 14:00 - 14:59 | Afternoon    | 37,9 |     | 18,0 | 18,0 | 19,05 |        | 96,72  |
| 2019/06/11 | CH2206 | Male | Three y/o | Control | Control | Feed Day | No | 14:05 | 14:00 - 14:59 | Afternoon    | 38,0 | 83  | 42,8 | 42,8 | 19,15 | 580,11 | 126,42 |
| 2019/06/11 | CH2205 | Male | Three y/o | Control | Control | Feed Day | No | 14:10 | 14:00 - 14:59 | Afternoon    | 37,9 | 68  | 16,2 | 16,2 | 19,05 | 564,71 | 93,13  |
| 2019/06/11 | CH2206 | Male | Three y/o | Control | Control | Feed Day | No | 14:10 | 14:00 - 14:59 | Afternoon    | 38,0 | 75  | 41,2 | 41,2 | 19,15 | 572,36 | 125,11 |
| 2019/06/11 | CH2205 | Male | Three y/o | Control | Control | Feed Day | No | 14:15 | 14:00 - 14:59 | Afternoon    | 37,8 | 68  | 10,6 | 10,6 | 18,95 | 564,71 | 78,73  |
| 2019/06/11 | CH2206 | Male | Three y/o | Control | Control | Feed Day | No | 14:15 | 14:00 - 14:59 | Afternoon    | 38,0 | 77  | 39,8 | 39,8 | 19,15 | 574,39 | 123,91 |
| 2019/06/11 | CH2205 | Male | Three y/o | Control | Control | Feed Day | No | 14:20 | 14:00 - 14:59 | Afternoon    | 37,7 | 188 | 19,6 | 19,6 | 18,85 | 636,34 | 99,63  |
| 2019/06/11 | CH2206 | Male | Three y/o | Control | Control | Feed Day | No | 14:20 | 14:00 - 14:59 | Afternoon    | 38,0 | 90  | 38,2 | 38,2 | 19,15 | 586,16 | 122,50 |
| 2019/06/11 | CH2205 | Male | Three y/o | Control | Control | Feed Day | No | 14:25 | 14:00 - 14:59 | Afternoon    | 37,7 | 86  | 14,4 | 14,4 | 18,85 | 582,77 | 89,12  |
| 2019/06/11 | CH2206 | Male | Three y/o | Control | Control | Feed Day | No | 14:25 | 14:00 - 14:59 | Afternoon    | 38,0 | 83  | 34,8 | 34,8 | 19,15 | 580,11 | 119,29 |
| 2019/06/11 | CH2205 | Male | Three y/o | Control | Control | Feed Day | No | 14:30 | 14:00 - 14:59 | Afternoon    | 37,7 | 72  | 25,8 | 25,8 | 18,85 | 569,20 | 109,02 |
| 2019/06/11 | CH2206 | Male | Three y/o | Control | Control | Feed Day | No | 14:30 | 14:00 - 14:59 | Afternoon    | 38,0 | 75  | 35,6 | 35,6 | 19,15 | 572,36 | 120,08 |
| 2019/06/11 | CH2205 | Male | Three y/o | Control | Control | Feed Day | No | 14:35 | 14:00 - 14:59 | Afternoon    | 37,7 | 102 | 27,6 | 27,6 | 18,85 | 595,30 | 111,33 |



|            |        |      |           |         |         |          |    |       |               |           |      |     |       |       |       |        |        |
|------------|--------|------|-----------|---------|---------|----------|----|-------|---------------|-----------|------|-----|-------|-------|-------|--------|--------|
| 2019/06/11 | CH2206 | Male | Three y/o | Control | Control | Feed Day | No | 14:35 | 14:00 - 14:59 | Afternoon | 38,0 | 185 | 44,8  | 44,8  | 19,15 | 635,34 | 127,99 |
| 2019/06/11 | CH2205 | Male | Three y/o | Control | Control | Feed Day | No | 14:40 | 14:00 - 14:59 | Afternoon | 37,7 | 106 | 64,2  | 64,2  | 18,85 | 598,06 | 140,44 |
| 2019/06/11 | CH2206 | Male | Three y/o | Control | Control | Feed Day | No | 14:40 | 14:00 - 14:59 | Afternoon | 38,0 | 180 | 23,2  | 23,2  | 19,15 | 633,61 | 105,39 |
| 2019/06/11 | CH2205 | Male | Three y/o | Control | Control | Feed Day | No | 14:45 | 14:00 - 14:59 | Afternoon | 37,7 | 75  | 10,2  | 10,2  | 18,85 | 572,36 | 77,43  |
| 2019/06/11 | CH2206 | Male | Three y/o | Control | Control | Feed Day | No | 14:45 | 14:00 - 14:59 | Afternoon | 38,0 | 125 | 38,8  | 38,8  | 19,15 | 609,60 | 123,04 |
| 2019/06/11 | CH2205 | Male | Three y/o | Control | Control | Feed Day | No | 14:50 | 14:00 - 14:59 | Afternoon | 37,7 | 98  | 16,8  | 16,8  | 18,85 | 592,41 | 94,37  |
| 2019/06/11 | CH2206 | Male | Three y/o | Control | Control | Feed Day | No | 14:50 | 14:00 - 14:59 | Afternoon | 37,9 | 97  | 47,8  | 47,8  | 19,05 | 591,66 | 130,23 |
| 2019/06/11 | CH2205 | Male | Three y/o | Control | Control | Feed Day | No | 14:55 | 14:00 - 14:59 | Afternoon | 37,7 | 73  | 14,6  | 14,6  | 18,85 | 570,27 | 89,59  |
| 2019/06/11 | CH2206 | Male | Three y/o | Control | Control | Feed Day | No | 14:55 | 14:00 - 14:59 | Afternoon | 37,9 |     | 38,6  | 38,6  | 19,05 |        | 122,86 |
| 2019/06/11 | CH2205 | Male | Three y/o | Control | Control | Feed Day | No | 15:00 | 15:00 - 15:59 | Afternoon | 37,7 | 78  | 18,2  | 18,2  | 18,85 | 575,38 | 97,10  |
| 2019/06/11 | CH2206 | Male | Three y/o | Control | Control | Feed Day | No | 15:00 | 15:00 - 15:59 | Afternoon | 37,9 | 47  | 40,2  | 40,2  | 19,05 | 534,23 | 124,26 |
| 2019/06/11 | CH2205 | Male | Three y/o | Control | Control | Feed Day | No | 15:05 | 15:00 - 15:59 | Afternoon | 37,7 |     | 35,6  | 35,6  | 18,85 |        | 120,08 |
| 2019/06/11 | CH2206 | Male | Three y/o | Control | Control | Feed Day | No | 15:05 | 15:00 - 15:59 | Afternoon | 37,8 | 76  | 54,2  | 54,2  | 18,95 | 573,39 | 134,57 |
| 2019/06/11 | CH2205 | Male | Three y/o | Control | Control | Feed Day | No | 15:10 | 15:00 - 15:59 | Afternoon | 37,7 | 81  | 18,2  | 18,2  | 18,85 | 578,26 | 97,10  |
| 2019/06/11 | CH2206 | Male | Three y/o | Control | Control | Feed Day | No | 15:10 | 15:00 - 15:59 | Afternoon | 37,9 | 76  | 51,8  | 51,8  | 19,05 | 573,39 | 133,01 |
| 2019/06/11 | CH2205 | Male | Three y/o | Control | Control | Feed Day | No | 15:15 | 15:00 - 15:59 | Afternoon | 37,8 | 62  | 17,0  | 17,0  | 18,95 | 557,33 | 94,77  |
| 2019/06/11 | CH2206 | Male | Three y/o | Control | Control | Feed Day | No | 15:15 | 15:00 - 15:59 | Afternoon | 37,9 | 80  | 47,4  | 47,4  | 19,05 | 577,31 | 129,94 |
| 2019/06/11 | CH2205 | Male | Three y/o | Control | Control | Feed Day | No | 15:20 | 15:00 - 15:59 | Afternoon | 37,9 | 73  | 15,4  | 15,4  | 19,05 | 570,27 | 91,41  |
| 2019/06/11 | CH2206 | Male | Three y/o | Control | Control | Feed Day | No | 15:20 | 15:00 - 15:59 | Afternoon | 37,9 | 83  | 50,2  | 50,2  | 19,05 | 580,11 | 131,92 |
| 2019/06/11 | CH2205 | Male | Three y/o | Control | Control | Feed Day | No | 15:25 | 15:00 - 15:59 | Afternoon | 37,9 | 177 | 14,4  | 14,4  | 19,05 | 632,55 | 89,12  |
| 2019/06/11 | CH2206 | Male | Three y/o | Control | Control | Feed Day | No | 15:25 | 15:00 - 15:59 | Afternoon | 37,9 | 92  | 50,2  | 50,2  | 19,05 | 587,78 | 131,92 |
| 2019/06/11 | CH2205 | Male | Three y/o | Control | Control | Feed Day | No | 15:30 | 15:00 - 15:59 | Afternoon | 37,9 | 68  | 10,6  | 10,6  | 19,05 | 564,71 | 78,73  |
| 2019/06/11 | CH2206 | Male | Three y/o | Control | Control | Feed Day | No | 15:30 | 15:00 - 15:59 | Afternoon | 38,0 | 83  | 40,6  | 40,6  | 19,15 | 580,11 | 124,60 |
| 2019/06/11 | CH2205 | Male | Three y/o | Control | Control | Feed Day | No | 15:35 | 15:00 - 15:59 | Afternoon | 37,9 | 70  | 15,8  | 15,8  | 19,05 | 566,99 | 92,28  |
| 2019/06/11 | CH2206 | Male | Three y/o | Control | Control | Feed Day | No | 15:35 | 15:00 - 15:59 | Afternoon | 38,0 | 88  | 53,2  | 53,2  | 19,15 | 584,49 | 133,93 |
| 2019/06/11 | CH2205 | Male | Three y/o | Control | Control | Feed Day | No | 15:40 | 15:00 - 15:59 | Afternoon | 37,9 | 88  | 33,2  | 33,2  | 19,05 | 584,49 | 117,68 |
| 2019/06/11 | CH2206 | Male | Three y/o | Control | Control | Feed Day | No | 15:40 | 15:00 - 15:59 | Afternoon | 38,0 | 91  | 51,6  | 51,6  | 19,15 | 586,98 | 132,87 |
| 2019/06/11 | CH2205 | Male | Three y/o | Control | Control | Feed Day | No | 15:45 | 15:00 - 15:59 | Afternoon | 37,9 | 69  | 20,4  | 20,4  | 19,05 | 565,86 | 100,99 |
| 2019/06/11 | CH2206 | Male | Three y/o | Control | Control | Feed Day | No | 15:45 | 15:00 - 15:59 | Afternoon | 38,0 | 81  | 55,0  | 55,0  | 19,15 | 578,26 | 135,08 |
| 2019/06/11 | CH2205 | Male | Three y/o | Control | Control | Feed Day | No | 15:50 | 15:00 - 15:59 | Afternoon | 37,9 | 75  | 38,6  | 38,6  | 19,05 | 572,36 | 122,86 |
| 2019/06/11 | CH2206 | Male | Three y/o | Control | Control | Feed Day | No | 15:50 | 15:00 - 15:59 | Afternoon | 38,1 | 92  | 31,2  | 31,2  | 19,26 | 587,78 | 115,54 |
| 2019/06/11 | CH2205 | Male | Three y/o | Control | Control | Feed Day | No | 15:55 | 15:00 - 15:59 | Afternoon | 37,9 | 47  | 100,0 | 100,0 | 19,05 | 534,23 | 155,84 |
| 2019/06/11 | CH2206 | Male | Three y/o | Control | Control | Feed Day | No | 15:55 | 15:00 - 15:59 | Afternoon | 38,1 | 154 | 23,2  | 23,2  | 19,26 | 623,58 | 105,39 |
| 2019/06/11 | CH2205 | Male | Three y/o | Control | Control | Feed Day | No | 16:00 | 16:00 - 16:59 | Evening   | 37,9 | 69  | 22,2  | 22,2  | 19,05 | 565,86 | 103,88 |
| 2019/06/11 | CH2206 | Male | Three y/o | Control | Control | Feed Day | No | 16:00 | 16:00 - 16:59 | Evening   | 38,1 | 80  | 42,8  | 42,8  | 19,26 | 577,31 | 126,42 |
| 2019/06/11 | CH2205 | Male | Three y/o | Control | Control | Feed Day | No | 16:05 | 16:00 - 16:59 | Evening   | 37,9 | 69  | 24,2  | 24,2  | 19,05 | 565,86 | 106,83 |
| 2019/06/11 | CH2206 | Male | Three y/o | Control | Control | Feed Day | No | 16:05 | 16:00 - 16:59 | Evening   | 38,0 | 92  | 56,4  | 56,4  | 19,15 | 587,78 | 135,95 |
| 2019/06/11 | CH2205 | Male | Three y/o | Control | Control | Feed Day | No | 16:10 | 16:00 - 16:59 | Evening   | 37,9 | 78  | 20,2  | 20,2  | 19,05 | 575,38 | 100,65 |
| 2019/06/11 | CH2206 | Male | Three y/o | Control | Control | Feed Day | No | 16:10 | 16:00 - 16:59 | Evening   | 38,0 | 101 | 52,6  | 52,6  | 19,15 | 594,59 | 133,54 |
| 2019/06/11 | CH2205 | Male | Three y/o | Control | Control | Feed Day | No | 16:15 | 16:00 - 16:59 | Evening   | 38,0 | 59  | 17,4  | 17,4  | 19,15 | 553,30 | 95,56  |
| 2019/06/11 | CH2206 | Male | Three y/o | Control | Control | Feed Day | No | 16:15 | 16:00 - 16:59 | Evening   | 38,0 | 75  | 60,4  | 60,4  | 19,15 | 572,36 | 138,32 |
| 2019/06/11 | CH2205 | Male | Three y/o | Control | Control | Feed Day | No | 16:20 | 16:00 - 16:59 | Evening   | 38,0 | 80  | 16,2  | 16,2  | 19,15 | 577,31 | 93,13  |
| 2019/06/11 | CH2206 | Male | Three y/o | Control | Control | Feed Day | No | 16:20 | 16:00 - 16:59 | Evening   | 38,0 | 43  | 60,2  | 60,2  | 19,15 | 526,50 | 138,21 |
| 2019/06/11 | CH2205 | Male | Three y/o | Control | Control | Feed Day | No | 16:25 | 16:00 - 16:59 | Evening   | 38,0 | 86  | 20,8  | 20,8  | 19,15 | 582,77 | 101,65 |
| 2019/06/11 | CH2206 | Male | Three y/o | Control | Control | Feed Day | No | 16:25 | 16:00 - 16:59 | Evening   | 38,0 | 92  | 57,0  | 57,0  | 19,15 | 587,78 | 136,32 |
| 2019/06/11 | CH2205 | Male | Three y/o | Control | Control | Feed Day | No | 16:30 | 16:00 - 16:59 | Evening   | 38,0 | 88  | 18,4  | 18,4  | 19,15 | 584,49 | 97,47  |
| 2019/06/11 | CH2206 | Male | Three y/o | Control | Control | Feed Day | No | 16:30 | 16:00 - 16:59 | Evening   | 38,0 | 88  | 56,8  | 56,8  | 19,15 | 584,49 | 136,20 |
| 2019/06/11 | CH2205 | Male | Three y/o | Control | Control | Feed Day | No | 16:35 | 16:00 - 16:59 | Evening   | 38,0 | 64  | 17,0  | 17,0  | 19,15 | 559,88 | 94,77  |
| 2019/06/11 | CH2206 | Male | Three y/o | Control | Control | Feed Day | No | 16:35 | 16:00 - 16:59 | Evening   | 38,0 | 74  | 54,0  | 54,0  | 19,15 | 571,33 | 134,45 |
| 2019/06/11 | CH2205 | Male | Three y/o | Control | Control | Feed Day | No | 16:40 | 16:00 - 16:59 | Evening   | 38,0 | 67  | 25,2  | 25,2  | 19,15 | 563,53 | 108,22 |
| 2019/06/11 | CH2206 | Male | Three y/o | Control | Control | Feed Day | No | 16:40 | 16:00 - 16:59 | Evening   | 38,0 | 52  | 51,4  | 51,4  | 19,15 | 542,83 | 132,74 |
| 2019/06/11 | CH2205 | Male | Three y/o | Control | Control | Feed Day | No | 16:45 | 16:00 - 16:59 | Evening   | 38,0 |     | 14,4  | 14,4  | 19,15 |        | 89,12  |
| 2019/06/11 | CH2206 | Male | Three y/o | Control | Control | Feed Day | No | 16:45 | 16:00 - 16:59 | Evening   | 38,0 | 68  | 54,4  | 54,4  | 19,15 | 564,71 | 134,70 |
| 2019/06/11 | CH2205 | Male | Three y/o | Control | Control | Feed Day | No | 16:50 | 16:00 - 16:59 | Evening   | 38,0 | 72  | 17,6  | 17,6  | 19,15 | 569,20 | 95,95  |
| 2019/06/11 | CH2206 | Male | Three y/o | Control | Control | Feed Day | No | 16:50 | 16:00 - 16:59 | Evening   | 38,0 | 98  | 27,4  | 27,4  | 19,15 | 592,41 | 111,09 |
| 2019/06/11 | CH2205 | Male | Three y/o | Control | Control | Feed Day | No | 16:55 | 16:00 - 16:59 | Evening   | 38,0 | 65  | 17,4  | 17,4  | 19,15 | 561,12 | 95,56  |
| 2019/06/11 | CH2206 | Male | Three y/o | Control | Control | Feed Day | No | 16:55 | 16:00 - 16:59 | Evening   | 38,0 | 99  | 16,4  | 16,4  | 19,15 | 593,14 | 93,55  |
| 2019/06/11 | CH2205 | Male | Three y/o | Control | Control | Feed Day | No | 17:00 | 17:00 - 17:59 | Evening   | 38,0 | 80  | 11,4  | 11,4  | 19,15 | 577,31 | 81,19  |
| 2019/06/11 | CH2206 | Male | Three y/o | Control | Control | Feed Day | No | 17:00 | 17:00 - 17:59 | Evening   | 37,9 |     | 20,2  | 20,2  | 19,05 |        | 100,65 |
| 2019/06/11 | CH2205 | Male | Three y/o | Control | Control | Feed Day | No | 17:05 | 17:00 - 17:59 | Evening   | 38,0 | 90  | 10,2  | 10,2  | 19,15 | 586,16 | 77,43  |
| 2019/06/11 | CH2206 | Male | Three y/o | Control | Control | Feed Day | No | 17:05 | 17:00 - 17:59 | Evening   | 37,9 | 111 | 40,4  | 40,4  | 19,05 | 601,33 | 124,43 |
| 2019/06/11 | CH2205 | Male | Three y/o | Control | Control | Feed Day | No | 17:10 | 17:00 - 17:59 | Evening   | 38,0 | 68  | 11,8  | 11,8  | 19,15 | 564,71 | 82,36  |
| 2019/06/11 | CH2206 | Male | Three y/o | Control | Control | Feed Day | No | 17:10 | 17:00 - 17:59 | Evening   | 37,9 |     | 47,4  | 47,4  | 19,05 |        | 129,94 |
| 2019/06/11 | CH2205 | Male | Three y/o | Control | Control | Feed Day | No | 17:15 | 17:00 - 17:59 | Evening   | 38,0 |     | 25,4  | 25,4  | 19,15 |        | 108,49 |
| 2019/06/11 | CH2206 | Male | Three y/o | Control | Control | Feed Day | No | 17:15 | 17:00 - 17:59 | Evening   | 37,9 |     | 42,8  | 42,8  | 19,05 |        | 126,42 |
| 2019/06/11 | CH2205 | Male | Three y/o | Control | Control | Feed Day | No | 17:20 | 17:00 - 17:59 | Evening   | 38,0 | 107 | 39,0  | 39,0  | 19,15 | 598,73 | 123,22 |
| 2019/06/11 | CH2206 | Male | Three y/o | Control | Control | Feed Day | No | 17:20 | 17:00 - 17:59 | Evening   | 37,9 | 162 | 168,4 | 168,4 | 19,05 | 626,88 | 174,08 |
| 2019/06/11 | CH2205 | Male | Three y/o | Control | Control | Feed Day | No | 17:25 | 17:00 - 17:59 | Evening   | 37,9 | 109 | 331,0 | 331,0 | 19,05 | 600,04 | 197,90 |
| 2019/06/11 | CH2206 | Male | Three y/o | Control | Control | Feed Day | No | 17:25 | 17:00 - 17:59 | Evening   | 37,9 | 114 | 41,4  | 41,4  | 19,05 | 603,20 | 125,27 |
| 2019/06/11 | CH2205 | Male | Three y/o | Control | Control | Feed Day | No | 17:30 | 17:00 - 17:59 | Evening   | 37,9 | 110 | 72,0  | 72,0  | 19,05 | 600,69 | 144,42 |



|            |        |      |           |         |         |          |    |       |               |         |      |     |       |       |       |        |        |
|------------|--------|------|-----------|---------|---------|----------|----|-------|---------------|---------|------|-----|-------|-------|-------|--------|--------|
| 2019/06/11 | CH2206 | Male | Three y/o | Control | Control | Feed Day | No | 17:30 | 17:00 - 17:59 | Evening | 37,9 | 123 | 385,0 | 385,0 | 19,05 | 608,49 | 203,26 |
| 2019/06/11 | CH2205 | Male | Three y/o | Control | Control | Feed Day | No | 17:35 | 17:00 - 17:59 | Evening | 38,0 | 113 | 181,0 | 181,0 | 19,15 | 602,58 | 176,61 |
| 2019/06/11 | CH2206 | Male | Three y/o | Control | Control | Feed Day | No | 17:35 | 17:00 - 17:59 | Evening | 37,9 | 109 | 25,2  | 25,2  | 19,05 | 600,04 | 108,22 |
| 2019/06/11 | CH2205 | Male | Three y/o | Control | Control | Feed Day | No | 17:40 | 17:00 - 17:59 | Evening | 37,9 | 77  | 24,6  | 24,6  | 19,05 | 574,39 | 107,39 |
| 2019/06/11 | CH2206 | Male | Three y/o | Control | Control | Feed Day | No | 17:40 | 17:00 - 17:59 | Evening | 37,9 | 88  | 27,6  | 27,6  | 19,05 | 584,49 | 111,33 |
| 2019/06/11 | CH2205 | Male | Three y/o | Control | Control | Feed Day | No | 17:45 | 17:00 - 17:59 | Evening | 37,9 | 44  | 9,2   | 9,2   | 19,05 | 528,51 | 73,94  |
| 2019/06/11 | CH2206 | Male | Three y/o | Control | Control | Feed Day | No | 17:45 | 17:00 - 17:59 | Evening | 37,9 | 77  | 6,4   | 6,4   | 19,05 | 574,39 | 61,70  |
| 2019/06/11 | CH2205 | Male | Three y/o | Control | Control | Feed Day | No | 17:50 | 17:00 - 17:59 | Evening | 37,9 | 84  | 3,6   | 3,6   | 19,05 | 581,01 | 42,42  |
| 2019/06/11 | CH2206 | Male | Three y/o | Control | Control | Feed Day | No | 17:50 | 17:00 - 17:59 | Evening | 37,9 | 76  | 7,2   | 7,2   | 19,05 | 573,39 | 65,66  |
| 2019/06/11 | CH2205 | Male | Three y/o | Control | Control | Feed Day | No | 17:55 | 17:00 - 17:59 | Evening | 37,9 | 52  | 5,8   | 5,8   | 19,05 | 542,83 | 58,39  |
| 2019/06/11 | CH2206 | Male | Three y/o | Control | Control | Feed Day | No | 17:55 | 17:00 - 17:59 | Evening | 37,9 | 75  | 29,8  | 29,8  | 19,05 | 572,36 | 113,97 |
| 2019/06/11 | CH2205 | Male | Three y/o | Control | Control | Feed Day | No | 18:00 | 18:00 - 18:59 | Evening | 37,9 | 73  | 4,2   | 4,2   | 19,05 | 570,27 | 47,57  |
| 2019/06/11 | CH2206 | Male | Three y/o | Control | Control | Feed Day | No | 18:00 | 18:00 - 18:59 | Evening | 37,8 | 64  | 29,0  | 29,0  | 18,95 | 559,88 | 113,03 |
| 2019/06/11 | CH2205 | Male | Three y/o | Control | Control | Feed Day | No | 18:05 | 18:00 - 18:59 | Evening | 37,9 |     | 7,8   | 7,8   | 19,05 |        | 68,36  |
| 2019/06/11 | CH2206 | Male | Three y/o | Control | Control | Feed Day | No | 18:05 | 18:00 - 18:59 | Evening | 37,8 | 84  | 29,2  | 29,2  | 18,95 | 581,01 | 113,27 |
| 2019/06/11 | CH2205 | Male | Three y/o | Control | Control | Feed Day | No | 18:10 | 18:00 - 18:59 | Evening | 37,9 |     | 8,6   | 8,6   | 19,05 |        | 71,66  |
| 2019/06/11 | CH2206 | Male | Three y/o | Control | Control | Feed Day | No | 18:10 | 18:00 - 18:59 | Evening | 37,8 | 82  | 52,6  | 52,6  | 18,95 | 579,19 | 133,54 |
| 2019/06/11 | CH2205 | Male | Three y/o | Control | Control | Feed Day | No | 18:15 | 18:00 - 18:59 | Evening | 37,9 | 126 | 12,0  | 12,0  | 19,05 | 610,14 | 82,93  |
| 2019/06/11 | CH2206 | Male | Three y/o | Control | Control | Feed Day | No | 18:15 | 18:00 - 18:59 | Evening | 37,9 | 78  | 36,0  | 36,0  | 19,05 | 575,38 | 120,46 |
| 2019/06/11 | CH2205 | Male | Three y/o | Control | Control | Feed Day | No | 18:20 | 18:00 - 18:59 | Evening | 37,9 |     | 19,2  | 19,2  | 19,05 |        | 98,92  |
| 2019/06/11 | CH2206 | Male | Three y/o | Control | Control | Feed Day | No | 18:20 | 18:00 - 18:59 | Evening | 37,9 | 53  | 28,0  | 28,0  | 19,05 | 544,43 | 111,83 |
| 2019/06/11 | CH2205 | Male | Three y/o | Control | Control | Feed Day | No | 18:25 | 18:00 - 18:59 | Evening | 37,7 |     | 18,2  | 18,2  | 18,85 |        | 97,10  |
| 2019/06/11 | CH2206 | Male | Three y/o | Control | Control | Feed Day | No | 18:25 | 18:00 - 18:59 | Evening | 37,9 | 74  | 32,4  | 32,4  | 19,05 | 571,33 | 116,84 |
| 2019/06/11 | CH2205 | Male | Three y/o | Control | Control | Feed Day | No | 18:30 | 18:00 - 18:59 | Evening | 37,6 |     | 13,6  | 13,6  | 18,75 |        | 87,18  |
| 2019/06/11 | CH2206 | Male | Three y/o | Control | Control | Feed Day | No | 18:30 | 18:00 - 18:59 | Evening | 37,9 | 80  | 40,2  | 40,2  | 19,05 | 577,31 | 124,26 |
| 2019/06/11 | CH2205 | Male | Three y/o | Control | Control | Feed Day | No | 18:35 | 18:00 - 18:59 | Evening | 37,5 | 60  | 13,2  | 13,2  | 18,65 | 554,67 | 86,17  |
| 2019/06/11 | CH2206 | Male | Three y/o | Control | Control | Feed Day | No | 18:35 | 18:00 - 18:59 | Evening | 37,9 | 81  | 44,4  | 44,4  | 19,05 | 578,26 | 127,69 |
| 2019/06/11 | CH2205 | Male | Three y/o | Control | Control | Feed Day | No | 18:40 | 18:00 - 18:59 | Evening | 37,6 | 56  | 15,4  | 15,4  | 18,75 | 549,01 | 91,41  |
| 2019/06/11 | CH2206 | Male | Three y/o | Control | Control | Feed Day | No | 18:40 | 18:00 - 18:59 | Evening | 37,9 | 80  | 41,2  | 41,2  | 19,05 | 577,31 | 125,11 |
| 2019/06/11 | CH2205 | Male | Three y/o | Control | Control | Feed Day | No | 18:45 | 18:00 - 18:59 | Evening | 37,6 | 79  | 14,0  | 14,0  | 18,75 | 576,36 | 88,17  |
| 2019/06/11 | CH2206 | Male | Three y/o | Control | Control | Feed Day | No | 18:45 | 18:00 - 18:59 | Evening | 37,9 | 76  | 41,8  | 41,8  | 19,05 | 573,39 | 125,60 |
| 2019/06/11 | CH2205 | Male | Three y/o | Control | Control | Feed Day | No | 18:50 | 18:00 - 18:59 | Evening | 37,7 | 53  | 16,8  | 16,8  | 18,85 | 544,43 | 94,37  |
| 2019/06/11 | CH2206 | Male | Three y/o | Control | Control | Feed Day | No | 18:50 | 18:00 - 18:59 | Evening | 37,9 | 80  | 38,2  | 38,2  | 19,05 | 577,31 | 122,50 |
| 2019/06/11 | CH2205 | Male | Three y/o | Control | Control | Feed Day | No | 18:55 | 18:00 - 18:59 | Evening | 37,7 | 90  | 17,4  | 17,4  | 18,85 | 586,16 | 95,56  |
| 2019/06/11 | CH2206 | Male | Three y/o | Control | Control | Feed Day | No | 18:55 | 18:00 - 18:59 | Evening | 38,0 | 80  | 53,4  | 53,4  | 19,15 | 577,31 | 134,06 |
| 2019/06/11 | CH2205 | Male | Three y/o | Control | Control | Feed Day | No | 19:00 | 19:00 - 19:59 | Evening | 37,7 | 64  | 15,6  | 15,6  | 18,85 | 559,88 | 91,85  |
| 2019/06/11 | CH2206 | Male | Three y/o | Control | Control | Feed Day | No | 19:00 | 19:00 - 19:59 | Evening | 38,0 | 77  | 44,6  | 44,6  | 19,15 | 574,39 | 127,84 |
| 2019/06/11 | CH2205 | Male | Three y/o | Control | Control | Feed Day | No | 19:05 | 19:00 - 19:59 | Evening | 37,7 | 57  | 16,6  | 16,6  | 18,85 | 550,47 | 93,96  |
| 2019/06/11 | CH2206 | Male | Three y/o | Control | Control | Feed Day | No | 19:05 | 19:00 - 19:59 | Evening | 38,0 | 70  | 43,0  | 43,0  | 19,15 | 566,99 | 126,58 |
| 2019/06/11 | CH2205 | Male | Three y/o | Control | Control | Feed Day | No | 19:10 | 19:00 - 19:59 | Evening | 37,9 | 83  | 36,6  | 36,6  | 19,05 | 580,11 | 121,03 |
| 2019/06/11 | CH2206 | Male | Three y/o | Control | Control | Feed Day | No | 19:10 | 19:00 - 19:59 | Evening | 38,0 | 84  | 44,2  | 44,2  | 19,15 | 581,01 | 127,53 |
| 2019/06/11 | CH2205 | Male | Three y/o | Control | Control | Feed Day | No | 19:15 | 19:00 - 19:59 | Evening | 37,9 | 93  | 10,0  | 10,0  | 19,05 | 588,58 | 76,76  |
| 2019/06/11 | CH2206 | Male | Three y/o | Control | Control | Feed Day | No | 19:15 | 19:00 - 19:59 | Evening | 38,0 | 73  | 17,8  | 17,8  | 19,15 | 570,27 | 96,34  |
| 2019/06/11 | CH2205 | Male | Three y/o | Control | Control | Feed Day | No | 19:20 | 19:00 - 19:59 | Evening | 37,9 | 75  | 8,0   | 8,0   | 19,05 | 572,36 | 69,22  |
| 2019/06/11 | CH2206 | Male | Three y/o | Control | Control | Feed Day | No | 19:20 | 19:00 - 19:59 | Evening | 37,9 | 72  | 16,2  | 16,2  | 19,05 | 569,20 | 93,13  |
| 2019/06/11 | CH2205 | Male | Three y/o | Control | Control | Feed Day | No | 19:25 | 19:00 - 19:59 | Evening | 37,9 | 49  | 13,8  | 13,8  | 19,05 | 537,80 | 87,68  |
| 2019/06/11 | CH2206 | Male | Three y/o | Control | Control | Feed Day | No | 19:25 | 19:00 - 19:59 | Evening | 37,9 | 80  | 13,2  | 13,2  | 19,05 | 577,31 | 86,17  |
| 2019/06/11 | CH2205 | Male | Three y/o | Control | Control | Feed Day | No | 19:30 | 19:00 - 19:59 | Evening | 38,0 | 60  | 5,4   | 5,4   | 19,15 | 554,67 | 55,99  |
| 2019/06/11 | CH2206 | Male | Three y/o | Control | Control | Feed Day | No | 19:30 | 19:00 - 19:59 | Evening | 37,9 | 148 | 22,4  | 22,4  | 19,05 | 620,97 | 104,19 |
| 2019/06/11 | CH2205 | Male | Three y/o | Control | Control | Feed Day | No | 19:35 | 19:00 - 19:59 | Evening | 37,9 | 60  | 5,8   | 5,8   | 19,05 | 554,67 | 58,39  |
| 2019/06/11 | CH2206 | Male | Three y/o | Control | Control | Feed Day | No | 19:35 | 19:00 - 19:59 | Evening | 38,0 | 95  | 24,4  | 24,4  | 19,15 | 590,14 | 107,11 |
| 2019/06/11 | CH2205 | Male | Three y/o | Control | Control | Feed Day | No | 19:40 | 19:00 - 19:59 | Evening | 37,9 | 59  | 6,4   | 6,4   | 19,05 | 553,30 | 61,70  |
| 2019/06/11 | CH2206 | Male | Three y/o | Control | Control | Feed Day | No | 19:40 | 19:00 - 19:59 | Evening | 37,9 | 79  | 22,6  | 22,6  | 19,05 | 576,36 | 104,49 |
| 2019/06/11 | CH2205 | Male | Three y/o | Control | Control | Feed Day | No | 19:45 | 19:00 - 19:59 | Evening | 38,0 |     | 5,0   | 5,0   | 19,15 |        | 53,41  |
| 2019/06/11 | CH2206 | Male | Three y/o | Control | Control | Feed Day | No | 19:45 | 19:00 - 19:59 | Evening | 37,7 | 82  | 19,8  | 19,8  | 18,85 | 579,19 | 99,97  |
| 2019/06/11 | CH2205 | Male | Three y/o | Control | Control | Feed Day | No | 19:50 | 19:00 - 19:59 | Evening | 38,0 | 42  | 9,8   | 9,8   | 19,15 | 524,42 | 76,07  |
| 2019/06/11 | CH2206 | Male | Three y/o | Control | Control | Feed Day | No | 19:50 | 19:00 - 19:59 | Evening | 37,4 | 48  | 25,6  | 25,6  | 18,55 | 536,04 | 108,76 |
| 2019/06/11 | CH2205 | Male | Three y/o | Control | Control | Feed Day | No | 19:55 | 19:00 - 19:59 | Evening | 38,0 | 82  | 8,2   | 8,2   | 19,15 | 579,19 | 70,05  |
| 2019/06/11 | CH2206 | Male | Three y/o | Control | Control | Feed Day | No | 19:55 | 19:00 - 19:59 | Evening | 37,3 | 79  | 37,6  | 37,6  | 18,46 | 576,36 | 121,96 |
| 2019/06/11 | CH2205 | Male | Three y/o | Control | Control | Feed Day | No | 20:00 | 20:00 - 20:59 | Night   | 38,0 | 44  | 5,0   | 5,0   | 19,15 | 528,51 | 53,41  |
| 2019/06/11 | CH2206 | Male | Three y/o | Control | Control | Feed Day | No | 20:00 | 20:00 - 20:59 | Night   | 37,3 | 81  | 45,8  | 45,8  | 18,46 | 578,26 | 128,76 |
| 2019/06/11 | CH2205 | Male | Three y/o | Control | Control | Feed Day | No | 20:05 | 20:00 - 20:59 | Night   | 38,0 | 48  | 6,8   | 6,8   | 19,15 | 536,04 | 63,74  |
| 2019/06/11 | CH2206 | Male | Three y/o | Control | Control | Feed Day | No | 20:05 | 20:00 - 20:59 | Night   | 37,3 | 137 | 50,6  | 50,6  | 18,46 | 615,83 | 132,20 |
| 2019/06/11 | CH2205 | Male | Three y/o | Control | Control | Feed Day | No | 20:10 | 20:00 - 20:59 | Night   | 38,0 | 56  | 7,0   | 7,0   | 19,15 | 549,01 | 64,72  |
| 2019/06/11 | CH2206 | Male | Three y/o | Control | Control | Feed Day | No | 20:10 | 20:00 - 20:59 | Night   | 37,3 | 78  | 51,4  | 51,4  | 18,46 | 575,38 | 132,74 |
| 2019/06/11 | CH2205 | Male | Three y/o | Control | Control | Feed Day | No | 20:15 | 20:00 - 20:59 | Night   | 37,9 | 82  | 5,4   | 5,4   | 19,05 | 579,19 | 55,99  |
| 2019/06/11 | CH2206 | Male | Three y/o | Control | Control | Feed Day | No | 20:15 | 20:00 - 20:59 | Night   | 37,3 | 83  | 51,8  | 51,8  | 18,46 | 580,11 | 133,01 |
| 2019/06/11 | CH2205 | Male | Three y/o | Control | Control | Feed Day | No | 20:20 | 20:00 - 20:59 | Night   | 37,9 | 46  | 4,4   | 4,4   | 19,05 | 532,38 | 49,12  |
| 2019/06/11 | CH2206 | Male | Three y/o | Control | Control | Feed Day | No | 20:20 | 20:00 - 20:59 | Night   | 37,4 | 76  | 47,2  | 47,2  | 18,55 | 573,39 | 129,80 |
| 2019/06/11 | CH2205 | Male | Three y/o | Control | Control | Feed Day | No | 20:25 | 20:00 - 20:59 | Night   | 37,9 | 81  | 6,0   | 6,0   | 19,05 | 578,26 | 59,53  |



|            |        |      |           |         |         |          |    |       |               |       |      |     |      |      |       |        |        |
|------------|--------|------|-----------|---------|---------|----------|----|-------|---------------|-------|------|-----|------|------|-------|--------|--------|
| 2019/06/11 | CH2206 | Male | Three y/o | Control | Control | Feed Day | No | 20:25 | 20:00 - 20:59 | Night | 37,4 | 68  | 47,2 | 47,2 | 18,55 | 564,71 | 129,80 |
| 2019/06/11 | CH2205 | Male | Three y/o | Control | Control | Feed Day | No | 20:30 | 20:00 - 20:59 | Night | 37,9 | 68  | 49,2 | 4,2  | 19,05 | 564,71 | 47,57  |
| 2019/06/11 | CH2206 | Male | Three y/o | Control | Control | Feed Day | No | 20:30 | 20:00 - 20:59 | Night | 37,4 | 50  | 49,2 | 49,2 | 18,55 | 539,52 | 131,23 |
| 2019/06/11 | CH2205 | Male | Three y/o | Control | Control | Feed Day | No | 20:35 | 20:00 - 20:59 | Night | 37,9 | 53  | 5,4  | 5,4  | 19,05 | 544,43 | 55,99  |
| 2019/06/11 | CH2206 | Male | Three y/o | Control | Control | Feed Day | No | 20:35 | 20:00 - 20:59 | Night | 37,4 | 46  | 46,6 | 46,6 | 18,55 | 532,38 | 129,35 |
| 2019/06/11 | CH2205 | Male | Three y/o | Control | Control | Feed Day | No | 20:40 | 20:00 - 20:59 | Night | 37,9 | 59  | 6,8  | 6,8  | 19,05 | 553,30 | 63,74  |
| 2019/06/11 | CH2206 | Male | Three y/o | Control | Control | Feed Day | No | 20:40 | 20:00 - 20:59 | Night | 37,4 | 41  | 52,0 | 52,0 | 18,55 | 522,29 | 133,14 |
| 2019/06/11 | CH2205 | Male | Three y/o | Control | Control | Feed Day | No | 20:45 | 20:00 - 20:59 | Night | 37,9 |     | 4,6  | 4,6  | 19,05 |        | 50,61  |
| 2019/06/11 | CH2206 | Male | Three y/o | Control | Control | Feed Day | No | 20:45 | 20:00 - 20:59 | Night | 37,5 | 79  | 46,8 | 46,8 | 18,65 | 576,36 | 129,50 |
| 2019/06/11 | CH2205 | Male | Three y/o | Control | Control | Feed Day | No | 20:50 | 20:00 - 20:59 | Night | 37,9 | 49  | 3,8  | 3,8  | 19,05 | 537,80 | 44,22  |
| 2019/06/11 | CH2206 | Male | Three y/o | Control | Control | Feed Day | No | 20:50 | 20:00 - 20:59 | Night | 37,5 | 70  | 47,0 | 47,0 | 18,65 | 566,99 | 129,65 |
| 2019/06/11 | CH2205 | Male | Three y/o | Control | Control | Feed Day | No | 20:55 | 20:00 - 20:59 | Night | 37,9 | 54  | 4,8  | 4,8  | 19,05 | 545,99 | 52,04  |
| 2019/06/11 | CH2206 | Male | Three y/o | Control | Control | Feed Day | No | 20:55 | 20:00 - 20:59 | Night | 37,5 | 73  | 50,4 | 50,4 | 18,65 | 570,27 | 132,06 |
| 2019/06/11 | CH2205 | Male | Three y/o | Control | Control | Feed Day | No | 21:00 | 21:00 - 21:59 | Night | 37,9 | 89  | 6,2  | 6,2  | 19,05 | 585,33 | 60,63  |
| 2019/06/11 | CH2206 | Male | Three y/o | Control | Control | Feed Day | No | 21:00 | 21:00 - 21:59 | Night | 37,5 | 80  | 49,0 | 49,0 | 18,65 | 577,31 | 131,09 |
| 2019/06/11 | CH2205 | Male | Three y/o | Control | Control | Feed Day | No | 21:05 | 21:00 - 21:59 | Night | 37,9 | 83  | 6,6  | 6,6  | 19,05 | 580,11 | 62,73  |
| 2019/06/11 | CH2206 | Male | Three y/o | Control | Control | Feed Day | No | 21:05 | 21:00 - 21:59 | Night | 37,5 | 60  | 46,6 | 46,6 | 18,65 | 554,67 | 129,35 |
| 2019/06/11 | CH2205 | Male | Three y/o | Control | Control | Feed Day | No | 21:10 | 21:00 - 21:59 | Night | 37,9 | 87  | 8,2  | 8,2  | 19,05 | 583,64 | 70,05  |
| 2019/06/11 | CH2206 | Male | Three y/o | Control | Control | Feed Day | No | 21:10 | 21:00 - 21:59 | Night | 37,5 | 67  | 46,6 | 46,6 | 18,65 | 563,53 | 129,35 |
| 2019/06/11 | CH2205 | Male | Three y/o | Control | Control | Feed Day | No | 21:15 | 21:00 - 21:59 | Night | 37,9 | 51  | 6,0  | 6,0  | 19,05 | 541,20 | 59,53  |
| 2019/06/11 | CH2206 | Male | Three y/o | Control | Control | Feed Day | No | 21:15 | 21:00 - 21:59 | Night | 37,5 | 79  | 51,8 | 51,8 | 18,65 | 576,36 | 133,01 |
| 2019/06/11 | CH2205 | Male | Three y/o | Control | Control | Feed Day | No | 21:20 | 21:00 - 21:59 | Night | 38,0 | 62  | 6,2  | 6,2  | 19,15 | 557,33 | 60,63  |
| 2019/06/11 | CH2206 | Male | Three y/o | Control | Control | Feed Day | No | 21:20 | 21:00 - 21:59 | Night | 37,5 | 66  | 54,6 | 54,6 | 18,65 | 562,34 | 134,83 |
| 2019/06/11 | CH2205 | Male | Three y/o | Control | Control | Feed Day | No | 21:25 | 21:00 - 21:59 | Night | 37,9 | 72  | 8,8  | 8,8  | 19,05 | 569,20 | 72,43  |
| 2019/06/11 | CH2206 | Male | Three y/o | Control | Control | Feed Day | No | 21:25 | 21:00 - 21:59 | Night | 37,5 | 44  | 53,6 | 53,6 | 18,65 | 528,51 | 134,19 |
| 2019/06/11 | CH2205 | Male | Three y/o | Control | Control | Feed Day | No | 21:30 | 21:00 - 21:59 | Night | 37,9 | 59  | 13,4 | 13,4 | 19,05 | 553,30 | 86,68  |
| 2019/06/11 | CH2206 | Male | Three y/o | Control | Control | Feed Day | No | 21:30 | 21:00 - 21:59 | Night | 37,7 | 81  | 51,2 | 51,2 | 18,85 | 578,26 | 132,61 |
| 2019/06/11 | CH2205 | Male | Three y/o | Control | Control | Feed Day | No | 21:35 | 21:00 - 21:59 | Night | 38,0 | 88  | 12,4 | 12,4 | 19,15 | 584,49 | 84,04  |
| 2019/06/11 | CH2206 | Male | Three y/o | Control | Control | Feed Day | No | 21:35 | 21:00 - 21:59 | Night | 37,7 | 49  | 50,2 | 50,2 | 18,85 | 537,80 | 131,92 |
| 2019/06/11 | CH2205 | Male | Three y/o | Control | Control | Feed Day | No | 21:40 | 21:00 - 21:59 | Night | 38,0 | 82  | 12,4 | 12,4 | 19,15 | 579,19 | 84,04  |
| 2019/06/11 | CH2206 | Male | Three y/o | Control | Control | Feed Day | No | 21:40 | 21:00 - 21:59 | Night | 37,7 | 75  | 49,0 | 49,0 | 18,85 | 572,36 | 131,09 |
| 2019/06/11 | CH2205 | Male | Three y/o | Control | Control | Feed Day | No | 21:45 | 21:00 - 21:59 | Night | 38,0 | 54  | 12,8 | 12,8 | 19,15 | 545,99 | 85,12  |
| 2019/06/11 | CH2206 | Male | Three y/o | Control | Control | Feed Day | No | 21:45 | 21:00 - 21:59 | Night | 37,7 | 49  | 37,2 | 37,2 | 18,85 | 537,80 | 121,59 |
| 2019/06/11 | CH2205 | Male | Three y/o | Control | Control | Feed Day | No | 21:50 | 21:00 - 21:59 | Night | 37,9 | 80  | 11,8 | 11,8 | 19,05 | 577,31 | 82,36  |
| 2019/06/11 | CH2206 | Male | Three y/o | Control | Control | Feed Day | No | 21:50 | 21:00 - 21:59 | Night | 37,8 | 102 | 24,0 | 24,0 | 18,95 | 595,30 | 106,55 |
| 2019/06/11 | CH2205 | Male | Three y/o | Control | Control | Feed Day | No | 21:55 | 21:00 - 21:59 | Night | 37,9 | 65  | 7,0  | 7,0  | 19,05 | 561,12 | 64,72  |
| 2019/06/11 | CH2206 | Male | Three y/o | Control | Control | Feed Day | No | 21:55 | 21:00 - 21:59 | Night | 37,5 | 71  | 20,8 | 20,8 | 18,65 | 568,10 | 101,65 |
| 2019/06/11 | CH2205 | Male | Three y/o | Control | Control | Feed Day | No | 22:00 | 22:00 - 22:59 | Night | 37,9 | 57  | 4,4  | 4,4  | 19,05 | 550,47 | 49,12  |
| 2019/06/11 | CH2206 | Male | Three y/o | Control | Control | Feed Day | No | 22:00 | 22:00 - 22:59 | Night | 37,5 | 83  | 17,4 | 17,4 | 18,65 | 580,11 | 95,56  |
| 2019/06/11 | CH2205 | Male | Three y/o | Control | Control | Feed Day | No | 22:05 | 22:00 - 22:59 | Night | 37,9 | 49  | 10,2 | 10,2 | 19,05 | 537,80 | 77,43  |
| 2019/06/11 | CH2206 | Male | Three y/o | Control | Control | Feed Day | No | 22:05 | 22:00 - 22:59 | Night | 37,5 | 44  | 15,6 | 15,6 | 18,65 | 528,51 | 91,85  |
| 2019/06/11 | CH2205 | Male | Three y/o | Control | Control | Feed Day | No | 22:10 | 22:00 - 22:59 | Night | 37,9 | 80  | 3,8  | 3,8  | 19,05 | 577,31 | 44,22  |
| 2019/06/11 | CH2206 | Male | Three y/o | Control | Control | Feed Day | No | 22:10 | 22:00 - 22:59 | Night | 37,5 | 97  | 21,2 | 21,2 | 18,65 | 591,66 | 102,31 |
| 2019/06/11 | CH2205 | Male | Three y/o | Control | Control | Feed Day | No | 22:15 | 22:00 - 22:59 | Night | 37,9 | 39  | 3,6  | 3,6  | 19,05 | 517,82 | 42,42  |
| 2019/06/11 | CH2206 | Male | Three y/o | Control | Control | Feed Day | No | 22:15 | 22:00 - 22:59 | Night | 37,5 | 80  | 16,2 | 16,2 | 18,65 | 577,31 | 93,13  |
| 2019/06/11 | CH2205 | Male | Three y/o | Control | Control | Feed Day | No | 22:20 | 22:00 - 22:59 | Night | 37,9 | 57  | 3,0  | 3,0  | 19,05 | 550,47 | 36,34  |
| 2019/06/11 | CH2206 | Male | Three y/o | Control | Control | Feed Day | No | 22:20 | 22:00 - 22:59 | Night | 37,6 | 70  | 16,0 | 16,0 | 18,75 | 566,99 | 92,71  |
| 2019/06/11 | CH2205 | Male | Three y/o | Control | Control | Feed Day | No | 22:25 | 22:00 - 22:59 | Night | 37,9 | 76  | 2,8  | 2,8  | 19,05 | 573,39 | 34,04  |
| 2019/06/11 | CH2206 | Male | Three y/o | Control | Control | Feed Day | No | 22:25 | 22:00 - 22:59 | Night | 37,7 | 73  | 15,8 | 15,8 | 18,85 | 570,27 | 92,28  |
| 2019/06/11 | CH2205 | Male | Three y/o | Control | Control | Feed Day | No | 22:30 | 22:00 - 22:59 | Night | 37,7 | 52  | 1,6  | 1,6  | 18,85 | 542,83 | 15,48  |
| 2019/06/11 | CH2206 | Male | Three y/o | Control | Control | Feed Day | No | 22:30 | 22:00 - 22:59 | Night | 37,7 | 59  | 17,8 | 17,8 | 18,85 | 553,30 | 96,34  |
| 2019/06/11 | CH2205 | Male | Three y/o | Control | Control | Feed Day | No | 22:35 | 22:00 - 22:59 | Night | 37,7 | 78  | 6,4  | 6,4  | 18,85 | 575,38 | 61,70  |
| 2019/06/11 | CH2206 | Male | Three y/o | Control | Control | Feed Day | No | 22:35 | 22:00 - 22:59 | Night | 37,7 | 78  | 18,8 | 18,8 | 18,85 | 575,38 | 98,20  |
| 2019/06/11 | CH2205 | Male | Three y/o | Control | Control | Feed Day | No | 22:40 | 22:00 - 22:59 | Night | 37,7 | 92  | 3,2  | 3,2  | 18,85 | 587,78 | 38,49  |
| 2019/06/11 | CH2206 | Male | Three y/o | Control | Control | Feed Day | No | 22:40 | 22:00 - 22:59 | Night | 37,7 | 60  | 19,4 | 19,4 | 18,85 | 554,67 | 99,28  |
| 2019/06/11 | CH2205 | Male | Three y/o | Control | Control | Feed Day | No | 22:45 | 22:00 - 22:59 | Night | 37,7 | 83  | 4,4  | 4,4  | 18,85 | 580,11 | 49,12  |
| 2019/06/11 | CH2206 | Male | Three y/o | Control | Control | Feed Day | No | 22:45 | 22:00 - 22:59 | Night | 37,7 | 45  | 18,8 | 18,8 | 18,85 | 530,47 | 98,20  |
| 2019/06/11 | CH2205 | Male | Three y/o | Control | Control | Feed Day | No | 22:50 | 22:00 - 22:59 | Night | 37,7 | 67  | 4,6  | 4,6  | 18,85 | 563,53 | 50,61  |
| 2019/06/11 | CH2206 | Male | Three y/o | Control | Control | Feed Day | No | 22:50 | 22:00 - 22:59 | Night | 37,7 | 43  | 18,6 | 18,6 | 18,85 | 526,50 | 97,84  |
| 2019/06/11 | CH2205 | Male | Three y/o | Control | Control | Feed Day | No | 22:55 | 22:00 - 22:59 | Night | 37,9 | 94  | 7,6  | 7,6  | 19,05 | 589,37 | 67,49  |
| 2019/06/11 | CH2206 | Male | Three y/o | Control | Control | Feed Day | No | 22:55 | 22:00 - 22:59 | Night | 37,7 | 43  | 18,4 | 18,4 | 18,85 | 526,50 | 97,47  |
| 2019/06/11 | CH2205 | Male | Three y/o | Control | Control | Feed Day | No | 23:00 | 23:00 - 23:59 | Night | 37,9 | 76  | 7,0  | 7,0  | 19,05 | 573,39 | 64,72  |
| 2019/06/11 | CH2206 | Male | Three y/o | Control | Control | Feed Day | No | 23:00 | 23:00 - 23:59 | Night | 37,7 | 74  | 21,8 | 21,8 | 18,85 | 571,33 | 103,26 |
| 2019/06/11 | CH2205 | Male | Three y/o | Control | Control | Feed Day | No | 23:05 | 23:00 - 23:59 | Night | 37,7 | 62  | 3,8  | 3,8  | 18,85 | 557,33 | 44,22  |
| 2019/06/11 | CH2206 | Male | Three y/o | Control | Control | Feed Day | No | 23:05 | 23:00 - 23:59 | Night | 37,7 | 83  | 26,8 | 26,8 | 18,85 | 580,11 | 110,33 |
| 2019/06/11 | CH2205 | Male | Three y/o | Control | Control | Feed Day | No | 23:10 | 23:00 - 23:59 | Night | 37,7 | 97  | 7,4  | 7,4  | 18,85 | 591,66 | 66,59  |
| 2019/06/11 | CH2206 | Male | Three y/o | Control | Control | Feed Day | No | 23:10 | 23:00 - 23:59 | Night | 37,7 | 76  | 25,4 | 25,4 | 18,85 | 573,39 | 108,49 |
| 2019/06/11 | CH2205 | Male | Three y/o | Control | Control | Feed Day | No | 23:15 | 23:00 - 23:59 | Night | 37,7 | 71  | 6,2  | 6,2  | 18,85 | 568,10 | 60,63  |
| 2019/06/11 | CH2206 | Male | Three y/o | Control | Control | Feed Day | No | 23:15 | 23:00 - 23:59 | Night | 37,6 | 73  | 28,6 | 28,6 | 18,75 | 570,27 | 112,56 |
| 2019/06/11 | CH2205 | Male | Three y/o | Control | Control | Feed Day | No | 23:20 | 23:00 - 23:59 | Night | 37,7 | 61  | 4,2  | 4,2  | 18,85 | 556,01 | 47,57  |



|    |            |        |      |           |         |         |          |    |       |               |               |      |     |       |       |       |        |        |
|----|------------|--------|------|-----------|---------|---------|----------|----|-------|---------------|---------------|------|-----|-------|-------|-------|--------|--------|
|    | 2019/06/11 | CH2206 | Male | Three y/o | Control | Control | Feed Day | No | 23:20 | 23:00 - 23:59 | Night         | 37,5 | 84  | 23,4  | 23,4  | 18,65 | 581,01 | 105,68 |
|    | 2019/06/11 | CH2205 | Male | Three y/o | Control | Control | Feed Day | No | 23:25 | 23:00 - 23:59 | Night         | 37,7 | 68  | 9,0   | 9,0   | 18,85 | 564,71 | 73,19  |
|    | 2019/06/11 | CH2206 | Male | Three y/o | Control | Control | Feed Day | No | 23:25 | 23:00 - 23:59 | Night         | 37,5 | 77  | 21,6  | 21,6  | 18,65 | 574,39 | 102,94 |
|    | 2019/06/11 | CH2205 | Male | Three y/o | Control | Control | Feed Day | No | 23:30 | 23:00 - 23:59 | Night         | 37,7 | 66  | 4,0   | 4,0   | 18,85 | 562,34 | 45,94  |
|    | 2019/06/11 | CH2206 | Male | Three y/o | Control | Control | Feed Day | No | 23:30 | 23:00 - 23:59 | Night         | 37,6 | 81  | 25,0  | 25,0  | 18,75 | 578,26 | 107,94 |
|    | 2019/06/11 | CH2205 | Male | Three y/o | Control | Control | Feed Day | No | 23:35 | 23:00 - 23:59 | Night         | 37,7 | 45  | 5,0   | 5,0   | 18,85 | 530,47 | 53,41  |
|    | 2019/06/11 | CH2206 | Male | Three y/o | Control | Control | Feed Day | No | 23:35 | 23:00 - 23:59 | Night         | 37,7 | 41  | 24,2  | 24,2  | 18,85 | 522,29 | 106,83 |
|    | 2019/06/11 | CH2205 | Male | Three y/o | Control | Control | Feed Day | No | 23:40 | 23:00 - 23:59 | Night         | 37,8 | 91  | 4,2   | 4,2   | 18,95 | 586,98 | 47,57  |
|    | 2019/06/11 | CH2206 | Male | Three y/o | Control | Control | Feed Day | No | 23:40 | 23:00 - 23:59 | Night         | 37,6 | 90  | 26,8  | 26,8  | 18,75 | 586,16 | 110,33 |
|    | 2019/06/11 | CH2205 | Male | Three y/o | Control | Control | Feed Day | No | 23:45 | 23:00 - 23:59 | Night         | 37,9 | 80  | 10,8  | 10,8  | 19,05 | 577,31 | 79,36  |
|    | 2019/06/11 | CH2206 | Male | Three y/o | Control | Control | Feed Day | No | 23:45 | 23:00 - 23:59 | Night         | 37,7 | 58  | 28,4  | 28,4  | 18,85 | 551,90 | 112,31 |
|    | 2019/06/11 | CH2205 | Male | Three y/o | Control | Control | Feed Day | No | 23:50 | 23:00 - 23:59 | Night         | 37,9 | 83  | 4,8   | 4,8   | 19,05 | 580,11 | 52,04  |
|    | 2019/06/11 | CH2206 | Male | Three y/o | Control | Control | Feed Day | No | 23:50 | 23:00 - 23:59 | Night         | 37,7 | 65  | 27,6  | 27,6  | 18,85 | 561,12 | 111,33 |
|    | 2019/06/11 | CH2205 | Male | Three y/o | Control | Control | Feed Day | No | 23:55 | 23:00 - 23:59 | Night         | 37,9 | 51  | 3,4   | 3,4   | 19,05 | 541,20 | 40,51  |
|    | 2019/06/11 | CH2206 | Male | Three y/o | Control | Control | Feed Day | No | 23:55 | 23:00 - 23:59 | Night         | 37,7 | 51  | 32,4  | 32,4  | 18,85 | 541,20 | 116,84 |
| 28 | 2019/06/12 | CH2205 | Male | Three y/o | Control | Control | Feed Day | No | 00:00 | 00:00 - 00:59 | Early Morning | 37,9 | 56  | 7,2   | 7,2   | 19,05 | 549,01 | 65,66  |
|    | 2019/06/12 | CH2206 | Male | Three y/o | Control | Control | Feed Day | No | 00:00 | 00:00 - 00:59 | Early Morning | 37,7 | 41  | 31,4  | 31,4  | 18,85 | 522,29 | 115,76 |
|    | 2019/06/12 | CH2205 | Male | Three y/o | Control | Control | Feed Day | No | 00:05 | 00:00 - 00:59 | Early Morning | 37,9 | 74  | 24,4  | 24,4  | 19,05 | 571,33 | 107,11 |
|    | 2019/06/12 | CH2206 | Male | Three y/o | Control | Control | Feed Day | No | 00:05 | 00:00 - 00:59 | Early Morning | 37,7 | 54  | 29,4  | 29,4  | 18,85 | 545,99 | 113,50 |
|    | 2019/06/12 | CH2205 | Male | Three y/o | Control | Control | Feed Day | No | 00:10 | 00:00 - 00:59 | Early Morning | 38,0 | 119 | 13,0  | 13,0  | 19,15 | 606,20 | 85,65  |
|    | 2019/06/12 | CH2206 | Male | Three y/o | Control | Control | Feed Day | No | 00:10 | 00:00 - 00:59 | Early Morning | 37,8 | 92  | 43,4  | 43,4  | 18,95 | 587,78 | 126,90 |
|    | 2019/06/12 | CH2205 | Male | Three y/o | Control | Control | Feed Day | No | 00:15 | 00:00 - 00:59 | Early Morning | 38,0 | 61  | 20,0  | 20,0  | 19,15 | 556,01 | 100,31 |
|    | 2019/06/12 | CH2206 | Male | Three y/o | Control | Control | Feed Day | No | 00:15 | 00:00 - 00:59 | Early Morning | 37,7 | 83  | 32,4  | 32,4  | 18,85 | 580,11 | 116,84 |
|    | 2019/06/12 | CH2205 | Male | Three y/o | Control | Control | Feed Day | No | 00:20 | 00:00 - 00:59 | Early Morning | 38,0 | 65  | 20,2  | 20,2  | 19,15 | 561,12 | 100,65 |
|    | 2019/06/12 | CH2206 | Male | Three y/o | Control | Control | Feed Day | No | 00:20 | 00:00 - 00:59 | Early Morning | 37,6 | 56  | 41,2  | 41,2  | 18,75 | 549,01 | 125,11 |
|    | 2019/06/12 | CH2205 | Male | Three y/o | Control | Control | Feed Day | No | 00:25 | 00:00 - 00:59 | Early Morning | 38,0 | 44  | 20,6  | 20,6  | 19,15 | 528,51 | 101,32 |
|    | 2019/06/12 | CH2206 | Male | Three y/o | Control | Control | Feed Day | No | 00:25 | 00:00 - 00:59 | Early Morning | 37,5 | 51  | 47,0  | 47,0  | 18,65 | 541,20 | 129,65 |
|    | 2019/06/12 | CH2205 | Male | Three y/o | Control | Control | Feed Day | No | 00:30 | 00:00 - 00:59 | Early Morning | 38,1 | 109 | 16,4  | 16,4  | 19,26 | 600,04 | 93,55  |
|    | 2019/06/12 | CH2206 | Male | Three y/o | Control | Control | Feed Day | No | 00:30 | 00:00 - 00:59 | Early Morning | 37,5 | 90  | 51,0  | 51,0  | 18,65 | 586,16 | 132,47 |
|    | 2019/06/12 | CH2205 | Male | Three y/o | Control | Control | Feed Day | No | 00:35 | 00:00 - 00:59 | Early Morning | 38,0 | 87  | 13,2  | 13,2  | 19,15 | 583,64 | 86,17  |
|    | 2019/06/12 | CH2206 | Male | Three y/o | Control | Control | Feed Day | No | 00:35 | 00:00 - 00:59 | Early Morning | 37,5 | 43  | 49,2  | 49,2  | 18,65 | 526,50 | 131,23 |
|    | 2019/06/12 | CH2205 | Male | Three y/o | Control | Control | Feed Day | No | 00:40 | 00:00 - 00:59 | Early Morning | 38,0 | 94  | 8,6   | 8,6   | 19,15 | 589,37 | 71,66  |
|    | 2019/06/12 | CH2206 | Male | Three y/o | Control | Control | Feed Day | No | 00:40 | 00:00 - 00:59 | Early Morning | 37,5 | 82  | 47,0  | 47,0  | 18,65 | 579,19 | 129,65 |
|    | 2019/06/12 | CH2205 | Male | Three y/o | Control | Control | Feed Day | No | 00:45 | 00:00 - 00:59 | Early Morning | 38,1 | 61  | 13,8  | 13,8  | 19,26 | 556,01 | 87,68  |
|    | 2019/06/12 | CH2206 | Male | Three y/o | Control | Control | Feed Day | No | 00:45 | 00:00 - 00:59 | Early Morning | 37,5 | 79  | 38,2  | 38,2  | 18,65 | 576,36 | 122,50 |
|    | 2019/06/12 | CH2205 | Male | Three y/o | Control | Control | Feed Day | No | 00:50 | 00:00 - 00:59 | Early Morning | 38,1 | 66  | 9,8   | 9,8   | 19,26 | 562,34 | 76,07  |
|    | 2019/06/12 | CH2206 | Male | Three y/o | Control | Control | Feed Day | No | 00:50 | 00:00 - 00:59 | Early Morning | 37,5 | 84  | 48,8  | 48,8  | 18,65 | 581,01 | 130,95 |
|    | 2019/06/12 | CH2205 | Male | Three y/o | Control | Control | Feed Day | No | 00:55 | 00:00 - 00:59 | Early Morning | 38,1 | 78  | 10,4  | 10,4  | 19,26 | 575,38 | 78,08  |
|    | 2019/06/12 | CH2206 | Male | Three y/o | Control | Control | Feed Day | No | 00:55 | 00:00 - 00:59 | Early Morning | 37,5 | 77  | 44,8  | 44,8  | 18,65 | 574,39 | 127,99 |
|    | 2019/06/12 | CH2205 | Male | Three y/o | Control | Control | Feed Day | No | 01:00 | 01:00 - 01:59 | Early Morning | 38,1 | 62  | 5,4   | 5,4   | 19,26 | 557,33 | 55,99  |
|    | 2019/06/12 | CH2206 | Male | Three y/o | Control | Control | Feed Day | No | 01:00 | 01:00 - 01:59 | Early Morning | 37,5 | 80  | 47,8  | 47,8  | 18,65 | 577,31 | 130,23 |
|    | 2019/06/12 | CH2205 | Male | Three y/o | Control | Control | Feed Day | No | 01:05 | 01:00 - 01:59 | Early Morning | 38,1 | 91  | 8,0   | 8,0   | 19,26 | 586,98 | 69,22  |
|    | 2019/06/12 | CH2206 | Male | Three y/o | Control | Control | Feed Day | No | 01:05 | 01:00 - 01:59 | Early Morning | 37,4 | 62  | 47,8  | 47,8  | 18,55 | 557,33 | 130,23 |
|    | 2019/06/12 | CH2205 | Male | Three y/o | Control | Control | Feed Day | No | 01:10 | 01:00 - 01:59 | Early Morning | 38,1 | 46  | 5,6   | 5,6   | 19,26 | 532,38 | 57,21  |
|    | 2019/06/12 | CH2206 | Male | Three y/o | Control | Control | Feed Day | No | 01:10 | 01:00 - 01:59 | Early Morning | 37,4 | 78  | 50,6  | 50,6  | 18,55 | 575,38 | 132,20 |
|    | 2019/06/12 | CH2205 | Male | Three y/o | Control | Control | Feed Day | No | 01:15 | 01:00 - 01:59 | Early Morning | 38,1 | 90  | 3,6   | 3,6   | 19,26 | 586,16 | 42,42  |
|    | 2019/06/12 | CH2206 | Male | Three y/o | Control | Control | Feed Day | No | 01:15 | 01:00 - 01:59 | Early Morning | 37,4 | 77  | 41,4  | 41,4  | 18,55 | 574,39 | 125,27 |
|    | 2019/06/12 | CH2205 | Male | Three y/o | Control | Control | Feed Day | No | 01:20 | 01:00 - 01:59 | Early Morning | 38,1 | 62  | 4,4   | 4,4   | 19,26 | 557,33 | 49,12  |
|    | 2019/06/12 | CH2206 | Male | Three y/o | Control | Control | Feed Day | No | 01:20 | 01:00 - 01:59 | Early Morning | 37,4 | 80  | 30,8  | 30,8  | 18,55 | 577,31 | 115,10 |
|    | 2019/06/12 | CH2205 | Male | Three y/o | Control | Control | Feed Day | No | 01:25 | 01:00 - 01:59 | Early Morning | 38,1 | 65  | 8,8   | 8,8   | 19,26 | 561,12 | 72,43  |
|    | 2019/06/12 | CH2206 | Male | Three y/o | Control | Control | Feed Day | No | 01:25 | 01:00 - 01:59 | Early Morning | 37,5 | 64  | 32,8  | 32,8  | 18,65 | 559,88 | 117,26 |
|    | 2019/06/12 | CH2205 | Male | Three y/o | Control | Control | Feed Day | No | 01:30 | 01:00 - 01:59 | Early Morning | 38,0 | 82  | 6,4   | 6,4   | 19,15 | 579,19 | 61,70  |
|    | 2019/06/12 | CH2206 | Male | Three y/o | Control | Control | Feed Day | No | 01:30 | 01:00 - 01:59 | Early Morning | 37,5 | 59  | 34,4  | 34,4  | 18,65 | 553,30 | 118,90 |
|    | 2019/06/12 | CH2205 | Male | Three y/o | Control | Control | Feed Day | No | 01:35 | 01:00 - 01:59 | Early Morning | 38,0 | 51  | 10,4  | 10,4  | 19,15 | 541,20 | 78,08  |
|    | 2019/06/12 | CH2206 | Male | Three y/o | Control | Control | Feed Day | No | 01:35 | 01:00 - 01:59 | Early Morning | 37,5 | 82  | 34,8  | 34,8  | 18,65 | 579,19 | 119,29 |
|    | 2019/06/12 | CH2205 | Male | Three y/o | Control | Control | Feed Day | No | 01:40 | 01:00 - 01:59 | Early Morning | 38,0 | 79  | 15,0  | 15,0  | 19,15 | 576,36 | 90,51  |
|    | 2019/06/12 | CH2206 | Male | Three y/o | Control | Control | Feed Day | No | 01:40 | 01:00 - 01:59 | Early Morning | 37,5 | 71  | 33,4  | 33,4  | 18,65 | 568,10 | 117,88 |
|    | 2019/06/12 | CH2205 | Male | Three y/o | Control | Control | Feed Day | No | 01:45 | 01:00 - 01:59 | Early Morning | 38,0 | 84  | 28,4  | 28,4  | 19,15 | 581,01 | 112,31 |
|    | 2019/06/12 | CH2206 | Male | Three y/o | Control | Control | Feed Day | No | 01:45 | 01:00 - 01:59 | Early Morning | 37,7 | 104 | 16,4  | 16,4  | 18,85 | 596,69 | 93,55  |
|    | 2019/06/12 | CH2205 | Male | Three y/o | Control | Control | Feed Day | No | 01:50 | 01:00 - 01:59 | Early Morning | 38,0 | 103 | 17,4  | 17,4  | 19,15 | 596,00 | 95,56  |
|    | 2019/06/12 | CH2206 | Male | Three y/o | Control | Control | Feed Day | No | 01:50 | 01:00 - 01:59 | Early Morning | 37,7 | 104 | 22,6  | 22,6  | 18,85 | 596,69 | 104,49 |
|    | 2019/06/12 | CH2205 | Male | Three y/o | Control | Control | Feed Day | No | 01:55 | 01:00 - 01:59 | Early Morning | 37,9 | 118 | 30,8  | 30,8  | 19,05 | 605,61 | 115,10 |
|    | 2019/06/12 | CH2206 | Male | Three y/o | Control | Control | Feed Day | No | 01:55 | 01:00 - 01:59 | Early Morning | 37,7 | 103 | 100,0 | 100,0 | 18,85 | 596,00 | 155,84 |
|    | 2019/06/12 | CH2205 | Male | Three y/o | Control | Control | Feed Day | No | 02:00 | 02:00 - 02:59 | Early Morning | 37,9 |     | 3,0   | 3,0   | 19,05 |        | 36,34  |
|    | 2019/06/12 | CH2206 | Male | Three y/o | Control | Control | Feed Day | No | 02:00 | 02:00 - 02:59 | Early Morning | 37,7 | 118 | 15,8  | 15,8  | 18,85 | 605,61 | 92,28  |
|    | 2019/06/12 | CH2205 | Male | Three y/o | Control | Control | Feed Day | No | 02:05 | 02:00 - 02:59 | Early Morning | 37,7 |     | 8,6   | 8,6   | 18,85 |        | 71,66  |
|    | 2019/06/12 | CH2206 | Male | Three y/o | Control | Control | Feed Day | No | 02:05 | 02:00 - 02:59 | Early Morning | 37,5 | 124 | 60,2  | 60,2  | 18,65 | 609,04 | 138,21 |
|    | 2019/06/12 | CH2205 | Male | Three y/o | Control | Control | Feed Day | No | 02:10 | 02:00 - 02:59 | Early Morning | 37,6 | 77  | 4,4   | 4,4   | 18,75 | 574,39 | 49,12  |
|    | 2019/06/12 | CH2206 | Male | Three y/o | Control | Control | Feed Day | No | 02:10 | 02:00 - 02:59 | Early Morning | 37,4 | 78  | 7,0   | 7,0   | 18,55 | 575,38 | 64,72  |
|    | 2019/06/12 | CH2205 | Male | Three y/o | Control | Control | Feed Day | No | 02:15 | 02:00 - 02:59 | Early Morning | 37,5 | 60  | 6,4   | 6,4   | 18,65 | 554,67 | 61,70  |



|            |        |      |           |         |         |          |    |       |               |               |      |     |       |       |       |        |        |
|------------|--------|------|-----------|---------|---------|----------|----|-------|---------------|---------------|------|-----|-------|-------|-------|--------|--------|
| 2019/06/12 | CH2206 | Male | Three y/o | Control | Control | Feed Day | No | 02:15 | 02:00 - 02:59 | Early Morning | 37,1 | 49  | 7,2   | 7,2   | 18,26 | 537,80 | 65,66  |
| 2019/06/12 | CH2205 | Male | Three y/o | Control | Control | Feed Day | No | 02:20 | 02:00 - 02:59 | Early Morning | 37,5 | 109 | 3,6   | 3,6   | 18,65 | 600,04 | 42,42  |
| 2019/06/12 | CH2206 | Male | Three y/o | Control | Control | Feed Day | No | 02:20 | 02:00 - 02:59 | Early Morning | 37,1 | 83  | 3,2   | 3,2   | 18,26 | 580,11 | 38,49  |
| 2019/06/12 | CH2205 | Male | Three y/o | Control | Control | Feed Day | No | 02:25 | 02:00 - 02:59 | Early Morning | 37,5 | 91  | 4,0   | 4,0   | 18,65 | 586,98 | 45,94  |
| 2019/06/12 | CH2206 | Male | Three y/o | Control | Control | Feed Day | No | 02:25 | 02:00 - 02:59 | Early Morning | 37,1 | 79  | 6,0   | 6,0   | 18,26 | 576,36 | 59,53  |
| 2019/06/12 | CH2205 | Male | Three y/o | Control | Control | Feed Day | No | 02:30 | 02:00 - 02:59 | Early Morning | 37,5 | 58  | 2,4   | 2,4   | 18,65 | 551,90 | 28,91  |
| 2019/06/12 | CH2206 | Male | Three y/o | Control | Control | Feed Day | No | 02:30 | 02:00 - 02:59 | Early Morning | 37,3 | 69  | 2,2   | 2,2   | 18,46 | 565,86 | 26,02  |
| 2019/06/12 | CH2205 | Male | Three y/o | Control | Control | Feed Day | No | 02:35 | 02:00 - 02:59 | Early Morning | 37,5 | 56  | 3,8   | 3,8   | 18,65 | 549,01 | 44,22  |
| 2019/06/12 | CH2206 | Male | Three y/o | Control | Control | Feed Day | No | 02:35 | 02:00 - 02:59 | Early Morning | 37,3 | 66  | 3,8   | 3,8   | 18,46 | 562,34 | 44,22  |
| 2019/06/12 | CH2205 | Male | Three y/o | Control | Control | Feed Day | No | 02:40 | 02:00 - 02:59 | Early Morning | 37,5 | 59  | 5,6   | 5,6   | 18,65 | 553,30 | 57,21  |
| 2019/06/12 | CH2206 | Male | Three y/o | Control | Control | Feed Day | No | 02:40 | 02:00 - 02:59 | Early Morning | 37,3 | 75  | 4,0   | 4,0   | 18,46 | 572,36 | 45,94  |
| 2019/06/12 | CH2205 | Male | Three y/o | Control | Control | Feed Day | No | 02:45 | 02:00 - 02:59 | Early Morning | 37,5 |     | 36,4  | 36,4  | 18,65 |        | 120,84 |
| 2019/06/12 | CH2206 | Male | Three y/o | Control | Control | Feed Day | No | 02:45 | 02:00 - 02:59 | Early Morning | 37,3 | 53  | 30,4  | 30,4  | 18,46 | 544,43 | 114,65 |
| 2019/06/12 | CH2205 | Male | Three y/o | Control | Control | Feed Day | No | 02:50 | 02:00 - 02:59 | Early Morning | 37,6 | 75  | 16,0  | 16,0  | 18,75 | 572,36 | 92,71  |
| 2019/06/12 | CH2206 | Male | Three y/o | Control | Control | Feed Day | No | 02:50 | 02:00 - 02:59 | Early Morning | 37,4 | 48  | 20,6  | 20,6  | 18,55 | 536,04 | 101,32 |
| 2019/06/12 | CH2205 | Male | Three y/o | Control | Control | Feed Day | No | 02:55 | 02:00 - 02:59 | Early Morning | 37,5 | 88  | 18,6  | 18,6  | 18,65 | 584,49 | 97,84  |
| 2019/06/12 | CH2206 | Male | Three y/o | Control | Control | Feed Day | No | 02:55 | 02:00 - 02:59 | Early Morning | 37,4 | 51  | 25,2  | 25,2  | 18,55 | 541,20 | 108,22 |
| 2019/06/12 | CH2205 | Male | Three y/o | Control | Control | Feed Day | No | 03:00 | 03:00 - 03:59 | Early Morning | 37,4 | 60  | 16,6  | 16,6  | 18,55 | 554,67 | 93,96  |
| 2019/06/12 | CH2206 | Male | Three y/o | Control | Control | Feed Day | No | 03:00 | 03:00 - 03:59 | Early Morning | 37,4 | 51  | 27,4  | 27,4  | 18,55 | 541,20 | 111,09 |
| 2019/06/12 | CH2205 | Male | Three y/o | Control | Control | Feed Day | No | 03:05 | 03:00 - 03:59 | Early Morning | 37,3 | 47  | 13,4  | 13,4  | 18,46 | 534,23 | 86,68  |
| 2019/06/12 | CH2206 | Male | Three y/o | Control | Control | Feed Day | No | 03:05 | 03:00 - 03:59 | Early Morning | 37,4 | 125 | 32,2  | 32,2  | 18,55 | 609,60 | 116,63 |
| 2019/06/12 | CH2205 | Male | Three y/o | Control | Control | Feed Day | No | 03:10 | 03:00 - 03:59 | Early Morning | 37,2 | 50  | 13,6  | 13,6  | 18,36 | 539,52 | 87,18  |
| 2019/06/12 | CH2206 | Male | Three y/o | Control | Control | Feed Day | No | 03:10 | 03:00 - 03:59 | Early Morning | 37,5 | 100 | 41,4  | 41,4  | 18,65 | 593,87 | 125,27 |
| 2019/06/12 | CH2205 | Male | Three y/o | Control | Control | Feed Day | No | 03:15 | 03:00 - 03:59 | Early Morning | 37,1 |     | 11,0  | 11,0  | 18,26 |        | 79,98  |
| 2019/06/12 | CH2206 | Male | Three y/o | Control | Control | Feed Day | No | 03:15 | 03:00 - 03:59 | Early Morning | 37,4 | 52  | 47,0  | 47,0  | 18,55 | 542,83 | 129,65 |
| 2019/06/12 | CH2205 | Male | Three y/o | Control | Control | Feed Day | No | 03:20 | 03:00 - 03:59 | Early Morning | 37,2 | 57  | 13,4  | 13,4  | 18,36 | 550,47 | 86,68  |
| 2019/06/12 | CH2206 | Male | Three y/o | Control | Control | Feed Day | No | 03:20 | 03:00 - 03:59 | Early Morning | 37,4 | 78  | 45,4  | 45,4  | 18,55 | 575,38 | 128,45 |
| 2019/06/12 | CH2205 | Male | Three y/o | Control | Control | Feed Day | No | 03:25 | 03:00 - 03:59 | Early Morning | 37,1 | 55  | 8,2   | 8,2   | 18,26 | 547,52 | 70,05  |
| 2019/06/12 | CH2206 | Male | Three y/o | Control | Control | Feed Day | No | 03:25 | 03:00 - 03:59 | Early Morning | 37,4 | 46  | 48,2  | 48,2  | 18,55 | 532,38 | 130,52 |
| 2019/06/12 | CH2205 | Male | Three y/o | Control | Control | Feed Day | No | 03:30 | 03:00 - 03:59 | Early Morning | 37,1 | 82  | 11,8  | 11,8  | 18,26 | 579,19 | 82,36  |
| 2019/06/12 | CH2206 | Male | Three y/o | Control | Control | Feed Day | No | 03:30 | 03:00 - 03:59 | Early Morning | 37,4 | 40  | 47,6  | 47,6  | 18,55 | 520,09 | 130,09 |
| 2019/06/12 | CH2205 | Male | Three y/o | Control | Control | Feed Day | No | 03:35 | 03:00 - 03:59 | Early Morning | 37,0 | 45  | 9,0   | 9,0   | 18,16 | 530,47 | 73,19  |
| 2019/06/12 | CH2206 | Male | Three y/o | Control | Control | Feed Day | No | 03:35 | 03:00 - 03:59 | Early Morning | 37,4 | 73  | 48,0  | 48,0  | 18,55 | 570,27 | 130,38 |
| 2019/06/12 | CH2205 | Male | Three y/o | Control | Control | Feed Day | No | 03:40 | 03:00 - 03:59 | Early Morning | 37,2 | 57  | 5,0   | 5,0   | 18,36 | 550,47 | 53,41  |
| 2019/06/12 | CH2206 | Male | Three y/o | Control | Control | Feed Day | No | 03:40 | 03:00 - 03:59 | Early Morning | 37,4 | 48  | 49,4  | 49,4  | 18,55 | 536,04 | 131,37 |
| 2019/06/12 | CH2205 | Male | Three y/o | Control | Control | Feed Day | No | 03:45 | 03:00 - 03:59 | Early Morning | 37,2 | 41  | 2,0   | 2,0   | 18,36 | 522,29 | 22,86  |
| 2019/06/12 | CH2206 | Male | Three y/o | Control | Control | Feed Day | No | 03:45 | 03:00 - 03:59 | Early Morning | 37,4 | 49  | 46,0  | 46,0  | 18,55 | 537,80 | 128,91 |
| 2019/06/12 | CH2205 | Male | Three y/o | Control | Control | Feed Day | No | 03:50 | 03:00 - 03:59 | Early Morning | 37,2 |     | 16,8  | 16,8  | 18,36 |        | 94,37  |
| 2019/06/12 | CH2206 | Male | Three y/o | Control | Control | Feed Day | No | 03:50 | 03:00 - 03:59 | Early Morning | 37,4 | 49  | 45,0  | 45,0  | 18,55 | 537,80 | 128,15 |
| 2019/06/12 | CH2205 | Male | Three y/o | Control | Control | Feed Day | No | 03:55 | 03:00 - 03:59 | Early Morning | 37,0 | 56  | 10,8  | 10,8  | 18,16 | 549,01 | 79,36  |
| 2019/06/12 | CH2206 | Male | Three y/o | Control | Control | Feed Day | No | 03:55 | 03:00 - 03:59 | Early Morning | 37,4 | 53  | 48,8  | 48,8  | 18,55 | 544,43 | 130,95 |
| 2019/06/12 | CH2205 | Male | Three y/o | Control | Control | Feed Day | No | 04:00 | 04:00 - 04:59 | Morning       | 37,0 | 58  | 9,4   | 9,4   | 18,16 | 551,90 | 74,66  |
| 2019/06/12 | CH2206 | Male | Three y/o | Control | Control | Feed Day | No | 04:00 | 04:00 - 04:59 | Morning       | 37,4 | 56  | 49,0  | 49,0  | 18,55 | 549,01 | 131,09 |
| 2019/06/12 | CH2205 | Male | Three y/o | Control | Control | Feed Day | No | 04:05 | 04:00 - 04:59 | Morning       | 36,9 | 48  | 12,2  | 12,2  | 18,06 | 536,04 | 83,49  |
| 2019/06/12 | CH2206 | Male | Three y/o | Control | Control | Feed Day | No | 04:05 | 04:00 - 04:59 | Morning       | 37,4 | 45  | 48,6  | 48,6  | 18,55 | 530,47 | 130,81 |
| 2019/06/12 | CH2205 | Male | Three y/o | Control | Control | Feed Day | No | 04:10 | 04:00 - 04:59 | Morning       | 36,8 | 49  | 52,4  | 52,4  | 17,96 | 537,80 | 133,41 |
| 2019/06/12 | CH2206 | Male | Three y/o | Control | Control | Feed Day | No | 04:10 | 04:00 - 04:59 | Morning       | 37,3 | 78  | 45,6  | 45,6  | 18,46 | 575,38 | 128,61 |
| 2019/06/12 | CH2205 | Male | Three y/o | Control | Control | Feed Day | No | 04:15 | 04:00 - 04:59 | Morning       | 37,0 | 60  | 17,8  | 17,8  | 18,16 | 554,67 | 96,34  |
| 2019/06/12 | CH2206 | Male | Three y/o | Control | Control | Feed Day | No | 04:15 | 04:00 - 04:59 | Morning       | 37,3 | 55  | 45,6  | 45,6  | 18,46 | 547,52 | 128,61 |
| 2019/06/12 | CH2205 | Male | Three y/o | Control | Control | Feed Day | No | 04:20 | 04:00 - 04:59 | Morning       | 37,1 | 52  | 6,6   | 6,6   | 18,26 | 542,83 | 62,73  |
| 2019/06/12 | CH2206 | Male | Three y/o | Control | Control | Feed Day | No | 04:20 | 04:00 - 04:59 | Morning       | 37,3 | 79  | 50,4  | 50,4  | 18,46 | 576,36 | 132,06 |
| 2019/06/12 | CH2205 | Male | Three y/o | Control | Control | Feed Day | No | 04:25 | 04:00 - 04:59 | Morning       | 37,1 | 47  | 8,6   | 8,6   | 18,26 | 534,23 | 71,66  |
| 2019/06/12 | CH2206 | Male | Three y/o | Control | Control | Feed Day | No | 04:25 | 04:00 - 04:59 | Morning       | 37,2 | 79  | 50,0  | 50,0  | 18,36 | 576,36 | 131,79 |
| 2019/06/12 | CH2205 | Male | Three y/o | Control | Control | Feed Day | No | 04:30 | 04:00 - 04:59 | Morning       | 37,1 | 70  | 23,4  | 23,4  | 18,26 | 566,99 | 105,68 |
| 2019/06/12 | CH2206 | Male | Three y/o | Control | Control | Feed Day | No | 04:30 | 04:00 - 04:59 | Morning       | 37,1 | 58  | 49,4  | 49,4  | 18,26 | 551,90 | 131,37 |
| 2019/06/12 | CH2205 | Male | Three y/o | Control | Control | Feed Day | No | 04:35 | 04:00 - 04:59 | Morning       | 37,1 | 83  | 20,6  | 20,6  | 18,26 | 580,11 | 101,32 |
| 2019/06/12 | CH2206 | Male | Three y/o | Control | Control | Feed Day | No | 04:35 | 04:00 - 04:59 | Morning       | 37,1 | 51  | 28,0  | 28,0  | 18,26 | 541,20 | 111,83 |
| 2019/06/12 | CH2205 | Male | Three y/o | Control | Control | Feed Day | No | 04:40 | 04:00 - 04:59 | Morning       | 37,1 | 110 | 50,8  | 50,8  | 18,26 | 600,69 | 132,33 |
| 2019/06/12 | CH2206 | Male | Three y/o | Control | Control | Feed Day | No | 04:40 | 04:00 - 04:59 | Morning       | 37,2 | 41  | 45,4  | 45,4  | 18,36 | 522,29 | 128,45 |
| 2019/06/12 | CH2205 | Male | Three y/o | Control | Control | Feed Day | No | 04:45 | 04:00 - 04:59 | Morning       | 37,2 | 120 | 46,6  | 46,6  | 18,36 | 606,78 | 129,35 |
| 2019/06/12 | CH2206 | Male | Three y/o | Control | Control | Feed Day | No | 04:45 | 04:00 - 04:59 | Morning       | 37,1 | 42  | 51,6  | 51,6  | 18,26 | 524,42 | 132,87 |
| 2019/06/12 | CH2205 | Male | Three y/o | Control | Control | Feed Day | No | 04:50 | 04:00 - 04:59 | Morning       | 37,2 | 143 | 79,4  | 79,4  | 18,36 | 618,69 | 147,81 |
| 2019/06/12 | CH2206 | Male | Three y/o | Control | Control | Feed Day | No | 04:50 | 04:00 - 04:59 | Morning       | 37,1 | 46  | 49,6  | 49,6  | 18,26 | 532,38 | 131,51 |
| 2019/06/12 | CH2205 | Male | Three y/o | Control | Control | Feed Day | No | 04:55 | 04:00 - 04:59 | Morning       | 37,3 | 103 | 78,4  | 78,4  | 18,46 | 596,00 | 147,37 |
| 2019/06/12 | CH2206 | Male | Three y/o | Control | Control | Feed Day | No | 04:55 | 04:00 - 04:59 | Morning       | 37,1 | 73  | 43,8  | 43,8  | 18,26 | 570,27 | 127,22 |
| 2019/06/12 | CH2205 | Male | Three y/o | Control | Control | Feed Day | No | 05:00 | 05:00 - 05:59 | Morning       | 37,4 | 140 | 25,0  | 25,0  | 18,55 | 617,28 | 107,94 |
| 2019/06/12 | CH2206 | Male | Three y/o | Control | Control | Feed Day | No | 05:00 | 05:00 - 05:59 | Morning       | 37,1 | 89  | 9,0   | 9,0   | 18,26 | 585,33 | 73,19  |
| 2019/06/12 | CH2205 | Male | Three y/o | Control | Control | Feed Day | No | 05:05 | 05:00 - 05:59 | Morning       | 37,5 | 108 | 154,4 | 154,4 | 18,65 | 599,39 | 171,03 |
| 2019/06/12 | CH2206 | Male | Three y/o | Control | Control | Feed Day | No | 05:05 | 05:00 - 05:59 | Morning       | 37,3 | 141 | 49,6  | 49,6  | 18,46 | 617,75 | 131,51 |
| 2019/06/12 | CH2205 | Male | Three y/o | Control | Control | Feed Day | No | 05:10 | 05:00 - 05:59 | Morning       | 37,7 | 114 | 24,4  | 24,4  | 18,85 | 603,20 | 107,11 |



|            |        |      |           |         |         |          |    |       |               |              |      |     |        |       |       |        |        |
|------------|--------|------|-----------|---------|---------|----------|----|-------|---------------|--------------|------|-----|--------|-------|-------|--------|--------|
| 2019/06/12 | CH2206 | Male | Three y/o | Control | Control | Feed Day | No | 05:10 | 05:00 - 05:59 | Morning      | 37,4 | 132 | 35,4   | 35,4  | 18,55 | 613,32 | 119,88 |
| 2019/06/12 | CH2205 | Male | Three y/o | Control | Control | Feed Day | No | 05:15 | 05:00 - 05:59 | Morning      | 37,7 | 134 | 85,2   | 85,2  | 18,85 | 614,33 | 150,27 |
| 2019/06/12 | CH2206 | Male | Three y/o | Control | Control | Feed Day | No | 05:15 | 05:00 - 05:59 | Morning      | 37,4 | 123 | 216,4  | 216,4 | 18,55 | 608,49 | 182,89 |
| 2019/06/12 | CH2205 | Male | Three y/o | Control | Control | Feed Day | No | 05:20 | 05:00 - 05:59 | Morning      | 37,9 | 126 | 1515,4 |       | 19,05 | 610,14 |        |
| 2019/06/12 | CH2206 | Male | Three y/o | Control | Control | Feed Day | No | 05:20 | 05:00 - 05:59 | Morning      | 37,5 | 128 | 214,0  | 214,0 | 18,65 | 611,22 | 182,50 |
| 2019/06/12 | CH2205 | Male | Three y/o | Control | Control | Feed Day | No | 05:25 | 05:00 - 05:59 | Morning      | 38,1 | 126 | 79,8   |       | 19,26 | 610,14 | 147,99 |
| 2019/06/12 | CH2206 | Male | Three y/o | Control | Control | Feed Day | No | 05:25 | 05:00 - 05:59 | Morning      | 37,8 | 115 | 23,8   | 23,8  | 18,95 | 603,82 | 106,26 |
| 2019/06/12 | CH2205 | Male | Three y/o | Control | Control | Feed Day | No | 05:30 | 05:00 - 05:59 | Morning      | 38,0 |     | 154,6  | 154,6 | 19,15 |        | 171,08 |
| 2019/06/12 | CH2206 | Male | Three y/o | Control | Control | Feed Day | No | 05:30 | 05:00 - 05:59 | Morning      | 37,7 | 197 | 115,0  | 115,0 | 18,85 | 639,25 | 160,72 |
| 2019/06/12 | CH2205 | Male | Three y/o | Control | Control | Feed Day | No | 05:35 | 05:00 - 05:59 | Morning      | 38,0 | 125 | 247,4  | 247,4 | 19,15 | 609,60 | 187,61 |
| 2019/06/12 | CH2206 | Male | Three y/o | Control | Control | Feed Day | No | 05:35 | 05:00 - 05:59 | Morning      | 37,9 | 115 | 198,0  | 198,0 | 19,05 | 603,82 | 179,77 |
| 2019/06/12 | CH2205 | Male | Three y/o | Control | Control | Feed Day | No | 05:40 | 05:00 - 05:59 | Morning      | 38,0 | 84  | 72,2   | 72,2  | 19,15 | 581,01 | 144,51 |
| 2019/06/12 | CH2206 | Male | Three y/o | Control | Control | Feed Day | No | 05:40 | 05:00 - 05:59 | Morning      | 38,0 | 114 | 59,0   | 59,0  | 19,15 | 603,20 | 137,51 |
| 2019/06/12 | CH2205 | Male | Three y/o | Control | Control | Feed Day | No | 05:45 | 05:00 - 05:59 | Morning      | 37,9 | 132 | 15,6   | 15,6  | 19,05 | 613,32 | 91,85  |
| 2019/06/12 | CH2206 | Male | Three y/o | Control | Control | Feed Day | No | 05:45 | 05:00 - 05:59 | Morning      | 38,0 | 121 | 131,8  | 131,8 | 19,15 | 607,35 | 165,49 |
| 2019/06/12 | CH2205 | Male | Three y/o | Control | Control | Feed Day | No | 05:50 | 05:00 - 05:59 | Morning      | 38,0 |     | 6,4    | 6,4   | 19,15 |        | 61,70  |
| 2019/06/12 | CH2206 | Male | Three y/o | Control | Control | Feed Day | No | 05:50 | 05:00 - 05:59 | Morning      | 38,1 | 99  | 165,2  | 165,2 | 19,26 | 593,14 | 173,40 |
| 2019/06/12 | CH2205 | Male | Three y/o | Control | Control | Feed Day | No | 05:55 | 05:00 - 05:59 | Morning      | 37,9 | 182 | 282,0  | 282,0 | 19,05 | 634,31 | 192,23 |
| 2019/06/12 | CH2206 | Male | Three y/o | Control | Control | Feed Day | No | 05:55 | 05:00 - 05:59 | Morning      | 38,1 | 174 | 89,8   | 89,8  | 19,26 | 631,46 | 152,10 |
| 2019/06/12 | CH2205 | Male | Three y/o | Control | Control | Feed Day | No | 06:00 | 06:00 - 06:59 | Morning      | 38,0 |     | 21,4   | 21,4  | 19,15 |        | 102,63 |
| 2019/06/12 | CH2206 | Male | Three y/o | Control | Control | Feed Day | No | 06:00 | 06:00 - 06:59 | Morning      | 38,1 | 114 | 72,8   | 72,8  | 19,26 | 603,20 | 144,80 |
| 2019/06/12 | CH2205 | Male | Three y/o | Control | Control | Feed Day | No | 06:05 | 06:00 - 06:59 | Morning      | 37,9 |     | 169,8  | 169,8 | 19,05 |        | 174,37 |
| 2019/06/12 | CH2206 | Male | Three y/o | Control | Control | Feed Day | No | 06:05 | 06:00 - 06:59 | Morning      | 38,0 | 114 | 198,8  | 198,8 | 19,15 | 603,20 | 179,91 |
| 2019/06/12 | CH2205 | Male | Three y/o | Control | Control | Feed Day | No | 06:10 | 06:00 - 06:59 | Morning      | 37,9 | 109 | 9,0    | 9,0   | 19,05 | 600,04 | 73,19  |
| 2019/06/12 | CH2206 | Male | Three y/o | Control | Control | Feed Day | No | 06:10 | 06:00 - 06:59 | Morning      | 38,1 | 88  | 34,6   | 34,6  | 19,26 | 584,49 | 119,10 |
| 2019/06/12 | CH2205 | Male | Three y/o | Control | Control | Feed Day | No | 06:15 | 06:00 - 06:59 | Morning      | 37,7 |     | 3,4    | 3,4   | 18,85 |        | 40,51  |
| 2019/06/12 | CH2206 | Male | Three y/o | Control | Control | Feed Day | No | 06:15 | 06:00 - 06:59 | Morning      | 37,7 | 76  | 38,2   | 38,2  | 18,85 | 573,39 | 122,50 |
| 2019/06/12 | CH2205 | Male | Three y/o | Control | Control | Feed Day | No | 06:20 | 06:00 - 06:59 | Morning      | 37,6 |     | 4,6    | 4,6   | 18,75 |        | 50,61  |
| 2019/06/12 | CH2206 | Male | Three y/o | Control | Control | Feed Day | No | 06:20 | 06:00 - 06:59 | Morning      | 37,3 | 113 | 33,6   | 33,6  | 18,46 | 602,58 | 118,09 |
| 2019/06/12 | CH2205 | Male | Three y/o | Control | Control | Feed Day | No | 06:25 | 06:00 - 06:59 | Morning      | 37,6 |     | 5,4    | 5,4   | 18,75 |        | 55,99  |
| 2019/06/12 | CH2206 | Male | Three y/o | Control | Control | Feed Day | No | 06:25 | 06:00 - 06:59 | Morning      | 37,2 | 77  | 33,2   | 33,2  | 18,36 | 574,39 | 117,68 |
| 2019/06/12 | CH2205 | Male | Three y/o | Control | Control | Feed Day | No | 06:30 | 06:00 - 06:59 | Morning      | 37,6 |     | 13,8   | 13,8  | 18,75 |        | 87,68  |
| 2019/06/12 | CH2206 | Male | Three y/o | Control | Control | Feed Day | No | 06:30 | 06:00 - 06:59 | Morning      | 37,0 | 54  | 31,8   | 31,8  | 18,16 | 545,99 | 116,20 |
| 2019/06/12 | CH2205 | Male | Three y/o | Control | Control | Feed Day | No | 06:35 | 06:00 - 06:59 | Morning      | 37,5 | 84  | 9,8    | 9,8   | 18,65 | 581,01 | 76,07  |
| 2019/06/12 | CH2206 | Male | Three y/o | Control | Control | Feed Day | No | 06:35 | 06:00 - 06:59 | Morning      | 36,9 | 41  | 30,2   | 30,2  | 18,06 | 522,29 | 114,42 |
| 2019/06/12 | CH2205 | Male | Three y/o | Control | Control | Feed Day | No | 06:40 | 06:00 - 06:59 | Morning      | 37,4 |     | 12,0   | 12,0  | 18,55 |        | 82,93  |
| 2019/06/12 | CH2206 | Male | Three y/o | Control | Control | Feed Day | No | 06:40 | 06:00 - 06:59 | Morning      | 36,9 | 54  | 26,2   | 26,2  | 18,06 | 545,99 | 109,55 |
| 2019/06/12 | CH2205 | Male | Three y/o | Control | Control | Feed Day | No | 06:45 | 06:00 - 06:59 | Morning      | 37,3 |     | 13,8   | 13,8  | 18,46 |        | 87,68  |
| 2019/06/12 | CH2206 | Male | Three y/o | Control | Control | Feed Day | No | 06:45 | 06:00 - 06:59 | Morning      | 37,0 | 83  | 25,6   | 25,6  | 18,16 | 580,11 | 108,76 |
| 2019/06/12 | CH2205 | Male | Three y/o | Control | Control | Feed Day | No | 06:50 | 06:00 - 06:59 | Morning      | 37,2 | 48  | 14,0   | 14,0  | 18,36 | 536,04 | 88,17  |
| 2019/06/12 | CH2206 | Male | Three y/o | Control | Control | Feed Day | No | 06:50 | 06:00 - 06:59 | Morning      | 37,2 | 51  | 26,4   | 26,4  | 18,36 | 541,20 | 109,81 |
| 2019/06/12 | CH2205 | Male | Three y/o | Control | Control | Feed Day | No | 06:55 | 06:00 - 06:59 | Morning      | 37,2 | 148 | 93,6   | 93,6  | 18,36 | 620,97 | 153,54 |
| 2019/06/12 | CH2206 | Male | Three y/o | Control | Control | Feed Day | No | 06:55 | 06:00 - 06:59 | Morning      | 37,3 | 92  | 16,4   | 16,4  | 18,46 | 587,78 | 93,55  |
| 2019/06/12 | CH2205 | Male | Three y/o | Control | Control | Feed Day | No | 07:00 | 07:00 - 07:59 | Morning      | 37,3 | 137 | 158,4  | 158,4 | 18,46 | 615,83 | 171,93 |
| 2019/06/12 | CH2206 | Male | Three y/o | Control | Control | Feed Day | No | 07:00 | 07:00 - 07:59 | Morning      | 37,3 | 101 | 34,2   | 34,2  | 18,46 | 594,59 | 118,70 |
| 2019/06/12 | CH2205 | Male | Three y/o | Control | Control | Feed Day | No | 07:05 | 07:00 - 07:59 | Morning      | 37,3 |     | 242,0  | 242,0 | 18,46 |        | 186,83 |
| 2019/06/12 | CH2206 | Male | Three y/o | Control | Control | Feed Day | No | 07:05 | 07:00 - 07:59 | Morning      | 37,3 | 84  | 101,8  | 101,8 | 18,46 | 581,01 | 156,47 |
| 2019/06/12 | CH2205 | Male | Three y/o | Control | Control | Feed Day | No | 07:10 | 07:00 - 07:59 | Morning      | 37,4 | 138 | 279,8  | 279,8 | 18,55 | 616,31 | 191,96 |
| 2019/06/12 | CH2206 | Male | Three y/o | Control | Control | Feed Day | No | 07:10 | 07:00 - 07:59 | Morning      | 37,5 | 124 | 213,6  | 213,6 | 18,65 | 609,04 | 182,43 |
| 2019/06/12 | CH2205 | Male | Three y/o | Control | Control | Feed Day | No | 07:15 | 07:00 - 07:59 | Morning      | 37,5 | 105 | 135,0  | 135,0 | 18,65 | 597,38 | 166,33 |
| 2019/06/12 | CH2206 | Male | Three y/o | Control | Control | Feed Day | No | 07:15 | 07:00 - 07:59 | Morning      | 37,7 | 120 | 120,6  | 120,6 | 18,85 | 606,78 | 162,38 |
| 2019/06/12 | CH2205 | Male | Three y/o | Control | Control | Feed Day | No | 07:20 | 07:00 - 07:59 | Morning      | 37,5 | 137 | 111,2  | 111,2 | 18,65 | 615,83 | 159,55 |
| 2019/06/12 | CH2206 | Male | Three y/o | Control | Control | Feed Day | No | 07:20 | 07:00 - 07:59 | Morning      | 37,8 | 125 | 50,0   | 50,0  | 18,95 | 609,60 | 131,79 |
| 2019/06/12 | CH2205 | Male | Three y/o | Control | Control | Feed Day | No | 07:25 | 07:00 - 07:59 | Morning      | 37,7 | 120 | 41,8   | 41,8  | 18,85 | 606,78 | 125,60 |
| 2019/06/12 | CH2206 | Male | Three y/o | Control | Control | Feed Day | No | 07:25 | 07:00 - 07:59 | Morning      | 37,8 | 131 | 162,2  | 162,2 | 18,95 | 612,80 | 172,76 |
| 2019/06/12 | CH2205 | Male | Three y/o | Control | Control | Feed Day | No | 07:30 | 07:00 - 07:59 | Morning      | 37,7 | 137 | 362,2  | 362,2 | 18,85 | 615,83 | 201,09 |
| 2019/06/12 | CH2206 | Male | Three y/o | Control | Control | Feed Day | No | 07:30 | 07:00 - 07:59 | Morning      | 38,0 | 113 | 179,2  | 179,2 | 19,15 | 602,58 | 176,26 |
| 2019/06/12 | CH2205 | Male | Three y/o | Control | Control | Feed Day | No | 07:35 | 07:00 - 07:59 | Morning      | 37,7 | 167 | 220,0  | 220,0 | 18,85 | 628,84 | 183,47 |
| 2019/06/12 | CH2206 | Male | Three y/o | Control | Control | Feed Day | No | 07:35 | 07:00 - 07:59 | Morning      | 38,1 | 124 | 244,4  | 244,4 | 19,26 | 609,04 | 187,18 |
| 2019/06/12 | CH2205 | Male | Three y/o | Control | Control | Feed Day | No | 07:40 | 07:00 - 07:59 | Morning      | 37,9 | 105 | 73,4   | 73,4  | 19,05 | 597,38 | 145,08 |
| 2019/06/12 | CH2206 | Male | Three y/o | Control | Control | Feed Day | No | 07:40 | 07:00 - 07:59 | Morning      | 38,1 |     | 169,6  | 169,6 | 19,26 |        | 174,32 |
| 2019/06/12 | CH2205 | Male | Three y/o | Control | Control | Feed Day | No | 07:45 | 07:00 - 07:59 | Morning      | 37,9 | 80  | 20,6   | 20,6  | 19,05 | 577,31 | 101,32 |
| 2019/06/12 | CH2206 | Male | Three y/o | Control | Control | Feed Day | No | 07:45 | 07:00 - 07:59 | Morning      | 38,0 | 113 | 13,4   | 13,4  | 19,15 | 602,58 | 86,68  |
| 2019/06/12 | CH2205 | Male | Three y/o | Control | Control | Feed Day | No | 07:50 | 07:00 - 07:59 | Morning      | 37,7 | 125 | 31,6   | 31,6  | 18,85 | 609,60 | 115,98 |
| 2019/06/12 | CH2206 | Male | Three y/o | Control | Control | Feed Day | No | 07:50 | 07:00 - 07:59 | Morning      | 37,9 | 119 | 26,8   | 26,8  | 19,05 | 606,20 | 110,33 |
| 2019/06/12 | CH2205 | Male | Three y/o | Control | Control | Feed Day | No | 07:55 | 07:00 - 07:59 | Morning      | 37,7 | 111 | 136,4  | 136,4 | 18,85 | 601,33 | 166,69 |
| 2019/06/12 | CH2206 | Male | Three y/o | Control | Control | Feed Day | No | 07:55 | 07:00 - 07:59 | Morning      | 37,8 | 114 | 7,6    | 7,6   | 18,95 | 603,20 | 67,49  |
| 2019/06/12 | CH2205 | Male | Three y/o | Control | Control | Feed Day | No | 08:00 | 08:00 - 08:59 | Late Morning | 37,7 | 93  | 79,6   |       | 18,85 | 588,58 | 147,90 |
| 2019/06/12 | CH2206 | Male | Three y/o | Control | Control | Feed Day | No | 08:00 | 08:00 - 08:59 | Late Morning | 37,8 | 99  | 15,2   | 15,2  | 18,95 | 593,14 | 90,96  |
| 2019/06/12 | CH2205 | Male | Three y/o | Control | Control | Feed Day | No | 08:05 | 08:00 - 08:59 | Late Morning | 37,9 | 125 | 144,4  | 144,4 | 19,05 | 609,60 | 168,68 |



|            |        |      |           |         |         |          |     |       |               |              |      |     |       |       |       |        |        |
|------------|--------|------|-----------|---------|---------|----------|-----|-------|---------------|--------------|------|-----|-------|-------|-------|--------|--------|
| 2019/06/12 | CH2206 | Male | Three y/o | Control | Control | Feed Day | No  | 08:05 | 08:00 - 08:59 | Late Morning | 37,8 | 145 | 121,4 | 121,4 | 18,95 | 619,62 | 162,61 |
| 2019/06/12 | CH2205 | Male | Three y/o | Control | Control | Feed Day | No  | 08:10 | 08:00 - 08:59 | Late Morning | 37,7 | 102 | 221,8 | 221,8 | 18,85 | 595,30 | 183,76 |
| 2019/06/12 | CH2206 | Male | Three y/o | Control | Control | Feed Day | No  | 08:10 | 08:00 - 08:59 | Late Morning | 37,9 | 131 | 59,6  | 59,6  | 19,05 | 612,80 | 137,86 |
| 2019/06/12 | CH2205 | Male | Three y/o | Control | Control | Feed Day | No  | 08:15 | 08:00 - 08:59 | Late Morning | 37,9 | 103 | 100,2 | 100,2 | 19,05 | 596,00 | 155,91 |
| 2019/06/12 | CH2206 | Male | Three y/o | Control | Control | Feed Day | No  | 08:15 | 08:00 - 08:59 | Late Morning | 38,1 | 112 | 78,2  | 78,2  | 19,26 | 601,96 | 147,28 |
| 2019/06/12 | CH2205 | Male | Three y/o | Control | Control | Feed Day | No  | 08:20 | 08:00 - 08:59 | Late Morning | 37,9 | 120 | 89,6  | 89,6  | 19,05 | 606,78 | 152,02 |
| 2019/06/12 | CH2206 | Male | Three y/o | Control | Control | Feed Day | No  | 08:20 | 08:00 - 08:59 | Late Morning | 38,0 | 124 | 366,8 | 366,8 | 19,15 | 609,04 | 201,54 |
| 2019/06/12 | CH2205 | Male | Three y/o | Control | Control | Feed Day | No  | 08:25 | 08:00 - 08:59 | Late Morning | 37,9 | 94  | 23,4  | 23,4  | 19,05 | 589,37 | 105,68 |
| 2019/06/12 | CH2206 | Male | Three y/o | Control | Control | Feed Day | No  | 08:25 | 08:00 - 08:59 | Late Morning | 37,9 | 73  | 83,2  | 83,2  | 19,05 | 570,27 | 149,44 |
| 2019/06/12 | CH2205 | Male | Three y/o | Control | Control | Feed Day | No  | 08:30 | 08:00 - 08:59 | Late Morning | 37,7 |     | 8,8   | 8,8   | 18,85 |        | 72,43  |
| 2019/06/12 | CH2206 | Male | Three y/o | Control | Control | Feed Day | No  | 08:30 | 08:00 - 08:59 | Late Morning | 37,9 | 123 | 78,0  | 78,0  | 19,05 | 608,49 | 147,20 |
| 2019/06/12 | CH2205 | Male | Three y/o | Control | Control | Feed Day | No  | 08:35 | 08:00 - 08:59 | Late Morning | 37,7 | 69  | 23,2  | 23,2  | 18,85 | 565,86 | 105,39 |
| 2019/06/12 | CH2206 | Male | Three y/o | Control | Control | Feed Day | No  | 08:35 | 08:00 - 08:59 | Late Morning | 38,0 | 121 | 148,0 | 148,0 | 19,15 | 607,35 | 169,55 |
| 2019/06/12 | CH2205 | Male | Three y/o | Control | Control | Feed Day | No  | 08:40 | 08:00 - 08:59 | Late Morning | 37,7 | 121 | 238,2 | 238,2 | 18,85 | 607,35 | 186,28 |
| 2019/06/12 | CH2206 | Male | Three y/o | Control | Control | Feed Day | No  | 08:40 | 08:00 - 08:59 | Late Morning | 37,9 | 128 | 90,6  | 90,6  | 19,05 | 611,22 | 152,40 |
| 2019/06/12 | CH2205 | Male | Three y/o | Control | Control | Feed Day | No  | 08:45 | 08:00 - 08:59 | Late Morning | 37,7 | 93  | 136,2 | 136,2 | 18,85 | 588,58 | 166,64 |
| 2019/06/12 | CH2206 | Male | Three y/o | Control | Control | Feed Day | No  | 08:45 | 08:00 - 08:59 | Late Morning | 37,9 |     | 346,4 | 346,4 | 19,05 |        | 199,51 |
| 2019/06/12 | CH2205 | Male | Three y/o | Control | Control | Feed Day | No  | 08:50 | 08:00 - 08:59 | Late Morning | 37,6 | 93  | 71,6  | 71,6  | 18,75 | 588,58 | 144,22 |
| 2019/06/12 | CH2206 | Male | Three y/o | Control | Control | Feed Day | No  | 08:50 | 08:00 - 08:59 | Late Morning | 37,8 | 101 | 131,8 | 131,8 | 18,95 | 594,59 | 165,49 |
| 2019/06/12 | CH2205 | Male | Three y/o | Control | Control | Feed Day | No  | 08:55 | 08:00 - 08:59 | Late Morning | 37,6 | 106 | 7,4   | 7,4   | 18,75 | 598,06 | 66,59  |
| 2019/06/12 | CH2206 | Male | Three y/o | Control | Control | Feed Day | No  | 08:55 | 08:00 - 08:59 | Late Morning | 37,8 | 84  | 23,8  | 23,8  | 18,95 | 581,01 | 106,26 |
| 2019/06/12 | CH2205 | Male | Three y/o | Control | Control | Feed Day | No  | 09:00 | 09:00 - 09:59 | Late Morning | 37,6 | 67  | 21,6  | 21,6  | 18,75 | 563,53 | 102,94 |
| 2019/06/12 | CH2206 | Male | Three y/o | Control | Control | Feed Day | No  | 09:00 | 09:00 - 09:59 | Late Morning | 37,8 | 83  | 35,6  | 35,6  | 18,95 | 580,11 | 120,08 |
| 2019/06/12 | CH2205 | Male | Three y/o | Control | Control | Feed Day | No  | 09:05 | 09:00 - 09:59 | Late Morning | 37,6 |     | 25,0  | 25,0  | 18,75 |        | 107,94 |
| 2019/06/12 | CH2206 | Male | Three y/o | Control | Control | Feed Day | No  | 09:05 | 09:00 - 09:59 | Late Morning | 37,7 | 80  | 27,2  | 27,2  | 18,85 | 577,31 | 110,83 |
| 2019/06/12 | CH2205 | Male | Three y/o | Control | Control | Feed Day | No  | 09:10 | 09:00 - 09:59 | Late Morning | 37,5 | 90  | 136,6 | 136,6 | 18,65 | 586,16 | 166,74 |
| 2019/06/12 | CH2206 | Male | Three y/o | Control | Control | Feed Day | No  | 09:10 | 09:00 - 09:59 | Late Morning | 37,5 | 51  | 18,8  | 18,8  | 18,65 | 541,20 | 98,20  |
| 2019/06/12 | CH2205 | Male | Three y/o | Control | Control | Feed Day | No  | 09:15 | 09:00 - 09:59 | Late Morning | 37,5 | 100 | 18,2  | 18,2  | 18,65 | 593,87 | 97,10  |
| 2019/06/12 | CH2206 | Male | Three y/o | Control | Control | Feed Day | No  | 09:15 | 09:00 - 09:59 | Late Morning | 37,4 | 92  | 29,2  | 29,2  | 18,55 | 587,78 | 113,27 |
| 2019/06/12 | CH2205 | Male | Three y/o | Control | Control | Feed Day | No  | 09:20 | 09:00 - 09:59 | Late Morning | 37,5 | 72  | 21,6  | 21,6  | 18,65 | 569,20 | 102,94 |
| 2019/06/12 | CH2206 | Male | Three y/o | Control | Control | Feed Day | No  | 09:20 | 09:00 - 09:59 | Late Morning | 37,5 | 56  | 14,6  | 14,6  | 18,65 | 549,01 | 89,59  |
| 2019/06/12 | CH2205 | Male | Three y/o | Control | Control | Feed Day | No  | 09:25 | 09:00 - 09:59 | Late Morning | 37,6 | 106 | 5,4   | 5,4   | 18,75 | 598,06 | 55,99  |
| 2019/06/12 | CH2206 | Male | Three y/o | Control | Control | Feed Day | No  | 09:25 | 09:00 - 09:59 | Late Morning | 37,6 | 103 | 50,8  | 50,8  | 18,75 | 596,00 | 132,33 |
| 2019/06/12 | CH2205 | Male | Three y/o | Control | Control | Feed Day | No  | 09:30 | 09:00 - 09:59 | Late Morning | 37,6 | 137 | 41,6  | 41,6  | 18,75 | 615,83 | 125,44 |
| 2019/06/12 | CH2206 | Male | Three y/o | Control | Control | Feed Day | No  | 09:30 | 09:00 - 09:59 | Late Morning | 37,7 | 100 | 64,2  | 64,2  | 18,85 | 593,87 | 140,44 |
| 2019/06/12 | CH2205 | Male | Three y/o | Control | Control | Feed Day | No  | 09:35 | 09:00 - 09:59 | Late Morning | 37,6 | 98  | 17,6  | 17,6  | 18,75 | 592,41 | 95,95  |
| 2019/06/12 | CH2206 | Male | Three y/o | Control | Control | Feed Day | No  | 09:35 | 09:00 - 09:59 | Late Morning | 37,7 | 68  | 31,6  | 31,6  | 18,85 | 564,71 | 115,98 |
| 2019/06/12 | CH2205 | Male | Three y/o | Control | Control | Feed Day | No  | 09:40 | 09:00 - 09:59 | Late Morning | 37,6 | 82  | 7,0   | 7,0   | 18,75 | 579,19 | 64,72  |
| 2019/06/12 | CH2206 | Male | Three y/o | Control | Control | Feed Day | No  | 09:40 | 09:00 - 09:59 | Late Morning | 37,7 | 57  | 23,4  | 23,4  | 18,85 | 550,47 | 105,68 |
| 2019/06/12 | CH2205 | Male | Three y/o | Control | Control | Feed Day | No  | 09:45 | 09:00 - 09:59 | Late Morning | 37,6 | 68  | 8,2   | 8,2   | 18,75 | 564,71 | 70,05  |
| 2019/06/12 | CH2206 | Male | Three y/o | Control | Control | Feed Day | No  | 09:45 | 09:00 - 09:59 | Late Morning | 37,8 | 90  | 15,8  | 15,8  | 18,95 | 586,16 | 92,28  |
| 2019/06/12 | CH2205 | Male | Three y/o | Control | Control | Feed Day | No  | 09:50 | 09:00 - 09:59 | Late Morning | 37,6 | 50  | 8,8   | 8,8   | 18,75 | 539,52 | 72,43  |
| 2019/06/12 | CH2206 | Male | Three y/o | Control | Control | Feed Day | No  | 09:50 | 09:00 - 09:59 | Late Morning | 37,8 | 53  | 13,8  | 13,8  | 18,95 | 544,43 | 87,68  |
| 2019/06/12 | CH2205 | Male | Three y/o | Control | Control | Feed Day | No  | 09:55 | 09:00 - 09:59 | Late Morning | 37,6 | 66  | 10,8  | 10,8  | 18,75 | 562,34 | 79,36  |
| 2019/06/12 | CH2206 | Male | Three y/o | Control | Control | Feed Day | No  | 09:55 | 09:00 - 09:59 | Late Morning | 37,6 | 84  | 12,4  | 12,4  | 18,75 | 581,01 | 84,04  |
| 2019/06/12 | CH2205 | Male | Three y/o | Control | Control | Feed Day | No  | 10:00 | 10:00 - 10:59 | Late Morning | 37,6 | 60  | 24,6  | 24,6  | 18,75 | 554,67 | 107,39 |
| 2019/06/12 | CH2206 | Male | Three y/o | Control | Control | Feed Day | No  | 10:00 | 10:00 - 10:59 | Late Morning | 37,4 | 73  | 16,8  | 16,8  | 18,55 | 570,27 | 94,37  |
| 2019/06/12 | CH2205 | Male | Three y/o | Control | Control | Feed Day | No  | 10:05 | 10:00 - 10:59 | Late Morning | 37,5 | 70  | 20,2  | 20,2  | 18,65 | 566,99 | 100,65 |
| 2019/06/12 | CH2206 | Male | Three y/o | Control | Control | Feed Day | No  | 10:05 | 10:00 - 10:59 | Late Morning | 37,3 | 46  | 28,2  | 28,2  | 18,46 | 532,38 | 112,07 |
| 2019/06/12 | CH2205 | Male | Three y/o | Control | Control | Feed Day | No  | 10:10 | 10:00 - 10:59 | Late Morning | 37,5 | 60  | 20,4  | 20,4  | 18,65 | 554,67 | 100,99 |
| 2019/06/12 | CH2206 | Male | Three y/o | Control | Control | Feed Day | No  | 10:10 | 10:00 - 10:59 | Late Morning | 37,3 | 76  | 42,2  | 42,2  | 18,46 | 573,39 | 125,93 |
| 2019/06/12 | CH2205 | Male | Three y/o | Control | Control | Feed Day | No  | 10:15 | 10:00 - 10:59 | Late Morning | 37,5 | 67  | 13,8  | 13,8  | 18,65 | 563,53 | 87,68  |
| 2019/06/12 | CH2206 | Male | Three y/o | Control | Control | Feed Day | No  | 10:15 | 10:00 - 10:59 | Late Morning | 37,4 | 45  | 32,6  | 32,6  | 18,55 | 530,47 | 117,05 |
| 2019/06/12 | CH2205 | Male | Three y/o | Control | Control | Feed Day | No  | 10:20 | 10:00 - 10:59 | Late Morning | 37,5 | 57  | 12,2  | 12,2  | 18,65 | 550,47 | 83,49  |
| 2019/06/12 | CH2206 | Male | Three y/o | Control | Control | Feed Day | No  | 10:20 | 10:00 - 10:59 | Late Morning | 37,4 | 67  | 28,0  | 28,0  | 18,55 | 563,53 | 111,83 |
| 2019/06/12 | CH2205 | Male | Three y/o | Control | Control | Feed Day | No  | 10:25 | 10:00 - 10:59 | Late Morning | 37,5 | 48  | 11,6  | 11,6  | 18,65 | 536,04 | 81,78  |
| 2019/06/12 | CH2206 | Male | Three y/o | Control | Control | Feed Day | No  | 10:25 | 10:00 - 10:59 | Late Morning | 37,4 |     | 18,8  | 18,8  | 18,55 |        | 98,20  |
| 2019/06/12 | CH2205 | Male | Three y/o | Control | Control | Feed Day | Yes | 10:30 | 10:00 - 10:59 | Late Morning | 37,6 | 52  | 9,4   | 9,4   | 18,75 | 542,83 | 74,66  |
| 2019/06/12 | CH2206 | Male | Three y/o | Control | Control | Feed Day | Yes | 10:30 | 10:00 - 10:59 | Late Morning | 37,4 | 56  | 11,6  | 11,6  | 18,55 | 549,01 | 81,78  |
| 2019/06/12 | CH2205 | Male | Three y/o | Control | Control | Feed Day | Yes | 10:35 | 10:00 - 10:59 | Late Morning | 37,6 | 45  | 21,4  | 21,4  | 18,75 | 530,47 | 102,63 |
| 2019/06/12 | CH2206 | Male | Three y/o | Control | Control | Feed Day | Yes | 10:35 | 10:00 - 10:59 | Late Morning | 37,4 | 42  | 34,2  | 34,2  | 18,55 | 524,42 | 118,70 |
| 2019/06/12 | CH2205 | Male | Three y/o | Control | Control | Feed Day | Yes | 10:40 | 10:00 - 10:59 | Late Morning | 37,6 | 123 | 10,2  | 10,2  | 18,75 | 608,49 | 77,43  |
| 2019/06/12 | CH2206 | Male | Three y/o | Control | Control | Feed Day | Yes | 10:40 | 10:00 - 10:59 | Late Morning | 37,4 | 54  | 20,4  | 20,4  | 18,55 | 545,99 | 100,99 |
| 2019/06/12 | CH2205 | Male | Three y/o | Control | Control | Feed Day | Yes | 10:45 | 10:00 - 10:59 | Late Morning | 37,6 | 64  | 19,6  | 19,6  | 18,75 | 559,88 | 99,63  |
| 2019/06/12 | CH2206 | Male | Three y/o | Control | Control | Feed Day | Yes | 10:45 | 10:00 - 10:59 | Late Morning | 37,4 | 50  | 27,6  | 27,6  | 18,55 | 539,52 | 111,33 |
| 2019/06/12 | CH2205 | Male | Three y/o | Control | Control | Feed Day | Yes | 10:50 | 10:00 - 10:59 | Late Morning | 37,6 | 63  | 11,4  | 11,4  | 18,75 | 558,62 | 81,19  |
| 2019/06/12 | CH2206 | Male | Three y/o | Control | Control | Feed Day | Yes | 10:50 | 10:00 - 10:59 | Late Morning | 37,4 | 92  | 50,2  | 50,2  | 18,55 | 587,78 | 131,92 |
| 2019/06/12 | CH2205 | Male | Three y/o | Control | Control | Feed Day | Yes | 10:55 | 10:00 - 10:59 | Late Morning | 37,6 | 61  | 11,4  | 11,4  | 18,75 | 556,01 | 81,19  |
| 2019/06/12 | CH2206 | Male | Three y/o | Control | Control | Feed Day | Yes | 10:55 | 10:00 - 10:59 | Late Morning | 37,5 | 99  | 104,6 | 104,6 | 18,65 | 593,14 | 157,41 |
| 2019/06/12 | CH2205 | Male | Three y/o | Control | Control | Feed Day | Yes | 11:00 | 11:00 - 11:59 | Late Morning | 37,6 |     | 15,6  | 15,6  | 18,75 |        | 91,85  |



|            |        |      |           |         |         |          |     |       |               |              |      |     |       |       |       |        |        |
|------------|--------|------|-----------|---------|---------|----------|-----|-------|---------------|--------------|------|-----|-------|-------|-------|--------|--------|
| 2019/06/12 | CH2206 | Male | Three y/o | Control | Control | Feed Day | Yes | 11:00 | 11:00 - 11:59 | Late Morning | 37,5 | 90  | 24,2  | 24,2  | 18,65 | 586,16 | 106,83 |
| 2019/06/12 | CH2205 | Male | Three y/o | Control | Control | Feed Day | Yes | 11:05 | 11:00 - 11:59 | Late Morning | 37,6 | 64  | 7,0   | 7,0   | 18,75 | 559,88 | 64,72  |
| 2019/06/12 | CH2206 | Male | Three y/o | Control | Control | Feed Day | Yes | 11:05 | 11:00 - 11:59 | Late Morning | 37,7 | 132 | 57,8  | 57,8  | 18,85 | 613,32 | 136,80 |
| 2019/06/12 | CH2205 | Male | Three y/o | Control | Control | Feed Day | Yes | 11:10 | 11:00 - 11:59 | Late Morning | 37,6 | 61  | 5,0   | 5,0   | 18,75 | 556,01 | 53,41  |
| 2019/06/12 | CH2206 | Male | Three y/o | Control | Control | Feed Day | Yes | 11:10 | 11:00 - 11:59 | Late Morning | 37,7 | 109 | 220,4 | 220,4 | 18,85 | 600,04 | 183,54 |
| 2019/06/12 | CH2205 | Male | Three y/o | Control | Control | Feed Day | Yes | 11:15 | 11:00 - 11:59 | Late Morning | 37,6 | 143 | 35,8  | 35,8  | 18,75 | 618,69 | 120,27 |
| 2019/06/12 | CH2206 | Male | Three y/o | Control | Control | Feed Day | Yes | 11:15 | 11:00 - 11:59 | Late Morning | 37,8 | 129 | 31,6  | 31,6  | 18,95 | 611,75 | 115,98 |
| 2019/06/12 | CH2205 | Male | Three y/o | Control | Control | Feed Day | Yes | 11:20 | 11:00 - 11:59 | Late Morning | 37,7 | 93  | 62,4  | 62,4  | 18,85 | 588,58 | 139,45 |
| 2019/06/12 | CH2206 | Male | Three y/o | Control | Control | Feed Day | Yes | 11:20 | 11:00 - 11:59 | Late Morning | 37,8 | 88  | 116,8 | 116,8 | 18,95 | 584,49 | 161,26 |
| 2019/06/12 | CH2205 | Male | Three y/o | Control | Control | Feed Day | Yes | 11:25 | 11:00 - 11:59 | Late Morning | 37,6 | 65  | 6,8   | 6,8   | 18,75 | 561,12 | 63,74  |
| 2019/06/12 | CH2206 | Male | Three y/o | Control | Control | Feed Day | Yes | 11:25 | 11:00 - 11:59 | Late Morning | 37,8 | 91  | 44,6  | 44,6  | 18,95 | 586,98 | 127,84 |
| 2019/06/12 | CH2205 | Male | Three y/o | Control | Control | Feed Day | No  | 11:30 | 11:00 - 11:59 | Late Morning | 37,6 | 70  | 15,6  | 15,6  | 18,75 | 566,99 | 91,85  |
| 2019/06/12 | CH2206 | Male | Three y/o | Control | Control | Feed Day | No  | 11:30 | 11:00 - 11:59 | Late Morning | 37,8 | 118 | 47,6  | 47,6  | 18,95 | 605,61 | 130,09 |
| 2019/06/12 | CH2205 | Male | Three y/o | Control | Control | Feed Day | No  | 11:35 | 11:00 - 11:59 | Late Morning | 37,6 | 60  | 57,4  | 57,4  | 18,75 | 554,67 | 136,56 |
| 2019/06/12 | CH2206 | Male | Three y/o | Control | Control | Feed Day | No  | 11:35 | 11:00 - 11:59 | Late Morning | 37,7 | 98  | 91,0  | 91,0  | 18,85 | 592,41 | 152,56 |
| 2019/06/12 | CH2205 | Male | Three y/o | Control | Control | Feed Day | No  | 11:40 | 11:00 - 11:59 | Late Morning | 37,7 | 94  | 39,0  | 39,0  | 18,85 | 589,37 | 123,22 |
| 2019/06/12 | CH2206 | Male | Three y/o | Control | Control | Feed Day | No  | 11:40 | 11:00 - 11:59 | Late Morning | 37,7 | 67  | 38,4  | 38,4  | 18,85 | 563,53 | 122,68 |
| 2019/06/12 | CH2205 | Male | Three y/o | Control | Control | Feed Day | No  | 11:45 | 11:00 - 11:59 | Late Morning | 37,7 | 74  | 25,2  | 25,2  | 18,85 | 571,33 | 108,22 |
| 2019/06/12 | CH2206 | Male | Three y/o | Control | Control | Feed Day | No  | 11:45 | 11:00 - 11:59 | Late Morning | 37,8 | 95  | 43,0  | 43,0  | 18,95 | 590,14 | 126,58 |
| 2019/06/12 | CH2205 | Male | Three y/o | Control | Control | Feed Day | No  | 11:50 | 11:00 - 11:59 | Late Morning | 37,7 | 55  | 23,6  | 23,6  | 18,85 | 547,52 | 105,97 |
| 2019/06/12 | CH2206 | Male | Three y/o | Control | Control | Feed Day | No  | 11:50 | 11:00 - 11:59 | Late Morning | 37,8 | 77  | 24,2  | 24,2  | 18,95 | 574,39 | 106,83 |
| 2019/06/12 | CH2205 | Male | Three y/o | Control | Control | Feed Day | No  | 11:55 | 11:00 - 11:59 | Late Morning | 37,6 | 66  | 754,4 | 754,4 | 18,75 | 562,34 | 227,23 |
| 2019/06/12 | CH2206 | Male | Three y/o | Control | Control | Feed Day | No  | 11:55 | 11:00 - 11:59 | Late Morning | 37,8 |     | 137,0 | 137,0 | 18,95 |        | 166,84 |
| 2019/06/12 | CH2205 | Male | Three y/o | Control | Control | Feed Day | No  | 12:00 | 12:00 - 12:59 | Afternoon    | 38,0 | 115 | 130,8 | 130,8 | 19,15 | 603,82 | 165,22 |
| 2019/06/12 | CH2206 | Male | Three y/o | Control | Control | Feed Day | No  | 12:00 | 12:00 - 12:59 | Afternoon    | 37,9 | 117 | 46,8  | 46,8  | 19,05 | 605,02 | 129,50 |
| 2019/06/12 | CH2205 | Male | Three y/o | Control | Control | Feed Day | No  | 12:05 | 12:00 - 12:59 | Afternoon    | 38,0 | 119 | 94,0  | 94,0  | 19,15 | 606,20 | 153,69 |
| 2019/06/12 | CH2206 | Male | Three y/o | Control | Control | Feed Day | No  | 12:05 | 12:00 - 12:59 | Afternoon    | 37,8 | 102 | 145,0 | 145,0 | 18,95 | 595,30 | 168,83 |
| 2019/06/12 | CH2205 | Male | Three y/o | Control | Control | Feed Day | No  | 12:10 | 12:00 - 12:59 | Afternoon    | 38,0 | 96  | 9,2   | 9,2   | 19,15 | 590,91 | 73,94  |
| 2019/06/12 | CH2206 | Male | Three y/o | Control | Control | Feed Day | No  | 12:10 | 12:00 - 12:59 | Afternoon    | 37,8 | 75  | 24,4  | 24,4  | 18,95 | 572,36 | 107,11 |
| 2019/06/12 | CH2205 | Male | Three y/o | Control | Control | Feed Day | No  | 12:15 | 12:00 - 12:59 | Afternoon    | 37,9 | 90  | 90,2  | 90,2  | 19,05 | 586,16 | 152,25 |
| 2019/06/12 | CH2206 | Male | Three y/o | Control | Control | Feed Day | No  | 12:15 | 12:00 - 12:59 | Afternoon    | 37,8 | 86  | 47,4  | 47,4  | 18,95 | 582,77 | 129,94 |
| 2019/06/12 | CH2205 | Male | Three y/o | Control | Control | Feed Day | No  | 12:20 | 12:00 - 12:59 | Afternoon    | 38,0 | 88  | 331,8 | 331,8 | 19,15 | 584,49 | 197,99 |
| 2019/06/12 | CH2206 | Male | Three y/o | Control | Control | Feed Day | No  | 12:20 | 12:00 - 12:59 | Afternoon    | 37,9 | 95  | 27,8  | 27,8  | 19,05 | 590,14 | 111,58 |
| 2019/06/12 | CH2205 | Male | Three y/o | Control | Control | Feed Day | No  | 12:25 | 12:00 - 12:59 | Afternoon    | 38,0 | 162 | 105,4 | 105,4 | 19,15 | 626,88 | 157,68 |
| 2019/06/12 | CH2206 | Male | Three y/o | Control | Control | Feed Day | No  | 12:25 | 12:00 - 12:59 | Afternoon    | 37,9 | 75  | 48,2  | 48,2  | 19,05 | 572,36 | 130,52 |
| 2019/06/12 | CH2205 | Male | Three y/o | Control | Control | Feed Day | No  | 12:30 | 12:00 - 12:59 | Afternoon    | 38,0 | 76  | 13,4  | 13,4  | 19,15 | 573,39 | 86,68  |
| 2019/06/12 | CH2206 | Male | Three y/o | Control | Control | Feed Day | No  | 12:30 | 12:00 - 12:59 | Afternoon    | 37,9 | 115 | 128,2 | 128,2 | 19,05 | 603,82 | 164,52 |
| 2019/06/12 | CH2205 | Male | Three y/o | Control | Control | Feed Day | No  | 12:35 | 12:00 - 12:59 | Afternoon    | 37,9 | 103 | 14,2  | 14,2  | 19,05 | 596,00 | 88,65  |
| 2019/06/12 | CH2206 | Male | Three y/o | Control | Control | Feed Day | No  | 12:35 | 12:00 - 12:59 | Afternoon    | 37,9 | 145 | 68,4  | 68,4  | 19,05 | 619,62 | 142,64 |
| 2019/06/12 | CH2205 | Male | Three y/o | Control | Control | Feed Day | No  | 12:40 | 12:00 - 12:59 | Afternoon    | 37,9 | 75  | 13,6  | 13,6  | 19,05 | 572,36 | 87,18  |
| 2019/06/12 | CH2206 | Male | Three y/o | Control | Control | Feed Day | No  | 12:40 | 12:00 - 12:59 | Afternoon    | 37,9 | 108 | 33,0  | 33,0  | 19,05 | 599,39 | 117,47 |
| 2019/06/12 | CH2205 | Male | Three y/o | Control | Control | Feed Day | No  | 12:45 | 12:00 - 12:59 | Afternoon    | 37,9 | 86  | 5,4   | 5,4   | 19,05 | 582,77 | 55,99  |
| 2019/06/12 | CH2206 | Male | Three y/o | Control | Control | Feed Day | No  | 12:45 | 12:00 - 12:59 | Afternoon    | 37,9 | 137 | 19,0  | 19,0  | 19,05 | 615,83 | 98,56  |
| 2019/06/12 | CH2205 | Male | Three y/o | Control | Control | Feed Day | No  | 12:50 | 12:00 - 12:59 | Afternoon    | 37,9 | 79  | 9,2   | 9,2   | 19,05 | 576,36 | 73,94  |
| 2019/06/12 | CH2206 | Male | Three y/o | Control | Control | Feed Day | No  | 12:50 | 12:00 - 12:59 | Afternoon    | 37,9 | 90  | 14,2  | 14,2  | 19,05 | 586,16 | 88,65  |
| 2019/06/12 | CH2205 | Male | Three y/o | Control | Control | Feed Day | No  | 12:55 | 12:00 - 12:59 | Afternoon    | 37,8 | 78  | 18,4  | 18,4  | 18,95 | 575,38 | 97,47  |
| 2019/06/12 | CH2206 | Male | Three y/o | Control | Control | Feed Day | No  | 12:55 | 12:00 - 12:59 | Afternoon    | 37,9 | 88  | 14,4  | 14,4  | 19,05 | 584,49 | 89,12  |
| 2019/06/12 | CH2205 | Male | Three y/o | Control | Control | Feed Day | No  | 13:00 | 13:00 - 13:59 | Afternoon    | 37,9 | 70  | 18,0  | 18,0  | 19,05 | 566,99 | 96,72  |
| 2019/06/12 | CH2206 | Male | Three y/o | Control | Control | Feed Day | No  | 13:00 | 13:00 - 13:59 | Afternoon    | 37,9 | 84  | 12,2  | 12,2  | 19,05 | 581,01 | 83,49  |
| 2019/06/12 | CH2205 | Male | Three y/o | Control | Control | Feed Day | No  | 13:05 | 13:00 - 13:59 | Afternoon    | 37,9 | 71  | 25,0  | 25,0  | 19,05 | 568,10 | 107,94 |
| 2019/06/12 | CH2206 | Male | Three y/o | Control | Control | Feed Day | No  | 13:05 | 13:00 - 13:59 | Afternoon    | 37,9 | 82  | 13,2  | 13,2  | 19,05 | 579,19 | 86,17  |
| 2019/06/12 | CH2205 | Male | Three y/o | Control | Control | Feed Day | No  | 13:10 | 13:00 - 13:59 | Afternoon    | 37,9 | 71  | 21,0  | 21,0  | 19,05 | 568,10 | 101,98 |
| 2019/06/12 | CH2206 | Male | Three y/o | Control | Control | Feed Day | No  | 13:10 | 13:00 - 13:59 | Afternoon    | 37,9 | 83  | 14,2  | 14,2  | 19,05 | 580,11 | 88,65  |
| 2019/06/12 | CH2205 | Male | Three y/o | Control | Control | Feed Day | No  | 13:15 | 13:00 - 13:59 | Afternoon    | 37,9 | 62  | 24,0  | 24,0  | 19,05 | 557,33 | 106,55 |
| 2019/06/12 | CH2206 | Male | Three y/o | Control | Control | Feed Day | No  | 13:15 | 13:00 - 13:59 | Afternoon    | 38,0 | 68  | 31,0  | 31,0  | 19,15 | 564,71 | 115,32 |
| 2019/06/12 | CH2205 | Male | Three y/o | Control | Control | Feed Day | No  | 13:20 | 13:00 - 13:59 | Afternoon    | 37,9 | 83  | 21,4  | 21,4  | 19,05 | 580,11 | 102,63 |
| 2019/06/12 | CH2206 | Male | Three y/o | Control | Control | Feed Day | No  | 13:20 | 13:00 - 13:59 | Afternoon    | 38,0 | 88  | 36,2  | 36,2  | 19,15 | 584,49 | 120,65 |
| 2019/06/12 | CH2205 | Male | Three y/o | Control | Control | Feed Day | No  | 13:25 | 13:00 - 13:59 | Afternoon    | 37,9 | 72  | 22,2  | 22,2  | 19,05 | 569,20 | 103,88 |
| 2019/06/12 | CH2206 | Male | Three y/o | Control | Control | Feed Day | No  | 13:25 | 13:00 - 13:59 | Afternoon    | 38,0 | 82  | 38,4  | 38,4  | 19,15 | 579,19 | 122,68 |
| 2019/06/12 | CH2205 | Male | Three y/o | Control | Control | Feed Day | No  | 13:30 | 13:00 - 13:59 | Afternoon    | 37,9 | 84  | 34,0  | 34,0  | 19,05 | 581,01 | 118,49 |
| 2019/06/12 | CH2206 | Male | Three y/o | Control | Control | Feed Day | No  | 13:30 | 13:00 - 13:59 | Afternoon    | 37,9 | 83  | 34,4  | 34,4  | 19,05 | 580,11 | 118,90 |
| 2019/06/12 | CH2205 | Male | Three y/o | Control | Control | Feed Day | No  | 13:35 | 13:00 - 13:59 | Afternoon    | 37,9 | 60  | 25,6  | 25,6  | 19,05 | 554,67 | 108,76 |
| 2019/06/12 | CH2206 | Male | Three y/o | Control | Control | Feed Day | No  | 13:35 | 13:00 - 13:59 | Afternoon    | 37,9 | 82  | 37,0  | 37,0  | 19,05 | 579,19 | 121,40 |
| 2019/06/12 | CH2205 | Male | Three y/o | Control | Control | Feed Day | No  | 13:40 | 13:00 - 13:59 | Afternoon    | 37,9 | 73  | 31,4  | 31,4  | 19,05 | 570,27 | 115,76 |
| 2019/06/12 | CH2206 | Male | Three y/o | Control | Control | Feed Day | No  | 13:40 | 13:00 - 13:59 | Afternoon    | 37,9 | 94  | 48,8  | 48,8  | 19,05 | 589,37 | 130,95 |
| 2019/06/12 | CH2205 | Male | Three y/o | Control | Control | Feed Day | No  | 13:45 | 13:00 - 13:59 | Afternoon    | 37,9 | 80  | 23,0  | 23,0  | 19,05 | 577,31 | 105,09 |
| 2019/06/12 | CH2206 | Male | Three y/o | Control | Control | Feed Day | No  | 13:45 | 13:00 - 13:59 | Afternoon    | 37,9 | 96  | 14,0  | 14,0  | 19,05 | 590,91 | 88,17  |
| 2019/06/12 | CH2205 | Male | Three y/o | Control | Control | Feed Day | No  | 13:50 | 13:00 - 13:59 | Afternoon    | 38,0 | 78  | 24,6  | 24,6  | 19,15 | 575,38 | 107,39 |
| 2019/06/12 | CH2206 | Male | Three y/o | Control | Control | Feed Day | No  | 13:50 | 13:00 - 13:59 | Afternoon    | 37,9 | 109 | 11,6  | 11,6  | 19,05 | 600,04 | 81,78  |
| 2019/06/12 | CH2205 | Male | Three y/o | Control | Control | Feed Day | No  | 13:55 | 13:00 - 13:59 | Afternoon    | 38,0 | 73  | 28,4  | 28,4  | 19,15 | 570,27 | 112,31 |



|            |        |      |           |         |         |          |    |       |               |           |      |     |       |       |       |        |        |
|------------|--------|------|-----------|---------|---------|----------|----|-------|---------------|-----------|------|-----|-------|-------|-------|--------|--------|
| 2019/06/12 | CH2206 | Male | Three y/o | Control | Control | Feed Day | No | 13:55 | 13:00 - 13:59 | Afternoon | 37,9 | 98  | 3,2   | 3,2   | 19,05 | 592,41 | 38,49  |
| 2019/06/12 | CH2205 | Male | Three y/o | Control | Control | Feed Day | No | 14:00 | 14:00 - 14:59 | Afternoon | 38,0 |     | 32,0  | 32,0  | 19,15 |        | 116,41 |
| 2019/06/12 | CH2206 | Male | Three y/o | Control | Control | Feed Day | No | 14:00 | 14:00 - 14:59 | Afternoon | 37,9 | 56  | 5,2   | 5,2   | 19,05 | 549,01 | 54,72  |
| 2019/06/12 | CH2205 | Male | Three y/o | Control | Control | Feed Day | No | 14:05 | 14:00 - 14:59 | Afternoon | 38,1 | 74  | 13,6  | 13,6  | 19,26 | 571,33 | 87,18  |
| 2019/06/12 | CH2206 | Male | Three y/o | Control | Control | Feed Day | No | 14:05 | 14:00 - 14:59 | Afternoon | 37,9 | 131 | 39,0  | 39,0  | 19,05 | 612,80 | 123,22 |
| 2019/06/12 | CH2205 | Male | Three y/o | Control | Control | Feed Day | No | 14:10 | 14:00 - 14:59 | Afternoon | 38,1 | 83  | 17,6  | 17,6  | 19,26 | 580,11 | 95,95  |
| 2019/06/12 | CH2206 | Male | Three y/o | Control | Control | Feed Day | No | 14:10 | 14:00 - 14:59 | Afternoon | 37,9 | 95  | 43,6  | 43,6  | 19,05 | 590,14 | 127,06 |
| 2019/06/12 | CH2205 | Male | Three y/o | Control | Control | Feed Day | No | 14:15 | 14:00 - 14:59 | Afternoon | 38,1 | 74  | 14,0  | 14,0  | 19,26 | 571,33 | 88,17  |
| 2019/06/12 | CH2206 | Male | Three y/o | Control | Control | Feed Day | No | 14:15 | 14:00 - 14:59 | Afternoon | 37,8 | 91  | 22,8  | 22,8  | 18,95 | 586,98 | 104,79 |
| 2019/06/12 | CH2205 | Male | Three y/o | Control | Control | Feed Day | No | 14:20 | 14:00 - 14:59 | Afternoon | 38,1 | 79  | 15,4  | 15,4  | 19,26 | 576,36 | 91,41  |
| 2019/06/12 | CH2206 | Male | Three y/o | Control | Control | Feed Day | No | 14:20 | 14:00 - 14:59 | Afternoon | 37,8 | 86  | 20,8  | 20,8  | 18,95 | 582,77 | 101,65 |
| 2019/06/12 | CH2205 | Male | Three y/o | Control | Control | Feed Day | No | 14:25 | 14:00 - 14:59 | Afternoon | 38,1 | 65  | 19,4  | 19,4  | 19,26 | 561,12 | 99,28  |
| 2019/06/12 | CH2206 | Male | Three y/o | Control | Control | Feed Day | No | 14:25 | 14:00 - 14:59 | Afternoon | 37,8 | 70  | 83,4  | 83,4  | 18,95 | 566,99 | 149,52 |
| 2019/06/12 | CH2205 | Male | Three y/o | Control | Control | Feed Day | No | 14:30 | 14:00 - 14:59 | Afternoon | 38,1 | 56  | 15,2  | 15,2  | 19,26 | 549,01 | 90,96  |
| 2019/06/12 | CH2206 | Male | Three y/o | Control | Control | Feed Day | No | 14:30 | 14:00 - 14:59 | Afternoon | 37,8 | 88  | 29,4  | 29,4  | 18,95 | 584,49 | 113,50 |
| 2019/06/12 | CH2205 | Male | Three y/o | Control | Control | Feed Day | No | 14:35 | 14:00 - 14:59 | Afternoon | 38,1 | 70  | 14,4  | 14,4  | 19,26 | 566,99 | 89,12  |
| 2019/06/12 | CH2206 | Male | Three y/o | Control | Control | Feed Day | No | 14:35 | 14:00 - 14:59 | Afternoon | 37,9 | 81  | 28,6  | 28,6  | 19,05 | 578,26 | 112,56 |
| 2019/06/12 | CH2205 | Male | Three y/o | Control | Control | Feed Day | No | 14:40 | 14:00 - 14:59 | Afternoon | 38,1 | 79  | 22,6  | 22,6  | 19,26 | 576,36 | 104,49 |
| 2019/06/12 | CH2206 | Male | Three y/o | Control | Control | Feed Day | No | 14:40 | 14:00 - 14:59 | Afternoon | 37,9 | 80  | 35,6  | 35,6  | 19,05 | 577,31 | 120,08 |
| 2019/06/12 | CH2205 | Male | Three y/o | Control | Control | Feed Day | No | 14:45 | 14:00 - 14:59 | Afternoon | 38,1 | 68  | 17,6  | 17,6  | 19,26 | 564,71 | 95,95  |
| 2019/06/12 | CH2206 | Male | Three y/o | Control | Control | Feed Day | No | 14:45 | 14:00 - 14:59 | Afternoon | 37,9 | 73  | 39,4  | 39,4  | 19,05 | 570,27 | 123,57 |
| 2019/06/12 | CH2205 | Male | Three y/o | Control | Control | Feed Day | No | 14:50 | 14:00 - 14:59 | Afternoon | 38,1 | 73  | 22,8  | 22,8  | 19,26 | 570,27 | 104,79 |
| 2019/06/12 | CH2206 | Male | Three y/o | Control | Control | Feed Day | No | 14:50 | 14:00 - 14:59 | Afternoon | 37,9 | 80  | 41,6  | 41,6  | 19,05 | 577,31 | 125,44 |
| 2019/06/12 | CH2205 | Male | Three y/o | Control | Control | Feed Day | No | 14:55 | 14:00 - 14:59 | Afternoon | 38,1 | 82  | 15,4  | 15,4  | 19,26 | 579,19 | 91,41  |
| 2019/06/12 | CH2206 | Male | Three y/o | Control | Control | Feed Day | No | 14:55 | 14:00 - 14:59 | Afternoon | 37,9 | 63  | 36,8  | 36,8  | 19,05 | 558,62 | 121,22 |
| 2019/06/12 | CH2205 | Male | Three y/o | Control | Control | Feed Day | No | 15:00 | 15:00 - 15:59 | Afternoon | 38,1 | 79  | 22,8  | 22,8  | 19,26 | 576,36 | 104,79 |
| 2019/06/12 | CH2206 | Male | Three y/o | Control | Control | Feed Day | No | 15:00 | 15:00 - 15:59 | Afternoon | 37,9 | 74  | 35,4  | 35,4  | 19,05 | 571,33 | 119,88 |
| 2019/06/12 | CH2205 | Male | Three y/o | Control | Control | Feed Day | No | 15:05 | 15:00 - 15:59 | Afternoon | 38,1 | 65  | 20,2  | 20,2  | 19,26 | 561,12 | 100,65 |
| 2019/06/12 | CH2206 | Male | Three y/o | Control | Control | Feed Day | No | 15:05 | 15:00 - 15:59 | Afternoon | 38,0 | 97  | 43,2  | 43,2  | 19,15 | 591,66 | 126,74 |
| 2019/06/12 | CH2205 | Male | Three y/o | Control | Control | Feed Day | No | 15:10 | 15:00 - 15:59 | Afternoon | 38,1 | 76  | 16,4  | 16,4  | 19,26 | 573,39 | 93,55  |
| 2019/06/12 | CH2206 | Male | Three y/o | Control | Control | Feed Day | No | 15:10 | 15:00 - 15:59 | Afternoon | 38,0 | 82  | 44,6  | 44,6  | 19,15 | 579,19 | 127,84 |
| 2019/06/12 | CH2205 | Male | Three y/o | Control | Control | Feed Day | No | 15:15 | 15:00 - 15:59 | Afternoon | 38,1 | 82  | 11,6  | 11,6  | 19,26 | 579,19 | 81,78  |
| 2019/06/12 | CH2206 | Male | Three y/o | Control | Control | Feed Day | No | 15:15 | 15:00 - 15:59 | Afternoon | 38,0 | 44  | 53,0  | 53,0  | 19,15 | 528,51 | 133,80 |
| 2019/06/12 | CH2205 | Male | Three y/o | Control | Control | Feed Day | No | 15:20 | 15:00 - 15:59 | Afternoon | 38,1 | 70  | 5,4   | 5,4   | 19,26 | 566,99 | 55,99  |
| 2019/06/12 | CH2206 | Male | Three y/o | Control | Control | Feed Day | No | 15:20 | 15:00 - 15:59 | Afternoon | 38,0 | 83  | 268,2 | 268,2 | 19,15 | 580,11 | 190,46 |
| 2019/06/12 | CH2205 | Male | Three y/o | Control | Control | Feed Day | No | 15:25 | 15:00 - 15:59 | Afternoon | 38,1 | 87  | 5,4   | 5,4   | 19,26 | 583,64 | 55,99  |
| 2019/06/12 | CH2206 | Male | Three y/o | Control | Control | Feed Day | No | 15:25 | 15:00 - 15:59 | Afternoon | 38,0 | 92  | 59,6  | 59,6  | 19,15 | 587,78 | 137,86 |
| 2019/06/12 | CH2205 | Male | Three y/o | Control | Control | Feed Day | No | 15:30 | 15:00 - 15:59 | Afternoon | 38,1 | 76  | 3,4   | 3,4   | 19,26 | 573,39 | 40,51  |
| 2019/06/12 | CH2206 | Male | Three y/o | Control | Control | Feed Day | No | 15:30 | 15:00 - 15:59 | Afternoon | 38,0 | 89  | 63,2  | 63,2  | 19,15 | 585,33 | 139,89 |
| 2019/06/12 | CH2205 | Male | Three y/o | Control | Control | Feed Day | No | 15:35 | 15:00 - 15:59 | Afternoon | 38,2 | 62  | 6,8   | 6,8   | 19,36 | 557,33 | 63,74  |
| 2019/06/12 | CH2206 | Male | Three y/o | Control | Control | Feed Day | No | 15:35 | 15:00 - 15:59 | Afternoon | 38,0 | 88  | 57,2  | 57,2  | 19,15 | 584,49 | 136,44 |
| 2019/06/12 | CH2205 | Male | Three y/o | Control | Control | Feed Day | No | 15:40 | 15:00 - 15:59 | Afternoon | 38,2 | 102 | 29,4  | 29,4  | 19,36 | 595,30 | 113,50 |
| 2019/06/12 | CH2206 | Male | Three y/o | Control | Control | Feed Day | No | 15:40 | 15:00 - 15:59 | Afternoon | 38,1 | 86  | 26,0  | 26,0  | 19,26 | 582,77 | 109,29 |
| 2019/06/12 | CH2205 | Male | Three y/o | Control | Control | Feed Day | No | 15:45 | 15:00 - 15:59 | Afternoon | 38,1 | 88  | 222,2 | 222,2 | 19,26 | 584,49 | 183,82 |
| 2019/06/12 | CH2206 | Male | Three y/o | Control | Control | Feed Day | No | 15:45 | 15:00 - 15:59 | Afternoon | 38,1 | 102 | 55,2  | 55,2  | 19,26 | 595,30 | 135,21 |
| 2019/06/12 | CH2205 | Male | Three y/o | Control | Control | Feed Day | No | 15:50 | 15:00 - 15:59 | Afternoon | 38,2 | 106 | 26,8  | 26,8  | 19,36 | 598,06 | 110,33 |
| 2019/06/12 | CH2206 | Male | Three y/o | Control | Control | Feed Day | No | 15:50 | 15:00 - 15:59 | Afternoon | 38,1 | 99  | 125,6 | 125,6 | 19,26 | 593,14 | 163,80 |
| 2019/06/12 | CH2205 | Male | Three y/o | Control | Control | Feed Day | No | 15:55 | 15:00 - 15:59 | Afternoon | 38,1 |     | 20,2  | 20,2  | 19,26 |        | 100,65 |
| 2019/06/12 | CH2206 | Male | Three y/o | Control | Control | Feed Day | No | 15:55 | 15:00 - 15:59 | Afternoon | 38,1 | 107 | 21,0  | 21,0  | 19,26 | 598,73 | 101,98 |
| 2019/06/12 | CH2205 | Male | Three y/o | Control | Control | Feed Day | No | 16:00 | 16:00 - 16:59 | Evening   | 38,0 | 82  | 22,8  | 22,8  | 19,15 | 579,19 | 104,79 |
| 2019/06/12 | CH2206 | Male | Three y/o | Control | Control | Feed Day | No | 16:00 | 16:00 - 16:59 | Evening   | 38,1 | 86  | 7,8   | 7,8   | 19,26 | 582,77 | 68,36  |
| 2019/06/12 | CH2205 | Male | Three y/o | Control | Control | Feed Day | No | 16:05 | 16:00 - 16:59 | Evening   | 38,0 | 86  | 16,0  | 16,0  | 19,15 | 582,77 | 92,71  |
| 2019/06/12 | CH2206 | Male | Three y/o | Control | Control | Feed Day | No | 16:05 | 16:00 - 16:59 | Evening   | 38,1 | 70  | 20,2  | 20,2  | 19,26 | 566,99 | 100,65 |
| 2019/06/12 | CH2205 | Male | Three y/o | Control | Control | Feed Day | No | 16:10 | 16:00 - 16:59 | Evening   | 38,0 | 77  | 1,6   | 1,6   | 19,15 | 574,39 | 15,48  |
| 2019/06/12 | CH2206 | Male | Three y/o | Control | Control | Feed Day | No | 16:10 | 16:00 - 16:59 | Evening   | 38,1 | 80  | 37,0  | 37,0  | 19,26 | 577,31 | 121,40 |
| 2019/06/12 | CH2205 | Male | Three y/o | Control | Control | Feed Day | No | 16:15 | 16:00 - 16:59 | Evening   | 38,1 | 73  | 5,4   | 5,4   | 19,26 | 570,27 | 55,99  |
| 2019/06/12 | CH2206 | Male | Three y/o | Control | Control | Feed Day | No | 16:15 | 16:00 - 16:59 | Evening   | 38,1 | 76  | 39,4  | 39,4  | 19,26 | 573,39 | 123,57 |
| 2019/06/12 | CH2205 | Male | Three y/o | Control | Control | Feed Day | No | 16:20 | 16:00 - 16:59 | Evening   | 38,1 | 82  | 6,4   | 6,4   | 19,26 | 579,19 | 61,70  |
| 2019/06/12 | CH2206 | Male | Three y/o | Control | Control | Feed Day | No | 16:20 | 16:00 - 16:59 | Evening   | 38,1 | 43  | 31,8  | 31,8  | 19,26 | 526,50 | 116,20 |
| 2019/06/12 | CH2205 | Male | Three y/o | Control | Control | Feed Day | No | 16:25 | 16:00 - 16:59 | Evening   | 38,1 | 65  | 8,6   | 8,6   | 19,26 | 561,12 | 71,66  |
| 2019/06/12 | CH2206 | Male | Three y/o | Control | Control | Feed Day | No | 16:25 | 16:00 - 16:59 | Evening   | 38,1 | 90  | 23,8  | 23,8  | 19,26 | 586,16 | 106,26 |
| 2019/06/12 | CH2205 | Male | Three y/o | Control | Control | Feed Day | No | 16:30 | 16:00 - 16:59 | Evening   | 38,1 | 62  | 75,2  | 75,2  | 19,26 | 557,33 | 145,93 |
| 2019/06/12 | CH2206 | Male | Three y/o | Control | Control | Feed Day | No | 16:30 | 16:00 - 16:59 | Evening   | 38,1 | 94  | 58,6  | 58,6  | 19,26 | 589,37 | 137,28 |
| 2019/06/12 | CH2205 | Male | Three y/o | Control | Control | Feed Day | No | 16:35 | 16:00 - 16:59 | Evening   | 38,1 | 88  | 21,6  | 21,6  | 19,26 | 584,49 | 102,94 |
| 2019/06/12 | CH2206 | Male | Three y/o | Control | Control | Feed Day | No | 16:35 | 16:00 - 16:59 | Evening   | 38,1 | 93  | 65,2  | 65,2  | 19,26 | 588,58 | 140,97 |
| 2019/06/12 | CH2205 | Male | Three y/o | Control | Control | Feed Day | No | 16:40 | 16:00 - 16:59 | Evening   | 38,0 |     | 17,2  | 17,2  | 19,15 |        | 95,17  |
| 2019/06/12 | CH2206 | Male | Three y/o | Control | Control | Feed Day | No | 16:40 | 16:00 - 16:59 | Evening   | 37,9 | 51  | 36,8  | 36,8  | 19,05 | 541,20 | 121,22 |
| 2019/06/12 | CH2205 | Male | Three y/o | Control | Control | Feed Day | No | 16:45 | 16:00 - 16:59 | Evening   | 38,1 |     | 17,2  | 17,2  | 19,26 |        | 95,17  |
| 2019/06/12 | CH2206 | Male | Three y/o | Control | Control | Feed Day | No | 16:45 | 16:00 - 16:59 | Evening   | 38,0 |     | 47,0  | 47,0  | 19,15 |        | 129,65 |
| 2019/06/12 | CH2205 | Male | Three y/o | Control | Control | Feed Day | No | 16:50 | 16:00 - 16:59 | Evening   | 38,0 | 160 | 22,2  | 22,2  | 19,15 | 626,07 | 103,88 |



|            |        |      |           |         |         |          |    |       |               |         |      |     |       |       |       |        |        |
|------------|--------|------|-----------|---------|---------|----------|----|-------|---------------|---------|------|-----|-------|-------|-------|--------|--------|
| 2019/06/12 | CH2206 | Male | Three y/o | Control | Control | Feed Day | No | 16:50 | 16:00 - 16:59 | Evening | 38,0 | 80  | 54,4  | 54,4  | 19,15 | 577,31 | 134,70 |
| 2019/06/12 | CH2205 | Male | Three y/o | Control | Control | Feed Day | No | 16:55 | 16:00 - 16:59 | Evening | 38,0 | 125 | 25,2  | 25,2  | 19,15 | 609,60 | 108,22 |
| 2019/06/12 | CH2206 | Male | Three y/o | Control | Control | Feed Day | No | 16:55 | 16:00 - 16:59 | Evening | 37,9 | 49  | 39,4  | 39,4  | 19,05 | 537,80 | 123,57 |
| 2019/06/12 | CH2205 | Male | Three y/o | Control | Control | Feed Day | No | 17:00 | 17:00 - 17:59 | Evening | 37,9 | 92  | 15,6  | 15,6  | 19,05 | 587,78 | 91,85  |
| 2019/06/12 | CH2206 | Male | Three y/o | Control | Control | Feed Day | No | 17:00 | 17:00 - 17:59 | Evening | 38,0 | 88  | 33,8  | 33,8  | 19,15 | 584,49 | 118,29 |
| 2019/06/12 | CH2205 | Male | Three y/o | Control | Control | Feed Day | No | 17:05 | 17:00 - 17:59 | Evening | 37,9 | 78  | 14,6  | 14,6  | 19,05 | 575,38 | 89,59  |
| 2019/06/12 | CH2206 | Male | Three y/o | Control | Control | Feed Day | No | 17:05 | 17:00 - 17:59 | Evening | 38,0 | 74  | 39,6  | 39,6  | 19,15 | 571,33 | 123,74 |
| 2019/06/12 | CH2205 | Male | Three y/o | Control | Control | Feed Day | No | 17:10 | 17:00 - 17:59 | Evening | 38,0 | 70  | 13,4  | 13,4  | 19,15 | 566,99 | 86,68  |
| 2019/06/12 | CH2206 | Male | Three y/o | Control | Control | Feed Day | No | 17:10 | 17:00 - 17:59 | Evening | 38,0 | 84  | 62,2  | 62,2  | 19,15 | 581,01 | 139,34 |
| 2019/06/12 | CH2205 | Male | Three y/o | Control | Control | Feed Day | No | 17:15 | 17:00 - 17:59 | Evening | 38,1 | 82  | 10,6  | 10,6  | 19,26 | 579,19 | 78,73  |
| 2019/06/12 | CH2206 | Male | Three y/o | Control | Control | Feed Day | No | 17:15 | 17:00 - 17:59 | Evening | 38,0 | 75  | 52,4  | 52,4  | 19,15 | 572,36 | 133,41 |
| 2019/06/12 | CH2205 | Male | Three y/o | Control | Control | Feed Day | No | 17:20 | 17:00 - 17:59 | Evening | 38,1 | 73  | 8,4   | 8,4   | 19,26 | 570,27 | 70,86  |
| 2019/06/12 | CH2206 | Male | Three y/o | Control | Control | Feed Day | No | 17:20 | 17:00 - 17:59 | Evening | 37,9 | 102 | 56,0  | 56,0  | 19,05 | 595,30 | 135,70 |
| 2019/06/12 | CH2205 | Male | Three y/o | Control | Control | Feed Day | No | 17:25 | 17:00 - 17:59 | Evening | 38,1 | 87  | 12,4  | 12,4  | 19,26 | 583,64 | 84,04  |
| 2019/06/12 | CH2206 | Male | Three y/o | Control | Control | Feed Day | No | 17:25 | 17:00 - 17:59 | Evening | 37,8 | 88  | 51,6  | 51,6  | 18,95 | 584,49 | 132,87 |
| 2019/06/12 | CH2205 | Male | Three y/o | Control | Control | Feed Day | No | 17:30 | 17:00 - 17:59 | Evening | 38,1 | 76  | 10,6  | 10,6  | 19,26 | 573,39 | 78,73  |
| 2019/06/12 | CH2206 | Male | Three y/o | Control | Control | Feed Day | No | 17:30 | 17:00 - 17:59 | Evening | 37,8 | 88  | 108,8 | 108,8 | 18,95 | 584,49 | 158,79 |
| 2019/06/12 | CH2205 | Male | Three y/o | Control | Control | Feed Day | No | 17:35 | 17:00 - 17:59 | Evening | 38,1 |     | 20,2  | 20,2  | 19,26 |        | 100,65 |
| 2019/06/12 | CH2206 | Male | Three y/o | Control | Control | Feed Day | No | 17:35 | 17:00 - 17:59 | Evening | 37,9 | 94  | 260,0 | 260,0 | 19,05 | 589,37 | 189,36 |
| 2019/06/12 | CH2205 | Male | Three y/o | Control | Control | Feed Day | No | 17:40 | 17:00 - 17:59 | Evening | 38,1 | 79  | 14,4  | 14,4  | 19,26 | 576,36 | 89,12  |
| 2019/06/12 | CH2206 | Male | Three y/o | Control | Control | Feed Day | No | 17:40 | 17:00 - 17:59 | Evening | 37,9 | 90  | 40,8  | 40,8  | 19,05 | 586,16 | 124,77 |
| 2019/06/12 | CH2205 | Male | Three y/o | Control | Control | Feed Day | No | 17:45 | 17:00 - 17:59 | Evening | 38,0 | 90  | 9,6   | 9,6   | 19,15 | 586,16 | 75,37  |
| 2019/06/12 | CH2206 | Male | Three y/o | Control | Control | Feed Day | No | 17:45 | 17:00 - 17:59 | Evening | 37,9 | 99  | 60,0  | 60,0  | 19,05 | 593,14 | 138,09 |
| 2019/06/12 | CH2205 | Male | Three y/o | Control | Control | Feed Day | No | 17:50 | 17:00 - 17:59 | Evening | 38,0 | 83  | 23,4  | 23,4  | 19,15 | 580,11 | 105,68 |
| 2019/06/12 | CH2206 | Male | Three y/o | Control | Control | Feed Day | No | 17:50 | 17:00 - 17:59 | Evening | 37,8 | 81  | 116,6 | 116,6 | 18,95 | 578,26 | 161,20 |
| 2019/06/12 | CH2205 | Male | Three y/o | Control | Control | Feed Day | No | 17:55 | 17:00 - 17:59 | Evening | 38,0 |     | 30,0  | 30,0  | 19,15 |        | 114,20 |
| 2019/06/12 | CH2206 | Male | Three y/o | Control | Control | Feed Day | No | 17:55 | 17:00 - 17:59 | Evening | 37,8 | 119 | 97,4  | 97,4  | 18,95 | 606,20 | 154,93 |
| 2019/06/12 | CH2205 | Male | Three y/o | Control | Control | Feed Day | No | 18:00 | 18:00 - 18:59 | Evening | 38,0 | 114 | 73,6  | 73,6  | 19,15 | 603,20 | 145,18 |
| 2019/06/12 | CH2206 | Male | Three y/o | Control | Control | Feed Day | No | 18:00 | 18:00 - 18:59 | Evening | 37,9 | 118 | 148,4 | 148,4 | 19,05 | 605,61 | 169,64 |
| 2019/06/12 | CH2205 | Male | Three y/o | Control | Control | Feed Day | No | 18:05 | 18:00 - 18:59 | Evening | 38,1 | 134 | 93,4  | 93,4  | 19,26 | 614,33 | 153,46 |
| 2019/06/12 | CH2206 | Male | Three y/o | Control | Control | Feed Day | No | 18:05 | 18:00 - 18:59 | Evening | 37,9 | 111 | 48,2  | 48,2  | 19,05 | 601,33 | 130,52 |
| 2019/06/12 | CH2205 | Male | Three y/o | Control | Control | Feed Day | No | 18:10 | 18:00 - 18:59 | Evening | 38,0 |     | 11,6  | 11,6  | 19,15 |        | 81,78  |
| 2019/06/12 | CH2206 | Male | Three y/o | Control | Control | Feed Day | No | 18:10 | 18:00 - 18:59 | Evening | 37,9 | 81  | 54,2  | 54,2  | 19,05 | 578,26 | 134,57 |
| 2019/06/12 | CH2205 | Male | Three y/o | Control | Control | Feed Day | No | 18:15 | 18:00 - 18:59 | Evening | 37,9 | 68  | 6,8   | 6,8   | 19,05 | 564,71 | 63,74  |
| 2019/06/12 | CH2206 | Male | Three y/o | Control | Control | Feed Day | No | 18:15 | 18:00 - 18:59 | Evening | 37,7 | 82  | 49,8  | 49,8  | 18,85 | 579,19 | 131,65 |
| 2019/06/12 | CH2205 | Male | Three y/o | Control | Control | Feed Day | No | 18:20 | 18:00 - 18:59 | Evening | 37,9 | 90  | 6,8   | 6,8   | 19,05 | 586,16 | 63,74  |
| 2019/06/12 | CH2206 | Male | Three y/o | Control | Control | Feed Day | No | 18:20 | 18:00 - 18:59 | Evening | 37,6 | 87  | 64,2  | 64,2  | 18,75 | 583,64 | 140,44 |
| 2019/06/12 | CH2205 | Male | Three y/o | Control | Control | Feed Day | No | 18:25 | 18:00 - 18:59 | Evening | 37,9 | 82  | 6,4   | 6,4   | 19,05 | 579,19 | 61,70  |
| 2019/06/12 | CH2206 | Male | Three y/o | Control | Control | Feed Day | No | 18:25 | 18:00 - 18:59 | Evening | 37,7 | 47  | 66,8  | 66,8  | 18,85 | 534,23 | 141,81 |
| 2019/06/12 | CH2205 | Male | Three y/o | Control | Control | Feed Day | No | 18:30 | 18:00 - 18:59 | Evening | 37,9 | 73  | 6,4   | 6,4   | 19,05 | 570,27 | 61,70  |
| 2019/06/12 | CH2206 | Male | Three y/o | Control | Control | Feed Day | No | 18:30 | 18:00 - 18:59 | Evening | 37,8 | 57  | 66,6  | 66,6  | 18,95 | 550,47 | 141,71 |
| 2019/06/12 | CH2205 | Male | Three y/o | Control | Control | Feed Day | No | 18:35 | 18:00 - 18:59 | Evening | 37,9 | 85  | 4,4   | 4,4   | 19,05 | 581,90 | 49,12  |
| 2019/06/12 | CH2206 | Male | Three y/o | Control | Control | Feed Day | No | 18:35 | 18:00 - 18:59 | Evening | 37,9 | 96  | 68,4  | 68,4  | 19,05 | 590,91 | 142,64 |
| 2019/06/12 | CH2205 | Male | Three y/o | Control | Control | Feed Day | No | 18:40 | 18:00 - 18:59 | Evening | 37,9 | 86  | 7,6   | 7,6   | 19,05 | 582,77 | 67,49  |
| 2019/06/12 | CH2206 | Male | Three y/o | Control | Control | Feed Day | No | 18:40 | 18:00 - 18:59 | Evening | 37,9 | 64  | 66,4  | 66,4  | 19,05 | 559,88 | 141,61 |
| 2019/06/12 | CH2205 | Male | Three y/o | Control | Control | Feed Day | No | 18:45 | 18:00 - 18:59 | Evening | 38,0 | 65  | 17,4  | 17,4  | 19,15 | 561,12 | 95,56  |
| 2019/06/12 | CH2206 | Male | Three y/o | Control | Control | Feed Day | No | 18:45 | 18:00 - 18:59 | Evening | 37,9 | 94  | 71,0  | 71,0  | 19,05 | 589,37 | 143,93 |
| 2019/06/12 | CH2205 | Male | Three y/o | Control | Control | Feed Day | No | 18:50 | 18:00 - 18:59 | Evening | 38,1 | 63  | 12,4  | 12,4  | 19,26 | 558,62 | 84,04  |
| 2019/06/12 | CH2206 | Male | Three y/o | Control | Control | Feed Day | No | 18:50 | 18:00 - 18:59 | Evening | 37,9 | 73  | 68,4  | 68,4  | 19,05 | 570,27 | 142,64 |
| 2019/06/12 | CH2205 | Male | Three y/o | Control | Control | Feed Day | No | 18:55 | 18:00 - 18:59 | Evening | 38,2 | 89  | 14,4  | 14,4  | 19,36 | 585,33 | 89,12  |
| 2019/06/12 | CH2206 | Male | Three y/o | Control | Control | Feed Day | No | 18:55 | 18:00 - 18:59 | Evening | 37,9 | 70  | 64,4  | 64,4  | 19,05 | 566,99 | 140,55 |
| 2019/06/12 | CH2205 | Male | Three y/o | Control | Control | Feed Day | No | 19:00 | 19:00 - 19:59 | Evening | 38,2 | 79  | 15,4  | 15,4  | 19,36 | 576,36 | 91,41  |
| 2019/06/12 | CH2206 | Male | Three y/o | Control | Control | Feed Day | No | 19:00 | 19:00 - 19:59 | Evening | 38,0 | 75  | 60,4  | 60,4  | 19,15 | 572,36 | 138,32 |
| 2019/06/12 | CH2205 | Male | Three y/o | Control | Control | Feed Day | No | 19:05 | 19:00 - 19:59 | Evening | 38,2 | 62  | 19,0  | 19,0  | 19,36 | 557,33 | 98,56  |
| 2019/06/12 | CH2206 | Male | Three y/o | Control | Control | Feed Day | No | 19:05 | 19:00 - 19:59 | Evening | 37,9 | 81  | 59,4  | 59,4  | 19,05 | 578,26 | 137,75 |
| 2019/06/12 | CH2205 | Male | Three y/o | Control | Control | Feed Day | No | 19:10 | 19:00 - 19:59 | Evening | 38,2 | 71  | 17,4  | 17,4  | 19,36 | 568,10 | 95,56  |
| 2019/06/12 | CH2206 | Male | Three y/o | Control | Control | Feed Day | No | 19:10 | 19:00 - 19:59 | Evening | 37,9 | 45  | 59,0  | 59,0  | 19,05 | 530,47 | 137,51 |
| 2019/06/12 | CH2205 | Male | Three y/o | Control | Control | Feed Day | No | 19:15 | 19:00 - 19:59 | Evening | 38,3 | 88  | 19,8  | 19,8  | 19,46 | 584,49 | 99,97  |
| 2019/06/12 | CH2206 | Male | Three y/o | Control | Control | Feed Day | No | 19:15 | 19:00 - 19:59 | Evening | 37,8 | 86  | 53,2  | 53,2  | 18,95 | 582,77 | 133,93 |
| 2019/06/12 | CH2205 | Male | Three y/o | Control | Control | Feed Day | No | 19:20 | 19:00 - 19:59 | Evening | 38,3 | 71  | 15,2  | 15,2  | 19,46 | 568,10 | 90,96  |
| 2019/06/12 | CH2206 | Male | Three y/o | Control | Control | Feed Day | No | 19:20 | 19:00 - 19:59 | Evening | 37,7 | 86  | 58,8  | 58,8  | 18,85 | 582,77 | 137,39 |
| 2019/06/12 | CH2205 | Male | Three y/o | Control | Control | Feed Day | No | 19:25 | 19:00 - 19:59 | Evening | 38,3 | 94  | 11,2  | 11,2  | 19,46 | 589,37 | 80,59  |
| 2019/06/12 | CH2206 | Male | Three y/o | Control | Control | Feed Day | No | 19:25 | 19:00 - 19:59 | Evening | 37,8 | 113 | 65,8  | 65,8  | 18,95 | 602,58 | 141,29 |
| 2019/06/12 | CH2205 | Male | Three y/o | Control | Control | Feed Day | No | 19:30 | 19:00 - 19:59 | Evening | 38,3 | 98  | 16,4  | 16,4  | 19,46 | 592,41 | 93,55  |
| 2019/06/12 | CH2206 | Male | Three y/o | Control | Control | Feed Day | No | 19:30 | 19:00 - 19:59 | Evening | 37,8 | 46  | 65,2  | 65,2  | 18,95 | 532,38 | 140,97 |
| 2019/06/12 | CH2205 | Male | Three y/o | Control | Control | Feed Day | No | 19:35 | 19:00 - 19:59 | Evening | 38,3 | 91  | 16,8  | 16,8  | 19,46 | 586,98 | 94,37  |
| 2019/06/12 | CH2206 | Male | Three y/o | Control | Control | Feed Day | No | 19:35 | 19:00 - 19:59 | Evening | 37,8 | 61  | 68,8  | 68,8  | 18,95 | 556,01 | 142,84 |
| 2019/06/12 | CH2205 | Male | Three y/o | Control | Control | Feed Day | No | 19:40 | 19:00 - 19:59 | Evening | 38,2 | 65  | 12,6  | 12,6  | 19,36 | 561,12 | 84,59  |
| 2019/06/12 | CH2206 | Male | Three y/o | Control | Control | Feed Day | No | 19:40 | 19:00 - 19:59 | Evening | 37,9 | 98  | 44,2  | 44,2  | 19,05 | 592,41 | 127,53 |
| 2019/06/12 | CH2205 | Male | Three y/o | Control | Control | Feed Day | No | 19:45 | 19:00 - 19:59 | Evening | 38,2 | 62  | 15,8  | 15,8  | 19,36 | 557,33 | 92,28  |



|            |        |      |           |         |         |          |    |       |               |         |      |     |      |      |       |        |        |
|------------|--------|------|-----------|---------|---------|----------|----|-------|---------------|---------|------|-----|------|------|-------|--------|--------|
| 2019/06/12 | CH2206 | Male | Three y/o | Control | Control | Feed Day | No | 19:45 | 19:00 - 19:59 | Evening | 37,9 | 83  | 30,0 | 30,0 | 19,05 | 580,11 | 114,20 |
| 2019/06/12 | CH2205 | Male | Three y/o | Control | Control | Feed Day | No | 19:50 | 19:00 - 19:59 | Evening | 38,2 | 73  | 18,0 | 18,0 | 19,36 | 570,27 | 96,72  |
| 2019/06/12 | CH2206 | Male | Three y/o | Control | Control | Feed Day | No | 19:50 | 19:00 - 19:59 | Evening | 37,9 | 84  | 32,8 | 32,8 | 19,05 | 581,01 | 117,26 |
| 2019/06/12 | CH2205 | Male | Three y/o | Control | Control | Feed Day | No | 19:55 | 19:00 - 19:59 | Evening | 38,2 | 97  | 17,0 | 17,0 | 19,36 | 591,66 | 94,77  |
| 2019/06/12 | CH2206 | Male | Three y/o | Control | Control | Feed Day | No | 19:55 | 19:00 - 19:59 | Evening | 37,9 | 83  | 32,2 | 32,2 | 19,05 | 580,11 | 116,63 |
| 2019/06/12 | CH2205 | Male | Three y/o | Control | Control | Feed Day | No | 20:00 | 20:00 - 20:59 | Night   | 38,2 | 68  | 11,2 | 11,2 | 19,36 | 564,71 | 80,59  |
| 2019/06/12 | CH2206 | Male | Three y/o | Control | Control | Feed Day | No | 20:00 | 20:00 - 20:59 | Night   | 37,9 | 45  | 34,4 | 34,4 | 19,05 | 530,47 | 118,90 |
| 2019/06/12 | CH2205 | Male | Three y/o | Control | Control | Feed Day | No | 20:05 | 20:00 - 20:59 | Night   | 38,1 | 63  | 21,2 | 21,2 | 19,26 | 558,62 | 102,31 |
| 2019/06/12 | CH2206 | Male | Three y/o | Control | Control | Feed Day | No | 20:05 | 20:00 - 20:59 | Night   | 37,9 | 91  | 33,0 | 33,0 | 19,05 | 586,98 | 117,47 |
| 2019/06/12 | CH2205 | Male | Three y/o | Control | Control | Feed Day | No | 20:10 | 20:00 - 20:59 | Night   | 38,1 | 91  | 17,0 | 17,0 | 19,26 | 586,98 | 94,77  |
| 2019/06/12 | CH2206 | Male | Three y/o | Control | Control | Feed Day | No | 20:10 | 20:00 - 20:59 | Night   | 37,9 | 66  | 32,6 | 32,6 | 19,05 | 562,34 | 117,05 |
| 2019/06/12 | CH2205 | Male | Three y/o | Control | Control | Feed Day | No | 20:15 | 20:00 - 20:59 | Night   | 38,1 | 65  | 2,4  | 2,4  | 19,26 | 561,12 | 28,91  |
| 2019/06/12 | CH2206 | Male | Three y/o | Control | Control | Feed Day | No | 20:15 | 20:00 - 20:59 | Night   | 38,0 | 42  | 37,0 | 37,0 | 19,15 | 524,42 | 121,40 |
| 2019/06/12 | CH2205 | Male | Three y/o | Control | Control | Feed Day | No | 20:20 | 20:00 - 20:59 | Night   | 38,1 | 58  | 5,6  | 5,6  | 19,26 | 551,90 | 57,21  |
| 2019/06/12 | CH2206 | Male | Three y/o | Control | Control | Feed Day | No | 20:20 | 20:00 - 20:59 | Night   | 38,0 | 84  | 36,4 | 36,4 | 19,15 | 581,01 | 120,84 |
| 2019/06/12 | CH2205 | Male | Three y/o | Control | Control | Feed Day | No | 20:25 | 20:00 - 20:59 | Night   | 38,1 | 54  | 1,4  | 1,4  | 19,26 | 545,99 | 11,07  |
| 2019/06/12 | CH2206 | Male | Three y/o | Control | Control | Feed Day | No | 20:25 | 20:00 - 20:59 | Night   | 38,0 | 77  | 33,4 | 33,4 | 19,15 | 574,39 | 117,88 |
| 2019/06/12 | CH2205 | Male | Three y/o | Control | Control | Feed Day | No | 20:30 | 20:00 - 20:59 | Night   | 38,1 | 63  | 3,6  | 3,6  | 19,26 | 558,62 | 42,42  |
| 2019/06/12 | CH2206 | Male | Three y/o | Control | Control | Feed Day | No | 20:30 | 20:00 - 20:59 | Night   | 38,0 | 47  | 37,6 | 37,6 | 19,15 | 534,23 | 121,96 |
| 2019/06/12 | CH2205 | Male | Three y/o | Control | Control | Feed Day | No | 20:35 | 20:00 - 20:59 | Night   | 38,2 | 49  | 4,6  | 4,6  | 19,36 | 537,80 | 50,61  |
| 2019/06/12 | CH2206 | Male | Three y/o | Control | Control | Feed Day | No | 20:35 | 20:00 - 20:59 | Night   | 38,0 | 82  | 32,8 | 32,8 | 19,15 | 579,19 | 117,26 |
| 2019/06/12 | CH2205 | Male | Three y/o | Control | Control | Feed Day | No | 20:40 | 20:00 - 20:59 | Night   | 38,2 | 60  | 6,6  | 6,6  | 19,36 | 554,67 | 62,73  |
| 2019/06/12 | CH2206 | Male | Three y/o | Control | Control | Feed Day | No | 20:40 | 20:00 - 20:59 | Night   | 38,0 | 65  | 39,0 | 39,0 | 19,15 | 561,12 | 123,22 |
| 2019/06/12 | CH2205 | Male | Three y/o | Control | Control | Feed Day | No | 20:45 | 20:00 - 20:59 | Night   | 38,2 | 100 | 9,0  | 9,0  | 19,36 | 593,87 | 73,19  |
| 2019/06/12 | CH2206 | Male | Three y/o | Control | Control | Feed Day | No | 20:45 | 20:00 - 20:59 | Night   | 38,0 | 45  | 36,0 | 36,0 | 19,15 | 530,47 | 120,46 |
| 2019/06/12 | CH2205 | Male | Three y/o | Control | Control | Feed Day | No | 20:50 | 20:00 - 20:59 | Night   | 38,1 | 70  | 9,2  | 9,2  | 19,26 | 566,99 | 73,94  |
| 2019/06/12 | CH2206 | Male | Three y/o | Control | Control | Feed Day | No | 20:50 | 20:00 - 20:59 | Night   | 38,0 | 86  | 36,2 | 36,2 | 19,15 | 582,77 | 120,65 |
| 2019/06/12 | CH2205 | Male | Three y/o | Control | Control | Feed Day | No | 20:55 | 20:00 - 20:59 | Night   | 38,0 | 82  | 12,0 | 12,0 | 19,15 | 579,19 | 82,93  |
| 2019/06/12 | CH2206 | Male | Three y/o | Control | Control | Feed Day | No | 20:55 | 20:00 - 20:59 | Night   | 38,0 | 60  | 34,6 | 34,6 | 19,15 | 554,67 | 119,10 |
| 2019/06/12 | CH2205 | Male | Three y/o | Control | Control | Feed Day | No | 21:00 | 21:00 - 21:59 | Night   | 38,0 | 85  | 3,0  | 3,0  | 19,15 | 581,90 | 36,34  |
| 2019/06/12 | CH2206 | Male | Three y/o | Control | Control | Feed Day | No | 21:00 | 21:00 - 21:59 | Night   | 38,0 | 74  | 39,0 | 39,0 | 19,15 | 571,33 | 123,22 |
| 2019/06/12 | CH2205 | Male | Three y/o | Control | Control | Feed Day | No | 21:05 | 21:00 - 21:59 | Night   | 37,9 | 86  | 1,8  | 1,8  | 19,05 | 582,77 | 19,38  |
| 2019/06/12 | CH2206 | Male | Three y/o | Control | Control | Feed Day | No | 21:05 | 21:00 - 21:59 | Night   | 38,0 |     | 37,2 | 37,2 | 19,15 |        | 121,59 |
| 2019/06/12 | CH2205 | Male | Three y/o | Control | Control | Feed Day | No | 21:10 | 21:00 - 21:59 | Night   | 37,9 | 125 | 6,0  | 6,0  | 19,05 | 609,60 | 59,53  |
| 2019/06/12 | CH2206 | Male | Three y/o | Control | Control | Feed Day | No | 21:10 | 21:00 - 21:59 | Night   | 38,1 | 84  | 36,2 | 36,2 | 19,26 | 581,01 | 120,65 |
| 2019/06/12 | CH2205 | Male | Three y/o | Control | Control | Feed Day | No | 21:15 | 21:00 - 21:59 | Night   | 37,9 | 93  | 3,0  | 3,0  | 19,05 | 588,58 | 36,34  |
| 2019/06/12 | CH2206 | Male | Three y/o | Control | Control | Feed Day | No | 21:15 | 21:00 - 21:59 | Night   | 38,1 | 66  | 40,8 | 40,8 | 19,26 | 562,34 | 124,77 |
| 2019/06/12 | CH2205 | Male | Three y/o | Control | Control | Feed Day | No | 21:20 | 21:00 - 21:59 | Night   | 37,9 | 97  | 4,8  | 4,8  | 19,05 | 591,66 | 52,04  |
| 2019/06/12 | CH2206 | Male | Three y/o | Control | Control | Feed Day | No | 21:20 | 21:00 - 21:59 | Night   | 38,1 | 73  | 41,0 | 41,0 | 19,26 | 570,27 | 124,94 |
| 2019/06/12 | CH2205 | Male | Three y/o | Control | Control | Feed Day | No | 21:25 | 21:00 - 21:59 | Night   | 38,0 | 94  | 9,2  | 9,2  | 19,15 | 589,37 | 73,94  |
| 2019/06/12 | CH2206 | Male | Three y/o | Control | Control | Feed Day | No | 21:25 | 21:00 - 21:59 | Night   | 38,0 | 65  | 38,8 | 38,8 | 19,15 | 561,12 | 123,04 |
| 2019/06/12 | CH2205 | Male | Three y/o | Control | Control | Feed Day | No | 21:30 | 21:00 - 21:59 | Night   | 38,0 | 62  | 10,0 | 10,0 | 19,15 | 557,33 | 76,76  |
| 2019/06/12 | CH2206 | Male | Three y/o | Control | Control | Feed Day | No | 21:30 | 21:00 - 21:59 | Night   | 38,0 | 73  | 39,6 | 39,6 | 19,15 | 570,27 | 123,74 |
| 2019/06/12 | CH2205 | Male | Three y/o | Control | Control | Feed Day | No | 21:35 | 21:00 - 21:59 | Night   | 38,1 | 65  | 10,6 | 10,6 | 19,26 | 561,12 | 78,73  |
| 2019/06/12 | CH2206 | Male | Three y/o | Control | Control | Feed Day | No | 21:35 | 21:00 - 21:59 | Night   | 38,0 | 77  | 39,6 | 39,6 | 19,15 | 574,39 | 123,74 |
| 2019/06/12 | CH2205 | Male | Three y/o | Control | Control | Feed Day | No | 21:40 | 21:00 - 21:59 | Night   | 38,1 | 74  | 9,8  | 9,8  | 19,26 | 571,33 | 76,07  |
| 2019/06/12 | CH2206 | Male | Three y/o | Control | Control | Feed Day | No | 21:40 | 21:00 - 21:59 | Night   | 38,0 | 47  | 37,6 | 37,6 | 19,15 | 534,23 | 121,96 |
| 2019/06/12 | CH2205 | Male | Three y/o | Control | Control | Feed Day | No | 21:45 | 21:00 - 21:59 | Night   | 38,1 | 82  | 14,6 | 14,6 | 19,26 | 579,19 | 89,59  |
| 2019/06/12 | CH2206 | Male | Three y/o | Control | Control | Feed Day | No | 21:45 | 21:00 - 21:59 | Night   | 38,0 | 79  | 45,0 | 45,0 | 19,15 | 576,36 | 128,15 |
| 2019/06/12 | CH2205 | Male | Three y/o | Control | Control | Feed Day | No | 21:50 | 21:00 - 21:59 | Night   | 38,1 | 46  | 18,6 | 18,6 | 19,26 | 532,38 | 97,84  |
| 2019/06/12 | CH2206 | Male | Three y/o | Control | Control | Feed Day | No | 21:50 | 21:00 - 21:59 | Night   | 38,0 | 61  | 39,8 | 39,8 | 19,15 | 556,01 | 123,91 |
| 2019/06/12 | CH2205 | Male | Three y/o | Control | Control | Feed Day | No | 21:55 | 21:00 - 21:59 | Night   | 38,1 | 100 | 18,6 | 18,6 | 19,26 | 593,87 | 97,84  |
| 2019/06/12 | CH2206 | Male | Three y/o | Control | Control | Feed Day | No | 21:55 | 21:00 - 21:59 | Night   | 38,0 | 60  | 41,2 | 41,2 | 19,15 | 554,67 | 125,11 |
| 2019/06/12 | CH2205 | Male | Three y/o | Control | Control | Feed Day | No | 22:00 | 22:00 - 22:59 | Night   | 38,1 | 137 | 21,4 | 21,4 | 19,26 | 615,83 | 102,63 |
| 2019/06/12 | CH2206 | Male | Three y/o | Control | Control | Feed Day | No | 22:00 | 22:00 - 22:59 | Night   | 38,0 | 51  | 45,8 | 45,8 | 19,15 | 541,20 | 128,76 |
| 2019/06/12 | CH2205 | Male | Three y/o | Control | Control | Feed Day | No | 22:05 | 22:00 - 22:59 | Night   | 38,2 | 103 | 5,6  | 5,6  | 19,36 | 596,00 | 57,21  |
| 2019/06/12 | CH2206 | Male | Three y/o | Control | Control | Feed Day | No | 22:05 | 22:00 - 22:59 | Night   | 38,0 | 79  | 47,2 | 47,2 | 19,15 | 576,36 | 129,80 |
| 2019/06/12 | CH2205 | Male | Three y/o | Control | Control | Feed Day | No | 22:10 | 22:00 - 22:59 | Night   | 38,1 | 96  | 6,0  | 6,0  | 19,26 | 590,91 | 59,53  |
| 2019/06/12 | CH2206 | Male | Three y/o | Control | Control | Feed Day | No | 22:10 | 22:00 - 22:59 | Night   | 38,0 | 84  | 43,8 | 43,8 | 19,15 | 581,01 | 127,22 |
| 2019/06/12 | CH2205 | Male | Three y/o | Control | Control | Feed Day | No | 22:15 | 22:00 - 22:59 | Night   | 38,1 | 117 | 42,6 | 42,6 | 19,26 | 605,02 | 126,26 |
| 2019/06/12 | CH2206 | Male | Three y/o | Control | Control | Feed Day | No | 22:15 | 22:00 - 22:59 | Night   | 38,0 | 86  | 49,2 | 49,2 | 19,15 | 582,77 | 131,23 |
| 2019/06/12 | CH2205 | Male | Three y/o | Control | Control | Feed Day | No | 22:20 | 22:00 - 22:59 | Night   | 38,1 | 69  | 11,6 | 11,6 | 19,26 | 565,86 | 81,78  |
| 2019/06/12 | CH2206 | Male | Three y/o | Control | Control | Feed Day | No | 22:20 | 22:00 - 22:59 | Night   | 38,0 | 44  | 52,6 | 52,6 | 19,15 | 528,51 | 133,54 |
| 2019/06/12 | CH2205 | Male | Three y/o | Control | Control | Feed Day | No | 22:25 | 22:00 - 22:59 | Night   | 37,9 | 66  | 14,0 | 14,0 | 19,05 | 562,34 | 88,17  |
| 2019/06/12 | CH2206 | Male | Three y/o | Control | Control | Feed Day | No | 22:25 | 22:00 - 22:59 | Night   | 38,0 | 49  | 51,0 | 51,0 | 19,15 | 537,80 | 132,47 |
| 2019/06/12 | CH2205 | Male | Three y/o | Control | Control | Feed Day | No | 22:30 | 22:00 - 22:59 | Night   | 37,9 | 75  | 10,4 | 10,4 | 19,05 | 572,36 | 78,08  |
| 2019/06/12 | CH2206 | Male | Three y/o | Control | Control | Feed Day | No | 22:30 | 22:00 - 22:59 | Night   | 37,9 | 54  | 50,2 | 50,2 | 19,05 | 545,99 | 131,92 |
| 2019/06/12 | CH2205 | Male | Three y/o | Control | Control | Feed Day | No | 22:35 | 22:00 - 22:59 | Night   | 37,7 | 88  | 13,0 | 13,0 | 18,85 | 584,49 | 85,65  |
| 2019/06/12 | CH2206 | Male | Three y/o | Control | Control | Feed Day | No | 22:35 | 22:00 - 22:59 | Night   | 37,9 | 50  | 48,4 | 48,4 | 19,05 | 539,52 | 130,66 |
| 2019/06/12 | CH2205 | Male | Three y/o | Control | Control | Feed Day | No | 22:40 | 22:00 - 22:59 | Night   | 37,7 | 60  | 31,0 | 31,0 | 18,85 | 554,67 | 115,32 |



|    |            |        |      |           |         |         |          |    |       |               |               |      |     |      |      |       |        |        |
|----|------------|--------|------|-----------|---------|---------|----------|----|-------|---------------|---------------|------|-----|------|------|-------|--------|--------|
|    | 2019/06/12 | CH2206 | Male | Three y/o | Control | Control | Feed Day | No | 22:40 | 22:00 - 22:59 | Night         | 37,9 | 78  | 47,8 | 47,8 | 19,05 | 575,38 | 130,23 |
|    | 2019/06/12 | CH2205 | Male | Three y/o | Control | Control | Feed Day | No | 22:45 | 22:00 - 22:59 | Night         | 37,7 | 92  | 6,0  | 6,0  | 18,85 | 587,78 | 59,53  |
|    | 2019/06/12 | CH2206 | Male | Three y/o | Control | Control | Feed Day | No | 22:45 | 22:00 - 22:59 | Night         | 37,9 | 73  | 51,4 | 51,4 | 19,05 | 570,27 | 132,74 |
|    | 2019/06/12 | CH2205 | Male | Three y/o | Control | Control | Feed Day | No | 22:50 | 22:00 - 22:59 | Night         | 37,7 | 51  | 9,0  | 9,0  | 18,85 | 541,20 | 73,19  |
|    | 2019/06/12 | CH2206 | Male | Three y/o | Control | Control | Feed Day | No | 22:50 | 22:00 - 22:59 | Night         | 37,9 | 47  | 49,2 | 49,2 | 19,05 | 534,23 | 131,23 |
|    | 2019/06/12 | CH2205 | Male | Three y/o | Control | Control | Feed Day | No | 22:55 | 22:00 - 22:59 | Night         | 37,7 | 88  | 5,0  | 5,0  | 18,85 | 584,49 | 53,41  |
|    | 2019/06/12 | CH2206 | Male | Three y/o | Control | Control | Feed Day | No | 22:55 | 22:00 - 22:59 | Night         | 37,9 | 42  | 52,4 | 52,4 | 19,05 | 524,42 | 133,41 |
|    | 2019/06/12 | CH2205 | Male | Three y/o | Control | Control | Feed Day | No | 23:00 | 23:00 - 23:59 | Night         | 37,6 | 111 | 10,2 | 10,2 | 18,75 | 601,33 | 77,43  |
|    | 2019/06/12 | CH2206 | Male | Three y/o | Control | Control | Feed Day | No | 23:00 | 23:00 - 23:59 | Night         | 37,9 | 60  | 51,4 | 51,4 | 19,05 | 554,67 | 132,74 |
|    | 2019/06/12 | CH2205 | Male | Three y/o | Control | Control | Feed Day | No | 23:05 | 23:00 - 23:59 | Night         | 37,7 | 69  | 9,2  | 9,2  | 18,85 | 565,86 | 73,94  |
|    | 2019/06/12 | CH2206 | Male | Three y/o | Control | Control | Feed Day | No | 23:05 | 23:00 - 23:59 | Night         | 37,9 | 85  | 48,2 | 48,2 | 19,05 | 581,90 | 130,52 |
|    | 2019/06/12 | CH2205 | Male | Three y/o | Control | Control | Feed Day | No | 23:10 | 23:00 - 23:59 | Night         | 37,9 | 89  | 9,0  | 9,0  | 19,05 | 585,33 | 73,19  |
|    | 2019/06/12 | CH2206 | Male | Three y/o | Control | Control | Feed Day | No | 23:10 | 23:00 - 23:59 | Night         | 37,9 | 75  | 46,2 | 46,2 | 19,05 | 572,36 | 129,06 |
|    | 2019/06/12 | CH2205 | Male | Three y/o | Control | Control | Feed Day | No | 23:15 | 23:00 - 23:59 | Night         | 38,0 | 75  | 7,4  | 7,4  | 19,15 | 572,36 | 66,59  |
|    | 2019/06/12 | CH2206 | Male | Three y/o | Control | Control | Feed Day | No | 23:15 | 23:00 - 23:59 | Night         | 37,9 | 111 | 59,0 | 59,0 | 19,05 | 601,33 | 137,51 |
|    | 2019/06/12 | CH2205 | Male | Three y/o | Control | Control | Feed Day | No | 23:20 | 23:00 - 23:59 | Night         | 38,0 | 89  | 9,4  | 9,4  | 19,15 | 585,33 | 74,66  |
|    | 2019/06/12 | CH2206 | Male | Three y/o | Control | Control | Feed Day | No | 23:20 | 23:00 - 23:59 | Night         | 37,9 | 53  | 63,8 | 63,8 | 19,05 | 544,43 | 140,22 |
|    | 2019/06/12 | CH2205 | Male | Three y/o | Control | Control | Feed Day | No | 23:25 | 23:00 - 23:59 | Night         | 38,0 | 60  | 20,6 | 20,6 | 19,15 | 554,67 | 101,32 |
|    | 2019/06/12 | CH2206 | Male | Three y/o | Control | Control | Feed Day | No | 23:25 | 23:00 - 23:59 | Night         | 37,8 | 78  | 65,6 | 65,6 | 18,95 | 575,38 | 141,19 |
|    | 2019/06/12 | CH2205 | Male | Three y/o | Control | Control | Feed Day | No | 23:30 | 23:00 - 23:59 | Night         | 38,0 | 101 | 5,2  | 5,2  | 19,15 | 594,59 | 54,72  |
|    | 2019/06/12 | CH2206 | Male | Three y/o | Control | Control | Feed Day | No | 23:30 | 23:00 - 23:59 | Night         | 37,8 | 85  | 67,6 | 67,6 | 18,95 | 581,90 | 142,23 |
|    | 2019/06/12 | CH2205 | Male | Three y/o | Control | Control | Feed Day | No | 23:35 | 23:00 - 23:59 | Night         | 37,9 | 80  | 5,8  | 5,8  | 19,05 | 577,31 | 58,39  |
|    | 2019/06/12 | CH2206 | Male | Three y/o | Control | Control | Feed Day | No | 23:35 | 23:00 - 23:59 | Night         | 37,8 | 54  | 64,8 | 64,8 | 18,95 | 545,99 | 140,76 |
|    | 2019/06/12 | CH2205 | Male | Three y/o | Control | Control | Feed Day | No | 23:40 | 23:00 - 23:59 | Night         | 38,0 | 95  | 7,2  | 7,2  | 19,15 | 590,14 | 65,66  |
|    | 2019/06/12 | CH2206 | Male | Three y/o | Control | Control | Feed Day | No | 23:40 | 23:00 - 23:59 | Night         | 37,8 | 47  | 59,4 | 59,4 | 18,95 | 534,23 | 137,75 |
|    | 2019/06/12 | CH2205 | Male | Three y/o | Control | Control | Feed Day | No | 23:45 | 23:00 - 23:59 | Night         | 38,0 | 78  | 6,4  | 6,4  | 19,15 | 575,38 | 61,70  |
|    | 2019/06/12 | CH2206 | Male | Three y/o | Control | Control | Feed Day | No | 23:45 | 23:00 - 23:59 | Night         | 37,8 | 85  | 63,4 | 63,4 | 18,95 | 581,90 | 140,00 |
|    | 2019/06/12 | CH2205 | Male | Three y/o | Control | Control | Feed Day | No | 23:50 | 23:00 - 23:59 | Night         | 38,1 | 156 | 12,4 | 12,4 | 19,26 | 624,43 | 84,04  |
|    | 2019/06/12 | CH2206 | Male | Three y/o | Control | Control | Feed Day | No | 23:50 | 23:00 - 23:59 | Night         | 37,8 | 60  | 64,6 | 64,6 | 18,95 | 554,67 | 140,65 |
|    | 2019/06/12 | CH2205 | Male | Three y/o | Control | Control | Feed Day | No | 23:55 | 23:00 - 23:59 | Night         | 38,1 | 97  | 13,6 | 13,6 | 19,26 | 591,66 | 87,18  |
|    | 2019/06/12 | CH2206 | Male | Three y/o | Control | Control | Feed Day | No | 23:55 | 23:00 - 23:59 | Night         | 37,7 | 79  | 62,4 | 62,4 | 18,85 | 576,36 | 139,45 |
| 29 | 2019/06/13 | CH2205 | Male | Three y/o | Control | Control | Feed Day | No | 00:00 | 00:00 - 00:59 | Early Morning | 38,0 | 78  | 14,4 | 14,4 | 19,15 | 575,38 | 89,12  |
|    | 2019/06/13 | CH2206 | Male | Three y/o | Control | Control | Feed Day | No | 00:00 | 00:00 - 00:59 | Early Morning | 37,7 | 53  | 59,4 | 59,4 | 18,85 | 544,43 | 137,75 |
|    | 2019/06/13 | CH2205 | Male | Three y/o | Control | Control | Feed Day | No | 00:05 | 00:00 - 00:59 | Early Morning | 38,0 | 98  | 23,6 | 23,6 | 19,15 | 592,41 | 105,97 |
|    | 2019/06/13 | CH2206 | Male | Three y/o | Control | Control | Feed Day | No | 00:05 | 00:00 - 00:59 | Early Morning | 37,7 | 84  | 58,8 | 58,8 | 18,85 | 581,01 | 137,39 |
|    | 2019/06/13 | CH2205 | Male | Three y/o | Control | Control | Feed Day | No | 00:10 | 00:00 - 00:59 | Early Morning | 38,0 | 84  | 8,2  | 8,2  | 19,15 | 581,01 | 70,05  |
|    | 2019/06/13 | CH2206 | Male | Three y/o | Control | Control | Feed Day | No | 00:10 | 00:00 - 00:59 | Early Morning | 37,7 | 70  | 60,8 | 60,8 | 18,85 | 566,99 | 138,55 |
|    | 2019/06/13 | CH2205 | Male | Three y/o | Control | Control | Feed Day | No | 00:15 | 00:00 - 00:59 | Early Morning | 38,0 | 70  | 17,4 | 17,4 | 19,15 | 566,99 | 95,56  |
|    | 2019/06/13 | CH2206 | Male | Three y/o | Control | Control | Feed Day | No | 00:15 | 00:00 - 00:59 | Early Morning | 37,7 | 86  | 59,8 | 59,8 | 18,85 | 582,77 | 137,98 |
|    | 2019/06/13 | CH2205 | Male | Three y/o | Control | Control | Feed Day | No | 00:20 | 00:00 - 00:59 | Early Morning | 38,0 | 60  | 15,2 | 15,2 | 19,15 | 554,67 | 90,96  |
|    | 2019/06/13 | CH2206 | Male | Three y/o | Control | Control | Feed Day | No | 00:20 | 00:00 - 00:59 | Early Morning | 37,8 | 85  | 66,4 | 66,4 | 18,95 | 581,90 | 141,61 |
|    | 2019/06/13 | CH2205 | Male | Three y/o | Control | Control | Feed Day | No | 00:25 | 00:00 - 00:59 | Early Morning | 38,0 | 86  | 14,2 | 14,2 | 19,15 | 582,77 | 88,65  |
|    | 2019/06/13 | CH2206 | Male | Three y/o | Control | Control | Feed Day | No | 00:25 | 00:00 - 00:59 | Early Morning | 37,8 | 47  | 62,4 | 62,4 | 18,95 | 534,23 | 139,45 |
|    | 2019/06/13 | CH2205 | Male | Three y/o | Control | Control | Feed Day | No | 00:30 | 00:00 - 00:59 | Early Morning | 38,0 | 105 | 8,4  | 8,4  | 19,15 | 597,38 | 70,86  |
|    | 2019/06/13 | CH2206 | Male | Three y/o | Control | Control | Feed Day | No | 00:30 | 00:00 - 00:59 | Early Morning | 37,7 | 69  | 62,4 | 62,4 | 18,85 | 565,86 | 139,45 |
|    | 2019/06/13 | CH2205 | Male | Three y/o | Control | Control | Feed Day | No | 00:35 | 00:00 - 00:59 | Early Morning | 38,1 | 55  | 8,2  | 8,2  | 19,26 | 547,52 | 70,05  |
|    | 2019/06/13 | CH2206 | Male | Three y/o | Control | Control | Feed Day | No | 00:35 | 00:00 - 00:59 | Early Morning | 37,7 | 72  | 70,8 | 70,8 | 18,85 | 569,20 | 143,83 |
|    | 2019/06/13 | CH2205 | Male | Three y/o | Control | Control | Feed Day | No | 00:40 | 00:00 - 00:59 | Early Morning | 38,1 | 84  | 8,0  | 8,0  | 19,26 | 581,01 | 69,22  |
|    | 2019/06/13 | CH2206 | Male | Three y/o | Control | Control | Feed Day | No | 00:40 | 00:00 - 00:59 | Early Morning | 37,7 | 57  | 71,0 | 71,0 | 18,85 | 550,47 | 143,93 |
|    | 2019/06/13 | CH2205 | Male | Three y/o | Control | Control | Feed Day | No | 00:45 | 00:00 - 00:59 | Early Morning | 38,1 | 76  | 4,8  | 4,8  | 19,26 | 573,39 | 52,04  |
|    | 2019/06/13 | CH2206 | Male | Three y/o | Control | Control | Feed Day | No | 00:45 | 00:00 - 00:59 | Early Morning | 37,7 | 45  | 68,0 | 68,0 | 18,85 | 530,47 | 142,43 |
|    | 2019/06/13 | CH2205 | Male | Three y/o | Control | Control | Feed Day | No | 00:50 | 00:00 - 00:59 | Early Morning | 38,0 | 76  | 3,8  | 3,8  | 19,15 | 573,39 | 44,22  |
|    | 2019/06/13 | CH2206 | Male | Three y/o | Control | Control | Feed Day | No | 00:50 | 00:00 - 00:59 | Early Morning | 37,7 | 46  | 56,8 | 56,8 | 18,85 | 532,38 | 136,20 |
|    | 2019/06/13 | CH2205 | Male | Three y/o | Control | Control | Feed Day | No | 00:55 | 00:00 - 00:59 | Early Morning | 38,0 | 66  | 7,2  | 7,2  | 19,15 | 562,34 | 65,66  |
|    | 2019/06/13 | CH2206 | Male | Three y/o | Control | Control | Feed Day | No | 00:55 | 00:00 - 00:59 | Early Morning | 37,7 | 58  | 53,6 | 53,6 | 18,85 | 551,90 | 134,19 |
|    | 2019/06/13 | CH2205 | Male | Three y/o | Control | Control | Feed Day | No | 01:00 | 01:00 - 01:59 | Early Morning | 38,0 | 69  | 16,4 | 16,4 | 19,15 | 565,86 | 93,55  |
|    | 2019/06/13 | CH2206 | Male | Three y/o | Control | Control | Feed Day | No | 01:00 | 01:00 - 01:59 | Early Morning | 37,7 | 57  | 56,8 | 56,8 | 18,85 | 550,47 | 136,20 |
|    | 2019/06/13 | CH2205 | Male | Three y/o | Control | Control | Feed Day | No | 01:05 | 01:00 - 01:59 | Early Morning | 38,0 | 72  | 8,2  | 8,2  | 19,15 | 569,20 | 70,05  |
|    | 2019/06/13 | CH2206 | Male | Three y/o | Control | Control | Feed Day | No | 01:05 | 01:00 - 01:59 | Early Morning | 37,7 | 87  | 36,0 | 36,0 | 18,85 | 583,64 | 120,46 |
|    | 2019/06/13 | CH2205 | Male | Three y/o | Control | Control | Feed Day | No | 01:10 | 01:00 - 01:59 | Early Morning | 37,9 | 62  | 14,8 | 14,8 | 19,05 | 557,33 | 90,05  |
|    | 2019/06/13 | CH2206 | Male | Three y/o | Control | Control | Feed Day | No | 01:10 | 01:00 - 01:59 | Early Morning | 37,8 | 150 | 62,8 | 62,8 | 18,95 | 621,86 | 139,67 |
|    | 2019/06/13 | CH2205 | Male | Three y/o | Control | Control | Feed Day | No | 01:15 | 01:00 - 01:59 | Early Morning | 37,7 | 61  | 14,4 | 14,4 | 18,85 | 556,01 | 89,12  |
|    | 2019/06/13 | CH2206 | Male | Three y/o | Control | Control | Feed Day | No | 01:15 | 01:00 - 01:59 | Early Morning | 37,7 | 131 | 19,2 | 19,2 | 18,85 | 612,80 | 98,92  |
|    | 2019/06/13 | CH2205 | Male | Three y/o | Control | Control | Feed Day | No | 01:20 | 01:00 - 01:59 | Early Morning | 37,9 | 74  | 15,8 | 15,8 | 19,05 | 571,33 | 92,28  |
|    | 2019/06/13 | CH2206 | Male | Three y/o | Control | Control | Feed Day | No | 01:20 | 01:00 - 01:59 | Early Morning | 37,5 | 101 | 5,6  | 5,6  | 18,65 | 594,59 | 57,21  |
|    | 2019/06/13 | CH2205 | Male | Three y/o | Control | Control | Feed Day | No | 01:25 | 01:00 - 01:59 | Early Morning | 37,9 | 66  | 10,4 | 10,4 | 19,05 | 562,34 | 78,08  |
|    | 2019/06/13 | CH2206 | Male | Three y/o | Control | Control | Feed Day | No | 01:25 | 01:00 - 01:59 | Early Morning | 37,3 |     | 57,6 | 57,6 | 18,46 |        | 136,68 |
|    | 2019/06/13 | CH2205 | Male | Three y/o | Control | Control | Feed Day | No | 01:30 | 01:00 - 01:59 | Early Morning | 37,9 | 61  | 16,4 | 16,4 | 19,05 | 556,01 | 93,55  |
|    | 2019/06/13 | CH2206 | Male | Three y/o | Control | Control | Feed Day | No | 01:30 | 01:00 - 01:59 | Early Morning | 37,5 | 46  | 43,2 | 43,2 | 18,65 | 532,38 | 126,74 |
|    | 2019/06/13 | CH2205 | Male | Three y/o | Control | Control | Feed Day | No | 01:35 | 01:00 - 01:59 | Early Morning | 37,9 | 84  | 11,0 | 11,0 | 19,05 | 581,01 | 79,98  |



|            |        |      |           |         |         |          |    |       |               |               |      |     |       |       |       |        |        |
|------------|--------|------|-----------|---------|---------|----------|----|-------|---------------|---------------|------|-----|-------|-------|-------|--------|--------|
| 2019/06/13 | CH2206 | Male | Three y/o | Control | Control | Feed Day | No | 01:35 | 01:00 - 01:59 | Early Morning | 37,5 | 66  | 40,2  | 40,2  | 18,65 | 562,34 | 124,26 |
| 2019/06/13 | CH2205 | Male | Three y/o | Control | Control | Feed Day | No | 01:40 | 01:00 - 01:59 | Early Morning | 37,9 | 66  | 10,0  | 10,0  | 19,05 | 562,34 | 76,76  |
| 2019/06/13 | CH2206 | Male | Three y/o | Control | Control | Feed Day | No | 01:40 | 01:00 - 01:59 | Early Morning | 37,4 | 150 | 75,6  | 75,6  | 18,55 | 621,86 | 146,11 |
| 2019/06/13 | CH2205 | Male | Three y/o | Control | Control | Feed Day | No | 01:45 | 01:00 - 01:59 | Early Morning | 38,0 | 70  | 8,8   | 8,8   | 19,15 | 566,99 | 72,43  |
| 2019/06/13 | CH2206 | Male | Three y/o | Control | Control | Feed Day | No | 01:45 | 01:00 - 01:59 | Early Morning | 37,3 | 70  | 62,2  | 62,2  | 18,46 | 566,99 | 139,34 |
| 2019/06/13 | CH2205 | Male | Three y/o | Control | Control | Feed Day | No | 01:50 | 01:00 - 01:59 | Early Morning | 38,0 | 63  | 10,6  | 10,6  | 19,15 | 558,62 | 78,73  |
| 2019/06/13 | CH2206 | Male | Three y/o | Control | Control | Feed Day | No | 01:50 | 01:00 - 01:59 | Early Morning | 37,2 | 47  | 65,4  | 65,4  | 18,36 | 534,23 | 141,08 |
| 2019/06/13 | CH2205 | Male | Three y/o | Control | Control | Feed Day | No | 01:55 | 01:00 - 01:59 | Early Morning | 38,0 | 78  | 10,0  | 10,0  | 19,15 | 575,38 | 76,76  |
| 2019/06/13 | CH2206 | Male | Three y/o | Control | Control | Feed Day | No | 01:55 | 01:00 - 01:59 | Early Morning | 37,1 | 107 | 60,8  | 60,8  | 18,26 | 598,73 | 138,55 |
| 2019/06/13 | CH2205 | Male | Three y/o | Control | Control | Feed Day | No | 02:00 | 02:00 - 02:59 | Early Morning | 38,0 | 63  | 8,2   | 8,2   | 19,15 | 558,62 | 70,05  |
| 2019/06/13 | CH2206 | Male | Three y/o | Control | Control | Feed Day | No | 02:00 | 02:00 - 02:59 | Early Morning | 37,2 | 88  | 54,2  | 54,2  | 18,36 | 584,49 | 134,57 |
| 2019/06/13 | CH2205 | Male | Three y/o | Control | Control | Feed Day | No | 02:05 | 02:00 - 02:59 | Early Morning | 38,0 | 87  | 3,8   | 3,8   | 19,15 | 583,64 | 44,22  |
| 2019/06/13 | CH2206 | Male | Three y/o | Control | Control | Feed Day | No | 02:05 | 02:00 - 02:59 | Early Morning | 37,2 | 57  | 60,6  | 60,6  | 18,36 | 550,47 | 138,44 |
| 2019/06/13 | CH2205 | Male | Three y/o | Control | Control | Feed Day | No | 02:10 | 02:00 - 02:59 | Early Morning | 38,0 | 115 | 13,6  | 13,6  | 19,15 | 603,82 | 87,18  |
| 2019/06/13 | CH2206 | Male | Three y/o | Control | Control | Feed Day | No | 02:10 | 02:00 - 02:59 | Early Morning | 37,2 | 48  | 62,0  | 62,0  | 18,36 | 536,04 | 139,23 |
| 2019/06/13 | CH2205 | Male | Three y/o | Control | Control | Feed Day | No | 02:15 | 02:00 - 02:59 | Early Morning | 38,0 | 85  | 9,6   | 9,6   | 19,15 | 581,90 | 75,37  |
| 2019/06/13 | CH2206 | Male | Three y/o | Control | Control | Feed Day | No | 02:15 | 02:00 - 02:59 | Early Morning | 37,1 | 101 | 63,6  | 63,6  | 18,26 | 594,59 | 140,11 |
| 2019/06/13 | CH2205 | Male | Three y/o | Control | Control | Feed Day | No | 02:20 | 02:00 - 02:59 | Early Morning | 37,9 | 80  | 6,4   | 6,4   | 19,05 | 577,31 | 61,70  |
| 2019/06/13 | CH2206 | Male | Three y/o | Control | Control | Feed Day | No | 02:20 | 02:00 - 02:59 | Early Morning | 37,0 | 56  | 70,0  | 70,0  | 18,16 | 549,01 | 143,44 |
| 2019/06/13 | CH2205 | Male | Three y/o | Control | Control | Feed Day | No | 02:25 | 02:00 - 02:59 | Early Morning | 37,9 | 53  | 8,2   | 8,2   | 19,05 | 544,43 | 70,05  |
| 2019/06/13 | CH2206 | Male | Three y/o | Control | Control | Feed Day | No | 02:25 | 02:00 - 02:59 | Early Morning | 37,0 | 78  | 62,8  | 62,8  | 18,16 | 575,38 | 139,67 |
| 2019/06/13 | CH2205 | Male | Three y/o | Control | Control | Feed Day | No | 02:30 | 02:00 - 02:59 | Early Morning | 37,7 | 67  | 1,6   | 1,6   | 18,85 | 563,53 | 15,48  |
| 2019/06/13 | CH2206 | Male | Three y/o | Control | Control | Feed Day | No | 02:30 | 02:00 - 02:59 | Early Morning | 37,0 | 86  | 58,8  | 58,8  | 18,16 | 582,77 | 137,39 |
| 2019/06/13 | CH2205 | Male | Three y/o | Control | Control | Feed Day | No | 02:35 | 02:00 - 02:59 | Early Morning | 37,7 | 73  | 10,2  | 10,2  | 18,85 | 570,27 | 77,43  |
| 2019/06/13 | CH2206 | Male | Three y/o | Control | Control | Feed Day | No | 02:35 | 02:00 - 02:59 | Early Morning | 36,9 | 46  | 70,0  | 70,0  | 18,06 | 532,38 | 143,44 |
| 2019/06/13 | CH2205 | Male | Three y/o | Control | Control | Feed Day | No | 02:40 | 02:00 - 02:59 | Early Morning | 37,9 | 59  | 8,4   | 8,4   | 19,05 | 553,30 | 70,86  |
| 2019/06/13 | CH2206 | Male | Three y/o | Control | Control | Feed Day | No | 02:40 | 02:00 - 02:59 | Early Morning | 37,0 | 98  | 37,8  | 37,8  | 18,16 | 592,41 | 122,14 |
| 2019/06/13 | CH2205 | Male | Three y/o | Control | Control | Feed Day | No | 02:45 | 02:00 - 02:59 | Early Morning | 37,9 | 79  | 3,6   | 3,6   | 19,05 | 576,36 | 42,42  |
| 2019/06/13 | CH2206 | Male | Three y/o | Control | Control | Feed Day | No | 02:45 | 02:00 - 02:59 | Early Morning | 37,0 | 47  | 43,0  | 43,0  | 18,16 | 534,23 | 126,58 |
| 2019/06/13 | CH2205 | Male | Three y/o | Control | Control | Feed Day | No | 02:50 | 02:00 - 02:59 | Early Morning | 37,9 | 57  | 3,8   | 3,8   | 19,05 | 550,47 | 44,22  |
| 2019/06/13 | CH2206 | Male | Three y/o | Control | Control | Feed Day | No | 02:50 | 02:00 - 02:59 | Early Morning | 37,1 | 60  | 41,2  | 41,2  | 18,26 | 554,67 | 125,11 |
| 2019/06/13 | CH2205 | Male | Three y/o | Control | Control | Feed Day | No | 02:55 | 02:00 - 02:59 | Early Morning | 37,9 | 65  | 6,0   | 6,0   | 19,05 | 561,12 | 59,53  |
| 2019/06/13 | CH2206 | Male | Three y/o | Control | Control | Feed Day | No | 02:55 | 02:00 - 02:59 | Early Morning | 37,2 | 51  | 57,4  | 57,4  | 18,36 | 541,20 | 136,56 |
| 2019/06/13 | CH2205 | Male | Three y/o | Control | Control | Feed Day | No | 03:00 | 03:00 - 03:59 | Early Morning | 37,9 | 71  | 7,0   | 7,0   | 19,05 | 568,10 | 64,72  |
| 2019/06/13 | CH2206 | Male | Three y/o | Control | Control | Feed Day | No | 03:00 | 03:00 - 03:59 | Early Morning | 37,3 | 86  | 54,8  | 54,8  | 18,46 | 582,77 | 134,96 |
| 2019/06/13 | CH2205 | Male | Three y/o | Control | Control | Feed Day | No | 03:05 | 03:00 - 03:59 | Early Morning | 37,7 | 60  | 6,0   | 6,0   | 18,85 | 554,67 | 59,53  |
| 2019/06/13 | CH2206 | Male | Three y/o | Control | Control | Feed Day | No | 03:05 | 03:00 - 03:59 | Early Morning | 37,3 | 79  | 58,8  | 58,8  | 18,46 | 576,36 | 137,39 |
| 2019/06/13 | CH2205 | Male | Three y/o | Control | Control | Feed Day | No | 03:10 | 03:00 - 03:59 | Early Morning | 37,6 | 54  | 8,4   | 8,4   | 18,75 | 545,99 | 70,86  |
| 2019/06/13 | CH2206 | Male | Three y/o | Control | Control | Feed Day | No | 03:10 | 03:00 - 03:59 | Early Morning | 37,3 | 44  | 57,4  | 57,4  | 18,46 | 528,51 | 136,56 |
| 2019/06/13 | CH2205 | Male | Three y/o | Control | Control | Feed Day | No | 03:15 | 03:00 - 03:59 | Early Morning | 37,5 | 88  | 8,0   | 8,0   | 18,65 | 584,49 | 69,22  |
| 2019/06/13 | CH2206 | Male | Three y/o | Control | Control | Feed Day | No | 03:15 | 03:00 - 03:59 | Early Morning | 37,3 |     | 48,4  | 48,4  | 18,46 |        | 130,66 |
| 2019/06/13 | CH2205 | Male | Three y/o | Control | Control | Feed Day | No | 03:20 | 03:00 - 03:59 | Early Morning | 37,5 | 52  | 2,0   | 2,0   | 18,65 | 542,83 | 22,86  |
| 2019/06/13 | CH2206 | Male | Three y/o | Control | Control | Feed Day | No | 03:20 | 03:00 - 03:59 | Early Morning | 37,3 | 54  | 53,0  | 53,0  | 18,46 | 545,99 | 133,80 |
| 2019/06/13 | CH2205 | Male | Three y/o | Control | Control | Feed Day | No | 03:25 | 03:00 - 03:59 | Early Morning | 37,5 | 103 | 6,2   | 6,2   | 18,65 | 596,00 | 60,63  |
| 2019/06/13 | CH2206 | Male | Three y/o | Control | Control | Feed Day | No | 03:25 | 03:00 - 03:59 | Early Morning | 37,3 | 90  | 56,2  | 56,2  | 18,46 | 586,16 | 135,83 |
| 2019/06/13 | CH2205 | Male | Three y/o | Control | Control | Feed Day | No | 03:30 | 03:00 - 03:59 | Early Morning | 37,5 | 73  | 5,2   | 5,2   | 18,65 | 570,27 | 54,72  |
| 2019/06/13 | CH2206 | Male | Three y/o | Control | Control | Feed Day | No | 03:30 | 03:00 - 03:59 | Early Morning | 37,3 | 49  | 57,0  | 57,0  | 18,46 | 537,80 | 136,32 |
| 2019/06/13 | CH2205 | Male | Three y/o | Control | Control | Feed Day | No | 03:35 | 03:00 - 03:59 | Early Morning | 37,4 | 42  | 5,2   | 5,2   | 18,55 | 524,42 | 54,72  |
| 2019/06/13 | CH2206 | Male | Three y/o | Control | Control | Feed Day | No | 03:35 | 03:00 - 03:59 | Early Morning | 37,4 | 43  | 59,2  | 59,2  | 18,55 | 526,50 | 137,63 |
| 2019/06/13 | CH2205 | Male | Three y/o | Control | Control | Feed Day | No | 03:40 | 03:00 - 03:59 | Early Morning | 37,4 | 48  | 2,2   | 2,2   | 18,55 | 536,04 | 26,02  |
| 2019/06/13 | CH2206 | Male | Three y/o | Control | Control | Feed Day | No | 03:40 | 03:00 - 03:59 | Early Morning | 37,4 | 77  | 58,4  | 58,4  | 18,55 | 574,39 | 137,16 |
| 2019/06/13 | CH2205 | Male | Three y/o | Control | Control | Feed Day | No | 03:45 | 03:00 - 03:59 | Early Morning | 37,3 | 89  | 3,6   | 3,6   | 18,46 | 585,33 | 42,42  |
| 2019/06/13 | CH2206 | Male | Three y/o | Control | Control | Feed Day | No | 03:45 | 03:00 - 03:59 | Early Morning | 37,4 | 80  | 61,4  | 61,4  | 18,55 | 577,31 | 138,89 |
| 2019/06/13 | CH2205 | Male | Three y/o | Control | Control | Feed Day | No | 03:50 | 03:00 - 03:59 | Early Morning | 37,3 | 49  | 7,4   | 7,4   | 18,46 | 537,80 | 66,59  |
| 2019/06/13 | CH2206 | Male | Three y/o | Control | Control | Feed Day | No | 03:50 | 03:00 - 03:59 | Early Morning | 37,4 | 47  | 59,4  | 59,4  | 18,55 | 534,23 | 137,75 |
| 2019/06/13 | CH2205 | Male | Three y/o | Control | Control | Feed Day | No | 03:55 | 03:00 - 03:59 | Early Morning | 37,4 | 79  | 19,6  | 19,6  | 18,55 | 576,36 | 99,63  |
| 2019/06/13 | CH2206 | Male | Three y/o | Control | Control | Feed Day | No | 03:55 | 03:00 - 03:59 | Early Morning | 37,4 |     | 86,8  | 86,8  | 18,55 |        | 150,91 |
| 2019/06/13 | CH2205 | Male | Three y/o | Control | Control | Feed Day | No | 04:00 | 04:00 - 04:59 | Morning       | 37,5 | 57  | 4,8   | 4,8   | 18,65 | 550,47 | 52,04  |
| 2019/06/13 | CH2206 | Male | Three y/o | Control | Control | Feed Day | No | 04:00 | 04:00 - 04:59 | Morning       | 37,5 | 134 | 83,0  | 83,0  | 18,65 | 614,33 | 149,36 |
| 2019/06/13 | CH2205 | Male | Three y/o | Control | Control | Feed Day | No | 04:05 | 04:00 - 04:59 | Morning       | 37,4 | 51  | 19,4  | 19,4  | 18,55 | 541,20 | 99,28  |
| 2019/06/13 | CH2206 | Male | Three y/o | Control | Control | Feed Day | No | 04:05 | 04:00 - 04:59 | Morning       | 37,5 | 99  | 184,0 | 184,0 | 18,65 | 593,14 | 177,19 |
| 2019/06/13 | CH2205 | Male | Three y/o | Control | Control | Feed Day | No | 04:10 | 04:00 - 04:59 | Morning       | 37,4 | 137 | 59,8  | 59,8  | 18,55 | 615,83 | 137,98 |
| 2019/06/13 | CH2206 | Male | Three y/o | Control | Control | Feed Day | No | 04:10 | 04:00 - 04:59 | Morning       | 37,4 |     | 126,8 | 126,8 | 18,55 |        | 164,13 |
| 2019/06/13 | CH2205 | Male | Three y/o | Control | Control | Feed Day | No | 04:15 | 04:00 - 04:59 | Morning       | 37,5 | 129 | 93,4  | 93,4  | 18,65 | 611,75 | 153,46 |
| 2019/06/13 | CH2206 | Male | Three y/o | Control | Control | Feed Day | No | 04:15 | 04:00 - 04:59 | Morning       | 37,3 | 80  | 156,0 | 156,0 | 18,46 | 577,31 | 171,39 |
| 2019/06/13 | CH2205 | Male | Three y/o | Control | Control | Feed Day | No | 04:20 | 04:00 - 04:59 | Morning       | 37,5 | 46  | 30,0  | 30,0  | 18,65 | 532,38 | 114,20 |
| 2019/06/13 | CH2206 | Male | Three y/o | Control | Control | Feed Day | No | 04:20 | 04:00 - 04:59 | Morning       | 37,4 | 110 | 161,2 | 161,2 | 18,55 | 600,69 | 172,54 |
| 2019/06/13 | CH2205 | Male | Three y/o | Control | Control | Feed Day | No | 04:25 | 04:00 - 04:59 | Morning       | 37,5 | 121 | 108,0 | 108,0 | 18,65 | 607,35 | 158,53 |
| 2019/06/13 | CH2206 | Male | Three y/o | Control | Control | Feed Day | No | 04:25 | 04:00 - 04:59 | Morning       | 37,4 | 113 | 355,4 | 355,4 | 18,55 | 602,58 | 200,42 |
| 2019/06/13 | CH2205 | Male | Three y/o | Control | Control | Feed Day | No | 04:30 | 04:00 - 04:59 | Morning       | 37,5 |     | 140,4 | 140,4 | 18,65 |        | 167,70 |



|            |        |      |           |         |         |          |    |       |               |         |      |     |       |       |       |        |        |
|------------|--------|------|-----------|---------|---------|----------|----|-------|---------------|---------|------|-----|-------|-------|-------|--------|--------|
| 2019/06/13 | CH2206 | Male | Three y/o | Control | Control | Feed Day | No | 04:30 | 04:00 - 04:59 | Morning | 37,5 | 106 | 136,8 | 136,8 | 18,65 | 598,06 | 166,79 |
| 2019/06/13 | CH2205 | Male | Three y/o | Control | Control | Feed Day | No | 04:35 | 04:00 - 04:59 | Morning | 37,5 | 88  | 46,2  | 46,2  | 18,65 | 584,49 | 129,06 |
| 2019/06/13 | CH2206 | Male | Three y/o | Control | Control | Feed Day | No | 04:35 | 04:00 - 04:59 | Morning | 37,5 | 109 | 171,8 | 171,8 | 18,65 | 600,04 | 174,78 |
| 2019/06/13 | CH2205 | Male | Three y/o | Control | Control | Feed Day | No | 04:40 | 04:00 - 04:59 | Morning | 37,6 | 124 | 179,0 | 179,0 | 18,75 | 609,04 | 176,22 |
| 2019/06/13 | CH2206 | Male | Three y/o | Control | Control | Feed Day | No | 04:40 | 04:00 - 04:59 | Morning | 37,7 | 118 | 70,8  | 70,8  | 18,85 | 605,61 | 143,83 |
| 2019/06/13 | CH2205 | Male | Three y/o | Control | Control | Feed Day | No | 04:45 | 04:00 - 04:59 | Morning | 37,7 | 97  | 24,8  | 24,8  | 18,85 | 591,66 | 107,67 |
| 2019/06/13 | CH2206 | Male | Three y/o | Control | Control | Feed Day | No | 04:45 | 04:00 - 04:59 | Morning | 37,7 | 91  | 204,4 | 204,4 | 18,85 | 586,98 | 180,88 |
| 2019/06/13 | CH2205 | Male | Three y/o | Control | Control | Feed Day | No | 04:50 | 04:00 - 04:59 | Morning | 37,7 | 188 | 91,2  | 91,2  | 18,85 | 636,34 | 152,63 |
| 2019/06/13 | CH2206 | Male | Three y/o | Control | Control | Feed Day | No | 04:50 | 04:00 - 04:59 | Morning | 37,8 | 103 | 194,0 | 194,0 | 18,95 | 596,00 | 179,05 |
| 2019/06/13 | CH2205 | Male | Three y/o | Control | Control | Feed Day | No | 04:55 | 04:00 - 04:59 | Morning | 37,9 | 145 | 67,2  | 67,2  | 19,05 | 619,62 | 142,02 |
| 2019/06/13 | CH2206 | Male | Three y/o | Control | Control | Feed Day | No | 04:55 | 04:00 - 04:59 | Morning | 37,8 | 100 | 44,0  | 44,0  | 18,95 | 593,87 | 127,37 |
| 2019/06/13 | CH2205 | Male | Three y/o | Control | Control | Feed Day | No | 05:00 | 05:00 - 05:59 | Morning | 37,7 |     | 19,0  | 19,0  | 18,85 |        | 98,56  |
| 2019/06/13 | CH2206 | Male | Three y/o | Control | Control | Feed Day | No | 05:00 | 05:00 - 05:59 | Morning | 37,7 | 75  | 63,0  | 63,0  | 18,85 | 572,36 | 139,78 |
| 2019/06/13 | CH2205 | Male | Three y/o | Control | Control | Feed Day | No | 05:05 | 05:00 - 05:59 | Morning | 37,5 | 109 | 16,8  | 16,8  | 18,65 | 600,04 | 94,37  |
| 2019/06/13 | CH2206 | Male | Three y/o | Control | Control | Feed Day | No | 05:05 | 05:00 - 05:59 | Morning | 37,3 | 45  | 83,6  | 83,6  | 18,46 | 530,47 | 149,61 |
| 2019/06/13 | CH2205 | Male | Three y/o | Control | Control | Feed Day | No | 05:10 | 05:00 - 05:59 | Morning | 37,3 | 59  | 19,4  | 19,4  | 18,46 | 553,30 | 99,28  |
| 2019/06/13 | CH2206 | Male | Three y/o | Control | Control | Feed Day | No | 05:10 | 05:00 - 05:59 | Morning | 37,2 | 154 | 12,4  | 12,4  | 18,36 | 623,58 | 84,04  |
| 2019/06/13 | CH2205 | Male | Three y/o | Control | Control | Feed Day | No | 05:15 | 05:00 - 05:59 | Morning | 37,2 | 56  | 19,6  | 19,6  | 18,36 | 549,01 | 99,63  |
| 2019/06/13 | CH2206 | Male | Three y/o | Control | Control | Feed Day | No | 05:15 | 05:00 - 05:59 | Morning | 36,9 | 44  | 12,8  | 12,8  | 18,06 | 528,51 | 85,12  |
| 2019/06/13 | CH2205 | Male | Three y/o | Control | Control | Feed Day | No | 05:20 | 05:00 - 05:59 | Morning | 37,1 | 69  | 16,8  | 16,8  | 18,26 | 565,86 | 94,37  |
| 2019/06/13 | CH2206 | Male | Three y/o | Control | Control | Feed Day | No | 05:20 | 05:00 - 05:59 | Morning | 37,0 | 52  | 15,0  | 15,0  | 18,16 | 542,83 | 90,51  |
| 2019/06/13 | CH2205 | Male | Three y/o | Control | Control | Feed Day | No | 05:25 | 05:00 - 05:59 | Morning | 37,0 | 44  | 17,2  | 17,2  | 18,16 | 528,51 | 95,17  |
| 2019/06/13 | CH2206 | Male | Three y/o | Control | Control | Feed Day | No | 05:25 | 05:00 - 05:59 | Morning | 37,1 | 85  | 8,6   | 8,6   | 18,26 | 581,90 | 71,66  |
| 2019/06/13 | CH2205 | Male | Three y/o | Control | Control | Feed Day | No | 05:30 | 05:00 - 05:59 | Morning | 36,8 | 61  | 18,0  | 18,0  | 17,96 | 556,01 | 96,72  |
| 2019/06/13 | CH2206 | Male | Three y/o | Control | Control | Feed Day | No | 05:30 | 05:00 - 05:59 | Morning | 37,1 | 45  | 3,8   | 3,8   | 18,26 | 530,47 | 44,22  |
| 2019/06/13 | CH2205 | Male | Three y/o | Control | Control | Feed Day | No | 05:35 | 05:00 - 05:59 | Morning | 37,1 | 58  | 14,4  | 14,4  | 18,26 | 551,90 | 89,12  |
| 2019/06/13 | CH2206 | Male | Three y/o | Control | Control | Feed Day | No | 05:35 | 05:00 - 05:59 | Morning | 37,1 | 44  | 2,6   | 2,6   | 18,26 | 528,51 | 31,57  |
| 2019/06/13 | CH2205 | Male | Three y/o | Control | Control | Feed Day | No | 05:40 | 05:00 - 05:59 | Morning | 37,2 | 75  | 17,2  | 17,2  | 18,36 | 572,36 | 95,17  |
| 2019/06/13 | CH2206 | Male | Three y/o | Control | Control | Feed Day | No | 05:40 | 05:00 - 05:59 | Morning | 37,1 | 104 | 26,0  | 26,0  | 18,26 | 596,69 | 109,29 |
| 2019/06/13 | CH2205 | Male | Three y/o | Control | Control | Feed Day | No | 05:45 | 05:00 - 05:59 | Morning | 37,2 | 57  | 15,4  | 15,4  | 18,36 | 550,47 | 91,41  |
| 2019/06/13 | CH2206 | Male | Three y/o | Control | Control | Feed Day | No | 05:45 | 05:00 - 05:59 | Morning | 37,1 | 62  | 9,6   | 9,6   | 18,26 | 557,33 | 75,37  |
| 2019/06/13 | CH2205 | Male | Three y/o | Control | Control | Feed Day | No | 05:50 | 05:00 - 05:59 | Morning | 37,2 |     | 20,6  | 20,6  | 18,36 |        | 101,32 |
| 2019/06/13 | CH2206 | Male | Three y/o | Control | Control | Feed Day | No | 05:50 | 05:00 - 05:59 | Morning | 37,0 | 44  | 11,2  | 11,2  | 18,16 | 528,51 | 80,59  |
| 2019/06/13 | CH2205 | Male | Three y/o | Control | Control | Feed Day | No | 05:55 | 05:00 - 05:59 | Morning | 37,2 | 92  | 14,6  | 14,6  | 18,36 | 587,78 | 89,59  |
| 2019/06/13 | CH2206 | Male | Three y/o | Control | Control | Feed Day | No | 05:55 | 05:00 - 05:59 | Morning | 36,9 | 49  | 16,2  | 16,2  | 18,06 | 537,80 | 93,13  |
| 2019/06/13 | CH2205 | Male | Three y/o | Control | Control | Feed Day | No | 06:00 | 06:00 - 06:59 | Morning | 37,1 | 68  | 9,4   | 9,4   | 18,26 | 564,71 | 74,66  |
| 2019/06/13 | CH2206 | Male | Three y/o | Control | Control | Feed Day | No | 06:00 | 06:00 - 06:59 | Morning | 36,8 | 79  | 25,0  | 25,0  | 17,96 | 576,36 | 107,94 |
| 2019/06/13 | CH2205 | Male | Three y/o | Control | Control | Feed Day | No | 06:05 | 06:00 - 06:59 | Morning | 37,1 | 63  | 15,4  | 15,4  | 18,26 | 558,62 | 91,41  |
| 2019/06/13 | CH2206 | Male | Three y/o | Control | Control | Feed Day | No | 06:05 | 06:00 - 06:59 | Morning | 36,8 | 71  | 26,0  | 26,0  | 17,96 | 568,10 | 109,29 |
| 2019/06/13 | CH2205 | Male | Three y/o | Control | Control | Feed Day | No | 06:10 | 06:00 - 06:59 | Morning | 37,1 |     | 15,2  | 15,2  | 18,26 |        | 90,96  |
| 2019/06/13 | CH2206 | Male | Three y/o | Control | Control | Feed Day | No | 06:10 | 06:00 - 06:59 | Morning | 36,8 | 65  | 24,0  | 24,0  | 17,96 | 561,12 | 106,55 |
| 2019/06/13 | CH2205 | Male | Three y/o | Control | Control | Feed Day | No | 06:15 | 06:00 - 06:59 | Morning | 37,1 | 82  | 21,2  | 21,2  | 18,26 | 579,19 | 102,31 |
| 2019/06/13 | CH2206 | Male | Three y/o | Control | Control | Feed Day | No | 06:15 | 06:00 - 06:59 | Morning | 36,8 | 49  | 14,4  | 14,4  | 17,96 | 537,80 | 89,12  |
| 2019/06/13 | CH2205 | Male | Three y/o | Control | Control | Feed Day | No | 06:20 | 06:00 - 06:59 | Morning | 37,1 | 49  | 18,8  | 18,8  | 18,26 | 537,80 | 98,20  |
| 2019/06/13 | CH2206 | Male | Three y/o | Control | Control | Feed Day | No | 06:20 | 06:00 - 06:59 | Morning | 36,8 | 48  | 22,0  | 22,0  | 17,96 | 536,04 | 103,57 |
| 2019/06/13 | CH2205 | Male | Three y/o | Control | Control | Feed Day | No | 06:25 | 06:00 - 06:59 | Morning | 37,1 | 147 | 14,0  | 14,0  | 18,26 | 620,52 | 88,17  |
| 2019/06/13 | CH2206 | Male | Three y/o | Control | Control | Feed Day | No | 06:25 | 06:00 - 06:59 | Morning | 36,6 | 45  | 30,8  | 30,8  | 17,77 | 530,47 | 115,10 |
| 2019/06/13 | CH2205 | Male | Three y/o | Control | Control | Feed Day | No | 06:30 | 06:00 - 06:59 | Morning | 37,1 | 120 | 107,6 | 107,6 | 18,26 | 606,78 | 158,40 |
| 2019/06/13 | CH2206 | Male | Three y/o | Control | Control | Feed Day | No | 06:30 | 06:00 - 06:59 | Morning | 36,9 | 194 | 54,4  | 54,4  | 18,06 | 638,30 | 134,70 |
| 2019/06/13 | CH2205 | Male | Three y/o | Control | Control | Feed Day | No | 06:35 | 06:00 - 06:59 | Morning | 37,2 | 68  | 117,2 | 117,2 | 18,36 | 564,71 | 161,38 |
| 2019/06/13 | CH2206 | Male | Three y/o | Control | Control | Feed Day | No | 06:35 | 06:00 - 06:59 | Morning | 37,1 | 118 | 128,0 | 128,0 | 18,26 | 605,61 | 164,46 |
| 2019/06/13 | CH2205 | Male | Three y/o | Control | Control | Feed Day | No | 06:40 | 06:00 - 06:59 | Morning | 37,3 | 107 | 104,8 | 104,8 | 18,46 | 598,73 | 157,48 |
| 2019/06/13 | CH2206 | Male | Three y/o | Control | Control | Feed Day | No | 06:40 | 06:00 - 06:59 | Morning | 37,3 | 138 | 267,4 | 267,4 | 18,46 | 616,31 | 190,36 |
| 2019/06/13 | CH2205 | Male | Three y/o | Control | Control | Feed Day | No | 06:45 | 06:00 - 06:59 | Morning | 37,3 | 112 | 75,4  | 75,4  | 18,46 | 601,96 | 146,02 |
| 2019/06/13 | CH2206 | Male | Three y/o | Control | Control | Feed Day | No | 06:45 | 06:00 - 06:59 | Morning | 37,4 | 125 | 193,6 | 193,6 | 18,55 | 609,60 | 178,97 |
| 2019/06/13 | CH2205 | Male | Three y/o | Control | Control | Feed Day | No | 06:50 | 06:00 - 06:59 | Morning | 37,4 | 124 | 104,2 | 104,2 | 18,55 | 609,04 | 157,28 |
| 2019/06/13 | CH2206 | Male | Three y/o | Control | Control | Feed Day | No | 06:50 | 06:00 - 06:59 | Morning | 37,4 | 111 | 59,6  | 59,6  | 18,55 | 601,33 | 137,86 |
| 2019/06/13 | CH2205 | Male | Three y/o | Control | Control | Feed Day | No | 06:55 | 06:00 - 06:59 | Morning | 37,5 | 124 | 161,2 | 161,2 | 18,65 | 609,04 | 172,54 |
| 2019/06/13 | CH2206 | Male | Three y/o | Control | Control | Feed Day | No | 06:55 | 06:00 - 06:59 | Morning | 37,5 | 119 | 74,0  | 74,0  | 18,65 | 606,20 | 145,37 |
| 2019/06/13 | CH2205 | Male | Three y/o | Control | Control | Feed Day | No | 07:00 | 07:00 - 07:59 | Morning | 37,5 | 121 | 116,4 | 116,4 | 18,65 | 607,35 | 161,14 |
| 2019/06/13 | CH2206 | Male | Three y/o | Control | Control | Feed Day | No | 07:00 | 07:00 - 07:59 | Morning | 37,7 | 140 | 126,8 | 126,8 | 18,85 | 617,28 | 164,13 |
| 2019/06/13 | CH2205 | Male | Three y/o | Control | Control | Feed Day | No | 07:05 | 07:00 - 07:59 | Morning | 37,6 | 120 | 515,0 | 515,0 | 18,75 | 606,78 | 213,60 |
| 2019/06/13 | CH2206 | Male | Three y/o | Control | Control | Feed Day | No | 07:05 | 07:00 - 07:59 | Morning | 37,8 |     | 319,6 | 319,6 | 18,95 |        | 196,66 |
| 2019/06/13 | CH2205 | Male | Three y/o | Control | Control | Feed Day | No | 07:10 | 07:00 - 07:59 | Morning | 37,6 | 128 | 55,0  | 55,0  | 18,75 | 611,22 | 135,08 |
| 2019/06/13 | CH2206 | Male | Three y/o | Control | Control | Feed Day | No | 07:10 | 07:00 - 07:59 | Morning | 37,8 |     | 133,0 | 133,0 | 18,95 |        | 165,80 |
| 2019/06/13 | CH2205 | Male | Three y/o | Control | Control | Feed Day | No | 07:15 | 07:00 - 07:59 | Morning | 37,7 | 52  | 175,2 | 175,2 | 18,85 | 542,83 | 175,47 |
| 2019/06/13 | CH2206 | Male | Three y/o | Control | Control | Feed Day | No | 07:15 | 07:00 - 07:59 | Morning | 37,8 | 113 | 78,8  | 78,8  | 18,95 | 602,58 | 147,55 |
| 2019/06/13 | CH2205 | Male | Three y/o | Control | Control | Feed Day | No | 07:20 | 07:00 - 07:59 | Morning | 37,8 |     | 265,0 | 265,0 | 18,95 |        | 190,04 |
| 2019/06/13 | CH2206 | Male | Three y/o | Control | Control | Feed Day | No | 07:20 | 07:00 - 07:59 | Morning | 37,9 | 156 | 104,0 | 104,0 | 19,05 | 624,43 | 157,21 |
| 2019/06/13 | CH2205 | Male | Three y/o | Control | Control | Feed Day | No | 07:25 | 07:00 - 07:59 | Morning | 38,0 | 160 | 173,0 | 173,0 | 19,15 | 626,07 | 175,02 |



|            |        |      |           |         |         |          |    |       |               |              |      |     |       |       |       |        |        |
|------------|--------|------|-----------|---------|---------|----------|----|-------|---------------|--------------|------|-----|-------|-------|-------|--------|--------|
| 2019/06/13 | CH2206 | Male | Three y/o | Control | Control | Feed Day | No | 07:25 | 07:00 - 07:59 | Morning      | 37,9 | 172 | 65,0  | 65,0  | 19,05 | 630,73 | 140,87 |
| 2019/06/13 | CH2205 | Male | Three y/o | Control | Control | Feed Day | No | 07:30 | 07:00 - 07:59 | Morning      | 38,0 | 89  | 44,2  | 44,2  | 19,15 | 585,33 | 127,53 |
| 2019/06/13 | CH2206 | Male | Three y/o | Control | Control | Feed Day | No | 07:30 | 07:00 - 07:59 | Morning      | 37,9 | 55  | 97,0  | 97,0  | 19,05 | 547,52 | 154,78 |
| 2019/06/13 | CH2205 | Male | Three y/o | Control | Control | Feed Day | No | 07:35 | 07:00 - 07:59 | Morning      | 38,0 | 145 | 368,2 | 368,2 | 19,15 | 619,62 | 201,67 |
| 2019/06/13 | CH2206 | Male | Three y/o | Control | Control | Feed Day | No | 07:35 | 07:00 - 07:59 | Morning      | 37,8 | 87  | 116,8 | 116,8 | 18,95 | 583,64 | 161,26 |
| 2019/06/13 | CH2205 | Male | Three y/o | Control | Control | Feed Day | No | 07:40 | 07:00 - 07:59 | Morning      | 38,0 | 62  | 45,2  | 45,2  | 19,15 | 557,33 | 128,30 |
| 2019/06/13 | CH2206 | Male | Three y/o | Control | Control | Feed Day | No | 07:40 | 07:00 - 07:59 | Morning      | 37,9 | 106 | 215,0 | 215,0 | 19,05 | 598,06 | 182,66 |
| 2019/06/13 | CH2205 | Male | Three y/o | Control | Control | Feed Day | No | 07:45 | 07:00 - 07:59 | Morning      | 37,9 |     | 6,8   | 6,8   | 19,05 |        | 63,74  |
| 2019/06/13 | CH2206 | Male | Three y/o | Control | Control | Feed Day | No | 07:45 | 07:00 - 07:59 | Morning      | 37,9 | 108 | 135,4 | 135,4 | 19,05 | 599,39 | 166,43 |
| 2019/06/13 | CH2205 | Male | Three y/o | Control | Control | Feed Day | No | 07:50 | 07:00 - 07:59 | Morning      | 37,6 | 85  | 217,0 | 217,0 | 18,75 | 581,90 | 182,99 |
| 2019/06/13 | CH2206 | Male | Three y/o | Control | Control | Feed Day | No | 07:50 | 07:00 - 07:59 | Morning      | 37,9 | 98  | 298,6 | 298,6 | 19,05 | 592,41 | 194,26 |
| 2019/06/13 | CH2205 | Male | Three y/o | Control | Control | Feed Day | No | 07:55 | 07:00 - 07:59 | Morning      | 37,6 | 98  | 298,8 | 298,8 | 18,75 | 592,41 | 194,28 |
| 2019/06/13 | CH2206 | Male | Three y/o | Control | Control | Feed Day | No | 07:55 | 07:00 - 07:59 | Morning      | 37,9 | 165 | 70,0  | 70,0  | 19,05 | 628,06 | 143,44 |
| 2019/06/13 | CH2205 | Male | Three y/o | Control | Control | Feed Day | No | 08:00 | 08:00 - 08:59 | Late Morning | 37,6 | 55  | 182,2 | 182,2 | 18,75 | 547,52 | 176,84 |
| 2019/06/13 | CH2206 | Male | Three y/o | Control | Control | Feed Day | No | 08:00 | 08:00 - 08:59 | Late Morning | 37,8 | 118 | 48,2  | 48,2  | 18,95 | 605,61 | 130,52 |
| 2019/06/13 | CH2205 | Male | Three y/o | Control | Control | Feed Day | No | 08:05 | 08:00 - 08:59 | Late Morning | 37,7 | 92  | 123,0 | 123,0 | 18,85 | 587,78 | 163,07 |
| 2019/06/13 | CH2206 | Male | Three y/o | Control | Control | Feed Day | No | 08:05 | 08:00 - 08:59 | Late Morning | 37,7 | 105 | 155,8 | 155,8 | 18,85 | 597,38 | 171,35 |
| 2019/06/13 | CH2205 | Male | Three y/o | Control | Control | Feed Day | No | 08:10 | 08:00 - 08:59 | Late Morning | 37,7 | 51  | 62,6  | 62,6  | 18,85 | 541,20 | 139,56 |
| 2019/06/13 | CH2206 | Male | Three y/o | Control | Control | Feed Day | No | 08:10 | 08:00 - 08:59 | Late Morning | 37,8 | 128 | 54,2  | 54,2  | 18,95 | 611,22 | 134,57 |
| 2019/06/13 | CH2205 | Male | Three y/o | Control | Control | Feed Day | No | 08:15 | 08:00 - 08:59 | Late Morning | 37,6 |     | 6,6   | 6,6   | 18,75 |        | 62,73  |
| 2019/06/13 | CH2206 | Male | Three y/o | Control | Control | Feed Day | No | 08:15 | 08:00 - 08:59 | Late Morning | 37,7 | 104 | 190,6 | 190,6 | 18,85 | 596,69 | 178,43 |
| 2019/06/13 | CH2205 | Male | Three y/o | Control | Control | Feed Day | No | 08:20 | 08:00 - 08:59 | Late Morning | 37,6 | 80  | 9,2   | 9,2   | 18,75 | 577,31 | 73,94  |
| 2019/06/13 | CH2206 | Male | Three y/o | Control | Control | Feed Day | No | 08:20 | 08:00 - 08:59 | Late Morning | 37,7 | 103 | 128,0 | 128,0 | 18,85 | 596,00 | 164,46 |
| 2019/06/13 | CH2205 | Male | Three y/o | Control | Control | Feed Day | No | 08:25 | 08:00 - 08:59 | Late Morning | 37,6 |     | 6,8   | 6,8   | 18,75 |        | 63,74  |
| 2019/06/13 | CH2206 | Male | Three y/o | Control | Control | Feed Day | No | 08:25 | 08:00 - 08:59 | Late Morning | 37,5 | 50  | 59,2  | 59,2  | 18,65 | 539,52 | 137,63 |
| 2019/06/13 | CH2205 | Male | Three y/o | Control | Control | Feed Day | No | 08:30 | 08:00 - 08:59 | Late Morning | 37,5 |     | 7,4   | 7,4   | 18,65 |        | 66,59  |
| 2019/06/13 | CH2206 | Male | Three y/o | Control | Control | Feed Day | No | 08:30 | 08:00 - 08:59 | Late Morning | 37,2 | 57  | 56,8  | 56,8  | 18,36 | 550,47 | 136,20 |
| 2019/06/13 | CH2205 | Male | Three y/o | Control | Control | Feed Day | No | 08:35 | 08:00 - 08:59 | Late Morning | 37,4 | 64  | 10,8  | 10,8  | 18,55 | 559,88 | 79,36  |
| 2019/06/13 | CH2206 | Male | Three y/o | Control | Control | Feed Day | No | 08:35 | 08:00 - 08:59 | Late Morning | 36,9 | 46  | 52,4  | 52,4  | 18,06 | 532,38 | 133,41 |
| 2019/06/13 | CH2205 | Male | Three y/o | Control | Control | Feed Day | No | 08:40 | 08:00 - 08:59 | Late Morning | 37,5 | 56  | 21,6  | 21,6  | 18,65 | 549,01 | 102,94 |
| 2019/06/13 | CH2206 | Male | Three y/o | Control | Control | Feed Day | No | 08:40 | 08:00 - 08:59 | Late Morning | 36,9 | 82  | 328,2 | 328,2 | 18,06 | 579,19 | 197,60 |
| 2019/06/13 | CH2205 | Male | Three y/o | Control | Control | Feed Day | No | 08:45 | 08:00 - 08:59 | Late Morning | 37,4 | 67  | 10,6  | 10,6  | 18,55 | 563,53 | 78,73  |
| 2019/06/13 | CH2206 | Male | Three y/o | Control | Control | Feed Day | No | 08:45 | 08:00 - 08:59 | Late Morning | 37,1 | 104 | 159,8 | 159,8 | 18,26 | 596,69 | 172,24 |
| 2019/06/13 | CH2205 | Male | Three y/o | Control | Control | Feed Day | No | 08:50 | 08:00 - 08:59 | Late Morning | 37,4 |     | 12,0  | 12,0  | 18,55 |        | 82,93  |
| 2019/06/13 | CH2206 | Male | Three y/o | Control | Control | Feed Day | No | 08:50 | 08:00 - 08:59 | Late Morning | 37,3 | 128 | 88,6  | 88,6  | 18,46 | 611,22 | 151,63 |
| 2019/06/13 | CH2205 | Male | Three y/o | Control | Control | Feed Day | No | 08:55 | 08:00 - 08:59 | Late Morning | 37,4 |     | 10,0  | 10,0  | 18,55 |        | 76,76  |
| 2019/06/13 | CH2206 | Male | Three y/o | Control | Control | Feed Day | No | 08:55 | 08:00 - 08:59 | Late Morning | 37,4 | 56  | 340,6 | 340,6 | 18,55 | 549,01 | 198,91 |
| 2019/06/13 | CH2205 | Male | Three y/o | Control | Control | Feed Day | No | 09:00 | 09:00 - 09:59 | Late Morning | 37,3 | 64  | 9,8   | 9,8   | 18,46 | 559,88 | 76,07  |
| 2019/06/13 | CH2206 | Male | Three y/o | Control | Control | Feed Day | No | 09:00 | 09:00 - 09:59 | Late Morning | 37,5 | 131 | 47,6  | 47,6  | 18,65 | 612,80 | 130,09 |
| 2019/06/13 | CH2205 | Male | Three y/o | Control | Control | Feed Day | No | 09:05 | 09:00 - 09:59 | Late Morning | 37,3 | 71  | 42,4  | 42,4  | 18,46 | 568,10 | 126,10 |
| 2019/06/13 | CH2206 | Male | Three y/o | Control | Control | Feed Day | No | 09:05 | 09:00 - 09:59 | Late Morning | 37,5 | 73  | 52,8  | 52,8  | 18,65 | 570,27 | 133,67 |
| 2019/06/13 | CH2205 | Male | Three y/o | Control | Control | Feed Day | No | 09:10 | 09:00 - 09:59 | Late Morning | 37,3 |     | 10,8  | 10,8  | 18,46 |        | 79,36  |
| 2019/06/13 | CH2206 | Male | Three y/o | Control | Control | Feed Day | No | 09:10 | 09:00 - 09:59 | Late Morning | 37,5 | 188 | 108,0 | 108,0 | 18,65 | 636,34 | 158,53 |
| 2019/06/13 | CH2205 | Male | Three y/o | Control | Control | Feed Day | No | 09:15 | 09:00 - 09:59 | Late Morning | 37,3 | 97  | 153,8 | 153,8 | 18,46 | 591,66 | 170,89 |
| 2019/06/13 | CH2206 | Male | Three y/o | Control | Control | Feed Day | No | 09:15 | 09:00 - 09:59 | Late Morning | 37,7 | 134 | 125,0 | 125,0 | 18,85 | 614,33 | 163,63 |
| 2019/06/13 | CH2205 | Male | Three y/o | Control | Control | Feed Day | No | 09:20 | 09:00 - 09:59 | Late Morning | 37,3 | 128 | 53,4  | 53,4  | 18,46 | 611,22 | 134,06 |
| 2019/06/13 | CH2206 | Male | Three y/o | Control | Control | Feed Day | No | 09:20 | 09:00 - 09:59 | Late Morning | 37,7 | 123 | 63,6  | 63,6  | 18,85 | 608,49 | 140,11 |
| 2019/06/13 | CH2205 | Male | Three y/o | Control | Control | Feed Day | No | 09:25 | 09:00 - 09:59 | Late Morning | 37,4 | 160 | 71,8  | 71,8  | 18,55 | 626,07 | 144,32 |
| 2019/06/13 | CH2206 | Male | Three y/o | Control | Control | Feed Day | No | 09:25 | 09:00 - 09:59 | Late Morning | 37,8 | 121 | 68,6  | 68,6  | 18,95 | 607,35 | 142,74 |
| 2019/06/13 | CH2205 | Male | Three y/o | Control | Control | Feed Day | No | 09:30 | 09:00 - 09:59 | Late Morning | 37,4 |     | 26,8  | 26,8  | 18,55 |        | 110,33 |
| 2019/06/13 | CH2206 | Male | Three y/o | Control | Control | Feed Day | No | 09:30 | 09:00 - 09:59 | Late Morning | 37,8 | 119 | 109,0 | 109,0 | 18,95 | 606,20 | 158,85 |
| 2019/06/13 | CH2205 | Male | Three y/o | Control | Control | Feed Day | No | 09:35 | 09:00 - 09:59 | Late Morning | 37,4 | 64  | 23,6  | 23,6  | 18,55 | 559,88 | 105,97 |
| 2019/06/13 | CH2206 | Male | Three y/o | Control | Control | Feed Day | No | 09:35 | 09:00 - 09:59 | Late Morning | 37,8 |     | 38,2  | 38,2  | 18,95 |        | 122,50 |
| 2019/06/13 | CH2205 | Male | Three y/o | Control | Control | Feed Day | No | 09:40 | 09:00 - 09:59 | Late Morning | 37,4 | 88  | 13,0  | 13,0  | 18,55 | 584,49 | 85,65  |
| 2019/06/13 | CH2206 | Male | Three y/o | Control | Control | Feed Day | No | 09:40 | 09:00 - 09:59 | Late Morning | 37,7 | 70  | 53,4  | 53,4  | 18,85 | 566,99 | 134,06 |
| 2019/06/13 | CH2205 | Male | Three y/o | Control | Control | Feed Day | No | 09:45 | 09:00 - 09:59 | Late Morning | 37,5 |     | 15,2  | 15,2  | 18,65 |        | 90,96  |
| 2019/06/13 | CH2206 | Male | Three y/o | Control | Control | Feed Day | No | 09:45 | 09:00 - 09:59 | Late Morning | 37,7 | 102 | 53,0  | 53,0  | 18,85 | 595,30 | 133,80 |
| 2019/06/13 | CH2205 | Male | Three y/o | Control | Control | Feed Day | No | 09:50 | 09:00 - 09:59 | Late Morning | 37,5 | 67  | 11,2  | 11,2  | 18,65 | 563,53 | 80,59  |
| 2019/06/13 | CH2206 | Male | Three y/o | Control | Control | Feed Day | No | 09:50 | 09:00 - 09:59 | Late Morning | 37,7 | 56  | 59,2  | 59,2  | 18,85 | 549,01 | 137,63 |
| 2019/06/13 | CH2205 | Male | Three y/o | Control | Control | Feed Day | No | 09:55 | 09:00 - 09:59 | Late Morning | 37,5 | 66  | 6,4   | 6,4   | 18,65 | 562,34 | 61,70  |
| 2019/06/13 | CH2206 | Male | Three y/o | Control | Control | Feed Day | No | 09:55 | 09:00 - 09:59 | Late Morning | 37,7 | 47  | 54,6  | 54,6  | 18,85 | 534,23 | 134,83 |
| 2019/06/13 | CH2205 | Male | Three y/o | Control | Control | Feed Day | No | 10:00 | 10:00 - 10:59 | Late Morning | 37,5 | 56  | 12,4  | 12,4  | 18,65 | 549,01 | 84,04  |
| 2019/06/13 | CH2206 | Male | Three y/o | Control | Control | Feed Day | No | 10:00 | 10:00 - 10:59 | Late Morning | 37,7 | 77  | 51,4  | 51,4  | 18,85 | 574,39 | 132,74 |
| 2019/06/13 | CH2205 | Male | Three y/o | Control | Control | Feed Day | No | 10:05 | 10:00 - 10:59 | Late Morning | 37,5 | 51  | 9,4   | 9,4   | 18,65 | 541,20 | 74,66  |
| 2019/06/13 | CH2206 | Male | Three y/o | Control | Control | Feed Day | No | 10:05 | 10:00 - 10:59 | Late Morning | 37,7 | 61  | 56,0  | 56,0  | 18,85 | 556,01 | 135,70 |
| 2019/06/13 | CH2205 | Male | Three y/o | Control | Control | Feed Day | No | 10:10 | 10:00 - 10:59 | Late Morning | 37,5 | 59  | 7,6   | 7,6   | 18,65 | 553,30 | 67,49  |
| 2019/06/13 | CH2206 | Male | Three y/o | Control | Control | Feed Day | No | 10:10 | 10:00 - 10:59 | Late Morning | 37,7 | 75  | 59,6  | 59,6  | 18,85 | 572,36 | 137,86 |
| 2019/06/13 | CH2205 | Male | Three y/o | Control | Control | Feed Day | No | 10:15 | 10:00 - 10:59 | Late Morning | 37,4 | 54  | 16,0  | 16,0  | 18,55 | 545,99 | 92,71  |
| 2019/06/13 | CH2206 | Male | Three y/o | Control | Control | Feed Day | No | 10:15 | 10:00 - 10:59 | Late Morning | 37,5 | 73  | 62,8  | 62,8  | 18,65 | 570,27 | 139,67 |
| 2019/06/13 | CH2205 | Male | Three y/o | Control | Control | Feed Day | No | 10:20 | 10:00 - 10:59 | Late Morning | 37,4 | 61  | 8,2   | 8,2   | 18,55 | 556,01 | 70,05  |



|            |        |      |           |         |         |          |     |       |               |              |      |     |       |       |       |        |        |
|------------|--------|------|-----------|---------|---------|----------|-----|-------|---------------|--------------|------|-----|-------|-------|-------|--------|--------|
| 2019/06/13 | CH2206 | Male | Three y/o | Control | Control | Feed Day | No  | 10:20 | 10:00 - 10:59 | Late Morning | 37,3 | 49  | 40,6  | 40,6  | 18,46 | 537,80 | 124,60 |
| 2019/06/13 | CH2205 | Male | Three y/o | Control | Control | Feed Day | No  | 10:25 | 10:00 - 10:59 | Late Morning | 37,4 | 47  | 9,4   | 9,4   | 18,55 | 534,23 | 74,66  |
| 2019/06/13 | CH2206 | Male | Three y/o | Control | Control | Feed Day | No  | 10:25 | 10:00 - 10:59 | Late Morning | 37,4 | 74  | 40,8  | 40,8  | 18,55 | 571,33 | 124,77 |
| 2019/06/13 | CH2205 | Male | Three y/o | Control | Control | Feed Day | Yes | 10:30 | 10:00 - 10:59 | Late Morning | 37,4 | 59  | 23,8  | 23,8  | 18,55 | 553,30 | 106,26 |
| 2019/06/13 | CH2206 | Male | Three y/o | Control | Control | Feed Day | Yes | 10:30 | 10:00 - 10:59 | Late Morning | 37,4 | 72  | 52,4  | 52,4  | 18,55 | 569,20 | 133,41 |
| 2019/06/13 | CH2205 | Male | Three y/o | Control | Control | Feed Day | Yes | 10:35 | 10:00 - 10:59 | Late Morning | 37,4 |     | 13,2  | 13,2  | 18,55 |        | 86,17  |
| 2019/06/13 | CH2206 | Male | Three y/o | Control | Control | Feed Day | Yes | 10:35 | 10:00 - 10:59 | Late Morning | 37,4 | 59  | 60,8  | 60,8  | 18,55 | 553,30 | 138,55 |
| 2019/06/13 | CH2205 | Male | Three y/o | Control | Control | Feed Day | Yes | 10:40 | 10:00 - 10:59 | Late Morning | 37,4 |     | 41,4  | 41,4  | 18,55 |        | 125,27 |
| 2019/06/13 | CH2206 | Male | Three y/o | Control | Control | Feed Day | Yes | 10:40 | 10:00 - 10:59 | Late Morning | 37,4 |     | 54,6  | 54,6  | 18,55 |        | 134,83 |
| 2019/06/13 | CH2205 | Male | Three y/o | Control | Control | Feed Day | Yes | 10:45 | 10:00 - 10:59 | Late Morning | 37,4 | 85  | 52,2  | 52,2  | 18,55 | 581,90 | 133,27 |
| 2019/06/13 | CH2206 | Male | Three y/o | Control | Control | Feed Day | Yes | 10:45 | 10:00 - 10:59 | Late Morning | 37,4 | 100 | 28,0  | 28,0  | 18,55 | 593,87 | 111,83 |
| 2019/06/13 | CH2205 | Male | Three y/o | Control | Control | Feed Day | Yes | 10:50 | 10:00 - 10:59 | Late Morning | 37,5 |     | 209,0 | 209,0 | 18,65 |        | 181,67 |
| 2019/06/13 | CH2206 | Male | Three y/o | Control | Control | Feed Day | Yes | 10:50 | 10:00 - 10:59 | Late Morning | 37,6 | 94  | 149,6 | 149,6 | 18,75 | 589,37 | 169,92 |
| 2019/06/13 | CH2205 | Male | Three y/o | Control | Control | Feed Day | Yes | 10:55 | 10:00 - 10:59 | Late Morning | 37,5 | 84  | 127,0 | 127,0 | 18,65 | 581,01 | 164,19 |
| 2019/06/13 | CH2206 | Male | Three y/o | Control | Control | Feed Day | Yes | 10:55 | 10:00 - 10:59 | Late Morning | 37,7 | 111 | 271,4 | 271,4 | 18,85 | 601,33 | 190,88 |
| 2019/06/13 | CH2205 | Male | Three y/o | Control | Control | Feed Day | Yes | 11:00 | 11:00 - 11:59 | Late Morning | 37,6 | 95  | 39,0  | 39,0  | 18,75 | 590,14 | 123,22 |
| 2019/06/13 | CH2206 | Male | Three y/o | Control | Control | Feed Day | Yes | 11:00 | 11:00 - 11:59 | Late Morning | 37,7 | 96  | 118,6 | 118,6 | 18,85 | 590,91 | 161,80 |
| 2019/06/13 | CH2205 | Male | Three y/o | Control | Control | Feed Day | Yes | 11:05 | 11:00 - 11:59 | Late Morning | 37,7 | 105 | 13,8  | 13,8  | 18,85 | 597,38 | 87,68  |
| 2019/06/13 | CH2206 | Male | Three y/o | Control | Control | Feed Day | Yes | 11:05 | 11:00 - 11:59 | Late Morning | 37,7 | 119 | 249,2 | 249,2 | 18,85 | 606,20 | 187,87 |
| 2019/06/13 | CH2205 | Male | Three y/o | Control | Control | Feed Day | Yes | 11:10 | 11:00 - 11:59 | Late Morning | 37,9 | 89  | 142,0 | 142,0 | 19,05 | 585,33 | 168,10 |
| 2019/06/13 | CH2206 | Male | Three y/o | Control | Control | Feed Day | Yes | 11:10 | 11:00 - 11:59 | Late Morning | 37,8 |     | 84,4  | 84,4  | 18,95 |        | 149,94 |
| 2019/06/13 | CH2205 | Male | Three y/o | Control | Control | Feed Day | Yes | 11:15 | 11:00 - 11:59 | Late Morning | 37,9 | 61  | 33,0  | 33,0  | 19,05 | 556,01 | 117,47 |
| 2019/06/13 | CH2206 | Male | Three y/o | Control | Control | Feed Day | Yes | 11:15 | 11:00 - 11:59 | Late Morning | 37,9 | 100 | 150,2 | 150,2 | 19,05 | 593,87 | 170,06 |
| 2019/06/13 | CH2205 | Male | Three y/o | Control | Control | Feed Day | Yes | 11:20 | 11:00 - 11:59 | Late Morning | 37,7 | 67  | 10,8  | 10,8  | 18,85 | 563,53 | 79,36  |
| 2019/06/13 | CH2206 | Male | Three y/o | Control | Control | Feed Day | Yes | 11:20 | 11:00 - 11:59 | Late Morning | 37,9 | 197 | 37,4  | 37,4  | 19,05 | 639,25 | 121,77 |
| 2019/06/13 | CH2205 | Male | Three y/o | Control | Control | Feed Day | Yes | 11:25 | 11:00 - 11:59 | Late Morning | 37,7 | 56  | 6,6   | 6,6   | 18,85 | 549,01 | 62,73  |
| 2019/06/13 | CH2206 | Male | Three y/o | Control | Control | Feed Day | Yes | 11:25 | 11:00 - 11:59 | Late Morning | 37,8 | 50  | 62,8  | 62,8  | 18,95 | 539,52 | 139,67 |
| 2019/06/13 | CH2205 | Male | Three y/o | Control | Control | Feed Day | No  | 11:30 | 11:00 - 11:59 | Late Morning | 37,7 | 143 | 19,0  | 19,0  | 18,85 | 618,69 | 98,56  |
| 2019/06/13 | CH2206 | Male | Three y/o | Control | Control | Feed Day | No  | 11:30 | 11:00 - 11:59 | Late Morning | 37,9 | 101 | 235,2 | 235,2 | 19,05 | 594,59 | 185,83 |
| 2019/06/13 | CH2205 | Male | Three y/o | Control | Control | Feed Day | No  | 11:35 | 11:00 - 11:59 | Late Morning | 37,7 | 73  | 7,8   | 7,8   | 18,85 | 570,27 | 68,36  |
| 2019/06/13 | CH2206 | Male | Three y/o | Control | Control | Feed Day | No  | 11:35 | 11:00 - 11:59 | Late Morning | 37,9 | 48  | 37,0  | 37,0  | 19,05 | 536,04 | 121,40 |
| 2019/06/13 | CH2205 | Male | Three y/o | Control | Control | Feed Day | No  | 11:40 | 11:00 - 11:59 | Late Morning | 37,7 | 82  | 1,8   | 1,8   | 18,85 | 579,19 | 19,38  |
| 2019/06/13 | CH2206 | Male | Three y/o | Control | Control | Feed Day | No  | 11:40 | 11:00 - 11:59 | Late Morning | 37,8 | 72  | 46,2  | 46,2  | 18,95 | 569,20 | 129,06 |
| 2019/06/13 | CH2205 | Male | Three y/o | Control | Control | Feed Day | No  | 11:45 | 11:00 - 11:59 | Late Morning | 37,6 | 97  | 9,4   | 9,4   | 18,75 | 591,66 | 74,66  |
| 2019/06/13 | CH2206 | Male | Three y/o | Control | Control | Feed Day | No  | 11:45 | 11:00 - 11:59 | Late Morning | 37,7 | 86  | 177,2 | 177,2 | 18,85 | 582,77 | 175,86 |
| 2019/06/13 | CH2205 | Male | Three y/o | Control | Control | Feed Day | No  | 11:50 | 11:00 - 11:59 | Late Morning | 37,6 | 57  | 50,6  | 50,6  | 18,75 | 550,47 | 132,20 |
| 2019/06/13 | CH2206 | Male | Three y/o | Control | Control | Feed Day | No  | 11:50 | 11:00 - 11:59 | Late Morning | 37,8 | 132 | 222,8 | 222,8 | 18,95 | 613,32 | 183,92 |
| 2019/06/13 | CH2205 | Male | Three y/o | Control | Control | Feed Day | No  | 11:55 | 11:00 - 11:59 | Late Morning | 37,7 | 174 | 108,4 | 108,4 | 18,85 | 631,46 | 158,66 |
| 2019/06/13 | CH2206 | Male | Three y/o | Control | Control | Feed Day | No  | 11:55 | 11:00 - 11:59 | Late Morning | 37,9 | 126 | 65,8  | 65,8  | 19,05 | 610,14 | 141,29 |
| 2019/06/13 | CH2205 | Male | Three y/o | Control | Control | Feed Day | No  | 12:00 | 12:00 - 12:59 | Afternoon    | 37,9 | 112 | 93,6  | 93,6  | 19,05 | 601,96 | 153,54 |
| 2019/06/13 | CH2206 | Male | Three y/o | Control | Control | Feed Day | No  | 12:00 | 12:00 - 12:59 | Afternoon    | 37,9 | 106 | 59,4  | 59,4  | 19,05 | 598,06 | 137,75 |
| 2019/06/13 | CH2205 | Male | Three y/o | Control | Control | Feed Day | No  | 12:05 | 12:00 - 12:59 | Afternoon    | 37,7 |     | 12,0  | 12,0  | 18,85 |        | 82,93  |
| 2019/06/13 | CH2206 | Male | Three y/o | Control | Control | Feed Day | No  | 12:05 | 12:00 - 12:59 | Afternoon    | 38,0 |     | 55,4  | 55,4  | 19,15 |        | 135,33 |
| 2019/06/13 | CH2205 | Male | Three y/o | Control | Control | Feed Day | No  | 12:10 | 12:00 - 12:59 | Afternoon    | 37,6 | 64  | 11,4  | 11,4  | 18,75 | 559,88 | 81,19  |
| 2019/06/13 | CH2206 | Male | Three y/o | Control | Control | Feed Day | No  | 12:10 | 12:00 - 12:59 | Afternoon    | 37,9 | 102 | 49,4  | 49,4  | 19,05 | 595,30 | 131,37 |
| 2019/06/13 | CH2205 | Male | Three y/o | Control | Control | Feed Day | No  | 12:15 | 12:00 - 12:59 | Afternoon    | 37,7 |     | 14,8  | 14,8  | 18,85 |        | 90,05  |
| 2019/06/13 | CH2206 | Male | Three y/o | Control | Control | Feed Day | No  | 12:15 | 12:00 - 12:59 | Afternoon    | 38,0 | 110 | 113,4 | 113,4 | 19,15 | 600,69 | 160,23 |
| 2019/06/13 | CH2205 | Male | Three y/o | Control | Control | Feed Day | No  | 12:20 | 12:00 - 12:59 | Afternoon    | 37,7 |     | 24,4  | 24,4  | 18,85 |        | 107,11 |
| 2019/06/13 | CH2206 | Male | Three y/o | Control | Control | Feed Day | No  | 12:20 | 12:00 - 12:59 | Afternoon    | 38,0 | 131 | 81,0  | 81,0  | 19,15 | 612,80 | 148,51 |
| 2019/06/13 | CH2205 | Male | Three y/o | Control | Control | Feed Day | No  | 12:25 | 12:00 - 12:59 | Afternoon    | 37,5 | 78  | 34,6  | 34,6  | 18,65 | 575,38 | 119,10 |
| 2019/06/13 | CH2206 | Male | Three y/o | Control | Control | Feed Day | No  | 12:25 | 12:00 - 12:59 | Afternoon    | 38,1 | 89  | 309,2 | 309,2 | 19,26 | 585,33 | 195,49 |
| 2019/06/13 | CH2205 | Male | Three y/o | Control | Control | Feed Day | No  | 12:30 | 12:00 - 12:59 | Afternoon    | 37,4 |     | 16,2  | 16,2  | 18,55 |        | 93,13  |
| 2019/06/13 | CH2206 | Male | Three y/o | Control | Control | Feed Day | No  | 12:30 | 12:00 - 12:59 | Afternoon    | 38,1 |     | 214,8 | 214,8 | 19,26 |        | 182,63 |
| 2019/06/13 | CH2205 | Male | Three y/o | Control | Control | Feed Day | No  | 12:35 | 12:00 - 12:59 | Afternoon    | 37,6 | 150 | 78,0  | 78,0  | 18,75 | 621,86 | 147,20 |
| 2019/06/13 | CH2206 | Male | Three y/o | Control | Control | Feed Day | No  | 12:35 | 12:00 - 12:59 | Afternoon    | 38,2 | 137 | 124,4 | 124,4 | 19,36 | 615,83 | 163,47 |
| 2019/06/13 | CH2205 | Male | Three y/o | Control | Control | Feed Day | No  | 12:40 | 12:00 - 12:59 | Afternoon    | 37,7 | 148 | 48,8  | 48,8  | 18,85 | 620,97 | 130,95 |
| 2019/06/13 | CH2206 | Male | Three y/o | Control | Control | Feed Day | No  | 12:40 | 12:00 - 12:59 | Afternoon    | 38,1 |     | 149,6 | 149,6 | 19,26 |        | 169,92 |
| 2019/06/13 | CH2205 | Male | Three y/o | Control | Control | Feed Day | No  | 12:45 | 12:00 - 12:59 | Afternoon    | 37,5 | 110 | 176,8 | 176,8 | 18,65 | 600,69 | 175,78 |
| 2019/06/13 | CH2206 | Male | Three y/o | Control | Control | Feed Day | No  | 12:45 | 12:00 - 12:59 | Afternoon    | 38,1 | 105 | 304,2 | 304,2 | 19,26 | 597,38 | 194,91 |
| 2019/06/13 | CH2205 | Male | Three y/o | Control | Control | Feed Day | No  | 12:50 | 12:00 - 12:59 | Afternoon    | 37,7 | 106 | 197,2 | 197,2 | 18,85 | 598,06 | 179,62 |
| 2019/06/13 | CH2206 | Male | Three y/o | Control | Control | Feed Day | No  | 12:50 | 12:00 - 12:59 | Afternoon    | 38,1 | 103 | 41,4  | 41,4  | 19,26 | 596,00 | 125,27 |
| 2019/06/13 | CH2205 | Male | Three y/o | Control | Control | Feed Day | No  | 12:55 | 12:00 - 12:59 | Afternoon    | 37,7 | 111 | 75,6  | 75,6  | 18,85 | 601,33 | 146,11 |
| 2019/06/13 | CH2206 | Male | Three y/o | Control | Control | Feed Day | No  | 12:55 | 12:00 - 12:59 | Afternoon    | 38,0 | 121 | 54,4  | 54,4  | 19,15 | 607,35 | 134,70 |
| 2019/06/13 | CH2205 | Male | Three y/o | Control | Control | Feed Day | No  | 13:00 | 13:00 - 13:59 | Afternoon    | 37,7 | 119 | 327,6 | 327,6 | 18,85 | 606,20 | 197,53 |
| 2019/06/13 | CH2206 | Male | Three y/o | Control | Control | Feed Day | No  | 13:00 | 13:00 - 13:59 | Afternoon    | 37,9 | 68  | 54,4  | 54,4  | 19,05 | 564,71 | 134,70 |
| 2019/06/13 | CH2205 | Male | Three y/o | Control | Control | Feed Day | No  | 13:05 | 13:00 - 13:59 | Afternoon    | 37,7 |     | 8,2   | 8,2   | 18,85 |        | 70,05  |
| 2019/06/13 | CH2206 | Male | Three y/o | Control | Control | Feed Day | No  | 13:05 | 13:00 - 13:59 | Afternoon    | 37,8 |     | 49,6  | 49,6  | 18,95 |        | 131,51 |
| 2019/06/13 | CH2205 | Male | Three y/o | Control | Control | Feed Day | No  | 13:10 | 13:00 - 13:59 | Afternoon    | 37,6 |     | 21,2  | 21,2  | 18,75 |        | 102,31 |
| 2019/06/13 | CH2206 | Male | Three y/o | Control | Control | Feed Day | No  | 13:10 | 13:00 - 13:59 | Afternoon    | 37,8 | 79  | 65,8  | 65,8  | 18,95 | 576,36 | 141,29 |
| 2019/06/13 | CH2205 | Male | Three y/o | Control | Control | Feed Day | No  | 13:15 | 13:00 - 13:59 | Afternoon    | 37,6 | 82  | 19,0  | 19,0  | 18,75 | 579,19 | 98,56  |



|            |        |      |           |         |         |          |    |       |               |           |      |     |       |       |       |        |        |
|------------|--------|------|-----------|---------|---------|----------|----|-------|---------------|-----------|------|-----|-------|-------|-------|--------|--------|
| 2019/06/13 | CH2206 | Male | Three y/o | Control | Control | Feed Day | No | 13:15 | 13:00 - 13:59 | Afternoon | 37,5 | 76  | 70,2  | 70,2  | 18,65 | 573,39 | 143,54 |
| 2019/06/13 | CH2205 | Male | Three y/o | Control | Control | Feed Day | No | 13:20 | 13:00 - 13:59 | Afternoon | 37,6 |     | 16,2  | 16,2  | 18,75 |        | 93,13  |
| 2019/06/13 | CH2206 | Male | Three y/o | Control | Control | Feed Day | No | 13:20 | 13:00 - 13:59 | Afternoon | 37,3 | 89  | 64,0  | 64,0  | 18,46 | 585,33 | 140,33 |
| 2019/06/13 | CH2205 | Male | Three y/o | Control | Control | Feed Day | No | 13:25 | 13:00 - 13:59 | Afternoon | 37,5 | 92  | 9,8   | 9,8   | 18,65 | 587,78 | 76,07  |
| 2019/06/13 | CH2206 | Male | Three y/o | Control | Control | Feed Day | No | 13:25 | 13:00 - 13:59 | Afternoon | 37,3 | 67  | 25,4  | 25,4  | 18,46 | 563,53 | 108,49 |
| 2019/06/13 | CH2205 | Male | Three y/o | Control | Control | Feed Day | No | 13:30 | 13:00 - 13:59 | Afternoon | 37,5 | 76  | 13,6  | 13,6  | 18,65 | 573,39 | 87,18  |
| 2019/06/13 | CH2206 | Male | Three y/o | Control | Control | Feed Day | No | 13:30 | 13:00 - 13:59 | Afternoon | 37,4 | 102 | 58,6  | 58,6  | 18,55 | 595,30 | 137,28 |
| 2019/06/13 | CH2205 | Male | Three y/o | Control | Control | Feed Day | No | 13:35 | 13:00 - 13:59 | Afternoon | 37,5 | 92  | 19,0  | 19,0  | 18,65 | 587,78 | 98,56  |
| 2019/06/13 | CH2206 | Male | Three y/o | Control | Control | Feed Day | No | 13:35 | 13:00 - 13:59 | Afternoon | 37,4 | 97  | 74,2  | 74,2  | 18,55 | 591,66 | 145,46 |
| 2019/06/13 | CH2205 | Male | Three y/o | Control | Control | Feed Day | No | 13:40 | 13:00 - 13:59 | Afternoon | 37,5 | 82  | 8,6   | 8,6   | 18,65 | 579,19 | 71,66  |
| 2019/06/13 | CH2206 | Male | Three y/o | Control | Control | Feed Day | No | 13:40 | 13:00 - 13:59 | Afternoon | 37,2 | 86  | 19,8  | 19,8  | 18,36 | 582,77 | 99,97  |
| 2019/06/13 | CH2205 | Male | Three y/o | Control | Control | Feed Day | No | 13:45 | 13:00 - 13:59 | Afternoon | 37,5 | 94  | 7,8   | 7,8   | 18,65 | 589,37 | 68,36  |
| 2019/06/13 | CH2206 | Male | Three y/o | Control | Control | Feed Day | No | 13:45 | 13:00 - 13:59 | Afternoon | 37,4 | 93  | 5,4   | 5,4   | 18,55 | 588,58 | 55,99  |
| 2019/06/13 | CH2205 | Male | Three y/o | Control | Control | Feed Day | No | 13:50 | 13:00 - 13:59 | Afternoon | 37,6 | 70  | 2,6   | 2,6   | 18,75 | 566,99 | 31,57  |
| 2019/06/13 | CH2206 | Male | Three y/o | Control | Control | Feed Day | No | 13:50 | 13:00 - 13:59 | Afternoon | 37,4 | 85  | 5,6   | 5,6   | 18,55 | 581,90 | 57,21  |
| 2019/06/13 | CH2205 | Male | Three y/o | Control | Control | Feed Day | No | 13:55 | 13:00 - 13:59 | Afternoon | 37,6 | 75  | 7,6   | 7,6   | 18,75 | 572,36 | 67,49  |
| 2019/06/13 | CH2206 | Male | Three y/o | Control | Control | Feed Day | No | 13:55 | 13:00 - 13:59 | Afternoon | 37,4 | 94  | 4,8   | 4,8   | 18,55 | 589,37 | 52,04  |
| 2019/06/13 | CH2205 | Male | Three y/o | Control | Control | Feed Day | No | 14:00 | 14:00 - 14:59 | Afternoon | 37,6 | 75  | 8,8   | 8,8   | 18,75 | 572,36 | 72,43  |
| 2019/06/13 | CH2206 | Male | Three y/o | Control | Control | Feed Day | No | 14:00 | 14:00 - 14:59 | Afternoon | 37,4 | 110 | 22,4  | 22,4  | 18,55 | 600,69 | 104,19 |
| 2019/06/13 | CH2205 | Male | Three y/o | Control | Control | Feed Day | No | 14:05 | 14:00 - 14:59 | Afternoon | 37,6 | 73  | 6,4   | 6,4   | 18,75 | 570,27 | 61,70  |
| 2019/06/13 | CH2206 | Male | Three y/o | Control | Control | Feed Day | No | 14:05 | 14:00 - 14:59 | Afternoon | 37,5 | 74  | 22,8  | 22,8  | 18,65 | 571,33 | 104,79 |
| 2019/06/13 | CH2205 | Male | Three y/o | Control | Control | Feed Day | No | 14:10 | 14:00 - 14:59 | Afternoon | 37,6 | 83  | 5,2   | 5,2   | 18,75 | 580,11 | 54,72  |
| 2019/06/13 | CH2206 | Male | Three y/o | Control | Control | Feed Day | No | 14:10 | 14:00 - 14:59 | Afternoon | 37,7 | 79  | 26,0  | 26,0  | 18,85 | 576,36 | 109,29 |
| 2019/06/13 | CH2205 | Male | Three y/o | Control | Control | Feed Day | No | 14:15 | 14:00 - 14:59 | Afternoon | 37,6 | 75  | 3,4   | 3,4   | 18,75 | 572,36 | 40,51  |
| 2019/06/13 | CH2206 | Male | Three y/o | Control | Control | Feed Day | No | 14:15 | 14:00 - 14:59 | Afternoon | 37,7 | 82  | 27,8  | 27,8  | 18,85 | 579,19 | 111,58 |
| 2019/06/13 | CH2205 | Male | Three y/o | Control | Control | Feed Day | No | 14:20 | 14:00 - 14:59 | Afternoon | 37,7 | 91  | 7,4   | 7,4   | 18,85 | 586,98 | 66,59  |
| 2019/06/13 | CH2206 | Male | Three y/o | Control | Control | Feed Day | No | 14:20 | 14:00 - 14:59 | Afternoon | 37,8 | 87  | 31,6  | 31,6  | 18,95 | 583,64 | 115,98 |
| 2019/06/13 | CH2205 | Male | Three y/o | Control | Control | Feed Day | No | 14:25 | 14:00 - 14:59 | Afternoon | 37,7 | 108 | 7,2   | 7,2   | 18,85 | 599,39 | 65,66  |
| 2019/06/13 | CH2206 | Male | Three y/o | Control | Control | Feed Day | No | 14:25 | 14:00 - 14:59 | Afternoon | 37,8 | 86  | 14,6  | 14,6  | 18,95 | 582,77 | 89,59  |
| 2019/06/13 | CH2205 | Male | Three y/o | Control | Control | Feed Day | No | 14:30 | 14:00 - 14:59 | Afternoon | 37,7 | 100 | 14,8  | 14,8  | 18,85 | 593,87 | 90,05  |
| 2019/06/13 | CH2206 | Male | Three y/o | Control | Control | Feed Day | No | 14:30 | 14:00 - 14:59 | Afternoon | 37,8 | 114 | 41,6  | 41,6  | 18,95 | 603,20 | 125,44 |
| 2019/06/13 | CH2205 | Male | Three y/o | Control | Control | Feed Day | No | 14:35 | 14:00 - 14:59 | Afternoon | 37,7 | 112 | 13,4  | 13,4  | 18,85 | 601,96 | 86,68  |
| 2019/06/13 | CH2206 | Male | Three y/o | Control | Control | Feed Day | No | 14:35 | 14:00 - 14:59 | Afternoon | 37,8 | 79  | 48,6  | 48,6  | 18,95 | 576,36 | 130,81 |
| 2019/06/13 | CH2205 | Male | Three y/o | Control | Control | Feed Day | No | 14:40 | 14:00 - 14:59 | Afternoon | 37,7 | 138 | 23,2  | 23,2  | 18,85 | 616,31 | 105,39 |
| 2019/06/13 | CH2206 | Male | Three y/o | Control | Control | Feed Day | No | 14:40 | 14:00 - 14:59 | Afternoon | 37,8 |     | 67,4  | 67,4  | 18,95 |        | 142,12 |
| 2019/06/13 | CH2205 | Male | Three y/o | Control | Control | Feed Day | No | 14:45 | 14:00 - 14:59 | Afternoon | 37,8 | 112 | 57,4  | 57,4  | 18,95 | 601,96 | 136,56 |
| 2019/06/13 | CH2206 | Male | Three y/o | Control | Control | Feed Day | No | 14:45 | 14:00 - 14:59 | Afternoon | 37,9 | 141 | 45,6  | 45,6  | 19,05 | 617,75 | 128,61 |
| 2019/06/13 | CH2205 | Male | Three y/o | Control | Control | Feed Day | No | 14:50 | 14:00 - 14:59 | Afternoon | 37,9 | 62  | 133,8 | 133,8 | 19,05 | 557,33 | 166,01 |
| 2019/06/13 | CH2206 | Male | Three y/o | Control | Control | Feed Day | No | 14:50 | 14:00 - 14:59 | Afternoon | 37,9 | 113 | 49,8  | 49,8  | 19,05 | 602,58 | 131,65 |
| 2019/06/13 | CH2205 | Male | Three y/o | Control | Control | Feed Day | No | 14:55 | 14:00 - 14:59 | Afternoon | 37,9 | 124 | 65,0  | 65,0  | 19,05 | 609,04 | 140,87 |
| 2019/06/13 | CH2206 | Male | Three y/o | Control | Control | Feed Day | No | 14:55 | 14:00 - 14:59 | Afternoon | 37,9 | 65  | 48,4  | 48,4  | 19,05 | 561,12 | 130,66 |
| 2019/06/13 | CH2205 | Male | Three y/o | Control | Control | Feed Day | No | 15:00 | 15:00 - 15:59 | Afternoon | 37,9 |     | 12,0  | 12,0  | 19,05 |        | 82,93  |
| 2019/06/13 | CH2206 | Male | Three y/o | Control | Control | Feed Day | No | 15:00 | 15:00 - 15:59 | Afternoon | 37,8 | 80  | 51,2  | 51,2  | 18,95 | 577,31 | 132,61 |
| 2019/06/13 | CH2205 | Male | Three y/o | Control | Control | Feed Day | No | 15:05 | 15:00 - 15:59 | Afternoon | 37,8 |     | 12,8  | 12,8  | 18,95 |        | 85,12  |
| 2019/06/13 | CH2206 | Male | Three y/o | Control | Control | Feed Day | No | 15:05 | 15:00 - 15:59 | Afternoon | 37,8 | 49  | 50,8  | 50,8  | 18,95 | 537,80 | 132,33 |
| 2019/06/13 | CH2205 | Male | Three y/o | Control | Control | Feed Day | No | 15:10 | 15:00 - 15:59 | Afternoon | 37,7 |     | 38,8  | 38,8  | 18,85 |        | 123,04 |
| 2019/06/13 | CH2206 | Male | Three y/o | Control | Control | Feed Day | No | 15:10 | 15:00 - 15:59 | Afternoon | 37,9 | 86  | 47,0  | 47,0  | 19,05 | 582,77 | 129,65 |
| 2019/06/13 | CH2205 | Male | Three y/o | Control | Control | Feed Day | No | 15:15 | 15:00 - 15:59 | Afternoon | 37,9 |     | 19,4  | 19,4  | 19,05 |        | 99,28  |
| 2019/06/13 | CH2206 | Male | Three y/o | Control | Control | Feed Day | No | 15:15 | 15:00 - 15:59 | Afternoon | 37,9 | 77  | 23,2  | 23,2  | 19,05 | 574,39 | 105,39 |
| 2019/06/13 | CH2205 | Male | Three y/o | Control | Control | Feed Day | No | 15:20 | 15:00 - 15:59 | Afternoon | 37,9 | 80  | 15,2  | 15,2  | 19,05 | 577,31 | 90,96  |
| 2019/06/13 | CH2206 | Male | Three y/o | Control | Control | Feed Day | No | 15:20 | 15:00 - 15:59 | Afternoon | 37,9 | 78  | 18,0  | 18,0  | 19,05 | 575,38 | 96,72  |
| 2019/06/13 | CH2205 | Male | Three y/o | Control | Control | Feed Day | No | 15:25 | 15:00 - 15:59 | Afternoon | 37,9 | 66  | 16,2  | 16,2  | 19,05 | 562,34 | 93,13  |
| 2019/06/13 | CH2206 | Male | Three y/o | Control | Control | Feed Day | No | 15:25 | 15:00 - 15:59 | Afternoon | 38,0 | 93  | 20,2  | 20,2  | 19,15 | 588,58 | 100,65 |
| 2019/06/13 | CH2205 | Male | Three y/o | Control | Control | Feed Day | No | 15:30 | 15:00 - 15:59 | Afternoon | 37,9 | 82  | 9,4   | 9,4   | 19,05 | 579,19 | 74,66  |
| 2019/06/13 | CH2206 | Male | Three y/o | Control | Control | Feed Day | No | 15:30 | 15:00 - 15:59 | Afternoon | 38,1 | 90  | 18,4  | 18,4  | 19,26 | 586,16 | 97,47  |
| 2019/06/13 | CH2205 | Male | Three y/o | Control | Control | Feed Day | No | 15:35 | 15:00 - 15:59 | Afternoon | 38,0 | 89  | 10,4  | 10,4  | 19,15 | 585,33 | 78,08  |
| 2019/06/13 | CH2206 | Male | Three y/o | Control | Control | Feed Day | No | 15:35 | 15:00 - 15:59 | Afternoon | 38,1 | 81  | 33,4  | 33,4  | 19,26 | 578,26 | 117,88 |
| 2019/06/13 | CH2205 | Male | Three y/o | Control | Control | Feed Day | No | 15:40 | 15:00 - 15:59 | Afternoon | 38,0 | 92  | 3,2   | 3,2   | 19,15 | 587,78 | 38,49  |
| 2019/06/13 | CH2206 | Male | Three y/o | Control | Control | Feed Day | No | 15:40 | 15:00 - 15:59 | Afternoon | 38,1 | 66  | 64,2  | 64,2  | 19,26 | 562,34 | 140,44 |
| 2019/06/13 | CH2205 | Male | Three y/o | Control | Control | Feed Day | No | 15:45 | 15:00 - 15:59 | Afternoon | 38,0 | 71  | 4,2   | 4,2   | 19,15 | 568,10 | 47,57  |
| 2019/06/13 | CH2206 | Male | Three y/o | Control | Control | Feed Day | No | 15:45 | 15:00 - 15:59 | Afternoon | 38,0 | 99  | 42,8  | 42,8  | 19,15 | 593,14 | 126,42 |
| 2019/06/13 | CH2205 | Male | Three y/o | Control | Control | Feed Day | No | 15:50 | 15:00 - 15:59 | Afternoon | 38,0 | 78  | 31,0  | 31,0  | 19,15 | 575,38 | 115,32 |
| 2019/06/13 | CH2206 | Male | Three y/o | Control | Control | Feed Day | No | 15:50 | 15:00 - 15:59 | Afternoon | 37,9 | 110 | 36,4  | 36,4  | 19,05 | 600,69 | 120,84 |
| 2019/06/13 | CH2205 | Male | Three y/o | Control | Control | Feed Day | No | 15:55 | 15:00 - 15:59 | Afternoon | 38,0 | 126 | 86,8  | 86,8  | 19,15 | 610,14 | 150,91 |
| 2019/06/13 | CH2206 | Male | Three y/o | Control | Control | Feed Day | No | 15:55 | 15:00 - 15:59 | Afternoon | 37,8 |     | 44,8  | 44,8  | 18,95 |        | 127,99 |
| 2019/06/13 | CH2205 | Male | Three y/o | Control | Control | Feed Day | No | 16:00 | 16:00 - 16:59 | Evening   | 38,0 | 96  | 52,8  | 52,8  | 19,15 | 590,91 | 133,67 |
| 2019/06/13 | CH2206 | Male | Three y/o | Control | Control | Feed Day | No | 16:00 | 16:00 - 16:59 | Evening   | 37,9 | 88  | 52,2  | 52,2  | 19,05 | 584,49 | 133,27 |
| 2019/06/13 | CH2205 | Male | Three y/o | Control | Control | Feed Day | No | 16:05 | 16:00 - 16:59 | Evening   | 38,0 | 174 | 69,6  | 69,6  | 19,15 | 631,46 | 143,24 |
| 2019/06/13 | CH2206 | Male | Three y/o | Control | Control | Feed Day | No | 16:05 | 16:00 - 16:59 | Evening   | 38,0 | 90  | 571,8 | 571,8 | 19,15 | 586,16 | 217,33 |
| 2019/06/13 | CH2205 | Male | Three y/o | Control | Control | Feed Day | No | 16:10 | 16:00 - 16:59 | Evening   | 38,1 | 102 | 10,0  | 10,0  | 19,26 | 595,30 | 76,76  |



|            |        |      |           |         |         |          |    |       |               |         |      |     |      |      |       |        |        |
|------------|--------|------|-----------|---------|---------|----------|----|-------|---------------|---------|------|-----|------|------|-------|--------|--------|
| 2019/06/13 | CH2206 | Male | Three y/o | Control | Control | Feed Day | No | 16:10 | 16:00 - 16:59 | Evening | 38,1 | 191 | 51,2 | 51,2 | 19,26 | 637,33 | 132,61 |
| 2019/06/13 | CH2205 | Male | Three y/o | Control | Control | Feed Day | No | 16:15 | 16:00 - 16:59 | Evening | 38,1 | 92  | 16,0 | 16,0 | 19,26 | 587,78 | 92,71  |
| 2019/06/13 | CH2206 | Male | Three y/o | Control | Control | Feed Day | No | 16:15 | 16:00 - 16:59 | Evening | 38,0 | 96  | 54,8 | 54,8 | 19,15 | 590,91 | 134,96 |
| 2019/06/13 | CH2205 | Male | Three y/o | Control | Control | Feed Day | No | 16:20 | 16:00 - 16:59 | Evening | 38,1 |     | 7,4  | 7,4  | 19,26 |        | 66,59  |
| 2019/06/13 | CH2206 | Male | Three y/o | Control | Control | Feed Day | No | 16:20 | 16:00 - 16:59 | Evening | 37,8 | 97  | 55,2 | 55,2 | 18,95 | 591,66 | 135,21 |
| 2019/06/13 | CH2205 | Male | Three y/o | Control | Control | Feed Day | No | 16:25 | 16:00 - 16:59 | Evening | 38,0 | 124 | 6,8  | 6,8  | 19,15 | 609,04 | 63,74  |
| 2019/06/13 | CH2206 | Male | Three y/o | Control | Control | Feed Day | No | 16:25 | 16:00 - 16:59 | Evening | 37,8 | 110 | 81,4 | 81,4 | 18,95 | 600,69 | 148,68 |
| 2019/06/13 | CH2205 | Male | Three y/o | Control | Control | Feed Day | No | 16:30 | 16:00 - 16:59 | Evening | 38,0 |     | 4,0  | 4,0  | 19,15 |        | 45,94  |
| 2019/06/13 | CH2206 | Male | Three y/o | Control | Control | Feed Day | No | 16:30 | 16:00 - 16:59 | Evening | 37,8 | 77  | 57,4 | 57,4 | 18,95 | 574,39 | 136,56 |
| 2019/06/13 | CH2205 | Male | Three y/o | Control | Control | Feed Day | No | 16:35 | 16:00 - 16:59 | Evening | 38,1 | 119 | 27,0 | 27,0 | 19,26 | 606,20 | 110,58 |
| 2019/06/13 | CH2206 | Male | Three y/o | Control | Control | Feed Day | No | 16:35 | 16:00 - 16:59 | Evening | 37,7 | 89  | 57,2 | 57,2 | 18,85 | 585,33 | 136,44 |
| 2019/06/13 | CH2205 | Male | Three y/o | Control | Control | Feed Day | No | 16:40 | 16:00 - 16:59 | Evening | 38,1 |     | 9,4  | 9,4  | 19,26 |        | 74,66  |
| 2019/06/13 | CH2206 | Male | Three y/o | Control | Control | Feed Day | No | 16:40 | 16:00 - 16:59 | Evening | 37,7 | 88  | 53,8 | 53,8 | 18,85 | 584,49 | 134,32 |
| 2019/06/13 | CH2205 | Male | Three y/o | Control | Control | Feed Day | No | 16:45 | 16:00 - 16:59 | Evening | 38,0 |     | 12,2 | 12,2 | 19,15 |        | 83,49  |
| 2019/06/13 | CH2206 | Male | Three y/o | Control | Control | Feed Day | No | 16:45 | 16:00 - 16:59 | Evening | 37,8 | 86  | 11,4 | 11,4 | 18,95 | 582,77 | 81,19  |
| 2019/06/13 | CH2205 | Male | Three y/o | Control | Control | Feed Day | No | 16:50 | 16:00 - 16:59 | Evening | 38,0 | 135 | 31,8 | 31,8 | 19,15 | 614,84 | 116,20 |
| 2019/06/13 | CH2206 | Male | Three y/o | Control | Control | Feed Day | No | 16:50 | 16:00 - 16:59 | Evening | 37,8 | 50  | 52,0 | 52,0 | 18,95 | 539,52 | 133,14 |
| 2019/06/13 | CH2205 | Male | Three y/o | Control | Control | Feed Day | No | 16:55 | 16:00 - 16:59 | Evening | 38,0 |     | 21,8 | 21,8 | 19,15 |        | 103,26 |
| 2019/06/13 | CH2206 | Male | Three y/o | Control | Control | Feed Day | No | 16:55 | 16:00 - 16:59 | Evening | 37,9 | 82  | 49,8 | 49,8 | 19,05 | 579,19 | 131,65 |
| 2019/06/13 | CH2205 | Male | Three y/o | Control | Control | Feed Day | No | 17:00 | 17:00 - 17:59 | Evening | 38,0 |     | 22,2 | 22,2 | 19,15 |        | 103,88 |
| 2019/06/13 | CH2206 | Male | Three y/o | Control | Control | Feed Day | No | 17:00 | 17:00 - 17:59 | Evening | 38,0 |     | 24,4 | 24,4 | 19,15 |        | 107,11 |
| 2019/06/13 | CH2205 | Male | Three y/o | Control | Control | Feed Day | No | 17:05 | 17:00 - 17:59 | Evening | 38,0 | 75  | 20,6 | 20,6 | 19,15 | 572,36 | 101,32 |
| 2019/06/13 | CH2206 | Male | Three y/o | Control | Control | Feed Day | No | 17:05 | 17:00 - 17:59 | Evening | 38,0 | 84  | 26,2 | 26,2 | 19,15 | 581,01 | 109,55 |
| 2019/06/13 | CH2205 | Male | Three y/o | Control | Control | Feed Day | No | 17:10 | 17:00 - 17:59 | Evening | 38,0 |     | 10,4 | 10,4 | 19,15 |        | 78,08  |
| 2019/06/13 | CH2206 | Male | Three y/o | Control | Control | Feed Day | No | 17:10 | 17:00 - 17:59 | Evening | 38,0 | 88  | 59,8 | 59,8 | 19,15 | 584,49 | 137,98 |
| 2019/06/13 | CH2205 | Male | Three y/o | Control | Control | Feed Day | No | 17:15 | 17:00 - 17:59 | Evening | 38,0 |     | 10,0 | 10,0 | 19,15 |        | 76,76  |
| 2019/06/13 | CH2206 | Male | Three y/o | Control | Control | Feed Day | No | 17:15 | 17:00 - 17:59 | Evening | 38,0 | 61  | 54,0 | 54,0 | 19,15 | 556,01 | 134,45 |
| 2019/06/13 | CH2205 | Male | Three y/o | Control | Control | Feed Day | No | 17:20 | 17:00 - 17:59 | Evening | 38,0 | 125 | 14,0 | 14,0 | 19,15 | 609,60 | 88,17  |
| 2019/06/13 | CH2206 | Male | Three y/o | Control | Control | Feed Day | No | 17:20 | 17:00 - 17:59 | Evening | 38,0 | 81  | 52,0 | 52,0 | 19,15 | 578,26 | 133,14 |
| 2019/06/13 | CH2205 | Male | Three y/o | Control | Control | Feed Day | No | 17:25 | 17:00 - 17:59 | Evening | 38,0 |     | 7,4  | 7,4  | 19,15 |        | 66,59  |
| 2019/06/13 | CH2206 | Male | Three y/o | Control | Control | Feed Day | No | 17:25 | 17:00 - 17:59 | Evening | 38,0 | 78  | 47,6 | 47,6 | 19,15 | 575,38 | 130,09 |
| 2019/06/13 | CH2205 | Male | Three y/o | Control | Control | Feed Day | No | 17:30 | 17:00 - 17:59 | Evening | 38,1 |     | 9,2  | 9,2  | 19,26 |        | 73,94  |
| 2019/06/13 | CH2206 | Male | Three y/o | Control | Control | Feed Day | No | 17:30 | 17:00 - 17:59 | Evening | 38,1 | 60  | 39,4 | 39,4 | 19,26 | 554,67 | 123,57 |
| 2019/06/13 | CH2205 | Male | Three y/o | Control | Control | Feed Day | No | 17:35 | 17:00 - 17:59 | Evening | 38,1 | 61  | 10,2 | 10,2 | 19,26 | 556,01 | 77,43  |
| 2019/06/13 | CH2206 | Male | Three y/o | Control | Control | Feed Day | No | 17:35 | 17:00 - 17:59 | Evening | 38,1 | 77  | 39,4 | 39,4 | 19,26 | 574,39 | 123,57 |
| 2019/06/13 | CH2205 | Male | Three y/o | Control | Control | Feed Day | No | 17:40 | 17:00 - 17:59 | Evening | 38,0 | 63  | 3,8  | 3,8  | 19,15 | 558,62 | 44,22  |
| 2019/06/13 | CH2206 | Male | Three y/o | Control | Control | Feed Day | No | 17:40 | 17:00 - 17:59 | Evening | 38,1 | 84  | 42,4 | 42,4 | 19,26 | 581,01 | 126,10 |
| 2019/06/13 | CH2205 | Male | Three y/o | Control | Control | Feed Day | No | 17:45 | 17:00 - 17:59 | Evening | 37,9 | 78  | 8,6  | 8,6  | 19,05 | 575,38 | 71,66  |
| 2019/06/13 | CH2206 | Male | Three y/o | Control | Control | Feed Day | No | 17:45 | 17:00 - 17:59 | Evening | 38,1 | 84  | 40,8 | 40,8 | 19,26 | 581,01 | 124,77 |
| 2019/06/13 | CH2205 | Male | Three y/o | Control | Control | Feed Day | No | 17:50 | 17:00 - 17:59 | Evening | 37,9 | 71  | 6,0  | 6,0  | 19,05 | 568,10 | 59,53  |
| 2019/06/13 | CH2206 | Male | Three y/o | Control | Control | Feed Day | No | 17:50 | 17:00 - 17:59 | Evening | 38,1 | 73  | 41,2 | 41,2 | 19,26 | 570,27 | 125,11 |
| 2019/06/13 | CH2205 | Male | Three y/o | Control | Control | Feed Day | No | 17:55 | 17:00 - 17:59 | Evening | 37,7 | 60  | 9,2  | 9,2  | 18,85 | 554,67 | 73,94  |
| 2019/06/13 | CH2206 | Male | Three y/o | Control | Control | Feed Day | No | 17:55 | 17:00 - 17:59 | Evening | 38,1 | 40  | 42,0 | 42,0 | 19,26 | 520,09 | 125,77 |
| 2019/06/13 | CH2205 | Male | Three y/o | Control | Control | Feed Day | No | 18:00 | 18:00 - 18:59 | Evening | 37,6 | 60  | 6,8  | 6,8  | 18,75 | 554,67 | 63,74  |
| 2019/06/13 | CH2206 | Male | Three y/o | Control | Control | Feed Day | No | 18:00 | 18:00 - 18:59 | Evening | 38,1 | 85  | 50,4 | 50,4 | 19,26 | 581,90 | 132,06 |
| 2019/06/13 | CH2205 | Male | Three y/o | Control | Control | Feed Day | No | 18:05 | 18:00 - 18:59 | Evening | 37,6 | 86  | 9,8  | 9,8  | 18,75 | 582,77 | 76,07  |
| 2019/06/13 | CH2206 | Male | Three y/o | Control | Control | Feed Day | No | 18:05 | 18:00 - 18:59 | Evening | 38,1 | 88  | 55,4 | 55,4 | 19,26 | 584,49 | 135,33 |
| 2019/06/13 | CH2205 | Male | Three y/o | Control | Control | Feed Day | No | 18:10 | 18:00 - 18:59 | Evening | 37,5 | 56  | 1,4  | 1,4  | 18,65 | 549,01 | 11,07  |
| 2019/06/13 | CH2206 | Male | Three y/o | Control | Control | Feed Day | No | 18:10 | 18:00 - 18:59 | Evening | 38,1 | 58  | 49,8 | 49,8 | 19,26 | 551,90 | 131,65 |
| 2019/06/13 | CH2205 | Male | Three y/o | Control | Control | Feed Day | No | 18:15 | 18:00 - 18:59 | Evening | 37,6 | 65  | 4,2  | 4,2  | 18,75 | 561,12 | 47,57  |
| 2019/06/13 | CH2206 | Male | Three y/o | Control | Control | Feed Day | No | 18:15 | 18:00 - 18:59 | Evening | 38,1 | 75  | 55,6 | 55,6 | 19,26 | 572,36 | 135,46 |
| 2019/06/13 | CH2205 | Male | Three y/o | Control | Control | Feed Day | No | 18:20 | 18:00 - 18:59 | Evening | 37,6 | 93  | 7,2  | 7,2  | 18,75 | 588,58 | 65,66  |
| 2019/06/13 | CH2206 | Male | Three y/o | Control | Control | Feed Day | No | 18:20 | 18:00 - 18:59 | Evening | 38,1 | 48  | 51,4 | 51,4 | 19,26 | 536,04 | 132,74 |
| 2019/06/13 | CH2205 | Male | Three y/o | Control | Control | Feed Day | No | 18:25 | 18:00 - 18:59 | Evening | 37,5 | 61  | 4,8  | 4,8  | 18,65 | 556,01 | 52,04  |
| 2019/06/13 | CH2206 | Male | Three y/o | Control | Control | Feed Day | No | 18:25 | 18:00 - 18:59 | Evening | 38,1 | 64  | 53,2 | 53,2 | 19,26 | 559,88 | 133,93 |
| 2019/06/13 | CH2205 | Male | Three y/o | Control | Control | Feed Day | No | 18:30 | 18:00 - 18:59 | Evening | 37,4 | 58  | 2,0  | 2,0  | 18,55 | 551,90 | 22,86  |
| 2019/06/13 | CH2206 | Male | Three y/o | Control | Control | Feed Day | No | 18:30 | 18:00 - 18:59 | Evening | 38,1 | 55  | 53,6 | 53,6 | 19,26 | 547,52 | 134,19 |
| 2019/06/13 | CH2205 | Male | Three y/o | Control | Control | Feed Day | No | 18:35 | 18:00 - 18:59 | Evening | 37,4 | 67  | 4,0  | 4,0  | 18,55 | 563,53 | 45,94  |
| 2019/06/13 | CH2206 | Male | Three y/o | Control | Control | Feed Day | No | 18:35 | 18:00 - 18:59 | Evening | 38,1 | 54  | 56,4 | 56,4 | 19,26 | 545,99 | 135,95 |
| 2019/06/13 | CH2205 | Male | Three y/o | Control | Control | Feed Day | No | 18:40 | 18:00 - 18:59 | Evening | 37,6 | 70  | 56,2 | 56,2 | 18,75 | 566,99 | 135,83 |
| 2019/06/13 | CH2206 | Male | Three y/o | Control | Control | Feed Day | No | 18:40 | 18:00 - 18:59 | Evening | 38,1 | 65  | 52,8 | 52,8 | 19,26 | 561,12 | 133,67 |
| 2019/06/13 | CH2205 | Male | Three y/o | Control | Control | Feed Day | No | 18:45 | 18:00 - 18:59 | Evening | 37,9 |     | 19,0 | 19,0 | 19,05 |        | 98,56  |
| 2019/06/13 | CH2206 | Male | Three y/o | Control | Control | Feed Day | No | 18:45 | 18:00 - 18:59 | Evening | 38,0 | 69  | 49,8 | 49,8 | 19,15 | 565,86 | 131,65 |
| 2019/06/13 | CH2205 | Male | Three y/o | Control | Control | Feed Day | No | 18:50 | 18:00 - 18:59 | Evening | 37,9 |     | 16,4 | 16,4 | 19,05 |        | 93,55  |
| 2019/06/13 | CH2206 | Male | Three y/o | Control | Control | Feed Day | No | 18:50 | 18:00 - 18:59 | Evening | 38,0 | 79  | 48,6 | 48,6 | 19,15 | 576,36 | 130,81 |
| 2019/06/13 | CH2205 | Male | Three y/o | Control | Control | Feed Day | No | 18:55 | 18:00 - 18:59 | Evening | 37,7 |     | 16,0 | 16,0 | 18,85 |        | 92,71  |
| 2019/06/13 | CH2206 | Male | Three y/o | Control | Control | Feed Day | No | 18:55 | 18:00 - 18:59 | Evening | 38,0 | 45  | 44,8 | 44,8 | 19,15 | 530,47 | 127,99 |
| 2019/06/13 | CH2205 | Male | Three y/o | Control | Control | Feed Day | No | 19:00 | 19:00 - 19:59 | Evening | 37,7 |     | 17,6 | 17,6 | 18,85 |        | 95,95  |
| 2019/06/13 | CH2206 | Male | Three y/o | Control | Control | Feed Day | No | 19:00 | 19:00 - 19:59 | Evening | 38,0 | 46  | 55,2 | 55,2 | 19,15 | 532,38 | 135,21 |
| 2019/06/13 | CH2205 | Male | Three y/o | Control | Control | Feed Day | No | 19:05 | 19:00 - 19:59 | Evening | 37,7 |     | 12,2 | 12,2 | 18,85 |        | 83,49  |



|            |        |      |           |         |         |          |    |       |               |         |      |     |      |      |       |        |        |
|------------|--------|------|-----------|---------|---------|----------|----|-------|---------------|---------|------|-----|------|------|-------|--------|--------|
| 2019/06/13 | CH2206 | Male | Three y/o | Control | Control | Feed Day | No | 19:05 | 19:00 - 19:59 | Evening | 38,0 | 88  | 50,2 | 50,2 | 19,15 | 584,49 | 131,92 |
| 2019/06/13 | CH2205 | Male | Three y/o | Control | Control | Feed Day | No | 19:10 | 19:00 - 19:59 | Evening | 37,7 |     | 13,8 | 13,8 | 18,85 |        | 87,68  |
| 2019/06/13 | CH2206 | Male | Three y/o | Control | Control | Feed Day | No | 19:10 | 19:00 - 19:59 | Evening | 38,0 | 52  | 47,4 | 47,4 | 19,15 | 542,83 | 129,94 |
| 2019/06/13 | CH2205 | Male | Three y/o | Control | Control | Feed Day | No | 19:15 | 19:00 - 19:59 | Evening | 37,7 | 52  | 16,0 | 16,0 | 18,85 | 542,83 | 92,71  |
| 2019/06/13 | CH2206 | Male | Three y/o | Control | Control | Feed Day | No | 19:15 | 19:00 - 19:59 | Evening | 38,0 | 49  | 40,4 | 40,4 | 19,15 | 537,80 | 124,43 |
| 2019/06/13 | CH2205 | Male | Three y/o | Control | Control | Feed Day | No | 19:20 | 19:00 - 19:59 | Evening | 37,7 | 59  | 14,8 | 14,8 | 18,85 | 553,30 | 90,05  |
| 2019/06/13 | CH2206 | Male | Three y/o | Control | Control | Feed Day | No | 19:20 | 19:00 - 19:59 | Evening | 37,9 | 88  | 39,4 | 39,4 | 19,05 | 584,49 | 123,57 |
| 2019/06/13 | CH2205 | Male | Three y/o | Control | Control | Feed Day | No | 19:25 | 19:00 - 19:59 | Evening | 37,7 | 59  | 16,6 | 16,6 | 18,85 | 553,30 | 93,96  |
| 2019/06/13 | CH2206 | Male | Three y/o | Control | Control | Feed Day | No | 19:25 | 19:00 - 19:59 | Evening | 37,9 | 48  | 40,4 | 40,4 | 19,05 | 536,04 | 124,43 |
| 2019/06/13 | CH2205 | Male | Three y/o | Control | Control | Feed Day | No | 19:30 | 19:00 - 19:59 | Evening | 37,7 | 55  | 15,4 | 15,4 | 18,85 | 547,52 | 91,41  |
| 2019/06/13 | CH2206 | Male | Three y/o | Control | Control | Feed Day | No | 19:30 | 19:00 - 19:59 | Evening | 37,9 | 82  | 40,6 | 40,6 | 19,05 | 579,19 | 124,60 |
| 2019/06/13 | CH2205 | Male | Three y/o | Control | Control | Feed Day | No | 19:35 | 19:00 - 19:59 | Evening | 37,7 | 68  | 14,0 | 14,0 | 18,85 | 564,71 | 88,17  |
| 2019/06/13 | CH2206 | Male | Three y/o | Control | Control | Feed Day | No | 19:35 | 19:00 - 19:59 | Evening | 37,9 | 94  | 49,8 | 49,8 | 19,05 | 589,37 | 131,65 |
| 2019/06/13 | CH2205 | Male | Three y/o | Control | Control | Feed Day | No | 19:40 | 19:00 - 19:59 | Evening | 37,7 | 73  | 12,8 | 12,8 | 18,85 | 570,27 | 85,12  |
| 2019/06/13 | CH2206 | Male | Three y/o | Control | Control | Feed Day | No | 19:40 | 19:00 - 19:59 | Evening | 37,9 | 83  | 49,4 | 49,4 | 19,05 | 580,11 | 131,37 |
| 2019/06/13 | CH2205 | Male | Three y/o | Control | Control | Feed Day | No | 19:45 | 19:00 - 19:59 | Evening | 37,8 | 60  | 14,6 | 14,6 | 18,95 | 554,67 | 89,59  |
| 2019/06/13 | CH2206 | Male | Three y/o | Control | Control | Feed Day | No | 19:45 | 19:00 - 19:59 | Evening | 37,9 | 88  | 51,2 | 51,2 | 19,05 | 584,49 | 132,61 |
| 2019/06/13 | CH2205 | Male | Three y/o | Control | Control | Feed Day | No | 19:50 | 19:00 - 19:59 | Evening | 37,9 | 88  | 17,8 | 17,8 | 19,05 | 584,49 | 96,34  |
| 2019/06/13 | CH2206 | Male | Three y/o | Control | Control | Feed Day | No | 19:50 | 19:00 - 19:59 | Evening | 37,9 | 70  | 55,2 | 55,2 | 19,05 | 566,99 | 135,21 |
| 2019/06/13 | CH2205 | Male | Three y/o | Control | Control | Feed Day | No | 19:55 | 19:00 - 19:59 | Evening | 37,9 | 58  | 18,8 | 18,8 | 19,05 | 551,90 | 98,20  |
| 2019/06/13 | CH2206 | Male | Three y/o | Control | Control | Feed Day | No | 19:55 | 19:00 - 19:59 | Evening | 37,9 | 48  | 52,4 | 52,4 | 19,05 | 536,04 | 133,41 |
| 2019/06/13 | CH2205 | Male | Three y/o | Control | Control | Feed Day | No | 20:00 | 20:00 - 20:59 | Night   | 37,9 | 90  | 17,4 | 17,4 | 19,05 | 586,16 | 95,56  |
| 2019/06/13 | CH2206 | Male | Three y/o | Control | Control | Feed Day | No | 20:00 | 20:00 - 20:59 | Night   | 37,9 | 61  | 53,6 | 53,6 | 19,05 | 556,01 | 134,19 |
| 2019/06/13 | CH2205 | Male | Three y/o | Control | Control | Feed Day | No | 20:05 | 20:00 - 20:59 | Night   | 37,9 | 75  | 18,0 | 18,0 | 19,05 | 572,36 | 96,72  |
| 2019/06/13 | CH2206 | Male | Three y/o | Control | Control | Feed Day | No | 20:05 | 20:00 - 20:59 | Night   | 37,9 | 106 | 66,8 | 66,8 | 19,05 | 598,06 | 141,81 |
| 2019/06/13 | CH2205 | Male | Three y/o | Control | Control | Feed Day | No | 20:10 | 20:00 - 20:59 | Night   | 38,0 | 49  | 19,8 | 19,8 | 19,15 | 537,80 | 99,97  |
| 2019/06/13 | CH2206 | Male | Three y/o | Control | Control | Feed Day | No | 20:10 | 20:00 - 20:59 | Night   | 37,9 | 86  | 66,2 | 66,2 | 19,05 | 582,77 | 141,50 |
| 2019/06/13 | CH2205 | Male | Three y/o | Control | Control | Feed Day | No | 20:15 | 20:00 - 20:59 | Night   | 37,9 | 59  | 19,2 | 19,2 | 19,05 | 553,30 | 98,92  |
| 2019/06/13 | CH2206 | Male | Three y/o | Control | Control | Feed Day | No | 20:15 | 20:00 - 20:59 | Night   | 37,7 | 80  | 69,6 | 69,6 | 18,85 | 577,31 | 143,24 |
| 2019/06/13 | CH2205 | Male | Three y/o | Control | Control | Feed Day | No | 20:20 | 20:00 - 20:59 | Night   | 37,9 | 65  | 17,2 | 17,2 | 19,05 | 561,12 | 95,17  |
| 2019/06/13 | CH2206 | Male | Three y/o | Control | Control | Feed Day | No | 20:20 | 20:00 - 20:59 | Night   | 37,5 | 85  | 18,2 | 18,2 | 18,65 | 581,90 | 97,10  |
| 2019/06/13 | CH2205 | Male | Three y/o | Control | Control | Feed Day | No | 20:25 | 20:00 - 20:59 | Night   | 38,0 | 57  | 11,8 | 11,8 | 19,15 | 550,47 | 82,36  |
| 2019/06/13 | CH2206 | Male | Three y/o | Control | Control | Feed Day | No | 20:25 | 20:00 - 20:59 | Night   | 37,4 | 65  | 15,0 | 15,0 | 18,55 | 561,12 | 90,51  |
| 2019/06/13 | CH2205 | Male | Three y/o | Control | Control | Feed Day | No | 20:30 | 20:00 - 20:59 | Night   | 38,0 | 65  | 12,2 | 12,2 | 19,15 | 561,12 | 83,49  |
| 2019/06/13 | CH2206 | Male | Three y/o | Control | Control | Feed Day | No | 20:30 | 20:00 - 20:59 | Night   | 37,4 | 61  | 13,6 | 13,6 | 18,55 | 556,01 | 87,18  |
| 2019/06/13 | CH2205 | Male | Three y/o | Control | Control | Feed Day | No | 20:35 | 20:00 - 20:59 | Night   | 38,0 | 92  | 17,8 | 17,8 | 19,15 | 587,78 | 96,34  |
| 2019/06/13 | CH2206 | Male | Three y/o | Control | Control | Feed Day | No | 20:35 | 20:00 - 20:59 | Night   | 37,4 | 58  | 14,6 | 14,6 | 18,55 | 551,90 | 89,59  |
| 2019/06/13 | CH2205 | Male | Three y/o | Control | Control | Feed Day | No | 20:40 | 20:00 - 20:59 | Night   | 38,0 | 58  | 10,0 | 10,0 | 19,15 | 551,90 | 76,76  |
| 2019/06/13 | CH2206 | Male | Three y/o | Control | Control | Feed Day | No | 20:40 | 20:00 - 20:59 | Night   | 37,4 | 77  | 17,4 | 17,4 | 18,55 | 574,39 | 95,56  |
| 2019/06/13 | CH2205 | Male | Three y/o | Control | Control | Feed Day | No | 20:45 | 20:00 - 20:59 | Night   | 38,0 | 73  | 10,4 | 10,4 | 19,15 | 570,27 | 78,08  |
| 2019/06/13 | CH2206 | Male | Three y/o | Control | Control | Feed Day | No | 20:45 | 20:00 - 20:59 | Night   | 37,5 | 61  | 19,8 | 19,8 | 18,65 | 556,01 | 99,97  |
| 2019/06/13 | CH2205 | Male | Three y/o | Control | Control | Feed Day | No | 20:50 | 20:00 - 20:59 | Night   | 38,0 | 64  | 9,8  | 9,8  | 19,15 | 559,88 | 76,07  |
| 2019/06/13 | CH2206 | Male | Three y/o | Control | Control | Feed Day | No | 20:50 | 20:00 - 20:59 | Night   | 37,5 | 76  | 19,6 | 19,6 | 18,65 | 573,39 | 99,63  |
| 2019/06/13 | CH2205 | Male | Three y/o | Control | Control | Feed Day | No | 20:55 | 20:00 - 20:59 | Night   | 37,9 | 90  | 7,4  | 7,4  | 19,05 | 586,16 | 66,59  |
| 2019/06/13 | CH2206 | Male | Three y/o | Control | Control | Feed Day | No | 20:55 | 20:00 - 20:59 | Night   | 37,6 | 84  | 14,8 | 14,8 | 18,75 | 581,01 | 90,05  |
| 2019/06/13 | CH2205 | Male | Three y/o | Control | Control | Feed Day | No | 21:00 | 21:00 - 21:59 | Night   | 38,0 | 68  | 7,4  | 7,4  | 19,15 | 564,71 | 66,59  |
| 2019/06/13 | CH2206 | Male | Three y/o | Control | Control | Feed Day | No | 21:00 | 21:00 - 21:59 | Night   | 37,6 | 47  | 20,2 | 20,2 | 18,75 | 534,23 | 100,65 |
| 2019/06/13 | CH2205 | Male | Three y/o | Control | Control | Feed Day | No | 21:05 | 21:00 - 21:59 | Night   | 38,0 | 80  | 15,6 | 15,6 | 19,15 | 577,31 | 91,85  |
| 2019/06/13 | CH2206 | Male | Three y/o | Control | Control | Feed Day | No | 21:05 | 21:00 - 21:59 | Night   | 37,7 | 68  | 24,6 | 24,6 | 18,85 | 564,71 | 107,39 |
| 2019/06/13 | CH2205 | Male | Three y/o | Control | Control | Feed Day | No | 21:10 | 21:00 - 21:59 | Night   | 37,9 | 70  | 8,4  | 8,4  | 19,05 | 566,99 | 70,86  |
| 2019/06/13 | CH2206 | Male | Three y/o | Control | Control | Feed Day | No | 21:10 | 21:00 - 21:59 | Night   | 37,7 | 62  | 18,4 | 18,4 | 18,85 | 557,33 | 97,47  |
| 2019/06/13 | CH2205 | Male | Three y/o | Control | Control | Feed Day | No | 21:15 | 21:00 - 21:59 | Night   | 37,9 | 63  | 11,8 | 11,8 | 19,05 | 558,62 | 82,36  |
| 2019/06/13 | CH2206 | Male | Three y/o | Control | Control | Feed Day | No | 21:15 | 21:00 - 21:59 | Night   | 37,7 | 74  | 22,0 | 22,0 | 18,85 | 571,33 | 103,57 |
| 2019/06/13 | CH2205 | Male | Three y/o | Control | Control | Feed Day | No | 21:20 | 21:00 - 21:59 | Night   | 37,9 | 84  | 9,0  | 9,0  | 19,05 | 581,01 | 73,19  |
| 2019/06/13 | CH2206 | Male | Three y/o | Control | Control | Feed Day | No | 21:20 | 21:00 - 21:59 | Night   | 37,7 | 58  | 5,0  | 5,0  | 18,85 | 551,90 | 53,41  |
| 2019/06/13 | CH2205 | Male | Three y/o | Control | Control | Feed Day | No | 21:25 | 21:00 - 21:59 | Night   | 38,0 | 88  | 7,8  | 7,8  | 19,15 | 584,49 | 68,36  |
| 2019/06/13 | CH2206 | Male | Three y/o | Control | Control | Feed Day | No | 21:25 | 21:00 - 21:59 | Night   | 37,8 | 75  | 5,6  | 5,6  | 18,95 | 572,36 | 57,21  |
| 2019/06/13 | CH2205 | Male | Three y/o | Control | Control | Feed Day | No | 21:30 | 21:00 - 21:59 | Night   | 38,0 | 63  | 9,4  | 9,4  | 19,15 | 558,62 | 74,66  |
| 2019/06/13 | CH2206 | Male | Three y/o | Control | Control | Feed Day | No | 21:30 | 21:00 - 21:59 | Night   | 37,9 | 58  | 5,4  | 5,4  | 19,05 | 551,90 | 55,99  |
| 2019/06/13 | CH2205 | Male | Three y/o | Control | Control | Feed Day | No | 21:35 | 21:00 - 21:59 | Night   | 38,0 | 50  | 8,6  | 8,6  | 19,15 | 539,52 | 71,66  |
| 2019/06/13 | CH2206 | Male | Three y/o | Control | Control | Feed Day | No | 21:35 | 21:00 - 21:59 | Night   | 37,8 | 57  | 2,6  | 2,6  | 18,95 | 550,47 | 31,57  |
| 2019/06/13 | CH2205 | Male | Three y/o | Control | Control | Feed Day | No | 21:40 | 21:00 - 21:59 | Night   | 37,9 | 90  | 10,8 | 10,8 | 19,05 | 586,16 | 79,36  |
| 2019/06/13 | CH2206 | Male | Three y/o | Control | Control | Feed Day | No | 21:40 | 21:00 - 21:59 | Night   | 37,8 | 86  | 7,2  | 7,2  | 18,95 | 582,77 | 65,66  |
| 2019/06/13 | CH2205 | Male | Three y/o | Control | Control | Feed Day | No | 21:45 | 21:00 - 21:59 | Night   | 37,9 | 84  | 13,4 | 13,4 | 19,05 | 581,01 | 86,68  |
| 2019/06/13 | CH2206 | Male | Three y/o | Control | Control | Feed Day | No | 21:45 | 21:00 - 21:59 | Night   | 37,8 | 74  | 3,8  | 3,8  | 18,95 | 571,33 | 44,22  |
| 2019/06/13 | CH2205 | Male | Three y/o | Control | Control | Feed Day | No | 21:50 | 21:00 - 21:59 | Night   | 37,9 | 107 | 12,8 | 12,8 | 19,05 | 598,73 | 85,12  |
| 2019/06/13 | CH2206 | Male | Three y/o | Control | Control | Feed Day | No | 21:50 | 21:00 - 21:59 | Night   | 37,8 | 52  | 6,0  | 6,0  | 18,95 | 542,83 | 59,53  |
| 2019/06/13 | CH2205 | Male | Three y/o | Control | Control | Feed Day | No | 21:55 | 21:00 - 21:59 | Night   | 37,9 | 51  | 10,2 | 10,2 | 19,05 | 541,20 | 77,43  |
| 2019/06/13 | CH2206 | Male | Three y/o | Control | Control | Feed Day | No | 21:55 | 21:00 - 21:59 | Night   | 37,8 | 78  | 5,8  | 5,8  | 18,95 | 575,38 | 58,39  |
| 2019/06/13 | CH2205 | Male | Three y/o | Control | Control | Feed Day | No | 22:00 | 22:00 - 22:59 | Night   | 37,9 | 86  | 11,4 | 11,4 | 19,05 | 582,77 | 81,19  |



|    |            |        |      |           |         |         |          |    |       |               |               |      |     |       |       |       |        |        |
|----|------------|--------|------|-----------|---------|---------|----------|----|-------|---------------|---------------|------|-----|-------|-------|-------|--------|--------|
|    | 2019/06/13 | CH2206 | Male | Three y/o | Control | Control | Feed Day | No | 22:00 | 22:00 - 22:59 | Night         | 37,8 | 83  | 4,4   | 4,4   | 18,95 | 580,11 | 49,12  |
|    | 2019/06/13 | CH2205 | Male | Three y/o | Control | Control | Feed Day | No | 22:05 | 22:00 - 22:59 | Night         | 37,9 | 86  | 14,2  | 14,2  | 19,05 | 582,77 | 88,65  |
|    | 2019/06/13 | CH2206 | Male | Three y/o | Control | Control | Feed Day | No | 22:05 | 22:00 - 22:59 | Night         | 37,8 | 86  | 5,0   | 5,0   | 18,95 | 582,77 | 53,41  |
|    | 2019/06/13 | CH2205 | Male | Three y/o | Control | Control | Feed Day | No | 22:10 | 22:00 - 22:59 | Night         | 37,9 | 82  | 11,2  | 11,2  | 19,05 | 579,19 | 80,59  |
|    | 2019/06/13 | CH2206 | Male | Three y/o | Control | Control | Feed Day | No | 22:10 | 22:00 - 22:59 | Night         | 37,8 | 80  | 2,8   | 2,8   | 18,95 | 577,31 | 34,04  |
|    | 2019/06/13 | CH2205 | Male | Three y/o | Control | Control | Feed Day | No | 22:15 | 22:00 - 22:59 | Night         | 37,9 | 55  | 10,6  | 10,6  | 19,05 | 547,52 | 78,73  |
|    | 2019/06/13 | CH2206 | Male | Three y/o | Control | Control | Feed Day | No | 22:15 | 22:00 - 22:59 | Night         | 37,8 | 79  | 3,4   | 3,4   | 18,95 | 576,36 | 40,51  |
|    | 2019/06/13 | CH2205 | Male | Three y/o | Control | Control | Feed Day | No | 22:20 | 22:00 - 22:59 | Night         | 37,9 | 85  | 15,2  | 15,2  | 19,05 | 581,90 | 90,96  |
|    | 2019/06/13 | CH2206 | Male | Three y/o | Control | Control | Feed Day | No | 22:20 | 22:00 - 22:59 | Night         | 37,8 | 86  | 3,4   | 3,4   | 18,95 | 582,77 | 40,51  |
|    | 2019/06/13 | CH2205 | Male | Three y/o | Control | Control | Feed Day | No | 22:25 | 22:00 - 22:59 | Night         | 37,9 | 39  | 12,8  | 12,8  | 19,05 | 517,82 | 85,12  |
|    | 2019/06/13 | CH2206 | Male | Three y/o | Control | Control | Feed Day | No | 22:25 | 22:00 - 22:59 | Night         | 37,8 | 77  | 4,6   | 4,6   | 18,95 | 574,39 | 50,61  |
|    | 2019/06/13 | CH2205 | Male | Three y/o | Control | Control | Feed Day | No | 22:30 | 22:00 - 22:59 | Night         | 37,9 |     | 7,4   | 7,4   | 19,05 |        | 66,59  |
|    | 2019/06/13 | CH2206 | Male | Three y/o | Control | Control | Feed Day | No | 22:30 | 22:00 - 22:59 | Night         | 37,8 | 46  | 4,4   | 4,4   | 18,95 | 532,38 | 49,12  |
|    | 2019/06/13 | CH2205 | Male | Three y/o | Control | Control | Feed Day | No | 22:35 | 22:00 - 22:59 | Night         | 37,9 | 56  | 7,6   | 7,6   | 19,05 | 549,01 | 67,49  |
|    | 2019/06/13 | CH2206 | Male | Three y/o | Control | Control | Feed Day | No | 22:35 | 22:00 - 22:59 | Night         | 37,8 | 74  | 7,4   | 7,4   | 18,95 | 571,33 | 66,59  |
|    | 2019/06/13 | CH2205 | Male | Three y/o | Control | Control | Feed Day | No | 22:40 | 22:00 - 22:59 | Night         | 37,9 | 58  | 4,4   | 4,4   | 19,05 | 551,90 | 49,12  |
|    | 2019/06/13 | CH2206 | Male | Three y/o | Control | Control | Feed Day | No | 22:40 | 22:00 - 22:59 | Night         | 37,7 | 83  | 4,6   | 4,6   | 18,85 | 580,11 | 50,61  |
|    | 2019/06/13 | CH2205 | Male | Three y/o | Control | Control | Feed Day | No | 22:45 | 22:00 - 22:59 | Night         | 37,9 | 63  | 4,2   | 4,2   | 19,05 | 558,62 | 47,57  |
|    | 2019/06/13 | CH2206 | Male | Three y/o | Control | Control | Feed Day | No | 22:45 | 22:00 - 22:59 | Night         | 37,7 | 52  | 1,4   | 1,4   | 18,85 | 542,83 | 11,07  |
|    | 2019/06/13 | CH2205 | Male | Three y/o | Control | Control | Feed Day | No | 22:50 | 22:00 - 22:59 | Night         | 37,9 | 88  | 2,0   | 2,0   | 19,05 | 584,49 | 22,86  |
|    | 2019/06/13 | CH2206 | Male | Three y/o | Control | Control | Feed Day | No | 22:50 | 22:00 - 22:59 | Night         | 37,7 | 77  | 32,0  | 32,0  | 18,85 | 574,39 | 116,41 |
|    | 2019/06/13 | CH2205 | Male | Three y/o | Control | Control | Feed Day | No | 22:55 | 22:00 - 22:59 | Night         | 37,9 | 66  | 4,0   | 4,0   | 19,05 | 562,34 | 45,94  |
|    | 2019/06/13 | CH2206 | Male | Three y/o | Control | Control | Feed Day | No | 22:55 | 22:00 - 22:59 | Night         | 37,7 | 74  | 50,6  | 50,6  | 18,85 | 571,33 | 132,20 |
|    | 2019/06/13 | CH2205 | Male | Three y/o | Control | Control | Feed Day | No | 23:00 | 23:00 - 23:59 | Night         | 37,9 | 79  | 6,4   | 6,4   | 19,05 | 576,36 | 61,70  |
|    | 2019/06/13 | CH2206 | Male | Three y/o | Control | Control | Feed Day | No | 23:00 | 23:00 - 23:59 | Night         | 37,7 | 54  | 50,2  | 50,2  | 18,85 | 545,99 | 131,92 |
|    | 2019/06/13 | CH2205 | Male | Three y/o | Control | Control | Feed Day | No | 23:05 | 23:00 - 23:59 | Night         | 37,9 | 48  | 5,2   | 5,2   | 19,05 | 536,04 | 54,72  |
|    | 2019/06/13 | CH2206 | Male | Three y/o | Control | Control | Feed Day | No | 23:05 | 23:00 - 23:59 | Night         | 37,7 | 64  | 58,8  | 58,8  | 18,85 | 559,88 | 137,39 |
|    | 2019/06/13 | CH2205 | Male | Three y/o | Control | Control | Feed Day | No | 23:10 | 23:00 - 23:59 | Night         | 37,9 | 34  | 8,4   | 8,4   | 19,05 | 505,29 | 70,86  |
|    | 2019/06/13 | CH2206 | Male | Three y/o | Control | Control | Feed Day | No | 23:10 | 23:00 - 23:59 | Night         | 37,7 | 41  | 63,0  | 63,0  | 18,85 | 522,29 | 139,78 |
|    | 2019/06/13 | CH2205 | Male | Three y/o | Control | Control | Feed Day | No | 23:15 | 23:00 - 23:59 | Night         | 37,9 | 61  | 7,6   | 7,6   | 19,05 | 556,01 | 67,49  |
|    | 2019/06/13 | CH2206 | Male | Three y/o | Control | Control | Feed Day | No | 23:15 | 23:00 - 23:59 | Night         | 37,7 | 80  | 60,4  | 60,4  | 18,85 | 577,31 | 138,32 |
|    | 2019/06/13 | CH2205 | Male | Three y/o | Control | Control | Feed Day | No | 23:20 | 23:00 - 23:59 | Night         | 37,9 | 84  | 4,4   | 4,4   | 19,05 | 581,01 | 49,12  |
|    | 2019/06/13 | CH2206 | Male | Three y/o | Control | Control | Feed Day | No | 23:20 | 23:00 - 23:59 | Night         | 37,7 | 69  | 65,8  | 65,8  | 18,85 | 565,86 | 141,29 |
|    | 2019/06/13 | CH2205 | Male | Three y/o | Control | Control | Feed Day | No | 23:25 | 23:00 - 23:59 | Night         | 37,9 | 56  | 1,2   | 1,2   | 19,05 | 549,01 | 5,99   |
|    | 2019/06/13 | CH2206 | Male | Three y/o | Control | Control | Feed Day | No | 23:25 | 23:00 - 23:59 | Night         | 37,5 | 88  | 61,2  | 61,2  | 18,65 | 584,49 | 138,78 |
|    | 2019/06/13 | CH2205 | Male | Three y/o | Control | Control | Feed Day | No | 23:30 | 23:00 - 23:59 | Night         | 37,9 | 51  | 3,6   | 3,6   | 19,05 | 541,20 | 42,42  |
|    | 2019/06/13 | CH2206 | Male | Three y/o | Control | Control | Feed Day | No | 23:30 | 23:00 - 23:59 | Night         | 37,5 | 80  | 60,6  | 60,6  | 18,65 | 577,31 | 138,44 |
|    | 2019/06/13 | CH2205 | Male | Three y/o | Control | Control | Feed Day | No | 23:35 | 23:00 - 23:59 | Night         | 37,9 | 58  | 40,8  | 40,8  | 19,05 | 551,90 | 124,77 |
|    | 2019/06/13 | CH2206 | Male | Three y/o | Control | Control | Feed Day | No | 23:35 | 23:00 - 23:59 | Night         | 37,5 | 98  | 47,6  | 47,6  | 18,65 | 592,41 | 130,09 |
|    | 2019/06/13 | CH2205 | Male | Three y/o | Control | Control | Feed Day | No | 23:40 | 23:00 - 23:59 | Night         | 37,7 | 76  | 41,4  | 41,4  | 18,85 | 573,39 | 125,27 |
|    | 2019/06/13 | CH2206 | Male | Three y/o | Control | Control | Feed Day | No | 23:40 | 23:00 - 23:59 | Night         | 37,5 | 80  | 64,6  | 64,6  | 18,65 | 577,31 | 140,65 |
|    | 2019/06/13 | CH2205 | Male | Three y/o | Control | Control | Feed Day | No | 23:45 | 23:00 - 23:59 | Night         | 37,7 | 91  | 123,0 | 123,0 | 18,85 | 586,98 | 163,07 |
|    | 2019/06/13 | CH2206 | Male | Three y/o | Control | Control | Feed Day | No | 23:45 | 23:00 - 23:59 | Night         | 37,7 | 134 | 117,8 | 117,8 | 18,85 | 614,33 | 161,56 |
|    | 2019/06/13 | CH2205 | Male | Three y/o | Control | Control | Feed Day | No | 23:50 | 23:00 - 23:59 | Night         | 37,9 |     | 39,8  | 39,8  | 19,05 |        | 123,91 |
|    | 2019/06/13 | CH2206 | Male | Three y/o | Control | Control | Feed Day | No | 23:50 | 23:00 - 23:59 | Night         | 37,5 | 156 | 54,6  | 54,6  | 18,65 | 624,43 | 134,83 |
|    | 2019/06/13 | CH2205 | Male | Three y/o | Control | Control | Feed Day | No | 23:55 | 23:00 - 23:59 | Night         | 37,9 | 76  | 18,8  | 18,8  | 19,05 | 573,39 | 98,20  |
|    | 2019/06/13 | CH2206 | Male | Three y/o | Control | Control | Feed Day | No | 23:55 | 23:00 - 23:59 | Night         | 37,5 | 103 | 8,8   | 8,8   | 18,65 | 596,00 | 72,43  |
| 30 | 2019/06/14 | CH2205 | Male | Three y/o | Control | Control | Feed Day | No | 00:00 | 00:00 - 00:59 | Early Morning | 37,5 | 125 | 15,6  | 15,6  | 18,65 | 609,60 | 91,85  |
|    | 2019/06/14 | CH2206 | Male | Three y/o | Control | Control | Feed Day | No | 00:00 | 00:00 - 00:59 | Early Morning | 37,3 |     | 115,6 | 115,6 | 18,46 |        | 160,90 |
|    | 2019/06/14 | CH2205 | Male | Three y/o | Control | Control | Feed Day | No | 00:05 | 00:00 - 00:59 | Early Morning | 37,4 | 61  | 15,4  | 15,4  | 18,55 | 556,01 | 91,41  |
|    | 2019/06/14 | CH2206 | Male | Three y/o | Control | Control | Feed Day | No | 00:05 | 00:00 - 00:59 | Early Morning | 37,1 | 82  | 15,6  | 15,6  | 18,26 | 579,19 | 91,85  |
|    | 2019/06/14 | CH2205 | Male | Three y/o | Control | Control | Feed Day | No | 00:10 | 00:00 - 00:59 | Early Morning | 37,2 | 77  | 13,2  | 13,2  | 18,36 | 574,39 | 86,17  |
|    | 2019/06/14 | CH2206 | Male | Three y/o | Control | Control | Feed Day | No | 00:10 | 00:00 - 00:59 | Early Morning | 37,1 | 86  | 15,4  | 15,4  | 18,26 | 582,77 | 91,41  |
|    | 2019/06/14 | CH2205 | Male | Three y/o | Control | Control | Feed Day | No | 00:15 | 00:00 - 00:59 | Early Morning | 37,1 | 76  | 17,0  | 17,0  | 18,26 | 573,39 | 94,77  |
|    | 2019/06/14 | CH2206 | Male | Three y/o | Control | Control | Feed Day | No | 00:15 | 00:00 - 00:59 | Early Morning | 37,1 | 56  | 10,0  | 10,0  | 18,26 | 549,01 | 76,76  |
|    | 2019/06/14 | CH2205 | Male | Three y/o | Control | Control | Feed Day | No | 00:20 | 00:00 - 00:59 | Early Morning | 37,1 | 60  | 19,8  | 19,8  | 18,26 | 554,67 | 99,97  |
|    | 2019/06/14 | CH2206 | Male | Three y/o | Control | Control | Feed Day | No | 00:20 | 00:00 - 00:59 | Early Morning | 37,2 | 88  | 13,6  | 13,6  | 18,36 | 584,49 | 87,18  |
|    | 2019/06/14 | CH2205 | Male | Three y/o | Control | Control | Feed Day | No | 00:25 | 00:00 - 00:59 | Early Morning | 37,1 | 63  | 16,6  | 16,6  | 18,26 | 558,62 | 93,96  |
|    | 2019/06/14 | CH2206 | Male | Three y/o | Control | Control | Feed Day | No | 00:25 | 00:00 - 00:59 | Early Morning | 37,2 | 73  | 16,0  | 16,0  | 18,36 | 570,27 | 92,71  |
|    | 2019/06/14 | CH2205 | Male | Three y/o | Control | Control | Feed Day | No | 00:30 | 00:00 - 00:59 | Early Morning | 37,1 | 60  | 14,0  | 14,0  | 18,26 | 554,67 | 88,17  |
|    | 2019/06/14 | CH2206 | Male | Three y/o | Control | Control | Feed Day | No | 00:30 | 00:00 - 00:59 | Early Morning | 37,3 | 51  | 39,8  | 39,8  | 18,46 | 541,20 | 123,91 |
|    | 2019/06/14 | CH2205 | Male | Three y/o | Control | Control | Feed Day | No | 00:35 | 00:00 - 00:59 | Early Morning | 37,0 | 85  | 16,6  | 16,6  | 18,16 | 581,90 | 93,96  |
|    | 2019/06/14 | CH2206 | Male | Three y/o | Control | Control | Feed Day | No | 00:35 | 00:00 - 00:59 | Early Morning | 37,3 | 69  | 36,8  | 36,8  | 18,46 | 565,86 | 121,22 |
|    | 2019/06/14 | CH2205 | Male | Three y/o | Control | Control | Feed Day | No | 00:40 | 00:00 - 00:59 | Early Morning | 37,0 | 73  | 15,4  | 15,4  | 18,16 | 570,27 | 91,41  |
|    | 2019/06/14 | CH2206 | Male | Three y/o | Control | Control | Feed Day | No | 00:40 | 00:00 - 00:59 | Early Morning | 37,3 | 43  | 41,8  | 41,8  | 18,46 | 526,50 | 125,60 |
|    | 2019/06/14 | CH2205 | Male | Three y/o | Control | Control | Feed Day | No | 00:45 | 00:00 - 00:59 | Early Morning | 37,0 | 87  | 16,2  | 16,2  | 18,16 | 583,64 | 93,13  |
|    | 2019/06/14 | CH2206 | Male | Three y/o | Control | Control | Feed Day | No | 00:45 | 00:00 - 00:59 | Early Morning | 37,3 | 83  | 38,4  | 38,4  | 18,46 | 580,11 | 122,68 |
|    | 2019/06/14 | CH2205 | Male | Three y/o | Control | Control | Feed Day | No | 00:50 | 00:00 - 00:59 | Early Morning | 37,0 | 83  | 18,0  | 18,0  | 18,16 | 580,11 | 96,72  |
|    | 2019/06/14 | CH2206 | Male | Three y/o | Control | Control | Feed Day | No | 00:50 | 00:00 - 00:59 | Early Morning | 37,3 | 75  | 29,0  | 29,0  | 18,46 | 572,36 | 113,03 |
|    | 2019/06/14 | CH2205 | Male | Three y/o | Control | Control | Feed Day | No | 00:55 | 00:00 - 00:59 | Early Morning | 37,1 | 99  | 17,6  | 17,6  | 18,26 | 593,14 | 95,95  |



|            |        |      |           |         |         |          |    |       |               |               |      |     |      |      |       |        |        |
|------------|--------|------|-----------|---------|---------|----------|----|-------|---------------|---------------|------|-----|------|------|-------|--------|--------|
| 2019/06/14 | CH2206 | Male | Three y/o | Control | Control | Feed Day | No | 00:55 | 00:00 - 00:59 | Early Morning | 37,3 | 57  | 31,0 | 31,0 | 18,46 | 550,47 | 115,32 |
| 2019/06/14 | CH2205 | Male | Three y/o | Control | Control | Feed Day | No | 01:00 | 01:00 - 01:59 | Early Morning | 37,0 | 44  | 18,0 | 18,0 | 18,16 | 528,51 | 96,72  |
| 2019/06/14 | CH2206 | Male | Three y/o | Control | Control | Feed Day | No | 01:00 | 01:00 - 01:59 | Early Morning | 37,3 | 69  | 29,0 | 29,0 | 18,46 | 565,86 | 113,03 |
| 2019/06/14 | CH2205 | Male | Three y/o | Control | Control | Feed Day | No | 01:05 | 01:00 - 01:59 | Early Morning | 37,0 | 74  | 17,2 | 17,2 | 18,16 | 571,33 | 95,17  |
| 2019/06/14 | CH2206 | Male | Three y/o | Control | Control | Feed Day | No | 01:05 | 01:00 - 01:59 | Early Morning | 37,3 | 81  | 26,8 | 26,8 | 18,46 | 578,26 | 110,33 |
| 2019/06/14 | CH2205 | Male | Three y/o | Control | Control | Feed Day | No | 01:10 | 01:00 - 01:59 | Early Morning | 37,0 | 90  | 18,4 | 18,4 | 18,16 | 586,16 | 97,47  |
| 2019/06/14 | CH2206 | Male | Three y/o | Control | Control | Feed Day | No | 01:10 | 01:00 - 01:59 | Early Morning | 37,3 | 83  | 27,8 | 27,8 | 18,46 | 580,11 | 111,58 |
| 2019/06/14 | CH2205 | Male | Three y/o | Control | Control | Feed Day | No | 01:15 | 01:00 - 01:59 | Early Morning | 37,1 | 108 | 13,8 | 13,8 | 18,26 | 599,39 | 87,68  |
| 2019/06/14 | CH2206 | Male | Three y/o | Control | Control | Feed Day | No | 01:15 | 01:00 - 01:59 | Early Morning | 37,3 | 84  | 27,4 | 27,4 | 18,46 | 581,01 | 111,09 |
| 2019/06/14 | CH2205 | Male | Three y/o | Control | Control | Feed Day | No | 01:20 | 01:00 - 01:59 | Early Morning | 37,2 | 63  | 12,0 | 12,0 | 18,36 | 558,62 | 82,93  |
| 2019/06/14 | CH2206 | Male | Three y/o | Control | Control | Feed Day | No | 01:20 | 01:00 - 01:59 | Early Morning | 37,3 | 53  | 32,6 | 32,6 | 18,46 | 544,43 | 117,05 |
| 2019/06/14 | CH2205 | Male | Three y/o | Control | Control | Feed Day | No | 01:25 | 01:00 - 01:59 | Early Morning | 37,2 | 79  | 12,2 | 12,2 | 18,36 | 576,36 | 83,49  |
| 2019/06/14 | CH2206 | Male | Three y/o | Control | Control | Feed Day | No | 01:25 | 01:00 - 01:59 | Early Morning | 37,3 | 48  | 32,2 | 32,2 | 18,46 | 536,04 | 116,63 |
| 2019/06/14 | CH2205 | Male | Three y/o | Control | Control | Feed Day | No | 01:30 | 01:00 - 01:59 | Early Morning | 37,3 | 73  | 9,6  | 9,6  | 18,46 | 570,27 | 75,37  |
| 2019/06/14 | CH2206 | Male | Three y/o | Control | Control | Feed Day | No | 01:30 | 01:00 - 01:59 | Early Morning | 37,3 | 42  | 30,8 | 30,8 | 18,46 | 524,42 | 115,10 |
| 2019/06/14 | CH2205 | Male | Three y/o | Control | Control | Feed Day | No | 01:35 | 01:00 - 01:59 | Early Morning | 37,4 | 56  | 18,6 | 18,6 | 18,55 | 549,01 | 97,84  |
| 2019/06/14 | CH2206 | Male | Three y/o | Control | Control | Feed Day | No | 01:35 | 01:00 - 01:59 | Early Morning | 37,3 | 80  | 32,8 | 32,8 | 18,46 | 577,31 | 117,26 |
| 2019/06/14 | CH2205 | Male | Three y/o | Control | Control | Feed Day | No | 01:40 | 01:00 - 01:59 | Early Morning | 37,4 | 86  | 21,0 | 21,0 | 18,55 | 582,77 | 101,98 |
| 2019/06/14 | CH2206 | Male | Three y/o | Control | Control | Feed Day | No | 01:40 | 01:00 - 01:59 | Early Morning | 37,3 | 61  | 38,4 | 38,4 | 18,46 | 556,01 | 122,68 |
| 2019/06/14 | CH2205 | Male | Three y/o | Control | Control | Feed Day | No | 01:45 | 01:00 - 01:59 | Early Morning | 37,5 | 47  | 28,0 | 28,0 | 18,65 | 534,23 | 111,83 |
| 2019/06/14 | CH2206 | Male | Three y/o | Control | Control | Feed Day | No | 01:45 | 01:00 - 01:59 | Early Morning | 37,4 | 50  | 48,4 | 48,4 | 18,55 | 539,52 | 130,66 |
| 2019/06/14 | CH2205 | Male | Three y/o | Control | Control | Feed Day | No | 01:50 | 01:00 - 01:59 | Early Morning | 37,4 | 60  | 19,4 | 19,4 | 18,55 | 554,67 | 99,28  |
| 2019/06/14 | CH2206 | Male | Three y/o | Control | Control | Feed Day | No | 01:50 | 01:00 - 01:59 | Early Morning | 37,4 | 92  | 59,2 | 59,2 | 18,55 | 587,78 | 137,63 |
| 2019/06/14 | CH2205 | Male | Three y/o | Control | Control | Feed Day | No | 01:55 | 01:00 - 01:59 | Early Morning | 37,4 | 88  | 14,2 | 14,2 | 18,55 | 584,49 | 88,65  |
| 2019/06/14 | CH2206 | Male | Three y/o | Control | Control | Feed Day | No | 01:55 | 01:00 - 01:59 | Early Morning | 37,5 | 58  | 65,4 | 65,4 | 18,65 | 551,90 | 141,08 |
| 2019/06/14 | CH2205 | Male | Three y/o | Control | Control | Feed Day | No | 02:00 | 02:00 - 02:59 | Early Morning | 37,2 | 59  | 15,6 | 15,6 | 18,36 | 553,30 | 91,85  |
| 2019/06/14 | CH2206 | Male | Three y/o | Control | Control | Feed Day | No | 02:00 | 02:00 - 02:59 | Early Morning | 37,5 | 55  | 65,6 | 65,6 | 18,65 | 547,52 | 141,19 |
| 2019/06/14 | CH2205 | Male | Three y/o | Control | Control | Feed Day | No | 02:05 | 02:00 - 02:59 | Early Morning | 37,1 | 51  | 21,2 | 21,2 | 18,26 | 541,20 | 102,31 |
| 2019/06/14 | CH2206 | Male | Three y/o | Control | Control | Feed Day | No | 02:05 | 02:00 - 02:59 | Early Morning | 37,5 | 49  | 64,0 | 64,0 | 18,65 | 537,80 | 140,33 |
| 2019/06/14 | CH2205 | Male | Three y/o | Control | Control | Feed Day | No | 02:10 | 02:00 - 02:59 | Early Morning | 37,1 | 61  | 21,2 | 21,2 | 18,26 | 556,01 | 102,31 |
| 2019/06/14 | CH2206 | Male | Three y/o | Control | Control | Feed Day | No | 02:10 | 02:00 - 02:59 | Early Morning | 37,5 | 49  | 63,0 | 63,0 | 18,65 | 537,80 | 139,78 |
| 2019/06/14 | CH2205 | Male | Three y/o | Control | Control | Feed Day | No | 02:15 | 02:00 - 02:59 | Early Morning | 37,2 | 123 | 39,0 | 39,0 | 18,36 | 608,49 | 123,22 |
| 2019/06/14 | CH2206 | Male | Three y/o | Control | Control | Feed Day | No | 02:15 | 02:00 - 02:59 | Early Morning | 37,5 | 56  | 65,6 | 65,6 | 18,65 | 549,01 | 141,19 |
| 2019/06/14 | CH2205 | Male | Three y/o | Control | Control | Feed Day | No | 02:20 | 02:00 - 02:59 | Early Morning | 37,2 | 60  | 16,6 | 16,6 | 18,36 | 554,67 | 93,96  |
| 2019/06/14 | CH2206 | Male | Three y/o | Control | Control | Feed Day | No | 02:20 | 02:00 - 02:59 | Early Morning | 37,5 | 46  | 68,6 | 68,6 | 18,65 | 532,38 | 142,74 |
| 2019/06/14 | CH2205 | Male | Three y/o | Control | Control | Feed Day | No | 02:25 | 02:00 - 02:59 | Early Morning | 37,1 | 51  | 10,2 | 10,2 | 18,26 | 541,20 | 77,43  |
| 2019/06/14 | CH2206 | Male | Three y/o | Control | Control | Feed Day | No | 02:25 | 02:00 - 02:59 | Early Morning | 37,7 | 79  | 66,8 | 66,8 | 18,85 | 576,36 | 141,81 |
| 2019/06/14 | CH2205 | Male | Three y/o | Control | Control | Feed Day | No | 02:30 | 02:00 - 02:59 | Early Morning | 37,1 | 45  | 7,6  | 7,6  | 18,26 | 530,47 | 67,49  |
| 2019/06/14 | CH2206 | Male | Three y/o | Control | Control | Feed Day | No | 02:30 | 02:00 - 02:59 | Early Morning | 37,7 | 49  | 67,6 | 67,6 | 18,85 | 537,80 | 142,23 |
| 2019/06/14 | CH2205 | Male | Three y/o | Control | Control | Feed Day | No | 02:35 | 02:00 - 02:59 | Early Morning | 37,1 | 98  | 6,4  | 6,4  | 18,26 | 592,41 | 61,70  |
| 2019/06/14 | CH2206 | Male | Three y/o | Control | Control | Feed Day | No | 02:35 | 02:00 - 02:59 | Early Morning | 37,7 | 49  | 66,2 | 66,2 | 18,85 | 537,80 | 141,50 |
| 2019/06/14 | CH2205 | Male | Three y/o | Control | Control | Feed Day | No | 02:40 | 02:00 - 02:59 | Early Morning | 37,1 | 76  | 10,2 | 10,2 | 18,26 | 573,39 | 77,43  |
| 2019/06/14 | CH2206 | Male | Three y/o | Control | Control | Feed Day | No | 02:40 | 02:00 - 02:59 | Early Morning | 37,7 | 95  | 70,2 | 70,2 | 18,85 | 590,14 | 143,54 |
| 2019/06/14 | CH2205 | Male | Three y/o | Control | Control | Feed Day | No | 02:45 | 02:00 - 02:59 | Early Morning | 37,1 | 54  | 9,8  | 9,8  | 18,26 | 545,99 | 76,07  |
| 2019/06/14 | CH2206 | Male | Three y/o | Control | Control | Feed Day | No | 02:45 | 02:00 - 02:59 | Early Morning | 37,7 | 81  | 67,6 | 67,6 | 18,85 | 578,26 | 142,23 |
| 2019/06/14 | CH2205 | Male | Three y/o | Control | Control | Feed Day | No | 02:50 | 02:00 - 02:59 | Early Morning | 37,0 | 87  | 8,4  | 8,4  | 18,16 | 583,64 | 70,86  |
| 2019/06/14 | CH2206 | Male | Three y/o | Control | Control | Feed Day | No | 02:50 | 02:00 - 02:59 | Early Morning | 37,7 | 72  | 67,2 | 67,2 | 18,85 | 569,20 | 142,02 |
| 2019/06/14 | CH2205 | Male | Three y/o | Control | Control | Feed Day | No | 02:55 | 02:00 - 02:59 | Early Morning | 37,3 | 66  | 7,0  | 7,0  | 18,46 | 562,34 | 64,72  |
| 2019/06/14 | CH2206 | Male | Three y/o | Control | Control | Feed Day | No | 02:55 | 02:00 - 02:59 | Early Morning | 37,7 | 103 | 67,0 | 67,0 | 18,85 | 596,00 | 141,92 |
| 2019/06/14 | CH2205 | Male | Three y/o | Control | Control | Feed Day | No | 03:00 | 03:00 - 03:59 | Early Morning | 37,3 | 91  | 6,0  | 6,0  | 18,46 | 586,98 | 59,53  |
| 2019/06/14 | CH2206 | Male | Three y/o | Control | Control | Feed Day | No | 03:00 | 03:00 - 03:59 | Early Morning | 37,7 | 48  | 65,6 | 65,6 | 18,85 | 536,04 | 141,19 |
| 2019/06/14 | CH2205 | Male | Three y/o | Control | Control | Feed Day | No | 03:05 | 03:00 - 03:59 | Early Morning | 37,3 | 82  | 11,2 | 11,2 | 18,46 | 579,19 | 80,59  |
| 2019/06/14 | CH2206 | Male | Three y/o | Control | Control | Feed Day | No | 03:05 | 03:00 - 03:59 | Early Morning | 37,5 | 48  | 62,0 | 62,0 | 18,65 | 536,04 | 139,23 |
| 2019/06/14 | CH2205 | Male | Three y/o | Control | Control | Feed Day | No | 03:10 | 03:00 - 03:59 | Early Morning | 37,3 | 56  | 15,6 | 15,6 | 18,46 | 549,01 | 91,85  |
| 2019/06/14 | CH2206 | Male | Three y/o | Control | Control | Feed Day | No | 03:10 | 03:00 - 03:59 | Early Morning | 37,5 | 48  | 66,4 | 66,4 | 18,65 | 536,04 | 141,61 |
| 2019/06/14 | CH2205 | Male | Three y/o | Control | Control | Feed Day | No | 03:15 | 03:00 - 03:59 | Early Morning | 37,3 | 75  | 5,8  | 5,8  | 18,46 | 572,36 | 58,39  |
| 2019/06/14 | CH2206 | Male | Three y/o | Control | Control | Feed Day | No | 03:15 | 03:00 - 03:59 | Early Morning | 37,5 | 55  | 70,8 | 70,8 | 18,65 | 547,52 | 143,83 |
| 2019/06/14 | CH2205 | Male | Three y/o | Control | Control | Feed Day | No | 03:20 | 03:00 - 03:59 | Early Morning | 37,3 | 61  | 9,0  | 9,0  | 18,46 | 556,01 | 73,19  |
| 2019/06/14 | CH2206 | Male | Three y/o | Control | Control | Feed Day | No | 03:20 | 03:00 - 03:59 | Early Morning | 37,5 | 50  | 60,2 | 60,2 | 18,65 | 539,52 | 138,21 |
| 2019/06/14 | CH2205 | Male | Three y/o | Control | Control | Feed Day | No | 03:25 | 03:00 - 03:59 | Early Morning | 37,3 | 63  | 4,8  | 4,8  | 18,46 | 558,62 | 52,04  |
| 2019/06/14 | CH2206 | Male | Three y/o | Control | Control | Feed Day | No | 03:25 | 03:00 - 03:59 | Early Morning | 37,4 | 51  | 59,2 | 59,2 | 18,55 | 541,20 | 137,63 |
| 2019/06/14 | CH2205 | Male | Three y/o | Control | Control | Feed Day | No | 03:30 | 03:00 - 03:59 | Early Morning | 37,3 | 74  | 8,4  | 8,4  | 18,46 | 571,33 | 70,86  |
| 2019/06/14 | CH2206 | Male | Three y/o | Control | Control | Feed Day | No | 03:30 | 03:00 - 03:59 | Early Morning | 37,3 | 82  | 58,4 | 58,4 | 18,46 | 579,19 | 137,16 |
| 2019/06/14 | CH2205 | Male | Three y/o | Control | Control | Feed Day | No | 03:35 | 03:00 - 03:59 | Early Morning | 37,3 | 94  | 7,8  | 7,8  | 18,46 | 589,37 | 68,36  |
| 2019/06/14 | CH2206 | Male | Three y/o | Control | Control | Feed Day | No | 03:35 | 03:00 - 03:59 | Early Morning | 37,2 | 81  | 57,0 | 57,0 | 18,36 | 578,26 | 136,32 |
| 2019/06/14 | CH2205 | Male | Three y/o | Control | Control | Feed Day | No | 03:40 | 03:00 - 03:59 | Early Morning | 37,3 |     | 12,2 | 12,2 | 18,46 |        | 83,49  |
| 2019/06/14 | CH2206 | Male | Three y/o | Control | Control | Feed Day | No | 03:40 | 03:00 - 03:59 | Early Morning | 37,1 | 73  | 54,0 | 54,0 | 18,26 | 570,27 | 134,45 |
| 2019/06/14 | CH2205 | Male | Three y/o | Control | Control | Feed Day | No | 03:45 | 03:00 - 03:59 | Early Morning | 37,3 | 51  | 18,8 | 18,8 | 18,46 | 541,20 | 98,20  |
| 2019/06/14 | CH2206 | Male | Three y/o | Control | Control | Feed Day | No | 03:45 | 03:00 - 03:59 | Early Morning | 37,1 | 49  | 54,6 | 54,6 | 18,26 | 537,80 | 134,83 |
| 2019/06/14 | CH2205 | Male | Three y/o | Control | Control | Feed Day | No | 03:50 | 03:00 - 03:59 | Early Morning | 37,4 |     | 8,0  | 8,0  | 18,55 |        | 69,22  |



|            |        |      |           |         |         |          |    |       |               |               |      |     |       |       |       |        |        |
|------------|--------|------|-----------|---------|---------|----------|----|-------|---------------|---------------|------|-----|-------|-------|-------|--------|--------|
| 2019/06/14 | CH2206 | Male | Three y/o | Control | Control | Feed Day | No | 03:50 | 03:00 - 03:59 | Early Morning | 37,2 | 148 | 137,8 | 137,8 | 18,36 | 620,97 | 167,05 |
| 2019/06/14 | CH2205 | Male | Three y/o | Control | Control | Feed Day | No | 03:55 | 03:00 - 03:59 | Early Morning | 37,5 | 120 | 23,2  | 23,2  | 18,65 | 606,78 | 105,39 |
| 2019/06/14 | CH2206 | Male | Three y/o | Control | Control | Feed Day | No | 03:55 | 03:00 - 03:59 | Early Morning | 37,2 |     | 210,2 | 210,2 | 18,36 |        | 181,87 |
| 2019/06/14 | CH2205 | Male | Three y/o | Control | Control | Feed Day | No | 04:00 | 04:00 - 04:59 | Morning       | 37,6 | 138 | 35,6  | 35,6  | 18,75 | 616,31 | 120,08 |
| 2019/06/14 | CH2206 | Male | Three y/o | Control | Control | Feed Day | No | 04:00 | 04:00 - 04:59 | Morning       | 37,3 |     | 59,8  | 59,8  | 18,46 |        | 137,98 |
| 2019/06/14 | CH2205 | Male | Three y/o | Control | Control | Feed Day | No | 04:05 | 04:00 - 04:59 | Morning       | 37,6 | 191 | 42,0  | 42,0  | 18,75 | 637,33 | 125,77 |
| 2019/06/14 | CH2206 | Male | Three y/o | Control | Control | Feed Day | No | 04:05 | 04:00 - 04:59 | Morning       | 37,3 | 121 | 192,0 | 192,0 | 18,46 | 607,35 | 178,68 |
| 2019/06/14 | CH2205 | Male | Three y/o | Control | Control | Feed Day | No | 04:10 | 04:00 - 04:59 | Morning       | 37,7 | 48  | 46,2  | 46,2  | 18,85 | 536,04 | 129,06 |
| 2019/06/14 | CH2206 | Male | Three y/o | Control | Control | Feed Day | No | 04:10 | 04:00 - 04:59 | Morning       | 37,4 | 105 | 46,8  | 46,8  | 18,55 | 597,38 | 129,50 |
| 2019/06/14 | CH2205 | Male | Three y/o | Control | Control | Feed Day | No | 04:15 | 04:00 - 04:59 | Morning       | 37,9 | 121 | 801,6 | 801,6 | 19,05 | 607,35 | 229,40 |
| 2019/06/14 | CH2206 | Male | Three y/o | Control | Control | Feed Day | No | 04:15 | 04:00 - 04:59 | Morning       | 37,7 | 182 | 22,0  | 22,0  | 18,85 | 634,31 | 103,57 |
| 2019/06/14 | CH2205 | Male | Three y/o | Control | Control | Feed Day | No | 04:20 | 04:00 - 04:59 | Morning       | 37,7 | 87  | 36,2  | 36,2  | 18,85 | 583,64 | 120,65 |
| 2019/06/14 | CH2206 | Male | Three y/o | Control | Control | Feed Day | No | 04:20 | 04:00 - 04:59 | Morning       | 37,5 | 135 | 446,2 | 446,2 | 18,65 | 614,84 | 208,50 |
| 2019/06/14 | CH2205 | Male | Three y/o | Control | Control | Feed Day | No | 04:25 | 04:00 - 04:59 | Morning       | 37,9 | 121 | 18,2  | 18,2  | 19,05 | 607,35 | 97,10  |
| 2019/06/14 | CH2206 | Male | Three y/o | Control | Control | Feed Day | No | 04:25 | 04:00 - 04:59 | Morning       | 37,8 |     | 139,6 | 139,6 | 18,95 |        | 167,50 |
| 2019/06/14 | CH2205 | Male | Three y/o | Control | Control | Feed Day | No | 04:30 | 04:00 - 04:59 | Morning       | 37,6 |     | 19,2  | 19,2  | 18,75 |        | 98,92  |
| 2019/06/14 | CH2206 | Male | Three y/o | Control | Control | Feed Day | No | 04:30 | 04:00 - 04:59 | Morning       | 37,5 | 99  | 62,8  | 62,8  | 18,65 | 593,14 | 139,67 |
| 2019/06/14 | CH2205 | Male | Three y/o | Control | Control | Feed Day | No | 04:35 | 04:00 - 04:59 | Morning       | 37,5 | 67  | 24,6  | 24,6  | 18,65 | 563,53 | 107,39 |
| 2019/06/14 | CH2206 | Male | Three y/o | Control | Control | Feed Day | No | 04:35 | 04:00 - 04:59 | Morning       | 37,4 | 101 | 70,6  | 70,6  | 18,55 | 594,59 | 143,73 |
| 2019/06/14 | CH2205 | Male | Three y/o | Control | Control | Feed Day | No | 04:40 | 04:00 - 04:59 | Morning       | 37,5 | 53  | 5,4   | 5,4   | 18,65 | 544,43 | 55,99  |
| 2019/06/14 | CH2206 | Male | Three y/o | Control | Control | Feed Day | No | 04:40 | 04:00 - 04:59 | Morning       | 37,4 | 123 | 99,8  | 99,8  | 18,55 | 608,49 | 155,77 |
| 2019/06/14 | CH2205 | Male | Three y/o | Control | Control | Feed Day | No | 04:45 | 04:00 - 04:59 | Morning       | 37,5 | 70  | 10,2  | 10,2  | 18,65 | 566,99 | 77,43  |
| 2019/06/14 | CH2206 | Male | Three y/o | Control | Control | Feed Day | No | 04:45 | 04:00 - 04:59 | Morning       | 37,4 | 94  | 55,2  | 55,2  | 18,55 | 589,37 | 135,21 |
| 2019/06/14 | CH2205 | Male | Three y/o | Control | Control | Feed Day | No | 04:50 | 04:00 - 04:59 | Morning       | 37,5 |     | 40,6  | 40,6  | 18,65 |        | 124,60 |
| 2019/06/14 | CH2206 | Male | Three y/o | Control | Control | Feed Day | No | 04:50 | 04:00 - 04:59 | Morning       | 37,0 | 48  | 10,4  | 10,4  | 18,16 | 536,04 | 78,08  |
| 2019/06/14 | CH2205 | Male | Three y/o | Control | Control | Feed Day | No | 04:55 | 04:00 - 04:59 | Morning       | 37,4 |     | 4,2   | 4,2   | 18,55 |        | 47,57  |
| 2019/06/14 | CH2206 | Male | Three y/o | Control | Control | Feed Day | No | 04:55 | 04:00 - 04:59 | Morning       | 36,5 | 67  | 13,4  | 13,4  | 17,67 | 563,53 | 86,68  |
| 2019/06/14 | CH2205 | Male | Three y/o | Control | Control | Feed Day | No | 05:00 | 05:00 - 05:59 | Morning       | 37,3 |     | 10,0  | 10,0  | 18,46 |        | 76,76  |
| 2019/06/14 | CH2206 | Male | Three y/o | Control | Control | Feed Day | No | 05:00 | 05:00 - 05:59 | Morning       | 36,4 | 50  | 33,0  | 33,0  | 17,57 | 539,52 | 117,47 |
| 2019/06/14 | CH2205 | Male | Three y/o | Control | Control | Feed Day | No | 05:05 | 05:00 - 05:59 | Morning       | 37,3 |     | 4,0   | 4,0   | 18,46 |        | 45,94  |
| 2019/06/14 | CH2206 | Male | Three y/o | Control | Control | Feed Day | No | 05:05 | 05:00 - 05:59 | Morning       | 36,5 | 72  | 14,4  | 14,4  | 17,67 | 569,20 | 89,12  |
| 2019/06/14 | CH2205 | Male | Three y/o | Control | Control | Feed Day | No | 05:10 | 05:00 - 05:59 | Morning       | 37,2 | 41  | 7,2   | 7,2   | 18,36 | 522,29 | 65,66  |
| 2019/06/14 | CH2206 | Male | Three y/o | Control | Control | Feed Day | No | 05:10 | 05:00 - 05:59 | Morning       | 36,6 | 48  | 16,8  | 16,8  | 17,77 | 536,04 | 94,37  |
| 2019/06/14 | CH2205 | Male | Three y/o | Control | Control | Feed Day | No | 05:15 | 05:00 - 05:59 | Morning       | 37,1 | 53  | 10,2  | 10,2  | 18,26 | 544,43 | 77,43  |
| 2019/06/14 | CH2206 | Male | Three y/o | Control | Control | Feed Day | No | 05:15 | 05:00 - 05:59 | Morning       | 36,8 | 43  | 21,8  | 21,8  | 17,96 | 526,50 | 103,26 |
| 2019/06/14 | CH2205 | Male | Three y/o | Control | Control | Feed Day | No | 05:20 | 05:00 - 05:59 | Morning       | 37,1 | 44  | 9,0   | 9,0   | 18,26 | 528,51 | 73,19  |
| 2019/06/14 | CH2206 | Male | Three y/o | Control | Control | Feed Day | No | 05:20 | 05:00 - 05:59 | Morning       | 37,3 |     | 15,6  | 15,6  | 18,46 |        | 91,85  |
| 2019/06/14 | CH2205 | Male | Three y/o | Control | Control | Feed Day | No | 05:25 | 05:00 - 05:59 | Morning       | 37,0 | 72  | 12,8  | 12,8  | 18,16 | 569,20 | 85,12  |
| 2019/06/14 | CH2206 | Male | Three y/o | Control | Control | Feed Day | No | 05:25 | 05:00 - 05:59 | Morning       | 37,3 | 60  | 20,6  | 20,6  | 18,46 | 554,67 | 101,32 |
| 2019/06/14 | CH2205 | Male | Three y/o | Control | Control | Feed Day | No | 05:30 | 05:00 - 05:59 | Morning       | 37,0 | 60  | 9,2   | 9,2   | 18,16 | 554,67 | 73,94  |
| 2019/06/14 | CH2206 | Male | Three y/o | Control | Control | Feed Day | No | 05:30 | 05:00 - 05:59 | Morning       | 37,3 | 45  | 19,2  | 19,2  | 18,46 | 530,47 | 98,92  |
| 2019/06/14 | CH2205 | Male | Three y/o | Control | Control | Feed Day | No | 05:35 | 05:00 - 05:59 | Morning       | 37,0 | 47  | 3,6   | 3,6   | 18,16 | 534,23 | 42,42  |
| 2019/06/14 | CH2206 | Male | Three y/o | Control | Control | Feed Day | No | 05:35 | 05:00 - 05:59 | Morning       | 37,3 | 46  | 23,6  | 23,6  | 18,46 | 532,38 | 105,97 |
| 2019/06/14 | CH2205 | Male | Three y/o | Control | Control | Feed Day | No | 05:40 | 05:00 - 05:59 | Morning       | 37,0 | 42  | 9,6   | 9,6   | 18,16 | 524,42 | 75,37  |
| 2019/06/14 | CH2206 | Male | Three y/o | Control | Control | Feed Day | No | 05:40 | 05:00 - 05:59 | Morning       | 37,3 |     | 32,8  | 32,8  | 18,46 |        | 117,26 |
| 2019/06/14 | CH2205 | Male | Three y/o | Control | Control | Feed Day | No | 05:45 | 05:00 - 05:59 | Morning       | 37,0 | 68  | 5,4   | 5,4   | 18,16 | 564,71 | 55,99  |
| 2019/06/14 | CH2206 | Male | Three y/o | Control | Control | Feed Day | No | 05:45 | 05:00 - 05:59 | Morning       | 37,3 | 46  | 29,4  | 29,4  | 18,46 | 532,38 | 113,50 |
| 2019/06/14 | CH2205 | Male | Three y/o | Control | Control | Feed Day | No | 05:50 | 05:00 - 05:59 | Morning       | 36,8 | 45  | 20,0  | 20,0  | 17,96 | 530,47 | 100,31 |
| 2019/06/14 | CH2206 | Male | Three y/o | Control | Control | Feed Day | No | 05:50 | 05:00 - 05:59 | Morning       | 37,2 | 75  | 23,8  | 23,8  | 18,36 | 572,36 | 106,26 |
| 2019/06/14 | CH2205 | Male | Three y/o | Control | Control | Feed Day | No | 05:55 | 05:00 - 05:59 | Morning       | 37,0 | 38  | 9,8   | 9,8   | 18,16 | 515,48 | 76,07  |
| 2019/06/14 | CH2206 | Male | Three y/o | Control | Control | Feed Day | No | 05:55 | 05:00 - 05:59 | Morning       | 37,2 | 47  | 13,6  | 13,6  | 18,36 | 534,23 | 87,18  |
| 2019/06/14 | CH2205 | Male | Three y/o | Control | Control | Feed Day | No | 06:00 | 06:00 - 06:59 | Morning       | 36,8 | 60  | 8,4   | 8,4   | 17,96 | 554,67 | 70,86  |
| 2019/06/14 | CH2206 | Male | Three y/o | Control | Control | Feed Day | No | 06:00 | 06:00 - 06:59 | Morning       | 37,1 | 49  | 6,6   | 6,6   | 18,26 | 537,80 | 62,73  |
| 2019/06/14 | CH2205 | Male | Three y/o | Control | Control | Feed Day | No | 06:05 | 06:00 - 06:59 | Morning       | 37,0 | 46  | 3,4   | 3,4   | 18,16 | 532,38 | 40,51  |
| 2019/06/14 | CH2206 | Male | Three y/o | Control | Control | Feed Day | No | 06:05 | 06:00 - 06:59 | Morning       | 37,1 | 45  | 4,6   | 4,6   | 18,26 | 530,47 | 50,61  |
| 2019/06/14 | CH2205 | Male | Three y/o | Control | Control | Feed Day | No | 06:10 | 06:00 - 06:59 | Morning       | 36,8 | 46  | 9,8   | 9,8   | 17,96 | 532,38 | 76,07  |
| 2019/06/14 | CH2206 | Male | Three y/o | Control | Control | Feed Day | No | 06:10 | 06:00 - 06:59 | Morning       | 37,1 | 58  | 6,6   | 6,6   | 18,26 | 551,90 | 62,73  |
| 2019/06/14 | CH2205 | Male | Three y/o | Control | Control | Feed Day | No | 06:15 | 06:00 - 06:59 | Morning       | 36,8 | 42  | 6,6   | 6,6   | 17,96 | 524,42 | 62,73  |
| 2019/06/14 | CH2206 | Male | Three y/o | Control | Control | Feed Day | No | 06:15 | 06:00 - 06:59 | Morning       | 37,1 | 47  | 39,0  | 39,0  | 18,26 | 534,23 | 123,22 |
| 2019/06/14 | CH2205 | Male | Three y/o | Control | Control | Feed Day | No | 06:20 | 06:00 - 06:59 | Morning       | 36,8 | 44  | 6,4   | 6,4   | 17,96 | 528,51 | 61,70  |
| 2019/06/14 | CH2206 | Male | Three y/o | Control | Control | Feed Day | No | 06:20 | 06:00 - 06:59 | Morning       | 37,2 | 86  | 58,4  | 58,4  | 18,36 | 582,77 | 137,16 |
| 2019/06/14 | CH2205 | Male | Three y/o | Control | Control | Feed Day | No | 06:25 | 06:00 - 06:59 | Morning       | 36,8 | 106 | 6,4   | 6,4   | 17,96 | 598,06 | 61,70  |
| 2019/06/14 | CH2206 | Male | Three y/o | Control | Control | Feed Day | No | 06:25 | 06:00 - 06:59 | Morning       | 37,2 | 77  | 59,8  | 59,8  | 18,36 | 574,39 | 137,98 |
| 2019/06/14 | CH2205 | Male | Three y/o | Control | Control | Feed Day | No | 06:30 | 06:00 - 06:59 | Morning       | 36,8 | 43  | 7,8   | 7,8   | 17,96 | 526,50 | 68,36  |
| 2019/06/14 | CH2206 | Male | Three y/o | Control | Control | Feed Day | No | 06:30 | 06:00 - 06:59 | Morning       | 37,3 | 74  | 71,6  | 71,6  | 18,46 | 571,33 | 144,22 |
| 2019/06/14 | CH2205 | Male | Three y/o | Control | Control | Feed Day | No | 06:35 | 06:00 - 06:59 | Morning       | 36,8 | 76  | 8,2   | 8,2   | 17,96 | 573,39 | 70,05  |
| 2019/06/14 | CH2206 | Male | Three y/o | Control | Control | Feed Day | No | 06:35 | 06:00 - 06:59 | Morning       | 37,3 | 51  | 63,6  | 63,6  | 18,46 | 541,20 | 140,11 |
| 2019/06/14 | CH2205 | Male | Three y/o | Control | Control | Feed Day | No | 06:40 | 06:00 - 06:59 | Morning       | 36,9 | 44  | 12,0  | 12,0  | 18,06 | 528,51 | 82,93  |
| 2019/06/14 | CH2206 | Male | Three y/o | Control | Control | Feed Day | No | 06:40 | 06:00 - 06:59 | Morning       | 37,3 | 45  | 64,0  | 64,0  | 18,46 | 530,47 | 140,33 |
| 2019/06/14 | CH2205 | Male | Three y/o | Control | Control | Feed Day | No | 06:45 | 06:00 - 06:59 | Morning       | 37,0 | 61  | 19,2  | 19,2  | 18,16 | 556,01 | 98,92  |



|            |        |      |           |         |         |          |    |       |               |              |      |     |       |       |       |        |        |
|------------|--------|------|-----------|---------|---------|----------|----|-------|---------------|--------------|------|-----|-------|-------|-------|--------|--------|
| 2019/06/14 | CH2206 | Male | Three y/o | Control | Control | Feed Day | No | 06:45 | 06:00 - 06:59 | Morning      | 37,3 | 55  | 61,6  | 61,6  | 18,46 | 547,52 | 139,00 |
| 2019/06/14 | CH2205 | Male | Three y/o | Control | Control | Feed Day | No | 06:50 | 06:00 - 06:59 | Morning      | 37,1 | 124 | 34,6  | 34,6  | 18,26 | 609,04 | 119,10 |
| 2019/06/14 | CH2206 | Male | Three y/o | Control | Control | Feed Day | No | 06:50 | 06:00 - 06:59 | Morning      | 37,3 | 145 | 63,6  | 63,6  | 18,46 | 619,62 | 140,11 |
| 2019/06/14 | CH2205 | Male | Three y/o | Control | Control | Feed Day | No | 06:55 | 06:00 - 06:59 | Morning      | 37,1 | 90  | 123,6 | 123,6 | 18,26 | 586,16 | 163,24 |
| 2019/06/14 | CH2206 | Male | Three y/o | Control | Control | Feed Day | No | 06:55 | 06:00 - 06:59 | Morning      | 37,3 | 131 | 307,4 | 307,4 | 18,46 | 612,80 | 195,28 |
| 2019/06/14 | CH2205 | Male | Three y/o | Control | Control | Feed Day | No | 07:00 | 07:00 - 07:59 | Morning      | 37,2 | 60  | 265,6 | 265,6 | 18,36 | 554,67 | 190,12 |
| 2019/06/14 | CH2206 | Male | Three y/o | Control | Control | Feed Day | No | 07:00 | 07:00 - 07:59 | Morning      | 37,4 | 126 | 56,4  | 56,4  | 18,55 | 610,14 | 135,95 |
| 2019/06/14 | CH2205 | Male | Three y/o | Control | Control | Feed Day | No | 07:05 | 07:00 - 07:59 | Morning      | 37,4 | 114 | 89,4  | 89,4  | 18,55 | 603,20 | 151,94 |
| 2019/06/14 | CH2206 | Male | Three y/o | Control | Control | Feed Day | No | 07:05 | 07:00 - 07:59 | Morning      | 37,5 | 107 | 192,2 | 192,2 | 18,65 | 598,73 | 178,72 |
| 2019/06/14 | CH2205 | Male | Three y/o | Control | Control | Feed Day | No | 07:10 | 07:00 - 07:59 | Morning      | 37,4 | 138 | 244,2 | 244,2 | 18,55 | 616,31 | 187,15 |
| 2019/06/14 | CH2206 | Male | Three y/o | Control | Control | Feed Day | No | 07:10 | 07:00 - 07:59 | Morning      | 37,7 | 108 | 74,0  | 74,0  | 18,85 | 599,39 | 145,37 |
| 2019/06/14 | CH2205 | Male | Three y/o | Control | Control | Feed Day | No | 07:15 | 07:00 - 07:59 | Morning      | 37,6 |     | 204,2 | 204,2 | 18,75 |        | 180,85 |
| 2019/06/14 | CH2206 | Male | Three y/o | Control | Control | Feed Day | No | 07:15 | 07:00 - 07:59 | Morning      | 37,7 | 108 | 96,8  | 96,8  | 18,85 | 599,39 | 154,71 |
| 2019/06/14 | CH2205 | Male | Three y/o | Control | Control | Feed Day | No | 07:20 | 07:00 - 07:59 | Morning      | 37,7 | 152 | 211,6 | 211,6 | 18,85 | 622,73 | 182,10 |
| 2019/06/14 | CH2206 | Male | Three y/o | Control | Control | Feed Day | No | 07:20 | 07:00 - 07:59 | Morning      | 37,8 |     | 162,0 | 162,0 | 18,95 |        | 172,72 |
| 2019/06/14 | CH2205 | Male | Three y/o | Control | Control | Feed Day | No | 07:25 | 07:00 - 07:59 | Morning      | 37,7 | 129 | 74,4  | 74,4  | 18,85 | 611,75 | 145,55 |
| 2019/06/14 | CH2206 | Male | Three y/o | Control | Control | Feed Day | No | 07:25 | 07:00 - 07:59 | Morning      | 37,8 | 123 | 116,4 | 116,4 | 18,95 | 608,49 | 161,14 |
| 2019/06/14 | CH2205 | Male | Three y/o | Control | Control | Feed Day | No | 07:30 | 07:00 - 07:59 | Morning      | 37,7 | 64  | 172,4 | 172,4 | 18,85 | 559,88 | 174,90 |
| 2019/06/14 | CH2206 | Male | Three y/o | Control | Control | Feed Day | No | 07:30 | 07:00 - 07:59 | Morning      | 37,8 | 134 | 49,4  | 49,4  | 18,95 | 614,33 | 131,37 |
| 2019/06/14 | CH2205 | Male | Three y/o | Control | Control | Feed Day | No | 07:35 | 07:00 - 07:59 | Morning      | 37,7 | 160 | 135,8 | 135,8 | 18,85 | 626,07 | 166,53 |
| 2019/06/14 | CH2206 | Male | Three y/o | Control | Control | Feed Day | No | 07:35 | 07:00 - 07:59 | Morning      | 37,8 | 75  | 38,4  | 38,4  | 18,95 | 572,36 | 122,68 |
| 2019/06/14 | CH2205 | Male | Three y/o | Control | Control | Feed Day | No | 07:40 | 07:00 - 07:59 | Morning      | 37,7 | 117 | 66,6  | 66,6  | 18,85 | 605,02 | 141,71 |
| 2019/06/14 | CH2206 | Male | Three y/o | Control | Control | Feed Day | No | 07:40 | 07:00 - 07:59 | Morning      | 37,8 | 117 | 151,0 | 151,0 | 18,95 | 605,02 | 170,25 |
| 2019/06/14 | CH2205 | Male | Three y/o | Control | Control | Feed Day | No | 07:45 | 07:00 - 07:59 | Morning      | 37,7 | 110 | 70,6  | 70,6  | 18,85 | 600,69 | 143,73 |
| 2019/06/14 | CH2206 | Male | Three y/o | Control | Control | Feed Day | No | 07:45 | 07:00 - 07:59 | Morning      | 37,8 | 34  | 182,6 | 182,6 | 18,95 | 505,29 | 176,92 |
| 2019/06/14 | CH2205 | Male | Three y/o | Control | Control | Feed Day | No | 07:50 | 07:00 - 07:59 | Morning      | 37,7 | 105 | 155,6 | 155,6 | 18,85 | 597,38 | 171,30 |
| 2019/06/14 | CH2206 | Male | Three y/o | Control | Control | Feed Day | No | 07:50 | 07:00 - 07:59 | Morning      | 37,8 | 119 | 139,4 | 139,4 | 18,95 | 606,20 | 167,45 |
| 2019/06/14 | CH2205 | Male | Three y/o | Control | Control | Feed Day | No | 07:55 | 07:00 - 07:59 | Morning      | 37,6 | 197 | 119,2 | 119,2 | 18,75 | 639,25 | 161,97 |
| 2019/06/14 | CH2206 | Male | Three y/o | Control | Control | Feed Day | No | 07:55 | 07:00 - 07:59 | Morning      | 37,8 | 185 | 107,6 | 107,6 | 18,95 | 635,34 | 158,40 |
| 2019/06/14 | CH2205 | Male | Three y/o | Control | Control | Feed Day | No | 08:00 | 08:00 - 08:59 | Late Morning | 37,9 | 152 | 42,0  | 42,0  | 19,05 | 622,73 | 125,77 |
| 2019/06/14 | CH2206 | Male | Three y/o | Control | Control | Feed Day | No | 08:00 | 08:00 - 08:59 | Late Morning | 38,0 | 97  | 86,4  | 86,4  | 19,15 | 591,66 | 150,75 |
| 2019/06/14 | CH2205 | Male | Three y/o | Control | Control | Feed Day | No | 08:05 | 08:00 - 08:59 | Late Morning | 38,0 | 86  | 62,8  | 62,8  | 19,15 | 582,77 | 139,67 |
| 2019/06/14 | CH2206 | Male | Three y/o | Control | Control | Feed Day | No | 08:05 | 08:00 - 08:59 | Late Morning | 37,9 | 182 | 63,4  | 63,4  | 19,05 | 634,31 | 140,00 |
| 2019/06/14 | CH2205 | Male | Three y/o | Control | Control | Feed Day | No | 08:10 | 08:00 - 08:59 | Late Morning | 37,9 |     | 30,0  | 30,0  | 19,05 |        | 114,20 |
| 2019/06/14 | CH2206 | Male | Three y/o | Control | Control | Feed Day | No | 08:10 | 08:00 - 08:59 | Late Morning | 37,9 | 98  | 30,8  | 30,8  | 19,05 | 592,41 | 115,10 |
| 2019/06/14 | CH2205 | Male | Three y/o | Control | Control | Feed Day | No | 08:15 | 08:00 - 08:59 | Late Morning | 38,0 | 67  | 128,0 | 128,0 | 19,15 | 563,53 | 164,46 |
| 2019/06/14 | CH2206 | Male | Three y/o | Control | Control | Feed Day | No | 08:15 | 08:00 - 08:59 | Late Morning | 37,9 | 90  | 92,2  | 92,2  | 19,05 | 586,16 | 153,01 |
| 2019/06/14 | CH2205 | Male | Three y/o | Control | Control | Feed Day | No | 08:20 | 08:00 - 08:59 | Late Morning | 38,0 |     | 330,8 | 330,8 | 19,15 |        | 197,88 |
| 2019/06/14 | CH2206 | Male | Three y/o | Control | Control | Feed Day | No | 08:20 | 08:00 - 08:59 | Late Morning | 37,8 | 115 | 109,6 | 109,6 | 18,95 | 603,82 | 159,04 |
| 2019/06/14 | CH2205 | Male | Three y/o | Control | Control | Feed Day | No | 08:25 | 08:00 - 08:59 | Late Morning | 38,0 |     | 175,4 | 175,4 | 19,15 |        | 175,51 |
| 2019/06/14 | CH2206 | Male | Three y/o | Control | Control | Feed Day | No | 08:25 | 08:00 - 08:59 | Late Morning | 37,9 | 129 | 155,8 | 155,8 | 19,05 | 611,75 | 171,35 |
| 2019/06/14 | CH2205 | Male | Three y/o | Control | Control | Feed Day | No | 08:30 | 08:00 - 08:59 | Late Morning | 38,0 | 105 | 142,8 | 142,8 | 19,15 | 597,38 | 168,29 |
| 2019/06/14 | CH2206 | Male | Three y/o | Control | Control | Feed Day | No | 08:30 | 08:00 - 08:59 | Late Morning | 37,8 | 106 | 118,6 | 118,6 | 18,95 | 598,06 | 161,80 |
| 2019/06/14 | CH2205 | Male | Three y/o | Control | Control | Feed Day | No | 08:35 | 08:00 - 08:59 | Late Morning | 38,0 |     | 285,0 | 285,0 | 19,15 |        | 192,61 |
| 2019/06/14 | CH2206 | Male | Three y/o | Control | Control | Feed Day | No | 08:35 | 08:00 - 08:59 | Late Morning | 37,8 | 103 | 126,6 | 126,6 | 18,95 | 596,00 | 164,08 |
| 2019/06/14 | CH2205 | Male | Three y/o | Control | Control | Feed Day | No | 08:40 | 08:00 - 08:59 | Late Morning | 37,9 | 182 | 34,8  | 34,8  | 19,05 | 634,31 | 119,29 |
| 2019/06/14 | CH2206 | Male | Three y/o | Control | Control | Feed Day | No | 08:40 | 08:00 - 08:59 | Late Morning | 37,8 | 52  | 52,8  | 52,8  | 18,95 | 542,83 | 133,67 |
| 2019/06/14 | CH2205 | Male | Three y/o | Control | Control | Feed Day | No | 08:45 | 08:00 - 08:59 | Late Morning | 37,9 |     | 17,6  | 17,6  | 19,05 |        | 95,95  |
| 2019/06/14 | CH2206 | Male | Three y/o | Control | Control | Feed Day | No | 08:45 | 08:00 - 08:59 | Late Morning | 37,5 | 97  | 181,4 | 181,4 | 18,65 | 591,66 | 176,69 |
| 2019/06/14 | CH2205 | Male | Three y/o | Control | Control | Feed Day | No | 08:50 | 08:00 - 08:59 | Late Morning | 37,8 | 107 | 21,8  | 21,8  | 18,95 | 598,73 | 103,26 |
| 2019/06/14 | CH2206 | Male | Three y/o | Control | Control | Feed Day | No | 08:50 | 08:00 - 08:59 | Late Morning | 37,7 | 78  | 66,4  | 66,4  | 18,85 | 575,38 | 141,61 |
| 2019/06/14 | CH2205 | Male | Three y/o | Control | Control | Feed Day | No | 08:55 | 08:00 - 08:59 | Late Morning | 37,9 | 92  | 186,4 | 186,4 | 19,05 | 587,78 | 177,64 |
| 2019/06/14 | CH2206 | Male | Three y/o | Control | Control | Feed Day | No | 08:55 | 08:00 - 08:59 | Late Morning | 37,5 |     | 137,6 | 137,6 | 18,65 |        | 166,99 |
| 2019/06/14 | CH2205 | Male | Three y/o | Control | Control | Feed Day | No | 09:00 | 09:00 - 09:59 | Late Morning | 37,9 | 103 | 125,4 | 125,4 | 19,05 | 596,00 | 163,75 |
| 2019/06/14 | CH2206 | Male | Three y/o | Control | Control | Feed Day | No | 09:00 | 09:00 - 09:59 | Late Morning | 37,7 | 129 | 234,4 | 234,4 | 18,85 | 611,75 | 185,71 |
| 2019/06/14 | CH2205 | Male | Three y/o | Control | Control | Feed Day | No | 09:05 | 09:00 - 09:59 | Late Morning | 37,9 | 50  | 363,2 | 363,2 | 19,05 | 539,52 | 201,19 |
| 2019/06/14 | CH2206 | Male | Three y/o | Control | Control | Feed Day | No | 09:05 | 09:00 - 09:59 | Late Morning | 37,5 | 85  | 26,0  | 26,0  | 18,65 | 581,90 | 109,29 |
| 2019/06/14 | CH2205 | Male | Three y/o | Control | Control | Feed Day | No | 09:10 | 09:00 - 09:59 | Late Morning | 37,9 | 126 | 175,2 | 175,2 | 19,05 | 610,14 | 175,47 |
| 2019/06/14 | CH2206 | Male | Three y/o | Control | Control | Feed Day | No | 09:10 | 09:00 - 09:59 | Late Morning | 37,8 | 83  | 47,0  | 47,0  | 18,95 | 580,11 | 129,65 |
| 2019/06/14 | CH2205 | Male | Three y/o | Control | Control | Feed Day | No | 09:15 | 09:00 - 09:59 | Late Morning | 38,0 | 80  | 51,0  | 51,0  | 19,15 | 577,31 | 132,47 |
| 2019/06/14 | CH2206 | Male | Three y/o | Control | Control | Feed Day | No | 09:15 | 09:00 - 09:59 | Late Morning | 37,4 | 70  | 57,0  | 57,0  | 18,55 | 566,99 | 136,32 |
| 2019/06/14 | CH2205 | Male | Three y/o | Control | Control | Feed Day | No | 09:20 | 09:00 - 09:59 | Late Morning | 37,9 | 73  | 15,4  | 15,4  | 19,05 | 570,27 | 91,41  |
| 2019/06/14 | CH2206 | Male | Three y/o | Control | Control | Feed Day | No | 09:20 | 09:00 - 09:59 | Late Morning | 37,3 | 96  | 54,4  | 54,4  | 18,46 | 590,91 | 134,70 |
| 2019/06/14 | CH2205 | Male | Three y/o | Control | Control | Feed Day | No | 09:25 | 09:00 - 09:59 | Late Morning | 37,8 | 67  | 13,2  | 13,2  | 18,95 | 563,53 | 86,17  |
| 2019/06/14 | CH2206 | Male | Three y/o | Control | Control | Feed Day | No | 09:25 | 09:00 - 09:59 | Late Morning | 36,9 | 55  | 53,8  | 53,8  | 18,06 | 547,52 | 134,32 |
| 2019/06/14 | CH2205 | Male | Three y/o | Control | Control | Feed Day | No | 09:30 | 09:00 - 09:59 | Late Morning | 37,9 | 66  | 11,0  | 11,0  | 19,05 | 562,34 | 79,98  |
| 2019/06/14 | CH2206 | Male | Three y/o | Control | Control | Feed Day | No | 09:30 | 09:00 - 09:59 | Late Morning | 36,6 | 53  | 30,4  | 30,4  | 17,77 | 544,43 | 114,65 |
| 2019/06/14 | CH2205 | Male | Three y/o | Control | Control | Feed Day | No | 09:35 | 09:00 - 09:59 | Late Morning | 37,8 | 52  | 5,8   | 5,8   | 18,95 | 542,83 | 58,39  |
| 2019/06/14 | CH2206 | Male | Three y/o | Control | Control | Feed Day | No | 09:35 | 09:00 - 09:59 | Late Morning | 36,9 | 68  | 1,6   | 1,6   | 18,06 | 564,71 | 15,48  |
| 2019/06/14 | CH2205 | Male | Three y/o | Control | Control | Feed Day | No | 09:40 | 09:00 - 09:59 | Late Morning | 37,7 | 56  | 7,6   | 7,6   | 18,85 | 549,01 | 67,49  |



|            |        |      |           |         |         |          |     |       |               |              |      |     |       |       |       |        |        |
|------------|--------|------|-----------|---------|---------|----------|-----|-------|---------------|--------------|------|-----|-------|-------|-------|--------|--------|
| 2019/06/14 | CH2206 | Male | Three y/o | Control | Control | Feed Day | No  | 09:40 | 09:00 - 09:59 | Late Morning | 37,1 | 79  | 8,0   | 8,0   | 18,26 | 576,36 | 69,22  |
| 2019/06/14 | CH2205 | Male | Three y/o | Control | Control | Feed Day | No  | 09:45 | 09:00 - 09:59 | Late Morning | 37,7 | 60  | 2,2   | 2,2   | 18,85 | 554,67 | 26,02  |
| 2019/06/14 | CH2206 | Male | Three y/o | Control | Control | Feed Day | No  | 09:45 | 09:00 - 09:59 | Late Morning | 37,2 | 71  | 32,4  | 32,4  | 18,36 | 568,10 | 116,84 |
| 2019/06/14 | CH2205 | Male | Three y/o | Control | Control | Feed Day | No  | 09:50 | 09:00 - 09:59 | Late Morning | 37,7 | 49  | 4,6   | 4,6   | 18,85 | 537,80 | 50,61  |
| 2019/06/14 | CH2206 | Male | Three y/o | Control | Control | Feed Day | No  | 09:50 | 09:00 - 09:59 | Late Morning | 37,3 |     | 35,0  | 35,0  | 18,46 |        | 119,49 |
| 2019/06/14 | CH2205 | Male | Three y/o | Control | Control | Feed Day | No  | 09:55 | 09:00 - 09:59 | Late Morning | 37,7 | 66  | 8,4   | 8,4   | 18,85 | 562,34 | 70,86  |
| 2019/06/14 | CH2206 | Male | Three y/o | Control | Control | Feed Day | No  | 09:55 | 09:00 - 09:59 | Late Morning | 37,3 | 60  | 37,8  | 37,8  | 18,46 | 554,67 | 122,14 |
| 2019/06/14 | CH2205 | Male | Three y/o | Control | Control | Feed Day | No  | 10:00 | 10:00 - 10:59 | Late Morning | 37,6 | 56  | 9,8   | 9,8   | 18,75 | 549,01 | 76,07  |
| 2019/06/14 | CH2206 | Male | Three y/o | Control | Control | Feed Day | No  | 10:00 | 10:00 - 10:59 | Late Morning | 37,3 | 79  | 17,4  | 17,4  | 18,46 | 576,36 | 95,56  |
| 2019/06/14 | CH2205 | Male | Three y/o | Control | Control | Feed Day | No  | 10:05 | 10:00 - 10:59 | Late Morning | 37,6 | 65  | 39,4  | 39,4  | 18,75 | 561,12 | 123,57 |
| 2019/06/14 | CH2206 | Male | Three y/o | Control | Control | Feed Day | No  | 10:05 | 10:00 - 10:59 | Late Morning | 37,3 | 47  | 16,6  | 16,6  | 18,46 | 534,23 | 93,96  |
| 2019/06/14 | CH2205 | Male | Three y/o | Control | Control | Feed Day | No  | 10:10 | 10:00 - 10:59 | Late Morning | 37,6 | 67  | 7,6   | 7,6   | 18,75 | 563,53 | 67,49  |
| 2019/06/14 | CH2206 | Male | Three y/o | Control | Control | Feed Day | No  | 10:10 | 10:00 - 10:59 | Late Morning | 37,4 |     | 46,8  | 46,8  | 18,55 |        | 129,50 |
| 2019/06/14 | CH2205 | Male | Three y/o | Control | Control | Feed Day | No  | 10:15 | 10:00 - 10:59 | Late Morning | 37,6 | 60  | 2,4   | 2,4   | 18,75 | 554,67 | 28,91  |
| 2019/06/14 | CH2206 | Male | Three y/o | Control | Control | Feed Day | No  | 10:15 | 10:00 - 10:59 | Late Morning | 37,4 | 174 | 25,6  | 25,6  | 18,55 | 631,46 | 108,76 |
| 2019/06/14 | CH2205 | Male | Three y/o | Control | Control | Feed Day | No  | 10:20 | 10:00 - 10:59 | Late Morning | 37,6 | 41  | 2,0   | 2,0   | 18,75 | 522,29 | 22,86  |
| 2019/06/14 | CH2206 | Male | Three y/o | Control | Control | Feed Day | No  | 10:20 | 10:00 - 10:59 | Late Morning | 37,4 | 46  | 4,0   | 4,0   | 18,55 | 532,38 | 45,94  |
| 2019/06/14 | CH2205 | Male | Three y/o | Control | Control | Feed Day | No  | 10:25 | 10:00 - 10:59 | Late Morning | 37,6 | 51  | 27,4  | 27,4  | 18,75 | 541,20 | 111,09 |
| 2019/06/14 | CH2206 | Male | Three y/o | Control | Control | Feed Day | No  | 10:25 | 10:00 - 10:59 | Late Morning | 37,4 | 65  | 14,0  | 14,0  | 18,55 | 561,12 | 88,17  |
| 2019/06/14 | CH2205 | Male | Three y/o | Control | Control | Feed Day | Yes | 10:30 | 10:00 - 10:59 | Late Morning | 37,6 | 61  | 42,0  | 42,0  | 18,75 | 556,01 | 125,77 |
| 2019/06/14 | CH2206 | Male | Three y/o | Control | Control | Feed Day | Yes | 10:30 | 10:00 - 10:59 | Late Morning | 37,4 | 43  | 22,2  | 22,2  | 18,55 | 526,50 | 103,88 |
| 2019/06/14 | CH2205 | Male | Three y/o | Control | Control | Feed Day | Yes | 10:35 | 10:00 - 10:59 | Late Morning | 37,6 | 70  | 12,4  | 12,4  | 18,75 | 566,99 | 84,04  |
| 2019/06/14 | CH2206 | Male | Three y/o | Control | Control | Feed Day | Yes | 10:35 | 10:00 - 10:59 | Late Morning | 37,4 | 50  | 26,6  | 26,6  | 18,55 | 539,52 | 110,07 |
| 2019/06/14 | CH2205 | Male | Three y/o | Control | Control | Feed Day | Yes | 10:40 | 10:00 - 10:59 | Late Morning | 37,6 | 61  | 93,0  | 93,0  | 18,75 | 556,01 | 153,31 |
| 2019/06/14 | CH2206 | Male | Three y/o | Control | Control | Feed Day | Yes | 10:40 | 10:00 - 10:59 | Late Morning | 37,4 | 73  | 18,6  | 18,6  | 18,55 | 570,27 | 97,84  |
| 2019/06/14 | CH2205 | Male | Three y/o | Control | Control | Feed Day | Yes | 10:45 | 10:00 - 10:59 | Late Morning | 37,6 | 103 | 122,2 | 122,2 | 18,75 | 596,00 | 162,84 |
| 2019/06/14 | CH2206 | Male | Three y/o | Control | Control | Feed Day | Yes | 10:45 | 10:00 - 10:59 | Late Morning | 37,4 | 78  | 39,6  | 39,6  | 18,55 | 575,38 | 123,74 |
| 2019/06/14 | CH2205 | Male | Three y/o | Control | Control | Feed Day | Yes | 10:50 | 10:00 - 10:59 | Late Morning | 37,6 | 128 | 43,4  | 43,4  | 18,75 | 611,22 | 126,90 |
| 2019/06/14 | CH2206 | Male | Three y/o | Control | Control | Feed Day | Yes | 10:50 | 10:00 - 10:59 | Late Morning | 37,4 | 69  | 38,6  | 38,6  | 18,55 | 565,86 | 122,86 |
| 2019/06/14 | CH2205 | Male | Three y/o | Control | Control | Feed Day | Yes | 10:55 | 10:00 - 10:59 | Late Morning | 37,6 | 105 | 95,4  | 95,4  | 18,75 | 597,38 | 154,20 |
| 2019/06/14 | CH2206 | Male | Three y/o | Control | Control | Feed Day | Yes | 10:55 | 10:00 - 10:59 | Late Morning | 37,4 | 67  | 125,0 | 125,0 | 18,55 | 563,53 | 163,63 |
| 2019/06/14 | CH2205 | Male | Three y/o | Control | Control | Feed Day | Yes | 11:00 | 11:00 - 11:59 | Late Morning | 37,7 | 93  | 120,8 | 120,8 | 18,85 | 588,58 | 162,44 |
| 2019/06/14 | CH2206 | Male | Three y/o | Control | Control | Feed Day | Yes | 11:00 | 11:00 - 11:59 | Late Morning | 37,5 | 121 | 134,2 | 134,2 | 18,65 | 607,35 | 166,12 |
| 2019/06/14 | CH2205 | Male | Three y/o | Control | Control | Feed Day | Yes | 11:05 | 11:00 - 11:59 | Late Morning | 37,7 | 45  | 32,8  | 32,8  | 18,85 | 530,47 | 117,26 |
| 2019/06/14 | CH2206 | Male | Three y/o | Control | Control | Feed Day | Yes | 11:05 | 11:00 - 11:59 | Late Morning | 37,5 | 117 | 104,2 | 104,2 | 18,65 | 605,02 | 157,28 |
| 2019/06/14 | CH2205 | Male | Three y/o | Control | Control | Feed Day | Yes | 11:10 | 11:00 - 11:59 | Late Morning | 37,7 | 68  | 72,8  | 72,8  | 18,85 | 564,71 | 144,80 |
| 2019/06/14 | CH2206 | Male | Three y/o | Control | Control | Feed Day | Yes | 11:10 | 11:00 - 11:59 | Late Morning | 37,7 | 100 | 150,2 | 150,2 | 18,85 | 593,87 | 170,06 |
| 2019/06/14 | CH2205 | Male | Three y/o | Control | Control | Feed Day | Yes | 11:15 | 11:00 - 11:59 | Late Morning | 37,7 |     | 182,0 | 182,0 | 18,85 |        | 176,80 |
| 2019/06/14 | CH2206 | Male | Three y/o | Control | Control | Feed Day | Yes | 11:15 | 11:00 - 11:59 | Late Morning | 37,7 | 110 | 194,8 | 194,8 | 18,85 | 600,69 | 179,19 |
| 2019/06/14 | CH2205 | Male | Three y/o | Control | Control | Feed Day | Yes | 11:20 | 11:00 - 11:59 | Late Morning | 37,7 | 63  | 346,6 | 346,6 | 18,85 | 558,62 | 199,53 |
| 2019/06/14 | CH2206 | Male | Three y/o | Control | Control | Feed Day | Yes | 11:20 | 11:00 - 11:59 | Late Morning | 37,7 | 107 | 172,6 | 172,6 | 18,85 | 598,73 | 174,94 |
| 2019/06/14 | CH2205 | Male | Three y/o | Control | Control | Feed Day | Yes | 11:25 | 11:00 - 11:59 | Late Morning | 37,7 | 52  | 218,8 | 218,8 | 18,85 | 542,83 | 183,28 |
| 2019/06/14 | CH2206 | Male | Three y/o | Control | Control | Feed Day | Yes | 11:25 | 11:00 - 11:59 | Late Morning | 37,7 | 95  | 185,8 | 185,8 | 18,85 | 590,14 | 177,53 |
| 2019/06/14 | CH2205 | Male | Three y/o | Control | Control | Feed Day | No  | 11:30 | 11:00 - 11:59 | Late Morning | 37,9 |     | 213,8 | 213,8 | 19,05 |        | 182,47 |
| 2019/06/14 | CH2206 | Male | Three y/o | Control | Control | Feed Day | No  | 11:30 | 11:00 - 11:59 | Late Morning | 37,8 | 98  | 36,0  | 36,0  | 18,95 | 592,41 | 120,46 |
| 2019/06/14 | CH2205 | Male | Three y/o | Control | Control | Feed Day | No  | 11:35 | 11:00 - 11:59 | Late Morning | 37,9 | 108 | 22,4  | 22,4  | 19,05 | 599,39 | 104,19 |
| 2019/06/14 | CH2206 | Male | Three y/o | Control | Control | Feed Day | No  | 11:35 | 11:00 - 11:59 | Late Morning | 37,8 | 100 | 103,2 | 103,2 | 18,95 | 593,87 | 156,94 |
| 2019/06/14 | CH2205 | Male | Three y/o | Control | Control | Feed Day | No  | 11:40 | 11:00 - 11:59 | Late Morning | 37,7 | 86  | 220,4 | 220,4 | 18,85 | 582,77 | 183,54 |
| 2019/06/14 | CH2206 | Male | Three y/o | Control | Control | Feed Day | No  | 11:40 | 11:00 - 11:59 | Late Morning | 37,8 | 90  | 185,4 | 185,4 | 18,95 | 586,16 | 177,45 |
| 2019/06/14 | CH2205 | Male | Three y/o | Control | Control | Feed Day | No  | 11:45 | 11:00 - 11:59 | Late Morning | 37,9 | 120 | 168,6 | 168,6 | 19,05 | 606,78 | 174,12 |
| 2019/06/14 | CH2206 | Male | Three y/o | Control | Control | Feed Day | No  | 11:45 | 11:00 - 11:59 | Late Morning | 37,9 | 120 | 234,6 | 234,6 | 19,05 | 606,78 | 185,74 |
| 2019/06/14 | CH2205 | Male | Three y/o | Control | Control | Feed Day | No  | 11:50 | 11:00 - 11:59 | Late Morning | 37,9 | 103 | 66,6  | 66,6  | 19,05 | 596,00 | 141,71 |
| 2019/06/14 | CH2206 | Male | Three y/o | Control | Control | Feed Day | No  | 11:50 | 11:00 - 11:59 | Late Morning | 37,9 | 103 | 109,6 | 109,6 | 19,05 | 596,00 | 159,04 |
| 2019/06/14 | CH2205 | Male | Three y/o | Control | Control | Feed Day | No  | 11:55 | 11:00 - 11:59 | Late Morning | 37,9 | 55  | 240,2 | 240,2 | 19,05 | 547,52 | 186,57 |
| 2019/06/14 | CH2206 | Male | Three y/o | Control | Control | Feed Day | No  | 11:55 | 11:00 - 11:59 | Late Morning | 37,9 | 162 | 189,4 | 189,4 | 19,05 | 626,88 | 178,20 |
| 2019/06/14 | CH2205 | Male | Three y/o | Control | Control | Feed Day | No  | 12:00 | 12:00 - 12:59 | Afternoon    | 38,0 | 123 | 34,8  | 34,8  | 19,15 | 608,49 | 119,29 |
| 2019/06/14 | CH2206 | Male | Three y/o | Control | Control | Feed Day | No  | 12:00 | 12:00 - 12:59 | Afternoon    | 38,0 | 111 | 21,2  | 21,2  | 19,15 | 601,33 | 102,31 |
| 2019/06/14 | CH2205 | Male | Three y/o | Control | Control | Feed Day | No  | 12:05 | 12:00 - 12:59 | Afternoon    | 37,9 | 121 | 130,0 | 130,0 | 19,05 | 607,35 | 165,01 |
| 2019/06/14 | CH2206 | Male | Three y/o | Control | Control | Feed Day | No  | 12:05 | 12:00 - 12:59 | Afternoon    | 37,9 | 117 | 19,4  | 19,4  | 19,05 | 605,02 | 99,28  |
| 2019/06/14 | CH2205 | Male | Three y/o | Control | Control | Feed Day | No  | 12:10 | 12:00 - 12:59 | Afternoon    | 38,0 | 106 | 200,8 | 200,8 | 19,15 | 598,06 | 180,26 |
| 2019/06/14 | CH2206 | Male | Three y/o | Control | Control | Feed Day | No  | 12:10 | 12:00 - 12:59 | Afternoon    | 38,0 | 117 | 212,2 | 212,2 | 19,15 | 605,02 | 182,20 |
| 2019/06/14 | CH2205 | Male | Three y/o | Control | Control | Feed Day | No  | 12:15 | 12:00 - 12:59 | Afternoon    | 38,0 |     | 85,4  | 85,4  | 19,15 |        | 150,35 |
| 2019/06/14 | CH2206 | Male | Three y/o | Control | Control | Feed Day | No  | 12:15 | 12:00 - 12:59 | Afternoon    | 38,0 | 113 | 128,6 | 128,6 | 19,15 | 602,58 | 164,63 |
| 2019/06/14 | CH2205 | Male | Three y/o | Control | Control | Feed Day | No  | 12:20 | 12:00 - 12:59 | Afternoon    | 38,0 | 117 | 149,4 | 149,4 | 19,15 | 605,02 | 169,88 |
| 2019/06/14 | CH2206 | Male | Three y/o | Control | Control | Feed Day | No  | 12:20 | 12:00 - 12:59 | Afternoon    | 38,1 | 125 | 29,8  | 29,8  | 19,26 | 609,60 | 113,97 |
| 2019/06/14 | CH2205 | Male | Three y/o | Control | Control | Feed Day | No  | 12:25 | 12:00 - 12:59 | Afternoon    | 38,1 | 138 | 470,2 | 470,2 | 19,26 | 616,31 | 210,36 |
| 2019/06/14 | CH2206 | Male | Three y/o | Control | Control | Feed Day | No  | 12:25 | 12:00 - 12:59 | Afternoon    | 38,0 | 135 | 105,6 | 105,6 | 19,15 | 614,84 | 157,74 |
| 2019/06/14 | CH2205 | Male | Three y/o | Control | Control | Feed Day | No  | 12:30 | 12:00 - 12:59 | Afternoon    | 38,1 |     | 17,0  | 17,0  | 19,26 |        | 94,77  |
| 2019/06/14 | CH2206 | Male | Three y/o | Control | Control | Feed Day | No  | 12:30 | 12:00 - 12:59 | Afternoon    | 38,0 | 197 | 65,0  | 65,0  | 19,15 | 639,25 | 140,87 |
| 2019/06/14 | CH2205 | Male | Three y/o | Control | Control | Feed Day | No  | 12:35 | 12:00 - 12:59 | Afternoon    | 38,0 |     | 11,4  | 11,4  | 19,15 |        | 81,19  |



|            |        |      |           |         |         |          |    |       |               |           |      |     |       |       |       |        |        |
|------------|--------|------|-----------|---------|---------|----------|----|-------|---------------|-----------|------|-----|-------|-------|-------|--------|--------|
| 2019/06/14 | CH2206 | Male | Three y/o | Control | Control | Feed Day | No | 12:35 | 12:00 - 12:59 | Afternoon | 38,0 | 74  | 46,6  | 46,6  | 19,15 | 571,33 | 129,35 |
| 2019/06/14 | CH2205 | Male | Three y/o | Control | Control | Feed Day | No | 12:40 | 12:00 - 12:59 | Afternoon | 38,0 |     | 18,6  | 18,6  | 19,15 |        | 97,84  |
| 2019/06/14 | CH2206 | Male | Three y/o | Control | Control | Feed Day | No | 12:40 | 12:00 - 12:59 | Afternoon | 38,0 | 86  | 41,0  | 41,0  | 19,15 | 582,77 | 124,94 |
| 2019/06/14 | CH2205 | Male | Three y/o | Control | Control | Feed Day | No | 12:45 | 12:00 - 12:59 | Afternoon | 38,0 | 112 | 16,2  | 16,2  | 19,15 | 601,96 | 93,13  |
| 2019/06/14 | CH2206 | Male | Three y/o | Control | Control | Feed Day | No | 12:45 | 12:00 - 12:59 | Afternoon | 37,9 | 94  | 25,0  | 25,0  | 19,05 | 589,37 | 107,94 |
| 2019/06/14 | CH2205 | Male | Three y/o | Control | Control | Feed Day | No | 12:50 | 12:00 - 12:59 | Afternoon | 37,9 | 62  | 13,2  | 13,2  | 19,05 | 557,33 | 86,17  |
| 2019/06/14 | CH2206 | Male | Three y/o | Control | Control | Feed Day | No | 12:50 | 12:00 - 12:59 | Afternoon | 37,9 | 84  | 62,2  | 62,2  | 19,05 | 581,01 | 139,34 |
| 2019/06/14 | CH2205 | Male | Three y/o | Control | Control | Feed Day | No | 12:55 | 12:00 - 12:59 | Afternoon | 37,9 |     | 19,0  | 19,0  | 19,05 |        | 98,56  |
| 2019/06/14 | CH2206 | Male | Three y/o | Control | Control | Feed Day | No | 12:55 | 12:00 - 12:59 | Afternoon | 38,0 | 53  | 63,2  | 63,2  | 19,15 | 544,43 | 139,89 |
| 2019/06/14 | CH2205 | Male | Three y/o | Control | Control | Feed Day | No | 13:00 | 13:00 - 13:59 | Afternoon | 37,9 | 74  | 9,2   | 9,2   | 19,05 | 571,33 | 73,94  |
| 2019/06/14 | CH2206 | Male | Three y/o | Control | Control | Feed Day | No | 13:00 | 13:00 - 13:59 | Afternoon | 38,0 |     | 67,0  | 67,0  | 19,15 |        | 141,92 |
| 2019/06/14 | CH2205 | Male | Three y/o | Control | Control | Feed Day | No | 13:05 | 13:00 - 13:59 | Afternoon | 37,9 | 76  | 9,4   | 9,4   | 19,05 | 573,39 | 74,66  |
| 2019/06/14 | CH2206 | Male | Three y/o | Control | Control | Feed Day | No | 13:05 | 13:00 - 13:59 | Afternoon | 38,0 | 73  | 63,2  | 63,2  | 19,15 | 570,27 | 139,89 |
| 2019/06/14 | CH2205 | Male | Three y/o | Control | Control | Feed Day | No | 13:10 | 13:00 - 13:59 | Afternoon | 37,9 | 65  | 9,8   | 9,8   | 19,05 | 561,12 | 76,07  |
| 2019/06/14 | CH2206 | Male | Three y/o | Control | Control | Feed Day | No | 13:10 | 13:00 - 13:59 | Afternoon | 38,0 | 76  | 42,6  | 42,6  | 19,15 | 573,39 | 126,26 |
| 2019/06/14 | CH2205 | Male | Three y/o | Control | Control | Feed Day | No | 13:15 | 13:00 - 13:59 | Afternoon | 37,9 | 61  | 3,4   | 3,4   | 19,05 | 556,01 | 40,51  |
| 2019/06/14 | CH2206 | Male | Three y/o | Control | Control | Feed Day | No | 13:15 | 13:00 - 13:59 | Afternoon | 38,0 | 72  | 26,2  | 26,2  | 19,15 | 569,20 | 109,55 |
| 2019/06/14 | CH2205 | Male | Three y/o | Control | Control | Feed Day | No | 13:20 | 13:00 - 13:59 | Afternoon | 37,9 | 83  | 5,0   | 5,0   | 19,05 | 580,11 | 53,41  |
| 2019/06/14 | CH2206 | Male | Three y/o | Control | Control | Feed Day | No | 13:20 | 13:00 - 13:59 | Afternoon | 38,1 | 65  | 25,0  | 25,0  | 19,26 | 561,12 | 107,94 |
| 2019/06/14 | CH2205 | Male | Three y/o | Control | Control | Feed Day | No | 13:25 | 13:00 - 13:59 | Afternoon | 37,9 | 79  | 3,8   | 3,8   | 19,05 | 576,36 | 44,22  |
| 2019/06/14 | CH2206 | Male | Three y/o | Control | Control | Feed Day | No | 13:25 | 13:00 - 13:59 | Afternoon | 38,1 | 68  | 25,8  | 25,8  | 19,26 | 564,71 | 109,02 |
| 2019/06/14 | CH2205 | Male | Three y/o | Control | Control | Feed Day | No | 13:30 | 13:00 - 13:59 | Afternoon | 37,8 | 83  | 8,6   | 8,6   | 18,95 | 580,11 | 71,66  |
| 2019/06/14 | CH2206 | Male | Three y/o | Control | Control | Feed Day | No | 13:30 | 13:00 - 13:59 | Afternoon | 38,1 | 63  | 34,6  | 34,6  | 19,26 | 558,62 | 119,10 |
| 2019/06/14 | CH2205 | Male | Three y/o | Control | Control | Feed Day | No | 13:35 | 13:00 - 13:59 | Afternoon | 37,7 | 82  | 5,2   | 5,2   | 18,85 | 579,19 | 54,72  |
| 2019/06/14 | CH2206 | Male | Three y/o | Control | Control | Feed Day | No | 13:35 | 13:00 - 13:59 | Afternoon | 38,1 | 75  | 34,4  | 34,4  | 19,26 | 572,36 | 118,90 |
| 2019/06/14 | CH2205 | Male | Three y/o | Control | Control | Feed Day | No | 13:40 | 13:00 - 13:59 | Afternoon | 37,7 | 84  | 11,2  | 11,2  | 18,85 | 581,01 | 80,59  |
| 2019/06/14 | CH2206 | Male | Three y/o | Control | Control | Feed Day | No | 13:40 | 13:00 - 13:59 | Afternoon | 38,1 | 83  | 34,0  | 34,0  | 19,26 | 580,11 | 118,49 |
| 2019/06/14 | CH2205 | Male | Three y/o | Control | Control | Feed Day | No | 13:45 | 13:00 - 13:59 | Afternoon | 37,7 | 79  | 4,2   | 4,2   | 18,85 | 576,36 | 47,57  |
| 2019/06/14 | CH2206 | Male | Three y/o | Control | Control | Feed Day | No | 13:45 | 13:00 - 13:59 | Afternoon | 38,1 | 85  | 38,6  | 38,6  | 19,26 | 581,90 | 122,86 |
| 2019/06/14 | CH2205 | Male | Three y/o | Control | Control | Feed Day | No | 13:50 | 13:00 - 13:59 | Afternoon | 37,7 | 83  | 9,0   | 9,0   | 18,85 | 580,11 | 73,19  |
| 2019/06/14 | CH2206 | Male | Three y/o | Control | Control | Feed Day | No | 13:50 | 13:00 - 13:59 | Afternoon | 38,2 | 113 | 42,4  | 42,4  | 19,36 | 602,58 | 126,10 |
| 2019/06/14 | CH2205 | Male | Three y/o | Control | Control | Feed Day | No | 13:55 | 13:00 - 13:59 | Afternoon | 37,7 | 85  | 8,8   | 8,8   | 18,85 | 581,90 | 72,43  |
| 2019/06/14 | CH2206 | Male | Three y/o | Control | Control | Feed Day | No | 13:55 | 13:00 - 13:59 | Afternoon | 38,2 | 48  | 49,8  | 49,8  | 19,36 | 536,04 | 131,65 |
| 2019/06/14 | CH2205 | Male | Three y/o | Control | Control | Feed Day | No | 14:00 | 14:00 - 14:59 | Afternoon | 37,7 | 65  | 7,2   | 7,2   | 18,85 | 561,12 | 65,66  |
| 2019/06/14 | CH2206 | Male | Three y/o | Control | Control | Feed Day | No | 14:00 | 14:00 - 14:59 | Afternoon | 38,2 | 77  | 51,6  | 51,6  | 19,36 | 574,39 | 132,87 |
| 2019/06/14 | CH2205 | Male | Three y/o | Control | Control | Feed Day | No | 14:05 | 14:00 - 14:59 | Afternoon | 37,9 |     | 8,6   | 8,6   | 19,05 |        | 71,66  |
| 2019/06/14 | CH2206 | Male | Three y/o | Control | Control | Feed Day | No | 14:05 | 14:00 - 14:59 | Afternoon | 38,2 | 93  | 43,4  | 43,4  | 19,36 | 588,58 | 126,90 |
| 2019/06/14 | CH2205 | Male | Three y/o | Control | Control | Feed Day | No | 14:10 | 14:00 - 14:59 | Afternoon | 37,9 | 72  | 3,2   | 3,2   | 19,05 | 569,20 | 38,49  |
| 2019/06/14 | CH2206 | Male | Three y/o | Control | Control | Feed Day | No | 14:10 | 14:00 - 14:59 | Afternoon | 38,2 | 92  | 38,6  | 38,6  | 19,36 | 587,78 | 122,86 |
| 2019/06/14 | CH2205 | Male | Three y/o | Control | Control | Feed Day | No | 14:15 | 14:00 - 14:59 | Afternoon | 37,9 | 75  | 3,0   | 3,0   | 19,05 | 572,36 | 36,34  |
| 2019/06/14 | CH2206 | Male | Three y/o | Control | Control | Feed Day | No | 14:15 | 14:00 - 14:59 | Afternoon | 38,1 | 69  | 41,4  | 41,4  | 19,26 | 565,86 | 125,27 |
| 2019/06/14 | CH2205 | Male | Three y/o | Control | Control | Feed Day | No | 14:20 | 14:00 - 14:59 | Afternoon | 37,9 | 84  | 2,8   | 2,8   | 19,05 | 581,01 | 34,04  |
| 2019/06/14 | CH2206 | Male | Three y/o | Control | Control | Feed Day | No | 14:20 | 14:00 - 14:59 | Afternoon | 38,1 | 88  | 39,4  | 39,4  | 19,26 | 584,49 | 123,57 |
| 2019/06/14 | CH2205 | Male | Three y/o | Control | Control | Feed Day | No | 14:25 | 14:00 - 14:59 | Afternoon | 37,9 | 81  | 3,4   | 3,4   | 19,05 | 578,26 | 40,51  |
| 2019/06/14 | CH2206 | Male | Three y/o | Control | Control | Feed Day | No | 14:25 | 14:00 - 14:59 | Afternoon | 38,1 | 50  | 12,4  | 12,4  | 19,26 | 539,52 | 84,04  |
| 2019/06/14 | CH2205 | Male | Three y/o | Control | Control | Feed Day | No | 14:30 | 14:00 - 14:59 | Afternoon | 37,9 | 62  | 4,0   | 4,0   | 19,05 | 557,33 | 45,94  |
| 2019/06/14 | CH2206 | Male | Three y/o | Control | Control | Feed Day | No | 14:30 | 14:00 - 14:59 | Afternoon | 38,1 | 75  | 11,6  | 11,6  | 19,26 | 572,36 | 81,78  |
| 2019/06/14 | CH2205 | Male | Three y/o | Control | Control | Feed Day | No | 14:35 | 14:00 - 14:59 | Afternoon | 37,9 | 86  | 5,8   | 5,8   | 19,05 | 582,77 | 58,39  |
| 2019/06/14 | CH2206 | Male | Three y/o | Control | Control | Feed Day | No | 14:35 | 14:00 - 14:59 | Afternoon | 38,1 | 77  | 21,2  | 21,2  | 19,26 | 574,39 | 102,31 |
| 2019/06/14 | CH2205 | Male | Three y/o | Control | Control | Feed Day | No | 14:40 | 14:00 - 14:59 | Afternoon | 38,0 | 88  | 21,6  | 21,6  | 19,15 | 584,49 | 102,94 |
| 2019/06/14 | CH2206 | Male | Three y/o | Control | Control | Feed Day | No | 14:40 | 14:00 - 14:59 | Afternoon | 38,1 | 80  | 16,8  | 16,8  | 19,26 | 577,31 | 94,37  |
| 2019/06/14 | CH2205 | Male | Three y/o | Control | Control | Feed Day | No | 14:45 | 14:00 - 14:59 | Afternoon | 38,0 |     | 26,4  | 26,4  | 19,15 |        | 109,81 |
| 2019/06/14 | CH2206 | Male | Three y/o | Control | Control | Feed Day | No | 14:45 | 14:00 - 14:59 | Afternoon | 38,1 | 66  | 22,6  | 22,6  | 19,26 | 562,34 | 104,49 |
| 2019/06/14 | CH2205 | Male | Three y/o | Control | Control | Feed Day | No | 14:50 | 14:00 - 14:59 | Afternoon | 38,0 | 68  | 20,0  | 20,0  | 19,15 | 564,71 | 100,31 |
| 2019/06/14 | CH2206 | Male | Three y/o | Control | Control | Feed Day | No | 14:50 | 14:00 - 14:59 | Afternoon | 38,1 | 73  | 23,0  | 23,0  | 19,26 | 570,27 | 105,09 |
| 2019/06/14 | CH2205 | Male | Three y/o | Control | Control | Feed Day | No | 14:55 | 14:00 - 14:59 | Afternoon | 38,0 | 83  | 21,0  | 21,0  | 19,15 | 580,11 | 101,98 |
| 2019/06/14 | CH2206 | Male | Three y/o | Control | Control | Feed Day | No | 14:55 | 14:00 - 14:59 | Afternoon | 38,1 | 48  | 25,8  | 25,8  | 19,26 | 536,04 | 109,02 |
| 2019/06/14 | CH2205 | Male | Three y/o | Control | Control | Feed Day | No | 15:00 | 15:00 - 15:59 | Afternoon | 38,0 | 81  | 17,2  | 17,2  | 19,15 | 578,26 | 95,17  |
| 2019/06/14 | CH2206 | Male | Three y/o | Control | Control | Feed Day | No | 15:00 | 15:00 - 15:59 | Afternoon | 38,1 | 84  | 24,2  | 24,2  | 19,26 | 581,01 | 106,83 |
| 2019/06/14 | CH2205 | Male | Three y/o | Control | Control | Feed Day | No | 15:05 | 15:00 - 15:59 | Afternoon | 38,0 | 80  | 18,2  | 18,2  | 19,15 | 577,31 | 97,10  |
| 2019/06/14 | CH2206 | Male | Three y/o | Control | Control | Feed Day | No | 15:05 | 15:00 - 15:59 | Afternoon | 38,1 | 85  | 28,6  | 28,6  | 19,26 | 581,90 | 112,56 |
| 2019/06/14 | CH2205 | Male | Three y/o | Control | Control | Feed Day | No | 15:10 | 15:00 - 15:59 | Afternoon | 38,0 | 97  | 19,4  | 19,4  | 19,15 | 591,66 | 99,28  |
| 2019/06/14 | CH2206 | Male | Three y/o | Control | Control | Feed Day | No | 15:10 | 15:00 - 15:59 | Afternoon | 38,1 | 73  | 41,6  | 41,6  | 19,26 | 570,27 | 125,44 |
| 2019/06/14 | CH2205 | Male | Three y/o | Control | Control | Feed Day | No | 15:15 | 15:00 - 15:59 | Afternoon | 38,1 | 87  | 18,6  | 18,6  | 19,26 | 583,64 | 97,84  |
| 2019/06/14 | CH2206 | Male | Three y/o | Control | Control | Feed Day | No | 15:15 | 15:00 - 15:59 | Afternoon | 38,1 | 88  | 46,6  | 46,6  | 19,26 | 584,49 | 129,35 |
| 2019/06/14 | CH2205 | Male | Three y/o | Control | Control | Feed Day | No | 15:20 | 15:00 - 15:59 | Afternoon | 38,1 | 62  | 20,4  | 20,4  | 19,26 | 557,33 | 100,99 |
| 2019/06/14 | CH2206 | Male | Three y/o | Control | Control | Feed Day | No | 15:20 | 15:00 - 15:59 | Afternoon | 38,0 | 96  | 63,4  | 63,4  | 19,15 | 590,91 | 140,00 |
| 2019/06/14 | CH2205 | Male | Three y/o | Control | Control | Feed Day | No | 15:25 | 15:00 - 15:59 | Afternoon | 38,1 | 82  | 302,6 | 302,6 | 19,26 | 579,19 | 194,73 |
| 2019/06/14 | CH2206 | Male | Three y/o | Control | Control | Feed Day | No | 15:25 | 15:00 - 15:59 | Afternoon | 37,9 | 112 | 98,4  | 98,4  | 19,05 | 601,96 | 155,28 |
| 2019/06/14 | CH2205 | Male | Three y/o | Control | Control | Feed Day | No | 15:30 | 15:00 - 15:59 | Afternoon | 38,2 | 154 | 322,6 | 322,6 | 19,36 | 623,58 | 196,99 |



|            |        |      |           |         |         |          |    |       |               |           |      |     |       |       |       |        |        |
|------------|--------|------|-----------|---------|---------|----------|----|-------|---------------|-----------|------|-----|-------|-------|-------|--------|--------|
| 2019/06/14 | CH2206 | Male | Three y/o | Control | Control | Feed Day | No | 15:30 | 15:00 - 15:59 | Afternoon | 37,9 | 40  | 88,8  | 88,8  | 19,05 | 520,09 | 151,71 |
| 2019/06/14 | CH2205 | Male | Three y/o | Control | Control | Feed Day | No | 15:35 | 15:00 - 15:59 | Afternoon | 38,2 | 93  | 17,4  | 17,4  | 19,36 | 588,58 | 95,56  |
| 2019/06/14 | CH2206 | Male | Three y/o | Control | Control | Feed Day | No | 15:35 | 15:00 - 15:59 | Afternoon | 38,1 |     | 83,6  | 83,6  | 19,26 |        | 149,61 |
| 2019/06/14 | CH2205 | Male | Three y/o | Control | Control | Feed Day | No | 15:40 | 15:00 - 15:59 | Afternoon | 38,2 | 117 | 46,8  | 46,8  | 19,36 | 605,02 | 129,50 |
| 2019/06/14 | CH2206 | Male | Three y/o | Control | Control | Feed Day | No | 15:40 | 15:00 - 15:59 | Afternoon | 38,1 | 103 | 62,6  | 62,6  | 19,26 | 596,00 | 139,56 |
| 2019/06/14 | CH2205 | Male | Three y/o | Control | Control | Feed Day | No | 15:45 | 15:00 - 15:59 | Afternoon | 38,2 | 94  | 20,2  | 20,2  | 19,36 | 589,37 | 100,65 |
| 2019/06/14 | CH2206 | Male | Three y/o | Control | Control | Feed Day | No | 15:45 | 15:00 - 15:59 | Afternoon | 38,1 | 114 | 30,2  | 30,2  | 19,26 | 603,20 | 114,42 |
| 2019/06/14 | CH2205 | Male | Three y/o | Control | Control | Feed Day | No | 15:50 | 15:00 - 15:59 | Afternoon | 38,2 | 132 | 17,4  | 17,4  | 19,36 | 613,32 | 95,56  |
| 2019/06/14 | CH2206 | Male | Three y/o | Control | Control | Feed Day | No | 15:50 | 15:00 - 15:59 | Afternoon | 38,1 | 83  | 89,2  | 89,2  | 19,26 | 580,11 | 151,86 |
| 2019/06/14 | CH2205 | Male | Three y/o | Control | Control | Feed Day | No | 15:55 | 15:00 - 15:59 | Afternoon | 38,3 | 61  | 12,6  | 12,6  | 19,46 | 556,01 | 84,59  |
| 2019/06/14 | CH2206 | Male | Three y/o | Control | Control | Feed Day | No | 15:55 | 15:00 - 15:59 | Afternoon | 38,0 |     | 125,2 | 125,2 | 19,15 |        | 163,69 |
| 2019/06/14 | CH2205 | Male | Three y/o | Control | Control | Feed Day | No | 16:00 | 16:00 - 16:59 | Evening   | 38,3 | 99  | 49,0  | 49,0  | 19,46 | 593,14 | 131,09 |
| 2019/06/14 | CH2206 | Male | Three y/o | Control | Control | Feed Day | No | 16:00 | 16:00 - 16:59 | Evening   | 38,1 | 119 | 59,2  | 59,2  | 19,26 | 606,20 | 137,63 |
| 2019/06/14 | CH2205 | Male | Three y/o | Control | Control | Feed Day | No | 16:05 | 16:00 - 16:59 | Evening   | 38,3 | 70  | 16,0  | 16,0  | 19,46 | 566,99 | 92,71  |
| 2019/06/14 | CH2206 | Male | Three y/o | Control | Control | Feed Day | No | 16:05 | 16:00 - 16:59 | Evening   | 38,2 |     | 38,6  | 38,6  | 19,36 |        | 122,86 |
| 2019/06/14 | CH2205 | Male | Three y/o | Control | Control | Feed Day | No | 16:10 | 16:00 - 16:59 | Evening   | 38,3 | 70  | 25,0  | 25,0  | 19,46 | 566,99 | 107,94 |
| 2019/06/14 | CH2206 | Male | Three y/o | Control | Control | Feed Day | No | 16:10 | 16:00 - 16:59 | Evening   | 38,2 | 82  | 43,4  | 43,4  | 19,36 | 579,19 | 126,90 |
| 2019/06/14 | CH2205 | Male | Three y/o | Control | Control | Feed Day | No | 16:15 | 16:00 - 16:59 | Evening   | 38,3 | 77  | 26,8  | 26,8  | 19,46 | 574,39 | 110,33 |
| 2019/06/14 | CH2206 | Male | Three y/o | Control | Control | Feed Day | No | 16:15 | 16:00 - 16:59 | Evening   | 38,1 | 89  | 44,4  | 44,4  | 19,26 | 585,33 | 127,69 |
| 2019/06/14 | CH2205 | Male | Three y/o | Control | Control | Feed Day | No | 16:20 | 16:00 - 16:59 | Evening   | 38,3 | 68  | 23,8  | 23,8  | 19,46 | 564,71 | 106,26 |
| 2019/06/14 | CH2206 | Male | Three y/o | Control | Control | Feed Day | No | 16:20 | 16:00 - 16:59 | Evening   | 38,1 | 86  | 32,8  | 32,8  | 19,26 | 582,77 | 117,26 |
| 2019/06/14 | CH2205 | Male | Three y/o | Control | Control | Feed Day | No | 16:25 | 16:00 - 16:59 | Evening   | 38,3 | 70  | 21,2  | 21,2  | 19,46 | 566,99 | 102,31 |
| 2019/06/14 | CH2206 | Male | Three y/o | Control | Control | Feed Day | No | 16:25 | 16:00 - 16:59 | Evening   | 38,0 | 90  | 37,4  | 37,4  | 19,15 | 586,16 | 121,77 |
| 2019/06/14 | CH2205 | Male | Three y/o | Control | Control | Feed Day | No | 16:30 | 16:00 - 16:59 | Evening   | 38,3 | 74  | 19,0  | 19,0  | 19,46 | 571,33 | 98,56  |
| 2019/06/14 | CH2206 | Male | Three y/o | Control | Control | Feed Day | No | 16:30 | 16:00 - 16:59 | Evening   | 38,0 | 43  | 18,8  | 18,8  | 19,15 | 526,50 | 98,20  |
| 2019/06/14 | CH2205 | Male | Three y/o | Control | Control | Feed Day | No | 16:35 | 16:00 - 16:59 | Evening   | 38,3 | 79  | 22,6  | 22,6  | 19,46 | 576,36 | 104,49 |
| 2019/06/14 | CH2206 | Male | Three y/o | Control | Control | Feed Day | No | 16:35 | 16:00 - 16:59 | Evening   | 37,9 | 85  | 37,6  | 37,6  | 19,05 | 581,90 | 121,96 |
| 2019/06/14 | CH2205 | Male | Three y/o | Control | Control | Feed Day | No | 16:40 | 16:00 - 16:59 | Evening   | 38,3 | 79  | 22,0  | 22,0  | 19,46 | 576,36 | 103,57 |
| 2019/06/14 | CH2206 | Male | Three y/o | Control | Control | Feed Day | No | 16:40 | 16:00 - 16:59 | Evening   | 37,9 |     | 63,0  | 63,0  | 19,05 |        | 139,78 |
| 2019/06/14 | CH2205 | Male | Three y/o | Control | Control | Feed Day | No | 16:45 | 16:00 - 16:59 | Evening   | 38,3 | 62  | 14,0  | 14,0  | 19,46 | 557,33 | 88,17  |
| 2019/06/14 | CH2206 | Male | Three y/o | Control | Control | Feed Day | No | 16:45 | 16:00 - 16:59 | Evening   | 37,9 | 79  | 55,8  | 55,8  | 19,05 | 576,36 | 135,58 |
| 2019/06/14 | CH2205 | Male | Three y/o | Control | Control | Feed Day | No | 16:50 | 16:00 - 16:59 | Evening   | 38,3 | 98  | 59,0  | 59,0  | 19,46 | 592,41 | 137,51 |
| 2019/06/14 | CH2206 | Male | Three y/o | Control | Control | Feed Day | No | 16:50 | 16:00 - 16:59 | Evening   | 37,9 | 45  | 62,8  | 62,8  | 19,05 | 530,47 | 139,67 |
| 2019/06/14 | CH2205 | Male | Three y/o | Control | Control | Feed Day | No | 16:55 | 16:00 - 16:59 | Evening   | 38,2 |     | 26,0  | 26,0  | 19,36 |        | 109,29 |
| 2019/06/14 | CH2206 | Male | Three y/o | Control | Control | Feed Day | No | 16:55 | 16:00 - 16:59 | Evening   | 37,8 | 84  | 61,0  | 61,0  | 18,95 | 581,01 | 138,67 |
| 2019/06/14 | CH2205 | Male | Three y/o | Control | Control | Feed Day | No | 17:00 | 17:00 - 17:59 | Evening   | 38,1 |     | 23,0  | 23,0  | 19,26 |        | 105,09 |
| 2019/06/14 | CH2206 | Male | Three y/o | Control | Control | Feed Day | No | 17:00 | 17:00 - 17:59 | Evening   | 37,8 | 46  | 58,8  | 58,8  | 18,95 | 532,38 | 137,39 |
| 2019/06/14 | CH2205 | Male | Three y/o | Control | Control | Feed Day | No | 17:05 | 17:00 - 17:59 | Evening   | 38,1 |     | 63,4  | 63,4  | 19,26 |        | 140,00 |
| 2019/06/14 | CH2206 | Male | Three y/o | Control | Control | Feed Day | No | 17:05 | 17:00 - 17:59 | Evening   | 37,8 | 82  | 58,6  | 58,6  | 18,95 | 579,19 | 137,28 |
| 2019/06/14 | CH2205 | Male | Three y/o | Control | Control | Feed Day | No | 17:10 | 17:00 - 17:59 | Evening   | 38,1 | 49  | 22,8  | 22,8  | 19,26 | 537,80 | 104,79 |
| 2019/06/14 | CH2206 | Male | Three y/o | Control | Control | Feed Day | No | 17:10 | 17:00 - 17:59 | Evening   | 37,8 | 82  | 32,8  | 32,8  | 18,95 | 579,19 | 117,26 |
| 2019/06/14 | CH2205 | Male | Three y/o | Control | Control | Feed Day | No | 17:15 | 17:00 - 17:59 | Evening   | 38,1 | 66  | 26,6  | 26,6  | 19,26 | 562,34 | 110,07 |
| 2019/06/14 | CH2206 | Male | Three y/o | Control | Control | Feed Day | No | 17:15 | 17:00 - 17:59 | Evening   | 37,8 | 58  | 63,6  | 63,6  | 18,95 | 551,90 | 140,11 |
| 2019/06/14 | CH2205 | Male | Three y/o | Control | Control | Feed Day | No | 17:20 | 17:00 - 17:59 | Evening   | 38,0 | 77  | 21,6  | 21,6  | 19,15 | 574,39 | 102,94 |
| 2019/06/14 | CH2206 | Male | Three y/o | Control | Control | Feed Day | No | 17:20 | 17:00 - 17:59 | Evening   | 37,8 | 46  | 49,8  | 49,8  | 18,95 | 532,38 | 131,65 |
| 2019/06/14 | CH2205 | Male | Three y/o | Control | Control | Feed Day | No | 17:25 | 17:00 - 17:59 | Evening   | 38,0 | 79  | 20,8  | 20,8  | 19,15 | 576,36 | 101,65 |
| 2019/06/14 | CH2206 | Male | Three y/o | Control | Control | Feed Day | No | 17:25 | 17:00 - 17:59 | Evening   | 37,8 | 79  | 56,2  | 56,2  | 18,95 | 576,36 | 135,83 |
| 2019/06/14 | CH2205 | Male | Three y/o | Control | Control | Feed Day | No | 17:30 | 17:00 - 17:59 | Evening   | 37,9 | 55  | 29,4  | 29,4  | 19,05 | 547,52 | 113,50 |
| 2019/06/14 | CH2206 | Male | Three y/o | Control | Control | Feed Day | No | 17:30 | 17:00 - 17:59 | Evening   | 37,7 | 79  | 52,0  | 52,0  | 18,85 | 576,36 | 133,14 |
| 2019/06/14 | CH2205 | Male | Three y/o | Control | Control | Feed Day | No | 17:35 | 17:00 - 17:59 | Evening   | 37,9 | 75  | 24,0  | 24,0  | 19,05 | 572,36 | 106,55 |
| 2019/06/14 | CH2206 | Male | Three y/o | Control | Control | Feed Day | No | 17:35 | 17:00 - 17:59 | Evening   | 37,5 | 82  | 44,2  | 44,2  | 18,65 | 579,19 | 127,53 |
| 2019/06/14 | CH2205 | Male | Three y/o | Control | Control | Feed Day | No | 17:40 | 17:00 - 17:59 | Evening   | 37,9 | 90  | 16,8  | 16,8  | 19,05 | 586,16 | 94,37  |
| 2019/06/14 | CH2206 | Male | Three y/o | Control | Control | Feed Day | No | 17:40 | 17:00 - 17:59 | Evening   | 37,7 | 41  | 12,6  | 12,6  | 18,85 | 522,29 | 84,59  |
| 2019/06/14 | CH2205 | Male | Three y/o | Control | Control | Feed Day | No | 17:45 | 17:00 - 17:59 | Evening   | 37,9 | 68  | 19,6  | 19,6  | 19,05 | 564,71 | 99,63  |
| 2019/06/14 | CH2206 | Male | Three y/o | Control | Control | Feed Day | No | 17:45 | 17:00 - 17:59 | Evening   | 37,8 | 78  | 10,8  | 10,8  | 18,95 | 575,38 | 79,36  |
| 2019/06/14 | CH2205 | Male | Three y/o | Control | Control | Feed Day | No | 17:50 | 17:00 - 17:59 | Evening   | 37,9 | 82  | 45,2  | 45,2  | 19,05 | 579,19 | 128,30 |
| 2019/06/14 | CH2206 | Male | Three y/o | Control | Control | Feed Day | No | 17:50 | 17:00 - 17:59 | Evening   | 37,8 | 66  | 13,2  | 13,2  | 18,95 | 562,34 | 86,17  |
| 2019/06/14 | CH2205 | Male | Three y/o | Control | Control | Feed Day | No | 17:55 | 17:00 - 17:59 | Evening   | 37,9 | 72  | 17,2  | 17,2  | 19,05 | 569,20 | 95,17  |
| 2019/06/14 | CH2206 | Male | Three y/o | Control | Control | Feed Day | No | 17:55 | 17:00 - 17:59 | Evening   | 37,9 | 45  | 12,2  | 12,2  | 19,05 | 530,47 | 83,49  |
| 2019/06/14 | CH2205 | Male | Three y/o | Control | Control | Feed Day | No | 18:00 | 18:00 - 18:59 | Evening   | 38,0 |     | 11,0  | 11,0  | 19,15 |        | 79,98  |
| 2019/06/14 | CH2206 | Male | Three y/o | Control | Control | Feed Day | No | 18:00 | 18:00 - 18:59 | Evening   | 37,9 | 83  | 14,8  | 14,8  | 19,05 | 580,11 | 90,05  |
| 2019/06/14 | CH2205 | Male | Three y/o | Control | Control | Feed Day | No | 18:05 | 18:00 - 18:59 | Evening   | 37,9 | 75  | 12,4  | 12,4  | 19,05 | 572,36 | 84,04  |
| 2019/06/14 | CH2206 | Male | Three y/o | Control | Control | Feed Day | No | 18:05 | 18:00 - 18:59 | Evening   | 38,0 | 47  | 15,4  | 15,4  | 19,15 | 534,23 | 91,41  |
| 2019/06/14 | CH2205 | Male | Three y/o | Control | Control | Feed Day | No | 18:10 | 18:00 - 18:59 | Evening   | 37,9 |     | 13,4  | 13,4  | 19,05 |        | 86,68  |
| 2019/06/14 | CH2206 | Male | Three y/o | Control | Control | Feed Day | No | 18:10 | 18:00 - 18:59 | Evening   | 38,0 | 79  | 16,6  | 16,6  | 19,15 | 576,36 | 93,96  |
| 2019/06/14 | CH2205 | Male | Three y/o | Control | Control | Feed Day | No | 18:15 | 18:00 - 18:59 | Evening   | 38,0 | 63  | 16,2  | 16,2  | 19,15 | 558,62 | 93,13  |
| 2019/06/14 | CH2206 | Male | Three y/o | Control | Control | Feed Day | No | 18:15 | 18:00 - 18:59 | Evening   | 38,0 | 45  | 20,0  | 20,0  | 19,15 | 530,47 | 100,31 |
| 2019/06/14 | CH2205 | Male | Three y/o | Control | Control | Feed Day | No | 18:20 | 18:00 - 18:59 | Evening   | 38,1 | 65  | 20,0  | 20,0  | 19,26 | 561,12 | 100,31 |
| 2019/06/14 | CH2206 | Male | Three y/o | Control | Control | Feed Day | No | 18:20 | 18:00 - 18:59 | Evening   | 38,0 | 47  | 26,4  | 26,4  | 19,15 | 534,23 | 109,81 |
| 2019/06/14 | CH2205 | Male | Three y/o | Control | Control | Feed Day | No | 18:25 | 18:00 - 18:59 | Evening   | 38,1 | 57  | 12,8  | 12,8  | 19,26 | 550,47 | 85,12  |



|            |        |      |           |         |         |          |    |       |               |         |      |     |      |      |       |        |        |
|------------|--------|------|-----------|---------|---------|----------|----|-------|---------------|---------|------|-----|------|------|-------|--------|--------|
| 2019/06/14 | CH2206 | Male | Three y/o | Control | Control | Feed Day | No | 18:25 | 18:00 - 18:59 | Evening | 38,0 | 47  | 28,6 | 28,6 | 19,15 | 534,23 | 112,56 |
| 2019/06/14 | CH2205 | Male | Three y/o | Control | Control | Feed Day | No | 18:30 | 18:00 - 18:59 | Evening | 38,1 | 73  | 18,6 | 18,6 | 19,26 | 570,27 | 97,84  |
| 2019/06/14 | CH2206 | Male | Three y/o | Control | Control | Feed Day | No | 18:30 | 18:00 - 18:59 | Evening | 38,0 | 82  | 22,2 | 22,2 | 19,15 | 579,19 | 103,88 |
| 2019/06/14 | CH2205 | Male | Three y/o | Control | Control | Feed Day | No | 18:35 | 18:00 - 18:59 | Evening | 38,1 | 76  | 17,2 | 17,2 | 19,26 | 573,39 | 95,17  |
| 2019/06/14 | CH2206 | Male | Three y/o | Control | Control | Feed Day | No | 18:35 | 18:00 - 18:59 | Evening | 38,0 | 49  | 15,2 | 15,2 | 19,15 | 537,80 | 90,96  |
| 2019/06/14 | CH2205 | Male | Three y/o | Control | Control | Feed Day | No | 18:40 | 18:00 - 18:59 | Evening | 38,1 | 66  | 15,4 | 15,4 | 19,26 | 562,34 | 91,41  |
| 2019/06/14 | CH2206 | Male | Three y/o | Control | Control | Feed Day | No | 18:40 | 18:00 - 18:59 | Evening | 38,0 | 86  | 13,4 | 13,4 | 19,15 | 582,77 | 86,68  |
| 2019/06/14 | CH2205 | Male | Three y/o | Control | Control | Feed Day | No | 18:45 | 18:00 - 18:59 | Evening | 38,1 |     | 13,4 | 13,4 | 19,26 |        | 86,68  |
| 2019/06/14 | CH2206 | Male | Three y/o | Control | Control | Feed Day | No | 18:45 | 18:00 - 18:59 | Evening | 38,0 | 89  | 9,2  | 9,2  | 19,15 | 585,33 | 73,94  |
| 2019/06/14 | CH2205 | Male | Three y/o | Control | Control | Feed Day | No | 18:50 | 18:00 - 18:59 | Evening | 38,1 | 71  | 18,0 | 18,0 | 19,26 | 568,10 | 96,72  |
| 2019/06/14 | CH2206 | Male | Three y/o | Control | Control | Feed Day | No | 18:50 | 18:00 - 18:59 | Evening | 38,0 | 48  | 10,6 | 10,6 | 19,15 | 536,04 | 78,73  |
| 2019/06/14 | CH2205 | Male | Three y/o | Control | Control | Feed Day | No | 18:55 | 18:00 - 18:59 | Evening | 38,1 | 71  | 18,2 | 18,2 | 19,26 | 568,10 | 97,10  |
| 2019/06/14 | CH2206 | Male | Three y/o | Control | Control | Feed Day | No | 18:55 | 18:00 - 18:59 | Evening | 38,0 | 88  | 13,4 | 13,4 | 19,15 | 584,49 | 86,68  |
| 2019/06/14 | CH2205 | Male | Three y/o | Control | Control | Feed Day | No | 19:00 | 19:00 - 19:59 | Evening | 38,2 | 53  | 14,0 | 14,0 | 19,36 | 544,43 | 88,17  |
| 2019/06/14 | CH2206 | Male | Three y/o | Control | Control | Feed Day | No | 19:00 | 19:00 - 19:59 | Evening | 38,0 | 83  | 7,6  | 7,6  | 19,15 | 580,11 | 67,49  |
| 2019/06/14 | CH2205 | Male | Three y/o | Control | Control | Feed Day | No | 19:05 | 19:00 - 19:59 | Evening | 38,2 | 74  | 13,6 | 13,6 | 19,36 | 571,33 | 87,18  |
| 2019/06/14 | CH2206 | Male | Three y/o | Control | Control | Feed Day | No | 19:05 | 19:00 - 19:59 | Evening | 38,0 | 97  | 66,0 | 66,0 | 19,15 | 591,66 | 141,40 |
| 2019/06/14 | CH2205 | Male | Three y/o | Control | Control | Feed Day | No | 19:10 | 19:00 - 19:59 | Evening | 38,2 | 68  | 16,8 | 16,8 | 19,36 | 564,71 | 94,37  |
| 2019/06/14 | CH2206 | Male | Three y/o | Control | Control | Feed Day | No | 19:10 | 19:00 - 19:59 | Evening | 37,9 | 91  | 66,4 | 66,4 | 19,05 | 586,98 | 141,61 |
| 2019/06/14 | CH2205 | Male | Three y/o | Control | Control | Feed Day | No | 19:15 | 19:00 - 19:59 | Evening | 38,2 | 68  | 15,4 | 15,4 | 19,36 | 564,71 | 91,41  |
| 2019/06/14 | CH2206 | Male | Three y/o | Control | Control | Feed Day | No | 19:15 | 19:00 - 19:59 | Evening | 37,9 | 86  | 62,4 | 62,4 | 19,05 | 582,77 | 139,45 |
| 2019/06/14 | CH2205 | Male | Three y/o | Control | Control | Feed Day | No | 19:20 | 19:00 - 19:59 | Evening | 38,2 | 55  | 11,8 | 11,8 | 19,36 | 547,52 | 82,36  |
| 2019/06/14 | CH2206 | Male | Three y/o | Control | Control | Feed Day | No | 19:20 | 19:00 - 19:59 | Evening | 37,9 | 58  | 52,2 | 52,2 | 19,05 | 551,90 | 133,27 |
| 2019/06/14 | CH2205 | Male | Three y/o | Control | Control | Feed Day | No | 19:25 | 19:00 - 19:59 | Evening | 38,2 | 63  | 25,4 | 25,4 | 19,36 | 558,62 | 108,49 |
| 2019/06/14 | CH2206 | Male | Three y/o | Control | Control | Feed Day | No | 19:25 | 19:00 - 19:59 | Evening | 37,9 | 86  | 56,2 | 56,2 | 19,05 | 582,77 | 135,83 |
| 2019/06/14 | CH2205 | Male | Three y/o | Control | Control | Feed Day | No | 19:30 | 19:00 - 19:59 | Evening | 38,2 | 86  | 14,6 | 14,6 | 19,36 | 582,77 | 89,59  |
| 2019/06/14 | CH2206 | Male | Three y/o | Control | Control | Feed Day | No | 19:30 | 19:00 - 19:59 | Evening | 37,9 | 44  | 50,2 | 50,2 | 19,05 | 528,51 | 131,92 |
| 2019/06/14 | CH2205 | Male | Three y/o | Control | Control | Feed Day | No | 19:35 | 19:00 - 19:59 | Evening | 38,2 | 88  | 16,0 | 16,0 | 19,36 | 584,49 | 92,71  |
| 2019/06/14 | CH2206 | Male | Three y/o | Control | Control | Feed Day | No | 19:35 | 19:00 - 19:59 | Evening | 37,9 | 80  | 59,8 | 59,8 | 19,05 | 577,31 | 137,98 |
| 2019/06/14 | CH2205 | Male | Three y/o | Control | Control | Feed Day | No | 19:40 | 19:00 - 19:59 | Evening | 38,2 | 65  | 18,0 | 18,0 | 19,36 | 561,12 | 96,72  |
| 2019/06/14 | CH2206 | Male | Three y/o | Control | Control | Feed Day | No | 19:40 | 19:00 - 19:59 | Evening | 37,8 | 80  | 63,4 | 63,4 | 18,95 | 577,31 | 140,00 |
| 2019/06/14 | CH2205 | Male | Three y/o | Control | Control | Feed Day | No | 19:45 | 19:00 - 19:59 | Evening | 38,2 | 100 | 18,6 | 18,6 | 19,36 | 593,87 | 97,84  |
| 2019/06/14 | CH2206 | Male | Three y/o | Control | Control | Feed Day | No | 19:45 | 19:00 - 19:59 | Evening | 37,8 | 44  | 61,4 | 61,4 | 18,95 | 528,51 | 138,89 |
| 2019/06/14 | CH2205 | Male | Three y/o | Control | Control | Feed Day | No | 19:50 | 19:00 - 19:59 | Evening | 38,2 | 54  | 16,2 | 16,2 | 19,36 | 545,99 | 93,13  |
| 2019/06/14 | CH2206 | Male | Three y/o | Control | Control | Feed Day | No | 19:50 | 19:00 - 19:59 | Evening | 37,8 | 57  | 65,6 | 65,6 | 18,95 | 550,47 | 141,19 |
| 2019/06/14 | CH2205 | Male | Three y/o | Control | Control | Feed Day | No | 19:55 | 19:00 - 19:59 | Evening | 38,2 | 69  | 18,0 | 18,0 | 19,36 | 565,86 | 96,72  |
| 2019/06/14 | CH2206 | Male | Three y/o | Control | Control | Feed Day | No | 19:55 | 19:00 - 19:59 | Evening | 37,8 | 88  | 68,2 | 68,2 | 18,95 | 584,49 | 142,53 |
| 2019/06/14 | CH2205 | Male | Three y/o | Control | Control | Feed Day | No | 20:00 | 20:00 - 20:59 | Night   | 38,2 | 80  | 24,4 | 24,4 | 19,36 | 577,31 | 107,11 |
| 2019/06/14 | CH2206 | Male | Three y/o | Control | Control | Feed Day | No | 20:00 | 20:00 - 20:59 | Night   | 37,8 | 49  | 62,2 | 62,2 | 18,95 | 537,80 | 139,34 |
| 2019/06/14 | CH2205 | Male | Three y/o | Control | Control | Feed Day | No | 20:05 | 20:00 - 20:59 | Night   | 38,2 | 81  | 18,8 | 18,8 | 19,36 | 578,26 | 98,20  |
| 2019/06/14 | CH2206 | Male | Three y/o | Control | Control | Feed Day | No | 20:05 | 20:00 - 20:59 | Night   | 37,8 | 76  | 61,6 | 61,6 | 18,95 | 573,39 | 139,00 |
| 2019/06/14 | CH2205 | Male | Three y/o | Control | Control | Feed Day | No | 20:10 | 20:00 - 20:59 | Night   | 38,2 | 62  | 18,0 | 18,0 | 19,36 | 557,33 | 96,72  |
| 2019/06/14 | CH2206 | Male | Three y/o | Control | Control | Feed Day | No | 20:10 | 20:00 - 20:59 | Night   | 37,8 | 70  | 54,6 | 54,6 | 18,95 | 566,99 | 134,83 |
| 2019/06/14 | CH2205 | Male | Three y/o | Control | Control | Feed Day | No | 20:15 | 20:00 - 20:59 | Night   | 38,2 | 84  | 16,4 | 16,4 | 19,36 | 581,01 | 93,55  |
| 2019/06/14 | CH2206 | Male | Three y/o | Control | Control | Feed Day | No | 20:15 | 20:00 - 20:59 | Night   | 37,8 | 93  | 53,4 | 53,4 | 18,95 | 588,58 | 134,06 |
| 2019/06/14 | CH2205 | Male | Three y/o | Control | Control | Feed Day | No | 20:20 | 20:00 - 20:59 | Night   | 38,2 | 60  | 16,6 | 16,6 | 19,36 | 554,67 | 93,96  |
| 2019/06/14 | CH2206 | Male | Three y/o | Control | Control | Feed Day | No | 20:20 | 20:00 - 20:59 | Night   | 37,8 | 82  | 47,0 | 47,0 | 18,95 | 579,19 | 129,65 |
| 2019/06/14 | CH2205 | Male | Three y/o | Control | Control | Feed Day | No | 20:25 | 20:00 - 20:59 | Night   | 38,2 | 63  | 16,2 | 16,2 | 19,36 | 558,62 | 93,13  |
| 2019/06/14 | CH2206 | Male | Three y/o | Control | Control | Feed Day | No | 20:25 | 20:00 - 20:59 | Night   | 37,8 | 55  | 47,2 | 47,2 | 18,95 | 547,52 | 129,80 |
| 2019/06/14 | CH2205 | Male | Three y/o | Control | Control | Feed Day | No | 20:30 | 20:00 - 20:59 | Night   | 38,2 | 58  | 20,6 | 20,6 | 19,36 | 551,90 | 101,32 |
| 2019/06/14 | CH2206 | Male | Three y/o | Control | Control | Feed Day | No | 20:30 | 20:00 - 20:59 | Night   | 37,8 | 41  | 50,6 | 50,6 | 18,95 | 522,29 | 132,20 |
| 2019/06/14 | CH2205 | Male | Three y/o | Control | Control | Feed Day | No | 20:35 | 20:00 - 20:59 | Night   | 38,2 | 77  | 18,0 | 18,0 | 19,36 | 574,39 | 96,72  |
| 2019/06/14 | CH2206 | Male | Three y/o | Control | Control | Feed Day | No | 20:35 | 20:00 - 20:59 | Night   | 37,8 | 90  | 50,6 | 50,6 | 18,95 | 586,16 | 132,20 |
| 2019/06/14 | CH2205 | Male | Three y/o | Control | Control | Feed Day | No | 20:40 | 20:00 - 20:59 | Night   | 38,2 | 84  | 15,8 | 15,8 | 19,36 | 581,01 | 92,28  |
| 2019/06/14 | CH2206 | Male | Three y/o | Control | Control | Feed Day | No | 20:40 | 20:00 - 20:59 | Night   | 37,7 | 79  | 57,2 | 57,2 | 18,85 | 576,36 | 136,44 |
| 2019/06/14 | CH2205 | Male | Three y/o | Control | Control | Feed Day | No | 20:45 | 20:00 - 20:59 | Night   | 38,2 | 59  | 17,0 | 17,0 | 19,36 | 553,30 | 94,77  |
| 2019/06/14 | CH2206 | Male | Three y/o | Control | Control | Feed Day | No | 20:45 | 20:00 - 20:59 | Night   | 37,7 | 63  | 65,4 | 65,4 | 18,85 | 558,62 | 141,08 |
| 2019/06/14 | CH2205 | Male | Three y/o | Control | Control | Feed Day | No | 20:50 | 20:00 - 20:59 | Night   | 38,2 | 50  | 18,2 | 18,2 | 19,36 | 539,52 | 97,10  |
| 2019/06/14 | CH2206 | Male | Three y/o | Control | Control | Feed Day | No | 20:50 | 20:00 - 20:59 | Night   | 37,7 | 53  | 60,6 | 60,6 | 18,85 | 544,43 | 138,44 |
| 2019/06/14 | CH2205 | Male | Three y/o | Control | Control | Feed Day | No | 20:55 | 20:00 - 20:59 | Night   | 38,2 | 78  | 19,0 | 19,0 | 19,36 | 575,38 | 98,56  |
| 2019/06/14 | CH2206 | Male | Three y/o | Control | Control | Feed Day | No | 20:55 | 20:00 - 20:59 | Night   | 37,7 | 91  | 33,2 | 33,2 | 18,85 | 586,98 | 117,68 |
| 2019/06/14 | CH2205 | Male | Three y/o | Control | Control | Feed Day | No | 21:00 | 21:00 - 21:59 | Night   | 38,2 | 88  | 14,2 | 14,2 | 19,36 | 584,49 | 88,65  |
| 2019/06/14 | CH2206 | Male | Three y/o | Control | Control | Feed Day | No | 21:00 | 21:00 - 21:59 | Night   | 37,7 | 64  | 49,2 | 49,2 | 18,85 | 559,88 | 131,23 |
| 2019/06/14 | CH2205 | Male | Three y/o | Control | Control | Feed Day | No | 21:05 | 21:00 - 21:59 | Night   | 38,2 | 90  | 13,6 | 13,6 | 19,36 | 586,16 | 87,18  |
| 2019/06/14 | CH2206 | Male | Three y/o | Control | Control | Feed Day | No | 21:05 | 21:00 - 21:59 | Night   | 37,6 | 61  | 50,0 | 50,0 | 18,75 | 556,01 | 131,79 |
| 2019/06/14 | CH2205 | Male | Three y/o | Control | Control | Feed Day | No | 21:10 | 21:00 - 21:59 | Night   | 38,2 | 83  | 17,2 | 17,2 | 19,36 | 580,11 | 95,17  |
| 2019/06/14 | CH2206 | Male | Three y/o | Control | Control | Feed Day | No | 21:10 | 21:00 - 21:59 | Night   | 37,5 | 56  | 26,4 | 26,4 | 18,65 | 549,01 | 109,81 |
| 2019/06/14 | CH2205 | Male | Three y/o | Control | Control | Feed Day | No | 21:15 | 21:00 - 21:59 | Night   | 38,2 | 71  | 17,2 | 17,2 | 19,36 | 568,10 | 95,17  |
| 2019/06/14 | CH2206 | Male | Three y/o | Control | Control | Feed Day | No | 21:15 | 21:00 - 21:59 | Night   | 37,5 | 86  | 12,2 | 12,2 | 18,65 | 582,77 | 83,49  |
| 2019/06/14 | CH2205 | Male | Three y/o | Control | Control | Feed Day | No | 21:20 | 21:00 - 21:59 | Night   | 38,1 | 63  | 17,4 | 17,4 | 19,26 | 558,62 | 95,56  |



|    |            |        |      |           |         |         |          |    |       |               |               |      |     |      |      |       |        |        |
|----|------------|--------|------|-----------|---------|---------|----------|----|-------|---------------|---------------|------|-----|------|------|-------|--------|--------|
|    | 2019/06/14 | CH2206 | Male | Three y/o | Control | Control | Feed Day | No | 21:20 | 21:00 - 21:59 | Night         | 37,4 | 83  | 20,4 | 20,4 | 18,55 | 580,11 | 100,99 |
|    | 2019/06/14 | CH2205 | Male | Three y/o | Control | Control | Feed Day | No | 21:25 | 21:00 - 21:59 | Night         | 38,1 | 67  | 19,2 | 19,2 | 19,26 | 563,53 | 98,92  |
|    | 2019/06/14 | CH2206 | Male | Three y/o | Control | Control | Feed Day | No | 21:25 | 21:00 - 21:59 | Night         | 37,4 | 84  | 23,6 | 23,6 | 18,55 | 581,01 | 105,97 |
|    | 2019/06/14 | CH2205 | Male | Three y/o | Control | Control | Feed Day | No | 21:30 | 21:00 - 21:59 | Night         | 38,1 | 84  | 30,6 | 30,6 | 19,26 | 581,01 | 114,87 |
|    | 2019/06/14 | CH2206 | Male | Three y/o | Control | Control | Feed Day | No | 21:30 | 21:00 - 21:59 | Night         | 37,3 | 57  | 21,4 | 21,4 | 18,46 | 550,47 | 102,63 |
|    | 2019/06/14 | CH2205 | Male | Three y/o | Control | Control | Feed Day | No | 21:35 | 21:00 - 21:59 | Night         | 38,2 | 105 | 24,0 | 24,0 | 19,36 | 597,38 | 106,55 |
|    | 2019/06/14 | CH2206 | Male | Three y/o | Control | Control | Feed Day | No | 21:35 | 21:00 - 21:59 | Night         | 37,5 | 74  | 35,8 | 35,8 | 18,65 | 571,33 | 120,27 |
|    | 2019/06/14 | CH2205 | Male | Three y/o | Control | Control | Feed Day | No | 21:40 | 21:00 - 21:59 | Night         | 38,2 | 97  | 10,8 | 10,8 | 19,36 | 591,66 | 79,36  |
|    | 2019/06/14 | CH2206 | Male | Three y/o | Control | Control | Feed Day | No | 21:40 | 21:00 - 21:59 | Night         | 37,5 | 121 | 83,6 | 83,6 | 18,65 | 607,35 | 149,61 |
|    | 2019/06/14 | CH2205 | Male | Three y/o | Control | Control | Feed Day | No | 21:45 | 21:00 - 21:59 | Night         | 38,1 | 76  | 24,4 | 24,4 | 19,26 | 573,39 | 107,11 |
|    | 2019/06/14 | CH2206 | Male | Three y/o | Control | Control | Feed Day | No | 21:45 | 21:00 - 21:59 | Night         | 37,7 | 109 | 44,0 | 44,0 | 18,85 | 600,04 | 127,37 |
|    | 2019/06/14 | CH2205 | Male | Three y/o | Control | Control | Feed Day | No | 21:50 | 21:00 - 21:59 | Night         | 38,0 | 119 | 17,8 | 17,8 | 19,15 | 606,20 | 96,34  |
|    | 2019/06/14 | CH2206 | Male | Three y/o | Control | Control | Feed Day | No | 21:50 | 21:00 - 21:59 | Night         | 37,5 | 96  | 51,6 | 51,6 | 18,65 | 590,91 | 132,87 |
|    | 2019/06/14 | CH2205 | Male | Three y/o | Control | Control | Feed Day | No | 21:55 | 21:00 - 21:59 | Night         | 38,0 | 88  | 8,8  | 8,8  | 19,15 | 584,49 | 72,43  |
|    | 2019/06/14 | CH2206 | Male | Three y/o | Control | Control | Feed Day | No | 21:55 | 21:00 - 21:59 | Night         | 37,4 | 92  | 65,0 | 65,0 | 18,55 | 587,78 | 140,87 |
|    | 2019/06/14 | CH2205 | Male | Three y/o | Control | Control | Feed Day | No | 22:00 | 22:00 - 22:59 | Night         | 37,9 | 84  | 14,2 | 14,2 | 19,05 | 581,01 | 88,65  |
|    | 2019/06/14 | CH2206 | Male | Three y/o | Control | Control | Feed Day | No | 22:00 | 22:00 - 22:59 | Night         | 37,0 | 46  | 65,2 | 65,2 | 18,16 | 532,38 | 140,97 |
|    | 2019/06/14 | CH2205 | Male | Three y/o | Control | Control | Feed Day | No | 22:05 | 22:00 - 22:59 | Night         | 38,0 | 47  | 19,4 | 19,4 | 19,15 | 534,23 | 99,28  |
|    | 2019/06/14 | CH2206 | Male | Three y/o | Control | Control | Feed Day | No | 22:05 | 22:00 - 22:59 | Night         | 36,9 | 78  | 68,4 | 68,4 | 18,06 | 575,38 | 142,64 |
|    | 2019/06/14 | CH2205 | Male | Three y/o | Control | Control | Feed Day | No | 22:10 | 22:00 - 22:59 | Night         | 37,9 | 86  | 19,4 | 19,4 | 19,05 | 582,77 | 99,28  |
|    | 2019/06/14 | CH2206 | Male | Three y/o | Control | Control | Feed Day | No | 22:10 | 22:00 - 22:59 | Night         | 37,0 | 81  | 62,0 | 62,0 | 18,16 | 578,26 | 139,23 |
|    | 2019/06/14 | CH2205 | Male | Three y/o | Control | Control | Feed Day | No | 22:15 | 22:00 - 22:59 | Night         | 38,0 | 62  | 20,0 | 20,0 | 19,15 | 557,33 | 100,31 |
|    | 2019/06/14 | CH2206 | Male | Three y/o | Control | Control | Feed Day | No | 22:15 | 22:00 - 22:59 | Night         | 37,1 | 45  | 62,4 | 62,4 | 18,26 | 530,47 | 139,45 |
|    | 2019/06/14 | CH2205 | Male | Three y/o | Control | Control | Feed Day | No | 22:20 | 22:00 - 22:59 | Night         | 38,0 | 91  | 12,8 | 12,8 | 19,15 | 586,98 | 85,12  |
|    | 2019/06/14 | CH2206 | Male | Three y/o | Control | Control | Feed Day | No | 22:20 | 22:00 - 22:59 | Night         | 37,3 | 84  | 50,8 | 50,8 | 18,46 | 581,01 | 132,33 |
|    | 2019/06/14 | CH2205 | Male | Three y/o | Control | Control | Feed Day | No | 22:25 | 22:00 - 22:59 | Night         | 37,9 | 60  | 15,8 | 15,8 | 19,05 | 554,67 | 92,28  |
|    | 2019/06/14 | CH2206 | Male | Three y/o | Control | Control | Feed Day | No | 22:25 | 22:00 - 22:59 | Night         | 37,4 | 83  | 9,0  | 9,0  | 18,55 | 580,11 | 73,19  |
|    | 2019/06/14 | CH2205 | Male | Three y/o | Control | Control | Feed Day | No | 22:30 | 22:00 - 22:59 | Night         | 37,9 | 56  | 13,8 | 13,8 | 19,05 | 549,01 | 87,68  |
|    | 2019/06/14 | CH2206 | Male | Three y/o | Control | Control | Feed Day | No | 22:30 | 22:00 - 22:59 | Night         | 37,5 | 78  | 11,0 | 11,0 | 18,65 | 575,38 | 79,98  |
|    | 2019/06/14 | CH2205 | Male | Three y/o | Control | Control | Feed Day | No | 22:35 | 22:00 - 22:59 | Night         | 37,7 | 67  | 15,6 | 15,6 | 18,85 | 563,53 | 91,85  |
|    | 2019/06/14 | CH2206 | Male | Three y/o | Control | Control | Feed Day | No | 22:35 | 22:00 - 22:59 | Night         | 37,5 | 46  | 8,6  | 8,6  | 18,65 | 532,38 | 71,66  |
|    | 2019/06/14 | CH2205 | Male | Three y/o | Control | Control | Feed Day | No | 22:40 | 22:00 - 22:59 | Night         | 37,7 | 88  | 10,8 | 10,8 | 18,85 | 584,49 | 79,36  |
|    | 2019/06/14 | CH2206 | Male | Three y/o | Control | Control | Feed Day | No | 22:40 | 22:00 - 22:59 | Night         | 37,5 | 43  | 8,0  | 8,0  | 18,65 | 526,50 | 69,22  |
|    | 2019/06/14 | CH2205 | Male | Three y/o | Control | Control | Feed Day | No | 22:45 | 22:00 - 22:59 | Night         | 37,7 | 63  | 9,2  | 9,2  | 18,85 | 558,62 | 73,94  |
|    | 2019/06/14 | CH2206 | Male | Three y/o | Control | Control | Feed Day | No | 22:45 | 22:00 - 22:59 | Night         | 37,5 | 82  | 10,4 | 10,4 | 18,65 | 579,19 | 78,08  |
|    | 2019/06/14 | CH2205 | Male | Three y/o | Control | Control | Feed Day | No | 22:50 | 22:00 - 22:59 | Night         | 37,7 | 93  | 11,8 | 11,8 | 18,85 | 588,58 | 82,36  |
|    | 2019/06/14 | CH2206 | Male | Three y/o | Control | Control | Feed Day | No | 22:50 | 22:00 - 22:59 | Night         | 37,4 |     | 8,6  | 8,6  | 18,55 |        | 71,66  |
|    | 2019/06/14 | CH2205 | Male | Three y/o | Control | Control | Feed Day | No | 22:55 | 22:00 - 22:59 | Night         | 37,7 | 65  | 13,0 | 13,0 | 18,85 | 561,12 | 85,65  |
|    | 2019/06/14 | CH2206 | Male | Three y/o | Control | Control | Feed Day | No | 22:55 | 22:00 - 22:59 | Night         | 37,4 | 45  | 12,8 | 12,8 | 18,55 | 530,47 | 85,12  |
|    | 2019/06/14 | CH2205 | Male | Three y/o | Control | Control | Feed Day | No | 23:00 | 23:00 - 23:59 | Night         | 37,7 | 69  | 15,0 | 15,0 | 18,85 | 565,86 | 90,51  |
|    | 2019/06/14 | CH2206 | Male | Three y/o | Control | Control | Feed Day | No | 23:00 | 23:00 - 23:59 | Night         | 37,4 | 77  | 12,4 | 12,4 | 18,55 | 574,39 | 84,04  |
|    | 2019/06/14 | CH2205 | Male | Three y/o | Control | Control | Feed Day | No | 23:05 | 23:00 - 23:59 | Night         | 37,7 | 81  | 10,4 | 10,4 | 18,85 | 578,26 | 78,08  |
|    | 2019/06/14 | CH2206 | Male | Three y/o | Control | Control | Feed Day | No | 23:05 | 23:00 - 23:59 | Night         | 37,5 | 75  | 12,6 | 12,6 | 18,65 | 572,36 | 84,59  |
|    | 2019/06/14 | CH2205 | Male | Three y/o | Control | Control | Feed Day | No | 23:10 | 23:00 - 23:59 | Night         | 37,6 | 62  | 15,6 | 15,6 | 18,75 | 557,33 | 91,85  |
|    | 2019/06/14 | CH2206 | Male | Three y/o | Control | Control | Feed Day | No | 23:10 | 23:00 - 23:59 | Night         | 37,6 | 57  | 15,4 | 15,4 | 18,75 | 550,47 | 91,41  |
|    | 2019/06/14 | CH2205 | Male | Three y/o | Control | Control | Feed Day | No | 23:15 | 23:00 - 23:59 | Night         | 37,6 | 59  | 16,6 | 16,6 | 18,75 | 553,30 | 93,96  |
|    | 2019/06/14 | CH2206 | Male | Three y/o | Control | Control | Feed Day | No | 23:15 | 23:00 - 23:59 | Night         | 37,7 | 74  | 12,4 | 12,4 | 18,85 | 571,33 | 84,04  |
|    | 2019/06/14 | CH2205 | Male | Three y/o | Control | Control | Feed Day | No | 23:20 | 23:00 - 23:59 | Night         | 37,6 |     | 15,8 | 15,8 | 18,75 |        | 92,28  |
|    | 2019/06/14 | CH2206 | Male | Three y/o | Control | Control | Feed Day | No | 23:20 | 23:00 - 23:59 | Night         | 37,7 | 79  | 12,6 | 12,6 | 18,85 | 576,36 | 84,59  |
|    | 2019/06/14 | CH2205 | Male | Three y/o | Control | Control | Feed Day | No | 23:25 | 23:00 - 23:59 | Night         | 37,7 | 59  | 11,4 | 11,4 | 18,85 | 553,30 | 81,19  |
|    | 2019/06/14 | CH2206 | Male | Three y/o | Control | Control | Feed Day | No | 23:25 | 23:00 - 23:59 | Night         | 37,7 | 92  | 11,8 | 11,8 | 18,85 | 587,78 | 82,36  |
|    | 2019/06/14 | CH2205 | Male | Three y/o | Control | Control | Feed Day | No | 23:30 | 23:00 - 23:59 | Night         | 37,7 |     | 13,2 | 13,2 | 18,85 |        | 86,17  |
|    | 2019/06/14 | CH2206 | Male | Three y/o | Control | Control | Feed Day | No | 23:30 | 23:00 - 23:59 | Night         | 37,7 |     | 57,0 | 57,0 | 18,85 |        | 136,32 |
|    | 2019/06/14 | CH2205 | Male | Three y/o | Control | Control | Feed Day | No | 23:35 | 23:00 - 23:59 | Night         | 37,6 |     | 8,0  | 8,0  | 18,75 |        | 69,22  |
|    | 2019/06/14 | CH2206 | Male | Three y/o | Control | Control | Feed Day | No | 23:35 | 23:00 - 23:59 | Night         | 37,7 | 78  | 64,6 | 64,6 | 18,85 | 575,38 | 140,65 |
|    | 2019/06/14 | CH2205 | Male | Three y/o | Control | Control | Feed Day | No | 23:40 | 23:00 - 23:59 | Night         | 37,6 | 54  | 6,4  | 6,4  | 18,75 | 545,99 | 61,70  |
|    | 2019/06/14 | CH2206 | Male | Three y/o | Control | Control | Feed Day | No | 23:40 | 23:00 - 23:59 | Night         | 37,4 | 78  | 60,4 | 60,4 | 18,55 | 575,38 | 138,32 |
|    | 2019/06/14 | CH2205 | Male | Three y/o | Control | Control | Feed Day | No | 23:45 | 23:00 - 23:59 | Night         | 37,6 | 50  | 4,4  | 4,4  | 18,75 | 539,52 | 49,12  |
|    | 2019/06/14 | CH2206 | Male | Three y/o | Control | Control | Feed Day | No | 23:45 | 23:00 - 23:59 | Night         | 37,4 | 84  | 56,2 | 56,2 | 18,55 | 581,01 | 135,83 |
|    | 2019/06/14 | CH2205 | Male | Three y/o | Control | Control | Feed Day | No | 23:50 | 23:00 - 23:59 | Night         | 37,6 | 91  | 6,6  | 6,6  | 18,75 | 586,98 | 62,73  |
|    | 2019/06/14 | CH2206 | Male | Three y/o | Control | Control | Feed Day | No | 23:50 | 23:00 - 23:59 | Night         | 37,3 | 52  | 41,8 | 41,8 | 18,46 | 542,83 | 125,60 |
|    | 2019/06/14 | CH2205 | Male | Three y/o | Control | Control | Feed Day | No | 23:55 | 23:00 - 23:59 | Night         | 37,7 | 89  | 14,4 | 14,4 | 18,85 | 585,33 | 89,12  |
|    | 2019/06/14 | CH2206 | Male | Three y/o | Control | Control | Feed Day | No | 23:55 | 23:00 - 23:59 | Night         | 37,3 | 88  | 50,8 | 50,8 | 18,46 | 584,49 | 132,33 |
| 31 | 2019/06/15 | CH2205 | Male | Three y/o | Control | Control | Feed Day | No | 00:00 | 00:00 - 00:59 | Early Morning | 37,7 | 77  | 11,8 | 11,8 | 18,85 | 574,39 | 82,36  |
|    | 2019/06/15 | CH2206 | Male | Three y/o | Control | Control | Feed Day | No | 00:00 | 00:00 - 00:59 | Early Morning | 37,3 | 48  | 47,8 | 47,8 | 18,46 | 536,04 | 130,23 |
|    | 2019/06/15 | CH2205 | Male | Three y/o | Control | Control | Feed Day | No | 00:05 | 00:00 - 00:59 | Early Morning | 37,7 | 53  | 8,6  | 8,6  | 18,85 | 544,43 | 71,66  |
|    | 2019/06/15 | CH2206 | Male | Three y/o | Control | Control | Feed Day | No | 00:05 | 00:00 - 00:59 | Early Morning | 37,3 | 57  | 52,4 | 52,4 | 18,46 | 550,47 | 133,41 |
|    | 2019/06/15 | CH2205 | Male | Three y/o | Control | Control | Feed Day | No | 00:10 | 00:00 - 00:59 | Early Morning | 37,7 | 40  | 14,0 | 14,0 | 18,85 | 520,09 | 88,17  |
|    | 2019/06/15 | CH2206 | Male | Three y/o | Control | Control | Feed Day | No | 00:10 | 00:00 - 00:59 | Early Morning | 37,3 | 53  | 52,2 | 52,2 | 18,46 | 544,43 | 133,27 |
|    | 2019/06/15 | CH2205 | Male | Three y/o | Control | Control | Feed Day | No | 00:15 | 00:00 - 00:59 | Early Morning | 37,6 | 84  | 15,2 | 15,2 | 18,75 | 581,01 | 90,96  |



|            |        |      |           |         |         |          |    |       |               |               |      |     |       |       |       |        |        |
|------------|--------|------|-----------|---------|---------|----------|----|-------|---------------|---------------|------|-----|-------|-------|-------|--------|--------|
| 2019/06/15 | CH2206 | Male | Three y/o | Control | Control | Feed Day | No | 00:15 | 00:00 - 00:59 | Early Morning | 37,3 | 83  | 49,8  | 49,8  | 18,46 | 580,11 | 131,65 |
| 2019/06/15 | CH2205 | Male | Three y/o | Control | Control | Feed Day | No | 00:20 | 00:00 - 00:59 | Early Morning | 37,6 | 55  | 17,6  | 17,6  | 18,75 | 547,52 | 95,95  |
| 2019/06/15 | CH2206 | Male | Three y/o | Control | Control | Feed Day | No | 00:20 | 00:00 - 00:59 | Early Morning | 37,4 | 113 | 55,6  | 55,6  | 18,55 | 602,58 | 135,46 |
| 2019/06/15 | CH2205 | Male | Three y/o | Control | Control | Feed Day | No | 00:25 | 00:00 - 00:59 | Early Morning | 37,6 | 80  | 20,2  | 20,2  | 18,75 | 577,31 | 100,65 |
| 2019/06/15 | CH2206 | Male | Three y/o | Control | Control | Feed Day | No | 00:25 | 00:00 - 00:59 | Early Morning | 37,4 | 98  | 56,2  | 56,2  | 18,55 | 592,41 | 135,83 |
| 2019/06/15 | CH2205 | Male | Three y/o | Control | Control | Feed Day | No | 00:30 | 00:00 - 00:59 | Early Morning | 37,6 | 62  | 14,8  | 14,8  | 18,75 | 557,33 | 90,05  |
| 2019/06/15 | CH2206 | Male | Three y/o | Control | Control | Feed Day | No | 00:30 | 00:00 - 00:59 | Early Morning | 37,4 | 78  | 67,2  | 67,2  | 18,55 | 575,38 | 142,02 |
| 2019/06/15 | CH2205 | Male | Three y/o | Control | Control | Feed Day | No | 00:35 | 00:00 - 00:59 | Early Morning | 37,6 | 75  | 18,4  | 18,4  | 18,75 | 572,36 | 97,47  |
| 2019/06/15 | CH2206 | Male | Three y/o | Control | Control | Feed Day | No | 00:35 | 00:00 - 00:59 | Early Morning | 37,4 | 69  | 65,4  | 65,4  | 18,55 | 565,86 | 141,08 |
| 2019/06/15 | CH2205 | Male | Three y/o | Control | Control | Feed Day | No | 00:40 | 00:00 - 00:59 | Early Morning | 37,6 | 59  | 21,0  | 21,0  | 18,75 | 553,30 | 101,98 |
| 2019/06/15 | CH2206 | Male | Three y/o | Control | Control | Feed Day | No | 00:40 | 00:00 - 00:59 | Early Morning | 37,5 | 73  | 63,0  | 63,0  | 18,65 | 570,27 | 139,78 |
| 2019/06/15 | CH2205 | Male | Three y/o | Control | Control | Feed Day | No | 00:45 | 00:00 - 00:59 | Early Morning | 37,6 | 79  | 15,4  | 15,4  | 18,75 | 576,36 | 91,41  |
| 2019/06/15 | CH2206 | Male | Three y/o | Control | Control | Feed Day | No | 00:45 | 00:00 - 00:59 | Early Morning | 37,5 | 42  | 62,2  | 62,2  | 18,65 | 524,42 | 139,34 |
| 2019/06/15 | CH2205 | Male | Three y/o | Control | Control | Feed Day | No | 00:50 | 00:00 - 00:59 | Early Morning | 37,6 | 88  | 7,6   | 7,6   | 18,75 | 584,49 | 67,49  |
| 2019/06/15 | CH2206 | Male | Three y/o | Control | Control | Feed Day | No | 00:50 | 00:00 - 00:59 | Early Morning | 37,5 | 90  | 63,8  | 63,8  | 18,65 | 586,16 | 140,22 |
| 2019/06/15 | CH2205 | Male | Three y/o | Control | Control | Feed Day | No | 00:55 | 00:00 - 00:59 | Early Morning | 37,5 |     | 4,2   | 4,2   | 18,65 |        | 47,57  |
| 2019/06/15 | CH2206 | Male | Three y/o | Control | Control | Feed Day | No | 00:55 | 00:00 - 00:59 | Early Morning | 37,5 | 53  | 67,0  | 67,0  | 18,65 | 544,43 | 141,92 |
| 2019/06/15 | CH2205 | Male | Three y/o | Control | Control | Feed Day | No | 01:00 | 01:00 - 01:59 | Early Morning | 37,5 | 56  | 8,6   | 8,6   | 18,65 | 549,01 | 71,66  |
| 2019/06/15 | CH2206 | Male | Three y/o | Control | Control | Feed Day | No | 01:00 | 01:00 - 01:59 | Early Morning | 37,6 | 71  | 66,0  | 66,0  | 18,75 | 568,10 | 141,40 |
| 2019/06/15 | CH2205 | Male | Three y/o | Control | Control | Feed Day | No | 01:05 | 01:00 - 01:59 | Early Morning | 37,5 | 82  | 12,6  | 12,6  | 18,65 | 579,19 | 84,59  |
| 2019/06/15 | CH2206 | Male | Three y/o | Control | Control | Feed Day | No | 01:05 | 01:00 - 01:59 | Early Morning | 37,7 | 76  | 69,6  | 69,6  | 18,85 | 573,39 | 143,24 |
| 2019/06/15 | CH2205 | Male | Three y/o | Control | Control | Feed Day | No | 01:10 | 01:00 - 01:59 | Early Morning | 37,5 | 103 | 11,2  | 11,2  | 18,65 | 596,00 | 80,59  |
| 2019/06/15 | CH2206 | Male | Three y/o | Control | Control | Feed Day | No | 01:10 | 01:00 - 01:59 | Early Morning | 37,7 | 41  | 71,0  | 71,0  | 18,85 | 522,29 | 143,93 |
| 2019/06/15 | CH2205 | Male | Three y/o | Control | Control | Feed Day | No | 01:15 | 01:00 - 01:59 | Early Morning | 37,5 | 57  | 11,0  | 11,0  | 18,65 | 550,47 | 79,98  |
| 2019/06/15 | CH2206 | Male | Three y/o | Control | Control | Feed Day | No | 01:15 | 01:00 - 01:59 | Early Morning | 37,7 | 65  | 64,0  | 64,0  | 18,85 | 561,12 | 140,33 |
| 2019/06/15 | CH2205 | Male | Three y/o | Control | Control | Feed Day | No | 01:20 | 01:00 - 01:59 | Early Morning | 37,5 | 56  | 9,6   | 9,6   | 18,65 | 549,01 | 75,37  |
| 2019/06/15 | CH2206 | Male | Three y/o | Control | Control | Feed Day | No | 01:20 | 01:00 - 01:59 | Early Morning | 37,7 | 48  | 51,8  | 51,8  | 18,85 | 536,04 | 133,01 |
| 2019/06/15 | CH2205 | Male | Three y/o | Control | Control | Feed Day | No | 01:25 | 01:00 - 01:59 | Early Morning | 37,5 | 59  | 11,2  | 11,2  | 18,65 | 553,30 | 80,59  |
| 2019/06/15 | CH2206 | Male | Three y/o | Control | Control | Feed Day | No | 01:25 | 01:00 - 01:59 | Early Morning | 37,7 | 47  | 52,6  | 52,6  | 18,85 | 534,23 | 133,54 |
| 2019/06/15 | CH2205 | Male | Three y/o | Control | Control | Feed Day | No | 01:30 | 01:00 - 01:59 | Early Morning | 37,5 | 55  | 11,0  | 11,0  | 18,65 | 547,52 | 79,98  |
| 2019/06/15 | CH2206 | Male | Three y/o | Control | Control | Feed Day | No | 01:30 | 01:00 - 01:59 | Early Morning | 37,7 | 68  | 51,2  | 51,2  | 18,85 | 564,71 | 132,61 |
| 2019/06/15 | CH2205 | Male | Three y/o | Control | Control | Feed Day | No | 01:35 | 01:00 - 01:59 | Early Morning | 37,5 | 49  | 16,8  | 16,8  | 18,65 | 537,80 | 94,37  |
| 2019/06/15 | CH2206 | Male | Three y/o | Control | Control | Feed Day | No | 01:35 | 01:00 - 01:59 | Early Morning | 37,7 | 56  | 52,2  | 52,2  | 18,85 | 549,01 | 133,27 |
| 2019/06/15 | CH2205 | Male | Three y/o | Control | Control | Feed Day | No | 01:40 | 01:00 - 01:59 | Early Morning | 37,6 | 63  | 9,2   | 9,2   | 18,75 | 558,62 | 73,94  |
| 2019/06/15 | CH2206 | Male | Three y/o | Control | Control | Feed Day | No | 01:40 | 01:00 - 01:59 | Early Morning | 37,7 | 73  | 55,2  | 55,2  | 18,85 | 570,27 | 135,21 |
| 2019/06/15 | CH2205 | Male | Three y/o | Control | Control | Feed Day | No | 01:45 | 01:00 - 01:59 | Early Morning | 37,6 | 83  | 9,4   | 9,4   | 18,75 | 580,11 | 74,66  |
| 2019/06/15 | CH2206 | Male | Three y/o | Control | Control | Feed Day | No | 01:45 | 01:00 - 01:59 | Early Morning | 37,7 | 51  | 50,2  | 50,2  | 18,85 | 541,20 | 131,92 |
| 2019/06/15 | CH2205 | Male | Three y/o | Control | Control | Feed Day | No | 01:50 | 01:00 - 01:59 | Early Morning | 37,6 | 69  | 10,4  | 10,4  | 18,75 | 565,86 | 78,08  |
| 2019/06/15 | CH2206 | Male | Three y/o | Control | Control | Feed Day | No | 01:50 | 01:00 - 01:59 | Early Morning | 37,7 | 70  | 43,0  | 43,0  | 18,85 | 566,99 | 126,58 |
| 2019/06/15 | CH2205 | Male | Three y/o | Control | Control | Feed Day | No | 01:55 | 01:00 - 01:59 | Early Morning | 37,6 | 90  | 12,0  | 12,0  | 18,75 | 586,16 | 82,93  |
| 2019/06/15 | CH2206 | Male | Three y/o | Control | Control | Feed Day | No | 01:55 | 01:00 - 01:59 | Early Morning | 37,7 | 69  | 41,4  | 41,4  | 18,85 | 565,86 | 125,27 |
| 2019/06/15 | CH2205 | Male | Three y/o | Control | Control | Feed Day | No | 02:00 | 02:00 - 02:59 | Early Morning | 37,6 | 81  | 18,2  | 18,2  | 18,75 | 578,26 | 97,10  |
| 2019/06/15 | CH2206 | Male | Three y/o | Control | Control | Feed Day | No | 02:00 | 02:00 - 02:59 | Early Morning | 37,7 | 60  | 38,2  | 38,2  | 18,85 | 554,67 | 122,50 |
| 2019/06/15 | CH2205 | Male | Three y/o | Control | Control | Feed Day | No | 02:05 | 02:00 - 02:59 | Early Morning | 37,6 | 54  | 16,0  | 16,0  | 18,75 | 545,99 | 92,71  |
| 2019/06/15 | CH2206 | Male | Three y/o | Control | Control | Feed Day | No | 02:05 | 02:00 - 02:59 | Early Morning | 37,7 | 45  | 49,2  | 49,2  | 18,85 | 530,47 | 131,23 |
| 2019/06/15 | CH2205 | Male | Three y/o | Control | Control | Feed Day | No | 02:10 | 02:00 - 02:59 | Early Morning | 37,6 | 88  | 13,6  | 13,6  | 18,75 | 584,49 | 87,18  |
| 2019/06/15 | CH2206 | Male | Three y/o | Control | Control | Feed Day | No | 02:10 | 02:00 - 02:59 | Early Morning | 37,5 | 41  | 52,2  | 52,2  | 18,65 | 522,29 | 133,27 |
| 2019/06/15 | CH2205 | Male | Three y/o | Control | Control | Feed Day | No | 02:15 | 02:00 - 02:59 | Early Morning | 37,6 | 134 | 65,4  | 65,4  | 18,75 | 614,33 | 141,08 |
| 2019/06/15 | CH2206 | Male | Three y/o | Control | Control | Feed Day | No | 02:15 | 02:00 - 02:59 | Early Morning | 37,5 | 143 | 72,2  | 72,2  | 18,65 | 618,69 | 144,51 |
| 2019/06/15 | CH2205 | Male | Three y/o | Control | Control | Feed Day | No | 02:20 | 02:00 - 02:59 | Early Morning | 37,6 | 98  | 91,0  | 91,0  | 18,75 | 592,41 | 152,56 |
| 2019/06/15 | CH2206 | Male | Three y/o | Control | Control | Feed Day | No | 02:20 | 02:00 - 02:59 | Early Morning | 37,5 |     | 72,2  | 72,2  | 18,65 |        | 144,51 |
| 2019/06/15 | CH2205 | Male | Three y/o | Control | Control | Feed Day | No | 02:25 | 02:00 - 02:59 | Early Morning | 37,6 | 128 | 21,4  | 21,4  | 18,75 | 611,22 | 102,63 |
| 2019/06/15 | CH2206 | Male | Three y/o | Control | Control | Feed Day | No | 02:25 | 02:00 - 02:59 | Early Morning | 37,5 | 154 | 123,8 | 123,8 | 18,65 | 623,58 | 163,30 |
| 2019/06/15 | CH2205 | Male | Three y/o | Control | Control | Feed Day | No | 02:30 | 02:00 - 02:59 | Early Morning | 37,6 | 117 | 354,6 | 354,6 | 18,75 | 605,02 | 200,34 |
| 2019/06/15 | CH2206 | Male | Three y/o | Control | Control | Feed Day | No | 02:30 | 02:00 - 02:59 | Early Morning | 37,5 |     | 689,0 | 689,0 | 18,65 |        | 223,99 |
| 2019/06/15 | CH2205 | Male | Three y/o | Control | Control | Feed Day | No | 02:35 | 02:00 - 02:59 | Early Morning | 37,7 | 55  | 86,6  | 86,6  | 18,85 | 547,52 | 150,83 |
| 2019/06/15 | CH2206 | Male | Three y/o | Control | Control | Feed Day | No | 02:35 | 02:00 - 02:59 | Early Morning | 37,5 | 128 | 86,8  | 86,8  | 18,65 | 611,22 | 150,91 |
| 2019/06/15 | CH2205 | Male | Three y/o | Control | Control | Feed Day | No | 02:40 | 02:00 - 02:59 | Early Morning | 37,9 | 118 | 89,8  | 89,8  | 19,05 | 605,61 | 152,10 |
| 2019/06/15 | CH2206 | Male | Three y/o | Control | Control | Feed Day | No | 02:40 | 02:00 - 02:59 | Early Morning | 37,7 | 120 | 106,8 | 106,8 | 18,85 | 606,78 | 158,14 |
| 2019/06/15 | CH2205 | Male | Three y/o | Control | Control | Feed Day | No | 02:45 | 02:00 - 02:59 | Early Morning | 37,7 | 123 | 86,6  | 86,6  | 18,85 | 608,49 | 150,83 |
| 2019/06/15 | CH2206 | Male | Three y/o | Control | Control | Feed Day | No | 02:45 | 02:00 - 02:59 | Early Morning | 37,7 | 115 | 30,8  | 30,8  | 18,85 | 603,82 | 115,10 |
| 2019/06/15 | CH2205 | Male | Three y/o | Control | Control | Feed Day | No | 02:50 | 02:00 - 02:59 | Early Morning | 37,7 | 106 | 162,0 | 162,0 | 18,85 | 598,06 | 172,72 |
| 2019/06/15 | CH2206 | Male | Three y/o | Control | Control | Feed Day | No | 02:50 | 02:00 - 02:59 | Early Morning | 37,7 | 111 | 512,4 | 512,4 | 18,85 | 601,33 | 213,42 |
| 2019/06/15 | CH2205 | Male | Three y/o | Control | Control | Feed Day | No | 02:55 | 02:00 - 02:59 | Early Morning | 37,9 |     | 85,4  | 85,4  | 19,05 |        | 150,35 |
| 2019/06/15 | CH2206 | Male | Three y/o | Control | Control | Feed Day | No | 02:55 | 02:00 - 02:59 | Early Morning | 37,8 | 137 | 162,0 | 162,0 | 18,95 | 615,83 | 172,72 |
| 2019/06/15 | CH2205 | Male | Three y/o | Control | Control | Feed Day | No | 03:00 | 03:00 - 03:59 | Early Morning | 37,9 | 97  | 44,4  | 44,4  | 19,05 | 591,66 | 127,69 |
| 2019/06/15 | CH2206 | Male | Three y/o | Control | Control | Feed Day | No | 03:00 | 03:00 - 03:59 | Early Morning | 37,8 | 106 | 112,4 | 112,4 | 18,95 | 598,06 | 159,92 |
| 2019/06/15 | CH2205 | Male | Three y/o | Control | Control | Feed Day | No | 03:05 | 03:00 - 03:59 | Early Morning | 37,7 |     | 36,6  | 36,6  | 18,85 |        | 121,03 |
| 2019/06/15 | CH2206 | Male | Three y/o | Control | Control | Feed Day | No | 03:05 | 03:00 - 03:59 | Early Morning | 37,9 | 119 | 219,0 | 219,0 | 19,05 | 606,20 | 183,31 |
| 2019/06/15 | CH2205 | Male | Three y/o | Control | Control | Feed Day | No | 03:10 | 03:00 - 03:59 | Early Morning | 37,7 | 128 | 85,4  | 85,4  | 18,85 | 611,22 | 150,35 |



|            |        |      |           |         |         |          |    |       |               |               |      |     |       |       |       |        |        |
|------------|--------|------|-----------|---------|---------|----------|----|-------|---------------|---------------|------|-----|-------|-------|-------|--------|--------|
| 2019/06/15 | CH2206 | Male | Three y/o | Control | Control | Feed Day | No | 03:10 | 03:00 - 03:59 | Early Morning | 37,9 | 54  | 241,0 | 241,0 | 19,05 | 545,99 | 186,69 |
| 2019/06/15 | CH2205 | Male | Three y/o | Control | Control | Feed Day | No | 03:15 | 03:00 - 03:59 | Early Morning | 37,7 | 128 | 27,0  | 27,0  | 18,85 | 611,22 | 110,58 |
| 2019/06/15 | CH2206 | Male | Three y/o | Control | Control | Feed Day | No | 03:15 | 03:00 - 03:59 | Early Morning | 37,9 | 104 | 70,2  | 70,2  | 19,05 | 596,69 | 143,54 |
| 2019/06/15 | CH2205 | Male | Three y/o | Control | Control | Feed Day | No | 03:20 | 03:00 - 03:59 | Early Morning | 37,6 | 69  | 23,6  | 23,6  | 18,75 | 565,86 | 105,97 |
| 2019/06/15 | CH2206 | Male | Three y/o | Control | Control | Feed Day | No | 03:20 | 03:00 - 03:59 | Early Morning | 37,8 | 90  | 105,8 | 105,8 | 18,95 | 586,16 | 157,81 |
| 2019/06/15 | CH2205 | Male | Three y/o | Control | Control | Feed Day | No | 03:25 | 03:00 - 03:59 | Early Morning | 37,5 | 121 | 31,6  | 31,6  | 18,65 | 607,35 | 115,98 |
| 2019/06/15 | CH2206 | Male | Three y/o | Control | Control | Feed Day | No | 03:25 | 03:00 - 03:59 | Early Morning | 37,4 | 53  | 67,8  | 67,8  | 18,55 | 544,43 | 142,33 |
| 2019/06/15 | CH2205 | Male | Three y/o | Control | Control | Feed Day | No | 03:30 | 03:00 - 03:59 | Early Morning | 37,4 | 94  | 21,6  | 21,6  | 18,55 | 589,37 | 102,94 |
| 2019/06/15 | CH2206 | Male | Three y/o | Control | Control | Feed Day | No | 03:30 | 03:00 - 03:59 | Early Morning | 37,2 | 85  | 64,6  | 64,6  | 18,36 | 581,90 | 140,65 |
| 2019/06/15 | CH2205 | Male | Three y/o | Control | Control | Feed Day | No | 03:35 | 03:00 - 03:59 | Early Morning | 37,4 |     | 13,0  | 13,0  | 18,55 |        | 85,65  |
| 2019/06/15 | CH2206 | Male | Three y/o | Control | Control | Feed Day | No | 03:35 | 03:00 - 03:59 | Early Morning | 37,1 | 50  | 66,0  | 66,0  | 18,26 | 539,52 | 141,40 |
| 2019/06/15 | CH2205 | Male | Three y/o | Control | Control | Feed Day | No | 03:40 | 03:00 - 03:59 | Early Morning | 37,4 | 56  | 3,2   | 3,2   | 18,55 | 549,01 | 38,49  |
| 2019/06/15 | CH2206 | Male | Three y/o | Control | Control | Feed Day | No | 03:40 | 03:00 - 03:59 | Early Morning | 37,1 | 77  | 54,6  | 54,6  | 18,26 | 574,39 | 134,83 |
| 2019/06/15 | CH2205 | Male | Three y/o | Control | Control | Feed Day | No | 03:45 | 03:00 - 03:59 | Early Morning | 37,3 | 50  | 6,4   | 6,4   | 18,46 | 539,52 | 61,70  |
| 2019/06/15 | CH2206 | Male | Three y/o | Control | Control | Feed Day | No | 03:45 | 03:00 - 03:59 | Early Morning | 37,0 | 79  | 62,4  | 62,4  | 18,16 | 576,36 | 139,45 |
| 2019/06/15 | CH2205 | Male | Three y/o | Control | Control | Feed Day | No | 03:50 | 03:00 - 03:59 | Early Morning | 37,2 | 46  | 6,4   | 6,4   | 18,36 | 532,38 | 61,70  |
| 2019/06/15 | CH2206 | Male | Three y/o | Control | Control | Feed Day | No | 03:50 | 03:00 - 03:59 | Early Morning | 37,1 | 84  | 61,0  | 61,0  | 18,26 | 581,01 | 138,67 |
| 2019/06/15 | CH2205 | Male | Three y/o | Control | Control | Feed Day | No | 03:55 | 03:00 - 03:59 | Early Morning | 37,1 | 70  | 12,8  | 12,8  | 18,26 | 566,99 | 85,12  |
| 2019/06/15 | CH2206 | Male | Three y/o | Control | Control | Feed Day | No | 03:55 | 03:00 - 03:59 | Early Morning | 37,1 | 46  | 63,8  | 63,8  | 18,26 | 532,38 | 140,22 |
| 2019/06/15 | CH2205 | Male | Three y/o | Control | Control | Feed Day | No | 04:00 | 04:00 - 04:59 | Morning       | 37,1 | 73  | 9,2   | 9,2   | 18,26 | 570,27 | 73,94  |
| 2019/06/15 | CH2206 | Male | Three y/o | Control | Control | Feed Day | No | 04:00 | 04:00 - 04:59 | Morning       | 37,1 | 49  | 66,2  | 66,2  | 18,26 | 537,80 | 141,50 |
| 2019/06/15 | CH2205 | Male | Three y/o | Control | Control | Feed Day | No | 04:05 | 04:00 - 04:59 | Morning       | 37,0 | 80  | 6,2   | 6,2   | 18,16 | 577,31 | 60,63  |
| 2019/06/15 | CH2206 | Male | Three y/o | Control | Control | Feed Day | No | 04:05 | 04:00 - 04:59 | Morning       | 37,0 | 52  | 71,0  | 71,0  | 18,16 | 542,83 | 143,93 |
| 2019/06/15 | CH2205 | Male | Three y/o | Control | Control | Feed Day | No | 04:10 | 04:00 - 04:59 | Morning       | 37,0 | 46  | 8,0   | 8,0   | 18,16 | 532,38 | 69,22  |
| 2019/06/15 | CH2206 | Male | Three y/o | Control | Control | Feed Day | No | 04:10 | 04:00 - 04:59 | Morning       | 36,9 | 45  | 61,0  | 61,0  | 18,06 | 530,47 | 138,67 |
| 2019/06/15 | CH2205 | Male | Three y/o | Control | Control | Feed Day | No | 04:15 | 04:00 - 04:59 | Morning       | 36,8 | 77  | 6,4   | 6,4   | 17,96 | 574,39 | 61,70  |
| 2019/06/15 | CH2206 | Male | Three y/o | Control | Control | Feed Day | No | 04:15 | 04:00 - 04:59 | Morning       | 36,8 | 47  | 62,0  | 62,0  | 17,96 | 534,23 | 139,23 |
| 2019/06/15 | CH2205 | Male | Three y/o | Control | Control | Feed Day | No | 04:20 | 04:00 - 04:59 | Morning       | 36,9 | 62  | 10,6  | 10,6  | 18,06 | 557,33 | 78,73  |
| 2019/06/15 | CH2206 | Male | Three y/o | Control | Control | Feed Day | No | 04:20 | 04:00 - 04:59 | Morning       | 36,8 | 47  | 42,0  | 42,0  | 17,96 | 534,23 | 125,77 |
| 2019/06/15 | CH2205 | Male | Three y/o | Control | Control | Feed Day | No | 04:25 | 04:00 - 04:59 | Morning       | 36,9 | 51  | 38,4  | 38,4  | 18,06 | 541,20 | 122,68 |
| 2019/06/15 | CH2206 | Male | Three y/o | Control | Control | Feed Day | No | 04:25 | 04:00 - 04:59 | Morning       | 36,8 | 46  | 48,4  | 48,4  | 17,96 | 532,38 | 130,66 |
| 2019/06/15 | CH2205 | Male | Three y/o | Control | Control | Feed Day | No | 04:30 | 04:00 - 04:59 | Morning       | 37,0 | 74  | 15,4  | 15,4  | 18,16 | 571,33 | 91,41  |
| 2019/06/15 | CH2206 | Male | Three y/o | Control | Control | Feed Day | No | 04:30 | 04:00 - 04:59 | Morning       | 36,8 | 49  | 44,2  | 44,2  | 17,96 | 537,80 | 127,53 |
| 2019/06/15 | CH2205 | Male | Three y/o | Control | Control | Feed Day | No | 04:35 | 04:00 - 04:59 | Morning       | 37,1 | 78  | 15,0  | 15,0  | 18,26 | 575,38 | 90,51  |
| 2019/06/15 | CH2206 | Male | Three y/o | Control | Control | Feed Day | No | 04:35 | 04:00 - 04:59 | Morning       | 36,9 | 49  | 48,2  | 48,2  | 18,06 | 537,80 | 130,52 |
| 2019/06/15 | CH2205 | Male | Three y/o | Control | Control | Feed Day | No | 04:40 | 04:00 - 04:59 | Morning       | 37,1 | 65  | 8,4   | 8,4   | 18,26 | 561,12 | 70,86  |
| 2019/06/15 | CH2206 | Male | Three y/o | Control | Control | Feed Day | No | 04:40 | 04:00 - 04:59 | Morning       | 36,9 | 49  | 45,6  | 45,6  | 18,06 | 537,80 | 128,61 |
| 2019/06/15 | CH2205 | Male | Three y/o | Control | Control | Feed Day | No | 04:45 | 04:00 - 04:59 | Morning       | 37,2 | 46  | 5,0   | 5,0   | 18,36 | 532,38 | 53,41  |
| 2019/06/15 | CH2206 | Male | Three y/o | Control | Control | Feed Day | No | 04:45 | 04:00 - 04:59 | Morning       | 37,0 | 98  | 45,4  | 45,4  | 18,16 | 592,41 | 128,45 |
| 2019/06/15 | CH2205 | Male | Three y/o | Control | Control | Feed Day | No | 04:50 | 04:00 - 04:59 | Morning       | 37,1 | 51  | 5,0   | 5,0   | 18,26 | 541,20 | 53,41  |
| 2019/06/15 | CH2206 | Male | Three y/o | Control | Control | Feed Day | No | 04:50 | 04:00 - 04:59 | Morning       | 37,1 | 43  | 36,4  | 36,4  | 18,26 | 526,50 | 120,84 |
| 2019/06/15 | CH2205 | Male | Three y/o | Control | Control | Feed Day | No | 04:55 | 04:00 - 04:59 | Morning       | 37,1 | 87  | 5,6   | 5,6   | 18,26 | 583,64 | 57,21  |
| 2019/06/15 | CH2206 | Male | Three y/o | Control | Control | Feed Day | No | 04:55 | 04:00 - 04:59 | Morning       | 37,1 | 50  | 20,6  | 20,6  | 18,26 | 539,52 | 101,32 |
| 2019/06/15 | CH2205 | Male | Three y/o | Control | Control | Feed Day | No | 05:00 | 05:00 - 05:59 | Morning       | 37,0 | 58  | 124,0 | 124,0 | 18,16 | 551,90 | 163,35 |
| 2019/06/15 | CH2206 | Male | Three y/o | Control | Control | Feed Day | No | 05:00 | 05:00 - 05:59 | Morning       | 37,1 | 43  | 308,0 | 308,0 | 18,26 | 526,50 | 195,35 |
| 2019/06/15 | CH2205 | Male | Three y/o | Control | Control | Feed Day | No | 05:05 | 05:00 - 05:59 | Morning       | 37,1 | 57  | 2,0   | 2,0   | 18,26 | 550,47 | 22,86  |
| 2019/06/15 | CH2206 | Male | Three y/o | Control | Control | Feed Day | No | 05:05 | 05:00 - 05:59 | Morning       | 37,2 | 92  | 21,2  | 21,2  | 18,36 | 587,78 | 102,31 |
| 2019/06/15 | CH2205 | Male | Three y/o | Control | Control | Feed Day | No | 05:10 | 05:00 - 05:59 | Morning       | 37,1 | 85  | 3,4   | 3,4   | 18,26 | 581,90 | 40,51  |
| 2019/06/15 | CH2206 | Male | Three y/o | Control | Control | Feed Day | No | 05:10 | 05:00 - 05:59 | Morning       | 37,1 | 57  | 25,6  | 25,6  | 18,26 | 550,47 | 108,76 |
| 2019/06/15 | CH2205 | Male | Three y/o | Control | Control | Feed Day | No | 05:15 | 05:00 - 05:59 | Morning       | 37,1 | 53  | 2,6   | 2,6   | 18,26 | 544,43 | 31,57  |
| 2019/06/15 | CH2206 | Male | Three y/o | Control | Control | Feed Day | No | 05:15 | 05:00 - 05:59 | Morning       | 37,1 | 52  | 21,4  | 21,4  | 18,26 | 542,83 | 102,63 |
| 2019/06/15 | CH2205 | Male | Three y/o | Control | Control | Feed Day | No | 05:20 | 05:00 - 05:59 | Morning       | 37,1 | 52  | 10,6  | 10,6  | 18,26 | 542,83 | 78,73  |
| 2019/06/15 | CH2206 | Male | Three y/o | Control | Control | Feed Day | No | 05:20 | 05:00 - 05:59 | Morning       | 37,1 | 47  | 18,0  | 18,0  | 18,26 | 534,23 | 96,72  |
| 2019/06/15 | CH2205 | Male | Three y/o | Control | Control | Feed Day | No | 05:25 | 05:00 - 05:59 | Morning       | 37,1 | 94  | 7,4   | 7,4   | 18,26 | 589,37 | 66,59  |
| 2019/06/15 | CH2206 | Male | Three y/o | Control | Control | Feed Day | No | 05:25 | 05:00 - 05:59 | Morning       | 37,1 | 55  | 23,6  | 23,6  | 18,26 | 547,52 | 105,97 |
| 2019/06/15 | CH2205 | Male | Three y/o | Control | Control | Feed Day | No | 05:30 | 05:00 - 05:59 | Morning       | 37,1 |     | 7,6   | 7,6   | 18,26 |        | 67,49  |
| 2019/06/15 | CH2206 | Male | Three y/o | Control | Control | Feed Day | No | 05:30 | 05:00 - 05:59 | Morning       | 37,1 | 52  | 21,6  | 21,6  | 18,26 | 542,83 | 102,94 |
| 2019/06/15 | CH2205 | Male | Three y/o | Control | Control | Feed Day | No | 05:35 | 05:00 - 05:59 | Morning       | 37,0 | 90  | 6,8   | 6,8   | 18,16 | 586,16 | 63,74  |
| 2019/06/15 | CH2206 | Male | Three y/o | Control | Control | Feed Day | No | 05:35 | 05:00 - 05:59 | Morning       | 37,1 | 67  | 17,6  | 17,6  | 18,26 | 563,53 | 95,95  |
| 2019/06/15 | CH2205 | Male | Three y/o | Control | Control | Feed Day | No | 05:40 | 05:00 - 05:59 | Morning       | 37,0 |     | 5,4   | 5,4   | 18,16 |        | 55,99  |
| 2019/06/15 | CH2206 | Male | Three y/o | Control | Control | Feed Day | No | 05:40 | 05:00 - 05:59 | Morning       | 37,2 | 85  | 23,2  | 23,2  | 18,36 | 581,90 | 105,39 |
| 2019/06/15 | CH2205 | Male | Three y/o | Control | Control | Feed Day | No | 05:45 | 05:00 - 05:59 | Morning       | 37,0 | 125 | 5,0   | 5,0   | 18,16 | 609,60 | 53,41  |
| 2019/06/15 | CH2206 | Male | Three y/o | Control | Control | Feed Day | No | 05:45 | 05:00 - 05:59 | Morning       | 37,1 | 90  | 15,6  | 15,6  | 18,26 | 586,16 | 91,85  |
| 2019/06/15 | CH2205 | Male | Three y/o | Control | Control | Feed Day | No | 05:50 | 05:00 - 05:59 | Morning       | 37,0 |     | 5,6   | 5,6   | 18,16 |        | 57,21  |
| 2019/06/15 | CH2206 | Male | Three y/o | Control | Control | Feed Day | No | 05:50 | 05:00 - 05:59 | Morning       | 37,1 | 54  | 21,6  | 21,6  | 18,26 | 545,99 | 102,94 |
| 2019/06/15 | CH2205 | Male | Three y/o | Control | Control | Feed Day | No | 05:55 | 05:00 - 05:59 | Morning       | 37,0 |     | 7,6   | 7,6   | 18,16 |        | 67,49  |
| 2019/06/15 | CH2206 | Male | Three y/o | Control | Control | Feed Day | No | 05:55 | 05:00 - 05:59 | Morning       | 37,1 | 60  | 15,6  | 15,6  | 18,26 | 554,67 | 91,85  |
| 2019/06/15 | CH2205 | Male | Three y/o | Control | Control | Feed Day | No | 06:00 | 06:00 - 06:59 | Morning       | 37,0 | 112 | 9,4   | 9,4   | 18,16 | 601,96 | 74,66  |
| 2019/06/15 | CH2206 | Male | Three y/o | Control | Control | Feed Day | No | 06:00 | 06:00 - 06:59 | Morning       | 37,1 | 49  | 20,4  | 20,4  | 18,26 | 537,80 | 100,99 |
| 2019/06/15 | CH2205 | Male | Three y/o | Control | Control | Feed Day | No | 06:05 | 06:00 - 06:59 | Morning       | 37,0 | 92  | 7,0   | 7,0   | 18,16 | 587,78 | 64,72  |



|            |        |      |           |         |         |          |    |       |               |              |      |     |       |       |       |        |        |
|------------|--------|------|-----------|---------|---------|----------|----|-------|---------------|--------------|------|-----|-------|-------|-------|--------|--------|
| 2019/06/15 | CH2206 | Male | Three y/o | Control | Control | Feed Day | No | 06:05 | 06:00 - 06:59 | Morning      | 37,1 | 43  | 13,0  | 13,0  | 18,26 | 526,50 | 85,65  |
| 2019/06/15 | CH2205 | Male | Three y/o | Control | Control | Feed Day | No | 06:10 | 06:00 - 06:59 | Morning      | 37,0 | 92  | 8,6   | 8,6   | 18,16 | 587,78 | 71,66  |
| 2019/06/15 | CH2206 | Male | Three y/o | Control | Control | Feed Day | No | 06:10 | 06:00 - 06:59 | Morning      | 37,2 | 58  | 7,6   | 7,6   | 18,36 | 551,90 | 67,49  |
| 2019/06/15 | CH2205 | Male | Three y/o | Control | Control | Feed Day | No | 06:15 | 06:00 - 06:59 | Morning      | 37,0 | 41  | 13,4  | 13,4  | 18,16 | 522,29 | 86,68  |
| 2019/06/15 | CH2206 | Male | Three y/o | Control | Control | Feed Day | No | 06:15 | 06:00 - 06:59 | Morning      | 37,1 | 60  | 36,6  | 36,6  | 18,26 | 554,67 | 121,03 |
| 2019/06/15 | CH2205 | Male | Three y/o | Control | Control | Feed Day | No | 06:20 | 06:00 - 06:59 | Morning      | 37,0 | 73  | 7,6   | 7,6   | 18,16 | 570,27 | 67,49  |
| 2019/06/15 | CH2206 | Male | Three y/o | Control | Control | Feed Day | No | 06:20 | 06:00 - 06:59 | Morning      | 37,2 | 143 | 43,6  | 43,6  | 18,36 | 618,69 | 127,06 |
| 2019/06/15 | CH2205 | Male | Three y/o | Control | Control | Feed Day | No | 06:25 | 06:00 - 06:59 | Morning      | 37,2 | 90  | 53,6  | 53,6  | 18,36 | 586,16 | 134,19 |
| 2019/06/15 | CH2206 | Male | Three y/o | Control | Control | Feed Day | No | 06:25 | 06:00 - 06:59 | Morning      | 37,2 | 126 | 112,6 | 112,6 | 18,36 | 610,14 | 159,98 |
| 2019/06/15 | CH2205 | Male | Three y/o | Control | Control | Feed Day | No | 06:30 | 06:00 - 06:59 | Morning      | 37,3 | 126 | 338,0 | 338,0 | 18,46 | 610,14 | 198,64 |
| 2019/06/15 | CH2206 | Male | Three y/o | Control | Control | Feed Day | No | 06:30 | 06:00 - 06:59 | Morning      | 37,2 | 167 | 847,4 |       | 18,36 | 628,84 |        |
| 2019/06/15 | CH2205 | Male | Three y/o | Control | Control | Feed Day | No | 06:35 | 06:00 - 06:59 | Morning      | 37,4 | 167 | 542,2 | 542,2 | 18,55 | 628,84 | 215,43 |
| 2019/06/15 | CH2206 | Male | Three y/o | Control | Control | Feed Day | No | 06:35 | 06:00 - 06:59 | Morning      | 37,3 | 117 | 60,0  | 60,0  | 18,46 | 605,02 | 138,09 |
| 2019/06/15 | CH2205 | Male | Three y/o | Control | Control | Feed Day | No | 06:40 | 06:00 - 06:59 | Morning      | 37,6 | 98  | 107,2 | 107,2 | 18,75 | 592,41 | 158,27 |
| 2019/06/15 | CH2206 | Male | Three y/o | Control | Control | Feed Day | No | 06:40 | 06:00 - 06:59 | Morning      | 37,5 | 162 | 390,8 | 390,8 | 18,65 | 626,88 | 203,79 |
| 2019/06/15 | CH2205 | Male | Three y/o | Control | Control | Feed Day | No | 06:45 | 06:00 - 06:59 | Morning      | 37,7 | 62  | 108,0 | 108,0 | 18,85 | 557,33 | 158,53 |
| 2019/06/15 | CH2206 | Male | Three y/o | Control | Control | Feed Day | No | 06:45 | 06:00 - 06:59 | Morning      | 37,7 | 114 | 84,8  | 84,8  | 18,85 | 603,20 | 150,10 |
| 2019/06/15 | CH2205 | Male | Three y/o | Control | Control | Feed Day | No | 06:50 | 06:00 - 06:59 | Morning      | 37,7 | 52  | 298,4 | 298,4 | 18,85 | 542,83 | 194,23 |
| 2019/06/15 | CH2206 | Male | Three y/o | Control | Control | Feed Day | No | 06:50 | 06:00 - 06:59 | Morning      | 37,8 |     | 93,0  | 93,0  | 18,95 |        | 153,31 |
| 2019/06/15 | CH2205 | Male | Three y/o | Control | Control | Feed Day | No | 06:55 | 06:00 - 06:59 | Morning      | 37,7 | 112 | 90,4  | 90,4  | 18,85 | 601,96 | 152,33 |
| 2019/06/15 | CH2206 | Male | Three y/o | Control | Control | Feed Day | No | 06:55 | 06:00 - 06:59 | Morning      | 37,8 | 134 | 120,0 | 120,0 | 18,95 | 614,33 | 162,21 |
| 2019/06/15 | CH2205 | Male | Three y/o | Control | Control | Feed Day | No | 07:00 | 07:00 - 07:59 | Morning      | 37,7 | 131 | 83,0  | 83,0  | 18,85 | 612,80 | 149,36 |
| 2019/06/15 | CH2206 | Male | Three y/o | Control | Control | Feed Day | No | 07:00 | 07:00 - 07:59 | Morning      | 37,8 | 123 | 124,8 | 124,8 | 18,95 | 608,49 | 163,58 |
| 2019/06/15 | CH2205 | Male | Three y/o | Control | Control | Feed Day | No | 07:05 | 07:00 - 07:59 | Morning      | 37,8 | 125 | 219,6 | 219,6 | 18,95 | 609,60 | 183,41 |
| 2019/06/15 | CH2206 | Male | Three y/o | Control | Control | Feed Day | No | 07:05 | 07:00 - 07:59 | Morning      | 37,8 | 119 | 152,0 | 152,0 | 18,95 | 606,20 | 170,48 |
| 2019/06/15 | CH2205 | Male | Three y/o | Control | Control | Feed Day | No | 07:10 | 07:00 - 07:59 | Morning      | 37,7 | 132 | 169,0 | 169,0 | 18,85 | 613,32 | 174,20 |
| 2019/06/15 | CH2206 | Male | Three y/o | Control | Control | Feed Day | No | 07:10 | 07:00 - 07:59 | Morning      | 37,9 | 135 | 125,2 | 125,2 | 19,05 | 614,84 | 163,69 |
| 2019/06/15 | CH2205 | Male | Three y/o | Control | Control | Feed Day | No | 07:15 | 07:00 - 07:59 | Morning      | 37,7 | 158 | 325,4 | 325,4 | 18,85 | 625,26 | 197,30 |
| 2019/06/15 | CH2206 | Male | Three y/o | Control | Control | Feed Day | No | 07:15 | 07:00 - 07:59 | Morning      | 37,9 |     | 57,0  | 57,0  | 19,05 |        | 136,32 |
| 2019/06/15 | CH2205 | Male | Three y/o | Control | Control | Feed Day | No | 07:20 | 07:00 - 07:59 | Morning      | 37,7 | 125 | 177,4 | 177,4 | 18,85 | 609,60 | 175,90 |
| 2019/06/15 | CH2206 | Male | Three y/o | Control | Control | Feed Day | No | 07:20 | 07:00 - 07:59 | Morning      | 38,0 | 115 | 363,4 | 363,4 | 19,15 | 603,82 | 201,21 |
| 2019/06/15 | CH2205 | Male | Three y/o | Control | Control | Feed Day | No | 07:25 | 07:00 - 07:59 | Morning      | 37,7 | 59  | 202,6 | 202,6 | 18,85 | 553,30 | 180,57 |
| 2019/06/15 | CH2206 | Male | Three y/o | Control | Control | Feed Day | No | 07:25 | 07:00 - 07:59 | Morning      | 38,0 | 123 | 48,0  | 48,0  | 19,15 | 608,49 | 130,38 |
| 2019/06/15 | CH2205 | Male | Three y/o | Control | Control | Feed Day | No | 07:30 | 07:00 - 07:59 | Morning      | 37,7 | 191 | 184,2 | 184,2 | 18,85 | 637,33 | 177,23 |
| 2019/06/15 | CH2206 | Male | Three y/o | Control | Control | Feed Day | No | 07:30 | 07:00 - 07:59 | Morning      | 37,9 | 125 | 98,0  | 98,0  | 19,05 | 609,60 | 155,14 |
| 2019/06/15 | CH2205 | Male | Three y/o | Control | Control | Feed Day | No | 07:35 | 07:00 - 07:59 | Morning      | 37,9 | 97  | 119,8 | 119,8 | 19,05 | 591,66 | 162,15 |
| 2019/06/15 | CH2206 | Male | Three y/o | Control | Control | Feed Day | No | 07:35 | 07:00 - 07:59 | Morning      | 37,9 |     | 283,0 | 283,0 | 19,05 |        | 192,36 |
| 2019/06/15 | CH2205 | Male | Three y/o | Control | Control | Feed Day | No | 07:40 | 07:00 - 07:59 | Morning      | 37,9 | 123 | 63,4  | 63,4  | 19,05 | 608,49 | 140,00 |
| 2019/06/15 | CH2206 | Male | Three y/o | Control | Control | Feed Day | No | 07:40 | 07:00 - 07:59 | Morning      | 37,9 | 97  | 105,6 | 105,6 | 19,05 | 591,66 | 157,74 |
| 2019/06/15 | CH2205 | Male | Three y/o | Control | Control | Feed Day | No | 07:45 | 07:00 - 07:59 | Morning      | 38,0 |     | 231,2 | 231,2 | 19,15 |        | 185,22 |
| 2019/06/15 | CH2206 | Male | Three y/o | Control | Control | Feed Day | No | 07:45 | 07:00 - 07:59 | Morning      | 37,9 | 112 | 125,6 | 125,6 | 19,05 | 601,96 | 163,80 |
| 2019/06/15 | CH2205 | Male | Three y/o | Control | Control | Feed Day | No | 07:50 | 07:00 - 07:59 | Morning      | 37,9 | 138 | 126,8 | 126,8 | 19,05 | 616,31 | 164,13 |
| 2019/06/15 | CH2206 | Male | Three y/o | Control | Control | Feed Day | No | 07:50 | 07:00 - 07:59 | Morning      | 37,9 | 140 | 183,8 | 183,8 | 19,05 | 617,28 | 177,15 |
| 2019/06/15 | CH2205 | Male | Three y/o | Control | Control | Feed Day | No | 07:55 | 07:00 - 07:59 | Morning      | 37,9 | 90  | 50,6  | 50,6  | 19,05 | 586,16 | 132,20 |
| 2019/06/15 | CH2206 | Male | Three y/o | Control | Control | Feed Day | No | 07:55 | 07:00 - 07:59 | Morning      | 37,9 | 154 | 132,2 | 132,2 | 19,05 | 623,58 | 165,59 |
| 2019/06/15 | CH2205 | Male | Three y/o | Control | Control | Feed Day | No | 08:00 | 08:00 - 08:59 | Late Morning | 37,7 | 86  | 259,4 | 259,4 | 18,85 | 582,77 | 189,28 |
| 2019/06/15 | CH2206 | Male | Three y/o | Control | Control | Feed Day | No | 08:00 | 08:00 - 08:59 | Late Morning | 37,8 | 105 | 67,6  | 67,6  | 18,95 | 597,38 | 142,23 |
| 2019/06/15 | CH2205 | Male | Three y/o | Control | Control | Feed Day | No | 08:05 | 08:00 - 08:59 | Late Morning | 37,9 | 89  | 124,6 | 124,6 | 19,05 | 585,33 | 163,52 |
| 2019/06/15 | CH2206 | Male | Three y/o | Control | Control | Feed Day | No | 08:05 | 08:00 - 08:59 | Late Morning | 37,8 | 107 | 73,6  | 73,6  | 18,95 | 598,73 | 145,18 |
| 2019/06/15 | CH2205 | Male | Three y/o | Control | Control | Feed Day | No | 08:10 | 08:00 - 08:59 | Late Morning | 37,9 | 60  | 145,6 | 145,6 | 19,05 | 554,67 | 168,97 |
| 2019/06/15 | CH2206 | Male | Three y/o | Control | Control | Feed Day | No | 08:10 | 08:00 - 08:59 | Late Morning | 37,8 | 107 | 68,8  | 68,8  | 18,95 | 598,73 | 142,84 |
| 2019/06/15 | CH2205 | Male | Three y/o | Control | Control | Feed Day | No | 08:15 | 08:00 - 08:59 | Late Morning | 37,9 | 54  | 147,0 | 147,0 | 19,05 | 545,99 | 169,31 |
| 2019/06/15 | CH2206 | Male | Three y/o | Control | Control | Feed Day | No | 08:15 | 08:00 - 08:59 | Late Morning | 37,8 | 117 | 132,2 | 132,2 | 18,95 | 605,02 | 165,59 |
| 2019/06/15 | CH2205 | Male | Three y/o | Control | Control | Feed Day | No | 08:20 | 08:00 - 08:59 | Late Morning | 37,7 | 109 | 92,0  | 92,0  | 18,85 | 600,04 | 152,94 |
| 2019/06/15 | CH2206 | Male | Three y/o | Control | Control | Feed Day | No | 08:20 | 08:00 - 08:59 | Late Morning | 37,8 |     | 255,6 | 255,6 | 18,95 |        | 188,76 |
| 2019/06/15 | CH2205 | Male | Three y/o | Control | Control | Feed Day | No | 08:25 | 08:00 - 08:59 | Late Morning | 37,7 | 137 | 96,8  | 96,8  | 18,85 | 615,83 | 154,71 |
| 2019/06/15 | CH2206 | Male | Three y/o | Control | Control | Feed Day | No | 08:25 | 08:00 - 08:59 | Late Morning | 37,8 | 109 | 141,0 | 141,0 | 18,95 | 600,04 | 167,85 |
| 2019/06/15 | CH2205 | Male | Three y/o | Control | Control | Feed Day | No | 08:30 | 08:00 - 08:59 | Late Morning | 37,9 | 103 | 182,2 | 182,2 | 19,05 | 596,00 | 176,84 |
| 2019/06/15 | CH2206 | Male | Three y/o | Control | Control | Feed Day | No | 08:30 | 08:00 - 08:59 | Late Morning | 38,0 | 109 | 15,8  | 15,8  | 19,15 | 600,04 | 92,28  |
| 2019/06/15 | CH2205 | Male | Three y/o | Control | Control | Feed Day | No | 08:35 | 08:00 - 08:59 | Late Morning | 37,7 | 107 | 138,4 | 138,4 | 18,85 | 598,73 | 167,20 |
| 2019/06/15 | CH2206 | Male | Three y/o | Control | Control | Feed Day | No | 08:35 | 08:00 - 08:59 | Late Morning | 37,5 |     | 15,8  | 15,8  | 18,65 |        | 92,28  |
| 2019/06/15 | CH2205 | Male | Three y/o | Control | Control | Feed Day | No | 08:40 | 08:00 - 08:59 | Late Morning | 37,7 | 125 | 153,2 | 153,2 | 18,85 | 609,60 | 170,76 |
| 2019/06/15 | CH2206 | Male | Three y/o | Control | Control | Feed Day | No | 08:40 | 08:00 - 08:59 | Late Morning | 37,2 | 123 | 51,8  | 51,8  | 18,36 | 608,49 | 133,01 |
| 2019/06/15 | CH2205 | Male | Three y/o | Control | Control | Feed Day | No | 08:45 | 08:00 - 08:59 | Late Morning | 37,7 |     | 332,4 | 332,4 | 18,85 |        | 198,05 |
| 2019/06/15 | CH2206 | Male | Three y/o | Control | Control | Feed Day | No | 08:45 | 08:00 - 08:59 | Late Morning | 37,3 |     | 108,8 | 108,8 | 18,46 |        | 158,79 |
| 2019/06/15 | CH2205 | Male | Three y/o | Control | Control | Feed Day | No | 08:50 | 08:00 - 08:59 | Late Morning | 37,7 | 100 | 55,6  | 55,6  | 18,85 | 593,87 | 135,46 |
| 2019/06/15 | CH2206 | Male | Three y/o | Control | Control | Feed Day | No | 08:50 | 08:00 - 08:59 | Late Morning | 37,5 | 60  | 118,4 | 118,4 | 18,65 | 554,67 | 161,74 |
| 2019/06/15 | CH2205 | Male | Three y/o | Control | Control | Feed Day | No | 08:55 | 08:00 - 08:59 | Late Morning | 37,9 | 126 | 144,2 | 144,2 | 19,05 | 610,14 | 168,64 |
| 2019/06/15 | CH2206 | Male | Three y/o | Control | Control | Feed Day | No | 08:55 | 08:00 - 08:59 | Late Morning | 37,7 | 113 | 138,8 | 138,8 | 18,85 | 602,58 | 167,30 |
| 2019/06/15 | CH2205 | Male | Three y/o | Control | Control | Feed Day | No | 09:00 | 09:00 - 09:59 | Late Morning | 37,9 |     | 156,2 | 156,2 | 19,05 |        | 171,44 |



|            |        |      |           |         |         |          |     |       |               |              |      |     |       |       |       |        |        |
|------------|--------|------|-----------|---------|---------|----------|-----|-------|---------------|--------------|------|-----|-------|-------|-------|--------|--------|
| 2019/06/15 | CH2206 | Male | Three y/o | Control | Control | Feed Day | No  | 09:00 | 09:00 - 09:59 | Late Morning | 37,7 | 106 | 318,2 | 318,2 | 18,85 | 598,06 | 196,50 |
| 2019/06/15 | CH2205 | Male | Three y/o | Control | Control | Feed Day | No  | 09:05 | 09:00 - 09:59 | Late Morning | 37,9 | 98  | 21,2  | 21,2  | 19,05 | 592,41 | 102,31 |
| 2019/06/15 | CH2206 | Male | Three y/o | Control | Control | Feed Day | No  | 09:05 | 09:00 - 09:59 | Late Morning | 37,8 | 110 | 63,8  | 63,8  | 18,95 | 600,69 | 140,22 |
| 2019/06/15 | CH2205 | Male | Three y/o | Control | Control | Feed Day | No  | 09:10 | 09:00 - 09:59 | Late Morning | 37,6 |     | 49,0  | 49,0  | 18,75 |        | 131,09 |
| 2019/06/15 | CH2206 | Male | Three y/o | Control | Control | Feed Day | No  | 09:10 | 09:00 - 09:59 | Late Morning | 37,7 | 80  | 63,4  | 63,4  | 18,85 | 577,31 | 140,00 |
| 2019/06/15 | CH2205 | Male | Three y/o | Control | Control | Feed Day | No  | 09:15 | 09:00 - 09:59 | Late Morning | 37,7 | 68  | 71,2  | 71,2  | 18,85 | 564,71 | 144,03 |
| 2019/06/15 | CH2206 | Male | Three y/o | Control | Control | Feed Day | No  | 09:15 | 09:00 - 09:59 | Late Morning | 37,4 | 110 | 13,6  | 13,6  | 18,55 | 600,69 | 87,18  |
| 2019/06/15 | CH2205 | Male | Three y/o | Control | Control | Feed Day | No  | 09:20 | 09:00 - 09:59 | Late Morning | 37,9 | 98  | 196,4 | 196,4 | 19,05 | 592,41 | 179,48 |
| 2019/06/15 | CH2206 | Male | Three y/o | Control | Control | Feed Day | No  | 09:20 | 09:00 - 09:59 | Late Morning | 37,5 | 104 | 46,6  | 46,6  | 18,65 | 596,69 | 129,35 |
| 2019/06/15 | CH2205 | Male | Three y/o | Control | Control | Feed Day | No  | 09:25 | 09:00 - 09:59 | Late Morning | 37,9 | 129 | 48,4  | 48,4  | 19,05 | 611,75 | 130,66 |
| 2019/06/15 | CH2206 | Male | Three y/o | Control | Control | Feed Day | No  | 09:25 | 09:00 - 09:59 | Late Morning | 37,8 | 48  | 50,8  | 50,8  | 18,95 | 536,04 | 132,33 |
| 2019/06/15 | CH2205 | Male | Three y/o | Control | Control | Feed Day | No  | 09:30 | 09:00 - 09:59 | Late Morning | 37,8 | 65  | 128,4 | 128,4 | 18,95 | 561,12 | 164,57 |
| 2019/06/15 | CH2206 | Male | Three y/o | Control | Control | Feed Day | No  | 09:30 | 09:00 - 09:59 | Late Morning | 37,5 | 117 | 48,6  | 48,6  | 18,65 | 605,02 | 130,81 |
| 2019/06/15 | CH2205 | Male | Three y/o | Control | Control | Feed Day | No  | 09:35 | 09:00 - 09:59 | Late Morning | 37,6 | 96  | 163,0 | 163,0 | 18,75 | 590,91 | 172,93 |
| 2019/06/15 | CH2206 | Male | Three y/o | Control | Control | Feed Day | No  | 09:35 | 09:00 - 09:59 | Late Morning | 37,4 |     | 46,4  | 46,4  | 18,55 |        | 129,21 |
| 2019/06/15 | CH2205 | Male | Three y/o | Control | Control | Feed Day | No  | 09:40 | 09:00 - 09:59 | Late Morning | 37,6 | 73  | 7,0   | 7,0   | 18,75 | 570,27 | 64,72  |
| 2019/06/15 | CH2206 | Male | Three y/o | Control | Control | Feed Day | No  | 09:40 | 09:00 - 09:59 | Late Morning | 37,4 | 62  | 52,0  | 52,0  | 18,55 | 557,33 | 133,14 |
| 2019/06/15 | CH2205 | Male | Three y/o | Control | Control | Feed Day | No  | 09:45 | 09:00 - 09:59 | Late Morning | 37,6 | 150 | 10,0  | 10,0  | 18,75 | 621,86 | 76,76  |
| 2019/06/15 | CH2206 | Male | Three y/o | Control | Control | Feed Day | No  | 09:45 | 09:00 - 09:59 | Late Morning | 37,3 | 93  | 24,4  | 24,4  | 18,46 | 588,58 | 107,11 |
| 2019/06/15 | CH2205 | Male | Three y/o | Control | Control | Feed Day | No  | 09:50 | 09:00 - 09:59 | Late Morning | 37,6 | 58  | 6,0   | 6,0   | 18,75 | 551,90 | 59,53  |
| 2019/06/15 | CH2206 | Male | Three y/o | Control | Control | Feed Day | No  | 09:50 | 09:00 - 09:59 | Late Morning | 37,4 | 70  | 69,2  | 69,2  | 18,55 | 566,99 | 143,04 |
| 2019/06/15 | CH2205 | Male | Three y/o | Control | Control | Feed Day | No  | 09:55 | 09:00 - 09:59 | Late Morning | 37,6 | 124 | 50,4  | 50,4  | 18,75 | 609,04 | 132,06 |
| 2019/06/15 | CH2206 | Male | Three y/o | Control | Control | Feed Day | No  | 09:55 | 09:00 - 09:59 | Late Morning | 37,5 | 103 | 183,8 | 183,8 | 18,65 | 596,00 | 177,15 |
| 2019/06/15 | CH2205 | Male | Three y/o | Control | Control | Feed Day | No  | 10:00 | 10:00 - 10:59 | Late Morning | 37,7 | 91  | 149,4 | 149,4 | 18,85 | 586,98 | 169,88 |
| 2019/06/15 | CH2206 | Male | Three y/o | Control | Control | Feed Day | No  | 10:00 | 10:00 - 10:59 | Late Morning | 37,7 |     | 74,4  | 74,4  | 18,85 |        | 145,55 |
| 2019/06/15 | CH2205 | Male | Three y/o | Control | Control | Feed Day | No  | 10:05 | 10:00 - 10:59 | Late Morning | 37,7 | 98  | 239,6 | 239,6 | 18,85 | 592,41 | 186,48 |
| 2019/06/15 | CH2206 | Male | Three y/o | Control | Control | Feed Day | No  | 10:05 | 10:00 - 10:59 | Late Morning | 37,7 | 100 | 39,2  | 39,2  | 18,85 | 593,87 | 123,39 |
| 2019/06/15 | CH2205 | Male | Three y/o | Control | Control | Feed Day | No  | 10:10 | 10:00 - 10:59 | Late Morning | 37,7 | 88  | 90,0  | 90,0  | 18,85 | 584,49 | 152,17 |
| 2019/06/15 | CH2206 | Male | Three y/o | Control | Control | Feed Day | No  | 10:10 | 10:00 - 10:59 | Late Morning | 37,7 |     | 68,4  | 68,4  | 18,85 |        | 142,64 |
| 2019/06/15 | CH2205 | Male | Three y/o | Control | Control | Feed Day | No  | 10:15 | 10:00 - 10:59 | Late Morning | 37,7 | 94  | 21,8  | 21,8  | 18,85 | 589,37 | 103,26 |
| 2019/06/15 | CH2206 | Male | Three y/o | Control | Control | Feed Day | No  | 10:15 | 10:00 - 10:59 | Late Morning | 37,7 | 103 | 34,8  | 34,8  | 18,85 | 596,00 | 119,29 |
| 2019/06/15 | CH2205 | Male | Three y/o | Control | Control | Feed Day | No  | 10:20 | 10:00 - 10:59 | Late Morning | 37,9 | 54  | 75,6  | 75,6  | 19,05 | 545,99 | 146,11 |
| 2019/06/15 | CH2206 | Male | Three y/o | Control | Control | Feed Day | No  | 10:20 | 10:00 - 10:59 | Late Morning | 37,7 | 55  | 18,8  | 18,8  | 18,85 | 547,52 | 98,20  |
| 2019/06/15 | CH2205 | Male | Three y/o | Control | Control | Feed Day | No  | 10:25 | 10:00 - 10:59 | Late Morning | 37,9 | 80  | 10,8  | 10,8  | 19,05 | 577,31 | 79,36  |
| 2019/06/15 | CH2206 | Male | Three y/o | Control | Control | Feed Day | No  | 10:25 | 10:00 - 10:59 | Late Morning | 37,7 | 50  | 40,0  | 40,0  | 18,85 | 539,52 | 124,09 |
| 2019/06/15 | CH2205 | Male | Three y/o | Control | Control | Feed Day | Yes | 10:30 | 10:00 - 10:59 | Late Morning | 37,8 | 66  | 48,6  | 48,6  | 18,95 | 562,34 | 130,81 |
| 2019/06/15 | CH2206 | Male | Three y/o | Control | Control | Feed Day | Yes | 10:30 | 10:00 - 10:59 | Late Morning | 37,7 | 46  | 38,8  | 38,8  | 18,85 | 532,38 | 123,04 |
| 2019/06/15 | CH2205 | Male | Three y/o | Control | Control | Feed Day | Yes | 10:35 | 10:00 - 10:59 | Late Morning | 37,7 | 73  | 15,8  | 15,8  | 18,85 | 570,27 | 92,28  |
| 2019/06/15 | CH2206 | Male | Three y/o | Control | Control | Feed Day | Yes | 10:35 | 10:00 - 10:59 | Late Morning | 37,7 | 73  | 20,4  | 20,4  | 18,85 | 570,27 | 100,99 |
| 2019/06/15 | CH2205 | Male | Three y/o | Control | Control | Feed Day | Yes | 10:40 | 10:00 - 10:59 | Late Morning | 37,7 | 54  | 17,2  | 17,2  | 18,85 | 545,99 | 95,17  |
| 2019/06/15 | CH2206 | Male | Three y/o | Control | Control | Feed Day | Yes | 10:40 | 10:00 - 10:59 | Late Morning | 37,7 | 56  | 2,6   | 2,6   | 18,85 | 549,01 | 31,57  |
| 2019/06/15 | CH2205 | Male | Three y/o | Control | Control | Feed Day | Yes | 10:45 | 10:00 - 10:59 | Late Morning | 37,7 | 65  | 16,4  | 16,4  | 18,85 | 561,12 | 93,55  |
| 2019/06/15 | CH2206 | Male | Three y/o | Control | Control | Feed Day | Yes | 10:45 | 10:00 - 10:59 | Late Morning | 37,7 | 44  | 3,8   | 3,8   | 18,85 | 528,51 | 44,22  |
| 2019/06/15 | CH2205 | Male | Three y/o | Control | Control | Feed Day | Yes | 10:50 | 10:00 - 10:59 | Late Morning | 37,7 | 70  | 17,0  | 17,0  | 18,85 | 566,99 | 94,77  |
| 2019/06/15 | CH2206 | Male | Three y/o | Control | Control | Feed Day | Yes | 10:50 | 10:00 - 10:59 | Late Morning | 37,7 | 65  | 6,8   | 6,8   | 18,85 | 561,12 | 63,74  |
| 2019/06/15 | CH2205 | Male | Three y/o | Control | Control | Feed Day | Yes | 10:55 | 10:00 - 10:59 | Late Morning | 37,7 | 62  | 18,6  | 18,6  | 18,85 | 557,33 | 97,84  |
| 2019/06/15 | CH2206 | Male | Three y/o | Control | Control | Feed Day | Yes | 10:55 | 10:00 - 10:59 | Late Morning | 37,6 | 61  | 3,6   | 3,6   | 18,75 | 556,01 | 42,42  |
| 2019/06/15 | CH2205 | Male | Three y/o | Control | Control | Feed Day | Yes | 11:00 | 11:00 - 11:59 | Late Morning | 37,6 | 63  | 12,2  | 12,2  | 18,75 | 558,62 | 83,49  |
| 2019/06/15 | CH2206 | Male | Three y/o | Control | Control | Feed Day | Yes | 11:00 | 11:00 - 11:59 | Late Morning | 37,5 | 44  | 2,8   | 2,8   | 18,65 | 528,51 | 34,04  |
| 2019/06/15 | CH2205 | Male | Three y/o | Control | Control | Feed Day | Yes | 11:05 | 11:00 - 11:59 | Late Morning | 37,6 | 63  | 18,0  | 18,0  | 18,75 | 558,62 | 96,72  |
| 2019/06/15 | CH2206 | Male | Three y/o | Control | Control | Feed Day | Yes | 11:05 | 11:00 - 11:59 | Late Morning | 37,5 | 57  | 4,6   | 4,6   | 18,65 | 550,47 | 50,61  |
| 2019/06/15 | CH2205 | Male | Three y/o | Control | Control | Feed Day | Yes | 11:10 | 11:00 - 11:59 | Late Morning | 37,6 | 63  | 19,0  | 19,0  | 18,75 | 558,62 | 98,56  |
| 2019/06/15 | CH2206 | Male | Three y/o | Control | Control | Feed Day | Yes | 11:10 | 11:00 - 11:59 | Late Morning | 37,5 | 56  | 21,8  | 21,8  | 18,65 | 549,01 | 103,26 |
| 2019/06/15 | CH2205 | Male | Three y/o | Control | Control | Feed Day | Yes | 11:15 | 11:00 - 11:59 | Late Morning | 37,6 | 59  | 15,4  | 15,4  | 18,75 | 553,30 | 91,41  |
| 2019/06/15 | CH2206 | Male | Three y/o | Control | Control | Feed Day | Yes | 11:15 | 11:00 - 11:59 | Late Morning | 37,5 | 55  | 21,0  | 21,0  | 18,65 | 547,52 | 101,98 |
| 2019/06/15 | CH2205 | Male | Three y/o | Control | Control | Feed Day | Yes | 11:20 | 11:00 - 11:59 | Late Morning | 37,6 | 67  | 21,6  | 21,6  | 18,75 | 563,53 | 102,94 |
| 2019/06/15 | CH2206 | Male | Three y/o | Control | Control | Feed Day | Yes | 11:20 | 11:00 - 11:59 | Late Morning | 37,5 | 50  | 7,4   | 7,4   | 18,65 | 539,52 | 66,59  |
| 2019/06/15 | CH2205 | Male | Three y/o | Control | Control | Feed Day | Yes | 11:25 | 11:00 - 11:59 | Late Morning | 37,6 | 53  | 24,2  | 24,2  | 18,75 | 544,43 | 106,83 |
| 2019/06/15 | CH2206 | Male | Three y/o | Control | Control | Feed Day | Yes | 11:25 | 11:00 - 11:59 | Late Morning | 37,5 | 82  | 50,0  | 50,0  | 18,65 | 579,19 | 131,79 |
| 2019/06/15 | CH2205 | Male | Three y/o | Control | Control | Feed Day | No  | 11:30 | 11:00 - 11:59 | Late Morning | 37,6 | 82  | 20,0  | 20,0  | 18,75 | 579,19 | 100,31 |
| 2019/06/15 | CH2206 | Male | Three y/o | Control | Control | Feed Day | No  | 11:30 | 11:00 - 11:59 | Late Morning | 37,5 | 86  | 75,6  | 75,6  | 18,65 | 582,77 | 146,11 |
| 2019/06/15 | CH2205 | Male | Three y/o | Control | Control | Feed Day | No  | 11:35 | 11:00 - 11:59 | Late Morning | 37,6 |     | 44,0  | 44,0  | 18,75 |        | 127,37 |
| 2019/06/15 | CH2206 | Male | Three y/o | Control | Control | Feed Day | No  | 11:35 | 11:00 - 11:59 | Late Morning | 37,7 | 111 | 114,8 | 114,8 | 18,85 | 601,33 | 160,66 |
| 2019/06/15 | CH2205 | Male | Three y/o | Control | Control | Feed Day | No  | 11:40 | 11:00 - 11:59 | Late Morning | 37,6 |     | 246,8 | 246,8 | 18,75 |        | 187,53 |
| 2019/06/15 | CH2206 | Male | Three y/o | Control | Control | Feed Day | No  | 11:40 | 11:00 - 11:59 | Late Morning | 37,7 | 103 | 50,0  | 50,0  | 18,85 | 596,00 | 131,79 |
| 2019/06/15 | CH2205 | Male | Three y/o | Control | Control | Feed Day | No  | 11:45 | 11:00 - 11:59 | Late Morning | 37,6 | 40  | 22,8  | 22,8  | 18,75 | 520,09 | 104,79 |
| 2019/06/15 | CH2206 | Male | Three y/o | Control | Control | Feed Day | No  | 11:45 | 11:00 - 11:59 | Late Morning | 37,7 | 47  | 26,4  | 26,4  | 18,85 | 534,23 | 109,81 |
| 2019/06/15 | CH2205 | Male | Three y/o | Control | Control | Feed Day | No  | 11:50 | 11:00 - 11:59 | Late Morning | 37,6 | 60  | 41,4  | 41,4  | 18,75 | 554,67 | 125,27 |
| 2019/06/15 | CH2206 | Male | Three y/o | Control | Control | Feed Day | No  | 11:50 | 11:00 - 11:59 | Late Morning | 37,7 | 102 | 97,8  | 97,8  | 18,85 | 595,30 | 155,07 |
| 2019/06/15 | CH2205 | Male | Three y/o | Control | Control | Feed Day | No  | 11:55 | 11:00 - 11:59 | Late Morning | 37,6 | 78  | 18,4  | 18,4  | 18,75 | 575,38 | 97,47  |



|            |        |      |           |         |         |          |    |       |               |              |      |     |       |       |       |        |        |
|------------|--------|------|-----------|---------|---------|----------|----|-------|---------------|--------------|------|-----|-------|-------|-------|--------|--------|
| 2019/06/15 | CH2206 | Male | Three y/o | Control | Control | Feed Day | No | 11:55 | 11:00 - 11:59 | Late Morning | 37,8 | 103 | 74,0  | 74,0  | 18,95 | 596,00 | 145,37 |
| 2019/06/15 | CH2205 | Male | Three y/o | Control | Control | Feed Day | No | 12:00 | 12:00 - 12:59 | Afternoon    | 37,6 | 82  | 60,6  | 60,6  | 18,75 | 579,19 | 138,44 |
| 2019/06/15 | CH2206 | Male | Three y/o | Control | Control | Feed Day | No | 12:00 | 12:00 - 12:59 | Afternoon    | 37,8 | 72  | 156,0 | 156,0 | 18,95 | 569,20 | 171,39 |
| 2019/06/15 | CH2205 | Male | Three y/o | Control | Control | Feed Day | No | 12:05 | 12:00 - 12:59 | Afternoon    | 37,6 | 62  | 169,8 | 169,8 | 18,75 | 557,33 | 174,37 |
| 2019/06/15 | CH2206 | Male | Three y/o | Control | Control | Feed Day | No | 12:05 | 12:00 - 12:59 | Afternoon    | 37,8 | 80  | 112,4 | 112,4 | 18,95 | 577,31 | 159,92 |
| 2019/06/15 | CH2205 | Male | Three y/o | Control | Control | Feed Day | No | 12:10 | 12:00 - 12:59 | Afternoon    | 37,6 |     | 157,4 | 157,4 | 18,75 |        | 171,71 |
| 2019/06/15 | CH2206 | Male | Three y/o | Control | Control | Feed Day | No | 12:10 | 12:00 - 12:59 | Afternoon    | 37,8 | 121 | 231,4 | 231,4 | 18,95 | 607,35 | 185,25 |
| 2019/06/15 | CH2205 | Male | Three y/o | Control | Control | Feed Day | No | 12:15 | 12:00 - 12:59 | Afternoon    | 37,7 | 93  | 29,2  | 29,2  | 18,85 | 588,58 | 113,27 |
| 2019/06/15 | CH2206 | Male | Three y/o | Control | Control | Feed Day | No | 12:15 | 12:00 - 12:59 | Afternoon    | 37,9 | 97  | 33,8  | 33,8  | 19,05 | 591,66 | 118,29 |
| 2019/06/15 | CH2205 | Male | Three y/o | Control | Control | Feed Day | No | 12:20 | 12:00 - 12:59 | Afternoon    | 37,6 | 90  | 95,0  | 95,0  | 18,75 | 586,16 | 154,06 |
| 2019/06/15 | CH2206 | Male | Three y/o | Control | Control | Feed Day | No | 12:20 | 12:00 - 12:59 | Afternoon    | 37,8 | 105 | 64,8  | 64,8  | 18,95 | 597,38 | 140,76 |
| 2019/06/15 | CH2205 | Male | Three y/o | Control | Control | Feed Day | No | 12:25 | 12:00 - 12:59 | Afternoon    | 37,7 |     | 19,8  | 19,8  | 18,85 |        | 99,97  |
| 2019/06/15 | CH2206 | Male | Three y/o | Control | Control | Feed Day | No | 12:25 | 12:00 - 12:59 | Afternoon    | 37,8 | 147 | 73,8  | 73,8  | 18,95 | 620,52 | 145,27 |
| 2019/06/15 | CH2205 | Male | Three y/o | Control | Control | Feed Day | No | 12:30 | 12:00 - 12:59 | Afternoon    | 37,7 | 80  | 14,0  | 14,0  | 18,85 | 577,31 | 88,17  |
| 2019/06/15 | CH2206 | Male | Three y/o | Control | Control | Feed Day | No | 12:30 | 12:00 - 12:59 | Afternoon    | 37,8 | 150 | 237,6 | 237,6 | 18,95 | 621,86 | 186,19 |
| 2019/06/15 | CH2205 | Male | Three y/o | Control | Control | Feed Day | No | 12:35 | 12:00 - 12:59 | Afternoon    | 37,7 | 73  | 16,4  | 16,4  | 18,85 | 570,27 | 93,55  |
| 2019/06/15 | CH2206 | Male | Three y/o | Control | Control | Feed Day | No | 12:35 | 12:00 - 12:59 | Afternoon    | 38,2 |     | 14,4  | 14,4  | 19,36 |        | 89,12  |
| 2019/06/15 | CH2205 | Male | Three y/o | Control | Control | Feed Day | No | 12:40 | 12:00 - 12:59 | Afternoon    | 37,7 |     | 10,4  | 10,4  | 18,85 |        | 78,08  |
| 2019/06/15 | CH2206 | Male | Three y/o | Control | Control | Feed Day | No | 12:40 | 12:00 - 12:59 | Afternoon    | 38,2 | 103 | 121,4 | 121,4 | 19,36 | 596,00 | 162,61 |
| 2019/06/15 | CH2205 | Male | Three y/o | Control | Control | Feed Day | No | 12:45 | 12:00 - 12:59 | Afternoon    | 37,6 | 67  | 8,2   | 8,2   | 18,75 | 563,53 | 70,05  |
| 2019/06/15 | CH2206 | Male | Three y/o | Control | Control | Feed Day | No | 12:45 | 12:00 - 12:59 | Afternoon    | 38,2 | 109 | 46,4  | 46,4  | 19,36 | 600,04 | 129,21 |
| 2019/06/15 | CH2205 | Male | Three y/o | Control | Control | Feed Day | No | 12:50 | 12:00 - 12:59 | Afternoon    | 37,5 |     | 8,8   | 8,8   | 18,65 |        | 72,43  |
| 2019/06/15 | CH2206 | Male | Three y/o | Control | Control | Feed Day | No | 12:50 | 12:00 - 12:59 | Afternoon    | 38,1 | 93  | 55,8  | 55,8  | 19,26 | 588,58 | 135,58 |
| 2019/06/15 | CH2205 | Male | Three y/o | Control | Control | Feed Day | No | 12:55 | 12:00 - 12:59 | Afternoon    | 37,5 | 131 | 24,0  | 24,0  | 18,65 | 612,80 | 106,55 |
| 2019/06/15 | CH2206 | Male | Three y/o | Control | Control | Feed Day | No | 12:55 | 12:00 - 12:59 | Afternoon    | 38,0 |     | 52,6  | 52,6  | 19,15 |        | 133,54 |
| 2019/06/15 | CH2205 | Male | Three y/o | Control | Control | Feed Day | No | 13:00 | 13:00 - 13:59 | Afternoon    | 37,5 | 63  | 7,8   | 7,8   | 18,65 | 558,62 | 68,36  |
| 2019/06/15 | CH2206 | Male | Three y/o | Control | Control | Feed Day | No | 13:00 | 13:00 - 13:59 | Afternoon    | 37,7 | 85  | 46,0  | 46,0  | 18,85 | 581,90 | 128,91 |
| 2019/06/15 | CH2205 | Male | Three y/o | Control | Control | Feed Day | No | 13:05 | 13:00 - 13:59 | Afternoon    | 37,4 | 69  | 6,4   | 6,4   | 18,55 | 565,86 | 61,70  |
| 2019/06/15 | CH2206 | Male | Three y/o | Control | Control | Feed Day | No | 13:05 | 13:00 - 13:59 | Afternoon    | 37,5 | 111 | 47,6  | 47,6  | 18,65 | 601,33 | 130,09 |
| 2019/06/15 | CH2205 | Male | Three y/o | Control | Control | Feed Day | No | 13:10 | 13:00 - 13:59 | Afternoon    | 37,5 | 62  | 5,4   | 5,4   | 18,65 | 557,33 | 55,99  |
| 2019/06/15 | CH2206 | Male | Three y/o | Control | Control | Feed Day | No | 13:10 | 13:00 - 13:59 | Afternoon    | 37,7 | 88  | 52,4  | 52,4  | 18,85 | 584,49 | 133,41 |
| 2019/06/15 | CH2205 | Male | Three y/o | Control | Control | Feed Day | No | 13:15 | 13:00 - 13:59 | Afternoon    | 37,5 | 83  | 4,4   | 4,4   | 18,65 | 580,11 | 49,12  |
| 2019/06/15 | CH2206 | Male | Three y/o | Control | Control | Feed Day | No | 13:15 | 13:00 - 13:59 | Afternoon    | 37,7 | 82  | 49,0  | 49,0  | 18,85 | 579,19 | 131,09 |
| 2019/06/15 | CH2205 | Male | Three y/o | Control | Control | Feed Day | No | 13:20 | 13:00 - 13:59 | Afternoon    | 37,5 |     | 5,0   | 5,0   | 18,65 |        | 53,41  |
| 2019/06/15 | CH2206 | Male | Three y/o | Control | Control | Feed Day | No | 13:20 | 13:00 - 13:59 | Afternoon    | 37,7 |     | 46,8  | 46,8  | 18,85 |        | 129,50 |
| 2019/06/15 | CH2205 | Male | Three y/o | Control | Control | Feed Day | No | 13:25 | 13:00 - 13:59 | Afternoon    | 37,5 |     | 20,6  | 20,6  | 18,65 |        | 101,32 |
| 2019/06/15 | CH2206 | Male | Three y/o | Control | Control | Feed Day | No | 13:25 | 13:00 - 13:59 | Afternoon    | 37,8 | 101 | 49,0  | 49,0  | 18,95 | 594,59 | 131,09 |
| 2019/06/15 | CH2205 | Male | Three y/o | Control | Control | Feed Day | No | 13:30 | 13:00 - 13:59 | Afternoon    | 37,4 |     | 8,8   | 8,8   | 18,55 |        | 72,43  |
| 2019/06/15 | CH2206 | Male | Three y/o | Control | Control | Feed Day | No | 13:30 | 13:00 - 13:59 | Afternoon    | 37,9 | 84  | 42,0  | 42,0  | 19,05 | 581,01 | 125,77 |
| 2019/06/15 | CH2205 | Male | Three y/o | Control | Control | Feed Day | No | 13:35 | 13:00 - 13:59 | Afternoon    | 37,5 | 140 | 7,6   | 7,6   | 18,65 | 617,28 | 67,49  |
| 2019/06/15 | CH2206 | Male | Three y/o | Control | Control | Feed Day | No | 13:35 | 13:00 - 13:59 | Afternoon    | 37,9 | 49  | 51,6  | 51,6  | 19,05 | 537,80 | 132,87 |
| 2019/06/15 | CH2205 | Male | Three y/o | Control | Control | Feed Day | No | 13:40 | 13:00 - 13:59 | Afternoon    | 37,5 | 79  | 6,0   | 6,0   | 18,65 | 576,36 | 59,53  |
| 2019/06/15 | CH2206 | Male | Three y/o | Control | Control | Feed Day | No | 13:40 | 13:00 - 13:59 | Afternoon    | 37,9 | 98  | 52,8  | 52,8  | 19,05 | 592,41 | 133,67 |
| 2019/06/15 | CH2205 | Male | Three y/o | Control | Control | Feed Day | No | 13:45 | 13:00 - 13:59 | Afternoon    | 37,5 | 60  | 11,4  | 11,4  | 18,65 | 554,67 | 81,19  |
| 2019/06/15 | CH2206 | Male | Three y/o | Control | Control | Feed Day | No | 13:45 | 13:00 - 13:59 | Afternoon    | 37,9 | 102 | 53,2  | 53,2  | 19,05 | 595,30 | 133,93 |
| 2019/06/15 | CH2205 | Male | Three y/o | Control | Control | Feed Day | No | 13:50 | 13:00 - 13:59 | Afternoon    | 37,5 | 59  | 27,8  | 27,8  | 18,65 | 553,30 | 111,58 |
| 2019/06/15 | CH2206 | Male | Three y/o | Control | Control | Feed Day | No | 13:50 | 13:00 - 13:59 | Afternoon    | 37,9 | 47  | 57,0  | 57,0  | 19,05 | 534,23 | 136,32 |
| 2019/06/15 | CH2205 | Male | Three y/o | Control | Control | Feed Day | No | 13:55 | 13:00 - 13:59 | Afternoon    | 37,6 | 69  | 26,8  | 26,8  | 18,75 | 565,86 | 110,33 |
| 2019/06/15 | CH2206 | Male | Three y/o | Control | Control | Feed Day | No | 13:55 | 13:00 - 13:59 | Afternoon    | 37,9 | 48  | 65,4  | 65,4  | 19,05 | 536,04 | 141,08 |
| 2019/06/15 | CH2205 | Male | Three y/o | Control | Control | Feed Day | No | 14:00 | 14:00 - 14:59 | Afternoon    | 37,6 | 77  | 25,8  | 25,8  | 18,75 | 574,39 | 109,02 |
| 2019/06/15 | CH2206 | Male | Three y/o | Control | Control | Feed Day | No | 14:00 | 14:00 - 14:59 | Afternoon    | 37,9 | 58  | 46,8  | 46,8  | 19,05 | 551,90 | 129,50 |
| 2019/06/15 | CH2205 | Male | Three y/o | Control | Control | Feed Day | No | 14:05 | 14:00 - 14:59 | Afternoon    | 37,6 |     | 47,8  | 47,8  | 18,75 |        | 130,23 |
| 2019/06/15 | CH2206 | Male | Three y/o | Control | Control | Feed Day | No | 14:05 | 14:00 - 14:59 | Afternoon    | 38,0 | 92  | 25,4  | 25,4  | 19,15 | 587,78 | 108,49 |
| 2019/06/15 | CH2205 | Male | Three y/o | Control | Control | Feed Day | No | 14:10 | 14:00 - 14:59 | Afternoon    | 37,7 | 63  | 19,6  | 19,6  | 18,85 | 558,62 | 99,63  |
| 2019/06/15 | CH2206 | Male | Three y/o | Control | Control | Feed Day | No | 14:10 | 14:00 - 14:59 | Afternoon    | 38,0 | 89  | 33,0  | 33,0  | 19,15 | 585,33 | 117,47 |
| 2019/06/15 | CH2205 | Male | Three y/o | Control | Control | Feed Day | No | 14:15 | 14:00 - 14:59 | Afternoon    | 37,7 | 59  | 18,8  | 18,8  | 18,85 | 553,30 | 98,20  |
| 2019/06/15 | CH2206 | Male | Three y/o | Control | Control | Feed Day | No | 14:15 | 14:00 - 14:59 | Afternoon    | 38,0 | 89  | 32,0  | 32,0  | 19,15 | 585,33 | 116,41 |
| 2019/06/15 | CH2205 | Male | Three y/o | Control | Control | Feed Day | No | 14:20 | 14:00 - 14:59 | Afternoon    | 37,7 | 106 | 17,4  | 17,4  | 18,85 | 598,06 | 95,56  |
| 2019/06/15 | CH2206 | Male | Three y/o | Control | Control | Feed Day | No | 14:20 | 14:00 - 14:59 | Afternoon    | 38,0 | 110 | 26,6  | 26,6  | 19,15 | 600,69 | 110,07 |
| 2019/06/15 | CH2205 | Male | Three y/o | Control | Control | Feed Day | No | 14:25 | 14:00 - 14:59 | Afternoon    | 37,7 | 47  | 18,2  | 18,2  | 18,85 | 534,23 | 97,10  |
| 2019/06/15 | CH2206 | Male | Three y/o | Control | Control | Feed Day | No | 14:25 | 14:00 - 14:59 | Afternoon    | 38,0 | 79  | 40,4  | 40,4  | 19,15 | 576,36 | 124,43 |
| 2019/06/15 | CH2205 | Male | Three y/o | Control | Control | Feed Day | No | 14:30 | 14:00 - 14:59 | Afternoon    | 37,7 | 69  | 10,2  | 10,2  | 18,85 | 565,86 | 77,43  |
| 2019/06/15 | CH2206 | Male | Three y/o | Control | Control | Feed Day | No | 14:30 | 14:00 - 14:59 | Afternoon    | 38,0 | 56  | 49,8  | 49,8  | 19,15 | 549,01 | 131,65 |
| 2019/06/15 | CH2205 | Male | Three y/o | Control | Control | Feed Day | No | 14:35 | 14:00 - 14:59 | Afternoon    | 37,7 | 65  | 14,6  | 14,6  | 18,85 | 561,12 | 89,59  |
| 2019/06/15 | CH2206 | Male | Three y/o | Control | Control | Feed Day | No | 14:35 | 14:00 - 14:59 | Afternoon    | 38,0 | 62  | 52,0  | 52,0  | 19,15 | 557,33 | 133,14 |
| 2019/06/15 | CH2205 | Male | Three y/o | Control | Control | Feed Day | No | 14:40 | 14:00 - 14:59 | Afternoon    | 37,8 | 80  | 12,6  | 12,6  | 18,95 | 577,31 | 84,59  |
| 2019/06/15 | CH2206 | Male | Three y/o | Control | Control | Feed Day | No | 14:40 | 14:00 - 14:59 | Afternoon    | 38,0 | 86  | 52,8  | 52,8  | 19,15 | 582,77 | 133,67 |
| 2019/06/15 | CH2205 | Male | Three y/o | Control | Control | Feed Day | No | 14:45 | 14:00 - 14:59 | Afternoon    | 37,9 | 81  | 12,0  | 12,0  | 19,05 | 578,26 | 82,93  |
| 2019/06/15 | CH2206 | Male | Three y/o | Control | Control | Feed Day | No | 14:45 | 14:00 - 14:59 | Afternoon    | 38,0 | 73  | 47,0  | 47,0  | 19,15 | 570,27 | 129,65 |
| 2019/06/15 | CH2205 | Male | Three y/o | Control | Control | Feed Day | No | 14:50 | 14:00 - 14:59 | Afternoon    | 37,7 | 197 | 12,6  | 12,6  | 18,85 | 639,25 | 84,59  |



|            |        |      |           |         |         |          |    |       |               |           |      |     |       |       |       |        |        |
|------------|--------|------|-----------|---------|---------|----------|----|-------|---------------|-----------|------|-----|-------|-------|-------|--------|--------|
| 2019/06/15 | CH2206 | Male | Three y/o | Control | Control | Feed Day | No | 14:50 | 14:00 - 14:59 | Afternoon | 38,0 | 86  | 50,2  | 50,2  | 19,15 | 582,77 | 131,92 |
| 2019/06/15 | CH2205 | Male | Three y/o | Control | Control | Feed Day | No | 14:55 | 14:00 - 14:59 | Afternoon | 37,8 | 89  | 18,8  | 18,8  | 18,95 | 585,33 | 98,20  |
| 2019/06/15 | CH2206 | Male | Three y/o | Control | Control | Feed Day | No | 14:55 | 14:00 - 14:59 | Afternoon | 38,0 | 87  | 31,8  | 31,8  | 19,15 | 583,64 | 116,20 |
| 2019/06/15 | CH2205 | Male | Three y/o | Control | Control | Feed Day | No | 15:00 | 15:00 - 15:59 | Afternoon | 37,7 | 73  | 21,4  | 21,4  | 18,85 | 570,27 | 102,63 |
| 2019/06/15 | CH2206 | Male | Three y/o | Control | Control | Feed Day | No | 15:00 | 15:00 - 15:59 | Afternoon | 38,0 | 84  | 13,8  | 13,8  | 19,15 | 581,01 | 87,68  |
| 2019/06/15 | CH2205 | Male | Three y/o | Control | Control | Feed Day | No | 15:05 | 15:00 - 15:59 | Afternoon | 37,9 | 50  | 23,8  | 23,8  | 19,05 | 539,52 | 106,26 |
| 2019/06/15 | CH2206 | Male | Three y/o | Control | Control | Feed Day | No | 15:05 | 15:00 - 15:59 | Afternoon | 38,0 | 85  | 5,0   | 5,0   | 19,15 | 581,90 | 53,41  |
| 2019/06/15 | CH2205 | Male | Three y/o | Control | Control | Feed Day | No | 15:10 | 15:00 - 15:59 | Afternoon | 37,9 | 55  | 21,0  | 21,0  | 19,05 | 547,52 | 101,98 |
| 2019/06/15 | CH2206 | Male | Three y/o | Control | Control | Feed Day | No | 15:10 | 15:00 - 15:59 | Afternoon | 38,0 | 81  | 36,4  | 36,4  | 19,15 | 578,26 | 120,84 |
| 2019/06/15 | CH2205 | Male | Three y/o | Control | Control | Feed Day | No | 15:15 | 15:00 - 15:59 | Afternoon | 37,9 | 92  | 24,2  | 24,2  | 19,05 | 587,78 | 106,83 |
| 2019/06/15 | CH2206 | Male | Three y/o | Control | Control | Feed Day | No | 15:15 | 15:00 - 15:59 | Afternoon | 38,0 | 90  | 38,8  | 38,8  | 19,15 | 586,16 | 123,04 |
| 2019/06/15 | CH2205 | Male | Three y/o | Control | Control | Feed Day | No | 15:20 | 15:00 - 15:59 | Afternoon | 37,9 | 66  | 30,8  | 30,8  | 19,05 | 562,34 | 115,10 |
| 2019/06/15 | CH2206 | Male | Three y/o | Control | Control | Feed Day | No | 15:20 | 15:00 - 15:59 | Afternoon | 38,0 | 90  | 38,0  | 38,0  | 19,15 | 586,16 | 122,32 |
| 2019/06/15 | CH2205 | Male | Three y/o | Control | Control | Feed Day | No | 15:25 | 15:00 - 15:59 | Afternoon | 37,9 | 67  | 24,6  | 24,6  | 19,05 | 563,53 | 107,39 |
| 2019/06/15 | CH2206 | Male | Three y/o | Control | Control | Feed Day | No | 15:25 | 15:00 - 15:59 | Afternoon | 38,0 | 110 | 43,0  | 43,0  | 19,15 | 600,69 | 126,58 |
| 2019/06/15 | CH2205 | Male | Three y/o | Control | Control | Feed Day | No | 15:30 | 15:00 - 15:59 | Afternoon | 38,0 | 120 | 40,8  | 40,8  | 19,15 | 606,78 | 124,77 |
| 2019/06/15 | CH2206 | Male | Three y/o | Control | Control | Feed Day | No | 15:30 | 15:00 - 15:59 | Afternoon | 38,0 | 150 | 130,8 | 130,8 | 19,15 | 621,86 | 165,22 |
| 2019/06/15 | CH2205 | Male | Three y/o | Control | Control | Feed Day | No | 15:35 | 15:00 - 15:59 | Afternoon | 38,1 | 81  | 9,0   | 9,0   | 19,26 | 578,26 | 73,19  |
| 2019/06/15 | CH2206 | Male | Three y/o | Control | Control | Feed Day | No | 15:35 | 15:00 - 15:59 | Afternoon | 38,1 | 158 | 13,0  | 13,0  | 19,26 | 625,26 | 85,65  |
| 2019/06/15 | CH2205 | Male | Three y/o | Control | Control | Feed Day | No | 15:40 | 15:00 - 15:59 | Afternoon | 38,1 | 84  | 8,6   | 8,6   | 19,26 | 581,01 | 71,66  |
| 2019/06/15 | CH2206 | Male | Three y/o | Control | Control | Feed Day | No | 15:40 | 15:00 - 15:59 | Afternoon | 38,1 | 86  | 22,4  | 22,4  | 19,26 | 582,77 | 104,19 |
| 2019/06/15 | CH2205 | Male | Three y/o | Control | Control | Feed Day | No | 15:45 | 15:00 - 15:59 | Afternoon | 38,1 |     | 17,4  | 17,4  | 19,26 |        | 95,56  |
| 2019/06/15 | CH2206 | Male | Three y/o | Control | Control | Feed Day | No | 15:45 | 15:00 - 15:59 | Afternoon | 38,1 | 84  | 5,0   | 5,0   | 19,26 | 581,01 | 53,41  |
| 2019/06/15 | CH2205 | Male | Three y/o | Control | Control | Feed Day | No | 15:50 | 15:00 - 15:59 | Afternoon | 38,0 | 140 | 36,4  | 36,4  | 19,15 | 617,28 | 120,84 |
| 2019/06/15 | CH2206 | Male | Three y/o | Control | Control | Feed Day | No | 15:50 | 15:00 - 15:59 | Afternoon | 38,1 | 62  | 7,4   | 7,4   | 19,26 | 557,33 | 66,59  |
| 2019/06/15 | CH2205 | Male | Three y/o | Control | Control | Feed Day | No | 15:55 | 15:00 - 15:59 | Afternoon | 37,9 | 74  | 22,6  | 22,6  | 19,05 | 571,33 | 104,49 |
| 2019/06/15 | CH2206 | Male | Three y/o | Control | Control | Feed Day | No | 15:55 | 15:00 - 15:59 | Afternoon | 38,2 | 73  | 4,4   | 4,4   | 19,36 | 570,27 | 49,12  |
| 2019/06/15 | CH2205 | Male | Three y/o | Control | Control | Feed Day | No | 16:00 | 16:00 - 16:59 | Evening   | 38,0 | 125 | 19,0  | 19,0  | 19,15 | 609,60 | 98,56  |
| 2019/06/15 | CH2206 | Male | Three y/o | Control | Control | Feed Day | No | 16:00 | 16:00 - 16:59 | Evening   | 38,2 | 84  | 6,4   | 6,4   | 19,36 | 581,01 | 61,70  |
| 2019/06/15 | CH2205 | Male | Three y/o | Control | Control | Feed Day | No | 16:05 | 16:00 - 16:59 | Evening   | 38,0 | 69  | 23,8  | 23,8  | 19,15 | 565,86 | 106,26 |
| 2019/06/15 | CH2206 | Male | Three y/o | Control | Control | Feed Day | No | 16:05 | 16:00 - 16:59 | Evening   | 38,2 | 47  | 5,4   | 5,4   | 19,36 | 534,23 | 55,99  |
| 2019/06/15 | CH2205 | Male | Three y/o | Control | Control | Feed Day | No | 16:10 | 16:00 - 16:59 | Evening   | 38,1 | 94  | 22,8  | 22,8  | 19,26 | 589,37 | 104,79 |
| 2019/06/15 | CH2206 | Male | Three y/o | Control | Control | Feed Day | No | 16:10 | 16:00 - 16:59 | Evening   | 38,2 | 50  | 5,2   | 5,2   | 19,36 | 539,52 | 54,72  |
| 2019/06/15 | CH2205 | Male | Three y/o | Control | Control | Feed Day | No | 16:15 | 16:00 - 16:59 | Evening   | 38,1 | 85  | 24,4  | 24,4  | 19,26 | 581,90 | 107,11 |
| 2019/06/15 | CH2206 | Male | Three y/o | Control | Control | Feed Day | No | 16:15 | 16:00 - 16:59 | Evening   | 38,2 | 47  | 3,0   | 3,0   | 19,36 | 534,23 | 36,34  |
| 2019/06/15 | CH2205 | Male | Three y/o | Control | Control | Feed Day | No | 16:20 | 16:00 - 16:59 | Evening   | 38,1 |     | 21,2  | 21,2  | 19,26 |        | 102,31 |
| 2019/06/15 | CH2206 | Male | Three y/o | Control | Control | Feed Day | No | 16:20 | 16:00 - 16:59 | Evening   | 38,2 | 88  | 6,0   | 6,0   | 19,36 | 584,49 | 59,53  |
| 2019/06/15 | CH2205 | Male | Three y/o | Control | Control | Feed Day | No | 16:25 | 16:00 - 16:59 | Evening   | 38,0 |     | 21,8  | 21,8  | 19,15 |        | 103,26 |
| 2019/06/15 | CH2206 | Male | Three y/o | Control | Control | Feed Day | No | 16:25 | 16:00 - 16:59 | Evening   | 38,2 | 61  | 8,8   | 8,8   | 19,36 | 556,01 | 72,43  |
| 2019/06/15 | CH2205 | Male | Three y/o | Control | Control | Feed Day | No | 16:30 | 16:00 - 16:59 | Evening   | 38,0 | 68  | 23,0  | 23,0  | 19,15 | 564,71 | 105,09 |
| 2019/06/15 | CH2206 | Male | Three y/o | Control | Control | Feed Day | No | 16:30 | 16:00 - 16:59 | Evening   | 38,1 | 90  | 8,4   | 8,4   | 19,26 | 586,16 | 70,86  |
| 2019/06/15 | CH2205 | Male | Three y/o | Control | Control | Feed Day | No | 16:35 | 16:00 - 16:59 | Evening   | 37,9 | 70  | 23,2  | 23,2  | 19,05 | 566,99 | 105,39 |
| 2019/06/15 | CH2206 | Male | Three y/o | Control | Control | Feed Day | No | 16:35 | 16:00 - 16:59 | Evening   | 38,0 | 50  | 48,0  | 48,0  | 19,15 | 539,52 | 130,38 |
| 2019/06/15 | CH2205 | Male | Three y/o | Control | Control | Feed Day | No | 16:40 | 16:00 - 16:59 | Evening   | 37,9 | 172 | 95,4  | 95,4  | 19,05 | 630,73 | 154,20 |
| 2019/06/15 | CH2206 | Male | Three y/o | Control | Control | Feed Day | No | 16:40 | 16:00 - 16:59 | Evening   | 38,0 | 131 | 52,6  | 52,6  | 19,15 | 612,80 | 133,54 |
| 2019/06/15 | CH2205 | Male | Three y/o | Control | Control | Feed Day | No | 16:45 | 16:00 - 16:59 | Evening   | 38,0 | 104 | 143,6 | 143,6 | 19,15 | 596,69 | 168,49 |
| 2019/06/15 | CH2206 | Male | Three y/o | Control | Control | Feed Day | No | 16:45 | 16:00 - 16:59 | Evening   | 38,0 |     | 55,6  | 55,6  | 19,15 |        | 135,46 |
| 2019/06/15 | CH2205 | Male | Three y/o | Control | Control | Feed Day | No | 16:50 | 16:00 - 16:59 | Evening   | 38,0 | 85  | 10,4  | 10,4  | 19,15 | 581,90 | 78,08  |
| 2019/06/15 | CH2206 | Male | Three y/o | Control | Control | Feed Day | No | 16:50 | 16:00 - 16:59 | Evening   | 37,9 | 83  | 50,4  | 50,4  | 19,05 | 580,11 | 132,06 |
| 2019/06/15 | CH2205 | Male | Three y/o | Control | Control | Feed Day | No | 16:55 | 16:00 - 16:59 | Evening   | 37,9 | 121 | 15,4  | 15,4  | 19,05 | 607,35 | 91,41  |
| 2019/06/15 | CH2206 | Male | Three y/o | Control | Control | Feed Day | No | 16:55 | 16:00 - 16:59 | Evening   | 37,9 | 82  | 49,2  | 49,2  | 19,05 | 579,19 | 131,23 |
| 2019/06/15 | CH2205 | Male | Three y/o | Control | Control | Feed Day | No | 17:00 | 17:00 - 17:59 | Evening   | 37,9 | 58  | 21,4  | 21,4  | 19,05 | 551,90 | 102,63 |
| 2019/06/15 | CH2206 | Male | Three y/o | Control | Control | Feed Day | No | 17:00 | 17:00 - 17:59 | Evening   | 37,8 | 90  | 44,6  | 44,6  | 18,95 | 586,16 | 127,84 |
| 2019/06/15 | CH2205 | Male | Three y/o | Control | Control | Feed Day | No | 17:05 | 17:00 - 17:59 | Evening   | 38,0 | 60  | 28,0  | 28,0  | 19,15 | 554,67 | 111,83 |
| 2019/06/15 | CH2206 | Male | Three y/o | Control | Control | Feed Day | No | 17:05 | 17:00 - 17:59 | Evening   | 37,8 | 67  | 45,6  | 45,6  | 18,95 | 563,53 | 128,61 |
| 2019/06/15 | CH2205 | Male | Three y/o | Control | Control | Feed Day | No | 17:10 | 17:00 - 17:59 | Evening   | 38,0 | 78  | 21,0  | 21,0  | 19,15 | 575,38 | 101,98 |
| 2019/06/15 | CH2206 | Male | Three y/o | Control | Control | Feed Day | No | 17:10 | 17:00 - 17:59 | Evening   | 37,8 | 78  | 69,6  | 69,6  | 18,95 | 575,38 | 143,24 |
| 2019/06/15 | CH2205 | Male | Three y/o | Control | Control | Feed Day | No | 17:15 | 17:00 - 17:59 | Evening   | 38,1 | 68  | 20,4  | 20,4  | 19,26 | 564,71 | 100,99 |
| 2019/06/15 | CH2206 | Male | Three y/o | Control | Control | Feed Day | No | 17:15 | 17:00 - 17:59 | Evening   | 37,8 | 72  | 64,8  | 64,8  | 18,95 | 569,20 | 140,76 |
| 2019/06/15 | CH2205 | Male | Three y/o | Control | Control | Feed Day | No | 17:20 | 17:00 - 17:59 | Evening   | 38,1 | 86  | 23,6  | 23,6  | 19,26 | 582,77 | 105,97 |
| 2019/06/15 | CH2206 | Male | Three y/o | Control | Control | Feed Day | No | 17:20 | 17:00 - 17:59 | Evening   | 37,8 | 90  | 56,4  | 56,4  | 18,95 | 586,16 | 135,95 |
| 2019/06/15 | CH2205 | Male | Three y/o | Control | Control | Feed Day | No | 17:25 | 17:00 - 17:59 | Evening   | 38,1 |     | 14,8  | 14,8  | 19,26 |        | 90,05  |
| 2019/06/15 | CH2206 | Male | Three y/o | Control | Control | Feed Day | No | 17:25 | 17:00 - 17:59 | Evening   | 37,7 | 82  | 34,4  | 34,4  | 18,85 | 579,19 | 118,90 |
| 2019/06/15 | CH2205 | Male | Three y/o | Control | Control | Feed Day | No | 17:30 | 17:00 - 17:59 | Evening   | 38,1 | 96  | 27,2  | 27,2  | 19,26 | 590,91 | 110,83 |
| 2019/06/15 | CH2206 | Male | Three y/o | Control | Control | Feed Day | No | 17:30 | 17:00 - 17:59 | Evening   | 37,8 | 107 | 133,0 | 133,0 | 18,95 | 598,73 | 165,80 |
| 2019/06/15 | CH2205 | Male | Three y/o | Control | Control | Feed Day | No | 17:35 | 17:00 - 17:59 | Evening   | 38,1 | 89  | 121,2 | 121,2 | 19,26 | 585,33 | 162,56 |
| 2019/06/15 | CH2206 | Male | Three y/o | Control | Control | Feed Day | No | 17:35 | 17:00 - 17:59 | Evening   | 37,7 | 110 | 44,8  | 44,8  | 18,85 | 600,69 | 127,99 |
| 2019/06/15 | CH2205 | Male | Three y/o | Control | Control | Feed Day | No | 17:40 | 17:00 - 17:59 | Evening   | 38,1 | 90  | 114,0 | 114,0 | 19,26 | 586,16 | 160,42 |
| 2019/06/15 | CH2206 | Male | Three y/o | Control | Control | Feed Day | No | 17:40 | 17:00 - 17:59 | Evening   | 37,5 | 82  | 39,2  | 39,2  | 18,65 | 579,19 | 123,39 |
| 2019/06/15 | CH2205 | Male | Three y/o | Control | Control | Feed Day | No | 17:45 | 17:00 - 17:59 | Evening   | 38,1 |     | 14,0  | 14,0  | 19,26 |        | 88,17  |



|            |        |      |           |         |         |          |    |       |               |         |      |     |      |      |       |        |        |
|------------|--------|------|-----------|---------|---------|----------|----|-------|---------------|---------|------|-----|------|------|-------|--------|--------|
| 2019/06/15 | CH2206 | Male | Three y/o | Control | Control | Feed Day | No | 17:45 | 17:00 - 17:59 | Evening | 37,4 | 90  | 40,2 | 40,2 | 18,55 | 586,16 | 124,26 |
| 2019/06/15 | CH2205 | Male | Three y/o | Control | Control | Feed Day | No | 17:50 | 17:00 - 17:59 | Evening | 37,9 | 118 | 6,2  | 6,2  | 19,05 | 605,61 | 60,63  |
| 2019/06/15 | CH2206 | Male | Three y/o | Control | Control | Feed Day | No | 17:50 | 17:00 - 17:59 | Evening | 37,5 | 76  | 48,2 | 48,2 | 18,65 | 573,39 | 130,52 |
| 2019/06/15 | CH2205 | Male | Three y/o | Control | Control | Feed Day | No | 17:55 | 17:00 - 17:59 | Evening | 37,9 |     | 4,0  | 4,0  | 19,05 |        | 45,94  |
| 2019/06/15 | CH2206 | Male | Three y/o | Control | Control | Feed Day | No | 17:55 | 17:00 - 17:59 | Evening | 37,5 |     | 60,6 | 60,6 | 18,65 |        | 138,44 |
| 2019/06/15 | CH2205 | Male | Three y/o | Control | Control | Feed Day | No | 18:00 | 18:00 - 18:59 | Evening | 37,9 | 56  | 1,8  | 1,8  | 19,05 | 549,01 | 19,38  |
| 2019/06/15 | CH2206 | Male | Three y/o | Control | Control | Feed Day | No | 18:00 | 18:00 - 18:59 | Evening | 37,3 | 45  | 56,8 | 56,8 | 18,46 | 530,47 | 136,20 |
| 2019/06/15 | CH2205 | Male | Three y/o | Control | Control | Feed Day | No | 18:05 | 18:00 - 18:59 | Evening | 37,9 | 58  | 5,4  | 5,4  | 19,05 | 551,90 | 55,99  |
| 2019/06/15 | CH2206 | Male | Three y/o | Control | Control | Feed Day | No | 18:05 | 18:00 - 18:59 | Evening | 37,2 | 70  | 52,2 | 52,2 | 18,36 | 566,99 | 133,27 |
| 2019/06/15 | CH2205 | Male | Three y/o | Control | Control | Feed Day | No | 18:10 | 18:00 - 18:59 | Evening | 37,9 | 72  | 6,6  | 6,6  | 19,05 | 569,20 | 62,73  |
| 2019/06/15 | CH2206 | Male | Three y/o | Control | Control | Feed Day | No | 18:10 | 18:00 - 18:59 | Evening | 37,2 | 81  | 20,6 | 20,6 | 18,36 | 578,26 | 101,32 |
| 2019/06/15 | CH2205 | Male | Three y/o | Control | Control | Feed Day | No | 18:15 | 18:00 - 18:59 | Evening | 38,0 | 59  | 5,6  | 5,6  | 19,15 | 553,30 | 57,21  |
| 2019/06/15 | CH2206 | Male | Three y/o | Control | Control | Feed Day | No | 18:15 | 18:00 - 18:59 | Evening | 37,4 | 83  | 14,0 | 14,0 | 18,55 | 580,11 | 88,17  |
| 2019/06/15 | CH2205 | Male | Three y/o | Control | Control | Feed Day | No | 18:20 | 18:00 - 18:59 | Evening | 38,0 | 61  | 5,0  | 5,0  | 19,15 | 556,01 | 53,41  |
| 2019/06/15 | CH2206 | Male | Three y/o | Control | Control | Feed Day | No | 18:20 | 18:00 - 18:59 | Evening | 37,5 | 72  | 16,0 | 16,0 | 18,65 | 569,20 | 92,71  |
| 2019/06/15 | CH2205 | Male | Three y/o | Control | Control | Feed Day | No | 18:25 | 18:00 - 18:59 | Evening | 38,1 | 72  | 3,4  | 3,4  | 19,26 | 569,20 | 40,51  |
| 2019/06/15 | CH2206 | Male | Three y/o | Control | Control | Feed Day | No | 18:25 | 18:00 - 18:59 | Evening | 37,7 | 49  | 14,4 | 14,4 | 18,85 | 537,80 | 89,12  |
| 2019/06/15 | CH2205 | Male | Three y/o | Control | Control | Feed Day | No | 18:30 | 18:00 - 18:59 | Evening | 38,1 | 82  | 8,4  | 8,4  | 19,26 | 579,19 | 70,86  |
| 2019/06/15 | CH2206 | Male | Three y/o | Control | Control | Feed Day | No | 18:30 | 18:00 - 18:59 | Evening | 37,8 | 45  | 52,0 | 52,0 | 18,95 | 530,47 | 133,14 |
| 2019/06/15 | CH2205 | Male | Three y/o | Control | Control | Feed Day | No | 18:35 | 18:00 - 18:59 | Evening | 38,1 | 64  | 10,2 | 10,2 | 19,26 | 559,88 | 77,43  |
| 2019/06/15 | CH2206 | Male | Three y/o | Control | Control | Feed Day | No | 18:35 | 18:00 - 18:59 | Evening | 37,8 | 78  | 41,8 | 41,8 | 18,95 | 575,38 | 125,60 |
| 2019/06/15 | CH2205 | Male | Three y/o | Control | Control | Feed Day | No | 18:40 | 18:00 - 18:59 | Evening | 38,1 | 49  | 6,8  | 6,8  | 19,26 | 537,80 | 63,74  |
| 2019/06/15 | CH2206 | Male | Three y/o | Control | Control | Feed Day | No | 18:40 | 18:00 - 18:59 | Evening | 37,8 | 51  | 15,4 | 15,4 | 18,95 | 541,20 | 91,41  |
| 2019/06/15 | CH2205 | Male | Three y/o | Control | Control | Feed Day | No | 18:45 | 18:00 - 18:59 | Evening | 38,1 | 78  | 5,2  | 5,2  | 19,26 | 575,38 | 54,72  |
| 2019/06/15 | CH2206 | Male | Three y/o | Control | Control | Feed Day | No | 18:45 | 18:00 - 18:59 | Evening | 37,8 | 45  | 16,6 | 16,6 | 18,95 | 530,47 | 93,96  |
| 2019/06/15 | CH2205 | Male | Three y/o | Control | Control | Feed Day | No | 18:50 | 18:00 - 18:59 | Evening | 38,2 | 53  | 5,8  | 5,8  | 19,36 | 544,43 | 58,39  |
| 2019/06/15 | CH2206 | Male | Three y/o | Control | Control | Feed Day | No | 18:50 | 18:00 - 18:59 | Evening | 37,8 | 62  | 20,6 | 20,6 | 18,95 | 557,33 | 101,32 |
| 2019/06/15 | CH2205 | Male | Three y/o | Control | Control | Feed Day | No | 18:55 | 18:00 - 18:59 | Evening | 38,2 | 96  | 8,0  | 8,0  | 19,36 | 590,91 | 69,22  |
| 2019/06/15 | CH2206 | Male | Three y/o | Control | Control | Feed Day | No | 18:55 | 18:00 - 18:59 | Evening | 37,8 | 88  | 13,8 | 13,8 | 18,95 | 584,49 | 87,68  |
| 2019/06/15 | CH2205 | Male | Three y/o | Control | Control | Feed Day | No | 19:00 | 19:00 - 19:59 | Evening | 38,2 | 83  | 6,4  | 6,4  | 19,36 | 580,11 | 61,70  |
| 2019/06/15 | CH2206 | Male | Three y/o | Control | Control | Feed Day | No | 19:00 | 19:00 - 19:59 | Evening | 37,8 | 41  | 12,8 | 12,8 | 18,95 | 522,29 | 85,12  |
| 2019/06/15 | CH2205 | Male | Three y/o | Control | Control | Feed Day | No | 19:05 | 19:00 - 19:59 | Evening | 38,2 | 77  | 3,4  | 3,4  | 19,36 | 574,39 | 40,51  |
| 2019/06/15 | CH2206 | Male | Three y/o | Control | Control | Feed Day | No | 19:05 | 19:00 - 19:59 | Evening | 37,9 | 50  | 15,4 | 15,4 | 19,05 | 539,52 | 91,41  |
| 2019/06/15 | CH2205 | Male | Three y/o | Control | Control | Feed Day | No | 19:10 | 19:00 - 19:59 | Evening | 38,2 | 78  | 4,2  | 4,2  | 19,36 | 575,38 | 47,57  |
| 2019/06/15 | CH2206 | Male | Three y/o | Control | Control | Feed Day | No | 19:10 | 19:00 - 19:59 | Evening | 37,9 | 83  | 18,4 | 18,4 | 19,05 | 580,11 | 97,47  |
| 2019/06/15 | CH2205 | Male | Three y/o | Control | Control | Feed Day | No | 19:15 | 19:00 - 19:59 | Evening | 38,2 | 75  | 4,8  | 4,8  | 19,36 | 572,36 | 52,04  |
| 2019/06/15 | CH2206 | Male | Three y/o | Control | Control | Feed Day | No | 19:15 | 19:00 - 19:59 | Evening | 37,9 | 82  | 20,4 | 20,4 | 19,05 | 579,19 | 100,99 |
| 2019/06/15 | CH2205 | Male | Three y/o | Control | Control | Feed Day | No | 19:20 | 19:00 - 19:59 | Evening | 38,2 | 55  | 4,0  | 4,0  | 19,36 | 547,52 | 45,94  |
| 2019/06/15 | CH2206 | Male | Three y/o | Control | Control | Feed Day | No | 19:20 | 19:00 - 19:59 | Evening | 37,9 | 56  | 18,6 | 18,6 | 19,05 | 549,01 | 97,84  |
| 2019/06/15 | CH2205 | Male | Three y/o | Control | Control | Feed Day | No | 19:25 | 19:00 - 19:59 | Evening | 38,2 | 57  | 18,2 | 18,2 | 19,36 | 550,47 | 97,10  |
| 2019/06/15 | CH2206 | Male | Three y/o | Control | Control | Feed Day | No | 19:25 | 19:00 - 19:59 | Evening | 37,9 | 64  | 21,6 | 21,6 | 19,05 | 559,88 | 102,94 |
| 2019/06/15 | CH2205 | Male | Three y/o | Control | Control | Feed Day | No | 19:30 | 19:00 - 19:59 | Evening | 38,2 | 80  | 4,0  | 4,0  | 19,36 | 577,31 | 45,94  |
| 2019/06/15 | CH2206 | Male | Three y/o | Control | Control | Feed Day | No | 19:30 | 19:00 - 19:59 | Evening | 37,9 | 68  | 17,6 | 17,6 | 19,05 | 564,71 | 95,95  |
| 2019/06/15 | CH2205 | Male | Three y/o | Control | Control | Feed Day | No | 19:35 | 19:00 - 19:59 | Evening | 38,2 | 63  | 4,0  | 4,0  | 19,36 | 558,62 | 45,94  |
| 2019/06/15 | CH2206 | Male | Three y/o | Control | Control | Feed Day | No | 19:35 | 19:00 - 19:59 | Evening | 38,0 | 79  | 22,6 | 22,6 | 19,15 | 576,36 | 104,49 |
| 2019/06/15 | CH2205 | Male | Three y/o | Control | Control | Feed Day | No | 19:40 | 19:00 - 19:59 | Evening | 38,2 | 55  | 6,4  | 6,4  | 19,36 | 547,52 | 61,70  |
| 2019/06/15 | CH2206 | Male | Three y/o | Control | Control | Feed Day | No | 19:40 | 19:00 - 19:59 | Evening | 37,9 | 46  | 50,8 | 50,8 | 19,05 | 532,38 | 132,33 |
| 2019/06/15 | CH2205 | Male | Three y/o | Control | Control | Feed Day | No | 19:45 | 19:00 - 19:59 | Evening | 38,2 | 52  | 3,2  | 3,2  | 19,36 | 542,83 | 38,49  |
| 2019/06/15 | CH2206 | Male | Three y/o | Control | Control | Feed Day | No | 19:45 | 19:00 - 19:59 | Evening | 37,9 | 63  | 40,6 | 40,6 | 19,05 | 558,62 | 124,60 |
| 2019/06/15 | CH2205 | Male | Three y/o | Control | Control | Feed Day | No | 19:50 | 19:00 - 19:59 | Evening | 38,2 | 63  | 4,6  | 4,6  | 19,36 | 558,62 | 50,61  |
| 2019/06/15 | CH2206 | Male | Three y/o | Control | Control | Feed Day | No | 19:50 | 19:00 - 19:59 | Evening | 37,9 | 63  | 39,8 | 39,8 | 19,05 | 558,62 | 123,91 |
| 2019/06/15 | CH2205 | Male | Three y/o | Control | Control | Feed Day | No | 19:55 | 19:00 - 19:59 | Evening | 38,2 | 60  | 5,0  | 5,0  | 19,36 | 554,67 | 53,41  |
| 2019/06/15 | CH2206 | Male | Three y/o | Control | Control | Feed Day | No | 19:55 | 19:00 - 19:59 | Evening | 37,9 | 61  | 42,2 | 42,2 | 19,05 | 556,01 | 125,93 |
| 2019/06/15 | CH2205 | Male | Three y/o | Control | Control | Feed Day | No | 20:00 | 20:00 - 20:59 | Night   | 38,2 | 45  | 2,6  | 2,6  | 19,36 | 530,47 | 31,57  |
| 2019/06/15 | CH2206 | Male | Three y/o | Control | Control | Feed Day | No | 20:00 | 20:00 - 20:59 | Night   | 37,9 | 54  | 43,4 | 43,4 | 19,05 | 545,99 | 126,90 |
| 2019/06/15 | CH2205 | Male | Three y/o | Control | Control | Feed Day | No | 20:05 | 20:00 - 20:59 | Night   | 38,2 | 60  | 2,0  | 2,0  | 19,36 | 554,67 | 22,86  |
| 2019/06/15 | CH2206 | Male | Three y/o | Control | Control | Feed Day | No | 20:05 | 20:00 - 20:59 | Night   | 37,9 | 61  | 43,4 | 43,4 | 19,05 | 556,01 | 126,90 |
| 2019/06/15 | CH2205 | Male | Three y/o | Control | Control | Feed Day | No | 20:10 | 20:00 - 20:59 | Night   | 38,2 | 66  | 2,0  | 2,0  | 19,36 | 562,34 | 22,86  |
| 2019/06/15 | CH2206 | Male | Three y/o | Control | Control | Feed Day | No | 20:10 | 20:00 - 20:59 | Night   | 38,0 | 41  | 48,2 | 48,2 | 19,15 | 522,29 | 130,52 |
| 2019/06/15 | CH2205 | Male | Three y/o | Control | Control | Feed Day | No | 20:15 | 20:00 - 20:59 | Night   | 38,2 | 64  | 2,8  | 2,8  | 19,36 | 559,88 | 34,04  |
| 2019/06/15 | CH2206 | Male | Three y/o | Control | Control | Feed Day | No | 20:15 | 20:00 - 20:59 | Night   | 38,0 | 51  | 39,6 | 39,6 | 19,15 | 541,20 | 123,74 |
| 2019/06/15 | CH2205 | Male | Three y/o | Control | Control | Feed Day | No | 20:20 | 20:00 - 20:59 | Night   | 38,2 | 65  | 4,4  | 4,4  | 19,36 | 561,12 | 49,12  |
| 2019/06/15 | CH2206 | Male | Three y/o | Control | Control | Feed Day | No | 20:20 | 20:00 - 20:59 | Night   | 38,0 | 63  | 41,8 | 41,8 | 19,15 | 558,62 | 125,60 |
| 2019/06/15 | CH2205 | Male | Three y/o | Control | Control | Feed Day | No | 20:25 | 20:00 - 20:59 | Night   | 38,2 | 72  | 4,8  | 4,8  | 19,36 | 569,20 | 52,04  |
| 2019/06/15 | CH2206 | Male | Three y/o | Control | Control | Feed Day | No | 20:25 | 20:00 - 20:59 | Night   | 38,0 | 95  | 43,6 | 43,6 | 19,15 | 590,14 | 127,06 |
| 2019/06/15 | CH2205 | Male | Three y/o | Control | Control | Feed Day | No | 20:30 | 20:00 - 20:59 | Night   | 38,2 | 66  | 4,4  | 4,4  | 19,36 | 562,34 | 49,12  |
| 2019/06/15 | CH2206 | Male | Three y/o | Control | Control | Feed Day | No | 20:30 | 20:00 - 20:59 | Night   | 38,0 | 69  | 48,4 | 48,4 | 19,15 | 565,86 | 130,66 |
| 2019/06/15 | CH2205 | Male | Three y/o | Control | Control | Feed Day | No | 20:35 | 20:00 - 20:59 | Night   | 38,2 | 57  | 6,8  | 6,8  | 19,36 | 550,47 | 63,74  |
| 2019/06/15 | CH2206 | Male | Three y/o | Control | Control | Feed Day | No | 20:35 | 20:00 - 20:59 | Night   | 37,9 | 46  | 42,4 | 42,4 | 19,05 | 532,38 | 126,10 |
| 2019/06/15 | CH2205 | Male | Three y/o | Control | Control | Feed Day | No | 20:40 | 20:00 - 20:59 | Night   | 38,2 | 52  | 2,2  | 2,2  | 19,36 | 542,83 | 26,02  |



|            |        |      |           |         |         |          |    |       |               |       |      |     |      |      |       |        |        |
|------------|--------|------|-----------|---------|---------|----------|----|-------|---------------|-------|------|-----|------|------|-------|--------|--------|
| 2019/06/15 | CH2206 | Male | Three y/o | Control | Control | Feed Day | No | 20:40 | 20:00 - 20:59 | Night | 37,9 | 74  | 44,0 | 44,0 | 19,05 | 571,33 | 127,37 |
| 2019/06/15 | CH2205 | Male | Three y/o | Control | Control | Feed Day | No | 20:45 | 20:00 - 20:59 | Night | 38,2 | 76  | 5,0  | 5,0  | 19,36 | 573,39 | 53,41  |
| 2019/06/15 | CH2206 | Male | Three y/o | Control | Control | Feed Day | No | 20:45 | 20:00 - 20:59 | Night | 37,9 | 72  | 36,0 | 36,0 | 19,05 | 569,20 | 120,46 |
| 2019/06/15 | CH2205 | Male | Three y/o | Control | Control | Feed Day | No | 20:50 | 20:00 - 20:59 | Night | 38,2 | 64  | 8,0  | 8,0  | 19,36 | 559,88 | 69,22  |
| 2019/06/15 | CH2206 | Male | Three y/o | Control | Control | Feed Day | No | 20:50 | 20:00 - 20:59 | Night | 37,9 | 43  | 38,4 | 38,4 | 19,05 | 526,50 | 122,68 |
| 2019/06/15 | CH2205 | Male | Three y/o | Control | Control | Feed Day | No | 20:55 | 20:00 - 20:59 | Night | 38,2 | 84  | 3,6  | 3,6  | 19,36 | 581,01 | 42,42  |
| 2019/06/15 | CH2206 | Male | Three y/o | Control | Control | Feed Day | No | 20:55 | 20:00 - 20:59 | Night | 37,9 | 56  | 34,4 | 34,4 | 19,05 | 549,01 | 118,90 |
| 2019/06/15 | CH2205 | Male | Three y/o | Control | Control | Feed Day | No | 21:00 | 21:00 - 21:59 | Night | 38,2 | 84  | 3,6  | 3,6  | 19,36 | 581,01 | 42,42  |
| 2019/06/15 | CH2206 | Male | Three y/o | Control | Control | Feed Day | No | 21:00 | 21:00 - 21:59 | Night | 37,9 | 72  | 35,8 | 35,8 | 19,05 | 569,20 | 120,27 |
| 2019/06/15 | CH2205 | Male | Three y/o | Control | Control | Feed Day | No | 21:05 | 21:00 - 21:59 | Night | 38,2 | 78  | 10,6 | 10,6 | 19,36 | 575,38 | 78,73  |
| 2019/06/15 | CH2206 | Male | Three y/o | Control | Control | Feed Day | No | 21:05 | 21:00 - 21:59 | Night | 37,9 | 55  | 32,6 | 32,6 | 19,05 | 547,52 | 117,05 |
| 2019/06/15 | CH2205 | Male | Three y/o | Control | Control | Feed Day | No | 21:10 | 21:00 - 21:59 | Night | 38,2 |     | 26,6 | 26,6 | 19,36 |        | 110,07 |
| 2019/06/15 | CH2206 | Male | Three y/o | Control | Control | Feed Day | No | 21:10 | 21:00 - 21:59 | Night | 38,0 | 103 | 45,4 | 45,4 | 19,15 | 596,00 | 128,45 |
| 2019/06/15 | CH2205 | Male | Three y/o | Control | Control | Feed Day | No | 21:15 | 21:00 - 21:59 | Night | 38,2 | 96  | 40,4 | 40,4 | 19,36 | 590,91 | 124,43 |
| 2019/06/15 | CH2206 | Male | Three y/o | Control | Control | Feed Day | No | 21:15 | 21:00 - 21:59 | Night | 37,9 | 49  | 44,2 | 44,2 | 19,05 | 537,80 | 127,53 |
| 2019/06/15 | CH2205 | Male | Three y/o | Control | Control | Feed Day | No | 21:20 | 21:00 - 21:59 | Night | 38,0 | 62  | 17,4 | 17,4 | 19,15 | 557,33 | 95,56  |
| 2019/06/15 | CH2206 | Male | Three y/o | Control | Control | Feed Day | No | 21:20 | 21:00 - 21:59 | Night | 37,8 | 74  | 21,8 | 21,8 | 18,95 | 571,33 | 103,26 |
| 2019/06/15 | CH2205 | Male | Three y/o | Control | Control | Feed Day | No | 21:25 | 21:00 - 21:59 | Night | 37,9 | 65  | 19,2 | 19,2 | 19,05 | 561,12 | 98,92  |
| 2019/06/15 | CH2206 | Male | Three y/o | Control | Control | Feed Day | No | 21:25 | 21:00 - 21:59 | Night | 37,7 | 58  | 2,6  | 2,6  | 18,85 | 551,90 | 31,57  |
| 2019/06/15 | CH2205 | Male | Three y/o | Control | Control | Feed Day | No | 21:30 | 21:00 - 21:59 | Night | 38,0 | 57  | 14,4 | 14,4 | 19,15 | 550,47 | 89,12  |
| 2019/06/15 | CH2206 | Male | Three y/o | Control | Control | Feed Day | No | 21:30 | 21:00 - 21:59 | Night | 37,7 | 87  | 9,8  | 9,8  | 18,85 | 583,64 | 76,07  |
| 2019/06/15 | CH2205 | Male | Three y/o | Control | Control | Feed Day | No | 21:35 | 21:00 - 21:59 | Night | 38,0 | 66  | 16,8 | 16,8 | 19,15 | 562,34 | 94,37  |
| 2019/06/15 | CH2206 | Male | Three y/o | Control | Control | Feed Day | No | 21:35 | 21:00 - 21:59 | Night | 37,8 | 67  | 11,0 | 11,0 | 18,95 | 563,53 | 79,98  |
| 2019/06/15 | CH2205 | Male | Three y/o | Control | Control | Feed Day | No | 21:40 | 21:00 - 21:59 | Night | 38,0 | 77  | 13,8 | 13,8 | 19,15 | 574,39 | 87,68  |
| 2019/06/15 | CH2206 | Male | Three y/o | Control | Control | Feed Day | No | 21:40 | 21:00 - 21:59 | Night | 37,8 | 83  | 17,0 | 17,0 | 18,95 | 580,11 | 94,77  |
| 2019/06/15 | CH2205 | Male | Three y/o | Control | Control | Feed Day | No | 21:45 | 21:00 - 21:59 | Night | 38,0 | 57  | 11,0 | 11,0 | 19,15 | 550,47 | 79,98  |
| 2019/06/15 | CH2206 | Male | Three y/o | Control | Control | Feed Day | No | 21:45 | 21:00 - 21:59 | Night | 37,8 | 57  | 20,0 | 20,0 | 18,95 | 550,47 | 100,31 |
| 2019/06/15 | CH2205 | Male | Three y/o | Control | Control | Feed Day | No | 21:50 | 21:00 - 21:59 | Night | 38,0 | 92  | 13,4 | 13,4 | 19,15 | 587,78 | 86,68  |
| 2019/06/15 | CH2206 | Male | Three y/o | Control | Control | Feed Day | No | 21:50 | 21:00 - 21:59 | Night | 37,7 | 46  | 9,8  | 9,8  | 18,85 | 532,38 | 76,07  |
| 2019/06/15 | CH2205 | Male | Three y/o | Control | Control | Feed Day | No | 21:55 | 21:00 - 21:59 | Night | 38,0 | 57  | 11,6 | 11,6 | 19,15 | 550,47 | 81,78  |
| 2019/06/15 | CH2206 | Male | Three y/o | Control | Control | Feed Day | No | 21:55 | 21:00 - 21:59 | Night | 37,7 | 83  | 10,4 | 10,4 | 18,85 | 580,11 | 78,08  |
| 2019/06/15 | CH2205 | Male | Three y/o | Control | Control | Feed Day | No | 22:00 | 22:00 - 22:59 | Night | 38,0 | 48  | 14,6 | 14,6 | 19,15 | 536,04 | 89,59  |
| 2019/06/15 | CH2206 | Male | Three y/o | Control | Control | Feed Day | No | 22:00 | 22:00 - 22:59 | Night | 37,7 | 79  | 47,2 | 47,2 | 18,85 | 576,36 | 129,80 |
| 2019/06/15 | CH2205 | Male | Three y/o | Control | Control | Feed Day | No | 22:05 | 22:00 - 22:59 | Night | 37,9 | 51  | 8,2  | 8,2  | 19,05 | 541,20 | 70,05  |
| 2019/06/15 | CH2206 | Male | Three y/o | Control | Control | Feed Day | No | 22:05 | 22:00 - 22:59 | Night | 37,7 | 79  | 21,6 | 21,6 | 18,85 | 576,36 | 102,94 |
| 2019/06/15 | CH2205 | Male | Three y/o | Control | Control | Feed Day | No | 22:10 | 22:00 - 22:59 | Night | 37,9 | 60  | 15,8 | 15,8 | 19,05 | 554,67 | 92,28  |
| 2019/06/15 | CH2206 | Male | Three y/o | Control | Control | Feed Day | No | 22:10 | 22:00 - 22:59 | Night | 37,7 | 70  | 26,0 | 26,0 | 18,85 | 566,99 | 109,29 |
| 2019/06/15 | CH2205 | Male | Three y/o | Control | Control | Feed Day | No | 22:15 | 22:00 - 22:59 | Night | 37,9 | 78  | 13,2 | 13,2 | 19,05 | 575,38 | 86,17  |
| 2019/06/15 | CH2206 | Male | Three y/o | Control | Control | Feed Day | No | 22:15 | 22:00 - 22:59 | Night | 37,5 | 79  | 23,2 | 23,2 | 18,65 | 576,36 | 105,39 |
| 2019/06/15 | CH2205 | Male | Three y/o | Control | Control | Feed Day | No | 22:20 | 22:00 - 22:59 | Night | 37,7 | 54  | 14,0 | 14,0 | 18,85 | 545,99 | 88,17  |
| 2019/06/15 | CH2206 | Male | Three y/o | Control | Control | Feed Day | No | 22:20 | 22:00 - 22:59 | Night | 37,5 | 73  | 27,0 | 27,0 | 18,65 | 570,27 | 110,58 |
| 2019/06/15 | CH2205 | Male | Three y/o | Control | Control | Feed Day | No | 22:25 | 22:00 - 22:59 | Night | 37,7 | 53  | 9,8  | 9,8  | 18,85 | 544,43 | 76,07  |
| 2019/06/15 | CH2206 | Male | Three y/o | Control | Control | Feed Day | No | 22:25 | 22:00 - 22:59 | Night | 37,4 | 83  | 26,0 | 26,0 | 18,55 | 580,11 | 109,29 |
| 2019/06/15 | CH2205 | Male | Three y/o | Control | Control | Feed Day | No | 22:30 | 22:00 - 22:59 | Night | 37,7 | 68  | 12,2 | 12,2 | 18,85 | 564,71 | 83,49  |
| 2019/06/15 | CH2206 | Male | Three y/o | Control | Control | Feed Day | No | 22:30 | 22:00 - 22:59 | Night | 37,4 | 85  | 38,4 | 38,4 | 18,55 | 581,90 | 122,68 |
| 2019/06/15 | CH2205 | Male | Three y/o | Control | Control | Feed Day | No | 22:35 | 22:00 - 22:59 | Night | 37,7 | 83  | 13,0 | 13,0 | 18,85 | 580,11 | 85,65  |
| 2019/06/15 | CH2206 | Male | Three y/o | Control | Control | Feed Day | No | 22:35 | 22:00 - 22:59 | Night | 37,7 | 62  | 34,8 | 34,8 | 18,85 | 557,33 | 119,29 |
| 2019/06/15 | CH2205 | Male | Three y/o | Control | Control | Feed Day | No | 22:40 | 22:00 - 22:59 | Night | 37,8 | 58  | 18,0 | 18,0 | 18,95 | 551,90 | 96,72  |
| 2019/06/15 | CH2206 | Male | Three y/o | Control | Control | Feed Day | No | 22:40 | 22:00 - 22:59 | Night | 37,7 | 43  | 36,4 | 36,4 | 18,85 | 526,50 | 120,84 |
| 2019/06/15 | CH2205 | Male | Three y/o | Control | Control | Feed Day | No | 22:45 | 22:00 - 22:59 | Night | 37,9 | 93  | 18,4 | 18,4 | 19,05 | 588,58 | 97,47  |
| 2019/06/15 | CH2206 | Male | Three y/o | Control | Control | Feed Day | No | 22:45 | 22:00 - 22:59 | Night | 37,7 | 84  | 36,6 | 36,6 | 18,85 | 581,01 | 121,03 |
| 2019/06/15 | CH2205 | Male | Three y/o | Control | Control | Feed Day | No | 22:50 | 22:00 - 22:59 | Night | 37,8 | 53  | 17,6 | 17,6 | 18,95 | 544,43 | 95,95  |
| 2019/06/15 | CH2206 | Male | Three y/o | Control | Control | Feed Day | No | 22:50 | 22:00 - 22:59 | Night | 37,7 | 42  | 39,6 | 39,6 | 18,85 | 524,42 | 123,74 |
| 2019/06/15 | CH2205 | Male | Three y/o | Control | Control | Feed Day | No | 22:55 | 22:00 - 22:59 | Night | 37,8 | 47  | 15,8 | 15,8 | 18,95 | 534,23 | 92,28  |
| 2019/06/15 | CH2206 | Male | Three y/o | Control | Control | Feed Day | No | 22:55 | 22:00 - 22:59 | Night | 37,5 | 56  | 30,0 | 30,0 | 18,65 | 549,01 | 114,20 |
| 2019/06/15 | CH2205 | Male | Three y/o | Control | Control | Feed Day | No | 23:00 | 23:00 - 23:59 | Night | 37,7 | 60  | 18,2 | 18,2 | 18,85 | 554,67 | 97,10  |
| 2019/06/15 | CH2206 | Male | Three y/o | Control | Control | Feed Day | No | 23:00 | 23:00 - 23:59 | Night | 37,5 | 90  | 10,4 | 10,4 | 18,65 | 586,16 | 78,08  |
| 2019/06/15 | CH2205 | Male | Three y/o | Control | Control | Feed Day | No | 23:05 | 23:00 - 23:59 | Night | 37,6 | 85  | 11,6 | 11,6 | 18,75 | 581,90 | 81,78  |
| 2019/06/15 | CH2206 | Male | Three y/o | Control | Control | Feed Day | No | 23:05 | 23:00 - 23:59 | Night | 37,5 | 58  | 9,6  | 9,6  | 18,65 | 551,90 | 75,37  |
| 2019/06/15 | CH2205 | Male | Three y/o | Control | Control | Feed Day | No | 23:10 | 23:00 - 23:59 | Night | 37,6 | 50  | 17,2 | 17,2 | 18,75 | 539,52 | 95,17  |
| 2019/06/15 | CH2206 | Male | Three y/o | Control | Control | Feed Day | No | 23:10 | 23:00 - 23:59 | Night | 37,5 | 102 | 12,8 | 12,8 | 18,65 | 595,30 | 85,12  |
| 2019/06/15 | CH2205 | Male | Three y/o | Control | Control | Feed Day | No | 23:15 | 23:00 - 23:59 | Night | 37,7 | 90  | 19,8 | 19,8 | 18,85 | 586,16 | 99,97  |
| 2019/06/15 | CH2206 | Male | Three y/o | Control | Control | Feed Day | No | 23:15 | 23:00 - 23:59 | Night | 37,6 | 86  | 16,4 | 16,4 | 18,75 | 582,77 | 93,55  |
| 2019/06/15 | CH2205 | Male | Three y/o | Control | Control | Feed Day | No | 23:20 | 23:00 - 23:59 | Night | 37,7 | 86  | 24,2 | 24,2 | 18,85 | 582,77 | 106,83 |
| 2019/06/15 | CH2206 | Male | Three y/o | Control | Control | Feed Day | No | 23:20 | 23:00 - 23:59 | Night | 37,7 | 62  | 19,4 | 19,4 | 18,85 | 557,33 | 99,28  |
| 2019/06/15 | CH2205 | Male | Three y/o | Control | Control | Feed Day | No | 23:25 | 23:00 - 23:59 | Night | 37,7 | 70  | 16,8 | 16,8 | 18,85 | 566,99 | 94,37  |
| 2019/06/15 | CH2206 | Male | Three y/o | Control | Control | Feed Day | No | 23:25 | 23:00 - 23:59 | Night | 37,7 | 57  | 40,0 | 40,0 | 18,85 | 550,47 | 124,09 |
| 2019/06/15 | CH2205 | Male | Three y/o | Control | Control | Feed Day | No | 23:30 | 23:00 - 23:59 | Night | 37,6 | 52  | 16,2 | 16,2 | 18,75 | 542,83 | 93,13  |
| 2019/06/15 | CH2206 | Male | Three y/o | Control | Control | Feed Day | No | 23:30 | 23:00 - 23:59 | Night | 37,8 | 66  | 36,6 | 36,6 | 18,95 | 562,34 | 121,03 |
| 2019/06/15 | CH2205 | Male | Three y/o | Control | Control | Feed Day | No | 23:35 | 23:00 - 23:59 | Night | 37,6 | 94  | 12,0 | 12,0 | 18,75 | 589,37 | 82,93  |



|    |            |        |      |           |         |         |          |    |       |               |               |      |     |       |       |       |        |        |
|----|------------|--------|------|-----------|---------|---------|----------|----|-------|---------------|---------------|------|-----|-------|-------|-------|--------|--------|
|    | 2019/06/15 | CH2206 | Male | Three y/o | Control | Control | Feed Day | No | 23:35 | 23:00 - 23:59 | Night         | 37,8 | 90  | 46,6  | 46,6  | 18,95 | 586,16 | 129,35 |
|    | 2019/06/15 | CH2205 | Male | Three y/o | Control | Control | Feed Day | No | 23:40 | 23:00 - 23:59 | Night         | 37,5 | 56  | 13,0  | 13,0  | 18,65 | 549,01 | 85,65  |
|    | 2019/06/15 | CH2206 | Male | Three y/o | Control | Control | Feed Day | No | 23:40 | 23:00 - 23:59 | Night         | 37,8 | 60  | 42,6  | 42,6  | 18,95 | 554,67 | 126,26 |
|    | 2019/06/15 | CH2205 | Male | Three y/o | Control | Control | Feed Day | No | 23:45 | 23:00 - 23:59 | Night         | 37,5 | 58  | 28,2  | 28,2  | 18,65 | 551,90 | 112,07 |
|    | 2019/06/15 | CH2206 | Male | Three y/o | Control | Control | Feed Day | No | 23:45 | 23:00 - 23:59 | Night         | 37,9 | 75  | 27,2  | 27,2  | 19,05 | 572,36 | 110,83 |
|    | 2019/06/15 | CH2205 | Male | Three y/o | Control | Control | Feed Day | No | 23:50 | 23:00 - 23:59 | Night         | 37,6 | 104 | 26,6  | 26,6  | 18,75 | 596,69 | 110,07 |
|    | 2019/06/15 | CH2206 | Male | Three y/o | Control | Control | Feed Day | No | 23:50 | 23:00 - 23:59 | Night         | 37,9 | 63  | 39,6  | 39,6  | 19,05 | 558,62 | 123,74 |
|    | 2019/06/15 | CH2205 | Male | Three y/o | Control | Control | Feed Day | No | 23:55 | 23:00 - 23:59 | Night         | 37,6 | 115 | 18,6  | 18,6  | 18,75 | 603,82 | 97,84  |
|    | 2019/06/15 | CH2206 | Male | Three y/o | Control | Control | Feed Day | No | 23:55 | 23:00 - 23:59 | Night         | 37,8 | 74  | 51,8  | 51,8  | 18,95 | 571,33 | 133,01 |
| 32 | 2019/06/16 | CH2205 | Male | Three y/o | Control | Control | Feed Day | No | 00:00 | 00:00 - 00:59 | Early Morning | 37,7 | 109 | 26,4  | 26,4  | 18,85 | 600,04 | 109,81 |
|    | 2019/06/16 | CH2206 | Male | Three y/o | Control | Control | Feed Day | No | 00:00 | 00:00 - 00:59 | Early Morning | 37,9 | 156 | 37,0  | 37,0  | 19,05 | 624,43 | 121,40 |
|    | 2019/06/16 | CH2205 | Male | Three y/o | Control | Control | Feed Day | No | 00:05 | 00:00 - 00:59 | Early Morning | 37,6 | 131 | 37,8  | 37,8  | 18,75 | 612,80 | 122,14 |
|    | 2019/06/16 | CH2206 | Male | Three y/o | Control | Control | Feed Day | No | 00:05 | 00:00 - 00:59 | Early Morning | 37,9 | 132 | 180,0 | 180,0 | 19,05 | 613,32 | 176,41 |
|    | 2019/06/16 | CH2205 | Male | Three y/o | Control | Control | Feed Day | No | 00:10 | 00:00 - 00:59 | Early Morning | 37,6 | 105 | 10,8  | 10,8  | 18,75 | 597,38 | 79,36  |
|    | 2019/06/16 | CH2206 | Male | Three y/o | Control | Control | Feed Day | No | 00:10 | 00:00 - 00:59 | Early Morning | 37,8 |     | 31,4  | 31,4  | 18,95 |        | 115,76 |
|    | 2019/06/16 | CH2205 | Male | Three y/o | Control | Control | Feed Day | No | 00:15 | 00:00 - 00:59 | Early Morning | 37,4 | 59  | 12,2  | 12,2  | 18,55 | 553,30 | 83,49  |
|    | 2019/06/16 | CH2206 | Male | Three y/o | Control | Control | Feed Day | No | 00:15 | 00:00 - 00:59 | Early Morning | 37,3 | 48  | 29,2  | 29,2  | 18,46 | 536,04 | 113,27 |
|    | 2019/06/16 | CH2205 | Male | Three y/o | Control | Control | Feed Day | No | 00:20 | 00:00 - 00:59 | Early Morning | 37,2 | 72  | 14,8  | 14,8  | 18,36 | 569,20 | 90,05  |
|    | 2019/06/16 | CH2206 | Male | Three y/o | Control | Control | Feed Day | No | 00:20 | 00:00 - 00:59 | Early Morning | 37,1 | 83  | 9,6   | 9,6   | 18,26 | 580,11 | 75,37  |
|    | 2019/06/16 | CH2205 | Male | Three y/o | Control | Control | Feed Day | No | 00:25 | 00:00 - 00:59 | Early Morning | 37,1 | 61  | 16,4  | 16,4  | 18,26 | 556,01 | 93,55  |
|    | 2019/06/16 | CH2206 | Male | Three y/o | Control | Control | Feed Day | No | 00:25 | 00:00 - 00:59 | Early Morning | 37,1 | 88  | 12,6  | 12,6  | 18,26 | 584,49 | 84,59  |
|    | 2019/06/16 | CH2205 | Male | Three y/o | Control | Control | Feed Day | No | 00:30 | 00:00 - 00:59 | Early Morning | 37,1 | 90  | 12,4  | 12,4  | 18,26 | 586,16 | 84,04  |
|    | 2019/06/16 | CH2206 | Male | Three y/o | Control | Control | Feed Day | No | 00:30 | 00:00 - 00:59 | Early Morning | 37,1 | 59  | 16,4  | 16,4  | 18,26 | 553,30 | 93,55  |
|    | 2019/06/16 | CH2205 | Male | Three y/o | Control | Control | Feed Day | No | 00:35 | 00:00 - 00:59 | Early Morning | 37,0 | 86  | 5,4   | 5,4   | 18,16 | 582,77 | 55,99  |
|    | 2019/06/16 | CH2206 | Male | Three y/o | Control | Control | Feed Day | No | 00:35 | 00:00 - 00:59 | Early Morning | 37,2 | 52  | 20,8  | 20,8  | 18,36 | 542,83 | 101,65 |
|    | 2019/06/16 | CH2205 | Male | Three y/o | Control | Control | Feed Day | No | 00:40 | 00:00 - 00:59 | Early Morning | 37,3 | 61  | 7,6   | 7,6   | 18,46 | 556,01 | 67,49  |
|    | 2019/06/16 | CH2206 | Male | Three y/o | Control | Control | Feed Day | No | 00:40 | 00:00 - 00:59 | Early Morning | 37,3 | 70  | 18,2  | 18,2  | 18,46 | 566,99 | 97,10  |
|    | 2019/06/16 | CH2205 | Male | Three y/o | Control | Control | Feed Day | No | 00:45 | 00:00 - 00:59 | Early Morning | 37,3 | 65  | 4,6   | 4,6   | 18,46 | 561,12 | 50,61  |
|    | 2019/06/16 | CH2206 | Male | Three y/o | Control | Control | Feed Day | No | 00:45 | 00:00 - 00:59 | Early Morning | 37,4 | 76  | 19,0  | 19,0  | 18,55 | 573,39 | 98,56  |
|    | 2019/06/16 | CH2205 | Male | Three y/o | Control | Control | Feed Day | No | 00:50 | 00:00 - 00:59 | Early Morning | 37,3 | 48  | 5,4   | 5,4   | 18,46 | 536,04 | 55,99  |
|    | 2019/06/16 | CH2206 | Male | Three y/o | Control | Control | Feed Day | No | 00:50 | 00:00 - 00:59 | Early Morning | 37,4 | 49  | 20,4  | 20,4  | 18,55 | 537,80 | 100,99 |
|    | 2019/06/16 | CH2205 | Male | Three y/o | Control | Control | Feed Day | No | 00:55 | 00:00 - 00:59 | Early Morning | 37,3 | 107 | 4,6   | 4,6   | 18,46 | 598,73 | 50,61  |
|    | 2019/06/16 | CH2206 | Male | Three y/o | Control | Control | Feed Day | No | 00:55 | 00:00 - 00:59 | Early Morning | 37,5 | 47  | 20,4  | 20,4  | 18,65 | 534,23 | 100,99 |
|    | 2019/06/16 | CH2205 | Male | Three y/o | Control | Control | Feed Day | No | 01:00 | 01:00 - 01:59 | Early Morning | 37,3 | 111 | 2,6   | 2,6   | 18,46 | 601,33 | 31,57  |
|    | 2019/06/16 | CH2206 | Male | Three y/o | Control | Control | Feed Day | No | 01:00 | 01:00 - 01:59 | Early Morning | 37,5 | 89  | 14,8  | 14,8  | 18,65 | 585,33 | 90,05  |
|    | 2019/06/16 | CH2205 | Male | Three y/o | Control | Control | Feed Day | No | 01:05 | 01:00 - 01:59 | Early Morning | 37,3 | 62  | 4,8   | 4,8   | 18,46 | 557,33 | 52,04  |
|    | 2019/06/16 | CH2206 | Male | Three y/o | Control | Control | Feed Day | No | 01:05 | 01:00 - 01:59 | Early Morning | 37,5 | 60  | 17,8  | 17,8  | 18,65 | 554,67 | 96,34  |
|    | 2019/06/16 | CH2205 | Male | Three y/o | Control | Control | Feed Day | No | 01:10 | 01:00 - 01:59 | Early Morning | 37,3 | 70  | 3,8   | 3,8   | 18,46 | 566,99 | 44,22  |
|    | 2019/06/16 | CH2206 | Male | Three y/o | Control | Control | Feed Day | No | 01:10 | 01:00 - 01:59 | Early Morning | 37,5 | 54  | 17,6  | 17,6  | 18,65 | 545,99 | 95,95  |
|    | 2019/06/16 | CH2205 | Male | Three y/o | Control | Control | Feed Day | No | 01:15 | 01:00 - 01:59 | Early Morning | 37,3 | 65  | 15,4  | 15,4  | 18,46 | 561,12 | 91,41  |
|    | 2019/06/16 | CH2206 | Male | Three y/o | Control | Control | Feed Day | No | 01:15 | 01:00 - 01:59 | Early Morning | 37,4 | 49  | 9,0   | 9,0   | 18,55 | 537,80 | 73,19  |
|    | 2019/06/16 | CH2205 | Male | Three y/o | Control | Control | Feed Day | No | 01:20 | 01:00 - 01:59 | Early Morning | 37,3 |     | 13,4  | 13,4  | 18,46 |        | 86,68  |
|    | 2019/06/16 | CH2206 | Male | Three y/o | Control | Control | Feed Day | No | 01:20 | 01:00 - 01:59 | Early Morning | 37,4 | 84  | 11,6  | 11,6  | 18,55 | 581,01 | 81,78  |
|    | 2019/06/16 | CH2205 | Male | Three y/o | Control | Control | Feed Day | No | 01:25 | 01:00 - 01:59 | Early Morning | 37,1 | 62  | 13,4  | 13,4  | 18,26 | 557,33 | 86,68  |
|    | 2019/06/16 | CH2206 | Male | Three y/o | Control | Control | Feed Day | No | 01:25 | 01:00 - 01:59 | Early Morning | 37,3 | 83  | 10,0  | 10,0  | 18,46 | 580,11 | 76,76  |
|    | 2019/06/16 | CH2205 | Male | Three y/o | Control | Control | Feed Day | No | 01:30 | 01:00 - 01:59 | Early Morning | 37,1 | 62  | 14,4  | 14,4  | 18,26 | 557,33 | 89,12  |
|    | 2019/06/16 | CH2206 | Male | Three y/o | Control | Control | Feed Day | No | 01:30 | 01:00 - 01:59 | Early Morning | 37,3 | 79  | 27,8  | 27,8  | 18,46 | 576,36 | 111,58 |
|    | 2019/06/16 | CH2205 | Male | Three y/o | Control | Control | Feed Day | No | 01:35 | 01:00 - 01:59 | Early Morning | 37,2 | 51  | 10,0  | 10,0  | 18,36 | 541,20 | 76,76  |
|    | 2019/06/16 | CH2206 | Male | Three y/o | Control | Control | Feed Day | No | 01:35 | 01:00 - 01:59 | Early Morning | 37,3 | 43  | 17,6  | 17,6  | 18,46 | 526,50 | 95,95  |
|    | 2019/06/16 | CH2205 | Male | Three y/o | Control | Control | Feed Day | No | 01:40 | 01:00 - 01:59 | Early Morning | 37,2 | 88  | 5,4   | 5,4   | 18,36 | 584,49 | 55,99  |
|    | 2019/06/16 | CH2206 | Male | Three y/o | Control | Control | Feed Day | No | 01:40 | 01:00 - 01:59 | Early Morning | 37,3 | 90  | 30,0  | 30,0  | 18,46 | 586,16 | 114,20 |
|    | 2019/06/16 | CH2205 | Male | Three y/o | Control | Control | Feed Day | No | 01:45 | 01:00 - 01:59 | Early Morning | 37,3 | 40  | 4,2   | 4,2   | 18,46 | 520,09 | 47,57  |
|    | 2019/06/16 | CH2206 | Male | Three y/o | Control | Control | Feed Day | No | 01:45 | 01:00 - 01:59 | Early Morning | 37,3 | 80  | 29,4  | 29,4  | 18,46 | 577,31 | 113,50 |
|    | 2019/06/16 | CH2205 | Male | Three y/o | Control | Control | Feed Day | No | 01:50 | 01:00 - 01:59 | Early Morning | 37,3 | 60  | 6,6   | 6,6   | 18,46 | 554,67 | 62,73  |
|    | 2019/06/16 | CH2206 | Male | Three y/o | Control | Control | Feed Day | No | 01:50 | 01:00 - 01:59 | Early Morning | 37,3 | 73  | 26,0  | 26,0  | 18,46 | 570,27 | 109,29 |
|    | 2019/06/16 | CH2205 | Male | Three y/o | Control | Control | Feed Day | No | 01:55 | 01:00 - 01:59 | Early Morning | 37,3 | 56  | 7,6   | 7,6   | 18,46 | 549,01 | 67,49  |
|    | 2019/06/16 | CH2206 | Male | Three y/o | Control | Control | Feed Day | No | 01:55 | 01:00 - 01:59 | Early Morning | 37,4 | 44  | 22,8  | 22,8  | 18,46 | 528,51 | 104,79 |
|    | 2019/06/16 | CH2205 | Male | Three y/o | Control | Control | Feed Day | No | 02:00 | 02:00 - 02:59 | Early Morning | 37,3 | 58  | 10,2  | 10,2  | 18,55 | 551,90 | 77,43  |
|    | 2019/06/16 | CH2206 | Male | Three y/o | Control | Control | Feed Day | No | 02:00 | 02:00 - 02:59 | Early Morning | 37,2 | 56  | 16,2  | 16,2  | 18,36 | 549,01 | 93,13  |
|    | 2019/06/16 | CH2205 | Male | Three y/o | Control | Control | Feed Day | No | 02:05 | 02:00 - 02:59 | Early Morning | 37,3 | 61  | 11,0  | 11,0  | 18,46 | 556,01 | 79,98  |
|    | 2019/06/16 | CH2206 | Male | Three y/o | Control | Control | Feed Day | No | 02:05 | 02:00 - 02:59 | Early Morning | 37,2 | 40  | 9,8   | 9,8   | 18,36 | 520,09 | 76,07  |
|    | 2019/06/16 | CH2205 | Male | Three y/o | Control | Control | Feed Day | No | 02:10 | 02:00 - 02:59 | Early Morning | 37,3 | 50  | 11,2  | 11,2  | 18,46 | 539,52 | 80,59  |
|    | 2019/06/16 | CH2206 | Male | Three y/o | Control | Control | Feed Day | No | 02:10 | 02:00 - 02:59 | Early Morning | 37,1 | 39  | 37,2  | 37,2  | 18,26 | 517,82 | 121,59 |
|    | 2019/06/16 | CH2205 | Male | Three y/o | Control | Control | Feed Day | No | 02:15 | 02:00 - 02:59 | Early Morning | 37,3 | 49  | 15,4  | 15,4  | 18,46 | 537,80 | 91,41  |
|    | 2019/06/16 | CH2206 | Male | Three y/o | Control | Control | Feed Day | No | 02:15 | 02:00 - 02:59 | Early Morning | 37,1 | 59  | 45,0  | 45,0  | 18,26 | 553,30 | 128,15 |
|    | 2019/06/16 | CH2205 | Male | Three y/o | Control | Control | Feed Day | No | 02:20 | 02:00 - 02:59 | Early Morning | 37,2 | 74  | 17,8  | 17,8  | 18,36 | 571,33 | 96,34  |
|    | 2019/06/16 | CH2206 | Male | Three y/o | Control | Control | Feed Day | No | 02:20 | 02:00 - 02:59 | Early Morning | 37,1 | 47  | 64,0  | 64,0  | 18,26 | 534,23 | 140,33 |
|    | 2019/06/16 | CH2205 | Male | Three y/o | Control | Control | Feed Day | No | 02:25 | 02:00 - 02:59 | Early Morning | 37,2 | 72  | 15,8  | 15,8  | 18,36 | 569,20 | 92,28  |
|    | 2019/06/16 | CH2206 | Male | Three y/o | Control | Control | Feed Day | No | 02:25 | 02:00 - 02:59 | Early Morning | 37,3 | 51  | 62,6  | 62,6  | 18,46 | 541,20 | 139,56 |
|    | 2019/06/16 | CH2205 | Male | Three y/o | Control | Control | Feed Day | No | 02:30 | 02:00 - 02:59 | Early Morning | 37,2 | 90  | 15,2  | 15,2  | 18,36 | 586,16 | 90,96  |



|            |        |      |           |         |         |          |    |       |               |               |      |     |       |       |       |        |        |
|------------|--------|------|-----------|---------|---------|----------|----|-------|---------------|---------------|------|-----|-------|-------|-------|--------|--------|
| 2019/06/16 | CH2206 | Male | Three y/o | Control | Control | Feed Day | No | 02:30 | 02:00 - 02:59 | Early Morning | 37,3 | 44  | 63,2  | 63,2  | 18,46 | 528,51 | 139,89 |
| 2019/06/16 | CH2205 | Male | Three y/o | Control | Control | Feed Day | No | 02:35 | 02:00 - 02:59 | Early Morning | 37,1 | 78  | 15,8  | 15,8  | 18,26 | 575,38 | 92,28  |
| 2019/06/16 | CH2206 | Male | Three y/o | Control | Control | Feed Day | No | 02:35 | 02:00 - 02:59 | Early Morning | 37,3 | 45  | 58,0  | 58,0  | 18,46 | 530,47 | 136,92 |
| 2019/06/16 | CH2205 | Male | Three y/o | Control | Control | Feed Day | No | 02:40 | 02:00 - 02:59 | Early Morning | 37,1 | 68  | 22,8  | 22,8  | 18,26 | 564,71 | 104,79 |
| 2019/06/16 | CH2206 | Male | Three y/o | Control | Control | Feed Day | No | 02:40 | 02:00 - 02:59 | Early Morning | 37,4 | 42  | 63,2  | 63,2  | 18,55 | 524,42 | 139,89 |
| 2019/06/16 | CH2205 | Male | Three y/o | Control | Control | Feed Day | No | 02:45 | 02:00 - 02:59 | Early Morning | 37,1 | 78  | 15,8  | 15,8  | 18,26 | 575,38 | 92,28  |
| 2019/06/16 | CH2206 | Male | Three y/o | Control | Control | Feed Day | No | 02:45 | 02:00 - 02:59 | Early Morning | 37,4 | 45  | 61,0  | 61,0  | 18,55 | 530,47 | 138,67 |
| 2019/06/16 | CH2205 | Male | Three y/o | Control | Control | Feed Day | No | 02:50 | 02:00 - 02:59 | Early Morning | 37,1 | 56  | 22,8  | 22,8  | 18,26 | 549,01 | 104,79 |
| 2019/06/16 | CH2206 | Male | Three y/o | Control | Control | Feed Day | No | 02:50 | 02:00 - 02:59 | Early Morning | 37,4 | 72  | 63,4  | 63,4  | 18,55 | 569,20 | 140,00 |
| 2019/06/16 | CH2205 | Male | Three y/o | Control | Control | Feed Day | No | 02:55 | 02:00 - 02:59 | Early Morning | 37,0 | 62  | 21,2  | 21,2  | 18,16 | 557,33 | 102,31 |
| 2019/06/16 | CH2206 | Male | Three y/o | Control | Control | Feed Day | No | 02:55 | 02:00 - 02:59 | Early Morning | 37,4 | 43  | 67,2  | 67,2  | 18,55 | 526,50 | 142,02 |
| 2019/06/16 | CH2205 | Male | Three y/o | Control | Control | Feed Day | No | 03:00 | 03:00 - 03:59 | Early Morning | 37,0 | 41  | 20,2  | 20,2  | 18,16 | 522,29 | 100,65 |
| 2019/06/16 | CH2206 | Male | Three y/o | Control | Control | Feed Day | No | 03:00 | 03:00 - 03:59 | Early Morning | 37,5 | 75  | 66,4  | 66,4  | 18,65 | 572,36 | 141,61 |
| 2019/06/16 | CH2205 | Male | Three y/o | Control | Control | Feed Day | No | 03:05 | 03:00 - 03:59 | Early Morning | 37,0 | 45  | 16,8  | 16,8  | 18,16 | 530,47 | 94,37  |
| 2019/06/16 | CH2206 | Male | Three y/o | Control | Control | Feed Day | No | 03:05 | 03:00 - 03:59 | Early Morning | 37,5 | 44  | 69,2  | 69,2  | 18,65 | 528,51 | 143,04 |
| 2019/06/16 | CH2205 | Male | Three y/o | Control | Control | Feed Day | No | 03:10 | 03:00 - 03:59 | Early Morning | 36,8 | 41  | 9,6   | 9,6   | 17,96 | 522,29 | 75,37  |
| 2019/06/16 | CH2206 | Male | Three y/o | Control | Control | Feed Day | No | 03:10 | 03:00 - 03:59 | Early Morning | 37,5 | 48  | 62,4  | 62,4  | 18,65 | 536,04 | 139,45 |
| 2019/06/16 | CH2205 | Male | Three y/o | Control | Control | Feed Day | No | 03:15 | 03:00 - 03:59 | Early Morning | 37,2 | 40  | 9,4   | 9,4   | 18,36 | 520,09 | 74,66  |
| 2019/06/16 | CH2206 | Male | Three y/o | Control | Control | Feed Day | No | 03:15 | 03:00 - 03:59 | Early Morning | 37,5 | 41  | 60,4  | 60,4  | 18,65 | 522,29 | 138,32 |
| 2019/06/16 | CH2205 | Male | Three y/o | Control | Control | Feed Day | No | 03:20 | 03:00 - 03:59 | Early Morning | 37,2 | 69  | 24,6  | 24,6  | 18,36 | 565,86 | 107,39 |
| 2019/06/16 | CH2206 | Male | Three y/o | Control | Control | Feed Day | No | 03:20 | 03:00 - 03:59 | Early Morning | 37,4 | 39  | 59,4  | 59,4  | 18,55 | 517,82 | 137,75 |
| 2019/06/16 | CH2205 | Male | Three y/o | Control | Control | Feed Day | No | 03:25 | 03:00 - 03:59 | Early Morning | 37,0 | 45  | 3,0   | 3,0   | 18,16 | 530,47 | 36,34  |
| 2019/06/16 | CH2206 | Male | Three y/o | Control | Control | Feed Day | No | 03:25 | 03:00 - 03:59 | Early Morning | 37,4 | 55  | 61,4  | 61,4  | 18,55 | 547,52 | 138,89 |
| 2019/06/16 | CH2205 | Male | Three y/o | Control | Control | Feed Day | No | 03:30 | 03:00 - 03:59 | Early Morning | 37,0 | 38  | 2,4   | 2,4   | 18,16 | 515,48 | 28,91  |
| 2019/06/16 | CH2206 | Male | Three y/o | Control | Control | Feed Day | No | 03:30 | 03:00 - 03:59 | Early Morning | 37,4 | 83  | 57,6  | 57,6  | 18,55 | 580,11 | 136,68 |
| 2019/06/16 | CH2205 | Male | Three y/o | Control | Control | Feed Day | No | 03:35 | 03:00 - 03:59 | Early Morning | 37,1 | 68  | 9,2   | 9,2   | 18,26 | 564,71 | 73,94  |
| 2019/06/16 | CH2206 | Male | Three y/o | Control | Control | Feed Day | No | 03:35 | 03:00 - 03:59 | Early Morning | 37,3 | 61  | 46,8  | 46,8  | 18,46 | 556,01 | 129,50 |
| 2019/06/16 | CH2205 | Male | Three y/o | Control | Control | Feed Day | No | 03:40 | 03:00 - 03:59 | Early Morning | 37,1 | 67  | 13,6  | 13,6  | 18,26 | 563,53 | 87,18  |
| 2019/06/16 | CH2206 | Male | Three y/o | Control | Control | Feed Day | No | 03:40 | 03:00 - 03:59 | Early Morning | 37,3 | 44  | 51,8  | 51,8  | 18,46 | 528,51 | 133,01 |
| 2019/06/16 | CH2205 | Male | Three y/o | Control | Control | Feed Day | No | 03:45 | 03:00 - 03:59 | Early Morning | 37,2 | 96  | 4,0   | 4,0   | 18,36 | 590,91 | 45,94  |
| 2019/06/16 | CH2206 | Male | Three y/o | Control | Control | Feed Day | No | 03:45 | 03:00 - 03:59 | Early Morning | 37,2 | 47  | 64,6  | 64,6  | 18,36 | 534,23 | 140,65 |
| 2019/06/16 | CH2205 | Male | Three y/o | Control | Control | Feed Day | No | 03:50 | 03:00 - 03:59 | Early Morning | 37,2 | 78  | 11,4  | 11,4  | 18,36 | 575,38 | 81,19  |
| 2019/06/16 | CH2206 | Male | Three y/o | Control | Control | Feed Day | No | 03:50 | 03:00 - 03:59 | Early Morning | 37,2 | 75  | 63,4  | 63,4  | 18,36 | 572,36 | 140,00 |
| 2019/06/16 | CH2205 | Male | Three y/o | Control | Control | Feed Day | No | 03:55 | 03:00 - 03:59 | Early Morning | 37,2 | 88  | 9,4   | 9,4   | 18,36 | 584,49 | 74,66  |
| 2019/06/16 | CH2206 | Male | Three y/o | Control | Control | Feed Day | No | 03:55 | 03:00 - 03:59 | Early Morning | 37,2 | 53  | 64,8  | 64,8  | 18,36 | 544,43 | 140,76 |
| 2019/06/16 | CH2205 | Male | Three y/o | Control | Control | Feed Day | No | 04:00 | 04:00 - 04:59 | Morning       | 37,2 |     | 11,0  | 11,0  | 18,36 |        | 79,98  |
| 2019/06/16 | CH2206 | Male | Three y/o | Control | Control | Feed Day | No | 04:00 | 04:00 - 04:59 | Morning       | 37,0 | 44  | 42,4  | 42,4  | 18,16 | 528,51 | 126,10 |
| 2019/06/16 | CH2205 | Male | Three y/o | Control | Control | Feed Day | No | 04:05 | 04:00 - 04:59 | Morning       | 37,3 | 71  | 82,0  | 82,0  | 18,46 | 568,10 | 148,93 |
| 2019/06/16 | CH2206 | Male | Three y/o | Control | Control | Feed Day | No | 04:05 | 04:00 - 04:59 | Morning       | 37,1 | 115 | 66,4  | 66,4  | 18,26 | 603,82 | 141,61 |
| 2019/06/16 | CH2205 | Male | Three y/o | Control | Control | Feed Day | No | 04:10 | 04:00 - 04:59 | Morning       | 37,4 | 99  | 58,4  | 58,4  | 18,55 | 593,14 | 137,16 |
| 2019/06/16 | CH2206 | Male | Three y/o | Control | Control | Feed Day | No | 04:10 | 04:00 - 04:59 | Morning       | 37,2 |     | 201,0 | 201,0 | 18,36 |        | 180,29 |
| 2019/06/16 | CH2205 | Male | Three y/o | Control | Control | Feed Day | No | 04:15 | 04:00 - 04:59 | Morning       | 37,4 | 99  | 66,2  | 66,2  | 18,55 | 593,14 | 141,50 |
| 2019/06/16 | CH2206 | Male | Three y/o | Control | Control | Feed Day | No | 04:15 | 04:00 - 04:59 | Morning       | 37,2 | 169 | 83,0  | 83,0  | 18,36 | 629,60 | 149,36 |
| 2019/06/16 | CH2205 | Male | Three y/o | Control | Control | Feed Day | No | 04:20 | 04:00 - 04:59 | Morning       | 37,4 | 117 | 144,0 | 144,0 | 18,55 | 605,02 | 168,59 |
| 2019/06/16 | CH2206 | Male | Three y/o | Control | Control | Feed Day | No | 04:20 | 04:00 - 04:59 | Morning       | 37,3 | 191 | 31,4  | 31,4  | 18,46 | 637,33 | 115,76 |
| 2019/06/16 | CH2205 | Male | Three y/o | Control | Control | Feed Day | No | 04:25 | 04:00 - 04:59 | Morning       | 37,5 |     | 104,8 | 104,8 | 18,65 |        | 157,48 |
| 2019/06/16 | CH2206 | Male | Three y/o | Control | Control | Feed Day | No | 04:25 | 04:00 - 04:59 | Morning       | 37,4 | 99  | 112,6 | 112,6 | 18,55 | 593,14 | 159,98 |
| 2019/06/16 | CH2205 | Male | Three y/o | Control | Control | Feed Day | No | 04:30 | 04:00 - 04:59 | Morning       | 37,6 | 125 | 141,4 | 141,4 | 18,75 | 609,60 | 167,95 |
| 2019/06/16 | CH2206 | Male | Three y/o | Control | Control | Feed Day | No | 04:30 | 04:00 - 04:59 | Morning       | 37,5 | 85  | 42,8  | 42,8  | 18,65 | 581,90 | 126,42 |
| 2019/06/16 | CH2205 | Male | Three y/o | Control | Control | Feed Day | No | 04:35 | 04:00 - 04:59 | Morning       | 37,6 | 125 | 139,6 | 139,6 | 18,75 | 609,60 | 167,50 |
| 2019/06/16 | CH2206 | Male | Three y/o | Control | Control | Feed Day | No | 04:35 | 04:00 - 04:59 | Morning       | 37,2 | 108 | 94,8  | 94,8  | 18,36 | 599,39 | 153,98 |
| 2019/06/16 | CH2205 | Male | Three y/o | Control | Control | Feed Day | No | 04:40 | 04:00 - 04:59 | Morning       | 37,6 |     | 297,8 | 297,8 | 18,75 |        | 194,16 |
| 2019/06/16 | CH2206 | Male | Three y/o | Control | Control | Feed Day | No | 04:40 | 04:00 - 04:59 | Morning       | 37,3 | 113 | 495,4 | 495,4 | 18,46 | 602,58 | 212,22 |
| 2019/06/16 | CH2205 | Male | Three y/o | Control | Control | Feed Day | No | 04:45 | 04:00 - 04:59 | Morning       | 37,9 | 67  | 83,0  | 83,0  | 19,05 | 563,53 | 149,36 |
| 2019/06/16 | CH2206 | Male | Three y/o | Control | Control | Feed Day | No | 04:45 | 04:00 - 04:59 | Morning       | 37,8 | 103 | 35,4  | 35,4  | 18,95 | 596,00 | 119,88 |
| 2019/06/16 | CH2205 | Male | Three y/o | Control | Control | Feed Day | No | 04:50 | 04:00 - 04:59 | Morning       | 37,9 | 118 | 131,2 | 131,2 | 19,05 | 605,61 | 165,33 |
| 2019/06/16 | CH2206 | Male | Three y/o | Control | Control | Feed Day | No | 04:50 | 04:00 - 04:59 | Morning       | 37,8 | 117 | 206,8 | 206,8 | 18,95 | 605,02 | 181,30 |
| 2019/06/16 | CH2205 | Male | Three y/o | Control | Control | Feed Day | No | 04:55 | 04:00 - 04:59 | Morning       | 37,8 | 137 | 12,6  | 12,6  | 18,95 | 615,83 | 84,59  |
| 2019/06/16 | CH2206 | Male | Three y/o | Control | Control | Feed Day | No | 04:55 | 04:00 - 04:59 | Morning       | 37,8 | 120 | 20,0  | 20,0  | 18,95 | 606,78 | 100,31 |
| 2019/06/16 | CH2205 | Male | Three y/o | Control | Control | Feed Day | No | 05:00 | 05:00 - 05:59 | Morning       | 37,5 |     | 2,0   | 2,0   | 18,65 |        | 22,86  |
| 2019/06/16 | CH2206 | Male | Three y/o | Control | Control | Feed Day | No | 05:00 | 05:00 - 05:59 | Morning       | 37,4 | 90  | 55,0  | 55,0  | 18,55 | 586,16 | 135,08 |
| 2019/06/16 | CH2205 | Male | Three y/o | Control | Control | Feed Day | No | 05:05 | 05:00 - 05:59 | Morning       | 37,2 |     | 99,6  | 99,6  | 18,36 |        | 155,70 |
| 2019/06/16 | CH2206 | Male | Three y/o | Control | Control | Feed Day | No | 05:05 | 05:00 - 05:59 | Morning       | 37,2 | 76  | 8,8   | 8,8   | 18,36 | 573,39 | 72,43  |
| 2019/06/16 | CH2205 | Male | Three y/o | Control | Control | Feed Day | No | 05:10 | 05:00 - 05:59 | Morning       | 37,0 |     | 9,0   | 9,0   | 18,16 |        | 73,19  |
| 2019/06/16 | CH2206 | Male | Three y/o | Control | Control | Feed Day | No | 05:10 | 05:00 - 05:59 | Morning       | 37,1 | 85  | 9,0   | 9,0   | 18,26 | 581,90 | 73,19  |
| 2019/06/16 | CH2205 | Male | Three y/o | Control | Control | Feed Day | No | 05:15 | 05:00 - 05:59 | Morning       | 36,8 |     | 10,0  | 10,0  | 17,96 |        | 76,76  |
| 2019/06/16 | CH2206 | Male | Three y/o | Control | Control | Feed Day | No | 05:15 | 05:00 - 05:59 | Morning       | 37,0 | 78  | 5,2   | 5,2   | 18,16 | 575,38 | 54,72  |
| 2019/06/16 | CH2205 | Male | Three y/o | Control | Control | Feed Day | No | 05:20 | 05:00 - 05:59 | Morning       | 36,8 |     | 12,8  | 12,8  | 17,96 |        | 85,12  |
| 2019/06/16 | CH2206 | Male | Three y/o | Control | Control | Feed Day | No | 05:20 | 05:00 - 05:59 | Morning       | 37,0 | 72  | 9,4   | 9,4   | 18,16 | 569,20 | 74,66  |
| 2019/06/16 | CH2205 | Male | Three y/o | Control | Control | Feed Day | No | 05:25 | 05:00 - 05:59 | Morning       | 37,1 |     | 12,4  | 12,4  | 18,26 |        | 84,04  |



|            |        |      |           |         |         |          |    |       |               |              |      |     |        |       |       |        |        |
|------------|--------|------|-----------|---------|---------|----------|----|-------|---------------|--------------|------|-----|--------|-------|-------|--------|--------|
| 2019/06/16 | CH2206 | Male | Three y/o | Control | Control | Feed Day | No | 05:25 | 05:00 - 05:59 | Morning      | 37,0 | 48  | 3,4    | 3,4   | 18,16 | 536,04 | 40,51  |
| 2019/06/16 | CH2205 | Male | Three y/o | Control | Control | Feed Day | No | 05:30 | 05:00 - 05:59 | Morning      | 37,2 | 60  | 14,4   | 14,4  | 18,36 | 554,67 | 89,12  |
| 2019/06/16 | CH2206 | Male | Three y/o | Control | Control | Feed Day | No | 05:30 | 05:00 - 05:59 | Morning      | 37,0 | 43  | 6,4    | 6,4   | 18,16 | 526,50 | 61,70  |
| 2019/06/16 | CH2205 | Male | Three y/o | Control | Control | Feed Day | No | 05:35 | 05:00 - 05:59 | Morning      | 37,2 | 76  | 9,4    | 9,4   | 18,36 | 573,39 | 74,66  |
| 2019/06/16 | CH2206 | Male | Three y/o | Control | Control | Feed Day | No | 05:35 | 05:00 - 05:59 | Morning      | 37,0 | 43  | 8,0    | 8,0   | 18,16 | 526,50 | 69,22  |
| 2019/06/16 | CH2205 | Male | Three y/o | Control | Control | Feed Day | No | 05:40 | 05:00 - 05:59 | Morning      | 37,1 | 77  | 16,0   | 16,0  | 18,26 | 574,39 | 92,71  |
| 2019/06/16 | CH2206 | Male | Three y/o | Control | Control | Feed Day | No | 05:40 | 05:00 - 05:59 | Morning      | 37,1 | 42  | 1,8    | 1,8   | 18,26 | 524,42 | 19,38  |
| 2019/06/16 | CH2205 | Male | Three y/o | Control | Control | Feed Day | No | 05:45 | 05:00 - 05:59 | Morning      | 37,1 | 57  | 15,4   | 15,4  | 18,26 | 550,47 | 91,41  |
| 2019/06/16 | CH2206 | Male | Three y/o | Control | Control | Feed Day | No | 05:45 | 05:00 - 05:59 | Morning      | 37,1 | 68  | 8,6    | 8,6   | 18,26 | 564,71 | 71,66  |
| 2019/06/16 | CH2205 | Male | Three y/o | Control | Control | Feed Day | No | 05:50 | 05:00 - 05:59 | Morning      | 37,1 | 68  | 23,4   | 23,4  | 18,26 | 564,71 | 105,68 |
| 2019/06/16 | CH2206 | Male | Three y/o | Control | Control | Feed Day | No | 05:50 | 05:00 - 05:59 | Morning      | 37,1 | 49  | 16,6   | 16,6  | 18,26 | 537,80 | 93,96  |
| 2019/06/16 | CH2205 | Male | Three y/o | Control | Control | Feed Day | No | 05:55 | 05:00 - 05:59 | Morning      | 37,2 | 60  | 9,4    | 9,4   | 18,36 | 554,67 | 74,66  |
| 2019/06/16 | CH2206 | Male | Three y/o | Control | Control | Feed Day | No | 05:55 | 05:00 - 05:59 | Morning      | 37,2 | 55  | 27,6   | 27,6  | 18,36 | 547,52 | 111,33 |
| 2019/06/16 | CH2205 | Male | Three y/o | Control | Control | Feed Day | No | 06:00 | 06:00 - 06:59 | Morning      | 37,2 | 45  | 16,6   | 16,6  | 18,36 | 530,47 | 93,96  |
| 2019/06/16 | CH2206 | Male | Three y/o | Control | Control | Feed Day | No | 06:00 | 06:00 - 06:59 | Morning      | 37,2 | 60  | 19,8   | 19,8  | 18,36 | 554,67 | 99,97  |
| 2019/06/16 | CH2205 | Male | Three y/o | Control | Control | Feed Day | No | 06:05 | 06:00 - 06:59 | Morning      | 37,1 | 47  | 14,8   | 14,8  | 18,26 | 534,23 | 90,05  |
| 2019/06/16 | CH2206 | Male | Three y/o | Control | Control | Feed Day | No | 06:05 | 06:00 - 06:59 | Morning      | 37,3 | 86  | 22,0   | 22,0  | 18,46 | 582,77 | 103,57 |
| 2019/06/16 | CH2205 | Male | Three y/o | Control | Control | Feed Day | No | 06:10 | 06:00 - 06:59 | Morning      | 37,1 | 63  | 24,8   | 24,8  | 18,26 | 558,62 | 107,67 |
| 2019/06/16 | CH2206 | Male | Three y/o | Control | Control | Feed Day | No | 06:10 | 06:00 - 06:59 | Morning      | 37,3 | 55  | 37,8   | 37,8  | 18,46 | 547,52 | 122,14 |
| 2019/06/16 | CH2205 | Male | Three y/o | Control | Control | Feed Day | No | 06:15 | 06:00 - 06:59 | Morning      | 37,1 | 86  | 18,2   | 18,2  | 18,26 | 582,77 | 97,10  |
| 2019/06/16 | CH2206 | Male | Three y/o | Control | Control | Feed Day | No | 06:15 | 06:00 - 06:59 | Morning      | 37,3 | 95  | 28,0   | 28,0  | 18,46 | 590,14 | 111,83 |
| 2019/06/16 | CH2205 | Male | Three y/o | Control | Control | Feed Day | No | 06:20 | 06:00 - 06:59 | Morning      | 37,1 | 66  | 22,6   | 22,6  | 18,26 | 562,34 | 104,49 |
| 2019/06/16 | CH2206 | Male | Three y/o | Control | Control | Feed Day | No | 06:20 | 06:00 - 06:59 | Morning      | 37,2 | 51  | 24,4   | 24,4  | 18,36 | 541,20 | 107,11 |
| 2019/06/16 | CH2205 | Male | Three y/o | Control | Control | Feed Day | No | 06:25 | 06:00 - 06:59 | Morning      | 37,1 | 69  | 23,8   | 23,8  | 18,26 | 565,86 | 106,26 |
| 2019/06/16 | CH2206 | Male | Three y/o | Control | Control | Feed Day | No | 06:25 | 06:00 - 06:59 | Morning      | 37,2 | 51  | 16,6   | 16,6  | 18,36 | 541,20 | 93,96  |
| 2019/06/16 | CH2205 | Male | Three y/o | Control | Control | Feed Day | No | 06:30 | 06:00 - 06:59 | Morning      | 37,1 | 55  | 29,2   | 29,2  | 18,26 | 547,52 | 113,27 |
| 2019/06/16 | CH2206 | Male | Three y/o | Control | Control | Feed Day | No | 06:30 | 06:00 - 06:59 | Morning      | 37,1 | 48  | 20,2   | 20,2  | 18,26 | 536,04 | 100,65 |
| 2019/06/16 | CH2205 | Male | Three y/o | Control | Control | Feed Day | No | 06:35 | 06:00 - 06:59 | Morning      | 37,2 | 145 | 80,2   | 80,2  | 18,36 | 619,62 | 148,16 |
| 2019/06/16 | CH2206 | Male | Three y/o | Control | Control | Feed Day | No | 06:35 | 06:00 - 06:59 | Morning      | 37,2 | 51  | 58,0   | 58,0  | 18,36 | 541,20 | 136,92 |
| 2019/06/16 | CH2205 | Male | Three y/o | Control | Control | Feed Day | No | 06:40 | 06:00 - 06:59 | Morning      | 37,3 | 85  | 193,4  | 193,4 | 18,46 | 581,90 | 178,94 |
| 2019/06/16 | CH2206 | Male | Three y/o | Control | Control | Feed Day | No | 06:40 | 06:00 - 06:59 | Morning      | 37,2 | 54  | 53,6   | 53,6  | 18,36 | 545,99 | 134,19 |
| 2019/06/16 | CH2205 | Male | Three y/o | Control | Control | Feed Day | No | 06:45 | 06:00 - 06:59 | Morning      | 37,3 | 138 | 524,6  | 524,6 | 18,46 | 616,31 | 214,26 |
| 2019/06/16 | CH2206 | Male | Three y/o | Control | Control | Feed Day | No | 06:45 | 06:00 - 06:59 | Morning      | 37,3 |     | 125,6  | 125,6 | 18,46 |        | 163,80 |
| 2019/06/16 | CH2205 | Male | Three y/o | Control | Control | Feed Day | No | 06:50 | 06:00 - 06:59 | Morning      | 37,5 |     | 146,8  | 146,8 | 18,65 |        | 169,26 |
| 2019/06/16 | CH2206 | Male | Three y/o | Control | Control | Feed Day | No | 06:50 | 06:00 - 06:59 | Morning      | 37,4 |     | 147,2  | 147,2 | 18,55 |        | 169,36 |
| 2019/06/16 | CH2205 | Male | Three y/o | Control | Control | Feed Day | No | 06:55 | 06:00 - 06:59 | Morning      | 37,6 |     | 98,4   | 98,4  | 18,75 |        | 155,28 |
| 2019/06/16 | CH2206 | Male | Three y/o | Control | Control | Feed Day | No | 06:55 | 06:00 - 06:59 | Morning      | 37,5 | 138 | 64,2   | 64,2  | 18,65 | 616,31 | 140,44 |
| 2019/06/16 | CH2205 | Male | Three y/o | Control | Control | Feed Day | No | 07:00 | 07:00 - 07:59 | Morning      | 37,6 | 86  | 69,8   | 69,8  | 18,75 | 582,77 | 143,34 |
| 2019/06/16 | CH2206 | Male | Three y/o | Control | Control | Feed Day | No | 07:00 | 07:00 - 07:59 | Morning      | 37,5 | 61  | 86,8   | 86,8  | 18,65 | 556,01 | 150,91 |
| 2019/06/16 | CH2205 | Male | Three y/o | Control | Control | Feed Day | No | 07:05 | 07:00 - 07:59 | Morning      | 37,9 | 126 | 293,8  | 293,8 | 19,05 | 610,14 | 193,68 |
| 2019/06/16 | CH2206 | Male | Three y/o | Control | Control | Feed Day | No | 07:05 | 07:00 - 07:59 | Morning      | 37,7 |     | 156,6  | 156,6 | 18,85 |        | 171,53 |
| 2019/06/16 | CH2205 | Male | Three y/o | Control | Control | Feed Day | No | 07:10 | 07:00 - 07:59 | Morning      | 37,9 | 98  | 248,0  | 248,0 | 19,05 | 592,41 | 187,70 |
| 2019/06/16 | CH2206 | Male | Three y/o | Control | Control | Feed Day | No | 07:10 | 07:00 - 07:59 | Morning      | 37,7 | 137 | 131,0  | 131,0 | 18,85 | 615,83 | 165,27 |
| 2019/06/16 | CH2205 | Male | Three y/o | Control | Control | Feed Day | No | 07:15 | 07:00 - 07:59 | Morning      | 37,9 |     | 181,4  | 181,4 | 19,05 |        | 176,69 |
| 2019/06/16 | CH2206 | Male | Three y/o | Control | Control | Feed Day | No | 07:15 | 07:00 - 07:59 | Morning      | 37,7 |     | 182,6  | 182,6 | 18,85 |        | 176,92 |
| 2019/06/16 | CH2205 | Male | Three y/o | Control | Control | Feed Day | No | 07:20 | 07:00 - 07:59 | Morning      | 38,0 | 77  | 172,2  | 172,2 | 19,15 | 574,39 | 174,86 |
| 2019/06/16 | CH2206 | Male | Three y/o | Control | Control | Feed Day | No | 07:20 | 07:00 - 07:59 | Morning      | 37,7 | 128 | 174,2  | 174,2 | 18,85 | 611,22 | 175,26 |
| 2019/06/16 | CH2205 | Male | Three y/o | Control | Control | Feed Day | No | 07:25 | 07:00 - 07:59 | Morning      | 38,0 | 180 | 1387,4 |       | 19,15 | 633,61 |        |
| 2019/06/16 | CH2206 | Male | Three y/o | Control | Control | Feed Day | No | 07:25 | 07:00 - 07:59 | Morning      | 37,8 | 158 | 798,6  | 798,6 | 18,95 | 625,26 | 229,27 |
| 2019/06/16 | CH2205 | Male | Three y/o | Control | Control | Feed Day | No | 07:30 | 07:00 - 07:59 | Morning      | 38,2 | 59  | 95,6   | 95,6  | 19,36 | 553,30 | 154,28 |
| 2019/06/16 | CH2206 | Male | Three y/o | Control | Control | Feed Day | No | 07:30 | 07:00 - 07:59 | Morning      | 37,9 | 111 | 80,2   | 80,2  | 19,05 | 601,33 | 148,16 |
| 2019/06/16 | CH2205 | Male | Three y/o | Control | Control | Feed Day | No | 07:35 | 07:00 - 07:59 | Morning      | 38,1 | 110 | 63,2   | 63,2  | 19,26 | 600,69 | 139,89 |
| 2019/06/16 | CH2206 | Male | Three y/o | Control | Control | Feed Day | No | 07:35 | 07:00 - 07:59 | Morning      | 37,9 | 110 | 98,6   | 98,6  | 19,05 | 600,69 | 155,35 |
| 2019/06/16 | CH2205 | Male | Three y/o | Control | Control | Feed Day | No | 07:40 | 07:00 - 07:59 | Morning      | 38,1 | 121 | 122,0  | 122,0 | 19,26 | 607,35 | 162,79 |
| 2019/06/16 | CH2206 | Male | Three y/o | Control | Control | Feed Day | No | 07:40 | 07:00 - 07:59 | Morning      | 37,8 | 191 | 33,2   | 33,2  | 18,95 | 637,33 | 117,68 |
| 2019/06/16 | CH2205 | Male | Three y/o | Control | Control | Feed Day | No | 07:45 | 07:00 - 07:59 | Morning      | 38,0 | 126 | 79,4   | 79,4  | 19,15 | 610,14 | 147,81 |
| 2019/06/16 | CH2206 | Male | Three y/o | Control | Control | Feed Day | No | 07:45 | 07:00 - 07:59 | Morning      | 37,8 |     | 101,6  | 101,6 | 18,95 |        | 156,40 |
| 2019/06/16 | CH2205 | Male | Three y/o | Control | Control | Feed Day | No | 07:50 | 07:00 - 07:59 | Morning      | 38,0 | 145 | 125,6  | 125,6 | 19,15 | 619,62 | 163,80 |
| 2019/06/16 | CH2206 | Male | Three y/o | Control | Control | Feed Day | No | 07:50 | 07:00 - 07:59 | Morning      | 37,8 | 147 | 128,6  | 128,6 | 18,95 | 620,52 | 164,63 |
| 2019/06/16 | CH2205 | Male | Three y/o | Control | Control | Feed Day | No | 07:55 | 07:00 - 07:59 | Morning      | 38,0 | 52  | 168,0  | 168,0 | 19,15 | 542,83 | 173,99 |
| 2019/06/16 | CH2206 | Male | Three y/o | Control | Control | Feed Day | No | 07:55 | 07:00 - 07:59 | Morning      | 37,9 | 148 | 308,8  | 308,8 | 19,05 | 620,97 | 195,44 |
| 2019/06/16 | CH2205 | Male | Three y/o | Control | Control | Feed Day | No | 08:00 | 08:00 - 08:59 | Late Morning | 37,9 | 60  | 350,2  | 350,2 | 19,05 | 554,67 | 199,90 |
| 2019/06/16 | CH2206 | Male | Three y/o | Control | Control | Feed Day | No | 08:00 | 08:00 - 08:59 | Late Morning | 37,9 | 115 | 182,0  | 182,0 | 19,05 | 603,82 | 176,80 |
| 2019/06/16 | CH2205 | Male | Three y/o | Control | Control | Feed Day | No | 08:05 | 08:00 - 08:59 | Late Morning | 37,8 | 100 | 62,6   | 62,6  | 18,95 | 593,87 | 139,56 |
| 2019/06/16 | CH2206 | Male | Three y/o | Control | Control | Feed Day | No | 08:05 | 08:00 - 08:59 | Late Morning | 37,9 | 162 | 213,4  | 213,4 | 19,05 | 626,88 | 182,40 |
| 2019/06/16 | CH2205 | Male | Three y/o | Control | Control | Feed Day | No | 08:10 | 08:00 - 08:59 | Late Morning | 37,7 | 123 | 192,2  | 192,2 | 18,85 | 608,49 | 178,72 |
| 2019/06/16 | CH2206 | Male | Three y/o | Control | Control | Feed Day | No | 08:10 | 08:00 - 08:59 | Late Morning | 37,9 | 143 | 242,8  | 242,8 | 19,05 | 618,69 | 186,95 |
| 2019/06/16 | CH2205 | Male | Three y/o | Control | Control | Feed Day | No | 08:15 | 08:00 - 08:59 | Late Morning | 37,7 | 107 | 157,4  | 157,4 | 18,85 | 598,73 | 171,71 |
| 2019/06/16 | CH2206 | Male | Three y/o | Control | Control | Feed Day | No | 08:15 | 08:00 - 08:59 | Late Morning | 37,8 | 98  | 136,0  | 136,0 | 18,95 | 592,41 | 166,59 |
| 2019/06/16 | CH2205 | Male | Three y/o | Control | Control | Feed Day | No | 08:20 | 08:00 - 08:59 | Late Morning | 37,7 | 86  | 486,0  | 486,0 | 18,85 | 582,77 | 211,54 |



|            |        |      |           |         |         |          |     |       |               |              |      |     |       |       |       |        |        |
|------------|--------|------|-----------|---------|---------|----------|-----|-------|---------------|--------------|------|-----|-------|-------|-------|--------|--------|
| 2019/06/16 | CH2206 | Male | Three y/o | Control | Control | Feed Day | No  | 08:20 | 08:00 - 08:59 | Late Morning | 38,0 | 112 | 79,6  | 79,6  | 19,15 | 601,96 | 147,90 |
| 2019/06/16 | CH2205 | Male | Three y/o | Control | Control | Feed Day | No  | 08:25 | 08:00 - 08:59 | Late Morning | 37,9 | 120 | 72,2  | 72,2  | 19,05 | 606,78 | 144,51 |
| 2019/06/16 | CH2206 | Male | Three y/o | Control | Control | Feed Day | No  | 08:25 | 08:00 - 08:59 | Late Morning | 37,9 | 87  | 24,2  | 24,2  | 19,05 | 583,64 | 106,83 |
| 2019/06/16 | CH2205 | Male | Three y/o | Control | Control | Feed Day | No  | 08:30 | 08:00 - 08:59 | Late Morning | 37,9 | 111 | 106,6 | 106,6 | 19,05 | 601,33 | 158,07 |
| 2019/06/16 | CH2206 | Male | Three y/o | Control | Control | Feed Day | No  | 08:30 | 08:00 - 08:59 | Late Morning | 37,8 | 121 | 67,0  | 67,0  | 18,95 | 607,35 | 141,92 |
| 2019/06/16 | CH2205 | Male | Three y/o | Control | Control | Feed Day | No  | 08:35 | 08:00 - 08:59 | Late Morning | 37,7 | 102 | 46,8  | 46,8  | 18,85 | 595,30 | 129,50 |
| 2019/06/16 | CH2206 | Male | Three y/o | Control | Control | Feed Day | No  | 08:35 | 08:00 - 08:59 | Late Morning | 37,8 | 45  | 103,4 | 103,4 | 18,95 | 530,47 | 157,01 |
| 2019/06/16 | CH2205 | Male | Three y/o | Control | Control | Feed Day | No  | 08:40 | 08:00 - 08:59 | Late Morning | 37,8 | 103 | 77,0  | 77,0  | 18,95 | 596,00 | 146,75 |
| 2019/06/16 | CH2206 | Male | Three y/o | Control | Control | Feed Day | No  | 08:40 | 08:00 - 08:59 | Late Morning | 37,7 |     | 69,0  | 69,0  | 18,85 |        | 142,94 |
| 2019/06/16 | CH2205 | Male | Three y/o | Control | Control | Feed Day | No  | 08:45 | 08:00 - 08:59 | Late Morning | 37,7 | 96  | 124,0 | 124,0 | 18,85 | 590,91 | 163,35 |
| 2019/06/16 | CH2206 | Male | Three y/o | Control | Control | Feed Day | No  | 08:45 | 08:00 - 08:59 | Late Morning | 37,7 |     | 24,8  | 24,8  | 18,85 |        | 107,67 |
| 2019/06/16 | CH2205 | Male | Three y/o | Control | Control | Feed Day | No  | 08:50 | 08:00 - 08:59 | Late Morning | 37,7 | 109 | 36,2  | 36,2  | 18,85 | 600,04 | 120,65 |
| 2019/06/16 | CH2206 | Male | Three y/o | Control | Control | Feed Day | No  | 08:50 | 08:00 - 08:59 | Late Morning | 37,7 | 114 | 103,6 | 103,6 | 18,85 | 603,20 | 157,08 |
| 2019/06/16 | CH2205 | Male | Three y/o | Control | Control | Feed Day | No  | 08:55 | 08:00 - 08:59 | Late Morning | 37,5 | 70  | 33,0  | 33,0  | 18,65 | 566,99 | 117,47 |
| 2019/06/16 | CH2206 | Male | Three y/o | Control | Control | Feed Day | No  | 08:55 | 08:00 - 08:59 | Late Morning | 37,7 | 115 | 61,0  | 61,0  | 18,85 | 603,82 | 138,67 |
| 2019/06/16 | CH2205 | Male | Three y/o | Control | Control | Feed Day | No  | 09:00 | 09:00 - 09:59 | Late Morning | 37,5 | 44  | 77,8  | 77,8  | 18,65 | 528,51 | 147,11 |
| 2019/06/16 | CH2206 | Male | Three y/o | Control | Control | Feed Day | No  | 09:00 | 09:00 - 09:59 | Late Morning | 37,7 | 106 | 30,0  | 30,0  | 18,85 | 598,06 | 114,20 |
| 2019/06/16 | CH2205 | Male | Three y/o | Control | Control | Feed Day | No  | 09:05 | 09:00 - 09:59 | Late Morning | 37,5 | 106 | 154,6 | 154,6 | 18,65 | 598,06 | 171,08 |
| 2019/06/16 | CH2206 | Male | Three y/o | Control | Control | Feed Day | No  | 09:05 | 09:00 - 09:59 | Late Morning | 37,4 | 81  | 42,6  | 42,6  | 18,55 | 578,26 | 126,26 |
| 2019/06/16 | CH2205 | Male | Three y/o | Control | Control | Feed Day | No  | 09:10 | 09:00 - 09:59 | Late Morning | 37,5 | 108 | 103,6 | 103,6 | 18,65 | 599,39 | 157,08 |
| 2019/06/16 | CH2206 | Male | Three y/o | Control | Control | Feed Day | No  | 09:10 | 09:00 - 09:59 | Late Morning | 37,1 | 65  | 31,2  | 31,2  | 18,26 | 561,12 | 115,54 |
| 2019/06/16 | CH2205 | Male | Three y/o | Control | Control | Feed Day | No  | 09:15 | 09:00 - 09:59 | Late Morning | 37,5 | 89  | 7,4   | 7,4   | 18,65 | 585,33 | 66,59  |
| 2019/06/16 | CH2206 | Male | Three y/o | Control | Control | Feed Day | No  | 09:15 | 09:00 - 09:59 | Late Morning | 37,0 | 76  | 44,4  | 44,4  | 18,16 | 573,39 | 127,69 |
| 2019/06/16 | CH2205 | Male | Three y/o | Control | Control | Feed Day | No  | 09:20 | 09:00 - 09:59 | Late Morning | 37,3 |     | 4,4   | 4,4   | 18,46 |        | 49,12  |
| 2019/06/16 | CH2206 | Male | Three y/o | Control | Control | Feed Day | No  | 09:20 | 09:00 - 09:59 | Late Morning | 36,9 | 111 | 33,8  | 33,8  | 18,06 | 601,33 | 118,29 |
| 2019/06/16 | CH2205 | Male | Three y/o | Control | Control | Feed Day | No  | 09:25 | 09:00 - 09:59 | Late Morning | 37,3 |     | 52,0  | 52,0  | 18,46 |        | 133,14 |
| 2019/06/16 | CH2206 | Male | Three y/o | Control | Control | Feed Day | No  | 09:25 | 09:00 - 09:59 | Late Morning | 37,0 | 53  | 35,2  | 35,2  | 18,16 | 544,43 | 119,69 |
| 2019/06/16 | CH2205 | Male | Three y/o | Control | Control | Feed Day | No  | 09:30 | 09:00 - 09:59 | Late Morning | 37,4 |     | 482,4 | 482,4 | 18,55 |        | 211,27 |
| 2019/06/16 | CH2206 | Male | Three y/o | Control | Control | Feed Day | No  | 09:30 | 09:00 - 09:59 | Late Morning | 37,1 | 63  | 39,0  | 39,0  | 18,26 | 558,62 | 123,22 |
| 2019/06/16 | CH2205 | Male | Three y/o | Control | Control | Feed Day | No  | 09:35 | 09:00 - 09:59 | Late Morning | 37,5 | 86  | 159,8 | 159,8 | 18,65 | 582,77 | 172,24 |
| 2019/06/16 | CH2206 | Male | Three y/o | Control | Control | Feed Day | No  | 09:35 | 09:00 - 09:59 | Late Morning | 37,1 | 92  | 53,0  | 53,0  | 18,26 | 587,78 | 133,80 |
| 2019/06/16 | CH2205 | Male | Three y/o | Control | Control | Feed Day | No  | 09:40 | 09:00 - 09:59 | Late Morning | 37,5 |     | 82,0  | 82,0  | 18,65 |        | 148,93 |
| 2019/06/16 | CH2206 | Male | Three y/o | Control | Control | Feed Day | No  | 09:40 | 09:00 - 09:59 | Late Morning | 37,3 | 154 | 66,6  | 66,6  | 18,46 | 623,58 | 141,71 |
| 2019/06/16 | CH2205 | Male | Three y/o | Control | Control | Feed Day | No  | 09:45 | 09:00 - 09:59 | Late Morning | 37,5 |     | 10,6  | 10,6  | 18,65 |        | 78,73  |
| 2019/06/16 | CH2206 | Male | Three y/o | Control | Control | Feed Day | No  | 09:45 | 09:00 - 09:59 | Late Morning | 37,4 | 120 | 81,6  | 81,6  | 18,55 | 606,78 | 148,76 |
| 2019/06/16 | CH2205 | Male | Three y/o | Control | Control | Feed Day | No  | 09:50 | 09:00 - 09:59 | Late Morning | 37,7 | 72  | 13,4  | 13,4  | 18,85 | 569,20 | 86,68  |
| 2019/06/16 | CH2206 | Male | Three y/o | Control | Control | Feed Day | No  | 09:50 | 09:00 - 09:59 | Late Morning | 37,5 |     | 90,8  | 90,8  | 18,65 |        | 152,48 |
| 2019/06/16 | CH2205 | Male | Three y/o | Control | Control | Feed Day | No  | 09:55 | 09:00 - 09:59 | Late Morning | 37,6 | 50  | 12,8  | 12,8  | 18,75 | 539,52 | 85,12  |
| 2019/06/16 | CH2206 | Male | Three y/o | Control | Control | Feed Day | No  | 09:55 | 09:00 - 09:59 | Late Morning | 37,4 | 63  | 32,0  | 32,0  | 18,55 | 558,62 | 116,41 |
| 2019/06/16 | CH2205 | Male | Three y/o | Control | Control | Feed Day | No  | 10:00 | 10:00 - 10:59 | Late Morning | 37,5 | 58  | 14,0  | 14,0  | 18,65 | 551,90 | 88,17  |
| 2019/06/16 | CH2206 | Male | Three y/o | Control | Control | Feed Day | No  | 10:00 | 10:00 - 10:59 | Late Morning | 37,5 | 45  | 47,2  | 47,2  | 18,65 | 530,47 | 129,80 |
| 2019/06/16 | CH2205 | Male | Three y/o | Control | Control | Feed Day | No  | 10:05 | 10:00 - 10:59 | Late Morning | 37,5 | 57  | 11,0  | 11,0  | 18,65 | 550,47 | 79,98  |
| 2019/06/16 | CH2206 | Male | Three y/o | Control | Control | Feed Day | No  | 10:05 | 10:00 - 10:59 | Late Morning | 37,5 | 70  | 38,0  | 38,0  | 18,65 | 566,99 | 122,32 |
| 2019/06/16 | CH2205 | Male | Three y/o | Control | Control | Feed Day | No  | 10:10 | 10:00 - 10:59 | Late Morning | 37,4 | 69  | 12,0  | 12,0  | 18,55 | 565,86 | 82,93  |
| 2019/06/16 | CH2206 | Male | Three y/o | Control | Control | Feed Day | No  | 10:10 | 10:00 - 10:59 | Late Morning | 37,5 | 58  | 47,8  | 47,8  | 18,65 | 551,90 | 130,23 |
| 2019/06/16 | CH2205 | Male | Three y/o | Control | Control | Feed Day | No  | 10:15 | 10:00 - 10:59 | Late Morning | 37,4 | 131 | 14,6  | 14,6  | 18,55 | 612,80 | 89,59  |
| 2019/06/16 | CH2206 | Male | Three y/o | Control | Control | Feed Day | No  | 10:15 | 10:00 - 10:59 | Late Morning | 37,4 | 65  | 38,0  | 38,0  | 18,55 | 561,12 | 122,32 |
| 2019/06/16 | CH2205 | Male | Three y/o | Control | Control | Feed Day | No  | 10:20 | 10:00 - 10:59 | Late Morning | 37,4 | 55  | 9,6   | 9,6   | 18,55 | 547,52 | 75,37  |
| 2019/06/16 | CH2206 | Male | Three y/o | Control | Control | Feed Day | No  | 10:20 | 10:00 - 10:59 | Late Morning | 37,5 | 53  | 30,6  | 30,6  | 18,65 | 544,43 | 114,87 |
| 2019/06/16 | CH2205 | Male | Three y/o | Control | Control | Feed Day | No  | 10:25 | 10:00 - 10:59 | Late Morning | 37,4 | 51  | 5,4   | 5,4   | 18,55 | 541,20 | 55,99  |
| 2019/06/16 | CH2206 | Male | Three y/o | Control | Control | Feed Day | No  | 10:25 | 10:00 - 10:59 | Late Morning | 37,5 | 60  | 27,0  | 27,0  | 18,65 | 554,67 | 110,58 |
| 2019/06/16 | CH2205 | Male | Three y/o | Control | Control | Feed Day | Yes | 10:30 | 10:00 - 10:59 | Late Morning | 37,4 | 60  | 4,6   | 4,6   | 18,55 | 554,67 | 50,61  |
| 2019/06/16 | CH2206 | Male | Three y/o | Control | Control | Feed Day | Yes | 10:30 | 10:00 - 10:59 | Late Morning | 37,5 | 94  | 52,4  | 52,4  | 18,65 | 589,37 | 133,41 |
| 2019/06/16 | CH2205 | Male | Three y/o | Control | Control | Feed Day | Yes | 10:35 | 10:00 - 10:59 | Late Morning | 37,3 | 63  | 3,2   | 3,2   | 18,46 | 558,62 | 38,49  |
| 2019/06/16 | CH2206 | Male | Three y/o | Control | Control | Feed Day | Yes | 10:35 | 10:00 - 10:59 | Late Morning | 37,5 | 52  | 55,2  | 55,2  | 18,65 | 542,83 | 135,21 |
| 2019/06/16 | CH2205 | Male | Three y/o | Control | Control | Feed Day | Yes | 10:40 | 10:00 - 10:59 | Late Morning | 37,3 | 49  | 4,8   | 4,8   | 18,46 | 537,80 | 52,04  |
| 2019/06/16 | CH2206 | Male | Three y/o | Control | Control | Feed Day | Yes | 10:40 | 10:00 - 10:59 | Late Morning | 37,5 | 45  | 57,0  | 57,0  | 18,65 | 530,47 | 136,32 |
| 2019/06/16 | CH2205 | Male | Three y/o | Control | Control | Feed Day | Yes | 10:45 | 10:00 - 10:59 | Late Morning | 37,3 | 66  | 7,8   | 7,8   | 18,46 | 562,34 | 68,36  |
| 2019/06/16 | CH2206 | Male | Three y/o | Control | Control | Feed Day | Yes | 10:45 | 10:00 - 10:59 | Late Morning | 37,5 | 48  | 51,2  | 51,2  | 18,65 | 536,04 | 132,61 |
| 2019/06/16 | CH2205 | Male | Three y/o | Control | Control | Feed Day | Yes | 10:50 | 10:00 - 10:59 | Late Morning | 37,3 | 45  | 9,4   | 9,4   | 18,46 | 530,47 | 74,66  |
| 2019/06/16 | CH2206 | Male | Three y/o | Control | Control | Feed Day | Yes | 10:50 | 10:00 - 10:59 | Late Morning | 37,5 | 52  | 31,4  | 31,4  | 18,65 | 542,83 | 115,76 |
| 2019/06/16 | CH2205 | Male | Three y/o | Control | Control | Feed Day | Yes | 10:55 | 10:00 - 10:59 | Late Morning | 37,3 | 77  | 62,8  | 62,8  | 18,46 | 574,39 | 139,67 |
| 2019/06/16 | CH2206 | Male | Three y/o | Control | Control | Feed Day | Yes | 10:55 | 10:00 - 10:59 | Late Morning | 37,5 | 117 | 182,4 | 182,4 | 18,65 | 605,02 | 176,88 |
| 2019/06/16 | CH2205 | Male | Three y/o | Control | Control | Feed Day | Yes | 11:00 | 11:00 - 11:59 | Late Morning | 37,3 | 75  | 22,6  | 22,6  | 18,46 | 572,36 | 104,49 |
| 2019/06/16 | CH2206 | Male | Three y/o | Control | Control | Feed Day | Yes | 11:00 | 11:00 - 11:59 | Late Morning | 37,5 | 111 | 156,8 | 156,8 | 18,65 | 601,33 | 171,57 |
| 2019/06/16 | CH2205 | Male | Three y/o | Control | Control | Feed Day | Yes | 11:05 | 11:00 - 11:59 | Late Morning | 37,3 | 115 | 30,8  | 30,8  | 18,46 | 603,82 | 115,10 |
| 2019/06/16 | CH2206 | Male | Three y/o | Control | Control | Feed Day | Yes | 11:05 | 11:00 - 11:59 | Late Morning | 37,6 | 138 | 122,6 | 122,6 | 18,75 | 616,31 | 162,96 |
| 2019/06/16 | CH2205 | Male | Three y/o | Control | Control | Feed Day | Yes | 11:10 | 11:00 - 11:59 | Late Morning | 37,3 |     | 43,4  | 43,4  | 18,46 |        | 126,90 |
| 2019/06/16 | CH2206 | Male | Three y/o | Control | Control | Feed Day | Yes | 11:10 | 11:00 - 11:59 | Late Morning | 37,7 | 121 | 28,6  | 28,6  | 18,85 | 607,35 | 112,56 |
| 2019/06/16 | CH2205 | Male | Three y/o | Control | Control | Feed Day | Yes | 11:15 | 11:00 - 11:59 | Late Morning | 37,4 | 60  | 268,0 | 268,0 | 18,55 | 554,67 | 190,43 |



|            |        |      |           |         |         |          |     |       |               |              |      |     |       |       |       |        |        |
|------------|--------|------|-----------|---------|---------|----------|-----|-------|---------------|--------------|------|-----|-------|-------|-------|--------|--------|
| 2019/06/16 | CH2206 | Male | Three y/o | Control | Control | Feed Day | Yes | 11:15 | 11:00 - 11:59 | Late Morning | 37,6 | 101 | 83,4  | 83,4  | 18,75 | 594,59 | 149,52 |
| 2019/06/16 | CH2205 | Male | Three y/o | Control | Control | Feed Day | Yes | 11:20 | 11:00 - 11:59 | Late Morning | 37,4 | 98  | 54,0  | 54,0  | 18,55 | 592,41 | 134,45 |
| 2019/06/16 | CH2206 | Male | Three y/o | Control | Control | Feed Day | Yes | 11:20 | 11:00 - 11:59 | Late Morning | 37,7 | 103 | 207,6 | 207,6 | 18,85 | 596,00 | 181,43 |
| 2019/06/16 | CH2205 | Male | Three y/o | Control | Control | Feed Day | Yes | 11:25 | 11:00 - 11:59 | Late Morning | 37,6 |     | 46,4  | 46,4  | 18,75 |        | 129,21 |
| 2019/06/16 | CH2206 | Male | Three y/o | Control | Control | Feed Day | Yes | 11:25 | 11:00 - 11:59 | Late Morning | 37,7 | 112 | 34,6  | 34,6  | 18,85 | 601,96 | 119,10 |
| 2019/06/16 | CH2205 | Male | Three y/o | Control | Control | Feed Day | No  | 11:30 | 11:00 - 11:59 | Late Morning | 37,6 | 118 | 18,4  | 18,4  | 18,75 | 605,61 | 97,47  |
| 2019/06/16 | CH2206 | Male | Three y/o | Control | Control | Feed Day | No  | 11:30 | 11:00 - 11:59 | Late Morning | 37,8 |     | 39,4  | 39,4  | 18,95 |        | 123,57 |
| 2019/06/16 | CH2205 | Male | Three y/o | Control | Control | Feed Day | No  | 11:35 | 11:00 - 11:59 | Late Morning | 37,7 | 109 | 88,6  | 88,6  | 18,85 | 600,04 | 151,63 |
| 2019/06/16 | CH2206 | Male | Three y/o | Control | Control | Feed Day | No  | 11:35 | 11:00 - 11:59 | Late Morning | 37,7 |     | 31,4  | 31,4  | 18,85 |        | 115,76 |
| 2019/06/16 | CH2205 | Male | Three y/o | Control | Control | Feed Day | No  | 11:40 | 11:00 - 11:59 | Late Morning | 37,6 | 114 | 35,2  | 35,2  | 18,75 | 603,20 | 119,69 |
| 2019/06/16 | CH2206 | Male | Three y/o | Control | Control | Feed Day | No  | 11:40 | 11:00 - 11:59 | Late Morning | 37,8 | 197 | 61,0  | 61,0  | 18,95 | 639,25 | 138,67 |
| 2019/06/16 | CH2205 | Male | Three y/o | Control | Control | Feed Day | No  | 11:45 | 11:00 - 11:59 | Late Morning | 37,6 |     | 27,0  | 27,0  | 18,75 |        | 110,58 |
| 2019/06/16 | CH2206 | Male | Three y/o | Control | Control | Feed Day | No  | 11:45 | 11:00 - 11:59 | Late Morning | 37,8 | 137 | 80,4  | 80,4  | 18,95 | 615,83 | 148,25 |
| 2019/06/16 | CH2205 | Male | Three y/o | Control | Control | Feed Day | No  | 11:50 | 11:00 - 11:59 | Late Morning | 37,7 |     | 56,0  | 56,0  | 18,85 |        | 135,70 |
| 2019/06/16 | CH2206 | Male | Three y/o | Control | Control | Feed Day | No  | 11:50 | 11:00 - 11:59 | Late Morning | 37,8 | 135 | 79,0  | 79,0  | 18,95 | 614,84 | 147,64 |
| 2019/06/16 | CH2205 | Male | Three y/o | Control | Control | Feed Day | No  | 11:55 | 11:00 - 11:59 | Late Morning | 37,9 | 100 | 66,2  | 66,2  | 19,05 | 593,87 | 141,50 |
| 2019/06/16 | CH2206 | Male | Three y/o | Control | Control | Feed Day | No  | 11:55 | 11:00 - 11:59 | Late Morning | 37,8 | 115 | 29,6  | 29,6  | 18,95 | 603,82 | 113,73 |
| 2019/06/16 | CH2205 | Male | Three y/o | Control | Control | Feed Day | No  | 12:00 | 12:00 - 12:59 | Afternoon    | 38,0 | 118 | 61,0  | 61,0  | 19,15 | 605,61 | 138,67 |
| 2019/06/16 | CH2206 | Male | Three y/o | Control | Control | Feed Day | No  | 12:00 | 12:00 - 12:59 | Afternoon    | 37,7 |     | 67,2  | 67,2  | 18,85 |        | 142,02 |
| 2019/06/16 | CH2205 | Male | Three y/o | Control | Control | Feed Day | No  | 12:05 | 12:00 - 12:59 | Afternoon    | 38,1 | 98  | 16,8  | 16,8  | 19,26 | 592,41 | 94,37  |
| 2019/06/16 | CH2206 | Male | Three y/o | Control | Control | Feed Day | No  | 12:05 | 12:00 - 12:59 | Afternoon    | 37,7 | 182 | 95,8  | 95,8  | 18,85 | 634,31 | 154,35 |
| 2019/06/16 | CH2205 | Male | Three y/o | Control | Control | Feed Day | No  | 12:10 | 12:00 - 12:59 | Afternoon    | 38,0 | 94  | 36,8  | 36,8  | 19,15 | 589,37 | 121,22 |
| 2019/06/16 | CH2206 | Male | Three y/o | Control | Control | Feed Day | No  | 12:10 | 12:00 - 12:59 | Afternoon    | 37,7 |     | 41,6  | 41,6  | 18,85 |        | 125,44 |
| 2019/06/16 | CH2205 | Male | Three y/o | Control | Control | Feed Day | No  | 12:15 | 12:00 - 12:59 | Afternoon    | 37,7 | 107 | 8,8   | 8,8   | 18,85 | 598,73 | 72,43  |
| 2019/06/16 | CH2206 | Male | Three y/o | Control | Control | Feed Day | No  | 12:15 | 12:00 - 12:59 | Afternoon    | 37,7 | 117 | 23,6  | 23,6  | 18,85 | 605,02 | 105,97 |
| 2019/06/16 | CH2205 | Male | Three y/o | Control | Control | Feed Day | No  | 12:20 | 12:00 - 12:59 | Afternoon    | 37,6 | 148 | 58,0  | 58,0  | 18,75 | 620,97 | 136,92 |
| 2019/06/16 | CH2206 | Male | Three y/o | Control | Control | Feed Day | No  | 12:20 | 12:00 - 12:59 | Afternoon    | 37,8 | 123 | 34,0  | 34,0  | 18,95 | 608,49 | 118,49 |
| 2019/06/16 | CH2205 | Male | Three y/o | Control | Control | Feed Day | No  | 12:25 | 12:00 - 12:59 | Afternoon    | 37,5 |     | 19,4  | 19,4  | 18,65 |        | 99,28  |
| 2019/06/16 | CH2206 | Male | Three y/o | Control | Control | Feed Day | No  | 12:25 | 12:00 - 12:59 | Afternoon    | 37,4 | 95  | 46,8  | 46,8  | 18,55 | 590,14 | 129,50 |
| 2019/06/16 | CH2205 | Male | Three y/o | Control | Control | Feed Day | No  | 12:30 | 12:00 - 12:59 | Afternoon    | 37,3 | 128 | 44,4  | 44,4  | 18,46 | 611,22 | 127,69 |
| 2019/06/16 | CH2206 | Male | Three y/o | Control | Control | Feed Day | No  | 12:30 | 12:00 - 12:59 | Afternoon    | 37,5 |     | 61,4  | 61,4  | 18,65 |        | 138,89 |
| 2019/06/16 | CH2205 | Male | Three y/o | Control | Control | Feed Day | No  | 12:35 | 12:00 - 12:59 | Afternoon    | 37,1 | 114 | 50,6  | 50,6  | 18,26 | 603,20 | 132,20 |
| 2019/06/16 | CH2206 | Male | Three y/o | Control | Control | Feed Day | No  | 12:35 | 12:00 - 12:59 | Afternoon    | 37,5 | 114 | 26,4  | 26,4  | 18,65 | 603,20 | 109,81 |
| 2019/06/16 | CH2205 | Male | Three y/o | Control | Control | Feed Day | No  | 12:40 | 12:00 - 12:59 | Afternoon    | 37,2 |     | 68,6  | 68,6  | 18,36 |        | 142,74 |
| 2019/06/16 | CH2206 | Male | Three y/o | Control | Control | Feed Day | No  | 12:40 | 12:00 - 12:59 | Afternoon    | 37,4 | 135 | 58,0  | 58,0  | 18,55 | 614,84 | 136,92 |
| 2019/06/16 | CH2205 | Male | Three y/o | Control | Control | Feed Day | No  | 12:45 | 12:00 - 12:59 | Afternoon    | 37,3 | 120 | 20,8  | 20,8  | 18,46 | 606,78 | 101,65 |
| 2019/06/16 | CH2206 | Male | Three y/o | Control | Control | Feed Day | No  | 12:45 | 12:00 - 12:59 | Afternoon    | 37,5 | 106 | 58,6  | 58,6  | 18,65 | 598,06 | 137,28 |
| 2019/06/16 | CH2205 | Male | Three y/o | Control | Control | Feed Day | No  | 12:50 | 12:00 - 12:59 | Afternoon    | 37,4 | 137 | 54,8  | 54,8  | 18,55 | 615,83 | 134,96 |
| 2019/06/16 | CH2206 | Male | Three y/o | Control | Control | Feed Day | No  | 12:50 | 12:00 - 12:59 | Afternoon    | 37,3 | 154 | 104,6 | 104,6 | 18,46 | 623,58 | 157,41 |
| 2019/06/16 | CH2205 | Male | Three y/o | Control | Control | Feed Day | No  | 12:55 | 12:00 - 12:59 | Afternoon    | 37,6 | 94  | 17,6  | 17,6  | 18,75 | 589,37 | 95,95  |
| 2019/06/16 | CH2206 | Male | Three y/o | Control | Control | Feed Day | No  | 12:55 | 12:00 - 12:59 | Afternoon    | 37,2 | 121 | 46,6  | 46,6  | 18,36 | 607,35 | 129,35 |
| 2019/06/16 | CH2205 | Male | Three y/o | Control | Control | Feed Day | No  | 13:00 | 13:00 - 13:59 | Afternoon    | 37,7 | 95  | 20,8  | 20,8  | 18,85 | 590,14 | 101,65 |
| 2019/06/16 | CH2206 | Male | Three y/o | Control | Control | Feed Day | No  | 13:00 | 13:00 - 13:59 | Afternoon    | 37,3 |     | 55,4  | 55,4  | 18,46 |        | 135,33 |
| 2019/06/16 | CH2205 | Male | Three y/o | Control | Control | Feed Day | No  | 13:05 | 13:00 - 13:59 | Afternoon    | 37,9 |     | 22,6  | 22,6  | 19,05 |        | 104,49 |
| 2019/06/16 | CH2206 | Male | Three y/o | Control | Control | Feed Day | No  | 13:05 | 13:00 - 13:59 | Afternoon    | 37,5 |     | 68,8  | 68,8  | 18,65 |        | 142,84 |
| 2019/06/16 | CH2205 | Male | Three y/o | Control | Control | Feed Day | No  | 13:10 | 13:00 - 13:59 | Afternoon    | 37,9 | 105 | 60,6  | 60,6  | 19,05 | 597,38 | 138,44 |
| 2019/06/16 | CH2206 | Male | Three y/o | Control | Control | Feed Day | No  | 13:10 | 13:00 - 13:59 | Afternoon    | 37,7 | 148 | 57,2  | 57,2  | 18,85 | 620,97 | 136,44 |
| 2019/06/16 | CH2205 | Male | Three y/o | Control | Control | Feed Day | No  | 13:15 | 13:00 - 13:59 | Afternoon    | 37,6 | 110 | 73,8  | 73,8  | 18,75 | 600,69 | 145,27 |
| 2019/06/16 | CH2206 | Male | Three y/o | Control | Control | Feed Day | No  | 13:15 | 13:00 - 13:59 | Afternoon    | 37,8 | 152 | 75,4  | 75,4  | 18,95 | 622,73 | 146,02 |
| 2019/06/16 | CH2205 | Male | Three y/o | Control | Control | Feed Day | No  | 13:20 | 13:00 - 13:59 | Afternoon    | 37,9 | 128 | 18,6  | 18,6  | 19,05 | 611,22 | 97,84  |
| 2019/06/16 | CH2206 | Male | Three y/o | Control | Control | Feed Day | No  | 13:20 | 13:00 - 13:59 | Afternoon    | 37,8 | 167 | 101,6 | 101,6 | 18,95 | 628,84 | 156,40 |
| 2019/06/16 | CH2205 | Male | Three y/o | Control | Control | Feed Day | No  | 13:25 | 13:00 - 13:59 | Afternoon    | 38,0 | 96  | 13,6  | 13,6  | 19,15 | 590,91 | 87,18  |
| 2019/06/16 | CH2206 | Male | Three y/o | Control | Control | Feed Day | No  | 13:25 | 13:00 - 13:59 | Afternoon    | 37,7 |     | 43,0  | 43,0  | 18,85 |        | 126,58 |
| 2019/06/16 | CH2205 | Male | Three y/o | Control | Control | Feed Day | No  | 13:30 | 13:00 - 13:59 | Afternoon    | 38,1 | 97  | 16,8  | 16,8  | 19,26 | 591,66 | 94,37  |
| 2019/06/16 | CH2206 | Male | Three y/o | Control | Control | Feed Day | No  | 13:30 | 13:00 - 13:59 | Afternoon    | 37,9 |     | 50,8  | 50,8  | 19,05 |        | 132,33 |
| 2019/06/16 | CH2205 | Male | Three y/o | Control | Control | Feed Day | No  | 13:35 | 13:00 - 13:59 | Afternoon    | 38,2 |     | 21,6  | 21,6  | 19,36 |        | 102,94 |
| 2019/06/16 | CH2206 | Male | Three y/o | Control | Control | Feed Day | No  | 13:35 | 13:00 - 13:59 | Afternoon    | 37,8 | 131 | 41,0  | 41,0  | 18,95 | 612,80 | 124,94 |
| 2019/06/16 | CH2205 | Male | Three y/o | Control | Control | Feed Day | No  | 13:40 | 13:00 - 13:59 | Afternoon    | 38,2 |     | 16,4  | 16,4  | 19,36 |        | 93,55  |
| 2019/06/16 | CH2206 | Male | Three y/o | Control | Control | Feed Day | No  | 13:40 | 13:00 - 13:59 | Afternoon    | 37,8 | 104 | 49,4  | 49,4  | 18,95 | 596,69 | 131,37 |
| 2019/06/16 | CH2205 | Male | Three y/o | Control | Control | Feed Day | No  | 13:45 | 13:00 - 13:59 | Afternoon    | 38,3 | 88  | 4,0   | 4,0   | 19,46 | 584,49 | 45,94  |
| 2019/06/16 | CH2206 | Male | Three y/o | Control | Control | Feed Day | No  | 13:45 | 13:00 - 13:59 | Afternoon    | 37,8 | 90  | 55,2  | 55,2  | 18,95 | 586,16 | 135,21 |
| 2019/06/16 | CH2205 | Male | Three y/o | Control | Control | Feed Day | No  | 13:50 | 13:00 - 13:59 | Afternoon    | 38,2 | 75  | 2,4   | 2,4   | 19,36 | 572,36 | 28,91  |
| 2019/06/16 | CH2206 | Male | Three y/o | Control | Control | Feed Day | No  | 13:50 | 13:00 - 13:59 | Afternoon    | 37,9 | 103 | 6,0   | 6,0   | 19,05 | 596,00 | 59,53  |
| 2019/06/16 | CH2205 | Male | Three y/o | Control | Control | Feed Day | No  | 13:55 | 13:00 - 13:59 | Afternoon    | 38,2 | 82  | 4,2   | 4,2   | 19,36 | 579,19 | 47,57  |
| 2019/06/16 | CH2206 | Male | Three y/o | Control | Control | Feed Day | No  | 13:55 | 13:00 - 13:59 | Afternoon    | 37,8 | 92  | 7,8   | 7,8   | 18,95 | 587,78 | 68,36  |
| 2019/06/16 | CH2205 | Male | Three y/o | Control | Control | Feed Day | No  | 14:00 | 14:00 - 14:59 | Afternoon    | 38,2 | 61  | 2,6   | 2,6   | 19,36 | 556,01 | 31,57  |
| 2019/06/16 | CH2206 | Male | Three y/o | Control | Control | Feed Day | No  | 14:00 | 14:00 - 14:59 | Afternoon    | 37,7 | 92  | 53,8  | 53,8  | 18,85 | 587,78 | 134,32 |
| 2019/06/16 | CH2205 | Male | Three y/o | Control | Control | Feed Day | No  | 14:05 | 14:00 - 14:59 | Afternoon    | 38,2 | 71  | 5,0   | 5,0   | 19,36 | 568,10 | 53,41  |
| 2019/06/16 | CH2206 | Male | Three y/o | Control | Control | Feed Day | No  | 14:05 | 14:00 - 14:59 | Afternoon    | 37,8 |     | 66,0  | 66,0  | 18,95 |        | 141,40 |
| 2019/06/16 | CH2205 | Male | Three y/o | Control | Control | Feed Day | No  | 14:10 | 14:00 - 14:59 | Afternoon    | 38,2 | 74  | 5,6   | 5,6   | 19,36 | 571,33 | 57,21  |



|            |        |      |           |         |         |          |    |       |               |           |      |     |       |       |       |        |        |
|------------|--------|------|-----------|---------|---------|----------|----|-------|---------------|-----------|------|-----|-------|-------|-------|--------|--------|
| 2019/06/16 | CH2206 | Male | Three y/o | Control | Control | Feed Day | No | 14:10 | 14:00 - 14:59 | Afternoon | 37,9 | 191 | 65,6  | 65,6  | 19,05 | 637,33 | 141,19 |
| 2019/06/16 | CH2205 | Male | Three y/o | Control | Control | Feed Day | No | 14:15 | 14:00 - 14:59 | Afternoon | 38,2 | 83  | 4,0   | 4,0   | 19,36 | 580,11 | 45,94  |
| 2019/06/16 | CH2206 | Male | Three y/o | Control | Control | Feed Day | No | 14:15 | 14:00 - 14:59 | Afternoon | 37,9 | 134 | 65,8  | 65,8  | 19,05 | 614,33 | 141,29 |
| 2019/06/16 | CH2205 | Male | Three y/o | Control | Control | Feed Day | No | 14:20 | 14:00 - 14:59 | Afternoon | 38,2 | 91  | 24,6  | 24,6  | 19,36 | 586,98 | 107,39 |
| 2019/06/16 | CH2206 | Male | Three y/o | Control | Control | Feed Day | No | 14:20 | 14:00 - 14:59 | Afternoon | 37,8 |     | 59,6  | 59,6  | 18,95 |        | 137,86 |
| 2019/06/16 | CH2205 | Male | Three y/o | Control | Control | Feed Day | No | 14:25 | 14:00 - 14:59 | Afternoon | 38,2 | 94  | 18,6  | 18,6  | 19,36 | 589,37 | 97,84  |
| 2019/06/16 | CH2206 | Male | Three y/o | Control | Control | Feed Day | No | 14:25 | 14:00 - 14:59 | Afternoon | 37,8 | 90  | 57,2  | 57,2  | 18,95 | 586,16 | 136,44 |
| 2019/06/16 | CH2205 | Male | Three y/o | Control | Control | Feed Day | No | 14:30 | 14:00 - 14:59 | Afternoon | 38,2 | 80  | 10,4  | 10,4  | 19,36 | 577,31 | 78,08  |
| 2019/06/16 | CH2206 | Male | Three y/o | Control | Control | Feed Day | No | 14:30 | 14:00 - 14:59 | Afternoon | 37,9 | 88  | 45,6  | 45,6  | 19,05 | 584,49 | 128,61 |
| 2019/06/16 | CH2205 | Male | Three y/o | Control | Control | Feed Day | No | 14:35 | 14:00 - 14:59 | Afternoon | 38,2 | 65  | 12,2  | 12,2  | 19,36 | 561,12 | 83,49  |
| 2019/06/16 | CH2206 | Male | Three y/o | Control | Control | Feed Day | No | 14:35 | 14:00 - 14:59 | Afternoon | 38,0 | 75  | 47,8  | 47,8  | 19,15 | 572,36 | 130,23 |
| 2019/06/16 | CH2205 | Male | Three y/o | Control | Control | Feed Day | No | 14:40 | 14:00 - 14:59 | Afternoon | 38,2 | 89  | 7,0   | 7,0   | 19,36 | 585,33 | 64,72  |
| 2019/06/16 | CH2206 | Male | Three y/o | Control | Control | Feed Day | No | 14:40 | 14:00 - 14:59 | Afternoon | 38,0 | 65  | 60,0  | 60,0  | 19,15 | 561,12 | 138,09 |
| 2019/06/16 | CH2205 | Male | Three y/o | Control | Control | Feed Day | No | 14:45 | 14:00 - 14:59 | Afternoon | 38,2 | 71  | 9,2   | 9,2   | 19,36 | 568,10 | 73,94  |
| 2019/06/16 | CH2206 | Male | Three y/o | Control | Control | Feed Day | No | 14:45 | 14:00 - 14:59 | Afternoon | 38,0 | 83  | 39,2  | 39,2  | 19,15 | 580,11 | 123,39 |
| 2019/06/16 | CH2205 | Male | Three y/o | Control | Control | Feed Day | No | 14:50 | 14:00 - 14:59 | Afternoon | 38,2 | 84  | 2,8   | 2,8   | 19,36 | 581,01 | 34,04  |
| 2019/06/16 | CH2206 | Male | Three y/o | Control | Control | Feed Day | No | 14:50 | 14:00 - 14:59 | Afternoon | 38,0 | 85  | 39,6  | 39,6  | 19,15 | 581,90 | 123,74 |
| 2019/06/16 | CH2205 | Male | Three y/o | Control | Control | Feed Day | No | 14:55 | 14:00 - 14:59 | Afternoon | 38,2 | 78  | 6,6   | 6,6   | 19,36 | 575,38 | 62,73  |
| 2019/06/16 | CH2206 | Male | Three y/o | Control | Control | Feed Day | No | 14:55 | 14:00 - 14:59 | Afternoon | 38,0 | 81  | 44,2  | 44,2  | 19,15 | 578,26 | 127,53 |
| 2019/06/16 | CH2205 | Male | Three y/o | Control | Control | Feed Day | No | 15:00 | 15:00 - 15:59 | Afternoon | 38,2 | 68  | 8,2   | 8,2   | 19,36 | 564,71 | 70,05  |
| 2019/06/16 | CH2206 | Male | Three y/o | Control | Control | Feed Day | No | 15:00 | 15:00 - 15:59 | Afternoon | 38,1 | 92  | 40,8  | 40,8  | 19,26 | 587,78 | 124,77 |
| 2019/06/16 | CH2205 | Male | Three y/o | Control | Control | Feed Day | No | 15:05 | 15:00 - 15:59 | Afternoon | 38,2 | 92  | 5,4   | 5,4   | 19,36 | 587,78 | 55,99  |
| 2019/06/16 | CH2206 | Male | Three y/o | Control | Control | Feed Day | No | 15:05 | 15:00 - 15:59 | Afternoon | 38,1 | 172 | 45,2  | 45,2  | 19,26 | 630,73 | 128,30 |
| 2019/06/16 | CH2205 | Male | Three y/o | Control | Control | Feed Day | No | 15:10 | 15:00 - 15:59 | Afternoon | 38,3 | 83  | 61,4  | 61,4  | 19,46 | 580,11 | 138,89 |
| 2019/06/16 | CH2206 | Male | Three y/o | Control | Control | Feed Day | No | 15:10 | 15:00 - 15:59 | Afternoon | 38,1 | 98  | 19,4  | 19,4  | 19,26 | 592,41 | 99,28  |
| 2019/06/16 | CH2205 | Male | Three y/o | Control | Control | Feed Day | No | 15:15 | 15:00 - 15:59 | Afternoon | 38,3 |     | 11,0  | 11,0  | 19,46 |        | 79,98  |
| 2019/06/16 | CH2206 | Male | Three y/o | Control | Control | Feed Day | No | 15:15 | 15:00 - 15:59 | Afternoon | 38,1 | 100 | 33,0  | 33,0  | 19,26 | 593,87 | 117,47 |
| 2019/06/16 | CH2205 | Male | Three y/o | Control | Control | Feed Day | No | 15:20 | 15:00 - 15:59 | Afternoon | 38,3 |     | 35,8  | 35,8  | 19,46 |        | 120,27 |
| 2019/06/16 | CH2206 | Male | Three y/o | Control | Control | Feed Day | No | 15:20 | 15:00 - 15:59 | Afternoon | 38,1 | 140 | 45,4  | 45,4  | 19,26 | 617,28 | 128,45 |
| 2019/06/16 | CH2205 | Male | Three y/o | Control | Control | Feed Day | No | 15:25 | 15:00 - 15:59 | Afternoon | 38,3 | 75  | 9,2   | 9,2   | 19,46 | 572,36 | 73,94  |
| 2019/06/16 | CH2206 | Male | Three y/o | Control | Control | Feed Day | No | 15:25 | 15:00 - 15:59 | Afternoon | 38,2 | 103 | 28,0  | 28,0  | 19,36 | 596,00 | 111,83 |
| 2019/06/16 | CH2205 | Male | Three y/o | Control | Control | Feed Day | No | 15:30 | 15:00 - 15:59 | Afternoon | 38,2 | 80  | 42,0  | 42,0  | 19,36 | 577,31 | 125,77 |
| 2019/06/16 | CH2206 | Male | Three y/o | Control | Control | Feed Day | No | 15:30 | 15:00 - 15:59 | Afternoon | 38,2 | 91  | 73,6  | 73,6  | 19,36 | 586,98 | 145,18 |
| 2019/06/16 | CH2205 | Male | Three y/o | Control | Control | Feed Day | No | 15:35 | 15:00 - 15:59 | Afternoon | 38,2 | 102 | 29,2  | 29,2  | 19,36 | 595,30 | 113,27 |
| 2019/06/16 | CH2206 | Male | Three y/o | Control | Control | Feed Day | No | 15:35 | 15:00 - 15:59 | Afternoon | 38,2 | 114 | 27,0  | 27,0  | 19,36 | 603,20 | 110,58 |
| 2019/06/16 | CH2205 | Male | Three y/o | Control | Control | Feed Day | No | 15:40 | 15:00 - 15:59 | Afternoon | 38,2 | 121 | 69,0  | 69,0  | 19,36 | 607,35 | 142,94 |
| 2019/06/16 | CH2206 | Male | Three y/o | Control | Control | Feed Day | No | 15:40 | 15:00 - 15:59 | Afternoon | 38,2 | 99  | 38,6  | 38,6  | 19,36 | 593,14 | 122,86 |
| 2019/06/16 | CH2205 | Male | Three y/o | Control | Control | Feed Day | No | 15:45 | 15:00 - 15:59 | Afternoon | 38,1 | 85  | 17,6  | 17,6  | 19,26 | 581,90 | 95,95  |
| 2019/06/16 | CH2206 | Male | Three y/o | Control | Control | Feed Day | No | 15:45 | 15:00 - 15:59 | Afternoon | 38,2 | 120 | 62,0  | 62,0  | 19,36 | 606,78 | 139,23 |
| 2019/06/16 | CH2205 | Male | Three y/o | Control | Control | Feed Day | No | 15:50 | 15:00 - 15:59 | Afternoon | 38,1 | 180 | 53,2  | 53,2  | 19,26 | 633,61 | 133,93 |
| 2019/06/16 | CH2206 | Male | Three y/o | Control | Control | Feed Day | No | 15:50 | 15:00 - 15:59 | Afternoon | 38,3 | 86  | 60,6  | 60,6  | 19,46 | 582,77 | 138,44 |
| 2019/06/16 | CH2205 | Male | Three y/o | Control | Control | Feed Day | No | 15:55 | 15:00 - 15:59 | Afternoon | 38,0 |     | 29,8  | 29,8  | 19,15 |        | 113,97 |
| 2019/06/16 | CH2206 | Male | Three y/o | Control | Control | Feed Day | No | 15:55 | 15:00 - 15:59 | Afternoon | 38,3 | 88  | 66,4  | 66,4  | 19,46 | 584,49 | 141,61 |
| 2019/06/16 | CH2205 | Male | Three y/o | Control | Control | Feed Day | No | 16:00 | 16:00 - 16:59 | Evening   | 38,2 | 115 | 36,4  | 36,4  | 19,36 | 603,82 | 120,84 |
| 2019/06/16 | CH2206 | Male | Three y/o | Control | Control | Feed Day | No | 16:00 | 16:00 - 16:59 | Evening   | 38,3 | 96  | 70,2  | 70,2  | 19,46 | 590,91 | 143,54 |
| 2019/06/16 | CH2205 | Male | Three y/o | Control | Control | Feed Day | No | 16:05 | 16:00 - 16:59 | Evening   | 38,2 | 85  | 3,4   | 3,4   | 19,36 | 581,90 | 40,51  |
| 2019/06/16 | CH2206 | Male | Three y/o | Control | Control | Feed Day | No | 16:05 | 16:00 - 16:59 | Evening   | 38,3 | 86  | 199,8 | 199,8 | 19,46 | 582,77 | 180,08 |
| 2019/06/16 | CH2205 | Male | Three y/o | Control | Control | Feed Day | No | 16:10 | 16:00 - 16:59 | Evening   | 38,3 | 89  | 6,6   | 6,6   | 19,46 | 585,33 | 62,73  |
| 2019/06/16 | CH2206 | Male | Three y/o | Control | Control | Feed Day | No | 16:10 | 16:00 - 16:59 | Evening   | 38,3 | 98  | 25,8  | 25,8  | 19,46 | 592,41 | 109,02 |
| 2019/06/16 | CH2205 | Male | Three y/o | Control | Control | Feed Day | No | 16:15 | 16:00 - 16:59 | Evening   | 38,3 | 62  | 5,0   | 5,0   | 19,46 | 557,33 | 53,41  |
| 2019/06/16 | CH2206 | Male | Three y/o | Control | Control | Feed Day | No | 16:15 | 16:00 - 16:59 | Evening   | 38,3 | 90  | 29,4  | 29,4  | 19,46 | 586,16 | 113,50 |
| 2019/06/16 | CH2205 | Male | Three y/o | Control | Control | Feed Day | No | 16:20 | 16:00 - 16:59 | Evening   | 38,3 | 82  | 5,4   | 5,4   | 19,46 | 579,19 | 55,99  |
| 2019/06/16 | CH2206 | Male | Three y/o | Control | Control | Feed Day | No | 16:20 | 16:00 - 16:59 | Evening   | 38,3 | 51  | 29,4  | 29,4  | 19,46 | 541,20 | 113,50 |
| 2019/06/16 | CH2205 | Male | Three y/o | Control | Control | Feed Day | No | 16:25 | 16:00 - 16:59 | Evening   | 38,3 | 56  | 5,4   | 5,4   | 19,46 | 549,01 | 55,99  |
| 2019/06/16 | CH2206 | Male | Three y/o | Control | Control | Feed Day | No | 16:25 | 16:00 - 16:59 | Evening   | 38,3 | 82  | 28,2  | 28,2  | 19,46 | 579,19 | 112,07 |
| 2019/06/16 | CH2205 | Male | Three y/o | Control | Control | Feed Day | No | 16:30 | 16:00 - 16:59 | Evening   | 38,3 | 80  | 9,0   | 9,0   | 19,46 | 577,31 | 73,19  |
| 2019/06/16 | CH2206 | Male | Three y/o | Control | Control | Feed Day | No | 16:30 | 16:00 - 16:59 | Evening   | 38,3 | 49  | 28,0  | 28,0  | 19,46 | 537,80 | 111,83 |
| 2019/06/16 | CH2205 | Male | Three y/o | Control | Control | Feed Day | No | 16:35 | 16:00 - 16:59 | Evening   | 38,3 | 76  | 9,6   | 9,6   | 19,46 | 573,39 | 75,37  |
| 2019/06/16 | CH2206 | Male | Three y/o | Control | Control | Feed Day | No | 16:35 | 16:00 - 16:59 | Evening   | 38,3 | 46  | 24,2  | 24,2  | 19,46 | 532,38 | 106,83 |
| 2019/06/16 | CH2205 | Male | Three y/o | Control | Control | Feed Day | No | 16:40 | 16:00 - 16:59 | Evening   | 38,3 | 68  | 15,2  | 15,2  | 19,46 | 564,71 | 90,96  |
| 2019/06/16 | CH2206 | Male | Three y/o | Control | Control | Feed Day | No | 16:40 | 16:00 - 16:59 | Evening   | 38,3 | 106 | 21,6  | 21,6  | 19,46 | 598,06 | 102,94 |
| 2019/06/16 | CH2205 | Male | Three y/o | Control | Control | Feed Day | No | 16:45 | 16:00 - 16:59 | Evening   | 38,3 |     | 13,6  | 13,6  | 19,46 |        | 87,18  |
| 2019/06/16 | CH2206 | Male | Three y/o | Control | Control | Feed Day | No | 16:45 | 16:00 - 16:59 | Evening   | 38,3 | 53  | 23,8  | 23,8  | 19,46 | 544,43 | 106,26 |
| 2019/06/16 | CH2205 | Male | Three y/o | Control | Control | Feed Day | No | 16:50 | 16:00 - 16:59 | Evening   | 38,3 |     | 18,0  | 18,0  | 19,46 |        | 96,72  |
| 2019/06/16 | CH2206 | Male | Three y/o | Control | Control | Feed Day | No | 16:50 | 16:00 - 16:59 | Evening   | 38,3 | 70  | 22,0  | 22,0  | 19,46 | 566,99 | 103,57 |
| 2019/06/16 | CH2205 | Male | Three y/o | Control | Control | Feed Day | No | 16:55 | 16:00 - 16:59 | Evening   | 38,3 |     | 19,0  | 19,0  | 19,46 |        | 98,56  |
| 2019/06/16 | CH2206 | Male | Three y/o | Control | Control | Feed Day | No | 16:55 | 16:00 - 16:59 | Evening   | 38,3 | 83  | 24,0  | 24,0  | 19,46 | 580,11 | 106,55 |
| 2019/06/16 | CH2205 | Male | Three y/o | Control | Control | Feed Day | No | 17:00 | 17:00 - 17:59 | Evening   | 38,2 |     | 17,4  | 17,4  | 19,36 |        | 95,56  |
| 2019/06/16 | CH2206 | Male | Three y/o | Control | Control | Feed Day | No | 17:00 | 17:00 - 17:59 | Evening   | 38,3 | 98  | 34,2  | 34,2  | 19,46 | 592,41 | 118,70 |
| 2019/06/16 | CH2205 | Male | Three y/o | Control | Control | Feed Day | No | 17:05 | 17:00 - 17:59 | Evening   | 38,2 |     | 11,8  | 11,8  | 19,36 |        | 82,36  |



|            |        |      |           |         |         |          |    |       |               |         |      |     |       |       |       |        |        |
|------------|--------|------|-----------|---------|---------|----------|----|-------|---------------|---------|------|-----|-------|-------|-------|--------|--------|
| 2019/06/16 | CH2206 | Male | Three y/o | Control | Control | Feed Day | No | 17:05 | 17:00 - 17:59 | Evening | 38,3 | 156 | 39,6  | 39,6  | 19,46 | 624,43 | 123,74 |
| 2019/06/16 | CH2205 | Male | Three y/o | Control | Control | Feed Day | No | 17:10 | 17:00 - 17:59 | Evening | 38,2 | 96  | 31,4  | 31,4  | 19,36 | 590,91 | 115,76 |
| 2019/06/16 | CH2206 | Male | Three y/o | Control | Control | Feed Day | No | 17:10 | 17:00 - 17:59 | Evening | 38,3 | 128 | 115,4 | 115,4 | 19,46 | 611,22 | 160,84 |
| 2019/06/16 | CH2205 | Male | Three y/o | Control | Control | Feed Day | No | 17:15 | 17:00 - 17:59 | Evening | 38,2 | 197 | 42,4  | 42,4  | 19,36 | 639,25 | 126,10 |
| 2019/06/16 | CH2206 | Male | Three y/o | Control | Control | Feed Day | No | 17:15 | 17:00 - 17:59 | Evening | 38,3 | 124 | 72,6  | 72,6  | 19,46 | 609,04 | 144,70 |
| 2019/06/16 | CH2205 | Male | Three y/o | Control | Control | Feed Day | No | 17:20 | 17:00 - 17:59 | Evening | 38,2 | 138 | 41,0  | 41,0  | 19,36 | 616,31 | 124,94 |
| 2019/06/16 | CH2206 | Male | Three y/o | Control | Control | Feed Day | No | 17:20 | 17:00 - 17:59 | Evening | 38,2 | 115 | 34,0  | 34,0  | 19,36 | 603,82 | 118,49 |
| 2019/06/16 | CH2205 | Male | Three y/o | Control | Control | Feed Day | No | 17:25 | 17:00 - 17:59 | Evening | 38,2 |     | 11,6  | 11,6  | 19,36 |        | 81,78  |
| 2019/06/16 | CH2206 | Male | Three y/o | Control | Control | Feed Day | No | 17:25 | 17:00 - 17:59 | Evening | 38,2 | 118 | 25,8  | 25,8  | 19,36 | 605,61 | 109,02 |
| 2019/06/16 | CH2205 | Male | Three y/o | Control | Control | Feed Day | No | 17:30 | 17:00 - 17:59 | Evening | 38,1 |     | 10,4  | 10,4  | 19,26 |        | 78,08  |
| 2019/06/16 | CH2206 | Male | Three y/o | Control | Control | Feed Day | No | 17:30 | 17:00 - 17:59 | Evening | 38,0 |     | 30,0  | 30,0  | 19,15 |        | 114,20 |
| 2019/06/16 | CH2205 | Male | Three y/o | Control | Control | Feed Day | No | 17:35 | 17:00 - 17:59 | Evening | 38,0 |     | 15,2  | 15,2  | 19,15 |        | 90,96  |
| 2019/06/16 | CH2206 | Male | Three y/o | Control | Control | Feed Day | No | 17:35 | 17:00 - 17:59 | Evening | 38,0 | 98  | 36,6  | 36,6  | 19,15 | 592,41 | 121,03 |
| 2019/06/16 | CH2205 | Male | Three y/o | Control | Control | Feed Day | No | 17:40 | 17:00 - 17:59 | Evening | 38,0 | 83  | 16,2  | 16,2  | 19,15 | 580,11 | 93,13  |
| 2019/06/16 | CH2206 | Male | Three y/o | Control | Control | Feed Day | No | 17:40 | 17:00 - 17:59 | Evening | 38,1 |     | 44,8  | 44,8  | 19,26 |        | 127,99 |
| 2019/06/16 | CH2205 | Male | Three y/o | Control | Control | Feed Day | No | 17:45 | 17:00 - 17:59 | Evening | 38,0 | 80  | 13,8  | 13,8  | 19,15 | 577,31 | 87,68  |
| 2019/06/16 | CH2206 | Male | Three y/o | Control | Control | Feed Day | No | 17:45 | 17:00 - 17:59 | Evening | 38,1 | 90  | 12,4  | 12,4  | 19,26 | 586,16 | 84,04  |
| 2019/06/16 | CH2205 | Male | Three y/o | Control | Control | Feed Day | No | 17:50 | 17:00 - 17:59 | Evening | 38,1 | 62  | 16,4  | 16,4  | 19,26 | 557,33 | 93,55  |
| 2019/06/16 | CH2206 | Male | Three y/o | Control | Control | Feed Day | No | 17:50 | 17:00 - 17:59 | Evening | 37,8 | 86  | 23,4  | 23,4  | 18,95 | 582,77 | 105,68 |
| 2019/06/16 | CH2205 | Male | Three y/o | Control | Control | Feed Day | No | 17:55 | 17:00 - 17:59 | Evening | 38,2 | 101 | 14,2  | 14,2  | 19,36 | 594,59 | 88,65  |
| 2019/06/16 | CH2206 | Male | Three y/o | Control | Control | Feed Day | No | 17:55 | 17:00 - 17:59 | Evening | 37,7 | 81  | 59,2  | 59,2  | 18,85 | 578,26 | 137,63 |
| 2019/06/16 | CH2205 | Male | Three y/o | Control | Control | Feed Day | No | 18:00 | 18:00 - 18:59 | Evening | 38,2 |     | 11,4  | 11,4  | 19,36 |        | 81,19  |
| 2019/06/16 | CH2206 | Male | Three y/o | Control | Control | Feed Day | No | 18:00 | 18:00 - 18:59 | Evening | 37,9 | 86  | 59,2  | 59,2  | 19,05 | 582,77 | 137,63 |
| 2019/06/16 | CH2205 | Male | Three y/o | Control | Control | Feed Day | No | 18:05 | 18:00 - 18:59 | Evening | 38,2 | 102 | 14,6  | 14,6  | 19,36 | 595,30 | 89,59  |
| 2019/06/16 | CH2206 | Male | Three y/o | Control | Control | Feed Day | No | 18:05 | 18:00 - 18:59 | Evening | 38,0 | 64  | 58,2  | 58,2  | 19,15 | 559,88 | 137,04 |
| 2019/06/16 | CH2205 | Male | Three y/o | Control | Control | Feed Day | No | 18:10 | 18:00 - 18:59 | Evening | 38,3 | 91  | 10,6  | 10,6  | 19,46 | 586,98 | 78,73  |
| 2019/06/16 | CH2206 | Male | Three y/o | Control | Control | Feed Day | No | 18:10 | 18:00 - 18:59 | Evening | 38,1 | 52  | 59,8  | 59,8  | 19,26 | 542,83 | 137,98 |
| 2019/06/16 | CH2205 | Male | Three y/o | Control | Control | Feed Day | No | 18:15 | 18:00 - 18:59 | Evening | 38,2 | 83  | 18,0  | 18,0  | 19,36 | 580,11 | 96,72  |
| 2019/06/16 | CH2206 | Male | Three y/o | Control | Control | Feed Day | No | 18:15 | 18:00 - 18:59 | Evening | 38,2 | 94  | 59,0  | 59,0  | 19,36 | 589,37 | 137,51 |
| 2019/06/16 | CH2205 | Male | Three y/o | Control | Control | Feed Day | No | 18:20 | 18:00 - 18:59 | Evening | 38,1 | 78  | 23,0  | 23,0  | 19,26 | 575,38 | 105,09 |
| 2019/06/16 | CH2206 | Male | Three y/o | Control | Control | Feed Day | No | 18:20 | 18:00 - 18:59 | Evening | 38,2 | 103 | 58,4  | 58,4  | 19,36 | 596,00 | 137,16 |
| 2019/06/16 | CH2205 | Male | Three y/o | Control | Control | Feed Day | No | 18:25 | 18:00 - 18:59 | Evening | 38,1 | 91  | 18,8  | 18,8  | 19,26 | 586,98 | 98,20  |
| 2019/06/16 | CH2206 | Male | Three y/o | Control | Control | Feed Day | No | 18:25 | 18:00 - 18:59 | Evening | 38,2 | 75  | 61,0  | 61,0  | 19,36 | 572,36 | 138,67 |
| 2019/06/16 | CH2205 | Male | Three y/o | Control | Control | Feed Day | No | 18:30 | 18:00 - 18:59 | Evening | 38,1 | 82  | 11,0  | 11,0  | 19,26 | 579,19 | 79,98  |
| 2019/06/16 | CH2206 | Male | Three y/o | Control | Control | Feed Day | No | 18:30 | 18:00 - 18:59 | Evening | 38,2 | 76  | 59,0  | 59,0  | 19,36 | 573,39 | 137,51 |
| 2019/06/16 | CH2205 | Male | Three y/o | Control | Control | Feed Day | No | 18:35 | 18:00 - 18:59 | Evening | 38,1 | 66  | 2,2   | 2,2   | 19,26 | 562,34 | 26,02  |
| 2019/06/16 | CH2206 | Male | Three y/o | Control | Control | Feed Day | No | 18:35 | 18:00 - 18:59 | Evening | 38,2 | 134 | 53,0  | 53,0  | 19,36 | 614,33 | 133,80 |
| 2019/06/16 | CH2205 | Male | Three y/o | Control | Control | Feed Day | No | 18:40 | 18:00 - 18:59 | Evening | 38,1 | 88  | 6,2   | 6,2   | 19,26 | 584,49 | 60,63  |
| 2019/06/16 | CH2206 | Male | Three y/o | Control | Control | Feed Day | No | 18:40 | 18:00 - 18:59 | Evening | 38,2 | 106 | 58,0  | 58,0  | 19,36 | 598,06 | 136,92 |
| 2019/06/16 | CH2205 | Male | Three y/o | Control | Control | Feed Day | No | 18:45 | 18:00 - 18:59 | Evening | 38,1 | 90  | 5,6   | 5,6   | 19,26 | 586,16 | 57,21  |
| 2019/06/16 | CH2206 | Male | Three y/o | Control | Control | Feed Day | No | 18:45 | 18:00 - 18:59 | Evening | 38,2 | 89  | 51,6  | 51,6  | 19,36 | 585,33 | 132,87 |
| 2019/06/16 | CH2205 | Male | Three y/o | Control | Control | Feed Day | No | 18:50 | 18:00 - 18:59 | Evening | 38,1 | 98  | 8,4   | 8,4   | 19,26 | 592,41 | 70,86  |
| 2019/06/16 | CH2206 | Male | Three y/o | Control | Control | Feed Day | No | 18:50 | 18:00 - 18:59 | Evening | 38,2 | 94  | 42,0  | 42,0  | 19,36 | 589,37 | 125,77 |
| 2019/06/16 | CH2205 | Male | Three y/o | Control | Control | Feed Day | No | 18:55 | 18:00 - 18:59 | Evening | 38,2 | 70  | 6,6   | 6,6   | 19,36 | 566,99 | 62,73  |
| 2019/06/16 | CH2206 | Male | Three y/o | Control | Control | Feed Day | No | 18:55 | 18:00 - 18:59 | Evening | 38,2 | 86  | 42,0  | 42,0  | 19,36 | 582,77 | 125,77 |
| 2019/06/16 | CH2205 | Male | Three y/o | Control | Control | Feed Day | No | 19:00 | 19:00 - 19:59 | Evening | 38,2 | 90  | 8,6   | 8,6   | 19,36 | 586,16 | 71,66  |
| 2019/06/16 | CH2206 | Male | Three y/o | Control | Control | Feed Day | No | 19:00 | 19:00 - 19:59 | Evening | 38,2 | 47  | 44,6  | 44,6  | 19,36 | 534,23 | 127,84 |
| 2019/06/16 | CH2205 | Male | Three y/o | Control | Control | Feed Day | No | 19:05 | 19:00 - 19:59 | Evening | 38,2 | 88  | 7,4   | 7,4   | 19,36 | 584,49 | 66,59  |
| 2019/06/16 | CH2206 | Male | Three y/o | Control | Control | Feed Day | No | 19:05 | 19:00 - 19:59 | Evening | 38,1 | 49  | 55,2  | 55,2  | 19,26 | 537,80 | 135,21 |
| 2019/06/16 | CH2205 | Male | Three y/o | Control | Control | Feed Day | No | 19:10 | 19:00 - 19:59 | Evening | 38,2 | 104 | 5,0   | 5,0   | 19,36 | 596,69 | 53,41  |
| 2019/06/16 | CH2206 | Male | Three y/o | Control | Control | Feed Day | No | 19:10 | 19:00 - 19:59 | Evening | 38,2 | 88  | 49,6  | 49,6  | 19,36 | 584,49 | 131,51 |
| 2019/06/16 | CH2205 | Male | Three y/o | Control | Control | Feed Day | No | 19:15 | 19:00 - 19:59 | Evening | 38,2 | 91  | 5,2   | 5,2   | 19,36 | 586,98 | 54,72  |
| 2019/06/16 | CH2206 | Male | Three y/o | Control | Control | Feed Day | No | 19:15 | 19:00 - 19:59 | Evening | 38,2 | 132 | 38,0  | 38,0  | 19,36 | 613,32 | 122,32 |
| 2019/06/16 | CH2205 | Male | Three y/o | Control | Control | Feed Day | No | 19:20 | 19:00 - 19:59 | Evening | 38,2 | 98  | 6,2   | 6,2   | 19,36 | 592,41 | 60,63  |
| 2019/06/16 | CH2206 | Male | Three y/o | Control | Control | Feed Day | No | 19:20 | 19:00 - 19:59 | Evening | 38,1 | 141 | 50,8  | 50,8  | 19,26 | 617,75 | 132,33 |
| 2019/06/16 | CH2205 | Male | Three y/o | Control | Control | Feed Day | No | 19:25 | 19:00 - 19:59 | Evening | 38,2 |     | 6,2   | 6,2   | 19,36 |        | 60,63  |
| 2019/06/16 | CH2206 | Male | Three y/o | Control | Control | Feed Day | No | 19:25 | 19:00 - 19:59 | Evening | 38,1 | 88  | 50,8  | 50,8  | 19,26 | 584,49 | 132,33 |
| 2019/06/16 | CH2205 | Male | Three y/o | Control | Control | Feed Day | No | 19:30 | 19:00 - 19:59 | Evening | 38,2 | 78  | 6,0   | 6,0   | 19,36 | 575,38 | 59,53  |
| 2019/06/16 | CH2206 | Male | Three y/o | Control | Control | Feed Day | No | 19:30 | 19:00 - 19:59 | Evening | 38,1 | 72  | 53,2  | 53,2  | 19,26 | 569,20 | 133,93 |
| 2019/06/16 | CH2205 | Male | Three y/o | Control | Control | Feed Day | No | 19:35 | 19:00 - 19:59 | Evening | 38,0 | 83  | 2,4   | 2,4   | 19,15 | 580,11 | 28,91  |
| 2019/06/16 | CH2206 | Male | Three y/o | Control | Control | Feed Day | No | 19:35 | 19:00 - 19:59 | Evening | 38,1 | 48  | 17,8  | 17,8  | 19,26 | 536,04 | 96,34  |
| 2019/06/16 | CH2205 | Male | Three y/o | Control | Control | Feed Day | No | 19:40 | 19:00 - 19:59 | Evening | 37,7 | 67  | 3,8   | 3,8   | 18,85 | 563,53 | 44,22  |
| 2019/06/16 | CH2206 | Male | Three y/o | Control | Control | Feed Day | No | 19:40 | 19:00 - 19:59 | Evening | 38,1 | 78  | 5,0   | 5,0   | 19,26 | 575,38 | 53,41  |
| 2019/06/16 | CH2205 | Male | Three y/o | Control | Control | Feed Day | No | 19:45 | 19:00 - 19:59 | Evening | 37,6 | 88  | 6,8   | 6,8   | 18,75 | 584,49 | 63,74  |
| 2019/06/16 | CH2206 | Male | Three y/o | Control | Control | Feed Day | No | 19:45 | 19:00 - 19:59 | Evening | 38,0 | 89  | 8,8   | 8,8   | 19,15 | 585,33 | 72,43  |
| 2019/06/16 | CH2205 | Male | Three y/o | Control | Control | Feed Day | No | 19:50 | 19:00 - 19:59 | Evening | 37,4 | 52  | 8,0   | 8,0   | 18,55 | 542,83 | 69,22  |
| 2019/06/16 | CH2206 | Male | Three y/o | Control | Control | Feed Day | No | 19:50 | 19:00 - 19:59 | Evening | 38,0 | 82  | 7,8   | 7,8   | 19,15 | 579,19 | 68,36  |
| 2019/06/16 | CH2205 | Male | Three y/o | Control | Control | Feed Day | No | 19:55 | 19:00 - 19:59 | Evening | 37,3 | 56  | 4,8   | 4,8   | 18,46 | 549,01 | 52,04  |
| 2019/06/16 | CH2206 | Male | Three y/o | Control | Control | Feed Day | No | 19:55 | 19:00 - 19:59 | Evening | 38,0 | 76  | 8,4   | 8,4   | 19,15 | 573,39 | 70,86  |
| 2019/06/16 | CH2205 | Male | Three y/o | Control | Control | Feed Day | No | 20:00 | 20:00 - 20:59 | Night   | 37,3 | 70  | 6,8   | 6,8   | 18,46 | 566,99 | 63,74  |



|            |        |      |           |         |         |          |    |       |               |       |      |     |      |      |       |        |        |
|------------|--------|------|-----------|---------|---------|----------|----|-------|---------------|-------|------|-----|------|------|-------|--------|--------|
| 2019/06/16 | CH2206 | Male | Three y/o | Control | Control | Feed Day | No | 20:00 | 20:00 - 20:59 | Night | 38,0 | 90  | 8,4  | 8,4  | 19,15 | 586,16 | 70,86  |
| 2019/06/16 | CH2205 | Male | Three y/o | Control | Control | Feed Day | No | 20:05 | 20:00 - 20:59 | Night | 37,4 | 69  | 8,0  | 8,0  | 18,55 | 565,86 | 69,22  |
| 2019/06/16 | CH2206 | Male | Three y/o | Control | Control | Feed Day | No | 20:05 | 20:00 - 20:59 | Night | 38,0 | 49  | 10,2 | 10,2 | 19,15 | 537,80 | 77,43  |
| 2019/06/16 | CH2205 | Male | Three y/o | Control | Control | Feed Day | No | 20:10 | 20:00 - 20:59 | Night | 37,4 | 62  | 9,2  | 9,2  | 18,55 | 557,33 | 73,94  |
| 2019/06/16 | CH2206 | Male | Three y/o | Control | Control | Feed Day | No | 20:10 | 20:00 - 20:59 | Night | 38,1 | 88  | 8,4  | 8,4  | 19,26 | 584,49 | 70,86  |
| 2019/06/16 | CH2205 | Male | Three y/o | Control | Control | Feed Day | No | 20:15 | 20:00 - 20:59 | Night | 37,4 | 70  | 33,2 | 33,2 | 18,55 | 566,99 | 117,68 |
| 2019/06/16 | CH2206 | Male | Three y/o | Control | Control | Feed Day | No | 20:15 | 20:00 - 20:59 | Night | 38,1 | 109 | 12,8 | 12,8 | 19,26 | 600,04 | 85,12  |
| 2019/06/16 | CH2205 | Male | Three y/o | Control | Control | Feed Day | No | 20:20 | 20:00 - 20:59 | Night | 37,7 | 121 | 3,8  | 3,8  | 18,85 | 607,35 | 44,22  |
| 2019/06/16 | CH2206 | Male | Three y/o | Control | Control | Feed Day | No | 20:20 | 20:00 - 20:59 | Night | 38,1 | 51  | 8,0  | 8,0  | 19,26 | 541,20 | 69,22  |
| 2019/06/16 | CH2205 | Male | Three y/o | Control | Control | Feed Day | No | 20:25 | 20:00 - 20:59 | Night | 37,9 |     | 5,0  | 5,0  | 19,05 |        | 53,41  |
| 2019/06/16 | CH2206 | Male | Three y/o | Control | Control | Feed Day | No | 20:25 | 20:00 - 20:59 | Night | 38,1 | 114 | 19,4 | 19,4 | 19,26 | 603,20 | 99,28  |
| 2019/06/16 | CH2205 | Male | Three y/o | Control | Control | Feed Day | No | 20:30 | 20:00 - 20:59 | Night | 38,0 | 67  | 3,8  | 3,8  | 19,15 | 563,53 | 44,22  |
| 2019/06/16 | CH2206 | Male | Three y/o | Control | Control | Feed Day | No | 20:30 | 20:00 - 20:59 | Night | 38,1 | 88  | 17,2 | 17,2 | 19,26 | 584,49 | 95,17  |
| 2019/06/16 | CH2205 | Male | Three y/o | Control | Control | Feed Day | No | 20:35 | 20:00 - 20:59 | Night | 38,1 | 61  | 4,6  | 4,6  | 19,26 | 556,01 | 50,61  |
| 2019/06/16 | CH2206 | Male | Three y/o | Control | Control | Feed Day | No | 20:35 | 20:00 - 20:59 | Night | 38,1 | 98  | 15,4 | 15,4 | 19,26 | 592,41 | 91,41  |
| 2019/06/16 | CH2205 | Male | Three y/o | Control | Control | Feed Day | No | 20:40 | 20:00 - 20:59 | Night | 38,1 | 72  | 2,8  | 2,8  | 19,26 | 569,20 | 34,04  |
| 2019/06/16 | CH2206 | Male | Three y/o | Control | Control | Feed Day | No | 20:40 | 20:00 - 20:59 | Night | 38,1 | 88  | 12,2 | 12,2 | 19,26 | 584,49 | 83,49  |
| 2019/06/16 | CH2205 | Male | Three y/o | Control | Control | Feed Day | No | 20:45 | 20:00 - 20:59 | Night | 38,2 |     | 76,2 | 76,2 | 19,36 |        | 146,38 |
| 2019/06/16 | CH2206 | Male | Three y/o | Control | Control | Feed Day | No | 20:45 | 20:00 - 20:59 | Night | 38,2 | 75  | 10,6 | 10,6 | 19,36 | 572,36 | 78,73  |
| 2019/06/16 | CH2205 | Male | Three y/o | Control | Control | Feed Day | No | 20:50 | 20:00 - 20:59 | Night | 38,1 |     | 10,2 | 10,2 | 19,26 |        | 77,43  |
| 2019/06/16 | CH2206 | Male | Three y/o | Control | Control | Feed Day | No | 20:50 | 20:00 - 20:59 | Night | 38,2 | 98  | 16,4 | 16,4 | 19,36 | 592,41 | 93,55  |
| 2019/06/16 | CH2205 | Male | Three y/o | Control | Control | Feed Day | No | 20:55 | 20:00 - 20:59 | Night | 38,1 | 99  | 13,2 | 13,2 | 19,26 | 593,14 | 86,17  |
| 2019/06/16 | CH2206 | Male | Three y/o | Control | Control | Feed Day | No | 20:55 | 20:00 - 20:59 | Night | 38,2 | 88  | 17,4 | 17,4 | 19,36 | 584,49 | 95,56  |
| 2019/06/16 | CH2205 | Male | Three y/o | Control | Control | Feed Day | No | 21:00 | 21:00 - 21:59 | Night | 38,1 | 137 | 10,2 | 10,2 | 19,26 | 615,83 | 77,43  |
| 2019/06/16 | CH2206 | Male | Three y/o | Control | Control | Feed Day | No | 21:00 | 21:00 - 21:59 | Night | 38,2 | 50  | 14,0 | 14,0 | 19,36 | 539,52 | 88,17  |
| 2019/06/16 | CH2205 | Male | Three y/o | Control | Control | Feed Day | No | 21:05 | 21:00 - 21:59 | Night | 38,2 | 93  | 8,6  | 8,6  | 19,36 | 588,58 | 71,66  |
| 2019/06/16 | CH2206 | Male | Three y/o | Control | Control | Feed Day | No | 21:05 | 21:00 - 21:59 | Night | 38,2 | 55  | 17,8 | 17,8 | 19,36 | 547,52 | 96,34  |
| 2019/06/16 | CH2205 | Male | Three y/o | Control | Control | Feed Day | No | 21:10 | 21:00 - 21:59 | Night | 38,2 | 80  | 6,0  | 6,0  | 19,36 | 577,31 | 59,53  |
| 2019/06/16 | CH2206 | Male | Three y/o | Control | Control | Feed Day | No | 21:10 | 21:00 - 21:59 | Night | 38,2 | 86  | 14,6 | 14,6 | 19,36 | 582,77 | 89,59  |
| 2019/06/16 | CH2205 | Male | Three y/o | Control | Control | Feed Day | No | 21:15 | 21:00 - 21:59 | Night | 38,2 | 52  | 7,4  | 7,4  | 19,36 | 542,83 | 66,59  |
| 2019/06/16 | CH2206 | Male | Three y/o | Control | Control | Feed Day | No | 21:15 | 21:00 - 21:59 | Night | 38,2 | 90  | 15,4 | 15,4 | 19,36 | 586,16 | 91,41  |
| 2019/06/16 | CH2205 | Male | Three y/o | Control | Control | Feed Day | No | 21:20 | 21:00 - 21:59 | Night | 38,1 | 51  | 7,4  | 7,4  | 19,26 | 541,20 | 66,59  |
| 2019/06/16 | CH2206 | Male | Three y/o | Control | Control | Feed Day | No | 21:20 | 21:00 - 21:59 | Night | 38,3 | 94  | 12,6 | 12,6 | 19,46 | 589,37 | 84,59  |
| 2019/06/16 | CH2205 | Male | Three y/o | Control | Control | Feed Day | No | 21:25 | 21:00 - 21:59 | Night | 38,1 | 68  | 6,4  | 6,4  | 19,26 | 564,71 | 61,70  |
| 2019/06/16 | CH2206 | Male | Three y/o | Control | Control | Feed Day | No | 21:25 | 21:00 - 21:59 | Night | 38,3 | 86  | 9,0  | 9,0  | 19,46 | 582,77 | 73,19  |
| 2019/06/16 | CH2205 | Male | Three y/o | Control | Control | Feed Day | No | 21:30 | 21:00 - 21:59 | Night | 38,1 | 78  | 12,4 | 12,4 | 19,26 | 575,38 | 84,04  |
| 2019/06/16 | CH2206 | Male | Three y/o | Control | Control | Feed Day | No | 21:30 | 21:00 - 21:59 | Night | 38,3 | 91  | 17,8 | 17,8 | 19,46 | 586,98 | 96,34  |
| 2019/06/16 | CH2205 | Male | Three y/o | Control | Control | Feed Day | No | 21:35 | 21:00 - 21:59 | Night | 38,1 | 68  | 6,6  | 6,6  | 19,26 | 564,71 | 62,73  |
| 2019/06/16 | CH2206 | Male | Three y/o | Control | Control | Feed Day | No | 21:35 | 21:00 - 21:59 | Night | 38,3 | 90  | 13,6 | 13,6 | 19,46 | 586,16 | 87,18  |
| 2019/06/16 | CH2205 | Male | Three y/o | Control | Control | Feed Day | No | 21:40 | 21:00 - 21:59 | Night | 38,0 | 58  | 7,8  | 7,8  | 19,15 | 551,90 | 68,36  |
| 2019/06/16 | CH2206 | Male | Three y/o | Control | Control | Feed Day | No | 21:40 | 21:00 - 21:59 | Night | 38,3 | 51  | 30,8 | 30,8 | 19,46 | 541,20 | 115,10 |
| 2019/06/16 | CH2205 | Male | Three y/o | Control | Control | Feed Day | No | 21:45 | 21:00 - 21:59 | Night | 38,1 | 82  | 7,0  | 7,0  | 19,26 | 579,19 | 64,72  |
| 2019/06/16 | CH2206 | Male | Three y/o | Control | Control | Feed Day | No | 21:45 | 21:00 - 21:59 | Night | 38,3 | 94  | 61,0 | 61,0 | 19,46 | 589,37 | 138,67 |
| 2019/06/16 | CH2205 | Male | Three y/o | Control | Control | Feed Day | No | 21:50 | 21:00 - 21:59 | Night | 38,2 | 156 | 6,4  | 6,4  | 19,36 | 624,43 | 61,70  |
| 2019/06/16 | CH2206 | Male | Three y/o | Control | Control | Feed Day | No | 21:50 | 21:00 - 21:59 | Night | 38,2 | 94  | 64,2 | 64,2 | 19,36 | 589,37 | 140,44 |
| 2019/06/16 | CH2205 | Male | Three y/o | Control | Control | Feed Day | No | 21:55 | 21:00 - 21:59 | Night | 38,3 | 74  | 6,2  | 6,2  | 19,46 | 571,33 | 60,63  |
| 2019/06/16 | CH2206 | Male | Three y/o | Control | Control | Feed Day | No | 21:55 | 21:00 - 21:59 | Night | 38,2 | 86  | 62,0 | 62,0 | 19,36 | 582,77 | 139,23 |
| 2019/06/16 | CH2205 | Male | Three y/o | Control | Control | Feed Day | No | 22:00 | 22:00 - 22:59 | Night | 38,3 | 94  | 6,6  | 6,6  | 19,46 | 589,37 | 62,73  |
| 2019/06/16 | CH2206 | Male | Three y/o | Control | Control | Feed Day | No | 22:00 | 22:00 - 22:59 | Night | 38,1 | 89  | 23,0 | 23,0 | 19,26 | 585,33 | 105,09 |
| 2019/06/16 | CH2205 | Male | Three y/o | Control | Control | Feed Day | No | 22:05 | 22:00 - 22:59 | Night | 38,3 |     | 28,6 | 28,6 | 19,46 |        | 112,56 |
| 2019/06/16 | CH2206 | Male | Three y/o | Control | Control | Feed Day | No | 22:05 | 22:00 - 22:59 | Night | 38,2 | 137 | 48,6 | 48,6 | 19,36 | 615,83 | 130,81 |
| 2019/06/16 | CH2205 | Male | Three y/o | Control | Control | Feed Day | No | 22:10 | 22:00 - 22:59 | Night | 38,4 |     | 17,4 | 17,4 | 19,56 |        | 95,56  |
| 2019/06/16 | CH2206 | Male | Three y/o | Control | Control | Feed Day | No | 22:10 | 22:00 - 22:59 | Night | 38,2 | 96  | 59,8 | 59,8 | 19,36 | 590,91 | 137,98 |
| 2019/06/16 | CH2205 | Male | Three y/o | Control | Control | Feed Day | No | 22:15 | 22:00 - 22:59 | Night | 38,3 | 94  | 14,0 | 14,0 | 19,46 | 589,37 | 88,17  |
| 2019/06/16 | CH2206 | Male | Three y/o | Control | Control | Feed Day | No | 22:15 | 22:00 - 22:59 | Night | 38,2 | 80  | 55,6 | 55,6 | 19,36 | 577,31 | 135,46 |
| 2019/06/16 | CH2205 | Male | Three y/o | Control | Control | Feed Day | No | 22:20 | 22:00 - 22:59 | Night | 38,2 |     | 17,4 | 17,4 | 19,36 |        | 95,56  |
| 2019/06/16 | CH2206 | Male | Three y/o | Control | Control | Feed Day | No | 22:20 | 22:00 - 22:59 | Night | 38,4 | 67  | 59,4 | 59,4 | 19,56 | 563,53 | 137,75 |
| 2019/06/16 | CH2205 | Male | Three y/o | Control | Control | Feed Day | No | 22:25 | 22:00 - 22:59 | Night | 38,1 | 152 | 8,2  | 8,2  | 19,26 | 622,73 | 70,05  |
| 2019/06/16 | CH2206 | Male | Three y/o | Control | Control | Feed Day | No | 22:25 | 22:00 - 22:59 | Night | 38,4 | 87  | 56,0 | 56,0 | 19,56 | 583,64 | 135,70 |
| 2019/06/16 | CH2205 | Male | Three y/o | Control | Control | Feed Day | No | 22:30 | 22:00 - 22:59 | Night | 38,1 |     | 5,8  | 5,8  | 19,26 |        | 58,39  |
| 2019/06/16 | CH2206 | Male | Three y/o | Control | Control | Feed Day | No | 22:30 | 22:00 - 22:59 | Night | 38,4 | 101 | 46,0 | 46,0 | 19,56 | 594,59 | 128,91 |
| 2019/06/16 | CH2205 | Male | Three y/o | Control | Control | Feed Day | No | 22:35 | 22:00 - 22:59 | Night | 38,1 | 60  | 11,2 | 11,2 | 19,26 | 554,67 | 80,59  |
| 2019/06/16 | CH2206 | Male | Three y/o | Control | Control | Feed Day | No | 22:35 | 22:00 - 22:59 | Night | 38,4 | 84  | 54,2 | 54,2 | 19,56 | 581,01 | 134,57 |
| 2019/06/16 | CH2205 | Male | Three y/o | Control | Control | Feed Day | No | 22:40 | 22:00 - 22:59 | Night | 38,0 | 83  | 5,4  | 5,4  | 19,15 | 580,11 | 55,99  |
| 2019/06/16 | CH2206 | Male | Three y/o | Control | Control | Feed Day | No | 22:40 | 22:00 - 22:59 | Night | 38,4 | 94  | 56,2 | 56,2 | 19,56 | 589,37 | 135,83 |
| 2019/06/16 | CH2205 | Male | Three y/o | Control | Control | Feed Day | No | 22:45 | 22:00 - 22:59 | Night | 37,7 | 61  | 6,6  | 6,6  | 18,85 | 556,01 | 62,73  |
| 2019/06/16 | CH2206 | Male | Three y/o | Control | Control | Feed Day | No | 22:45 | 22:00 - 22:59 | Night | 38,4 | 99  | 54,4 | 54,4 | 19,56 | 593,14 | 134,70 |
| 2019/06/16 | CH2205 | Male | Three y/o | Control | Control | Feed Day | No | 22:50 | 22:00 - 22:59 | Night | 37,6 | 82  | 20,4 | 20,4 | 18,75 | 579,19 | 100,99 |
| 2019/06/16 | CH2206 | Male | Three y/o | Control | Control | Feed Day | No | 22:50 | 22:00 - 22:59 | Night | 38,4 | 82  | 51,8 | 51,8 | 19,56 | 579,19 | 133,01 |
| 2019/06/16 | CH2205 | Male | Three y/o | Control | Control | Feed Day | No | 22:55 | 22:00 - 22:59 | Night | 37,6 | 87  | 7,6  | 7,6  | 18,75 | 583,64 | 67,49  |



|    |            |        |      |           |         |         |          |    |       |               |               |      |     |      |      |       |        |        |
|----|------------|--------|------|-----------|---------|---------|----------|----|-------|---------------|---------------|------|-----|------|------|-------|--------|--------|
|    | 2019/06/16 | CH2206 | Male | Three y/o | Control | Control | Feed Day | No | 22:55 | 22:00 - 22:59 | Night         | 38,4 | 50  | 57,8 | 57,8 | 19,56 | 539,52 | 136,80 |
|    | 2019/06/16 | CH2205 | Male | Three y/o | Control | Control | Feed Day | No | 23:00 | 23:00 - 23:59 | Night         | 37,5 | 92  | 9,8  | 9,8  | 18,65 | 587,78 | 76,07  |
|    | 2019/06/16 | CH2206 | Male | Three y/o | Control | Control | Feed Day | No | 23:00 | 23:00 - 23:59 | Night         | 38,4 | 114 | 50,2 | 50,2 | 19,56 | 603,20 | 131,92 |
|    | 2019/06/16 | CH2205 | Male | Three y/o | Control | Control | Feed Day | No | 23:05 | 23:00 - 23:59 | Night         | 37,4 | 93  | 10,6 | 10,6 | 18,55 | 588,58 | 78,73  |
|    | 2019/06/16 | CH2206 | Male | Three y/o | Control | Control | Feed Day | No | 23:05 | 23:00 - 23:59 | Night         | 38,4 | 93  | 54,4 | 54,4 | 19,56 | 588,58 | 134,70 |
|    | 2019/06/16 | CH2205 | Male | Three y/o | Control | Control | Feed Day | No | 23:10 | 23:00 - 23:59 | Night         | 37,4 | 43  | 8,0  | 8,0  | 18,55 | 526,50 | 69,22  |
|    | 2019/06/16 | CH2206 | Male | Three y/o | Control | Control | Feed Day | No | 23:10 | 23:00 - 23:59 | Night         | 38,4 | 94  | 55,4 | 55,4 | 19,56 | 589,37 | 135,33 |
|    | 2019/06/16 | CH2205 | Male | Three y/o | Control | Control | Feed Day | No | 23:15 | 23:00 - 23:59 | Night         | 37,4 | 73  | 12,4 | 12,4 | 18,55 | 570,27 | 84,04  |
|    | 2019/06/16 | CH2206 | Male | Three y/o | Control | Control | Feed Day | No | 23:15 | 23:00 - 23:59 | Night         | 38,4 | 50  | 47,6 | 47,6 | 19,56 | 539,52 | 130,09 |
|    | 2019/06/16 | CH2205 | Male | Three y/o | Control | Control | Feed Day | No | 23:20 | 23:00 - 23:59 | Night         | 37,3 | 73  | 13,2 | 13,2 | 18,46 | 570,27 | 86,17  |
|    | 2019/06/16 | CH2206 | Male | Three y/o | Control | Control | Feed Day | No | 23:20 | 23:00 - 23:59 | Night         | 38,4 | 103 | 48,8 | 48,8 | 19,56 | 596,00 | 130,95 |
|    | 2019/06/16 | CH2205 | Male | Three y/o | Control | Control | Feed Day | No | 23:25 | 23:00 - 23:59 | Night         | 37,3 | 88  | 10,8 | 10,8 | 18,46 | 584,49 | 79,36  |
|    | 2019/06/16 | CH2206 | Male | Three y/o | Control | Control | Feed Day | No | 23:25 | 23:00 - 23:59 | Night         | 38,4 | 94  | 43,8 | 43,8 | 19,56 | 589,37 | 127,22 |
|    | 2019/06/16 | CH2205 | Male | Three y/o | Control | Control | Feed Day | No | 23:30 | 23:00 - 23:59 | Night         | 37,3 | 94  | 5,8  | 5,8  | 18,46 | 589,37 | 58,39  |
|    | 2019/06/16 | CH2206 | Male | Three y/o | Control | Control | Feed Day | No | 23:30 | 23:00 - 23:59 | Night         | 38,4 | 97  | 43,0 | 43,0 | 19,56 | 591,66 | 126,58 |
|    | 2019/06/16 | CH2205 | Male | Three y/o | Control | Control | Feed Day | No | 23:35 | 23:00 - 23:59 | Night         | 37,4 | 89  | 12,6 | 12,6 | 18,55 | 585,33 | 84,59  |
|    | 2019/06/16 | CH2206 | Male | Three y/o | Control | Control | Feed Day | No | 23:35 | 23:00 - 23:59 | Night         | 38,4 | 98  | 47,4 | 47,4 | 19,56 | 592,41 | 129,94 |
|    | 2019/06/16 | CH2205 | Male | Three y/o | Control | Control | Feed Day | No | 23:40 | 23:00 - 23:59 | Night         | 37,5 | 67  | 8,0  | 8,0  | 18,65 | 563,53 | 69,22  |
|    | 2019/06/16 | CH2206 | Male | Three y/o | Control | Control | Feed Day | No | 23:40 | 23:00 - 23:59 | Night         | 38,4 | 104 | 47,2 | 47,2 | 19,56 | 596,69 | 129,80 |
|    | 2019/06/16 | CH2205 | Male | Three y/o | Control | Control | Feed Day | No | 23:45 | 23:00 - 23:59 | Night         | 37,4 | 98  | 12,0 | 12,0 | 18,55 | 592,41 | 82,93  |
|    | 2019/06/16 | CH2206 | Male | Three y/o | Control | Control | Feed Day | No | 23:45 | 23:00 - 23:59 | Night         | 38,4 | 98  | 39,2 | 39,2 | 19,56 | 592,41 | 123,39 |
|    | 2019/06/16 | CH2205 | Male | Three y/o | Control | Control | Feed Day | No | 23:50 | 23:00 - 23:59 | Night         | 37,4 | 78  | 9,4  | 9,4  | 18,55 | 575,38 | 74,66  |
|    | 2019/06/16 | CH2206 | Male | Three y/o | Control | Control | Feed Day | No | 23:50 | 23:00 - 23:59 | Night         | 38,4 | 90  | 50,4 | 50,4 | 19,56 | 586,16 | 132,06 |
|    | 2019/06/16 | CH2205 | Male | Three y/o | Control | Control | Feed Day | No | 23:55 | 23:00 - 23:59 | Night         | 37,4 | 83  | 13,2 | 13,2 | 18,55 | 580,11 | 86,17  |
|    | 2019/06/16 | CH2206 | Male | Three y/o | Control | Control | Feed Day | No | 23:55 | 23:00 - 23:59 | Night         | 38,4 | 48  | 47,2 | 47,2 | 19,56 | 536,04 | 129,80 |
| 33 | 2019/06/17 | CH2205 | Male | Three y/o | Control | Control | Fast Day | No | 00:00 | 00:00 - 00:59 | Early Morning | 37,3 | 77  | 11,4 | 11,4 | 18,46 | 574,39 | 81,19  |
|    | 2019/06/17 | CH2206 | Male | Three y/o | Control | Control | Fast Day | No | 00:00 | 00:00 - 00:59 | Early Morning | 38,4 | 101 | 49,0 | 49,0 | 19,56 | 594,59 | 131,09 |
|    | 2019/06/17 | CH2205 | Male | Three y/o | Control | Control | Fast Day | No | 00:05 | 00:00 - 00:59 | Early Morning | 37,3 | 89  | 10,8 | 10,8 | 18,46 | 585,33 | 79,36  |
|    | 2019/06/17 | CH2206 | Male | Three y/o | Control | Control | Fast Day | No | 00:05 | 00:00 - 00:59 | Early Morning | 38,4 | 90  | 47,2 | 47,2 | 19,56 | 586,16 | 129,80 |
|    | 2019/06/17 | CH2205 | Male | Three y/o | Control | Control | Fast Day | No | 00:10 | 00:00 - 00:59 | Early Morning | 37,3 | 90  | 12,2 | 12,2 | 18,46 | 586,16 | 83,49  |
|    | 2019/06/17 | CH2206 | Male | Three y/o | Control | Control | Fast Day | No | 00:10 | 00:00 - 00:59 | Early Morning | 38,4 | 95  | 45,4 | 45,4 | 19,56 | 590,14 | 128,45 |
|    | 2019/06/17 | CH2205 | Male | Three y/o | Control | Control | Fast Day | No | 00:15 | 00:00 - 00:59 | Early Morning | 37,2 | 93  | 9,2  | 9,2  | 18,36 | 588,58 | 73,94  |
|    | 2019/06/17 | CH2206 | Male | Three y/o | Control | Control | Fast Day | No | 00:15 | 00:00 - 00:59 | Early Morning | 38,4 | 84  | 45,6 | 45,6 | 19,56 | 581,01 | 128,61 |
|    | 2019/06/17 | CH2205 | Male | Three y/o | Control | Control | Fast Day | No | 00:20 | 00:00 - 00:59 | Early Morning | 37,2 | 93  | 15,6 | 15,6 | 18,36 | 588,58 | 91,85  |
|    | 2019/06/17 | CH2206 | Male | Three y/o | Control | Control | Fast Day | No | 00:20 | 00:00 - 00:59 | Early Morning | 38,4 | 106 | 47,0 | 47,0 | 19,56 | 598,06 | 129,65 |
|    | 2019/06/17 | CH2205 | Male | Three y/o | Control | Control | Fast Day | No | 00:25 | 00:00 - 00:59 | Early Morning | 37,2 | 46  | 12,2 | 12,2 | 18,36 | 532,38 | 83,49  |
|    | 2019/06/17 | CH2206 | Male | Three y/o | Control | Control | Fast Day | No | 00:25 | 00:00 - 00:59 | Early Morning | 38,4 | 83  | 47,0 | 47,0 | 19,56 | 580,11 | 129,65 |
|    | 2019/06/17 | CH2205 | Male | Three y/o | Control | Control | Fast Day | No | 00:30 | 00:00 - 00:59 | Early Morning | 37,3 | 107 | 21,8 | 21,8 | 18,46 | 598,73 | 103,26 |
|    | 2019/06/17 | CH2206 | Male | Three y/o | Control | Control | Fast Day | No | 00:30 | 00:00 - 00:59 | Early Morning | 38,4 | 99  | 50,0 | 50,0 | 19,56 | 593,14 | 131,79 |
|    | 2019/06/17 | CH2205 | Male | Three y/o | Control | Control | Fast Day | No | 00:35 | 00:00 - 00:59 | Early Morning | 37,6 | 119 | 15,0 | 15,0 | 18,75 | 606,20 | 90,51  |
|    | 2019/06/17 | CH2206 | Male | Three y/o | Control | Control | Fast Day | No | 00:35 | 00:00 - 00:59 | Early Morning | 38,4 | 162 | 41,6 | 41,6 | 19,56 | 626,88 | 125,44 |
|    | 2019/06/17 | CH2205 | Male | Three y/o | Control | Control | Fast Day | No | 00:40 | 00:00 - 00:59 | Early Morning | 37,6 | 82  | 15,4 | 15,4 | 18,75 | 579,19 | 91,41  |
|    | 2019/06/17 | CH2206 | Male | Three y/o | Control | Control | Fast Day | No | 00:40 | 00:00 - 00:59 | Early Morning | 38,3 | 90  | 25,6 | 25,6 | 19,46 | 586,16 | 108,76 |
|    | 2019/06/17 | CH2205 | Male | Three y/o | Control | Control | Fast Day | No | 00:45 | 00:00 - 00:59 | Early Morning | 37,6 | 94  | 18,4 | 18,4 | 18,75 | 589,37 | 97,47  |
|    | 2019/06/17 | CH2206 | Male | Three y/o | Control | Control | Fast Day | No | 00:45 | 00:00 - 00:59 | Early Morning | 38,2 | 83  | 40,2 | 40,2 | 19,36 | 580,11 | 124,26 |
|    | 2019/06/17 | CH2205 | Male | Three y/o | Control | Control | Fast Day | No | 00:50 | 00:00 - 00:59 | Early Morning | 37,7 | 83  | 16,0 | 16,0 | 18,85 | 580,11 | 92,71  |
|    | 2019/06/17 | CH2206 | Male | Three y/o | Control | Control | Fast Day | No | 00:50 | 00:00 - 00:59 | Early Morning | 38,2 | 55  | 32,6 | 32,6 | 19,36 | 547,52 | 117,05 |
|    | 2019/06/17 | CH2205 | Male | Three y/o | Control | Control | Fast Day | No | 00:55 | 00:00 - 00:59 | Early Morning | 37,9 | 51  | 16,4 | 16,4 | 19,05 | 541,20 | 93,55  |
|    | 2019/06/17 | CH2206 | Male | Three y/o | Control | Control | Fast Day | No | 00:55 | 00:00 - 00:59 | Early Morning | 38,2 | 87  | 10,8 | 10,8 | 19,36 | 583,64 | 79,36  |
|    | 2019/06/17 | CH2205 | Male | Three y/o | Control | Control | Fast Day | No | 01:00 | 01:00 - 01:59 | Early Morning | 38,0 | 64  | 18,0 | 18,0 | 19,15 | 559,88 | 96,72  |
|    | 2019/06/17 | CH2206 | Male | Three y/o | Control | Control | Fast Day | No | 01:00 | 01:00 - 01:59 | Early Morning | 38,1 | 98  | 5,0  | 5,0  | 19,26 | 592,41 | 53,41  |
|    | 2019/06/17 | CH2205 | Male | Three y/o | Control | Control | Fast Day | No | 01:05 | 01:00 - 01:59 | Early Morning | 38,0 | 84  | 13,2 | 13,2 | 19,15 | 581,01 | 86,17  |
|    | 2019/06/17 | CH2206 | Male | Three y/o | Control | Control | Fast Day | No | 01:05 | 01:00 - 01:59 | Early Morning | 38,0 | 48  | 12,4 | 12,4 | 19,15 | 536,04 | 84,04  |
|    | 2019/06/17 | CH2205 | Male | Three y/o | Control | Control | Fast Day | No | 01:10 | 01:00 - 01:59 | Early Morning | 38,1 | 68  | 17,2 | 17,2 | 19,26 | 564,71 | 95,17  |
|    | 2019/06/17 | CH2206 | Male | Three y/o | Control | Control | Fast Day | No | 01:10 | 01:00 - 01:59 | Early Morning | 38,1 | 97  | 8,4  | 8,4  | 19,26 | 591,66 | 70,86  |
|    | 2019/06/17 | CH2205 | Male | Three y/o | Control | Control | Fast Day | No | 01:15 | 01:00 - 01:59 | Early Morning | 38,1 | 75  | 13,8 | 13,8 | 19,26 | 572,36 | 87,68  |
|    | 2019/06/17 | CH2206 | Male | Three y/o | Control | Control | Fast Day | No | 01:15 | 01:00 - 01:59 | Early Morning | 38,1 | 109 | 31,6 | 31,6 | 19,26 | 600,04 | 115,98 |
|    | 2019/06/17 | CH2205 | Male | Three y/o | Control | Control | Fast Day | No | 01:20 | 01:00 - 01:59 | Early Morning | 38,1 | 84  | 10,0 | 10,0 | 19,26 | 581,01 | 76,76  |
|    | 2019/06/17 | CH2206 | Male | Three y/o | Control | Control | Fast Day | No | 01:20 | 01:00 - 01:59 | Early Morning | 38,1 | 96  | 30,4 | 30,4 | 19,26 | 590,91 | 114,65 |
|    | 2019/06/17 | CH2205 | Male | Three y/o | Control | Control | Fast Day | No | 01:25 | 01:00 - 01:59 | Early Morning | 38,0 | 90  | 11,2 | 11,2 | 19,15 | 586,16 | 80,59  |
|    | 2019/06/17 | CH2206 | Male | Three y/o | Control | Control | Fast Day | No | 01:25 | 01:00 - 01:59 | Early Morning | 38,1 | 100 | 21,0 | 21,0 | 19,26 | 593,87 | 101,98 |
|    | 2019/06/17 | CH2205 | Male | Three y/o | Control | Control | Fast Day | No | 01:30 | 01:00 - 01:59 | Early Morning | 37,9 | 106 | 3,6  | 3,6  | 19,05 | 598,06 | 42,42  |
|    | 2019/06/17 | CH2206 | Male | Three y/o | Control | Control | Fast Day | No | 01:30 | 01:00 - 01:59 | Early Morning | 38,2 | 87  | 32,8 | 32,8 | 19,36 | 583,64 | 117,26 |
|    | 2019/06/17 | CH2205 | Male | Three y/o | Control | Control | Fast Day | No | 01:35 | 01:00 - 01:59 | Early Morning | 37,6 | 69  | 19,0 | 19,0 | 18,75 | 565,86 | 98,56  |
|    | 2019/06/17 | CH2206 | Male | Three y/o | Control | Control | Fast Day | No | 01:35 | 01:00 - 01:59 | Early Morning | 38,2 | 90  | 29,6 | 29,6 | 19,36 | 586,16 | 113,73 |
|    | 2019/06/17 | CH2205 | Male | Three y/o | Control | Control | Fast Day | No | 01:40 | 01:00 - 01:59 | Early Morning | 37,6 |     | 15,8 | 15,8 | 18,75 |        | 92,28  |
|    | 2019/06/17 | CH2206 | Male | Three y/o | Control | Control | Fast Day | No | 01:40 | 01:00 - 01:59 | Early Morning | 38,2 | 93  | 23,2 | 23,2 | 19,36 | 588,58 | 105,39 |
|    | 2019/06/17 | CH2205 | Male | Three y/o | Control | Control | Fast Day | No | 01:45 | 01:00 - 01:59 | Early Morning | 37,7 | 76  | 18,8 | 18,8 | 18,85 | 573,39 | 98,20  |
|    | 2019/06/17 | CH2206 | Male | Three y/o | Control | Control | Fast Day | No | 01:45 | 01:00 - 01:59 | Early Morning | 38,2 | 94  | 25,0 | 25,0 | 19,36 | 589,37 | 107,94 |
|    | 2019/06/17 | CH2205 | Male | Three y/o | Control | Control | Fast Day | No | 01:50 | 01:00 - 01:59 | Early Morning | 37,7 | 58  | 18,0 | 18,0 | 18,85 | 551,90 | 96,72  |



|            |        |      |           |         |         |          |    |       |               |               |      |     |      |      |       |        |        |
|------------|--------|------|-----------|---------|---------|----------|----|-------|---------------|---------------|------|-----|------|------|-------|--------|--------|
| 2019/06/17 | CH2206 | Male | Three y/o | Control | Control | Fast Day | No | 01:50 | 01:00 - 01:59 | Early Morning | 38,2 | 98  | 25,6 | 25,6 | 19,36 | 592,41 | 108,76 |
| 2019/06/17 | CH2205 | Male | Three y/o | Control | Control | Fast Day | No | 01:55 | 01:00 - 01:59 | Early Morning | 37,7 | 91  | 15,8 | 15,8 | 18,85 | 586,98 | 92,28  |
| 2019/06/17 | CH2206 | Male | Three y/o | Control | Control | Fast Day | No | 01:55 | 01:00 - 01:59 | Early Morning | 38,2 | 94  | 22,0 | 22,0 | 19,36 | 589,37 | 103,57 |
| 2019/06/17 | CH2205 | Male | Three y/o | Control | Control | Fast Day | No | 02:00 | 02:00 - 02:59 | Early Morning | 37,7 | 82  | 19,2 | 19,2 | 18,85 | 579,19 | 98,92  |
| 2019/06/17 | CH2206 | Male | Three y/o | Control | Control | Fast Day | No | 02:00 | 02:00 - 02:59 | Early Morning | 38,2 | 53  | 21,8 | 21,8 | 19,36 | 544,43 | 103,26 |
| 2019/06/17 | CH2205 | Male | Three y/o | Control | Control | Fast Day | No | 02:05 | 02:00 - 02:59 | Early Morning | 37,7 | 79  | 22,0 | 22,0 | 18,85 | 576,36 | 103,57 |
| 2019/06/17 | CH2206 | Male | Three y/o | Control | Control | Fast Day | No | 02:05 | 02:00 - 02:59 | Early Morning | 38,2 | 94  | 23,6 | 23,6 | 19,36 | 589,37 | 105,97 |
| 2019/06/17 | CH2205 | Male | Three y/o | Control | Control | Fast Day | No | 02:10 | 02:00 - 02:59 | Early Morning | 37,7 | 86  | 19,2 | 19,2 | 18,85 | 582,77 | 98,92  |
| 2019/06/17 | CH2206 | Male | Three y/o | Control | Control | Fast Day | No | 02:10 | 02:00 - 02:59 | Early Morning | 38,2 | 117 | 31,8 | 31,8 | 19,36 | 605,02 | 116,20 |
| 2019/06/17 | CH2205 | Male | Three y/o | Control | Control | Fast Day | No | 02:15 | 02:00 - 02:59 | Early Morning | 37,7 | 88  | 18,4 | 18,4 | 18,85 | 584,49 | 97,47  |
| 2019/06/17 | CH2206 | Male | Three y/o | Control | Control | Fast Day | No | 02:15 | 02:00 - 02:59 | Early Morning | 38,2 | 96  | 27,8 | 27,8 | 19,36 | 590,91 | 111,58 |
| 2019/06/17 | CH2205 | Male | Three y/o | Control | Control | Fast Day | No | 02:20 | 02:00 - 02:59 | Early Morning | 37,7 | 91  | 17,6 | 17,6 | 18,85 | 586,98 | 95,95  |
| 2019/06/17 | CH2206 | Male | Three y/o | Control | Control | Fast Day | No | 02:20 | 02:00 - 02:59 | Early Morning | 38,2 | 93  | 28,6 | 28,6 | 19,36 | 588,58 | 112,56 |
| 2019/06/17 | CH2205 | Male | Three y/o | Control | Control | Fast Day | No | 02:25 | 02:00 - 02:59 | Early Morning | 37,6 | 91  | 18,2 | 18,2 | 18,75 | 586,98 | 97,10  |
| 2019/06/17 | CH2206 | Male | Three y/o | Control | Control | Fast Day | No | 02:25 | 02:00 - 02:59 | Early Morning | 38,2 | 79  | 27,8 | 27,8 | 19,36 | 576,36 | 111,58 |
| 2019/06/17 | CH2205 | Male | Three y/o | Control | Control | Fast Day | No | 02:30 | 02:00 - 02:59 | Early Morning | 37,5 | 114 | 9,4  | 9,4  | 18,65 | 603,20 | 74,66  |
| 2019/06/17 | CH2206 | Male | Three y/o | Control | Control | Fast Day | No | 02:30 | 02:00 - 02:59 | Early Morning | 38,2 | 55  | 26,4 | 26,4 | 19,36 | 547,52 | 109,81 |
| 2019/06/17 | CH2205 | Male | Three y/o | Control | Control | Fast Day | No | 02:35 | 02:00 - 02:59 | Early Morning | 37,6 | 88  | 15,6 | 15,6 | 18,75 | 584,49 | 91,85  |
| 2019/06/17 | CH2206 | Male | Three y/o | Control | Control | Fast Day | No | 02:35 | 02:00 - 02:59 | Early Morning | 38,2 | 75  | 30,0 | 30,0 | 19,36 | 572,36 | 114,20 |
| 2019/06/17 | CH2205 | Male | Three y/o | Control | Control | Fast Day | No | 02:40 | 02:00 - 02:59 | Early Morning | 37,6 | 56  | 15,6 | 15,6 | 18,75 | 549,01 | 91,85  |
| 2019/06/17 | CH2206 | Male | Three y/o | Control | Control | Fast Day | No | 02:40 | 02:00 - 02:59 | Early Morning | 38,2 | 61  | 25,6 | 25,6 | 19,36 | 556,01 | 108,76 |
| 2019/06/17 | CH2205 | Male | Three y/o | Control | Control | Fast Day | No | 02:45 | 02:00 - 02:59 | Early Morning | 37,6 | 76  | 14,4 | 14,4 | 18,75 | 573,39 | 89,12  |
| 2019/06/17 | CH2206 | Male | Three y/o | Control | Control | Fast Day | No | 02:45 | 02:00 - 02:59 | Early Morning | 38,1 | 93  | 26,2 | 26,2 | 19,26 | 588,58 | 109,55 |
| 2019/06/17 | CH2205 | Male | Three y/o | Control | Control | Fast Day | No | 02:50 | 02:00 - 02:59 | Early Morning | 37,5 | 100 | 8,8  | 8,8  | 18,65 | 593,87 | 72,43  |
| 2019/06/17 | CH2206 | Male | Three y/o | Control | Control | Fast Day | No | 02:50 | 02:00 - 02:59 | Early Morning | 38,1 | 89  | 24,4 | 24,4 | 19,26 | 585,33 | 107,11 |
| 2019/06/17 | CH2205 | Male | Three y/o | Control | Control | Fast Day | No | 02:55 | 02:00 - 02:59 | Early Morning | 37,7 | 141 | 5,8  | 5,8  | 18,85 | 617,75 | 58,39  |
| 2019/06/17 | CH2206 | Male | Three y/o | Control | Control | Fast Day | No | 02:55 | 02:00 - 02:59 | Early Morning | 38,2 | 101 | 9,2  | 9,2  | 19,36 | 594,59 | 73,94  |
| 2019/06/17 | CH2205 | Male | Three y/o | Control | Control | Fast Day | No | 03:00 | 03:00 - 03:59 | Early Morning | 37,7 | 92  | 2,6  | 2,6  | 18,85 | 587,78 | 31,57  |
| 2019/06/17 | CH2206 | Male | Three y/o | Control | Control | Fast Day | No | 03:00 | 03:00 - 03:59 | Early Morning | 38,1 | 75  | 12,4 | 12,4 | 19,26 | 572,36 | 84,04  |
| 2019/06/17 | CH2205 | Male | Three y/o | Control | Control | Fast Day | No | 03:05 | 03:00 - 03:59 | Early Morning | 37,9 | 70  | 1,0  | 1,0  | 19,05 | 566,99 | 0,00   |
| 2019/06/17 | CH2206 | Male | Three y/o | Control | Control | Fast Day | No | 03:05 | 03:00 - 03:59 | Early Morning | 38,1 | 86  | 13,6 | 13,6 | 19,26 | 582,77 | 87,18  |
| 2019/06/17 | CH2205 | Male | Three y/o | Control | Control | Fast Day | No | 03:10 | 03:00 - 03:59 | Early Morning | 37,9 | 93  | 4,4  | 4,4  | 19,05 | 588,58 | 49,12  |
| 2019/06/17 | CH2206 | Male | Three y/o | Control | Control | Fast Day | No | 03:10 | 03:00 - 03:59 | Early Morning | 38,1 | 84  | 13,4 | 13,4 | 19,26 | 581,01 | 86,68  |
| 2019/06/17 | CH2205 | Male | Three y/o | Control | Control | Fast Day | No | 03:15 | 03:00 - 03:59 | Early Morning | 38,0 | 86  | 5,6  | 5,6  | 19,15 | 582,77 | 57,21  |
| 2019/06/17 | CH2206 | Male | Three y/o | Control | Control | Fast Day | No | 03:15 | 03:00 - 03:59 | Early Morning | 38,1 | 49  | 15,4 | 15,4 | 19,26 | 537,80 | 91,41  |
| 2019/06/17 | CH2205 | Male | Three y/o | Control | Control | Fast Day | No | 03:20 | 03:00 - 03:59 | Early Morning | 38,0 | 73  | 8,8  | 8,8  | 19,15 | 570,27 | 72,43  |
| 2019/06/17 | CH2206 | Male | Three y/o | Control | Control | Fast Day | No | 03:20 | 03:00 - 03:59 | Early Morning | 38,1 | 78  | 10,8 | 10,8 | 19,26 | 575,38 | 79,36  |
| 2019/06/17 | CH2205 | Male | Three y/o | Control | Control | Fast Day | No | 03:25 | 03:00 - 03:59 | Early Morning | 38,0 | 76  | 2,8  | 2,8  | 19,15 | 573,39 | 34,04  |
| 2019/06/17 | CH2206 | Male | Three y/o | Control | Control | Fast Day | No | 03:25 | 03:00 - 03:59 | Early Morning | 38,1 | 107 | 18,2 | 18,2 | 19,26 | 598,73 | 97,10  |
| 2019/06/17 | CH2205 | Male | Three y/o | Control | Control | Fast Day | No | 03:30 | 03:00 - 03:59 | Early Morning | 38,1 | 103 | 6,6  | 6,6  | 19,26 | 596,00 | 62,73  |
| 2019/06/17 | CH2206 | Male | Three y/o | Control | Control | Fast Day | No | 03:30 | 03:00 - 03:59 | Early Morning | 38,0 | 94  | 17,8 | 17,8 | 19,15 | 589,37 | 96,34  |
| 2019/06/17 | CH2205 | Male | Three y/o | Control | Control | Fast Day | No | 03:35 | 03:00 - 03:59 | Early Morning | 38,0 | 96  | 6,4  | 6,4  | 19,15 | 590,91 | 61,70  |
| 2019/06/17 | CH2206 | Male | Three y/o | Control | Control | Fast Day | No | 03:35 | 03:00 - 03:59 | Early Morning | 37,9 | 77  | 17,8 | 17,8 | 19,05 | 574,39 | 96,34  |
| 2019/06/17 | CH2205 | Male | Three y/o | Control | Control | Fast Day | No | 03:40 | 03:00 - 03:59 | Early Morning | 37,9 | 47  | 3,6  | 3,6  | 19,05 | 534,23 | 42,42  |
| 2019/06/17 | CH2206 | Male | Three y/o | Control | Control | Fast Day | No | 03:40 | 03:00 - 03:59 | Early Morning | 37,9 | 93  | 22,4 | 22,4 | 19,05 | 588,58 | 104,19 |
| 2019/06/17 | CH2205 | Male | Three y/o | Control | Control | Fast Day | No | 03:45 | 03:00 - 03:59 | Early Morning | 37,7 | 80  | 7,4  | 7,4  | 18,85 | 577,31 | 66,59  |
| 2019/06/17 | CH2206 | Male | Three y/o | Control | Control | Fast Day | No | 03:45 | 03:00 - 03:59 | Early Morning | 37,9 | 96  | 12,6 | 12,6 | 19,05 | 590,91 | 84,59  |
| 2019/06/17 | CH2205 | Male | Three y/o | Control | Control | Fast Day | No | 03:50 | 03:00 - 03:59 | Early Morning | 37,6 | 76  | 5,2  | 5,2  | 18,75 | 573,39 | 54,72  |
| 2019/06/17 | CH2206 | Male | Three y/o | Control | Control | Fast Day | No | 03:50 | 03:00 - 03:59 | Early Morning | 37,8 | 89  | 17,8 | 17,8 | 18,95 | 585,33 | 96,34  |
| 2019/06/17 | CH2205 | Male | Three y/o | Control | Control | Fast Day | No | 03:55 | 03:00 - 03:59 | Early Morning | 37,9 | 97  | 15,0 | 15,0 | 19,05 | 591,66 | 90,51  |
| 2019/06/17 | CH2206 | Male | Three y/o | Control | Control | Fast Day | No | 03:55 | 03:00 - 03:59 | Early Morning | 37,8 | 99  | 16,4 | 16,4 | 18,95 | 593,14 | 93,55  |
| 2019/06/17 | CH2205 | Male | Three y/o | Control | Control | Fast Day | No | 04:00 | 04:00 - 04:59 | Morning       | 38,0 | 141 | 13,8 | 13,8 | 19,15 | 617,75 | 87,68  |
| 2019/06/17 | CH2206 | Male | Three y/o | Control | Control | Fast Day | No | 04:00 | 04:00 - 04:59 | Morning       | 37,8 | 74  | 17,6 | 17,6 | 18,95 | 571,33 | 95,95  |
| 2019/06/17 | CH2205 | Male | Three y/o | Control | Control | Fast Day | No | 04:05 | 04:00 - 04:59 | Morning       | 38,2 | 131 | 12,2 | 12,2 | 19,36 | 612,80 | 83,49  |
| 2019/06/17 | CH2206 | Male | Three y/o | Control | Control | Fast Day | No | 04:05 | 04:00 - 04:59 | Morning       | 37,9 | 126 | 39,6 | 39,6 | 19,05 | 610,14 | 123,74 |
| 2019/06/17 | CH2205 | Male | Three y/o | Control | Control | Fast Day | No | 04:10 | 04:00 - 04:59 | Morning       | 38,0 | 162 | 5,6  | 5,6  | 19,15 | 626,88 | 57,21  |
| 2019/06/17 | CH2206 | Male | Three y/o | Control | Control | Fast Day | No | 04:10 | 04:00 - 04:59 | Morning       | 37,9 | 84  | 43,2 | 43,2 | 19,05 | 581,01 | 126,74 |
| 2019/06/17 | CH2205 | Male | Three y/o | Control | Control | Fast Day | No | 04:15 | 04:00 - 04:59 | Morning       | 37,9 | 120 | 1,0  | 1,0  | 19,05 | 606,78 | 0,00   |
| 2019/06/17 | CH2206 | Male | Three y/o | Control | Control | Fast Day | No | 04:15 | 04:00 - 04:59 | Morning       | 37,9 | 102 | 51,2 | 51,2 | 19,05 | 595,30 | 132,61 |
| 2019/06/17 | CH2205 | Male | Three y/o | Control | Control | Fast Day | No | 04:20 | 04:00 - 04:59 | Morning       | 37,7 |     | 3,4  | 3,4  | 18,85 |        | 40,51  |
| 2019/06/17 | CH2206 | Male | Three y/o | Control | Control | Fast Day | No | 04:20 | 04:00 - 04:59 | Morning       | 37,9 | 106 | 48,8 | 48,8 | 19,05 | 598,06 | 130,95 |
| 2019/06/17 | CH2205 | Male | Three y/o | Control | Control | Fast Day | No | 04:25 | 04:00 - 04:59 | Morning       | 37,7 | 88  | 4,2  | 4,2  | 18,85 | 584,49 | 47,57  |
| 2019/06/17 | CH2206 | Male | Three y/o | Control | Control | Fast Day | No | 04:25 | 04:00 - 04:59 | Morning       | 37,9 | 96  | 45,8 | 45,8 | 19,05 | 590,91 | 128,76 |
| 2019/06/17 | CH2205 | Male | Three y/o | Control | Control | Fast Day | No | 04:30 | 04:00 - 04:59 | Morning       | 37,7 | 79  | 7,0  | 7,0  | 18,85 | 576,36 | 64,72  |
| 2019/06/17 | CH2206 | Male | Three y/o | Control | Control | Fast Day | No | 04:30 | 04:00 - 04:59 | Morning       | 38,0 | 105 | 52,8 | 52,8 | 19,15 | 597,38 | 133,67 |
| 2019/06/17 | CH2205 | Male | Three y/o | Control | Control | Fast Day | No | 04:35 | 04:00 - 04:59 | Morning       | 37,7 | 68  | 9,4  | 9,4  | 18,85 | 564,71 | 74,66  |
| 2019/06/17 | CH2206 | Male | Three y/o | Control | Control | Fast Day | No | 04:35 | 04:00 - 04:59 | Morning       | 38,0 | 88  | 60,4 | 60,4 | 19,15 | 584,49 | 138,32 |
| 2019/06/17 | CH2205 | Male | Three y/o | Control | Control | Fast Day | No | 04:40 | 04:00 - 04:59 | Morning       | 37,9 | 101 | 10,0 | 10,0 | 19,05 | 594,59 | 76,76  |
| 2019/06/17 | CH2206 | Male | Three y/o | Control | Control | Fast Day | No | 04:40 | 04:00 - 04:59 | Morning       | 38,0 | 94  | 58,2 | 58,2 | 19,15 | 589,37 | 137,04 |
| 2019/06/17 | CH2205 | Male | Three y/o | Control | Control | Fast Day | No | 04:45 | 04:00 - 04:59 | Morning       | 38,0 | 74  | 10,0 | 10,0 | 19,15 | 571,33 | 76,76  |



|            |        |      |           |         |         |          |    |       |               |         |      |     |       |       |       |        |        |
|------------|--------|------|-----------|---------|---------|----------|----|-------|---------------|---------|------|-----|-------|-------|-------|--------|--------|
| 2019/06/17 | CH2206 | Male | Three y/o | Control | Control | Fast Day | No | 04:45 | 04:00 - 04:59 | Morning | 38,0 | 98  | 61,8  | 61,8  | 19,15 | 592,41 | 139,12 |
| 2019/06/17 | CH2205 | Male | Three y/o | Control | Control | Fast Day | No | 04:50 | 04:00 - 04:59 | Morning | 38,1 | 72  | 13,8  | 13,8  | 19,26 | 569,20 | 87,68  |
| 2019/06/17 | CH2206 | Male | Three y/o | Control | Control | Fast Day | No | 04:50 | 04:00 - 04:59 | Morning | 38,0 | 112 | 51,4  | 51,4  | 19,15 | 601,96 | 132,74 |
| 2019/06/17 | CH2205 | Male | Three y/o | Control | Control | Fast Day | No | 04:55 | 04:00 - 04:59 | Morning | 38,1 |     | 14,0  | 14,0  | 19,26 |        | 88,17  |
| 2019/06/17 | CH2206 | Male | Three y/o | Control | Control | Fast Day | No | 04:55 | 04:00 - 04:59 | Morning | 38,0 | 107 | 55,0  | 55,0  | 19,15 | 598,73 | 135,08 |
| 2019/06/17 | CH2205 | Male | Three y/o | Control | Control | Fast Day | No | 05:00 | 05:00 - 05:59 | Morning | 38,1 | 112 | 10,0  | 10,0  | 19,26 | 601,96 | 76,76  |
| 2019/06/17 | CH2206 | Male | Three y/o | Control | Control | Fast Day | No | 05:00 | 05:00 - 05:59 | Morning | 38,0 | 103 | 70,0  | 70,0  | 19,15 | 596,00 | 143,44 |
| 2019/06/17 | CH2205 | Male | Three y/o | Control | Control | Fast Day | No | 05:05 | 05:00 - 05:59 | Morning | 38,1 | 78  | 3,2   | 3,2   | 19,26 | 575,38 | 38,49  |
| 2019/06/17 | CH2206 | Male | Three y/o | Control | Control | Fast Day | No | 05:05 | 05:00 - 05:59 | Morning | 38,1 | 88  | 38,8  | 38,8  | 19,26 | 584,49 | 123,04 |
| 2019/06/17 | CH2205 | Male | Three y/o | Control | Control | Fast Day | No | 05:10 | 05:00 - 05:59 | Morning | 38,1 |     | 2,2   | 2,2   | 19,26 |        | 26,02  |
| 2019/06/17 | CH2206 | Male | Three y/o | Control | Control | Fast Day | No | 05:10 | 05:00 - 05:59 | Morning | 38,1 | 90  | 44,4  | 44,4  | 19,26 | 586,16 | 127,69 |
| 2019/06/17 | CH2205 | Male | Three y/o | Control | Control | Fast Day | No | 05:15 | 05:00 - 05:59 | Morning | 38,1 | 103 | 2,4   | 2,4   | 19,26 | 596,00 | 28,91  |
| 2019/06/17 | CH2206 | Male | Three y/o | Control | Control | Fast Day | No | 05:15 | 05:00 - 05:59 | Morning | 38,1 | 108 | 43,6  | 43,6  | 19,26 | 599,39 | 127,06 |
| 2019/06/17 | CH2205 | Male | Three y/o | Control | Control | Fast Day | No | 05:20 | 05:00 - 05:59 | Morning | 38,1 |     | 4,0   | 4,0   | 19,26 |        | 45,94  |
| 2019/06/17 | CH2206 | Male | Three y/o | Control | Control | Fast Day | No | 05:20 | 05:00 - 05:59 | Morning | 38,0 | 103 | 43,4  | 43,4  | 19,15 | 596,00 | 126,90 |
| 2019/06/17 | CH2205 | Male | Three y/o | Control | Control | Fast Day | No | 05:25 | 05:00 - 05:59 | Morning | 38,1 | 61  | 5,0   | 5,0   | 19,26 | 556,01 | 53,41  |
| 2019/06/17 | CH2206 | Male | Three y/o | Control | Control | Fast Day | No | 05:25 | 05:00 - 05:59 | Morning | 38,0 | 86  | 39,6  | 39,6  | 19,15 | 582,77 | 123,74 |
| 2019/06/17 | CH2205 | Male | Three y/o | Control | Control | Fast Day | No | 05:30 | 05:00 - 05:59 | Morning | 38,1 |     | 2,6   | 2,6   | 19,26 |        | 31,57  |
| 2019/06/17 | CH2206 | Male | Three y/o | Control | Control | Fast Day | No | 05:30 | 05:00 - 05:59 | Morning | 38,1 | 105 | 43,6  | 43,6  | 19,26 | 597,38 | 127,06 |
| 2019/06/17 | CH2205 | Male | Three y/o | Control | Control | Fast Day | No | 05:35 | 05:00 - 05:59 | Morning | 38,1 | 83  | 2,8   | 2,8   | 19,26 | 580,11 | 34,04  |
| 2019/06/17 | CH2206 | Male | Three y/o | Control | Control | Fast Day | No | 05:35 | 05:00 - 05:59 | Morning | 38,0 | 101 | 37,2  | 37,2  | 19,15 | 594,59 | 121,59 |
| 2019/06/17 | CH2205 | Male | Three y/o | Control | Control | Fast Day | No | 05:40 | 05:00 - 05:59 | Morning | 38,1 | 90  | 2,0   | 2,0   | 19,26 | 586,16 | 22,86  |
| 2019/06/17 | CH2206 | Male | Three y/o | Control | Control | Fast Day | No | 05:40 | 05:00 - 05:59 | Morning | 38,0 | 104 | 31,0  | 31,0  | 19,15 | 596,69 | 115,32 |
| 2019/06/17 | CH2205 | Male | Three y/o | Control | Control | Fast Day | No | 05:45 | 05:00 - 05:59 | Morning | 38,1 |     | 1,6   | 1,6   | 19,26 |        | 15,48  |
| 2019/06/17 | CH2206 | Male | Three y/o | Control | Control | Fast Day | No | 05:45 | 05:00 - 05:59 | Morning | 38,0 | 124 | 42,6  | 42,6  | 19,15 | 609,04 | 126,26 |
| 2019/06/17 | CH2205 | Male | Three y/o | Control | Control | Fast Day | No | 05:50 | 05:00 - 05:59 | Morning | 38,2 | 71  | 5,4   | 5,4   | 19,36 | 568,10 | 55,99  |
| 2019/06/17 | CH2206 | Male | Three y/o | Control | Control | Fast Day | No | 05:50 | 05:00 - 05:59 | Morning | 38,0 | 101 | 38,2  | 38,2  | 19,15 | 594,59 | 122,50 |
| 2019/06/17 | CH2205 | Male | Three y/o | Control | Control | Fast Day | No | 05:55 | 05:00 - 05:59 | Morning | 38,2 | 68  | 2,6   | 2,6   | 19,36 | 564,71 | 31,57  |
| 2019/06/17 | CH2206 | Male | Three y/o | Control | Control | Fast Day | No | 05:55 | 05:00 - 05:59 | Morning | 38,0 | 106 | 39,2  | 39,2  | 19,15 | 598,06 | 123,39 |
| 2019/06/17 | CH2205 | Male | Three y/o | Control | Control | Fast Day | No | 06:00 | 06:00 - 06:59 | Morning | 38,2 | 77  | 2,8   | 2,8   | 19,36 | 574,39 | 34,04  |
| 2019/06/17 | CH2206 | Male | Three y/o | Control | Control | Fast Day | No | 06:00 | 06:00 - 06:59 | Morning | 38,0 | 107 | 37,8  | 37,8  | 19,15 | 598,73 | 122,14 |
| 2019/06/17 | CH2205 | Male | Three y/o | Control | Control | Fast Day | No | 06:05 | 06:00 - 06:59 | Morning | 38,2 | 74  | 2,6   | 2,6   | 19,36 | 571,33 | 31,57  |
| 2019/06/17 | CH2206 | Male | Three y/o | Control | Control | Fast Day | No | 06:05 | 06:00 - 06:59 | Morning | 38,0 | 103 | 29,4  | 29,4  | 19,15 | 596,00 | 113,50 |
| 2019/06/17 | CH2205 | Male | Three y/o | Control | Control | Fast Day | No | 06:10 | 06:00 - 06:59 | Morning | 38,1 |     | 1,8   | 1,8   | 19,26 |        | 19,38  |
| 2019/06/17 | CH2206 | Male | Three y/o | Control | Control | Fast Day | No | 06:10 | 06:00 - 06:59 | Morning | 38,0 | 49  | 79,0  | 79,0  | 19,15 | 537,80 | 147,64 |
| 2019/06/17 | CH2205 | Male | Three y/o | Control | Control | Fast Day | No | 06:15 | 06:00 - 06:59 | Morning | 38,1 | 112 | 18,4  | 18,4  | 19,26 | 601,96 | 97,47  |
| 2019/06/17 | CH2206 | Male | Three y/o | Control | Control | Fast Day | No | 06:15 | 06:00 - 06:59 | Morning | 38,0 |     | 66,0  | 66,0  | 19,15 |        | 141,40 |
| 2019/06/17 | CH2205 | Male | Three y/o | Control | Control | Fast Day | No | 06:20 | 06:00 - 06:59 | Morning | 38,2 |     | 51,0  | 51,0  | 19,36 |        | 132,47 |
| 2019/06/17 | CH2206 | Male | Three y/o | Control | Control | Fast Day | No | 06:20 | 06:00 - 06:59 | Morning | 37,7 |     | 56,4  | 56,4  | 18,85 |        | 135,95 |
| 2019/06/17 | CH2205 | Male | Three y/o | Control | Control | Fast Day | No | 06:25 | 06:00 - 06:59 | Morning | 38,2 | 121 | 42,2  | 42,2  | 19,36 | 607,35 | 125,93 |
| 2019/06/17 | CH2206 | Male | Three y/o | Control | Control | Fast Day | No | 06:25 | 06:00 - 06:59 | Morning | 37,7 | 145 | 47,8  | 47,8  | 18,85 | 619,62 | 130,23 |
| 2019/06/17 | CH2205 | Male | Three y/o | Control | Control | Fast Day | No | 06:30 | 06:00 - 06:59 | Morning | 38,1 | 74  | 158,2 | 158,2 | 19,26 | 571,33 | 171,88 |
| 2019/06/17 | CH2206 | Male | Three y/o | Control | Control | Fast Day | No | 06:30 | 06:00 - 06:59 | Morning | 37,5 | 123 | 18,4  | 18,4  | 18,65 | 608,49 | 97,47  |
| 2019/06/17 | CH2205 | Male | Three y/o | Control | Control | Fast Day | No | 06:35 | 06:00 - 06:59 | Morning | 38,1 | 145 | 91,8  | 91,8  | 19,26 | 619,62 | 152,86 |
| 2019/06/17 | CH2206 | Male | Three y/o | Control | Control | Fast Day | No | 06:35 | 06:00 - 06:59 | Morning | 37,4 |     | 27,8  | 27,8  | 18,55 |        | 111,58 |
| 2019/06/17 | CH2205 | Male | Three y/o | Control | Control | Fast Day | No | 06:40 | 06:00 - 06:59 | Morning | 38,1 |     | 65,8  | 65,8  | 19,26 |        | 141,29 |
| 2019/06/17 | CH2206 | Male | Three y/o | Control | Control | Fast Day | No | 06:40 | 06:00 - 06:59 | Morning | 37,5 | 132 | 81,0  | 81,0  | 18,65 | 613,32 | 148,51 |
| 2019/06/17 | CH2205 | Male | Three y/o | Control | Control | Fast Day | No | 06:45 | 06:00 - 06:59 | Morning | 38,0 | 143 | 365,8 | 365,8 | 19,15 | 618,69 | 201,44 |
| 2019/06/17 | CH2206 | Male | Three y/o | Control | Control | Fast Day | No | 06:45 | 06:00 - 06:59 | Morning | 37,5 | 140 | 71,4  | 71,4  | 18,65 | 617,28 | 144,12 |
| 2019/06/17 | CH2205 | Male | Three y/o | Control | Control | Fast Day | No | 06:50 | 06:00 - 06:59 | Morning | 38,0 |     | 96,6  | 96,6  | 19,15 |        | 154,64 |
| 2019/06/17 | CH2206 | Male | Three y/o | Control | Control | Fast Day | No | 06:50 | 06:00 - 06:59 | Morning | 37,5 | 128 | 81,0  | 81,0  | 18,65 | 611,22 | 148,51 |
| 2019/06/17 | CH2205 | Male | Three y/o | Control | Control | Fast Day | No | 06:55 | 06:00 - 06:59 | Morning | 38,0 | 148 | 155,8 | 155,8 | 19,15 | 620,97 | 171,35 |
| 2019/06/17 | CH2206 | Male | Three y/o | Control | Control | Fast Day | No | 06:55 | 06:00 - 06:59 | Morning | 37,7 | 137 | 139,0 | 139,0 | 18,85 | 615,83 | 167,35 |
| 2019/06/17 | CH2205 | Male | Three y/o | Control | Control | Fast Day | No | 07:00 | 07:00 - 07:59 | Morning | 38,0 |     | 162,6 | 162,6 | 19,15 |        | 172,85 |
| 2019/06/17 | CH2206 | Male | Three y/o | Control | Control | Fast Day | No | 07:00 | 07:00 - 07:59 | Morning | 37,7 | 114 | 87,2  | 87,2  | 18,85 | 603,20 | 151,07 |
| 2019/06/17 | CH2205 | Male | Three y/o | Control | Control | Fast Day | No | 07:05 | 07:00 - 07:59 | Morning | 38,0 |     | 316,8 | 316,8 | 19,15 |        | 196,35 |
| 2019/06/17 | CH2206 | Male | Three y/o | Control | Control | Fast Day | No | 07:05 | 07:00 - 07:59 | Morning | 37,7 | 137 | 43,0  | 43,0  | 18,85 | 615,83 | 126,58 |
| 2019/06/17 | CH2205 | Male | Three y/o | Control | Control | Fast Day | No | 07:10 | 07:00 - 07:59 | Morning | 38,0 | 78  | 376,8 | 376,8 | 19,15 | 575,38 | 202,49 |
| 2019/06/17 | CH2206 | Male | Three y/o | Control | Control | Fast Day | No | 07:10 | 07:00 - 07:59 | Morning | 37,8 | 156 | 119,6 | 119,6 | 18,95 | 624,43 | 162,09 |
| 2019/06/17 | CH2205 | Male | Three y/o | Control | Control | Fast Day | No | 07:15 | 07:00 - 07:59 | Morning | 38,0 | 143 | 73,2  | 73,2  | 19,15 | 618,69 | 144,99 |
| 2019/06/17 | CH2206 | Male | Three y/o | Control | Control | Fast Day | No | 07:15 | 07:00 - 07:59 | Morning | 37,8 | 137 | 472,0 | 472,0 | 18,95 | 615,83 | 210,50 |
| 2019/06/17 | CH2205 | Male | Three y/o | Control | Control | Fast Day | No | 07:20 | 07:00 - 07:59 | Morning | 38,0 | 143 | 281,6 | 281,6 | 19,15 | 618,69 | 192,18 |
| 2019/06/17 | CH2206 | Male | Three y/o | Control | Control | Fast Day | No | 07:20 | 07:00 - 07:59 | Morning | 37,8 | 135 | 100,0 | 100,0 | 18,95 | 614,84 | 155,84 |
| 2019/06/17 | CH2205 | Male | Three y/o | Control | Control | Fast Day | No | 07:25 | 07:00 - 07:59 | Morning | 38,0 | 135 | 123,6 | 123,6 | 19,15 | 614,84 | 163,24 |
| 2019/06/17 | CH2206 | Male | Three y/o | Control | Control | Fast Day | No | 07:25 | 07:00 - 07:59 | Morning | 37,7 |     | 96,2  | 96,2  | 18,85 |        | 154,49 |
| 2019/06/17 | CH2205 | Male | Three y/o | Control | Control | Fast Day | No | 07:30 | 07:00 - 07:59 | Morning | 38,0 |     | 147,4 | 147,4 | 19,15 |        | 169,40 |
| 2019/06/17 | CH2206 | Male | Three y/o | Control | Control | Fast Day | No | 07:30 | 07:00 - 07:59 | Morning | 37,7 | 145 | 56,2  | 56,2  | 18,85 | 619,62 | 135,83 |
| 2019/06/17 | CH2205 | Male | Three y/o | Control | Control | Fast Day | No | 07:35 | 07:00 - 07:59 | Morning | 38,0 | 147 | 81,2  | 81,2  | 19,15 | 620,52 | 148,59 |
| 2019/06/17 | CH2206 | Male | Three y/o | Control | Control | Fast Day | No | 07:35 | 07:00 - 07:59 | Morning | 37,7 | 148 | 110,0 | 110,0 | 18,85 | 620,97 | 159,17 |
| 2019/06/17 | CH2205 | Male | Three y/o | Control | Control | Fast Day | No | 07:40 | 07:00 - 07:59 | Morning | 38,0 | 138 | 241,6 | 241,6 | 19,15 | 616,31 | 186,77 |



|            |        |      |           |         |         |          |    |       |               |              |      |     |       |       |       |        |        |
|------------|--------|------|-----------|---------|---------|----------|----|-------|---------------|--------------|------|-----|-------|-------|-------|--------|--------|
| 2019/06/17 | CH2206 | Male | Three y/o | Control | Control | Fast Day | No | 07:40 | 07:00 - 07:59 | Morning      | 37,7 | 147 | 80,4  | 80,4  | 18,85 | 620,52 | 148,25 |
| 2019/06/17 | CH2205 | Male | Three y/o | Control | Control | Fast Day | No | 07:45 | 07:00 - 07:59 | Morning      | 38,0 | 143 | 77,6  | 77,6  | 19,15 | 618,69 | 147,02 |
| 2019/06/17 | CH2206 | Male | Three y/o | Control | Control | Fast Day | No | 07:45 | 07:00 - 07:59 | Morning      | 37,7 | 132 | 66,8  | 66,8  | 18,85 | 613,32 | 141,81 |
| 2019/06/17 | CH2205 | Male | Three y/o | Control | Control | Fast Day | No | 07:50 | 07:00 - 07:59 | Morning      | 38,0 | 138 | 91,0  | 91,0  | 19,15 | 616,31 | 152,56 |
| 2019/06/17 | CH2206 | Male | Three y/o | Control | Control | Fast Day | No | 07:50 | 07:00 - 07:59 | Morning      | 37,7 | 129 | 134,0 | 134,0 | 18,85 | 611,75 | 166,07 |
| 2019/06/17 | CH2205 | Male | Three y/o | Control | Control | Fast Day | No | 07:55 | 07:00 - 07:59 | Morning      | 38,0 |     | 167,4 | 167,4 | 19,15 |        | 173,87 |
| 2019/06/17 | CH2206 | Male | Three y/o | Control | Control | Fast Day | No | 07:55 | 07:00 - 07:59 | Morning      | 37,7 | 126 | 61,0  | 61,0  | 18,85 | 610,14 | 138,67 |
| 2019/06/17 | CH2205 | Male | Three y/o | Control | Control | Fast Day | No | 08:00 | 08:00 - 08:59 | Late Morning | 38,0 |     | 90,2  | 90,2  | 19,15 |        | 152,25 |
| 2019/06/17 | CH2206 | Male | Three y/o | Control | Control | Fast Day | No | 08:00 | 08:00 - 08:59 | Late Morning | 37,7 | 94  | 29,2  | 29,2  | 18,85 | 589,37 | 113,27 |
| 2019/06/17 | CH2205 | Male | Three y/o | Control | Control | Fast Day | No | 08:05 | 08:00 - 08:59 | Late Morning | 38,0 | 77  | 153,6 | 153,6 | 19,15 | 574,39 | 170,85 |
| 2019/06/17 | CH2206 | Male | Three y/o | Control | Control | Fast Day | No | 08:05 | 08:00 - 08:59 | Late Morning | 37,5 | 95  | 26,8  | 26,8  | 18,65 | 590,14 | 110,33 |
| 2019/06/17 | CH2205 | Male | Three y/o | Control | Control | Fast Day | No | 08:10 | 08:00 - 08:59 | Late Morning | 37,9 | 165 | 56,8  | 56,8  | 19,05 | 628,06 | 136,20 |
| 2019/06/17 | CH2206 | Male | Three y/o | Control | Control | Fast Day | No | 08:10 | 08:00 - 08:59 | Late Morning | 37,3 | 92  | 34,4  | 34,4  | 18,46 | 587,78 | 118,90 |
| 2019/06/17 | CH2205 | Male | Three y/o | Control | Control | Fast Day | No | 08:15 | 08:00 - 08:59 | Late Morning | 37,6 |     | 23,0  | 23,0  | 18,75 |        | 105,09 |
| 2019/06/17 | CH2206 | Male | Three y/o | Control | Control | Fast Day | No | 08:15 | 08:00 - 08:59 | Late Morning | 37,3 | 96  | 32,2  | 32,2  | 18,46 | 590,91 | 116,63 |
| 2019/06/17 | CH2205 | Male | Three y/o | Control | Control | Fast Day | No | 08:20 | 08:00 - 08:59 | Late Morning | 37,5 |     | 23,2  | 23,2  | 18,65 |        | 105,39 |
| 2019/06/17 | CH2206 | Male | Three y/o | Control | Control | Fast Day | No | 08:20 | 08:00 - 08:59 | Late Morning | 37,3 | 92  | 33,0  | 33,0  | 18,46 | 587,78 | 117,47 |
| 2019/06/17 | CH2205 | Male | Three y/o | Control | Control | Fast Day | No | 08:25 | 08:00 - 08:59 | Late Morning | 37,5 |     | 6,2   | 6,2   | 18,65 |        | 60,63  |
| 2019/06/17 | CH2206 | Male | Three y/o | Control | Control | Fast Day | No | 08:25 | 08:00 - 08:59 | Late Morning | 37,4 | 101 | 20,4  | 20,4  | 18,55 | 594,59 | 100,99 |
| 2019/06/17 | CH2205 | Male | Three y/o | Control | Control | Fast Day | No | 08:30 | 08:00 - 08:59 | Late Morning | 37,5 |     | 14,4  | 14,4  | 18,65 |        | 89,12  |
| 2019/06/17 | CH2206 | Male | Three y/o | Control | Control | Fast Day | No | 08:30 | 08:00 - 08:59 | Late Morning | 37,5 | 105 | 32,6  | 32,6  | 18,65 | 597,38 | 117,05 |
| 2019/06/17 | CH2205 | Male | Three y/o | Control | Control | Fast Day | No | 08:35 | 08:00 - 08:59 | Late Morning | 37,5 |     | 4,2   | 4,2   | 18,65 |        | 47,57  |
| 2019/06/17 | CH2206 | Male | Three y/o | Control | Control | Fast Day | No | 08:35 | 08:00 - 08:59 | Late Morning | 37,5 |     | 30,2  | 30,2  | 18,65 |        | 114,42 |
| 2019/06/17 | CH2205 | Male | Three y/o | Control | Control | Fast Day | No | 08:40 | 08:00 - 08:59 | Late Morning | 37,6 |     | 9,4   | 9,4   | 18,75 |        | 74,66  |
| 2019/06/17 | CH2206 | Male | Three y/o | Control | Control | Fast Day | No | 08:40 | 08:00 - 08:59 | Late Morning | 37,5 | 102 | 13,6  | 13,6  | 18,65 | 595,30 | 87,18  |
| 2019/06/17 | CH2205 | Male | Three y/o | Control | Control | Fast Day | No | 08:45 | 08:00 - 08:59 | Late Morning | 37,7 | 87  | 10,6  | 10,6  | 18,85 | 583,64 | 78,73  |
| 2019/06/17 | CH2206 | Male | Three y/o | Control | Control | Fast Day | No | 08:45 | 08:00 - 08:59 | Late Morning | 37,3 | 102 | 22,2  | 22,2  | 18,46 | 595,30 | 103,88 |
| 2019/06/17 | CH2205 | Male | Three y/o | Control | Control | Fast Day | No | 08:50 | 08:00 - 08:59 | Late Morning | 37,9 |     | 10,0  | 10,0  | 19,05 |        | 76,76  |
| 2019/06/17 | CH2206 | Male | Three y/o | Control | Control | Fast Day | No | 08:50 | 08:00 - 08:59 | Late Morning | 37,2 | 109 | 37,6  | 37,6  | 18,36 | 600,04 | 121,96 |
| 2019/06/17 | CH2205 | Male | Three y/o | Control | Control | Fast Day | No | 08:55 | 08:00 - 08:59 | Late Morning | 37,9 |     | 25,2  | 25,2  | 19,05 |        | 108,22 |
| 2019/06/17 | CH2206 | Male | Three y/o | Control | Control | Fast Day | No | 08:55 | 08:00 - 08:59 | Late Morning | 37,2 | 107 | 49,0  | 49,0  | 18,36 | 598,73 | 131,09 |
| 2019/06/17 | CH2205 | Male | Three y/o | Control | Control | Fast Day | No | 09:00 | 09:00 - 09:59 | Late Morning | 37,9 | 94  | 12,8  | 12,8  | 19,05 | 589,37 | 85,12  |
| 2019/06/17 | CH2206 | Male | Three y/o | Control | Control | Fast Day | No | 09:00 | 09:00 - 09:59 | Late Morning | 37,4 | 180 | 55,8  | 55,8  | 18,55 | 633,61 | 135,58 |
| 2019/06/17 | CH2205 | Male | Three y/o | Control | Control | Fast Day | No | 09:05 | 09:00 - 09:59 | Late Morning | 37,9 | 84  | 8,8   | 8,8   | 19,05 | 581,01 | 72,43  |
| 2019/06/17 | CH2206 | Male | Three y/o | Control | Control | Fast Day | No | 09:05 | 09:00 - 09:59 | Late Morning | 37,6 | 108 | 55,0  | 55,0  | 18,75 | 599,39 | 135,08 |
| 2019/06/17 | CH2205 | Male | Three y/o | Control | Control | Fast Day | No | 09:10 | 09:00 - 09:59 | Late Morning | 37,9 | 94  | 14,6  | 14,6  | 19,05 | 589,37 | 89,59  |
| 2019/06/17 | CH2206 | Male | Three y/o | Control | Control | Fast Day | No | 09:10 | 09:00 - 09:59 | Late Morning | 37,7 | 106 | 68,8  | 68,8  | 18,85 | 598,06 | 142,84 |
| 2019/06/17 | CH2205 | Male | Three y/o | Control | Control | Fast Day | No | 09:15 | 09:00 - 09:59 | Late Morning | 37,8 | 86  | 12,8  | 12,8  | 18,95 | 582,77 | 85,12  |
| 2019/06/17 | CH2206 | Male | Three y/o | Control | Control | Fast Day | No | 09:15 | 09:00 - 09:59 | Late Morning | 37,7 | 158 | 63,6  | 63,6  | 18,85 | 625,26 | 140,11 |
| 2019/06/17 | CH2205 | Male | Three y/o | Control | Control | Fast Day | No | 09:20 | 09:00 - 09:59 | Late Morning | 37,7 | 89  | 17,6  | 17,6  | 18,85 | 585,33 | 95,95  |
| 2019/06/17 | CH2206 | Male | Three y/o | Control | Control | Fast Day | No | 09:20 | 09:00 - 09:59 | Late Morning | 37,7 | 94  | 56,2  | 56,2  | 18,85 | 589,37 | 135,83 |
| 2019/06/17 | CH2205 | Male | Three y/o | Control | Control | Fast Day | No | 09:25 | 09:00 - 09:59 | Late Morning | 37,7 | 93  | 3,6   | 3,6   | 18,85 | 588,58 | 42,42  |
| 2019/06/17 | CH2206 | Male | Three y/o | Control | Control | Fast Day | No | 09:25 | 09:00 - 09:59 | Late Morning | 37,7 | 100 | 37,0  | 37,0  | 18,85 | 593,87 | 121,40 |
| 2019/06/17 | CH2205 | Male | Three y/o | Control | Control | Fast Day | No | 09:30 | 09:00 - 09:59 | Late Morning | 37,7 | 134 | 17,6  | 17,6  | 18,85 | 614,33 | 95,95  |
| 2019/06/17 | CH2206 | Male | Three y/o | Control | Control | Fast Day | No | 09:30 | 09:00 - 09:59 | Late Morning | 37,7 |     | 49,0  | 49,0  | 18,85 |        | 131,09 |
| 2019/06/17 | CH2205 | Male | Three y/o | Control | Control | Fast Day | No | 09:35 | 09:00 - 09:59 | Late Morning | 37,7 | 134 | 7,8   | 7,8   | 18,85 | 614,33 | 68,36  |
| 2019/06/17 | CH2206 | Male | Three y/o | Control | Control | Fast Day | No | 09:35 | 09:00 - 09:59 | Late Morning | 37,7 | 109 | 48,0  | 48,0  | 18,85 | 600,04 | 130,38 |
| 2019/06/17 | CH2205 | Male | Three y/o | Control | Control | Fast Day | No | 09:40 | 09:00 - 09:59 | Late Morning | 37,7 | 76  | 11,6  | 11,6  | 18,85 | 573,39 | 81,78  |
| 2019/06/17 | CH2206 | Male | Three y/o | Control | Control | Fast Day | No | 09:40 | 09:00 - 09:59 | Late Morning | 37,8 | 94  | 54,2  | 54,2  | 18,95 | 589,37 | 134,57 |
| 2019/06/17 | CH2205 | Male | Three y/o | Control | Control | Fast Day | No | 09:45 | 09:00 - 09:59 | Late Morning | 37,7 | 80  | 9,2   | 9,2   | 18,85 | 577,31 | 73,94  |
| 2019/06/17 | CH2206 | Male | Three y/o | Control | Control | Fast Day | No | 09:45 | 09:00 - 09:59 | Late Morning | 37,8 | 73  | 49,4  | 49,4  | 18,95 | 570,27 | 131,37 |
| 2019/06/17 | CH2205 | Male | Three y/o | Control | Control | Fast Day | No | 09:50 | 09:00 - 09:59 | Late Morning | 37,7 | 85  | 12,6  | 12,6  | 18,85 | 581,90 | 84,59  |
| 2019/06/17 | CH2206 | Male | Three y/o | Control | Control | Fast Day | No | 09:50 | 09:00 - 09:59 | Late Morning | 37,8 | 74  | 46,4  | 46,4  | 18,95 | 571,33 | 129,21 |
| 2019/06/17 | CH2205 | Male | Three y/o | Control | Control | Fast Day | No | 09:55 | 09:00 - 09:59 | Late Morning | 37,9 | 77  | 5,0   | 5,0   | 19,05 | 574,39 | 53,41  |
| 2019/06/17 | CH2206 | Male | Three y/o | Control | Control | Fast Day | No | 09:55 | 09:00 - 09:59 | Late Morning | 37,8 | 156 | 44,0  | 44,0  | 18,95 | 624,43 | 127,37 |
| 2019/06/17 | CH2205 | Male | Three y/o | Control | Control | Fast Day | No | 10:00 | 10:00 - 10:59 | Late Morning | 37,9 | 93  | 9,6   | 9,6   | 19,05 | 588,58 | 75,37  |
| 2019/06/17 | CH2206 | Male | Three y/o | Control | Control | Fast Day | No | 10:00 | 10:00 - 10:59 | Late Morning | 37,9 | 91  | 51,4  | 51,4  | 19,05 | 586,98 | 132,74 |
| 2019/06/17 | CH2205 | Male | Three y/o | Control | Control | Fast Day | No | 10:05 | 10:00 - 10:59 | Late Morning | 37,9 | 86  | 10,6  | 10,6  | 19,05 | 582,77 | 78,73  |
| 2019/06/17 | CH2206 | Male | Three y/o | Control | Control | Fast Day | No | 10:05 | 10:00 - 10:59 | Late Morning | 37,9 | 107 | 44,0  | 44,0  | 19,05 | 598,73 | 127,37 |
| 2019/06/17 | CH2205 | Male | Three y/o | Control | Control | Fast Day | No | 10:10 | 10:00 - 10:59 | Late Morning | 37,9 | 89  | 3,6   | 3,6   | 19,05 | 585,33 | 42,42  |
| 2019/06/17 | CH2206 | Male | Three y/o | Control | Control | Fast Day | No | 10:10 | 10:00 - 10:59 | Late Morning | 37,9 | 100 | 48,4  | 48,4  | 19,05 | 593,87 | 130,66 |
| 2019/06/17 | CH2205 | Male | Three y/o | Control | Control | Fast Day | No | 10:15 | 10:00 - 10:59 | Late Morning | 37,9 | 85  | 6,8   | 6,8   | 19,05 | 581,90 | 63,74  |
| 2019/06/17 | CH2206 | Male | Three y/o | Control | Control | Fast Day | No | 10:15 | 10:00 - 10:59 | Late Morning | 37,9 | 102 | 43,2  | 43,2  | 19,05 | 595,30 | 126,74 |
| 2019/06/17 | CH2205 | Male | Three y/o | Control | Control | Fast Day | No | 10:20 | 10:00 - 10:59 | Late Morning | 37,9 | 61  | 10,0  | 10,0  | 19,05 | 556,01 | 76,76  |
| 2019/06/17 | CH2206 | Male | Three y/o | Control | Control | Fast Day | No | 10:20 | 10:00 - 10:59 | Late Morning | 37,9 | 112 | 44,2  | 44,2  | 19,05 | 601,96 | 127,53 |
| 2019/06/17 | CH2205 | Male | Three y/o | Control | Control | Fast Day | No | 10:25 | 10:00 - 10:59 | Late Morning | 37,9 | 75  | 12,2  | 12,2  | 19,05 | 572,36 | 83,49  |
| 2019/06/17 | CH2206 | Male | Three y/o | Control | Control | Fast Day | No | 10:25 | 10:00 - 10:59 | Late Morning | 37,9 | 104 | 52,6  | 52,6  | 19,05 | 596,69 | 133,54 |
| 2019/06/17 | CH2205 | Male | Three y/o | Control | Control | Fast Day | No | 10:30 | 10:00 - 10:59 | Late Morning | 37,9 |     | 6,4   | 6,4   | 19,05 |        | 61,70  |
| 2019/06/17 | CH2206 | Male | Three y/o | Control | Control | Fast Day | No | 10:30 | 10:00 - 10:59 | Late Morning | 37,9 | 91  | 40,8  | 40,8  | 19,05 | 586,98 | 124,77 |
| 2019/06/17 | CH2205 | Male | Three y/o | Control | Control | Fast Day | No | 10:35 | 10:00 - 10:59 | Late Morning | 37,9 |     | 9,2   | 9,2   | 19,05 |        | 73,94  |



|            |        |      |           |         |         |          |    |       |               |              |      |     |       |       |       |        |        |
|------------|--------|------|-----------|---------|---------|----------|----|-------|---------------|--------------|------|-----|-------|-------|-------|--------|--------|
| 2019/06/17 | CH2206 | Male | Three y/o | Control | Control | Fast Day | No | 10:35 | 10:00 - 10:59 | Late Morning | 37,9 | 95  | 48,4  | 48,4  | 19,05 | 590,14 | 130,66 |
| 2019/06/17 | CH2205 | Male | Three y/o | Control | Control | Fast Day | No | 10:40 | 10:00 - 10:59 | Late Morning | 38,0 | 75  | 7,2   | 7,2   | 19,15 | 572,36 | 65,66  |
| 2019/06/17 | CH2206 | Male | Three y/o | Control | Control | Fast Day | No | 10:40 | 10:00 - 10:59 | Late Morning | 37,9 | 88  | 52,0  | 52,0  | 19,05 | 584,49 | 133,14 |
| 2019/06/17 | CH2205 | Male | Three y/o | Control | Control | Fast Day | No | 10:45 | 10:00 - 10:59 | Late Morning | 38,0 | 84  | 10,4  | 10,4  | 19,15 | 581,01 | 78,08  |
| 2019/06/17 | CH2206 | Male | Three y/o | Control | Control | Fast Day | No | 10:45 | 10:00 - 10:59 | Late Morning | 38,0 | 82  | 70,4  | 70,4  | 19,15 | 579,19 | 143,64 |
| 2019/06/17 | CH2205 | Male | Three y/o | Control | Control | Fast Day | No | 10:50 | 10:00 - 10:59 | Late Morning | 38,0 | 69  | 10,4  | 10,4  | 19,15 | 565,86 | 78,08  |
| 2019/06/17 | CH2206 | Male | Three y/o | Control | Control | Fast Day | No | 10:50 | 10:00 - 10:59 | Late Morning | 38,0 | 93  | 65,6  | 65,6  | 19,15 | 588,58 | 141,19 |
| 2019/06/17 | CH2205 | Male | Three y/o | Control | Control | Fast Day | No | 10:55 | 10:00 - 10:59 | Late Morning | 38,0 | 76  | 4,6   | 4,6   | 19,15 | 573,39 | 50,61  |
| 2019/06/17 | CH2206 | Male | Three y/o | Control | Control | Fast Day | No | 10:55 | 10:00 - 10:59 | Late Morning | 38,0 | 108 | 68,4  | 68,4  | 19,15 | 599,39 | 142,64 |
| 2019/06/17 | CH2205 | Male | Three y/o | Control | Control | Fast Day | No | 11:00 | 11:00 - 11:59 | Late Morning | 38,1 |     | 5,2   | 5,2   | 19,26 |        | 54,72  |
| 2019/06/17 | CH2206 | Male | Three y/o | Control | Control | Fast Day | No | 11:00 | 11:00 - 11:59 | Late Morning | 38,0 | 92  | 74,2  | 74,2  | 19,15 | 587,78 | 145,46 |
| 2019/06/17 | CH2205 | Male | Three y/o | Control | Control | Fast Day | No | 11:05 | 11:00 - 11:59 | Late Morning | 38,1 |     | 9,2   | 9,2   | 19,26 |        | 73,94  |
| 2019/06/17 | CH2206 | Male | Three y/o | Control | Control | Fast Day | No | 11:05 | 11:00 - 11:59 | Late Morning | 38,0 | 103 | 72,0  | 72,0  | 19,15 | 596,00 | 144,42 |
| 2019/06/17 | CH2205 | Male | Three y/o | Control | Control | Fast Day | No | 11:10 | 11:00 - 11:59 | Late Morning | 38,1 | 104 | 11,8  | 11,8  | 19,26 | 596,69 | 82,36  |
| 2019/06/17 | CH2206 | Male | Three y/o | Control | Control | Fast Day | No | 11:10 | 11:00 - 11:59 | Late Morning | 38,1 | 99  | 64,0  | 64,0  | 19,26 | 593,14 | 140,33 |
| 2019/06/17 | CH2205 | Male | Three y/o | Control | Control | Fast Day | No | 11:15 | 11:00 - 11:59 | Late Morning | 38,1 | 128 | 31,6  | 31,6  | 19,26 | 611,22 | 115,98 |
| 2019/06/17 | CH2206 | Male | Three y/o | Control | Control | Fast Day | No | 11:15 | 11:00 - 11:59 | Late Morning | 38,1 | 120 | 31,6  | 31,6  | 19,26 | 606,78 | 115,98 |
| 2019/06/17 | CH2205 | Male | Three y/o | Control | Control | Fast Day | No | 11:20 | 11:00 - 11:59 | Late Morning | 38,1 | 61  | 68,2  | 68,2  | 19,26 | 556,01 | 142,53 |
| 2019/06/17 | CH2206 | Male | Three y/o | Control | Control | Fast Day | No | 11:20 | 11:00 - 11:59 | Late Morning | 38,1 | 103 | 141,4 | 141,4 | 19,26 | 596,00 | 167,95 |
| 2019/06/17 | CH2205 | Male | Three y/o | Control | Control | Fast Day | No | 11:25 | 11:00 - 11:59 | Late Morning | 38,1 |     | 40,0  | 40,0  | 19,26 |        | 124,09 |
| 2019/06/17 | CH2206 | Male | Three y/o | Control | Control | Fast Day | No | 11:25 | 11:00 - 11:59 | Late Morning | 38,1 | 137 | 44,8  | 44,8  | 19,26 | 615,83 | 127,99 |
| 2019/06/17 | CH2205 | Male | Three y/o | Control | Control | Fast Day | No | 11:30 | 11:00 - 11:59 | Late Morning | 38,1 | 60  | 9,8   | 9,8   | 19,26 | 554,67 | 76,07  |
| 2019/06/17 | CH2206 | Male | Three y/o | Control | Control | Fast Day | No | 11:30 | 11:00 - 11:59 | Late Morning | 38,0 | 117 | 104,2 | 104,2 | 19,15 | 605,02 | 157,28 |
| 2019/06/17 | CH2205 | Male | Three y/o | Control | Control | Fast Day | No | 11:35 | 11:00 - 11:59 | Late Morning | 38,1 | 128 | 49,2  | 49,2  | 19,26 | 611,22 | 131,23 |
| 2019/06/17 | CH2206 | Male | Three y/o | Control | Control | Fast Day | No | 11:35 | 11:00 - 11:59 | Late Morning | 38,0 |     | 35,8  | 35,8  | 19,15 |        | 120,27 |
| 2019/06/17 | CH2205 | Male | Three y/o | Control | Control | Fast Day | No | 11:40 | 11:00 - 11:59 | Late Morning | 38,1 | 92  | 25,6  | 25,6  | 19,26 | 587,78 | 108,76 |
| 2019/06/17 | CH2206 | Male | Three y/o | Control | Control | Fast Day | No | 11:40 | 11:00 - 11:59 | Late Morning | 38,0 | 89  | 30,0  | 30,0  | 19,15 | 585,33 | 114,20 |
| 2019/06/17 | CH2205 | Male | Three y/o | Control | Control | Fast Day | No | 11:45 | 11:00 - 11:59 | Late Morning | 38,0 | 83  | 21,8  | 21,8  | 19,15 | 580,11 | 103,26 |
| 2019/06/17 | CH2206 | Male | Three y/o | Control | Control | Fast Day | No | 11:45 | 11:00 - 11:59 | Late Morning | 38,0 | 104 | 17,4  | 17,4  | 19,15 | 596,69 | 95,56  |
| 2019/06/17 | CH2205 | Male | Three y/o | Control | Control | Fast Day | No | 11:50 | 11:00 - 11:59 | Late Morning | 38,0 | 85  | 25,6  | 25,6  | 19,15 | 581,90 | 108,76 |
| 2019/06/17 | CH2206 | Male | Three y/o | Control | Control | Fast Day | No | 11:50 | 11:00 - 11:59 | Late Morning | 38,0 | 92  | 35,6  | 35,6  | 19,15 | 587,78 | 120,08 |
| 2019/06/17 | CH2205 | Male | Three y/o | Control | Control | Fast Day | No | 11:55 | 11:00 - 11:59 | Late Morning | 38,1 | 121 | 13,4  | 13,4  | 19,26 | 607,35 | 86,68  |
| 2019/06/17 | CH2206 | Male | Three y/o | Control | Control | Fast Day | No | 11:55 | 11:00 - 11:59 | Late Morning | 38,0 | 118 | 39,2  | 39,2  | 19,15 | 605,61 | 123,39 |
| 2019/06/17 | CH2205 | Male | Three y/o | Control | Control | Fast Day | No | 12:00 | 12:00 - 12:59 | Afternoon    | 38,1 |     | 10,0  | 10,0  | 19,26 |        | 76,76  |
| 2019/06/17 | CH2206 | Male | Three y/o | Control | Control | Fast Day | No | 12:00 | 12:00 - 12:59 | Afternoon    | 38,0 | 108 | 35,4  | 35,4  | 19,15 | 599,39 | 119,88 |
| 2019/06/17 | CH2205 | Male | Three y/o | Control | Control | Fast Day | No | 12:05 | 12:00 - 12:59 | Afternoon    | 38,1 | 63  | 17,0  | 17,0  | 19,26 | 558,62 | 94,77  |
| 2019/06/17 | CH2206 | Male | Three y/o | Control | Control | Fast Day | No | 12:05 | 12:00 - 12:59 | Afternoon    | 38,0 | 93  | 54,2  | 54,2  | 19,15 | 588,58 | 134,57 |
| 2019/06/17 | CH2205 | Male | Three y/o | Control | Control | Fast Day | No | 12:10 | 12:00 - 12:59 | Afternoon    | 38,1 | 83  | 11,8  | 11,8  | 19,26 | 580,11 | 82,36  |
| 2019/06/17 | CH2206 | Male | Three y/o | Control | Control | Fast Day | No | 12:10 | 12:00 - 12:59 | Afternoon    | 38,0 | 85  | 50,4  | 50,4  | 19,15 | 581,90 | 132,06 |
| 2019/06/17 | CH2205 | Male | Three y/o | Control | Control | Fast Day | No | 12:15 | 12:00 - 12:59 | Afternoon    | 38,1 | 68  | 11,8  | 11,8  | 19,26 | 564,71 | 82,36  |
| 2019/06/17 | CH2206 | Male | Three y/o | Control | Control | Fast Day | No | 12:15 | 12:00 - 12:59 | Afternoon    | 38,0 | 103 | 44,2  | 44,2  | 19,15 | 596,00 | 127,53 |
| 2019/06/17 | CH2205 | Male | Three y/o | Control | Control | Fast Day | No | 12:20 | 12:00 - 12:59 | Afternoon    | 38,1 | 75  | 11,6  | 11,6  | 19,26 | 572,36 | 81,78  |
| 2019/06/17 | CH2206 | Male | Three y/o | Control | Control | Fast Day | No | 12:20 | 12:00 - 12:59 | Afternoon    | 38,0 | 103 | 47,8  | 47,8  | 19,15 | 596,00 | 130,23 |
| 2019/06/17 | CH2205 | Male | Three y/o | Control | Control | Fast Day | No | 12:25 | 12:00 - 12:59 | Afternoon    | 38,1 | 89  | 6,6   | 6,6   | 19,26 | 585,33 | 62,73  |
| 2019/06/17 | CH2206 | Male | Three y/o | Control | Control | Fast Day | No | 12:25 | 12:00 - 12:59 | Afternoon    | 38,0 | 86  | 51,2  | 51,2  | 19,15 | 582,77 | 132,61 |
| 2019/06/17 | CH2205 | Male | Three y/o | Control | Control | Fast Day | No | 12:30 | 12:00 - 12:59 | Afternoon    | 38,1 | 80  | 6,6   | 6,6   | 19,26 | 577,31 | 62,73  |
| 2019/06/17 | CH2206 | Male | Three y/o | Control | Control | Fast Day | No | 12:30 | 12:00 - 12:59 | Afternoon    | 38,0 | 92  | 52,4  | 52,4  | 19,15 | 587,78 | 133,41 |
| 2019/06/17 | CH2205 | Male | Three y/o | Control | Control | Fast Day | No | 12:35 | 12:00 - 12:59 | Afternoon    | 38,0 | 91  | 9,8   | 9,8   | 19,15 | 586,98 | 76,07  |
| 2019/06/17 | CH2206 | Male | Three y/o | Control | Control | Fast Day | No | 12:35 | 12:00 - 12:59 | Afternoon    | 38,0 | 93  | 56,0  | 56,0  | 19,15 | 588,58 | 135,70 |
| 2019/06/17 | CH2205 | Male | Three y/o | Control | Control | Fast Day | No | 12:40 | 12:00 - 12:59 | Afternoon    | 38,0 | 96  | 10,4  | 10,4  | 19,15 | 590,91 | 78,08  |
| 2019/06/17 | CH2206 | Male | Three y/o | Control | Control | Fast Day | No | 12:40 | 12:00 - 12:59 | Afternoon    | 38,0 | 64  | 54,0  | 54,0  | 19,15 | 559,88 | 134,45 |
| 2019/06/17 | CH2205 | Male | Three y/o | Control | Control | Fast Day | No | 12:45 | 12:00 - 12:59 | Afternoon    | 38,0 | 82  | 13,6  | 13,6  | 19,15 | 579,19 | 87,18  |
| 2019/06/17 | CH2206 | Male | Three y/o | Control | Control | Fast Day | No | 12:45 | 12:00 - 12:59 | Afternoon    | 38,0 | 86  | 52,4  | 52,4  | 19,15 | 582,77 | 133,41 |
| 2019/06/17 | CH2205 | Male | Three y/o | Control | Control | Fast Day | No | 12:50 | 12:00 - 12:59 | Afternoon    | 38,1 | 91  | 4,0   | 4,0   | 19,26 | 586,98 | 45,94  |
| 2019/06/17 | CH2206 | Male | Three y/o | Control | Control | Fast Day | No | 12:50 | 12:00 - 12:59 | Afternoon    | 38,0 | 60  | 54,0  | 54,0  | 19,15 | 554,67 | 134,45 |
| 2019/06/17 | CH2205 | Male | Three y/o | Control | Control | Fast Day | No | 12:55 | 12:00 - 12:59 | Afternoon    | 38,1 | 90  | 7,6   | 7,6   | 19,26 | 586,16 | 67,49  |
| 2019/06/17 | CH2206 | Male | Three y/o | Control | Control | Fast Day | No | 12:55 | 12:00 - 12:59 | Afternoon    | 38,0 | 92  | 52,4  | 52,4  | 19,15 | 587,78 | 133,41 |
| 2019/06/17 | CH2205 | Male | Three y/o | Control | Control | Fast Day | No | 13:00 | 13:00 - 13:59 | Afternoon    | 38,2 | 71  | 4,4   | 4,4   | 19,36 | 568,10 | 49,12  |
| 2019/06/17 | CH2206 | Male | Three y/o | Control | Control | Fast Day | No | 13:00 | 13:00 - 13:59 | Afternoon    | 38,0 | 90  | 54,0  | 54,0  | 19,15 | 586,16 | 134,45 |
| 2019/06/17 | CH2205 | Male | Three y/o | Control | Control | Fast Day | No | 13:05 | 13:00 - 13:59 | Afternoon    | 38,2 | 83  | 8,4   | 8,4   | 19,36 | 580,11 | 70,86  |
| 2019/06/17 | CH2206 | Male | Three y/o | Control | Control | Fast Day | No | 13:05 | 13:00 - 13:59 | Afternoon    | 38,0 | 85  | 55,8  | 55,8  | 19,15 | 581,90 | 135,58 |
| 2019/06/17 | CH2205 | Male | Three y/o | Control | Control | Fast Day | No | 13:10 | 13:00 - 13:59 | Afternoon    | 38,2 | 78  | 10,0  | 10,0  | 19,36 | 575,38 | 76,76  |
| 2019/06/17 | CH2206 | Male | Three y/o | Control | Control | Fast Day | No | 13:10 | 13:00 - 13:59 | Afternoon    | 38,0 | 79  | 61,8  | 61,8  | 19,15 | 576,36 | 139,12 |
| 2019/06/17 | CH2205 | Male | Three y/o | Control | Control | Fast Day | No | 13:15 | 13:00 - 13:59 | Afternoon    | 38,3 | 76  | 13,4  | 13,4  | 19,46 | 573,39 | 86,68  |
| 2019/06/17 | CH2206 | Male | Three y/o | Control | Control | Fast Day | No | 13:15 | 13:00 - 13:59 | Afternoon    | 38,0 | 65  | 61,4  | 61,4  | 19,15 | 561,12 | 138,89 |
| 2019/06/17 | CH2205 | Male | Three y/o | Control | Control | Fast Day | No | 13:20 | 13:00 - 13:59 | Afternoon    | 38,3 | 92  | 11,2  | 11,2  | 19,46 | 587,78 | 80,59  |
| 2019/06/17 | CH2206 | Male | Three y/o | Control | Control | Fast Day | No | 13:20 | 13:00 - 13:59 | Afternoon    | 38,0 | 108 | 23,4  | 23,4  | 19,15 | 599,39 | 105,68 |
| 2019/06/17 | CH2205 | Male | Three y/o | Control | Control | Fast Day | No | 13:25 | 13:00 - 13:59 | Afternoon    | 38,3 | 83  | 8,4   | 8,4   | 19,46 | 580,11 | 70,86  |
| 2019/06/17 | CH2206 | Male | Three y/o | Control | Control | Fast Day | No | 13:25 | 13:00 - 13:59 | Afternoon    | 38,1 | 91  | 44,2  | 44,2  | 19,26 | 586,98 | 127,53 |
| 2019/06/17 | CH2205 | Male | Three y/o | Control | Control | Fast Day | No | 13:30 | 13:00 - 13:59 | Afternoon    | 38,2 | 75  | 12,0  | 12,0  | 19,36 | 572,36 | 82,93  |



|            |        |      |           |         |         |          |    |       |               |           |      |     |       |       |       |        |        |
|------------|--------|------|-----------|---------|---------|----------|----|-------|---------------|-----------|------|-----|-------|-------|-------|--------|--------|
| 2019/06/17 | CH2206 | Male | Three y/o | Control | Control | Fast Day | No | 13:30 | 13:00 - 13:59 | Afternoon | 38,0 | 85  | 49,4  | 49,4  | 19,15 | 581,90 | 131,37 |
| 2019/06/17 | CH2205 | Male | Three y/o | Control | Control | Fast Day | No | 13:35 | 13:00 - 13:59 | Afternoon | 38,3 | 76  | 6,4   | 6,4   | 19,46 | 573,39 | 61,70  |
| 2019/06/17 | CH2206 | Male | Three y/o | Control | Control | Fast Day | No | 13:35 | 13:00 - 13:59 | Afternoon | 38,1 | 79  | 35,0  | 35,0  | 19,26 | 576,36 | 119,49 |
| 2019/06/17 | CH2205 | Male | Three y/o | Control | Control | Fast Day | No | 13:40 | 13:00 - 13:59 | Afternoon | 38,3 | 65  | 11,2  | 11,2  | 19,46 | 561,12 | 80,59  |
| 2019/06/17 | CH2206 | Male | Three y/o | Control | Control | Fast Day | No | 13:40 | 13:00 - 13:59 | Afternoon | 38,1 | 62  | 40,4  | 40,4  | 19,26 | 557,33 | 124,43 |
| 2019/06/17 | CH2205 | Male | Three y/o | Control | Control | Fast Day | No | 13:45 | 13:00 - 13:59 | Afternoon | 38,3 | 75  | 7,4   | 7,4   | 19,46 | 572,36 | 66,59  |
| 2019/06/17 | CH2206 | Male | Three y/o | Control | Control | Fast Day | No | 13:45 | 13:00 - 13:59 | Afternoon | 38,1 | 69  | 39,8  | 39,8  | 19,26 | 565,86 | 123,91 |
| 2019/06/17 | CH2205 | Male | Three y/o | Control | Control | Fast Day | No | 13:50 | 13:00 - 13:59 | Afternoon | 38,3 | 77  | 5,2   | 5,2   | 19,46 | 574,39 | 54,72  |
| 2019/06/17 | CH2206 | Male | Three y/o | Control | Control | Fast Day | No | 13:50 | 13:00 - 13:59 | Afternoon | 38,1 | 95  | 42,6  | 42,6  | 19,26 | 590,14 | 126,26 |
| 2019/06/17 | CH2205 | Male | Three y/o | Control | Control | Fast Day | No | 13:55 | 13:00 - 13:59 | Afternoon | 38,3 | 99  | 3,4   | 3,4   | 19,46 | 593,14 | 40,51  |
| 2019/06/17 | CH2206 | Male | Three y/o | Control | Control | Fast Day | No | 13:55 | 13:00 - 13:59 | Afternoon | 38,1 | 58  | 50,8  | 50,8  | 19,26 | 551,90 | 132,33 |
| 2019/06/17 | CH2205 | Male | Three y/o | Control | Control | Fast Day | No | 14:00 | 14:00 - 14:59 | Afternoon | 38,3 | 103 | 16,8  | 16,8  | 19,46 | 596,00 | 94,37  |
| 2019/06/17 | CH2206 | Male | Three y/o | Control | Control | Fast Day | No | 14:00 | 14:00 - 14:59 | Afternoon | 38,1 | 84  | 40,4  | 40,4  | 19,26 | 581,01 | 124,43 |
| 2019/06/17 | CH2205 | Male | Three y/o | Control | Control | Fast Day | No | 14:05 | 14:00 - 14:59 | Afternoon | 38,3 | 124 | 55,0  | 55,0  | 19,46 | 609,04 | 135,08 |
| 2019/06/17 | CH2206 | Male | Three y/o | Control | Control | Fast Day | No | 14:05 | 14:00 - 14:59 | Afternoon | 38,1 | 87  | 33,2  | 33,2  | 19,26 | 583,64 | 117,68 |
| 2019/06/17 | CH2205 | Male | Three y/o | Control | Control | Fast Day | No | 14:10 | 14:00 - 14:59 | Afternoon | 38,4 | 77  | 15,4  | 15,4  | 19,56 | 574,39 | 91,41  |
| 2019/06/17 | CH2206 | Male | Three y/o | Control | Control | Fast Day | No | 14:10 | 14:00 - 14:59 | Afternoon | 38,1 | 83  | 42,6  | 42,6  | 19,26 | 580,11 | 126,26 |
| 2019/06/17 | CH2205 | Male | Three y/o | Control | Control | Fast Day | No | 14:15 | 14:00 - 14:59 | Afternoon | 38,4 | 69  | 17,4  | 17,4  | 19,56 | 565,86 | 95,56  |
| 2019/06/17 | CH2206 | Male | Three y/o | Control | Control | Fast Day | No | 14:15 | 14:00 - 14:59 | Afternoon | 38,1 | 66  | 26,8  | 26,8  | 19,26 | 562,34 | 110,33 |
| 2019/06/17 | CH2205 | Male | Three y/o | Control | Control | Fast Day | No | 14:20 | 14:00 - 14:59 | Afternoon | 38,4 | 64  | 18,4  | 18,4  | 19,56 | 559,88 | 97,47  |
| 2019/06/17 | CH2206 | Male | Three y/o | Control | Control | Fast Day | No | 14:20 | 14:00 - 14:59 | Afternoon | 38,1 | 98  | 25,0  | 25,0  | 19,26 | 592,41 | 107,94 |
| 2019/06/17 | CH2205 | Male | Three y/o | Control | Control | Fast Day | No | 14:25 | 14:00 - 14:59 | Afternoon | 38,4 | 113 | 13,2  | 13,2  | 19,56 | 602,58 | 86,17  |
| 2019/06/17 | CH2206 | Male | Three y/o | Control | Control | Fast Day | No | 14:25 | 14:00 - 14:59 | Afternoon | 38,0 | 99  | 30,2  | 30,2  | 19,15 | 593,14 | 114,42 |
| 2019/06/17 | CH2205 | Male | Three y/o | Control | Control | Fast Day | No | 14:30 | 14:00 - 14:59 | Afternoon | 38,3 |     | 12,6  | 12,6  | 19,46 |        | 84,59  |
| 2019/06/17 | CH2206 | Male | Three y/o | Control | Control | Fast Day | No | 14:30 | 14:00 - 14:59 | Afternoon | 38,0 | 70  | 31,0  | 31,0  | 19,15 | 566,99 | 115,32 |
| 2019/06/17 | CH2205 | Male | Three y/o | Control | Control | Fast Day | No | 14:35 | 14:00 - 14:59 | Afternoon | 38,4 | 82  | 22,8  | 22,8  | 19,56 | 579,19 | 104,79 |
| 2019/06/17 | CH2206 | Male | Three y/o | Control | Control | Fast Day | No | 14:35 | 14:00 - 14:59 | Afternoon | 38,1 | 87  | 39,6  | 39,6  | 19,26 | 583,64 | 123,74 |
| 2019/06/17 | CH2205 | Male | Three y/o | Control | Control | Fast Day | No | 14:40 | 14:00 - 14:59 | Afternoon | 38,4 | 79  | 21,0  | 21,0  | 19,56 | 576,36 | 101,98 |
| 2019/06/17 | CH2206 | Male | Three y/o | Control | Control | Fast Day | No | 14:40 | 14:00 - 14:59 | Afternoon | 38,1 | 57  | 34,2  | 34,2  | 19,26 | 550,47 | 118,70 |
| 2019/06/17 | CH2205 | Male | Three y/o | Control | Control | Fast Day | No | 14:45 | 14:00 - 14:59 | Afternoon | 38,4 | 78  | 21,6  | 21,6  | 19,56 | 575,38 | 102,94 |
| 2019/06/17 | CH2206 | Male | Three y/o | Control | Control | Fast Day | No | 14:45 | 14:00 - 14:59 | Afternoon | 38,1 | 92  | 41,6  | 41,6  | 19,26 | 587,78 | 125,44 |
| 2019/06/17 | CH2205 | Male | Three y/o | Control | Control | Fast Day | No | 14:50 | 14:00 - 14:59 | Afternoon | 38,4 | 68  | 19,0  | 19,0  | 19,56 | 564,71 | 98,56  |
| 2019/06/17 | CH2206 | Male | Three y/o | Control | Control | Fast Day | No | 14:50 | 14:00 - 14:59 | Afternoon | 38,1 | 100 | 39,4  | 39,4  | 19,26 | 593,87 | 123,57 |
| 2019/06/17 | CH2205 | Male | Three y/o | Control | Control | Fast Day | No | 14:55 | 14:00 - 14:59 | Afternoon | 38,4 | 80  | 18,0  | 18,0  | 19,56 | 577,31 | 96,72  |
| 2019/06/17 | CH2206 | Male | Three y/o | Control | Control | Fast Day | No | 14:55 | 14:00 - 14:59 | Afternoon | 38,1 | 90  | 35,4  | 35,4  | 19,26 | 586,16 | 119,88 |
| 2019/06/17 | CH2205 | Male | Three y/o | Control | Control | Fast Day | No | 15:00 | 15:00 - 15:59 | Afternoon | 38,4 | 79  | 19,6  | 19,6  | 19,56 | 576,36 | 99,63  |
| 2019/06/17 | CH2206 | Male | Three y/o | Control | Control | Fast Day | No | 15:00 | 15:00 - 15:59 | Afternoon | 38,1 | 67  | 26,6  | 26,6  | 19,26 | 563,53 | 110,07 |
| 2019/06/17 | CH2205 | Male | Three y/o | Control | Control | Fast Day | No | 15:05 | 15:00 - 15:59 | Afternoon | 38,4 | 71  | 22,2  | 22,2  | 19,56 | 568,10 | 103,88 |
| 2019/06/17 | CH2206 | Male | Three y/o | Control | Control | Fast Day | No | 15:05 | 15:00 - 15:59 | Afternoon | 38,1 | 49  | 24,8  | 24,8  | 19,26 | 537,80 | 107,67 |
| 2019/06/17 | CH2205 | Male | Three y/o | Control | Control | Fast Day | No | 15:10 | 15:00 - 15:59 | Afternoon | 38,4 | 92  | 16,0  | 16,0  | 19,56 | 587,78 | 92,71  |
| 2019/06/17 | CH2206 | Male | Three y/o | Control | Control | Fast Day | No | 15:10 | 15:00 - 15:59 | Afternoon | 38,1 | 83  | 25,2  | 25,2  | 19,26 | 580,11 | 108,22 |
| 2019/06/17 | CH2205 | Male | Three y/o | Control | Control | Fast Day | No | 15:15 | 15:00 - 15:59 | Afternoon | 38,4 | 117 | 63,4  | 63,4  | 19,56 | 605,02 | 140,00 |
| 2019/06/17 | CH2206 | Male | Three y/o | Control | Control | Fast Day | No | 15:15 | 15:00 - 15:59 | Afternoon | 38,1 | 55  | 37,6  | 37,6  | 19,26 | 547,52 | 121,96 |
| 2019/06/17 | CH2205 | Male | Three y/o | Control | Control | Fast Day | No | 15:20 | 15:00 - 15:59 | Afternoon | 38,5 | 124 | 25,6  | 25,6  | 19,66 | 609,04 | 108,76 |
| 2019/06/17 | CH2206 | Male | Three y/o | Control | Control | Fast Day | No | 15:20 | 15:00 - 15:59 | Afternoon | 38,1 | 49  | 53,4  | 53,4  | 19,26 | 537,80 | 134,06 |
| 2019/06/17 | CH2205 | Male | Three y/o | Control | Control | Fast Day | No | 15:25 | 15:00 - 15:59 | Afternoon | 38,4 | 83  | 20,0  | 20,0  | 19,56 | 580,11 | 100,31 |
| 2019/06/17 | CH2206 | Male | Three y/o | Control | Control | Fast Day | No | 15:25 | 15:00 - 15:59 | Afternoon | 38,0 | 125 | 37,0  | 37,0  | 19,15 | 609,60 | 121,40 |
| 2019/06/17 | CH2205 | Male | Three y/o | Control | Control | Fast Day | No | 15:30 | 15:00 - 15:59 | Afternoon | 38,4 | 80  | 14,2  | 14,2  | 19,56 | 577,31 | 88,65  |
| 2019/06/17 | CH2206 | Male | Three y/o | Control | Control | Fast Day | No | 15:30 | 15:00 - 15:59 | Afternoon | 38,0 | 110 | 105,4 | 105,4 | 19,15 | 600,69 | 157,68 |
| 2019/06/17 | CH2205 | Male | Three y/o | Control | Control | Fast Day | No | 15:35 | 15:00 - 15:59 | Afternoon | 38,3 | 75  | 63,4  | 63,4  | 19,46 | 572,36 | 140,00 |
| 2019/06/17 | CH2206 | Male | Three y/o | Control | Control | Fast Day | No | 15:35 | 15:00 - 15:59 | Afternoon | 38,1 | 162 | 120,4 | 120,4 | 19,26 | 626,88 | 162,32 |
| 2019/06/17 | CH2205 | Male | Three y/o | Control | Control | Fast Day | No | 15:40 | 15:00 - 15:59 | Afternoon | 38,3 | 92  | 82,2  | 82,2  | 19,46 | 587,78 | 149,02 |
| 2019/06/17 | CH2206 | Male | Three y/o | Control | Control | Fast Day | No | 15:40 | 15:00 - 15:59 | Afternoon | 38,0 | 118 | 28,6  | 28,6  | 19,15 | 605,61 | 112,56 |
| 2019/06/17 | CH2205 | Male | Three y/o | Control | Control | Fast Day | No | 15:45 | 15:00 - 15:59 | Afternoon | 38,3 | 94  | 7,2   | 7,2   | 19,46 | 589,37 | 65,66  |
| 2019/06/17 | CH2206 | Male | Three y/o | Control | Control | Fast Day | No | 15:45 | 15:00 - 15:59 | Afternoon | 38,0 | 90  | 35,4  | 35,4  | 19,15 | 586,16 | 119,88 |
| 2019/06/17 | CH2205 | Male | Three y/o | Control | Control | Fast Day | No | 15:50 | 15:00 - 15:59 | Afternoon | 38,3 | 72  | 6,0   | 6,0   | 19,46 | 569,20 | 59,53  |
| 2019/06/17 | CH2206 | Male | Three y/o | Control | Control | Fast Day | No | 15:50 | 15:00 - 15:59 | Afternoon | 38,0 | 90  | 19,4  | 19,4  | 19,15 | 586,16 | 99,28  |
| 2019/06/17 | CH2205 | Male | Three y/o | Control | Control | Fast Day | No | 15:55 | 15:00 - 15:59 | Afternoon | 38,3 | 68  | 18,8  | 18,8  | 19,46 | 564,71 | 98,20  |
| 2019/06/17 | CH2206 | Male | Three y/o | Control | Control | Fast Day | No | 15:55 | 15:00 - 15:59 | Afternoon | 38,0 | 85  | 21,2  | 21,2  | 19,15 | 581,90 | 102,31 |
| 2019/06/17 | CH2205 | Male | Three y/o | Control | Control | Fast Day | No | 16:00 | 16:00 - 16:59 | Evening   | 38,3 |     | 25,2  | 25,2  | 19,46 |        | 108,22 |
| 2019/06/17 | CH2206 | Male | Three y/o | Control | Control | Fast Day | No | 16:00 | 16:00 - 16:59 | Evening   | 38,1 | 82  | 52,2  | 52,2  | 19,26 | 579,19 | 133,27 |
| 2019/06/17 | CH2205 | Male | Three y/o | Control | Control | Fast Day | No | 16:05 | 16:00 - 16:59 | Evening   | 38,3 | 75  | 25,4  | 25,4  | 19,46 | 572,36 | 108,49 |
| 2019/06/17 | CH2206 | Male | Three y/o | Control | Control | Fast Day | No | 16:05 | 16:00 - 16:59 | Evening   | 38,1 | 96  | 51,6  | 51,6  | 19,26 | 590,91 | 132,87 |
| 2019/06/17 | CH2205 | Male | Three y/o | Control | Control | Fast Day | No | 16:10 | 16:00 - 16:59 | Evening   | 38,3 | 79  | 20,6  | 20,6  | 19,46 | 576,36 | 101,32 |
| 2019/06/17 | CH2206 | Male | Three y/o | Control | Control | Fast Day | No | 16:10 | 16:00 - 16:59 | Evening   | 38,0 | 147 | 21,4  | 21,4  | 19,15 | 620,52 | 102,63 |
| 2019/06/17 | CH2205 | Male | Three y/o | Control | Control | Fast Day | No | 16:15 | 16:00 - 16:59 | Evening   | 38,3 | 83  | 17,4  | 17,4  | 19,46 | 580,11 | 95,56  |
| 2019/06/17 | CH2206 | Male | Three y/o | Control | Control | Fast Day | No | 16:15 | 16:00 - 16:59 | Evening   | 38,0 | 84  | 4,2   | 4,2   | 19,15 | 581,01 | 47,57  |
| 2019/06/17 | CH2205 | Male | Three y/o | Control | Control | Fast Day | No | 16:20 | 16:00 - 16:59 | Evening   | 38,3 |     | 193,6 | 193,6 | 19,46 |        | 178,97 |
| 2019/06/17 | CH2206 | Male | Three y/o | Control | Control | Fast Day | No | 16:20 | 16:00 - 16:59 | Evening   | 38,0 | 64  | 66,0  | 66,0  | 19,15 | 559,88 | 141,40 |
| 2019/06/17 | CH2205 | Male | Three y/o | Control | Control | Fast Day | No | 16:25 | 16:00 - 16:59 | Evening   | 38,2 |     | 41,6  | 41,6  | 19,36 |        | 125,44 |



|            |        |      |           |         |         |          |    |       |               |         |      |     |       |       |       |        |        |
|------------|--------|------|-----------|---------|---------|----------|----|-------|---------------|---------|------|-----|-------|-------|-------|--------|--------|
| 2019/06/17 | CH2206 | Male | Three y/o | Control | Control | Fast Day | No | 16:25 | 16:00 - 16:59 | Evening | 38,1 | 107 | 58,0  | 58,0  | 19,26 | 598,73 | 136,92 |
| 2019/06/17 | CH2205 | Male | Three y/o | Control | Control | Fast Day | No | 16:30 | 16:00 - 16:59 | Evening | 38,2 | 160 | 97,0  | 97,0  | 19,36 | 626,07 | 154,78 |
| 2019/06/17 | CH2206 | Male | Three y/o | Control | Control | Fast Day | No | 16:30 | 16:00 - 16:59 | Evening | 38,0 | 156 | 39,0  | 39,0  | 19,15 | 624,43 | 123,22 |
| 2019/06/17 | CH2205 | Male | Three y/o | Control | Control | Fast Day | No | 16:35 | 16:00 - 16:59 | Evening | 38,2 | 124 | 98,0  | 98,0  | 19,36 | 609,04 | 155,14 |
| 2019/06/17 | CH2206 | Male | Three y/o | Control | Control | Fast Day | No | 16:35 | 16:00 - 16:59 | Evening | 38,0 | 112 | 30,6  | 30,6  | 19,15 | 601,96 | 114,87 |
| 2019/06/17 | CH2205 | Male | Three y/o | Control | Control | Fast Day | No | 16:40 | 16:00 - 16:59 | Evening | 38,2 | 124 | 137,8 | 137,8 | 19,36 | 609,04 | 167,05 |
| 2019/06/17 | CH2206 | Male | Three y/o | Control | Control | Fast Day | No | 16:40 | 16:00 - 16:59 | Evening | 37,9 | 87  | 12,2  | 12,2  | 19,05 | 583,64 | 83,49  |
| 2019/06/17 | CH2205 | Male | Three y/o | Control | Control | Fast Day | No | 16:45 | 16:00 - 16:59 | Evening | 38,2 | 126 | 64,2  | 64,2  | 19,36 | 610,14 | 140,44 |
| 2019/06/17 | CH2206 | Male | Three y/o | Control | Control | Fast Day | No | 16:45 | 16:00 - 16:59 | Evening | 37,9 | 143 | 54,8  | 54,8  | 19,05 | 618,69 | 134,96 |
| 2019/06/17 | CH2205 | Male | Three y/o | Control | Control | Fast Day | No | 16:50 | 16:00 - 16:59 | Evening | 38,2 | 83  | 11,6  | 11,6  | 19,36 | 580,11 | 81,78  |
| 2019/06/17 | CH2206 | Male | Three y/o | Control | Control | Fast Day | No | 16:50 | 16:00 - 16:59 | Evening | 37,9 | 65  | 47,8  | 47,8  | 19,05 | 561,12 | 130,23 |
| 2019/06/17 | CH2205 | Male | Three y/o | Control | Control | Fast Day | No | 16:55 | 16:00 - 16:59 | Evening | 38,2 | 94  | 222,6 | 222,6 | 19,36 | 589,37 | 183,89 |
| 2019/06/17 | CH2206 | Male | Three y/o | Control | Control | Fast Day | No | 16:55 | 16:00 - 16:59 | Evening | 37,9 | 141 | 64,2  | 64,2  | 19,05 | 617,75 | 140,44 |
| 2019/06/17 | CH2205 | Male | Three y/o | Control | Control | Fast Day | No | 17:00 | 17:00 - 17:59 | Evening | 38,3 | 125 | 28,4  | 28,4  | 19,46 | 609,60 | 112,31 |
| 2019/06/17 | CH2206 | Male | Three y/o | Control | Control | Fast Day | No | 17:00 | 17:00 - 17:59 | Evening | 37,9 | 148 | 177,4 | 177,4 | 19,05 | 620,97 | 175,90 |
| 2019/06/17 | CH2205 | Male | Three y/o | Control | Control | Fast Day | No | 17:05 | 17:00 - 17:59 | Evening | 38,3 | 128 | 99,6  | 99,6  | 19,46 | 611,22 | 155,70 |
| 2019/06/17 | CH2206 | Male | Three y/o | Control | Control | Fast Day | No | 17:05 | 17:00 - 17:59 | Evening | 37,9 |     | 118,2 | 118,2 | 19,05 |        | 161,68 |
| 2019/06/17 | CH2205 | Male | Three y/o | Control | Control | Fast Day | No | 17:10 | 17:00 - 17:59 | Evening | 38,3 | 120 | 96,2  | 96,2  | 19,46 | 606,78 | 154,49 |
| 2019/06/17 | CH2206 | Male | Three y/o | Control | Control | Fast Day | No | 17:10 | 17:00 - 17:59 | Evening | 37,9 | 120 | 198,0 | 198,0 | 19,05 | 606,78 | 179,77 |
| 2019/06/17 | CH2205 | Male | Three y/o | Control | Control | Fast Day | No | 17:15 | 17:00 - 17:59 | Evening | 38,3 |     | 165,8 | 165,8 | 19,46 |        | 173,53 |
| 2019/06/17 | CH2206 | Male | Three y/o | Control | Control | Fast Day | No | 17:15 | 17:00 - 17:59 | Evening | 38,0 |     | 63,6  | 63,6  | 19,15 |        | 140,11 |
| 2019/06/17 | CH2205 | Male | Three y/o | Control | Control | Fast Day | No | 17:20 | 17:00 - 17:59 | Evening | 38,3 |     | 135,0 | 135,0 | 19,46 |        | 166,33 |
| 2019/06/17 | CH2206 | Male | Three y/o | Control | Control | Fast Day | No | 17:20 | 17:00 - 17:59 | Evening | 38,0 | 121 | 147,0 | 147,0 | 19,15 | 607,35 | 169,31 |
| 2019/06/17 | CH2205 | Male | Three y/o | Control | Control | Fast Day | No | 17:25 | 17:00 - 17:59 | Evening | 38,4 | 92  | 44,2  | 44,2  | 19,56 | 587,78 | 127,53 |
| 2019/06/17 | CH2206 | Male | Three y/o | Control | Control | Fast Day | No | 17:25 | 17:00 - 17:59 | Evening | 38,0 |     | 41,0  | 41,0  | 19,15 |        | 124,94 |
| 2019/06/17 | CH2205 | Male | Three y/o | Control | Control | Fast Day | No | 17:30 | 17:00 - 17:59 | Evening | 38,4 |     | 111,0 | 111,0 | 19,56 |        | 159,48 |
| 2019/06/17 | CH2206 | Male | Three y/o | Control | Control | Fast Day | No | 17:30 | 17:00 - 17:59 | Evening | 38,0 | 172 | 32,8  | 32,8  | 19,15 | 630,73 | 117,26 |
| 2019/06/17 | CH2205 | Male | Three y/o | Control | Control | Fast Day | No | 17:35 | 17:00 - 17:59 | Evening | 38,4 |     | 85,2  | 85,2  | 19,56 |        | 150,27 |
| 2019/06/17 | CH2206 | Male | Three y/o | Control | Control | Fast Day | No | 17:35 | 17:00 - 17:59 | Evening | 38,0 | 131 | 143,6 | 143,6 | 19,15 | 612,80 | 168,49 |
| 2019/06/17 | CH2205 | Male | Three y/o | Control | Control | Fast Day | No | 17:40 | 17:00 - 17:59 | Evening | 38,4 |     | 98,6  | 98,6  | 19,56 |        | 155,35 |
| 2019/06/17 | CH2206 | Male | Three y/o | Control | Control | Fast Day | No | 17:40 | 17:00 - 17:59 | Evening | 38,0 | 121 | 102,6 | 102,6 | 19,15 | 607,35 | 156,74 |
| 2019/06/17 | CH2205 | Male | Three y/o | Control | Control | Fast Day | No | 17:45 | 17:00 - 17:59 | Evening | 38,4 | 129 | 18,6  | 18,6  | 19,56 | 611,75 | 97,84  |
| 2019/06/17 | CH2206 | Male | Three y/o | Control | Control | Fast Day | No | 17:45 | 17:00 - 17:59 | Evening | 38,0 | 188 | 100,4 | 100,4 | 19,15 | 636,34 | 155,98 |
| 2019/06/17 | CH2205 | Male | Three y/o | Control | Control | Fast Day | No | 17:50 | 17:00 - 17:59 | Evening | 38,2 |     | 16,8  | 16,8  | 19,36 |        | 94,37  |
| 2019/06/17 | CH2206 | Male | Three y/o | Control | Control | Fast Day | No | 17:50 | 17:00 - 17:59 | Evening | 37,9 |     | 10,2  | 10,2  | 19,05 |        | 77,43  |
| 2019/06/17 | CH2205 | Male | Three y/o | Control | Control | Fast Day | No | 17:55 | 17:00 - 17:59 | Evening | 38,2 | 126 | 34,0  | 34,0  | 19,36 | 610,14 | 118,49 |
| 2019/06/17 | CH2206 | Male | Three y/o | Control | Control | Fast Day | No | 17:55 | 17:00 - 17:59 | Evening | 37,8 | 86  | 53,4  | 53,4  | 18,95 | 582,77 | 134,06 |
| 2019/06/17 | CH2205 | Male | Three y/o | Control | Control | Fast Day | No | 18:00 | 18:00 - 18:59 | Evening | 38,3 | 143 | 78,0  | 78,0  | 19,46 | 618,69 | 147,20 |
| 2019/06/17 | CH2206 | Male | Three y/o | Control | Control | Fast Day | No | 18:00 | 18:00 - 18:59 | Evening | 37,9 | 138 | 88,2  | 88,2  | 19,05 | 616,31 | 151,47 |
| 2019/06/17 | CH2205 | Male | Three y/o | Control | Control | Fast Day | No | 18:05 | 18:00 - 18:59 | Evening | 38,4 |     | 9,4   | 9,4   | 19,56 |        | 74,66  |
| 2019/06/17 | CH2206 | Male | Three y/o | Control | Control | Fast Day | No | 18:05 | 18:00 - 18:59 | Evening | 38,0 | 117 | 36,6  | 36,6  | 19,15 | 605,02 | 121,03 |
| 2019/06/17 | CH2205 | Male | Three y/o | Control | Control | Fast Day | No | 18:10 | 18:00 - 18:59 | Evening | 38,3 |     | 12,2  | 12,2  | 19,46 |        | 83,49  |
| 2019/06/17 | CH2206 | Male | Three y/o | Control | Control | Fast Day | No | 18:10 | 18:00 - 18:59 | Evening | 37,9 | 82  | 38,4  | 38,4  | 19,05 | 579,19 | 122,68 |
| 2019/06/17 | CH2205 | Male | Three y/o | Control | Control | Fast Day | No | 18:15 | 18:00 - 18:59 | Evening | 38,3 | 73  | 5,2   | 5,2   | 19,46 | 570,27 | 54,72  |
| 2019/06/17 | CH2206 | Male | Three y/o | Control | Control | Fast Day | No | 18:15 | 18:00 - 18:59 | Evening | 37,9 | 63  | 38,2  | 38,2  | 19,05 | 558,62 | 122,50 |
| 2019/06/17 | CH2205 | Male | Three y/o | Control | Control | Fast Day | No | 18:20 | 18:00 - 18:59 | Evening | 38,3 | 79  | 2,4   | 2,4   | 19,46 | 576,36 | 28,91  |
| 2019/06/17 | CH2206 | Male | Three y/o | Control | Control | Fast Day | No | 18:20 | 18:00 - 18:59 | Evening | 38,0 | 76  | 48,0  | 48,0  | 19,15 | 573,39 | 130,38 |
| 2019/06/17 | CH2205 | Male | Three y/o | Control | Control | Fast Day | No | 18:25 | 18:00 - 18:59 | Evening | 38,4 | 65  | 2,2   | 2,2   | 19,56 | 561,12 | 26,02  |
| 2019/06/17 | CH2206 | Male | Three y/o | Control | Control | Fast Day | No | 18:25 | 18:00 - 18:59 | Evening | 37,8 | 65  | 27,4  | 27,4  | 18,95 | 561,12 | 111,09 |
| 2019/06/17 | CH2205 | Male | Three y/o | Control | Control | Fast Day | No | 18:30 | 18:00 - 18:59 | Evening | 38,4 | 67  | 3,4   | 3,4   | 19,56 | 563,53 | 40,51  |
| 2019/06/17 | CH2206 | Male | Three y/o | Control | Control | Fast Day | No | 18:30 | 18:00 - 18:59 | Evening | 37,7 | 84  | 24,4  | 24,4  | 18,85 | 581,01 | 107,11 |
| 2019/06/17 | CH2205 | Male | Three y/o | Control | Control | Fast Day | No | 18:35 | 18:00 - 18:59 | Evening | 38,4 | 68  | 8,2   | 8,2   | 19,56 | 564,71 | 70,05  |
| 2019/06/17 | CH2206 | Male | Three y/o | Control | Control | Fast Day | No | 18:35 | 18:00 - 18:59 | Evening | 37,5 | 80  | 48,6  | 48,6  | 18,65 | 577,31 | 130,81 |
| 2019/06/17 | CH2205 | Male | Three y/o | Control | Control | Fast Day | No | 18:40 | 18:00 - 18:59 | Evening | 38,4 | 88  | 11,0  | 11,0  | 19,56 | 584,49 | 79,98  |
| 2019/06/17 | CH2206 | Male | Three y/o | Control | Control | Fast Day | No | 18:40 | 18:00 - 18:59 | Evening | 37,4 | 86  | 42,2  | 42,2  | 18,55 | 582,77 | 125,93 |
| 2019/06/17 | CH2205 | Male | Three y/o | Control | Control | Fast Day | No | 18:45 | 18:00 - 18:59 | Evening | 38,4 | 74  | 5,8   | 5,8   | 19,56 | 571,33 | 58,39  |
| 2019/06/17 | CH2206 | Male | Three y/o | Control | Control | Fast Day | No | 18:45 | 18:00 - 18:59 | Evening | 37,5 | 104 | 23,8  | 23,8  | 18,65 | 596,69 | 106,26 |
| 2019/06/17 | CH2205 | Male | Three y/o | Control | Control | Fast Day | No | 18:50 | 18:00 - 18:59 | Evening | 38,4 | 72  | 5,6   | 5,6   | 19,56 | 569,20 | 57,21  |
| 2019/06/17 | CH2206 | Male | Three y/o | Control | Control | Fast Day | No | 18:50 | 18:00 - 18:59 | Evening | 37,6 | 81  | 52,4  | 52,4  | 18,75 | 578,26 | 133,41 |
| 2019/06/17 | CH2205 | Male | Three y/o | Control | Control | Fast Day | No | 18:55 | 18:00 - 18:59 | Evening | 38,3 | 66  | 7,4   | 7,4   | 19,46 | 562,34 | 66,59  |
| 2019/06/17 | CH2206 | Male | Three y/o | Control | Control | Fast Day | No | 18:55 | 18:00 - 18:59 | Evening | 37,7 | 88  | 56,0  | 56,0  | 18,85 | 584,49 | 135,70 |
| 2019/06/17 | CH2205 | Male | Three y/o | Control | Control | Fast Day | No | 19:00 | 19:00 - 19:59 | Evening | 38,3 | 65  | 5,8   | 5,8   | 19,46 | 561,12 | 58,39  |
| 2019/06/17 | CH2206 | Male | Three y/o | Control | Control | Fast Day | No | 19:00 | 19:00 - 19:59 | Evening | 37,7 | 76  | 62,2  | 62,2  | 18,85 | 573,39 | 139,34 |
| 2019/06/17 | CH2205 | Male | Three y/o | Control | Control | Fast Day | No | 19:05 | 19:00 - 19:59 | Evening | 38,3 | 68  | 4,6   | 4,6   | 19,46 | 564,71 | 50,61  |
| 2019/06/17 | CH2206 | Male | Three y/o | Control | Control | Fast Day | No | 19:05 | 19:00 - 19:59 | Evening | 37,8 | 84  | 67,0  | 67,0  | 18,95 | 581,01 | 141,92 |
| 2019/06/17 | CH2205 | Male | Three y/o | Control | Control | Fast Day | No | 19:10 | 19:00 - 19:59 | Evening | 38,2 | 59  | 3,6   | 3,6   | 19,36 | 553,30 | 42,42  |
| 2019/06/17 | CH2206 | Male | Three y/o | Control | Control | Fast Day | No | 19:10 | 19:00 - 19:59 | Evening | 37,8 | 88  | 47,6  | 47,6  | 18,95 | 584,49 | 130,09 |
| 2019/06/17 | CH2205 | Male | Three y/o | Control | Control | Fast Day | No | 19:15 | 19:00 - 19:59 | Evening | 38,1 | 64  | 4,6   | 4,6   | 19,26 | 559,88 | 50,61  |
| 2019/06/17 | CH2206 | Male | Three y/o | Control | Control | Fast Day | No | 19:15 | 19:00 - 19:59 | Evening | 37,8 | 83  | 40,4  | 40,4  | 18,95 | 580,11 | 124,43 |
| 2019/06/17 | CH2205 | Male | Three y/o | Control | Control | Fast Day | No | 19:20 | 19:00 - 19:59 | Evening | 38,1 | 55  | 16,6  | 16,6  | 19,26 | 547,52 | 93,96  |



|            |        |      |           |         |         |          |    |       |               |         |      |     |      |      |       |        |        |
|------------|--------|------|-----------|---------|---------|----------|----|-------|---------------|---------|------|-----|------|------|-------|--------|--------|
| 2019/06/17 | CH2206 | Male | Three y/o | Control | Control | Fast Day | No | 19:20 | 19:00 - 19:59 | Evening | 37,8 | 44  | 35,6 | 35,6 | 18,95 | 528,51 | 120,08 |
| 2019/06/17 | CH2205 | Male | Three y/o | Control | Control | Fast Day | No | 19:25 | 19:00 - 19:59 | Evening | 38,2 | 147 | 3,0  | 3,0  | 19,36 | 620,52 | 36,34  |
| 2019/06/17 | CH2206 | Male | Three y/o | Control | Control | Fast Day | No | 19:25 | 19:00 - 19:59 | Evening | 37,8 | 124 | 31,8 | 31,8 | 18,95 | 609,04 | 116,20 |
| 2019/06/17 | CH2205 | Male | Three y/o | Control | Control | Fast Day | No | 19:30 | 19:00 - 19:59 | Evening | 38,1 | 100 | 7,2  | 7,2  | 19,26 | 593,87 | 65,66  |
| 2019/06/17 | CH2206 | Male | Three y/o | Control | Control | Fast Day | No | 19:30 | 19:00 - 19:59 | Evening | 37,8 | 90  | 5,2  | 5,2  | 18,95 | 586,16 | 54,72  |
| 2019/06/17 | CH2205 | Male | Three y/o | Control | Control | Fast Day | No | 19:35 | 19:00 - 19:59 | Evening | 37,8 | 64  | 6,6  | 6,6  | 18,95 | 559,88 | 62,73  |
| 2019/06/17 | CH2206 | Male | Three y/o | Control | Control | Fast Day | No | 19:35 | 19:00 - 19:59 | Evening | 37,7 | 103 | 3,2  | 3,2  | 18,85 | 596,00 | 38,49  |
| 2019/06/17 | CH2205 | Male | Three y/o | Control | Control | Fast Day | No | 19:40 | 19:00 - 19:59 | Evening | 37,6 | 65  | 8,0  | 8,0  | 18,75 | 561,12 | 69,22  |
| 2019/06/17 | CH2206 | Male | Three y/o | Control | Control | Fast Day | No | 19:40 | 19:00 - 19:59 | Evening | 37,6 | 86  | 5,2  | 5,2  | 18,75 | 582,77 | 54,72  |
| 2019/06/17 | CH2205 | Male | Three y/o | Control | Control | Fast Day | No | 19:45 | 19:00 - 19:59 | Evening | 37,4 | 66  | 5,8  | 5,8  | 18,55 | 562,34 | 58,39  |
| 2019/06/17 | CH2206 | Male | Three y/o | Control | Control | Fast Day | No | 19:45 | 19:00 - 19:59 | Evening | 37,5 | 68  | 10,0 | 10,0 | 18,65 | 564,71 | 76,76  |
| 2019/06/17 | CH2205 | Male | Three y/o | Control | Control | Fast Day | No | 19:50 | 19:00 - 19:59 | Evening | 37,3 | 63  | 9,6  | 9,6  | 18,46 | 558,62 | 75,37  |
| 2019/06/17 | CH2206 | Male | Three y/o | Control | Control | Fast Day | No | 19:50 | 19:00 - 19:59 | Evening | 37,5 | 84  | 5,2  | 5,2  | 18,65 | 581,01 | 54,72  |
| 2019/06/17 | CH2205 | Male | Three y/o | Control | Control | Fast Day | No | 19:55 | 19:00 - 19:59 | Evening | 37,2 | 63  | 6,0  | 6,0  | 18,36 | 558,62 | 59,53  |
| 2019/06/17 | CH2206 | Male | Three y/o | Control | Control | Fast Day | No | 19:55 | 19:00 - 19:59 | Evening | 37,5 | 51  | 8,6  | 8,6  | 18,65 | 541,20 | 71,66  |
| 2019/06/17 | CH2205 | Male | Three y/o | Control | Control | Fast Day | No | 20:00 | 20:00 - 20:59 | Night   | 37,2 | 90  | 5,4  | 5,4  | 18,36 | 586,16 | 55,99  |
| 2019/06/17 | CH2206 | Male | Three y/o | Control | Control | Fast Day | No | 20:00 | 20:00 - 20:59 | Night   | 37,5 | 70  | 7,6  | 7,6  | 18,65 | 566,99 | 67,49  |
| 2019/06/17 | CH2205 | Male | Three y/o | Control | Control | Fast Day | No | 20:05 | 20:00 - 20:59 | Night   | 37,3 | 88  | 12,0 | 12,0 | 18,46 | 584,49 | 82,93  |
| 2019/06/17 | CH2206 | Male | Three y/o | Control | Control | Fast Day | No | 20:05 | 20:00 - 20:59 | Night   | 37,5 | 89  | 11,8 | 11,8 | 18,65 | 585,33 | 82,36  |
| 2019/06/17 | CH2205 | Male | Three y/o | Control | Control | Fast Day | No | 20:10 | 20:00 - 20:59 | Night   | 37,2 | 82  | 12,4 | 12,4 | 18,36 | 579,19 | 84,04  |
| 2019/06/17 | CH2206 | Male | Three y/o | Control | Control | Fast Day | No | 20:10 | 20:00 - 20:59 | Night   | 37,4 | 69  | 13,6 | 13,6 | 18,55 | 565,86 | 87,18  |
| 2019/06/17 | CH2205 | Male | Three y/o | Control | Control | Fast Day | No | 20:15 | 20:00 - 20:59 | Night   | 37,2 | 83  | 3,4  | 3,4  | 18,36 | 580,11 | 40,51  |
| 2019/06/17 | CH2206 | Male | Three y/o | Control | Control | Fast Day | No | 20:15 | 20:00 - 20:59 | Night   | 37,4 | 88  | 30,2 | 30,2 | 18,55 | 584,49 | 114,42 |
| 2019/06/17 | CH2205 | Male | Three y/o | Control | Control | Fast Day | No | 20:20 | 20:00 - 20:59 | Night   | 37,2 | 79  | 5,2  | 5,2  | 18,36 | 576,36 | 54,72  |
| 2019/06/17 | CH2206 | Male | Three y/o | Control | Control | Fast Day | No | 20:20 | 20:00 - 20:59 | Night   | 37,5 | 92  | 33,4 | 33,4 | 18,65 | 587,78 | 117,88 |
| 2019/06/17 | CH2205 | Male | Three y/o | Control | Control | Fast Day | No | 20:25 | 20:00 - 20:59 | Night   | 37,3 | 88  | 4,0  | 4,0  | 18,46 | 584,49 | 45,94  |
| 2019/06/17 | CH2206 | Male | Three y/o | Control | Control | Fast Day | No | 20:25 | 20:00 - 20:59 | Night   | 37,5 | 57  | 40,4 | 40,4 | 18,65 | 550,47 | 124,43 |
| 2019/06/17 | CH2205 | Male | Three y/o | Control | Control | Fast Day | No | 20:30 | 20:00 - 20:59 | Night   | 37,3 | 61  | 11,6 | 11,6 | 18,46 | 556,01 | 81,78  |
| 2019/06/17 | CH2206 | Male | Three y/o | Control | Control | Fast Day | No | 20:30 | 20:00 - 20:59 | Night   | 37,5 | 79  | 22,4 | 22,4 | 18,65 | 576,36 | 104,19 |
| 2019/06/17 | CH2205 | Male | Three y/o | Control | Control | Fast Day | No | 20:35 | 20:00 - 20:59 | Night   | 37,3 | 58  | 8,4  | 8,4  | 18,46 | 551,90 | 70,86  |
| 2019/06/17 | CH2206 | Male | Three y/o | Control | Control | Fast Day | No | 20:35 | 20:00 - 20:59 | Night   | 37,5 | 83  | 30,4 | 30,4 | 18,65 | 580,11 | 114,65 |
| 2019/06/17 | CH2205 | Male | Three y/o | Control | Control | Fast Day | No | 20:40 | 20:00 - 20:59 | Night   | 37,4 | 101 | 3,4  | 3,4  | 18,55 | 594,59 | 40,51  |
| 2019/06/17 | CH2206 | Male | Three y/o | Control | Control | Fast Day | No | 20:40 | 20:00 - 20:59 | Night   | 37,6 | 93  | 46,2 | 46,2 | 18,75 | 588,58 | 129,06 |
| 2019/06/17 | CH2205 | Male | Three y/o | Control | Control | Fast Day | No | 20:45 | 20:00 - 20:59 | Night   | 37,4 | 69  | 3,4  | 3,4  | 18,55 | 565,86 | 40,51  |
| 2019/06/17 | CH2206 | Male | Three y/o | Control | Control | Fast Day | No | 20:45 | 20:00 - 20:59 | Night   | 37,7 | 99  | 34,8 | 34,8 | 18,85 | 593,14 | 119,29 |
| 2019/06/17 | CH2205 | Male | Three y/o | Control | Control | Fast Day | No | 20:50 | 20:00 - 20:59 | Night   | 37,4 | 62  | 8,6  | 8,6  | 18,55 | 557,33 | 71,66  |
| 2019/06/17 | CH2206 | Male | Three y/o | Control | Control | Fast Day | No | 20:50 | 20:00 - 20:59 | Night   | 37,7 | 95  | 52,4 | 52,4 | 18,85 | 590,14 | 133,41 |
| 2019/06/17 | CH2205 | Male | Three y/o | Control | Control | Fast Day | No | 20:55 | 20:00 - 20:59 | Night   | 37,3 | 75  | 11,0 | 11,0 | 18,46 | 572,36 | 79,98  |
| 2019/06/17 | CH2206 | Male | Three y/o | Control | Control | Fast Day | No | 20:55 | 20:00 - 20:59 | Night   | 37,7 | 51  | 61,6 | 61,6 | 18,85 | 541,20 | 139,00 |
| 2019/06/17 | CH2205 | Male | Three y/o | Control | Control | Fast Day | No | 21:00 | 21:00 - 21:59 | Night   | 37,3 | 84  | 4,4  | 4,4  | 18,46 | 581,01 | 49,12  |
| 2019/06/17 | CH2206 | Male | Three y/o | Control | Control | Fast Day | No | 21:00 | 21:00 - 21:59 | Night   | 37,5 | 87  | 57,8 | 57,8 | 18,65 | 583,64 | 136,80 |
| 2019/06/17 | CH2205 | Male | Three y/o | Control | Control | Fast Day | No | 21:05 | 21:00 - 21:59 | Night   | 37,3 | 65  | 6,8  | 6,8  | 18,46 | 561,12 | 63,74  |
| 2019/06/17 | CH2206 | Male | Three y/o | Control | Control | Fast Day | No | 21:05 | 21:00 - 21:59 | Night   | 37,4 | 94  | 48,2 | 48,2 | 18,55 | 589,37 | 130,52 |
| 2019/06/17 | CH2205 | Male | Three y/o | Control | Control | Fast Day | No | 21:10 | 21:00 - 21:59 | Night   | 37,4 | 90  | 4,2  | 4,2  | 18,55 | 586,16 | 47,57  |
| 2019/06/17 | CH2206 | Male | Three y/o | Control | Control | Fast Day | No | 21:10 | 21:00 - 21:59 | Night   | 37,4 | 98  | 64,6 | 64,6 | 18,55 | 592,41 | 140,65 |
| 2019/06/17 | CH2205 | Male | Three y/o | Control | Control | Fast Day | No | 21:15 | 21:00 - 21:59 | Night   | 37,3 | 69  | 9,2  | 9,2  | 18,46 | 565,86 | 73,94  |
| 2019/06/17 | CH2206 | Male | Three y/o | Control | Control | Fast Day | No | 21:15 | 21:00 - 21:59 | Night   | 37,3 | 60  | 63,2 | 63,2 | 18,46 | 554,67 | 139,89 |
| 2019/06/17 | CH2205 | Male | Three y/o | Control | Control | Fast Day | No | 21:20 | 21:00 - 21:59 | Night   | 37,3 | 88  | 8,8  | 8,8  | 18,46 | 584,49 | 72,43  |
| 2019/06/17 | CH2206 | Male | Three y/o | Control | Control | Fast Day | No | 21:20 | 21:00 - 21:59 | Night   | 37,2 | 98  | 63,0 | 63,0 | 18,36 | 592,41 | 139,78 |
| 2019/06/17 | CH2205 | Male | Three y/o | Control | Control | Fast Day | No | 21:25 | 21:00 - 21:59 | Night   | 37,2 | 66  | 3,8  | 3,8  | 18,36 | 562,34 | 44,22  |
| 2019/06/17 | CH2206 | Male | Three y/o | Control | Control | Fast Day | No | 21:25 | 21:00 - 21:59 | Night   | 37,2 | 68  | 64,2 | 64,2 | 18,36 | 564,71 | 140,44 |
| 2019/06/17 | CH2205 | Male | Three y/o | Control | Control | Fast Day | No | 21:30 | 21:00 - 21:59 | Night   | 37,2 | 74  | 10,4 | 10,4 | 18,36 | 571,33 | 78,08  |
| 2019/06/17 | CH2206 | Male | Three y/o | Control | Control | Fast Day | No | 21:30 | 21:00 - 21:59 | Night   | 37,1 | 74  | 54,8 | 54,8 | 18,26 | 571,33 | 134,96 |
| 2019/06/17 | CH2205 | Male | Three y/o | Control | Control | Fast Day | No | 21:35 | 21:00 - 21:59 | Night   | 37,2 | 84  | 10,0 | 10,0 | 18,36 | 581,01 | 76,76  |
| 2019/06/17 | CH2206 | Male | Three y/o | Control | Control | Fast Day | No | 21:35 | 21:00 - 21:59 | Night   | 37,1 | 97  | 57,8 | 57,8 | 18,26 | 591,66 | 136,80 |
| 2019/06/17 | CH2205 | Male | Three y/o | Control | Control | Fast Day | No | 21:40 | 21:00 - 21:59 | Night   | 37,2 | 66  | 4,2  | 4,2  | 18,36 | 562,34 | 47,57  |
| 2019/06/17 | CH2206 | Male | Three y/o | Control | Control | Fast Day | No | 21:40 | 21:00 - 21:59 | Night   | 37,2 | 88  | 60,2 | 60,2 | 18,36 | 584,49 | 138,21 |
| 2019/06/17 | CH2205 | Male | Three y/o | Control | Control | Fast Day | No | 21:45 | 21:00 - 21:59 | Night   | 37,2 | 89  | 6,0  | 6,0  | 18,36 | 585,33 | 59,53  |
| 2019/06/17 | CH2206 | Male | Three y/o | Control | Control | Fast Day | No | 21:45 | 21:00 - 21:59 | Night   | 37,2 | 84  | 64,0 | 64,0 | 18,36 | 581,01 | 140,33 |
| 2019/06/17 | CH2205 | Male | Three y/o | Control | Control | Fast Day | No | 21:50 | 21:00 - 21:59 | Night   | 37,2 | 96  | 3,4  | 3,4  | 18,36 | 590,91 | 40,51  |
| 2019/06/17 | CH2206 | Male | Three y/o | Control | Control | Fast Day | No | 21:50 | 21:00 - 21:59 | Night   | 37,2 | 86  | 70,0 | 70,0 | 18,36 | 582,77 | 143,44 |
| 2019/06/17 | CH2205 | Male | Three y/o | Control | Control | Fast Day | No | 21:55 | 21:00 - 21:59 | Night   | 37,2 | 68  | 4,2  | 4,2  | 18,36 | 564,71 | 47,57  |
| 2019/06/17 | CH2206 | Male | Three y/o | Control | Control | Fast Day | No | 21:55 | 21:00 - 21:59 | Night   | 37,2 | 71  | 64,4 | 64,4 | 18,36 | 568,10 | 140,55 |
| 2019/06/17 | CH2205 | Male | Three y/o | Control | Control | Fast Day | No | 22:00 | 22:00 - 22:59 | Night   | 37,2 | 90  | 3,0  | 3,0  | 18,36 | 586,16 | 36,34  |
| 2019/06/17 | CH2206 | Male | Three y/o | Control | Control | Fast Day | No | 22:00 | 22:00 - 22:59 | Night   | 37,2 | 88  | 66,2 | 66,2 | 18,36 | 584,49 | 141,50 |
| 2019/06/17 | CH2205 | Male | Three y/o | Control | Control | Fast Day | No | 22:05 | 22:00 - 22:59 | Night   | 37,2 | 94  | 6,4  | 6,4  | 18,36 | 589,37 | 61,70  |
| 2019/06/17 | CH2206 | Male | Three y/o | Control | Control | Fast Day | No | 22:05 | 22:00 - 22:59 | Night   | 37,2 | 108 | 53,4 | 53,4 | 18,36 | 599,39 | 134,06 |
| 2019/06/17 | CH2205 | Male | Three y/o | Control | Control | Fast Day | No | 22:10 | 22:00 - 22:59 | Night   | 37,3 |     | 5,6  | 5,6  | 18,46 |        | 57,21  |
| 2019/06/17 | CH2206 | Male | Three y/o | Control | Control | Fast Day | No | 22:10 | 22:00 - 22:59 | Night   | 37,2 | 113 | 47,6 | 47,6 | 18,36 | 602,58 | 130,09 |
| 2019/06/17 | CH2205 | Male | Three y/o | Control | Control | Fast Day | No | 22:15 | 22:00 - 22:59 | Night   | 37,3 | 68  | 1,8  | 1,8  | 18,46 | 564,71 | 19,38  |



|    |            |        |      |           |         |         |          |    |       |               |               |      |     |      |      |       |        |        |
|----|------------|--------|------|-----------|---------|---------|----------|----|-------|---------------|---------------|------|-----|------|------|-------|--------|--------|
|    | 2019/06/17 | CH2206 | Male | Three y/o | Control | Control | Fast Day | No | 22:15 | 22:00 - 22:59 | Night         | 37,3 | 63  | 54,8 | 54,8 | 18,46 | 558,62 | 134,96 |
|    | 2019/06/17 | CH2205 | Male | Three y/o | Control | Control | Fast Day | No | 22:20 | 22:00 - 22:59 | Night         | 37,3 | 90  | 3,0  | 3,0  | 18,46 | 586,16 | 36,34  |
|    | 2019/06/17 | CH2206 | Male | Three y/o | Control | Control | Fast Day | No | 22:20 | 22:00 - 22:59 | Night         | 37,4 | 81  | 51,8 | 51,8 | 18,55 | 578,26 | 133,01 |
|    | 2019/06/17 | CH2205 | Male | Three y/o | Control | Control | Fast Day | No | 22:25 | 22:00 - 22:59 | Night         | 37,3 | 97  | 6,8  | 6,8  | 18,46 | 591,66 | 63,74  |
|    | 2019/06/17 | CH2206 | Male | Three y/o | Control | Control | Fast Day | No | 22:25 | 22:00 - 22:59 | Night         | 37,5 | 69  | 70,8 | 70,8 | 18,65 | 565,86 | 143,83 |
|    | 2019/06/17 | CH2205 | Male | Three y/o | Control | Control | Fast Day | No | 22:30 | 22:00 - 22:59 | Night         | 37,6 |     | 6,8  | 6,8  | 18,75 |        | 63,74  |
|    | 2019/06/17 | CH2206 | Male | Three y/o | Control | Control | Fast Day | No | 22:30 | 22:00 - 22:59 | Night         | 37,5 | 65  | 65,4 | 65,4 | 18,65 | 561,12 | 141,08 |
|    | 2019/06/17 | CH2205 | Male | Three y/o | Control | Control | Fast Day | No | 22:35 | 22:00 - 22:59 | Night         | 37,5 | 78  | 11,0 | 11,0 | 18,65 | 575,38 | 79,98  |
|    | 2019/06/17 | CH2206 | Male | Three y/o | Control | Control | Fast Day | No | 22:35 | 22:00 - 22:59 | Night         | 37,5 | 91  | 68,2 | 68,2 | 18,65 | 586,98 | 142,53 |
|    | 2019/06/17 | CH2205 | Male | Three y/o | Control | Control | Fast Day | No | 22:40 | 22:00 - 22:59 | Night         | 37,5 | 91  | 5,6  | 5,6  | 18,65 | 586,98 | 57,21  |
|    | 2019/06/17 | CH2206 | Male | Three y/o | Control | Control | Fast Day | No | 22:40 | 22:00 - 22:59 | Night         | 37,3 | 113 | 68,2 | 68,2 | 18,46 | 602,58 | 142,53 |
|    | 2019/06/17 | CH2205 | Male | Three y/o | Control | Control | Fast Day | No | 22:45 | 22:00 - 22:59 | Night         | 37,5 | 61  | 7,6  | 7,6  | 18,65 | 556,01 | 67,49  |
|    | 2019/06/17 | CH2206 | Male | Three y/o | Control | Control | Fast Day | No | 22:45 | 22:00 - 22:59 | Night         | 37,2 | 77  | 66,8 | 66,8 | 18,36 | 574,39 | 141,81 |
|    | 2019/06/17 | CH2205 | Male | Three y/o | Control | Control | Fast Day | No | 22:50 | 22:00 - 22:59 | Night         | 37,4 | 85  | 4,8  | 4,8  | 18,55 | 581,90 | 52,04  |
|    | 2019/06/17 | CH2206 | Male | Three y/o | Control | Control | Fast Day | No | 22:50 | 22:00 - 22:59 | Night         | 37,1 | 84  | 62,8 | 62,8 | 18,26 | 581,01 | 139,67 |
|    | 2019/06/17 | CH2205 | Male | Three y/o | Control | Control | Fast Day | No | 22:55 | 22:00 - 22:59 | Night         | 37,4 | 90  | 4,0  | 4,0  | 18,55 | 586,16 | 45,94  |
|    | 2019/06/17 | CH2206 | Male | Three y/o | Control | Control | Fast Day | No | 22:55 | 22:00 - 22:59 | Night         | 37,0 | 86  | 69,2 | 69,2 | 18,16 | 582,77 | 143,04 |
|    | 2019/06/17 | CH2205 | Male | Three y/o | Control | Control | Fast Day | No | 23:00 | 23:00 - 23:59 | Night         | 37,4 | 58  | 8,4  | 8,4  | 18,55 | 551,90 | 70,86  |
|    | 2019/06/17 | CH2206 | Male | Three y/o | Control | Control | Fast Day | No | 23:00 | 23:00 - 23:59 | Night         | 37,0 | 68  | 62,6 | 62,6 | 18,16 | 564,71 | 139,56 |
|    | 2019/06/17 | CH2205 | Male | Three y/o | Control | Control | Fast Day | No | 23:05 | 23:00 - 23:59 | Night         | 37,4 | 50  | 5,0  | 5,0  | 18,55 | 539,52 | 53,41  |
|    | 2019/06/17 | CH2206 | Male | Three y/o | Control | Control | Fast Day | No | 23:05 | 23:00 - 23:59 | Night         | 37,0 | 113 | 58,6 | 58,6 | 18,16 | 602,58 | 137,28 |
|    | 2019/06/17 | CH2205 | Male | Three y/o | Control | Control | Fast Day | No | 23:10 | 23:00 - 23:59 | Night         | 37,4 | 94  | 11,0 | 11,0 | 18,55 | 589,37 | 79,98  |
|    | 2019/06/17 | CH2206 | Male | Three y/o | Control | Control | Fast Day | No | 23:10 | 23:00 - 23:59 | Night         | 36,9 | 89  | 66,8 | 66,8 | 18,06 | 585,33 | 141,81 |
|    | 2019/06/17 | CH2205 | Male | Three y/o | Control | Control | Fast Day | No | 23:15 | 23:00 - 23:59 | Night         | 37,4 | 56  | 2,0  | 2,0  | 18,55 | 549,01 | 22,86  |
|    | 2019/06/17 | CH2206 | Male | Three y/o | Control | Control | Fast Day | No | 23:15 | 23:00 - 23:59 | Night         | 36,9 | 94  | 66,2 | 66,2 | 18,06 | 589,37 | 141,50 |
|    | 2019/06/17 | CH2205 | Male | Three y/o | Control | Control | Fast Day | No | 23:20 | 23:00 - 23:59 | Night         | 37,4 | 49  | 5,8  | 5,8  | 18,55 | 537,80 | 58,39  |
|    | 2019/06/17 | CH2206 | Male | Three y/o | Control | Control | Fast Day | No | 23:20 | 23:00 - 23:59 | Night         | 36,9 | 94  | 63,0 | 63,0 | 18,06 | 589,37 | 139,78 |
|    | 2019/06/17 | CH2205 | Male | Three y/o | Control | Control | Fast Day | No | 23:25 | 23:00 - 23:59 | Night         | 37,4 | 63  | 7,0  | 7,0  | 18,55 | 558,62 | 64,72  |
|    | 2019/06/17 | CH2206 | Male | Three y/o | Control | Control | Fast Day | No | 23:25 | 23:00 - 23:59 | Night         | 36,8 | 85  | 63,4 | 63,4 | 17,96 | 581,90 | 140,00 |
|    | 2019/06/17 | CH2205 | Male | Three y/o | Control | Control | Fast Day | No | 23:30 | 23:00 - 23:59 | Night         | 37,6 | 67  | 16,2 | 16,2 | 18,75 | 563,53 | 93,13  |
|    | 2019/06/17 | CH2206 | Male | Three y/o | Control | Control | Fast Day | No | 23:30 | 23:00 - 23:59 | Night         | 36,7 | 108 | 65,6 | 65,6 | 17,87 | 599,39 | 141,19 |
|    | 2019/06/17 | CH2205 | Male | Three y/o | Control | Control | Fast Day | No | 23:35 | 23:00 - 23:59 | Night         | 37,6 | 82  | 14,0 | 14,0 | 18,75 | 579,19 | 88,17  |
|    | 2019/06/17 | CH2206 | Male | Three y/o | Control | Control | Fast Day | No | 23:35 | 23:00 - 23:59 | Night         | 36,7 | 98  | 67,6 | 67,6 | 17,87 | 592,41 | 142,23 |
|    | 2019/06/17 | CH2205 | Male | Three y/o | Control | Control | Fast Day | No | 23:40 | 23:00 - 23:59 | Night         | 37,6 | 61  | 10,8 | 10,8 | 18,75 | 556,01 | 79,36  |
|    | 2019/06/17 | CH2206 | Male | Three y/o | Control | Control | Fast Day | No | 23:40 | 23:00 - 23:59 | Night         | 37,0 |     | 32,6 | 32,6 | 18,16 |        | 117,05 |
|    | 2019/06/17 | CH2205 | Male | Three y/o | Control | Control | Fast Day | No | 23:45 | 23:00 - 23:59 | Night         | 37,6 | 79  | 25,6 | 25,6 | 18,75 | 576,36 | 108,76 |
|    | 2019/06/17 | CH2206 | Male | Three y/o | Control | Control | Fast Day | No | 23:45 | 23:00 - 23:59 | Night         | 37,2 | 99  | 20,0 | 20,0 | 18,36 | 593,14 | 100,31 |
|    | 2019/06/17 | CH2205 | Male | Three y/o | Control | Control | Fast Day | No | 23:50 | 23:00 - 23:59 | Night         | 37,6 | 143 | 28,0 | 28,0 | 18,75 | 618,69 | 111,83 |
|    | 2019/06/17 | CH2206 | Male | Three y/o | Control | Control | Fast Day | No | 23:50 | 23:00 - 23:59 | Night         | 37,1 | 88  | 32,4 | 32,4 | 18,26 | 584,49 | 116,84 |
|    | 2019/06/17 | CH2205 | Male | Three y/o | Control | Control | Fast Day | No | 23:55 | 23:00 - 23:59 | Night         | 37,6 |     | 35,0 | 35,0 | 18,75 |        | 119,49 |
|    | 2019/06/17 | CH2206 | Male | Three y/o | Control | Control | Fast Day | No | 23:55 | 23:00 - 23:59 | Night         | 37,0 | 88  | 58,4 | 58,4 | 18,16 | 584,49 | 137,16 |
| 34 | 2019/06/18 | CH2205 | Male | Three y/o | Control | Control | Feed Day | No | 00:00 | 00:00 - 00:59 | Early Morning | 37,7 |     | 21,8 | 21,8 | 18,85 |        | 103,26 |
|    | 2019/06/18 | CH2206 | Male | Three y/o | Control | Control | Feed Day | No | 00:00 | 00:00 - 00:59 | Early Morning | 37,2 | 86  | 62,6 | 62,6 | 18,36 | 582,77 | 139,56 |
|    | 2019/06/18 | CH2205 | Male | Three y/o | Control | Control | Feed Day | No | 00:05 | 00:00 - 00:59 | Early Morning | 37,7 | 70  | 14,6 | 14,6 | 18,85 | 566,99 | 89,59  |
|    | 2019/06/18 | CH2206 | Male | Three y/o | Control | Control | Feed Day | No | 00:05 | 00:00 - 00:59 | Early Morning | 37,1 | 85  | 65,2 | 65,2 | 18,26 | 581,90 | 140,97 |
|    | 2019/06/18 | CH2205 | Male | Three y/o | Control | Control | Feed Day | No | 00:10 | 00:00 - 00:59 | Early Morning | 37,6 |     | 14,8 | 14,8 | 18,75 |        | 90,05  |
|    | 2019/06/18 | CH2206 | Male | Three y/o | Control | Control | Feed Day | No | 00:10 | 00:00 - 00:59 | Early Morning | 37,0 | 64  | 66,0 | 66,0 | 18,16 | 559,88 | 141,40 |
|    | 2019/06/18 | CH2205 | Male | Three y/o | Control | Control | Feed Day | No | 00:15 | 00:00 - 00:59 | Early Morning | 37,5 |     | 14,8 | 14,8 | 18,65 |        | 90,05  |
|    | 2019/06/18 | CH2206 | Male | Three y/o | Control | Control | Feed Day | No | 00:15 | 00:00 - 00:59 | Early Morning | 37,0 | 58  | 67,4 | 67,4 | 18,16 | 551,90 | 142,12 |
|    | 2019/06/18 | CH2205 | Male | Three y/o | Control | Control | Feed Day | No | 00:20 | 00:00 - 00:59 | Early Morning | 37,5 |     | 12,2 | 12,2 | 18,65 |        | 83,49  |
|    | 2019/06/18 | CH2206 | Male | Three y/o | Control | Control | Feed Day | No | 00:20 | 00:00 - 00:59 | Early Morning | 37,0 | 72  | 66,2 | 66,2 | 18,16 | 569,20 | 141,50 |
|    | 2019/06/18 | CH2205 | Male | Three y/o | Control | Control | Feed Day | No | 00:25 | 00:00 - 00:59 | Early Morning | 37,4 |     | 18,6 | 18,6 | 18,55 |        | 97,84  |
|    | 2019/06/18 | CH2206 | Male | Three y/o | Control | Control | Feed Day | No | 00:25 | 00:00 - 00:59 | Early Morning | 37,0 | 77  | 62,4 | 62,4 | 18,16 | 574,39 | 139,45 |
|    | 2019/06/18 | CH2205 | Male | Three y/o | Control | Control | Feed Day | No | 00:30 | 00:00 - 00:59 | Early Morning | 37,4 | 63  | 17,6 | 17,6 | 18,55 | 558,62 | 95,95  |
|    | 2019/06/18 | CH2206 | Male | Three y/o | Control | Control | Feed Day | No | 00:30 | 00:00 - 00:59 | Early Morning | 37,0 | 70  | 66,0 | 66,0 | 18,16 | 566,99 | 141,40 |
|    | 2019/06/18 | CH2205 | Male | Three y/o | Control | Control | Feed Day | No | 00:35 | 00:00 - 00:59 | Early Morning | 37,3 | 61  | 19,6 | 19,6 | 18,46 | 556,01 | 99,63  |
|    | 2019/06/18 | CH2206 | Male | Three y/o | Control | Control | Feed Day | No | 00:35 | 00:00 - 00:59 | Early Morning | 37,0 | 84  | 63,4 | 63,4 | 18,16 | 581,01 | 140,00 |
|    | 2019/06/18 | CH2205 | Male | Three y/o | Control | Control | Feed Day | No | 00:40 | 00:00 - 00:59 | Early Morning | 37,3 | 57  | 18,6 | 18,6 | 18,46 | 550,47 | 97,84  |
|    | 2019/06/18 | CH2206 | Male | Three y/o | Control | Control | Feed Day | No | 00:40 | 00:00 - 00:59 | Early Morning | 37,0 | 92  | 63,0 | 63,0 | 18,16 | 587,78 | 139,78 |
|    | 2019/06/18 | CH2205 | Male | Three y/o | Control | Control | Feed Day | No | 00:45 | 00:00 - 00:59 | Early Morning | 37,4 |     | 18,0 | 18,0 | 18,55 |        | 96,72  |
|    | 2019/06/18 | CH2206 | Male | Three y/o | Control | Control | Feed Day | No | 00:45 | 00:00 - 00:59 | Early Morning | 37,1 | 45  | 63,0 | 63,0 | 18,26 | 530,47 | 139,78 |
|    | 2019/06/18 | CH2205 | Male | Three y/o | Control | Control | Feed Day | No | 00:50 | 00:00 - 00:59 | Early Morning | 37,3 |     | 14,0 | 14,0 | 18,46 |        | 88,17  |
|    | 2019/06/18 | CH2206 | Male | Three y/o | Control | Control | Feed Day | No | 00:50 | 00:00 - 00:59 | Early Morning | 37,1 | 79  | 65,0 | 65,0 | 18,26 | 576,36 | 140,87 |
|    | 2019/06/18 | CH2205 | Male | Three y/o | Control | Control | Feed Day | No | 00:55 | 00:00 - 00:59 | Early Morning | 37,4 |     | 15,4 | 15,4 | 18,55 |        | 91,41  |
|    | 2019/06/18 | CH2206 | Male | Three y/o | Control | Control | Feed Day | No | 00:55 | 00:00 - 00:59 | Early Morning | 37,1 | 59  | 62,0 | 62,0 | 18,26 | 553,30 | 139,23 |
|    | 2019/06/18 | CH2205 | Male | Three y/o | Control | Control | Feed Day | No | 01:00 | 01:00 - 01:59 | Early Morning | 37,4 |     | 15,8 | 15,8 | 18,55 |        | 92,28  |
|    | 2019/06/18 | CH2206 | Male | Three y/o | Control | Control | Feed Day | No | 01:00 | 01:00 - 01:59 | Early Morning | 37,2 | 84  | 64,6 | 64,6 | 18,36 | 581,01 | 140,65 |
|    | 2019/06/18 | CH2205 | Male | Three y/o | Control | Control | Feed Day | No | 01:05 | 01:00 - 01:59 | Early Morning | 37,4 | 71  | 14,6 | 14,6 | 18,55 | 568,10 | 89,59  |
|    | 2019/06/18 | CH2206 | Male | Three y/o | Control | Control | Feed Day | No | 01:05 | 01:00 - 01:59 | Early Morning | 37,2 | 84  | 64,4 | 64,4 | 18,36 | 581,01 | 140,55 |
|    | 2019/06/18 | CH2205 | Male | Three y/o | Control | Control | Feed Day | No | 01:10 | 01:00 - 01:59 | Early Morning | 37,4 |     | 13,6 | 13,6 | 18,55 |        | 87,18  |



|            |        |      |           |         |         |          |    |       |               |               |      |     |       |       |       |        |        |
|------------|--------|------|-----------|---------|---------|----------|----|-------|---------------|---------------|------|-----|-------|-------|-------|--------|--------|
| 2019/06/18 | CH2206 | Male | Three y/o | Control | Control | Feed Day | No | 01:10 | 01:00 - 01:59 | Early Morning | 37,2 | 83  | 44,0  | 44,0  | 18,36 | 580,11 | 127,37 |
| 2019/06/18 | CH2205 | Male | Three y/o | Control | Control | Feed Day | No | 01:15 | 01:00 - 01:59 | Early Morning | 37,4 | 87  | 15,8  | 15,8  | 18,55 | 583,64 | 92,28  |
| 2019/06/18 | CH2206 | Male | Three y/o | Control | Control | Feed Day | No | 01:15 | 01:00 - 01:59 | Early Morning | 37,2 | 80  | 20,8  | 20,8  | 18,36 | 577,31 | 101,65 |
| 2019/06/18 | CH2205 | Male | Three y/o | Control | Control | Feed Day | No | 01:20 | 01:00 - 01:59 | Early Morning | 37,4 |     | 17,4  | 17,4  | 18,55 |        | 95,56  |
| 2019/06/18 | CH2206 | Male | Three y/o | Control | Control | Feed Day | No | 01:20 | 01:00 - 01:59 | Early Morning | 37,3 | 90  | 22,8  | 22,8  | 18,46 | 586,16 | 104,79 |
| 2019/06/18 | CH2205 | Male | Three y/o | Control | Control | Feed Day | No | 01:25 | 01:00 - 01:59 | Early Morning | 37,4 |     | 13,0  | 13,0  | 18,55 |        | 85,65  |
| 2019/06/18 | CH2206 | Male | Three y/o | Control | Control | Feed Day | No | 01:25 | 01:00 - 01:59 | Early Morning | 37,3 | 64  | 11,6  | 11,6  | 18,46 | 559,88 | 81,78  |
| 2019/06/18 | CH2205 | Male | Three y/o | Control | Control | Feed Day | No | 01:30 | 01:00 - 01:59 | Early Morning | 37,4 | 117 | 14,4  | 14,4  | 18,55 | 605,02 | 89,12  |
| 2019/06/18 | CH2206 | Male | Three y/o | Control | Control | Feed Day | No | 01:30 | 01:00 - 01:59 | Early Morning | 37,4 | 98  | 4,8   | 4,8   | 18,55 | 592,41 | 52,04  |
| 2019/06/18 | CH2205 | Male | Three y/o | Control | Control | Feed Day | No | 01:35 | 01:00 - 01:59 | Early Morning | 37,4 |     | 7,2   | 7,2   | 18,55 |        | 65,66  |
| 2019/06/18 | CH2206 | Male | Three y/o | Control | Control | Feed Day | No | 01:35 | 01:00 - 01:59 | Early Morning | 37,4 | 107 | 5,4   | 5,4   | 18,55 | 598,73 | 55,99  |
| 2019/06/18 | CH2205 | Male | Three y/o | Control | Control | Feed Day | No | 01:40 | 01:00 - 01:59 | Early Morning | 37,4 | 86  | 5,6   | 5,6   | 18,55 | 582,77 | 57,21  |
| 2019/06/18 | CH2206 | Male | Three y/o | Control | Control | Feed Day | No | 01:40 | 01:00 - 01:59 | Early Morning | 37,3 | 88  | 1,8   | 1,8   | 18,46 | 584,49 | 19,38  |
| 2019/06/18 | CH2205 | Male | Three y/o | Control | Control | Feed Day | No | 01:45 | 01:00 - 01:59 | Early Morning | 37,4 | 53  | 4,6   | 4,6   | 18,55 | 544,43 | 50,61  |
| 2019/06/18 | CH2206 | Male | Three y/o | Control | Control | Feed Day | No | 01:45 | 01:00 - 01:59 | Early Morning | 37,3 |     | 5,2   | 5,2   | 18,46 |        | 54,72  |
| 2019/06/18 | CH2205 | Male | Three y/o | Control | Control | Feed Day | No | 01:50 | 01:00 - 01:59 | Early Morning | 37,4 | 95  | 7,8   | 7,8   | 18,55 | 590,14 | 68,36  |
| 2019/06/18 | CH2206 | Male | Three y/o | Control | Control | Feed Day | No | 01:50 | 01:00 - 01:59 | Early Morning | 37,3 | 55  | 5,4   | 5,4   | 18,46 | 547,52 | 55,99  |
| 2019/06/18 | CH2205 | Male | Three y/o | Control | Control | Feed Day | No | 01:55 | 01:00 - 01:59 | Early Morning | 37,4 | 94  | 7,6   | 7,6   | 18,55 | 589,37 | 67,49  |
| 2019/06/18 | CH2206 | Male | Three y/o | Control | Control | Feed Day | No | 01:55 | 01:00 - 01:59 | Early Morning | 37,4 | 76  | 7,0   | 7,0   | 18,55 | 573,39 | 64,72  |
| 2019/06/18 | CH2205 | Male | Three y/o | Control | Control | Feed Day | No | 02:00 | 02:00 - 02:59 | Early Morning | 37,4 | 58  | 17,2  | 17,2  | 18,55 | 551,90 | 95,17  |
| 2019/06/18 | CH2206 | Male | Three y/o | Control | Control | Feed Day | No | 02:00 | 02:00 - 02:59 | Early Morning | 37,3 | 50  | 9,0   | 9,0   | 18,46 | 539,52 | 73,19  |
| 2019/06/18 | CH2205 | Male | Three y/o | Control | Control | Feed Day | No | 02:05 | 02:00 - 02:59 | Early Morning | 37,4 | 50  | 13,4  | 13,4  | 18,55 | 539,52 | 86,68  |
| 2019/06/18 | CH2206 | Male | Three y/o | Control | Control | Feed Day | No | 02:05 | 02:00 - 02:59 | Early Morning | 37,3 | 92  | 56,2  | 56,2  | 18,46 | 587,78 | 135,83 |
| 2019/06/18 | CH2205 | Male | Three y/o | Control | Control | Feed Day | No | 02:10 | 02:00 - 02:59 | Early Morning | 37,4 | 82  | 13,2  | 13,2  | 18,55 | 579,19 | 86,17  |
| 2019/06/18 | CH2206 | Male | Three y/o | Control | Control | Feed Day | No | 02:10 | 02:00 - 02:59 | Early Morning | 37,3 | 53  | 53,6  | 53,6  | 18,46 | 544,43 | 134,19 |
| 2019/06/18 | CH2205 | Male | Three y/o | Control | Control | Feed Day | No | 02:15 | 02:00 - 02:59 | Early Morning | 37,4 | 83  | 10,2  | 10,2  | 18,55 | 580,11 | 77,43  |
| 2019/06/18 | CH2206 | Male | Three y/o | Control | Control | Feed Day | No | 02:15 | 02:00 - 02:59 | Early Morning | 37,2 | 84  | 58,8  | 58,8  | 18,36 | 581,01 | 137,39 |
| 2019/06/18 | CH2205 | Male | Three y/o | Control | Control | Feed Day | No | 02:20 | 02:00 - 02:59 | Early Morning | 37,4 | 66  | 11,8  | 11,8  | 18,55 | 562,34 | 82,36  |
| 2019/06/18 | CH2206 | Male | Three y/o | Control | Control | Feed Day | No | 02:20 | 02:00 - 02:59 | Early Morning | 37,1 | 49  | 63,8  | 63,8  | 18,26 | 537,80 | 140,22 |
| 2019/06/18 | CH2205 | Male | Three y/o | Control | Control | Feed Day | No | 02:25 | 02:00 - 02:59 | Early Morning | 37,4 | 58  | 3,4   | 3,4   | 18,55 | 551,90 | 40,51  |
| 2019/06/18 | CH2206 | Male | Three y/o | Control | Control | Feed Day | No | 02:25 | 02:00 - 02:59 | Early Morning | 37,0 | 51  | 63,0  | 63,0  | 18,16 | 541,20 | 139,78 |
| 2019/06/18 | CH2205 | Male | Three y/o | Control | Control | Feed Day | No | 02:30 | 02:00 - 02:59 | Early Morning | 37,4 | 58  | 16,6  | 16,6  | 18,55 | 551,90 | 93,96  |
| 2019/06/18 | CH2206 | Male | Three y/o | Control | Control | Feed Day | No | 02:30 | 02:00 - 02:59 | Early Morning | 37,0 | 83  | 59,4  | 59,4  | 18,16 | 580,11 | 137,75 |
| 2019/06/18 | CH2205 | Male | Three y/o | Control | Control | Feed Day | No | 02:35 | 02:00 - 02:59 | Early Morning | 37,4 | 87  | 7,8   | 7,8   | 18,55 | 583,64 | 68,36  |
| 2019/06/18 | CH2206 | Male | Three y/o | Control | Control | Feed Day | No | 02:35 | 02:00 - 02:59 | Early Morning | 36,9 | 82  | 32,8  | 32,8  | 18,06 | 579,19 | 117,26 |
| 2019/06/18 | CH2205 | Male | Three y/o | Control | Control | Feed Day | No | 02:40 | 02:00 - 02:59 | Early Morning | 37,3 | 41  | 13,0  | 13,0  | 18,46 | 522,29 | 85,65  |
| 2019/06/18 | CH2206 | Male | Three y/o | Control | Control | Feed Day | No | 02:40 | 02:00 - 02:59 | Early Morning | 37,0 | 73  | 30,0  | 30,0  | 18,16 | 570,27 | 114,20 |
| 2019/06/18 | CH2205 | Male | Three y/o | Control | Control | Feed Day | No | 02:45 | 02:00 - 02:59 | Early Morning | 37,4 | 82  | 15,6  | 15,6  | 18,55 | 579,19 | 91,85  |
| 2019/06/18 | CH2206 | Male | Three y/o | Control | Control | Feed Day | No | 02:45 | 02:00 - 02:59 | Early Morning | 37,1 | 56  | 30,4  | 30,4  | 18,26 | 549,01 | 114,65 |
| 2019/06/18 | CH2205 | Male | Three y/o | Control | Control | Feed Day | No | 02:50 | 02:00 - 02:59 | Early Morning | 37,3 | 92  | 20,2  | 20,2  | 18,46 | 587,78 | 100,65 |
| 2019/06/18 | CH2206 | Male | Three y/o | Control | Control | Feed Day | No | 02:50 | 02:00 - 02:59 | Early Morning | 37,2 | 54  | 34,2  | 34,2  | 18,36 | 545,99 | 118,70 |
| 2019/06/18 | CH2205 | Male | Three y/o | Control | Control | Feed Day | No | 02:55 | 02:00 - 02:59 | Early Morning | 37,4 | 177 | 19,8  | 19,8  | 18,55 | 632,55 | 99,97  |
| 2019/06/18 | CH2206 | Male | Three y/o | Control | Control | Feed Day | No | 02:55 | 02:00 - 02:59 | Early Morning | 37,2 | 45  | 24,4  | 24,4  | 18,36 | 530,47 | 107,11 |
| 2019/06/18 | CH2205 | Male | Three y/o | Control | Control | Feed Day | No | 03:00 | 03:00 - 03:59 | Early Morning | 37,5 | 129 | 72,0  | 72,0  | 18,65 | 611,75 | 144,42 |
| 2019/06/18 | CH2206 | Male | Three y/o | Control | Control | Feed Day | No | 03:00 | 03:00 - 03:59 | Early Morning | 37,3 | 97  | 78,2  | 78,2  | 18,46 | 591,66 | 147,28 |
| 2019/06/18 | CH2205 | Male | Three y/o | Control | Control | Feed Day | No | 03:05 | 03:00 - 03:59 | Early Morning | 37,5 | 124 | 183,2 | 183,2 | 18,65 | 609,04 | 177,03 |
| 2019/06/18 | CH2206 | Male | Three y/o | Control | Control | Feed Day | No | 03:05 | 03:00 - 03:59 | Early Morning | 37,4 |     | 67,6  | 67,6  | 18,55 |        | 142,23 |
| 2019/06/18 | CH2205 | Male | Three y/o | Control | Control | Feed Day | No | 03:10 | 03:00 - 03:59 | Early Morning | 37,5 | 60  | 37,8  | 37,8  | 18,65 | 554,67 | 122,14 |
| 2019/06/18 | CH2206 | Male | Three y/o | Control | Control | Feed Day | No | 03:10 | 03:00 - 03:59 | Early Morning | 37,4 | 86  | 33,8  | 33,8  | 18,55 | 582,77 | 118,29 |
| 2019/06/18 | CH2205 | Male | Three y/o | Control | Control | Feed Day | No | 03:15 | 03:00 - 03:59 | Early Morning | 37,6 | 113 | 67,8  | 67,8  | 18,75 | 602,58 | 142,33 |
| 2019/06/18 | CH2206 | Male | Three y/o | Control | Control | Feed Day | No | 03:15 | 03:00 - 03:59 | Early Morning | 37,4 | 156 | 23,4  | 23,4  | 18,55 | 624,43 | 105,68 |
| 2019/06/18 | CH2205 | Male | Three y/o | Control | Control | Feed Day | No | 03:20 | 03:00 - 03:59 | Early Morning | 37,6 | 120 | 142,4 | 142,4 | 18,75 | 606,78 | 168,20 |
| 2019/06/18 | CH2206 | Male | Three y/o | Control | Control | Feed Day | No | 03:20 | 03:00 - 03:59 | Early Morning | 37,4 | 118 | 75,2  | 75,2  | 18,55 | 605,61 | 145,93 |
| 2019/06/18 | CH2205 | Male | Three y/o | Control | Control | Feed Day | No | 03:25 | 03:00 - 03:59 | Early Morning | 37,6 | 57  | 405,4 | 405,4 | 18,75 | 550,47 | 205,09 |
| 2019/06/18 | CH2206 | Male | Three y/o | Control | Control | Feed Day | No | 03:25 | 03:00 - 03:59 | Early Morning | 37,4 | 121 | 63,0  | 63,0  | 18,55 | 607,35 | 139,78 |
| 2019/06/18 | CH2205 | Male | Three y/o | Control | Control | Feed Day | No | 03:30 | 03:00 - 03:59 | Early Morning | 37,7 | 78  | 198,2 | 198,2 | 18,85 | 575,38 | 179,80 |
| 2019/06/18 | CH2206 | Male | Three y/o | Control | Control | Feed Day | No | 03:30 | 03:00 - 03:59 | Early Morning | 37,4 | 105 | 66,4  | 66,4  | 18,55 | 597,38 | 141,61 |
| 2019/06/18 | CH2205 | Male | Three y/o | Control | Control | Feed Day | No | 03:35 | 03:00 - 03:59 | Early Morning | 37,7 | 106 | 16,8  | 16,8  | 18,85 | 598,06 | 94,37  |
| 2019/06/18 | CH2206 | Male | Three y/o | Control | Control | Feed Day | No | 03:35 | 03:00 - 03:59 | Early Morning | 37,4 |     | 82,6  | 82,6  | 18,55 |        | 149,19 |
| 2019/06/18 | CH2205 | Male | Three y/o | Control | Control | Feed Day | No | 03:40 | 03:00 - 03:59 | Early Morning | 37,9 |     | 52,6  | 52,6  | 19,05 |        | 133,54 |
| 2019/06/18 | CH2206 | Male | Three y/o | Control | Control | Feed Day | No | 03:40 | 03:00 - 03:59 | Early Morning | 37,6 | 112 | 40,8  | 40,8  | 18,75 | 601,96 | 124,77 |
| 2019/06/18 | CH2205 | Male | Three y/o | Control | Control | Feed Day | No | 03:45 | 03:00 - 03:59 | Early Morning | 37,9 |     | 28,6  | 28,6  | 19,05 |        | 112,56 |
| 2019/06/18 | CH2206 | Male | Three y/o | Control | Control | Feed Day | No | 03:45 | 03:00 - 03:59 | Early Morning | 37,6 | 98  | 19,6  | 19,6  | 18,75 | 592,41 | 99,63  |
| 2019/06/18 | CH2205 | Male | Three y/o | Control | Control | Feed Day | No | 03:50 | 03:00 - 03:59 | Early Morning | 37,7 | 97  | 13,0  | 13,0  | 18,85 | 591,66 | 85,65  |
| 2019/06/18 | CH2206 | Male | Three y/o | Control | Control | Feed Day | No | 03:50 | 03:00 - 03:59 | Early Morning | 37,3 | 72  | 23,6  | 23,6  | 18,46 | 569,20 | 105,97 |
| 2019/06/18 | CH2205 | Male | Three y/o | Control | Control | Feed Day | No | 03:55 | 03:00 - 03:59 | Early Morning | 37,5 | 56  | 13,2  | 13,2  | 18,65 | 549,01 | 86,17  |
| 2019/06/18 | CH2206 | Male | Three y/o | Control | Control | Feed Day | No | 03:55 | 03:00 - 03:59 | Early Morning | 37,0 | 84  | 13,2  | 13,2  | 18,16 | 581,01 | 86,17  |
| 2019/06/18 | CH2205 | Male | Three y/o | Control | Control | Feed Day | No | 04:00 | 04:00 - 04:59 | Morning       | 37,3 | 56  | 12,6  | 12,6  | 18,46 | 549,01 | 84,59  |
| 2019/06/18 | CH2206 | Male | Three y/o | Control | Control | Feed Day | No | 04:00 | 04:00 - 04:59 | Morning       | 36,6 | 80  | 6,8   | 6,8   | 17,77 | 577,31 | 63,74  |
| 2019/06/18 | CH2205 | Male | Three y/o | Control | Control | Feed Day | No | 04:05 | 04:00 - 04:59 | Morning       | 37,3 | 56  | 13,0  | 13,0  | 18,46 | 549,01 | 85,65  |



|            |        |      |           |         |         |          |    |       |               |         |      |     |       |       |       |        |        |
|------------|--------|------|-----------|---------|---------|----------|----|-------|---------------|---------|------|-----|-------|-------|-------|--------|--------|
| 2019/06/18 | CH2206 | Male | Three y/o | Control | Control | Feed Day | No | 04:05 | 04:00 - 04:59 | Morning | 36,6 | 84  | 15,0  | 15,0  | 17,77 | 581,01 | 90,51  |
| 2019/06/18 | CH2205 | Male | Three y/o | Control | Control | Feed Day | No | 04:10 | 04:00 - 04:59 | Morning | 37,2 | 83  | 14,0  | 14,0  | 18,36 | 580,11 | 88,17  |
| 2019/06/18 | CH2206 | Male | Three y/o | Control | Control | Feed Day | No | 04:10 | 04:00 - 04:59 | Morning | 36,5 | 84  | 12,0  | 12,0  | 17,67 | 581,01 | 82,93  |
| 2019/06/18 | CH2205 | Male | Three y/o | Control | Control | Feed Day | No | 04:15 | 04:00 - 04:59 | Morning | 37,2 | 59  | 20,2  | 20,2  | 18,36 | 553,30 | 100,65 |
| 2019/06/18 | CH2206 | Male | Three y/o | Control | Control | Feed Day | No | 04:15 | 04:00 - 04:59 | Morning | 36,5 | 84  | 14,4  | 14,4  | 17,67 | 581,01 | 89,12  |
| 2019/06/18 | CH2205 | Male | Three y/o | Control | Control | Feed Day | No | 04:20 | 04:00 - 04:59 | Morning | 37,2 | 79  | 19,0  | 19,0  | 18,36 | 576,36 | 98,56  |
| 2019/06/18 | CH2206 | Male | Three y/o | Control | Control | Feed Day | No | 04:20 | 04:00 - 04:59 | Morning | 36,6 | 72  | 14,4  | 14,4  | 17,77 | 569,20 | 89,12  |
| 2019/06/18 | CH2205 | Male | Three y/o | Control | Control | Feed Day | No | 04:25 | 04:00 - 04:59 | Morning | 37,2 | 83  | 16,2  | 16,2  | 18,36 | 580,11 | 93,13  |
| 2019/06/18 | CH2206 | Male | Three y/o | Control | Control | Feed Day | No | 04:25 | 04:00 - 04:59 | Morning | 36,6 | 88  | 9,0   | 9,0   | 17,77 | 584,49 | 73,19  |
| 2019/06/18 | CH2205 | Male | Three y/o | Control | Control | Feed Day | No | 04:30 | 04:00 - 04:59 | Morning | 37,2 | 72  | 18,6  | 18,6  | 18,36 | 569,20 | 97,84  |
| 2019/06/18 | CH2206 | Male | Three y/o | Control | Control | Feed Day | No | 04:30 | 04:00 - 04:59 | Morning | 36,8 | 60  | 2,6   | 2,6   | 17,96 | 554,67 | 31,57  |
| 2019/06/18 | CH2205 | Male | Three y/o | Control | Control | Feed Day | No | 04:35 | 04:00 - 04:59 | Morning | 37,2 | 92  | 15,6  | 15,6  | 18,36 | 587,78 | 91,85  |
| 2019/06/18 | CH2206 | Male | Three y/o | Control | Control | Feed Day | No | 04:35 | 04:00 - 04:59 | Morning | 36,6 | 46  | 7,4   | 7,4   | 17,77 | 532,38 | 66,59  |
| 2019/06/18 | CH2205 | Male | Three y/o | Control | Control | Feed Day | No | 04:40 | 04:00 - 04:59 | Morning | 37,1 | 52  | 20,0  | 20,0  | 18,26 | 542,83 | 100,31 |
| 2019/06/18 | CH2206 | Male | Three y/o | Control | Control | Feed Day | No | 04:40 | 04:00 - 04:59 | Morning | 36,6 | 77  | 35,6  | 35,6  | 17,77 | 574,39 | 120,08 |
| 2019/06/18 | CH2205 | Male | Three y/o | Control | Control | Feed Day | No | 04:45 | 04:00 - 04:59 | Morning | 37,1 | 59  | 17,0  | 17,0  | 18,26 | 553,30 | 94,77  |
| 2019/06/18 | CH2206 | Male | Three y/o | Control | Control | Feed Day | No | 04:45 | 04:00 - 04:59 | Morning | 36,9 | 68  | 38,8  | 38,8  | 18,06 | 564,71 | 123,04 |
| 2019/06/18 | CH2205 | Male | Three y/o | Control | Control | Feed Day | No | 04:50 | 04:00 - 04:59 | Morning | 37,1 | 86  | 15,2  | 15,2  | 18,26 | 582,77 | 90,96  |
| 2019/06/18 | CH2206 | Male | Three y/o | Control | Control | Feed Day | No | 04:50 | 04:00 - 04:59 | Morning | 36,9 | 78  | 37,8  | 37,8  | 18,06 | 575,38 | 122,14 |
| 2019/06/18 | CH2205 | Male | Three y/o | Control | Control | Feed Day | No | 04:55 | 04:00 - 04:59 | Morning | 37,2 | 65  | 21,4  | 21,4  | 18,36 | 561,12 | 102,63 |
| 2019/06/18 | CH2206 | Male | Three y/o | Control | Control | Feed Day | No | 04:55 | 04:00 - 04:59 | Morning | 37,0 | 80  | 36,2  | 36,2  | 18,16 | 577,31 | 120,65 |
| 2019/06/18 | CH2205 | Male | Three y/o | Control | Control | Feed Day | No | 05:00 | 05:00 - 05:59 | Morning | 37,2 | 43  | 14,0  | 14,0  | 18,36 | 526,50 | 88,17  |
| 2019/06/18 | CH2206 | Male | Three y/o | Control | Control | Feed Day | No | 05:00 | 05:00 - 05:59 | Morning | 37,0 | 65  | 64,0  | 64,0  | 18,16 | 561,12 | 140,33 |
| 2019/06/18 | CH2205 | Male | Three y/o | Control | Control | Feed Day | No | 05:05 | 05:00 - 05:59 | Morning | 37,2 | 46  | 17,0  | 17,0  | 18,36 | 532,38 | 94,77  |
| 2019/06/18 | CH2206 | Male | Three y/o | Control | Control | Feed Day | No | 05:05 | 05:00 - 05:59 | Morning | 37,0 | 83  | 37,2  | 37,2  | 18,16 | 580,11 | 121,59 |
| 2019/06/18 | CH2205 | Male | Three y/o | Control | Control | Feed Day | No | 05:10 | 05:00 - 05:59 | Morning | 37,2 |     | 16,6  | 16,6  | 18,36 |        | 93,96  |
| 2019/06/18 | CH2206 | Male | Three y/o | Control | Control | Feed Day | No | 05:10 | 05:00 - 05:59 | Morning | 37,0 | 64  | 38,4  | 38,4  | 18,16 | 559,88 | 122,68 |
| 2019/06/18 | CH2205 | Male | Three y/o | Control | Control | Feed Day | No | 05:15 | 05:00 - 05:59 | Morning | 37,2 | 72  | 15,0  | 15,0  | 18,36 | 569,20 | 90,51  |
| 2019/06/18 | CH2206 | Male | Three y/o | Control | Control | Feed Day | No | 05:15 | 05:00 - 05:59 | Morning | 37,1 | 43  | 42,6  | 42,6  | 18,26 | 526,50 | 126,26 |
| 2019/06/18 | CH2205 | Male | Three y/o | Control | Control | Feed Day | No | 05:20 | 05:00 - 05:59 | Morning | 37,1 | 58  | 13,8  | 13,8  | 18,26 | 551,90 | 87,68  |
| 2019/06/18 | CH2206 | Male | Three y/o | Control | Control | Feed Day | No | 05:20 | 05:00 - 05:59 | Morning | 37,1 | 44  | 47,6  | 47,6  | 18,26 | 528,51 | 130,09 |
| 2019/06/18 | CH2205 | Male | Three y/o | Control | Control | Feed Day | No | 05:25 | 05:00 - 05:59 | Morning | 37,0 | 94  | 9,8   | 9,8   | 18,16 | 589,37 | 76,07  |
| 2019/06/18 | CH2206 | Male | Three y/o | Control | Control | Feed Day | No | 05:25 | 05:00 - 05:59 | Morning | 37,2 | 82  | 61,4  | 61,4  | 18,36 | 579,19 | 138,89 |
| 2019/06/18 | CH2205 | Male | Three y/o | Control | Control | Feed Day | No | 05:30 | 05:00 - 05:59 | Morning | 36,8 | 63  | 8,0   | 8,0   | 17,96 | 558,62 | 69,22  |
| 2019/06/18 | CH2206 | Male | Three y/o | Control | Control | Feed Day | No | 05:30 | 05:00 - 05:59 | Morning | 37,1 | 77  | 64,2  | 64,2  | 18,26 | 574,39 | 140,44 |
| 2019/06/18 | CH2205 | Male | Three y/o | Control | Control | Feed Day | No | 05:35 | 05:00 - 05:59 | Morning | 36,8 | 48  | 9,0   | 9,0   | 17,96 | 536,04 | 73,19  |
| 2019/06/18 | CH2206 | Male | Three y/o | Control | Control | Feed Day | No | 05:35 | 05:00 - 05:59 | Morning | 37,2 | 72  | 63,8  | 63,8  | 18,36 | 569,20 | 140,22 |
| 2019/06/18 | CH2205 | Male | Three y/o | Control | Control | Feed Day | No | 05:40 | 05:00 - 05:59 | Morning | 36,7 | 46  | 8,4   | 8,4   | 17,87 | 532,38 | 70,86  |
| 2019/06/18 | CH2206 | Male | Three y/o | Control | Control | Feed Day | No | 05:40 | 05:00 - 05:59 | Morning | 37,2 | 61  | 63,2  | 63,2  | 18,36 | 556,01 | 139,89 |
| 2019/06/18 | CH2205 | Male | Three y/o | Control | Control | Feed Day | No | 05:45 | 05:00 - 05:59 | Morning | 36,7 | 57  | 12,8  | 12,8  | 17,87 | 550,47 | 85,12  |
| 2019/06/18 | CH2206 | Male | Three y/o | Control | Control | Feed Day | No | 05:45 | 05:00 - 05:59 | Morning | 37,1 | 74  | 61,8  | 61,8  | 18,26 | 571,33 | 139,12 |
| 2019/06/18 | CH2205 | Male | Three y/o | Control | Control | Feed Day | No | 05:50 | 05:00 - 05:59 | Morning | 36,7 |     | 13,8  | 13,8  | 17,87 |        | 87,68  |
| 2019/06/18 | CH2206 | Male | Three y/o | Control | Control | Feed Day | No | 05:50 | 05:00 - 05:59 | Morning | 37,0 | 75  | 67,0  | 67,0  | 18,16 | 572,36 | 141,92 |
| 2019/06/18 | CH2205 | Male | Three y/o | Control | Control | Feed Day | No | 05:55 | 05:00 - 05:59 | Morning | 36,8 | 92  | 12,6  | 12,6  | 17,96 | 587,78 | 84,59  |
| 2019/06/18 | CH2206 | Male | Three y/o | Control | Control | Feed Day | No | 05:55 | 05:00 - 05:59 | Morning | 37,1 | 78  | 50,8  | 50,8  | 18,26 | 575,38 | 132,33 |
| 2019/06/18 | CH2205 | Male | Three y/o | Control | Control | Feed Day | No | 06:00 | 06:00 - 06:59 | Morning | 37,1 | 128 | 61,4  | 61,4  | 18,26 | 611,22 | 138,89 |
| 2019/06/18 | CH2206 | Male | Three y/o | Control | Control | Feed Day | No | 06:00 | 06:00 - 06:59 | Morning | 37,2 | 117 | 184,4 | 184,4 | 18,36 | 605,02 | 177,26 |
| 2019/06/18 | CH2205 | Male | Three y/o | Control | Control | Feed Day | No | 06:05 | 06:00 - 06:59 | Morning | 37,2 | 137 | 145,8 | 145,8 | 18,36 | 615,83 | 169,02 |
| 2019/06/18 | CH2206 | Male | Three y/o | Control | Control | Feed Day | No | 06:05 | 06:00 - 06:59 | Morning | 37,3 | 107 | 65,0  | 65,0  | 18,46 | 598,73 | 140,87 |
| 2019/06/18 | CH2205 | Male | Three y/o | Control | Control | Feed Day | No | 06:10 | 06:00 - 06:59 | Morning | 37,2 | 88  | 195,0 | 195,0 | 18,36 | 584,49 | 179,23 |
| 2019/06/18 | CH2206 | Male | Three y/o | Control | Control | Feed Day | No | 06:10 | 06:00 - 06:59 | Morning | 37,3 | 55  | 476,4 | 476,4 | 18,46 | 547,52 | 210,83 |
| 2019/06/18 | CH2205 | Male | Three y/o | Control | Control | Feed Day | No | 06:15 | 06:00 - 06:59 | Morning | 37,4 | 131 | 484,8 | 484,8 | 18,55 | 612,80 | 211,45 |
| 2019/06/18 | CH2206 | Male | Three y/o | Control | Control | Feed Day | No | 06:15 | 06:00 - 06:59 | Morning | 37,5 | 118 | 26,4  | 26,4  | 18,65 | 605,61 | 109,81 |
| 2019/06/18 | CH2205 | Male | Three y/o | Control | Control | Feed Day | No | 06:20 | 06:00 - 06:59 | Morning | 37,5 | 143 | 85,4  | 85,4  | 18,65 | 618,69 | 150,35 |
| 2019/06/18 | CH2206 | Male | Three y/o | Control | Control | Feed Day | No | 06:20 | 06:00 - 06:59 | Morning | 37,5 | 124 | 2,6   | 2,6   | 18,65 | 609,04 | 31,57  |
| 2019/06/18 | CH2205 | Male | Three y/o | Control | Control | Feed Day | No | 06:25 | 06:00 - 06:59 | Morning | 37,5 | 57  | 50,8  | 50,8  | 18,65 | 550,47 | 132,33 |
| 2019/06/18 | CH2206 | Male | Three y/o | Control | Control | Feed Day | No | 06:25 | 06:00 - 06:59 | Morning | 37,2 |     | 16,4  | 16,4  | 18,36 |        | 93,55  |
| 2019/06/18 | CH2205 | Male | Three y/o | Control | Control | Feed Day | No | 06:30 | 06:00 - 06:59 | Morning | 37,4 | 63  | 7,2   | 7,2   | 18,55 | 558,62 | 65,66  |
| 2019/06/18 | CH2206 | Male | Three y/o | Control | Control | Feed Day | No | 06:30 | 06:00 - 06:59 | Morning | 36,9 | 96  | 20,6  | 20,6  | 18,06 | 590,91 | 101,32 |
| 2019/06/18 | CH2205 | Male | Three y/o | Control | Control | Feed Day | No | 06:35 | 06:00 - 06:59 | Morning | 37,2 | 70  | 57,2  | 57,2  | 18,36 | 566,99 | 136,44 |
| 2019/06/18 | CH2206 | Male | Three y/o | Control | Control | Feed Day | No | 06:35 | 06:00 - 06:59 | Morning | 36,4 | 134 | 154,0 | 154,0 | 17,57 | 614,33 | 170,94 |
| 2019/06/18 | CH2205 | Male | Three y/o | Control | Control | Feed Day | No | 06:40 | 06:00 - 06:59 | Morning | 37,4 | 109 | 99,8  | 99,8  | 18,55 | 600,04 | 155,77 |
| 2019/06/18 | CH2206 | Male | Three y/o | Control | Control | Feed Day | No | 06:40 | 06:00 - 06:59 | Morning | 36,8 | 57  | 39,6  | 39,6  | 17,96 | 550,47 | 123,74 |
| 2019/06/18 | CH2205 | Male | Three y/o | Control | Control | Feed Day | No | 06:45 | 06:00 - 06:59 | Morning | 37,5 | 124 | 65,8  | 65,8  | 18,65 | 609,04 | 141,29 |
| 2019/06/18 | CH2206 | Male | Three y/o | Control | Control | Feed Day | No | 06:45 | 06:00 - 06:59 | Morning | 37,0 | 141 | 53,0  | 53,0  | 18,16 | 617,75 | 133,80 |
| 2019/06/18 | CH2205 | Male | Three y/o | Control | Control | Feed Day | No | 06:50 | 06:00 - 06:59 | Morning | 37,6 | 77  | 176,8 | 176,8 | 18,75 | 574,39 | 175,78 |
| 2019/06/18 | CH2206 | Male | Three y/o | Control | Control | Feed Day | No | 06:50 | 06:00 - 06:59 | Morning | 37,0 | 86  | 38,0  | 38,0  | 18,16 | 582,77 | 122,32 |
| 2019/06/18 | CH2205 | Male | Three y/o | Control | Control | Feed Day | No | 06:55 | 06:00 - 06:59 | Morning | 37,6 |     | 86,4  | 86,4  | 18,75 |        | 150,75 |
| 2019/06/18 | CH2206 | Male | Three y/o | Control | Control | Feed Day | No | 06:55 | 06:00 - 06:59 | Morning | 37,0 | 120 | 164,2 | 164,2 | 18,16 | 606,78 | 173,19 |
| 2019/06/18 | CH2205 | Male | Three y/o | Control | Control | Feed Day | No | 07:00 | 07:00 - 07:59 | Morning | 37,7 | 91  | 176,4 | 176,4 | 18,85 | 586,98 | 175,71 |



|            |        |      |           |         |         |          |    |       |               |              |      |     |       |       |       |        |        |
|------------|--------|------|-----------|---------|---------|----------|----|-------|---------------|--------------|------|-----|-------|-------|-------|--------|--------|
| 2019/06/18 | CH2206 | Male | Three y/o | Control | Control | Feed Day | No | 07:00 | 07:00 - 07:59 | Morning      | 37,2 | 128 | 105,2 | 105,2 | 18,36 | 611,22 | 157,61 |
| 2019/06/18 | CH2205 | Male | Three y/o | Control | Control | Feed Day | No | 07:05 | 07:00 - 07:59 | Morning      | 37,7 |     | 130,0 | 130,0 | 18,85 |        | 165,01 |
| 2019/06/18 | CH2206 | Male | Three y/o | Control | Control | Feed Day | No | 07:05 | 07:00 - 07:59 | Morning      | 37,3 | 113 | 120,6 | 120,6 | 18,46 | 602,58 | 162,38 |
| 2019/06/18 | CH2205 | Male | Three y/o | Control | Control | Feed Day | No | 07:10 | 07:00 - 07:59 | Morning      | 37,7 |     | 139,2 | 139,2 | 18,85 |        | 167,40 |
| 2019/06/18 | CH2206 | Male | Three y/o | Control | Control | Feed Day | No | 07:10 | 07:00 - 07:59 | Morning      | 37,4 | 188 | 125,0 | 125,0 | 18,55 | 636,34 | 163,63 |
| 2019/06/18 | CH2205 | Male | Three y/o | Control | Control | Feed Day | No | 07:15 | 07:00 - 07:59 | Morning      | 37,7 |     | 114,8 | 114,8 | 18,85 |        | 160,66 |
| 2019/06/18 | CH2206 | Male | Three y/o | Control | Control | Feed Day | No | 07:15 | 07:00 - 07:59 | Morning      | 37,4 | 140 | 118,8 | 118,8 | 18,55 | 617,28 | 161,86 |
| 2019/06/18 | CH2205 | Male | Three y/o | Control | Control | Feed Day | No | 07:20 | 07:00 - 07:59 | Morning      | 37,7 | 88  | 92,0  | 92,0  | 18,85 | 584,49 | 152,94 |
| 2019/06/18 | CH2206 | Male | Three y/o | Control | Control | Feed Day | No | 07:20 | 07:00 - 07:59 | Morning      | 37,5 |     | 264,4 | 264,4 | 18,65 |        | 189,96 |
| 2019/06/18 | CH2205 | Male | Three y/o | Control | Control | Feed Day | No | 07:25 | 07:00 - 07:59 | Morning      | 37,7 |     | 164,6 | 164,6 | 18,85 |        | 173,27 |
| 2019/06/18 | CH2206 | Male | Three y/o | Control | Control | Feed Day | No | 07:25 | 07:00 - 07:59 | Morning      | 37,5 | 126 | 277,4 | 277,4 | 18,65 | 610,14 | 191,65 |
| 2019/06/18 | CH2205 | Male | Three y/o | Control | Control | Feed Day | No | 07:30 | 07:00 - 07:59 | Morning      | 37,7 |     | 75,6  | 75,6  | 18,85 |        | 146,11 |
| 2019/06/18 | CH2206 | Male | Three y/o | Control | Control | Feed Day | No | 07:30 | 07:00 - 07:59 | Morning      | 37,5 | 111 | 89,2  | 89,2  | 18,65 | 601,33 | 151,86 |
| 2019/06/18 | CH2205 | Male | Three y/o | Control | Control | Feed Day | No | 07:35 | 07:00 - 07:59 | Morning      | 37,7 |     | 371,6 | 371,6 | 18,85 |        | 202,00 |
| 2019/06/18 | CH2206 | Male | Three y/o | Control | Control | Feed Day | No | 07:35 | 07:00 - 07:59 | Morning      | 37,5 | 118 | 328,8 | 328,8 | 18,65 | 605,61 | 197,66 |
| 2019/06/18 | CH2205 | Male | Three y/o | Control | Control | Feed Day | No | 07:40 | 07:00 - 07:59 | Morning      | 37,7 | 172 | 123,2 | 123,2 | 18,85 | 630,73 | 163,13 |
| 2019/06/18 | CH2206 | Male | Three y/o | Control | Control | Feed Day | No | 07:40 | 07:00 - 07:59 | Morning      | 37,7 |     | 214,2 | 214,2 | 18,85 |        | 182,53 |
| 2019/06/18 | CH2205 | Male | Three y/o | Control | Control | Feed Day | No | 07:45 | 07:00 - 07:59 | Morning      | 37,9 | 101 | 145,6 | 145,6 | 19,05 | 594,59 | 168,97 |
| 2019/06/18 | CH2206 | Male | Three y/o | Control | Control | Feed Day | No | 07:45 | 07:00 - 07:59 | Morning      | 37,8 | 121 | 118,6 | 118,6 | 18,95 | 607,35 | 161,80 |
| 2019/06/18 | CH2205 | Male | Three y/o | Control | Control | Feed Day | No | 07:50 | 07:00 - 07:59 | Morning      | 37,8 | 112 | 242,8 | 242,8 | 18,95 | 601,96 | 186,95 |
| 2019/06/18 | CH2206 | Male | Three y/o | Control | Control | Feed Day | No | 07:50 | 07:00 - 07:59 | Morning      | 37,7 | 75  | 146,6 | 146,6 | 18,85 | 572,36 | 169,21 |
| 2019/06/18 | CH2205 | Male | Three y/o | Control | Control | Feed Day | No | 07:55 | 07:00 - 07:59 | Morning      | 37,7 | 100 | 151,4 | 151,4 | 18,85 | 593,87 | 170,34 |
| 2019/06/18 | CH2206 | Male | Three y/o | Control | Control | Feed Day | No | 07:55 | 07:00 - 07:59 | Morning      | 37,5 | 105 | 73,6  | 73,6  | 18,65 | 597,38 | 145,18 |
| 2019/06/18 | CH2205 | Male | Three y/o | Control | Control | Feed Day | No | 08:00 | 08:00 - 08:59 | Late Morning | 37,7 | 126 | 107,8 | 107,8 | 18,85 | 610,14 | 158,46 |
| 2019/06/18 | CH2206 | Male | Three y/o | Control | Control | Feed Day | No | 08:00 | 08:00 - 08:59 | Late Morning | 37,5 | 94  | 41,0  | 41,0  | 18,65 | 589,37 | 124,94 |
| 2019/06/18 | CH2205 | Male | Three y/o | Control | Control | Feed Day | No | 08:05 | 08:00 - 08:59 | Late Morning | 37,7 | 108 | 71,4  | 71,4  | 18,85 | 599,39 | 144,12 |
| 2019/06/18 | CH2206 | Male | Three y/o | Control | Control | Feed Day | No | 08:05 | 08:00 - 08:59 | Late Morning | 37,2 |     | 48,6  | 48,6  | 18,36 |        | 130,81 |
| 2019/06/18 | CH2205 | Male | Three y/o | Control | Control | Feed Day | No | 08:10 | 08:00 - 08:59 | Late Morning | 37,5 | 87  | 23,0  | 23,0  | 18,65 | 583,64 | 105,09 |
| 2019/06/18 | CH2206 | Male | Three y/o | Control | Control | Feed Day | No | 08:10 | 08:00 - 08:59 | Late Morning | 36,9 | 110 | 55,0  | 55,0  | 18,06 | 600,69 | 135,08 |
| 2019/06/18 | CH2205 | Male | Three y/o | Control | Control | Feed Day | No | 08:15 | 08:00 - 08:59 | Late Morning | 37,3 | 70  | 26,8  | 26,8  | 18,46 | 566,99 | 110,33 |
| 2019/06/18 | CH2206 | Male | Three y/o | Control | Control | Feed Day | No | 08:15 | 08:00 - 08:59 | Late Morning | 37,2 | 48  | 64,4  | 64,4  | 18,36 | 536,04 | 140,55 |
| 2019/06/18 | CH2205 | Male | Three y/o | Control | Control | Feed Day | No | 08:20 | 08:00 - 08:59 | Late Morning | 37,0 | 105 | 21,4  | 21,4  | 18,16 | 597,38 | 102,63 |
| 2019/06/18 | CH2206 | Male | Three y/o | Control | Control | Feed Day | No | 08:20 | 08:00 - 08:59 | Late Morning | 37,3 | 96  | 86,0  | 86,0  | 18,46 | 590,91 | 150,59 |
| 2019/06/18 | CH2205 | Male | Three y/o | Control | Control | Feed Day | No | 08:25 | 08:00 - 08:59 | Late Morning | 36,8 | 57  | 20,4  | 20,4  | 17,96 | 550,47 | 100,99 |
| 2019/06/18 | CH2206 | Male | Three y/o | Control | Control | Feed Day | No | 08:25 | 08:00 - 08:59 | Late Morning | 37,2 | 76  | 68,4  | 68,4  | 18,36 | 573,39 | 142,64 |
| 2019/06/18 | CH2205 | Male | Three y/o | Control | Control | Feed Day | No | 08:30 | 08:00 - 08:59 | Late Morning | 36,7 | 62  | 19,6  | 19,6  | 17,87 | 557,33 | 99,63  |
| 2019/06/18 | CH2206 | Male | Three y/o | Control | Control | Feed Day | No | 08:30 | 08:00 - 08:59 | Late Morning | 37,3 | 56  | 69,6  | 69,6  | 18,46 | 549,01 | 143,24 |
| 2019/06/18 | CH2205 | Male | Three y/o | Control | Control | Feed Day | No | 08:35 | 08:00 - 08:59 | Late Morning | 36,6 | 45  | 17,4  | 17,4  | 17,77 | 530,47 | 95,56  |
| 2019/06/18 | CH2206 | Male | Three y/o | Control | Control | Feed Day | No | 08:35 | 08:00 - 08:59 | Late Morning | 37,2 | 57  | 66,0  | 66,0  | 18,36 | 550,47 | 141,40 |
| 2019/06/18 | CH2205 | Male | Three y/o | Control | Control | Feed Day | No | 08:40 | 08:00 - 08:59 | Late Morning | 37,0 | 119 | 19,6  | 19,6  | 18,16 | 606,20 | 99,63  |
| 2019/06/18 | CH2206 | Male | Three y/o | Control | Control | Feed Day | No | 08:40 | 08:00 - 08:59 | Late Morning | 37,2 | 50  | 67,6  | 67,6  | 18,36 | 539,52 | 142,23 |
| 2019/06/18 | CH2205 | Male | Three y/o | Control | Control | Feed Day | No | 08:45 | 08:00 - 08:59 | Late Morning | 37,0 |     | 234,8 | 234,8 | 18,16 |        | 185,77 |
| 2019/06/18 | CH2206 | Male | Three y/o | Control | Control | Feed Day | No | 08:45 | 08:00 - 08:59 | Late Morning | 37,2 | 66  | 109,4 | 109,4 | 18,36 | 562,34 | 158,98 |
| 2019/06/18 | CH2205 | Male | Three y/o | Control | Control | Feed Day | No | 08:50 | 08:00 - 08:59 | Late Morning | 36,5 | 100 | 100,4 | 100,4 | 17,67 | 593,87 | 155,98 |
| 2019/06/18 | CH2206 | Male | Three y/o | Control | Control | Feed Day | No | 08:50 | 08:00 - 08:59 | Late Morning | 37,3 | 132 | 38,8  | 38,8  | 18,46 | 613,32 | 123,04 |
| 2019/06/18 | CH2205 | Male | Three y/o | Control | Control | Feed Day | No | 08:55 | 08:00 - 08:59 | Late Morning | 36,8 | 96  | 39,8  | 39,8  | 17,96 | 590,91 | 123,91 |
| 2019/06/18 | CH2206 | Male | Three y/o | Control | Control | Feed Day | No | 08:55 | 08:00 - 08:59 | Late Morning | 37,3 |     | 110,6 | 110,6 | 18,46 |        | 159,36 |
| 2019/06/18 | CH2205 | Male | Three y/o | Control | Control | Feed Day | No | 09:00 | 09:00 - 09:59 | Late Morning | 37,0 | 58  | 71,4  | 71,4  | 18,16 | 551,90 | 144,12 |
| 2019/06/18 | CH2206 | Male | Three y/o | Control | Control | Feed Day | No | 09:00 | 09:00 - 09:59 | Late Morning | 37,3 | 97  | 40,0  | 40,0  | 18,46 | 591,66 | 124,09 |
| 2019/06/18 | CH2205 | Male | Three y/o | Control | Control | Feed Day | No | 09:05 | 09:00 - 09:59 | Late Morning | 37,1 |     | 179,0 | 179,0 | 18,26 |        | 176,22 |
| 2019/06/18 | CH2206 | Male | Three y/o | Control | Control | Feed Day | No | 09:05 | 09:00 - 09:59 | Late Morning | 37,3 | 100 | 45,0  | 45,0  | 18,46 | 593,87 | 128,15 |
| 2019/06/18 | CH2205 | Male | Three y/o | Control | Control | Feed Day | No | 09:10 | 09:00 - 09:59 | Late Morning | 37,2 | 108 | 50,8  | 50,8  | 18,36 | 599,39 | 132,33 |
| 2019/06/18 | CH2206 | Male | Three y/o | Control | Control | Feed Day | No | 09:10 | 09:00 - 09:59 | Late Morning | 37,2 | 138 | 42,6  | 42,6  | 18,36 | 616,31 | 126,26 |
| 2019/06/18 | CH2205 | Male | Three y/o | Control | Control | Feed Day | No | 09:15 | 09:00 - 09:59 | Late Morning | 37,2 | 147 | 17,2  | 17,2  | 18,36 | 620,52 | 95,17  |
| 2019/06/18 | CH2206 | Male | Three y/o | Control | Control | Feed Day | No | 09:15 | 09:00 - 09:59 | Late Morning | 37,2 | 88  | 55,8  | 55,8  | 18,36 | 584,49 | 135,58 |
| 2019/06/18 | CH2205 | Male | Three y/o | Control | Control | Feed Day | No | 09:20 | 09:00 - 09:59 | Late Morning | 37,2 | 180 | 34,0  | 34,0  | 18,36 | 633,61 | 118,49 |
| 2019/06/18 | CH2206 | Male | Three y/o | Control | Control | Feed Day | No | 09:20 | 09:00 - 09:59 | Late Morning | 37,2 | 67  | 49,8  | 49,8  | 18,36 | 563,53 | 131,65 |
| 2019/06/18 | CH2205 | Male | Three y/o | Control | Control | Feed Day | No | 09:25 | 09:00 - 09:59 | Late Morning | 37,3 | 68  | 14,2  | 14,2  | 18,46 | 564,71 | 88,65  |
| 2019/06/18 | CH2206 | Male | Three y/o | Control | Control | Feed Day | No | 09:25 | 09:00 - 09:59 | Late Morning | 37,1 | 112 | 50,0  | 50,0  | 18,26 | 601,96 | 131,79 |
| 2019/06/18 | CH2205 | Male | Three y/o | Control | Control | Feed Day | No | 09:30 | 09:00 - 09:59 | Late Morning | 37,2 | 54  | 15,2  | 15,2  | 18,36 | 545,99 | 90,96  |
| 2019/06/18 | CH2206 | Male | Three y/o | Control | Control | Feed Day | No | 09:30 | 09:00 - 09:59 | Late Morning | 37,2 | 93  | 48,4  | 48,4  | 18,36 | 588,58 | 130,66 |
| 2019/06/18 | CH2205 | Male | Three y/o | Control | Control | Feed Day | No | 09:35 | 09:00 - 09:59 | Late Morning | 37,2 | 53  | 22,2  | 22,2  | 18,36 | 544,43 | 103,88 |
| 2019/06/18 | CH2206 | Male | Three y/o | Control | Control | Feed Day | No | 09:35 | 09:00 - 09:59 | Late Morning | 37,3 | 88  | 38,6  | 38,6  | 18,46 | 584,49 | 122,86 |
| 2019/06/18 | CH2205 | Male | Three y/o | Control | Control | Feed Day | No | 09:40 | 09:00 - 09:59 | Late Morning | 37,2 |     | 21,6  | 21,6  | 18,36 |        | 102,94 |
| 2019/06/18 | CH2206 | Male | Three y/o | Control | Control | Feed Day | No | 09:40 | 09:00 - 09:59 | Late Morning | 36,5 | 76  | 35,6  | 35,6  | 17,67 | 573,39 | 120,08 |
| 2019/06/18 | CH2205 | Male | Three y/o | Control | Control | Feed Day | No | 09:45 | 09:00 - 09:59 | Late Morning | 37,2 | 92  | 19,6  | 19,6  | 18,36 | 587,78 | 99,63  |
| 2019/06/18 | CH2206 | Male | Three y/o | Control | Control | Feed Day | No | 09:45 | 09:00 - 09:59 | Late Morning | 36,4 | 57  | 20,8  | 20,8  | 17,57 | 550,47 | 101,65 |
| 2019/06/18 | CH2205 | Male | Three y/o | Control | Control | Feed Day | No | 09:50 | 09:00 - 09:59 | Late Morning | 37,2 | 128 | 17,6  | 17,6  | 18,36 | 611,22 | 95,95  |
| 2019/06/18 | CH2206 | Male | Three y/o | Control | Control | Feed Day | No | 09:50 | 09:00 - 09:59 | Late Morning | 36,4 | 59  | 18,0  | 18,0  | 17,57 | 553,30 | 96,72  |
| 2019/06/18 | CH2205 | Male | Three y/o | Control | Control | Feed Day | No | 09:55 | 09:00 - 09:59 | Late Morning | 37,2 | 69  | 2,6   | 2,6   | 18,36 | 565,86 | 31,57  |



|            |        |      |           |         |         |          |     |       |               |              |      |     |       |       |       |        |        |
|------------|--------|------|-----------|---------|---------|----------|-----|-------|---------------|--------------|------|-----|-------|-------|-------|--------|--------|
| 2019/06/18 | CH2206 | Male | Three y/o | Control | Control | Feed Day | No  | 09:55 | 09:00 - 09:59 | Late Morning | 36,3 | 91  | 33,8  | 33,8  | 17,48 | 586,98 | 118,29 |
| 2019/06/18 | CH2205 | Male | Three y/o | Control | Control | Feed Day | No  | 10:00 | 10:00 - 10:59 | Late Morning | 37,2 | 40  | 7,4   | 7,4   | 18,36 | 520,09 | 66,59  |
| 2019/06/18 | CH2206 | Male | Three y/o | Control | Control | Feed Day | No  | 10:00 | 10:00 - 10:59 | Late Morning | 36,2 | 48  | 35,6  | 35,6  | 17,38 | 536,04 | 120,08 |
| 2019/06/18 | CH2205 | Male | Three y/o | Control | Control | Feed Day | No  | 10:05 | 10:00 - 10:59 | Late Morning | 37,2 | 58  | 29,4  | 29,4  | 18,36 | 551,90 | 113,50 |
| 2019/06/18 | CH2206 | Male | Three y/o | Control | Control | Feed Day | No  | 10:05 | 10:00 - 10:59 | Late Morning | 36,1 | 66  | 39,4  | 39,4  | 17,29 | 562,34 | 123,57 |
| 2019/06/18 | CH2205 | Male | Three y/o | Control | Control | Feed Day | No  | 10:10 | 10:00 - 10:59 | Late Morning | 37,2 | 65  | 23,2  | 23,2  | 18,36 | 561,12 | 105,39 |
| 2019/06/18 | CH2206 | Male | Three y/o | Control | Control | Feed Day | No  | 10:10 | 10:00 - 10:59 | Late Morning | 36,3 | 110 | 100,0 | 100,0 | 17,48 | 600,69 | 155,84 |
| 2019/06/18 | CH2205 | Male | Three y/o | Control | Control | Feed Day | No  | 10:15 | 10:00 - 10:59 | Late Morning | 37,2 |     | 12,4  | 12,4  | 18,36 |        | 84,04  |
| 2019/06/18 | CH2206 | Male | Three y/o | Control | Control | Feed Day | No  | 10:15 | 10:00 - 10:59 | Late Morning | 36,6 | 63  | 29,8  | 29,8  | 17,77 | 558,62 | 113,97 |
| 2019/06/18 | CH2205 | Male | Three y/o | Control | Control | Feed Day | No  | 10:20 | 10:00 - 10:59 | Late Morning | 37,2 | 66  | 16,0  | 16,0  | 18,36 | 562,34 | 92,71  |
| 2019/06/18 | CH2206 | Male | Three y/o | Control | Control | Feed Day | No  | 10:20 | 10:00 - 10:59 | Late Morning | 36,9 | 68  | 17,8  | 17,8  | 18,06 | 564,71 | 96,34  |
| 2019/06/18 | CH2205 | Male | Three y/o | Control | Control | Feed Day | No  | 10:25 | 10:00 - 10:59 | Late Morning | 37,2 |     | 11,6  | 11,6  | 18,36 |        | 81,78  |
| 2019/06/18 | CH2206 | Male | Three y/o | Control | Control | Feed Day | No  | 10:25 | 10:00 - 10:59 | Late Morning | 37,1 | 64  | 85,8  | 85,8  | 18,26 | 559,88 | 150,51 |
| 2019/06/18 | CH2205 | Male | Three y/o | Control | Control | Feed Day | Yes | 10:30 | 10:00 - 10:59 | Late Morning | 37,2 | 68  | 4,4   | 4,4   | 18,36 | 564,71 | 49,12  |
| 2019/06/18 | CH2206 | Male | Three y/o | Control | Control | Feed Day | Yes | 10:30 | 10:00 - 10:59 | Late Morning | 37,0 | 47  | 56,6  | 56,6  | 18,16 | 534,23 | 136,07 |
| 2019/06/18 | CH2205 | Male | Three y/o | Control | Control | Feed Day | Yes | 10:35 | 10:00 - 10:59 | Late Morning | 37,2 | 60  | 9,6   | 9,6   | 18,36 | 554,67 | 75,37  |
| 2019/06/18 | CH2206 | Male | Three y/o | Control | Control | Feed Day | Yes | 10:35 | 10:00 - 10:59 | Late Morning | 36,9 | 65  | 56,8  | 56,8  | 18,06 | 561,12 | 136,20 |
| 2019/06/18 | CH2205 | Male | Three y/o | Control | Control | Feed Day | Yes | 10:40 | 10:00 - 10:59 | Late Morning | 37,2 | 72  | 7,8   | 7,8   | 18,36 | 569,20 | 68,36  |
| 2019/06/18 | CH2206 | Male | Three y/o | Control | Control | Feed Day | Yes | 10:40 | 10:00 - 10:59 | Late Morning | 37,0 | 71  | 64,0  | 64,0  | 18,16 | 568,10 | 140,33 |
| 2019/06/18 | CH2205 | Male | Three y/o | Control | Control | Feed Day | Yes | 10:45 | 10:00 - 10:59 | Late Morning | 37,2 | 49  | 5,6   | 5,6   | 18,36 | 537,80 | 57,21  |
| 2019/06/18 | CH2206 | Male | Three y/o | Control | Control | Feed Day | Yes | 10:45 | 10:00 - 10:59 | Late Morning | 36,9 | 56  | 67,2  | 67,2  | 18,06 | 549,01 | 142,02 |
| 2019/06/18 | CH2205 | Male | Three y/o | Control | Control | Feed Day | Yes | 10:50 | 10:00 - 10:59 | Late Morning | 37,1 | 54  | 3,4   | 3,4   | 18,26 | 545,99 | 40,51  |
| 2019/06/18 | CH2206 | Male | Three y/o | Control | Control | Feed Day | Yes | 10:50 | 10:00 - 10:59 | Late Morning | 36,8 | 72  | 65,0  | 65,0  | 17,96 | 569,20 | 140,87 |
| 2019/06/18 | CH2205 | Male | Three y/o | Control | Control | Feed Day | Yes | 10:55 | 10:00 - 10:59 | Late Morning | 37,2 | 43  | 4,4   | 4,4   | 18,36 | 526,50 | 49,12  |
| 2019/06/18 | CH2206 | Male | Three y/o | Control | Control | Feed Day | Yes | 10:55 | 10:00 - 10:59 | Late Morning | 36,5 | 48  | 61,2  | 61,2  | 17,67 | 536,04 | 138,78 |
| 2019/06/18 | CH2205 | Male | Three y/o | Control | Control | Feed Day | Yes | 11:00 | 11:00 - 11:59 | Late Morning | 37,2 | 53  | 12,4  | 12,4  | 18,36 | 544,43 | 84,04  |
| 2019/06/18 | CH2206 | Male | Three y/o | Control | Control | Feed Day | Yes | 11:00 | 11:00 - 11:59 | Late Morning | 36,5 | 67  | 62,8  | 62,8  | 17,67 | 563,53 | 139,67 |
| 2019/06/18 | CH2205 | Male | Three y/o | Control | Control | Feed Day | Yes | 11:05 | 11:00 - 11:59 | Late Morning | 37,3 | 70  | 15,6  | 15,6  | 18,46 | 566,99 | 91,85  |
| 2019/06/18 | CH2206 | Male | Three y/o | Control | Control | Feed Day | Yes | 11:05 | 11:00 - 11:59 | Late Morning | 36,6 | 88  | 184,6 | 184,6 | 17,77 | 584,49 | 177,30 |
| 2019/06/18 | CH2205 | Male | Three y/o | Control | Control | Feed Day | Yes | 11:10 | 11:00 - 11:59 | Late Morning | 37,3 | 68  | 207,4 | 207,4 | 18,46 | 564,71 | 181,40 |
| 2019/06/18 | CH2206 | Male | Three y/o | Control | Control | Feed Day | Yes | 11:10 | 11:00 - 11:59 | Late Morning | 37,0 |     | 123,2 | 123,2 | 18,16 |        | 163,13 |
| 2019/06/18 | CH2205 | Male | Three y/o | Control | Control | Feed Day | Yes | 11:15 | 11:00 - 11:59 | Late Morning | 37,3 | 87  | 16,2  | 16,2  | 18,46 | 583,64 | 93,13  |
| 2019/06/18 | CH2206 | Male | Three y/o | Control | Control | Feed Day | Yes | 11:15 | 11:00 - 11:59 | Late Morning | 37,2 | 66  | 62,8  | 62,8  | 18,36 | 562,34 | 139,67 |
| 2019/06/18 | CH2205 | Male | Three y/o | Control | Control | Feed Day | Yes | 11:20 | 11:00 - 11:59 | Late Morning | 37,3 | 65  | 3,2   | 3,2   | 18,46 | 561,12 | 38,49  |
| 2019/06/18 | CH2206 | Male | Three y/o | Control | Control | Feed Day | Yes | 11:20 | 11:00 - 11:59 | Late Morning | 37,3 | 66  | 46,6  | 46,6  | 18,46 | 562,34 | 129,35 |
| 2019/06/18 | CH2205 | Male | Three y/o | Control | Control | Feed Day | Yes | 11:25 | 11:00 - 11:59 | Late Morning | 37,3 | 64  | 4,2   | 4,2   | 18,46 | 559,88 | 47,57  |
| 2019/06/18 | CH2206 | Male | Three y/o | Control | Control | Feed Day | Yes | 11:25 | 11:00 - 11:59 | Late Morning | 37,3 | 132 | 31,8  | 31,8  | 18,46 | 613,32 | 116,20 |
| 2019/06/18 | CH2205 | Male | Three y/o | Control | Control | Feed Day | No  | 11:30 | 11:00 - 11:59 | Late Morning | 37,3 | 57  | 7,8   | 7,8   | 18,46 | 550,47 | 68,36  |
| 2019/06/18 | CH2206 | Male | Three y/o | Control | Control | Feed Day | No  | 11:30 | 11:00 - 11:59 | Late Morning | 37,4 |     | 31,0  | 31,0  | 18,55 |        | 115,32 |
| 2019/06/18 | CH2205 | Male | Three y/o | Control | Control | Feed Day | No  | 11:35 | 11:00 - 11:59 | Late Morning | 37,3 | 52  | 18,6  | 18,6  | 18,46 | 542,83 | 97,84  |
| 2019/06/18 | CH2206 | Male | Three y/o | Control | Control | Feed Day | No  | 11:35 | 11:00 - 11:59 | Late Morning | 37,4 | 76  | 20,2  | 20,2  | 18,55 | 573,39 | 100,65 |
| 2019/06/18 | CH2205 | Male | Three y/o | Control | Control | Feed Day | No  | 11:40 | 11:00 - 11:59 | Late Morning | 37,4 | 140 | 100,2 | 100,2 | 18,55 | 617,28 | 155,91 |
| 2019/06/18 | CH2206 | Male | Three y/o | Control | Control | Feed Day | No  | 11:40 | 11:00 - 11:59 | Late Morning | 37,5 | 70  | 93,6  | 93,6  | 18,65 | 566,99 | 153,54 |
| 2019/06/18 | CH2205 | Male | Three y/o | Control | Control | Feed Day | No  | 11:45 | 11:00 - 11:59 | Late Morning | 37,5 | 94  | 120,2 | 120,2 | 18,65 | 589,37 | 162,27 |
| 2019/06/18 | CH2206 | Male | Three y/o | Control | Control | Feed Day | No  | 11:45 | 11:00 - 11:59 | Late Morning | 37,5 | 110 | 109,0 | 109,0 | 18,65 | 600,69 | 158,85 |
| 2019/06/18 | CH2205 | Male | Three y/o | Control | Control | Feed Day | No  | 11:50 | 11:00 - 11:59 | Late Morning | 37,5 | 69  | 38,0  | 38,0  | 18,65 | 565,86 | 122,32 |
| 2019/06/18 | CH2206 | Male | Three y/o | Control | Control | Feed Day | No  | 11:50 | 11:00 - 11:59 | Late Morning | 37,7 | 98  | 148,8 | 148,8 | 18,85 | 592,41 | 169,74 |
| 2019/06/18 | CH2205 | Male | Three y/o | Control | Control | Feed Day | No  | 11:55 | 11:00 - 11:59 | Late Morning | 37,5 | 91  | 222,2 | 222,2 | 18,65 | 586,98 | 183,82 |
| 2019/06/18 | CH2206 | Male | Three y/o | Control | Control | Feed Day | No  | 11:55 | 11:00 - 11:59 | Late Morning | 37,7 | 113 | 201,2 | 201,2 | 18,85 | 602,58 | 180,33 |
| 2019/06/18 | CH2205 | Male | Three y/o | Control | Control | Feed Day | No  | 12:00 | 12:00 - 12:59 | Afternoon    | 37,7 | 147 | 45,0  | 45,0  | 18,85 | 620,52 | 128,15 |
| 2019/06/18 | CH2206 | Male | Three y/o | Control | Control | Feed Day | No  | 12:00 | 12:00 - 12:59 | Afternoon    | 37,8 | 141 | 78,4  | 78,4  | 18,95 | 617,75 | 147,37 |
| 2019/06/18 | CH2205 | Male | Three y/o | Control | Control | Feed Day | No  | 12:05 | 12:00 - 12:59 | Afternoon    | 37,6 |     | 16,4  | 16,4  | 18,75 |        | 93,55  |
| 2019/06/18 | CH2206 | Male | Three y/o | Control | Control | Feed Day | No  | 12:05 | 12:00 - 12:59 | Afternoon    | 37,7 | 150 | 48,8  | 48,8  | 18,85 | 621,86 | 130,95 |
| 2019/06/18 | CH2205 | Male | Three y/o | Control | Control | Feed Day | No  | 12:10 | 12:00 - 12:59 | Afternoon    | 37,6 | 138 | 55,2  | 55,2  | 18,75 | 616,31 | 135,21 |
| 2019/06/18 | CH2206 | Male | Three y/o | Control | Control | Feed Day | No  | 12:10 | 12:00 - 12:59 | Afternoon    | 37,7 | 97  | 73,0  | 73,0  | 18,85 | 591,66 | 144,89 |
| 2019/06/18 | CH2205 | Male | Three y/o | Control | Control | Feed Day | No  | 12:15 | 12:00 - 12:59 | Afternoon    | 37,6 | 74  | 13,0  | 13,0  | 18,75 | 571,33 | 85,65  |
| 2019/06/18 | CH2206 | Male | Three y/o | Control | Control | Feed Day | No  | 12:15 | 12:00 - 12:59 | Afternoon    | 37,7 | 104 | 31,8  | 31,8  | 18,85 | 596,69 | 116,20 |
| 2019/06/18 | CH2205 | Male | Three y/o | Control | Control | Feed Day | No  | 12:20 | 12:00 - 12:59 | Afternoon    | 37,7 | 90  | 54,8  | 54,8  | 18,85 | 586,16 | 134,96 |
| 2019/06/18 | CH2206 | Male | Three y/o | Control | Control | Feed Day | No  | 12:20 | 12:00 - 12:59 | Afternoon    | 37,7 | 119 | 44,6  | 44,6  | 18,85 | 606,20 | 127,84 |
| 2019/06/18 | CH2205 | Male | Three y/o | Control | Control | Feed Day | No  | 12:25 | 12:00 - 12:59 | Afternoon    | 37,7 | 160 | 146,0 | 146,0 | 18,85 | 626,07 | 169,07 |
| 2019/06/18 | CH2206 | Male | Three y/o | Control | Control | Feed Day | No  | 12:25 | 12:00 - 12:59 | Afternoon    | 37,8 | 92  | 26,4  | 26,4  | 18,95 | 587,78 | 109,81 |
| 2019/06/18 | CH2205 | Male | Three y/o | Control | Control | Feed Day | No  | 12:30 | 12:00 - 12:59 | Afternoon    | 37,9 | 113 | 259,8 | 259,8 | 19,05 | 602,58 | 189,34 |
| 2019/06/18 | CH2206 | Male | Three y/o | Control | Control | Feed Day | No  | 12:30 | 12:00 - 12:59 | Afternoon    | 37,8 |     | 19,2  | 19,2  | 18,95 |        | 98,92  |
| 2019/06/18 | CH2205 | Male | Three y/o | Control | Control | Feed Day | No  | 12:35 | 12:00 - 12:59 | Afternoon    | 37,9 |     | 31,4  | 31,4  | 19,05 |        | 115,76 |
| 2019/06/18 | CH2206 | Male | Three y/o | Control | Control | Feed Day | No  | 12:35 | 12:00 - 12:59 | Afternoon    | 37,8 | 97  | 20,2  | 20,2  | 18,95 | 591,66 | 100,65 |
| 2019/06/18 | CH2205 | Male | Three y/o | Control | Control | Feed Day | No  | 12:40 | 12:00 - 12:59 | Afternoon    | 37,9 | 84  | 28,8  | 28,8  | 19,05 | 581,01 | 112,79 |
| 2019/06/18 | CH2206 | Male | Three y/o | Control | Control | Feed Day | No  | 12:40 | 12:00 - 12:59 | Afternoon    | 37,8 | 83  | 23,6  | 23,6  | 18,95 | 580,11 | 105,97 |
| 2019/06/18 | CH2205 | Male | Three y/o | Control | Control | Feed Day | No  | 12:45 | 12:00 - 12:59 | Afternoon    | 37,9 | 67  | 9,6   | 9,6   | 19,05 | 563,53 | 75,37  |
| 2019/06/18 | CH2206 | Male | Three y/o | Control | Control | Feed Day | No  | 12:45 | 12:00 - 12:59 | Afternoon    | 37,8 | 73  | 13,0  | 13,0  | 18,95 | 570,27 | 85,65  |
| 2019/06/18 | CH2205 | Male | Three y/o | Control | Control | Feed Day | No  | 12:50 | 12:00 - 12:59 | Afternoon    | 37,9 | 59  | 7,6   | 7,6   | 19,05 | 553,30 | 67,49  |



|            |        |      |           |         |         |          |    |       |               |           |      |     |      |      |       |        |        |
|------------|--------|------|-----------|---------|---------|----------|----|-------|---------------|-----------|------|-----|------|------|-------|--------|--------|
| 2019/06/18 | CH2206 | Male | Three y/o | Control | Control | Feed Day | No | 12:50 | 12:00 - 12:59 | Afternoon | 37,9 | 88  | 18,8 | 18,8 | 19,05 | 584,49 | 98,20  |
| 2019/06/18 | CH2205 | Male | Three y/o | Control | Control | Feed Day | No | 12:55 | 12:00 - 12:59 | Afternoon | 37,9 | 90  | 9,8  | 9,8  | 19,05 | 586,16 | 76,07  |
| 2019/06/18 | CH2206 | Male | Three y/o | Control | Control | Feed Day | No | 12:55 | 12:00 - 12:59 | Afternoon | 37,9 | 90  | 15,8 | 15,8 | 19,05 | 586,16 | 92,28  |
| 2019/06/18 | CH2205 | Male | Three y/o | Control | Control | Feed Day | No | 13:00 | 13:00 - 13:59 | Afternoon | 37,9 | 73  | 22,6 | 22,6 | 19,05 | 570,27 | 104,49 |
| 2019/06/18 | CH2206 | Male | Three y/o | Control | Control | Feed Day | No | 13:00 | 13:00 - 13:59 | Afternoon | 37,9 | 104 | 34,6 | 34,6 | 19,05 | 596,69 | 119,10 |
| 2019/06/18 | CH2205 | Male | Three y/o | Control | Control | Feed Day | No | 13:05 | 13:00 - 13:59 | Afternoon | 37,8 | 69  | 25,6 | 25,6 | 18,95 | 565,86 | 108,76 |
| 2019/06/18 | CH2206 | Male | Three y/o | Control | Control | Feed Day | No | 13:05 | 13:00 - 13:59 | Afternoon | 37,9 | 57  | 41,6 | 41,6 | 19,05 | 550,47 | 125,44 |
| 2019/06/18 | CH2205 | Male | Three y/o | Control | Control | Feed Day | No | 13:10 | 13:00 - 13:59 | Afternoon | 37,8 | 94  | 2,8  | 2,8  | 18,95 | 589,37 | 34,04  |
| 2019/06/18 | CH2206 | Male | Three y/o | Control | Control | Feed Day | No | 13:10 | 13:00 - 13:59 | Afternoon | 37,9 | 90  | 43,6 | 43,6 | 19,05 | 586,16 | 127,06 |
| 2019/06/18 | CH2205 | Male | Three y/o | Control | Control | Feed Day | No | 13:15 | 13:00 - 13:59 | Afternoon | 37,7 | 74  | 43,2 | 43,2 | 18,85 | 571,33 | 126,74 |
| 2019/06/18 | CH2206 | Male | Three y/o | Control | Control | Feed Day | No | 13:15 | 13:00 - 13:59 | Afternoon | 37,9 | 94  | 57,6 | 57,6 | 19,05 | 589,37 | 136,68 |
| 2019/06/18 | CH2205 | Male | Three y/o | Control | Control | Feed Day | No | 13:20 | 13:00 - 13:59 | Afternoon | 37,7 | 82  | 5,4  | 5,4  | 18,85 | 579,19 | 55,99  |
| 2019/06/18 | CH2206 | Male | Three y/o | Control | Control | Feed Day | No | 13:20 | 13:00 - 13:59 | Afternoon | 37,8 | 72  | 57,8 | 57,8 | 18,95 | 569,20 | 136,80 |
| 2019/06/18 | CH2205 | Male | Three y/o | Control | Control | Feed Day | No | 13:25 | 13:00 - 13:59 | Afternoon | 37,7 | 74  | 3,0  | 3,0  | 18,85 | 571,33 | 36,34  |
| 2019/06/18 | CH2206 | Male | Three y/o | Control | Control | Feed Day | No | 13:25 | 13:00 - 13:59 | Afternoon | 37,8 | 82  | 58,2 | 58,2 | 18,95 | 579,19 | 137,04 |
| 2019/06/18 | CH2205 | Male | Three y/o | Control | Control | Feed Day | No | 13:30 | 13:00 - 13:59 | Afternoon | 37,8 | 83  | 5,8  | 5,8  | 18,95 | 580,11 | 58,39  |
| 2019/06/18 | CH2206 | Male | Three y/o | Control | Control | Feed Day | No | 13:30 | 13:00 - 13:59 | Afternoon | 37,8 | 70  | 56,8 | 56,8 | 18,95 | 566,99 | 136,20 |
| 2019/06/18 | CH2205 | Male | Three y/o | Control | Control | Feed Day | No | 13:35 | 13:00 - 13:59 | Afternoon | 37,9 | 67  | 3,6  | 3,6  | 19,05 | 563,53 | 42,42  |
| 2019/06/18 | CH2206 | Male | Three y/o | Control | Control | Feed Day | No | 13:35 | 13:00 - 13:59 | Afternoon | 37,9 | 89  | 59,4 | 59,4 | 19,05 | 585,33 | 137,75 |
| 2019/06/18 | CH2205 | Male | Three y/o | Control | Control | Feed Day | No | 13:40 | 13:00 - 13:59 | Afternoon | 37,9 | 71  | 2,8  | 2,8  | 19,05 | 568,10 | 34,04  |
| 2019/06/18 | CH2206 | Male | Three y/o | Control | Control | Feed Day | No | 13:40 | 13:00 - 13:59 | Afternoon | 37,9 | 87  | 62,8 | 62,8 | 19,05 | 583,64 | 139,67 |
| 2019/06/18 | CH2205 | Male | Three y/o | Control | Control | Feed Day | No | 13:45 | 13:00 - 13:59 | Afternoon | 37,9 | 72  | 9,6  | 9,6  | 19,05 | 569,20 | 75,37  |
| 2019/06/18 | CH2206 | Male | Three y/o | Control | Control | Feed Day | No | 13:45 | 13:00 - 13:59 | Afternoon | 37,9 | 90  | 52,6 | 52,6 | 19,05 | 586,16 | 133,54 |
| 2019/06/18 | CH2205 | Male | Three y/o | Control | Control | Feed Day | No | 13:50 | 13:00 - 13:59 | Afternoon | 37,9 | 54  | 4,4  | 4,4  | 19,05 | 545,99 | 49,12  |
| 2019/06/18 | CH2206 | Male | Three y/o | Control | Control | Feed Day | No | 13:50 | 13:00 - 13:59 | Afternoon | 37,9 | 74  | 59,8 | 59,8 | 19,05 | 571,33 | 137,98 |
| 2019/06/18 | CH2205 | Male | Three y/o | Control | Control | Feed Day | No | 13:55 | 13:00 - 13:59 | Afternoon | 37,9 | 61  | 67,6 | 67,6 | 19,05 | 556,01 | 142,23 |
| 2019/06/18 | CH2206 | Male | Three y/o | Control | Control | Feed Day | No | 13:55 | 13:00 - 13:59 | Afternoon | 37,9 | 85  | 48,8 | 48,8 | 19,05 | 581,90 | 130,95 |
| 2019/06/18 | CH2205 | Male | Three y/o | Control | Control | Feed Day | No | 14:00 | 14:00 - 14:59 | Afternoon | 37,9 | 73  | 8,6  | 8,6  | 19,05 | 570,27 | 71,66  |
| 2019/06/18 | CH2206 | Male | Three y/o | Control | Control | Feed Day | No | 14:00 | 14:00 - 14:59 | Afternoon | 38,0 | 94  | 31,2 | 31,2 | 19,15 | 589,37 | 115,54 |
| 2019/06/18 | CH2205 | Male | Three y/o | Control | Control | Feed Day | No | 14:05 | 14:00 - 14:59 | Afternoon | 38,0 | 77  | 8,0  | 8,0  | 19,15 | 574,39 | 69,22  |
| 2019/06/18 | CH2206 | Male | Three y/o | Control | Control | Feed Day | No | 14:05 | 14:00 - 14:59 | Afternoon | 38,0 | 132 | 37,2 | 37,2 | 19,15 | 613,32 | 121,59 |
| 2019/06/18 | CH2205 | Male | Three y/o | Control | Control | Feed Day | No | 14:10 | 14:00 - 14:59 | Afternoon | 38,0 | 66  | 2,8  | 2,8  | 19,15 | 562,34 | 34,04  |
| 2019/06/18 | CH2206 | Male | Three y/o | Control | Control | Feed Day | No | 14:10 | 14:00 - 14:59 | Afternoon | 38,0 | 96  | 54,0 | 54,0 | 19,15 | 590,91 | 134,45 |
| 2019/06/18 | CH2205 | Male | Three y/o | Control | Control | Feed Day | No | 14:15 | 14:00 - 14:59 | Afternoon | 38,0 | 71  | 6,6  | 6,6  | 19,15 | 568,10 | 62,73  |
| 2019/06/18 | CH2206 | Male | Three y/o | Control | Control | Feed Day | No | 14:15 | 14:00 - 14:59 | Afternoon | 38,0 | 104 | 47,0 | 47,0 | 19,15 | 596,69 | 129,65 |
| 2019/06/18 | CH2205 | Male | Three y/o | Control | Control | Feed Day | No | 14:20 | 14:00 - 14:59 | Afternoon | 38,0 | 63  | 3,0  | 3,0  | 19,15 | 558,62 | 36,34  |
| 2019/06/18 | CH2206 | Male | Three y/o | Control | Control | Feed Day | No | 14:20 | 14:00 - 14:59 | Afternoon | 38,0 | 98  | 54,0 | 54,0 | 19,15 | 592,41 | 134,45 |
| 2019/06/18 | CH2205 | Male | Three y/o | Control | Control | Feed Day | No | 14:25 | 14:00 - 14:59 | Afternoon | 38,0 | 55  | 7,0  | 7,0  | 19,15 | 547,52 | 64,72  |
| 2019/06/18 | CH2206 | Male | Three y/o | Control | Control | Feed Day | No | 14:25 | 14:00 - 14:59 | Afternoon | 38,1 | 81  | 48,4 | 48,4 | 19,26 | 578,26 | 130,66 |
| 2019/06/18 | CH2205 | Male | Three y/o | Control | Control | Feed Day | No | 14:30 | 14:00 - 14:59 | Afternoon | 38,0 | 59  | 2,8  | 2,8  | 19,15 | 553,30 | 34,04  |
| 2019/06/18 | CH2206 | Male | Three y/o | Control | Control | Feed Day | No | 14:30 | 14:00 - 14:59 | Afternoon | 38,1 | 76  | 53,0 | 53,0 | 19,26 | 573,39 | 133,80 |
| 2019/06/18 | CH2205 | Male | Three y/o | Control | Control | Feed Day | No | 14:35 | 14:00 - 14:59 | Afternoon | 38,1 | 63  | 5,2  | 5,2  | 19,26 | 558,62 | 54,72  |
| 2019/06/18 | CH2206 | Male | Three y/o | Control | Control | Feed Day | No | 14:35 | 14:00 - 14:59 | Afternoon | 38,1 | 77  | 56,4 | 56,4 | 19,26 | 574,39 | 135,95 |
| 2019/06/18 | CH2205 | Male | Three y/o | Control | Control | Feed Day | No | 14:40 | 14:00 - 14:59 | Afternoon | 38,1 | 56  | 4,6  | 4,6  | 19,26 | 549,01 | 50,61  |
| 2019/06/18 | CH2206 | Male | Three y/o | Control | Control | Feed Day | No | 14:40 | 14:00 - 14:59 | Afternoon | 38,2 | 101 | 12,6 | 12,6 | 19,36 | 594,59 | 84,59  |
| 2019/06/18 | CH2205 | Male | Three y/o | Control | Control | Feed Day | No | 14:45 | 14:00 - 14:59 | Afternoon | 38,1 | 78  | 2,8  | 2,8  | 19,26 | 575,38 | 34,04  |
| 2019/06/18 | CH2206 | Male | Three y/o | Control | Control | Feed Day | No | 14:45 | 14:00 - 14:59 | Afternoon | 38,2 | 104 | 13,2 | 13,2 | 19,36 | 596,69 | 86,17  |
| 2019/06/18 | CH2205 | Male | Three y/o | Control | Control | Feed Day | No | 14:50 | 14:00 - 14:59 | Afternoon | 38,1 | 55  | 3,8  | 3,8  | 19,26 | 547,52 | 44,22  |
| 2019/06/18 | CH2206 | Male | Three y/o | Control | Control | Feed Day | No | 14:50 | 14:00 - 14:59 | Afternoon | 38,2 | 84  | 14,4 | 14,4 | 19,36 | 581,01 | 89,12  |
| 2019/06/18 | CH2205 | Male | Three y/o | Control | Control | Feed Day | No | 14:55 | 14:00 - 14:59 | Afternoon | 38,0 | 71  | 9,4  | 9,4  | 19,15 | 568,10 | 74,66  |
| 2019/06/18 | CH2206 | Male | Three y/o | Control | Control | Feed Day | No | 14:55 | 14:00 - 14:59 | Afternoon | 38,2 |     | 19,4 | 19,4 | 19,36 |        | 99,28  |
| 2019/06/18 | CH2205 | Male | Three y/o | Control | Control | Feed Day | No | 15:00 | 15:00 - 15:59 | Afternoon | 38,0 |     | 5,2  | 5,2  | 19,15 |        | 54,72  |
| 2019/06/18 | CH2206 | Male | Three y/o | Control | Control | Feed Day | No | 15:00 | 15:00 - 15:59 | Afternoon | 38,2 | 86  | 10,8 | 10,8 | 19,36 | 582,77 | 79,36  |
| 2019/06/18 | CH2205 | Male | Three y/o | Control | Control | Feed Day | No | 15:05 | 15:00 - 15:59 | Afternoon | 38,0 | 57  | 6,6  | 6,6  | 19,15 | 550,47 | 62,73  |
| 2019/06/18 | CH2206 | Male | Three y/o | Control | Control | Feed Day | No | 15:05 | 15:00 - 15:59 | Afternoon | 38,2 | 108 | 52,6 | 52,6 | 19,36 | 599,39 | 133,54 |
| 2019/06/18 | CH2205 | Male | Three y/o | Control | Control | Feed Day | No | 15:10 | 15:00 - 15:59 | Afternoon | 38,0 | 63  | 32,8 | 32,8 | 19,15 | 558,62 | 117,26 |
| 2019/06/18 | CH2206 | Male | Three y/o | Control | Control | Feed Day | No | 15:10 | 15:00 - 15:59 | Afternoon | 38,2 | 75  | 56,0 | 56,0 | 19,36 | 572,36 | 135,70 |
| 2019/06/18 | CH2205 | Male | Three y/o | Control | Control | Feed Day | No | 15:15 | 15:00 - 15:59 | Afternoon | 38,0 | 90  | 17,8 | 17,8 | 19,15 | 586,16 | 96,34  |
| 2019/06/18 | CH2206 | Male | Three y/o | Control | Control | Feed Day | No | 15:15 | 15:00 - 15:59 | Afternoon | 38,2 | 84  | 51,0 | 51,0 | 19,36 | 581,01 | 132,47 |
| 2019/06/18 | CH2205 | Male | Three y/o | Control | Control | Feed Day | No | 15:20 | 15:00 - 15:59 | Afternoon | 38,0 | 78  | 4,2  | 4,2  | 19,15 | 575,38 | 47,57  |
| 2019/06/18 | CH2206 | Male | Three y/o | Control | Control | Feed Day | No | 15:20 | 15:00 - 15:59 | Afternoon | 38,2 | 71  | 49,8 | 49,8 | 19,36 | 568,10 | 131,65 |
| 2019/06/18 | CH2205 | Male | Three y/o | Control | Control | Feed Day | No | 15:25 | 15:00 - 15:59 | Afternoon | 38,0 |     | 4,6  | 4,6  | 19,15 |        | 50,61  |
| 2019/06/18 | CH2206 | Male | Three y/o | Control | Control | Feed Day | No | 15:25 | 15:00 - 15:59 | Afternoon | 38,2 | 86  | 52,8 | 52,8 | 19,36 | 582,77 | 133,67 |
| 2019/06/18 | CH2205 | Male | Three y/o | Control | Control | Feed Day | No | 15:30 | 15:00 - 15:59 | Afternoon | 38,0 | 92  | 9,4  | 9,4  | 19,15 | 587,78 | 74,66  |
| 2019/06/18 | CH2206 | Male | Three y/o | Control | Control | Feed Day | No | 15:30 | 15:00 - 15:59 | Afternoon | 38,2 | 103 | 65,2 | 65,2 | 19,36 | 596,00 | 140,97 |
| 2019/06/18 | CH2205 | Male | Three y/o | Control | Control | Feed Day | No | 15:35 | 15:00 - 15:59 | Afternoon | 38,0 | 95  | 2,6  | 2,6  | 19,15 | 590,14 | 31,57  |
| 2019/06/18 | CH2206 | Male | Three y/o | Control | Control | Feed Day | No | 15:35 | 15:00 - 15:59 | Afternoon | 38,2 | 67  | 52,6 | 52,6 | 19,36 | 563,53 | 133,54 |
| 2019/06/18 | CH2205 | Male | Three y/o | Control | Control | Feed Day | No | 15:40 | 15:00 - 15:59 | Afternoon | 38,0 | 53  | 6,4  | 6,4  | 19,15 | 544,43 | 61,70  |
| 2019/06/18 | CH2206 | Male | Three y/o | Control | Control | Feed Day | No | 15:40 | 15:00 - 15:59 | Afternoon | 38,2 | 74  | 59,2 | 59,2 | 19,36 | 571,33 | 137,63 |
| 2019/06/18 | CH2205 | Male | Three y/o | Control | Control | Feed Day | No | 15:45 | 15:00 - 15:59 | Afternoon | 38,0 | 57  | 8,0  | 8,0  | 19,15 | 550,47 | 69,22  |



|            |        |      |           |         |         |          |    |       |               |           |      |     |       |       |       |        |        |
|------------|--------|------|-----------|---------|---------|----------|----|-------|---------------|-----------|------|-----|-------|-------|-------|--------|--------|
| 2019/06/18 | CH2206 | Male | Three y/o | Control | Control | Feed Day | No | 15:45 | 15:00 - 15:59 | Afternoon | 38,2 | 86  | 57,8  | 57,8  | 19,36 | 582,77 | 136,80 |
| 2019/06/18 | CH2205 | Male | Three y/o | Control | Control | Feed Day | No | 15:50 | 15:00 - 15:59 | Afternoon | 38,0 | 58  | 15,6  | 15,6  | 19,15 | 551,90 | 91,85  |
| 2019/06/18 | CH2206 | Male | Three y/o | Control | Control | Feed Day | No | 15:50 | 15:00 - 15:59 | Afternoon | 38,2 | 86  | 65,6  | 65,6  | 19,36 | 582,77 | 141,19 |
| 2019/06/18 | CH2205 | Male | Three y/o | Control | Control | Feed Day | No | 15:55 | 15:00 - 15:59 | Afternoon | 38,0 | 89  | 13,4  | 13,4  | 19,15 | 585,33 | 86,68  |
| 2019/06/18 | CH2206 | Male | Three y/o | Control | Control | Feed Day | No | 15:55 | 15:00 - 15:59 | Afternoon | 38,2 | 78  | 47,8  | 47,8  | 19,36 | 575,38 | 130,23 |
| 2019/06/18 | CH2205 | Male | Three y/o | Control | Control | Feed Day | No | 16:00 | 16:00 - 16:59 | Evening   | 38,0 | 48  | 12,8  | 12,8  | 19,15 | 536,04 | 85,12  |
| 2019/06/18 | CH2206 | Male | Three y/o | Control | Control | Feed Day | No | 16:00 | 16:00 - 16:59 | Evening   | 38,1 | 61  | 37,0  | 37,0  | 19,26 | 556,01 | 121,40 |
| 2019/06/18 | CH2205 | Male | Three y/o | Control | Control | Feed Day | No | 16:05 | 16:00 - 16:59 | Evening   | 38,0 | 83  | 49,0  | 49,0  | 19,15 | 580,11 | 131,09 |
| 2019/06/18 | CH2206 | Male | Three y/o | Control | Control | Feed Day | No | 16:05 | 16:00 - 16:59 | Evening   | 38,1 | 82  | 47,4  | 47,4  | 19,26 | 579,19 | 129,94 |
| 2019/06/18 | CH2205 | Male | Three y/o | Control | Control | Feed Day | No | 16:10 | 16:00 - 16:59 | Evening   | 38,0 | 114 | 94,0  | 94,0  | 19,15 | 603,20 | 153,69 |
| 2019/06/18 | CH2206 | Male | Three y/o | Control | Control | Feed Day | No | 16:10 | 16:00 - 16:59 | Evening   | 38,1 | 118 | 83,8  | 83,8  | 19,26 | 605,61 | 149,69 |
| 2019/06/18 | CH2205 | Male | Three y/o | Control | Control | Feed Day | No | 16:15 | 16:00 - 16:59 | Evening   | 38,0 | 73  | 5,2   | 5,2   | 19,15 | 570,27 | 54,72  |
| 2019/06/18 | CH2206 | Male | Three y/o | Control | Control | Feed Day | No | 16:15 | 16:00 - 16:59 | Evening   | 38,1 | 93  | 39,2  | 39,2  | 19,26 | 588,58 | 123,39 |
| 2019/06/18 | CH2205 | Male | Three y/o | Control | Control | Feed Day | No | 16:20 | 16:00 - 16:59 | Evening   | 38,0 | 80  | 19,4  | 19,4  | 19,15 | 577,31 | 99,28  |
| 2019/06/18 | CH2206 | Male | Three y/o | Control | Control | Feed Day | No | 16:20 | 16:00 - 16:59 | Evening   | 38,0 | 82  | 33,4  | 33,4  | 19,15 | 579,19 | 117,88 |
| 2019/06/18 | CH2205 | Male | Three y/o | Control | Control | Feed Day | No | 16:25 | 16:00 - 16:59 | Evening   | 38,0 | 36  | 18,8  | 18,8  | 19,15 | 510,56 | 98,20  |
| 2019/06/18 | CH2206 | Male | Three y/o | Control | Control | Feed Day | No | 16:25 | 16:00 - 16:59 | Evening   | 38,0 | 82  | 40,6  | 40,6  | 19,15 | 579,19 | 124,60 |
| 2019/06/18 | CH2205 | Male | Three y/o | Control | Control | Feed Day | No | 16:30 | 16:00 - 16:59 | Evening   | 38,0 | 61  | 19,0  | 19,0  | 19,15 | 556,01 | 98,56  |
| 2019/06/18 | CH2206 | Male | Three y/o | Control | Control | Feed Day | No | 16:30 | 16:00 - 16:59 | Evening   | 38,1 | 87  | 36,4  | 36,4  | 19,26 | 583,64 | 120,84 |
| 2019/06/18 | CH2205 | Male | Three y/o | Control | Control | Feed Day | No | 16:35 | 16:00 - 16:59 | Evening   | 38,0 |     | 34,6  | 34,6  | 19,15 |        | 119,10 |
| 2019/06/18 | CH2206 | Male | Three y/o | Control | Control | Feed Day | No | 16:35 | 16:00 - 16:59 | Evening   | 38,1 |     | 97,8  | 97,8  | 19,26 |        | 155,07 |
| 2019/06/18 | CH2205 | Male | Three y/o | Control | Control | Feed Day | No | 16:40 | 16:00 - 16:59 | Evening   | 38,0 | 113 | 18,6  | 18,6  | 19,15 | 602,58 | 97,84  |
| 2019/06/18 | CH2206 | Male | Three y/o | Control | Control | Feed Day | No | 16:40 | 16:00 - 16:59 | Evening   | 38,1 | 145 | 40,6  | 40,6  | 19,26 | 619,62 | 124,60 |
| 2019/06/18 | CH2205 | Male | Three y/o | Control | Control | Feed Day | No | 16:45 | 16:00 - 16:59 | Evening   | 38,0 | 96  | 26,6  | 26,6  | 19,15 | 590,91 | 110,07 |
| 2019/06/18 | CH2206 | Male | Three y/o | Control | Control | Feed Day | No | 16:45 | 16:00 - 16:59 | Evening   | 38,0 | 100 | 46,4  | 46,4  | 19,15 | 593,87 | 129,21 |
| 2019/06/18 | CH2205 | Male | Three y/o | Control | Control | Feed Day | No | 16:50 | 16:00 - 16:59 | Evening   | 38,0 | 67  | 26,0  | 26,0  | 19,15 | 563,53 | 109,29 |
| 2019/06/18 | CH2206 | Male | Three y/o | Control | Control | Feed Day | No | 16:50 | 16:00 - 16:59 | Evening   | 38,0 | 82  | 38,4  | 38,4  | 19,15 | 579,19 | 122,68 |
| 2019/06/18 | CH2205 | Male | Three y/o | Control | Control | Feed Day | No | 16:55 | 16:00 - 16:59 | Evening   | 38,0 | 70  | 26,4  | 26,4  | 19,15 | 566,99 | 109,81 |
| 2019/06/18 | CH2206 | Male | Three y/o | Control | Control | Feed Day | No | 16:55 | 16:00 - 16:59 | Evening   | 38,0 | 78  | 42,6  | 42,6  | 19,15 | 575,38 | 126,26 |
| 2019/06/18 | CH2205 | Male | Three y/o | Control | Control | Feed Day | No | 17:00 | 17:00 - 17:59 | Evening   | 38,0 | 79  | 26,0  | 26,0  | 19,15 | 576,36 | 109,29 |
| 2019/06/18 | CH2206 | Male | Three y/o | Control | Control | Feed Day | No | 17:00 | 17:00 - 17:59 | Evening   | 38,0 | 104 | 38,8  | 38,8  | 19,15 | 596,69 | 123,04 |
| 2019/06/18 | CH2205 | Male | Three y/o | Control | Control | Feed Day | No | 17:05 | 17:00 - 17:59 | Evening   | 38,0 | 68  | 49,8  | 49,8  | 19,15 | 564,71 | 131,65 |
| 2019/06/18 | CH2206 | Male | Three y/o | Control | Control | Feed Day | No | 17:05 | 17:00 - 17:59 | Evening   | 38,0 | 71  | 44,2  | 44,2  | 19,15 | 568,10 | 127,53 |
| 2019/06/18 | CH2205 | Male | Three y/o | Control | Control | Feed Day | No | 17:10 | 17:00 - 17:59 | Evening   | 38,0 | 158 | 16,0  | 16,0  | 19,15 | 625,26 | 92,71  |
| 2019/06/18 | CH2206 | Male | Three y/o | Control | Control | Feed Day | No | 17:10 | 17:00 - 17:59 | Evening   | 37,9 | 93  | 86,0  | 86,0  | 19,05 | 588,58 | 150,59 |
| 2019/06/18 | CH2205 | Male | Three y/o | Control | Control | Feed Day | No | 17:15 | 17:00 - 17:59 | Evening   | 38,0 | 107 | 47,6  | 47,6  | 19,15 | 598,73 | 130,09 |
| 2019/06/18 | CH2206 | Male | Three y/o | Control | Control | Feed Day | No | 17:15 | 17:00 - 17:59 | Evening   | 37,9 | 69  | 44,4  | 44,4  | 19,05 | 565,86 | 127,69 |
| 2019/06/18 | CH2205 | Male | Three y/o | Control | Control | Feed Day | No | 17:20 | 17:00 - 17:59 | Evening   | 38,0 | 94  | 60,6  | 60,6  | 19,15 | 589,37 | 138,44 |
| 2019/06/18 | CH2206 | Male | Three y/o | Control | Control | Feed Day | No | 17:20 | 17:00 - 17:59 | Evening   | 37,8 | 46  | 51,2  | 51,2  | 18,95 | 532,38 | 132,61 |
| 2019/06/18 | CH2205 | Male | Three y/o | Control | Control | Feed Day | No | 17:25 | 17:00 - 17:59 | Evening   | 38,0 | 107 | 74,8  | 74,8  | 19,15 | 598,73 | 145,74 |
| 2019/06/18 | CH2206 | Male | Three y/o | Control | Control | Feed Day | No | 17:25 | 17:00 - 17:59 | Evening   | 37,7 | 94  | 30,8  | 30,8  | 18,85 | 589,37 | 115,10 |
| 2019/06/18 | CH2205 | Male | Three y/o | Control | Control | Feed Day | No | 17:30 | 17:00 - 17:59 | Evening   | 38,1 | 138 | 164,6 | 164,6 | 19,26 | 616,31 | 173,27 |
| 2019/06/18 | CH2206 | Male | Three y/o | Control | Control | Feed Day | No | 17:30 | 17:00 - 17:59 | Evening   | 37,8 | 113 | 277,0 | 277,0 | 18,95 | 602,58 | 191,60 |
| 2019/06/18 | CH2205 | Male | Three y/o | Control | Control | Feed Day | No | 17:35 | 17:00 - 17:59 | Evening   | 38,2 | 45  | 25,6  | 25,6  | 19,36 | 530,47 | 108,76 |
| 2019/06/18 | CH2206 | Male | Three y/o | Control | Control | Feed Day | No | 17:35 | 17:00 - 17:59 | Evening   | 37,8 | 107 | 29,8  | 29,8  | 18,95 | 598,73 | 113,97 |
| 2019/06/18 | CH2205 | Male | Three y/o | Control | Control | Feed Day | No | 17:40 | 17:00 - 17:59 | Evening   | 38,2 | 92  | 7,2   | 7,2   | 19,36 | 587,78 | 65,66  |
| 2019/06/18 | CH2206 | Male | Three y/o | Control | Control | Feed Day | No | 17:40 | 17:00 - 17:59 | Evening   | 37,8 | 80  | 31,6  | 31,6  | 18,95 | 577,31 | 115,98 |
| 2019/06/18 | CH2205 | Male | Three y/o | Control | Control | Feed Day | No | 17:45 | 17:00 - 17:59 | Evening   | 38,2 | 72  | 13,8  | 13,8  | 19,36 | 569,20 | 87,68  |
| 2019/06/18 | CH2206 | Male | Three y/o | Control | Control | Feed Day | No | 17:45 | 17:00 - 17:59 | Evening   | 37,8 | 76  | 55,6  | 55,6  | 18,95 | 573,39 | 135,46 |
| 2019/06/18 | CH2205 | Male | Three y/o | Control | Control | Feed Day | No | 17:50 | 17:00 - 17:59 | Evening   | 38,2 |     | 32,4  | 32,4  | 19,36 |        | 116,84 |
| 2019/06/18 | CH2206 | Male | Three y/o | Control | Control | Feed Day | No | 17:50 | 17:00 - 17:59 | Evening   | 37,8 | 83  | 42,0  | 42,0  | 18,95 | 580,11 | 125,77 |
| 2019/06/18 | CH2205 | Male | Three y/o | Control | Control | Feed Day | No | 17:55 | 17:00 - 17:59 | Evening   | 38,2 | 113 | 58,2  | 58,2  | 19,36 | 602,58 | 137,04 |
| 2019/06/18 | CH2206 | Male | Three y/o | Control | Control | Feed Day | No | 17:55 | 17:00 - 17:59 | Evening   | 37,7 | 78  | 33,2  | 33,2  | 18,85 | 575,38 | 117,68 |
| 2019/06/18 | CH2205 | Male | Three y/o | Control | Control | Feed Day | No | 18:00 | 18:00 - 18:59 | Evening   | 38,2 |     | 8,4   | 8,4   | 19,36 |        | 70,86  |
| 2019/06/18 | CH2206 | Male | Three y/o | Control | Control | Feed Day | No | 18:00 | 18:00 - 18:59 | Evening   | 37,7 | 84  | 39,4  | 39,4  | 18,85 | 581,01 | 123,57 |
| 2019/06/18 | CH2205 | Male | Three y/o | Control | Control | Feed Day | No | 18:05 | 18:00 - 18:59 | Evening   | 38,1 | 52  | 4,4   | 4,4   | 19,26 | 542,83 | 49,12  |
| 2019/06/18 | CH2206 | Male | Three y/o | Control | Control | Feed Day | No | 18:05 | 18:00 - 18:59 | Evening   | 37,7 | 78  | 52,0  | 52,0  | 18,85 | 575,38 | 133,14 |
| 2019/06/18 | CH2205 | Male | Three y/o | Control | Control | Feed Day | No | 18:10 | 18:00 - 18:59 | Evening   | 38,1 | 74  | 4,6   | 4,6   | 19,26 | 571,33 | 50,61  |
| 2019/06/18 | CH2206 | Male | Three y/o | Control | Control | Feed Day | No | 18:10 | 18:00 - 18:59 | Evening   | 37,5 | 78  | 56,6  | 56,6  | 18,65 | 575,38 | 136,07 |
| 2019/06/18 | CH2205 | Male | Three y/o | Control | Control | Feed Day | No | 18:15 | 18:00 - 18:59 | Evening   | 38,2 | 60  | 7,8   | 7,8   | 19,36 | 554,67 | 68,36  |
| 2019/06/18 | CH2206 | Male | Three y/o | Control | Control | Feed Day | No | 18:15 | 18:00 - 18:59 | Evening   | 37,7 | 72  | 53,4  | 53,4  | 18,85 | 569,20 | 134,06 |
| 2019/06/18 | CH2205 | Male | Three y/o | Control | Control | Feed Day | No | 18:20 | 18:00 - 18:59 | Evening   | 38,2 | 88  | 4,0   | 4,0   | 19,36 | 584,49 | 45,94  |
| 2019/06/18 | CH2206 | Male | Three y/o | Control | Control | Feed Day | No | 18:20 | 18:00 - 18:59 | Evening   | 37,7 | 63  | 52,0  | 52,0  | 18,85 | 558,62 | 133,14 |
| 2019/06/18 | CH2205 | Male | Three y/o | Control | Control | Feed Day | No | 18:25 | 18:00 - 18:59 | Evening   | 38,2 | 56  | 5,8   | 5,8   | 19,36 | 549,01 | 58,39  |
| 2019/06/18 | CH2206 | Male | Three y/o | Control | Control | Feed Day | No | 18:25 | 18:00 - 18:59 | Evening   | 37,8 | 76  | 47,6  | 47,6  | 18,95 | 573,39 | 130,09 |
| 2019/06/18 | CH2205 | Male | Three y/o | Control | Control | Feed Day | No | 18:30 | 18:00 - 18:59 | Evening   | 38,3 | 75  | 8,6   | 8,6   | 19,46 | 572,36 | 71,66  |
| 2019/06/18 | CH2206 | Male | Three y/o | Control | Control | Feed Day | No | 18:30 | 18:00 - 18:59 | Evening   | 37,8 | 70  | 58,4  | 58,4  | 18,95 | 566,99 | 137,16 |
| 2019/06/18 | CH2205 | Male | Three y/o | Control | Control | Feed Day | No | 18:35 | 18:00 - 18:59 | Evening   | 38,3 | 71  | 6,2   | 6,2   | 19,46 | 568,10 | 60,63  |
| 2019/06/18 | CH2206 | Male | Three y/o | Control | Control | Feed Day | No | 18:35 | 18:00 - 18:59 | Evening   | 37,9 | 88  | 58,4  | 58,4  | 19,05 | 584,49 | 137,16 |
| 2019/06/18 | CH2205 | Male | Three y/o | Control | Control | Feed Day | No | 18:40 | 18:00 - 18:59 | Evening   | 38,3 | 65  | 2,4   | 2,4   | 19,46 | 561,12 | 28,91  |



|            |        |      |           |         |         |          |    |       |               |         |      |     |      |      |       |        |        |
|------------|--------|------|-----------|---------|---------|----------|----|-------|---------------|---------|------|-----|------|------|-------|--------|--------|
| 2019/06/18 | CH2206 | Male | Three y/o | Control | Control | Feed Day | No | 18:40 | 18:00 - 18:59 | Evening | 37,9 | 109 | 75,0 | 75,0 | 19,05 | 600,04 | 145,83 |
| 2019/06/18 | CH2205 | Male | Three y/o | Control | Control | Feed Day | No | 18:45 | 18:00 - 18:59 | Evening | 38,3 | 86  | 4,4  | 4,4  | 19,46 | 582,77 | 49,12  |
| 2019/06/18 | CH2206 | Male | Three y/o | Control | Control | Feed Day | No | 18:45 | 18:00 - 18:59 | Evening | 37,9 | 82  | 64,2 | 64,2 | 19,05 | 579,19 | 140,44 |
| 2019/06/18 | CH2205 | Male | Three y/o | Control | Control | Feed Day | No | 18:50 | 18:00 - 18:59 | Evening | 38,3 | 82  | 5,4  | 5,4  | 19,46 | 579,19 | 55,99  |
| 2019/06/18 | CH2206 | Male | Three y/o | Control | Control | Feed Day | No | 18:50 | 18:00 - 18:59 | Evening | 37,9 | 81  | 66,2 | 66,2 | 19,05 | 578,26 | 141,50 |
| 2019/06/18 | CH2205 | Male | Three y/o | Control | Control | Feed Day | No | 18:55 | 18:00 - 18:59 | Evening | 38,2 | 57  | 4,8  | 4,8  | 19,36 | 550,47 | 52,04  |
| 2019/06/18 | CH2206 | Male | Three y/o | Control | Control | Feed Day | No | 18:55 | 18:00 - 18:59 | Evening | 37,9 | 85  | 62,4 | 62,4 | 19,05 | 581,90 | 139,45 |
| 2019/06/18 | CH2205 | Male | Three y/o | Control | Control | Feed Day | No | 19:00 | 19:00 - 19:59 | Evening | 38,2 | 57  | 9,0  | 9,0  | 19,36 | 550,47 | 73,19  |
| 2019/06/18 | CH2206 | Male | Three y/o | Control | Control | Feed Day | No | 19:00 | 19:00 - 19:59 | Evening | 37,9 | 83  | 67,0 | 67,0 | 19,05 | 580,11 | 141,92 |
| 2019/06/18 | CH2205 | Male | Three y/o | Control | Control | Feed Day | No | 19:05 | 19:00 - 19:59 | Evening | 38,2 | 104 | 11,8 | 11,8 | 19,36 | 596,69 | 82,36  |
| 2019/06/18 | CH2206 | Male | Three y/o | Control | Control | Feed Day | No | 19:05 | 19:00 - 19:59 | Evening | 37,9 | 63  | 64,4 | 64,4 | 19,05 | 558,62 | 140,55 |
| 2019/06/18 | CH2205 | Male | Three y/o | Control | Control | Feed Day | No | 19:10 | 19:00 - 19:59 | Evening | 38,1 | 69  | 16,2 | 16,2 | 19,26 | 565,86 | 93,13  |
| 2019/06/18 | CH2206 | Male | Three y/o | Control | Control | Feed Day | No | 19:10 | 19:00 - 19:59 | Evening | 37,9 | 82  | 67,2 | 67,2 | 19,05 | 579,19 | 142,02 |
| 2019/06/18 | CH2205 | Male | Three y/o | Control | Control | Feed Day | No | 19:15 | 19:00 - 19:59 | Evening | 38,1 | 76  | 16,0 | 16,0 | 19,26 | 573,39 | 92,71  |
| 2019/06/18 | CH2206 | Male | Three y/o | Control | Control | Feed Day | No | 19:15 | 19:00 - 19:59 | Evening | 37,9 | 57  | 65,8 | 65,8 | 19,05 | 550,47 | 141,29 |
| 2019/06/18 | CH2205 | Male | Three y/o | Control | Control | Feed Day | No | 19:20 | 19:00 - 19:59 | Evening | 38,1 | 58  | 10,2 | 10,2 | 19,26 | 551,90 | 77,43  |
| 2019/06/18 | CH2206 | Male | Three y/o | Control | Control | Feed Day | No | 19:20 | 19:00 - 19:59 | Evening | 37,9 | 73  | 72,2 | 72,2 | 19,05 | 570,27 | 144,51 |
| 2019/06/18 | CH2205 | Male | Three y/o | Control | Control | Feed Day | No | 19:25 | 19:00 - 19:59 | Evening | 38,0 | 132 | 12,4 | 12,4 | 19,15 | 613,32 | 84,04  |
| 2019/06/18 | CH2206 | Male | Three y/o | Control | Control | Feed Day | No | 19:25 | 19:00 - 19:59 | Evening | 37,9 | 90  | 67,4 | 67,4 | 19,05 | 586,16 | 142,12 |
| 2019/06/18 | CH2205 | Male | Three y/o | Control | Control | Feed Day | No | 19:30 | 19:00 - 19:59 | Evening | 38,0 | 73  | 10,4 | 10,4 | 19,15 | 570,27 | 78,08  |
| 2019/06/18 | CH2206 | Male | Three y/o | Control | Control | Feed Day | No | 19:30 | 19:00 - 19:59 | Evening | 37,9 | 70  | 65,0 | 65,0 | 19,05 | 566,99 | 140,87 |
| 2019/06/18 | CH2205 | Male | Three y/o | Control | Control | Feed Day | No | 19:35 | 19:00 - 19:59 | Evening | 38,0 |     | 12,8 | 12,8 | 19,15 |        | 85,12  |
| 2019/06/18 | CH2206 | Male | Three y/o | Control | Control | Feed Day | No | 19:35 | 19:00 - 19:59 | Evening | 37,8 | 160 | 57,2 | 57,2 | 18,95 | 626,07 | 136,44 |
| 2019/06/18 | CH2205 | Male | Three y/o | Control | Control | Feed Day | No | 19:40 | 19:00 - 19:59 | Evening | 37,9 | 73  | 12,4 | 12,4 | 19,05 | 570,27 | 84,04  |
| 2019/06/18 | CH2206 | Male | Three y/o | Control | Control | Feed Day | No | 19:40 | 19:00 - 19:59 | Evening | 37,9 | 68  | 40,4 | 40,4 | 19,05 | 564,71 | 124,43 |
| 2019/06/18 | CH2205 | Male | Three y/o | Control | Control | Feed Day | No | 19:45 | 19:00 - 19:59 | Evening | 37,9 |     | 15,2 | 15,2 | 19,05 |        | 90,96  |
| 2019/06/18 | CH2206 | Male | Three y/o | Control | Control | Feed Day | No | 19:45 | 19:00 - 19:59 | Evening | 37,7 | 90  | 47,8 | 47,8 | 18,85 | 586,16 | 130,23 |
| 2019/06/18 | CH2205 | Male | Three y/o | Control | Control | Feed Day | No | 19:50 | 19:00 - 19:59 | Evening | 37,9 |     | 7,8  | 7,8  | 19,05 |        | 68,36  |
| 2019/06/18 | CH2206 | Male | Three y/o | Control | Control | Feed Day | No | 19:50 | 19:00 - 19:59 | Evening | 37,5 | 66  | 43,0 | 43,0 | 18,65 | 562,34 | 126,58 |
| 2019/06/18 | CH2205 | Male | Three y/o | Control | Control | Feed Day | No | 19:55 | 19:00 - 19:59 | Evening | 37,9 |     | 10,6 | 10,6 | 19,05 |        | 78,73  |
| 2019/06/18 | CH2206 | Male | Three y/o | Control | Control | Feed Day | No | 19:55 | 19:00 - 19:59 | Evening | 37,4 | 54  | 39,0 | 39,0 | 18,55 | 545,99 | 123,22 |
| 2019/06/18 | CH2205 | Male | Three y/o | Control | Control | Feed Day | No | 20:00 | 20:00 - 20:59 | Night   | 37,9 | 72  | 12,0 | 12,0 | 19,05 | 569,20 | 82,93  |
| 2019/06/18 | CH2206 | Male | Three y/o | Control | Control | Feed Day | No | 20:00 | 20:00 - 20:59 | Night   | 37,7 | 74  | 28,8 | 28,8 | 18,85 | 571,33 | 112,79 |
| 2019/06/18 | CH2205 | Male | Three y/o | Control | Control | Feed Day | No | 20:05 | 20:00 - 20:59 | Night   | 37,9 | 54  | 13,4 | 13,4 | 19,05 | 545,99 | 86,68  |
| 2019/06/18 | CH2206 | Male | Three y/o | Control | Control | Feed Day | No | 20:05 | 20:00 - 20:59 | Night   | 37,8 | 72  | 32,8 | 32,8 | 18,95 | 569,20 | 117,26 |
| 2019/06/18 | CH2205 | Male | Three y/o | Control | Control | Feed Day | No | 20:10 | 20:00 - 20:59 | Night   | 37,9 | 83  | 13,2 | 13,2 | 19,05 | 580,11 | 86,17  |
| 2019/06/18 | CH2206 | Male | Three y/o | Control | Control | Feed Day | No | 20:10 | 20:00 - 20:59 | Night   | 37,8 | 107 | 33,6 | 33,6 | 18,95 | 598,73 | 118,09 |
| 2019/06/18 | CH2205 | Male | Three y/o | Control | Control | Feed Day | No | 20:15 | 20:00 - 20:59 | Night   | 37,9 | 71  | 13,4 | 13,4 | 19,05 | 568,10 | 86,68  |
| 2019/06/18 | CH2206 | Male | Three y/o | Control | Control | Feed Day | No | 20:15 | 20:00 - 20:59 | Night   | 37,8 | 83  | 36,6 | 36,6 | 18,95 | 580,11 | 121,03 |
| 2019/06/18 | CH2205 | Male | Three y/o | Control | Control | Feed Day | No | 20:20 | 20:00 - 20:59 | Night   | 37,9 |     | 15,4 | 15,4 | 19,05 |        | 91,41  |
| 2019/06/18 | CH2206 | Male | Three y/o | Control | Control | Feed Day | No | 20:20 | 20:00 - 20:59 | Night   | 37,8 | 45  | 42,6 | 42,6 | 18,95 | 530,47 | 126,26 |
| 2019/06/18 | CH2205 | Male | Three y/o | Control | Control | Feed Day | No | 20:25 | 20:00 - 20:59 | Night   | 38,0 | 54  | 20,4 | 20,4 | 19,15 | 545,99 | 100,99 |
| 2019/06/18 | CH2206 | Male | Three y/o | Control | Control | Feed Day | No | 20:25 | 20:00 - 20:59 | Night   | 37,9 | 84  | 50,0 | 50,0 | 19,05 | 581,01 | 131,79 |
| 2019/06/18 | CH2205 | Male | Three y/o | Control | Control | Feed Day | No | 20:30 | 20:00 - 20:59 | Night   | 38,0 | 90  | 22,2 | 22,2 | 19,15 | 586,16 | 103,88 |
| 2019/06/18 | CH2206 | Male | Three y/o | Control | Control | Feed Day | No | 20:30 | 20:00 - 20:59 | Night   | 37,9 | 88  | 47,2 | 47,2 | 19,05 | 584,49 | 129,80 |
| 2019/06/18 | CH2205 | Male | Three y/o | Control | Control | Feed Day | No | 20:35 | 20:00 - 20:59 | Night   | 38,0 | 79  | 16,0 | 16,0 | 19,15 | 576,36 | 92,71  |
| 2019/06/18 | CH2206 | Male | Three y/o | Control | Control | Feed Day | No | 20:35 | 20:00 - 20:59 | Night   | 37,9 | 134 | 44,2 | 44,2 | 19,05 | 614,33 | 127,53 |
| 2019/06/18 | CH2205 | Male | Three y/o | Control | Control | Feed Day | No | 20:40 | 20:00 - 20:59 | Night   | 38,0 | 101 | 18,2 | 18,2 | 19,15 | 594,59 | 97,10  |
| 2019/06/18 | CH2206 | Male | Three y/o | Control | Control | Feed Day | No | 20:40 | 20:00 - 20:59 | Night   | 37,8 | 93  | 40,8 | 40,8 | 18,95 | 588,58 | 124,77 |
| 2019/06/18 | CH2205 | Male | Three y/o | Control | Control | Feed Day | No | 20:45 | 20:00 - 20:59 | Night   | 38,0 | 91  | 17,6 | 17,6 | 19,15 | 586,98 | 95,95  |
| 2019/06/18 | CH2206 | Male | Three y/o | Control | Control | Feed Day | No | 20:45 | 20:00 - 20:59 | Night   | 37,8 | 90  | 39,8 | 39,8 | 18,95 | 586,16 | 123,91 |
| 2019/06/18 | CH2205 | Male | Three y/o | Control | Control | Feed Day | No | 20:50 | 20:00 - 20:59 | Night   | 38,0 | 69  | 13,4 | 13,4 | 19,15 | 565,86 | 86,68  |
| 2019/06/18 | CH2206 | Male | Three y/o | Control | Control | Feed Day | No | 20:50 | 20:00 - 20:59 | Night   | 37,8 | 91  | 43,4 | 43,4 | 18,95 | 586,98 | 126,90 |
| 2019/06/18 | CH2205 | Male | Three y/o | Control | Control | Feed Day | No | 20:55 | 20:00 - 20:59 | Night   | 38,0 | 68  | 20,0 | 20,0 | 19,15 | 564,71 | 100,31 |
| 2019/06/18 | CH2206 | Male | Three y/o | Control | Control | Feed Day | No | 20:55 | 20:00 - 20:59 | Night   | 37,8 | 62  | 51,8 | 51,8 | 18,95 | 557,33 | 133,01 |
| 2019/06/18 | CH2205 | Male | Three y/o | Control | Control | Feed Day | No | 21:00 | 21:00 - 21:59 | Night   | 38,1 | 64  | 14,6 | 14,6 | 19,26 | 559,88 | 89,59  |
| 2019/06/18 | CH2206 | Male | Three y/o | Control | Control | Feed Day | No | 21:00 | 21:00 - 21:59 | Night   | 37,7 | 84  | 47,4 | 47,4 | 18,85 | 581,01 | 129,94 |
| 2019/06/18 | CH2205 | Male | Three y/o | Control | Control | Feed Day | No | 21:05 | 21:00 - 21:59 | Night   | 38,1 | 60  | 21,6 | 21,6 | 19,26 | 554,67 | 102,94 |
| 2019/06/18 | CH2206 | Male | Three y/o | Control | Control | Feed Day | No | 21:05 | 21:00 - 21:59 | Night   | 37,6 | 83  | 50,4 | 50,4 | 18,75 | 580,11 | 132,06 |
| 2019/06/18 | CH2205 | Male | Three y/o | Control | Control | Feed Day | No | 21:10 | 21:00 - 21:59 | Night   | 38,0 | 90  | 16,6 | 16,6 | 19,15 | 586,16 | 93,96  |
| 2019/06/18 | CH2206 | Male | Three y/o | Control | Control | Feed Day | No | 21:10 | 21:00 - 21:59 | Night   | 37,5 |     | 52,4 | 52,4 | 18,65 |        | 133,41 |
| 2019/06/18 | CH2205 | Male | Three y/o | Control | Control | Feed Day | No | 21:15 | 21:00 - 21:59 | Night   | 38,0 | 69  | 21,2 | 21,2 | 19,15 | 565,86 | 102,31 |
| 2019/06/18 | CH2206 | Male | Three y/o | Control | Control | Feed Day | No | 21:15 | 21:00 - 21:59 | Night   | 37,8 | 49  | 61,4 | 61,4 | 18,95 | 537,80 | 138,89 |
| 2019/06/18 | CH2205 | Male | Three y/o | Control | Control | Feed Day | No | 21:20 | 21:00 - 21:59 | Night   | 38,0 | 58  | 17,2 | 17,2 | 19,15 | 551,90 | 95,17  |
| 2019/06/18 | CH2206 | Male | Three y/o | Control | Control | Feed Day | No | 21:20 | 21:00 - 21:59 | Night   | 37,8 | 64  | 64,2 | 64,2 | 18,95 | 559,88 | 140,44 |
| 2019/06/18 | CH2205 | Male | Three y/o | Control | Control | Feed Day | No | 21:25 | 21:00 - 21:59 | Night   | 38,0 | 97  | 24,0 | 24,0 | 19,15 | 591,66 | 106,55 |
| 2019/06/18 | CH2206 | Male | Three y/o | Control | Control | Feed Day | No | 21:25 | 21:00 - 21:59 | Night   | 37,8 | 90  | 68,8 | 68,8 | 18,95 | 586,16 | 142,84 |
| 2019/06/18 | CH2205 | Male | Three y/o | Control | Control | Feed Day | No | 21:30 | 21:00 - 21:59 | Night   | 38,0 | 67  | 21,4 | 21,4 | 19,15 | 563,53 | 102,63 |
| 2019/06/18 | CH2206 | Male | Three y/o | Control | Control | Feed Day | No | 21:30 | 21:00 - 21:59 | Night   | 37,8 | 84  | 67,2 | 67,2 | 18,95 | 581,01 | 142,02 |
| 2019/06/18 | CH2205 | Male | Three y/o | Control | Control | Feed Day | No | 21:35 | 21:00 - 21:59 | Night   | 38,0 | 55  | 22,4 | 22,4 | 19,15 | 547,52 | 104,19 |



|    |            |        |      |           |         |         |          |    |       |               |               |      |     |      |      |       |        |        |
|----|------------|--------|------|-----------|---------|---------|----------|----|-------|---------------|---------------|------|-----|------|------|-------|--------|--------|
|    | 2019/06/18 | CH2206 | Male | Three y/o | Control | Control | Feed Day | No | 21:35 | 21:00 - 21:59 | Night         | 37,8 | 84  | 64,4 | 64,4 | 18,95 | 581,01 | 140,55 |
|    | 2019/06/18 | CH2205 | Male | Three y/o | Control | Control | Feed Day | No | 21:40 | 21:00 - 21:59 | Night         | 38,0 | 68  | 21,6 | 21,6 | 19,15 | 564,71 | 102,94 |
|    | 2019/06/18 | CH2206 | Male | Three y/o | Control | Control | Feed Day | No | 21:40 | 21:00 - 21:59 | Night         | 37,7 | 86  | 64,8 | 64,8 | 18,85 | 582,77 | 140,76 |
|    | 2019/06/18 | CH2205 | Male | Three y/o | Control | Control | Feed Day | No | 21:45 | 21:00 - 21:59 | Night         | 38,0 | 72  | 22,4 | 22,4 | 19,15 | 569,20 | 104,19 |
|    | 2019/06/18 | CH2206 | Male | Three y/o | Control | Control | Feed Day | No | 21:45 | 21:00 - 21:59 | Night         | 37,7 | 70  | 64,4 | 64,4 | 18,85 | 566,99 | 140,55 |
|    | 2019/06/18 | CH2205 | Male | Three y/o | Control | Control | Feed Day | No | 21:50 | 21:00 - 21:59 | Night         | 38,0 | 75  | 17,8 | 17,8 | 19,15 | 572,36 | 96,34  |
|    | 2019/06/18 | CH2206 | Male | Three y/o | Control | Control | Feed Day | No | 21:50 | 21:00 - 21:59 | Night         | 37,7 | 52  | 65,8 | 65,8 | 18,85 | 542,83 | 141,29 |
|    | 2019/06/18 | CH2205 | Male | Three y/o | Control | Control | Feed Day | No | 21:55 | 21:00 - 21:59 | Night         | 38,0 | 80  | 11,8 | 11,8 | 19,15 | 577,31 | 82,36  |
|    | 2019/06/18 | CH2206 | Male | Three y/o | Control | Control | Feed Day | No | 21:55 | 21:00 - 21:59 | Night         | 37,7 | 71  | 65,8 | 65,8 | 18,85 | 568,10 | 141,29 |
|    | 2019/06/18 | CH2205 | Male | Three y/o | Control | Control | Feed Day | No | 22:00 | 22:00 - 22:59 | Night         | 38,0 | 49  | 16,4 | 16,4 | 19,15 | 537,80 | 93,55  |
|    | 2019/06/18 | CH2206 | Male | Three y/o | Control | Control | Feed Day | No | 22:00 | 22:00 - 22:59 | Night         | 37,7 | 69  | 68,0 | 68,0 | 18,85 | 565,86 | 142,43 |
|    | 2019/06/18 | CH2205 | Male | Three y/o | Control | Control | Feed Day | No | 22:05 | 22:00 - 22:59 | Night         | 38,0 | 83  | 14,4 | 14,4 | 19,15 | 580,11 | 89,12  |
|    | 2019/06/18 | CH2206 | Male | Three y/o | Control | Control | Feed Day | No | 22:05 | 22:00 - 22:59 | Night         | 37,8 | 50  | 69,0 | 69,0 | 18,95 | 539,52 | 142,94 |
|    | 2019/06/18 | CH2205 | Male | Three y/o | Control | Control | Feed Day | No | 22:10 | 22:00 - 22:59 | Night         | 38,0 | 57  | 11,6 | 11,6 | 19,15 | 550,47 | 81,78  |
|    | 2019/06/18 | CH2206 | Male | Three y/o | Control | Control | Feed Day | No | 22:10 | 22:00 - 22:59 | Night         | 37,8 | 92  | 65,4 | 65,4 | 18,95 | 587,78 | 141,08 |
|    | 2019/06/18 | CH2205 | Male | Three y/o | Control | Control | Feed Day | No | 22:15 | 22:00 - 22:59 | Night         | 38,0 | 78  | 15,8 | 15,8 | 19,15 | 575,38 | 92,28  |
|    | 2019/06/18 | CH2206 | Male | Three y/o | Control | Control | Feed Day | No | 22:15 | 22:00 - 22:59 | Night         | 37,8 | 82  | 55,2 | 55,2 | 18,95 | 579,19 | 135,21 |
|    | 2019/06/18 | CH2205 | Male | Three y/o | Control | Control | Feed Day | No | 22:20 | 22:00 - 22:59 | Night         | 38,0 |     | 11,2 | 11,2 | 19,15 |        | 80,59  |
|    | 2019/06/18 | CH2206 | Male | Three y/o | Control | Control | Feed Day | No | 22:20 | 22:00 - 22:59 | Night         | 37,7 | 88  | 67,4 | 67,4 | 18,85 | 584,49 | 142,12 |
|    | 2019/06/18 | CH2205 | Male | Three y/o | Control | Control | Feed Day | No | 22:25 | 22:00 - 22:59 | Night         | 38,0 |     | 9,8  | 9,8  | 19,15 |        | 76,07  |
|    | 2019/06/18 | CH2206 | Male | Three y/o | Control | Control | Feed Day | No | 22:25 | 22:00 - 22:59 | Night         | 37,7 | 61  | 68,2 | 68,2 | 18,85 | 556,01 | 142,53 |
|    | 2019/06/18 | CH2205 | Male | Three y/o | Control | Control | Feed Day | No | 22:30 | 22:00 - 22:59 | Night         | 37,9 |     | 16,2 | 16,2 | 19,05 |        | 93,13  |
|    | 2019/06/18 | CH2206 | Male | Three y/o | Control | Control | Feed Day | No | 22:30 | 22:00 - 22:59 | Night         | 37,7 | 86  | 57,4 | 57,4 | 18,85 | 582,77 | 136,56 |
|    | 2019/06/18 | CH2205 | Male | Three y/o | Control | Control | Feed Day | No | 22:35 | 22:00 - 22:59 | Night         | 37,9 | 95  | 6,8  | 6,8  | 19,05 | 590,14 | 63,74  |
|    | 2019/06/18 | CH2206 | Male | Three y/o | Control | Control | Feed Day | No | 22:35 | 22:00 - 22:59 | Night         | 37,7 | 83  | 53,6 | 53,6 | 18,85 | 580,11 | 134,19 |
|    | 2019/06/18 | CH2205 | Male | Three y/o | Control | Control | Feed Day | No | 22:40 | 22:00 - 22:59 | Night         | 37,9 |     | 3,8  | 3,8  | 19,05 |        | 44,22  |
|    | 2019/06/18 | CH2206 | Male | Three y/o | Control | Control | Feed Day | No | 22:40 | 22:00 - 22:59 | Night         | 37,7 | 44  | 53,2 | 53,2 | 18,85 | 528,51 | 133,93 |
|    | 2019/06/18 | CH2205 | Male | Three y/o | Control | Control | Feed Day | No | 22:45 | 22:00 - 22:59 | Night         | 37,8 |     | 3,2  | 3,2  | 18,95 |        | 38,49  |
|    | 2019/06/18 | CH2206 | Male | Three y/o | Control | Control | Feed Day | No | 22:45 | 22:00 - 22:59 | Night         | 37,7 | 90  | 53,6 | 53,6 | 18,85 | 586,16 | 134,19 |
|    | 2019/06/18 | CH2205 | Male | Three y/o | Control | Control | Feed Day | No | 22:50 | 22:00 - 22:59 | Night         | 37,9 | 58  | 2,8  | 2,8  | 19,05 | 551,90 | 34,04  |
|    | 2019/06/18 | CH2206 | Male | Three y/o | Control | Control | Feed Day | No | 22:50 | 22:00 - 22:59 | Night         | 37,7 | 82  | 57,2 | 57,2 | 18,85 | 579,19 | 136,44 |
|    | 2019/06/18 | CH2205 | Male | Three y/o | Control | Control | Feed Day | No | 22:55 | 22:00 - 22:59 | Night         | 37,7 | 59  | 4,0  | 4,0  | 18,85 | 553,30 | 45,94  |
|    | 2019/06/18 | CH2206 | Male | Three y/o | Control | Control | Feed Day | No | 22:55 | 22:00 - 22:59 | Night         | 37,7 | 86  | 52,4 | 52,4 | 18,85 | 582,77 | 133,41 |
|    | 2019/06/18 | CH2205 | Male | Three y/o | Control | Control | Feed Day | No | 23:00 | 23:00 - 23:59 | Night         | 37,7 | 93  | 4,2  | 4,2  | 18,85 | 588,58 | 47,57  |
|    | 2019/06/18 | CH2206 | Male | Three y/o | Control | Control | Feed Day | No | 23:00 | 23:00 - 23:59 | Night         | 37,7 | 79  | 52,0 | 52,0 | 18,85 | 576,36 | 133,14 |
|    | 2019/06/18 | CH2205 | Male | Three y/o | Control | Control | Feed Day | No | 23:05 | 23:00 - 23:59 | Night         | 37,7 | 95  | 6,0  | 6,0  | 18,85 | 590,14 | 59,53  |
|    | 2019/06/18 | CH2206 | Male | Three y/o | Control | Control | Feed Day | No | 23:05 | 23:00 - 23:59 | Night         | 37,5 | 58  | 58,4 | 58,4 | 18,65 | 551,90 | 137,16 |
|    | 2019/06/18 | CH2205 | Male | Three y/o | Control | Control | Feed Day | No | 23:10 | 23:00 - 23:59 | Night         | 37,7 | 90  | 6,0  | 6,0  | 18,85 | 586,16 | 59,53  |
|    | 2019/06/18 | CH2206 | Male | Three y/o | Control | Control | Feed Day | No | 23:10 | 23:00 - 23:59 | Night         | 37,4 | 87  | 59,6 | 59,6 | 18,55 | 583,64 | 137,86 |
|    | 2019/06/18 | CH2205 | Male | Three y/o | Control | Control | Feed Day | No | 23:15 | 23:00 - 23:59 | Night         | 37,6 | 61  | 9,4  | 9,4  | 18,75 | 556,01 | 74,66  |
|    | 2019/06/18 | CH2206 | Male | Three y/o | Control | Control | Feed Day | No | 23:15 | 23:00 - 23:59 | Night         | 37,4 | 119 | 57,6 | 57,6 | 18,55 | 606,20 | 136,68 |
|    | 2019/06/18 | CH2205 | Male | Three y/o | Control | Control | Feed Day | No | 23:20 | 23:00 - 23:59 | Night         | 37,7 |     | 5,4  | 5,4  | 18,85 |        | 55,99  |
|    | 2019/06/18 | CH2206 | Male | Three y/o | Control | Control | Feed Day | No | 23:20 | 23:00 - 23:59 | Night         | 37,3 | 61  | 52,8 | 52,8 | 18,46 | 556,01 | 133,67 |
|    | 2019/06/18 | CH2205 | Male | Three y/o | Control | Control | Feed Day | No | 23:25 | 23:00 - 23:59 | Night         | 37,6 | 92  | 8,0  | 8,0  | 18,75 | 587,78 | 69,22  |
|    | 2019/06/18 | CH2206 | Male | Three y/o | Control | Control | Feed Day | No | 23:25 | 23:00 - 23:59 | Night         | 37,3 | 45  | 51,0 | 51,0 | 18,46 | 530,47 | 132,47 |
|    | 2019/06/18 | CH2205 | Male | Three y/o | Control | Control | Feed Day | No | 23:30 | 23:00 - 23:59 | Night         | 37,7 |     | 13,8 | 13,8 | 18,85 |        | 87,68  |
|    | 2019/06/18 | CH2206 | Male | Three y/o | Control | Control | Feed Day | No | 23:30 | 23:00 - 23:59 | Night         | 37,4 | 90  | 45,0 | 45,0 | 18,55 | 586,16 | 128,15 |
|    | 2019/06/18 | CH2205 | Male | Three y/o | Control | Control | Feed Day | No | 23:35 | 23:00 - 23:59 | Night         | 37,7 |     | 16,0 | 16,0 | 18,85 |        | 92,71  |
|    | 2019/06/18 | CH2206 | Male | Three y/o | Control | Control | Feed Day | No | 23:35 | 23:00 - 23:59 | Night         | 37,4 | 84  | 46,6 | 46,6 | 18,55 | 581,01 | 129,35 |
|    | 2019/06/18 | CH2205 | Male | Three y/o | Control | Control | Feed Day | No | 23:40 | 23:00 - 23:59 | Night         | 37,7 | 188 | 18,0 | 18,0 | 18,85 | 636,34 | 96,72  |
|    | 2019/06/18 | CH2206 | Male | Three y/o | Control | Control | Feed Day | No | 23:40 | 23:00 - 23:59 | Night         | 37,4 | 100 | 52,4 | 52,4 | 18,55 | 593,87 | 133,41 |
|    | 2019/06/18 | CH2205 | Male | Three y/o | Control | Control | Feed Day | No | 23:45 | 23:00 - 23:59 | Night         | 37,7 | 84  | 16,2 | 16,2 | 18,85 | 581,01 | 93,13  |
|    | 2019/06/18 | CH2206 | Male | Three y/o | Control | Control | Feed Day | No | 23:45 | 23:00 - 23:59 | Night         | 37,4 | 84  | 43,4 | 43,4 | 18,55 | 581,01 | 126,90 |
|    | 2019/06/18 | CH2205 | Male | Three y/o | Control | Control | Feed Day | No | 23:50 | 23:00 - 23:59 | Night         | 37,7 | 49  | 19,4 | 19,4 | 18,85 | 537,80 | 99,28  |
|    | 2019/06/18 | CH2206 | Male | Three y/o | Control | Control | Feed Day | No | 23:50 | 23:00 - 23:59 | Night         | 37,4 | 68  | 52,0 | 52,0 | 18,55 | 564,71 | 133,14 |
|    | 2019/06/18 | CH2205 | Male | Three y/o | Control | Control | Feed Day | No | 23:55 | 23:00 - 23:59 | Night         | 37,7 | 65  | 20,4 | 20,4 | 18,85 | 561,12 | 100,99 |
|    | 2019/06/18 | CH2206 | Male | Three y/o | Control | Control | Feed Day | No | 23:55 | 23:00 - 23:59 | Night         | 37,4 | 86  | 30,6 | 30,6 | 18,55 | 582,77 | 114,87 |
| 35 | 2019/06/19 | CH2205 | Male | Three y/o | Control | Control | Feed Day | No | 00:00 | 00:00 - 00:59 | Early Morning | 37,7 | 88  | 16,8 | 16,8 | 18,85 | 584,49 | 94,37  |
|    | 2019/06/19 | CH2206 | Male | Three y/o | Control | Control | Feed Day | No | 00:00 | 00:00 - 00:59 | Early Morning | 37,5 | 47  | 25,0 | 25,0 | 18,65 | 534,23 | 107,94 |
|    | 2019/06/19 | CH2205 | Male | Three y/o | Control | Control | Feed Day | No | 00:05 | 00:00 - 00:59 | Early Morning | 37,9 | 90  | 11,2 | 11,2 | 19,05 | 586,16 | 80,59  |
|    | 2019/06/19 | CH2206 | Male | Three y/o | Control | Control | Feed Day | No | 00:05 | 00:00 - 00:59 | Early Morning | 37,5 | 100 | 31,0 | 31,0 | 18,65 | 593,87 | 115,32 |
|    | 2019/06/19 | CH2205 | Male | Three y/o | Control | Control | Feed Day | No | 00:10 | 00:00 - 00:59 | Early Morning | 37,7 | 92  | 7,6  | 7,6  | 18,85 | 587,78 | 67,49  |
|    | 2019/06/19 | CH2206 | Male | Three y/o | Control | Control | Feed Day | No | 00:10 | 00:00 - 00:59 | Early Morning | 37,7 | 114 | 22,8 | 22,8 | 18,85 | 603,20 | 104,79 |
|    | 2019/06/19 | CH2205 | Male | Three y/o | Control | Control | Feed Day | No | 00:15 | 00:00 - 00:59 | Early Morning | 37,7 | 67  | 11,2 | 11,2 | 18,85 | 563,53 | 80,59  |
|    | 2019/06/19 | CH2206 | Male | Three y/o | Control | Control | Feed Day | No | 00:15 | 00:00 - 00:59 | Early Morning | 37,6 | 99  | 29,6 | 29,6 | 18,75 | 593,14 | 113,73 |
|    | 2019/06/19 | CH2205 | Male | Three y/o | Control | Control | Feed Day | No | 00:20 | 00:00 - 00:59 | Early Morning | 37,7 | 64  | 21,0 | 21,0 | 18,85 | 559,88 | 101,98 |
|    | 2019/06/19 | CH2206 | Male | Three y/o | Control | Control | Feed Day | No | 00:20 | 00:00 - 00:59 | Early Morning | 37,5 | 96  | 33,0 | 33,0 | 18,65 | 590,91 | 117,47 |
|    | 2019/06/19 | CH2205 | Male | Three y/o | Control | Control | Feed Day | No | 00:25 | 00:00 - 00:59 | Early Morning | 37,6 | 41  | 18,8 | 18,8 | 18,75 | 522,29 | 98,20  |
|    | 2019/06/19 | CH2206 | Male | Three y/o | Control | Control | Feed Day | No | 00:25 | 00:00 - 00:59 | Early Morning | 37,3 | 88  | 54,0 | 54,0 | 18,46 | 584,49 | 134,45 |
|    | 2019/06/19 | CH2205 | Male | Three y/o | Control | Control | Feed Day | No | 00:30 | 00:00 - 00:59 | Early Morning | 37,6 | 52  | 24,4 | 24,4 | 18,75 | 542,83 | 107,11 |



|            |        |      |           |         |         |          |    |       |               |               |      |     |       |       |       |        |        |
|------------|--------|------|-----------|---------|---------|----------|----|-------|---------------|---------------|------|-----|-------|-------|-------|--------|--------|
| 2019/06/19 | CH2206 | Male | Three y/o | Control | Control | Feed Day | No | 00:30 | 00:00 - 00:59 | Early Morning | 37,3 | 75  | 54,2  | 54,2  | 18,46 | 572,36 | 134,57 |
| 2019/06/19 | CH2205 | Male | Three y/o | Control | Control | Feed Day | No | 00:35 | 00:00 - 00:59 | Early Morning | 37,5 | 53  | 18,6  | 18,6  | 18,65 | 544,43 | 97,84  |
| 2019/06/19 | CH2206 | Male | Three y/o | Control | Control | Feed Day | No | 00:35 | 00:00 - 00:59 | Early Morning | 37,3 | 84  | 61,4  | 61,4  | 18,46 | 581,01 | 138,89 |
| 2019/06/19 | CH2205 | Male | Three y/o | Control | Control | Feed Day | No | 00:40 | 00:00 - 00:59 | Early Morning | 37,5 | 53  | 11,2  | 11,2  | 18,65 | 544,43 | 80,59  |
| 2019/06/19 | CH2206 | Male | Three y/o | Control | Control | Feed Day | No | 00:40 | 00:00 - 00:59 | Early Morning | 37,4 | 60  | 61,6  | 61,6  | 18,55 | 554,67 | 139,00 |
| 2019/06/19 | CH2205 | Male | Three y/o | Control | Control | Feed Day | No | 00:45 | 00:00 - 00:59 | Early Morning | 37,5 | 75  | 24,0  | 24,0  | 18,65 | 572,36 | 106,55 |
| 2019/06/19 | CH2206 | Male | Three y/o | Control | Control | Feed Day | No | 00:45 | 00:00 - 00:59 | Early Morning | 37,4 | 87  | 69,4  | 69,4  | 18,55 | 583,64 | 143,14 |
| 2019/06/19 | CH2205 | Male | Three y/o | Control | Control | Feed Day | No | 00:50 | 00:00 - 00:59 | Early Morning | 37,5 | 80  | 11,6  | 11,6  | 18,65 | 577,31 | 81,78  |
| 2019/06/19 | CH2206 | Male | Three y/o | Control | Control | Feed Day | No | 00:50 | 00:00 - 00:59 | Early Morning | 37,3 | 81  | 63,6  | 63,6  | 18,46 | 578,26 | 140,11 |
| 2019/06/19 | CH2205 | Male | Three y/o | Control | Control | Feed Day | No | 00:55 | 00:00 - 00:59 | Early Morning | 37,5 | 57  | 7,2   | 7,2   | 18,65 | 550,47 | 65,66  |
| 2019/06/19 | CH2206 | Male | Three y/o | Control | Control | Feed Day | No | 00:55 | 00:00 - 00:59 | Early Morning | 37,3 | 73  | 65,8  | 65,8  | 18,46 | 570,27 | 141,29 |
| 2019/06/19 | CH2205 | Male | Three y/o | Control | Control | Feed Day | No | 01:00 | 01:00 - 01:59 | Early Morning | 37,4 | 49  | 17,0  | 17,0  | 18,55 | 537,80 | 94,77  |
| 2019/06/19 | CH2206 | Male | Three y/o | Control | Control | Feed Day | No | 01:00 | 01:00 - 01:59 | Early Morning | 37,2 | 75  | 64,8  | 64,8  | 18,36 | 572,36 | 140,76 |
| 2019/06/19 | CH2205 | Male | Three y/o | Control | Control | Feed Day | No | 01:05 | 01:00 - 01:59 | Early Morning | 37,4 | 63  | 89,8  | 89,8  | 18,55 | 558,62 | 152,10 |
| 2019/06/19 | CH2206 | Male | Three y/o | Control | Control | Feed Day | No | 01:05 | 01:00 - 01:59 | Early Morning | 37,1 | 89  | 63,2  | 63,2  | 18,26 | 585,33 | 139,89 |
| 2019/06/19 | CH2205 | Male | Three y/o | Control | Control | Feed Day | No | 01:10 | 01:00 - 01:59 | Early Morning | 37,5 | 91  | 14,4  | 14,4  | 18,65 | 586,98 | 89,12  |
| 2019/06/19 | CH2206 | Male | Three y/o | Control | Control | Feed Day | No | 01:10 | 01:00 - 01:59 | Early Morning | 37,1 | 50  | 19,4  | 19,4  | 18,26 | 539,52 | 99,28  |
| 2019/06/19 | CH2205 | Male | Three y/o | Control | Control | Feed Day | No | 01:15 | 01:00 - 01:59 | Early Morning | 37,5 | 84  | 14,6  | 14,6  | 18,65 | 581,01 | 89,59  |
| 2019/06/19 | CH2206 | Male | Three y/o | Control | Control | Feed Day | No | 01:15 | 01:00 - 01:59 | Early Morning | 37,1 | 60  | 14,8  | 14,8  | 18,26 | 554,67 | 90,05  |
| 2019/06/19 | CH2205 | Male | Three y/o | Control | Control | Feed Day | No | 01:20 | 01:00 - 01:59 | Early Morning | 37,5 | 86  | 11,8  | 11,8  | 18,65 | 582,77 | 82,36  |
| 2019/06/19 | CH2206 | Male | Three y/o | Control | Control | Feed Day | No | 01:20 | 01:00 - 01:59 | Early Morning | 37,2 | 83  | 10,4  | 10,4  | 18,36 | 580,11 | 78,08  |
| 2019/06/19 | CH2205 | Male | Three y/o | Control | Control | Feed Day | No | 01:25 | 01:00 - 01:59 | Early Morning | 37,4 | 60  | 12,8  | 12,8  | 18,55 | 554,67 | 85,12  |
| 2019/06/19 | CH2206 | Male | Three y/o | Control | Control | Feed Day | No | 01:25 | 01:00 - 01:59 | Early Morning | 37,3 | 62  | 10,6  | 10,6  | 18,46 | 557,33 | 78,73  |
| 2019/06/19 | CH2205 | Male | Three y/o | Control | Control | Feed Day | No | 01:30 | 01:00 - 01:59 | Early Morning | 37,3 | 57  | 14,6  | 14,6  | 18,46 | 550,47 | 89,59  |
| 2019/06/19 | CH2206 | Male | Three y/o | Control | Control | Feed Day | No | 01:30 | 01:00 - 01:59 | Early Morning | 37,3 | 51  | 9,6   | 9,6   | 18,46 | 541,20 | 75,37  |
| 2019/06/19 | CH2205 | Male | Three y/o | Control | Control | Feed Day | No | 01:35 | 01:00 - 01:59 | Early Morning | 37,3 | 49  | 13,2  | 13,2  | 18,46 | 537,80 | 86,17  |
| 2019/06/19 | CH2206 | Male | Three y/o | Control | Control | Feed Day | No | 01:35 | 01:00 - 01:59 | Early Morning | 37,4 | 75  | 19,4  | 19,4  | 18,55 | 572,36 | 99,28  |
| 2019/06/19 | CH2205 | Male | Three y/o | Control | Control | Feed Day | No | 01:40 | 01:00 - 01:59 | Early Morning | 37,3 | 71  | 11,2  | 11,2  | 18,46 | 568,10 | 80,59  |
| 2019/06/19 | CH2206 | Male | Three y/o | Control | Control | Feed Day | No | 01:40 | 01:00 - 01:59 | Early Morning | 37,3 | 81  | 23,4  | 23,4  | 18,46 | 578,26 | 105,68 |
| 2019/06/19 | CH2205 | Male | Three y/o | Control | Control | Feed Day | No | 01:45 | 01:00 - 01:59 | Early Morning | 37,3 | 62  | 12,6  | 12,6  | 18,46 | 557,33 | 84,59  |
| 2019/06/19 | CH2206 | Male | Three y/o | Control | Control | Feed Day | No | 01:45 | 01:00 - 01:59 | Early Morning | 37,3 | 82  | 19,2  | 19,2  | 18,46 | 579,19 | 98,92  |
| 2019/06/19 | CH2205 | Male | Three y/o | Control | Control | Feed Day | No | 01:50 | 01:00 - 01:59 | Early Morning | 37,2 | 81  | 14,8  | 14,8  | 18,36 | 578,26 | 90,05  |
| 2019/06/19 | CH2206 | Male | Three y/o | Control | Control | Feed Day | No | 01:50 | 01:00 - 01:59 | Early Morning | 37,2 | 49  | 28,6  | 28,6  | 18,36 | 537,80 | 112,56 |
| 2019/06/19 | CH2205 | Male | Three y/o | Control | Control | Feed Day | No | 01:55 | 01:00 - 01:59 | Early Morning | 37,3 |     | 18,0  | 18,0  | 18,46 |        | 96,72  |
| 2019/06/19 | CH2206 | Male | Three y/o | Control | Control | Feed Day | No | 01:55 | 01:00 - 01:59 | Early Morning | 37,5 | 80  | 36,6  | 36,6  | 18,65 | 577,31 | 121,03 |
| 2019/06/19 | CH2205 | Male | Three y/o | Control | Control | Feed Day | No | 02:00 | 02:00 - 02:59 | Early Morning | 37,3 | 56  | 18,6  | 18,6  | 18,46 | 549,01 | 97,84  |
| 2019/06/19 | CH2206 | Male | Three y/o | Control | Control | Feed Day | No | 02:00 | 02:00 - 02:59 | Early Morning | 37,5 | 44  | 36,6  | 36,6  | 18,65 | 528,51 | 121,03 |
| 2019/06/19 | CH2205 | Male | Three y/o | Control | Control | Feed Day | No | 02:05 | 02:00 - 02:59 | Early Morning | 37,3 |     | 27,2  | 27,2  | 18,46 |        | 110,83 |
| 2019/06/19 | CH2206 | Male | Three y/o | Control | Control | Feed Day | No | 02:05 | 02:00 - 02:59 | Early Morning | 37,4 | 107 | 16,8  | 16,8  | 18,55 | 598,73 | 94,37  |
| 2019/06/19 | CH2205 | Male | Three y/o | Control | Control | Feed Day | No | 02:10 | 02:00 - 02:59 | Early Morning | 37,3 | 55  | 18,8  | 18,8  | 18,46 | 547,52 | 98,20  |
| 2019/06/19 | CH2206 | Male | Three y/o | Control | Control | Feed Day | No | 02:10 | 02:00 - 02:59 | Early Morning | 37,4 | 49  | 20,2  | 20,2  | 18,55 | 537,80 | 100,65 |
| 2019/06/19 | CH2205 | Male | Three y/o | Control | Control | Feed Day | No | 02:15 | 02:00 - 02:59 | Early Morning | 37,2 | 68  | 27,0  | 27,0  | 18,36 | 564,71 | 110,58 |
| 2019/06/19 | CH2206 | Male | Three y/o | Control | Control | Feed Day | No | 02:15 | 02:00 - 02:59 | Early Morning | 37,3 | 63  | 40,8  | 40,8  | 18,46 | 558,62 | 124,77 |
| 2019/06/19 | CH2205 | Male | Three y/o | Control | Control | Feed Day | No | 02:20 | 02:00 - 02:59 | Early Morning | 37,4 | 124 | 73,0  | 73,0  | 18,55 | 609,04 | 144,89 |
| 2019/06/19 | CH2206 | Male | Three y/o | Control | Control | Feed Day | No | 02:20 | 02:00 - 02:59 | Early Morning | 37,4 | 124 | 51,4  | 51,4  | 18,55 | 609,04 | 132,74 |
| 2019/06/19 | CH2205 | Male | Three y/o | Control | Control | Feed Day | No | 02:25 | 02:00 - 02:59 | Early Morning | 37,4 | 58  | 116,0 | 116,0 | 18,55 | 551,90 | 161,02 |
| 2019/06/19 | CH2206 | Male | Three y/o | Control | Control | Feed Day | No | 02:25 | 02:00 - 02:59 | Early Morning | 37,5 | 103 | 127,0 | 127,0 | 18,65 | 596,00 | 164,19 |
| 2019/06/19 | CH2205 | Male | Three y/o | Control | Control | Feed Day | No | 02:30 | 02:00 - 02:59 | Early Morning | 37,5 | 124 | 87,6  | 87,6  | 18,65 | 609,04 | 151,23 |
| 2019/06/19 | CH2206 | Male | Three y/o | Control | Control | Feed Day | No | 02:30 | 02:00 - 02:59 | Early Morning | 37,4 | 125 | 34,8  | 34,8  | 18,55 | 609,60 | 119,29 |
| 2019/06/19 | CH2205 | Male | Three y/o | Control | Control | Feed Day | No | 02:35 | 02:00 - 02:59 | Early Morning | 37,6 | 75  | 86,0  | 86,0  | 18,75 | 572,36 | 150,59 |
| 2019/06/19 | CH2206 | Male | Three y/o | Control | Control | Feed Day | No | 02:35 | 02:00 - 02:59 | Early Morning | 37,5 | 114 | 77,8  | 77,8  | 18,65 | 603,20 | 147,11 |
| 2019/06/19 | CH2205 | Male | Three y/o | Control | Control | Feed Day | No | 02:40 | 02:00 - 02:59 | Early Morning | 37,6 | 60  | 42,4  | 42,4  | 18,75 | 554,67 | 126,10 |
| 2019/06/19 | CH2206 | Male | Three y/o | Control | Control | Feed Day | No | 02:40 | 02:00 - 02:59 | Early Morning | 37,4 |     | 67,2  | 67,2  | 18,55 |        | 142,02 |
| 2019/06/19 | CH2205 | Male | Three y/o | Control | Control | Feed Day | No | 02:45 | 02:00 - 02:59 | Early Morning | 37,7 | 59  | 215,4 | 215,4 | 18,85 | 553,30 | 182,73 |
| 2019/06/19 | CH2206 | Male | Three y/o | Control | Control | Feed Day | No | 02:45 | 02:00 - 02:59 | Early Morning | 37,5 | 145 | 71,4  | 71,4  | 18,65 | 619,62 | 144,12 |
| 2019/06/19 | CH2205 | Male | Three y/o | Control | Control | Feed Day | No | 02:50 | 02:00 - 02:59 | Early Morning | 37,7 | 94  | 208,0 | 208,0 | 18,85 | 589,37 | 181,50 |
| 2019/06/19 | CH2206 | Male | Three y/o | Control | Control | Feed Day | No | 02:50 | 02:00 - 02:59 | Early Morning | 37,5 |     | 35,6  | 35,6  | 18,65 |        | 120,08 |
| 2019/06/19 | CH2205 | Male | Three y/o | Control | Control | Feed Day | No | 02:55 | 02:00 - 02:59 | Early Morning | 37,7 | 169 | 50,4  | 50,4  | 18,85 | 629,60 | 132,06 |
| 2019/06/19 | CH2206 | Male | Three y/o | Control | Control | Feed Day | No | 02:55 | 02:00 - 02:59 | Early Morning | 37,5 | 85  | 16,8  | 16,8  | 18,65 | 581,90 | 94,37  |
| 2019/06/19 | CH2205 | Male | Three y/o | Control | Control | Feed Day | No | 03:00 | 03:00 - 03:59 | Early Morning | 37,6 |     | 5,8   | 5,8   | 18,75 |        | 58,39  |
| 2019/06/19 | CH2206 | Male | Three y/o | Control | Control | Feed Day | No | 03:00 | 03:00 - 03:59 | Early Morning | 37,4 | 73  | 16,4  | 16,4  | 18,55 | 570,27 | 93,55  |
| 2019/06/19 | CH2205 | Male | Three y/o | Control | Control | Feed Day | No | 03:05 | 03:00 - 03:59 | Early Morning | 37,4 |     | 110,0 | 110,0 | 18,55 |        | 159,17 |
| 2019/06/19 | CH2206 | Male | Three y/o | Control | Control | Feed Day | No | 03:05 | 03:00 - 03:59 | Early Morning | 37,1 | 52  | 66,2  | 66,2  | 18,26 | 542,83 | 141,50 |
| 2019/06/19 | CH2205 | Male | Three y/o | Control | Control | Feed Day | No | 03:10 | 03:00 - 03:59 | Early Morning | 37,6 | 125 | 252,2 | 252,2 | 18,75 | 609,60 | 188,29 |
| 2019/06/19 | CH2206 | Male | Three y/o | Control | Control | Feed Day | No | 03:10 | 03:00 - 03:59 | Early Morning | 37,2 |     | 117,4 | 117,4 | 18,36 |        | 161,44 |
| 2019/06/19 | CH2205 | Male | Three y/o | Control | Control | Feed Day | No | 03:15 | 03:00 - 03:59 | Early Morning | 37,7 | 98  | 138,2 | 138,2 | 18,85 | 592,41 | 167,15 |
| 2019/06/19 | CH2206 | Male | Three y/o | Control | Control | Feed Day | No | 03:15 | 03:00 - 03:59 | Early Morning | 37,4 | 112 | 113,2 | 113,2 | 18,55 | 601,96 | 160,17 |
| 2019/06/19 | CH2205 | Male | Three y/o | Control | Control | Feed Day | No | 03:20 | 03:00 - 03:59 | Early Morning | 37,7 |     | 239,4 | 239,4 | 18,85 |        | 186,45 |
| 2019/06/19 | CH2206 | Male | Three y/o | Control | Control | Feed Day | No | 03:20 | 03:00 - 03:59 | Early Morning | 37,2 | 72  | 6,8   | 6,8   | 18,36 | 569,20 | 63,74  |
| 2019/06/19 | CH2205 | Male | Three y/o | Control | Control | Feed Day | No | 03:25 | 03:00 - 03:59 | Early Morning | 37,7 | 60  | 69,0  | 69,0  | 18,85 | 554,67 | 142,94 |



|            |        |      |           |         |         |          |    |       |               |               |      |     |       |       |       |        |        |
|------------|--------|------|-----------|---------|---------|----------|----|-------|---------------|---------------|------|-----|-------|-------|-------|--------|--------|
| 2019/06/19 | CH2206 | Male | Three y/o | Control | Control | Feed Day | No | 03:25 | 03:00 - 03:59 | Early Morning | 36,8 | 45  | 7,8   | 7,8   | 17,96 | 530,47 | 68,36  |
| 2019/06/19 | CH2205 | Male | Three y/o | Control | Control | Feed Day | No | 03:30 | 03:00 - 03:59 | Early Morning | 37,8 |     | 71,2  | 71,2  | 18,95 |        | 144,03 |
| 2019/06/19 | CH2206 | Male | Three y/o | Control | Control | Feed Day | No | 03:30 | 03:00 - 03:59 | Early Morning | 36,8 | 88  | 46,4  | 46,4  | 17,96 | 584,49 | 129,21 |
| 2019/06/19 | CH2205 | Male | Three y/o | Control | Control | Feed Day | No | 03:35 | 03:00 - 03:59 | Early Morning | 37,9 |     | 6,4   | 6,4   | 19,05 |        | 61,70  |
| 2019/06/19 | CH2206 | Male | Three y/o | Control | Control | Feed Day | No | 03:35 | 03:00 - 03:59 | Early Morning | 37,1 | 197 | 45,8  | 45,8  | 18,26 | 639,25 | 128,76 |
| 2019/06/19 | CH2205 | Male | Three y/o | Control | Control | Feed Day | No | 03:40 | 03:00 - 03:59 | Early Morning | 37,6 |     | 12,6  | 12,6  | 18,75 |        | 84,59  |
| 2019/06/19 | CH2206 | Male | Three y/o | Control | Control | Feed Day | No | 03:40 | 03:00 - 03:59 | Early Morning | 36,9 | 77  | 26,0  | 26,0  | 18,06 | 574,39 | 109,29 |
| 2019/06/19 | CH2205 | Male | Three y/o | Control | Control | Feed Day | No | 03:45 | 03:00 - 03:59 | Early Morning | 37,5 |     | 94,0  | 94,0  | 18,65 |        | 153,69 |
| 2019/06/19 | CH2206 | Male | Three y/o | Control | Control | Feed Day | No | 03:45 | 03:00 - 03:59 | Early Morning | 36,8 | 97  | 40,6  | 40,6  | 17,96 | 591,66 | 124,60 |
| 2019/06/19 | CH2205 | Male | Three y/o | Control | Control | Feed Day | No | 03:50 | 03:00 - 03:59 | Early Morning | 37,7 | 83  | 134,4 | 134,4 | 18,85 | 580,11 | 166,17 |
| 2019/06/19 | CH2206 | Male | Three y/o | Control | Control | Feed Day | No | 03:50 | 03:00 - 03:59 | Early Morning | 36,8 | 45  | 36,8  | 36,8  | 17,96 | 530,47 | 121,22 |
| 2019/06/19 | CH2205 | Male | Three y/o | Control | Control | Feed Day | No | 03:55 | 03:00 - 03:59 | Early Morning | 37,9 |     | 19,6  | 19,6  | 19,05 |        | 99,63  |
| 2019/06/19 | CH2206 | Male | Three y/o | Control | Control | Feed Day | No | 03:55 | 03:00 - 03:59 | Early Morning | 37,0 | 86  | 52,8  | 52,8  | 18,16 | 582,77 | 133,67 |
| 2019/06/19 | CH2205 | Male | Three y/o | Control | Control | Feed Day | No | 04:00 | 04:00 - 04:59 | Morning       | 37,6 | 83  | 12,0  | 12,0  | 18,75 | 580,11 | 82,93  |
| 2019/06/19 | CH2206 | Male | Three y/o | Control | Control | Feed Day | No | 04:00 | 04:00 - 04:59 | Morning       | 37,2 | 80  | 71,6  | 71,6  | 18,36 | 577,31 | 144,22 |
| 2019/06/19 | CH2205 | Male | Three y/o | Control | Control | Feed Day | No | 04:05 | 04:00 - 04:59 | Morning       | 37,5 | 72  | 9,4   | 9,4   | 18,65 | 569,20 | 74,66  |
| 2019/06/19 | CH2206 | Male | Three y/o | Control | Control | Feed Day | No | 04:05 | 04:00 - 04:59 | Morning       | 37,2 | 49  | 61,6  | 61,6  | 18,36 | 537,80 | 139,00 |
| 2019/06/19 | CH2205 | Male | Three y/o | Control | Control | Feed Day | No | 04:10 | 04:00 - 04:59 | Morning       | 37,3 | 63  | 7,6   | 7,6   | 18,46 | 558,62 | 67,49  |
| 2019/06/19 | CH2206 | Male | Three y/o | Control | Control | Feed Day | No | 04:10 | 04:00 - 04:59 | Morning       | 37,2 | 53  | 61,2  | 61,2  | 18,36 | 544,43 | 138,78 |
| 2019/06/19 | CH2205 | Male | Three y/o | Control | Control | Feed Day | No | 04:15 | 04:00 - 04:59 | Morning       | 37,2 | 58  | 5,2   | 5,2   | 18,36 | 551,90 | 54,72  |
| 2019/06/19 | CH2206 | Male | Three y/o | Control | Control | Feed Day | No | 04:15 | 04:00 - 04:59 | Morning       | 37,3 | 50  | 68,6  | 68,6  | 18,46 | 539,52 | 142,74 |
| 2019/06/19 | CH2205 | Male | Three y/o | Control | Control | Feed Day | No | 04:20 | 04:00 - 04:59 | Morning       | 37,1 | 53  | 9,0   | 9,0   | 18,26 | 544,43 | 73,19  |
| 2019/06/19 | CH2206 | Male | Three y/o | Control | Control | Feed Day | No | 04:20 | 04:00 - 04:59 | Morning       | 37,3 | 50  | 61,2  | 61,2  | 18,46 | 539,52 | 138,78 |
| 2019/06/19 | CH2205 | Male | Three y/o | Control | Control | Feed Day | No | 04:25 | 04:00 - 04:59 | Morning       | 37,2 | 160 | 34,8  | 34,8  | 18,36 | 626,07 | 119,29 |
| 2019/06/19 | CH2206 | Male | Three y/o | Control | Control | Feed Day | No | 04:25 | 04:00 - 04:59 | Morning       | 37,3 | 86  | 79,4  | 79,4  | 18,46 | 582,77 | 147,81 |
| 2019/06/19 | CH2205 | Male | Three y/o | Control | Control | Feed Day | No | 04:30 | 04:00 - 04:59 | Morning       | 37,4 | 131 | 133,6 | 133,6 | 18,55 | 612,80 | 165,96 |
| 2019/06/19 | CH2206 | Male | Three y/o | Control | Control | Feed Day | No | 04:30 | 04:00 - 04:59 | Morning       | 37,4 | 107 | 162,6 | 162,6 | 18,55 | 598,73 | 172,85 |
| 2019/06/19 | CH2205 | Male | Three y/o | Control | Control | Feed Day | No | 04:35 | 04:00 - 04:59 | Morning       | 37,6 | 112 | 179,8 | 179,8 | 18,75 | 601,96 | 176,38 |
| 2019/06/19 | CH2206 | Male | Three y/o | Control | Control | Feed Day | No | 04:35 | 04:00 - 04:59 | Morning       | 37,4 | 134 | 101,8 | 101,8 | 18,55 | 614,33 | 156,47 |
| 2019/06/19 | CH2205 | Male | Three y/o | Control | Control | Feed Day | No | 04:40 | 04:00 - 04:59 | Morning       | 37,7 | 44  | 567,6 | 567,6 | 18,85 | 528,51 | 217,06 |
| 2019/06/19 | CH2206 | Male | Three y/o | Control | Control | Feed Day | No | 04:40 | 04:00 - 04:59 | Morning       | 37,6 | 110 | 138,2 | 138,2 | 18,75 | 600,69 | 167,15 |
| 2019/06/19 | CH2205 | Male | Three y/o | Control | Control | Feed Day | No | 04:45 | 04:00 - 04:59 | Morning       | 37,7 | 61  | 144,4 | 144,4 | 18,85 | 556,01 | 168,68 |
| 2019/06/19 | CH2206 | Male | Three y/o | Control | Control | Feed Day | No | 04:45 | 04:00 - 04:59 | Morning       | 37,7 | 140 | 114,2 | 114,2 | 18,85 | 617,28 | 160,48 |
| 2019/06/19 | CH2205 | Male | Three y/o | Control | Control | Feed Day | No | 04:50 | 04:00 - 04:59 | Morning       | 37,9 | 162 | 579,0 | 579,0 | 19,05 | 626,88 | 217,77 |
| 2019/06/19 | CH2206 | Male | Three y/o | Control | Control | Feed Day | No | 04:50 | 04:00 - 04:59 | Morning       | 37,8 | 125 | 134,6 | 134,6 | 18,95 | 609,60 | 166,22 |
| 2019/06/19 | CH2205 | Male | Three y/o | Control | Control | Feed Day | No | 04:55 | 04:00 - 04:59 | Morning       | 38,1 | 88  | 19,8  | 19,8  | 19,26 | 584,49 | 99,97  |
| 2019/06/19 | CH2206 | Male | Three y/o | Control | Control | Feed Day | No | 04:55 | 04:00 - 04:59 | Morning       | 37,9 | 47  | 34,6  | 34,6  | 19,05 | 534,23 | 119,10 |
| 2019/06/19 | CH2205 | Male | Three y/o | Control | Control | Feed Day | No | 05:00 | 05:00 - 05:59 | Morning       | 37,7 |     | 6,0   | 6,0   | 18,85 |        | 59,53  |
| 2019/06/19 | CH2206 | Male | Three y/o | Control | Control | Feed Day | No | 05:00 | 05:00 - 05:59 | Morning       | 37,5 | 143 | 3,0   | 3,0   | 18,65 | 618,69 | 36,34  |
| 2019/06/19 | CH2205 | Male | Three y/o | Control | Control | Feed Day | No | 05:05 | 05:00 - 05:59 | Morning       | 37,9 | 75  | 20,8  | 20,8  | 19,05 | 572,36 | 101,65 |
| 2019/06/19 | CH2206 | Male | Three y/o | Control | Control | Feed Day | No | 05:05 | 05:00 - 05:59 | Morning       | 37,2 | 83  | 31,0  | 31,0  | 18,36 | 580,11 | 115,32 |
| 2019/06/19 | CH2205 | Male | Three y/o | Control | Control | Feed Day | No | 05:10 | 05:00 - 05:59 | Morning       | 37,6 |     | 22,2  | 22,2  | 18,75 |        | 103,88 |
| 2019/06/19 | CH2206 | Male | Three y/o | Control | Control | Feed Day | No | 05:10 | 05:00 - 05:59 | Morning       | 37,0 | 50  | 31,4  | 31,4  | 18,16 | 539,52 | 115,76 |
| 2019/06/19 | CH2205 | Male | Three y/o | Control | Control | Feed Day | No | 05:15 | 05:00 - 05:59 | Morning       | 37,4 | 84  | 21,6  | 21,6  | 18,55 | 581,01 | 102,94 |
| 2019/06/19 | CH2206 | Male | Three y/o | Control | Control | Feed Day | No | 05:15 | 05:00 - 05:59 | Morning       | 36,9 |     | 14,6  | 14,6  | 18,06 |        | 89,59  |
| 2019/06/19 | CH2205 | Male | Three y/o | Control | Control | Feed Day | No | 05:20 | 05:00 - 05:59 | Morning       | 37,4 | 49  | 21,6  | 21,6  | 18,55 | 537,80 | 102,94 |
| 2019/06/19 | CH2206 | Male | Three y/o | Control | Control | Feed Day | No | 05:20 | 05:00 - 05:59 | Morning       | 37,0 | 54  | 10,2  | 10,2  | 18,16 | 545,99 | 77,43  |
| 2019/06/19 | CH2205 | Male | Three y/o | Control | Control | Feed Day | No | 05:25 | 05:00 - 05:59 | Morning       | 37,4 | 54  | 20,0  | 20,0  | 18,55 | 545,99 | 100,31 |
| 2019/06/19 | CH2206 | Male | Three y/o | Control | Control | Feed Day | No | 05:25 | 05:00 - 05:59 | Morning       | 37,0 | 60  | 5,2   | 5,2   | 18,16 | 554,67 | 54,72  |
| 2019/06/19 | CH2205 | Male | Three y/o | Control | Control | Feed Day | No | 05:30 | 05:00 - 05:59 | Morning       | 37,3 | 78  | 25,6  | 25,6  | 18,46 | 575,38 | 108,76 |
| 2019/06/19 | CH2206 | Male | Three y/o | Control | Control | Feed Day | No | 05:30 | 05:00 - 05:59 | Morning       | 36,9 | 79  | 5,6   | 5,6   | 18,06 | 576,36 | 57,21  |
| 2019/06/19 | CH2205 | Male | Three y/o | Control | Control | Feed Day | No | 05:35 | 05:00 - 05:59 | Morning       | 37,3 | 78  | 24,2  | 24,2  | 18,46 | 575,38 | 106,83 |
| 2019/06/19 | CH2206 | Male | Three y/o | Control | Control | Feed Day | No | 05:35 | 05:00 - 05:59 | Morning       | 36,9 | 53  | 2,0   | 2,0   | 18,06 | 544,43 | 22,86  |
| 2019/06/19 | CH2205 | Male | Three y/o | Control | Control | Feed Day | No | 05:40 | 05:00 - 05:59 | Morning       | 37,3 | 74  | 56,4  | 56,4  | 18,46 | 571,33 | 135,95 |
| 2019/06/19 | CH2206 | Male | Three y/o | Control | Control | Feed Day | No | 05:40 | 05:00 - 05:59 | Morning       | 36,9 | 45  | 25,0  | 25,0  | 18,06 | 530,47 | 107,94 |
| 2019/06/19 | CH2205 | Male | Three y/o | Control | Control | Feed Day | No | 05:45 | 05:00 - 05:59 | Morning       | 37,4 | 120 | 15,4  | 15,4  | 18,55 | 606,78 | 91,41  |
| 2019/06/19 | CH2206 | Male | Three y/o | Control | Control | Feed Day | No | 05:45 | 05:00 - 05:59 | Morning       | 37,0 | 88  | 42,0  | 42,0  | 18,16 | 584,49 | 125,77 |
| 2019/06/19 | CH2205 | Male | Three y/o | Control | Control | Feed Day | No | 05:50 | 05:00 - 05:59 | Morning       | 37,4 |     | 13,2  | 13,2  | 18,55 |        | 86,17  |
| 2019/06/19 | CH2206 | Male | Three y/o | Control | Control | Feed Day | No | 05:50 | 05:00 - 05:59 | Morning       | 37,0 | 60  | 47,2  | 47,2  | 18,16 | 554,67 | 129,80 |
| 2019/06/19 | CH2205 | Male | Three y/o | Control | Control | Feed Day | No | 05:55 | 05:00 - 05:59 | Morning       | 37,4 | 55  | 9,6   | 9,6   | 18,55 | 547,52 | 75,37  |
| 2019/06/19 | CH2206 | Male | Three y/o | Control | Control | Feed Day | No | 05:55 | 05:00 - 05:59 | Morning       | 37,0 | 82  | 35,8  | 35,8  | 18,16 | 579,19 | 120,27 |
| 2019/06/19 | CH2205 | Male | Three y/o | Control | Control | Feed Day | No | 06:00 | 06:00 - 06:59 | Morning       | 37,3 |     | 10,4  | 10,4  | 18,46 |        | 78,08  |
| 2019/06/19 | CH2206 | Male | Three y/o | Control | Control | Feed Day | No | 06:00 | 06:00 - 06:59 | Morning       | 37,0 | 72  | 30,0  | 30,0  | 18,16 | 569,20 | 114,20 |
| 2019/06/19 | CH2205 | Male | Three y/o | Control | Control | Feed Day | No | 06:05 | 06:00 - 06:59 | Morning       | 37,3 | 56  | 12,6  | 12,6  | 18,46 | 549,01 | 84,59  |
| 2019/06/19 | CH2206 | Male | Three y/o | Control | Control | Feed Day | No | 06:05 | 06:00 - 06:59 | Morning       | 37,0 | 49  | 33,2  | 33,2  | 18,16 | 537,80 | 117,68 |
| 2019/06/19 | CH2205 | Male | Three y/o | Control | Control | Feed Day | No | 06:10 | 06:00 - 06:59 | Morning       | 37,2 | 60  | 17,0  | 17,0  | 18,36 | 554,67 | 94,77  |
| 2019/06/19 | CH2206 | Male | Three y/o | Control | Control | Feed Day | No | 06:10 | 06:00 - 06:59 | Morning       | 36,9 | 48  | 56,0  | 56,0  | 18,06 | 536,04 | 135,70 |
| 2019/06/19 | CH2205 | Male | Three y/o | Control | Control | Feed Day | No | 06:15 | 06:00 - 06:59 | Morning       | 37,3 | 51  | 15,4  | 15,4  | 18,46 | 541,20 | 91,41  |
| 2019/06/19 | CH2206 | Male | Three y/o | Control | Control | Feed Day | No | 06:15 | 06:00 - 06:59 | Morning       | 36,9 | 66  | 42,4  | 42,4  | 18,06 | 562,34 | 126,10 |
| 2019/06/19 | CH2205 | Male | Three y/o | Control | Control | Feed Day | No | 06:20 | 06:00 - 06:59 | Morning       | 37,3 | 52  | 10,2  | 10,2  | 18,46 | 542,83 | 77,43  |



|            |        |      |           |         |         |          |    |       |               |              |      |     |       |       |       |        |        |
|------------|--------|------|-----------|---------|---------|----------|----|-------|---------------|--------------|------|-----|-------|-------|-------|--------|--------|
| 2019/06/19 | CH2206 | Male | Three y/o | Control | Control | Feed Day | No | 06:20 | 06:00 - 06:59 | Morning      | 37,0 | 58  | 46,6  | 46,6  | 18,16 | 551,90 | 129,35 |
| 2019/06/19 | CH2205 | Male | Three y/o | Control | Control | Feed Day | No | 06:25 | 06:00 - 06:59 | Morning      | 37,2 | 76  | 14,8  | 14,8  | 18,36 | 573,39 | 90,05  |
| 2019/06/19 | CH2206 | Male | Three y/o | Control | Control | Feed Day | No | 06:25 | 06:00 - 06:59 | Morning      | 37,1 | 46  | 47,2  | 47,2  | 18,26 | 532,38 | 129,80 |
| 2019/06/19 | CH2205 | Male | Three y/o | Control | Control | Feed Day | No | 06:30 | 06:00 - 06:59 | Morning      | 37,3 | 71  | 9,2   | 9,2   | 18,46 | 568,10 | 73,94  |
| 2019/06/19 | CH2206 | Male | Three y/o | Control | Control | Feed Day | No | 06:30 | 06:00 - 06:59 | Morning      | 37,1 | 84  | 59,8  | 59,8  | 18,26 | 581,01 | 137,98 |
| 2019/06/19 | CH2205 | Male | Three y/o | Control | Control | Feed Day | No | 06:35 | 06:00 - 06:59 | Morning      | 37,2 | 74  | 9,8   | 9,8   | 18,36 | 571,33 | 76,07  |
| 2019/06/19 | CH2206 | Male | Three y/o | Control | Control | Feed Day | No | 06:35 | 06:00 - 06:59 | Morning      | 37,2 | 57  | 61,8  | 61,8  | 18,36 | 550,47 | 139,12 |
| 2019/06/19 | CH2205 | Male | Three y/o | Control | Control | Feed Day | No | 06:40 | 06:00 - 06:59 | Morning      | 37,2 | 132 | 171,6 | 171,6 | 18,36 | 613,32 | 174,74 |
| 2019/06/19 | CH2206 | Male | Three y/o | Control | Control | Feed Day | No | 06:40 | 06:00 - 06:59 | Morning      | 37,2 |     | 10,0  | 10,0  | 18,36 |        | 76,76  |
| 2019/06/19 | CH2205 | Male | Three y/o | Control | Control | Feed Day | No | 06:45 | 06:00 - 06:59 | Morning      | 37,3 | 180 | 261,6 | 261,6 | 18,46 | 633,61 | 189,58 |
| 2019/06/19 | CH2206 | Male | Three y/o | Control | Control | Feed Day | No | 06:45 | 06:00 - 06:59 | Morning      | 37,2 | 61  | 14,2  | 14,2  | 18,36 | 556,01 | 88,65  |
| 2019/06/19 | CH2205 | Male | Three y/o | Control | Control | Feed Day | No | 06:50 | 06:00 - 06:59 | Morning      | 37,3 | 134 | 212,8 | 212,8 | 18,46 | 614,33 | 182,30 |
| 2019/06/19 | CH2206 | Male | Three y/o | Control | Control | Feed Day | No | 06:50 | 06:00 - 06:59 | Morning      | 37,2 | 82  | 22,2  | 22,2  | 18,36 | 579,19 | 103,88 |
| 2019/06/19 | CH2205 | Male | Three y/o | Control | Control | Feed Day | No | 06:55 | 06:00 - 06:59 | Morning      | 37,4 |     | 154,4 | 154,4 | 18,55 |        | 171,03 |
| 2019/06/19 | CH2206 | Male | Three y/o | Control | Control | Feed Day | No | 06:55 | 06:00 - 06:59 | Morning      | 37,2 |     | 76,4  | 76,4  | 18,36 |        | 146,48 |
| 2019/06/19 | CH2205 | Male | Three y/o | Control | Control | Feed Day | No | 07:00 | 07:00 - 07:59 | Morning      | 37,5 | 78  | 313,0 | 313,0 | 18,65 | 575,38 | 195,92 |
| 2019/06/19 | CH2206 | Male | Three y/o | Control | Control | Feed Day | No | 07:00 | 07:00 - 07:59 | Morning      | 37,3 | 138 | 161,0 | 161,0 | 18,46 | 616,31 | 172,50 |
| 2019/06/19 | CH2205 | Male | Three y/o | Control | Control | Feed Day | No | 07:05 | 07:00 - 07:59 | Morning      | 37,6 | 110 | 241,6 | 241,6 | 18,75 | 600,69 | 186,77 |
| 2019/06/19 | CH2206 | Male | Three y/o | Control | Control | Feed Day | No | 07:05 | 07:00 - 07:59 | Morning      | 37,3 |     | 86,6  | 86,6  | 18,46 |        | 150,83 |
| 2019/06/19 | CH2205 | Male | Three y/o | Control | Control | Feed Day | No | 07:10 | 07:00 - 07:59 | Morning      | 37,6 | 120 | 138,0 | 138,0 | 18,75 | 606,78 | 167,10 |
| 2019/06/19 | CH2206 | Male | Three y/o | Control | Control | Feed Day | No | 07:10 | 07:00 - 07:59 | Morning      | 37,3 | 125 | 90,6  | 90,6  | 18,46 | 609,60 | 152,40 |
| 2019/06/19 | CH2205 | Male | Three y/o | Control | Control | Feed Day | No | 07:15 | 07:00 - 07:59 | Morning      | 37,7 | 191 | 117,2 | 117,2 | 18,85 | 637,33 | 161,38 |
| 2019/06/19 | CH2206 | Male | Three y/o | Control | Control | Feed Day | No | 07:15 | 07:00 - 07:59 | Morning      | 37,5 | 156 | 90,4  | 90,4  | 18,65 | 624,43 | 152,33 |
| 2019/06/19 | CH2205 | Male | Three y/o | Control | Control | Feed Day | No | 07:20 | 07:00 - 07:59 | Morning      | 37,9 |     | 150,8 | 150,8 | 19,05 |        | 170,20 |
| 2019/06/19 | CH2206 | Male | Three y/o | Control | Control | Feed Day | No | 07:20 | 07:00 - 07:59 | Morning      | 37,7 | 118 | 231,2 | 231,2 | 18,85 | 605,61 | 185,22 |
| 2019/06/19 | CH2205 | Male | Three y/o | Control | Control | Feed Day | No | 07:25 | 07:00 - 07:59 | Morning      | 37,9 | 101 | 82,0  | 82,0  | 19,05 | 594,59 | 148,93 |
| 2019/06/19 | CH2206 | Male | Three y/o | Control | Control | Feed Day | No | 07:25 | 07:00 - 07:59 | Morning      | 37,8 | 131 | 131,2 | 131,2 | 18,95 | 612,80 | 165,33 |
| 2019/06/19 | CH2205 | Male | Three y/o | Control | Control | Feed Day | No | 07:30 | 07:00 - 07:59 | Morning      | 37,9 | 111 | 41,6  | 41,6  | 19,05 | 601,33 | 125,44 |
| 2019/06/19 | CH2206 | Male | Three y/o | Control | Control | Feed Day | No | 07:30 | 07:00 - 07:59 | Morning      | 37,8 | 124 | 141,4 | 141,4 | 18,95 | 609,04 | 167,95 |
| 2019/06/19 | CH2205 | Male | Three y/o | Control | Control | Feed Day | No | 07:35 | 07:00 - 07:59 | Morning      | 37,9 | 103 | 22,2  | 22,2  | 19,05 | 596,00 | 103,88 |
| 2019/06/19 | CH2206 | Male | Three y/o | Control | Control | Feed Day | No | 07:35 | 07:00 - 07:59 | Morning      | 37,8 | 103 | 13,6  | 13,6  | 18,95 | 596,00 | 87,18  |
| 2019/06/19 | CH2205 | Male | Three y/o | Control | Control | Feed Day | No | 07:40 | 07:00 - 07:59 | Morning      | 37,7 |     | 15,0  | 15,0  | 18,85 |        | 90,51  |
| 2019/06/19 | CH2206 | Male | Three y/o | Control | Control | Feed Day | No | 07:40 | 07:00 - 07:59 | Morning      | 37,7 | 119 | 45,4  | 45,4  | 18,85 | 606,20 | 128,45 |
| 2019/06/19 | CH2205 | Male | Three y/o | Control | Control | Feed Day | No | 07:45 | 07:00 - 07:59 | Morning      | 37,6 | 134 | 250,4 | 250,4 | 18,75 | 614,33 | 188,04 |
| 2019/06/19 | CH2206 | Male | Three y/o | Control | Control | Feed Day | No | 07:45 | 07:00 - 07:59 | Morning      | 37,7 | 137 | 67,0  | 67,0  | 18,85 | 615,83 | 141,92 |
| 2019/06/19 | CH2205 | Male | Three y/o | Control | Control | Feed Day | No | 07:50 | 07:00 - 07:59 | Morning      | 37,6 |     | 545,6 | 545,6 | 18,75 |        | 215,66 |
| 2019/06/19 | CH2206 | Male | Three y/o | Control | Control | Feed Day | No | 07:50 | 07:00 - 07:59 | Morning      | 37,7 | 147 | 206,0 | 206,0 | 18,85 | 620,52 | 181,16 |
| 2019/06/19 | CH2205 | Male | Three y/o | Control | Control | Feed Day | No | 07:55 | 07:00 - 07:59 | Morning      | 37,7 | 124 | 141,4 | 141,4 | 18,85 | 609,04 | 167,95 |
| 2019/06/19 | CH2206 | Male | Three y/o | Control | Control | Feed Day | No | 07:55 | 07:00 - 07:59 | Morning      | 37,7 |     | 103,0 | 103,0 | 18,85 |        | 156,87 |
| 2019/06/19 | CH2205 | Male | Three y/o | Control | Control | Feed Day | No | 08:00 | 08:00 - 08:59 | Late Morning | 37,7 |     | 246,8 | 246,8 | 18,85 |        | 187,53 |
| 2019/06/19 | CH2206 | Male | Three y/o | Control | Control | Feed Day | No | 08:00 | 08:00 - 08:59 | Late Morning | 37,7 | 109 | 30,4  | 30,4  | 18,85 | 600,04 | 114,65 |
| 2019/06/19 | CH2205 | Male | Three y/o | Control | Control | Feed Day | No | 08:05 | 08:00 - 08:59 | Late Morning | 37,7 |     | 101,4 | 101,4 | 18,85 |        | 156,33 |
| 2019/06/19 | CH2206 | Male | Three y/o | Control | Control | Feed Day | No | 08:05 | 08:00 - 08:59 | Late Morning | 37,4 | 70  | 24,0  | 24,0  | 18,55 | 566,99 | 106,55 |
| 2019/06/19 | CH2205 | Male | Three y/o | Control | Control | Feed Day | No | 08:10 | 08:00 - 08:59 | Late Morning | 37,6 |     | 76,2  | 76,2  | 18,75 |        | 146,38 |
| 2019/06/19 | CH2206 | Male | Three y/o | Control | Control | Feed Day | No | 08:10 | 08:00 - 08:59 | Late Morning | 37,1 |     | 44,2  | 44,2  | 18,26 |        | 127,53 |
| 2019/06/19 | CH2205 | Male | Three y/o | Control | Control | Feed Day | No | 08:15 | 08:00 - 08:59 | Late Morning | 37,7 |     | 114,0 | 114,0 | 18,85 |        | 160,42 |
| 2019/06/19 | CH2206 | Male | Three y/o | Control | Control | Feed Day | No | 08:15 | 08:00 - 08:59 | Late Morning | 37,2 | 107 | 115,4 | 115,4 | 18,36 | 598,73 | 160,84 |
| 2019/06/19 | CH2205 | Male | Three y/o | Control | Control | Feed Day | No | 08:20 | 08:00 - 08:59 | Late Morning | 37,7 |     | 191,2 | 191,2 | 18,85 |        | 178,54 |
| 2019/06/19 | CH2206 | Male | Three y/o | Control | Control | Feed Day | No | 08:20 | 08:00 - 08:59 | Late Morning | 37,3 |     | 69,4  | 69,4  | 18,46 |        | 143,14 |
| 2019/06/19 | CH2205 | Male | Three y/o | Control | Control | Feed Day | No | 08:25 | 08:00 - 08:59 | Late Morning | 37,7 |     | 83,2  | 83,2  | 18,85 |        | 149,44 |
| 2019/06/19 | CH2206 | Male | Three y/o | Control | Control | Feed Day | No | 08:25 | 08:00 - 08:59 | Late Morning | 37,4 | 113 | 28,8  | 28,8  | 18,55 | 602,58 | 112,79 |
| 2019/06/19 | CH2205 | Male | Three y/o | Control | Control | Feed Day | No | 08:30 | 08:00 - 08:59 | Late Morning | 37,7 | 102 | 81,4  | 81,4  | 18,85 | 595,30 | 148,68 |
| 2019/06/19 | CH2206 | Male | Three y/o | Control | Control | Feed Day | No | 08:30 | 08:00 - 08:59 | Late Morning | 37,4 |     | 14,8  | 14,8  | 18,55 |        | 90,05  |
| 2019/06/19 | CH2205 | Male | Three y/o | Control | Control | Feed Day | No | 08:35 | 08:00 - 08:59 | Late Morning | 37,7 | 64  | 8,8   | 8,8   | 18,85 | 559,88 | 72,43  |
| 2019/06/19 | CH2206 | Male | Three y/o | Control | Control | Feed Day | No | 08:35 | 08:00 - 08:59 | Late Morning | 37,1 | 56  | 8,2   | 8,2   | 18,26 | 549,01 | 70,05  |
| 2019/06/19 | CH2205 | Male | Three y/o | Control | Control | Feed Day | No | 08:40 | 08:00 - 08:59 | Late Morning | 37,7 |     | 203,6 | 203,6 | 18,85 |        | 180,75 |
| 2019/06/19 | CH2206 | Male | Three y/o | Control | Control | Feed Day | No | 08:40 | 08:00 - 08:59 | Late Morning | 36,4 | 71  | 10,2  | 10,2  | 17,57 | 568,10 | 77,43  |
| 2019/06/19 | CH2205 | Male | Three y/o | Control | Control | Feed Day | No | 08:45 | 08:00 - 08:59 | Late Morning | 37,7 | 106 | 204,4 | 204,4 | 18,85 | 598,06 | 180,88 |
| 2019/06/19 | CH2206 | Male | Three y/o | Control | Control | Feed Day | No | 08:45 | 08:00 - 08:59 | Late Morning | 35,9 | 89  | 23,4  | 23,4  | 17,09 | 585,33 | 105,68 |
| 2019/06/19 | CH2205 | Male | Three y/o | Control | Control | Feed Day | No | 08:50 | 08:00 - 08:59 | Late Morning | 37,7 |     | 184,8 | 184,8 | 18,85 |        | 177,34 |
| 2019/06/19 | CH2206 | Male | Three y/o | Control | Control | Feed Day | No | 08:50 | 08:00 - 08:59 | Late Morning | 36,2 | 64  | 6,8   | 6,8   | 17,38 | 559,88 | 63,74  |
| 2019/06/19 | CH2205 | Male | Three y/o | Control | Control | Feed Day | No | 08:55 | 08:00 - 08:59 | Late Morning | 37,6 | 77  | 2,8   | 2,8   | 18,75 | 574,39 | 34,04  |
| 2019/06/19 | CH2206 | Male | Three y/o | Control | Control | Feed Day | No | 08:55 | 08:00 - 08:59 | Late Morning | 35,9 | 75  | 63,6  | 63,6  | 17,09 | 572,36 | 140,11 |
| 2019/06/19 | CH2205 | Male | Three y/o | Control | Control | Feed Day | No | 09:00 | 09:00 - 09:59 | Late Morning | 37,6 | 58  | 5,2   | 5,2   | 18,75 | 551,90 | 54,72  |
| 2019/06/19 | CH2206 | Male | Three y/o | Control | Control | Feed Day | No | 09:00 | 09:00 - 09:59 | Late Morning | 35,9 |     | 15,8  | 15,8  | 17,09 |        | 92,28  |
| 2019/06/19 | CH2205 | Male | Three y/o | Control | Control | Feed Day | No | 09:05 | 09:00 - 09:59 | Late Morning | 37,6 | 50  | 6,6   | 6,6   | 18,75 | 539,52 | 62,73  |
| 2019/06/19 | CH2206 | Male | Three y/o | Control | Control | Feed Day | No | 09:05 | 09:00 - 09:59 | Late Morning | 35,7 | 61  | 27,2  | 27,2  | 16,90 | 556,01 | 110,83 |
| 2019/06/19 | CH2205 | Male | Three y/o | Control | Control | Feed Day | No | 09:10 | 09:00 - 09:59 | Late Morning | 37,7 |     | 20,0  | 20,0  | 18,85 |        | 100,31 |
| 2019/06/19 | CH2206 | Male | Three y/o | Control | Control | Feed Day | No | 09:10 | 09:00 - 09:59 | Late Morning | 35,7 | 73  | 34,0  | 34,0  | 16,90 | 570,27 | 118,49 |
| 2019/06/19 | CH2205 | Male | Three y/o | Control | Control | Feed Day | No | 09:15 | 09:00 - 09:59 | Late Morning | 37,7 | 68  | 15,0  | 15,0  | 18,85 | 564,71 | 90,51  |



|            |        |      |           |         |         |          |     |       |               |              |      |     |       |       |       |        |        |
|------------|--------|------|-----------|---------|---------|----------|-----|-------|---------------|--------------|------|-----|-------|-------|-------|--------|--------|
| 2019/06/19 | CH2206 | Male | Three y/o | Control | Control | Feed Day | No  | 09:15 | 09:00 - 09:59 | Late Morning | 35,7 | 79  | 44,8  | 44,8  | 16,90 | 576,36 | 127,99 |
| 2019/06/19 | CH2205 | Male | Three y/o | Control | Control | Feed Day | No  | 09:20 | 09:00 - 09:59 | Late Morning | 37,6 | 103 | 17,0  | 17,0  | 18,75 | 596,00 | 94,77  |
| 2019/06/19 | CH2206 | Male | Three y/o | Control | Control | Feed Day | No  | 09:20 | 09:00 - 09:59 | Late Morning | 36,2 | 69  | 41,4  | 41,4  | 17,38 | 565,86 | 125,27 |
| 2019/06/19 | CH2205 | Male | Three y/o | Control | Control | Feed Day | No  | 09:25 | 09:00 - 09:59 | Late Morning | 37,6 |     | 27,2  | 27,2  | 18,75 |        | 110,83 |
| 2019/06/19 | CH2206 | Male | Three y/o | Control | Control | Feed Day | No  | 09:25 | 09:00 - 09:59 | Late Morning | 36,3 | 101 | 62,6  | 62,6  | 17,48 | 594,59 | 139,56 |
| 2019/06/19 | CH2205 | Male | Three y/o | Control | Control | Feed Day | No  | 09:30 | 09:00 - 09:59 | Late Morning | 37,5 |     | 21,6  | 21,6  | 18,65 |        | 102,94 |
| 2019/06/19 | CH2206 | Male | Three y/o | Control | Control | Feed Day | No  | 09:30 | 09:00 - 09:59 | Late Morning | 36,6 | 84  | 53,2  | 53,2  | 17,77 | 581,01 | 133,93 |
| 2019/06/19 | CH2205 | Male | Three y/o | Control | Control | Feed Day | No  | 09:35 | 09:00 - 09:59 | Late Morning | 37,5 | 65  | 21,2  | 21,2  | 18,65 | 561,12 | 102,31 |
| 2019/06/19 | CH2206 | Male | Three y/o | Control | Control | Feed Day | No  | 09:35 | 09:00 - 09:59 | Late Morning | 36,9 | 51  | 56,2  | 56,2  | 18,06 | 541,20 | 135,83 |
| 2019/06/19 | CH2205 | Male | Three y/o | Control | Control | Feed Day | No  | 09:40 | 09:00 - 09:59 | Late Morning | 37,4 | 58  | 7,2   | 7,2   | 18,55 | 551,90 | 65,66  |
| 2019/06/19 | CH2206 | Male | Three y/o | Control | Control | Feed Day | No  | 09:40 | 09:00 - 09:59 | Late Morning | 37,0 | 76  | 55,6  | 55,6  | 18,16 | 573,39 | 135,46 |
| 2019/06/19 | CH2205 | Male | Three y/o | Control | Control | Feed Day | No  | 09:45 | 09:00 - 09:59 | Late Morning | 37,4 | 68  | 22,6  | 22,6  | 18,55 | 564,71 | 104,49 |
| 2019/06/19 | CH2206 | Male | Three y/o | Control | Control | Feed Day | No  | 09:45 | 09:00 - 09:59 | Late Morning | 37,1 | 105 | 111,4 | 111,4 | 18,26 | 597,38 | 159,61 |
| 2019/06/19 | CH2205 | Male | Three y/o | Control | Control | Feed Day | No  | 09:50 | 09:00 - 09:59 | Late Morning | 37,3 | 74  | 53,4  | 53,4  | 18,46 | 571,33 | 134,06 |
| 2019/06/19 | CH2206 | Male | Three y/o | Control | Control | Feed Day | No  | 09:50 | 09:00 - 09:59 | Late Morning | 37,1 | 83  | 36,8  | 36,8  | 18,26 | 580,11 | 121,22 |
| 2019/06/19 | CH2205 | Male | Three y/o | Control | Control | Feed Day | No  | 09:55 | 09:00 - 09:59 | Late Morning | 37,4 | 48  | 288,6 | 288,6 | 18,55 | 536,04 | 193,05 |
| 2019/06/19 | CH2206 | Male | Three y/o | Control | Control | Feed Day | No  | 09:55 | 09:00 - 09:59 | Late Morning | 37,1 | 154 | 25,8  | 25,8  | 18,26 | 623,58 | 109,02 |
| 2019/06/19 | CH2205 | Male | Three y/o | Control | Control | Feed Day | No  | 10:00 | 10:00 - 10:59 | Late Morning | 37,4 | 84  | 34,0  | 34,0  | 18,55 | 581,01 | 118,49 |
| 2019/06/19 | CH2206 | Male | Three y/o | Control | Control | Feed Day | No  | 10:00 | 10:00 - 10:59 | Late Morning | 37,1 | 103 | 22,8  | 22,8  | 18,26 | 596,00 | 104,79 |
| 2019/06/19 | CH2205 | Male | Three y/o | Control | Control | Feed Day | No  | 10:05 | 10:00 - 10:59 | Late Morning | 37,4 |     | 11,8  | 11,8  | 18,55 |        | 82,36  |
| 2019/06/19 | CH2206 | Male | Three y/o | Control | Control | Feed Day | No  | 10:05 | 10:00 - 10:59 | Late Morning | 37,2 | 77  | 51,2  | 51,2  | 18,36 | 574,39 | 132,61 |
| 2019/06/19 | CH2205 | Male | Three y/o | Control | Control | Feed Day | No  | 10:10 | 10:00 - 10:59 | Late Morning | 37,3 |     | 35,2  | 35,2  | 18,46 |        | 119,69 |
| 2019/06/19 | CH2206 | Male | Three y/o | Control | Control | Feed Day | No  | 10:10 | 10:00 - 10:59 | Late Morning | 37,2 | 73  | 58,4  | 58,4  | 18,36 | 570,27 | 137,16 |
| 2019/06/19 | CH2205 | Male | Three y/o | Control | Control | Feed Day | No  | 10:15 | 10:00 - 10:59 | Late Morning | 37,4 | 100 | 13,2  | 13,2  | 18,55 | 593,87 | 86,17  |
| 2019/06/19 | CH2206 | Male | Three y/o | Control | Control | Feed Day | No  | 10:15 | 10:00 - 10:59 | Late Morning | 37,2 | 70  | 22,8  | 22,8  | 18,36 | 566,99 | 104,79 |
| 2019/06/19 | CH2205 | Male | Three y/o | Control | Control | Feed Day | No  | 10:20 | 10:00 - 10:59 | Late Morning | 37,4 | 47  | 18,8  | 18,8  | 18,55 | 534,23 | 98,20  |
| 2019/06/19 | CH2206 | Male | Three y/o | Control | Control | Feed Day | No  | 10:20 | 10:00 - 10:59 | Late Morning | 37,2 | 76  | 29,2  | 29,2  | 18,36 | 573,39 | 113,27 |
| 2019/06/19 | CH2205 | Male | Three y/o | Control | Control | Feed Day | No  | 10:25 | 10:00 - 10:59 | Late Morning | 37,4 |     | 27,2  | 27,2  | 18,55 |        | 110,83 |
| 2019/06/19 | CH2206 | Male | Three y/o | Control | Control | Feed Day | No  | 10:25 | 10:00 - 10:59 | Late Morning | 37,3 | 84  | 46,6  | 46,6  | 18,46 | 581,01 | 129,35 |
| 2019/06/19 | CH2205 | Male | Three y/o | Control | Control | Feed Day | Yes | 10:30 | 10:00 - 10:59 | Late Morning | 37,4 | 145 | 13,2  | 13,2  | 18,55 | 619,62 | 86,17  |
| 2019/06/19 | CH2206 | Male | Three y/o | Control | Control | Feed Day | Yes | 10:30 | 10:00 - 10:59 | Late Morning | 37,3 | 55  | 35,2  | 35,2  | 18,46 | 547,52 | 119,69 |
| 2019/06/19 | CH2205 | Male | Three y/o | Control | Control | Feed Day | Yes | 10:35 | 10:00 - 10:59 | Late Morning | 37,4 | 59  | 10,0  | 10,0  | 18,55 | 553,30 | 76,76  |
| 2019/06/19 | CH2206 | Male | Three y/o | Control | Control | Feed Day | Yes | 10:35 | 10:00 - 10:59 | Late Morning | 37,3 | 86  | 36,0  | 36,0  | 18,46 | 582,77 | 120,46 |
| 2019/06/19 | CH2205 | Male | Three y/o | Control | Control | Feed Day | Yes | 10:40 | 10:00 - 10:59 | Late Morning | 37,4 | 58  | 13,8  | 13,8  | 18,55 | 551,90 | 87,68  |
| 2019/06/19 | CH2206 | Male | Three y/o | Control | Control | Feed Day | Yes | 10:40 | 10:00 - 10:59 | Late Morning | 37,4 | 68  | 47,8  | 47,8  | 18,55 | 564,71 | 130,23 |
| 2019/06/19 | CH2205 | Male | Three y/o | Control | Control | Feed Day | Yes | 10:45 | 10:00 - 10:59 | Late Morning | 37,4 | 64  | 12,8  | 12,8  | 18,55 | 559,88 | 85,12  |
| 2019/06/19 | CH2206 | Male | Three y/o | Control | Control | Feed Day | Yes | 10:45 | 10:00 - 10:59 | Late Morning | 37,4 | 74  | 46,6  | 46,6  | 18,55 | 571,33 | 129,35 |
| 2019/06/19 | CH2205 | Male | Three y/o | Control | Control | Feed Day | Yes | 10:50 | 10:00 - 10:59 | Late Morning | 37,4 | 48  | 14,6  | 14,6  | 18,55 | 536,04 | 89,59  |
| 2019/06/19 | CH2206 | Male | Three y/o | Control | Control | Feed Day | Yes | 10:50 | 10:00 - 10:59 | Late Morning | 37,4 | 91  | 63,8  | 63,8  | 18,55 | 586,98 | 140,22 |
| 2019/06/19 | CH2205 | Male | Three y/o | Control | Control | Feed Day | Yes | 10:55 | 10:00 - 10:59 | Late Morning | 37,4 | 68  | 19,6  | 19,6  | 18,55 | 564,71 | 99,63  |
| 2019/06/19 | CH2206 | Male | Three y/o | Control | Control | Feed Day | Yes | 10:55 | 10:00 - 10:59 | Late Morning | 37,5 | 49  | 62,2  | 62,2  | 18,65 | 537,80 | 139,34 |
| 2019/06/19 | CH2205 | Male | Three y/o | Control | Control | Feed Day | Yes | 11:00 | 11:00 - 11:59 | Late Morning | 37,4 |     | 15,8  | 15,8  | 18,55 |        | 92,28  |
| 2019/06/19 | CH2206 | Male | Three y/o | Control | Control | Feed Day | Yes | 11:00 | 11:00 - 11:59 | Late Morning | 37,5 | 57  | 33,2  | 33,2  | 18,65 | 550,47 | 117,68 |
| 2019/06/19 | CH2205 | Male | Three y/o | Control | Control | Feed Day | Yes | 11:05 | 11:00 - 11:59 | Late Morning | 37,4 | 76  | 79,0  | 79,0  | 18,55 | 573,39 | 147,64 |
| 2019/06/19 | CH2206 | Male | Three y/o | Control | Control | Feed Day | Yes | 11:05 | 11:00 - 11:59 | Late Morning | 37,6 | 90  | 27,0  | 27,0  | 18,75 | 586,16 | 110,58 |
| 2019/06/19 | CH2205 | Male | Three y/o | Control | Control | Feed Day | Yes | 11:10 | 11:00 - 11:59 | Late Morning | 37,5 | 41  | 25,6  | 25,6  | 18,65 | 522,29 | 108,76 |
| 2019/06/19 | CH2206 | Male | Three y/o | Control | Control | Feed Day | Yes | 11:10 | 11:00 - 11:59 | Late Morning | 37,7 | 77  | 61,6  | 61,6  | 18,85 | 574,39 | 139,00 |
| 2019/06/19 | CH2205 | Male | Three y/o | Control | Control | Feed Day | Yes | 11:15 | 11:00 - 11:59 | Late Morning | 37,4 |     | 128,2 | 128,2 | 18,55 |        | 164,52 |
| 2019/06/19 | CH2206 | Male | Three y/o | Control | Control | Feed Day | Yes | 11:15 | 11:00 - 11:59 | Late Morning | 37,7 | 108 | 120,4 | 120,4 | 18,85 | 599,39 | 162,32 |
| 2019/06/19 | CH2205 | Male | Three y/o | Control | Control | Feed Day | Yes | 11:20 | 11:00 - 11:59 | Late Morning | 37,4 | 115 | 103,0 | 103,0 | 18,55 | 603,82 | 156,87 |
| 2019/06/19 | CH2206 | Male | Three y/o | Control | Control | Feed Day | Yes | 11:20 | 11:00 - 11:59 | Late Morning | 37,8 | 125 | 54,4  | 54,4  | 18,95 | 609,60 | 134,70 |
| 2019/06/19 | CH2205 | Male | Three y/o | Control | Control | Feed Day | Yes | 11:25 | 11:00 - 11:59 | Late Morning | 37,5 | 90  | 103,2 | 103,2 | 18,65 | 586,16 | 156,94 |
| 2019/06/19 | CH2206 | Male | Three y/o | Control | Control | Feed Day | Yes | 11:25 | 11:00 - 11:59 | Late Morning | 37,7 | 81  | 35,4  | 35,4  | 18,85 | 578,26 | 119,88 |
| 2019/06/19 | CH2205 | Male | Three y/o | Control | Control | Feed Day | No  | 11:30 | 11:00 - 11:59 | Late Morning | 37,4 | 60  | 17,8  | 17,8  | 18,55 | 554,67 | 96,34  |
| 2019/06/19 | CH2206 | Male | Three y/o | Control | Control | Feed Day | No  | 11:30 | 11:00 - 11:59 | Late Morning | 37,7 | 94  | 21,6  | 21,6  | 18,85 | 589,37 | 102,94 |
| 2019/06/19 | CH2205 | Male | Three y/o | Control | Control | Feed Day | No  | 11:35 | 11:00 - 11:59 | Late Morning | 37,5 | 51  | 16,0  | 16,0  | 18,65 | 541,20 | 92,71  |
| 2019/06/19 | CH2206 | Male | Three y/o | Control | Control | Feed Day | No  | 11:35 | 11:00 - 11:59 | Late Morning | 37,7 | 59  | 14,6  | 14,6  | 18,85 | 553,30 | 89,59  |
| 2019/06/19 | CH2205 | Male | Three y/o | Control | Control | Feed Day | No  | 11:40 | 11:00 - 11:59 | Late Morning | 37,5 | 62  | 18,6  | 18,6  | 18,65 | 557,33 | 97,84  |
| 2019/06/19 | CH2206 | Male | Three y/o | Control | Control | Feed Day | No  | 11:40 | 11:00 - 11:59 | Late Morning | 37,7 | 70  | 223,6 | 223,6 | 18,85 | 566,99 | 184,05 |
| 2019/06/19 | CH2205 | Male | Three y/o | Control | Control | Feed Day | No  | 11:45 | 11:00 - 11:59 | Late Morning | 37,6 | 126 | 14,4  | 14,4  | 18,75 | 610,14 | 89,12  |
| 2019/06/19 | CH2206 | Male | Three y/o | Control | Control | Feed Day | No  | 11:45 | 11:00 - 11:59 | Late Morning | 37,7 | 61  | 13,2  | 13,2  | 18,85 | 556,01 | 86,17  |
| 2019/06/19 | CH2205 | Male | Three y/o | Control | Control | Feed Day | No  | 11:50 | 11:00 - 11:59 | Late Morning | 37,6 | 53  | 14,8  | 14,8  | 18,75 | 544,43 | 90,05  |
| 2019/06/19 | CH2206 | Male | Three y/o | Control | Control | Feed Day | No  | 11:50 | 11:00 - 11:59 | Late Morning | 37,8 | 65  | 29,2  | 29,2  | 18,95 | 561,12 | 113,27 |
| 2019/06/19 | CH2205 | Male | Three y/o | Control | Control | Feed Day | No  | 11:55 | 11:00 - 11:59 | Late Morning | 37,7 | 56  | 178,0 | 178,0 | 18,85 | 549,01 | 176,02 |
| 2019/06/19 | CH2206 | Male | Three y/o | Control | Control | Feed Day | No  | 11:55 | 11:00 - 11:59 | Late Morning | 37,8 |     | 98,8  | 98,8  | 18,95 |        | 155,42 |
| 2019/06/19 | CH2205 | Male | Three y/o | Control | Control | Feed Day | No  | 12:00 | 12:00 - 12:59 | Afternoon    | 37,8 |     | 79,4  | 79,4  | 18,95 |        | 147,81 |
| 2019/06/19 | CH2206 | Male | Three y/o | Control | Control | Feed Day | No  | 12:00 | 12:00 - 12:59 | Afternoon    | 37,8 |     | 39,6  | 39,6  | 18,95 |        | 123,74 |
| 2019/06/19 | CH2205 | Male | Three y/o | Control | Control | Feed Day | No  | 12:05 | 12:00 - 12:59 | Afternoon    | 37,7 |     | 79,8  | 79,8  | 18,85 |        | 147,99 |
| 2019/06/19 | CH2206 | Male | Three y/o | Control | Control | Feed Day | No  | 12:05 | 12:00 - 12:59 | Afternoon    | 37,8 | 93  | 43,4  | 43,4  | 18,95 | 588,58 | 126,90 |
| 2019/06/19 | CH2205 | Male | Three y/o | Control | Control | Feed Day | No  | 12:10 | 12:00 - 12:59 | Afternoon    | 37,7 | 121 | 55,8  | 55,8  | 18,85 | 607,35 | 135,58 |



|            |        |      |           |         |         |          |    |       |               |           |      |     |       |       |       |        |        |
|------------|--------|------|-----------|---------|---------|----------|----|-------|---------------|-----------|------|-----|-------|-------|-------|--------|--------|
| 2019/06/19 | CH2206 | Male | Three y/o | Control | Control | Feed Day | No | 12:10 | 12:00 - 12:59 | Afternoon | 37,7 | 100 | 64,6  | 64,6  | 18,85 | 593,87 | 140,65 |
| 2019/06/19 | CH2205 | Male | Three y/o | Control | Control | Feed Day | No | 12:15 | 12:00 - 12:59 | Afternoon | 37,7 | 110 | 116,8 | 116,8 | 18,85 | 600,69 | 161,26 |
| 2019/06/19 | CH2206 | Male | Three y/o | Control | Control | Feed Day | No | 12:15 | 12:00 - 12:59 | Afternoon | 37,7 | 110 | 47,6  | 47,6  | 18,85 | 600,69 | 130,09 |
| 2019/06/19 | CH2205 | Male | Three y/o | Control | Control | Feed Day | No | 12:20 | 12:00 - 12:59 | Afternoon | 37,9 | 103 | 6,2   | 6,2   | 19,05 | 596,00 | 60,63  |
| 2019/06/19 | CH2206 | Male | Three y/o | Control | Control | Feed Day | No | 12:20 | 12:00 - 12:59 | Afternoon | 37,7 | 105 | 23,4  | 23,4  | 18,85 | 597,38 | 105,68 |
| 2019/06/19 | CH2205 | Male | Three y/o | Control | Control | Feed Day | No | 12:25 | 12:00 - 12:59 | Afternoon | 37,7 |     | 3,4   | 3,4   | 18,85 |        | 40,51  |
| 2019/06/19 | CH2206 | Male | Three y/o | Control | Control | Feed Day | No | 12:25 | 12:00 - 12:59 | Afternoon | 37,7 | 90  | 29,6  | 29,6  | 18,85 | 586,16 | 113,73 |
| 2019/06/19 | CH2205 | Male | Three y/o | Control | Control | Feed Day | No | 12:30 | 12:00 - 12:59 | Afternoon | 37,7 |     | 367,6 | 367,6 | 18,85 |        | 201,62 |
| 2019/06/19 | CH2206 | Male | Three y/o | Control | Control | Feed Day | No | 12:30 | 12:00 - 12:59 | Afternoon | 37,7 | 94  | 45,6  | 45,6  | 18,85 | 589,37 | 128,61 |
| 2019/06/19 | CH2205 | Male | Three y/o | Control | Control | Feed Day | No | 12:35 | 12:00 - 12:59 | Afternoon | 37,9 | 31  | 196,8 | 196,8 | 19,05 | 496,63 | 179,55 |
| 2019/06/19 | CH2206 | Male | Three y/o | Control | Control | Feed Day | No | 12:35 | 12:00 - 12:59 | Afternoon | 37,7 | 79  | 40,0  | 40,0  | 18,85 | 576,36 | 124,09 |
| 2019/06/19 | CH2205 | Male | Three y/o | Control | Control | Feed Day | No | 12:40 | 12:00 - 12:59 | Afternoon | 37,9 | 113 | 9,4   | 9,4   | 19,05 | 602,58 | 74,66  |
| 2019/06/19 | CH2206 | Male | Three y/o | Control | Control | Feed Day | No | 12:40 | 12:00 - 12:59 | Afternoon | 37,7 | 80  | 37,4  | 37,4  | 18,85 | 577,31 | 121,77 |
| 2019/06/19 | CH2205 | Male | Three y/o | Control | Control | Feed Day | No | 12:45 | 12:00 - 12:59 | Afternoon | 37,9 | 77  | 410,6 | 410,6 | 19,05 | 574,39 | 205,54 |
| 2019/06/19 | CH2206 | Male | Three y/o | Control | Control | Feed Day | No | 12:45 | 12:00 - 12:59 | Afternoon | 37,7 | 84  | 63,8  | 63,8  | 18,85 | 581,01 | 140,22 |
| 2019/06/19 | CH2205 | Male | Three y/o | Control | Control | Feed Day | No | 12:50 | 12:00 - 12:59 | Afternoon | 38,0 | 104 | 11,4  | 11,4  | 19,15 | 596,69 | 81,19  |
| 2019/06/19 | CH2206 | Male | Three y/o | Control | Control | Feed Day | No | 12:50 | 12:00 - 12:59 | Afternoon | 37,7 | 98  | 63,4  | 63,4  | 18,85 | 592,41 | 140,00 |
| 2019/06/19 | CH2205 | Male | Three y/o | Control | Control | Feed Day | No | 12:55 | 12:00 - 12:59 | Afternoon | 37,9 | 75  | 8,0   | 8,0   | 19,05 | 572,36 | 69,22  |
| 2019/06/19 | CH2206 | Male | Three y/o | Control | Control | Feed Day | No | 12:55 | 12:00 - 12:59 | Afternoon | 37,7 | 82  | 54,2  | 54,2  | 18,85 | 579,19 | 134,57 |
| 2019/06/19 | CH2205 | Male | Three y/o | Control | Control | Feed Day | No | 13:00 | 13:00 - 13:59 | Afternoon | 37,9 | 71  | 8,2   | 8,2   | 19,05 | 568,10 | 70,05  |
| 2019/06/19 | CH2206 | Male | Three y/o | Control | Control | Feed Day | No | 13:00 | 13:00 - 13:59 | Afternoon | 37,8 | 70  | 23,2  | 23,2  | 18,95 | 566,99 | 105,39 |
| 2019/06/19 | CH2205 | Male | Three y/o | Control | Control | Feed Day | No | 13:05 | 13:00 - 13:59 | Afternoon | 37,9 | 74  | 7,0   | 7,0   | 19,05 | 571,33 | 64,72  |
| 2019/06/19 | CH2206 | Male | Three y/o | Control | Control | Feed Day | No | 13:05 | 13:00 - 13:59 | Afternoon | 37,8 | 83  | 22,8  | 22,8  | 18,95 | 580,11 | 104,79 |
| 2019/06/19 | CH2205 | Male | Three y/o | Control | Control | Feed Day | No | 13:10 | 13:00 - 13:59 | Afternoon | 37,9 | 70  | 6,2   | 6,2   | 19,05 | 566,99 | 60,63  |
| 2019/06/19 | CH2206 | Male | Three y/o | Control | Control | Feed Day | No | 13:10 | 13:00 - 13:59 | Afternoon | 37,8 | 86  | 26,6  | 26,6  | 18,95 | 582,77 | 110,07 |
| 2019/06/19 | CH2205 | Male | Three y/o | Control | Control | Feed Day | No | 13:15 | 13:00 - 13:59 | Afternoon | 37,9 | 66  | 3,8   | 3,8   | 19,05 | 562,34 | 44,22  |
| 2019/06/19 | CH2206 | Male | Three y/o | Control | Control | Feed Day | No | 13:15 | 13:00 - 13:59 | Afternoon | 37,8 | 90  | 47,6  | 47,6  | 18,95 | 586,16 | 130,09 |
| 2019/06/19 | CH2205 | Male | Three y/o | Control | Control | Feed Day | No | 13:20 | 13:00 - 13:59 | Afternoon | 37,9 | 69  | 7,2   | 7,2   | 19,05 | 565,86 | 65,66  |
| 2019/06/19 | CH2206 | Male | Three y/o | Control | Control | Feed Day | No | 13:20 | 13:00 - 13:59 | Afternoon | 37,8 | 68  | 65,6  | 65,6  | 18,95 | 564,71 | 141,19 |
| 2019/06/19 | CH2205 | Male | Three y/o | Control | Control | Feed Day | No | 13:25 | 13:00 - 13:59 | Afternoon | 37,9 | 57  | 4,0   | 4,0   | 19,05 | 550,47 | 45,94  |
| 2019/06/19 | CH2206 | Male | Three y/o | Control | Control | Feed Day | No | 13:25 | 13:00 - 13:59 | Afternoon | 37,8 | 80  | 58,2  | 58,2  | 18,95 | 577,31 | 137,04 |
| 2019/06/19 | CH2205 | Male | Three y/o | Control | Control | Feed Day | No | 13:30 | 13:00 - 13:59 | Afternoon | 37,9 | 60  | 8,0   | 8,0   | 19,05 | 554,67 | 69,22  |
| 2019/06/19 | CH2206 | Male | Three y/o | Control | Control | Feed Day | No | 13:30 | 13:00 - 13:59 | Afternoon | 37,9 | 77  | 41,4  | 41,4  | 19,05 | 574,39 | 125,27 |
| 2019/06/19 | CH2205 | Male | Three y/o | Control | Control | Feed Day | No | 13:35 | 13:00 - 13:59 | Afternoon | 37,9 | 71  | 4,4   | 4,4   | 19,05 | 568,10 | 49,12  |
| 2019/06/19 | CH2206 | Male | Three y/o | Control | Control | Feed Day | No | 13:35 | 13:00 - 13:59 | Afternoon | 37,9 | 93  | 27,0  | 27,0  | 19,05 | 588,58 | 110,58 |
| 2019/06/19 | CH2205 | Male | Three y/o | Control | Control | Feed Day | No | 13:40 | 13:00 - 13:59 | Afternoon | 37,9 | 60  | 5,6   | 5,6   | 19,05 | 554,67 | 57,21  |
| 2019/06/19 | CH2206 | Male | Three y/o | Control | Control | Feed Day | No | 13:40 | 13:00 - 13:59 | Afternoon | 37,9 | 76  | 41,6  | 41,6  | 19,05 | 573,39 | 125,44 |
| 2019/06/19 | CH2205 | Male | Three y/o | Control | Control | Feed Day | No | 13:45 | 13:00 - 13:59 | Afternoon | 37,9 | 98  | 20,0  | 20,0  | 19,05 | 592,41 | 100,31 |
| 2019/06/19 | CH2206 | Male | Three y/o | Control | Control | Feed Day | No | 13:45 | 13:00 - 13:59 | Afternoon | 38,0 |     | 27,6  | 27,6  | 19,15 |        | 111,33 |
| 2019/06/19 | CH2205 | Male | Three y/o | Control | Control | Feed Day | No | 13:50 | 13:00 - 13:59 | Afternoon | 37,9 | 70  | 34,8  | 34,8  | 19,05 | 566,99 | 119,29 |
| 2019/06/19 | CH2206 | Male | Three y/o | Control | Control | Feed Day | No | 13:50 | 13:00 - 13:59 | Afternoon | 38,0 | 86  | 13,8  | 13,8  | 19,15 | 582,77 | 87,68  |
| 2019/06/19 | CH2205 | Male | Three y/o | Control | Control | Feed Day | No | 13:55 | 13:00 - 13:59 | Afternoon | 37,9 | 76  | 18,6  | 18,6  | 19,05 | 573,39 | 97,84  |
| 2019/06/19 | CH2206 | Male | Three y/o | Control | Control | Feed Day | No | 13:55 | 13:00 - 13:59 | Afternoon | 38,0 | 78  | 9,4   | 9,4   | 19,15 | 575,38 | 74,66  |
| 2019/06/19 | CH2205 | Male | Three y/o | Control | Control | Feed Day | No | 14:00 | 14:00 - 14:59 | Afternoon | 37,8 | 71  | 19,0  | 19,0  | 18,95 | 568,10 | 98,56  |
| 2019/06/19 | CH2206 | Male | Three y/o | Control | Control | Feed Day | No | 14:00 | 14:00 - 14:59 | Afternoon | 38,0 | 98  | 9,4   | 9,4   | 19,15 | 592,41 | 74,66  |
| 2019/06/19 | CH2205 | Male | Three y/o | Control | Control | Feed Day | No | 14:05 | 14:00 - 14:59 | Afternoon | 37,8 | 75  | 19,0  | 19,0  | 18,95 | 572,36 | 98,56  |
| 2019/06/19 | CH2206 | Male | Three y/o | Control | Control | Feed Day | No | 14:05 | 14:00 - 14:59 | Afternoon | 38,0 | 91  | 12,2  | 12,2  | 19,15 | 586,98 | 83,49  |
| 2019/06/19 | CH2205 | Male | Three y/o | Control | Control | Feed Day | No | 14:10 | 14:00 - 14:59 | Afternoon | 37,7 | 86  | 16,6  | 16,6  | 18,85 | 582,77 | 93,96  |
| 2019/06/19 | CH2206 | Male | Three y/o | Control | Control | Feed Day | No | 14:10 | 14:00 - 14:59 | Afternoon | 38,0 | 80  | 5,6   | 5,6   | 19,15 | 577,31 | 57,21  |
| 2019/06/19 | CH2205 | Male | Three y/o | Control | Control | Feed Day | No | 14:15 | 14:00 - 14:59 | Afternoon | 37,7 | 68  | 16,0  | 16,0  | 18,85 | 564,71 | 92,71  |
| 2019/06/19 | CH2206 | Male | Three y/o | Control | Control | Feed Day | No | 14:15 | 14:00 - 14:59 | Afternoon | 38,0 | 72  | 7,4   | 7,4   | 19,15 | 569,20 | 66,59  |
| 2019/06/19 | CH2205 | Male | Three y/o | Control | Control | Feed Day | No | 14:20 | 14:00 - 14:59 | Afternoon | 37,7 | 73  | 14,6  | 14,6  | 18,85 | 570,27 | 89,59  |
| 2019/06/19 | CH2206 | Male | Three y/o | Control | Control | Feed Day | No | 14:20 | 14:00 - 14:59 | Afternoon | 38,0 | 86  | 10,2  | 10,2  | 19,15 | 582,77 | 77,43  |
| 2019/06/19 | CH2205 | Male | Three y/o | Control | Control | Feed Day | No | 14:25 | 14:00 - 14:59 | Afternoon | 37,7 | 65  | 12,2  | 12,2  | 18,85 | 561,12 | 83,49  |
| 2019/06/19 | CH2206 | Male | Three y/o | Control | Control | Feed Day | No | 14:25 | 14:00 - 14:59 | Afternoon | 38,0 | 85  | 15,4  | 15,4  | 19,15 | 581,90 | 91,41  |
| 2019/06/19 | CH2205 | Male | Three y/o | Control | Control | Feed Day | No | 14:30 | 14:00 - 14:59 | Afternoon | 37,7 | 77  | 2,0   | 2,0   | 18,85 | 574,39 | 22,86  |
| 2019/06/19 | CH2206 | Male | Three y/o | Control | Control | Feed Day | No | 14:30 | 14:00 - 14:59 | Afternoon | 37,9 | 82  | 15,6  | 15,6  | 19,05 | 579,19 | 91,85  |
| 2019/06/19 | CH2205 | Male | Three y/o | Control | Control | Feed Day | No | 14:35 | 14:00 - 14:59 | Afternoon | 37,7 | 82  | 13,8  | 13,8  | 18,85 | 579,19 | 87,68  |
| 2019/06/19 | CH2206 | Male | Three y/o | Control | Control | Feed Day | No | 14:35 | 14:00 - 14:59 | Afternoon | 37,9 | 82  | 56,2  | 56,2  | 19,05 | 579,19 | 135,83 |
| 2019/06/19 | CH2205 | Male | Three y/o | Control | Control | Feed Day | No | 14:40 | 14:00 - 14:59 | Afternoon | 37,7 | 67  | 9,4   | 9,4   | 18,85 | 563,53 | 74,66  |
| 2019/06/19 | CH2206 | Male | Three y/o | Control | Control | Feed Day | No | 14:40 | 14:00 - 14:59 | Afternoon | 38,0 | 89  | 15,2  | 15,2  | 19,15 | 585,33 | 90,96  |
| 2019/06/19 | CH2205 | Male | Three y/o | Control | Control | Feed Day | No | 14:45 | 14:00 - 14:59 | Afternoon | 37,7 | 73  | 6,0   | 6,0   | 18,85 | 570,27 | 59,53  |
| 2019/06/19 | CH2206 | Male | Three y/o | Control | Control | Feed Day | No | 14:45 | 14:00 - 14:59 | Afternoon | 38,0 | 73  | 9,4   | 9,4   | 19,15 | 570,27 | 74,66  |
| 2019/06/19 | CH2205 | Male | Three y/o | Control | Control | Feed Day | No | 14:50 | 14:00 - 14:59 | Afternoon | 37,7 | 73  | 11,8  | 11,8  | 18,85 | 570,27 | 82,36  |
| 2019/06/19 | CH2206 | Male | Three y/o | Control | Control | Feed Day | No | 14:50 | 14:00 - 14:59 | Afternoon | 37,9 | 93  | 8,8   | 8,8   | 19,05 | 588,58 | 72,43  |
| 2019/06/19 | CH2205 | Male | Three y/o | Control | Control | Feed Day | No | 14:55 | 14:00 - 14:59 | Afternoon | 37,7 | 71  | 5,8   | 5,8   | 18,85 | 568,10 | 58,39  |
| 2019/06/19 | CH2206 | Male | Three y/o | Control | Control | Feed Day | No | 14:55 | 14:00 - 14:59 | Afternoon | 37,9 | 86  | 10,0  | 10,0  | 19,05 | 582,77 | 76,76  |
| 2019/06/19 | CH2205 | Male | Three y/o | Control | Control | Feed Day | No | 15:00 | 15:00 - 15:59 | Afternoon | 37,7 | 82  | 9,0   | 9,0   | 18,85 | 579,19 | 73,19  |
| 2019/06/19 | CH2206 | Male | Three y/o | Control | Control | Feed Day | No | 15:00 | 15:00 - 15:59 | Afternoon | 37,9 | 82  | 8,8   | 8,8   | 19,05 | 579,19 | 72,43  |
| 2019/06/19 | CH2205 | Male | Three y/o | Control | Control | Feed Day | No | 15:05 | 15:00 - 15:59 | Afternoon | 37,7 | 97  | 6,6   | 6,6   | 18,85 | 591,66 | 62,73  |



|            |        |      |           |         |         |          |    |       |               |           |      |     |       |       |       |        |        |
|------------|--------|------|-----------|---------|---------|----------|----|-------|---------------|-----------|------|-----|-------|-------|-------|--------|--------|
| 2019/06/19 | CH2206 | Male | Three y/o | Control | Control | Feed Day | No | 15:05 | 15:00 - 15:59 | Afternoon | 37,9 | 90  | 7,4   | 7,4   | 19,05 | 586,16 | 66,59  |
| 2019/06/19 | CH2205 | Male | Three y/o | Control | Control | Feed Day | No | 15:10 | 15:00 - 15:59 | Afternoon | 37,7 | 73  | 3,4   | 3,4   | 18,85 | 570,27 | 40,51  |
| 2019/06/19 | CH2206 | Male | Three y/o | Control | Control | Feed Day | No | 15:10 | 15:00 - 15:59 | Afternoon | 37,9 | 82  | 8,0   | 8,0   | 19,05 | 579,19 | 69,22  |
| 2019/06/19 | CH2205 | Male | Three y/o | Control | Control | Feed Day | No | 15:15 | 15:00 - 15:59 | Afternoon | 37,7 | 70  | 9,2   | 9,2   | 18,85 | 566,99 | 73,94  |
| 2019/06/19 | CH2206 | Male | Three y/o | Control | Control | Feed Day | No | 15:15 | 15:00 - 15:59 | Afternoon | 37,9 | 83  | 10,2  | 10,2  | 19,05 | 580,11 | 77,43  |
| 2019/06/19 | CH2205 | Male | Three y/o | Control | Control | Feed Day | No | 15:20 | 15:00 - 15:59 | Afternoon | 37,7 | 77  | 16,2  | 16,2  | 18,85 | 574,39 | 93,13  |
| 2019/06/19 | CH2206 | Male | Three y/o | Control | Control | Feed Day | No | 15:20 | 15:00 - 15:59 | Afternoon | 37,9 | 67  | 18,2  | 18,2  | 19,05 | 563,53 | 97,10  |
| 2019/06/19 | CH2205 | Male | Three y/o | Control | Control | Feed Day | No | 15:25 | 15:00 - 15:59 | Afternoon | 37,7 | 76  | 6,4   | 6,4   | 18,85 | 573,39 | 61,70  |
| 2019/06/19 | CH2206 | Male | Three y/o | Control | Control | Feed Day | No | 15:25 | 15:00 - 15:59 | Afternoon | 37,9 | 85  | 32,4  | 32,4  | 19,05 | 581,90 | 116,84 |
| 2019/06/19 | CH2205 | Male | Three y/o | Control | Control | Feed Day | No | 15:30 | 15:00 - 15:59 | Afternoon | 37,7 | 78  | 5,6   | 5,6   | 18,85 | 575,38 | 57,21  |
| 2019/06/19 | CH2206 | Male | Three y/o | Control | Control | Feed Day | No | 15:30 | 15:00 - 15:59 | Afternoon | 37,9 | 78  | 39,6  | 39,6  | 19,05 | 575,38 | 123,74 |
| 2019/06/19 | CH2205 | Male | Three y/o | Control | Control | Feed Day | No | 15:35 | 15:00 - 15:59 | Afternoon | 37,7 | 65  | 8,2   | 8,2   | 18,85 | 561,12 | 70,05  |
| 2019/06/19 | CH2206 | Male | Three y/o | Control | Control | Feed Day | No | 15:35 | 15:00 - 15:59 | Afternoon | 38,0 | 51  | 35,8  | 35,8  | 19,15 | 541,20 | 120,27 |
| 2019/06/19 | CH2205 | Male | Three y/o | Control | Control | Feed Day | No | 15:40 | 15:00 - 15:59 | Afternoon | 37,7 | 60  | 8,0   | 8,0   | 18,85 | 554,67 | 69,22  |
| 2019/06/19 | CH2206 | Male | Three y/o | Control | Control | Feed Day | No | 15:40 | 15:00 - 15:59 | Afternoon | 38,0 | 90  | 31,2  | 31,2  | 19,15 | 586,16 | 115,54 |
| 2019/06/19 | CH2205 | Male | Three y/o | Control | Control | Feed Day | No | 15:45 | 15:00 - 15:59 | Afternoon | 37,6 |     | 4,8   | 4,8   | 18,75 |        | 52,04  |
| 2019/06/19 | CH2206 | Male | Three y/o | Control | Control | Feed Day | No | 15:45 | 15:00 - 15:59 | Afternoon | 38,0 | 95  | 28,2  | 28,2  | 19,15 | 590,14 | 112,07 |
| 2019/06/19 | CH2205 | Male | Three y/o | Control | Control | Feed Day | No | 15:50 | 15:00 - 15:59 | Afternoon | 37,6 | 57  | 5,0   | 5,0   | 18,75 | 550,47 | 53,41  |
| 2019/06/19 | CH2206 | Male | Three y/o | Control | Control | Feed Day | No | 15:50 | 15:00 - 15:59 | Afternoon | 38,0 | 82  | 19,2  | 19,2  | 19,15 | 579,19 | 98,92  |
| 2019/06/19 | CH2205 | Male | Three y/o | Control | Control | Feed Day | No | 15:55 | 15:00 - 15:59 | Afternoon | 37,8 | 94  | 17,4  | 17,4  | 18,95 | 589,37 | 95,56  |
| 2019/06/19 | CH2206 | Male | Three y/o | Control | Control | Feed Day | No | 15:55 | 15:00 - 15:59 | Afternoon | 38,0 | 87  | 16,0  | 16,0  | 19,15 | 583,64 | 92,71  |
| 2019/06/19 | CH2205 | Male | Three y/o | Control | Control | Feed Day | No | 16:00 | 16:00 - 16:59 | Evening   | 37,9 | 107 | 173,4 | 173,4 | 19,05 | 598,73 | 175,10 |
| 2019/06/19 | CH2206 | Male | Three y/o | Control | Control | Feed Day | No | 16:00 | 16:00 - 16:59 | Evening   | 37,9 |     | 32,4  | 32,4  | 19,05 |        | 116,84 |
| 2019/06/19 | CH2205 | Male | Three y/o | Control | Control | Feed Day | No | 16:05 | 16:00 - 16:59 | Evening   | 37,9 | 105 | 75,8  | 75,8  | 19,05 | 597,38 | 146,20 |
| 2019/06/19 | CH2206 | Male | Three y/o | Control | Control | Feed Day | No | 16:05 | 16:00 - 16:59 | Evening   | 37,9 | 80  | 24,0  | 24,0  | 19,05 | 577,31 | 106,55 |
| 2019/06/19 | CH2205 | Male | Three y/o | Control | Control | Feed Day | No | 16:10 | 16:00 - 16:59 | Evening   | 37,9 | 88  | 25,6  | 25,6  | 19,05 | 584,49 | 108,76 |
| 2019/06/19 | CH2206 | Male | Three y/o | Control | Control | Feed Day | No | 16:10 | 16:00 - 16:59 | Evening   | 37,9 | 131 | 115,2 | 115,2 | 19,05 | 612,80 | 160,78 |
| 2019/06/19 | CH2205 | Male | Three y/o | Control | Control | Feed Day | No | 16:15 | 16:00 - 16:59 | Evening   | 37,9 | 90  | 19,8  | 19,8  | 19,05 | 586,16 | 99,97  |
| 2019/06/19 | CH2206 | Male | Three y/o | Control | Control | Feed Day | No | 16:15 | 16:00 - 16:59 | Evening   | 37,9 | 86  | 56,8  | 56,8  | 19,05 | 582,77 | 136,20 |
| 2019/06/19 | CH2205 | Male | Three y/o | Control | Control | Feed Day | No | 16:20 | 16:00 - 16:59 | Evening   | 37,9 | 71  | 24,8  | 24,8  | 19,05 | 568,10 | 107,67 |
| 2019/06/19 | CH2206 | Male | Three y/o | Control | Control | Feed Day | No | 16:20 | 16:00 - 16:59 | Evening   | 37,9 | 67  | 43,2  | 43,2  | 19,05 | 563,53 | 126,74 |
| 2019/06/19 | CH2205 | Male | Three y/o | Control | Control | Feed Day | No | 16:25 | 16:00 - 16:59 | Evening   | 38,0 | 61  | 25,4  | 25,4  | 19,15 | 556,01 | 108,49 |
| 2019/06/19 | CH2206 | Male | Three y/o | Control | Control | Feed Day | No | 16:25 | 16:00 - 16:59 | Evening   | 37,9 | 67  | 47,6  | 47,6  | 19,05 | 563,53 | 130,09 |
| 2019/06/19 | CH2205 | Male | Three y/o | Control | Control | Feed Day | No | 16:30 | 16:00 - 16:59 | Evening   | 38,0 | 62  | 27,4  | 27,4  | 19,15 | 557,33 | 111,09 |
| 2019/06/19 | CH2206 | Male | Three y/o | Control | Control | Feed Day | No | 16:30 | 16:00 - 16:59 | Evening   | 38,0 | 79  | 44,0  | 44,0  | 19,15 | 576,36 | 127,37 |
| 2019/06/19 | CH2205 | Male | Three y/o | Control | Control | Feed Day | No | 16:35 | 16:00 - 16:59 | Evening   | 38,0 | 70  | 16,8  | 16,8  | 19,15 | 566,99 | 94,37  |
| 2019/06/19 | CH2206 | Male | Three y/o | Control | Control | Feed Day | No | 16:35 | 16:00 - 16:59 | Evening   | 38,0 | 61  | 40,4  | 40,4  | 19,15 | 556,01 | 124,43 |
| 2019/06/19 | CH2205 | Male | Three y/o | Control | Control | Feed Day | No | 16:40 | 16:00 - 16:59 | Evening   | 38,0 |     | 46,4  | 46,4  | 19,15 |        | 129,21 |
| 2019/06/19 | CH2206 | Male | Three y/o | Control | Control | Feed Day | No | 16:40 | 16:00 - 16:59 | Evening   | 38,0 | 92  | 41,2  | 41,2  | 19,15 | 587,78 | 125,11 |
| 2019/06/19 | CH2205 | Male | Three y/o | Control | Control | Feed Day | No | 16:45 | 16:00 - 16:59 | Evening   | 38,0 | 81  | 52,0  | 52,0  | 19,15 | 578,26 | 133,14 |
| 2019/06/19 | CH2206 | Male | Three y/o | Control | Control | Feed Day | No | 16:45 | 16:00 - 16:59 | Evening   | 38,0 | 74  | 45,2  | 45,2  | 19,15 | 571,33 | 128,30 |
| 2019/06/19 | CH2205 | Male | Three y/o | Control | Control | Feed Day | No | 16:50 | 16:00 - 16:59 | Evening   | 38,1 | 70  | 6,6   | 6,6   | 19,26 | 566,99 | 62,73  |
| 2019/06/19 | CH2206 | Male | Three y/o | Control | Control | Feed Day | No | 16:50 | 16:00 - 16:59 | Evening   | 38,0 |     | 56,8  | 56,8  | 19,15 |        | 136,20 |
| 2019/06/19 | CH2205 | Male | Three y/o | Control | Control | Feed Day | No | 16:55 | 16:00 - 16:59 | Evening   | 38,0 | 83  | 13,8  | 13,8  | 19,15 | 580,11 | 87,68  |
| 2019/06/19 | CH2206 | Male | Three y/o | Control | Control | Feed Day | No | 16:55 | 16:00 - 16:59 | Evening   | 38,0 | 43  | 61,2  | 61,2  | 19,15 | 526,50 | 138,78 |
| 2019/06/19 | CH2205 | Male | Three y/o | Control | Control | Feed Day | No | 17:00 | 17:00 - 17:59 | Evening   | 38,1 | 103 | 76,8  | 76,8  | 19,26 | 596,00 | 146,66 |
| 2019/06/19 | CH2206 | Male | Three y/o | Control | Control | Feed Day | No | 17:00 | 17:00 - 17:59 | Evening   | 38,0 | 77  | 53,0  | 53,0  | 19,15 | 574,39 | 133,80 |
| 2019/06/19 | CH2205 | Male | Three y/o | Control | Control | Feed Day | No | 17:05 | 17:00 - 17:59 | Evening   | 38,0 | 78  | 7,2   | 7,2   | 19,15 | 575,38 | 65,66  |
| 2019/06/19 | CH2206 | Male | Three y/o | Control | Control | Feed Day | No | 17:05 | 17:00 - 17:59 | Evening   | 38,0 | 83  | 55,6  | 55,6  | 19,15 | 580,11 | 135,46 |
| 2019/06/19 | CH2205 | Male | Three y/o | Control | Control | Feed Day | No | 17:10 | 17:00 - 17:59 | Evening   | 38,0 | 60  | 4,8   | 4,8   | 19,15 | 554,67 | 52,04  |
| 2019/06/19 | CH2206 | Male | Three y/o | Control | Control | Feed Day | No | 17:10 | 17:00 - 17:59 | Evening   | 37,9 | 81  | 54,8  | 54,8  | 19,05 | 578,26 | 134,96 |
| 2019/06/19 | CH2205 | Male | Three y/o | Control | Control | Feed Day | No | 17:15 | 17:00 - 17:59 | Evening   | 38,1 | 56  | 4,8   | 4,8   | 19,26 | 549,01 | 52,04  |
| 2019/06/19 | CH2206 | Male | Three y/o | Control | Control | Feed Day | No | 17:15 | 17:00 - 17:59 | Evening   | 37,8 | 45  | 60,0  | 60,0  | 18,95 | 530,47 | 138,09 |
| 2019/06/19 | CH2205 | Male | Three y/o | Control | Control | Feed Day | No | 17:20 | 17:00 - 17:59 | Evening   | 38,1 | 60  | 4,2   | 4,2   | 19,26 | 554,67 | 47,57  |
| 2019/06/19 | CH2206 | Male | Three y/o | Control | Control | Feed Day | No | 17:20 | 17:00 - 17:59 | Evening   | 37,8 | 78  | 69,8  | 69,8  | 18,95 | 575,38 | 143,34 |
| 2019/06/19 | CH2205 | Male | Three y/o | Control | Control | Feed Day | No | 17:25 | 17:00 - 17:59 | Evening   | 38,1 | 79  | 7,2   | 7,2   | 19,26 | 576,36 | 65,66  |
| 2019/06/19 | CH2206 | Male | Three y/o | Control | Control | Feed Day | No | 17:25 | 17:00 - 17:59 | Evening   | 37,8 | 74  | 67,6  | 67,6  | 18,95 | 571,33 | 142,23 |
| 2019/06/19 | CH2205 | Male | Three y/o | Control | Control | Feed Day | No | 17:30 | 17:00 - 17:59 | Evening   | 38,1 | 48  | 11,0  | 11,0  | 19,26 | 536,04 | 79,98  |
| 2019/06/19 | CH2206 | Male | Three y/o | Control | Control | Feed Day | No | 17:30 | 17:00 - 17:59 | Evening   | 37,8 | 86  | 67,6  | 67,6  | 18,95 | 582,77 | 142,23 |
| 2019/06/19 | CH2205 | Male | Three y/o | Control | Control | Feed Day | No | 17:35 | 17:00 - 17:59 | Evening   | 38,1 |     | 7,4   | 7,4   | 19,26 |        | 66,59  |
| 2019/06/19 | CH2206 | Male | Three y/o | Control | Control | Feed Day | No | 17:35 | 17:00 - 17:59 | Evening   | 37,9 | 84  | 70,6  | 70,6  | 19,05 | 581,01 | 143,73 |
| 2019/06/19 | CH2205 | Male | Three y/o | Control | Control | Feed Day | No | 17:40 | 17:00 - 17:59 | Evening   | 38,1 | 60  | 11,0  | 11,0  | 19,26 | 554,67 | 79,98  |
| 2019/06/19 | CH2206 | Male | Three y/o | Control | Control | Feed Day | No | 17:40 | 17:00 - 17:59 | Evening   | 37,9 | 177 | 66,4  | 66,4  | 19,05 | 632,55 | 141,61 |
| 2019/06/19 | CH2205 | Male | Three y/o | Control | Control | Feed Day | No | 17:45 | 17:00 - 17:59 | Evening   | 38,1 | 87  | 12,6  | 12,6  | 19,26 | 583,64 | 84,59  |
| 2019/06/19 | CH2206 | Male | Three y/o | Control | Control | Feed Day | No | 17:45 | 17:00 - 17:59 | Evening   | 37,9 | 93  | 63,2  | 63,2  | 19,05 | 588,58 | 139,89 |
| 2019/06/19 | CH2205 | Male | Three y/o | Control | Control | Feed Day | No | 17:50 | 17:00 - 17:59 | Evening   | 38,0 | 73  | 9,8   | 9,8   | 19,15 | 570,27 | 76,07  |
| 2019/06/19 | CH2206 | Male | Three y/o | Control | Control | Feed Day | No | 17:50 | 17:00 - 17:59 | Evening   | 37,9 | 81  | 44,8  | 44,8  | 19,05 | 578,26 | 127,99 |
| 2019/06/19 | CH2205 | Male | Three y/o | Control | Control | Feed Day | No | 17:55 | 17:00 - 17:59 | Evening   | 37,9 | 70  | 5,2   | 5,2   | 19,05 | 566,99 | 54,72  |
| 2019/06/19 | CH2206 | Male | Three y/o | Control | Control | Feed Day | No | 17:55 | 17:00 - 17:59 | Evening   | 37,8 | 84  | 47,6  | 47,6  | 18,95 | 581,01 | 130,09 |
| 2019/06/19 | CH2205 | Male | Three y/o | Control | Control | Feed Day | No | 18:00 | 18:00 - 18:59 | Evening   | 38,0 | 48  | 12,6  | 12,6  | 19,15 | 536,04 | 84,59  |



|            |        |      |           |         |         |          |    |       |               |         |      |     |      |      |       |        |        |
|------------|--------|------|-----------|---------|---------|----------|----|-------|---------------|---------|------|-----|------|------|-------|--------|--------|
| 2019/06/19 | CH2206 | Male | Three y/o | Control | Control | Feed Day | No | 18:00 | 18:00 - 18:59 | Evening | 37,8 | 83  | 49,0 | 49,0 | 18,95 | 580,11 | 131,09 |
| 2019/06/19 | CH2205 | Male | Three y/o | Control | Control | Feed Day | No | 18:05 | 18:00 - 18:59 | Evening | 38,0 | 80  | 15,2 | 15,2 | 19,15 | 577,31 | 90,96  |
| 2019/06/19 | CH2206 | Male | Three y/o | Control | Control | Feed Day | No | 18:05 | 18:00 - 18:59 | Evening | 37,8 | 83  | 49,4 | 49,4 | 18,95 | 580,11 | 131,37 |
| 2019/06/19 | CH2205 | Male | Three y/o | Control | Control | Feed Day | No | 18:10 | 18:00 - 18:59 | Evening | 37,9 | 84  | 10,2 | 10,2 | 19,05 | 581,01 | 77,43  |
| 2019/06/19 | CH2206 | Male | Three y/o | Control | Control | Feed Day | No | 18:10 | 18:00 - 18:59 | Evening | 37,8 | 89  | 41,8 | 41,8 | 18,95 | 585,33 | 125,60 |
| 2019/06/19 | CH2205 | Male | Three y/o | Control | Control | Feed Day | No | 18:15 | 18:00 - 18:59 | Evening | 37,8 | 70  | 7,0  | 7,0  | 18,95 | 566,99 | 64,72  |
| 2019/06/19 | CH2206 | Male | Three y/o | Control | Control | Feed Day | No | 18:15 | 18:00 - 18:59 | Evening | 37,7 | 75  | 50,2 | 50,2 | 18,85 | 572,36 | 131,92 |
| 2019/06/19 | CH2205 | Male | Three y/o | Control | Control | Feed Day | No | 18:20 | 18:00 - 18:59 | Evening | 37,7 | 77  | 5,0  | 5,0  | 18,85 | 574,39 | 53,41  |
| 2019/06/19 | CH2206 | Male | Three y/o | Control | Control | Feed Day | No | 18:20 | 18:00 - 18:59 | Evening | 37,4 | 46  | 48,4 | 48,4 | 18,55 | 532,38 | 130,66 |
| 2019/06/19 | CH2205 | Male | Three y/o | Control | Control | Feed Day | No | 18:25 | 18:00 - 18:59 | Evening | 37,7 | 90  | 6,8  | 6,8  | 18,85 | 586,16 | 63,74  |
| 2019/06/19 | CH2206 | Male | Three y/o | Control | Control | Feed Day | No | 18:25 | 18:00 - 18:59 | Evening | 37,1 | 81  | 18,0 | 18,0 | 18,26 | 578,26 | 96,72  |
| 2019/06/19 | CH2205 | Male | Three y/o | Control | Control | Feed Day | No | 18:30 | 18:00 - 18:59 | Evening | 37,6 | 59  | 8,0  | 8,0  | 18,75 | 553,30 | 69,22  |
| 2019/06/19 | CH2206 | Male | Three y/o | Control | Control | Feed Day | No | 18:30 | 18:00 - 18:59 | Evening | 37,7 | 88  | 14,6 | 14,6 | 18,85 | 584,49 | 89,59  |
| 2019/06/19 | CH2205 | Male | Three y/o | Control | Control | Feed Day | No | 18:35 | 18:00 - 18:59 | Evening | 37,6 | 83  | 9,2  | 9,2  | 18,75 | 580,11 | 73,94  |
| 2019/06/19 | CH2206 | Male | Three y/o | Control | Control | Feed Day | No | 18:35 | 18:00 - 18:59 | Evening | 37,7 | 49  | 16,6 | 16,6 | 18,85 | 537,80 | 93,96  |
| 2019/06/19 | CH2205 | Male | Three y/o | Control | Control | Feed Day | No | 18:40 | 18:00 - 18:59 | Evening | 37,6 | 64  | 7,8  | 7,8  | 18,75 | 559,88 | 68,36  |
| 2019/06/19 | CH2206 | Male | Three y/o | Control | Control | Feed Day | No | 18:40 | 18:00 - 18:59 | Evening | 37,7 | 81  | 21,2 | 21,2 | 18,85 | 578,26 | 102,31 |
| 2019/06/19 | CH2205 | Male | Three y/o | Control | Control | Feed Day | No | 18:45 | 18:00 - 18:59 | Evening | 37,6 | 81  | 5,4  | 5,4  | 18,75 | 578,26 | 55,99  |
| 2019/06/19 | CH2206 | Male | Three y/o | Control | Control | Feed Day | No | 18:45 | 18:00 - 18:59 | Evening | 37,7 | 83  | 22,0 | 22,0 | 18,85 | 580,11 | 103,57 |
| 2019/06/19 | CH2205 | Male | Three y/o | Control | Control | Feed Day | No | 18:50 | 18:00 - 18:59 | Evening | 37,6 | 79  | 6,8  | 6,8  | 18,75 | 576,36 | 63,74  |
| 2019/06/19 | CH2206 | Male | Three y/o | Control | Control | Feed Day | No | 18:50 | 18:00 - 18:59 | Evening | 37,8 | 81  | 17,4 | 17,4 | 18,95 | 578,26 | 95,56  |
| 2019/06/19 | CH2205 | Male | Three y/o | Control | Control | Feed Day | No | 18:55 | 18:00 - 18:59 | Evening | 37,6 | 86  | 12,6 | 12,6 | 18,75 | 582,77 | 84,59  |
| 2019/06/19 | CH2206 | Male | Three y/o | Control | Control | Feed Day | No | 18:55 | 18:00 - 18:59 | Evening | 37,8 | 57  | 18,2 | 18,2 | 18,95 | 550,47 | 97,10  |
| 2019/06/19 | CH2205 | Male | Three y/o | Control | Control | Feed Day | No | 19:00 | 19:00 - 19:59 | Evening | 37,6 | 47  | 8,0  | 8,0  | 18,75 | 534,23 | 69,22  |
| 2019/06/19 | CH2206 | Male | Three y/o | Control | Control | Feed Day | No | 19:00 | 19:00 - 19:59 | Evening | 37,8 | 89  | 33,2 | 33,2 | 18,95 | 585,33 | 117,68 |
| 2019/06/19 | CH2205 | Male | Three y/o | Control | Control | Feed Day | No | 19:05 | 19:00 - 19:59 | Evening | 37,6 | 70  | 4,6  | 4,6  | 18,75 | 566,99 | 50,61  |
| 2019/06/19 | CH2206 | Male | Three y/o | Control | Control | Feed Day | No | 19:05 | 19:00 - 19:59 | Evening | 37,8 | 85  | 66,8 | 66,8 | 18,95 | 581,90 | 141,81 |
| 2019/06/19 | CH2205 | Male | Three y/o | Control | Control | Feed Day | No | 19:10 | 19:00 - 19:59 | Evening | 37,6 |     | 3,6  | 3,6  | 18,75 |        | 42,42  |
| 2019/06/19 | CH2206 | Male | Three y/o | Control | Control | Feed Day | No | 19:10 | 19:00 - 19:59 | Evening | 37,7 | 46  | 66,8 | 66,8 | 18,85 | 532,38 | 141,81 |
| 2019/06/19 | CH2205 | Male | Three y/o | Control | Control | Feed Day | No | 19:15 | 19:00 - 19:59 | Evening | 37,5 |     | 4,2  | 4,2  | 18,65 |        | 47,57  |
| 2019/06/19 | CH2206 | Male | Three y/o | Control | Control | Feed Day | No | 19:15 | 19:00 - 19:59 | Evening | 37,5 | 46  | 54,4 | 54,4 | 18,65 | 532,38 | 134,70 |
| 2019/06/19 | CH2205 | Male | Three y/o | Control | Control | Feed Day | No | 19:20 | 19:00 - 19:59 | Evening | 37,4 | 61  | 9,4  | 9,4  | 18,55 | 556,01 | 74,66  |
| 2019/06/19 | CH2206 | Male | Three y/o | Control | Control | Feed Day | No | 19:20 | 19:00 - 19:59 | Evening | 37,5 | 93  | 62,6 | 62,6 | 18,65 | 588,58 | 139,56 |
| 2019/06/19 | CH2205 | Male | Three y/o | Control | Control | Feed Day | No | 19:25 | 19:00 - 19:59 | Evening | 37,5 | 91  | 9,4  | 9,4  | 18,65 | 586,98 | 74,66  |
| 2019/06/19 | CH2206 | Male | Three y/o | Control | Control | Feed Day | No | 19:25 | 19:00 - 19:59 | Evening | 37,5 | 70  | 58,2 | 58,2 | 18,65 | 566,99 | 137,04 |
| 2019/06/19 | CH2205 | Male | Three y/o | Control | Control | Feed Day | No | 19:30 | 19:00 - 19:59 | Evening | 37,5 | 81  | 8,4  | 8,4  | 18,65 | 578,26 | 70,86  |
| 2019/06/19 | CH2206 | Male | Three y/o | Control | Control | Feed Day | No | 19:30 | 19:00 - 19:59 | Evening | 37,7 | 97  | 52,0 | 52,0 | 18,85 | 591,66 | 133,14 |
| 2019/06/19 | CH2205 | Male | Three y/o | Control | Control | Feed Day | No | 19:35 | 19:00 - 19:59 | Evening | 37,7 |     | 8,8  | 8,8  | 18,85 |        | 72,43  |
| 2019/06/19 | CH2206 | Male | Three y/o | Control | Control | Feed Day | No | 19:35 | 19:00 - 19:59 | Evening | 37,7 | 86  | 61,6 | 61,6 | 18,85 | 582,77 | 139,00 |
| 2019/06/19 | CH2205 | Male | Three y/o | Control | Control | Feed Day | No | 19:40 | 19:00 - 19:59 | Evening | 37,7 | 50  | 6,4  | 6,4  | 18,85 | 539,52 | 61,70  |
| 2019/06/19 | CH2206 | Male | Three y/o | Control | Control | Feed Day | No | 19:40 | 19:00 - 19:59 | Evening | 37,5 | 62  | 60,6 | 60,6 | 18,65 | 557,33 | 138,44 |
| 2019/06/19 | CH2205 | Male | Three y/o | Control | Control | Feed Day | No | 19:45 | 19:00 - 19:59 | Evening | 37,9 |     | 12,2 | 12,2 | 19,05 |        | 83,49  |
| 2019/06/19 | CH2206 | Male | Three y/o | Control | Control | Feed Day | No | 19:45 | 19:00 - 19:59 | Evening | 37,5 | 90  | 60,6 | 60,6 | 18,65 | 586,16 | 138,44 |
| 2019/06/19 | CH2205 | Male | Three y/o | Control | Control | Feed Day | No | 19:50 | 19:00 - 19:59 | Evening | 37,9 | 51  | 19,4 | 19,4 | 19,05 | 541,20 | 99,28  |
| 2019/06/19 | CH2206 | Male | Three y/o | Control | Control | Feed Day | No | 19:50 | 19:00 - 19:59 | Evening | 37,5 | 75  | 66,2 | 66,2 | 18,65 | 572,36 | 141,50 |
| 2019/06/19 | CH2205 | Male | Three y/o | Control | Control | Feed Day | No | 19:55 | 19:00 - 19:59 | Evening | 37,9 | 85  | 7,0  | 7,0  | 19,05 | 581,90 | 64,72  |
| 2019/06/19 | CH2206 | Male | Three y/o | Control | Control | Feed Day | No | 19:55 | 19:00 - 19:59 | Evening | 37,5 | 64  | 58,2 | 58,2 | 18,65 | 559,88 | 137,04 |
| 2019/06/19 | CH2205 | Male | Three y/o | Control | Control | Feed Day | No | 20:00 | 20:00 - 20:59 | Night   | 38,0 | 84  | 12,4 | 12,4 | 19,15 | 581,01 | 84,04  |
| 2019/06/19 | CH2206 | Male | Three y/o | Control | Control | Feed Day | No | 20:00 | 20:00 - 20:59 | Night   | 37,5 | 48  | 62,6 | 62,6 | 18,65 | 536,04 | 139,56 |
| 2019/06/19 | CH2205 | Male | Three y/o | Control | Control | Feed Day | No | 20:05 | 20:00 - 20:59 | Night   | 37,9 | 86  | 7,0  | 7,0  | 19,05 | 582,77 | 64,72  |
| 2019/06/19 | CH2206 | Male | Three y/o | Control | Control | Feed Day | No | 20:05 | 20:00 - 20:59 | Night   | 37,5 | 43  | 65,8 | 65,8 | 18,65 | 526,50 | 141,29 |
| 2019/06/19 | CH2205 | Male | Three y/o | Control | Control | Feed Day | No | 20:10 | 20:00 - 20:59 | Night   | 37,9 | 47  | 12,6 | 12,6 | 19,05 | 534,23 | 84,59  |
| 2019/06/19 | CH2206 | Male | Three y/o | Control | Control | Feed Day | No | 20:10 | 20:00 - 20:59 | Night   | 37,5 | 72  | 67,2 | 67,2 | 18,65 | 569,20 | 142,02 |
| 2019/06/19 | CH2205 | Male | Three y/o | Control | Control | Feed Day | No | 20:15 | 20:00 - 20:59 | Night   | 37,9 | 75  | 15,4 | 15,4 | 19,05 | 572,36 | 91,41  |
| 2019/06/19 | CH2206 | Male | Three y/o | Control | Control | Feed Day | No | 20:15 | 20:00 - 20:59 | Night   | 37,5 | 85  | 43,4 | 43,4 | 18,65 | 581,90 | 126,90 |
| 2019/06/19 | CH2205 | Male | Three y/o | Control | Control | Feed Day | No | 20:20 | 20:00 - 20:59 | Night   | 37,9 | 92  | 13,4 | 13,4 | 19,05 | 587,78 | 86,68  |
| 2019/06/19 | CH2206 | Male | Three y/o | Control | Control | Feed Day | No | 20:20 | 20:00 - 20:59 | Night   | 37,7 | 66  | 46,2 | 46,2 | 18,85 | 562,34 | 129,06 |
| 2019/06/19 | CH2205 | Male | Three y/o | Control | Control | Feed Day | No | 20:25 | 20:00 - 20:59 | Night   | 37,9 | 64  | 10,2 | 10,2 | 19,05 | 559,88 | 77,43  |
| 2019/06/19 | CH2206 | Male | Three y/o | Control | Control | Feed Day | No | 20:25 | 20:00 - 20:59 | Night   | 37,7 | 73  | 67,6 | 67,6 | 18,85 | 570,27 | 142,23 |
| 2019/06/19 | CH2205 | Male | Three y/o | Control | Control | Feed Day | No | 20:30 | 20:00 - 20:59 | Night   | 37,9 | 46  | 8,6  | 8,6  | 19,05 | 532,38 | 71,66  |
| 2019/06/19 | CH2206 | Male | Three y/o | Control | Control | Feed Day | No | 20:30 | 20:00 - 20:59 | Night   | 37,8 | 118 | 76,8 | 76,8 | 18,95 | 605,61 | 146,66 |
| 2019/06/19 | CH2205 | Male | Three y/o | Control | Control | Feed Day | No | 20:35 | 20:00 - 20:59 | Night   | 37,9 | 85  | 14,4 | 14,4 | 19,05 | 581,90 | 89,12  |
| 2019/06/19 | CH2206 | Male | Three y/o | Control | Control | Feed Day | No | 20:35 | 20:00 - 20:59 | Night   | 37,5 | 83  | 27,0 | 27,0 | 18,65 | 580,11 | 110,58 |
| 2019/06/19 | CH2205 | Male | Three y/o | Control | Control | Feed Day | No | 20:40 | 20:00 - 20:59 | Night   | 37,9 | 79  | 12,2 | 12,2 | 19,05 | 576,36 | 83,49  |
| 2019/06/19 | CH2206 | Male | Three y/o | Control | Control | Feed Day | No | 20:40 | 20:00 - 20:59 | Night   | 37,7 | 83  | 10,0 | 10,0 | 18,85 | 580,11 | 76,76  |
| 2019/06/19 | CH2205 | Male | Three y/o | Control | Control | Feed Day | No | 20:45 | 20:00 - 20:59 | Night   | 37,9 | 56  | 17,2 | 17,2 | 19,05 | 549,01 | 95,17  |
| 2019/06/19 | CH2206 | Male | Three y/o | Control | Control | Feed Day | No | 20:45 | 20:00 - 20:59 | Night   | 37,7 | 86  | 8,8  | 8,8  | 18,85 | 582,77 | 72,43  |
| 2019/06/19 | CH2205 | Male | Three y/o | Control | Control | Feed Day | No | 20:50 | 20:00 - 20:59 | Night   | 37,9 | 84  | 8,6  | 8,6  | 19,05 | 581,01 | 71,66  |
| 2019/06/19 | CH2206 | Male | Three y/o | Control | Control | Feed Day | No | 20:50 | 20:00 - 20:59 | Night   | 37,7 | 77  | 31,6 | 31,6 | 18,85 | 574,39 | 115,98 |
| 2019/06/19 | CH2205 | Male | Three y/o | Control | Control | Feed Day | No | 20:55 | 20:00 - 20:59 | Night   | 37,9 | 82  | 7,4  | 7,4  | 19,05 | 579,19 | 66,59  |



|            |        |      |           |         |         |          |    |       |               |       |      |     |       |       |       |        |        |
|------------|--------|------|-----------|---------|---------|----------|----|-------|---------------|-------|------|-----|-------|-------|-------|--------|--------|
| 2019/06/19 | CH2206 | Male | Three y/o | Control | Control | Feed Day | No | 20:55 | 20:00 - 20:59 | Night | 37,7 | 83  | 35,6  | 35,6  | 18,85 | 580,11 | 120,08 |
| 2019/06/19 | CH2205 | Male | Three y/o | Control | Control | Feed Day | No | 21:00 | 21:00 - 21:59 | Night | 37,9 |     | 13,4  | 13,4  | 19,05 |        | 86,68  |
| 2019/06/19 | CH2206 | Male | Three y/o | Control | Control | Feed Day | No | 21:00 | 21:00 - 21:59 | Night | 37,7 | 79  | 34,4  | 34,4  | 18,85 | 576,36 | 118,90 |
| 2019/06/19 | CH2205 | Male | Three y/o | Control | Control | Feed Day | No | 21:05 | 21:00 - 21:59 | Night | 37,9 | 83  | 7,8   | 7,8   | 19,05 | 580,11 | 68,36  |
| 2019/06/19 | CH2206 | Male | Three y/o | Control | Control | Feed Day | No | 21:05 | 21:00 - 21:59 | Night | 37,7 | 85  | 40,6  | 40,6  | 18,85 | 581,90 | 124,60 |
| 2019/06/19 | CH2205 | Male | Three y/o | Control | Control | Feed Day | No | 21:10 | 21:00 - 21:59 | Night | 37,9 | 92  | 4,4   | 4,4   | 19,05 | 587,78 | 49,12  |
| 2019/06/19 | CH2206 | Male | Three y/o | Control | Control | Feed Day | No | 21:10 | 21:00 - 21:59 | Night | 37,7 | 47  | 34,8  | 34,8  | 18,85 | 534,23 | 119,29 |
| 2019/06/19 | CH2205 | Male | Three y/o | Control | Control | Feed Day | No | 21:15 | 21:00 - 21:59 | Night | 37,9 | 86  | 7,4   | 7,4   | 19,05 | 582,77 | 66,59  |
| 2019/06/19 | CH2206 | Male | Three y/o | Control | Control | Feed Day | No | 21:15 | 21:00 - 21:59 | Night | 37,7 | 72  | 39,0  | 39,0  | 18,85 | 569,20 | 123,22 |
| 2019/06/19 | CH2205 | Male | Three y/o | Control | Control | Feed Day | No | 21:20 | 21:00 - 21:59 | Night | 37,9 | 65  | 6,6   | 6,6   | 19,05 | 561,12 | 62,73  |
| 2019/06/19 | CH2206 | Male | Three y/o | Control | Control | Feed Day | No | 21:20 | 21:00 - 21:59 | Night | 37,7 | 73  | 42,4  | 42,4  | 18,85 | 570,27 | 126,10 |
| 2019/06/19 | CH2205 | Male | Three y/o | Control | Control | Feed Day | No | 21:25 | 21:00 - 21:59 | Night | 37,9 | 47  | 8,6   | 8,6   | 19,05 | 534,23 | 71,66  |
| 2019/06/19 | CH2206 | Male | Three y/o | Control | Control | Feed Day | No | 21:25 | 21:00 - 21:59 | Night | 37,7 | 61  | 39,6  | 39,6  | 18,85 | 556,01 | 123,74 |
| 2019/06/19 | CH2205 | Male | Three y/o | Control | Control | Feed Day | No | 21:30 | 21:00 - 21:59 | Night | 37,7 | 58  | 10,2  | 10,2  | 18,85 | 551,90 | 77,43  |
| 2019/06/19 | CH2206 | Male | Three y/o | Control | Control | Feed Day | No | 21:30 | 21:00 - 21:59 | Night | 37,7 | 73  | 34,8  | 34,8  | 18,85 | 570,27 | 119,29 |
| 2019/06/19 | CH2205 | Male | Three y/o | Control | Control | Feed Day | No | 21:35 | 21:00 - 21:59 | Night | 37,7 | 92  | 4,2   | 4,2   | 18,85 | 587,78 | 47,57  |
| 2019/06/19 | CH2206 | Male | Three y/o | Control | Control | Feed Day | No | 21:35 | 21:00 - 21:59 | Night | 37,7 | 79  | 36,4  | 36,4  | 18,85 | 576,36 | 120,84 |
| 2019/06/19 | CH2205 | Male | Three y/o | Control | Control | Feed Day | No | 21:40 | 21:00 - 21:59 | Night | 37,7 | 104 | 10,0  | 10,0  | 18,85 | 596,69 | 76,76  |
| 2019/06/19 | CH2206 | Male | Three y/o | Control | Control | Feed Day | No | 21:40 | 21:00 - 21:59 | Night | 37,8 | 80  | 42,0  | 42,0  | 18,95 | 577,31 | 125,77 |
| 2019/06/19 | CH2205 | Male | Three y/o | Control | Control | Feed Day | No | 21:45 | 21:00 - 21:59 | Night | 37,7 | 84  | 8,8   | 8,8   | 18,85 | 581,01 | 72,43  |
| 2019/06/19 | CH2206 | Male | Three y/o | Control | Control | Feed Day | No | 21:45 | 21:00 - 21:59 | Night | 37,9 | 78  | 38,4  | 38,4  | 19,05 | 575,38 | 122,68 |
| 2019/06/19 | CH2205 | Male | Three y/o | Control | Control | Feed Day | No | 21:50 | 21:00 - 21:59 | Night | 37,7 | 86  | 6,0   | 6,0   | 18,85 | 582,77 | 59,53  |
| 2019/06/19 | CH2206 | Male | Three y/o | Control | Control | Feed Day | No | 21:50 | 21:00 - 21:59 | Night | 37,9 | 95  | 45,2  | 45,2  | 19,05 | 590,14 | 128,30 |
| 2019/06/19 | CH2205 | Male | Three y/o | Control | Control | Feed Day | No | 21:55 | 21:00 - 21:59 | Night | 37,7 | 93  | 8,6   | 8,6   | 18,85 | 588,58 | 71,66  |
| 2019/06/19 | CH2206 | Male | Three y/o | Control | Control | Feed Day | No | 21:55 | 21:00 - 21:59 | Night | 37,9 | 85  | 41,4  | 41,4  | 19,05 | 581,90 | 125,27 |
| 2019/06/19 | CH2205 | Male | Three y/o | Control | Control | Feed Day | No | 22:00 | 22:00 - 22:59 | Night | 37,7 | 52  | 6,6   | 6,6   | 18,85 | 542,83 | 62,73  |
| 2019/06/19 | CH2206 | Male | Three y/o | Control | Control | Feed Day | No | 22:00 | 22:00 - 22:59 | Night | 37,9 | 70  | 44,2  | 44,2  | 19,05 | 566,99 | 127,53 |
| 2019/06/19 | CH2205 | Male | Three y/o | Control | Control | Feed Day | No | 22:05 | 22:00 - 22:59 | Night | 37,8 | 81  | 8,0   | 8,0   | 18,95 | 578,26 | 69,22  |
| 2019/06/19 | CH2206 | Male | Three y/o | Control | Control | Feed Day | No | 22:05 | 22:00 - 22:59 | Night | 37,9 | 81  | 40,0  | 40,0  | 19,05 | 578,26 | 124,09 |
| 2019/06/19 | CH2205 | Male | Three y/o | Control | Control | Feed Day | No | 22:10 | 22:00 - 22:59 | Night | 37,7 | 72  | 5,0   | 5,0   | 18,85 | 569,20 | 53,41  |
| 2019/06/19 | CH2206 | Male | Three y/o | Control | Control | Feed Day | No | 22:10 | 22:00 - 22:59 | Night | 37,9 | 72  | 42,2  | 42,2  | 19,05 | 569,20 | 125,93 |
| 2019/06/19 | CH2205 | Male | Three y/o | Control | Control | Feed Day | No | 22:15 | 22:00 - 22:59 | Night | 37,7 | 99  | 5,0   | 5,0   | 18,85 | 593,14 | 53,41  |
| 2019/06/19 | CH2206 | Male | Three y/o | Control | Control | Feed Day | No | 22:15 | 22:00 - 22:59 | Night | 37,9 | 64  | 43,4  | 43,4  | 19,05 | 559,88 | 126,90 |
| 2019/06/19 | CH2205 | Male | Three y/o | Control | Control | Feed Day | No | 22:20 | 22:00 - 22:59 | Night | 37,7 | 45  | 7,0   | 7,0   | 18,85 | 530,47 | 64,72  |
| 2019/06/19 | CH2206 | Male | Three y/o | Control | Control | Feed Day | No | 22:20 | 22:00 - 22:59 | Night | 37,9 | 70  | 48,6  | 48,6  | 19,05 | 566,99 | 130,81 |
| 2019/06/19 | CH2205 | Male | Three y/o | Control | Control | Feed Day | No | 22:25 | 22:00 - 22:59 | Night | 37,8 | 65  | 1,6   | 1,6   | 18,95 | 561,12 | 15,48  |
| 2019/06/19 | CH2206 | Male | Three y/o | Control | Control | Feed Day | No | 22:25 | 22:00 - 22:59 | Night | 37,9 | 103 | 40,8  | 40,8  | 19,05 | 596,00 | 124,77 |
| 2019/06/19 | CH2205 | Male | Three y/o | Control | Control | Feed Day | No | 22:30 | 22:00 - 22:59 | Night | 37,7 | 62  | 3,4   | 3,4   | 18,85 | 557,33 | 40,51  |
| 2019/06/19 | CH2206 | Male | Three y/o | Control | Control | Feed Day | No | 22:30 | 22:00 - 22:59 | Night | 37,9 | 83  | 46,2  | 46,2  | 19,05 | 580,11 | 129,06 |
| 2019/06/19 | CH2205 | Male | Three y/o | Control | Control | Feed Day | No | 22:35 | 22:00 - 22:59 | Night | 37,7 | 63  | 5,2   | 5,2   | 18,85 | 558,62 | 54,72  |
| 2019/06/19 | CH2206 | Male | Three y/o | Control | Control | Feed Day | No | 22:35 | 22:00 - 22:59 | Night | 37,9 | 83  | 46,2  | 46,2  | 19,05 | 580,11 | 129,06 |
| 2019/06/19 | CH2205 | Male | Three y/o | Control | Control | Feed Day | No | 22:40 | 22:00 - 22:59 | Night | 37,7 | 83  | 6,0   | 6,0   | 18,85 | 580,11 | 59,53  |
| 2019/06/19 | CH2206 | Male | Three y/o | Control | Control | Feed Day | No | 22:40 | 22:00 - 22:59 | Night | 37,9 | 48  | 49,0  | 49,0  | 19,05 | 536,04 | 131,09 |
| 2019/06/19 | CH2205 | Male | Three y/o | Control | Control | Feed Day | No | 22:45 | 22:00 - 22:59 | Night | 37,7 | 68  | 8,8   | 8,8   | 18,85 | 564,71 | 72,43  |
| 2019/06/19 | CH2206 | Male | Three y/o | Control | Control | Feed Day | No | 22:45 | 22:00 - 22:59 | Night | 37,9 | 79  | 43,2  | 43,2  | 19,05 | 576,36 | 126,74 |
| 2019/06/19 | CH2205 | Male | Three y/o | Control | Control | Feed Day | No | 22:50 | 22:00 - 22:59 | Night | 37,7 | 84  | 4,0   | 4,0   | 18,85 | 581,01 | 45,94  |
| 2019/06/19 | CH2206 | Male | Three y/o | Control | Control | Feed Day | No | 22:50 | 22:00 - 22:59 | Night | 37,9 | 63  | 45,2  | 45,2  | 19,05 | 558,62 | 128,30 |
| 2019/06/19 | CH2205 | Male | Three y/o | Control | Control | Feed Day | No | 22:55 | 22:00 - 22:59 | Night | 37,7 | 84  | 4,0   | 4,0   | 18,85 | 581,01 | 45,94  |
| 2019/06/19 | CH2206 | Male | Three y/o | Control | Control | Feed Day | No | 22:55 | 22:00 - 22:59 | Night | 37,9 | 75  | 51,4  | 51,4  | 19,05 | 572,36 | 132,74 |
| 2019/06/19 | CH2205 | Male | Three y/o | Control | Control | Feed Day | No | 23:00 | 23:00 - 23:59 | Night | 37,7 | 49  | 8,6   | 8,6   | 18,85 | 537,80 | 71,66  |
| 2019/06/19 | CH2206 | Male | Three y/o | Control | Control | Feed Day | No | 23:00 | 23:00 - 23:59 | Night | 37,9 | 43  | 50,6  | 50,6  | 19,05 | 526,50 | 132,20 |
| 2019/06/19 | CH2205 | Male | Three y/o | Control | Control | Feed Day | No | 23:05 | 23:00 - 23:59 | Night | 37,9 | 68  | 5,4   | 5,4   | 19,05 | 564,71 | 55,99  |
| 2019/06/19 | CH2206 | Male | Three y/o | Control | Control | Feed Day | No | 23:05 | 23:00 - 23:59 | Night | 37,9 | 56  | 48,0  | 48,0  | 19,05 | 549,01 | 130,38 |
| 2019/06/19 | CH2205 | Male | Three y/o | Control | Control | Feed Day | No | 23:10 | 23:00 - 23:59 | Night | 37,9 | 79  | 7,4   | 7,4   | 19,05 | 576,36 | 66,59  |
| 2019/06/19 | CH2206 | Male | Three y/o | Control | Control | Feed Day | No | 23:10 | 23:00 - 23:59 | Night | 37,9 | 63  | 47,4  | 47,4  | 19,05 | 558,62 | 129,94 |
| 2019/06/19 | CH2205 | Male | Three y/o | Control | Control | Feed Day | No | 23:15 | 23:00 - 23:59 | Night | 37,9 | 90  | 9,0   | 9,0   | 19,05 | 586,16 | 73,19  |
| 2019/06/19 | CH2206 | Male | Three y/o | Control | Control | Feed Day | No | 23:15 | 23:00 - 23:59 | Night | 37,9 | 73  | 49,0  | 49,0  | 19,05 | 570,27 | 131,09 |
| 2019/06/19 | CH2205 | Male | Three y/o | Control | Control | Feed Day | No | 23:20 | 23:00 - 23:59 | Night | 37,9 | 101 | 16,2  | 16,2  | 19,05 | 594,59 | 93,13  |
| 2019/06/19 | CH2206 | Male | Three y/o | Control | Control | Feed Day | No | 23:20 | 23:00 - 23:59 | Night | 37,8 | 97  | 49,2  | 49,2  | 18,95 | 591,66 | 131,23 |
| 2019/06/19 | CH2205 | Male | Three y/o | Control | Control | Feed Day | No | 23:25 | 23:00 - 23:59 | Night | 37,9 | 102 | 9,8   | 9,8   | 19,05 | 595,30 | 76,07  |
| 2019/06/19 | CH2206 | Male | Three y/o | Control | Control | Feed Day | No | 23:25 | 23:00 - 23:59 | Night | 37,8 | 106 | 119,6 | 119,6 | 18,95 | 598,06 | 162,09 |
| 2019/06/19 | CH2205 | Male | Three y/o | Control | Control | Feed Day | No | 23:30 | 23:00 - 23:59 | Night | 37,6 | 93  | 12,8  | 12,8  | 18,75 | 588,58 | 85,12  |
| 2019/06/19 | CH2206 | Male | Three y/o | Control | Control | Feed Day | No | 23:30 | 23:00 - 23:59 | Night | 37,8 | 92  | 45,8  | 45,8  | 18,95 | 587,78 | 128,76 |
| 2019/06/19 | CH2205 | Male | Three y/o | Control | Control | Feed Day | No | 23:35 | 23:00 - 23:59 | Night | 37,5 | 88  | 6,0   | 6,0   | 18,65 | 584,49 | 59,53  |
| 2019/06/19 | CH2206 | Male | Three y/o | Control | Control | Feed Day | No | 23:35 | 23:00 - 23:59 | Night | 37,5 | 82  | 48,4  | 48,4  | 18,65 | 579,19 | 130,66 |
| 2019/06/19 | CH2205 | Male | Three y/o | Control | Control | Feed Day | No | 23:40 | 23:00 - 23:59 | Night | 37,5 | 75  | 5,4   | 5,4   | 18,65 | 572,36 | 55,99  |
| 2019/06/19 | CH2206 | Male | Three y/o | Control | Control | Feed Day | No | 23:40 | 23:00 - 23:59 | Night | 37,5 | 60  | 50,4  | 50,4  | 18,65 | 554,67 | 132,06 |
| 2019/06/19 | CH2205 | Male | Three y/o | Control | Control | Feed Day | No | 23:45 | 23:00 - 23:59 | Night | 37,5 | 92  | 4,6   | 4,6   | 18,65 | 587,78 | 50,61  |
| 2019/06/19 | CH2206 | Male | Three y/o | Control | Control | Feed Day | No | 23:45 | 23:00 - 23:59 | Night | 37,4 | 85  | 67,8  | 67,8  | 18,55 | 581,90 | 142,33 |
| 2019/06/19 | CH2205 | Male | Three y/o | Control | Control | Feed Day | No | 23:50 | 23:00 - 23:59 | Night | 37,4 | 92  | 8,8   | 8,8   | 18,55 | 587,78 | 72,43  |



|    |            |        |      |           |         |         |          |    |       |               |               |      |     |       |       |       |        |        |
|----|------------|--------|------|-----------|---------|---------|----------|----|-------|---------------|---------------|------|-----|-------|-------|-------|--------|--------|
|    | 2019/06/19 | CH2206 | Male | Three y/o | Control | Control | Feed Day | No | 23:50 | 23:00 - 23:59 | Night         | 37,3 | 76  | 65,6  | 65,6  | 18,46 | 573,39 | 141,19 |
|    | 2019/06/19 | CH2205 | Male | Three y/o | Control | Control | Feed Day | No | 23:55 | 23:00 - 23:59 | Night         | 37,4 | 62  | 2,8   | 2,8   | 18,55 | 557,33 | 34,04  |
|    | 2019/06/19 | CH2206 | Male | Three y/o | Control | Control | Feed Day | No | 23:55 | 23:00 - 23:59 | Night         | 37,3 | 88  | 66,8  | 66,8  | 18,46 | 584,49 | 141,81 |
| 36 | 2019/06/20 | CH2205 | Male | Three y/o | Control | Control | Feed Day | No | 00:00 | 00:00 - 00:59 | Early Morning | 37,4 | 47  | 2,2   | 2,2   | 18,55 | 534,23 | 26,02  |
|    | 2019/06/20 | CH2206 | Male | Three y/o | Control | Control | Feed Day | No | 00:00 | 00:00 - 00:59 | Early Morning | 37,3 | 77  | 65,6  | 65,6  | 18,46 | 574,39 | 141,19 |
|    | 2019/06/20 | CH2205 | Male | Three y/o | Control | Control | Feed Day | No | 00:05 | 00:00 - 00:59 | Early Morning | 37,4 | 90  | 5,4   | 5,4   | 18,55 | 586,16 | 55,99  |
|    | 2019/06/20 | CH2206 | Male | Three y/o | Control | Control | Feed Day | No | 00:05 | 00:00 - 00:59 | Early Morning | 37,3 | 51  | 66,2  | 66,2  | 18,46 | 541,20 | 141,50 |
|    | 2019/06/20 | CH2205 | Male | Three y/o | Control | Control | Feed Day | No | 00:10 | 00:00 - 00:59 | Early Morning | 37,5 | 115 | 6,6   | 6,6   | 18,65 | 603,82 | 62,73  |
|    | 2019/06/20 | CH2206 | Male | Three y/o | Control | Control | Feed Day | No | 00:10 | 00:00 - 00:59 | Early Morning | 37,3 | 93  | 57,0  | 57,0  | 18,46 | 588,58 | 136,32 |
|    | 2019/06/20 | CH2205 | Male | Three y/o | Control | Control | Feed Day | No | 00:15 | 00:00 - 00:59 | Early Morning | 37,6 | 59  | 7,6   | 7,6   | 18,75 | 553,30 | 67,49  |
|    | 2019/06/20 | CH2206 | Male | Three y/o | Control | Control | Feed Day | No | 00:15 | 00:00 - 00:59 | Early Morning | 37,4 | 79  | 53,8  | 53,8  | 18,55 | 576,36 | 134,32 |
|    | 2019/06/20 | CH2205 | Male | Three y/o | Control | Control | Feed Day | No | 00:20 | 00:00 - 00:59 | Early Morning | 37,6 | 94  | 5,4   | 5,4   | 18,75 | 589,37 | 55,99  |
|    | 2019/06/20 | CH2206 | Male | Three y/o | Control | Control | Feed Day | No | 00:20 | 00:00 - 00:59 | Early Morning | 37,4 | 92  | 52,6  | 52,6  | 18,55 | 587,78 | 133,54 |
|    | 2019/06/20 | CH2205 | Male | Three y/o | Control | Control | Feed Day | No | 00:25 | 00:00 - 00:59 | Early Morning | 37,6 | 83  | 3,6   | 3,6   | 18,75 | 580,11 | 42,42  |
|    | 2019/06/20 | CH2206 | Male | Three y/o | Control | Control | Feed Day | No | 00:25 | 00:00 - 00:59 | Early Morning | 37,4 | 90  | 54,6  | 54,6  | 18,55 | 586,16 | 134,83 |
|    | 2019/06/20 | CH2205 | Male | Three y/o | Control | Control | Feed Day | No | 00:30 | 00:00 - 00:59 | Early Morning | 37,5 | 91  | 6,0   | 6,0   | 18,65 | 586,98 | 59,53  |
|    | 2019/06/20 | CH2206 | Male | Three y/o | Control | Control | Feed Day | No | 00:30 | 00:00 - 00:59 | Early Morning | 37,4 | 92  | 64,6  | 64,6  | 18,55 | 587,78 | 140,65 |
|    | 2019/06/20 | CH2205 | Male | Three y/o | Control | Control | Feed Day | No | 00:35 | 00:00 - 00:59 | Early Morning | 37,5 | 103 | 5,0   | 5,0   | 18,65 | 596,00 | 53,41  |
|    | 2019/06/20 | CH2206 | Male | Three y/o | Control | Control | Feed Day | No | 00:35 | 00:00 - 00:59 | Early Morning | 37,5 | 86  | 66,0  | 66,0  | 18,65 | 582,77 | 141,40 |
|    | 2019/06/20 | CH2205 | Male | Three y/o | Control | Control | Feed Day | No | 00:40 | 00:00 - 00:59 | Early Morning | 37,5 | 69  | 7,4   | 7,4   | 18,65 | 565,86 | 66,59  |
|    | 2019/06/20 | CH2206 | Male | Three y/o | Control | Control | Feed Day | No | 00:40 | 00:00 - 00:59 | Early Morning | 37,5 | 64  | 65,6  | 65,6  | 18,65 | 559,88 | 141,19 |
|    | 2019/06/20 | CH2205 | Male | Three y/o | Control | Control | Feed Day | No | 00:45 | 00:00 - 00:59 | Early Morning | 37,6 | 96  | 5,6   | 5,6   | 18,75 | 590,91 | 57,21  |
|    | 2019/06/20 | CH2206 | Male | Three y/o | Control | Control | Feed Day | No | 00:45 | 00:00 - 00:59 | Early Morning | 37,5 | 45  | 64,4  | 64,4  | 18,65 | 530,47 | 140,55 |
|    | 2019/06/20 | CH2205 | Male | Three y/o | Control | Control | Feed Day | No | 00:50 | 00:00 - 00:59 | Early Morning | 37,6 | 55  | 2,8   | 2,8   | 18,75 | 547,52 | 34,04  |
|    | 2019/06/20 | CH2206 | Male | Three y/o | Control | Control | Feed Day | No | 00:50 | 00:00 - 00:59 | Early Morning | 37,5 | 83  | 66,2  | 66,2  | 18,65 | 580,11 | 141,50 |
|    | 2019/06/20 | CH2205 | Male | Three y/o | Control | Control | Feed Day | No | 00:55 | 00:00 - 00:59 | Early Morning | 37,6 | 73  | 2,8   | 2,8   | 18,75 | 570,27 | 34,04  |
|    | 2019/06/20 | CH2206 | Male | Three y/o | Control | Control | Feed Day | No | 00:55 | 00:00 - 00:59 | Early Morning | 37,5 | 77  | 63,6  | 63,6  | 18,65 | 574,39 | 140,11 |
|    | 2019/06/20 | CH2205 | Male | Three y/o | Control | Control | Feed Day | No | 01:00 | 01:00 - 01:59 | Early Morning | 37,6 | 44  | 114,4 | 114,4 | 18,75 | 528,51 | 160,54 |
|    | 2019/06/20 | CH2206 | Male | Three y/o | Control | Control | Feed Day | No | 01:00 | 01:00 - 01:59 | Early Morning | 37,5 | 67  | 38,0  | 38,0  | 18,65 | 563,53 | 122,32 |
|    | 2019/06/20 | CH2205 | Male | Three y/o | Control | Control | Feed Day | No | 01:05 | 01:00 - 01:59 | Early Morning | 37,7 | 94  | 7,4   | 7,4   | 18,85 | 589,37 | 66,59  |
|    | 2019/06/20 | CH2206 | Male | Three y/o | Control | Control | Feed Day | No | 01:05 | 01:00 - 01:59 | Early Morning | 37,5 | 89  | 29,4  | 29,4  | 18,65 | 585,33 | 113,50 |
|    | 2019/06/20 | CH2205 | Male | Three y/o | Control | Control | Feed Day | No | 01:10 | 01:00 - 01:59 | Early Morning | 37,6 | 85  | 3,0   | 3,0   | 18,75 | 581,90 | 36,34  |
|    | 2019/06/20 | CH2206 | Male | Three y/o | Control | Control | Feed Day | No | 01:10 | 01:00 - 01:59 | Early Morning | 37,5 | 48  | 27,8  | 27,8  | 18,65 | 536,04 | 111,58 |
|    | 2019/06/20 | CH2205 | Male | Three y/o | Control | Control | Feed Day | No | 01:15 | 01:00 - 01:59 | Early Morning | 37,6 | 49  | 4,4   | 4,4   | 18,75 | 537,80 | 49,12  |
|    | 2019/06/20 | CH2206 | Male | Three y/o | Control | Control | Feed Day | No | 01:15 | 01:00 - 01:59 | Early Morning | 37,5 | 102 | 24,8  | 24,8  | 18,65 | 595,30 | 107,67 |
|    | 2019/06/20 | CH2205 | Male | Three y/o | Control | Control | Feed Day | No | 01:20 | 01:00 - 01:59 | Early Morning | 37,6 | 90  | 4,6   | 4,6   | 18,75 | 586,16 | 50,61  |
|    | 2019/06/20 | CH2206 | Male | Three y/o | Control | Control | Feed Day | No | 01:20 | 01:00 - 01:59 | Early Morning | 37,5 | 77  | 23,8  | 23,8  | 18,65 | 574,39 | 106,26 |
|    | 2019/06/20 | CH2205 | Male | Three y/o | Control | Control | Feed Day | No | 01:25 | 01:00 - 01:59 | Early Morning | 37,6 | 70  | 11,0  | 11,0  | 18,75 | 566,99 | 79,98  |
|    | 2019/06/20 | CH2206 | Male | Three y/o | Control | Control | Feed Day | No | 01:25 | 01:00 - 01:59 | Early Morning | 37,4 | 86  | 22,0  | 22,0  | 18,55 | 582,77 | 103,57 |
|    | 2019/06/20 | CH2205 | Male | Three y/o | Control | Control | Feed Day | No | 01:30 | 01:00 - 01:59 | Early Morning | 37,6 | 55  | 9,8   | 9,8   | 18,75 | 547,52 | 76,07  |
|    | 2019/06/20 | CH2206 | Male | Three y/o | Control | Control | Feed Day | No | 01:30 | 01:00 - 01:59 | Early Morning | 37,5 | 50  | 18,4  | 18,4  | 18,65 | 539,52 | 97,47  |
|    | 2019/06/20 | CH2205 | Male | Three y/o | Control | Control | Feed Day | No | 01:35 | 01:00 - 01:59 | Early Morning | 37,6 | 56  | 9,4   | 9,4   | 18,75 | 549,01 | 74,66  |
|    | 2019/06/20 | CH2206 | Male | Three y/o | Control | Control | Feed Day | No | 01:35 | 01:00 - 01:59 | Early Morning | 37,5 | 80  | 20,2  | 20,2  | 18,65 | 577,31 | 100,65 |
|    | 2019/06/20 | CH2205 | Male | Three y/o | Control | Control | Feed Day | No | 01:40 | 01:00 - 01:59 | Early Morning | 37,6 | 63  | 5,6   | 5,6   | 18,75 | 558,62 | 57,21  |
|    | 2019/06/20 | CH2206 | Male | Three y/o | Control | Control | Feed Day | No | 01:40 | 01:00 - 01:59 | Early Morning | 37,5 | 67  | 5,8   | 5,8   | 18,65 | 563,53 | 58,39  |
|    | 2019/06/20 | CH2205 | Male | Three y/o | Control | Control | Feed Day | No | 01:45 | 01:00 - 01:59 | Early Morning | 37,6 | 58  | 9,2   | 9,2   | 18,75 | 551,90 | 73,94  |
|    | 2019/06/20 | CH2206 | Male | Three y/o | Control | Control | Feed Day | No | 01:45 | 01:00 - 01:59 | Early Morning | 37,5 | 46  | 10,6  | 10,6  | 18,65 | 532,38 | 78,73  |
|    | 2019/06/20 | CH2205 | Male | Three y/o | Control | Control | Feed Day | No | 01:50 | 01:00 - 01:59 | Early Morning | 37,6 | 66  | 6,4   | 6,4   | 18,75 | 562,34 | 61,70  |
|    | 2019/06/20 | CH2206 | Male | Three y/o | Control | Control | Feed Day | No | 01:50 | 01:00 - 01:59 | Early Morning | 37,4 | 94  | 10,6  | 10,6  | 18,55 | 589,37 | 78,73  |
|    | 2019/06/20 | CH2205 | Male | Three y/o | Control | Control | Feed Day | No | 01:55 | 01:00 - 01:59 | Early Morning | 37,6 | 112 | 8,4   | 8,4   | 18,75 | 601,96 | 70,86  |
|    | 2019/06/20 | CH2206 | Male | Three y/o | Control | Control | Feed Day | No | 01:55 | 01:00 - 01:59 | Early Morning | 37,4 | 117 | 57,2  | 57,2  | 18,55 | 605,02 | 136,44 |
|    | 2019/06/20 | CH2205 | Male | Three y/o | Control | Control | Feed Day | No | 02:00 | 02:00 - 02:59 | Early Morning | 37,6 | 57  | 3,8   | 3,8   | 18,75 | 550,47 | 44,22  |
|    | 2019/06/20 | CH2206 | Male | Three y/o | Control | Control | Feed Day | No | 02:00 | 02:00 - 02:59 | Early Morning | 37,3 | 88  | 59,4  | 59,4  | 18,46 | 584,49 | 137,75 |
|    | 2019/06/20 | CH2205 | Male | Three y/o | Control | Control | Feed Day | No | 02:05 | 02:00 - 02:59 | Early Morning | 37,6 | 80  | 4,8   | 4,8   | 18,75 | 577,31 | 52,04  |
|    | 2019/06/20 | CH2206 | Male | Three y/o | Control | Control | Feed Day | No | 02:05 | 02:00 - 02:59 | Early Morning | 37,3 | 69  | 59,8  | 59,8  | 18,46 | 565,86 | 137,98 |
|    | 2019/06/20 | CH2205 | Male | Three y/o | Control | Control | Feed Day | No | 02:10 | 02:00 - 02:59 | Early Morning | 37,6 | 88  | 3,6   | 3,6   | 18,75 | 584,49 | 42,42  |
|    | 2019/06/20 | CH2206 | Male | Three y/o | Control | Control | Feed Day | No | 02:10 | 02:00 - 02:59 | Early Morning | 37,3 | 45  | 53,8  | 53,8  | 18,46 | 530,47 | 134,32 |
|    | 2019/06/20 | CH2205 | Male | Three y/o | Control | Control | Feed Day | No | 02:15 | 02:00 - 02:59 | Early Morning | 37,6 | 154 | 4,4   | 4,4   | 18,75 | 623,58 | 49,12  |
|    | 2019/06/20 | CH2206 | Male | Three y/o | Control | Control | Feed Day | No | 02:15 | 02:00 - 02:59 | Early Morning | 37,3 | 75  | 55,2  | 55,2  | 18,46 | 572,36 | 135,21 |
|    | 2019/06/20 | CH2205 | Male | Three y/o | Control | Control | Feed Day | No | 02:20 | 02:00 - 02:59 | Early Morning | 37,5 | 54  | 13,2  | 13,2  | 18,65 | 545,99 | 86,17  |
|    | 2019/06/20 | CH2206 | Male | Three y/o | Control | Control | Feed Day | No | 02:20 | 02:00 - 02:59 | Early Morning | 37,3 | 57  | 59,6  | 59,6  | 18,46 | 550,47 | 137,86 |
|    | 2019/06/20 | CH2205 | Male | Three y/o | Control | Control | Feed Day | No | 02:25 | 02:00 - 02:59 | Early Morning | 37,5 | 57  | 3,0   | 3,0   | 18,65 | 550,47 | 36,34  |
|    | 2019/06/20 | CH2206 | Male | Three y/o | Control | Control | Feed Day | No | 02:25 | 02:00 - 02:59 | Early Morning | 37,3 | 56  | 53,6  | 53,6  | 18,46 | 549,01 | 134,19 |
|    | 2019/06/20 | CH2205 | Male | Three y/o | Control | Control | Feed Day | No | 02:30 | 02:00 - 02:59 | Early Morning | 37,4 | 94  | 5,0   | 5,0   | 18,55 | 589,37 | 53,41  |
|    | 2019/06/20 | CH2206 | Male | Three y/o | Control | Control | Feed Day | No | 02:30 | 02:00 - 02:59 | Early Morning | 37,3 |     | 68,8  | 68,8  | 18,46 |        | 142,84 |
|    | 2019/06/20 | CH2205 | Male | Three y/o | Control | Control | Feed Day | No | 02:35 | 02:00 - 02:59 | Early Morning | 37,4 | 73  | 29,8  | 29,8  | 18,55 | 570,27 | 113,97 |
|    | 2019/06/20 | CH2206 | Male | Three y/o | Control | Control | Feed Day | No | 02:35 | 02:00 - 02:59 | Early Morning | 37,4 | 108 | 43,0  | 43,0  | 18,55 | 599,39 | 126,58 |
|    | 2019/06/20 | CH2205 | Male | Three y/o | Control | Control | Feed Day | No | 02:40 | 02:00 - 02:59 | Early Morning | 37,4 | 104 | 9,0   | 9,0   | 18,55 | 596,69 | 73,19  |
|    | 2019/06/20 | CH2206 | Male | Three y/o | Control | Control | Feed Day | No | 02:40 | 02:00 - 02:59 | Early Morning | 37,4 | 105 | 110,6 | 110,6 | 18,55 | 597,38 | 159,36 |
|    | 2019/06/20 | CH2205 | Male | Three y/o | Control | Control | Feed Day | No | 02:45 | 02:00 - 02:59 | Early Morning | 37,4 | 66  | 254,2 | 254,2 | 18,55 | 562,34 | 188,57 |



|            |        |      |           |         |         |          |    |       |               |               |      |     |       |       |       |        |        |
|------------|--------|------|-----------|---------|---------|----------|----|-------|---------------|---------------|------|-----|-------|-------|-------|--------|--------|
| 2019/06/20 | CH2206 | Male | Three y/o | Control | Control | Feed Day | No | 02:45 | 02:00 - 02:59 | Early Morning | 37,4 | 132 | 110,8 | 110,8 | 18,55 | 613,32 | 159,42 |
| 2019/06/20 | CH2205 | Male | Three y/o | Control | Control | Feed Day | No | 02:50 | 02:00 - 02:59 | Early Morning | 37,4 | 87  | 86,2  | 86,2  | 18,55 | 583,64 | 150,67 |
| 2019/06/20 | CH2206 | Male | Three y/o | Control | Control | Feed Day | No | 02:50 | 02:00 - 02:59 | Early Morning | 37,4 | 131 | 107,6 | 107,6 | 18,55 | 612,80 | 158,40 |
| 2019/06/20 | CH2205 | Male | Three y/o | Control | Control | Feed Day | No | 02:55 | 02:00 - 02:59 | Early Morning | 37,5 | 53  | 67,2  | 67,2  | 18,65 | 544,43 | 142,02 |
| 2019/06/20 | CH2206 | Male | Three y/o | Control | Control | Feed Day | No | 02:55 | 02:00 - 02:59 | Early Morning | 37,5 | 57  | 88,6  | 88,6  | 18,65 | 550,47 | 151,63 |
| 2019/06/20 | CH2205 | Male | Three y/o | Control | Control | Feed Day | No | 03:00 | 03:00 - 03:59 | Early Morning | 37,5 | 106 | 104,8 | 104,8 | 18,65 | 598,06 | 157,48 |
| 2019/06/20 | CH2206 | Male | Three y/o | Control | Control | Feed Day | No | 03:00 | 03:00 - 03:59 | Early Morning | 37,5 | 101 | 56,2  | 56,2  | 18,65 | 594,59 | 135,83 |
| 2019/06/20 | CH2205 | Male | Three y/o | Control | Control | Feed Day | No | 03:05 | 03:00 - 03:59 | Early Morning | 37,6 | 119 | 154,0 | 154,0 | 18,75 | 606,20 | 170,94 |
| 2019/06/20 | CH2206 | Male | Three y/o | Control | Control | Feed Day | No | 03:05 | 03:00 - 03:59 | Early Morning | 37,5 |     | 82,4  | 82,4  | 18,65 |        | 149,10 |
| 2019/06/20 | CH2205 | Male | Three y/o | Control | Control | Feed Day | No | 03:10 | 03:00 - 03:59 | Early Morning | 37,6 | 84  | 15,0  | 15,0  | 18,75 | 581,01 | 90,51  |
| 2019/06/20 | CH2206 | Male | Three y/o | Control | Control | Feed Day | No | 03:10 | 03:00 - 03:59 | Early Morning | 37,5 | 138 | 96,0  | 96,0  | 18,65 | 616,31 | 154,42 |
| 2019/06/20 | CH2205 | Male | Three y/o | Control | Control | Feed Day | No | 03:15 | 03:00 - 03:59 | Early Morning | 37,6 |     | 10,6  | 10,6  | 18,75 |        | 78,73  |
| 2019/06/20 | CH2206 | Male | Three y/o | Control | Control | Feed Day | No | 03:15 | 03:00 - 03:59 | Early Morning | 37,5 | 69  | 57,6  | 57,6  | 18,65 | 565,86 | 136,68 |
| 2019/06/20 | CH2205 | Male | Three y/o | Control | Control | Feed Day | No | 03:20 | 03:00 - 03:59 | Early Morning | 37,5 |     | 10,0  | 10,0  | 18,65 |        | 76,76  |
| 2019/06/20 | CH2206 | Male | Three y/o | Control | Control | Feed Day | No | 03:20 | 03:00 - 03:59 | Early Morning | 37,5 | 94  | 64,2  | 64,2  | 18,65 | 589,37 | 140,44 |
| 2019/06/20 | CH2205 | Male | Three y/o | Control | Control | Feed Day | No | 03:25 | 03:00 - 03:59 | Early Morning | 37,4 |     | 33,2  | 33,2  | 18,55 |        | 117,68 |
| 2019/06/20 | CH2206 | Male | Three y/o | Control | Control | Feed Day | No | 03:25 | 03:00 - 03:59 | Early Morning | 37,3 | 51  | 56,6  | 56,6  | 18,46 | 541,20 | 136,07 |
| 2019/06/20 | CH2205 | Male | Three y/o | Control | Control | Feed Day | No | 03:30 | 03:00 - 03:59 | Early Morning | 37,5 | 106 | 42,6  | 42,6  | 18,65 | 598,06 | 126,26 |
| 2019/06/20 | CH2206 | Male | Three y/o | Control | Control | Feed Day | No | 03:30 | 03:00 - 03:59 | Early Morning | 37,3 | 117 | 166,2 | 166,2 | 18,46 | 605,02 | 173,61 |
| 2019/06/20 | CH2205 | Male | Three y/o | Control | Control | Feed Day | No | 03:35 | 03:00 - 03:59 | Early Morning | 37,6 | 61  | 277,8 | 277,8 | 18,75 | 556,01 | 191,70 |
| 2019/06/20 | CH2206 | Male | Three y/o | Control | Control | Feed Day | No | 03:35 | 03:00 - 03:59 | Early Morning | 37,4 |     | 38,0  | 38,0  | 18,55 |        | 122,32 |
| 2019/06/20 | CH2205 | Male | Three y/o | Control | Control | Feed Day | No | 03:40 | 03:00 - 03:59 | Early Morning | 37,7 |     | 137,2 | 137,2 | 18,85 |        | 166,89 |
| 2019/06/20 | CH2206 | Male | Three y/o | Control | Control | Feed Day | No | 03:40 | 03:00 - 03:59 | Early Morning | 37,5 | 138 | 194,2 | 194,2 | 18,65 | 616,31 | 179,08 |
| 2019/06/20 | CH2205 | Male | Three y/o | Control | Control | Feed Day | No | 03:45 | 03:00 - 03:59 | Early Morning | 37,7 |     | 150,6 | 150,6 | 18,85 |        | 170,16 |
| 2019/06/20 | CH2206 | Male | Three y/o | Control | Control | Feed Day | No | 03:45 | 03:00 - 03:59 | Early Morning | 37,5 | 90  | 21,2  | 21,2  | 18,65 | 586,16 | 102,31 |
| 2019/06/20 | CH2205 | Male | Three y/o | Control | Control | Feed Day | No | 03:50 | 03:00 - 03:59 | Early Morning | 37,7 | 76  | 10,2  | 10,2  | 18,85 | 573,39 | 77,43  |
| 2019/06/20 | CH2206 | Male | Three y/o | Control | Control | Feed Day | No | 03:50 | 03:00 - 03:59 | Early Morning | 37,3 | 72  | 26,8  | 26,8  | 18,46 | 569,20 | 110,33 |
| 2019/06/20 | CH2205 | Male | Three y/o | Control | Control | Feed Day | No | 03:55 | 03:00 - 03:59 | Early Morning | 37,5 |     | 90,6  | 90,6  | 18,65 |        | 152,40 |
| 2019/06/20 | CH2206 | Male | Three y/o | Control | Control | Feed Day | No | 03:55 | 03:00 - 03:59 | Early Morning | 37,3 | 114 | 214,8 | 214,8 | 18,46 | 603,20 | 182,63 |
| 2019/06/20 | CH2205 | Male | Three y/o | Control | Control | Feed Day | No | 04:00 | 04:00 - 04:59 | Morning       | 37,6 | 148 | 565,2 | 565,2 | 18,75 | 620,97 | 216,91 |
| 2019/06/20 | CH2206 | Male | Three y/o | Control | Control | Feed Day | No | 04:00 | 04:00 - 04:59 | Morning       | 37,4 | 129 | 294,0 | 294,0 | 18,55 | 611,75 | 193,71 |
| 2019/06/20 | CH2205 | Male | Three y/o | Control | Control | Feed Day | No | 04:05 | 04:00 - 04:59 | Morning       | 37,7 |     | 13,0  | 13,0  | 18,85 |        | 85,65  |
| 2019/06/20 | CH2206 | Male | Three y/o | Control | Control | Feed Day | No | 04:05 | 04:00 - 04:59 | Morning       | 37,5 |     | 40,6  | 40,6  | 18,65 |        | 124,60 |
| 2019/06/20 | CH2205 | Male | Three y/o | Control | Control | Feed Day | No | 04:10 | 04:00 - 04:59 | Morning       | 37,6 | 101 | 12,4  | 12,4  | 18,75 | 594,59 | 84,04  |
| 2019/06/20 | CH2206 | Male | Three y/o | Control | Control | Feed Day | No | 04:10 | 04:00 - 04:59 | Morning       | 37,4 | 70  | 43,0  | 43,0  | 18,55 | 566,99 | 126,58 |
| 2019/06/20 | CH2205 | Male | Three y/o | Control | Control | Feed Day | No | 04:15 | 04:00 - 04:59 | Morning       | 37,6 | 65  | 15,0  | 15,0  | 18,75 | 561,12 | 90,51  |
| 2019/06/20 | CH2206 | Male | Three y/o | Control | Control | Feed Day | No | 04:15 | 04:00 - 04:59 | Morning       | 37,1 | 52  | 41,8  | 41,8  | 18,26 | 542,83 | 125,60 |
| 2019/06/20 | CH2205 | Male | Three y/o | Control | Control | Feed Day | No | 04:20 | 04:00 - 04:59 | Morning       | 37,6 |     | 16,2  | 16,2  | 18,75 |        | 93,13  |
| 2019/06/20 | CH2206 | Male | Three y/o | Control | Control | Feed Day | No | 04:20 | 04:00 - 04:59 | Morning       | 36,9 | 77  | 28,0  | 28,0  | 18,06 | 574,39 | 111,83 |
| 2019/06/20 | CH2205 | Male | Three y/o | Control | Control | Feed Day | No | 04:25 | 04:00 - 04:59 | Morning       | 37,5 | 45  | 16,6  | 16,6  | 18,65 | 530,47 | 93,96  |
| 2019/06/20 | CH2206 | Male | Three y/o | Control | Control | Feed Day | No | 04:25 | 04:00 - 04:59 | Morning       | 36,8 | 48  | 26,6  | 26,6  | 17,96 | 536,04 | 110,07 |
| 2019/06/20 | CH2205 | Male | Three y/o | Control | Control | Feed Day | No | 04:30 | 04:00 - 04:59 | Morning       | 37,5 | 69  | 21,2  | 21,2  | 18,65 | 565,86 | 102,31 |
| 2019/06/20 | CH2206 | Male | Three y/o | Control | Control | Feed Day | No | 04:30 | 04:00 - 04:59 | Morning       | 36,6 | 76  | 29,4  | 29,4  | 17,77 | 573,39 | 113,50 |
| 2019/06/20 | CH2205 | Male | Three y/o | Control | Control | Feed Day | No | 04:35 | 04:00 - 04:59 | Morning       | 37,5 | 69  | 18,6  | 18,6  | 18,65 | 565,86 | 97,84  |
| 2019/06/20 | CH2206 | Male | Three y/o | Control | Control | Feed Day | No | 04:35 | 04:00 - 04:59 | Morning       | 37,2 | 47  | 34,4  | 34,4  | 18,36 | 534,23 | 118,90 |
| 2019/06/20 | CH2205 | Male | Three y/o | Control | Control | Feed Day | No | 04:40 | 04:00 - 04:59 | Morning       | 37,5 | 50  | 17,0  | 17,0  | 18,65 | 539,52 | 94,77  |
| 2019/06/20 | CH2206 | Male | Three y/o | Control | Control | Feed Day | No | 04:40 | 04:00 - 04:59 | Morning       | 37,3 | 51  | 28,6  | 28,6  | 18,46 | 541,20 | 112,56 |
| 2019/06/20 | CH2205 | Male | Three y/o | Control | Control | Feed Day | No | 04:45 | 04:00 - 04:59 | Morning       | 37,5 | 46  | 18,2  | 18,2  | 18,65 | 532,38 | 97,10  |
| 2019/06/20 | CH2206 | Male | Three y/o | Control | Control | Feed Day | No | 04:45 | 04:00 - 04:59 | Morning       | 37,3 |     | 39,8  | 39,8  | 18,46 |        | 123,91 |
| 2019/06/20 | CH2205 | Male | Three y/o | Control | Control | Feed Day | No | 04:50 | 04:00 - 04:59 | Morning       | 37,5 | 67  | 18,0  | 18,0  | 18,65 | 563,53 | 96,72  |
| 2019/06/20 | CH2206 | Male | Three y/o | Control | Control | Feed Day | No | 04:50 | 04:00 - 04:59 | Morning       | 37,3 | 49  | 37,8  | 37,8  | 18,46 | 537,80 | 122,14 |
| 2019/06/20 | CH2205 | Male | Three y/o | Control | Control | Feed Day | No | 04:55 | 04:00 - 04:59 | Morning       | 37,5 | 48  | 21,0  | 21,0  | 18,65 | 536,04 | 101,98 |
| 2019/06/20 | CH2206 | Male | Three y/o | Control | Control | Feed Day | No | 04:55 | 04:00 - 04:59 | Morning       | 37,3 |     | 33,4  | 33,4  | 18,46 |        | 117,88 |
| 2019/06/20 | CH2205 | Male | Three y/o | Control | Control | Feed Day | No | 05:00 | 05:00 - 05:59 | Morning       | 37,5 | 76  | 32,0  | 32,0  | 18,65 | 573,39 | 116,41 |
| 2019/06/20 | CH2206 | Male | Three y/o | Control | Control | Feed Day | No | 05:00 | 05:00 - 05:59 | Morning       | 37,3 | 65  | 35,0  | 35,0  | 18,46 | 561,12 | 119,49 |
| 2019/06/20 | CH2205 | Male | Three y/o | Control | Control | Feed Day | No | 05:05 | 05:00 - 05:59 | Morning       | 37,5 | 47  | 9,8   | 9,8   | 18,65 | 534,23 | 76,07  |
| 2019/06/20 | CH2206 | Male | Three y/o | Control | Control | Feed Day | No | 05:05 | 05:00 - 05:59 | Morning       | 37,2 | 42  | 40,0  | 40,0  | 18,36 | 524,42 | 124,09 |
| 2019/06/20 | CH2205 | Male | Three y/o | Control | Control | Feed Day | No | 05:10 | 05:00 - 05:59 | Morning       | 37,4 | 72  | 8,0   | 8,0   | 18,55 | 569,20 | 69,22  |
| 2019/06/20 | CH2206 | Male | Three y/o | Control | Control | Feed Day | No | 05:10 | 05:00 - 05:59 | Morning       | 37,2 | 55  | 37,2  | 37,2  | 18,36 | 547,52 | 121,59 |
| 2019/06/20 | CH2205 | Male | Three y/o | Control | Control | Feed Day | No | 05:15 | 05:00 - 05:59 | Morning       | 37,4 | 78  | 7,4   | 7,4   | 18,55 | 575,38 | 66,59  |
| 2019/06/20 | CH2206 | Male | Three y/o | Control | Control | Feed Day | No | 05:15 | 05:00 - 05:59 | Morning       | 37,2 | 49  | 39,2  | 39,2  | 18,36 | 537,80 | 123,39 |
| 2019/06/20 | CH2205 | Male | Three y/o | Control | Control | Feed Day | No | 05:20 | 05:00 - 05:59 | Morning       | 37,4 | 80  | 12,0  | 12,0  | 18,55 | 577,31 | 82,93  |
| 2019/06/20 | CH2206 | Male | Three y/o | Control | Control | Feed Day | No | 05:20 | 05:00 - 05:59 | Morning       | 37,2 | 53  | 35,6  | 35,6  | 18,36 | 544,43 | 120,08 |
| 2019/06/20 | CH2205 | Male | Three y/o | Control | Control | Feed Day | No | 05:25 | 05:00 - 05:59 | Morning       | 37,4 | 74  | 16,8  | 16,8  | 18,55 | 571,33 | 94,37  |
| 2019/06/20 | CH2206 | Male | Three y/o | Control | Control | Feed Day | No | 05:25 | 05:00 - 05:59 | Morning       | 37,2 | 70  | 32,4  | 32,4  | 18,36 | 566,99 | 116,84 |
| 2019/06/20 | CH2205 | Male | Three y/o | Control | Control | Feed Day | No | 05:30 | 05:00 - 05:59 | Morning       | 37,4 | 48  | 16,6  | 16,6  | 18,55 | 536,04 | 93,96  |
| 2019/06/20 | CH2206 | Male | Three y/o | Control | Control | Feed Day | No | 05:30 | 05:00 - 05:59 | Morning       | 37,2 | 71  | 34,2  | 34,2  | 18,36 | 568,10 | 118,70 |
| 2019/06/20 | CH2205 | Male | Three y/o | Control | Control | Feed Day | No | 05:35 | 05:00 - 05:59 | Morning       | 37,4 | 61  | 11,6  | 11,6  | 18,55 | 556,01 | 81,78  |
| 2019/06/20 | CH2206 | Male | Three y/o | Control | Control | Feed Day | No | 05:35 | 05:00 - 05:59 | Morning       | 37,2 | 53  | 22,2  | 22,2  | 18,36 | 544,43 | 103,88 |
| 2019/06/20 | CH2205 | Male | Three y/o | Control | Control | Feed Day | No | 05:40 | 05:00 - 05:59 | Morning       | 37,4 | 67  | 15,0  | 15,0  | 18,55 | 563,53 | 90,51  |



|            |        |      |           |         |         |          |    |       |               |              |      |     |       |       |       |        |        |
|------------|--------|------|-----------|---------|---------|----------|----|-------|---------------|--------------|------|-----|-------|-------|-------|--------|--------|
| 2019/06/20 | CH2206 | Male | Three y/o | Control | Control | Feed Day | No | 05:40 | 05:00 - 05:59 | Morning      | 37,2 | 74  | 31,2  | 31,2  | 18,36 | 571,33 | 115,54 |
| 2019/06/20 | CH2205 | Male | Three y/o | Control | Control | Feed Day | No | 05:45 | 05:00 - 05:59 | Morning      | 37,4 | 75  | 10,8  | 10,8  | 18,55 | 572,36 | 79,36  |
| 2019/06/20 | CH2206 | Male | Three y/o | Control | Control | Feed Day | No | 05:45 | 05:00 - 05:59 | Morning      | 37,2 | 70  | 44,6  | 44,6  | 18,36 | 566,99 | 127,84 |
| 2019/06/20 | CH2205 | Male | Three y/o | Control | Control | Feed Day | No | 05:50 | 05:00 - 05:59 | Morning      | 37,3 | 76  | 8,2   | 8,2   | 18,46 | 573,39 | 70,05  |
| 2019/06/20 | CH2206 | Male | Three y/o | Control | Control | Feed Day | No | 05:50 | 05:00 - 05:59 | Morning      | 37,2 | 75  | 46,0  | 46,0  | 18,36 | 572,36 | 128,91 |
| 2019/06/20 | CH2205 | Male | Three y/o | Control | Control | Feed Day | No | 05:55 | 05:00 - 05:59 | Morning      | 37,3 |     | 7,6   | 7,6   | 18,46 |        | 67,49  |
| 2019/06/20 | CH2206 | Male | Three y/o | Control | Control | Feed Day | No | 05:55 | 05:00 - 05:59 | Morning      | 37,2 | 54  | 48,8  | 48,8  | 18,36 | 545,99 | 130,95 |
| 2019/06/20 | CH2205 | Male | Three y/o | Control | Control | Feed Day | No | 06:00 | 06:00 - 06:59 | Morning      | 37,2 |     | 11,2  | 11,2  | 18,36 |        | 80,59  |
| 2019/06/20 | CH2206 | Male | Three y/o | Control | Control | Feed Day | No | 06:00 | 06:00 - 06:59 | Morning      | 37,2 | 73  | 65,6  | 65,6  | 18,36 | 570,27 | 141,19 |
| 2019/06/20 | CH2205 | Male | Three y/o | Control | Control | Feed Day | No | 06:05 | 06:00 - 06:59 | Morning      | 37,2 | 48  | 5,4   | 5,4   | 18,36 | 536,04 | 55,99  |
| 2019/06/20 | CH2206 | Male | Three y/o | Control | Control | Feed Day | No | 06:05 | 06:00 - 06:59 | Morning      | 37,2 | 51  | 91,0  | 91,0  | 18,36 | 541,20 | 152,56 |
| 2019/06/20 | CH2205 | Male | Three y/o | Control | Control | Feed Day | No | 06:10 | 06:00 - 06:59 | Morning      | 37,1 |     | 7,8   | 7,8   | 18,26 |        | 68,36  |
| 2019/06/20 | CH2206 | Male | Three y/o | Control | Control | Feed Day | No | 06:10 | 06:00 - 06:59 | Morning      | 37,2 | 51  | 39,2  | 39,2  | 18,36 | 541,20 | 123,39 |
| 2019/06/20 | CH2205 | Male | Three y/o | Control | Control | Feed Day | No | 06:15 | 06:00 - 06:59 | Morning      | 37,1 | 124 | 18,0  | 18,0  | 18,26 | 609,04 | 96,72  |
| 2019/06/20 | CH2206 | Male | Three y/o | Control | Control | Feed Day | No | 06:15 | 06:00 - 06:59 | Morning      | 37,1 | 131 | 54,8  | 54,8  | 18,26 | 612,80 | 134,96 |
| 2019/06/20 | CH2205 | Male | Three y/o | Control | Control | Feed Day | No | 06:20 | 06:00 - 06:59 | Morning      | 37,3 | 115 | 114,2 | 114,2 | 18,46 | 603,82 | 160,48 |
| 2019/06/20 | CH2206 | Male | Three y/o | Control | Control | Feed Day | No | 06:20 | 06:00 - 06:59 | Morning      | 37,2 | 75  | 56,4  | 56,4  | 18,36 | 572,36 | 135,95 |
| 2019/06/20 | CH2205 | Male | Three y/o | Control | Control | Feed Day | No | 06:25 | 06:00 - 06:59 | Morning      | 37,4 | 39  | 102,6 | 102,6 | 18,55 | 517,82 | 156,74 |
| 2019/06/20 | CH2206 | Male | Three y/o | Control | Control | Feed Day | No | 06:25 | 06:00 - 06:59 | Morning      | 37,1 | 154 | 152,6 | 152,6 | 18,26 | 623,58 | 170,62 |
| 2019/06/20 | CH2205 | Male | Three y/o | Control | Control | Feed Day | No | 06:30 | 06:00 - 06:59 | Morning      | 37,4 | 93  | 92,6  | 92,6  | 18,55 | 588,58 | 153,16 |
| 2019/06/20 | CH2206 | Male | Three y/o | Control | Control | Feed Day | No | 06:30 | 06:00 - 06:59 | Morning      | 37,2 | 185 | 100,2 | 100,2 | 18,36 | 635,34 | 155,91 |
| 2019/06/20 | CH2205 | Male | Three y/o | Control | Control | Feed Day | No | 06:35 | 06:00 - 06:59 | Morning      | 37,5 | 57  | 96,8  | 96,8  | 18,65 | 550,47 | 154,71 |
| 2019/06/20 | CH2206 | Male | Three y/o | Control | Control | Feed Day | No | 06:35 | 06:00 - 06:59 | Morning      | 37,3 | 121 | 97,2  | 97,2  | 18,46 | 607,35 | 154,85 |
| 2019/06/20 | CH2205 | Male | Three y/o | Control | Control | Feed Day | No | 06:40 | 06:00 - 06:59 | Morning      | 37,5 | 117 | 151,2 | 151,2 | 18,65 | 605,02 | 170,30 |
| 2019/06/20 | CH2206 | Male | Three y/o | Control | Control | Feed Day | No | 06:40 | 06:00 - 06:59 | Morning      | 37,4 |     | 118,8 | 118,8 | 18,55 |        | 161,86 |
| 2019/06/20 | CH2205 | Male | Three y/o | Control | Control | Feed Day | No | 06:45 | 06:00 - 06:59 | Morning      | 37,6 | 111 | 149,8 | 149,8 | 18,75 | 601,33 | 169,97 |
| 2019/06/20 | CH2206 | Male | Three y/o | Control | Control | Feed Day | No | 06:45 | 06:00 - 06:59 | Morning      | 37,5 | 132 | 52,0  | 52,0  | 18,65 | 613,32 | 133,14 |
| 2019/06/20 | CH2205 | Male | Three y/o | Control | Control | Feed Day | No | 06:50 | 06:00 - 06:59 | Morning      | 37,5 | 113 | 399,2 | 399,2 | 18,65 | 602,58 | 204,54 |
| 2019/06/20 | CH2206 | Male | Three y/o | Control | Control | Feed Day | No | 06:50 | 06:00 - 06:59 | Morning      | 37,5 | 126 | 85,4  | 85,4  | 18,65 | 610,14 | 150,35 |
| 2019/06/20 | CH2205 | Male | Three y/o | Control | Control | Feed Day | No | 06:55 | 06:00 - 06:59 | Morning      | 37,6 |     | 238,4 | 238,4 | 18,75 |        | 186,30 |
| 2019/06/20 | CH2206 | Male | Three y/o | Control | Control | Feed Day | No | 06:55 | 06:00 - 06:59 | Morning      | 37,5 | 110 | 45,8  | 45,8  | 18,65 | 600,69 | 128,76 |
| 2019/06/20 | CH2205 | Male | Three y/o | Control | Control | Feed Day | No | 07:00 | 07:00 - 07:59 | Morning      | 37,7 | 46  | 197,2 | 197,2 | 18,85 | 532,38 | 179,62 |
| 2019/06/20 | CH2206 | Male | Three y/o | Control | Control | Feed Day | No | 07:00 | 07:00 - 07:59 | Morning      | 37,8 | 107 | 21,6  | 21,6  | 18,95 | 598,73 | 102,94 |
| 2019/06/20 | CH2205 | Male | Three y/o | Control | Control | Feed Day | No | 07:05 | 07:00 - 07:59 | Morning      | 37,7 |     | 115,2 | 115,2 | 18,85 |        | 160,78 |
| 2019/06/20 | CH2206 | Male | Three y/o | Control | Control | Feed Day | No | 07:05 | 07:00 - 07:59 | Morning      | 37,7 | 134 | 47,0  | 47,0  | 18,85 | 614,33 | 129,65 |
| 2019/06/20 | CH2205 | Male | Three y/o | Control | Control | Feed Day | No | 07:10 | 07:00 - 07:59 | Morning      | 37,7 | 128 | 151,0 | 151,0 | 18,85 | 611,22 | 170,25 |
| 2019/06/20 | CH2206 | Male | Three y/o | Control | Control | Feed Day | No | 07:10 | 07:00 - 07:59 | Morning      | 37,7 | 126 | 91,4  | 91,4  | 18,85 | 610,14 | 152,71 |
| 2019/06/20 | CH2205 | Male | Three y/o | Control | Control | Feed Day | No | 07:15 | 07:00 - 07:59 | Morning      | 37,7 |     | 172,4 | 172,4 | 18,85 |        | 174,90 |
| 2019/06/20 | CH2206 | Male | Three y/o | Control | Control | Feed Day | No | 07:15 | 07:00 - 07:59 | Morning      | 37,8 | 114 | 116,0 | 116,0 | 18,95 | 603,20 | 161,02 |
| 2019/06/20 | CH2205 | Male | Three y/o | Control | Control | Feed Day | No | 07:20 | 07:00 - 07:59 | Morning      | 37,9 | 104 | 126,2 | 126,2 | 19,05 | 596,69 | 163,97 |
| 2019/06/20 | CH2206 | Male | Three y/o | Control | Control | Feed Day | No | 07:20 | 07:00 - 07:59 | Morning      | 37,8 | 120 | 62,8  | 62,8  | 18,95 | 606,78 | 139,67 |
| 2019/06/20 | CH2205 | Male | Three y/o | Control | Control | Feed Day | No | 07:25 | 07:00 - 07:59 | Morning      | 37,9 | 96  | 210,0 | 210,0 | 19,05 | 590,91 | 181,84 |
| 2019/06/20 | CH2206 | Male | Three y/o | Control | Control | Feed Day | No | 07:25 | 07:00 - 07:59 | Morning      | 37,9 | 115 | 157,2 | 157,2 | 19,05 | 603,82 | 171,66 |
| 2019/06/20 | CH2205 | Male | Three y/o | Control | Control | Feed Day | No | 07:30 | 07:00 - 07:59 | Morning      | 37,9 |     | 330,2 | 330,2 | 19,05 |        | 197,81 |
| 2019/06/20 | CH2206 | Male | Three y/o | Control | Control | Feed Day | No | 07:30 | 07:00 - 07:59 | Morning      | 38,0 | 125 | 210,2 | 210,2 | 19,15 | 609,60 | 181,87 |
| 2019/06/20 | CH2205 | Male | Three y/o | Control | Control | Feed Day | No | 07:35 | 07:00 - 07:59 | Morning      | 38,0 | 103 | 185,8 | 185,8 | 19,15 | 596,00 | 177,53 |
| 2019/06/20 | CH2206 | Male | Three y/o | Control | Control | Feed Day | No | 07:35 | 07:00 - 07:59 | Morning      | 38,0 | 94  | 8,2   | 8,2   | 19,15 | 589,37 | 70,05  |
| 2019/06/20 | CH2205 | Male | Three y/o | Control | Control | Feed Day | No | 07:40 | 07:00 - 07:59 | Morning      | 38,0 | 76  | 59,8  | 59,8  | 19,15 | 573,39 | 137,98 |
| 2019/06/20 | CH2206 | Male | Three y/o | Control | Control | Feed Day | No | 07:40 | 07:00 - 07:59 | Morning      | 38,0 | 97  | 31,4  | 31,4  | 19,15 | 591,66 | 115,76 |
| 2019/06/20 | CH2205 | Male | Three y/o | Control | Control | Feed Day | No | 07:45 | 07:00 - 07:59 | Morning      | 38,0 | 50  | 326,2 | 326,2 | 19,15 | 539,52 | 197,38 |
| 2019/06/20 | CH2206 | Male | Three y/o | Control | Control | Feed Day | No | 07:45 | 07:00 - 07:59 | Morning      | 37,9 | 102 | 18,2  | 18,2  | 19,05 | 595,30 | 97,10  |
| 2019/06/20 | CH2205 | Male | Three y/o | Control | Control | Feed Day | No | 07:50 | 07:00 - 07:59 | Morning      | 38,0 | 57  | 153,2 | 153,2 | 19,15 | 550,47 | 170,76 |
| 2019/06/20 | CH2206 | Male | Three y/o | Control | Control | Feed Day | No | 07:50 | 07:00 - 07:59 | Morning      | 37,9 | 177 | 16,8  | 16,8  | 19,05 | 632,55 | 94,37  |
| 2019/06/20 | CH2205 | Male | Three y/o | Control | Control | Feed Day | No | 07:55 | 07:00 - 07:59 | Morning      | 38,0 |     | 158,4 | 158,4 | 19,15 |        | 171,93 |
| 2019/06/20 | CH2206 | Male | Three y/o | Control | Control | Feed Day | No | 07:55 | 07:00 - 07:59 | Morning      | 37,8 |     | 164,4 | 164,4 | 18,95 |        | 173,23 |
| 2019/06/20 | CH2205 | Male | Three y/o | Control | Control | Feed Day | No | 08:00 | 08:00 - 08:59 | Late Morning | 37,9 |     | 142,0 | 142,0 | 19,05 |        | 168,10 |
| 2019/06/20 | CH2206 | Male | Three y/o | Control | Control | Feed Day | No | 08:00 | 08:00 - 08:59 | Late Morning | 37,8 | 106 | 58,6  | 58,6  | 18,95 | 598,06 | 137,28 |
| 2019/06/20 | CH2205 | Male | Three y/o | Control | Control | Feed Day | No | 08:05 | 08:00 - 08:59 | Late Morning | 38,0 | 104 | 41,4  | 41,4  | 19,15 | 596,69 | 125,27 |
| 2019/06/20 | CH2206 | Male | Three y/o | Control | Control | Feed Day | No | 08:05 | 08:00 - 08:59 | Late Morning | 38,0 | 114 | 265,4 | 265,4 | 19,15 | 603,20 | 190,09 |
| 2019/06/20 | CH2205 | Male | Three y/o | Control | Control | Feed Day | No | 08:10 | 08:00 - 08:59 | Late Morning | 38,0 | 56  | 60,8  | 60,8  | 19,15 | 549,01 | 138,55 |
| 2019/06/20 | CH2206 | Male | Three y/o | Control | Control | Feed Day | No | 08:10 | 08:00 - 08:59 | Late Morning | 38,0 |     | 130,0 | 130,0 | 19,15 |        | 165,01 |
| 2019/06/20 | CH2205 | Male | Three y/o | Control | Control | Feed Day | No | 08:15 | 08:00 - 08:59 | Late Morning | 37,7 | 85  | 18,6  | 18,6  | 18,85 | 581,90 | 97,84  |
| 2019/06/20 | CH2206 | Male | Three y/o | Control | Control | Feed Day | No | 08:15 | 08:00 - 08:59 | Late Morning | 38,0 | 109 | 194,0 | 194,0 | 19,15 | 600,04 | 179,05 |
| 2019/06/20 | CH2205 | Male | Three y/o | Control | Control | Feed Day | No | 08:20 | 08:00 - 08:59 | Late Morning | 37,7 | 72  | 25,8  | 25,8  | 18,85 | 569,20 | 109,02 |
| 2019/06/20 | CH2206 | Male | Three y/o | Control | Control | Feed Day | No | 08:20 | 08:00 - 08:59 | Late Morning | 38,0 | 117 | 107,0 | 107,0 | 19,15 | 605,02 | 158,20 |
| 2019/06/20 | CH2205 | Male | Three y/o | Control | Control | Feed Day | No | 08:25 | 08:00 - 08:59 | Late Morning | 37,7 | 137 | 18,6  | 18,6  | 18,85 | 615,83 | 97,84  |
| 2019/06/20 | CH2206 | Male | Three y/o | Control | Control | Feed Day | No | 08:25 | 08:00 - 08:59 | Late Morning | 38,0 | 120 | 32,8  | 32,8  | 19,15 | 606,78 | 117,26 |
| 2019/06/20 | CH2205 | Male | Three y/o | Control | Control | Feed Day | No | 08:30 | 08:00 - 08:59 | Late Morning | 37,7 | 96  | 192,4 | 192,4 | 18,85 | 590,91 | 178,76 |
| 2019/06/20 | CH2206 | Male | Three y/o | Control | Control | Feed Day | No | 08:30 | 08:00 - 08:59 | Late Morning | 38,0 | 125 | 274,2 | 274,2 | 19,15 | 609,60 | 191,24 |
| 2019/06/20 | CH2205 | Male | Three y/o | Control | Control | Feed Day | No | 08:35 | 08:00 - 08:59 | Late Morning | 37,7 | 101 | 88,4  | 88,4  | 18,85 | 594,59 | 151,55 |



|            |        |      |           |         |         |          |     |       |               |              |      |     |       |       |       |        |        |
|------------|--------|------|-----------|---------|---------|----------|-----|-------|---------------|--------------|------|-----|-------|-------|-------|--------|--------|
| 2019/06/20 | CH2206 | Male | Three y/o | Control | Control | Feed Day | No  | 08:35 | 08:00 - 08:59 | Late Morning | 37,9 | 114 | 43,2  | 43,2  | 19,05 | 603,20 | 126,74 |
| 2019/06/20 | CH2205 | Male | Three y/o | Control | Control | Feed Day | No  | 08:40 | 08:00 - 08:59 | Late Morning | 37,7 | 108 | 247,6 | 247,6 | 18,85 | 599,39 | 187,64 |
| 2019/06/20 | CH2206 | Male | Three y/o | Control | Control | Feed Day | No  | 08:40 | 08:00 - 08:59 | Late Morning | 37,9 | 165 | 152,6 | 152,6 | 19,05 | 628,06 | 170,62 |
| 2019/06/20 | CH2205 | Male | Three y/o | Control | Control | Feed Day | No  | 08:45 | 08:00 - 08:59 | Late Morning | 37,6 |     | 319,6 | 319,6 | 18,75 |        | 196,66 |
| 2019/06/20 | CH2206 | Male | Three y/o | Control | Control | Feed Day | No  | 08:45 | 08:00 - 08:59 | Late Morning | 37,9 | 50  | 2,8   | 2,8   | 19,05 | 539,52 | 34,04  |
| 2019/06/20 | CH2205 | Male | Three y/o | Control | Control | Feed Day | No  | 08:50 | 08:00 - 08:59 | Late Morning | 37,6 | 79  | 73,6  | 73,6  | 18,75 | 576,36 | 145,18 |
| 2019/06/20 | CH2206 | Male | Three y/o | Control | Control | Feed Day | No  | 08:50 | 08:00 - 08:59 | Late Morning | 37,7 | 45  | 134,8 | 134,8 | 18,85 | 530,47 | 166,28 |
| 2019/06/20 | CH2205 | Male | Three y/o | Control | Control | Feed Day | No  | 08:55 | 08:00 - 08:59 | Late Morning | 37,6 | 109 | 19,8  | 19,8  | 18,75 | 600,04 | 99,97  |
| 2019/06/20 | CH2206 | Male | Three y/o | Control | Control | Feed Day | No  | 08:55 | 08:00 - 08:59 | Late Morning | 37,8 | 126 | 36,0  | 36,0  | 18,95 | 610,14 | 120,46 |
| 2019/06/20 | CH2205 | Male | Three y/o | Control | Control | Feed Day | No  | 09:00 | 09:00 - 09:59 | Late Morning | 37,5 | 123 | 66,0  | 66,0  | 18,65 | 608,49 | 141,40 |
| 2019/06/20 | CH2206 | Male | Three y/o | Control | Control | Feed Day | No  | 09:00 | 09:00 - 09:59 | Late Morning | 37,7 | 68  | 51,8  | 51,8  | 18,85 | 564,71 | 133,01 |
| 2019/06/20 | CH2205 | Male | Three y/o | Control | Control | Feed Day | No  | 09:05 | 09:00 - 09:59 | Late Morning | 37,5 | 60  | 2,4   | 2,4   | 18,65 | 554,67 | 28,91  |
| 2019/06/20 | CH2206 | Male | Three y/o | Control | Control | Feed Day | No  | 09:05 | 09:00 - 09:59 | Late Morning | 37,5 | 90  | 13,6  | 13,6  | 18,65 | 586,16 | 87,18  |
| 2019/06/20 | CH2205 | Male | Three y/o | Control | Control | Feed Day | No  | 09:10 | 09:00 - 09:59 | Late Morning | 37,5 | 68  | 4,0   | 4,0   | 18,65 | 564,71 | 45,94  |
| 2019/06/20 | CH2206 | Male | Three y/o | Control | Control | Feed Day | No  | 09:10 | 09:00 - 09:59 | Late Morning | 37,4 | 78  | 35,4  | 35,4  | 18,55 | 575,38 | 119,88 |
| 2019/06/20 | CH2205 | Male | Three y/o | Control | Control | Feed Day | No  | 09:15 | 09:00 - 09:59 | Late Morning | 37,5 | 77  | 21,2  | 21,2  | 18,65 | 574,39 | 102,31 |
| 2019/06/20 | CH2206 | Male | Three y/o | Control | Control | Feed Day | No  | 09:15 | 09:00 - 09:59 | Late Morning | 37,2 | 55  | 22,6  | 22,6  | 18,36 | 547,52 | 104,49 |
| 2019/06/20 | CH2205 | Male | Three y/o | Control | Control | Feed Day | No  | 09:20 | 09:00 - 09:59 | Late Morning | 37,5 | 48  | 17,4  | 17,4  | 18,65 | 536,04 | 95,56  |
| 2019/06/20 | CH2206 | Male | Three y/o | Control | Control | Feed Day | No  | 09:20 | 09:00 - 09:59 | Late Morning | 36,9 | 76  | 9,6   | 9,6   | 18,06 | 573,39 | 75,37  |
| 2019/06/20 | CH2205 | Male | Three y/o | Control | Control | Feed Day | No  | 09:25 | 09:00 - 09:59 | Late Morning | 37,5 | 53  | 20,6  | 20,6  | 18,65 | 544,43 | 101,32 |
| 2019/06/20 | CH2206 | Male | Three y/o | Control | Control | Feed Day | No  | 09:25 | 09:00 - 09:59 | Late Morning | 36,8 | 74  | 5,4   | 5,4   | 17,96 | 571,33 | 55,99  |
| 2019/06/20 | CH2205 | Male | Three y/o | Control | Control | Feed Day | No  | 09:30 | 09:00 - 09:59 | Late Morning | 37,5 | 44  | 11,0  | 11,0  | 18,65 | 528,51 | 79,98  |
| 2019/06/20 | CH2206 | Male | Three y/o | Control | Control | Feed Day | No  | 09:30 | 09:00 - 09:59 | Late Morning | 36,6 | 84  | 6,8   | 6,8   | 17,77 | 581,01 | 63,74  |
| 2019/06/20 | CH2205 | Male | Three y/o | Control | Control | Feed Day | No  | 09:35 | 09:00 - 09:59 | Late Morning | 37,5 | 185 | 16,4  | 16,4  | 18,65 | 635,34 | 93,55  |
| 2019/06/20 | CH2206 | Male | Three y/o | Control | Control | Feed Day | No  | 09:35 | 09:00 - 09:59 | Late Morning | 36,9 | 59  | 20,4  | 20,4  | 18,06 | 553,30 | 100,99 |
| 2019/06/20 | CH2205 | Male | Three y/o | Control | Control | Feed Day | No  | 09:40 | 09:00 - 09:59 | Late Morning | 37,4 | 61  | 24,0  | 24,0  | 18,55 | 556,01 | 106,55 |
| 2019/06/20 | CH2206 | Male | Three y/o | Control | Control | Feed Day | No  | 09:40 | 09:00 - 09:59 | Late Morning | 36,9 | 57  | 43,2  | 43,2  | 18,06 | 550,47 | 126,74 |
| 2019/06/20 | CH2205 | Male | Three y/o | Control | Control | Feed Day | No  | 09:45 | 09:00 - 09:59 | Late Morning | 37,4 | 62  | 23,6  | 23,6  | 18,55 | 557,33 | 105,97 |
| 2019/06/20 | CH2206 | Male | Three y/o | Control | Control | Feed Day | No  | 09:45 | 09:00 - 09:59 | Late Morning | 36,9 | 55  | 53,2  | 53,2  | 18,06 | 547,52 | 133,93 |
| 2019/06/20 | CH2205 | Male | Three y/o | Control | Control | Feed Day | No  | 09:50 | 09:00 - 09:59 | Late Morning | 37,3 | 49  | 20,0  | 20,0  | 18,46 | 537,80 | 100,31 |
| 2019/06/20 | CH2206 | Male | Three y/o | Control | Control | Feed Day | No  | 09:50 | 09:00 - 09:59 | Late Morning | 37,0 | 54  | 30,8  | 30,8  | 18,16 | 545,99 | 115,10 |
| 2019/06/20 | CH2205 | Male | Three y/o | Control | Control | Feed Day | No  | 09:55 | 09:00 - 09:59 | Late Morning | 37,2 | 70  | 20,0  | 20,0  | 18,36 | 566,99 | 100,31 |
| 2019/06/20 | CH2206 | Male | Three y/o | Control | Control | Feed Day | No  | 09:55 | 09:00 - 09:59 | Late Morning | 37,1 | 81  | 9,2   | 9,2   | 18,26 | 578,26 | 73,94  |
| 2019/06/20 | CH2205 | Male | Three y/o | Control | Control | Feed Day | No  | 10:00 | 10:00 - 10:59 | Late Morning | 37,2 | 70  | 17,6  | 17,6  | 18,36 | 566,99 | 95,95  |
| 2019/06/20 | CH2206 | Male | Three y/o | Control | Control | Feed Day | No  | 10:00 | 10:00 - 10:59 | Late Morning | 37,2 | 75  | 31,4  | 31,4  | 18,36 | 572,36 | 115,76 |
| 2019/06/20 | CH2205 | Male | Three y/o | Control | Control | Feed Day | No  | 10:05 | 10:00 - 10:59 | Late Morning | 37,2 | 56  | 12,2  | 12,2  | 18,36 | 549,01 | 83,49  |
| 2019/06/20 | CH2206 | Male | Three y/o | Control | Control | Feed Day | No  | 10:05 | 10:00 - 10:59 | Late Morning | 37,2 | 56  | 38,2  | 38,2  | 18,36 | 549,01 | 122,50 |
| 2019/06/20 | CH2205 | Male | Three y/o | Control | Control | Feed Day | No  | 10:10 | 10:00 - 10:59 | Late Morning | 37,2 | 60  | 15,4  | 15,4  | 18,36 | 554,67 | 91,41  |
| 2019/06/20 | CH2206 | Male | Three y/o | Control | Control | Feed Day | No  | 10:10 | 10:00 - 10:59 | Late Morning | 37,3 | 56  | 44,0  | 44,0  | 18,46 | 549,01 | 127,37 |
| 2019/06/20 | CH2205 | Male | Three y/o | Control | Control | Feed Day | No  | 10:15 | 10:00 - 10:59 | Late Morning | 37,2 | 51  | 24,2  | 24,2  | 18,36 | 541,20 | 106,83 |
| 2019/06/20 | CH2206 | Male | Three y/o | Control | Control | Feed Day | No  | 10:15 | 10:00 - 10:59 | Late Morning | 37,3 | 87  | 53,0  | 53,0  | 18,46 | 583,64 | 133,80 |
| 2019/06/20 | CH2205 | Male | Three y/o | Control | Control | Feed Day | No  | 10:20 | 10:00 - 10:59 | Late Morning | 37,2 | 57  | 5,0   | 5,0   | 18,36 | 550,47 | 53,41  |
| 2019/06/20 | CH2206 | Male | Three y/o | Control | Control | Feed Day | No  | 10:20 | 10:00 - 10:59 | Late Morning | 37,3 | 44  | 49,6  | 49,6  | 18,46 | 528,51 | 131,51 |
| 2019/06/20 | CH2205 | Male | Three y/o | Control | Control | Feed Day | No  | 10:25 | 10:00 - 10:59 | Late Morning | 37,2 | 45  | 10,6  | 10,6  | 18,36 | 530,47 | 78,73  |
| 2019/06/20 | CH2206 | Male | Three y/o | Control | Control | Feed Day | No  | 10:25 | 10:00 - 10:59 | Late Morning | 37,3 | 80  | 49,0  | 49,0  | 18,46 | 577,31 | 131,09 |
| 2019/06/20 | CH2205 | Male | Three y/o | Control | Control | Feed Day | Yes | 10:30 | 10:00 - 10:59 | Late Morning | 37,2 | 43  | 15,8  | 15,8  | 18,36 | 526,50 | 92,28  |
| 2019/06/20 | CH2206 | Male | Three y/o | Control | Control | Feed Day | Yes | 10:30 | 10:00 - 10:59 | Late Morning | 37,3 | 43  | 47,6  | 47,6  | 18,46 | 526,50 | 130,09 |
| 2019/06/20 | CH2205 | Male | Three y/o | Control | Control | Feed Day | Yes | 10:35 | 10:00 - 10:59 | Late Morning | 37,2 | 56  | 10,0  | 10,0  | 18,36 | 549,01 | 76,76  |
| 2019/06/20 | CH2206 | Male | Three y/o | Control | Control | Feed Day | Yes | 10:35 | 10:00 - 10:59 | Late Morning | 37,3 | 59  | 49,4  | 49,4  | 18,46 | 553,30 | 131,37 |
| 2019/06/20 | CH2205 | Male | Three y/o | Control | Control | Feed Day | Yes | 10:40 | 10:00 - 10:59 | Late Morning | 37,2 | 76  | 21,2  | 21,2  | 18,36 | 573,39 | 102,31 |
| 2019/06/20 | CH2206 | Male | Three y/o | Control | Control | Feed Day | Yes | 10:40 | 10:00 - 10:59 | Late Morning | 37,3 | 115 | 49,8  | 49,8  | 18,46 | 603,82 | 131,65 |
| 2019/06/20 | CH2205 | Male | Three y/o | Control | Control | Feed Day | Yes | 10:45 | 10:00 - 10:59 | Late Morning | 37,2 | 42  | 19,4  | 19,4  | 18,36 | 524,42 | 99,28  |
| 2019/06/20 | CH2206 | Male | Three y/o | Control | Control | Feed Day | Yes | 10:45 | 10:00 - 10:59 | Late Morning | 37,3 | 50  | 49,2  | 49,2  | 18,46 | 539,52 | 131,23 |
| 2019/06/20 | CH2205 | Male | Three y/o | Control | Control | Feed Day | Yes | 10:50 | 10:00 - 10:59 | Late Morning | 37,1 | 44  | 7,2   | 7,2   | 18,26 | 528,51 | 65,66  |
| 2019/06/20 | CH2206 | Male | Three y/o | Control | Control | Feed Day | Yes | 10:50 | 10:00 - 10:59 | Late Morning | 37,3 | 58  | 46,2  | 46,2  | 18,46 | 551,90 | 129,06 |
| 2019/06/20 | CH2205 | Male | Three y/o | Control | Control | Feed Day | Yes | 10:55 | 10:00 - 10:59 | Late Morning | 37,1 | 64  | 4,6   | 4,6   | 18,26 | 559,88 | 50,61  |
| 2019/06/20 | CH2206 | Male | Three y/o | Control | Control | Feed Day | Yes | 10:55 | 10:00 - 10:59 | Late Morning | 37,3 | 76  | 15,2  | 15,2  | 18,46 | 573,39 | 90,96  |
| 2019/06/20 | CH2205 | Male | Three y/o | Control | Control | Feed Day | Yes | 11:00 | 11:00 - 11:59 | Late Morning | 37,1 |     | 40,6  | 40,6  | 18,26 |        | 124,60 |
| 2019/06/20 | CH2206 | Male | Three y/o | Control | Control | Feed Day | Yes | 11:00 | 11:00 - 11:59 | Late Morning | 37,3 | 81  | 24,2  | 24,2  | 18,46 | 578,26 | 106,83 |
| 2019/06/20 | CH2205 | Male | Three y/o | Control | Control | Feed Day | Yes | 11:05 | 11:00 - 11:59 | Late Morning | 37,2 | 84  | 78,8  | 78,8  | 18,36 | 581,01 | 147,55 |
| 2019/06/20 | CH2206 | Male | Three y/o | Control | Control | Feed Day | Yes | 11:05 | 11:00 - 11:59 | Late Morning | 37,3 | 77  | 34,0  | 34,0  | 18,46 | 574,39 | 118,49 |
| 2019/06/20 | CH2205 | Male | Three y/o | Control | Control | Feed Day | Yes | 11:10 | 11:00 - 11:59 | Late Morning | 37,2 | 107 | 116,8 | 116,8 | 18,36 | 598,73 | 161,26 |
| 2019/06/20 | CH2206 | Male | Three y/o | Control | Control | Feed Day | Yes | 11:10 | 11:00 - 11:59 | Late Morning | 37,4 | 115 | 69,6  | 69,6  | 18,55 | 603,82 | 143,24 |
| 2019/06/20 | CH2205 | Male | Three y/o | Control | Control | Feed Day | Yes | 11:15 | 11:00 - 11:59 | Late Morning | 37,3 | 79  | 11,6  | 11,6  | 18,46 | 576,36 | 81,78  |
| 2019/06/20 | CH2206 | Male | Three y/o | Control | Control | Feed Day | Yes | 11:15 | 11:00 - 11:59 | Late Morning | 37,4 |     | 38,4  | 38,4  | 18,55 |        | 122,68 |
| 2019/06/20 | CH2205 | Male | Three y/o | Control | Control | Feed Day | Yes | 11:20 | 11:00 - 11:59 | Late Morning | 37,3 |     | 243,6 | 243,6 | 18,46 |        | 187,07 |
| 2019/06/20 | CH2206 | Male | Three y/o | Control | Control | Feed Day | Yes | 11:20 | 11:00 - 11:59 | Late Morning | 37,4 | 68  | 48,4  | 48,4  | 18,55 | 564,71 | 130,66 |
| 2019/06/20 | CH2205 | Male | Three y/o | Control | Control | Feed Day | Yes | 11:25 | 11:00 - 11:59 | Late Morning | 37,3 |     | 251,0 | 251,0 | 18,46 |        | 188,12 |
| 2019/06/20 | CH2206 | Male | Three y/o | Control | Control | Feed Day | Yes | 11:25 | 11:00 - 11:59 | Late Morning | 37,4 | 61  | 80,0  | 80,0  | 18,55 | 556,01 | 148,08 |
| 2019/06/20 | CH2205 | Male | Three y/o | Control | Control | Feed Day | No  | 11:30 | 11:00 - 11:59 | Late Morning | 37,4 |     | 56,4  | 56,4  | 18,55 |        | 135,95 |



|            |        |      |           |         |         |          |    |       |               |              |      |     |       |       |       |        |        |
|------------|--------|------|-----------|---------|---------|----------|----|-------|---------------|--------------|------|-----|-------|-------|-------|--------|--------|
| 2019/06/20 | CH2206 | Male | Three y/o | Control | Control | Feed Day | No | 11:30 | 11:00 - 11:59 | Late Morning | 37,5 | 128 | 73,0  | 73,0  | 18,65 | 611,22 | 144,89 |
| 2019/06/20 | CH2205 | Male | Three y/o | Control | Control | Feed Day | No | 11:35 | 11:00 - 11:59 | Late Morning | 37,4 |     | 33,4  | 33,4  | 18,55 |        | 117,88 |
| 2019/06/20 | CH2206 | Male | Three y/o | Control | Control | Feed Day | No | 11:35 | 11:00 - 11:59 | Late Morning | 37,5 |     | 59,6  | 59,6  | 18,65 |        | 137,86 |
| 2019/06/20 | CH2205 | Male | Three y/o | Control | Control | Feed Day | No | 11:40 | 11:00 - 11:59 | Late Morning | 37,4 | 58  | 23,6  | 23,6  | 18,55 | 551,90 | 105,97 |
| 2019/06/20 | CH2206 | Male | Three y/o | Control | Control | Feed Day | No | 11:40 | 11:00 - 11:59 | Late Morning | 37,5 | 98  | 33,6  | 33,6  | 18,65 | 592,41 | 118,09 |
| 2019/06/20 | CH2205 | Male | Three y/o | Control | Control | Feed Day | No | 11:45 | 11:00 - 11:59 | Late Morning | 37,4 | 55  | 73,8  | 73,8  | 18,55 | 547,52 | 145,27 |
| 2019/06/20 | CH2206 | Male | Three y/o | Control | Control | Feed Day | No | 11:45 | 11:00 - 11:59 | Late Morning | 37,5 | 86  | 92,6  | 92,6  | 18,65 | 582,77 | 153,16 |
| 2019/06/20 | CH2205 | Male | Three y/o | Control | Control | Feed Day | No | 11:50 | 11:00 - 11:59 | Late Morning | 37,5 | 47  | 52,2  | 52,2  | 18,65 | 534,23 | 133,27 |
| 2019/06/20 | CH2206 | Male | Three y/o | Control | Control | Feed Day | No | 11:50 | 11:00 - 11:59 | Late Morning | 37,7 | 94  | 37,0  | 37,0  | 18,85 | 589,37 | 121,40 |
| 2019/06/20 | CH2205 | Male | Three y/o | Control | Control | Feed Day | No | 11:55 | 11:00 - 11:59 | Late Morning | 37,5 | 62  | 52,8  | 52,8  | 18,65 | 557,33 | 133,67 |
| 2019/06/20 | CH2206 | Male | Three y/o | Control | Control | Feed Day | No | 11:55 | 11:00 - 11:59 | Late Morning | 37,7 | 57  | 48,8  | 48,8  | 18,85 | 550,47 | 130,95 |
| 2019/06/20 | CH2205 | Male | Three y/o | Control | Control | Feed Day | No | 12:00 | 12:00 - 12:59 | Afternoon    | 37,5 |     | 32,6  | 32,6  | 18,65 |        | 117,05 |
| 2019/06/20 | CH2206 | Male | Three y/o | Control | Control | Feed Day | No | 12:00 | 12:00 - 12:59 | Afternoon    | 37,8 | 109 | 106,4 | 106,4 | 18,95 | 600,04 | 158,01 |
| 2019/06/20 | CH2205 | Male | Three y/o | Control | Control | Feed Day | No | 12:05 | 12:00 - 12:59 | Afternoon    | 37,7 | 94  | 50,2  | 50,2  | 18,85 | 589,37 | 131,92 |
| 2019/06/20 | CH2206 | Male | Three y/o | Control | Control | Feed Day | No | 12:05 | 12:00 - 12:59 | Afternoon    | 37,9 | 93  | 30,4  | 30,4  | 19,05 | 588,58 | 114,65 |
| 2019/06/20 | CH2205 | Male | Three y/o | Control | Control | Feed Day | No | 12:10 | 12:00 - 12:59 | Afternoon    | 37,6 | 88  | 16,8  | 16,8  | 18,75 | 584,49 | 94,37  |
| 2019/06/20 | CH2206 | Male | Three y/o | Control | Control | Feed Day | No | 12:10 | 12:00 - 12:59 | Afternoon    | 37,9 | 156 | 30,0  | 30,0  | 19,05 | 624,43 | 114,20 |
| 2019/06/20 | CH2205 | Male | Three y/o | Control | Control | Feed Day | No | 12:15 | 12:00 - 12:59 | Afternoon    | 37,7 | 102 | 54,4  | 54,4  | 18,85 | 595,30 | 134,70 |
| 2019/06/20 | CH2206 | Male | Three y/o | Control | Control | Feed Day | No | 12:15 | 12:00 - 12:59 | Afternoon    | 37,9 | 77  | 48,6  | 48,6  | 19,05 | 574,39 | 130,81 |
| 2019/06/20 | CH2205 | Male | Three y/o | Control | Control | Feed Day | No | 12:20 | 12:00 - 12:59 | Afternoon    | 37,7 | 55  | 11,6  | 11,6  | 18,85 | 547,52 | 81,78  |
| 2019/06/20 | CH2206 | Male | Three y/o | Control | Control | Feed Day | No | 12:20 | 12:00 - 12:59 | Afternoon    | 37,9 | 79  | 39,4  | 39,4  | 19,05 | 576,36 | 123,57 |
| 2019/06/20 | CH2205 | Male | Three y/o | Control | Control | Feed Day | No | 12:25 | 12:00 - 12:59 | Afternoon    | 37,7 | 82  | 76,8  | 76,8  | 18,85 | 579,19 | 146,66 |
| 2019/06/20 | CH2206 | Male | Three y/o | Control | Control | Feed Day | No | 12:25 | 12:00 - 12:59 | Afternoon    | 37,8 | 86  | 39,4  | 39,4  | 18,95 | 582,77 | 123,57 |
| 2019/06/20 | CH2205 | Male | Three y/o | Control | Control | Feed Day | No | 12:30 | 12:00 - 12:59 | Afternoon    | 37,7 | 109 | 24,2  | 24,2  | 18,85 | 600,04 | 106,83 |
| 2019/06/20 | CH2206 | Male | Three y/o | Control | Control | Feed Day | No | 12:30 | 12:00 - 12:59 | Afternoon    | 37,8 | 88  | 34,6  | 34,6  | 18,95 | 584,49 | 119,10 |
| 2019/06/20 | CH2205 | Male | Three y/o | Control | Control | Feed Day | No | 12:35 | 12:00 - 12:59 | Afternoon    | 37,6 | 67  | 22,8  | 22,8  | 18,75 | 563,53 | 104,79 |
| 2019/06/20 | CH2206 | Male | Three y/o | Control | Control | Feed Day | No | 12:35 | 12:00 - 12:59 | Afternoon    | 37,8 | 79  | 40,8  | 40,8  | 18,95 | 576,36 | 124,77 |
| 2019/06/20 | CH2205 | Male | Three y/o | Control | Control | Feed Day | No | 12:40 | 12:00 - 12:59 | Afternoon    | 37,6 | 64  | 18,6  | 18,6  | 18,75 | 559,88 | 97,84  |
| 2019/06/20 | CH2206 | Male | Three y/o | Control | Control | Feed Day | No | 12:40 | 12:00 - 12:59 | Afternoon    | 37,8 | 80  | 49,8  | 49,8  | 18,95 | 577,31 | 131,65 |
| 2019/06/20 | CH2205 | Male | Three y/o | Control | Control | Feed Day | No | 12:45 | 12:00 - 12:59 | Afternoon    | 37,6 | 60  | 22,6  | 22,6  | 18,75 | 554,67 | 104,49 |
| 2019/06/20 | CH2206 | Male | Three y/o | Control | Control | Feed Day | No | 12:45 | 12:00 - 12:59 | Afternoon    | 37,8 | 83  | 45,0  | 45,0  | 18,95 | 580,11 | 128,15 |
| 2019/06/20 | CH2205 | Male | Three y/o | Control | Control | Feed Day | No | 12:50 | 12:00 - 12:59 | Afternoon    | 37,6 | 72  | 20,8  | 20,8  | 18,75 | 569,20 | 101,65 |
| 2019/06/20 | CH2206 | Male | Three y/o | Control | Control | Feed Day | No | 12:50 | 12:00 - 12:59 | Afternoon    | 37,8 | 82  | 45,2  | 45,2  | 18,95 | 579,19 | 128,30 |
| 2019/06/20 | CH2205 | Male | Three y/o | Control | Control | Feed Day | No | 12:55 | 12:00 - 12:59 | Afternoon    | 37,6 | 62  | 19,6  | 19,6  | 18,75 | 557,33 | 99,63  |
| 2019/06/20 | CH2206 | Male | Three y/o | Control | Control | Feed Day | No | 12:55 | 12:00 - 12:59 | Afternoon    | 37,8 | 76  | 44,2  | 44,2  | 18,95 | 573,39 | 127,53 |
| 2019/06/20 | CH2205 | Male | Three y/o | Control | Control | Feed Day | No | 13:00 | 13:00 - 13:59 | Afternoon    | 37,6 | 65  | 14,6  | 14,6  | 18,75 | 561,12 | 89,59  |
| 2019/06/20 | CH2206 | Male | Three y/o | Control | Control | Feed Day | No | 13:00 | 13:00 - 13:59 | Afternoon    | 37,7 | 76  | 42,6  | 42,6  | 18,85 | 573,39 | 126,26 |
| 2019/06/20 | CH2205 | Male | Three y/o | Control | Control | Feed Day | No | 13:05 | 13:00 - 13:59 | Afternoon    | 37,6 | 79  | 12,6  | 12,6  | 18,75 | 576,36 | 84,59  |
| 2019/06/20 | CH2206 | Male | Three y/o | Control | Control | Feed Day | No | 13:05 | 13:00 - 13:59 | Afternoon    | 37,7 | 88  | 47,4  | 47,4  | 18,85 | 584,49 | 129,94 |
| 2019/06/20 | CH2205 | Male | Three y/o | Control | Control | Feed Day | No | 13:10 | 13:00 - 13:59 | Afternoon    | 37,6 | 64  | 11,8  | 11,8  | 18,75 | 559,88 | 82,36  |
| 2019/06/20 | CH2206 | Male | Three y/o | Control | Control | Feed Day | No | 13:10 | 13:00 - 13:59 | Afternoon    | 37,7 | 52  | 39,2  | 39,2  | 18,85 | 542,83 | 123,39 |
| 2019/06/20 | CH2205 | Male | Three y/o | Control | Control | Feed Day | No | 13:15 | 13:00 - 13:59 | Afternoon    | 37,6 | 56  | 14,8  | 14,8  | 18,75 | 549,01 | 90,05  |
| 2019/06/20 | CH2206 | Male | Three y/o | Control | Control | Feed Day | No | 13:15 | 13:00 - 13:59 | Afternoon    | 37,7 | 70  | 18,4  | 18,4  | 18,85 | 566,99 | 97,47  |
| 2019/06/20 | CH2205 | Male | Three y/o | Control | Control | Feed Day | No | 13:20 | 13:00 - 13:59 | Afternoon    | 37,6 | 79  | 17,2  | 17,2  | 18,75 | 576,36 | 95,17  |
| 2019/06/20 | CH2206 | Male | Three y/o | Control | Control | Feed Day | No | 13:20 | 13:00 - 13:59 | Afternoon    | 37,7 | 57  | 24,2  | 24,2  | 18,85 | 550,47 | 106,83 |
| 2019/06/20 | CH2205 | Male | Three y/o | Control | Control | Feed Day | No | 13:25 | 13:00 - 13:59 | Afternoon    | 37,6 | 53  | 18,6  | 18,6  | 18,75 | 544,43 | 97,84  |
| 2019/06/20 | CH2206 | Male | Three y/o | Control | Control | Feed Day | No | 13:25 | 13:00 - 13:59 | Afternoon    | 37,8 | 118 | 21,0  | 21,0  | 18,95 | 605,61 | 101,98 |
| 2019/06/20 | CH2205 | Male | Three y/o | Control | Control | Feed Day | No | 13:30 | 13:00 - 13:59 | Afternoon    | 37,6 | 68  | 13,0  | 13,0  | 18,75 | 564,71 | 85,65  |
| 2019/06/20 | CH2206 | Male | Three y/o | Control | Control | Feed Day | No | 13:30 | 13:00 - 13:59 | Afternoon    | 37,8 | 83  | 14,4  | 14,4  | 18,95 | 580,11 | 89,12  |
| 2019/06/20 | CH2205 | Male | Three y/o | Control | Control | Feed Day | No | 13:35 | 13:00 - 13:59 | Afternoon    | 37,6 | 50  | 19,4  | 19,4  | 18,75 | 539,52 | 99,28  |
| 2019/06/20 | CH2206 | Male | Three y/o | Control | Control | Feed Day | No | 13:35 | 13:00 - 13:59 | Afternoon    | 37,8 | 80  | 9,6   | 9,6   | 18,95 | 577,31 | 75,37  |
| 2019/06/20 | CH2205 | Male | Three y/o | Control | Control | Feed Day | No | 13:40 | 13:00 - 13:59 | Afternoon    | 37,6 | 55  | 18,4  | 18,4  | 18,75 | 547,52 | 97,47  |
| 2019/06/20 | CH2206 | Male | Three y/o | Control | Control | Feed Day | No | 13:40 | 13:00 - 13:59 | Afternoon    | 37,7 | 85  | 45,0  | 45,0  | 18,85 | 581,90 | 128,15 |
| 2019/06/20 | CH2205 | Male | Three y/o | Control | Control | Feed Day | No | 13:45 | 13:00 - 13:59 | Afternoon    | 37,6 | 83  | 15,0  | 15,0  | 18,75 | 580,11 | 90,51  |
| 2019/06/20 | CH2206 | Male | Three y/o | Control | Control | Feed Day | No | 13:45 | 13:00 - 13:59 | Afternoon    | 37,7 | 86  | 44,4  | 44,4  | 18,85 | 582,77 | 127,69 |
| 2019/06/20 | CH2205 | Male | Three y/o | Control | Control | Feed Day | No | 13:50 | 13:00 - 13:59 | Afternoon    | 37,6 | 61  | 15,6  | 15,6  | 18,75 | 556,01 | 91,85  |
| 2019/06/20 | CH2206 | Male | Three y/o | Control | Control | Feed Day | No | 13:50 | 13:00 - 13:59 | Afternoon    | 37,7 | 71  | 43,2  | 43,2  | 18,85 | 568,10 | 126,74 |
| 2019/06/20 | CH2205 | Male | Three y/o | Control | Control | Feed Day | No | 13:55 | 13:00 - 13:59 | Afternoon    | 37,6 | 65  | 16,4  | 16,4  | 18,75 | 561,12 | 93,55  |
| 2019/06/20 | CH2206 | Male | Three y/o | Control | Control | Feed Day | No | 13:55 | 13:00 - 13:59 | Afternoon    | 37,8 | 72  | 42,6  | 42,6  | 18,95 | 569,20 | 126,26 |
| 2019/06/20 | CH2205 | Male | Three y/o | Control | Control | Feed Day | No | 14:00 | 14:00 - 14:59 | Afternoon    | 37,6 | 66  | 16,8  | 16,8  | 18,75 | 562,34 | 94,37  |
| 2019/06/20 | CH2206 | Male | Three y/o | Control | Control | Feed Day | No | 14:00 | 14:00 - 14:59 | Afternoon    | 37,8 | 107 | 33,2  | 33,2  | 18,95 | 598,73 | 117,68 |
| 2019/06/20 | CH2205 | Male | Three y/o | Control | Control | Feed Day | No | 14:05 | 14:00 - 14:59 | Afternoon    | 37,6 | 84  | 13,8  | 13,8  | 18,75 | 581,01 | 87,68  |
| 2019/06/20 | CH2206 | Male | Three y/o | Control | Control | Feed Day | No | 14:05 | 14:00 - 14:59 | Afternoon    | 37,8 | 86  | 50,0  | 50,0  | 18,95 | 582,77 | 131,79 |
| 2019/06/20 | CH2205 | Male | Three y/o | Control | Control | Feed Day | No | 14:10 | 14:00 - 14:59 | Afternoon    | 37,6 | 52  | 8,2   | 8,2   | 18,75 | 542,83 | 70,05  |
| 2019/06/20 | CH2206 | Male | Three y/o | Control | Control | Feed Day | No | 14:10 | 14:00 - 14:59 | Afternoon    | 37,8 | 94  | 51,6  | 51,6  | 18,95 | 589,37 | 132,87 |
| 2019/06/20 | CH2205 | Male | Three y/o | Control | Control | Feed Day | No | 14:15 | 14:00 - 14:59 | Afternoon    | 37,6 | 72  | 15,8  | 15,8  | 18,75 | 569,20 | 92,28  |
| 2019/06/20 | CH2206 | Male | Three y/o | Control | Control | Feed Day | No | 14:15 | 14:00 - 14:59 | Afternoon    | 37,8 | 86  | 52,4  | 52,4  | 18,95 | 582,77 | 133,41 |
| 2019/06/20 | CH2205 | Male | Three y/o | Control | Control | Feed Day | No | 14:20 | 14:00 - 14:59 | Afternoon    | 37,6 | 65  | 19,4  | 19,4  | 18,75 | 561,12 | 99,28  |
| 2019/06/20 | CH2206 | Male | Three y/o | Control | Control | Feed Day | No | 14:20 | 14:00 - 14:59 | Afternoon    | 37,8 | 98  | 46,0  | 46,0  | 18,95 | 592,41 | 128,91 |
| 2019/06/20 | CH2205 | Male | Three y/o | Control | Control | Feed Day | No | 14:25 | 14:00 - 14:59 | Afternoon    | 37,7 |     | 33,8  | 33,8  | 18,85 |        | 118,29 |



|            |        |      |           |         |         |          |    |       |               |           |      |     |       |       |       |        |        |
|------------|--------|------|-----------|---------|---------|----------|----|-------|---------------|-----------|------|-----|-------|-------|-------|--------|--------|
| 2019/06/20 | CH2206 | Male | Three y/o | Control | Control | Feed Day | No | 14:25 | 14:00 - 14:59 | Afternoon | 37,9 | 113 | 36,2  | 36,2  | 19,05 | 602,58 | 120,65 |
| 2019/06/20 | CH2205 | Male | Three y/o | Control | Control | Feed Day | No | 14:30 | 14:00 - 14:59 | Afternoon | 37,7 | 92  | 6,8   | 6,8   | 18,85 | 587,78 | 63,74  |
| 2019/06/20 | CH2206 | Male | Three y/o | Control | Control | Feed Day | No | 14:30 | 14:00 - 14:59 | Afternoon | 37,9 | 83  | 48,6  | 48,6  | 19,05 | 580,11 | 130,81 |
| 2019/06/20 | CH2205 | Male | Three y/o | Control | Control | Feed Day | No | 14:35 | 14:00 - 14:59 | Afternoon | 37,7 | 56  | 6,0   | 6,0   | 18,85 | 549,01 | 59,53  |
| 2019/06/20 | CH2206 | Male | Three y/o | Control | Control | Feed Day | No | 14:35 | 14:00 - 14:59 | Afternoon | 37,9 | 80  | 29,6  | 29,6  | 19,05 | 577,31 | 113,73 |
| 2019/06/20 | CH2205 | Male | Three y/o | Control | Control | Feed Day | No | 14:40 | 14:00 - 14:59 | Afternoon | 37,7 | 78  | 10,8  | 10,8  | 18,85 | 575,38 | 79,36  |
| 2019/06/20 | CH2206 | Male | Three y/o | Control | Control | Feed Day | No | 14:40 | 14:00 - 14:59 | Afternoon | 37,9 | 98  | 54,2  | 54,2  | 19,05 | 592,41 | 134,57 |
| 2019/06/20 | CH2205 | Male | Three y/o | Control | Control | Feed Day | No | 14:45 | 14:00 - 14:59 | Afternoon | 37,9 | 83  | 6,6   | 6,6   | 19,05 | 580,11 | 62,73  |
| 2019/06/20 | CH2206 | Male | Three y/o | Control | Control | Feed Day | No | 14:45 | 14:00 - 14:59 | Afternoon | 37,9 | 81  | 48,6  | 48,6  | 19,05 | 578,26 | 130,81 |
| 2019/06/20 | CH2205 | Male | Three y/o | Control | Control | Feed Day | No | 14:50 | 14:00 - 14:59 | Afternoon | 37,8 | 73  | 5,0   | 5,0   | 18,95 | 570,27 | 53,41  |
| 2019/06/20 | CH2206 | Male | Three y/o | Control | Control | Feed Day | No | 14:50 | 14:00 - 14:59 | Afternoon | 37,9 | 80  | 47,2  | 47,2  | 19,05 | 577,31 | 129,80 |
| 2019/06/20 | CH2205 | Male | Three y/o | Control | Control | Feed Day | No | 14:55 | 14:00 - 14:59 | Afternoon | 37,9 | 61  | 4,0   | 4,0   | 19,05 | 556,01 | 45,94  |
| 2019/06/20 | CH2206 | Male | Three y/o | Control | Control | Feed Day | No | 14:55 | 14:00 - 14:59 | Afternoon | 37,9 | 62  | 42,6  | 42,6  | 19,05 | 557,33 | 126,26 |
| 2019/06/20 | CH2205 | Male | Three y/o | Control | Control | Feed Day | No | 15:00 | 15:00 - 15:59 | Afternoon | 37,9 | 74  | 5,4   | 5,4   | 19,05 | 571,33 | 55,99  |
| 2019/06/20 | CH2206 | Male | Three y/o | Control | Control | Feed Day | No | 15:00 | 15:00 - 15:59 | Afternoon | 37,9 | 82  | 46,4  | 46,4  | 19,05 | 579,19 | 129,21 |
| 2019/06/20 | CH2205 | Male | Three y/o | Control | Control | Feed Day | No | 15:05 | 15:00 - 15:59 | Afternoon | 37,9 | 85  | 8,8   | 8,8   | 19,05 | 581,90 | 72,43  |
| 2019/06/20 | CH2206 | Male | Three y/o | Control | Control | Feed Day | No | 15:05 | 15:00 - 15:59 | Afternoon | 37,9 | 80  | 38,6  | 38,6  | 19,05 | 577,31 | 122,86 |
| 2019/06/20 | CH2205 | Male | Three y/o | Control | Control | Feed Day | No | 15:10 | 15:00 - 15:59 | Afternoon | 37,9 | 82  | 10,0  | 10,0  | 19,05 | 579,19 | 76,76  |
| 2019/06/20 | CH2206 | Male | Three y/o | Control | Control | Feed Day | No | 15:10 | 15:00 - 15:59 | Afternoon | 37,9 | 75  | 46,6  | 46,6  | 19,05 | 572,36 | 129,35 |
| 2019/06/20 | CH2205 | Male | Three y/o | Control | Control | Feed Day | No | 15:15 | 15:00 - 15:59 | Afternoon | 37,9 | 60  | 23,0  | 23,0  | 19,05 | 554,67 | 105,09 |
| 2019/06/20 | CH2206 | Male | Three y/o | Control | Control | Feed Day | No | 15:15 | 15:00 - 15:59 | Afternoon | 37,9 | 80  | 322,2 | 322,2 | 19,05 | 577,31 | 196,95 |
| 2019/06/20 | CH2205 | Male | Three y/o | Control | Control | Feed Day | No | 15:20 | 15:00 - 15:59 | Afternoon | 37,9 | 71  | 25,0  | 25,0  | 19,05 | 568,10 | 107,94 |
| 2019/06/20 | CH2206 | Male | Three y/o | Control | Control | Feed Day | No | 15:20 | 15:00 - 15:59 | Afternoon | 38,0 | 91  | 42,8  | 42,8  | 19,15 | 586,98 | 126,42 |
| 2019/06/20 | CH2205 | Male | Three y/o | Control | Control | Feed Day | No | 15:25 | 15:00 - 15:59 | Afternoon | 37,9 | 59  | 23,4  | 23,4  | 19,05 | 553,30 | 105,68 |
| 2019/06/20 | CH2206 | Male | Three y/o | Control | Control | Feed Day | No | 15:25 | 15:00 - 15:59 | Afternoon | 38,0 | 88  | 42,4  | 42,4  | 19,15 | 584,49 | 126,10 |
| 2019/06/20 | CH2205 | Male | Three y/o | Control | Control | Feed Day | No | 15:30 | 15:00 - 15:59 | Afternoon | 38,0 | 80  | 22,4  | 22,4  | 19,15 | 577,31 | 104,19 |
| 2019/06/20 | CH2206 | Male | Three y/o | Control | Control | Feed Day | No | 15:30 | 15:00 - 15:59 | Afternoon | 38,0 | 90  | 43,0  | 43,0  | 19,15 | 586,16 | 126,58 |
| 2019/06/20 | CH2205 | Male | Three y/o | Control | Control | Feed Day | No | 15:35 | 15:00 - 15:59 | Afternoon | 38,0 | 112 | 7,4   | 7,4   | 19,15 | 601,96 | 66,59  |
| 2019/06/20 | CH2206 | Male | Three y/o | Control | Control | Feed Day | No | 15:35 | 15:00 - 15:59 | Afternoon | 38,0 | 85  | 41,0  | 41,0  | 19,15 | 581,90 | 124,94 |
| 2019/06/20 | CH2205 | Male | Three y/o | Control | Control | Feed Day | No | 15:40 | 15:00 - 15:59 | Afternoon | 38,0 | 65  | 6,4   | 6,4   | 19,15 | 561,12 | 61,70  |
| 2019/06/20 | CH2206 | Male | Three y/o | Control | Control | Feed Day | No | 15:40 | 15:00 - 15:59 | Afternoon | 38,0 | 85  | 35,0  | 35,0  | 19,15 | 581,90 | 119,49 |
| 2019/06/20 | CH2205 | Male | Three y/o | Control | Control | Feed Day | No | 15:45 | 15:00 - 15:59 | Afternoon | 38,0 | 68  | 3,0   | 3,0   | 19,15 | 564,71 | 36,34  |
| 2019/06/20 | CH2206 | Male | Three y/o | Control | Control | Feed Day | No | 15:45 | 15:00 - 15:59 | Afternoon | 38,0 | 96  | 42,8  | 42,8  | 19,15 | 590,91 | 126,42 |
| 2019/06/20 | CH2205 | Male | Three y/o | Control | Control | Feed Day | No | 15:50 | 15:00 - 15:59 | Afternoon | 38,0 | 59  | 3,4   | 3,4   | 19,15 | 553,30 | 40,51  |
| 2019/06/20 | CH2206 | Male | Three y/o | Control | Control | Feed Day | No | 15:50 | 15:00 - 15:59 | Afternoon | 38,0 | 113 | 42,4  | 42,4  | 19,15 | 602,58 | 126,10 |
| 2019/06/20 | CH2205 | Male | Three y/o | Control | Control | Feed Day | No | 15:55 | 15:00 - 15:59 | Afternoon | 38,0 | 64  | 7,8   | 7,8   | 19,15 | 559,88 | 68,36  |
| 2019/06/20 | CH2206 | Male | Three y/o | Control | Control | Feed Day | No | 15:55 | 15:00 - 15:59 | Afternoon | 38,0 | 93  | 44,6  | 44,6  | 19,15 | 588,58 | 127,84 |
| 2019/06/20 | CH2205 | Male | Three y/o | Control | Control | Feed Day | No | 16:00 | 16:00 - 16:59 | Evening   | 38,0 | 73  | 5,6   | 5,6   | 19,15 | 570,27 | 57,21  |
| 2019/06/20 | CH2206 | Male | Three y/o | Control | Control | Feed Day | No | 16:00 | 16:00 - 16:59 | Evening   | 38,0 | 103 | 41,8  | 41,8  | 19,15 | 596,00 | 125,60 |
| 2019/06/20 | CH2205 | Male | Three y/o | Control | Control | Feed Day | No | 16:05 | 16:00 - 16:59 | Evening   | 38,0 | 83  | 10,4  | 10,4  | 19,15 | 580,11 | 78,08  |
| 2019/06/20 | CH2206 | Male | Three y/o | Control | Control | Feed Day | No | 16:05 | 16:00 - 16:59 | Evening   | 38,0 | 87  | 43,4  | 43,4  | 19,15 | 583,64 | 126,90 |
| 2019/06/20 | CH2205 | Male | Three y/o | Control | Control | Feed Day | No | 16:10 | 16:00 - 16:59 | Evening   | 38,0 | 79  | 23,0  | 23,0  | 19,15 | 576,36 | 105,09 |
| 2019/06/20 | CH2206 | Male | Three y/o | Control | Control | Feed Day | No | 16:10 | 16:00 - 16:59 | Evening   | 38,0 | 83  | 45,4  | 45,4  | 19,15 | 580,11 | 128,45 |
| 2019/06/20 | CH2205 | Male | Three y/o | Control | Control | Feed Day | No | 16:15 | 16:00 - 16:59 | Evening   | 38,0 |     | 28,6  | 28,6  | 19,15 |        | 112,56 |
| 2019/06/20 | CH2206 | Male | Three y/o | Control | Control | Feed Day | No | 16:15 | 16:00 - 16:59 | Evening   | 38,0 | 82  | 44,6  | 44,6  | 19,15 | 579,19 | 127,84 |
| 2019/06/20 | CH2205 | Male | Three y/o | Control | Control | Feed Day | No | 16:20 | 16:00 - 16:59 | Evening   | 38,0 |     | 13,2  | 13,2  | 19,15 |        | 86,17  |
| 2019/06/20 | CH2206 | Male | Three y/o | Control | Control | Feed Day | No | 16:20 | 16:00 - 16:59 | Evening   | 38,0 | 81  | 40,0  | 40,0  | 19,15 | 578,26 | 124,09 |
| 2019/06/20 | CH2205 | Male | Three y/o | Control | Control | Feed Day | No | 16:25 | 16:00 - 16:59 | Evening   | 38,0 | 83  | 8,4   | 8,4   | 19,15 | 580,11 | 70,86  |
| 2019/06/20 | CH2206 | Male | Three y/o | Control | Control | Feed Day | No | 16:25 | 16:00 - 16:59 | Evening   | 38,0 |     | 24,4  | 24,4  | 19,15 |        | 107,11 |
| 2019/06/20 | CH2205 | Male | Three y/o | Control | Control | Feed Day | No | 16:30 | 16:00 - 16:59 | Evening   | 38,0 |     | 27,0  | 27,0  | 19,15 |        | 110,58 |
| 2019/06/20 | CH2206 | Male | Three y/o | Control | Control | Feed Day | No | 16:30 | 16:00 - 16:59 | Evening   | 38,0 | 82  | 26,4  | 26,4  | 19,15 | 579,19 | 109,81 |
| 2019/06/20 | CH2205 | Male | Three y/o | Control | Control | Feed Day | No | 16:35 | 16:00 - 16:59 | Evening   | 37,9 |     | 30,6  | 30,6  | 19,05 |        | 114,87 |
| 2019/06/20 | CH2206 | Male | Three y/o | Control | Control | Feed Day | No | 16:35 | 16:00 - 16:59 | Evening   | 37,9 | 94  | 40,0  | 40,0  | 19,05 | 589,37 | 124,09 |
| 2019/06/20 | CH2205 | Male | Three y/o | Control | Control | Feed Day | No | 16:40 | 16:00 - 16:59 | Evening   | 37,9 | 125 | 24,8  | 24,8  | 19,05 | 609,60 | 107,67 |
| 2019/06/20 | CH2206 | Male | Three y/o | Control | Control | Feed Day | No | 16:40 | 16:00 - 16:59 | Evening   | 37,9 | 119 | 39,4  | 39,4  | 19,05 | 606,20 | 123,57 |
| 2019/06/20 | CH2205 | Male | Three y/o | Control | Control | Feed Day | No | 16:45 | 16:00 - 16:59 | Evening   | 37,9 | 172 | 124,0 | 124,0 | 19,05 | 630,73 | 163,35 |
| 2019/06/20 | CH2206 | Male | Three y/o | Control | Control | Feed Day | No | 16:45 | 16:00 - 16:59 | Evening   | 37,9 | 88  | 35,2  | 35,2  | 19,05 | 584,49 | 119,69 |
| 2019/06/20 | CH2205 | Male | Three y/o | Control | Control | Feed Day | No | 16:50 | 16:00 - 16:59 | Evening   | 37,9 |     | 154,6 | 154,6 | 19,05 |        | 171,08 |
| 2019/06/20 | CH2206 | Male | Three y/o | Control | Control | Feed Day | No | 16:50 | 16:00 - 16:59 | Evening   | 38,0 |     | 34,0  | 34,0  | 19,15 |        | 118,49 |
| 2019/06/20 | CH2205 | Male | Three y/o | Control | Control | Feed Day | No | 16:55 | 16:00 - 16:59 | Evening   | 38,0 | 72  | 5,4   | 5,4   | 19,15 | 569,20 | 55,99  |
| 2019/06/20 | CH2206 | Male | Three y/o | Control | Control | Feed Day | No | 16:55 | 16:00 - 16:59 | Evening   | 37,9 | 86  | 14,6  | 14,6  | 19,05 | 582,77 | 89,59  |
| 2019/06/20 | CH2205 | Male | Three y/o | Control | Control | Feed Day | No | 17:00 | 17:00 - 17:59 | Evening   | 38,0 | 79  | 19,6  | 19,6  | 19,15 | 576,36 | 99,63  |
| 2019/06/20 | CH2206 | Male | Three y/o | Control | Control | Feed Day | No | 17:00 | 17:00 - 17:59 | Evening   | 38,0 | 103 | 340,0 | 340,0 | 19,15 | 596,00 | 198,85 |
| 2019/06/20 | CH2205 | Male | Three y/o | Control | Control | Feed Day | No | 17:05 | 17:00 - 17:59 | Evening   | 38,0 | 74  | 71,8  | 71,8  | 19,15 | 571,33 | 144,32 |
| 2019/06/20 | CH2206 | Male | Three y/o | Control | Control | Feed Day | No | 17:05 | 17:00 - 17:59 | Evening   | 38,0 | 126 | 38,0  | 38,0  | 19,15 | 610,14 | 122,32 |
| 2019/06/20 | CH2205 | Male | Three y/o | Control | Control | Feed Day | No | 17:10 | 17:00 - 17:59 | Evening   | 38,0 | 148 | 107,0 | 107,0 | 19,15 | 620,97 | 158,20 |
| 2019/06/20 | CH2206 | Male | Three y/o | Control | Control | Feed Day | No | 17:10 | 17:00 - 17:59 | Evening   | 37,9 | 79  | 17,8  | 17,8  | 19,05 | 576,36 | 96,34  |
| 2019/06/20 | CH2205 | Male | Three y/o | Control | Control | Feed Day | No | 17:15 | 17:00 - 17:59 | Evening   | 38,0 | 95  | 103,6 | 103,6 | 19,15 | 590,14 | 157,08 |
| 2019/06/20 | CH2206 | Male | Three y/o | Control | Control | Feed Day | No | 17:15 | 17:00 - 17:59 | Evening   | 38,0 | 89  | 27,0  | 27,0  | 19,15 | 585,33 | 110,58 |
| 2019/06/20 | CH2205 | Male | Three y/o | Control | Control | Feed Day | No | 17:20 | 17:00 - 17:59 | Evening   | 38,0 | 100 | 45,0  | 45,0  | 19,15 | 593,87 | 128,15 |



|            |        |      |           |         |         |          |    |       |               |         |      |     |       |       |       |        |        |
|------------|--------|------|-----------|---------|---------|----------|----|-------|---------------|---------|------|-----|-------|-------|-------|--------|--------|
| 2019/06/20 | CH2206 | Male | Three y/o | Control | Control | Feed Day | No | 17:20 | 17:00 - 17:59 | Evening | 38,0 | 77  | 53,8  | 53,8  | 19,15 | 574,39 | 134,32 |
| 2019/06/20 | CH2205 | Male | Three y/o | Control | Control | Feed Day | No | 17:25 | 17:00 - 17:59 | Evening | 38,0 | 119 | 145,0 | 145,0 | 19,15 | 606,20 | 168,83 |
| 2019/06/20 | CH2206 | Male | Three y/o | Control | Control | Feed Day | No | 17:25 | 17:00 - 17:59 | Evening | 38,0 | 85  | 56,0  | 56,0  | 19,15 | 581,90 | 135,70 |
| 2019/06/20 | CH2205 | Male | Three y/o | Control | Control | Feed Day | No | 17:30 | 17:00 - 17:59 | Evening | 38,0 |     | 21,0  | 21,0  | 19,15 |        | 101,98 |
| 2019/06/20 | CH2206 | Male | Three y/o | Control | Control | Feed Day | No | 17:30 | 17:00 - 17:59 | Evening | 38,0 | 80  | 48,2  | 48,2  | 19,15 | 577,31 | 130,52 |
| 2019/06/20 | CH2205 | Male | Three y/o | Control | Control | Feed Day | No | 17:35 | 17:00 - 17:59 | Evening | 37,9 | 75  | 10,4  | 10,4  | 19,05 | 572,36 | 78,08  |
| 2019/06/20 | CH2206 | Male | Three y/o | Control | Control | Feed Day | No | 17:35 | 17:00 - 17:59 | Evening | 38,0 | 99  | 21,6  | 21,6  | 19,15 | 593,14 | 102,94 |
| 2019/06/20 | CH2205 | Male | Three y/o | Control | Control | Feed Day | No | 17:40 | 17:00 - 17:59 | Evening | 38,0 | 56  | 2,6   | 2,6   | 19,15 | 549,01 | 31,57  |
| 2019/06/20 | CH2206 | Male | Three y/o | Control | Control | Feed Day | No | 17:40 | 17:00 - 17:59 | Evening | 38,0 | 77  | 24,8  | 24,8  | 19,15 | 574,39 | 107,67 |
| 2019/06/20 | CH2205 | Male | Three y/o | Control | Control | Feed Day | No | 17:45 | 17:00 - 17:59 | Evening | 38,0 | 88  | 9,0   | 9,0   | 19,15 | 584,49 | 73,19  |
| 2019/06/20 | CH2206 | Male | Three y/o | Control | Control | Feed Day | No | 17:45 | 17:00 - 17:59 | Evening | 37,9 | 82  | 24,0  | 24,0  | 19,05 | 579,19 | 106,55 |
| 2019/06/20 | CH2205 | Male | Three y/o | Control | Control | Feed Day | No | 17:50 | 17:00 - 17:59 | Evening | 38,0 | 76  | 11,0  | 11,0  | 19,15 | 573,39 | 79,98  |
| 2019/06/20 | CH2206 | Male | Three y/o | Control | Control | Feed Day | No | 17:50 | 17:00 - 17:59 | Evening | 37,8 | 80  | 24,6  | 24,6  | 18,95 | 577,31 | 107,39 |
| 2019/06/20 | CH2205 | Male | Three y/o | Control | Control | Feed Day | No | 17:55 | 17:00 - 17:59 | Evening | 38,0 | 61  | 6,4   | 6,4   | 19,15 | 556,01 | 61,70  |
| 2019/06/20 | CH2206 | Male | Three y/o | Control | Control | Feed Day | No | 17:55 | 17:00 - 17:59 | Evening | 37,8 | 82  | 43,2  | 43,2  | 18,95 | 579,19 | 126,74 |
| 2019/06/20 | CH2205 | Male | Three y/o | Control | Control | Feed Day | No | 18:00 | 18:00 - 18:59 | Evening | 38,1 | 59  | 4,4   | 4,4   | 19,26 | 553,30 | 49,12  |
| 2019/06/20 | CH2206 | Male | Three y/o | Control | Control | Feed Day | No | 18:00 | 18:00 - 18:59 | Evening | 37,8 | 105 | 20,4  | 20,4  | 18,95 | 597,38 | 100,99 |
| 2019/06/20 | CH2205 | Male | Three y/o | Control | Control | Feed Day | No | 18:05 | 18:00 - 18:59 | Evening | 38,1 | 84  | 6,4   | 6,4   | 19,26 | 581,01 | 61,70  |
| 2019/06/20 | CH2206 | Male | Three y/o | Control | Control | Feed Day | No | 18:05 | 18:00 - 18:59 | Evening | 37,8 | 83  | 12,2  | 12,2  | 18,95 | 580,11 | 83,49  |
| 2019/06/20 | CH2205 | Male | Three y/o | Control | Control | Feed Day | No | 18:10 | 18:00 - 18:59 | Evening | 38,1 | 56  | 17,6  | 17,6  | 19,26 | 549,01 | 95,95  |
| 2019/06/20 | CH2206 | Male | Three y/o | Control | Control | Feed Day | No | 18:10 | 18:00 - 18:59 | Evening | 37,8 | 81  | 35,4  | 35,4  | 18,95 | 578,26 | 119,88 |
| 2019/06/20 | CH2205 | Male | Three y/o | Control | Control | Feed Day | No | 18:15 | 18:00 - 18:59 | Evening | 38,1 | 86  | 13,4  | 13,4  | 19,26 | 582,77 | 86,68  |
| 2019/06/20 | CH2206 | Male | Three y/o | Control | Control | Feed Day | No | 18:15 | 18:00 - 18:59 | Evening | 37,8 | 70  | 41,4  | 41,4  | 18,95 | 566,99 | 125,27 |
| 2019/06/20 | CH2205 | Male | Three y/o | Control | Control | Feed Day | No | 18:20 | 18:00 - 18:59 | Evening | 38,1 | 56  | 10,4  | 10,4  | 19,26 | 549,01 | 78,08  |
| 2019/06/20 | CH2206 | Male | Three y/o | Control | Control | Feed Day | No | 18:20 | 18:00 - 18:59 | Evening | 37,7 | 70  | 40,8  | 40,8  | 18,85 | 566,99 | 124,77 |
| 2019/06/20 | CH2205 | Male | Three y/o | Control | Control | Feed Day | No | 18:25 | 18:00 - 18:59 | Evening | 38,0 |     | 13,0  | 13,0  | 19,15 |        | 85,65  |
| 2019/06/20 | CH2206 | Male | Three y/o | Control | Control | Feed Day | No | 18:25 | 18:00 - 18:59 | Evening | 37,7 | 86  | 36,0  | 36,0  | 18,85 | 582,77 | 120,46 |
| 2019/06/20 | CH2205 | Male | Three y/o | Control | Control | Feed Day | No | 18:30 | 18:00 - 18:59 | Evening | 37,9 | 76  | 16,6  | 16,6  | 19,05 | 573,39 | 93,96  |
| 2019/06/20 | CH2206 | Male | Three y/o | Control | Control | Feed Day | No | 18:30 | 18:00 - 18:59 | Evening | 37,5 | 47  | 37,0  | 37,0  | 18,65 | 534,23 | 121,40 |
| 2019/06/20 | CH2205 | Male | Three y/o | Control | Control | Feed Day | No | 18:35 | 18:00 - 18:59 | Evening | 37,9 | 50  | 15,4  | 15,4  | 19,05 | 539,52 | 91,41  |
| 2019/06/20 | CH2206 | Male | Three y/o | Control | Control | Feed Day | No | 18:35 | 18:00 - 18:59 | Evening | 37,5 | 51  | 38,2  | 38,2  | 18,65 | 541,20 | 122,50 |
| 2019/06/20 | CH2205 | Male | Three y/o | Control | Control | Feed Day | No | 18:40 | 18:00 - 18:59 | Evening | 37,9 | 61  | 18,4  | 18,4  | 19,05 | 556,01 | 97,47  |
| 2019/06/20 | CH2206 | Male | Three y/o | Control | Control | Feed Day | No | 18:40 | 18:00 - 18:59 | Evening | 37,5 | 95  | 38,4  | 38,4  | 18,65 | 590,14 | 122,68 |
| 2019/06/20 | CH2205 | Male | Three y/o | Control | Control | Feed Day | No | 18:45 | 18:00 - 18:59 | Evening | 37,9 | 83  | 10,2  | 10,2  | 19,05 | 580,11 | 77,43  |
| 2019/06/20 | CH2206 | Male | Three y/o | Control | Control | Feed Day | No | 18:45 | 18:00 - 18:59 | Evening | 37,4 | 68  | 42,0  | 42,0  | 18,55 | 564,71 | 125,77 |
| 2019/06/20 | CH2205 | Male | Three y/o | Control | Control | Feed Day | No | 18:50 | 18:00 - 18:59 | Evening | 37,9 | 80  | 12,4  | 12,4  | 19,05 | 577,31 | 84,04  |
| 2019/06/20 | CH2206 | Male | Three y/o | Control | Control | Feed Day | No | 18:50 | 18:00 - 18:59 | Evening | 37,4 | 75  | 38,4  | 38,4  | 18,55 | 572,36 | 122,68 |
| 2019/06/20 | CH2205 | Male | Three y/o | Control | Control | Feed Day | No | 18:55 | 18:00 - 18:59 | Evening | 38,0 | 56  | 14,4  | 14,4  | 19,15 | 549,01 | 89,12  |
| 2019/06/20 | CH2206 | Male | Three y/o | Control | Control | Feed Day | No | 18:55 | 18:00 - 18:59 | Evening | 37,4 | 61  | 42,4  | 42,4  | 18,55 | 556,01 | 126,10 |
| 2019/06/20 | CH2205 | Male | Three y/o | Control | Control | Feed Day | No | 19:00 | 19:00 - 19:59 | Evening | 38,0 | 79  | 16,8  | 16,8  | 19,15 | 576,36 | 94,37  |
| 2019/06/20 | CH2206 | Male | Three y/o | Control | Control | Feed Day | No | 19:00 | 19:00 - 19:59 | Evening | 37,4 | 75  | 54,4  | 54,4  | 18,55 | 572,36 | 134,70 |
| 2019/06/20 | CH2205 | Male | Three y/o | Control | Control | Feed Day | No | 19:05 | 19:00 - 19:59 | Evening | 38,1 | 65  | 15,4  | 15,4  | 19,26 | 561,12 | 91,41  |
| 2019/06/20 | CH2206 | Male | Three y/o | Control | Control | Feed Day | No | 19:05 | 19:00 - 19:59 | Evening | 37,4 | 84  | 52,4  | 52,4  | 18,55 | 581,01 | 133,41 |
| 2019/06/20 | CH2205 | Male | Three y/o | Control | Control | Feed Day | No | 19:10 | 19:00 - 19:59 | Evening | 38,1 | 65  | 8,0   | 8,0   | 19,26 | 561,12 | 69,22  |
| 2019/06/20 | CH2206 | Male | Three y/o | Control | Control | Feed Day | No | 19:10 | 19:00 - 19:59 | Evening | 37,5 | 88  | 45,4  | 45,4  | 18,65 | 584,49 | 128,45 |
| 2019/06/20 | CH2205 | Male | Three y/o | Control | Control | Feed Day | No | 19:15 | 19:00 - 19:59 | Evening | 38,1 | 68  | 9,8   | 9,8   | 19,26 | 564,71 | 76,07  |
| 2019/06/20 | CH2206 | Male | Three y/o | Control | Control | Feed Day | No | 19:15 | 19:00 - 19:59 | Evening | 37,5 | 84  | 43,8  | 43,8  | 18,65 | 581,01 | 127,22 |
| 2019/06/20 | CH2205 | Male | Three y/o | Control | Control | Feed Day | No | 19:20 | 19:00 - 19:59 | Evening | 38,1 | 79  | 16,2  | 16,2  | 19,26 | 576,36 | 93,13  |
| 2019/06/20 | CH2206 | Male | Three y/o | Control | Control | Feed Day | No | 19:20 | 19:00 - 19:59 | Evening | 37,5 | 47  | 40,2  | 40,2  | 18,65 | 534,23 | 124,26 |
| 2019/06/20 | CH2205 | Male | Three y/o | Control | Control | Feed Day | No | 19:25 | 19:00 - 19:59 | Evening | 38,1 | 57  | 17,8  | 17,8  | 19,26 | 550,47 | 96,34  |
| 2019/06/20 | CH2206 | Male | Three y/o | Control | Control | Feed Day | No | 19:25 | 19:00 - 19:59 | Evening | 37,5 | 89  | 38,0  | 38,0  | 18,65 | 585,33 | 122,32 |
| 2019/06/20 | CH2205 | Male | Three y/o | Control | Control | Feed Day | No | 19:30 | 19:00 - 19:59 | Evening | 38,1 | 53  | 13,0  | 13,0  | 19,26 | 544,43 | 85,65  |
| 2019/06/20 | CH2206 | Male | Three y/o | Control | Control | Feed Day | No | 19:30 | 19:00 - 19:59 | Evening | 37,5 | 97  | 46,4  | 46,4  | 18,65 | 591,66 | 129,21 |
| 2019/06/20 | CH2205 | Male | Three y/o | Control | Control | Feed Day | No | 19:35 | 19:00 - 19:59 | Evening | 38,1 |     | 18,2  | 18,2  | 19,26 |        | 97,10  |
| 2019/06/20 | CH2206 | Male | Three y/o | Control | Control | Feed Day | No | 19:35 | 19:00 - 19:59 | Evening | 37,7 | 92  | 34,6  | 34,6  | 18,85 | 587,78 | 119,10 |
| 2019/06/20 | CH2205 | Male | Three y/o | Control | Control | Feed Day | No | 19:40 | 19:00 - 19:59 | Evening | 38,1 | 46  | 19,0  | 19,0  | 19,26 | 532,38 | 98,56  |
| 2019/06/20 | CH2206 | Male | Three y/o | Control | Control | Feed Day | No | 19:40 | 19:00 - 19:59 | Evening | 37,7 | 77  | 39,0  | 39,0  | 18,85 | 574,39 | 123,22 |
| 2019/06/20 | CH2205 | Male | Three y/o | Control | Control | Feed Day | No | 19:45 | 19:00 - 19:59 | Evening | 38,1 | 65  | 16,2  | 16,2  | 19,26 | 561,12 | 93,13  |
| 2019/06/20 | CH2206 | Male | Three y/o | Control | Control | Feed Day | No | 19:45 | 19:00 - 19:59 | Evening | 37,8 | 88  | 31,4  | 31,4  | 18,95 | 584,49 | 115,76 |
| 2019/06/20 | CH2205 | Male | Three y/o | Control | Control | Feed Day | No | 19:50 | 19:00 - 19:59 | Evening | 38,0 | 59  | 18,0  | 18,0  | 19,15 | 553,30 | 96,72  |
| 2019/06/20 | CH2206 | Male | Three y/o | Control | Control | Feed Day | No | 19:50 | 19:00 - 19:59 | Evening | 37,8 | 71  | 34,4  | 34,4  | 18,95 | 568,10 | 118,90 |
| 2019/06/20 | CH2205 | Male | Three y/o | Control | Control | Feed Day | No | 19:55 | 19:00 - 19:59 | Evening | 38,1 | 188 | 4,6   | 4,6   | 19,26 | 636,34 | 50,61  |
| 2019/06/20 | CH2206 | Male | Three y/o | Control | Control | Feed Day | No | 19:55 | 19:00 - 19:59 | Evening | 37,8 | 47  | 26,4  | 26,4  | 18,95 | 534,23 | 109,81 |
| 2019/06/20 | CH2205 | Male | Three y/o | Control | Control | Feed Day | No | 20:00 | 20:00 - 20:59 | Night   | 38,1 | 158 | 26,6  | 26,6  | 19,26 | 625,26 | 110,07 |
| 2019/06/20 | CH2206 | Male | Three y/o | Control | Control | Feed Day | No | 20:00 | 20:00 - 20:59 | Night   | 37,8 | 97  | 23,4  | 23,4  | 18,95 | 591,66 | 105,68 |
| 2019/06/20 | CH2205 | Male | Three y/o | Control | Control | Feed Day | No | 20:05 | 20:00 - 20:59 | Night   | 38,0 | 66  | 22,4  | 22,4  | 19,15 | 562,34 | 104,19 |
| 2019/06/20 | CH2206 | Male | Three y/o | Control | Control | Feed Day | No | 20:05 | 20:00 - 20:59 | Night   | 37,8 | 85  | 19,4  | 19,4  | 18,95 | 581,90 | 99,28  |
| 2019/06/20 | CH2205 | Male | Three y/o | Control | Control | Feed Day | No | 20:10 | 20:00 - 20:59 | Night   | 38,0 | 84  | 23,6  | 23,6  | 19,15 | 581,01 | 105,97 |
| 2019/06/20 | CH2206 | Male | Three y/o | Control | Control | Feed Day | No | 20:10 | 20:00 - 20:59 | Night   | 37,8 | 52  | 25,0  | 25,0  | 18,95 | 542,83 | 107,94 |
| 2019/06/20 | CH2205 | Male | Three y/o | Control | Control | Feed Day | No | 20:15 | 20:00 - 20:59 | Night   | 37,9 | 56  | 18,8  | 18,8  | 19,05 | 549,01 | 98,20  |



|            |        |      |           |         |         |          |    |       |               |       |      |     |      |      |       |        |        |
|------------|--------|------|-----------|---------|---------|----------|----|-------|---------------|-------|------|-----|------|------|-------|--------|--------|
| 2019/06/20 | CH2206 | Male | Three y/o | Control | Control | Feed Day | No | 20:15 | 20:00 - 20:59 | Night | 37,9 | 80  | 28,6 | 28,6 | 19,05 | 577,31 | 112,56 |
| 2019/06/20 | CH2205 | Male | Three y/o | Control | Control | Feed Day | No | 20:20 | 20:00 - 20:59 | Night | 37,9 | 80  | 19,2 | 19,2 | 19,05 | 577,31 | 98,92  |
| 2019/06/20 | CH2206 | Male | Three y/o | Control | Control | Feed Day | No | 20:20 | 20:00 - 20:59 | Night | 37,9 | 85  | 26,0 | 26,0 | 19,05 | 581,90 | 109,29 |
| 2019/06/20 | CH2205 | Male | Three y/o | Control | Control | Feed Day | No | 20:25 | 20:00 - 20:59 | Night | 37,7 | 134 | 22,6 | 22,6 | 18,85 | 614,33 | 104,49 |
| 2019/06/20 | CH2206 | Male | Three y/o | Control | Control | Feed Day | No | 20:25 | 20:00 - 20:59 | Night | 37,9 | 86  | 29,6 | 29,6 | 19,05 | 582,77 | 113,73 |
| 2019/06/20 | CH2205 | Male | Three y/o | Control | Control | Feed Day | No | 20:30 | 20:00 - 20:59 | Night | 37,7 | 51  | 21,8 | 21,8 | 18,85 | 541,20 | 103,26 |
| 2019/06/20 | CH2206 | Male | Three y/o | Control | Control | Feed Day | No | 20:30 | 20:00 - 20:59 | Night | 37,9 | 81  | 24,4 | 24,4 | 19,05 | 578,26 | 107,11 |
| 2019/06/20 | CH2205 | Male | Three y/o | Control | Control | Feed Day | No | 20:35 | 20:00 - 20:59 | Night | 37,7 | 64  | 21,0 | 21,0 | 18,85 | 559,88 | 101,98 |
| 2019/06/20 | CH2206 | Male | Three y/o | Control | Control | Feed Day | No | 20:35 | 20:00 - 20:59 | Night | 37,9 | 64  | 28,0 | 28,0 | 19,05 | 559,88 | 111,83 |
| 2019/06/20 | CH2205 | Male | Three y/o | Control | Control | Feed Day | No | 20:40 | 20:00 - 20:59 | Night | 37,6 | 50  | 20,6 | 20,6 | 18,75 | 539,52 | 101,32 |
| 2019/06/20 | CH2206 | Male | Three y/o | Control | Control | Feed Day | No | 20:40 | 20:00 - 20:59 | Night | 37,9 | 67  | 34,4 | 34,4 | 19,05 | 563,53 | 118,90 |
| 2019/06/20 | CH2205 | Male | Three y/o | Control | Control | Feed Day | No | 20:45 | 20:00 - 20:59 | Night | 37,7 | 57  | 17,4 | 17,4 | 18,85 | 550,47 | 95,56  |
| 2019/06/20 | CH2206 | Male | Three y/o | Control | Control | Feed Day | No | 20:45 | 20:00 - 20:59 | Night | 37,9 | 64  | 37,2 | 37,2 | 19,05 | 559,88 | 121,59 |
| 2019/06/20 | CH2205 | Male | Three y/o | Control | Control | Feed Day | No | 20:50 | 20:00 - 20:59 | Night | 37,7 | 55  | 14,8 | 14,8 | 18,85 | 547,52 | 90,05  |
| 2019/06/20 | CH2206 | Male | Three y/o | Control | Control | Feed Day | No | 20:50 | 20:00 - 20:59 | Night | 37,9 | 97  | 35,4 | 35,4 | 19,05 | 591,66 | 119,88 |
| 2019/06/20 | CH2205 | Male | Three y/o | Control | Control | Feed Day | No | 20:55 | 20:00 - 20:59 | Night | 37,7 | 87  | 13,0 | 13,0 | 18,85 | 583,64 | 85,65  |
| 2019/06/20 | CH2206 | Male | Three y/o | Control | Control | Feed Day | No | 20:55 | 20:00 - 20:59 | Night | 37,8 | 56  | 49,4 | 49,4 | 18,95 | 549,01 | 131,37 |
| 2019/06/20 | CH2205 | Male | Three y/o | Control | Control | Feed Day | No | 21:00 | 21:00 - 21:59 | Night | 37,7 | 53  | 16,2 | 16,2 | 18,85 | 544,43 | 93,13  |
| 2019/06/20 | CH2206 | Male | Three y/o | Control | Control | Feed Day | No | 21:00 | 21:00 - 21:59 | Night | 37,8 | 82  | 54,0 | 54,0 | 18,95 | 579,19 | 134,45 |
| 2019/06/20 | CH2205 | Male | Three y/o | Control | Control | Feed Day | No | 21:05 | 21:00 - 21:59 | Night | 37,7 | 82  | 18,8 | 18,8 | 18,85 | 579,19 | 98,20  |
| 2019/06/20 | CH2206 | Male | Three y/o | Control | Control | Feed Day | No | 21:05 | 21:00 - 21:59 | Night | 37,8 | 87  | 48,4 | 48,4 | 18,95 | 583,64 | 130,66 |
| 2019/06/20 | CH2205 | Male | Three y/o | Control | Control | Feed Day | No | 21:10 | 21:00 - 21:59 | Night | 37,7 | 63  | 16,8 | 16,8 | 18,85 | 558,62 | 94,37  |
| 2019/06/20 | CH2206 | Male | Three y/o | Control | Control | Feed Day | No | 21:10 | 21:00 - 21:59 | Night | 37,8 | 86  | 44,2 | 44,2 | 18,95 | 582,77 | 127,53 |
| 2019/06/20 | CH2205 | Male | Three y/o | Control | Control | Feed Day | No | 21:15 | 21:00 - 21:59 | Night | 37,7 | 48  | 18,8 | 18,8 | 18,85 | 536,04 | 98,20  |
| 2019/06/20 | CH2206 | Male | Three y/o | Control | Control | Feed Day | No | 21:15 | 21:00 - 21:59 | Night | 37,8 | 77  | 47,0 | 47,0 | 18,95 | 574,39 | 129,65 |
| 2019/06/20 | CH2205 | Male | Three y/o | Control | Control | Feed Day | No | 21:20 | 21:00 - 21:59 | Night | 37,7 | 80  | 19,6 | 19,6 | 18,85 | 577,31 | 99,63  |
| 2019/06/20 | CH2206 | Male | Three y/o | Control | Control | Feed Day | No | 21:20 | 21:00 - 21:59 | Night | 37,8 | 88  | 44,8 | 44,8 | 18,95 | 584,49 | 127,99 |
| 2019/06/20 | CH2205 | Male | Three y/o | Control | Control | Feed Day | No | 21:25 | 21:00 - 21:59 | Night | 37,8 | 56  | 19,6 | 19,6 | 18,95 | 549,01 | 99,63  |
| 2019/06/20 | CH2206 | Male | Three y/o | Control | Control | Feed Day | No | 21:25 | 21:00 - 21:59 | Night | 37,8 | 54  | 41,8 | 41,8 | 18,95 | 545,99 | 125,60 |
| 2019/06/20 | CH2205 | Male | Three y/o | Control | Control | Feed Day | No | 21:30 | 21:00 - 21:59 | Night | 37,9 | 74  | 15,8 | 15,8 | 19,05 | 571,33 | 92,28  |
| 2019/06/20 | CH2206 | Male | Three y/o | Control | Control | Feed Day | No | 21:30 | 21:00 - 21:59 | Night | 37,8 | 60  | 47,0 | 47,0 | 18,95 | 554,67 | 129,65 |
| 2019/06/20 | CH2205 | Male | Three y/o | Control | Control | Feed Day | No | 21:35 | 21:00 - 21:59 | Night | 37,9 | 46  | 19,0 | 19,0 | 19,05 | 532,38 | 98,56  |
| 2019/06/20 | CH2206 | Male | Three y/o | Control | Control | Feed Day | No | 21:35 | 21:00 - 21:59 | Night | 37,8 | 61  | 40,4 | 40,4 | 18,95 | 556,01 | 124,43 |
| 2019/06/20 | CH2205 | Male | Three y/o | Control | Control | Feed Day | No | 21:40 | 21:00 - 21:59 | Night | 37,9 | 61  | 17,8 | 17,8 | 19,05 | 556,01 | 96,34  |
| 2019/06/20 | CH2206 | Male | Three y/o | Control | Control | Feed Day | No | 21:40 | 21:00 - 21:59 | Night | 37,8 | 84  | 46,0 | 46,0 | 18,95 | 581,01 | 128,91 |
| 2019/06/20 | CH2205 | Male | Three y/o | Control | Control | Feed Day | No | 21:45 | 21:00 - 21:59 | Night | 37,9 | 56  | 23,8 | 23,8 | 19,05 | 549,01 | 106,26 |
| 2019/06/20 | CH2206 | Male | Three y/o | Control | Control | Feed Day | No | 21:45 | 21:00 - 21:59 | Night | 37,8 | 53  | 37,8 | 37,8 | 18,95 | 544,43 | 122,14 |
| 2019/06/20 | CH2205 | Male | Three y/o | Control | Control | Feed Day | No | 21:50 | 21:00 - 21:59 | Night | 37,9 | 74  | 22,0 | 22,0 | 19,05 | 571,33 | 103,57 |
| 2019/06/20 | CH2206 | Male | Three y/o | Control | Control | Feed Day | No | 21:50 | 21:00 - 21:59 | Night | 37,8 | 82  | 42,0 | 42,0 | 18,95 | 579,19 | 125,77 |
| 2019/06/20 | CH2205 | Male | Three y/o | Control | Control | Feed Day | No | 21:55 | 21:00 - 21:59 | Night | 37,9 | 63  | 22,8 | 22,8 | 19,05 | 558,62 | 104,79 |
| 2019/06/20 | CH2206 | Male | Three y/o | Control | Control | Feed Day | No | 21:55 | 21:00 - 21:59 | Night | 37,8 | 76  | 42,8 | 42,8 | 18,95 | 573,39 | 126,42 |
| 2019/06/20 | CH2205 | Male | Three y/o | Control | Control | Feed Day | No | 22:00 | 22:00 - 22:59 | Night | 37,9 | 54  | 22,4 | 22,4 | 19,05 | 545,99 | 104,19 |
| 2019/06/20 | CH2206 | Male | Three y/o | Control | Control | Feed Day | No | 22:00 | 22:00 - 22:59 | Night | 37,8 | 53  | 42,0 | 42,0 | 18,95 | 544,43 | 125,77 |
| 2019/06/20 | CH2205 | Male | Three y/o | Control | Control | Feed Day | No | 22:05 | 22:00 - 22:59 | Night | 37,8 | 72  | 14,0 | 14,0 | 18,95 | 569,20 | 88,17  |
| 2019/06/20 | CH2206 | Male | Three y/o | Control | Control | Feed Day | No | 22:05 | 22:00 - 22:59 | Night | 37,8 | 68  | 41,6 | 41,6 | 18,95 | 564,71 | 125,44 |
| 2019/06/20 | CH2205 | Male | Three y/o | Control | Control | Feed Day | No | 22:10 | 22:00 - 22:59 | Night | 37,7 | 51  | 13,8 | 13,8 | 18,85 | 541,20 | 87,68  |
| 2019/06/20 | CH2206 | Male | Three y/o | Control | Control | Feed Day | No | 22:10 | 22:00 - 22:59 | Night | 37,8 | 76  | 42,4 | 42,4 | 18,95 | 573,39 | 126,10 |
| 2019/06/20 | CH2205 | Male | Three y/o | Control | Control | Feed Day | No | 22:15 | 22:00 - 22:59 | Night | 37,7 | 62  | 18,4 | 18,4 | 18,85 | 557,33 | 97,47  |
| 2019/06/20 | CH2206 | Male | Three y/o | Control | Control | Feed Day | No | 22:15 | 22:00 - 22:59 | Night | 37,8 | 81  | 34,4 | 34,4 | 18,95 | 578,26 | 118,90 |
| 2019/06/20 | CH2205 | Male | Three y/o | Control | Control | Feed Day | No | 22:20 | 22:00 - 22:59 | Night | 37,7 | 90  | 35,0 | 35,0 | 18,85 | 586,16 | 119,49 |
| 2019/06/20 | CH2206 | Male | Three y/o | Control | Control | Feed Day | No | 22:20 | 22:00 - 22:59 | Night | 37,9 | 109 | 12,8 | 12,8 | 19,05 | 600,04 | 85,12  |
| 2019/06/20 | CH2205 | Male | Three y/o | Control | Control | Feed Day | No | 22:25 | 22:00 - 22:59 | Night | 37,7 | 94  | 17,4 | 17,4 | 18,85 | 589,37 | 95,56  |
| 2019/06/20 | CH2206 | Male | Three y/o | Control | Control | Feed Day | No | 22:25 | 22:00 - 22:59 | Night | 37,9 | 89  | 12,8 | 12,8 | 19,05 | 585,33 | 85,12  |
| 2019/06/20 | CH2205 | Male | Three y/o | Control | Control | Feed Day | No | 22:30 | 22:00 - 22:59 | Night | 37,7 |     | 17,8 | 17,8 | 18,85 |        | 96,34  |
| 2019/06/20 | CH2206 | Male | Three y/o | Control | Control | Feed Day | No | 22:30 | 22:00 - 22:59 | Night | 37,8 | 80  | 28,4 | 28,4 | 18,95 | 577,31 | 112,31 |
| 2019/06/20 | CH2205 | Male | Three y/o | Control | Control | Feed Day | No | 22:35 | 22:00 - 22:59 | Night | 37,7 |     | 11,0 | 11,0 | 18,85 |        | 79,98  |
| 2019/06/20 | CH2206 | Male | Three y/o | Control | Control | Feed Day | No | 22:35 | 22:00 - 22:59 | Night | 37,7 | 47  | 48,4 | 48,4 | 18,85 | 534,23 | 130,66 |
| 2019/06/20 | CH2205 | Male | Three y/o | Control | Control | Feed Day | No | 22:40 | 22:00 - 22:59 | Night | 37,6 |     | 18,4 | 18,4 | 18,75 |        | 97,47  |
| 2019/06/20 | CH2206 | Male | Three y/o | Control | Control | Feed Day | No | 22:40 | 22:00 - 22:59 | Night | 37,6 | 49  | 54,2 | 54,2 | 18,75 | 537,80 | 134,57 |
| 2019/06/20 | CH2205 | Male | Three y/o | Control | Control | Feed Day | No | 22:45 | 22:00 - 22:59 | Night | 37,6 | 60  | 14,2 | 14,2 | 18,75 | 554,67 | 88,65  |
| 2019/06/20 | CH2206 | Male | Three y/o | Control | Control | Feed Day | No | 22:45 | 22:00 - 22:59 | Night | 37,5 | 70  | 40,8 | 40,8 | 18,65 | 566,99 | 124,77 |
| 2019/06/20 | CH2205 | Male | Three y/o | Control | Control | Feed Day | No | 22:50 | 22:00 - 22:59 | Night | 37,6 |     | 11,0 | 11,0 | 18,75 |        | 79,98  |
| 2019/06/20 | CH2206 | Male | Three y/o | Control | Control | Feed Day | No | 22:50 | 22:00 - 22:59 | Night | 37,5 | 61  | 47,0 | 47,0 | 18,65 | 556,01 | 129,65 |
| 2019/06/20 | CH2205 | Male | Three y/o | Control | Control | Feed Day | No | 22:55 | 22:00 - 22:59 | Night | 37,6 | 152 | 29,0 | 29,0 | 18,75 | 622,73 | 113,03 |
| 2019/06/20 | CH2206 | Male | Three y/o | Control | Control | Feed Day | No | 22:55 | 22:00 - 22:59 | Night | 37,5 | 84  | 48,4 | 48,4 | 18,65 | 581,01 | 130,66 |
| 2019/06/20 | CH2205 | Male | Three y/o | Control | Control | Feed Day | No | 23:00 | 23:00 - 23:59 | Night | 37,6 | 58  | 10,2 | 10,2 | 18,75 | 551,90 | 77,43  |
| 2019/06/20 | CH2206 | Male | Three y/o | Control | Control | Feed Day | No | 23:00 | 23:00 - 23:59 | Night | 37,7 | 65  | 49,2 | 49,2 | 18,85 | 561,12 | 131,23 |
| 2019/06/20 | CH2205 | Male | Three y/o | Control | Control | Feed Day | No | 23:05 | 23:00 - 23:59 | Night | 37,6 |     | 13,6 | 13,6 | 18,75 |        | 87,18  |
| 2019/06/20 | CH2206 | Male | Three y/o | Control | Control | Feed Day | No | 23:05 | 23:00 - 23:59 | Night | 37,7 | 84  | 47,8 | 47,8 | 18,85 | 581,01 | 130,23 |
| 2019/06/20 | CH2205 | Male | Three y/o | Control | Control | Feed Day | No | 23:10 | 23:00 - 23:59 | Night | 37,6 | 84  | 14,0 | 14,0 | 18,75 | 581,01 | 88,17  |



|    |            |        |      |           |         |         |          |    |       |               |               |      |     |       |       |       |        |        |
|----|------------|--------|------|-----------|---------|---------|----------|----|-------|---------------|---------------|------|-----|-------|-------|-------|--------|--------|
|    | 2019/06/20 | CH2206 | Male | Three y/o | Control | Control | Feed Day | No | 23:10 | 23:00 - 23:59 | Night         | 37,7 | 52  | 50,0  | 50,0  | 18,85 | 542,83 | 131,79 |
|    | 2019/06/20 | CH2205 | Male | Three y/o | Control | Control | Feed Day | No | 23:15 | 23:00 - 23:59 | Night         | 37,6 | 160 | 11,8  | 11,8  | 18,75 | 626,07 | 82,36  |
|    | 2019/06/20 | CH2206 | Male | Three y/o | Control | Control | Feed Day | No | 23:15 | 23:00 - 23:59 | Night         | 37,7 | 55  | 47,4  | 47,4  | 18,85 | 547,52 | 129,94 |
|    | 2019/06/20 | CH2205 | Male | Three y/o | Control | Control | Feed Day | No | 23:20 | 23:00 - 23:59 | Night         | 37,7 | 89  | 21,8  | 21,8  | 18,85 | 585,33 | 103,26 |
|    | 2019/06/20 | CH2206 | Male | Three y/o | Control | Control | Feed Day | No | 23:20 | 23:00 - 23:59 | Night         | 37,7 | 78  | 42,6  | 42,6  | 18,85 | 575,38 | 126,26 |
|    | 2019/06/20 | CH2205 | Male | Three y/o | Control | Control | Feed Day | No | 23:25 | 23:00 - 23:59 | Night         | 37,7 | 85  | 21,6  | 21,6  | 18,85 | 581,90 | 102,94 |
|    | 2019/06/20 | CH2206 | Male | Three y/o | Control | Control | Feed Day | No | 23:25 | 23:00 - 23:59 | Night         | 37,7 | 84  | 50,6  | 50,6  | 18,85 | 581,01 | 132,20 |
|    | 2019/06/20 | CH2205 | Male | Three y/o | Control | Control | Feed Day | No | 23:30 | 23:00 - 23:59 | Night         | 37,7 | 56  | 24,0  | 24,0  | 18,85 | 549,01 | 106,55 |
|    | 2019/06/20 | CH2206 | Male | Three y/o | Control | Control | Feed Day | No | 23:30 | 23:00 - 23:59 | Night         | 37,7 | 78  | 46,2  | 46,2  | 18,85 | 575,38 | 129,06 |
|    | 2019/06/20 | CH2205 | Male | Three y/o | Control | Control | Feed Day | No | 23:35 | 23:00 - 23:59 | Night         | 37,7 | 67  | 23,2  | 23,2  | 18,85 | 563,53 | 105,39 |
|    | 2019/06/20 | CH2206 | Male | Three y/o | Control | Control | Feed Day | No | 23:35 | 23:00 - 23:59 | Night         | 37,7 | 94  | 34,0  | 34,0  | 18,85 | 589,37 | 118,49 |
|    | 2019/06/20 | CH2205 | Male | Three y/o | Control | Control | Feed Day | No | 23:40 | 23:00 - 23:59 | Night         | 37,9 |     | 18,2  | 18,2  | 19,05 |        | 97,10  |
|    | 2019/06/20 | CH2206 | Male | Three y/o | Control | Control | Feed Day | No | 23:40 | 23:00 - 23:59 | Night         | 37,7 | 76  | 17,6  | 17,6  | 18,85 | 573,39 | 95,95  |
|    | 2019/06/20 | CH2205 | Male | Three y/o | Control | Control | Feed Day | No | 23:45 | 23:00 - 23:59 | Night         | 37,7 |     | 21,2  | 21,2  | 18,85 |        | 102,31 |
|    | 2019/06/20 | CH2206 | Male | Three y/o | Control | Control | Feed Day | No | 23:45 | 23:00 - 23:59 | Night         | 37,7 | 67  | 20,0  | 20,0  | 18,85 | 563,53 | 100,31 |
|    | 2019/06/20 | CH2205 | Male | Three y/o | Control | Control | Feed Day | No | 23:50 | 23:00 - 23:59 | Night         | 37,7 |     | 12,0  | 12,0  | 18,85 |        | 82,93  |
|    | 2019/06/20 | CH2206 | Male | Three y/o | Control | Control | Feed Day | No | 23:50 | 23:00 - 23:59 | Night         | 37,5 | 54  | 31,2  | 31,2  | 18,65 | 545,99 | 115,54 |
|    | 2019/06/20 | CH2205 | Male | Three y/o | Control | Control | Feed Day | No | 23:55 | 23:00 - 23:59 | Night         | 37,6 |     | 14,0  | 14,0  | 18,75 |        | 88,17  |
|    | 2019/06/20 | CH2206 | Male | Three y/o | Control | Control | Feed Day | No | 23:55 | 23:00 - 23:59 | Night         | 37,4 | 82  | 33,6  | 33,6  | 18,55 | 579,19 | 118,09 |
| 37 | 2019/06/21 | CH2205 | Male | Three y/o | Control | Control | Feed Day | No | 00:00 | 00:00 - 00:59 | Early Morning | 37,6 | 44  | 12,2  | 12,2  | 18,75 | 528,51 | 83,49  |
|    | 2019/06/21 | CH2206 | Male | Three y/o | Control | Control | Feed Day | No | 00:00 | 00:00 - 00:59 | Early Morning | 37,4 | 61  | 36,0  | 36,0  | 18,55 | 556,01 | 120,46 |
|    | 2019/06/21 | CH2205 | Male | Three y/o | Control | Control | Feed Day | No | 00:05 | 00:00 - 00:59 | Early Morning | 37,6 | 53  | 13,4  | 13,4  | 18,75 | 544,43 | 86,68  |
|    | 2019/06/21 | CH2206 | Male | Three y/o | Control | Control | Feed Day | No | 00:05 | 00:00 - 00:59 | Early Morning | 37,4 | 77  | 35,0  | 35,0  | 18,55 | 574,39 | 119,49 |
|    | 2019/06/21 | CH2205 | Male | Three y/o | Control | Control | Feed Day | No | 00:10 | 00:00 - 00:59 | Early Morning | 37,5 | 59  | 15,6  | 15,6  | 18,65 | 553,30 | 91,85  |
|    | 2019/06/21 | CH2206 | Male | Three y/o | Control | Control | Feed Day | No | 00:10 | 00:00 - 00:59 | Early Morning | 37,3 | 88  | 43,8  | 43,8  | 18,46 | 584,49 | 127,22 |
|    | 2019/06/21 | CH2205 | Male | Three y/o | Control | Control | Feed Day | No | 00:15 | 00:00 - 00:59 | Early Morning | 37,5 | 88  | 10,8  | 10,8  | 18,65 | 584,49 | 79,36  |
|    | 2019/06/21 | CH2206 | Male | Three y/o | Control | Control | Feed Day | No | 00:15 | 00:00 - 00:59 | Early Morning | 37,3 | 92  | 40,4  | 40,4  | 18,46 | 587,78 | 124,43 |
|    | 2019/06/21 | CH2205 | Male | Three y/o | Control | Control | Feed Day | No | 00:20 | 00:00 - 00:59 | Early Morning | 37,6 |     | 3,0   | 3,0   | 18,75 |        | 36,34  |
|    | 2019/06/21 | CH2206 | Male | Three y/o | Control | Control | Feed Day | No | 00:20 | 00:00 - 00:59 | Early Morning | 37,3 | 63  | 12,6  | 12,6  | 18,46 | 558,62 | 84,59  |
|    | 2019/06/21 | CH2205 | Male | Three y/o | Control | Control | Feed Day | No | 00:25 | 00:00 - 00:59 | Early Morning | 37,5 | 82  | 5,0   | 5,0   | 18,65 | 579,19 | 53,41  |
|    | 2019/06/21 | CH2206 | Male | Three y/o | Control | Control | Feed Day | No | 00:25 | 00:00 - 00:59 | Early Morning | 37,3 | 132 | 77,4  | 77,4  | 18,46 | 613,32 | 146,93 |
|    | 2019/06/21 | CH2205 | Male | Three y/o | Control | Control | Feed Day | No | 00:30 | 00:00 - 00:59 | Early Morning | 37,5 | 48  | 4,0   | 4,0   | 18,65 | 536,04 | 45,94  |
|    | 2019/06/21 | CH2206 | Male | Three y/o | Control | Control | Feed Day | No | 00:30 | 00:00 - 00:59 | Early Morning | 37,3 | 118 | 32,4  | 32,4  | 18,46 | 605,61 | 116,84 |
|    | 2019/06/21 | CH2205 | Male | Three y/o | Control | Control | Feed Day | No | 00:35 | 00:00 - 00:59 | Early Morning | 37,6 | 46  | 6,0   | 6,0   | 18,75 | 532,38 | 59,53  |
|    | 2019/06/21 | CH2206 | Male | Three y/o | Control | Control | Feed Day | No | 00:35 | 00:00 - 00:59 | Early Morning | 37,3 | 71  | 35,4  | 35,4  | 18,46 | 568,10 | 119,88 |
|    | 2019/06/21 | CH2205 | Male | Three y/o | Control | Control | Feed Day | No | 00:40 | 00:00 - 00:59 | Early Morning | 37,6 | 69  | 6,0   | 6,0   | 18,75 | 565,86 | 59,53  |
|    | 2019/06/21 | CH2206 | Male | Three y/o | Control | Control | Feed Day | No | 00:40 | 00:00 - 00:59 | Early Morning | 37,4 | 78  | 7,2   | 7,2   | 18,55 | 575,38 | 65,66  |
|    | 2019/06/21 | CH2205 | Male | Three y/o | Control | Control | Feed Day | No | 00:45 | 00:00 - 00:59 | Early Morning | 37,6 | 51  | 6,8   | 6,8   | 18,75 | 541,20 | 63,74  |
|    | 2019/06/21 | CH2206 | Male | Three y/o | Control | Control | Feed Day | No | 00:45 | 00:00 - 00:59 | Early Morning | 37,2 | 65  | 9,2   | 9,2   | 18,36 | 561,12 | 73,94  |
|    | 2019/06/21 | CH2205 | Male | Three y/o | Control | Control | Feed Day | No | 00:50 | 00:00 - 00:59 | Early Morning | 37,6 | 50  | 5,4   | 5,4   | 18,75 | 539,52 | 55,99  |
|    | 2019/06/21 | CH2206 | Male | Three y/o | Control | Control | Feed Day | No | 00:50 | 00:00 - 00:59 | Early Morning | 36,9 | 51  | 45,0  | 45,0  | 18,06 | 541,20 | 128,15 |
|    | 2019/06/21 | CH2205 | Male | Three y/o | Control | Control | Feed Day | No | 00:55 | 00:00 - 00:59 | Early Morning | 37,6 | 45  | 11,4  | 11,4  | 18,75 | 530,47 | 81,19  |
|    | 2019/06/21 | CH2206 | Male | Three y/o | Control | Control | Feed Day | No | 00:55 | 00:00 - 00:59 | Early Morning | 36,9 | 45  | 22,2  | 22,2  | 18,06 | 530,47 | 103,88 |
|    | 2019/06/21 | CH2205 | Male | Three y/o | Control | Control | Feed Day | No | 01:00 | 01:00 - 01:59 | Early Morning | 37,6 | 66  | 6,2   | 6,2   | 18,75 | 562,34 | 60,63  |
|    | 2019/06/21 | CH2206 | Male | Three y/o | Control | Control | Feed Day | No | 01:00 | 01:00 - 01:59 | Early Morning | 36,8 | 87  | 26,0  | 26,0  | 17,96 | 583,64 | 109,29 |
|    | 2019/06/21 | CH2205 | Male | Three y/o | Control | Control | Feed Day | No | 01:05 | 01:00 - 01:59 | Early Morning | 37,6 | 55  | 6,2   | 6,2   | 18,75 | 547,52 | 60,63  |
|    | 2019/06/21 | CH2206 | Male | Three y/o | Control | Control | Feed Day | No | 01:05 | 01:00 - 01:59 | Early Morning | 36,8 | 76  | 45,0  | 45,0  | 17,96 | 573,39 | 128,15 |
|    | 2019/06/21 | CH2205 | Male | Three y/o | Control | Control | Feed Day | No | 01:10 | 01:00 - 01:59 | Early Morning | 37,4 | 61  | 4,0   | 4,0   | 18,55 | 556,01 | 45,94  |
|    | 2019/06/21 | CH2206 | Male | Three y/o | Control | Control | Feed Day | No | 01:10 | 01:00 - 01:59 | Early Morning | 36,8 | 75  | 38,4  | 38,4  | 17,96 | 572,36 | 122,68 |
|    | 2019/06/21 | CH2205 | Male | Three y/o | Control | Control | Feed Day | No | 01:15 | 01:00 - 01:59 | Early Morning | 37,3 | 54  | 4,8   | 4,8   | 18,46 | 545,99 | 52,04  |
|    | 2019/06/21 | CH2206 | Male | Three y/o | Control | Control | Feed Day | No | 01:15 | 01:00 - 01:59 | Early Morning | 36,9 | 70  | 41,4  | 41,4  | 18,06 | 566,99 | 125,27 |
|    | 2019/06/21 | CH2205 | Male | Three y/o | Control | Control | Feed Day | No | 01:20 | 01:00 - 01:59 | Early Morning | 37,1 | 56  | 6,2   | 6,2   | 18,26 | 549,01 | 60,63  |
|    | 2019/06/21 | CH2206 | Male | Three y/o | Control | Control | Feed Day | No | 01:20 | 01:00 - 01:59 | Early Morning | 36,9 | 56  | 43,6  | 43,6  | 18,06 | 549,01 | 127,06 |
|    | 2019/06/21 | CH2205 | Male | Three y/o | Control | Control | Feed Day | No | 01:25 | 01:00 - 01:59 | Early Morning | 37,0 | 86  | 3,6   | 3,6   | 18,16 | 582,77 | 42,42  |
|    | 2019/06/21 | CH2206 | Male | Three y/o | Control | Control | Feed Day | No | 01:25 | 01:00 - 01:59 | Early Morning | 36,9 | 49  | 49,8  | 49,8  | 18,06 | 537,80 | 131,65 |
|    | 2019/06/21 | CH2205 | Male | Three y/o | Control | Control | Feed Day | No | 01:30 | 01:00 - 01:59 | Early Morning | 37,0 | 53  | 4,0   | 4,0   | 18,16 | 544,43 | 45,94  |
|    | 2019/06/21 | CH2206 | Male | Three y/o | Control | Control | Feed Day | No | 01:30 | 01:00 - 01:59 | Early Morning | 37,0 | 83  | 48,4  | 48,4  | 18,16 | 580,11 | 130,66 |
|    | 2019/06/21 | CH2205 | Male | Three y/o | Control | Control | Feed Day | No | 01:35 | 01:00 - 01:59 | Early Morning | 36,8 | 81  | 3,4   | 3,4   | 17,96 | 578,26 | 40,51  |
|    | 2019/06/21 | CH2206 | Male | Three y/o | Control | Control | Feed Day | No | 01:35 | 01:00 - 01:59 | Early Morning | 37,1 | 86  | 45,8  | 45,8  | 18,26 | 582,77 | 128,76 |
|    | 2019/06/21 | CH2205 | Male | Three y/o | Control | Control | Feed Day | No | 01:40 | 01:00 - 01:59 | Early Morning | 36,8 | 70  | 4,8   | 4,8   | 17,96 | 566,99 | 52,04  |
|    | 2019/06/21 | CH2206 | Male | Three y/o | Control | Control | Feed Day | No | 01:40 | 01:00 - 01:59 | Early Morning | 37,1 | 80  | 40,8  | 40,8  | 18,26 | 577,31 | 124,77 |
|    | 2019/06/21 | CH2205 | Male | Three y/o | Control | Control | Feed Day | No | 01:45 | 01:00 - 01:59 | Early Morning | 36,8 | 43  | 3,4   | 3,4   | 17,96 | 526,50 | 40,51  |
|    | 2019/06/21 | CH2206 | Male | Three y/o | Control | Control | Feed Day | No | 01:45 | 01:00 - 01:59 | Early Morning | 37,0 | 66  | 39,2  | 39,2  | 18,16 | 562,34 | 123,39 |
|    | 2019/06/21 | CH2205 | Male | Three y/o | Control | Control | Feed Day | No | 01:50 | 01:00 - 01:59 | Early Morning | 36,8 | 42  | 38,0  | 38,0  | 17,96 | 524,42 | 122,32 |
|    | 2019/06/21 | CH2206 | Male | Three y/o | Control | Control | Feed Day | No | 01:50 | 01:00 - 01:59 | Early Morning | 37,0 | 98  | 24,4  | 24,4  | 18,16 | 592,41 | 107,11 |
|    | 2019/06/21 | CH2205 | Male | Three y/o | Control | Control | Feed Day | No | 01:55 | 01:00 - 01:59 | Early Morning | 37,1 |     | 75,8  | 75,8  | 18,26 |        | 146,20 |
|    | 2019/06/21 | CH2206 | Male | Three y/o | Control | Control | Feed Day | No | 01:55 | 01:00 - 01:59 | Early Morning | 37,1 | 107 | 31,4  | 31,4  | 18,26 | 598,73 | 115,76 |
|    | 2019/06/21 | CH2205 | Male | Three y/o | Control | Control | Feed Day | No | 02:00 | 02:00 - 02:59 | Early Morning | 37,2 |     | 67,4  | 67,4  | 18,36 |        | 142,12 |
|    | 2019/06/21 | CH2206 | Male | Three y/o | Control | Control | Feed Day | No | 02:00 | 02:00 - 02:59 | Early Morning | 37,2 | 123 | 71,0  | 71,0  | 18,36 | 608,49 | 143,93 |
|    | 2019/06/21 | CH2205 | Male | Three y/o | Control | Control | Feed Day | No | 02:05 | 02:00 - 02:59 | Early Morning | 37,3 |     | 159,6 | 159,6 | 18,46 |        | 172,19 |



|            |        |      |           |         |         |          |    |       |               |               |      |     |       |       |       |        |        |
|------------|--------|------|-----------|---------|---------|----------|----|-------|---------------|---------------|------|-----|-------|-------|-------|--------|--------|
| 2019/06/21 | CH2206 | Male | Three y/o | Control | Control | Feed Day | No | 02:05 | 02:00 - 02:59 | Early Morning | 37,2 | 93  | 54,8  | 54,8  | 18,36 | 588,58 | 134,96 |
| 2019/06/21 | CH2205 | Male | Three y/o | Control | Control | Feed Day | No | 02:10 | 02:00 - 02:59 | Early Morning | 37,4 | 121 | 44,4  | 44,4  | 18,55 | 607,35 | 127,69 |
| 2019/06/21 | CH2206 | Male | Three y/o | Control | Control | Feed Day | No | 02:10 | 02:00 - 02:59 | Early Morning | 37,2 | 92  | 78,4  | 78,4  | 18,36 | 587,78 | 147,37 |
| 2019/06/21 | CH2205 | Male | Three y/o | Control | Control | Feed Day | No | 02:15 | 02:00 - 02:59 | Early Morning | 37,4 | 98  | 37,2  | 37,2  | 18,55 | 592,41 | 121,59 |
| 2019/06/21 | CH2206 | Male | Three y/o | Control | Control | Feed Day | No | 02:15 | 02:00 - 02:59 | Early Morning | 37,4 |     | 93,6  | 93,6  | 18,55 |        | 153,54 |
| 2019/06/21 | CH2205 | Male | Three y/o | Control | Control | Feed Day | No | 02:20 | 02:00 - 02:59 | Early Morning | 37,5 | 124 | 135,8 | 135,8 | 18,65 | 609,04 | 166,53 |
| 2019/06/21 | CH2206 | Male | Three y/o | Control | Control | Feed Day | No | 02:20 | 02:00 - 02:59 | Early Morning | 37,4 | 119 | 63,0  | 63,0  | 18,55 | 606,20 | 139,78 |
| 2019/06/21 | CH2205 | Male | Three y/o | Control | Control | Feed Day | No | 02:25 | 02:00 - 02:59 | Early Morning | 37,6 |     | 106,4 | 106,4 | 18,75 |        | 158,01 |
| 2019/06/21 | CH2206 | Male | Three y/o | Control | Control | Feed Day | No | 02:25 | 02:00 - 02:59 | Early Morning | 37,4 | 96  | 157,4 | 157,4 | 18,55 | 590,91 | 171,71 |
| 2019/06/21 | CH2205 | Male | Three y/o | Control | Control | Feed Day | No | 02:30 | 02:00 - 02:59 | Early Morning | 37,7 | 103 | 169,6 | 169,6 | 18,85 | 596,00 | 174,32 |
| 2019/06/21 | CH2206 | Male | Three y/o | Control | Control | Feed Day | No | 02:30 | 02:00 - 02:59 | Early Morning | 37,5 | 94  | 11,0  | 11,0  | 18,65 | 589,37 | 79,98  |
| 2019/06/21 | CH2205 | Male | Three y/o | Control | Control | Feed Day | No | 02:35 | 02:00 - 02:59 | Early Morning | 37,7 | 167 | 221,0 | 221,0 | 18,85 | 628,84 | 183,63 |
| 2019/06/21 | CH2206 | Male | Three y/o | Control | Control | Feed Day | No | 02:35 | 02:00 - 02:59 | Early Morning | 37,3 | 43  | 6,6   | 6,6   | 18,46 | 526,50 | 62,73  |
| 2019/06/21 | CH2205 | Male | Three y/o | Control | Control | Feed Day | No | 02:40 | 02:00 - 02:59 | Early Morning | 37,8 |     | 147,8 | 147,8 | 18,95 |        | 169,50 |
| 2019/06/21 | CH2206 | Male | Three y/o | Control | Control | Feed Day | No | 02:40 | 02:00 - 02:59 | Early Morning | 37,1 | 64  | 7,0   | 7,0   | 18,26 | 559,88 | 64,72  |
| 2019/06/21 | CH2205 | Male | Three y/o | Control | Control | Feed Day | No | 02:45 | 02:00 - 02:59 | Early Morning | 37,9 | 108 | 305,4 | 305,4 | 19,05 | 599,39 | 195,05 |
| 2019/06/21 | CH2206 | Male | Three y/o | Control | Control | Feed Day | No | 02:45 | 02:00 - 02:59 | Early Morning | 37,1 | 53  | 30,0  | 30,0  | 18,26 | 544,43 | 114,20 |
| 2019/06/21 | CH2205 | Male | Three y/o | Control | Control | Feed Day | No | 02:50 | 02:00 - 02:59 | Early Morning | 37,9 | 59  | 62,8  | 62,8  | 19,05 | 553,30 | 139,67 |
| 2019/06/21 | CH2206 | Male | Three y/o | Control | Control | Feed Day | No | 02:50 | 02:00 - 02:59 | Early Morning | 36,9 | 54  | 38,2  | 38,2  | 18,06 | 545,99 | 122,50 |
| 2019/06/21 | CH2205 | Male | Three y/o | Control | Control | Feed Day | No | 02:55 | 02:00 - 02:59 | Early Morning | 37,9 | 52  | 159,6 | 159,6 | 19,05 | 542,83 | 172,19 |
| 2019/06/21 | CH2206 | Male | Three y/o | Control | Control | Feed Day | No | 02:55 | 02:00 - 02:59 | Early Morning | 36,9 | 44  | 46,0  | 46,0  | 18,06 | 528,51 | 128,91 |
| 2019/06/21 | CH2205 | Male | Three y/o | Control | Control | Feed Day | No | 03:00 | 03:00 - 03:59 | Early Morning | 37,9 | 97  | 7,6   | 7,6   | 19,05 | 591,66 | 67,49  |
| 2019/06/21 | CH2206 | Male | Three y/o | Control | Control | Feed Day | No | 03:00 | 03:00 - 03:59 | Early Morning | 37,0 | 49  | 40,8  | 40,8  | 18,16 | 537,80 | 124,77 |
| 2019/06/21 | CH2205 | Male | Three y/o | Control | Control | Feed Day | No | 03:05 | 03:00 - 03:59 | Early Morning | 37,7 | 65  | 17,0  | 17,0  | 18,85 | 561,12 | 94,77  |
| 2019/06/21 | CH2206 | Male | Three y/o | Control | Control | Feed Day | No | 03:05 | 03:00 - 03:59 | Early Morning | 37,0 | 46  | 47,2  | 47,2  | 18,16 | 532,38 | 129,80 |
| 2019/06/21 | CH2205 | Male | Three y/o | Control | Control | Feed Day | No | 03:10 | 03:00 - 03:59 | Early Morning | 37,6 |     | 300,8 | 300,8 | 18,75 |        | 194,51 |
| 2019/06/21 | CH2206 | Male | Three y/o | Control | Control | Feed Day | No | 03:10 | 03:00 - 03:59 | Early Morning | 37,1 | 45  | 46,8  | 46,8  | 18,26 | 530,47 | 129,50 |
| 2019/06/21 | CH2205 | Male | Three y/o | Control | Control | Feed Day | No | 03:15 | 03:00 - 03:59 | Early Morning | 37,7 | 113 | 106,2 | 106,2 | 18,85 | 602,58 | 157,94 |
| 2019/06/21 | CH2206 | Male | Three y/o | Control | Control | Feed Day | No | 03:15 | 03:00 - 03:59 | Early Morning | 37,2 | 48  | 44,4  | 44,4  | 18,36 | 536,04 | 127,69 |
| 2019/06/21 | CH2205 | Male | Three y/o | Control | Control | Feed Day | No | 03:20 | 03:00 - 03:59 | Early Morning | 37,9 |     | 152,4 | 152,4 | 19,05 |        | 170,57 |
| 2019/06/21 | CH2206 | Male | Three y/o | Control | Control | Feed Day | No | 03:20 | 03:00 - 03:59 | Early Morning | 37,2 | 45  | 32,0  | 32,0  | 18,36 | 530,47 | 116,41 |
| 2019/06/21 | CH2205 | Male | Three y/o | Control | Control | Feed Day | No | 03:25 | 03:00 - 03:59 | Early Morning | 37,9 |     | 45,6  | 45,6  | 19,05 |        | 128,61 |
| 2019/06/21 | CH2206 | Male | Three y/o | Control | Control | Feed Day | No | 03:25 | 03:00 - 03:59 | Early Morning | 37,2 | 69  | 40,2  | 40,2  | 18,36 | 565,86 | 124,26 |
| 2019/06/21 | CH2205 | Male | Three y/o | Control | Control | Feed Day | No | 03:30 | 03:00 - 03:59 | Early Morning | 37,9 | 100 | 28,2  | 28,2  | 19,05 | 593,87 | 112,07 |
| 2019/06/21 | CH2206 | Male | Three y/o | Control | Control | Feed Day | No | 03:30 | 03:00 - 03:59 | Early Morning | 37,2 | 55  | 14,8  | 14,8  | 18,36 | 547,52 | 90,05  |
| 2019/06/21 | CH2205 | Male | Three y/o | Control | Control | Feed Day | No | 03:35 | 03:00 - 03:59 | Early Morning | 37,7 | 60  | 21,8  | 21,8  | 18,85 | 554,67 | 103,26 |
| 2019/06/21 | CH2206 | Male | Three y/o | Control | Control | Feed Day | No | 03:35 | 03:00 - 03:59 | Early Morning | 37,2 | 74  | 21,6  | 21,6  | 18,36 | 571,33 | 102,94 |
| 2019/06/21 | CH2205 | Male | Three y/o | Control | Control | Feed Day | No | 03:40 | 03:00 - 03:59 | Early Morning | 37,5 |     | 17,2  | 17,2  | 18,65 |        | 95,17  |
| 2019/06/21 | CH2206 | Male | Three y/o | Control | Control | Feed Day | No | 03:40 | 03:00 - 03:59 | Early Morning | 37,1 | 68  | 29,0  | 29,0  | 18,26 | 564,71 | 113,03 |
| 2019/06/21 | CH2205 | Male | Three y/o | Control | Control | Feed Day | No | 03:45 | 03:00 - 03:59 | Early Morning | 37,4 | 65  | 13,4  | 13,4  | 18,55 | 561,12 | 86,68  |
| 2019/06/21 | CH2206 | Male | Three y/o | Control | Control | Feed Day | No | 03:45 | 03:00 - 03:59 | Early Morning | 37,2 | 73  | 28,4  | 28,4  | 18,36 | 570,27 | 112,31 |
| 2019/06/21 | CH2205 | Male | Three y/o | Control | Control | Feed Day | No | 03:50 | 03:00 - 03:59 | Early Morning | 37,4 | 67  | 3,6   | 3,6   | 18,55 | 563,53 | 42,42  |
| 2019/06/21 | CH2206 | Male | Three y/o | Control | Control | Feed Day | No | 03:50 | 03:00 - 03:59 | Early Morning | 37,2 | 83  | 25,6  | 25,6  | 18,36 | 580,11 | 108,76 |
| 2019/06/21 | CH2205 | Male | Three y/o | Control | Control | Feed Day | No | 03:55 | 03:00 - 03:59 | Early Morning | 37,4 | 61  | 4,6   | 4,6   | 18,55 | 556,01 | 50,61  |
| 2019/06/21 | CH2206 | Male | Three y/o | Control | Control | Feed Day | No | 03:55 | 03:00 - 03:59 | Early Morning | 37,2 | 48  | 29,0  | 29,0  | 18,36 | 536,04 | 113,03 |
| 2019/06/21 | CH2205 | Male | Three y/o | Control | Control | Feed Day | No | 04:00 | 04:00 - 04:59 | Morning       | 37,4 | 46  | 3,8   | 3,8   | 18,55 | 532,38 | 44,22  |
| 2019/06/21 | CH2206 | Male | Three y/o | Control | Control | Feed Day | No | 04:00 | 04:00 - 04:59 | Morning       | 37,2 | 42  | 31,2  | 31,2  | 18,36 | 524,42 | 115,54 |
| 2019/06/21 | CH2205 | Male | Three y/o | Control | Control | Feed Day | No | 04:05 | 04:00 - 04:59 | Morning       | 37,4 | 44  | 4,2   | 4,2   | 18,55 | 528,51 | 47,57  |
| 2019/06/21 | CH2206 | Male | Three y/o | Control | Control | Feed Day | No | 04:05 | 04:00 - 04:59 | Morning       | 37,2 | 46  | 28,0  | 28,0  | 18,36 | 532,38 | 111,83 |
| 2019/06/21 | CH2205 | Male | Three y/o | Control | Control | Feed Day | No | 04:10 | 04:00 - 04:59 | Morning       | 37,4 | 45  | 5,6   | 5,6   | 18,55 | 530,47 | 57,21  |
| 2019/06/21 | CH2206 | Male | Three y/o | Control | Control | Feed Day | No | 04:10 | 04:00 - 04:59 | Morning       | 37,2 | 48  | 21,8  | 21,8  | 18,36 | 536,04 | 103,26 |
| 2019/06/21 | CH2205 | Male | Three y/o | Control | Control | Feed Day | No | 04:15 | 04:00 - 04:59 | Morning       | 37,4 | 58  | 5,8   | 5,8   | 18,55 | 551,90 | 58,39  |
| 2019/06/21 | CH2206 | Male | Three y/o | Control | Control | Feed Day | No | 04:15 | 04:00 - 04:59 | Morning       | 37,2 | 62  | 19,0  | 19,0  | 18,36 | 557,33 | 98,56  |
| 2019/06/21 | CH2205 | Male | Three y/o | Control | Control | Feed Day | No | 04:20 | 04:00 - 04:59 | Morning       | 37,4 | 60  | 3,6   | 3,6   | 18,55 | 554,67 | 42,42  |
| 2019/06/21 | CH2206 | Male | Three y/o | Control | Control | Feed Day | No | 04:20 | 04:00 - 04:59 | Morning       | 37,2 | 50  | 19,0  | 19,0  | 18,36 | 539,52 | 98,56  |
| 2019/06/21 | CH2205 | Male | Three y/o | Control | Control | Feed Day | No | 04:25 | 04:00 - 04:59 | Morning       | 37,4 | 41  | 3,2   | 3,2   | 18,55 | 522,29 | 38,49  |
| 2019/06/21 | CH2206 | Male | Three y/o | Control | Control | Feed Day | No | 04:25 | 04:00 - 04:59 | Morning       | 37,2 | 44  | 21,6  | 21,6  | 18,36 | 528,51 | 102,94 |
| 2019/06/21 | CH2205 | Male | Three y/o | Control | Control | Feed Day | No | 04:30 | 04:00 - 04:59 | Morning       | 37,4 | 46  | 3,6   | 3,6   | 18,55 | 532,38 | 42,42  |
| 2019/06/21 | CH2206 | Male | Three y/o | Control | Control | Feed Day | No | 04:30 | 04:00 - 04:59 | Morning       | 37,2 | 56  | 20,8  | 20,8  | 18,36 | 549,01 | 101,65 |
| 2019/06/21 | CH2205 | Male | Three y/o | Control | Control | Feed Day | No | 04:35 | 04:00 - 04:59 | Morning       | 37,4 | 42  | 15,2  | 15,2  | 18,55 | 524,42 | 90,96  |
| 2019/06/21 | CH2206 | Male | Three y/o | Control | Control | Feed Day | No | 04:35 | 04:00 - 04:59 | Morning       | 37,2 | 44  | 35,6  | 35,6  | 18,36 | 528,51 | 120,08 |
| 2019/06/21 | CH2205 | Male | Three y/o | Control | Control | Feed Day | No | 04:40 | 04:00 - 04:59 | Morning       | 37,4 | 49  | 22,0  | 22,0  | 18,55 | 537,80 | 103,57 |
| 2019/06/21 | CH2206 | Male | Three y/o | Control | Control | Feed Day | No | 04:40 | 04:00 - 04:59 | Morning       | 37,2 | 50  | 44,4  | 44,4  | 18,36 | 539,52 | 127,69 |
| 2019/06/21 | CH2205 | Male | Three y/o | Control | Control | Feed Day | No | 04:45 | 04:00 - 04:59 | Morning       | 37,3 |     | 21,6  | 21,6  | 18,46 |        | 102,94 |
| 2019/06/21 | CH2206 | Male | Three y/o | Control | Control | Feed Day | No | 04:45 | 04:00 - 04:59 | Morning       | 37,2 |     | 36,0  | 36,0  | 18,36 |        | 120,46 |
| 2019/06/21 | CH2205 | Male | Three y/o | Control | Control | Feed Day | No | 04:50 | 04:00 - 04:59 | Morning       | 37,3 | 48  | 19,2  | 19,2  | 18,46 | 536,04 | 98,92  |
| 2019/06/21 | CH2206 | Male | Three y/o | Control | Control | Feed Day | No | 04:50 | 04:00 - 04:59 | Morning       | 37,2 | 49  | 34,8  | 34,8  | 18,36 | 537,80 | 119,29 |
| 2019/06/21 | CH2205 | Male | Three y/o | Control | Control | Feed Day | No | 04:55 | 04:00 - 04:59 | Morning       | 37,2 | 42  | 20,0  | 20,0  | 18,36 | 524,42 | 100,31 |
| 2019/06/21 | CH2206 | Male | Three y/o | Control | Control | Feed Day | No | 04:55 | 04:00 - 04:59 | Morning       | 37,2 | 64  | 33,2  | 33,2  | 18,36 | 559,88 | 117,68 |
| 2019/06/21 | CH2205 | Male | Three y/o | Control | Control | Feed Day | No | 05:00 | 05:00 - 05:59 | Morning       | 37,2 | 61  | 8,0   | 8,0   | 18,36 | 556,01 | 69,22  |



|            |        |      |           |         |         |          |    |       |               |         |      |     |       |       |       |        |        |
|------------|--------|------|-----------|---------|---------|----------|----|-------|---------------|---------|------|-----|-------|-------|-------|--------|--------|
| 2019/06/21 | CH2206 | Male | Three y/o | Control | Control | Feed Day | No | 05:00 | 05:00 - 05:59 | Morning | 37,1 |     | 15,0  | 15,0  | 18,26 |        | 90,51  |
| 2019/06/21 | CH2205 | Male | Three y/o | Control | Control | Feed Day | No | 05:05 | 05:00 - 05:59 | Morning | 37,2 | 46  | 19,2  | 19,2  | 18,36 | 532,38 | 98,92  |
| 2019/06/21 | CH2206 | Male | Three y/o | Control | Control | Feed Day | No | 05:05 | 05:00 - 05:59 | Morning | 37,1 | 56  | 35,8  | 35,8  | 18,26 | 549,01 | 120,27 |
| 2019/06/21 | CH2205 | Male | Three y/o | Control | Control | Feed Day | No | 05:10 | 05:00 - 05:59 | Morning | 37,1 | 53  | 14,0  | 14,0  | 18,26 | 544,43 | 88,17  |
| 2019/06/21 | CH2206 | Male | Three y/o | Control | Control | Feed Day | No | 05:10 | 05:00 - 05:59 | Morning | 37,1 | 55  | 27,6  | 27,6  | 18,26 | 547,52 | 111,33 |
| 2019/06/21 | CH2205 | Male | Three y/o | Control | Control | Feed Day | No | 05:15 | 05:00 - 05:59 | Morning | 37,1 | 68  | 12,8  | 12,8  | 18,26 | 564,71 | 85,12  |
| 2019/06/21 | CH2206 | Male | Three y/o | Control | Control | Feed Day | No | 05:15 | 05:00 - 05:59 | Morning | 37,1 | 45  | 9,6   | 9,6   | 18,26 | 530,47 | 75,37  |
| 2019/06/21 | CH2205 | Male | Three y/o | Control | Control | Feed Day | No | 05:20 | 05:00 - 05:59 | Morning | 37,1 | 41  | 3,6   | 3,6   | 18,26 | 522,29 | 42,42  |
| 2019/06/21 | CH2206 | Male | Three y/o | Control | Control | Feed Day | No | 05:20 | 05:00 - 05:59 | Morning | 37,1 | 79  | 7,6   | 7,6   | 18,26 | 576,36 | 67,49  |
| 2019/06/21 | CH2205 | Male | Three y/o | Control | Control | Feed Day | No | 05:25 | 05:00 - 05:59 | Morning | 37,1 | 65  | 7,6   | 7,6   | 18,26 | 561,12 | 67,49  |
| 2019/06/21 | CH2206 | Male | Three y/o | Control | Control | Feed Day | No | 05:25 | 05:00 - 05:59 | Morning | 37,1 | 44  | 7,6   | 7,6   | 18,26 | 528,51 | 67,49  |
| 2019/06/21 | CH2205 | Male | Three y/o | Control | Control | Feed Day | No | 05:30 | 05:00 - 05:59 | Morning | 37,1 | 58  | 12,2  | 12,2  | 18,26 | 551,90 | 83,49  |
| 2019/06/21 | CH2206 | Male | Three y/o | Control | Control | Feed Day | No | 05:30 | 05:00 - 05:59 | Morning | 37,1 | 72  | 13,0  | 13,0  | 18,26 | 569,20 | 85,65  |
| 2019/06/21 | CH2205 | Male | Three y/o | Control | Control | Feed Day | No | 05:35 | 05:00 - 05:59 | Morning | 37,1 | 64  | 18,2  | 18,2  | 18,26 | 559,88 | 97,10  |
| 2019/06/21 | CH2206 | Male | Three y/o | Control | Control | Feed Day | No | 05:35 | 05:00 - 05:59 | Morning | 37,1 | 63  | 9,4   | 9,4   | 18,26 | 558,62 | 74,66  |
| 2019/06/21 | CH2205 | Male | Three y/o | Control | Control | Feed Day | No | 05:40 | 05:00 - 05:59 | Morning | 37,1 | 49  | 17,4  | 17,4  | 18,26 | 537,80 | 95,56  |
| 2019/06/21 | CH2206 | Male | Three y/o | Control | Control | Feed Day | No | 05:40 | 05:00 - 05:59 | Morning | 37,1 | 82  | 155,8 | 155,8 | 18,26 | 579,19 | 171,35 |
| 2019/06/21 | CH2205 | Male | Three y/o | Control | Control | Feed Day | No | 05:45 | 05:00 - 05:59 | Morning | 37,1 |     | 148,8 | 148,8 | 18,26 |        | 169,74 |
| 2019/06/21 | CH2206 | Male | Three y/o | Control | Control | Feed Day | No | 05:45 | 05:00 - 05:59 | Morning | 37,2 | 47  | 52,6  | 52,6  | 18,36 | 534,23 | 133,54 |
| 2019/06/21 | CH2205 | Male | Three y/o | Control | Control | Feed Day | No | 05:50 | 05:00 - 05:59 | Morning | 37,2 | 30  | 34,4  | 34,4  | 18,36 | 493,51 | 118,90 |
| 2019/06/21 | CH2206 | Male | Three y/o | Control | Control | Feed Day | No | 05:50 | 05:00 - 05:59 | Morning | 37,2 | 42  | 51,0  | 51,0  | 18,36 | 524,42 | 132,47 |
| 2019/06/21 | CH2205 | Male | Three y/o | Control | Control | Feed Day | No | 05:55 | 05:00 - 05:59 | Morning | 37,2 |     | 215,8 | 215,8 | 18,36 |        | 182,80 |
| 2019/06/21 | CH2206 | Male | Three y/o | Control | Control | Feed Day | No | 05:55 | 05:00 - 05:59 | Morning | 37,2 | 77  | 45,0  | 45,0  | 18,36 | 574,39 | 128,15 |
| 2019/06/21 | CH2205 | Male | Three y/o | Control | Control | Feed Day | No | 06:00 | 06:00 - 06:59 | Morning | 37,3 | 114 | 57,2  | 57,2  | 18,46 | 603,20 | 136,44 |
| 2019/06/21 | CH2206 | Male | Three y/o | Control | Control | Feed Day | No | 06:00 | 06:00 - 06:59 | Morning | 37,2 | 57  | 29,4  | 29,4  | 18,36 | 550,47 | 113,50 |
| 2019/06/21 | CH2205 | Male | Three y/o | Control | Control | Feed Day | No | 06:05 | 06:00 - 06:59 | Morning | 37,4 | 114 | 121,2 | 121,2 | 18,55 | 603,20 | 162,56 |
| 2019/06/21 | CH2206 | Male | Three y/o | Control | Control | Feed Day | No | 06:05 | 06:00 - 06:59 | Morning | 37,2 | 97  | 16,6  | 16,6  | 18,36 | 591,66 | 93,96  |
| 2019/06/21 | CH2205 | Male | Three y/o | Control | Control | Feed Day | No | 06:10 | 06:00 - 06:59 | Morning | 37,5 | 110 | 53,6  | 53,6  | 18,65 | 600,69 | 134,19 |
| 2019/06/21 | CH2206 | Male | Three y/o | Control | Control | Feed Day | No | 06:10 | 06:00 - 06:59 | Morning | 37,3 | 107 | 27,6  | 27,6  | 18,46 | 598,73 | 111,33 |
| 2019/06/21 | CH2205 | Male | Three y/o | Control | Control | Feed Day | No | 06:15 | 06:00 - 06:59 | Morning | 37,6 | 120 | 200,4 | 200,4 | 18,75 | 606,78 | 180,19 |
| 2019/06/21 | CH2206 | Male | Three y/o | Control | Control | Feed Day | No | 06:15 | 06:00 - 06:59 | Morning | 37,3 | 76  | 30,8  | 30,8  | 18,46 | 573,39 | 115,10 |
| 2019/06/21 | CH2205 | Male | Three y/o | Control | Control | Feed Day | No | 06:20 | 06:00 - 06:59 | Morning | 37,6 | 131 | 112,4 | 112,4 | 18,75 | 612,80 | 159,92 |
| 2019/06/21 | CH2206 | Male | Three y/o | Control | Control | Feed Day | No | 06:20 | 06:00 - 06:59 | Morning | 37,3 | 107 | 121,2 | 121,2 | 18,46 | 598,73 | 162,56 |
| 2019/06/21 | CH2205 | Male | Three y/o | Control | Control | Feed Day | No | 06:25 | 06:00 - 06:59 | Morning | 37,6 | 148 | 29,2  | 29,2  | 18,75 | 620,97 | 113,27 |
| 2019/06/21 | CH2206 | Male | Three y/o | Control | Control | Feed Day | No | 06:25 | 06:00 - 06:59 | Morning | 37,3 | 167 | 214,4 | 214,4 | 18,46 | 628,84 | 182,57 |
| 2019/06/21 | CH2205 | Male | Three y/o | Control | Control | Feed Day | No | 06:30 | 06:00 - 06:59 | Morning | 37,6 | 156 | 142,2 | 142,2 | 18,75 | 624,43 | 168,15 |
| 2019/06/21 | CH2206 | Male | Three y/o | Control | Control | Feed Day | No | 06:30 | 06:00 - 06:59 | Morning | 37,4 | 61  | 277,2 | 277,2 | 18,55 | 556,01 | 191,63 |
| 2019/06/21 | CH2205 | Male | Three y/o | Control | Control | Feed Day | No | 06:35 | 06:00 - 06:59 | Morning | 37,7 | 143 | 84,4  | 84,4  | 18,85 | 618,69 | 149,94 |
| 2019/06/21 | CH2206 | Male | Three y/o | Control | Control | Feed Day | No | 06:35 | 06:00 - 06:59 | Morning | 37,5 | 129 | 180,0 | 180,0 | 18,65 | 611,75 | 176,41 |
| 2019/06/21 | CH2205 | Male | Three y/o | Control | Control | Feed Day | No | 06:40 | 06:00 - 06:59 | Morning | 37,7 |     | 303,2 | 303,2 | 18,85 |        | 194,80 |
| 2019/06/21 | CH2206 | Male | Three y/o | Control | Control | Feed Day | No | 06:40 | 06:00 - 06:59 | Morning | 37,6 | 120 | 88,4  | 88,4  | 18,75 | 606,78 | 151,55 |
| 2019/06/21 | CH2205 | Male | Three y/o | Control | Control | Feed Day | No | 06:45 | 06:00 - 06:59 | Morning | 37,7 | 88  | 235,8 | 235,8 | 18,85 | 584,49 | 185,92 |
| 2019/06/21 | CH2206 | Male | Three y/o | Control | Control | Feed Day | No | 06:45 | 06:00 - 06:59 | Morning | 37,7 | 111 | 38,0  | 38,0  | 18,85 | 601,33 | 122,32 |
| 2019/06/21 | CH2205 | Male | Three y/o | Control | Control | Feed Day | No | 06:50 | 06:00 - 06:59 | Morning | 37,7 | 167 | 230,4 | 230,4 | 18,85 | 628,84 | 185,10 |
| 2019/06/21 | CH2206 | Male | Three y/o | Control | Control | Feed Day | No | 06:50 | 06:00 - 06:59 | Morning | 37,7 | 150 | 52,8  | 52,8  | 18,85 | 621,86 | 133,67 |
| 2019/06/21 | CH2205 | Male | Three y/o | Control | Control | Feed Day | No | 06:55 | 06:00 - 06:59 | Morning | 37,9 |     | 141,8 | 141,8 | 19,05 |        | 168,05 |
| 2019/06/21 | CH2206 | Male | Three y/o | Control | Control | Feed Day | No | 06:55 | 06:00 - 06:59 | Morning | 37,9 | 137 | 138,8 | 138,8 | 19,05 | 615,83 | 167,30 |
| 2019/06/21 | CH2205 | Male | Three y/o | Control | Control | Feed Day | No | 07:00 | 07:00 - 07:59 | Morning | 37,9 | 106 | 146,2 | 146,2 | 19,05 | 598,06 | 169,12 |
| 2019/06/21 | CH2206 | Male | Three y/o | Control | Control | Feed Day | No | 07:00 | 07:00 - 07:59 | Morning | 37,9 | 114 | 128,0 | 128,0 | 19,05 | 603,20 | 164,46 |
| 2019/06/21 | CH2205 | Male | Three y/o | Control | Control | Feed Day | No | 07:05 | 07:00 - 07:59 | Morning | 37,9 | 58  | 151,8 | 151,8 | 19,05 | 551,90 | 170,44 |
| 2019/06/21 | CH2206 | Male | Three y/o | Control | Control | Feed Day | No | 07:05 | 07:00 - 07:59 | Morning | 37,8 | 121 | 91,4  | 91,4  | 18,95 | 607,35 | 152,71 |
| 2019/06/21 | CH2205 | Male | Three y/o | Control | Control | Feed Day | No | 07:10 | 07:00 - 07:59 | Morning | 37,9 | 124 | 62,6  | 62,6  | 19,05 | 609,04 | 139,56 |
| 2019/06/21 | CH2206 | Male | Three y/o | Control | Control | Feed Day | No | 07:10 | 07:00 - 07:59 | Morning | 37,9 | 119 | 117,0 | 117,0 | 19,05 | 606,20 | 161,32 |
| 2019/06/21 | CH2205 | Male | Three y/o | Control | Control | Feed Day | No | 07:15 | 07:00 - 07:59 | Morning | 38,0 | 53  | 232,8 | 232,8 | 19,15 | 544,43 | 185,47 |
| 2019/06/21 | CH2206 | Male | Three y/o | Control | Control | Feed Day | No | 07:15 | 07:00 - 07:59 | Morning | 37,9 | 121 | 120,6 | 120,6 | 19,05 | 607,35 | 162,38 |
| 2019/06/21 | CH2205 | Male | Three y/o | Control | Control | Feed Day | No | 07:20 | 07:00 - 07:59 | Morning | 37,9 | 73  | 126,4 | 126,4 | 19,05 | 570,27 | 164,02 |
| 2019/06/21 | CH2206 | Male | Three y/o | Control | Control | Feed Day | No | 07:20 | 07:00 - 07:59 | Morning | 37,9 | 100 | 145,0 | 145,0 | 19,05 | 593,87 | 168,83 |
| 2019/06/21 | CH2205 | Male | Three y/o | Control | Control | Feed Day | No | 07:25 | 07:00 - 07:59 | Morning | 38,0 | 119 | 85,4  | 85,4  | 19,15 | 606,20 | 150,35 |
| 2019/06/21 | CH2206 | Male | Three y/o | Control | Control | Feed Day | No | 07:25 | 07:00 - 07:59 | Morning | 37,9 | 99  | 42,4  | 42,4  | 19,05 | 593,14 | 126,10 |
| 2019/06/21 | CH2205 | Male | Three y/o | Control | Control | Feed Day | No | 07:30 | 07:00 - 07:59 | Morning | 38,0 | 50  | 106,6 | 106,6 | 19,15 | 539,52 | 158,07 |
| 2019/06/21 | CH2206 | Male | Three y/o | Control | Control | Feed Day | No | 07:30 | 07:00 - 07:59 | Morning | 37,8 | 103 | 120,8 | 120,8 | 18,95 | 596,00 | 162,44 |
| 2019/06/21 | CH2205 | Male | Three y/o | Control | Control | Feed Day | No | 07:35 | 07:00 - 07:59 | Morning | 37,9 |     | 288,8 | 288,8 | 19,05 |        | 193,08 |
| 2019/06/21 | CH2206 | Male | Three y/o | Control | Control | Feed Day | No | 07:35 | 07:00 - 07:59 | Morning | 37,9 | 109 | 150,6 | 150,6 | 19,05 | 600,04 | 170,16 |
| 2019/06/21 | CH2205 | Male | Three y/o | Control | Control | Feed Day | No | 07:40 | 07:00 - 07:59 | Morning | 38,0 | 62  | 298,8 | 298,8 | 19,15 | 557,33 | 194,28 |
| 2019/06/21 | CH2206 | Male | Three y/o | Control | Control | Feed Day | No | 07:40 | 07:00 - 07:59 | Morning | 37,8 | 134 | 155,2 | 155,2 | 18,95 | 614,33 | 171,21 |
| 2019/06/21 | CH2205 | Male | Three y/o | Control | Control | Feed Day | No | 07:45 | 07:00 - 07:59 | Morning | 38,0 | 120 | 137,6 | 137,6 | 19,15 | 606,78 | 166,99 |
| 2019/06/21 | CH2206 | Male | Three y/o | Control | Control | Feed Day | No | 07:45 | 07:00 - 07:59 | Morning | 37,9 | 93  | 18,0  | 18,0  | 19,05 | 588,58 | 96,72  |
| 2019/06/21 | CH2205 | Male | Three y/o | Control | Control | Feed Day | No | 07:50 | 07:00 - 07:59 | Morning | 38,0 | 154 | 381,2 | 381,2 | 19,15 | 623,58 | 202,91 |
| 2019/06/21 | CH2206 | Male | Three y/o | Control | Control | Feed Day | No | 07:50 | 07:00 - 07:59 | Morning | 37,7 | 101 | 192,6 | 192,6 | 18,85 | 594,59 | 178,79 |
| 2019/06/21 | CH2205 | Male | Three y/o | Control | Control | Feed Day | No | 07:55 | 07:00 - 07:59 | Morning | 37,9 | 111 | 73,2  | 73,2  | 19,05 | 601,33 | 144,99 |



|            |        |      |           |         |         |          |     |       |               |              |      |     |       |       |       |        |        |
|------------|--------|------|-----------|---------|---------|----------|-----|-------|---------------|--------------|------|-----|-------|-------|-------|--------|--------|
| 2019/06/21 | CH2206 | Male | Three y/o | Control | Control | Feed Day | No  | 07:55 | 07:00 - 07:59 | Morning      | 37,7 |     | 23,0  | 23,0  | 18,85 |        | 105,09 |
| 2019/06/21 | CH2205 | Male | Three y/o | Control | Control | Feed Day | No  | 08:00 | 08:00 - 08:59 | Late Morning | 37,9 | 59  | 18,4  | 18,4  | 19,05 | 553,30 | 97,47  |
| 2019/06/21 | CH2206 | Male | Three y/o | Control | Control | Feed Day | No  | 08:00 | 08:00 - 08:59 | Late Morning | 37,7 |     | 33,8  | 33,8  | 18,85 |        | 118,29 |
| 2019/06/21 | CH2205 | Male | Three y/o | Control | Control | Feed Day | No  | 08:05 | 08:00 - 08:59 | Late Morning | 37,7 |     | 262,6 | 262,6 | 18,85 |        | 189,72 |
| 2019/06/21 | CH2206 | Male | Three y/o | Control | Control | Feed Day | No  | 08:05 | 08:00 - 08:59 | Late Morning | 37,7 | 110 | 33,0  | 33,0  | 18,85 | 600,69 | 117,47 |
| 2019/06/21 | CH2205 | Male | Three y/o | Control | Control | Feed Day | No  | 08:10 | 08:00 - 08:59 | Late Morning | 37,7 | 126 | 121,4 | 121,4 | 18,85 | 610,14 | 162,61 |
| 2019/06/21 | CH2206 | Male | Three y/o | Control | Control | Feed Day | No  | 08:10 | 08:00 - 08:59 | Late Morning | 37,7 |     | 44,0  | 44,0  | 18,85 |        | 127,37 |
| 2019/06/21 | CH2205 | Male | Three y/o | Control | Control | Feed Day | No  | 08:15 | 08:00 - 08:59 | Late Morning | 37,7 | 103 | 79,6  | 79,6  | 18,85 | 596,00 | 147,90 |
| 2019/06/21 | CH2206 | Male | Three y/o | Control | Control | Feed Day | No  | 08:15 | 08:00 - 08:59 | Late Morning | 37,5 | 96  | 22,4  | 22,4  | 18,65 | 590,91 | 104,19 |
| 2019/06/21 | CH2205 | Male | Three y/o | Control | Control | Feed Day | No  | 08:20 | 08:00 - 08:59 | Late Morning | 37,6 | 52  | 271,4 | 271,4 | 18,75 | 542,83 | 190,88 |
| 2019/06/21 | CH2206 | Male | Three y/o | Control | Control | Feed Day | No  | 08:20 | 08:00 - 08:59 | Late Morning | 37,7 |     | 465,0 | 465,0 | 18,85 |        | 209,96 |
| 2019/06/21 | CH2205 | Male | Three y/o | Control | Control | Feed Day | No  | 08:25 | 08:00 - 08:59 | Late Morning | 38,1 |     | 506,4 | 506,4 | 19,26 |        | 213,00 |
| 2019/06/21 | CH2206 | Male | Three y/o | Control | Control | Feed Day | No  | 08:25 | 08:00 - 08:59 | Late Morning | 37,7 | 197 | 102,6 | 102,6 | 18,85 | 639,25 | 156,74 |
| 2019/06/21 | CH2205 | Male | Three y/o | Control | Control | Feed Day | No  | 08:30 | 08:00 - 08:59 | Late Morning | 38,2 |     | 142,4 | 142,4 | 19,36 |        | 168,20 |
| 2019/06/21 | CH2206 | Male | Three y/o | Control | Control | Feed Day | No  | 08:30 | 08:00 - 08:59 | Late Morning | 37,8 |     | 332,6 | 332,6 | 18,95 |        | 198,07 |
| 2019/06/21 | CH2205 | Male | Three y/o | Control | Control | Feed Day | No  | 08:35 | 08:00 - 08:59 | Late Morning | 38,3 | 158 | 122,4 | 122,4 | 19,46 | 625,26 | 162,90 |
| 2019/06/21 | CH2206 | Male | Three y/o | Control | Control | Feed Day | No  | 08:35 | 08:00 - 08:59 | Late Morning | 37,8 | 141 | 98,0  | 98,0  | 18,95 | 617,75 | 155,14 |
| 2019/06/21 | CH2205 | Male | Three y/o | Control | Control | Feed Day | No  | 08:40 | 08:00 - 08:59 | Late Morning | 38,3 |     | 57,0  | 57,0  | 19,46 |        | 136,32 |
| 2019/06/21 | CH2206 | Male | Three y/o | Control | Control | Feed Day | No  | 08:40 | 08:00 - 08:59 | Late Morning | 37,8 | 132 | 270,4 | 270,4 | 18,95 | 613,32 | 190,75 |
| 2019/06/21 | CH2205 | Male | Three y/o | Control | Control | Feed Day | No  | 08:45 | 08:00 - 08:59 | Late Morning | 38,1 | 85  | 25,6  | 25,6  | 19,26 | 581,90 | 108,76 |
| 2019/06/21 | CH2206 | Male | Three y/o | Control | Control | Feed Day | No  | 08:45 | 08:00 - 08:59 | Late Morning | 37,8 |     | 152,6 | 152,6 | 18,95 |        | 170,62 |
| 2019/06/21 | CH2205 | Male | Three y/o | Control | Control | Feed Day | No  | 08:50 | 08:00 - 08:59 | Late Morning | 38,0 | 71  | 3,6   | 3,6   | 19,15 | 568,10 | 42,42  |
| 2019/06/21 | CH2206 | Male | Three y/o | Control | Control | Feed Day | No  | 08:50 | 08:00 - 08:59 | Late Morning | 37,8 | 85  | 35,0  | 35,0  | 18,95 | 581,90 | 119,49 |
| 2019/06/21 | CH2205 | Male | Three y/o | Control | Control | Feed Day | No  | 08:55 | 08:00 - 08:59 | Late Morning | 38,0 | 71  | 7,8   | 7,8   | 19,15 | 568,10 | 68,36  |
| 2019/06/21 | CH2206 | Male | Three y/o | Control | Control | Feed Day | No  | 08:55 | 08:00 - 08:59 | Late Morning | 37,8 | 77  | 44,2  | 44,2  | 18,95 | 574,39 | 127,53 |
| 2019/06/21 | CH2205 | Male | Three y/o | Control | Control | Feed Day | No  | 09:00 | 09:00 - 09:59 | Late Morning | 38,0 | 77  | 28,2  | 28,2  | 19,15 | 574,39 | 112,07 |
| 2019/06/21 | CH2206 | Male | Three y/o | Control | Control | Feed Day | No  | 09:00 | 09:00 - 09:59 | Late Morning | 37,7 | 63  | 94,6  | 94,6  | 18,85 | 558,62 | 153,91 |
| 2019/06/21 | CH2205 | Male | Three y/o | Control | Control | Feed Day | No  | 09:05 | 09:00 - 09:59 | Late Morning | 38,0 | 35  | 169,4 | 169,4 | 19,15 | 507,97 | 174,28 |
| 2019/06/21 | CH2206 | Male | Three y/o | Control | Control | Feed Day | No  | 09:05 | 09:00 - 09:59 | Late Morning | 37,7 | 89  | 110,6 | 110,6 | 18,85 | 585,33 | 159,36 |
| 2019/06/21 | CH2205 | Male | Three y/o | Control | Control | Feed Day | No  | 09:10 | 09:00 - 09:59 | Late Morning | 38,0 | 96  | 42,2  | 42,2  | 19,15 | 590,91 | 125,93 |
| 2019/06/21 | CH2206 | Male | Three y/o | Control | Control | Feed Day | No  | 09:10 | 09:00 - 09:59 | Late Morning | 37,9 | 104 | 68,6  | 68,6  | 19,05 | 596,69 | 142,74 |
| 2019/06/21 | CH2205 | Male | Three y/o | Control | Control | Feed Day | No  | 09:15 | 09:00 - 09:59 | Late Morning | 38,0 | 126 | 30,2  | 30,2  | 19,15 | 610,14 | 114,42 |
| 2019/06/21 | CH2206 | Male | Three y/o | Control | Control | Feed Day | No  | 09:15 | 09:00 - 09:59 | Late Morning | 38,0 | 124 | 28,8  | 28,8  | 19,15 | 609,04 | 112,79 |
| 2019/06/21 | CH2205 | Male | Three y/o | Control | Control | Feed Day | No  | 09:20 | 09:00 - 09:59 | Late Morning | 38,0 | 68  | 41,4  | 41,4  | 19,15 | 564,71 | 125,27 |
| 2019/06/21 | CH2206 | Male | Three y/o | Control | Control | Feed Day | No  | 09:20 | 09:00 - 09:59 | Late Morning | 37,9 | 93  | 113,2 | 113,2 | 19,05 | 588,58 | 160,17 |
| 2019/06/21 | CH2205 | Male | Three y/o | Control | Control | Feed Day | No  | 09:25 | 09:00 - 09:59 | Late Morning | 37,9 | 137 | 23,2  | 23,2  | 19,05 | 615,83 | 105,39 |
| 2019/06/21 | CH2206 | Male | Three y/o | Control | Control | Feed Day | No  | 09:25 | 09:00 - 09:59 | Late Morning | 37,9 | 115 | 70,4  | 70,4  | 19,05 | 603,82 | 143,64 |
| 2019/06/21 | CH2205 | Male | Three y/o | Control | Control | Feed Day | No  | 09:30 | 09:00 - 09:59 | Late Morning | 37,9 | 97  | 154,4 | 154,4 | 19,05 | 591,66 | 171,03 |
| 2019/06/21 | CH2206 | Male | Three y/o | Control | Control | Feed Day | No  | 09:30 | 09:00 - 09:59 | Late Morning | 37,9 | 73  | 41,4  | 41,4  | 19,05 | 570,27 | 125,27 |
| 2019/06/21 | CH2205 | Male | Three y/o | Control | Control | Feed Day | No  | 09:35 | 09:00 - 09:59 | Late Morning | 37,7 | 75  | 11,8  | 11,8  | 18,85 | 572,36 | 82,36  |
| 2019/06/21 | CH2206 | Male | Three y/o | Control | Control | Feed Day | No  | 09:35 | 09:00 - 09:59 | Late Morning | 37,8 | 69  | 24,2  | 24,2  | 18,95 | 565,86 | 106,83 |
| 2019/06/21 | CH2205 | Male | Three y/o | Control | Control | Feed Day | No  | 09:40 | 09:00 - 09:59 | Late Morning | 37,7 | 67  | 14,2  | 14,2  | 18,85 | 563,53 | 88,65  |
| 2019/06/21 | CH2206 | Male | Three y/o | Control | Control | Feed Day | No  | 09:40 | 09:00 - 09:59 | Late Morning | 37,7 | 76  | 59,2  | 59,2  | 18,85 | 573,39 | 137,63 |
| 2019/06/21 | CH2205 | Male | Three y/o | Control | Control | Feed Day | No  | 09:45 | 09:00 - 09:59 | Late Morning | 37,6 | 73  | 75,6  | 75,6  | 18,75 | 570,27 | 146,11 |
| 2019/06/21 | CH2206 | Male | Three y/o | Control | Control | Feed Day | No  | 09:45 | 09:00 - 09:59 | Late Morning | 37,7 | 86  | 125,6 | 125,6 | 18,85 | 582,77 | 163,80 |
| 2019/06/21 | CH2205 | Male | Three y/o | Control | Control | Feed Day | No  | 09:50 | 09:00 - 09:59 | Late Morning | 37,7 | 89  | 28,2  | 28,2  | 18,85 | 585,33 | 112,07 |
| 2019/06/21 | CH2206 | Male | Three y/o | Control | Control | Feed Day | No  | 09:50 | 09:00 - 09:59 | Late Morning | 37,8 | 90  | 34,4  | 34,4  | 18,95 | 586,16 | 118,90 |
| 2019/06/21 | CH2205 | Male | Three y/o | Control | Control | Feed Day | No  | 09:55 | 09:00 - 09:59 | Late Morning | 37,5 | 107 | 94,6  | 94,6  | 18,65 | 598,73 | 153,91 |
| 2019/06/21 | CH2206 | Male | Three y/o | Control | Control | Feed Day | No  | 09:55 | 09:00 - 09:59 | Late Morning | 37,7 |     | 12,8  | 12,8  | 18,85 |        | 85,12  |
| 2019/06/21 | CH2205 | Male | Three y/o | Control | Control | Feed Day | No  | 10:00 | 10:00 - 10:59 | Late Morning | 37,5 | 125 | 98,4  | 98,4  | 18,65 | 609,60 | 155,28 |
| 2019/06/21 | CH2206 | Male | Three y/o | Control | Control | Feed Day | No  | 10:00 | 10:00 - 10:59 | Late Morning | 37,5 | 88  | 88,2  | 88,2  | 18,65 | 584,49 | 151,47 |
| 2019/06/21 | CH2205 | Male | Three y/o | Control | Control | Feed Day | No  | 10:05 | 10:00 - 10:59 | Late Morning | 37,6 |     | 28,6  | 28,6  | 18,75 |        | 112,56 |
| 2019/06/21 | CH2206 | Male | Three y/o | Control | Control | Feed Day | No  | 10:05 | 10:00 - 10:59 | Late Morning | 37,7 |     | 19,6  | 19,6  | 18,85 |        | 99,63  |
| 2019/06/21 | CH2205 | Male | Three y/o | Control | Control | Feed Day | No  | 10:10 | 10:00 - 10:59 | Late Morning | 37,6 | 160 | 211,0 | 211,0 | 18,75 | 626,07 | 182,00 |
| 2019/06/21 | CH2206 | Male | Three y/o | Control | Control | Feed Day | No  | 10:10 | 10:00 - 10:59 | Late Morning | 37,7 |     | 27,4  | 27,4  | 18,85 |        | 111,09 |
| 2019/06/21 | CH2205 | Male | Three y/o | Control | Control | Feed Day | No  | 10:15 | 10:00 - 10:59 | Late Morning | 37,6 | 108 | 6,8   | 6,8   | 18,75 | 599,39 | 63,74  |
| 2019/06/21 | CH2206 | Male | Three y/o | Control | Control | Feed Day | No  | 10:15 | 10:00 - 10:59 | Late Morning | 37,7 | 80  | 40,2  | 40,2  | 18,85 | 577,31 | 124,26 |
| 2019/06/21 | CH2205 | Male | Three y/o | Control | Control | Feed Day | No  | 10:20 | 10:00 - 10:59 | Late Morning | 37,6 | 70  | 13,4  | 13,4  | 18,75 | 566,99 | 86,68  |
| 2019/06/21 | CH2206 | Male | Three y/o | Control | Control | Feed Day | No  | 10:20 | 10:00 - 10:59 | Late Morning | 37,7 | 86  | 37,2  | 37,2  | 18,85 | 582,77 | 121,59 |
| 2019/06/21 | CH2205 | Male | Three y/o | Control | Control | Feed Day | No  | 10:25 | 10:00 - 10:59 | Late Morning | 37,6 | 65  | 8,6   | 8,6   | 18,75 | 561,12 | 71,66  |
| 2019/06/21 | CH2206 | Male | Three y/o | Control | Control | Feed Day | No  | 10:25 | 10:00 - 10:59 | Late Morning | 37,7 | 84  | 51,6  | 51,6  | 18,85 | 581,01 | 132,87 |
| 2019/06/21 | CH2205 | Male | Three y/o | Control | Control | Feed Day | Yes | 10:30 | 10:00 - 10:59 | Late Morning | 37,6 | 65  | 6,0   | 6,0   | 18,75 | 561,12 | 59,53  |
| 2019/06/21 | CH2206 | Male | Three y/o | Control | Control | Feed Day | Yes | 10:30 | 10:00 - 10:59 | Late Morning | 37,7 | 88  | 49,8  | 49,8  | 18,85 | 584,49 | 131,65 |
| 2019/06/21 | CH2205 | Male | Three y/o | Control | Control | Feed Day | Yes | 10:35 | 10:00 - 10:59 | Late Morning | 37,6 | 65  | 7,8   | 7,8   | 18,75 | 561,12 | 68,36  |
| 2019/06/21 | CH2206 | Male | Three y/o | Control | Control | Feed Day | Yes | 10:35 | 10:00 - 10:59 | Late Morning | 37,7 | 81  | 54,4  | 54,4  | 18,85 | 578,26 | 134,70 |
| 2019/06/21 | CH2205 | Male | Three y/o | Control | Control | Feed Day | Yes | 10:40 | 10:00 - 10:59 | Late Morning | 37,6 | 75  | 7,4   | 7,4   | 18,75 | 572,36 | 66,59  |
| 2019/06/21 | CH2206 | Male | Three y/o | Control | Control | Feed Day | Yes | 10:40 | 10:00 - 10:59 | Late Morning | 37,7 | 88  | 55,2  | 55,2  | 18,85 | 584,49 | 135,21 |
| 2019/06/21 | CH2205 | Male | Three y/o | Control | Control | Feed Day | Yes | 10:45 | 10:00 - 10:59 | Late Morning | 37,6 | 66  | 11,0  | 11,0  | 18,75 | 562,34 | 79,98  |
| 2019/06/21 | CH2206 | Male | Three y/o | Control | Control | Feed Day | Yes | 10:45 | 10:00 - 10:59 | Late Morning | 37,5 | 83  | 53,0  | 53,0  | 18,65 | 580,11 | 133,80 |
| 2019/06/21 | CH2205 | Male | Three y/o | Control | Control | Feed Day | Yes | 10:50 | 10:00 - 10:59 | Late Morning | 37,6 | 78  | 8,0   | 8,0   | 18,75 | 575,38 | 69,22  |



|            |        |      |           |         |         |          |     |       |               |              |      |     |       |       |       |        |        |
|------------|--------|------|-----------|---------|---------|----------|-----|-------|---------------|--------------|------|-----|-------|-------|-------|--------|--------|
| 2019/06/21 | CH2206 | Male | Three y/o | Control | Control | Feed Day | Yes | 10:50 | 10:00 - 10:59 | Late Morning | 37,5 | 95  | 51,6  | 51,6  | 18,65 | 590,14 | 132,87 |
| 2019/06/21 | CH2205 | Male | Three y/o | Control | Control | Feed Day | Yes | 10:55 | 10:00 - 10:59 | Late Morning | 37,6 | 78  | 10,6  | 10,6  | 18,75 | 575,38 | 78,73  |
| 2019/06/21 | CH2206 | Male | Three y/o | Control | Control | Feed Day | Yes | 10:55 | 10:00 - 10:59 | Late Morning | 37,5 | 79  | 55,6  | 55,6  | 18,65 | 576,36 | 135,46 |
| 2019/06/21 | CH2205 | Male | Three y/o | Control | Control | Feed Day | Yes | 11:00 | 11:00 - 11:59 | Late Morning | 37,6 | 70  | 13,8  | 13,8  | 18,75 | 566,99 | 87,68  |
| 2019/06/21 | CH2206 | Male | Three y/o | Control | Control | Feed Day | Yes | 11:00 | 11:00 - 11:59 | Late Morning | 37,5 | 86  | 40,8  | 40,8  | 18,65 | 582,77 | 124,77 |
| 2019/06/21 | CH2205 | Male | Three y/o | Control | Control | Feed Day | Yes | 11:05 | 11:00 - 11:59 | Late Morning | 37,6 | 45  | 14,6  | 14,6  | 18,75 | 530,47 | 89,59  |
| 2019/06/21 | CH2206 | Male | Three y/o | Control | Control | Feed Day | Yes | 11:05 | 11:00 - 11:59 | Late Morning | 37,5 | 82  | 40,6  | 40,6  | 18,65 | 579,19 | 124,60 |
| 2019/06/21 | CH2205 | Male | Three y/o | Control | Control | Feed Day | Yes | 11:10 | 11:00 - 11:59 | Late Morning | 37,6 | 72  | 12,4  | 12,4  | 18,75 | 569,20 | 84,04  |
| 2019/06/21 | CH2206 | Male | Three y/o | Control | Control | Feed Day | Yes | 11:10 | 11:00 - 11:59 | Late Morning | 37,5 | 81  | 32,2  | 32,2  | 18,65 | 578,26 | 116,63 |
| 2019/06/21 | CH2205 | Male | Three y/o | Control | Control | Feed Day | Yes | 11:15 | 11:00 - 11:59 | Late Morning | 37,6 | 81  | 8,6   | 8,6   | 18,75 | 578,26 | 71,66  |
| 2019/06/21 | CH2206 | Male | Three y/o | Control | Control | Feed Day | Yes | 11:15 | 11:00 - 11:59 | Late Morning | 37,5 | 86  | 35,4  | 35,4  | 18,65 | 582,77 | 119,88 |
| 2019/06/21 | CH2205 | Male | Three y/o | Control | Control | Feed Day | Yes | 11:20 | 11:00 - 11:59 | Late Morning | 37,6 | 61  | 13,6  | 13,6  | 18,75 | 556,01 | 87,18  |
| 2019/06/21 | CH2206 | Male | Three y/o | Control | Control | Feed Day | Yes | 11:20 | 11:00 - 11:59 | Late Morning | 37,5 | 64  | 44,4  | 44,4  | 18,65 | 559,88 | 127,69 |
| 2019/06/21 | CH2205 | Male | Three y/o | Control | Control | Feed Day | Yes | 11:25 | 11:00 - 11:59 | Late Morning | 37,6 |     | 16,4  | 16,4  | 18,75 |        | 93,55  |
| 2019/06/21 | CH2206 | Male | Three y/o | Control | Control | Feed Day | Yes | 11:25 | 11:00 - 11:59 | Late Morning | 37,5 | 63  | 43,6  | 43,6  | 18,65 | 558,62 | 127,06 |
| 2019/06/21 | CH2205 | Male | Three y/o | Control | Control | Feed Day | No  | 11:30 | 11:00 - 11:59 | Late Morning | 37,6 | 77  | 12,6  | 12,6  | 18,75 | 574,39 | 84,59  |
| 2019/06/21 | CH2206 | Male | Three y/o | Control | Control | Feed Day | No  | 11:30 | 11:00 - 11:59 | Late Morning | 37,5 | 72  | 43,0  | 43,0  | 18,65 | 569,20 | 126,58 |
| 2019/06/21 | CH2205 | Male | Three y/o | Control | Control | Feed Day | No  | 11:35 | 11:00 - 11:59 | Late Morning | 37,6 | 69  | 17,8  | 17,8  | 18,75 | 565,86 | 96,34  |
| 2019/06/21 | CH2206 | Male | Three y/o | Control | Control | Feed Day | No  | 11:35 | 11:00 - 11:59 | Late Morning | 37,6 |     | 39,0  | 39,0  | 18,75 |        | 123,22 |
| 2019/06/21 | CH2205 | Male | Three y/o | Control | Control | Feed Day | No  | 11:40 | 11:00 - 11:59 | Late Morning | 37,6 | 72  | 14,8  | 14,8  | 18,75 | 569,20 | 90,05  |
| 2019/06/21 | CH2206 | Male | Three y/o | Control | Control | Feed Day | No  | 11:40 | 11:00 - 11:59 | Late Morning | 37,7 | 79  | 38,0  | 38,0  | 18,85 | 576,36 | 122,32 |
| 2019/06/21 | CH2205 | Male | Three y/o | Control | Control | Feed Day | No  | 11:45 | 11:00 - 11:59 | Late Morning | 37,6 | 67  | 13,4  | 13,4  | 18,75 | 563,53 | 86,68  |
| 2019/06/21 | CH2206 | Male | Three y/o | Control | Control | Feed Day | No  | 11:45 | 11:00 - 11:59 | Late Morning | 37,7 | 88  | 27,2  | 27,2  | 18,85 | 584,49 | 110,83 |
| 2019/06/21 | CH2205 | Male | Three y/o | Control | Control | Feed Day | No  | 11:50 | 11:00 - 11:59 | Late Morning | 37,6 | 60  | 11,6  | 11,6  | 18,75 | 554,67 | 81,78  |
| 2019/06/21 | CH2206 | Male | Three y/o | Control | Control | Feed Day | No  | 11:50 | 11:00 - 11:59 | Late Morning | 37,7 | 86  | 19,2  | 19,2  | 18,85 | 582,77 | 98,92  |
| 2019/06/21 | CH2205 | Male | Three y/o | Control | Control | Feed Day | No  | 11:55 | 11:00 - 11:59 | Late Morning | 37,6 | 65  | 4,8   | 4,8   | 18,75 | 561,12 | 52,04  |
| 2019/06/21 | CH2206 | Male | Three y/o | Control | Control | Feed Day | No  | 11:55 | 11:00 - 11:59 | Late Morning | 37,7 | 82  | 28,0  | 28,0  | 18,85 | 579,19 | 111,83 |
| 2019/06/21 | CH2205 | Male | Three y/o | Control | Control | Feed Day | No  | 12:00 | 12:00 - 12:59 | Afternoon    | 37,6 | 68  | 8,6   | 8,6   | 18,75 | 564,71 | 71,66  |
| 2019/06/21 | CH2206 | Male | Three y/o | Control | Control | Feed Day | No  | 12:00 | 12:00 - 12:59 | Afternoon    | 37,7 | 75  | 26,4  | 26,4  | 18,85 | 572,36 | 109,81 |
| 2019/06/21 | CH2205 | Male | Three y/o | Control | Control | Feed Day | No  | 12:05 | 12:00 - 12:59 | Afternoon    | 37,7 | 58  | 6,4   | 6,4   | 18,85 | 551,90 | 61,70  |
| 2019/06/21 | CH2206 | Male | Three y/o | Control | Control | Feed Day | No  | 12:05 | 12:00 - 12:59 | Afternoon    | 37,7 | 82  | 24,2  | 24,2  | 18,85 | 579,19 | 106,83 |
| 2019/06/21 | CH2205 | Male | Three y/o | Control | Control | Feed Day | No  | 12:10 | 12:00 - 12:59 | Afternoon    | 37,7 | 67  | 11,2  | 11,2  | 18,85 | 563,53 | 80,59  |
| 2019/06/21 | CH2206 | Male | Three y/o | Control | Control | Feed Day | No  | 12:10 | 12:00 - 12:59 | Afternoon    | 37,7 | 85  | 46,0  | 46,0  | 18,85 | 581,90 | 128,91 |
| 2019/06/21 | CH2205 | Male | Three y/o | Control | Control | Feed Day | No  | 12:15 | 12:00 - 12:59 | Afternoon    | 37,7 | 64  | 30,2  | 30,2  | 18,85 | 559,88 | 114,42 |
| 2019/06/21 | CH2206 | Male | Three y/o | Control | Control | Feed Day | No  | 12:15 | 12:00 - 12:59 | Afternoon    | 37,8 | 86  | 36,6  | 36,6  | 18,95 | 582,77 | 121,03 |
| 2019/06/21 | CH2205 | Male | Three y/o | Control | Control | Feed Day | No  | 12:20 | 12:00 - 12:59 | Afternoon    | 37,7 | 83  | 14,0  | 14,0  | 18,85 | 580,11 | 88,17  |
| 2019/06/21 | CH2206 | Male | Three y/o | Control | Control | Feed Day | No  | 12:20 | 12:00 - 12:59 | Afternoon    | 37,8 |     | 78,4  | 78,4  | 18,95 |        | 147,37 |
| 2019/06/21 | CH2205 | Male | Three y/o | Control | Control | Feed Day | No  | 12:25 | 12:00 - 12:59 | Afternoon    | 37,7 | 71  | 10,8  | 10,8  | 18,85 | 568,10 | 79,36  |
| 2019/06/21 | CH2206 | Male | Three y/o | Control | Control | Feed Day | No  | 12:25 | 12:00 - 12:59 | Afternoon    | 37,8 | 93  | 54,4  | 54,4  | 18,95 | 588,58 | 134,70 |
| 2019/06/21 | CH2205 | Male | Three y/o | Control | Control | Feed Day | No  | 12:30 | 12:00 - 12:59 | Afternoon    | 37,7 | 60  | 15,0  | 15,0  | 18,85 | 554,67 | 90,51  |
| 2019/06/21 | CH2206 | Male | Three y/o | Control | Control | Feed Day | No  | 12:30 | 12:00 - 12:59 | Afternoon    | 37,8 | 92  | 48,4  | 48,4  | 18,95 | 587,78 | 130,66 |
| 2019/06/21 | CH2205 | Male | Three y/o | Control | Control | Feed Day | No  | 12:35 | 12:00 - 12:59 | Afternoon    | 37,7 | 68  | 21,0  | 21,0  | 18,85 | 564,71 | 101,98 |
| 2019/06/21 | CH2206 | Male | Three y/o | Control | Control | Feed Day | No  | 12:35 | 12:00 - 12:59 | Afternoon    | 37,8 |     | 53,6  | 53,6  | 18,95 |        | 134,19 |
| 2019/06/21 | CH2205 | Male | Three y/o | Control | Control | Feed Day | No  | 12:40 | 12:00 - 12:59 | Afternoon    | 37,7 | 72  | 9,8   | 9,8   | 18,85 | 569,20 | 76,07  |
| 2019/06/21 | CH2206 | Male | Three y/o | Control | Control | Feed Day | No  | 12:40 | 12:00 - 12:59 | Afternoon    | 37,8 | 75  | 51,2  | 51,2  | 18,95 | 572,36 | 132,61 |
| 2019/06/21 | CH2205 | Male | Three y/o | Control | Control | Feed Day | No  | 12:45 | 12:00 - 12:59 | Afternoon    | 37,7 | 66  | 10,2  | 10,2  | 18,85 | 562,34 | 77,43  |
| 2019/06/21 | CH2206 | Male | Three y/o | Control | Control | Feed Day | No  | 12:45 | 12:00 - 12:59 | Afternoon    | 37,8 | 84  | 52,8  | 52,8  | 18,95 | 581,01 | 133,67 |
| 2019/06/21 | CH2205 | Male | Three y/o | Control | Control | Feed Day | No  | 12:50 | 12:00 - 12:59 | Afternoon    | 37,7 | 71  | 59,4  | 59,4  | 18,85 | 568,10 | 137,75 |
| 2019/06/21 | CH2206 | Male | Three y/o | Control | Control | Feed Day | No  | 12:50 | 12:00 - 12:59 | Afternoon    | 37,8 | 76  | 49,8  | 49,8  | 18,95 | 573,39 | 131,65 |
| 2019/06/21 | CH2205 | Male | Three y/o | Control | Control | Feed Day | No  | 12:55 | 12:00 - 12:59 | Afternoon    | 37,7 | 110 | 117,2 | 117,2 | 18,85 | 600,69 | 161,38 |
| 2019/06/21 | CH2206 | Male | Three y/o | Control | Control | Feed Day | No  | 12:55 | 12:00 - 12:59 | Afternoon    | 37,8 |     | 57,8  | 57,8  | 18,95 |        | 136,80 |
| 2019/06/21 | CH2205 | Male | Three y/o | Control | Control | Feed Day | No  | 13:00 | 13:00 - 13:59 | Afternoon    | 37,6 | 103 | 66,6  | 66,6  | 18,75 | 596,00 | 141,71 |
| 2019/06/21 | CH2206 | Male | Three y/o | Control | Control | Feed Day | No  | 13:00 | 13:00 - 13:59 | Afternoon    | 37,8 | 120 | 85,2  | 85,2  | 18,95 | 606,78 | 150,27 |
| 2019/06/21 | CH2205 | Male | Three y/o | Control | Control | Feed Day | No  | 13:05 | 13:00 - 13:59 | Afternoon    | 37,6 | 74  | 8,6   | 8,6   | 18,75 | 571,33 | 71,66  |
| 2019/06/21 | CH2206 | Male | Three y/o | Control | Control | Feed Day | No  | 13:05 | 13:00 - 13:59 | Afternoon    | 37,8 | 105 | 40,2  | 40,2  | 18,95 | 597,38 | 124,26 |
| 2019/06/21 | CH2205 | Male | Three y/o | Control | Control | Feed Day | No  | 13:10 | 13:00 - 13:59 | Afternoon    | 37,6 | 68  | 4,0   | 4,0   | 18,75 | 564,71 | 45,94  |
| 2019/06/21 | CH2206 | Male | Three y/o | Control | Control | Feed Day | No  | 13:10 | 13:00 - 13:59 | Afternoon    | 37,8 | 76  | 45,4  | 45,4  | 18,95 | 573,39 | 128,45 |
| 2019/06/21 | CH2205 | Male | Three y/o | Control | Control | Feed Day | No  | 13:15 | 13:00 - 13:59 | Afternoon    | 37,6 | 72  | 4,0   | 4,0   | 18,75 | 569,20 | 45,94  |
| 2019/06/21 | CH2206 | Male | Three y/o | Control | Control | Feed Day | No  | 13:15 | 13:00 - 13:59 | Afternoon    | 37,8 | 72  | 49,0  | 49,0  | 18,95 | 569,20 | 131,09 |
| 2019/06/21 | CH2205 | Male | Three y/o | Control | Control | Feed Day | No  | 13:20 | 13:00 - 13:59 | Afternoon    | 37,6 | 63  | 5,6   | 5,6   | 18,75 | 558,62 | 57,21  |
| 2019/06/21 | CH2206 | Male | Three y/o | Control | Control | Feed Day | No  | 13:20 | 13:00 - 13:59 | Afternoon    | 37,8 | 75  | 56,4  | 56,4  | 18,95 | 572,36 | 135,95 |
| 2019/06/21 | CH2205 | Male | Three y/o | Control | Control | Feed Day | No  | 13:25 | 13:00 - 13:59 | Afternoon    | 37,7 | 60  | 8,8   | 8,8   | 18,85 | 554,67 | 72,43  |
| 2019/06/21 | CH2206 | Male | Three y/o | Control | Control | Feed Day | No  | 13:25 | 13:00 - 13:59 | Afternoon    | 37,8 | 78  | 49,8  | 49,8  | 18,95 | 575,38 | 131,65 |
| 2019/06/21 | CH2205 | Male | Three y/o | Control | Control | Feed Day | No  | 13:30 | 13:00 - 13:59 | Afternoon    | 37,7 | 69  | 10,2  | 10,2  | 18,85 | 565,86 | 77,43  |
| 2019/06/21 | CH2206 | Male | Three y/o | Control | Control | Feed Day | No  | 13:30 | 13:00 - 13:59 | Afternoon    | 37,8 | 74  | 53,6  | 53,6  | 18,95 | 571,33 | 134,19 |
| 2019/06/21 | CH2205 | Male | Three y/o | Control | Control | Feed Day | No  | 13:35 | 13:00 - 13:59 | Afternoon    | 37,7 | 63  | 6,8   | 6,8   | 18,85 | 558,62 | 63,74  |
| 2019/06/21 | CH2206 | Male | Three y/o | Control | Control | Feed Day | No  | 13:35 | 13:00 - 13:59 | Afternoon    | 37,8 | 70  | 50,0  | 50,0  | 18,95 | 566,99 | 131,79 |
| 2019/06/21 | CH2205 | Male | Three y/o | Control | Control | Feed Day | No  | 13:40 | 13:00 - 13:59 | Afternoon    | 37,7 | 48  | 6,2   | 6,2   | 18,85 | 536,04 | 60,63  |
| 2019/06/21 | CH2206 | Male | Three y/o | Control | Control | Feed Day | No  | 13:40 | 13:00 - 13:59 | Afternoon    | 37,9 | 70  | 50,0  | 50,0  | 19,05 | 566,99 | 131,79 |
| 2019/06/21 | CH2205 | Male | Three y/o | Control | Control | Feed Day | No  | 13:45 | 13:00 - 13:59 | Afternoon    | 37,7 | 85  | 11,2  | 11,2  | 18,85 | 581,90 | 80,59  |



|            |        |      |           |         |         |          |    |       |               |           |      |     |      |      |       |        |        |
|------------|--------|------|-----------|---------|---------|----------|----|-------|---------------|-----------|------|-----|------|------|-------|--------|--------|
| 2019/06/21 | CH2206 | Male | Three y/o | Control | Control | Feed Day | No | 13:45 | 13:00 - 13:59 | Afternoon | 37,9 | 82  | 49,8 | 49,8 | 19,05 | 579,19 | 131,65 |
| 2019/06/21 | CH2205 | Male | Three y/o | Control | Control | Feed Day | No | 13:50 | 13:00 - 13:59 | Afternoon | 37,7 | 61  | 9,2  | 9,2  | 18,85 | 556,01 | 73,94  |
| 2019/06/21 | CH2206 | Male | Three y/o | Control | Control | Feed Day | No | 13:50 | 13:00 - 13:59 | Afternoon | 37,9 | 73  | 51,2 | 51,2 | 19,05 | 570,27 | 132,61 |
| 2019/06/21 | CH2205 | Male | Three y/o | Control | Control | Feed Day | No | 13:55 | 13:00 - 13:59 | Afternoon | 37,7 | 59  | 8,6  | 8,6  | 18,85 | 553,30 | 71,66  |
| 2019/06/21 | CH2206 | Male | Three y/o | Control | Control | Feed Day | No | 13:55 | 13:00 - 13:59 | Afternoon | 37,9 | 62  | 48,0 | 48,0 | 19,05 | 557,33 | 130,38 |
| 2019/06/21 | CH2205 | Male | Three y/o | Control | Control | Feed Day | No | 14:00 | 14:00 - 14:59 | Afternoon | 37,7 | 65  | 12,8 | 12,8 | 18,85 | 561,12 | 85,12  |
| 2019/06/21 | CH2206 | Male | Three y/o | Control | Control | Feed Day | No | 14:00 | 14:00 - 14:59 | Afternoon | 37,9 | 70  | 44,2 | 44,2 | 19,05 | 566,99 | 127,53 |
| 2019/06/21 | CH2205 | Male | Three y/o | Control | Control | Feed Day | No | 14:05 | 14:00 - 14:59 | Afternoon | 37,7 | 67  | 9,2  | 9,2  | 18,85 | 563,53 | 73,94  |
| 2019/06/21 | CH2206 | Male | Three y/o | Control | Control | Feed Day | No | 14:05 | 14:00 - 14:59 | Afternoon | 37,9 | 71  | 50,6 | 50,6 | 19,05 | 568,10 | 132,20 |
| 2019/06/21 | CH2205 | Male | Three y/o | Control | Control | Feed Day | No | 14:10 | 14:00 - 14:59 | Afternoon | 37,7 | 66  | 6,0  | 6,0  | 18,85 | 562,34 | 59,53  |
| 2019/06/21 | CH2206 | Male | Three y/o | Control | Control | Feed Day | No | 14:10 | 14:00 - 14:59 | Afternoon | 38,0 | 75  | 50,6 | 50,6 | 19,15 | 572,36 | 132,20 |
| 2019/06/21 | CH2205 | Male | Three y/o | Control | Control | Feed Day | No | 14:15 | 14:00 - 14:59 | Afternoon | 37,7 | 77  | 8,0  | 8,0  | 18,85 | 574,39 | 69,22  |
| 2019/06/21 | CH2206 | Male | Three y/o | Control | Control | Feed Day | No | 14:15 | 14:00 - 14:59 | Afternoon | 38,0 | 83  | 45,2 | 45,2 | 19,15 | 580,11 | 128,30 |
| 2019/06/21 | CH2205 | Male | Three y/o | Control | Control | Feed Day | No | 14:20 | 14:00 - 14:59 | Afternoon | 37,7 | 68  | 6,4  | 6,4  | 18,85 | 564,71 | 61,70  |
| 2019/06/21 | CH2206 | Male | Three y/o | Control | Control | Feed Day | No | 14:20 | 14:00 - 14:59 | Afternoon | 38,0 | 73  | 46,4 | 46,4 | 19,15 | 570,27 | 129,21 |
| 2019/06/21 | CH2205 | Male | Three y/o | Control | Control | Feed Day | No | 14:25 | 14:00 - 14:59 | Afternoon | 37,7 | 56  | 8,0  | 8,0  | 18,85 | 549,01 | 69,22  |
| 2019/06/21 | CH2206 | Male | Three y/o | Control | Control | Feed Day | No | 14:25 | 14:00 - 14:59 | Afternoon | 37,9 | 51  | 47,8 | 47,8 | 19,05 | 541,20 | 130,23 |
| 2019/06/21 | CH2205 | Male | Three y/o | Control | Control | Feed Day | No | 14:30 | 14:00 - 14:59 | Afternoon | 37,7 | 51  | 13,8 | 13,8 | 18,85 | 541,20 | 87,68  |
| 2019/06/21 | CH2206 | Male | Three y/o | Control | Control | Feed Day | No | 14:30 | 14:00 - 14:59 | Afternoon | 38,0 | 80  | 49,4 | 49,4 | 19,15 | 577,31 | 131,37 |
| 2019/06/21 | CH2205 | Male | Three y/o | Control | Control | Feed Day | No | 14:35 | 14:00 - 14:59 | Afternoon | 37,7 | 71  | 9,8  | 9,8  | 18,85 | 568,10 | 76,07  |
| 2019/06/21 | CH2206 | Male | Three y/o | Control | Control | Feed Day | No | 14:35 | 14:00 - 14:59 | Afternoon | 38,0 | 50  | 45,4 | 45,4 | 19,15 | 539,52 | 128,45 |
| 2019/06/21 | CH2205 | Male | Three y/o | Control | Control | Feed Day | No | 14:40 | 14:00 - 14:59 | Afternoon | 37,7 | 49  | 11,0 | 11,0 | 18,85 | 537,80 | 79,98  |
| 2019/06/21 | CH2206 | Male | Three y/o | Control | Control | Feed Day | No | 14:40 | 14:00 - 14:59 | Afternoon | 38,0 | 102 | 77,6 | 77,6 | 19,15 | 595,30 | 147,02 |
| 2019/06/21 | CH2205 | Male | Three y/o | Control | Control | Feed Day | No | 14:45 | 14:00 - 14:59 | Afternoon | 37,8 | 57  | 14,4 | 14,4 | 18,95 | 550,47 | 89,12  |
| 2019/06/21 | CH2206 | Male | Three y/o | Control | Control | Feed Day | No | 14:45 | 14:00 - 14:59 | Afternoon | 38,0 | 79  | 41,6 | 41,6 | 19,15 | 576,36 | 125,44 |
| 2019/06/21 | CH2205 | Male | Three y/o | Control | Control | Feed Day | No | 14:50 | 14:00 - 14:59 | Afternoon | 37,9 | 54  | 6,6  | 6,6  | 19,05 | 545,99 | 62,73  |
| 2019/06/21 | CH2206 | Male | Three y/o | Control | Control | Feed Day | No | 14:50 | 14:00 - 14:59 | Afternoon | 38,0 | 74  | 46,6 | 46,6 | 19,15 | 571,33 | 129,35 |
| 2019/06/21 | CH2205 | Male | Three y/o | Control | Control | Feed Day | No | 14:55 | 14:00 - 14:59 | Afternoon | 37,9 | 71  | 12,0 | 12,0 | 19,05 | 568,10 | 82,93  |
| 2019/06/21 | CH2206 | Male | Three y/o | Control | Control | Feed Day | No | 14:55 | 14:00 - 14:59 | Afternoon | 38,0 | 70  | 25,8 | 25,8 | 19,15 | 566,99 | 109,02 |
| 2019/06/21 | CH2205 | Male | Three y/o | Control | Control | Feed Day | No | 15:00 | 15:00 - 15:59 | Afternoon | 37,8 | 68  | 2,6  | 2,6  | 18,95 | 564,71 | 31,57  |
| 2019/06/21 | CH2206 | Male | Three y/o | Control | Control | Feed Day | No | 15:00 | 15:00 - 15:59 | Afternoon | 38,0 | 85  | 38,4 | 38,4 | 19,15 | 581,90 | 122,68 |
| 2019/06/21 | CH2205 | Male | Three y/o | Control | Control | Feed Day | No | 15:05 | 15:00 - 15:59 | Afternoon | 37,9 | 84  | 5,6  | 5,6  | 19,05 | 581,01 | 57,21  |
| 2019/06/21 | CH2206 | Male | Three y/o | Control | Control | Feed Day | No | 15:05 | 15:00 - 15:59 | Afternoon | 38,0 | 75  | 39,4 | 39,4 | 19,15 | 572,36 | 123,57 |
| 2019/06/21 | CH2205 | Male | Three y/o | Control | Control | Feed Day | No | 15:10 | 15:00 - 15:59 | Afternoon | 37,9 | 71  | 5,2  | 5,2  | 19,05 | 568,10 | 54,72  |
| 2019/06/21 | CH2206 | Male | Three y/o | Control | Control | Feed Day | No | 15:10 | 15:00 - 15:59 | Afternoon | 38,0 | 86  | 26,0 | 26,0 | 19,15 | 582,77 | 109,29 |
| 2019/06/21 | CH2205 | Male | Three y/o | Control | Control | Feed Day | No | 15:15 | 15:00 - 15:59 | Afternoon | 37,9 | 67  | 5,0  | 5,0  | 19,05 | 563,53 | 53,41  |
| 2019/06/21 | CH2206 | Male | Three y/o | Control | Control | Feed Day | No | 15:15 | 15:00 - 15:59 | Afternoon | 38,0 | 72  | 32,6 | 32,6 | 19,15 | 569,20 | 117,05 |
| 2019/06/21 | CH2205 | Male | Three y/o | Control | Control | Feed Day | No | 15:20 | 15:00 - 15:59 | Afternoon | 37,9 | 51  | 4,4  | 4,4  | 19,05 | 541,20 | 49,12  |
| 2019/06/21 | CH2206 | Male | Three y/o | Control | Control | Feed Day | No | 15:20 | 15:00 - 15:59 | Afternoon | 38,0 | 80  | 35,2 | 35,2 | 19,15 | 577,31 | 119,69 |
| 2019/06/21 | CH2205 | Male | Three y/o | Control | Control | Feed Day | No | 15:25 | 15:00 - 15:59 | Afternoon | 37,9 | 65  | 4,8  | 4,8  | 19,05 | 561,12 | 52,04  |
| 2019/06/21 | CH2206 | Male | Three y/o | Control | Control | Feed Day | No | 15:25 | 15:00 - 15:59 | Afternoon | 38,0 | 77  | 39,4 | 39,4 | 19,15 | 574,39 | 123,57 |
| 2019/06/21 | CH2205 | Male | Three y/o | Control | Control | Feed Day | No | 15:30 | 15:00 - 15:59 | Afternoon | 38,0 | 62  | 11,6 | 11,6 | 19,15 | 557,33 | 81,78  |
| 2019/06/21 | CH2206 | Male | Three y/o | Control | Control | Feed Day | No | 15:30 | 15:00 - 15:59 | Afternoon | 38,0 | 83  | 47,0 | 47,0 | 19,15 | 580,11 | 129,65 |
| 2019/06/21 | CH2205 | Male | Three y/o | Control | Control | Feed Day | No | 15:35 | 15:00 - 15:59 | Afternoon | 38,0 | 80  | 8,2  | 8,2  | 19,15 | 577,31 | 70,05  |
| 2019/06/21 | CH2206 | Male | Three y/o | Control | Control | Feed Day | No | 15:35 | 15:00 - 15:59 | Afternoon | 38,0 | 78  | 40,8 | 40,8 | 19,15 | 575,38 | 124,77 |
| 2019/06/21 | CH2205 | Male | Three y/o | Control | Control | Feed Day | No | 15:40 | 15:00 - 15:59 | Afternoon | 38,0 | 55  | 7,8  | 7,8  | 19,15 | 547,52 | 68,36  |
| 2019/06/21 | CH2206 | Male | Three y/o | Control | Control | Feed Day | No | 15:40 | 15:00 - 15:59 | Afternoon | 38,0 | 94  | 8,0  | 8,0  | 19,15 | 589,37 | 69,22  |
| 2019/06/21 | CH2205 | Male | Three y/o | Control | Control | Feed Day | No | 15:45 | 15:00 - 15:59 | Afternoon | 38,0 | 51  | 6,8  | 6,8  | 19,15 | 541,20 | 63,74  |
| 2019/06/21 | CH2206 | Male | Three y/o | Control | Control | Feed Day | No | 15:45 | 15:00 - 15:59 | Afternoon | 38,0 | 79  | 11,6 | 11,6 | 19,15 | 576,36 | 81,78  |
| 2019/06/21 | CH2205 | Male | Three y/o | Control | Control | Feed Day | No | 15:50 | 15:00 - 15:59 | Afternoon | 37,9 | 67  | 2,0  | 2,0  | 19,05 | 563,53 | 22,86  |
| 2019/06/21 | CH2206 | Male | Three y/o | Control | Control | Feed Day | No | 15:50 | 15:00 - 15:59 | Afternoon | 38,0 | 68  | 11,4 | 11,4 | 19,15 | 564,71 | 81,19  |
| 2019/06/21 | CH2205 | Male | Three y/o | Control | Control | Feed Day | No | 15:55 | 15:00 - 15:59 | Afternoon | 37,9 | 86  | 2,6  | 2,6  | 19,05 | 582,77 | 31,57  |
| 2019/06/21 | CH2206 | Male | Three y/o | Control | Control | Feed Day | No | 15:55 | 15:00 - 15:59 | Afternoon | 38,0 | 83  | 9,0  | 9,0  | 19,15 | 580,11 | 73,19  |
| 2019/06/21 | CH2205 | Male | Three y/o | Control | Control | Feed Day | No | 16:00 | 16:00 - 16:59 | Evening   | 37,9 | 62  | 11,4 | 11,4 | 19,05 | 557,33 | 81,19  |
| 2019/06/21 | CH2206 | Male | Three y/o | Control | Control | Feed Day | No | 16:00 | 16:00 - 16:59 | Evening   | 38,0 | 77  | 25,8 | 25,8 | 19,15 | 574,39 | 109,02 |
| 2019/06/21 | CH2205 | Male | Three y/o | Control | Control | Feed Day | No | 16:05 | 16:00 - 16:59 | Evening   | 37,9 | 76  | 66,8 | 66,8 | 19,05 | 573,39 | 141,81 |
| 2019/06/21 | CH2206 | Male | Three y/o | Control | Control | Feed Day | No | 16:05 | 16:00 - 16:59 | Evening   | 38,0 | 110 | 70,0 | 70,0 | 19,15 | 600,69 | 143,44 |
| 2019/06/21 | CH2205 | Male | Three y/o | Control | Control | Feed Day | No | 16:10 | 16:00 - 16:59 | Evening   | 37,9 | 47  | 18,4 | 18,4 | 19,05 | 534,23 | 97,47  |
| 2019/06/21 | CH2206 | Male | Three y/o | Control | Control | Feed Day | No | 16:10 | 16:00 - 16:59 | Evening   | 38,0 | 82  | 54,8 | 54,8 | 19,15 | 579,19 | 134,96 |
| 2019/06/21 | CH2205 | Male | Three y/o | Control | Control | Feed Day | No | 16:15 | 16:00 - 16:59 | Evening   | 37,9 | 61  | 16,8 | 16,8 | 19,05 | 556,01 | 94,37  |
| 2019/06/21 | CH2206 | Male | Three y/o | Control | Control | Feed Day | No | 16:15 | 16:00 - 16:59 | Evening   | 38,0 | 69  | 51,8 | 51,8 | 19,15 | 565,86 | 133,01 |
| 2019/06/21 | CH2205 | Male | Three y/o | Control | Control | Feed Day | No | 16:20 | 16:00 - 16:59 | Evening   | 37,9 | 63  | 37,8 | 37,8 | 19,05 | 558,62 | 122,14 |
| 2019/06/21 | CH2206 | Male | Three y/o | Control | Control | Feed Day | No | 16:20 | 16:00 - 16:59 | Evening   | 38,0 | 74  | 29,8 | 29,8 | 19,15 | 571,33 | 113,97 |
| 2019/06/21 | CH2205 | Male | Three y/o | Control | Control | Feed Day | No | 16:25 | 16:00 - 16:59 | Evening   | 37,9 | 86  | 83,4 | 83,4 | 19,05 | 582,77 | 149,52 |
| 2019/06/21 | CH2206 | Male | Three y/o | Control | Control | Feed Day | No | 16:25 | 16:00 - 16:59 | Evening   | 38,0 | 108 | 60,4 | 60,4 | 19,15 | 599,39 | 138,32 |
| 2019/06/21 | CH2205 | Male | Three y/o | Control | Control | Feed Day | No | 16:30 | 16:00 - 16:59 | Evening   | 37,9 |     | 7,0  | 7,0  | 19,05 |        | 64,72  |
| 2019/06/21 | CH2206 | Male | Three y/o | Control | Control | Feed Day | No | 16:30 | 16:00 - 16:59 | Evening   | 38,0 | 92  | 42,2 | 42,2 | 19,15 | 587,78 | 125,93 |
| 2019/06/21 | CH2205 | Male | Three y/o | Control | Control | Feed Day | No | 16:35 | 16:00 - 16:59 | Evening   | 37,9 | 80  | 11,0 | 11,0 | 19,05 | 577,31 | 79,98  |
| 2019/06/21 | CH2206 | Male | Three y/o | Control | Control | Feed Day | No | 16:35 | 16:00 - 16:59 | Evening   | 38,0 | 92  | 32,8 | 32,8 | 19,15 | 587,78 | 117,26 |
| 2019/06/21 | CH2205 | Male | Three y/o | Control | Control | Feed Day | No | 16:40 | 16:00 - 16:59 | Evening   | 37,9 | 53  | 11,6 | 11,6 | 19,05 | 544,43 | 81,78  |



|            |        |      |           |         |         |          |    |       |               |         |      |     |      |      |       |        |        |
|------------|--------|------|-----------|---------|---------|----------|----|-------|---------------|---------|------|-----|------|------|-------|--------|--------|
| 2019/06/21 | CH2206 | Male | Three y/o | Control | Control | Feed Day | No | 16:40 | 16:00 - 16:59 | Evening | 37,9 | 79  | 28,2 | 28,2 | 19,05 | 576,36 | 112,07 |
| 2019/06/21 | CH2205 | Male | Three y/o | Control | Control | Feed Day | No | 16:45 | 16:00 - 16:59 | Evening | 37,9 | 65  | 17,8 | 17,8 | 19,05 | 561,12 | 96,34  |
| 2019/06/21 | CH2206 | Male | Three y/o | Control | Control | Feed Day | No | 16:45 | 16:00 - 16:59 | Evening | 37,9 | 79  | 8,6  | 8,6  | 19,05 | 576,36 | 71,66  |
| 2019/06/21 | CH2205 | Male | Three y/o | Control | Control | Feed Day | No | 16:50 | 16:00 - 16:59 | Evening | 37,9 |     | 13,2 | 13,2 | 19,05 |        | 86,17  |
| 2019/06/21 | CH2206 | Male | Three y/o | Control | Control | Feed Day | No | 16:50 | 16:00 - 16:59 | Evening | 37,9 | 72  | 29,6 | 29,6 | 19,05 | 569,20 | 113,73 |
| 2019/06/21 | CH2205 | Male | Three y/o | Control | Control | Feed Day | No | 16:55 | 16:00 - 16:59 | Evening | 37,9 |     | 16,6 | 16,6 | 19,05 |        | 93,96  |
| 2019/06/21 | CH2206 | Male | Three y/o | Control | Control | Feed Day | No | 16:55 | 16:00 - 16:59 | Evening | 37,9 | 59  | 38,8 | 38,8 | 19,05 | 553,30 | 123,04 |
| 2019/06/21 | CH2205 | Male | Three y/o | Control | Control | Feed Day | No | 17:00 | 17:00 - 17:59 | Evening | 37,9 | 74  | 15,4 | 15,4 | 19,05 | 571,33 | 91,41  |
| 2019/06/21 | CH2206 | Male | Three y/o | Control | Control | Feed Day | No | 17:00 | 17:00 - 17:59 | Evening | 37,8 |     | 35,2 | 35,2 | 18,95 |        | 119,69 |
| 2019/06/21 | CH2205 | Male | Three y/o | Control | Control | Feed Day | No | 17:05 | 17:00 - 17:59 | Evening | 37,7 | 61  | 11,0 | 11,0 | 18,85 | 556,01 | 79,98  |
| 2019/06/21 | CH2206 | Male | Three y/o | Control | Control | Feed Day | No | 17:05 | 17:00 - 17:59 | Evening | 37,9 | 67  | 23,0 | 23,0 | 19,05 | 563,53 | 105,09 |
| 2019/06/21 | CH2205 | Male | Three y/o | Control | Control | Feed Day | No | 17:10 | 17:00 - 17:59 | Evening | 37,8 | 58  | 15,0 | 15,0 | 18,95 | 551,90 | 90,51  |
| 2019/06/21 | CH2206 | Male | Three y/o | Control | Control | Feed Day | No | 17:10 | 17:00 - 17:59 | Evening | 37,9 | 81  | 27,6 | 27,6 | 19,05 | 578,26 | 111,33 |
| 2019/06/21 | CH2205 | Male | Three y/o | Control | Control | Feed Day | No | 17:15 | 17:00 - 17:59 | Evening | 37,9 | 67  | 11,0 | 11,0 | 19,05 | 563,53 | 79,98  |
| 2019/06/21 | CH2206 | Male | Three y/o | Control | Control | Feed Day | No | 17:15 | 17:00 - 17:59 | Evening | 37,9 | 48  | 23,6 | 23,6 | 19,05 | 536,04 | 105,97 |
| 2019/06/21 | CH2205 | Male | Three y/o | Control | Control | Feed Day | No | 17:20 | 17:00 - 17:59 | Evening | 37,9 | 61  | 14,4 | 14,4 | 19,05 | 556,01 | 89,12  |
| 2019/06/21 | CH2206 | Male | Three y/o | Control | Control | Feed Day | No | 17:20 | 17:00 - 17:59 | Evening | 37,9 | 60  | 17,4 | 17,4 | 19,05 | 554,67 | 95,56  |
| 2019/06/21 | CH2205 | Male | Three y/o | Control | Control | Feed Day | No | 17:25 | 17:00 - 17:59 | Evening | 37,9 | 85  | 12,0 | 12,0 | 19,05 | 581,90 | 82,93  |
| 2019/06/21 | CH2206 | Male | Three y/o | Control | Control | Feed Day | No | 17:25 | 17:00 - 17:59 | Evening | 37,9 | 48  | 19,2 | 19,2 | 19,05 | 536,04 | 98,92  |
| 2019/06/21 | CH2205 | Male | Three y/o | Control | Control | Feed Day | No | 17:30 | 17:00 - 17:59 | Evening | 37,9 | 77  | 12,8 | 12,8 | 19,05 | 574,39 | 85,12  |
| 2019/06/21 | CH2206 | Male | Three y/o | Control | Control | Feed Day | No | 17:30 | 17:00 - 17:59 | Evening | 37,9 | 83  | 9,0  | 9,0  | 19,05 | 580,11 | 73,19  |
| 2019/06/21 | CH2205 | Male | Three y/o | Control | Control | Feed Day | No | 17:35 | 17:00 - 17:59 | Evening | 37,9 | 89  | 9,6  | 9,6  | 19,05 | 585,33 | 75,37  |
| 2019/06/21 | CH2206 | Male | Three y/o | Control | Control | Feed Day | No | 17:35 | 17:00 - 17:59 | Evening | 37,8 | 97  | 41,2 | 41,2 | 18,95 | 591,66 | 125,11 |
| 2019/06/21 | CH2205 | Male | Three y/o | Control | Control | Feed Day | No | 17:40 | 17:00 - 17:59 | Evening | 37,9 | 82  | 11,2 | 11,2 | 19,05 | 579,19 | 80,59  |
| 2019/06/21 | CH2206 | Male | Three y/o | Control | Control | Feed Day | No | 17:40 | 17:00 - 17:59 | Evening | 37,9 | 124 | 9,6  | 9,6  | 19,05 | 609,04 | 75,37  |
| 2019/06/21 | CH2205 | Male | Three y/o | Control | Control | Feed Day | No | 17:45 | 17:00 - 17:59 | Evening | 38,0 | 86  | 18,0 | 18,0 | 19,15 | 582,77 | 96,72  |
| 2019/06/21 | CH2206 | Male | Three y/o | Control | Control | Feed Day | No | 17:45 | 17:00 - 17:59 | Evening | 37,8 |     | 10,4 | 10,4 | 18,95 |        | 78,08  |
| 2019/06/21 | CH2205 | Male | Three y/o | Control | Control | Feed Day | No | 17:50 | 17:00 - 17:59 | Evening | 37,9 | 49  | 13,0 | 13,0 | 19,05 | 537,80 | 85,65  |
| 2019/06/21 | CH2206 | Male | Three y/o | Control | Control | Feed Day | No | 17:50 | 17:00 - 17:59 | Evening | 37,8 | 64  | 16,4 | 16,4 | 18,95 | 559,88 | 93,55  |
| 2019/06/21 | CH2205 | Male | Three y/o | Control | Control | Feed Day | No | 17:55 | 17:00 - 17:59 | Evening | 37,8 | 47  | 16,2 | 16,2 | 18,95 | 534,23 | 93,13  |
| 2019/06/21 | CH2206 | Male | Three y/o | Control | Control | Feed Day | No | 17:55 | 17:00 - 17:59 | Evening | 37,7 | 80  | 16,4 | 16,4 | 18,85 | 577,31 | 93,55  |
| 2019/06/21 | CH2205 | Male | Three y/o | Control | Control | Feed Day | No | 18:00 | 18:00 - 18:59 | Evening | 37,9 |     | 11,8 | 11,8 | 19,05 |        | 82,36  |
| 2019/06/21 | CH2206 | Male | Three y/o | Control | Control | Feed Day | No | 18:00 | 18:00 - 18:59 | Evening | 37,7 | 51  | 9,8  | 9,8  | 18,85 | 541,20 | 76,07  |
| 2019/06/21 | CH2205 | Male | Three y/o | Control | Control | Feed Day | No | 18:05 | 18:00 - 18:59 | Evening | 37,9 |     | 5,4  | 5,4  | 19,05 |        | 55,99  |
| 2019/06/21 | CH2206 | Male | Three y/o | Control | Control | Feed Day | No | 18:05 | 18:00 - 18:59 | Evening | 37,7 | 64  | 10,8 | 10,8 | 18,85 | 559,88 | 79,36  |
| 2019/06/21 | CH2205 | Male | Three y/o | Control | Control | Feed Day | No | 18:10 | 18:00 - 18:59 | Evening | 37,9 |     | 11,0 | 11,0 | 19,05 |        | 79,98  |
| 2019/06/21 | CH2206 | Male | Three y/o | Control | Control | Feed Day | No | 18:10 | 18:00 - 18:59 | Evening | 37,5 | 86  | 24,8 | 24,8 | 18,65 | 582,77 | 107,67 |
| 2019/06/21 | CH2205 | Male | Three y/o | Control | Control | Feed Day | No | 18:15 | 18:00 - 18:59 | Evening | 37,9 | 79  | 16,8 | 16,8 | 19,05 | 576,36 | 94,37  |
| 2019/06/21 | CH2206 | Male | Three y/o | Control | Control | Feed Day | No | 18:15 | 18:00 - 18:59 | Evening | 37,4 | 68  | 45,2 | 45,2 | 18,55 | 564,71 | 128,30 |
| 2019/06/21 | CH2205 | Male | Three y/o | Control | Control | Feed Day | No | 18:20 | 18:00 - 18:59 | Evening | 37,7 | 87  | 17,6 | 17,6 | 18,85 | 583,64 | 95,95  |
| 2019/06/21 | CH2206 | Male | Three y/o | Control | Control | Feed Day | No | 18:20 | 18:00 - 18:59 | Evening | 37,3 | 81  | 46,0 | 46,0 | 18,46 | 578,26 | 128,91 |
| 2019/06/21 | CH2205 | Male | Three y/o | Control | Control | Feed Day | No | 18:25 | 18:00 - 18:59 | Evening | 37,7 | 53  | 14,8 | 14,8 | 18,85 | 544,43 | 90,05  |
| 2019/06/21 | CH2206 | Male | Three y/o | Control | Control | Feed Day | No | 18:25 | 18:00 - 18:59 | Evening | 37,2 | 51  | 49,2 | 49,2 | 18,36 | 541,20 | 131,23 |
| 2019/06/21 | CH2205 | Male | Three y/o | Control | Control | Feed Day | No | 18:30 | 18:00 - 18:59 | Evening | 37,7 | 54  | 15,0 | 15,0 | 18,85 | 545,99 | 90,51  |
| 2019/06/21 | CH2206 | Male | Three y/o | Control | Control | Feed Day | No | 18:30 | 18:00 - 18:59 | Evening | 37,2 | 79  | 47,4 | 47,4 | 18,36 | 576,36 | 129,94 |
| 2019/06/21 | CH2205 | Male | Three y/o | Control | Control | Feed Day | No | 18:35 | 18:00 - 18:59 | Evening | 37,7 | 57  | 15,6 | 15,6 | 18,85 | 550,47 | 91,85  |
| 2019/06/21 | CH2206 | Male | Three y/o | Control | Control | Feed Day | No | 18:35 | 18:00 - 18:59 | Evening | 37,2 | 80  | 52,4 | 52,4 | 18,36 | 577,31 | 133,41 |
| 2019/06/21 | CH2205 | Male | Three y/o | Control | Control | Feed Day | No | 18:40 | 18:00 - 18:59 | Evening | 37,7 | 84  | 11,4 | 11,4 | 18,85 | 581,01 | 81,19  |
| 2019/06/21 | CH2206 | Male | Three y/o | Control | Control | Feed Day | No | 18:40 | 18:00 - 18:59 | Evening | 37,2 | 91  | 51,6 | 51,6 | 18,36 | 586,98 | 132,87 |
| 2019/06/21 | CH2205 | Male | Three y/o | Control | Control | Feed Day | No | 18:45 | 18:00 - 18:59 | Evening | 37,7 | 55  | 13,0 | 13,0 | 18,85 | 547,52 | 85,65  |
| 2019/06/21 | CH2206 | Male | Three y/o | Control | Control | Feed Day | No | 18:45 | 18:00 - 18:59 | Evening | 37,2 | 89  | 50,8 | 50,8 | 18,36 | 585,33 | 132,33 |
| 2019/06/21 | CH2205 | Male | Three y/o | Control | Control | Feed Day | No | 18:50 | 18:00 - 18:59 | Evening | 37,7 | 66  | 14,6 | 14,6 | 18,85 | 562,34 | 89,59  |
| 2019/06/21 | CH2206 | Male | Three y/o | Control | Control | Feed Day | No | 18:50 | 18:00 - 18:59 | Evening | 37,2 | 68  | 54,4 | 54,4 | 18,36 | 564,71 | 134,70 |
| 2019/06/21 | CH2205 | Male | Three y/o | Control | Control | Feed Day | No | 18:55 | 18:00 - 18:59 | Evening | 37,7 | 70  | 10,8 | 10,8 | 18,85 | 566,99 | 79,36  |
| 2019/06/21 | CH2206 | Male | Three y/o | Control | Control | Feed Day | No | 18:55 | 18:00 - 18:59 | Evening | 37,2 | 90  | 50,8 | 50,8 | 18,36 | 586,16 | 132,33 |
| 2019/06/21 | CH2205 | Male | Three y/o | Control | Control | Feed Day | No | 19:00 | 19:00 - 19:59 | Evening | 37,7 | 79  | 16,6 | 16,6 | 18,85 | 576,36 | 93,96  |
| 2019/06/21 | CH2206 | Male | Three y/o | Control | Control | Feed Day | No | 19:00 | 19:00 - 19:59 | Evening | 37,2 | 49  | 53,8 | 53,8 | 18,36 | 537,80 | 134,32 |
| 2019/06/21 | CH2205 | Male | Three y/o | Control | Control | Feed Day | No | 19:05 | 19:00 - 19:59 | Evening | 37,7 |     | 12,4 | 12,4 | 18,85 |        | 84,04  |
| 2019/06/21 | CH2206 | Male | Three y/o | Control | Control | Feed Day | No | 19:05 | 19:00 - 19:59 | Evening | 37,2 | 73  | 50,4 | 50,4 | 18,36 | 570,27 | 132,06 |
| 2019/06/21 | CH2205 | Male | Three y/o | Control | Control | Feed Day | No | 19:10 | 19:00 - 19:59 | Evening | 37,7 | 90  | 16,2 | 16,2 | 18,85 | 586,16 | 93,13  |
| 2019/06/21 | CH2206 | Male | Three y/o | Control | Control | Feed Day | No | 19:10 | 19:00 - 19:59 | Evening | 37,2 | 93  | 48,0 | 48,0 | 18,36 | 588,58 | 130,38 |
| 2019/06/21 | CH2205 | Male | Three y/o | Control | Control | Feed Day | No | 19:15 | 19:00 - 19:59 | Evening | 37,6 | 106 | 16,4 | 16,4 | 18,75 | 598,06 | 93,55  |
| 2019/06/21 | CH2206 | Male | Three y/o | Control | Control | Feed Day | No | 19:15 | 19:00 - 19:59 | Evening | 37,3 | 101 | 45,0 | 45,0 | 18,46 | 594,59 | 128,15 |
| 2019/06/21 | CH2205 | Male | Three y/o | Control | Control | Feed Day | No | 19:20 | 19:00 - 19:59 | Evening | 37,6 | 70  | 7,8  | 7,8  | 18,75 | 566,99 | 68,36  |
| 2019/06/21 | CH2206 | Male | Three y/o | Control | Control | Feed Day | No | 19:20 | 19:00 - 19:59 | Evening | 37,2 | 92  | 51,8 | 51,8 | 18,36 | 587,78 | 133,01 |
| 2019/06/21 | CH2205 | Male | Three y/o | Control | Control | Feed Day | No | 19:25 | 19:00 - 19:59 | Evening | 37,9 | 85  | 11,0 | 11,0 | 19,05 | 581,90 | 79,98  |
| 2019/06/21 | CH2206 | Male | Three y/o | Control | Control | Feed Day | No | 19:25 | 19:00 - 19:59 | Evening | 37,2 | 57  | 56,0 | 56,0 | 18,36 | 550,47 | 135,70 |
| 2019/06/21 | CH2205 | Male | Three y/o | Control | Control | Feed Day | No | 19:30 | 19:00 - 19:59 | Evening | 37,9 | 71  | 9,6  | 9,6  | 19,05 | 568,10 | 75,37  |
| 2019/06/21 | CH2206 | Male | Three y/o | Control | Control | Feed Day | No | 19:30 | 19:00 - 19:59 | Evening | 37,3 | 89  | 60,0 | 60,0 | 18,46 | 585,33 | 138,09 |
| 2019/06/21 | CH2205 | Male | Three y/o | Control | Control | Feed Day | No | 19:35 | 19:00 - 19:59 | Evening | 37,9 | 77  | 12,2 | 12,2 | 19,05 | 574,39 | 83,49  |



|            |        |      |           |         |         |          |    |       |               |         |      |     |      |      |       |        |        |
|------------|--------|------|-----------|---------|---------|----------|----|-------|---------------|---------|------|-----|------|------|-------|--------|--------|
| 2019/06/21 | CH2206 | Male | Three y/o | Control | Control | Feed Day | No | 19:35 | 19:00 - 19:59 | Evening | 37,4 | 80  | 60,0 | 60,0 | 18,55 | 577,31 | 138,09 |
| 2019/06/21 | CH2205 | Male | Three y/o | Control | Control | Feed Day | No | 19:40 | 19:00 - 19:59 | Evening | 38,0 | 72  | 17,2 | 17,2 | 19,15 | 569,20 | 95,17  |
| 2019/06/21 | CH2206 | Male | Three y/o | Control | Control | Feed Day | No | 19:40 | 19:00 - 19:59 | Evening | 37,4 | 90  | 49,8 | 49,8 | 18,55 | 586,16 | 131,65 |
| 2019/06/21 | CH2205 | Male | Three y/o | Control | Control | Feed Day | No | 19:45 | 19:00 - 19:59 | Evening | 38,0 | 73  | 3,8  | 3,8  | 19,15 | 570,27 | 44,22  |
| 2019/06/21 | CH2206 | Male | Three y/o | Control | Control | Feed Day | No | 19:45 | 19:00 - 19:59 | Evening | 37,5 | 103 | 3,6  | 3,6  | 18,65 | 596,00 | 42,42  |
| 2019/06/21 | CH2205 | Male | Three y/o | Control | Control | Feed Day | No | 19:50 | 19:00 - 19:59 | Evening | 38,0 | 84  | 4,6  | 4,6  | 19,15 | 581,01 | 50,61  |
| 2019/06/21 | CH2206 | Male | Three y/o | Control | Control | Feed Day | No | 19:50 | 19:00 - 19:59 | Evening | 37,3 | 86  | 1,4  | 1,4  | 18,46 | 582,77 | 11,07  |
| 2019/06/21 | CH2205 | Male | Three y/o | Control | Control | Feed Day | No | 19:55 | 19:00 - 19:59 | Evening | 38,0 | 75  | 12,0 | 12,0 | 19,15 | 572,36 | 82,93  |
| 2019/06/21 | CH2206 | Male | Three y/o | Control | Control | Feed Day | No | 19:55 | 19:00 - 19:59 | Evening | 37,2 | 93  | 21,2 | 21,2 | 18,36 | 588,58 | 102,31 |
| 2019/06/21 | CH2205 | Male | Three y/o | Control | Control | Feed Day | No | 20:00 | 20:00 - 20:59 | Night   | 38,0 | 55  | 7,4  | 7,4  | 19,15 | 547,52 | 66,59  |
| 2019/06/21 | CH2206 | Male | Three y/o | Control | Control | Feed Day | No | 20:00 | 20:00 - 20:59 | Night   | 37,1 | 91  | 19,4 | 19,4 | 18,26 | 586,98 | 99,28  |
| 2019/06/21 | CH2205 | Male | Three y/o | Control | Control | Feed Day | No | 20:05 | 20:00 - 20:59 | Night   | 37,9 | 56  | 4,0  | 4,0  | 19,05 | 549,01 | 45,94  |
| 2019/06/21 | CH2206 | Male | Three y/o | Control | Control | Feed Day | No | 20:05 | 20:00 - 20:59 | Night   | 36,9 | 94  | 15,8 | 15,8 | 18,06 | 589,37 | 92,28  |
| 2019/06/21 | CH2205 | Male | Three y/o | Control | Control | Feed Day | No | 20:10 | 20:00 - 20:59 | Night   | 37,9 | 55  | 7,4  | 7,4  | 19,05 | 547,52 | 66,59  |
| 2019/06/21 | CH2206 | Male | Three y/o | Control | Control | Feed Day | No | 20:10 | 20:00 - 20:59 | Night   | 36,7 | 94  | 28,4 | 28,4 | 17,87 | 589,37 | 112,31 |
| 2019/06/21 | CH2205 | Male | Three y/o | Control | Control | Feed Day | No | 20:15 | 20:00 - 20:59 | Night   | 37,9 | 40  | 8,2  | 8,2  | 19,05 | 520,09 | 70,05  |
| 2019/06/21 | CH2206 | Male | Three y/o | Control | Control | Feed Day | No | 20:15 | 20:00 - 20:59 | Night   | 36,8 | 46  | 27,0 | 27,0 | 17,96 | 532,38 | 110,58 |
| 2019/06/21 | CH2205 | Male | Three y/o | Control | Control | Feed Day | No | 20:20 | 20:00 - 20:59 | Night   | 37,9 | 71  | 8,2  | 8,2  | 19,05 | 568,10 | 70,05  |
| 2019/06/21 | CH2206 | Male | Three y/o | Control | Control | Feed Day | No | 20:20 | 20:00 - 20:59 | Night   | 36,8 | 87  | 22,8 | 22,8 | 17,96 | 583,64 | 104,79 |
| 2019/06/21 | CH2205 | Male | Three y/o | Control | Control | Feed Day | No | 20:25 | 20:00 - 20:59 | Night   | 37,9 | 66  | 12,6 | 12,6 | 19,05 | 562,34 | 84,59  |
| 2019/06/21 | CH2206 | Male | Three y/o | Control | Control | Feed Day | No | 20:25 | 20:00 - 20:59 | Night   | 36,8 | 67  | 47,6 | 47,6 | 17,96 | 563,53 | 130,09 |
| 2019/06/21 | CH2205 | Male | Three y/o | Control | Control | Feed Day | No | 20:30 | 20:00 - 20:59 | Night   | 37,9 | 87  | 2,8  | 2,8  | 19,05 | 583,64 | 34,04  |
| 2019/06/21 | CH2206 | Male | Three y/o | Control | Control | Feed Day | No | 20:30 | 20:00 - 20:59 | Night   | 36,8 | 100 | 46,0 | 46,0 | 17,96 | 593,87 | 128,91 |
| 2019/06/21 | CH2205 | Male | Three y/o | Control | Control | Feed Day | No | 20:35 | 20:00 - 20:59 | Night   | 37,9 | 68  | 12,4 | 12,4 | 19,05 | 564,71 | 84,04  |
| 2019/06/21 | CH2206 | Male | Three y/o | Control | Control | Feed Day | No | 20:35 | 20:00 - 20:59 | Night   | 36,8 | 75  | 44,2 | 44,2 | 17,96 | 572,36 | 127,53 |
| 2019/06/21 | CH2205 | Male | Three y/o | Control | Control | Feed Day | No | 20:40 | 20:00 - 20:59 | Night   | 38,0 | 98  | 13,4 | 13,4 | 19,15 | 592,41 | 86,68  |
| 2019/06/21 | CH2206 | Male | Three y/o | Control | Control | Feed Day | No | 20:40 | 20:00 - 20:59 | Night   | 36,9 | 63  | 37,4 | 37,4 | 18,06 | 558,62 | 121,77 |
| 2019/06/21 | CH2205 | Male | Three y/o | Control | Control | Feed Day | No | 20:45 | 20:00 - 20:59 | Night   | 37,9 | 80  | 14,0 | 14,0 | 19,05 | 577,31 | 88,17  |
| 2019/06/21 | CH2206 | Male | Three y/o | Control | Control | Feed Day | No | 20:45 | 20:00 - 20:59 | Night   | 37,1 | 90  | 46,6 | 46,6 | 18,26 | 586,16 | 129,35 |
| 2019/06/21 | CH2205 | Male | Three y/o | Control | Control | Feed Day | No | 20:50 | 20:00 - 20:59 | Night   | 37,8 | 63  | 12,6 | 12,6 | 18,95 | 558,62 | 84,59  |
| 2019/06/21 | CH2206 | Male | Three y/o | Control | Control | Feed Day | No | 20:50 | 20:00 - 20:59 | Night   | 37,3 | 64  | 42,8 | 42,8 | 18,46 | 559,88 | 126,42 |
| 2019/06/21 | CH2205 | Male | Three y/o | Control | Control | Feed Day | No | 20:55 | 20:00 - 20:59 | Night   | 37,7 | 61  | 12,4 | 12,4 | 18,85 | 556,01 | 84,04  |
| 2019/06/21 | CH2206 | Male | Three y/o | Control | Control | Feed Day | No | 20:55 | 20:00 - 20:59 | Night   | 37,4 | 94  | 42,2 | 42,2 | 18,55 | 589,37 | 125,93 |
| 2019/06/21 | CH2205 | Male | Three y/o | Control | Control | Feed Day | No | 21:00 | 21:00 - 21:59 | Night   | 37,7 | 56  | 10,4 | 10,4 | 18,85 | 549,01 | 78,08  |
| 2019/06/21 | CH2206 | Male | Three y/o | Control | Control | Feed Day | No | 21:00 | 21:00 - 21:59 | Night   | 37,5 | 84  | 42,4 | 42,4 | 18,65 | 581,01 | 126,10 |
| 2019/06/21 | CH2205 | Male | Three y/o | Control | Control | Feed Day | No | 21:05 | 21:00 - 21:59 | Night   | 37,7 | 46  | 9,6  | 9,6  | 18,85 | 532,38 | 75,37  |
| 2019/06/21 | CH2206 | Male | Three y/o | Control | Control | Feed Day | No | 21:05 | 21:00 - 21:59 | Night   | 37,5 | 90  | 47,4 | 47,4 | 18,65 | 586,16 | 129,94 |
| 2019/06/21 | CH2205 | Male | Three y/o | Control | Control | Feed Day | No | 21:10 | 21:00 - 21:59 | Night   | 37,7 | 56  | 9,8  | 9,8  | 18,85 | 549,01 | 76,07  |
| 2019/06/21 | CH2206 | Male | Three y/o | Control | Control | Feed Day | No | 21:10 | 21:00 - 21:59 | Night   | 37,7 | 119 | 33,0 | 33,0 | 18,85 | 606,20 | 117,47 |
| 2019/06/21 | CH2205 | Male | Three y/o | Control | Control | Feed Day | No | 21:15 | 21:00 - 21:59 | Night   | 37,7 | 72  | 3,6  | 3,6  | 18,85 | 569,20 | 42,42  |
| 2019/06/21 | CH2206 | Male | Three y/o | Control | Control | Feed Day | No | 21:15 | 21:00 - 21:59 | Night   | 37,7 | 89  | 28,8 | 28,8 | 18,85 | 585,33 | 112,79 |
| 2019/06/21 | CH2205 | Male | Three y/o | Control | Control | Feed Day | No | 21:20 | 21:00 - 21:59 | Night   | 37,6 | 63  | 3,8  | 3,8  | 18,75 | 558,62 | 44,22  |
| 2019/06/21 | CH2206 | Male | Three y/o | Control | Control | Feed Day | No | 21:20 | 21:00 - 21:59 | Night   | 37,4 | 89  | 24,8 | 24,8 | 18,55 | 585,33 | 107,67 |
| 2019/06/21 | CH2205 | Male | Three y/o | Control | Control | Feed Day | No | 21:25 | 21:00 - 21:59 | Night   | 37,6 | 87  | 6,4  | 6,4  | 18,75 | 583,64 | 61,70  |
| 2019/06/21 | CH2206 | Male | Three y/o | Control | Control | Feed Day | No | 21:25 | 21:00 - 21:59 | Night   | 37,3 | 48  | 34,8 | 34,8 | 18,46 | 536,04 | 119,29 |
| 2019/06/21 | CH2205 | Male | Three y/o | Control | Control | Feed Day | No | 21:30 | 21:00 - 21:59 | Night   | 37,6 | 53  | 7,4  | 7,4  | 18,75 | 544,43 | 66,59  |
| 2019/06/21 | CH2206 | Male | Three y/o | Control | Control | Feed Day | No | 21:30 | 21:00 - 21:59 | Night   | 37,4 | 87  | 31,2 | 31,2 | 18,55 | 583,64 | 115,54 |
| 2019/06/21 | CH2205 | Male | Three y/o | Control | Control | Feed Day | No | 21:35 | 21:00 - 21:59 | Night   | 37,6 |     | 12,6 | 12,6 | 18,75 |        | 84,59  |
| 2019/06/21 | CH2206 | Male | Three y/o | Control | Control | Feed Day | No | 21:35 | 21:00 - 21:59 | Night   | 37,5 | 79  | 34,4 | 34,4 | 18,65 | 576,36 | 118,90 |
| 2019/06/21 | CH2205 | Male | Three y/o | Control | Control | Feed Day | No | 21:40 | 21:00 - 21:59 | Night   | 37,6 | 90  | 9,2  | 9,2  | 18,75 | 586,16 | 73,94  |
| 2019/06/21 | CH2206 | Male | Three y/o | Control | Control | Feed Day | No | 21:40 | 21:00 - 21:59 | Night   | 37,6 | 84  | 40,8 | 40,8 | 18,75 | 581,01 | 124,77 |
| 2019/06/21 | CH2205 | Male | Three y/o | Control | Control | Feed Day | No | 21:45 | 21:00 - 21:59 | Night   | 37,7 | 91  | 6,8  | 6,8  | 18,85 | 586,98 | 63,74  |
| 2019/06/21 | CH2206 | Male | Three y/o | Control | Control | Feed Day | No | 21:45 | 21:00 - 21:59 | Night   | 37,7 | 62  | 46,8 | 46,8 | 18,85 | 557,33 | 129,50 |
| 2019/06/21 | CH2205 | Male | Three y/o | Control | Control | Feed Day | No | 21:50 | 21:00 - 21:59 | Night   | 37,7 | 62  | 3,4  | 3,4  | 18,85 | 557,33 | 40,51  |
| 2019/06/21 | CH2206 | Male | Three y/o | Control | Control | Feed Day | No | 21:50 | 21:00 - 21:59 | Night   | 37,7 | 57  | 41,0 | 41,0 | 18,85 | 550,47 | 124,94 |
| 2019/06/21 | CH2205 | Male | Three y/o | Control | Control | Feed Day | No | 21:55 | 21:00 - 21:59 | Night   | 37,7 | 60  | 6,0  | 6,0  | 18,85 | 554,67 | 59,53  |
| 2019/06/21 | CH2206 | Male | Three y/o | Control | Control | Feed Day | No | 21:55 | 21:00 - 21:59 | Night   | 37,8 | 53  | 37,0 | 37,0 | 18,95 | 544,43 | 121,40 |
| 2019/06/21 | CH2205 | Male | Three y/o | Control | Control | Feed Day | No | 22:00 | 22:00 - 22:59 | Night   | 37,7 | 32  | 10,4 | 10,4 | 18,85 | 499,63 | 78,08  |
| 2019/06/21 | CH2206 | Male | Three y/o | Control | Control | Feed Day | No | 22:00 | 22:00 - 22:59 | Night   | 37,8 | 67  | 34,6 | 34,6 | 18,95 | 563,53 | 119,10 |
| 2019/06/21 | CH2205 | Male | Three y/o | Control | Control | Feed Day | No | 22:05 | 22:00 - 22:59 | Night   | 37,7 | 53  | 1,4  | 1,4  | 18,85 | 544,43 | 11,07  |
| 2019/06/21 | CH2206 | Male | Three y/o | Control | Control | Feed Day | No | 22:05 | 22:00 - 22:59 | Night   | 37,7 | 50  | 39,2 | 39,2 | 18,85 | 539,52 | 123,39 |
| 2019/06/21 | CH2205 | Male | Three y/o | Control | Control | Feed Day | No | 22:10 | 22:00 - 22:59 | Night   | 37,7 | 103 | 4,2  | 4,2  | 18,85 | 596,00 | 47,57  |
| 2019/06/21 | CH2206 | Male | Three y/o | Control | Control | Feed Day | No | 22:10 | 22:00 - 22:59 | Night   | 37,7 |     | 40,6 | 40,6 | 18,85 |        | 124,60 |
| 2019/06/21 | CH2205 | Male | Three y/o | Control | Control | Feed Day | No | 22:15 | 22:00 - 22:59 | Night   | 37,7 | 68  | 4,4  | 4,4  | 18,85 | 564,71 | 49,12  |
| 2019/06/21 | CH2206 | Male | Three y/o | Control | Control | Feed Day | No | 22:15 | 22:00 - 22:59 | Night   | 37,7 | 84  | 41,2 | 41,2 | 18,85 | 581,01 | 125,11 |
| 2019/06/21 | CH2205 | Male | Three y/o | Control | Control | Feed Day | No | 22:20 | 22:00 - 22:59 | Night   | 37,7 | 76  | 3,8  | 3,8  | 18,85 | 573,39 | 44,22  |
| 2019/06/21 | CH2206 | Male | Three y/o | Control | Control | Feed Day | No | 22:20 | 22:00 - 22:59 | Night   | 37,7 | 64  | 46,0 | 46,0 | 18,85 | 559,88 | 128,91 |
| 2019/06/21 | CH2205 | Male | Three y/o | Control | Control | Feed Day | No | 22:25 | 22:00 - 22:59 | Night   | 37,7 | 87  | 2,4  | 2,4  | 18,85 | 583,64 | 28,91  |
| 2019/06/21 | CH2206 | Male | Three y/o | Control | Control | Feed Day | No | 22:25 | 22:00 - 22:59 | Night   | 37,7 | 70  | 43,0 | 43,0 | 18,85 | 566,99 | 126,58 |
| 2019/06/21 | CH2205 | Male | Three y/o | Control | Control | Feed Day | No | 22:30 | 22:00 - 22:59 | Night   | 37,7 | 45  | 2,8  | 2,8  | 18,85 | 530,47 | 34,04  |



|    |            |        |      |           |         |         |          |    |       |               |               |      |     |       |       |       |        |        |
|----|------------|--------|------|-----------|---------|---------|----------|----|-------|---------------|---------------|------|-----|-------|-------|-------|--------|--------|
|    | 2019/06/21 | CH2206 | Male | Three y/o | Control | Control | Feed Day | No | 22:30 | 22:00 - 22:59 | Night         | 37,7 | 72  | 43,4  | 43,4  | 18,85 | 569,20 | 126,90 |
|    | 2019/06/21 | CH2205 | Male | Three y/o | Control | Control | Feed Day | No | 22:35 | 22:00 - 22:59 | Night         | 37,7 | 55  | 4,2   | 4,2   | 18,85 | 547,52 | 47,57  |
|    | 2019/06/21 | CH2206 | Male | Three y/o | Control | Control | Feed Day | No | 22:35 | 22:00 - 22:59 | Night         | 37,7 | 49  | 43,2  | 43,2  | 18,85 | 537,80 | 126,74 |
|    | 2019/06/21 | CH2205 | Male | Three y/o | Control | Control | Feed Day | No | 22:40 | 22:00 - 22:59 | Night         | 37,7 | 56  | 9,0   | 9,0   | 18,85 | 549,01 | 73,19  |
|    | 2019/06/21 | CH2206 | Male | Three y/o | Control | Control | Feed Day | No | 22:40 | 22:00 - 22:59 | Night         | 37,7 | 58  | 32,0  | 32,0  | 18,85 | 551,90 | 116,41 |
|    | 2019/06/21 | CH2205 | Male | Three y/o | Control | Control | Feed Day | No | 22:45 | 22:00 - 22:59 | Night         | 37,7 | 79  | 4,6   | 4,6   | 18,85 | 576,36 | 50,61  |
|    | 2019/06/21 | CH2206 | Male | Three y/o | Control | Control | Feed Day | No | 22:45 | 22:00 - 22:59 | Night         | 37,7 | 46  | 26,4  | 26,4  | 18,85 | 532,38 | 109,81 |
|    | 2019/06/21 | CH2205 | Male | Three y/o | Control | Control | Feed Day | No | 22:50 | 22:00 - 22:59 | Night         | 37,7 | 76  | 7,8   | 7,8   | 18,85 | 573,39 | 68,36  |
|    | 2019/06/21 | CH2206 | Male | Three y/o | Control | Control | Feed Day | No | 22:50 | 22:00 - 22:59 | Night         | 37,5 | 79  | 27,6  | 27,6  | 18,65 | 576,36 | 111,33 |
|    | 2019/06/21 | CH2205 | Male | Three y/o | Control | Control | Feed Day | No | 22:55 | 22:00 - 22:59 | Night         | 37,6 | 67  | 2,4   | 2,4   | 18,75 | 563,53 | 28,91  |
|    | 2019/06/21 | CH2206 | Male | Three y/o | Control | Control | Feed Day | No | 22:55 | 22:00 - 22:59 | Night         | 37,5 | 74  | 31,0  | 31,0  | 18,65 | 571,33 | 115,32 |
|    | 2019/06/21 | CH2205 | Male | Three y/o | Control | Control | Feed Day | No | 23:00 | 23:00 - 23:59 | Night         | 37,6 | 109 | 5,2   | 5,2   | 18,75 | 600,04 | 54,72  |
|    | 2019/06/21 | CH2206 | Male | Three y/o | Control | Control | Feed Day | No | 23:00 | 23:00 - 23:59 | Night         | 37,4 | 84  | 19,0  | 19,0  | 18,55 | 581,01 | 98,56  |
|    | 2019/06/21 | CH2205 | Male | Three y/o | Control | Control | Feed Day | No | 23:05 | 23:00 - 23:59 | Night         | 37,6 | 64  | 7,2   | 7,2   | 18,75 | 559,88 | 65,66  |
|    | 2019/06/21 | CH2206 | Male | Three y/o | Control | Control | Feed Day | No | 23:05 | 23:00 - 23:59 | Night         | 37,3 | 84  | 45,6  | 45,6  | 18,46 | 581,01 | 128,61 |
|    | 2019/06/21 | CH2205 | Male | Three y/o | Control | Control | Feed Day | No | 23:10 | 23:00 - 23:59 | Night         | 37,6 | 84  | 21,8  | 21,8  | 18,75 | 581,01 | 103,26 |
|    | 2019/06/21 | CH2206 | Male | Three y/o | Control | Control | Feed Day | No | 23:10 | 23:00 - 23:59 | Night         | 37,3 | 114 | 37,2  | 37,2  | 18,46 | 603,20 | 121,59 |
|    | 2019/06/21 | CH2205 | Male | Three y/o | Control | Control | Feed Day | No | 23:15 | 23:00 - 23:59 | Night         | 37,7 | 70  | 12,4  | 12,4  | 18,85 | 566,99 | 84,04  |
|    | 2019/06/21 | CH2206 | Male | Three y/o | Control | Control | Feed Day | No | 23:15 | 23:00 - 23:59 | Night         | 37,3 | 73  | 44,2  | 44,2  | 18,46 | 570,27 | 127,53 |
|    | 2019/06/21 | CH2205 | Male | Three y/o | Control | Control | Feed Day | No | 23:20 | 23:00 - 23:59 | Night         | 37,6 | 56  | 11,2  | 11,2  | 18,75 | 549,01 | 80,59  |
|    | 2019/06/21 | CH2206 | Male | Three y/o | Control | Control | Feed Day | No | 23:20 | 23:00 - 23:59 | Night         | 37,4 | 60  | 37,6  | 37,6  | 18,55 | 554,67 | 121,96 |
|    | 2019/06/21 | CH2205 | Male | Three y/o | Control | Control | Feed Day | No | 23:25 | 23:00 - 23:59 | Night         | 37,5 | 57  | 6,0   | 6,0   | 18,65 | 550,47 | 59,53  |
|    | 2019/06/21 | CH2206 | Male | Three y/o | Control | Control | Feed Day | No | 23:25 | 23:00 - 23:59 | Night         | 37,4 | 73  | 42,6  | 42,6  | 18,55 | 570,27 | 126,26 |
|    | 2019/06/21 | CH2205 | Male | Three y/o | Control | Control | Feed Day | No | 23:30 | 23:00 - 23:59 | Night         | 37,5 | 48  | 7,0   | 7,0   | 18,65 | 536,04 | 64,72  |
|    | 2019/06/21 | CH2206 | Male | Three y/o | Control | Control | Feed Day | No | 23:30 | 23:00 - 23:59 | Night         | 37,5 | 83  | 45,8  | 45,8  | 18,65 | 580,11 | 128,76 |
|    | 2019/06/21 | CH2205 | Male | Three y/o | Control | Control | Feed Day | No | 23:35 | 23:00 - 23:59 | Night         | 37,5 | 64  | 5,0   | 5,0   | 18,65 | 559,88 | 53,41  |
|    | 2019/06/21 | CH2206 | Male | Three y/o | Control | Control | Feed Day | No | 23:35 | 23:00 - 23:59 | Night         | 37,5 | 59  | 48,2  | 48,2  | 18,65 | 553,30 | 130,52 |
|    | 2019/06/21 | CH2205 | Male | Three y/o | Control | Control | Feed Day | No | 23:40 | 23:00 - 23:59 | Night         | 37,4 | 64  | 6,6   | 6,6   | 18,55 | 559,88 | 62,73  |
|    | 2019/06/21 | CH2206 | Male | Three y/o | Control | Control | Feed Day | No | 23:40 | 23:00 - 23:59 | Night         | 37,4 | 74  | 46,4  | 46,4  | 18,55 | 571,33 | 129,21 |
|    | 2019/06/21 | CH2205 | Male | Three y/o | Control | Control | Feed Day | No | 23:45 | 23:00 - 23:59 | Night         | 37,4 |     | 12,2  | 12,2  | 18,55 |        | 83,49  |
|    | 2019/06/21 | CH2206 | Male | Three y/o | Control | Control | Feed Day | No | 23:45 | 23:00 - 23:59 | Night         | 37,4 | 63  | 41,0  | 41,0  | 18,55 | 558,62 | 124,94 |
|    | 2019/06/21 | CH2205 | Male | Three y/o | Control | Control | Feed Day | No | 23:50 | 23:00 - 23:59 | Night         | 37,5 | 71  | 4,8   | 4,8   | 18,65 | 568,10 | 52,04  |
|    | 2019/06/21 | CH2206 | Male | Three y/o | Control | Control | Feed Day | No | 23:50 | 23:00 - 23:59 | Night         | 37,4 | 75  | 48,0  | 48,0  | 18,55 | 572,36 | 130,38 |
|    | 2019/06/21 | CH2205 | Male | Three y/o | Control | Control | Feed Day | No | 23:55 | 23:00 - 23:59 | Night         | 37,4 | 169 | 5,8   | 5,8   | 18,55 | 629,60 | 58,39  |
|    | 2019/06/21 | CH2206 | Male | Three y/o | Control | Control | Feed Day | No | 23:55 | 23:00 - 23:59 | Night         | 37,4 | 46  | 40,2  | 40,2  | 18,55 | 532,38 | 124,26 |
| 38 | 2019/06/22 | CH2205 | Male | Three y/o | Control | Control | Feed Day | No | 00:00 | 00:00 - 00:59 | Early Morning | 37,4 | 64  | 9,0   | 9,0   | 18,55 | 559,88 | 73,19  |
|    | 2019/06/22 | CH2206 | Male | Three y/o | Control | Control | Feed Day | No | 00:00 | 00:00 - 00:59 | Early Morning | 37,4 | 71  | 48,0  | 48,0  | 18,55 | 568,10 | 130,38 |
|    | 2019/06/22 | CH2205 | Male | Three y/o | Control | Control | Feed Day | No | 00:05 | 00:00 - 00:59 | Early Morning | 37,4 | 69  | 10,8  | 10,8  | 18,55 | 565,86 | 79,36  |
|    | 2019/06/22 | CH2206 | Male | Three y/o | Control | Control | Feed Day | No | 00:05 | 00:00 - 00:59 | Early Morning | 37,4 | 84  | 50,4  | 50,4  | 18,55 | 581,01 | 132,06 |
|    | 2019/06/22 | CH2205 | Male | Three y/o | Control | Control | Feed Day | No | 00:10 | 00:00 - 00:59 | Early Morning | 37,3 | 65  | 14,6  | 14,6  | 18,46 | 561,12 | 89,59  |
|    | 2019/06/22 | CH2206 | Male | Three y/o | Control | Control | Feed Day | No | 00:10 | 00:00 - 00:59 | Early Morning | 37,4 | 77  | 45,8  | 45,8  | 18,55 | 574,39 | 128,76 |
|    | 2019/06/22 | CH2205 | Male | Three y/o | Control | Control | Feed Day | No | 00:15 | 00:00 - 00:59 | Early Morning | 37,3 | 64  | 15,4  | 15,4  | 18,46 | 559,88 | 91,41  |
|    | 2019/06/22 | CH2206 | Male | Three y/o | Control | Control | Feed Day | No | 00:15 | 00:00 - 00:59 | Early Morning | 37,4 | 50  | 50,4  | 50,4  | 18,55 | 539,52 | 132,06 |
|    | 2019/06/22 | CH2205 | Male | Three y/o | Control | Control | Feed Day | No | 00:20 | 00:00 - 00:59 | Early Morning | 37,3 | 53  | 14,0  | 14,0  | 18,46 | 544,43 | 88,17  |
|    | 2019/06/22 | CH2206 | Male | Three y/o | Control | Control | Feed Day | No | 00:20 | 00:00 - 00:59 | Early Morning | 37,4 | 76  | 45,8  | 45,8  | 18,55 | 573,39 | 128,76 |
|    | 2019/06/22 | CH2205 | Male | Three y/o | Control | Control | Feed Day | No | 00:25 | 00:00 - 00:59 | Early Morning | 37,4 | 76  | 15,0  | 15,0  | 18,55 | 573,39 | 90,51  |
|    | 2019/06/22 | CH2206 | Male | Three y/o | Control | Control | Feed Day | No | 00:25 | 00:00 - 00:59 | Early Morning | 37,5 | 87  | 45,4  | 45,4  | 18,65 | 583,64 | 128,45 |
|    | 2019/06/22 | CH2205 | Male | Three y/o | Control | Control | Feed Day | No | 00:30 | 00:00 - 00:59 | Early Morning | 37,4 |     | 89,8  | 89,8  | 18,55 |        | 152,10 |
|    | 2019/06/22 | CH2206 | Male | Three y/o | Control | Control | Feed Day | No | 00:30 | 00:00 - 00:59 | Early Morning | 37,5 | 98  | 41,4  | 41,4  | 18,65 | 592,41 | 125,27 |
|    | 2019/06/22 | CH2205 | Male | Three y/o | Control | Control | Feed Day | No | 00:35 | 00:00 - 00:59 | Early Morning | 37,5 | 94  | 125,8 | 125,8 | 18,65 | 589,37 | 163,86 |
|    | 2019/06/22 | CH2206 | Male | Three y/o | Control | Control | Feed Day | No | 00:35 | 00:00 - 00:59 | Early Morning | 37,5 | 108 | 14,8  | 14,8  | 18,65 | 599,39 | 90,05  |
|    | 2019/06/22 | CH2205 | Male | Three y/o | Control | Control | Feed Day | No | 00:40 | 00:00 - 00:59 | Early Morning | 37,6 | 59  | 118,4 | 118,4 | 18,75 | 553,30 | 161,74 |
|    | 2019/06/22 | CH2206 | Male | Three y/o | Control | Control | Feed Day | No | 00:40 | 00:00 - 00:59 | Early Morning | 37,5 | 106 | 64,4  | 64,4  | 18,65 | 598,06 | 140,55 |
|    | 2019/06/22 | CH2205 | Male | Three y/o | Control | Control | Feed Day | No | 00:45 | 00:00 - 00:59 | Early Morning | 37,5 |     | 13,6  | 13,6  | 18,65 |        | 87,18  |
|    | 2019/06/22 | CH2206 | Male | Three y/o | Control | Control | Feed Day | No | 00:45 | 00:00 - 00:59 | Early Morning | 37,5 | 94  | 27,4  | 27,4  | 18,65 | 589,37 | 111,09 |
|    | 2019/06/22 | CH2205 | Male | Three y/o | Control | Control | Feed Day | No | 00:50 | 00:00 - 00:59 | Early Morning | 37,4 | 82  | 24,6  | 24,6  | 18,55 | 579,19 | 107,39 |
|    | 2019/06/22 | CH2206 | Male | Three y/o | Control | Control | Feed Day | No | 00:50 | 00:00 - 00:59 | Early Morning | 37,3 | 63  | 38,8  | 38,8  | 18,46 | 558,62 | 123,04 |
|    | 2019/06/22 | CH2205 | Male | Three y/o | Control | Control | Feed Day | No | 00:55 | 00:00 - 00:59 | Early Morning | 37,4 | 72  | 7,2   | 7,2   | 18,55 | 569,20 | 65,66  |
|    | 2019/06/22 | CH2206 | Male | Three y/o | Control | Control | Feed Day | No | 00:55 | 00:00 - 00:59 | Early Morning | 37,1 | 78  | 16,4  | 16,4  | 18,26 | 575,38 | 93,55  |
|    | 2019/06/22 | CH2205 | Male | Three y/o | Control | Control | Feed Day | No | 01:00 | 01:00 - 01:59 | Early Morning | 37,3 | 92  | 6,0   | 6,0   | 18,46 | 587,78 | 59,53  |
|    | 2019/06/22 | CH2206 | Male | Three y/o | Control | Control | Feed Day | No | 01:00 | 01:00 - 01:59 | Early Morning | 37,2 | 46  | 16,6  | 16,6  | 18,36 | 532,38 | 93,96  |
|    | 2019/06/22 | CH2205 | Male | Three y/o | Control | Control | Feed Day | No | 01:05 | 01:00 - 01:59 | Early Morning | 37,3 | 98  | 43,8  | 43,8  | 18,46 | 592,41 | 127,22 |
|    | 2019/06/22 | CH2206 | Male | Three y/o | Control | Control | Feed Day | No | 01:05 | 01:00 - 01:59 | Early Morning | 37,1 | 80  | 59,6  | 59,6  | 18,26 | 577,31 | 137,86 |
|    | 2019/06/22 | CH2205 | Male | Three y/o | Control | Control | Feed Day | No | 01:10 | 01:00 - 01:59 | Early Morning | 37,3 |     | 109,8 | 109,8 | 18,46 |        | 159,11 |
|    | 2019/06/22 | CH2206 | Male | Three y/o | Control | Control | Feed Day | No | 01:10 | 01:00 - 01:59 | Early Morning | 37,0 | 107 | 48,2  | 48,2  | 18,16 | 598,73 | 130,52 |
|    | 2019/06/22 | CH2205 | Male | Three y/o | Control | Control | Feed Day | No | 01:15 | 01:00 - 01:59 | Early Morning | 37,5 | 49  | 196,8 | 196,8 | 18,65 | 537,80 | 179,55 |
|    | 2019/06/22 | CH2206 | Male | Three y/o | Control | Control | Feed Day | No | 01:15 | 01:00 - 01:59 | Early Morning | 37,1 | 101 | 75,8  | 75,8  | 18,26 | 594,59 | 146,20 |
|    | 2019/06/22 | CH2205 | Male | Three y/o | Control | Control | Feed Day | No | 01:20 | 01:00 - 01:59 | Early Morning | 37,5 |     | 26,0  | 26,0  | 18,65 |        | 109,29 |
|    | 2019/06/22 | CH2206 | Male | Three y/o | Control | Control | Feed Day | No | 01:20 | 01:00 - 01:59 | Early Morning | 37,2 | 46  | 3,4   | 3,4   | 18,36 | 532,38 | 40,51  |
|    | 2019/06/22 | CH2205 | Male | Three y/o | Control | Control | Feed Day | No | 01:25 | 01:00 - 01:59 | Early Morning | 37,4 | 78  | 26,2  | 26,2  | 18,55 | 575,38 | 109,55 |



|            |        |      |           |         |         |          |    |       |               |               |      |     |       |       |       |        |        |
|------------|--------|------|-----------|---------|---------|----------|----|-------|---------------|---------------|------|-----|-------|-------|-------|--------|--------|
| 2019/06/22 | CH2206 | Male | Three y/o | Control | Control | Feed Day | No | 01:25 | 01:00 - 01:59 | Early Morning | 37,1 | 43  | 11,2  | 11,2  | 18,26 | 526,50 | 80,59  |
| 2019/06/22 | CH2205 | Male | Three y/o | Control | Control | Feed Day | No | 01:30 | 01:00 - 01:59 | Early Morning | 37,4 |     | 23,8  | 23,8  | 18,55 |        | 106,26 |
| 2019/06/22 | CH2206 | Male | Three y/o | Control | Control | Feed Day | No | 01:30 | 01:00 - 01:59 | Early Morning | 37,1 | 79  | 8,6   | 8,6   | 18,26 | 576,36 | 71,66  |
| 2019/06/22 | CH2205 | Male | Three y/o | Control | Control | Feed Day | No | 01:35 | 01:00 - 01:59 | Early Morning | 37,4 |     | 20,4  | 20,4  | 18,55 |        | 100,99 |
| 2019/06/22 | CH2206 | Male | Three y/o | Control | Control | Feed Day | No | 01:35 | 01:00 - 01:59 | Early Morning | 37,1 | 77  | 10,0  | 10,0  | 18,26 | 574,39 | 76,76  |
| 2019/06/22 | CH2205 | Male | Three y/o | Control | Control | Feed Day | No | 01:40 | 01:00 - 01:59 | Early Morning | 37,5 |     | 27,4  | 27,4  | 18,65 |        | 111,09 |
| 2019/06/22 | CH2206 | Male | Three y/o | Control | Control | Feed Day | No | 01:40 | 01:00 - 01:59 | Early Morning | 37,2 | 90  | 9,8   | 9,8   | 18,36 | 586,16 | 76,07  |
| 2019/06/22 | CH2205 | Male | Three y/o | Control | Control | Feed Day | No | 01:45 | 01:00 - 01:59 | Early Morning | 37,5 |     | 31,4  | 31,4  | 18,65 |        | 115,76 |
| 2019/06/22 | CH2206 | Male | Three y/o | Control | Control | Feed Day | No | 01:45 | 01:00 - 01:59 | Early Morning | 37,2 | 55  | 12,8  | 12,8  | 18,36 | 547,52 | 85,12  |
| 2019/06/22 | CH2205 | Male | Three y/o | Control | Control | Feed Day | No | 01:50 | 01:00 - 01:59 | Early Morning | 37,5 |     | 24,0  | 24,0  | 18,65 |        | 106,55 |
| 2019/06/22 | CH2206 | Male | Three y/o | Control | Control | Feed Day | No | 01:50 | 01:00 - 01:59 | Early Morning | 37,2 | 75  | 9,8   | 9,8   | 18,36 | 572,36 | 76,07  |
| 2019/06/22 | CH2205 | Male | Three y/o | Control | Control | Feed Day | No | 01:55 | 01:00 - 01:59 | Early Morning | 37,4 | 74  | 19,0  | 19,0  | 18,55 | 571,33 | 98,56  |
| 2019/06/22 | CH2206 | Male | Three y/o | Control | Control | Feed Day | No | 01:55 | 01:00 - 01:59 | Early Morning | 37,2 | 93  | 11,2  | 11,2  | 18,36 | 588,58 | 80,59  |
| 2019/06/22 | CH2205 | Male | Three y/o | Control | Control | Feed Day | No | 02:00 | 02:00 - 02:59 | Early Morning | 37,4 |     | 12,4  | 12,4  | 18,55 |        | 84,04  |
| 2019/06/22 | CH2206 | Male | Three y/o | Control | Control | Feed Day | No | 02:00 | 02:00 - 02:59 | Early Morning | 37,2 | 67  | 7,6   | 7,6   | 18,36 | 563,53 | 67,49  |
| 2019/06/22 | CH2205 | Male | Three y/o | Control | Control | Feed Day | No | 02:05 | 02:00 - 02:59 | Early Morning | 37,4 | 113 | 17,6  | 17,6  | 18,55 | 602,58 | 95,95  |
| 2019/06/22 | CH2206 | Male | Three y/o | Control | Control | Feed Day | No | 02:05 | 02:00 - 02:59 | Early Morning | 37,3 |     | 40,0  | 40,0  | 18,46 |        | 124,09 |
| 2019/06/22 | CH2205 | Male | Three y/o | Control | Control | Feed Day | No | 02:10 | 02:00 - 02:59 | Early Morning | 37,3 | 55  | 20,0  | 20,0  | 18,46 | 547,52 | 100,31 |
| 2019/06/22 | CH2206 | Male | Three y/o | Control | Control | Feed Day | No | 02:10 | 02:00 - 02:59 | Early Morning | 37,2 | 47  | 48,0  | 48,0  | 18,36 | 534,23 | 130,38 |
| 2019/06/22 | CH2205 | Male | Three y/o | Control | Control | Feed Day | No | 02:15 | 02:00 - 02:59 | Early Morning | 37,3 | 73  | 13,8  | 13,8  | 18,46 | 570,27 | 87,68  |
| 2019/06/22 | CH2206 | Male | Three y/o | Control | Control | Feed Day | No | 02:15 | 02:00 - 02:59 | Early Morning | 37,2 | 49  | 45,2  | 45,2  | 18,36 | 537,80 | 128,30 |
| 2019/06/22 | CH2205 | Male | Three y/o | Control | Control | Feed Day | No | 02:20 | 02:00 - 02:59 | Early Morning | 37,1 | 52  | 15,0  | 15,0  | 18,26 | 542,83 | 90,51  |
| 2019/06/22 | CH2206 | Male | Three y/o | Control | Control | Feed Day | No | 02:20 | 02:00 - 02:59 | Early Morning | 37,1 | 71  | 46,6  | 46,6  | 18,26 | 568,10 | 129,35 |
| 2019/06/22 | CH2205 | Male | Three y/o | Control | Control | Feed Day | No | 02:25 | 02:00 - 02:59 | Early Morning | 37,1 | 55  | 10,0  | 10,0  | 18,26 | 547,52 | 76,76  |
| 2019/06/22 | CH2206 | Male | Three y/o | Control | Control | Feed Day | No | 02:25 | 02:00 - 02:59 | Early Morning | 37,0 | 50  | 47,4  | 47,4  | 18,16 | 539,52 | 129,94 |
| 2019/06/22 | CH2205 | Male | Three y/o | Control | Control | Feed Day | No | 02:30 | 02:00 - 02:59 | Early Morning | 37,0 | 55  | 5,4   | 5,4   | 18,16 | 547,52 | 55,99  |
| 2019/06/22 | CH2206 | Male | Three y/o | Control | Control | Feed Day | No | 02:30 | 02:00 - 02:59 | Early Morning | 36,9 | 45  | 47,4  | 47,4  | 18,06 | 530,47 | 129,94 |
| 2019/06/22 | CH2205 | Male | Three y/o | Control | Control | Feed Day | No | 02:35 | 02:00 - 02:59 | Early Morning | 37,0 | 36  | 8,2   | 8,2   | 18,16 | 510,56 | 70,05  |
| 2019/06/22 | CH2206 | Male | Three y/o | Control | Control | Feed Day | No | 02:35 | 02:00 - 02:59 | Early Morning | 36,9 | 50  | 48,4  | 48,4  | 18,06 | 539,52 | 130,66 |
| 2019/06/22 | CH2205 | Male | Three y/o | Control | Control | Feed Day | No | 02:40 | 02:00 - 02:59 | Early Morning | 37,0 | 91  | 6,0   | 6,0   | 18,16 | 586,98 | 59,53  |
| 2019/06/22 | CH2206 | Male | Three y/o | Control | Control | Feed Day | No | 02:40 | 02:00 - 02:59 | Early Morning | 36,8 | 41  | 48,8  | 48,8  | 17,96 | 522,29 | 130,95 |
| 2019/06/22 | CH2205 | Male | Three y/o | Control | Control | Feed Day | No | 02:45 | 02:00 - 02:59 | Early Morning | 37,1 | 67  | 10,0  | 10,0  | 18,26 | 563,53 | 76,76  |
| 2019/06/22 | CH2206 | Male | Three y/o | Control | Control | Feed Day | No | 02:45 | 02:00 - 02:59 | Early Morning | 36,9 | 77  | 48,2  | 48,2  | 18,06 | 574,39 | 130,52 |
| 2019/06/22 | CH2205 | Male | Three y/o | Control | Control | Feed Day | No | 02:50 | 02:00 - 02:59 | Early Morning | 37,0 | 82  | 14,8  | 14,8  | 18,16 | 579,19 | 90,05  |
| 2019/06/22 | CH2206 | Male | Three y/o | Control | Control | Feed Day | No | 02:50 | 02:00 - 02:59 | Early Morning | 37,0 | 53  | 41,6  | 41,6  | 18,16 | 544,43 | 125,44 |
| 2019/06/22 | CH2205 | Male | Three y/o | Control | Control | Feed Day | No | 02:55 | 02:00 - 02:59 | Early Morning | 36,8 | 99  | 17,6  | 17,6  | 17,96 | 593,14 | 95,95  |
| 2019/06/22 | CH2206 | Male | Three y/o | Control | Control | Feed Day | No | 02:55 | 02:00 - 02:59 | Early Morning | 36,9 | 78  | 18,0  | 18,0  | 18,06 | 575,38 | 96,72  |
| 2019/06/22 | CH2205 | Male | Three y/o | Control | Control | Feed Day | No | 03:00 | 03:00 - 03:59 | Early Morning | 37,0 | 75  | 10,6  | 10,6  | 18,16 | 572,36 | 78,73  |
| 2019/06/22 | CH2206 | Male | Three y/o | Control | Control | Feed Day | No | 03:00 | 03:00 - 03:59 | Early Morning | 37,0 | 97  | 29,0  | 29,0  | 18,16 | 591,66 | 113,03 |
| 2019/06/22 | CH2205 | Male | Three y/o | Control | Control | Feed Day | No | 03:05 | 03:00 - 03:59 | Early Morning | 37,0 | 68  | 12,0  | 12,0  | 18,16 | 564,71 | 82,93  |
| 2019/06/22 | CH2206 | Male | Three y/o | Control | Control | Feed Day | No | 03:05 | 03:00 - 03:59 | Early Morning | 37,2 | 91  | 36,4  | 36,4  | 18,36 | 586,98 | 120,84 |
| 2019/06/22 | CH2205 | Male | Three y/o | Control | Control | Feed Day | No | 03:10 | 03:00 - 03:59 | Early Morning | 36,9 | 44  | 14,8  | 14,8  | 18,06 | 528,51 | 90,05  |
| 2019/06/22 | CH2206 | Male | Three y/o | Control | Control | Feed Day | No | 03:10 | 03:00 - 03:59 | Early Morning | 37,2 | 132 | 57,8  | 57,8  | 18,36 | 613,32 | 136,80 |
| 2019/06/22 | CH2205 | Male | Three y/o | Control | Control | Feed Day | No | 03:15 | 03:00 - 03:59 | Early Morning | 36,8 | 56  | 11,8  | 11,8  | 17,96 | 549,01 | 82,36  |
| 2019/06/22 | CH2206 | Male | Three y/o | Control | Control | Feed Day | No | 03:15 | 03:00 - 03:59 | Early Morning | 37,3 | 86  | 24,6  | 24,6  | 18,46 | 582,77 | 107,39 |
| 2019/06/22 | CH2205 | Male | Three y/o | Control | Control | Feed Day | No | 03:20 | 03:00 - 03:59 | Early Morning | 36,9 |     | 25,2  | 25,2  | 18,06 |        | 108,22 |
| 2019/06/22 | CH2206 | Male | Three y/o | Control | Control | Feed Day | No | 03:20 | 03:00 - 03:59 | Early Morning | 37,3 | 106 | 111,6 | 111,6 | 18,46 | 598,06 | 159,67 |
| 2019/06/22 | CH2205 | Male | Three y/o | Control | Control | Feed Day | No | 03:25 | 03:00 - 03:59 | Early Morning | 37,1 | 121 | 38,6  | 38,6  | 18,26 | 607,35 | 122,86 |
| 2019/06/22 | CH2206 | Male | Three y/o | Control | Control | Feed Day | No | 03:25 | 03:00 - 03:59 | Early Morning | 37,3 | 103 | 149,6 | 149,6 | 18,46 | 596,00 | 169,92 |
| 2019/06/22 | CH2205 | Male | Three y/o | Control | Control | Feed Day | No | 03:30 | 03:00 - 03:59 | Early Morning | 37,2 | 117 | 25,2  | 25,2  | 18,36 | 605,02 | 108,22 |
| 2019/06/22 | CH2206 | Male | Three y/o | Control | Control | Feed Day | No | 03:30 | 03:00 - 03:59 | Early Morning | 37,4 |     | 222,0 | 222,0 | 18,55 |        | 183,79 |
| 2019/06/22 | CH2205 | Male | Three y/o | Control | Control | Feed Day | No | 03:35 | 03:00 - 03:59 | Early Morning | 37,2 | 88  | 12,0  | 12,0  | 18,36 | 584,49 | 82,93  |
| 2019/06/22 | CH2206 | Male | Three y/o | Control | Control | Feed Day | No | 03:35 | 03:00 - 03:59 | Early Morning | 37,6 | 110 | 203,4 | 203,4 | 18,75 | 600,69 | 180,71 |
| 2019/06/22 | CH2205 | Male | Three y/o | Control | Control | Feed Day | No | 03:40 | 03:00 - 03:59 | Early Morning | 37,3 | 94  | 240,8 | 240,8 | 18,46 | 589,37 | 186,66 |
| 2019/06/22 | CH2206 | Male | Three y/o | Control | Control | Feed Day | No | 03:40 | 03:00 - 03:59 | Early Morning | 37,6 | 109 | 47,8  | 47,8  | 18,75 | 600,04 | 130,23 |
| 2019/06/22 | CH2205 | Male | Three y/o | Control | Control | Feed Day | No | 03:45 | 03:00 - 03:59 | Early Morning | 37,3 | 97  | 75,2  | 75,2  | 18,46 | 591,66 | 145,93 |
| 2019/06/22 | CH2206 | Male | Three y/o | Control | Control | Feed Day | No | 03:45 | 03:00 - 03:59 | Early Morning | 37,5 | 97  | 91,6  | 91,6  | 18,65 | 591,66 | 152,79 |
| 2019/06/22 | CH2205 | Male | Three y/o | Control | Control | Feed Day | No | 03:50 | 03:00 - 03:59 | Early Morning | 37,4 | 97  | 78,8  | 78,8  | 18,55 | 591,66 | 147,55 |
| 2019/06/22 | CH2206 | Male | Three y/o | Control | Control | Feed Day | No | 03:50 | 03:00 - 03:59 | Early Morning | 37,7 | 114 | 249,6 | 249,6 | 18,85 | 603,20 | 187,92 |
| 2019/06/22 | CH2205 | Male | Three y/o | Control | Control | Feed Day | No | 03:55 | 03:00 - 03:59 | Early Morning | 37,4 |     | 34,8  | 34,8  | 18,55 |        | 119,29 |
| 2019/06/22 | CH2206 | Male | Three y/o | Control | Control | Feed Day | No | 03:55 | 03:00 - 03:59 | Early Morning | 37,8 | 106 | 23,6  | 23,6  | 18,95 | 598,06 | 105,97 |
| 2019/06/22 | CH2205 | Male | Three y/o | Control | Control | Feed Day | No | 04:00 | 04:00 - 04:59 | Morning       | 37,4 | 73  | 11,4  | 11,4  | 18,55 | 570,27 | 81,19  |
| 2019/06/22 | CH2206 | Male | Three y/o | Control | Control | Feed Day | No | 04:00 | 04:00 - 04:59 | Morning       | 37,7 | 94  | 15,4  | 15,4  | 18,85 | 589,37 | 91,41  |
| 2019/06/22 | CH2205 | Male | Three y/o | Control | Control | Feed Day | No | 04:05 | 04:00 - 04:59 | Morning       | 37,4 |     | 12,4  | 12,4  | 18,55 |        | 84,04  |
| 2019/06/22 | CH2206 | Male | Three y/o | Control | Control | Feed Day | No | 04:05 | 04:00 - 04:59 | Morning       | 37,7 | 76  | 7,0   | 7,0   | 18,85 | 573,39 | 64,72  |
| 2019/06/22 | CH2205 | Male | Three y/o | Control | Control | Feed Day | No | 04:10 | 04:00 - 04:59 | Morning       | 37,4 |     | 11,2  | 11,2  | 18,55 |        | 80,59  |
| 2019/06/22 | CH2206 | Male | Three y/o | Control | Control | Feed Day | No | 04:10 | 04:00 - 04:59 | Morning       | 37,2 | 58  | 7,4   | 7,4   | 18,36 | 551,90 | 66,59  |
| 2019/06/22 | CH2205 | Male | Three y/o | Control | Control | Feed Day | No | 04:15 | 04:00 - 04:59 | Morning       | 37,4 | 64  | 39,2  | 39,2  | 18,55 | 559,88 | 123,39 |
| 2019/06/22 | CH2206 | Male | Three y/o | Control | Control | Feed Day | No | 04:15 | 04:00 - 04:59 | Morning       | 36,9 | 72  | 14,4  | 14,4  | 18,06 | 569,20 | 89,12  |
| 2019/06/22 | CH2205 | Male | Three y/o | Control | Control | Feed Day | No | 04:20 | 04:00 - 04:59 | Morning       | 37,5 | 36  | 23,8  | 23,8  | 18,65 | 510,56 | 106,26 |



|            |        |      |           |         |         |          |    |       |               |         |      |     |       |       |       |        |        |
|------------|--------|------|-----------|---------|---------|----------|----|-------|---------------|---------|------|-----|-------|-------|-------|--------|--------|
| 2019/06/22 | CH2206 | Male | Three y/o | Control | Control | Feed Day | No | 04:20 | 04:00 - 04:59 | Morning | 36,8 | 46  | 37,6  | 37,6  | 17,96 | 532,38 | 121,96 |
| 2019/06/22 | CH2205 | Male | Three y/o | Control | Control | Feed Day | No | 04:25 | 04:00 - 04:59 | Morning | 37,4 | 65  | 20,6  | 20,6  | 18,55 | 561,12 | 101,32 |
| 2019/06/22 | CH2206 | Male | Three y/o | Control | Control | Feed Day | No | 04:25 | 04:00 - 04:59 | Morning | 37,2 | 63  | 48,0  | 48,0  | 18,36 | 558,62 | 130,38 |
| 2019/06/22 | CH2205 | Male | Three y/o | Control | Control | Feed Day | No | 04:30 | 04:00 - 04:59 | Morning | 37,3 | 65  | 18,6  | 18,6  | 18,46 | 561,12 | 97,84  |
| 2019/06/22 | CH2206 | Male | Three y/o | Control | Control | Feed Day | No | 04:30 | 04:00 - 04:59 | Morning | 37,2 | 50  | 47,4  | 47,4  | 18,36 | 539,52 | 129,94 |
| 2019/06/22 | CH2205 | Male | Three y/o | Control | Control | Feed Day | No | 04:35 | 04:00 - 04:59 | Morning | 37,3 | 77  | 15,4  | 15,4  | 18,46 | 574,39 | 91,41  |
| 2019/06/22 | CH2206 | Male | Three y/o | Control | Control | Feed Day | No | 04:35 | 04:00 - 04:59 | Morning | 37,2 | 51  | 43,6  | 43,6  | 18,36 | 541,20 | 127,06 |
| 2019/06/22 | CH2205 | Male | Three y/o | Control | Control | Feed Day | No | 04:40 | 04:00 - 04:59 | Morning | 37,3 | 51  | 15,8  | 15,8  | 18,46 | 541,20 | 92,28  |
| 2019/06/22 | CH2206 | Male | Three y/o | Control | Control | Feed Day | No | 04:40 | 04:00 - 04:59 | Morning | 37,2 | 52  | 47,2  | 47,2  | 18,36 | 542,83 | 129,80 |
| 2019/06/22 | CH2205 | Male | Three y/o | Control | Control | Feed Day | No | 04:45 | 04:00 - 04:59 | Morning | 37,3 | 52  | 19,0  | 19,0  | 18,46 | 542,83 | 98,56  |
| 2019/06/22 | CH2206 | Male | Three y/o | Control | Control | Feed Day | No | 04:45 | 04:00 - 04:59 | Morning | 37,2 | 51  | 47,8  | 47,8  | 18,36 | 541,20 | 130,23 |
| 2019/06/22 | CH2205 | Male | Three y/o | Control | Control | Feed Day | No | 04:50 | 04:00 - 04:59 | Morning | 37,3 | 76  | 46,0  | 46,0  | 18,46 | 573,39 | 128,91 |
| 2019/06/22 | CH2206 | Male | Three y/o | Control | Control | Feed Day | No | 04:50 | 04:00 - 04:59 | Morning | 37,2 | 56  | 15,6  | 15,6  | 18,36 | 549,01 | 91,85  |
| 2019/06/22 | CH2205 | Male | Three y/o | Control | Control | Feed Day | No | 04:55 | 04:00 - 04:59 | Morning | 37,3 | 78  | 31,0  | 31,0  | 18,46 | 575,38 | 115,32 |
| 2019/06/22 | CH2206 | Male | Three y/o | Control | Control | Feed Day | No | 04:55 | 04:00 - 04:59 | Morning | 37,2 | 44  | 3,2   | 3,2   | 18,36 | 528,51 | 38,49  |
| 2019/06/22 | CH2205 | Male | Three y/o | Control | Control | Feed Day | No | 05:00 | 05:00 - 05:59 | Morning | 37,3 | 50  | 3,0   | 3,0   | 18,46 | 539,52 | 36,34  |
| 2019/06/22 | CH2206 | Male | Three y/o | Control | Control | Feed Day | No | 05:00 | 05:00 - 05:59 | Morning | 37,1 | 77  | 6,0   | 6,0   | 18,26 | 574,39 | 59,53  |
| 2019/06/22 | CH2205 | Male | Three y/o | Control | Control | Feed Day | No | 05:05 | 05:00 - 05:59 | Morning | 37,2 | 64  | 19,8  | 19,8  | 18,36 | 559,88 | 99,97  |
| 2019/06/22 | CH2206 | Male | Three y/o | Control | Control | Feed Day | No | 05:05 | 05:00 - 05:59 | Morning | 37,1 | 75  | 36,8  | 36,8  | 18,26 | 572,36 | 121,22 |
| 2019/06/22 | CH2205 | Male | Three y/o | Control | Control | Feed Day | No | 05:10 | 05:00 - 05:59 | Morning | 37,2 | 74  | 23,8  | 23,8  | 18,36 | 571,33 | 106,26 |
| 2019/06/22 | CH2206 | Male | Three y/o | Control | Control | Feed Day | No | 05:10 | 05:00 - 05:59 | Morning | 37,2 | 77  | 44,4  | 44,4  | 18,36 | 574,39 | 127,69 |
| 2019/06/22 | CH2205 | Male | Three y/o | Control | Control | Feed Day | No | 05:15 | 05:00 - 05:59 | Morning | 37,3 |     | 63,0  | 63,0  | 18,46 |        | 139,78 |
| 2019/06/22 | CH2206 | Male | Three y/o | Control | Control | Feed Day | No | 05:15 | 05:00 - 05:59 | Morning | 37,2 | 53  | 49,2  | 49,2  | 18,36 | 544,43 | 131,23 |
| 2019/06/22 | CH2205 | Male | Three y/o | Control | Control | Feed Day | No | 05:20 | 05:00 - 05:59 | Morning | 37,3 | 65  | 27,8  | 27,8  | 18,46 | 561,12 | 111,58 |
| 2019/06/22 | CH2206 | Male | Three y/o | Control | Control | Feed Day | No | 05:20 | 05:00 - 05:59 | Morning | 37,2 | 47  | 51,2  | 51,2  | 18,36 | 534,23 | 132,61 |
| 2019/06/22 | CH2205 | Male | Three y/o | Control | Control | Feed Day | No | 05:25 | 05:00 - 05:59 | Morning | 37,3 |     | 24,4  | 24,4  | 18,46 |        | 107,11 |
| 2019/06/22 | CH2206 | Male | Three y/o | Control | Control | Feed Day | No | 05:25 | 05:00 - 05:59 | Morning | 37,2 | 54  | 50,8  | 50,8  | 18,36 | 545,99 | 132,33 |
| 2019/06/22 | CH2205 | Male | Three y/o | Control | Control | Feed Day | No | 05:30 | 05:00 - 05:59 | Morning | 37,3 | 89  | 27,4  | 27,4  | 18,46 | 585,33 | 111,09 |
| 2019/06/22 | CH2206 | Male | Three y/o | Control | Control | Feed Day | No | 05:30 | 05:00 - 05:59 | Morning | 37,2 | 63  | 45,4  | 45,4  | 18,36 | 558,62 | 128,45 |
| 2019/06/22 | CH2205 | Male | Three y/o | Control | Control | Feed Day | No | 05:35 | 05:00 - 05:59 | Morning | 37,3 | 73  | 29,2  | 29,2  | 18,46 | 570,27 | 113,27 |
| 2019/06/22 | CH2206 | Male | Three y/o | Control | Control | Feed Day | No | 05:35 | 05:00 - 05:59 | Morning | 37,2 | 45  | 45,4  | 45,4  | 18,36 | 530,47 | 128,45 |
| 2019/06/22 | CH2205 | Male | Three y/o | Control | Control | Feed Day | No | 05:40 | 05:00 - 05:59 | Morning | 37,3 | 128 | 51,6  | 51,6  | 18,46 | 611,22 | 132,87 |
| 2019/06/22 | CH2206 | Male | Three y/o | Control | Control | Feed Day | No | 05:40 | 05:00 - 05:59 | Morning | 37,2 | 73  | 26,0  | 26,0  | 18,36 | 570,27 | 109,29 |
| 2019/06/22 | CH2205 | Male | Three y/o | Control | Control | Feed Day | No | 05:45 | 05:00 - 05:59 | Morning | 37,3 |     | 24,2  | 24,2  | 18,46 |        | 106,83 |
| 2019/06/22 | CH2206 | Male | Three y/o | Control | Control | Feed Day | No | 05:45 | 05:00 - 05:59 | Morning | 37,2 | 41  | 21,6  | 21,6  | 18,36 | 522,29 | 102,94 |
| 2019/06/22 | CH2205 | Male | Three y/o | Control | Control | Feed Day | No | 05:50 | 05:00 - 05:59 | Morning | 37,3 |     | 24,6  | 24,6  | 18,46 |        | 107,39 |
| 2019/06/22 | CH2206 | Male | Three y/o | Control | Control | Feed Day | No | 05:50 | 05:00 - 05:59 | Morning | 37,2 | 53  | 46,6  | 46,6  | 18,36 | 544,43 | 129,35 |
| 2019/06/22 | CH2205 | Male | Three y/o | Control | Control | Feed Day | No | 05:55 | 05:00 - 05:59 | Morning | 37,3 |     | 23,4  | 23,4  | 18,46 |        | 105,68 |
| 2019/06/22 | CH2206 | Male | Three y/o | Control | Control | Feed Day | No | 05:55 | 05:00 - 05:59 | Morning | 37,1 | 53  | 46,8  | 46,8  | 18,26 | 544,43 | 129,50 |
| 2019/06/22 | CH2205 | Male | Three y/o | Control | Control | Feed Day | No | 06:00 | 06:00 - 06:59 | Morning | 37,3 |     | 28,6  | 28,6  | 18,46 |        | 112,56 |
| 2019/06/22 | CH2206 | Male | Three y/o | Control | Control | Feed Day | No | 06:00 | 06:00 - 06:59 | Morning | 37,2 | 44  | 43,6  | 43,6  | 18,36 | 528,51 | 127,06 |
| 2019/06/22 | CH2205 | Male | Three y/o | Control | Control | Feed Day | No | 06:05 | 06:00 - 06:59 | Morning | 37,3 |     | 27,8  | 27,8  | 18,46 |        | 111,58 |
| 2019/06/22 | CH2206 | Male | Three y/o | Control | Control | Feed Day | No | 06:05 | 06:00 - 06:59 | Morning | 37,2 | 43  | 39,8  | 39,8  | 18,36 | 526,50 | 123,91 |
| 2019/06/22 | CH2205 | Male | Three y/o | Control | Control | Feed Day | No | 06:10 | 06:00 - 06:59 | Morning | 37,3 | 65  | 49,0  | 49,0  | 18,46 | 561,12 | 131,09 |
| 2019/06/22 | CH2206 | Male | Three y/o | Control | Control | Feed Day | No | 06:10 | 06:00 - 06:59 | Morning | 37,2 | 51  | 33,2  | 33,2  | 18,36 | 541,20 | 117,68 |
| 2019/06/22 | CH2205 | Male | Three y/o | Control | Control | Feed Day | No | 06:15 | 06:00 - 06:59 | Morning | 37,3 | 78  | 37,4  | 37,4  | 18,46 | 575,38 | 121,77 |
| 2019/06/22 | CH2206 | Male | Three y/o | Control | Control | Feed Day | No | 06:15 | 06:00 - 06:59 | Morning | 37,2 | 65  | 34,2  | 34,2  | 18,36 | 561,12 | 118,70 |
| 2019/06/22 | CH2205 | Male | Three y/o | Control | Control | Feed Day | No | 06:20 | 06:00 - 06:59 | Morning | 37,3 | 115 | 137,2 | 137,2 | 18,46 | 603,82 | 166,89 |
| 2019/06/22 | CH2206 | Male | Three y/o | Control | Control | Feed Day | No | 06:20 | 06:00 - 06:59 | Morning | 37,2 | 62  | 34,4  | 34,4  | 18,36 | 557,33 | 118,90 |
| 2019/06/22 | CH2205 | Male | Three y/o | Control | Control | Feed Day | No | 06:25 | 06:00 - 06:59 | Morning | 37,4 | 131 | 48,2  | 48,2  | 18,55 | 612,80 | 130,52 |
| 2019/06/22 | CH2206 | Male | Three y/o | Control | Control | Feed Day | No | 06:25 | 06:00 - 06:59 | Morning | 37,2 | 51  | 33,8  | 33,8  | 18,36 | 541,20 | 118,29 |
| 2019/06/22 | CH2205 | Male | Three y/o | Control | Control | Feed Day | No | 06:30 | 06:00 - 06:59 | Morning | 37,4 |     | 53,4  | 53,4  | 18,55 |        | 134,06 |
| 2019/06/22 | CH2206 | Male | Three y/o | Control | Control | Feed Day | No | 06:30 | 06:00 - 06:59 | Morning | 37,2 | 46  | 29,8  | 29,8  | 18,36 | 532,38 | 113,97 |
| 2019/06/22 | CH2205 | Male | Three y/o | Control | Control | Feed Day | No | 06:35 | 06:00 - 06:59 | Morning | 37,4 | 58  | 91,8  | 91,8  | 18,55 | 551,90 | 152,86 |
| 2019/06/22 | CH2206 | Male | Three y/o | Control | Control | Feed Day | No | 06:35 | 06:00 - 06:59 | Morning | 37,2 | 48  | 42,0  | 42,0  | 18,36 | 536,04 | 125,77 |
| 2019/06/22 | CH2205 | Male | Three y/o | Control | Control | Feed Day | No | 06:40 | 06:00 - 06:59 | Morning | 37,4 | 115 | 148,8 | 148,8 | 18,55 | 603,82 | 169,74 |
| 2019/06/22 | CH2206 | Male | Three y/o | Control | Control | Feed Day | No | 06:40 | 06:00 - 06:59 | Morning | 37,2 | 42  | 27,6  | 27,6  | 18,36 | 524,42 | 111,33 |
| 2019/06/22 | CH2205 | Male | Three y/o | Control | Control | Feed Day | No | 06:45 | 06:00 - 06:59 | Morning | 37,4 | 128 | 259,8 | 259,8 | 18,55 | 611,22 | 189,34 |
| 2019/06/22 | CH2206 | Male | Three y/o | Control | Control | Feed Day | No | 06:45 | 06:00 - 06:59 | Morning | 37,2 | 83  | 12,0  | 12,0  | 18,36 | 580,11 | 82,93  |
| 2019/06/22 | CH2205 | Male | Three y/o | Control | Control | Feed Day | No | 06:50 | 06:00 - 06:59 | Morning | 37,6 | 75  | 19,0  | 19,0  | 18,75 | 572,36 | 98,56  |
| 2019/06/22 | CH2206 | Male | Three y/o | Control | Control | Feed Day | No | 06:50 | 06:00 - 06:59 | Morning | 37,2 | 112 | 28,4  | 28,4  | 18,36 | 601,96 | 112,31 |
| 2019/06/22 | CH2205 | Male | Three y/o | Control | Control | Feed Day | No | 06:55 | 06:00 - 06:59 | Morning | 37,5 | 67  | 167,4 | 167,4 | 18,65 | 563,53 | 173,87 |
| 2019/06/22 | CH2206 | Male | Three y/o | Control | Control | Feed Day | No | 06:55 | 06:00 - 06:59 | Morning | 37,3 |     | 23,8  | 23,8  | 18,46 |        | 106,26 |
| 2019/06/22 | CH2205 | Male | Three y/o | Control | Control | Feed Day | No | 07:00 | 07:00 - 07:59 | Morning | 37,6 | 97  | 67,4  | 67,4  | 18,75 | 591,66 | 142,12 |
| 2019/06/22 | CH2206 | Male | Three y/o | Control | Control | Feed Day | No | 07:00 | 07:00 - 07:59 | Morning | 37,4 | 96  | 88,4  | 88,4  | 18,55 | 590,91 | 151,55 |
| 2019/06/22 | CH2205 | Male | Three y/o | Control | Control | Feed Day | No | 07:05 | 07:00 - 07:59 | Morning | 37,6 | 86  | 110,0 | 110,0 | 18,75 | 582,77 | 159,17 |
| 2019/06/22 | CH2206 | Male | Three y/o | Control | Control | Feed Day | No | 07:05 | 07:00 - 07:59 | Morning | 37,4 | 97  | 65,2  | 65,2  | 18,55 | 591,66 | 140,97 |
| 2019/06/22 | CH2205 | Male | Three y/o | Control | Control | Feed Day | No | 07:10 | 07:00 - 07:59 | Morning | 37,6 | 80  | 13,4  | 13,4  | 18,75 | 577,31 | 86,68  |
| 2019/06/22 | CH2206 | Male | Three y/o | Control | Control | Feed Day | No | 07:10 | 07:00 - 07:59 | Morning | 37,3 | 99  | 20,6  | 20,6  | 18,46 | 593,14 | 101,32 |
| 2019/06/22 | CH2205 | Male | Three y/o | Control | Control | Feed Day | No | 07:15 | 07:00 - 07:59 | Morning | 37,5 | 107 | 88,2  | 88,2  | 18,65 | 598,73 | 151,47 |



|            |        |      |           |         |         |          |    |       |               |              |      |     |       |       |       |        |        |
|------------|--------|------|-----------|---------|---------|----------|----|-------|---------------|--------------|------|-----|-------|-------|-------|--------|--------|
| 2019/06/22 | CH2206 | Male | Three y/o | Control | Control | Feed Day | No | 07:15 | 07:00 - 07:59 | Morning      | 37,2 | 55  | 51,0  | 51,0  | 18,36 | 547,52 | 132,47 |
| 2019/06/22 | CH2205 | Male | Three y/o | Control | Control | Feed Day | No | 07:20 | 07:00 - 07:59 | Morning      | 37,5 |     | 274,8 | 274,8 | 18,65 |        | 191,32 |
| 2019/06/22 | CH2206 | Male | Three y/o | Control | Control | Feed Day | No | 07:20 | 07:00 - 07:59 | Morning      | 37,3 | 109 | 36,6  | 36,6  | 18,46 | 600,04 | 121,03 |
| 2019/06/22 | CH2205 | Male | Three y/o | Control | Control | Feed Day | No | 07:25 | 07:00 - 07:59 | Morning      | 37,5 | 75  | 7,2   | 7,2   | 18,65 | 572,36 | 65,66  |
| 2019/06/22 | CH2206 | Male | Three y/o | Control | Control | Feed Day | No | 07:25 | 07:00 - 07:59 | Morning      | 37,3 | 100 | 274,4 | 274,4 | 18,46 | 593,87 | 191,27 |
| 2019/06/22 | CH2205 | Male | Three y/o | Control | Control | Feed Day | No | 07:30 | 07:00 - 07:59 | Morning      | 37,6 |     | 35,8  | 35,8  | 18,75 |        | 120,27 |
| 2019/06/22 | CH2206 | Male | Three y/o | Control | Control | Feed Day | No | 07:30 | 07:00 - 07:59 | Morning      | 37,4 | 115 | 102,4 | 102,4 | 18,55 | 603,82 | 156,67 |
| 2019/06/22 | CH2205 | Male | Three y/o | Control | Control | Feed Day | No | 07:35 | 07:00 - 07:59 | Morning      | 37,5 | 94  | 71,0  | 71,0  | 18,65 | 589,37 | 143,93 |
| 2019/06/22 | CH2206 | Male | Three y/o | Control | Control | Feed Day | No | 07:35 | 07:00 - 07:59 | Morning      | 37,5 | 121 | 158,4 | 158,4 | 18,65 | 607,35 | 171,93 |
| 2019/06/22 | CH2205 | Male | Three y/o | Control | Control | Feed Day | No | 07:40 | 07:00 - 07:59 | Morning      | 37,5 | 74  | 7,0   | 7,0   | 18,65 | 571,33 | 64,72  |
| 2019/06/22 | CH2206 | Male | Three y/o | Control | Control | Feed Day | No | 07:40 | 07:00 - 07:59 | Morning      | 37,7 | 97  | 121,8 | 121,8 | 18,85 | 591,66 | 162,73 |
| 2019/06/22 | CH2205 | Male | Three y/o | Control | Control | Feed Day | No | 07:45 | 07:00 - 07:59 | Morning      | 37,6 | 73  | 98,8  | 98,8  | 18,75 | 570,27 | 155,42 |
| 2019/06/22 | CH2206 | Male | Three y/o | Control | Control | Feed Day | No | 07:45 | 07:00 - 07:59 | Morning      | 37,7 | 112 | 32,0  | 32,0  | 18,85 | 601,96 | 116,41 |
| 2019/06/22 | CH2205 | Male | Three y/o | Control | Control | Feed Day | No | 07:50 | 07:00 - 07:59 | Morning      | 37,6 | 106 | 110,0 | 110,0 | 18,75 | 598,06 | 159,17 |
| 2019/06/22 | CH2206 | Male | Three y/o | Control | Control | Feed Day | No | 07:50 | 07:00 - 07:59 | Morning      | 37,7 | 88  | 61,8  | 61,8  | 18,85 | 584,49 | 139,12 |
| 2019/06/22 | CH2205 | Male | Three y/o | Control | Control | Feed Day | No | 07:55 | 07:00 - 07:59 | Morning      | 37,6 |     | 22,2  | 22,2  | 18,75 |        | 103,88 |
| 2019/06/22 | CH2206 | Male | Three y/o | Control | Control | Feed Day | No | 07:55 | 07:00 - 07:59 | Morning      | 37,7 | 112 | 101,0 | 101,0 | 18,85 | 601,96 | 156,19 |
| 2019/06/22 | CH2205 | Male | Three y/o | Control | Control | Feed Day | No | 08:00 | 08:00 - 08:59 | Late Morning | 37,6 | 50  | 49,4  | 49,4  | 18,75 | 539,52 | 131,37 |
| 2019/06/22 | CH2206 | Male | Three y/o | Control | Control | Feed Day | No | 08:00 | 08:00 - 08:59 | Late Morning | 37,7 |     | 96,2  | 96,2  | 18,85 |        | 154,49 |
| 2019/06/22 | CH2205 | Male | Three y/o | Control | Control | Feed Day | No | 08:05 | 08:00 - 08:59 | Late Morning | 37,6 | 77  | 171,6 | 171,6 | 18,75 | 574,39 | 174,74 |
| 2019/06/22 | CH2206 | Male | Three y/o | Control | Control | Feed Day | No | 08:05 | 08:00 - 08:59 | Late Morning | 37,7 | 105 | 107,0 | 107,0 | 18,85 | 597,38 | 158,20 |
| 2019/06/22 | CH2205 | Male | Three y/o | Control | Control | Feed Day | No | 08:10 | 08:00 - 08:59 | Late Morning | 37,6 | 65  | 12,6  | 12,6  | 18,75 | 561,12 | 84,59  |
| 2019/06/22 | CH2206 | Male | Three y/o | Control | Control | Feed Day | No | 08:10 | 08:00 - 08:59 | Late Morning | 37,8 | 65  | 25,6  | 25,6  | 18,95 | 561,12 | 108,76 |
| 2019/06/22 | CH2205 | Male | Three y/o | Control | Control | Feed Day | No | 08:15 | 08:00 - 08:59 | Late Morning | 37,6 | 63  | 106,8 | 106,8 | 18,75 | 558,62 | 158,14 |
| 2019/06/22 | CH2206 | Male | Three y/o | Control | Control | Feed Day | No | 08:15 | 08:00 - 08:59 | Late Morning | 37,7 | 69  | 29,4  | 29,4  | 18,85 | 565,86 | 113,50 |
| 2019/06/22 | CH2205 | Male | Three y/o | Control | Control | Feed Day | No | 08:20 | 08:00 - 08:59 | Late Morning | 37,6 | 83  | 74,2  | 74,2  | 18,75 | 580,11 | 145,46 |
| 2019/06/22 | CH2206 | Male | Three y/o | Control | Control | Feed Day | No | 08:20 | 08:00 - 08:59 | Late Morning | 37,7 | 103 | 57,6  | 57,6  | 18,85 | 596,00 | 136,68 |
| 2019/06/22 | CH2205 | Male | Three y/o | Control | Control | Feed Day | No | 08:25 | 08:00 - 08:59 | Late Morning | 37,8 | 129 | 92,0  | 92,0  | 18,95 | 611,75 | 152,94 |
| 2019/06/22 | CH2206 | Male | Three y/o | Control | Control | Feed Day | No | 08:25 | 08:00 - 08:59 | Late Morning | 37,7 | 118 | 107,6 | 107,6 | 18,85 | 605,61 | 158,40 |
| 2019/06/22 | CH2205 | Male | Three y/o | Control | Control | Feed Day | No | 08:30 | 08:00 - 08:59 | Late Morning | 37,9 | 76  | 176,8 | 176,8 | 19,05 | 573,39 | 175,78 |
| 2019/06/22 | CH2206 | Male | Three y/o | Control | Control | Feed Day | No | 08:30 | 08:00 - 08:59 | Late Morning | 37,7 | 118 | 52,2  | 52,2  | 18,85 | 605,61 | 133,27 |
| 2019/06/22 | CH2205 | Male | Three y/o | Control | Control | Feed Day | No | 08:35 | 08:00 - 08:59 | Late Morning | 37,9 | 113 | 103,6 | 103,6 | 19,05 | 602,58 | 157,08 |
| 2019/06/22 | CH2206 | Male | Three y/o | Control | Control | Feed Day | No | 08:35 | 08:00 - 08:59 | Late Morning | 37,7 | 107 | 33,6  | 33,6  | 18,85 | 598,73 | 118,09 |
| 2019/06/22 | CH2205 | Male | Three y/o | Control | Control | Feed Day | No | 08:40 | 08:00 - 08:59 | Late Morning | 37,9 | 94  | 64,6  | 64,6  | 19,05 | 589,37 | 140,65 |
| 2019/06/22 | CH2206 | Male | Three y/o | Control | Control | Feed Day | No | 08:40 | 08:00 - 08:59 | Late Morning | 37,8 | 134 | 88,4  | 88,4  | 18,95 | 614,33 | 151,55 |
| 2019/06/22 | CH2205 | Male | Three y/o | Control | Control | Feed Day | No | 08:45 | 08:00 - 08:59 | Late Morning | 37,9 | 125 | 91,6  | 91,6  | 19,05 | 609,60 | 152,79 |
| 2019/06/22 | CH2206 | Male | Three y/o | Control | Control | Feed Day | No | 08:45 | 08:00 - 08:59 | Late Morning | 37,8 | 118 | 119,4 | 119,4 | 18,95 | 605,61 | 162,03 |
| 2019/06/22 | CH2205 | Male | Three y/o | Control | Control | Feed Day | No | 08:50 | 08:00 - 08:59 | Late Morning | 37,7 | 55  | 10,8  | 10,8  | 18,85 | 547,52 | 79,36  |
| 2019/06/22 | CH2206 | Male | Three y/o | Control | Control | Feed Day | No | 08:50 | 08:00 - 08:59 | Late Morning | 37,8 | 88  | 42,2  | 42,2  | 18,95 | 584,49 | 125,93 |
| 2019/06/22 | CH2205 | Male | Three y/o | Control | Control | Feed Day | No | 08:55 | 08:00 - 08:59 | Late Morning | 37,7 | 59  | 13,8  | 13,8  | 18,85 | 553,30 | 87,68  |
| 2019/06/22 | CH2206 | Male | Three y/o | Control | Control | Feed Day | No | 08:55 | 08:00 - 08:59 | Late Morning | 37,8 | 121 | 104,6 | 104,6 | 18,95 | 607,35 | 157,41 |
| 2019/06/22 | CH2205 | Male | Three y/o | Control | Control | Feed Day | No | 09:00 | 09:00 - 09:59 | Late Morning | 37,7 | 93  | 194,8 | 194,8 | 18,85 | 588,58 | 179,19 |
| 2019/06/22 | CH2206 | Male | Three y/o | Control | Control | Feed Day | No | 09:00 | 09:00 - 09:59 | Late Morning | 37,9 | 99  | 126,4 | 126,4 | 19,05 | 593,14 | 164,02 |
| 2019/06/22 | CH2205 | Male | Three y/o | Control | Control | Feed Day | No | 09:05 | 09:00 - 09:59 | Late Morning | 37,7 | 83  | 115,4 | 115,4 | 18,85 | 580,11 | 160,84 |
| 2019/06/22 | CH2206 | Male | Three y/o | Control | Control | Feed Day | No | 09:05 | 09:00 - 09:59 | Late Morning | 37,8 | 49  | 50,4  | 50,4  | 18,95 | 537,80 | 132,06 |
| 2019/06/22 | CH2205 | Male | Three y/o | Control | Control | Feed Day | No | 09:10 | 09:00 - 09:59 | Late Morning | 37,7 | 74  | 51,0  | 51,0  | 18,85 | 571,33 | 132,47 |
| 2019/06/22 | CH2206 | Male | Three y/o | Control | Control | Feed Day | No | 09:10 | 09:00 - 09:59 | Late Morning | 37,8 | 68  | 46,4  | 46,4  | 18,95 | 564,71 | 129,21 |
| 2019/06/22 | CH2205 | Male | Three y/o | Control | Control | Feed Day | No | 09:15 | 09:00 - 09:59 | Late Morning | 37,6 |     | 128,2 | 128,2 | 18,75 |        | 164,52 |
| 2019/06/22 | CH2206 | Male | Three y/o | Control | Control | Feed Day | No | 09:15 | 09:00 - 09:59 | Late Morning | 37,7 |     | 13,6  | 13,6  | 18,85 |        | 87,18  |
| 2019/06/22 | CH2205 | Male | Three y/o | Control | Control | Feed Day | No | 09:20 | 09:00 - 09:59 | Late Morning | 37,6 | 70  | 34,4  | 34,4  | 18,75 | 566,99 | 118,90 |
| 2019/06/22 | CH2206 | Male | Three y/o | Control | Control | Feed Day | No | 09:20 | 09:00 - 09:59 | Late Morning | 37,7 |     | 36,0  | 36,0  | 18,85 |        | 120,46 |
| 2019/06/22 | CH2205 | Male | Three y/o | Control | Control | Feed Day | No | 09:25 | 09:00 - 09:59 | Late Morning | 37,6 |     | 230,0 | 230,0 | 18,75 |        | 185,04 |
| 2019/06/22 | CH2206 | Male | Three y/o | Control | Control | Feed Day | No | 09:25 | 09:00 - 09:59 | Late Morning | 37,7 | 93  | 45,6  | 45,6  | 18,85 | 588,58 | 128,61 |
| 2019/06/22 | CH2205 | Male | Three y/o | Control | Control | Feed Day | No | 09:30 | 09:00 - 09:59 | Late Morning | 37,7 | 90  | 169,2 | 169,2 | 18,85 | 586,16 | 174,24 |
| 2019/06/22 | CH2206 | Male | Three y/o | Control | Control | Feed Day | No | 09:30 | 09:00 - 09:59 | Late Morning | 37,8 | 113 | 54,2  | 54,2  | 18,95 | 602,58 | 134,57 |
| 2019/06/22 | CH2205 | Male | Three y/o | Control | Control | Feed Day | No | 09:35 | 09:00 - 09:59 | Late Morning | 38,0 | 107 | 30,8  | 30,8  | 19,15 | 598,73 | 115,10 |
| 2019/06/22 | CH2206 | Male | Three y/o | Control | Control | Feed Day | No | 09:35 | 09:00 - 09:59 | Late Morning | 37,8 | 107 | 16,6  | 16,6  | 18,95 | 598,73 | 93,96  |
| 2019/06/22 | CH2205 | Male | Three y/o | Control | Control | Feed Day | No | 09:40 | 09:00 - 09:59 | Late Morning | 37,7 | 92  | 17,6  | 17,6  | 18,85 | 587,78 | 95,95  |
| 2019/06/22 | CH2206 | Male | Three y/o | Control | Control | Feed Day | No | 09:40 | 09:00 - 09:59 | Late Morning | 37,7 | 115 | 55,8  | 55,8  | 18,85 | 603,82 | 135,58 |
| 2019/06/22 | CH2205 | Male | Three y/o | Control | Control | Feed Day | No | 09:45 | 09:00 - 09:59 | Late Morning | 37,6 | 45  | 81,4  | 81,4  | 18,75 | 530,47 | 148,68 |
| 2019/06/22 | CH2206 | Male | Three y/o | Control | Control | Feed Day | No | 09:45 | 09:00 - 09:59 | Late Morning | 37,8 | 101 | 69,0  | 69,0  | 18,95 | 594,59 | 142,94 |
| 2019/06/22 | CH2205 | Male | Three y/o | Control | Control | Feed Day | No | 09:50 | 09:00 - 09:59 | Late Morning | 37,7 | 92  | 98,6  | 98,6  | 18,85 | 587,78 | 155,35 |
| 2019/06/22 | CH2206 | Male | Three y/o | Control | Control | Feed Day | No | 09:50 | 09:00 - 09:59 | Late Morning | 37,8 | 103 | 69,6  | 69,6  | 18,95 | 596,00 | 143,24 |
| 2019/06/22 | CH2205 | Male | Three y/o | Control | Control | Feed Day | No | 09:55 | 09:00 - 09:59 | Late Morning | 37,7 | 97  | 21,8  | 21,8  | 18,85 | 591,66 | 103,26 |
| 2019/06/22 | CH2206 | Male | Three y/o | Control | Control | Feed Day | No | 09:55 | 09:00 - 09:59 | Late Morning | 37,8 | 102 | 22,0  | 22,0  | 18,95 | 595,30 | 103,57 |
| 2019/06/22 | CH2205 | Male | Three y/o | Control | Control | Feed Day | No | 10:00 | 10:00 - 10:59 | Late Morning | 37,7 |     | 39,0  | 39,0  | 18,85 |        | 123,22 |
| 2019/06/22 | CH2206 | Male | Three y/o | Control | Control | Feed Day | No | 10:00 | 10:00 - 10:59 | Late Morning | 37,8 | 125 | 68,4  | 68,4  | 18,95 | 609,60 | 142,64 |
| 2019/06/22 | CH2205 | Male | Three y/o | Control | Control | Feed Day | No | 10:05 | 10:00 - 10:59 | Late Morning | 37,7 | 77  | 18,6  | 18,6  | 18,85 | 574,39 | 97,84  |
| 2019/06/22 | CH2206 | Male | Three y/o | Control | Control | Feed Day | No | 10:05 | 10:00 - 10:59 | Late Morning | 37,8 | 76  | 50,0  | 50,0  | 18,95 | 573,39 | 131,79 |
| 2019/06/22 | CH2205 | Male | Three y/o | Control | Control | Feed Day | No | 10:10 | 10:00 - 10:59 | Late Morning | 37,7 |     | 10,0  | 10,0  | 18,85 |        | 76,76  |



|            |        |      |           |         |         |          |     |       |               |              |      |     |      |      |       |        |        |
|------------|--------|------|-----------|---------|---------|----------|-----|-------|---------------|--------------|------|-----|------|------|-------|--------|--------|
| 2019/06/22 | CH2206 | Male | Three y/o | Control | Control | Feed Day | No  | 10:10 | 10:00 - 10:59 | Late Morning | 37,7 | 72  | 44,2 | 44,2 | 18,85 | 569,20 | 127,53 |
| 2019/06/22 | CH2205 | Male | Three y/o | Control | Control | Feed Day | No  | 10:15 | 10:00 - 10:59 | Late Morning | 37,7 | 64  | 3,6  | 3,6  | 18,85 | 559,88 | 42,42  |
| 2019/06/22 | CH2206 | Male | Three y/o | Control | Control | Feed Day | No  | 10:15 | 10:00 - 10:59 | Late Morning | 37,7 |     | 46,4 | 46,4 | 18,85 |        | 129,21 |
| 2019/06/22 | CH2205 | Male | Three y/o | Control | Control | Feed Day | No  | 10:20 | 10:00 - 10:59 | Late Morning | 37,7 | 68  | 6,6  | 6,6  | 18,85 | 564,71 | 62,73  |
| 2019/06/22 | CH2206 | Male | Three y/o | Control | Control | Feed Day | No  | 10:20 | 10:00 - 10:59 | Late Morning | 37,8 |     | 49,0 | 49,0 | 18,95 |        | 131,09 |
| 2019/06/22 | CH2205 | Male | Three y/o | Control | Control | Feed Day | No  | 10:25 | 10:00 - 10:59 | Late Morning | 37,7 | 68  | 7,2  | 7,2  | 18,85 | 564,71 | 65,66  |
| 2019/06/22 | CH2206 | Male | Three y/o | Control | Control | Feed Day | No  | 10:25 | 10:00 - 10:59 | Late Morning | 37,8 | 71  | 48,8 | 48,8 | 18,95 | 568,10 | 130,95 |
| 2019/06/22 | CH2205 | Male | Three y/o | Control | Control | Feed Day | Yes | 10:30 | 10:00 - 10:59 | Late Morning | 37,7 | 84  | 9,6  | 9,6  | 18,85 | 581,01 | 75,37  |
| 2019/06/22 | CH2206 | Male | Three y/o | Control | Control | Feed Day | Yes | 10:30 | 10:00 - 10:59 | Late Morning | 37,7 | 73  | 51,2 | 51,2 | 18,85 | 570,27 | 132,61 |
| 2019/06/22 | CH2205 | Male | Three y/o | Control | Control | Feed Day | Yes | 10:35 | 10:00 - 10:59 | Late Morning | 37,6 | 64  | 9,0  | 9,0  | 18,75 | 559,88 | 73,19  |
| 2019/06/22 | CH2206 | Male | Three y/o | Control | Control | Feed Day | Yes | 10:35 | 10:00 - 10:59 | Late Morning | 37,7 | 47  | 53,2 | 53,2 | 18,85 | 534,23 | 133,93 |
| 2019/06/22 | CH2205 | Male | Three y/o | Control | Control | Feed Day | Yes | 10:40 | 10:00 - 10:59 | Late Morning | 37,6 | 66  | 3,2  | 3,2  | 18,75 | 562,34 | 38,49  |
| 2019/06/22 | CH2206 | Male | Three y/o | Control | Control | Feed Day | Yes | 10:40 | 10:00 - 10:59 | Late Morning | 37,7 | 82  | 49,6 | 49,6 | 18,85 | 579,19 | 131,51 |
| 2019/06/22 | CH2205 | Male | Three y/o | Control | Control | Feed Day | Yes | 10:45 | 10:00 - 10:59 | Late Morning | 37,6 | 73  | 16,0 | 16,0 | 18,75 | 570,27 | 92,71  |
| 2019/06/22 | CH2206 | Male | Three y/o | Control | Control | Feed Day | Yes | 10:45 | 10:00 - 10:59 | Late Morning | 37,7 | 93  | 41,8 | 41,8 | 18,85 | 588,58 | 125,60 |
| 2019/06/22 | CH2205 | Male | Three y/o | Control | Control | Feed Day | Yes | 10:50 | 10:00 - 10:59 | Late Morning | 37,5 | 83  | 10,6 | 10,6 | 18,65 | 580,11 | 78,73  |
| 2019/06/22 | CH2206 | Male | Three y/o | Control | Control | Feed Day | Yes | 10:50 | 10:00 - 10:59 | Late Morning | 37,7 | 68  | 39,8 | 39,8 | 18,85 | 564,71 | 123,91 |
| 2019/06/22 | CH2205 | Male | Three y/o | Control | Control | Feed Day | Yes | 10:55 | 10:00 - 10:59 | Late Morning | 37,5 | 64  | 6,6  | 6,6  | 18,65 | 559,88 | 62,73  |
| 2019/06/22 | CH2206 | Male | Three y/o | Control | Control | Feed Day | Yes | 10:55 | 10:00 - 10:59 | Late Morning | 37,7 | 63  | 39,0 | 39,0 | 18,85 | 558,62 | 123,22 |
| 2019/06/22 | CH2205 | Male | Three y/o | Control | Control | Feed Day | Yes | 11:00 | 11:00 - 11:59 | Late Morning | 37,5 | 61  | 6,6  | 6,6  | 18,65 | 556,01 | 62,73  |
| 2019/06/22 | CH2206 | Male | Three y/o | Control | Control | Feed Day | Yes | 11:00 | 11:00 - 11:59 | Late Morning | 37,7 | 64  | 35,4 | 35,4 | 18,85 | 559,88 | 119,88 |
| 2019/06/22 | CH2205 | Male | Three y/o | Control | Control | Feed Day | Yes | 11:05 | 11:00 - 11:59 | Late Morning | 37,5 | 77  | 5,6  | 5,6  | 18,65 | 574,39 | 57,21  |
| 2019/06/22 | CH2206 | Male | Three y/o | Control | Control | Feed Day | Yes | 11:05 | 11:00 - 11:59 | Late Morning | 37,7 | 65  | 35,8 | 35,8 | 18,85 | 561,12 | 120,27 |
| 2019/06/22 | CH2205 | Male | Three y/o | Control | Control | Feed Day | Yes | 11:10 | 11:00 - 11:59 | Late Morning | 37,5 | 68  | 5,6  | 5,6  | 18,65 | 564,71 | 57,21  |
| 2019/06/22 | CH2206 | Male | Three y/o | Control | Control | Feed Day | Yes | 11:10 | 11:00 - 11:59 | Late Morning | 37,7 | 60  | 51,0 | 51,0 | 18,85 | 554,67 | 132,47 |
| 2019/06/22 | CH2205 | Male | Three y/o | Control | Control | Feed Day | Yes | 11:15 | 11:00 - 11:59 | Late Morning | 37,4 | 79  | 8,4  | 8,4  | 18,55 | 576,36 | 70,86  |
| 2019/06/22 | CH2206 | Male | Three y/o | Control | Control | Feed Day | Yes | 11:15 | 11:00 - 11:59 | Late Morning | 37,7 | 70  | 50,4 | 50,4 | 18,85 | 566,99 | 132,06 |
| 2019/06/22 | CH2205 | Male | Three y/o | Control | Control | Feed Day | Yes | 11:20 | 11:00 - 11:59 | Late Morning | 37,4 | 82  | 15,0 | 15,0 | 18,55 | 579,19 | 90,51  |
| 2019/06/22 | CH2206 | Male | Three y/o | Control | Control | Feed Day | Yes | 11:20 | 11:00 - 11:59 | Late Morning | 37,7 | 75  | 23,8 | 23,8 | 18,85 | 572,36 | 106,26 |
| 2019/06/22 | CH2205 | Male | Three y/o | Control | Control | Feed Day | Yes | 11:25 | 11:00 - 11:59 | Late Morning | 37,4 | 58  | 22,6 | 22,6 | 18,55 | 551,90 | 104,49 |
| 2019/06/22 | CH2206 | Male | Three y/o | Control | Control | Feed Day | Yes | 11:25 | 11:00 - 11:59 | Late Morning | 37,7 | 48  | 35,0 | 35,0 | 18,85 | 536,04 | 119,49 |
| 2019/06/22 | CH2205 | Male | Three y/o | Control | Control | Feed Day | No  | 11:30 | 11:00 - 11:59 | Late Morning | 37,4 | 61  | 20,0 | 20,0 | 18,55 | 556,01 | 100,31 |
| 2019/06/22 | CH2206 | Male | Three y/o | Control | Control | Feed Day | No  | 11:30 | 11:00 - 11:59 | Late Morning | 37,7 | 88  | 40,4 | 40,4 | 18,85 | 584,49 | 124,43 |
| 2019/06/22 | CH2205 | Male | Three y/o | Control | Control | Feed Day | No  | 11:35 | 11:00 - 11:59 | Late Morning | 37,4 | 56  | 15,6 | 15,6 | 18,55 | 549,01 | 91,85  |
| 2019/06/22 | CH2206 | Male | Three y/o | Control | Control | Feed Day | No  | 11:35 | 11:00 - 11:59 | Late Morning | 37,7 | 114 | 37,4 | 37,4 | 18,85 | 603,20 | 121,77 |
| 2019/06/22 | CH2205 | Male | Three y/o | Control | Control | Feed Day | No  | 11:40 | 11:00 - 11:59 | Late Morning | 37,5 | 68  | 10,2 | 10,2 | 18,65 | 564,71 | 77,43  |
| 2019/06/22 | CH2206 | Male | Three y/o | Control | Control | Feed Day | No  | 11:40 | 11:00 - 11:59 | Late Morning | 37,7 | 77  | 32,8 | 32,8 | 18,85 | 574,39 | 117,26 |
| 2019/06/22 | CH2205 | Male | Three y/o | Control | Control | Feed Day | No  | 11:45 | 11:00 - 11:59 | Late Morning | 37,5 | 65  | 7,0  | 7,0  | 18,65 | 561,12 | 64,72  |
| 2019/06/22 | CH2206 | Male | Three y/o | Control | Control | Feed Day | No  | 11:45 | 11:00 - 11:59 | Late Morning | 37,7 | 87  | 30,4 | 30,4 | 18,85 | 583,64 | 114,65 |
| 2019/06/22 | CH2205 | Male | Three y/o | Control | Control | Feed Day | No  | 11:50 | 11:00 - 11:59 | Late Morning | 37,6 | 68  | 15,0 | 15,0 | 18,75 | 564,71 | 90,51  |
| 2019/06/22 | CH2206 | Male | Three y/o | Control | Control | Feed Day | No  | 11:50 | 11:00 - 11:59 | Late Morning | 37,7 | 73  | 25,2 | 25,2 | 18,85 | 570,27 | 108,22 |
| 2019/06/22 | CH2205 | Male | Three y/o | Control | Control | Feed Day | No  | 11:55 | 11:00 - 11:59 | Late Morning | 37,6 | 63  | 10,0 | 10,0 | 18,75 | 558,62 | 76,76  |
| 2019/06/22 | CH2206 | Male | Three y/o | Control | Control | Feed Day | No  | 11:55 | 11:00 - 11:59 | Late Morning | 37,7 | 71  | 29,6 | 29,6 | 18,85 | 568,10 | 113,73 |
| 2019/06/22 | CH2205 | Male | Three y/o | Control | Control | Feed Day | No  | 12:00 | 12:00 - 12:59 | Afternoon    | 37,6 |     | 5,8  | 5,8  | 18,75 |        | 58,39  |
| 2019/06/22 | CH2206 | Male | Three y/o | Control | Control | Feed Day | No  | 12:00 | 12:00 - 12:59 | Afternoon    | 37,8 | 114 | 28,0 | 28,0 | 18,95 | 603,20 | 111,83 |
| 2019/06/22 | CH2205 | Male | Three y/o | Control | Control | Feed Day | No  | 12:05 | 12:00 - 12:59 | Afternoon    | 37,7 | 78  | 13,6 | 13,6 | 18,85 | 575,38 | 87,18  |
| 2019/06/22 | CH2206 | Male | Three y/o | Control | Control | Feed Day | No  | 12:05 | 12:00 - 12:59 | Afternoon    | 37,8 | 83  | 51,4 | 51,4 | 18,95 | 580,11 | 132,74 |
| 2019/06/22 | CH2205 | Male | Three y/o | Control | Control | Feed Day | No  | 12:10 | 12:00 - 12:59 | Afternoon    | 37,7 | 73  | 14,8 | 14,8 | 18,85 | 570,27 | 90,05  |
| 2019/06/22 | CH2206 | Male | Three y/o | Control | Control | Feed Day | No  | 12:10 | 12:00 - 12:59 | Afternoon    | 37,8 | 72  | 43,4 | 43,4 | 18,95 | 569,20 | 126,90 |
| 2019/06/22 | CH2205 | Male | Three y/o | Control | Control | Feed Day | No  | 12:15 | 12:00 - 12:59 | Afternoon    | 37,7 | 76  | 20,0 | 20,0 | 18,85 | 573,39 | 100,31 |
| 2019/06/22 | CH2206 | Male | Three y/o | Control | Control | Feed Day | No  | 12:15 | 12:00 - 12:59 | Afternoon    | 37,8 | 92  | 31,0 | 31,0 | 18,95 | 587,78 | 115,32 |
| 2019/06/22 | CH2205 | Male | Three y/o | Control | Control | Feed Day | No  | 12:20 | 12:00 - 12:59 | Afternoon    | 37,7 | 73  | 18,2 | 18,2 | 18,85 | 570,27 | 97,10  |
| 2019/06/22 | CH2206 | Male | Three y/o | Control | Control | Feed Day | No  | 12:20 | 12:00 - 12:59 | Afternoon    | 37,8 | 89  | 33,6 | 33,6 | 18,95 | 585,33 | 118,09 |
| 2019/06/22 | CH2205 | Male | Three y/o | Control | Control | Feed Day | No  | 12:25 | 12:00 - 12:59 | Afternoon    | 37,7 | 64  | 16,2 | 16,2 | 18,85 | 559,88 | 93,13  |
| 2019/06/22 | CH2206 | Male | Three y/o | Control | Control | Feed Day | No  | 12:25 | 12:00 - 12:59 | Afternoon    | 37,8 | 90  | 27,0 | 27,0 | 18,95 | 586,16 | 110,58 |
| 2019/06/22 | CH2205 | Male | Three y/o | Control | Control | Feed Day | No  | 12:30 | 12:00 - 12:59 | Afternoon    | 37,7 | 69  | 19,6 | 19,6 | 18,85 | 565,86 | 99,63  |
| 2019/06/22 | CH2206 | Male | Three y/o | Control | Control | Feed Day | No  | 12:30 | 12:00 - 12:59 | Afternoon    | 37,8 | 92  | 33,2 | 33,2 | 18,95 | 587,78 | 117,68 |
| 2019/06/22 | CH2205 | Male | Three y/o | Control | Control | Feed Day | No  | 12:35 | 12:00 - 12:59 | Afternoon    | 37,7 | 66  | 20,8 | 20,8 | 18,85 | 562,34 | 101,65 |
| 2019/06/22 | CH2206 | Male | Three y/o | Control | Control | Feed Day | No  | 12:35 | 12:00 - 12:59 | Afternoon    | 37,8 | 83  | 31,0 | 31,0 | 18,95 | 580,11 | 115,32 |
| 2019/06/22 | CH2205 | Male | Three y/o | Control | Control | Feed Day | No  | 12:40 | 12:00 - 12:59 | Afternoon    | 37,7 | 59  | 18,4 | 18,4 | 18,85 | 553,30 | 97,47  |
| 2019/06/22 | CH2206 | Male | Three y/o | Control | Control | Feed Day | No  | 12:40 | 12:00 - 12:59 | Afternoon    | 37,8 | 63  | 28,4 | 28,4 | 18,95 | 558,62 | 112,31 |
| 2019/06/22 | CH2205 | Male | Three y/o | Control | Control | Feed Day | No  | 12:45 | 12:00 - 12:59 | Afternoon    | 37,7 | 83  | 21,0 | 21,0 | 18,85 | 580,11 | 101,98 |
| 2019/06/22 | CH2206 | Male | Three y/o | Control | Control | Feed Day | No  | 12:45 | 12:00 - 12:59 | Afternoon    | 37,8 | 49  | 25,6 | 25,6 | 18,95 | 537,80 | 108,76 |
| 2019/06/22 | CH2205 | Male | Three y/o | Control | Control | Feed Day | No  | 12:50 | 12:00 - 12:59 | Afternoon    | 37,7 | 61  | 20,6 | 20,6 | 18,85 | 556,01 | 101,32 |
| 2019/06/22 | CH2206 | Male | Three y/o | Control | Control | Feed Day | No  | 12:50 | 12:00 - 12:59 | Afternoon    | 37,8 | 73  | 25,6 | 25,6 | 18,95 | 570,27 | 108,76 |
| 2019/06/22 | CH2205 | Male | Three y/o | Control | Control | Feed Day | No  | 12:55 | 12:00 - 12:59 | Afternoon    | 37,7 | 41  | 22,6 | 22,6 | 18,85 | 522,29 | 104,49 |
| 2019/06/22 | CH2206 | Male | Three y/o | Control | Control | Feed Day | No  | 12:55 | 12:00 - 12:59 | Afternoon    | 37,8 | 88  | 18,4 | 18,4 | 18,95 | 584,49 | 97,47  |
| 2019/06/22 | CH2205 | Male | Three y/o | Control | Control | Feed Day | No  | 13:00 | 13:00 - 13:59 | Afternoon    | 37,7 | 71  | 24,8 | 24,8 | 18,85 | 568,10 | 107,67 |
| 2019/06/22 | CH2206 | Male | Three y/o | Control | Control | Feed Day | No  | 13:00 | 13:00 - 13:59 | Afternoon    | 37,8 | 92  | 3,6  | 3,6  | 18,95 | 587,78 | 42,42  |
| 2019/06/22 | CH2205 | Male | Three y/o | Control | Control | Feed Day | No  | 13:05 | 13:00 - 13:59 | Afternoon    | 37,7 | 65  | 23,6 | 23,6 | 18,85 | 561,12 | 105,97 |



|            |        |      |           |         |         |          |    |       |               |           |      |     |       |       |       |        |        |
|------------|--------|------|-----------|---------|---------|----------|----|-------|---------------|-----------|------|-----|-------|-------|-------|--------|--------|
| 2019/06/22 | CH2206 | Male | Three y/o | Control | Control | Feed Day | No | 13:05 | 13:00 - 13:59 | Afternoon | 37,7 | 98  | 26,4  | 26,4  | 18,85 | 592,41 | 109,81 |
| 2019/06/22 | CH2205 | Male | Three y/o | Control | Control | Feed Day | No | 13:10 | 13:00 - 13:59 | Afternoon | 37,7 | 70  | 20,4  | 20,4  | 18,85 | 566,99 | 100,99 |
| 2019/06/22 | CH2206 | Male | Three y/o | Control | Control | Feed Day | No | 13:10 | 13:00 - 13:59 | Afternoon | 37,7 | 77  | 20,8  | 20,8  | 18,85 | 574,39 | 101,65 |
| 2019/06/22 | CH2205 | Male | Three y/o | Control | Control | Feed Day | No | 13:15 | 13:00 - 13:59 | Afternoon | 37,7 | 55  | 22,0  | 22,0  | 18,85 | 547,52 | 103,57 |
| 2019/06/22 | CH2206 | Male | Three y/o | Control | Control | Feed Day | No | 13:15 | 13:00 - 13:59 | Afternoon | 37,8 | 72  | 26,8  | 26,8  | 18,95 | 569,20 | 110,33 |
| 2019/06/22 | CH2205 | Male | Three y/o | Control | Control | Feed Day | No | 13:20 | 13:00 - 13:59 | Afternoon | 37,6 |     | 20,6  | 20,6  | 18,75 |        | 101,32 |
| 2019/06/22 | CH2206 | Male | Three y/o | Control | Control | Feed Day | No | 13:20 | 13:00 - 13:59 | Afternoon | 37,8 | 75  | 25,4  | 25,4  | 18,95 | 572,36 | 108,49 |
| 2019/06/22 | CH2205 | Male | Three y/o | Control | Control | Feed Day | No | 13:25 | 13:00 - 13:59 | Afternoon | 37,6 | 57  | 18,2  | 18,2  | 18,75 | 550,47 | 97,10  |
| 2019/06/22 | CH2206 | Male | Three y/o | Control | Control | Feed Day | No | 13:25 | 13:00 - 13:59 | Afternoon | 37,7 | 83  | 26,2  | 26,2  | 18,85 | 580,11 | 109,55 |
| 2019/06/22 | CH2205 | Male | Three y/o | Control | Control | Feed Day | No | 13:30 | 13:00 - 13:59 | Afternoon | 37,6 | 81  | 25,8  | 25,8  | 18,75 | 578,26 | 109,02 |
| 2019/06/22 | CH2206 | Male | Three y/o | Control | Control | Feed Day | No | 13:30 | 13:00 - 13:59 | Afternoon | 37,7 | 95  | 38,4  | 38,4  | 18,85 | 590,14 | 122,68 |
| 2019/06/22 | CH2205 | Male | Three y/o | Control | Control | Feed Day | No | 13:35 | 13:00 - 13:59 | Afternoon | 37,6 | 74  | 19,4  | 19,4  | 18,75 | 571,33 | 99,28  |
| 2019/06/22 | CH2206 | Male | Three y/o | Control | Control | Feed Day | No | 13:35 | 13:00 - 13:59 | Afternoon | 37,8 | 47  | 37,4  | 37,4  | 18,95 | 534,23 | 121,77 |
| 2019/06/22 | CH2205 | Male | Three y/o | Control | Control | Feed Day | No | 13:40 | 13:00 - 13:59 | Afternoon | 37,6 | 72  | 16,2  | 16,2  | 18,75 | 569,20 | 93,13  |
| 2019/06/22 | CH2206 | Male | Three y/o | Control | Control | Feed Day | No | 13:40 | 13:00 - 13:59 | Afternoon | 37,7 | 97  | 20,2  | 20,2  | 18,85 | 591,66 | 100,65 |
| 2019/06/22 | CH2205 | Male | Three y/o | Control | Control | Feed Day | No | 13:45 | 13:00 - 13:59 | Afternoon | 37,6 | 52  | 18,8  | 18,8  | 18,75 | 542,83 | 98,20  |
| 2019/06/22 | CH2206 | Male | Three y/o | Control | Control | Feed Day | No | 13:45 | 13:00 - 13:59 | Afternoon | 37,7 | 89  | 29,4  | 29,4  | 18,85 | 585,33 | 113,50 |
| 2019/06/22 | CH2205 | Male | Three y/o | Control | Control | Feed Day | No | 13:50 | 13:00 - 13:59 | Afternoon | 37,6 | 75  | 19,6  | 19,6  | 18,75 | 572,36 | 99,63  |
| 2019/06/22 | CH2206 | Male | Three y/o | Control | Control | Feed Day | No | 13:50 | 13:00 - 13:59 | Afternoon | 37,7 | 82  | 23,2  | 23,2  | 18,85 | 579,19 | 105,39 |
| 2019/06/22 | CH2205 | Male | Three y/o | Control | Control | Feed Day | No | 13:55 | 13:00 - 13:59 | Afternoon | 37,6 | 65  | 19,2  | 19,2  | 18,75 | 561,12 | 98,92  |
| 2019/06/22 | CH2206 | Male | Three y/o | Control | Control | Feed Day | No | 13:55 | 13:00 - 13:59 | Afternoon | 37,7 | 45  | 14,4  | 14,4  | 18,85 | 530,47 | 89,12  |
| 2019/06/22 | CH2205 | Male | Three y/o | Control | Control | Feed Day | No | 14:00 | 14:00 - 14:59 | Afternoon | 37,6 | 49  | 16,6  | 16,6  | 18,75 | 537,80 | 93,96  |
| 2019/06/22 | CH2206 | Male | Three y/o | Control | Control | Feed Day | No | 14:00 | 14:00 - 14:59 | Afternoon | 37,7 | 80  | 17,6  | 17,6  | 18,85 | 577,31 | 95,95  |
| 2019/06/22 | CH2205 | Male | Three y/o | Control | Control | Feed Day | No | 14:05 | 14:00 - 14:59 | Afternoon | 37,6 | 65  | 18,8  | 18,8  | 18,75 | 561,12 | 98,20  |
| 2019/06/22 | CH2206 | Male | Three y/o | Control | Control | Feed Day | No | 14:05 | 14:00 - 14:59 | Afternoon | 37,7 | 86  | 21,0  | 21,0  | 18,85 | 582,77 | 101,98 |
| 2019/06/22 | CH2205 | Male | Three y/o | Control | Control | Feed Day | No | 14:10 | 14:00 - 14:59 | Afternoon | 37,6 | 57  | 19,0  | 19,0  | 18,75 | 550,47 | 98,56  |
| 2019/06/22 | CH2206 | Male | Three y/o | Control | Control | Feed Day | No | 14:10 | 14:00 - 14:59 | Afternoon | 37,7 | 82  | 8,2   | 8,2   | 18,85 | 579,19 | 70,05  |
| 2019/06/22 | CH2205 | Male | Three y/o | Control | Control | Feed Day | No | 14:15 | 14:00 - 14:59 | Afternoon | 37,6 | 55  | 18,4  | 18,4  | 18,75 | 547,52 | 97,47  |
| 2019/06/22 | CH2206 | Male | Three y/o | Control | Control | Feed Day | No | 14:15 | 14:00 - 14:59 | Afternoon | 37,7 | 84  | 3,8   | 3,8   | 18,85 | 581,01 | 44,22  |
| 2019/06/22 | CH2205 | Male | Three y/o | Control | Control | Feed Day | No | 14:20 | 14:00 - 14:59 | Afternoon | 37,6 | 89  | 38,8  | 38,8  | 18,75 | 585,33 | 123,04 |
| 2019/06/22 | CH2206 | Male | Three y/o | Control | Control | Feed Day | No | 14:20 | 14:00 - 14:59 | Afternoon | 37,7 | 86  | 21,4  | 21,4  | 18,85 | 582,77 | 102,63 |
| 2019/06/22 | CH2205 | Male | Three y/o | Control | Control | Feed Day | No | 14:25 | 14:00 - 14:59 | Afternoon | 37,6 | 98  | 25,2  | 25,2  | 18,75 | 592,41 | 108,22 |
| 2019/06/22 | CH2206 | Male | Three y/o | Control | Control | Feed Day | No | 14:25 | 14:00 - 14:59 | Afternoon | 37,7 | 85  | 20,6  | 20,6  | 18,85 | 581,90 | 101,32 |
| 2019/06/22 | CH2205 | Male | Three y/o | Control | Control | Feed Day | No | 14:30 | 14:00 - 14:59 | Afternoon | 37,6 |     | 11,4  | 11,4  | 18,75 |        | 81,19  |
| 2019/06/22 | CH2206 | Male | Three y/o | Control | Control | Feed Day | No | 14:30 | 14:00 - 14:59 | Afternoon | 37,7 | 84  | 7,4   | 7,4   | 18,85 | 581,01 | 66,59  |
| 2019/06/22 | CH2205 | Male | Three y/o | Control | Control | Feed Day | No | 14:35 | 14:00 - 14:59 | Afternoon | 37,6 | 64  | 40,4  | 40,4  | 18,75 | 559,88 | 124,43 |
| 2019/06/22 | CH2206 | Male | Three y/o | Control | Control | Feed Day | No | 14:35 | 14:00 - 14:59 | Afternoon | 37,7 | 49  | 4,2   | 4,2   | 18,85 | 537,80 | 47,57  |
| 2019/06/22 | CH2205 | Male | Three y/o | Control | Control | Feed Day | No | 14:40 | 14:00 - 14:59 | Afternoon | 37,7 | 81  | 10,4  | 10,4  | 18,85 | 578,26 | 78,08  |
| 2019/06/22 | CH2206 | Male | Three y/o | Control | Control | Feed Day | No | 14:40 | 14:00 - 14:59 | Afternoon | 37,7 | 90  | 10,8  | 10,8  | 18,85 | 586,16 | 79,36  |
| 2019/06/22 | CH2205 | Male | Three y/o | Control | Control | Feed Day | No | 14:45 | 14:00 - 14:59 | Afternoon | 37,6 | 138 | 66,0  | 66,0  | 18,75 | 616,31 | 141,40 |
| 2019/06/22 | CH2206 | Male | Three y/o | Control | Control | Feed Day | No | 14:45 | 14:00 - 14:59 | Afternoon | 37,7 | 125 | 22,4  | 22,4  | 18,85 | 609,60 | 104,19 |
| 2019/06/22 | CH2205 | Male | Three y/o | Control | Control | Feed Day | No | 14:50 | 14:00 - 14:59 | Afternoon | 37,7 | 124 | 15,0  | 15,0  | 18,85 | 609,04 | 90,51  |
| 2019/06/22 | CH2206 | Male | Three y/o | Control | Control | Feed Day | No | 14:50 | 14:00 - 14:59 | Afternoon | 37,8 | 115 | 55,8  | 55,8  | 18,95 | 603,82 | 135,58 |
| 2019/06/22 | CH2205 | Male | Three y/o | Control | Control | Feed Day | No | 14:55 | 14:00 - 14:59 | Afternoon | 37,6 | 68  | 17,2  | 17,2  | 18,75 | 564,71 | 95,17  |
| 2019/06/22 | CH2206 | Male | Three y/o | Control | Control | Feed Day | No | 14:55 | 14:00 - 14:59 | Afternoon | 37,8 | 103 | 47,8  | 47,8  | 18,95 | 596,00 | 130,23 |
| 2019/06/22 | CH2205 | Male | Three y/o | Control | Control | Feed Day | No | 15:00 | 15:00 - 15:59 | Afternoon | 37,6 | 63  | 101,6 | 101,6 | 18,75 | 558,62 | 156,40 |
| 2019/06/22 | CH2206 | Male | Three y/o | Control | Control | Feed Day | No | 15:00 | 15:00 - 15:59 | Afternoon | 37,8 | 37  | 94,0  | 94,0  | 18,95 | 513,06 | 153,69 |
| 2019/06/22 | CH2205 | Male | Three y/o | Control | Control | Feed Day | No | 15:05 | 15:00 - 15:59 | Afternoon | 37,9 |     | 95,6  | 95,6  | 19,05 |        | 154,28 |
| 2019/06/22 | CH2206 | Male | Three y/o | Control | Control | Feed Day | No | 15:05 | 15:00 - 15:59 | Afternoon | 37,9 | 79  | 55,0  | 55,0  | 19,05 | 576,36 | 135,08 |
| 2019/06/22 | CH2205 | Male | Three y/o | Control | Control | Feed Day | No | 15:10 | 15:00 - 15:59 | Afternoon | 37,9 | 110 | 20,4  | 20,4  | 19,05 | 600,69 | 100,99 |
| 2019/06/22 | CH2206 | Male | Three y/o | Control | Control | Feed Day | No | 15:10 | 15:00 - 15:59 | Afternoon | 37,9 |     | 84,4  | 84,4  | 19,05 |        | 149,94 |
| 2019/06/22 | CH2205 | Male | Three y/o | Control | Control | Feed Day | No | 15:15 | 15:00 - 15:59 | Afternoon | 37,9 |     | 19,4  | 19,4  | 19,05 |        | 99,28  |
| 2019/06/22 | CH2206 | Male | Three y/o | Control | Control | Feed Day | No | 15:15 | 15:00 - 15:59 | Afternoon | 37,9 |     | 48,8  | 48,8  | 19,05 |        | 130,95 |
| 2019/06/22 | CH2205 | Male | Three y/o | Control | Control | Feed Day | No | 15:20 | 15:00 - 15:59 | Afternoon | 37,9 |     | 21,2  | 21,2  | 19,05 |        | 102,31 |
| 2019/06/22 | CH2206 | Male | Three y/o | Control | Control | Feed Day | No | 15:20 | 15:00 - 15:59 | Afternoon | 37,9 | 92  | 18,8  | 18,8  | 19,05 | 587,78 | 98,20  |
| 2019/06/22 | CH2205 | Male | Three y/o | Control | Control | Feed Day | No | 15:25 | 15:00 - 15:59 | Afternoon | 37,9 | 72  | 20,8  | 20,8  | 19,05 | 569,20 | 101,65 |
| 2019/06/22 | CH2206 | Male | Three y/o | Control | Control | Feed Day | No | 15:25 | 15:00 - 15:59 | Afternoon | 37,9 | 88  | 35,6  | 35,6  | 19,05 | 584,49 | 120,08 |
| 2019/06/22 | CH2205 | Male | Three y/o | Control | Control | Feed Day | No | 15:30 | 15:00 - 15:59 | Afternoon | 37,9 |     | 70,8  | 70,8  | 19,05 |        | 143,83 |
| 2019/06/22 | CH2206 | Male | Three y/o | Control | Control | Feed Day | No | 15:30 | 15:00 - 15:59 | Afternoon | 37,9 |     | 77,2  | 77,2  | 19,05 | 596,00 | 146,84 |
| 2019/06/22 | CH2205 | Male | Three y/o | Control | Control | Feed Day | No | 15:35 | 15:00 - 15:59 | Afternoon | 37,9 | 69  | 20,2  | 20,2  | 19,05 | 565,86 | 100,65 |
| 2019/06/22 | CH2206 | Male | Three y/o | Control | Control | Feed Day | No | 15:35 | 15:00 - 15:59 | Afternoon | 37,9 | 77  | 44,0  | 44,0  | 19,05 | 574,39 | 127,37 |
| 2019/06/22 | CH2205 | Male | Three y/o | Control | Control | Feed Day | No | 15:40 | 15:00 - 15:59 | Afternoon | 37,9 | 70  | 8,0   | 8,0   | 19,05 | 566,99 | 69,22  |
| 2019/06/22 | CH2206 | Male | Three y/o | Control | Control | Feed Day | No | 15:40 | 15:00 - 15:59 | Afternoon | 38,0 | 78  | 36,0  | 36,0  | 19,15 | 575,38 | 120,46 |
| 2019/06/22 | CH2205 | Male | Three y/o | Control | Control | Feed Day | No | 15:45 | 15:00 - 15:59 | Afternoon | 37,9 | 61  | 7,0   | 7,0   | 19,05 | 556,01 | 64,72  |
| 2019/06/22 | CH2206 | Male | Three y/o | Control | Control | Feed Day | No | 15:45 | 15:00 - 15:59 | Afternoon | 38,0 | 76  | 38,4  | 38,4  | 19,15 | 573,39 | 122,68 |
| 2019/06/22 | CH2205 | Male | Three y/o | Control | Control | Feed Day | No | 15:50 | 15:00 - 15:59 | Afternoon | 37,9 | 60  | 8,0   | 8,0   | 19,05 | 554,67 | 69,22  |
| 2019/06/22 | CH2206 | Male | Three y/o | Control | Control | Feed Day | No | 15:50 | 15:00 - 15:59 | Afternoon | 38,0 | 75  | 36,6  | 36,6  | 19,15 | 572,36 | 121,03 |
| 2019/06/22 | CH2205 | Male | Three y/o | Control | Control | Feed Day | No | 15:55 | 15:00 - 15:59 | Afternoon | 37,9 | 60  | 10,4  | 10,4  | 19,05 | 554,67 | 78,08  |
| 2019/06/22 | CH2206 | Male | Three y/o | Control | Control | Feed Day | No | 15:55 | 15:00 - 15:59 | Afternoon | 38,0 | 49  | 40,8  | 40,8  | 19,15 | 537,80 | 124,77 |
| 2019/06/22 | CH2205 | Male | Three y/o | Control | Control | Feed Day | No | 16:00 | 16:00 - 16:59 | Evening   | 37,9 | 58  | 12,0  | 12,0  | 19,05 | 551,90 | 82,93  |



|            |        |      |           |         |         |          |    |       |               |         |      |     |      |      |       |        |        |
|------------|--------|------|-----------|---------|---------|----------|----|-------|---------------|---------|------|-----|------|------|-------|--------|--------|
| 2019/06/22 | CH2206 | Male | Three y/o | Control | Control | Feed Day | No | 16:00 | 16:00 - 16:59 | Evening | 38,0 | 87  | 35,6 | 35,6 | 19,15 | 583,64 | 120,08 |
| 2019/06/22 | CH2205 | Male | Three y/o | Control | Control | Feed Day | No | 16:05 | 16:00 - 16:59 | Evening | 37,9 | 64  | 9,4  | 9,4  | 19,05 | 559,88 | 74,66  |
| 2019/06/22 | CH2206 | Male | Three y/o | Control | Control | Feed Day | No | 16:05 | 16:00 - 16:59 | Evening | 38,0 | 64  | 35,8 | 35,8 | 19,15 | 559,88 | 120,27 |
| 2019/06/22 | CH2205 | Male | Three y/o | Control | Control | Feed Day | No | 16:10 | 16:00 - 16:59 | Evening | 37,9 | 57  | 9,0  | 9,0  | 19,05 | 550,47 | 73,19  |
| 2019/06/22 | CH2206 | Male | Three y/o | Control | Control | Feed Day | No | 16:10 | 16:00 - 16:59 | Evening | 38,0 | 84  | 45,8 | 45,8 | 19,15 | 581,01 | 128,76 |
| 2019/06/22 | CH2205 | Male | Three y/o | Control | Control | Feed Day | No | 16:15 | 16:00 - 16:59 | Evening | 37,9 |     | 15,8 | 15,8 | 19,05 |        | 92,28  |
| 2019/06/22 | CH2206 | Male | Three y/o | Control | Control | Feed Day | No | 16:15 | 16:00 - 16:59 | Evening | 38,0 | 124 | 47,6 | 47,6 | 19,15 | 609,04 | 130,09 |
| 2019/06/22 | CH2205 | Male | Three y/o | Control | Control | Feed Day | No | 16:20 | 16:00 - 16:59 | Evening | 37,9 | 64  | 7,2  | 7,2  | 19,05 | 559,88 | 65,66  |
| 2019/06/22 | CH2206 | Male | Three y/o | Control | Control | Feed Day | No | 16:20 | 16:00 - 16:59 | Evening | 37,9 | 90  | 54,2 | 54,2 | 19,05 | 586,16 | 134,57 |
| 2019/06/22 | CH2205 | Male | Three y/o | Control | Control | Feed Day | No | 16:25 | 16:00 - 16:59 | Evening | 37,9 | 64  | 10,8 | 10,8 | 19,05 | 559,88 | 79,36  |
| 2019/06/22 | CH2206 | Male | Three y/o | Control | Control | Feed Day | No | 16:25 | 16:00 - 16:59 | Evening | 37,9 | 82  | 53,8 | 53,8 | 19,05 | 579,19 | 134,32 |
| 2019/06/22 | CH2205 | Male | Three y/o | Control | Control | Feed Day | No | 16:30 | 16:00 - 16:59 | Evening | 37,9 | 63  | 5,6  | 5,6  | 19,05 | 558,62 | 57,21  |
| 2019/06/22 | CH2206 | Male | Three y/o | Control | Control | Feed Day | No | 16:30 | 16:00 - 16:59 | Evening | 37,9 | 67  | 51,8 | 51,8 | 19,05 | 563,53 | 133,01 |
| 2019/06/22 | CH2205 | Male | Three y/o | Control | Control | Feed Day | No | 16:35 | 16:00 - 16:59 | Evening | 37,9 | 69  | 7,4  | 7,4  | 19,05 | 565,86 | 66,59  |
| 2019/06/22 | CH2206 | Male | Three y/o | Control | Control | Feed Day | No | 16:35 | 16:00 - 16:59 | Evening | 37,9 | 74  | 46,2 | 46,2 | 19,05 | 571,33 | 129,06 |
| 2019/06/22 | CH2205 | Male | Three y/o | Control | Control | Feed Day | No | 16:40 | 16:00 - 16:59 | Evening | 37,9 | 62  | 9,4  | 9,4  | 19,05 | 557,33 | 74,66  |
| 2019/06/22 | CH2206 | Male | Three y/o | Control | Control | Feed Day | No | 16:40 | 16:00 - 16:59 | Evening | 37,9 | 60  | 50,2 | 50,2 | 19,05 | 554,67 | 131,92 |
| 2019/06/22 | CH2205 | Male | Three y/o | Control | Control | Feed Day | No | 16:45 | 16:00 - 16:59 | Evening | 37,9 | 40  | 6,6  | 6,6  | 19,05 | 520,09 | 62,73  |
| 2019/06/22 | CH2206 | Male | Three y/o | Control | Control | Feed Day | No | 16:45 | 16:00 - 16:59 | Evening | 37,9 | 100 | 54,8 | 54,8 | 19,05 | 593,87 | 134,96 |
| 2019/06/22 | CH2205 | Male | Three y/o | Control | Control | Feed Day | No | 16:50 | 16:00 - 16:59 | Evening | 37,9 | 65  | 11,8 | 11,8 | 19,05 | 561,12 | 82,36  |
| 2019/06/22 | CH2206 | Male | Three y/o | Control | Control | Feed Day | No | 16:50 | 16:00 - 16:59 | Evening | 37,9 | 79  | 45,4 | 45,4 | 19,05 | 576,36 | 128,45 |
| 2019/06/22 | CH2205 | Male | Three y/o | Control | Control | Feed Day | No | 16:55 | 16:00 - 16:59 | Evening | 37,9 | 67  | 19,8 | 19,8 | 19,05 | 563,53 | 99,97  |
| 2019/06/22 | CH2206 | Male | Three y/o | Control | Control | Feed Day | No | 16:55 | 16:00 - 16:59 | Evening | 37,9 | 46  | 55,4 | 55,4 | 19,05 | 532,38 | 135,33 |
| 2019/06/22 | CH2205 | Male | Three y/o | Control | Control | Feed Day | No | 17:00 | 17:00 - 17:59 | Evening | 37,9 | 71  | 23,6 | 23,6 | 19,05 | 568,10 | 105,97 |
| 2019/06/22 | CH2206 | Male | Three y/o | Control | Control | Feed Day | No | 17:00 | 17:00 - 17:59 | Evening | 37,9 | 49  | 50,8 | 50,8 | 19,05 | 537,80 | 132,33 |
| 2019/06/22 | CH2205 | Male | Three y/o | Control | Control | Feed Day | No | 17:05 | 17:00 - 17:59 | Evening | 37,9 | 68  | 23,4 | 23,4 | 19,05 | 564,71 | 105,68 |
| 2019/06/22 | CH2206 | Male | Three y/o | Control | Control | Feed Day | No | 17:05 | 17:00 - 17:59 | Evening | 37,9 | 67  | 52,8 | 52,8 | 19,05 | 563,53 | 133,67 |
| 2019/06/22 | CH2205 | Male | Three y/o | Control | Control | Feed Day | No | 17:10 | 17:00 - 17:59 | Evening | 37,9 | 84  | 18,6 | 18,6 | 19,05 | 581,01 | 97,84  |
| 2019/06/22 | CH2206 | Male | Three y/o | Control | Control | Feed Day | No | 17:10 | 17:00 - 17:59 | Evening | 37,9 | 60  | 54,8 | 54,8 | 19,05 | 554,67 | 134,96 |
| 2019/06/22 | CH2205 | Male | Three y/o | Control | Control | Feed Day | No | 17:15 | 17:00 - 17:59 | Evening | 38,0 | 62  | 13,2 | 13,2 | 19,15 | 557,33 | 86,17  |
| 2019/06/22 | CH2206 | Male | Three y/o | Control | Control | Feed Day | No | 17:15 | 17:00 - 17:59 | Evening | 37,9 | 68  | 49,8 | 49,8 | 19,05 | 564,71 | 131,65 |
| 2019/06/22 | CH2205 | Male | Three y/o | Control | Control | Feed Day | No | 17:20 | 17:00 - 17:59 | Evening | 38,0 | 52  | 8,2  | 8,2  | 19,15 | 542,83 | 70,05  |
| 2019/06/22 | CH2206 | Male | Three y/o | Control | Control | Feed Day | No | 17:20 | 17:00 - 17:59 | Evening | 37,9 | 76  | 51,8 | 51,8 | 19,05 | 573,39 | 133,01 |
| 2019/06/22 | CH2205 | Male | Three y/o | Control | Control | Feed Day | No | 17:25 | 17:00 - 17:59 | Evening | 38,0 | 68  | 8,0  | 8,0  | 19,15 | 564,71 | 69,22  |
| 2019/06/22 | CH2206 | Male | Three y/o | Control | Control | Feed Day | No | 17:25 | 17:00 - 17:59 | Evening | 37,9 | 64  | 57,4 | 57,4 | 19,05 | 559,88 | 136,56 |
| 2019/06/22 | CH2205 | Male | Three y/o | Control | Control | Feed Day | No | 17:30 | 17:00 - 17:59 | Evening | 38,0 | 191 | 20,4 | 20,4 | 19,15 | 637,33 | 100,99 |
| 2019/06/22 | CH2206 | Male | Three y/o | Control | Control | Feed Day | No | 17:30 | 17:00 - 17:59 | Evening | 37,9 | 83  | 51,4 | 51,4 | 19,05 | 580,11 | 132,74 |
| 2019/06/22 | CH2205 | Male | Three y/o | Control | Control | Feed Day | No | 17:35 | 17:00 - 17:59 | Evening | 38,0 | 108 | 9,2  | 9,2  | 19,15 | 599,39 | 73,94  |
| 2019/06/22 | CH2206 | Male | Three y/o | Control | Control | Feed Day | No | 17:35 | 17:00 - 17:59 | Evening | 37,9 | 72  | 50,4 | 50,4 | 19,05 | 569,20 | 132,06 |
| 2019/06/22 | CH2205 | Male | Three y/o | Control | Control | Feed Day | No | 17:40 | 17:00 - 17:59 | Evening | 37,9 | 67  | 8,8  | 8,8  | 19,05 | 563,53 | 72,43  |
| 2019/06/22 | CH2206 | Male | Three y/o | Control | Control | Feed Day | No | 17:40 | 17:00 - 17:59 | Evening | 37,9 | 94  | 50,2 | 50,2 | 19,05 | 589,37 | 131,92 |
| 2019/06/22 | CH2205 | Male | Three y/o | Control | Control | Feed Day | No | 17:45 | 17:00 - 17:59 | Evening | 37,9 | 63  | 9,0  | 9,0  | 19,05 | 558,62 | 73,19  |
| 2019/06/22 | CH2206 | Male | Three y/o | Control | Control | Feed Day | No | 17:45 | 17:00 - 17:59 | Evening | 37,9 | 63  | 44,4 | 44,4 | 19,05 | 558,62 | 127,69 |
| 2019/06/22 | CH2205 | Male | Three y/o | Control | Control | Feed Day | No | 17:50 | 17:00 - 17:59 | Evening | 37,9 |     | 27,4 | 27,4 | 19,05 |        | 111,09 |
| 2019/06/22 | CH2206 | Male | Three y/o | Control | Control | Feed Day | No | 17:50 | 17:00 - 17:59 | Evening | 37,9 | 84  | 25,2 | 25,2 | 19,05 | 581,01 | 108,22 |
| 2019/06/22 | CH2205 | Male | Three y/o | Control | Control | Feed Day | No | 17:55 | 17:00 - 17:59 | Evening | 37,9 | 86  | 21,0 | 21,0 | 19,05 | 582,77 | 101,98 |
| 2019/06/22 | CH2206 | Male | Three y/o | Control | Control | Feed Day | No | 17:55 | 17:00 - 17:59 | Evening | 37,9 | 92  | 30,0 | 30,0 | 19,05 | 587,78 | 114,20 |
| 2019/06/22 | CH2205 | Male | Three y/o | Control | Control | Feed Day | No | 18:00 | 18:00 - 18:59 | Evening | 37,9 | 54  | 23,2 | 23,2 | 19,05 | 545,99 | 105,39 |
| 2019/06/22 | CH2206 | Male | Three y/o | Control | Control | Feed Day | No | 18:00 | 18:00 - 18:59 | Evening | 37,9 |     | 22,0 | 22,0 | 19,05 |        | 103,57 |
| 2019/06/22 | CH2205 | Male | Three y/o | Control | Control | Feed Day | No | 18:05 | 18:00 - 18:59 | Evening | 37,9 | 61  | 20,6 | 20,6 | 19,05 | 556,01 | 101,32 |
| 2019/06/22 | CH2206 | Male | Three y/o | Control | Control | Feed Day | No | 18:05 | 18:00 - 18:59 | Evening | 37,8 |     | 18,0 | 18,0 | 18,95 |        | 96,72  |
| 2019/06/22 | CH2205 | Male | Three y/o | Control | Control | Feed Day | No | 18:10 | 18:00 - 18:59 | Evening | 37,9 | 80  | 21,6 | 21,6 | 19,05 | 577,31 | 102,94 |
| 2019/06/22 | CH2206 | Male | Three y/o | Control | Control | Feed Day | No | 18:10 | 18:00 - 18:59 | Evening | 37,5 | 72  | 16,2 | 16,2 | 18,65 | 569,20 | 93,13  |
| 2019/06/22 | CH2205 | Male | Three y/o | Control | Control | Feed Day | No | 18:15 | 18:00 - 18:59 | Evening | 37,9 | 90  | 24,2 | 24,2 | 19,05 | 586,16 | 106,83 |
| 2019/06/22 | CH2206 | Male | Three y/o | Control | Control | Feed Day | No | 18:15 | 18:00 - 18:59 | Evening | 37,5 | 57  | 12,6 | 12,6 | 18,65 | 550,47 | 84,59  |
| 2019/06/22 | CH2205 | Male | Three y/o | Control | Control | Feed Day | No | 18:20 | 18:00 - 18:59 | Evening | 37,9 | 89  | 23,0 | 23,0 | 19,05 | 585,33 | 105,09 |
| 2019/06/22 | CH2206 | Male | Three y/o | Control | Control | Feed Day | No | 18:20 | 18:00 - 18:59 | Evening | 37,3 | 68  | 19,0 | 19,0 | 18,46 | 564,71 | 98,56  |
| 2019/06/22 | CH2205 | Male | Three y/o | Control | Control | Feed Day | No | 18:25 | 18:00 - 18:59 | Evening | 37,9 | 48  | 16,4 | 16,4 | 19,05 | 536,04 | 93,55  |
| 2019/06/22 | CH2206 | Male | Three y/o | Control | Control | Feed Day | No | 18:25 | 18:00 - 18:59 | Evening | 37,3 | 75  | 23,4 | 23,4 | 18,46 | 572,36 | 105,68 |
| 2019/06/22 | CH2205 | Male | Three y/o | Control | Control | Feed Day | No | 18:30 | 18:00 - 18:59 | Evening | 37,9 | 62  | 19,2 | 19,2 | 19,05 | 557,33 | 98,92  |
| 2019/06/22 | CH2206 | Male | Three y/o | Control | Control | Feed Day | No | 18:30 | 18:00 - 18:59 | Evening | 37,3 | 70  | 17,0 | 17,0 | 18,46 | 566,99 | 94,77  |
| 2019/06/22 | CH2205 | Male | Three y/o | Control | Control | Feed Day | No | 18:35 | 18:00 - 18:59 | Evening | 37,9 | 50  | 21,2 | 21,2 | 19,05 | 539,52 | 102,31 |
| 2019/06/22 | CH2206 | Male | Three y/o | Control | Control | Feed Day | No | 18:35 | 18:00 - 18:59 | Evening | 37,3 | 60  | 30,4 | 30,4 | 18,46 | 554,67 | 114,65 |
| 2019/06/22 | CH2205 | Male | Three y/o | Control | Control | Feed Day | No | 18:40 | 18:00 - 18:59 | Evening | 38,0 | 68  | 24,4 | 24,4 | 19,15 | 564,71 | 107,11 |
| 2019/06/22 | CH2206 | Male | Three y/o | Control | Control | Feed Day | No | 18:40 | 18:00 - 18:59 | Evening | 37,2 | 55  | 40,0 | 40,0 | 18,36 | 547,52 | 124,09 |
| 2019/06/22 | CH2205 | Male | Three y/o | Control | Control | Feed Day | No | 18:45 | 18:00 - 18:59 | Evening | 37,9 | 60  | 21,4 | 21,4 | 19,05 | 554,67 | 102,63 |
| 2019/06/22 | CH2206 | Male | Three y/o | Control | Control | Feed Day | No | 18:45 | 18:00 - 18:59 | Evening | 37,4 | 50  | 43,8 | 43,8 | 18,55 | 539,52 | 127,22 |
| 2019/06/22 | CH2205 | Male | Three y/o | Control | Control | Feed Day | No | 18:50 | 18:00 - 18:59 | Evening | 38,0 | 61  | 26,8 | 26,8 | 19,15 | 556,01 | 110,33 |
| 2019/06/22 | CH2206 | Male | Three y/o | Control | Control | Feed Day | No | 18:50 | 18:00 - 18:59 | Evening | 37,5 | 94  | 49,4 | 49,4 | 18,65 | 589,37 | 131,37 |
| 2019/06/22 | CH2205 | Male | Three y/o | Control | Control | Feed Day | No | 18:55 | 18:00 - 18:59 | Evening | 38,0 | 69  | 21,8 | 21,8 | 19,15 | 565,86 | 103,26 |



|            |        |      |           |         |         |          |    |       |               |         |      |     |      |      |       |        |        |
|------------|--------|------|-----------|---------|---------|----------|----|-------|---------------|---------|------|-----|------|------|-------|--------|--------|
| 2019/06/22 | CH2206 | Male | Three y/o | Control | Control | Feed Day | No | 18:55 | 18:00 - 18:59 | Evening | 37,6 | 59  | 46,6 | 46,6 | 18,75 | 553,30 | 129,35 |
| 2019/06/22 | CH2205 | Male | Three y/o | Control | Control | Feed Day | No | 19:00 | 19:00 - 19:59 | Evening | 38,0 | 60  | 33,0 | 33,0 | 19,15 | 554,67 | 117,47 |
| 2019/06/22 | CH2206 | Male | Three y/o | Control | Control | Feed Day | No | 19:00 | 19:00 - 19:59 | Evening | 37,7 | 48  | 45,6 | 45,6 | 18,85 | 536,04 | 128,61 |
| 2019/06/22 | CH2205 | Male | Three y/o | Control | Control | Feed Day | No | 19:05 | 19:00 - 19:59 | Evening | 38,0 | 88  | 18,2 | 18,2 | 19,15 | 584,49 | 97,10  |
| 2019/06/22 | CH2206 | Male | Three y/o | Control | Control | Feed Day | No | 19:05 | 19:00 - 19:59 | Evening | 37,5 | 80  | 53,8 | 53,8 | 18,65 | 577,31 | 134,32 |
| 2019/06/22 | CH2205 | Male | Three y/o | Control | Control | Feed Day | No | 19:10 | 19:00 - 19:59 | Evening | 37,9 | 67  | 32,6 | 32,6 | 19,05 | 563,53 | 117,05 |
| 2019/06/22 | CH2206 | Male | Three y/o | Control | Control | Feed Day | No | 19:10 | 19:00 - 19:59 | Evening | 37,6 | 76  | 53,6 | 53,6 | 18,75 | 573,39 | 134,19 |
| 2019/06/22 | CH2205 | Male | Three y/o | Control | Control | Feed Day | No | 19:15 | 19:00 - 19:59 | Evening | 37,9 | 97  | 12,8 | 12,8 | 19,05 | 591,66 | 85,12  |
| 2019/06/22 | CH2206 | Male | Three y/o | Control | Control | Feed Day | No | 19:15 | 19:00 - 19:59 | Evening | 37,7 | 47  | 51,2 | 51,2 | 18,85 | 534,23 | 132,61 |
| 2019/06/22 | CH2205 | Male | Three y/o | Control | Control | Feed Day | No | 19:20 | 19:00 - 19:59 | Evening | 37,9 |     | 10,6 | 10,6 | 19,05 |        | 78,73  |
| 2019/06/22 | CH2206 | Male | Three y/o | Control | Control | Feed Day | No | 19:20 | 19:00 - 19:59 | Evening | 37,8 | 67  | 46,8 | 46,8 | 18,95 | 563,53 | 129,50 |
| 2019/06/22 | CH2205 | Male | Three y/o | Control | Control | Feed Day | No | 19:25 | 19:00 - 19:59 | Evening | 37,7 |     | 12,4 | 12,4 | 18,85 |        | 84,04  |
| 2019/06/22 | CH2206 | Male | Three y/o | Control | Control | Feed Day | No | 19:25 | 19:00 - 19:59 | Evening | 37,8 | 73  | 51,0 | 51,0 | 18,95 | 570,27 | 132,47 |
| 2019/06/22 | CH2205 | Male | Three y/o | Control | Control | Feed Day | No | 19:30 | 19:00 - 19:59 | Evening | 37,9 | 71  | 2,4  | 2,4  | 19,05 | 568,10 | 28,91  |
| 2019/06/22 | CH2206 | Male | Three y/o | Control | Control | Feed Day | No | 19:30 | 19:00 - 19:59 | Evening | 37,8 | 69  | 60,2 | 60,2 | 18,95 | 565,86 | 138,21 |
| 2019/06/22 | CH2205 | Male | Three y/o | Control | Control | Feed Day | No | 19:35 | 19:00 - 19:59 | Evening | 37,7 | 69  | 1,8  | 1,8  | 18,85 | 565,86 | 19,38  |
| 2019/06/22 | CH2206 | Male | Three y/o | Control | Control | Feed Day | No | 19:35 | 19:00 - 19:59 | Evening | 37,8 | 62  | 53,4 | 53,4 | 18,95 | 557,33 | 134,06 |
| 2019/06/22 | CH2205 | Male | Three y/o | Control | Control | Feed Day | No | 19:40 | 19:00 - 19:59 | Evening | 37,7 | 71  | 2,4  | 2,4  | 18,85 | 568,10 | 28,91  |
| 2019/06/22 | CH2206 | Male | Three y/o | Control | Control | Feed Day | No | 19:40 | 19:00 - 19:59 | Evening | 37,8 | 84  | 44,4 | 44,4 | 18,95 | 581,01 | 127,69 |
| 2019/06/22 | CH2205 | Male | Three y/o | Control | Control | Feed Day | No | 19:45 | 19:00 - 19:59 | Evening | 37,7 |     | 24,6 | 24,6 | 18,85 |        | 107,39 |
| 2019/06/22 | CH2206 | Male | Three y/o | Control | Control | Feed Day | No | 19:45 | 19:00 - 19:59 | Evening | 37,8 | 135 | 24,4 | 24,4 | 18,95 | 614,84 | 107,11 |
| 2019/06/22 | CH2205 | Male | Three y/o | Control | Control | Feed Day | No | 19:50 | 19:00 - 19:59 | Evening | 37,6 |     | 27,4 | 27,4 | 18,75 |        | 111,09 |
| 2019/06/22 | CH2206 | Male | Three y/o | Control | Control | Feed Day | No | 19:50 | 19:00 - 19:59 | Evening | 37,8 | 49  | 25,4 | 25,4 | 18,95 | 537,80 | 108,49 |
| 2019/06/22 | CH2205 | Male | Three y/o | Control | Control | Feed Day | No | 19:55 | 19:00 - 19:59 | Evening | 37,7 |     | 26,0 | 26,0 | 18,85 |        | 109,29 |
| 2019/06/22 | CH2206 | Male | Three y/o | Control | Control | Feed Day | No | 19:55 | 19:00 - 19:59 | Evening | 37,7 | 85  | 19,4 | 19,4 | 18,85 | 581,90 | 99,28  |
| 2019/06/22 | CH2205 | Male | Three y/o | Control | Control | Feed Day | No | 20:00 | 20:00 - 20:59 | Night   | 37,7 | 64  | 17,8 | 17,8 | 18,85 | 559,88 | 96,34  |
| 2019/06/22 | CH2206 | Male | Three y/o | Control | Control | Feed Day | No | 20:00 | 20:00 - 20:59 | Night   | 37,7 | 86  | 24,8 | 24,8 | 18,85 | 582,77 | 107,67 |
| 2019/06/22 | CH2205 | Male | Three y/o | Control | Control | Feed Day | No | 20:05 | 20:00 - 20:59 | Night   | 37,7 | 63  | 25,4 | 25,4 | 18,85 | 558,62 | 108,49 |
| 2019/06/22 | CH2206 | Male | Three y/o | Control | Control | Feed Day | No | 20:05 | 20:00 - 20:59 | Night   | 37,6 | 66  | 24,8 | 24,8 | 18,75 | 562,34 | 107,67 |
| 2019/06/22 | CH2205 | Male | Three y/o | Control | Control | Feed Day | No | 20:10 | 20:00 - 20:59 | Night   | 37,8 | 60  | 21,4 | 21,4 | 18,95 | 554,67 | 102,63 |
| 2019/06/22 | CH2206 | Male | Three y/o | Control | Control | Feed Day | No | 20:10 | 20:00 - 20:59 | Night   | 37,5 | 80  | 35,2 | 35,2 | 18,65 | 577,31 | 119,69 |
| 2019/06/22 | CH2205 | Male | Three y/o | Control | Control | Feed Day | No | 20:15 | 20:00 - 20:59 | Night   | 37,9 | 60  | 22,0 | 22,0 | 19,05 | 554,67 | 103,57 |
| 2019/06/22 | CH2206 | Male | Three y/o | Control | Control | Feed Day | No | 20:15 | 20:00 - 20:59 | Night   | 37,5 | 89  | 42,0 | 42,0 | 18,65 | 585,33 | 125,77 |
| 2019/06/22 | CH2205 | Male | Three y/o | Control | Control | Feed Day | No | 20:20 | 20:00 - 20:59 | Night   | 37,9 | 37  | 65,2 | 65,2 | 19,05 | 513,06 | 140,97 |
| 2019/06/22 | CH2206 | Male | Three y/o | Control | Control | Feed Day | No | 20:20 | 20:00 - 20:59 | Night   | 37,5 | 90  | 44,2 | 44,2 | 18,65 | 586,16 | 127,53 |
| 2019/06/22 | CH2205 | Male | Three y/o | Control | Control | Feed Day | No | 20:25 | 20:00 - 20:59 | Night   | 37,9 | 65  | 20,6 | 20,6 | 19,05 | 561,12 | 101,32 |
| 2019/06/22 | CH2206 | Male | Three y/o | Control | Control | Feed Day | No | 20:25 | 20:00 - 20:59 | Night   | 37,5 | 83  | 39,0 | 39,0 | 18,65 | 580,11 | 123,22 |
| 2019/06/22 | CH2205 | Male | Three y/o | Control | Control | Feed Day | No | 20:30 | 20:00 - 20:59 | Night   | 37,7 | 67  | 23,8 | 23,8 | 18,85 | 563,53 | 106,26 |
| 2019/06/22 | CH2206 | Male | Three y/o | Control | Control | Feed Day | No | 20:30 | 20:00 - 20:59 | Night   | 37,5 | 54  | 47,4 | 47,4 | 18,65 | 545,99 | 129,94 |
| 2019/06/22 | CH2205 | Male | Three y/o | Control | Control | Feed Day | No | 20:35 | 20:00 - 20:59 | Night   | 37,6 | 62  | 20,2 | 20,2 | 18,75 | 557,33 | 100,65 |
| 2019/06/22 | CH2206 | Male | Three y/o | Control | Control | Feed Day | No | 20:35 | 20:00 - 20:59 | Night   | 37,5 | 82  | 43,4 | 43,4 | 18,65 | 579,19 | 126,90 |
| 2019/06/22 | CH2205 | Male | Three y/o | Control | Control | Feed Day | No | 20:40 | 20:00 - 20:59 | Night   | 37,5 | 71  | 24,2 | 24,2 | 18,65 | 568,10 | 106,83 |
| 2019/06/22 | CH2206 | Male | Three y/o | Control | Control | Feed Day | No | 20:40 | 20:00 - 20:59 | Night   | 37,5 | 101 | 39,8 | 39,8 | 18,65 | 594,59 | 123,91 |
| 2019/06/22 | CH2205 | Male | Three y/o | Control | Control | Feed Day | No | 20:45 | 20:00 - 20:59 | Night   | 37,6 | 47  | 19,8 | 19,8 | 18,75 | 534,23 | 99,97  |
| 2019/06/22 | CH2206 | Male | Three y/o | Control | Control | Feed Day | No | 20:45 | 20:00 - 20:59 | Night   | 37,5 | 61  | 33,0 | 33,0 | 18,65 | 556,01 | 117,47 |
| 2019/06/22 | CH2205 | Male | Three y/o | Control | Control | Feed Day | No | 20:50 | 20:00 - 20:59 | Night   | 37,7 | 63  | 15,4 | 15,4 | 18,85 | 558,62 | 91,41  |
| 2019/06/22 | CH2206 | Male | Three y/o | Control | Control | Feed Day | No | 20:50 | 20:00 - 20:59 | Night   | 37,7 | 80  | 28,6 | 28,6 | 18,85 | 577,31 | 112,56 |
| 2019/06/22 | CH2205 | Male | Three y/o | Control | Control | Feed Day | No | 20:55 | 20:00 - 20:59 | Night   | 37,9 | 66  | 15,4 | 15,4 | 19,05 | 562,34 | 91,41  |
| 2019/06/22 | CH2206 | Male | Three y/o | Control | Control | Feed Day | No | 20:55 | 20:00 - 20:59 | Night   | 37,7 | 69  | 26,6 | 26,6 | 18,85 | 565,86 | 110,07 |
| 2019/06/22 | CH2205 | Male | Three y/o | Control | Control | Feed Day | No | 21:00 | 21:00 - 21:59 | Night   | 37,9 | 40  | 17,2 | 17,2 | 19,05 | 520,09 | 95,17  |
| 2019/06/22 | CH2206 | Male | Three y/o | Control | Control | Feed Day | No | 21:00 | 21:00 - 21:59 | Night   | 37,8 | 67  | 22,2 | 22,2 | 18,95 | 563,53 | 103,88 |
| 2019/06/22 | CH2205 | Male | Three y/o | Control | Control | Feed Day | No | 21:05 | 21:00 - 21:59 | Night   | 37,9 |     | 23,0 | 23,0 | 19,05 |        | 105,09 |
| 2019/06/22 | CH2206 | Male | Three y/o | Control | Control | Feed Day | No | 21:05 | 21:00 - 21:59 | Night   | 37,8 | 90  | 23,6 | 23,6 | 18,95 | 586,16 | 105,97 |
| 2019/06/22 | CH2205 | Male | Three y/o | Control | Control | Feed Day | No | 21:10 | 21:00 - 21:59 | Night   | 37,9 | 70  | 20,2 | 20,2 | 19,05 | 566,99 | 100,65 |
| 2019/06/22 | CH2206 | Male | Three y/o | Control | Control | Feed Day | No | 21:10 | 21:00 - 21:59 | Night   | 37,7 | 81  | 14,8 | 14,8 | 18,85 | 578,26 | 90,05  |
| 2019/06/22 | CH2205 | Male | Three y/o | Control | Control | Feed Day | No | 21:15 | 21:00 - 21:59 | Night   | 37,7 | 63  | 20,6 | 20,6 | 18,85 | 558,62 | 101,32 |
| 2019/06/22 | CH2206 | Male | Three y/o | Control | Control | Feed Day | No | 21:15 | 21:00 - 21:59 | Night   | 37,7 | 87  | 13,0 | 13,0 | 18,85 | 583,64 | 85,65  |
| 2019/06/22 | CH2205 | Male | Three y/o | Control | Control | Feed Day | No | 21:20 | 21:00 - 21:59 | Night   | 37,7 | 71  | 20,0 | 20,0 | 18,85 | 568,10 | 100,31 |
| 2019/06/22 | CH2206 | Male | Three y/o | Control | Control | Feed Day | No | 21:20 | 21:00 - 21:59 | Night   | 37,7 | 45  | 10,8 | 10,8 | 18,85 | 530,47 | 79,36  |
| 2019/06/22 | CH2205 | Male | Three y/o | Control | Control | Feed Day | No | 21:25 | 21:00 - 21:59 | Night   | 37,6 | 79  | 23,4 | 23,4 | 18,75 | 576,36 | 105,68 |
| 2019/06/22 | CH2206 | Male | Three y/o | Control | Control | Feed Day | No | 21:25 | 21:00 - 21:59 | Night   | 37,7 | 74  | 38,4 | 38,4 | 18,85 | 571,33 | 122,68 |
| 2019/06/22 | CH2205 | Male | Three y/o | Control | Control | Feed Day | No | 21:30 | 21:00 - 21:59 | Night   | 37,6 | 62  | 21,2 | 21,2 | 18,75 | 557,33 | 102,31 |
| 2019/06/22 | CH2206 | Male | Three y/o | Control | Control | Feed Day | No | 21:30 | 21:00 - 21:59 | Night   | 37,8 | 81  | 39,2 | 39,2 | 18,95 | 578,26 | 123,39 |
| 2019/06/22 | CH2205 | Male | Three y/o | Control | Control | Feed Day | No | 21:35 | 21:00 - 21:59 | Night   | 37,6 | 72  | 34,0 | 34,0 | 18,75 | 569,20 | 118,49 |
| 2019/06/22 | CH2206 | Male | Three y/o | Control | Control | Feed Day | No | 21:35 | 21:00 - 21:59 | Night   | 37,8 | 72  | 37,4 | 37,4 | 18,95 | 569,20 | 121,77 |
| 2019/06/22 | CH2205 | Male | Three y/o | Control | Control | Feed Day | No | 21:40 | 21:00 - 21:59 | Night   | 37,7 | 90  | 32,8 | 32,8 | 18,85 | 586,16 | 117,26 |
| 2019/06/22 | CH2206 | Male | Three y/o | Control | Control | Feed Day | No | 21:40 | 21:00 - 21:59 | Night   | 37,8 | 51  | 17,4 | 17,4 | 18,95 | 541,20 | 95,56  |
| 2019/06/22 | CH2205 | Male | Three y/o | Control | Control | Feed Day | No | 21:45 | 21:00 - 21:59 | Night   | 37,7 | 56  | 34,6 | 34,6 | 18,85 | 549,01 | 119,10 |
| 2019/06/22 | CH2206 | Male | Three y/o | Control | Control | Feed Day | No | 21:45 | 21:00 - 21:59 | Night   | 37,7 | 54  | 19,2 | 19,2 | 18,85 | 545,99 | 98,92  |
| 2019/06/22 | CH2205 | Male | Three y/o | Control | Control | Feed Day | No | 21:50 | 21:00 - 21:59 | Night   | 37,7 | 66  | 16,0 | 16,0 | 18,85 | 562,34 | 92,71  |



|    |            |        |      |           |         |         |          |    |       |               |               |      |     |       |       |       |        |        |
|----|------------|--------|------|-----------|---------|---------|----------|----|-------|---------------|---------------|------|-----|-------|-------|-------|--------|--------|
|    | 2019/06/22 | CH2206 | Male | Three y/o | Control | Control | Feed Day | No | 21:50 | 21:00 - 21:59 | Night         | 37,6 | 61  | 27,8  | 27,8  | 18,75 | 556,01 | 111,58 |
|    | 2019/06/22 | CH2205 | Male | Three y/o | Control | Control | Feed Day | No | 21:55 | 21:00 - 21:59 | Night         | 37,8 |     | 52,8  | 52,8  | 18,95 |        | 133,67 |
|    | 2019/06/22 | CH2206 | Male | Three y/o | Control | Control | Feed Day | No | 21:55 | 21:00 - 21:59 | Night         | 37,5 | 121 | 117,0 | 117,0 | 18,65 | 607,35 | 161,32 |
|    | 2019/06/22 | CH2205 | Male | Three y/o | Control | Control | Feed Day | No | 22:00 | 22:00 - 22:59 | Night         | 37,9 | 112 | 19,4  | 19,4  | 19,05 | 601,96 | 99,28  |
|    | 2019/06/22 | CH2206 | Male | Three y/o | Control | Control | Feed Day | No | 22:00 | 22:00 - 22:59 | Night         | 37,6 | 112 | 38,4  | 38,4  | 18,75 | 601,96 | 122,68 |
|    | 2019/06/22 | CH2205 | Male | Three y/o | Control | Control | Feed Day | No | 22:05 | 22:00 - 22:59 | Night         | 38,0 | 113 | 70,6  | 70,6  | 19,15 | 602,58 | 143,73 |
|    | 2019/06/22 | CH2206 | Male | Three y/o | Control | Control | Feed Day | No | 22:05 | 22:00 - 22:59 | Night         | 37,7 | 128 | 73,2  | 73,2  | 18,85 | 611,22 | 144,99 |
|    | 2019/06/22 | CH2205 | Male | Three y/o | Control | Control | Feed Day | No | 22:10 | 22:00 - 22:59 | Night         | 38,0 |     | 127,0 | 127,0 | 19,15 |        | 164,19 |
|    | 2019/06/22 | CH2206 | Male | Three y/o | Control | Control | Feed Day | No | 22:10 | 22:00 - 22:59 | Night         | 37,6 | 140 | 119,6 | 119,6 | 18,75 | 617,28 | 162,09 |
|    | 2019/06/22 | CH2205 | Male | Three y/o | Control | Control | Feed Day | No | 22:15 | 22:00 - 22:59 | Night         | 37,9 | 135 | 125,4 | 125,4 | 19,05 | 614,84 | 163,75 |
|    | 2019/06/22 | CH2206 | Male | Three y/o | Control | Control | Feed Day | No | 22:15 | 22:00 - 22:59 | Night         | 37,7 | 103 | 47,2  | 47,2  | 18,85 | 596,00 | 129,80 |
|    | 2019/06/22 | CH2205 | Male | Three y/o | Control | Control | Feed Day | No | 22:20 | 22:00 - 22:59 | Night         | 38,0 | 105 | 69,4  | 69,4  | 19,15 | 597,38 | 143,14 |
|    | 2019/06/22 | CH2206 | Male | Three y/o | Control | Control | Feed Day | No | 22:20 | 22:00 - 22:59 | Night         | 37,8 | 101 | 27,2  | 27,2  | 18,95 | 594,59 | 110,83 |
|    | 2019/06/22 | CH2205 | Male | Three y/o | Control | Control | Feed Day | No | 22:25 | 22:00 - 22:59 | Night         | 37,9 | 70  | 23,6  | 23,6  | 19,05 | 566,99 | 105,97 |
|    | 2019/06/22 | CH2206 | Male | Three y/o | Control | Control | Feed Day | No | 22:25 | 22:00 - 22:59 | Night         | 37,7 | 65  | 31,6  | 31,6  | 18,85 | 561,12 | 115,98 |
|    | 2019/06/22 | CH2205 | Male | Three y/o | Control | Control | Feed Day | No | 22:30 | 22:00 - 22:59 | Night         | 37,7 |     | 25,0  | 25,0  | 18,85 |        | 107,94 |
|    | 2019/06/22 | CH2206 | Male | Three y/o | Control | Control | Feed Day | No | 22:30 | 22:00 - 22:59 | Night         | 37,4 | 75  | 19,0  | 19,0  | 18,55 | 572,36 | 98,56  |
|    | 2019/06/22 | CH2205 | Male | Three y/o | Control | Control | Feed Day | No | 22:35 | 22:00 - 22:59 | Night         | 37,8 |     | 56,0  | 56,0  | 18,95 |        | 135,70 |
|    | 2019/06/22 | CH2206 | Male | Three y/o | Control | Control | Feed Day | No | 22:35 | 22:00 - 22:59 | Night         | 37,4 | 98  | 26,0  | 26,0  | 18,55 | 592,41 | 109,29 |
|    | 2019/06/22 | CH2205 | Male | Three y/o | Control | Control | Feed Day | No | 22:40 | 22:00 - 22:59 | Night         | 37,7 |     | 26,8  | 26,8  | 18,85 |        | 110,33 |
|    | 2019/06/22 | CH2206 | Male | Three y/o | Control | Control | Feed Day | No | 22:40 | 22:00 - 22:59 | Night         | 37,4 | 93  | 31,2  | 31,2  | 18,55 | 588,58 | 115,54 |
|    | 2019/06/22 | CH2205 | Male | Three y/o | Control | Control | Feed Day | No | 22:45 | 22:00 - 22:59 | Night         | 37,7 |     | 22,6  | 22,6  | 18,85 |        | 104,49 |
|    | 2019/06/22 | CH2206 | Male | Three y/o | Control | Control | Feed Day | No | 22:45 | 22:00 - 22:59 | Night         | 37,2 | 79  | 29,4  | 29,4  | 18,36 | 576,36 | 113,50 |
|    | 2019/06/22 | CH2205 | Male | Three y/o | Control | Control | Feed Day | No | 22:50 | 22:00 - 22:59 | Night         | 37,7 |     | 27,8  | 27,8  | 18,85 |        | 111,58 |
|    | 2019/06/22 | CH2206 | Male | Three y/o | Control | Control | Feed Day | No | 22:50 | 22:00 - 22:59 | Night         | 36,9 | 76  | 12,8  | 12,8  | 18,06 | 573,39 | 85,12  |
|    | 2019/06/22 | CH2205 | Male | Three y/o | Control | Control | Feed Day | No | 22:55 | 22:00 - 22:59 | Night         | 37,7 |     | 22,0  | 22,0  | 18,85 |        | 103,57 |
|    | 2019/06/22 | CH2206 | Male | Three y/o | Control | Control | Feed Day | No | 22:55 | 22:00 - 22:59 | Night         | 36,9 | 71  | 6,0   | 6,0   | 18,06 | 568,10 | 59,53  |
|    | 2019/06/22 | CH2205 | Male | Three y/o | Control | Control | Feed Day | No | 23:00 | 23:00 - 23:59 | Night         | 37,6 |     | 13,2  | 13,2  | 18,75 |        | 86,17  |
|    | 2019/06/22 | CH2206 | Male | Three y/o | Control | Control | Feed Day | No | 23:00 | 23:00 - 23:59 | Night         | 36,9 | 102 | 14,8  | 14,8  | 18,06 | 595,30 | 90,05  |
|    | 2019/06/22 | CH2205 | Male | Three y/o | Control | Control | Feed Day | No | 23:05 | 23:00 - 23:59 | Night         | 37,6 | 64  | 12,0  | 12,0  | 18,75 | 559,88 | 82,93  |
|    | 2019/06/22 | CH2206 | Male | Three y/o | Control | Control | Feed Day | No | 23:05 | 23:00 - 23:59 | Night         | 36,8 | 63  | 26,2  | 26,2  | 17,96 | 558,62 | 109,55 |
|    | 2019/06/22 | CH2205 | Male | Three y/o | Control | Control | Feed Day | No | 23:10 | 23:00 - 23:59 | Night         | 37,6 | 62  | 10,6  | 10,6  | 18,75 | 557,33 | 78,73  |
|    | 2019/06/22 | CH2206 | Male | Three y/o | Control | Control | Feed Day | No | 23:10 | 23:00 - 23:59 | Night         | 36,8 | 64  | 30,0  | 30,0  | 17,96 | 559,88 | 114,20 |
|    | 2019/06/22 | CH2205 | Male | Three y/o | Control | Control | Feed Day | No | 23:15 | 23:00 - 23:59 | Night         | 37,5 | 65  | 14,2  | 14,2  | 18,65 | 561,12 | 88,65  |
|    | 2019/06/22 | CH2206 | Male | Three y/o | Control | Control | Feed Day | No | 23:15 | 23:00 - 23:59 | Night         | 36,6 | 58  | 31,6  | 31,6  | 17,77 | 551,90 | 115,98 |
|    | 2019/06/22 | CH2205 | Male | Three y/o | Control | Control | Feed Day | No | 23:20 | 23:00 - 23:59 | Night         | 37,4 | 43  | 14,4  | 14,4  | 18,55 | 526,50 | 89,12  |
|    | 2019/06/22 | CH2206 | Male | Three y/o | Control | Control | Feed Day | No | 23:20 | 23:00 - 23:59 | Night         | 36,6 | 70  | 33,2  | 33,2  | 17,77 | 566,99 | 117,68 |
|    | 2019/06/22 | CH2205 | Male | Three y/o | Control | Control | Feed Day | No | 23:25 | 23:00 - 23:59 | Night         | 37,4 | 85  | 7,0   | 7,0   | 18,55 | 581,90 | 64,72  |
|    | 2019/06/22 | CH2206 | Male | Three y/o | Control | Control | Feed Day | No | 23:25 | 23:00 - 23:59 | Night         | 36,5 | 53  | 29,8  | 29,8  | 17,67 | 544,43 | 113,97 |
|    | 2019/06/22 | CH2205 | Male | Three y/o | Control | Control | Feed Day | No | 23:30 | 23:00 - 23:59 | Night         | 37,4 | 61  | 9,4   | 9,4   | 18,55 | 556,01 | 74,66  |
|    | 2019/06/22 | CH2206 | Male | Three y/o | Control | Control | Feed Day | No | 23:30 | 23:00 - 23:59 | Night         | 36,4 | 61  | 16,2  | 16,2  | 17,57 | 556,01 | 93,13  |
|    | 2019/06/22 | CH2205 | Male | Three y/o | Control | Control | Feed Day | No | 23:35 | 23:00 - 23:59 | Night         | 37,4 | 62  | 6,0   | 6,0   | 18,55 | 557,33 | 59,53  |
|    | 2019/06/22 | CH2206 | Male | Three y/o | Control | Control | Feed Day | No | 23:35 | 23:00 - 23:59 | Night         | 36,5 | 81  | 11,4  | 11,4  | 17,67 | 578,26 | 81,19  |
|    | 2019/06/22 | CH2205 | Male | Three y/o | Control | Control | Feed Day | No | 23:40 | 23:00 - 23:59 | Night         | 37,4 | 61  | 3,2   | 3,2   | 18,55 | 556,01 | 38,49  |
|    | 2019/06/22 | CH2206 | Male | Three y/o | Control | Control | Feed Day | No | 23:40 | 23:00 - 23:59 | Night         | 36,5 | 56  | 13,2  | 13,2  | 17,67 | 549,01 | 86,17  |
|    | 2019/06/22 | CH2205 | Male | Three y/o | Control | Control | Feed Day | No | 23:45 | 23:00 - 23:59 | Night         | 37,4 |     | 8,4   | 8,4   | 18,55 |        | 70,86  |
|    | 2019/06/22 | CH2206 | Male | Three y/o | Control | Control | Feed Day | No | 23:45 | 23:00 - 23:59 | Night         | 36,6 | 53  | 32,0  | 32,0  | 17,77 | 544,43 | 116,41 |
|    | 2019/06/22 | CH2205 | Male | Three y/o | Control | Control | Feed Day | No | 23:50 | 23:00 - 23:59 | Night         | 37,3 | 58  | 19,8  | 19,8  | 18,46 | 551,90 | 99,97  |
|    | 2019/06/22 | CH2206 | Male | Three y/o | Control | Control | Feed Day | No | 23:50 | 23:00 - 23:59 | Night         | 36,8 | 50  | 224,4 | 224,4 | 17,96 | 539,52 | 184,17 |
|    | 2019/06/22 | CH2205 | Male | Three y/o | Control | Control | Feed Day | No | 23:55 | 23:00 - 23:59 | Night         | 37,4 | 152 | 31,2  | 31,2  | 18,55 | 622,73 | 115,54 |
|    | 2019/06/22 | CH2206 | Male | Three y/o | Control | Control | Feed Day | No | 23:55 | 23:00 - 23:59 | Night         | 37,0 | 88  | 75,2  | 75,2  | 18,16 | 584,49 | 145,93 |
| 39 | 2019/06/23 | CH2205 | Male | Three y/o | Control | Control | Feed Day | No | 00:00 | 00:00 - 00:59 | Early Morning | 37,5 | 35  | 82,6  | 82,6  | 18,65 | 507,97 | 149,19 |
|    | 2019/06/23 | CH2206 | Male | Three y/o | Control | Control | Feed Day | No | 00:00 | 00:00 - 00:59 | Early Morning | 37,2 | 120 | 72,8  | 72,8  | 18,36 | 606,78 | 144,80 |
|    | 2019/06/23 | CH2205 | Male | Three y/o | Control | Control | Feed Day | No | 00:05 | 00:00 - 00:59 | Early Morning | 37,6 | 110 | 51,6  | 51,6  | 18,75 | 600,69 | 132,87 |
|    | 2019/06/23 | CH2206 | Male | Three y/o | Control | Control | Feed Day | No | 00:05 | 00:00 - 00:59 | Early Morning | 37,3 | 87  | 14,0  | 14,0  | 18,46 | 583,64 | 88,17  |
|    | 2019/06/23 | CH2205 | Male | Three y/o | Control | Control | Feed Day | No | 00:10 | 00:00 - 00:59 | Early Morning | 37,6 | 103 | 223,4 | 223,4 | 18,75 | 596,00 | 184,01 |
|    | 2019/06/23 | CH2206 | Male | Three y/o | Control | Control | Feed Day | No | 00:10 | 00:00 - 00:59 | Early Morning | 37,2 | 125 | 64,0  | 64,0  | 18,36 | 609,60 | 140,33 |
|    | 2019/06/23 | CH2205 | Male | Three y/o | Control | Control | Feed Day | No | 00:15 | 00:00 - 00:59 | Early Morning | 37,7 | 119 | 69,8  | 69,8  | 18,85 | 606,20 | 143,34 |
|    | 2019/06/23 | CH2206 | Male | Three y/o | Control | Control | Feed Day | No | 00:15 | 00:00 - 00:59 | Early Morning | 37,4 | 150 | 45,8  | 45,8  | 18,55 | 621,86 | 128,76 |
|    | 2019/06/23 | CH2205 | Male | Three y/o | Control | Control | Feed Day | No | 00:20 | 00:00 - 00:59 | Early Morning | 37,9 | 147 | 40,6  | 40,6  | 19,05 | 620,52 | 124,60 |
|    | 2019/06/23 | CH2206 | Male | Three y/o | Control | Control | Feed Day | No | 00:20 | 00:00 - 00:59 | Early Morning | 37,2 | 80  | 119,0 | 119,0 | 18,36 | 577,31 | 161,92 |
|    | 2019/06/23 | CH2205 | Male | Three y/o | Control | Control | Feed Day | No | 00:25 | 00:00 - 00:59 | Early Morning | 37,5 | 55  | 23,6  | 23,6  | 19,05 | 547,52 | 105,97 |
|    | 2019/06/23 | CH2206 | Male | Three y/o | Control | Control | Feed Day | No | 00:25 | 00:00 - 00:59 | Early Morning | 37,9 | 124 | 127,2 | 127,2 | 18,65 | 609,04 | 164,24 |
|    | 2019/06/23 | CH2205 | Male | Three y/o | Control | Control | Feed Day | No | 00:30 | 00:00 - 00:59 | Early Morning | 37,7 |     | 21,6  | 21,6  | 18,85 |        | 102,94 |
|    | 2019/06/23 | CH2206 | Male | Three y/o | Control | Control | Feed Day | No | 00:30 | 00:00 - 00:59 | Early Morning | 37,3 | 47  | 6,2   | 6,2   | 18,46 | 534,23 | 60,63  |
|    | 2019/06/23 | CH2205 | Male | Three y/o | Control | Control | Feed Day | No | 00:35 | 00:00 - 00:59 | Early Morning | 37,7 |     | 13,4  | 13,4  | 18,85 |        | 86,68  |
|    | 2019/06/23 | CH2206 | Male | Three y/o | Control | Control | Feed Day | No | 00:35 | 00:00 - 00:59 | Early Morning | 37,3 | 49  | 125,8 | 125,8 | 18,46 | 537,80 | 163,86 |
|    | 2019/06/23 | CH2205 | Male | Three y/o | Control | Control | Feed Day | No | 00:40 | 00:00 - 00:59 | Early Morning | 37,8 | 83  | 96,0  | 96,0  | 18,95 | 580,11 | 154,42 |
|    | 2019/06/23 | CH2206 | Male | Three y/o | Control | Control | Feed Day | No | 00:40 | 00:00 - 00:59 | Early Morning | 37,3 | 51  | 26,8  | 26,8  | 18,46 | 541,20 | 110,33 |
|    | 2019/06/23 | CH2205 | Male | Three y/o | Control | Control | Feed Day | No | 00:45 | 00:00 - 00:59 | Early Morning | 37,7 |     | 15,6  | 15,6  | 18,85 |        | 91,85  |



|            |        |      |           |         |         |          |    |       |               |               |      |     |      |      |       |        |        |
|------------|--------|------|-----------|---------|---------|----------|----|-------|---------------|---------------|------|-----|------|------|-------|--------|--------|
| 2019/06/23 | CH2206 | Male | Three y/o | Control | Control | Feed Day | No | 00:45 | 00:00 - 00:59 | Early Morning | 37,2 | 74  | 22,8 | 22,8 | 18,36 | 571,33 | 104,79 |
| 2019/06/23 | CH2205 | Male | Three y/o | Control | Control | Feed Day | No | 00:50 | 00:00 - 00:59 | Early Morning | 37,5 | 63  | 15,0 | 15,0 | 18,65 | 558,62 | 90,51  |
| 2019/06/23 | CH2206 | Male | Three y/o | Control | Control | Feed Day | No | 00:50 | 00:00 - 00:59 | Early Morning | 37,2 | 52  | 24,8 | 24,8 | 18,36 | 542,83 | 107,67 |
| 2019/06/23 | CH2205 | Male | Three y/o | Control | Control | Feed Day | No | 00:55 | 00:00 - 00:59 | Early Morning | 37,5 | 56  | 15,6 | 15,6 | 18,65 | 549,01 | 91,85  |
| 2019/06/23 | CH2206 | Male | Three y/o | Control | Control | Feed Day | No | 00:55 | 00:00 - 00:59 | Early Morning | 37,2 | 52  | 21,4 | 21,4 | 18,36 | 542,83 | 102,63 |
| 2019/06/23 | CH2205 | Male | Three y/o | Control | Control | Feed Day | No | 01:00 | 01:00 - 01:59 | Early Morning | 37,4 | 60  | 20,6 | 20,6 | 18,55 | 554,67 | 101,32 |
| 2019/06/23 | CH2206 | Male | Three y/o | Control | Control | Feed Day | No | 01:00 | 01:00 - 01:59 | Early Morning | 37,2 | 57  | 19,4 | 19,4 | 18,36 | 550,47 | 99,28  |
| 2019/06/23 | CH2205 | Male | Three y/o | Control | Control | Feed Day | No | 01:05 | 01:00 - 01:59 | Early Morning | 37,4 | 55  | 18,0 | 18,0 | 18,55 | 547,52 | 96,72  |
| 2019/06/23 | CH2206 | Male | Three y/o | Control | Control | Feed Day | No | 01:05 | 01:00 - 01:59 | Early Morning | 37,3 | 68  | 17,2 | 17,2 | 18,46 | 564,71 | 95,17  |
| 2019/06/23 | CH2205 | Male | Three y/o | Control | Control | Feed Day | No | 01:10 | 01:00 - 01:59 | Early Morning | 37,3 | 55  | 17,6 | 17,6 | 18,46 | 547,52 | 95,95  |
| 2019/06/23 | CH2206 | Male | Three y/o | Control | Control | Feed Day | No | 01:10 | 01:00 - 01:59 | Early Morning | 37,3 | 53  | 13,4 | 13,4 | 18,46 | 544,43 | 86,68  |
| 2019/06/23 | CH2205 | Male | Three y/o | Control | Control | Feed Day | No | 01:15 | 01:00 - 01:59 | Early Morning | 37,3 | 63  | 10,6 | 10,6 | 18,46 | 558,62 | 78,73  |
| 2019/06/23 | CH2206 | Male | Three y/o | Control | Control | Feed Day | No | 01:15 | 01:00 - 01:59 | Early Morning | 37,4 | 73  | 6,8  | 6,8  | 18,55 | 570,27 | 63,74  |
| 2019/06/23 | CH2205 | Male | Three y/o | Control | Control | Feed Day | No | 01:20 | 01:00 - 01:59 | Early Morning | 37,3 | 57  | 18,8 | 18,8 | 18,46 | 550,47 | 98,20  |
| 2019/06/23 | CH2206 | Male | Three y/o | Control | Control | Feed Day | No | 01:20 | 01:00 - 01:59 | Early Morning | 37,4 | 49  | 4,4  | 4,4  | 18,55 | 537,80 | 49,12  |
| 2019/06/23 | CH2205 | Male | Three y/o | Control | Control | Feed Day | No | 01:25 | 01:00 - 01:59 | Early Morning | 37,3 | 52  | 19,2 | 19,2 | 18,46 | 542,83 | 98,92  |
| 2019/06/23 | CH2206 | Male | Three y/o | Control | Control | Feed Day | No | 01:25 | 01:00 - 01:59 | Early Morning | 37,4 | 63  | 8,6  | 8,6  | 18,55 | 558,62 | 71,66  |
| 2019/06/23 | CH2205 | Male | Three y/o | Control | Control | Feed Day | No | 01:30 | 01:00 - 01:59 | Early Morning | 37,2 | 58  | 13,4 | 13,4 | 18,36 | 551,90 | 86,68  |
| 2019/06/23 | CH2206 | Male | Three y/o | Control | Control | Feed Day | No | 01:30 | 01:00 - 01:59 | Early Morning | 37,4 | 79  | 1,6  | 1,6  | 18,55 | 576,36 | 15,48  |
| 2019/06/23 | CH2205 | Male | Three y/o | Control | Control | Feed Day | No | 01:35 | 01:00 - 01:59 | Early Morning | 37,2 | 77  | 2,8  | 2,8  | 18,36 | 574,39 | 34,04  |
| 2019/06/23 | CH2206 | Male | Three y/o | Control | Control | Feed Day | No | 01:35 | 01:00 - 01:59 | Early Morning | 37,3 | 49  | 27,6 | 27,6 | 18,46 | 537,80 | 111,33 |
| 2019/06/23 | CH2205 | Male | Three y/o | Control | Control | Feed Day | No | 01:40 | 01:00 - 01:59 | Early Morning | 37,3 | 167 | 9,0  | 9,0  | 18,46 | 628,84 | 73,19  |
| 2019/06/23 | CH2206 | Male | Three y/o | Control | Control | Feed Day | No | 01:40 | 01:00 - 01:59 | Early Morning | 37,3 | 121 | 29,2 | 29,2 | 18,46 | 607,35 | 113,27 |
| 2019/06/23 | CH2205 | Male | Three y/o | Control | Control | Feed Day | No | 01:45 | 01:00 - 01:59 | Early Morning | 37,4 | 50  | 14,4 | 14,4 | 18,55 | 539,52 | 89,12  |
| 2019/06/23 | CH2206 | Male | Three y/o | Control | Control | Feed Day | No | 01:45 | 01:00 - 01:59 | Early Morning | 37,3 | 47  | 14,8 | 14,8 | 18,46 | 534,23 | 90,05  |
| 2019/06/23 | CH2205 | Male | Three y/o | Control | Control | Feed Day | No | 01:50 | 01:00 - 01:59 | Early Morning | 37,4 | 75  | 13,2 | 13,2 | 18,55 | 572,36 | 86,17  |
| 2019/06/23 | CH2206 | Male | Three y/o | Control | Control | Feed Day | No | 01:50 | 01:00 - 01:59 | Early Morning | 37,2 | 63  | 26,8 | 26,8 | 18,36 | 558,62 | 110,33 |
| 2019/06/23 | CH2205 | Male | Three y/o | Control | Control | Feed Day | No | 01:55 | 01:00 - 01:59 | Early Morning | 37,4 | 49  | 10,4 | 10,4 | 18,55 | 537,80 | 78,08  |
| 2019/06/23 | CH2206 | Male | Three y/o | Control | Control | Feed Day | No | 01:55 | 01:00 - 01:59 | Early Morning | 37,2 | 63  | 28,2 | 28,2 | 18,36 | 558,62 | 112,07 |
| 2019/06/23 | CH2205 | Male | Three y/o | Control | Control | Feed Day | No | 02:00 | 02:00 - 02:59 | Early Morning | 37,4 | 56  | 9,2  | 9,2  | 18,55 | 549,01 | 73,94  |
| 2019/06/23 | CH2206 | Male | Three y/o | Control | Control | Feed Day | No | 02:00 | 02:00 - 02:59 | Early Morning | 37,2 | 39  | 28,4 | 28,4 | 18,36 | 517,82 | 112,31 |
| 2019/06/23 | CH2205 | Male | Three y/o | Control | Control | Feed Day | No | 02:05 | 02:00 - 02:59 | Early Morning | 37,4 | 60  | 12,4 | 12,4 | 18,55 | 554,67 | 84,04  |
| 2019/06/23 | CH2206 | Male | Three y/o | Control | Control | Feed Day | No | 02:05 | 02:00 - 02:59 | Early Morning | 37,2 | 45  | 29,8 | 29,8 | 18,36 | 530,47 | 113,97 |
| 2019/06/23 | CH2205 | Male | Three y/o | Control | Control | Feed Day | No | 02:10 | 02:00 - 02:59 | Early Morning | 37,4 | 41  | 14,4 | 14,4 | 18,55 | 522,29 | 89,12  |
| 2019/06/23 | CH2206 | Male | Three y/o | Control | Control | Feed Day | No | 02:10 | 02:00 - 02:59 | Early Morning | 37,2 | 95  | 21,6 | 21,6 | 18,36 | 590,14 | 102,94 |
| 2019/06/23 | CH2205 | Male | Three y/o | Control | Control | Feed Day | No | 02:15 | 02:00 - 02:59 | Early Morning | 37,3 | 71  | 18,4 | 18,4 | 18,46 | 568,10 | 97,47  |
| 2019/06/23 | CH2206 | Male | Three y/o | Control | Control | Feed Day | No | 02:15 | 02:00 - 02:59 | Early Morning | 37,2 | 49  | 29,0 | 29,0 | 18,36 | 537,80 | 113,03 |
| 2019/06/23 | CH2205 | Male | Three y/o | Control | Control | Feed Day | No | 02:20 | 02:00 - 02:59 | Early Morning | 37,3 | 54  | 15,8 | 15,8 | 18,46 | 545,99 | 92,28  |
| 2019/06/23 | CH2206 | Male | Three y/o | Control | Control | Feed Day | No | 02:20 | 02:00 - 02:59 | Early Morning | 37,1 | 55  | 31,8 | 31,8 | 18,26 | 547,52 | 116,20 |
| 2019/06/23 | CH2205 | Male | Three y/o | Control | Control | Feed Day | No | 02:25 | 02:00 - 02:59 | Early Morning | 37,3 | 47  | 14,6 | 14,6 | 18,46 | 534,23 | 89,59  |
| 2019/06/23 | CH2206 | Male | Three y/o | Control | Control | Feed Day | No | 02:25 | 02:00 - 02:59 | Early Morning | 37,1 | 68  | 25,8 | 25,8 | 18,26 | 564,71 | 109,02 |
| 2019/06/23 | CH2205 | Male | Three y/o | Control | Control | Feed Day | No | 02:30 | 02:00 - 02:59 | Early Morning | 37,3 |     | 15,6 | 15,6 | 18,46 |        | 91,85  |
| 2019/06/23 | CH2206 | Male | Three y/o | Control | Control | Feed Day | No | 02:30 | 02:00 - 02:59 | Early Morning | 37,1 | 125 | 14,0 | 14,0 | 18,26 | 609,60 | 88,17  |
| 2019/06/23 | CH2205 | Male | Three y/o | Control | Control | Feed Day | No | 02:35 | 02:00 - 02:59 | Early Morning | 37,3 | 47  | 17,8 | 17,8 | 18,46 | 534,23 | 96,34  |
| 2019/06/23 | CH2206 | Male | Three y/o | Control | Control | Feed Day | No | 02:35 | 02:00 - 02:59 | Early Morning | 37,1 | 52  | 24,4 | 24,4 | 18,26 | 542,83 | 107,11 |
| 2019/06/23 | CH2205 | Male | Three y/o | Control | Control | Feed Day | No | 02:40 | 02:00 - 02:59 | Early Morning | 37,3 | 61  | 19,8 | 19,8 | 18,46 | 556,01 | 99,97  |
| 2019/06/23 | CH2206 | Male | Three y/o | Control | Control | Feed Day | No | 02:40 | 02:00 - 02:59 | Early Morning | 37,1 | 54  | 22,8 | 22,8 | 18,26 | 545,99 | 104,79 |
| 2019/06/23 | CH2205 | Male | Three y/o | Control | Control | Feed Day | No | 02:45 | 02:00 - 02:59 | Early Morning | 37,3 | 74  | 12,0 | 12,0 | 18,46 | 571,33 | 82,93  |
| 2019/06/23 | CH2206 | Male | Three y/o | Control | Control | Feed Day | No | 02:45 | 02:00 - 02:59 | Early Morning | 37,1 | 57  | 18,2 | 18,2 | 18,26 | 550,47 | 97,10  |
| 2019/06/23 | CH2205 | Male | Three y/o | Control | Control | Feed Day | No | 02:50 | 02:00 - 02:59 | Early Morning | 37,3 | 55  | 18,4 | 18,4 | 18,46 | 547,52 | 97,47  |
| 2019/06/23 | CH2206 | Male | Three y/o | Control | Control | Feed Day | No | 02:50 | 02:00 - 02:59 | Early Morning | 37,1 | 51  | 19,6 | 19,6 | 18,26 | 541,20 | 99,63  |
| 2019/06/23 | CH2205 | Male | Three y/o | Control | Control | Feed Day | No | 02:55 | 02:00 - 02:59 | Early Morning | 37,3 | 66  | 15,6 | 15,6 | 18,46 | 562,34 | 91,85  |
| 2019/06/23 | CH2206 | Male | Three y/o | Control | Control | Feed Day | No | 02:55 | 02:00 - 02:59 | Early Morning | 37,1 | 51  | 23,8 | 23,8 | 18,26 | 541,20 | 106,26 |
| 2019/06/23 | CH2205 | Male | Three y/o | Control | Control | Feed Day | No | 03:00 | 03:00 - 03:59 | Early Morning | 37,3 | 49  | 2,2  | 2,2  | 18,46 | 537,80 | 26,02  |
| 2019/06/23 | CH2206 | Male | Three y/o | Control | Control | Feed Day | No | 03:00 | 03:00 - 03:59 | Early Morning | 37,2 | 46  | 30,8 | 30,8 | 18,36 | 532,38 | 115,10 |
| 2019/06/23 | CH2205 | Male | Three y/o | Control | Control | Feed Day | No | 03:05 | 03:00 - 03:59 | Early Morning | 37,3 | 48  | 4,6  | 4,6  | 18,46 | 536,04 | 50,61  |
| 2019/06/23 | CH2206 | Male | Three y/o | Control | Control | Feed Day | No | 03:05 | 03:00 - 03:59 | Early Morning | 37,2 | 78  | 51,8 | 51,8 | 18,36 | 575,38 | 133,01 |
| 2019/06/23 | CH2205 | Male | Three y/o | Control | Control | Feed Day | No | 03:10 | 03:00 - 03:59 | Early Morning | 37,3 | 60  | 2,8  | 2,8  | 18,46 | 554,67 | 34,04  |
| 2019/06/23 | CH2206 | Male | Three y/o | Control | Control | Feed Day | No | 03:10 | 03:00 - 03:59 | Early Morning | 37,2 | 66  | 44,0 | 44,0 | 18,36 | 562,34 | 127,37 |
| 2019/06/23 | CH2205 | Male | Three y/o | Control | Control | Feed Day | No | 03:15 | 03:00 - 03:59 | Early Morning | 37,3 | 45  | 3,8  | 3,8  | 18,46 | 530,47 | 44,22  |
| 2019/06/23 | CH2206 | Male | Three y/o | Control | Control | Feed Day | No | 03:15 | 03:00 - 03:59 | Early Morning | 37,2 | 45  | 44,8 | 44,8 | 18,36 | 530,47 | 127,99 |
| 2019/06/23 | CH2205 | Male | Three y/o | Control | Control | Feed Day | No | 03:20 | 03:00 - 03:59 | Early Morning | 37,3 | 71  | 4,8  | 4,8  | 18,46 | 568,10 | 52,04  |
| 2019/06/23 | CH2206 | Male | Three y/o | Control | Control | Feed Day | No | 03:20 | 03:00 - 03:59 | Early Morning | 37,2 | 72  | 45,0 | 45,0 | 18,36 | 569,20 | 128,15 |
| 2019/06/23 | CH2205 | Male | Three y/o | Control | Control | Feed Day | No | 03:25 | 03:00 - 03:59 | Early Morning | 37,2 | 52  | 10,8 | 10,8 | 18,36 | 542,83 | 79,36  |
| 2019/06/23 | CH2206 | Male | Three y/o | Control | Control | Feed Day | No | 03:25 | 03:00 - 03:59 | Early Morning | 37,1 | 50  | 35,6 | 35,6 | 18,26 | 539,52 | 120,08 |
| 2019/06/23 | CH2205 | Male | Three y/o | Control | Control | Feed Day | No | 03:30 | 03:00 - 03:59 | Early Morning | 37,2 | 54  | 5,6  | 5,6  | 18,36 | 545,99 | 57,21  |
| 2019/06/23 | CH2206 | Male | Three y/o | Control | Control | Feed Day | No | 03:30 | 03:00 - 03:59 | Early Morning | 37,1 | 56  | 31,6 | 31,6 | 18,26 | 549,01 | 115,98 |
| 2019/06/23 | CH2205 | Male | Three y/o | Control | Control | Feed Day | No | 03:35 | 03:00 - 03:59 | Early Morning | 37,2 | 55  | 11,6 | 11,6 | 18,36 | 547,52 | 81,78  |
| 2019/06/23 | CH2206 | Male | Three y/o | Control | Control | Feed Day | No | 03:35 | 03:00 - 03:59 | Early Morning | 37,1 | 51  | 33,6 | 33,6 | 18,26 | 541,20 | 118,09 |
| 2019/06/23 | CH2205 | Male | Three y/o | Control | Control | Feed Day | No | 03:40 | 03:00 - 03:59 | Early Morning | 37,2 | 41  | 16,4 | 16,4 | 18,36 | 522,29 | 93,55  |



|            |        |      |           |         |         |          |    |       |               |               |      |     |       |       |       |        |        |
|------------|--------|------|-----------|---------|---------|----------|----|-------|---------------|---------------|------|-----|-------|-------|-------|--------|--------|
| 2019/06/23 | CH2206 | Male | Three y/o | Control | Control | Feed Day | No | 03:40 | 03:00 - 03:59 | Early Morning | 37,1 | 61  | 45,0  | 45,0  | 18,26 | 556,01 | 128,15 |
| 2019/06/23 | CH2205 | Male | Three y/o | Control | Control | Feed Day | No | 03:45 | 03:00 - 03:59 | Early Morning | 37,2 | 43  | 16,2  | 16,2  | 18,36 | 526,50 | 93,13  |
| 2019/06/23 | CH2206 | Male | Three y/o | Control | Control | Feed Day | No | 03:45 | 03:00 - 03:59 | Early Morning | 37,1 | 79  | 47,6  | 47,6  | 18,26 | 576,36 | 130,09 |
| 2019/06/23 | CH2205 | Male | Three y/o | Control | Control | Feed Day | No | 03:50 | 03:00 - 03:59 | Early Morning | 37,2 | 75  | 13,6  | 13,6  | 18,36 | 572,36 | 87,18  |
| 2019/06/23 | CH2206 | Male | Three y/o | Control | Control | Feed Day | No | 03:50 | 03:00 - 03:59 | Early Morning | 37,1 | 73  | 39,8  | 39,8  | 18,26 | 570,27 | 123,91 |
| 2019/06/23 | CH2205 | Male | Three y/o | Control | Control | Feed Day | No | 03:55 | 03:00 - 03:59 | Early Morning | 37,2 | 177 | 12,8  | 12,8  | 18,36 | 632,55 | 85,12  |
| 2019/06/23 | CH2206 | Male | Three y/o | Control | Control | Feed Day | No | 03:55 | 03:00 - 03:59 | Early Morning | 37,2 | 81  | 15,8  | 15,8  | 18,36 | 578,26 | 92,28  |
| 2019/06/23 | CH2205 | Male | Three y/o | Control | Control | Feed Day | No | 04:00 | 04:00 - 04:59 | Morning       | 37,2 | 67  | 14,8  | 14,8  | 18,36 | 563,53 | 90,05  |
| 2019/06/23 | CH2206 | Male | Three y/o | Control | Control | Feed Day | No | 04:00 | 04:00 - 04:59 | Morning       | 37,2 | 53  | 13,4  | 13,4  | 18,36 | 544,43 | 86,68  |
| 2019/06/23 | CH2205 | Male | Three y/o | Control | Control | Feed Day | No | 04:05 | 04:00 - 04:59 | Morning       | 37,2 | 103 | 18,4  | 18,4  | 18,36 | 596,00 | 97,47  |
| 2019/06/23 | CH2206 | Male | Three y/o | Control | Control | Feed Day | No | 04:05 | 04:00 - 04:59 | Morning       | 37,2 | 51  | 10,4  | 10,4  | 18,36 | 541,20 | 78,08  |
| 2019/06/23 | CH2205 | Male | Three y/o | Control | Control | Feed Day | No | 04:10 | 04:00 - 04:59 | Morning       | 37,1 | 49  | 12,6  | 12,6  | 18,26 | 537,80 | 84,59  |
| 2019/06/23 | CH2206 | Male | Three y/o | Control | Control | Feed Day | No | 04:10 | 04:00 - 04:59 | Morning       | 37,2 | 71  | 12,6  | 12,6  | 18,36 | 568,10 | 84,59  |
| 2019/06/23 | CH2205 | Male | Three y/o | Control | Control | Feed Day | No | 04:15 | 04:00 - 04:59 | Morning       | 37,1 | 60  | 22,6  | 22,6  | 18,26 | 554,67 | 104,49 |
| 2019/06/23 | CH2206 | Male | Three y/o | Control | Control | Feed Day | No | 04:15 | 04:00 - 04:59 | Morning       | 37,2 | 46  | 18,2  | 18,2  | 18,36 | 532,38 | 97,10  |
| 2019/06/23 | CH2205 | Male | Three y/o | Control | Control | Feed Day | No | 04:20 | 04:00 - 04:59 | Morning       | 37,1 | 62  | 6,2   | 6,2   | 18,26 | 557,33 | 60,63  |
| 2019/06/23 | CH2206 | Male | Three y/o | Control | Control | Feed Day | No | 04:20 | 04:00 - 04:59 | Morning       | 37,2 | 64  | 23,6  | 23,6  | 18,36 | 559,88 | 105,97 |
| 2019/06/23 | CH2205 | Male | Three y/o | Control | Control | Feed Day | No | 04:25 | 04:00 - 04:59 | Morning       | 37,1 | 62  | 6,8   | 6,8   | 18,26 | 557,33 | 63,74  |
| 2019/06/23 | CH2206 | Male | Three y/o | Control | Control | Feed Day | No | 04:25 | 04:00 - 04:59 | Morning       | 37,2 | 45  | 19,2  | 19,2  | 18,36 | 530,47 | 98,92  |
| 2019/06/23 | CH2205 | Male | Three y/o | Control | Control | Feed Day | No | 04:30 | 04:00 - 04:59 | Morning       | 37,1 | 49  | 5,4   | 5,4   | 18,26 | 537,80 | 55,99  |
| 2019/06/23 | CH2206 | Male | Three y/o | Control | Control | Feed Day | No | 04:30 | 04:00 - 04:59 | Morning       | 37,2 | 51  | 17,6  | 17,6  | 18,36 | 541,20 | 95,95  |
| 2019/06/23 | CH2205 | Male | Three y/o | Control | Control | Feed Day | No | 04:35 | 04:00 - 04:59 | Morning       | 37,1 | 57  | 10,0  | 10,0  | 18,26 | 550,47 | 76,76  |
| 2019/06/23 | CH2206 | Male | Three y/o | Control | Control | Feed Day | No | 04:35 | 04:00 - 04:59 | Morning       | 37,2 | 51  | 21,0  | 21,0  | 18,36 | 541,20 | 101,98 |
| 2019/06/23 | CH2205 | Male | Three y/o | Control | Control | Feed Day | No | 04:40 | 04:00 - 04:59 | Morning       | 37,1 | 62  | 9,8   | 9,8   | 18,26 | 557,33 | 76,07  |
| 2019/06/23 | CH2206 | Male | Three y/o | Control | Control | Feed Day | No | 04:40 | 04:00 - 04:59 | Morning       | 37,2 | 81  | 18,2  | 18,2  | 18,36 | 578,26 | 97,10  |
| 2019/06/23 | CH2205 | Male | Three y/o | Control | Control | Feed Day | No | 04:45 | 04:00 - 04:59 | Morning       | 37,1 | 60  | 8,8   | 8,8   | 18,26 | 554,67 | 72,43  |
| 2019/06/23 | CH2206 | Male | Three y/o | Control | Control | Feed Day | No | 04:45 | 04:00 - 04:59 | Morning       | 37,2 | 79  | 13,4  | 13,4  | 18,36 | 576,36 | 86,68  |
| 2019/06/23 | CH2205 | Male | Three y/o | Control | Control | Feed Day | No | 04:50 | 04:00 - 04:59 | Morning       | 37,1 | 44  | 8,2   | 8,2   | 18,26 | 528,51 | 70,05  |
| 2019/06/23 | CH2206 | Male | Three y/o | Control | Control | Feed Day | No | 04:50 | 04:00 - 04:59 | Morning       | 37,2 | 55  | 17,6  | 17,6  | 18,36 | 547,52 | 95,95  |
| 2019/06/23 | CH2205 | Male | Three y/o | Control | Control | Feed Day | No | 04:55 | 04:00 - 04:59 | Morning       | 37,1 | 41  | 10,8  | 10,8  | 18,26 | 522,29 | 79,36  |
| 2019/06/23 | CH2206 | Male | Three y/o | Control | Control | Feed Day | No | 04:55 | 04:00 - 04:59 | Morning       | 37,1 | 52  | 16,0  | 16,0  | 18,26 | 542,83 | 92,71  |
| 2019/06/23 | CH2205 | Male | Three y/o | Control | Control | Feed Day | No | 05:00 | 05:00 - 05:59 | Morning       | 37,1 | 63  | 23,0  | 23,0  | 18,26 | 558,62 | 105,09 |
| 2019/06/23 | CH2206 | Male | Three y/o | Control | Control | Feed Day | No | 05:00 | 05:00 - 05:59 | Morning       | 37,0 | 57  | 49,0  | 49,0  | 18,16 | 550,47 | 131,09 |
| 2019/06/23 | CH2205 | Male | Three y/o | Control | Control | Feed Day | No | 05:05 | 05:00 - 05:59 | Morning       | 37,1 | 62  | 8,6   | 8,6   | 18,26 | 557,33 | 71,66  |
| 2019/06/23 | CH2206 | Male | Three y/o | Control | Control | Feed Day | No | 05:05 | 05:00 - 05:59 | Morning       | 36,9 | 44  | 21,6  | 21,6  | 18,06 | 528,51 | 102,94 |
| 2019/06/23 | CH2205 | Male | Three y/o | Control | Control | Feed Day | No | 05:10 | 05:00 - 05:59 | Morning       | 37,1 | 64  | 4,8   | 4,8   | 18,26 | 559,88 | 52,04  |
| 2019/06/23 | CH2206 | Male | Three y/o | Control | Control | Feed Day | No | 05:10 | 05:00 - 05:59 | Morning       | 36,9 | 49  | 19,0  | 19,0  | 18,06 | 537,80 | 98,56  |
| 2019/06/23 | CH2205 | Male | Three y/o | Control | Control | Feed Day | No | 05:15 | 05:00 - 05:59 | Morning       | 37,1 | 62  | 4,6   | 4,6   | 18,26 | 557,33 | 50,61  |
| 2019/06/23 | CH2206 | Male | Three y/o | Control | Control | Feed Day | No | 05:15 | 05:00 - 05:59 | Morning       | 36,9 | 57  | 22,6  | 22,6  | 18,06 | 550,47 | 104,49 |
| 2019/06/23 | CH2205 | Male | Three y/o | Control | Control | Feed Day | No | 05:20 | 05:00 - 05:59 | Morning       | 37,1 | 65  | 3,0   | 3,0   | 18,26 | 561,12 | 36,34  |
| 2019/06/23 | CH2206 | Male | Three y/o | Control | Control | Feed Day | No | 05:20 | 05:00 - 05:59 | Morning       | 36,8 | 43  | 26,2  | 26,2  | 17,96 | 526,50 | 109,55 |
| 2019/06/23 | CH2205 | Male | Three y/o | Control | Control | Feed Day | No | 05:25 | 05:00 - 05:59 | Morning       | 37,1 | 68  | 25,0  | 25,0  | 18,26 | 564,71 | 107,94 |
| 2019/06/23 | CH2206 | Male | Three y/o | Control | Control | Feed Day | No | 05:25 | 05:00 - 05:59 | Morning       | 36,9 | 90  | 36,4  | 36,4  | 18,06 | 586,16 | 120,84 |
| 2019/06/23 | CH2205 | Male | Three y/o | Control | Control | Feed Day | No | 05:30 | 05:00 - 05:59 | Morning       | 37,3 | 129 | 27,4  | 27,4  | 18,46 | 611,75 | 111,09 |
| 2019/06/23 | CH2206 | Male | Three y/o | Control | Control | Feed Day | No | 05:30 | 05:00 - 05:59 | Morning       | 37,0 | 105 | 42,2  | 42,2  | 18,16 | 597,38 | 125,93 |
| 2019/06/23 | CH2205 | Male | Three y/o | Control | Control | Feed Day | No | 05:35 | 05:00 - 05:59 | Morning       | 37,3 | 117 | 75,2  | 75,2  | 18,46 | 605,02 | 145,93 |
| 2019/06/23 | CH2206 | Male | Three y/o | Control | Control | Feed Day | No | 05:35 | 05:00 - 05:59 | Morning       | 37,1 | 118 | 116,0 | 116,0 | 18,26 | 605,61 | 161,02 |
| 2019/06/23 | CH2205 | Male | Three y/o | Control | Control | Feed Day | No | 05:40 | 05:00 - 05:59 | Morning       | 37,3 | 88  | 15,2  | 15,2  | 18,46 | 584,49 | 90,96  |
| 2019/06/23 | CH2206 | Male | Three y/o | Control | Control | Feed Day | No | 05:40 | 05:00 - 05:59 | Morning       | 37,2 | 82  | 75,4  | 75,4  | 18,36 | 579,19 | 146,02 |
| 2019/06/23 | CH2205 | Male | Three y/o | Control | Control | Feed Day | No | 05:45 | 05:00 - 05:59 | Morning       | 37,3 | 132 | 140,2 | 140,2 | 18,46 | 613,32 | 167,65 |
| 2019/06/23 | CH2206 | Male | Three y/o | Control | Control | Feed Day | No | 05:45 | 05:00 - 05:59 | Morning       | 37,2 | 121 | 43,2  | 43,2  | 18,36 | 607,35 | 126,74 |
| 2019/06/23 | CH2205 | Male | Three y/o | Control | Control | Feed Day | No | 05:50 | 05:00 - 05:59 | Morning       | 37,4 |     | 120,4 | 120,4 | 18,55 |        | 162,32 |
| 2019/06/23 | CH2206 | Male | Three y/o | Control | Control | Feed Day | No | 05:50 | 05:00 - 05:59 | Morning       | 37,3 |     | 35,4  | 35,4  | 18,46 | 605,61 | 119,88 |
| 2019/06/23 | CH2205 | Male | Three y/o | Control | Control | Feed Day | No | 05:55 | 05:00 - 05:59 | Morning       | 37,5 | 107 | 138,2 | 138,2 | 18,65 | 598,73 | 167,15 |
| 2019/06/23 | CH2206 | Male | Three y/o | Control | Control | Feed Day | No | 05:55 | 05:00 - 05:59 | Morning       | 37,4 | 135 | 36,6  | 36,6  | 18,55 | 614,84 | 121,03 |
| 2019/06/23 | CH2205 | Male | Three y/o | Control | Control | Feed Day | No | 06:00 | 06:00 - 06:59 | Morning       | 37,7 |     | 90,2  | 90,2  | 18,85 |        | 152,25 |
| 2019/06/23 | CH2206 | Male | Three y/o | Control | Control | Feed Day | No | 06:00 | 06:00 - 06:59 | Morning       | 37,5 | 88  | 14,0  | 14,0  | 18,65 | 584,49 | 88,17  |
| 2019/06/23 | CH2205 | Male | Three y/o | Control | Control | Feed Day | No | 06:05 | 06:00 - 06:59 | Morning       | 37,7 | 107 | 307,2 | 307,2 | 18,85 | 598,73 | 195,26 |
| 2019/06/23 | CH2206 | Male | Three y/o | Control | Control | Feed Day | No | 06:05 | 06:00 - 06:59 | Morning       | 37,5 | 64  | 33,4  | 33,4  | 18,65 | 559,88 | 117,88 |
| 2019/06/23 | CH2205 | Male | Three y/o | Control | Control | Feed Day | No | 06:10 | 06:00 - 06:59 | Morning       | 37,9 |     | 127,4 | 127,4 | 19,05 |        | 164,30 |
| 2019/06/23 | CH2206 | Male | Three y/o | Control | Control | Feed Day | No | 06:10 | 06:00 - 06:59 | Morning       | 37,3 | 74  | 29,4  | 29,4  | 18,46 | 571,33 | 113,50 |
| 2019/06/23 | CH2205 | Male | Three y/o | Control | Control | Feed Day | No | 06:15 | 06:00 - 06:59 | Morning       | 37,9 | 104 | 30,4  | 30,4  | 19,05 | 596,69 | 114,65 |
| 2019/06/23 | CH2206 | Male | Three y/o | Control | Control | Feed Day | No | 06:15 | 06:00 - 06:59 | Morning       | 37,2 | 52  | 35,4  | 35,4  | 18,36 | 542,83 | 119,88 |
| 2019/06/23 | CH2205 | Male | Three y/o | Control | Control | Feed Day | No | 06:20 | 06:00 - 06:59 | Morning       | 37,9 | 68  | 16,0  | 16,0  | 19,05 | 564,71 | 92,71  |
| 2019/06/23 | CH2206 | Male | Three y/o | Control | Control | Feed Day | No | 06:20 | 06:00 - 06:59 | Morning       | 37,2 | 50  | 35,2  | 35,2  | 18,36 | 539,52 | 119,69 |
| 2019/06/23 | CH2205 | Male | Three y/o | Control | Control | Feed Day | No | 06:25 | 06:00 - 06:59 | Morning       | 37,9 | 52  | 30,8  | 30,8  | 19,05 | 542,83 | 115,10 |
| 2019/06/23 | CH2206 | Male | Three y/o | Control | Control | Feed Day | No | 06:25 | 06:00 - 06:59 | Morning       | 37,2 | 54  | 34,0  | 34,0  | 18,36 | 545,99 | 118,49 |
| 2019/06/23 | CH2205 | Male | Three y/o | Control | Control | Feed Day | No | 06:30 | 06:00 - 06:59 | Morning       | 37,7 |     | 34,0  | 34,0  | 18,85 |        | 118,49 |
| 2019/06/23 | CH2206 | Male | Three y/o | Control | Control | Feed Day | No | 06:30 | 06:00 - 06:59 | Morning       | 37,2 | 77  | 28,6  | 28,6  | 18,36 | 574,39 | 112,56 |
| 2019/06/23 | CH2205 | Male | Three y/o | Control | Control | Feed Day | No | 06:35 | 06:00 - 06:59 | Morning       | 37,7 | 145 | 154,4 | 154,4 | 18,85 | 619,62 | 171,03 |



|            |        |      |           |         |         |          |    |       |               |              |      |     |       |       |       |        |        |
|------------|--------|------|-----------|---------|---------|----------|----|-------|---------------|--------------|------|-----|-------|-------|-------|--------|--------|
| 2019/06/23 | CH2206 | Male | Three y/o | Control | Control | Feed Day | No | 06:35 | 06:00 - 06:59 | Morning      | 37,2 | 80  | 24,0  | 24,0  | 18,36 | 577,31 | 106,55 |
| 2019/06/23 | CH2205 | Male | Three y/o | Control | Control | Feed Day | No | 06:40 | 06:00 - 06:59 | Morning      | 37,6 | 123 | 267,2 | 267,2 | 18,75 | 608,49 | 190,33 |
| 2019/06/23 | CH2206 | Male | Three y/o | Control | Control | Feed Day | No | 06:40 | 06:00 - 06:59 | Morning      | 37,3 | 103 | 82,2  | 82,2  | 18,46 | 596,00 | 149,02 |
| 2019/06/23 | CH2205 | Male | Three y/o | Control | Control | Feed Day | No | 06:45 | 06:00 - 06:59 | Morning      | 37,7 | 93  | 118,6 | 118,6 | 18,85 | 588,58 | 161,80 |
| 2019/06/23 | CH2206 | Male | Three y/o | Control | Control | Feed Day | No | 06:45 | 06:00 - 06:59 | Morning      | 37,4 | 99  | 32,2  | 32,2  | 18,55 | 593,14 | 116,63 |
| 2019/06/23 | CH2205 | Male | Three y/o | Control | Control | Feed Day | No | 06:50 | 06:00 - 06:59 | Morning      | 37,7 | 124 | 71,6  | 71,6  | 18,85 | 609,04 | 144,22 |
| 2019/06/23 | CH2206 | Male | Three y/o | Control | Control | Feed Day | No | 06:50 | 06:00 - 06:59 | Morning      | 37,4 | 101 | 85,2  | 85,2  | 18,55 | 594,59 | 150,27 |
| 2019/06/23 | CH2205 | Male | Three y/o | Control | Control | Feed Day | No | 06:55 | 06:00 - 06:59 | Morning      | 37,9 | 106 | 23,6  | 23,6  | 19,05 | 598,06 | 105,97 |
| 2019/06/23 | CH2206 | Male | Three y/o | Control | Control | Feed Day | No | 06:55 | 06:00 - 06:59 | Morning      | 37,5 | 105 | 51,2  | 51,2  | 18,65 | 597,38 | 132,61 |
| 2019/06/23 | CH2205 | Male | Three y/o | Control | Control | Feed Day | No | 07:00 | 07:00 - 07:59 | Morning      | 37,7 | 55  | 74,4  | 74,4  | 18,85 | 547,52 | 145,55 |
| 2019/06/23 | CH2206 | Male | Three y/o | Control | Control | Feed Day | No | 07:00 | 07:00 - 07:59 | Morning      | 37,5 | 92  | 151,0 | 151,0 | 18,65 | 587,78 | 170,25 |
| 2019/06/23 | CH2205 | Male | Three y/o | Control | Control | Feed Day | No | 07:05 | 07:00 - 07:59 | Morning      | 37,8 | 118 | 56,2  | 56,2  | 18,95 | 605,61 | 135,83 |
| 2019/06/23 | CH2206 | Male | Three y/o | Control | Control | Feed Day | No | 07:05 | 07:00 - 07:59 | Morning      | 37,5 | 103 | 50,2  | 50,2  | 18,65 | 596,00 | 131,92 |
| 2019/06/23 | CH2205 | Male | Three y/o | Control | Control | Feed Day | No | 07:10 | 07:00 - 07:59 | Morning      | 37,9 |     | 134,2 | 134,2 | 19,05 |        | 166,12 |
| 2019/06/23 | CH2206 | Male | Three y/o | Control | Control | Feed Day | No | 07:10 | 07:00 - 07:59 | Morning      | 37,7 | 101 | 42,0  | 42,0  | 18,85 | 594,59 | 125,77 |
| 2019/06/23 | CH2205 | Male | Three y/o | Control | Control | Feed Day | No | 07:15 | 07:00 - 07:59 | Morning      | 37,9 | 95  | 67,4  | 67,4  | 19,05 | 590,14 | 142,12 |
| 2019/06/23 | CH2206 | Male | Three y/o | Control | Control | Feed Day | No | 07:15 | 07:00 - 07:59 | Morning      | 37,8 | 165 | 47,8  | 47,8  | 18,95 | 628,06 | 130,23 |
| 2019/06/23 | CH2205 | Male | Three y/o | Control | Control | Feed Day | No | 07:20 | 07:00 - 07:59 | Morning      | 37,7 | 109 | 40,4  | 40,4  | 18,85 | 600,04 | 124,43 |
| 2019/06/23 | CH2206 | Male | Three y/o | Control | Control | Feed Day | No | 07:20 | 07:00 - 07:59 | Morning      | 37,7 | 106 | 16,4  | 16,4  | 18,85 | 598,06 | 93,55  |
| 2019/06/23 | CH2205 | Male | Three y/o | Control | Control | Feed Day | No | 07:25 | 07:00 - 07:59 | Morning      | 37,7 | 108 | 76,2  | 76,2  | 18,85 | 599,39 | 146,38 |
| 2019/06/23 | CH2206 | Male | Three y/o | Control | Control | Feed Day | No | 07:25 | 07:00 - 07:59 | Morning      | 37,7 | 114 | 109,2 | 109,2 | 18,85 | 603,20 | 158,91 |
| 2019/06/23 | CH2205 | Male | Three y/o | Control | Control | Feed Day | No | 07:30 | 07:00 - 07:59 | Morning      | 37,6 | 74  | 14,8  | 14,8  | 18,75 | 571,33 | 90,05  |
| 2019/06/23 | CH2206 | Male | Three y/o | Control | Control | Feed Day | No | 07:30 | 07:00 - 07:59 | Morning      | 37,8 | 124 | 128,8 | 128,8 | 18,95 | 609,04 | 164,68 |
| 2019/06/23 | CH2205 | Male | Three y/o | Control | Control | Feed Day | No | 07:35 | 07:00 - 07:59 | Morning      | 37,7 | 102 | 6,2   | 6,2   | 18,85 | 595,30 | 60,63  |
| 2019/06/23 | CH2206 | Male | Three y/o | Control | Control | Feed Day | No | 07:35 | 07:00 - 07:59 | Morning      | 37,9 | 137 | 87,0  | 87,0  | 19,05 | 615,83 | 150,99 |
| 2019/06/23 | CH2205 | Male | Three y/o | Control | Control | Feed Day | No | 07:40 | 07:00 - 07:59 | Morning      | 37,6 | 88  | 141,2 | 141,2 | 18,75 | 584,49 | 167,90 |
| 2019/06/23 | CH2206 | Male | Three y/o | Control | Control | Feed Day | No | 07:40 | 07:00 - 07:59 | Morning      | 37,9 | 128 | 81,0  | 81,0  | 19,05 | 611,22 | 148,51 |
| 2019/06/23 | CH2205 | Male | Three y/o | Control | Control | Feed Day | No | 07:45 | 07:00 - 07:59 | Morning      | 37,6 | 111 | 74,2  | 74,2  | 18,75 | 601,33 | 145,46 |
| 2019/06/23 | CH2206 | Male | Three y/o | Control | Control | Feed Day | No | 07:45 | 07:00 - 07:59 | Morning      | 37,9 | 134 | 120,8 | 120,8 | 19,05 | 614,33 | 162,44 |
| 2019/06/23 | CH2205 | Male | Three y/o | Control | Control | Feed Day | No | 07:50 | 07:00 - 07:59 | Morning      | 37,6 |     | 114,8 | 114,8 | 18,75 |        | 160,66 |
| 2019/06/23 | CH2206 | Male | Three y/o | Control | Control | Feed Day | No | 07:50 | 07:00 - 07:59 | Morning      | 37,9 | 117 | 328,4 | 328,4 | 19,05 | 605,02 | 197,62 |
| 2019/06/23 | CH2205 | Male | Three y/o | Control | Control | Feed Day | No | 07:55 | 07:00 - 07:59 | Morning      | 37,6 | 97  | 41,6  | 41,6  | 18,75 | 591,66 | 125,44 |
| 2019/06/23 | CH2206 | Male | Three y/o | Control | Control | Feed Day | No | 07:55 | 07:00 - 07:59 | Morning      | 37,9 | 81  | 55,4  | 55,4  | 19,05 | 578,26 | 135,33 |
| 2019/06/23 | CH2205 | Male | Three y/o | Control | Control | Feed Day | No | 08:00 | 08:00 - 08:59 | Late Morning | 37,5 | 148 | 89,6  | 89,6  | 18,65 | 620,97 | 152,02 |
| 2019/06/23 | CH2206 | Male | Three y/o | Control | Control | Feed Day | No | 08:00 | 08:00 - 08:59 | Late Morning | 37,9 | 118 | 208,8 | 208,8 | 19,05 | 605,61 | 181,63 |
| 2019/06/23 | CH2205 | Male | Three y/o | Control | Control | Feed Day | No | 08:05 | 08:00 - 08:59 | Late Morning | 37,6 | 113 | 34,2  | 34,2  | 18,75 | 602,58 | 118,70 |
| 2019/06/23 | CH2206 | Male | Three y/o | Control | Control | Feed Day | No | 08:05 | 08:00 - 08:59 | Late Morning | 37,9 | 103 | 53,2  | 53,2  | 19,05 | 596,00 | 133,93 |
| 2019/06/23 | CH2205 | Male | Three y/o | Control | Control | Feed Day | No | 08:10 | 08:00 - 08:59 | Late Morning | 37,7 | 62  | 63,6  | 63,6  | 18,85 | 557,33 | 140,11 |
| 2019/06/23 | CH2206 | Male | Three y/o | Control | Control | Feed Day | No | 08:10 | 08:00 - 08:59 | Late Morning | 37,9 | 124 | 134,4 | 134,4 | 19,05 | 609,04 | 166,17 |
| 2019/06/23 | CH2205 | Male | Three y/o | Control | Control | Feed Day | No | 08:15 | 08:00 - 08:59 | Late Morning | 37,9 | 103 | 235,4 | 235,4 | 19,05 | 596,00 | 185,86 |
| 2019/06/23 | CH2206 | Male | Three y/o | Control | Control | Feed Day | No | 08:15 | 08:00 - 08:59 | Late Morning | 38,0 | 111 | 36,2  | 36,2  | 19,15 | 601,33 | 120,65 |
| 2019/06/23 | CH2205 | Male | Three y/o | Control | Control | Feed Day | No | 08:20 | 08:00 - 08:59 | Late Morning | 38,0 | 134 | 151,2 | 151,2 | 19,15 | 614,33 | 170,30 |
| 2019/06/23 | CH2206 | Male | Three y/o | Control | Control | Feed Day | No | 08:20 | 08:00 - 08:59 | Late Morning | 37,9 | 126 | 15,6  | 15,6  | 19,05 | 610,14 | 91,85  |
| 2019/06/23 | CH2205 | Male | Three y/o | Control | Control | Feed Day | No | 08:25 | 08:00 - 08:59 | Late Morning | 38,0 |     | 14,6  | 14,6  | 19,15 |        | 89,59  |
| 2019/06/23 | CH2206 | Male | Three y/o | Control | Control | Feed Day | No | 08:25 | 08:00 - 08:59 | Late Morning | 37,8 | 131 | 300,2 | 300,2 | 18,95 | 612,80 | 194,44 |
| 2019/06/23 | CH2205 | Male | Three y/o | Control | Control | Feed Day | No | 08:30 | 08:00 - 08:59 | Late Morning | 37,9 | 106 | 70,8  | 70,8  | 19,05 | 598,06 | 143,83 |
| 2019/06/23 | CH2206 | Male | Three y/o | Control | Control | Feed Day | No | 08:30 | 08:00 - 08:59 | Late Morning | 37,9 | 143 | 85,8  | 85,8  | 19,05 | 618,69 | 150,51 |
| 2019/06/23 | CH2205 | Male | Three y/o | Control | Control | Feed Day | No | 08:35 | 08:00 - 08:59 | Late Morning | 38,0 | 99  | 10,8  | 10,8  | 19,15 | 593,14 | 79,36  |
| 2019/06/23 | CH2206 | Male | Three y/o | Control | Control | Feed Day | No | 08:35 | 08:00 - 08:59 | Late Morning | 38,0 | 148 | 571,6 | 571,6 | 19,15 | 620,97 | 217,32 |
| 2019/06/23 | CH2205 | Male | Three y/o | Control | Control | Feed Day | No | 08:40 | 08:00 - 08:59 | Late Morning | 38,0 | 77  | 19,2  | 19,2  | 19,15 | 574,39 | 98,92  |
| 2019/06/23 | CH2206 | Male | Three y/o | Control | Control | Feed Day | No | 08:40 | 08:00 - 08:59 | Late Morning | 38,1 | 131 | 57,6  | 57,6  | 19,26 | 612,80 | 136,68 |
| 2019/06/23 | CH2205 | Male | Three y/o | Control | Control | Feed Day | No | 08:45 | 08:00 - 08:59 | Late Morning | 37,9 | 77  | 217,0 | 217,0 | 19,05 | 574,39 | 182,99 |
| 2019/06/23 | CH2206 | Male | Three y/o | Control | Control | Feed Day | No | 08:45 | 08:00 - 08:59 | Late Morning | 38,0 | 82  | 14,0  | 14,0  | 19,15 | 579,19 | 88,17  |
| 2019/06/23 | CH2205 | Male | Three y/o | Control | Control | Feed Day | No | 08:50 | 08:00 - 08:59 | Late Morning | 38,0 | 156 | 596,4 | 596,4 | 19,15 | 624,43 | 218,83 |
| 2019/06/23 | CH2206 | Male | Three y/o | Control | Control | Feed Day | No | 08:50 | 08:00 - 08:59 | Late Morning | 38,0 | 120 | 76,8  | 76,8  | 19,15 | 606,78 | 146,66 |
| 2019/06/23 | CH2205 | Male | Three y/o | Control | Control | Feed Day | No | 08:55 | 08:00 - 08:59 | Late Morning | 38,0 | 111 | 82,6  | 82,6  | 19,15 | 601,33 | 149,19 |
| 2019/06/23 | CH2206 | Male | Three y/o | Control | Control | Feed Day | No | 08:55 | 08:00 - 08:59 | Late Morning | 38,0 | 129 | 102,8 | 102,8 | 19,15 | 611,75 | 156,81 |
| 2019/06/23 | CH2205 | Male | Three y/o | Control | Control | Feed Day | No | 09:00 | 09:00 - 09:59 | Late Morning | 38,0 | 111 | 51,4  | 51,4  | 19,15 | 601,33 | 132,74 |
| 2019/06/23 | CH2206 | Male | Three y/o | Control | Control | Feed Day | No | 09:00 | 09:00 - 09:59 | Late Morning | 38,0 | 129 | 124,2 | 124,2 | 19,15 | 611,75 | 163,41 |
| 2019/06/23 | CH2205 | Male | Three y/o | Control | Control | Feed Day | No | 09:05 | 09:00 - 09:59 | Late Morning | 38,0 | 98  | 41,0  | 41,0  | 19,15 | 592,41 | 124,94 |
| 2019/06/23 | CH2206 | Male | Three y/o | Control | Control | Feed Day | No | 09:05 | 09:00 - 09:59 | Late Morning | 38,0 |     | 82,6  | 82,6  | 19,15 |        | 149,19 |
| 2019/06/23 | CH2205 | Male | Three y/o | Control | Control | Feed Day | No | 09:10 | 09:00 - 09:59 | Late Morning | 38,1 | 117 | 141,2 | 141,2 | 19,26 | 605,02 | 167,90 |
| 2019/06/23 | CH2206 | Male | Three y/o | Control | Control | Feed Day | No | 09:10 | 09:00 - 09:59 | Late Morning | 38,0 | 156 | 100,8 | 100,8 | 19,15 | 624,43 | 156,12 |
| 2019/06/23 | CH2205 | Male | Three y/o | Control | Control | Feed Day | No | 09:15 | 09:00 - 09:59 | Late Morning | 38,1 | 88  | 18,6  | 18,6  | 19,26 | 584,49 | 97,84  |
| 2019/06/23 | CH2206 | Male | Three y/o | Control | Control | Feed Day | No | 09:15 | 09:00 - 09:59 | Late Morning | 38,1 | 103 | 90,0  | 90,0  | 19,26 | 596,00 | 152,17 |
| 2019/06/23 | CH2205 | Male | Three y/o | Control | Control | Feed Day | No | 09:20 | 09:00 - 09:59 | Late Morning | 38,1 | 100 | 149,0 | 149,0 | 19,26 | 593,87 | 169,78 |
| 2019/06/23 | CH2206 | Male | Three y/o | Control | Control | Feed Day | No | 09:20 | 09:00 - 09:59 | Late Morning | 38,1 | 115 | 96,4  | 96,4  | 19,26 | 603,82 | 154,57 |
| 2019/06/23 | CH2205 | Male | Three y/o | Control | Control | Feed Day | No | 09:25 | 09:00 - 09:59 | Late Morning | 38,1 | 111 | 213,0 | 213,0 | 19,26 | 601,33 | 182,34 |
| 2019/06/23 | CH2206 | Male | Three y/o | Control | Control | Feed Day | No | 09:25 | 09:00 - 09:59 | Late Morning | 38,1 | 121 | 60,8  | 60,8  | 19,26 | 607,35 | 138,55 |
| 2019/06/23 | CH2205 | Male | Three y/o | Control | Control | Feed Day | No | 09:30 | 09:00 - 09:59 | Late Morning | 38,1 | 82  | 10,4  | 10,4  | 19,26 | 579,19 | 78,08  |



|            |        |      |           |         |         |          |    |       |               |              |      |     |       |       |       |        |        |
|------------|--------|------|-----------|---------|---------|----------|----|-------|---------------|--------------|------|-----|-------|-------|-------|--------|--------|
| 2019/06/23 | CH2206 | Male | Three y/o | Control | Control | Feed Day | No | 09:30 | 09:00 - 09:59 | Late Morning | 38,1 | 128 | 181,4 | 181,4 | 19,26 | 611,22 | 176,69 |
| 2019/06/23 | CH2205 | Male | Three y/o | Control | Control | Feed Day | No | 09:35 | 09:00 - 09:59 | Late Morning | 38,0 |     | 38,2  | 38,2  | 19,15 |        | 122,50 |
| 2019/06/23 | CH2206 | Male | Three y/o | Control | Control | Feed Day | No | 09:35 | 09:00 - 09:59 | Late Morning | 38,1 | 132 | 238,4 | 238,4 | 19,26 | 613,32 | 186,30 |
| 2019/06/23 | CH2205 | Male | Three y/o | Control | Control | Feed Day | No | 09:40 | 09:00 - 09:59 | Late Morning | 38,0 | 114 | 68,8  | 68,8  | 19,15 | 603,20 | 142,84 |
| 2019/06/23 | CH2206 | Male | Three y/o | Control | Control | Feed Day | No | 09:40 | 09:00 - 09:59 | Late Morning | 38,1 | 150 | 49,6  | 49,6  | 19,26 | 621,86 | 131,51 |
| 2019/06/23 | CH2205 | Male | Three y/o | Control | Control | Feed Day | No | 09:45 | 09:00 - 09:59 | Late Morning | 38,0 | 110 | 33,2  | 33,2  | 19,15 | 600,69 | 117,68 |
| 2019/06/23 | CH2206 | Male | Three y/o | Control | Control | Feed Day | No | 09:45 | 09:00 - 09:59 | Late Morning | 38,0 |     | 15,2  | 15,2  | 19,15 |        | 90,96  |
| 2019/06/23 | CH2205 | Male | Three y/o | Control | Control | Feed Day | No | 09:50 | 09:00 - 09:59 | Late Morning | 37,8 |     | 12,6  | 12,6  | 18,95 |        | 84,59  |
| 2019/06/23 | CH2206 | Male | Three y/o | Control | Control | Feed Day | No | 09:50 | 09:00 - 09:59 | Late Morning | 37,9 | 79  | 24,6  | 24,6  | 19,05 | 576,36 | 107,39 |
| 2019/06/23 | CH2205 | Male | Three y/o | Control | Control | Feed Day | No | 09:55 | 09:00 - 09:59 | Late Morning | 37,6 |     | 13,0  | 13,0  | 18,75 |        | 85,65  |
| 2019/06/23 | CH2206 | Male | Three y/o | Control | Control | Feed Day | No | 09:55 | 09:00 - 09:59 | Late Morning | 37,7 | 53  | 22,6  | 22,6  | 18,85 | 544,43 | 104,49 |
| 2019/06/23 | CH2205 | Male | Three y/o | Control | Control | Feed Day | No | 10:00 | 10:00 - 10:59 | Late Morning | 37,6 |     | 13,4  | 13,4  | 18,75 |        | 86,68  |
| 2019/06/23 | CH2206 | Male | Three y/o | Control | Control | Feed Day | No | 10:00 | 10:00 - 10:59 | Late Morning | 37,6 | 91  | 26,8  | 26,8  | 18,75 | 586,98 | 110,33 |
| 2019/06/23 | CH2205 | Male | Three y/o | Control | Control | Feed Day | No | 10:05 | 10:00 - 10:59 | Late Morning | 37,5 | 82  | 12,4  | 12,4  | 18,65 | 579,19 | 84,04  |
| 2019/06/23 | CH2206 | Male | Three y/o | Control | Control | Feed Day | No | 10:05 | 10:00 - 10:59 | Late Morning | 37,7 | 79  | 53,2  | 53,2  | 18,85 | 576,36 | 133,93 |
| 2019/06/23 | CH2205 | Male | Three y/o | Control | Control | Feed Day | No | 10:10 | 10:00 - 10:59 | Late Morning | 37,5 |     | 9,2   | 9,2   | 18,65 |        | 73,94  |
| 2019/06/23 | CH2206 | Male | Three y/o | Control | Control | Feed Day | No | 10:10 | 10:00 - 10:59 | Late Morning | 37,7 | 108 | 26,8  | 26,8  | 18,85 | 599,39 | 110,33 |
| 2019/06/23 | CH2205 | Male | Three y/o | Control | Control | Feed Day | No | 10:15 | 10:00 - 10:59 | Late Morning | 37,6 | 75  | 63,0  | 63,0  | 18,75 | 572,36 | 139,78 |
| 2019/06/23 | CH2206 | Male | Three y/o | Control | Control | Feed Day | No | 10:15 | 10:00 - 10:59 | Late Morning | 37,8 | 115 | 84,4  | 84,4  | 18,95 | 603,82 | 149,94 |
| 2019/06/23 | CH2205 | Male | Three y/o | Control | Control | Feed Day | No | 10:20 | 10:00 - 10:59 | Late Morning | 37,6 | 92  | 289,4 | 289,4 | 18,75 | 587,78 | 193,15 |
| 2019/06/23 | CH2206 | Male | Three y/o | Control | Control | Feed Day | No | 10:20 | 10:00 - 10:59 | Late Morning | 37,9 |     | 172,4 | 172,4 | 19,05 |        | 174,90 |
| 2019/06/23 | CH2205 | Male | Three y/o | Control | Control | Feed Day | No | 10:25 | 10:00 - 10:59 | Late Morning | 37,6 | 118 | 130,6 | 130,6 | 18,75 | 605,61 | 165,17 |
| 2019/06/23 | CH2206 | Male | Three y/o | Control | Control | Feed Day | No | 10:25 | 10:00 - 10:59 | Late Morning | 37,9 |     | 110,6 | 110,6 | 19,05 |        | 159,36 |
| 2019/06/23 | CH2205 | Male | Three y/o | Control | Control | Feed Day | No | 10:30 | 10:00 - 10:59 | Late Morning | 37,6 | 90  | 59,6  | 59,6  | 18,75 | 586,16 | 137,86 |
| 2019/06/23 | CH2206 | Male | Three y/o | Control | Control | Feed Day | No | 10:30 | 10:00 - 10:59 | Late Morning | 37,9 | 104 | 188,4 | 188,4 | 19,05 | 596,69 | 178,02 |
| 2019/06/23 | CH2205 | Male | Three y/o | Control | Control | Feed Day | No | 10:35 | 10:00 - 10:59 | Late Morning | 37,6 | 74  | 15,6  | 15,6  | 18,75 | 571,33 | 91,85  |
| 2019/06/23 | CH2206 | Male | Three y/o | Control | Control | Feed Day | No | 10:35 | 10:00 - 10:59 | Late Morning | 37,9 | 88  | 18,0  | 18,0  | 19,05 | 584,49 | 96,72  |
| 2019/06/23 | CH2205 | Male | Three y/o | Control | Control | Feed Day | No | 10:40 | 10:00 - 10:59 | Late Morning | 37,6 | 86  | 74,2  | 74,2  | 18,75 | 582,77 | 145,46 |
| 2019/06/23 | CH2206 | Male | Three y/o | Control | Control | Feed Day | No | 10:40 | 10:00 - 10:59 | Late Morning | 37,8 | 71  | 28,6  | 28,6  | 18,95 | 568,10 | 112,56 |
| 2019/06/23 | CH2205 | Male | Three y/o | Control | Control | Feed Day | No | 10:45 | 10:00 - 10:59 | Late Morning | 37,7 | 99  | 46,2  | 46,2  | 18,85 | 593,14 | 129,06 |
| 2019/06/23 | CH2206 | Male | Three y/o | Control | Control | Feed Day | No | 10:45 | 10:00 - 10:59 | Late Morning | 37,9 | 129 | 546,2 | 546,2 | 18,95 | 611,75 | 215,69 |
| 2019/06/23 | CH2205 | Male | Three y/o | Control | Control | Feed Day | No | 10:50 | 10:00 - 10:59 | Late Morning | 37,7 | 177 | 95,8  | 95,8  | 18,85 | 632,55 | 154,35 |
| 2019/06/23 | CH2206 | Male | Three y/o | Control | Control | Feed Day | No | 10:50 | 10:00 - 10:59 | Late Morning | 37,9 |     | 181,8 | 181,8 | 19,05 |        | 176,76 |
| 2019/06/23 | CH2205 | Male | Three y/o | Control | Control | Feed Day | No | 10:55 | 10:00 - 10:59 | Late Morning | 37,9 | 120 | 348,2 | 348,2 | 19,05 | 606,78 | 199,70 |
| 2019/06/23 | CH2206 | Male | Three y/o | Control | Control | Feed Day | No | 10:55 | 10:00 - 10:59 | Late Morning | 38,0 | 126 | 867,6 |       | 19,15 | 610,14 |        |
| 2019/06/23 | CH2205 | Male | Three y/o | Control | Control | Feed Day | No | 11:00 | 11:00 - 11:59 | Late Morning | 38,0 | 125 | 39,8  | 39,8  | 19,15 | 609,60 | 123,91 |
| 2019/06/23 | CH2206 | Male | Three y/o | Control | Control | Feed Day | No | 11:00 | 11:00 - 11:59 | Late Morning | 38,2 |     | 152,4 | 152,4 | 19,36 |        | 170,57 |
| 2019/06/23 | CH2205 | Male | Three y/o | Control | Control | Feed Day | No | 11:05 | 11:00 - 11:59 | Late Morning | 38,1 | 152 | 28,8  | 28,8  | 19,26 | 622,73 | 112,79 |
| 2019/06/23 | CH2206 | Male | Three y/o | Control | Control | Feed Day | No | 11:05 | 11:00 - 11:59 | Late Morning | 38,2 | 117 | 111,6 | 111,6 | 19,36 | 605,02 | 159,67 |
| 2019/06/23 | CH2205 | Male | Three y/o | Control | Control | Feed Day | No | 11:10 | 11:00 - 11:59 | Late Morning | 38,0 | 69  | 104,8 | 104,8 | 19,15 | 565,86 | 157,48 |
| 2019/06/23 | CH2206 | Male | Three y/o | Control | Control | Feed Day | No | 11:10 | 11:00 - 11:59 | Late Morning | 38,2 | 73  | 161,2 | 161,2 | 19,36 | 570,27 | 172,54 |
| 2019/06/23 | CH2205 | Male | Three y/o | Control | Control | Feed Day | No | 11:15 | 11:00 - 11:59 | Late Morning | 38,0 | 82  | 99,6  | 99,6  | 19,15 | 579,19 | 155,70 |
| 2019/06/23 | CH2206 | Male | Three y/o | Control | Control | Feed Day | No | 11:15 | 11:00 - 11:59 | Late Morning | 38,2 | 124 | 134,6 | 134,6 | 19,36 | 609,04 | 166,22 |
| 2019/06/23 | CH2205 | Male | Three y/o | Control | Control | Feed Day | No | 11:20 | 11:00 - 11:59 | Late Morning | 38,0 | 115 | 104,0 | 104,0 | 19,15 | 603,82 | 157,21 |
| 2019/06/23 | CH2206 | Male | Three y/o | Control | Control | Feed Day | No | 11:20 | 11:00 - 11:59 | Late Morning | 38,2 | 138 | 59,2  | 59,2  | 19,36 | 616,31 | 137,63 |
| 2019/06/23 | CH2205 | Male | Three y/o | Control | Control | Feed Day | No | 11:25 | 11:00 - 11:59 | Late Morning | 38,0 | 115 | 34,2  | 34,2  | 19,15 | 603,82 | 118,70 |
| 2019/06/23 | CH2206 | Male | Three y/o | Control | Control | Feed Day | No | 11:25 | 11:00 - 11:59 | Late Morning | 38,2 | 80  | 128,4 | 128,4 | 19,36 | 577,31 | 164,57 |
| 2019/06/23 | CH2205 | Male | Three y/o | Control | Control | Feed Day | No | 11:30 | 11:00 - 11:59 | Late Morning | 38,0 | 123 | 47,0  | 47,0  | 19,15 | 608,49 | 129,65 |
| 2019/06/23 | CH2206 | Male | Three y/o | Control | Control | Feed Day | No | 11:30 | 11:00 - 11:59 | Late Morning | 38,2 |     | 166,0 | 166,0 | 19,36 |        | 173,57 |
| 2019/06/23 | CH2205 | Male | Three y/o | Control | Control | Feed Day | No | 11:35 | 11:00 - 11:59 | Late Morning | 38,2 |     | 116,0 | 116,0 | 19,36 |        | 161,02 |
| 2019/06/23 | CH2206 | Male | Three y/o | Control | Control | Feed Day | No | 11:35 | 11:00 - 11:59 | Late Morning | 38,3 | 117 | 21,2  | 21,2  | 19,46 | 605,02 | 102,31 |
| 2019/06/23 | CH2205 | Male | Three y/o | Control | Control | Feed Day | No | 11:40 | 11:00 - 11:59 | Late Morning | 38,0 | 82  | 88,8  | 88,8  | 19,15 | 579,19 | 151,71 |
| 2019/06/23 | CH2206 | Male | Three y/o | Control | Control | Feed Day | No | 11:40 | 11:00 - 11:59 | Late Morning | 38,1 | 119 | 27,2  | 27,2  | 19,26 | 606,20 | 110,83 |
| 2019/06/23 | CH2205 | Male | Three y/o | Control | Control | Feed Day | No | 11:45 | 11:00 - 11:59 | Late Morning | 37,9 | 110 | 49,8  | 49,8  | 19,05 | 600,69 | 131,65 |
| 2019/06/23 | CH2206 | Male | Three y/o | Control | Control | Feed Day | No | 11:45 | 11:00 - 11:59 | Late Morning | 37,9 | 110 | 43,2  | 43,2  | 19,05 | 600,69 | 126,74 |
| 2019/06/23 | CH2205 | Male | Three y/o | Control | Control | Feed Day | No | 11:50 | 11:00 - 11:59 | Late Morning | 38,0 |     | 91,8  | 91,8  | 19,15 |        | 152,86 |
| 2019/06/23 | CH2206 | Male | Three y/o | Control | Control | Feed Day | No | 11:50 | 11:00 - 11:59 | Late Morning | 37,9 | 124 | 10,6  | 10,6  | 19,05 | 609,04 | 78,73  |
| 2019/06/23 | CH2205 | Male | Three y/o | Control | Control | Feed Day | No | 11:55 | 11:00 - 11:59 | Late Morning | 37,9 |     | 18,4  | 18,4  | 19,05 |        | 97,47  |
| 2019/06/23 | CH2206 | Male | Three y/o | Control | Control | Feed Day | No | 11:55 | 11:00 - 11:59 | Late Morning | 37,9 |     | 30,4  | 30,4  | 19,05 |        | 114,65 |
| 2019/06/23 | CH2205 | Male | Three y/o | Control | Control | Feed Day | No | 12:00 | 12:00 - 12:59 | Afternoon    | 37,9 | 111 | 46,0  | 46,0  | 19,05 | 601,33 | 128,91 |
| 2019/06/23 | CH2206 | Male | Three y/o | Control | Control | Feed Day | No | 12:00 | 12:00 - 12:59 | Afternoon    | 37,8 | 194 | 22,2  | 22,2  | 18,95 | 638,30 | 103,88 |
| 2019/06/23 | CH2205 | Male | Three y/o | Control | Control | Feed Day | No | 12:05 | 12:00 - 12:59 | Afternoon    | 37,7 | 104 | 162,4 | 162,4 | 18,85 | 596,69 | 172,80 |
| 2019/06/23 | CH2206 | Male | Three y/o | Control | Control | Feed Day | No | 12:05 | 12:00 - 12:59 | Afternoon    | 37,8 | 124 | 36,8  | 36,8  | 18,95 | 609,04 | 121,22 |
| 2019/06/23 | CH2205 | Male | Three y/o | Control | Control | Feed Day | No | 12:10 | 12:00 - 12:59 | Afternoon    | 37,7 | 88  | 70,8  | 70,8  | 18,85 | 584,49 | 143,83 |
| 2019/06/23 | CH2206 | Male | Three y/o | Control | Control | Feed Day | No | 12:10 | 12:00 - 12:59 | Afternoon    | 37,8 | 120 | 72,4  | 72,4  | 18,95 | 606,78 | 144,61 |
| 2019/06/23 | CH2205 | Male | Three y/o | Control | Control | Feed Day | No | 12:15 | 12:00 - 12:59 | Afternoon    | 37,9 | 138 | 28,6  | 28,6  | 19,05 | 616,31 | 112,56 |
| 2019/06/23 | CH2206 | Male | Three y/o | Control | Control | Feed Day | No | 12:15 | 12:00 - 12:59 | Afternoon    | 37,8 | 113 | 56,8  | 56,8  | 18,95 | 602,58 | 136,20 |
| 2019/06/23 | CH2205 | Male | Three y/o | Control | Control | Feed Day | No | 12:20 | 12:00 - 12:59 | Afternoon    | 37,6 | 100 | 46,0  | 46,0  | 18,75 | 593,87 | 128,91 |
| 2019/06/23 | CH2206 | Male | Three y/o | Control | Control | Feed Day | No | 12:20 | 12:00 - 12:59 | Afternoon    | 37,9 | 115 | 39,6  | 39,6  | 19,05 | 603,82 | 123,74 |
| 2019/06/23 | CH2205 | Male | Three y/o | Control | Control | Feed Day | No | 12:25 | 12:00 - 12:59 | Afternoon    | 37,6 | 84  | 12,4  | 12,4  | 18,75 | 581,01 | 84,04  |



|            |        |      |           |         |         |          |    |       |               |           |      |     |       |       |       |        |        |
|------------|--------|------|-----------|---------|---------|----------|----|-------|---------------|-----------|------|-----|-------|-------|-------|--------|--------|
| 2019/06/23 | CH2206 | Male | Three y/o | Control | Control | Feed Day | No | 12:25 | 12:00 - 12:59 | Afternoon | 37,9 | 112 | 69,0  | 69,0  | 19,05 | 601,96 | 142,94 |
| 2019/06/23 | CH2205 | Male | Three y/o | Control | Control | Feed Day | No | 12:30 | 12:00 - 12:59 | Afternoon | 37,9 | 102 | 19,2  | 19,2  | 19,05 | 595,30 | 98,92  |
| 2019/06/23 | CH2206 | Male | Three y/o | Control | Control | Feed Day | No | 12:30 | 12:00 - 12:59 | Afternoon | 37,9 | 112 | 62,8  | 62,8  | 19,05 | 601,96 | 139,67 |
| 2019/06/23 | CH2205 | Male | Three y/o | Control | Control | Feed Day | No | 12:35 | 12:00 - 12:59 | Afternoon | 37,9 | 75  | 18,8  | 18,8  | 19,05 | 572,36 | 98,20  |
| 2019/06/23 | CH2206 | Male | Three y/o | Control | Control | Feed Day | No | 12:35 | 12:00 - 12:59 | Afternoon | 37,7 | 103 | 44,0  | 44,0  | 18,85 | 596,00 | 127,37 |
| 2019/06/23 | CH2205 | Male | Three y/o | Control | Control | Feed Day | No | 12:40 | 12:00 - 12:59 | Afternoon | 37,9 | 67  | 26,8  | 26,8  | 19,05 | 563,53 | 110,33 |
| 2019/06/23 | CH2206 | Male | Three y/o | Control | Control | Feed Day | No | 12:40 | 12:00 - 12:59 | Afternoon | 37,8 | 109 | 42,8  | 42,8  | 18,95 | 600,04 | 126,42 |
| 2019/06/23 | CH2205 | Male | Three y/o | Control | Control | Feed Day | No | 12:45 | 12:00 - 12:59 | Afternoon | 37,9 | 74  | 21,6  | 21,6  | 19,05 | 571,33 | 102,94 |
| 2019/06/23 | CH2206 | Male | Three y/o | Control | Control | Feed Day | No | 12:45 | 12:00 - 12:59 | Afternoon | 37,8 | 107 | 41,4  | 41,4  | 18,95 | 598,73 | 125,27 |
| 2019/06/23 | CH2205 | Male | Three y/o | Control | Control | Feed Day | No | 12:50 | 12:00 - 12:59 | Afternoon | 38,0 | 77  | 27,6  | 27,6  | 19,15 | 574,39 | 111,33 |
| 2019/06/23 | CH2206 | Male | Three y/o | Control | Control | Feed Day | No | 12:50 | 12:00 - 12:59 | Afternoon | 37,8 | 97  | 52,4  | 52,4  | 18,95 | 591,66 | 133,41 |
| 2019/06/23 | CH2205 | Male | Three y/o | Control | Control | Feed Day | No | 12:55 | 12:00 - 12:59 | Afternoon | 38,0 | 73  | 22,4  | 22,4  | 19,15 | 570,27 | 104,19 |
| 2019/06/23 | CH2206 | Male | Three y/o | Control | Control | Feed Day | No | 12:55 | 12:00 - 12:59 | Afternoon | 37,4 | 128 | 74,0  | 74,0  | 18,55 | 611,22 | 145,37 |
| 2019/06/23 | CH2205 | Male | Three y/o | Control | Control | Feed Day | No | 13:00 | 13:00 - 13:59 | Afternoon | 38,0 | 70  | 28,0  | 28,0  | 19,15 | 566,99 | 111,83 |
| 2019/06/23 | CH2206 | Male | Three y/o | Control | Control | Feed Day | No | 13:00 | 13:00 - 13:59 | Afternoon | 37,4 |     | 29,6  | 29,6  | 18,55 |        | 113,73 |
| 2019/06/23 | CH2205 | Male | Three y/o | Control | Control | Feed Day | No | 13:05 | 13:00 - 13:59 | Afternoon | 38,0 | 59  | 25,4  | 25,4  | 19,15 | 553,30 | 108,49 |
| 2019/06/23 | CH2206 | Male | Three y/o | Control | Control | Feed Day | No | 13:05 | 13:00 - 13:59 | Afternoon | 37,4 | 109 | 80,8  | 80,8  | 18,55 | 600,04 | 148,42 |
| 2019/06/23 | CH2205 | Male | Three y/o | Control | Control | Feed Day | No | 13:10 | 13:00 - 13:59 | Afternoon | 38,0 | 80  | 31,6  | 31,6  | 19,15 | 577,31 | 115,98 |
| 2019/06/23 | CH2206 | Male | Three y/o | Control | Control | Feed Day | No | 13:10 | 13:00 - 13:59 | Afternoon | 37,5 | 131 | 35,4  | 35,4  | 18,65 | 612,80 | 119,88 |
| 2019/06/23 | CH2205 | Male | Three y/o | Control | Control | Feed Day | No | 13:15 | 13:00 - 13:59 | Afternoon | 38,0 | 76  | 20,8  | 20,8  | 19,15 | 573,39 | 101,65 |
| 2019/06/23 | CH2206 | Male | Three y/o | Control | Control | Feed Day | No | 13:15 | 13:00 - 13:59 | Afternoon | 37,7 | 106 | 44,2  | 44,2  | 18,85 | 598,06 | 127,53 |
| 2019/06/23 | CH2205 | Male | Three y/o | Control | Control | Feed Day | No | 13:20 | 13:00 - 13:59 | Afternoon | 38,0 | 109 | 97,4  | 97,4  | 19,15 | 600,04 | 154,93 |
| 2019/06/23 | CH2206 | Male | Three y/o | Control | Control | Feed Day | No | 13:20 | 13:00 - 13:59 | Afternoon | 37,8 | 96  | 84,0  | 84,0  | 18,95 | 590,91 | 149,77 |
| 2019/06/23 | CH2205 | Male | Three y/o | Control | Control | Feed Day | No | 13:25 | 13:00 - 13:59 | Afternoon | 37,9 | 191 | 45,4  | 45,4  | 19,05 | 637,33 | 128,45 |
| 2019/06/23 | CH2206 | Male | Three y/o | Control | Control | Feed Day | No | 13:25 | 13:00 - 13:59 | Afternoon | 38,0 | 114 | 51,6  | 51,6  | 19,15 | 603,20 | 132,87 |
| 2019/06/23 | CH2205 | Male | Three y/o | Control | Control | Feed Day | No | 13:30 | 13:00 - 13:59 | Afternoon | 37,9 | 150 | 52,6  | 52,6  | 19,05 | 621,86 | 133,54 |
| 2019/06/23 | CH2206 | Male | Three y/o | Control | Control | Feed Day | No | 13:30 | 13:00 - 13:59 | Afternoon | 38,0 |     | 53,4  | 53,4  | 19,15 |        | 134,06 |
| 2019/06/23 | CH2205 | Male | Three y/o | Control | Control | Feed Day | No | 13:35 | 13:00 - 13:59 | Afternoon | 38,0 | 140 | 15,2  | 15,2  | 19,15 | 617,28 | 90,96  |
| 2019/06/23 | CH2206 | Male | Three y/o | Control | Control | Feed Day | No | 13:35 | 13:00 - 13:59 | Afternoon | 38,0 | 110 | 29,4  | 29,4  | 19,15 | 600,69 | 113,50 |
| 2019/06/23 | CH2205 | Male | Three y/o | Control | Control | Feed Day | No | 13:40 | 13:00 - 13:59 | Afternoon | 38,1 | 123 | 32,4  | 32,4  | 19,26 | 608,49 | 116,84 |
| 2019/06/23 | CH2206 | Male | Three y/o | Control | Control | Feed Day | No | 13:40 | 13:00 - 13:59 | Afternoon | 38,0 | 113 | 59,6  | 59,6  | 19,15 | 602,58 | 137,86 |
| 2019/06/23 | CH2205 | Male | Three y/o | Control | Control | Feed Day | No | 13:45 | 13:00 - 13:59 | Afternoon | 38,1 |     | 6,6   | 6,6   | 19,26 |        | 62,73  |
| 2019/06/23 | CH2206 | Male | Three y/o | Control | Control | Feed Day | No | 13:45 | 13:00 - 13:59 | Afternoon | 38,0 | 105 | 48,6  | 48,6  | 19,15 | 597,38 | 130,81 |
| 2019/06/23 | CH2205 | Male | Three y/o | Control | Control | Feed Day | No | 13:50 | 13:00 - 13:59 | Afternoon | 38,0 | 61  | 5,6   | 5,6   | 19,15 | 556,01 | 57,21  |
| 2019/06/23 | CH2206 | Male | Three y/o | Control | Control | Feed Day | No | 13:50 | 13:00 - 13:59 | Afternoon | 37,8 | 117 | 43,4  | 43,4  | 18,95 | 605,02 | 126,90 |
| 2019/06/23 | CH2205 | Male | Three y/o | Control | Control | Feed Day | No | 13:55 | 13:00 - 13:59 | Afternoon | 38,1 | 76  | 2,8   | 2,8   | 19,26 | 573,39 | 34,04  |
| 2019/06/23 | CH2206 | Male | Three y/o | Control | Control | Feed Day | No | 13:55 | 13:00 - 13:59 | Afternoon | 37,4 | 103 | 9,6   | 9,6   | 18,55 | 596,00 | 75,37  |
| 2019/06/23 | CH2205 | Male | Three y/o | Control | Control | Feed Day | No | 14:00 | 14:00 - 14:59 | Afternoon | 38,1 | 76  | 26,2  | 26,2  | 19,26 | 573,39 | 109,55 |
| 2019/06/23 | CH2206 | Male | Three y/o | Control | Control | Feed Day | No | 14:00 | 14:00 - 14:59 | Afternoon | 37,5 | 95  | 6,2   | 6,2   | 18,65 | 590,14 | 60,63  |
| 2019/06/23 | CH2205 | Male | Three y/o | Control | Control | Feed Day | No | 14:05 | 14:00 - 14:59 | Afternoon | 38,1 | 98  | 36,6  | 36,6  | 19,26 | 592,41 | 121,03 |
| 2019/06/23 | CH2206 | Male | Three y/o | Control | Control | Feed Day | No | 14:05 | 14:00 - 14:59 | Afternoon | 37,8 | 113 | 2,6   | 2,6   | 18,95 | 602,58 | 31,57  |
| 2019/06/23 | CH2205 | Male | Three y/o | Control | Control | Feed Day | No | 14:10 | 14:00 - 14:59 | Afternoon | 38,0 |     | 19,0  | 19,0  | 19,15 |        | 98,56  |
| 2019/06/23 | CH2206 | Male | Three y/o | Control | Control | Feed Day | No | 14:10 | 14:00 - 14:59 | Afternoon | 37,9 | 107 | 2,2   | 2,2   | 19,05 | 598,73 | 26,02  |
| 2019/06/23 | CH2205 | Male | Three y/o | Control | Control | Feed Day | No | 14:15 | 14:00 - 14:59 | Afternoon | 38,1 | 111 | 133,8 | 133,8 | 19,26 | 601,33 | 166,01 |
| 2019/06/23 | CH2206 | Male | Three y/o | Control | Control | Feed Day | No | 14:15 | 14:00 - 14:59 | Afternoon | 38,0 | 105 | 37,0  | 37,0  | 19,15 | 597,38 | 121,40 |
| 2019/06/23 | CH2205 | Male | Three y/o | Control | Control | Feed Day | No | 14:20 | 14:00 - 14:59 | Afternoon | 38,1 | 147 | 21,6  | 21,6  | 19,26 | 620,52 | 102,94 |
| 2019/06/23 | CH2206 | Male | Three y/o | Control | Control | Feed Day | No | 14:20 | 14:00 - 14:59 | Afternoon | 38,1 | 160 | 60,2  | 60,2  | 19,26 | 626,07 | 138,21 |
| 2019/06/23 | CH2205 | Male | Three y/o | Control | Control | Feed Day | No | 14:25 | 14:00 - 14:59 | Afternoon | 38,2 | 41  | 17,4  | 17,4  | 19,36 | 522,29 | 95,56  |
| 2019/06/23 | CH2206 | Male | Three y/o | Control | Control | Feed Day | No | 14:25 | 14:00 - 14:59 | Afternoon | 38,0 |     | 55,0  | 55,0  | 19,15 |        | 135,08 |
| 2019/06/23 | CH2205 | Male | Three y/o | Control | Control | Feed Day | No | 14:30 | 14:00 - 14:59 | Afternoon | 38,0 |     | 21,4  | 21,4  | 19,15 |        | 102,63 |
| 2019/06/23 | CH2206 | Male | Three y/o | Control | Control | Feed Day | No | 14:30 | 14:00 - 14:59 | Afternoon | 37,9 |     | 81,4  | 81,4  | 19,05 |        | 148,68 |
| 2019/06/23 | CH2205 | Male | Three y/o | Control | Control | Feed Day | No | 14:35 | 14:00 - 14:59 | Afternoon | 37,9 |     | 18,0  | 18,0  | 19,05 |        | 96,72  |
| 2019/06/23 | CH2206 | Male | Three y/o | Control | Control | Feed Day | No | 14:35 | 14:00 - 14:59 | Afternoon | 37,9 |     | 54,2  | 54,2  | 19,05 |        | 134,57 |
| 2019/06/23 | CH2205 | Male | Three y/o | Control | Control | Feed Day | No | 14:40 | 14:00 - 14:59 | Afternoon | 38,0 | 140 | 53,0  | 53,0  | 19,15 | 617,28 | 133,80 |
| 2019/06/23 | CH2206 | Male | Three y/o | Control | Control | Feed Day | No | 14:40 | 14:00 - 14:59 | Afternoon | 38,0 | 148 | 71,6  | 71,6  | 19,15 | 620,97 | 144,22 |
| 2019/06/23 | CH2205 | Male | Three y/o | Control | Control | Feed Day | No | 14:45 | 14:00 - 14:59 | Afternoon | 37,9 | 86  | 34,4  | 34,4  | 19,05 | 582,77 | 118,90 |
| 2019/06/23 | CH2206 | Male | Three y/o | Control | Control | Feed Day | No | 14:45 | 14:00 - 14:59 | Afternoon | 38,1 | 121 | 119,2 | 119,2 | 19,26 | 607,35 | 161,97 |
| 2019/06/23 | CH2205 | Male | Three y/o | Control | Control | Feed Day | No | 14:50 | 14:00 - 14:59 | Afternoon | 37,9 | 70  | 19,0  | 19,0  | 19,05 | 566,99 | 98,56  |
| 2019/06/23 | CH2206 | Male | Three y/o | Control | Control | Feed Day | No | 14:50 | 14:00 - 14:59 | Afternoon | 38,1 | 106 | 5,8   | 5,8   | 19,26 | 598,06 | 58,39  |
| 2019/06/23 | CH2205 | Male | Three y/o | Control | Control | Feed Day | No | 14:55 | 14:00 - 14:59 | Afternoon | 37,9 | 68  | 18,4  | 18,4  | 19,05 | 564,71 | 97,47  |
| 2019/06/23 | CH2206 | Male | Three y/o | Control | Control | Feed Day | No | 14:55 | 14:00 - 14:59 | Afternoon | 38,1 | 98  | 7,0   | 7,0   | 19,26 | 592,41 | 64,72  |
| 2019/06/23 | CH2205 | Male | Three y/o | Control | Control | Feed Day | No | 15:00 | 15:00 - 15:59 | Afternoon | 38,0 | 63  | 21,6  | 21,6  | 19,15 | 558,62 | 102,94 |
| 2019/06/23 | CH2206 | Male | Three y/o | Control | Control | Feed Day | No | 15:00 | 15:00 - 15:59 | Afternoon | 38,2 | 88  | 3,4   | 3,4   | 19,36 | 584,49 | 40,51  |
| 2019/06/23 | CH2205 | Male | Three y/o | Control | Control | Feed Day | No | 15:05 | 15:00 - 15:59 | Afternoon | 38,0 | 62  | 19,8  | 19,8  | 19,15 | 557,33 | 99,97  |
| 2019/06/23 | CH2206 | Male | Three y/o | Control | Control | Feed Day | No | 15:05 | 15:00 - 15:59 | Afternoon | 38,2 | 85  | 4,8   | 4,8   | 19,36 | 581,90 | 52,04  |
| 2019/06/23 | CH2205 | Male | Three y/o | Control | Control | Feed Day | No | 15:10 | 15:00 - 15:59 | Afternoon | 38,0 | 80  | 23,0  | 23,0  | 19,15 | 577,31 | 105,09 |
| 2019/06/23 | CH2206 | Male | Three y/o | Control | Control | Feed Day | No | 15:10 | 15:00 - 15:59 | Afternoon | 38,2 | 119 | 5,8   | 5,8   | 19,36 | 606,20 | 58,39  |
| 2019/06/23 | CH2205 | Male | Three y/o | Control | Control | Feed Day | No | 15:15 | 15:00 - 15:59 | Afternoon | 38,1 | 79  | 19,8  | 19,8  | 19,26 | 576,36 | 99,97  |
| 2019/06/23 | CH2206 | Male | Three y/o | Control | Control | Feed Day | No | 15:15 | 15:00 - 15:59 | Afternoon | 38,3 | 111 | 5,0   | 5,0   | 19,46 | 601,33 | 53,41  |
| 2019/06/23 | CH2205 | Male | Three y/o | Control | Control | Feed Day | No | 15:20 | 15:00 - 15:59 | Afternoon | 38,1 | 68  | 21,8  | 21,8  | 19,26 | 564,71 | 103,26 |



|            |        |      |           |         |         |          |    |       |               |           |      |     |       |       |       |        |        |
|------------|--------|------|-----------|---------|---------|----------|----|-------|---------------|-----------|------|-----|-------|-------|-------|--------|--------|
| 2019/06/23 | CH2206 | Male | Three y/o | Control | Control | Feed Day | No | 15:20 | 15:00 - 15:59 | Afternoon | 38,3 | 106 | 4,4   | 4,4   | 19,46 | 598,06 | 49,12  |
| 2019/06/23 | CH2205 | Male | Three y/o | Control | Control | Feed Day | No | 15:25 | 15:00 - 15:59 | Afternoon | 38,1 | 162 | 4,0   | 4,0   | 19,26 | 626,88 | 45,94  |
| 2019/06/23 | CH2206 | Male | Three y/o | Control | Control | Feed Day | No | 15:25 | 15:00 - 15:59 | Afternoon | 38,3 | 99  | 5,0   | 5,0   | 19,46 | 593,14 | 53,41  |
| 2019/06/23 | CH2205 | Male | Three y/o | Control | Control | Feed Day | No | 15:30 | 15:00 - 15:59 | Afternoon | 38,0 | 58  | 4,2   | 4,2   | 19,15 | 551,90 | 47,57  |
| 2019/06/23 | CH2206 | Male | Three y/o | Control | Control | Feed Day | No | 15:30 | 15:00 - 15:59 | Afternoon | 38,2 | 98  | 29,0  | 29,0  | 19,36 | 592,41 | 113,03 |
| 2019/06/23 | CH2205 | Male | Three y/o | Control | Control | Feed Day | No | 15:35 | 15:00 - 15:59 | Afternoon | 37,9 | 83  | 8,4   | 8,4   | 19,05 | 580,11 | 70,86  |
| 2019/06/23 | CH2206 | Male | Three y/o | Control | Control | Feed Day | No | 15:35 | 15:00 - 15:59 | Afternoon | 38,2 |     | 50,0  | 50,0  | 19,36 |        | 131,79 |
| 2019/06/23 | CH2205 | Male | Three y/o | Control | Control | Feed Day | No | 15:40 | 15:00 - 15:59 | Afternoon | 37,7 | 79  | 8,0   | 8,0   | 18,85 | 576,36 | 69,22  |
| 2019/06/23 | CH2206 | Male | Three y/o | Control | Control | Feed Day | No | 15:40 | 15:00 - 15:59 | Afternoon | 38,2 | 120 | 69,0  | 69,0  | 19,36 | 606,78 | 142,94 |
| 2019/06/23 | CH2205 | Male | Three y/o | Control | Control | Feed Day | No | 15:45 | 15:00 - 15:59 | Afternoon | 37,6 | 55  | 4,4   | 4,4   | 18,75 | 547,52 | 49,12  |
| 2019/06/23 | CH2206 | Male | Three y/o | Control | Control | Feed Day | No | 15:45 | 15:00 - 15:59 | Afternoon | 38,1 | 109 | 67,4  | 67,4  | 19,26 | 600,04 | 142,12 |
| 2019/06/23 | CH2205 | Male | Three y/o | Control | Control | Feed Day | No | 15:50 | 15:00 - 15:59 | Afternoon | 37,6 | 75  | 11,0  | 11,0  | 18,75 | 572,36 | 79,98  |
| 2019/06/23 | CH2206 | Male | Three y/o | Control | Control | Feed Day | No | 15:50 | 15:00 - 15:59 | Afternoon | 38,1 |     | 86,0  | 86,0  | 19,26 |        | 150,59 |
| 2019/06/23 | CH2205 | Male | Three y/o | Control | Control | Feed Day | No | 15:55 | 15:00 - 15:59 | Afternoon | 37,7 | 71  | 11,8  | 11,8  | 18,85 | 568,10 | 82,36  |
| 2019/06/23 | CH2206 | Male | Three y/o | Control | Control | Feed Day | No | 15:55 | 15:00 - 15:59 | Afternoon | 38,1 | 39  | 69,6  | 69,6  | 19,26 | 517,82 | 143,24 |
| 2019/06/23 | CH2205 | Male | Three y/o | Control | Control | Feed Day | No | 16:00 | 16:00 - 16:59 | Evening   | 37,9 | 61  | 15,2  | 15,2  | 19,05 | 556,01 | 90,96  |
| 2019/06/23 | CH2206 | Male | Three y/o | Control | Control | Feed Day | No | 16:00 | 16:00 - 16:59 | Evening   | 37,7 | 108 | 35,4  | 35,4  | 18,85 | 599,39 | 119,88 |
| 2019/06/23 | CH2205 | Male | Three y/o | Control | Control | Feed Day | No | 16:05 | 16:00 - 16:59 | Evening   | 38,0 | 91  | 13,2  | 13,2  | 19,15 | 586,98 | 86,17  |
| 2019/06/23 | CH2206 | Male | Three y/o | Control | Control | Feed Day | No | 16:05 | 16:00 - 16:59 | Evening   | 37,5 | 93  | 48,8  | 48,8  | 18,65 | 588,58 | 130,95 |
| 2019/06/23 | CH2205 | Male | Three y/o | Control | Control | Feed Day | No | 16:10 | 16:00 - 16:59 | Evening   | 38,0 | 105 | 80,2  | 80,2  | 19,15 | 597,38 | 148,16 |
| 2019/06/23 | CH2206 | Male | Three y/o | Control | Control | Feed Day | No | 16:10 | 16:00 - 16:59 | Evening   | 37,5 | 111 | 464,4 | 464,4 | 18,65 | 601,33 | 209,92 |
| 2019/06/23 | CH2205 | Male | Three y/o | Control | Control | Feed Day | No | 16:15 | 16:00 - 16:59 | Evening   | 38,0 | 125 | 190,8 | 190,8 | 19,15 | 609,60 | 178,46 |
| 2019/06/23 | CH2206 | Male | Three y/o | Control | Control | Feed Day | No | 16:15 | 16:00 - 16:59 | Evening   | 37,8 | 109 | 14,4  | 14,4  | 18,95 | 600,04 | 89,12  |
| 2019/06/23 | CH2205 | Male | Three y/o | Control | Control | Feed Day | No | 16:20 | 16:00 - 16:59 | Evening   | 38,0 |     | 52,6  | 52,6  | 19,15 |        | 133,54 |
| 2019/06/23 | CH2206 | Male | Three y/o | Control | Control | Feed Day | No | 16:20 | 16:00 - 16:59 | Evening   | 37,9 | 108 | 47,8  | 47,8  | 19,05 | 599,39 | 130,23 |
| 2019/06/23 | CH2205 | Male | Three y/o | Control | Control | Feed Day | No | 16:25 | 16:00 - 16:59 | Evening   | 37,9 |     | 27,4  | 27,4  | 19,05 |        | 111,09 |
| 2019/06/23 | CH2206 | Male | Three y/o | Control | Control | Feed Day | No | 16:25 | 16:00 - 16:59 | Evening   | 38,0 | 105 | 20,0  | 20,0  | 19,15 | 597,38 | 100,31 |
| 2019/06/23 | CH2205 | Male | Three y/o | Control | Control | Feed Day | No | 16:30 | 16:00 - 16:59 | Evening   | 37,9 |     | 28,2  | 28,2  | 19,05 |        | 112,07 |
| 2019/06/23 | CH2206 | Male | Three y/o | Control | Control | Feed Day | No | 16:30 | 16:00 - 16:59 | Evening   | 38,0 |     | 28,4  | 28,4  | 19,15 |        | 112,31 |
| 2019/06/23 | CH2205 | Male | Three y/o | Control | Control | Feed Day | No | 16:35 | 16:00 - 16:59 | Evening   | 37,9 |     | 15,4  | 15,4  | 19,05 |        | 91,41  |
| 2019/06/23 | CH2206 | Male | Three y/o | Control | Control | Feed Day | No | 16:35 | 16:00 - 16:59 | Evening   | 37,9 | 102 | 33,2  | 33,2  | 19,05 | 595,30 | 117,68 |
| 2019/06/23 | CH2205 | Male | Three y/o | Control | Control | Feed Day | No | 16:40 | 16:00 - 16:59 | Evening   | 37,9 | 64  | 4,4   | 4,4   | 19,05 | 559,88 | 49,12  |
| 2019/06/23 | CH2206 | Male | Three y/o | Control | Control | Feed Day | No | 16:40 | 16:00 - 16:59 | Evening   | 37,9 | 80  | 44,8  | 44,8  | 19,05 | 577,31 | 127,99 |
| 2019/06/23 | CH2205 | Male | Three y/o | Control | Control | Feed Day | No | 16:45 | 16:00 - 16:59 | Evening   | 37,9 | 88  | 9,2   | 9,2   | 19,05 | 584,49 | 73,94  |
| 2019/06/23 | CH2206 | Male | Three y/o | Control | Control | Feed Day | No | 16:45 | 16:00 - 16:59 | Evening   | 38,0 | 91  | 35,2  | 35,2  | 19,15 | 586,98 | 119,69 |
| 2019/06/23 | CH2205 | Male | Three y/o | Control | Control | Feed Day | No | 16:50 | 16:00 - 16:59 | Evening   | 38,0 | 115 | 23,6  | 23,6  | 19,15 | 603,82 | 105,97 |
| 2019/06/23 | CH2206 | Male | Three y/o | Control | Control | Feed Day | No | 16:50 | 16:00 - 16:59 | Evening   | 38,0 | 152 | 30,4  | 30,4  | 19,15 | 622,73 | 114,65 |
| 2019/06/23 | CH2205 | Male | Three y/o | Control | Control | Feed Day | No | 16:55 | 16:00 - 16:59 | Evening   | 37,9 |     | 19,6  | 19,6  | 19,05 |        | 99,63  |
| 2019/06/23 | CH2206 | Male | Three y/o | Control | Control | Feed Day | No | 16:55 | 16:00 - 16:59 | Evening   | 38,1 |     | 56,4  | 56,4  | 19,26 |        | 135,95 |
| 2019/06/23 | CH2205 | Male | Three y/o | Control | Control | Feed Day | No | 17:00 | 17:00 - 17:59 | Evening   | 37,9 |     | 23,6  | 23,6  | 19,05 |        | 105,97 |
| 2019/06/23 | CH2206 | Male | Three y/o | Control | Control | Feed Day | No | 17:00 | 17:00 - 17:59 | Evening   | 38,1 | 90  | 45,2  | 45,2  | 19,26 | 586,16 | 128,30 |
| 2019/06/23 | CH2205 | Male | Three y/o | Control | Control | Feed Day | No | 17:05 | 17:00 - 17:59 | Evening   | 37,9 | 70  | 24,6  | 24,6  | 19,05 | 566,99 | 107,39 |
| 2019/06/23 | CH2206 | Male | Three y/o | Control | Control | Feed Day | No | 17:05 | 17:00 - 17:59 | Evening   | 38,1 | 94  | 19,6  | 19,6  | 19,26 | 589,37 | 99,63  |
| 2019/06/23 | CH2205 | Male | Three y/o | Control | Control | Feed Day | No | 17:10 | 17:00 - 17:59 | Evening   | 37,9 | 69  | 18,2  | 18,2  | 19,05 | 565,86 | 97,10  |
| 2019/06/23 | CH2206 | Male | Three y/o | Control | Control | Feed Day | No | 17:10 | 17:00 - 17:59 | Evening   | 38,1 | 87  | 23,8  | 23,8  | 19,26 | 583,64 | 106,26 |
| 2019/06/23 | CH2205 | Male | Three y/o | Control | Control | Feed Day | No | 17:15 | 17:00 - 17:59 | Evening   | 37,9 | 96  | 17,4  | 17,4  | 19,05 | 590,91 | 95,56  |
| 2019/06/23 | CH2206 | Male | Three y/o | Control | Control | Feed Day | No | 17:15 | 17:00 - 17:59 | Evening   | 38,1 | 69  | 34,8  | 34,8  | 19,26 | 565,86 | 119,29 |
| 2019/06/23 | CH2205 | Male | Three y/o | Control | Control | Feed Day | No | 17:20 | 17:00 - 17:59 | Evening   | 37,8 | 82  | 18,2  | 18,2  | 18,95 | 579,19 | 97,10  |
| 2019/06/23 | CH2206 | Male | Three y/o | Control | Control | Feed Day | No | 17:20 | 17:00 - 17:59 | Evening   | 38,0 | 88  | 50,2  | 50,2  | 19,15 | 584,49 | 131,92 |
| 2019/06/23 | CH2205 | Male | Three y/o | Control | Control | Feed Day | No | 17:25 | 17:00 - 17:59 | Evening   | 37,7 | 57  | 20,2  | 20,2  | 18,85 | 550,47 | 100,65 |
| 2019/06/23 | CH2206 | Male | Three y/o | Control | Control | Feed Day | No | 17:25 | 17:00 - 17:59 | Evening   | 38,0 | 83  | 51,4  | 51,4  | 19,15 | 580,11 | 132,74 |
| 2019/06/23 | CH2205 | Male | Three y/o | Control | Control | Feed Day | No | 17:30 | 17:00 - 17:59 | Evening   | 37,6 | 69  | 22,2  | 22,2  | 18,75 | 565,86 | 103,88 |
| 2019/06/23 | CH2206 | Male | Three y/o | Control | Control | Feed Day | No | 17:30 | 17:00 - 17:59 | Evening   | 38,0 |     | 44,0  | 44,0  | 19,15 |        | 127,37 |
| 2019/06/23 | CH2205 | Male | Three y/o | Control | Control | Feed Day | No | 17:35 | 17:00 - 17:59 | Evening   | 37,6 | 71  | 18,6  | 18,6  | 18,75 | 568,10 | 97,84  |
| 2019/06/23 | CH2206 | Male | Three y/o | Control | Control | Feed Day | No | 17:35 | 17:00 - 17:59 | Evening   | 38,0 | 90  | 39,4  | 39,4  | 19,15 | 586,16 | 123,57 |
| 2019/06/23 | CH2205 | Male | Three y/o | Control | Control | Feed Day | No | 17:40 | 17:00 - 17:59 | Evening   | 37,6 | 95  | 12,2  | 12,2  | 18,75 | 590,14 | 83,49  |
| 2019/06/23 | CH2206 | Male | Three y/o | Control | Control | Feed Day | No | 17:40 | 17:00 - 17:59 | Evening   | 38,0 | 92  | 39,8  | 39,8  | 19,15 | 587,78 | 123,91 |
| 2019/06/23 | CH2205 | Male | Three y/o | Control | Control | Feed Day | No | 17:45 | 17:00 - 17:59 | Evening   | 37,5 | 88  | 14,2  | 14,2  | 18,65 | 584,49 | 88,65  |
| 2019/06/23 | CH2206 | Male | Three y/o | Control | Control | Feed Day | No | 17:45 | 17:00 - 17:59 | Evening   | 38,0 | 92  | 54,4  | 54,4  | 19,15 | 587,78 | 134,70 |
| 2019/06/23 | CH2205 | Male | Three y/o | Control | Control | Feed Day | No | 17:50 | 17:00 - 17:59 | Evening   | 37,5 |     | 12,6  | 12,6  | 18,65 |        | 84,59  |
| 2019/06/23 | CH2206 | Male | Three y/o | Control | Control | Feed Day | No | 17:50 | 17:00 - 17:59 | Evening   | 38,0 | 66  | 56,6  | 56,6  | 19,15 | 562,34 | 136,07 |
| 2019/06/23 | CH2205 | Male | Three y/o | Control | Control | Feed Day | No | 17:55 | 17:00 - 17:59 | Evening   | 37,7 | 47  | 7,6   | 7,6   | 18,85 | 534,23 | 67,49  |
| 2019/06/23 | CH2206 | Male | Three y/o | Control | Control | Feed Day | No | 17:55 | 17:00 - 17:59 | Evening   | 38,0 | 95  | 56,4  | 56,4  | 19,15 | 590,14 | 135,95 |
| 2019/06/23 | CH2205 | Male | Three y/o | Control | Control | Feed Day | No | 18:00 | 18:00 - 18:59 | Evening   | 37,7 | 98  | 7,6   | 7,6   | 18,85 | 592,41 | 67,49  |
| 2019/06/23 | CH2206 | Male | Three y/o | Control | Control | Feed Day | No | 18:00 | 18:00 - 18:59 | Evening   | 38,0 | 97  | 56,0  | 56,0  | 19,15 | 591,66 | 135,70 |
| 2019/06/23 | CH2205 | Male | Three y/o | Control | Control | Feed Day | No | 18:05 | 18:00 - 18:59 | Evening   | 37,9 | 55  | 7,0   | 7,0   | 19,05 | 547,52 | 64,72  |
| 2019/06/23 | CH2206 | Male | Three y/o | Control | Control | Feed Day | No | 18:05 | 18:00 - 18:59 | Evening   | 38,0 | 80  | 53,8  | 53,8  | 19,15 | 577,31 | 134,32 |
| 2019/06/23 | CH2205 | Male | Three y/o | Control | Control | Feed Day | No | 18:10 | 18:00 - 18:59 | Evening   | 37,9 | 61  | 4,2   | 4,2   | 19,05 | 556,01 | 47,57  |
| 2019/06/23 | CH2206 | Male | Three y/o | Control | Control | Feed Day | No | 18:10 | 18:00 - 18:59 | Evening   | 38,0 | 92  | 56,4  | 56,4  | 19,15 | 587,78 | 135,95 |
| 2019/06/23 | CH2205 | Male | Three y/o | Control | Control | Feed Day | No | 18:15 | 18:00 - 18:59 | Evening   | 37,9 | 105 | 28,6  | 28,6  | 19,05 | 597,38 | 112,56 |



|            |        |      |           |         |         |          |    |       |               |         |      |     |      |      |       |        |        |
|------------|--------|------|-----------|---------|---------|----------|----|-------|---------------|---------|------|-----|------|------|-------|--------|--------|
| 2019/06/23 | CH2206 | Male | Three y/o | Control | Control | Feed Day | No | 18:15 | 18:00 - 18:59 | Evening | 38,0 | 74  | 53,2 | 53,2 | 19,15 | 571,33 | 133,93 |
| 2019/06/23 | CH2205 | Male | Three y/o | Control | Control | Feed Day | No | 18:20 | 18:00 - 18:59 | Evening | 37,9 | 78  | 28,4 | 28,4 | 19,05 | 575,38 | 112,31 |
| 2019/06/23 | CH2206 | Male | Three y/o | Control | Control | Feed Day | No | 18:20 | 18:00 - 18:59 | Evening | 38,0 | 75  | 59,4 | 59,4 | 19,15 | 572,36 | 137,75 |
| 2019/06/23 | CH2205 | Male | Three y/o | Control | Control | Feed Day | No | 18:25 | 18:00 - 18:59 | Evening | 37,9 | 92  | 19,0 | 19,0 | 19,05 | 587,78 | 98,56  |
| 2019/06/23 | CH2206 | Male | Three y/o | Control | Control | Feed Day | No | 18:25 | 18:00 - 18:59 | Evening | 38,0 | 83  | 53,6 | 53,6 | 19,15 | 580,11 | 134,19 |
| 2019/06/23 | CH2205 | Male | Three y/o | Control | Control | Feed Day | No | 18:30 | 18:00 - 18:59 | Evening | 37,9 | 90  | 20,4 | 20,4 | 19,05 | 586,16 | 100,99 |
| 2019/06/23 | CH2206 | Male | Three y/o | Control | Control | Feed Day | No | 18:30 | 18:00 - 18:59 | Evening | 38,0 | 89  | 58,0 | 58,0 | 19,15 | 585,33 | 136,92 |
| 2019/06/23 | CH2205 | Male | Three y/o | Control | Control | Feed Day | No | 18:35 | 18:00 - 18:59 | Evening | 37,7 | 85  | 19,6 | 19,6 | 18,85 | 581,90 | 99,63  |
| 2019/06/23 | CH2206 | Male | Three y/o | Control | Control | Feed Day | No | 18:35 | 18:00 - 18:59 | Evening | 38,0 | 98  | 56,0 | 56,0 | 19,15 | 592,41 | 135,70 |
| 2019/06/23 | CH2205 | Male | Three y/o | Control | Control | Feed Day | No | 18:40 | 18:00 - 18:59 | Evening | 37,6 | 98  | 22,8 | 22,8 | 18,75 | 592,41 | 104,79 |
| 2019/06/23 | CH2206 | Male | Three y/o | Control | Control | Feed Day | No | 18:40 | 18:00 - 18:59 | Evening | 38,1 | 91  | 51,4 | 51,4 | 19,26 | 586,98 | 132,74 |
| 2019/06/23 | CH2205 | Male | Three y/o | Control | Control | Feed Day | No | 18:45 | 18:00 - 18:59 | Evening | 37,7 |     | 30,8 | 30,8 | 18,85 |        | 115,10 |
| 2019/06/23 | CH2206 | Male | Three y/o | Control | Control | Feed Day | No | 18:45 | 18:00 - 18:59 | Evening | 38,0 | 85  | 36,8 | 36,8 | 19,15 | 581,90 | 121,22 |
| 2019/06/23 | CH2205 | Male | Three y/o | Control | Control | Feed Day | No | 18:50 | 18:00 - 18:59 | Evening | 37,7 |     | 27,2 | 27,2 | 18,85 |        | 110,83 |
| 2019/06/23 | CH2206 | Male | Three y/o | Control | Control | Feed Day | No | 18:50 | 18:00 - 18:59 | Evening | 38,0 | 101 | 30,8 | 30,8 | 19,15 | 594,59 | 115,10 |
| 2019/06/23 | CH2205 | Male | Three y/o | Control | Control | Feed Day | No | 18:55 | 18:00 - 18:59 | Evening | 37,7 |     | 25,8 | 25,8 | 18,85 |        | 109,02 |
| 2019/06/23 | CH2206 | Male | Three y/o | Control | Control | Feed Day | No | 18:55 | 18:00 - 18:59 | Evening | 37,9 | 97  | 49,2 | 49,2 | 19,05 | 591,66 | 131,23 |
| 2019/06/23 | CH2205 | Male | Three y/o | Control | Control | Feed Day | No | 19:00 | 19:00 - 19:59 | Evening | 37,9 |     | 13,8 | 13,8 | 19,05 |        | 87,68  |
| 2019/06/23 | CH2206 | Male | Three y/o | Control | Control | Feed Day | No | 19:00 | 19:00 - 19:59 | Evening | 37,9 | 84  | 55,4 | 55,4 | 19,05 | 581,01 | 135,33 |
| 2019/06/23 | CH2205 | Male | Three y/o | Control | Control | Feed Day | No | 19:05 | 19:00 - 19:59 | Evening | 37,7 | 59  | 15,6 | 15,6 | 18,85 | 553,30 | 91,85  |
| 2019/06/23 | CH2206 | Male | Three y/o | Control | Control | Feed Day | No | 19:05 | 19:00 - 19:59 | Evening | 37,9 | 86  | 49,8 | 49,8 | 19,05 | 582,77 | 131,65 |
| 2019/06/23 | CH2205 | Male | Three y/o | Control | Control | Feed Day | No | 19:10 | 19:00 - 19:59 | Evening | 37,6 | 62  | 19,6 | 19,6 | 18,75 | 557,33 | 99,63  |
| 2019/06/23 | CH2206 | Male | Three y/o | Control | Control | Feed Day | No | 19:10 | 19:00 - 19:59 | Evening | 37,9 | 80  | 57,2 | 57,2 | 19,05 | 577,31 | 136,44 |
| 2019/06/23 | CH2205 | Male | Three y/o | Control | Control | Feed Day | No | 19:15 | 19:00 - 19:59 | Evening | 37,5 | 68  | 13,2 | 13,2 | 18,65 | 564,71 | 86,17  |
| 2019/06/23 | CH2206 | Male | Three y/o | Control | Control | Feed Day | No | 19:15 | 19:00 - 19:59 | Evening | 37,9 | 92  | 53,8 | 53,8 | 19,05 | 587,78 | 134,32 |
| 2019/06/23 | CH2205 | Male | Three y/o | Control | Control | Feed Day | No | 19:20 | 19:00 - 19:59 | Evening | 37,5 | 96  | 17,2 | 17,2 | 18,65 | 590,91 | 95,17  |
| 2019/06/23 | CH2206 | Male | Three y/o | Control | Control | Feed Day | No | 19:20 | 19:00 - 19:59 | Evening | 37,9 | 79  | 71,8 | 71,8 | 19,05 | 576,36 | 144,32 |
| 2019/06/23 | CH2205 | Male | Three y/o | Control | Control | Feed Day | No | 19:25 | 19:00 - 19:59 | Evening | 37,5 | 85  | 19,6 | 19,6 | 18,65 | 581,90 | 99,63  |
| 2019/06/23 | CH2206 | Male | Three y/o | Control | Control | Feed Day | No | 19:25 | 19:00 - 19:59 | Evening | 37,9 | 86  | 47,4 | 47,4 | 19,05 | 582,77 | 129,94 |
| 2019/06/23 | CH2205 | Male | Three y/o | Control | Control | Feed Day | No | 19:30 | 19:00 - 19:59 | Evening | 37,5 | 63  | 17,2 | 17,2 | 18,65 | 558,62 | 95,17  |
| 2019/06/23 | CH2206 | Male | Three y/o | Control | Control | Feed Day | No | 19:30 | 19:00 - 19:59 | Evening | 38,0 | 97  | 45,4 | 45,4 | 19,15 | 591,66 | 128,45 |
| 2019/06/23 | CH2205 | Male | Three y/o | Control | Control | Feed Day | No | 19:35 | 19:00 - 19:59 | Evening | 37,5 | 56  | 16,2 | 16,2 | 18,65 | 549,01 | 93,13  |
| 2019/06/23 | CH2206 | Male | Three y/o | Control | Control | Feed Day | No | 19:35 | 19:00 - 19:59 | Evening | 38,0 | 79  | 46,0 | 46,0 | 19,15 | 576,36 | 128,91 |
| 2019/06/23 | CH2205 | Male | Three y/o | Control | Control | Feed Day | No | 19:40 | 19:00 - 19:59 | Evening | 37,5 | 103 | 25,2 | 25,2 | 18,65 | 596,00 | 108,22 |
| 2019/06/23 | CH2206 | Male | Three y/o | Control | Control | Feed Day | No | 19:40 | 19:00 - 19:59 | Evening | 38,0 | 49  | 46,2 | 46,2 | 19,15 | 537,80 | 129,06 |
| 2019/06/23 | CH2205 | Male | Three y/o | Control | Control | Feed Day | No | 19:45 | 19:00 - 19:59 | Evening | 37,5 | 70  | 15,0 | 15,0 | 18,65 | 566,99 | 90,51  |
| 2019/06/23 | CH2206 | Male | Three y/o | Control | Control | Feed Day | No | 19:45 | 19:00 - 19:59 | Evening | 38,0 | 67  | 45,2 | 45,2 | 19,15 | 563,53 | 128,30 |
| 2019/06/23 | CH2205 | Male | Three y/o | Control | Control | Feed Day | No | 19:50 | 19:00 - 19:59 | Evening | 37,5 | 66  | 6,8  | 6,8  | 18,65 | 562,34 | 63,74  |
| 2019/06/23 | CH2206 | Male | Three y/o | Control | Control | Feed Day | No | 19:50 | 19:00 - 19:59 | Evening | 38,1 | 101 | 44,0 | 44,0 | 19,26 | 594,59 | 127,37 |
| 2019/06/23 | CH2205 | Male | Three y/o | Control | Control | Feed Day | No | 19:55 | 19:00 - 19:59 | Evening | 37,6 | 72  | 12,4 | 12,4 | 18,75 | 569,20 | 84,04  |
| 2019/06/23 | CH2206 | Male | Three y/o | Control | Control | Feed Day | No | 19:55 | 19:00 - 19:59 | Evening | 38,1 | 78  | 45,4 | 45,4 | 19,26 | 575,38 | 128,45 |
| 2019/06/23 | CH2205 | Male | Three y/o | Control | Control | Feed Day | No | 20:00 | 20:00 - 20:59 | Night   | 37,7 | 66  | 16,2 | 16,2 | 18,85 | 562,34 | 93,13  |
| 2019/06/23 | CH2206 | Male | Three y/o | Control | Control | Feed Day | No | 20:00 | 20:00 - 20:59 | Night   | 38,1 | 86  | 42,8 | 42,8 | 19,26 | 582,77 | 126,42 |
| 2019/06/23 | CH2205 | Male | Three y/o | Control | Control | Feed Day | No | 20:05 | 20:00 - 20:59 | Night   | 37,7 | 90  | 12,2 | 12,2 | 18,85 | 586,16 | 83,49  |
| 2019/06/23 | CH2206 | Male | Three y/o | Control | Control | Feed Day | No | 20:05 | 20:00 - 20:59 | Night   | 38,1 | 92  | 45,0 | 45,0 | 19,26 | 587,78 | 128,15 |
| 2019/06/23 | CH2205 | Male | Three y/o | Control | Control | Feed Day | No | 20:10 | 20:00 - 20:59 | Night   | 37,7 | 94  | 15,6 | 15,6 | 18,85 | 589,37 | 91,85  |
| 2019/06/23 | CH2206 | Male | Three y/o | Control | Control | Feed Day | No | 20:10 | 20:00 - 20:59 | Night   | 38,1 | 90  | 42,2 | 42,2 | 19,26 | 586,16 | 125,93 |
| 2019/06/23 | CH2205 | Male | Three y/o | Control | Control | Feed Day | No | 20:15 | 20:00 - 20:59 | Night   | 37,9 | 62  | 6,8  | 6,8  | 19,05 | 557,33 | 63,74  |
| 2019/06/23 | CH2206 | Male | Three y/o | Control | Control | Feed Day | No | 20:15 | 20:00 - 20:59 | Night   | 38,1 | 75  | 52,0 | 52,0 | 19,26 | 572,36 | 133,14 |
| 2019/06/23 | CH2205 | Male | Three y/o | Control | Control | Feed Day | No | 20:20 | 20:00 - 20:59 | Night   | 37,9 | 78  | 15,6 | 15,6 | 19,05 | 575,38 | 91,85  |
| 2019/06/23 | CH2206 | Male | Three y/o | Control | Control | Feed Day | No | 20:20 | 20:00 - 20:59 | Night   | 38,0 | 92  | 38,4 | 38,4 | 19,15 | 587,78 | 122,68 |
| 2019/06/23 | CH2205 | Male | Three y/o | Control | Control | Feed Day | No | 20:25 | 20:00 - 20:59 | Night   | 37,9 | 57  | 15,6 | 15,6 | 19,05 | 550,47 | 91,85  |
| 2019/06/23 | CH2206 | Male | Three y/o | Control | Control | Feed Day | No | 20:25 | 20:00 - 20:59 | Night   | 38,0 | 88  | 44,4 | 44,4 | 19,15 | 584,49 | 127,69 |
| 2019/06/23 | CH2205 | Male | Three y/o | Control | Control | Feed Day | No | 20:30 | 20:00 - 20:59 | Night   | 37,9 | 93  | 11,2 | 11,2 | 19,05 | 588,58 | 80,59  |
| 2019/06/23 | CH2206 | Male | Three y/o | Control | Control | Feed Day | No | 20:30 | 20:00 - 20:59 | Night   | 38,0 | 86  | 40,6 | 40,6 | 19,15 | 582,77 | 124,60 |
| 2019/06/23 | CH2205 | Male | Three y/o | Control | Control | Feed Day | No | 20:35 | 20:00 - 20:59 | Night   | 37,9 | 103 | 18,6 | 18,6 | 19,05 | 596,00 | 97,84  |
| 2019/06/23 | CH2206 | Male | Three y/o | Control | Control | Feed Day | No | 20:35 | 20:00 - 20:59 | Night   | 38,0 | 76  | 32,8 | 32,8 | 19,15 | 573,39 | 117,26 |
| 2019/06/23 | CH2205 | Male | Three y/o | Control | Control | Feed Day | No | 20:40 | 20:00 - 20:59 | Night   | 37,9 | 64  | 18,0 | 18,0 | 19,05 | 559,88 | 96,72  |
| 2019/06/23 | CH2206 | Male | Three y/o | Control | Control | Feed Day | No | 20:40 | 20:00 - 20:59 | Night   | 37,9 | 82  | 28,2 | 28,2 | 19,05 | 579,19 | 112,07 |
| 2019/06/23 | CH2205 | Male | Three y/o | Control | Control | Feed Day | No | 20:45 | 20:00 - 20:59 | Night   | 37,9 | 100 | 14,6 | 14,6 | 19,05 | 593,87 | 89,59  |
| 2019/06/23 | CH2206 | Male | Three y/o | Control | Control | Feed Day | No | 20:45 | 20:00 - 20:59 | Night   | 37,9 | 79  | 32,8 | 32,8 | 19,05 | 576,36 | 117,26 |
| 2019/06/23 | CH2205 | Male | Three y/o | Control | Control | Feed Day | No | 20:50 | 20:00 - 20:59 | Night   | 37,9 | 114 | 7,4  | 7,4  | 19,05 | 603,20 | 66,59  |
| 2019/06/23 | CH2206 | Male | Three y/o | Control | Control | Feed Day | No | 20:50 | 20:00 - 20:59 | Night   | 37,8 | 49  | 30,2 | 30,2 | 18,95 | 537,80 | 114,42 |
| 2019/06/23 | CH2205 | Male | Three y/o | Control | Control | Feed Day | No | 20:55 | 20:00 - 20:59 | Night   | 37,9 | 68  | 11,6 | 11,6 | 19,05 | 564,71 | 81,78  |
| 2019/06/23 | CH2206 | Male | Three y/o | Control | Control | Feed Day | No | 20:55 | 20:00 - 20:59 | Night   | 37,7 | 92  | 43,8 | 43,8 | 18,85 | 587,78 | 127,22 |
| 2019/06/23 | CH2205 | Male | Three y/o | Control | Control | Feed Day | No | 21:00 | 21:00 - 21:59 | Night   | 37,7 | 58  | 8,6  | 8,6  | 18,85 | 551,90 | 71,66  |
| 2019/06/23 | CH2206 | Male | Three y/o | Control | Control | Feed Day | No | 21:00 | 21:00 - 21:59 | Night   | 37,7 | 79  | 49,8 | 49,8 | 18,85 | 576,36 | 131,65 |
| 2019/06/23 | CH2205 | Male | Three y/o | Control | Control | Feed Day | No | 21:05 | 21:00 - 21:59 | Night   | 37,7 | 84  | 34,8 | 34,8 | 18,85 | 581,01 | 119,29 |
| 2019/06/23 | CH2206 | Male | Three y/o | Control | Control | Feed Day | No | 21:05 | 21:00 - 21:59 | Night   | 37,7 | 77  | 36,4 | 36,4 | 18,85 | 574,39 | 120,84 |
| 2019/06/23 | CH2205 | Male | Three y/o | Control | Control | Feed Day | No | 21:10 | 21:00 - 21:59 | Night   | 37,7 | 84  | 57,4 | 57,4 | 18,85 | 581,01 | 136,56 |



|    |            |        |      |           |         |         |          |    |       |               |               |      |     |      |      |       |        |        |
|----|------------|--------|------|-----------|---------|---------|----------|----|-------|---------------|---------------|------|-----|------|------|-------|--------|--------|
|    | 2019/06/23 | CH2206 | Male | Three y/o | Control | Control | Feed Day | No | 21:10 | 21:00 - 21:59 | Night         | 37,8 | 110 | 65,4 | 65,4 | 18,95 | 600,69 | 141,08 |
|    | 2019/06/23 | CH2205 | Male | Three y/o | Control | Control | Feed Day | No | 21:15 | 21:00 - 21:59 | Night         | 37,7 | 62  | 23,4 | 23,4 | 18,85 | 557,33 | 105,68 |
|    | 2019/06/23 | CH2206 | Male | Three y/o | Control | Control | Feed Day | No | 21:15 | 21:00 - 21:59 | Night         | 37,7 | 92  | 59,2 | 59,2 | 18,85 | 587,78 | 137,63 |
|    | 2019/06/23 | CH2205 | Male | Three y/o | Control | Control | Feed Day | No | 21:20 | 21:00 - 21:59 | Night         | 37,7 | 67  | 24,4 | 24,4 | 18,85 | 563,53 | 107,11 |
|    | 2019/06/23 | CH2206 | Male | Three y/o | Control | Control | Feed Day | No | 21:20 | 21:00 - 21:59 | Night         | 37,7 | 85  | 60,4 | 60,4 | 18,85 | 581,90 | 138,32 |
|    | 2019/06/23 | CH2205 | Male | Three y/o | Control | Control | Feed Day | No | 21:25 | 21:00 - 21:59 | Night         | 37,6 | 68  | 20,8 | 20,8 | 18,75 | 564,71 | 101,65 |
|    | 2019/06/23 | CH2206 | Male | Three y/o | Control | Control | Feed Day | No | 21:25 | 21:00 - 21:59 | Night         | 37,7 | 86  | 56,4 | 56,4 | 18,85 | 582,77 | 135,95 |
|    | 2019/06/23 | CH2205 | Male | Three y/o | Control | Control | Feed Day | No | 21:30 | 21:00 - 21:59 | Night         | 37,6 | 61  | 21,4 | 21,4 | 18,75 | 556,01 | 102,63 |
|    | 2019/06/23 | CH2206 | Male | Three y/o | Control | Control | Feed Day | No | 21:30 | 21:00 - 21:59 | Night         | 37,7 | 63  | 60,0 | 60,0 | 18,85 | 558,62 | 138,09 |
|    | 2019/06/23 | CH2205 | Male | Three y/o | Control | Control | Feed Day | No | 21:35 | 21:00 - 21:59 | Night         | 37,6 | 65  | 18,4 | 18,4 | 18,75 | 561,12 | 97,47  |
|    | 2019/06/23 | CH2206 | Male | Three y/o | Control | Control | Feed Day | No | 21:35 | 21:00 - 21:59 | Night         | 37,7 | 90  | 57,6 | 57,6 | 18,85 | 586,16 | 136,68 |
|    | 2019/06/23 | CH2205 | Male | Three y/o | Control | Control | Feed Day | No | 21:40 | 21:00 - 21:59 | Night         | 37,6 | 65  | 29,0 | 29,0 | 18,75 | 561,12 | 113,03 |
|    | 2019/06/23 | CH2206 | Male | Three y/o | Control | Control | Feed Day | No | 21:40 | 21:00 - 21:59 | Night         | 37,7 | 70  | 58,6 | 58,6 | 18,85 | 566,99 | 137,28 |
|    | 2019/06/23 | CH2205 | Male | Three y/o | Control | Control | Feed Day | No | 21:45 | 21:00 - 21:59 | Night         | 37,7 | 92  | 25,2 | 25,2 | 18,85 | 587,78 | 108,22 |
|    | 2019/06/23 | CH2206 | Male | Three y/o | Control | Control | Feed Day | No | 21:45 | 21:00 - 21:59 | Night         | 37,7 | 47  | 58,2 | 58,2 | 18,85 | 534,23 | 137,04 |
|    | 2019/06/23 | CH2205 | Male | Three y/o | Control | Control | Feed Day | No | 21:50 | 21:00 - 21:59 | Night         | 37,7 | 58  | 22,8 | 22,8 | 18,85 | 551,90 | 104,79 |
|    | 2019/06/23 | CH2206 | Male | Three y/o | Control | Control | Feed Day | No | 21:50 | 21:00 - 21:59 | Night         | 37,7 | 81  | 59,2 | 59,2 | 18,85 | 578,26 | 137,63 |
|    | 2019/06/23 | CH2205 | Male | Three y/o | Control | Control | Feed Day | No | 21:55 | 21:00 - 21:59 | Night         | 37,7 | 68  | 22,6 | 22,6 | 18,85 | 564,71 | 104,49 |
|    | 2019/06/23 | CH2206 | Male | Three y/o | Control | Control | Feed Day | No | 21:55 | 21:00 - 21:59 | Night         | 37,7 | 93  | 64,4 | 64,4 | 18,85 | 588,58 | 140,55 |
|    | 2019/06/23 | CH2205 | Male | Three y/o | Control | Control | Feed Day | No | 22:00 | 22:00 - 22:59 | Night         | 37,7 | 76  | 20,8 | 20,8 | 18,85 | 573,39 | 101,65 |
|    | 2019/06/23 | CH2206 | Male | Three y/o | Control | Control | Feed Day | No | 22:00 | 22:00 - 22:59 | Night         | 37,7 | 98  | 58,0 | 58,0 | 18,85 | 592,41 | 136,92 |
|    | 2019/06/23 | CH2205 | Male | Three y/o | Control | Control | Feed Day | No | 22:05 | 22:00 - 22:59 | Night         | 37,7 | 72  | 19,8 | 19,8 | 18,85 | 569,20 | 99,97  |
|    | 2019/06/23 | CH2206 | Male | Three y/o | Control | Control | Feed Day | No | 22:05 | 22:00 - 22:59 | Night         | 37,8 | 82  | 43,2 | 43,2 | 18,95 | 579,19 | 126,74 |
|    | 2019/06/23 | CH2205 | Male | Three y/o | Control | Control | Feed Day | No | 22:10 | 22:00 - 22:59 | Night         | 37,7 | 67  | 24,0 | 24,0 | 18,85 | 563,53 | 106,55 |
|    | 2019/06/23 | CH2206 | Male | Three y/o | Control | Control | Feed Day | No | 22:10 | 22:00 - 22:59 | Night         | 37,9 | 89  | 45,6 | 45,6 | 19,05 | 585,33 | 128,61 |
|    | 2019/06/23 | CH2205 | Male | Three y/o | Control | Control | Feed Day | No | 22:15 | 22:00 - 22:59 | Night         | 37,9 | 70  | 20,6 | 20,6 | 19,05 | 566,99 | 101,32 |
|    | 2019/06/23 | CH2206 | Male | Three y/o | Control | Control | Feed Day | No | 22:15 | 22:00 - 22:59 | Night         | 37,9 | 84  | 47,2 | 47,2 | 19,05 | 581,01 | 129,80 |
|    | 2019/06/23 | CH2205 | Male | Three y/o | Control | Control | Feed Day | No | 22:20 | 22:00 - 22:59 | Night         | 37,9 | 80  | 21,8 | 21,8 | 19,05 | 577,31 | 103,26 |
|    | 2019/06/23 | CH2206 | Male | Three y/o | Control | Control | Feed Day | No | 22:20 | 22:00 - 22:59 | Night         | 37,9 | 79  | 52,0 | 52,0 | 19,05 | 576,36 | 133,14 |
|    | 2019/06/23 | CH2205 | Male | Three y/o | Control | Control | Feed Day | No | 22:25 | 22:00 - 22:59 | Night         | 37,9 | 62  | 28,0 | 28,0 | 19,05 | 557,33 | 111,83 |
|    | 2019/06/23 | CH2206 | Male | Three y/o | Control | Control | Feed Day | No | 22:25 | 22:00 - 22:59 | Night         | 37,9 | 53  | 45,4 | 45,4 | 19,05 | 544,43 | 128,45 |
|    | 2019/06/23 | CH2205 | Male | Three y/o | Control | Control | Feed Day | No | 22:30 | 22:00 - 22:59 | Night         | 37,7 | 78  | 23,8 | 23,8 | 18,85 | 575,38 | 106,26 |
|    | 2019/06/23 | CH2206 | Male | Three y/o | Control | Control | Feed Day | No | 22:30 | 22:00 - 22:59 | Night         | 37,9 | 98  | 55,8 | 55,8 | 19,05 | 592,41 | 135,58 |
|    | 2019/06/23 | CH2205 | Male | Three y/o | Control | Control | Feed Day | No | 22:35 | 22:00 - 22:59 | Night         | 37,7 | 96  | 23,8 | 23,8 | 18,85 | 590,91 | 106,26 |
|    | 2019/06/23 | CH2206 | Male | Three y/o | Control | Control | Feed Day | No | 22:35 | 22:00 - 22:59 | Night         | 37,9 | 57  | 51,6 | 51,6 | 19,05 | 550,47 | 132,87 |
|    | 2019/06/23 | CH2205 | Male | Three y/o | Control | Control | Feed Day | No | 22:40 | 22:00 - 22:59 | Night         | 37,7 | 89  | 22,2 | 22,2 | 18,85 | 585,33 | 103,88 |
|    | 2019/06/23 | CH2206 | Male | Three y/o | Control | Control | Feed Day | No | 22:40 | 22:00 - 22:59 | Night         | 37,9 | 42  | 59,0 | 59,0 | 19,05 | 524,42 | 137,51 |
|    | 2019/06/23 | CH2205 | Male | Three y/o | Control | Control | Feed Day | No | 22:45 | 22:00 - 22:59 | Night         | 37,8 | 78  | 23,8 | 23,8 | 18,95 | 575,38 | 106,26 |
|    | 2019/06/23 | CH2206 | Male | Three y/o | Control | Control | Feed Day | No | 22:45 | 22:00 - 22:59 | Night         | 37,9 | 46  | 59,0 | 59,0 | 19,05 | 532,38 | 137,51 |
|    | 2019/06/23 | CH2205 | Male | Three y/o | Control | Control | Feed Day | No | 22:50 | 22:00 - 22:59 | Night         | 37,9 | 69  | 28,8 | 28,8 | 19,05 | 565,86 | 112,79 |
|    | 2019/06/23 | CH2206 | Male | Three y/o | Control | Control | Feed Day | No | 22:50 | 22:00 - 22:59 | Night         | 37,8 | 68  | 59,4 | 59,4 | 18,95 | 564,71 | 137,75 |
|    | 2019/06/23 | CH2205 | Male | Three y/o | Control | Control | Feed Day | No | 22:55 | 22:00 - 22:59 | Night         | 37,9 | 70  | 25,4 | 25,4 | 19,05 | 566,99 | 108,49 |
|    | 2019/06/23 | CH2206 | Male | Three y/o | Control | Control | Feed Day | No | 22:55 | 22:00 - 22:59 | Night         | 37,9 | 90  | 45,8 | 45,8 | 19,05 | 586,16 | 128,76 |
|    | 2019/06/23 | CH2205 | Male | Three y/o | Control | Control | Feed Day | No | 23:00 | 23:00 - 23:59 | Night         | 37,9 | 68  | 39,8 | 39,8 | 19,05 | 564,71 | 123,91 |
|    | 2019/06/23 | CH2206 | Male | Three y/o | Control | Control | Feed Day | No | 23:00 | 23:00 - 23:59 | Night         | 37,9 | 79  | 53,0 | 53,0 | 19,05 | 576,36 | 133,80 |
|    | 2019/06/23 | CH2205 | Male | Three y/o | Control | Control | Feed Day | No | 23:05 | 23:00 - 23:59 | Night         | 37,9 | 106 | 27,4 | 27,4 | 19,05 | 598,06 | 111,09 |
|    | 2019/06/23 | CH2206 | Male | Three y/o | Control | Control | Feed Day | No | 23:05 | 23:00 - 23:59 | Night         | 37,9 | 95  | 42,4 | 42,4 | 19,05 | 590,14 | 126,10 |
|    | 2019/06/23 | CH2205 | Male | Three y/o | Control | Control | Feed Day | No | 23:10 | 23:00 - 23:59 | Night         | 37,9 | 59  | 20,6 | 20,6 | 19,05 | 553,30 | 101,32 |
|    | 2019/06/23 | CH2206 | Male | Three y/o | Control | Control | Feed Day | No | 23:10 | 23:00 - 23:59 | Night         | 37,9 | 79  | 38,2 | 38,2 | 19,05 | 576,36 | 122,50 |
|    | 2019/06/23 | CH2205 | Male | Three y/o | Control | Control | Feed Day | No | 23:15 | 23:00 - 23:59 | Night         | 37,9 | 73  | 23,0 | 23,0 | 19,05 | 570,27 | 105,09 |
|    | 2019/06/23 | CH2206 | Male | Three y/o | Control | Control | Feed Day | No | 23:15 | 23:00 - 23:59 | Night         | 37,9 | 77  | 38,2 | 38,2 | 19,05 | 574,39 | 122,50 |
|    | 2019/06/23 | CH2205 | Male | Three y/o | Control | Control | Feed Day | No | 23:20 | 23:00 - 23:59 | Night         | 37,9 | 65  | 24,6 | 24,6 | 19,05 | 561,12 | 107,39 |
|    | 2019/06/23 | CH2206 | Male | Three y/o | Control | Control | Feed Day | No | 23:20 | 23:00 - 23:59 | Night         | 37,9 | 92  | 43,2 | 43,2 | 19,05 | 587,78 | 126,74 |
|    | 2019/06/23 | CH2205 | Male | Three y/o | Control | Control | Feed Day | No | 23:25 | 23:00 - 23:59 | Night         | 37,9 | 71  | 22,6 | 22,6 | 19,05 | 568,10 | 104,49 |
|    | 2019/06/23 | CH2206 | Male | Three y/o | Control | Control | Feed Day | No | 23:25 | 23:00 - 23:59 | Night         | 37,9 | 89  | 29,8 | 29,8 | 19,05 | 585,33 | 113,97 |
|    | 2019/06/23 | CH2205 | Male | Three y/o | Control | Control | Feed Day | No | 23:30 | 23:00 - 23:59 | Night         | 38,0 | 80  | 18,6 | 18,6 | 19,15 | 577,31 | 97,84  |
|    | 2019/06/23 | CH2206 | Male | Three y/o | Control | Control | Feed Day | No | 23:30 | 23:00 - 23:59 | Night         | 37,9 | 102 | 31,6 | 31,6 | 19,05 | 595,30 | 115,98 |
|    | 2019/06/23 | CH2205 | Male | Three y/o | Control | Control | Feed Day | No | 23:35 | 23:00 - 23:59 | Night         | 38,0 | 63  | 16,0 | 16,0 | 19,15 | 558,62 | 92,71  |
|    | 2019/06/23 | CH2206 | Male | Three y/o | Control | Control | Feed Day | No | 23:35 | 23:00 - 23:59 | Night         | 37,9 | 86  | 18,6 | 18,6 | 19,05 | 582,77 | 97,84  |
|    | 2019/06/23 | CH2205 | Male | Three y/o | Control | Control | Feed Day | No | 23:40 | 23:00 - 23:59 | Night         | 38,0 | 55  | 15,4 | 15,4 | 19,15 | 547,52 | 91,41  |
|    | 2019/06/23 | CH2206 | Male | Three y/o | Control | Control | Feed Day | No | 23:40 | 23:00 - 23:59 | Night         | 37,8 | 92  | 28,4 | 28,4 | 18,95 | 587,78 | 112,31 |
|    | 2019/06/23 | CH2205 | Male | Three y/o | Control | Control | Feed Day | No | 23:45 | 23:00 - 23:59 | Night         | 38,0 | 84  | 19,6 | 19,6 | 19,15 | 581,01 | 99,63  |
|    | 2019/06/23 | CH2206 | Male | Three y/o | Control | Control | Feed Day | No | 23:45 | 23:00 - 23:59 | Night         | 37,8 | 134 | 47,0 | 47,0 | 18,95 | 614,33 | 129,65 |
|    | 2019/06/23 | CH2205 | Male | Three y/o | Control | Control | Feed Day | No | 23:50 | 23:00 - 23:59 | Night         | 38,0 | 66  | 17,8 | 17,8 | 19,15 | 562,34 | 96,34  |
|    | 2019/06/23 | CH2206 | Male | Three y/o | Control | Control | Feed Day | No | 23:50 | 23:00 - 23:59 | Night         | 37,5 | 83  | 52,4 | 52,4 | 18,65 | 580,11 | 133,41 |
|    | 2019/06/23 | CH2205 | Male | Three y/o | Control | Control | Feed Day | No | 23:55 | 23:00 - 23:59 | Night         | 38,0 | 70  | 20,0 | 20,0 | 19,15 | 566,99 | 100,31 |
|    | 2019/06/23 | CH2206 | Male | Three y/o | Control | Control | Feed Day | No | 23:55 | 23:00 - 23:59 | Night         | 37,7 | 103 | 55,6 | 55,6 | 18,85 | 596,00 | 135,46 |
| 40 | 2019/06/24 | CH2205 | Male | Three y/o | Control | Control | Fast Day | No | 00:00 | 00:00 - 00:59 | Early Morning | 38,0 | 82  | 21,8 | 21,8 | 19,15 | 579,19 | 103,26 |
|    | 2019/06/24 | CH2206 | Male | Three y/o | Control | Control | Fast Day | No | 00:00 | 00:00 - 00:59 | Early Morning | 37,7 | 83  | 50,4 | 50,4 | 18,85 | 580,11 | 132,06 |
|    | 2019/06/24 | CH2205 | Male | Three y/o | Control | Control | Fast Day | No | 00:05 | 00:00 - 00:59 | Early Morning | 38,0 | 44  | 20,8 | 20,8 | 19,15 | 528,51 | 101,65 |



|            |        |      |           |         |         |          |    |       |               |               |      |     |       |       |       |        |        |
|------------|--------|------|-----------|---------|---------|----------|----|-------|---------------|---------------|------|-----|-------|-------|-------|--------|--------|
| 2019/06/24 | CH2206 | Male | Three y/o | Control | Control | Fast Day | No | 00:05 | 00:00 - 00:59 | Early Morning | 37,7 | 79  | 54,4  | 54,4  | 18,85 | 576,36 | 134,70 |
| 2019/06/24 | CH2205 | Male | Three y/o | Control | Control | Fast Day | No | 00:10 | 00:00 - 00:59 | Early Morning | 38,0 | 53  | 20,0  | 20,0  | 19,15 | 544,43 | 100,31 |
| 2019/06/24 | CH2206 | Male | Three y/o | Control | Control | Fast Day | No | 00:10 | 00:00 - 00:59 | Early Morning | 37,7 | 91  | 57,2  | 57,2  | 18,85 | 586,98 | 136,44 |
| 2019/06/24 | CH2205 | Male | Three y/o | Control | Control | Fast Day | No | 00:15 | 00:00 - 00:59 | Early Morning | 38,0 | 64  | 20,6  | 20,6  | 19,15 | 559,88 | 101,32 |
| 2019/06/24 | CH2206 | Male | Three y/o | Control | Control | Fast Day | No | 00:15 | 00:00 - 00:59 | Early Morning | 37,7 | 67  | 52,4  | 52,4  | 18,85 | 563,53 | 133,41 |
| 2019/06/24 | CH2205 | Male | Three y/o | Control | Control | Fast Day | No | 00:20 | 00:00 - 00:59 | Early Morning | 38,0 | 60  | 26,2  | 26,2  | 19,15 | 554,67 | 109,55 |
| 2019/06/24 | CH2206 | Male | Three y/o | Control | Control | Fast Day | No | 00:20 | 00:00 - 00:59 | Early Morning | 37,8 | 49  | 52,4  | 52,4  | 18,95 | 537,80 | 133,41 |
| 2019/06/24 | CH2205 | Male | Three y/o | Control | Control | Fast Day | No | 00:25 | 00:00 - 00:59 | Early Morning | 38,1 | 67  | 2,0   | 2,0   | 19,26 | 563,53 | 22,86  |
| 2019/06/24 | CH2206 | Male | Three y/o | Control | Control | Fast Day | No | 00:25 | 00:00 - 00:59 | Early Morning | 37,8 | 94  | 24,6  | 24,6  | 18,95 | 589,37 | 107,39 |
| 2019/06/24 | CH2205 | Male | Three y/o | Control | Control | Fast Day | No | 00:30 | 00:00 - 00:59 | Early Morning | 38,1 | 69  | 2,0   | 2,0   | 19,26 | 565,86 | 22,86  |
| 2019/06/24 | CH2206 | Male | Three y/o | Control | Control | Fast Day | No | 00:30 | 00:00 - 00:59 | Early Morning | 37,7 | 96  | 27,2  | 27,2  | 18,85 | 590,91 | 110,83 |
| 2019/06/24 | CH2205 | Male | Three y/o | Control | Control | Fast Day | No | 00:35 | 00:00 - 00:59 | Early Morning | 38,1 | 75  | 5,2   | 5,2   | 19,26 | 572,36 | 54,72  |
| 2019/06/24 | CH2206 | Male | Three y/o | Control | Control | Fast Day | No | 00:35 | 00:00 - 00:59 | Early Morning | 37,6 | 152 | 53,2  | 53,2  | 18,75 | 622,73 | 133,93 |
| 2019/06/24 | CH2205 | Male | Three y/o | Control | Control | Fast Day | No | 00:40 | 00:00 - 00:59 | Early Morning | 38,1 | 57  | 4,2   | 4,2   | 19,26 | 550,47 | 47,57  |
| 2019/06/24 | CH2206 | Male | Three y/o | Control | Control | Fast Day | No | 00:40 | 00:00 - 00:59 | Early Morning | 37,5 | 93  | 50,8  | 50,8  | 18,65 | 588,58 | 132,33 |
| 2019/06/24 | CH2205 | Male | Three y/o | Control | Control | Fast Day | No | 00:45 | 00:00 - 00:59 | Early Morning | 38,1 | 82  | 4,4   | 4,4   | 19,26 | 579,19 | 49,12  |
| 2019/06/24 | CH2206 | Male | Three y/o | Control | Control | Fast Day | No | 00:45 | 00:00 - 00:59 | Early Morning | 37,5 | 48  | 49,6  | 49,6  | 18,65 | 536,04 | 131,51 |
| 2019/06/24 | CH2205 | Male | Three y/o | Control | Control | Fast Day | No | 00:50 | 00:00 - 00:59 | Early Morning | 38,1 | 51  | 3,2   | 3,2   | 19,26 | 541,20 | 38,49  |
| 2019/06/24 | CH2206 | Male | Three y/o | Control | Control | Fast Day | No | 00:50 | 00:00 - 00:59 | Early Morning | 37,5 | 94  | 49,6  | 49,6  | 18,65 | 589,37 | 131,51 |
| 2019/06/24 | CH2205 | Male | Three y/o | Control | Control | Fast Day | No | 00:55 | 00:00 - 00:59 | Early Morning | 38,1 | 51  | 2,6   | 2,6   | 19,26 | 541,20 | 31,57  |
| 2019/06/24 | CH2206 | Male | Three y/o | Control | Control | Fast Day | No | 00:55 | 00:00 - 00:59 | Early Morning | 37,5 | 90  | 44,6  | 44,6  | 18,65 | 586,16 | 127,84 |
| 2019/06/24 | CH2205 | Male | Three y/o | Control | Control | Fast Day | No | 01:00 | 01:00 - 01:59 | Early Morning | 38,1 | 49  | 2,8   | 2,8   | 19,26 | 537,80 | 34,04  |
| 2019/06/24 | CH2206 | Male | Three y/o | Control | Control | Fast Day | No | 01:00 | 01:00 - 01:59 | Early Morning | 37,5 | 84  | 49,6  | 49,6  | 18,65 | 581,01 | 131,51 |
| 2019/06/24 | CH2205 | Male | Three y/o | Control | Control | Fast Day | No | 01:05 | 01:00 - 01:59 | Early Morning | 38,1 | 68  | 2,4   | 2,4   | 19,26 | 564,71 | 28,91  |
| 2019/06/24 | CH2206 | Male | Three y/o | Control | Control | Fast Day | No | 01:05 | 01:00 - 01:59 | Early Morning | 37,5 | 81  | 48,2  | 48,2  | 18,65 | 578,26 | 130,52 |
| 2019/06/24 | CH2205 | Male | Three y/o | Control | Control | Fast Day | No | 01:10 | 01:00 - 01:59 | Early Morning | 38,1 | 51  | 3,6   | 3,6   | 19,26 | 541,20 | 42,42  |
| 2019/06/24 | CH2206 | Male | Three y/o | Control | Control | Fast Day | No | 01:10 | 01:00 - 01:59 | Early Morning | 37,5 | 94  | 32,6  | 32,6  | 18,65 | 589,37 | 117,05 |
| 2019/06/24 | CH2205 | Male | Three y/o | Control | Control | Fast Day | No | 01:15 | 01:00 - 01:59 | Early Morning | 38,1 | 82  | 4,2   | 4,2   | 19,26 | 579,19 | 47,57  |
| 2019/06/24 | CH2206 | Male | Three y/o | Control | Control | Fast Day | No | 01:15 | 01:00 - 01:59 | Early Morning | 37,4 | 73  | 34,6  | 34,6  | 18,55 | 570,27 | 119,10 |
| 2019/06/24 | CH2205 | Male | Three y/o | Control | Control | Fast Day | No | 01:20 | 01:00 - 01:59 | Early Morning | 38,1 | 98  | 4,8   | 4,8   | 19,26 | 592,41 | 52,04  |
| 2019/06/24 | CH2206 | Male | Three y/o | Control | Control | Fast Day | No | 01:20 | 01:00 - 01:59 | Early Morning | 37,4 | 47  | 36,4  | 36,4  | 18,55 | 534,23 | 120,84 |
| 2019/06/24 | CH2205 | Male | Three y/o | Control | Control | Fast Day | No | 01:25 | 01:00 - 01:59 | Early Morning | 38,1 | 64  | 4,6   | 4,6   | 19,26 | 559,88 | 50,61  |
| 2019/06/24 | CH2206 | Male | Three y/o | Control | Control | Fast Day | No | 01:25 | 01:00 - 01:59 | Early Morning | 37,4 | 106 | 12,2  | 12,2  | 18,55 | 598,06 | 83,49  |
| 2019/06/24 | CH2205 | Male | Three y/o | Control | Control | Fast Day | No | 01:30 | 01:00 - 01:59 | Early Morning | 38,1 | 65  | 5,6   | 5,6   | 19,26 | 561,12 | 57,21  |
| 2019/06/24 | CH2206 | Male | Three y/o | Control | Control | Fast Day | No | 01:30 | 01:00 - 01:59 | Early Morning | 37,4 | 67  | 2,4   | 2,4   | 18,55 | 563,53 | 28,91  |
| 2019/06/24 | CH2205 | Male | Three y/o | Control | Control | Fast Day | No | 01:35 | 01:00 - 01:59 | Early Morning | 38,1 | 98  | 4,8   | 4,8   | 19,26 | 592,41 | 52,04  |
| 2019/06/24 | CH2206 | Male | Three y/o | Control | Control | Fast Day | No | 01:35 | 01:00 - 01:59 | Early Morning | 37,4 | 70  | 3,6   | 3,6   | 18,55 | 566,99 | 42,42  |
| 2019/06/24 | CH2205 | Male | Three y/o | Control | Control | Fast Day | No | 01:40 | 01:00 - 01:59 | Early Morning | 38,1 | 65  | 9,6   | 9,6   | 19,26 | 561,12 | 75,37  |
| 2019/06/24 | CH2206 | Male | Three y/o | Control | Control | Fast Day | No | 01:40 | 01:00 - 01:59 | Early Morning | 37,5 | 67  | 2,4   | 2,4   | 18,65 | 563,53 | 28,91  |
| 2019/06/24 | CH2205 | Male | Three y/o | Control | Control | Fast Day | No | 01:45 | 01:00 - 01:59 | Early Morning | 38,1 | 67  | 13,0  | 13,0  | 19,26 | 563,53 | 85,65  |
| 2019/06/24 | CH2206 | Male | Three y/o | Control | Control | Fast Day | No | 01:45 | 01:00 - 01:59 | Early Morning | 37,5 | 90  | 3,0   | 3,0   | 18,65 | 586,16 | 36,34  |
| 2019/06/24 | CH2205 | Male | Three y/o | Control | Control | Fast Day | No | 01:50 | 01:00 - 01:59 | Early Morning | 38,0 | 82  | 11,2  | 11,2  | 19,15 | 579,19 | 80,59  |
| 2019/06/24 | CH2206 | Male | Three y/o | Control | Control | Fast Day | No | 01:50 | 01:00 - 01:59 | Early Morning | 37,5 | 86  | 19,2  | 19,2  | 18,65 | 582,77 | 98,92  |
| 2019/06/24 | CH2205 | Male | Three y/o | Control | Control | Fast Day | No | 01:55 | 01:00 - 01:59 | Early Morning | 38,0 | 101 | 49,4  | 49,4  | 19,15 | 594,59 | 131,37 |
| 2019/06/24 | CH2206 | Male | Three y/o | Control | Control | Fast Day | No | 01:55 | 01:00 - 01:59 | Early Morning | 37,5 | 110 | 27,2  | 27,2  | 18,65 | 600,69 | 110,83 |
| 2019/06/24 | CH2205 | Male | Three y/o | Control | Control | Fast Day | No | 02:00 | 02:00 - 02:59 | Early Morning | 38,0 | 86  | 8,8   | 8,8   | 19,15 | 582,77 | 72,43  |
| 2019/06/24 | CH2206 | Male | Three y/o | Control | Control | Fast Day | No | 02:00 | 02:00 - 02:59 | Early Morning | 37,6 | 148 | 45,0  | 45,0  | 18,75 | 620,97 | 128,15 |
| 2019/06/24 | CH2205 | Male | Three y/o | Control | Control | Fast Day | No | 02:05 | 02:00 - 02:59 | Early Morning | 38,0 | 109 | 21,6  | 21,6  | 19,15 | 600,04 | 102,94 |
| 2019/06/24 | CH2206 | Male | Three y/o | Control | Control | Fast Day | No | 02:05 | 02:00 - 02:59 | Early Morning | 37,6 | 86  | 45,0  | 45,0  | 18,75 | 582,77 | 128,15 |
| 2019/06/24 | CH2205 | Male | Three y/o | Control | Control | Fast Day | No | 02:10 | 02:00 - 02:59 | Early Morning | 37,7 | 90  | 25,0  | 25,0  | 18,85 | 586,16 | 107,94 |
| 2019/06/24 | CH2206 | Male | Three y/o | Control | Control | Fast Day | No | 02:10 | 02:00 - 02:59 | Early Morning | 37,5 | 113 | 49,0  | 49,0  | 18,65 | 602,58 | 131,09 |
| 2019/06/24 | CH2205 | Male | Three y/o | Control | Control | Fast Day | No | 02:15 | 02:00 - 02:59 | Early Morning | 37,6 |     | 33,0  | 33,0  | 18,75 |        | 117,47 |
| 2019/06/24 | CH2206 | Male | Three y/o | Control | Control | Fast Day | No | 02:15 | 02:00 - 02:59 | Early Morning | 37,4 | 121 | 25,4  | 25,4  | 18,55 | 607,35 | 108,49 |
| 2019/06/24 | CH2205 | Male | Three y/o | Control | Control | Fast Day | No | 02:20 | 02:00 - 02:59 | Early Morning | 37,4 | 87  | 44,8  | 44,8  | 18,55 | 583,64 | 127,99 |
| 2019/06/24 | CH2206 | Male | Three y/o | Control | Control | Fast Day | No | 02:20 | 02:00 - 02:59 | Early Morning | 37,4 |     | 27,4  | 27,4  | 18,55 |        | 111,09 |
| 2019/06/24 | CH2205 | Male | Three y/o | Control | Control | Fast Day | No | 02:25 | 02:00 - 02:59 | Early Morning | 37,2 | 113 | 53,2  | 53,2  | 18,36 | 602,58 | 133,93 |
| 2019/06/24 | CH2206 | Male | Three y/o | Control | Control | Fast Day | No | 02:25 | 02:00 - 02:59 | Early Morning | 37,4 | 126 | 20,2  | 20,2  | 18,55 | 610,14 | 100,65 |
| 2019/06/24 | CH2205 | Male | Three y/o | Control | Control | Fast Day | No | 02:30 | 02:00 - 02:59 | Early Morning | 36,7 | 92  | 29,8  | 29,8  | 17,87 | 587,78 | 113,97 |
| 2019/06/24 | CH2206 | Male | Three y/o | Control | Control | Fast Day | No | 02:30 | 02:00 - 02:59 | Early Morning | 37,4 |     | 68,8  | 68,8  | 18,55 |        | 142,84 |
| 2019/06/24 | CH2205 | Male | Three y/o | Control | Control | Fast Day | No | 02:35 | 02:00 - 02:59 | Early Morning | 37,3 |     | 26,4  | 26,4  | 18,46 |        | 109,81 |
| 2019/06/24 | CH2206 | Male | Three y/o | Control | Control | Fast Day | No | 02:35 | 02:00 - 02:59 | Early Morning | 37,2 |     | 41,4  | 41,4  | 18,36 |        | 125,27 |
| 2019/06/24 | CH2205 | Male | Three y/o | Control | Control | Fast Day | No | 02:40 | 02:00 - 02:59 | Early Morning | 37,2 | 111 | 35,4  | 35,4  | 18,36 | 601,33 | 119,88 |
| 2019/06/24 | CH2206 | Male | Three y/o | Control | Control | Fast Day | No | 02:40 | 02:00 - 02:59 | Early Morning | 37,3 |     | 44,6  | 44,6  | 18,46 |        | 127,84 |
| 2019/06/24 | CH2205 | Male | Three y/o | Control | Control | Fast Day | No | 02:45 | 02:00 - 02:59 | Early Morning | 37,3 | 101 | 23,8  | 23,8  | 18,46 | 594,59 | 106,26 |
| 2019/06/24 | CH2206 | Male | Three y/o | Control | Control | Fast Day | No | 02:45 | 02:00 - 02:59 | Early Morning | 37,4 | 112 | 12,8  | 12,8  | 18,55 | 601,96 | 85,12  |
| 2019/06/24 | CH2205 | Male | Three y/o | Control | Control | Fast Day | No | 02:50 | 02:00 - 02:59 | Early Morning | 37,3 | 91  | 175,4 | 175,4 | 18,46 | 586,98 | 175,51 |
| 2019/06/24 | CH2206 | Male | Three y/o | Control | Control | Fast Day | No | 02:50 | 02:00 - 02:59 | Early Morning | 37,4 |     | 75,2  | 75,2  | 18,55 |        | 145,93 |
| 2019/06/24 | CH2205 | Male | Three y/o | Control | Control | Fast Day | No | 02:55 | 02:00 - 02:59 | Early Morning | 37,4 | 83  | 102,0 | 102,0 | 18,55 | 580,11 | 156,53 |
| 2019/06/24 | CH2206 | Male | Three y/o | Control | Control | Fast Day | No | 02:55 | 02:00 - 02:59 | Early Morning | 37,4 | 92  | 45,8  | 45,8  | 18,55 | 587,78 | 128,76 |
| 2019/06/24 | CH2205 | Male | Three y/o | Control | Control | Fast Day | No | 03:00 | 03:00 - 03:59 | Early Morning | 37,5 | 99  | 48,2  | 48,2  | 18,65 | 593,14 | 130,52 |



|            |        |      |           |         |         |          |    |       |               |               |      |     |       |       |       |        |        |
|------------|--------|------|-----------|---------|---------|----------|----|-------|---------------|---------------|------|-----|-------|-------|-------|--------|--------|
| 2019/06/24 | CH2206 | Male | Three y/o | Control | Control | Fast Day | No | 03:00 | 03:00 - 03:59 | Early Morning | 37,4 | 134 | 97,4  | 97,4  | 18,55 | 614,33 | 154,93 |
| 2019/06/24 | CH2205 | Male | Three y/o | Control | Control | Fast Day | No | 03:05 | 03:00 - 03:59 | Early Morning | 37,6 | 123 | 11,8  | 11,8  | 18,75 | 608,49 | 82,36  |
| 2019/06/24 | CH2206 | Male | Three y/o | Control | Control | Fast Day | No | 03:05 | 03:00 - 03:59 | Early Morning | 37,5 | 119 | 26,2  | 26,2  | 18,65 | 606,20 | 109,55 |
| 2019/06/24 | CH2205 | Male | Three y/o | Control | Control | Fast Day | No | 03:10 | 03:00 - 03:59 | Early Morning | 37,5 | 91  | 24,8  | 24,8  | 18,65 | 586,98 | 107,67 |
| 2019/06/24 | CH2206 | Male | Three y/o | Control | Control | Fast Day | No | 03:10 | 03:00 - 03:59 | Early Morning | 37,4 |     | 16,8  | 16,8  | 18,55 |        | 94,37  |
| 2019/06/24 | CH2205 | Male | Three y/o | Control | Control | Fast Day | No | 03:15 | 03:00 - 03:59 | Early Morning | 37,4 | 85  | 32,4  | 32,4  | 18,55 | 581,90 | 116,84 |
| 2019/06/24 | CH2206 | Male | Three y/o | Control | Control | Fast Day | No | 03:15 | 03:00 - 03:59 | Early Morning | 37,4 | 115 | 229,0 | 229,0 | 18,55 | 603,82 | 184,89 |
| 2019/06/24 | CH2205 | Male | Three y/o | Control | Control | Fast Day | No | 03:20 | 03:00 - 03:59 | Early Morning | 37,5 | 124 | 36,6  | 36,6  | 18,65 | 609,04 | 121,03 |
| 2019/06/24 | CH2206 | Male | Three y/o | Control | Control | Fast Day | No | 03:20 | 03:00 - 03:59 | Early Morning | 37,4 | 111 | 19,8  | 19,8  | 18,55 | 601,33 | 99,97  |
| 2019/06/24 | CH2205 | Male | Three y/o | Control | Control | Fast Day | No | 03:25 | 03:00 - 03:59 | Early Morning | 37,6 | 72  | 17,2  | 17,2  | 18,75 | 569,20 | 95,17  |
| 2019/06/24 | CH2206 | Male | Three y/o | Control | Control | Fast Day | No | 03:25 | 03:00 - 03:59 | Early Morning | 37,4 | 112 | 14,0  | 14,0  | 18,55 | 601,96 | 88,17  |
| 2019/06/24 | CH2205 | Male | Three y/o | Control | Control | Fast Day | No | 03:30 | 03:00 - 03:59 | Early Morning | 37,6 | 69  | 19,2  | 19,2  | 18,75 | 565,86 | 98,92  |
| 2019/06/24 | CH2206 | Male | Three y/o | Control | Control | Fast Day | No | 03:30 | 03:00 - 03:59 | Early Morning | 37,4 | 71  | 20,8  | 20,8  | 18,55 | 568,10 | 101,65 |
| 2019/06/24 | CH2205 | Male | Three y/o | Control | Control | Fast Day | No | 03:35 | 03:00 - 03:59 | Early Morning | 37,6 | 59  | 20,4  | 20,4  | 18,75 | 553,30 | 100,99 |
| 2019/06/24 | CH2206 | Male | Three y/o | Control | Control | Fast Day | No | 03:35 | 03:00 - 03:59 | Early Morning | 37,3 | 90  | 28,8  | 28,8  | 18,46 | 586,16 | 112,79 |
| 2019/06/24 | CH2205 | Male | Three y/o | Control | Control | Fast Day | No | 03:40 | 03:00 - 03:59 | Early Morning | 37,7 | 72  | 21,6  | 21,6  | 18,85 | 569,20 | 102,94 |
| 2019/06/24 | CH2206 | Male | Three y/o | Control | Control | Fast Day | No | 03:40 | 03:00 - 03:59 | Early Morning | 37,3 | 83  | 33,6  | 33,6  | 18,46 | 580,11 | 118,09 |
| 2019/06/24 | CH2205 | Male | Three y/o | Control | Control | Fast Day | No | 03:45 | 03:00 - 03:59 | Early Morning | 37,7 | 84  | 12,8  | 12,8  | 18,85 | 581,01 | 85,12  |
| 2019/06/24 | CH2206 | Male | Three y/o | Control | Control | Fast Day | No | 03:45 | 03:00 - 03:59 | Early Morning | 37,2 | 93  | 30,4  | 30,4  | 18,36 | 588,58 | 114,65 |
| 2019/06/24 | CH2205 | Male | Three y/o | Control | Control | Fast Day | No | 03:50 | 03:00 - 03:59 | Early Morning | 37,7 | 66  | 12,4  | 12,4  | 18,85 | 562,34 | 84,04  |
| 2019/06/24 | CH2206 | Male | Three y/o | Control | Control | Fast Day | No | 03:50 | 03:00 - 03:59 | Early Morning | 37,1 | 62  | 47,8  | 47,8  | 18,26 | 557,33 | 130,23 |
| 2019/06/24 | CH2205 | Male | Three y/o | Control | Control | Fast Day | No | 03:55 | 03:00 - 03:59 | Early Morning | 37,7 | 70  | 12,6  | 12,6  | 18,85 | 566,99 | 84,59  |
| 2019/06/24 | CH2206 | Male | Three y/o | Control | Control | Fast Day | No | 03:55 | 03:00 - 03:59 | Early Morning | 37,1 | 74  | 50,8  | 50,8  | 18,26 | 571,33 | 132,33 |
| 2019/06/24 | CH2205 | Male | Three y/o | Control | Control | Fast Day | No | 04:00 | 04:00 - 04:59 | Morning       | 37,7 | 50  | 12,4  | 12,4  | 18,85 | 539,52 | 84,04  |
| 2019/06/24 | CH2206 | Male | Three y/o | Control | Control | Fast Day | No | 04:00 | 04:00 - 04:59 | Morning       | 37,1 | 57  | 50,8  | 50,8  | 18,26 | 550,47 | 132,33 |
| 2019/06/24 | CH2205 | Male | Three y/o | Control | Control | Fast Day | No | 04:05 | 04:00 - 04:59 | Morning       | 37,7 | 53  | 10,4  | 10,4  | 18,85 | 544,43 | 78,08  |
| 2019/06/24 | CH2206 | Male | Three y/o | Control | Control | Fast Day | No | 04:05 | 04:00 - 04:59 | Morning       | 37,2 | 46  | 50,2  | 50,2  | 18,36 | 532,38 | 131,92 |
| 2019/06/24 | CH2205 | Male | Three y/o | Control | Control | Fast Day | No | 04:10 | 04:00 - 04:59 | Morning       | 37,7 | 87  | 10,8  | 10,8  | 18,85 | 583,64 | 79,36  |
| 2019/06/24 | CH2206 | Male | Three y/o | Control | Control | Fast Day | No | 04:10 | 04:00 - 04:59 | Morning       | 37,2 | 86  | 47,2  | 47,2  | 18,36 | 582,77 | 129,80 |
| 2019/06/24 | CH2205 | Male | Three y/o | Control | Control | Fast Day | No | 04:15 | 04:00 - 04:59 | Morning       | 37,7 | 72  | 11,2  | 11,2  | 18,85 | 569,20 | 80,59  |
| 2019/06/24 | CH2206 | Male | Three y/o | Control | Control | Fast Day | No | 04:15 | 04:00 - 04:59 | Morning       | 37,2 | 94  | 50,8  | 50,8  | 18,36 | 589,37 | 132,33 |
| 2019/06/24 | CH2205 | Male | Three y/o | Control | Control | Fast Day | No | 04:20 | 04:00 - 04:59 | Morning       | 37,7 | 72  | 11,0  | 11,0  | 18,85 | 569,20 | 79,98  |
| 2019/06/24 | CH2206 | Male | Three y/o | Control | Control | Fast Day | No | 04:20 | 04:00 - 04:59 | Morning       | 37,2 | 49  | 48,8  | 48,8  | 18,36 | 537,80 | 130,95 |
| 2019/06/24 | CH2205 | Male | Three y/o | Control | Control | Fast Day | No | 04:25 | 04:00 - 04:59 | Morning       | 37,7 | 67  | 7,8   | 7,8   | 18,85 | 563,53 | 68,36  |
| 2019/06/24 | CH2206 | Male | Three y/o | Control | Control | Fast Day | No | 04:25 | 04:00 - 04:59 | Morning       | 37,2 | 88  | 46,8  | 46,8  | 18,36 | 584,49 | 129,50 |
| 2019/06/24 | CH2205 | Male | Three y/o | Control | Control | Fast Day | No | 04:30 | 04:00 - 04:59 | Morning       | 37,7 | 68  | 13,2  | 13,2  | 18,85 | 564,71 | 86,17  |
| 2019/06/24 | CH2206 | Male | Three y/o | Control | Control | Fast Day | No | 04:30 | 04:00 - 04:59 | Morning       | 37,3 | 94  | 50,0  | 50,0  | 18,46 | 589,37 | 131,79 |
| 2019/06/24 | CH2205 | Male | Three y/o | Control | Control | Fast Day | No | 04:35 | 04:00 - 04:59 | Morning       | 37,7 | 65  | 11,8  | 11,8  | 18,85 | 561,12 | 82,36  |
| 2019/06/24 | CH2206 | Male | Three y/o | Control | Control | Fast Day | No | 04:35 | 04:00 - 04:59 | Morning       | 37,3 | 90  | 46,2  | 46,2  | 18,46 | 586,16 | 129,06 |
| 2019/06/24 | CH2205 | Male | Three y/o | Control | Control | Fast Day | No | 04:40 | 04:00 - 04:59 | Morning       | 37,7 | 68  | 9,4   | 9,4   | 18,85 | 564,71 | 74,66  |
| 2019/06/24 | CH2206 | Male | Three y/o | Control | Control | Fast Day | No | 04:40 | 04:00 - 04:59 | Morning       | 37,3 | 79  | 53,6  | 53,6  | 18,46 | 576,36 | 134,19 |
| 2019/06/24 | CH2205 | Male | Three y/o | Control | Control | Fast Day | No | 04:45 | 04:00 - 04:59 | Morning       | 37,7 | 73  | 8,2   | 8,2   | 18,85 | 570,27 | 70,05  |
| 2019/06/24 | CH2206 | Male | Three y/o | Control | Control | Fast Day | No | 04:45 | 04:00 - 04:59 | Morning       | 37,3 | 105 | 49,8  | 49,8  | 18,46 | 597,38 | 131,65 |
| 2019/06/24 | CH2205 | Male | Three y/o | Control | Control | Fast Day | No | 04:50 | 04:00 - 04:59 | Morning       | 37,7 | 58  | 3,8   | 3,8   | 18,85 | 551,90 | 44,22  |
| 2019/06/24 | CH2206 | Male | Three y/o | Control | Control | Fast Day | No | 04:50 | 04:00 - 04:59 | Morning       | 37,3 | 104 | 48,8  | 48,8  | 18,46 | 596,69 | 130,95 |
| 2019/06/24 | CH2205 | Male | Three y/o | Control | Control | Fast Day | No | 04:55 | 04:00 - 04:59 | Morning       | 37,7 | 73  | 6,2   | 6,2   | 18,85 | 570,27 | 60,63  |
| 2019/06/24 | CH2206 | Male | Three y/o | Control | Control | Fast Day | No | 04:55 | 04:00 - 04:59 | Morning       | 37,3 | 70  | 48,4  | 48,4  | 18,46 | 566,99 | 130,66 |
| 2019/06/24 | CH2205 | Male | Three y/o | Control | Control | Fast Day | No | 05:00 | 05:00 - 05:59 | Morning       | 37,7 | 85  | 35,0  | 35,0  | 18,85 | 581,90 | 119,49 |
| 2019/06/24 | CH2206 | Male | Three y/o | Control | Control | Fast Day | No | 05:00 | 05:00 - 05:59 | Morning       | 37,3 | 76  | 43,0  | 43,0  | 18,46 | 573,39 | 126,58 |
| 2019/06/24 | CH2205 | Male | Three y/o | Control | Control | Fast Day | No | 05:05 | 05:00 - 05:59 | Morning       | 37,7 | 43  | 6,2   | 6,2   | 18,85 | 526,50 | 60,63  |
| 2019/06/24 | CH2206 | Male | Three y/o | Control | Control | Fast Day | No | 05:05 | 05:00 - 05:59 | Morning       | 37,3 | 57  | 46,8  | 46,8  | 18,46 | 550,47 | 129,50 |
| 2019/06/24 | CH2205 | Male | Three y/o | Control | Control | Fast Day | No | 05:10 | 05:00 - 05:59 | Morning       | 37,7 | 68  | 5,6   | 5,6   | 18,85 | 564,71 | 57,21  |
| 2019/06/24 | CH2206 | Male | Three y/o | Control | Control | Fast Day | No | 05:10 | 05:00 - 05:59 | Morning       | 37,3 | 98  | 44,2  | 44,2  | 18,46 | 592,41 | 127,53 |
| 2019/06/24 | CH2205 | Male | Three y/o | Control | Control | Fast Day | No | 05:15 | 05:00 - 05:59 | Morning       | 37,7 | 64  | 9,0   | 9,0   | 18,85 | 559,88 | 73,19  |
| 2019/06/24 | CH2206 | Male | Three y/o | Control | Control | Fast Day | No | 05:15 | 05:00 - 05:59 | Morning       | 37,3 | 182 | 15,4  | 15,4  | 18,46 | 634,31 | 91,41  |
| 2019/06/24 | CH2205 | Male | Three y/o | Control | Control | Fast Day | No | 05:20 | 05:00 - 05:59 | Morning       | 37,7 | 73  | 12,4  | 12,4  | 18,85 | 570,27 | 84,04  |
| 2019/06/24 | CH2206 | Male | Three y/o | Control | Control | Fast Day | No | 05:20 | 05:00 - 05:59 | Morning       | 37,2 | 92  | 7,6   | 7,6   | 18,36 | 587,78 | 67,49  |
| 2019/06/24 | CH2205 | Male | Three y/o | Control | Control | Fast Day | No | 05:25 | 05:00 - 05:59 | Morning       | 37,7 | 62  | 17,2  | 17,2  | 18,85 | 557,33 | 95,17  |
| 2019/06/24 | CH2206 | Male | Three y/o | Control | Control | Fast Day | No | 05:25 | 05:00 - 05:59 | Morning       | 37,2 | 68  | 6,4   | 6,4   | 18,36 | 564,71 | 61,70  |
| 2019/06/24 | CH2205 | Male | Three y/o | Control | Control | Fast Day | No | 05:30 | 05:00 - 05:59 | Morning       | 37,7 | 68  | 16,8  | 16,8  | 18,85 | 564,71 | 94,37  |
| 2019/06/24 | CH2206 | Male | Three y/o | Control | Control | Fast Day | No | 05:30 | 05:00 - 05:59 | Morning       | 37,2 | 107 | 36,6  | 36,6  | 18,36 | 598,73 | 121,03 |
| 2019/06/24 | CH2205 | Male | Three y/o | Control | Control | Fast Day | No | 05:35 | 05:00 - 05:59 | Morning       | 37,6 | 59  | 51,6  | 51,6  | 18,75 | 553,30 | 132,87 |
| 2019/06/24 | CH2206 | Male | Three y/o | Control | Control | Fast Day | No | 05:35 | 05:00 - 05:59 | Morning       | 37,2 | 53  | 45,8  | 45,8  | 18,36 | 544,43 | 128,76 |
| 2019/06/24 | CH2205 | Male | Three y/o | Control | Control | Fast Day | No | 05:40 | 05:00 - 05:59 | Morning       | 37,7 | 58  | 4,4   | 4,4   | 18,85 | 551,90 | 49,12  |
| 2019/06/24 | CH2206 | Male | Three y/o | Control | Control | Fast Day | No | 05:40 | 05:00 - 05:59 | Morning       | 37,3 | 92  | 50,2  | 50,2  | 18,46 | 587,78 | 131,92 |
| 2019/06/24 | CH2205 | Male | Three y/o | Control | Control | Fast Day | No | 05:45 | 05:00 - 05:59 | Morning       | 37,6 | 67  | 5,8   | 5,8   | 18,75 | 563,53 | 58,39  |
| 2019/06/24 | CH2206 | Male | Three y/o | Control | Control | Fast Day | No | 05:45 | 05:00 - 05:59 | Morning       | 37,3 | 44  | 48,6  | 48,6  | 18,46 | 528,51 | 130,81 |
| 2019/06/24 | CH2205 | Male | Three y/o | Control | Control | Fast Day | No | 05:50 | 05:00 - 05:59 | Morning       | 37,6 | 73  | 2,2   | 2,2   | 18,75 | 570,27 | 26,02  |
| 2019/06/24 | CH2206 | Male | Three y/o | Control | Control | Fast Day | No | 05:50 | 05:00 - 05:59 | Morning       | 37,3 | 79  | 49,6  | 49,6  | 18,46 | 576,36 | 131,51 |
| 2019/06/24 | CH2205 | Male | Three y/o | Control | Control | Fast Day | No | 05:55 | 05:00 - 05:59 | Morning       | 37,6 | 67  | 3,4   | 3,4   | 18,75 | 563,53 | 40,51  |



|            |        |      |           |         |         |          |    |       |               |              |      |     |       |       |       |        |        |
|------------|--------|------|-----------|---------|---------|----------|----|-------|---------------|--------------|------|-----|-------|-------|-------|--------|--------|
| 2019/06/24 | CH2206 | Male | Three y/o | Control | Control | Fast Day | No | 05:55 | 05:00 - 05:59 | Morning      | 37,4 | 70  | 54,8  | 54,8  | 18,55 | 566,99 | 134,96 |
| 2019/06/24 | CH2205 | Male | Three y/o | Control | Control | Fast Day | No | 06:00 | 06:00 - 06:59 | Morning      | 37,6 | 56  | 4,0   | 4,0   | 18,75 | 549,01 | 45,94  |
| 2019/06/24 | CH2206 | Male | Three y/o | Control | Control | Fast Day | No | 06:00 | 06:00 - 06:59 | Morning      | 37,4 | 63  | 55,8  | 55,8  | 18,55 | 558,62 | 135,58 |
| 2019/06/24 | CH2205 | Male | Three y/o | Control | Control | Fast Day | No | 06:05 | 06:00 - 06:59 | Morning      | 37,6 | 71  | 5,6   | 5,6   | 18,75 | 568,10 | 57,21  |
| 2019/06/24 | CH2206 | Male | Three y/o | Control | Control | Fast Day | No | 06:05 | 06:00 - 06:59 | Morning      | 37,4 | 65  | 57,2  | 57,2  | 18,55 | 561,12 | 136,44 |
| 2019/06/24 | CH2205 | Male | Three y/o | Control | Control | Fast Day | No | 06:10 | 06:00 - 06:59 | Morning      | 37,6 | 51  | 3,4   | 3,4   | 18,75 | 541,20 | 40,51  |
| 2019/06/24 | CH2206 | Male | Three y/o | Control | Control | Fast Day | No | 06:10 | 06:00 - 06:59 | Morning      | 37,4 | 98  | 60,8  | 60,8  | 18,55 | 592,41 | 138,55 |
| 2019/06/24 | CH2205 | Male | Three y/o | Control | Control | Fast Day | No | 06:15 | 06:00 - 06:59 | Morning      | 37,6 | 69  | 9,4   | 9,4   | 18,75 | 565,86 | 74,66  |
| 2019/06/24 | CH2206 | Male | Three y/o | Control | Control | Fast Day | No | 06:15 | 06:00 - 06:59 | Morning      | 37,4 | 88  | 57,2  | 57,2  | 18,55 | 584,49 | 136,44 |
| 2019/06/24 | CH2205 | Male | Three y/o | Control | Control | Fast Day | No | 06:20 | 06:00 - 06:59 | Morning      | 37,7 | 80  | 4,6   | 4,6   | 18,85 | 577,31 | 50,61  |
| 2019/06/24 | CH2206 | Male | Three y/o | Control | Control | Fast Day | No | 06:20 | 06:00 - 06:59 | Morning      | 37,4 | 86  | 54,0  | 54,0  | 18,55 | 582,77 | 134,45 |
| 2019/06/24 | CH2205 | Male | Three y/o | Control | Control | Fast Day | No | 06:25 | 06:00 - 06:59 | Morning      | 37,7 | 59  | 7,4   | 7,4   | 18,85 | 553,30 | 66,59  |
| 2019/06/24 | CH2206 | Male | Three y/o | Control | Control | Fast Day | No | 06:25 | 06:00 - 06:59 | Morning      | 37,4 | 56  | 54,8  | 54,8  | 18,55 | 549,01 | 134,96 |
| 2019/06/24 | CH2205 | Male | Three y/o | Control | Control | Fast Day | No | 06:30 | 06:00 - 06:59 | Morning      | 37,7 | 60  | 19,4  | 19,4  | 18,85 | 554,67 | 99,28  |
| 2019/06/24 | CH2206 | Male | Three y/o | Control | Control | Fast Day | No | 06:30 | 06:00 - 06:59 | Morning      | 37,5 | 83  | 45,8  | 45,8  | 18,65 | 580,11 | 128,76 |
| 2019/06/24 | CH2205 | Male | Three y/o | Control | Control | Fast Day | No | 06:35 | 06:00 - 06:59 | Morning      | 37,7 | 71  | 10,0  | 10,0  | 18,85 | 568,10 | 76,76  |
| 2019/06/24 | CH2206 | Male | Three y/o | Control | Control | Fast Day | No | 06:35 | 06:00 - 06:59 | Morning      | 37,5 | 83  | 47,0  | 47,0  | 18,65 | 580,11 | 129,65 |
| 2019/06/24 | CH2205 | Male | Three y/o | Control | Control | Fast Day | No | 06:40 | 06:00 - 06:59 | Morning      | 37,7 | 73  | 20,4  | 20,4  | 18,85 | 570,27 | 100,99 |
| 2019/06/24 | CH2206 | Male | Three y/o | Control | Control | Fast Day | No | 06:40 | 06:00 - 06:59 | Morning      | 37,5 | 45  | 46,4  | 46,4  | 18,65 | 530,47 | 129,21 |
| 2019/06/24 | CH2205 | Male | Three y/o | Control | Control | Fast Day | No | 06:45 | 06:00 - 06:59 | Morning      | 37,7 | 49  | 65,0  | 65,0  | 18,85 | 537,80 | 140,87 |
| 2019/06/24 | CH2206 | Male | Three y/o | Control | Control | Fast Day | No | 06:45 | 06:00 - 06:59 | Morning      | 37,5 | 97  | 50,0  | 50,0  | 18,65 | 591,66 | 131,79 |
| 2019/06/24 | CH2205 | Male | Three y/o | Control | Control | Fast Day | No | 06:50 | 06:00 - 06:59 | Morning      | 37,8 | 114 | 175,2 | 175,2 | 18,95 | 603,20 | 175,47 |
| 2019/06/24 | CH2206 | Male | Three y/o | Control | Control | Fast Day | No | 06:50 | 06:00 - 06:59 | Morning      | 37,5 | 60  | 51,0  | 51,0  | 18,65 | 554,67 | 132,47 |
| 2019/06/24 | CH2205 | Male | Three y/o | Control | Control | Fast Day | No | 06:55 | 06:00 - 06:59 | Morning      | 37,7 | 57  | 77,8  | 77,8  | 18,85 | 550,47 | 147,11 |
| 2019/06/24 | CH2206 | Male | Three y/o | Control | Control | Fast Day | No | 06:55 | 06:00 - 06:59 | Morning      | 37,5 | 80  | 49,8  | 49,8  | 18,65 | 577,31 | 131,65 |
| 2019/06/24 | CH2205 | Male | Three y/o | Control | Control | Fast Day | No | 07:00 | 07:00 - 07:59 | Morning      | 37,6 | 57  | 152,0 | 152,0 | 18,75 | 550,47 | 170,48 |
| 2019/06/24 | CH2206 | Male | Three y/o | Control | Control | Fast Day | No | 07:00 | 07:00 - 07:59 | Morning      | 37,5 | 69  | 63,2  | 63,2  | 18,65 | 565,86 | 139,89 |
| 2019/06/24 | CH2205 | Male | Three y/o | Control | Control | Fast Day | No | 07:05 | 07:00 - 07:59 | Morning      | 37,6 |     | 11,0  | 11,0  | 18,75 |        | 79,98  |
| 2019/06/24 | CH2206 | Male | Three y/o | Control | Control | Fast Day | No | 07:05 | 07:00 - 07:59 | Morning      | 37,5 | 70  | 45,6  | 45,6  | 18,65 | 566,99 | 128,61 |
| 2019/06/24 | CH2205 | Male | Three y/o | Control | Control | Fast Day | No | 07:10 | 07:00 - 07:59 | Morning      | 37,5 |     | 9,0   | 9,0   | 18,65 |        | 73,19  |
| 2019/06/24 | CH2206 | Male | Three y/o | Control | Control | Fast Day | No | 07:10 | 07:00 - 07:59 | Morning      | 37,5 | 94  | 50,6  | 50,6  | 18,65 | 589,37 | 132,20 |
| 2019/06/24 | CH2205 | Male | Three y/o | Control | Control | Fast Day | No | 07:15 | 07:00 - 07:59 | Morning      | 37,4 | 81  | 5,2   | 5,2   | 18,55 | 578,26 | 54,72  |
| 2019/06/24 | CH2206 | Male | Three y/o | Control | Control | Fast Day | No | 07:15 | 07:00 - 07:59 | Morning      | 37,5 | 48  | 47,0  | 47,0  | 18,65 | 536,04 | 129,65 |
| 2019/06/24 | CH2205 | Male | Three y/o | Control | Control | Fast Day | No | 07:20 | 07:00 - 07:59 | Morning      | 37,4 |     | 6,8   | 6,8   | 18,55 |        | 63,74  |
| 2019/06/24 | CH2206 | Male | Three y/o | Control | Control | Fast Day | No | 07:20 | 07:00 - 07:59 | Morning      | 37,5 | 111 | 53,0  | 53,0  | 18,65 | 601,33 | 133,80 |
| 2019/06/24 | CH2205 | Male | Three y/o | Control | Control | Fast Day | No | 07:25 | 07:00 - 07:59 | Morning      | 37,4 | 86  | 31,8  | 31,8  | 18,55 | 582,77 | 116,20 |
| 2019/06/24 | CH2206 | Male | Three y/o | Control | Control | Fast Day | No | 07:25 | 07:00 - 07:59 | Morning      | 37,5 | 93  | 46,2  | 46,2  | 18,65 | 588,58 | 129,06 |
| 2019/06/24 | CH2205 | Male | Three y/o | Control | Control | Fast Day | No | 07:30 | 07:00 - 07:59 | Morning      | 37,4 | 76  | 60,6  | 60,6  | 18,55 | 573,39 | 138,44 |
| 2019/06/24 | CH2206 | Male | Three y/o | Control | Control | Fast Day | No | 07:30 | 07:00 - 07:59 | Morning      | 37,5 | 80  | 48,2  | 48,2  | 18,65 | 577,31 | 130,52 |
| 2019/06/24 | CH2205 | Male | Three y/o | Control | Control | Fast Day | No | 07:35 | 07:00 - 07:59 | Morning      | 37,5 | 95  | 25,4  | 25,4  | 18,65 | 590,14 | 108,49 |
| 2019/06/24 | CH2206 | Male | Three y/o | Control | Control | Fast Day | No | 07:35 | 07:00 - 07:59 | Morning      | 37,5 | 88  | 42,2  | 42,2  | 18,65 | 584,49 | 125,93 |
| 2019/06/24 | CH2205 | Male | Three y/o | Control | Control | Fast Day | No | 07:40 | 07:00 - 07:59 | Morning      | 37,5 | 98  | 12,6  | 12,6  | 18,65 | 592,41 | 84,59  |
| 2019/06/24 | CH2206 | Male | Three y/o | Control | Control | Fast Day | No | 07:40 | 07:00 - 07:59 | Morning      | 37,5 | 69  | 46,8  | 46,8  | 18,65 | 565,86 | 129,50 |
| 2019/06/24 | CH2205 | Male | Three y/o | Control | Control | Fast Day | No | 07:45 | 07:00 - 07:59 | Morning      | 37,5 |     | 10,4  | 10,4  | 18,65 |        | 78,08  |
| 2019/06/24 | CH2206 | Male | Three y/o | Control | Control | Fast Day | No | 07:45 | 07:00 - 07:59 | Morning      | 37,5 | 44  | 48,8  | 48,8  | 18,65 | 528,51 | 130,95 |
| 2019/06/24 | CH2205 | Male | Three y/o | Control | Control | Fast Day | No | 07:50 | 07:00 - 07:59 | Morning      | 37,4 | 81  | 12,0  | 12,0  | 18,55 | 578,26 | 82,93  |
| 2019/06/24 | CH2206 | Male | Three y/o | Control | Control | Fast Day | No | 07:50 | 07:00 - 07:59 | Morning      | 37,4 | 88  | 44,6  | 44,6  | 18,55 | 584,49 | 127,84 |
| 2019/06/24 | CH2205 | Male | Three y/o | Control | Control | Fast Day | No | 07:55 | 07:00 - 07:59 | Morning      | 37,4 | 70  | 11,6  | 11,6  | 18,55 | 566,99 | 81,78  |
| 2019/06/24 | CH2206 | Male | Three y/o | Control | Control | Fast Day | No | 07:55 | 07:00 - 07:59 | Morning      | 37,4 | 52  | 42,2  | 42,2  | 18,55 | 542,83 | 125,93 |
| 2019/06/24 | CH2205 | Male | Three y/o | Control | Control | Fast Day | No | 08:00 | 08:00 - 08:59 | Late Morning | 37,3 | 69  | 10,2  | 10,2  | 18,46 | 565,86 | 77,43  |
| 2019/06/24 | CH2206 | Male | Three y/o | Control | Control | Fast Day | No | 08:00 | 08:00 - 08:59 | Late Morning | 37,4 | 84  | 42,8  | 42,8  | 18,55 | 581,01 | 126,42 |
| 2019/06/24 | CH2205 | Male | Three y/o | Control | Control | Fast Day | No | 08:05 | 08:00 - 08:59 | Late Morning | 37,1 | 59  | 13,0  | 13,0  | 18,26 | 553,30 | 85,65  |
| 2019/06/24 | CH2206 | Male | Three y/o | Control | Control | Fast Day | No | 08:05 | 08:00 - 08:59 | Late Morning | 37,4 | 57  | 40,4  | 40,4  | 18,55 | 550,47 | 124,43 |
| 2019/06/24 | CH2205 | Male | Three y/o | Control | Control | Fast Day | No | 08:10 | 08:00 - 08:59 | Late Morning | 37,0 | 45  | 11,4  | 11,4  | 18,16 | 530,47 | 81,19  |
| 2019/06/24 | CH2206 | Male | Three y/o | Control | Control | Fast Day | No | 08:10 | 08:00 - 08:59 | Late Morning | 37,4 | 71  | 45,0  | 45,0  | 18,55 | 568,10 | 128,15 |
| 2019/06/24 | CH2205 | Male | Three y/o | Control | Control | Fast Day | No | 08:15 | 08:00 - 08:59 | Late Morning | 36,8 | 50  | 8,0   | 8,0   | 17,96 | 539,52 | 69,22  |
| 2019/06/24 | CH2206 | Male | Three y/o | Control | Control | Fast Day | No | 08:15 | 08:00 - 08:59 | Late Morning | 37,4 | 88  | 45,0  | 45,0  | 18,55 | 584,49 | 128,15 |
| 2019/06/24 | CH2205 | Male | Three y/o | Control | Control | Fast Day | No | 08:20 | 08:00 - 08:59 | Late Morning | 36,6 | 57  | 10,4  | 10,4  | 17,77 | 550,47 | 78,08  |
| 2019/06/24 | CH2206 | Male | Three y/o | Control | Control | Fast Day | No | 08:20 | 08:00 - 08:59 | Late Morning | 37,4 | 103 | 49,2  | 49,2  | 18,55 | 596,00 | 131,23 |
| 2019/06/24 | CH2205 | Male | Three y/o | Control | Control | Fast Day | No | 08:25 | 08:00 - 08:59 | Late Morning | 36,4 | 42  | 10,8  | 10,8  | 17,57 | 524,42 | 79,36  |
| 2019/06/24 | CH2206 | Male | Three y/o | Control | Control | Fast Day | No | 08:25 | 08:00 - 08:59 | Late Morning | 37,4 | 102 | 46,6  | 46,6  | 18,55 | 595,30 | 129,35 |
| 2019/06/24 | CH2205 | Male | Three y/o | Control | Control | Fast Day | No | 08:30 | 08:00 - 08:59 | Late Morning | 36,4 | 71  | 10,4  | 10,4  | 17,57 | 568,10 | 78,08  |
| 2019/06/24 | CH2206 | Male | Three y/o | Control | Control | Fast Day | No | 08:30 | 08:00 - 08:59 | Late Morning | 37,4 | 52  | 54,4  | 54,4  | 18,55 | 542,83 | 134,70 |
| 2019/06/24 | CH2205 | Male | Three y/o | Control | Control | Fast Day | No | 08:35 | 08:00 - 08:59 | Late Morning | 36,6 |     | 9,6   | 9,6   | 17,77 |        | 75,37  |
| 2019/06/24 | CH2206 | Male | Three y/o | Control | Control | Fast Day | No | 08:35 | 08:00 - 08:59 | Late Morning | 37,4 | 90  | 44,4  | 44,4  | 18,55 | 586,16 | 127,69 |
| 2019/06/24 | CH2205 | Male | Three y/o | Control | Control | Fast Day | No | 08:40 | 08:00 - 08:59 | Late Morning | 36,7 | 60  | 9,6   | 9,6   | 17,87 | 554,67 | 75,37  |
| 2019/06/24 | CH2206 | Male | Three y/o | Control | Control | Fast Day | No | 08:40 | 08:00 - 08:59 | Late Morning | 37,4 | 81  | 11,8  | 11,8  | 18,55 | 578,26 | 82,36  |
| 2019/06/24 | CH2205 | Male | Three y/o | Control | Control | Fast Day | No | 08:45 | 08:00 - 08:59 | Late Morning | 36,7 | 87  | 11,6  | 11,6  | 17,87 | 583,64 | 81,78  |
| 2019/06/24 | CH2206 | Male | Three y/o | Control | Control | Fast Day | No | 08:45 | 08:00 - 08:59 | Late Morning | 37,4 | 97  | 25,2  | 25,2  | 18,55 | 591,66 | 108,22 |
| 2019/06/24 | CH2205 | Male | Three y/o | Control | Control | Fast Day | No | 08:50 | 08:00 - 08:59 | Late Morning | 36,8 | 182 | 50,0  | 50,0  | 17,96 | 634,31 | 131,79 |



|            |        |      |           |         |         |          |     |       |               |              |      |     |       |       |       |        |        |
|------------|--------|------|-----------|---------|---------|----------|-----|-------|---------------|--------------|------|-----|-------|-------|-------|--------|--------|
| 2019/06/24 | CH2206 | Male | Three y/o | Control | Control | Fast Day | No  | 08:50 | 08:00 - 08:59 | Late Morning | 37,4 | 160 | 44,2  | 44,2  | 18,55 | 626,07 | 127,53 |
| 2019/06/24 | CH2205 | Male | Three y/o | Control | Control | Fast Day | No  | 08:55 | 08:00 - 08:59 | Late Morning | 37,1 | 110 | 45,4  | 45,4  | 18,26 | 600,69 | 128,45 |
| 2019/06/24 | CH2206 | Male | Three y/o | Control | Control | Fast Day | No  | 08:55 | 08:00 - 08:59 | Late Morning | 37,5 | 64  | 81,8  | 81,8  | 18,65 | 559,88 | 148,85 |
| 2019/06/24 | CH2205 | Male | Three y/o | Control | Control | Fast Day | No  | 09:00 | 09:00 - 09:59 | Late Morning | 37,2 | 111 | 90,4  | 90,4  | 18,36 | 601,33 | 152,33 |
| 2019/06/24 | CH2206 | Male | Three y/o | Control | Control | Fast Day | No  | 09:00 | 09:00 - 09:59 | Late Morning | 37,5 |     | 35,6  | 35,6  | 18,65 |        | 120,08 |
| 2019/06/24 | CH2205 | Male | Three y/o | Control | Control | Fast Day | No  | 09:05 | 09:00 - 09:59 | Late Morning | 37,3 | 99  | 118,8 | 118,8 | 18,46 | 593,14 | 161,86 |
| 2019/06/24 | CH2206 | Male | Three y/o | Control | Control | Fast Day | No  | 09:05 | 09:00 - 09:59 | Late Morning | 37,4 | 103 | 100,6 | 100,6 | 18,55 | 596,00 | 156,05 |
| 2019/06/24 | CH2205 | Male | Three y/o | Control | Control | Fast Day | No  | 09:10 | 09:00 - 09:59 | Late Morning | 37,3 |     | 13,0  | 13,0  | 18,46 |        | 85,65  |
| 2019/06/24 | CH2206 | Male | Three y/o | Control | Control | Fast Day | No  | 09:10 | 09:00 - 09:59 | Late Morning | 37,5 | 87  | 17,2  | 17,2  | 18,65 | 583,64 | 95,17  |
| 2019/06/24 | CH2205 | Male | Three y/o | Control | Control | Fast Day | No  | 09:15 | 09:00 - 09:59 | Late Morning | 37,2 |     | 16,4  | 16,4  | 18,36 |        | 93,55  |
| 2019/06/24 | CH2206 | Male | Three y/o | Control | Control | Fast Day | No  | 09:15 | 09:00 - 09:59 | Late Morning | 37,5 | 185 | 105,6 | 105,6 | 18,65 | 635,34 | 157,74 |
| 2019/06/24 | CH2205 | Male | Three y/o | Control | Control | Fast Day | No  | 09:20 | 09:00 - 09:59 | Late Morning | 37,2 |     | 15,4  | 15,4  | 18,36 |        | 91,41  |
| 2019/06/24 | CH2206 | Male | Three y/o | Control | Control | Fast Day | No  | 09:20 | 09:00 - 09:59 | Late Morning | 37,4 |     | 81,6  | 81,6  | 18,55 |        | 148,76 |
| 2019/06/24 | CH2205 | Male | Three y/o | Control | Control | Fast Day | No  | 09:25 | 09:00 - 09:59 | Late Morning | 37,3 |     | 18,2  | 18,2  | 18,46 |        | 97,10  |
| 2019/06/24 | CH2206 | Male | Three y/o | Control | Control | Fast Day | No  | 09:25 | 09:00 - 09:59 | Late Morning | 37,5 | 97  | 14,0  | 14,0  | 18,65 | 591,66 | 88,17  |
| 2019/06/24 | CH2205 | Male | Three y/o | Control | Control | Fast Day | No  | 09:30 | 09:00 - 09:59 | Late Morning | 37,3 | 64  | 18,8  | 18,8  | 18,46 | 559,88 | 98,20  |
| 2019/06/24 | CH2206 | Male | Three y/o | Control | Control | Fast Day | No  | 09:30 | 09:00 - 09:59 | Late Morning | 37,4 | 126 | 13,6  | 13,6  | 18,55 | 610,14 | 87,18  |
| 2019/06/24 | CH2205 | Male | Three y/o | Control | Control | Fast Day | No  | 09:35 | 09:00 - 09:59 | Late Morning | 37,4 |     | 15,6  | 15,6  | 18,55 |        | 91,85  |
| 2019/06/24 | CH2206 | Male | Three y/o | Control | Control | Fast Day | No  | 09:35 | 09:00 - 09:59 | Late Morning | 37,4 | 90  | 23,6  | 23,6  | 18,55 | 586,16 | 105,97 |
| 2019/06/24 | CH2205 | Male | Three y/o | Control | Control | Fast Day | No  | 09:40 | 09:00 - 09:59 | Late Morning | 37,3 |     | 15,4  | 15,4  | 18,46 |        | 91,41  |
| 2019/06/24 | CH2206 | Male | Three y/o | Control | Control | Fast Day | No  | 09:40 | 09:00 - 09:59 | Late Morning | 37,3 | 79  | 34,2  | 34,2  | 18,46 | 576,36 | 118,70 |
| 2019/06/24 | CH2205 | Male | Three y/o | Control | Control | Fast Day | No  | 09:45 | 09:00 - 09:59 | Late Morning | 37,3 | 86  | 17,0  | 17,0  | 18,46 | 582,77 | 94,77  |
| 2019/06/24 | CH2206 | Male | Three y/o | Control | Control | Fast Day | No  | 09:45 | 09:00 - 09:59 | Late Morning | 37,3 | 68  | 34,2  | 34,2  | 18,46 | 564,71 | 118,70 |
| 2019/06/24 | CH2205 | Male | Three y/o | Control | Control | Fast Day | No  | 09:50 | 09:00 - 09:59 | Late Morning | 37,3 | 84  | 14,8  | 14,8  | 18,46 | 581,01 | 90,05  |
| 2019/06/24 | CH2206 | Male | Three y/o | Control | Control | Fast Day | No  | 09:50 | 09:00 - 09:59 | Late Morning | 37,2 | 84  | 27,4  | 27,4  | 18,36 | 581,01 | 111,09 |
| 2019/06/24 | CH2205 | Male | Three y/o | Control | Control | Fast Day | No  | 09:55 | 09:00 - 09:59 | Late Morning | 37,3 | 126 | 44,0  | 44,0  | 18,46 | 610,14 | 127,37 |
| 2019/06/24 | CH2206 | Male | Three y/o | Control | Control | Fast Day | No  | 09:55 | 09:00 - 09:59 | Late Morning | 37,3 | 115 | 141,4 | 141,4 | 18,46 | 603,82 | 167,95 |
| 2019/06/24 | CH2205 | Male | Three y/o | Control | Control | Fast Day | No  | 10:00 | 10:00 - 10:59 | Late Morning | 37,4 | 73  | 55,2  | 55,2  | 18,55 | 570,27 | 135,21 |
| 2019/06/24 | CH2206 | Male | Three y/o | Control | Control | Fast Day | No  | 10:00 | 10:00 - 10:59 | Late Morning | 37,4 | 112 | 61,0  | 61,0  | 18,55 | 601,96 | 138,67 |
| 2019/06/24 | CH2205 | Male | Three y/o | Control | Control | Fast Day | No  | 10:05 | 10:00 - 10:59 | Late Morning | 37,4 | 76  | 60,8  | 60,8  | 18,55 | 573,39 | 138,55 |
| 2019/06/24 | CH2206 | Male | Three y/o | Control | Control | Fast Day | No  | 10:05 | 10:00 - 10:59 | Late Morning | 37,5 | 128 | 81,2  | 81,2  | 18,65 | 611,22 | 148,59 |
| 2019/06/24 | CH2205 | Male | Three y/o | Control | Control | Fast Day | No  | 10:10 | 10:00 - 10:59 | Late Morning | 37,3 | 90  | 46,8  | 46,8  | 18,46 | 586,16 | 129,50 |
| 2019/06/24 | CH2206 | Male | Three y/o | Control | Control | Fast Day | No  | 10:10 | 10:00 - 10:59 | Late Morning | 37,4 | 119 | 26,4  | 26,4  | 18,55 | 606,20 | 109,81 |
| 2019/06/24 | CH2205 | Male | Three y/o | Control | Control | Fast Day | No  | 10:15 | 10:00 - 10:59 | Late Morning | 37,3 | 105 | 63,6  | 63,6  | 18,46 | 597,38 | 140,11 |
| 2019/06/24 | CH2206 | Male | Three y/o | Control | Control | Fast Day | No  | 10:15 | 10:00 - 10:59 | Late Morning | 37,4 | 52  | 83,6  | 83,6  | 18,55 | 542,83 | 149,61 |
| 2019/06/24 | CH2205 | Male | Three y/o | Control | Control | Fast Day | No  | 10:20 | 10:00 - 10:59 | Late Morning | 37,3 | 145 | 234,0 | 234,0 | 18,46 | 619,62 | 185,65 |
| 2019/06/24 | CH2206 | Male | Three y/o | Control | Control | Fast Day | No  | 10:20 | 10:00 - 10:59 | Late Morning | 37,4 | 165 | 107,8 | 107,8 | 18,55 | 628,06 | 158,46 |
| 2019/06/24 | CH2205 | Male | Three y/o | Control | Control | Fast Day | No  | 10:25 | 10:00 - 10:59 | Late Morning | 37,4 | 102 | 115,0 | 115,0 | 18,55 | 595,30 | 160,72 |
| 2019/06/24 | CH2206 | Male | Three y/o | Control | Control | Fast Day | No  | 10:25 | 10:00 - 10:59 | Late Morning | 37,5 | 140 | 172,0 | 172,0 | 18,65 | 617,28 | 174,82 |
| 2019/06/24 | CH2205 | Male | Three y/o | Control | Control | Fast Day | Yes | 10:30 | 10:00 - 10:59 | Late Morning | 37,5 | 56  | 201,0 | 201,0 | 18,65 | 549,01 | 180,29 |
| 2019/06/24 | CH2206 | Male | Three y/o | Control | Control | Fast Day | Yes | 10:30 | 10:00 - 10:59 | Late Morning | 37,5 | 105 | 39,4  | 39,4  | 18,65 | 597,38 | 123,57 |
| 2019/06/24 | CH2205 | Male | Three y/o | Control | Control | Fast Day | Yes | 10:35 | 10:00 - 10:59 | Late Morning | 37,5 | 102 | 241,8 | 241,8 | 18,65 | 595,30 | 186,80 |
| 2019/06/24 | CH2206 | Male | Three y/o | Control | Control | Fast Day | Yes | 10:35 | 10:00 - 10:59 | Late Morning | 37,5 | 88  | 63,4  | 63,4  | 18,65 | 584,49 | 140,00 |
| 2019/06/24 | CH2205 | Male | Three y/o | Control | Control | Fast Day | Yes | 10:40 | 10:00 - 10:59 | Late Morning | 37,6 | 93  | 16,0  | 16,0  | 18,75 | 588,58 | 92,71  |
| 2019/06/24 | CH2206 | Male | Three y/o | Control | Control | Fast Day | Yes | 10:40 | 10:00 - 10:59 | Late Morning | 37,5 | 120 | 122,8 | 122,8 | 18,65 | 606,78 | 163,01 |
| 2019/06/24 | CH2205 | Male | Three y/o | Control | Control | Fast Day | Yes | 10:45 | 10:00 - 10:59 | Late Morning | 37,5 | 64  | 21,4  | 21,4  | 18,65 | 559,88 | 102,63 |
| 2019/06/24 | CH2206 | Male | Three y/o | Control | Control | Fast Day | Yes | 10:45 | 10:00 - 10:59 | Late Morning | 37,5 | 131 | 68,2  | 68,2  | 18,65 | 612,80 | 142,53 |
| 2019/06/24 | CH2205 | Male | Three y/o | Control | Control | Fast Day | Yes | 10:50 | 10:00 - 10:59 | Late Morning | 37,5 | 73  | 34,2  | 34,2  | 18,65 | 570,27 | 118,70 |
| 2019/06/24 | CH2206 | Male | Three y/o | Control | Control | Fast Day | Yes | 10:50 | 10:00 - 10:59 | Late Morning | 37,5 | 73  | 289,4 | 289,4 | 18,65 | 570,27 | 193,15 |
| 2019/06/24 | CH2205 | Male | Three y/o | Control | Control | Fast Day | Yes | 10:55 | 10:00 - 10:59 | Late Morning | 37,5 | 74  | 19,2  | 19,2  | 18,65 | 571,33 | 98,92  |
| 2019/06/24 | CH2206 | Male | Three y/o | Control | Control | Fast Day | Yes | 10:55 | 10:00 - 10:59 | Late Morning | 37,7 | 129 | 129,2 | 129,2 | 18,85 | 611,75 | 164,79 |
| 2019/06/24 | CH2205 | Male | Three y/o | Control | Control | Fast Day | Yes | 11:00 | 11:00 - 11:59 | Late Morning | 37,6 | 70  | 259,6 | 259,6 | 18,75 | 566,99 | 189,31 |
| 2019/06/24 | CH2206 | Male | Three y/o | Control | Control | Fast Day | Yes | 11:00 | 11:00 - 11:59 | Late Morning | 37,7 |     | 46,0  | 46,0  | 18,85 |        | 128,91 |
| 2019/06/24 | CH2205 | Male | Three y/o | Control | Control | Fast Day | Yes | 11:05 | 11:00 - 11:59 | Late Morning | 37,6 | 88  | 62,8  | 62,8  | 18,75 | 584,49 | 139,67 |
| 2019/06/24 | CH2206 | Male | Three y/o | Control | Control | Fast Day | Yes | 11:05 | 11:00 - 11:59 | Late Morning | 37,7 | 68  | 31,0  | 31,0  | 18,85 | 564,71 | 115,32 |
| 2019/06/24 | CH2205 | Male | Three y/o | Control | Control | Fast Day | Yes | 11:10 | 11:00 - 11:59 | Late Morning | 37,5 | 70  | 14,6  | 14,6  | 18,65 | 566,99 | 89,59  |
| 2019/06/24 | CH2206 | Male | Three y/o | Control | Control | Fast Day | Yes | 11:10 | 11:00 - 11:59 | Late Morning | 37,5 | 55  | 34,0  | 34,0  | 18,65 | 547,52 | 118,49 |
| 2019/06/24 | CH2205 | Male | Three y/o | Control | Control | Fast Day | Yes | 11:15 | 11:00 - 11:59 | Late Morning | 37,5 | 88  | 188,2 | 188,2 | 18,65 | 584,49 | 177,98 |
| 2019/06/24 | CH2206 | Male | Three y/o | Control | Control | Fast Day | Yes | 11:15 | 11:00 - 11:59 | Late Morning | 37,4 |     | 44,8  | 44,8  | 18,55 |        | 127,99 |
| 2019/06/24 | CH2205 | Male | Three y/o | Control | Control | Fast Day | Yes | 11:20 | 11:00 - 11:59 | Late Morning | 37,6 | 118 | 22,6  | 22,6  | 18,75 | 605,61 | 104,49 |
| 2019/06/24 | CH2206 | Male | Three y/o | Control | Control | Fast Day | Yes | 11:20 | 11:00 - 11:59 | Late Morning | 37,5 | 60  | 71,2  | 71,2  | 18,65 | 554,67 | 144,03 |
| 2019/06/24 | CH2205 | Male | Three y/o | Control | Control | Fast Day | Yes | 11:25 | 11:00 - 11:59 | Late Morning | 37,6 |     | 165,8 | 165,8 | 18,75 |        | 173,53 |
| 2019/06/24 | CH2206 | Male | Three y/o | Control | Control | Fast Day | Yes | 11:25 | 11:00 - 11:59 | Late Morning | 37,5 | 88  | 54,0  | 54,0  | 18,65 | 584,49 | 134,45 |
| 2019/06/24 | CH2205 | Male | Three y/o | Control | Control | Fast Day | No  | 11:30 | 11:00 - 11:59 | Late Morning | 37,6 | 114 | 78,4  | 78,4  | 18,75 | 603,20 | 147,37 |
| 2019/06/24 | CH2206 | Male | Three y/o | Control | Control | Fast Day | No  | 11:30 | 11:00 - 11:59 | Late Morning | 37,5 | 45  | 53,8  | 53,8  | 18,65 | 530,47 | 134,32 |
| 2019/06/24 | CH2205 | Male | Three y/o | Control | Control | Fast Day | No  | 11:35 | 11:00 - 11:59 | Late Morning | 37,6 | 55  | 24,4  | 24,4  | 18,75 | 547,52 | 107,11 |
| 2019/06/24 | CH2206 | Male | Three y/o | Control | Control | Fast Day | No  | 11:35 | 11:00 - 11:59 | Late Morning | 37,5 | 54  | 50,2  | 50,2  | 18,65 | 545,99 | 131,92 |
| 2019/06/24 | CH2205 | Male | Three y/o | Control | Control | Fast Day | No  | 11:40 | 11:00 - 11:59 | Late Morning | 37,6 | 47  | 38,4  | 38,4  | 18,75 | 534,23 | 122,68 |
| 2019/06/24 | CH2206 | Male | Three y/o | Control | Control | Fast Day | No  | 11:40 | 11:00 - 11:59 | Late Morning | 37,5 | 71  | 72,2  | 72,2  | 18,65 | 568,10 | 144,51 |
| 2019/06/24 | CH2205 | Male | Three y/o | Control | Control | Fast Day | No  | 11:45 | 11:00 - 11:59 | Late Morning | 37,6 |     | 69,2  | 69,2  | 18,75 |        | 143,04 |



|            |        |      |           |         |         |          |    |       |               |              |      |     |       |       |       |        |        |
|------------|--------|------|-----------|---------|---------|----------|----|-------|---------------|--------------|------|-----|-------|-------|-------|--------|--------|
| 2019/06/24 | CH2206 | Male | Three y/o | Control | Control | Fast Day | No | 11:45 | 11:00 - 11:59 | Late Morning | 37,5 | 61  | 39,6  | 39,6  | 18,65 | 556,01 | 123,74 |
| 2019/06/24 | CH2205 | Male | Three y/o | Control | Control | Fast Day | No | 11:50 | 11:00 - 11:59 | Late Morning | 37,7 | 118 | 75,4  | 75,4  | 18,85 | 605,61 | 146,02 |
| 2019/06/24 | CH2206 | Male | Three y/o | Control | Control | Fast Day | No | 11:50 | 11:00 - 11:59 | Late Morning | 37,5 | 96  | 39,4  | 39,4  | 18,65 | 590,91 | 123,57 |
| 2019/06/24 | CH2205 | Male | Three y/o | Control | Control | Fast Day | No | 11:55 | 11:00 - 11:59 | Late Morning | 37,7 | 87  | 343,0 | 343,0 | 18,85 | 583,64 | 199,16 |
| 2019/06/24 | CH2206 | Male | Three y/o | Control | Control | Fast Day | No | 11:55 | 11:00 - 11:59 | Late Morning | 37,5 | 54  | 81,2  | 81,2  | 18,65 | 545,99 | 148,59 |
| 2019/06/24 | CH2205 | Male | Three y/o | Control | Control | Fast Day | No | 12:00 | 12:00 - 12:59 | Afternoon    | 37,7 | 145 | 158,8 | 158,8 | 18,85 | 619,62 | 172,02 |
| 2019/06/24 | CH2206 | Male | Three y/o | Control | Control | Fast Day | No | 12:00 | 12:00 - 12:59 | Afternoon    | 37,4 | 62  | 80,8  | 80,8  | 18,55 | 557,33 | 148,42 |
| 2019/06/24 | CH2205 | Male | Three y/o | Control | Control | Fast Day | No | 12:05 | 12:00 - 12:59 | Afternoon    | 37,7 | 55  | 35,2  | 35,2  | 18,85 | 547,52 | 119,69 |
| 2019/06/24 | CH2206 | Male | Three y/o | Control | Control | Fast Day | No | 12:05 | 12:00 - 12:59 | Afternoon    | 37,4 | 91  | 40,2  | 40,2  | 18,55 | 586,98 | 124,26 |
| 2019/06/24 | CH2205 | Male | Three y/o | Control | Control | Fast Day | No | 12:10 | 12:00 - 12:59 | Afternoon    | 37,7 | 128 | 165,2 | 165,2 | 18,85 | 611,22 | 173,40 |
| 2019/06/24 | CH2206 | Male | Three y/o | Control | Control | Fast Day | No | 12:10 | 12:00 - 12:59 | Afternoon    | 37,4 | 103 | 297,8 | 297,8 | 18,55 | 596,00 | 194,16 |
| 2019/06/24 | CH2205 | Male | Three y/o | Control | Control | Fast Day | No | 12:15 | 12:00 - 12:59 | Afternoon    | 37,7 | 177 | 215,2 | 215,2 | 18,85 | 632,55 | 182,70 |
| 2019/06/24 | CH2206 | Male | Three y/o | Control | Control | Fast Day | No | 12:15 | 12:00 - 12:59 | Afternoon    | 37,5 | 109 | 52,2  | 52,2  | 18,65 | 600,04 | 133,27 |
| 2019/06/24 | CH2205 | Male | Three y/o | Control | Control | Fast Day | No | 12:20 | 12:00 - 12:59 | Afternoon    | 37,9 | 48  | 62,0  | 62,0  | 19,05 | 536,04 | 139,23 |
| 2019/06/24 | CH2206 | Male | Three y/o | Control | Control | Fast Day | No | 12:20 | 12:00 - 12:59 | Afternoon    | 37,5 | 87  | 45,8  | 45,8  | 18,65 | 583,64 | 128,76 |
| 2019/06/24 | CH2205 | Male | Three y/o | Control | Control | Fast Day | No | 12:25 | 12:00 - 12:59 | Afternoon    | 37,9 | 45  | 6,0   | 6,0   | 19,05 | 530,47 | 59,53  |
| 2019/06/24 | CH2206 | Male | Three y/o | Control | Control | Fast Day | No | 12:25 | 12:00 - 12:59 | Afternoon    | 37,5 | 54  | 42,6  | 42,6  | 18,65 | 545,99 | 126,26 |
| 2019/06/24 | CH2205 | Male | Three y/o | Control | Control | Fast Day | No | 12:30 | 12:00 - 12:59 | Afternoon    | 37,9 | 57  | 6,0   | 6,0   | 19,05 | 550,47 | 59,53  |
| 2019/06/24 | CH2206 | Male | Three y/o | Control | Control | Fast Day | No | 12:30 | 12:00 - 12:59 | Afternoon    | 37,5 | 45  | 35,0  | 35,0  | 18,65 | 530,47 | 119,49 |
| 2019/06/24 | CH2205 | Male | Three y/o | Control | Control | Fast Day | No | 12:35 | 12:00 - 12:59 | Afternoon    | 37,9 | 63  | 5,2   | 5,2   | 19,05 | 558,62 | 54,72  |
| 2019/06/24 | CH2206 | Male | Three y/o | Control | Control | Fast Day | No | 12:35 | 12:00 - 12:59 | Afternoon    | 37,5 | 74  | 40,2  | 40,2  | 18,65 | 571,33 | 124,26 |
| 2019/06/24 | CH2205 | Male | Three y/o | Control | Control | Fast Day | No | 12:40 | 12:00 - 12:59 | Afternoon    | 37,9 | 53  | 21,0  | 21,0  | 19,05 | 544,43 | 101,98 |
| 2019/06/24 | CH2206 | Male | Three y/o | Control | Control | Fast Day | No | 12:40 | 12:00 - 12:59 | Afternoon    | 37,5 | 65  | 36,2  | 36,2  | 18,65 | 561,12 | 120,65 |
| 2019/06/24 | CH2205 | Male | Three y/o | Control | Control | Fast Day | No | 12:45 | 12:00 - 12:59 | Afternoon    | 37,9 | 54  | 31,2  | 31,2  | 19,05 | 545,99 | 115,54 |
| 2019/06/24 | CH2206 | Male | Three y/o | Control | Control | Fast Day | No | 12:45 | 12:00 - 12:59 | Afternoon    | 37,5 | 95  | 36,4  | 36,4  | 18,65 | 590,14 | 120,84 |
| 2019/06/24 | CH2205 | Male | Three y/o | Control | Control | Fast Day | No | 12:50 | 12:00 - 12:59 | Afternoon    | 37,9 | 60  | 184,4 | 184,4 | 19,05 | 554,67 | 177,26 |
| 2019/06/24 | CH2206 | Male | Three y/o | Control | Control | Fast Day | No | 12:50 | 12:00 - 12:59 | Afternoon    | 37,7 | 86  | 304,6 | 304,6 | 18,85 | 582,77 | 194,96 |
| 2019/06/24 | CH2205 | Male | Three y/o | Control | Control | Fast Day | No | 12:55 | 12:00 - 12:59 | Afternoon    | 38,0 | 94  | 315,2 | 315,2 | 19,15 | 589,37 | 196,17 |
| 2019/06/24 | CH2206 | Male | Three y/o | Control | Control | Fast Day | No | 12:55 | 12:00 - 12:59 | Afternoon    | 37,8 | 35  | 19,2  | 19,2  | 18,95 | 507,97 | 98,92  |
| 2019/06/24 | CH2205 | Male | Three y/o | Control | Control | Fast Day | No | 13:00 | 13:00 - 13:59 | Afternoon    | 38,0 | 93  | 46,2  | 46,2  | 19,15 | 588,58 | 129,06 |
| 2019/06/24 | CH2206 | Male | Three y/o | Control | Control | Fast Day | No | 13:00 | 13:00 - 13:59 | Afternoon    | 37,7 |     | 51,0  | 51,0  | 18,85 |        | 132,47 |
| 2019/06/24 | CH2205 | Male | Three y/o | Control | Control | Fast Day | No | 13:05 | 13:00 - 13:59 | Afternoon    | 37,9 | 54  | 14,6  | 14,6  | 19,05 | 545,99 | 89,59  |
| 2019/06/24 | CH2206 | Male | Three y/o | Control | Control | Fast Day | No | 13:05 | 13:00 - 13:59 | Afternoon    | 37,7 | 111 | 49,6  | 49,6  | 18,85 | 601,33 | 131,51 |
| 2019/06/24 | CH2205 | Male | Three y/o | Control | Control | Fast Day | No | 13:10 | 13:00 - 13:59 | Afternoon    | 37,9 | 52  | 5,6   | 5,6   | 19,05 | 542,83 | 57,21  |
| 2019/06/24 | CH2206 | Male | Three y/o | Control | Control | Fast Day | No | 13:10 | 13:00 - 13:59 | Afternoon    | 37,7 | 55  | 41,8  | 41,8  | 18,85 | 547,52 | 125,60 |
| 2019/06/24 | CH2205 | Male | Three y/o | Control | Control | Fast Day | No | 13:15 | 13:00 - 13:59 | Afternoon    | 37,9 |     | 19,8  | 19,8  | 19,05 |        | 99,97  |
| 2019/06/24 | CH2206 | Male | Three y/o | Control | Control | Fast Day | No | 13:15 | 13:00 - 13:59 | Afternoon    | 37,7 | 54  | 22,8  | 22,8  | 18,85 | 545,99 | 104,79 |
| 2019/06/24 | CH2205 | Male | Three y/o | Control | Control | Fast Day | No | 13:20 | 13:00 - 13:59 | Afternoon    | 37,9 | 51  | 10,8  | 10,8  | 19,05 | 541,20 | 79,36  |
| 2019/06/24 | CH2206 | Male | Three y/o | Control | Control | Fast Day | No | 13:20 | 13:00 - 13:59 | Afternoon    | 37,7 | 66  | 39,6  | 39,6  | 18,85 | 562,34 | 123,74 |
| 2019/06/24 | CH2205 | Male | Three y/o | Control | Control | Fast Day | No | 13:25 | 13:00 - 13:59 | Afternoon    | 37,7 | 49  | 46,8  | 46,8  | 18,85 | 537,80 | 129,50 |
| 2019/06/24 | CH2206 | Male | Three y/o | Control | Control | Fast Day | No | 13:25 | 13:00 - 13:59 | Afternoon    | 37,7 | 65  | 50,8  | 50,8  | 18,85 | 561,12 | 132,33 |
| 2019/06/24 | CH2205 | Male | Three y/o | Control | Control | Fast Day | No | 13:30 | 13:00 - 13:59 | Afternoon    | 37,9 | 51  | 7,2   | 7,2   | 19,05 | 541,20 | 65,66  |
| 2019/06/24 | CH2206 | Male | Three y/o | Control | Control | Fast Day | No | 13:30 | 13:00 - 13:59 | Afternoon    | 37,7 | 70  | 53,4  | 53,4  | 18,85 | 566,99 | 134,06 |
| 2019/06/24 | CH2205 | Male | Three y/o | Control | Control | Fast Day | No | 13:35 | 13:00 - 13:59 | Afternoon    | 37,9 | 61  | 6,4   | 6,4   | 19,05 | 556,01 | 61,70  |
| 2019/06/24 | CH2206 | Male | Three y/o | Control | Control | Fast Day | No | 13:35 | 13:00 - 13:59 | Afternoon    | 37,7 | 44  | 58,2  | 58,2  | 18,85 | 528,51 | 137,04 |
| 2019/06/24 | CH2205 | Male | Three y/o | Control | Control | Fast Day | No | 13:40 | 13:00 - 13:59 | Afternoon    | 37,9 | 53  | 4,2   | 4,2   | 19,05 | 544,43 | 47,57  |
| 2019/06/24 | CH2206 | Male | Three y/o | Control | Control | Fast Day | No | 13:40 | 13:00 - 13:59 | Afternoon    | 37,7 | 56  | 57,6  | 57,6  | 18,85 | 549,01 | 136,68 |
| 2019/06/24 | CH2205 | Male | Three y/o | Control | Control | Fast Day | No | 13:45 | 13:00 - 13:59 | Afternoon    | 37,9 | 53  | 9,4   | 9,4   | 19,05 | 544,43 | 74,66  |
| 2019/06/24 | CH2206 | Male | Three y/o | Control | Control | Fast Day | No | 13:45 | 13:00 - 13:59 | Afternoon    | 37,7 | 73  | 56,8  | 56,8  | 18,85 | 570,27 | 136,20 |
| 2019/06/24 | CH2205 | Male | Three y/o | Control | Control | Fast Day | No | 13:50 | 13:00 - 13:59 | Afternoon    | 37,9 | 92  | 3,2   | 3,2   | 19,05 | 587,78 | 38,49  |
| 2019/06/24 | CH2206 | Male | Three y/o | Control | Control | Fast Day | No | 13:50 | 13:00 - 13:59 | Afternoon    | 37,8 | 61  | 53,2  | 53,2  | 18,95 | 556,01 | 133,93 |
| 2019/06/24 | CH2205 | Male | Three y/o | Control | Control | Fast Day | No | 13:55 | 13:00 - 13:59 | Afternoon    | 37,9 | 53  | 9,8   | 9,8   | 19,05 | 544,43 | 76,07  |
| 2019/06/24 | CH2206 | Male | Three y/o | Control | Control | Fast Day | No | 13:55 | 13:00 - 13:59 | Afternoon    | 37,8 | 91  | 54,8  | 54,8  | 18,95 | 586,98 | 134,96 |
| 2019/06/24 | CH2205 | Male | Three y/o | Control | Control | Fast Day | No | 14:00 | 14:00 - 14:59 | Afternoon    | 37,9 | 54  | 7,4   | 7,4   | 19,05 | 545,99 | 66,59  |
| 2019/06/24 | CH2206 | Male | Three y/o | Control | Control | Fast Day | No | 14:00 | 14:00 - 14:59 | Afternoon    | 37,8 | 64  | 55,8  | 55,8  | 18,95 | 559,88 | 135,58 |
| 2019/06/24 | CH2205 | Male | Three y/o | Control | Control | Fast Day | No | 14:05 | 14:00 - 14:59 | Afternoon    | 37,9 | 53  | 9,0   | 9,0   | 19,05 | 544,43 | 73,19  |
| 2019/06/24 | CH2206 | Male | Three y/o | Control | Control | Fast Day | No | 14:05 | 14:00 - 14:59 | Afternoon    | 37,8 | 63  | 50,2  | 50,2  | 18,95 | 558,62 | 131,92 |
| 2019/06/24 | CH2205 | Male | Three y/o | Control | Control | Fast Day | No | 14:10 | 14:00 - 14:59 | Afternoon    | 38,0 | 55  | 16,2  | 16,2  | 19,15 | 547,52 | 93,13  |
| 2019/06/24 | CH2206 | Male | Three y/o | Control | Control | Fast Day | No | 14:10 | 14:00 - 14:59 | Afternoon    | 37,9 | 67  | 59,8  | 59,8  | 19,05 | 563,53 | 137,98 |
| 2019/06/24 | CH2205 | Male | Three y/o | Control | Control | Fast Day | No | 14:15 | 14:00 - 14:59 | Afternoon    | 38,0 | 69  | 23,0  | 23,0  | 19,15 | 565,86 | 105,09 |
| 2019/06/24 | CH2206 | Male | Three y/o | Control | Control | Fast Day | No | 14:15 | 14:00 - 14:59 | Afternoon    | 37,9 | 56  | 53,2  | 53,2  | 19,05 | 549,01 | 133,93 |
| 2019/06/24 | CH2205 | Male | Three y/o | Control | Control | Fast Day | No | 14:20 | 14:00 - 14:59 | Afternoon    | 38,0 | 49  | 19,0  | 19,0  | 19,15 | 537,80 | 98,56  |
| 2019/06/24 | CH2206 | Male | Three y/o | Control | Control | Fast Day | No | 14:20 | 14:00 - 14:59 | Afternoon    | 37,9 | 55  | 57,2  | 57,2  | 19,05 | 547,52 | 136,44 |
| 2019/06/24 | CH2205 | Male | Three y/o | Control | Control | Fast Day | No | 14:25 | 14:00 - 14:59 | Afternoon    | 38,0 | 60  | 19,6  | 19,6  | 19,15 | 554,67 | 99,63  |
| 2019/06/24 | CH2206 | Male | Three y/o | Control | Control | Fast Day | No | 14:25 | 14:00 - 14:59 | Afternoon    | 37,9 | 65  | 55,0  | 55,0  | 19,05 | 561,12 | 135,08 |
| 2019/06/24 | CH2205 | Male | Three y/o | Control | Control | Fast Day | No | 14:30 | 14:00 - 14:59 | Afternoon    | 38,0 | 54  | 20,4  | 20,4  | 19,15 | 545,99 | 100,99 |
| 2019/06/24 | CH2206 | Male | Three y/o | Control | Control | Fast Day | No | 14:30 | 14:00 - 14:59 | Afternoon    | 37,9 | 57  | 50,0  | 50,0  | 19,05 | 550,47 | 131,79 |
| 2019/06/24 | CH2205 | Male | Three y/o | Control | Control | Fast Day | No | 14:35 | 14:00 - 14:59 | Afternoon    | 38,0 |     | 14,4  | 14,4  | 19,15 |        | 89,12  |
| 2019/06/24 | CH2206 | Male | Three y/o | Control | Control | Fast Day | No | 14:35 | 14:00 - 14:59 | Afternoon    | 37,9 | 50  | 53,2  | 53,2  | 19,05 | 539,52 | 133,93 |
| 2019/06/24 | CH2205 | Male | Three y/o | Control | Control | Fast Day | No | 14:40 | 14:00 - 14:59 | Afternoon    | 37,9 |     | 9,8   | 9,8   | 19,05 |        | 76,07  |



|            |        |      |           |         |         |          |    |       |               |           |      |     |       |       |       |        |        |
|------------|--------|------|-----------|---------|---------|----------|----|-------|---------------|-----------|------|-----|-------|-------|-------|--------|--------|
| 2019/06/24 | CH2206 | Male | Three y/o | Control | Control | Fast Day | No | 14:40 | 14:00 - 14:59 | Afternoon | 37,9 | 50  | 45,4  | 45,4  | 19,05 | 539,52 | 128,45 |
| 2019/06/24 | CH2205 | Male | Three y/o | Control | Control | Fast Day | No | 14:45 | 14:00 - 14:59 | Afternoon | 37,9 | 44  | 10,2  | 10,2  | 19,05 | 528,51 | 77,43  |
| 2019/06/24 | CH2206 | Male | Three y/o | Control | Control | Fast Day | No | 14:45 | 14:00 - 14:59 | Afternoon | 37,9 | 55  | 40,8  | 40,8  | 19,05 | 547,52 | 124,77 |
| 2019/06/24 | CH2205 | Male | Three y/o | Control | Control | Fast Day | No | 14:50 | 14:00 - 14:59 | Afternoon | 37,9 | 57  | 5,8   | 5,8   | 19,05 | 550,47 | 58,39  |
| 2019/06/24 | CH2206 | Male | Three y/o | Control | Control | Fast Day | No | 14:50 | 14:00 - 14:59 | Afternoon | 38,0 | 76  | 40,8  | 40,8  | 19,15 | 573,39 | 124,77 |
| 2019/06/24 | CH2205 | Male | Three y/o | Control | Control | Fast Day | No | 14:55 | 14:00 - 14:59 | Afternoon | 37,9 | 70  | 4,2   | 4,2   | 19,05 | 566,99 | 47,57  |
| 2019/06/24 | CH2206 | Male | Three y/o | Control | Control | Fast Day | No | 14:55 | 14:00 - 14:59 | Afternoon | 38,0 | 92  | 46,8  | 46,8  | 19,15 | 587,78 | 129,50 |
| 2019/06/24 | CH2205 | Male | Three y/o | Control | Control | Fast Day | No | 15:00 | 15:00 - 15:59 | Afternoon | 37,9 | 45  | 6,2   | 6,2   | 19,05 | 530,47 | 60,63  |
| 2019/06/24 | CH2206 | Male | Three y/o | Control | Control | Fast Day | No | 15:00 | 15:00 - 15:59 | Afternoon | 38,0 | 47  | 51,6  | 51,6  | 19,15 | 534,23 | 132,87 |
| 2019/06/24 | CH2205 | Male | Three y/o | Control | Control | Fast Day | No | 15:05 | 15:00 - 15:59 | Afternoon | 37,9 | 48  | 9,8   | 9,8   | 19,05 | 536,04 | 76,07  |
| 2019/06/24 | CH2206 | Male | Three y/o | Control | Control | Fast Day | No | 15:05 | 15:00 - 15:59 | Afternoon | 38,0 | 59  | 67,8  | 67,8  | 19,15 | 553,30 | 142,33 |
| 2019/06/24 | CH2205 | Male | Three y/o | Control | Control | Fast Day | No | 15:10 | 15:00 - 15:59 | Afternoon | 37,9 | 53  | 9,0   | 9,0   | 19,05 | 544,43 | 73,19  |
| 2019/06/24 | CH2206 | Male | Three y/o | Control | Control | Fast Day | No | 15:10 | 15:00 - 15:59 | Afternoon | 38,0 | 47  | 50,6  | 50,6  | 19,15 | 534,23 | 132,20 |
| 2019/06/24 | CH2205 | Male | Three y/o | Control | Control | Fast Day | No | 15:15 | 15:00 - 15:59 | Afternoon | 37,9 | 52  | 6,8   | 6,8   | 19,05 | 542,83 | 63,74  |
| 2019/06/24 | CH2206 | Male | Three y/o | Control | Control | Fast Day | No | 15:15 | 15:00 - 15:59 | Afternoon | 38,0 | 52  | 49,0  | 49,0  | 19,15 | 542,83 | 131,09 |
| 2019/06/24 | CH2205 | Male | Three y/o | Control | Control | Fast Day | No | 15:20 | 15:00 - 15:59 | Afternoon | 37,9 | 50  | 5,2   | 5,2   | 19,05 | 539,52 | 54,72  |
| 2019/06/24 | CH2206 | Male | Three y/o | Control | Control | Fast Day | No | 15:20 | 15:00 - 15:59 | Afternoon | 38,0 | 50  | 53,6  | 53,6  | 19,15 | 539,52 | 134,19 |
| 2019/06/24 | CH2205 | Male | Three y/o | Control | Control | Fast Day | No | 15:25 | 15:00 - 15:59 | Afternoon | 38,0 | 67  | 10,6  | 10,6  | 19,15 | 563,53 | 78,73  |
| 2019/06/24 | CH2206 | Male | Three y/o | Control | Control | Fast Day | No | 15:25 | 15:00 - 15:59 | Afternoon | 38,0 | 68  | 40,2  | 40,2  | 19,15 | 564,71 | 124,26 |
| 2019/06/24 | CH2205 | Male | Three y/o | Control | Control | Fast Day | No | 15:30 | 15:00 - 15:59 | Afternoon | 38,0 | 55  | 12,2  | 12,2  | 19,15 | 547,52 | 83,49  |
| 2019/06/24 | CH2206 | Male | Three y/o | Control | Control | Fast Day | No | 15:30 | 15:00 - 15:59 | Afternoon | 38,0 | 48  | 36,4  | 36,4  | 19,15 | 536,04 | 120,84 |
| 2019/06/24 | CH2205 | Male | Three y/o | Control | Control | Fast Day | No | 15:35 | 15:00 - 15:59 | Afternoon | 38,1 | 47  | 12,8  | 12,8  | 19,26 | 534,23 | 85,12  |
| 2019/06/24 | CH2206 | Male | Three y/o | Control | Control | Fast Day | No | 15:35 | 15:00 - 15:59 | Afternoon | 38,0 | 54  | 46,8  | 46,8  | 19,15 | 545,99 | 129,50 |
| 2019/06/24 | CH2205 | Male | Three y/o | Control | Control | Fast Day | No | 15:40 | 15:00 - 15:59 | Afternoon | 38,1 | 57  | 10,0  | 10,0  | 19,26 | 550,47 | 76,76  |
| 2019/06/24 | CH2206 | Male | Three y/o | Control | Control | Fast Day | No | 15:40 | 15:00 - 15:59 | Afternoon | 38,0 | 55  | 45,2  | 45,2  | 19,15 | 547,52 | 128,30 |
| 2019/06/24 | CH2205 | Male | Three y/o | Control | Control | Fast Day | No | 15:45 | 15:00 - 15:59 | Afternoon | 38,1 | 46  | 7,2   | 7,2   | 19,26 | 532,38 | 65,66  |
| 2019/06/24 | CH2206 | Male | Three y/o | Control | Control | Fast Day | No | 15:45 | 15:00 - 15:59 | Afternoon | 37,9 |     | 46,0  | 46,0  | 19,05 |        | 128,91 |
| 2019/06/24 | CH2205 | Male | Three y/o | Control | Control | Fast Day | No | 15:50 | 15:00 - 15:59 | Afternoon | 38,1 | 47  | 14,0  | 14,0  | 19,26 | 534,23 | 88,17  |
| 2019/06/24 | CH2206 | Male | Three y/o | Control | Control | Fast Day | No | 15:50 | 15:00 - 15:59 | Afternoon | 37,9 |     | 14,4  | 14,4  | 19,05 |        | 89,12  |
| 2019/06/24 | CH2205 | Male | Three y/o | Control | Control | Fast Day | No | 15:55 | 15:00 - 15:59 | Afternoon | 38,1 | 68  | 45,2  | 45,2  | 19,26 | 564,71 | 128,30 |
| 2019/06/24 | CH2206 | Male | Three y/o | Control | Control | Fast Day | No | 15:55 | 15:00 - 15:59 | Afternoon | 37,9 | 50  | 25,4  | 25,4  | 19,05 | 539,52 | 108,49 |
| 2019/06/24 | CH2205 | Male | Three y/o | Control | Control | Fast Day | No | 16:00 | 16:00 - 16:59 | Evening   | 38,1 | 119 | 123,4 | 123,4 | 19,26 | 606,20 | 163,18 |
| 2019/06/24 | CH2206 | Male | Three y/o | Control | Control | Fast Day | No | 16:00 | 16:00 - 16:59 | Evening   | 37,9 | 102 | 28,6  | 28,6  | 19,05 | 595,30 | 112,56 |
| 2019/06/24 | CH2205 | Male | Three y/o | Control | Control | Fast Day | No | 16:05 | 16:00 - 16:59 | Evening   | 38,1 | 103 | 23,4  | 23,4  | 19,26 | 596,00 | 105,68 |
| 2019/06/24 | CH2206 | Male | Three y/o | Control | Control | Fast Day | No | 16:05 | 16:00 - 16:59 | Evening   | 37,8 | 66  | 31,2  | 31,2  | 18,95 | 562,34 | 115,54 |
| 2019/06/24 | CH2205 | Male | Three y/o | Control | Control | Fast Day | No | 16:10 | 16:00 - 16:59 | Evening   | 38,1 | 105 | 85,8  | 85,8  | 19,26 | 597,38 | 150,51 |
| 2019/06/24 | CH2206 | Male | Three y/o | Control | Control | Fast Day | No | 16:10 | 16:00 - 16:59 | Evening   | 37,8 | 90  | 116,4 | 116,4 | 18,95 | 586,16 | 161,14 |
| 2019/06/24 | CH2205 | Male | Three y/o | Control | Control | Fast Day | No | 16:15 | 16:00 - 16:59 | Evening   | 38,1 | 112 | 78,6  | 78,6  | 19,26 | 601,96 | 147,46 |
| 2019/06/24 | CH2206 | Male | Three y/o | Control | Control | Fast Day | No | 16:15 | 16:00 - 16:59 | Evening   | 37,9 | 88  | 70,6  | 70,6  | 19,05 | 584,49 | 143,73 |
| 2019/06/24 | CH2205 | Male | Three y/o | Control | Control | Fast Day | No | 16:20 | 16:00 - 16:59 | Evening   | 38,1 |     | 97,4  | 97,4  | 19,26 |        | 154,93 |
| 2019/06/24 | CH2206 | Male | Three y/o | Control | Control | Fast Day | No | 16:20 | 16:00 - 16:59 | Evening   | 37,9 | 103 | 39,8  | 39,8  | 19,05 | 596,00 | 123,91 |
| 2019/06/24 | CH2205 | Male | Three y/o | Control | Control | Fast Day | No | 16:25 | 16:00 - 16:59 | Evening   | 38,1 |     | 105,2 | 105,2 | 19,26 |        | 157,61 |
| 2019/06/24 | CH2206 | Male | Three y/o | Control | Control | Fast Day | No | 16:25 | 16:00 - 16:59 | Evening   | 37,9 | 68  | 45,4  | 45,4  | 19,05 | 564,71 | 128,45 |
| 2019/06/24 | CH2205 | Male | Three y/o | Control | Control | Fast Day | No | 16:30 | 16:00 - 16:59 | Evening   | 38,2 | 98  | 48,4  | 48,4  | 19,36 | 592,41 | 130,66 |
| 2019/06/24 | CH2206 | Male | Three y/o | Control | Control | Fast Day | No | 16:30 | 16:00 - 16:59 | Evening   | 37,9 | 54  | 16,0  | 16,0  | 19,05 | 545,99 | 92,71  |
| 2019/06/24 | CH2205 | Male | Three y/o | Control | Control | Fast Day | No | 16:35 | 16:00 - 16:59 | Evening   | 38,1 | 111 | 62,8  | 62,8  | 19,26 | 601,33 | 139,67 |
| 2019/06/24 | CH2206 | Male | Three y/o | Control | Control | Fast Day | No | 16:35 | 16:00 - 16:59 | Evening   | 37,8 | 61  | 21,6  | 21,6  | 18,95 | 556,01 | 102,94 |
| 2019/06/24 | CH2205 | Male | Three y/o | Control | Control | Fast Day | No | 16:40 | 16:00 - 16:59 | Evening   | 38,2 | 197 | 57,8  | 57,8  | 19,36 | 639,25 | 136,80 |
| 2019/06/24 | CH2206 | Male | Three y/o | Control | Control | Fast Day | No | 16:40 | 16:00 - 16:59 | Evening   | 37,8 | 75  | 14,8  | 14,8  | 18,95 | 572,36 | 90,05  |
| 2019/06/24 | CH2205 | Male | Three y/o | Control | Control | Fast Day | No | 16:45 | 16:00 - 16:59 | Evening   | 38,3 | 90  | 91,4  | 91,4  | 19,46 | 586,16 | 152,71 |
| 2019/06/24 | CH2206 | Male | Three y/o | Control | Control | Fast Day | No | 16:45 | 16:00 - 16:59 | Evening   | 37,7 | 50  | 13,8  | 13,8  | 18,85 | 539,52 | 87,68  |
| 2019/06/24 | CH2205 | Male | Three y/o | Control | Control | Fast Day | No | 16:50 | 16:00 - 16:59 | Evening   | 38,4 | 77  | 64,2  | 64,2  | 19,56 | 574,39 | 140,44 |
| 2019/06/24 | CH2206 | Male | Three y/o | Control | Control | Fast Day | No | 16:50 | 16:00 - 16:59 | Evening   | 37,5 | 81  | 20,6  | 20,6  | 18,65 | 578,26 | 101,32 |
| 2019/06/24 | CH2205 | Male | Three y/o | Control | Control | Fast Day | No | 16:55 | 16:00 - 16:59 | Evening   | 38,3 | 67  | 10,8  | 10,8  | 19,46 | 563,53 | 79,36  |
| 2019/06/24 | CH2206 | Male | Three y/o | Control | Control | Fast Day | No | 16:55 | 16:00 - 16:59 | Evening   | 37,5 | 52  | 20,6  | 20,6  | 18,65 | 542,83 | 101,32 |
| 2019/06/24 | CH2205 | Male | Three y/o | Control | Control | Fast Day | No | 17:00 | 17:00 - 17:59 | Evening   | 38,3 | 106 | 65,6  | 65,6  | 19,46 | 598,06 | 141,19 |
| 2019/06/24 | CH2206 | Male | Three y/o | Control | Control | Fast Day | No | 17:00 | 17:00 - 17:59 | Evening   | 37,5 | 85  | 15,4  | 15,4  | 18,65 | 581,90 | 91,41  |
| 2019/06/24 | CH2205 | Male | Three y/o | Control | Control | Fast Day | No | 17:05 | 17:00 - 17:59 | Evening   | 38,3 | 73  | 114,8 | 114,8 | 19,46 | 570,27 | 160,66 |
| 2019/06/24 | CH2206 | Male | Three y/o | Control | Control | Fast Day | No | 17:05 | 17:00 - 17:59 | Evening   | 37,5 | 50  | 26,2  | 26,2  | 18,65 | 539,52 | 109,55 |
| 2019/06/24 | CH2205 | Male | Three y/o | Control | Control | Fast Day | No | 17:10 | 17:00 - 17:59 | Evening   | 38,3 | 105 | 53,8  | 53,8  | 19,46 | 597,38 | 134,32 |
| 2019/06/24 | CH2206 | Male | Three y/o | Control | Control | Fast Day | No | 17:10 | 17:00 - 17:59 | Evening   | 37,5 | 108 | 176,4 | 176,4 | 18,65 | 599,39 | 175,71 |
| 2019/06/24 | CH2205 | Male | Three y/o | Control | Control | Fast Day | No | 17:15 | 17:00 - 17:59 | Evening   | 38,4 | 148 | 139,0 | 139,0 | 19,56 | 620,97 | 167,35 |
| 2019/06/24 | CH2206 | Male | Three y/o | Control | Control | Fast Day | No | 17:15 | 17:00 - 17:59 | Evening   | 37,7 | 138 | 176,4 | 176,4 | 18,85 | 616,31 | 175,71 |
| 2019/06/24 | CH2205 | Male | Three y/o | Control | Control | Fast Day | No | 17:20 | 17:00 - 17:59 | Evening   | 38,4 | 113 | 87,4  | 87,4  | 19,56 | 602,58 | 151,15 |
| 2019/06/24 | CH2206 | Male | Three y/o | Control | Control | Fast Day | No | 17:20 | 17:00 - 17:59 | Evening   | 37,8 | 103 | 89,6  | 89,6  | 18,95 | 596,00 | 152,02 |
| 2019/06/24 | CH2205 | Male | Three y/o | Control | Control | Fast Day | No | 17:25 | 17:00 - 17:59 | Evening   | 38,5 |     | 452,8 | 452,8 | 19,66 |        | 209,02 |
| 2019/06/24 | CH2206 | Male | Three y/o | Control | Control | Fast Day | No | 17:25 | 17:00 - 17:59 | Evening   | 37,9 | 115 | 58,6  | 58,6  | 19,05 | 603,82 | 137,28 |
| 2019/06/24 | CH2205 | Male | Three y/o | Control | Control | Fast Day | No | 17:30 | 17:00 - 17:59 | Evening   | 38,5 | 86  | 60,8  | 60,8  | 19,66 | 582,77 | 138,55 |
| 2019/06/24 | CH2206 | Male | Three y/o | Control | Control | Fast Day | No | 17:30 | 17:00 - 17:59 | Evening   | 37,9 | 71  | 67,4  | 67,4  | 19,05 | 568,10 | 142,12 |
| 2019/06/24 | CH2205 | Male | Three y/o | Control | Control | Fast Day | No | 17:35 | 17:00 - 17:59 | Evening   | 38,4 | 49  | 240,2 | 240,2 | 19,56 | 537,80 | 186,57 |



|            |        |      |           |         |         |          |    |       |               |         |      |     |       |       |       |        |        |
|------------|--------|------|-----------|---------|---------|----------|----|-------|---------------|---------|------|-----|-------|-------|-------|--------|--------|
| 2019/06/24 | CH2206 | Male | Three y/o | Control | Control | Fast Day | No | 17:35 | 17:00 - 17:59 | Evening | 37,9 | 111 | 72,0  | 72,0  | 19,05 | 601,33 | 144,42 |
| 2019/06/24 | CH2205 | Male | Three y/o | Control | Control | Fast Day | No | 17:40 | 17:00 - 17:59 | Evening | 38,5 |     | 296,0 | 296,0 | 19,66 |        | 193,95 |
| 2019/06/24 | CH2206 | Male | Three y/o | Control | Control | Fast Day | No | 17:40 | 17:00 - 17:59 | Evening | 38,0 | 92  | 28,4  | 28,4  | 19,15 | 587,78 | 112,31 |
| 2019/06/24 | CH2205 | Male | Three y/o | Control | Control | Fast Day | No | 17:45 | 17:00 - 17:59 | Evening | 38,5 | 115 | 66,0  | 66,0  | 19,66 | 603,82 | 141,40 |
| 2019/06/24 | CH2206 | Male | Three y/o | Control | Control | Fast Day | No | 17:45 | 17:00 - 17:59 | Evening | 37,9 | 117 | 123,4 | 123,4 | 19,05 | 605,02 | 163,18 |
| 2019/06/24 | CH2205 | Male | Three y/o | Control | Control | Fast Day | No | 17:50 | 17:00 - 17:59 | Evening | 38,7 | 154 | 140,2 | 140,2 | 19,87 | 623,58 | 167,65 |
| 2019/06/24 | CH2206 | Male | Three y/o | Control | Control | Fast Day | No | 17:50 | 17:00 - 17:59 | Evening | 38,0 | 103 | 279,0 | 279,0 | 19,15 | 596,00 | 191,86 |
| 2019/06/24 | CH2205 | Male | Three y/o | Control | Control | Fast Day | No | 17:55 | 17:00 - 17:59 | Evening | 38,8 |     | 18,6  | 18,6  | 19,97 |        | 97,84  |
| 2019/06/24 | CH2206 | Male | Three y/o | Control | Control | Fast Day | No | 17:55 | 17:00 - 17:59 | Evening | 38,1 |     | 112,2 | 112,2 | 19,26 |        | 159,86 |
| 2019/06/24 | CH2205 | Male | Three y/o | Control | Control | Fast Day | No | 18:00 | 18:00 - 18:59 | Evening | 38,7 | 53  | 29,6  | 29,6  | 19,87 | 544,43 | 113,73 |
| 2019/06/24 | CH2206 | Male | Three y/o | Control | Control | Fast Day | No | 18:00 | 18:00 - 18:59 | Evening | 38,0 | 118 | 38,6  | 38,6  | 19,15 | 605,61 | 122,86 |
| 2019/06/24 | CH2205 | Male | Three y/o | Control | Control | Fast Day | No | 18:05 | 18:00 - 18:59 | Evening | 38,7 | 93  | 28,4  | 28,4  | 19,87 | 588,58 | 112,31 |
| 2019/06/24 | CH2206 | Male | Three y/o | Control | Control | Fast Day | No | 18:05 | 18:00 - 18:59 | Evening | 37,9 |     | 9,0   | 9,0   | 19,05 |        | 73,19  |
| 2019/06/24 | CH2205 | Male | Three y/o | Control | Control | Fast Day | No | 18:10 | 18:00 - 18:59 | Evening | 38,5 |     | 23,6  | 23,6  | 19,66 |        | 105,97 |
| 2019/06/24 | CH2206 | Male | Three y/o | Control | Control | Fast Day | No | 18:10 | 18:00 - 18:59 | Evening | 37,5 | 128 | 13,4  | 13,4  | 18,65 | 611,22 | 86,68  |
| 2019/06/24 | CH2205 | Male | Three y/o | Control | Control | Fast Day | No | 18:15 | 18:00 - 18:59 | Evening | 38,5 |     | 19,0  | 19,0  | 19,66 |        | 98,56  |
| 2019/06/24 | CH2206 | Male | Three y/o | Control | Control | Fast Day | No | 18:15 | 18:00 - 18:59 | Evening | 37,5 | 47  | 10,8  | 10,8  | 18,65 | 534,23 | 79,36  |
| 2019/06/24 | CH2205 | Male | Three y/o | Control | Control | Fast Day | No | 18:20 | 18:00 - 18:59 | Evening | 38,3 | 60  | 21,4  | 21,4  | 19,46 | 554,67 | 102,63 |
| 2019/06/24 | CH2206 | Male | Three y/o | Control | Control | Fast Day | No | 18:20 | 18:00 - 18:59 | Evening | 37,4 | 52  | 17,8  | 17,8  | 18,55 | 542,83 | 96,34  |
| 2019/06/24 | CH2205 | Male | Three y/o | Control | Control | Fast Day | No | 18:25 | 18:00 - 18:59 | Evening | 38,3 |     | 22,0  | 22,0  | 19,46 |        | 103,57 |
| 2019/06/24 | CH2206 | Male | Three y/o | Control | Control | Fast Day | No | 18:25 | 18:00 - 18:59 | Evening | 37,5 | 46  | 21,6  | 21,6  | 18,65 | 532,38 | 102,94 |
| 2019/06/24 | CH2205 | Male | Three y/o | Control | Control | Fast Day | No | 18:30 | 18:00 - 18:59 | Evening | 38,3 | 62  | 16,6  | 16,6  | 19,46 | 557,33 | 93,96  |
| 2019/06/24 | CH2206 | Male | Three y/o | Control | Control | Fast Day | No | 18:30 | 18:00 - 18:59 | Evening | 37,6 | 48  | 24,2  | 24,2  | 18,75 | 536,04 | 106,83 |
| 2019/06/24 | CH2205 | Male | Three y/o | Control | Control | Fast Day | No | 18:35 | 18:00 - 18:59 | Evening | 38,2 | 51  | 14,2  | 14,2  | 19,36 | 541,20 | 88,65  |
| 2019/06/24 | CH2206 | Male | Three y/o | Control | Control | Fast Day | No | 18:35 | 18:00 - 18:59 | Evening | 37,7 | 54  | 27,4  | 27,4  | 18,85 | 545,99 | 111,09 |
| 2019/06/24 | CH2205 | Male | Three y/o | Control | Control | Fast Day | No | 18:40 | 18:00 - 18:59 | Evening | 38,1 | 58  | 15,0  | 15,0  | 19,26 | 551,90 | 90,51  |
| 2019/06/24 | CH2206 | Male | Three y/o | Control | Control | Fast Day | No | 18:40 | 18:00 - 18:59 | Evening | 37,7 | 51  | 28,0  | 28,0  | 18,85 | 541,20 | 111,83 |
| 2019/06/24 | CH2205 | Male | Three y/o | Control | Control | Fast Day | No | 18:45 | 18:00 - 18:59 | Evening | 38,1 | 55  | 11,6  | 11,6  | 19,26 | 547,52 | 81,78  |
| 2019/06/24 | CH2206 | Male | Three y/o | Control | Control | Fast Day | No | 18:45 | 18:00 - 18:59 | Evening | 37,7 | 82  | 38,6  | 38,6  | 18,85 | 579,19 | 122,86 |
| 2019/06/24 | CH2205 | Male | Three y/o | Control | Control | Fast Day | No | 18:50 | 18:00 - 18:59 | Evening | 38,0 | 61  | 10,8  | 10,8  | 19,15 | 556,01 | 79,36  |
| 2019/06/24 | CH2206 | Male | Three y/o | Control | Control | Fast Day | No | 18:50 | 18:00 - 18:59 | Evening | 37,7 | 50  | 36,0  | 36,0  | 18,85 | 539,52 | 120,46 |
| 2019/06/24 | CH2205 | Male | Three y/o | Control | Control | Fast Day | No | 18:55 | 18:00 - 18:59 | Evening | 38,0 | 55  | 11,6  | 11,6  | 19,15 | 547,52 | 81,78  |
| 2019/06/24 | CH2206 | Male | Three y/o | Control | Control | Fast Day | No | 18:55 | 18:00 - 18:59 | Evening | 37,8 | 78  | 38,4  | 38,4  | 18,95 | 575,38 | 122,68 |
| 2019/06/24 | CH2205 | Male | Three y/o | Control | Control | Fast Day | No | 19:00 | 19:00 - 19:59 | Evening | 38,0 | 64  | 11,8  | 11,8  | 19,15 | 559,88 | 82,36  |
| 2019/06/24 | CH2206 | Male | Three y/o | Control | Control | Fast Day | No | 19:00 | 19:00 - 19:59 | Evening | 37,8 | 43  | 36,8  | 36,8  | 18,95 | 526,50 | 121,22 |
| 2019/06/24 | CH2205 | Male | Three y/o | Control | Control | Fast Day | No | 19:05 | 19:00 - 19:59 | Evening | 38,0 | 48  | 10,2  | 10,2  | 19,15 | 536,04 | 77,43  |
| 2019/06/24 | CH2206 | Male | Three y/o | Control | Control | Fast Day | No | 19:05 | 19:00 - 19:59 | Evening | 37,8 | 54  | 28,0  | 28,0  | 18,95 | 545,99 | 111,83 |
| 2019/06/24 | CH2205 | Male | Three y/o | Control | Control | Fast Day | No | 19:10 | 19:00 - 19:59 | Evening | 37,9 | 43  | 13,2  | 13,2  | 19,05 | 526,50 | 86,17  |
| 2019/06/24 | CH2206 | Male | Three y/o | Control | Control | Fast Day | No | 19:10 | 19:00 - 19:59 | Evening | 37,8 | 45  | 23,2  | 23,2  | 18,95 | 530,47 | 105,39 |
| 2019/06/24 | CH2205 | Male | Three y/o | Control | Control | Fast Day | No | 19:15 | 19:00 - 19:59 | Evening | 37,9 | 43  | 15,0  | 15,0  | 19,05 | 526,50 | 90,51  |
| 2019/06/24 | CH2206 | Male | Three y/o | Control | Control | Fast Day | No | 19:15 | 19:00 - 19:59 | Evening | 37,8 | 91  | 47,6  | 47,6  | 18,95 | 586,98 | 130,09 |
| 2019/06/24 | CH2205 | Male | Three y/o | Control | Control | Fast Day | No | 19:20 | 19:00 - 19:59 | Evening | 38,0 | 61  | 17,8  | 17,8  | 19,15 | 556,01 | 96,34  |
| 2019/06/24 | CH2206 | Male | Three y/o | Control | Control | Fast Day | No | 19:20 | 19:00 - 19:59 | Evening | 37,8 | 52  | 29,8  | 29,8  | 18,95 | 542,83 | 113,97 |
| 2019/06/24 | CH2205 | Male | Three y/o | Control | Control | Fast Day | No | 19:25 | 19:00 - 19:59 | Evening | 37,9 | 82  | 12,6  | 12,6  | 19,05 | 579,19 | 84,59  |
| 2019/06/24 | CH2206 | Male | Three y/o | Control | Control | Fast Day | No | 19:25 | 19:00 - 19:59 | Evening | 37,7 | 49  | 38,6  | 38,6  | 18,85 | 537,80 | 122,86 |
| 2019/06/24 | CH2205 | Male | Three y/o | Control | Control | Fast Day | No | 19:30 | 19:00 - 19:59 | Evening | 38,0 | 49  | 9,8   | 9,8   | 19,15 | 537,80 | 76,07  |
| 2019/06/24 | CH2206 | Male | Three y/o | Control | Control | Fast Day | No | 19:30 | 19:00 - 19:59 | Evening | 37,7 | 47  | 42,0  | 42,0  | 18,85 | 534,23 | 125,77 |
| 2019/06/24 | CH2205 | Male | Three y/o | Control | Control | Fast Day | No | 19:35 | 19:00 - 19:59 | Evening | 38,0 | 67  | 13,2  | 13,2  | 19,15 | 563,53 | 86,17  |
| 2019/06/24 | CH2206 | Male | Three y/o | Control | Control | Fast Day | No | 19:35 | 19:00 - 19:59 | Evening | 37,5 | 57  | 34,0  | 34,0  | 18,65 | 550,47 | 118,49 |
| 2019/06/24 | CH2205 | Male | Three y/o | Control | Control | Fast Day | No | 19:40 | 19:00 - 19:59 | Evening | 38,0 | 56  | 22,8  | 22,8  | 19,15 | 549,01 | 104,79 |
| 2019/06/24 | CH2206 | Male | Three y/o | Control | Control | Fast Day | No | 19:40 | 19:00 - 19:59 | Evening | 37,5 | 47  | 27,6  | 27,6  | 18,65 | 534,23 | 111,33 |
| 2019/06/24 | CH2205 | Male | Three y/o | Control | Control | Fast Day | No | 19:45 | 19:00 - 19:59 | Evening | 37,9 | 42  | 20,6  | 20,6  | 19,05 | 524,42 | 101,32 |
| 2019/06/24 | CH2206 | Male | Three y/o | Control | Control | Fast Day | No | 19:45 | 19:00 - 19:59 | Evening | 37,5 | 44  | 31,2  | 31,2  | 18,65 | 528,51 | 115,54 |
| 2019/06/24 | CH2205 | Male | Three y/o | Control | Control | Fast Day | No | 19:50 | 19:00 - 19:59 | Evening | 37,9 | 47  | 15,0  | 15,0  | 19,05 | 534,23 | 90,51  |
| 2019/06/24 | CH2206 | Male | Three y/o | Control | Control | Fast Day | No | 19:50 | 19:00 - 19:59 | Evening | 37,5 | 48  | 49,0  | 49,0  | 18,65 | 536,04 | 131,09 |
| 2019/06/24 | CH2205 | Male | Three y/o | Control | Control | Fast Day | No | 19:55 | 19:00 - 19:59 | Evening | 37,9 | 67  | 22,2  | 22,2  | 19,05 | 563,53 | 103,88 |
| 2019/06/24 | CH2206 | Male | Three y/o | Control | Control | Fast Day | No | 19:55 | 19:00 - 19:59 | Evening | 37,5 | 48  | 52,6  | 52,6  | 18,65 | 536,04 | 133,54 |
| 2019/06/24 | CH2205 | Male | Three y/o | Control | Control | Fast Day | No | 20:00 | 20:00 - 20:59 | Night   | 37,8 | 68  | 18,2  | 18,2  | 18,95 | 564,71 | 97,10  |
| 2019/06/24 | CH2206 | Male | Three y/o | Control | Control | Fast Day | No | 20:00 | 20:00 - 20:59 | Night   | 37,5 | 54  | 52,6  | 52,6  | 18,65 | 545,99 | 133,54 |
| 2019/06/24 | CH2205 | Male | Three y/o | Control | Control | Fast Day | No | 20:05 | 20:00 - 20:59 | Night   | 37,7 | 47  | 13,6  | 13,6  | 18,85 | 534,23 | 87,18  |
| 2019/06/24 | CH2206 | Male | Three y/o | Control | Control | Fast Day | No | 20:05 | 20:00 - 20:59 | Night   | 37,5 | 46  | 53,4  | 53,4  | 18,65 | 532,38 | 134,06 |
| 2019/06/24 | CH2205 | Male | Three y/o | Control | Control | Fast Day | No | 20:10 | 20:00 - 20:59 | Night   | 37,6 | 43  | 19,4  | 19,4  | 18,75 | 526,50 | 99,28  |
| 2019/06/24 | CH2206 | Male | Three y/o | Control | Control | Fast Day | No | 20:10 | 20:00 - 20:59 | Night   | 37,8 | 78  | 51,0  | 51,0  | 18,55 | 575,38 | 132,47 |
| 2019/06/24 | CH2205 | Male | Three y/o | Control | Control | Fast Day | No | 20:15 | 20:00 - 20:59 | Night   | 37,6 | 58  | 17,0  | 17,0  | 18,75 | 551,90 | 94,77  |
| 2019/06/24 | CH2206 | Male | Three y/o | Control | Control | Fast Day | No | 20:15 | 20:00 - 20:59 | Night   | 37,4 | 70  | 51,0  | 51,0  | 18,55 | 566,99 | 132,47 |
| 2019/06/24 | CH2205 | Male | Three y/o | Control | Control | Fast Day | No | 20:20 | 20:00 - 20:59 | Night   | 37,6 | 50  | 20,2  | 20,2  | 18,75 | 539,52 | 100,65 |
| 2019/06/24 | CH2206 | Male | Three y/o | Control | Control | Fast Day | No | 20:20 | 20:00 - 20:59 | Night   | 37,4 | 49  | 45,6  | 45,6  | 18,55 | 537,80 | 128,61 |
| 2019/06/24 | CH2205 | Male | Three y/o | Control | Control | Fast Day | No | 20:25 | 20:00 - 20:59 | Night   | 37,6 | 56  | 19,8  | 19,8  | 18,75 | 549,01 | 99,97  |
| 2019/06/24 | CH2206 | Male | Three y/o | Control | Control | Fast Day | No | 20:25 | 20:00 - 20:59 | Night   | 37,4 | 76  | 49,4  | 49,4  | 18,55 | 573,39 | 131,37 |
| 2019/06/24 | CH2205 | Male | Three y/o | Control | Control | Fast Day | No | 20:30 | 20:00 - 20:59 | Night   | 37,6 | 46  | 13,6  | 13,6  | 18,75 | 532,38 | 87,18  |



|            |        |      |           |         |         |          |    |       |               |       |      |     |      |      |       |        |        |
|------------|--------|------|-----------|---------|---------|----------|----|-------|---------------|-------|------|-----|------|------|-------|--------|--------|
| 2019/06/24 | CH2206 | Male | Three y/o | Control | Control | Fast Day | No | 20:30 | 20:00 - 20:59 | Night | 37,4 | 47  | 54,0 | 54,0 | 18,55 | 534,23 | 134,45 |
| 2019/06/24 | CH2205 | Male | Three y/o | Control | Control | Fast Day | No | 20:35 | 20:00 - 20:59 | Night | 37,5 | 51  | 9,2  | 9,2  | 18,65 | 541,20 | 73,94  |
| 2019/06/24 | CH2206 | Male | Three y/o | Control | Control | Fast Day | No | 20:35 | 20:00 - 20:59 | Night | 37,4 | 77  | 57,0 | 57,0 | 18,55 | 574,39 | 136,32 |
| 2019/06/24 | CH2205 | Male | Three y/o | Control | Control | Fast Day | No | 20:40 | 20:00 - 20:59 | Night | 37,5 | 58  | 10,2 | 10,2 | 18,65 | 551,90 | 77,43  |
| 2019/06/24 | CH2206 | Male | Three y/o | Control | Control | Fast Day | No | 20:40 | 20:00 - 20:59 | Night | 37,4 |     | 52,2 | 52,2 | 18,55 |        | 133,27 |
| 2019/06/24 | CH2205 | Male | Three y/o | Control | Control | Fast Day | No | 20:45 | 20:00 - 20:59 | Night | 37,5 | 48  | 12,8 | 12,8 | 18,65 | 536,04 | 85,12  |
| 2019/06/24 | CH2206 | Male | Three y/o | Control | Control | Fast Day | No | 20:45 | 20:00 - 20:59 | Night | 37,4 | 90  | 53,8 | 53,8 | 18,55 | 586,16 | 134,32 |
| 2019/06/24 | CH2205 | Male | Three y/o | Control | Control | Fast Day | No | 20:50 | 20:00 - 20:59 | Night | 37,5 | 57  | 14,0 | 14,0 | 18,65 | 550,47 | 88,17  |
| 2019/06/24 | CH2206 | Male | Three y/o | Control | Control | Fast Day | No | 20:50 | 20:00 - 20:59 | Night | 37,4 | 55  | 51,8 | 51,8 | 18,55 | 547,52 | 133,01 |
| 2019/06/24 | CH2205 | Male | Three y/o | Control | Control | Fast Day | No | 20:55 | 20:00 - 20:59 | Night | 37,4 | 41  | 18,8 | 18,8 | 18,55 | 522,29 | 98,20  |
| 2019/06/24 | CH2206 | Male | Three y/o | Control | Control | Fast Day | No | 20:55 | 20:00 - 20:59 | Night | 37,4 | 45  | 51,6 | 51,6 | 18,55 | 530,47 | 132,87 |
| 2019/06/24 | CH2205 | Male | Three y/o | Control | Control | Fast Day | No | 21:00 | 21:00 - 21:59 | Night | 37,3 | 68  | 5,6  | 5,6  | 18,46 | 564,71 | 57,21  |
| 2019/06/24 | CH2206 | Male | Three y/o | Control | Control | Fast Day | No | 21:00 | 21:00 - 21:59 | Night | 37,4 | 46  | 51,8 | 51,8 | 18,55 | 532,38 | 133,01 |
| 2019/06/24 | CH2205 | Male | Three y/o | Control | Control | Fast Day | No | 21:05 | 21:00 - 21:59 | Night | 37,3 | 62  | 5,8  | 5,8  | 18,46 | 557,33 | 58,39  |
| 2019/06/24 | CH2206 | Male | Three y/o | Control | Control | Fast Day | No | 21:05 | 21:00 - 21:59 | Night | 37,4 | 46  | 57,0 | 57,0 | 18,55 | 532,38 | 136,32 |
| 2019/06/24 | CH2205 | Male | Three y/o | Control | Control | Fast Day | No | 21:10 | 21:00 - 21:59 | Night | 37,3 | 47  | 5,2  | 5,2  | 18,46 | 534,23 | 54,72  |
| 2019/06/24 | CH2206 | Male | Three y/o | Control | Control | Fast Day | No | 21:10 | 21:00 - 21:59 | Night | 37,4 | 71  | 53,0 | 53,0 | 18,55 | 568,10 | 133,80 |
| 2019/06/24 | CH2205 | Male | Three y/o | Control | Control | Fast Day | No | 21:15 | 21:00 - 21:59 | Night | 37,4 | 49  | 8,2  | 8,2  | 18,55 | 537,80 | 70,05  |
| 2019/06/24 | CH2206 | Male | Three y/o | Control | Control | Fast Day | No | 21:15 | 21:00 - 21:59 | Night | 37,4 | 71  | 22,4 | 22,4 | 18,55 | 568,10 | 104,19 |
| 2019/06/24 | CH2205 | Male | Three y/o | Control | Control | Fast Day | No | 21:20 | 21:00 - 21:59 | Night | 37,3 | 54  | 7,4  | 7,4  | 18,46 | 545,99 | 66,59  |
| 2019/06/24 | CH2206 | Male | Three y/o | Control | Control | Fast Day | No | 21:20 | 21:00 - 21:59 | Night | 37,4 | 78  | 4,6  | 4,6  | 18,55 | 575,38 | 50,61  |
| 2019/06/24 | CH2205 | Male | Three y/o | Control | Control | Fast Day | No | 21:25 | 21:00 - 21:59 | Night | 37,3 | 63  | 9,2  | 9,2  | 18,46 | 558,62 | 73,94  |
| 2019/06/24 | CH2206 | Male | Three y/o | Control | Control | Fast Day | No | 21:25 | 21:00 - 21:59 | Night | 37,3 | 49  | 6,8  | 6,8  | 18,46 | 537,80 | 63,74  |
| 2019/06/24 | CH2205 | Male | Three y/o | Control | Control | Fast Day | No | 21:30 | 21:00 - 21:59 | Night | 37,3 | 47  | 9,4  | 9,4  | 18,46 | 534,23 | 74,66  |
| 2019/06/24 | CH2206 | Male | Three y/o | Control | Control | Fast Day | No | 21:30 | 21:00 - 21:59 | Night | 37,3 | 50  | 7,2  | 7,2  | 18,46 | 539,52 | 65,66  |
| 2019/06/24 | CH2205 | Male | Three y/o | Control | Control | Fast Day | No | 21:35 | 21:00 - 21:59 | Night | 37,3 | 50  | 8,8  | 8,8  | 18,46 | 539,52 | 72,43  |
| 2019/06/24 | CH2206 | Male | Three y/o | Control | Control | Fast Day | No | 21:35 | 21:00 - 21:59 | Night | 37,2 | 86  | 4,0  | 4,0  | 18,36 | 582,77 | 45,94  |
| 2019/06/24 | CH2205 | Male | Three y/o | Control | Control | Fast Day | No | 21:40 | 21:00 - 21:59 | Night | 37,3 | 59  | 7,8  | 7,8  | 18,46 | 553,30 | 68,36  |
| 2019/06/24 | CH2206 | Male | Three y/o | Control | Control | Fast Day | No | 21:40 | 21:00 - 21:59 | Night | 37,2 | 56  | 2,4  | 2,4  | 18,36 | 549,01 | 28,91  |
| 2019/06/24 | CH2205 | Male | Three y/o | Control | Control | Fast Day | No | 21:45 | 21:00 - 21:59 | Night | 37,4 |     | 9,4  | 9,4  | 18,55 |        | 74,66  |
| 2019/06/24 | CH2206 | Male | Three y/o | Control | Control | Fast Day | No | 21:45 | 21:00 - 21:59 | Night | 37,2 | 64  | 2,6  | 2,6  | 18,36 | 559,88 | 31,57  |
| 2019/06/24 | CH2205 | Male | Three y/o | Control | Control | Fast Day | No | 21:50 | 21:00 - 21:59 | Night | 37,4 | 55  | 7,2  | 7,2  | 18,55 | 547,52 | 65,66  |
| 2019/06/24 | CH2206 | Male | Three y/o | Control | Control | Fast Day | No | 21:50 | 21:00 - 21:59 | Night | 37,2 | 54  | 2,4  | 2,4  | 18,36 | 545,99 | 28,91  |
| 2019/06/24 | CH2205 | Male | Three y/o | Control | Control | Fast Day | No | 21:55 | 21:00 - 21:59 | Night | 37,4 | 51  | 8,0  | 8,0  | 18,55 | 541,20 | 69,22  |
| 2019/06/24 | CH2206 | Male | Three y/o | Control | Control | Fast Day | No | 21:55 | 21:00 - 21:59 | Night | 37,2 | 44  | 4,8  | 4,8  | 18,36 | 528,51 | 52,04  |
| 2019/06/24 | CH2205 | Male | Three y/o | Control | Control | Fast Day | No | 22:00 | 22:00 - 22:59 | Night | 37,4 | 57  | 11,2 | 11,2 | 18,55 | 550,47 | 80,59  |
| 2019/06/24 | CH2206 | Male | Three y/o | Control | Control | Fast Day | No | 22:00 | 22:00 - 22:59 | Night | 37,2 | 46  | 3,2  | 3,2  | 18,36 | 532,38 | 38,49  |
| 2019/06/24 | CH2205 | Male | Three y/o | Control | Control | Fast Day | No | 22:05 | 22:00 - 22:59 | Night | 37,5 | 75  | 26,8 | 26,8 | 18,55 | 572,36 | 110,33 |
| 2019/06/24 | CH2206 | Male | Three y/o | Control | Control | Fast Day | No | 22:05 | 22:00 - 22:59 | Night | 37,1 | 47  | 21,2 | 21,2 | 18,26 | 534,23 | 102,31 |
| 2019/06/24 | CH2205 | Male | Three y/o | Control | Control | Fast Day | No | 22:10 | 22:00 - 22:59 | Night | 37,4 | 70  | 20,0 | 20,0 | 18,55 | 566,99 | 100,31 |
| 2019/06/24 | CH2206 | Male | Three y/o | Control | Control | Fast Day | No | 22:10 | 22:00 - 22:59 | Night | 37,2 | 56  | 11,6 | 11,6 | 18,36 | 549,01 | 81,78  |
| 2019/06/24 | CH2205 | Male | Three y/o | Control | Control | Fast Day | No | 22:15 | 22:00 - 22:59 | Night | 37,4 | 53  | 19,0 | 19,0 | 18,55 | 544,43 | 98,56  |
| 2019/06/24 | CH2206 | Male | Three y/o | Control | Control | Fast Day | No | 22:15 | 22:00 - 22:59 | Night | 37,2 | 42  | 13,6 | 13,6 | 18,36 | 524,42 | 87,18  |
| 2019/06/24 | CH2205 | Male | Three y/o | Control | Control | Fast Day | No | 22:20 | 22:00 - 22:59 | Night | 37,4 | 53  | 19,8 | 19,8 | 18,55 | 544,43 | 99,97  |
| 2019/06/24 | CH2206 | Male | Three y/o | Control | Control | Fast Day | No | 22:20 | 22:00 - 22:59 | Night | 37,3 | 46  | 18,0 | 18,0 | 18,46 | 532,38 | 96,72  |
| 2019/06/24 | CH2205 | Male | Three y/o | Control | Control | Fast Day | No | 22:25 | 22:00 - 22:59 | Night | 37,4 | 43  | 18,6 | 18,6 | 18,55 | 526,50 | 97,84  |
| 2019/06/24 | CH2206 | Male | Three y/o | Control | Control | Fast Day | No | 22:25 | 22:00 - 22:59 | Night | 37,3 | 49  | 34,2 | 34,2 | 18,46 | 537,80 | 118,70 |
| 2019/06/24 | CH2205 | Male | Three y/o | Control | Control | Fast Day | No | 22:30 | 22:00 - 22:59 | Night | 37,4 | 52  | 20,6 | 20,6 | 18,55 | 542,83 | 101,32 |
| 2019/06/24 | CH2206 | Male | Three y/o | Control | Control | Fast Day | No | 22:30 | 22:00 - 22:59 | Night | 37,4 | 44  | 30,6 | 30,6 | 18,55 | 528,51 | 114,87 |
| 2019/06/24 | CH2205 | Male | Three y/o | Control | Control | Fast Day | No | 22:35 | 22:00 - 22:59 | Night | 37,4 | 45  | 20,8 | 20,8 | 18,55 | 530,47 | 101,65 |
| 2019/06/24 | CH2206 | Male | Three y/o | Control | Control | Fast Day | No | 22:35 | 22:00 - 22:59 | Night | 37,4 | 50  | 33,0 | 33,0 | 18,55 | 539,52 | 117,47 |
| 2019/06/24 | CH2205 | Male | Three y/o | Control | Control | Fast Day | No | 22:40 | 22:00 - 22:59 | Night | 37,3 | 56  | 17,2 | 17,2 | 18,46 | 549,01 | 95,17  |
| 2019/06/24 | CH2206 | Male | Three y/o | Control | Control | Fast Day | No | 22:40 | 22:00 - 22:59 | Night | 37,4 | 43  | 43,6 | 43,6 | 18,55 | 526,50 | 127,06 |
| 2019/06/24 | CH2205 | Male | Three y/o | Control | Control | Fast Day | No | 22:45 | 22:00 - 22:59 | Night | 37,3 | 56  | 16,0 | 16,0 | 18,46 | 549,01 | 92,71  |
| 2019/06/24 | CH2206 | Male | Three y/o | Control | Control | Fast Day | No | 22:45 | 22:00 - 22:59 | Night | 37,4 | 124 | 44,0 | 44,0 | 18,55 | 609,04 | 127,37 |
| 2019/06/24 | CH2205 | Male | Three y/o | Control | Control | Fast Day | No | 22:50 | 22:00 - 22:59 | Night | 37,3 | 46  | 17,8 | 17,8 | 18,46 | 532,38 | 96,34  |
| 2019/06/24 | CH2206 | Male | Three y/o | Control | Control | Fast Day | No | 22:50 | 22:00 - 22:59 | Night | 37,4 | 106 | 41,0 | 41,0 | 18,55 | 598,06 | 124,94 |
| 2019/06/24 | CH2205 | Male | Three y/o | Control | Control | Fast Day | No | 22:55 | 22:00 - 22:59 | Night | 37,3 | 59  | 19,2 | 19,2 | 18,46 | 553,30 | 98,92  |
| 2019/06/24 | CH2206 | Male | Three y/o | Control | Control | Fast Day | No | 22:55 | 22:00 - 22:59 | Night | 37,4 | 47  | 42,0 | 42,0 | 18,55 | 534,23 | 125,77 |
| 2019/06/24 | CH2205 | Male | Three y/o | Control | Control | Fast Day | No | 23:00 | 23:00 - 23:59 | Night | 37,3 | 63  | 17,6 | 17,6 | 18,46 | 558,62 | 95,95  |
| 2019/06/24 | CH2206 | Male | Three y/o | Control | Control | Fast Day | No | 23:00 | 23:00 - 23:59 | Night | 37,4 | 40  | 46,2 | 46,2 | 18,55 | 520,09 | 129,06 |
| 2019/06/24 | CH2205 | Male | Three y/o | Control | Control | Fast Day | No | 23:05 | 23:00 - 23:59 | Night | 37,2 | 48  | 22,4 | 22,4 | 18,36 | 536,04 | 104,19 |
| 2019/06/24 | CH2206 | Male | Three y/o | Control | Control | Fast Day | No | 23:05 | 23:00 - 23:59 | Night | 37,4 | 43  | 42,8 | 42,8 | 18,55 | 526,50 | 126,42 |
| 2019/06/24 | CH2205 | Male | Three y/o | Control | Control | Fast Day | No | 23:10 | 23:00 - 23:59 | Night | 37,2 | 44  | 18,8 | 18,8 | 18,36 | 528,51 | 98,20  |
| 2019/06/24 | CH2206 | Male | Three y/o | Control | Control | Fast Day | No | 23:10 | 23:00 - 23:59 | Night | 37,3 | 74  | 40,2 | 40,2 | 18,46 | 571,33 | 124,26 |
| 2019/06/24 | CH2205 | Male | Three y/o | Control | Control | Fast Day | No | 23:15 | 23:00 - 23:59 | Night | 37,2 | 66  | 17,2 | 17,2 | 18,36 | 562,34 | 95,17  |
| 2019/06/24 | CH2206 | Male | Three y/o | Control | Control | Fast Day | No | 23:15 | 23:00 - 23:59 | Night | 37,3 | 80  | 44,0 | 44,0 | 18,46 | 577,31 | 127,37 |
| 2019/06/24 | CH2205 | Male | Three y/o | Control | Control | Fast Day | No | 23:20 | 23:00 - 23:59 | Night | 37,2 | 57  | 22,4 | 22,4 | 18,36 | 550,47 | 104,19 |
| 2019/06/24 | CH2206 | Male | Three y/o | Control | Control | Fast Day | No | 23:20 | 23:00 - 23:59 | Night | 37,3 | 46  | 44,2 | 44,2 | 18,46 | 532,38 | 127,53 |
| 2019/06/24 | CH2205 | Male | Three y/o | Control | Control | Fast Day | No | 23:25 | 23:00 - 23:59 | Night | 37,2 | 50  | 14,2 | 14,2 | 18,36 | 539,52 | 88,65  |



|    |            |        |      |           |         |         |          |    |       |               |               |      |     |       |       |       |        |        |
|----|------------|--------|------|-----------|---------|---------|----------|----|-------|---------------|---------------|------|-----|-------|-------|-------|--------|--------|
|    | 2019/06/24 | CH2206 | Male | Three y/o | Control | Control | Fast Day | No | 23:25 | 23:00 - 23:59 | Night         | 37,2 | 43  | 45,6  | 45,6  | 18,36 | 526,50 | 128,61 |
|    | 2019/06/24 | CH2205 | Male | Three y/o | Control | Control | Fast Day | No | 23:30 | 23:00 - 23:59 | Night         | 37,2 | 64  | 10,4  | 10,4  | 18,36 | 559,88 | 78,08  |
|    | 2019/06/24 | CH2206 | Male | Three y/o | Control | Control | Fast Day | No | 23:30 | 23:00 - 23:59 | Night         | 37,2 | 47  | 43,2  | 43,2  | 18,36 | 534,23 | 126,74 |
|    | 2019/06/24 | CH2205 | Male | Three y/o | Control | Control | Fast Day | No | 23:35 | 23:00 - 23:59 | Night         | 37,2 | 56  | 26,4  | 26,4  | 18,36 | 549,01 | 109,81 |
|    | 2019/06/24 | CH2206 | Male | Three y/o | Control | Control | Fast Day | No | 23:35 | 23:00 - 23:59 | Night         | 37,2 | 82  | 36,2  | 36,2  | 18,36 | 579,19 | 120,65 |
|    | 2019/06/24 | CH2205 | Male | Three y/o | Control | Control | Fast Day | No | 23:40 | 23:00 - 23:59 | Night         | 37,3 | 98  | 26,6  | 26,6  | 18,46 | 592,41 | 110,07 |
|    | 2019/06/24 | CH2206 | Male | Three y/o | Control | Control | Fast Day | No | 23:40 | 23:00 - 23:59 | Night         | 37,3 | 97  | 7,6   | 7,6   | 18,46 | 591,66 | 67,49  |
|    | 2019/06/24 | CH2205 | Male | Three y/o | Control | Control | Fast Day | No | 23:45 | 23:00 - 23:59 | Night         | 37,3 | 50  | 21,6  | 21,6  | 18,46 | 539,52 | 102,94 |
|    | 2019/06/24 | CH2206 | Male | Three y/o | Control | Control | Fast Day | No | 23:45 | 23:00 - 23:59 | Night         | 37,2 | 72  | 36,2  | 36,2  | 18,36 | 569,20 | 120,65 |
|    | 2019/06/24 | CH2205 | Male | Three y/o | Control | Control | Fast Day | No | 23:50 | 23:00 - 23:59 | Night         | 37,3 |     | 21,6  | 21,6  | 18,46 |        | 102,94 |
|    | 2019/06/24 | CH2206 | Male | Three y/o | Control | Control | Fast Day | No | 23:50 | 23:00 - 23:59 | Night         | 37,1 | 51  | 43,6  | 43,6  | 18,26 | 541,20 | 127,06 |
|    | 2019/06/24 | CH2205 | Male | Three y/o | Control | Control | Fast Day | No | 23:55 | 23:00 - 23:59 | Night         | 37,3 |     | 26,4  | 26,4  | 18,46 |        | 109,81 |
|    | 2019/06/24 | CH2206 | Male | Three y/o | Control | Control | Fast Day | No | 23:55 | 23:00 - 23:59 | Night         | 37,1 | 44  | 43,6  | 43,6  | 18,26 | 528,51 | 127,06 |
| 41 | 2019/06/25 | CH2205 | Male | Three y/o | Control | Control | Feed Day | No | 00:00 | 00:00 - 00:59 | Early Morning | 37,3 | 31  | 22,8  | 22,8  | 18,46 | 496,63 | 104,79 |
|    | 2019/06/25 | CH2206 | Male | Three y/o | Control | Control | Feed Day | No | 00:00 | 00:00 - 00:59 | Early Morning | 37,1 | 79  | 30,6  | 30,6  | 18,26 | 576,36 | 114,87 |
|    | 2019/06/25 | CH2205 | Male | Three y/o | Control | Control | Feed Day | No | 00:05 | 00:00 - 00:59 | Early Morning | 37,3 |     | 23,4  | 23,4  | 18,46 |        | 105,68 |
|    | 2019/06/25 | CH2206 | Male | Three y/o | Control | Control | Feed Day | No | 00:05 | 00:00 - 00:59 | Early Morning | 37,0 | 46  | 27,4  | 27,4  | 18,16 | 532,38 | 111,09 |
|    | 2019/06/25 | CH2205 | Male | Three y/o | Control | Control | Feed Day | No | 00:10 | 00:00 - 00:59 | Early Morning | 37,3 | 65  | 17,4  | 17,4  | 18,46 | 561,12 | 95,56  |
|    | 2019/06/25 | CH2206 | Male | Three y/o | Control | Control | Feed Day | No | 00:10 | 00:00 - 00:59 | Early Morning | 37,0 | 42  | 22,8  | 22,8  | 18,16 | 524,42 | 104,79 |
|    | 2019/06/25 | CH2205 | Male | Three y/o | Control | Control | Feed Day | No | 00:15 | 00:00 - 00:59 | Early Morning | 37,3 |     | 18,6  | 18,6  | 18,46 |        | 97,84  |
|    | 2019/06/25 | CH2206 | Male | Three y/o | Control | Control | Feed Day | No | 00:15 | 00:00 - 00:59 | Early Morning | 36,9 | 54  | 37,6  | 37,6  | 18,06 | 545,99 | 121,96 |
|    | 2019/06/25 | CH2205 | Male | Three y/o | Control | Control | Feed Day | No | 00:20 | 00:00 - 00:59 | Early Morning | 37,3 | 55  | 22,8  | 22,8  | 18,46 | 547,52 | 104,79 |
|    | 2019/06/25 | CH2206 | Male | Three y/o | Control | Control | Feed Day | No | 00:20 | 00:00 - 00:59 | Early Morning | 36,9 | 88  | 16,8  | 16,8  | 18,06 | 584,49 | 94,37  |
|    | 2019/06/25 | CH2205 | Male | Three y/o | Control | Control | Feed Day | No | 00:25 | 00:00 - 00:59 | Early Morning | 37,3 | 63  | 23,6  | 23,6  | 18,46 | 558,62 | 105,97 |
|    | 2019/06/25 | CH2206 | Male | Three y/o | Control | Control | Feed Day | No | 00:25 | 00:00 - 00:59 | Early Morning | 37,0 | 71  | 9,4   | 9,4   | 18,16 | 568,10 | 74,66  |
|    | 2019/06/25 | CH2205 | Male | Three y/o | Control | Control | Feed Day | No | 00:30 | 00:00 - 00:59 | Early Morning | 37,4 | 169 | 20,0  | 20,0  | 18,55 | 629,60 | 100,31 |
|    | 2019/06/25 | CH2206 | Male | Three y/o | Control | Control | Feed Day | No | 00:30 | 00:00 - 00:59 | Early Morning | 37,0 | 64  | 11,6  | 11,6  | 18,16 | 559,88 | 81,78  |
|    | 2019/06/25 | CH2205 | Male | Three y/o | Control | Control | Feed Day | No | 00:35 | 00:00 - 00:59 | Early Morning | 37,4 | 47  | 19,4  | 19,4  | 18,55 | 534,23 | 99,28  |
|    | 2019/06/25 | CH2206 | Male | Three y/o | Control | Control | Feed Day | No | 00:35 | 00:00 - 00:59 | Early Morning | 37,0 | 49  | 39,2  | 39,2  | 18,16 | 537,80 | 123,39 |
|    | 2019/06/25 | CH2205 | Male | Three y/o | Control | Control | Feed Day | No | 00:40 | 00:00 - 00:59 | Early Morning | 37,4 | 47  | 25,8  | 25,8  | 18,55 | 534,23 | 109,02 |
|    | 2019/06/25 | CH2206 | Male | Three y/o | Control | Control | Feed Day | No | 00:40 | 00:00 - 00:59 | Early Morning | 37,0 | 50  | 42,6  | 42,6  | 18,16 | 539,52 | 126,26 |
|    | 2019/06/25 | CH2205 | Male | Three y/o | Control | Control | Feed Day | No | 00:45 | 00:00 - 00:59 | Early Morning | 37,3 | 61  | 27,4  | 27,4  | 18,46 | 556,01 | 111,09 |
|    | 2019/06/25 | CH2206 | Male | Three y/o | Control | Control | Feed Day | No | 00:45 | 00:00 - 00:59 | Early Morning | 37,0 | 45  | 30,6  | 30,6  | 18,16 | 530,47 | 114,87 |
|    | 2019/06/25 | CH2205 | Male | Three y/o | Control | Control | Feed Day | No | 00:50 | 00:00 - 00:59 | Early Morning | 37,4 | 41  | 10,2  | 10,2  | 18,55 | 522,29 | 77,43  |
|    | 2019/06/25 | CH2206 | Male | Three y/o | Control | Control | Feed Day | No | 00:50 | 00:00 - 00:59 | Early Morning | 37,1 | 89  | 6,4   | 6,4   | 18,26 | 585,33 | 61,70  |
|    | 2019/06/25 | CH2205 | Male | Three y/o | Control | Control | Feed Day | No | 00:55 | 00:00 - 00:59 | Early Morning | 37,4 | 59  | 5,4   | 5,4   | 18,55 | 553,30 | 55,99  |
|    | 2019/06/25 | CH2206 | Male | Three y/o | Control | Control | Feed Day | No | 00:55 | 00:00 - 00:59 | Early Morning | 37,1 | 74  | 5,4   | 5,4   | 18,26 | 571,33 | 55,99  |
|    | 2019/06/25 | CH2205 | Male | Three y/o | Control | Control | Feed Day | No | 01:00 | 01:00 - 01:59 | Early Morning | 37,5 | 44  | 3,6   | 3,6   | 18,65 | 528,51 | 42,42  |
|    | 2019/06/25 | CH2206 | Male | Three y/o | Control | Control | Feed Day | No | 01:00 | 01:00 - 01:59 | Early Morning | 37,0 | 75  | 27,4  | 27,4  | 18,16 | 572,36 | 111,09 |
|    | 2019/06/25 | CH2205 | Male | Three y/o | Control | Control | Feed Day | No | 01:05 | 01:00 - 01:59 | Early Morning | 37,5 | 53  | 12,8  | 12,8  | 18,65 | 544,43 | 85,12  |
|    | 2019/06/25 | CH2206 | Male | Three y/o | Control | Control | Feed Day | No | 01:05 | 01:00 - 01:59 | Early Morning | 37,0 | 90  | 32,6  | 32,6  | 18,16 | 586,16 | 117,05 |
|    | 2019/06/25 | CH2205 | Male | Three y/o | Control | Control | Feed Day | No | 01:10 | 01:00 - 01:59 | Early Morning | 37,5 | 64  | 15,4  | 15,4  | 18,65 | 559,88 | 91,41  |
|    | 2019/06/25 | CH2206 | Male | Three y/o | Control | Control | Feed Day | No | 01:10 | 01:00 - 01:59 | Early Morning | 37,0 | 50  | 27,2  | 27,2  | 18,16 | 539,52 | 110,83 |
|    | 2019/06/25 | CH2205 | Male | Three y/o | Control | Control | Feed Day | No | 01:15 | 01:00 - 01:59 | Early Morning | 37,6 |     | 25,2  | 25,2  | 18,75 |        | 108,22 |
|    | 2019/06/25 | CH2206 | Male | Three y/o | Control | Control | Feed Day | No | 01:15 | 01:00 - 01:59 | Early Morning | 37,1 | 78  | 38,4  | 38,4  | 18,26 | 575,38 | 122,68 |
|    | 2019/06/25 | CH2205 | Male | Three y/o | Control | Control | Feed Day | No | 01:20 | 01:00 - 01:59 | Early Morning | 37,4 | 98  | 24,8  | 24,8  | 18,55 | 592,41 | 107,67 |
|    | 2019/06/25 | CH2206 | Male | Three y/o | Control | Control | Feed Day | No | 01:20 | 01:00 - 01:59 | Early Morning | 37,1 |     | 53,0  | 53,0  | 18,26 |        | 133,80 |
|    | 2019/06/25 | CH2205 | Male | Three y/o | Control | Control | Feed Day | No | 01:25 | 01:00 - 01:59 | Early Morning | 37,3 |     | 114,2 | 114,2 | 18,46 |        | 594,59 |
|    | 2019/06/25 | CH2206 | Male | Three y/o | Control | Control | Feed Day | No | 01:25 | 01:00 - 01:59 | Early Morning | 37,2 | 121 | 62,2  | 62,2  | 18,36 | 607,35 | 139,34 |
|    | 2019/06/25 | CH2205 | Male | Three y/o | Control | Control | Feed Day | No | 01:30 | 01:00 - 01:59 | Early Morning | 37,4 | 82  | 29,8  | 29,8  | 18,55 | 579,19 | 113,97 |
|    | 2019/06/25 | CH2206 | Male | Three y/o | Control | Control | Feed Day | No | 01:30 | 01:00 - 01:59 | Early Morning | 37,3 | 121 | 55,2  | 55,2  | 18,46 | 607,35 | 135,21 |
|    | 2019/06/25 | CH2205 | Male | Three y/o | Control | Control | Feed Day | No | 01:35 | 01:00 - 01:59 | Early Morning | 37,5 |     | 36,6  | 36,6  | 18,65 |        | 121,03 |
|    | 2019/06/25 | CH2206 | Male | Three y/o | Control | Control | Feed Day | No | 01:35 | 01:00 - 01:59 | Early Morning | 37,4 | 88  | 37,0  | 37,0  | 18,55 | 584,49 | 121,40 |
|    | 2019/06/25 | CH2205 | Male | Three y/o | Control | Control | Feed Day | No | 01:40 | 01:00 - 01:59 | Early Morning | 37,6 |     | 58,2  | 58,2  | 18,75 |        | 137,04 |
|    | 2019/06/25 | CH2206 | Male | Three y/o | Control | Control | Feed Day | No | 01:40 | 01:00 - 01:59 | Early Morning | 37,5 | 134 | 51,8  | 51,8  | 18,65 | 614,33 | 133,01 |
|    | 2019/06/25 | CH2205 | Male | Three y/o | Control | Control | Feed Day | No | 01:45 | 01:00 - 01:59 | Early Morning | 37,6 | 54  | 156,8 | 156,8 | 18,75 | 545,99 | 171,57 |
|    | 2019/06/25 | CH2206 | Male | Three y/o | Control | Control | Feed Day | No | 01:45 | 01:00 - 01:59 | Early Morning | 37,5 | 177 | 124,2 | 124,2 | 18,65 | 632,55 | 163,41 |
|    | 2019/06/25 | CH2205 | Male | Three y/o | Control | Control | Feed Day | No | 01:50 | 01:00 - 01:59 | Early Morning | 37,7 | 107 | 75,6  | 75,6  | 18,85 | 598,73 | 146,11 |
|    | 2019/06/25 | CH2206 | Male | Three y/o | Control | Control | Feed Day | No | 01:50 | 01:00 - 01:59 | Early Morning | 37,7 | 120 | 119,0 | 119,0 | 18,85 | 606,78 | 161,92 |
|    | 2019/06/25 | CH2205 | Male | Three y/o | Control | Control | Feed Day | No | 01:55 | 01:00 - 01:59 | Early Morning | 37,8 | 197 | 92,2  | 92,2  | 18,95 | 639,25 | 153,01 |
|    | 2019/06/25 | CH2206 | Male | Three y/o | Control | Control | Feed Day | No | 01:55 | 01:00 - 01:59 | Early Morning | 37,7 | 128 | 50,8  | 50,8  | 18,85 | 611,22 | 132,33 |
|    | 2019/06/25 | CH2205 | Male | Three y/o | Control | Control | Feed Day | No | 02:00 | 02:00 - 02:59 | Early Morning | 37,9 |     | 192,4 | 192,4 | 19,05 |        | 178,76 |
|    | 2019/06/25 | CH2206 | Male | Three y/o | Control | Control | Feed Day | No | 02:00 | 02:00 - 02:59 | Early Morning | 37,8 | 108 | 13,4  | 13,4  | 18,95 | 599,39 | 86,68  |
|    | 2019/06/25 | CH2205 | Male | Three y/o | Control | Control | Feed Day | No | 02:05 | 02:00 - 02:59 | Early Morning | 38,0 | 114 | 91,6  | 91,6  | 19,15 | 603,20 | 152,79 |
|    | 2019/06/25 | CH2206 | Male | Three y/o | Control | Control | Feed Day | No | 02:05 | 02:00 - 02:59 | Early Morning | 37,8 | 110 | 43,4  | 43,4  | 18,95 | 600,69 | 126,90 |
|    | 2019/06/25 | CH2205 | Male | Three y/o | Control | Control | Feed Day | No | 02:10 | 02:00 - 02:59 | Early Morning | 37,9 | 98  | 47,0  | 47,0  | 19,05 | 592,41 | 129,65 |
|    | 2019/06/25 | CH2206 | Male | Three y/o | Control | Control | Feed Day | No | 02:10 | 02:00 - 02:59 | Early Morning | 37,8 | 96  | 206,4 | 206,4 | 18,95 | 590,91 | 181,23 |
|    | 2019/06/25 | CH2205 | Male | Three y/o | Control | Control | Feed Day | No | 02:15 | 02:00 - 02:59 | Early Morning | 37,9 | 72  | 28,6  | 28,6  | 19,05 | 569,20 | 112,56 |
|    | 2019/06/25 | CH2206 | Male | Three y/o | Control | Control | Feed Day | No | 02:15 | 02:00 - 02:59 | Early Morning | 37,8 | 65  | 52,6  | 52,6  | 18,95 | 561,12 | 133,54 |
|    | 2019/06/25 | CH2205 | Male | Three y/o | Control | Control | Feed Day | No | 02:20 | 02:00 - 02:59 | Early Morning | 37,7 |     | 21,8  | 21,8  | 18,85 |        | 103,26 |



|            |        |      |           |         |         |          |    |       |               |               |      |    |      |      |       |        |        |
|------------|--------|------|-----------|---------|---------|----------|----|-------|---------------|---------------|------|----|------|------|-------|--------|--------|
| 2019/06/25 | CH2206 | Male | Three y/o | Control | Control | Feed Day | No | 02:20 | 02:00 - 02:59 | Early Morning | 37,5 | 54 | 9,8  | 9,8  | 18,65 | 545,99 | 76,07  |
| 2019/06/25 | CH2205 | Male | Three y/o | Control | Control | Feed Day | No | 02:25 | 02:00 - 02:59 | Early Morning | 37,7 | 70 | 18,6 | 18,6 | 18,85 | 566,99 | 97,84  |
| 2019/06/25 | CH2206 | Male | Three y/o | Control | Control | Feed Day | No | 02:25 | 02:00 - 02:59 | Early Morning | 37,2 | 57 | 4,4  | 4,4  | 18,36 | 550,47 | 49,12  |
| 2019/06/25 | CH2205 | Male | Three y/o | Control | Control | Feed Day | No | 02:30 | 02:00 - 02:59 | Early Morning | 37,7 | 72 | 13,4 | 13,4 | 18,85 | 569,20 | 86,68  |
| 2019/06/25 | CH2206 | Male | Three y/o | Control | Control | Feed Day | No | 02:30 | 02:00 - 02:59 | Early Morning | 37,0 | 51 | 33,4 | 33,4 | 18,16 | 541,20 | 117,88 |
| 2019/06/25 | CH2205 | Male | Three y/o | Control | Control | Feed Day | No | 02:35 | 02:00 - 02:59 | Early Morning | 37,7 | 49 | 14,8 | 14,8 | 18,85 | 537,80 | 90,05  |
| 2019/06/25 | CH2206 | Male | Three y/o | Control | Control | Feed Day | No | 02:35 | 02:00 - 02:59 | Early Morning | 37,3 | 52 | 42,2 | 42,2 | 18,46 | 542,83 | 125,93 |
| 2019/06/25 | CH2205 | Male | Three y/o | Control | Control | Feed Day | No | 02:40 | 02:00 - 02:59 | Early Morning | 37,7 | 42 | 16,6 | 16,6 | 18,85 | 524,42 | 93,96  |
| 2019/06/25 | CH2206 | Male | Three y/o | Control | Control | Feed Day | No | 02:40 | 02:00 - 02:59 | Early Morning | 37,3 | 53 | 36,0 | 36,0 | 18,46 | 544,43 | 120,46 |
| 2019/06/25 | CH2205 | Male | Three y/o | Control | Control | Feed Day | No | 02:45 | 02:00 - 02:59 | Early Morning | 37,7 | 57 | 7,0  | 7,0  | 18,85 | 550,47 | 64,72  |
| 2019/06/25 | CH2206 | Male | Three y/o | Control | Control | Feed Day | No | 02:45 | 02:00 - 02:59 | Early Morning | 37,2 | 77 | 13,6 | 13,6 | 18,36 | 574,39 | 87,18  |
| 2019/06/25 | CH2205 | Male | Three y/o | Control | Control | Feed Day | No | 02:50 | 02:00 - 02:59 | Early Morning | 37,7 | 42 | 5,2  | 5,2  | 18,85 | 524,42 | 54,72  |
| 2019/06/25 | CH2206 | Male | Three y/o | Control | Control | Feed Day | No | 02:50 | 02:00 - 02:59 | Early Morning | 37,2 | 48 | 16,4 | 16,4 | 18,36 | 536,04 | 93,55  |
| 2019/06/25 | CH2205 | Male | Three y/o | Control | Control | Feed Day | No | 02:55 | 02:00 - 02:59 | Early Morning | 37,6 | 68 | 7,2  | 7,2  | 18,75 | 564,71 | 65,66  |
| 2019/06/25 | CH2206 | Male | Three y/o | Control | Control | Feed Day | No | 02:55 | 02:00 - 02:59 | Early Morning | 37,1 | 49 | 11,6 | 11,6 | 18,26 | 537,80 | 81,78  |
| 2019/06/25 | CH2205 | Male | Three y/o | Control | Control | Feed Day | No | 03:00 | 03:00 - 03:59 | Early Morning | 37,6 | 58 | 13,0 | 13,0 | 18,75 | 551,90 | 85,65  |
| 2019/06/25 | CH2206 | Male | Three y/o | Control | Control | Feed Day | No | 03:00 | 03:00 - 03:59 | Early Morning | 37,1 | 48 | 12,4 | 12,4 | 18,26 | 536,04 | 84,04  |
| 2019/06/25 | CH2205 | Male | Three y/o | Control | Control | Feed Day | No | 03:05 | 03:00 - 03:59 | Early Morning | 37,5 | 45 | 8,0  | 8,0  | 18,65 | 530,47 | 69,22  |
| 2019/06/25 | CH2206 | Male | Three y/o | Control | Control | Feed Day | No | 03:05 | 03:00 - 03:59 | Early Morning | 37,1 | 49 | 5,6  | 5,6  | 18,26 | 537,80 | 57,21  |
| 2019/06/25 | CH2205 | Male | Three y/o | Control | Control | Feed Day | No | 03:10 | 03:00 - 03:59 | Early Morning | 37,5 | 58 | 13,0 | 13,0 | 18,65 | 551,90 | 85,65  |
| 2019/06/25 | CH2206 | Male | Three y/o | Control | Control | Feed Day | No | 03:10 | 03:00 - 03:59 | Early Morning | 37,0 | 52 | 31,8 | 31,8 | 18,16 | 542,83 | 116,20 |
| 2019/06/25 | CH2205 | Male | Three y/o | Control | Control | Feed Day | No | 03:15 | 03:00 - 03:59 | Early Morning | 37,5 | 70 | 11,8 | 11,8 | 18,65 | 566,99 | 82,36  |
| 2019/06/25 | CH2206 | Male | Three y/o | Control | Control | Feed Day | No | 03:15 | 03:00 - 03:59 | Early Morning | 37,0 | 68 | 13,2 | 13,2 | 18,16 | 564,71 | 86,17  |
| 2019/06/25 | CH2205 | Male | Three y/o | Control | Control | Feed Day | No | 03:20 | 03:00 - 03:59 | Early Morning | 37,5 | 47 | 9,6  | 9,6  | 18,65 | 534,23 | 75,37  |
| 2019/06/25 | CH2206 | Male | Three y/o | Control | Control | Feed Day | No | 03:20 | 03:00 - 03:59 | Early Morning | 37,0 | 54 | 15,4 | 15,4 | 18,16 | 545,99 | 91,41  |
| 2019/06/25 | CH2205 | Male | Three y/o | Control | Control | Feed Day | No | 03:25 | 03:00 - 03:59 | Early Morning | 37,4 | 77 | 11,6 | 11,6 | 18,55 | 574,39 | 81,78  |
| 2019/06/25 | CH2206 | Male | Three y/o | Control | Control | Feed Day | No | 03:25 | 03:00 - 03:59 | Early Morning | 37,0 | 43 | 11,0 | 11,0 | 18,16 | 526,50 | 79,98  |
| 2019/06/25 | CH2205 | Male | Three y/o | Control | Control | Feed Day | No | 03:30 | 03:00 - 03:59 | Early Morning | 37,4 | 62 | 12,4 | 12,4 | 18,55 | 557,33 | 84,04  |
| 2019/06/25 | CH2206 | Male | Three y/o | Control | Control | Feed Day | No | 03:30 | 03:00 - 03:59 | Early Morning | 37,0 | 48 | 6,2  | 6,2  | 18,16 | 536,04 | 60,63  |
| 2019/06/25 | CH2205 | Male | Three y/o | Control | Control | Feed Day | No | 03:35 | 03:00 - 03:59 | Early Morning | 37,3 | 70 | 13,8 | 13,8 | 18,46 | 566,99 | 87,68  |
| 2019/06/25 | CH2206 | Male | Three y/o | Control | Control | Feed Day | No | 03:35 | 03:00 - 03:59 | Early Morning | 36,9 | 50 | 27,4 | 27,4 | 18,06 | 539,52 | 111,09 |
| 2019/06/25 | CH2205 | Male | Three y/o | Control | Control | Feed Day | No | 03:40 | 03:00 - 03:59 | Early Morning | 37,3 | 42 | 14,6 | 14,6 | 18,46 | 524,42 | 89,59  |
| 2019/06/25 | CH2206 | Male | Three y/o | Control | Control | Feed Day | No | 03:40 | 03:00 - 03:59 | Early Morning | 36,9 | 49 | 31,6 | 31,6 | 18,06 | 537,80 | 115,98 |
| 2019/06/25 | CH2205 | Male | Three y/o | Control | Control | Feed Day | No | 03:45 | 03:00 - 03:59 | Early Morning | 37,3 | 68 | 5,6  | 5,6  | 18,46 | 564,71 | 57,21  |
| 2019/06/25 | CH2206 | Male | Three y/o | Control | Control | Feed Day | No | 03:45 | 03:00 - 03:59 | Early Morning | 37,0 | 39 | 37,0 | 37,0 | 18,16 | 517,82 | 121,40 |
| 2019/06/25 | CH2205 | Male | Three y/o | Control | Control | Feed Day | No | 03:50 | 03:00 - 03:59 | Early Morning | 37,3 | 65 | 5,6  | 5,6  | 18,46 | 561,12 | 57,21  |
| 2019/06/25 | CH2206 | Male | Three y/o | Control | Control | Feed Day | No | 03:50 | 03:00 - 03:59 | Early Morning | 37,0 | 43 | 40,0 | 40,0 | 18,16 | 526,50 | 124,09 |
| 2019/06/25 | CH2205 | Male | Three y/o | Control | Control | Feed Day | No | 03:55 | 03:00 - 03:59 | Early Morning | 37,3 | 64 | 7,8  | 7,8  | 18,46 | 559,88 | 68,36  |
| 2019/06/25 | CH2206 | Male | Three y/o | Control | Control | Feed Day | No | 03:55 | 03:00 - 03:59 | Early Morning | 37,1 | 69 | 51,0 | 51,0 | 18,26 | 565,86 | 132,47 |
| 2019/06/25 | CH2205 | Male | Three y/o | Control | Control | Feed Day | No | 04:00 | 04:00 - 04:59 | Morning       | 37,3 | 63 | 7,8  | 7,8  | 18,46 | 558,62 | 68,36  |
| 2019/06/25 | CH2206 | Male | Three y/o | Control | Control | Feed Day | No | 04:00 | 04:00 - 04:59 | Morning       | 37,0 | 67 | 46,8 | 46,8 | 18,16 | 563,53 | 129,50 |
| 2019/06/25 | CH2205 | Male | Three y/o | Control | Control | Feed Day | No | 04:05 | 04:00 - 04:59 | Morning       | 37,2 | 73 | 9,0  | 9,0  | 18,36 | 570,27 | 73,19  |
| 2019/06/25 | CH2206 | Male | Three y/o | Control | Control | Feed Day | No | 04:05 | 04:00 - 04:59 | Morning       | 36,9 | 60 | 45,4 | 45,4 | 18,06 | 554,67 | 128,45 |
| 2019/06/25 | CH2205 | Male | Three y/o | Control | Control | Feed Day | No | 04:10 | 04:00 - 04:59 | Morning       | 37,2 | 59 | 9,4  | 9,4  | 18,36 | 553,30 | 74,66  |
| 2019/06/25 | CH2206 | Male | Three y/o | Control | Control | Feed Day | No | 04:10 | 04:00 - 04:59 | Morning       | 36,8 | 76 | 46,8 | 46,8 | 17,96 | 573,39 | 129,50 |
| 2019/06/25 | CH2205 | Male | Three y/o | Control | Control | Feed Day | No | 04:15 | 04:00 - 04:59 | Morning       | 37,1 | 58 | 19,2 | 19,2 | 18,26 | 551,90 | 98,92  |
| 2019/06/25 | CH2206 | Male | Three y/o | Control | Control | Feed Day | No | 04:15 | 04:00 - 04:59 | Morning       | 36,8 | 47 | 34,0 | 34,0 | 17,96 | 534,23 | 118,49 |
| 2019/06/25 | CH2205 | Male | Three y/o | Control | Control | Feed Day | No | 04:20 | 04:00 - 04:59 | Morning       | 37,1 | 72 | 24,0 | 24,0 | 18,26 | 569,20 | 106,55 |
| 2019/06/25 | CH2206 | Male | Three y/o | Control | Control | Feed Day | No | 04:20 | 04:00 - 04:59 | Morning       | 36,8 | 76 | 24,6 | 24,6 | 17,96 | 573,39 | 107,39 |
| 2019/06/25 | CH2205 | Male | Three y/o | Control | Control | Feed Day | No | 04:25 | 04:00 - 04:59 | Morning       | 37,1 |    | 22,4 | 22,4 | 18,26 |        | 104,19 |
| 2019/06/25 | CH2206 | Male | Three y/o | Control | Control | Feed Day | No | 04:25 | 04:00 - 04:59 | Morning       | 36,9 | 49 | 22,6 | 22,6 | 18,06 | 537,80 | 104,49 |
| 2019/06/25 | CH2205 | Male | Three y/o | Control | Control | Feed Day | No | 04:30 | 04:00 - 04:59 | Morning       | 37,1 | 45 | 16,8 | 16,8 | 18,26 | 530,47 | 94,37  |
| 2019/06/25 | CH2206 | Male | Three y/o | Control | Control | Feed Day | No | 04:30 | 04:00 - 04:59 | Morning       | 36,9 | 81 | 25,4 | 25,4 | 18,06 | 578,26 | 108,49 |
| 2019/06/25 | CH2205 | Male | Three y/o | Control | Control | Feed Day | No | 04:35 | 04:00 - 04:59 | Morning       | 37,0 | 47 | 19,4 | 19,4 | 18,16 | 534,23 | 99,28  |
| 2019/06/25 | CH2206 | Male | Three y/o | Control | Control | Feed Day | No | 04:35 | 04:00 - 04:59 | Morning       | 37,0 | 49 | 24,0 | 24,0 | 18,16 | 537,80 | 106,55 |
| 2019/06/25 | CH2205 | Male | Three y/o | Control | Control | Feed Day | No | 04:40 | 04:00 - 04:59 | Morning       | 37,0 | 57 | 16,4 | 16,4 | 18,16 | 550,47 | 93,55  |
| 2019/06/25 | CH2206 | Male | Three y/o | Control | Control | Feed Day | No | 04:40 | 04:00 - 04:59 | Morning       | 37,0 | 51 | 25,0 | 25,0 | 18,16 | 541,20 | 107,94 |
| 2019/06/25 | CH2205 | Male | Three y/o | Control | Control | Feed Day | No | 04:45 | 04:00 - 04:59 | Morning       | 37,0 | 65 | 13,8 | 13,8 | 18,16 | 561,12 | 87,68  |
| 2019/06/25 | CH2206 | Male | Three y/o | Control | Control | Feed Day | No | 04:45 | 04:00 - 04:59 | Morning       | 37,0 | 50 | 32,2 | 32,2 | 18,16 | 539,52 | 116,63 |
| 2019/06/25 | CH2205 | Male | Three y/o | Control | Control | Feed Day | No | 04:50 | 04:00 - 04:59 | Morning       | 37,0 | 67 | 9,8  | 9,8  | 18,16 | 563,53 | 76,07  |
| 2019/06/25 | CH2206 | Male | Three y/o | Control | Control | Feed Day | No | 04:50 | 04:00 - 04:59 | Morning       | 37,0 | 47 | 34,0 | 34,0 | 18,16 | 534,23 | 118,49 |
| 2019/06/25 | CH2205 | Male | Three y/o | Control | Control | Feed Day | No | 04:55 | 04:00 - 04:59 | Morning       | 37,0 | 39 | 9,4  | 9,4  | 18,16 | 517,82 | 74,66  |
| 2019/06/25 | CH2206 | Male | Three y/o | Control | Control | Feed Day | No | 04:55 | 04:00 - 04:59 | Morning       | 37,0 | 43 | 30,6 | 30,6 | 18,16 | 526,50 | 114,87 |
| 2019/06/25 | CH2205 | Male | Three y/o | Control | Control | Feed Day | No | 05:00 | 05:00 - 05:59 | Morning       | 37,0 | 47 | 18,0 | 18,0 | 18,16 | 534,23 | 96,72  |
| 2019/06/25 | CH2206 | Male | Three y/o | Control | Control | Feed Day | No | 05:00 | 05:00 - 05:59 | Morning       | 37,0 | 51 | 23,0 | 23,0 | 18,16 | 541,20 | 105,09 |
| 2019/06/25 | CH2205 | Male | Three y/o | Control | Control | Feed Day | No | 05:05 | 05:00 - 05:59 | Morning       | 37,0 | 57 | 16,0 | 16,0 | 18,16 | 550,47 | 92,71  |
| 2019/06/25 | CH2206 | Male | Three y/o | Control | Control | Feed Day | No | 05:05 | 05:00 - 05:59 | Morning       | 37,0 | 39 | 14,4 | 14,4 | 18,16 | 517,82 | 89,12  |
| 2019/06/25 | CH2205 | Male | Three y/o | Control | Control | Feed Day | No | 05:10 | 05:00 - 05:59 | Morning       | 37,0 | 42 | 17,0 | 17,0 | 18,16 | 524,42 | 94,77  |
| 2019/06/25 | CH2206 | Male | Three y/o | Control | Control | Feed Day | No | 05:10 | 05:00 - 05:59 | Morning       | 37,0 | 46 | 5,8  | 5,8  | 18,16 | 532,38 | 58,39  |
| 2019/06/25 | CH2205 | Male | Three y/o | Control | Control | Feed Day | No | 05:15 | 05:00 - 05:59 | Morning       | 37,0 | 44 | 17,4 | 17,4 | 18,16 | 528,51 | 95,56  |



|            |        |      |           |         |         |          |    |       |               |              |      |     |       |       |       |        |        |
|------------|--------|------|-----------|---------|---------|----------|----|-------|---------------|--------------|------|-----|-------|-------|-------|--------|--------|
| 2019/06/25 | CH2206 | Male | Three y/o | Control | Control | Feed Day | No | 05:15 | 05:00 - 05:59 | Morning      | 37,0 | 43  | 3,8   | 3,8   | 18,16 | 526,50 | 44,22  |
| 2019/06/25 | CH2205 | Male | Three y/o | Control | Control | Feed Day | No | 05:20 | 05:00 - 05:59 | Morning      | 37,0 | 124 | 10,8  | 10,8  | 18,16 | 609,04 | 79,36  |
| 2019/06/25 | CH2206 | Male | Three y/o | Control | Control | Feed Day | No | 05:20 | 05:00 - 05:59 | Morning      | 37,0 | 77  | 32,6  | 32,6  | 18,16 | 574,39 | 117,05 |
| 2019/06/25 | CH2205 | Male | Three y/o | Control | Control | Feed Day | No | 05:25 | 05:00 - 05:59 | Morning      | 37,0 | 60  | 13,6  | 13,6  | 18,16 | 554,67 | 87,18  |
| 2019/06/25 | CH2206 | Male | Three y/o | Control | Control | Feed Day | No | 05:25 | 05:00 - 05:59 | Morning      | 37,0 | 49  | 38,2  | 38,2  | 18,16 | 537,80 | 122,50 |
| 2019/06/25 | CH2205 | Male | Three y/o | Control | Control | Feed Day | No | 05:30 | 05:00 - 05:59 | Morning      | 37,0 | 61  | 17,6  | 17,6  | 18,16 | 556,01 | 95,95  |
| 2019/06/25 | CH2206 | Male | Three y/o | Control | Control | Feed Day | No | 05:30 | 05:00 - 05:59 | Morning      | 37,0 | 50  | 34,8  | 34,8  | 18,16 | 539,52 | 119,29 |
| 2019/06/25 | CH2205 | Male | Three y/o | Control | Control | Feed Day | No | 05:35 | 05:00 - 05:59 | Morning      | 37,0 | 70  | 15,4  | 15,4  | 18,16 | 566,99 | 91,41  |
| 2019/06/25 | CH2206 | Male | Three y/o | Control | Control | Feed Day | No | 05:35 | 05:00 - 05:59 | Morning      | 37,0 | 197 | 30,2  | 30,2  | 18,16 | 639,25 | 114,42 |
| 2019/06/25 | CH2205 | Male | Three y/o | Control | Control | Feed Day | No | 05:40 | 05:00 - 05:59 | Morning      | 37,0 | 40  | 18,2  | 18,2  | 18,16 | 520,09 | 97,10  |
| 2019/06/25 | CH2206 | Male | Three y/o | Control | Control | Feed Day | No | 05:40 | 05:00 - 05:59 | Morning      | 37,0 | 39  | 34,2  | 34,2  | 18,16 | 517,82 | 118,70 |
| 2019/06/25 | CH2205 | Male | Three y/o | Control | Control | Feed Day | No | 05:45 | 05:00 - 05:59 | Morning      | 37,0 | 51  | 14,0  | 14,0  | 18,16 | 541,20 | 88,17  |
| 2019/06/25 | CH2206 | Male | Three y/o | Control | Control | Feed Day | No | 05:45 | 05:00 - 05:59 | Morning      | 37,0 | 50  | 31,0  | 31,0  | 18,16 | 539,52 | 115,32 |
| 2019/06/25 | CH2205 | Male | Three y/o | Control | Control | Feed Day | No | 05:50 | 05:00 - 05:59 | Morning      | 37,0 | 71  | 13,8  | 13,8  | 18,16 | 568,10 | 87,68  |
| 2019/06/25 | CH2206 | Male | Three y/o | Control | Control | Feed Day | No | 05:50 | 05:00 - 05:59 | Morning      | 37,0 | 51  | 2,8   | 2,8   | 18,16 | 541,20 | 34,04  |
| 2019/06/25 | CH2205 | Male | Three y/o | Control | Control | Feed Day | No | 05:55 | 05:00 - 05:59 | Morning      | 37,0 | 70  | 10,4  | 10,4  | 18,16 | 566,99 | 78,08  |
| 2019/06/25 | CH2206 | Male | Three y/o | Control | Control | Feed Day | No | 05:55 | 05:00 - 05:59 | Morning      | 37,0 | 83  | 10,8  | 10,8  | 18,16 | 580,11 | 79,36  |
| 2019/06/25 | CH2205 | Male | Three y/o | Control | Control | Feed Day | No | 06:00 | 06:00 - 06:59 | Morning      | 37,0 | 49  | 18,2  | 18,2  | 18,16 | 537,80 | 97,10  |
| 2019/06/25 | CH2206 | Male | Three y/o | Control | Control | Feed Day | No | 06:00 | 06:00 - 06:59 | Morning      | 37,0 | 75  | 31,4  | 31,4  | 18,16 | 572,36 | 115,76 |
| 2019/06/25 | CH2205 | Male | Three y/o | Control | Control | Feed Day | No | 06:05 | 06:00 - 06:59 | Morning      | 37,0 | 37  | 11,4  | 11,4  | 18,16 | 513,06 | 81,19  |
| 2019/06/25 | CH2206 | Male | Three y/o | Control | Control | Feed Day | No | 06:05 | 06:00 - 06:59 | Morning      | 37,0 | 80  | 31,6  | 31,6  | 18,16 | 577,31 | 115,98 |
| 2019/06/25 | CH2205 | Male | Three y/o | Control | Control | Feed Day | No | 06:10 | 06:00 - 06:59 | Morning      | 37,0 |     | 12,6  | 12,6  | 18,16 |        | 84,59  |
| 2019/06/25 | CH2206 | Male | Three y/o | Control | Control | Feed Day | No | 06:10 | 06:00 - 06:59 | Morning      | 37,1 | 47  | 17,4  | 17,4  | 18,26 | 534,23 | 95,56  |
| 2019/06/25 | CH2205 | Male | Three y/o | Control | Control | Feed Day | No | 06:15 | 06:00 - 06:59 | Morning      | 37,0 | 48  | 12,6  | 12,6  | 18,16 | 536,04 | 84,59  |
| 2019/06/25 | CH2206 | Male | Three y/o | Control | Control | Feed Day | No | 06:15 | 06:00 - 06:59 | Morning      | 37,0 | 71  | 19,8  | 19,8  | 18,16 | 568,10 | 99,97  |
| 2019/06/25 | CH2205 | Male | Three y/o | Control | Control | Feed Day | No | 06:20 | 06:00 - 06:59 | Morning      | 37,0 | 119 | 11,8  | 11,8  | 18,16 | 606,20 | 82,36  |
| 2019/06/25 | CH2206 | Male | Three y/o | Control | Control | Feed Day | No | 06:20 | 06:00 - 06:59 | Morning      | 37,0 | 79  | 14,8  | 14,8  | 18,16 | 576,36 | 90,05  |
| 2019/06/25 | CH2205 | Male | Three y/o | Control | Control | Feed Day | No | 06:25 | 06:00 - 06:59 | Morning      | 37,0 | 44  | 15,8  | 15,8  | 18,16 | 528,51 | 92,28  |
| 2019/06/25 | CH2206 | Male | Three y/o | Control | Control | Feed Day | No | 06:25 | 06:00 - 06:59 | Morning      | 37,0 | 99  | 29,6  | 29,6  | 18,16 | 593,14 | 113,73 |
| 2019/06/25 | CH2205 | Male | Three y/o | Control | Control | Feed Day | No | 06:30 | 06:00 - 06:59 | Morning      | 37,1 | 167 | 78,2  | 78,2  | 18,26 | 628,84 | 147,28 |
| 2019/06/25 | CH2206 | Male | Three y/o | Control | Control | Feed Day | No | 06:30 | 06:00 - 06:59 | Morning      | 37,1 | 111 | 38,8  | 38,8  | 18,26 | 601,33 | 123,04 |
| 2019/06/25 | CH2205 | Male | Three y/o | Control | Control | Feed Day | No | 06:35 | 06:00 - 06:59 | Morning      | 37,2 | 128 | 116,0 | 116,0 | 18,36 | 611,22 | 161,02 |
| 2019/06/25 | CH2206 | Male | Three y/o | Control | Control | Feed Day | No | 06:35 | 06:00 - 06:59 | Morning      | 37,2 | 110 | 94,2  | 94,2  | 18,36 | 600,69 | 153,76 |
| 2019/06/25 | CH2205 | Male | Three y/o | Control | Control | Feed Day | No | 06:40 | 06:00 - 06:59 | Morning      | 37,2 | 135 | 51,8  | 51,8  | 18,36 | 614,84 | 133,01 |
| 2019/06/25 | CH2206 | Male | Three y/o | Control | Control | Feed Day | No | 06:40 | 06:00 - 06:59 | Morning      | 37,2 | 89  | 58,4  | 58,4  | 18,36 | 585,33 | 137,16 |
| 2019/06/25 | CH2205 | Male | Three y/o | Control | Control | Feed Day | No | 06:45 | 06:00 - 06:59 | Morning      | 37,3 |     | 123,0 | 123,0 | 18,46 |        | 163,07 |
| 2019/06/25 | CH2206 | Male | Three y/o | Control | Control | Feed Day | No | 06:45 | 06:00 - 06:59 | Morning      | 37,4 | 135 | 101,0 | 101,0 | 18,55 | 614,84 | 156,19 |
| 2019/06/25 | CH2205 | Male | Three y/o | Control | Control | Feed Day | No | 06:50 | 06:00 - 06:59 | Morning      | 37,4 | 79  | 80,0  | 80,0  | 18,55 | 576,36 | 148,08 |
| 2019/06/25 | CH2206 | Male | Three y/o | Control | Control | Feed Day | No | 06:50 | 06:00 - 06:59 | Morning      | 37,5 | 129 | 45,0  | 45,0  | 18,65 | 611,75 | 128,15 |
| 2019/06/25 | CH2205 | Male | Three y/o | Control | Control | Feed Day | No | 06:55 | 06:00 - 06:59 | Morning      | 37,5 | 167 | 37,0  | 37,0  | 18,65 | 628,84 | 121,40 |
| 2019/06/25 | CH2206 | Male | Three y/o | Control | Control | Feed Day | No | 06:55 | 06:00 - 06:59 | Morning      | 37,7 | 128 | 111,6 | 111,6 | 18,85 | 611,22 | 159,67 |
| 2019/06/25 | CH2205 | Male | Three y/o | Control | Control | Feed Day | No | 07:00 | 07:00 - 07:59 | Morning      | 37,6 | 65  | 281,4 | 281,4 | 18,75 | 561,12 | 192,16 |
| 2019/06/25 | CH2206 | Male | Three y/o | Control | Control | Feed Day | No | 07:00 | 07:00 - 07:59 | Morning      | 37,7 | 55  | 117,6 | 117,6 | 18,85 | 547,52 | 161,50 |
| 2019/06/25 | CH2205 | Male | Three y/o | Control | Control | Feed Day | No | 07:05 | 07:00 - 07:59 | Morning      | 37,7 | 69  | 128,4 | 128,4 | 18,85 | 565,86 | 164,57 |
| 2019/06/25 | CH2206 | Male | Three y/o | Control | Control | Feed Day | No | 07:05 | 07:00 - 07:59 | Morning      | 37,8 | 128 | 78,4  | 78,4  | 18,95 | 611,22 | 147,37 |
| 2019/06/25 | CH2205 | Male | Three y/o | Control | Control | Feed Day | No | 07:10 | 07:00 - 07:59 | Morning      | 37,9 | 132 | 13,8  | 13,8  | 19,05 | 613,32 | 87,68  |
| 2019/06/25 | CH2206 | Male | Three y/o | Control | Control | Feed Day | No | 07:10 | 07:00 - 07:59 | Morning      | 37,8 | 120 | 118,2 | 118,2 | 18,95 | 606,78 | 161,68 |
| 2019/06/25 | CH2205 | Male | Three y/o | Control | Control | Feed Day | No | 07:15 | 07:00 - 07:59 | Morning      | 37,9 |     | 343,2 | 343,2 | 19,05 |        | 199,18 |
| 2019/06/25 | CH2206 | Male | Three y/o | Control | Control | Feed Day | No | 07:15 | 07:00 - 07:59 | Morning      | 37,9 | 94  | 103,4 | 103,4 | 19,05 | 589,37 | 157,01 |
| 2019/06/25 | CH2205 | Male | Three y/o | Control | Control | Feed Day | No | 07:20 | 07:00 - 07:59 | Morning      | 37,9 | 131 | 249,2 | 249,2 | 19,05 | 612,80 | 187,87 |
| 2019/06/25 | CH2206 | Male | Three y/o | Control | Control | Feed Day | No | 07:20 | 07:00 - 07:59 | Morning      | 37,8 | 110 | 187,6 | 187,6 | 18,95 | 600,69 | 177,87 |
| 2019/06/25 | CH2205 | Male | Three y/o | Control | Control | Feed Day | No | 07:25 | 07:00 - 07:59 | Morning      | 37,9 | 113 | 57,0  | 57,0  | 19,05 | 602,58 | 136,32 |
| 2019/06/25 | CH2206 | Male | Three y/o | Control | Control | Feed Day | No | 07:25 | 07:00 - 07:59 | Morning      | 37,8 | 121 | 269,6 | 269,6 | 18,95 | 607,35 | 190,64 |
| 2019/06/25 | CH2205 | Male | Three y/o | Control | Control | Feed Day | No | 07:30 | 07:00 - 07:59 | Morning      | 37,7 | 89  | 16,6  | 16,6  | 18,85 | 585,33 | 93,96  |
| 2019/06/25 | CH2206 | Male | Three y/o | Control | Control | Feed Day | No | 07:30 | 07:00 - 07:59 | Morning      | 37,9 | 118 | 115,2 | 115,2 | 19,05 | 605,61 | 160,78 |
| 2019/06/25 | CH2205 | Male | Three y/o | Control | Control | Feed Day | No | 07:35 | 07:00 - 07:59 | Morning      | 37,6 | 177 | 46,0  | 46,0  | 18,75 | 632,55 | 128,91 |
| 2019/06/25 | CH2206 | Male | Three y/o | Control | Control | Feed Day | No | 07:35 | 07:00 - 07:59 | Morning      | 37,8 | 113 | 10,6  | 10,6  | 18,95 | 602,58 | 78,73  |
| 2019/06/25 | CH2205 | Male | Three y/o | Control | Control | Feed Day | No | 07:40 | 07:00 - 07:59 | Morning      | 37,7 | 118 | 182,2 | 182,2 | 18,85 | 605,61 | 176,84 |
| 2019/06/25 | CH2206 | Male | Three y/o | Control | Control | Feed Day | No | 07:40 | 07:00 - 07:59 | Morning      | 37,7 | 91  | 11,0  | 11,0  | 18,85 | 586,98 | 79,98  |
| 2019/06/25 | CH2205 | Male | Three y/o | Control | Control | Feed Day | No | 07:45 | 07:00 - 07:59 | Morning      | 37,7 | 114 | 55,2  | 55,2  | 18,85 | 603,20 | 135,21 |
| 2019/06/25 | CH2206 | Male | Three y/o | Control | Control | Feed Day | No | 07:45 | 07:00 - 07:59 | Morning      | 37,5 | 128 | 26,4  | 26,4  | 18,65 | 611,22 | 109,81 |
| 2019/06/25 | CH2205 | Male | Three y/o | Control | Control | Feed Day | No | 07:50 | 07:00 - 07:59 | Morning      | 37,7 | 98  | 33,6  | 33,6  | 18,85 | 592,41 | 118,09 |
| 2019/06/25 | CH2206 | Male | Three y/o | Control | Control | Feed Day | No | 07:50 | 07:00 - 07:59 | Morning      | 37,6 | 110 | 7,8   | 7,8   | 18,75 | 600,69 | 68,36  |
| 2019/06/25 | CH2205 | Male | Three y/o | Control | Control | Feed Day | No | 07:55 | 07:00 - 07:59 | Morning      | 37,7 |     | 13,8  | 13,8  | 18,85 |        | 87,68  |
| 2019/06/25 | CH2206 | Male | Three y/o | Control | Control | Feed Day | No | 07:55 | 07:00 - 07:59 | Morning      | 37,4 |     | 64,2  | 64,2  | 18,55 |        | 140,44 |
| 2019/06/25 | CH2205 | Male | Three y/o | Control | Control | Feed Day | No | 08:00 | 08:00 - 08:59 | Late Morning | 37,7 | 108 | 53,0  | 53,0  | 18,85 | 599,39 | 133,80 |
| 2019/06/25 | CH2206 | Male | Three y/o | Control | Control | Feed Day | No | 08:00 | 08:00 - 08:59 | Late Morning | 37,7 | 123 | 93,8  | 93,8  | 18,85 | 608,49 | 153,61 |
| 2019/06/25 | CH2205 | Male | Three y/o | Control | Control | Feed Day | No | 08:05 | 08:00 - 08:59 | Late Morning | 37,7 | 110 | 67,0  | 67,0  | 18,85 | 600,69 | 141,92 |
| 2019/06/25 | CH2206 | Male | Three y/o | Control | Control | Feed Day | No | 08:05 | 08:00 - 08:59 | Late Morning | 37,7 | 118 | 477,4 | 477,4 | 18,85 | 605,61 | 210,90 |
| 2019/06/25 | CH2205 | Male | Three y/o | Control | Control | Feed Day | No | 08:10 | 08:00 - 08:59 | Late Morning | 37,7 | 113 | 122,2 | 122,2 | 18,85 | 602,58 | 162,84 |



|            |        |      |           |         |         |          |     |       |               |              |      |     |       |       |       |        |        |
|------------|--------|------|-----------|---------|---------|----------|-----|-------|---------------|--------------|------|-----|-------|-------|-------|--------|--------|
| 2019/06/25 | CH2206 | Male | Three y/o | Control | Control | Feed Day | No  | 08:10 | 08:00 - 08:59 | Late Morning | 37,8 | 126 | 49,2  | 49,2  | 18,95 | 610,14 | 131,23 |
| 2019/06/25 | CH2205 | Male | Three y/o | Control | Control | Feed Day | No  | 08:15 | 08:00 - 08:59 | Late Morning | 37,7 | 114 | 209,8 | 209,8 | 18,85 | 603,20 | 181,80 |
| 2019/06/25 | CH2206 | Male | Three y/o | Control | Control | Feed Day | No  | 08:15 | 08:00 - 08:59 | Late Morning | 37,7 | 115 | 81,0  | 81,0  | 18,85 | 603,82 | 148,51 |
| 2019/06/25 | CH2205 | Male | Three y/o | Control | Control | Feed Day | No  | 08:20 | 08:00 - 08:59 | Late Morning | 37,6 |     | 34,8  | 34,8  | 18,75 |        | 119,29 |
| 2019/06/25 | CH2206 | Male | Three y/o | Control | Control | Feed Day | No  | 08:20 | 08:00 - 08:59 | Late Morning | 37,5 | 94  | 72,8  | 72,8  | 18,65 | 589,37 | 144,80 |
| 2019/06/25 | CH2205 | Male | Three y/o | Control | Control | Feed Day | No  | 08:25 | 08:00 - 08:59 | Late Morning | 37,6 | 76  | 43,2  | 43,2  | 18,75 | 573,39 | 126,74 |
| 2019/06/25 | CH2206 | Male | Three y/o | Control | Control | Feed Day | No  | 08:25 | 08:00 - 08:59 | Late Morning | 37,5 | 70  | 8,0   | 8,0   | 18,65 | 566,99 | 69,22  |
| 2019/06/25 | CH2205 | Male | Three y/o | Control | Control | Feed Day | No  | 08:30 | 08:00 - 08:59 | Late Morning | 37,6 | 125 | 58,2  | 58,2  | 18,75 | 609,60 | 137,04 |
| 2019/06/25 | CH2206 | Male | Three y/o | Control | Control | Feed Day | No  | 08:30 | 08:00 - 08:59 | Late Morning | 37,5 | 126 | 30,6  | 30,6  | 18,65 | 610,14 | 114,87 |
| 2019/06/25 | CH2205 | Male | Three y/o | Control | Control | Feed Day | No  | 08:35 | 08:00 - 08:59 | Late Morning | 37,6 | 131 | 227,4 | 227,4 | 18,75 | 612,80 | 184,64 |
| 2019/06/25 | CH2206 | Male | Three y/o | Control | Control | Feed Day | No  | 08:35 | 08:00 - 08:59 | Late Morning | 37,5 | 101 | 191,6 | 191,6 | 18,65 | 594,59 | 178,61 |
| 2019/06/25 | CH2205 | Male | Three y/o | Control | Control | Feed Day | No  | 08:40 | 08:00 - 08:59 | Late Morning | 37,6 | 75  | 12,6  | 12,6  | 18,75 | 572,36 | 84,59  |
| 2019/06/25 | CH2206 | Male | Three y/o | Control | Control | Feed Day | No  | 08:40 | 08:00 - 08:59 | Late Morning | 37,7 | 194 | 201,4 | 201,4 | 18,85 | 638,30 | 180,36 |
| 2019/06/25 | CH2205 | Male | Three y/o | Control | Control | Feed Day | No  | 08:45 | 08:00 - 08:59 | Late Morning | 37,5 |     | 36,6  | 36,6  | 18,65 |        | 121,03 |
| 2019/06/25 | CH2206 | Male | Three y/o | Control | Control | Feed Day | No  | 08:45 | 08:00 - 08:59 | Late Morning | 37,8 | 111 | 63,8  | 63,8  | 18,95 | 601,33 | 140,22 |
| 2019/06/25 | CH2205 | Male | Three y/o | Control | Control | Feed Day | No  | 08:50 | 08:00 - 08:59 | Late Morning | 37,5 |     | 22,2  | 22,2  | 18,65 |        | 103,88 |
| 2019/06/25 | CH2206 | Male | Three y/o | Control | Control | Feed Day | No  | 08:50 | 08:00 - 08:59 | Late Morning | 37,8 | 108 | 52,6  | 52,6  | 18,95 | 599,39 | 133,54 |
| 2019/06/25 | CH2205 | Male | Three y/o | Control | Control | Feed Day | No  | 08:55 | 08:00 - 08:59 | Late Morning | 37,3 |     | 21,6  | 21,6  | 18,46 |        | 102,94 |
| 2019/06/25 | CH2206 | Male | Three y/o | Control | Control | Feed Day | No  | 08:55 | 08:00 - 08:59 | Late Morning | 37,7 | 73  | 113,0 | 113,0 | 18,85 | 570,27 | 160,11 |
| 2019/06/25 | CH2205 | Male | Three y/o | Control | Control | Feed Day | No  | 09:00 | 09:00 - 09:59 | Late Morning | 37,1 | 113 | 9,4   | 9,4   | 18,26 | 602,58 | 74,66  |
| 2019/06/25 | CH2206 | Male | Three y/o | Control | Control | Feed Day | No  | 09:00 | 09:00 - 09:59 | Late Morning | 37,7 | 129 | 31,6  | 31,6  | 18,85 | 611,75 | 115,98 |
| 2019/06/25 | CH2205 | Male | Three y/o | Control | Control | Feed Day | No  | 09:05 | 09:00 - 09:59 | Late Morning | 37,1 |     | 11,4  | 11,4  | 18,26 |        | 81,19  |
| 2019/06/25 | CH2206 | Male | Three y/o | Control | Control | Feed Day | No  | 09:05 | 09:00 - 09:59 | Late Morning | 37,7 | 81  | 28,8  | 28,8  | 18,85 | 578,26 | 112,79 |
| 2019/06/25 | CH2205 | Male | Three y/o | Control | Control | Feed Day | No  | 09:10 | 09:00 - 09:59 | Late Morning | 37,0 |     | 7,4   | 7,4   | 18,16 |        | 66,59  |
| 2019/06/25 | CH2206 | Male | Three y/o | Control | Control | Feed Day | No  | 09:10 | 09:00 - 09:59 | Late Morning | 37,5 | 62  | 28,4  | 28,4  | 18,65 | 557,33 | 112,31 |
| 2019/06/25 | CH2205 | Male | Three y/o | Control | Control | Feed Day | No  | 09:15 | 09:00 - 09:59 | Late Morning | 37,0 | 53  | 9,8   | 9,8   | 18,16 | 544,43 | 76,07  |
| 2019/06/25 | CH2206 | Male | Three y/o | Control | Control | Feed Day | No  | 09:15 | 09:00 - 09:59 | Late Morning | 37,3 | 56  | 25,8  | 25,8  | 18,46 | 549,01 | 109,02 |
| 2019/06/25 | CH2205 | Male | Three y/o | Control | Control | Feed Day | No  | 09:20 | 09:00 - 09:59 | Late Morning | 37,0 |     | 5,2   | 5,2   | 18,16 |        | 54,72  |
| 2019/06/25 | CH2206 | Male | Three y/o | Control | Control | Feed Day | No  | 09:20 | 09:00 - 09:59 | Late Morning | 37,3 | 48  | 27,2  | 27,2  | 18,46 | 536,04 | 110,83 |
| 2019/06/25 | CH2205 | Male | Three y/o | Control | Control | Feed Day | No  | 09:25 | 09:00 - 09:59 | Late Morning | 37,1 | 78  | 10,2  | 10,2  | 18,26 | 575,38 | 77,43  |
| 2019/06/25 | CH2206 | Male | Three y/o | Control | Control | Feed Day | No  | 09:25 | 09:00 - 09:59 | Late Morning | 37,2 | 53  | 24,8  | 24,8  | 18,36 | 544,43 | 107,67 |
| 2019/06/25 | CH2205 | Male | Three y/o | Control | Control | Feed Day | No  | 09:30 | 09:00 - 09:59 | Late Morning | 37,2 | 43  | 13,4  | 13,4  | 18,36 | 526,50 | 86,68  |
| 2019/06/25 | CH2206 | Male | Three y/o | Control | Control | Feed Day | No  | 09:30 | 09:00 - 09:59 | Late Morning | 37,2 | 89  | 33,0  | 33,0  | 18,36 | 585,33 | 117,47 |
| 2019/06/25 | CH2205 | Male | Three y/o | Control | Control | Feed Day | No  | 09:35 | 09:00 - 09:59 | Late Morning | 37,2 | 46  | 5,0   | 5,0   | 18,36 | 532,38 | 53,41  |
| 2019/06/25 | CH2206 | Male | Three y/o | Control | Control | Feed Day | No  | 09:35 | 09:00 - 09:59 | Late Morning | 37,2 | 75  | 39,8  | 39,8  | 18,36 | 572,36 | 123,91 |
| 2019/06/25 | CH2205 | Male | Three y/o | Control | Control | Feed Day | No  | 09:40 | 09:00 - 09:59 | Late Morning | 37,3 | 57  | 7,0   | 7,0   | 18,46 | 550,47 | 64,72  |
| 2019/06/25 | CH2206 | Male | Three y/o | Control | Control | Feed Day | No  | 09:40 | 09:00 - 09:59 | Late Morning | 37,0 | 86  | 27,2  | 27,2  | 18,16 | 582,77 | 110,83 |
| 2019/06/25 | CH2205 | Male | Three y/o | Control | Control | Feed Day | No  | 09:45 | 09:00 - 09:59 | Late Morning | 37,3 | 43  | 6,4   | 6,4   | 18,46 | 526,50 | 61,70  |
| 2019/06/25 | CH2206 | Male | Three y/o | Control | Control | Feed Day | No  | 09:45 | 09:00 - 09:59 | Late Morning | 37,1 |     | 27,4  | 27,4  | 18,26 |        | 111,09 |
| 2019/06/25 | CH2205 | Male | Three y/o | Control | Control | Feed Day | No  | 09:50 | 09:00 - 09:59 | Late Morning | 37,4 | 69  | 21,6  | 21,6  | 18,55 | 565,86 | 102,94 |
| 2019/06/25 | CH2206 | Male | Three y/o | Control | Control | Feed Day | No  | 09:50 | 09:00 - 09:59 | Late Morning | 37,2 | 97  | 60,2  | 60,2  | 18,36 | 591,66 | 138,21 |
| 2019/06/25 | CH2205 | Male | Three y/o | Control | Control | Feed Day | No  | 09:55 | 09:00 - 09:59 | Late Morning | 37,4 | 67  | 19,2  | 19,2  | 18,55 | 563,53 | 98,92  |
| 2019/06/25 | CH2206 | Male | Three y/o | Control | Control | Feed Day | No  | 09:55 | 09:00 - 09:59 | Late Morning | 37,2 | 48  | 14,4  | 14,4  | 18,36 | 536,04 | 89,12  |
| 2019/06/25 | CH2205 | Male | Three y/o | Control | Control | Feed Day | No  | 10:00 | 10:00 - 10:59 | Late Morning | 37,4 | 41  | 18,4  | 18,4  | 18,55 | 522,29 | 97,47  |
| 2019/06/25 | CH2206 | Male | Three y/o | Control | Control | Feed Day | No  | 10:00 | 10:00 - 10:59 | Late Morning | 37,2 | 54  | 14,6  | 14,6  | 18,36 | 545,99 | 89,59  |
| 2019/06/25 | CH2205 | Male | Three y/o | Control | Control | Feed Day | No  | 10:05 | 10:00 - 10:59 | Late Morning | 37,3 | 88  | 238,4 | 238,4 | 18,46 | 584,49 | 186,30 |
| 2019/06/25 | CH2206 | Male | Three y/o | Control | Control | Feed Day | No  | 10:05 | 10:00 - 10:59 | Late Morning | 37,2 | 165 | 80,2  | 80,2  | 18,36 | 628,06 | 148,16 |
| 2019/06/25 | CH2205 | Male | Three y/o | Control | Control | Feed Day | No  | 10:10 | 10:00 - 10:59 | Late Morning | 37,3 | 124 | 20,8  | 20,8  | 18,46 | 609,04 | 101,65 |
| 2019/06/25 | CH2206 | Male | Three y/o | Control | Control | Feed Day | No  | 10:10 | 10:00 - 10:59 | Late Morning | 37,2 | 112 | 98,0  | 98,0  | 18,36 | 601,96 | 155,14 |
| 2019/06/25 | CH2205 | Male | Three y/o | Control | Control | Feed Day | No  | 10:15 | 10:00 - 10:59 | Late Morning | 37,3 | 64  | 6,8   | 6,8   | 18,46 | 559,88 | 63,74  |
| 2019/06/25 | CH2206 | Male | Three y/o | Control | Control | Feed Day | No  | 10:15 | 10:00 - 10:59 | Late Morning | 37,3 | 107 | 29,4  | 29,4  | 18,46 | 598,73 | 113,50 |
| 2019/06/25 | CH2205 | Male | Three y/o | Control | Control | Feed Day | No  | 10:20 | 10:00 - 10:59 | Late Morning | 37,4 | 86  | 36,8  | 36,8  | 18,55 | 582,77 | 121,22 |
| 2019/06/25 | CH2206 | Male | Three y/o | Control | Control | Feed Day | No  | 10:20 | 10:00 - 10:59 | Late Morning | 37,4 | 90  | 28,4  | 28,4  | 18,55 | 586,16 | 112,31 |
| 2019/06/25 | CH2205 | Male | Three y/o | Control | Control | Feed Day | No  | 10:25 | 10:00 - 10:59 | Late Morning | 37,4 |     | 77,2  | 77,2  | 18,55 |        | 146,84 |
| 2019/06/25 | CH2206 | Male | Three y/o | Control | Control | Feed Day | No  | 10:25 | 10:00 - 10:59 | Late Morning | 37,3 | 65  | 30,6  | 30,6  | 18,46 | 561,12 | 114,87 |
| 2019/06/25 | CH2205 | Male | Three y/o | Control | Control | Feed Day | Yes | 10:30 | 10:00 - 10:59 | Late Morning | 37,4 |     | 28,0  | 28,0  | 18,55 |        | 111,83 |
| 2019/06/25 | CH2206 | Male | Three y/o | Control | Control | Feed Day | Yes | 10:30 | 10:00 - 10:59 | Late Morning | 37,3 | 53  | 38,4  | 38,4  | 18,46 | 544,43 | 122,68 |
| 2019/06/25 | CH2205 | Male | Three y/o | Control | Control | Feed Day | Yes | 10:35 | 10:00 - 10:59 | Late Morning | 37,4 | 76  | 12,2  | 12,2  | 18,55 | 573,39 | 83,49  |
| 2019/06/25 | CH2206 | Male | Three y/o | Control | Control | Feed Day | Yes | 10:35 | 10:00 - 10:59 | Late Morning | 37,3 | 71  | 64,4  | 64,4  | 18,46 | 568,10 | 140,55 |
| 2019/06/25 | CH2205 | Male | Three y/o | Control | Control | Feed Day | Yes | 10:40 | 10:00 - 10:59 | Late Morning | 37,4 |     | 66,4  | 66,4  | 18,55 |        | 141,61 |
| 2019/06/25 | CH2206 | Male | Three y/o | Control | Control | Feed Day | Yes | 10:40 | 10:00 - 10:59 | Late Morning | 37,3 | 64  | 26,8  | 26,8  | 18,46 | 559,88 | 110,33 |
| 2019/06/25 | CH2205 | Male | Three y/o | Control | Control | Feed Day | Yes | 10:45 | 10:00 - 10:59 | Late Morning | 37,5 | 71  | 15,0  | 15,0  | 18,65 | 568,10 | 90,51  |
| 2019/06/25 | CH2206 | Male | Three y/o | Control | Control | Feed Day | Yes | 10:45 | 10:00 - 10:59 | Late Morning | 37,3 | 70  | 26,2  | 26,2  | 18,46 | 566,99 | 109,55 |
| 2019/06/25 | CH2205 | Male | Three y/o | Control | Control | Feed Day | Yes | 10:50 | 10:00 - 10:59 | Late Morning | 37,5 | 68  | 32,6  | 32,6  | 18,65 | 564,71 | 117,05 |
| 2019/06/25 | CH2206 | Male | Three y/o | Control | Control | Feed Day | Yes | 10:50 | 10:00 - 10:59 | Late Morning | 37,4 | 96  | 289,2 | 289,2 | 18,55 | 590,91 | 193,12 |
| 2019/06/25 | CH2205 | Male | Three y/o | Control | Control | Feed Day | Yes | 10:55 | 10:00 - 10:59 | Late Morning | 37,5 | 86  | 9,2   | 9,2   | 18,65 | 582,77 | 73,94  |
| 2019/06/25 | CH2206 | Male | Three y/o | Control | Control | Feed Day | Yes | 10:55 | 10:00 - 10:59 | Late Morning | 37,5 | 110 | 246,4 | 246,4 | 18,65 | 600,69 | 187,47 |
| 2019/06/25 | CH2205 | Male | Three y/o | Control | Control | Feed Day | Yes | 11:00 | 11:00 - 11:59 | Late Morning | 37,5 | 114 | 102,4 | 102,4 | 18,65 | 603,20 | 156,67 |
| 2019/06/25 | CH2206 | Male | Three y/o | Control | Control | Feed Day | Yes | 11:00 | 11:00 - 11:59 | Late Morning | 37,5 | 92  | 13,8  | 13,8  | 18,65 | 587,78 | 87,68  |
| 2019/06/25 | CH2205 | Male | Three y/o | Control | Control | Feed Day | Yes | 11:05 | 11:00 - 11:59 | Late Morning | 37,5 | 94  | 216,8 | 216,8 | 18,65 | 589,37 | 182,96 |



|            |        |      |           |         |         |          |     |       |               |              |      |     |       |       |       |        |        |
|------------|--------|------|-----------|---------|---------|----------|-----|-------|---------------|--------------|------|-----|-------|-------|-------|--------|--------|
| 2019/06/25 | CH2206 | Male | Three y/o | Control | Control | Feed Day | Yes | 11:05 | 11:00 - 11:59 | Late Morning | 37,5 | 65  | 19,8  | 19,8  | 18,65 | 561,12 | 99,97  |
| 2019/06/25 | CH2205 | Male | Three y/o | Control | Control | Feed Day | Yes | 11:10 | 11:00 - 11:59 | Late Morning | 37,6 | 54  | 123,2 | 123,2 | 18,75 | 545,99 | 163,13 |
| 2019/06/25 | CH2206 | Male | Three y/o | Control | Control | Feed Day | Yes | 11:10 | 11:00 - 11:59 | Late Morning | 37,7 | 104 | 59,6  | 59,6  | 18,85 | 596,69 | 137,86 |
| 2019/06/25 | CH2205 | Male | Three y/o | Control | Control | Feed Day | Yes | 11:15 | 11:00 - 11:59 | Late Morning | 37,7 |     | 42,2  | 42,2  | 18,85 |        | 125,93 |
| 2019/06/25 | CH2206 | Male | Three y/o | Control | Control | Feed Day | Yes | 11:15 | 11:00 - 11:59 | Late Morning | 37,7 | 61  | 44,2  | 44,2  | 18,85 | 556,01 | 127,53 |
| 2019/06/25 | CH2205 | Male | Three y/o | Control | Control | Feed Day | Yes | 11:20 | 11:00 - 11:59 | Late Morning | 37,6 | 98  | 98,4  | 98,4  | 18,75 | 592,41 | 155,28 |
| 2019/06/25 | CH2206 | Male | Three y/o | Control | Control | Feed Day | Yes | 11:20 | 11:00 - 11:59 | Late Morning | 37,7 | 68  | 42,0  | 42,0  | 18,85 | 564,71 | 125,77 |
| 2019/06/25 | CH2205 | Male | Three y/o | Control | Control | Feed Day | Yes | 11:25 | 11:00 - 11:59 | Late Morning | 37,7 | 112 | 159,2 | 159,2 | 18,85 | 601,96 | 172,10 |
| 2019/06/25 | CH2206 | Male | Three y/o | Control | Control | Feed Day | Yes | 11:25 | 11:00 - 11:59 | Late Morning | 37,7 | 165 | 44,8  | 44,8  | 18,85 | 628,06 | 127,99 |
| 2019/06/25 | CH2205 | Male | Three y/o | Control | Control | Feed Day | No  | 11:30 | 11:00 - 11:59 | Late Morning | 37,7 |     | 92,4  | 92,4  | 18,85 |        | 153,09 |
| 2019/06/25 | CH2206 | Male | Three y/o | Control | Control | Feed Day | No  | 11:30 | 11:00 - 11:59 | Late Morning | 37,7 | 56  | 39,6  | 39,6  | 18,85 | 549,01 | 123,74 |
| 2019/06/25 | CH2205 | Male | Three y/o | Control | Control | Feed Day | No  | 11:35 | 11:00 - 11:59 | Late Morning | 37,7 |     | 32,6  | 32,6  | 18,85 |        | 117,05 |
| 2019/06/25 | CH2206 | Male | Three y/o | Control | Control | Feed Day | No  | 11:35 | 11:00 - 11:59 | Late Morning | 37,7 | 156 | 49,4  | 49,4  | 18,85 | 624,43 | 131,37 |
| 2019/06/25 | CH2205 | Male | Three y/o | Control | Control | Feed Day | No  | 11:40 | 11:00 - 11:59 | Late Morning | 37,7 | 63  | 27,8  | 27,8  | 18,85 | 558,62 | 111,58 |
| 2019/06/25 | CH2206 | Male | Three y/o | Control | Control | Feed Day | No  | 11:40 | 11:00 - 11:59 | Late Morning | 37,7 | 115 | 30,6  | 30,6  | 18,85 | 603,82 | 114,87 |
| 2019/06/25 | CH2205 | Male | Three y/o | Control | Control | Feed Day | No  | 11:45 | 11:00 - 11:59 | Late Morning | 37,7 | 82  | 23,0  | 23,0  | 18,85 | 579,19 | 105,09 |
| 2019/06/25 | CH2206 | Male | Three y/o | Control | Control | Feed Day | No  | 11:45 | 11:00 - 11:59 | Late Morning | 37,7 | 101 | 52,8  | 52,8  | 18,85 | 594,59 | 133,67 |
| 2019/06/25 | CH2205 | Male | Three y/o | Control | Control | Feed Day | No  | 11:50 | 11:00 - 11:59 | Late Morning | 37,7 | 48  | 20,2  | 20,2  | 18,85 | 536,04 | 100,65 |
| 2019/06/25 | CH2206 | Male | Three y/o | Control | Control | Feed Day | No  | 11:50 | 11:00 - 11:59 | Late Morning | 37,7 | 64  | 43,0  | 43,0  | 18,85 | 559,88 | 126,58 |
| 2019/06/25 | CH2205 | Male | Three y/o | Control | Control | Feed Day | No  | 11:55 | 11:00 - 11:59 | Late Morning | 37,7 | 50  | 14,2  | 14,2  | 18,85 | 539,52 | 88,65  |
| 2019/06/25 | CH2206 | Male | Three y/o | Control | Control | Feed Day | No  | 11:55 | 11:00 - 11:59 | Late Morning | 37,7 | 111 | 96,6  | 96,6  | 18,85 | 601,33 | 154,64 |
| 2019/06/25 | CH2205 | Male | Three y/o | Control | Control | Feed Day | No  | 12:00 | 12:00 - 12:59 | Afternoon    | 37,7 | 69  | 17,4  | 17,4  | 18,85 | 565,86 | 95,56  |
| 2019/06/25 | CH2206 | Male | Three y/o | Control | Control | Feed Day | No  | 12:00 | 12:00 - 12:59 | Afternoon    | 37,8 | 108 | 99,0  | 99,0  | 18,95 | 599,39 | 155,49 |
| 2019/06/25 | CH2205 | Male | Three y/o | Control | Control | Feed Day | No  | 12:05 | 12:00 - 12:59 | Afternoon    | 37,7 | 74  | 106,4 | 106,4 | 18,85 | 571,33 | 158,01 |
| 2019/06/25 | CH2206 | Male | Three y/o | Control | Control | Feed Day | No  | 12:05 | 12:00 - 12:59 | Afternoon    | 37,8 | 104 | 153,0 | 153,0 | 18,95 | 596,69 | 170,71 |
| 2019/06/25 | CH2205 | Male | Three y/o | Control | Control | Feed Day | No  | 12:10 | 12:00 - 12:59 | Afternoon    | 37,7 |     | 87,8  | 87,8  | 18,85 |        | 151,31 |
| 2019/06/25 | CH2206 | Male | Three y/o | Control | Control | Feed Day | No  | 12:10 | 12:00 - 12:59 | Afternoon    | 37,9 | 197 | 97,4  | 97,4  | 19,05 | 639,25 | 154,93 |
| 2019/06/25 | CH2205 | Male | Three y/o | Control | Control | Feed Day | No  | 12:15 | 12:00 - 12:59 | Afternoon    | 37,7 | 110 | 106,0 | 106,0 | 18,85 | 600,69 | 157,88 |
| 2019/06/25 | CH2206 | Male | Three y/o | Control | Control | Feed Day | No  | 12:15 | 12:00 - 12:59 | Afternoon    | 37,9 | 114 | 111,4 | 111,4 | 19,05 | 603,20 | 159,61 |
| 2019/06/25 | CH2205 | Male | Three y/o | Control | Control | Feed Day | No  | 12:20 | 12:00 - 12:59 | Afternoon    | 37,9 | 88  | 88,2  | 88,2  | 19,05 | 584,49 | 151,47 |
| 2019/06/25 | CH2206 | Male | Three y/o | Control | Control | Feed Day | No  | 12:20 | 12:00 - 12:59 | Afternoon    | 38,1 | 106 | 33,8  | 33,8  | 19,26 | 598,06 | 118,29 |
| 2019/06/25 | CH2205 | Male | Three y/o | Control | Control | Feed Day | No  | 12:25 | 12:00 - 12:59 | Afternoon    | 37,7 | 86  | 78,0  | 78,0  | 18,85 | 582,77 | 147,20 |
| 2019/06/25 | CH2206 | Male | Three y/o | Control | Control | Feed Day | No  | 12:25 | 12:00 - 12:59 | Afternoon    | 38,0 | 91  | 27,0  | 27,0  | 19,15 | 586,98 | 110,58 |
| 2019/06/25 | CH2205 | Male | Three y/o | Control | Control | Feed Day | No  | 12:30 | 12:00 - 12:59 | Afternoon    | 37,6 | 93  | 132,8 | 132,8 | 18,75 | 588,58 | 165,75 |
| 2019/06/25 | CH2206 | Male | Three y/o | Control | Control | Feed Day | No  | 12:30 | 12:00 - 12:59 | Afternoon    | 37,9 | 80  | 12,4  | 12,4  | 19,05 | 577,31 | 84,04  |
| 2019/06/25 | CH2205 | Male | Three y/o | Control | Control | Feed Day | No  | 12:35 | 12:00 - 12:59 | Afternoon    | 37,7 | 87  | 172,6 | 172,6 | 18,85 | 583,64 | 174,94 |
| 2019/06/25 | CH2206 | Male | Three y/o | Control | Control | Feed Day | No  | 12:35 | 12:00 - 12:59 | Afternoon    | 37,9 | 46  | 29,0  | 29,0  | 19,05 | 532,38 | 113,03 |
| 2019/06/25 | CH2205 | Male | Three y/o | Control | Control | Feed Day | No  | 12:40 | 12:00 - 12:59 | Afternoon    | 37,8 | 33  | 23,2  | 23,2  | 18,95 | 502,51 | 105,39 |
| 2019/06/25 | CH2206 | Male | Three y/o | Control | Control | Feed Day | No  | 12:40 | 12:00 - 12:59 | Afternoon    | 37,9 | 80  | 33,2  | 33,2  | 19,05 | 577,31 | 117,68 |
| 2019/06/25 | CH2205 | Male | Three y/o | Control | Control | Feed Day | No  | 12:45 | 12:00 - 12:59 | Afternoon    | 37,7 | 76  | 98,4  | 98,4  | 18,85 | 573,39 | 155,28 |
| 2019/06/25 | CH2206 | Male | Three y/o | Control | Control | Feed Day | No  | 12:45 | 12:00 - 12:59 | Afternoon    | 37,9 | 59  | 35,8  | 35,8  | 19,05 | 553,30 | 120,27 |
| 2019/06/25 | CH2205 | Male | Three y/o | Control | Control | Feed Day | No  | 12:50 | 12:00 - 12:59 | Afternoon    | 37,9 | 90  | 72,6  | 72,6  | 19,05 | 586,16 | 144,70 |
| 2019/06/25 | CH2206 | Male | Three y/o | Control | Control | Feed Day | No  | 12:50 | 12:00 - 12:59 | Afternoon    | 37,9 | 102 | 23,6  | 23,6  | 19,05 | 595,30 | 105,97 |
| 2019/06/25 | CH2205 | Male | Three y/o | Control | Control | Feed Day | No  | 12:55 | 12:00 - 12:59 | Afternoon    | 37,9 | 123 | 34,6  | 34,6  | 19,05 | 608,49 | 119,10 |
| 2019/06/25 | CH2206 | Male | Three y/o | Control | Control | Feed Day | No  | 12:55 | 12:00 - 12:59 | Afternoon    | 37,9 | 88  | 15,2  | 15,2  | 19,05 | 584,49 | 90,96  |
| 2019/06/25 | CH2205 | Male | Three y/o | Control | Control | Feed Day | No  | 13:00 | 13:00 - 13:59 | Afternoon    | 37,9 | 72  | 77,2  | 77,2  | 19,05 | 569,20 | 146,84 |
| 2019/06/25 | CH2206 | Male | Three y/o | Control | Control | Feed Day | No  | 13:00 | 13:00 - 13:59 | Afternoon    | 37,9 | 86  | 90,8  | 90,8  | 19,05 | 582,77 | 152,48 |
| 2019/06/25 | CH2205 | Male | Three y/o | Control | Control | Feed Day | No  | 13:05 | 13:00 - 13:59 | Afternoon    | 38,0 |     | 56,2  | 56,2  | 19,15 |        | 135,83 |
| 2019/06/25 | CH2206 | Male | Three y/o | Control | Control | Feed Day | No  | 13:05 | 13:00 - 13:59 | Afternoon    | 38,0 |     | 32,2  | 32,2  | 19,15 |        | 116,63 |
| 2019/06/25 | CH2205 | Male | Three y/o | Control | Control | Feed Day | No  | 13:10 | 13:00 - 13:59 | Afternoon    | 38,0 | 67  | 13,6  | 13,6  | 19,15 | 563,53 | 87,18  |
| 2019/06/25 | CH2206 | Male | Three y/o | Control | Control | Feed Day | No  | 13:10 | 13:00 - 13:59 | Afternoon    | 38,0 | 87  | 54,2  | 54,2  | 19,15 | 583,64 | 134,57 |
| 2019/06/25 | CH2205 | Male | Three y/o | Control | Control | Feed Day | No  | 13:15 | 13:00 - 13:59 | Afternoon    | 37,9 | 69  | 3,6   | 3,6   | 19,05 | 565,86 | 42,42  |
| 2019/06/25 | CH2206 | Male | Three y/o | Control | Control | Feed Day | No  | 13:15 | 13:00 - 13:59 | Afternoon    | 38,0 | 90  | 56,0  | 56,0  | 19,15 | 586,16 | 135,70 |
| 2019/06/25 | CH2205 | Male | Three y/o | Control | Control | Feed Day | No  | 13:20 | 13:00 - 13:59 | Afternoon    | 37,9 | 115 | 74,6  | 74,6  | 19,05 | 603,82 | 145,65 |
| 2019/06/25 | CH2206 | Male | Three y/o | Control | Control | Feed Day | No  | 13:20 | 13:00 - 13:59 | Afternoon    | 38,0 | 90  | 48,4  | 48,4  | 19,15 | 586,16 | 130,66 |
| 2019/06/25 | CH2205 | Male | Three y/o | Control | Control | Feed Day | No  | 13:25 | 13:00 - 13:59 | Afternoon    | 37,9 | 58  | 69,4  | 69,4  | 19,05 | 551,90 | 143,14 |
| 2019/06/25 | CH2206 | Male | Three y/o | Control | Control | Feed Day | No  | 13:25 | 13:00 - 13:59 | Afternoon    | 37,9 | 72  | 48,6  | 48,6  | 19,05 | 569,20 | 130,81 |
| 2019/06/25 | CH2205 | Male | Three y/o | Control | Control | Feed Day | No  | 13:30 | 13:00 - 13:59 | Afternoon    | 37,9 | 79  | 16,8  | 16,8  | 19,05 | 576,36 | 94,37  |
| 2019/06/25 | CH2206 | Male | Three y/o | Control | Control | Feed Day | No  | 13:30 | 13:00 - 13:59 | Afternoon    | 37,9 | 81  | 52,0  | 52,0  | 19,05 | 578,26 | 133,14 |
| 2019/06/25 | CH2205 | Male | Three y/o | Control | Control | Feed Day | No  | 13:35 | 13:00 - 13:59 | Afternoon    | 37,9 | 64  | 14,4  | 14,4  | 19,05 | 559,88 | 89,12  |
| 2019/06/25 | CH2206 | Male | Three y/o | Control | Control | Feed Day | No  | 13:35 | 13:00 - 13:59 | Afternoon    | 37,9 | 79  | 48,0  | 48,0  | 19,05 | 576,36 | 130,38 |
| 2019/06/25 | CH2205 | Male | Three y/o | Control | Control | Feed Day | No  | 13:40 | 13:00 - 13:59 | Afternoon    | 37,9 | 191 | 150,0 | 150,0 | 19,05 | 637,33 | 170,02 |
| 2019/06/25 | CH2206 | Male | Three y/o | Control | Control | Feed Day | No  | 13:40 | 13:00 - 13:59 | Afternoon    | 37,9 |     | 40,4  | 40,4  | 19,05 |        | 124,43 |
| 2019/06/25 | CH2205 | Male | Three y/o | Control | Control | Feed Day | No  | 13:45 | 13:00 - 13:59 | Afternoon    | 37,9 | 59  | 20,2  | 20,2  | 19,05 | 553,30 | 100,65 |
| 2019/06/25 | CH2206 | Male | Three y/o | Control | Control | Feed Day | No  | 13:45 | 13:00 - 13:59 | Afternoon    | 37,9 | 73  | 47,4  | 47,4  | 19,05 | 570,27 | 129,94 |
| 2019/06/25 | CH2205 | Male | Three y/o | Control | Control | Feed Day | No  | 13:50 | 13:00 - 13:59 | Afternoon    | 37,9 |     | 47,4  | 47,4  | 19,05 |        | 129,94 |
| 2019/06/25 | CH2206 | Male | Three y/o | Control | Control | Feed Day | No  | 13:50 | 13:00 - 13:59 | Afternoon    | 37,9 | 100 | 28,2  | 28,2  | 19,05 | 593,87 | 112,07 |
| 2019/06/25 | CH2205 | Male | Three y/o | Control | Control | Feed Day | No  | 13:55 | 13:00 - 13:59 | Afternoon    | 37,9 | 111 | 293,6 | 293,6 | 19,05 | 601,33 | 193,66 |
| 2019/06/25 | CH2206 | Male | Three y/o | Control | Control | Feed Day | No  | 13:55 | 13:00 - 13:59 | Afternoon    | 37,9 | 158 | 40,4  | 40,4  | 19,05 | 625,26 | 124,43 |
| 2019/06/25 | CH2205 | Male | Three y/o | Control | Control | Feed Day | No  | 14:00 | 14:00 - 14:59 | Afternoon    | 37,9 | 110 | 69,6  | 69,6  | 19,05 | 600,69 | 143,24 |



|            |        |      |           |         |         |          |    |       |               |           |      |     |       |       |       |        |        |
|------------|--------|------|-----------|---------|---------|----------|----|-------|---------------|-----------|------|-----|-------|-------|-------|--------|--------|
| 2019/06/25 | CH2206 | Male | Three y/o | Control | Control | Feed Day | No | 14:00 | 14:00 - 14:59 | Afternoon | 37,9 | 101 | 44,6  | 44,6  | 19,05 | 594,59 | 127,84 |
| 2019/06/25 | CH2205 | Male | Three y/o | Control | Control | Feed Day | No | 14:05 | 14:00 - 14:59 | Afternoon | 37,9 | 61  | 15,4  | 15,4  | 19,05 | 556,01 | 91,41  |
| 2019/06/25 | CH2206 | Male | Three y/o | Control | Control | Feed Day | No | 14:05 | 14:00 - 14:59 | Afternoon | 37,9 | 74  | 43,4  | 43,4  | 19,05 | 571,33 | 126,90 |
| 2019/06/25 | CH2205 | Male | Three y/o | Control | Control | Feed Day | No | 14:10 | 14:00 - 14:59 | Afternoon | 37,9 | 67  | 13,4  | 13,4  | 19,05 | 563,53 | 86,68  |
| 2019/06/25 | CH2206 | Male | Three y/o | Control | Control | Feed Day | No | 14:10 | 14:00 - 14:59 | Afternoon | 37,9 | 63  | 44,4  | 44,4  | 19,05 | 558,62 | 127,69 |
| 2019/06/25 | CH2205 | Male | Three y/o | Control | Control | Feed Day | No | 14:15 | 14:00 - 14:59 | Afternoon | 37,9 | 72  | 13,0  | 13,0  | 19,05 | 569,20 | 85,65  |
| 2019/06/25 | CH2206 | Male | Three y/o | Control | Control | Feed Day | No | 14:15 | 14:00 - 14:59 | Afternoon | 37,9 | 86  | 40,0  | 40,0  | 19,05 | 582,77 | 124,09 |
| 2019/06/25 | CH2205 | Male | Three y/o | Control | Control | Feed Day | No | 14:20 | 14:00 - 14:59 | Afternoon | 38,0 | 68  | 9,0   | 9,0   | 19,15 | 564,71 | 73,19  |
| 2019/06/25 | CH2206 | Male | Three y/o | Control | Control | Feed Day | No | 14:20 | 14:00 - 14:59 | Afternoon | 37,9 | 79  | 36,8  | 36,8  | 19,05 | 576,36 | 121,22 |
| 2019/06/25 | CH2205 | Male | Three y/o | Control | Control | Feed Day | No | 14:25 | 14:00 - 14:59 | Afternoon | 38,0 | 76  | 13,8  | 13,8  | 19,15 | 573,39 | 87,68  |
| 2019/06/25 | CH2206 | Male | Three y/o | Control | Control | Feed Day | No | 14:25 | 14:00 - 14:59 | Afternoon | 37,9 | 79  | 40,8  | 40,8  | 19,05 | 576,36 | 124,77 |
| 2019/06/25 | CH2205 | Male | Three y/o | Control | Control | Feed Day | No | 14:30 | 14:00 - 14:59 | Afternoon | 38,0 | 89  | 8,2   | 8,2   | 19,15 | 585,33 | 70,05  |
| 2019/06/25 | CH2206 | Male | Three y/o | Control | Control | Feed Day | No | 14:30 | 14:00 - 14:59 | Afternoon | 37,9 | 79  | 23,8  | 23,8  | 19,05 | 576,36 | 106,26 |
| 2019/06/25 | CH2205 | Male | Three y/o | Control | Control | Feed Day | No | 14:35 | 14:00 - 14:59 | Afternoon | 38,0 | 67  | 11,0  | 11,0  | 19,15 | 563,53 | 79,98  |
| 2019/06/25 | CH2206 | Male | Three y/o | Control | Control | Feed Day | No | 14:35 | 14:00 - 14:59 | Afternoon | 37,9 | 68  | 13,4  | 13,4  | 19,05 | 564,71 | 86,68  |
| 2019/06/25 | CH2205 | Male | Three y/o | Control | Control | Feed Day | No | 14:40 | 14:00 - 14:59 | Afternoon | 38,0 | 68  | 12,6  | 12,6  | 19,15 | 564,71 | 84,59  |
| 2019/06/25 | CH2206 | Male | Three y/o | Control | Control | Feed Day | No | 14:40 | 14:00 - 14:59 | Afternoon | 37,9 | 48  | 17,0  | 17,0  | 19,05 | 536,04 | 94,77  |
| 2019/06/25 | CH2205 | Male | Three y/o | Control | Control | Feed Day | No | 14:45 | 14:00 - 14:59 | Afternoon | 38,0 | 67  | 13,0  | 13,0  | 19,15 | 563,53 | 85,65  |
| 2019/06/25 | CH2206 | Male | Three y/o | Control | Control | Feed Day | No | 14:45 | 14:00 - 14:59 | Afternoon | 37,9 | 75  | 22,4  | 22,4  | 19,05 | 572,36 | 104,19 |
| 2019/06/25 | CH2205 | Male | Three y/o | Control | Control | Feed Day | No | 14:50 | 14:00 - 14:59 | Afternoon | 38,0 | 74  | 14,6  | 14,6  | 19,15 | 571,33 | 89,59  |
| 2019/06/25 | CH2206 | Male | Three y/o | Control | Control | Feed Day | No | 14:50 | 14:00 - 14:59 | Afternoon | 37,9 | 79  | 25,0  | 25,0  | 19,05 | 576,36 | 107,94 |
| 2019/06/25 | CH2205 | Male | Three y/o | Control | Control | Feed Day | No | 14:55 | 14:00 - 14:59 | Afternoon | 38,0 | 74  | 11,4  | 11,4  | 19,15 | 571,33 | 81,19  |
| 2019/06/25 | CH2206 | Male | Three y/o | Control | Control | Feed Day | No | 14:55 | 14:00 - 14:59 | Afternoon | 37,9 | 62  | 26,6  | 26,6  | 19,05 | 557,33 | 110,07 |
| 2019/06/25 | CH2205 | Male | Three y/o | Control | Control | Feed Day | No | 15:00 | 15:00 - 15:59 | Afternoon | 38,0 | 54  | 6,0   | 6,0   | 19,15 | 545,99 | 59,53  |
| 2019/06/25 | CH2206 | Male | Three y/o | Control | Control | Feed Day | No | 15:00 | 15:00 - 15:59 | Afternoon | 37,9 | 80  | 22,6  | 22,6  | 19,05 | 577,31 | 104,49 |
| 2019/06/25 | CH2205 | Male | Three y/o | Control | Control | Feed Day | No | 15:05 | 15:00 - 15:59 | Afternoon | 38,0 | 71  | 6,4   | 6,4   | 19,15 | 568,10 | 61,70  |
| 2019/06/25 | CH2206 | Male | Three y/o | Control | Control | Feed Day | No | 15:05 | 15:00 - 15:59 | Afternoon | 37,9 | 71  | 22,6  | 22,6  | 19,05 | 568,10 | 104,49 |
| 2019/06/25 | CH2205 | Male | Three y/o | Control | Control | Feed Day | No | 15:10 | 15:00 - 15:59 | Afternoon | 38,0 | 70  | 12,6  | 12,6  | 19,15 | 566,99 | 84,59  |
| 2019/06/25 | CH2206 | Male | Three y/o | Control | Control | Feed Day | No | 15:10 | 15:00 - 15:59 | Afternoon | 37,9 | 84  | 19,2  | 19,2  | 19,05 | 581,01 | 98,92  |
| 2019/06/25 | CH2205 | Male | Three y/o | Control | Control | Feed Day | No | 15:15 | 15:00 - 15:59 | Afternoon | 38,0 | 50  | 12,2  | 12,2  | 19,15 | 539,52 | 83,49  |
| 2019/06/25 | CH2206 | Male | Three y/o | Control | Control | Feed Day | No | 15:15 | 15:00 - 15:59 | Afternoon | 37,9 | 90  | 16,8  | 16,8  | 19,05 | 586,16 | 94,37  |
| 2019/06/25 | CH2205 | Male | Three y/o | Control | Control | Feed Day | No | 15:20 | 15:00 - 15:59 | Afternoon | 38,0 | 69  | 13,6  | 13,6  | 19,15 | 565,86 | 87,18  |
| 2019/06/25 | CH2206 | Male | Three y/o | Control | Control | Feed Day | No | 15:20 | 15:00 - 15:59 | Afternoon | 37,9 | 69  | 20,6  | 20,6  | 19,05 | 565,86 | 101,32 |
| 2019/06/25 | CH2205 | Male | Three y/o | Control | Control | Feed Day | No | 15:25 | 15:00 - 15:59 | Afternoon | 38,0 | 74  | 12,0  | 12,0  | 19,15 | 571,33 | 82,93  |
| 2019/06/25 | CH2206 | Male | Three y/o | Control | Control | Feed Day | No | 15:25 | 15:00 - 15:59 | Afternoon | 38,0 | 75  | 24,8  | 24,8  | 19,15 | 572,36 | 107,67 |
| 2019/06/25 | CH2205 | Male | Three y/o | Control | Control | Feed Day | No | 15:30 | 15:00 - 15:59 | Afternoon | 38,0 | 70  | 16,0  | 16,0  | 19,15 | 566,99 | 92,71  |
| 2019/06/25 | CH2206 | Male | Three y/o | Control | Control | Feed Day | No | 15:30 | 15:00 - 15:59 | Afternoon | 38,0 | 83  | 20,8  | 20,8  | 19,15 | 580,11 | 101,65 |
| 2019/06/25 | CH2205 | Male | Three y/o | Control | Control | Feed Day | No | 15:35 | 15:00 - 15:59 | Afternoon | 38,1 | 68  | 10,4  | 10,4  | 19,26 | 564,71 | 78,08  |
| 2019/06/25 | CH2206 | Male | Three y/o | Control | Control | Feed Day | No | 15:35 | 15:00 - 15:59 | Afternoon | 38,0 | 87  | 19,2  | 19,2  | 19,15 | 583,64 | 98,92  |
| 2019/06/25 | CH2205 | Male | Three y/o | Control | Control | Feed Day | No | 15:40 | 15:00 - 15:59 | Afternoon | 38,1 | 70  | 156,0 | 156,0 | 19,26 | 566,99 | 171,39 |
| 2019/06/25 | CH2206 | Male | Three y/o | Control | Control | Feed Day | No | 15:40 | 15:00 - 15:59 | Afternoon | 38,0 | 80  | 44,2  | 44,2  | 19,15 | 577,31 | 127,53 |
| 2019/06/25 | CH2205 | Male | Three y/o | Control | Control | Feed Day | No | 15:45 | 15:00 - 15:59 | Afternoon | 38,0 |     | 27,0  | 27,0  | 19,15 |        | 110,58 |
| 2019/06/25 | CH2206 | Male | Three y/o | Control | Control | Feed Day | No | 15:45 | 15:00 - 15:59 | Afternoon | 38,0 |     | 28,2  | 28,2  | 19,15 |        | 606,20 |
| 2019/06/25 | CH2205 | Male | Three y/o | Control | Control | Feed Day | No | 15:50 | 15:00 - 15:59 | Afternoon | 38,0 | 123 | 31,8  | 31,8  | 19,15 | 608,49 | 116,20 |
| 2019/06/25 | CH2206 | Male | Three y/o | Control | Control | Feed Day | No | 15:50 | 15:00 - 15:59 | Afternoon | 38,0 | 88  | 9,8   | 9,8   | 19,15 | 584,49 | 76,07  |
| 2019/06/25 | CH2205 | Male | Three y/o | Control | Control | Feed Day | No | 15:55 | 15:00 - 15:59 | Afternoon | 38,0 | 92  | 15,4  | 15,4  | 19,15 | 587,78 | 91,41  |
| 2019/06/25 | CH2206 | Male | Three y/o | Control | Control | Feed Day | No | 15:55 | 15:00 - 15:59 | Afternoon | 38,0 | 81  | 6,0   | 6,0   | 19,15 | 578,26 | 59,53  |
| 2019/06/25 | CH2205 | Male | Three y/o | Control | Control | Feed Day | No | 16:00 | 16:00 - 16:59 | Evening   | 38,0 |     | 9,8   | 9,8   | 19,15 |        | 76,07  |
| 2019/06/25 | CH2206 | Male | Three y/o | Control | Control | Feed Day | No | 16:00 | 16:00 - 16:59 | Evening   | 38,0 | 97  | 15,8  | 15,8  | 19,15 | 591,66 | 92,28  |
| 2019/06/25 | CH2205 | Male | Three y/o | Control | Control | Feed Day | No | 16:05 | 16:00 - 16:59 | Evening   | 38,1 | 60  | 202,2 | 202,2 | 19,26 | 554,67 | 180,50 |
| 2019/06/25 | CH2206 | Male | Three y/o | Control | Control | Feed Day | No | 16:05 | 16:00 - 16:59 | Evening   | 38,0 | 101 | 118,8 | 118,8 | 19,15 | 594,59 | 161,86 |
| 2019/06/25 | CH2205 | Male | Three y/o | Control | Control | Feed Day | No | 16:10 | 16:00 - 16:59 | Evening   | 38,1 | 120 | 10,2  | 10,2  | 19,26 | 606,78 | 77,43  |
| 2019/06/25 | CH2206 | Male | Three y/o | Control | Control | Feed Day | No | 16:10 | 16:00 - 16:59 | Evening   | 38,1 | 119 | 123,0 | 123,0 | 19,26 | 606,20 | 163,07 |
| 2019/06/25 | CH2205 | Male | Three y/o | Control | Control | Feed Day | No | 16:15 | 16:00 - 16:59 | Evening   | 38,1 | 70  | 6,6   | 6,6   | 19,26 | 566,99 | 62,73  |
| 2019/06/25 | CH2206 | Male | Three y/o | Control | Control | Feed Day | No | 16:15 | 16:00 - 16:59 | Evening   | 38,0 | 92  | 32,6  | 32,6  | 19,15 | 587,78 | 117,05 |
| 2019/06/25 | CH2205 | Male | Three y/o | Control | Control | Feed Day | No | 16:20 | 16:00 - 16:59 | Evening   | 38,1 | 98  | 16,6  | 16,6  | 19,26 | 592,41 | 93,96  |
| 2019/06/25 | CH2206 | Male | Three y/o | Control | Control | Feed Day | No | 16:20 | 16:00 - 16:59 | Evening   | 38,0 | 82  | 38,8  | 38,8  | 19,15 | 579,19 | 123,04 |
| 2019/06/25 | CH2205 | Male | Three y/o | Control | Control | Feed Day | No | 16:25 | 16:00 - 16:59 | Evening   | 38,1 |     | 21,0  | 21,0  | 19,26 |        | 101,98 |
| 2019/06/25 | CH2206 | Male | Three y/o | Control | Control | Feed Day | No | 16:25 | 16:00 - 16:59 | Evening   | 38,0 |     | 35,2  | 35,2  | 19,15 |        | 614,84 |
| 2019/06/25 | CH2205 | Male | Three y/o | Control | Control | Feed Day | No | 16:30 | 16:00 - 16:59 | Evening   | 38,1 | 68  | 10,0  | 10,0  | 19,26 | 564,71 | 76,76  |
| 2019/06/25 | CH2206 | Male | Three y/o | Control | Control | Feed Day | No | 16:30 | 16:00 - 16:59 | Evening   | 38,0 | 71  | 36,4  | 36,4  | 19,15 | 568,10 | 120,84 |
| 2019/06/25 | CH2205 | Male | Three y/o | Control | Control | Feed Day | No | 16:35 | 16:00 - 16:59 | Evening   | 38,1 | 56  | 12,8  | 12,8  | 19,26 | 549,01 | 85,12  |
| 2019/06/25 | CH2206 | Male | Three y/o | Control | Control | Feed Day | No | 16:35 | 16:00 - 16:59 | Evening   | 38,0 | 79  | 39,8  | 39,8  | 19,15 | 576,36 | 123,91 |
| 2019/06/25 | CH2205 | Male | Three y/o | Control | Control | Feed Day | No | 16:40 | 16:00 - 16:59 | Evening   | 38,1 | 50  | 17,4  | 17,4  | 19,26 | 539,52 | 95,56  |
| 2019/06/25 | CH2206 | Male | Three y/o | Control | Control | Feed Day | No | 16:40 | 16:00 - 16:59 | Evening   | 37,9 | 77  | 41,8  | 41,8  | 19,05 | 574,39 | 125,60 |
| 2019/06/25 | CH2205 | Male | Three y/o | Control | Control | Feed Day | No | 16:45 | 16:00 - 16:59 | Evening   | 38,0 | 70  | 11,6  | 11,6  | 19,15 | 566,99 | 81,78  |
| 2019/06/25 | CH2206 | Male | Three y/o | Control | Control | Feed Day | No | 16:45 | 16:00 - 16:59 | Evening   | 37,9 | 84  | 41,4  | 41,4  | 19,05 | 581,01 | 125,27 |
| 2019/06/25 | CH2205 | Male | Three y/o | Control | Control | Feed Day | No | 16:50 | 16:00 - 16:59 | Evening   | 38,0 | 67  | 12,4  | 12,4  | 19,15 | 563,53 | 84,04  |
| 2019/06/25 | CH2206 | Male | Three y/o | Control | Control | Feed Day | No | 16:50 | 16:00 - 16:59 | Evening   | 37,8 | 145 | 36,0  | 36,0  | 18,95 | 619,62 | 120,46 |
| 2019/06/25 | CH2205 | Male | Three y/o | Control | Control | Feed Day | No | 16:55 | 16:00 - 16:59 | Evening   | 38,1 | 64  | 9,6   | 9,6   | 19,26 | 559,88 | 75,37  |



|            |        |      |           |         |         |          |    |       |               |         |      |     |       |       |       |        |        |
|------------|--------|------|-----------|---------|---------|----------|----|-------|---------------|---------|------|-----|-------|-------|-------|--------|--------|
| 2019/06/25 | CH2206 | Male | Three y/o | Control | Control | Feed Day | No | 16:55 | 16:00 - 16:59 | Evening | 37,7 | 80  | 32,2  | 32,2  | 18,85 | 577,31 | 116,63 |
| 2019/06/25 | CH2205 | Male | Three y/o | Control | Control | Feed Day | No | 17:00 | 17:00 - 17:59 | Evening | 38,1 | 75  | 12,8  | 12,8  | 19,26 | 572,36 | 85,12  |
| 2019/06/25 | CH2206 | Male | Three y/o | Control | Control | Feed Day | No | 17:00 | 17:00 - 17:59 | Evening | 37,4 | 58  | 20,8  | 20,8  | 18,55 | 551,90 | 101,65 |
| 2019/06/25 | CH2205 | Male | Three y/o | Control | Control | Feed Day | No | 17:05 | 17:00 - 17:59 | Evening | 38,1 | 125 | 25,2  | 25,2  | 19,26 | 609,60 | 108,22 |
| 2019/06/25 | CH2206 | Male | Three y/o | Control | Control | Feed Day | No | 17:05 | 17:00 - 17:59 | Evening | 37,4 |     | 28,8  | 28,8  | 18,55 |        | 112,79 |
| 2019/06/25 | CH2205 | Male | Three y/o | Control | Control | Feed Day | No | 17:10 | 17:00 - 17:59 | Evening | 38,1 |     | 25,6  | 25,6  | 19,26 |        | 108,76 |
| 2019/06/25 | CH2206 | Male | Three y/o | Control | Control | Feed Day | No | 17:10 | 17:00 - 17:59 | Evening | 37,5 |     | 21,8  | 21,8  | 18,65 |        | 103,26 |
| 2019/06/25 | CH2205 | Male | Three y/o | Control | Control | Feed Day | No | 17:15 | 17:00 - 17:59 | Evening | 38,1 | 70  | 16,8  | 16,8  | 19,26 | 566,99 | 94,37  |
| 2019/06/25 | CH2206 | Male | Three y/o | Control | Control | Feed Day | No | 17:15 | 17:00 - 17:59 | Evening | 37,9 | 36  | 12,2  | 12,2  | 19,05 | 510,56 | 83,49  |
| 2019/06/25 | CH2205 | Male | Three y/o | Control | Control | Feed Day | No | 17:20 | 17:00 - 17:59 | Evening | 38,0 | 63  | 20,6  | 20,6  | 19,15 | 558,62 | 101,32 |
| 2019/06/25 | CH2206 | Male | Three y/o | Control | Control | Feed Day | No | 17:20 | 17:00 - 17:59 | Evening | 37,9 | 77  | 7,2   | 7,2   | 19,05 | 574,39 | 65,66  |
| 2019/06/25 | CH2205 | Male | Three y/o | Control | Control | Feed Day | No | 17:25 | 17:00 - 17:59 | Evening | 37,9 | 67  | 20,2  | 20,2  | 19,05 | 563,53 | 100,65 |
| 2019/06/25 | CH2206 | Male | Three y/o | Control | Control | Feed Day | No | 17:25 | 17:00 - 17:59 | Evening | 37,9 | 70  | 11,8  | 11,8  | 19,05 | 566,99 | 82,36  |
| 2019/06/25 | CH2205 | Male | Three y/o | Control | Control | Feed Day | No | 17:30 | 17:00 - 17:59 | Evening | 37,9 |     | 13,2  | 13,2  | 19,05 |        | 86,17  |
| 2019/06/25 | CH2206 | Male | Three y/o | Control | Control | Feed Day | No | 17:30 | 17:00 - 17:59 | Evening | 37,8 | 152 | 91,2  | 91,2  | 18,95 | 622,73 | 152,63 |
| 2019/06/25 | CH2205 | Male | Three y/o | Control | Control | Feed Day | No | 17:35 | 17:00 - 17:59 | Evening | 38,1 | 54  | 108,2 | 108,2 | 19,26 | 545,99 | 158,59 |
| 2019/06/25 | CH2206 | Male | Three y/o | Control | Control | Feed Day | No | 17:35 | 17:00 - 17:59 | Evening | 38,0 | 111 | 25,6  | 25,6  | 19,15 | 601,33 | 108,76 |
| 2019/06/25 | CH2205 | Male | Three y/o | Control | Control | Feed Day | No | 17:40 | 17:00 - 17:59 | Evening | 38,1 | 81  | 22,4  | 22,4  | 19,26 | 578,26 | 104,19 |
| 2019/06/25 | CH2206 | Male | Three y/o | Control | Control | Feed Day | No | 17:40 | 17:00 - 17:59 | Evening | 37,9 | 97  | 11,6  | 11,6  | 19,05 | 591,66 | 81,78  |
| 2019/06/25 | CH2205 | Male | Three y/o | Control | Control | Feed Day | No | 17:45 | 17:00 - 17:59 | Evening | 38,1 |     | 3,8   | 3,8   | 19,26 |        | 44,22  |
| 2019/06/25 | CH2206 | Male | Three y/o | Control | Control | Feed Day | No | 17:45 | 17:00 - 17:59 | Evening | 37,9 | 106 | 17,8  | 17,8  | 19,05 | 598,06 | 96,34  |
| 2019/06/25 | CH2205 | Male | Three y/o | Control | Control | Feed Day | No | 17:50 | 17:00 - 17:59 | Evening | 38,0 |     | 2,6   | 2,6   | 19,15 |        | 31,57  |
| 2019/06/25 | CH2206 | Male | Three y/o | Control | Control | Feed Day | No | 17:50 | 17:00 - 17:59 | Evening | 37,8 | 84  | 15,4  | 15,4  | 18,95 | 581,01 | 91,41  |
| 2019/06/25 | CH2205 | Male | Three y/o | Control | Control | Feed Day | No | 17:55 | 17:00 - 17:59 | Evening | 38,1 |     | 35,0  | 35,0  | 19,26 |        | 119,49 |
| 2019/06/25 | CH2206 | Male | Three y/o | Control | Control | Feed Day | No | 17:55 | 17:00 - 17:59 | Evening | 37,8 | 131 | 36,2  | 36,2  | 18,95 | 612,80 | 120,65 |
| 2019/06/25 | CH2205 | Male | Three y/o | Control | Control | Feed Day | No | 18:00 | 18:00 - 18:59 | Evening | 38,1 | 95  | 119,2 | 119,2 | 19,26 | 590,14 | 161,97 |
| 2019/06/25 | CH2206 | Male | Three y/o | Control | Control | Feed Day | No | 18:00 | 18:00 - 18:59 | Evening | 37,8 | 112 | 65,4  | 65,4  | 18,95 | 601,96 | 141,08 |
| 2019/06/25 | CH2205 | Male | Three y/o | Control | Control | Feed Day | No | 18:05 | 18:00 - 18:59 | Evening | 38,0 | 104 | 25,2  | 25,2  | 19,15 | 596,69 | 108,22 |
| 2019/06/25 | CH2206 | Male | Three y/o | Control | Control | Feed Day | No | 18:05 | 18:00 - 18:59 | Evening | 37,8 | 50  | 20,6  | 20,6  | 18,95 | 539,52 | 101,32 |
| 2019/06/25 | CH2205 | Male | Three y/o | Control | Control | Feed Day | No | 18:10 | 18:00 - 18:59 | Evening | 37,9 |     | 13,8  | 13,8  | 19,05 |        | 87,68  |
| 2019/06/25 | CH2206 | Male | Three y/o | Control | Control | Feed Day | No | 18:10 | 18:00 - 18:59 | Evening | 37,7 | 50  | 45,2  | 45,2  | 18,85 | 539,52 | 128,30 |
| 2019/06/25 | CH2205 | Male | Three y/o | Control | Control | Feed Day | No | 18:15 | 18:00 - 18:59 | Evening | 37,9 | 71  | 12,8  | 12,8  | 19,05 | 568,10 | 85,12  |
| 2019/06/25 | CH2206 | Male | Three y/o | Control | Control | Feed Day | No | 18:15 | 18:00 - 18:59 | Evening | 37,5 | 72  | 52,8  | 52,8  | 18,65 | 569,20 | 133,67 |
| 2019/06/25 | CH2205 | Male | Three y/o | Control | Control | Feed Day | No | 18:20 | 18:00 - 18:59 | Evening | 37,9 | 182 | 12,6  | 12,6  | 19,05 | 634,31 | 84,59  |
| 2019/06/25 | CH2206 | Male | Three y/o | Control | Control | Feed Day | No | 18:20 | 18:00 - 18:59 | Evening | 37,7 | 69  | 49,6  | 49,6  | 18,85 | 565,86 | 131,51 |
| 2019/06/25 | CH2205 | Male | Three y/o | Control | Control | Feed Day | No | 18:25 | 18:00 - 18:59 | Evening | 38,0 |     | 11,2  | 11,2  | 19,15 |        | 80,59  |
| 2019/06/25 | CH2206 | Male | Three y/o | Control | Control | Feed Day | No | 18:25 | 18:00 - 18:59 | Evening | 37,7 | 75  | 51,2  | 51,2  | 18,85 | 572,36 | 132,61 |
| 2019/06/25 | CH2205 | Male | Three y/o | Control | Control | Feed Day | No | 18:30 | 18:00 - 18:59 | Evening | 38,0 |     | 5,4   | 5,4   | 19,15 |        | 55,99  |
| 2019/06/25 | CH2206 | Male | Three y/o | Control | Control | Feed Day | No | 18:30 | 18:00 - 18:59 | Evening | 37,8 | 65  | 47,4  | 47,4  | 18,95 | 561,12 | 129,94 |
| 2019/06/25 | CH2205 | Male | Three y/o | Control | Control | Feed Day | No | 18:35 | 18:00 - 18:59 | Evening | 38,1 |     | 7,6   | 7,6   | 19,26 |        | 67,49  |
| 2019/06/25 | CH2206 | Male | Three y/o | Control | Control | Feed Day | No | 18:35 | 18:00 - 18:59 | Evening | 37,8 | 77  | 52,6  | 52,6  | 18,95 | 574,39 | 133,54 |
| 2019/06/25 | CH2205 | Male | Three y/o | Control | Control | Feed Day | No | 18:40 | 18:00 - 18:59 | Evening | 38,1 | 63  | 9,4   | 9,4   | 19,26 | 558,62 | 74,66  |
| 2019/06/25 | CH2206 | Male | Three y/o | Control | Control | Feed Day | No | 18:40 | 18:00 - 18:59 | Evening | 37,9 | 70  | 52,4  | 52,4  | 19,05 | 566,99 | 133,41 |
| 2019/06/25 | CH2205 | Male | Three y/o | Control | Control | Feed Day | No | 18:45 | 18:00 - 18:59 | Evening | 38,0 | 58  | 13,4  | 13,4  | 19,15 | 551,90 | 86,68  |
| 2019/06/25 | CH2206 | Male | Three y/o | Control | Control | Feed Day | No | 18:45 | 18:00 - 18:59 | Evening | 37,9 | 48  | 48,2  | 48,2  | 19,05 | 536,04 | 130,52 |
| 2019/06/25 | CH2205 | Male | Three y/o | Control | Control | Feed Day | No | 18:50 | 18:00 - 18:59 | Evening | 37,9 | 64  | 12,4  | 12,4  | 19,05 | 559,88 | 84,04  |
| 2019/06/25 | CH2206 | Male | Three y/o | Control | Control | Feed Day | No | 18:50 | 18:00 - 18:59 | Evening | 37,9 | 71  | 48,8  | 48,8  | 19,05 | 568,10 | 130,95 |
| 2019/06/25 | CH2205 | Male | Three y/o | Control | Control | Feed Day | No | 18:55 | 18:00 - 18:59 | Evening | 37,9 | 66  | 15,4  | 15,4  | 19,05 | 562,34 | 91,41  |
| 2019/06/25 | CH2206 | Male | Three y/o | Control | Control | Feed Day | No | 18:55 | 18:00 - 18:59 | Evening | 37,9 | 61  | 15,4  | 15,4  | 19,05 | 556,01 | 91,41  |
| 2019/06/25 | CH2205 | Male | Three y/o | Control | Control | Feed Day | No | 19:00 | 19:00 - 19:59 | Evening | 38,0 | 70  | 12,8  | 12,8  | 19,15 | 566,99 | 85,12  |
| 2019/06/25 | CH2206 | Male | Three y/o | Control | Control | Feed Day | No | 19:00 | 19:00 - 19:59 | Evening | 37,9 | 62  | 4,2   | 4,2   | 19,05 | 557,33 | 47,57  |
| 2019/06/25 | CH2205 | Male | Three y/o | Control | Control | Feed Day | No | 19:05 | 19:00 - 19:59 | Evening | 37,9 | 62  | 14,2  | 14,2  | 19,05 | 557,33 | 88,65  |
| 2019/06/25 | CH2206 | Male | Three y/o | Control | Control | Feed Day | No | 19:05 | 19:00 - 19:59 | Evening | 37,9 | 80  | 3,0   | 3,0   | 19,05 | 577,31 | 36,34  |
| 2019/06/25 | CH2205 | Male | Three y/o | Control | Control | Feed Day | No | 19:10 | 19:00 - 19:59 | Evening | 37,7 | 70  | 15,0  | 15,0  | 18,85 | 566,99 | 90,51  |
| 2019/06/25 | CH2206 | Male | Three y/o | Control | Control | Feed Day | No | 19:10 | 19:00 - 19:59 | Evening | 37,9 | 80  | 4,0   | 4,0   | 19,05 | 577,31 | 45,94  |
| 2019/06/25 | CH2205 | Male | Three y/o | Control | Control | Feed Day | No | 19:15 | 19:00 - 19:59 | Evening | 37,7 | 57  | 12,0  | 12,0  | 18,85 | 550,47 | 82,93  |
| 2019/06/25 | CH2206 | Male | Three y/o | Control | Control | Feed Day | No | 19:15 | 19:00 - 19:59 | Evening | 37,9 | 55  | 3,8   | 3,8   | 19,05 | 547,52 | 44,22  |
| 2019/06/25 | CH2205 | Male | Three y/o | Control | Control | Feed Day | No | 19:20 | 19:00 - 19:59 | Evening | 37,7 | 65  | 7,8   | 7,8   | 18,85 | 561,12 | 68,36  |
| 2019/06/25 | CH2206 | Male | Three y/o | Control | Control | Feed Day | No | 19:20 | 19:00 - 19:59 | Evening | 37,9 | 50  | 1,4   | 1,4   | 19,05 | 539,52 | 11,07  |
| 2019/06/25 | CH2205 | Male | Three y/o | Control | Control | Feed Day | No | 19:25 | 19:00 - 19:59 | Evening | 37,6 | 82  | 12,2  | 12,2  | 18,75 | 579,19 | 83,49  |
| 2019/06/25 | CH2206 | Male | Three y/o | Control | Control | Feed Day | No | 19:25 | 19:00 - 19:59 | Evening | 37,9 | 62  | 4,4   | 4,4   | 19,05 | 557,33 | 49,12  |
| 2019/06/25 | CH2205 | Male | Three y/o | Control | Control | Feed Day | No | 19:30 | 19:00 - 19:59 | Evening | 37,6 | 75  | 11,8  | 11,8  | 18,75 | 572,36 | 82,36  |
| 2019/06/25 | CH2206 | Male | Three y/o | Control | Control | Feed Day | No | 19:30 | 19:00 - 19:59 | Evening | 37,9 | 70  | 40,2  | 40,2  | 19,05 | 566,99 | 124,26 |
| 2019/06/25 | CH2205 | Male | Three y/o | Control | Control | Feed Day | No | 19:35 | 19:00 - 19:59 | Evening | 37,5 | 58  | 11,0  | 11,0  | 18,65 | 551,90 | 79,98  |
| 2019/06/25 | CH2206 | Male | Three y/o | Control | Control | Feed Day | No | 19:35 | 19:00 - 19:59 | Evening | 37,9 | 57  | 35,2  | 35,2  | 19,05 | 550,47 | 119,69 |
| 2019/06/25 | CH2205 | Male | Three y/o | Control | Control | Feed Day | No | 19:40 | 19:00 - 19:59 | Evening | 37,5 | 67  | 11,4  | 11,4  | 18,65 | 563,53 | 81,19  |
| 2019/06/25 | CH2206 | Male | Three y/o | Control | Control | Feed Day | No | 19:40 | 19:00 - 19:59 | Evening | 37,9 | 51  | 32,6  | 32,6  | 19,05 | 541,20 | 117,05 |
| 2019/06/25 | CH2205 | Male | Three y/o | Control | Control | Feed Day | No | 19:45 | 19:00 - 19:59 | Evening | 37,5 | 72  | 10,0  | 10,0  | 18,65 | 569,20 | 76,76  |
| 2019/06/25 | CH2206 | Male | Three y/o | Control | Control | Feed Day | No | 19:45 | 19:00 - 19:59 | Evening | 37,9 | 44  | 33,6  | 33,6  | 19,05 | 528,51 | 118,09 |
| 2019/06/25 | CH2205 | Male | Three y/o | Control | Control | Feed Day | No | 19:50 | 19:00 - 19:59 | Evening | 37,5 | 60  | 3,0   | 3,0   | 18,65 | 554,67 | 36,34  |



|            |        |      |           |         |         |          |    |       |               |         |      |     |      |      |       |        |        |
|------------|--------|------|-----------|---------|---------|----------|----|-------|---------------|---------|------|-----|------|------|-------|--------|--------|
| 2019/06/25 | CH2206 | Male | Three y/o | Control | Control | Feed Day | No | 19:50 | 19:00 - 19:59 | Evening | 37,9 | 57  | 33,2 | 33,2 | 19,05 | 550,47 | 117,68 |
| 2019/06/25 | CH2205 | Male | Three y/o | Control | Control | Feed Day | No | 19:55 | 19:00 - 19:59 | Evening | 37,5 | 62  | 9,2  | 9,2  | 18,65 | 557,33 | 73,94  |
| 2019/06/25 | CH2206 | Male | Three y/o | Control | Control | Feed Day | No | 19:55 | 19:00 - 19:59 | Evening | 37,9 | 77  | 32,8 | 32,8 | 19,05 | 574,39 | 117,26 |
| 2019/06/25 | CH2205 | Male | Three y/o | Control | Control | Feed Day | No | 20:00 | 20:00 - 20:59 | Night   | 37,6 | 68  | 5,0  | 5,0  | 18,75 | 564,71 | 53,41  |
| 2019/06/25 | CH2206 | Male | Three y/o | Control | Control | Feed Day | No | 20:00 | 20:00 - 20:59 | Night   | 37,9 | 83  | 30,6 | 30,6 | 19,05 | 580,11 | 114,87 |
| 2019/06/25 | CH2205 | Male | Three y/o | Control | Control | Feed Day | No | 20:05 | 20:00 - 20:59 | Night   | 37,5 | 55  | 5,2  | 5,2  | 18,65 | 547,52 | 54,72  |
| 2019/06/25 | CH2206 | Male | Three y/o | Control | Control | Feed Day | No | 20:05 | 20:00 - 20:59 | Night   | 37,9 | 70  | 36,6 | 36,6 | 19,05 | 566,99 | 121,03 |
| 2019/06/25 | CH2205 | Male | Three y/o | Control | Control | Feed Day | No | 20:10 | 20:00 - 20:59 | Night   | 37,6 | 89  | 8,0  | 8,0  | 18,75 | 585,33 | 69,22  |
| 2019/06/25 | CH2206 | Male | Three y/o | Control | Control | Feed Day | No | 20:10 | 20:00 - 20:59 | Night   | 37,9 | 53  | 34,4 | 34,4 | 19,05 | 544,43 | 118,90 |
| 2019/06/25 | CH2205 | Male | Three y/o | Control | Control | Feed Day | No | 20:15 | 20:00 - 20:59 | Night   | 37,6 | 68  | 8,0  | 8,0  | 18,75 | 564,71 | 69,22  |
| 2019/06/25 | CH2206 | Male | Three y/o | Control | Control | Feed Day | No | 20:15 | 20:00 - 20:59 | Night   | 37,9 | 44  | 32,6 | 32,6 | 19,05 | 528,51 | 117,05 |
| 2019/06/25 | CH2205 | Male | Three y/o | Control | Control | Feed Day | No | 20:20 | 20:00 - 20:59 | Night   | 37,7 | 69  | 5,0  | 5,0  | 18,85 | 565,86 | 53,41  |
| 2019/06/25 | CH2206 | Male | Three y/o | Control | Control | Feed Day | No | 20:20 | 20:00 - 20:59 | Night   | 37,9 | 87  | 31,0 | 31,0 | 19,05 | 583,64 | 115,32 |
| 2019/06/25 | CH2205 | Male | Three y/o | Control | Control | Feed Day | No | 20:25 | 20:00 - 20:59 | Night   | 37,7 | 69  | 5,6  | 5,6  | 18,85 | 565,86 | 57,21  |
| 2019/06/25 | CH2206 | Male | Three y/o | Control | Control | Feed Day | No | 20:25 | 20:00 - 20:59 | Night   | 37,9 | 77  | 29,4 | 29,4 | 19,05 | 574,39 | 113,50 |
| 2019/06/25 | CH2205 | Male | Three y/o | Control | Control | Feed Day | No | 20:30 | 20:00 - 20:59 | Night   | 37,8 | 71  | 3,6  | 3,6  | 18,95 | 568,10 | 42,42  |
| 2019/06/25 | CH2206 | Male | Three y/o | Control | Control | Feed Day | No | 20:30 | 20:00 - 20:59 | Night   | 37,9 | 76  | 27,4 | 27,4 | 19,05 | 573,39 | 111,09 |
| 2019/06/25 | CH2205 | Male | Three y/o | Control | Control | Feed Day | No | 20:35 | 20:00 - 20:59 | Night   | 37,9 |     | 15,8 | 15,8 | 19,05 |        | 92,28  |
| 2019/06/25 | CH2206 | Male | Three y/o | Control | Control | Feed Day | No | 20:35 | 20:00 - 20:59 | Night   | 37,9 | 73  | 27,4 | 27,4 | 19,05 | 570,27 | 111,09 |
| 2019/06/25 | CH2205 | Male | Three y/o | Control | Control | Feed Day | No | 20:40 | 20:00 - 20:59 | Night   | 37,9 | 67  | 12,4 | 12,4 | 19,05 | 563,53 | 84,04  |
| 2019/06/25 | CH2206 | Male | Three y/o | Control | Control | Feed Day | No | 20:40 | 20:00 - 20:59 | Night   | 37,9 | 84  | 26,6 | 26,6 | 19,05 | 581,01 | 110,07 |
| 2019/06/25 | CH2205 | Male | Three y/o | Control | Control | Feed Day | No | 20:45 | 20:00 - 20:59 | Night   | 37,9 | 70  | 12,8 | 12,8 | 19,05 | 566,99 | 85,12  |
| 2019/06/25 | CH2206 | Male | Three y/o | Control | Control | Feed Day | No | 20:45 | 20:00 - 20:59 | Night   | 37,9 | 55  | 30,0 | 30,0 | 19,05 | 547,52 | 114,20 |
| 2019/06/25 | CH2205 | Male | Three y/o | Control | Control | Feed Day | No | 20:50 | 20:00 - 20:59 | Night   | 37,9 | 68  | 11,6 | 11,6 | 19,05 | 564,71 | 81,78  |
| 2019/06/25 | CH2206 | Male | Three y/o | Control | Control | Feed Day | No | 20:50 | 20:00 - 20:59 | Night   | 37,9 | 98  | 28,2 | 28,2 | 19,05 | 592,41 | 112,07 |
| 2019/06/25 | CH2205 | Male | Three y/o | Control | Control | Feed Day | No | 20:55 | 20:00 - 20:59 | Night   | 37,9 | 66  | 13,4 | 13,4 | 19,05 | 562,34 | 86,68  |
| 2019/06/25 | CH2206 | Male | Three y/o | Control | Control | Feed Day | No | 20:55 | 20:00 - 20:59 | Night   | 37,9 | 57  | 23,2 | 23,2 | 19,05 | 550,47 | 105,39 |
| 2019/06/25 | CH2205 | Male | Three y/o | Control | Control | Feed Day | No | 21:00 | 21:00 - 21:59 | Night   | 37,9 | 72  | 10,4 | 10,4 | 19,05 | 569,20 | 78,08  |
| 2019/06/25 | CH2206 | Male | Three y/o | Control | Control | Feed Day | No | 21:00 | 21:00 - 21:59 | Night   | 37,9 | 45  | 28,4 | 28,4 | 19,05 | 530,47 | 112,31 |
| 2019/06/25 | CH2205 | Male | Three y/o | Control | Control | Feed Day | No | 21:05 | 21:00 - 21:59 | Night   | 37,9 | 77  | 5,4  | 5,4  | 19,05 | 574,39 | 55,99  |
| 2019/06/25 | CH2206 | Male | Three y/o | Control | Control | Feed Day | No | 21:05 | 21:00 - 21:59 | Night   | 37,9 | 47  | 30,0 | 30,0 | 19,05 | 534,23 | 114,20 |
| 2019/06/25 | CH2205 | Male | Three y/o | Control | Control | Feed Day | No | 21:10 | 21:00 - 21:59 | Night   | 37,9 | 47  | 10,8 | 10,8 | 19,05 | 534,23 | 79,36  |
| 2019/06/25 | CH2206 | Male | Three y/o | Control | Control | Feed Day | No | 21:10 | 21:00 - 21:59 | Night   | 37,9 | 80  | 28,2 | 28,2 | 19,05 | 577,31 | 112,07 |
| 2019/06/25 | CH2205 | Male | Three y/o | Control | Control | Feed Day | No | 21:15 | 21:00 - 21:59 | Night   | 37,9 | 73  | 13,2 | 13,2 | 19,05 | 570,27 | 86,17  |
| 2019/06/25 | CH2206 | Male | Three y/o | Control | Control | Feed Day | No | 21:15 | 21:00 - 21:59 | Night   | 37,9 | 94  | 29,0 | 29,0 | 19,05 | 589,37 | 113,03 |
| 2019/06/25 | CH2205 | Male | Three y/o | Control | Control | Feed Day | No | 21:20 | 21:00 - 21:59 | Night   | 37,9 | 58  | 10,2 | 10,2 | 19,05 | 551,90 | 77,43  |
| 2019/06/25 | CH2206 | Male | Three y/o | Control | Control | Feed Day | No | 21:20 | 21:00 - 21:59 | Night   | 37,9 | 83  | 30,6 | 30,6 | 19,05 | 580,11 | 114,87 |
| 2019/06/25 | CH2205 | Male | Three y/o | Control | Control | Feed Day | No | 21:25 | 21:00 - 21:59 | Night   | 37,9 | 69  | 10,6 | 10,6 | 19,05 | 565,86 | 78,73  |
| 2019/06/25 | CH2206 | Male | Three y/o | Control | Control | Feed Day | No | 21:25 | 21:00 - 21:59 | Night   | 37,8 | 46  | 33,0 | 33,0 | 18,95 | 532,38 | 117,47 |
| 2019/06/25 | CH2205 | Male | Three y/o | Control | Control | Feed Day | No | 21:30 | 21:00 - 21:59 | Night   | 37,8 | 91  | 7,6  | 7,6  | 18,95 | 586,98 | 67,49  |
| 2019/06/25 | CH2206 | Male | Three y/o | Control | Control | Feed Day | No | 21:30 | 21:00 - 21:59 | Night   | 37,8 | 92  | 36,0 | 36,0 | 18,95 | 587,78 | 120,46 |
| 2019/06/25 | CH2205 | Male | Three y/o | Control | Control | Feed Day | No | 21:35 | 21:00 - 21:59 | Night   | 37,7 | 73  | 6,2  | 6,2  | 18,85 | 570,27 | 60,63  |
| 2019/06/25 | CH2206 | Male | Three y/o | Control | Control | Feed Day | No | 21:35 | 21:00 - 21:59 | Night   | 37,8 | 52  | 41,8 | 41,8 | 18,95 | 542,83 | 125,60 |
| 2019/06/25 | CH2205 | Male | Three y/o | Control | Control | Feed Day | No | 21:40 | 21:00 - 21:59 | Night   | 37,7 | 73  | 4,8  | 4,8  | 18,85 | 570,27 | 52,04  |
| 2019/06/25 | CH2206 | Male | Three y/o | Control | Control | Feed Day | No | 21:40 | 21:00 - 21:59 | Night   | 37,8 | 74  | 34,6 | 34,6 | 18,95 | 571,33 | 119,10 |
| 2019/06/25 | CH2205 | Male | Three y/o | Control | Control | Feed Day | No | 21:45 | 21:00 - 21:59 | Night   | 37,7 | 70  | 3,0  | 3,0  | 18,85 | 566,99 | 36,34  |
| 2019/06/25 | CH2206 | Male | Three y/o | Control | Control | Feed Day | No | 21:45 | 21:00 - 21:59 | Night   | 37,8 | 81  | 38,0 | 38,0 | 18,95 | 578,26 | 122,32 |
| 2019/06/25 | CH2205 | Male | Three y/o | Control | Control | Feed Day | No | 21:50 | 21:00 - 21:59 | Night   | 37,7 | 53  | 7,2  | 7,2  | 18,85 | 544,43 | 65,66  |
| 2019/06/25 | CH2206 | Male | Three y/o | Control | Control | Feed Day | No | 21:50 | 21:00 - 21:59 | Night   | 37,8 | 92  | 36,6 | 36,6 | 18,95 | 587,78 | 121,03 |
| 2019/06/25 | CH2205 | Male | Three y/o | Control | Control | Feed Day | No | 21:55 | 21:00 - 21:59 | Night   | 37,6 | 69  | 10,4 | 10,4 | 18,75 | 565,86 | 78,08  |
| 2019/06/25 | CH2206 | Male | Three y/o | Control | Control | Feed Day | No | 21:55 | 21:00 - 21:59 | Night   | 37,8 | 74  | 55,2 | 55,2 | 18,95 | 571,33 | 135,21 |
| 2019/06/25 | CH2205 | Male | Three y/o | Control | Control | Feed Day | No | 22:00 | 22:00 - 22:59 | Night   | 37,6 | 61  | 8,4  | 8,4  | 18,75 | 556,01 | 70,86  |
| 2019/06/25 | CH2206 | Male | Three y/o | Control | Control | Feed Day | No | 22:00 | 22:00 - 22:59 | Night   | 37,8 | 78  | 49,2 | 49,2 | 18,95 | 575,38 | 131,23 |
| 2019/06/25 | CH2205 | Male | Three y/o | Control | Control | Feed Day | No | 22:05 | 22:00 - 22:59 | Night   | 37,5 | 61  | 12,8 | 12,8 | 18,65 | 556,01 | 85,12  |
| 2019/06/25 | CH2206 | Male | Three y/o | Control | Control | Feed Day | No | 22:05 | 22:00 - 22:59 | Night   | 37,7 | 73  | 50,8 | 50,8 | 18,85 | 570,27 | 132,33 |
| 2019/06/25 | CH2205 | Male | Three y/o | Control | Control | Feed Day | No | 22:10 | 22:00 - 22:59 | Night   | 37,4 | 71  | 11,2 | 11,2 | 18,55 | 568,10 | 80,59  |
| 2019/06/25 | CH2206 | Male | Three y/o | Control | Control | Feed Day | No | 22:10 | 22:00 - 22:59 | Night   | 37,5 | 84  | 53,6 | 53,6 | 18,65 | 581,01 | 134,19 |
| 2019/06/25 | CH2205 | Male | Three y/o | Control | Control | Feed Day | No | 22:15 | 22:00 - 22:59 | Night   | 37,3 | 86  | 12,4 | 12,4 | 18,46 | 582,77 | 84,04  |
| 2019/06/25 | CH2206 | Male | Three y/o | Control | Control | Feed Day | No | 22:15 | 22:00 - 22:59 | Night   | 37,7 |     | 21,4 | 21,4 | 18,85 |        | 102,63 |
| 2019/06/25 | CH2205 | Male | Three y/o | Control | Control | Feed Day | No | 22:20 | 22:00 - 22:59 | Night   | 37,3 | 74  | 9,6  | 9,6  | 18,46 | 571,33 | 75,37  |
| 2019/06/25 | CH2206 | Male | Three y/o | Control | Control | Feed Day | No | 22:20 | 22:00 - 22:59 | Night   | 37,7 | 140 | 77,4 | 77,4 | 18,85 | 617,28 | 146,93 |
| 2019/06/25 | CH2205 | Male | Three y/o | Control | Control | Feed Day | No | 22:25 | 22:00 - 22:59 | Night   | 37,2 | 71  | 11,4 | 11,4 | 18,36 | 568,10 | 81,19  |
| 2019/06/25 | CH2206 | Male | Three y/o | Control | Control | Feed Day | No | 22:25 | 22:00 - 22:59 | Night   | 37,7 | 100 | 42,6 | 42,6 | 18,85 | 593,87 | 126,26 |
| 2019/06/25 | CH2205 | Male | Three y/o | Control | Control | Feed Day | No | 22:30 | 22:00 - 22:59 | Night   | 37,2 | 68  | 15,4 | 15,4 | 18,36 | 564,71 | 91,41  |
| 2019/06/25 | CH2206 | Male | Three y/o | Control | Control | Feed Day | No | 22:30 | 22:00 - 22:59 | Night   | 37,4 | 92  | 33,8 | 33,8 | 18,55 | 587,78 | 118,29 |
| 2019/06/25 | CH2205 | Male | Three y/o | Control | Control | Feed Day | No | 22:35 | 22:00 - 22:59 | Night   | 37,1 | 92  | 6,0  | 6,0  | 18,26 | 587,78 | 59,53  |
| 2019/06/25 | CH2206 | Male | Three y/o | Control | Control | Feed Day | No | 22:35 | 22:00 - 22:59 | Night   | 37,1 | 83  | 11,4 | 11,4 | 18,26 | 580,11 | 81,19  |
| 2019/06/25 | CH2205 | Male | Three y/o | Control | Control | Feed Day | No | 22:40 | 22:00 - 22:59 | Night   | 37,1 | 62  | 3,8  | 3,8  | 18,26 | 557,33 | 44,22  |
| 2019/06/25 | CH2206 | Male | Three y/o | Control | Control | Feed Day | No | 22:40 | 22:00 - 22:59 | Night   | 37,0 | 72  | 14,4 | 14,4 | 18,16 | 569,20 | 89,12  |
| 2019/06/25 | CH2205 | Male | Three y/o | Control | Control | Feed Day | No | 22:45 | 22:00 - 22:59 | Night   | 37,1 | 70  | 8,4  | 8,4  | 18,26 | 566,99 | 70,86  |



|    |            |        |      |           |         |         |          |    |       |               |               |      |     |       |       |       |        |        |
|----|------------|--------|------|-----------|---------|---------|----------|----|-------|---------------|---------------|------|-----|-------|-------|-------|--------|--------|
|    | 2019/06/25 | CH2206 | Male | Three y/o | Control | Control | Feed Day | No | 22:45 | 22:00 - 22:59 | Night         | 37,1 | 78  | 24,8  | 24,8  | 18,26 | 575,38 | 107,67 |
|    | 2019/06/25 | CH2205 | Male | Three y/o | Control | Control | Feed Day | No | 22:50 | 22:00 - 22:59 | Night         | 37,5 | 65  | 11,0  | 11,0  | 18,65 | 561,12 | 79,98  |
|    | 2019/06/25 | CH2206 | Male | Three y/o | Control | Control | Feed Day | No | 22:50 | 22:00 - 22:59 | Night         | 37,2 | 75  | 20,4  | 20,4  | 18,36 | 572,36 | 100,99 |
|    | 2019/06/25 | CH2205 | Male | Three y/o | Control | Control | Feed Day | No | 22:55 | 22:00 - 22:59 | Night         | 37,5 | 71  | 4,6   | 4,6   | 18,65 | 568,10 | 50,61  |
|    | 2019/06/25 | CH2206 | Male | Three y/o | Control | Control | Feed Day | No | 22:55 | 22:00 - 22:59 | Night         | 37,2 | 68  | 26,0  | 26,0  | 18,36 | 564,71 | 109,29 |
|    | 2019/06/25 | CH2205 | Male | Three y/o | Control | Control | Feed Day | No | 23:00 | 23:00 - 23:59 | Night         | 37,5 | 59  | 7,4   | 7,4   | 18,65 | 553,30 | 66,59  |
|    | 2019/06/25 | CH2206 | Male | Three y/o | Control | Control | Feed Day | No | 23:00 | 23:00 - 23:59 | Night         | 37,2 | 60  | 24,6  | 24,6  | 18,36 | 554,67 | 107,39 |
|    | 2019/06/25 | CH2205 | Male | Three y/o | Control | Control | Feed Day | No | 23:05 | 23:00 - 23:59 | Night         | 37,5 |     | 10,4  | 10,4  | 18,65 |        | 78,08  |
|    | 2019/06/25 | CH2206 | Male | Three y/o | Control | Control | Feed Day | No | 23:05 | 23:00 - 23:59 | Night         | 37,2 | 138 | 21,0  | 21,0  | 18,36 | 616,31 | 101,98 |
|    | 2019/06/25 | CH2205 | Male | Three y/o | Control | Control | Feed Day | No | 23:10 | 23:00 - 23:59 | Night         | 37,5 | 68  | 11,8  | 11,8  | 18,65 | 564,71 | 82,36  |
|    | 2019/06/25 | CH2206 | Male | Three y/o | Control | Control | Feed Day | No | 23:10 | 23:00 - 23:59 | Night         | 37,3 | 91  | 36,4  | 36,4  | 18,46 | 586,98 | 120,84 |
|    | 2019/06/25 | CH2205 | Male | Three y/o | Control | Control | Feed Day | No | 23:15 | 23:00 - 23:59 | Night         | 37,5 | 55  | 9,0   | 9,0   | 18,65 | 547,52 | 73,19  |
|    | 2019/06/25 | CH2206 | Male | Three y/o | Control | Control | Feed Day | No | 23:15 | 23:00 - 23:59 | Night         | 37,1 | 55  | 38,2  | 38,2  | 18,26 | 547,52 | 122,50 |
|    | 2019/06/25 | CH2205 | Male | Three y/o | Control | Control | Feed Day | No | 23:20 | 23:00 - 23:59 | Night         | 37,5 | 71  | 11,8  | 11,8  | 18,65 | 568,10 | 82,36  |
|    | 2019/06/25 | CH2206 | Male | Three y/o | Control | Control | Feed Day | No | 23:20 | 23:00 - 23:59 | Night         | 37,1 | 46  | 39,8  | 39,8  | 18,26 | 532,38 | 123,91 |
|    | 2019/06/25 | CH2205 | Male | Three y/o | Control | Control | Feed Day | No | 23:25 | 23:00 - 23:59 | Night         | 37,5 | 65  | 17,0  | 17,0  | 18,65 | 561,12 | 94,77  |
|    | 2019/06/25 | CH2206 | Male | Three y/o | Control | Control | Feed Day | No | 23:25 | 23:00 - 23:59 | Night         | 37,1 | 54  | 39,8  | 39,8  | 18,26 | 545,99 | 123,91 |
|    | 2019/06/25 | CH2205 | Male | Three y/o | Control | Control | Feed Day | No | 23:30 | 23:00 - 23:59 | Night         | 37,5 | 70  | 13,4  | 13,4  | 18,65 | 566,99 | 86,68  |
|    | 2019/06/25 | CH2206 | Male | Three y/o | Control | Control | Feed Day | No | 23:30 | 23:00 - 23:59 | Night         | 37,2 | 61  | 44,0  | 44,0  | 18,36 | 556,01 | 127,37 |
|    | 2019/06/25 | CH2205 | Male | Three y/o | Control | Control | Feed Day | No | 23:35 | 23:00 - 23:59 | Night         | 37,5 | 188 | 12,2  | 12,2  | 18,65 | 636,34 | 83,49  |
|    | 2019/06/25 | CH2206 | Male | Three y/o | Control | Control | Feed Day | No | 23:35 | 23:00 - 23:59 | Night         | 37,2 | 44  | 47,0  | 47,0  | 18,36 | 528,51 | 129,65 |
|    | 2019/06/25 | CH2205 | Male | Three y/o | Control | Control | Feed Day | No | 23:40 | 23:00 - 23:59 | Night         | 37,6 | 73  | 7,2   | 7,2   | 18,75 | 570,27 | 65,66  |
|    | 2019/06/25 | CH2206 | Male | Three y/o | Control | Control | Feed Day | No | 23:40 | 23:00 - 23:59 | Night         | 37,3 | 63  | 47,4  | 47,4  | 18,46 | 558,62 | 129,94 |
|    | 2019/06/25 | CH2205 | Male | Three y/o | Control | Control | Feed Day | No | 23:45 | 23:00 - 23:59 | Night         | 37,5 | 73  | 15,6  | 15,6  | 18,65 | 570,27 | 91,85  |
|    | 2019/06/25 | CH2206 | Male | Three y/o | Control | Control | Feed Day | No | 23:45 | 23:00 - 23:59 | Night         | 37,3 | 42  | 46,0  | 46,0  | 18,46 | 524,42 | 128,91 |
|    | 2019/06/25 | CH2205 | Male | Three y/o | Control | Control | Feed Day | No | 23:50 | 23:00 - 23:59 | Night         | 37,5 | 73  | 8,0   | 8,0   | 18,65 | 570,27 | 69,22  |
|    | 2019/06/25 | CH2206 | Male | Three y/o | Control | Control | Feed Day | No | 23:50 | 23:00 - 23:59 | Night         | 37,4 | 52  | 43,6  | 43,6  | 18,55 | 542,83 | 127,06 |
|    | 2019/06/25 | CH2205 | Male | Three y/o | Control | Control | Feed Day | No | 23:55 | 23:00 - 23:59 | Night         | 37,5 | 63  | 6,6   | 6,6   | 18,65 | 558,62 | 62,73  |
|    | 2019/06/25 | CH2206 | Male | Three y/o | Control | Control | Feed Day | No | 23:55 | 23:00 - 23:59 | Night         | 37,4 | 57  | 43,2  | 43,2  | 18,55 | 550,47 | 126,74 |
| 42 | 2019/06/26 | CH2205 | Male | Three y/o | Control | Control | Feed Day | No | 00:00 | 00:00 - 00:59 | Early Morning | 37,4 | 69  | 18,2  | 18,2  | 18,55 | 565,86 | 97,10  |
|    | 2019/06/26 | CH2206 | Male | Three y/o | Control | Control | Feed Day | No | 00:00 | 00:00 - 00:59 | Early Morning | 37,5 | 99  | 38,6  | 38,6  | 18,65 | 593,14 | 122,86 |
|    | 2019/06/26 | CH2205 | Male | Three y/o | Control | Control | Feed Day | No | 00:05 | 00:00 - 00:59 | Early Morning | 37,6 | 63  | 22,2  | 22,2  | 18,75 | 558,62 | 103,88 |
|    | 2019/06/26 | CH2206 | Male | Three y/o | Control | Control | Feed Day | No | 00:05 | 00:00 - 00:59 | Early Morning | 37,5 | 83  | 44,2  | 44,2  | 18,65 | 580,11 | 127,53 |
|    | 2019/06/26 | CH2205 | Male | Three y/o | Control | Control | Feed Day | No | 00:10 | 00:00 - 00:59 | Early Morning | 37,6 | 35  | 19,4  | 19,4  | 18,75 | 507,97 | 99,28  |
|    | 2019/06/26 | CH2206 | Male | Three y/o | Control | Control | Feed Day | No | 00:10 | 00:00 - 00:59 | Early Morning | 37,5 | 75  | 40,2  | 40,2  | 18,65 | 572,36 | 124,26 |
|    | 2019/06/26 | CH2205 | Male | Three y/o | Control | Control | Feed Day | No | 00:15 | 00:00 - 00:59 | Early Morning | 37,6 | 73  | 22,0  | 22,0  | 18,75 | 570,27 | 103,57 |
|    | 2019/06/26 | CH2206 | Male | Three y/o | Control | Control | Feed Day | No | 00:15 | 00:00 - 00:59 | Early Morning | 37,5 | 85  | 40,2  | 40,2  | 18,65 | 581,90 | 124,26 |
|    | 2019/06/26 | CH2205 | Male | Three y/o | Control | Control | Feed Day | No | 00:20 | 00:00 - 00:59 | Early Morning | 37,6 | 66  | 24,8  | 24,8  | 18,75 | 562,34 | 107,67 |
|    | 2019/06/26 | CH2206 | Male | Three y/o | Control | Control | Feed Day | No | 00:20 | 00:00 - 00:59 | Early Morning | 37,5 | 48  | 41,2  | 41,2  | 18,65 | 536,04 | 125,11 |
|    | 2019/06/26 | CH2205 | Male | Three y/o | Control | Control | Feed Day | No | 00:25 | 00:00 - 00:59 | Early Morning | 37,6 | 71  | 25,0  | 25,0  | 18,75 | 568,10 | 107,94 |
|    | 2019/06/26 | CH2206 | Male | Three y/o | Control | Control | Feed Day | No | 00:25 | 00:00 - 00:59 | Early Morning | 37,5 | 86  | 33,0  | 33,0  | 18,65 | 582,77 | 117,47 |
|    | 2019/06/26 | CH2205 | Male | Three y/o | Control | Control | Feed Day | No | 00:30 | 00:00 - 00:59 | Early Morning | 37,6 | 67  | 23,8  | 23,8  | 18,75 | 563,53 | 106,26 |
|    | 2019/06/26 | CH2206 | Male | Three y/o | Control | Control | Feed Day | No | 00:30 | 00:00 - 00:59 | Early Morning | 37,5 | 51  | 34,6  | 34,6  | 18,65 | 541,20 | 119,10 |
|    | 2019/06/26 | CH2205 | Male | Three y/o | Control | Control | Feed Day | No | 00:35 | 00:00 - 00:59 | Early Morning | 37,6 | 73  | 22,0  | 22,0  | 18,75 | 570,27 | 103,57 |
|    | 2019/06/26 | CH2206 | Male | Three y/o | Control | Control | Feed Day | No | 00:35 | 00:00 - 00:59 | Early Morning | 37,5 | 86  | 39,2  | 39,2  | 18,65 | 582,77 | 123,39 |
|    | 2019/06/26 | CH2205 | Male | Three y/o | Control | Control | Feed Day | No | 00:40 | 00:00 - 00:59 | Early Morning | 37,6 | 56  | 20,0  | 20,0  | 18,75 | 549,01 | 100,31 |
|    | 2019/06/26 | CH2206 | Male | Three y/o | Control | Control | Feed Day | No | 00:40 | 00:00 - 00:59 | Early Morning | 37,5 | 57  | 33,0  | 33,0  | 18,65 | 550,47 | 117,47 |
|    | 2019/06/26 | CH2205 | Male | Three y/o | Control | Control | Feed Day | No | 00:45 | 00:00 - 00:59 | Early Morning | 37,6 | 57  | 19,2  | 19,2  | 18,75 | 550,47 | 98,92  |
|    | 2019/06/26 | CH2206 | Male | Three y/o | Control | Control | Feed Day | No | 00:45 | 00:00 - 00:59 | Early Morning | 37,4 | 44  | 36,8  | 36,8  | 18,55 | 528,51 | 121,22 |
|    | 2019/06/26 | CH2205 | Male | Three y/o | Control | Control | Feed Day | No | 00:50 | 00:00 - 00:59 | Early Morning | 37,6 | 70  | 23,0  | 23,0  | 18,75 | 566,99 | 105,09 |
|    | 2019/06/26 | CH2206 | Male | Three y/o | Control | Control | Feed Day | No | 00:50 | 00:00 - 00:59 | Early Morning | 37,5 | 84  | 43,4  | 43,4  | 18,65 | 581,01 | 126,90 |
|    | 2019/06/26 | CH2205 | Male | Three y/o | Control | Control | Feed Day | No | 00:55 | 00:00 - 00:59 | Early Morning | 37,6 | 72  | 20,4  | 20,4  | 18,75 | 569,20 | 100,99 |
|    | 2019/06/26 | CH2206 | Male | Three y/o | Control | Control | Feed Day | No | 00:55 | 00:00 - 00:59 | Early Morning | 37,4 | 78  | 45,8  | 45,8  | 18,55 | 575,38 | 128,76 |
|    | 2019/06/26 | CH2205 | Male | Three y/o | Control | Control | Feed Day | No | 01:00 | 01:00 - 01:59 | Early Morning | 37,6 | 67  | 19,8  | 19,8  | 18,75 | 563,53 | 99,97  |
|    | 2019/06/26 | CH2206 | Male | Three y/o | Control | Control | Feed Day | No | 01:00 | 01:00 - 01:59 | Early Morning | 37,4 | 63  | 25,2  | 25,2  | 18,55 | 558,62 | 108,22 |
|    | 2019/06/26 | CH2205 | Male | Three y/o | Control | Control | Feed Day | No | 01:05 | 01:00 - 01:59 | Early Morning | 37,6 | 60  | 20,8  | 20,8  | 18,75 | 554,67 | 101,65 |
|    | 2019/06/26 | CH2206 | Male | Three y/o | Control | Control | Feed Day | No | 01:05 | 01:00 - 01:59 | Early Morning | 37,4 | 40  | 21,2  | 21,2  | 18,55 | 520,09 | 102,31 |
|    | 2019/06/26 | CH2205 | Male | Three y/o | Control | Control | Feed Day | No | 01:10 | 01:00 - 01:59 | Early Morning | 37,6 | 94  | 40,6  | 40,6  | 18,75 | 589,37 | 124,60 |
|    | 2019/06/26 | CH2206 | Male | Three y/o | Control | Control | Feed Day | No | 01:10 | 01:00 - 01:59 | Early Morning | 37,4 | 78  | 39,0  | 39,0  | 18,55 | 575,38 | 123,22 |
|    | 2019/06/26 | CH2205 | Male | Three y/o | Control | Control | Feed Day | No | 01:15 | 01:00 - 01:59 | Early Morning | 37,6 | 119 | 61,4  | 61,4  | 18,75 | 606,20 | 138,89 |
|    | 2019/06/26 | CH2206 | Male | Three y/o | Control | Control | Feed Day | No | 01:15 | 01:00 - 01:59 | Early Morning | 37,4 | 104 | 45,2  | 45,2  | 18,55 | 596,69 | 128,30 |
|    | 2019/06/26 | CH2205 | Male | Three y/o | Control | Control | Feed Day | No | 01:20 | 01:00 - 01:59 | Early Morning | 37,6 | 107 | 61,4  | 61,4  | 18,75 | 598,73 | 138,89 |
|    | 2019/06/26 | CH2206 | Male | Three y/o | Control | Control | Feed Day | No | 01:20 | 01:00 - 01:59 | Early Morning | 37,5 | 94  | 89,2  | 89,2  | 18,65 | 589,37 | 151,86 |
|    | 2019/06/26 | CH2205 | Male | Three y/o | Control | Control | Feed Day | No | 01:25 | 01:00 - 01:59 | Early Morning | 37,6 | 74  | 108,2 | 108,2 | 18,75 | 571,33 | 158,59 |
|    | 2019/06/26 | CH2206 | Male | Three y/o | Control | Control | Feed Day | No | 01:25 | 01:00 - 01:59 | Early Morning | 37,5 | 129 | 83,6  | 83,6  | 18,65 | 611,75 | 149,61 |
|    | 2019/06/26 | CH2205 | Male | Three y/o | Control | Control | Feed Day | No | 01:30 | 01:00 - 01:59 | Early Morning | 37,6 | 106 | 131,2 | 131,2 | 18,75 | 598,06 | 165,33 |
|    | 2019/06/26 | CH2206 | Male | Three y/o | Control | Control | Feed Day | No | 01:30 | 01:00 - 01:59 | Early Morning | 37,7 | 119 | 85,0  | 85,0  | 18,85 | 606,20 | 150,18 |
|    | 2019/06/26 | CH2205 | Male | Three y/o | Control | Control | Feed Day | No | 01:35 | 01:00 - 01:59 | Early Morning | 37,7 | 115 | 50,6  | 50,6  | 18,85 | 603,82 | 132,20 |
|    | 2019/06/26 | CH2206 | Male | Three y/o | Control | Control | Feed Day | No | 01:35 | 01:00 - 01:59 | Early Morning | 37,7 | 105 | 31,6  | 31,6  | 18,85 | 597,38 | 115,98 |
|    | 2019/06/26 | CH2205 | Male | Three y/o | Control | Control | Feed Day | No | 01:40 | 01:00 - 01:59 | Early Morning | 37,7 | 84  | 7,2   | 7,2   | 18,85 | 581,01 | 65,66  |



|            |        |      |           |         |         |          |    |       |               |               |      |     |      |      |       |        |        |
|------------|--------|------|-----------|---------|---------|----------|----|-------|---------------|---------------|------|-----|------|------|-------|--------|--------|
| 2019/06/26 | CH2206 | Male | Three y/o | Control | Control | Feed Day | No | 01:40 | 01:00 - 01:59 | Early Morning | 37,5 | 78  | 30,0 | 30,0 | 18,65 | 575,38 | 114,20 |
| 2019/06/26 | CH2205 | Male | Three y/o | Control | Control | Feed Day | No | 01:45 | 01:00 - 01:59 | Early Morning | 37,6 | 61  | 3,8  | 3,8  | 18,75 | 556,01 | 44,22  |
| 2019/06/26 | CH2206 | Male | Three y/o | Control | Control | Feed Day | No | 01:45 | 01:00 - 01:59 | Early Morning | 37,3 | 69  | 26,8 | 26,8 | 18,46 | 565,86 | 110,33 |
| 2019/06/26 | CH2205 | Male | Three y/o | Control | Control | Feed Day | No | 01:50 | 01:00 - 01:59 | Early Morning | 37,5 | 47  | 4,0  | 4,0  | 18,65 | 534,23 | 45,94  |
| 2019/06/26 | CH2206 | Male | Three y/o | Control | Control | Feed Day | No | 01:50 | 01:00 - 01:59 | Early Morning | 37,2 | 47  | 18,4 | 18,4 | 18,36 | 534,23 | 97,47  |
| 2019/06/26 | CH2205 | Male | Three y/o | Control | Control | Feed Day | No | 01:55 | 01:00 - 01:59 | Early Morning | 37,4 |     | 6,2  | 6,2  | 18,55 |        | 60,63  |
| 2019/06/26 | CH2206 | Male | Three y/o | Control | Control | Feed Day | No | 01:55 | 01:00 - 01:59 | Early Morning | 37,2 | 74  | 50,6 | 50,6 | 18,36 | 571,33 | 132,20 |
| 2019/06/26 | CH2205 | Male | Three y/o | Control | Control | Feed Day | No | 02:00 | 02:00 - 02:59 | Early Morning | 37,4 | 60  | 4,8  | 4,8  | 18,55 | 554,67 | 52,04  |
| 2019/06/26 | CH2206 | Male | Three y/o | Control | Control | Feed Day | No | 02:00 | 02:00 - 02:59 | Early Morning | 37,2 | 70  | 48,0 | 48,0 | 18,36 | 566,99 | 130,38 |
| 2019/06/26 | CH2205 | Male | Three y/o | Control | Control | Feed Day | No | 02:05 | 02:00 - 02:59 | Early Morning | 37,3 | 65  | 3,8  | 3,8  | 18,46 | 561,12 | 44,22  |
| 2019/06/26 | CH2206 | Male | Three y/o | Control | Control | Feed Day | No | 02:05 | 02:00 - 02:59 | Early Morning | 37,2 | 69  | 51,6 | 51,6 | 18,36 | 565,86 | 132,87 |
| 2019/06/26 | CH2205 | Male | Three y/o | Control | Control | Feed Day | No | 02:10 | 02:00 - 02:59 | Early Morning | 37,3 | 66  | 8,4  | 8,4  | 18,46 | 562,34 | 70,86  |
| 2019/06/26 | CH2206 | Male | Three y/o | Control | Control | Feed Day | No | 02:10 | 02:00 - 02:59 | Early Morning | 37,3 | 31  | 53,4 | 53,4 | 18,46 | 496,63 | 134,06 |
| 2019/06/26 | CH2205 | Male | Three y/o | Control | Control | Feed Day | No | 02:15 | 02:00 - 02:59 | Early Morning | 37,3 |     | 9,6  | 9,6  | 18,46 |        | 75,37  |
| 2019/06/26 | CH2206 | Male | Three y/o | Control | Control | Feed Day | No | 02:15 | 02:00 - 02:59 | Early Morning | 37,3 | 60  | 52,4 | 52,4 | 18,46 | 554,67 | 133,41 |
| 2019/06/26 | CH2205 | Male | Three y/o | Control | Control | Feed Day | No | 02:20 | 02:00 - 02:59 | Early Morning | 37,3 | 56  | 7,0  | 7,0  | 18,46 | 549,01 | 64,72  |
| 2019/06/26 | CH2206 | Male | Three y/o | Control | Control | Feed Day | No | 02:20 | 02:00 - 02:59 | Early Morning | 37,3 | 41  | 52,2 | 52,2 | 18,46 | 522,29 | 133,27 |
| 2019/06/26 | CH2205 | Male | Three y/o | Control | Control | Feed Day | No | 02:25 | 02:00 - 02:59 | Early Morning | 37,3 | 64  | 4,2  | 4,2  | 18,46 | 559,88 | 47,57  |
| 2019/06/26 | CH2206 | Male | Three y/o | Control | Control | Feed Day | No | 02:25 | 02:00 - 02:59 | Early Morning | 37,2 | 50  | 53,2 | 53,2 | 18,36 | 539,52 | 133,93 |
| 2019/06/26 | CH2205 | Male | Three y/o | Control | Control | Feed Day | No | 02:30 | 02:00 - 02:59 | Early Morning | 37,3 | 48  | 8,4  | 8,4  | 18,46 | 536,04 | 70,86  |
| 2019/06/26 | CH2206 | Male | Three y/o | Control | Control | Feed Day | No | 02:30 | 02:00 - 02:59 | Early Morning | 37,2 | 72  | 50,4 | 50,4 | 18,36 | 569,20 | 132,06 |
| 2019/06/26 | CH2205 | Male | Three y/o | Control | Control | Feed Day | No | 02:35 | 02:00 - 02:59 | Early Morning | 37,2 | 46  | 7,6  | 7,6  | 18,36 | 532,38 | 67,49  |
| 2019/06/26 | CH2206 | Male | Three y/o | Control | Control | Feed Day | No | 02:35 | 02:00 - 02:59 | Early Morning | 37,2 | 51  | 51,6 | 51,6 | 18,36 | 541,20 | 132,87 |
| 2019/06/26 | CH2205 | Male | Three y/o | Control | Control | Feed Day | No | 02:40 | 02:00 - 02:59 | Early Morning | 37,2 | 62  | 7,6  | 7,6  | 18,36 | 557,33 | 67,49  |
| 2019/06/26 | CH2206 | Male | Three y/o | Control | Control | Feed Day | No | 02:40 | 02:00 - 02:59 | Early Morning | 37,2 | 43  | 50,6 | 50,6 | 18,36 | 526,50 | 132,20 |
| 2019/06/26 | CH2205 | Male | Three y/o | Control | Control | Feed Day | No | 02:45 | 02:00 - 02:59 | Early Morning | 37,2 | 50  | 11,0 | 11,0 | 18,36 | 539,52 | 79,98  |
| 2019/06/26 | CH2206 | Male | Three y/o | Control | Control | Feed Day | No | 02:45 | 02:00 - 02:59 | Early Morning | 37,3 | 54  | 51,6 | 51,6 | 18,46 | 545,99 | 132,87 |
| 2019/06/26 | CH2205 | Male | Three y/o | Control | Control | Feed Day | No | 02:50 | 02:00 - 02:59 | Early Morning | 37,1 | 44  | 10,2 | 10,2 | 18,26 | 528,51 | 77,43  |
| 2019/06/26 | CH2206 | Male | Three y/o | Control | Control | Feed Day | No | 02:50 | 02:00 - 02:59 | Early Morning | 37,3 | 73  | 48,6 | 48,6 | 18,46 | 570,27 | 130,81 |
| 2019/06/26 | CH2205 | Male | Three y/o | Control | Control | Feed Day | No | 02:55 | 02:00 - 02:59 | Early Morning | 37,1 | 61  | 7,0  | 7,0  | 18,26 | 556,01 | 64,72  |
| 2019/06/26 | CH2206 | Male | Three y/o | Control | Control | Feed Day | No | 02:55 | 02:00 - 02:59 | Early Morning | 37,4 | 78  | 53,2 | 53,2 | 18,55 | 575,38 | 133,93 |
| 2019/06/26 | CH2205 | Male | Three y/o | Control | Control | Feed Day | No | 03:00 | 03:00 - 03:59 | Early Morning | 37,1 | 56  | 6,8  | 6,8  | 18,26 | 549,01 | 63,74  |
| 2019/06/26 | CH2206 | Male | Three y/o | Control | Control | Feed Day | No | 03:00 | 03:00 - 03:59 | Early Morning | 37,3 | 50  | 47,6 | 47,6 | 18,46 | 539,52 | 130,09 |
| 2019/06/26 | CH2205 | Male | Three y/o | Control | Control | Feed Day | No | 03:05 | 03:00 - 03:59 | Early Morning | 37,0 | 46  | 22,4 | 22,4 | 18,16 | 532,38 | 104,19 |
| 2019/06/26 | CH2206 | Male | Three y/o | Control | Control | Feed Day | No | 03:05 | 03:00 - 03:59 | Early Morning | 37,3 | 80  | 37,0 | 37,0 | 18,46 | 577,31 | 121,40 |
| 2019/06/26 | CH2205 | Male | Three y/o | Control | Control | Feed Day | No | 03:10 | 03:00 - 03:59 | Early Morning | 37,1 | 78  | 1,4  | 1,4  | 18,26 | 575,38 | 11,07  |
| 2019/06/26 | CH2206 | Male | Three y/o | Control | Control | Feed Day | No | 03:10 | 03:00 - 03:59 | Early Morning | 37,3 | 51  | 18,2 | 18,2 | 18,46 | 541,20 | 97,10  |
| 2019/06/26 | CH2205 | Male | Three y/o | Control | Control | Feed Day | No | 03:15 | 03:00 - 03:59 | Early Morning | 37,2 |     | 4,2  | 4,2  | 18,36 |        | 47,57  |
| 2019/06/26 | CH2206 | Male | Three y/o | Control | Control | Feed Day | No | 03:15 | 03:00 - 03:59 | Early Morning | 37,3 | 40  | 15,2 | 15,2 | 18,46 | 520,09 | 90,96  |
| 2019/06/26 | CH2205 | Male | Three y/o | Control | Control | Feed Day | No | 03:20 | 03:00 - 03:59 | Early Morning | 37,1 |     | 5,6  | 5,6  | 18,26 |        | 57,21  |
| 2019/06/26 | CH2206 | Male | Three y/o | Control | Control | Feed Day | No | 03:20 | 03:00 - 03:59 | Early Morning | 37,3 | 83  | 26,2 | 26,2 | 18,46 | 580,11 | 109,55 |
| 2019/06/26 | CH2205 | Male | Three y/o | Control | Control | Feed Day | No | 03:25 | 03:00 - 03:59 | Early Morning | 37,1 | 42  | 3,2  | 3,2  | 18,26 | 524,42 | 38,49  |
| 2019/06/26 | CH2206 | Male | Three y/o | Control | Control | Feed Day | No | 03:25 | 03:00 - 03:59 | Early Morning | 37,4 | 80  | 21,8 | 21,8 | 18,55 | 577,31 | 103,26 |
| 2019/06/26 | CH2205 | Male | Three y/o | Control | Control | Feed Day | No | 03:30 | 03:00 - 03:59 | Early Morning | 37,1 |     | 8,8  | 8,8  | 18,26 |        | 72,43  |
| 2019/06/26 | CH2206 | Male | Three y/o | Control | Control | Feed Day | No | 03:30 | 03:00 - 03:59 | Early Morning | 37,4 | 46  | 26,0 | 26,0 | 18,55 | 532,38 | 109,29 |
| 2019/06/26 | CH2205 | Male | Three y/o | Control | Control | Feed Day | No | 03:35 | 03:00 - 03:59 | Early Morning | 37,1 | 92  | 7,0  | 7,0  | 18,26 | 587,78 | 64,72  |
| 2019/06/26 | CH2206 | Male | Three y/o | Control | Control | Feed Day | No | 03:35 | 03:00 - 03:59 | Early Morning | 37,4 | 85  | 32,2 | 32,2 | 18,55 | 581,90 | 116,63 |
| 2019/06/26 | CH2205 | Male | Three y/o | Control | Control | Feed Day | No | 03:40 | 03:00 - 03:59 | Early Morning | 37,1 | 40  | 8,4  | 8,4  | 18,26 | 520,09 | 70,86  |
| 2019/06/26 | CH2206 | Male | Three y/o | Control | Control | Feed Day | No | 03:40 | 03:00 - 03:59 | Early Morning | 37,3 | 45  | 29,4 | 29,4 | 18,46 | 530,47 | 113,50 |
| 2019/06/26 | CH2205 | Male | Three y/o | Control | Control | Feed Day | No | 03:45 | 03:00 - 03:59 | Early Morning | 37,1 |     | 6,4  | 6,4  | 18,26 |        | 61,70  |
| 2019/06/26 | CH2206 | Male | Three y/o | Control | Control | Feed Day | No | 03:45 | 03:00 - 03:59 | Early Morning | 37,3 | 72  | 27,0 | 27,0 | 18,46 | 569,20 | 110,58 |
| 2019/06/26 | CH2205 | Male | Three y/o | Control | Control | Feed Day | No | 03:50 | 03:00 - 03:59 | Early Morning | 37,1 | 59  | 2,0  | 2,0  | 18,26 | 553,30 | 22,86  |
| 2019/06/26 | CH2206 | Male | Three y/o | Control | Control | Feed Day | No | 03:50 | 03:00 - 03:59 | Early Morning | 37,3 | 46  | 23,0 | 23,0 | 18,46 | 532,38 | 105,09 |
| 2019/06/26 | CH2205 | Male | Three y/o | Control | Control | Feed Day | No | 03:55 | 03:00 - 03:59 | Early Morning | 37,1 | 60  | 4,4  | 4,4  | 18,26 | 554,67 | 49,12  |
| 2019/06/26 | CH2206 | Male | Three y/o | Control | Control | Feed Day | No | 03:55 | 03:00 - 03:59 | Early Morning | 37,3 | 41  | 25,0 | 25,0 | 18,46 | 522,29 | 107,94 |
| 2019/06/26 | CH2205 | Male | Three y/o | Control | Control | Feed Day | No | 04:00 | 04:00 - 04:59 | Morning       | 37,1 | 68  | 2,0  | 2,0  | 18,26 | 564,71 | 22,86  |
| 2019/06/26 | CH2206 | Male | Three y/o | Control | Control | Feed Day | No | 04:00 | 04:00 - 04:59 | Morning       | 37,3 | 54  | 24,8 | 24,8 | 18,46 | 545,99 | 107,67 |
| 2019/06/26 | CH2205 | Male | Three y/o | Control | Control | Feed Day | No | 04:05 | 04:00 - 04:59 | Morning       | 37,1 | 41  | 7,2  | 7,2  | 18,26 | 522,29 | 65,66  |
| 2019/06/26 | CH2206 | Male | Three y/o | Control | Control | Feed Day | No | 04:05 | 04:00 - 04:59 | Morning       | 37,3 | 44  | 29,8 | 29,8 | 18,46 | 528,51 | 113,97 |
| 2019/06/26 | CH2205 | Male | Three y/o | Control | Control | Feed Day | No | 04:10 | 04:00 - 04:59 | Morning       | 37,1 | 45  | 10,8 | 10,8 | 18,26 | 530,47 | 79,36  |
| 2019/06/26 | CH2206 | Male | Three y/o | Control | Control | Feed Day | No | 04:10 | 04:00 - 04:59 | Morning       | 37,3 | 49  | 27,4 | 27,4 | 18,46 | 537,80 | 111,09 |
| 2019/06/26 | CH2205 | Male | Three y/o | Control | Control | Feed Day | No | 04:15 | 04:00 - 04:59 | Morning       | 37,1 | 59  | 10,0 | 10,0 | 18,26 | 553,30 | 76,76  |
| 2019/06/26 | CH2206 | Male | Three y/o | Control | Control | Feed Day | No | 04:15 | 04:00 - 04:59 | Morning       | 37,3 | 43  | 10,8 | 10,8 | 18,46 | 526,50 | 79,36  |
| 2019/06/26 | CH2205 | Male | Three y/o | Control | Control | Feed Day | No | 04:20 | 04:00 - 04:59 | Morning       | 37,1 | 51  | 9,0  | 9,0  | 18,26 | 541,20 | 73,19  |
| 2019/06/26 | CH2206 | Male | Three y/o | Control | Control | Feed Day | No | 04:20 | 04:00 - 04:59 | Morning       | 37,3 | 42  | 26,2 | 26,2 | 18,46 | 524,42 | 109,55 |
| 2019/06/26 | CH2205 | Male | Three y/o | Control | Control | Feed Day | No | 04:25 | 04:00 - 04:59 | Morning       | 37,1 | 47  | 6,8  | 6,8  | 18,26 | 534,23 | 63,74  |
| 2019/06/26 | CH2206 | Male | Three y/o | Control | Control | Feed Day | No | 04:25 | 04:00 - 04:59 | Morning       | 37,3 | 51  | 35,0 | 35,0 | 18,46 | 541,20 | 119,49 |
| 2019/06/26 | CH2205 | Male | Three y/o | Control | Control | Feed Day | No | 04:30 | 04:00 - 04:59 | Morning       | 37,1 | 111 | 7,0  | 7,0  | 18,26 | 601,33 | 64,72  |
| 2019/06/26 | CH2206 | Male | Three y/o | Control | Control | Feed Day | No | 04:30 | 04:00 - 04:59 | Morning       | 37,3 | 131 | 26,4 | 26,4 | 18,46 | 612,80 | 109,81 |
| 2019/06/26 | CH2205 | Male | Three y/o | Control | Control | Feed Day | No | 04:35 | 04:00 - 04:59 | Morning       | 37,1 | 54  | 10,4 | 10,4 | 18,26 | 545,99 | 78,08  |



|            |        |      |           |         |         |          |    |       |               |         |      |     |        |       |       |        |        |
|------------|--------|------|-----------|---------|---------|----------|----|-------|---------------|---------|------|-----|--------|-------|-------|--------|--------|
| 2019/06/26 | CH2206 | Male | Three y/o | Control | Control | Feed Day | No | 04:35 | 04:00 - 04:59 | Morning | 37,3 | 49  | 20,4   | 20,4  | 18,46 | 537,80 | 100,99 |
| 2019/06/26 | CH2205 | Male | Three y/o | Control | Control | Feed Day | No | 04:40 | 04:00 - 04:59 | Morning | 37,1 | 51  | 14,8   | 14,8  | 18,26 | 541,20 | 90,05  |
| 2019/06/26 | CH2206 | Male | Three y/o | Control | Control | Feed Day | No | 04:40 | 04:00 - 04:59 | Morning | 37,3 | 68  | 21,0   | 21,0  | 18,46 | 564,71 | 101,98 |
| 2019/06/26 | CH2205 | Male | Three y/o | Control | Control | Feed Day | No | 04:45 | 04:00 - 04:59 | Morning | 37,2 | 44  | 17,8   | 17,8  | 18,36 | 528,51 | 96,34  |
| 2019/06/26 | CH2206 | Male | Three y/o | Control | Control | Feed Day | No | 04:45 | 04:00 - 04:59 | Morning | 37,3 | 66  | 21,4   | 21,4  | 18,46 | 562,34 | 102,63 |
| 2019/06/26 | CH2205 | Male | Three y/o | Control | Control | Feed Day | No | 04:50 | 04:00 - 04:59 | Morning | 37,1 | 48  | 17,0   | 17,0  | 18,26 | 536,04 | 94,77  |
| 2019/06/26 | CH2206 | Male | Three y/o | Control | Control | Feed Day | No | 04:50 | 04:00 - 04:59 | Morning | 37,3 | 44  | 18,8   | 18,8  | 18,46 | 528,51 | 98,20  |
| 2019/06/26 | CH2205 | Male | Three y/o | Control | Control | Feed Day | No | 04:55 | 04:00 - 04:59 | Morning | 37,1 | 53  | 18,0   | 18,0  | 18,26 | 544,43 | 96,72  |
| 2019/06/26 | CH2206 | Male | Three y/o | Control | Control | Feed Day | No | 04:55 | 04:00 - 04:59 | Morning | 37,3 | 41  | 16,6   | 16,6  | 18,46 | 522,29 | 93,96  |
| 2019/06/26 | CH2205 | Male | Three y/o | Control | Control | Feed Day | No | 05:00 | 05:00 - 05:59 | Morning | 37,1 | 67  | 3,0    | 3,0   | 18,26 | 563,53 | 36,34  |
| 2019/06/26 | CH2206 | Male | Three y/o | Control | Control | Feed Day | No | 05:00 | 05:00 - 05:59 | Morning | 37,3 | 44  | 2,0    | 2,0   | 18,46 | 528,51 | 22,86  |
| 2019/06/26 | CH2205 | Male | Three y/o | Control | Control | Feed Day | No | 05:05 | 05:00 - 05:59 | Morning | 37,1 | 63  | 19,8   | 19,8  | 18,26 | 558,62 | 99,97  |
| 2019/06/26 | CH2206 | Male | Three y/o | Control | Control | Feed Day | No | 05:05 | 05:00 - 05:59 | Morning | 37,3 | 96  | 13,4   | 13,4  | 18,46 | 590,91 | 86,68  |
| 2019/06/26 | CH2205 | Male | Three y/o | Control | Control | Feed Day | No | 05:10 | 05:00 - 05:59 | Morning | 37,1 | 51  | 17,8   | 17,8  | 18,26 | 541,20 | 96,34  |
| 2019/06/26 | CH2206 | Male | Three y/o | Control | Control | Feed Day | No | 05:10 | 05:00 - 05:59 | Morning | 37,3 | 52  | 16,4   | 16,4  | 18,46 | 542,83 | 93,55  |
| 2019/06/26 | CH2205 | Male | Three y/o | Control | Control | Feed Day | No | 05:15 | 05:00 - 05:59 | Morning | 37,1 | 65  | 13,2   | 13,2  | 18,26 | 561,12 | 86,17  |
| 2019/06/26 | CH2206 | Male | Three y/o | Control | Control | Feed Day | No | 05:15 | 05:00 - 05:59 | Morning | 37,2 | 49  | 27,0   | 27,0  | 18,36 | 537,80 | 110,58 |
| 2019/06/26 | CH2205 | Male | Three y/o | Control | Control | Feed Day | No | 05:20 | 05:00 - 05:59 | Morning | 37,1 | 36  | 18,2   | 18,2  | 18,26 | 510,56 | 97,10  |
| 2019/06/26 | CH2206 | Male | Three y/o | Control | Control | Feed Day | No | 05:20 | 05:00 - 05:59 | Morning | 37,2 | 53  | 35,2   | 35,2  | 18,36 | 544,43 | 119,69 |
| 2019/06/26 | CH2205 | Male | Three y/o | Control | Control | Feed Day | No | 05:25 | 05:00 - 05:59 | Morning | 37,1 | 72  | 14,0   | 14,0  | 18,26 | 569,20 | 88,17  |
| 2019/06/26 | CH2206 | Male | Three y/o | Control | Control | Feed Day | No | 05:25 | 05:00 - 05:59 | Morning | 37,2 | 85  | 36,2   | 36,2  | 18,36 | 581,90 | 120,65 |
| 2019/06/26 | CH2205 | Male | Three y/o | Control | Control | Feed Day | No | 05:30 | 05:00 - 05:59 | Morning | 37,1 | 86  | 13,8   | 13,8  | 18,26 | 582,77 | 87,68  |
| 2019/06/26 | CH2206 | Male | Three y/o | Control | Control | Feed Day | No | 05:30 | 05:00 - 05:59 | Morning | 37,2 | 96  | 15,8   | 15,8  | 18,36 | 590,91 | 92,28  |
| 2019/06/26 | CH2205 | Male | Three y/o | Control | Control | Feed Day | No | 05:35 | 05:00 - 05:59 | Morning | 37,1 |     | 15,4   | 15,4  | 18,26 |        | 91,41  |
| 2019/06/26 | CH2206 | Male | Three y/o | Control | Control | Feed Day | No | 05:35 | 05:00 - 05:59 | Morning | 37,1 | 46  | 27,4   | 27,4  | 18,26 | 532,38 | 111,09 |
| 2019/06/26 | CH2205 | Male | Three y/o | Control | Control | Feed Day | No | 05:40 | 05:00 - 05:59 | Morning | 37,0 | 58  | 14,4   | 14,4  | 18,16 | 551,90 | 89,12  |
| 2019/06/26 | CH2206 | Male | Three y/o | Control | Control | Feed Day | No | 05:40 | 05:00 - 05:59 | Morning | 37,1 | 42  | 32,0   | 32,0  | 18,26 | 524,42 | 116,41 |
| 2019/06/26 | CH2205 | Male | Three y/o | Control | Control | Feed Day | No | 05:45 | 05:00 - 05:59 | Morning | 37,0 |     | 10,6   | 10,6  | 18,16 |        | 78,73  |
| 2019/06/26 | CH2206 | Male | Three y/o | Control | Control | Feed Day | No | 05:45 | 05:00 - 05:59 | Morning | 37,1 | 74  | 27,4   | 27,4  | 18,26 | 571,33 | 111,09 |
| 2019/06/26 | CH2205 | Male | Three y/o | Control | Control | Feed Day | No | 05:50 | 05:00 - 05:59 | Morning | 36,8 | 61  | 22,4   | 22,4  | 17,96 | 556,01 | 104,19 |
| 2019/06/26 | CH2206 | Male | Three y/o | Control | Control | Feed Day | No | 05:50 | 05:00 - 05:59 | Morning | 37,1 | 52  | 25,2   | 25,2  | 18,26 | 542,83 | 108,22 |
| 2019/06/26 | CH2205 | Male | Three y/o | Control | Control | Feed Day | No | 05:55 | 05:00 - 05:59 | Morning | 37,0 | 118 | 33,2   | 33,2  | 18,16 | 605,61 | 117,68 |
| 2019/06/26 | CH2206 | Male | Three y/o | Control | Control | Feed Day | No | 05:55 | 05:00 - 05:59 | Morning | 37,1 | 52  | 9,0    | 9,0   | 18,26 | 542,83 | 73,19  |
| 2019/06/26 | CH2205 | Male | Three y/o | Control | Control | Feed Day | No | 06:00 | 06:00 - 06:59 | Morning | 37,1 | 114 | 320,4  | 320,4 | 18,26 | 603,20 | 196,75 |
| 2019/06/26 | CH2206 | Male | Three y/o | Control | Control | Feed Day | No | 06:00 | 06:00 - 06:59 | Morning | 37,2 | 103 | 69,6   | 69,6  | 18,36 | 596,00 | 143,24 |
| 2019/06/26 | CH2205 | Male | Three y/o | Control | Control | Feed Day | No | 06:05 | 06:00 - 06:59 | Morning | 37,2 | 68  | 65,4   | 65,4  | 18,36 | 564,71 | 141,08 |
| 2019/06/26 | CH2206 | Male | Three y/o | Control | Control | Feed Day | No | 06:05 | 06:00 - 06:59 | Morning | 37,3 | 102 | 97,0   | 97,0  | 18,46 | 595,30 | 154,78 |
| 2019/06/26 | CH2205 | Male | Three y/o | Control | Control | Feed Day | No | 06:10 | 06:00 - 06:59 | Morning | 37,3 | 140 | 1055,2 |       | 18,46 | 617,28 |        |
| 2019/06/26 | CH2206 | Male | Three y/o | Control | Control | Feed Day | No | 06:10 | 06:00 - 06:59 | Morning | 37,3 | 120 | 96,6   | 96,6  | 18,46 | 606,78 | 154,64 |
| 2019/06/26 | CH2205 | Male | Three y/o | Control | Control | Feed Day | No | 06:15 | 06:00 - 06:59 | Morning | 37,5 |     | 223,2  | 223,2 | 18,65 |        | 183,98 |
| 2019/06/26 | CH2206 | Male | Three y/o | Control | Control | Feed Day | No | 06:15 | 06:00 - 06:59 | Morning | 37,5 | 119 | 97,8   | 97,8  | 18,65 | 606,20 | 155,07 |
| 2019/06/26 | CH2205 | Male | Three y/o | Control | Control | Feed Day | No | 06:20 | 06:00 - 06:59 | Morning | 37,6 | 57  | 138,0  | 138,0 | 18,75 | 550,47 | 167,10 |
| 2019/06/26 | CH2206 | Male | Three y/o | Control | Control | Feed Day | No | 06:20 | 06:00 - 06:59 | Morning | 37,5 | 113 | 60,2   | 60,2  | 18,65 | 602,58 | 138,21 |
| 2019/06/26 | CH2205 | Male | Three y/o | Control | Control | Feed Day | No | 06:25 | 06:00 - 06:59 | Morning | 37,6 | 132 | 319,0  | 319,0 | 18,75 | 613,32 | 196,59 |
| 2019/06/26 | CH2206 | Male | Three y/o | Control | Control | Feed Day | No | 06:25 | 06:00 - 06:59 | Morning | 37,7 | 132 | 45,6   | 45,6  | 18,85 | 613,32 | 128,61 |
| 2019/06/26 | CH2205 | Male | Three y/o | Control | Control | Feed Day | No | 06:30 | 06:00 - 06:59 | Morning | 37,8 | 191 | 348,6  | 348,6 | 18,95 | 637,33 | 199,74 |
| 2019/06/26 | CH2206 | Male | Three y/o | Control | Control | Feed Day | No | 06:30 | 06:00 - 06:59 | Morning | 37,7 | 182 | 25,8   | 25,8  | 18,85 | 634,31 | 109,02 |
| 2019/06/26 | CH2205 | Male | Three y/o | Control | Control | Feed Day | No | 06:35 | 06:00 - 06:59 | Morning | 37,9 |     | 132,8  | 132,8 | 19,05 |        | 165,75 |
| 2019/06/26 | CH2206 | Male | Three y/o | Control | Control | Feed Day | No | 06:35 | 06:00 - 06:59 | Morning | 37,9 | 113 | 93,2   | 93,2  | 19,05 | 602,58 | 153,39 |
| 2019/06/26 | CH2205 | Male | Three y/o | Control | Control | Feed Day | No | 06:40 | 06:00 - 06:59 | Morning | 37,9 |     | 64,0   | 64,0  | 19,05 |        | 140,33 |
| 2019/06/26 | CH2206 | Male | Three y/o | Control | Control | Feed Day | No | 06:40 | 06:00 - 06:59 | Morning | 37,8 | 128 | 100,8  | 100,8 | 18,95 | 611,22 | 156,12 |
| 2019/06/26 | CH2205 | Male | Three y/o | Control | Control | Feed Day | No | 06:45 | 06:00 - 06:59 | Morning | 37,8 | 61  | 104,8  | 104,8 | 18,95 | 556,01 | 157,48 |
| 2019/06/26 | CH2206 | Male | Three y/o | Control | Control | Feed Day | No | 06:45 | 06:00 - 06:59 | Morning | 37,9 | 177 | 53,8   | 53,8  | 19,05 | 632,55 | 134,32 |
| 2019/06/26 | CH2205 | Male | Three y/o | Control | Control | Feed Day | No | 06:50 | 06:00 - 06:59 | Morning | 37,9 | 75  | 75,6   | 75,6  | 19,05 | 572,36 | 146,11 |
| 2019/06/26 | CH2206 | Male | Three y/o | Control | Control | Feed Day | No | 06:50 | 06:00 - 06:59 | Morning | 37,9 | 94  | 30,0   | 30,0  | 19,05 | 589,37 | 114,20 |
| 2019/06/26 | CH2205 | Male | Three y/o | Control | Control | Feed Day | No | 06:55 | 06:00 - 06:59 | Morning | 38,2 | 46  | 135,0  | 135,0 | 19,36 | 532,38 | 166,33 |
| 2019/06/26 | CH2206 | Male | Three y/o | Control | Control | Feed Day | No | 06:55 | 06:00 - 06:59 | Morning | 37,9 | 120 | 38,6   | 38,6  | 19,05 | 606,78 | 122,86 |
| 2019/06/26 | CH2205 | Male | Three y/o | Control | Control | Feed Day | No | 07:00 | 07:00 - 07:59 | Morning | 38,0 | 57  | 131,6  | 131,6 | 19,15 | 550,47 | 165,43 |
| 2019/06/26 | CH2206 | Male | Three y/o | Control | Control | Feed Day | No | 07:00 | 07:00 - 07:59 | Morning | 37,9 | 82  | 22,4   | 22,4  | 19,05 | 579,19 | 104,19 |
| 2019/06/26 | CH2205 | Male | Three y/o | Control | Control | Feed Day | No | 07:05 | 07:00 - 07:59 | Morning | 38,0 | 95  | 147,4  | 147,4 | 19,15 | 590,14 | 169,40 |
| 2019/06/26 | CH2206 | Male | Three y/o | Control | Control | Feed Day | No | 07:05 | 07:00 - 07:59 | Morning | 37,5 | 150 | 43,8   | 43,8  | 18,65 | 621,86 | 127,22 |
| 2019/06/26 | CH2205 | Male | Three y/o | Control | Control | Feed Day | No | 07:10 | 07:00 - 07:59 | Morning | 38,0 | 107 | 204,8  | 204,8 | 19,15 | 598,73 | 180,95 |
| 2019/06/26 | CH2206 | Male | Three y/o | Control | Control | Feed Day | No | 07:10 | 07:00 - 07:59 | Morning | 37,7 | 109 | 174,0  | 174,0 | 18,85 | 600,04 | 175,22 |
| 2019/06/26 | CH2205 | Male | Three y/o | Control | Control | Feed Day | No | 07:15 | 07:00 - 07:59 | Morning | 38,0 | 112 | 130,0  | 130,0 | 19,15 | 601,96 | 165,01 |
| 2019/06/26 | CH2206 | Male | Three y/o | Control | Control | Feed Day | No | 07:15 | 07:00 - 07:59 | Morning | 37,7 | 126 | 169,0  | 169,0 | 18,85 | 610,14 | 174,20 |
| 2019/06/26 | CH2205 | Male | Three y/o | Control | Control | Feed Day | No | 07:20 | 07:00 - 07:59 | Morning | 37,9 | 57  | 289,2  | 289,2 | 19,05 | 550,47 | 193,12 |
| 2019/06/26 | CH2206 | Male | Three y/o | Control | Control | Feed Day | No | 07:20 | 07:00 - 07:59 | Morning | 37,7 | 145 | 92,4   | 92,4  | 18,85 | 619,62 | 153,09 |
| 2019/06/26 | CH2205 | Male | Three y/o | Control | Control | Feed Day | No | 07:25 | 07:00 - 07:59 | Morning | 38,0 |     | 283,8  | 283,8 | 19,15 |        | 192,46 |
| 2019/06/26 | CH2206 | Male | Three y/o | Control | Control | Feed Day | No | 07:25 | 07:00 - 07:59 | Morning | 37,9 | 145 | 139,0  | 139,0 | 19,05 | 619,62 | 167,35 |
| 2019/06/26 | CH2205 | Male | Three y/o | Control | Control | Feed Day | No | 07:30 | 07:00 - 07:59 | Morning | 38,0 |     | 835,8  |       | 19,15 |        |        |



|            |        |      |           |         |         |          |    |       |               |              |      |     |       |       |       |        |        |
|------------|--------|------|-----------|---------|---------|----------|----|-------|---------------|--------------|------|-----|-------|-------|-------|--------|--------|
| 2019/06/26 | CH2206 | Male | Three y/o | Control | Control | Feed Day | No | 07:30 | 07:00 - 07:59 | Morning      | 37,9 | 167 | 23,6  | 23,6  | 19,05 | 628,84 | 105,97 |
| 2019/06/26 | CH2205 | Male | Three y/o | Control | Control | Feed Day | No | 07:35 | 07:00 - 07:59 | Morning      | 38,0 | 103 | 207,0 | 207,0 | 19,15 | 596,00 | 181,33 |
| 2019/06/26 | CH2206 | Male | Three y/o | Control | Control | Feed Day | No | 07:35 | 07:00 - 07:59 | Morning      | 38,0 | 72  | 83,4  | 83,4  | 19,15 | 569,20 | 149,52 |
| 2019/06/26 | CH2205 | Male | Three y/o | Control | Control | Feed Day | No | 07:40 | 07:00 - 07:59 | Morning      | 38,0 | 66  | 21,8  | 21,8  | 19,15 | 562,34 | 103,26 |
| 2019/06/26 | CH2206 | Male | Three y/o | Control | Control | Feed Day | No | 07:40 | 07:00 - 07:59 | Morning      | 37,8 | 119 | 190,6 | 190,6 | 18,95 | 606,20 | 178,43 |
| 2019/06/26 | CH2205 | Male | Three y/o | Control | Control | Feed Day | No | 07:45 | 07:00 - 07:59 | Morning      | 37,6 | 79  | 53,0  | 53,0  | 18,75 | 576,36 | 133,80 |
| 2019/06/26 | CH2206 | Male | Three y/o | Control | Control | Feed Day | No | 07:45 | 07:00 - 07:59 | Morning      | 37,8 |     | 397,6 | 397,6 | 18,95 |        | 204,40 |
| 2019/06/26 | CH2205 | Male | Three y/o | Control | Control | Feed Day | No | 07:50 | 07:00 - 07:59 | Morning      | 37,7 | 53  | 154,0 | 154,0 | 18,85 | 544,43 | 170,94 |
| 2019/06/26 | CH2206 | Male | Three y/o | Control | Control | Feed Day | No | 07:50 | 07:00 - 07:59 | Morning      | 37,9 | 129 | 197,4 | 197,4 | 19,05 | 611,75 | 179,66 |
| 2019/06/26 | CH2205 | Male | Three y/o | Control | Control | Feed Day | No | 07:55 | 07:00 - 07:59 | Morning      | 37,7 | 57  | 133,8 | 133,8 | 18,85 | 550,47 | 166,01 |
| 2019/06/26 | CH2206 | Male | Three y/o | Control | Control | Feed Day | No | 07:55 | 07:00 - 07:59 | Morning      | 37,9 | 197 | 57,2  | 57,2  | 19,05 | 639,25 | 136,44 |
| 2019/06/26 | CH2205 | Male | Three y/o | Control | Control | Feed Day | No | 08:00 | 08:00 - 08:59 | Late Morning | 37,7 | 115 | 105,6 | 105,6 | 18,85 | 603,82 | 157,74 |
| 2019/06/26 | CH2206 | Male | Three y/o | Control | Control | Feed Day | No | 08:00 | 08:00 - 08:59 | Late Morning | 37,8 | 109 | 61,4  | 61,4  | 18,95 | 600,04 | 138,89 |
| 2019/06/26 | CH2205 | Male | Three y/o | Control | Control | Feed Day | No | 08:05 | 08:00 - 08:59 | Late Morning | 37,7 |     | 117,4 | 117,4 | 18,85 |        | 161,44 |
| 2019/06/26 | CH2206 | Male | Three y/o | Control | Control | Feed Day | No | 08:05 | 08:00 - 08:59 | Late Morning | 37,5 | 74  | 1,6   | 1,6   | 18,65 | 571,33 | 15,48  |
| 2019/06/26 | CH2205 | Male | Three y/o | Control | Control | Feed Day | No | 08:10 | 08:00 - 08:59 | Late Morning | 37,7 | 100 | 242,8 | 242,8 | 18,85 | 593,87 | 186,95 |
| 2019/06/26 | CH2206 | Male | Three y/o | Control | Control | Feed Day | No | 08:10 | 08:00 - 08:59 | Late Morning | 37,2 | 75  | 4,4   | 4,4   | 18,36 | 572,36 | 49,12  |
| 2019/06/26 | CH2205 | Male | Three y/o | Control | Control | Feed Day | No | 08:15 | 08:00 - 08:59 | Late Morning | 37,7 |     | 176,2 | 176,2 | 18,85 |        | 175,67 |
| 2019/06/26 | CH2206 | Male | Three y/o | Control | Control | Feed Day | No | 08:15 | 08:00 - 08:59 | Late Morning | 36,9 | 72  | 24,2  | 24,2  | 18,06 | 569,20 | 106,83 |
| 2019/06/26 | CH2205 | Male | Three y/o | Control | Control | Feed Day | No | 08:20 | 08:00 - 08:59 | Late Morning | 37,6 | 188 | 29,2  | 29,2  | 18,75 | 636,34 | 113,27 |
| 2019/06/26 | CH2206 | Male | Three y/o | Control | Control | Feed Day | No | 08:20 | 08:00 - 08:59 | Late Morning | 36,5 | 78  | 30,4  | 30,4  | 17,67 | 575,38 | 114,65 |
| 2019/06/26 | CH2205 | Male | Three y/o | Control | Control | Feed Day | No | 08:25 | 08:00 - 08:59 | Late Morning | 37,5 | 81  | 28,8  | 28,8  | 18,65 | 578,26 | 112,79 |
| 2019/06/26 | CH2206 | Male | Three y/o | Control | Control | Feed Day | No | 08:25 | 08:00 - 08:59 | Late Morning | 36,4 | 115 | 29,8  | 29,8  | 17,57 | 603,82 | 113,97 |
| 2019/06/26 | CH2205 | Male | Three y/o | Control | Control | Feed Day | No | 08:30 | 08:00 - 08:59 | Late Morning | 37,6 | 89  | 110,0 | 110,0 | 18,75 | 585,33 | 159,17 |
| 2019/06/26 | CH2206 | Male | Three y/o | Control | Control | Feed Day | No | 08:30 | 08:00 - 08:59 | Late Morning | 36,6 | 42  | 32,0  | 32,0  | 17,77 | 524,42 | 116,41 |
| 2019/06/26 | CH2205 | Male | Three y/o | Control | Control | Feed Day | No | 08:35 | 08:00 - 08:59 | Late Morning | 37,6 | 70  | 5,2   | 5,2   | 18,75 | 566,99 | 54,72  |
| 2019/06/26 | CH2206 | Male | Three y/o | Control | Control | Feed Day | No | 08:35 | 08:00 - 08:59 | Late Morning | 36,6 | 51  | 40,4  | 40,4  | 17,77 | 541,20 | 124,43 |
| 2019/06/26 | CH2205 | Male | Three y/o | Control | Control | Feed Day | No | 08:40 | 08:00 - 08:59 | Late Morning | 37,3 |     | 5,2   | 5,2   | 18,46 |        | 54,72  |
| 2019/06/26 | CH2206 | Male | Three y/o | Control | Control | Feed Day | No | 08:40 | 08:00 - 08:59 | Late Morning | 36,4 | 70  | 34,6  | 34,6  | 17,57 | 566,99 | 119,10 |
| 2019/06/26 | CH2205 | Male | Three y/o | Control | Control | Feed Day | No | 08:45 | 08:00 - 08:59 | Late Morning | 37,0 |     | 21,4  | 21,4  | 18,16 |        | 102,63 |
| 2019/06/26 | CH2206 | Male | Three y/o | Control | Control | Feed Day | No | 08:45 | 08:00 - 08:59 | Late Morning | 36,4 | 74  | 35,8  | 35,8  | 17,57 | 571,33 | 120,27 |
| 2019/06/26 | CH2205 | Male | Three y/o | Control | Control | Feed Day | No | 08:50 | 08:00 - 08:59 | Late Morning | 37,1 | 61  | 12,6  | 12,6  | 18,26 | 556,01 | 84,59  |
| 2019/06/26 | CH2206 | Male | Three y/o | Control | Control | Feed Day | No | 08:50 | 08:00 - 08:59 | Late Morning | 36,4 | 64  | 42,6  | 42,6  | 17,57 | 559,88 | 126,26 |
| 2019/06/26 | CH2205 | Male | Three y/o | Control | Control | Feed Day | No | 08:55 | 08:00 - 08:59 | Late Morning | 37,2 | 55  | 11,8  | 11,8  | 18,36 | 547,52 | 82,36  |
| 2019/06/26 | CH2206 | Male | Three y/o | Control | Control | Feed Day | No | 08:55 | 08:00 - 08:59 | Late Morning | 36,4 | 43  | 54,2  | 54,2  | 17,57 | 526,50 | 134,57 |
| 2019/06/26 | CH2205 | Male | Three y/o | Control | Control | Feed Day | No | 09:00 | 09:00 - 09:59 | Late Morning | 37,3 | 77  | 11,4  | 11,4  | 18,46 | 574,39 | 81,19  |
| 2019/06/26 | CH2206 | Male | Three y/o | Control | Control | Feed Day | No | 09:00 | 09:00 - 09:59 | Late Morning | 36,6 | 48  | 51,0  | 51,0  | 17,77 | 536,04 | 132,47 |
| 2019/06/26 | CH2205 | Male | Three y/o | Control | Control | Feed Day | No | 09:05 | 09:00 - 09:59 | Late Morning | 37,3 | 49  | 11,0  | 11,0  | 18,46 | 537,80 | 79,98  |
| 2019/06/26 | CH2206 | Male | Three y/o | Control | Control | Feed Day | No | 09:05 | 09:00 - 09:59 | Late Morning | 36,7 | 50  | 48,0  | 48,0  | 17,87 | 539,52 | 130,38 |
| 2019/06/26 | CH2205 | Male | Three y/o | Control | Control | Feed Day | No | 09:10 | 09:00 - 09:59 | Late Morning | 37,3 | 46  | 5,2   | 5,2   | 18,46 | 532,38 | 54,72  |
| 2019/06/26 | CH2206 | Male | Three y/o | Control | Control | Feed Day | No | 09:10 | 09:00 - 09:59 | Late Morning | 36,8 | 56  | 42,2  | 42,2  | 17,96 | 549,01 | 125,93 |
| 2019/06/26 | CH2205 | Male | Three y/o | Control | Control | Feed Day | No | 09:15 | 09:00 - 09:59 | Late Morning | 37,3 | 46  | 5,4   | 5,4   | 18,46 | 532,38 | 55,99  |
| 2019/06/26 | CH2206 | Male | Three y/o | Control | Control | Feed Day | No | 09:15 | 09:00 - 09:59 | Late Morning | 37,0 | 50  | 51,2  | 51,2  | 18,16 | 539,52 | 132,61 |
| 2019/06/26 | CH2205 | Male | Three y/o | Control | Control | Feed Day | No | 09:20 | 09:00 - 09:59 | Late Morning | 37,2 | 67  | 7,8   | 7,8   | 18,36 | 563,53 | 68,36  |
| 2019/06/26 | CH2206 | Male | Three y/o | Control | Control | Feed Day | No | 09:20 | 09:00 - 09:59 | Late Morning | 37,0 | 79  | 41,2  | 41,2  | 18,16 | 576,36 | 125,11 |
| 2019/06/26 | CH2205 | Male | Three y/o | Control | Control | Feed Day | No | 09:25 | 09:00 - 09:59 | Late Morning | 37,2 | 60  | 7,2   | 7,2   | 18,36 | 554,67 | 65,66  |
| 2019/06/26 | CH2206 | Male | Three y/o | Control | Control | Feed Day | No | 09:25 | 09:00 - 09:59 | Late Morning | 37,1 | 58  | 31,2  | 31,2  | 18,26 | 551,90 | 115,54 |
| 2019/06/26 | CH2205 | Male | Three y/o | Control | Control | Feed Day | No | 09:30 | 09:00 - 09:59 | Late Morning | 37,3 | 82  | 40,6  | 40,6  | 18,46 | 579,19 | 124,60 |
| 2019/06/26 | CH2206 | Male | Three y/o | Control | Control | Feed Day | No | 09:30 | 09:00 - 09:59 | Late Morning | 37,2 | 94  | 76,4  | 76,4  | 18,36 | 589,37 | 146,48 |
| 2019/06/26 | CH2205 | Male | Three y/o | Control | Control | Feed Day | No | 09:35 | 09:00 - 09:59 | Late Morning | 37,3 | 94  | 46,2  | 46,2  | 18,46 | 589,37 | 129,06 |
| 2019/06/26 | CH2206 | Male | Three y/o | Control | Control | Feed Day | No | 09:35 | 09:00 - 09:59 | Late Morning | 37,4 | 147 | 175,0 | 175,0 | 18,55 | 620,52 | 175,43 |
| 2019/06/26 | CH2205 | Male | Three y/o | Control | Control | Feed Day | No | 09:40 | 09:00 - 09:59 | Late Morning | 37,3 |     | 130,6 | 130,6 | 18,46 |        | 165,17 |
| 2019/06/26 | CH2206 | Male | Three y/o | Control | Control | Feed Day | No | 09:40 | 09:00 - 09:59 | Late Morning | 37,5 | 105 | 81,8  | 81,8  | 18,65 | 597,38 | 148,85 |
| 2019/06/26 | CH2205 | Male | Three y/o | Control | Control | Feed Day | No | 09:45 | 09:00 - 09:59 | Late Morning | 37,3 | 80  | 36,6  | 36,6  | 18,46 | 577,31 | 121,03 |
| 2019/06/26 | CH2206 | Male | Three y/o | Control | Control | Feed Day | No | 09:45 | 09:00 - 09:59 | Late Morning | 37,5 | 120 | 104,0 | 104,0 | 18,65 | 606,78 | 157,21 |
| 2019/06/26 | CH2205 | Male | Three y/o | Control | Control | Feed Day | No | 09:50 | 09:00 - 09:59 | Late Morning | 37,4 | 78  | 41,8  | 41,8  | 18,55 | 575,38 | 125,60 |
| 2019/06/26 | CH2206 | Male | Three y/o | Control | Control | Feed Day | No | 09:50 | 09:00 - 09:59 | Late Morning | 37,7 |     | 63,8  | 63,8  | 18,85 |        | 140,22 |
| 2019/06/26 | CH2205 | Male | Three y/o | Control | Control | Feed Day | No | 09:55 | 09:00 - 09:59 | Late Morning | 37,5 | 180 | 49,0  | 49,0  | 18,65 | 633,61 | 131,09 |
| 2019/06/26 | CH2206 | Male | Three y/o | Control | Control | Feed Day | No | 09:55 | 09:00 - 09:59 | Late Morning | 37,7 | 92  | 70,0  | 70,0  | 18,85 | 587,78 | 143,44 |
| 2019/06/26 | CH2205 | Male | Three y/o | Control | Control | Feed Day | No | 10:00 | 10:00 - 10:59 | Late Morning | 37,5 | 106 | 124,2 | 124,2 | 18,65 | 598,06 | 163,41 |
| 2019/06/26 | CH2206 | Male | Three y/o | Control | Control | Feed Day | No | 10:00 | 10:00 - 10:59 | Late Morning | 37,7 | 73  | 19,6  | 19,6  | 18,85 | 570,27 | 99,63  |
| 2019/06/26 | CH2205 | Male | Three y/o | Control | Control | Feed Day | No | 10:05 | 10:00 - 10:59 | Late Morning | 37,6 | 90  | 40,2  | 40,2  | 18,75 | 586,16 | 124,26 |
| 2019/06/26 | CH2206 | Male | Three y/o | Control | Control | Feed Day | No | 10:05 | 10:00 - 10:59 | Late Morning | 37,7 | 112 | 177,2 | 177,2 | 18,85 | 601,96 | 175,86 |
| 2019/06/26 | CH2205 | Male | Three y/o | Control | Control | Feed Day | No | 10:10 | 10:00 - 10:59 | Late Morning | 37,6 | 80  | 19,8  | 19,8  | 18,75 | 577,31 | 99,97  |
| 2019/06/26 | CH2206 | Male | Three y/o | Control | Control | Feed Day | No | 10:10 | 10:00 - 10:59 | Late Morning | 37,8 | 91  | 18,8  | 18,8  | 18,95 | 586,98 | 98,20  |
| 2019/06/26 | CH2205 | Male | Three y/o | Control | Control | Feed Day | No | 10:15 | 10:00 - 10:59 | Late Morning | 37,6 | 103 | 11,8  | 11,8  | 18,75 | 596,00 | 82,36  |
| 2019/06/26 | CH2206 | Male | Three y/o | Control | Control | Feed Day | No | 10:15 | 10:00 - 10:59 | Late Morning | 37,8 | 120 | 121,2 | 121,2 | 18,95 | 606,78 | 162,56 |
| 2019/06/26 | CH2205 | Male | Three y/o | Control | Control | Feed Day | No | 10:20 | 10:00 - 10:59 | Late Morning | 37,6 | 79  | 12,2  | 12,2  | 18,75 | 576,36 | 83,49  |
| 2019/06/26 | CH2206 | Male | Three y/o | Control | Control | Feed Day | No | 10:20 | 10:00 - 10:59 | Late Morning | 37,8 | 66  | 72,0  | 72,0  | 18,95 | 562,34 | 144,42 |
| 2019/06/26 | CH2205 | Male | Three y/o | Control | Control | Feed Day | No | 10:25 | 10:00 - 10:59 | Late Morning | 37,6 | 77  | 14,0  | 14,0  | 18,75 | 574,39 | 88,17  |



|            |        |      |           |         |         |          |     |       |               |              |      |     |       |       |       |        |        |
|------------|--------|------|-----------|---------|---------|----------|-----|-------|---------------|--------------|------|-----|-------|-------|-------|--------|--------|
| 2019/06/26 | CH2206 | Male | Three y/o | Control | Control | Feed Day | No  | 10:25 | 10:00 - 10:59 | Late Morning | 37,8 | 69  | 56,0  | 56,0  | 18,95 | 565,86 | 135,70 |
| 2019/06/26 | CH2205 | Male | Three y/o | Control | Control | Feed Day | Yes | 10:30 | 10:00 - 10:59 | Late Morning | 37,6 | 49  | 13,2  | 13,2  | 18,75 | 537,80 | 86,17  |
| 2019/06/26 | CH2206 | Male | Three y/o | Control | Control | Feed Day | Yes | 10:30 | 10:00 - 10:59 | Late Morning | 37,9 | 90  | 49,2  | 49,2  | 19,05 | 586,16 | 131,23 |
| 2019/06/26 | CH2205 | Male | Three y/o | Control | Control | Feed Day | Yes | 10:35 | 10:00 - 10:59 | Late Morning | 37,6 | 62  | 40,0  | 40,0  | 18,75 | 557,33 | 124,09 |
| 2019/06/26 | CH2206 | Male | Three y/o | Control | Control | Feed Day | Yes | 10:35 | 10:00 - 10:59 | Late Morning | 37,8 | 66  | 83,2  | 83,2  | 18,95 | 562,34 | 149,44 |
| 2019/06/26 | CH2205 | Male | Three y/o | Control | Control | Feed Day | Yes | 10:40 | 10:00 - 10:59 | Late Morning | 37,7 | 106 | 13,8  | 13,8  | 18,85 | 598,06 | 87,68  |
| 2019/06/26 | CH2206 | Male | Three y/o | Control | Control | Feed Day | Yes | 10:40 | 10:00 - 10:59 | Late Morning | 37,9 | 108 | 34,0  | 34,0  | 19,05 | 599,39 | 118,49 |
| 2019/06/26 | CH2205 | Male | Three y/o | Control | Control | Feed Day | Yes | 10:45 | 10:00 - 10:59 | Late Morning | 37,7 | 57  | 4,6   | 4,6   | 18,85 | 550,47 | 50,61  |
| 2019/06/26 | CH2206 | Male | Three y/o | Control | Control | Feed Day | Yes | 10:45 | 10:00 - 10:59 | Late Morning | 37,8 | 76  | 46,2  | 46,2  | 18,95 | 573,39 | 129,06 |
| 2019/06/26 | CH2205 | Male | Three y/o | Control | Control | Feed Day | Yes | 10:50 | 10:00 - 10:59 | Late Morning | 37,7 | 61  | 4,6   | 4,6   | 18,85 | 556,01 | 50,61  |
| 2019/06/26 | CH2206 | Male | Three y/o | Control | Control | Feed Day | Yes | 10:50 | 10:00 - 10:59 | Late Morning | 37,8 | 65  | 51,6  | 51,6  | 18,95 | 561,12 | 132,87 |
| 2019/06/26 | CH2205 | Male | Three y/o | Control | Control | Feed Day | Yes | 10:55 | 10:00 - 10:59 | Late Morning | 37,7 | 47  | 37,2  | 37,2  | 18,85 | 534,23 | 121,59 |
| 2019/06/26 | CH2206 | Male | Three y/o | Control | Control | Feed Day | Yes | 10:55 | 10:00 - 10:59 | Late Morning | 37,8 | 55  | 50,4  | 50,4  | 18,95 | 547,52 | 132,06 |
| 2019/06/26 | CH2205 | Male | Three y/o | Control | Control | Feed Day | Yes | 11:00 | 11:00 - 11:59 | Late Morning | 37,7 | 60  | 7,0   | 7,0   | 18,85 | 554,67 | 64,72  |
| 2019/06/26 | CH2206 | Male | Three y/o | Control | Control | Feed Day | Yes | 11:00 | 11:00 - 11:59 | Late Morning | 37,8 | 75  | 50,6  | 50,6  | 18,95 | 572,36 | 132,20 |
| 2019/06/26 | CH2205 | Male | Three y/o | Control | Control | Feed Day | Yes | 11:05 | 11:00 - 11:59 | Late Morning | 37,7 | 73  | 9,6   | 9,6   | 18,85 | 570,27 | 75,37  |
| 2019/06/26 | CH2206 | Male | Three y/o | Control | Control | Feed Day | Yes | 11:05 | 11:00 - 11:59 | Late Morning | 37,8 | 55  | 46,2  | 46,2  | 18,95 | 547,52 | 129,06 |
| 2019/06/26 | CH2205 | Male | Three y/o | Control | Control | Feed Day | Yes | 11:10 | 11:00 - 11:59 | Late Morning | 37,6 | 47  | 11,8  | 11,8  | 18,75 | 534,23 | 82,36  |
| 2019/06/26 | CH2206 | Male | Three y/o | Control | Control | Feed Day | Yes | 11:10 | 11:00 - 11:59 | Late Morning | 37,8 | 76  | 45,8  | 45,8  | 18,95 | 573,39 | 128,76 |
| 2019/06/26 | CH2205 | Male | Three y/o | Control | Control | Feed Day | Yes | 11:15 | 11:00 - 11:59 | Late Morning | 37,6 | 60  | 9,2   | 9,2   | 18,75 | 554,67 | 73,94  |
| 2019/06/26 | CH2206 | Male | Three y/o | Control | Control | Feed Day | Yes | 11:15 | 11:00 - 11:59 | Late Morning | 37,8 | 76  | 59,0  | 59,0  | 18,95 | 573,39 | 137,51 |
| 2019/06/26 | CH2205 | Male | Three y/o | Control | Control | Feed Day | Yes | 11:20 | 11:00 - 11:59 | Late Morning | 37,6 | 64  | 10,8  | 10,8  | 18,75 | 559,88 | 79,36  |
| 2019/06/26 | CH2206 | Male | Three y/o | Control | Control | Feed Day | Yes | 11:20 | 11:00 - 11:59 | Late Morning | 37,8 | 49  | 57,2  | 57,2  | 18,95 | 537,80 | 136,44 |
| 2019/06/26 | CH2205 | Male | Three y/o | Control | Control | Feed Day | Yes | 11:25 | 11:00 - 11:59 | Late Morning | 37,5 | 69  | 7,8   | 7,8   | 18,65 | 565,86 | 68,36  |
| 2019/06/26 | CH2206 | Male | Three y/o | Control | Control | Feed Day | Yes | 11:25 | 11:00 - 11:59 | Late Morning | 37,7 | 80  | 345,6 | 345,6 | 18,85 | 577,31 | 199,43 |
| 2019/06/26 | CH2205 | Male | Three y/o | Control | Control | Feed Day | No  | 11:30 | 11:00 - 11:59 | Late Morning | 37,5 | 68  | 10,0  | 10,0  | 18,65 | 564,71 | 76,76  |
| 2019/06/26 | CH2206 | Male | Three y/o | Control | Control | Feed Day | No  | 11:30 | 11:00 - 11:59 | Late Morning | 37,8 | 120 | 21,2  | 21,2  | 18,95 | 606,78 | 102,31 |
| 2019/06/26 | CH2205 | Male | Three y/o | Control | Control | Feed Day | No  | 11:35 | 11:00 - 11:59 | Late Morning | 37,5 | 68  | 98,6  | 98,6  | 18,65 | 564,71 | 155,35 |
| 2019/06/26 | CH2206 | Male | Three y/o | Control | Control | Feed Day | No  | 11:35 | 11:00 - 11:59 | Late Morning | 37,8 |     | 4,4   | 4,4   | 18,95 |        | 49,12  |
| 2019/06/26 | CH2205 | Male | Three y/o | Control | Control | Feed Day | No  | 11:40 | 11:00 - 11:59 | Late Morning | 37,6 | 96  | 45,6  | 45,6  | 18,75 | 590,91 | 128,61 |
| 2019/06/26 | CH2206 | Male | Three y/o | Control | Control | Feed Day | No  | 11:40 | 11:00 - 11:59 | Late Morning | 37,8 | 44  | 142,0 | 142,0 | 18,95 | 528,51 | 168,10 |
| 2019/06/26 | CH2205 | Male | Three y/o | Control | Control | Feed Day | No  | 11:45 | 11:00 - 11:59 | Late Morning | 37,5 | 156 | 61,8  | 61,8  | 18,65 | 624,43 | 139,12 |
| 2019/06/26 | CH2206 | Male | Three y/o | Control | Control | Feed Day | No  | 11:45 | 11:00 - 11:59 | Late Morning | 37,8 | 94  | 332,8 | 332,8 | 18,95 | 589,37 | 198,09 |
| 2019/06/26 | CH2205 | Male | Three y/o | Control | Control | Feed Day | No  | 11:50 | 11:00 - 11:59 | Late Morning | 37,6 | 73  | 53,4  | 53,4  | 18,75 | 570,27 | 134,06 |
| 2019/06/26 | CH2206 | Male | Three y/o | Control | Control | Feed Day | No  | 11:50 | 11:00 - 11:59 | Late Morning | 37,8 | 80  | 22,2  | 22,2  | 18,95 | 577,31 | 103,88 |
| 2019/06/26 | CH2205 | Male | Three y/o | Control | Control | Feed Day | No  | 11:55 | 11:00 - 11:59 | Late Morning | 37,6 | 128 | 66,2  | 66,2  | 18,75 | 611,22 | 141,50 |
| 2019/06/26 | CH2206 | Male | Three y/o | Control | Control | Feed Day | No  | 11:55 | 11:00 - 11:59 | Late Morning | 37,8 |     | 41,6  | 41,6  | 18,95 |        | 125,44 |
| 2019/06/26 | CH2205 | Male | Three y/o | Control | Control | Feed Day | No  | 12:00 | 12:00 - 12:59 | Afternoon    | 37,6 | 42  | 27,2  | 27,2  | 18,75 | 524,42 | 110,83 |
| 2019/06/26 | CH2206 | Male | Three y/o | Control | Control | Feed Day | No  | 12:00 | 12:00 - 12:59 | Afternoon    | 37,8 | 117 | 37,4  | 37,4  | 18,95 | 605,02 | 121,77 |
| 2019/06/26 | CH2205 | Male | Three y/o | Control | Control | Feed Day | No  | 12:05 | 12:00 - 12:59 | Afternoon    | 37,6 | 80  | 7,6   | 7,6   | 18,75 | 577,31 | 67,49  |
| 2019/06/26 | CH2206 | Male | Three y/o | Control | Control | Feed Day | No  | 12:05 | 12:00 - 12:59 | Afternoon    | 37,8 | 102 | 88,4  | 88,4  | 18,95 | 595,30 | 151,55 |
| 2019/06/26 | CH2205 | Male | Three y/o | Control | Control | Feed Day | No  | 12:10 | 12:00 - 12:59 | Afternoon    | 37,6 | 84  | 198,6 | 198,6 | 18,75 | 581,01 | 179,87 |
| 2019/06/26 | CH2206 | Male | Three y/o | Control | Control | Feed Day | No  | 12:10 | 12:00 - 12:59 | Afternoon    | 37,9 | 194 | 85,0  | 85,0  | 19,05 | 638,30 | 150,18 |
| 2019/06/26 | CH2205 | Male | Three y/o | Control | Control | Feed Day | No  | 12:15 | 12:00 - 12:59 | Afternoon    | 37,7 | 101 | 40,4  | 40,4  | 18,85 | 594,59 | 124,43 |
| 2019/06/26 | CH2206 | Male | Three y/o | Control | Control | Feed Day | No  | 12:15 | 12:00 - 12:59 | Afternoon    | 37,9 | 109 | 89,8  | 89,8  | 19,05 | 600,04 | 152,10 |
| 2019/06/26 | CH2205 | Male | Three y/o | Control | Control | Feed Day | No  | 12:20 | 12:00 - 12:59 | Afternoon    | 37,7 |     | 57,0  | 57,0  | 18,85 |        | 136,32 |
| 2019/06/26 | CH2206 | Male | Three y/o | Control | Control | Feed Day | No  | 12:20 | 12:00 - 12:59 | Afternoon    | 38,0 | 194 | 68,0  | 68,0  | 19,15 | 638,30 | 142,43 |
| 2019/06/26 | CH2205 | Male | Three y/o | Control | Control | Feed Day | No  | 12:25 | 12:00 - 12:59 | Afternoon    | 37,8 | 77  | 33,0  | 33,0  | 18,95 | 574,39 | 117,47 |
| 2019/06/26 | CH2206 | Male | Three y/o | Control | Control | Feed Day | No  | 12:25 | 12:00 - 12:59 | Afternoon    | 38,1 | 177 | 34,2  | 34,2  | 19,26 | 632,55 | 118,70 |
| 2019/06/26 | CH2205 | Male | Three y/o | Control | Control | Feed Day | No  | 12:30 | 12:00 - 12:59 | Afternoon    | 37,7 | 98  | 89,0  | 89,0  | 18,85 | 592,41 | 151,78 |
| 2019/06/26 | CH2206 | Male | Three y/o | Control | Control | Feed Day | No  | 12:30 | 12:00 - 12:59 | Afternoon    | 38,0 | 103 | 22,8  | 22,8  | 19,15 | 596,00 | 104,79 |
| 2019/06/26 | CH2205 | Male | Three y/o | Control | Control | Feed Day | No  | 12:35 | 12:00 - 12:59 | Afternoon    | 37,9 | 169 | 108,0 | 108,0 | 19,05 | 629,60 | 158,53 |
| 2019/06/26 | CH2206 | Male | Three y/o | Control | Control | Feed Day | No  | 12:35 | 12:00 - 12:59 | Afternoon    | 38,0 | 46  | 10,8  | 10,8  | 19,15 | 532,38 | 79,36  |
| 2019/06/26 | CH2205 | Male | Three y/o | Control | Control | Feed Day | No  | 12:40 | 12:00 - 12:59 | Afternoon    | 37,9 | 78  | 242,2 | 242,2 | 19,05 | 575,38 | 186,86 |
| 2019/06/26 | CH2206 | Male | Three y/o | Control | Control | Feed Day | No  | 12:40 | 12:00 - 12:59 | Afternoon    | 38,0 | 88  | 16,8  | 16,8  | 19,15 | 584,49 | 94,37  |
| 2019/06/26 | CH2205 | Male | Three y/o | Control | Control | Feed Day | No  | 12:45 | 12:00 - 12:59 | Afternoon    | 38,0 |     | 112,8 | 112,8 | 19,15 |        | 160,05 |
| 2019/06/26 | CH2206 | Male | Three y/o | Control | Control | Feed Day | No  | 12:45 | 12:00 - 12:59 | Afternoon    | 38,0 | 88  | 31,0  | 31,0  | 19,15 | 584,49 | 115,32 |
| 2019/06/26 | CH2205 | Male | Three y/o | Control | Control | Feed Day | No  | 12:50 | 12:00 - 12:59 | Afternoon    | 38,0 |     | 71,2  | 71,2  | 19,15 |        | 144,03 |
| 2019/06/26 | CH2206 | Male | Three y/o | Control | Control | Feed Day | No  | 12:50 | 12:00 - 12:59 | Afternoon    | 38,0 | 67  | 42,6  | 42,6  | 19,15 | 563,53 | 126,26 |
| 2019/06/26 | CH2205 | Male | Three y/o | Control | Control | Feed Day | No  | 12:55 | 12:00 - 12:59 | Afternoon    | 38,0 | 62  | 147,2 | 147,2 | 19,15 | 557,33 | 169,36 |
| 2019/06/26 | CH2206 | Male | Three y/o | Control | Control | Feed Day | No  | 12:55 | 12:00 - 12:59 | Afternoon    | 38,0 | 78  | 50,8  | 50,8  | 19,15 | 575,38 | 132,33 |
| 2019/06/26 | CH2205 | Male | Three y/o | Control | Control | Feed Day | No  | 13:00 | 13:00 - 13:59 | Afternoon    | 37,9 |     | 100,0 | 100,0 | 19,05 |        | 155,84 |
| 2019/06/26 | CH2206 | Male | Three y/o | Control | Control | Feed Day | No  | 13:00 | 13:00 - 13:59 | Afternoon    | 38,0 | 77  | 25,4  | 25,4  | 19,15 | 574,39 | 108,49 |
| 2019/06/26 | CH2205 | Male | Three y/o | Control | Control | Feed Day | No  | 13:05 | 13:00 - 13:59 | Afternoon    | 38,0 | 104 | 11,0  | 11,0  | 19,15 | 596,69 | 79,98  |
| 2019/06/26 | CH2206 | Male | Three y/o | Control | Control | Feed Day | No  | 13:05 | 13:00 - 13:59 | Afternoon    | 38,0 | 76  | 41,0  | 41,0  | 19,15 | 573,39 | 124,94 |
| 2019/06/26 | CH2205 | Male | Three y/o | Control | Control | Feed Day | No  | 13:10 | 13:00 - 13:59 | Afternoon    | 37,9 | 59  | 5,4   | 5,4   | 19,05 | 553,30 | 55,99  |
| 2019/06/26 | CH2206 | Male | Three y/o | Control | Control | Feed Day | No  | 13:10 | 13:00 - 13:59 | Afternoon    | 37,9 | 78  | 43,6  | 43,6  | 19,05 | 575,38 | 127,06 |
| 2019/06/26 | CH2205 | Male | Three y/o | Control | Control | Feed Day | No  | 13:15 | 13:00 - 13:59 | Afternoon    | 38,0 | 68  | 4,6   | 4,6   | 19,15 | 564,71 | 50,61  |
| 2019/06/26 | CH2206 | Male | Three y/o | Control | Control | Feed Day | No  | 13:15 | 13:00 - 13:59 | Afternoon    | 37,9 | 68  | 42,0  | 42,0  | 19,05 | 564,71 | 125,77 |
| 2019/06/26 | CH2205 | Male | Three y/o | Control | Control | Feed Day | No  | 13:20 | 13:00 - 13:59 | Afternoon    | 38,0 | 53  | 6,0   | 6,0   | 19,15 | 544,43 | 59,53  |



|            |        |      |           |         |         |          |    |       |               |           |      |     |      |      |       |        |        |
|------------|--------|------|-----------|---------|---------|----------|----|-------|---------------|-----------|------|-----|------|------|-------|--------|--------|
| 2019/06/26 | CH2206 | Male | Three y/o | Control | Control | Feed Day | No | 13:20 | 13:00 - 13:59 | Afternoon | 37,9 | 77  | 66,6 | 66,6 | 19,05 | 574,39 | 141,71 |
| 2019/06/26 | CH2205 | Male | Three y/o | Control | Control | Feed Day | No | 13:25 | 13:00 - 13:59 | Afternoon | 38,0 | 57  | 4,8  | 4,8  | 19,15 | 550,47 | 52,04  |
| 2019/06/26 | CH2206 | Male | Three y/o | Control | Control | Feed Day | No | 13:25 | 13:00 - 13:59 | Afternoon | 37,9 | 80  | 53,0 | 53,0 | 19,05 | 577,31 | 133,80 |
| 2019/06/26 | CH2205 | Male | Three y/o | Control | Control | Feed Day | No | 13:30 | 13:00 - 13:59 | Afternoon | 37,9 | 66  | 45,4 | 45,4 | 19,05 | 562,34 | 128,45 |
| 2019/06/26 | CH2206 | Male | Three y/o | Control | Control | Feed Day | No | 13:30 | 13:00 - 13:59 | Afternoon | 37,9 | 85  | 52,8 | 52,8 | 19,05 | 581,90 | 133,67 |
| 2019/06/26 | CH2205 | Male | Three y/o | Control | Control | Feed Day | No | 13:35 | 13:00 - 13:59 | Afternoon | 37,9 | 69  | 17,4 | 17,4 | 19,05 | 565,86 | 95,56  |
| 2019/06/26 | CH2206 | Male | Three y/o | Control | Control | Feed Day | No | 13:35 | 13:00 - 13:59 | Afternoon | 37,9 | 76  | 49,0 | 49,0 | 19,05 | 573,39 | 131,09 |
| 2019/06/26 | CH2205 | Male | Three y/o | Control | Control | Feed Day | No | 13:40 | 13:00 - 13:59 | Afternoon | 37,9 |     | 16,4 | 16,4 | 19,05 |        | 93,55  |
| 2019/06/26 | CH2206 | Male | Three y/o | Control | Control | Feed Day | No | 13:40 | 13:00 - 13:59 | Afternoon | 37,9 | 67  | 47,4 | 47,4 | 19,05 | 563,53 | 129,94 |
| 2019/06/26 | CH2205 | Male | Three y/o | Control | Control | Feed Day | No | 13:45 | 13:00 - 13:59 | Afternoon | 37,9 | 61  | 8,0  | 8,0  | 19,05 | 556,01 | 69,22  |
| 2019/06/26 | CH2206 | Male | Three y/o | Control | Control | Feed Day | No | 13:45 | 13:00 - 13:59 | Afternoon | 38,0 | 89  | 55,6 | 55,6 | 19,15 | 585,33 | 135,46 |
| 2019/06/26 | CH2205 | Male | Three y/o | Control | Control | Feed Day | No | 13:50 | 13:00 - 13:59 | Afternoon | 37,9 | 119 | 23,0 | 23,0 | 19,05 | 606,20 | 105,09 |
| 2019/06/26 | CH2206 | Male | Three y/o | Control | Control | Feed Day | No | 13:50 | 13:00 - 13:59 | Afternoon | 38,0 | 70  | 40,0 | 40,0 | 19,15 | 566,99 | 124,09 |
| 2019/06/26 | CH2205 | Male | Three y/o | Control | Control | Feed Day | No | 13:55 | 13:00 - 13:59 | Afternoon | 37,7 |     | 13,4 | 13,4 | 18,85 |        | 86,68  |
| 2019/06/26 | CH2206 | Male | Three y/o | Control | Control | Feed Day | No | 13:55 | 13:00 - 13:59 | Afternoon | 38,0 | 77  | 33,8 | 33,8 | 19,15 | 574,39 | 118,29 |
| 2019/06/26 | CH2205 | Male | Three y/o | Control | Control | Feed Day | No | 14:00 | 14:00 - 14:59 | Afternoon | 37,7 | 67  | 11,0 | 11,0 | 18,85 | 563,53 | 79,98  |
| 2019/06/26 | CH2206 | Male | Three y/o | Control | Control | Feed Day | No | 14:00 | 14:00 - 14:59 | Afternoon | 38,1 | 89  | 37,0 | 37,0 | 19,26 | 585,33 | 121,40 |
| 2019/06/26 | CH2205 | Male | Three y/o | Control | Control | Feed Day | No | 14:05 | 14:00 - 14:59 | Afternoon | 37,7 | 80  | 19,6 | 19,6 | 18,85 | 577,31 | 99,63  |
| 2019/06/26 | CH2206 | Male | Three y/o | Control | Control | Feed Day | No | 14:05 | 14:00 - 14:59 | Afternoon | 38,1 | 90  | 39,4 | 39,4 | 19,26 | 586,16 | 123,57 |
| 2019/06/26 | CH2205 | Male | Three y/o | Control | Control | Feed Day | No | 14:10 | 14:00 - 14:59 | Afternoon | 37,7 | 54  | 19,6 | 19,6 | 18,85 | 545,99 | 99,63  |
| 2019/06/26 | CH2206 | Male | Three y/o | Control | Control | Feed Day | No | 14:10 | 14:00 - 14:59 | Afternoon | 38,0 | 98  | 33,8 | 33,8 | 19,15 | 592,41 | 118,29 |
| 2019/06/26 | CH2205 | Male | Three y/o | Control | Control | Feed Day | No | 14:15 | 14:00 - 14:59 | Afternoon | 37,7 | 76  | 21,4 | 21,4 | 18,85 | 573,39 | 102,63 |
| 2019/06/26 | CH2206 | Male | Three y/o | Control | Control | Feed Day | No | 14:15 | 14:00 - 14:59 | Afternoon | 38,0 | 90  | 35,6 | 35,6 | 19,15 | 586,16 | 120,08 |
| 2019/06/26 | CH2205 | Male | Three y/o | Control | Control | Feed Day | No | 14:20 | 14:00 - 14:59 | Afternoon | 37,7 | 66  | 16,8 | 16,8 | 18,85 | 562,34 | 94,37  |
| 2019/06/26 | CH2206 | Male | Three y/o | Control | Control | Feed Day | No | 14:20 | 14:00 - 14:59 | Afternoon | 38,0 | 137 | 45,2 | 45,2 | 19,15 | 612,83 | 128,30 |
| 2019/06/26 | CH2205 | Male | Three y/o | Control | Control | Feed Day | No | 14:25 | 14:00 - 14:59 | Afternoon | 37,7 | 78  | 22,8 | 22,8 | 18,85 | 575,38 | 104,79 |
| 2019/06/26 | CH2206 | Male | Three y/o | Control | Control | Feed Day | No | 14:25 | 14:00 - 14:59 | Afternoon | 38,0 | 46  | 57,2 | 57,2 | 19,15 | 532,38 | 136,44 |
| 2019/06/26 | CH2205 | Male | Three y/o | Control | Control | Feed Day | No | 14:30 | 14:00 - 14:59 | Afternoon | 37,7 |     | 26,4 | 26,4 | 18,85 |        | 109,81 |
| 2019/06/26 | CH2206 | Male | Three y/o | Control | Control | Feed Day | No | 14:30 | 14:00 - 14:59 | Afternoon | 38,0 | 87  | 41,0 | 41,0 | 19,15 | 583,64 | 124,94 |
| 2019/06/26 | CH2205 | Male | Three y/o | Control | Control | Feed Day | No | 14:35 | 14:00 - 14:59 | Afternoon | 37,9 | 70  | 3,0  | 3,0  | 19,05 | 566,99 | 36,34  |
| 2019/06/26 | CH2206 | Male | Three y/o | Control | Control | Feed Day | No | 14:35 | 14:00 - 14:59 | Afternoon | 38,0 | 75  | 51,8 | 51,8 | 19,15 | 572,36 | 133,01 |
| 2019/06/26 | CH2205 | Male | Three y/o | Control | Control | Feed Day | No | 14:40 | 14:00 - 14:59 | Afternoon | 37,9 | 64  | 2,4  | 2,4  | 19,05 | 559,88 | 28,91  |
| 2019/06/26 | CH2206 | Male | Three y/o | Control | Control | Feed Day | No | 14:40 | 14:00 - 14:59 | Afternoon | 38,1 | 76  | 36,6 | 36,6 | 19,26 | 573,39 | 121,03 |
| 2019/06/26 | CH2205 | Male | Three y/o | Control | Control | Feed Day | No | 14:45 | 14:00 - 14:59 | Afternoon | 38,0 | 57  | 4,2  | 4,2  | 19,15 | 550,47 | 47,57  |
| 2019/06/26 | CH2206 | Male | Three y/o | Control | Control | Feed Day | No | 14:45 | 14:00 - 14:59 | Afternoon | 38,1 | 75  | 26,4 | 26,4 | 19,26 | 572,36 | 109,81 |
| 2019/06/26 | CH2205 | Male | Three y/o | Control | Control | Feed Day | No | 14:50 | 14:00 - 14:59 | Afternoon | 38,0 | 70  | 5,2  | 5,2  | 19,15 | 566,99 | 54,72  |
| 2019/06/26 | CH2206 | Male | Three y/o | Control | Control | Feed Day | No | 14:50 | 14:00 - 14:59 | Afternoon | 38,1 |     | 16,8 | 16,8 | 19,26 |        | 94,37  |
| 2019/06/26 | CH2205 | Male | Three y/o | Control | Control | Feed Day | No | 14:55 | 14:00 - 14:59 | Afternoon | 38,0 | 76  | 58,6 | 58,6 | 19,15 | 573,39 | 137,28 |
| 2019/06/26 | CH2206 | Male | Three y/o | Control | Control | Feed Day | No | 14:55 | 14:00 - 14:59 | Afternoon | 38,1 | 121 | 89,8 | 89,8 | 19,26 | 607,35 | 152,10 |
| 2019/06/26 | CH2205 | Male | Three y/o | Control | Control | Feed Day | No | 15:00 | 15:00 - 15:59 | Afternoon | 38,1 | 115 | 6,6  | 6,6  | 19,26 | 603,82 | 62,73  |
| 2019/06/26 | CH2206 | Male | Three y/o | Control | Control | Feed Day | No | 15:00 | 15:00 - 15:59 | Afternoon | 38,1 | 86  | 49,6 | 49,6 | 19,26 | 582,77 | 131,51 |
| 2019/06/26 | CH2205 | Male | Three y/o | Control | Control | Feed Day | No | 15:05 | 15:00 - 15:59 | Afternoon | 38,1 | 69  | 2,6  | 2,6  | 19,26 | 565,86 | 31,57  |
| 2019/06/26 | CH2206 | Male | Three y/o | Control | Control | Feed Day | No | 15:05 | 15:00 - 15:59 | Afternoon | 38,1 | 74  | 51,6 | 51,6 | 19,26 | 571,33 | 132,87 |
| 2019/06/26 | CH2205 | Male | Three y/o | Control | Control | Feed Day | No | 15:10 | 15:00 - 15:59 | Afternoon | 38,1 | 60  | 4,2  | 4,2  | 19,26 | 554,67 | 47,57  |
| 2019/06/26 | CH2206 | Male | Three y/o | Control | Control | Feed Day | No | 15:10 | 15:00 - 15:59 | Afternoon | 38,1 | 86  | 49,0 | 49,0 | 19,26 | 582,77 | 131,09 |
| 2019/06/26 | CH2205 | Male | Three y/o | Control | Control | Feed Day | No | 15:15 | 15:00 - 15:59 | Afternoon | 38,1 | 69  | 2,2  | 2,2  | 19,26 | 565,86 | 26,02  |
| 2019/06/26 | CH2206 | Male | Three y/o | Control | Control | Feed Day | No | 15:15 | 15:00 - 15:59 | Afternoon | 38,1 | 63  | 45,2 | 45,2 | 19,26 | 558,62 | 128,30 |
| 2019/06/26 | CH2205 | Male | Three y/o | Control | Control | Feed Day | No | 15:20 | 15:00 - 15:59 | Afternoon | 38,1 | 72  | 4,0  | 4,0  | 19,26 | 569,20 | 45,94  |
| 2019/06/26 | CH2206 | Male | Three y/o | Control | Control | Feed Day | No | 15:20 | 15:00 - 15:59 | Afternoon | 38,1 | 79  | 45,8 | 45,8 | 19,26 | 576,36 | 128,76 |
| 2019/06/26 | CH2205 | Male | Three y/o | Control | Control | Feed Day | No | 15:25 | 15:00 - 15:59 | Afternoon | 38,1 | 80  | 4,0  | 4,0  | 19,26 | 577,31 | 45,94  |
| 2019/06/26 | CH2206 | Male | Three y/o | Control | Control | Feed Day | No | 15:25 | 15:00 - 15:59 | Afternoon | 38,1 | 87  | 43,6 | 43,6 | 19,26 | 583,64 | 127,06 |
| 2019/06/26 | CH2205 | Male | Three y/o | Control | Control | Feed Day | No | 15:30 | 15:00 - 15:59 | Afternoon | 38,2 | 72  | 6,2  | 6,2  | 19,36 | 569,20 | 60,63  |
| 2019/06/26 | CH2206 | Male | Three y/o | Control | Control | Feed Day | No | 15:30 | 15:00 - 15:59 | Afternoon | 38,1 | 74  | 50,2 | 50,2 | 19,26 | 571,33 | 131,92 |
| 2019/06/26 | CH2205 | Male | Three y/o | Control | Control | Feed Day | No | 15:35 | 15:00 - 15:59 | Afternoon | 38,2 | 72  | 14,6 | 14,6 | 19,36 | 569,20 | 89,59  |
| 2019/06/26 | CH2206 | Male | Three y/o | Control | Control | Feed Day | No | 15:35 | 15:00 - 15:59 | Afternoon | 38,2 | 77  | 44,0 | 44,0 | 19,36 | 574,39 | 127,37 |
| 2019/06/26 | CH2205 | Male | Three y/o | Control | Control | Feed Day | No | 15:40 | 15:00 - 15:59 | Afternoon | 38,3 | 72  | 9,8  | 9,8  | 19,46 | 569,20 | 76,07  |
| 2019/06/26 | CH2206 | Male | Three y/o | Control | Control | Feed Day | No | 15:40 | 15:00 - 15:59 | Afternoon | 38,2 | 78  | 43,8 | 43,8 | 19,36 | 575,38 | 127,22 |
| 2019/06/26 | CH2205 | Male | Three y/o | Control | Control | Feed Day | No | 15:45 | 15:00 - 15:59 | Afternoon | 38,3 | 91  | 3,0  | 3,0  | 19,46 | 586,98 | 36,34  |
| 2019/06/26 | CH2206 | Male | Three y/o | Control | Control | Feed Day | No | 15:45 | 15:00 - 15:59 | Afternoon | 38,2 | 77  | 42,2 | 42,2 | 19,36 | 574,39 | 125,93 |
| 2019/06/26 | CH2205 | Male | Three y/o | Control | Control | Feed Day | No | 15:50 | 15:00 - 15:59 | Afternoon | 38,3 | 73  | 4,0  | 4,0  | 19,46 | 570,27 | 45,94  |
| 2019/06/26 | CH2206 | Male | Three y/o | Control | Control | Feed Day | No | 15:50 | 15:00 - 15:59 | Afternoon | 38,2 | 69  | 51,0 | 51,0 | 19,36 | 565,86 | 132,47 |
| 2019/06/26 | CH2205 | Male | Three y/o | Control | Control | Feed Day | No | 15:55 | 15:00 - 15:59 | Afternoon | 38,3 | 89  | 1,8  | 1,8  | 19,46 | 585,33 | 19,38  |
| 2019/06/26 | CH2206 | Male | Three y/o | Control | Control | Feed Day | No | 15:55 | 15:00 - 15:59 | Afternoon | 38,2 | 86  | 41,8 | 41,8 | 19,36 | 582,77 | 125,60 |
| 2019/06/26 | CH2205 | Male | Three y/o | Control | Control | Feed Day | No | 16:00 | 16:00 - 16:59 | Evening   | 38,3 | 67  | 6,0  | 6,0  | 19,46 | 563,53 | 59,53  |
| 2019/06/26 | CH2206 | Male | Three y/o | Control | Control | Feed Day | No | 16:00 | 16:00 - 16:59 | Evening   | 38,2 |     | 22,4 | 22,4 | 19,36 |        | 104,19 |
| 2019/06/26 | CH2205 | Male | Three y/o | Control | Control | Feed Day | No | 16:05 | 16:00 - 16:59 | Evening   | 38,3 | 60  | 11,8 | 11,8 | 19,46 | 554,67 | 82,36  |
| 2019/06/26 | CH2206 | Male | Three y/o | Control | Control | Feed Day | No | 16:05 | 16:00 - 16:59 | Evening   | 38,2 | 80  | 23,8 | 23,8 | 19,36 | 577,31 | 106,26 |
| 2019/06/26 | CH2205 | Male | Three y/o | Control | Control | Feed Day | No | 16:10 | 16:00 - 16:59 | Evening   | 38,3 | 58  | 4,0  | 4,0  | 19,46 | 551,90 | 45,94  |
| 2019/06/26 | CH2206 | Male | Three y/o | Control | Control | Feed Day | No | 16:10 | 16:00 - 16:59 | Evening   | 38,1 | 90  | 39,2 | 39,2 | 19,26 | 586,16 | 123,39 |
| 2019/06/26 | CH2205 | Male | Three y/o | Control | Control | Feed Day | No | 16:15 | 16:00 - 16:59 | Evening   | 38,3 | 61  | 11,6 | 11,6 | 19,46 | 556,01 | 81,78  |



|            |        |      |           |         |         |          |    |       |               |         |      |     |       |       |       |        |        |
|------------|--------|------|-----------|---------|---------|----------|----|-------|---------------|---------|------|-----|-------|-------|-------|--------|--------|
| 2019/06/26 | CH2206 | Male | Three y/o | Control | Control | Feed Day | No | 16:15 | 16:00 - 16:59 | Evening | 38,0 | 83  | 48,4  | 48,4  | 19,15 | 580,11 | 130,66 |
| 2019/06/26 | CH2205 | Male | Three y/o | Control | Control | Feed Day | No | 16:20 | 16:00 - 16:59 | Evening | 38,3 | 65  | 162,2 | 162,2 | 19,46 | 561,12 | 172,76 |
| 2019/06/26 | CH2206 | Male | Three y/o | Control | Control | Feed Day | No | 16:20 | 16:00 - 16:59 | Evening | 38,1 | 132 | 14,6  | 14,6  | 19,26 | 613,32 | 89,59  |
| 2019/06/26 | CH2205 | Male | Three y/o | Control | Control | Feed Day | No | 16:25 | 16:00 - 16:59 | Evening | 38,3 | 99  | 114,0 | 114,0 | 19,46 | 593,14 | 160,42 |
| 2019/06/26 | CH2206 | Male | Three y/o | Control | Control | Feed Day | No | 16:25 | 16:00 - 16:59 | Evening | 38,1 | 96  | 20,4  | 20,4  | 19,26 | 590,91 | 100,99 |
| 2019/06/26 | CH2205 | Male | Three y/o | Control | Control | Feed Day | No | 16:30 | 16:00 - 16:59 | Evening | 38,3 | 74  | 23,2  | 23,2  | 19,46 | 571,33 | 105,39 |
| 2019/06/26 | CH2206 | Male | Three y/o | Control | Control | Feed Day | No | 16:30 | 16:00 - 16:59 | Evening | 38,0 | 84  | 21,8  | 21,8  | 19,15 | 581,01 | 103,26 |
| 2019/06/26 | CH2205 | Male | Three y/o | Control | Control | Feed Day | No | 16:35 | 16:00 - 16:59 | Evening | 38,2 |     | 146,6 | 146,6 | 19,36 |        | 169,21 |
| 2019/06/26 | CH2206 | Male | Three y/o | Control | Control | Feed Day | No | 16:35 | 16:00 - 16:59 | Evening | 37,9 |     | 22,8  | 22,8  | 19,05 |        | 104,79 |
| 2019/06/26 | CH2205 | Male | Three y/o | Control | Control | Feed Day | No | 16:40 | 16:00 - 16:59 | Evening | 38,2 | 74  | 8,0   | 8,0   | 19,36 | 571,33 | 69,22  |
| 2019/06/26 | CH2206 | Male | Three y/o | Control | Control | Feed Day | No | 16:40 | 16:00 - 16:59 | Evening | 37,9 |     | 21,4  | 21,4  | 19,05 |        | 102,63 |
| 2019/06/26 | CH2205 | Male | Three y/o | Control | Control | Feed Day | No | 16:45 | 16:00 - 16:59 | Evening | 38,1 | 67  | 10,4  | 10,4  | 19,26 | 563,53 | 78,08  |
| 2019/06/26 | CH2206 | Male | Three y/o | Control | Control | Feed Day | No | 16:45 | 16:00 - 16:59 | Evening | 37,9 | 99  | 16,2  | 16,2  | 19,05 | 593,14 | 93,13  |
| 2019/06/26 | CH2205 | Male | Three y/o | Control | Control | Feed Day | No | 16:50 | 16:00 - 16:59 | Evening | 37,9 | 59  | 46,4  | 46,4  | 19,05 | 553,30 | 129,21 |
| 2019/06/26 | CH2206 | Male | Three y/o | Control | Control | Feed Day | No | 16:50 | 16:00 - 16:59 | Evening | 37,9 | 53  | 21,6  | 21,6  | 19,05 | 544,43 | 102,94 |
| 2019/06/26 | CH2205 | Male | Three y/o | Control | Control | Feed Day | No | 16:55 | 16:00 - 16:59 | Evening | 38,0 |     | 21,0  | 21,0  | 19,15 |        | 101,98 |
| 2019/06/26 | CH2206 | Male | Three y/o | Control | Control | Feed Day | No | 16:55 | 16:00 - 16:59 | Evening | 37,9 | 69  | 16,6  | 16,6  | 19,05 | 565,86 | 93,96  |
| 2019/06/26 | CH2205 | Male | Three y/o | Control | Control | Feed Day | No | 17:00 | 17:00 - 17:59 | Evening | 38,0 | 90  | 25,2  | 25,2  | 19,15 | 586,16 | 108,22 |
| 2019/06/26 | CH2206 | Male | Three y/o | Control | Control | Feed Day | No | 17:00 | 17:00 - 17:59 | Evening | 37,9 | 118 | 21,0  | 21,0  | 19,05 | 605,61 | 101,98 |
| 2019/06/26 | CH2205 | Male | Three y/o | Control | Control | Feed Day | No | 17:05 | 17:00 - 17:59 | Evening | 37,9 |     | 21,4  | 21,4  | 19,05 |        | 102,63 |
| 2019/06/26 | CH2206 | Male | Three y/o | Control | Control | Feed Day | No | 17:05 | 17:00 - 17:59 | Evening | 37,9 | 185 | 23,8  | 23,8  | 19,05 | 635,34 | 106,26 |
| 2019/06/26 | CH2205 | Male | Three y/o | Control | Control | Feed Day | No | 17:10 | 17:00 - 17:59 | Evening | 38,0 |     | 17,6  | 17,6  | 19,15 |        | 95,95  |
| 2019/06/26 | CH2206 | Male | Three y/o | Control | Control | Feed Day | No | 17:10 | 17:00 - 17:59 | Evening | 37,9 | 90  | 21,8  | 21,8  | 19,05 | 586,16 | 103,26 |
| 2019/06/26 | CH2205 | Male | Three y/o | Control | Control | Feed Day | No | 17:15 | 17:00 - 17:59 | Evening | 38,0 |     | 25,2  | 25,2  | 19,15 |        | 108,22 |
| 2019/06/26 | CH2206 | Male | Three y/o | Control | Control | Feed Day | No | 17:15 | 17:00 - 17:59 | Evening | 37,9 | 197 | 16,0  | 16,0  | 19,05 | 639,25 | 92,71  |
| 2019/06/26 | CH2205 | Male | Three y/o | Control | Control | Feed Day | No | 17:20 | 17:00 - 17:59 | Evening | 38,0 |     | 146,6 | 146,6 | 19,15 |        | 169,21 |
| 2019/06/26 | CH2206 | Male | Three y/o | Control | Control | Feed Day | No | 17:20 | 17:00 - 17:59 | Evening | 37,9 | 85  | 21,8  | 21,8  | 19,05 | 581,90 | 103,26 |
| 2019/06/26 | CH2205 | Male | Three y/o | Control | Control | Feed Day | No | 17:25 | 17:00 - 17:59 | Evening | 38,0 | 69  | 157,6 | 157,6 | 19,15 | 565,86 | 171,75 |
| 2019/06/26 | CH2206 | Male | Three y/o | Control | Control | Feed Day | No | 17:25 | 17:00 - 17:59 | Evening | 37,9 | 188 | 110,2 | 110,2 | 19,05 | 636,34 | 159,23 |
| 2019/06/26 | CH2205 | Male | Three y/o | Control | Control | Feed Day | No | 17:30 | 17:00 - 17:59 | Evening | 38,1 | 40  | 185,0 | 185,0 | 19,26 | 520,09 | 177,38 |
| 2019/06/26 | CH2206 | Male | Three y/o | Control | Control | Feed Day | No | 17:30 | 17:00 - 17:59 | Evening | 37,9 | 118 | 47,8  | 47,8  | 19,05 | 605,61 | 130,23 |
| 2019/06/26 | CH2205 | Male | Three y/o | Control | Control | Feed Day | No | 17:35 | 17:00 - 17:59 | Evening | 38,2 | 125 | 14,8  | 14,8  | 19,36 | 609,60 | 90,05  |
| 2019/06/26 | CH2206 | Male | Three y/o | Control | Control | Feed Day | No | 17:35 | 17:00 - 17:59 | Evening | 37,9 | 107 | 47,8  | 47,8  | 19,05 | 598,73 | 130,23 |
| 2019/06/26 | CH2205 | Male | Three y/o | Control | Control | Feed Day | No | 17:40 | 17:00 - 17:59 | Evening | 38,1 | 62  | 12,4  | 12,4  | 19,26 | 557,33 | 84,04  |
| 2019/06/26 | CH2206 | Male | Three y/o | Control | Control | Feed Day | No | 17:40 | 17:00 - 17:59 | Evening | 37,9 | 77  | 19,8  | 19,8  | 19,05 | 574,39 | 99,97  |
| 2019/06/26 | CH2205 | Male | Three y/o | Control | Control | Feed Day | No | 17:45 | 17:00 - 17:59 | Evening | 38,0 | 52  | 8,2   | 8,2   | 19,15 | 542,83 | 70,05  |
| 2019/06/26 | CH2206 | Male | Three y/o | Control | Control | Feed Day | No | 17:45 | 17:00 - 17:59 | Evening | 37,8 | 45  | 15,6  | 15,6  | 18,95 | 530,47 | 91,85  |
| 2019/06/26 | CH2205 | Male | Three y/o | Control | Control | Feed Day | No | 17:50 | 17:00 - 17:59 | Evening | 38,0 | 88  | 48,4  | 48,4  | 19,15 | 584,49 | 130,66 |
| 2019/06/26 | CH2206 | Male | Three y/o | Control | Control | Feed Day | No | 17:50 | 17:00 - 17:59 | Evening | 37,7 | 67  | 33,8  | 33,8  | 18,85 | 563,53 | 118,29 |
| 2019/06/26 | CH2205 | Male | Three y/o | Control | Control | Feed Day | No | 17:55 | 17:00 - 17:59 | Evening | 38,1 | 104 | 68,2  | 68,2  | 19,26 | 596,69 | 142,53 |
| 2019/06/26 | CH2206 | Male | Three y/o | Control | Control | Feed Day | No | 17:55 | 17:00 - 17:59 | Evening | 37,5 | 64  | 18,2  | 18,2  | 18,65 | 559,88 | 97,10  |
| 2019/06/26 | CH2205 | Male | Three y/o | Control | Control | Feed Day | No | 18:00 | 18:00 - 18:59 | Evening | 38,1 | 94  | 14,0  | 14,0  | 19,26 | 589,37 | 88,17  |
| 2019/06/26 | CH2206 | Male | Three y/o | Control | Control | Feed Day | No | 18:00 | 18:00 - 18:59 | Evening | 37,9 | 117 | 17,8  | 17,8  | 19,05 | 605,02 | 96,34  |
| 2019/06/26 | CH2205 | Male | Three y/o | Control | Control | Feed Day | No | 18:05 | 18:00 - 18:59 | Evening | 38,0 |     | 9,8   | 9,8   | 19,15 |        | 76,07  |
| 2019/06/26 | CH2206 | Male | Three y/o | Control | Control | Feed Day | No | 18:05 | 18:00 - 18:59 | Evening | 37,7 |     | 26,0  | 26,0  | 18,85 |        | 109,29 |
| 2019/06/26 | CH2205 | Male | Three y/o | Control | Control | Feed Day | No | 18:10 | 18:00 - 18:59 | Evening | 37,9 | 92  | 9,8   | 9,8   | 19,05 | 587,78 | 76,07  |
| 2019/06/26 | CH2206 | Male | Three y/o | Control | Control | Feed Day | No | 18:10 | 18:00 - 18:59 | Evening | 37,5 |     | 18,0  | 18,0  | 18,65 |        | 96,72  |
| 2019/06/26 | CH2205 | Male | Three y/o | Control | Control | Feed Day | No | 18:15 | 18:00 - 18:59 | Evening | 37,9 | 87  | 39,6  | 39,6  | 19,05 | 583,64 | 123,74 |
| 2019/06/26 | CH2206 | Male | Three y/o | Control | Control | Feed Day | No | 18:15 | 18:00 - 18:59 | Evening | 37,5 | 121 | 16,2  | 16,2  | 18,65 | 607,35 | 93,13  |
| 2019/06/26 | CH2205 | Male | Three y/o | Control | Control | Feed Day | No | 18:20 | 18:00 - 18:59 | Evening | 38,0 | 96  | 10,4  | 10,4  | 19,15 | 590,91 | 78,08  |
| 2019/06/26 | CH2206 | Male | Three y/o | Control | Control | Feed Day | No | 18:20 | 18:00 - 18:59 | Evening | 37,6 | 128 | 19,2  | 19,2  | 18,75 | 611,22 | 98,92  |
| 2019/06/26 | CH2205 | Male | Three y/o | Control | Control | Feed Day | No | 18:25 | 18:00 - 18:59 | Evening | 38,0 | 79  | 12,6  | 12,6  | 19,15 | 576,36 | 84,59  |
| 2019/06/26 | CH2206 | Male | Three y/o | Control | Control | Feed Day | No | 18:25 | 18:00 - 18:59 | Evening | 37,7 | 89  | 21,8  | 21,8  | 18,85 | 585,33 | 103,26 |
| 2019/06/26 | CH2205 | Male | Three y/o | Control | Control | Feed Day | No | 18:30 | 18:00 - 18:59 | Evening | 38,1 | 73  | 12,2  | 12,2  | 19,26 | 570,27 | 83,49  |
| 2019/06/26 | CH2206 | Male | Three y/o | Control | Control | Feed Day | No | 18:30 | 18:00 - 18:59 | Evening | 37,8 | 94  | 33,8  | 33,8  | 18,95 | 589,37 | 118,29 |
| 2019/06/26 | CH2205 | Male | Three y/o | Control | Control | Feed Day | No | 18:35 | 18:00 - 18:59 | Evening | 38,1 | 71  | 12,8  | 12,8  | 19,26 | 568,10 | 85,12  |
| 2019/06/26 | CH2206 | Male | Three y/o | Control | Control | Feed Day | No | 18:35 | 18:00 - 18:59 | Evening | 37,8 | 74  | 34,8  | 34,8  | 18,95 | 571,33 | 119,29 |
| 2019/06/26 | CH2205 | Male | Three y/o | Control | Control | Feed Day | No | 18:40 | 18:00 - 18:59 | Evening | 38,1 | 100 | 13,0  | 13,0  | 19,26 | 593,87 | 85,65  |
| 2019/06/26 | CH2206 | Male | Three y/o | Control | Control | Feed Day | No | 18:40 | 18:00 - 18:59 | Evening | 37,8 | 82  | 31,6  | 31,6  | 18,95 | 579,19 | 115,98 |
| 2019/06/26 | CH2205 | Male | Three y/o | Control | Control | Feed Day | No | 18:45 | 18:00 - 18:59 | Evening | 38,1 | 73  | 9,8   | 9,8   | 19,26 | 570,27 | 76,07  |
| 2019/06/26 | CH2206 | Male | Three y/o | Control | Control | Feed Day | No | 18:45 | 18:00 - 18:59 | Evening | 37,7 | 82  | 27,2  | 27,2  | 18,85 | 579,19 | 110,83 |
| 2019/06/26 | CH2205 | Male | Three y/o | Control | Control | Feed Day | No | 18:50 | 18:00 - 18:59 | Evening | 38,1 | 71  | 36,2  | 36,2  | 19,26 | 568,10 | 120,65 |
| 2019/06/26 | CH2206 | Male | Three y/o | Control | Control | Feed Day | No | 18:50 | 18:00 - 18:59 | Evening | 37,7 | 46  | 23,2  | 23,2  | 18,85 | 532,38 | 105,39 |
| 2019/06/26 | CH2205 | Male | Three y/o | Control | Control | Feed Day | No | 18:55 | 18:00 - 18:59 | Evening | 38,1 |     | 5,6   | 5,6   | 19,26 |        | 57,21  |
| 2019/06/26 | CH2206 | Male | Three y/o | Control | Control | Feed Day | No | 18:55 | 18:00 - 18:59 | Evening | 37,7 | 86  | 5,8   | 5,8   | 18,85 | 582,77 | 58,39  |
| 2019/06/26 | CH2205 | Male | Three y/o | Control | Control | Feed Day | No | 19:00 | 19:00 - 19:59 | Evening | 38,0 | 103 | 4,6   | 4,6   | 19,15 | 596,00 | 50,61  |
| 2019/06/26 | CH2206 | Male | Three y/o | Control | Control | Feed Day | No | 19:00 | 19:00 - 19:59 | Evening | 37,7 | 48  | 5,8   | 5,8   | 18,85 | 536,04 | 58,39  |
| 2019/06/26 | CH2205 | Male | Three y/o | Control | Control | Feed Day | No | 19:05 | 19:00 - 19:59 | Evening | 38,0 | 90  | 11,0  | 11,0  | 19,15 | 586,16 | 79,98  |
| 2019/06/26 | CH2206 | Male | Three y/o | Control | Control | Feed Day | No | 19:05 | 19:00 - 19:59 | Evening | 37,7 |     | 5,8   | 5,8   | 18,85 |        | 58,39  |
| 2019/06/26 | CH2205 | Male | Three y/o | Control | Control | Feed Day | No | 19:10 | 19:00 - 19:59 | Evening | 38,0 | 76  | 10,8  | 10,8  | 19,15 | 573,39 | 79,36  |



|            |        |      |           |         |         |          |    |       |               |         |      |     |      |      |       |        |        |
|------------|--------|------|-----------|---------|---------|----------|----|-------|---------------|---------|------|-----|------|------|-------|--------|--------|
| 2019/06/26 | CH2206 | Male | Three y/o | Control | Control | Feed Day | No | 19:10 | 19:00 - 19:59 | Evening | 37,7 | 69  | 3,6  | 3,6  | 18,85 | 565,86 | 42,42  |
| 2019/06/26 | CH2205 | Male | Three y/o | Control | Control | Feed Day | No | 19:15 | 19:00 - 19:59 | Evening | 37,7 | 74  | 14,6 | 14,6 | 18,85 | 571,33 | 89,59  |
| 2019/06/26 | CH2206 | Male | Three y/o | Control | Control | Feed Day | No | 19:15 | 19:00 - 19:59 | Evening | 37,7 | 47  | 35,4 | 35,4 | 18,85 | 534,23 | 119,88 |
| 2019/06/26 | CH2205 | Male | Three y/o | Control | Control | Feed Day | No | 19:20 | 19:00 - 19:59 | Evening | 37,7 | 70  | 12,6 | 12,6 | 18,85 | 566,99 | 84,59  |
| 2019/06/26 | CH2206 | Male | Three y/o | Control | Control | Feed Day | No | 19:20 | 19:00 - 19:59 | Evening | 37,7 | 83  | 41,6 | 41,6 | 18,85 | 580,11 | 125,44 |
| 2019/06/26 | CH2205 | Male | Three y/o | Control | Control | Feed Day | No | 19:25 | 19:00 - 19:59 | Evening | 37,6 | 85  | 11,8 | 11,8 | 18,75 | 581,90 | 82,36  |
| 2019/06/26 | CH2206 | Male | Three y/o | Control | Control | Feed Day | No | 19:25 | 19:00 - 19:59 | Evening | 37,7 | 44  | 38,4 | 38,4 | 18,85 | 528,51 | 122,68 |
| 2019/06/26 | CH2205 | Male | Three y/o | Control | Control | Feed Day | No | 19:30 | 19:00 - 19:59 | Evening | 37,5 | 55  | 14,0 | 14,0 | 18,65 | 547,52 | 88,17  |
| 2019/06/26 | CH2206 | Male | Three y/o | Control | Control | Feed Day | No | 19:30 | 19:00 - 19:59 | Evening | 37,7 | 98  | 57,6 | 57,6 | 18,85 | 592,41 | 136,68 |
| 2019/06/26 | CH2205 | Male | Three y/o | Control | Control | Feed Day | No | 19:35 | 19:00 - 19:59 | Evening | 37,4 | 70  | 14,6 | 14,6 | 18,55 | 566,99 | 89,59  |
| 2019/06/26 | CH2206 | Male | Three y/o | Control | Control | Feed Day | No | 19:35 | 19:00 - 19:59 | Evening | 37,8 | 92  | 65,2 | 65,2 | 18,95 | 587,78 | 140,97 |
| 2019/06/26 | CH2205 | Male | Three y/o | Control | Control | Feed Day | No | 19:40 | 19:00 - 19:59 | Evening | 37,3 | 52  | 12,2 | 12,2 | 18,46 | 542,83 | 83,49  |
| 2019/06/26 | CH2206 | Male | Three y/o | Control | Control | Feed Day | No | 19:40 | 19:00 - 19:59 | Evening | 37,8 | 85  | 67,6 | 67,6 | 18,95 | 581,90 | 142,23 |
| 2019/06/26 | CH2205 | Male | Three y/o | Control | Control | Feed Day | No | 19:45 | 19:00 - 19:59 | Evening | 37,3 | 87  | 12,8 | 12,8 | 18,46 | 583,64 | 85,12  |
| 2019/06/26 | CH2206 | Male | Three y/o | Control | Control | Feed Day | No | 19:45 | 19:00 - 19:59 | Evening | 37,8 | 88  | 65,2 | 65,2 | 18,95 | 584,49 | 140,97 |
| 2019/06/26 | CH2205 | Male | Three y/o | Control | Control | Feed Day | No | 19:50 | 19:00 - 19:59 | Evening | 37,3 | 72  | 14,8 | 14,8 | 18,46 | 569,20 | 90,05  |
| 2019/06/26 | CH2206 | Male | Three y/o | Control | Control | Feed Day | No | 19:50 | 19:00 - 19:59 | Evening | 37,8 | 47  | 75,4 | 75,4 | 18,95 | 534,23 | 146,02 |
| 2019/06/26 | CH2205 | Male | Three y/o | Control | Control | Feed Day | No | 19:55 | 19:00 - 19:59 | Evening | 37,3 | 70  | 16,4 | 16,4 | 18,46 | 566,99 | 93,55  |
| 2019/06/26 | CH2206 | Male | Three y/o | Control | Control | Feed Day | No | 19:55 | 19:00 - 19:59 | Evening | 37,9 | 70  | 70,8 | 70,8 | 19,05 | 566,99 | 143,83 |
| 2019/06/26 | CH2205 | Male | Three y/o | Control | Control | Feed Day | No | 20:00 | 20:00 - 20:59 | Night   | 37,2 | 74  | 12,0 | 12,0 | 18,36 | 571,33 | 82,93  |
| 2019/06/26 | CH2206 | Male | Three y/o | Control | Control | Feed Day | No | 20:00 | 20:00 - 20:59 | Night   | 37,9 | 50  | 55,0 | 55,0 | 19,05 | 539,52 | 135,08 |
| 2019/06/26 | CH2205 | Male | Three y/o | Control | Control | Feed Day | No | 20:05 | 20:00 - 20:59 | Night   | 37,2 | 66  | 6,4  | 6,4  | 18,36 | 562,34 | 61,70  |
| 2019/06/26 | CH2206 | Male | Three y/o | Control | Control | Feed Day | No | 20:05 | 20:00 - 20:59 | Night   | 38,0 | 140 | 30,2 | 30,2 | 19,15 | 617,28 | 114,42 |
| 2019/06/26 | CH2205 | Male | Three y/o | Control | Control | Feed Day | No | 20:10 | 20:00 - 20:59 | Night   | 37,3 | 76  | 3,8  | 3,8  | 18,46 | 573,39 | 44,22  |
| 2019/06/26 | CH2206 | Male | Three y/o | Control | Control | Feed Day | No | 20:10 | 20:00 - 20:59 | Night   | 38,0 | 91  | 28,2 | 28,2 | 19,15 | 586,98 | 112,07 |
| 2019/06/26 | CH2205 | Male | Three y/o | Control | Control | Feed Day | No | 20:15 | 20:00 - 20:59 | Night   | 37,4 | 78  | 6,0  | 6,0  | 18,55 | 575,38 | 59,53  |
| 2019/06/26 | CH2206 | Male | Three y/o | Control | Control | Feed Day | No | 20:15 | 20:00 - 20:59 | Night   | 37,9 | 88  | 22,6 | 22,6 | 19,05 | 584,49 | 104,49 |
| 2019/06/26 | CH2205 | Male | Three y/o | Control | Control | Feed Day | No | 20:20 | 20:00 - 20:59 | Night   | 37,4 | 73  | 4,4  | 4,4  | 18,55 | 570,27 | 49,12  |
| 2019/06/26 | CH2206 | Male | Three y/o | Control | Control | Feed Day | No | 20:20 | 20:00 - 20:59 | Night   | 37,9 | 81  | 23,6 | 23,6 | 19,05 | 578,26 | 105,97 |
| 2019/06/26 | CH2205 | Male | Three y/o | Control | Control | Feed Day | No | 20:25 | 20:00 - 20:59 | Night   | 37,4 | 75  | 5,4  | 5,4  | 18,55 | 572,36 | 55,99  |
| 2019/06/26 | CH2206 | Male | Three y/o | Control | Control | Feed Day | No | 20:25 | 20:00 - 20:59 | Night   | 37,9 | 80  | 23,6 | 23,6 | 19,05 | 577,31 | 105,97 |
| 2019/06/26 | CH2205 | Male | Three y/o | Control | Control | Feed Day | No | 20:30 | 20:00 - 20:59 | Night   | 37,4 | 65  | 26,0 | 26,0 | 18,55 | 561,12 | 109,29 |
| 2019/06/26 | CH2206 | Male | Three y/o | Control | Control | Feed Day | No | 20:30 | 20:00 - 20:59 | Night   | 37,9 | 92  | 29,8 | 29,8 | 19,05 | 587,78 | 113,97 |
| 2019/06/26 | CH2205 | Male | Three y/o | Control | Control | Feed Day | No | 20:35 | 20:00 - 20:59 | Night   | 37,7 | 88  | 23,0 | 23,0 | 18,85 | 584,49 | 105,09 |
| 2019/06/26 | CH2206 | Male | Three y/o | Control | Control | Feed Day | No | 20:35 | 20:00 - 20:59 | Night   | 37,9 | 64  | 29,0 | 29,0 | 19,05 | 559,88 | 113,03 |
| 2019/06/26 | CH2205 | Male | Three y/o | Control | Control | Feed Day | No | 20:40 | 20:00 - 20:59 | Night   | 37,7 | 101 | 21,2 | 21,2 | 18,85 | 594,59 | 102,31 |
| 2019/06/26 | CH2206 | Male | Three y/o | Control | Control | Feed Day | No | 20:40 | 20:00 - 20:59 | Night   | 37,9 | 65  | 24,6 | 24,6 | 19,05 | 561,12 | 107,39 |
| 2019/06/26 | CH2205 | Male | Three y/o | Control | Control | Feed Day | No | 20:45 | 20:00 - 20:59 | Night   | 37,9 | 73  | 10,2 | 10,2 | 19,05 | 570,27 | 77,43  |
| 2019/06/26 | CH2206 | Male | Three y/o | Control | Control | Feed Day | No | 20:45 | 20:00 - 20:59 | Night   | 37,9 | 47  | 15,4 | 15,4 | 19,05 | 534,23 | 91,41  |
| 2019/06/26 | CH2205 | Male | Three y/o | Control | Control | Feed Day | No | 20:50 | 20:00 - 20:59 | Night   | 37,8 |     | 7,4  | 7,4  | 18,95 |        | 66,59  |
| 2019/06/26 | CH2206 | Male | Three y/o | Control | Control | Feed Day | No | 20:50 | 20:00 - 20:59 | Night   | 37,8 | 46  | 37,0 | 37,0 | 18,95 | 532,38 | 121,40 |
| 2019/06/26 | CH2205 | Male | Three y/o | Control | Control | Feed Day | No | 20:55 | 20:00 - 20:59 | Night   | 37,7 |     | 11,2 | 11,2 | 18,85 |        | 80,59  |
| 2019/06/26 | CH2206 | Male | Three y/o | Control | Control | Feed Day | No | 20:55 | 20:00 - 20:59 | Night   | 37,9 | 78  | 51,0 | 51,0 | 19,05 | 575,38 | 132,47 |
| 2019/06/26 | CH2205 | Male | Three y/o | Control | Control | Feed Day | No | 21:00 | 21:00 - 21:59 | Night   | 37,7 | 64  | 5,8  | 5,8  | 18,85 | 559,88 | 58,39  |
| 2019/06/26 | CH2206 | Male | Three y/o | Control | Control | Feed Day | No | 21:00 | 21:00 - 21:59 | Night   | 37,9 | 86  | 50,2 | 50,2 | 19,05 | 582,77 | 131,92 |
| 2019/06/26 | CH2205 | Male | Three y/o | Control | Control | Feed Day | No | 21:05 | 21:00 - 21:59 | Night   | 37,9 | 156 | 15,2 | 15,2 | 19,05 | 624,43 | 90,96  |
| 2019/06/26 | CH2206 | Male | Three y/o | Control | Control | Feed Day | No | 21:05 | 21:00 - 21:59 | Night   | 37,9 | 131 | 45,4 | 45,4 | 19,05 | 612,80 | 128,45 |
| 2019/06/26 | CH2205 | Male | Three y/o | Control | Control | Feed Day | No | 21:10 | 21:00 - 21:59 | Night   | 37,9 | 71  | 12,4 | 12,4 | 19,05 | 568,10 | 84,04  |
| 2019/06/26 | CH2206 | Male | Three y/o | Control | Control | Feed Day | No | 21:10 | 21:00 - 21:59 | Night   | 37,8 | 70  | 47,8 | 47,8 | 18,95 | 566,99 | 130,23 |
| 2019/06/26 | CH2205 | Male | Three y/o | Control | Control | Feed Day | No | 21:15 | 21:00 - 21:59 | Night   | 37,9 | 69  | 13,6 | 13,6 | 19,05 | 565,86 | 87,18  |
| 2019/06/26 | CH2206 | Male | Three y/o | Control | Control | Feed Day | No | 21:15 | 21:00 - 21:59 | Night   | 37,8 | 65  | 48,4 | 48,4 | 18,95 | 561,12 | 130,66 |
| 2019/06/26 | CH2205 | Male | Three y/o | Control | Control | Feed Day | No | 21:20 | 21:00 - 21:59 | Night   | 38,0 | 43  | 11,4 | 11,4 | 19,15 | 526,50 | 81,19  |
| 2019/06/26 | CH2206 | Male | Three y/o | Control | Control | Feed Day | No | 21:20 | 21:00 - 21:59 | Night   | 37,8 | 63  | 48,4 | 48,4 | 18,95 | 558,62 | 130,66 |
| 2019/06/26 | CH2205 | Male | Three y/o | Control | Control | Feed Day | No | 21:25 | 21:00 - 21:59 | Night   | 38,0 | 69  | 8,0  | 8,0  | 19,15 | 565,86 | 69,22  |
| 2019/06/26 | CH2206 | Male | Three y/o | Control | Control | Feed Day | No | 21:25 | 21:00 - 21:59 | Night   | 37,9 | 57  | 49,6 | 49,6 | 19,05 | 550,47 | 131,51 |
| 2019/06/26 | CH2205 | Male | Three y/o | Control | Control | Feed Day | No | 21:30 | 21:00 - 21:59 | Night   | 38,1 | 70  | 6,4  | 6,4  | 19,26 | 566,99 | 61,70  |
| 2019/06/26 | CH2206 | Male | Three y/o | Control | Control | Feed Day | No | 21:30 | 21:00 - 21:59 | Night   | 37,9 | 41  | 55,2 | 55,2 | 19,05 | 522,29 | 135,21 |
| 2019/06/26 | CH2205 | Male | Three y/o | Control | Control | Feed Day | No | 21:35 | 21:00 - 21:59 | Night   | 38,1 | 67  | 14,4 | 14,4 | 19,26 | 563,53 | 89,12  |
| 2019/06/26 | CH2206 | Male | Three y/o | Control | Control | Feed Day | No | 21:35 | 21:00 - 21:59 | Night   | 37,9 | 96  | 47,2 | 47,2 | 19,05 | 590,91 | 129,80 |
| 2019/06/26 | CH2205 | Male | Three y/o | Control | Control | Feed Day | No | 21:40 | 21:00 - 21:59 | Night   | 38,1 | 64  | 13,4 | 13,4 | 19,26 | 559,88 | 86,68  |
| 2019/06/26 | CH2206 | Male | Three y/o | Control | Control | Feed Day | No | 21:40 | 21:00 - 21:59 | Night   | 38,0 | 84  | 47,8 | 47,8 | 19,15 | 581,01 | 130,23 |
| 2019/06/26 | CH2205 | Male | Three y/o | Control | Control | Feed Day | No | 21:45 | 21:00 - 21:59 | Night   | 38,1 | 72  | 12,6 | 12,6 | 19,26 | 569,20 | 84,59  |
| 2019/06/26 | CH2206 | Male | Three y/o | Control | Control | Feed Day | No | 21:45 | 21:00 - 21:59 | Night   | 38,0 | 84  | 50,0 | 50,0 | 19,15 | 581,01 | 131,79 |
| 2019/06/26 | CH2205 | Male | Three y/o | Control | Control | Feed Day | No | 21:50 | 21:00 - 21:59 | Night   | 38,1 | 73  | 11,2 | 11,2 | 19,26 | 570,27 | 80,59  |
| 2019/06/26 | CH2206 | Male | Three y/o | Control | Control | Feed Day | No | 21:50 | 21:00 - 21:59 | Night   | 38,0 | 77  | 48,6 | 48,6 | 19,15 | 574,39 | 130,81 |
| 2019/06/26 | CH2205 | Male | Three y/o | Control | Control | Feed Day | No | 21:55 | 21:00 - 21:59 | Night   | 38,1 | 48  | 10,0 | 10,0 | 19,26 | 536,04 | 76,76  |
| 2019/06/26 | CH2206 | Male | Three y/o | Control | Control | Feed Day | No | 21:55 | 21:00 - 21:59 | Night   | 38,0 | 61  | 48,0 | 48,0 | 19,15 | 556,01 | 130,38 |
| 2019/06/26 | CH2205 | Male | Three y/o | Control | Control | Feed Day | No | 22:00 | 22:00 - 22:59 | Night   | 38,1 | 75  | 6,8  | 6,8  | 19,26 | 572,36 | 63,74  |
| 2019/06/26 | CH2206 | Male | Three y/o | Control | Control | Feed Day | No | 22:00 | 22:00 - 22:59 | Night   | 38,0 | 95  | 52,4 | 52,4 | 19,15 | 590,14 | 133,41 |
| 2019/06/26 | CH2205 | Male | Three y/o | Control | Control | Feed Day | No | 22:05 | 22:00 - 22:59 | Night   | 38,1 | 75  | 15,4 | 15,4 | 19,26 | 572,36 | 91,41  |



|    |            |        |        |           |                  |           |          |    |       |               |               |      |     |       |       |       |        |        |
|----|------------|--------|--------|-----------|------------------|-----------|----------|----|-------|---------------|---------------|------|-----|-------|-------|-------|--------|--------|
|    | 2019/06/26 | CH2206 | Male   | Three y/o | Control          | Control   | Feed Day | No | 22:05 | 22:00 - 22:59 | Night         | 38,0 | 86  | 53,6  | 53,6  | 19,15 | 582,77 | 134,19 |
|    | 2019/06/26 | CH2205 | Male   | Three y/o | Control          | Control   | Feed Day | No | 22:10 | 22:00 - 22:59 | Night         | 38,1 | 68  | 11,4  | 11,4  | 19,26 | 564,71 | 81,19  |
|    | 2019/06/26 | CH2206 | Male   | Three y/o | Control          | Control   | Feed Day | No | 22:10 | 22:00 - 22:59 | Night         | 38,0 | 83  | 53,2  | 53,2  | 19,15 | 580,11 | 133,93 |
|    | 2019/06/26 | CH2205 | Male   | Three y/o | Control          | Control   | Feed Day | No | 22:15 | 22:00 - 22:59 | Night         | 38,1 | 63  | 11,0  | 11,0  | 19,26 | 558,62 | 79,98  |
|    | 2019/06/26 | CH2206 | Male   | Three y/o | Control          | Control   | Feed Day | No | 22:15 | 22:00 - 22:59 | Night         | 38,0 | 70  | 48,2  | 48,2  | 19,15 | 566,99 | 130,52 |
|    | 2019/06/26 | CH2205 | Male   | Three y/o | Control          | Control   | Feed Day | No | 22:20 | 22:00 - 22:59 | Night         | 38,1 | 70  | 8,8   | 8,8   | 19,26 | 566,99 | 72,43  |
|    | 2019/06/26 | CH2206 | Male   | Three y/o | Control          | Control   | Feed Day | No | 22:20 | 22:00 - 22:59 | Night         | 38,1 | 72  | 49,8  | 49,8  | 19,26 | 569,20 | 131,65 |
|    | 2019/06/26 | CH2205 | Male   | Three y/o | Control          | Control   | Feed Day | No | 22:25 | 22:00 - 22:59 | Night         | 38,1 | 40  | 10,6  | 10,6  | 19,26 | 520,09 | 78,73  |
|    | 2019/06/26 | CH2206 | Male   | Three y/o | Control          | Control   | Feed Day | No | 22:25 | 22:00 - 22:59 | Night         | 38,1 | 83  | 55,0  | 55,0  | 19,26 | 580,11 | 135,08 |
|    | 2019/06/26 | CH2205 | Male   | Three y/o | Control          | Control   | Feed Day | No | 22:30 | 22:00 - 22:59 | Night         | 38,1 | 71  | 13,2  | 13,2  | 19,26 | 568,10 | 86,17  |
|    | 2019/06/26 | CH2206 | Male   | Three y/o | Control          | Control   | Feed Day | No | 22:30 | 22:00 - 22:59 | Night         | 38,1 | 87  | 52,6  | 52,6  | 19,26 | 583,64 | 133,54 |
|    | 2019/06/26 | CH2205 | Male   | Three y/o | Control          | Control   | Feed Day | No | 22:35 | 22:00 - 22:59 | Night         | 38,1 | 71  | 11,0  | 11,0  | 19,26 | 568,10 | 79,98  |
|    | 2019/06/26 | CH2206 | Male   | Three y/o | Control          | Control   | Feed Day | No | 22:35 | 22:00 - 22:59 | Night         | 38,1 | 73  | 51,6  | 51,6  | 19,26 | 570,27 | 132,87 |
|    | 2019/06/26 | CH2205 | Male   | Three y/o | Control          | Control   | Feed Day | No | 22:40 | 22:00 - 22:59 | Night         | 38,1 | 73  | 11,2  | 11,2  | 19,26 | 570,27 | 80,59  |
|    | 2019/06/26 | CH2206 | Male   | Three y/o | Control          | Control   | Feed Day | No | 22:40 | 22:00 - 22:59 | Night         | 38,1 | 43  | 51,4  | 51,4  | 19,26 | 526,50 | 132,74 |
|    | 2019/06/26 | CH2205 | Male   | Three y/o | Control          | Control   | Feed Day | No | 22:45 | 22:00 - 22:59 | Night         | 38,1 | 48  | 10,2  | 10,2  | 19,26 | 536,04 | 77,43  |
|    | 2019/06/26 | CH2206 | Male   | Three y/o | Control          | Control   | Feed Day | No | 22:45 | 22:00 - 22:59 | Night         | 38,1 | 44  | 54,8  | 54,8  | 19,26 | 528,51 | 134,96 |
|    | 2019/06/26 | CH2205 | Male   | Three y/o | Control          | Control   | Feed Day | No | 22:50 | 22:00 - 22:59 | Night         | 38,1 | 137 | 12,4  | 12,4  | 19,26 | 615,83 | 84,04  |
|    | 2019/06/26 | CH2206 | Male   | Three y/o | Control          | Control   | Feed Day | No | 22:50 | 22:00 - 22:59 | Night         | 38,1 | 92  | 39,6  | 39,6  | 19,26 | 587,78 | 123,74 |
|    | 2019/06/26 | CH2205 | Male   | Three y/o | Control          | Control   | Feed Day | No | 22:55 | 22:00 - 22:59 | Night         | 38,1 | 103 | 14,0  | 14,0  | 19,26 | 596,00 | 88,17  |
|    | 2019/06/26 | CH2206 | Male   | Three y/o | Control          | Control   | Feed Day | No | 22:55 | 22:00 - 22:59 | Night         | 38,0 | 58  | 43,4  | 43,4  | 19,15 | 551,90 | 126,90 |
|    | 2019/06/26 | CH2205 | Male   | Three y/o | Control          | Control   | Feed Day | No | 23:00 | 23:00 - 23:59 | Night         | 38,0 | 65  | 11,6  | 11,6  | 19,15 | 561,12 | 81,78  |
|    | 2019/06/26 | CH2206 | Male   | Three y/o | Control          | Control   | Feed Day | No | 23:00 | 23:00 - 23:59 | Night         | 38,0 | 82  | 42,8  | 42,8  | 19,15 | 579,19 | 126,42 |
|    | 2019/06/26 | CH2205 | Male   | Three y/o | Control          | Control   | Feed Day | No | 23:05 | 23:00 - 23:59 | Night         | 38,0 | 68  | 10,8  | 10,8  | 19,15 | 564,71 | 79,36  |
|    | 2019/06/26 | CH2206 | Male   | Three y/o | Control          | Control   | Feed Day | No | 23:05 | 23:00 - 23:59 | Night         | 38,0 | 54  | 43,8  | 43,8  | 19,15 | 545,99 | 127,22 |
|    | 2019/06/26 | CH2205 | Male   | Three y/o | Control          | Control   | Feed Day | No | 23:10 | 23:00 - 23:59 | Night         | 38,0 | 71  | 10,2  | 10,2  | 19,15 | 568,10 | 77,43  |
|    | 2019/06/26 | CH2206 | Male   | Three y/o | Control          | Control   | Feed Day | No | 23:10 | 23:00 - 23:59 | Night         | 38,0 | 70  | 42,0  | 42,0  | 19,15 | 566,99 | 125,77 |
|    | 2019/06/26 | CH2205 | Male   | Three y/o | Control          | Control   | Feed Day | No | 23:15 | 23:00 - 23:59 | Night         | 38,0 | 73  | 16,0  | 16,0  | 19,15 | 570,27 | 92,71  |
|    | 2019/06/26 | CH2206 | Male   | Three y/o | Control          | Control   | Feed Day | No | 23:15 | 23:00 - 23:59 | Night         | 38,0 | 49  | 43,8  | 43,8  | 19,15 | 537,80 | 127,22 |
|    | 2019/06/26 | CH2205 | Male   | Three y/o | Control          | Control   | Feed Day | No | 23:20 | 23:00 - 23:59 | Night         | 37,9 | 46  | 14,4  | 14,4  | 19,05 | 532,38 | 89,12  |
|    | 2019/06/26 | CH2206 | Male   | Three y/o | Control          | Control   | Feed Day | No | 23:20 | 23:00 - 23:59 | Night         | 38,0 | 42  | 45,4  | 45,4  | 19,15 | 524,42 | 128,45 |
|    | 2019/06/26 | CH2205 | Male   | Three y/o | Control          | Control   | Feed Day | No | 23:25 | 23:00 - 23:59 | Night         | 37,9 | 60  | 6,6   | 6,6   | 19,05 | 554,67 | 62,73  |
|    | 2019/06/26 | CH2206 | Male   | Three y/o | Control          | Control   | Feed Day | No | 23:25 | 23:00 - 23:59 | Night         | 37,9 | 70  | 43,8  | 43,8  | 19,05 | 566,99 | 127,22 |
|    | 2019/06/26 | CH2205 | Male   | Three y/o | Control          | Control   | Feed Day | No | 23:30 | 23:00 - 23:59 | Night         | 37,9 | 51  | 14,0  | 14,0  | 19,05 | 541,20 | 88,17  |
|    | 2019/06/26 | CH2206 | Male   | Three y/o | Control          | Control   | Feed Day | No | 23:30 | 23:00 - 23:59 | Night         | 37,9 | 53  | 22,4  | 22,4  | 19,05 | 544,43 | 104,19 |
|    | 2019/06/26 | CH2205 | Male   | Three y/o | Control          | Control   | Feed Day | No | 23:35 | 23:00 - 23:59 | Night         | 37,9 | 73  | 56,4  | 56,4  | 19,05 | 570,27 | 135,95 |
|    | 2019/06/26 | CH2206 | Male   | Three y/o | Control          | Control   | Feed Day | No | 23:35 | 23:00 - 23:59 | Night         | 37,9 | 145 | 31,6  | 31,6  | 19,05 | 619,62 | 115,98 |
|    | 2019/06/26 | CH2205 | Male   | Three y/o | Control          | Control   | Feed Day | No | 23:40 | 23:00 - 23:59 | Night         | 37,9 | 115 | 32,8  | 32,8  | 19,05 | 603,82 | 117,26 |
|    | 2019/06/26 | CH2206 | Male   | Three y/o | Control          | Control   | Feed Day | No | 23:40 | 23:00 - 23:59 | Night         | 37,9 | 117 | 19,0  | 19,0  | 19,05 | 605,02 | 98,56  |
|    | 2019/06/26 | CH2205 | Male   | Three y/o | Control          | Control   | Feed Day | No | 23:45 | 23:00 - 23:59 | Night         | 37,9 | 53  | 25,8  | 25,8  | 19,05 | 544,43 | 109,02 |
|    | 2019/06/26 | CH2206 | Male   | Three y/o | Control          | Control   | Feed Day | No | 23:45 | 23:00 - 23:59 | Night         | 37,9 | 113 | 30,2  | 30,2  | 19,05 | 602,58 | 114,42 |
|    | 2019/06/26 | CH2205 | Male   | Three y/o | Control          | Control   | Feed Day | No | 23:50 | 23:00 - 23:59 | Night         | 37,7 |     | 23,8  | 23,8  | 18,85 |        | 106,26 |
|    | 2019/06/26 | CH2206 | Male   | Three y/o | Control          | Control   | Feed Day | No | 23:50 | 23:00 - 23:59 | Night         | 37,8 | 87  | 22,2  | 22,2  | 18,95 | 583,64 | 103,88 |
|    | 2019/06/26 | CH2205 | Male   | Three y/o | Control          | Control   | Feed Day | No | 23:55 | 23:00 - 23:59 | Night         | 37,7 | 97  | 178,4 | 178,4 | 18,85 | 591,66 | 176,10 |
|    | 2019/06/26 | CH2206 | Male   | Three y/o | Control          | Control   | Feed Day | No | 23:55 | 23:00 - 23:59 | Night         | 37,5 | 119 | 18,6  | 18,6  | 18,65 | 606,20 | 97,84  |
| 43 | 2019/07/31 | CH2276 | Female | Two y/o   | Treatment (Wk 1) | Treatment | Fast Day | No | 00:00 | 00:00 - 00:59 | Early Morning | 37,4 | 98  | 6,8   | 6,8   | 18,55 | 592,41 | 63,74  |
|    | 2019/07/31 | CH2276 | Female | Two y/o   | Treatment (Wk 1) | Treatment | Fast Day | No | 00:05 | 00:00 - 00:59 | Early Morning | 37,4 | 55  | 8,4   | 8,4   | 18,55 | 547,52 | 70,86  |
|    | 2019/07/31 | CH2276 | Female | Two y/o   | Treatment (Wk 1) | Treatment | Fast Day | No | 00:10 | 00:00 - 00:59 | Early Morning | 37,4 | 86  | 9,6   | 9,6   | 18,55 | 582,77 | 75,37  |
|    | 2019/07/31 | CH2276 | Female | Two y/o   | Treatment (Wk 1) | Treatment | Fast Day | No | 00:15 | 00:00 - 00:59 | Early Morning | 37,4 | 53  | 9,0   | 9,0   | 18,55 | 544,43 | 73,19  |
|    | 2019/07/31 | CH2276 | Female | Two y/o   | Treatment (Wk 1) | Treatment | Fast Day | No | 00:20 | 00:00 - 00:59 | Early Morning | 37,5 | 62  | 11,4  | 11,4  | 18,65 | 557,33 | 81,19  |
|    | 2019/07/31 | CH2276 | Female | Two y/o   | Treatment (Wk 1) | Treatment | Fast Day | No | 00:25 | 00:00 - 00:59 | Early Morning | 37,5 | 54  | 9,8   | 9,8   | 18,65 | 545,99 | 76,07  |
|    | 2019/07/31 | CH2276 | Female | Two y/o   | Treatment (Wk 1) | Treatment | Fast Day | No | 00:30 | 00:00 - 00:59 | Early Morning | 37,5 | 92  | 8,4   | 8,4   | 18,65 | 587,78 | 70,86  |
|    | 2019/07/31 | CH2276 | Female | Two y/o   | Treatment (Wk 1) | Treatment | Fast Day | No | 00:35 | 00:00 - 00:59 | Early Morning | 37,5 | 92  | 7,8   | 7,8   | 18,65 | 587,78 | 68,36  |
|    | 2019/07/31 | CH2276 | Female | Two y/o   | Treatment (Wk 1) | Treatment | Fast Day | No | 00:40 | 00:00 - 00:59 | Early Morning | 37,5 | 57  | 8,4   | 8,4   | 18,65 | 550,47 | 70,86  |
|    | 2019/07/31 | CH2276 | Female | Two y/o   | Treatment (Wk 1) | Treatment | Fast Day | No | 00:45 | 00:00 - 00:59 | Early Morning | 37,5 | 64  | 10,2  | 10,2  | 18,65 | 559,88 | 77,43  |
|    | 2019/07/31 | CH2276 | Female | Two y/o   | Treatment (Wk 1) | Treatment | Fast Day | No | 00:50 | 00:00 - 00:59 | Early Morning | 37,5 | 77  | 3,2   | 3,2   | 18,65 | 574,39 | 38,49  |
|    | 2019/07/31 | CH2276 | Female | Two y/o   | Treatment (Wk 1) | Treatment | Fast Day | No | 00:55 | 00:00 - 00:59 | Early Morning | 37,5 | 65  | 16,4  | 16,4  | 18,65 | 561,12 | 93,55  |
|    | 2019/07/31 | CH2276 | Female | Two y/o   | Treatment (Wk 1) | Treatment | Fast Day | No | 01:00 | 01:00 - 01:59 | Early Morning | 37,5 | 61  | 13,4  | 13,4  | 18,65 | 556,01 | 86,68  |
|    | 2019/07/31 | CH2276 | Female | Two y/o   | Treatment (Wk 1) | Treatment | Fast Day | No | 01:05 | 01:00 - 01:59 | Early Morning | 37,4 | 80  | 16,2  | 16,2  | 18,55 | 577,31 | 93,13  |
|    | 2019/07/31 | CH2276 | Female | Two y/o   | Treatment (Wk 1) | Treatment | Fast Day | No | 01:10 | 01:00 - 01:59 | Early Morning | 37,1 | 78  | 13,4  | 13,4  | 18,26 | 575,38 | 86,68  |
|    | 2019/07/31 | CH2276 | Female | Two y/o   | Treatment (Wk 1) | Treatment | Fast Day | No | 01:15 | 01:00 - 01:59 | Early Morning | 37,0 | 58  | 20,0  | 20,0  | 18,16 | 551,90 | 100,31 |
|    | 2019/07/31 | CH2276 | Female | Two y/o   | Treatment (Wk 1) | Treatment | Fast Day | No | 01:20 | 01:00 - 01:59 | Early Morning | 37,0 | 62  | 20,0  | 20,0  | 18,16 | 557,33 | 100,31 |
|    | 2019/07/31 | CH2276 | Female | Two y/o   | Treatment (Wk 1) | Treatment | Fast Day | No | 01:25 | 01:00 - 01:59 | Early Morning | 37,0 | 59  | 18,6  | 18,6  | 18,16 | 553,30 | 97,84  |
|    | 2019/07/31 | CH2276 | Female | Two y/o   | Treatment (Wk 1) | Treatment | Fast Day | No | 01:30 | 01:00 - 01:59 | Early Morning | 36,9 | 54  | 19,4  | 19,4  | 18,06 | 545,99 | 99,28  |
|    | 2019/07/31 | CH2276 | Female | Two y/o   | Treatment (Wk 1) | Treatment | Fast Day | No | 01:35 | 01:00 - 01:59 | Early Morning | 36,9 | 90  | 17,8  | 17,8  | 18,06 | 586,16 | 96,34  |
|    | 2019/07/31 | CH2276 | Female | Two y/o   | Treatment (Wk 1) | Treatment | Fast Day | No | 01:40 | 01:00 - 01:59 | Early Morning | 36,9 | 93  | 15,4  | 15,4  | 18,06 | 588,58 | 91,41  |
|    | 2019/07/31 | CH2276 | Female | Two y/o   | Treatment (Wk 1) | Treatment | Fast Day | No | 01:45 | 01:00 - 01:59 | Early Morning | 36,9 | 87  | 23,0  | 23,0  | 18,06 | 583,64 | 105,09 |
|    | 2019/07/31 | CH2276 | Female | Two y/o   | Treatment (Wk 1) | Treatment | Fast Day | No | 01:50 | 01:00 - 01:59 | Early Morning | 36,9 | 61  | 20,0  | 20,0  | 18,06 | 556,01 | 100,31 |
|    | 2019/07/31 | CH2276 | Female | Two y/o   | Treatment (Wk 1) | Treatment | Fast Day | No | 01:55 | 01:00 - 01:59 | Early Morning | 36,9 | 82  | 19,6  | 19,6  | 18,06 | 579,19 | 99,63  |
|    | 2019/07/31 | CH2276 | Female | Two y/o   | Treatment (Wk 1) | Treatment | Fast Day | No | 02:00 | 02:00 - 02:59 | Early Morning | 36,9 | 49  | 22,6  | 22,6  | 18,06 | 537,80 | 104,49 |



|            |        |        |         |                  |           |          |    |       |               |               |      |     |       |       |       |        |        |
|------------|--------|--------|---------|------------------|-----------|----------|----|-------|---------------|---------------|------|-----|-------|-------|-------|--------|--------|
| 2019/07/31 | CH2276 | Female | Two y/o | Treatment (Wk 1) | Treatment | Fast Day | No | 02:05 | 02:00 - 02:59 | Early Morning | 36,8 | 88  | 24,8  | 24,8  | 17,96 | 584,49 | 107,67 |
| 2019/07/31 | CH2276 | Female | Two y/o | Treatment (Wk 1) | Treatment | Fast Day | No | 02:10 | 02:00 - 02:59 | Early Morning | 36,8 | 137 | 11,4  | 11,4  | 17,96 | 615,83 | 81,19  |
| 2019/07/31 | CH2276 | Female | Two y/o | Treatment (Wk 1) | Treatment | Fast Day | No | 02:15 | 02:00 - 02:59 | Early Morning | 36,9 | 58  | 10,4  | 10,4  | 18,06 | 551,90 | 78,08  |
| 2019/07/31 | CH2276 | Female | Two y/o | Treatment (Wk 1) | Treatment | Fast Day | No | 02:20 | 02:00 - 02:59 | Early Morning | 36,9 | 55  | 8,8   | 8,8   | 18,06 | 547,52 | 72,43  |
| 2019/07/31 | CH2276 | Female | Two y/o | Treatment (Wk 1) | Treatment | Fast Day | No | 02:25 | 02:00 - 02:59 | Early Morning | 36,9 | 57  | 10,4  | 10,4  | 18,06 | 550,47 | 78,08  |
| 2019/07/31 | CH2276 | Female | Two y/o | Treatment (Wk 1) | Treatment | Fast Day | No | 02:30 | 02:00 - 02:59 | Early Morning | 36,9 | 92  | 12,6  | 12,6  | 18,06 | 587,78 | 84,59  |
| 2019/07/31 | CH2276 | Female | Two y/o | Treatment (Wk 1) | Treatment | Fast Day | No | 02:35 | 02:00 - 02:59 | Early Morning | 36,9 | 60  | 16,0  | 16,0  | 18,06 | 554,67 | 92,71  |
| 2019/07/31 | CH2276 | Female | Two y/o | Treatment (Wk 1) | Treatment | Fast Day | No | 02:40 | 02:00 - 02:59 | Early Morning | 36,9 | 57  | 3,6   | 3,6   | 18,06 | 550,47 | 42,42  |
| 2019/07/31 | CH2276 | Female | Two y/o | Treatment (Wk 1) | Treatment | Fast Day | No | 02:45 | 02:00 - 02:59 | Early Morning | 37,0 | 53  | 3,8   | 3,8   | 18,16 | 544,43 | 44,22  |
| 2019/07/31 | CH2276 | Female | Two y/o | Treatment (Wk 1) | Treatment | Fast Day | No | 02:50 | 02:00 - 02:59 | Early Morning | 37,0 | 52  | 8,8   | 8,8   | 18,16 | 542,83 | 72,43  |
| 2019/07/31 | CH2276 | Female | Two y/o | Treatment (Wk 1) | Treatment | Fast Day | No | 02:55 | 02:00 - 02:59 | Early Morning | 37,0 | 47  | 3,4   | 3,4   | 18,16 | 534,23 | 40,51  |
| 2019/07/31 | CH2276 | Female | Two y/o | Treatment (Wk 1) | Treatment | Fast Day | No | 03:00 | 03:00 - 03:59 | Early Morning | 37,0 |     | 19,0  | 19,0  | 18,16 |        | 98,56  |
| 2019/07/31 | CH2276 | Female | Two y/o | Treatment (Wk 1) | Treatment | Fast Day | No | 03:05 | 03:00 - 03:59 | Early Morning | 37,0 | 59  | 14,6  | 14,6  | 18,16 | 553,30 | 89,59  |
| 2019/07/31 | CH2276 | Female | Two y/o | Treatment (Wk 1) | Treatment | Fast Day | No | 03:10 | 03:00 - 03:59 | Early Morning | 36,9 | 61  | 14,2  | 14,2  | 18,06 | 556,01 | 88,65  |
| 2019/07/31 | CH2276 | Female | Two y/o | Treatment (Wk 1) | Treatment | Fast Day | No | 03:15 | 03:00 - 03:59 | Early Morning | 36,9 | 90  | 14,4  | 14,4  | 18,06 | 586,16 | 89,12  |
| 2019/07/31 | CH2276 | Female | Two y/o | Treatment (Wk 1) | Treatment | Fast Day | No | 03:20 | 03:00 - 03:59 | Early Morning | 36,8 | 46  | 17,2  | 17,2  | 17,96 | 532,38 | 95,17  |
| 2019/07/31 | CH2276 | Female | Two y/o | Treatment (Wk 1) | Treatment | Fast Day | No | 03:25 | 03:00 - 03:59 | Early Morning | 36,8 | 84  | 15,8  | 15,8  | 17,96 | 581,01 | 92,28  |
| 2019/07/31 | CH2276 | Female | Two y/o | Treatment (Wk 1) | Treatment | Fast Day | No | 03:30 | 03:00 - 03:59 | Early Morning | 36,8 | 53  | 12,6  | 12,6  | 17,96 | 544,43 | 84,59  |
| 2019/07/31 | CH2276 | Female | Two y/o | Treatment (Wk 1) | Treatment | Fast Day | No | 03:35 | 03:00 - 03:59 | Early Morning | 36,8 | 103 | 5,8   | 5,8   | 17,96 | 596,00 | 58,39  |
| 2019/07/31 | CH2276 | Female | Two y/o | Treatment (Wk 1) | Treatment | Fast Day | No | 03:40 | 03:00 - 03:59 | Early Morning | 36,8 | 66  | 6,2   | 6,2   | 17,96 | 562,34 | 60,63  |
| 2019/07/31 | CH2276 | Female | Two y/o | Treatment (Wk 1) | Treatment | Fast Day | No | 03:45 | 03:00 - 03:59 | Early Morning | 36,8 | 62  | 9,8   | 9,8   | 17,96 | 557,33 | 76,07  |
| 2019/07/31 | CH2276 | Female | Two y/o | Treatment (Wk 1) | Treatment | Fast Day | No | 03:50 | 03:00 - 03:59 | Early Morning | 36,8 | 54  | 5,2   | 5,2   | 17,96 | 545,99 | 54,72  |
| 2019/07/31 | CH2276 | Female | Two y/o | Treatment (Wk 1) | Treatment | Fast Day | No | 03:55 | 03:00 - 03:59 | Early Morning | 36,8 | 51  | 6,4   | 6,4   | 17,96 | 541,20 | 61,70  |
| 2019/07/31 | CH2276 | Female | Two y/o | Treatment (Wk 1) | Treatment | Fast Day | No | 04:00 | 04:00 - 04:59 | Morning       | 36,8 | 90  | 11,0  | 11,0  | 17,96 | 586,16 | 79,98  |
| 2019/07/31 | CH2276 | Female | Two y/o | Treatment (Wk 1) | Treatment | Fast Day | No | 04:05 | 04:00 - 04:59 | Morning       | 36,8 | 54  | 9,8   | 9,8   | 17,96 | 545,99 | 76,07  |
| 2019/07/31 | CH2276 | Female | Two y/o | Treatment (Wk 1) | Treatment | Fast Day | No | 04:10 | 04:00 - 04:59 | Morning       | 36,8 | 62  | 5,8   | 5,8   | 17,96 | 557,33 | 58,39  |
| 2019/07/31 | CH2276 | Female | Two y/o | Treatment (Wk 1) | Treatment | Fast Day | No | 04:15 | 04:00 - 04:59 | Morning       | 36,8 | 57  | 7,6   | 7,6   | 17,96 | 550,47 | 67,49  |
| 2019/07/31 | CH2276 | Female | Two y/o | Treatment (Wk 1) | Treatment | Fast Day | No | 04:20 | 04:00 - 04:59 | Morning       | 36,8 | 79  | 4,2   | 4,2   | 17,96 | 576,36 | 47,57  |
| 2019/07/31 | CH2276 | Female | Two y/o | Treatment (Wk 1) | Treatment | Fast Day | No | 04:25 | 04:00 - 04:59 | Morning       | 36,8 | 60  | 7,2   | 7,2   | 17,96 | 554,67 | 65,66  |
| 2019/07/31 | CH2276 | Female | Two y/o | Treatment (Wk 1) | Treatment | Fast Day | No | 04:30 | 04:00 - 04:59 | Morning       | 36,8 | 77  | 3,6   | 3,6   | 17,96 | 574,39 | 42,42  |
| 2019/07/31 | CH2276 | Female | Two y/o | Treatment (Wk 1) | Treatment | Fast Day | No | 04:35 | 04:00 - 04:59 | Morning       | 36,8 | 76  | 8,0   | 8,0   | 17,96 | 573,39 | 69,22  |
| 2019/07/31 | CH2276 | Female | Two y/o | Treatment (Wk 1) | Treatment | Fast Day | No | 04:40 | 04:00 - 04:59 | Morning       | 36,8 | 59  | 22,6  | 22,6  | 17,96 | 553,30 | 104,49 |
| 2019/07/31 | CH2276 | Female | Two y/o | Treatment (Wk 1) | Treatment | Fast Day | No | 04:45 | 04:00 - 04:59 | Morning       | 36,8 | 121 | 7,8   | 7,8   | 17,96 | 607,35 | 68,36  |
| 2019/07/31 | CH2276 | Female | Two y/o | Treatment (Wk 1) | Treatment | Fast Day | No | 04:50 | 04:00 - 04:59 | Morning       | 36,8 | 60  | 27,8  | 27,8  | 17,96 | 554,67 | 111,58 |
| 2019/07/31 | CH2276 | Female | Two y/o | Treatment (Wk 1) | Treatment | Fast Day | No | 04:55 | 04:00 - 04:59 | Morning       | 36,9 | 57  | 56,0  | 56,0  | 18,06 | 550,47 | 135,70 |
| 2019/07/31 | CH2276 | Female | Two y/o | Treatment (Wk 1) | Treatment | Fast Day | No | 05:00 | 05:00 - 05:59 | Morning       | 36,9 |     | 41,0  | 41,0  | 18,06 |        | 124,94 |
| 2019/07/31 | CH2276 | Female | Two y/o | Treatment (Wk 1) | Treatment | Fast Day | No | 05:05 | 05:00 - 05:59 | Morning       | 36,9 | 107 | 117,2 | 117,2 | 18,06 | 598,73 | 161,38 |
| 2019/07/31 | CH2276 | Female | Two y/o | Treatment (Wk 1) | Treatment | Fast Day | No | 05:10 | 05:00 - 05:59 | Morning       | 37,1 | 141 | 76,6  | 76,6  | 18,26 | 617,75 | 146,57 |
| 2019/07/31 | CH2276 | Female | Two y/o | Treatment (Wk 1) | Treatment | Fast Day | No | 05:15 | 05:00 - 05:59 | Morning       | 37,3 | 150 | 38,0  | 38,0  | 18,46 | 621,86 | 122,32 |
| 2019/07/31 | CH2276 | Female | Two y/o | Treatment (Wk 1) | Treatment | Fast Day | No | 05:20 | 05:00 - 05:59 | Morning       | 37,4 | 169 | 776,8 | 776,8 | 18,55 | 629,60 | 228,28 |
| 2019/07/31 | CH2276 | Female | Two y/o | Treatment (Wk 1) | Treatment | Fast Day | No | 05:25 | 05:00 - 05:59 | Morning       | 37,4 | 52  | 466,0 | 466,0 | 18,55 | 542,83 | 210,04 |
| 2019/07/31 | CH2276 | Female | Two y/o | Treatment (Wk 1) | Treatment | Fast Day | No | 05:30 | 05:00 - 05:59 | Morning       | 37,7 | 63  | 570,4 | 570,4 | 18,85 | 558,62 | 217,24 |
| 2019/07/31 | CH2276 | Female | Two y/o | Treatment (Wk 1) | Treatment | Fast Day | No | 05:35 | 05:00 - 05:59 | Morning       | 37,8 | 197 | 75,8  | 75,8  | 18,95 | 639,25 | 146,20 |
| 2019/07/31 | CH2276 | Female | Two y/o | Treatment (Wk 1) | Treatment | Fast Day | No | 05:40 | 05:00 - 05:59 | Morning       | 38,0 | 132 | 57,2  | 57,2  | 19,15 | 613,32 | 136,44 |
| 2019/07/31 | CH2276 | Female | Two y/o | Treatment (Wk 1) | Treatment | Fast Day | No | 05:45 | 05:00 - 05:59 | Morning       | 38,0 | 63  | 483,8 | 483,8 | 19,15 | 558,62 | 211,37 |
| 2019/07/31 | CH2276 | Female | Two y/o | Treatment (Wk 1) | Treatment | Fast Day | No | 05:50 | 05:00 - 05:59 | Morning       | 38,7 | 67  | 163,6 | 163,6 | 19,87 | 563,53 | 173,06 |
| 2019/07/31 | CH2276 | Female | Two y/o | Treatment (Wk 1) | Treatment | Fast Day | No | 05:55 | 05:00 - 05:59 | Morning       | 38,5 | 113 | 40,4  | 40,4  | 19,66 | 602,58 | 124,43 |
| 2019/07/31 | CH2276 | Female | Two y/o | Treatment (Wk 1) | Treatment | Fast Day | No | 06:00 | 06:00 - 06:59 | Morning       | 38,3 | 36  | 304,2 | 304,2 | 19,46 | 510,56 | 194,91 |
| 2019/07/31 | CH2276 | Female | Two y/o | Treatment (Wk 1) | Treatment | Fast Day | No | 06:05 | 06:00 - 06:59 | Morning       | 38,3 | 82  | 482,0 | 482,0 | 19,46 | 579,19 | 211,24 |
| 2019/07/31 | CH2276 | Female | Two y/o | Treatment (Wk 1) | Treatment | Fast Day | No | 06:10 | 06:00 - 06:59 | Morning       | 38,2 | 120 | 435,4 | 435,4 | 19,36 | 606,78 | 207,63 |
| 2019/07/31 | CH2276 | Female | Two y/o | Treatment (Wk 1) | Treatment | Fast Day | No | 06:15 | 06:00 - 06:59 | Morning       | 38,2 | 48  | 420,8 | 420,8 | 19,36 | 536,04 | 206,41 |
| 2019/07/31 | CH2276 | Female | Two y/o | Treatment (Wk 1) | Treatment | Fast Day | No | 06:20 | 06:00 - 06:59 | Morning       | 38,2 | 83  | 332,0 | 332,0 | 19,36 | 580,11 | 198,01 |
| 2019/07/31 | CH2276 | Female | Two y/o | Treatment (Wk 1) | Treatment | Fast Day | No | 06:25 | 06:00 - 06:59 | Morning       | 38,2 | 117 | 81,6  | 81,6  | 19,36 | 605,02 | 148,76 |
| 2019/07/31 | CH2276 | Female | Two y/o | Treatment (Wk 1) | Treatment | Fast Day | No | 06:30 | 06:00 - 06:59 | Morning       | 38,2 | 145 | 82,0  | 82,0  | 19,36 | 619,62 | 148,93 |
| 2019/07/31 | CH2276 | Female | Two y/o | Treatment (Wk 1) | Treatment | Fast Day | No | 06:35 | 06:00 - 06:59 | Morning       | 38,3 | 100 | 297,4 | 297,4 | 19,46 | 593,87 | 194,11 |
| 2019/07/31 | CH2276 | Female | Two y/o | Treatment (Wk 1) | Treatment | Fast Day | No | 06:40 | 06:00 - 06:59 | Morning       | 38,2 | 80  | 244,0 | 244,0 | 19,36 | 577,31 | 187,12 |
| 2019/07/31 | CH2276 | Female | Two y/o | Treatment (Wk 1) | Treatment | Fast Day | No | 06:45 | 06:00 - 06:59 | Morning       | 38,3 | 185 | 142,0 | 142,0 | 19,46 | 635,34 | 168,10 |
| 2019/07/31 | CH2276 | Female | Two y/o | Treatment (Wk 1) | Treatment | Fast Day | No | 06:50 | 06:00 - 06:59 | Morning       | 38,3 | 150 | 133,4 | 133,4 | 19,46 | 621,86 | 165,91 |
| 2019/07/31 | CH2276 | Female | Two y/o | Treatment (Wk 1) | Treatment | Fast Day | No | 06:55 | 06:00 - 06:59 | Morning       | 38,3 | 71  | 568,6 | 568,6 | 19,46 | 568,10 | 217,13 |
| 2019/07/31 | CH2276 | Female | Two y/o | Treatment (Wk 1) | Treatment | Fast Day | No | 07:00 | 07:00 - 07:59 | Morning       | 38,3 | 162 | 35,6  | 35,6  | 19,46 | 626,88 | 120,08 |
| 2019/07/31 | CH2276 | Female | Two y/o | Treatment (Wk 1) | Treatment | Fast Day | No | 07:05 | 07:00 - 07:59 | Morning       | 38,3 | 85  | 246,4 | 246,4 | 19,46 | 581,90 | 187,47 |
| 2019/07/31 | CH2276 | Female | Two y/o | Treatment (Wk 1) | Treatment | Fast Day | No | 07:10 | 07:00 - 07:59 | Morning       | 38,3 | 31  | 360,0 | 360,0 | 19,46 | 496,63 | 200,88 |
| 2019/07/31 | CH2276 | Female | Two y/o | Treatment (Wk 1) | Treatment | Fast Day | No | 07:15 | 07:00 - 07:59 | Morning       | 38,3 | 86  | 216,4 | 216,4 | 19,46 | 582,77 | 182,89 |
| 2019/07/31 | CH2276 | Female | Two y/o | Treatment (Wk 1) | Treatment | Fast Day | No | 07:20 | 07:00 - 07:59 | Morning       | 38,3 | 125 | 165,8 | 165,8 | 19,46 | 609,60 | 173,53 |
| 2019/07/31 | CH2276 | Female | Two y/o | Treatment (Wk 1) | Treatment | Fast Day | No | 07:25 | 07:00 - 07:59 | Morning       | 38,3 | 114 | 105,8 | 105,8 | 19,46 | 603,20 | 157,81 |
| 2019/07/31 | CH2276 | Female | Two y/o | Treatment (Wk 1) | Treatment | Fast Day | No | 07:30 | 07:00 - 07:59 | Morning       | 38,2 | 80  | 202,2 | 202,2 | 19,36 | 577,31 | 180,50 |
| 2019/07/31 | CH2276 | Female | Two y/o | Treatment (Wk 1) | Treatment | Fast Day | No | 07:35 | 07:00 - 07:59 | Morning       | 38,1 | 95  | 477,0 | 477,0 | 19,26 | 590,14 | 210,87 |
| 2019/07/31 | CH2276 | Female | Two y/o | Treatment (Wk 1) | Treatment | Fast Day | No | 07:40 | 07:00 - 07:59 | Morning       | 38,0 | 118 | 121,4 | 121,4 | 19,15 | 605,61 | 162,61 |
| 2019/07/31 | CH2276 | Female | Two y/o | Treatment (Wk 1) | Treatment | Fast Day | No | 07:45 | 07:00 - 07:59 | Morning       | 37,9 | 80  | 131,8 | 131,8 | 19,05 | 577,31 | 165,49 |
| 2019/07/31 | CH2276 | Female | Two y/o | Treatment (Wk 1) | Treatment | Fast Day | No | 07:50 | 07:00 - 07:59 | Morning       | 38,0 | 55  | 33,0  | 33,0  | 19,15 | 547,52 | 117,47 |



|            |        |        |         |                  |           |          |    |       |               |              |      |     |       |       |       |        |
|------------|--------|--------|---------|------------------|-----------|----------|----|-------|---------------|--------------|------|-----|-------|-------|-------|--------|
| 2019/07/31 | CH2276 | Female | Two y/o | Treatment (Wk 1) | Treatment | Fast Day | No | 07:55 | 07:00 - 07:59 | Morning      | 38,0 |     | 63,8  | 63,8  | 19,15 | 140,22 |
| 2019/07/31 | CH2276 | Female | Two y/o | Treatment (Wk 1) | Treatment | Fast Day | No | 08:00 | 08:00 - 08:59 | Late Morning | 38,0 | 59  | 179,6 | 179,6 | 19,15 | 553,30 |
| 2019/07/31 | CH2276 | Female | Two y/o | Treatment (Wk 1) | Treatment | Fast Day | No | 08:05 | 08:00 - 08:59 | Late Morning | 38,0 | 121 | 74,6  | 74,6  | 19,15 | 607,35 |
| 2019/07/31 | CH2276 | Female | Two y/o | Treatment (Wk 1) | Treatment | Fast Day | No | 08:10 | 08:00 - 08:59 | Late Morning | 38,0 |     | 59,6  | 59,6  | 19,15 | 137,86 |
| 2019/07/31 | CH2276 | Female | Two y/o | Treatment (Wk 1) | Treatment | Fast Day | No | 08:15 | 08:00 - 08:59 | Late Morning | 37,9 | 88  | 23,8  | 23,8  | 19,05 | 584,49 |
| 2019/07/31 | CH2276 | Female | Two y/o | Treatment (Wk 1) | Treatment | Fast Day | No | 08:20 | 08:00 - 08:59 | Late Morning | 37,8 | 84  | 14,6  | 14,6  | 18,95 | 581,01 |
| 2019/07/31 | CH2276 | Female | Two y/o | Treatment (Wk 1) | Treatment | Fast Day | No | 08:25 | 08:00 - 08:59 | Late Morning | 37,8 | 58  | 25,8  | 25,8  | 18,95 | 551,90 |
| 2019/07/31 | CH2276 | Female | Two y/o | Treatment (Wk 1) | Treatment | Fast Day | No | 08:30 | 08:00 - 08:59 | Late Morning | 37,8 | 79  | 57,2  | 57,2  | 18,95 | 576,36 |
| 2019/07/31 | CH2276 | Female | Two y/o | Treatment (Wk 1) | Treatment | Fast Day | No | 08:35 | 08:00 - 08:59 | Late Morning | 37,8 | 75  | 60,0  | 60,0  | 18,95 | 572,36 |
| 2019/07/31 | CH2276 | Female | Two y/o | Treatment (Wk 1) | Treatment | Fast Day | No | 08:40 | 08:00 - 08:59 | Late Morning | 37,9 | 58  | 136,2 | 136,2 | 19,05 | 551,90 |
| 2019/07/31 | CH2276 | Female | Two y/o | Treatment (Wk 1) | Treatment | Fast Day | No | 08:45 | 08:00 - 08:59 | Late Morning | 38,0 |     | 61,4  | 61,4  | 19,15 | 138,89 |
| 2019/07/31 | CH2276 | Female | Two y/o | Treatment (Wk 1) | Treatment | Fast Day | No | 08:50 | 08:00 - 08:59 | Late Morning | 37,9 |     | 817,6 | 817,6 | 19,05 | 230,11 |
| 2019/07/31 | CH2276 | Female | Two y/o | Treatment (Wk 1) | Treatment | Fast Day | No | 08:55 | 08:00 - 08:59 | Late Morning | 37,8 | 111 | 361,4 | 361,4 | 18,95 | 601,33 |
| 2019/07/31 | CH2276 | Female | Two y/o | Treatment (Wk 1) | Treatment | Fast Day | No | 09:00 | 09:00 - 09:59 | Late Morning | 37,8 | 56  | 188,8 | 188,8 | 18,95 | 549,01 |
| 2019/07/31 | CH2276 | Female | Two y/o | Treatment (Wk 1) | Treatment | Fast Day | No | 09:05 | 09:00 - 09:59 | Late Morning | 37,8 | 62  | 560,8 | 560,8 | 18,95 | 557,33 |
| 2019/07/31 | CH2276 | Female | Two y/o | Treatment (Wk 1) | Treatment | Fast Day | No | 09:10 | 09:00 - 09:59 | Late Morning | 37,8 |     | 55,2  | 55,2  | 18,95 | 135,21 |
| 2019/07/31 | CH2276 | Female | Two y/o | Treatment (Wk 1) | Treatment | Fast Day | No | 09:15 | 09:00 - 09:59 | Late Morning | 37,9 | 103 | 72,8  | 72,8  | 19,05 | 596,00 |
| 2019/07/31 | CH2276 | Female | Two y/o | Treatment (Wk 1) | Treatment | Fast Day | No | 09:20 | 09:00 - 09:59 | Late Morning | 37,9 |     | 153,0 | 153,0 | 19,05 | 170,71 |
| 2019/07/31 | CH2276 | Female | Two y/o | Treatment (Wk 1) | Treatment | Fast Day | No | 09:25 | 09:00 - 09:59 | Late Morning | 38,0 | 113 | 101,2 | 101,2 | 19,15 | 602,58 |
| 2019/07/31 | CH2276 | Female | Two y/o | Treatment (Wk 1) | Treatment | Fast Day | No | 09:30 | 09:00 - 09:59 | Late Morning | 38,2 | 92  | 20,0  | 20,0  | 19,36 | 587,78 |
| 2019/07/31 | CH2276 | Female | Two y/o | Treatment (Wk 1) | Treatment | Fast Day | No | 09:35 | 09:00 - 09:59 | Late Morning | 38,2 | 86  | 35,8  | 35,8  | 19,36 | 582,77 |
| 2019/07/31 | CH2276 | Female | Two y/o | Treatment (Wk 1) | Treatment | Fast Day | No | 09:40 | 09:00 - 09:59 | Late Morning | 38,2 | 80  | 81,4  | 81,4  | 19,36 | 577,31 |
| 2019/07/31 | CH2276 | Female | Two y/o | Treatment (Wk 1) | Treatment | Fast Day | No | 09:45 | 09:00 - 09:59 | Late Morning | 38,2 | 62  | 39,8  | 39,8  | 19,36 | 557,33 |
| 2019/07/31 | CH2276 | Female | Two y/o | Treatment (Wk 1) | Treatment | Fast Day | No | 09:50 | 09:00 - 09:59 | Late Morning | 38,2 | 58  | 30,4  | 30,4  | 19,36 | 551,90 |
| 2019/07/31 | CH2276 | Female | Two y/o | Treatment (Wk 1) | Treatment | Fast Day | No | 09:55 | 09:00 - 09:59 | Late Morning | 38,2 | 194 | 42,6  | 42,6  | 19,36 | 638,30 |
| 2019/07/31 | CH2276 | Female | Two y/o | Treatment (Wk 1) | Treatment | Fast Day | No | 10:00 | 10:00 - 10:59 | Late Morning | 38,2 |     | 63,0  | 63,0  | 19,36 | 139,78 |
| 2019/07/31 | CH2276 | Female | Two y/o | Treatment (Wk 1) | Treatment | Fast Day | No | 10:05 | 10:00 - 10:59 | Late Morning | 38,2 | 70  | 70,6  | 70,6  | 19,36 | 566,99 |
| 2019/07/31 | CH2276 | Female | Two y/o | Treatment (Wk 1) | Treatment | Fast Day | No | 10:10 | 10:00 - 10:59 | Late Morning | 38,2 | 62  | 67,8  | 67,8  | 19,36 | 557,33 |
| 2019/07/31 | CH2276 | Female | Two y/o | Treatment (Wk 1) | Treatment | Fast Day | No | 10:15 | 10:00 - 10:59 | Late Morning | 38,2 | 79  | 70,0  | 70,0  | 19,36 | 576,36 |
| 2019/07/31 | CH2276 | Female | Two y/o | Treatment (Wk 1) | Treatment | Fast Day | No | 10:20 | 10:00 - 10:59 | Late Morning | 38,0 | 64  | 50,4  | 50,4  | 19,15 | 559,88 |
| 2019/07/31 | CH2276 | Female | Two y/o | Treatment (Wk 1) | Treatment | Fast Day | No | 10:25 | 10:00 - 10:59 | Late Morning | 38,1 | 78  | 29,6  | 29,6  | 19,26 | 575,38 |
| 2019/07/31 | CH2276 | Female | Two y/o | Treatment (Wk 1) | Treatment | Fast Day | No | 10:30 | 10:00 - 10:59 | Late Morning | 38,2 | 99  | 81,0  | 81,0  | 19,36 | 593,14 |
| 2019/07/31 | CH2276 | Female | Two y/o | Treatment (Wk 1) | Treatment | Fast Day | No | 10:35 | 10:00 - 10:59 | Late Morning | 38,2 | 63  | 174,6 | 174,6 | 19,36 | 558,62 |
| 2019/07/31 | CH2276 | Female | Two y/o | Treatment (Wk 1) | Treatment | Fast Day | No | 10:40 | 10:00 - 10:59 | Late Morning | 38,2 | 59  | 76,6  | 76,6  | 19,36 | 553,30 |
| 2019/07/31 | CH2276 | Female | Two y/o | Treatment (Wk 1) | Treatment | Fast Day | No | 10:45 | 10:00 - 10:59 | Late Morning | 38,2 | 110 | 44,0  | 44,0  | 19,36 | 600,69 |
| 2019/07/31 | CH2276 | Female | Two y/o | Treatment (Wk 1) | Treatment | Fast Day | No | 10:50 | 10:00 - 10:59 | Late Morning | 38,0 | 84  | 54,2  | 54,2  | 19,15 | 581,01 |
| 2019/07/31 | CH2276 | Female | Two y/o | Treatment (Wk 1) | Treatment | Fast Day | No | 10:55 | 10:00 - 10:59 | Late Morning | 38,0 | 78  | 125,2 | 125,2 | 19,15 | 575,38 |
| 2019/07/31 | CH2276 | Female | Two y/o | Treatment (Wk 1) | Treatment | Fast Day | No | 11:00 | 11:00 - 11:59 | Late Morning | 38,0 | 115 | 74,8  | 74,8  | 19,15 | 603,82 |
| 2019/07/31 | CH2276 | Female | Two y/o | Treatment (Wk 1) | Treatment | Fast Day | No | 11:05 | 11:00 - 11:59 | Late Morning | 38,2 | 106 | 56,2  | 56,2  | 19,36 | 598,06 |
| 2019/07/31 | CH2276 | Female | Two y/o | Treatment (Wk 1) | Treatment | Fast Day | No | 11:10 | 11:00 - 11:59 | Late Morning | 38,1 |     | 74,4  | 74,4  | 19,26 | 145,55 |
| 2019/07/31 | CH2276 | Female | Two y/o | Treatment (Wk 1) | Treatment | Fast Day | No | 11:15 | 11:00 - 11:59 | Late Morning | 38,0 | 82  | 52,6  | 52,6  | 19,15 | 579,19 |
| 2019/07/31 | CH2276 | Female | Two y/o | Treatment (Wk 1) | Treatment | Fast Day | No | 11:20 | 11:00 - 11:59 | Late Morning | 38,0 | 65  | 49,2  | 49,2  | 19,15 | 561,12 |
| 2019/07/31 | CH2276 | Female | Two y/o | Treatment (Wk 1) | Treatment | Fast Day | No | 11:25 | 11:00 - 11:59 | Late Morning | 38,0 | 70  | 20,4  | 20,4  | 19,15 | 566,99 |
| 2019/07/31 | CH2276 | Female | Two y/o | Treatment (Wk 1) | Treatment | Fast Day | No | 11:30 | 11:00 - 11:59 | Late Morning | 38,0 | 62  | 24,4  | 24,4  | 19,15 | 557,33 |
| 2019/07/31 | CH2276 | Female | Two y/o | Treatment (Wk 1) | Treatment | Fast Day | No | 11:35 | 11:00 - 11:59 | Late Morning | 38,0 | 61  | 24,2  | 24,2  | 19,15 | 556,01 |
| 2019/07/31 | CH2276 | Female | Two y/o | Treatment (Wk 1) | Treatment | Fast Day | No | 11:40 | 11:00 - 11:59 | Late Morning | 38,0 | 62  | 16,8  | 16,8  | 19,15 | 557,33 |
| 2019/07/31 | CH2276 | Female | Two y/o | Treatment (Wk 1) | Treatment | Fast Day | No | 11:45 | 11:00 - 11:59 | Late Morning | 38,0 | 71  | 63,2  | 63,2  | 19,15 | 568,10 |
| 2019/07/31 | CH2276 | Female | Two y/o | Treatment (Wk 1) | Treatment | Fast Day | No | 11:50 | 11:00 - 11:59 | Late Morning | 38,0 | 56  | 84,8  | 84,8  | 19,15 | 549,01 |
| 2019/07/31 | CH2276 | Female | Two y/o | Treatment (Wk 1) | Treatment | Fast Day | No | 11:55 | 11:00 - 11:59 | Late Morning | 37,9 | 83  | 28,0  | 28,0  | 19,05 | 580,11 |
| 2019/07/31 | CH2276 | Female | Two y/o | Treatment (Wk 1) | Treatment | Fast Day | No | 12:00 | 12:00 - 12:59 | Afternoon    | 37,9 | 60  | 24,8  | 24,8  | 19,05 | 554,67 |
| 2019/07/31 | CH2276 | Female | Two y/o | Treatment (Wk 1) | Treatment | Fast Day | No | 12:05 | 12:00 - 12:59 | Afternoon    | 37,9 | 90  | 36,0  | 36,0  | 19,05 | 586,16 |
| 2019/07/31 | CH2276 | Female | Two y/o | Treatment (Wk 1) | Treatment | Fast Day | No | 12:10 | 12:00 - 12:59 | Afternoon    | 37,9 | 77  | 214,8 | 214,8 | 19,05 | 574,39 |
| 2019/07/31 | CH2276 | Female | Two y/o | Treatment (Wk 1) | Treatment | Fast Day | No | 12:15 | 12:00 - 12:59 | Afternoon    | 38,0 | 111 | 138,8 | 138,8 | 19,15 | 601,33 |
| 2019/07/31 | CH2276 | Female | Two y/o | Treatment (Wk 1) | Treatment | Fast Day | No | 12:20 | 12:00 - 12:59 | Afternoon    | 38,0 | 89  | 75,4  | 75,4  | 19,15 | 585,33 |
| 2019/07/31 | CH2276 | Female | Two y/o | Treatment (Wk 1) | Treatment | Fast Day | No | 12:25 | 12:00 - 12:59 | Afternoon    | 38,0 | 69  | 58,0  | 58,0  | 19,15 | 565,86 |
| 2019/07/31 | CH2276 | Female | Two y/o | Treatment (Wk 1) | Treatment | Fast Day | No | 12:30 | 12:00 - 12:59 | Afternoon    | 38,2 | 63  | 16,0  | 16,0  | 19,36 | 558,62 |
| 2019/07/31 | CH2276 | Female | Two y/o | Treatment (Wk 1) | Treatment | Fast Day | No | 12:35 | 12:00 - 12:59 | Afternoon    | 38,2 | 59  | 17,6  | 17,6  | 19,36 | 553,30 |
| 2019/07/31 | CH2276 | Female | Two y/o | Treatment (Wk 1) | Treatment | Fast Day | No | 12:40 | 12:00 - 12:59 | Afternoon    | 38,2 | 65  | 19,0  | 19,0  | 19,36 | 561,12 |
| 2019/07/31 | CH2276 | Female | Two y/o | Treatment (Wk 1) | Treatment | Fast Day | No | 12:45 | 12:00 - 12:59 | Afternoon    | 38,1 | 55  | 12,4  | 12,4  | 19,26 | 547,52 |
| 2019/07/31 | CH2276 | Female | Two y/o | Treatment (Wk 1) | Treatment | Fast Day | No | 12:50 | 12:00 - 12:59 | Afternoon    | 38,0 | 60  | 16,4  | 16,4  | 19,15 | 554,67 |
| 2019/07/31 | CH2276 | Female | Two y/o | Treatment (Wk 1) | Treatment | Fast Day | No | 12:55 | 12:00 - 12:59 | Afternoon    | 38,0 | 56  | 14,4  | 14,4  | 19,15 | 549,01 |
| 2019/07/31 | CH2276 | Female | Two y/o | Treatment (Wk 1) | Treatment | Fast Day | No | 13:00 | 13:00 - 13:59 | Afternoon    | 38,0 | 62  | 45,4  | 45,4  | 19,15 | 557,33 |
| 2019/07/31 | CH2276 | Female | Two y/o | Treatment (Wk 1) | Treatment | Fast Day | No | 13:05 | 13:00 - 13:59 | Afternoon    | 37,9 | 62  | 76,0  | 76,0  | 19,05 | 557,33 |
| 2019/07/31 | CH2276 | Female | Two y/o | Treatment (Wk 1) | Treatment | Fast Day | No | 13:10 | 13:00 - 13:59 | Afternoon    | 37,9 | 64  | 49,2  | 49,2  | 19,05 | 559,88 |
| 2019/07/31 | CH2276 | Female | Two y/o | Treatment (Wk 1) | Treatment | Fast Day | No | 13:15 | 13:00 - 13:59 | Afternoon    | 38,0 | 71  | 19,2  | 19,2  | 19,15 | 568,10 |
| 2019/07/31 | CH2276 | Female | Two y/o | Treatment (Wk 1) | Treatment | Fast Day | No | 13:20 | 13:00 - 13:59 | Afternoon    | 37,9 | 79  | 56,8  | 56,8  | 19,05 | 576,36 |
| 2019/07/31 | CH2276 | Female | Two y/o | Treatment (Wk 1) | Treatment | Fast Day | No | 13:25 | 13:00 - 13:59 | Afternoon    | 37,9 | 64  | 22,4  | 22,4  | 19,05 | 559,88 |
| 2019/07/31 | CH2276 | Female | Two y/o | Treatment (Wk 1) | Treatment | Fast Day | No | 13:30 | 13:00 - 13:59 | Afternoon    | 37,9 | 113 | 46,0  | 46,0  | 19,05 | 602,58 |
| 2019/07/31 | CH2276 | Female | Two y/o | Treatment (Wk 1) | Treatment | Fast Day | No | 13:35 | 13:00 - 13:59 | Afternoon    | 37,9 | 81  | 89,2  | 89,2  | 19,05 | 578,26 |
| 2019/07/31 | CH2276 | Female | Two y/o | Treatment (Wk 1) | Treatment | Fast Day | No | 13:40 | 13:00 - 13:59 | Afternoon    | 37,9 | 78  | 47,6  | 47,6  | 19,05 | 575,38 |



|            |        |        |         |                  |           |          |    |       |               |           |      |     |       |       |       |        |        |
|------------|--------|--------|---------|------------------|-----------|----------|----|-------|---------------|-----------|------|-----|-------|-------|-------|--------|--------|
| 2019/07/31 | CH2276 | Female | Two y/o | Treatment (Wk 1) | Treatment | Fast Day | No | 13:45 | 13:00 - 13:59 | Afternoon | 37,9 | 84  | 49,6  | 49,6  | 19,05 | 581,01 | 131,51 |
| 2019/07/31 | CH2276 | Female | Two y/o | Treatment (Wk 1) | Treatment | Fast Day | No | 13:50 | 13:00 - 13:59 | Afternoon | 37,9 | 52  | 79,4  | 79,4  | 19,05 | 542,83 | 147,81 |
| 2019/07/31 | CH2276 | Female | Two y/o | Treatment (Wk 1) | Treatment | Fast Day | No | 13:55 | 13:00 - 13:59 | Afternoon | 37,9 | 55  | 170,4 | 170,4 | 19,05 | 547,52 | 174,49 |
| 2019/07/31 | CH2276 | Female | Two y/o | Treatment (Wk 1) | Treatment | Fast Day | No | 14:00 | 14:00 - 14:59 | Afternoon | 37,9 | 158 | 146,0 | 146,0 | 19,05 | 625,26 | 169,07 |
| 2019/07/31 | CH2276 | Female | Two y/o | Treatment (Wk 1) | Treatment | Fast Day | No | 14:05 | 14:00 - 14:59 | Afternoon | 38,0 | 90  | 18,0  | 18,0  | 19,15 | 586,16 | 96,72  |
| 2019/07/31 | CH2276 | Female | Two y/o | Treatment (Wk 1) | Treatment | Fast Day | No | 14:10 | 14:00 - 14:59 | Afternoon | 38,0 | 62  | 13,0  | 13,0  | 19,15 | 557,33 | 85,65  |
| 2019/07/31 | CH2276 | Female | Two y/o | Treatment (Wk 1) | Treatment | Fast Day | No | 14:15 | 14:00 - 14:59 | Afternoon | 38,0 | 60  | 15,8  | 15,8  | 19,15 | 554,67 | 92,28  |
| 2019/07/31 | CH2276 | Female | Two y/o | Treatment (Wk 1) | Treatment | Fast Day | No | 14:20 | 14:00 - 14:59 | Afternoon | 38,0 | 64  | 17,2  | 17,2  | 19,15 | 559,88 | 95,17  |
| 2019/07/31 | CH2276 | Female | Two y/o | Treatment (Wk 1) | Treatment | Fast Day | No | 14:25 | 14:00 - 14:59 | Afternoon | 38,0 | 57  | 15,0  | 15,0  | 19,15 | 550,47 | 90,51  |
| 2019/07/31 | CH2276 | Female | Two y/o | Treatment (Wk 1) | Treatment | Fast Day | No | 14:30 | 14:00 - 14:59 | Afternoon | 38,0 | 58  | 11,4  | 11,4  | 19,15 | 551,90 | 81,19  |
| 2019/07/31 | CH2276 | Female | Two y/o | Treatment (Wk 1) | Treatment | Fast Day | No | 14:35 | 14:00 - 14:59 | Afternoon | 38,1 | 64  | 15,2  | 15,2  | 19,26 | 559,88 | 90,96  |
| 2019/07/31 | CH2276 | Female | Two y/o | Treatment (Wk 1) | Treatment | Fast Day | No | 14:40 | 14:00 - 14:59 | Afternoon | 38,1 | 66  | 22,2  | 22,2  | 19,26 | 562,34 | 103,88 |
| 2019/07/31 | CH2276 | Female | Two y/o | Treatment (Wk 1) | Treatment | Fast Day | No | 14:45 | 14:00 - 14:59 | Afternoon | 38,2 | 73  | 22,8  | 22,8  | 19,36 | 570,27 | 104,79 |
| 2019/07/31 | CH2276 | Female | Two y/o | Treatment (Wk 1) | Treatment | Fast Day | No | 14:50 | 14:00 - 14:59 | Afternoon | 38,2 | 88  | 28,4  | 28,4  | 19,36 | 584,49 | 112,31 |
| 2019/07/31 | CH2276 | Female | Two y/o | Treatment (Wk 1) | Treatment | Fast Day | No | 14:55 | 14:00 - 14:59 | Afternoon | 38,2 | 61  | 430,8 | 430,8 | 19,36 | 556,01 | 207,25 |
| 2019/07/31 | CH2276 | Female | Two y/o | Treatment (Wk 1) | Treatment | Fast Day | No | 15:00 | 15:00 - 15:59 | Afternoon | 38,3 | 87  | 217,8 | 217,8 | 19,46 | 583,64 | 183,12 |
| 2019/07/31 | CH2276 | Female | Two y/o | Treatment (Wk 1) | Treatment | Fast Day | No | 15:05 | 15:00 - 15:59 | Afternoon | 38,2 | 69  | 80,6  | 80,6  | 19,36 | 565,86 | 148,34 |
| 2019/07/31 | CH2276 | Female | Two y/o | Treatment (Wk 1) | Treatment | Fast Day | No | 15:10 | 15:00 - 15:59 | Afternoon | 38,3 | 92  | 72,8  | 72,8  | 19,46 | 587,78 | 144,80 |
| 2019/07/31 | CH2276 | Female | Two y/o | Treatment (Wk 1) | Treatment | Fast Day | No | 15:15 | 15:00 - 15:59 | Afternoon | 38,2 | 104 | 606,4 | 606,4 | 19,36 | 596,69 | 219,42 |
| 2019/07/31 | CH2276 | Female | Two y/o | Treatment (Wk 1) | Treatment | Fast Day | No | 15:20 | 15:00 - 15:59 | Afternoon | 38,4 | 43  | 125,0 | 125,0 | 19,56 | 526,50 | 163,63 |
| 2019/07/31 | CH2276 | Female | Two y/o | Treatment (Wk 1) | Treatment | Fast Day | No | 15:25 | 15:00 - 15:59 | Afternoon | 38,4 | 88  | 45,2  | 45,2  | 19,56 | 584,49 | 128,30 |
| 2019/07/31 | CH2276 | Female | Two y/o | Treatment (Wk 1) | Treatment | Fast Day | No | 15:30 | 15:00 - 15:59 | Afternoon | 38,4 | 67  | 161,4 | 161,4 | 19,56 | 563,53 | 172,59 |
| 2019/07/31 | CH2276 | Female | Two y/o | Treatment (Wk 1) | Treatment | Fast Day | No | 15:35 | 15:00 - 15:59 | Afternoon | 38,5 | 137 | 74,0  | 74,0  | 19,66 | 615,83 | 145,37 |
| 2019/07/31 | CH2276 | Female | Two y/o | Treatment (Wk 1) | Treatment | Fast Day | No | 15:40 | 15:00 - 15:59 | Afternoon | 38,6 | 66  | 128,6 | 128,6 | 19,76 | 562,34 | 164,63 |
| 2019/07/31 | CH2276 | Female | Two y/o | Treatment (Wk 1) | Treatment | Fast Day | No | 15:45 | 15:00 - 15:59 | Afternoon | 38,6 | 62  | 203,8 | 203,8 | 19,76 | 557,33 | 180,78 |
| 2019/07/31 | CH2276 | Female | Two y/o | Treatment (Wk 1) | Treatment | Fast Day | No | 15:50 | 15:00 - 15:59 | Afternoon | 38,6 | 61  | 274,2 | 274,2 | 19,76 | 556,01 | 191,24 |
| 2019/07/31 | CH2276 | Female | Two y/o | Treatment (Wk 1) | Treatment | Fast Day | No | 15:55 | 15:00 - 15:59 | Afternoon | 38,7 | 113 | 179,6 | 179,6 | 19,87 | 602,58 | 176,34 |
| 2019/07/31 | CH2276 | Female | Two y/o | Treatment (Wk 1) | Treatment | Fast Day | No | 16:00 | 16:00 - 16:59 | Evening   | 39,4 | 36  | 105,8 | 105,8 | 20,59 | 510,56 | 157,81 |
| 2019/07/31 | CH2276 | Female | Two y/o | Treatment (Wk 1) | Treatment | Fast Day | No | 16:05 | 16:00 - 16:59 | Evening   | 39,3 | 138 | 368,2 | 368,2 | 20,49 | 616,31 | 201,67 |
| 2019/07/31 | CH2276 | Female | Two y/o | Treatment (Wk 1) | Treatment | Fast Day | No | 16:10 | 16:00 - 16:59 | Evening   | 39,2 |     | 115,0 | 115,0 | 20,38 |        | 160,72 |
| 2019/07/31 | CH2276 | Female | Two y/o | Treatment (Wk 1) | Treatment | Fast Day | No | 16:15 | 16:00 - 16:59 | Evening   | 39,1 | 109 | 112,6 | 112,6 | 20,28 | 600,04 | 159,98 |
| 2019/07/31 | CH2276 | Female | Two y/o | Treatment (Wk 1) | Treatment | Fast Day | No | 16:20 | 16:00 - 16:59 | Evening   | 39,2 | 129 | 371,8 | 371,8 | 20,38 | 611,75 | 202,02 |
| 2019/07/31 | CH2276 | Female | Two y/o | Treatment (Wk 1) | Treatment | Fast Day | No | 16:25 | 16:00 - 16:59 | Evening   | 39,2 | 61  | 84,4  | 84,4  | 20,38 | 556,01 | 149,94 |
| 2019/07/31 | CH2276 | Female | Two y/o | Treatment (Wk 1) | Treatment | Fast Day | No | 16:30 | 16:00 - 16:59 | Evening   | 39,1 | 125 | 86,0  | 86,0  | 20,28 | 609,60 | 150,59 |
| 2019/07/31 | CH2276 | Female | Two y/o | Treatment (Wk 1) | Treatment | Fast Day | No | 16:35 | 16:00 - 16:59 | Evening   | 39,0 | 101 | 103,8 | 103,8 | 20,18 | 594,59 | 157,14 |
| 2019/07/31 | CH2276 | Female | Two y/o | Treatment (Wk 1) | Treatment | Fast Day | No | 16:40 | 16:00 - 16:59 | Evening   | 39,0 | 64  | 148,6 | 148,6 | 20,18 | 559,88 | 169,69 |
| 2019/07/31 | CH2276 | Female | Two y/o | Treatment (Wk 1) | Treatment | Fast Day | No | 16:45 | 16:00 - 16:59 | Evening   | 39,0 | 62  | 70,2  | 70,2  | 20,18 | 557,33 | 143,54 |
| 2019/07/31 | CH2276 | Female | Two y/o | Treatment (Wk 1) | Treatment | Fast Day | No | 16:50 | 16:00 - 16:59 | Evening   | 39,0 |     | 15,0  | 15,0  | 20,18 |        | 90,51  |
| 2019/07/31 | CH2276 | Female | Two y/o | Treatment (Wk 1) | Treatment | Fast Day | No | 16:55 | 16:00 - 16:59 | Evening   | 39,0 | 158 | 10,2  | 10,2  | 20,18 | 625,26 | 77,43  |
| 2019/07/31 | CH2276 | Female | Two y/o | Treatment (Wk 1) | Treatment | Fast Day | No | 17:00 | 17:00 - 17:59 | Evening   | 38,8 | 60  | 7,2   | 7,2   | 19,97 | 554,67 | 65,66  |
| 2019/07/31 | CH2276 | Female | Two y/o | Treatment (Wk 1) | Treatment | Fast Day | No | 17:05 | 17:00 - 17:59 | Evening   | 38,8 | 67  | 10,0  | 10,0  | 19,97 | 563,53 | 76,76  |
| 2019/07/31 | CH2276 | Female | Two y/o | Treatment (Wk 1) | Treatment | Fast Day | No | 17:10 | 17:00 - 17:59 | Evening   | 38,7 | 58  | 12,6  | 12,6  | 19,87 | 551,90 | 84,59  |
| 2019/07/31 | CH2276 | Female | Two y/o | Treatment (Wk 1) | Treatment | Fast Day | No | 17:15 | 17:00 - 17:59 | Evening   | 38,7 | 59  | 64,4  | 64,4  | 19,87 | 553,30 | 140,55 |
| 2019/07/31 | CH2276 | Female | Two y/o | Treatment (Wk 1) | Treatment | Fast Day | No | 17:20 | 17:00 - 17:59 | Evening   | 38,6 | 111 | 222,8 | 222,8 | 19,76 | 601,33 | 183,92 |
| 2019/07/31 | CH2276 | Female | Two y/o | Treatment (Wk 1) | Treatment | Fast Day | No | 17:25 | 17:00 - 17:59 | Evening   | 38,6 | 131 | 35,0  | 35,0  | 19,76 | 612,80 | 119,49 |
| 2019/07/31 | CH2276 | Female | Two y/o | Treatment (Wk 1) | Treatment | Fast Day | No | 17:30 | 17:00 - 17:59 | Evening   | 38,6 | 79  | 48,0  | 48,0  | 19,76 | 576,36 | 130,38 |
| 2019/07/31 | CH2276 | Female | Two y/o | Treatment (Wk 1) | Treatment | Fast Day | No | 17:35 | 17:00 - 17:59 | Evening   | 38,6 | 77  | 533,6 | 533,6 | 19,76 | 574,39 | 214,86 |
| 2019/07/31 | CH2276 | Female | Two y/o | Treatment (Wk 1) | Treatment | Fast Day | No | 17:40 | 17:00 - 17:59 | Evening   | 38,6 | 99  | 37,0  | 37,0  | 19,76 | 593,14 | 121,40 |
| 2019/07/31 | CH2276 | Female | Two y/o | Treatment (Wk 1) | Treatment | Fast Day | No | 17:45 | 17:00 - 17:59 | Evening   | 38,6 |     | 152,0 | 152,0 | 19,76 |        | 170,48 |
| 2019/07/31 | CH2276 | Female | Two y/o | Treatment (Wk 1) | Treatment | Fast Day | No | 17:50 | 17:00 - 17:59 | Evening   | 38,7 | 134 | 354,4 | 354,4 | 19,87 | 614,33 | 200,32 |
| 2019/07/31 | CH2276 | Female | Two y/o | Treatment (Wk 1) | Treatment | Fast Day | No | 17:55 | 17:00 - 17:59 | Evening   | 38,7 | 108 | 48,8  | 48,8  | 19,87 | 599,39 | 130,95 |
| 2019/07/31 | CH2276 | Female | Two y/o | Treatment (Wk 1) | Treatment | Fast Day | No | 18:00 | 18:00 - 18:59 | Evening   | 38,7 | 185 | 132,6 | 132,6 | 19,87 | 635,34 | 165,70 |
| 2019/07/31 | CH2276 | Female | Two y/o | Treatment (Wk 1) | Treatment | Fast Day | No | 18:05 | 18:00 - 18:59 | Evening   | 38,7 | 185 | 171,6 | 171,6 | 19,87 | 635,34 | 174,74 |
| 2019/07/31 | CH2276 | Female | Two y/o | Treatment (Wk 1) | Treatment | Fast Day | No | 18:10 | 18:00 - 18:59 | Evening   | 38,8 | 113 | 82,2  | 82,2  | 19,97 | 602,58 | 149,02 |
| 2019/07/31 | CH2276 | Female | Two y/o | Treatment (Wk 1) | Treatment | Fast Day | No | 18:15 | 18:00 - 18:59 | Evening   | 39,1 |     | 102,0 | 102,0 | 20,28 |        | 156,53 |
| 2019/07/31 | CH2276 | Female | Two y/o | Treatment (Wk 1) | Treatment | Fast Day | No | 18:20 | 18:00 - 18:59 | Evening   | 39,0 | 112 | 209,4 | 209,4 | 20,18 | 601,96 | 181,74 |
| 2019/07/31 | CH2276 | Female | Two y/o | Treatment (Wk 1) | Treatment | Fast Day | No | 18:25 | 18:00 - 18:59 | Evening   | 39,1 | 103 | 18,2  | 18,2  | 20,28 | 596,00 | 97,10  |
| 2019/07/31 | CH2276 | Female | Two y/o | Treatment (Wk 1) | Treatment | Fast Day | No | 18:30 | 18:00 - 18:59 | Evening   | 38,9 | 68  | 15,8  | 15,8  | 20,07 | 564,71 | 92,28  |
| 2019/07/31 | CH2276 | Female | Two y/o | Treatment (Wk 1) | Treatment | Fast Day | No | 18:35 | 18:00 - 18:59 | Evening   | 38,7 | 74  | 14,8  | 14,8  | 19,87 | 571,33 | 90,05  |
| 2019/07/31 | CH2276 | Female | Two y/o | Treatment (Wk 1) | Treatment | Fast Day | No | 18:40 | 18:00 - 18:59 | Evening   | 38,7 | 64  | 13,0  | 13,0  | 19,87 | 559,88 | 85,65  |
| 2019/07/31 | CH2276 | Female | Two y/o | Treatment (Wk 1) | Treatment | Fast Day | No | 18:45 | 18:00 - 18:59 | Evening   | 38,5 | 60  | 16,4  | 16,4  | 19,66 | 554,67 | 93,55  |
| 2019/07/31 | CH2276 | Female | Two y/o | Treatment (Wk 1) | Treatment | Fast Day | No | 18:50 | 18:00 - 18:59 | Evening   | 38,4 | 66  | 16,2  | 16,2  | 19,56 | 562,34 | 93,13  |
| 2019/07/31 | CH2276 | Female | Two y/o | Treatment (Wk 1) | Treatment | Fast Day | No | 18:55 | 18:00 - 18:59 | Evening   | 38,3 | 66  | 12,8  | 12,8  | 19,46 | 562,34 | 85,12  |
| 2019/07/31 | CH2276 | Female | Two y/o | Treatment (Wk 1) | Treatment | Fast Day | No | 19:00 | 19:00 - 19:59 | Evening   | 38,2 | 53  | 13,6  | 13,6  | 19,36 | 544,43 | 87,18  |
| 2019/07/31 | CH2276 | Female | Two y/o | Treatment (Wk 1) | Treatment | Fast Day | No | 19:05 | 19:00 - 19:59 | Evening   | 38,0 | 52  | 14,6  | 14,6  | 19,15 | 542,83 | 89,59  |
| 2019/07/31 | CH2276 | Female | Two y/o | Treatment (Wk 1) | Treatment | Fast Day | No | 19:10 | 19:00 - 19:59 | Evening   | 37,9 | 63  | 11,6  | 11,6  | 19,05 | 558,62 | 81,78  |
| 2019/07/31 | CH2276 | Female | Two y/o | Treatment (Wk 1) | Treatment | Fast Day | No | 19:15 | 19:00 - 19:59 | Evening   | 37,8 | 46  | 11,8  | 11,8  | 18,95 | 532,38 | 82,36  |
| 2019/07/31 | CH2276 | Female | Two y/o | Treatment (Wk 1) | Treatment | Fast Day | No | 19:20 | 19:00 - 19:59 | Evening   | 37,8 | 59  | 9,4   | 9,4   | 18,95 | 553,30 | 74,66  |
| 2019/07/31 | CH2276 | Female | Two y/o | Treatment (Wk 1) | Treatment | Fast Day | No | 19:25 | 19:00 - 19:59 | Evening   | 37,6 | 49  | 12,0  | 12,0  | 18,75 | 537,80 | 82,93  |
| 2019/07/31 | CH2276 | Female | Two y/o | Treatment (Wk 1) | Treatment | Fast Day | No | 19:30 | 19:00 - 19:59 | Evening   | 37,6 | 60  | 12,6  | 12,6  | 18,75 | 554,67 | 84,59  |



|    |            |        |        |         |                  |           |          |    |       |               |               |      |     |       |       |       |        |        |
|----|------------|--------|--------|---------|------------------|-----------|----------|----|-------|---------------|---------------|------|-----|-------|-------|-------|--------|--------|
|    | 2019/07/31 | CH2276 | Female | Two y/o | Treatment (Wk 1) | Treatment | Fast Day | No | 19:35 | 19:00 - 19:59 | Evening       | 37,5 | 57  | 11,0  | 11,0  | 18,65 | 550,47 | 79,98  |
|    | 2019/07/31 | CH2276 | Female | Two y/o | Treatment (Wk 1) | Treatment | Fast Day | No | 19:40 | 19:00 - 19:59 | Evening       | 37,5 | 60  | 36,6  | 36,6  | 18,65 | 554,67 | 121,03 |
|    | 2019/07/31 | CH2276 | Female | Two y/o | Treatment (Wk 1) | Treatment | Fast Day | No | 19:45 | 19:00 - 19:59 | Evening       | 37,6 | 64  | 19,6  | 19,6  | 18,75 | 559,88 | 99,63  |
|    | 2019/07/31 | CH2276 | Female | Two y/o | Treatment (Wk 1) | Treatment | Fast Day | No | 19:50 | 19:00 - 19:59 | Evening       | 37,6 | 48  | 24,6  | 24,6  | 18,75 | 536,04 | 107,39 |
|    | 2019/07/31 | CH2276 | Female | Two y/o | Treatment (Wk 1) | Treatment | Fast Day | No | 19:55 | 19:00 - 19:59 | Evening       | 37,6 | 56  | 15,2  | 15,2  | 18,75 | 549,01 | 90,96  |
|    | 2019/07/31 | CH2276 | Female | Two y/o | Treatment (Wk 1) | Treatment | Fast Day | No | 20:00 | 20:00 - 20:59 | Night         | 37,6 | 55  | 6,4   | 6,4   | 18,75 | 547,52 | 61,70  |
|    | 2019/07/31 | CH2276 | Female | Two y/o | Treatment (Wk 1) | Treatment | Fast Day | No | 20:05 | 20:00 - 20:59 | Night         | 37,5 | 78  | 9,8   | 9,8   | 18,65 | 575,38 | 76,07  |
|    | 2019/07/31 | CH2276 | Female | Two y/o | Treatment (Wk 1) | Treatment | Fast Day | No | 20:10 | 20:00 - 20:59 | Night         | 37,5 | 60  | 8,2   | 8,2   | 18,65 | 554,67 | 70,05  |
|    | 2019/07/31 | CH2276 | Female | Two y/o | Treatment (Wk 1) | Treatment | Fast Day | No | 20:15 | 20:00 - 20:59 | Night         | 37,5 | 60  | 15,6  | 15,6  | 18,65 | 554,67 | 91,85  |
|    | 2019/07/31 | CH2276 | Female | Two y/o | Treatment (Wk 1) | Treatment | Fast Day | No | 20:20 | 20:00 - 20:59 | Night         | 37,5 | 57  | 10,2  | 10,2  | 18,65 | 550,47 | 77,43  |
|    | 2019/07/31 | CH2276 | Female | Two y/o | Treatment (Wk 1) | Treatment | Fast Day | No | 20:25 | 20:00 - 20:59 | Night         | 37,5 | 57  | 23,8  | 23,8  | 18,65 | 550,47 | 106,26 |
|    | 2019/07/31 | CH2276 | Female | Two y/o | Treatment (Wk 1) | Treatment | Fast Day | No | 20:30 | 20:00 - 20:59 | Night         | 37,5 | 59  | 39,0  | 39,0  | 18,65 | 553,30 | 123,22 |
|    | 2019/07/31 | CH2276 | Female | Two y/o | Treatment (Wk 1) | Treatment | Fast Day | No | 20:35 | 20:00 - 20:59 | Night         | 37,4 | 94  | 28,4  | 28,4  | 18,55 | 589,37 | 112,31 |
|    | 2019/07/31 | CH2276 | Female | Two y/o | Treatment (Wk 1) | Treatment | Fast Day | No | 20:40 | 20:00 - 20:59 | Night         | 37,4 | 73  | 52,4  | 52,4  | 18,55 | 570,27 | 133,41 |
|    | 2019/07/31 | CH2276 | Female | Two y/o | Treatment (Wk 1) | Treatment | Fast Day | No | 20:45 | 20:00 - 20:59 | Night         | 37,4 | 37  | 151,2 | 151,2 | 18,55 | 513,06 | 170,30 |
|    | 2019/07/31 | CH2276 | Female | Two y/o | Treatment (Wk 1) | Treatment | Fast Day | No | 20:50 | 20:00 - 20:59 | Night         | 37,5 | 112 | 53,8  | 53,8  | 18,65 | 601,96 | 134,32 |
|    | 2019/07/31 | CH2276 | Female | Two y/o | Treatment (Wk 1) | Treatment | Fast Day | No | 20:55 | 20:00 - 20:59 | Night         | 37,6 |     | 421,8 | 421,8 | 18,75 |        | 206,50 |
|    | 2019/07/31 | CH2276 | Female | Two y/o | Treatment (Wk 1) | Treatment | Fast Day | No | 21:00 | 21:00 - 21:59 | Night         | 37,7 | 82  | 94,2  | 94,2  | 18,85 | 579,19 | 153,76 |
|    | 2019/07/31 | CH2276 | Female | Two y/o | Treatment (Wk 1) | Treatment | Fast Day | No | 21:05 | 21:00 - 21:59 | Night         | 37,7 |     | 109,0 | 109,0 | 18,85 |        | 158,85 |
|    | 2019/07/31 | CH2276 | Female | Two y/o | Treatment (Wk 1) | Treatment | Fast Day | No | 21:10 | 21:00 - 21:59 | Night         | 37,7 | 69  | 149,2 | 149,2 | 18,85 | 565,86 | 169,83 |
|    | 2019/07/31 | CH2276 | Female | Two y/o | Treatment (Wk 1) | Treatment | Fast Day | No | 21:15 | 21:00 - 21:59 | Night         | 37,8 | 55  | 113,8 | 113,8 | 18,95 | 547,52 | 160,35 |
|    | 2019/07/31 | CH2276 | Female | Two y/o | Treatment (Wk 1) | Treatment | Fast Day | No | 21:20 | 21:00 - 21:59 | Night         | 37,9 |     | 164,6 | 164,6 | 19,05 |        | 173,27 |
|    | 2019/07/31 | CH2276 | Female | Two y/o | Treatment (Wk 1) | Treatment | Fast Day | No | 21:25 | 21:00 - 21:59 | Night         | 38,0 | 134 | 77,8  | 77,8  | 19,15 | 614,33 | 147,11 |
|    | 2019/07/31 | CH2276 | Female | Two y/o | Treatment (Wk 1) | Treatment | Fast Day | No | 21:30 | 21:00 - 21:59 | Night         | 37,9 | 94  | 13,4  | 13,4  | 19,05 | 589,37 | 86,68  |
|    | 2019/07/31 | CH2276 | Female | Two y/o | Treatment (Wk 1) | Treatment | Fast Day | No | 21:35 | 21:00 - 21:59 | Night         | 38,0 | 60  | 17,0  | 17,0  | 19,15 | 554,67 | 94,77  |
|    | 2019/07/31 | CH2276 | Female | Two y/o | Treatment (Wk 1) | Treatment | Fast Day | No | 21:40 | 21:00 - 21:59 | Night         | 38,0 | 59  | 11,4  | 11,4  | 19,15 | 553,30 | 81,19  |
|    | 2019/07/31 | CH2276 | Female | Two y/o | Treatment (Wk 1) | Treatment | Fast Day | No | 21:45 | 21:00 - 21:59 | Night         | 38,0 |     | 18,2  | 18,2  | 19,15 |        | 97,10  |
|    | 2019/07/31 | CH2276 | Female | Two y/o | Treatment (Wk 1) | Treatment | Fast Day | No | 21:50 | 21:00 - 21:59 | Night         | 37,9 |     | 26,6  | 26,6  | 19,05 |        | 110,07 |
|    | 2019/07/31 | CH2276 | Female | Two y/o | Treatment (Wk 1) | Treatment | Fast Day | No | 21:55 | 21:00 - 21:59 | Night         | 37,8 | 92  | 224,0 | 224,0 | 18,95 | 587,78 | 184,11 |
|    | 2019/07/31 | CH2276 | Female | Two y/o | Treatment (Wk 1) | Treatment | Fast Day | No | 22:00 | 22:00 - 22:59 | Night         | 37,8 | 107 | 60,4  | 60,4  | 18,95 | 598,73 | 138,32 |
|    | 2019/07/31 | CH2276 | Female | Two y/o | Treatment (Wk 1) | Treatment | Fast Day | No | 22:05 | 22:00 - 22:59 | Night         | 37,7 | 62  | 41,2  | 41,2  | 18,85 | 557,33 | 125,11 |
|    | 2019/07/31 | CH2276 | Female | Two y/o | Treatment (Wk 1) | Treatment | Fast Day | No | 22:10 | 22:00 - 22:59 | Night         | 37,7 | 102 | 189,6 | 189,6 | 18,85 | 595,30 | 178,24 |
|    | 2019/07/31 | CH2276 | Female | Two y/o | Treatment (Wk 1) | Treatment | Fast Day | No | 22:15 | 22:00 - 22:59 | Night         | 37,8 | 106 | 31,8  | 31,8  | 18,95 | 598,06 | 116,20 |
|    | 2019/07/31 | CH2276 | Female | Two y/o | Treatment (Wk 1) | Treatment | Fast Day | No | 22:20 | 22:00 - 22:59 | Night         | 37,7 | 66  | 24,6  | 24,6  | 18,85 | 562,34 | 107,39 |
|    | 2019/07/31 | CH2276 | Female | Two y/o | Treatment (Wk 1) | Treatment | Fast Day | No | 22:25 | 22:00 - 22:59 | Night         | 37,7 | 55  | 21,0  | 21,0  | 18,85 | 547,52 | 101,98 |
|    | 2019/07/31 | CH2276 | Female | Two y/o | Treatment (Wk 1) | Treatment | Fast Day | No | 22:30 | 22:00 - 22:59 | Night         | 37,7 | 61  | 22,6  | 22,6  | 18,85 | 556,01 | 104,49 |
|    | 2019/07/31 | CH2276 | Female | Two y/o | Treatment (Wk 1) | Treatment | Fast Day | No | 22:35 | 22:00 - 22:59 | Night         | 37,7 | 54  | 22,2  | 22,2  | 18,85 | 545,99 | 103,88 |
|    | 2019/07/31 | CH2276 | Female | Two y/o | Treatment (Wk 1) | Treatment | Fast Day | No | 22:40 | 22:00 - 22:59 | Night         | 37,7 | 54  | 16,6  | 16,6  | 18,85 | 545,99 | 93,96  |
|    | 2019/07/31 | CH2276 | Female | Two y/o | Treatment (Wk 1) | Treatment | Fast Day | No | 22:45 | 22:00 - 22:59 | Night         | 37,6 | 51  | 19,0  | 19,0  | 18,75 | 541,20 | 98,56  |
|    | 2019/07/31 | CH2276 | Female | Two y/o | Treatment (Wk 1) | Treatment | Fast Day | No | 22:50 | 22:00 - 22:59 | Night         | 37,6 | 53  | 18,0  | 18,0  | 18,75 | 544,43 | 96,72  |
|    | 2019/07/31 | CH2276 | Female | Two y/o | Treatment (Wk 1) | Treatment | Fast Day | No | 22:55 | 22:00 - 22:59 | Night         | 37,5 | 46  | 17,8  | 17,8  | 18,65 | 532,38 | 96,34  |
|    | 2019/07/31 | CH2276 | Female | Two y/o | Treatment (Wk 1) | Treatment | Fast Day | No | 23:00 | 23:00 - 23:59 | Night         | 37,4 | 83  | 21,2  | 21,2  | 18,55 | 580,11 | 102,31 |
|    | 2019/07/31 | CH2276 | Female | Two y/o | Treatment (Wk 1) | Treatment | Fast Day | No | 23:05 | 23:00 - 23:59 | Night         | 37,4 | 69  | 13,8  | 13,8  | 18,55 | 565,86 | 87,68  |
|    | 2019/07/31 | CH2276 | Female | Two y/o | Treatment (Wk 1) | Treatment | Fast Day | No | 23:10 | 23:00 - 23:59 | Night         | 37,3 | 48  | 13,2  | 13,2  | 18,46 | 536,04 | 86,17  |
|    | 2019/07/31 | CH2276 | Female | Two y/o | Treatment (Wk 1) | Treatment | Fast Day | No | 23:15 | 23:00 - 23:59 | Night         | 37,1 | 58  | 15,8  | 15,8  | 18,26 | 551,90 | 92,28  |
|    | 2019/07/31 | CH2276 | Female | Two y/o | Treatment (Wk 1) | Treatment | Fast Day | No | 23:20 | 23:00 - 23:59 | Night         | 37,0 | 51  | 10,2  | 10,2  | 18,16 | 541,20 | 77,43  |
|    | 2019/07/31 | CH2276 | Female | Two y/o | Treatment (Wk 1) | Treatment | Fast Day | No | 23:25 | 23:00 - 23:59 | Night         | 36,9 | 51  | 15,8  | 15,8  | 18,06 | 541,20 | 92,28  |
|    | 2019/07/31 | CH2276 | Female | Two y/o | Treatment (Wk 1) | Treatment | Fast Day | No | 23:30 | 23:00 - 23:59 | Night         | 36,9 | 54  | 10,2  | 10,2  | 18,06 | 545,99 | 77,43  |
|    | 2019/07/31 | CH2276 | Female | Two y/o | Treatment (Wk 1) | Treatment | Fast Day | No | 23:35 | 23:00 - 23:59 | Night         | 36,8 | 53  | 12,0  | 12,0  | 17,96 | 544,43 | 82,93  |
|    | 2019/07/31 | CH2276 | Female | Two y/o | Treatment (Wk 1) | Treatment | Fast Day | No | 23:40 | 23:00 - 23:59 | Night         | 36,8 | 69  | 12,2  | 12,2  | 17,96 | 565,86 | 83,49  |
|    | 2019/07/31 | CH2276 | Female | Two y/o | Treatment (Wk 1) | Treatment | Fast Day | No | 23:45 | 23:00 - 23:59 | Night         | 36,9 | 60  | 49,4  | 49,4  | 18,06 | 554,67 | 131,37 |
|    | 2019/07/31 | CH2276 | Female | Two y/o | Treatment (Wk 1) | Treatment | Fast Day | No | 23:50 | 23:00 - 23:59 | Night         | 37,0 | 83  | 49,2  | 49,2  | 18,16 | 580,11 | 131,23 |
|    | 2019/07/31 | CH2276 | Female | Two y/o | Treatment (Wk 1) | Treatment | Fast Day | No | 23:55 | 23:00 - 23:59 | Night         | 37,0 | 64  | 47,8  | 47,8  | 18,16 | 559,88 | 130,23 |
| 44 | 2019/08/01 | CH2276 | Female | Two y/o | Treatment (Wk 1) | Treatment | Feed Day | No | 00:00 | 00:00 - 00:59 | Early Morning | 37,1 | 83  | 47,8  | 47,8  | 18,26 | 580,11 | 130,23 |
|    | 2019/08/01 | CH2276 | Female | Two y/o | Treatment (Wk 1) | Treatment | Feed Day | No | 00:05 | 00:00 - 00:59 | Early Morning | 37,1 | 51  | 46,8  | 46,8  | 18,26 | 541,20 | 129,50 |
|    | 2019/08/01 | CH2276 | Female | Two y/o | Treatment (Wk 1) | Treatment | Feed Day | No | 00:10 | 00:00 - 00:59 | Early Morning | 37,1 | 160 | 21,4  | 21,4  | 18,26 | 626,07 | 102,63 |
|    | 2019/08/01 | CH2276 | Female | Two y/o | Treatment (Wk 1) | Treatment | Feed Day | No | 00:15 | 00:00 - 00:59 | Early Morning | 37,0 | 54  | 20,2  | 20,2  | 18,16 | 545,99 | 100,65 |
|    | 2019/08/01 | CH2276 | Female | Two y/o | Treatment (Wk 1) | Treatment | Feed Day | No | 00:20 | 00:00 - 00:59 | Early Morning | 36,8 | 85  | 16,4  | 16,4  | 17,96 | 581,90 | 93,55  |
|    | 2019/08/01 | CH2276 | Female | Two y/o | Treatment (Wk 1) | Treatment | Feed Day | No | 00:25 | 00:00 - 00:59 | Early Morning | 36,6 |     | 15,8  | 15,8  | 17,77 |        | 92,28  |
|    | 2019/08/01 | CH2276 | Female | Two y/o | Treatment (Wk 1) | Treatment | Feed Day | No | 00:30 | 00:00 - 00:59 | Early Morning | 36,4 | 64  | 18,0  | 18,0  | 17,57 | 559,88 | 96,72  |
|    | 2019/08/01 | CH2276 | Female | Two y/o | Treatment (Wk 1) | Treatment | Feed Day | No | 00:35 | 00:00 - 00:59 | Early Morning | 36,2 | 66  | 17,6  | 17,6  | 17,38 | 562,34 | 95,95  |
|    | 2019/08/01 | CH2276 | Female | Two y/o | Treatment (Wk 1) | Treatment | Feed Day | No | 00:40 | 00:00 - 00:59 | Early Morning | 36,2 | 50  | 21,8  | 21,8  | 17,38 | 539,52 | 103,26 |
|    | 2019/08/01 | CH2276 | Female | Two y/o | Treatment (Wk 1) | Treatment | Feed Day | No | 00:45 | 00:00 - 00:59 | Early Morning | 36,1 | 49  | 15,8  | 15,8  | 17,29 | 537,80 | 92,28  |
|    | 2019/08/01 | CH2276 | Female | Two y/o | Treatment (Wk 1) | Treatment | Feed Day | No | 00:50 | 00:00 - 00:59 | Early Morning | 36,1 |     | 17,6  | 17,6  | 17,29 |        | 95,95  |
|    | 2019/08/01 | CH2276 | Female | Two y/o | Treatment (Wk 1) | Treatment | Feed Day | No | 00:55 | 00:00 - 00:59 | Early Morning | 36,0 | 59  | 19,8  | 19,8  | 17,19 | 553,30 | 99,97  |
|    | 2019/08/01 | CH2276 | Female | Two y/o | Treatment (Wk 1) | Treatment | Feed Day | No | 01:00 | 01:00 - 01:59 | Early Morning | 36,0 | 52  | 24,2  | 24,2  | 17,19 | 542,83 | 106,83 |
|    | 2019/08/01 | CH2276 | Female | Two y/o | Treatment (Wk 1) | Treatment | Feed Day | No | 01:05 | 01:00 - 01:59 | Early Morning | 35,9 | 56  | 16,8  | 16,8  | 17,09 | 549,01 | 94,37  |
|    | 2019/08/01 | CH2276 | Female | Two y/o | Treatment (Wk 1) | Treatment | Feed Day | No | 01:10 | 01:00 - 01:59 | Early Morning | 35,9 | 94  | 29,4  | 29,4  | 17,09 | 589,37 | 113,50 |
|    | 2019/08/01 | CH2276 | Female | Two y/o | Treatment (Wk 1) | Treatment | Feed Day | No | 01:15 | 01:00 - 01:59 | Early Morning | 35,9 | 55  | 21,2  | 21,2  | 17,09 | 547,52 | 102,31 |
|    | 2019/08/01 | CH2276 | Female | Two y/o | Treatment (Wk 1) | Treatment | Feed Day | No | 01:20 | 01:00 - 01:59 | Early Morning | 36,0 | 86  | 23,2  | 23,2  | 17,19 | 582,77 |        |



|            |        |        |         |                  |           |          |    |       |               |               |      |     |       |       |       |        |        |
|------------|--------|--------|---------|------------------|-----------|----------|----|-------|---------------|---------------|------|-----|-------|-------|-------|--------|--------|
| 2019/08/01 | CH2276 | Female | Two y/o | Treatment (Wk 1) | Treatment | Feed Day | No | 01:25 | 01:00 - 01:59 | Early Morning | 36,0 | 55  | 18,8  | 18,8  | 17,19 | 547,52 | 98,20  |
| 2019/08/01 | CH2276 | Female | Two y/o | Treatment (Wk 1) | Treatment | Feed Day | No | 01:30 | 01:00 - 01:59 | Early Morning | 36,0 | 60  | 18,4  | 18,4  | 17,19 | 554,67 | 97,47  |
| 2019/08/01 | CH2276 | Female | Two y/o | Treatment (Wk 1) | Treatment | Feed Day | No | 01:35 | 01:00 - 01:59 | Early Morning | 36,1 | 49  | 23,6  | 23,6  | 17,29 | 537,80 | 105,97 |
| 2019/08/01 | CH2276 | Female | Two y/o | Treatment (Wk 1) | Treatment | Feed Day | No | 01:40 | 01:00 - 01:59 | Early Morning | 36,1 | 55  | 13,0  | 13,0  | 17,29 | 547,52 | 85,65  |
| 2019/08/01 | CH2276 | Female | Two y/o | Treatment (Wk 1) | Treatment | Feed Day | No | 01:45 | 01:00 - 01:59 | Early Morning | 36,0 | 62  | 24,4  | 24,4  | 17,19 | 557,33 | 107,11 |
| 2019/08/01 | CH2276 | Female | Two y/o | Treatment (Wk 1) | Treatment | Feed Day | No | 01:50 | 01:00 - 01:59 | Early Morning | 36,0 | 59  | 21,2  | 21,2  | 17,19 | 553,30 | 102,31 |
| 2019/08/01 | CH2276 | Female | Two y/o | Treatment (Wk 1) | Treatment | Feed Day | No | 01:55 | 01:00 - 01:59 | Early Morning | 36,0 | 51  | 25,6  | 25,6  | 17,19 | 541,20 | 108,76 |
| 2019/08/01 | CH2276 | Female | Two y/o | Treatment (Wk 1) | Treatment | Feed Day | No | 02:00 | 02:00 - 02:59 | Early Morning | 36,0 | 93  | 6,6   | 6,6   | 17,19 | 588,58 | 62,73  |
| 2019/08/01 | CH2276 | Female | Two y/o | Treatment (Wk 1) | Treatment | Feed Day | No | 02:05 | 02:00 - 02:59 | Early Morning | 36,1 | 55  | 19,8  | 19,8  | 17,29 | 547,52 | 99,97  |
| 2019/08/01 | CH2276 | Female | Two y/o | Treatment (Wk 1) | Treatment | Feed Day | No | 02:10 | 02:00 - 02:59 | Early Morning | 36,1 | 58  | 20,6  | 20,6  | 17,29 | 551,90 | 101,32 |
| 2019/08/01 | CH2276 | Female | Two y/o | Treatment (Wk 1) | Treatment | Feed Day | No | 02:15 | 02:00 - 02:59 | Early Morning | 36,1 | 55  | 21,6  | 21,6  | 17,29 | 547,52 | 102,94 |
| 2019/08/01 | CH2276 | Female | Two y/o | Treatment (Wk 1) | Treatment | Feed Day | No | 02:20 | 02:00 - 02:59 | Early Morning | 36,1 | 62  | 23,0  | 23,0  | 17,29 | 557,33 | 105,09 |
| 2019/08/01 | CH2276 | Female | Two y/o | Treatment (Wk 1) | Treatment | Feed Day | No | 02:25 | 02:00 - 02:59 | Early Morning | 36,1 | 57  | 14,0  | 14,0  | 17,29 | 550,47 | 88,17  |
| 2019/08/01 | CH2276 | Female | Two y/o | Treatment (Wk 1) | Treatment | Feed Day | No | 02:30 | 02:00 - 02:59 | Early Morning | 36,1 | 95  | 22,4  | 22,4  | 17,29 | 590,14 | 104,19 |
| 2019/08/01 | CH2276 | Female | Two y/o | Treatment (Wk 1) | Treatment | Feed Day | No | 02:35 | 02:00 - 02:59 | Early Morning | 36,1 |     | 20,6  | 20,6  | 17,29 |        | 101,32 |
| 2019/08/01 | CH2276 | Female | Two y/o | Treatment (Wk 1) | Treatment | Feed Day | No | 02:40 | 02:00 - 02:59 | Early Morning | 36,1 | 58  | 22,2  | 22,2  | 17,29 | 551,90 | 103,88 |
| 2019/08/01 | CH2276 | Female | Two y/o | Treatment (Wk 1) | Treatment | Feed Day | No | 02:45 | 02:00 - 02:59 | Early Morning | 36,1 | 63  | 18,4  | 18,4  | 17,29 | 558,62 | 97,47  |
| 2019/08/01 | CH2276 | Female | Two y/o | Treatment (Wk 1) | Treatment | Feed Day | No | 02:50 | 02:00 - 02:59 | Early Morning | 36,1 | 52  | 21,0  | 21,0  | 17,29 | 542,83 | 101,98 |
| 2019/08/01 | CH2276 | Female | Two y/o | Treatment (Wk 1) | Treatment | Feed Day | No | 02:55 | 02:00 - 02:59 | Early Morning | 36,1 | 60  | 26,6  | 26,6  | 17,29 | 554,67 | 110,07 |
| 2019/08/01 | CH2276 | Female | Two y/o | Treatment (Wk 1) | Treatment | Feed Day | No | 03:00 | 03:00 - 03:59 | Early Morning | 36,1 | 82  | 19,4  | 19,4  | 17,29 | 579,19 | 99,28  |
| 2019/08/01 | CH2276 | Female | Two y/o | Treatment (Wk 1) | Treatment | Feed Day | No | 03:05 | 03:00 - 03:59 | Early Morning | 36,1 | 58  | 21,2  | 21,2  | 17,29 | 551,90 | 102,31 |
| 2019/08/01 | CH2276 | Female | Two y/o | Treatment (Wk 1) | Treatment | Feed Day | No | 03:10 | 03:00 - 03:59 | Early Morning | 36,1 | 59  | 15,8  | 15,8  | 17,29 | 553,30 | 92,28  |
| 2019/08/01 | CH2276 | Female | Two y/o | Treatment (Wk 1) | Treatment | Feed Day | No | 03:15 | 03:00 - 03:59 | Early Morning | 36,1 | 54  | 19,0  | 19,0  | 17,29 | 545,99 | 98,56  |
| 2019/08/01 | CH2276 | Female | Two y/o | Treatment (Wk 1) | Treatment | Feed Day | No | 03:20 | 03:00 - 03:59 | Early Morning | 36,1 | 57  | 22,8  | 22,8  | 17,29 | 550,47 | 104,79 |
| 2019/08/01 | CH2276 | Female | Two y/o | Treatment (Wk 1) | Treatment | Feed Day | No | 03:25 | 03:00 - 03:59 | Early Morning | 36,1 | 51  | 25,2  | 25,2  | 17,29 | 541,20 | 108,22 |
| 2019/08/01 | CH2276 | Female | Two y/o | Treatment (Wk 1) | Treatment | Feed Day | No | 03:30 | 03:00 - 03:59 | Early Morning | 36,1 | 91  | 36,0  | 36,0  | 17,29 | 586,98 | 120,46 |
| 2019/08/01 | CH2276 | Female | Two y/o | Treatment (Wk 1) | Treatment | Feed Day | No | 03:35 | 03:00 - 03:59 | Early Morning | 36,2 | 180 | 36,6  | 36,6  | 17,38 | 633,61 | 121,03 |
| 2019/08/01 | CH2276 | Female | Two y/o | Treatment (Wk 1) | Treatment | Feed Day | No | 03:40 | 03:00 - 03:59 | Early Morning | 36,5 | 67  | 31,8  | 31,8  | 17,67 | 563,53 | 116,20 |
| 2019/08/01 | CH2276 | Female | Two y/o | Treatment (Wk 1) | Treatment | Feed Day | No | 03:45 | 03:00 - 03:59 | Early Morning | 36,6 | 96  | 28,6  | 28,6  | 17,77 | 590,91 | 112,56 |
| 2019/08/01 | CH2276 | Female | Two y/o | Treatment (Wk 1) | Treatment | Feed Day | No | 03:50 | 03:00 - 03:59 | Early Morning | 36,7 | 59  | 20,6  | 20,6  | 17,87 | 553,30 | 101,32 |
| 2019/08/01 | CH2276 | Female | Two y/o | Treatment (Wk 1) | Treatment | Feed Day | No | 03:55 | 03:00 - 03:59 | Early Morning | 36,8 | 81  | 25,8  | 25,8  | 17,96 | 578,26 | 109,02 |
| 2019/08/01 | CH2276 | Female | Two y/o | Treatment (Wk 1) | Treatment | Feed Day | No | 04:00 | 04:00 - 04:59 | Morning       | 36,8 | 68  | 22,4  | 22,4  | 17,96 | 564,71 | 104,19 |
| 2019/08/01 | CH2276 | Female | Two y/o | Treatment (Wk 1) | Treatment | Feed Day | No | 04:05 | 04:00 - 04:59 | Morning       | 36,8 | 55  | 27,2  | 27,2  | 17,96 | 547,52 | 110,83 |
| 2019/08/01 | CH2276 | Female | Two y/o | Treatment (Wk 1) | Treatment | Feed Day | No | 04:10 | 04:00 - 04:59 | Morning       | 36,9 | 191 | 31,0  | 31,0  | 18,06 | 637,33 | 115,32 |
| 2019/08/01 | CH2276 | Female | Two y/o | Treatment (Wk 1) | Treatment | Feed Day | No | 04:15 | 04:00 - 04:59 | Morning       | 36,9 | 63  | 21,8  | 21,8  | 18,06 | 558,62 | 103,26 |
| 2019/08/01 | CH2276 | Female | Two y/o | Treatment (Wk 1) | Treatment | Feed Day | No | 04:20 | 04:00 - 04:59 | Morning       | 36,9 | 57  | 31,4  | 31,4  | 18,06 | 550,47 | 115,76 |
| 2019/08/01 | CH2276 | Female | Two y/o | Treatment (Wk 1) | Treatment | Feed Day | No | 04:25 | 04:00 - 04:59 | Morning       | 36,9 | 51  | 28,8  | 28,8  | 18,06 | 541,20 | 112,79 |
| 2019/08/01 | CH2276 | Female | Two y/o | Treatment (Wk 1) | Treatment | Feed Day | No | 04:30 | 04:00 - 04:59 | Morning       | 36,9 | 52  | 27,6  | 27,6  | 18,06 | 542,83 | 111,33 |
| 2019/08/01 | CH2276 | Female | Two y/o | Treatment (Wk 1) | Treatment | Feed Day | No | 04:35 | 04:00 - 04:59 | Morning       | 36,9 | 63  | 16,6  | 16,6  | 18,06 | 558,62 | 93,96  |
| 2019/08/01 | CH2276 | Female | Two y/o | Treatment (Wk 1) | Treatment | Feed Day | No | 04:40 | 04:00 - 04:59 | Morning       | 36,9 | 61  | 22,0  | 22,0  | 18,06 | 556,01 | 103,57 |
| 2019/08/01 | CH2276 | Female | Two y/o | Treatment (Wk 1) | Treatment | Feed Day | No | 04:45 | 04:00 - 04:59 | Morning       | 36,9 | 57  | 30,4  | 30,4  | 18,06 | 550,47 | 114,65 |
| 2019/08/01 | CH2276 | Female | Two y/o | Treatment (Wk 1) | Treatment | Feed Day | No | 04:50 | 04:00 - 04:59 | Morning       | 36,8 | 52  | 20,8  | 20,8  | 17,96 | 542,83 | 101,65 |
| 2019/08/01 | CH2276 | Female | Two y/o | Treatment (Wk 1) | Treatment | Feed Day | No | 04:55 | 04:00 - 04:59 | Morning       | 36,8 | 54  | 18,0  | 18,0  | 17,96 | 545,99 | 96,72  |
| 2019/08/01 | CH2276 | Female | Two y/o | Treatment (Wk 1) | Treatment | Feed Day | No | 05:00 | 05:00 - 05:59 | Morning       | 36,8 | 42  | 17,0  | 17,0  | 17,96 | 524,42 | 94,77  |
| 2019/08/01 | CH2276 | Female | Two y/o | Treatment (Wk 1) | Treatment | Feed Day | No | 05:05 | 05:00 - 05:59 | Morning       | 36,8 | 59  | 21,4  | 21,4  | 17,96 | 553,30 | 102,63 |
| 2019/08/01 | CH2276 | Female | Two y/o | Treatment (Wk 1) | Treatment | Feed Day | No | 05:10 | 05:00 - 05:59 | Morning       | 36,8 | 57  | 18,0  | 18,0  | 17,96 | 550,47 | 96,72  |
| 2019/08/01 | CH2276 | Female | Two y/o | Treatment (Wk 1) | Treatment | Feed Day | No | 05:15 | 05:00 - 05:59 | Morning       | 36,8 | 66  | 12,0  | 12,0  | 17,96 | 562,34 | 82,93  |
| 2019/08/01 | CH2276 | Female | Two y/o | Treatment (Wk 1) | Treatment | Feed Day | No | 05:20 | 05:00 - 05:59 | Morning       | 36,7 | 59  | 17,4  | 17,4  | 17,87 | 553,30 | 95,56  |
| 2019/08/01 | CH2276 | Female | Two y/o | Treatment (Wk 1) | Treatment | Feed Day | No | 05:25 | 05:00 - 05:59 | Morning       | 36,7 | 48  | 14,8  | 14,8  | 17,87 | 536,04 | 90,05  |
| 2019/08/01 | CH2276 | Female | Two y/o | Treatment (Wk 1) | Treatment | Feed Day | No | 05:30 | 05:00 - 05:59 | Morning       | 36,7 | 60  | 22,8  | 22,8  | 17,87 | 554,67 | 104,79 |
| 2019/08/01 | CH2276 | Female | Two y/o | Treatment (Wk 1) | Treatment | Feed Day | No | 05:35 | 05:00 - 05:59 | Morning       | 36,7 | 88  | 19,2  | 19,2  | 17,87 | 584,49 | 98,92  |
| 2019/08/01 | CH2276 | Female | Two y/o | Treatment (Wk 1) | Treatment | Feed Day | No | 05:40 | 05:00 - 05:59 | Morning       | 36,7 | 91  | 18,0  | 18,0  | 17,87 | 586,98 | 96,72  |
| 2019/08/01 | CH2276 | Female | Two y/o | Treatment (Wk 1) | Treatment | Feed Day | No | 05:45 | 05:00 - 05:59 | Morning       | 36,6 |     | 42,4  | 42,4  | 17,77 |        | 126,10 |
| 2019/08/01 | CH2276 | Female | Two y/o | Treatment (Wk 1) | Treatment | Feed Day | No | 05:50 | 05:00 - 05:59 | Morning       | 36,6 |     | 33,8  | 33,8  | 17,77 |        | 595,30 |
| 2019/08/01 | CH2276 | Female | Two y/o | Treatment (Wk 1) | Treatment | Feed Day | No | 05:55 | 05:00 - 05:59 | Morning       | 36,7 |     | 113,4 | 113,4 | 17,87 |        | 160,23 |
| 2019/08/01 | CH2276 | Female | Two y/o | Treatment (Wk 1) | Treatment | Feed Day | No | 06:00 | 06:00 - 06:59 | Morning       | 36,8 | 56  | 479,0 | 479,0 | 17,96 | 549,01 | 211,02 |
| 2019/08/01 | CH2276 | Female | Two y/o | Treatment (Wk 1) | Treatment | Feed Day | No | 06:05 | 06:00 - 06:59 | Morning       | 36,9 | 156 | 22,0  | 22,0  | 18,06 | 624,43 | 103,57 |
| 2019/08/01 | CH2276 | Female | Two y/o | Treatment (Wk 1) | Treatment | Feed Day | No | 06:10 | 06:00 - 06:59 | Morning       | 37,1 | 102 | 69,4  | 69,4  | 18,26 | 595,30 | 143,14 |
| 2019/08/01 | CH2276 | Female | Two y/o | Treatment (Wk 1) | Treatment | Feed Day | No | 06:15 | 06:00 - 06:59 | Morning       | 37,3 | 147 | 107,6 | 107,6 | 18,46 | 620,52 | 158,40 |
| 2019/08/01 | CH2276 | Female | Two y/o | Treatment (Wk 1) | Treatment | Feed Day | No | 06:20 | 06:00 - 06:59 | Morning       | 37,5 | 71  | 73,0  | 73,0  | 18,65 | 568,10 | 144,89 |
| 2019/08/01 | CH2276 | Female | Two y/o | Treatment (Wk 1) | Treatment | Feed Day | No | 06:25 | 06:00 - 06:59 | Morning       | 37,5 | 101 | 266,0 | 266,0 | 18,65 | 594,59 | 190,17 |
| 2019/08/01 | CH2276 | Female | Two y/o | Treatment (Wk 1) | Treatment | Feed Day | No | 06:30 | 06:00 - 06:59 | Morning       | 38,0 | 129 | 228,8 | 228,8 | 19,15 | 611,75 | 184,86 |
| 2019/08/01 | CH2276 | Female | Two y/o | Treatment (Wk 1) | Treatment | Feed Day | No | 06:35 | 06:00 - 06:59 | Morning       | 38,0 |     | 165,6 | 165,6 | 19,15 |        | 173,49 |
| 2019/08/01 | CH2276 | Female | Two y/o | Treatment (Wk 1) | Treatment | Feed Day | No | 06:40 | 06:00 - 06:59 | Morning       | 38,0 |     | 103,2 | 103,2 | 19,15 |        | 562,34 |
| 2019/08/01 | CH2276 | Female | Two y/o | Treatment (Wk 1) | Treatment | Feed Day | No | 06:45 | 06:00 - 06:59 | Morning       | 38,0 | 66  | 220,2 | 220,2 | 19,15 |        | 183,51 |
| 2019/08/01 | CH2276 | Female | Two y/o | Treatment (Wk 1) | Treatment | Feed Day | No | 06:50 | 06:00 - 06:59 | Morning       | 38,0 |     | 130,6 | 130,6 | 19,15 |        | 165,17 |
| 2019/08/01 | CH2276 | Female | Two y/o | Treatment (Wk 1) | Treatment | Feed Day | No | 06:55 | 06:00 - 06:59 | Morning       | 38,0 | 104 | 292,0 | 292,0 | 19,15 | 596,69 | 193,46 |
| 2019/08/01 | CH2276 | Female | Two y/o | Treatment (Wk 1) | Treatment | Feed Day | No | 07:00 | 07:00 - 07:59 | Morning       | 37,9 | 167 | 32,4  | 32,4  | 19,05 | 628,84 | 116,84 |
| 2019/08/01 | CH2276 | Female | Two y/o | Treatment (Wk 1) | Treatment | Feed Day | No | 07:05 | 07:00 - 07:59 | Morning       | 37,8 | 188 | 574,6 | 574,6 | 18,95 | 636,34 | 217,50 |
| 2019/08/01 | CH2276 | Female | Two y/o | Treatment (Wk 1) | Treatment | Feed Day | No | 07:10 | 07:00 - 07:59 | Morning       | 37,8 | 121 | 60,8  | 60,8  | 18,95 | 607,35 | 138,55 |



|            |        |        |         |                  |           |          |     |       |               |              |      |     |       |       |       |        |        |
|------------|--------|--------|---------|------------------|-----------|----------|-----|-------|---------------|--------------|------|-----|-------|-------|-------|--------|--------|
| 2019/08/01 | CH2276 | Female | Two y/o | Treatment (Wk 1) | Treatment | Feed Day | No  | 07:15 | 07:00 - 07:59 | Morning      | 37,8 | 174 | 76,8  | 76,8  | 18,95 | 631,46 | 146,66 |
| 2019/08/01 | CH2276 | Female | Two y/o | Treatment (Wk 1) | Treatment | Feed Day | No  | 07:20 | 07:00 - 07:59 | Morning      | 37,9 |     | 123,8 | 123,8 | 19,05 |        | 163,30 |
| 2019/08/01 | CH2276 | Female | Two y/o | Treatment (Wk 1) | Treatment | Feed Day | No  | 07:25 | 07:00 - 07:59 | Morning      | 37,9 | 83  | 111,0 | 111,0 | 19,05 | 580,11 | 159,48 |
| 2019/08/01 | CH2276 | Female | Two y/o | Treatment (Wk 1) | Treatment | Feed Day | No  | 07:30 | 07:00 - 07:59 | Morning      | 37,7 | 85  | 42,4  | 42,4  | 18,85 | 581,90 | 126,10 |
| 2019/08/01 | CH2276 | Female | Two y/o | Treatment (Wk 1) | Treatment | Feed Day | No  | 07:35 | 07:00 - 07:59 | Morning      | 37,6 | 88  | 196,8 | 196,8 | 18,75 | 584,49 | 179,55 |
| 2019/08/01 | CH2276 | Female | Two y/o | Treatment (Wk 1) | Treatment | Feed Day | No  | 07:40 | 07:00 - 07:59 | Morning      | 37,6 |     | 241,2 | 241,2 | 18,75 |        | 186,72 |
| 2019/08/01 | CH2276 | Female | Two y/o | Treatment (Wk 1) | Treatment | Feed Day | No  | 07:45 | 07:00 - 07:59 | Morning      | 37,6 | 81  | 166,6 | 166,6 | 18,75 | 578,26 | 173,70 |
| 2019/08/01 | CH2276 | Female | Two y/o | Treatment (Wk 1) | Treatment | Feed Day | No  | 07:50 | 07:00 - 07:59 | Morning      | 37,6 | 98  | 55,6  | 55,6  | 18,75 | 592,41 | 135,46 |
| 2019/08/01 | CH2276 | Female | Two y/o | Treatment (Wk 1) | Treatment | Feed Day | No  | 07:55 | 07:00 - 07:59 | Morning      | 37,5 |     | 40,6  | 40,6  | 18,65 |        | 124,60 |
| 2019/08/01 | CH2276 | Female | Two y/o | Treatment (Wk 1) | Treatment | Feed Day | No  | 08:00 | 08:00 - 08:59 | Late Morning | 37,4 | 85  | 52,4  | 52,4  | 18,55 | 581,90 | 133,41 |
| 2019/08/01 | CH2276 | Female | Two y/o | Treatment (Wk 1) | Treatment | Feed Day | No  | 08:05 | 08:00 - 08:59 | Late Morning | 37,3 | 57  | 53,6  | 53,6  | 18,46 | 550,47 | 134,19 |
| 2019/08/01 | CH2276 | Female | Two y/o | Treatment (Wk 1) | Treatment | Feed Day | No  | 08:10 | 08:00 - 08:59 | Late Morning | 37,3 | 94  | 53,0  | 53,0  | 18,46 | 589,37 | 133,80 |
| 2019/08/01 | CH2276 | Female | Two y/o | Treatment (Wk 1) | Treatment | Feed Day | No  | 08:15 | 08:00 - 08:59 | Late Morning | 37,3 | 61  | 62,6  | 62,6  | 18,46 | 556,01 | 139,56 |
| 2019/08/01 | CH2276 | Female | Two y/o | Treatment (Wk 1) | Treatment | Feed Day | No  | 08:20 | 08:00 - 08:59 | Late Morning | 37,1 | 66  | 55,8  | 55,8  | 18,26 | 562,34 | 135,58 |
| 2019/08/01 | CH2276 | Female | Two y/o | Treatment (Wk 1) | Treatment | Feed Day | No  | 08:25 | 08:00 - 08:59 | Late Morning | 37,1 |     | 55,0  | 55,0  | 18,26 |        | 135,08 |
| 2019/08/01 | CH2276 | Female | Two y/o | Treatment (Wk 1) | Treatment | Feed Day | No  | 08:30 | 08:00 - 08:59 | Late Morning | 37,1 | 61  | 66,8  | 66,8  | 18,26 | 556,01 | 141,81 |
| 2019/08/01 | CH2276 | Female | Two y/o | Treatment (Wk 1) | Treatment | Feed Day | No  | 08:35 | 08:00 - 08:59 | Late Morning | 37,1 | 53  | 62,4  | 62,4  | 18,26 | 544,43 | 139,45 |
| 2019/08/01 | CH2276 | Female | Two y/o | Treatment (Wk 1) | Treatment | Feed Day | No  | 08:40 | 08:00 - 08:59 | Late Morning | 37,2 | 60  | 63,2  | 63,2  | 18,36 | 554,67 | 139,89 |
| 2019/08/01 | CH2276 | Female | Two y/o | Treatment (Wk 1) | Treatment | Feed Day | No  | 08:45 | 08:00 - 08:59 | Late Morning | 37,3 | 60  | 63,6  | 63,6  | 18,46 | 554,67 | 140,11 |
| 2019/08/01 | CH2276 | Female | Two y/o | Treatment (Wk 1) | Treatment | Feed Day | No  | 08:50 | 08:00 - 08:59 | Late Morning | 37,3 | 53  | 62,2  | 62,2  | 18,46 | 544,43 | 139,34 |
| 2019/08/01 | CH2276 | Female | Two y/o | Treatment (Wk 1) | Treatment | Feed Day | No  | 08:55 | 08:00 - 08:59 | Late Morning | 37,4 | 65  | 77,0  | 77,0  | 18,55 | 561,12 | 146,75 |
| 2019/08/01 | CH2276 | Female | Two y/o | Treatment (Wk 1) | Treatment | Feed Day | No  | 09:00 | 09:00 - 09:59 | Late Morning | 37,5 | 86  | 211,6 | 211,6 | 18,65 | 582,77 | 182,10 |
| 2019/08/01 | CH2276 | Female | Two y/o | Treatment (Wk 1) | Treatment | Feed Day | No  | 09:05 | 09:00 - 09:59 | Late Morning | 37,5 |     | 88,8  | 88,8  | 18,65 |        | 151,71 |
| 2019/08/01 | CH2276 | Female | Two y/o | Treatment (Wk 1) | Treatment | Feed Day | No  | 09:10 | 09:00 - 09:59 | Late Morning | 37,5 | 150 | 357,8 | 357,8 | 18,65 | 621,86 | 200,66 |
| 2019/08/01 | CH2276 | Female | Two y/o | Treatment (Wk 1) | Treatment | Feed Day | No  | 09:15 | 09:00 - 09:59 | Late Morning | 37,5 | 93  | 683,2 | 683,2 | 18,65 | 588,58 | 223,68 |
| 2019/08/01 | CH2276 | Female | Two y/o | Treatment (Wk 1) | Treatment | Feed Day | No  | 09:20 | 09:00 - 09:59 | Late Morning | 37,5 | 61  | 150,0 | 150,0 | 18,65 | 556,01 | 170,02 |
| 2019/08/01 | CH2276 | Female | Two y/o | Treatment (Wk 1) | Treatment | Feed Day | No  | 09:25 | 09:00 - 09:59 | Late Morning | 37,5 | 58  | 153,2 | 153,2 | 18,65 | 551,90 | 170,76 |
| 2019/08/01 | CH2276 | Female | Two y/o | Treatment (Wk 1) | Treatment | Feed Day | No  | 09:30 | 09:00 - 09:59 | Late Morning | 37,5 |     | 109,0 | 109,0 | 18,65 |        | 158,85 |
| 2019/08/01 | CH2276 | Female | Two y/o | Treatment (Wk 1) | Treatment | Feed Day | No  | 09:35 | 09:00 - 09:59 | Late Morning | 37,6 | 73  | 97,0  | 97,0  | 18,75 | 570,27 | 154,78 |
| 2019/08/01 | CH2276 | Female | Two y/o | Treatment (Wk 1) | Treatment | Feed Day | No  | 09:40 | 09:00 - 09:59 | Late Morning | 37,8 | 86  | 101,6 | 101,6 | 18,95 | 582,77 | 156,40 |
| 2019/08/01 | CH2276 | Female | Two y/o | Treatment (Wk 1) | Treatment | Feed Day | No  | 09:45 | 09:00 - 09:59 | Late Morning | 37,8 | 79  | 146,4 | 146,4 | 18,95 | 576,36 | 169,17 |
| 2019/08/01 | CH2276 | Female | Two y/o | Treatment (Wk 1) | Treatment | Feed Day | No  | 09:50 | 09:00 - 09:59 | Late Morning | 37,9 | 92  | 325,8 | 325,8 | 19,05 | 587,78 | 197,34 |
| 2019/08/01 | CH2276 | Female | Two y/o | Treatment (Wk 1) | Treatment | Feed Day | No  | 09:55 | 09:00 - 09:59 | Late Morning | 37,9 | 59  | 36,6  | 36,6  | 19,05 | 553,30 | 121,03 |
| 2019/08/01 | CH2276 | Female | Two y/o | Treatment (Wk 1) | Treatment | Feed Day | No  | 10:00 | 10:00 - 10:59 | Late Morning | 37,9 | 80  | 67,6  | 67,6  | 19,05 | 577,31 | 142,23 |
| 2019/08/01 | CH2276 | Female | Two y/o | Treatment (Wk 1) | Treatment | Feed Day | No  | 10:05 | 10:00 - 10:59 | Late Morning | 37,9 | 40  | 188,2 | 188,2 | 19,05 | 520,09 | 177,98 |
| 2019/08/01 | CH2276 | Female | Two y/o | Treatment (Wk 1) | Treatment | Feed Day | No  | 10:10 | 10:00 - 10:59 | Late Morning | 37,9 | 90  | 75,4  | 75,4  | 19,05 | 586,16 | 146,02 |
| 2019/08/01 | CH2276 | Female | Two y/o | Treatment (Wk 1) | Treatment | Feed Day | No  | 10:15 | 10:00 - 10:59 | Late Morning | 37,9 | 97  | 423,0 | 423,0 | 19,05 | 591,66 | 206,60 |
| 2019/08/01 | CH2276 | Female | Two y/o | Treatment (Wk 1) | Treatment | Feed Day | No  | 10:20 | 10:00 - 10:59 | Late Morning | 37,8 | 89  | 59,4  | 59,4  | 18,95 | 585,33 | 137,75 |
| 2019/08/01 | CH2276 | Female | Two y/o | Treatment (Wk 1) | Treatment | Feed Day | No  | 10:25 | 10:00 - 10:59 | Late Morning | 37,8 | 79  | 97,2  | 97,2  | 18,95 | 576,36 | 154,85 |
| 2019/08/01 | CH2276 | Female | Two y/o | Treatment (Wk 1) | Treatment | Feed Day | Yes | 10:30 | 10:00 - 10:59 | Late Morning | 37,9 | 62  | 38,8  | 38,8  | 19,05 | 557,33 | 123,04 |
| 2019/08/01 | CH2276 | Female | Two y/o | Treatment (Wk 1) | Treatment | Feed Day | Yes | 10:35 | 10:00 - 10:59 | Late Morning | 37,9 | 62  | 34,6  | 34,6  | 19,05 | 557,33 | 119,10 |
| 2019/08/01 | CH2276 | Female | Two y/o | Treatment (Wk 1) | Treatment | Feed Day | Yes | 10:40 | 10:00 - 10:59 | Late Morning | 37,9 | 78  | 36,8  | 36,8  | 19,05 | 575,38 | 121,22 |
| 2019/08/01 | CH2276 | Female | Two y/o | Treatment (Wk 1) | Treatment | Feed Day | Yes | 10:45 | 10:00 - 10:59 | Late Morning | 38,0 | 138 | 106,6 | 106,6 | 19,15 | 616,31 | 158,07 |
| 2019/08/01 | CH2276 | Female | Two y/o | Treatment (Wk 1) | Treatment | Feed Day | Yes | 10:50 | 10:00 - 10:59 | Late Morning | 38,0 |     | 130,2 | 130,2 | 19,15 |        | 165,06 |
| 2019/08/01 | CH2276 | Female | Two y/o | Treatment (Wk 1) | Treatment | Feed Day | Yes | 10:55 | 10:00 - 10:59 | Late Morning | 38,0 | 65  | 55,6  | 55,6  | 19,15 | 561,12 | 135,46 |
| 2019/08/01 | CH2276 | Female | Two y/o | Treatment (Wk 1) | Treatment | Feed Day | Yes | 11:00 | 11:00 - 11:59 | Late Morning | 38,0 | 106 | 10,6  | 10,6  | 19,15 | 598,06 | 78,73  |
| 2019/08/01 | CH2276 | Female | Two y/o | Treatment (Wk 1) | Treatment | Feed Day | Yes | 11:05 | 11:00 - 11:59 | Late Morning | 37,9 |     | 35,0  | 35,0  | 19,05 |        | 119,49 |
| 2019/08/01 | CH2276 | Female | Two y/o | Treatment (Wk 1) | Treatment | Feed Day | Yes | 11:10 | 11:00 - 11:59 | Late Morning | 37,7 | 69  | 100,6 | 100,6 | 18,85 | 565,86 | 156,05 |
| 2019/08/01 | CH2276 | Female | Two y/o | Treatment (Wk 1) | Treatment | Feed Day | Yes | 11:15 | 11:00 - 11:59 | Late Morning | 37,7 | 67  | 114,6 | 114,6 | 18,85 | 563,53 | 160,60 |
| 2019/08/01 | CH2276 | Female | Two y/o | Treatment (Wk 1) | Treatment | Feed Day | Yes | 11:20 | 11:00 - 11:59 | Late Morning | 37,7 |     | 244,6 | 244,6 | 18,85 |        | 187,21 |
| 2019/08/01 | CH2276 | Female | Two y/o | Treatment (Wk 1) | Treatment | Feed Day | Yes | 11:25 | 11:00 - 11:59 | Late Morning | 37,7 | 169 | 103,4 | 103,4 | 18,85 | 629,60 | 157,01 |
| 2019/08/01 | CH2276 | Female | Two y/o | Treatment (Wk 1) | Treatment | Feed Day | No  | 11:30 | 11:00 - 11:59 | Late Morning | 37,8 |     | 127,4 | 127,4 | 18,95 |        | 164,30 |
| 2019/08/01 | CH2276 | Female | Two y/o | Treatment (Wk 1) | Treatment | Feed Day | No  | 11:35 | 11:00 - 11:59 | Late Morning | 38,0 | 107 | 111,4 | 111,4 | 19,15 | 598,73 | 159,61 |
| 2019/08/01 | CH2276 | Female | Two y/o | Treatment (Wk 1) | Treatment | Feed Day | No  | 11:40 | 11:00 - 11:59 | Late Morning | 38,0 |     | 66,8  | 66,8  | 19,15 |        | 141,81 |
| 2019/08/01 | CH2276 | Female | Two y/o | Treatment (Wk 1) | Treatment | Feed Day | No  | 11:45 | 11:00 - 11:59 | Late Morning | 38,0 | 103 | 64,2  | 64,2  | 19,15 | 596,00 | 140,44 |
| 2019/08/01 | CH2276 | Female | Two y/o | Treatment (Wk 1) | Treatment | Feed Day | No  | 11:50 | 11:00 - 11:59 | Late Morning | 37,9 | 64  | 76,4  | 76,4  | 19,05 | 559,88 | 146,48 |
| 2019/08/01 | CH2276 | Female | Two y/o | Treatment (Wk 1) | Treatment | Feed Day | No  | 11:55 | 11:00 - 11:59 | Late Morning | 37,9 | 81  | 40,6  | 40,6  | 19,05 | 578,26 | 124,60 |
| 2019/08/01 | CH2276 | Female | Two y/o | Treatment (Wk 1) | Treatment | Feed Day | No  | 12:00 | 12:00 - 12:59 | Afternoon    | 37,9 | 86  | 58,8  | 58,8  | 19,05 | 582,77 | 137,39 |
| 2019/08/01 | CH2276 | Female | Two y/o | Treatment (Wk 1) | Treatment | Feed Day | No  | 12:05 | 12:00 - 12:59 | Afternoon    | 37,9 | 76  | 81,4  | 81,4  | 19,05 | 573,39 | 148,68 |
| 2019/08/01 | CH2276 | Female | Two y/o | Treatment (Wk 1) | Treatment | Feed Day | No  | 12:10 | 12:00 - 12:59 | Afternoon    | 37,9 | 77  | 53,2  | 53,2  | 19,05 | 574,39 | 133,93 |
| 2019/08/01 | CH2276 | Female | Two y/o | Treatment (Wk 1) | Treatment | Feed Day | No  | 12:15 | 12:00 - 12:59 | Afternoon    | 37,8 | 94  | 25,2  | 25,2  | 18,95 | 589,37 | 108,22 |
| 2019/08/01 | CH2276 | Female | Two y/o | Treatment (Wk 1) | Treatment | Feed Day | No  | 12:20 | 12:00 - 12:59 | Afternoon    | 37,9 | 87  | 49,4  | 49,4  | 19,05 | 583,64 | 131,37 |
| 2019/08/01 | CH2276 | Female | Two y/o | Treatment (Wk 1) | Treatment | Feed Day | No  | 12:25 | 12:00 - 12:59 | Afternoon    | 38,3 | 119 | 116,6 | 116,6 | 19,46 | 606,20 | 161,20 |
| 2019/08/01 | CH2276 | Female | Two y/o | Treatment (Wk 1) | Treatment | Feed Day | No  | 12:30 | 12:00 - 12:59 | Afternoon    | 38,4 | 100 | 35,6  | 35,6  | 19,56 | 593,87 | 120,08 |
| 2019/08/01 | CH2276 | Female | Two y/o | Treatment (Wk 1) | Treatment | Feed Day | No  | 12:35 | 12:00 - 12:59 | Afternoon    | 38,4 | 104 | 57,2  | 57,2  | 19,56 | 596,69 | 136,44 |
| 2019/08/01 | CH2276 | Female | Two y/o | Treatment (Wk 1) | Treatment | Feed Day | No  | 12:40 | 12:00 - 12:59 | Afternoon    | 38,4 | 53  | 84,2  | 84,2  | 19,56 | 544,43 | 149,85 |
| 2019/08/01 | CH2276 | Female | Two y/o | Treatment (Wk 1) | Treatment | Feed Day | No  | 12:45 | 12:00 - 12:59 | Afternoon    | 38,4 | 96  | 40,6  | 40,6  | 19,56 | 590,91 | 124,60 |
| 2019/08/01 | CH2276 | Female | Two y/o | Treatment (Wk 1) | Treatment | Feed Day | No  | 12:50 | 12:00 - 12:59 | Afternoon    | 38,4 | 88  | 46,2  | 46,2  | 19,56 | 584,49 | 129,06 |
| 2019/08/01 | CH2276 | Female | Two y/o | Treatment (Wk 1) | Treatment | Feed Day | No  | 12:55 | 12:00 - 12:59 | Afternoon    | 38,4 | 86  | 30,6  | 30,6  | 19,56 | 582,77 | 114,87 |
| 2019/08/01 | CH2276 | Female | Two y/o | Treatment (Wk 1) | Treatment | Feed Day | No  | 13:00 | 13:00 - 13:59 | Afternoon    | 38,4 | 88  | 36,6  | 36,6  | 19,56 | 584,49 | 121,03 |



|            |        |        |         |                  |           |          |     |       |               |           |      |     |       |       |       |        |        |
|------------|--------|--------|---------|------------------|-----------|----------|-----|-------|---------------|-----------|------|-----|-------|-------|-------|--------|--------|
| 2019/08/01 | CH2276 | Female | Two y/o | Treatment (Wk 1) | Treatment | Feed Day | No  | 13:05 | 13:00 - 13:59 | Afternoon | 38,4 | 92  | 57,2  | 57,2  | 19,56 | 587,78 | 136,44 |
| 2019/08/01 | CH2276 | Female | Two y/o | Treatment (Wk 1) | Treatment | Feed Day | No  | 13:10 | 13:00 - 13:59 | Afternoon | 38,4 | 92  | 58,8  | 58,8  | 19,56 | 587,78 | 137,39 |
| 2019/08/01 | CH2276 | Female | Two y/o | Treatment (Wk 1) | Treatment | Feed Day | No  | 13:15 | 13:00 - 13:59 | Afternoon | 38,4 | 86  | 60,6  | 60,6  | 19,56 | 582,77 | 138,44 |
| 2019/08/01 | CH2276 | Female | Two y/o | Treatment (Wk 1) | Treatment | Feed Day | No  | 13:20 | 13:00 - 13:59 | Afternoon | 38,3 | 80  | 47,8  | 47,8  | 19,46 | 577,31 | 130,23 |
| 2019/08/01 | CH2276 | Female | Two y/o | Treatment (Wk 1) | Treatment | Feed Day | No  | 13:25 | 13:00 - 13:59 | Afternoon | 38,3 | 91  | 22,8  | 22,8  | 19,46 | 586,98 | 104,79 |
| 2019/08/01 | CH2276 | Female | Two y/o | Treatment (Wk 1) | Treatment | Feed Day | No  | 13:30 | 13:00 - 13:59 | Afternoon | 38,3 | 82  | 30,2  | 30,2  | 19,46 | 579,19 | 114,42 |
| 2019/08/01 | CH2276 | Female | Two y/o | Treatment (Wk 1) | Treatment | Feed Day | No  | 13:35 | 13:00 - 13:59 | Afternoon | 38,3 |     | 29,0  | 29,0  | 19,46 |        | 113,03 |
| 2019/08/01 | CH2276 | Female | Two y/o | Treatment (Wk 1) | Treatment | Feed Day | No  | 13:40 | 13:00 - 13:59 | Afternoon | 38,3 | 86  | 83,4  | 83,4  | 19,46 | 582,77 | 149,52 |
| 2019/08/01 | CH2276 | Female | Two y/o | Treatment (Wk 1) | Treatment | Feed Day | No  | 13:45 | 13:00 - 13:59 | Afternoon | 38,3 | 88  | 85,0  | 85,0  | 19,46 | 584,49 | 150,18 |
| 2019/08/01 | CH2276 | Female | Two y/o | Treatment (Wk 1) | Treatment | Feed Day | No  | 13:50 | 13:00 - 13:59 | Afternoon | 38,2 | 71  | 84,2  | 84,2  | 19,36 | 568,10 | 149,85 |
| 2019/08/01 | CH2276 | Female | Two y/o | Treatment (Wk 1) | Treatment | Feed Day | No  | 13:55 | 13:00 - 13:59 | Afternoon | 38,2 | 86  | 91,4  | 91,4  | 19,36 | 582,77 | 152,71 |
| 2019/08/01 | CH2276 | Female | Two y/o | Treatment (Wk 1) | Treatment | Feed Day | No  | 14:00 | 14:00 - 14:59 | Afternoon | 38,0 | 90  | 71,4  | 71,4  | 19,15 | 586,16 | 144,12 |
| 2019/08/01 | CH2276 | Female | Two y/o | Treatment (Wk 1) | Treatment | Feed Day | No  | 14:05 | 14:00 - 14:59 | Afternoon | 38,0 | 70  | 59,0  | 59,0  | 19,15 | 566,99 | 137,51 |
| 2019/08/01 | CH2276 | Female | Two y/o | Treatment (Wk 1) | Treatment | Feed Day | No  | 14:10 | 14:00 - 14:59 | Afternoon | 38,0 | 76  | 57,4  | 57,4  | 19,15 | 573,39 | 136,56 |
| 2019/08/01 | CH2276 | Female | Two y/o | Treatment (Wk 1) | Treatment | Feed Day | No  | 14:15 | 14:00 - 14:59 | Afternoon | 38,0 | 99  | 76,0  | 76,0  | 19,15 | 593,14 | 146,29 |
| 2019/08/01 | CH2276 | Female | Two y/o | Treatment (Wk 1) | Treatment | Feed Day | No  | 14:20 | 14:00 - 14:59 | Afternoon | 38,0 | 88  | 49,2  | 49,2  | 19,15 | 584,49 | 131,23 |
| 2019/08/01 | CH2276 | Female | Two y/o | Treatment (Wk 1) | Treatment | Feed Day | No  | 14:25 | 14:00 - 14:59 | Afternoon | 38,0 | 132 | 238,4 | 238,4 | 19,15 | 613,32 | 186,30 |
| 2019/08/01 | CH2276 | Female | Two y/o | Treatment (Wk 1) | Treatment | Feed Day | No  | 14:30 | 14:00 - 14:59 | Afternoon | 38,0 | 82  | 54,6  | 54,6  | 19,26 | 579,19 | 134,83 |
| 2019/08/01 | CH2276 | Female | Two y/o | Treatment (Wk 1) | Treatment | Feed Day | No  | 14:35 | 14:00 - 14:59 | Afternoon | 38,2 | 117 | 39,0  | 39,0  | 19,36 | 605,02 | 123,22 |
| 2019/08/01 | CH2276 | Female | Two y/o | Treatment (Wk 1) | Treatment | Feed Day | No  | 14:40 | 14:00 - 14:59 | Afternoon | 38,2 | 85  | 43,4  | 43,4  | 19,36 | 581,90 | 126,90 |
| 2019/08/01 | CH2276 | Female | Two y/o | Treatment (Wk 1) | Treatment | Feed Day | No  | 14:45 | 14:00 - 14:59 | Afternoon | 38,2 | 84  | 25,6  | 25,6  | 19,36 | 581,01 | 108,76 |
| 2019/08/01 | CH2276 | Female | Two y/o | Treatment (Wk 1) | Treatment | Feed Day | No  | 14:50 | 14:00 - 14:59 | Afternoon | 38,3 | 79  | 57,0  | 57,0  | 19,46 | 576,36 | 136,32 |
| 2019/08/01 | CH2276 | Female | Two y/o | Treatment (Wk 1) | Treatment | Feed Day | No  | 14:55 | 14:00 - 14:59 | Afternoon | 38,3 | 97  | 53,4  | 53,4  | 19,46 | 591,66 | 134,06 |
| 2019/08/01 | CH2276 | Female | Two y/o | Treatment (Wk 1) | Treatment | Feed Day | No  | 15:00 | 15:00 - 15:59 | Afternoon | 38,3 | 84  | 61,0  | 61,0  | 19,46 | 581,01 | 138,67 |
| 2019/08/01 | CH2276 | Female | Two y/o | Treatment (Wk 1) | Treatment | Feed Day | No  | 15:05 | 15:00 - 15:59 | Afternoon | 38,2 | 80  | 80,2  | 80,2  | 19,36 | 577,31 | 148,16 |
| 2019/08/01 | CH2276 | Female | Two y/o | Treatment (Wk 1) | Treatment | Feed Day | No  | 15:10 | 15:00 - 15:59 | Afternoon | 38,2 | 77  | 79,4  | 79,4  | 19,36 | 574,39 | 147,81 |
| 2019/08/01 | CH2276 | Female | Two y/o | Treatment (Wk 1) | Treatment | Feed Day | No  | 15:15 | 15:00 - 15:59 | Afternoon | 38,2 | 79  | 78,4  | 78,4  | 19,36 | 576,36 | 147,37 |
| 2019/08/01 | CH2276 | Female | Two y/o | Treatment (Wk 1) | Treatment | Feed Day | No  | 15:20 | 15:00 - 15:59 | Afternoon | 38,2 | 81  | 68,0  | 68,0  | 19,36 | 578,26 | 142,43 |
| 2019/08/01 | CH2276 | Female | Two y/o | Treatment (Wk 1) | Treatment | Feed Day | No  | 15:25 | 15:00 - 15:59 | Afternoon | 38,2 | 85  | 55,8  | 55,8  | 19,36 | 581,90 | 135,58 |
| 2019/08/01 | CH2276 | Female | Two y/o | Treatment (Wk 1) | Treatment | Feed Day | Yes | 15:30 | 15:00 - 15:59 | Afternoon | 38,2 | 68  | 105,2 | 105,2 | 19,36 | 564,71 | 157,61 |
| 2019/08/01 | CH2276 | Female | Two y/o | Treatment (Wk 1) | Treatment | Feed Day | Yes | 15:35 | 15:00 - 15:59 | Afternoon | 38,2 | 79  | 84,0  | 84,0  | 19,36 | 576,36 | 149,77 |
| 2019/08/01 | CH2276 | Female | Two y/o | Treatment (Wk 1) | Treatment | Feed Day | Yes | 15:40 | 15:00 - 15:59 | Afternoon | 38,2 | 84  | 72,8  | 72,8  | 19,36 | 581,01 | 144,80 |
| 2019/08/01 | CH2276 | Female | Two y/o | Treatment (Wk 1) | Treatment | Feed Day | Yes | 15:45 | 15:00 - 15:59 | Afternoon | 38,2 | 194 | 56,0  | 56,0  | 19,36 | 638,30 | 135,70 |
| 2019/08/01 | CH2276 | Female | Two y/o | Treatment (Wk 1) | Treatment | Feed Day | Yes | 15:50 | 15:00 - 15:59 | Afternoon | 38,3 | 90  | 58,6  | 58,6  | 19,46 | 586,16 | 137,28 |
| 2019/08/01 | CH2276 | Female | Two y/o | Treatment (Wk 1) | Treatment | Feed Day | Yes | 15:55 | 15:00 - 15:59 | Afternoon | 38,3 | 89  | 67,0  | 67,0  | 19,46 | 585,33 | 141,92 |
| 2019/08/01 | CH2276 | Female | Two y/o | Treatment (Wk 1) | Treatment | Feed Day | Yes | 16:00 | 16:00 - 16:59 | Evening   | 38,2 | 99  | 71,6  | 71,6  | 19,36 | 593,14 | 144,22 |
| 2019/08/01 | CH2276 | Female | Two y/o | Treatment (Wk 1) | Treatment | Feed Day | Yes | 16:05 | 16:00 - 16:59 | Evening   | 38,2 | 105 | 30,8  | 30,8  | 19,36 | 597,38 | 115,10 |
| 2019/08/01 | CH2276 | Female | Two y/o | Treatment (Wk 1) | Treatment | Feed Day | Yes | 16:10 | 16:00 - 16:59 | Evening   | 38,3 | 78  | 45,4  | 45,4  | 19,46 | 575,38 | 128,45 |
| 2019/08/01 | CH2276 | Female | Two y/o | Treatment (Wk 1) | Treatment | Feed Day | Yes | 16:15 | 16:00 - 16:59 | Evening   | 38,3 | 73  | 29,2  | 29,2  | 19,46 | 570,27 | 113,27 |
| 2019/08/01 | CH2276 | Female | Two y/o | Treatment (Wk 1) | Treatment | Feed Day | Yes | 16:20 | 16:00 - 16:59 | Evening   | 38,3 | 96  | 47,4  | 47,4  | 19,46 | 590,91 | 129,94 |
| 2019/08/01 | CH2276 | Female | Two y/o | Treatment (Wk 1) | Treatment | Feed Day | Yes | 16:25 | 16:00 - 16:59 | Evening   | 38,3 | 84  | 43,2  | 43,2  | 19,46 | 581,01 | 126,74 |
| 2019/08/01 | CH2276 | Female | Two y/o | Treatment (Wk 1) | Treatment | Feed Day | No  | 16:30 | 16:00 - 16:59 | Evening   | 38,4 | 74  | 29,4  | 29,4  | 19,56 | 571,33 | 113,50 |
| 2019/08/01 | CH2276 | Female | Two y/o | Treatment (Wk 1) | Treatment | Feed Day | No  | 16:35 | 16:00 - 16:59 | Evening   | 38,4 |     | 119,8 | 119,8 | 19,56 |        | 162,15 |
| 2019/08/01 | CH2276 | Female | Two y/o | Treatment (Wk 1) | Treatment | Feed Day | No  | 16:40 | 16:00 - 16:59 | Evening   | 38,5 | 81  | 85,4  | 85,4  | 19,66 | 578,26 | 150,35 |
| 2019/08/01 | CH2276 | Female | Two y/o | Treatment (Wk 1) | Treatment | Feed Day | No  | 16:45 | 16:00 - 16:59 | Evening   | 38,5 | 75  | 86,6  | 86,6  | 19,66 | 572,36 | 150,83 |
| 2019/08/01 | CH2276 | Female | Two y/o | Treatment (Wk 1) | Treatment | Feed Day | No  | 16:50 | 16:00 - 16:59 | Evening   | 38,5 | 90  | 72,8  | 72,8  | 19,66 | 586,16 | 144,80 |
| 2019/08/01 | CH2276 | Female | Two y/o | Treatment (Wk 1) | Treatment | Feed Day | No  | 16:55 | 16:00 - 16:59 | Evening   | 38,5 | 82  | 82,2  | 82,2  | 19,66 | 579,19 | 149,02 |
| 2019/08/01 | CH2276 | Female | Two y/o | Treatment (Wk 1) | Treatment | Feed Day | No  | 17:00 | 17:00 - 17:59 | Evening   | 38,4 | 99  | 83,6  | 83,6  | 19,56 | 593,14 | 149,61 |
| 2019/08/01 | CH2276 | Female | Two y/o | Treatment (Wk 1) | Treatment | Feed Day | No  | 17:05 | 17:00 - 17:59 | Evening   | 38,4 | 62  | 80,6  | 80,6  | 19,56 | 557,33 | 148,34 |
| 2019/08/01 | CH2276 | Female | Two y/o | Treatment (Wk 1) | Treatment | Feed Day | No  | 17:10 | 17:00 - 17:59 | Evening   | 38,4 | 71  | 76,4  | 76,4  | 19,56 | 568,10 | 146,48 |
| 2019/08/01 | CH2276 | Female | Two y/o | Treatment (Wk 1) | Treatment | Feed Day | No  | 17:15 | 17:00 - 17:59 | Evening   | 38,4 | 93  | 61,0  | 61,0  | 19,56 | 588,58 | 138,67 |
| 2019/08/01 | CH2276 | Female | Two y/o | Treatment (Wk 1) | Treatment | Feed Day | No  | 17:20 | 17:00 - 17:59 | Evening   | 38,3 |     | 34,0  | 34,0  | 19,46 |        | 118,49 |
| 2019/08/01 | CH2276 | Female | Two y/o | Treatment (Wk 1) | Treatment | Feed Day | No  | 17:25 | 17:00 - 17:59 | Evening   | 38,3 | 88  | 29,2  | 29,2  | 19,46 | 584,49 | 113,27 |
| 2019/08/01 | CH2276 | Female | Two y/o | Treatment (Wk 1) | Treatment | Feed Day | No  | 17:30 | 17:00 - 17:59 | Evening   | 38,3 | 68  | 34,4  | 34,4  | 19,46 | 564,71 | 118,90 |
| 2019/08/01 | CH2276 | Female | Two y/o | Treatment (Wk 1) | Treatment | Feed Day | No  | 17:35 | 17:00 - 17:59 | Evening   | 38,3 | 90  | 35,6  | 35,6  | 19,46 | 586,16 | 120,08 |
| 2019/08/01 | CH2276 | Female | Two y/o | Treatment (Wk 1) | Treatment | Feed Day | No  | 17:40 | 17:00 - 17:59 | Evening   | 38,3 | 83  | 67,2  | 67,2  | 19,46 | 580,11 | 142,02 |
| 2019/08/01 | CH2276 | Female | Two y/o | Treatment (Wk 1) | Treatment | Feed Day | No  | 17:45 | 17:00 - 17:59 | Evening   | 38,3 | 103 | 59,6  | 59,6  | 19,46 | 596,00 | 137,86 |
| 2019/08/01 | CH2276 | Female | Two y/o | Treatment (Wk 1) | Treatment | Feed Day | No  | 17:50 | 17:00 - 17:59 | Evening   | 38,2 | 68  | 36,4  | 36,4  | 19,36 | 564,71 | 120,84 |
| 2019/08/01 | CH2276 | Female | Two y/o | Treatment (Wk 1) | Treatment | Feed Day | No  | 17:55 | 17:00 - 17:59 | Evening   | 38,2 | 64  | 115,0 | 115,0 | 19,36 | 559,88 | 160,72 |
| 2019/08/01 | CH2276 | Female | Two y/o | Treatment (Wk 1) | Treatment | Feed Day | No  | 18:00 | 18:00 - 18:59 | Evening   | 38,2 |     | 33,2  | 33,2  | 19,36 |        | 117,68 |
| 2019/08/01 | CH2276 | Female | Two y/o | Treatment (Wk 1) | Treatment | Feed Day | No  | 18:05 | 18:00 - 18:59 | Evening   | 38,0 | 68  | 36,8  | 36,8  | 19,15 | 564,71 | 121,22 |
| 2019/08/01 | CH2276 | Female | Two y/o | Treatment (Wk 1) | Treatment | Feed Day | No  | 18:10 | 18:00 - 18:59 | Evening   | 38,0 | 119 | 56,4  | 56,4  | 19,15 | 606,20 | 135,95 |
| 2019/08/01 | CH2276 | Female | Two y/o | Treatment (Wk 1) | Treatment | Feed Day | No  | 18:15 | 18:00 - 18:59 | Evening   | 38,0 | 117 | 21,0  | 21,0  | 19,15 | 605,02 | 101,98 |
| 2019/08/01 | CH2276 | Female | Two y/o | Treatment (Wk 1) | Treatment | Feed Day | No  | 18:20 | 18:00 - 18:59 | Evening   | 37,9 | 83  | 26,0  | 26,0  | 19,05 | 580,11 | 109,29 |
| 2019/08/01 | CH2276 | Female | Two y/o | Treatment (Wk 1) | Treatment | Feed Day | No  | 18:25 | 18:00 - 18:59 | Evening   | 37,7 |     | 23,4  | 23,4  | 18,85 |        | 105,68 |
| 2019/08/01 | CH2276 | Female | Two y/o | Treatment (Wk 1) | Treatment | Feed Day | No  | 18:30 | 18:00 - 18:59 | Evening   | 37,8 | 100 | 19,4  | 19,4  | 18,95 | 593,87 | 99,28  |
| 2019/08/01 | CH2276 | Female | Two y/o | Treatment (Wk 1) | Treatment | Feed Day | No  | 18:35 | 18:00 - 18:59 | Evening   | 37,8 | 80  | 102,6 | 102,6 | 18,95 | 577,31 | 156,74 |
| 2019/08/01 | CH2276 | Female | Two y/o | Treatment (Wk 1) | Treatment | Feed Day | No  | 18:40 | 18:00 - 18:59 | Evening   | 37,8 | 119 | 61,6  | 61,6  | 18,95 | 606,20 | 139,00 |
| 2019/08/01 | CH2276 | Female | Two y/o | Treatment (Wk 1) | Treatment | Feed Day | No  | 18:45 | 18:00 - 18:59 | Evening   | 37,9 | 101 | 28,8  | 28,8  | 19,05 | 594,59 | 112,79 |
| 2019/08/01 | CH2276 | Female | Two y/o | Treatment (Wk 1) | Treatment | Feed Day | No  | 18:50 | 18:00 - 18:59 | Evening   | 37,9 | 86  | 47,6  | 47,6  | 19,05 | 582,77 | 130,09 |



|    |            |        |        |         |                  |           |          |    |       |               |               |      |     |       |       |       |        |        |
|----|------------|--------|--------|---------|------------------|-----------|----------|----|-------|---------------|---------------|------|-----|-------|-------|-------|--------|--------|
|    | 2019/08/01 | CH2276 | Female | Two y/o | Treatment (Wk 1) | Treatment | Feed Day | No | 18:55 | 18:00 - 18:59 | Evening       | 37,9 | 89  | 406,2 | 406,2 | 19,05 | 585,33 | 205,16 |
|    | 2019/08/01 | CH2276 | Female | Two y/o | Treatment (Wk 1) | Treatment | Feed Day | No | 19:00 | 19:00 - 19:59 | Evening       | 38,2 | 102 | 47,0  | 47,0  | 19,36 | 595,30 | 129,65 |
|    | 2019/08/01 | CH2276 | Female | Two y/o | Treatment (Wk 1) | Treatment | Feed Day | No | 19:05 | 19:00 - 19:59 | Evening       | 38,2 | 93  | 38,4  | 38,4  | 19,36 | 588,58 | 122,68 |
|    | 2019/08/01 | CH2276 | Female | Two y/o | Treatment (Wk 1) | Treatment | Feed Day | No | 19:10 | 19:00 - 19:59 | Evening       | 38,0 | 88  | 27,8  | 27,8  | 19,15 | 584,49 | 111,58 |
|    | 2019/08/01 | CH2276 | Female | Two y/o | Treatment (Wk 1) | Treatment | Feed Day | No | 19:15 | 19:00 - 19:59 | Evening       | 38,0 | 88  | 23,8  | 23,8  | 19,15 | 584,49 | 106,26 |
|    | 2019/08/01 | CH2276 | Female | Two y/o | Treatment (Wk 1) | Treatment | Feed Day | No | 19:20 | 19:00 - 19:59 | Evening       | 37,9 | 89  | 52,8  | 52,8  | 19,05 | 585,33 | 133,67 |
|    | 2019/08/01 | CH2276 | Female | Two y/o | Treatment (Wk 1) | Treatment | Feed Day | No | 19:25 | 19:00 - 19:59 | Evening       | 37,9 | 88  | 88,8  | 88,8  | 19,05 | 584,49 | 151,71 |
|    | 2019/08/01 | CH2276 | Female | Two y/o | Treatment (Wk 1) | Treatment | Feed Day | No | 19:30 | 19:00 - 19:59 | Evening       | 38,0 | 95  | 84,0  | 84,0  | 19,15 | 590,14 | 149,77 |
|    | 2019/08/01 | CH2276 | Female | Two y/o | Treatment (Wk 1) | Treatment | Feed Day | No | 19:35 | 19:00 - 19:59 | Evening       | 38,0 | 91  | 85,2  | 85,2  | 19,15 | 586,98 | 150,27 |
|    | 2019/08/01 | CH2276 | Female | Two y/o | Treatment (Wk 1) | Treatment | Feed Day | No | 19:40 | 19:00 - 19:59 | Evening       | 38,0 | 81  | 76,8  | 76,8  | 19,15 | 578,26 | 146,66 |
|    | 2019/08/01 | CH2276 | Female | Two y/o | Treatment (Wk 1) | Treatment | Feed Day | No | 19:45 | 19:00 - 19:59 | Evening       | 38,0 | 82  | 83,2  | 83,2  | 19,15 | 579,19 | 149,44 |
|    | 2019/08/01 | CH2276 | Female | Two y/o | Treatment (Wk 1) | Treatment | Feed Day | No | 19:50 | 19:00 - 19:59 | Evening       | 38,0 | 94  | 84,8  | 84,8  | 19,15 | 589,37 | 150,10 |
|    | 2019/08/01 | CH2276 | Female | Two y/o | Treatment (Wk 1) | Treatment | Feed Day | No | 19:55 | 19:00 - 19:59 | Evening       | 38,0 | 73  | 85,0  | 85,0  | 19,15 | 570,27 | 150,18 |
|    | 2019/08/01 | CH2276 | Female | Two y/o | Treatment (Wk 1) | Treatment | Feed Day | No | 20:00 | 20:00 - 20:59 | Night         | 37,9 | 84  | 80,8  | 80,8  | 19,05 | 581,01 | 148,42 |
|    | 2019/08/01 | CH2276 | Female | Two y/o | Treatment (Wk 1) | Treatment | Feed Day | No | 20:05 | 20:00 - 20:59 | Night         | 37,9 | 80  | 84,0  | 84,0  | 19,05 | 577,31 | 149,77 |
|    | 2019/08/01 | CH2276 | Female | Two y/o | Treatment (Wk 1) | Treatment | Feed Day | No | 20:10 | 20:00 - 20:59 | Night         | 37,9 | 78  | 83,0  | 83,0  | 19,05 | 575,38 | 149,36 |
|    | 2019/08/01 | CH2276 | Female | Two y/o | Treatment (Wk 1) | Treatment | Feed Day | No | 20:15 | 20:00 - 20:59 | Night         | 38,0 | 99  | 87,0  | 87,0  | 19,15 | 593,14 | 150,99 |
|    | 2019/08/01 | CH2276 | Female | Two y/o | Treatment (Wk 1) | Treatment | Feed Day | No | 20:20 | 20:00 - 20:59 | Night         | 38,0 | 91  | 90,0  | 90,0  | 19,15 | 586,98 | 152,17 |
|    | 2019/08/01 | CH2276 | Female | Two y/o | Treatment (Wk 1) | Treatment | Feed Day | No | 20:25 | 20:00 - 20:59 | Night         | 38,0 | 91  | 80,8  | 80,8  | 19,15 | 586,98 | 148,42 |
|    | 2019/08/01 | CH2276 | Female | Two y/o | Treatment (Wk 1) | Treatment | Feed Day | No | 20:30 | 20:00 - 20:59 | Night         | 38,0 | 78  | 77,6  | 77,6  | 19,15 | 575,38 | 147,02 |
|    | 2019/08/01 | CH2276 | Female | Two y/o | Treatment (Wk 1) | Treatment | Feed Day | No | 20:35 | 20:00 - 20:59 | Night         | 38,0 | 105 | 76,6  | 76,6  | 19,15 | 597,38 | 146,57 |
|    | 2019/08/01 | CH2276 | Female | Two y/o | Treatment (Wk 1) | Treatment | Feed Day | No | 20:40 | 20:00 - 20:59 | Night         | 38,0 | 78  | 79,4  | 79,4  | 19,15 | 575,38 | 147,81 |
|    | 2019/08/01 | CH2276 | Female | Two y/o | Treatment (Wk 1) | Treatment | Feed Day | No | 20:45 | 20:00 - 20:59 | Night         | 38,0 | 89  | 79,6  | 79,6  | 19,15 | 585,33 | 147,90 |
|    | 2019/08/01 | CH2276 | Female | Two y/o | Treatment (Wk 1) | Treatment | Feed Day | No | 20:50 | 20:00 - 20:59 | Night         | 37,9 | 91  | 82,0  | 82,0  | 19,05 | 586,98 | 148,93 |
|    | 2019/08/01 | CH2276 | Female | Two y/o | Treatment (Wk 1) | Treatment | Feed Day | No | 20:55 | 20:00 - 20:59 | Night         | 37,9 | 84  | 71,6  | 71,6  | 19,05 | 581,01 | 144,22 |
|    | 2019/08/01 | CH2276 | Female | Two y/o | Treatment (Wk 1) | Treatment | Feed Day | No | 21:00 | 21:00 - 21:59 | Night         | 37,8 | 92  | 70,8  | 70,8  | 18,95 | 587,78 | 143,83 |
|    | 2019/08/01 | CH2276 | Female | Two y/o | Treatment (Wk 1) | Treatment | Feed Day | No | 21:05 | 21:00 - 21:59 | Night         | 37,8 | 80  | 78,2  | 78,2  | 18,95 | 577,31 | 147,28 |
|    | 2019/08/01 | CH2276 | Female | Two y/o | Treatment (Wk 1) | Treatment | Feed Day | No | 21:10 | 21:00 - 21:59 | Night         | 37,8 | 79  | 79,6  | 79,6  | 18,95 | 576,36 | 147,90 |
|    | 2019/08/01 | CH2276 | Female | Two y/o | Treatment (Wk 1) | Treatment | Feed Day | No | 21:15 | 21:00 - 21:59 | Night         | 37,8 | 100 | 78,6  | 78,6  | 18,95 | 593,87 | 147,46 |
|    | 2019/08/01 | CH2276 | Female | Two y/o | Treatment (Wk 1) | Treatment | Feed Day | No | 21:20 | 21:00 - 21:59 | Night         | 37,8 | 95  | 64,0  | 64,0  | 18,95 | 590,14 | 140,33 |
|    | 2019/08/01 | CH2276 | Female | Two y/o | Treatment (Wk 1) | Treatment | Feed Day | No | 21:25 | 21:00 - 21:59 | Night         | 37,8 | 119 | 33,0  | 33,0  | 18,95 | 606,20 | 117,47 |
|    | 2019/08/01 | CH2276 | Female | Two y/o | Treatment (Wk 1) | Treatment | Feed Day | No | 21:30 | 21:00 - 21:59 | Night         | 37,8 | 92  | 32,6  | 32,6  | 18,95 | 587,78 | 117,05 |
|    | 2019/08/01 | CH2276 | Female | Two y/o | Treatment (Wk 1) | Treatment | Feed Day | No | 21:35 | 21:00 - 21:59 | Night         | 37,7 | 94  | 44,2  | 44,2  | 18,85 | 589,37 | 127,53 |
|    | 2019/08/01 | CH2276 | Female | Two y/o | Treatment (Wk 1) | Treatment | Feed Day | No | 21:40 | 21:00 - 21:59 | Night         | 37,7 | 90  | 34,8  | 34,8  | 18,85 | 586,16 | 119,29 |
|    | 2019/08/01 | CH2276 | Female | Two y/o | Treatment (Wk 1) | Treatment | Feed Day | No | 21:45 | 21:00 - 21:59 | Night         | 37,7 | 86  | 38,0  | 38,0  | 18,85 | 582,77 | 122,32 |
|    | 2019/08/01 | CH2276 | Female | Two y/o | Treatment (Wk 1) | Treatment | Feed Day | No | 21:50 | 21:00 - 21:59 | Night         | 37,8 | 84  | 38,8  | 38,8  | 18,95 | 581,01 | 123,04 |
|    | 2019/08/01 | CH2276 | Female | Two y/o | Treatment (Wk 1) | Treatment | Feed Day | No | 21:55 | 21:00 - 21:59 | Night         | 37,7 | 82  | 38,2  | 38,2  | 18,85 | 579,19 | 122,50 |
|    | 2019/08/01 | CH2276 | Female | Two y/o | Treatment (Wk 1) | Treatment | Feed Day | No | 22:00 | 22:00 - 22:59 | Night         | 37,8 | 77  | 45,2  | 45,2  | 18,95 | 574,39 | 128,30 |
|    | 2019/08/01 | CH2276 | Female | Two y/o | Treatment (Wk 1) | Treatment | Feed Day | No | 22:05 | 22:00 - 22:59 | Night         | 37,7 | 90  | 55,0  | 55,0  | 18,85 | 586,16 | 135,08 |
|    | 2019/08/01 | CH2276 | Female | Two y/o | Treatment (Wk 1) | Treatment | Feed Day | No | 22:10 | 22:00 - 22:59 | Night         | 37,9 | 109 | 50,2  | 50,2  | 19,05 | 600,04 | 131,92 |
|    | 2019/08/01 | CH2276 | Female | Two y/o | Treatment (Wk 1) | Treatment | Feed Day | No | 22:15 | 22:00 - 22:59 | Night         | 37,8 | 99  | 36,4  | 36,4  | 18,95 | 593,14 | 120,84 |
|    | 2019/08/01 | CH2276 | Female | Two y/o | Treatment (Wk 1) | Treatment | Feed Day | No | 22:20 | 22:00 - 22:59 | Night         | 37,8 | 88  | 38,0  | 38,0  | 18,95 | 584,49 | 122,32 |
|    | 2019/08/01 | CH2276 | Female | Two y/o | Treatment (Wk 1) | Treatment | Feed Day | No | 22:25 | 22:00 - 22:59 | Night         | 37,8 | 92  | 25,6  | 25,6  | 18,95 | 587,78 | 108,76 |
|    | 2019/08/01 | CH2276 | Female | Two y/o | Treatment (Wk 1) | Treatment | Feed Day | No | 22:30 | 22:00 - 22:59 | Night         | 37,8 | 115 | 22,0  | 22,0  | 18,95 | 603,82 | 103,57 |
|    | 2019/08/01 | CH2276 | Female | Two y/o | Treatment (Wk 1) | Treatment | Feed Day | No | 22:35 | 22:00 - 22:59 | Night         | 37,7 | 91  | 61,4  | 61,4  | 18,85 | 586,98 | 138,89 |
|    | 2019/08/01 | CH2276 | Female | Two y/o | Treatment (Wk 1) | Treatment | Feed Day | No | 22:40 | 22:00 - 22:59 | Night         | 37,8 | 92  | 52,4  | 52,4  | 18,95 | 587,78 | 133,41 |
|    | 2019/08/01 | CH2276 | Female | Two y/o | Treatment (Wk 1) | Treatment | Feed Day | No | 22:45 | 22:00 - 22:59 | Night         | 37,8 | 100 | 37,6  | 37,6  | 18,95 | 593,87 | 121,96 |
|    | 2019/08/01 | CH2276 | Female | Two y/o | Treatment (Wk 1) | Treatment | Feed Day | No | 22:50 | 22:00 - 22:59 | Night         | 37,9 | 83  | 34,6  | 34,6  | 19,05 | 580,11 | 119,10 |
|    | 2019/08/01 | CH2276 | Female | Two y/o | Treatment (Wk 1) | Treatment | Feed Day | No | 22:55 | 22:00 - 22:59 | Night         | 37,9 | 72  | 24,4  | 24,4  | 19,05 | 569,20 | 107,11 |
|    | 2019/08/01 | CH2276 | Female | Two y/o | Treatment (Wk 1) | Treatment | Feed Day | No | 23:00 | 23:00 - 23:59 | Night         | 37,9 | 87  | 22,4  | 22,4  | 19,05 | 583,64 | 104,19 |
|    | 2019/08/01 | CH2276 | Female | Two y/o | Treatment (Wk 1) | Treatment | Feed Day | No | 23:05 | 23:00 - 23:59 | Night         | 37,9 | 75  | 27,0  | 27,0  | 19,05 | 572,36 | 110,58 |
|    | 2019/08/01 | CH2276 | Female | Two y/o | Treatment (Wk 1) | Treatment | Feed Day | No | 23:10 | 23:00 - 23:59 | Night         | 37,9 | 94  | 30,2  | 30,2  | 19,05 | 589,37 | 114,42 |
|    | 2019/08/01 | CH2276 | Female | Two y/o | Treatment (Wk 1) | Treatment | Feed Day | No | 23:15 | 23:00 - 23:59 | Night         | 37,9 | 69  | 27,8  | 27,8  | 19,05 | 565,86 | 111,58 |
|    | 2019/08/01 | CH2276 | Female | Two y/o | Treatment (Wk 1) | Treatment | Feed Day | No | 23:20 | 23:00 - 23:59 | Night         | 37,8 |     | 36,2  | 36,2  | 18,95 |        | 120,65 |
|    | 2019/08/01 | CH2276 | Female | Two y/o | Treatment (Wk 1) | Treatment | Feed Day | No | 23:25 | 23:00 - 23:59 | Night         | 37,8 | 104 | 29,0  | 29,0  | 18,95 | 596,69 | 113,03 |
|    | 2019/08/01 | CH2276 | Female | Two y/o | Treatment (Wk 1) | Treatment | Feed Day | No | 23:30 | 23:00 - 23:59 | Night         | 37,6 | 94  | 34,4  | 34,4  | 18,75 | 589,37 | 118,90 |
|    | 2019/08/01 | CH2276 | Female | Two y/o | Treatment (Wk 1) | Treatment | Feed Day | No | 23:35 | 23:00 - 23:59 | Night         | 37,5 | 98  | 24,4  | 24,4  | 18,65 | 592,41 | 107,11 |
|    | 2019/08/01 | CH2276 | Female | Two y/o | Treatment (Wk 1) | Treatment | Feed Day | No | 23:40 | 23:00 - 23:59 | Night         | 37,4 |     | 26,2  | 26,2  | 18,55 |        | 109,55 |
|    | 2019/08/01 | CH2276 | Female | Two y/o | Treatment (Wk 1) | Treatment | Feed Day | No | 23:45 | 23:00 - 23:59 | Night         | 37,3 | 123 | 61,0  | 61,0  | 18,46 | 608,49 | 138,67 |
|    | 2019/08/01 | CH2276 | Female | Two y/o | Treatment (Wk 1) | Treatment | Feed Day | No | 23:50 | 23:00 - 23:59 | Night         | 37,3 | 124 | 22,0  | 22,0  | 18,46 | 609,04 | 103,57 |
|    | 2019/08/01 | CH2276 | Female | Two y/o | Treatment (Wk 1) | Treatment | Feed Day | No | 23:55 | 23:00 - 23:59 | Night         | 37,4 | 79  | 26,8  | 26,8  | 18,55 | 576,36 | 110,33 |
| 45 | 2019/08/02 | CH2276 | Female | Two y/o | Treatment (Wk 1) | Treatment | Feed Day | No | 00:00 | 00:00 - 00:59 | Early Morning | 37,4 | 95  | 22,0  | 22,0  | 18,55 | 590,14 | 103,57 |
|    | 2019/08/02 | CH2276 | Female | Two y/o | Treatment (Wk 1) | Treatment | Feed Day | No | 00:05 | 00:00 - 00:59 | Early Morning | 37,4 | 96  | 25,6  | 25,6  | 18,55 | 590,91 | 108,76 |
|    | 2019/08/02 | CH2276 | Female | Two y/o | Treatment (Wk 1) | Treatment | Feed Day | No | 00:10 | 00:00 - 00:59 | Early Morning | 37,4 | 103 | 27,2  | 27,2  | 18,55 | 596,00 | 110,83 |
|    | 2019/08/02 | CH2276 | Female | Two y/o | Treatment (Wk 1) | Treatment | Feed Day | No | 00:15 | 00:00 - 00:59 | Early Morning | 37,4 | 86  | 29,4  | 29,4  | 18,55 | 582,77 | 113,50 |
|    | 2019/08/02 | CH2276 | Female | Two y/o | Treatment (Wk 1) | Treatment | Feed Day | No | 00:20 | 00:00 - 00:59 | Early Morning | 37,4 | 83  | 24,6  | 24,6  | 18,55 | 580,11 | 107,39 |
|    | 2019/08/02 | CH2276 | Female | Two y/o | Treatment (Wk 1) | Treatment | Feed Day | No | 00:25 | 00:00 - 00:59 | Early Morning | 37,5 | 69  | 22,8  | 22,8  | 18,65 | 565,86 | 104,79 |
|    | 2019/08/02 | CH2276 | Female | Two y/o | Treatment (Wk 1) | Treatment | Feed Day | No | 00:30 | 00:00 - 00:59 | Early Morning | 37,5 | 89  | 24,6  | 24,6  | 18,65 | 585,33 | 107,39 |
|    | 2019/08/02 | CH2276 | Female | Two y/o | Treatment (Wk 1) | Treatment | Feed Day | No | 00:35 | 00:00 - 00:59 | Early Morning | 37,5 | 94  | 19,6  | 19,6  | 18,65 | 589,37 | 99,63  |
|    | 2019/08/02 | CH2276 | Female | Two y/o | Treatment (Wk 1) | Treatment | Feed Day | No | 00:40 | 00:00 - 00:59 | Early Morning | 37,4 | 86  | 20,2  | 20,2  | 18,55 | 582,77 |        |



|            |        |        |         |                  |           |          |    |       |               |               |      |     |       |       |       |        |        |
|------------|--------|--------|---------|------------------|-----------|----------|----|-------|---------------|---------------|------|-----|-------|-------|-------|--------|--------|
| 2019/08/02 | CH2276 | Female | Two y/o | Treatment (Wk 1) | Treatment | Feed Day | No | 00:45 | 00:00 - 00:59 | Early Morning | 37,3 | 57  | 18,2  | 18,2  | 18,46 | 550,47 | 97,10  |
| 2019/08/02 | CH2276 | Female | Two y/o | Treatment (Wk 1) | Treatment | Feed Day | No | 00:50 | 00:00 - 00:59 | Early Morning | 37,3 | 63  | 20,4  | 20,4  | 18,46 | 558,62 | 100,99 |
| 2019/08/02 | CH2276 | Female | Two y/o | Treatment (Wk 1) | Treatment | Feed Day | No | 00:55 | 00:00 - 00:59 | Early Morning | 37,3 | 108 | 31,4  | 31,4  | 18,46 | 599,39 | 115,76 |
| 2019/08/02 | CH2276 | Female | Two y/o | Treatment (Wk 1) | Treatment | Feed Day | No | 01:00 | 01:00 - 01:59 | Early Morning | 37,3 | 69  | 24,6  | 24,6  | 18,46 | 565,86 | 107,39 |
| 2019/08/02 | CH2276 | Female | Two y/o | Treatment (Wk 1) | Treatment | Feed Day | No | 01:05 | 01:00 - 01:59 | Early Morning | 37,3 | 73  | 24,6  | 24,6  | 18,46 | 570,27 | 107,39 |
| 2019/08/02 | CH2276 | Female | Two y/o | Treatment (Wk 1) | Treatment | Feed Day | No | 01:10 | 01:00 - 01:59 | Early Morning | 37,3 | 98  | 64,2  | 64,2  | 18,46 | 592,41 | 140,44 |
| 2019/08/02 | CH2276 | Female | Two y/o | Treatment (Wk 1) | Treatment | Feed Day | No | 01:15 | 01:00 - 01:59 | Early Morning | 37,5 |     | 52,8  | 52,8  | 18,65 |        | 133,67 |
| 2019/08/02 | CH2276 | Female | Two y/o | Treatment (Wk 1) | Treatment | Feed Day | No | 01:20 | 01:00 - 01:59 | Early Morning | 37,4 | 97  | 41,4  | 41,4  | 18,55 | 591,66 | 125,27 |
| 2019/08/02 | CH2276 | Female | Two y/o | Treatment (Wk 1) | Treatment | Feed Day | No | 01:25 | 01:00 - 01:59 | Early Morning | 37,5 | 92  | 34,4  | 34,4  | 18,65 | 587,78 | 118,90 |
| 2019/08/02 | CH2276 | Female | Two y/o | Treatment (Wk 1) | Treatment | Feed Day | No | 01:30 | 01:00 - 01:59 | Early Morning | 37,5 | 54  | 22,6  | 22,6  | 18,65 | 545,99 | 104,49 |
| 2019/08/02 | CH2276 | Female | Two y/o | Treatment (Wk 1) | Treatment | Feed Day | No | 01:35 | 01:00 - 01:59 | Early Morning | 37,6 | 73  | 24,0  | 24,0  | 18,75 | 570,27 | 106,55 |
| 2019/08/02 | CH2276 | Female | Two y/o | Treatment (Wk 1) | Treatment | Feed Day | No | 01:40 | 01:00 - 01:59 | Early Morning | 37,6 | 69  | 29,4  | 29,4  | 18,75 | 565,86 | 113,50 |
| 2019/08/02 | CH2276 | Female | Two y/o | Treatment (Wk 1) | Treatment | Feed Day | No | 01:45 | 01:00 - 01:59 | Early Morning | 37,7 | 93  | 30,4  | 30,4  | 18,85 | 588,58 | 114,65 |
| 2019/08/02 | CH2276 | Female | Two y/o | Treatment (Wk 1) | Treatment | Feed Day | No | 01:50 | 01:00 - 01:59 | Early Morning | 37,7 | 98  | 34,6  | 34,6  | 18,85 | 592,41 | 119,10 |
| 2019/08/02 | CH2276 | Female | Two y/o | Treatment (Wk 1) | Treatment | Feed Day | No | 01:55 | 01:00 - 01:59 | Early Morning | 37,8 | 100 | 25,6  | 25,6  | 18,95 | 593,87 | 108,76 |
| 2019/08/02 | CH2276 | Female | Two y/o | Treatment (Wk 1) | Treatment | Feed Day | No | 02:00 | 02:00 - 02:59 | Early Morning | 37,7 | 82  | 41,6  | 41,6  | 18,85 | 579,19 | 125,44 |
| 2019/08/02 | CH2276 | Female | Two y/o | Treatment (Wk 1) | Treatment | Feed Day | No | 02:05 | 02:00 - 02:59 | Early Morning | 37,7 | 110 | 45,0  | 45,0  | 18,85 | 600,69 | 128,15 |
| 2019/08/02 | CH2276 | Female | Two y/o | Treatment (Wk 1) | Treatment | Feed Day | No | 02:10 | 02:00 - 02:59 | Early Morning | 37,7 | 100 | 16,0  | 16,0  | 18,85 | 593,87 | 92,71  |
| 2019/08/02 | CH2276 | Female | Two y/o | Treatment (Wk 1) | Treatment | Feed Day | No | 02:15 | 02:00 - 02:59 | Early Morning | 37,5 | 73  | 17,2  | 17,2  | 18,65 | 570,27 | 95,17  |
| 2019/08/02 | CH2276 | Female | Two y/o | Treatment (Wk 1) | Treatment | Feed Day | No | 02:20 | 02:00 - 02:59 | Early Morning | 37,4 | 74  | 14,4  | 14,4  | 18,55 | 571,33 | 89,12  |
| 2019/08/02 | CH2276 | Female | Two y/o | Treatment (Wk 1) | Treatment | Feed Day | No | 02:25 | 02:00 - 02:59 | Early Morning | 37,3 | 67  | 20,4  | 20,4  | 18,46 | 563,53 | 100,99 |
| 2019/08/02 | CH2276 | Female | Two y/o | Treatment (Wk 1) | Treatment | Feed Day | No | 02:30 | 02:00 - 02:59 | Early Morning | 37,2 | 109 | 18,8  | 18,8  | 18,36 | 600,04 | 98,20  |
| 2019/08/02 | CH2276 | Female | Two y/o | Treatment (Wk 1) | Treatment | Feed Day | No | 02:35 | 02:00 - 02:59 | Early Morning | 37,1 | 70  | 15,0  | 15,0  | 18,26 | 566,99 | 90,51  |
| 2019/08/02 | CH2276 | Female | Two y/o | Treatment (Wk 1) | Treatment | Feed Day | No | 02:40 | 02:00 - 02:59 | Early Morning | 37,0 | 79  | 28,6  | 28,6  | 18,16 | 576,36 | 112,56 |
| 2019/08/02 | CH2276 | Female | Two y/o | Treatment (Wk 1) | Treatment | Feed Day | No | 02:45 | 02:00 - 02:59 | Early Morning | 37,1 | 104 | 37,8  | 37,8  | 18,26 | 596,69 | 122,14 |
| 2019/08/02 | CH2276 | Female | Two y/o | Treatment (Wk 1) | Treatment | Feed Day | No | 02:50 | 02:00 - 02:59 | Early Morning | 37,3 | 95  | 33,0  | 33,0  | 18,46 | 590,14 | 117,47 |
| 2019/08/02 | CH2276 | Female | Two y/o | Treatment (Wk 1) | Treatment | Feed Day | No | 02:55 | 02:00 - 02:59 | Early Morning | 37,4 | 79  | 28,8  | 28,8  | 18,55 | 576,36 | 112,79 |
| 2019/08/02 | CH2276 | Female | Two y/o | Treatment (Wk 1) | Treatment | Feed Day | No | 03:00 | 03:00 - 03:59 | Early Morning | 37,5 | 97  | 27,8  | 27,8  | 18,65 | 591,66 | 111,58 |
| 2019/08/02 | CH2276 | Female | Two y/o | Treatment (Wk 1) | Treatment | Feed Day | No | 03:05 | 03:00 - 03:59 | Early Morning | 37,5 | 68  | 25,8  | 25,8  | 18,65 | 564,71 | 109,02 |
| 2019/08/02 | CH2276 | Female | Two y/o | Treatment (Wk 1) | Treatment | Feed Day | No | 03:10 | 03:00 - 03:59 | Early Morning | 37,5 | 103 | 23,0  | 23,0  | 18,65 | 596,00 | 105,09 |
| 2019/08/02 | CH2276 | Female | Two y/o | Treatment (Wk 1) | Treatment | Feed Day | No | 03:15 | 03:00 - 03:59 | Early Morning | 37,5 | 62  | 24,4  | 24,4  | 18,65 | 557,33 | 107,11 |
| 2019/08/02 | CH2276 | Female | Two y/o | Treatment (Wk 1) | Treatment | Feed Day | No | 03:20 | 03:00 - 03:59 | Early Morning | 37,5 | 96  | 24,8  | 24,8  | 18,65 | 590,91 | 107,67 |
| 2019/08/02 | CH2276 | Female | Two y/o | Treatment (Wk 1) | Treatment | Feed Day | No | 03:25 | 03:00 - 03:59 | Early Morning | 37,5 | 91  | 52,6  | 52,6  | 18,65 | 586,98 | 133,54 |
| 2019/08/02 | CH2276 | Female | Two y/o | Treatment (Wk 1) | Treatment | Feed Day | No | 03:30 | 03:00 - 03:59 | Early Morning | 37,4 | 112 | 49,0  | 49,0  | 18,55 | 601,96 | 131,09 |
| 2019/08/02 | CH2276 | Female | Two y/o | Treatment (Wk 1) | Treatment | Feed Day | No | 03:35 | 03:00 - 03:59 | Early Morning | 37,5 | 99  | 42,8  | 42,8  | 18,65 | 593,14 | 126,42 |
| 2019/08/02 | CH2276 | Female | Two y/o | Treatment (Wk 1) | Treatment | Feed Day | No | 03:40 | 03:00 - 03:59 | Early Morning | 37,6 | 104 | 29,6  | 29,6  | 18,75 | 596,69 | 113,73 |
| 2019/08/02 | CH2276 | Female | Two y/o | Treatment (Wk 1) | Treatment | Feed Day | No | 03:45 | 03:00 - 03:59 | Early Morning | 37,6 | 79  | 25,6  | 25,6  | 18,75 | 576,36 | 108,76 |
| 2019/08/02 | CH2276 | Female | Two y/o | Treatment (Wk 1) | Treatment | Feed Day | No | 03:50 | 03:00 - 03:59 | Early Morning | 37,6 | 66  | 46,8  | 46,8  | 18,75 | 562,34 | 129,50 |
| 2019/08/02 | CH2276 | Female | Two y/o | Treatment (Wk 1) | Treatment | Feed Day | No | 03:55 | 03:00 - 03:59 | Early Morning | 37,6 | 100 | 26,6  | 26,6  | 18,75 | 593,87 | 110,07 |
| 2019/08/02 | CH2276 | Female | Two y/o | Treatment (Wk 1) | Treatment | Feed Day | No | 04:00 | 04:00 - 04:59 | Morning       | 37,6 | 104 | 31,2  | 31,2  | 18,75 | 596,69 | 115,54 |
| 2019/08/02 | CH2276 | Female | Two y/o | Treatment (Wk 1) | Treatment | Feed Day | No | 04:05 | 04:00 - 04:59 | Morning       | 37,6 | 88  | 46,6  | 46,6  | 18,75 | 584,49 | 129,35 |
| 2019/08/02 | CH2276 | Female | Two y/o | Treatment (Wk 1) | Treatment | Feed Day | No | 04:10 | 04:00 - 04:59 | Morning       | 37,6 | 82  | 57,2  | 57,2  | 18,75 | 579,19 | 136,44 |
| 2019/08/02 | CH2276 | Female | Two y/o | Treatment (Wk 1) | Treatment | Feed Day | No | 04:15 | 04:00 - 04:59 | Morning       | 37,6 | 82  | 44,0  | 44,0  | 18,75 | 579,19 | 127,37 |
| 2019/08/02 | CH2276 | Female | Two y/o | Treatment (Wk 1) | Treatment | Feed Day | No | 04:20 | 04:00 - 04:59 | Morning       | 37,6 |     | 32,0  | 32,0  | 18,75 |        | 116,41 |
| 2019/08/02 | CH2276 | Female | Two y/o | Treatment (Wk 1) | Treatment | Feed Day | No | 04:25 | 04:00 - 04:59 | Morning       | 37,6 | 67  | 41,8  | 41,8  | 18,75 | 563,53 | 125,60 |
| 2019/08/02 | CH2276 | Female | Two y/o | Treatment (Wk 1) | Treatment | Feed Day | No | 04:30 | 04:00 - 04:59 | Morning       | 37,5 | 94  | 48,8  | 48,8  | 18,65 | 589,37 | 130,95 |
| 2019/08/02 | CH2276 | Female | Two y/o | Treatment (Wk 1) | Treatment | Feed Day | No | 04:35 | 04:00 - 04:59 | Morning       | 37,5 | 95  | 61,8  | 61,8  | 18,65 | 590,14 | 139,12 |
| 2019/08/02 | CH2276 | Female | Two y/o | Treatment (Wk 1) | Treatment | Feed Day | No | 04:40 | 04:00 - 04:59 | Morning       | 37,4 | 98  | 55,6  | 55,6  | 18,55 | 592,41 | 135,46 |
| 2019/08/02 | CH2276 | Female | Two y/o | Treatment (Wk 1) | Treatment | Feed Day | No | 04:45 | 04:00 - 04:59 | Morning       | 37,3 | 109 | 38,8  | 38,8  | 18,46 | 600,04 | 123,04 |
| 2019/08/02 | CH2276 | Female | Two y/o | Treatment (Wk 1) | Treatment | Feed Day | No | 04:50 | 04:00 - 04:59 | Morning       | 37,4 | 97  | 72,8  | 72,8  | 18,55 | 591,66 | 144,80 |
| 2019/08/02 | CH2276 | Female | Two y/o | Treatment (Wk 1) | Treatment | Feed Day | No | 04:55 | 04:00 - 04:59 | Morning       | 37,5 | 48  | 43,0  | 43,0  | 18,65 | 536,04 | 126,58 |
| 2019/08/02 | CH2276 | Female | Two y/o | Treatment (Wk 1) | Treatment | Feed Day | No | 05:00 | 05:00 - 05:59 | Morning       | 37,5 |     | 64,0  | 64,0  | 18,65 |        | 140,33 |
| 2019/08/02 | CH2276 | Female | Two y/o | Treatment (Wk 1) | Treatment | Feed Day | No | 05:05 | 05:00 - 05:59 | Morning       | 37,4 |     | 228,4 | 228,4 | 18,55 |        | 184,79 |
| 2019/08/02 | CH2276 | Female | Two y/o | Treatment (Wk 1) | Treatment | Feed Day | No | 05:10 | 05:00 - 05:59 | Morning       | 37,4 | 160 | 318,2 | 318,2 | 18,55 | 626,07 | 196,50 |
| 2019/08/02 | CH2276 | Female | Two y/o | Treatment (Wk 1) | Treatment | Feed Day | No | 05:15 | 05:00 - 05:59 | Morning       | 37,5 | 83  | 68,4  | 68,4  | 18,65 | 580,11 | 142,64 |
| 2019/08/02 | CH2276 | Female | Two y/o | Treatment (Wk 1) | Treatment | Feed Day | No | 05:20 | 05:00 - 05:59 | Morning       | 37,6 | 88  | 233,6 | 233,6 | 18,75 | 584,49 | 185,59 |
| 2019/08/02 | CH2276 | Female | Two y/o | Treatment (Wk 1) | Treatment | Feed Day | No | 05:25 | 05:00 - 05:59 | Morning       | 37,6 | 150 | 225,0 | 225,0 | 18,75 | 621,86 | 184,27 |
| 2019/08/02 | CH2276 | Female | Two y/o | Treatment (Wk 1) | Treatment | Feed Day | No | 05:30 | 05:00 - 05:59 | Morning       | 37,7 | 119 | 119,6 | 119,6 | 18,85 | 606,20 | 162,09 |
| 2019/08/02 | CH2276 | Female | Two y/o | Treatment (Wk 1) | Treatment | Feed Day | No | 05:35 | 05:00 - 05:59 | Morning       | 37,7 | 115 | 43,4  | 43,4  | 18,85 | 603,82 | 126,90 |
| 2019/08/02 | CH2276 | Female | Two y/o | Treatment (Wk 1) | Treatment | Feed Day | No | 05:40 | 05:00 - 05:59 | Morning       | 37,6 | 98  | 71,2  | 71,2  | 18,75 | 592,41 | 144,03 |
| 2019/08/02 | CH2276 | Female | Two y/o | Treatment (Wk 1) | Treatment | Feed Day | No | 05:45 | 05:00 - 05:59 | Morning       | 37,6 | 88  | 108,0 | 108,0 | 18,75 | 584,49 | 158,53 |
| 2019/08/02 | CH2276 | Female | Two y/o | Treatment (Wk 1) | Treatment | Feed Day | No | 05:50 | 05:00 - 05:59 | Morning       | 37,6 | 90  | 469,2 | 469,2 | 18,75 | 586,16 | 210,28 |
| 2019/08/02 | CH2276 | Female | Two y/o | Treatment (Wk 1) | Treatment | Feed Day | No | 05:55 | 05:00 - 05:59 | Morning       | 37,8 |     | 133,0 | 133,0 | 18,95 |        | 165,80 |
| 2019/08/02 | CH2276 | Female | Two y/o | Treatment (Wk 1) | Treatment | Feed Day | No | 06:00 | 06:00 - 06:59 | Morning       | 37,8 |     | 144,8 | 144,8 | 18,95 |        | 168,78 |
| 2019/08/02 | CH2276 | Female | Two y/o | Treatment (Wk 1) | Treatment | Feed Day | No | 06:05 | 06:00 - 06:59 | Morning       | 37,8 |     | 179,8 | 179,8 | 18,95 |        | 176,38 |
| 2019/08/02 | CH2276 | Female | Two y/o | Treatment (Wk 1) | Treatment | Feed Day | No | 06:10 | 06:00 - 06:59 | Morning       | 37,8 | 73  | 191,0 | 191,0 | 18,95 | 570,27 | 178,50 |
| 2019/08/02 | CH2276 | Female | Two y/o | Treatment (Wk 1) | Treatment | Feed Day | No | 06:15 | 06:00 - 06:59 | Morning       | 37,9 | 101 | 35,0  | 35,0  | 19,05 | 594,59 | 119,49 |
| 2019/08/02 | CH2276 | Female | Two y/o | Treatment (Wk 1) | Treatment | Feed Day | No | 06:20 | 06:00 - 06:59 | Morning       | 37,9 | 124 | 122,8 | 122,8 | 19,05 | 609,04 | 163,01 |
| 2019/08/02 | CH2276 | Female | Two y/o | Treatment (Wk 1) | Treatment | Feed Day | No | 06:25 | 06:00 - 06:59 | Morning       | 37,9 | 160 | 317,0 | 317,0 | 19,05 | 626,07 | 196,37 |
| 2019/08/02 | CH2276 | Female | Two y/o | Treatment (Wk 1) | Treatment | Feed Day | No | 06:30 | 06:00 - 06:59 | Morning       | 38,2 | 188 | 299,0 | 299,0 | 19,36 | 636,34 | 194,30 |



|            |        |        |         |                  |           |          |     |       |               |              |      |     |       |       |       |        |        |
|------------|--------|--------|---------|------------------|-----------|----------|-----|-------|---------------|--------------|------|-----|-------|-------|-------|--------|--------|
| 2019/08/02 | CH2276 | Female | Two y/o | Treatment (Wk 1) | Treatment | Feed Day | No  | 06:35 | 06:00 - 06:59 | Morning      | 38,2 | 108 | 376,8 | 376,8 | 19,36 | 599,39 | 202,49 |
| 2019/08/02 | CH2276 | Female | Two y/o | Treatment (Wk 1) | Treatment | Feed Day | No  | 06:40 | 06:00 - 06:59 | Morning      | 38,0 | 141 | 197,8 | 197,8 | 19,15 | 617,75 | 179,73 |
| 2019/08/02 | CH2276 | Female | Two y/o | Treatment (Wk 1) | Treatment | Feed Day | No  | 06:45 | 06:00 - 06:59 | Morning      | 38,0 | 68  | 130,6 | 130,6 | 19,15 | 564,71 | 165,17 |
| 2019/08/02 | CH2276 | Female | Two y/o | Treatment (Wk 1) | Treatment | Feed Day | No  | 06:50 | 06:00 - 06:59 | Morning      | 37,9 | 47  | 123,0 | 123,0 | 19,05 | 534,23 | 163,07 |
| 2019/08/02 | CH2276 | Female | Two y/o | Treatment (Wk 1) | Treatment | Feed Day | No  | 06:55 | 06:00 - 06:59 | Morning      | 37,9 | 52  | 182,4 | 182,4 | 19,05 | 542,83 | 176,88 |
| 2019/08/02 | CH2276 | Female | Two y/o | Treatment (Wk 1) | Treatment | Feed Day | No  | 07:00 | 07:00 - 07:59 | Morning      | 38,0 | 45  | 249,6 | 249,6 | 19,15 | 530,47 | 187,92 |
| 2019/08/02 | CH2276 | Female | Two y/o | Treatment (Wk 1) | Treatment | Feed Day | No  | 07:05 | 07:00 - 07:59 | Morning      | 37,9 | 65  | 162,0 | 162,0 | 19,05 | 561,12 | 172,72 |
| 2019/08/02 | CH2276 | Female | Two y/o | Treatment (Wk 1) | Treatment | Feed Day | No  | 07:10 | 07:00 - 07:59 | Morning      | 37,9 | 172 | 282,0 | 282,0 | 19,05 | 630,73 | 192,23 |
| 2019/08/02 | CH2276 | Female | Two y/o | Treatment (Wk 1) | Treatment | Feed Day | No  | 07:15 | 07:00 - 07:59 | Morning      | 37,8 | 104 | 229,8 | 229,8 | 18,95 | 596,69 | 185,01 |
| 2019/08/02 | CH2276 | Female | Two y/o | Treatment (Wk 1) | Treatment | Feed Day | No  | 07:20 | 07:00 - 07:59 | Morning      | 37,7 | 119 | 91,6  | 91,6  | 18,85 | 606,20 | 152,79 |
| 2019/08/02 | CH2276 | Female | Two y/o | Treatment (Wk 1) | Treatment | Feed Day | No  | 07:25 | 07:00 - 07:59 | Morning      | 37,7 | 109 | 225,2 | 225,2 | 18,85 | 600,04 | 184,30 |
| 2019/08/02 | CH2276 | Female | Two y/o | Treatment (Wk 1) | Treatment | Feed Day | No  | 07:30 | 07:00 - 07:59 | Morning      | 37,7 | 88  | 179,6 | 179,6 | 18,85 | 584,49 | 176,34 |
| 2019/08/02 | CH2276 | Female | Two y/o | Treatment (Wk 1) | Treatment | Feed Day | No  | 07:35 | 07:00 - 07:59 | Morning      | 37,7 | 60  | 72,4  | 72,4  | 18,85 | 554,67 | 144,61 |
| 2019/08/02 | CH2276 | Female | Two y/o | Treatment (Wk 1) | Treatment | Feed Day | No  | 07:40 | 07:00 - 07:59 | Morning      | 37,6 | 65  | 120,0 | 120,0 | 18,75 | 561,12 | 162,21 |
| 2019/08/02 | CH2276 | Female | Two y/o | Treatment (Wk 1) | Treatment | Feed Day | No  | 07:45 | 07:00 - 07:59 | Morning      | 37,6 | 68  | 59,8  | 59,8  | 18,75 | 564,71 | 137,98 |
| 2019/08/02 | CH2276 | Female | Two y/o | Treatment (Wk 1) | Treatment | Feed Day | No  | 07:50 | 07:00 - 07:59 | Morning      | 37,5 |     | 34,2  | 34,2  | 18,65 |        | 118,70 |
| 2019/08/02 | CH2276 | Female | Two y/o | Treatment (Wk 1) | Treatment | Feed Day | No  | 07:55 | 07:00 - 07:59 | Morning      | 37,4 | 66  | 34,4  | 34,4  | 18,55 | 562,34 | 118,90 |
| 2019/08/02 | CH2276 | Female | Two y/o | Treatment (Wk 1) | Treatment | Feed Day | No  | 08:00 | 08:00 - 08:59 | Late Morning | 37,3 |     | 45,0  | 45,0  | 18,46 |        | 128,15 |
| 2019/08/02 | CH2276 | Female | Two y/o | Treatment (Wk 1) | Treatment | Feed Day | No  | 08:05 | 08:00 - 08:59 | Late Morning | 37,2 |     | 200,8 | 200,8 | 18,36 |        | 180,26 |
| 2019/08/02 | CH2276 | Female | Two y/o | Treatment (Wk 1) | Treatment | Feed Day | No  | 08:10 | 08:00 - 08:59 | Late Morning | 37,3 | 110 | 83,2  | 83,2  | 18,46 | 600,69 | 149,44 |
| 2019/08/02 | CH2276 | Female | Two y/o | Treatment (Wk 1) | Treatment | Feed Day | No  | 08:15 | 08:00 - 08:59 | Late Morning | 37,5 | 121 | 338,4 | 338,4 | 18,65 | 607,35 | 198,68 |
| 2019/08/02 | CH2276 | Female | Two y/o | Treatment (Wk 1) | Treatment | Feed Day | No  | 08:20 | 08:00 - 08:59 | Late Morning | 37,6 | 115 | 184,8 | 184,8 | 18,75 | 603,82 | 177,34 |
| 2019/08/02 | CH2276 | Female | Two y/o | Treatment (Wk 1) | Treatment | Feed Day | No  | 08:25 | 08:00 - 08:59 | Late Morning | 37,6 | 103 | 68,8  | 68,8  | 18,75 | 596,00 | 142,84 |
| 2019/08/02 | CH2276 | Female | Two y/o | Treatment (Wk 1) | Treatment | Feed Day | No  | 08:30 | 08:00 - 08:59 | Late Morning | 37,6 | 106 | 107,0 | 107,0 | 18,75 | 598,06 | 158,20 |
| 2019/08/02 | CH2276 | Female | Two y/o | Treatment (Wk 1) | Treatment | Feed Day | No  | 08:35 | 08:00 - 08:59 | Late Morning | 37,5 | 88  | 53,2  | 53,2  | 18,65 | 584,49 | 133,93 |
| 2019/08/02 | CH2276 | Female | Two y/o | Treatment (Wk 1) | Treatment | Feed Day | No  | 08:40 | 08:00 - 08:59 | Late Morning | 37,5 | 84  | 17,4  | 17,4  | 18,65 | 581,01 | 95,56  |
| 2019/08/02 | CH2276 | Female | Two y/o | Treatment (Wk 1) | Treatment | Feed Day | No  | 08:45 | 08:00 - 08:59 | Late Morning | 37,5 | 86  | 37,0  | 37,0  | 18,65 | 582,77 | 121,40 |
| 2019/08/02 | CH2276 | Female | Two y/o | Treatment (Wk 1) | Treatment | Feed Day | No  | 08:50 | 08:00 - 08:59 | Late Morning | 37,5 | 117 | 65,8  | 65,8  | 18,65 | 605,02 | 141,29 |
| 2019/08/02 | CH2276 | Female | Two y/o | Treatment (Wk 1) | Treatment | Feed Day | No  | 08:55 | 08:00 - 08:59 | Late Morning | 37,4 | 86  | 57,2  | 57,2  | 18,55 | 582,77 | 136,44 |
| 2019/08/02 | CH2276 | Female | Two y/o | Treatment (Wk 1) | Treatment | Feed Day | No  | 09:00 | 09:00 - 09:59 | Late Morning | 37,4 | 58  | 63,0  | 63,0  | 18,55 | 551,90 | 139,78 |
| 2019/08/02 | CH2276 | Female | Two y/o | Treatment (Wk 1) | Treatment | Feed Day | No  | 09:05 | 09:00 - 09:59 | Late Morning | 37,4 | 53  | 64,8  | 64,8  | 18,55 | 544,43 | 140,76 |
| 2019/08/02 | CH2276 | Female | Two y/o | Treatment (Wk 1) | Treatment | Feed Day | No  | 09:10 | 09:00 - 09:59 | Late Morning | 37,3 | 60  | 66,4  | 66,4  | 18,46 | 554,67 | 141,61 |
| 2019/08/02 | CH2276 | Female | Two y/o | Treatment (Wk 1) | Treatment | Feed Day | No  | 09:15 | 09:00 - 09:59 | Late Morning | 37,3 | 94  | 66,6  | 66,6  | 18,46 | 589,37 | 141,71 |
| 2019/08/02 | CH2276 | Female | Two y/o | Treatment (Wk 1) | Treatment | Feed Day | No  | 09:20 | 09:00 - 09:59 | Late Morning | 37,3 | 35  | 317,0 | 317,0 | 18,46 | 507,97 | 196,37 |
| 2019/08/02 | CH2276 | Female | Two y/o | Treatment (Wk 1) | Treatment | Feed Day | No  | 09:25 | 09:00 - 09:59 | Late Morning | 37,4 | 30  | 634,0 | 634,0 | 18,55 | 493,51 | 221,01 |
| 2019/08/02 | CH2276 | Female | Two y/o | Treatment (Wk 1) | Treatment | Feed Day | No  | 09:30 | 09:00 - 09:59 | Late Morning | 37,8 |     | 63,6  | 63,6  | 18,95 |        | 140,11 |
| 2019/08/02 | CH2276 | Female | Two y/o | Treatment (Wk 1) | Treatment | Feed Day | No  | 09:35 | 09:00 - 09:59 | Late Morning | 37,9 | 84  | 55,4  | 55,4  | 19,05 | 581,01 | 135,33 |
| 2019/08/02 | CH2276 | Female | Two y/o | Treatment (Wk 1) | Treatment | Feed Day | No  | 09:40 | 09:00 - 09:59 | Late Morning | 37,8 | 100 | 73,0  | 73,0  | 18,95 | 593,87 | 144,89 |
| 2019/08/02 | CH2276 | Female | Two y/o | Treatment (Wk 1) | Treatment | Feed Day | No  | 09:45 | 09:00 - 09:59 | Late Morning | 37,8 | 83  | 67,8  | 67,8  | 18,95 | 580,11 | 142,33 |
| 2019/08/02 | CH2276 | Female | Two y/o | Treatment (Wk 1) | Treatment | Feed Day | No  | 09:50 | 09:00 - 09:59 | Late Morning | 37,8 | 61  | 51,2  | 51,2  | 18,95 | 556,01 | 132,61 |
| 2019/08/02 | CH2276 | Female | Two y/o | Treatment (Wk 1) | Treatment | Feed Day | No  | 09:55 | 09:00 - 09:59 | Late Morning | 37,8 | 83  | 55,2  | 55,2  | 18,95 | 580,11 | 135,21 |
| 2019/08/02 | CH2276 | Female | Two y/o | Treatment (Wk 1) | Treatment | Feed Day | No  | 10:00 | 10:00 - 10:59 | Late Morning | 37,8 | 62  | 59,0  | 59,0  | 18,95 | 557,33 | 137,51 |
| 2019/08/02 | CH2276 | Female | Two y/o | Treatment (Wk 1) | Treatment | Feed Day | No  | 10:05 | 10:00 - 10:59 | Late Morning | 37,8 | 62  | 62,4  | 62,4  | 18,95 | 557,33 | 139,45 |
| 2019/08/02 | CH2276 | Female | Two y/o | Treatment (Wk 1) | Treatment | Feed Day | No  | 10:10 | 10:00 - 10:59 | Late Morning | 37,7 | 79  | 59,4  | 59,4  | 18,85 | 576,36 | 137,75 |
| 2019/08/02 | CH2276 | Female | Two y/o | Treatment (Wk 1) | Treatment | Feed Day | No  | 10:15 | 10:00 - 10:59 | Late Morning | 37,7 | 63  | 58,4  | 58,4  | 18,85 | 558,62 | 137,16 |
| 2019/08/02 | CH2276 | Female | Two y/o | Treatment (Wk 1) | Treatment | Feed Day | No  | 10:20 | 10:00 - 10:59 | Late Morning | 37,7 | 57  | 50,0  | 50,0  | 18,85 | 550,47 | 131,79 |
| 2019/08/02 | CH2276 | Female | Two y/o | Treatment (Wk 1) | Treatment | Feed Day | No  | 10:25 | 10:00 - 10:59 | Late Morning | 37,6 | 56  | 46,0  | 46,0  | 18,75 | 549,01 | 128,91 |
| 2019/08/02 | CH2276 | Female | Two y/o | Treatment (Wk 1) | Treatment | Feed Day | Yes | 10:30 | 10:00 - 10:59 | Late Morning | 37,6 | 73  | 32,0  | 32,0  | 18,75 | 570,27 | 116,41 |
| 2019/08/02 | CH2276 | Female | Two y/o | Treatment (Wk 1) | Treatment | Feed Day | Yes | 10:35 | 10:00 - 10:59 | Late Morning | 37,5 | 60  | 53,4  | 53,4  | 18,65 | 554,67 | 134,06 |
| 2019/08/02 | CH2276 | Female | Two y/o | Treatment (Wk 1) | Treatment | Feed Day | Yes | 10:40 | 10:00 - 10:59 | Late Morning | 37,5 | 87  | 59,2  | 59,2  | 18,65 | 583,64 | 137,63 |
| 2019/08/02 | CH2276 | Female | Two y/o | Treatment (Wk 1) | Treatment | Feed Day | Yes | 10:45 | 10:00 - 10:59 | Late Morning | 37,6 | 98  | 33,8  | 33,8  | 18,75 | 592,41 | 118,29 |
| 2019/08/02 | CH2276 | Female | Two y/o | Treatment (Wk 1) | Treatment | Feed Day | Yes | 10:50 | 10:00 - 10:59 | Late Morning | 37,6 |     | 202,2 | 202,2 | 18,75 |        | 180,50 |
| 2019/08/02 | CH2276 | Female | Two y/o | Treatment (Wk 1) | Treatment | Feed Day | Yes | 10:55 | 10:00 - 10:59 | Late Morning | 37,6 | 126 | 101,6 | 101,6 | 18,75 | 610,14 | 156,40 |
| 2019/08/02 | CH2276 | Female | Two y/o | Treatment (Wk 1) | Treatment | Feed Day | Yes | 11:00 | 11:00 - 11:59 | Late Morning | 37,6 | 55  | 87,4  | 87,4  | 18,75 | 547,52 | 151,15 |
| 2019/08/02 | CH2276 | Female | Two y/o | Treatment (Wk 1) | Treatment | Feed Day | Yes | 11:05 | 11:00 - 11:59 | Late Morning | 37,6 | 83  | 134,2 | 134,2 | 18,75 | 580,11 | 166,12 |
| 2019/08/02 | CH2276 | Female | Two y/o | Treatment (Wk 1) | Treatment | Feed Day | Yes | 11:10 | 11:00 - 11:59 | Late Morning | 37,6 | 73  | 61,0  | 61,0  | 18,75 | 570,27 | 138,67 |
| 2019/08/02 | CH2276 | Female | Two y/o | Treatment (Wk 1) | Treatment | Feed Day | Yes | 11:15 | 11:00 - 11:59 | Late Morning | 37,6 | 64  | 73,6  | 73,6  | 18,75 | 559,88 | 145,18 |
| 2019/08/02 | CH2276 | Female | Two y/o | Treatment (Wk 1) | Treatment | Feed Day | Yes | 11:20 | 11:00 - 11:59 | Late Morning | 37,6 | 63  | 49,0  | 49,0  | 18,75 | 558,62 | 131,09 |
| 2019/08/02 | CH2276 | Female | Two y/o | Treatment (Wk 1) | Treatment | Feed Day | Yes | 11:25 | 11:00 - 11:59 | Late Morning | 37,6 | 71  | 37,2  | 37,2  | 18,75 | 568,10 | 121,59 |
| 2019/08/02 | CH2276 | Female | Two y/o | Treatment (Wk 1) | Treatment | Feed Day | No  | 11:30 | 11:00 - 11:59 | Late Morning | 37,6 | 63  | 50,6  | 50,6  | 18,75 | 558,62 | 132,20 |
| 2019/08/02 | CH2276 | Female | Two y/o | Treatment (Wk 1) | Treatment | Feed Day | No  | 11:35 | 11:00 - 11:59 | Late Morning | 37,7 | 63  | 51,0  | 51,0  | 18,85 | 558,62 | 132,47 |
| 2019/08/02 | CH2276 | Female | Two y/o | Treatment (Wk 1) | Treatment | Feed Day | No  | 11:40 | 11:00 - 11:59 | Late Morning | 37,7 | 61  | 39,0  | 39,0  | 18,85 | 556,01 | 123,22 |
| 2019/08/02 | CH2276 | Female | Two y/o | Treatment (Wk 1) | Treatment | Feed Day | No  | 11:45 | 11:00 - 11:59 | Late Morning | 37,7 | 69  | 50,6  | 50,6  | 18,85 | 565,86 | 132,20 |
| 2019/08/02 | CH2276 | Female | Two y/o | Treatment (Wk 1) | Treatment | Feed Day | No  | 11:50 | 11:00 - 11:59 | Late Morning | 37,7 | 147 | 79,0  | 79,0  | 18,85 | 620,52 | 147,64 |
| 2019/08/02 | CH2276 | Female | Two y/o | Treatment (Wk 1) | Treatment | Feed Day | No  | 11:55 | 11:00 - 11:59 | Late Morning | 37,8 | 137 | 70,2  | 70,2  | 18,95 | 615,83 | 143,54 |
| 2019/08/02 | CH2276 | Female | Two y/o | Treatment (Wk 1) | Treatment | Feed Day | No  | 12:00 | 12:00 - 12:59 | Afternoon    | 37,9 | 121 | 20,6  | 20,6  | 19,05 | 607,35 | 101,32 |
| 2019/08/02 | CH2276 | Female | Two y/o | Treatment (Wk 1) | Treatment | Feed Day | No  | 12:05 | 12:00 - 12:59 | Afternoon    | 38,0 | 69  | 37,6  | 37,6  | 19,15 | 565,86 | 121,96 |
| 2019/08/02 | CH2276 | Female | Two y/o | Treatment (Wk 1) | Treatment | Feed Day | No  | 12:10 | 12:00 - 12:59 | Afternoon    | 38,1 | 131 | 71,0  | 71,0  | 19,26 | 612,80 | 143,93 |
| 2019/08/02 | CH2276 | Female | Two y/o | Treatment (Wk 1) | Treatment | Feed Day | No  | 12:15 | 12:00 - 12:59 | Afternoon    | 38,2 | 128 | 67,2  | 67,2  | 19,36 | 611,22 | 142,02 |
| 2019/08/02 | CH2276 | Female | Two y/o | Treatment (Wk 1) | Treatment | Feed Day | No  | 12:20 | 12:00 - 12:59 | Afternoon    | 38,3 |     | 64,2  | 64,2  | 19,46 |        | 140,44 |



|            |        |        |         |                  |           |          |    |       |               |           |      |     |       |       |       |        |        |
|------------|--------|--------|---------|------------------|-----------|----------|----|-------|---------------|-----------|------|-----|-------|-------|-------|--------|--------|
| 2019/08/02 | CH2276 | Female | Two y/o | Treatment (Wk 1) | Treatment | Feed Day | No | 12:25 | 12:00 - 12:59 | Afternoon | 38,4 | 128 | 49,0  | 49,0  | 19,56 | 611,22 | 131,09 |
| 2019/08/02 | CH2276 | Female | Two y/o | Treatment (Wk 1) | Treatment | Feed Day | No | 12:30 | 12:00 - 12:59 | Afternoon | 38,5 | 128 | 105,6 | 105,6 | 19,66 | 611,22 | 157,74 |
| 2019/08/02 | CH2276 | Female | Two y/o | Treatment (Wk 1) | Treatment | Feed Day | No | 12:35 | 12:00 - 12:59 | Afternoon | 38,5 | 132 | 63,4  | 63,4  | 19,66 | 613,32 | 140,00 |
| 2019/08/02 | CH2276 | Female | Two y/o | Treatment (Wk 1) | Treatment | Feed Day | No | 12:40 | 12:00 - 12:59 | Afternoon | 38,6 |     | 49,0  | 49,0  | 19,76 |        | 131,09 |
| 2019/08/02 | CH2276 | Female | Two y/o | Treatment (Wk 1) | Treatment | Feed Day | No | 12:45 | 12:00 - 12:59 | Afternoon | 38,8 | 118 | 43,6  | 43,6  | 19,97 | 605,61 | 127,06 |
| 2019/08/02 | CH2276 | Female | Two y/o | Treatment (Wk 1) | Treatment | Feed Day | No | 12:50 | 12:00 - 12:59 | Afternoon | 39,0 | 124 | 46,0  | 46,0  | 20,18 | 609,04 | 128,91 |
| 2019/08/02 | CH2276 | Female | Two y/o | Treatment (Wk 1) | Treatment | Feed Day | No | 12:55 | 12:00 - 12:59 | Afternoon | 39,0 | 145 | 47,2  | 47,2  | 20,18 | 619,62 | 129,80 |
| 2019/08/02 | CH2276 | Female | Two y/o | Treatment (Wk 1) | Treatment | Feed Day | No | 13:00 | 13:00 - 13:59 | Afternoon | 39,1 | 113 | 70,8  | 70,8  | 20,28 | 602,58 | 143,83 |
| 2019/08/02 | CH2276 | Female | Two y/o | Treatment (Wk 1) | Treatment | Feed Day | No | 13:05 | 13:00 - 13:59 | Afternoon | 39,1 | 111 | 83,6  | 83,6  | 20,28 | 601,33 | 149,61 |
| 2019/08/02 | CH2276 | Female | Two y/o | Treatment (Wk 1) | Treatment | Feed Day | No | 13:10 | 13:00 - 13:59 | Afternoon | 39,0 | 162 | 88,0  | 88,0  | 20,18 | 626,88 | 151,39 |
| 2019/08/02 | CH2276 | Female | Two y/o | Treatment (Wk 1) | Treatment | Feed Day | No | 13:15 | 13:00 - 13:59 | Afternoon | 39,0 | 124 | 54,8  | 54,8  | 20,18 | 609,04 | 134,96 |
| 2019/08/02 | CH2276 | Female | Two y/o | Treatment (Wk 1) | Treatment | Feed Day | No | 13:20 | 13:00 - 13:59 | Afternoon | 38,9 | 115 | 60,0  | 60,0  | 20,07 | 603,82 | 138,09 |
| 2019/08/02 | CH2276 | Female | Two y/o | Treatment (Wk 1) | Treatment | Feed Day | No | 13:25 | 13:00 - 13:59 | Afternoon | 38,9 | 143 | 44,4  | 44,4  | 20,07 | 618,69 | 127,69 |
| 2019/08/02 | CH2276 | Female | Two y/o | Treatment (Wk 1) | Treatment | Feed Day | No | 13:30 | 13:00 - 13:59 | Afternoon | 38,9 | 118 | 37,8  | 37,8  | 20,07 | 605,61 | 122,14 |
| 2019/08/02 | CH2276 | Female | Two y/o | Treatment (Wk 1) | Treatment | Feed Day | No | 13:35 | 13:00 - 13:59 | Afternoon | 38,8 | 132 | 54,6  | 54,6  | 19,97 | 613,32 | 134,83 |
| 2019/08/02 | CH2276 | Female | Two y/o | Treatment (Wk 1) | Treatment | Feed Day | No | 13:40 | 13:00 - 13:59 | Afternoon | 39,0 | 117 | 63,4  | 63,4  | 20,18 | 605,02 | 140,00 |
| 2019/08/02 | CH2276 | Female | Two y/o | Treatment (Wk 1) | Treatment | Feed Day | No | 13:45 | 13:00 - 13:59 | Afternoon | 38,9 | 110 | 66,8  | 66,8  | 20,07 | 600,69 | 141,81 |
| 2019/08/02 | CH2276 | Female | Two y/o | Treatment (Wk 1) | Treatment | Feed Day | No | 13:50 | 13:00 - 13:59 | Afternoon | 38,8 |     | 67,0  | 67,0  | 19,97 |        | 141,92 |
| 2019/08/02 | CH2276 | Female | Two y/o | Treatment (Wk 1) | Treatment | Feed Day | No | 13:55 | 13:00 - 13:59 | Afternoon | 38,8 | 119 | 52,0  | 52,0  | 19,97 | 606,20 | 133,14 |
| 2019/08/02 | CH2276 | Female | Two y/o | Treatment (Wk 1) | Treatment | Feed Day | No | 14:00 | 14:00 - 14:59 | Afternoon | 38,8 | 108 | 50,0  | 50,0  | 19,97 | 599,39 | 131,79 |
| 2019/08/02 | CH2276 | Female | Two y/o | Treatment (Wk 1) | Treatment | Feed Day | No | 14:05 | 14:00 - 14:59 | Afternoon | 38,8 | 107 | 74,4  | 74,4  | 19,97 | 598,73 | 145,55 |
| 2019/08/02 | CH2276 | Female | Two y/o | Treatment (Wk 1) | Treatment | Feed Day | No | 14:10 | 14:00 - 14:59 | Afternoon | 38,8 | 102 | 81,2  | 81,2  | 19,97 | 595,30 | 148,59 |
| 2019/08/02 | CH2276 | Female | Two y/o | Treatment (Wk 1) | Treatment | Feed Day | No | 14:15 | 14:00 - 14:59 | Afternoon | 38,8 | 102 | 81,8  | 81,8  | 19,97 | 595,30 | 148,85 |
| 2019/08/02 | CH2276 | Female | Two y/o | Treatment (Wk 1) | Treatment | Feed Day | No | 14:20 | 14:00 - 14:59 | Afternoon | 38,7 | 103 | 75,4  | 75,4  | 19,87 | 596,00 | 146,02 |
| 2019/08/02 | CH2276 | Female | Two y/o | Treatment (Wk 1) | Treatment | Feed Day | No | 14:25 | 14:00 - 14:59 | Afternoon | 38,7 | 106 | 74,6  | 74,6  | 19,87 | 598,06 | 145,65 |
| 2019/08/02 | CH2276 | Female | Two y/o | Treatment (Wk 1) | Treatment | Feed Day | No | 14:30 | 14:00 - 14:59 | Afternoon | 38,6 | 100 | 71,8  | 71,8  | 19,76 | 593,87 | 144,32 |
| 2019/08/02 | CH2276 | Female | Two y/o | Treatment (Wk 1) | Treatment | Feed Day | No | 14:35 | 14:00 - 14:59 | Afternoon | 38,6 | 104 | 71,8  | 71,8  | 19,76 | 596,69 | 144,32 |
| 2019/08/02 | CH2276 | Female | Two y/o | Treatment (Wk 1) | Treatment | Feed Day | No | 14:40 | 14:00 - 14:59 | Afternoon | 38,5 | 96  | 73,4  | 73,4  | 19,66 | 590,91 | 145,08 |
| 2019/08/02 | CH2276 | Female | Two y/o | Treatment (Wk 1) | Treatment | Feed Day | No | 14:45 | 14:00 - 14:59 | Afternoon | 38,5 | 101 | 73,8  | 73,8  | 19,66 | 594,59 | 145,27 |
| 2019/08/02 | CH2276 | Female | Two y/o | Treatment (Wk 1) | Treatment | Feed Day | No | 14:50 | 14:00 - 14:59 | Afternoon | 38,5 | 99  | 55,2  | 55,2  | 19,66 | 593,14 | 135,21 |
| 2019/08/02 | CH2276 | Female | Two y/o | Treatment (Wk 1) | Treatment | Feed Day | No | 14:55 | 14:00 - 14:59 | Afternoon | 38,4 | 95  | 82,2  | 82,2  | 19,56 | 590,14 | 149,02 |
| 2019/08/02 | CH2276 | Female | Two y/o | Treatment (Wk 1) | Treatment | Feed Day | No | 15:00 | 15:00 - 15:59 | Afternoon | 38,3 | 101 | 44,0  | 44,0  | 19,46 | 594,59 | 127,37 |
| 2019/08/02 | CH2276 | Female | Two y/o | Treatment (Wk 1) | Treatment | Feed Day | No | 15:05 | 15:00 - 15:59 | Afternoon | 38,3 | 114 | 76,6  | 76,6  | 19,46 | 603,20 | 146,57 |
| 2019/08/02 | CH2276 | Female | Two y/o | Treatment (Wk 1) | Treatment | Feed Day | No | 15:10 | 15:00 - 15:59 | Afternoon | 38,3 | 95  | 73,4  | 73,4  | 19,46 | 590,14 | 145,08 |
| 2019/08/02 | CH2276 | Female | Two y/o | Treatment (Wk 1) | Treatment | Feed Day | No | 15:15 | 15:00 - 15:59 | Afternoon | 38,3 | 94  | 74,2  | 74,2  | 19,46 | 589,37 | 145,46 |
| 2019/08/02 | CH2276 | Female | Two y/o | Treatment (Wk 1) | Treatment | Feed Day | No | 15:20 | 15:00 - 15:59 | Afternoon | 38,3 | 102 | 88,8  | 88,8  | 19,46 | 595,30 | 151,71 |
| 2019/08/02 | CH2276 | Female | Two y/o | Treatment (Wk 1) | Treatment | Feed Day | No | 15:25 | 15:00 - 15:59 | Afternoon | 38,3 | 103 | 45,6  | 45,6  | 19,46 | 596,00 | 128,61 |
| 2019/08/02 | CH2276 | Female | Two y/o | Treatment (Wk 1) | Treatment | Feed Day | No | 15:30 | 15:00 - 15:59 | Afternoon | 38,4 | 110 | 43,0  | 43,0  | 19,56 | 600,69 | 126,58 |
| 2019/08/02 | CH2276 | Female | Two y/o | Treatment (Wk 1) | Treatment | Feed Day | No | 15:35 | 15:00 - 15:59 | Afternoon | 38,3 |     | 184,8 | 184,8 | 19,46 |        | 177,34 |
| 2019/08/02 | CH2276 | Female | Two y/o | Treatment (Wk 1) | Treatment | Feed Day | No | 15:40 | 15:00 - 15:59 | Afternoon | 38,4 | 114 | 131,8 | 131,8 | 19,56 | 603,20 | 165,49 |
| 2019/08/02 | CH2276 | Female | Two y/o | Treatment (Wk 1) | Treatment | Feed Day | No | 15:45 | 15:00 - 15:59 | Afternoon | 38,3 | 106 | 45,0  | 45,0  | 19,46 | 598,06 | 128,15 |
| 2019/08/02 | CH2276 | Female | Two y/o | Treatment (Wk 1) | Treatment | Feed Day | No | 15:50 | 15:00 - 15:59 | Afternoon | 38,3 | 101 | 46,4  | 46,4  | 19,46 | 594,59 | 129,21 |
| 2019/08/02 | CH2276 | Female | Two y/o | Treatment (Wk 1) | Treatment | Feed Day | No | 15:55 | 15:00 - 15:59 | Afternoon | 38,3 | 97  | 51,2  | 51,2  | 19,46 | 591,66 | 132,61 |
| 2019/08/02 | CH2276 | Female | Two y/o | Treatment (Wk 1) | Treatment | Feed Day | No | 16:00 | 16:00 - 16:59 | Evening   | 38,4 | 97  | 58,8  | 58,8  | 19,56 | 591,66 | 137,39 |
| 2019/08/02 | CH2276 | Female | Two y/o | Treatment (Wk 1) | Treatment | Feed Day | No | 16:05 | 16:00 - 16:59 | Evening   | 38,4 | 73  | 68,8  | 68,8  | 19,56 | 570,27 | 142,84 |
| 2019/08/02 | CH2276 | Female | Two y/o | Treatment (Wk 1) | Treatment | Feed Day | No | 16:10 | 16:00 - 16:59 | Evening   | 38,4 | 101 | 45,0  | 45,0  | 19,56 | 594,59 | 128,15 |
| 2019/08/02 | CH2276 | Female | Two y/o | Treatment (Wk 1) | Treatment | Feed Day | No | 16:15 | 16:00 - 16:59 | Evening   | 38,5 | 103 | 37,0  | 37,0  | 19,66 | 596,00 | 121,40 |
| 2019/08/02 | CH2276 | Female | Two y/o | Treatment (Wk 1) | Treatment | Feed Day | No | 16:20 | 16:00 - 16:59 | Evening   | 38,4 | 141 | 50,2  | 50,2  | 19,56 | 617,75 | 131,92 |
| 2019/08/02 | CH2276 | Female | Two y/o | Treatment (Wk 1) | Treatment | Feed Day | No | 16:25 | 16:00 - 16:59 | Evening   | 38,4 | 108 | 32,0  | 32,0  | 19,56 | 599,39 | 116,41 |
| 2019/08/02 | CH2276 | Female | Two y/o | Treatment (Wk 1) | Treatment | Feed Day | No | 16:30 | 16:00 - 16:59 | Evening   | 38,4 | 107 | 64,2  | 64,2  | 19,56 | 598,73 | 140,44 |
| 2019/08/02 | CH2276 | Female | Two y/o | Treatment (Wk 1) | Treatment | Feed Day | No | 16:35 | 16:00 - 16:59 | Evening   | 38,4 | 97  | 71,8  | 71,8  | 19,56 | 591,66 | 144,32 |
| 2019/08/02 | CH2276 | Female | Two y/o | Treatment (Wk 1) | Treatment | Feed Day | No | 16:40 | 16:00 - 16:59 | Evening   | 38,5 | 90  | 71,0  | 71,0  | 19,66 | 586,16 | 143,93 |
| 2019/08/02 | CH2276 | Female | Two y/o | Treatment (Wk 1) | Treatment | Feed Day | No | 16:45 | 16:00 - 16:59 | Evening   | 38,5 | 111 | 58,4  | 58,4  | 19,66 | 601,33 | 137,16 |
| 2019/08/02 | CH2276 | Female | Two y/o | Treatment (Wk 1) | Treatment | Feed Day | No | 16:50 | 16:00 - 16:59 | Evening   | 38,6 | 90  | 31,6  | 31,6  | 19,76 | 586,16 | 115,98 |
| 2019/08/02 | CH2276 | Female | Two y/o | Treatment (Wk 1) | Treatment | Feed Day | No | 16:55 | 16:00 - 16:59 | Evening   | 38,6 | 82  | 36,6  | 36,6  | 19,76 | 579,19 | 121,03 |
| 2019/08/02 | CH2276 | Female | Two y/o | Treatment (Wk 1) | Treatment | Feed Day | No | 17:00 | 17:00 - 17:59 | Evening   | 38,6 | 94  | 42,0  | 42,0  | 19,76 | 589,37 | 125,77 |
| 2019/08/02 | CH2276 | Female | Two y/o | Treatment (Wk 1) | Treatment | Feed Day | No | 17:05 | 17:00 - 17:59 | Evening   | 38,6 | 92  | 52,4  | 52,4  | 19,76 | 587,78 | 133,41 |
| 2019/08/02 | CH2276 | Female | Two y/o | Treatment (Wk 1) | Treatment | Feed Day | No | 17:10 | 17:00 - 17:59 | Evening   | 38,6 | 85  | 41,0  | 41,0  | 19,76 | 581,90 | 124,94 |
| 2019/08/02 | CH2276 | Female | Two y/o | Treatment (Wk 1) | Treatment | Feed Day | No | 17:15 | 17:00 - 17:59 | Evening   | 38,6 | 97  | 84,8  | 84,8  | 19,76 | 591,66 | 150,10 |
| 2019/08/02 | CH2276 | Female | Two y/o | Treatment (Wk 1) | Treatment | Feed Day | No | 17:20 | 17:00 - 17:59 | Evening   | 38,6 | 120 | 38,8  | 38,8  | 19,76 | 606,78 | 123,04 |
| 2019/08/02 | CH2276 | Female | Two y/o | Treatment (Wk 1) | Treatment | Feed Day | No | 17:25 | 17:00 - 17:59 | Evening   | 38,5 | 107 | 17,4  | 17,4  | 19,66 | 598,73 | 95,56  |
| 2019/08/02 | CH2276 | Female | Two y/o | Treatment (Wk 1) | Treatment | Feed Day | No | 17:30 | 17:00 - 17:59 | Evening   | 38,4 | 165 | 45,0  | 45,0  | 19,56 | 628,06 | 128,15 |
| 2019/08/02 | CH2276 | Female | Two y/o | Treatment (Wk 1) | Treatment | Feed Day | No | 17:35 | 17:00 - 17:59 | Evening   | 38,4 | 112 | 73,6  | 73,6  | 19,56 | 601,96 | 145,18 |
| 2019/08/02 | CH2276 | Female | Two y/o | Treatment (Wk 1) | Treatment | Feed Day | No | 17:40 | 17:00 - 17:59 | Evening   | 38,4 | 94  | 68,2  | 68,2  | 19,56 | 589,37 | 142,53 |
| 2019/08/02 | CH2276 | Female | Two y/o | Treatment (Wk 1) | Treatment | Feed Day | No | 17:45 | 17:00 - 17:59 | Evening   | 38,4 | 101 | 60,2  | 60,2  | 19,56 | 594,59 | 138,21 |
| 2019/08/02 | CH2276 | Female | Two y/o | Treatment (Wk 1) | Treatment | Feed Day | No | 17:50 | 17:00 - 17:59 | Evening   | 38,4 | 165 | 144,6 | 144,6 | 19,56 | 628,06 | 168,73 |
| 2019/08/02 | CH2276 | Female | Two y/o | Treatment (Wk 1) | Treatment | Feed Day | No | 17:55 | 17:00 - 17:59 | Evening   | 38,6 | 114 | 73,2  | 73,2  | 19,76 | 603,20 | 144,99 |
| 2019/08/02 | CH2276 | Female | Two y/o | Treatment (Wk 1) | Treatment | Feed Day | No | 18:00 | 18:00 - 18:59 | Evening   | 38,5 | 121 | 73,8  | 73,8  | 19,66 | 607,35 | 145,27 |
| 2019/08/02 | CH2276 | Female | Two y/o | Treatment (Wk 1) | Treatment | Feed Day | No | 18:05 | 18:00 - 18:59 | Evening   | 38,5 | 89  | 255,6 | 255,6 | 19,66 | 585,33 | 188,76 |
| 2019/08/02 | CH2276 | Female | Two y/o | Treatment (Wk 1) | Treatment | Feed Day | No | 18:10 | 18:00 - 18:59 | Evening   | 38,5 |     | 303,0 | 303,0 | 19,66 |        | 194,77 |



|    |            |        |        |         |                  |           |          |    |       |               |               |      |     |       |       |       |        |        |
|----|------------|--------|--------|---------|------------------|-----------|----------|----|-------|---------------|---------------|------|-----|-------|-------|-------|--------|--------|
|    | 2019/08/02 | CH2276 | Female | Two y/o | Treatment (Wk 1) | Treatment | Feed Day | No | 18:15 | 18:00 - 18:59 | Evening       | 38,5 | 90  | 157,6 | 157,6 | 19,66 | 586,16 | 171,75 |
|    | 2019/08/02 | CH2276 | Female | Two y/o | Treatment (Wk 1) | Treatment | Feed Day | No | 18:20 | 18:00 - 18:59 | Evening       | 38,5 | 72  | 120,2 | 120,2 | 19,66 | 569,20 | 162,27 |
|    | 2019/08/02 | CH2276 | Female | Two y/o | Treatment (Wk 1) | Treatment | Feed Day | No | 18:25 | 18:00 - 18:59 | Evening       | 38,5 |     | 307,4 | 307,4 | 19,66 |        | 195,28 |
|    | 2019/08/02 | CH2276 | Female | Two y/o | Treatment (Wk 1) | Treatment | Feed Day | No | 18:30 | 18:00 - 18:59 | Evening       | 38,5 |     | 81,4  | 81,4  | 19,66 |        | 148,68 |
|    | 2019/08/02 | CH2276 | Female | Two y/o | Treatment (Wk 1) | Treatment | Feed Day | No | 18:35 | 18:00 - 18:59 | Evening       | 38,4 | 59  | 78,2  | 78,2  | 19,56 | 553,30 | 147,28 |
|    | 2019/08/02 | CH2276 | Female | Two y/o | Treatment (Wk 1) | Treatment | Feed Day | No | 18:40 | 18:00 - 18:59 | Evening       | 38,3 | 90  | 63,8  | 63,8  | 19,46 | 586,16 | 140,22 |
|    | 2019/08/02 | CH2276 | Female | Two y/o | Treatment (Wk 1) | Treatment | Feed Day | No | 18:45 | 18:00 - 18:59 | Evening       | 38,2 | 150 | 47,0  | 47,0  | 19,36 | 621,86 | 129,65 |
|    | 2019/08/02 | CH2276 | Female | Two y/o | Treatment (Wk 1) | Treatment | Feed Day | No | 18:50 | 18:00 - 18:59 | Evening       | 38,4 |     | 50,4  | 50,4  | 19,56 |        | 132,06 |
|    | 2019/08/02 | CH2276 | Female | Two y/o | Treatment (Wk 1) | Treatment | Feed Day | No | 18:55 | 18:00 - 18:59 | Evening       | 38,4 | 78  | 51,2  | 51,2  | 19,56 | 575,38 | 132,61 |
|    | 2019/08/02 | CH2276 | Female | Two y/o | Treatment (Wk 1) | Treatment | Feed Day | No | 19:00 | 19:00 - 19:59 | Evening       | 38,4 | 140 | 48,0  | 48,0  | 19,56 | 617,28 | 130,38 |
|    | 2019/08/02 | CH2276 | Female | Two y/o | Treatment (Wk 1) | Treatment | Feed Day | No | 19:05 | 19:00 - 19:59 | Evening       | 38,4 |     | 55,4  | 55,4  | 19,56 |        | 135,33 |
|    | 2019/08/02 | CH2276 | Female | Two y/o | Treatment (Wk 1) | Treatment | Feed Day | No | 19:10 | 19:00 - 19:59 | Evening       | 38,4 | 86  | 39,2  | 39,2  | 19,56 | 582,77 | 123,39 |
|    | 2019/08/02 | CH2276 | Female | Two y/o | Treatment (Wk 1) | Treatment | Feed Day | No | 19:15 | 19:00 - 19:59 | Evening       | 38,2 | 83  | 52,6  | 52,6  | 19,36 | 580,11 | 133,54 |
|    | 2019/08/02 | CH2276 | Female | Two y/o | Treatment (Wk 1) | Treatment | Feed Day | No | 19:20 | 19:00 - 19:59 | Evening       | 38,2 | 64  | 30,6  | 30,6  | 19,36 | 559,88 | 114,87 |
|    | 2019/08/02 | CH2276 | Female | Two y/o | Treatment (Wk 1) | Treatment | Feed Day | No | 19:25 | 19:00 - 19:59 | Evening       | 38,2 | 92  | 29,4  | 29,4  | 19,36 | 587,78 | 113,50 |
|    | 2019/08/02 | CH2276 | Female | Two y/o | Treatment (Wk 1) | Treatment | Feed Day | No | 19:30 | 19:00 - 19:59 | Evening       | 38,2 | 61  | 33,4  | 33,4  | 19,36 | 556,01 | 117,88 |
|    | 2019/08/02 | CH2276 | Female | Two y/o | Treatment (Wk 1) | Treatment | Feed Day | No | 19:35 | 19:00 - 19:59 | Evening       | 38,1 | 72  | 40,6  | 40,6  | 19,26 | 569,20 | 124,60 |
|    | 2019/08/02 | CH2276 | Female | Two y/o | Treatment (Wk 1) | Treatment | Feed Day | No | 19:40 | 19:00 - 19:59 | Evening       | 38,2 | 64  | 39,6  | 39,6  | 19,36 | 559,88 | 123,74 |
|    | 2019/08/02 | CH2276 | Female | Two y/o | Treatment (Wk 1) | Treatment | Feed Day | No | 19:45 | 19:00 - 19:59 | Evening       | 38,2 | 90  | 35,2  | 35,2  | 19,36 | 586,16 | 119,69 |
|    | 2019/08/02 | CH2276 | Female | Two y/o | Treatment (Wk 1) | Treatment | Feed Day | No | 19:50 | 19:00 - 19:59 | Evening       | 38,2 | 70  | 64,0  | 64,0  | 19,36 | 566,99 | 140,33 |
|    | 2019/08/02 | CH2276 | Female | Two y/o | Treatment (Wk 1) | Treatment | Feed Day | No | 19:55 | 19:00 - 19:59 | Evening       | 38,2 | 84  | 82,0  | 82,0  | 19,36 | 581,01 | 148,93 |
|    | 2019/08/02 | CH2276 | Female | Two y/o | Treatment (Wk 1) | Treatment | Feed Day | No | 20:00 | 20:00 - 20:59 | Night         | 38,2 | 82  | 86,0  | 86,0  | 19,36 | 579,19 | 150,59 |
|    | 2019/08/02 | CH2276 | Female | Two y/o | Treatment (Wk 1) | Treatment | Feed Day | No | 20:05 | 20:00 - 20:59 | Night         | 38,0 | 85  | 83,2  | 83,2  | 19,15 | 581,90 | 149,44 |
|    | 2019/08/02 | CH2276 | Female | Two y/o | Treatment (Wk 1) | Treatment | Feed Day | No | 20:10 | 20:00 - 20:59 | Night         | 38,0 | 69  | 68,0  | 68,0  | 19,15 | 565,86 | 142,43 |
|    | 2019/08/02 | CH2276 | Female | Two y/o | Treatment (Wk 1) | Treatment | Feed Day | No | 20:15 | 20:00 - 20:59 | Night         | 38,0 | 61  | 76,2  | 76,2  | 19,15 | 556,01 | 146,38 |
|    | 2019/08/02 | CH2276 | Female | Two y/o | Treatment (Wk 1) | Treatment | Feed Day | No | 20:20 | 20:00 - 20:59 | Night         | 37,9 | 91  | 76,8  | 76,8  | 19,05 | 586,98 | 146,66 |
|    | 2019/08/02 | CH2276 | Female | Two y/o | Treatment (Wk 1) | Treatment | Feed Day | No | 20:25 | 20:00 - 20:59 | Night         | 37,8 | 92  | 77,6  | 77,6  | 18,95 | 587,78 | 147,02 |
|    | 2019/08/02 | CH2276 | Female | Two y/o | Treatment (Wk 1) | Treatment | Feed Day | No | 20:30 | 20:00 - 20:59 | Night         | 37,7 | 93  | 81,6  | 81,6  | 18,85 | 588,58 | 148,76 |
|    | 2019/08/02 | CH2276 | Female | Two y/o | Treatment (Wk 1) | Treatment | Feed Day | No | 20:35 | 20:00 - 20:59 | Night         | 37,6 | 72  | 78,0  | 78,0  | 18,75 | 569,20 | 147,20 |
|    | 2019/08/02 | CH2276 | Female | Two y/o | Treatment (Wk 1) | Treatment | Feed Day | No | 20:40 | 20:00 - 20:59 | Night         | 37,6 | 100 | 82,8  | 82,8  | 18,75 | 593,87 | 149,27 |
|    | 2019/08/02 | CH2276 | Female | Two y/o | Treatment (Wk 1) | Treatment | Feed Day | No | 20:45 | 20:00 - 20:59 | Night         | 37,6 | 94  | 79,2  | 79,2  | 18,75 | 589,37 | 147,73 |
|    | 2019/08/02 | CH2276 | Female | Two y/o | Treatment (Wk 1) | Treatment | Feed Day | No | 20:50 | 20:00 - 20:59 | Night         | 37,6 |     | 70,4  | 70,4  | 18,75 |        | 143,64 |
|    | 2019/08/02 | CH2276 | Female | Two y/o | Treatment (Wk 1) | Treatment | Feed Day | No | 20:55 | 20:00 - 20:59 | Night         | 37,6 | 94  | 74,6  | 74,6  | 18,75 | 589,37 | 145,65 |
|    | 2019/08/02 | CH2276 | Female | Two y/o | Treatment (Wk 1) | Treatment | Feed Day | No | 21:00 | 21:00 - 21:59 | Night         | 37,6 | 97  | 82,0  | 82,0  | 18,75 | 591,66 | 148,93 |
|    | 2019/08/02 | CH2276 | Female | Two y/o | Treatment (Wk 1) | Treatment | Feed Day | No | 21:05 | 21:00 - 21:59 | Night         | 37,6 | 77  | 76,8  | 76,8  | 18,75 | 574,39 | 146,66 |
|    | 2019/08/02 | CH2276 | Female | Two y/o | Treatment (Wk 1) | Treatment | Feed Day | No | 21:10 | 21:00 - 21:59 | Night         | 37,6 | 96  | 71,6  | 71,6  | 18,75 | 590,91 | 144,22 |
|    | 2019/08/02 | CH2276 | Female | Two y/o | Treatment (Wk 1) | Treatment | Feed Day | No | 21:15 | 21:00 - 21:59 | Night         | 37,6 | 91  | 74,6  | 74,6  | 18,75 | 586,98 | 145,65 |
|    | 2019/08/02 | CH2276 | Female | Two y/o | Treatment (Wk 1) | Treatment | Feed Day | No | 21:20 | 21:00 - 21:59 | Night         | 37,6 | 98  | 72,8  | 72,8  | 18,75 | 592,41 | 144,80 |
|    | 2019/08/02 | CH2276 | Female | Two y/o | Treatment (Wk 1) | Treatment | Feed Day | No | 21:25 | 21:00 - 21:59 | Night         | 37,6 | 106 | 74,6  | 74,6  | 18,75 | 598,06 | 145,65 |
|    | 2019/08/02 | CH2276 | Female | Two y/o | Treatment (Wk 1) | Treatment | Feed Day | No | 21:30 | 21:00 - 21:59 | Night         | 37,6 | 62  | 74,8  | 74,8  | 18,75 | 557,33 | 145,74 |
|    | 2019/08/02 | CH2276 | Female | Two y/o | Treatment (Wk 1) | Treatment | Feed Day | No | 21:35 | 21:00 - 21:59 | Night         | 37,6 | 73  | 78,2  | 78,2  | 18,75 | 570,27 | 147,28 |
|    | 2019/08/02 | CH2276 | Female | Two y/o | Treatment (Wk 1) | Treatment | Feed Day | No | 21:40 | 21:00 - 21:59 | Night         | 37,6 | 92  | 79,6  | 79,6  | 18,75 | 587,78 | 147,90 |
|    | 2019/08/02 | CH2276 | Female | Two y/o | Treatment (Wk 1) | Treatment | Feed Day | No | 21:45 | 21:00 - 21:59 | Night         | 37,6 | 103 | 79,0  | 79,0  | 18,75 | 596,00 | 147,64 |
|    | 2019/08/02 | CH2276 | Female | Two y/o | Treatment (Wk 1) | Treatment | Feed Day | No | 21:50 | 21:00 - 21:59 | Night         | 37,6 |     | 69,8  | 69,8  | 18,75 |        | 143,34 |
|    | 2019/08/02 | CH2276 | Female | Two y/o | Treatment (Wk 1) | Treatment | Feed Day | No | 21:55 | 21:00 - 21:59 | Night         | 37,6 | 68  | 60,8  | 60,8  | 18,75 | 564,71 | 138,55 |
|    | 2019/08/02 | CH2276 | Female | Two y/o | Treatment (Wk 1) | Treatment | Feed Day | No | 22:00 | 22:00 - 22:59 | Night         | 37,6 | 62  | 70,8  | 70,8  | 18,75 | 557,33 | 143,83 |
|    | 2019/08/02 | CH2276 | Female | Two y/o | Treatment (Wk 1) | Treatment | Feed Day | No | 22:05 | 22:00 - 22:59 | Night         | 37,7 | 92  | 66,2  | 66,2  | 18,85 | 587,78 | 141,50 |
|    | 2019/08/02 | CH2276 | Female | Two y/o | Treatment (Wk 1) | Treatment | Feed Day | No | 22:10 | 22:00 - 22:59 | Night         | 37,7 | 93  | 59,0  | 59,0  | 18,85 | 588,58 | 137,51 |
|    | 2019/08/02 | CH2276 | Female | Two y/o | Treatment (Wk 1) | Treatment | Feed Day | No | 22:15 | 22:00 - 22:59 | Night         | 37,6 | 74  | 60,0  | 60,0  | 18,75 | 571,33 | 138,09 |
|    | 2019/08/02 | CH2276 | Female | Two y/o | Treatment (Wk 1) | Treatment | Feed Day | No | 22:20 | 22:00 - 22:59 | Night         | 37,6 | 70  | 62,4  | 62,4  | 18,75 | 566,99 | 139,45 |
|    | 2019/08/02 | CH2276 | Female | Two y/o | Treatment (Wk 1) | Treatment | Feed Day | No | 22:25 | 22:00 - 22:59 | Night         | 37,6 | 98  | 64,0  | 64,0  | 18,75 | 592,41 | 140,33 |
|    | 2019/08/02 | CH2276 | Female | Two y/o | Treatment (Wk 1) | Treatment | Feed Day | No | 22:30 | 22:00 - 22:59 | Night         | 37,6 | 75  | 64,4  | 64,4  | 18,75 | 572,36 | 140,55 |
|    | 2019/08/02 | CH2276 | Female | Two y/o | Treatment (Wk 1) | Treatment | Feed Day | No | 22:35 | 22:00 - 22:59 | Night         | 37,6 | 99  | 61,8  | 61,8  | 18,75 | 593,14 | 139,12 |
|    | 2019/08/02 | CH2276 | Female | Two y/o | Treatment (Wk 1) | Treatment | Feed Day | No | 22:40 | 22:00 - 22:59 | Night         | 37,6 | 99  | 64,4  | 64,4  | 18,75 | 593,14 | 140,55 |
|    | 2019/08/02 | CH2276 | Female | Two y/o | Treatment (Wk 1) | Treatment | Feed Day | No | 22:45 | 22:00 - 22:59 | Night         | 37,6 | 101 | 63,2  | 63,2  | 18,75 | 594,59 | 139,89 |
|    | 2019/08/02 | CH2276 | Female | Two y/o | Treatment (Wk 1) | Treatment | Feed Day | No | 22:50 | 22:00 - 22:59 | Night         | 37,6 | 61  | 64,8  | 64,8  | 18,75 | 556,01 | 140,76 |
|    | 2019/08/02 | CH2276 | Female | Two y/o | Treatment (Wk 1) | Treatment | Feed Day | No | 22:55 | 22:00 - 22:59 | Night         | 37,6 | 84  | 66,0  | 66,0  | 18,75 | 581,01 | 141,40 |
|    | 2019/08/02 | CH2276 | Female | Two y/o | Treatment (Wk 1) | Treatment | Feed Day | No | 23:00 | 23:00 - 23:59 | Night         | 37,6 | 99  | 66,6  | 66,6  | 18,75 | 593,14 | 141,71 |
|    | 2019/08/02 | CH2276 | Female | Two y/o | Treatment (Wk 1) | Treatment | Feed Day | No | 23:05 | 23:00 - 23:59 | Night         | 37,6 | 63  | 61,8  | 61,8  | 18,75 | 558,62 | 139,12 |
|    | 2019/08/02 | CH2276 | Female | Two y/o | Treatment (Wk 1) | Treatment | Feed Day | No | 23:10 | 23:00 - 23:59 | Night         | 37,6 | 71  | 63,2  | 63,2  | 18,75 | 568,10 | 139,89 |
|    | 2019/08/02 | CH2276 | Female | Two y/o | Treatment (Wk 1) | Treatment | Feed Day | No | 23:15 | 23:00 - 23:59 | Night         | 37,6 | 63  | 64,6  | 64,6  | 18,75 | 558,62 | 140,65 |
|    | 2019/08/02 | CH2276 | Female | Two y/o | Treatment (Wk 1) | Treatment | Feed Day | No | 23:20 | 23:00 - 23:59 | Night         | 37,6 | 63  | 65,8  | 65,8  | 18,75 | 558,62 | 141,29 |
|    | 2019/08/02 | CH2276 | Female | Two y/o | Treatment (Wk 1) | Treatment | Feed Day | No | 23:25 | 23:00 - 23:59 | Night         | 37,6 | 63  | 66,8  | 66,8  | 18,75 | 558,62 | 141,81 |
|    | 2019/08/02 | CH2276 | Female | Two y/o | Treatment (Wk 1) | Treatment | Feed Day | No | 23:30 | 23:00 - 23:59 | Night         | 37,6 | 88  | 61,8  | 61,8  | 18,75 | 584,49 | 139,12 |
|    | 2019/08/02 | CH2276 | Female | Two y/o | Treatment (Wk 1) | Treatment | Feed Day | No | 23:35 | 23:00 - 23:59 | Night         | 37,6 | 93  | 53,6  | 53,6  | 18,75 | 588,58 | 134,19 |
|    | 2019/08/02 | CH2276 | Female | Two y/o | Treatment (Wk 1) | Treatment | Feed Day | No | 23:40 | 23:00 - 23:59 | Night         | 37,6 | 105 | 63,8  | 63,8  | 18,75 | 597,38 | 140,22 |
|    | 2019/08/02 | CH2276 | Female | Two y/o | Treatment (Wk 1) | Treatment | Feed Day | No | 23:45 | 23:00 - 23:59 | Night         | 37,7 | 65  | 57,8  | 57,8  | 18,85 | 561,12 | 136,80 |
|    | 2019/08/02 | CH2276 | Female | Two y/o | Treatment (Wk 1) | Treatment | Feed Day | No | 23:50 | 23:00 - 23:59 | Night         | 37,7 | 98  | 62,4  | 62,4  | 18,85 | 592,41 | 139,45 |
|    | 2019/08/02 | CH2276 | Female | Two y/o | Treatment (Wk 1) | Treatment | Feed Day | No | 23:55 | 23:00 - 23:59 | Night         | 37,7 | 96  | 59,8  | 59,8  | 18,85 | 590,91 | 137,98 |
| 46 | 2019/08/03 | CH2276 | Female | Two y/o | Treatment (Wk 1) | Treatment | Feed Day | No | 00:00 | 00:00 - 00:59 | Early Morning | 37,6 | 98  | 65,4  | 65,4  | 18,75 | 592,41 | 141,08 |



|            |        |        |         |                  |           |          |    |       |               |               |      |     |       |       |       |        |        |
|------------|--------|--------|---------|------------------|-----------|----------|----|-------|---------------|---------------|------|-----|-------|-------|-------|--------|--------|
| 2019/08/03 | CH2276 | Female | Two y/o | Treatment (Wk 1) | Treatment | Feed Day | No | 00:05 | 00:00 - 00:59 | Early Morning | 37,6 | 62  | 64,4  | 64,4  | 18,75 | 557,33 | 140,55 |
| 2019/08/03 | CH2276 | Female | Two y/o | Treatment (Wk 1) | Treatment | Feed Day | No | 00:10 | 00:00 - 00:59 | Early Morning | 37,6 | 92  | 61,2  | 61,2  | 18,75 | 587,78 | 138,78 |
| 2019/08/03 | CH2276 | Female | Two y/o | Treatment (Wk 1) | Treatment | Feed Day | No | 00:15 | 00:00 - 00:59 | Early Morning | 37,6 | 63  | 64,8  | 64,8  | 18,75 | 558,62 | 140,76 |
| 2019/08/03 | CH2276 | Female | Two y/o | Treatment (Wk 1) | Treatment | Feed Day | No | 00:20 | 00:00 - 00:59 | Early Morning | 37,6 | 97  | 61,2  | 61,2  | 18,75 | 591,66 | 138,78 |
| 2019/08/03 | CH2276 | Female | Two y/o | Treatment (Wk 1) | Treatment | Feed Day | No | 00:25 | 00:00 - 00:59 | Early Morning | 37,6 | 71  | 64,4  | 64,4  | 18,75 | 568,10 | 140,55 |
| 2019/08/03 | CH2276 | Female | Two y/o | Treatment (Wk 1) | Treatment | Feed Day | No | 00:30 | 00:00 - 00:59 | Early Morning | 37,6 | 94  | 72,2  | 72,2  | 18,75 | 589,37 | 144,51 |
| 2019/08/03 | CH2276 | Female | Two y/o | Treatment (Wk 1) | Treatment | Feed Day | No | 00:35 | 00:00 - 00:59 | Early Morning | 37,6 | 68  | 69,0  | 69,0  | 18,75 | 564,71 | 142,94 |
| 2019/08/03 | CH2276 | Female | Two y/o | Treatment (Wk 1) | Treatment | Feed Day | No | 00:40 | 00:00 - 00:59 | Early Morning | 37,6 | 93  | 68,6  | 68,6  | 18,75 | 588,58 | 142,74 |
| 2019/08/03 | CH2276 | Female | Two y/o | Treatment (Wk 1) | Treatment | Feed Day | No | 00:45 | 00:00 - 00:59 | Early Morning | 37,6 | 68  | 69,6  | 69,6  | 18,75 | 564,71 | 143,24 |
| 2019/08/03 | CH2276 | Female | Two y/o | Treatment (Wk 1) | Treatment | Feed Day | No | 00:50 | 00:00 - 00:59 | Early Morning | 37,6 | 98  | 65,8  | 65,8  | 18,75 | 592,41 | 141,29 |
| 2019/08/03 | CH2276 | Female | Two y/o | Treatment (Wk 1) | Treatment | Feed Day | No | 00:55 | 00:00 - 00:59 | Early Morning | 37,6 | 94  | 59,6  | 59,6  | 18,75 | 589,37 | 137,86 |
| 2019/08/03 | CH2276 | Female | Two y/o | Treatment (Wk 1) | Treatment | Feed Day | No | 01:00 | 01:00 - 01:59 | Early Morning | 37,7 | 100 | 61,8  | 61,8  | 18,85 | 593,87 | 139,12 |
| 2019/08/03 | CH2276 | Female | Two y/o | Treatment (Wk 1) | Treatment | Feed Day | No | 01:05 | 01:00 - 01:59 | Early Morning | 37,7 | 93  | 23,6  | 23,6  | 18,85 | 588,58 | 105,97 |
| 2019/08/03 | CH2276 | Female | Two y/o | Treatment (Wk 1) | Treatment | Feed Day | No | 01:10 | 01:00 - 01:59 | Early Morning | 37,6 | 85  | 25,0  | 25,0  | 18,75 | 581,90 | 107,94 |
| 2019/08/03 | CH2276 | Female | Two y/o | Treatment (Wk 1) | Treatment | Feed Day | No | 01:15 | 01:00 - 01:59 | Early Morning | 37,6 | 58  | 50,6  | 50,6  | 18,75 | 551,90 | 132,20 |
| 2019/08/03 | CH2276 | Female | Two y/o | Treatment (Wk 1) | Treatment | Feed Day | No | 01:20 | 01:00 - 01:59 | Early Morning | 37,6 | 67  | 24,6  | 24,6  | 18,75 | 563,53 | 107,39 |
| 2019/08/03 | CH2276 | Female | Two y/o | Treatment (Wk 1) | Treatment | Feed Day | No | 01:25 | 01:00 - 01:59 | Early Morning | 37,6 | 91  | 34,4  | 34,4  | 18,75 | 586,98 | 118,90 |
| 2019/08/03 | CH2276 | Female | Two y/o | Treatment (Wk 1) | Treatment | Feed Day | No | 01:30 | 01:00 - 01:59 | Early Morning | 37,5 | 90  | 46,0  | 46,0  | 18,65 | 586,16 | 128,91 |
| 2019/08/03 | CH2276 | Female | Two y/o | Treatment (Wk 1) | Treatment | Feed Day | No | 01:35 | 01:00 - 01:59 | Early Morning | 37,5 | 99  | 44,0  | 44,0  | 18,65 | 593,14 | 127,37 |
| 2019/08/03 | CH2276 | Female | Two y/o | Treatment (Wk 1) | Treatment | Feed Day | No | 01:40 | 01:00 - 01:59 | Early Morning | 37,5 | 68  | 45,8  | 45,8  | 18,65 | 564,71 | 128,76 |
| 2019/08/03 | CH2276 | Female | Two y/o | Treatment (Wk 1) | Treatment | Feed Day | No | 01:45 | 01:00 - 01:59 | Early Morning | 37,5 | 69  | 47,6  | 47,6  | 18,65 | 565,86 | 130,09 |
| 2019/08/03 | CH2276 | Female | Two y/o | Treatment (Wk 1) | Treatment | Feed Day | No | 01:50 | 01:00 - 01:59 | Early Morning | 37,5 | 63  | 49,4  | 49,4  | 18,65 | 558,62 | 131,37 |
| 2019/08/03 | CH2276 | Female | Two y/o | Treatment (Wk 1) | Treatment | Feed Day | No | 01:55 | 01:00 - 01:59 | Early Morning | 37,5 | 63  | 51,8  | 51,8  | 18,65 | 558,62 | 133,01 |
| 2019/08/03 | CH2276 | Female | Two y/o | Treatment (Wk 1) | Treatment | Feed Day | No | 02:00 | 02:00 - 02:59 | Early Morning | 37,5 | 66  | 66,8  | 66,8  | 18,65 | 562,34 | 141,81 |
| 2019/08/03 | CH2276 | Female | Two y/o | Treatment (Wk 1) | Treatment | Feed Day | No | 02:05 | 02:00 - 02:59 | Early Morning | 37,5 | 93  | 70,6  | 70,6  | 18,65 | 588,58 | 143,73 |
| 2019/08/03 | CH2276 | Female | Two y/o | Treatment (Wk 1) | Treatment | Feed Day | No | 02:10 | 02:00 - 02:59 | Early Morning | 37,5 | 59  | 70,6  | 70,6  | 18,65 | 553,30 | 143,73 |
| 2019/08/03 | CH2276 | Female | Two y/o | Treatment (Wk 1) | Treatment | Feed Day | No | 02:15 | 02:00 - 02:59 | Early Morning | 37,5 | 92  | 82,2  | 82,2  | 18,65 | 587,78 | 149,02 |
| 2019/08/03 | CH2276 | Female | Two y/o | Treatment (Wk 1) | Treatment | Feed Day | No | 02:20 | 02:00 - 02:59 | Early Morning | 37,5 | 96  | 87,8  | 87,8  | 18,65 | 590,91 | 151,31 |
| 2019/08/03 | CH2276 | Female | Two y/o | Treatment (Wk 1) | Treatment | Feed Day | No | 02:25 | 02:00 - 02:59 | Early Morning | 37,5 | 75  | 84,2  | 84,2  | 18,65 | 572,36 | 149,85 |
| 2019/08/03 | CH2276 | Female | Two y/o | Treatment (Wk 1) | Treatment | Feed Day | No | 02:30 | 02:00 - 02:59 | Early Morning | 37,4 | 78  | 80,8  | 80,8  | 18,55 | 575,38 | 148,42 |
| 2019/08/03 | CH2276 | Female | Two y/o | Treatment (Wk 1) | Treatment | Feed Day | No | 02:35 | 02:00 - 02:59 | Early Morning | 37,4 |     | 85,2  | 85,2  | 18,55 |        | 150,27 |
| 2019/08/03 | CH2276 | Female | Two y/o | Treatment (Wk 1) | Treatment | Feed Day | No | 02:40 | 02:00 - 02:59 | Early Morning | 37,4 | 61  | 71,6  | 71,6  | 18,55 | 556,01 | 144,22 |
| 2019/08/03 | CH2276 | Female | Two y/o | Treatment (Wk 1) | Treatment | Feed Day | No | 02:45 | 02:00 - 02:59 | Early Morning | 37,4 | 94  | 77,2  | 77,2  | 18,55 | 589,37 | 146,84 |
| 2019/08/03 | CH2276 | Female | Two y/o | Treatment (Wk 1) | Treatment | Feed Day | No | 02:50 | 02:00 - 02:59 | Early Morning | 37,3 | 71  | 80,4  | 80,4  | 18,46 | 568,10 | 148,25 |
| 2019/08/03 | CH2276 | Female | Two y/o | Treatment (Wk 1) | Treatment | Feed Day | No | 02:55 | 02:00 - 02:59 | Early Morning | 37,3 | 64  | 82,0  | 82,0  | 18,46 | 559,88 | 148,93 |
| 2019/08/03 | CH2276 | Female | Two y/o | Treatment (Wk 1) | Treatment | Feed Day | No | 03:00 | 03:00 - 03:59 | Early Morning | 37,4 | 64  | 82,0  | 82,0  | 18,55 | 559,88 | 148,93 |
| 2019/08/03 | CH2276 | Female | Two y/o | Treatment (Wk 1) | Treatment | Feed Day | No | 03:05 | 03:00 - 03:59 | Early Morning | 37,3 | 67  | 85,2  | 85,2  | 18,46 | 563,53 | 150,27 |
| 2019/08/03 | CH2276 | Female | Two y/o | Treatment (Wk 1) | Treatment | Feed Day | No | 03:10 | 03:00 - 03:59 | Early Morning | 37,3 | 90  | 81,2  | 81,2  | 18,46 | 586,16 | 148,59 |
| 2019/08/03 | CH2276 | Female | Two y/o | Treatment (Wk 1) | Treatment | Feed Day | No | 03:15 | 03:00 - 03:59 | Early Morning | 37,2 | 80  | 80,2  | 80,2  | 18,36 | 577,31 | 148,16 |
| 2019/08/03 | CH2276 | Female | Two y/o | Treatment (Wk 1) | Treatment | Feed Day | No | 03:20 | 03:00 - 03:59 | Early Morning | 37,3 | 86  | 84,2  | 84,2  | 18,46 | 582,77 | 149,85 |
| 2019/08/03 | CH2276 | Female | Two y/o | Treatment (Wk 1) | Treatment | Feed Day | No | 03:25 | 03:00 - 03:59 | Early Morning | 37,3 | 95  | 82,8  | 82,8  | 18,46 | 590,14 | 149,27 |
| 2019/08/03 | CH2276 | Female | Two y/o | Treatment (Wk 1) | Treatment | Feed Day | No | 03:30 | 03:00 - 03:59 | Early Morning | 37,3 | 62  | 84,8  | 84,8  | 18,46 | 557,33 | 150,10 |
| 2019/08/03 | CH2276 | Female | Two y/o | Treatment (Wk 1) | Treatment | Feed Day | No | 03:35 | 03:00 - 03:59 | Early Morning | 37,2 | 65  | 89,0  | 89,0  | 18,36 | 561,12 | 151,78 |
| 2019/08/03 | CH2276 | Female | Two y/o | Treatment (Wk 1) | Treatment | Feed Day | No | 03:40 | 03:00 - 03:59 | Early Morning | 37,1 | 56  | 90,6  | 90,6  | 18,26 | 549,01 | 152,40 |
| 2019/08/03 | CH2276 | Female | Two y/o | Treatment (Wk 1) | Treatment | Feed Day | No | 03:45 | 03:00 - 03:59 | Early Morning | 37,1 | 58  | 84,8  | 84,8  | 18,26 | 551,90 | 150,10 |
| 2019/08/03 | CH2276 | Female | Two y/o | Treatment (Wk 1) | Treatment | Feed Day | No | 03:50 | 03:00 - 03:59 | Early Morning | 37,2 | 90  | 88,4  | 88,4  | 18,36 | 586,16 | 151,55 |
| 2019/08/03 | CH2276 | Female | Two y/o | Treatment (Wk 1) | Treatment | Feed Day | No | 03:55 | 03:00 - 03:59 | Early Morning | 37,3 |     | 79,0  | 79,0  | 18,46 |        | 147,64 |
| 2019/08/03 | CH2276 | Female | Two y/o | Treatment (Wk 1) | Treatment | Feed Day | No | 04:00 | 04:00 - 04:59 | Morning       | 37,3 | 95  | 36,2  | 36,2  | 18,46 | 590,14 | 120,65 |
| 2019/08/03 | CH2276 | Female | Two y/o | Treatment (Wk 1) | Treatment | Feed Day | No | 04:05 | 04:00 - 04:59 | Morning       | 37,3 | 64  | 49,0  | 49,0  | 18,46 | 559,88 | 131,09 |
| 2019/08/03 | CH2276 | Female | Two y/o | Treatment (Wk 1) | Treatment | Feed Day | No | 04:10 | 04:00 - 04:59 | Morning       | 37,3 | 61  | 68,0  | 68,0  | 18,46 | 556,01 | 142,43 |
| 2019/08/03 | CH2276 | Female | Two y/o | Treatment (Wk 1) | Treatment | Feed Day | No | 04:15 | 04:00 - 04:59 | Morning       | 37,3 | 108 | 47,4  | 47,4  | 18,46 | 599,39 | 129,94 |
| 2019/08/03 | CH2276 | Female | Two y/o | Treatment (Wk 1) | Treatment | Feed Day | No | 04:20 | 04:00 - 04:59 | Morning       | 37,1 |     | 44,8  | 44,8  | 18,26 |        | 127,99 |
| 2019/08/03 | CH2276 | Female | Two y/o | Treatment (Wk 1) | Treatment | Feed Day | No | 04:25 | 04:00 - 04:59 | Morning       | 37,1 |     | 40,2  | 40,2  | 18,26 |        | 124,26 |
| 2019/08/03 | CH2276 | Female | Two y/o | Treatment (Wk 1) | Treatment | Feed Day | No | 04:30 | 04:00 - 04:59 | Morning       | 37,1 | 76  | 50,4  | 50,4  | 18,26 | 573,39 | 132,06 |
| 2019/08/03 | CH2276 | Female | Two y/o | Treatment (Wk 1) | Treatment | Feed Day | No | 04:35 | 04:00 - 04:59 | Morning       | 37,1 | 102 | 107,0 | 107,0 | 18,26 | 595,30 | 158,20 |
| 2019/08/03 | CH2276 | Female | Two y/o | Treatment (Wk 1) | Treatment | Feed Day | No | 04:40 | 04:00 - 04:59 | Morning       | 37,1 | 182 | 54,4  | 54,4  | 18,26 | 634,31 | 134,70 |
| 2019/08/03 | CH2276 | Female | Two y/o | Treatment (Wk 1) | Treatment | Feed Day | No | 04:45 | 04:00 - 04:59 | Morning       | 37,3 | 34  | 123,2 | 123,2 | 18,46 | 505,29 | 163,13 |
| 2019/08/03 | CH2276 | Female | Two y/o | Treatment (Wk 1) | Treatment | Feed Day | No | 04:50 | 04:00 - 04:59 | Morning       | 37,4 | 70  | 41,6  | 41,6  | 18,55 | 566,99 | 125,44 |
| 2019/08/03 | CH2276 | Female | Two y/o | Treatment (Wk 1) | Treatment | Feed Day | No | 04:55 | 04:00 - 04:59 | Morning       | 37,5 | 31  | 426,6 | 426,6 | 18,65 | 496,63 | 206,90 |
| 2019/08/03 | CH2276 | Female | Two y/o | Treatment (Wk 1) | Treatment | Feed Day | No | 05:00 | 05:00 - 05:59 | Morning       | 37,5 | 79  | 67,0  | 67,0  | 18,65 | 576,36 | 141,92 |
| 2019/08/03 | CH2276 | Female | Two y/o | Treatment (Wk 1) | Treatment | Feed Day | No | 05:05 | 05:00 - 05:59 | Morning       | 37,5 | 39  | 441,0 | 441,0 | 18,65 | 517,82 | 208,08 |
| 2019/08/03 | CH2276 | Female | Two y/o | Treatment (Wk 1) | Treatment | Feed Day | No | 05:10 | 05:00 - 05:59 | Morning       | 37,7 | 131 | 126,4 | 126,4 | 18,85 | 612,80 | 164,02 |
| 2019/08/03 | CH2276 | Female | Two y/o | Treatment (Wk 1) | Treatment | Feed Day | No | 05:15 | 05:00 - 05:59 | Morning       | 37,7 | 91  | 60,0  | 60,0  | 18,85 | 586,98 | 138,09 |
| 2019/08/03 | CH2276 | Female | Two y/o | Treatment (Wk 1) | Treatment | Feed Day | No | 05:20 | 05:00 - 05:59 | Morning       | 37,7 | 103 | 86,0  | 86,0  | 18,85 | 596,00 | 150,59 |
| 2019/08/03 | CH2276 | Female | Two y/o | Treatment (Wk 1) | Treatment | Feed Day | No | 05:25 | 05:00 - 05:59 | Morning       | 37,6 | 152 | 117,4 | 117,4 | 18,75 | 622,73 | 161,44 |
| 2019/08/03 | CH2276 | Female | Two y/o | Treatment (Wk 1) | Treatment | Feed Day | No | 05:30 | 05:00 - 05:59 | Morning       | 37,6 | 160 | 129,4 | 129,4 | 18,75 | 626,07 | 164,84 |
| 2019/08/03 | CH2276 | Female | Two y/o | Treatment (Wk 1) | Treatment | Feed Day | No | 05:35 | 05:00 - 05:59 | Morning       | 37,6 |     | 183,2 | 183,2 | 18,75 |        | 177,03 |
| 2019/08/03 | CH2276 | Female | Two y/o | Treatment (Wk 1) | Treatment | Feed Day | No | 05:40 | 05:00 - 05:59 | Morning       | 37,6 | 121 | 98,2  | 98,2  | 18,75 | 607,35 | 155,21 |
| 2019/08/03 | CH2276 | Female | Two y/o | Treatment (Wk 1) | Treatment | Feed Day | No | 05:45 | 05:00 - 05:59 | Morning       | 37,7 | 141 | 196,2 | 196,2 | 18,85 | 617,75 | 179,44 |
| 2019/08/03 | CH2276 | Female | Two y/o | Treatment (Wk 1) | Treatment | Feed Day | No | 05:50 | 05:00 - 05:59 | Morning       | 37,7 | 117 | 277,0 | 277,0 | 18,85 | 605,02 | 191,60 |



|            |        |        |         |                  |           |          |     |       |               |              |      |     |       |       |       |        |        |
|------------|--------|--------|---------|------------------|-----------|----------|-----|-------|---------------|--------------|------|-----|-------|-------|-------|--------|--------|
| 2019/08/03 | CH2276 | Female | Two y/o | Treatment (Wk 1) | Treatment | Feed Day | No  | 05:55 | 05:00 - 05:59 | Morning      | 37,8 | 83  | 102,2 | 102,2 | 18,95 | 580,11 | 156,60 |
| 2019/08/03 | CH2276 | Female | Two y/o | Treatment (Wk 1) | Treatment | Feed Day | No  | 06:00 | 06:00 - 06:59 | Morning      | 37,8 | 107 | 28,2  | 28,2  | 18,95 | 598,73 | 112,07 |
| 2019/08/03 | CH2276 | Female | Two y/o | Treatment (Wk 1) | Treatment | Feed Day | No  | 06:05 | 06:00 - 06:59 | Morning      | 37,5 | 62  | 26,4  | 26,4  | 18,65 | 557,33 | 109,81 |
| 2019/08/03 | CH2276 | Female | Two y/o | Treatment (Wk 1) | Treatment | Feed Day | No  | 06:10 | 06:00 - 06:59 | Morning      | 37,3 | 60  | 23,6  | 23,6  | 18,46 | 554,67 | 105,97 |
| 2019/08/03 | CH2276 | Female | Two y/o | Treatment (Wk 1) | Treatment | Feed Day | No  | 06:15 | 06:00 - 06:59 | Morning      | 37,1 | 58  | 27,4  | 27,4  | 18,26 | 551,90 | 111,09 |
| 2019/08/03 | CH2276 | Female | Two y/o | Treatment (Wk 1) | Treatment | Feed Day | No  | 06:20 | 06:00 - 06:59 | Morning      | 37,1 | 56  | 26,8  | 26,8  | 18,26 | 549,01 | 110,33 |
| 2019/08/03 | CH2276 | Female | Two y/o | Treatment (Wk 1) | Treatment | Feed Day | No  | 06:25 | 06:00 - 06:59 | Morning      | 37,0 | 61  | 27,0  | 27,0  | 18,16 | 556,01 | 110,58 |
| 2019/08/03 | CH2276 | Female | Two y/o | Treatment (Wk 1) | Treatment | Feed Day | No  | 06:30 | 06:00 - 06:59 | Morning      | 37,0 | 64  | 34,8  | 34,8  | 18,16 | 559,88 | 119,29 |
| 2019/08/03 | CH2276 | Female | Two y/o | Treatment (Wk 1) | Treatment | Feed Day | No  | 06:35 | 06:00 - 06:59 | Morning      | 36,9 | 53  | 36,2  | 36,2  | 18,06 | 544,43 | 120,65 |
| 2019/08/03 | CH2276 | Female | Two y/o | Treatment (Wk 1) | Treatment | Feed Day | No  | 06:40 | 06:00 - 06:59 | Morning      | 37,0 |     | 247,8 | 247,8 | 18,16 |        | 187,67 |
| 2019/08/03 | CH2276 | Female | Two y/o | Treatment (Wk 1) | Treatment | Feed Day | No  | 06:45 | 06:00 - 06:59 | Morning      | 37,2 | 62  | 61,4  | 61,4  | 18,36 | 557,33 | 138,89 |
| 2019/08/03 | CH2276 | Female | Two y/o | Treatment (Wk 1) | Treatment | Feed Day | No  | 06:50 | 06:00 - 06:59 | Morning      | 37,1 | 84  | 60,4  | 60,4  | 18,26 | 581,01 | 138,32 |
| 2019/08/03 | CH2276 | Female | Two y/o | Treatment (Wk 1) | Treatment | Feed Day | No  | 06:55 | 06:00 - 06:59 | Morning      | 37,3 | 90  | 127,0 | 127,0 | 18,46 | 586,16 | 164,19 |
| 2019/08/03 | CH2276 | Female | Two y/o | Treatment (Wk 1) | Treatment | Feed Day | No  | 07:00 | 07:00 - 07:59 | Morning      | 37,5 |     | 148,8 | 148,8 | 18,65 |        | 169,74 |
| 2019/08/03 | CH2276 | Female | Two y/o | Treatment (Wk 1) | Treatment | Feed Day | No  | 07:05 | 07:00 - 07:59 | Morning      | 37,6 |     | 163,6 | 163,6 | 18,75 |        | 173,06 |
| 2019/08/03 | CH2276 | Female | Two y/o | Treatment (Wk 1) | Treatment | Feed Day | No  | 07:10 | 07:00 - 07:59 | Morning      | 37,6 | 79  | 334,2 | 334,2 | 18,75 | 576,36 | 198,24 |
| 2019/08/03 | CH2276 | Female | Two y/o | Treatment (Wk 1) | Treatment | Feed Day | No  | 07:15 | 07:00 - 07:59 | Morning      | 38,0 | 111 | 89,0  | 89,0  | 19,15 | 601,33 | 151,78 |
| 2019/08/03 | CH2276 | Female | Two y/o | Treatment (Wk 1) | Treatment | Feed Day | No  | 07:20 | 07:00 - 07:59 | Morning      | 37,9 | 62  | 171,6 | 171,6 | 19,05 | 557,33 | 174,74 |
| 2019/08/03 | CH2276 | Female | Two y/o | Treatment (Wk 1) | Treatment | Feed Day | No  | 07:25 | 07:00 - 07:59 | Morning      | 37,8 | 110 | 131,4 | 131,4 | 18,95 | 600,69 | 165,38 |
| 2019/08/03 | CH2276 | Female | Two y/o | Treatment (Wk 1) | Treatment | Feed Day | No  | 07:30 | 07:00 - 07:59 | Morning      | 37,8 | 60  | 59,8  | 59,8  | 18,95 | 554,67 | 137,98 |
| 2019/08/03 | CH2276 | Female | Two y/o | Treatment (Wk 1) | Treatment | Feed Day | No  | 07:35 | 07:00 - 07:59 | Morning      | 37,7 | 110 | 48,0  | 48,0  | 18,85 | 600,69 | 130,38 |
| 2019/08/03 | CH2276 | Female | Two y/o | Treatment (Wk 1) | Treatment | Feed Day | No  | 07:40 | 07:00 - 07:59 | Morning      | 37,7 | 66  | 52,6  | 52,6  | 18,85 | 562,34 | 133,54 |
| 2019/08/03 | CH2276 | Female | Two y/o | Treatment (Wk 1) | Treatment | Feed Day | No  | 07:45 | 07:00 - 07:59 | Morning      | 37,7 | 123 | 377,4 | 377,4 | 18,85 | 608,49 | 202,55 |
| 2019/08/03 | CH2276 | Female | Two y/o | Treatment (Wk 1) | Treatment | Feed Day | No  | 07:50 | 07:00 - 07:59 | Morning      | 37,7 | 129 | 86,8  | 86,8  | 18,85 | 611,75 | 150,91 |
| 2019/08/03 | CH2276 | Female | Two y/o | Treatment (Wk 1) | Treatment | Feed Day | No  | 07:55 | 07:00 - 07:59 | Morning      | 37,7 | 135 | 113,2 | 113,2 | 18,85 | 614,84 | 160,17 |
| 2019/08/03 | CH2276 | Female | Two y/o | Treatment (Wk 1) | Treatment | Feed Day | No  | 08:00 | 08:00 - 08:59 | Late Morning | 37,7 | 123 | 102,6 | 102,6 | 18,85 | 608,49 | 156,74 |
| 2019/08/03 | CH2276 | Female | Two y/o | Treatment (Wk 1) | Treatment | Feed Day | No  | 08:05 | 08:00 - 08:59 | Late Morning | 37,6 | 83  | 98,8  | 98,8  | 18,75 | 580,11 | 155,42 |
| 2019/08/03 | CH2276 | Female | Two y/o | Treatment (Wk 1) | Treatment | Feed Day | No  | 08:10 | 08:00 - 08:59 | Late Morning | 37,6 | 49  | 124,2 | 124,2 | 18,75 | 537,80 | 163,41 |
| 2019/08/03 | CH2276 | Female | Two y/o | Treatment (Wk 1) | Treatment | Feed Day | No  | 08:15 | 08:00 - 08:59 | Late Morning | 37,6 | 119 | 114,2 | 114,2 | 18,75 | 606,20 | 160,48 |
| 2019/08/03 | CH2276 | Female | Two y/o | Treatment (Wk 1) | Treatment | Feed Day | No  | 08:20 | 08:00 - 08:59 | Late Morning | 37,6 | 112 | 61,2  | 61,2  | 18,75 | 601,96 | 138,78 |
| 2019/08/03 | CH2276 | Female | Two y/o | Treatment (Wk 1) | Treatment | Feed Day | No  | 08:25 | 08:00 - 08:59 | Late Morning | 37,6 | 64  | 67,2  | 67,2  | 18,75 | 559,88 | 142,02 |
| 2019/08/03 | CH2276 | Female | Two y/o | Treatment (Wk 1) | Treatment | Feed Day | No  | 08:30 | 08:00 - 08:59 | Late Morning | 37,6 | 57  | 70,2  | 70,2  | 18,75 | 550,47 | 143,54 |
| 2019/08/03 | CH2276 | Female | Two y/o | Treatment (Wk 1) | Treatment | Feed Day | No  | 08:35 | 08:00 - 08:59 | Late Morning | 37,8 | 135 | 32,6  | 32,6  | 18,95 | 614,84 | 117,05 |
| 2019/08/03 | CH2276 | Female | Two y/o | Treatment (Wk 1) | Treatment | Feed Day | No  | 08:40 | 08:00 - 08:59 | Late Morning | 37,7 | 158 | 363,0 | 363,0 | 18,85 | 625,26 | 201,17 |
| 2019/08/03 | CH2276 | Female | Two y/o | Treatment (Wk 1) | Treatment | Feed Day | No  | 08:45 | 08:00 - 08:59 | Late Morning | 37,6 |     | 78,0  | 78,0  | 18,75 |        | 147,20 |
| 2019/08/03 | CH2276 | Female | Two y/o | Treatment (Wk 1) | Treatment | Feed Day | No  | 08:50 | 08:00 - 08:59 | Late Morning | 37,6 | 92  | 57,6  | 57,6  | 18,75 | 587,78 | 136,68 |
| 2019/08/03 | CH2276 | Female | Two y/o | Treatment (Wk 1) | Treatment | Feed Day | No  | 08:55 | 08:00 - 08:59 | Late Morning | 37,5 | 60  | 39,0  | 39,0  | 18,65 | 554,67 | 123,22 |
| 2019/08/03 | CH2276 | Female | Two y/o | Treatment (Wk 1) | Treatment | Feed Day | No  | 09:00 | 09:00 - 09:59 | Late Morning | 37,5 | 67  | 190,4 | 190,4 | 18,65 | 563,53 | 178,39 |
| 2019/08/03 | CH2276 | Female | Two y/o | Treatment (Wk 1) | Treatment | Feed Day | No  | 09:05 | 09:00 - 09:59 | Late Morning | 37,9 |     | 85,6  | 85,6  | 19,05 |        | 150,43 |
| 2019/08/03 | CH2276 | Female | Two y/o | Treatment (Wk 1) | Treatment | Feed Day | No  | 09:10 | 09:00 - 09:59 | Late Morning | 37,8 | 194 | 56,4  | 56,4  | 18,95 | 638,30 | 135,95 |
| 2019/08/03 | CH2276 | Female | Two y/o | Treatment (Wk 1) | Treatment | Feed Day | No  | 09:15 | 09:00 - 09:59 | Late Morning | 37,8 | 111 | 40,2  | 40,2  | 18,95 | 601,33 | 124,26 |
| 2019/08/03 | CH2276 | Female | Two y/o | Treatment (Wk 1) | Treatment | Feed Day | No  | 09:20 | 09:00 - 09:59 | Late Morning | 37,8 | 103 | 64,2  | 64,2  | 18,95 | 596,00 | 140,44 |
| 2019/08/03 | CH2276 | Female | Two y/o | Treatment (Wk 1) | Treatment | Feed Day | No  | 09:25 | 09:00 - 09:59 | Late Morning | 37,9 | 93  | 71,0  | 71,0  | 19,05 | 588,58 | 143,93 |
| 2019/08/03 | CH2276 | Female | Two y/o | Treatment (Wk 1) | Treatment | Feed Day | No  | 09:30 | 09:00 - 09:59 | Late Morning | 38,0 | 65  | 20,4  | 20,4  | 19,15 | 561,12 | 100,99 |
| 2019/08/03 | CH2276 | Female | Two y/o | Treatment (Wk 1) | Treatment | Feed Day | No  | 09:35 | 09:00 - 09:59 | Late Morning | 38,0 | 66  | 33,8  | 33,8  | 19,15 | 562,34 | 118,29 |
| 2019/08/03 | CH2276 | Female | Two y/o | Treatment (Wk 1) | Treatment | Feed Day | No  | 09:40 | 09:00 - 09:59 | Late Morning | 38,2 |     | 42,8  | 42,8  | 19,36 |        | 126,42 |
| 2019/08/03 | CH2276 | Female | Two y/o | Treatment (Wk 1) | Treatment | Feed Day | No  | 09:45 | 09:00 - 09:59 | Late Morning | 38,2 | 65  | 39,2  | 39,2  | 19,36 | 561,12 | 123,39 |
| 2019/08/03 | CH2276 | Female | Two y/o | Treatment (Wk 1) | Treatment | Feed Day | No  | 09:50 | 09:00 - 09:59 | Late Morning | 38,2 | 89  | 50,6  | 50,6  | 19,36 | 585,33 | 132,20 |
| 2019/08/03 | CH2276 | Female | Two y/o | Treatment (Wk 1) | Treatment | Feed Day | No  | 09:55 | 09:00 - 09:59 | Late Morning | 38,2 | 140 | 45,0  | 45,0  | 19,36 | 617,28 | 128,15 |
| 2019/08/03 | CH2276 | Female | Two y/o | Treatment (Wk 1) | Treatment | Feed Day | No  | 10:00 | 10:00 - 10:59 | Late Morning | 38,3 | 65  | 51,8  | 51,8  | 19,46 | 561,12 | 133,01 |
| 2019/08/03 | CH2276 | Female | Two y/o | Treatment (Wk 1) | Treatment | Feed Day | No  | 10:05 | 10:00 - 10:59 | Late Morning | 38,3 | 78  | 54,6  | 54,6  | 19,46 | 575,38 | 134,83 |
| 2019/08/03 | CH2276 | Female | Two y/o | Treatment (Wk 1) | Treatment | Feed Day | No  | 10:10 | 10:00 - 10:59 | Late Morning | 38,3 | 66  | 50,8  | 50,8  | 19,46 | 562,34 | 132,33 |
| 2019/08/03 | CH2276 | Female | Two y/o | Treatment (Wk 1) | Treatment | Feed Day | No  | 10:15 | 10:00 - 10:59 | Late Morning | 38,3 | 84  | 42,6  | 42,6  | 19,46 | 581,01 | 126,26 |
| 2019/08/03 | CH2276 | Female | Two y/o | Treatment (Wk 1) | Treatment | Feed Day | No  | 10:20 | 10:00 - 10:59 | Late Morning | 38,3 | 63  | 58,6  | 58,6  | 19,46 | 558,62 | 137,28 |
| 2019/08/03 | CH2276 | Female | Two y/o | Treatment (Wk 1) | Treatment | Feed Day | No  | 10:25 | 10:00 - 10:59 | Late Morning | 38,3 | 62  | 41,8  | 41,8  | 19,46 | 557,33 | 125,60 |
| 2019/08/03 | CH2276 | Female | Two y/o | Treatment (Wk 1) | Treatment | Feed Day | Yes | 10:30 | 10:00 - 10:59 | Late Morning | 38,2 | 63  | 33,6  | 33,6  | 19,36 | 558,62 | 118,09 |
| 2019/08/03 | CH2276 | Female | Two y/o | Treatment (Wk 1) | Treatment | Feed Day | Yes | 10:35 | 10:00 - 10:59 | Late Morning | 38,2 | 63  | 35,2  | 35,2  | 19,36 | 558,62 | 119,69 |
| 2019/08/03 | CH2276 | Female | Two y/o | Treatment (Wk 1) | Treatment | Feed Day | Yes | 10:40 | 10:00 - 10:59 | Late Morning | 38,3 | 74  | 58,4  | 58,4  | 19,46 | 571,33 | 137,16 |
| 2019/08/03 | CH2276 | Female | Two y/o | Treatment (Wk 1) | Treatment | Feed Day | Yes | 10:45 | 10:00 - 10:59 | Late Morning | 38,3 | 118 | 159,8 | 159,8 | 19,46 | 605,61 | 172,24 |
| 2019/08/03 | CH2276 | Female | Two y/o | Treatment (Wk 1) | Treatment | Feed Day | Yes | 10:50 | 10:00 - 10:59 | Late Morning | 38,3 | 105 | 25,8  | 25,8  | 19,46 | 597,38 | 109,02 |
| 2019/08/03 | CH2276 | Female | Two y/o | Treatment (Wk 1) | Treatment | Feed Day | Yes | 10:55 | 10:00 - 10:59 | Late Morning | 38,2 |     | 43,4  | 43,4  | 19,36 |        | 126,90 |
| 2019/08/03 | CH2276 | Female | Two y/o | Treatment (Wk 1) | Treatment | Feed Day | Yes | 11:00 | 11:00 - 11:59 | Late Morning | 38,0 |     | 85,8  | 85,8  | 19,15 |        | 150,51 |
| 2019/08/03 | CH2276 | Female | Two y/o | Treatment (Wk 1) | Treatment | Feed Day | Yes | 11:05 | 11:00 - 11:59 | Late Morning | 37,9 | 70  | 59,8  | 59,8  | 19,05 | 566,99 | 137,98 |
| 2019/08/03 | CH2276 | Female | Two y/o | Treatment (Wk 1) | Treatment | Feed Day | Yes | 11:10 | 11:00 - 11:59 | Late Morning | 37,8 | 95  | 83,2  | 83,2  | 18,95 | 590,14 | 149,44 |
| 2019/08/03 | CH2276 | Female | Two y/o | Treatment (Wk 1) | Treatment | Feed Day | Yes | 11:15 | 11:00 - 11:59 | Late Morning | 37,7 | 103 | 50,0  | 50,0  | 18,85 | 596,00 | 131,79 |
| 2019/08/03 | CH2276 | Female | Two y/o | Treatment (Wk 1) | Treatment | Feed Day | Yes | 11:20 | 11:00 - 11:59 | Late Morning | 37,7 | 74  | 80,0  | 80,0  | 18,85 | 571,33 | 148,08 |
| 2019/08/03 | CH2276 | Female | Two y/o | Treatment (Wk 1) | Treatment | Feed Day | Yes | 11:25 | 11:00 - 11:59 | Late Morning | 37,6 | 68  | 89,4  | 89,4  | 18,75 | 564,71 | 151,94 |
| 2019/08/03 | CH2276 | Female | Two y/o | Treatment (Wk 1) | Treatment | Feed Day | No  | 11:30 | 11:00 - 11:59 | Late Morning | 37,6 | 158 | 64,0  | 64,0  | 18,75 | 625,26 | 140,33 |
| 2019/08/03 | CH2276 | Female | Two y/o | Treatment (Wk 1) | Treatment | Feed Day | No  | 11:35 | 11:00 - 11:59 | Late Morning | 37,6 |     | 64,2  | 64,2  | 18,75 |        | 140,44 |
| 2019/08/03 | CH2276 | Female | Two y/o | Treatment (Wk 1) | Treatment | Feed Day | No  | 11:40 | 11:00 - 11:59 | Late Morning | 37,6 | 84  | 83,0  | 83,0  | 18,75 | 581,01 | 149,36 |



|            |        |        |         |                  |           |          |     |       |               |              |      |     |       |       |       |        |        |
|------------|--------|--------|---------|------------------|-----------|----------|-----|-------|---------------|--------------|------|-----|-------|-------|-------|--------|--------|
| 2019/08/03 | CH2276 | Female | Two y/o | Treatment (Wk 1) | Treatment | Feed Day | No  | 11:45 | 11:00 - 11:59 | Late Morning | 37,5 | 64  | 75,6  | 75,6  | 18,65 | 559,88 | 146,11 |
| 2019/08/03 | CH2276 | Female | Two y/o | Treatment (Wk 1) | Treatment | Feed Day | No  | 11:50 | 11:00 - 11:59 | Late Morning | 37,6 | 112 | 71,8  | 71,8  | 18,75 | 601,96 | 144,32 |
| 2019/08/03 | CH2276 | Female | Two y/o | Treatment (Wk 1) | Treatment | Feed Day | No  | 11:55 | 11:00 - 11:59 | Late Morning | 37,5 | 76  | 79,6  | 79,6  | 18,65 | 573,39 | 147,90 |
| 2019/08/03 | CH2276 | Female | Two y/o | Treatment (Wk 1) | Treatment | Feed Day | No  | 12:00 | 12:00 - 12:59 | Afternoon    | 37,5 | 79  | 77,2  | 77,2  | 18,65 | 576,36 | 146,84 |
| 2019/08/03 | CH2276 | Female | Two y/o | Treatment (Wk 1) | Treatment | Feed Day | No  | 12:05 | 12:00 - 12:59 | Afternoon    | 37,6 | 99  | 49,0  | 49,0  | 18,75 | 593,14 | 131,09 |
| 2019/08/03 | CH2276 | Female | Two y/o | Treatment (Wk 1) | Treatment | Feed Day | No  | 12:10 | 12:00 - 12:59 | Afternoon    | 37,6 | 79  | 116,2 | 116,2 | 18,75 | 576,36 | 161,08 |
| 2019/08/03 | CH2276 | Female | Two y/o | Treatment (Wk 1) | Treatment | Feed Day | No  | 12:15 | 12:00 - 12:59 | Afternoon    | 37,8 | 123 | 198,4 | 198,4 | 18,95 | 608,49 | 179,84 |
| 2019/08/03 | CH2276 | Female | Two y/o | Treatment (Wk 1) | Treatment | Feed Day | No  | 12:20 | 12:00 - 12:59 | Afternoon    | 38,0 | 141 | 76,0  | 76,0  | 19,15 | 617,75 | 146,29 |
| 2019/08/03 | CH2276 | Female | Two y/o | Treatment (Wk 1) | Treatment | Feed Day | No  | 12:25 | 12:00 - 12:59 | Afternoon    | 38,0 | 95  | 84,4  | 84,4  | 19,15 | 590,14 | 149,94 |
| 2019/08/03 | CH2276 | Female | Two y/o | Treatment (Wk 1) | Treatment | Feed Day | No  | 12:30 | 12:00 - 12:59 | Afternoon    | 37,9 | 90  | 64,6  | 64,6  | 19,05 | 586,16 | 140,65 |
| 2019/08/03 | CH2276 | Female | Two y/o | Treatment (Wk 1) | Treatment | Feed Day | No  | 12:35 | 12:00 - 12:59 | Afternoon    | 37,9 | 98  | 66,0  | 66,0  | 19,05 | 592,41 | 141,40 |
| 2019/08/03 | CH2276 | Female | Two y/o | Treatment (Wk 1) | Treatment | Feed Day | No  | 12:40 | 12:00 - 12:59 | Afternoon    | 38,0 | 102 | 79,0  | 79,0  | 19,15 | 595,30 | 147,64 |
| 2019/08/03 | CH2276 | Female | Two y/o | Treatment (Wk 1) | Treatment | Feed Day | No  | 12:45 | 12:00 - 12:59 | Afternoon    | 38,0 | 117 | 639,2 | 639,2 | 19,15 | 605,02 | 221,30 |
| 2019/08/03 | CH2276 | Female | Two y/o | Treatment (Wk 1) | Treatment | Feed Day | No  | 12:50 | 12:00 - 12:59 | Afternoon    | 38,1 | 98  | 85,4  | 85,4  | 19,26 | 592,41 | 150,35 |
| 2019/08/03 | CH2276 | Female | Two y/o | Treatment (Wk 1) | Treatment | Feed Day | No  | 12:55 | 12:00 - 12:59 | Afternoon    | 38,2 | 110 | 67,6  | 67,6  | 19,36 | 600,69 | 142,23 |
| 2019/08/03 | CH2276 | Female | Two y/o | Treatment (Wk 1) | Treatment | Feed Day | No  | 13:00 | 13:00 - 13:59 | Afternoon    | 38,2 | 98  | 68,4  | 68,4  | 19,36 | 592,41 | 142,64 |
| 2019/08/03 | CH2276 | Female | Two y/o | Treatment (Wk 1) | Treatment | Feed Day | No  | 13:05 | 13:00 - 13:59 | Afternoon    | 38,2 | 125 | 78,0  | 78,0  | 19,36 | 609,60 | 147,20 |
| 2019/08/03 | CH2276 | Female | Two y/o | Treatment (Wk 1) | Treatment | Feed Day | No  | 13:10 | 13:00 - 13:59 | Afternoon    | 38,2 | 84  | 42,8  | 42,8  | 19,36 | 581,01 | 126,42 |
| 2019/08/03 | CH2276 | Female | Two y/o | Treatment (Wk 1) | Treatment | Feed Day | No  | 13:15 | 13:00 - 13:59 | Afternoon    | 38,2 | 72  | 111,0 | 111,0 | 19,36 | 569,20 | 159,48 |
| 2019/08/03 | CH2276 | Female | Two y/o | Treatment (Wk 1) | Treatment | Feed Day | No  | 13:20 | 13:00 - 13:59 | Afternoon    | 38,0 | 54  | 114,4 | 114,4 | 19,15 | 545,99 | 160,54 |
| 2019/08/03 | CH2276 | Female | Two y/o | Treatment (Wk 1) | Treatment | Feed Day | No  | 13:25 | 13:00 - 13:59 | Afternoon    | 38,0 |     | 202,8 | 202,8 | 19,15 |        | 180,61 |
| 2019/08/03 | CH2276 | Female | Two y/o | Treatment (Wk 1) | Treatment | Feed Day | No  | 13:30 | 13:00 - 13:59 | Afternoon    | 38,0 |     | 74,4  | 74,4  | 19,15 |        | 145,55 |
| 2019/08/03 | CH2276 | Female | Two y/o | Treatment (Wk 1) | Treatment | Feed Day | No  | 13:35 | 13:00 - 13:59 | Afternoon    | 38,0 | 94  | 76,4  | 76,4  | 19,15 | 589,37 | 146,48 |
| 2019/08/03 | CH2276 | Female | Two y/o | Treatment (Wk 1) | Treatment | Feed Day | No  | 13:40 | 13:00 - 13:59 | Afternoon    | 38,0 | 83  | 77,8  | 77,8  | 19,15 | 580,11 | 147,11 |
| 2019/08/03 | CH2276 | Female | Two y/o | Treatment (Wk 1) | Treatment | Feed Day | No  | 13:45 | 13:00 - 13:59 | Afternoon    | 38,1 | 75  | 77,6  | 77,6  | 19,26 | 572,36 | 147,02 |
| 2019/08/03 | CH2276 | Female | Two y/o | Treatment (Wk 1) | Treatment | Feed Day | No  | 13:50 | 13:00 - 13:59 | Afternoon    | 38,2 | 88  | 76,0  | 76,0  | 19,36 | 584,49 | 146,29 |
| 2019/08/03 | CH2276 | Female | Two y/o | Treatment (Wk 1) | Treatment | Feed Day | No  | 13:55 | 13:00 - 13:59 | Afternoon    | 38,2 | 86  | 75,6  | 75,6  | 19,36 | 582,77 | 146,11 |
| 2019/08/03 | CH2276 | Female | Two y/o | Treatment (Wk 1) | Treatment | Feed Day | No  | 14:00 | 14:00 - 14:59 | Afternoon    | 38,2 |     | 78,0  | 78,0  | 19,36 |        | 147,20 |
| 2019/08/03 | CH2276 | Female | Two y/o | Treatment (Wk 1) | Treatment | Feed Day | No  | 14:05 | 14:00 - 14:59 | Afternoon    | 38,2 | 70  | 78,4  | 78,4  | 19,36 | 566,99 | 147,37 |
| 2019/08/03 | CH2276 | Female | Two y/o | Treatment (Wk 1) | Treatment | Feed Day | No  | 14:10 | 14:00 - 14:59 | Afternoon    | 38,2 |     | 77,4  | 77,4  | 19,36 |        | 146,93 |
| 2019/08/03 | CH2276 | Female | Two y/o | Treatment (Wk 1) | Treatment | Feed Day | No  | 14:15 | 14:00 - 14:59 | Afternoon    | 38,2 | 191 | 98,0  | 98,0  | 19,36 | 637,33 | 155,14 |
| 2019/08/03 | CH2276 | Female | Two y/o | Treatment (Wk 1) | Treatment | Feed Day | No  | 14:20 | 14:00 - 14:59 | Afternoon    | 38,2 | 68  | 75,6  | 75,6  | 19,36 | 564,71 | 146,11 |
| 2019/08/03 | CH2276 | Female | Two y/o | Treatment (Wk 1) | Treatment | Feed Day | No  | 14:25 | 14:00 - 14:59 | Afternoon    | 38,2 | 83  | 78,8  | 78,8  | 19,36 | 580,11 | 147,55 |
| 2019/08/03 | CH2276 | Female | Two y/o | Treatment (Wk 1) | Treatment | Feed Day | No  | 14:30 | 14:00 - 14:59 | Afternoon    | 38,2 | 70  | 79,2  | 79,2  | 19,36 | 566,99 | 147,73 |
| 2019/08/03 | CH2276 | Female | Two y/o | Treatment (Wk 1) | Treatment | Feed Day | No  | 14:35 | 14:00 - 14:59 | Afternoon    | 38,2 | 91  | 74,8  | 74,8  | 19,36 | 586,98 | 145,74 |
| 2019/08/03 | CH2276 | Female | Two y/o | Treatment (Wk 1) | Treatment | Feed Day | No  | 14:40 | 14:00 - 14:59 | Afternoon    | 38,2 | 70  | 59,2  | 59,2  | 19,36 | 566,99 | 137,63 |
| 2019/08/03 | CH2276 | Female | Two y/o | Treatment (Wk 1) | Treatment | Feed Day | No  | 14:45 | 14:00 - 14:59 | Afternoon    | 38,3 | 63  | 78,2  | 78,2  | 19,46 | 558,62 | 147,28 |
| 2019/08/03 | CH2276 | Female | Two y/o | Treatment (Wk 1) | Treatment | Feed Day | No  | 14:50 | 14:00 - 14:59 | Afternoon    | 38,2 | 89  | 62,0  | 62,0  | 19,36 | 585,33 | 139,23 |
| 2019/08/03 | CH2276 | Female | Two y/o | Treatment (Wk 1) | Treatment | Feed Day | No  | 14:55 | 14:00 - 14:59 | Afternoon    | 38,2 | 93  | 66,0  | 66,0  | 19,36 | 588,58 | 141,40 |
| 2019/08/03 | CH2276 | Female | Two y/o | Treatment (Wk 1) | Treatment | Feed Day | No  | 15:00 | 15:00 - 15:59 | Afternoon    | 38,2 |     | 145,0 | 145,0 | 19,36 |        | 168,83 |
| 2019/08/03 | CH2276 | Female | Two y/o | Treatment (Wk 1) | Treatment | Feed Day | No  | 15:05 | 15:00 - 15:59 | Afternoon    | 38,1 | 105 | 56,8  | 56,8  | 19,26 | 597,38 | 136,20 |
| 2019/08/03 | CH2276 | Female | Two y/o | Treatment (Wk 1) | Treatment | Feed Day | No  | 15:10 | 15:00 - 15:59 | Afternoon    | 38,0 | 69  | 70,4  | 70,4  | 19,15 | 565,86 | 143,64 |
| 2019/08/03 | CH2276 | Female | Two y/o | Treatment (Wk 1) | Treatment | Feed Day | No  | 15:15 | 15:00 - 15:59 | Afternoon    | 38,1 | 83  | 71,0  | 71,0  | 19,26 | 580,11 | 143,93 |
| 2019/08/03 | CH2276 | Female | Two y/o | Treatment (Wk 1) | Treatment | Feed Day | No  | 15:20 | 15:00 - 15:59 | Afternoon    | 38,2 | 197 | 118,6 | 118,6 | 19,36 | 639,25 | 161,80 |
| 2019/08/03 | CH2276 | Female | Two y/o | Treatment (Wk 1) | Treatment | Feed Day | No  | 15:25 | 15:00 - 15:59 | Afternoon    | 38,2 | 80  | 39,4  | 39,4  | 19,36 | 577,31 | 123,57 |
| 2019/08/03 | CH2276 | Female | Two y/o | Treatment (Wk 1) | Treatment | Feed Day | Yes | 15:30 | 15:00 - 15:59 | Afternoon    | 38,2 | 82  | 51,2  | 51,2  | 19,36 | 579,19 | 132,61 |
| 2019/08/03 | CH2276 | Female | Two y/o | Treatment (Wk 1) | Treatment | Feed Day | Yes | 15:35 | 15:00 - 15:59 | Afternoon    | 38,2 | 92  | 42,8  | 42,8  | 19,36 | 587,78 | 126,42 |
| 2019/08/03 | CH2276 | Female | Two y/o | Treatment (Wk 1) | Treatment | Feed Day | Yes | 15:40 | 15:00 - 15:59 | Afternoon    | 38,2 | 85  | 24,6  | 24,6  | 19,36 | 581,90 | 107,39 |
| 2019/08/03 | CH2276 | Female | Two y/o | Treatment (Wk 1) | Treatment | Feed Day | Yes | 15:45 | 15:00 - 15:59 | Afternoon    | 38,2 | 90  | 25,6  | 25,6  | 19,36 | 586,16 | 108,76 |
| 2019/08/03 | CH2276 | Female | Two y/o | Treatment (Wk 1) | Treatment | Feed Day | Yes | 15:50 | 15:00 - 15:59 | Afternoon    | 38,3 | 61  | 20,2  | 20,2  | 19,46 | 556,01 | 100,65 |
| 2019/08/03 | CH2276 | Female | Two y/o | Treatment (Wk 1) | Treatment | Feed Day | Yes | 15:55 | 15:00 - 15:59 | Afternoon    | 38,3 | 115 | 24,4  | 24,4  | 19,46 | 603,82 | 107,11 |
| 2019/08/03 | CH2276 | Female | Two y/o | Treatment (Wk 1) | Treatment | Feed Day | Yes | 16:00 | 16:00 - 16:59 | Evening      | 38,3 | 88  | 25,4  | 25,4  | 19,46 | 584,49 | 108,49 |
| 2019/08/03 | CH2276 | Female | Two y/o | Treatment (Wk 1) | Treatment | Feed Day | Yes | 16:05 | 16:00 - 16:59 | Evening      | 38,3 | 99  | 46,2  | 46,2  | 19,46 | 593,14 | 129,06 |
| 2019/08/03 | CH2276 | Female | Two y/o | Treatment (Wk 1) | Treatment | Feed Day | Yes | 16:10 | 16:00 - 16:59 | Evening      | 38,3 | 94  | 38,6  | 38,6  | 19,46 | 589,37 | 122,86 |
| 2019/08/03 | CH2276 | Female | Two y/o | Treatment (Wk 1) | Treatment | Feed Day | Yes | 16:15 | 16:00 - 16:59 | Evening      | 38,4 | 93  | 34,0  | 34,0  | 19,56 | 588,58 | 118,49 |
| 2019/08/03 | CH2276 | Female | Two y/o | Treatment (Wk 1) | Treatment | Feed Day | Yes | 16:20 | 16:00 - 16:59 | Evening      | 38,4 | 98  | 38,4  | 38,4  | 19,56 | 592,41 | 122,68 |
| 2019/08/03 | CH2276 | Female | Two y/o | Treatment (Wk 1) | Treatment | Feed Day | Yes | 16:25 | 16:00 - 16:59 | Evening      | 38,3 | 102 | 73,2  | 73,2  | 19,46 | 595,30 | 144,99 |
| 2019/08/03 | CH2276 | Female | Two y/o | Treatment (Wk 1) | Treatment | Feed Day | No  | 16:30 | 16:00 - 16:59 | Evening      | 38,3 |     | 54,4  | 54,4  | 19,46 |        | 134,70 |
| 2019/08/03 | CH2276 | Female | Two y/o | Treatment (Wk 1) | Treatment | Feed Day | No  | 16:35 | 16:00 - 16:59 | Evening      | 38,4 | 84  | 61,8  | 61,8  | 19,56 | 581,01 | 139,12 |
| 2019/08/03 | CH2276 | Female | Two y/o | Treatment (Wk 1) | Treatment | Feed Day | No  | 16:40 | 16:00 - 16:59 | Evening      | 38,3 | 86  | 47,4  | 47,4  | 19,46 | 582,77 | 129,94 |
| 2019/08/03 | CH2276 | Female | Two y/o | Treatment (Wk 1) | Treatment | Feed Day | No  | 16:45 | 16:00 - 16:59 | Evening      | 38,3 | 90  | 44,6  | 44,6  | 19,46 | 586,16 | 127,84 |
| 2019/08/03 | CH2276 | Female | Two y/o | Treatment (Wk 1) | Treatment | Feed Day | No  | 16:50 | 16:00 - 16:59 | Evening      | 38,3 | 83  | 54,0  | 54,0  | 19,46 | 580,11 | 134,45 |
| 2019/08/03 | CH2276 | Female | Two y/o | Treatment (Wk 1) | Treatment | Feed Day | No  | 16:55 | 16:00 - 16:59 | Evening      | 38,3 |     | 59,8  | 59,8  | 19,46 |        | 137,98 |
| 2019/08/03 | CH2276 | Female | Two y/o | Treatment (Wk 1) | Treatment | Feed Day | No  | 17:00 | 17:00 - 17:59 | Evening      | 38,3 |     | 79,2  | 79,2  | 19,46 |        | 147,73 |
| 2019/08/03 | CH2276 | Female | Two y/o | Treatment (Wk 1) | Treatment | Feed Day | No  | 17:05 | 17:00 - 17:59 | Evening      | 38,3 | 88  | 79,4  | 79,4  | 19,46 | 584,49 | 147,81 |
| 2019/08/03 | CH2276 | Female | Two y/o | Treatment (Wk 1) | Treatment | Feed Day | No  | 17:10 | 17:00 - 17:59 | Evening      | 38,3 | 65  | 83,2  | 83,2  | 19,46 | 561,12 | 149,44 |
| 2019/08/03 | CH2276 | Female | Two y/o | Treatment (Wk 1) | Treatment | Feed Day | No  | 17:15 | 17:00 - 17:59 | Evening      | 38,3 | 85  | 68,0  | 68,0  | 19,46 | 581,90 | 142,43 |
| 2019/08/03 | CH2276 | Female | Two y/o | Treatment (Wk 1) | Treatment | Feed Day | No  | 17:20 | 17:00 - 17:59 | Evening      | 38,3 | 100 | 73,8  | 73,8  | 19,46 | 593,87 | 145,27 |
| 2019/08/03 | CH2276 | Female | Two y/o | Treatment (Wk 1) | Treatment | Feed Day | No  | 17:25 | 17:00 - 17:59 | Evening      | 38,3 | 123 | 175,2 | 175,2 | 19,46 | 608,49 | 175,47 |
| 2019/08/03 | CH2276 | Female | Two y/o | Treatment (Wk 1) | Treatment | Feed Day | No  | 17:30 | 17:00 - 17:59 | Evening      | 38,3 | 79  | 143,6 | 143,6 | 19,46 | 576,36 | 168,49 |



|            |        |        |         |                  |           |          |    |       |               |         |      |     |       |       |       |        |        |
|------------|--------|--------|---------|------------------|-----------|----------|----|-------|---------------|---------|------|-----|-------|-------|-------|--------|--------|
| 2019/08/03 | CH2276 | Female | Two y/o | Treatment (Wk 1) | Treatment | Feed Day | No | 17:35 | 17:00 - 17:59 | Evening | 38,2 | 102 | 57,6  | 57,6  | 19,36 | 595,30 | 136,68 |
| 2019/08/03 | CH2276 | Female | Two y/o | Treatment (Wk 1) | Treatment | Feed Day | No | 17:40 | 17:00 - 17:59 | Evening | 38,2 | 98  | 224,0 | 224,0 | 19,36 | 592,41 | 184,11 |
| 2019/08/03 | CH2276 | Female | Two y/o | Treatment (Wk 1) | Treatment | Feed Day | No | 17:45 | 17:00 - 17:59 | Evening | 38,2 | 76  | 278,6 | 278,6 | 19,36 | 573,39 | 191,80 |
| 2019/08/03 | CH2276 | Female | Two y/o | Treatment (Wk 1) | Treatment | Feed Day | No | 17:50 | 17:00 - 17:59 | Evening | 38,2 | 126 | 104,6 | 104,6 | 19,36 | 610,14 | 157,41 |
| 2019/08/03 | CH2276 | Female | Two y/o | Treatment (Wk 1) | Treatment | Feed Day | No | 17:55 | 17:00 - 17:59 | Evening | 38,2 | 108 | 56,4  | 56,4  | 19,36 | 599,39 | 135,95 |
| 2019/08/03 | CH2276 | Female | Two y/o | Treatment (Wk 1) | Treatment | Feed Day | No | 18:00 | 18:00 - 18:59 | Evening | 38,0 | 91  | 69,0  | 69,0  | 19,15 | 586,98 | 142,94 |
| 2019/08/03 | CH2276 | Female | Two y/o | Treatment (Wk 1) | Treatment | Feed Day | No | 18:05 | 18:00 - 18:59 | Evening | 38,0 |     | 107,0 | 107,0 | 19,15 |        | 158,20 |
| 2019/08/03 | CH2276 | Female | Two y/o | Treatment (Wk 1) | Treatment | Feed Day | No | 18:10 | 18:00 - 18:59 | Evening | 38,3 |     | 240,2 | 240,2 | 19,46 |        | 186,57 |
| 2019/08/03 | CH2276 | Female | Two y/o | Treatment (Wk 1) | Treatment | Feed Day | No | 18:15 | 18:00 - 18:59 | Evening | 38,4 | 141 | 506,4 | 506,4 | 19,56 | 617,75 | 213,00 |
| 2019/08/03 | CH2276 | Female | Two y/o | Treatment (Wk 1) | Treatment | Feed Day | No | 18:20 | 18:00 - 18:59 | Evening | 38,4 | 124 | 257,2 | 257,2 | 19,56 | 609,04 | 188,98 |
| 2019/08/03 | CH2276 | Female | Two y/o | Treatment (Wk 1) | Treatment | Feed Day | No | 18:25 | 18:00 - 18:59 | Evening | 38,4 | 131 | 170,2 | 170,2 | 19,56 | 612,80 | 174,45 |
| 2019/08/03 | CH2276 | Female | Two y/o | Treatment (Wk 1) | Treatment | Feed Day | No | 18:30 | 18:00 - 18:59 | Evening | 38,4 | 80  | 270,6 | 270,6 | 19,56 | 577,31 | 190,78 |
| 2019/08/03 | CH2276 | Female | Two y/o | Treatment (Wk 1) | Treatment | Feed Day | No | 18:35 | 18:00 - 18:59 | Evening | 38,4 |     | 422,2 | 422,2 | 19,56 |        | 206,53 |
| 2019/08/03 | CH2276 | Female | Two y/o | Treatment (Wk 1) | Treatment | Feed Day | No | 18:40 | 18:00 - 18:59 | Evening | 38,4 |     | 350,2 | 350,2 | 19,56 |        | 199,90 |
| 2019/08/03 | CH2276 | Female | Two y/o | Treatment (Wk 1) | Treatment | Feed Day | No | 18:45 | 18:00 - 18:59 | Evening | 38,4 |     | 89,2  | 89,2  | 19,56 |        | 151,86 |
| 2019/08/03 | CH2276 | Female | Two y/o | Treatment (Wk 1) | Treatment | Feed Day | No | 18:50 | 18:00 - 18:59 | Evening | 38,4 | 137 | 340,0 | 340,0 | 19,56 | 615,83 | 198,85 |
| 2019/08/03 | CH2276 | Female | Two y/o | Treatment (Wk 1) | Treatment | Feed Day | No | 18:55 | 18:00 - 18:59 | Evening | 38,4 | 124 | 165,2 | 165,2 | 19,56 | 609,04 | 173,40 |
| 2019/08/03 | CH2276 | Female | Two y/o | Treatment (Wk 1) | Treatment | Feed Day | No | 19:00 | 19:00 - 19:59 | Evening | 38,4 | 75  | 126,4 | 126,4 | 19,56 | 572,36 | 164,02 |
| 2019/08/03 | CH2276 | Female | Two y/o | Treatment (Wk 1) | Treatment | Feed Day | No | 19:05 | 19:00 - 19:59 | Evening | 38,4 | 90  | 74,8  | 74,8  | 19,56 | 586,16 | 145,74 |
| 2019/08/03 | CH2276 | Female | Two y/o | Treatment (Wk 1) | Treatment | Feed Day | No | 19:10 | 19:00 - 19:59 | Evening | 38,4 | 73  | 53,0  | 53,0  | 19,56 | 570,27 | 133,80 |
| 2019/08/03 | CH2276 | Female | Two y/o | Treatment (Wk 1) | Treatment | Feed Day | No | 19:15 | 19:00 - 19:59 | Evening | 38,3 | 99  | 50,6  | 50,6  | 19,46 | 593,14 | 132,20 |
| 2019/08/03 | CH2276 | Female | Two y/o | Treatment (Wk 1) | Treatment | Feed Day | No | 19:20 | 19:00 - 19:59 | Evening | 38,2 | 85  | 62,8  | 62,8  | 19,36 | 581,90 | 139,67 |
| 2019/08/03 | CH2276 | Female | Two y/o | Treatment (Wk 1) | Treatment | Feed Day | No | 19:25 | 19:00 - 19:59 | Evening | 38,2 | 107 | 48,6  | 48,6  | 19,36 | 598,73 | 130,81 |
| 2019/08/03 | CH2276 | Female | Two y/o | Treatment (Wk 1) | Treatment | Feed Day | No | 19:30 | 19:00 - 19:59 | Evening | 38,2 | 90  | 49,6  | 49,6  | 19,36 | 586,16 | 131,51 |
| 2019/08/03 | CH2276 | Female | Two y/o | Treatment (Wk 1) | Treatment | Feed Day | No | 19:35 | 19:00 - 19:59 | Evening | 38,2 | 92  | 48,0  | 48,0  | 19,36 | 587,78 | 130,38 |
| 2019/08/03 | CH2276 | Female | Two y/o | Treatment (Wk 1) | Treatment | Feed Day | No | 19:40 | 19:00 - 19:59 | Evening | 38,2 | 94  | 62,4  | 62,4  | 19,36 | 589,37 | 139,45 |
| 2019/08/03 | CH2276 | Female | Two y/o | Treatment (Wk 1) | Treatment | Feed Day | No | 19:45 | 19:00 - 19:59 | Evening | 38,2 | 88  | 49,2  | 49,2  | 19,36 | 584,49 | 131,23 |
| 2019/08/03 | CH2276 | Female | Two y/o | Treatment (Wk 1) | Treatment | Feed Day | No | 19:50 | 19:00 - 19:59 | Evening | 38,2 | 100 | 32,6  | 32,6  | 19,36 | 593,87 | 117,05 |
| 2019/08/03 | CH2276 | Female | Two y/o | Treatment (Wk 1) | Treatment | Feed Day | No | 19:55 | 19:00 - 19:59 | Evening | 38,0 | 91  | 32,2  | 32,2  | 19,15 | 586,98 | 116,63 |
| 2019/08/03 | CH2276 | Female | Two y/o | Treatment (Wk 1) | Treatment | Feed Day | No | 20:00 | 20:00 - 20:59 | Night   | 37,9 | 97  | 25,8  | 25,8  | 19,05 | 591,66 | 109,02 |
| 2019/08/03 | CH2276 | Female | Two y/o | Treatment (Wk 1) | Treatment | Feed Day | No | 20:05 | 20:00 - 20:59 | Night   | 37,8 | 86  | 27,6  | 27,6  | 18,95 | 582,77 | 111,33 |
| 2019/08/03 | CH2276 | Female | Two y/o | Treatment (Wk 1) | Treatment | Feed Day | No | 20:10 | 20:00 - 20:59 | Night   | 37,7 | 109 | 28,4  | 28,4  | 18,85 | 600,04 | 112,31 |
| 2019/08/03 | CH2276 | Female | Two y/o | Treatment (Wk 1) | Treatment | Feed Day | No | 20:15 | 20:00 - 20:59 | Night   | 37,8 | 89  | 35,2  | 35,2  | 18,95 | 585,33 | 119,69 |
| 2019/08/03 | CH2276 | Female | Two y/o | Treatment (Wk 1) | Treatment | Feed Day | No | 20:20 | 20:00 - 20:59 | Night   | 38,0 | 96  | 30,4  | 30,4  | 19,15 | 590,91 | 114,65 |
| 2019/08/03 | CH2276 | Female | Two y/o | Treatment (Wk 1) | Treatment | Feed Day | No | 20:25 | 20:00 - 20:59 | Night   | 38,2 | 98  | 63,8  | 63,8  | 19,36 | 592,41 | 140,22 |
| 2019/08/03 | CH2276 | Female | Two y/o | Treatment (Wk 1) | Treatment | Feed Day | No | 20:30 | 20:00 - 20:59 | Night   | 38,0 | 84  | 80,8  | 80,8  | 19,15 | 581,01 | 148,42 |
| 2019/08/03 | CH2276 | Female | Two y/o | Treatment (Wk 1) | Treatment | Feed Day | No | 20:35 | 20:00 - 20:59 | Night   | 37,9 | 103 | 87,4  | 87,4  | 19,05 | 596,00 | 151,15 |
| 2019/08/03 | CH2276 | Female | Two y/o | Treatment (Wk 1) | Treatment | Feed Day | No | 20:40 | 20:00 - 20:59 | Night   | 37,9 | 81  | 81,6  | 81,6  | 19,05 | 578,26 | 148,76 |
| 2019/08/03 | CH2276 | Female | Two y/o | Treatment (Wk 1) | Treatment | Feed Day | No | 20:45 | 20:00 - 20:59 | Night   | 37,8 | 102 | 85,0  | 85,0  | 18,95 | 595,30 | 150,18 |
| 2019/08/03 | CH2276 | Female | Two y/o | Treatment (Wk 1) | Treatment | Feed Day | No | 20:50 | 20:00 - 20:59 | Night   | 37,7 | 92  | 83,6  | 83,6  | 18,85 | 587,78 | 149,61 |
| 2019/08/03 | CH2276 | Female | Two y/o | Treatment (Wk 1) | Treatment | Feed Day | No | 20:55 | 20:00 - 20:59 | Night   | 37,7 | 73  | 80,2  | 80,2  | 18,85 | 570,27 | 148,16 |
| 2019/08/03 | CH2276 | Female | Two y/o | Treatment (Wk 1) | Treatment | Feed Day | No | 21:00 | 21:00 - 21:59 | Night   | 37,7 | 57  | 75,4  | 75,4  | 18,85 | 550,47 | 146,02 |
| 2019/08/03 | CH2276 | Female | Two y/o | Treatment (Wk 1) | Treatment | Feed Day | No | 21:05 | 21:00 - 21:59 | Night   | 37,7 | 96  | 78,2  | 78,2  | 18,85 | 590,91 | 147,28 |
| 2019/08/03 | CH2276 | Female | Two y/o | Treatment (Wk 1) | Treatment | Feed Day | No | 21:10 | 21:00 - 21:59 | Night   | 37,6 | 80  | 75,4  | 75,4  | 18,75 | 577,31 | 146,02 |
| 2019/08/03 | CH2276 | Female | Two y/o | Treatment (Wk 1) | Treatment | Feed Day | No | 21:15 | 21:00 - 21:59 | Night   | 37,5 | 88  | 79,0  | 79,0  | 18,65 | 584,49 | 147,64 |
| 2019/08/03 | CH2276 | Female | Two y/o | Treatment (Wk 1) | Treatment | Feed Day | No | 21:20 | 21:00 - 21:59 | Night   | 37,4 | 83  | 81,2  | 81,2  | 18,55 | 580,11 | 148,59 |
| 2019/08/03 | CH2276 | Female | Two y/o | Treatment (Wk 1) | Treatment | Feed Day | No | 21:25 | 21:00 - 21:59 | Night   | 37,4 | 79  | 71,4  | 71,4  | 18,55 | 576,36 | 144,12 |
| 2019/08/03 | CH2276 | Female | Two y/o | Treatment (Wk 1) | Treatment | Feed Day | No | 21:30 | 21:00 - 21:59 | Night   | 37,3 | 115 | 43,8  | 43,8  | 18,46 | 603,82 | 127,22 |
| 2019/08/03 | CH2276 | Female | Two y/o | Treatment (Wk 1) | Treatment | Feed Day | No | 21:35 | 21:00 - 21:59 | Night   | 37,4 | 78  | 58,0  | 58,0  | 18,55 | 575,38 | 136,92 |
| 2019/08/03 | CH2276 | Female | Two y/o | Treatment (Wk 1) | Treatment | Feed Day | No | 21:40 | 21:00 - 21:59 | Night   | 37,5 | 94  | 44,6  | 44,6  | 18,65 | 589,37 | 127,84 |
| 2019/08/03 | CH2276 | Female | Two y/o | Treatment (Wk 1) | Treatment | Feed Day | No | 21:45 | 21:00 - 21:59 | Night   | 37,6 | 98  | 35,6  | 35,6  | 18,75 | 592,41 | 120,08 |
| 2019/08/03 | CH2276 | Female | Two y/o | Treatment (Wk 1) | Treatment | Feed Day | No | 21:50 | 21:00 - 21:59 | Night   | 37,6 | 105 | 36,2  | 36,2  | 18,75 | 597,38 | 120,65 |
| 2019/08/03 | CH2276 | Female | Two y/o | Treatment (Wk 1) | Treatment | Feed Day | No | 21:55 | 21:00 - 21:59 | Night   | 37,6 | 69  | 35,4  | 35,4  | 18,75 | 565,86 | 119,88 |
| 2019/08/03 | CH2276 | Female | Two y/o | Treatment (Wk 1) | Treatment | Feed Day | No | 22:00 | 22:00 - 22:59 | Night   | 37,7 | 71  | 40,4  | 40,4  | 18,85 | 568,10 | 124,43 |
| 2019/08/03 | CH2276 | Female | Two y/o | Treatment (Wk 1) | Treatment | Feed Day | No | 22:05 | 22:00 - 22:59 | Night   | 37,7 | 83  | 36,6  | 36,6  | 18,85 | 580,11 | 121,03 |
| 2019/08/03 | CH2276 | Female | Two y/o | Treatment (Wk 1) | Treatment | Feed Day | No | 22:10 | 22:00 - 22:59 | Night   | 37,7 | 103 | 36,6  | 36,6  | 18,85 | 596,00 | 121,03 |
| 2019/08/03 | CH2276 | Female | Two y/o | Treatment (Wk 1) | Treatment | Feed Day | No | 22:15 | 22:00 - 22:59 | Night   | 37,7 | 75  | 32,6  | 32,6  | 18,85 | 572,36 | 117,05 |
| 2019/08/03 | CH2276 | Female | Two y/o | Treatment (Wk 1) | Treatment | Feed Day | No | 22:20 | 22:00 - 22:59 | Night   | 37,7 | 69  | 31,8  | 31,8  | 18,85 | 565,86 | 116,20 |
| 2019/08/03 | CH2276 | Female | Two y/o | Treatment (Wk 1) | Treatment | Feed Day | No | 22:25 | 22:00 - 22:59 | Night   | 37,7 | 90  | 21,0  | 21,0  | 18,85 | 586,16 | 101,98 |
| 2019/08/03 | CH2276 | Female | Two y/o | Treatment (Wk 1) | Treatment | Feed Day | No | 22:30 | 22:00 - 22:59 | Night   | 37,7 | 70  | 16,6  | 16,6  | 18,85 | 566,99 | 93,96  |
| 2019/08/03 | CH2276 | Female | Two y/o | Treatment (Wk 1) | Treatment | Feed Day | No | 22:35 | 22:00 - 22:59 | Night   | 37,7 | 107 | 45,2  | 45,2  | 18,85 | 598,73 | 128,30 |
| 2019/08/03 | CH2276 | Female | Two y/o | Treatment (Wk 1) | Treatment | Feed Day | No | 22:40 | 22:00 - 22:59 | Night   | 37,7 | 86  | 28,4  | 28,4  | 18,85 | 582,77 | 112,31 |
| 2019/08/03 | CH2276 | Female | Two y/o | Treatment (Wk 1) | Treatment | Feed Day | No | 22:45 | 22:00 - 22:59 | Night   | 37,6 | 109 | 28,6  | 28,6  | 18,75 | 600,04 | 112,56 |
| 2019/08/03 | CH2276 | Female | Two y/o | Treatment (Wk 1) | Treatment | Feed Day | No | 22:50 | 22:00 - 22:59 | Night   | 37,5 |     | 30,6  | 30,6  | 18,65 |        | 114,87 |
| 2019/08/03 | CH2276 | Female | Two y/o | Treatment (Wk 1) | Treatment | Feed Day | No | 22:55 | 22:00 - 22:59 | Night   | 37,6 | 84  | 30,6  | 30,6  | 18,75 | 581,01 | 114,87 |
| 2019/08/03 | CH2276 | Female | Two y/o | Treatment (Wk 1) | Treatment | Feed Day | No | 23:00 | 23:00 - 23:59 | Night   | 37,7 | 73  | 35,2  | 35,2  | 18,85 | 570,27 | 119,69 |
| 2019/08/03 | CH2276 | Female | Two y/o | Treatment (Wk 1) | Treatment | Feed Day | No | 23:05 | 23:00 - 23:59 | Night   | 37,8 | 97  | 46,2  | 46,2  | 18,95 | 591,66 | 129,06 |
| 2019/08/03 | CH2276 | Female | Two y/o | Treatment (Wk 1) | Treatment | Feed Day | No | 23:10 | 23:00 - 23:59 | Night   | 37,7 | 90  | 47,0  | 47,0  | 18,85 | 586,16 | 129,65 |
| 2019/08/03 | CH2276 | Female | Two y/o | Treatment (Wk 1) | Treatment | Feed Day | No | 23:15 | 23:00 - 23:59 | Night   | 37,7 | 98  | 46,6  | 46,6  | 18,85 | 592,41 | 129,35 |
| 2019/08/03 | CH2276 | Female | Two y/o | Treatment (Wk 1) | Treatment | Feed Day | No | 23:20 | 23:00 - 23:59 | Night   | 37,7 | 92  | 38,8  | 38,8  | 18,85 | 587,78 | 123,04 |



|    |            |        |        |         |                  |           |          |    |       |               |               |      |     |       |       |       |        |        |
|----|------------|--------|--------|---------|------------------|-----------|----------|----|-------|---------------|---------------|------|-----|-------|-------|-------|--------|--------|
|    | 2019/08/03 | CH2276 | Female | Two y/o | Treatment (Wk 1) | Treatment | Feed Day | No | 23:25 | 23:00 - 23:59 | Night         | 37,6 | 99  | 43,6  | 43,6  | 18,75 | 593,14 | 127,06 |
|    | 2019/08/03 | CH2276 | Female | Two y/o | Treatment (Wk 1) | Treatment | Feed Day | No | 23:30 | 23:00 - 23:59 | Night         | 37,5 | 99  | 47,0  | 47,0  | 18,65 | 593,14 | 129,65 |
|    | 2019/08/03 | CH2276 | Female | Two y/o | Treatment (Wk 1) | Treatment | Feed Day | No | 23:35 | 23:00 - 23:59 | Night         | 37,5 | 86  | 63,2  | 63,2  | 18,65 | 582,77 | 139,89 |
|    | 2019/08/03 | CH2276 | Female | Two y/o | Treatment (Wk 1) | Treatment | Feed Day | No | 23:40 | 23:00 - 23:59 | Night         | 37,4 | 71  | 45,8  | 45,8  | 18,55 | 568,10 | 128,76 |
|    | 2019/08/03 | CH2276 | Female | Two y/o | Treatment (Wk 1) | Treatment | Feed Day | No | 23:45 | 23:00 - 23:59 | Night         | 37,5 | 70  | 33,6  | 33,6  | 18,65 | 566,99 | 118,09 |
|    | 2019/08/03 | CH2276 | Female | Two y/o | Treatment (Wk 1) | Treatment | Feed Day | No | 23:50 | 23:00 - 23:59 | Night         | 37,6 |     | 82,2  | 82,2  | 18,75 |        | 149,02 |
|    | 2019/08/03 | CH2276 | Female | Two y/o | Treatment (Wk 1) | Treatment | Feed Day | No | 23:55 | 23:00 - 23:59 | Night         | 37,6 | 99  | 34,8  | 34,8  | 18,75 | 593,14 | 119,29 |
| 47 | 2019/08/04 | CH2276 | Female | Two y/o | Treatment (Wk 1) | Treatment | Fast Day | No | 00:00 | 00:00 - 00:59 | Early Morning | 37,6 | 67  | 30,0  | 30,0  | 18,75 | 563,53 | 114,20 |
|    | 2019/08/04 | CH2276 | Female | Two y/o | Treatment (Wk 1) | Treatment | Fast Day | No | 00:05 | 00:00 - 00:59 | Early Morning | 37,6 | 94  | 23,2  | 23,2  | 18,75 | 589,37 | 105,39 |
|    | 2019/08/04 | CH2276 | Female | Two y/o | Treatment (Wk 1) | Treatment | Fast Day | No | 00:10 | 00:00 - 00:59 | Early Morning | 37,7 | 70  | 21,2  | 21,2  | 18,85 | 566,99 | 102,31 |
|    | 2019/08/04 | CH2276 | Female | Two y/o | Treatment (Wk 1) | Treatment | Fast Day | No | 00:15 | 00:00 - 00:59 | Early Morning | 37,7 | 64  | 36,2  | 36,2  | 18,85 | 559,88 | 120,65 |
|    | 2019/08/04 | CH2276 | Female | Two y/o | Treatment (Wk 1) | Treatment | Fast Day | No | 00:20 | 00:00 - 00:59 | Early Morning | 37,7 | 71  | 39,4  | 39,4  | 18,85 | 568,10 | 123,57 |
|    | 2019/08/04 | CH2276 | Female | Two y/o | Treatment (Wk 1) | Treatment | Fast Day | No | 00:25 | 00:00 - 00:59 | Early Morning | 37,7 | 103 | 40,4  | 40,4  | 18,85 | 596,00 | 124,43 |
|    | 2019/08/04 | CH2276 | Female | Two y/o | Treatment (Wk 1) | Treatment | Fast Day | No | 00:30 | 00:00 - 00:59 | Early Morning | 37,7 | 102 | 40,6  | 40,6  | 18,85 | 595,30 | 124,60 |
|    | 2019/08/04 | CH2276 | Female | Two y/o | Treatment (Wk 1) | Treatment | Fast Day | No | 00:35 | 00:00 - 00:59 | Early Morning | 37,8 | 108 | 37,4  | 37,4  | 18,95 | 599,39 | 121,77 |
|    | 2019/08/04 | CH2276 | Female | Two y/o | Treatment (Wk 1) | Treatment | Fast Day | No | 00:40 | 00:00 - 00:59 | Early Morning | 37,8 | 81  | 20,0  | 20,0  | 18,95 | 578,26 | 100,31 |
|    | 2019/08/04 | CH2276 | Female | Two y/o | Treatment (Wk 1) | Treatment | Fast Day | No | 00:45 | 00:00 - 00:59 | Early Morning | 37,7 | 100 | 21,8  | 21,8  | 18,85 | 593,87 | 103,26 |
|    | 2019/08/04 | CH2276 | Female | Two y/o | Treatment (Wk 1) | Treatment | Fast Day | No | 00:50 | 00:00 - 00:59 | Early Morning | 37,6 | 98  | 27,6  | 27,6  | 18,75 | 592,41 | 111,33 |
|    | 2019/08/04 | CH2276 | Female | Two y/o | Treatment (Wk 1) | Treatment | Fast Day | No | 00:55 | 00:00 - 00:59 | Early Morning | 37,6 | 73  | 47,2  | 47,2  | 18,75 | 570,27 | 129,80 |
|    | 2019/08/04 | CH2276 | Female | Two y/o | Treatment (Wk 1) | Treatment | Fast Day | No | 01:00 | 01:00 - 01:59 | Early Morning | 37,6 | 97  | 23,0  | 23,0  | 18,75 | 591,66 | 105,09 |
|    | 2019/08/04 | CH2276 | Female | Two y/o | Treatment (Wk 1) | Treatment | Fast Day | No | 01:05 | 01:00 - 01:59 | Early Morning | 37,5 | 93  | 35,4  | 35,4  | 18,65 | 588,58 | 119,88 |
|    | 2019/08/04 | CH2276 | Female | Two y/o | Treatment (Wk 1) | Treatment | Fast Day | No | 01:10 | 01:00 - 01:59 | Early Morning | 37,5 | 106 | 75,2  | 75,2  | 18,65 | 598,06 | 145,93 |
|    | 2019/08/04 | CH2276 | Female | Two y/o | Treatment (Wk 1) | Treatment | Fast Day | No | 01:15 | 01:00 - 01:59 | Early Morning | 37,6 | 162 | 58,6  | 58,6  | 18,75 | 626,88 | 137,28 |
|    | 2019/08/04 | CH2276 | Female | Two y/o | Treatment (Wk 1) | Treatment | Fast Day | No | 01:20 | 01:00 - 01:59 | Early Morning | 37,5 | 154 | 42,2  | 42,2  | 18,65 | 623,58 | 125,93 |
|    | 2019/08/04 | CH2276 | Female | Two y/o | Treatment (Wk 1) | Treatment | Fast Day | No | 01:25 | 01:00 - 01:59 | Early Morning | 37,5 | 90  | 41,6  | 41,6  | 18,65 | 586,16 | 125,44 |
|    | 2019/08/04 | CH2276 | Female | Two y/o | Treatment (Wk 1) | Treatment | Fast Day | No | 01:30 | 01:00 - 01:59 | Early Morning | 37,6 | 88  | 34,6  | 34,6  | 18,75 | 584,49 | 119,10 |
|    | 2019/08/04 | CH2276 | Female | Two y/o | Treatment (Wk 1) | Treatment | Fast Day | No | 01:35 | 01:00 - 01:59 | Early Morning | 37,6 | 75  | 32,6  | 32,6  | 18,75 | 572,36 | 117,05 |
|    | 2019/08/04 | CH2276 | Female | Two y/o | Treatment (Wk 1) | Treatment | Fast Day | No | 01:40 | 01:00 - 01:59 | Early Morning | 37,6 | 95  | 31,4  | 31,4  | 18,75 | 590,14 | 115,76 |
|    | 2019/08/04 | CH2276 | Female | Two y/o | Treatment (Wk 1) | Treatment | Fast Day | No | 01:45 | 01:00 - 01:59 | Early Morning | 37,7 | 90  | 26,0  | 26,0  | 18,85 | 586,16 | 109,29 |
|    | 2019/08/04 | CH2276 | Female | Two y/o | Treatment (Wk 1) | Treatment | Fast Day | No | 01:50 | 01:00 - 01:59 | Early Morning | 37,6 | 74  | 22,6  | 22,6  | 18,75 | 571,33 | 104,49 |
|    | 2019/08/04 | CH2276 | Female | Two y/o | Treatment (Wk 1) | Treatment | Fast Day | No | 01:55 | 01:00 - 01:59 | Early Morning | 37,4 | 86  | 31,6  | 31,6  | 18,55 | 582,77 | 115,98 |
|    | 2019/08/04 | CH2276 | Female | Two y/o | Treatment (Wk 1) | Treatment | Fast Day | No | 02:00 | 02:00 - 02:59 | Early Morning | 37,0 | 58  | 26,4  | 26,4  | 18,16 | 551,90 | 109,81 |
|    | 2019/08/04 | CH2276 | Female | Two y/o | Treatment (Wk 1) | Treatment | Fast Day | No | 02:05 | 02:00 - 02:59 | Early Morning | 36,7 | 98  | 26,0  | 26,0  | 17,87 | 592,41 | 109,29 |
|    | 2019/08/04 | CH2276 | Female | Two y/o | Treatment (Wk 1) | Treatment | Fast Day | No | 02:10 | 02:00 - 02:59 | Early Morning | 36,6 | 72  | 26,8  | 26,8  | 17,77 | 569,20 | 110,33 |
|    | 2019/08/04 | CH2276 | Female | Two y/o | Treatment (Wk 1) | Treatment | Fast Day | No | 02:15 | 02:00 - 02:59 | Early Morning | 36,6 | 64  | 27,8  | 27,8  | 17,77 | 559,88 | 111,58 |
|    | 2019/08/04 | CH2276 | Female | Two y/o | Treatment (Wk 1) | Treatment | Fast Day | No | 02:20 | 02:00 - 02:59 | Early Morning | 36,5 | 63  | 29,8  | 29,8  | 17,67 | 558,62 | 113,97 |
|    | 2019/08/04 | CH2276 | Female | Two y/o | Treatment (Wk 1) | Treatment | Fast Day | No | 02:25 | 02:00 - 02:59 | Early Morning | 36,4 | 71  | 26,6  | 26,6  | 17,57 | 568,10 | 110,07 |
|    | 2019/08/04 | CH2276 | Female | Two y/o | Treatment (Wk 1) | Treatment | Fast Day | No | 02:30 | 02:00 - 02:59 | Early Morning | 36,4 | 98  | 37,4  | 37,4  | 17,57 | 592,41 | 121,77 |
|    | 2019/08/04 | CH2276 | Female | Two y/o | Treatment (Wk 1) | Treatment | Fast Day | No | 02:35 | 02:00 - 02:59 | Early Morning | 36,6 | 96  | 23,8  | 23,8  | 17,77 | 590,91 | 106,26 |
|    | 2019/08/04 | CH2276 | Female | Two y/o | Treatment (Wk 1) | Treatment | Fast Day | No | 02:40 | 02:00 - 02:59 | Early Morning | 36,8 | 90  | 26,4  | 26,4  | 17,96 | 586,16 | 109,81 |
|    | 2019/08/04 | CH2276 | Female | Two y/o | Treatment (Wk 1) | Treatment | Fast Day | No | 02:45 | 02:00 - 02:59 | Early Morning | 37,0 | 95  | 32,0  | 32,0  | 18,16 | 590,14 | 116,41 |
|    | 2019/08/04 | CH2276 | Female | Two y/o | Treatment (Wk 1) | Treatment | Fast Day | No | 02:50 | 02:00 - 02:59 | Early Morning | 37,1 | 113 | 40,4  | 40,4  | 18,26 | 602,58 | 124,43 |
|    | 2019/08/04 | CH2276 | Female | Two y/o | Treatment (Wk 1) | Treatment | Fast Day | No | 02:55 | 02:00 - 02:59 | Early Morning | 37,2 | 67  | 44,8  | 44,8  | 18,36 | 563,53 | 127,99 |
|    | 2019/08/04 | CH2276 | Female | Two y/o | Treatment (Wk 1) | Treatment | Fast Day | No | 03:00 | 03:00 - 03:59 | Early Morning | 37,3 | 94  | 50,6  | 50,6  | 18,46 | 589,37 | 132,20 |
|    | 2019/08/04 | CH2276 | Female | Two y/o | Treatment (Wk 1) | Treatment | Fast Day | No | 03:05 | 03:00 - 03:59 | Early Morning | 37,4 | 93  | 54,0  | 54,0  | 18,55 | 588,58 | 134,45 |
|    | 2019/08/04 | CH2276 | Female | Two y/o | Treatment (Wk 1) | Treatment | Fast Day | No | 03:10 | 03:00 - 03:59 | Early Morning | 37,4 | 60  | 52,2  | 52,2  | 18,55 | 554,67 | 133,27 |
|    | 2019/08/04 | CH2276 | Female | Two y/o | Treatment (Wk 1) | Treatment | Fast Day | No | 03:15 | 03:00 - 03:59 | Early Morning | 37,5 | 98  | 52,2  | 52,2  | 18,65 | 592,41 | 133,27 |
|    | 2019/08/04 | CH2276 | Female | Two y/o | Treatment (Wk 1) | Treatment | Fast Day | No | 03:20 | 03:00 - 03:59 | Early Morning | 37,5 | 194 | 46,8  | 46,8  | 18,65 | 638,30 | 129,50 |
|    | 2019/08/04 | CH2276 | Female | Two y/o | Treatment (Wk 1) | Treatment | Fast Day | No | 03:25 | 03:00 - 03:59 | Early Morning | 37,5 | 112 | 36,2  | 36,2  | 18,65 | 601,96 | 120,65 |
|    | 2019/08/04 | CH2276 | Female | Two y/o | Treatment (Wk 1) | Treatment | Fast Day | No | 03:30 | 03:00 - 03:59 | Early Morning | 37,5 | 77  | 30,2  | 30,2  | 18,65 | 574,39 | 114,42 |
|    | 2019/08/04 | CH2276 | Female | Two y/o | Treatment (Wk 1) | Treatment | Fast Day | No | 03:35 | 03:00 - 03:59 | Early Morning | 37,4 | 113 | 49,4  | 49,4  | 18,55 | 602,58 | 131,37 |
|    | 2019/08/04 | CH2276 | Female | Two y/o | Treatment (Wk 1) | Treatment | Fast Day | No | 03:40 | 03:00 - 03:59 | Early Morning | 37,3 | 97  | 47,4  | 47,4  | 18,46 | 591,66 | 129,94 |
|    | 2019/08/04 | CH2276 | Female | Two y/o | Treatment (Wk 1) | Treatment | Fast Day | No | 03:45 | 03:00 - 03:59 | Early Morning | 37,2 | 126 | 55,2  | 55,2  | 18,36 | 610,14 | 135,21 |
|    | 2019/08/04 | CH2276 | Female | Two y/o | Treatment (Wk 1) | Treatment | Fast Day | No | 03:50 | 03:00 - 03:59 | Early Morning | 37,4 | 132 | 416,6 | 416,6 | 18,55 | 613,32 | 206,06 |
|    | 2019/08/04 | CH2276 | Female | Two y/o | Treatment (Wk 1) | Treatment | Fast Day | No | 03:55 | 03:00 - 03:59 | Early Morning | 37,4 | 68  | 90,2  | 90,2  | 18,55 | 564,71 | 152,25 |
|    | 2019/08/04 | CH2276 | Female | Two y/o | Treatment (Wk 1) | Treatment | Fast Day | No | 04:00 | 04:00 - 04:59 | Morning       | 37,4 |     | 91,6  | 91,6  | 18,55 |        | 152,79 |
|    | 2019/08/04 | CH2276 | Female | Two y/o | Treatment (Wk 1) | Treatment | Fast Day | No | 04:05 | 04:00 - 04:59 | Morning       | 37,4 | 54  | 566,2 | 566,2 | 18,55 | 545,99 | 216,98 |
|    | 2019/08/04 | CH2276 | Female | Two y/o | Treatment (Wk 1) | Treatment | Fast Day | No | 04:10 | 04:00 - 04:59 | Morning       | 37,5 | 134 | 181,8 | 181,8 | 18,65 | 614,33 | 176,76 |
|    | 2019/08/04 | CH2276 | Female | Two y/o | Treatment (Wk 1) | Treatment | Fast Day | No | 04:15 | 04:00 - 04:59 | Morning       | 37,4 | 123 | 223,0 | 223,0 | 18,55 | 608,49 | 183,95 |
|    | 2019/08/04 | CH2276 | Female | Two y/o | Treatment (Wk 1) | Treatment | Fast Day | No | 04:20 | 04:00 - 04:59 | Morning       | 37,5 | 76  | 32,6  | 32,6  | 18,65 | 573,39 | 117,05 |
|    | 2019/08/04 | CH2276 | Female | Two y/o | Treatment (Wk 1) | Treatment | Fast Day | No | 04:25 | 04:00 - 04:59 | Morning       | 37,4 | 95  | 24,6  | 24,6  | 18,55 | 590,14 | 107,39 |
|    | 2019/08/04 | CH2276 | Female | Two y/o | Treatment (Wk 1) | Treatment | Fast Day | No | 04:30 | 04:00 - 04:59 | Morning       | 37,5 | 66  | 25,0  | 25,0  | 18,65 | 562,34 | 107,94 |
|    | 2019/08/04 | CH2276 | Female | Two y/o | Treatment (Wk 1) | Treatment | Fast Day | No | 04:35 | 04:00 - 04:59 | Morning       | 37,5 | 68  | 18,8  | 18,8  | 18,65 | 564,71 | 98,20  |
|    | 2019/08/04 | CH2276 | Female | Two y/o | Treatment (Wk 1) | Treatment | Fast Day | No | 04:40 | 04:00 - 04:59 | Morning       | 37,5 | 73  | 20,4  | 20,4  | 18,65 | 570,27 | 100,99 |
|    | 2019/08/04 | CH2276 | Female | Two y/o | Treatment (Wk 1) | Treatment | Fast Day | No | 04:45 | 04:00 - 04:59 | Morning       | 37,5 | 76  | 27,2  | 27,2  | 18,65 | 573,39 | 110,83 |
|    | 2019/08/04 | CH2276 | Female | Two y/o | Treatment (Wk 1) | Treatment | Fast Day | No | 04:50 | 04:00 - 04:59 | Morning       | 37,5 | 63  | 24,6  | 24,6  | 18,65 | 558,62 | 107,39 |
|    | 2019/08/04 | CH2276 | Female | Two y/o | Treatment (Wk 1) | Treatment | Fast Day | No | 04:55 | 04:00 - 04:59 | Morning       | 37,5 | 67  | 26,2  | 26,2  | 18,65 | 563,53 | 109,55 |
|    | 2019/08/04 | CH2276 | Female | Two y/o | Treatment (Wk 1) | Treatment | Fast Day | No | 05:00 | 05:00 - 05:59 | Morning       | 37,5 | 62  | 20,0  | 20,0  | 18,65 | 557,33 | 100,31 |
|    | 2019/08/04 | CH2276 | Female | Two y/o | Treatment (Wk 1) | Treatment | Fast Day | No | 05:05 | 05:00 - 05:59 | Morning       | 37,4 | 61  | 20,8  | 20,8  | 18,55 | 556,01 | 101,65 |
|    | 2019/08/04 | CH2276 | Female | Two y/o | Treatment (Wk 1) | Treatment | Fast Day | No | 05:10 | 05:00 - 05:59 | Morning       | 37,1 | 66  |       |       |       |        |        |



|            |        |        |         |                  |           |          |    |       |               |              |      |     |       |       |       |        |        |
|------------|--------|--------|---------|------------------|-----------|----------|----|-------|---------------|--------------|------|-----|-------|-------|-------|--------|--------|
| 2019/08/04 | CH2276 | Female | Two y/o | Treatment (Wk 1) | Treatment | Fast Day | No | 05:15 | 05:00 - 05:59 | Morning      | 36,8 | 103 | 22,2  | 22,2  | 17,96 | 596,00 | 103,88 |
| 2019/08/04 | CH2276 | Female | Two y/o | Treatment (Wk 1) | Treatment | Fast Day | No | 05:20 | 05:00 - 05:59 | Morning      | 36,6 | 90  | 18,2  | 18,2  | 17,77 | 586,16 | 97,10  |
| 2019/08/04 | CH2276 | Female | Two y/o | Treatment (Wk 1) | Treatment | Fast Day | No | 05:25 | 05:00 - 05:59 | Morning      | 36,4 | 66  | 27,2  | 27,2  | 17,57 | 562,34 | 110,83 |
| 2019/08/04 | CH2276 | Female | Two y/o | Treatment (Wk 1) | Treatment | Fast Day | No | 05:30 | 05:00 - 05:59 | Morning      | 36,4 | 83  | 28,6  | 28,6  | 17,57 | 580,11 | 112,56 |
| 2019/08/04 | CH2276 | Female | Two y/o | Treatment (Wk 1) | Treatment | Fast Day | No | 05:35 | 05:00 - 05:59 | Morning      | 36,4 | 60  | 19,0  | 19,0  | 17,57 | 554,67 | 98,56  |
| 2019/08/04 | CH2276 | Female | Two y/o | Treatment (Wk 1) | Treatment | Fast Day | No | 05:40 | 05:00 - 05:59 | Morning      | 36,4 | 62  | 20,6  | 20,6  | 17,57 | 557,33 | 101,32 |
| 2019/08/04 | CH2276 | Female | Two y/o | Treatment (Wk 1) | Treatment | Fast Day | No | 05:45 | 05:00 - 05:59 | Morning      | 36,4 | 90  | 24,4  | 24,4  | 17,57 | 586,16 | 107,11 |
| 2019/08/04 | CH2276 | Female | Two y/o | Treatment (Wk 1) | Treatment | Fast Day | No | 05:50 | 05:00 - 05:59 | Morning      | 36,4 | 58  | 25,8  | 25,8  | 17,57 | 551,90 | 109,02 |
| 2019/08/04 | CH2276 | Female | Two y/o | Treatment (Wk 1) | Treatment | Fast Day | No | 05:55 | 05:00 - 05:59 | Morning      | 36,2 | 92  | 28,8  | 28,8  | 17,38 | 587,78 | 112,79 |
| 2019/08/04 | CH2276 | Female | Two y/o | Treatment (Wk 1) | Treatment | Fast Day | No | 06:00 | 06:00 - 06:59 | Morning      | 36,2 | 53  | 27,2  | 27,2  | 17,38 | 544,43 | 110,83 |
| 2019/08/04 | CH2276 | Female | Two y/o | Treatment (Wk 1) | Treatment | Fast Day | No | 06:05 | 06:00 - 06:59 | Morning      | 36,1 | 60  | 37,6  | 37,6  | 17,29 | 554,67 | 121,96 |
| 2019/08/04 | CH2276 | Female | Two y/o | Treatment (Wk 1) | Treatment | Fast Day | No | 06:10 | 06:00 - 06:59 | Morning      | 36,1 | 152 | 69,8  | 69,8  | 17,29 | 622,73 | 143,34 |
| 2019/08/04 | CH2276 | Female | Two y/o | Treatment (Wk 1) | Treatment | Fast Day | No | 06:15 | 06:00 - 06:59 | Morning      | 36,5 | 61  | 139,4 | 139,4 | 17,67 | 556,01 | 167,45 |
| 2019/08/04 | CH2276 | Female | Two y/o | Treatment (Wk 1) | Treatment | Fast Day | No | 06:20 | 06:00 - 06:59 | Morning      | 36,7 | 188 | 269,2 | 269,2 | 17,87 | 636,34 | 190,59 |
| 2019/08/04 | CH2276 | Female | Two y/o | Treatment (Wk 1) | Treatment | Fast Day | No | 06:25 | 06:00 - 06:59 | Morning      | 37,0 |     | 616,6 | 616,6 | 18,16 |        | 220,02 |
| 2019/08/04 | CH2276 | Female | Two y/o | Treatment (Wk 1) | Treatment | Fast Day | No | 06:30 | 06:00 - 06:59 | Morning      | 37,4 | 80  | 116,6 | 116,6 | 18,55 | 577,31 | 161,20 |
| 2019/08/04 | CH2276 | Female | Two y/o | Treatment (Wk 1) | Treatment | Fast Day | No | 06:35 | 06:00 - 06:59 | Morning      | 37,5 | 194 | 232,8 | 232,8 | 18,65 | 638,30 | 185,47 |
| 2019/08/04 | CH2276 | Female | Two y/o | Treatment (Wk 1) | Treatment | Fast Day | No | 06:40 | 06:00 - 06:59 | Morning      | 37,6 |     | 110,8 | 110,8 | 18,75 |        | 159,42 |
| 2019/08/04 | CH2276 | Female | Two y/o | Treatment (Wk 1) | Treatment | Fast Day | No | 06:45 | 06:00 - 06:59 | Morning      | 37,6 | 115 | 209,6 | 209,6 | 18,75 | 603,82 | 181,77 |
| 2019/08/04 | CH2276 | Female | Two y/o | Treatment (Wk 1) | Treatment | Fast Day | No | 06:50 | 06:00 - 06:59 | Morning      | 37,6 | 104 | 289,8 | 289,8 | 18,75 | 596,69 | 193,20 |
| 2019/08/04 | CH2276 | Female | Two y/o | Treatment (Wk 1) | Treatment | Fast Day | No | 06:55 | 06:00 - 06:59 | Morning      | 37,7 | 108 | 148,0 | 148,0 | 18,85 | 599,39 | 166,55 |
| 2019/08/04 | CH2276 | Female | Two y/o | Treatment (Wk 1) | Treatment | Fast Day | No | 07:00 | 07:00 - 07:59 | Morning      | 37,7 | 59  | 131,8 | 131,8 | 18,85 | 553,30 | 165,49 |
| 2019/08/04 | CH2276 | Female | Two y/o | Treatment (Wk 1) | Treatment | Fast Day | No | 07:05 | 07:00 - 07:59 | Morning      | 37,9 | 113 | 252,6 | 252,6 | 19,05 | 602,58 | 188,35 |
| 2019/08/04 | CH2276 | Female | Two y/o | Treatment (Wk 1) | Treatment | Fast Day | No | 07:10 | 07:00 - 07:59 | Morning      | 37,9 | 102 | 933,8 |       | 19,05 | 595,30 |        |
| 2019/08/04 | CH2276 | Female | Two y/o | Treatment (Wk 1) | Treatment | Fast Day | No | 07:15 | 07:00 - 07:59 | Morning      | 38,0 | 106 | 150,8 | 150,8 | 19,15 | 598,06 | 170,20 |
| 2019/08/04 | CH2276 | Female | Two y/o | Treatment (Wk 1) | Treatment | Fast Day | No | 07:20 | 07:00 - 07:59 | Morning      | 37,9 |     | 277,6 | 277,6 | 19,05 |        | 191,68 |
| 2019/08/04 | CH2276 | Female | Two y/o | Treatment (Wk 1) | Treatment | Fast Day | No | 07:25 | 07:00 - 07:59 | Morning      | 37,9 | 134 | 63,0  | 63,0  | 19,05 | 614,33 | 139,78 |
| 2019/08/04 | CH2276 | Female | Two y/o | Treatment (Wk 1) | Treatment | Fast Day | No | 07:30 | 07:00 - 07:59 | Morning      | 37,8 | 115 | 107,8 | 107,8 | 18,95 | 603,82 | 158,46 |
| 2019/08/04 | CH2276 | Female | Two y/o | Treatment (Wk 1) | Treatment | Fast Day | No | 07:35 | 07:00 - 07:59 | Morning      | 37,8 | 128 | 249,4 | 249,4 | 18,95 | 611,22 | 187,90 |
| 2019/08/04 | CH2276 | Female | Two y/o | Treatment (Wk 1) | Treatment | Fast Day | No | 07:40 | 07:00 - 07:59 | Morning      | 37,7 | 80  | 144,4 | 144,4 | 18,85 | 577,31 | 168,68 |
| 2019/08/04 | CH2276 | Female | Two y/o | Treatment (Wk 1) | Treatment | Fast Day | No | 07:45 | 07:00 - 07:59 | Morning      | 37,7 | 131 | 130,0 | 130,0 | 18,85 | 612,80 | 165,01 |
| 2019/08/04 | CH2276 | Female | Two y/o | Treatment (Wk 1) | Treatment | Fast Day | No | 07:50 | 07:00 - 07:59 | Morning      | 37,8 |     | 105,4 | 105,4 | 18,95 |        | 157,68 |
| 2019/08/04 | CH2276 | Female | Two y/o | Treatment (Wk 1) | Treatment | Fast Day | No | 07:55 | 07:00 - 07:59 | Morning      | 37,8 | 126 | 242,2 | 242,2 | 18,95 | 610,14 | 186,86 |
| 2019/08/04 | CH2276 | Female | Two y/o | Treatment (Wk 1) | Treatment | Fast Day | No | 08:00 | 08:00 - 08:59 | Late Morning | 37,8 | 91  | 120,6 | 120,6 | 18,95 | 586,98 | 162,38 |
| 2019/08/04 | CH2276 | Female | Two y/o | Treatment (Wk 1) | Treatment | Fast Day | No | 08:05 | 08:00 - 08:59 | Late Morning | 37,9 | 103 | 65,4  | 65,4  | 19,05 | 596,00 | 141,08 |
| 2019/08/04 | CH2276 | Female | Two y/o | Treatment (Wk 1) | Treatment | Fast Day | No | 08:10 | 08:00 - 08:59 | Late Morning | 37,9 | 105 | 384,4 | 384,4 | 19,05 | 597,38 | 203,20 |
| 2019/08/04 | CH2276 | Female | Two y/o | Treatment (Wk 1) | Treatment | Fast Day | No | 08:15 | 08:00 - 08:59 | Late Morning | 37,9 | 67  | 380,0 | 380,0 | 19,05 | 563,53 | 202,79 |
| 2019/08/04 | CH2276 | Female | Two y/o | Treatment (Wk 1) | Treatment | Fast Day | No | 08:20 | 08:00 - 08:59 | Late Morning | 37,8 | 108 | 183,6 | 183,6 | 18,95 | 599,39 | 177,11 |
| 2019/08/04 | CH2276 | Female | Two y/o | Treatment (Wk 1) | Treatment | Fast Day | No | 08:25 | 08:00 - 08:59 | Late Morning | 37,8 | 54  | 727,0 | 727,0 | 18,95 | 545,99 | 225,91 |
| 2019/08/04 | CH2276 | Female | Two y/o | Treatment (Wk 1) | Treatment | Fast Day | No | 08:30 | 08:00 - 08:59 | Late Morning | 37,8 | 138 | 579,6 | 579,6 | 18,95 | 616,31 | 217,81 |
| 2019/08/04 | CH2276 | Female | Two y/o | Treatment (Wk 1) | Treatment | Fast Day | No | 08:35 | 08:00 - 08:59 | Late Morning | 37,8 | 113 | 59,8  | 59,8  | 18,95 | 602,58 | 137,98 |
| 2019/08/04 | CH2276 | Female | Two y/o | Treatment (Wk 1) | Treatment | Fast Day | No | 08:40 | 08:00 - 08:59 | Late Morning | 37,8 | 162 | 44,8  | 44,8  | 18,95 | 626,88 | 127,99 |
| 2019/08/04 | CH2276 | Female | Two y/o | Treatment (Wk 1) | Treatment | Fast Day | No | 08:45 | 08:00 - 08:59 | Late Morning | 37,7 | 129 | 75,8  | 75,8  | 18,85 | 611,75 | 146,20 |
| 2019/08/04 | CH2276 | Female | Two y/o | Treatment (Wk 1) | Treatment | Fast Day | No | 08:50 | 08:00 - 08:59 | Late Morning | 37,7 | 79  | 79,2  | 79,2  | 18,85 | 576,36 | 147,73 |
| 2019/08/04 | CH2276 | Female | Two y/o | Treatment (Wk 1) | Treatment | Fast Day | No | 08:55 | 08:00 - 08:59 | Late Morning | 37,8 | 63  | 81,4  | 81,4  | 18,95 | 558,62 | 148,68 |
| 2019/08/04 | CH2276 | Female | Two y/o | Treatment (Wk 1) | Treatment | Fast Day | No | 09:00 | 09:00 - 09:59 | Late Morning | 37,8 | 69  | 80,0  | 80,0  | 18,95 | 565,86 | 148,08 |
| 2019/08/04 | CH2276 | Female | Two y/o | Treatment (Wk 1) | Treatment | Fast Day | No | 09:05 | 09:00 - 09:59 | Late Morning | 37,9 | 61  | 81,6  | 81,6  | 19,05 | 556,01 | 148,76 |
| 2019/08/04 | CH2276 | Female | Two y/o | Treatment (Wk 1) | Treatment | Fast Day | No | 09:10 | 09:00 - 09:59 | Late Morning | 38,0 | 60  | 78,8  | 78,8  | 19,15 | 554,67 | 147,55 |
| 2019/08/04 | CH2276 | Female | Two y/o | Treatment (Wk 1) | Treatment | Fast Day | No | 09:15 | 09:00 - 09:59 | Late Morning | 38,1 | 82  | 78,6  | 78,6  | 19,26 | 579,19 | 147,46 |
| 2019/08/04 | CH2276 | Female | Two y/o | Treatment (Wk 1) | Treatment | Fast Day | No | 09:20 | 09:00 - 09:59 | Late Morning | 38,2 | 64  | 75,4  | 75,4  | 19,36 | 559,88 | 146,02 |
| 2019/08/04 | CH2276 | Female | Two y/o | Treatment (Wk 1) | Treatment | Fast Day | No | 09:25 | 09:00 - 09:59 | Late Morning | 38,2 | 81  | 76,6  | 76,6  | 19,36 | 578,26 | 146,57 |
| 2019/08/04 | CH2276 | Female | Two y/o | Treatment (Wk 1) | Treatment | Fast Day | No | 09:30 | 09:00 - 09:59 | Late Morning | 38,2 | 67  | 75,4  | 75,4  | 19,36 | 563,53 | 146,02 |
| 2019/08/04 | CH2276 | Female | Two y/o | Treatment (Wk 1) | Treatment | Fast Day | No | 09:35 | 09:00 - 09:59 | Late Morning | 38,2 | 64  | 74,2  | 74,2  | 19,36 | 559,88 | 145,46 |
| 2019/08/04 | CH2276 | Female | Two y/o | Treatment (Wk 1) | Treatment | Fast Day | No | 09:40 | 09:00 - 09:59 | Late Morning | 38,2 | 68  | 70,6  | 70,6  | 19,36 | 564,71 | 143,73 |
| 2019/08/04 | CH2276 | Female | Two y/o | Treatment (Wk 1) | Treatment | Fast Day | No | 09:45 | 09:00 - 09:59 | Late Morning | 38,2 | 75  | 71,6  | 71,6  | 19,36 | 572,36 | 144,22 |
| 2019/08/04 | CH2276 | Female | Two y/o | Treatment (Wk 1) | Treatment | Fast Day | No | 09:50 | 09:00 - 09:59 | Late Morning | 38,1 | 67  | 76,4  | 76,4  | 19,26 | 563,53 | 146,48 |
| 2019/08/04 | CH2276 | Female | Two y/o | Treatment (Wk 1) | Treatment | Fast Day | No | 09:55 | 09:00 - 09:59 | Late Morning | 38,0 | 92  | 87,0  | 87,0  | 19,15 | 587,78 | 150,99 |
| 2019/08/04 | CH2276 | Female | Two y/o | Treatment (Wk 1) | Treatment | Fast Day | No | 10:00 | 10:00 - 10:59 | Late Morning | 38,0 | 91  | 76,0  | 76,0  | 19,15 | 586,98 | 146,29 |
| 2019/08/04 | CH2276 | Female | Two y/o | Treatment (Wk 1) | Treatment | Fast Day | No | 10:05 | 10:00 - 10:59 | Late Morning | 38,0 | 86  | 60,2  | 60,2  | 19,15 | 582,77 | 138,21 |
| 2019/08/04 | CH2276 | Female | Two y/o | Treatment (Wk 1) | Treatment | Fast Day | No | 10:10 | 10:00 - 10:59 | Late Morning | 38,0 | 98  | 76,2  | 76,2  | 19,15 | 592,41 | 146,38 |
| 2019/08/04 | CH2276 | Female | Two y/o | Treatment (Wk 1) | Treatment | Fast Day | No | 10:15 | 10:00 - 10:59 | Late Morning | 38,0 | 81  | 48,0  | 48,0  | 19,15 | 578,26 | 130,38 |
| 2019/08/04 | CH2276 | Female | Two y/o | Treatment (Wk 1) | Treatment | Fast Day | No | 10:20 | 10:00 - 10:59 | Late Morning | 37,9 | 87  | 34,4  | 34,4  | 19,05 | 583,64 | 118,90 |
| 2019/08/04 | CH2276 | Female | Two y/o | Treatment (Wk 1) | Treatment | Fast Day | No | 10:25 | 10:00 - 10:59 | Late Morning | 37,8 | 75  | 41,8  | 41,8  | 18,95 | 572,36 | 125,60 |
| 2019/08/04 | CH2276 | Female | Two y/o | Treatment (Wk 1) | Treatment | Fast Day | No | 10:30 | 10:00 - 10:59 | Late Morning | 37,7 | 59  | 44,2  | 44,2  | 18,85 | 553,30 | 127,53 |
| 2019/08/04 | CH2276 | Female | Two y/o | Treatment (Wk 1) | Treatment | Fast Day | No | 10:35 | 10:00 - 10:59 | Late Morning | 37,7 | 89  | 66,2  | 66,2  | 18,85 | 585,33 | 141,50 |
| 2019/08/04 | CH2276 | Female | Two y/o | Treatment (Wk 1) | Treatment | Fast Day | No | 10:40 | 10:00 - 10:59 | Late Morning | 37,6 |     | 58,0  | 58,0  | 18,75 |        | 136,92 |
| 2019/08/04 | CH2276 | Female | Two y/o | Treatment (Wk 1) | Treatment | Fast Day | No | 10:45 | 10:00 - 10:59 | Late Morning | 37,6 | 92  | 78,8  | 78,8  | 18,75 | 587,78 | 147,55 |
| 2019/08/04 | CH2276 | Female | Two y/o | Treatment (Wk 1) | Treatment | Fast Day | No | 10:50 | 10:00 - 10:59 | Late Morning | 37,5 | 147 | 344,0 | 344,0 | 18,65 | 620,52 | 199,27 |
| 2019/08/04 | CH2276 | Female | Two y/o | Treatment (Wk 1) | Treatment | Fast Day | No | 10:55 | 10:00 - 10:59 | Late Morning | 37,6 | 114 | 41,2  | 41,2  | 18,75 | 603,20 | 125,11 |
| 2019/08/04 | CH2276 | Female | Two y/o | Treatment (Wk 1) | Treatment | Fast Day | No | 11:00 | 11:00 - 11:59 | Late Morning | 37,7 | 63  | 97,0  | 97,0  | 18,85 | 558,62 | 154,78 |



|            |        |        |         |                  |           |          |    |       |               |              |      |     |       |       |       |        |        |
|------------|--------|--------|---------|------------------|-----------|----------|----|-------|---------------|--------------|------|-----|-------|-------|-------|--------|--------|
| 2019/08/04 | CH2276 | Female | Two y/o | Treatment (Wk 1) | Treatment | Fast Day | No | 11:05 | 11:00 - 11:59 | Late Morning | 37,7 | 86  | 44,2  | 44,2  | 18,85 | 582,77 | 127,53 |
| 2019/08/04 | CH2276 | Female | Two y/o | Treatment (Wk 1) | Treatment | Fast Day | No | 11:10 | 11:00 - 11:59 | Late Morning | 37,8 | 69  | 37,8  | 37,8  | 18,95 | 565,86 | 122,14 |
| 2019/08/04 | CH2276 | Female | Two y/o | Treatment (Wk 1) | Treatment | Fast Day | No | 11:15 | 11:00 - 11:59 | Late Morning | 37,8 | 64  | 45,4  | 45,4  | 18,95 | 559,88 | 128,45 |
| 2019/08/04 | CH2276 | Female | Two y/o | Treatment (Wk 1) | Treatment | Fast Day | No | 11:20 | 11:00 - 11:59 | Late Morning | 37,9 | 65  | 45,2  | 45,2  | 19,05 | 561,12 | 128,30 |
| 2019/08/04 | CH2276 | Female | Two y/o | Treatment (Wk 1) | Treatment | Fast Day | No | 11:25 | 11:00 - 11:59 | Late Morning | 37,9 | 90  | 50,2  | 50,2  | 19,05 | 586,16 | 131,92 |
| 2019/08/04 | CH2276 | Female | Two y/o | Treatment (Wk 1) | Treatment | Fast Day | No | 11:30 | 11:00 - 11:59 | Late Morning | 38,0 | 59  | 38,0  | 38,0  | 19,15 | 553,30 | 122,32 |
| 2019/08/04 | CH2276 | Female | Two y/o | Treatment (Wk 1) | Treatment | Fast Day | No | 11:35 | 11:00 - 11:59 | Late Morning | 38,0 | 62  | 52,6  | 52,6  | 19,15 | 557,33 | 133,54 |
| 2019/08/04 | CH2276 | Female | Two y/o | Treatment (Wk 1) | Treatment | Fast Day | No | 11:40 | 11:00 - 11:59 | Late Morning | 38,0 | 84  | 78,6  | 78,6  | 19,15 | 581,01 | 147,46 |
| 2019/08/04 | CH2276 | Female | Two y/o | Treatment (Wk 1) | Treatment | Fast Day | No | 11:45 | 11:00 - 11:59 | Late Morning | 38,1 | 147 | 569,6 | 569,6 | 19,26 | 620,52 | 217,19 |
| 2019/08/04 | CH2276 | Female | Two y/o | Treatment (Wk 1) | Treatment | Fast Day | No | 11:50 | 11:00 - 11:59 | Late Morning | 38,2 | 73  | 59,6  | 59,6  | 19,36 | 570,27 | 137,86 |
| 2019/08/04 | CH2276 | Female | Two y/o | Treatment (Wk 1) | Treatment | Fast Day | No | 11:55 | 11:00 - 11:59 | Late Morning | 38,2 | 63  | 249,2 | 249,2 | 19,36 | 558,62 | 187,87 |
| 2019/08/04 | CH2276 | Female | Two y/o | Treatment (Wk 1) | Treatment | Fast Day | No | 12:00 | 12:00 - 12:59 | Afternoon    | 38,2 | 69  | 55,0  | 55,0  | 19,36 | 565,86 | 135,08 |
| 2019/08/04 | CH2276 | Female | Two y/o | Treatment (Wk 1) | Treatment | Fast Day | No | 12:05 | 12:00 - 12:59 | Afternoon    | 38,2 | 88  | 48,8  | 48,8  | 19,36 | 584,49 | 130,95 |
| 2019/08/04 | CH2276 | Female | Two y/o | Treatment (Wk 1) | Treatment | Fast Day | No | 12:10 | 12:00 - 12:59 | Afternoon    | 38,2 | 84  | 67,4  | 67,4  | 19,36 | 581,01 | 142,12 |
| 2019/08/04 | CH2276 | Female | Two y/o | Treatment (Wk 1) | Treatment | Fast Day | No | 12:15 | 12:00 - 12:59 | Afternoon    | 38,2 | 73  | 69,0  | 69,0  | 19,36 | 570,27 | 142,94 |
| 2019/08/04 | CH2276 | Female | Two y/o | Treatment (Wk 1) | Treatment | Fast Day | No | 12:20 | 12:00 - 12:59 | Afternoon    | 38,2 | 104 | 397,6 | 397,6 | 19,36 | 596,69 | 204,40 |
| 2019/08/04 | CH2276 | Female | Two y/o | Treatment (Wk 1) | Treatment | Fast Day | No | 12:25 | 12:00 - 12:59 | Afternoon    | 38,3 | 80  | 75,2  | 75,2  | 19,46 | 577,31 | 145,93 |
| 2019/08/04 | CH2276 | Female | Two y/o | Treatment (Wk 1) | Treatment | Fast Day | No | 12:30 | 12:00 - 12:59 | Afternoon    | 38,2 | 84  | 74,4  | 74,4  | 19,36 | 581,01 | 145,55 |
| 2019/08/04 | CH2276 | Female | Two y/o | Treatment (Wk 1) | Treatment | Fast Day | No | 12:35 | 12:00 - 12:59 | Afternoon    | 38,2 | 63  | 70,2  | 70,2  | 19,36 | 558,62 | 143,54 |
| 2019/08/04 | CH2276 | Female | Two y/o | Treatment (Wk 1) | Treatment | Fast Day | No | 12:40 | 12:00 - 12:59 | Afternoon    | 38,1 | 90  | 69,2  | 69,2  | 19,26 | 586,16 | 143,04 |
| 2019/08/04 | CH2276 | Female | Two y/o | Treatment (Wk 1) | Treatment | Fast Day | No | 12:45 | 12:00 - 12:59 | Afternoon    | 38,0 | 50  | 72,4  | 72,4  | 19,15 | 539,52 | 144,61 |
| 2019/08/04 | CH2276 | Female | Two y/o | Treatment (Wk 1) | Treatment | Fast Day | No | 12:50 | 12:00 - 12:59 | Afternoon    | 37,9 | 90  | 76,2  | 76,2  | 19,05 | 586,16 | 146,38 |
| 2019/08/04 | CH2276 | Female | Two y/o | Treatment (Wk 1) | Treatment | Fast Day | No | 12:55 | 12:00 - 12:59 | Afternoon    | 37,8 | 58  | 65,2  | 65,2  | 18,95 | 551,90 | 140,97 |
| 2019/08/04 | CH2276 | Female | Two y/o | Treatment (Wk 1) | Treatment | Fast Day | No | 13:00 | 13:00 - 13:59 | Afternoon    | 37,8 | 61  | 57,8  | 57,8  | 18,95 | 556,01 | 136,80 |
| 2019/08/04 | CH2276 | Female | Two y/o | Treatment (Wk 1) | Treatment | Fast Day | No | 13:05 | 13:00 - 13:59 | Afternoon    | 37,7 | 78  | 51,2  | 51,2  | 18,85 | 575,38 | 132,61 |
| 2019/08/04 | CH2276 | Female | Two y/o | Treatment (Wk 1) | Treatment | Fast Day | No | 13:10 | 13:00 - 13:59 | Afternoon    | 37,7 | 60  | 75,0  | 75,0  | 18,85 | 554,67 | 145,83 |
| 2019/08/04 | CH2276 | Female | Two y/o | Treatment (Wk 1) | Treatment | Fast Day | No | 13:15 | 13:00 - 13:59 | Afternoon    | 37,7 | 61  | 82,6  | 82,6  | 18,85 | 556,01 | 149,19 |
| 2019/08/04 | CH2276 | Female | Two y/o | Treatment (Wk 1) | Treatment | Fast Day | No | 13:20 | 13:00 - 13:59 | Afternoon    | 37,8 | 60  | 86,0  | 86,0  | 18,95 | 554,67 | 150,59 |
| 2019/08/04 | CH2276 | Female | Two y/o | Treatment (Wk 1) | Treatment | Fast Day | No | 13:25 | 13:00 - 13:59 | Afternoon    | 37,8 | 150 | 44,8  | 44,8  | 18,95 | 621,86 | 127,99 |
| 2019/08/04 | CH2276 | Female | Two y/o | Treatment (Wk 1) | Treatment | Fast Day | No | 13:30 | 13:00 - 13:59 | Afternoon    | 37,8 | 59  | 23,0  | 23,0  | 18,95 | 553,30 | 105,09 |
| 2019/08/04 | CH2276 | Female | Two y/o | Treatment (Wk 1) | Treatment | Fast Day | No | 13:35 | 13:00 - 13:59 | Afternoon    | 37,8 | 59  | 23,2  | 23,2  | 18,95 | 553,30 | 105,39 |
| 2019/08/04 | CH2276 | Female | Two y/o | Treatment (Wk 1) | Treatment | Fast Day | No | 13:40 | 13:00 - 13:59 | Afternoon    | 37,8 | 61  | 22,2  | 22,2  | 18,95 | 556,01 | 103,88 |
| 2019/08/04 | CH2276 | Female | Two y/o | Treatment (Wk 1) | Treatment | Fast Day | No | 13:45 | 13:00 - 13:59 | Afternoon    | 37,8 | 43  | 24,0  | 24,0  | 18,95 | 526,50 | 106,55 |
| 2019/08/04 | CH2276 | Female | Two y/o | Treatment (Wk 1) | Treatment | Fast Day | No | 13:50 | 13:00 - 13:59 | Afternoon    | 37,7 | 79  | 31,0  | 31,0  | 18,85 | 576,36 | 115,32 |
| 2019/08/04 | CH2276 | Female | Two y/o | Treatment (Wk 1) | Treatment | Fast Day | No | 13:55 | 13:00 - 13:59 | Afternoon    | 37,7 | 103 | 23,4  | 23,4  | 18,85 | 596,00 | 105,68 |
| 2019/08/04 | CH2276 | Female | Two y/o | Treatment (Wk 1) | Treatment | Fast Day | No | 14:00 | 14:00 - 14:59 | Afternoon    | 37,6 | 54  | 28,2  | 28,2  | 18,75 | 545,99 | 112,07 |
| 2019/08/04 | CH2276 | Female | Two y/o | Treatment (Wk 1) | Treatment | Fast Day | No | 14:05 | 14:00 - 14:59 | Afternoon    | 37,6 | 83  | 22,4  | 22,4  | 18,75 | 580,11 | 104,19 |
| 2019/08/04 | CH2276 | Female | Two y/o | Treatment (Wk 1) | Treatment | Fast Day | No | 14:10 | 14:00 - 14:59 | Afternoon    | 37,5 | 43  | 23,8  | 23,8  | 18,65 | 526,50 | 106,26 |
| 2019/08/04 | CH2276 | Female | Two y/o | Treatment (Wk 1) | Treatment | Fast Day | No | 14:15 | 14:00 - 14:59 | Afternoon    | 37,5 | 48  | 32,6  | 32,6  | 18,65 | 536,04 | 117,05 |
| 2019/08/04 | CH2276 | Female | Two y/o | Treatment (Wk 1) | Treatment | Fast Day | No | 14:20 | 14:00 - 14:59 | Afternoon    | 37,5 | 99  | 89,2  | 89,2  | 18,65 | 593,14 | 151,86 |
| 2019/08/04 | CH2276 | Female | Two y/o | Treatment (Wk 1) | Treatment | Fast Day | No | 14:25 | 14:00 - 14:59 | Afternoon    | 37,5 | 83  | 71,6  | 71,6  | 18,65 | 580,11 | 144,22 |
| 2019/08/04 | CH2276 | Female | Two y/o | Treatment (Wk 1) | Treatment | Fast Day | No | 14:30 | 14:00 - 14:59 | Afternoon    | 37,5 | 55  | 61,2  | 61,2  | 18,65 | 547,52 | 138,78 |
| 2019/08/04 | CH2276 | Female | Two y/o | Treatment (Wk 1) | Treatment | Fast Day | No | 14:35 | 14:00 - 14:59 | Afternoon    | 37,5 | 60  | 122,0 | 122,0 | 18,65 | 554,67 | 162,79 |
| 2019/08/04 | CH2276 | Female | Two y/o | Treatment (Wk 1) | Treatment | Fast Day | No | 14:40 | 14:00 - 14:59 | Afternoon    | 37,6 | 57  | 85,2  | 85,2  | 18,75 | 550,47 | 150,27 |
| 2019/08/04 | CH2276 | Female | Two y/o | Treatment (Wk 1) | Treatment | Fast Day | No | 14:45 | 14:00 - 14:59 | Afternoon    | 37,6 | 99  | 67,0  | 67,0  | 18,75 | 593,14 | 141,92 |
| 2019/08/04 | CH2276 | Female | Two y/o | Treatment (Wk 1) | Treatment | Fast Day | No | 14:50 | 14:00 - 14:59 | Afternoon    | 37,7 | 91  | 64,6  | 64,6  | 18,85 | 586,98 | 140,65 |
| 2019/08/04 | CH2276 | Female | Two y/o | Treatment (Wk 1) | Treatment | Fast Day | No | 14:55 | 14:00 - 14:59 | Afternoon    | 37,6 | 66  | 243,2 | 243,2 | 18,75 | 562,34 | 187,01 |
| 2019/08/04 | CH2276 | Female | Two y/o | Treatment (Wk 1) | Treatment | Fast Day | No | 15:00 | 15:00 - 15:59 | Afternoon    | 37,6 | 98  | 80,0  | 80,0  | 18,75 | 592,41 | 148,08 |
| 2019/08/04 | CH2276 | Female | Two y/o | Treatment (Wk 1) | Treatment | Fast Day | No | 15:05 | 15:00 - 15:59 | Afternoon    | 37,7 |     | 150,0 | 150,0 | 18,85 |        | 170,02 |
| 2019/08/04 | CH2276 | Female | Two y/o | Treatment (Wk 1) | Treatment | Fast Day | No | 15:10 | 15:00 - 15:59 | Afternoon    | 37,8 | 87  | 294,6 | 294,6 | 18,95 | 583,64 | 193,78 |
| 2019/08/04 | CH2276 | Female | Two y/o | Treatment (Wk 1) | Treatment | Fast Day | No | 15:15 | 15:00 - 15:59 | Afternoon    | 37,8 | 93  | 34,4  | 34,4  | 18,95 | 588,58 | 118,90 |
| 2019/08/04 | CH2276 | Female | Two y/o | Treatment (Wk 1) | Treatment | Fast Day | No | 15:20 | 15:00 - 15:59 | Afternoon    | 37,9 | 61  | 53,4  | 53,4  | 19,05 | 556,01 | 134,06 |
| 2019/08/04 | CH2276 | Female | Two y/o | Treatment (Wk 1) | Treatment | Fast Day | No | 15:25 | 15:00 - 15:59 | Afternoon    | 37,9 | 57  | 52,4  | 52,4  | 19,05 | 550,47 | 133,41 |
| 2019/08/04 | CH2276 | Female | Two y/o | Treatment (Wk 1) | Treatment | Fast Day | No | 15:30 | 15:00 - 15:59 | Afternoon    | 37,9 | 62  | 88,0  | 88,0  | 19,05 | 557,33 | 151,39 |
| 2019/08/04 | CH2276 | Female | Two y/o | Treatment (Wk 1) | Treatment | Fast Day | No | 15:35 | 15:00 - 15:59 | Afternoon    | 38,0 | 77  | 163,2 | 163,2 | 19,15 | 574,39 | 172,97 |
| 2019/08/04 | CH2276 | Female | Two y/o | Treatment (Wk 1) | Treatment | Fast Day | No | 15:40 | 15:00 - 15:59 | Afternoon    | 38,0 |     | 115,0 | 115,0 | 19,15 |        | 160,72 |
| 2019/08/04 | CH2276 | Female | Two y/o | Treatment (Wk 1) | Treatment | Fast Day | No | 15:45 | 15:00 - 15:59 | Afternoon    | 38,0 | 80  | 69,6  | 69,6  | 19,15 | 577,31 | 143,24 |
| 2019/08/04 | CH2276 | Female | Two y/o | Treatment (Wk 1) | Treatment | Fast Day | No | 15:50 | 15:00 - 15:59 | Afternoon    | 38,0 | 57  | 64,2  | 64,2  | 19,15 | 550,47 | 140,44 |
| 2019/08/04 | CH2276 | Female | Two y/o | Treatment (Wk 1) | Treatment | Fast Day | No | 15:55 | 15:00 - 15:59 | Afternoon    | 38,1 | 64  | 129,2 | 129,2 | 19,26 | 559,88 | 164,79 |
| 2019/08/04 | CH2276 | Female | Two y/o | Treatment (Wk 1) | Treatment | Fast Day | No | 16:00 | 16:00 - 16:59 | Evening      | 38,2 | 77  | 88,2  | 88,2  | 19,36 | 574,39 | 151,47 |
| 2019/08/04 | CH2276 | Female | Two y/o | Treatment (Wk 1) | Treatment | Fast Day | No | 16:05 | 16:00 - 16:59 | Evening      | 38,3 | 57  | 383,2 | 383,2 | 19,46 | 550,47 | 203,09 |
| 2019/08/04 | CH2276 | Female | Two y/o | Treatment (Wk 1) | Treatment | Fast Day | No | 16:10 | 16:00 - 16:59 | Evening      | 38,3 |     | 54,6  | 54,6  | 19,46 |        | 134,83 |
| 2019/08/04 | CH2276 | Female | Two y/o | Treatment (Wk 1) | Treatment | Fast Day | No | 16:15 | 16:00 - 16:59 | Evening      | 38,3 | 117 | 54,2  | 54,2  | 19,46 | 605,02 | 134,57 |
| 2019/08/04 | CH2276 | Female | Two y/o | Treatment (Wk 1) | Treatment | Fast Day | No | 16:20 | 16:00 - 16:59 | Evening      | 38,3 | 137 | 71,2  | 71,2  | 19,46 | 615,83 | 144,03 |
| 2019/08/04 | CH2276 | Female | Two y/o | Treatment (Wk 1) | Treatment | Fast Day | No | 16:25 | 16:00 - 16:59 | Evening      | 38,2 | 82  | 58,6  | 58,6  | 19,36 | 579,19 | 137,28 |
| 2019/08/04 | CH2276 | Female | Two y/o | Treatment (Wk 1) | Treatment | Fast Day | No | 16:30 | 16:00 - 16:59 | Evening      | 38,3 | 61  | 58,0  | 58,0  | 19,46 | 556,01 | 136,92 |
| 2019/08/04 | CH2276 | Female | Two y/o | Treatment (Wk 1) | Treatment | Fast Day | No | 16:35 | 16:00 - 16:59 | Evening      | 38,3 | 182 | 58,2  | 58,2  | 19,46 | 634,31 | 137,04 |
| 2019/08/04 | CH2276 | Female | Two y/o | Treatment (Wk 1) | Treatment | Fast Day | No | 16:40 | 16:00 - 16:59 | Evening      | 38,4 | 61  | 44,2  | 44,2  | 19,56 | 556,01 | 127,53 |
| 2019/08/04 | CH2276 | Female | Two y/o | Treatment (Wk 1) | Treatment | Fast Day | No | 16:45 | 16:00 - 16:59 | Evening      | 38,4 | 59  | 48,6  | 48,6  | 19,56 | 553,30 | 130,81 |
| 2019/08/04 | CH2276 | Female | Two y/o | Treatment (Wk 1) | Treatment | Fast Day | No | 16:50 | 16:00 - 16:59 | Evening      | 38,4 | 57  | 46,2  | 46,2  | 19,56 | 550,47 | 129,06 |



|            |        |        |         |                  |           |          |    |       |               |         |      |     |       |       |       |        |        |
|------------|--------|--------|---------|------------------|-----------|----------|----|-------|---------------|---------|------|-----|-------|-------|-------|--------|--------|
| 2019/08/04 | CH2276 | Female | Two y/o | Treatment (Wk 1) | Treatment | Fast Day | No | 16:55 | 16:00 - 16:59 | Evening | 38,4 | 60  | 54,0  | 54,0  | 19,56 | 554,67 | 134,45 |
| 2019/08/04 | CH2276 | Female | Two y/o | Treatment (Wk 1) | Treatment | Fast Day | No | 17:00 | 17:00 - 17:59 | Evening | 38,4 | 60  | 72,8  | 72,8  | 19,56 | 554,67 | 144,80 |
| 2019/08/04 | CH2276 | Female | Two y/o | Treatment (Wk 1) | Treatment | Fast Day | No | 17:05 | 17:00 - 17:59 | Evening | 38,5 | 83  | 188,0 | 188,0 | 19,66 | 580,11 | 177,94 |
| 2019/08/04 | CH2276 | Female | Two y/o | Treatment (Wk 1) | Treatment | Fast Day | No | 17:10 | 17:00 - 17:59 | Evening | 38,4 | 94  | 60,6  | 60,6  | 19,56 | 589,37 | 138,44 |
| 2019/08/04 | CH2276 | Female | Two y/o | Treatment (Wk 1) | Treatment | Fast Day | No | 17:15 | 17:00 - 17:59 | Evening | 38,4 |     | 147,4 | 147,4 | 19,56 |        | 169,40 |
| 2019/08/04 | CH2276 | Female | Two y/o | Treatment (Wk 1) | Treatment | Fast Day | No | 17:20 | 17:00 - 17:59 | Evening | 38,3 | 112 | 85,8  | 85,8  | 19,46 | 601,96 | 150,51 |
| 2019/08/04 | CH2276 | Female | Two y/o | Treatment (Wk 1) | Treatment | Fast Day | No | 17:25 | 17:00 - 17:59 | Evening | 38,5 | 72  | 217,2 | 217,2 | 19,66 | 569,20 | 183,02 |
| 2019/08/04 | CH2276 | Female | Two y/o | Treatment (Wk 1) | Treatment | Fast Day | No | 17:30 | 17:00 - 17:59 | Evening | 38,4 |     | 63,8  | 63,8  | 19,56 |        | 140,22 |
| 2019/08/04 | CH2276 | Female | Two y/o | Treatment (Wk 1) | Treatment | Fast Day | No | 17:35 | 17:00 - 17:59 | Evening | 38,4 | 88  | 132,4 | 132,4 | 19,56 | 584,49 | 165,65 |
| 2019/08/04 | CH2276 | Female | Two y/o | Treatment (Wk 1) | Treatment | Fast Day | No | 17:40 | 17:00 - 17:59 | Evening | 38,6 | 169 | 78,6  | 78,6  | 19,76 | 629,60 | 147,46 |
| 2019/08/04 | CH2276 | Female | Two y/o | Treatment (Wk 1) | Treatment | Fast Day | No | 17:45 | 17:00 - 17:59 | Evening | 38,5 | 55  | 533,4 | 533,4 | 19,66 | 547,52 | 214,85 |
| 2019/08/04 | CH2276 | Female | Two y/o | Treatment (Wk 1) | Treatment | Fast Day | No | 17:50 | 17:00 - 17:59 | Evening | 38,6 | 138 | 142,0 | 142,0 | 19,76 | 616,31 | 168,10 |
| 2019/08/04 | CH2276 | Female | Two y/o | Treatment (Wk 1) | Treatment | Fast Day | No | 17:55 | 17:00 - 17:59 | Evening | 38,6 | 165 | 151,8 | 151,8 | 19,76 | 628,06 | 170,44 |
| 2019/08/04 | CH2276 | Female | Two y/o | Treatment (Wk 1) | Treatment | Fast Day | No | 18:00 | 18:00 - 18:59 | Evening | 38,7 | 115 | 326,4 | 326,4 | 19,87 | 603,82 | 197,41 |
| 2019/08/04 | CH2276 | Female | Two y/o | Treatment (Wk 1) | Treatment | Fast Day | No | 18:05 | 18:00 - 18:59 | Evening | 39,0 |     | 304,8 | 304,8 | 20,18 |        | 194,98 |
| 2019/08/04 | CH2276 | Female | Two y/o | Treatment (Wk 1) | Treatment | Fast Day | No | 18:10 | 18:00 - 18:59 | Evening | 39,0 | 72  | 814,6 | 814,6 | 20,18 | 569,20 | 229,98 |
| 2019/08/04 | CH2276 | Female | Two y/o | Treatment (Wk 1) | Treatment | Fast Day | No | 18:15 | 18:00 - 18:59 | Evening | 39,1 |     | 468,0 | 468,0 | 20,28 |        | 210,19 |
| 2019/08/04 | CH2276 | Female | Two y/o | Treatment (Wk 1) | Treatment | Fast Day | No | 18:20 | 18:00 - 18:59 | Evening | 39,2 | 71  | 94,0  | 94,0  | 20,38 | 568,10 | 153,69 |
| 2019/08/04 | CH2276 | Female | Two y/o | Treatment (Wk 1) | Treatment | Fast Day | No | 18:25 | 18:00 - 18:59 | Evening | 39,1 |     | 237,0 | 237,0 | 20,28 |        | 186,10 |
| 2019/08/04 | CH2276 | Female | Two y/o | Treatment (Wk 1) | Treatment | Fast Day | No | 18:30 | 18:00 - 18:59 | Evening | 39,1 | 121 | 156,4 | 156,4 | 20,28 | 607,35 | 171,48 |
| 2019/08/04 | CH2276 | Female | Two y/o | Treatment (Wk 1) | Treatment | Fast Day | No | 18:35 | 18:00 - 18:59 | Evening | 39,0 | 105 | 36,8  | 36,8  | 20,18 | 597,38 | 121,22 |
| 2019/08/04 | CH2276 | Female | Two y/o | Treatment (Wk 1) | Treatment | Fast Day | No | 18:40 | 18:00 - 18:59 | Evening | 38,8 | 83  | 45,0  | 45,0  | 19,97 | 580,11 | 128,15 |
| 2019/08/04 | CH2276 | Female | Two y/o | Treatment (Wk 1) | Treatment | Fast Day | No | 18:45 | 18:00 - 18:59 | Evening | 38,8 | 88  | 39,2  | 39,2  | 19,97 | 584,49 | 123,39 |
| 2019/08/04 | CH2276 | Female | Two y/o | Treatment (Wk 1) | Treatment | Fast Day | No | 18:50 | 18:00 - 18:59 | Evening | 38,6 | 74  | 32,8  | 32,8  | 19,76 | 571,33 | 117,26 |
| 2019/08/04 | CH2276 | Female | Two y/o | Treatment (Wk 1) | Treatment | Fast Day | No | 18:55 | 18:00 - 18:59 | Evening | 38,4 | 88  | 35,6  | 35,6  | 19,56 | 584,49 | 120,08 |
| 2019/08/04 | CH2276 | Female | Two y/o | Treatment (Wk 1) | Treatment | Fast Day | No | 19:00 | 19:00 - 19:59 | Evening | 38,2 | 62  | 43,4  | 43,4  | 19,36 | 557,33 | 126,90 |
| 2019/08/04 | CH2276 | Female | Two y/o | Treatment (Wk 1) | Treatment | Fast Day | No | 19:05 | 19:00 - 19:59 | Evening | 38,0 | 65  | 47,0  | 47,0  | 19,15 | 561,12 | 129,65 |
| 2019/08/04 | CH2276 | Female | Two y/o | Treatment (Wk 1) | Treatment | Fast Day | No | 19:10 | 19:00 - 19:59 | Evening | 37,9 | 60  | 48,6  | 48,6  | 19,05 | 554,67 | 130,81 |
| 2019/08/04 | CH2276 | Female | Two y/o | Treatment (Wk 1) | Treatment | Fast Day | No | 19:15 | 19:00 - 19:59 | Evening | 37,8 |     | 49,8  | 49,8  | 18,95 |        | 131,65 |
| 2019/08/04 | CH2276 | Female | Two y/o | Treatment (Wk 1) | Treatment | Fast Day | No | 19:20 | 19:00 - 19:59 | Evening | 37,7 |     | 39,6  | 39,6  | 18,85 | 550,47 | 123,74 |
| 2019/08/04 | CH2276 | Female | Two y/o | Treatment (Wk 1) | Treatment | Fast Day | No | 19:25 | 19:00 - 19:59 | Evening | 37,6 | 57  | 36,8  | 36,8  | 18,75 | 550,47 | 121,22 |
| 2019/08/04 | CH2276 | Female | Two y/o | Treatment (Wk 1) | Treatment | Fast Day | No | 19:30 | 19:00 - 19:59 | Evening | 37,5 | 64  | 38,4  | 38,4  | 18,65 | 559,88 | 122,68 |
| 2019/08/04 | CH2276 | Female | Two y/o | Treatment (Wk 1) | Treatment | Fast Day | No | 19:35 | 19:00 - 19:59 | Evening | 37,4 | 67  | 42,4  | 42,4  | 18,55 | 563,53 | 126,10 |
| 2019/08/04 | CH2276 | Female | Two y/o | Treatment (Wk 1) | Treatment | Fast Day | No | 19:40 | 19:00 - 19:59 | Evening | 37,3 | 66  | 39,6  | 39,6  | 18,46 | 562,34 | 123,74 |
| 2019/08/04 | CH2276 | Female | Two y/o | Treatment (Wk 1) | Treatment | Fast Day | No | 19:45 | 19:00 - 19:59 | Evening | 37,1 | 52  | 39,8  | 39,8  | 18,26 | 542,83 | 123,91 |
| 2019/08/04 | CH2276 | Female | Two y/o | Treatment (Wk 1) | Treatment | Fast Day | No | 19:50 | 19:00 - 19:59 | Evening | 37,1 | 53  | 37,6  | 37,6  | 18,26 | 544,43 | 121,96 |
| 2019/08/04 | CH2276 | Female | Two y/o | Treatment (Wk 1) | Treatment | Fast Day | No | 19:55 | 19:00 - 19:59 | Evening | 37,0 | 64  | 40,8  | 40,8  | 18,16 | 559,88 | 124,77 |
| 2019/08/04 | CH2276 | Female | Two y/o | Treatment (Wk 1) | Treatment | Fast Day | No | 20:00 | 20:00 - 20:59 | Night   | 37,1 | 54  | 42,6  | 42,6  | 18,26 | 545,99 | 126,26 |
| 2019/08/04 | CH2276 | Female | Two y/o | Treatment (Wk 1) | Treatment | Fast Day | No | 20:05 | 20:00 - 20:59 | Night   | 37,1 | 60  | 39,0  | 39,0  | 18,26 | 554,67 | 123,22 |
| 2019/08/04 | CH2276 | Female | Two y/o | Treatment (Wk 1) | Treatment | Fast Day | No | 20:10 | 20:00 - 20:59 | Night   | 37,2 | 59  | 38,6  | 38,6  | 18,36 | 553,30 | 122,86 |
| 2019/08/04 | CH2276 | Female | Two y/o | Treatment (Wk 1) | Treatment | Fast Day | No | 20:15 | 20:00 - 20:59 | Night   | 37,2 | 53  | 38,4  | 38,4  | 18,36 | 544,43 | 122,68 |
| 2019/08/04 | CH2276 | Female | Two y/o | Treatment (Wk 1) | Treatment | Fast Day | No | 20:20 | 20:00 - 20:59 | Night   | 37,3 | 57  | 37,8  | 37,8  | 18,46 | 550,47 | 122,14 |
| 2019/08/04 | CH2276 | Female | Two y/o | Treatment (Wk 1) | Treatment | Fast Day | No | 20:25 | 20:00 - 20:59 | Night   | 37,3 | 64  | 36,0  | 36,0  | 18,46 | 559,88 | 120,46 |
| 2019/08/04 | CH2276 | Female | Two y/o | Treatment (Wk 1) | Treatment | Fast Day | No | 20:30 | 20:00 - 20:59 | Night   | 37,3 | 58  | 36,2  | 36,2  | 18,46 | 551,90 | 120,65 |
| 2019/08/04 | CH2276 | Female | Two y/o | Treatment (Wk 1) | Treatment | Fast Day | No | 20:35 | 20:00 - 20:59 | Night   | 37,3 | 59  | 40,6  | 40,6  | 18,46 | 553,30 | 124,60 |
| 2019/08/04 | CH2276 | Female | Two y/o | Treatment (Wk 1) | Treatment | Fast Day | No | 20:40 | 20:00 - 20:59 | Night   | 37,4 | 59  | 45,0  | 45,0  | 18,55 | 553,30 | 128,15 |
| 2019/08/04 | CH2276 | Female | Two y/o | Treatment (Wk 1) | Treatment | Fast Day | No | 20:45 | 20:00 - 20:59 | Night   | 37,4 | 53  | 33,4  | 33,4  | 18,55 | 544,43 | 117,88 |
| 2019/08/04 | CH2276 | Female | Two y/o | Treatment (Wk 1) | Treatment | Fast Day | No | 20:50 | 20:00 - 20:59 | Night   | 37,4 | 51  | 51,2  | 51,2  | 18,55 | 541,20 | 132,61 |
| 2019/08/04 | CH2276 | Female | Two y/o | Treatment (Wk 1) | Treatment | Fast Day | No | 20:55 | 20:00 - 20:59 | Night   | 37,4 | 51  | 139,8 | 139,8 | 18,55 | 541,20 | 167,55 |
| 2019/08/04 | CH2276 | Female | Two y/o | Treatment (Wk 1) | Treatment | Fast Day | No | 21:00 | 21:00 - 21:59 | Night   | 37,5 |     | 80,2  | 80,2  | 18,65 |        | 148,16 |
| 2019/08/04 | CH2276 | Female | Two y/o | Treatment (Wk 1) | Treatment | Fast Day | No | 21:05 | 21:00 - 21:59 | Night   | 37,5 | 112 | 44,0  | 44,0  | 18,65 | 601,96 | 127,37 |
| 2019/08/04 | CH2276 | Female | Two y/o | Treatment (Wk 1) | Treatment | Fast Day | No | 21:10 | 21:00 - 21:59 | Night   | 37,4 | 124 | 52,6  | 52,6  | 18,55 | 609,04 | 133,54 |
| 2019/08/04 | CH2276 | Female | Two y/o | Treatment (Wk 1) | Treatment | Fast Day | No | 21:15 | 21:00 - 21:59 | Night   | 37,4 | 91  | 55,4  | 55,4  | 18,55 | 586,98 | 135,33 |
| 2019/08/04 | CH2276 | Female | Two y/o | Treatment (Wk 1) | Treatment | Fast Day | No | 21:20 | 21:00 - 21:59 | Night   | 37,5 | 92  | 48,4  | 48,4  | 18,65 | 587,78 | 130,66 |
| 2019/08/04 | CH2276 | Female | Two y/o | Treatment (Wk 1) | Treatment | Fast Day | No | 21:25 | 21:00 - 21:59 | Night   | 37,5 | 58  | 51,4  | 51,4  | 18,65 | 551,90 | 132,74 |
| 2019/08/04 | CH2276 | Female | Two y/o | Treatment (Wk 1) | Treatment | Fast Day | No | 21:30 | 21:00 - 21:59 | Night   | 37,5 | 56  | 48,6  | 48,6  | 18,65 | 549,01 | 130,81 |
| 2019/08/04 | CH2276 | Female | Two y/o | Treatment (Wk 1) | Treatment | Fast Day | No | 21:35 | 21:00 - 21:59 | Night   | 37,5 | 110 | 46,2  | 46,2  | 18,65 | 600,69 | 129,06 |
| 2019/08/04 | CH2276 | Female | Two y/o | Treatment (Wk 1) | Treatment | Fast Day | No | 21:40 | 21:00 - 21:59 | Night   | 37,5 | 64  | 44,0  | 44,0  | 18,65 | 559,88 | 127,37 |
| 2019/08/04 | CH2276 | Female | Two y/o | Treatment (Wk 1) | Treatment | Fast Day | No | 21:45 | 21:00 - 21:59 | Night   | 37,5 | 83  | 46,6  | 46,6  | 18,65 | 580,11 | 129,35 |
| 2019/08/04 | CH2276 | Female | Two y/o | Treatment (Wk 1) | Treatment | Fast Day | No | 21:50 | 21:00 - 21:59 | Night   | 37,5 | 57  | 53,2  | 53,2  | 18,65 | 550,47 | 133,93 |
| 2019/08/04 | CH2276 | Female | Two y/o | Treatment (Wk 1) | Treatment | Fast Day | No | 21:55 | 21:00 - 21:59 | Night   | 37,5 | 92  | 41,8  | 41,8  | 18,65 | 587,78 | 125,60 |
| 2019/08/04 | CH2276 | Female | Two y/o | Treatment (Wk 1) | Treatment | Fast Day | No | 22:00 | 22:00 - 22:59 | Night   | 37,5 | 60  | 41,4  | 41,4  | 18,65 | 554,67 | 125,27 |
| 2019/08/04 | CH2276 | Female | Two y/o | Treatment (Wk 1) | Treatment | Fast Day | No | 22:05 | 22:00 - 22:59 | Night   | 37,4 | 56  | 34,2  | 34,2  | 18,55 | 549,01 | 118,70 |
| 2019/08/04 | CH2276 | Female | Two y/o | Treatment (Wk 1) | Treatment | Fast Day | No | 22:10 | 22:00 - 22:59 | Night   | 37,3 | 61  | 44,6  | 44,6  | 18,46 | 556,01 | 127,84 |
| 2019/08/04 | CH2276 | Female | Two y/o | Treatment (Wk 1) | Treatment | Fast Day | No | 22:15 | 22:00 - 22:59 | Night   | 37,1 | 62  | 27,0  | 27,0  | 18,26 | 557,33 | 110,58 |
| 2019/08/04 | CH2276 | Female | Two y/o | Treatment (Wk 1) | Treatment | Fast Day | No | 22:20 | 22:00 - 22:59 | Night   | 37,1 | 61  | 13,6  | 13,6  | 18,26 | 556,01 | 87,18  |
| 2019/08/04 | CH2276 | Female | Two y/o | Treatment (Wk 1) | Treatment | Fast Day | No | 22:25 | 22:00 - 22:59 | Night   | 37,1 | 59  | 44,2  | 44,2  | 18,26 | 553,30 | 127,53 |
| 2019/08/04 | CH2276 | Female | Two y/o | Treatment (Wk 1) | Treatment | Fast Day | No | 22:30 | 22:00 - 22:59 | Night   | 37,1 | 137 | 52,8  | 52,8  | 18,26 | 615,83 | 133,67 |
| 2019/08/04 | CH2276 | Female | Two y/o | Treatment (Wk 1) | Treatment | Fast Day | No | 22:35 | 22:00 - 22:59 | Night   | 37,1 |     | 48,6  | 48,6  | 18,26 |        | 130,81 |
| 2019/08/04 | CH2276 | Female | Two y/o | Treatment (Wk 1) | Treatment | Fast Day | No | 22:40 | 22:00 - 22:59 | Night   | 37,1 | 86  | 45,2  | 45,2  | 18,26 | 582,77 | 128,30 |



|    |            |        |        |         |                  |           |          |    |       |               |               |      |     |        |       |       |        |        |
|----|------------|--------|--------|---------|------------------|-----------|----------|----|-------|---------------|---------------|------|-----|--------|-------|-------|--------|--------|
|    | 2019/08/04 | CH2276 | Female | Two y/o | Treatment (Wk 1) | Treatment | Fast Day | No | 22:45 | 22:00 - 22:59 | Night         | 37,1 |     | 42,8   | 42,8  | 18,26 |        | 126,42 |
|    | 2019/08/04 | CH2276 | Female | Two y/o | Treatment (Wk 1) | Treatment | Fast Day | No | 22:50 | 22:00 - 22:59 | Night         | 37,1 | 84  | 40,8   | 40,8  | 18,26 | 581,01 | 124,77 |
|    | 2019/08/04 | CH2276 | Female | Two y/o | Treatment (Wk 1) | Treatment | Fast Day | No | 22:55 | 22:00 - 22:59 | Night         | 37,1 | 64  | 42,0   | 42,0  | 18,26 | 559,88 | 125,77 |
|    | 2019/08/04 | CH2276 | Female | Two y/o | Treatment (Wk 1) | Treatment | Fast Day | No | 23:00 | 23:00 - 23:59 | Night         | 37,1 | 59  | 51,8   | 51,8  | 18,26 | 553,30 | 133,01 |
|    | 2019/08/04 | CH2276 | Female | Two y/o | Treatment (Wk 1) | Treatment | Fast Day | No | 23:05 | 23:00 - 23:59 | Night         | 37,1 |     | 81,0   | 81,0  | 18,26 |        | 148,51 |
|    | 2019/08/04 | CH2276 | Female | Two y/o | Treatment (Wk 1) | Treatment | Fast Day | No | 23:10 | 23:00 - 23:59 | Night         | 37,4 | 120 | 137,0  | 137,0 | 18,55 | 606,78 | 166,84 |
|    | 2019/08/04 | CH2276 | Female | Two y/o | Treatment (Wk 1) | Treatment | Fast Day | No | 23:15 | 23:00 - 23:59 | Night         | 37,5 | 97  | 63,6   | 63,6  | 18,65 | 591,66 | 140,11 |
|    | 2019/08/04 | CH2276 | Female | Two y/o | Treatment (Wk 1) | Treatment | Fast Day | No | 23:20 | 23:00 - 23:59 | Night         | 37,4 | 107 | 64,6   | 64,6  | 18,55 | 598,73 | 140,65 |
|    | 2019/08/04 | CH2276 | Female | Two y/o | Treatment (Wk 1) | Treatment | Fast Day | No | 23:25 | 23:00 - 23:59 | Night         | 37,5 | 101 | 242,2  | 242,2 | 18,65 | 594,59 | 186,86 |
|    | 2019/08/04 | CH2276 | Female | Two y/o | Treatment (Wk 1) | Treatment | Fast Day | No | 23:30 | 23:00 - 23:59 | Night         | 37,5 | 177 | 388,2  | 388,2 | 18,65 | 632,55 | 203,55 |
|    | 2019/08/04 | CH2276 | Female | Two y/o | Treatment (Wk 1) | Treatment | Fast Day | No | 23:35 | 23:00 - 23:59 | Night         | 37,6 | 80  | 1136,4 |       | 18,75 | 577,31 |        |
|    | 2019/08/04 | CH2276 | Female | Two y/o | Treatment (Wk 1) | Treatment | Fast Day | No | 23:40 | 23:00 - 23:59 | Night         | 37,9 | 143 | 117,4  | 117,4 | 19,05 | 618,69 | 161,44 |
|    | 2019/08/04 | CH2276 | Female | Two y/o | Treatment (Wk 1) | Treatment | Fast Day | No | 23:45 | 23:00 - 23:59 | Night         | 38,2 | 162 | 179,6  | 179,6 | 19,36 | 626,88 | 176,34 |
|    | 2019/08/04 | CH2276 | Female | Two y/o | Treatment (Wk 1) | Treatment | Fast Day | No | 23:50 | 23:00 - 23:59 | Night         | 38,4 | 100 | 377,4  | 377,4 | 19,56 | 593,87 | 202,55 |
|    | 2019/08/04 | CH2276 | Female | Two y/o | Treatment (Wk 1) | Treatment | Fast Day | No | 23:55 | 23:00 - 23:59 | Night         | 38,3 | 100 | 57,0   | 57,0  | 19,46 | 593,87 | 136,32 |
| 48 | 2019/08/05 | CH2276 | Female | Two y/o | Treatment (Wk 1) | Treatment | Feed Day | No | 00:00 | 00:00 - 00:59 | Early Morning | 38,2 | 69  | 46,4   | 46,4  | 19,36 | 565,86 | 129,21 |
|    | 2019/08/05 | CH2276 | Female | Two y/o | Treatment (Wk 1) | Treatment | Feed Day | No | 00:05 | 00:00 - 00:59 | Early Morning | 38,2 | 62  | 42,4   | 42,4  | 19,36 | 557,33 | 126,10 |
|    | 2019/08/05 | CH2276 | Female | Two y/o | Treatment (Wk 1) | Treatment | Feed Day | No | 00:10 | 00:00 - 00:59 | Early Morning | 38,2 | 70  | 54,2   | 54,2  | 19,36 | 566,99 | 134,57 |
|    | 2019/08/05 | CH2276 | Female | Two y/o | Treatment (Wk 1) | Treatment | Feed Day | No | 00:15 | 00:00 - 00:59 | Early Morning | 38,0 | 63  | 52,6   | 52,6  | 19,15 | 558,62 | 133,54 |
|    | 2019/08/05 | CH2276 | Female | Two y/o | Treatment (Wk 1) | Treatment | Feed Day | No | 00:20 | 00:00 - 00:59 | Early Morning | 38,0 | 59  | 49,8   | 49,8  | 19,15 | 553,30 | 131,65 |
|    | 2019/08/05 | CH2276 | Female | Two y/o | Treatment (Wk 1) | Treatment | Feed Day | No | 00:25 | 00:00 - 00:59 | Early Morning | 37,9 | 90  | 44,0   | 44,0  | 19,05 | 586,16 | 127,37 |
|    | 2019/08/05 | CH2276 | Female | Two y/o | Treatment (Wk 1) | Treatment | Feed Day | No | 00:30 | 00:00 - 00:59 | Early Morning | 37,9 | 55  | 47,0   | 47,0  | 19,05 | 547,52 | 129,65 |
|    | 2019/08/05 | CH2276 | Female | Two y/o | Treatment (Wk 1) | Treatment | Feed Day | No | 00:35 | 00:00 - 00:59 | Early Morning | 37,8 | 62  | 45,2   | 45,2  | 18,95 | 557,33 | 128,30 |
|    | 2019/08/05 | CH2276 | Female | Two y/o | Treatment (Wk 1) | Treatment | Feed Day | No | 00:40 | 00:00 - 00:59 | Early Morning | 37,7 | 90  | 47,6   | 47,6  | 18,85 | 586,16 | 130,09 |
|    | 2019/08/05 | CH2276 | Female | Two y/o | Treatment (Wk 1) | Treatment | Feed Day | No | 00:45 | 00:00 - 00:59 | Early Morning | 37,6 | 93  | 27,2   | 27,2  | 18,75 | 588,58 | 110,83 |
|    | 2019/08/05 | CH2276 | Female | Two y/o | Treatment (Wk 1) | Treatment | Feed Day | No | 00:50 | 00:00 - 00:59 | Early Morning | 37,6 | 59  | 29,8   | 29,8  | 18,75 | 553,30 | 113,97 |
|    | 2019/08/05 | CH2276 | Female | Two y/o | Treatment (Wk 1) | Treatment | Feed Day | No | 00:55 | 00:00 - 00:59 | Early Morning | 37,6 | 63  | 47,8   | 47,8  | 18,75 | 558,62 | 130,23 |
|    | 2019/08/05 | CH2276 | Female | Two y/o | Treatment (Wk 1) | Treatment | Feed Day | No | 01:00 | 01:00 - 01:59 | Early Morning | 37,5 | 55  | 42,8   | 42,8  | 18,65 | 547,52 | 126,42 |
|    | 2019/08/05 | CH2276 | Female | Two y/o | Treatment (Wk 1) | Treatment | Feed Day | No | 01:05 | 01:00 - 01:59 | Early Morning | 37,3 | 67  | 43,0   | 43,0  | 18,46 | 563,53 | 126,58 |
|    | 2019/08/05 | CH2276 | Female | Two y/o | Treatment (Wk 1) | Treatment | Feed Day | No | 01:10 | 01:00 - 01:59 | Early Morning | 37,2 | 88  | 41,6   | 41,6  | 18,36 | 584,49 | 125,44 |
|    | 2019/08/05 | CH2276 | Female | Two y/o | Treatment (Wk 1) | Treatment | Feed Day | No | 01:15 | 01:00 - 01:59 | Early Morning | 37,0 | 62  | 40,2   | 40,2  | 18,16 | 557,33 | 124,26 |
|    | 2019/08/05 | CH2276 | Female | Two y/o | Treatment (Wk 1) | Treatment | Feed Day | No | 01:20 | 01:00 - 01:59 | Early Morning | 37,0 | 61  | 42,2   | 42,2  | 18,16 | 556,01 | 125,93 |
|    | 2019/08/05 | CH2276 | Female | Two y/o | Treatment (Wk 1) | Treatment | Feed Day | No | 01:25 | 01:00 - 01:59 | Early Morning | 37,0 | 50  | 41,4   | 41,4  | 18,16 | 539,52 | 125,27 |
|    | 2019/08/05 | CH2276 | Female | Two y/o | Treatment (Wk 1) | Treatment | Feed Day | No | 01:30 | 01:00 - 01:59 | Early Morning | 37,0 | 55  | 41,8   | 41,8  | 18,16 | 547,52 | 125,60 |
|    | 2019/08/05 | CH2276 | Female | Two y/o | Treatment (Wk 1) | Treatment | Feed Day | No | 01:35 | 01:00 - 01:59 | Early Morning | 36,9 | 60  | 40,8   | 40,8  | 18,06 | 554,67 | 124,77 |
|    | 2019/08/05 | CH2276 | Female | Two y/o | Treatment (Wk 1) | Treatment | Feed Day | No | 01:40 | 01:00 - 01:59 | Early Morning | 36,9 | 60  | 37,4   | 37,4  | 18,06 | 554,67 | 121,77 |
|    | 2019/08/05 | CH2276 | Female | Two y/o | Treatment (Wk 1) | Treatment | Feed Day | No | 01:45 | 01:00 - 01:59 | Early Morning | 36,8 | 55  | 45,0   | 45,0  | 17,96 | 547,52 | 128,15 |
|    | 2019/08/05 | CH2276 | Female | Two y/o | Treatment (Wk 1) | Treatment | Feed Day | No | 01:50 | 01:00 - 01:59 | Early Morning | 36,8 | 57  | 42,2   | 42,2  | 17,96 | 550,47 | 125,93 |
|    | 2019/08/05 | CH2276 | Female | Two y/o | Treatment (Wk 1) | Treatment | Feed Day | No | 01:55 | 01:00 - 01:59 | Early Morning | 36,8 | 57  | 41,6   | 41,6  | 17,96 | 550,47 | 125,44 |
|    | 2019/08/05 | CH2276 | Female | Two y/o | Treatment (Wk 1) | Treatment | Feed Day | No | 02:00 | 02:00 - 02:59 | Early Morning | 36,8 | 69  | 43,6   | 43,6  | 17,96 | 565,86 | 127,06 |
|    | 2019/08/05 | CH2276 | Female | Two y/o | Treatment (Wk 1) | Treatment | Feed Day | No | 02:05 | 02:00 - 02:59 | Early Morning | 36,8 | 62  | 39,2   | 39,2  | 17,96 | 557,33 | 123,39 |
|    | 2019/08/05 | CH2276 | Female | Two y/o | Treatment (Wk 1) | Treatment | Feed Day | No | 02:10 | 02:00 - 02:59 | Early Morning | 36,7 | 57  | 49,0   | 49,0  | 17,87 | 550,47 | 131,09 |
|    | 2019/08/05 | CH2276 | Female | Two y/o | Treatment (Wk 1) | Treatment | Feed Day | No | 02:15 | 02:00 - 02:59 | Early Morning | 36,8 | 132 | 70,8   | 70,8  | 17,96 | 613,32 | 143,83 |
|    | 2019/08/05 | CH2276 | Female | Two y/o | Treatment (Wk 1) | Treatment | Feed Day | No | 02:20 | 02:00 - 02:59 | Early Morning | 37,1 | 165 | 208,8  | 208,8 | 18,26 | 628,06 | 181,63 |
|    | 2019/08/05 | CH2276 | Female | Two y/o | Treatment (Wk 1) | Treatment | Feed Day | No | 02:25 | 02:00 - 02:59 | Early Morning | 37,3 | 131 | 83,6   | 83,6  | 18,46 | 612,80 | 149,61 |
|    | 2019/08/05 | CH2276 | Female | Two y/o | Treatment (Wk 1) | Treatment | Feed Day | No | 02:30 | 02:00 - 02:59 | Early Morning | 37,5 | 79  | 114,0  | 114,0 | 18,65 | 576,36 | 160,42 |
|    | 2019/08/05 | CH2276 | Female | Two y/o | Treatment (Wk 1) | Treatment | Feed Day | No | 02:35 | 02:00 - 02:59 | Early Morning | 37,6 |     | 234,4  | 234,4 | 18,75 |        | 185,71 |
|    | 2019/08/05 | CH2276 | Female | Two y/o | Treatment (Wk 1) | Treatment | Feed Day | No | 02:40 | 02:00 - 02:59 | Early Morning | 37,7 |     | 166,6  | 166,6 | 18,85 |        | 173,70 |
|    | 2019/08/05 | CH2276 | Female | Two y/o | Treatment (Wk 1) | Treatment | Feed Day | No | 02:45 | 02:00 - 02:59 | Early Morning | 37,9 | 119 | 490,8  | 490,8 | 19,05 | 606,20 | 211,89 |
|    | 2019/08/05 | CH2276 | Female | Two y/o | Treatment (Wk 1) | Treatment | Feed Day | No | 02:50 | 02:00 - 02:59 | Early Morning | 37,9 | 156 | 139,2  | 139,2 | 19,05 | 624,43 | 167,40 |
|    | 2019/08/05 | CH2276 | Female | Two y/o | Treatment (Wk 1) | Treatment | Feed Day | No | 02:55 | 02:00 - 02:59 | Early Morning | 38,1 |     | 626,8  | 626,8 | 19,26 |        | 220,60 |
|    | 2019/08/05 | CH2276 | Female | Two y/o | Treatment (Wk 1) | Treatment | Feed Day | No | 03:00 | 03:00 - 03:59 | Early Morning | 38,2 | 185 | 104,2  | 104,2 | 19,36 | 635,34 | 157,28 |
|    | 2019/08/05 | CH2276 | Female | Two y/o | Treatment (Wk 1) | Treatment | Feed Day | No | 03:05 | 03:00 - 03:59 | Early Morning | 38,2 | 82  | 466,6  | 466,6 | 19,36 | 579,19 | 210,09 |
|    | 2019/08/05 | CH2276 | Female | Two y/o | Treatment (Wk 1) | Treatment | Feed Day | No | 03:10 | 03:00 - 03:59 | Early Morning | 38,2 | 60  | 176,4  | 176,4 | 19,36 | 554,67 | 175,71 |
|    | 2019/08/05 | CH2276 | Female | Two y/o | Treatment (Wk 1) | Treatment | Feed Day | No | 03:15 | 03:00 - 03:59 | Early Morning | 38,2 | 134 | 155,2  | 155,2 | 19,36 | 614,33 | 171,21 |
|    | 2019/08/05 | CH2276 | Female | Two y/o | Treatment (Wk 1) | Treatment | Feed Day | No | 03:20 | 03:00 - 03:59 | Early Morning | 38,2 | 53  | 57,2   | 57,2  | 19,36 | 544,43 | 136,44 |
|    | 2019/08/05 | CH2276 | Female | Two y/o | Treatment (Wk 1) | Treatment | Feed Day | No | 03:25 | 03:00 - 03:59 | Early Morning | 38,0 | 95  | 49,4   | 49,4  | 19,15 | 590,14 | 131,37 |
|    | 2019/08/05 | CH2276 | Female | Two y/o | Treatment (Wk 1) | Treatment | Feed Day | No | 03:30 | 03:00 - 03:59 | Early Morning | 37,9 | 62  | 39,4   | 39,4  | 19,05 | 557,33 | 123,57 |
|    | 2019/08/05 | CH2276 | Female | Two y/o | Treatment (Wk 1) | Treatment | Feed Day | No | 03:35 | 03:00 - 03:59 | Early Morning | 37,8 | 61  | 48,6   | 48,6  | 18,95 | 556,01 | 130,81 |
|    | 2019/08    |        |        |         |                  |           |          |    |       |               |               |      |     |        |       |       |        |        |



|            |        |        |         |                  |           |          |    |       |               |              |      |     |        |       |       |        |        |
|------------|--------|--------|---------|------------------|-----------|----------|----|-------|---------------|--------------|------|-----|--------|-------|-------|--------|--------|
| 2019/08/05 | CH2276 | Female | Two y/o | Treatment (Wk 1) | Treatment | Feed Day | No | 04:35 | 04:00 - 04:59 | Morning      | 37,6 | 169 | 137,4  | 137,4 | 18,75 | 629,60 | 166,94 |
| 2019/08/05 | CH2276 | Female | Two y/o | Treatment (Wk 1) | Treatment | Feed Day | No | 04:40 | 04:00 - 04:59 | Morning      | 37,7 |     | 410,8  | 410,8 | 18,85 |        | 205,56 |
| 2019/08/05 | CH2276 | Female | Two y/o | Treatment (Wk 1) | Treatment | Feed Day | No | 04:45 | 04:00 - 04:59 | Morning      | 38,0 | 180 | 241,6  | 241,6 | 19,15 | 633,61 | 186,77 |
| 2019/08/05 | CH2276 | Female | Two y/o | Treatment (Wk 1) | Treatment | Feed Day | No | 04:50 | 04:00 - 04:59 | Morning      | 38,2 | 128 | 195,2  | 195,2 | 19,36 | 611,22 | 179,26 |
| 2019/08/05 | CH2276 | Female | Two y/o | Treatment (Wk 1) | Treatment | Feed Day | No | 04:55 | 04:00 - 04:59 | Morning      | 38,4 | 92  | 1070,8 |       | 19,56 | 587,78 |        |
| 2019/08/05 | CH2276 | Female | Two y/o | Treatment (Wk 1) | Treatment | Feed Day | No | 05:00 | 05:00 - 05:59 | Morning      | 38,5 | 101 | 60,0   | 60,0  | 19,66 | 594,59 | 138,09 |
| 2019/08/05 | CH2276 | Female | Two y/o | Treatment (Wk 1) | Treatment | Feed Day | No | 05:05 | 05:00 - 05:59 | Morning      | 38,4 | 126 | 149,4  | 149,4 | 19,56 | 610,14 | 169,88 |
| 2019/08/05 | CH2276 | Female | Two y/o | Treatment (Wk 1) | Treatment | Feed Day | No | 05:10 | 05:00 - 05:59 | Morning      | 38,3 | 119 | 305,4  | 305,4 | 19,46 | 606,20 | 195,05 |
| 2019/08/05 | CH2276 | Female | Two y/o | Treatment (Wk 1) | Treatment | Feed Day | No | 05:15 | 05:00 - 05:59 | Morning      | 38,2 | 81  | 179,2  | 179,2 | 19,36 | 578,26 | 176,26 |
| 2019/08/05 | CH2276 | Female | Two y/o | Treatment (Wk 1) | Treatment | Feed Day | No | 05:20 | 05:00 - 05:59 | Morning      | 38,4 | 131 | 229,0  | 229,0 | 19,56 | 612,80 | 184,89 |
| 2019/08/05 | CH2276 | Female | Two y/o | Treatment (Wk 1) | Treatment | Feed Day | No | 05:25 | 05:00 - 05:59 | Morning      | 39,0 | 129 | 69,4   | 69,4  | 20,18 | 611,75 | 143,14 |
| 2019/08/05 | CH2276 | Female | Two y/o | Treatment (Wk 1) | Treatment | Feed Day | No | 05:30 | 05:00 - 05:59 | Morning      | 38,8 |     | 61,0   | 61,0  | 19,97 |        | 138,67 |
| 2019/08/05 | CH2276 | Female | Two y/o | Treatment (Wk 1) | Treatment | Feed Day | No | 05:35 | 05:00 - 05:59 | Morning      | 38,8 | 96  | 62,0   | 62,0  | 19,97 | 590,91 | 139,23 |
| 2019/08/05 | CH2276 | Female | Two y/o | Treatment (Wk 1) | Treatment | Feed Day | No | 05:40 | 05:00 - 05:59 | Morning      | 38,6 | 103 | 58,6   | 58,6  | 19,76 | 596,00 | 137,28 |
| 2019/08/05 | CH2276 | Female | Two y/o | Treatment (Wk 1) | Treatment | Feed Day | No | 05:45 | 05:00 - 05:59 | Morning      | 38,4 | 68  | 59,0   | 59,0  | 19,56 | 564,71 | 137,51 |
| 2019/08/05 | CH2276 | Female | Two y/o | Treatment (Wk 1) | Treatment | Feed Day | No | 05:50 | 05:00 - 05:59 | Morning      | 38,2 | 82  | 56,4   | 56,4  | 19,36 | 579,19 | 135,95 |
| 2019/08/05 | CH2276 | Female | Two y/o | Treatment (Wk 1) | Treatment | Feed Day | No | 05:55 | 05:00 - 05:59 | Morning      | 38,1 | 65  | 60,4   | 60,4  | 19,26 | 561,12 | 138,32 |
| 2019/08/05 | CH2276 | Female | Two y/o | Treatment (Wk 1) | Treatment | Feed Day | No | 06:00 | 06:00 - 06:59 | Morning      | 38,0 | 66  | 60,6   | 60,6  | 19,15 | 562,34 | 138,44 |
| 2019/08/05 | CH2276 | Female | Two y/o | Treatment (Wk 1) | Treatment | Feed Day | No | 06:05 | 06:00 - 06:59 | Morning      | 37,9 | 75  | 60,0   | 60,0  | 19,05 | 572,36 | 138,09 |
| 2019/08/05 | CH2276 | Female | Two y/o | Treatment (Wk 1) | Treatment | Feed Day | No | 06:10 | 06:00 - 06:59 | Morning      | 38,0 | 63  | 71,2   | 71,2  | 19,15 | 558,62 | 144,03 |
| 2019/08/05 | CH2276 | Female | Two y/o | Treatment (Wk 1) | Treatment | Feed Day | No | 06:15 | 06:00 - 06:59 | Morning      | 38,0 | 113 | 64,6   | 64,6  | 19,15 | 602,58 | 140,65 |
| 2019/08/05 | CH2276 | Female | Two y/o | Treatment (Wk 1) | Treatment | Feed Day | No | 06:20 | 06:00 - 06:59 | Morning      | 37,8 | 73  | 56,2   | 56,2  | 18,95 | 570,27 | 135,83 |
| 2019/08/05 | CH2276 | Female | Two y/o | Treatment (Wk 1) | Treatment | Feed Day | No | 06:25 | 06:00 - 06:59 | Morning      | 37,6 | 99  | 52,8   | 52,8  | 18,75 | 593,14 | 133,67 |
| 2019/08/05 | CH2276 | Female | Two y/o | Treatment (Wk 1) | Treatment | Feed Day | No | 06:30 | 06:00 - 06:59 | Morning      | 37,4 | 109 | 56,2   | 56,2  | 18,55 | 600,04 | 135,83 |
| 2019/08/05 | CH2276 | Female | Two y/o | Treatment (Wk 1) | Treatment | Feed Day | No | 06:35 | 06:00 - 06:59 | Morning      | 37,1 | 62  | 56,4   | 56,4  | 18,26 | 557,33 | 135,95 |
| 2019/08/05 | CH2276 | Female | Two y/o | Treatment (Wk 1) | Treatment | Feed Day | No | 06:40 | 06:00 - 06:59 | Morning      | 37,3 | 104 | 81,8   | 81,8  | 18,46 | 596,69 | 148,85 |
| 2019/08/05 | CH2276 | Female | Two y/o | Treatment (Wk 1) | Treatment | Feed Day | No | 06:45 | 06:00 - 06:59 | Morning      | 37,3 | 101 | 200,2  | 200,2 | 18,46 | 594,59 | 180,15 |
| 2019/08/05 | CH2276 | Female | Two y/o | Treatment (Wk 1) | Treatment | Feed Day | No | 06:50 | 06:00 - 06:59 | Morning      | 37,4 |     | 226,8  | 226,8 | 18,55 |        | 184,55 |
| 2019/08/05 | CH2276 | Female | Two y/o | Treatment (Wk 1) | Treatment | Feed Day | No | 06:55 | 06:00 - 06:59 | Morning      | 37,5 | 132 | 252,4  | 252,4 | 18,65 | 613,32 | 188,32 |
| 2019/08/05 | CH2276 | Female | Two y/o | Treatment (Wk 1) | Treatment | Feed Day | No | 07:00 | 07:00 - 07:59 | Morning      | 37,6 | 76  | 55,0   | 55,0  | 18,75 | 573,39 | 135,08 |
| 2019/08/05 | CH2276 | Female | Two y/o | Treatment (Wk 1) | Treatment | Feed Day | No | 07:05 | 07:00 - 07:59 | Morning      | 37,6 | 94  | 75,2   | 75,2  | 18,75 | 589,37 | 145,93 |
| 2019/08/05 | CH2276 | Female | Two y/o | Treatment (Wk 1) | Treatment | Feed Day | No | 07:10 | 07:00 - 07:59 | Morning      | 37,6 | 132 | 153,4  | 153,4 | 18,75 | 613,32 | 170,80 |
| 2019/08/05 | CH2276 | Female | Two y/o | Treatment (Wk 1) | Treatment | Feed Day | No | 07:15 | 07:00 - 07:59 | Morning      | 37,7 | 79  | 80,2   | 80,2  | 18,85 | 576,36 | 148,16 |
| 2019/08/05 | CH2276 | Female | Two y/o | Treatment (Wk 1) | Treatment | Feed Day | No | 07:20 | 07:00 - 07:59 | Morning      | 37,9 | 56  | 316,8  | 316,8 | 19,05 | 549,01 | 196,35 |
| 2019/08/05 | CH2276 | Female | Two y/o | Treatment (Wk 1) | Treatment | Feed Day | No | 07:25 | 07:00 - 07:59 | Morning      | 38,0 | 113 | 54,6   | 54,6  | 19,15 | 602,58 | 134,83 |
| 2019/08/05 | CH2276 | Female | Two y/o | Treatment (Wk 1) | Treatment | Feed Day | No | 07:30 | 07:00 - 07:59 | Morning      | 37,9 | 70  | 130,8  | 130,8 | 19,05 | 566,99 | 165,22 |
| 2019/08/05 | CH2276 | Female | Two y/o | Treatment (Wk 1) | Treatment | Feed Day | No | 07:35 | 07:00 - 07:59 | Morning      | 37,9 | 90  | 90,4   | 90,4  | 19,05 | 586,16 | 152,33 |
| 2019/08/05 | CH2276 | Female | Two y/o | Treatment (Wk 1) | Treatment | Feed Day | No | 07:40 | 07:00 - 07:59 | Morning      | 37,8 |     | 410,6  | 410,6 | 18,95 |        | 205,54 |
| 2019/08/05 | CH2276 | Female | Two y/o | Treatment (Wk 1) | Treatment | Feed Day | No | 07:45 | 07:00 - 07:59 | Morning      | 37,7 | 156 | 434,2  | 434,2 | 18,85 | 624,43 | 207,53 |
| 2019/08/05 | CH2276 | Female | Two y/o | Treatment (Wk 1) | Treatment | Feed Day | No | 07:50 | 07:00 - 07:59 | Morning      | 37,8 | 117 | 475,6  | 475,6 | 18,95 | 605,02 | 210,77 |
| 2019/08/05 | CH2276 | Female | Two y/o | Treatment (Wk 1) | Treatment | Feed Day | No | 07:55 | 07:00 - 07:59 | Morning      | 37,8 | 59  | 787,8  | 787,8 | 18,95 | 553,30 | 228,78 |
| 2019/08/05 | CH2276 | Female | Two y/o | Treatment (Wk 1) | Treatment | Feed Day | No | 08:00 | 08:00 - 08:59 | Late Morning | 37,8 | 121 | 112,0  | 112,0 | 18,95 | 607,35 | 159,80 |
| 2019/08/05 | CH2276 | Female | Two y/o | Treatment (Wk 1) | Treatment | Feed Day | No | 08:05 | 08:00 - 08:59 | Late Morning | 37,7 | 68  | 75,6   | 75,6  | 18,85 | 564,71 | 146,11 |
| 2019/08/05 | CH2276 | Female | Two y/o | Treatment (Wk 1) | Treatment | Feed Day | No | 08:10 | 08:00 - 08:59 | Late Morning | 37,6 | 93  | 233,8  | 233,8 | 18,75 | 588,58 | 185,62 |
| 2019/08/05 | CH2276 | Female | Two y/o | Treatment (Wk 1) | Treatment | Feed Day | No | 08:15 | 08:00 - 08:59 | Late Morning | 37,6 | 84  | 92,0   | 92,0  | 18,75 | 581,01 | 152,94 |
| 2019/08/05 | CH2276 | Female | Two y/o | Treatment (Wk 1) | Treatment | Feed Day | No | 08:20 | 08:00 - 08:59 | Late Morning | 37,6 | 114 | 254,2  | 254,2 | 18,75 | 603,20 | 188,57 |
| 2019/08/05 | CH2276 | Female | Two y/o | Treatment (Wk 1) | Treatment | Feed Day | No | 08:25 | 08:00 - 08:59 | Late Morning | 37,6 | 140 | 164,0  | 164,0 | 18,75 | 617,28 | 173,15 |
| 2019/08/05 | CH2276 | Female | Two y/o | Treatment (Wk 1) | Treatment | Feed Day | No | 08:30 | 08:00 - 08:59 | Late Morning | 37,7 | 114 | 69,2   | 69,2  | 18,85 | 603,20 | 143,04 |
| 2019/08/05 | CH2276 | Female | Two y/o | Treatment (Wk 1) | Treatment | Feed Day | No | 08:35 | 08:00 - 08:59 | Late Morning | 37,7 | 69  | 68,0   | 68,0  | 18,85 | 565,86 | 142,43 |
| 2019/08/05 | CH2276 | Female | Two y/o | Treatment (Wk 1) | Treatment | Feed Day | No | 08:40 | 08:00 - 08:59 | Late Morning | 37,7 |     | 66,0   | 66,0  | 18,85 |        | 141,40 |
| 2019/08/05 | CH2276 | Female | Two y/o | Treatment (Wk 1) | Treatment | Feed Day | No | 08:45 | 08:00 - 08:59 | Late Morning | 37,8 | 76  | 71,0   | 71,0  | 18,95 | 573,39 | 143,93 |
| 2019/08/05 | CH2276 | Female | Two y/o | Treatment (Wk 1) | Treatment | Feed Day | No | 08:50 | 08:00 - 08:59 | Late Morning | 37,8 | 60  | 70,2   | 70,2  | 18,95 | 554,67 | 143,54 |
| 2019/08/05 | CH2276 | Female | Two y/o | Treatment (Wk 1) | Treatment | Feed Day | No | 08:55 | 08:00 - 08:59 | Late Morning | 37,8 | 55  | 54,6   | 54,6  | 18,95 | 547,52 | 134,83 |
| 2019/08/05 | CH2276 | Female | Two y/o | Treatment (Wk 1) | Treatment | Feed Day | No | 09:00 | 09:00 - 09:59 | Late Morning | 37,8 | 117 | 40,6   | 40,6  | 18,95 | 605,02 | 124,60 |
| 2019/08/05 | CH2276 | Female | Two y/o | Treatment (Wk 1) | Treatment | Feed Day | No | 09:05 | 09:00 - 09:59 | Late Morning | 37,7 | 57  | 63,2   | 63,2  | 18,85 | 550,47 | 139,89 |
| 2019/08/05 | CH2276 | Female | Two y/o | Treatment (Wk 1) | Treatment | Feed Day | No | 09:10 | 09:00 - 09:59 | Late Morning | 37,7 | 55  | 48,0   | 48,0  | 18,85 | 547,52 | 130,38 |
| 2019/08/05 | CH2276 | Female | Two y/o | Treatment (Wk 1) | Treatment | Feed Day | No | 09:15 | 09:00 - 09:59 | Late Morning | 37,6 | 85  | 66,2   | 66,2  | 18,75 | 581,90 | 141,50 |
| 2019/08/05 | CH2276 | Female | Two y/o | Treatment (Wk 1) | Treatment | Feed Day | No | 09:20 | 09:00 - 09:59 | Late Morning | 37,6 | 56  | 68,6   | 68,6  | 18,75 | 549,01 | 142,74 |
| 2019/08/05 | CH2276 | Female | Two y/o | Treatment (Wk 1) | Treatment | Feed Day | No | 09:25 | 09:00 - 09:59 | Late Morning | 37,6 | 55  | 71,8   | 71,8  | 18,75 | 547,52 | 144,32 |
| 2019/08/05 | CH2276 | Female | Two y/o | Treatment (Wk 1) | Treatment | Feed Day | No | 09:30 | 09:00 - 09:59 | Late Morning | 37,6 | 55  | 57,4   | 57,4  | 18,75 | 547,52 | 136,56 |
| 2019/08/05 | CH2276 | Female | Two y/o | Treatment (Wk 1) | Treatment | Feed Day | No | 09:35 | 09:00 - 09:59 | Late Morning | 37,6 | 59  | 57,8   | 57,8  | 18,75 | 553,30 | 136,80 |
| 2019/08/05 | CH2276 | Female | Two y/o | Treatment (Wk 1) | Treatment | Feed Day | No | 09:40 | 09:00 - 09:59 | Late Morning | 37,5 | 44  | 80,8   | 80,8  | 18,65 | 528,51 | 148,42 |
| 2019/08/05 | CH2276 | Female | Two y/o | Treatment (Wk 1) | Treatment | Feed Day | No | 09:45 | 09:00 - 09:59 | Late Morning | 37,4 | 129 | 82,8   | 82,8  | 18,55 | 611,75 | 149,27 |
| 2019/08/05 | CH2276 | Female | Two y/o | Treatment (Wk 1) | Treatment | Feed Day | No | 09:50 | 09:00 - 09:59 | Late Morning | 37,4 | 55  | 51,8   | 51,8  | 18,55 | 547,52 | 133,01 |
| 2019/08/05 | CH2276 | Female | Two y/o | Treatment (Wk 1) | Treatment | Feed Day | No | 09:55 | 09:00 - 09:59 | Late Morning | 37,4 | 57  | 51,0   | 51,0  | 18,55 | 550,47 | 132,47 |
| 2019/08/05 | CH2276 | Female | Two y/o | Treatment (Wk 1) | Treatment | Feed Day | No | 10:00 | 10:00 - 10:59 | Late Morning | 37,3 | 113 | 44,2   | 44,2  | 18,46 | 602,58 | 127,53 |
| 2019/08/05 | CH2276 | Female | Two y/o | Treatment (Wk 1) | Treatment | Feed Day | No | 10:05 | 10:00 - 10:59 | Late Morning | 37,1 |     | 127,2  | 127,2 | 18,26 |        | 164,24 |
| 2019/08/05 | CH2276 | Female | Two y/o | Treatment (Wk 1) | Treatment | Feed Day | No | 10:10 | 10:00 - 10:59 | Late Morning | 37,1 | 64  | 149,4  | 149,4 | 18,26 | 559,88 | 169,88 |
| 2019/08/05 | CH2276 | Female | Two y/o | Treatment (Wk 1) | Treatment | Feed Day | No | 10:15 | 10:00 - 10:59 | Late Morning | 37,1 | 59  | 59,4   | 59,4  | 18,26 | 553,30 | 137,75 |
| 2019/08/05 | CH2276 | Female | Two y/o | Treatment (Wk 1) | Treatment | Feed Day | No | 10:20 | 10:00 - 10:59 | Late Morning | 37,1 | 61  | 53,8   | 53,8  | 18,26 | 556,01 | 134,32 |



|            |        |        |         |                  |           |          |     |       |               |              |      |     |       |       |       |        |        |
|------------|--------|--------|---------|------------------|-----------|----------|-----|-------|---------------|--------------|------|-----|-------|-------|-------|--------|--------|
| 2019/08/05 | CH2276 | Female | Two y/o | Treatment (Wk 1) | Treatment | Feed Day | No  | 10:25 | 10:00 - 10:59 | Late Morning | 37,2 | 58  | 60,4  | 60,4  | 18,36 | 551,90 | 138,32 |
| 2019/08/05 | CH2276 | Female | Two y/o | Treatment (Wk 1) | Treatment | Feed Day | Yes | 10:30 | 10:00 - 10:59 | Late Morning | 37,3 | 97  | 72,0  | 72,0  | 18,46 | 591,66 | 144,42 |
| 2019/08/05 | CH2276 | Female | Two y/o | Treatment (Wk 1) | Treatment | Feed Day | Yes | 10:35 | 10:00 - 10:59 | Late Morning | 37,4 | 98  | 80,6  | 80,6  | 18,55 | 592,41 | 148,34 |
| 2019/08/05 | CH2276 | Female | Two y/o | Treatment (Wk 1) | Treatment | Feed Day | Yes | 10:40 | 10:00 - 10:59 | Late Morning | 37,4 | 63  | 69,8  | 69,8  | 18,55 | 558,62 | 143,34 |
| 2019/08/05 | CH2276 | Female | Two y/o | Treatment (Wk 1) | Treatment | Feed Day | Yes | 10:45 | 10:00 - 10:59 | Late Morning | 37,5 | 131 | 224,8 | 224,8 | 18,65 | 612,80 | 184,23 |
| 2019/08/05 | CH2276 | Female | Two y/o | Treatment (Wk 1) | Treatment | Feed Day | Yes | 10:50 | 10:00 - 10:59 | Late Morning | 37,6 |     | 93,0  | 93,0  | 18,75 |        | 153,31 |
| 2019/08/05 | CH2276 | Female | Two y/o | Treatment (Wk 1) | Treatment | Feed Day | Yes | 10:55 | 10:00 - 10:59 | Late Morning | 37,6 | 61  | 160,8 | 160,8 | 18,75 |        | 172,46 |
| 2019/08/05 | CH2276 | Female | Two y/o | Treatment (Wk 1) | Treatment | Feed Day | Yes | 11:00 | 11:00 - 11:59 | Late Morning | 37,7 | 57  | 195,0 | 195,0 | 18,85 | 550,47 | 179,23 |
| 2019/08/05 | CH2276 | Female | Two y/o | Treatment (Wk 1) | Treatment | Feed Day | Yes | 11:05 | 11:00 - 11:59 | Late Morning | 37,8 | 90  | 73,4  | 73,4  | 18,95 | 586,16 | 145,08 |
| 2019/08/05 | CH2276 | Female | Two y/o | Treatment (Wk 1) | Treatment | Feed Day | Yes | 11:10 | 11:00 - 11:59 | Late Morning | 37,8 | 94  | 73,6  | 73,6  | 18,95 | 589,37 | 145,18 |
| 2019/08/05 | CH2276 | Female | Two y/o | Treatment (Wk 1) | Treatment | Feed Day | Yes | 11:15 | 11:00 - 11:59 | Late Morning | 37,8 | 99  | 65,8  | 65,8  | 18,95 | 593,14 | 141,29 |
| 2019/08/05 | CH2276 | Female | Two y/o | Treatment (Wk 1) | Treatment | Feed Day | Yes | 11:20 | 11:00 - 11:59 | Late Morning | 37,8 | 114 | 86,0  | 86,0  | 18,95 | 603,20 | 150,59 |
| 2019/08/05 | CH2276 | Female | Two y/o | Treatment (Wk 1) | Treatment | Feed Day | Yes | 11:25 | 11:00 - 11:59 | Late Morning | 37,8 | 123 | 130,4 | 130,4 | 18,95 | 608,49 | 165,11 |
| 2019/08/05 | CH2276 | Female | Two y/o | Treatment (Wk 1) | Treatment | Feed Day | No  | 11:30 | 11:00 - 11:59 | Late Morning | 37,9 | 114 | 94,2  | 94,2  | 19,05 | 603,20 | 153,76 |
| 2019/08/05 | CH2276 | Female | Two y/o | Treatment (Wk 1) | Treatment | Feed Day | No  | 11:35 | 11:00 - 11:59 | Late Morning | 37,9 | 90  | 60,6  | 60,6  | 19,05 | 586,16 | 138,44 |
| 2019/08/05 | CH2276 | Female | Two y/o | Treatment (Wk 1) | Treatment | Feed Day | No  | 11:40 | 11:00 - 11:59 | Late Morning | 37,9 | 92  | 61,6  | 61,6  | 19,05 | 587,78 | 139,00 |
| 2019/08/05 | CH2276 | Female | Two y/o | Treatment (Wk 1) | Treatment | Feed Day | No  | 11:45 | 11:00 - 11:59 | Late Morning | 37,9 | 86  | 60,6  | 60,6  | 19,05 | 582,77 | 138,44 |
| 2019/08/05 | CH2276 | Female | Two y/o | Treatment (Wk 1) | Treatment | Feed Day | No  | 11:50 | 11:00 - 11:59 | Late Morning | 38,0 | 98  | 45,0  | 45,0  | 19,15 | 592,41 | 128,15 |
| 2019/08/05 | CH2276 | Female | Two y/o | Treatment (Wk 1) | Treatment | Feed Day | No  | 11:55 | 11:00 - 11:59 | Late Morning | 38,0 | 84  | 62,6  | 62,6  | 19,15 | 581,01 | 139,56 |
| 2019/08/05 | CH2276 | Female | Two y/o | Treatment (Wk 1) | Treatment | Feed Day | No  | 12:00 | 12:00 - 12:59 | Afternoon    | 38,2 | 68  | 67,4  | 67,4  | 19,36 | 564,71 | 142,12 |
| 2019/08/05 | CH2276 | Female | Two y/o | Treatment (Wk 1) | Treatment | Feed Day | No  | 12:05 | 12:00 - 12:59 | Afternoon    | 38,2 | 83  | 71,6  | 71,6  | 19,36 | 580,11 | 144,22 |
| 2019/08/05 | CH2276 | Female | Two y/o | Treatment (Wk 1) | Treatment | Feed Day | No  | 12:10 | 12:00 - 12:59 | Afternoon    | 38,3 |     | 53,4  | 53,4  | 19,46 |        | 134,06 |
| 2019/08/05 | CH2276 | Female | Two y/o | Treatment (Wk 1) | Treatment | Feed Day | No  | 12:15 | 12:00 - 12:59 | Afternoon    | 38,3 | 60  | 63,0  | 63,0  | 19,46 | 554,67 | 139,78 |
| 2019/08/05 | CH2276 | Female | Two y/o | Treatment (Wk 1) | Treatment | Feed Day | No  | 12:20 | 12:00 - 12:59 | Afternoon    | 38,3 | 89  | 68,4  | 68,4  | 19,46 | 585,33 | 142,64 |
| 2019/08/05 | CH2276 | Female | Two y/o | Treatment (Wk 1) | Treatment | Feed Day | No  | 12:25 | 12:00 - 12:59 | Afternoon    | 38,3 | 71  | 65,8  | 65,8  | 19,46 | 568,10 | 141,29 |
| 2019/08/05 | CH2276 | Female | Two y/o | Treatment (Wk 1) | Treatment | Feed Day | No  | 12:30 | 12:00 - 12:59 | Afternoon    | 38,3 | 86  | 65,0  | 65,0  | 19,46 | 582,77 | 140,87 |
| 2019/08/05 | CH2276 | Female | Two y/o | Treatment (Wk 1) | Treatment | Feed Day | No  | 12:35 | 12:00 - 12:59 | Afternoon    | 38,3 |     | 78,2  | 78,2  | 19,46 |        | 147,28 |
| 2019/08/05 | CH2276 | Female | Two y/o | Treatment (Wk 1) | Treatment | Feed Day | No  | 12:40 | 12:00 - 12:59 | Afternoon    | 38,3 | 68  | 81,2  | 81,2  | 19,46 | 564,71 | 148,59 |
| 2019/08/05 | CH2276 | Female | Two y/o | Treatment (Wk 1) | Treatment | Feed Day | No  | 12:45 | 12:00 - 12:59 | Afternoon    | 38,4 | 76  | 78,6  | 78,6  | 19,56 | 573,39 | 147,46 |
| 2019/08/05 | CH2276 | Female | Two y/o | Treatment (Wk 1) | Treatment | Feed Day | No  | 12:50 | 12:00 - 12:59 | Afternoon    | 38,3 | 64  | 88,0  | 88,0  | 19,46 | 559,88 | 151,39 |
| 2019/08/05 | CH2276 | Female | Two y/o | Treatment (Wk 1) | Treatment | Feed Day | No  | 12:55 | 12:00 - 12:59 | Afternoon    | 38,3 | 68  | 82,2  | 82,2  | 19,46 | 564,71 | 149,02 |
| 2019/08/05 | CH2276 | Female | Two y/o | Treatment (Wk 1) | Treatment | Feed Day | No  | 13:00 | 13:00 - 13:59 | Afternoon    | 38,3 | 77  | 80,8  | 80,8  | 19,46 | 574,39 | 148,42 |
| 2019/08/05 | CH2276 | Female | Two y/o | Treatment (Wk 1) | Treatment | Feed Day | No  | 13:05 | 13:00 - 13:59 | Afternoon    | 38,3 | 79  | 83,0  | 83,0  | 19,46 | 576,36 | 149,36 |
| 2019/08/05 | CH2276 | Female | Two y/o | Treatment (Wk 1) | Treatment | Feed Day | No  | 13:10 | 13:00 - 13:59 | Afternoon    | 38,2 | 80  | 58,8  | 58,8  | 19,36 | 577,31 | 137,39 |
| 2019/08/05 | CH2276 | Female | Two y/o | Treatment (Wk 1) | Treatment | Feed Day | No  | 13:15 | 13:00 - 13:59 | Afternoon    | 38,2 | 67  | 59,6  | 59,6  | 19,36 | 563,53 | 137,86 |
| 2019/08/05 | CH2276 | Female | Two y/o | Treatment (Wk 1) | Treatment | Feed Day | No  | 13:20 | 13:00 - 13:59 | Afternoon    | 38,2 | 80  | 54,6  | 54,6  | 19,36 | 577,31 | 134,83 |
| 2019/08/05 | CH2276 | Female | Two y/o | Treatment (Wk 1) | Treatment | Feed Day | No  | 13:25 | 13:00 - 13:59 | Afternoon    | 38,2 | 98  | 59,2  | 59,2  | 19,36 | 592,41 | 137,63 |
| 2019/08/05 | CH2276 | Female | Two y/o | Treatment (Wk 1) | Treatment | Feed Day | No  | 13:30 | 13:00 - 13:59 | Afternoon    | 38,2 | 96  | 76,2  | 76,2  | 19,36 | 590,91 | 146,38 |
| 2019/08/05 | CH2276 | Female | Two y/o | Treatment (Wk 1) | Treatment | Feed Day | No  | 13:35 | 13:00 - 13:59 | Afternoon    | 38,2 | 91  | 296,2 | 296,2 | 19,36 | 586,98 | 193,97 |
| 2019/08/05 | CH2276 | Female | Two y/o | Treatment (Wk 1) | Treatment | Feed Day | No  | 13:40 | 13:00 - 13:59 | Afternoon    | 38,1 | 109 | 58,4  | 58,4  | 19,26 | 600,04 | 137,16 |
| 2019/08/05 | CH2276 | Female | Two y/o | Treatment (Wk 1) | Treatment | Feed Day | No  | 13:45 | 13:00 - 13:59 | Afternoon    | 38,0 | 76  | 71,2  | 71,2  | 19,15 | 573,39 | 144,03 |
| 2019/08/05 | CH2276 | Female | Two y/o | Treatment (Wk 1) | Treatment | Feed Day | No  | 13:50 | 13:00 - 13:59 | Afternoon    | 38,0 | 86  | 69,6  | 69,6  | 19,15 | 582,77 | 143,24 |
| 2019/08/05 | CH2276 | Female | Two y/o | Treatment (Wk 1) | Treatment | Feed Day | No  | 13:55 | 13:00 - 13:59 | Afternoon    | 38,0 | 89  | 78,8  | 78,8  | 19,15 | 585,33 | 147,55 |
| 2019/08/05 | CH2276 | Female | Two y/o | Treatment (Wk 1) | Treatment | Feed Day | No  | 14:00 | 14:00 - 14:59 | Afternoon    | 38,0 |     | 92,2  | 92,2  | 19,15 |        | 153,01 |
| 2019/08/05 | CH2276 | Female | Two y/o | Treatment (Wk 1) | Treatment | Feed Day | No  | 14:05 | 14:00 - 14:59 | Afternoon    | 38,0 | 66  | 62,6  | 62,6  | 19,15 | 562,34 | 139,56 |
| 2019/08/05 | CH2276 | Female | Two y/o | Treatment (Wk 1) | Treatment | Feed Day | No  | 14:10 | 14:00 - 14:59 | Afternoon    | 37,9 | 79  | 67,4  | 67,4  | 19,05 | 576,36 | 142,12 |
| 2019/08/05 | CH2276 | Female | Two y/o | Treatment (Wk 1) | Treatment | Feed Day | No  | 14:15 | 14:00 - 14:59 | Afternoon    | 37,9 | 68  | 70,8  | 70,8  | 19,05 | 564,71 | 143,83 |
| 2019/08/05 | CH2276 | Female | Two y/o | Treatment (Wk 1) | Treatment | Feed Day | No  | 14:20 | 14:00 - 14:59 | Afternoon    | 37,9 | 98  | 71,2  | 71,2  | 19,05 | 592,41 | 144,03 |
| 2019/08/05 | CH2276 | Female | Two y/o | Treatment (Wk 1) | Treatment | Feed Day | No  | 14:25 | 14:00 - 14:59 | Afternoon    | 37,9 | 90  | 69,2  | 69,2  | 19,05 | 586,16 | 143,04 |
| 2019/08/05 | CH2276 | Female | Two y/o | Treatment (Wk 1) | Treatment | Feed Day | No  | 14:30 | 14:00 - 14:59 | Afternoon    | 37,9 | 80  | 73,2  | 73,2  | 19,05 | 577,31 | 144,99 |
| 2019/08/05 | CH2276 | Female | Two y/o | Treatment (Wk 1) | Treatment | Feed Day | No  | 14:35 | 14:00 - 14:59 | Afternoon    | 37,9 | 62  | 73,0  | 73,0  | 19,05 | 557,33 | 144,89 |
| 2019/08/05 | CH2276 | Female | Two y/o | Treatment (Wk 1) | Treatment | Feed Day | No  | 14:40 | 14:00 - 14:59 | Afternoon    | 37,9 |     | 81,8  | 81,8  | 19,05 |        | 148,85 |
| 2019/08/05 | CH2276 | Female | Two y/o | Treatment (Wk 1) | Treatment | Feed Day | No  | 14:45 | 14:00 - 14:59 | Afternoon    | 37,9 | 121 | 213,0 | 213,0 | 19,05 | 607,35 | 182,34 |
| 2019/08/05 | CH2276 | Female | Two y/o | Treatment (Wk 1) | Treatment | Feed Day | No  | 14:50 | 14:00 - 14:59 | Afternoon    | 37,9 |     | 72,8  | 72,8  | 19,05 |        | 144,80 |
| 2019/08/05 | CH2276 | Female | Two y/o | Treatment (Wk 1) | Treatment | Feed Day | No  | 14:55 | 14:00 - 14:59 | Afternoon    | 37,9 | 65  | 71,2  | 71,2  | 19,05 | 561,12 | 144,03 |
| 2019/08/05 | CH2276 | Female | Two y/o | Treatment (Wk 1) | Treatment | Feed Day | No  | 15:00 | 15:00 - 15:59 | Afternoon    | 37,9 | 84  | 86,4  | 86,4  | 19,05 | 581,01 | 150,75 |
| 2019/08/05 | CH2276 | Female | Two y/o | Treatment (Wk 1) | Treatment | Feed Day | No  | 15:05 | 15:00 - 15:59 | Afternoon    | 37,9 | 73  | 84,2  | 84,2  | 19,05 | 570,27 | 149,85 |
| 2019/08/05 | CH2276 | Female | Two y/o | Treatment (Wk 1) | Treatment | Feed Day | No  | 15:10 | 15:00 - 15:59 | Afternoon    | 37,9 | 66  | 75,8  | 75,8  | 19,05 | 562,34 | 146,20 |
| 2019/08/05 | CH2276 | Female | Two y/o | Treatment (Wk 1) | Treatment | Feed Day | No  | 15:15 | 15:00 - 15:59 | Afternoon    | 37,9 | 69  | 70,0  | 70,0  | 19,05 | 565,86 | 143,44 |
| 2019/08/05 | CH2276 | Female | Two y/o | Treatment (Wk 1) | Treatment | Feed Day | No  | 15:20 | 15:00 - 15:59 | Afternoon    | 38,0 | 61  | 71,4  | 71,4  | 19,15 | 556,01 | 144,12 |
| 2019/08/05 | CH2276 | Female | Two y/o | Treatment (Wk 1) | Treatment | Feed Day | No  | 15:25 | 15:00 - 15:59 | Afternoon    | 38,0 | 71  | 66,4  | 66,4  | 19,15 | 568,10 | 141,61 |
| 2019/08/05 | CH2276 | Female | Two y/o | Treatment (Wk 1) | Treatment | Feed Day | Yes | 15:30 | 15:00 - 15:59 | Afternoon    | 38,0 | 66  | 87,8  | 87,8  | 19,15 | 562,34 | 151,31 |
| 2019/08/05 | CH2276 | Female | Two y/o | Treatment (Wk 1) | Treatment | Feed Day | Yes | 15:35 | 15:00 - 15:59 | Afternoon    | 38,0 | 60  | 87,0  | 87,0  | 19,15 | 554,67 | 150,99 |
| 2019/08/05 | CH2276 | Female | Two y/o | Treatment (Wk 1) | Treatment | Feed Day | Yes | 15:40 | 15:00 - 15:59 | Afternoon    | 37,9 | 82  | 95,4  | 95,4  | 19,05 | 579,19 | 154,20 |
| 2019/08/05 | CH2276 | Female | Two y/o | Treatment (Wk 1) | Treatment | Feed Day | Yes | 15:45 | 15:00 - 15:59 | Afternoon    | 38,0 | 104 | 281,4 | 281,4 | 19,15 | 596,69 | 192,16 |
| 2019/08/05 | CH2276 | Female | Two y/o | Treatment (Wk 1) | Treatment | Feed Day | Yes | 15:50 | 15:00 - 15:59 | Afternoon    | 38,0 | 104 | 275,8 | 275,8 | 19,15 | 596,69 | 191,45 |
| 2019/08/05 | CH2276 | Female | Two y/o | Treatment (Wk 1) | Treatment | Feed Day | Yes | 15:55 | 15:00 - 15:59 | Afternoon    | 38,0 | 194 | 71,6  | 71,6  | 19,15 | 638,30 | 144,22 |
| 2019/08/05 | CH2276 | Female | Two y/o | Treatment (Wk 1) | Treatment | Feed Day | Yes | 16:00 | 16:00 - 16:59 | Evening      | 38,2 | 63  | 69,2  | 69,2  | 19,36 | 558,62 | 143,04 |
| 2019/08/05 | CH2276 | Female | Two y/o | Treatment (Wk 1) | Treatment | Feed Day | Yes | 16:05 | 16:00 - 16:59 | Evening      | 38,2 | 80  | 81,4  | 81,4  | 19,36 | 577,31 | 148,68 |
| 2019/08/05 | CH2276 | Female | Two y/o | Treatment (Wk 1) | Treatment | Feed Day | Yes | 16:10 | 16:00 - 16:59 | Evening      | 38,2 | 162 | 62,0  | 62,0  | 19,36 | 626,88 | 139,23 |



|            |        |        |         |                  |           |          |     |       |               |         |      |     |       |       |       |        |        |
|------------|--------|--------|---------|------------------|-----------|----------|-----|-------|---------------|---------|------|-----|-------|-------|-------|--------|--------|
| 2019/08/05 | CH2276 | Female | Two y/o | Treatment (Wk 1) | Treatment | Feed Day | Yes | 16:15 | 16:00 - 16:59 | Evening | 38,3 | 72  | 60,2  | 60,2  | 19,46 | 569,20 | 138,21 |
| 2019/08/05 | CH2276 | Female | Two y/o | Treatment (Wk 1) | Treatment | Feed Day | Yes | 16:20 | 16:00 - 16:59 | Evening | 38,2 | 64  | 55,2  | 55,2  | 19,36 | 559,88 | 135,21 |
| 2019/08/05 | CH2276 | Female | Two y/o | Treatment (Wk 1) | Treatment | Feed Day | Yes | 16:25 | 16:00 - 16:59 | Evening | 38,1 | 86  | 66,0  | 66,0  | 19,26 | 582,77 | 141,40 |
| 2019/08/05 | CH2276 | Female | Two y/o | Treatment (Wk 1) | Treatment | Feed Day | No  | 16:30 | 16:00 - 16:59 | Evening | 38,1 | 93  | 59,4  | 59,4  | 19,26 | 588,58 | 137,75 |
| 2019/08/05 | CH2276 | Female | Two y/o | Treatment (Wk 1) | Treatment | Feed Day | No  | 16:35 | 16:00 - 16:59 | Evening | 38,0 | 53  | 65,4  | 65,4  | 19,15 | 544,43 | 141,08 |
| 2019/08/05 | CH2276 | Female | Two y/o | Treatment (Wk 1) | Treatment | Feed Day | No  | 16:40 | 16:00 - 16:59 | Evening | 38,0 | 64  | 56,4  | 56,4  | 19,15 | 559,88 | 135,95 |
| 2019/08/05 | CH2276 | Female | Two y/o | Treatment (Wk 1) | Treatment | Feed Day | No  | 16:45 | 16:00 - 16:59 | Evening | 37,9 | 117 | 55,6  | 55,6  | 19,05 | 605,02 | 135,46 |
| 2019/08/05 | CH2276 | Female | Two y/o | Treatment (Wk 1) | Treatment | Feed Day | No  | 16:50 | 16:00 - 16:59 | Evening | 38,0 | 62  | 78,6  | 78,6  | 19,15 | 557,33 | 147,46 |
| 2019/08/05 | CH2276 | Female | Two y/o | Treatment (Wk 1) | Treatment | Feed Day | No  | 16:55 | 16:00 - 16:59 | Evening | 38,0 | 61  | 78,4  | 78,4  | 19,15 | 556,01 | 147,37 |
| 2019/08/05 | CH2276 | Female | Two y/o | Treatment (Wk 1) | Treatment | Feed Day | No  | 17:00 | 17:00 - 17:59 | Evening | 38,1 | 68  | 78,8  | 78,8  | 19,26 | 564,71 | 147,55 |
| 2019/08/05 | CH2276 | Female | Two y/o | Treatment (Wk 1) | Treatment | Feed Day | No  | 17:05 | 17:00 - 17:59 | Evening | 38,1 | 67  | 82,0  | 82,0  | 19,26 | 563,53 | 148,93 |
| 2019/08/05 | CH2276 | Female | Two y/o | Treatment (Wk 1) | Treatment | Feed Day | No  | 17:10 | 17:00 - 17:59 | Evening | 38,2 | 56  | 74,8  | 74,8  | 19,36 | 549,01 | 145,74 |
| 2019/08/05 | CH2276 | Female | Two y/o | Treatment (Wk 1) | Treatment | Feed Day | No  | 17:15 | 17:00 - 17:59 | Evening | 38,2 | 90  | 116,4 | 116,4 | 19,36 | 586,16 | 161,14 |
| 2019/08/05 | CH2276 | Female | Two y/o | Treatment (Wk 1) | Treatment | Feed Day | No  | 17:20 | 17:00 - 17:59 | Evening | 38,2 | 104 | 191,6 | 191,6 | 19,36 | 596,69 | 178,61 |
| 2019/08/05 | CH2276 | Female | Two y/o | Treatment (Wk 1) | Treatment | Feed Day | No  | 17:25 | 17:00 - 17:59 | Evening | 38,0 | 123 | 72,6  | 72,6  | 19,15 | 608,49 | 144,70 |
| 2019/08/05 | CH2276 | Female | Two y/o | Treatment (Wk 1) | Treatment | Feed Day | No  | 17:30 | 17:00 - 17:59 | Evening | 38,0 | 56  | 68,4  | 68,4  | 19,15 | 549,01 | 142,64 |
| 2019/08/05 | CH2276 | Female | Two y/o | Treatment (Wk 1) | Treatment | Feed Day | No  | 17:35 | 17:00 - 17:59 | Evening | 37,9 |     | 72,2  | 72,2  | 19,05 |        | 144,51 |
| 2019/08/05 | CH2276 | Female | Two y/o | Treatment (Wk 1) | Treatment | Feed Day | No  | 17:40 | 17:00 - 17:59 | Evening | 38,0 |     | 165,0 | 165,0 | 19,15 |        | 173,36 |
| 2019/08/05 | CH2276 | Female | Two y/o | Treatment (Wk 1) | Treatment | Feed Day | No  | 17:45 | 17:00 - 17:59 | Evening | 38,0 | 78  | 155,4 | 155,4 | 19,15 | 575,38 | 171,26 |
| 2019/08/05 | CH2276 | Female | Two y/o | Treatment (Wk 1) | Treatment | Feed Day | No  | 17:50 | 17:00 - 17:59 | Evening | 38,2 | 76  | 381,0 | 381,0 | 19,36 | 573,39 | 202,89 |
| 2019/08/05 | CH2276 | Female | Two y/o | Treatment (Wk 1) | Treatment | Feed Day | No  | 17:55 | 17:00 - 17:59 | Evening | 38,2 | 65  | 208,6 | 208,6 | 19,36 | 561,12 | 181,60 |
| 2019/08/05 | CH2276 | Female | Two y/o | Treatment (Wk 1) | Treatment | Feed Day | No  | 18:00 | 18:00 - 18:59 | Evening | 38,3 | 197 | 123,6 | 123,6 | 19,46 | 639,25 | 163,24 |
| 2019/08/05 | CH2276 | Female | Two y/o | Treatment (Wk 1) | Treatment | Feed Day | No  | 18:05 | 18:00 - 18:59 | Evening | 38,5 | 180 | 176,0 | 176,0 | 19,66 | 633,61 | 175,63 |
| 2019/08/05 | CH2276 | Female | Two y/o | Treatment (Wk 1) | Treatment | Feed Day | No  | 18:10 | 18:00 - 18:59 | Evening | 38,6 | 66  | 110,0 | 110,0 | 19,76 | 562,34 | 159,17 |
| 2019/08/05 | CH2276 | Female | Two y/o | Treatment (Wk 1) | Treatment | Feed Day | No  | 18:15 | 18:00 - 18:59 | Evening | 38,6 | 95  | 88,6  | 88,6  | 19,76 | 590,14 | 151,63 |
| 2019/08/05 | CH2276 | Female | Two y/o | Treatment (Wk 1) | Treatment | Feed Day | No  | 18:20 | 18:00 - 18:59 | Evening | 38,5 | 101 | 104,8 | 104,8 | 19,66 | 594,59 | 157,48 |
| 2019/08/05 | CH2276 | Female | Two y/o | Treatment (Wk 1) | Treatment | Feed Day | No  | 18:25 | 18:00 - 18:59 | Evening | 38,5 | 75  | 61,0  | 61,0  | 19,66 | 572,36 | 138,67 |
| 2019/08/05 | CH2276 | Female | Two y/o | Treatment (Wk 1) | Treatment | Feed Day | No  | 18:30 | 18:00 - 18:59 | Evening | 38,4 | 60  | 47,0  | 47,0  | 19,56 | 554,67 | 129,65 |
| 2019/08/05 | CH2276 | Female | Two y/o | Treatment (Wk 1) | Treatment | Feed Day | No  | 18:35 | 18:00 - 18:59 | Evening | 38,4 | 87  | 50,0  | 50,0  | 19,56 | 583,64 | 131,79 |
| 2019/08/05 | CH2276 | Female | Two y/o | Treatment (Wk 1) | Treatment | Feed Day | No  | 18:40 | 18:00 - 18:59 | Evening | 38,3 | 58  | 41,4  | 41,4  | 19,46 | 551,90 | 125,27 |
| 2019/08/05 | CH2276 | Female | Two y/o | Treatment (Wk 1) | Treatment | Feed Day | No  | 18:45 | 18:00 - 18:59 | Evening | 38,2 | 76  | 50,2  | 50,2  | 19,36 | 573,39 | 131,92 |
| 2019/08/05 | CH2276 | Female | Two y/o | Treatment (Wk 1) | Treatment | Feed Day | No  | 18:50 | 18:00 - 18:59 | Evening | 38,0 | 90  | 57,4  | 57,4  | 19,15 | 586,16 | 136,56 |
| 2019/08/05 | CH2276 | Female | Two y/o | Treatment (Wk 1) | Treatment | Feed Day | No  | 18:55 | 18:00 - 18:59 | Evening | 38,1 | 92  | 61,0  | 61,0  | 19,26 | 587,78 | 138,67 |
| 2019/08/05 | CH2276 | Female | Two y/o | Treatment (Wk 1) | Treatment | Feed Day | No  | 19:00 | 19:00 - 19:59 | Evening | 38,2 | 62  | 59,6  | 59,6  | 19,36 | 557,33 | 137,86 |
| 2019/08/05 | CH2276 | Female | Two y/o | Treatment (Wk 1) | Treatment | Feed Day | No  | 19:05 | 19:00 - 19:59 | Evening | 38,2 | 61  | 61,4  | 61,4  | 19,36 | 556,01 | 138,89 |
| 2019/08/05 | CH2276 | Female | Two y/o | Treatment (Wk 1) | Treatment | Feed Day | No  | 19:10 | 19:00 - 19:59 | Evening | 38,2 | 66  | 60,6  | 60,6  | 19,36 | 562,34 | 138,44 |
| 2019/08/05 | CH2276 | Female | Two y/o | Treatment (Wk 1) | Treatment | Feed Day | No  | 19:15 | 19:00 - 19:59 | Evening | 38,2 | 90  | 65,4  | 65,4  | 19,36 | 586,16 | 141,08 |
| 2019/08/05 | CH2276 | Female | Two y/o | Treatment (Wk 1) | Treatment | Feed Day | No  | 19:20 | 19:00 - 19:59 | Evening | 38,2 | 65  | 60,2  | 60,2  | 19,36 | 561,12 | 138,21 |
| 2019/08/05 | CH2276 | Female | Two y/o | Treatment (Wk 1) | Treatment | Feed Day | No  | 19:25 | 19:00 - 19:59 | Evening | 38,1 | 86  | 64,6  | 64,6  | 19,26 | 582,77 | 140,65 |
| 2019/08/05 | CH2276 | Female | Two y/o | Treatment (Wk 1) | Treatment | Feed Day | No  | 19:30 | 19:00 - 19:59 | Evening | 38,0 | 63  | 66,2  | 66,2  | 19,15 | 558,62 | 141,50 |
| 2019/08/05 | CH2276 | Female | Two y/o | Treatment (Wk 1) | Treatment | Feed Day | No  | 19:35 | 19:00 - 19:59 | Evening | 38,0 | 66  | 64,2  | 64,2  | 19,15 | 562,34 | 140,44 |
| 2019/08/05 | CH2276 | Female | Two y/o | Treatment (Wk 1) | Treatment | Feed Day | No  | 19:40 | 19:00 - 19:59 | Evening | 38,0 | 65  | 64,0  | 64,0  | 19,15 | 561,12 | 140,33 |
| 2019/08/05 | CH2276 | Female | Two y/o | Treatment (Wk 1) | Treatment | Feed Day | No  | 19:45 | 19:00 - 19:59 | Evening | 37,9 | 53  | 67,4  | 67,4  | 19,05 | 544,43 | 142,12 |
| 2019/08/05 | CH2276 | Female | Two y/o | Treatment (Wk 1) | Treatment | Feed Day | No  | 19:50 | 19:00 - 19:59 | Evening | 37,9 | 88  | 60,2  | 60,2  | 19,05 | 584,49 | 138,21 |
| 2019/08/05 | CH2276 | Female | Two y/o | Treatment (Wk 1) | Treatment | Feed Day | No  | 19:55 | 19:00 - 19:59 | Evening | 37,8 | 64  | 61,0  | 61,0  | 18,95 | 559,88 | 138,67 |
| 2019/08/05 | CH2276 | Female | Two y/o | Treatment (Wk 1) | Treatment | Feed Day | No  | 20:00 | 20:00 - 20:59 | Night   | 37,7 | 86  | 67,6  | 67,6  | 18,85 | 582,77 | 142,23 |
| 2019/08/05 | CH2276 | Female | Two y/o | Treatment (Wk 1) | Treatment | Feed Day | No  | 20:05 | 20:00 - 20:59 | Night   | 37,7 | 77  | 68,8  | 68,8  | 18,85 | 574,39 | 142,84 |
| 2019/08/05 | CH2276 | Female | Two y/o | Treatment (Wk 1) | Treatment | Feed Day | No  | 20:10 | 20:00 - 20:59 | Night   | 37,7 | 57  | 64,4  | 64,4  | 18,85 | 550,47 | 140,55 |
| 2019/08/05 | CH2276 | Female | Two y/o | Treatment (Wk 1) | Treatment | Feed Day | No  | 20:15 | 20:00 - 20:59 | Night   | 37,6 |     | 203,2 | 203,2 | 18,75 |        | 180,68 |
| 2019/08/05 | CH2276 | Female | Two y/o | Treatment (Wk 1) | Treatment | Feed Day | No  | 20:20 | 20:00 - 20:59 | Night   | 37,5 | 75  | 46,4  | 46,4  | 18,65 | 572,36 | 129,21 |
| 2019/08/05 | CH2276 | Female | Two y/o | Treatment (Wk 1) | Treatment | Feed Day | No  | 20:25 | 20:00 - 20:59 | Night   | 37,4 | 63  | 37,0  | 37,0  | 18,55 | 558,62 | 121,40 |
| 2019/08/05 | CH2276 | Female | Two y/o | Treatment (Wk 1) | Treatment | Feed Day | No  | 20:30 | 20:00 - 20:59 | Night   | 37,4 | 62  | 36,0  | 36,0  | 18,55 | 557,33 | 120,46 |
| 2019/08/05 | CH2276 | Female | Two y/o | Treatment (Wk 1) | Treatment | Feed Day | No  | 20:35 | 20:00 - 20:59 | Night   | 37,5 | 60  | 40,2  | 40,2  | 18,65 | 554,67 | 124,26 |
| 2019/08/05 | CH2276 | Female | Two y/o | Treatment (Wk 1) | Treatment | Feed Day | No  | 20:40 | 20:00 - 20:59 | Night   | 37,5 | 57  | 37,0  | 37,0  | 18,65 | 550,47 | 121,40 |
| 2019/08/05 | CH2276 | Female | Two y/o | Treatment (Wk 1) | Treatment | Feed Day | No  | 20:45 | 20:00 - 20:59 | Night   | 37,5 | 60  | 41,2  | 41,2  | 18,65 | 554,67 | 125,11 |
| 2019/08/05 | CH2276 | Female | Two y/o | Treatment (Wk 1) | Treatment | Feed Day | No  | 20:50 | 20:00 - 20:59 | Night   | 37,5 | 62  | 40,6  | 40,6  | 18,65 | 557,33 | 124,60 |
| 2019/08/05 | CH2276 | Female | Two y/o | Treatment (Wk 1) | Treatment | Feed Day | No  | 20:55 | 20:00 - 20:59 | Night   | 37,4 | 88  | 40,4  | 40,4  | 18,55 | 584,49 | 124,43 |
| 2019/08/05 | CH2276 | Female | Two y/o | Treatment (Wk 1) | Treatment | Feed Day | No  | 21:00 | 21:00 - 21:59 | Night   | 37,4 | 65  | 48,2  | 48,2  | 18,55 | 561,12 | 130,52 |
| 2019/08/05 | CH2276 | Female | Two y/o | Treatment (Wk 1) | Treatment | Feed Day | No  | 21:05 | 21:00 - 21:59 | Night   | 37,4 | 60  | 47,0  | 47,0  | 18,55 | 554,67 | 129,65 |
| 2019/08/05 | CH2276 | Female | Two y/o | Treatment (Wk 1) | Treatment | Feed Day | No  | 21:10 | 21:00 - 21:59 | Night   | 37,4 | 63  | 48,2  | 48,2  | 18,55 | 558,62 | 130,52 |
| 2019/08/05 | CH2276 | Female | Two y/o | Treatment (Wk 1) | Treatment | Feed Day | No  | 21:15 | 21:00 - 21:59 | Night   | 37,4 | 57  | 44,8  | 44,8  | 18,55 | 550,47 | 127,99 |
| 2019/08/05 | CH2276 | Female | Two y/o | Treatment (Wk 1) | Treatment | Feed Day | No  | 21:20 | 21:00 - 21:59 | Night   | 37,4 | 93  | 46,4  | 46,4  | 18,55 | 588,58 | 129,21 |
| 2019/08/05 | CH2276 | Female | Two y/o | Treatment (Wk 1) | Treatment | Feed Day | No  | 21:25 | 21:00 - 21:59 | Night   | 37,4 | 63  | 44,6  | 44,6  | 18,55 | 558,62 | 127,84 |
| 2019/08/05 | CH2276 | Female | Two y/o | Treatment (Wk 1) | Treatment | Feed Day | No  | 21:30 | 21:00 - 21:59 | Night   | 37,4 | 63  | 44,6  | 44,6  | 18,55 | 558,62 | 127,84 |
| 2019/08/05 | CH2276 | Female | Two y/o | Treatment (Wk 1) | Treatment | Feed Day | No  | 21:35 | 21:00 - 21:59 | Night   | 37,4 | 65  | 47,8  | 47,8  | 18,55 | 561,12 | 130,23 |
| 2019/08/05 | CH2276 | Female | Two y/o | Treatment (Wk 1) | Treatment | Feed Day | No  | 21:40 | 21:00 - 21:59 | Night   | 37,3 | 88  | 47,6  | 47,6  | 18,46 | 584,49 | 130,09 |
| 2019/08/05 | CH2276 | Female | Two y/o | Treatment (Wk 1) | Treatment | Feed Day | No  | 21:45 | 21:00 - 21:59 | Night   | 37,3 | 92  | 47,6  | 47,6  | 18,46 | 587,78 | 130,09 |
| 2019/08/05 | CH2276 | Female | Two y/o | Treatment (Wk 1) | Treatment | Feed Day | No  | 21:50 | 21:00 - 21:59 | Night   | 37,5 | 92  | 30,8  | 30,8  | 18,65 | 587,78 | 115,10 |
| 2019/08/05 | CH2276 | Female | Two y/o | Treatment (Wk 1) | Treatment | Feed Day | No  | 21:55 | 21:00 - 21:59 | Night   | 37,5 | 59  | 38,6  | 38,6  | 18,65 | 553,30 | 122,86 |
| 2019/08/05 | CH2276 | Female | Two y/o | Treatment (Wk 1) | Treatment | Feed Day | No  | 22:00 | 22:00 - 22:59 | Night   | 37,6 | 59  | 36,2  | 36,2  | 18,75 | 553,30 | 120,65 |



|    |            |        |        |         |                  |           |          |    |       |               |               |      |     |       |       |       |        |        |
|----|------------|--------|--------|---------|------------------|-----------|----------|----|-------|---------------|---------------|------|-----|-------|-------|-------|--------|--------|
|    | 2019/08/05 | CH2276 | Female | Two y/o | Treatment (Wk 1) | Treatment | Feed Day | No | 22:05 | 22:00 - 22:59 | Night         | 37,6 | 59  | 35,6  | 35,6  | 18,75 | 553,30 | 120,08 |
|    | 2019/08/05 | CH2276 | Female | Two y/o | Treatment (Wk 1) | Treatment | Feed Day | No | 22:10 | 22:00 - 22:59 | Night         | 37,6 | 57  | 35,0  | 35,0  | 18,75 | 550,47 | 119,49 |
|    | 2019/08/05 | CH2276 | Female | Two y/o | Treatment (Wk 1) | Treatment | Feed Day | No | 22:15 | 22:00 - 22:59 | Night         | 37,7 | 60  | 42,4  | 42,4  | 18,85 | 554,67 | 126,10 |
|    | 2019/08/05 | CH2276 | Female | Two y/o | Treatment (Wk 1) | Treatment | Feed Day | No | 22:20 | 22:00 - 22:59 | Night         | 37,7 | 91  | 44,6  | 44,6  | 18,85 | 586,98 | 127,84 |
|    | 2019/08/05 | CH2276 | Female | Two y/o | Treatment (Wk 1) | Treatment | Feed Day | No | 22:25 | 22:00 - 22:59 | Night         | 37,7 | 50  | 35,2  | 35,2  | 18,85 | 539,52 | 119,69 |
|    | 2019/08/05 | CH2276 | Female | Two y/o | Treatment (Wk 1) | Treatment | Feed Day | No | 22:30 | 22:00 - 22:59 | Night         | 37,7 | 95  | 44,8  | 44,8  | 18,85 | 590,14 | 127,99 |
|    | 2019/08/05 | CH2276 | Female | Two y/o | Treatment (Wk 1) | Treatment | Feed Day | No | 22:35 | 22:00 - 22:59 | Night         | 37,7 | 92  | 41,4  | 41,4  | 18,85 | 587,78 | 125,27 |
|    | 2019/08/05 | CH2276 | Female | Two y/o | Treatment (Wk 1) | Treatment | Feed Day | No | 22:40 | 22:00 - 22:59 | Night         | 37,6 | 85  | 40,8  | 40,8  | 18,75 | 581,90 | 124,77 |
|    | 2019/08/05 | CH2276 | Female | Two y/o | Treatment (Wk 1) | Treatment | Feed Day | No | 22:45 | 22:00 - 22:59 | Night         | 37,6 | 67  | 41,2  | 41,2  | 18,75 | 563,53 | 125,11 |
|    | 2019/08/05 | CH2276 | Female | Two y/o | Treatment (Wk 1) | Treatment | Feed Day | No | 22:50 | 22:00 - 22:59 | Night         | 37,6 | 87  | 39,0  | 39,0  | 18,75 | 583,64 | 123,22 |
|    | 2019/08/05 | CH2276 | Female | Two y/o | Treatment (Wk 1) | Treatment | Feed Day | No | 22:55 | 22:00 - 22:59 | Night         | 37,5 | 93  | 38,0  | 38,0  | 18,65 | 588,58 | 122,32 |
|    | 2019/08/05 | CH2276 | Female | Two y/o | Treatment (Wk 1) | Treatment | Feed Day | No | 23:00 | 23:00 - 23:59 | Night         | 37,4 | 57  | 29,6  | 29,6  | 18,55 | 550,47 | 113,73 |
|    | 2019/08/05 | CH2276 | Female | Two y/o | Treatment (Wk 1) | Treatment | Feed Day | No | 23:05 | 23:00 - 23:59 | Night         | 37,4 | 87  | 25,6  | 25,6  | 18,55 | 583,64 | 108,76 |
|    | 2019/08/05 | CH2276 | Female | Two y/o | Treatment (Wk 1) | Treatment | Feed Day | No | 23:10 | 23:00 - 23:59 | Night         | 37,3 | 57  | 25,0  | 25,0  | 18,46 | 550,47 | 107,94 |
|    | 2019/08/05 | CH2276 | Female | Two y/o | Treatment (Wk 1) | Treatment | Feed Day | No | 23:15 | 23:00 - 23:59 | Night         | 37,3 | 99  | 29,0  | 29,0  | 18,46 | 593,14 | 113,03 |
|    | 2019/08/05 | CH2276 | Female | Two y/o | Treatment (Wk 1) | Treatment | Feed Day | No | 23:20 | 23:00 - 23:59 | Night         | 37,2 | 60  | 34,0  | 34,0  | 18,36 | 554,67 | 118,49 |
|    | 2019/08/05 | CH2276 | Female | Two y/o | Treatment (Wk 1) | Treatment | Feed Day | No | 23:25 | 23:00 - 23:59 | Night         | 37,3 | 96  | 41,4  | 41,4  | 18,46 | 590,91 | 125,27 |
|    | 2019/08/05 | CH2276 | Female | Two y/o | Treatment (Wk 1) | Treatment | Feed Day | No | 23:30 | 23:00 - 23:59 | Night         | 37,4 | 59  | 40,4  | 40,4  | 18,55 | 553,30 | 124,43 |
|    | 2019/08/05 | CH2276 | Female | Two y/o | Treatment (Wk 1) | Treatment | Feed Day | No | 23:35 | 23:00 - 23:59 | Night         | 37,4 | 58  | 39,2  | 39,2  | 18,55 | 551,90 | 123,39 |
|    | 2019/08/05 | CH2276 | Female | Two y/o | Treatment (Wk 1) | Treatment | Feed Day | No | 23:40 | 23:00 - 23:59 | Night         | 37,3 | 89  | 48,0  | 48,0  | 18,46 | 585,33 | 130,38 |
|    | 2019/08/05 | CH2276 | Female | Two y/o | Treatment (Wk 1) | Treatment | Feed Day | No | 23:45 | 23:00 - 23:59 | Night         | 37,3 | 95  | 54,2  | 54,2  | 18,46 | 590,14 | 134,57 |
|    | 2019/08/05 | CH2276 | Female | Two y/o | Treatment (Wk 1) | Treatment | Feed Day | No | 23:50 | 23:00 - 23:59 | Night         | 37,3 | 84  | 46,6  | 46,6  | 18,46 | 581,01 | 129,35 |
|    | 2019/08/05 | CH2276 | Female | Two y/o | Treatment (Wk 1) | Treatment | Feed Day | No | 23:55 | 23:00 - 23:59 | Night         | 37,3 | 90  | 60,6  | 60,6  | 18,46 | 586,16 | 138,44 |
| 49 | 2019/08/06 | CH2276 | Female | Two y/o | Treatment (Wk 1) | Treatment | Feed Day | No | 00:00 | 00:00 - 00:59 | Early Morning | 37,4 | 51  | 52,2  | 52,2  | 18,55 | 541,20 | 133,27 |
|    | 2019/08/06 | CH2276 | Female | Two y/o | Treatment (Wk 1) | Treatment | Feed Day | No | 00:05 | 00:00 - 00:59 | Early Morning | 37,4 | 63  | 17,2  | 17,2  | 18,55 | 558,62 | 95,17  |
|    | 2019/08/06 | CH2276 | Female | Two y/o | Treatment (Wk 1) | Treatment | Feed Day | No | 00:10 | 00:00 - 00:59 | Early Morning | 37,4 | 165 | 47,2  | 47,2  | 18,55 | 628,06 | 129,80 |
|    | 2019/08/06 | CH2276 | Female | Two y/o | Treatment (Wk 1) | Treatment | Feed Day | No | 00:15 | 00:00 - 00:59 | Early Morning | 37,3 | 59  | 49,4  | 49,4  | 18,46 | 553,30 | 131,37 |
|    | 2019/08/06 | CH2276 | Female | Two y/o | Treatment (Wk 1) | Treatment | Feed Day | No | 00:20 | 00:00 - 00:59 | Early Morning | 37,3 | 160 | 49,0  | 49,0  | 18,46 | 626,07 | 131,09 |
|    | 2019/08/06 | CH2276 | Female | Two y/o | Treatment (Wk 1) | Treatment | Feed Day | No | 00:25 | 00:00 - 00:59 | Early Morning | 37,2 | 76  | 44,0  | 44,0  | 18,36 | 573,39 | 127,37 |
|    | 2019/08/06 | CH2276 | Female | Two y/o | Treatment (Wk 1) | Treatment | Feed Day | No | 00:30 | 00:00 - 00:59 | Early Morning | 37,1 | 65  | 46,6  | 46,6  | 18,26 | 561,12 | 129,35 |
|    | 2019/08/06 | CH2276 | Female | Two y/o | Treatment (Wk 1) | Treatment | Feed Day | No | 00:35 | 00:00 - 00:59 | Early Morning | 37,0 | 54  | 44,4  | 44,4  | 18,16 | 545,99 | 127,69 |
|    | 2019/08/06 | CH2276 | Female | Two y/o | Treatment (Wk 1) | Treatment | Feed Day | No | 00:40 | 00:00 - 00:59 | Early Morning | 36,8 |     | 45,8  | 45,8  | 17,96 |        | 128,76 |
|    | 2019/08/06 | CH2276 | Female | Two y/o | Treatment (Wk 1) | Treatment | Feed Day | No | 00:45 | 00:00 - 00:59 | Early Morning | 36,6 | 56  | 41,6  | 41,6  | 17,77 | 549,01 | 125,44 |
|    | 2019/08/06 | CH2276 | Female | Two y/o | Treatment (Wk 1) | Treatment | Feed Day | No | 00:50 | 00:00 - 00:59 | Early Morning | 36,5 | 53  | 49,2  | 49,2  | 17,67 | 544,43 | 131,23 |
|    | 2019/08/06 | CH2276 | Female | Two y/o | Treatment (Wk 1) | Treatment | Feed Day | No | 00:55 | 00:00 - 00:59 | Early Morning | 36,5 | 60  | 47,4  | 47,4  | 17,67 | 554,67 | 129,94 |
|    | 2019/08/06 | CH2276 | Female | Two y/o | Treatment (Wk 1) | Treatment | Feed Day | No | 01:00 | 01:00 - 01:59 | Early Morning | 36,5 | 52  | 43,0  | 43,0  | 17,67 | 542,83 | 126,58 |
|    | 2019/08/06 | CH2276 | Female | Two y/o | Treatment (Wk 1) | Treatment | Feed Day | No | 01:05 | 01:00 - 01:59 | Early Morning | 36,5 | 79  | 40,0  | 40,0  | 17,67 | 576,36 | 124,09 |
|    | 2019/08/06 | CH2276 | Female | Two y/o | Treatment (Wk 1) | Treatment | Feed Day | No | 01:10 | 01:00 - 01:59 | Early Morning | 36,4 |     | 46,6  | 46,6  | 17,57 |        | 129,35 |
|    | 2019/08/06 | CH2276 | Female | Two y/o | Treatment (Wk 1) | Treatment | Feed Day | No | 01:15 | 01:00 - 01:59 | Early Morning | 36,5 | 61  | 52,8  | 52,8  | 17,67 | 556,01 | 133,67 |
|    | 2019/08/06 | CH2276 | Female | Two y/o | Treatment (Wk 1) | Treatment | Feed Day | No | 01:20 | 01:00 - 01:59 | Early Morning | 36,5 | 55  | 61,2  | 61,2  | 17,67 | 547,52 | 138,78 |
|    | 2019/08/06 | CH2276 | Female | Two y/o | Treatment (Wk 1) | Treatment | Feed Day | No | 01:25 | 01:00 - 01:59 | Early Morning | 36,6 |     | 118,4 | 118,4 | 17,77 |        | 161,74 |
|    | 2019/08/06 | CH2276 | Female | Two y/o | Treatment (Wk 1) | Treatment | Feed Day | No | 01:30 | 01:00 - 01:59 | Early Morning | 36,8 | 140 | 161,0 | 161,0 | 17,96 | 617,28 | 172,50 |
|    | 2019/08/06 | CH2276 | Female | Two y/o | Treatment (Wk 1) | Treatment | Feed Day | No | 01:35 | 01:00 - 01:59 | Early Morning | 36,9 | 98  | 141,6 | 141,6 | 18,06 | 592,41 | 168,00 |
|    | 2019/08/06 | CH2276 | Female | Two y/o | Treatment (Wk 1) | Treatment | Feed Day | No | 01:40 | 01:00 - 01:59 | Early Morning | 37,0 | 103 | 248,2 | 248,2 | 18,16 | 596,00 | 187,73 |
|    | 2019/08/06 | CH2276 | Female | Two y/o | Treatment (Wk 1) | Treatment | Feed Day | No | 01:45 | 01:00 - 01:59 | Early Morning | 37,1 | 150 | 72,0  | 72,0  | 18,26 | 621,86 | 144,42 |
|    | 2019/08/06 | CH2276 | Female | Two y/o | Treatment (Wk 1) | Treatment | Feed Day | No | 01:50 | 01:00 - 01:59 | Early Morning | 37,3 | 131 | 142,8 | 142,8 | 18,46 | 612,80 | 168,29 |
|    | 2019/08/06 | CH2276 | Female | Two y/o | Treatment (Wk 1) | Treatment | Feed Day | No | 01:55 | 01:00 - 01:59 | Early Morning | 37,4 | 105 | 84,8  | 84,8  | 18,55 | 597,38 | 150,10 |
|    | 2019/08/06 | CH2276 | Female | Two y/o | Treatment (Wk 1) | Treatment | Feed Day | No | 02:00 | 02:00 - 02:59 | Early Morning | 37,5 | 119 | 308,0 | 308,0 | 18,65 | 606,20 | 195,35 |
|    | 2019/08/06 | CH2276 | Female | Two y/o | Treatment (Wk 1) | Treatment | Feed Day | No | 02:05 | 02:00 - 02:59 | Early Morning | 37,6 | 90  | 183,6 | 183,6 | 18,75 | 586,16 | 177,11 |
|    | 2019/08/06 | CH2276 | Female | Two y/o | Treatment (Wk 1) | Treatment | Feed Day | No | 02:10 | 02:00 - 02:59 | Early Morning | 37,6 | 150 | 374,4 | 374,4 | 18,75 | 621,86 | 202,27 |
|    | 2019/08/06 | CH2276 | Female | Two y/o | Treatment (Wk 1) | Treatment | Feed Day | No | 02:15 | 02:00 - 02:59 | Early Morning | 37,6 | 180 | 440,4 | 440,4 | 18,75 | 633,61 | 208,03 |
|    | 2019/08/06 | CH2276 | Female | Two y/o | Treatment (Wk 1) | Treatment | Feed Day | No | 02:20 | 02:00 - 02:59 | Early Morning | 37,7 |     | 116,6 | 116,6 | 18,85 |        | 161,20 |
|    | 2019/08/06 | CH2276 | Female | Two y/o | Treatment (Wk 1) | Treatment | Feed Day | No | 02:25 | 02:00 - 02:59 | Early Morning | 37,7 | 105 | 156,0 | 156,0 | 18,85 | 597,38 | 171,39 |
|    | 2019/08/06 | CH2276 | Female | Two y/o | Treatment (Wk 1) | Treatment | Feed Day | No | 02:30 | 02:00 - 02:59 | Early Morning | 37,8 | 118 | 162,2 | 162,2 | 18,95 | 605,61 | 172,76 |
|    | 2019/08/06 | CH2276 | Female | Two y/o | Treatment (Wk 1) | Treatment | Feed Day | No | 02:35 | 02:00 - 02:59 | Early Morning | 37,8 | 111 | 144,8 | 144,8 | 18,95 | 601,33 | 168,78 |
|    | 2019/08/06 | CH2276 | Female | Two y/o | Treatment (Wk 1) | Treatment | Feed Day | No | 02:40 | 02:00 - 02:59 | Early Morning | 37,8 | 90  | 102,6 | 102,6 | 18,95 | 586,16 | 156,74 |
|    | 2019/08/06 | CH2276 | Female | Two y/o | Treatment (Wk 1) | Treatment | Feed Day | No | 02:45 | 02:00 - 02:59 | Early Morning | 37,8 |     | 140,0 | 140,0 | 18,95 |        | 167,60 |
|    | 2019/08/06 | CH2276 | Female | Two y/o | Treatment (Wk 1) | Treatment | Feed Day | No | 02:50 | 02:00 - 02:59 | Early Morning | 37,8 | 88  | 41,0  | 41,0  | 18,95 | 584,49 | 124,94 |
|    | 2019/08/06 | CH2276 | Female | Two y/o | Treatment (Wk 1) | Treatment | Feed Day | No | 02:55 | 02:00 - 02:59 | Early Morning | 37,5 | 54  | 51,0  | 51,0  | 18,65 | 545,99 | 132,47 |
|    | 2019/08/06 | CH2276 | Female | Two y/o | Treatment (Wk 1) | Treatment | Feed Day | No | 03:00 | 03:00 - 03:59 | Early Morning | 37,4 | 197 | 305,6 | 305,6 | 18,55 | 639,25 | 195,07 |
|    | 2019/08/06 | CH2276 | Female | Two y/o | Treatment (Wk 1) | Treatment | Feed Day | No | 03:05 | 03:00 - 03:59 | Early Morning | 37,6 | 65  | 79,0  | 79,0  | 18,75 | 561,12 | 147,64 |
|    | 2019/08/06 | CH2276 | Female | Two y/o | Treatment (Wk 1) | Treatment | Feed Day | No | 03:10 | 03:00 - 03:59 | Early Morning | 37,5 | 84  | 51,0  | 51,0  | 18,65 | 581,01 | 132,47 |
|    | 2019/08/06 | CH2276 | Female | Two y/o | Treatment (Wk 1) | Treatment | Feed Day | No | 03:15 | 03:00 - 03:59 | Early Morning | 37,4 | 56  | 51,8  | 51,8  | 18,55 | 549,01 | 133,01 |
|    | 2019/08/06 | CH2276 | Female | Two y/o | Treatment (Wk 1) | Treatment | Feed Day | No | 03:20 | 03:00 - 03:59 | Early Morning | 37,3 | 65  | 51,4  | 51,4  | 18,46 | 561,12 | 132,74 |
|    | 2019/08/06 | CH2276 | Female | Two y/o | Treatment (Wk 1) | Treatment | Feed Day | No | 03:25 | 03:00 - 03:59 | Early Morning | 37,3 |     | 56,6  | 56,6  | 18,46 |        | 136,07 |
|    | 2019/08/06 | CH2276 | Female | Two y/o | Treatment (Wk 1) | Treatment | Feed Day | No | 03:30 | 03:00 - 03:59 | Early Morning | 37,4 | 56  | 53,0  | 53,0  | 18,55 | 549,01 | 133,80 |
|    | 2019/08/06 | CH2276 | Female | Two y/o | Treatment (Wk 1) | Treatment | Feed Day | No | 03:35 | 03:00 - 03:59 | Early Morning | 37,4 | 56  | 58,0  | 58,0  | 18,55 | 549,01 | 136,92 |
|    | 2019/08/06 | CH2276 | Female | Two y/o | Treatment (Wk 1) | Treatment | Feed Day | No | 03:40 | 03:00 - 03:59 | Early Morning | 37,4 | 88  | 38,2  | 38,2  | 18,55 | 584,49 | 122,50 |
|    | 2019/08/06 | CH2276 | Female | Two y/o | Treatment (Wk 1) | Treatment | Feed Day | No | 03:45 | 03:00 - 03:59 | Early Morning | 37,3 | 64  | 39,0  | 39,0  | 18,46 | 559,88 | 123,22 |
|    | 2019/08/06 | CH2276 | Female | Two y/o | Treatment (Wk 1) | Treatment | Feed Day | No | 03:50 | 03:00 - 03:59 | Early Morning | 37,1 | 55  | 38,4  | 38,4  |       |        |        |



|            |        |        |         |                  |           |          |    |       |               |               |      |     |       |       |       |        |        |
|------------|--------|--------|---------|------------------|-----------|----------|----|-------|---------------|---------------|------|-----|-------|-------|-------|--------|--------|
| 2019/08/06 | CH2276 | Female | Two y/o | Treatment (Wk 1) | Treatment | Feed Day | No | 03:55 | 03:00 - 03:59 | Early Morning | 37,0 | 70  | 45,4  | 45,4  | 18,16 | 566,99 | 128,45 |
| 2019/08/06 | CH2276 | Female | Two y/o | Treatment (Wk 1) | Treatment | Feed Day | No | 04:00 | 04:00 - 04:59 | Morning       | 36,9 | 61  | 40,6  | 40,6  | 18,06 | 556,01 | 124,60 |
| 2019/08/06 | CH2276 | Female | Two y/o | Treatment (Wk 1) | Treatment | Feed Day | No | 04:05 | 04:00 - 04:59 | Morning       | 36,8 | 54  | 40,4  | 40,4  | 17,96 | 545,99 | 124,43 |
| 2019/08/06 | CH2276 | Female | Two y/o | Treatment (Wk 1) | Treatment | Feed Day | No | 04:10 | 04:00 - 04:59 | Morning       | 36,7 | 53  | 37,6  | 37,6  | 17,87 | 544,43 | 121,96 |
| 2019/08/06 | CH2276 | Female | Two y/o | Treatment (Wk 1) | Treatment | Feed Day | No | 04:15 | 04:00 - 04:59 | Morning       | 36,6 | 61  | 39,0  | 39,0  | 17,77 | 556,01 | 123,22 |
| 2019/08/06 | CH2276 | Female | Two y/o | Treatment (Wk 1) | Treatment | Feed Day | No | 04:20 | 04:00 - 04:59 | Morning       | 36,5 | 50  | 38,8  | 38,8  | 17,67 | 539,52 | 123,04 |
| 2019/08/06 | CH2276 | Female | Two y/o | Treatment (Wk 1) | Treatment | Feed Day | No | 04:25 | 04:00 - 04:59 | Morning       | 36,5 | 51  | 38,8  | 38,8  | 17,67 | 541,20 | 123,04 |
| 2019/08/06 | CH2276 | Female | Two y/o | Treatment (Wk 1) | Treatment | Feed Day | No | 04:30 | 04:00 - 04:59 | Morning       | 36,5 | 41  | 37,4  | 37,4  | 17,67 | 522,29 | 121,77 |
| 2019/08/06 | CH2276 | Female | Two y/o | Treatment (Wk 1) | Treatment | Feed Day | No | 04:35 | 04:00 - 04:59 | Morning       | 36,5 | 50  | 44,0  | 44,0  | 17,67 | 539,52 | 127,37 |
| 2019/08/06 | CH2276 | Female | Two y/o | Treatment (Wk 1) | Treatment | Feed Day | No | 04:40 | 04:00 - 04:59 | Morning       | 36,5 | 60  | 47,4  | 47,4  | 17,67 | 554,67 | 129,94 |
| 2019/08/06 | CH2276 | Female | Two y/o | Treatment (Wk 1) | Treatment | Feed Day | No | 04:45 | 04:00 - 04:59 | Morning       | 36,5 | 52  | 40,8  | 40,8  | 17,67 | 542,83 | 124,77 |
| 2019/08/06 | CH2276 | Female | Two y/o | Treatment (Wk 1) | Treatment | Feed Day | No | 04:50 | 04:00 - 04:59 | Morning       | 36,6 | 92  | 95,2  | 95,2  | 17,77 | 587,78 | 154,13 |
| 2019/08/06 | CH2276 | Female | Two y/o | Treatment (Wk 1) | Treatment | Feed Day | No | 04:55 | 04:00 - 04:59 | Morning       | 36,6 | 50  | 52,0  | 52,0  | 17,77 | 539,52 | 133,14 |
| 2019/08/06 | CH2276 | Female | Two y/o | Treatment (Wk 1) | Treatment | Feed Day | No | 05:00 | 05:00 - 05:59 | Morning       | 36,6 | 52  | 55,0  | 55,0  | 17,77 | 542,83 | 135,08 |
| 2019/08/06 | CH2276 | Female | Two y/o | Treatment (Wk 1) | Treatment | Feed Day | No | 05:05 | 05:00 - 05:59 | Morning       | 36,7 | 56  | 42,4  | 42,4  | 17,87 | 549,01 | 126,10 |
| 2019/08/06 | CH2276 | Female | Two y/o | Treatment (Wk 1) | Treatment | Feed Day | No | 05:10 | 05:00 - 05:59 | Morning       | 36,7 | 48  | 38,2  | 38,2  | 17,87 | 536,04 | 122,50 |
| 2019/08/06 | CH2276 | Female | Two y/o | Treatment (Wk 1) | Treatment | Feed Day | No | 05:15 | 05:00 - 05:59 | Morning       | 36,7 | 53  | 40,6  | 40,6  | 17,87 | 544,43 | 124,60 |
| 2019/08/06 | CH2276 | Female | Two y/o | Treatment (Wk 1) | Treatment | Feed Day | No | 05:20 | 05:00 - 05:59 | Morning       | 36,7 | 65  | 78,4  | 78,4  | 17,87 | 561,12 | 147,37 |
| 2019/08/06 | CH2276 | Female | Two y/o | Treatment (Wk 1) | Treatment | Feed Day | No | 05:25 | 05:00 - 05:59 | Morning       | 36,7 | 98  | 180,0 | 180,0 | 17,87 | 592,41 | 176,41 |
| 2019/08/06 | CH2276 | Female | Two y/o | Treatment (Wk 1) | Treatment | Feed Day | No | 05:30 | 05:00 - 05:59 | Morning       | 36,8 |     | 232,6 | 232,6 | 17,96 |        | 185,44 |
| 2019/08/06 | CH2276 | Female | Two y/o | Treatment (Wk 1) | Treatment | Feed Day | No | 05:35 | 05:00 - 05:59 | Morning       | 37,0 | 103 | 529,4 | 529,4 | 18,16 | 596,00 | 214,58 |
| 2019/08/06 | CH2276 | Female | Two y/o | Treatment (Wk 1) | Treatment | Feed Day | No | 05:40 | 05:00 - 05:59 | Morning       | 37,3 |     | 99,4  | 99,4  | 18,46 |        | 155,63 |
| 2019/08/06 | CH2276 | Female | Two y/o | Treatment (Wk 1) | Treatment | Feed Day | No | 05:45 | 05:00 - 05:59 | Morning       | 37,5 | 79  | 158,6 | 158,6 | 18,65 | 576,36 | 171,97 |
| 2019/08/06 | CH2276 | Female | Two y/o | Treatment (Wk 1) | Treatment | Feed Day | No | 05:50 | 05:00 - 05:59 | Morning       | 37,5 | 172 | 584,0 | 584,0 | 18,65 | 630,73 | 218,08 |
| 2019/08/06 | CH2276 | Female | Two y/o | Treatment (Wk 1) | Treatment | Feed Day | No | 05:55 | 05:00 - 05:59 | Morning       | 37,6 | 64  | 177,4 | 177,4 | 18,75 | 559,88 | 175,90 |
| 2019/08/06 | CH2276 | Female | Two y/o | Treatment (Wk 1) | Treatment | Feed Day | No | 06:00 | 06:00 - 06:59 | Morning       | 37,7 |     | 119,0 | 119,0 | 18,85 |        | 161,92 |
| 2019/08/06 | CH2276 | Female | Two y/o | Treatment (Wk 1) | Treatment | Feed Day | No | 06:05 | 06:00 - 06:59 | Morning       | 37,8 | 67  | 47,4  | 47,4  | 18,95 | 563,53 | 129,94 |
| 2019/08/06 | CH2276 | Female | Two y/o | Treatment (Wk 1) | Treatment | Feed Day | No | 06:10 | 06:00 - 06:59 | Morning       | 37,8 |     | 430,0 | 430,0 | 18,95 |        | 207,18 |
| 2019/08/06 | CH2276 | Female | Two y/o | Treatment (Wk 1) | Treatment | Feed Day | No | 06:15 | 06:00 - 06:59 | Morning       | 37,8 | 61  | 73,4  | 73,4  | 18,95 | 556,01 | 145,08 |
| 2019/08/06 | CH2276 | Female | Two y/o | Treatment (Wk 1) | Treatment | Feed Day | No | 06:20 | 06:00 - 06:59 | Morning       | 37,9 | 103 | 140,6 | 140,6 | 19,05 | 596,00 | 167,75 |
| 2019/08/06 | CH2276 | Female | Two y/o | Treatment (Wk 1) | Treatment | Feed Day | No | 06:25 | 06:00 - 06:59 | Morning       | 37,9 | 92  | 60,0  | 60,0  | 19,05 | 587,78 | 138,09 |
| 2019/08/06 | CH2276 | Female | Two y/o | Treatment (Wk 1) | Treatment | Feed Day | No | 06:30 | 06:00 - 06:59 | Morning       | 37,9 |     | 93,0  | 93,0  | 19,05 |        | 153,31 |
| 2019/08/06 | CH2276 | Female | Two y/o | Treatment (Wk 1) | Treatment | Feed Day | No | 06:35 | 06:00 - 06:59 | Morning       | 38,0 |     | 530,4 | 530,4 | 19,15 |        | 214,65 |
| 2019/08/06 | CH2276 | Female | Two y/o | Treatment (Wk 1) | Treatment | Feed Day | No | 06:40 | 06:00 - 06:59 | Morning       | 38,5 | 110 | 139,2 | 139,2 | 19,66 | 600,69 | 167,40 |
| 2019/08/06 | CH2276 | Female | Two y/o | Treatment (Wk 1) | Treatment | Feed Day | No | 06:45 | 06:00 - 06:59 | Morning       | 38,4 | 90  | 133,4 | 133,4 | 19,56 | 586,16 | 165,91 |
| 2019/08/06 | CH2276 | Female | Two y/o | Treatment (Wk 1) | Treatment | Feed Day | No | 06:50 | 06:00 - 06:59 | Morning       | 38,6 | 126 | 88,0  | 88,0  | 19,76 | 610,14 | 151,39 |
| 2019/08/06 | CH2276 | Female | Two y/o | Treatment (Wk 1) | Treatment | Feed Day | No | 06:55 | 06:00 - 06:59 | Morning       | 38,4 | 118 | 136,2 | 136,2 | 19,56 | 605,61 | 166,64 |
| 2019/08/06 | CH2276 | Female | Two y/o | Treatment (Wk 1) | Treatment | Feed Day | No | 07:00 | 07:00 - 07:59 | Morning       | 38,3 | 99  | 351,6 | 351,6 | 19,46 | 593,14 | 200,04 |
| 2019/08/06 | CH2276 | Female | Two y/o | Treatment (Wk 1) | Treatment | Feed Day | No | 07:05 | 07:00 - 07:59 | Morning       | 38,2 | 46  | 69,8  | 69,8  | 19,36 | 532,38 | 143,34 |
| 2019/08/06 | CH2276 | Female | Two y/o | Treatment (Wk 1) | Treatment | Feed Day | No | 07:10 | 07:00 - 07:59 | Morning       | 38,2 | 105 | 308,2 | 308,2 | 19,36 | 597,38 | 195,37 |
| 2019/08/06 | CH2276 | Female | Two y/o | Treatment (Wk 1) | Treatment | Feed Day | No | 07:15 | 07:00 - 07:59 | Morning       | 38,1 |     | 233,2 | 233,2 | 19,26 |        | 185,53 |
| 2019/08/06 | CH2276 | Female | Two y/o | Treatment (Wk 1) | Treatment | Feed Day | No | 07:20 | 07:00 - 07:59 | Morning       | 37,9 | 57  | 193,2 | 193,2 | 19,05 | 550,47 | 178,90 |
| 2019/08/06 | CH2276 | Female | Two y/o | Treatment (Wk 1) | Treatment | Feed Day | No | 07:25 | 07:00 - 07:59 | Morning       | 38,0 | 79  | 158,2 | 158,2 | 19,15 | 576,36 | 171,88 |
| 2019/08/06 | CH2276 | Female | Two y/o | Treatment (Wk 1) | Treatment | Feed Day | No | 07:30 | 07:00 - 07:59 | Morning       | 37,9 |     | 285,2 | 285,2 | 19,05 |        | 192,63 |
| 2019/08/06 | CH2276 | Female | Two y/o | Treatment (Wk 1) | Treatment | Feed Day | No | 07:35 | 07:00 - 07:59 | Morning       | 38,3 | 174 | 246,6 | 246,6 | 19,46 | 631,46 | 187,50 |
| 2019/08/06 | CH2276 | Female | Two y/o | Treatment (Wk 1) | Treatment | Feed Day | No | 07:40 | 07:00 - 07:59 | Morning       | 38,5 | 80  | 73,2  | 73,2  | 19,66 | 577,31 | 144,99 |
| 2019/08/06 | CH2276 | Female | Two y/o | Treatment (Wk 1) | Treatment | Feed Day | No | 07:45 | 07:00 - 07:59 | Morning       | 38,4 | 67  | 59,4  | 59,4  | 19,56 | 563,53 | 137,75 |
| 2019/08/06 | CH2276 | Female | Two y/o | Treatment (Wk 1) | Treatment | Feed Day | No | 07:50 | 07:00 - 07:59 | Morning       | 38,2 | 81  | 54,6  | 54,6  | 19,36 | 578,26 | 134,83 |
| 2019/08/06 | CH2276 | Female | Two y/o | Treatment (Wk 1) | Treatment | Feed Day | No | 07:55 | 07:00 - 07:59 | Morning       | 38,0 | 68  | 98,4  | 98,4  | 19,15 | 564,71 | 155,28 |
| 2019/08/06 | CH2276 | Female | Two y/o | Treatment (Wk 1) | Treatment | Feed Day | No | 08:00 | 08:00 - 08:59 | Late Morning  | 38,0 | 124 | 196,2 | 196,2 | 19,15 | 609,04 | 179,44 |
| 2019/08/06 | CH2276 | Female | Two y/o | Treatment (Wk 1) | Treatment | Feed Day | No | 08:05 | 08:00 - 08:59 | Late Morning  | 38,0 | 72  | 123,8 | 123,8 | 19,15 | 569,20 | 163,30 |
| 2019/08/06 | CH2276 | Female | Two y/o | Treatment (Wk 1) | Treatment | Feed Day | No | 08:10 | 08:00 - 08:59 | Late Morning  | 37,9 | 112 | 108,8 | 108,8 | 19,05 | 601,96 | 158,79 |
| 2019/08/06 | CH2276 | Female | Two y/o | Treatment (Wk 1) | Treatment | Feed Day | No | 08:15 | 08:00 - 08:59 | Late Morning  | 37,8 | 83  | 54,4  | 54,4  | 18,95 | 580,11 | 134,70 |
| 2019/08/06 | CH2276 | Female | Two y/o | Treatment (Wk 1) | Treatment | Feed Day | No | 08:20 | 08:00 - 08:59 | Late Morning  | 37,8 | 67  | 61,4  | 61,4  | 18,95 | 563,53 | 138,89 |
| 2019/08/06 | CH2276 | Female | Two y/o | Treatment (Wk 1) | Treatment | Feed Day | No | 08:25 | 08:00 - 08:59 | Late Morning  | 37,8 | 78  | 51,2  | 51,2  | 18,95 | 575,38 | 132,61 |
| 2019/08/06 | CH2276 | Female | Two y/o | Treatment (Wk 1) | Treatment | Feed Day | No | 08:30 | 08:00 - 08:59 | Late Morning  | 37,8 | 75  | 75,4  | 75,4  | 18,95 | 572,36 | 146,02 |
| 2019/08/06 | CH2276 | Female | Two y/o | Treatment (Wk 1) | Treatment | Feed Day | No | 08:35 | 08:00 - 08:59 | Late Morning  | 37,7 | 57  | 73,2  | 73,2  | 18,85 | 550,47 | 144,99 |
| 2019/08/06 | CH2276 | Female | Two y/o | Treatment (Wk 1) | Treatment | Feed Day | No | 08:40 | 08:00 - 08:59 | Late Morning  | 37,7 | 53  | 60,4  | 60,4  | 18,85 | 544,43 | 138,32 |
| 2019/08/06 | CH2276 | Female | Two y/o | Treatment (Wk 1) | Treatment | Feed Day | No | 08:45 | 08:00 - 08:59 | Late Morning  | 37,7 | 57  | 55,0  | 55,0  | 18,85 | 550,47 | 135,08 |
| 2019/08/06 | CH2276 | Female | Two y/o | Treatment (Wk 1) | Treatment | Feed Day | No | 08:50 | 08:00 - 08:59 | Late Morning  | 37,6 | 58  | 50,8  | 50,8  | 18,75 | 551,90 | 132,33 |
| 2019/08/06 | CH2276 | Female | Two y/o | Treatment (Wk 1) | Treatment | Feed Day | No | 08:55 | 08:00 - 08:59 | Late Morning  | 37,5 | 60  | 64,4  | 64,4  | 18,65 | 554,67 | 140,55 |
| 2019/08/06 | CH2276 | Female | Two y/o | Treatment (Wk 1) | Treatment | Feed Day | No | 09:00 | 09:00 - 09:59 | Late Morning  | 37,4 | 61  | 65,0  | 65,0  | 18,55 | 556,01 | 140,87 |
| 2019/08/06 | CH2276 | Female | Two y/o | Treatment (Wk 1) | Treatment | Feed Day | No | 09:05 | 09:00 - 09:59 | Late Morning  | 37,4 |     | 70,2  | 70,2  | 18,55 |        | 143,54 |
| 2019/08/06 | CH2276 | Female | Two y/o | Treatment (Wk 1) | Treatment | Feed Day | No | 09:10 | 09:00 - 09:59 | Late Morning  | 37,3 | 57  | 64,8  | 64,8  | 18,46 | 550,47 | 140,76 |
| 2019/08/06 | CH2276 | Female | Two y/o | Treatment (Wk 1) | Treatment | Feed Day | No | 09:15 | 09:00 - 09:59 | Late Morning  | 37,3 | 50  | 69,2  | 69,2  | 18,46 | 539,52 | 143,04 |
| 2019/08/06 | CH2276 | Female | Two y/o | Treatment (Wk 1) | Treatment | Feed Day | No | 09:20 | 09:00 - 09:59 | Late Morning  | 37,1 | 58  | 64,2  | 64,2  | 18,26 | 551,90 | 140,44 |
| 2019/08/06 | CH2276 | Female | Two y/o | Treatment (Wk 1) | Treatment | Feed Day | No | 09:25 | 09:00 - 09:59 | Late Morning  | 37,1 | 160 | 62,2  | 62,2  | 18,26 | 626,07 | 139,34 |
| 2019/08/06 | CH2276 | Female | Two y/o | Treatment (Wk 1) | Treatment | Feed Day | No | 09:30 | 09:00 - 09:59 | Late Morning  | 37,1 | 51  | 65,4  | 65,4  | 18,26 | 541,20 | 141,08 |
| 2019/08/06 | CH2276 | Female | Two y/o | Treatment (Wk 1) | Treatment | Feed Day | No | 09:35 | 09:00 - 09:59 | Late Morning  | 37,0 | 55  | 104,2 | 104,2 | 18,16 | 547,52 | 157,28 |
| 2019/08/06 | CH2276 | Female | Two y/o | Treatment (Wk 1) | Treatment | Feed Day | No | 09:40 | 09:00 - 09:59 | Late Morning  | 36,9 | 128 | 239,2 | 239,2 | 18,06 | 611,22 | 186,42 |



|            |        |        |         |                  |           |          |     |       |               |              |      |     |       |       |       |        |        |
|------------|--------|--------|---------|------------------|-----------|----------|-----|-------|---------------|--------------|------|-----|-------|-------|-------|--------|--------|
| 2019/08/06 | CH2276 | Female | Two y/o | Treatment (Wk 1) | Treatment | Feed Day | No  | 09:45 | 09:00 - 09:59 | Late Morning | 36,8 | 104 | 102,6 | 102,6 | 17,96 | 596,69 | 156,74 |
| 2019/08/06 | CH2276 | Female | Two y/o | Treatment (Wk 1) | Treatment | Feed Day | No  | 09:50 | 09:00 - 09:59 | Late Morning | 36,9 | 126 | 358,0 | 358,0 | 18,06 | 610,14 | 200,68 |
| 2019/08/06 | CH2276 | Female | Two y/o | Treatment (Wk 1) | Treatment | Feed Day | No  | 09:55 | 09:00 - 09:59 | Late Morning | 37,0 | 66  | 74,4  | 74,4  | 18,16 | 562,34 | 145,55 |
| 2019/08/06 | CH2276 | Female | Two y/o | Treatment (Wk 1) | Treatment | Feed Day | No  | 10:00 | 10:00 - 10:59 | Late Morning | 37,1 | 60  | 88,0  | 88,0  | 18,26 | 554,67 | 151,39 |
| 2019/08/06 | CH2276 | Female | Two y/o | Treatment (Wk 1) | Treatment | Feed Day | No  | 10:05 | 10:00 - 10:59 | Late Morning | 37,2 | 152 | 124,8 | 124,8 | 18,36 | 622,73 | 163,58 |
| 2019/08/06 | CH2276 | Female | Two y/o | Treatment (Wk 1) | Treatment | Feed Day | No  | 10:10 | 10:00 - 10:59 | Late Morning | 37,3 | 87  | 80,8  | 80,8  | 18,46 | 583,64 | 148,42 |
| 2019/08/06 | CH2276 | Female | Two y/o | Treatment (Wk 1) | Treatment | Feed Day | No  | 10:15 | 10:00 - 10:59 | Late Morning | 37,4 | 78  | 86,2  | 86,2  | 18,55 | 575,38 | 150,67 |
| 2019/08/06 | CH2276 | Female | Two y/o | Treatment (Wk 1) | Treatment | Feed Day | No  | 10:20 | 10:00 - 10:59 | Late Morning | 37,5 | 60  | 85,0  | 85,0  | 18,65 | 554,67 | 150,18 |
| 2019/08/06 | CH2276 | Female | Two y/o | Treatment (Wk 1) | Treatment | Feed Day | No  | 10:25 | 10:00 - 10:59 | Late Morning | 37,5 | 57  | 77,6  | 77,6  | 18,65 | 550,47 | 147,02 |
| 2019/08/06 | CH2276 | Female | Two y/o | Treatment (Wk 1) | Treatment | Feed Day | Yes | 10:30 | 10:00 - 10:59 | Late Morning | 37,6 | 61  | 72,8  | 72,8  | 18,75 | 556,01 | 144,80 |
| 2019/08/06 | CH2276 | Female | Two y/o | Treatment (Wk 1) | Treatment | Feed Day | Yes | 10:35 | 10:00 - 10:59 | Late Morning | 37,7 | 154 | 73,2  | 73,2  | 18,85 | 623,58 | 144,99 |
| 2019/08/06 | CH2276 | Female | Two y/o | Treatment (Wk 1) | Treatment | Feed Day | Yes | 10:40 | 10:00 - 10:59 | Late Morning | 37,7 | 92  | 86,6  | 86,6  | 18,85 | 587,78 | 150,83 |
| 2019/08/06 | CH2276 | Female | Two y/o | Treatment (Wk 1) | Treatment | Feed Day | Yes | 10:45 | 10:00 - 10:59 | Late Morning | 37,8 | 83  | 167,8 | 167,8 | 18,95 | 580,11 | 173,95 |
| 2019/08/06 | CH2276 | Female | Two y/o | Treatment (Wk 1) | Treatment | Feed Day | Yes | 10:50 | 10:00 - 10:59 | Late Morning | 37,8 | 38  | 193,8 | 193,8 | 18,95 | 515,48 | 179,01 |
| 2019/08/06 | CH2276 | Female | Two y/o | Treatment (Wk 1) | Treatment | Feed Day | Yes | 10:55 | 10:00 - 10:59 | Late Morning | 37,8 | 106 | 73,6  | 73,6  | 18,95 | 598,06 | 145,18 |
| 2019/08/06 | CH2276 | Female | Two y/o | Treatment (Wk 1) | Treatment | Feed Day | Yes | 11:00 | 11:00 - 11:59 | Late Morning | 37,8 | 191 | 85,6  | 85,6  | 18,95 | 637,33 | 150,43 |
| 2019/08/06 | CH2276 | Female | Two y/o | Treatment (Wk 1) | Treatment | Feed Day | Yes | 11:05 | 11:00 - 11:59 | Late Morning | 37,7 | 147 | 313,0 | 313,0 | 18,85 | 620,52 | 195,92 |
| 2019/08/06 | CH2276 | Female | Two y/o | Treatment (Wk 1) | Treatment | Feed Day | Yes | 11:10 | 11:00 - 11:59 | Late Morning | 37,7 |     | 103,6 | 103,6 | 18,85 |        | 157,08 |
| 2019/08/06 | CH2276 | Female | Two y/o | Treatment (Wk 1) | Treatment | Feed Day | Yes | 11:15 | 11:00 - 11:59 | Late Morning | 37,7 | 148 | 357,8 | 357,8 | 18,85 | 620,97 | 200,66 |
| 2019/08/06 | CH2276 | Female | Two y/o | Treatment (Wk 1) | Treatment | Feed Day | Yes | 11:20 | 11:00 - 11:59 | Late Morning | 37,7 | 99  | 58,8  | 58,8  | 18,85 | 593,14 | 137,39 |
| 2019/08/06 | CH2276 | Female | Two y/o | Treatment (Wk 1) | Treatment | Feed Day | Yes | 11:25 | 11:00 - 11:59 | Late Morning | 37,7 | 86  | 135,4 | 135,4 | 18,85 | 582,77 | 166,43 |
| 2019/08/06 | CH2276 | Female | Two y/o | Treatment (Wk 1) | Treatment | Feed Day | No  | 11:30 | 11:00 - 11:59 | Late Morning | 37,8 | 108 | 87,8  | 87,8  | 18,95 | 599,39 | 151,31 |
| 2019/08/06 | CH2276 | Female | Two y/o | Treatment (Wk 1) | Treatment | Feed Day | No  | 11:35 | 11:00 - 11:59 | Late Morning | 37,8 | 79  | 88,8  | 88,8  | 18,95 | 576,36 | 151,71 |
| 2019/08/06 | CH2276 | Female | Two y/o | Treatment (Wk 1) | Treatment | Feed Day | No  | 11:40 | 11:00 - 11:59 | Late Morning | 37,8 | 114 | 206,0 | 206,0 | 18,95 | 603,20 | 181,16 |
| 2019/08/06 | CH2276 | Female | Two y/o | Treatment (Wk 1) | Treatment | Feed Day | No  | 11:45 | 11:00 - 11:59 | Late Morning | 37,8 | 83  | 64,0  | 64,0  | 18,95 | 580,11 | 140,33 |
| 2019/08/06 | CH2276 | Female | Two y/o | Treatment (Wk 1) | Treatment | Feed Day | No  | 11:50 | 11:00 - 11:59 | Late Morning | 37,8 | 79  | 57,8  | 57,8  | 18,95 | 576,36 | 136,80 |
| 2019/08/06 | CH2276 | Female | Two y/o | Treatment (Wk 1) | Treatment | Feed Day | No  | 11:55 | 11:00 - 11:59 | Late Morning | 37,8 |     | 67,6  | 67,6  | 18,95 |        | 142,23 |
| 2019/08/06 | CH2276 | Female | Two y/o | Treatment (Wk 1) | Treatment | Feed Day | No  | 12:00 | 12:00 - 12:59 | Afternoon    | 37,8 | 81  | 74,8  | 74,8  | 18,95 | 578,26 | 145,74 |
| 2019/08/06 | CH2276 | Female | Two y/o | Treatment (Wk 1) | Treatment | Feed Day | No  | 12:05 | 12:00 - 12:59 | Afternoon    | 37,8 | 104 | 84,2  | 84,2  | 18,95 | 596,69 | 149,85 |
| 2019/08/06 | CH2276 | Female | Two y/o | Treatment (Wk 1) | Treatment | Feed Day | No  | 12:10 | 12:00 - 12:59 | Afternoon    | 37,9 | 90  | 68,0  | 68,0  | 19,05 | 586,16 | 142,43 |
| 2019/08/06 | CH2276 | Female | Two y/o | Treatment (Wk 1) | Treatment | Feed Day | No  | 12:15 | 12:00 - 12:59 | Afternoon    | 37,9 | 93  | 65,8  | 65,8  | 19,05 | 588,58 | 141,29 |
| 2019/08/06 | CH2276 | Female | Two y/o | Treatment (Wk 1) | Treatment | Feed Day | No  | 12:20 | 12:00 - 12:59 | Afternoon    | 37,8 | 88  | 68,0  | 68,0  | 18,95 | 584,49 | 142,43 |
| 2019/08/06 | CH2276 | Female | Two y/o | Treatment (Wk 1) | Treatment | Feed Day | No  | 12:25 | 12:00 - 12:59 | Afternoon    | 37,9 | 97  | 68,0  | 68,0  | 19,05 | 591,66 | 142,43 |
| 2019/08/06 | CH2276 | Female | Two y/o | Treatment (Wk 1) | Treatment | Feed Day | No  | 12:30 | 12:00 - 12:59 | Afternoon    | 37,9 | 98  | 54,0  | 54,0  | 19,05 | 592,41 | 134,45 |
| 2019/08/06 | CH2276 | Female | Two y/o | Treatment (Wk 1) | Treatment | Feed Day | No  | 12:35 | 12:00 - 12:59 | Afternoon    | 37,8 | 92  | 119,8 | 119,8 | 18,95 | 587,78 | 162,15 |
| 2019/08/06 | CH2276 | Female | Two y/o | Treatment (Wk 1) | Treatment | Feed Day | No  | 12:40 | 12:00 - 12:59 | Afternoon    | 37,8 | 89  | 137,2 | 137,2 | 18,95 | 585,33 | 166,89 |
| 2019/08/06 | CH2276 | Female | Two y/o | Treatment (Wk 1) | Treatment | Feed Day | No  | 12:45 | 12:00 - 12:59 | Afternoon    | 37,8 | 77  | 60,8  | 60,8  | 18,95 | 574,39 | 138,55 |
| 2019/08/06 | CH2276 | Female | Two y/o | Treatment (Wk 1) | Treatment | Feed Day | No  | 12:50 | 12:00 - 12:59 | Afternoon    | 37,9 | 81  | 58,4  | 58,4  | 19,05 | 578,26 | 137,16 |
| 2019/08/06 | CH2276 | Female | Two y/o | Treatment (Wk 1) | Treatment | Feed Day | No  | 12:55 | 12:00 - 12:59 | Afternoon    | 37,9 | 81  | 56,8  | 56,8  | 19,05 | 578,26 | 136,20 |
| 2019/08/06 | CH2276 | Female | Two y/o | Treatment (Wk 1) | Treatment | Feed Day | No  | 13:00 | 13:00 - 13:59 | Afternoon    | 37,9 | 80  | 59,8  | 59,8  | 19,05 | 577,31 | 137,98 |
| 2019/08/06 | CH2276 | Female | Two y/o | Treatment (Wk 1) | Treatment | Feed Day | No  | 13:05 | 13:00 - 13:59 | Afternoon    | 37,9 | 66  | 60,2  | 60,2  | 19,05 | 562,34 | 138,21 |
| 2019/08/06 | CH2276 | Female | Two y/o | Treatment (Wk 1) | Treatment | Feed Day | No  | 13:10 | 13:00 - 13:59 | Afternoon    | 37,9 | 91  | 59,8  | 59,8  | 19,05 | 586,98 | 137,98 |
| 2019/08/06 | CH2276 | Female | Two y/o | Treatment (Wk 1) | Treatment | Feed Day | No  | 13:15 | 13:00 - 13:59 | Afternoon    | 37,9 | 75  | 57,4  | 57,4  | 19,05 | 572,36 | 136,56 |
| 2019/08/06 | CH2276 | Female | Two y/o | Treatment (Wk 1) | Treatment | Feed Day | No  | 13:20 | 13:00 - 13:59 | Afternoon    | 37,9 | 86  | 44,6  | 44,6  | 19,05 | 582,77 | 127,84 |
| 2019/08/06 | CH2276 | Female | Two y/o | Treatment (Wk 1) | Treatment | Feed Day | No  | 13:25 | 13:00 - 13:59 | Afternoon    | 37,9 | 84  | 31,2  | 31,2  | 19,05 | 581,01 | 115,54 |
| 2019/08/06 | CH2276 | Female | Two y/o | Treatment (Wk 1) | Treatment | Feed Day | No  | 13:30 | 13:00 - 13:59 | Afternoon    | 37,9 | 82  | 5,6   | 5,6   | 19,05 | 579,19 | 57,21  |
| 2019/08/06 | CH2276 | Female | Two y/o | Treatment (Wk 1) | Treatment | Feed Day | No  | 13:35 | 13:00 - 13:59 | Afternoon    | 37,9 | 98  | 20,6  | 20,6  | 19,05 | 592,41 | 101,32 |
| 2019/08/06 | CH2276 | Female | Two y/o | Treatment (Wk 1) | Treatment | Feed Day | No  | 13:40 | 13:00 - 13:59 | Afternoon    | 37,9 | 90  | 4,0   | 4,0   | 19,05 | 586,16 | 45,94  |
| 2019/08/06 | CH2276 | Female | Two y/o | Treatment (Wk 1) | Treatment | Feed Day | No  | 13:45 | 13:00 - 13:59 | Afternoon    | 37,9 | 86  | 7,0   | 7,0   | 19,05 | 582,77 | 64,72  |
| 2019/08/06 | CH2276 | Female | Two y/o | Treatment (Wk 1) | Treatment | Feed Day | No  | 13:50 | 13:00 - 13:59 | Afternoon    | 37,9 | 88  | 25,6  | 25,6  | 19,05 | 584,49 | 108,76 |
| 2019/08/06 | CH2276 | Female | Two y/o | Treatment (Wk 1) | Treatment | Feed Day | No  | 13:55 | 13:00 - 13:59 | Afternoon    | 38,0 | 82  | 18,4  | 18,4  | 19,15 | 579,19 | 97,47  |
| 2019/08/06 | CH2276 | Female | Two y/o | Treatment (Wk 1) | Treatment | Feed Day | No  | 14:00 | 14:00 - 14:59 | Afternoon    | 38,0 | 90  | 40,0  | 40,0  | 19,15 | 586,16 | 124,09 |
| 2019/08/06 | CH2276 | Female | Two y/o | Treatment (Wk 1) | Treatment | Feed Day | No  | 14:05 | 14:00 - 14:59 | Afternoon    | 38,0 | 77  | 27,2  | 27,2  | 19,15 | 574,39 | 110,83 |
| 2019/08/06 | CH2276 | Female | Two y/o | Treatment (Wk 1) | Treatment | Feed Day | No  | 14:10 | 14:00 - 14:59 | Afternoon    | 38,0 | 88  | 43,8  | 43,8  | 19,15 | 584,49 | 127,22 |
| 2019/08/06 | CH2276 | Female | Two y/o | Treatment (Wk 1) | Treatment | Feed Day | No  | 14:15 | 14:00 - 14:59 | Afternoon    | 38,2 | 88  | 30,6  | 30,6  | 19,36 | 584,49 | 114,87 |
| 2019/08/06 | CH2276 | Female | Two y/o | Treatment (Wk 1) | Treatment | Feed Day | No  | 14:20 | 14:00 - 14:59 | Afternoon    | 38,2 | 92  | 26,6  | 26,6  | 19,36 | 587,78 | 110,07 |
| 2019/08/06 | CH2276 | Female | Two y/o | Treatment (Wk 1) | Treatment | Feed Day | No  | 14:25 | 14:00 - 14:59 | Afternoon    | 38,2 | 88  | 60,6  | 60,6  | 19,36 | 584,49 | 138,44 |
| 2019/08/06 | CH2276 | Female | Two y/o | Treatment (Wk 1) | Treatment | Feed Day | No  | 14:30 | 14:00 - 14:59 | Afternoon    | 38,2 | 76  | 60,4  | 60,4  | 19,36 | 573,39 | 138,32 |
| 2019/08/06 | CH2276 | Female | Two y/o | Treatment (Wk 1) | Treatment | Feed Day | No  | 14:35 | 14:00 - 14:59 | Afternoon    | 38,2 | 71  | 55,8  | 55,8  | 19,36 | 568,10 | 135,58 |
| 2019/08/06 | CH2276 | Female | Two y/o | Treatment (Wk 1) | Treatment | Feed Day | No  | 14:40 | 14:00 - 14:59 | Afternoon    | 38,2 | 92  | 61,0  | 61,0  | 19,36 | 587,78 | 138,67 |
| 2019/08/06 | CH2276 | Female | Two y/o | Treatment (Wk 1) | Treatment | Feed Day | No  | 14:45 | 14:00 - 14:59 | Afternoon    | 38,1 | 94  | 78,6  | 78,6  | 19,26 | 589,37 | 147,46 |
| 2019/08/06 | CH2276 | Female | Two y/o | Treatment (Wk 1) | Treatment | Feed Day | No  | 14:50 | 14:00 - 14:59 | Afternoon    | 38,0 | 73  | 52,4  | 52,4  | 19,15 | 570,27 | 133,41 |
| 2019/08/06 | CH2276 | Female | Two y/o | Treatment (Wk 1) | Treatment | Feed Day | No  | 14:55 | 14:00 - 14:59 | Afternoon    | 38,0 | 154 | 73,0  | 73,0  | 19,15 | 623,58 | 144,89 |
| 2019/08/06 | CH2276 | Female | Two y/o | Treatment (Wk 1) | Treatment | Feed Day | No  | 15:00 | 15:00 - 15:59 | Afternoon    | 38,0 | 88  | 80,8  | 80,8  | 19,15 | 584,49 | 148,42 |
| 2019/08/06 | CH2276 | Female | Two y/o | Treatment (Wk 1) | Treatment | Feed Day | No  | 15:05 | 15:00 - 15:59 | Afternoon    | 37,9 | 98  | 86,2  | 86,2  | 19,05 | 592,41 | 150,67 |
| 2019/08/06 | CH2276 | Female | Two y/o | Treatment (Wk 1) | Treatment | Feed Day | No  | 15:10 | 15:00 - 15:59 | Afternoon    | 37,9 | 60  | 75,6  | 75,6  | 19,05 | 554,67 | 146,11 |
| 2019/08/06 | CH2276 | Female | Two y/o | Treatment (Wk 1) | Treatment | Feed Day | No  | 15:15 | 15:00 - 15:59 | Afternoon    | 38,0 |     | 68,6  | 68,6  | 19,15 |        | 142,74 |
| 2019/08/06 | CH2276 | Female | Two y/o | Treatment (Wk 1) | Treatment | Feed Day | No  | 15:20 | 15:00 - 15:59 | Afternoon    | 38,0 |     | 91,2  | 91,2  | 19,15 |        | 152,63 |
| 2019/08/06 | CH2276 | Female | Two y/o | Treatment (Wk 1) | Treatment | Feed Day | No  | 15:25 | 15:00 - 15:59 | Afternoon    | 38,0 | 89  | 372,8 | 372,8 | 19,15 | 585,33 | 202,12 |
| 2019/08/06 | CH2276 | Female | Two y/o | Treatment (Wk 1) | Treatment | Feed Day | Yes | 15:30 | 15:00 - 15:59 | Afternoon    | 38,2 |     | 471,8 | 471,8 | 19,36 |        | 210,48 |



|            |        |        |         |                  |           |          |     |       |               |           |      |     |       |       |       |        |        |
|------------|--------|--------|---------|------------------|-----------|----------|-----|-------|---------------|-----------|------|-----|-------|-------|-------|--------|--------|
| 2019/08/06 | CH2276 | Female | Two y/o | Treatment (Wk 1) | Treatment | Feed Day | Yes | 15:35 | 15:00 - 15:59 | Afternoon | 38,6 | 117 | 68,6  | 68,6  | 19,76 | 605,02 | 142,74 |
| 2019/08/06 | CH2276 | Female | Two y/o | Treatment (Wk 1) | Treatment | Feed Day | Yes | 15:40 | 15:00 - 15:59 | Afternoon | 38,6 | 102 | 64,2  | 64,2  | 19,76 | 595,30 | 140,44 |
| 2019/08/06 | CH2276 | Female | Two y/o | Treatment (Wk 1) | Treatment | Feed Day | Yes | 15:45 | 15:00 - 15:59 | Afternoon | 38,7 |     | 59,4  | 59,4  | 19,87 |        | 137,75 |
| 2019/08/06 | CH2276 | Female | Two y/o | Treatment (Wk 1) | Treatment | Feed Day | Yes | 15:50 | 15:00 - 15:59 | Afternoon | 38,7 | 78  | 69,8  | 69,8  | 19,87 | 575,38 | 143,34 |
| 2019/08/06 | CH2276 | Female | Two y/o | Treatment (Wk 1) | Treatment | Feed Day | Yes | 15:55 | 15:00 - 15:59 | Afternoon | 38,7 | 103 | 73,4  | 73,4  | 19,87 | 596,00 | 145,08 |
| 2019/08/06 | CH2276 | Female | Two y/o | Treatment (Wk 1) | Treatment | Feed Day | Yes | 16:00 | 16:00 - 16:59 | Evening   | 38,7 | 96  | 63,6  | 63,6  | 19,87 | 590,91 | 140,11 |
| 2019/08/06 | CH2276 | Female | Two y/o | Treatment (Wk 1) | Treatment | Feed Day | Yes | 16:05 | 16:00 - 16:59 | Evening   | 38,7 |     | 63,4  | 63,4  | 19,87 |        | 140,00 |
| 2019/08/06 | CH2276 | Female | Two y/o | Treatment (Wk 1) | Treatment | Feed Day | Yes | 16:10 | 16:00 - 16:59 | Evening   | 38,7 | 86  | 60,0  | 60,0  | 19,87 | 582,77 | 138,09 |
| 2019/08/06 | CH2276 | Female | Two y/o | Treatment (Wk 1) | Treatment | Feed Day | Yes | 16:15 | 16:00 - 16:59 | Evening   | 38,7 | 93  | 54,8  | 54,8  | 19,87 | 588,58 | 134,96 |
| 2019/08/06 | CH2276 | Female | Two y/o | Treatment (Wk 1) | Treatment | Feed Day | Yes | 16:20 | 16:00 - 16:59 | Evening   | 38,7 | 88  | 50,8  | 50,8  | 19,87 | 584,49 | 132,33 |
| 2019/08/06 | CH2276 | Female | Two y/o | Treatment (Wk 1) | Treatment | Feed Day | Yes | 16:25 | 16:00 - 16:59 | Evening   | 38,6 | 86  | 69,4  | 69,4  | 19,76 | 582,77 | 143,14 |
| 2019/08/06 | CH2276 | Female | Two y/o | Treatment (Wk 1) | Treatment | Feed Day | No  | 16:30 | 16:00 - 16:59 | Evening   | 38,6 | 106 | 68,0  | 68,0  | 19,76 | 598,06 | 142,43 |
| 2019/08/06 | CH2276 | Female | Two y/o | Treatment (Wk 1) | Treatment | Feed Day | No  | 16:35 | 16:00 - 16:59 | Evening   | 38,5 | 87  | 68,4  | 68,4  | 19,66 | 583,64 | 142,64 |
| 2019/08/06 | CH2276 | Female | Two y/o | Treatment (Wk 1) | Treatment | Feed Day | No  | 16:40 | 16:00 - 16:59 | Evening   | 38,5 | 88  | 67,8  | 67,8  | 19,66 | 584,49 | 142,33 |
| 2019/08/06 | CH2276 | Female | Two y/o | Treatment (Wk 1) | Treatment | Feed Day | No  | 16:45 | 16:00 - 16:59 | Evening   | 38,5 | 68  | 73,2  | 73,2  | 19,66 | 564,71 | 144,99 |
| 2019/08/06 | CH2276 | Female | Two y/o | Treatment (Wk 1) | Treatment | Feed Day | No  | 16:50 | 16:00 - 16:59 | Evening   | 38,5 | 62  | 68,8  | 68,8  | 19,66 | 557,33 | 142,84 |
| 2019/08/06 | CH2276 | Female | Two y/o | Treatment (Wk 1) | Treatment | Feed Day | No  | 16:55 | 16:00 - 16:59 | Evening   | 38,5 | 84  | 64,0  | 64,0  | 19,66 | 581,01 | 140,33 |
| 2019/08/06 | CH2276 | Female | Two y/o | Treatment (Wk 1) | Treatment | Feed Day | No  | 17:00 | 17:00 - 17:59 | Evening   | 38,5 | 87  | 68,4  | 68,4  | 19,66 | 583,64 | 142,64 |
| 2019/08/06 | CH2276 | Female | Two y/o | Treatment (Wk 1) | Treatment | Feed Day | No  | 17:05 | 17:00 - 17:59 | Evening   | 38,5 | 96  | 71,4  | 71,4  | 19,66 | 590,91 | 144,12 |
| 2019/08/06 | CH2276 | Female | Two y/o | Treatment (Wk 1) | Treatment | Feed Day | No  | 17:10 | 17:00 - 17:59 | Evening   | 38,5 | 73  | 70,6  | 70,6  | 19,66 | 570,27 | 143,73 |
| 2019/08/06 | CH2276 | Female | Two y/o | Treatment (Wk 1) | Treatment | Feed Day | No  | 17:15 | 17:00 - 17:59 | Evening   | 38,5 | 94  | 68,0  | 68,0  | 19,66 | 589,37 | 142,43 |
| 2019/08/06 | CH2276 | Female | Two y/o | Treatment (Wk 1) | Treatment | Feed Day | No  | 17:20 | 17:00 - 17:59 | Evening   | 38,5 | 74  | 72,4  | 72,4  | 19,66 | 571,33 | 144,61 |
| 2019/08/06 | CH2276 | Female | Two y/o | Treatment (Wk 1) | Treatment | Feed Day | No  | 17:25 | 17:00 - 17:59 | Evening   | 38,5 | 94  | 59,4  | 59,4  | 19,66 | 589,37 | 137,75 |
| 2019/08/06 | CH2276 | Female | Two y/o | Treatment (Wk 1) | Treatment | Feed Day | No  | 17:30 | 17:00 - 17:59 | Evening   | 38,5 | 109 | 230,2 | 230,2 | 19,66 | 600,04 | 185,07 |
| 2019/08/06 | CH2276 | Female | Two y/o | Treatment (Wk 1) | Treatment | Feed Day | No  | 17:35 | 17:00 - 17:59 | Evening   | 38,4 | 90  | 63,2  | 63,2  | 19,56 | 586,16 | 139,89 |
| 2019/08/06 | CH2276 | Female | Two y/o | Treatment (Wk 1) | Treatment | Feed Day | No  | 17:40 | 17:00 - 17:59 | Evening   | 38,4 | 79  | 66,2  | 66,2  | 19,56 | 576,36 | 141,50 |
| 2019/08/06 | CH2276 | Female | Two y/o | Treatment (Wk 1) | Treatment | Feed Day | No  | 17:45 | 17:00 - 17:59 | Evening   | 38,3 | 90  | 74,8  | 74,8  | 19,46 | 586,16 | 145,74 |
| 2019/08/06 | CH2276 | Female | Two y/o | Treatment (Wk 1) | Treatment | Feed Day | No  | 17:50 | 17:00 - 17:59 | Evening   | 38,3 | 131 | 59,0  | 59,0  | 19,46 | 612,80 | 137,51 |
| 2019/08/06 | CH2276 | Female | Two y/o | Treatment (Wk 1) | Treatment | Feed Day | No  | 17:55 | 17:00 - 17:59 | Evening   | 38,3 |     | 201,6 | 201,6 | 19,46 |        | 180,40 |
| 2019/08/06 | CH2276 | Female | Two y/o | Treatment (Wk 1) | Treatment | Feed Day | No  | 18:00 | 18:00 - 18:59 | Evening   | 38,3 | 140 | 125,2 | 125,2 | 19,46 | 617,28 | 163,69 |
| 2019/08/06 | CH2276 | Female | Two y/o | Treatment (Wk 1) | Treatment | Feed Day | No  | 18:05 | 18:00 - 18:59 | Evening   | 38,3 | 70  | 419,4 | 419,4 | 19,46 | 566,99 | 206,30 |
| 2019/08/06 | CH2276 | Female | Two y/o | Treatment (Wk 1) | Treatment | Feed Day | No  | 18:10 | 18:00 - 18:59 | Evening   | 38,4 | 109 | 167,8 | 167,8 | 19,56 | 600,04 | 173,95 |
| 2019/08/06 | CH2276 | Female | Two y/o | Treatment (Wk 1) | Treatment | Feed Day | No  | 18:15 | 18:00 - 18:59 | Evening   | 38,4 |     | 78,0  | 78,0  | 19,56 |        | 147,20 |
| 2019/08/06 | CH2276 | Female | Two y/o | Treatment (Wk 1) | Treatment | Feed Day | No  | 18:20 | 18:00 - 18:59 | Evening   | 38,4 | 118 | 226,4 | 226,4 | 19,56 | 605,61 | 184,48 |
| 2019/08/06 | CH2276 | Female | Two y/o | Treatment (Wk 1) | Treatment | Feed Day | No  | 18:25 | 18:00 - 18:59 | Evening   | 38,4 |     | 395,2 | 395,2 | 19,56 |        | 204,19 |
| 2019/08/06 | CH2276 | Female | Two y/o | Treatment (Wk 1) | Treatment | Feed Day | No  | 18:30 | 18:00 - 18:59 | Evening   | 38,4 | 147 | 362,8 | 362,8 | 19,56 | 620,52 | 201,15 |
| 2019/08/06 | CH2276 | Female | Two y/o | Treatment (Wk 1) | Treatment | Feed Day | No  | 18:35 | 18:00 - 18:59 | Evening   | 38,4 | 70  | 128,6 | 128,6 | 19,56 | 566,99 | 164,63 |
| 2019/08/06 | CH2276 | Female | Two y/o | Treatment (Wk 1) | Treatment | Feed Day | No  | 18:40 | 18:00 - 18:59 | Evening   | 38,4 | 143 | 221,4 | 221,4 | 19,56 | 618,69 | 183,70 |
| 2019/08/06 | CH2276 | Female | Two y/o | Treatment (Wk 1) | Treatment | Feed Day | No  | 18:45 | 18:00 - 18:59 | Evening   | 38,4 | 61  | 184,2 | 184,2 | 19,56 | 556,01 | 177,23 |
| 2019/08/06 | CH2276 | Female | Two y/o | Treatment (Wk 1) | Treatment | Feed Day | No  | 18:50 | 18:00 - 18:59 | Evening   | 38,4 | 131 | 88,2  | 88,2  | 19,56 | 612,80 | 151,47 |
| 2019/08/06 | CH2276 | Female | Two y/o | Treatment (Wk 1) | Treatment | Feed Day | No  | 18:55 | 18:00 - 18:59 | Evening   | 38,4 |     | 654,8 | 654,8 | 19,56 |        | 222,17 |
| 2019/08/06 | CH2276 | Female | Two y/o | Treatment (Wk 1) | Treatment | Feed Day | No  | 19:00 | 19:00 - 19:59 | Evening   | 38,4 |     | 77,6  | 77,6  | 19,56 |        | 147,02 |
| 2019/08/06 | CH2276 | Female | Two y/o | Treatment (Wk 1) | Treatment | Feed Day | No  | 19:05 | 19:00 - 19:59 | Evening   | 38,4 |     | 67,0  | 67,0  | 19,56 |        | 141,92 |
| 2019/08/06 | CH2276 | Female | Two y/o | Treatment (Wk 1) | Treatment | Feed Day | No  | 19:10 | 19:00 - 19:59 | Evening   | 38,3 | 91  | 61,4  | 61,4  | 19,46 | 586,98 | 138,89 |
| 2019/08/06 | CH2276 | Female | Two y/o | Treatment (Wk 1) | Treatment | Feed Day | No  | 19:15 | 19:00 - 19:59 | Evening   | 38,3 | 99  | 74,2  | 74,2  | 19,46 | 593,14 | 145,46 |
| 2019/08/06 | CH2276 | Female | Two y/o | Treatment (Wk 1) | Treatment | Feed Day | No  | 19:20 | 19:00 - 19:59 | Evening   | 38,3 | 94  | 71,4  | 71,4  | 19,46 | 589,37 | 144,12 |
| 2019/08/06 | CH2276 | Female | Two y/o | Treatment (Wk 1) | Treatment | Feed Day | No  | 19:25 | 19:00 - 19:59 | Evening   | 38,3 | 92  | 67,6  | 67,6  | 19,46 | 587,78 | 142,23 |
| 2019/08/06 | CH2276 | Female | Two y/o | Treatment (Wk 1) | Treatment | Feed Day | No  | 19:30 | 19:00 - 19:59 | Evening   | 38,3 | 93  | 68,4  | 68,4  | 19,46 | 588,58 | 142,64 |
| 2019/08/06 | CH2276 | Female | Two y/o | Treatment (Wk 1) | Treatment | Feed Day | No  | 19:35 | 19:00 - 19:59 | Evening   | 38,3 | 89  | 73,0  | 73,0  | 19,46 | 585,33 | 144,89 |
| 2019/08/06 | CH2276 | Female | Two y/o | Treatment (Wk 1) | Treatment | Feed Day | No  | 19:40 | 19:00 - 19:59 | Evening   | 38,3 | 86  | 67,4  | 67,4  | 19,46 | 582,77 | 142,12 |
| 2019/08/06 | CH2276 | Female | Two y/o | Treatment (Wk 1) | Treatment | Feed Day | No  | 19:45 | 19:00 - 19:59 | Evening   | 38,3 | 94  | 71,0  | 71,0  | 19,46 | 589,37 | 143,93 |
| 2019/08/06 | CH2276 | Female | Two y/o | Treatment (Wk 1) | Treatment | Feed Day | No  | 19:50 | 19:00 - 19:59 | Evening   | 38,3 | 91  | 70,0  | 70,0  | 19,46 | 586,98 | 143,44 |
| 2019/08/06 | CH2276 | Female | Two y/o | Treatment (Wk 1) | Treatment | Feed Day | No  | 19:55 | 19:00 - 19:59 | Evening   | 38,3 | 99  | 67,4  | 67,4  | 19,46 | 593,14 | 142,12 |
| 2019/08/06 | CH2276 | Female | Two y/o | Treatment (Wk 1) | Treatment | Feed Day | No  | 20:00 | 20:00 - 20:59 | Night     | 38,3 | 107 | 68,2  | 68,2  | 19,46 | 598,73 | 142,53 |
| 2019/08/06 | CH2276 | Female | Two y/o | Treatment (Wk 1) | Treatment | Feed Day | No  | 20:05 | 20:00 - 20:59 | Night     | 38,3 | 102 | 68,0  | 68,0  | 19,46 | 595,30 | 142,43 |
| 2019/08/06 | CH2276 | Female | Two y/o | Treatment (Wk 1) | Treatment | Feed Day | No  | 20:10 | 20:00 - 20:59 | Night     | 38,3 | 114 | 70,0  | 70,0  | 19,46 | 603,20 | 143,44 |
| 2019/08/06 | CH2276 | Female | Two y/o | Treatment (Wk 1) | Treatment | Feed Day | No  | 20:15 | 20:00 - 20:59 | Night     | 38,3 | 90  | 73,0  | 73,0  | 19,46 | 586,16 | 144,89 |
| 2019/08/06 | CH2276 | Female | Two y/o | Treatment (Wk 1) | Treatment | Feed Day | No  | 20:20 | 20:00 - 20:59 | Night     | 38,3 | 86  | 72,2  | 72,2  | 19,46 | 582,77 | 144,51 |
| 2019/08/06 | CH2276 | Female | Two y/o | Treatment (Wk 1) | Treatment | Feed Day | No  | 20:25 | 20:00 - 20:59 | Night     | 38,2 | 104 | 68,2  | 68,2  | 19,36 | 596,69 | 142,53 |
| 2019/08/06 | CH2276 | Female | Two y/o | Treatment (Wk 1) | Treatment | Feed Day | No  | 20:30 | 20:00 - 20:59 | Night     | 38,2 | 92  | 65,0  | 65,0  | 19,36 | 587,78 | 140,87 |
| 2019/08/06 | CH2276 | Female | Two y/o | Treatment (Wk 1) | Treatment | Feed Day | No  | 20:35 | 20:00 - 20:59 | Night     | 38,2 | 98  | 65,0  | 65,0  | 19,36 | 592,41 | 140,87 |
| 2019/08/06 | CH2276 | Female | Two y/o | Treatment (Wk 1) | Treatment | Feed Day | No  | 20:40 | 20:00 - 20:59 | Night     | 38,2 | 103 | 60,0  | 60,0  | 19,36 | 596,00 | 138,09 |
| 2019/08/06 | CH2276 | Female | Two y/o | Treatment (Wk 1) | Treatment | Feed Day | No  | 20:45 | 20:00 - 20:59 | Night     | 38,2 | 86  | 62,4  | 62,4  | 19,36 | 582,77 | 139,45 |
| 2019/08/06 | CH2276 | Female | Two y/o | Treatment (Wk 1) | Treatment | Feed Day | No  | 20:50 | 20:00 - 20:59 | Night     | 38,2 | 96  | 65,6  | 65,6  | 19,36 | 590,91 | 141,19 |
| 2019/08/06 | CH2276 | Female | Two y/o | Treatment (Wk 1) | Treatment | Feed Day | No  | 20:55 | 20:00 - 20:59 | Night     | 38,2 | 103 | 64,8  | 64,8  | 19,36 | 596,00 | 140,76 |
| 2019/08/06 | CH2276 | Female | Two y/o | Treatment (Wk 1) | Treatment | Feed Day | No  | 21:00 | 21:00 - 21:59 | Night     | 38,2 | 80  | 64,6  | 64,6  | 19,36 | 577,31 | 140,65 |
| 2019/08/06 | CH2276 | Female | Two y/o | Treatment (Wk 1) | Treatment | Feed Day | No  | 21:05 | 21:00 - 21:59 | Night     | 38,2 | 98  | 67,0  | 67,0  | 19,36 | 592,41 | 141,92 |
| 2019/08/06 | CH2276 | Female | Two y/o | Treatment (Wk 1) | Treatment | Feed Day | No  | 21:10 | 21:00 - 21:59 | Night     | 38,2 | 83  | 74,2  | 74,2  | 19,36 | 580,11 | 145,46 |
| 2019/08/06 | CH2276 | Female | Two y/o | Treatment (Wk 1) | Treatment | Feed Day | No  | 21:15 | 21:00 - 21:59 | Night     | 38,2 | 98  | 66,6  | 66,6  | 19,36 | 592,41 | 141,71 |
| 2019/08/06 | CH2276 | Female | Two y/o | Treatment (Wk 1) | Treatment | Feed Day | No  | 21:20 | 21:00 - 21:59 | Night     | 38,2 | 137 | 69,8  | 69,8  | 19,36 | 615,83 | 143,34 |



|    |            |        |        |         |                  |           |          |    |       |               |               |      |     |      |      |       |        |        |
|----|------------|--------|--------|---------|------------------|-----------|----------|----|-------|---------------|---------------|------|-----|------|------|-------|--------|--------|
|    | 2019/08/06 | CH2276 | Female | Two y/o | Treatment (Wk 1) | Treatment | Feed Day | No | 21:25 | 21:00 - 21:59 | Night         | 38,1 | 103 | 73,0 | 73,0 | 19,26 | 596,00 | 144,89 |
|    | 2019/08/06 | CH2276 | Female | Two y/o | Treatment (Wk 1) | Treatment | Feed Day | No | 21:30 | 21:00 - 21:59 | Night         | 38,0 | 103 | 74,2 | 74,2 | 19,15 | 596,00 | 145,46 |
|    | 2019/08/06 | CH2276 | Female | Two y/o | Treatment (Wk 1) | Treatment | Feed Day | No | 21:35 | 21:00 - 21:59 | Night         | 38,0 | 86  | 69,0 | 69,0 | 19,15 | 582,77 | 142,94 |
|    | 2019/08/06 | CH2276 | Female | Two y/o | Treatment (Wk 1) | Treatment | Feed Day | No | 21:40 | 21:00 - 21:59 | Night         | 38,0 | 94  | 67,8 | 67,8 | 19,15 | 589,37 | 142,33 |
|    | 2019/08/06 | CH2276 | Female | Two y/o | Treatment (Wk 1) | Treatment | Feed Day | No | 21:45 | 21:00 - 21:59 | Night         | 38,0 | 79  | 65,8 | 65,8 | 19,15 | 576,36 | 141,29 |
|    | 2019/08/06 | CH2276 | Female | Two y/o | Treatment (Wk 1) | Treatment | Feed Day | No | 21:50 | 21:00 - 21:59 | Night         | 38,0 | 94  | 66,4 | 66,4 | 19,15 | 589,37 | 141,61 |
|    | 2019/08/06 | CH2276 | Female | Two y/o | Treatment (Wk 1) | Treatment | Feed Day | No | 21:55 | 21:00 - 21:59 | Night         | 38,0 | 89  | 69,8 | 69,8 | 19,15 | 585,33 | 143,34 |
|    | 2019/08/06 | CH2276 | Female | Two y/o | Treatment (Wk 1) | Treatment | Feed Day | No | 22:00 | 22:00 - 22:59 | Night         | 38,0 |     | 73,6 | 73,6 | 19,15 |        | 145,18 |
|    | 2019/08/06 | CH2276 | Female | Two y/o | Treatment (Wk 1) | Treatment | Feed Day | No | 22:05 | 22:00 - 22:59 | Night         | 38,0 | 106 | 74,0 | 74,0 | 19,15 | 598,06 | 145,37 |
|    | 2019/08/06 | CH2276 | Female | Two y/o | Treatment (Wk 1) | Treatment | Feed Day | No | 22:10 | 22:00 - 22:59 | Night         | 37,9 | 97  | 59,2 | 59,2 | 19,05 | 591,66 | 137,63 |
|    | 2019/08/06 | CH2276 | Female | Two y/o | Treatment (Wk 1) | Treatment | Feed Day | No | 22:15 | 22:00 - 22:59 | Night         | 37,9 | 82  | 59,6 | 59,6 | 19,05 | 579,19 | 137,86 |
|    | 2019/08/06 | CH2276 | Female | Two y/o | Treatment (Wk 1) | Treatment | Feed Day | No | 22:20 | 22:00 - 22:59 | Night         | 37,9 | 94  | 66,6 | 66,6 | 19,05 | 589,37 | 141,71 |
|    | 2019/08/06 | CH2276 | Female | Two y/o | Treatment (Wk 1) | Treatment | Feed Day | No | 22:25 | 22:00 - 22:59 | Night         | 37,9 | 69  | 69,2 | 69,2 | 19,05 | 565,86 | 143,04 |
|    | 2019/08/06 | CH2276 | Female | Two y/o | Treatment (Wk 1) | Treatment | Feed Day | No | 22:30 | 22:00 - 22:59 | Night         | 37,9 | 56  | 68,2 | 68,2 | 19,05 | 549,01 | 142,53 |
|    | 2019/08/06 | CH2276 | Female | Two y/o | Treatment (Wk 1) | Treatment | Feed Day | No | 22:35 | 22:00 - 22:59 | Night         | 37,9 |     | 73,8 | 73,8 | 19,05 |        | 145,27 |
|    | 2019/08/06 | CH2276 | Female | Two y/o | Treatment (Wk 1) | Treatment | Feed Day | No | 22:40 | 22:00 - 22:59 | Night         | 37,9 | 83  | 67,2 | 67,2 | 19,05 | 580,11 | 142,02 |
|    | 2019/08/06 | CH2276 | Female | Two y/o | Treatment (Wk 1) | Treatment | Feed Day | No | 22:45 | 22:00 - 22:59 | Night         | 37,9 | 66  | 73,2 | 73,2 | 19,05 | 562,34 | 144,99 |
|    | 2019/08/06 | CH2276 | Female | Two y/o | Treatment (Wk 1) | Treatment | Feed Day | No | 22:50 | 22:00 - 22:59 | Night         | 37,9 | 73  | 66,8 | 66,8 | 19,05 | 570,27 | 141,81 |
|    | 2019/08/06 | CH2276 | Female | Two y/o | Treatment (Wk 1) | Treatment | Feed Day | No | 22:55 | 22:00 - 22:59 | Night         | 37,8 | 89  | 53,2 | 53,2 | 18,95 | 585,33 | 133,93 |
|    | 2019/08/06 | CH2276 | Female | Two y/o | Treatment (Wk 1) | Treatment | Feed Day | No | 23:00 | 23:00 - 23:59 | Night         | 37,6 | 73  | 50,4 | 50,4 | 18,75 | 570,27 | 132,06 |
|    | 2019/08/06 | CH2276 | Female | Two y/o | Treatment (Wk 1) | Treatment | Feed Day | No | 23:05 | 23:00 - 23:59 | Night         | 37,5 | 104 | 56,2 | 56,2 | 18,65 | 596,69 | 135,83 |
|    | 2019/08/06 | CH2276 | Female | Two y/o | Treatment (Wk 1) | Treatment | Feed Day | No | 23:10 | 23:00 - 23:59 | Night         | 37,4 | 66  | 62,4 | 62,4 | 18,55 | 562,34 | 139,45 |
|    | 2019/08/06 | CH2276 | Female | Two y/o | Treatment (Wk 1) | Treatment | Feed Day | No | 23:15 | 23:00 - 23:59 | Night         | 37,4 | 99  | 58,0 | 58,0 | 18,55 | 593,14 | 136,92 |
|    | 2019/08/06 | CH2276 | Female | Two y/o | Treatment (Wk 1) | Treatment | Feed Day | No | 23:20 | 23:00 - 23:59 | Night         | 37,3 | 73  | 62,0 | 62,0 | 18,46 | 570,27 | 139,23 |
|    | 2019/08/06 | CH2276 | Female | Two y/o | Treatment (Wk 1) | Treatment | Feed Day | No | 23:25 | 23:00 - 23:59 | Night         | 37,3 | 100 | 70,0 | 70,0 | 18,46 | 593,87 | 143,44 |
|    | 2019/08/06 | CH2276 | Female | Two y/o | Treatment (Wk 1) | Treatment | Feed Day | No | 23:30 | 23:00 - 23:59 | Night         | 37,3 | 73  | 60,2 | 60,2 | 18,46 | 570,27 | 138,21 |
|    | 2019/08/06 | CH2276 | Female | Two y/o | Treatment (Wk 1) | Treatment | Feed Day | No | 23:35 | 23:00 - 23:59 | Night         | 37,3 | 99  | 59,0 | 59,0 | 18,46 | 593,14 | 137,51 |
|    | 2019/08/06 | CH2276 | Female | Two y/o | Treatment (Wk 1) | Treatment | Feed Day | No | 23:40 | 23:00 - 23:59 | Night         | 37,4 | 98  | 58,8 | 58,8 | 18,55 | 592,41 | 137,39 |
|    | 2019/08/06 | CH2276 | Female | Two y/o | Treatment (Wk 1) | Treatment | Feed Day | No | 23:45 | 23:00 - 23:59 | Night         | 37,4 | 110 | 67,8 | 67,8 | 18,55 | 600,69 | 142,33 |
|    | 2019/08/06 | CH2276 | Female | Two y/o | Treatment (Wk 1) | Treatment | Feed Day | No | 23:50 | 23:00 - 23:59 | Night         | 37,4 | 63  | 67,2 | 67,2 | 18,55 | 558,62 | 142,02 |
|    | 2019/08/06 | CH2276 | Female | Two y/o | Treatment (Wk 1) | Treatment | Feed Day | No | 23:55 | 23:00 - 23:59 | Night         | 37,4 | 74  | 66,8 | 66,8 | 18,55 | 571,33 | 141,81 |
| 50 | 2019/08/07 | CH2276 | Female | Two y/o | Treatment (Wk 2) | Treatment | Fast Day | No | 00:00 | 00:00 - 00:59 | Early Morning | 37,4 | 72  | 64,8 | 64,8 | 18,55 | 569,20 | 140,76 |
|    | 2019/08/07 | CH2276 | Female | Two y/o | Treatment (Wk 2) | Treatment | Fast Day | No | 00:05 | 00:00 - 00:59 | Early Morning | 37,4 | 65  | 54,0 | 54,0 | 18,55 | 561,12 | 134,45 |
|    | 2019/08/07 | CH2276 | Female | Two y/o | Treatment (Wk 2) | Treatment | Fast Day | No | 00:10 | 00:00 - 00:59 | Early Morning | 37,3 | 65  | 55,4 | 55,4 | 18,46 | 561,12 | 135,33 |
|    | 2019/08/07 | CH2276 | Female | Two y/o | Treatment (Wk 2) | Treatment | Fast Day | No | 00:15 | 00:00 - 00:59 | Early Morning | 37,3 | 64  | 54,0 | 54,0 | 18,46 | 559,88 | 134,45 |
|    | 2019/08/07 | CH2276 | Female | Two y/o | Treatment (Wk 2) | Treatment | Fast Day | No | 00:20 | 00:00 - 00:59 | Early Morning | 37,3 | 95  | 57,6 | 57,6 | 18,46 | 590,14 | 136,68 |
|    | 2019/08/07 | CH2276 | Female | Two y/o | Treatment (Wk 2) | Treatment | Fast Day | No | 00:25 | 00:00 - 00:59 | Early Morning | 37,2 | 98  | 61,0 | 61,0 | 18,36 | 592,41 | 138,67 |
|    | 2019/08/07 | CH2276 | Female | Two y/o | Treatment (Wk 2) | Treatment | Fast Day | No | 00:30 | 00:00 - 00:59 | Early Morning | 37,2 | 101 | 56,4 | 56,4 | 18,36 | 594,59 | 135,95 |
|    | 2019/08/07 | CH2276 | Female | Two y/o | Treatment (Wk 2) | Treatment | Fast Day | No | 00:35 | 00:00 - 00:59 | Early Morning | 37,3 | 98  | 54,0 | 54,0 | 18,46 | 592,41 | 134,45 |
|    | 2019/08/07 | CH2276 | Female | Two y/o | Treatment (Wk 2) | Treatment | Fast Day | No | 00:40 | 00:00 - 00:59 | Early Morning | 37,3 | 61  | 55,4 | 55,4 | 18,46 | 556,01 | 135,33 |
|    | 2019/08/07 | CH2276 | Female | Two y/o | Treatment (Wk 2) | Treatment | Fast Day | No | 00:45 | 00:00 - 00:59 | Early Morning | 37,3 | 65  | 62,8 | 62,8 | 18,46 | 561,12 | 139,67 |
|    | 2019/08/07 | CH2276 | Female | Two y/o | Treatment (Wk 2) | Treatment | Fast Day | No | 00:50 | 00:00 - 00:59 | Early Morning | 37,3 | 94  | 59,4 | 59,4 | 18,46 | 589,37 | 137,75 |
|    | 2019/08/07 | CH2276 | Female | Two y/o | Treatment (Wk 2) | Treatment | Fast Day | No | 00:55 | 00:00 - 00:59 | Early Morning | 37,2 | 99  | 60,4 | 60,4 | 18,36 | 593,14 | 138,32 |
|    | 2019/08/07 | CH2276 | Female | Two y/o | Treatment (Wk 2) | Treatment | Fast Day | No | 01:00 | 01:00 - 01:59 | Early Morning | 37,1 | 98  | 63,2 | 63,2 | 18,26 | 592,41 | 139,89 |
|    | 2019/08/07 | CH2276 | Female | Two y/o | Treatment (Wk 2) | Treatment | Fast Day | No | 01:05 | 01:00 - 01:59 | Early Morning | 37,1 | 59  | 64,8 | 64,8 | 18,26 | 553,30 | 140,76 |
|    | 2019/08/07 | CH2276 | Female | Two y/o | Treatment (Wk 2) | Treatment | Fast Day | No | 01:10 | 01:00 - 01:59 | Early Morning | 37,1 | 68  | 62,0 | 62,0 | 18,26 | 564,71 | 139,23 |
|    | 2019/08/07 | CH2276 | Female | Two y/o | Treatment (Wk 2) | Treatment | Fast Day | No | 01:15 | 01:00 - 01:59 | Early Morning | 37,1 |     | 46,8 | 46,8 | 18,26 |        | 129,50 |
|    | 2019/08/07 | CH2276 | Female | Two y/o | Treatment (Wk 2) | Treatment | Fast Day | No | 01:20 | 01:00 - 01:59 | Early Morning | 37,2 | 93  | 42,6 | 42,6 | 18,36 | 588,58 | 126,26 |
|    | 2019/08/07 | CH2276 | Female | Two y/o | Treatment (Wk 2) | Treatment | Fast Day | No | 01:25 | 01:00 - 01:59 | Early Morning | 37,1 | 103 | 47,6 | 47,6 | 18,26 | 596,00 | 130,09 |
|    | 2019/08/07 | CH2276 | Female | Two y/o | Treatment (Wk 2) | Treatment | Fast Day | No | 01:30 | 01:00 - 01:59 | Early Morning | 37,0 | 68  | 48,0 | 48,0 | 18,16 | 564,71 | 130,38 |
|    | 2019/08/07 | CH2276 | Female | Two y/o | Treatment (Wk 2) | Treatment | Fast Day | No | 01:35 | 01:00 - 01:59 | Early Morning | 36,9 | 99  | 41,2 | 41,2 | 18,06 | 593,14 | 125,11 |
|    | 2019/08/07 | CH2276 | Female | Two y/o | Treatment (Wk 2) | Treatment | Fast Day | No | 01:40 | 01:00 - 01:59 | Early Morning | 36,9 | 63  | 42,8 | 42,8 | 18,06 | 558,62 | 126,42 |
|    | 2019/08/07 | CH2276 | Female | Two y/o | Treatment (Wk 2) | Treatment | Fast Day | No | 01:45 | 01:00 - 01:59 | Early Morning | 36,9 | 97  | 39,6 | 39,6 | 18,06 | 591,66 | 123,74 |
|    | 2019/08/07 | CH2276 | Female | Two y/o | Treatment (Wk 2) | Treatment | Fast Day | No | 01:50 | 01:00 - 01:59 | Early Morning | 36,9 | 62  | 46,0 | 46,0 | 18,06 | 557,33 | 128,91 |
|    | 2019/08/07 | CH2276 | Female | Two y/o | Treatment (Wk 2) | Treatment | Fast Day | No | 01:55 | 01:00 - 01:59 | Early Morning | 37,0 | 54  | 42,8 | 42,8 | 18,16 | 545,99 | 126,42 |
|    | 2019/08/07 | CH2276 | Female | Two y/o | Treatment (Wk 2) | Treatment | Fast Day | No | 02:00 | 02:00 - 02:59 | Early Morning | 37,0 | 44  | 42,6 | 42,6 | 18,16 | 528,51 | 126,26 |
|    | 2019/08/07 | CH2276 | Female | Two y/o | Treatment (Wk 2) | Treatment | Fast Day | No | 02:05 | 02:00 - 02:59 | Early Morning | 37,0 | 53  | 45,2 | 45,2 | 18,16 | 544,43 | 128,30 |
|    | 2019/08/07 | CH2276 | Female | Two y/o | Treatment (Wk 2) | Treatment | Fast Day | No | 02:10 | 02:00 - 02:59 | Early Morning | 37,0 | 47  | 47,4 | 47,4 | 18,16 | 534,23 | 129,94 |
|    | 2019/08/07 | CH2276 | Female | Two y/o | Treatment (Wk 2) | Treatment | Fast Day | No | 02:15 | 02:00 - 02:59 | Early Morning | 37,0 | 100 | 65,8 | 65,8 | 18,16 | 593,87 | 141,29 |
|    | 2019/08/07 | CH2276 | Female | Two y/o | Treatment (Wk 2) | Treatment | Fast Day | No | 02:20 | 02:00 - 02:59 | Early Morning | 37,1 | 88  | 61,6 | 61,6 | 18,26 | 584,49 | 139,00 |
|    | 2019/08/07 | CH2276 | Female | Two y/o | Treatment (Wk 2) | Treatment | Fast Day | No | 02:25 | 02:00 - 02:59 | Early Morning | 37,1 | 57  | 50,4 | 50,4 | 18,26 | 550,47 | 132,06 |
|    | 2019/08/07 | CH2276 | Female | Two y/o | Treatment (Wk 2) | Treatment | Fast Day | No | 02:30 | 02:00 - 02:59 | Early Morning | 37,0 | 82  | 47,4 | 47,4 | 18,16 | 579,19 | 129,94 |
|    | 2019/08/07 | CH2276 | Female | Two y/o | Treatment (Wk 2) | Treatment | Fast Day | No | 02:35 | 02:00 - 02:59 | Early Morning | 37,0 |     | 65,8 | 65,8 | 18,16 |        | 141,29 |
|    | 2019/08/07 | CH2276 | Female | Two y/o | Treatment (Wk 2) | Treatment | Fast Day | No | 02:40 | 02:00 - 02:59 | Early Morning | 37,2 | 94  | 42,8 | 42,8 | 18,36 | 589,37 | 126,42 |
|    | 2019/08/07 | CH2276 | Female | Two y/o | Treatment (Wk 2) | Treatment | Fast Day | No | 02:45 | 02:00 - 02:59 | Early Morning | 37,1 | 59  | 54,2 | 54,2 | 18,26 | 553,30 | 134,57 |
|    | 2019/08/07 | CH2276 | Female | Two y/o | Treatment (Wk 2) | Treatment | Fast Day | No | 02:50 | 02:00 - 02:59 | Early Morning | 37,1 | 61  | 60,4 | 60,4 | 18,26 | 556,01 | 138,32 |
|    | 2019/08/07 | CH2276 | Female | Two y/o | Treatment (Wk 2) | Treatment | Fast Day | No | 02:55 | 02:00 - 02:59 | Early Morning | 37,1 | 93  | 55,2 | 55,2 | 18,26 | 588,58 | 135,21 |
|    | 2019/08/07 | CH2276 | Female | Two y/o | Treatment (Wk 2) | Treatment | Fast Day | No | 03:00 | 03:00 - 03:59 | Early Morning | 37,1 | 58  | 56,4 | 56,4 | 18,26 | 551,90 | 135,95 |
|    | 2019/08/07 | CH2276 | Female | Two y/o | Treatment (Wk 2) | Treatment | Fast Day | No | 03:05 | 03:00 - 03:59 | Early Morning | 37,1 | 59  | 52,2 | 52,2 | 18,26 | 553,30 | 133,27 |
|    | 2019/08/07 | CH2276 | Female | Two y/o | Treatment (Wk 2) | Treatment | Fast Day | No | 03:10 | 03:00 - 03:59 | Early Morning | 37,0 | 52  | 52,0 | 52,0 | 18,16 | 542,83 | 133    |



|            |        |        |         |                  |           |          |    |       |               |               |      |     |       |       |       |        |        |
|------------|--------|--------|---------|------------------|-----------|----------|----|-------|---------------|---------------|------|-----|-------|-------|-------|--------|--------|
| 2019/08/07 | CH2276 | Female | Two y/o | Treatment (Wk 2) | Treatment | Fast Day | No | 03:15 | 03:00 - 03:59 | Early Morning | 37,1 | 63  | 49,4  | 49,4  | 18,26 | 558,62 | 131,37 |
| 2019/08/07 | CH2276 | Female | Two y/o | Treatment (Wk 2) | Treatment | Fast Day | No | 03:20 | 03:00 - 03:59 | Early Morning | 37,0 | 60  | 50,8  | 50,8  | 18,16 | 554,67 | 132,33 |
| 2019/08/07 | CH2276 | Female | Two y/o | Treatment (Wk 2) | Treatment | Fast Day | No | 03:25 | 03:00 - 03:59 | Early Morning | 37,0 | 58  | 64,8  | 64,8  | 18,16 | 551,90 | 140,76 |
| 2019/08/07 | CH2276 | Female | Two y/o | Treatment (Wk 2) | Treatment | Fast Day | No | 03:30 | 03:00 - 03:59 | Early Morning | 36,9 | 62  | 65,0  | 65,0  | 18,06 | 557,33 | 140,87 |
| 2019/08/07 | CH2276 | Female | Two y/o | Treatment (Wk 2) | Treatment | Fast Day | No | 03:35 | 03:00 - 03:59 | Early Morning | 37,0 | 88  | 62,0  | 62,0  | 18,16 | 584,49 | 139,23 |
| 2019/08/07 | CH2276 | Female | Two y/o | Treatment (Wk 2) | Treatment | Fast Day | No | 03:40 | 03:00 - 03:59 | Early Morning | 37,0 |     | 81,2  | 81,2  | 18,16 |        | 148,59 |
| 2019/08/07 | CH2276 | Female | Two y/o | Treatment (Wk 2) | Treatment | Fast Day | No | 03:45 | 03:00 - 03:59 | Early Morning | 37,0 |     | 81,2  | 81,2  | 18,16 |        | 148,59 |
| 2019/08/07 | CH2276 | Female | Two y/o | Treatment (Wk 2) | Treatment | Fast Day | No | 03:50 | 03:00 - 03:59 | Early Morning | 37,1 | 86  | 80,2  | 80,2  | 18,26 | 582,77 | 148,16 |
| 2019/08/07 | CH2276 | Female | Two y/o | Treatment (Wk 2) | Treatment | Fast Day | No | 03:55 | 03:00 - 03:59 | Early Morning | 37,1 | 94  | 82,2  | 82,2  | 18,26 | 589,37 | 149,02 |
| 2019/08/07 | CH2276 | Female | Two y/o | Treatment (Wk 2) | Treatment | Fast Day | No | 04:00 | 04:00 - 04:59 | Morning       | 37,1 | 48  | 81,6  | 81,6  | 18,26 | 536,04 | 148,76 |
| 2019/08/07 | CH2276 | Female | Two y/o | Treatment (Wk 2) | Treatment | Fast Day | No | 04:05 | 04:00 - 04:59 | Morning       | 37,1 | 96  | 75,0  | 75,0  | 18,26 | 590,91 | 145,83 |
| 2019/08/07 | CH2276 | Female | Two y/o | Treatment (Wk 2) | Treatment | Fast Day | No | 04:10 | 04:00 - 04:59 | Morning       | 37,1 | 99  | 58,0  | 58,0  | 18,26 | 593,14 | 136,92 |
| 2019/08/07 | CH2276 | Female | Two y/o | Treatment (Wk 2) | Treatment | Fast Day | No | 04:15 | 04:00 - 04:59 | Morning       | 37,1 | 57  | 47,0  | 47,0  | 18,26 | 550,47 | 129,65 |
| 2019/08/07 | CH2276 | Female | Two y/o | Treatment (Wk 2) | Treatment | Fast Day | No | 04:20 | 04:00 - 04:59 | Morning       | 37,0 | 55  | 47,0  | 47,0  | 18,16 | 547,52 | 129,65 |
| 2019/08/07 | CH2276 | Female | Two y/o | Treatment (Wk 2) | Treatment | Fast Day | No | 04:25 | 04:00 - 04:59 | Morning       | 37,0 | 55  | 53,6  | 53,6  | 18,16 | 547,52 | 134,19 |
| 2019/08/07 | CH2276 | Female | Two y/o | Treatment (Wk 2) | Treatment | Fast Day | No | 04:30 | 04:00 - 04:59 | Morning       | 36,9 | 60  | 89,0  | 89,0  | 18,06 | 554,67 | 151,78 |
| 2019/08/07 | CH2276 | Female | Two y/o | Treatment (Wk 2) | Treatment | Fast Day | No | 04:35 | 04:00 - 04:59 | Morning       | 36,9 | 98  | 195,8 | 195,8 | 18,06 | 592,41 | 179,37 |
| 2019/08/07 | CH2276 | Female | Two y/o | Treatment (Wk 2) | Treatment | Fast Day | No | 04:40 | 04:00 - 04:59 | Morning       | 37,0 |     | 45,0  | 45,0  | 18,16 |        | 128,15 |
| 2019/08/07 | CH2276 | Female | Two y/o | Treatment (Wk 2) | Treatment | Fast Day | No | 04:45 | 04:00 - 04:59 | Morning       | 36,9 |     | 77,2  | 77,2  | 18,06 |        | 146,84 |
| 2019/08/07 | CH2276 | Female | Two y/o | Treatment (Wk 2) | Treatment | Fast Day | No | 04:50 | 04:00 - 04:59 | Morning       | 36,9 | 108 | 242,0 | 242,0 | 18,06 | 599,39 | 186,83 |
| 2019/08/07 | CH2276 | Female | Two y/o | Treatment (Wk 2) | Treatment | Fast Day | No | 04:55 | 04:00 - 04:59 | Morning       | 37,0 | 169 | 198,0 | 198,0 | 18,16 | 629,60 | 179,77 |
| 2019/08/07 | CH2276 | Female | Two y/o | Treatment (Wk 2) | Treatment | Fast Day | No | 05:00 | 05:00 - 05:59 | Morning       | 37,1 | 185 | 105,0 | 105,0 | 18,26 | 635,34 | 157,55 |
| 2019/08/07 | CH2276 | Female | Two y/o | Treatment (Wk 2) | Treatment | Fast Day | No | 05:05 | 05:00 - 05:59 | Morning       | 37,3 | 147 | 180,8 | 180,8 | 18,46 | 620,52 | 176,57 |
| 2019/08/07 | CH2276 | Female | Two y/o | Treatment (Wk 2) | Treatment | Fast Day | No | 05:10 | 05:00 - 05:59 | Morning       | 37,5 |     | 172,6 | 172,6 | 18,65 |        | 174,94 |
| 2019/08/07 | CH2276 | Female | Two y/o | Treatment (Wk 2) | Treatment | Fast Day | No | 05:15 | 05:00 - 05:59 | Morning       | 37,5 |     | 203,4 | 203,4 | 18,65 |        | 180,71 |
| 2019/08/07 | CH2276 | Female | Two y/o | Treatment (Wk 2) | Treatment | Fast Day | No | 05:20 | 05:00 - 05:59 | Morning       | 37,6 | 83  | 151,4 | 151,4 | 18,75 | 580,11 | 170,34 |
| 2019/08/07 | CH2276 | Female | Two y/o | Treatment (Wk 2) | Treatment | Fast Day | No | 05:25 | 05:00 - 05:59 | Morning       | 37,6 | 128 | 102,6 | 102,6 | 18,75 | 611,22 | 156,74 |
| 2019/08/07 | CH2276 | Female | Two y/o | Treatment (Wk 2) | Treatment | Fast Day | No | 05:30 | 05:00 - 05:59 | Morning       | 37,6 | 117 | 306,6 | 306,6 | 18,75 | 605,02 | 195,19 |
| 2019/08/07 | CH2276 | Female | Two y/o | Treatment (Wk 2) | Treatment | Fast Day | No | 05:35 | 05:00 - 05:59 | Morning       | 38,0 | 156 | 170,2 | 170,2 | 19,15 | 624,43 | 174,45 |
| 2019/08/07 | CH2276 | Female | Two y/o | Treatment (Wk 2) | Treatment | Fast Day | No | 05:40 | 05:00 - 05:59 | Morning       | 38,2 |     | 377,0 | 377,0 | 19,36 |        | 202,51 |
| 2019/08/07 | CH2276 | Female | Two y/o | Treatment (Wk 2) | Treatment | Fast Day | No | 05:45 | 05:00 - 05:59 | Morning       | 38,3 | 143 | 495,8 | 495,8 | 19,46 | 618,69 | 212,25 |
| 2019/08/07 | CH2276 | Female | Two y/o | Treatment (Wk 2) | Treatment | Fast Day | No | 05:50 | 05:00 - 05:59 | Morning       | 38,2 | 104 | 176,4 | 176,4 | 19,36 | 596,69 | 175,71 |
| 2019/08/07 | CH2276 | Female | Two y/o | Treatment (Wk 2) | Treatment | Fast Day | No | 05:55 | 05:00 - 05:59 | Morning       | 38,2 | 110 | 121,0 | 121,0 | 19,36 | 600,69 | 162,50 |
| 2019/08/07 | CH2276 | Female | Two y/o | Treatment (Wk 2) | Treatment | Fast Day | No | 06:00 | 06:00 - 06:59 | Morning       | 38,2 |     | 62,2  | 62,2  | 19,36 |        | 139,34 |
| 2019/08/07 | CH2276 | Female | Two y/o | Treatment (Wk 2) | Treatment | Fast Day | No | 06:05 | 06:00 - 06:59 | Morning       | 37,9 | 68  | 142,2 | 142,2 | 19,05 | 564,71 | 168,15 |
| 2019/08/07 | CH2276 | Female | Two y/o | Treatment (Wk 2) | Treatment | Fast Day | No | 06:10 | 06:00 - 06:59 | Morning       | 37,7 |     | 190,6 | 190,6 | 18,85 |        | 178,43 |
| 2019/08/07 | CH2276 | Female | Two y/o | Treatment (Wk 2) | Treatment | Fast Day | No | 06:15 | 06:00 - 06:59 | Morning       | 37,8 | 126 | 370,2 | 370,2 | 18,95 | 610,14 | 201,87 |
| 2019/08/07 | CH2276 | Female | Two y/o | Treatment (Wk 2) | Treatment | Fast Day | No | 06:20 | 06:00 - 06:59 | Morning       | 37,9 | 84  | 503,0 | 503,0 | 19,05 | 581,01 | 212,76 |
| 2019/08/07 | CH2276 | Female | Two y/o | Treatment (Wk 2) | Treatment | Fast Day | No | 06:25 | 06:00 - 06:59 | Morning       | 37,9 | 115 | 179,2 | 179,2 | 19,05 | 603,82 | 176,26 |
| 2019/08/07 | CH2276 | Female | Two y/o | Treatment (Wk 2) | Treatment | Fast Day | No | 06:30 | 06:00 - 06:59 | Morning       | 37,8 | 125 | 173,6 | 173,6 | 18,95 | 609,60 | 175,14 |
| 2019/08/07 | CH2276 | Female | Two y/o | Treatment (Wk 2) | Treatment | Fast Day | No | 06:35 | 06:00 - 06:59 | Morning       | 38,0 |     | 555,6 | 555,6 | 19,15 |        | 216,30 |
| 2019/08/07 | CH2276 | Female | Two y/o | Treatment (Wk 2) | Treatment | Fast Day | No | 06:40 | 06:00 - 06:59 | Morning       | 38,3 | 75  | 84,0  | 84,0  | 19,46 | 572,36 | 149,77 |
| 2019/08/07 | CH2276 | Female | Two y/o | Treatment (Wk 2) | Treatment | Fast Day | No | 06:45 | 06:00 - 06:59 | Morning       | 38,3 |     | 415,2 | 415,2 | 19,46 |        | 205,94 |
| 2019/08/07 | CH2276 | Female | Two y/o | Treatment (Wk 2) | Treatment | Fast Day | No | 06:50 | 06:00 - 06:59 | Morning       | 38,2 | 84  | 105,4 | 105,4 | 19,36 | 581,01 | 157,68 |
| 2019/08/07 | CH2276 | Female | Two y/o | Treatment (Wk 2) | Treatment | Fast Day | No | 06:55 | 06:00 - 06:59 | Morning       | 38,1 | 134 | 159,2 | 159,2 | 19,26 | 614,33 | 172,10 |
| 2019/08/07 | CH2276 | Female | Two y/o | Treatment (Wk 2) | Treatment | Fast Day | No | 07:00 | 07:00 - 07:59 | Morning       | 38,0 | 74  | 209,6 | 209,6 | 19,15 | 571,33 | 181,77 |
| 2019/08/07 | CH2276 | Female | Two y/o | Treatment (Wk 2) | Treatment | Fast Day | No | 07:05 | 07:00 - 07:59 | Morning       | 38,0 | 58  | 332,2 | 332,2 | 19,15 | 551,90 | 198,03 |
| 2019/08/07 | CH2276 | Female | Two y/o | Treatment (Wk 2) | Treatment | Fast Day | No | 07:10 | 07:00 - 07:59 | Morning       | 37,9 | 92  | 111,2 | 111,2 | 19,05 | 587,78 | 159,55 |
| 2019/08/07 | CH2276 | Female | Two y/o | Treatment (Wk 2) | Treatment | Fast Day | No | 07:15 | 07:00 - 07:59 | Morning       | 37,9 | 131 | 167,0 | 167,0 | 19,05 | 612,80 | 173,78 |
| 2019/08/07 | CH2276 | Female | Two y/o | Treatment (Wk 2) | Treatment | Fast Day | No | 07:20 | 07:00 - 07:59 | Morning       | 38,2 | 134 | 317,4 | 317,4 | 19,36 | 614,33 | 196,42 |
| 2019/08/07 | CH2276 | Female | Two y/o | Treatment (Wk 2) | Treatment | Fast Day | No | 07:25 | 07:00 - 07:59 | Morning       | 38,3 | 118 | 85,0  | 85,0  | 19,46 | 605,61 | 150,18 |
| 2019/08/07 | CH2276 | Female | Two y/o | Treatment (Wk 2) | Treatment | Fast Day | No | 07:30 | 07:00 - 07:59 | Morning       | 38,1 | 97  | 77,8  | 77,8  | 19,26 | 591,66 | 147,11 |
| 2019/08/07 | CH2276 | Female | Two y/o | Treatment (Wk 2) | Treatment | Fast Day | No | 07:35 | 07:00 - 07:59 | Morning       | 38,2 | 135 | 880,8 |       | 19,36 | 614,84 |        |
| 2019/08/07 | CH2276 | Female | Two y/o | Treatment (Wk 2) | Treatment | Fast Day | No | 07:40 | 07:00 - 07:59 | Morning       | 38,0 | 158 | 586,6 | 586,6 | 19,15 | 625,26 | 218,24 |
| 2019/08/07 | CH2276 | Female | Two y/o | Treatment (Wk 2) | Treatment | Fast Day | No | 07:45 | 07:00 - 07:59 | Morning       | 37,9 | 80  | 85,6  | 85,6  | 19,05 | 577,31 | 150,43 |
| 2019/08/07 | CH2276 | Female | Two y/o | Treatment (Wk 2) | Treatment | Fast Day | No | 07:50 | 07:00 - 07:59 | Morning       | 37,8 |     | 114,2 | 114,2 | 18,95 |        | 160,48 |
| 2019/08/07 | CH2276 | Female | Two y/o | Treatment (Wk 2) | Treatment | Fast Day | No | 07:55 | 07:00 - 07:59 | Morning       | 37,7 | 117 | 70,0  | 70,0  | 18,85 | 605,02 | 143,44 |
| 2019/08/07 | CH2276 | Female | Two y/o | Treatment (Wk 2) | Treatment | Fast Day | No | 08:00 | 08:00 - 08:59 | Late Morning  | 37,7 | 80  | 454,0 | 454,0 | 18,85 | 577,31 | 209,11 |
| 2019/08/07 | CH2276 | Female | Two y/o | Treatment (Wk 2) | Treatment | Fast Day | No | 08:05 | 08:00 - 08:59 | Late Morning  | 37,7 | 107 | 118,2 | 118,2 | 18,85 | 598,73 | 161,68 |
| 2019/08/07 | CH2276 | Female | Two y/o | Treatment (Wk 2) | Treatment | Fast Day | No | 08:10 | 08:00 - 08:59 | Late Morning  | 37,6 | 59  | 433,6 | 433,6 | 18,75 | 553,30 | 207,48 |
| 2019/08/07 | CH2276 | Female | Two y/o | Treatment (Wk 2) | Treatment | Fast Day | No | 08:15 | 08:00 - 08:59 | Late Morning  | 37,5 | 79  | 60,2  | 60,2  | 18,65 | 576,36 | 138,21 |
| 2019/08/07 | CH2276 | Female | Two y/o | Treatment (Wk 2) | Treatment | Fast Day | No | 08:20 | 08:00 - 08:59 | Late Morning  | 37,4 | 62  | 64,8  | 64,8  | 18,55 | 557,33 | 140,76 |
| 2019/08/07 | CH2276 | Female | Two y/o | Treatment (Wk 2) | Treatment | Fast Day | No | 08:25 | 08:00 - 08:59 | Late Morning  | 37,2 | 56  | 65,0  | 65,0  | 18,36 | 549,01 | 140,87 |
| 2019/08/07 | CH2276 | Female | Two y/o | Treatment (Wk 2) | Treatment | Fast Day | No | 08:30 | 08:00 - 08:59 | Late Morning  | 37,4 | 84  | 71,0  | 71,0  | 18,55 | 581,01 | 143,93 |
| 2019/08/07 | CH2276 | Female | Two y/o | Treatment (Wk 2) | Treatment | Fast Day | No | 08:35 | 08:00 - 08:59 | Late Morning  | 37,5 | 70  | 55,2  | 55,2  | 18,65 | 566,99 | 135,21 |
| 2019/08/07 | CH2276 | Female | Two y/o | Treatment (Wk 2) | Treatment | Fast Day | No | 08:40 | 08:00 - 08:59 | Late Morning  | 37,5 | 78  | 63,0  | 63,0  | 18,65 | 575,38 | 139,78 |
| 2019/08/07 | CH2276 | Female | Two y/o | Treatment (Wk 2) | Treatment | Fast Day | No | 08:45 | 08:00 - 08:59 | Late Morning  | 37,5 | 70  | 209,4 | 209,4 | 18,65 | 566,99 | 181,74 |
| 2019/08/07 | CH2276 | Female | Two y/o | Treatment (Wk 2) | Treatment | Fast Day | No | 08:50 | 08:00 - 08:59 | Late Morning  | 37,5 | 143 | 278,6 | 278,6 | 18,65 | 618,69 | 191,80 |
| 2019/08/07 | CH2276 | Female | Two y/o | Treatment (Wk 2) | Treatment | Fast Day | No | 08:55 | 08:00 - 08:59 | Late Morning  | 37,5 | 114 | 76,2  | 76,2  | 18,65 | 603,20 | 146,38 |
| 2019/08/07 | CH2276 | Female | Two y/o | Treatment (Wk 2) | Treatment | Fast Day | No | 09:00 | 09:00 - 09:59 | Late Morning  | 37,5 | 109 | 79,0  | 79,0  | 18,65 | 600,04 | 147,64 |



|            |        |        |         |                  |           |          |    |       |               |              |      |     |       |       |       |        |
|------------|--------|--------|---------|------------------|-----------|----------|----|-------|---------------|--------------|------|-----|-------|-------|-------|--------|
| 2019/08/07 | CH2276 | Female | Two y/o | Treatment (Wk 2) | Treatment | Fast Day | No | 09:05 | 09:00 - 09:59 | Late Morning | 37,5 |     | 92,6  | 92,6  | 18,65 | 153,16 |
| 2019/08/07 | CH2276 | Female | Two y/o | Treatment (Wk 2) | Treatment | Fast Day | No | 09:10 | 09:00 - 09:59 | Late Morning | 37,7 |     | 369,2 | 369,2 | 18,85 | 201,77 |
| 2019/08/07 | CH2276 | Female | Two y/o | Treatment (Wk 2) | Treatment | Fast Day | No | 09:15 | 09:00 - 09:59 | Late Morning | 38,2 | 138 | 150,8 | 150,8 | 19,36 | 616,31 |
| 2019/08/07 | CH2276 | Female | Two y/o | Treatment (Wk 2) | Treatment | Fast Day | No | 09:20 | 09:00 - 09:59 | Late Morning | 38,2 | 101 | 69,0  | 69,0  | 19,36 | 594,59 |
| 2019/08/07 | CH2276 | Female | Two y/o | Treatment (Wk 2) | Treatment | Fast Day | No | 09:25 | 09:00 - 09:59 | Late Morning | 38,2 | 156 | 108,6 | 108,6 | 19,36 | 624,43 |
| 2019/08/07 | CH2276 | Female | Two y/o | Treatment (Wk 2) | Treatment | Fast Day | No | 09:30 | 09:00 - 09:59 | Late Morning | 38,0 | 123 | 105,4 | 105,4 | 19,15 | 608,49 |
| 2019/08/07 | CH2276 | Female | Two y/o | Treatment (Wk 2) | Treatment | Fast Day | No | 09:35 | 09:00 - 09:59 | Late Morning | 38,0 | 182 | 83,4  | 83,4  | 19,15 | 634,31 |
| 2019/08/07 | CH2276 | Female | Two y/o | Treatment (Wk 2) | Treatment | Fast Day | No | 09:40 | 09:00 - 09:59 | Late Morning | 37,9 | 69  | 100,4 | 100,4 | 19,05 | 565,86 |
| 2019/08/07 | CH2276 | Female | Two y/o | Treatment (Wk 2) | Treatment | Fast Day | No | 09:45 | 09:00 - 09:59 | Late Morning | 37,9 | 56  | 77,8  | 77,8  | 19,05 | 549,01 |
| 2019/08/07 | CH2276 | Female | Two y/o | Treatment (Wk 2) | Treatment | Fast Day | No | 09:50 | 09:00 - 09:59 | Late Morning | 37,9 | 67  | 62,6  | 62,6  | 19,05 | 563,53 |
| 2019/08/07 | CH2276 | Female | Two y/o | Treatment (Wk 2) | Treatment | Fast Day | No | 09:55 | 09:00 - 09:59 | Late Morning | 37,8 | 86  | 92,2  | 92,2  | 18,95 | 582,77 |
| 2019/08/07 | CH2276 | Female | Two y/o | Treatment (Wk 2) | Treatment | Fast Day | No | 10:00 | 10:00 - 10:59 | Late Morning | 37,8 | 113 | 88,0  | 88,0  | 18,95 | 602,58 |
| 2019/08/07 | CH2276 | Female | Two y/o | Treatment (Wk 2) | Treatment | Fast Day | No | 10:05 | 10:00 - 10:59 | Late Morning | 37,8 | 86  | 124,2 | 124,2 | 18,95 | 582,77 |
| 2019/08/07 | CH2276 | Female | Two y/o | Treatment (Wk 2) | Treatment | Fast Day | No | 10:10 | 10:00 - 10:59 | Late Morning | 37,8 | 88  | 64,0  | 64,0  | 18,95 | 584,49 |
| 2019/08/07 | CH2276 | Female | Two y/o | Treatment (Wk 2) | Treatment | Fast Day | No | 10:15 | 10:00 - 10:59 | Late Morning | 37,8 | 60  | 67,6  | 67,6  | 18,95 | 554,67 |
| 2019/08/07 | CH2276 | Female | Two y/o | Treatment (Wk 2) | Treatment | Fast Day | No | 10:20 | 10:00 - 10:59 | Late Morning | 37,8 | 60  | 55,0  | 55,0  | 18,95 | 554,67 |
| 2019/08/07 | CH2276 | Female | Two y/o | Treatment (Wk 2) | Treatment | Fast Day | No | 10:25 | 10:00 - 10:59 | Late Morning | 37,8 |     | 72,6  | 72,6  | 18,95 | 444,70 |
| 2019/08/07 | CH2276 | Female | Two y/o | Treatment (Wk 2) | Treatment | Fast Day | No | 10:30 | 10:00 - 10:59 | Late Morning | 37,8 | 60  | 245,2 | 245,2 | 18,95 | 554,67 |
| 2019/08/07 | CH2276 | Female | Two y/o | Treatment (Wk 2) | Treatment | Fast Day | No | 10:35 | 10:00 - 10:59 | Late Morning | 37,8 |     | 244,2 | 244,2 | 18,95 | 187,15 |
| 2019/08/07 | CH2276 | Female | Two y/o | Treatment (Wk 2) | Treatment | Fast Day | No | 10:40 | 10:00 - 10:59 | Late Morning | 37,8 | 105 | 133,8 | 133,8 | 18,95 | 597,38 |
| 2019/08/07 | CH2276 | Female | Two y/o | Treatment (Wk 2) | Treatment | Fast Day | No | 10:45 | 10:00 - 10:59 | Late Morning | 37,8 | 84  | 302,2 | 302,2 | 18,95 | 581,01 |
| 2019/08/07 | CH2276 | Female | Two y/o | Treatment (Wk 2) | Treatment | Fast Day | No | 10:50 | 10:00 - 10:59 | Late Morning | 37,9 | 140 | 340,6 | 340,6 | 19,05 | 617,28 |
| 2019/08/07 | CH2276 | Female | Two y/o | Treatment (Wk 2) | Treatment | Fast Day | No | 10:55 | 10:00 - 10:59 | Late Morning | 38,2 |     | 83,6  | 83,6  | 19,36 | 149,61 |
| 2019/08/07 | CH2276 | Female | Two y/o | Treatment (Wk 2) | Treatment | Fast Day | No | 11:00 | 11:00 - 11:59 | Late Morning | 38,2 | 101 | 124,4 | 124,4 | 19,36 | 594,59 |
| 2019/08/07 | CH2276 | Female | Two y/o | Treatment (Wk 2) | Treatment | Fast Day | No | 11:05 | 11:00 - 11:59 | Late Morning | 38,3 | 83  | 109,6 | 109,6 | 19,46 | 580,11 |
| 2019/08/07 | CH2276 | Female | Two y/o | Treatment (Wk 2) | Treatment | Fast Day | No | 11:10 | 11:00 - 11:59 | Late Morning | 38,4 | 93  | 98,8  | 98,8  | 19,56 | 588,58 |
| 2019/08/07 | CH2276 | Female | Two y/o | Treatment (Wk 2) | Treatment | Fast Day | No | 11:15 | 11:00 - 11:59 | Late Morning | 38,5 |     | 68,6  | 68,6  | 19,66 | 142,74 |
| 2019/08/07 | CH2276 | Female | Two y/o | Treatment (Wk 2) | Treatment | Fast Day | No | 11:20 | 11:00 - 11:59 | Late Morning | 38,4 | 78  | 55,8  | 55,8  | 19,56 | 575,38 |
| 2019/08/07 | CH2276 | Female | Two y/o | Treatment (Wk 2) | Treatment | Fast Day | No | 11:25 | 11:00 - 11:59 | Late Morning | 38,4 | 84  | 68,8  | 68,8  | 19,56 | 581,01 |
| 2019/08/07 | CH2276 | Female | Two y/o | Treatment (Wk 2) | Treatment | Fast Day | No | 11:30 | 11:00 - 11:59 | Late Morning | 38,3 | 98  | 76,0  | 76,0  | 19,46 | 592,41 |
| 2019/08/07 | CH2276 | Female | Two y/o | Treatment (Wk 2) | Treatment | Fast Day | No | 11:35 | 11:00 - 11:59 | Late Morning | 38,3 | 90  | 110,2 | 110,2 | 19,46 | 586,16 |
| 2019/08/07 | CH2276 | Female | Two y/o | Treatment (Wk 2) | Treatment | Fast Day | No | 11:40 | 11:00 - 11:59 | Late Morning | 38,3 | 84  | 99,4  | 99,4  | 19,46 | 581,01 |
| 2019/08/07 | CH2276 | Female | Two y/o | Treatment (Wk 2) | Treatment | Fast Day | No | 11:45 | 11:00 - 11:59 | Late Morning | 38,2 | 82  | 42,8  | 42,8  | 19,36 | 579,19 |
| 2019/08/07 | CH2276 | Female | Two y/o | Treatment (Wk 2) | Treatment | Fast Day | No | 11:50 | 11:00 - 11:59 | Late Morning | 38,2 | 114 | 144,2 | 144,2 | 19,36 | 603,20 |
| 2019/08/07 | CH2276 | Female | Two y/o | Treatment (Wk 2) | Treatment | Fast Day | No | 11:55 | 11:00 - 11:59 | Late Morning | 38,2 | 83  | 63,0  | 63,0  | 19,36 | 580,11 |
| 2019/08/07 | CH2276 | Female | Two y/o | Treatment (Wk 2) | Treatment | Fast Day | No | 12:00 | 12:00 - 12:59 | Afternoon    | 38,2 | 69  | 60,2  | 60,2  | 19,36 | 565,86 |
| 2019/08/07 | CH2276 | Female | Two y/o | Treatment (Wk 2) | Treatment | Fast Day | No | 12:05 | 12:00 - 12:59 | Afternoon    | 38,1 | 73  | 47,4  | 47,4  | 19,26 | 570,27 |
| 2019/08/07 | CH2276 | Female | Two y/o | Treatment (Wk 2) | Treatment | Fast Day | No | 12:10 | 12:00 - 12:59 | Afternoon    | 38,0 | 67  | 80,6  | 80,6  | 19,15 | 563,53 |
| 2019/08/07 | CH2276 | Female | Two y/o | Treatment (Wk 2) | Treatment | Fast Day | No | 12:15 | 12:00 - 12:59 | Afternoon    | 38,1 | 103 | 74,0  | 74,0  | 19,26 | 596,00 |
| 2019/08/07 | CH2276 | Female | Two y/o | Treatment (Wk 2) | Treatment | Fast Day | No | 12:20 | 12:00 - 12:59 | Afternoon    | 38,0 | 106 | 87,0  | 87,0  | 19,15 | 598,06 |
| 2019/08/07 | CH2276 | Female | Two y/o | Treatment (Wk 2) | Treatment | Fast Day | No | 12:25 | 12:00 - 12:59 | Afternoon    | 38,0 | 75  | 71,2  | 71,2  | 19,15 | 572,36 |
| 2019/08/07 | CH2276 | Female | Two y/o | Treatment (Wk 2) | Treatment | Fast Day | No | 12:30 | 12:00 - 12:59 | Afternoon    | 38,0 | 63  | 70,4  | 70,4  | 19,15 | 558,62 |
| 2019/08/07 | CH2276 | Female | Two y/o | Treatment (Wk 2) | Treatment | Fast Day | No | 12:35 | 12:00 - 12:59 | Afternoon    | 38,0 | 60  | 54,4  | 54,4  | 19,15 | 554,67 |
| 2019/08/07 | CH2276 | Female | Two y/o | Treatment (Wk 2) | Treatment | Fast Day | No | 12:40 | 12:00 - 12:59 | Afternoon    | 38,0 | 59  | 63,2  | 63,2  | 19,15 | 553,30 |
| 2019/08/07 | CH2276 | Female | Two y/o | Treatment (Wk 2) | Treatment | Fast Day | No | 12:45 | 12:00 - 12:59 | Afternoon    | 37,9 | 94  | 250,4 | 250,4 | 19,05 | 589,37 |
| 2019/08/07 | CH2276 | Female | Two y/o | Treatment (Wk 2) | Treatment | Fast Day | No | 12:50 | 12:00 - 12:59 | Afternoon    | 37,9 | 62  | 63,0  | 63,0  | 19,05 | 557,33 |
| 2019/08/07 | CH2276 | Female | Two y/o | Treatment (Wk 2) | Treatment | Fast Day | No | 12:55 | 12:00 - 12:59 | Afternoon    | 37,8 | 58  | 72,6  | 72,6  | 18,95 | 551,90 |
| 2019/08/07 | CH2276 | Female | Two y/o | Treatment (Wk 2) | Treatment | Fast Day | No | 13:00 | 13:00 - 13:59 | Afternoon    | 37,8 |     | 66,2  | 66,2  | 18,95 | 141,50 |
| 2019/08/07 | CH2276 | Female | Two y/o | Treatment (Wk 2) | Treatment | Fast Day | No | 13:05 | 13:00 - 13:59 | Afternoon    | 37,8 | 63  | 57,4  | 57,4  | 18,95 | 558,62 |
| 2019/08/07 | CH2276 | Female | Two y/o | Treatment (Wk 2) | Treatment | Fast Day | No | 13:10 | 13:00 - 13:59 | Afternoon    | 37,8 | 53  | 63,4  | 63,4  | 18,95 | 544,43 |
| 2019/08/07 | CH2276 | Female | Two y/o | Treatment (Wk 2) | Treatment | Fast Day | No | 13:15 | 13:00 - 13:59 | Afternoon    | 37,8 | 62  | 68,0  | 68,0  | 18,95 | 557,33 |
| 2019/08/07 | CH2276 | Female | Two y/o | Treatment (Wk 2) | Treatment | Fast Day | No | 13:20 | 13:00 - 13:59 | Afternoon    | 37,8 | 54  | 64,0  | 64,0  | 18,95 | 545,99 |
| 2019/08/07 | CH2276 | Female | Two y/o | Treatment (Wk 2) | Treatment | Fast Day | No | 13:25 | 13:00 - 13:59 | Afternoon    | 37,7 | 56  | 63,6  | 63,6  | 18,85 | 549,01 |
| 2019/08/07 | CH2276 | Female | Two y/o | Treatment (Wk 2) | Treatment | Fast Day | No | 13:30 | 13:00 - 13:59 | Afternoon    | 37,7 | 56  | 64,8  | 64,8  | 18,85 | 549,01 |
| 2019/08/07 | CH2276 | Female | Two y/o | Treatment (Wk 2) | Treatment | Fast Day | No | 13:35 | 13:00 - 13:59 | Afternoon    | 37,7 | 57  | 53,6  | 53,6  | 18,85 | 550,47 |
| 2019/08/07 | CH2276 | Female | Two y/o | Treatment (Wk 2) | Treatment | Fast Day | No | 13:40 | 13:00 - 13:59 | Afternoon    | 37,7 | 57  | 56,4  | 56,4  | 18,85 | 550,47 |
| 2019/08/07 | CH2276 | Female | Two y/o | Treatment (Wk 2) | Treatment | Fast Day | No | 13:45 | 13:00 - 13:59 | Afternoon    | 37,7 | 55  | 66,0  | 66,0  | 18,85 | 547,52 |
| 2019/08/07 | CH2276 | Female | Two y/o | Treatment (Wk 2) | Treatment | Fast Day | No | 13:50 | 13:00 - 13:59 | Afternoon    | 37,7 | 56  | 66,0  | 66,0  | 18,85 | 549,01 |
| 2019/08/07 | CH2276 | Female | Two y/o | Treatment (Wk 2) | Treatment | Fast Day | No | 13:55 | 13:00 - 13:59 | Afternoon    | 37,7 | 67  | 64,6  | 64,6  | 18,85 | 563,53 |
| 2019/08/07 | CH2276 | Female | Two y/o | Treatment (Wk 2) | Treatment | Fast Day | No | 14:00 | 14:00 - 14:59 | Afternoon    | 37,7 | 60  | 59,4  | 59,4  | 18,85 | 554,67 |
| 2019/08/07 | CH2276 | Female | Two y/o | Treatment (Wk 2) | Treatment | Fast Day | No | 14:05 | 14:00 - 14:59 | Afternoon    | 37,6 | 61  | 61,8  | 61,8  | 18,75 | 556,01 |
| 2019/08/07 | CH2276 | Female | Two y/o | Treatment (Wk 2) | Treatment | Fast Day | No | 14:10 | 14:00 - 14:59 | Afternoon    | 37,6 | 57  | 68,0  | 68,0  | 18,75 | 550,47 |
| 2019/08/07 | CH2276 | Female | Two y/o | Treatment (Wk 2) | Treatment | Fast Day | No | 14:15 | 14:00 - 14:59 | Afternoon    | 37,6 | 60  | 67,0  | 67,0  | 18,75 | 554,67 |
| 2019/08/07 | CH2276 | Female | Two y/o | Treatment (Wk 2) | Treatment | Fast Day | No | 14:20 | 14:00 - 14:59 | Afternoon    | 37,6 | 60  | 61,2  | 61,2  | 18,75 | 554,67 |
| 2019/08/07 | CH2276 | Female | Two y/o | Treatment (Wk 2) | Treatment | Fast Day | No | 14:25 | 14:00 - 14:59 | Afternoon    | 37,6 | 61  | 62,2  | 62,2  | 18,75 | 556,01 |
| 2019/08/07 | CH2276 | Female | Two y/o | Treatment (Wk 2) | Treatment | Fast Day | No | 14:30 | 14:00 - 14:59 | Afternoon    | 37,7 | 63  | 68,0  | 68,0  | 18,85 | 558,62 |
| 2019/08/07 | CH2276 | Female | Two y/o | Treatment (Wk 2) | Treatment | Fast Day | No | 14:35 | 14:00 - 14:59 | Afternoon    | 37,7 | 58  | 58,2  | 58,2  | 18,85 | 551,90 |
| 2019/08/07 | CH2276 | Female | Two y/o | Treatment (Wk 2) | Treatment | Fast Day | No | 14:40 | 14:00 - 14:59 | Afternoon    | 37,7 | 58  | 76,2  | 76,2  | 18,85 | 551,90 |
| 2019/08/07 | CH2276 | Female | Two y/o | Treatment (Wk 2) | Treatment | Fast Day | No | 14:45 | 14:00 - 14:59 | Afternoon    | 37,8 | 60  | 58,8  | 58,8  | 18,95 | 554,67 |
| 2019/08/07 | CH2276 | Female | Two y/o | Treatment (Wk 2) | Treatment | Fast Day | No | 14:50 | 14:00 - 14:59 | Afternoon    | 37,8 | 64  | 63,2  | 63,2  | 18,95 | 559,88 |



|            |        |        |         |                  |           |          |    |       |               |           |      |     |       |       |       |        |        |
|------------|--------|--------|---------|------------------|-----------|----------|----|-------|---------------|-----------|------|-----|-------|-------|-------|--------|--------|
| 2019/08/07 | CH2276 | Female | Two y/o | Treatment (Wk 2) | Treatment | Fast Day | No | 14:55 | 14:00 - 14:59 | Afternoon | 37,8 | 57  | 69,4  | 69,4  | 18,95 | 550,47 | 143,14 |
| 2019/08/07 | CH2276 | Female | Two y/o | Treatment (Wk 2) | Treatment | Fast Day | No | 15:00 | 15:00 - 15:59 | Afternoon | 37,7 | 98  | 104,6 | 104,6 | 18,85 | 592,41 | 157,41 |
| 2019/08/07 | CH2276 | Female | Two y/o | Treatment (Wk 2) | Treatment | Fast Day | No | 15:05 | 15:00 - 15:59 | Afternoon | 37,7 | 115 | 53,4  | 53,4  | 18,85 | 603,82 | 134,06 |
| 2019/08/07 | CH2276 | Female | Two y/o | Treatment (Wk 2) | Treatment | Fast Day | No | 15:10 | 15:00 - 15:59 | Afternoon | 37,8 | 64  | 102,4 | 102,4 | 18,95 | 559,88 | 156,67 |
| 2019/08/07 | CH2276 | Female | Two y/o | Treatment (Wk 2) | Treatment | Fast Day | No | 15:15 | 15:00 - 15:59 | Afternoon | 37,8 | 103 | 132,4 | 132,4 | 18,95 | 596,00 | 165,65 |
| 2019/08/07 | CH2276 | Female | Two y/o | Treatment (Wk 2) | Treatment | Fast Day | No | 15:20 | 15:00 - 15:59 | Afternoon | 37,8 | 77  | 55,2  | 55,2  | 18,95 | 574,39 | 135,21 |
| 2019/08/07 | CH2276 | Female | Two y/o | Treatment (Wk 2) | Treatment | Fast Day | No | 15:25 | 15:00 - 15:59 | Afternoon | 37,9 |     | 64,6  | 64,6  | 19,05 |        | 140,65 |
| 2019/08/07 | CH2276 | Female | Two y/o | Treatment (Wk 2) | Treatment | Fast Day | No | 15:30 | 15:00 - 15:59 | Afternoon | 38,0 | 80  | 72,4  | 72,4  | 19,15 | 577,31 | 144,61 |
| 2019/08/07 | CH2276 | Female | Two y/o | Treatment (Wk 2) | Treatment | Fast Day | No | 15:35 | 15:00 - 15:59 | Afternoon | 38,0 | 61  | 59,4  | 59,4  | 19,15 | 556,01 | 137,75 |
| 2019/08/07 | CH2276 | Female | Two y/o | Treatment (Wk 2) | Treatment | Fast Day | No | 15:40 | 15:00 - 15:59 | Afternoon | 37,9 | 84  | 130,2 | 130,2 | 19,05 | 581,01 | 165,06 |
| 2019/08/07 | CH2276 | Female | Two y/o | Treatment (Wk 2) | Treatment | Fast Day | No | 15:45 | 15:00 - 15:59 | Afternoon | 38,0 | 126 | 86,6  | 86,6  | 19,15 | 610,14 | 150,83 |
| 2019/08/07 | CH2276 | Female | Two y/o | Treatment (Wk 2) | Treatment | Fast Day | No | 15:50 | 15:00 - 15:59 | Afternoon | 38,2 | 113 | 80,2  | 80,2  | 19,36 | 602,58 | 148,16 |
| 2019/08/07 | CH2276 | Female | Two y/o | Treatment (Wk 2) | Treatment | Fast Day | No | 15:55 | 15:00 - 15:59 | Afternoon | 38,3 | 62  | 78,4  | 78,4  | 19,46 | 557,33 | 147,37 |
| 2019/08/07 | CH2276 | Female | Two y/o | Treatment (Wk 2) | Treatment | Fast Day | No | 16:00 | 16:00 - 16:59 | Evening   | 38,3 | 87  | 360,6 | 360,6 | 19,46 | 583,64 | 200,94 |
| 2019/08/07 | CH2276 | Female | Two y/o | Treatment (Wk 2) | Treatment | Fast Day | No | 16:05 | 16:00 - 16:59 | Evening   | 38,4 | 125 | 454,2 | 454,2 | 19,56 | 609,60 | 209,13 |
| 2019/08/07 | CH2276 | Female | Two y/o | Treatment (Wk 2) | Treatment | Fast Day | No | 16:10 | 16:00 - 16:59 | Evening   | 38,5 |     | 120,4 | 120,4 | 19,66 |        | 162,32 |
| 2019/08/07 | CH2276 | Female | Two y/o | Treatment (Wk 2) | Treatment | Fast Day | No | 16:15 | 16:00 - 16:59 | Evening   | 38,5 | 53  | 503,2 | 503,2 | 19,66 | 544,43 | 212,77 |
| 2019/08/07 | CH2276 | Female | Two y/o | Treatment (Wk 2) | Treatment | Fast Day | No | 16:20 | 16:00 - 16:59 | Evening   | 38,6 | 103 | 73,4  | 73,4  | 19,76 | 596,00 | 145,08 |
| 2019/08/07 | CH2276 | Female | Two y/o | Treatment (Wk 2) | Treatment | Fast Day | No | 16:25 | 16:00 - 16:59 | Evening   | 38,6 | 70  | 79,0  | 79,0  | 19,76 | 566,99 | 147,64 |
| 2019/08/07 | CH2276 | Female | Two y/o | Treatment (Wk 2) | Treatment | Fast Day | No | 16:30 | 16:00 - 16:59 | Evening   | 38,6 | 62  | 77,0  | 77,0  | 19,76 | 557,33 | 146,75 |
| 2019/08/07 | CH2276 | Female | Two y/o | Treatment (Wk 2) | Treatment | Fast Day | No | 16:35 | 16:00 - 16:59 | Evening   | 38,6 | 90  | 256,2 | 256,2 | 19,76 | 586,16 | 188,84 |
| 2019/08/07 | CH2276 | Female | Two y/o | Treatment (Wk 2) | Treatment | Fast Day | No | 16:40 | 16:00 - 16:59 | Evening   | 38,7 | 77  | 213,8 | 213,8 | 19,87 | 574,39 | 182,47 |
| 2019/08/07 | CH2276 | Female | Two y/o | Treatment (Wk 2) | Treatment | Fast Day | No | 16:45 | 16:00 - 16:59 | Evening   | 38,7 | 117 | 281,0 | 281,0 | 19,87 | 605,02 | 192,11 |
| 2019/08/07 | CH2276 | Female | Two y/o | Treatment (Wk 2) | Treatment | Fast Day | No | 16:50 | 16:00 - 16:59 | Evening   | 38,7 | 98  | 62,4  | 62,4  | 19,87 | 592,41 | 139,45 |
| 2019/08/07 | CH2276 | Female | Two y/o | Treatment (Wk 2) | Treatment | Fast Day | No | 16:55 | 16:00 - 16:59 | Evening   | 38,6 | 89  | 91,0  | 91,0  | 19,76 | 585,33 | 152,56 |
| 2019/08/07 | CH2276 | Female | Two y/o | Treatment (Wk 2) | Treatment | Fast Day | No | 17:00 | 17:00 - 17:59 | Evening   | 38,5 | 85  | 81,8  | 81,8  | 19,66 | 581,90 | 148,85 |
| 2019/08/07 | CH2276 | Female | Two y/o | Treatment (Wk 2) | Treatment | Fast Day | No | 17:05 | 17:00 - 17:59 | Evening   | 38,5 | 63  | 75,2  | 75,2  | 19,66 | 558,62 | 145,93 |
| 2019/08/07 | CH2276 | Female | Two y/o | Treatment (Wk 2) | Treatment | Fast Day | No | 17:10 | 17:00 - 17:59 | Evening   | 38,4 | 59  | 61,4  | 61,4  | 19,56 | 553,30 | 138,89 |
| 2019/08/07 | CH2276 | Female | Two y/o | Treatment (Wk 2) | Treatment | Fast Day | No | 17:15 | 17:00 - 17:59 | Evening   | 38,3 | 61  | 68,0  | 68,0  | 19,46 | 556,01 | 142,43 |
| 2019/08/07 | CH2276 | Female | Two y/o | Treatment (Wk 2) | Treatment | Fast Day | No | 17:20 | 17:00 - 17:59 | Evening   | 38,3 | 64  | 91,6  | 91,6  | 19,46 | 559,88 | 152,79 |
| 2019/08/07 | CH2276 | Female | Two y/o | Treatment (Wk 2) | Treatment | Fast Day | No | 17:25 | 17:00 - 17:59 | Evening   | 38,3 | 82  | 87,2  | 87,2  | 19,46 | 579,19 | 151,07 |
| 2019/08/07 | CH2276 | Female | Two y/o | Treatment (Wk 2) | Treatment | Fast Day | No | 17:30 | 17:00 - 17:59 | Evening   | 38,3 | 103 | 92,6  | 92,6  | 19,46 | 596,00 | 153,16 |
| 2019/08/07 | CH2276 | Female | Two y/o | Treatment (Wk 2) | Treatment | Fast Day | No | 17:35 | 17:00 - 17:59 | Evening   | 38,2 | 75  | 114,8 | 114,8 | 19,36 | 572,36 | 160,66 |
| 2019/08/07 | CH2276 | Female | Two y/o | Treatment (Wk 2) | Treatment | Fast Day | No | 17:40 | 17:00 - 17:59 | Evening   | 38,2 | 120 | 603,4 | 603,4 | 19,36 | 606,78 | 219,25 |
| 2019/08/07 | CH2276 | Female | Two y/o | Treatment (Wk 2) | Treatment | Fast Day | No | 17:45 | 17:00 - 17:59 | Evening   | 38,4 | 147 | 114,0 | 114,0 | 19,56 | 620,52 | 160,42 |
| 2019/08/07 | CH2276 | Female | Two y/o | Treatment (Wk 2) | Treatment | Fast Day | No | 17:50 | 17:00 - 17:59 | Evening   | 38,4 | 119 | 129,0 | 129,0 | 19,56 | 606,20 | 164,74 |
| 2019/08/07 | CH2276 | Female | Two y/o | Treatment (Wk 2) | Treatment | Fast Day | No | 17:55 | 17:00 - 17:59 | Evening   | 38,5 | 128 | 151,8 | 151,8 | 19,66 | 611,22 | 170,44 |
| 2019/08/07 | CH2276 | Female | Two y/o | Treatment (Wk 2) | Treatment | Fast Day | No | 18:00 | 18:00 - 18:59 | Evening   | 38,5 | 90  | 108,0 | 108,0 | 19,66 | 586,16 | 158,53 |
| 2019/08/07 | CH2276 | Female | Two y/o | Treatment (Wk 2) | Treatment | Fast Day | No | 18:05 | 18:00 - 18:59 | Evening   | 38,8 | 148 | 572,2 | 572,2 | 19,97 | 620,97 | 217,35 |
| 2019/08/07 | CH2276 | Female | Two y/o | Treatment (Wk 2) | Treatment | Fast Day | No | 18:10 | 18:00 - 18:59 | Evening   | 38,9 | 109 | 58,8  | 58,8  | 20,07 | 600,04 | 137,39 |
| 2019/08/07 | CH2276 | Female | Two y/o | Treatment (Wk 2) | Treatment | Fast Day | No | 18:15 | 18:00 - 18:59 | Evening   | 39,1 | 65  | 426,4 | 426,4 | 20,28 | 561,12 | 206,88 |
| 2019/08/07 | CH2276 | Female | Two y/o | Treatment (Wk 2) | Treatment | Fast Day | No | 18:20 | 18:00 - 18:59 | Evening   | 39,0 | 101 | 70,8  | 70,8  | 20,18 | 594,59 | 143,83 |
| 2019/08/07 | CH2276 | Female | Two y/o | Treatment (Wk 2) | Treatment | Fast Day | No | 18:25 | 18:00 - 18:59 | Evening   | 38,8 | 92  | 58,0  | 58,0  | 19,97 | 587,78 | 136,92 |
| 2019/08/07 | CH2276 | Female | Two y/o | Treatment (Wk 2) | Treatment | Fast Day | No | 18:30 | 18:00 - 18:59 | Evening   | 38,7 | 67  | 55,4  | 55,4  | 19,87 | 563,53 | 135,33 |
| 2019/08/07 | CH2276 | Female | Two y/o | Treatment (Wk 2) | Treatment | Fast Day | No | 18:35 | 18:00 - 18:59 | Evening   | 38,6 |     | 66,2  | 66,2  | 19,76 |        | 141,50 |
| 2019/08/07 | CH2276 | Female | Two y/o | Treatment (Wk 2) | Treatment | Fast Day | No | 18:40 | 18:00 - 18:59 | Evening   | 38,5 | 72  | 78,0  | 78,0  | 19,66 | 569,20 | 147,20 |
| 2019/08/07 | CH2276 | Female | Two y/o | Treatment (Wk 2) | Treatment | Fast Day | No | 18:45 | 18:00 - 18:59 | Evening   | 38,4 | 60  | 77,6  | 77,6  | 19,56 | 554,67 | 147,02 |
| 2019/08/07 | CH2276 | Female | Two y/o | Treatment (Wk 2) | Treatment | Fast Day | No | 18:50 | 18:00 - 18:59 | Evening   | 38,4 | 94  | 68,8  | 68,8  | 19,56 | 589,37 | 142,84 |
| 2019/08/07 | CH2276 | Female | Two y/o | Treatment (Wk 2) | Treatment | Fast Day | No | 18:55 | 18:00 - 18:59 | Evening   | 38,3 | 68  | 67,2  | 67,2  | 19,46 | 564,71 | 142,02 |
| 2019/08/07 | CH2276 | Female | Two y/o | Treatment (Wk 2) | Treatment | Fast Day | No | 19:00 | 19:00 - 19:59 | Evening   | 38,2 | 68  | 53,8  | 53,8  | 19,36 | 564,71 | 134,32 |
| 2019/08/07 | CH2276 | Female | Two y/o | Treatment (Wk 2) | Treatment | Fast Day | No | 19:05 | 19:00 - 19:59 | Evening   | 38,0 | 60  | 63,6  | 63,6  | 19,15 | 554,67 | 140,11 |
| 2019/08/07 | CH2276 | Female | Two y/o | Treatment (Wk 2) | Treatment | Fast Day | No | 19:10 | 19:00 - 19:59 | Evening   | 37,9 | 65  | 66,8  | 66,8  | 19,05 | 561,12 | 141,81 |
| 2019/08/07 | CH2276 | Female | Two y/o | Treatment (Wk 2) | Treatment | Fast Day | No | 19:15 | 19:00 - 19:59 | Evening   | 37,8 | 63  | 64,2  | 64,2  | 18,95 | 558,62 | 140,44 |
| 2019/08/07 | CH2276 | Female | Two y/o | Treatment (Wk 2) | Treatment | Fast Day | No | 19:20 | 19:00 - 19:59 | Evening   | 37,7 | 56  | 64,0  | 64,0  | 18,85 | 549,01 | 140,33 |
| 2019/08/07 | CH2276 | Female | Two y/o | Treatment (Wk 2) | Treatment | Fast Day | No | 19:25 | 19:00 - 19:59 | Evening   | 37,7 | 55  | 68,4  | 68,4  | 18,85 | 547,52 | 142,64 |
| 2019/08/07 | CH2276 | Female | Two y/o | Treatment (Wk 2) | Treatment | Fast Day | No | 19:30 | 19:00 - 19:59 | Evening   | 37,6 | 60  | 66,6  | 66,6  | 18,75 | 554,67 | 141,71 |
| 2019/08/07 | CH2276 | Female | Two y/o | Treatment (Wk 2) | Treatment | Fast Day | No | 19:35 | 19:00 - 19:59 | Evening   | 37,5 | 64  | 62,0  | 62,0  | 18,65 | 559,88 | 139,23 |
| 2019/08/07 | CH2276 | Female | Two y/o | Treatment (Wk 2) | Treatment | Fast Day | No | 19:40 | 19:00 - 19:59 | Evening   | 37,4 | 64  | 71,2  | 71,2  | 18,55 | 559,88 | 144,03 |
| 2019/08/07 | CH2276 | Female | Two y/o | Treatment (Wk 2) | Treatment | Fast Day | No | 19:45 | 19:00 - 19:59 | Evening   | 37,3 | 50  | 67,0  | 67,0  | 18,46 | 539,52 | 141,92 |
| 2019/08/07 | CH2276 | Female | Two y/o | Treatment (Wk 2) | Treatment | Fast Day | No | 19:50 | 19:00 - 19:59 | Evening   | 37,1 | 54  | 78,0  | 78,0  | 18,26 | 545,99 | 147,20 |
| 2019/08/07 | CH2276 | Female | Two y/o | Treatment (Wk 2) | Treatment | Fast Day | No | 19:55 | 19:00 - 19:59 | Evening   | 37,0 | 82  | 70,6  | 70,6  | 18,16 | 579,19 | 143,73 |
| 2019/08/07 | CH2276 | Female | Two y/o | Treatment (Wk 2) | Treatment | Fast Day | No | 20:00 | 20:00 - 20:59 | Night     | 37,0 | 86  | 65,2  | 65,2  | 18,16 | 582,77 | 140,97 |
| 2019/08/07 | CH2276 | Female | Two y/o | Treatment (Wk 2) | Treatment | Fast Day | No | 20:05 | 20:00 - 20:59 | Night     | 36,9 | 64  | 67,4  | 67,4  | 18,06 | 559,88 | 142,12 |
| 2019/08/07 | CH2276 | Female | Two y/o | Treatment (Wk 2) | Treatment | Fast Day | No | 20:10 | 20:00 - 20:59 | Night     | 36,9 | 74  | 65,8  | 65,8  | 18,06 | 571,33 | 141,29 |
| 2019/08/07 | CH2276 | Female | Two y/o | Treatment (Wk 2) | Treatment | Fast Day | No | 20:15 | 20:00 - 20:59 | Night     | 36,9 | 64  | 74,2  | 74,2  | 18,06 | 559,88 | 145,46 |
| 2019/08/07 | CH2276 | Female | Two y/o | Treatment (Wk 2) | Treatment | Fast Day | No | 20:20 | 20:00 - 20:59 | Night     | 36,9 | 52  | 72,8  | 72,8  | 18,06 | 542,83 | 144,80 |
| 2019/08/07 | CH2276 | Female | Two y/o | Treatment (Wk 2) | Treatment | Fast Day | No | 20:25 | 20:00 - 20:59 | Night     | 36,9 | 63  | 73,4  | 73,4  | 18,06 | 558,62 | 145,08 |
| 2019/08/07 | CH2276 | Female | Two y/o | Treatment (Wk 2) | Treatment | Fast Day | No | 20:30 | 20:00 - 20:59 | Night     | 36,9 |     | 56,4  | 56,4  | 18,06 |        | 135,95 |
| 2019/08/07 | CH2276 | Female | Two y/o | Treatment (Wk 2) | Treatment | Fast Day | No | 20:35 | 20:00 - 20:59 | Night     | 37,0 | 86  | 54,0  | 54,0  | 18,16 | 582,77 | 134,45 |
| 2019/08/07 | CH2276 | Female | Two y/o | Treatment (Wk 2) | Treatment | Fast Day | No | 20:40 | 20:00 - 20:59 | Night     | 37,3 | 84  | 62,6  | 62,6  | 18,46 | 581,01 | 139,56 |



|    |            |        |        |         |                  |           |          |    |       |               |               |      |     |       |       |       |        |        |
|----|------------|--------|--------|---------|------------------|-----------|----------|----|-------|---------------|---------------|------|-----|-------|-------|-------|--------|--------|
|    | 2019/08/07 | CH2276 | Female | Two y/o | Treatment (Wk 2) | Treatment | Fast Day | No | 20:45 | 20:00 - 20:59 | Night         | 37,4 | 96  | 49,0  | 49,0  | 18,55 | 590,91 | 131,09 |
|    | 2019/08/07 | CH2276 | Female | Two y/o | Treatment (Wk 2) | Treatment | Fast Day | No | 20:50 | 20:00 - 20:59 | Night         | 37,4 | 60  | 49,8  | 49,8  | 18,55 | 554,67 | 131,65 |
|    | 2019/08/07 | CH2276 | Female | Two y/o | Treatment (Wk 2) | Treatment | Fast Day | No | 20:55 | 20:00 - 20:59 | Night         | 37,4 | 53  | 50,6  | 50,6  | 18,55 | 544,43 | 132,20 |
|    | 2019/08/07 | CH2276 | Female | Two y/o | Treatment (Wk 2) | Treatment | Fast Day | No | 21:00 | 21:00 - 21:59 | Night         | 37,3 | 51  | 42,0  | 42,0  | 18,46 | 541,20 | 125,77 |
|    | 2019/08/07 | CH2276 | Female | Two y/o | Treatment (Wk 2) | Treatment | Fast Day | No | 21:05 | 21:00 - 21:59 | Night         | 37,2 | 55  | 36,8  | 36,8  | 18,36 | 547,52 | 121,22 |
|    | 2019/08/07 | CH2276 | Female | Two y/o | Treatment (Wk 2) | Treatment | Fast Day | No | 21:10 | 21:00 - 21:59 | Night         | 37,1 | 52  | 44,0  | 44,0  | 18,26 | 542,83 | 127,37 |
|    | 2019/08/07 | CH2276 | Female | Two y/o | Treatment (Wk 2) | Treatment | Fast Day | No | 21:15 | 21:00 - 21:59 | Night         | 37,1 | 53  | 67,0  | 67,0  | 18,26 | 544,43 | 141,92 |
|    | 2019/08/07 | CH2276 | Female | Two y/o | Treatment (Wk 2) | Treatment | Fast Day | No | 21:20 | 21:00 - 21:59 | Night         | 37,0 | 114 | 78,0  | 78,0  | 18,16 | 603,20 | 147,20 |
|    | 2019/08/07 | CH2276 | Female | Two y/o | Treatment (Wk 2) | Treatment | Fast Day | No | 21:25 | 21:00 - 21:59 | Night         | 37,1 | 147 | 125,2 | 125,2 | 18,26 | 620,52 | 163,69 |
|    | 2019/08/07 | CH2276 | Female | Two y/o | Treatment (Wk 2) | Treatment | Fast Day | No | 21:30 | 21:00 - 21:59 | Night         | 37,1 |     | 71,8  | 71,8  | 18,26 |        | 144,32 |
|    | 2019/08/07 | CH2276 | Female | Two y/o | Treatment (Wk 2) | Treatment | Fast Day | No | 21:35 | 21:00 - 21:59 | Night         | 37,1 | 66  | 83,6  | 83,6  | 18,26 | 562,34 | 149,61 |
|    | 2019/08/07 | CH2276 | Female | Two y/o | Treatment (Wk 2) | Treatment | Fast Day | No | 21:40 | 21:00 - 21:59 | Night         | 37,1 | 63  | 66,2  | 66,2  | 18,26 | 558,62 | 141,50 |
|    | 2019/08/07 | CH2276 | Female | Two y/o | Treatment (Wk 2) | Treatment | Fast Day | No | 21:45 | 21:00 - 21:59 | Night         | 37,0 | 56  | 69,4  | 69,4  | 18,16 | 549,01 | 143,14 |
|    | 2019/08/07 | CH2276 | Female | Two y/o | Treatment (Wk 2) | Treatment | Fast Day | No | 21:50 | 21:00 - 21:59 | Night         | 37,3 | 57  | 48,4  | 48,4  | 18,46 | 550,47 | 130,66 |
|    | 2019/08/07 | CH2276 | Female | Two y/o | Treatment (Wk 2) | Treatment | Fast Day | No | 21:55 | 21:00 - 21:59 | Night         | 37,3 | 51  | 50,0  | 50,0  | 18,46 | 541,20 | 131,79 |
|    | 2019/08/07 | CH2276 | Female | Two y/o | Treatment (Wk 2) | Treatment | Fast Day | No | 22:00 | 22:00 - 22:59 | Night         | 37,3 | 61  | 48,2  | 48,2  | 18,46 | 556,01 | 130,52 |
|    | 2019/08/07 | CH2276 | Female | Two y/o | Treatment (Wk 2) | Treatment | Fast Day | No | 22:05 | 22:00 - 22:59 | Night         | 37,4 | 66  | 50,4  | 50,4  | 18,55 | 562,34 | 132,06 |
|    | 2019/08/07 | CH2276 | Female | Two y/o | Treatment (Wk 2) | Treatment | Fast Day | No | 22:10 | 22:00 - 22:59 | Night         | 37,4 | 61  | 53,2  | 53,2  | 18,55 | 556,01 | 133,93 |
|    | 2019/08/07 | CH2276 | Female | Two y/o | Treatment (Wk 2) | Treatment | Fast Day | No | 22:15 | 22:00 - 22:59 | Night         | 37,4 | 51  | 57,8  | 57,8  | 18,55 | 541,20 | 136,80 |
|    | 2019/08/07 | CH2276 | Female | Two y/o | Treatment (Wk 2) | Treatment | Fast Day | No | 22:20 | 22:00 - 22:59 | Night         | 37,4 | 54  | 67,0  | 67,0  | 18,55 | 545,99 | 141,92 |
|    | 2019/08/07 | CH2276 | Female | Two y/o | Treatment (Wk 2) | Treatment | Fast Day | No | 22:25 | 22:00 - 22:59 | Night         | 37,4 | 56  | 67,8  | 67,8  | 18,55 | 549,01 | 142,33 |
|    | 2019/08/07 | CH2276 | Female | Two y/o | Treatment (Wk 2) | Treatment | Fast Day | No | 22:30 | 22:00 - 22:59 | Night         | 37,4 | 82  | 71,6  | 71,6  | 18,55 | 579,19 | 144,22 |
|    | 2019/08/07 | CH2276 | Female | Two y/o | Treatment (Wk 2) | Treatment | Fast Day | No | 22:35 | 22:00 - 22:59 | Night         | 37,4 | 63  | 70,6  | 70,6  | 18,55 | 558,62 | 143,73 |
|    | 2019/08/07 | CH2276 | Female | Two y/o | Treatment (Wk 2) | Treatment | Fast Day | No | 22:40 | 22:00 - 22:59 | Night         | 37,4 | 99  | 69,6  | 69,6  | 18,55 | 593,14 | 143,24 |
|    | 2019/08/07 | CH2276 | Female | Two y/o | Treatment (Wk 2) | Treatment | Fast Day | No | 22:45 | 22:00 - 22:59 | Night         | 37,4 | 56  | 83,6  | 83,6  | 18,55 | 549,01 | 149,61 |
|    | 2019/08/07 | CH2276 | Female | Two y/o | Treatment (Wk 2) | Treatment | Fast Day | No | 22:50 | 22:00 - 22:59 | Night         | 37,4 | 138 | 43,8  | 43,8  | 18,55 | 616,31 | 127,22 |
|    | 2019/08/07 | CH2276 | Female | Two y/o | Treatment (Wk 2) | Treatment | Fast Day | No | 22:55 | 22:00 - 22:59 | Night         | 37,2 | 64  | 73,6  | 73,6  | 18,36 | 559,88 | 145,18 |
|    | 2019/08/07 | CH2276 | Female | Two y/o | Treatment (Wk 2) | Treatment | Fast Day | No | 23:00 | 23:00 - 23:59 | Night         | 37,1 | 88  | 79,0  | 79,0  | 18,26 | 584,49 | 147,64 |
|    | 2019/08/07 | CH2276 | Female | Two y/o | Treatment (Wk 2) | Treatment | Fast Day | No | 23:05 | 23:00 - 23:59 | Night         | 37,1 | 111 | 78,6  | 78,6  | 18,26 | 601,33 | 147,46 |
|    | 2019/08/07 | CH2276 | Female | Two y/o | Treatment (Wk 2) | Treatment | Fast Day | No | 23:10 | 23:00 - 23:59 | Night         | 37,1 | 54  | 60,0  | 60,0  | 18,26 | 545,99 | 138,09 |
|    | 2019/08/07 | CH2276 | Female | Two y/o | Treatment (Wk 2) | Treatment | Fast Day | No | 23:15 | 23:00 - 23:59 | Night         | 37,1 | 65  | 59,8  | 59,8  | 18,26 | 561,12 | 137,98 |
|    | 2019/08/07 | CH2276 | Female | Two y/o | Treatment (Wk 2) | Treatment | Fast Day | No | 23:20 | 23:00 - 23:59 | Night         | 37,1 | 114 | 78,0  | 78,0  | 18,26 | 603,20 | 147,20 |
|    | 2019/08/07 | CH2276 | Female | Two y/o | Treatment (Wk 2) | Treatment | Fast Day | No | 23:25 | 23:00 - 23:59 | Night         | 37,2 | 108 | 76,0  | 76,0  | 18,36 | 599,39 | 146,29 |
|    | 2019/08/07 | CH2276 | Female | Two y/o | Treatment (Wk 2) | Treatment | Fast Day | No | 23:30 | 23:00 - 23:59 | Night         | 37,1 | 69  | 46,8  | 46,8  | 18,26 | 565,86 | 129,50 |
|    | 2019/08/07 | CH2276 | Female | Two y/o | Treatment (Wk 2) | Treatment | Fast Day | No | 23:35 | 23:00 - 23:59 | Night         | 37,0 | 54  | 48,8  | 48,8  | 18,16 | 545,99 | 130,95 |
|    | 2019/08/07 | CH2276 | Female | Two y/o | Treatment (Wk 2) | Treatment | Fast Day | No | 23:40 | 23:00 - 23:59 | Night         | 37,1 | 55  | 47,4  | 47,4  | 18,26 | 547,52 | 129,94 |
|    | 2019/08/07 | CH2276 | Female | Two y/o | Treatment (Wk 2) | Treatment | Fast Day | No | 23:45 | 23:00 - 23:59 | Night         | 37,1 | 98  | 51,6  | 51,6  | 18,26 | 592,41 | 132,87 |
|    | 2019/08/07 | CH2276 | Female | Two y/o | Treatment (Wk 2) | Treatment | Fast Day | No | 23:50 | 23:00 - 23:59 | Night         | 37,1 | 55  | 45,4  | 45,4  | 18,26 | 547,52 | 128,45 |
|    | 2019/08/07 | CH2276 | Female | Two y/o | Treatment (Wk 2) | Treatment | Fast Day | No | 23:55 | 23:00 - 23:59 | Night         | 37,1 | 44  | 43,6  | 43,6  | 18,26 | 528,51 | 127,06 |
| 51 | 2019/08/08 | CH2276 | Female | Two y/o | Treatment (Wk 2) | Treatment | Feed Day | No | 00:00 | 00:00 - 00:59 | Early Morning | 37,1 | 45  | 53,2  | 53,2  | 18,26 | 530,47 | 133,93 |
|    | 2019/08/08 | CH2276 | Female | Two y/o | Treatment (Wk 2) | Treatment | Feed Day | No | 00:05 | 00:00 - 00:59 | Early Morning | 37,1 | 58  | 52,4  | 52,4  | 18,26 | 551,90 | 133,41 |
|    | 2019/08/08 | CH2276 | Female | Two y/o | Treatment (Wk 2) | Treatment | Feed Day | No | 00:10 | 00:00 - 00:59 | Early Morning | 37,1 | 62  | 46,6  | 46,6  | 18,26 | 557,33 | 129,35 |
|    | 2019/08/08 | CH2276 | Female | Two y/o | Treatment (Wk 2) | Treatment | Feed Day | No | 00:15 | 00:00 - 00:59 | Early Morning | 37,1 | 53  | 49,8  | 49,8  | 18,26 | 544,43 | 131,65 |
|    | 2019/08/08 | CH2276 | Female | Two y/o | Treatment (Wk 2) | Treatment | Feed Day | No | 00:20 | 00:00 - 00:59 | Early Morning | 37,1 | 51  | 49,0  | 49,0  | 18,26 | 541,20 | 131,09 |
|    | 2019/08/08 | CH2276 | Female | Two y/o | Treatment (Wk 2) | Treatment | Feed Day | No | 00:25 | 00:00 - 00:59 | Early Morning | 37,1 | 56  | 57,0  | 57,0  | 18,26 | 549,01 | 136,32 |
|    | 2019/08/08 | CH2276 | Female | Two y/o | Treatment (Wk 2) | Treatment | Feed Day | No | 00:30 | 00:00 - 00:59 | Early Morning | 37,1 | 52  | 55,6  | 55,6  | 18,26 | 542,83 | 135,46 |
|    | 2019/08/08 | CH2276 | Female | Two y/o | Treatment (Wk 2) | Treatment | Feed Day | No | 00:35 | 00:00 - 00:59 | Early Morning | 37,1 | 80  | 50,4  | 50,4  | 18,26 | 577,31 | 132,06 |
|    | 2019/08/08 | CH2276 | Female | Two y/o | Treatment (Wk 2) | Treatment | Feed Day | No | 00:40 | 00:00 - 00:59 | Early Morning | 37,1 | 60  | 49,6  | 49,6  | 18,26 | 554,67 | 131,51 |
|    | 2019/08/08 | CH2276 | Female | Two y/o | Treatment (Wk 2) | Treatment | Feed Day | No | 00:45 | 00:00 - 00:59 | Early Morning | 37,1 | 59  | 47,6  | 47,6  | 18,26 | 553,30 | 130,09 |
|    | 2019/08/08 | CH2276 | Female | Two y/o | Treatment (Wk 2) | Treatment | Feed Day | No | 00:50 | 00:00 - 00:59 | Early Morning | 37,1 | 70  | 49,0  | 49,0  | 18,26 | 566,99 | 131,09 |
|    | 2019/08/08 | CH2276 | Female | Two y/o | Treatment (Wk 2) | Treatment | Feed Day | No | 00:55 | 00:00 - 00:59 | Early Morning | 37,0 | 54  | 49,2  | 49,2  | 18,16 | 545,99 | 131,23 |
|    | 2019/08/08 | CH2276 | Female | Two y/o | Treatment (Wk 2) | Treatment | Feed Day | No | 01:00 | 01:00 - 01:59 | Early Morning | 37,0 | 57  | 48,0  | 48,0  | 18,16 | 550,47 | 130,38 |
|    | 2019/08/08 | CH2276 | Female | Two y/o | Treatment (Wk 2) | Treatment | Feed Day | No | 01:05 | 01:00 - 01:59 | Early Morning | 37,0 | 69  | 52,2  | 52,2  | 18,16 | 565,86 | 133,27 |
|    | 2019/08/08 | CH2276 | Female | Two y/o | Treatment (Wk 2) | Treatment | Feed Day | No | 01:10 | 01:00 - 01:59 | Early Morning | 37,0 | 88  | 50,6  | 50,6  | 18,16 | 584,49 | 132,20 |
|    | 2019/08/08 | CH2276 | Female | Two y/o | Treatment (Wk 2) | Treatment | Feed Day | No | 01:15 | 01:00 - 01:59 | Early Morning | 37,0 | 57  | 52,6  | 52,6  | 18,16 | 550,47 | 133,54 |
|    | 2019/08/08 | CH2276 | Female | Two y/o | Treatment (Wk 2) | Treatment | Feed Day | No | 01:20 | 01:00 - 01:59 | Early Morning | 37,0 | 71  | 48,0  | 48,0  | 18,16 | 568,10 | 130,38 |
|    | 2019/08/08 | CH2276 | Female | Two y/o | Treatment (Wk 2) | Treatment | Feed Day | No | 01:25 | 01:00 - 01:59 | Early Morning | 37,0 | 57  | 71,2  | 71,2  | 18,16 | 550,47 | 144,03 |
|    | 2019/08/08 | CH2276 | Female | Two y/o | Treatment (Wk 2) | Treatment | Feed Day | No | 01:30 | 01:00 - 01:59 | Early Morning | 37,0 | 64  | 40,0  | 40,0  | 18,16 | 559,88 | 124,09 |
|    | 2019/08/08 | CH2276 | Female | Two y/o | Treatment (Wk 2) | Treatment | Feed Day | No | 01:35 | 01:00 - 01:59 | Early Morning | 37,0 | 58  | 42,6  | 42,6  | 18,16 | 551,90 | 126,26 |
|    | 2019/08/08 | CH2276 | Female | Two y/o | Treatment (Wk 2) | Treatment | Feed Day | No | 01:40 | 01:00 - 01:59 | Early Morning | 36,9 | 84  | 29,0  | 29,0  | 18,06 | 581,01 | 113,03 |
|    | 2019/08/08 | CH2276 | Female | Two y/o | Treatment (Wk 2) | Treatment | Feed Day | No | 01:45 | 01:00 - 01:59 | Early Morning | 36,9 | 90  | 32,4  | 32,4  | 18,06 | 586,16 | 116,84 |
|    | 2019/08/08 | CH2276 | Female | Two y/o | Treatment (Wk 2) | Treatment | Feed Day | No | 01:50 | 01:00 - 01:59 | Early Morning | 36,9 | 78  | 39,2  | 39,2  | 18,06 | 575,38 | 123,39 |
|    | 2019/08/08 | CH2276 | Female | Two y/o | Treatment (Wk 2) | Treatment | Feed Day | No | 01:55 | 01:00 - 01:59 | Early Morning | 36,9 | 53  | 33,0  | 33,0  | 18,06 | 544,43 | 117,47 |
|    | 2019/08/08 | CH2276 | Female | Two y/o | Treatment (Wk 2) | Treatment | Feed Day | No | 02:00 | 02:00 - 02:59 | Early Morning | 36,9 | 70  | 32,2  | 32,2  | 18,06 | 566,99 | 116,63 |
|    | 2019/08/08 | CH2276 | Female | Two y/o | Treatment (Wk 2) | Treatment | Feed Day | No | 02:05 | 02:00 - 02:59 | Early Morning | 36,9 | 88  | 44,4  | 44,4  | 18,06 | 584,49 | 127,69 |
|    | 2019/08/08 | CH2276 | Female | Two y/o | Treatment (Wk 2) | Treatment | Feed Day | No | 02:10 | 02:00 - 02:59 | Early Morning | 36,9 | 70  | 38,2  | 38,2  | 18,06 | 566,99 | 122,50 |
|    | 2019/08/08 | CH2276 | Female | Two y/o | Treatment (Wk 2) | Treatment | Feed Day | No | 02:15 | 02:00 - 02:59 | Early Morning | 36,9 | 59  | 31,8  | 31,8  | 18,06 | 553,30 | 116,20 |
|    | 2019/08/08 | CH2276 | Female | Two y/o | Treatment (Wk 2) | Treatment | Feed Day | No | 02:20 | 02:00 - 02:59 | Early Morning | 36,9 | 83  | 36,6  | 36,6  | 18,06 | 580,11 | 121,03 |
|    | 2019/08/08 | CH2276 | Female | Two y/o | Treatment (Wk 2) | Treatment | Feed Day | No | 02:25 | 02:00 - 02:59 | Early Morning | 36,9 | 53  | 49,4  | 49,4  | 18,06 | 544,43 | 131,37 |
|    | 2019/08/08 | CH2276 | Female | Two y/o | Treatment (Wk 2) | Treatment | Feed Day | No | 02:30 | 02:00 - 02:59 | Early Morning | 36,9 | 59  | 47,0  | 47,0  | 18,   |        |        |



|            |        |        |         |                  |           |          |    |       |               |               |      |     |       |       |       |        |        |
|------------|--------|--------|---------|------------------|-----------|----------|----|-------|---------------|---------------|------|-----|-------|-------|-------|--------|--------|
| 2019/08/08 | CH2276 | Female | Two y/o | Treatment (Wk 2) | Treatment | Feed Day | No | 02:35 | 02:00 - 02:59 | Early Morning | 36,9 | 40  | 52,2  | 52,2  | 18,06 | 520,09 | 133,27 |
| 2019/08/08 | CH2276 | Female | Two y/o | Treatment (Wk 2) | Treatment | Feed Day | No | 02:40 | 02:00 - 02:59 | Early Morning | 36,9 | 93  | 49,0  | 49,0  | 18,06 | 588,58 | 131,09 |
| 2019/08/08 | CH2276 | Female | Two y/o | Treatment (Wk 2) | Treatment | Feed Day | No | 02:45 | 02:00 - 02:59 | Early Morning | 36,9 | 88  | 49,6  | 49,6  | 18,06 | 584,49 | 131,51 |
| 2019/08/08 | CH2276 | Female | Two y/o | Treatment (Wk 2) | Treatment | Feed Day | No | 02:50 | 02:00 - 02:59 | Early Morning | 36,9 | 79  | 45,2  | 45,2  | 18,06 | 576,36 | 128,30 |
| 2019/08/08 | CH2276 | Female | Two y/o | Treatment (Wk 2) | Treatment | Feed Day | No | 02:55 | 02:00 - 02:59 | Early Morning | 36,9 | 52  | 46,0  | 46,0  | 18,06 | 542,83 | 128,91 |
| 2019/08/08 | CH2276 | Female | Two y/o | Treatment (Wk 2) | Treatment | Feed Day | No | 03:00 | 03:00 - 03:59 | Early Morning | 36,9 | 92  | 85,2  | 85,2  | 18,06 | 587,78 | 150,27 |
| 2019/08/08 | CH2276 | Female | Two y/o | Treatment (Wk 2) | Treatment | Feed Day | No | 03:05 | 03:00 - 03:59 | Early Morning | 36,9 | 169 | 59,4  | 59,4  | 18,06 | 629,60 | 137,75 |
| 2019/08/08 | CH2276 | Female | Two y/o | Treatment (Wk 2) | Treatment | Feed Day | No | 03:10 | 03:00 - 03:59 | Early Morning | 36,9 | 88  | 55,0  | 55,0  | 18,06 | 584,49 | 135,08 |
| 2019/08/08 | CH2276 | Female | Two y/o | Treatment (Wk 2) | Treatment | Feed Day | No | 03:15 | 03:00 - 03:59 | Early Morning | 36,9 | 56  | 57,4  | 57,4  | 18,06 | 549,01 | 136,56 |
| 2019/08/08 | CH2276 | Female | Two y/o | Treatment (Wk 2) | Treatment | Feed Day | No | 03:20 | 03:00 - 03:59 | Early Morning | 36,9 | 52  | 53,4  | 53,4  | 18,06 | 542,83 | 134,06 |
| 2019/08/08 | CH2276 | Female | Two y/o | Treatment (Wk 2) | Treatment | Feed Day | No | 03:25 | 03:00 - 03:59 | Early Morning | 36,9 | 64  | 52,2  | 52,2  | 18,06 | 559,88 | 133,27 |
| 2019/08/08 | CH2276 | Female | Two y/o | Treatment (Wk 2) | Treatment | Feed Day | No | 03:30 | 03:00 - 03:59 | Early Morning | 36,9 | 55  | 56,6  | 56,6  | 18,06 | 547,52 | 136,07 |
| 2019/08/08 | CH2276 | Female | Two y/o | Treatment (Wk 2) | Treatment | Feed Day | No | 03:35 | 03:00 - 03:59 | Early Morning | 37,0 | 52  | 61,6  | 61,6  | 18,16 | 542,83 | 139,00 |
| 2019/08/08 | CH2276 | Female | Two y/o | Treatment (Wk 2) | Treatment | Feed Day | No | 03:40 | 03:00 - 03:59 | Early Morning | 37,0 | 63  | 66,0  | 66,0  | 18,16 | 558,62 | 141,40 |
| 2019/08/08 | CH2276 | Female | Two y/o | Treatment (Wk 2) | Treatment | Feed Day | No | 03:45 | 03:00 - 03:59 | Early Morning | 37,1 | 72  | 65,4  | 65,4  | 18,26 | 569,20 | 141,08 |
| 2019/08/08 | CH2276 | Female | Two y/o | Treatment (Wk 2) | Treatment | Feed Day | No | 03:50 | 03:00 - 03:59 | Early Morning | 37,1 | 53  | 68,0  | 68,0  | 18,26 | 544,43 | 142,43 |
| 2019/08/08 | CH2276 | Female | Two y/o | Treatment (Wk 2) | Treatment | Feed Day | No | 03:55 | 03:00 - 03:59 | Early Morning | 37,1 | 61  | 68,6  | 68,6  | 18,26 | 556,01 | 142,74 |
| 2019/08/08 | CH2276 | Female | Two y/o | Treatment (Wk 2) | Treatment | Feed Day | No | 04:00 | 04:00 - 04:59 | Morning       | 37,2 | 63  | 74,0  | 74,0  | 18,36 | 558,62 | 145,37 |
| 2019/08/08 | CH2276 | Female | Two y/o | Treatment (Wk 2) | Treatment | Feed Day | No | 04:05 | 04:00 - 04:59 | Morning       | 37,3 | 49  | 81,2  | 81,2  | 18,46 | 537,80 | 148,59 |
| 2019/08/08 | CH2276 | Female | Two y/o | Treatment (Wk 2) | Treatment | Feed Day | No | 04:10 | 04:00 - 04:59 | Morning       | 37,3 | 76  | 78,2  | 78,2  | 18,46 | 573,39 | 147,28 |
| 2019/08/08 | CH2276 | Female | Two y/o | Treatment (Wk 2) | Treatment | Feed Day | No | 04:15 | 04:00 - 04:59 | Morning       | 37,2 | 52  | 77,4  | 77,4  | 18,36 | 542,83 | 146,93 |
| 2019/08/08 | CH2276 | Female | Two y/o | Treatment (Wk 2) | Treatment | Feed Day | No | 04:20 | 04:00 - 04:59 | Morning       | 37,2 | 58  | 79,4  | 79,4  | 18,36 | 551,90 | 147,81 |
| 2019/08/08 | CH2276 | Female | Two y/o | Treatment (Wk 2) | Treatment | Feed Day | No | 04:25 | 04:00 - 04:59 | Morning       | 37,2 | 57  | 83,0  | 83,0  | 18,36 | 550,47 | 149,36 |
| 2019/08/08 | CH2276 | Female | Two y/o | Treatment (Wk 2) | Treatment | Feed Day | No | 04:30 | 04:00 - 04:59 | Morning       | 37,1 | 75  | 80,6  | 80,6  | 18,26 | 572,36 | 148,34 |
| 2019/08/08 | CH2276 | Female | Two y/o | Treatment (Wk 2) | Treatment | Feed Day | No | 04:35 | 04:00 - 04:59 | Morning       | 37,1 | 55  | 79,2  | 79,2  | 18,26 | 547,52 | 147,73 |
| 2019/08/08 | CH2276 | Female | Two y/o | Treatment (Wk 2) | Treatment | Feed Day | No | 04:40 | 04:00 - 04:59 | Morning       | 37,1 | 60  | 86,4  | 86,4  | 18,26 | 554,67 | 150,75 |
| 2019/08/08 | CH2276 | Female | Two y/o | Treatment (Wk 2) | Treatment | Feed Day | No | 04:45 | 04:00 - 04:59 | Morning       | 37,1 | 92  | 87,6  | 87,6  | 18,26 | 587,78 | 151,23 |
| 2019/08/08 | CH2276 | Female | Two y/o | Treatment (Wk 2) | Treatment | Feed Day | No | 04:50 | 04:00 - 04:59 | Morning       | 37,1 | 67  | 65,4  | 65,4  | 18,26 | 563,53 | 141,08 |
| 2019/08/08 | CH2276 | Female | Two y/o | Treatment (Wk 2) | Treatment | Feed Day | No | 04:55 | 04:00 - 04:59 | Morning       | 37,1 | 64  | 45,4  | 45,4  | 18,26 | 559,88 | 128,45 |
| 2019/08/08 | CH2276 | Female | Two y/o | Treatment (Wk 2) | Treatment | Feed Day | No | 05:00 | 05:00 - 05:59 | Morning       | 37,1 | 52  | 55,0  | 55,0  | 18,26 | 542,83 | 135,08 |
| 2019/08/08 | CH2276 | Female | Two y/o | Treatment (Wk 2) | Treatment | Feed Day | No | 05:05 | 05:00 - 05:59 | Morning       | 37,1 | 60  | 62,2  | 62,2  | 18,26 | 554,67 | 139,34 |
| 2019/08/08 | CH2276 | Female | Two y/o | Treatment (Wk 2) | Treatment | Feed Day | No | 05:10 | 05:00 - 05:59 | Morning       | 37,1 | 55  | 38,4  | 38,4  | 18,26 | 547,52 | 122,68 |
| 2019/08/08 | CH2276 | Female | Two y/o | Treatment (Wk 2) | Treatment | Feed Day | No | 05:15 | 05:00 - 05:59 | Morning       | 37,0 | 57  | 50,4  | 50,4  | 18,16 | 550,47 | 132,06 |
| 2019/08/08 | CH2276 | Female | Two y/o | Treatment (Wk 2) | Treatment | Feed Day | No | 05:20 | 05:00 - 05:59 | Morning       | 37,0 | 51  | 42,0  | 42,0  | 18,16 | 541,20 | 125,77 |
| 2019/08/08 | CH2276 | Female | Two y/o | Treatment (Wk 2) | Treatment | Feed Day | No | 05:25 | 05:00 - 05:59 | Morning       | 37,0 | 64  | 45,2  | 45,2  | 18,16 | 559,88 | 128,30 |
| 2019/08/08 | CH2276 | Female | Two y/o | Treatment (Wk 2) | Treatment | Feed Day | No | 05:30 | 05:00 - 05:59 | Morning       | 36,9 | 56  | 44,4  | 44,4  | 18,06 | 549,01 | 127,69 |
| 2019/08/08 | CH2276 | Female | Two y/o | Treatment (Wk 2) | Treatment | Feed Day | No | 05:35 | 05:00 - 05:59 | Morning       | 36,9 | 51  | 44,8  | 44,8  | 18,06 | 541,20 | 127,99 |
| 2019/08/08 | CH2276 | Female | Two y/o | Treatment (Wk 2) | Treatment | Feed Day | No | 05:40 | 05:00 - 05:59 | Morning       | 36,9 | 56  | 48,8  | 48,8  | 18,06 | 549,01 | 130,95 |
| 2019/08/08 | CH2276 | Female | Two y/o | Treatment (Wk 2) | Treatment | Feed Day | No | 05:45 | 05:00 - 05:59 | Morning       | 36,9 | 53  | 73,4  | 73,4  | 18,06 | 544,43 | 145,08 |
| 2019/08/08 | CH2276 | Female | Two y/o | Treatment (Wk 2) | Treatment | Feed Day | No | 05:50 | 05:00 - 05:59 | Morning       | 36,8 | 79  | 91,2  | 91,2  | 17,96 | 576,36 | 152,63 |
| 2019/08/08 | CH2276 | Female | Two y/o | Treatment (Wk 2) | Treatment | Feed Day | No | 05:55 | 05:00 - 05:59 | Morning       | 36,7 |     | 81,2  | 81,2  | 17,87 |        | 148,59 |
| 2019/08/08 | CH2276 | Female | Two y/o | Treatment (Wk 2) | Treatment | Feed Day | No | 06:00 | 06:00 - 06:59 | Morning       | 36,7 | 118 | 93,8  | 93,8  | 17,87 | 605,61 | 153,61 |
| 2019/08/08 | CH2276 | Female | Two y/o | Treatment (Wk 2) | Treatment | Feed Day | No | 06:05 | 06:00 - 06:59 | Morning       | 36,7 | 61  | 175,0 | 175,0 | 17,87 | 556,01 | 175,43 |
| 2019/08/08 | CH2276 | Female | Two y/o | Treatment (Wk 2) | Treatment | Feed Day | No | 06:10 | 06:00 - 06:59 | Morning       | 36,7 | 126 | 202,2 | 202,2 | 17,87 | 610,14 | 180,50 |
| 2019/08/08 | CH2276 | Female | Two y/o | Treatment (Wk 2) | Treatment | Feed Day | No | 06:15 | 06:00 - 06:59 | Morning       | 36,8 |     | 416,6 | 416,6 | 17,96 |        | 206,06 |
| 2019/08/08 | CH2276 | Female | Two y/o | Treatment (Wk 2) | Treatment | Feed Day | No | 06:20 | 06:00 - 06:59 | Morning       | 37,0 | 167 | 112,8 | 112,8 | 18,16 | 628,84 | 160,05 |
| 2019/08/08 | CH2276 | Female | Two y/o | Treatment (Wk 2) | Treatment | Feed Day | No | 06:25 | 06:00 - 06:59 | Morning       | 37,3 | 71  | 188,8 | 188,8 | 18,46 | 568,10 | 178,09 |
| 2019/08/08 | CH2276 | Female | Two y/o | Treatment (Wk 2) | Treatment | Feed Day | No | 06:30 | 06:00 - 06:59 | Morning       | 37,7 | 108 | 386,0 | 386,0 | 18,85 | 599,39 | 203,35 |
| 2019/08/08 | CH2276 | Female | Two y/o | Treatment (Wk 2) | Treatment | Feed Day | No | 06:35 | 06:00 - 06:59 | Morning       | 37,7 | 73  | 209,2 | 209,2 | 18,85 | 570,27 | 181,70 |
| 2019/08/08 | CH2276 | Female | Two y/o | Treatment (Wk 2) | Treatment | Feed Day | No | 06:40 | 06:00 - 06:59 | Morning       | 37,8 | 188 | 774,2 | 774,2 | 18,95 | 636,34 | 228,16 |
| 2019/08/08 | CH2276 | Female | Two y/o | Treatment (Wk 2) | Treatment | Feed Day | No | 06:45 | 06:00 - 06:59 | Morning       | 37,9 | 102 | 127,6 | 127,6 | 19,05 | 595,30 | 164,35 |
| 2019/08/08 | CH2276 | Female | Two y/o | Treatment (Wk 2) | Treatment | Feed Day | No | 06:50 | 06:00 - 06:59 | Morning       | 37,9 | 65  | 54,2  | 54,2  | 19,05 | 561,12 | 134,57 |
| 2019/08/08 | CH2276 | Female | Two y/o | Treatment (Wk 2) | Treatment | Feed Day | No | 06:55 | 06:00 - 06:59 | Morning       | 37,9 | 107 | 111,4 | 111,4 | 19,05 | 598,73 | 159,61 |
| 2019/08/08 | CH2276 | Female | Two y/o | Treatment (Wk 2) | Treatment | Feed Day | No | 07:00 | 07:00 - 07:59 | Morning       | 38,0 | 86  | 316,2 | 316,2 | 19,15 | 582,77 | 196,28 |
| 2019/08/08 | CH2276 | Female | Two y/o | Treatment (Wk 2) | Treatment | Feed Day | No | 07:05 | 07:00 - 07:59 | Morning       | 38,0 | 72  | 190,8 | 190,8 | 19,15 | 569,20 | 178,46 |
| 2019/08/08 | CH2276 | Female | Two y/o | Treatment (Wk 2) | Treatment | Feed Day | No | 07:10 | 07:00 - 07:59 | Morning       | 38,0 |     | 250,0 | 250,0 | 19,15 |        | 187,98 |
| 2019/08/08 | CH2276 | Female | Two y/o | Treatment (Wk 2) | Treatment | Feed Day | No | 07:15 | 07:00 - 07:59 | Morning       | 38,0 | 77  | 77,0  | 77,0  | 19,15 | 574,39 | 146,75 |
| 2019/08/08 | CH2276 | Female | Two y/o | Treatment (Wk 2) | Treatment | Feed Day | No | 07:20 | 07:00 - 07:59 | Morning       | 37,9 | 100 | 331,0 | 331,0 | 19,05 | 593,87 | 197,90 |
| 2019/08/08 | CH2276 | Female | Two y/o | Treatment (Wk 2) | Treatment | Feed Day | No | 07:25 | 07:00 - 07:59 | Morning       | 37,9 | 96  | 162,2 | 162,2 | 19,05 | 590,91 | 172,76 |
| 2019/08/08 | CH2276 | Female | Two y/o | Treatment (Wk 2) | Treatment | Feed Day | No | 07:30 | 07:00 - 07:59 | Morning       | 37,9 | 111 | 214,4 | 214,4 | 19,05 | 601,33 | 182,57 |
| 2019/08/08 | CH2276 | Female | Two y/o | Treatment (Wk 2) | Treatment | Feed Day | No | 07:35 | 07:00 - 07:59 | Morning       | 37,8 | 103 | 132,2 | 132,2 | 18,95 | 596,00 | 165,59 |
| 2019/08/08 | CH2276 | Female | Two y/o | Treatment (Wk 2) | Treatment | Feed Day | No | 07:40 | 07:00 - 07:59 | Morning       | 37,8 |     | 292,6 | 292,6 | 18,95 |        | 193,54 |
| 2019/08/08 | CH2276 | Female | Two y/o | Treatment (Wk 2) | Treatment | Feed Day | No | 07:45 | 07:00 - 07:59 | Morning       | 37,8 | 59  | 153,4 | 153,4 | 18,95 | 553,30 | 170,80 |
| 2019/08/08 | CH2276 | Female | Two y/o | Treatment (Wk 2) | Treatment | Feed Day | No | 07:50 | 07:00 - 07:59 | Morning       | 37,7 | 101 | 126,8 | 126,8 | 18,85 | 594,59 | 164,13 |
| 2019/08/08 | CH2276 | Female | Two y/o | Treatment (Wk 2) | Treatment | Feed Day | No | 07:55 | 07:00 - 07:59 | Morning       | 37,7 |     | 268,0 | 268,0 | 18,85 |        | 190,43 |
| 2019/08/08 | CH2276 | Female | Two y/o | Treatment (Wk 2) | Treatment | Feed Day | No | 08:00 | 08:00 - 08:59 | Late Morning  | 37,7 | 172 | 126,4 | 126,4 | 18,85 | 630,73 | 164,02 |
| 2019/08/08 | CH2276 | Female | Two y/o | Treatment (Wk 2) | Treatment | Feed Day | No | 08:05 | 08:00 - 08:59 | Late Morning  | 37,7 | 76  | 233,2 | 233,2 | 18,85 | 573,39 | 185,53 |
| 2019/08/08 | CH2276 | Female | Two y/o | Treatment (Wk 2) | Treatment | Feed Day | No | 08:10 | 08:00 - 08:59 | Late Morning  | 37,6 | 141 | 100,8 | 100,8 | 18,75 | 617,75 | 156,12 |
| 2019/08/08 | CH2276 | Female | Two y/o | Treatment (Wk 2) | Treatment | Feed Day | No | 08:15 | 08:00 - 08:59 | Late Morning  | 37,6 | 70  | 107,8 | 107,8 | 18,75 | 566,99 | 158,46 |
| 2019/08/08 | CH2276 | Female | Two y/o | Treatment (Wk 2) | Treatment | Feed Day | No | 08:20 | 08:00 - 08:59 | Late Morning  | 37,6 | 125 | 342,8 | 342,8 | 18,75 | 609,60 | 199,14 |



|            |        |        |         |                  |           |          |     |       |               |              |      |     |        |       |       |        |        |
|------------|--------|--------|---------|------------------|-----------|----------|-----|-------|---------------|--------------|------|-----|--------|-------|-------|--------|--------|
| 2019/08/08 | CH2276 | Female | Two y/o | Treatment (Wk 2) | Treatment | Feed Day | No  | 08:25 | 08:00 - 08:59 | Late Morning | 37,5 | 111 | 150,8  | 150,8 | 18,65 | 601,33 | 170,20 |
| 2019/08/08 | CH2276 | Female | Two y/o | Treatment (Wk 2) | Treatment | Feed Day | No  | 08:30 | 08:00 - 08:59 | Late Morning | 37,6 |     | 315,6  | 315,6 | 18,75 |        | 196,21 |
| 2019/08/08 | CH2276 | Female | Two y/o | Treatment (Wk 2) | Treatment | Feed Day | No  | 08:35 | 08:00 - 08:59 | Late Morning | 37,6 | 137 | 153,0  | 153,0 | 18,75 | 615,83 | 170,71 |
| 2019/08/08 | CH2276 | Female | Two y/o | Treatment (Wk 2) | Treatment | Feed Day | No  | 08:40 | 08:00 - 08:59 | Late Morning | 37,7 | 90  | 85,2   | 85,2  | 18,85 | 586,16 | 150,27 |
| 2019/08/08 | CH2276 | Female | Two y/o | Treatment (Wk 2) | Treatment | Feed Day | No  | 08:45 | 08:00 - 08:59 | Late Morning | 37,7 | 78  | 75,0   | 75,0  | 18,85 | 575,38 | 145,83 |
| 2019/08/08 | CH2276 | Female | Two y/o | Treatment (Wk 2) | Treatment | Feed Day | No  | 08:50 | 08:00 - 08:59 | Late Morning | 37,6 | 65  | 117,6  | 117,6 | 18,75 | 561,12 | 161,50 |
| 2019/08/08 | CH2276 | Female | Two y/o | Treatment (Wk 2) | Treatment | Feed Day | No  | 08:55 | 08:00 - 08:59 | Late Morning | 37,6 | 55  | 234,8  | 234,8 | 18,75 | 547,52 | 185,77 |
| 2019/08/08 | CH2276 | Female | Two y/o | Treatment (Wk 2) | Treatment | Feed Day | No  | 09:00 | 09:00 - 09:59 | Late Morning | 38,2 |     | 281,6  | 281,6 | 19,36 |        | 192,18 |
| 2019/08/08 | CH2276 | Female | Two y/o | Treatment (Wk 2) | Treatment | Feed Day | No  | 09:05 | 09:00 - 09:59 | Late Morning | 38,5 | 125 | 257,4  | 257,4 | 19,66 | 609,60 | 189,01 |
| 2019/08/08 | CH2276 | Female | Two y/o | Treatment (Wk 2) | Treatment | Feed Day | No  | 09:10 | 09:00 - 09:59 | Late Morning | 38,5 | 148 | 124,6  | 124,6 | 19,66 | 620,97 | 163,52 |
| 2019/08/08 | CH2276 | Female | Two y/o | Treatment (Wk 2) | Treatment | Feed Day | No  | 09:15 | 09:00 - 09:59 | Late Morning | 38,4 |     | 130,2  | 130,2 | 19,56 |        | 165,06 |
| 2019/08/08 | CH2276 | Female | Two y/o | Treatment (Wk 2) | Treatment | Feed Day | No  | 09:20 | 09:00 - 09:59 | Late Morning | 38,4 | 112 | 242,8  | 242,8 | 19,56 | 601,96 | 186,95 |
| 2019/08/08 | CH2276 | Female | Two y/o | Treatment (Wk 2) | Treatment | Feed Day | No  | 09:25 | 09:00 - 09:59 | Late Morning | 38,3 |     | 146,8  | 146,8 | 19,46 |        | 169,26 |
| 2019/08/08 | CH2276 | Female | Two y/o | Treatment (Wk 2) | Treatment | Feed Day | No  | 09:30 | 09:00 - 09:59 | Late Morning | 38,3 | 112 | 68,8   | 68,8  | 19,46 | 601,96 | 142,84 |
| 2019/08/08 | CH2276 | Female | Two y/o | Treatment (Wk 2) | Treatment | Feed Day | No  | 09:35 | 09:00 - 09:59 | Late Morning | 38,2 |     | 77,4   | 77,4  | 19,36 |        | 146,93 |
| 2019/08/08 | CH2276 | Female | Two y/o | Treatment (Wk 2) | Treatment | Feed Day | No  | 09:40 | 09:00 - 09:59 | Late Morning | 38,2 | 90  | 54,8   | 54,8  | 19,36 | 586,16 | 134,96 |
| 2019/08/08 | CH2276 | Female | Two y/o | Treatment (Wk 2) | Treatment | Feed Day | No  | 09:45 | 09:00 - 09:59 | Late Morning | 38,0 | 89  | 72,2   | 72,2  | 19,15 | 585,33 | 144,51 |
| 2019/08/08 | CH2276 | Female | Two y/o | Treatment (Wk 2) | Treatment | Feed Day | No  | 09:50 | 09:00 - 09:59 | Late Morning | 38,0 | 64  | 39,8   | 39,8  | 19,15 | 559,88 | 123,91 |
| 2019/08/08 | CH2276 | Female | Two y/o | Treatment (Wk 2) | Treatment | Feed Day | No  | 09:55 | 09:00 - 09:59 | Late Morning | 37,9 | 59  | 75,8   | 75,8  | 19,05 | 553,30 | 146,20 |
| 2019/08/08 | CH2276 | Female | Two y/o | Treatment (Wk 2) | Treatment | Feed Day | No  | 10:00 | 10:00 - 10:59 | Late Morning | 37,9 | 62  | 75,2   | 75,2  | 19,05 | 557,33 | 145,93 |
| 2019/08/08 | CH2276 | Female | Two y/o | Treatment (Wk 2) | Treatment | Feed Day | No  | 10:05 | 10:00 - 10:59 | Late Morning | 37,8 | 81  | 90,2   | 90,2  | 18,95 | 578,26 | 152,25 |
| 2019/08/08 | CH2276 | Female | Two y/o | Treatment (Wk 2) | Treatment | Feed Day | No  | 10:10 | 10:00 - 10:59 | Late Morning | 37,7 | 98  | 150,6  | 150,6 | 18,85 | 592,41 | 170,16 |
| 2019/08/08 | CH2276 | Female | Two y/o | Treatment (Wk 2) | Treatment | Feed Day | No  | 10:15 | 10:00 - 10:59 | Late Morning | 37,7 | 92  | 541,2  | 541,2 | 18,85 | 587,78 | 215,37 |
| 2019/08/08 | CH2276 | Female | Two y/o | Treatment (Wk 2) | Treatment | Feed Day | No  | 10:20 | 10:00 - 10:59 | Late Morning | 37,8 |     | 339,0  | 339,0 | 18,95 |        | 198,75 |
| 2019/08/08 | CH2276 | Female | Two y/o | Treatment (Wk 2) | Treatment | Feed Day | No  | 10:25 | 10:00 - 10:59 | Late Morning | 37,8 | 83  | 207,8  | 207,8 | 18,95 | 580,11 | 181,47 |
| 2019/08/08 | CH2276 | Female | Two y/o | Treatment (Wk 2) | Treatment | Feed Day | Yes | 10:30 | 10:00 - 10:59 | Late Morning | 37,8 | 30  | 108,8  | 108,8 | 18,95 | 493,51 | 158,79 |
| 2019/08/08 | CH2276 | Female | Two y/o | Treatment (Wk 2) | Treatment | Feed Day | Yes | 10:35 | 10:00 - 10:59 | Late Morning | 37,8 |     | 82,2   | 82,2  | 18,95 |        | 149,02 |
| 2019/08/08 | CH2276 | Female | Two y/o | Treatment (Wk 2) | Treatment | Feed Day | Yes | 10:40 | 10:00 - 10:59 | Late Morning | 37,8 | 103 | 71,6   | 71,6  | 18,95 | 596,00 | 144,22 |
| 2019/08/08 | CH2276 | Female | Two y/o | Treatment (Wk 2) | Treatment | Feed Day | Yes | 10:45 | 10:00 - 10:59 | Late Morning | 37,8 | 79  | 99,4   | 99,4  | 18,95 | 576,36 | 155,63 |
| 2019/08/08 | CH2276 | Female | Two y/o | Treatment (Wk 2) | Treatment | Feed Day | Yes | 10:50 | 10:00 - 10:59 | Late Morning | 37,9 | 72  | 111,2  | 111,2 | 19,05 | 569,20 | 159,55 |
| 2019/08/08 | CH2276 | Female | Two y/o | Treatment (Wk 2) | Treatment | Feed Day | Yes | 10:55 | 10:00 - 10:59 | Late Morning | 37,9 | 103 | 145,8  | 145,8 | 19,05 | 596,00 | 169,02 |
| 2019/08/08 | CH2276 | Female | Two y/o | Treatment (Wk 2) | Treatment | Feed Day | Yes | 11:00 | 11:00 - 11:59 | Late Morning | 38,0 | 106 | 1092,0 |       | 19,15 | 598,06 |        |
| 2019/08/08 | CH2276 | Female | Two y/o | Treatment (Wk 2) | Treatment | Feed Day | Yes | 11:05 | 11:00 - 11:59 | Late Morning | 38,3 |     | 52,8   | 52,8  | 19,46 |        | 133,67 |
| 2019/08/08 | CH2276 | Female | Two y/o | Treatment (Wk 2) | Treatment | Feed Day | Yes | 11:10 | 11:00 - 11:59 | Late Morning | 38,2 | 112 | 93,4   | 93,4  | 19,36 | 601,96 | 153,46 |
| 2019/08/08 | CH2276 | Female | Two y/o | Treatment (Wk 2) | Treatment | Feed Day | Yes | 11:15 | 11:00 - 11:59 | Late Morning | 38,1 | 84  | 70,8   | 70,8  | 19,26 | 581,01 | 143,83 |
| 2019/08/08 | CH2276 | Female | Two y/o | Treatment (Wk 2) | Treatment | Feed Day | Yes | 11:20 | 11:00 - 11:59 | Late Morning | 38,0 | 97  | 57,8   | 57,8  | 19,15 | 591,66 | 136,80 |
| 2019/08/08 | CH2276 | Female | Two y/o | Treatment (Wk 2) | Treatment | Feed Day | Yes | 11:25 | 11:00 - 11:59 | Late Morning | 38,0 | 72  | 84,2   | 84,2  | 19,15 | 569,20 | 149,85 |
| 2019/08/08 | CH2276 | Female | Two y/o | Treatment (Wk 2) | Treatment | Feed Day | No  | 11:30 | 11:00 - 11:59 | Late Morning | 38,0 |     | 61,6   | 61,6  | 19,15 |        | 139,00 |
| 2019/08/08 | CH2276 | Female | Two y/o | Treatment (Wk 2) | Treatment | Feed Day | No  | 11:35 | 11:00 - 11:59 | Late Morning | 38,0 | 53  | 93,0   | 93,0  | 19,15 | 544,43 | 153,31 |
| 2019/08/08 | CH2276 | Female | Two y/o | Treatment (Wk 2) | Treatment | Feed Day | No  | 11:40 | 11:00 - 11:59 | Late Morning | 38,0 | 67  | 77,8   | 77,8  | 19,15 | 563,53 | 147,11 |
| 2019/08/08 | CH2276 | Female | Two y/o | Treatment (Wk 2) | Treatment | Feed Day | No  | 11:45 | 11:00 - 11:59 | Late Morning | 38,0 | 124 | 100,4  | 100,4 | 19,15 | 609,04 | 155,98 |
| 2019/08/08 | CH2276 | Female | Two y/o | Treatment (Wk 2) | Treatment | Feed Day | No  | 11:50 | 11:00 - 11:59 | Late Morning | 37,9 | 84  | 81,8   | 81,8  | 19,05 | 581,01 | 148,85 |
| 2019/08/08 | CH2276 | Female | Two y/o | Treatment (Wk 2) | Treatment | Feed Day | No  | 11:55 | 11:00 - 11:59 | Late Morning | 37,9 | 41  | 63,2   | 63,2  | 19,05 | 522,29 | 139,89 |
| 2019/08/08 | CH2276 | Female | Two y/o | Treatment (Wk 2) | Treatment | Feed Day | No  | 12:00 | 12:00 - 12:59 | Afternoon    | 37,9 | 67  | 74,6   | 74,6  | 19,05 | 563,53 | 145,65 |
| 2019/08/08 | CH2276 | Female | Two y/o | Treatment (Wk 2) | Treatment | Feed Day | No  | 12:05 | 12:00 - 12:59 | Afternoon    | 37,9 | 88  | 69,8   | 69,8  | 19,05 | 584,49 | 143,34 |
| 2019/08/08 | CH2276 | Female | Two y/o | Treatment (Wk 2) | Treatment | Feed Day | No  | 12:10 | 12:00 - 12:59 | Afternoon    | 37,9 | 68  | 46,0   | 46,0  | 19,05 | 564,71 | 128,91 |
| 2019/08/08 | CH2276 | Female | Two y/o | Treatment (Wk 2) | Treatment | Feed Day | No  | 12:15 | 12:00 - 12:59 | Afternoon    | 37,9 | 73  | 47,4   | 47,4  | 19,05 | 570,27 | 129,94 |
| 2019/08/08 | CH2276 | Female | Two y/o | Treatment (Wk 2) | Treatment | Feed Day | No  | 12:20 | 12:00 - 12:59 | Afternoon    | 37,9 | 86  | 46,6   | 46,6  | 19,05 | 582,77 | 129,35 |
| 2019/08/08 | CH2276 | Female | Two y/o | Treatment (Wk 2) | Treatment | Feed Day | No  | 12:25 | 12:00 - 12:59 | Afternoon    | 37,8 | 77  | 38,4   | 38,4  | 18,95 | 574,39 | 122,68 |
| 2019/08/08 | CH2276 | Female | Two y/o | Treatment (Wk 2) | Treatment | Feed Day | No  | 12:30 | 12:00 - 12:59 | Afternoon    | 37,8 | 64  | 38,0   | 38,0  | 18,95 | 559,88 | 122,32 |
| 2019/08/08 | CH2276 | Female | Two y/o | Treatment (Wk 2) | Treatment | Feed Day | No  | 12:35 | 12:00 - 12:59 | Afternoon    | 37,8 | 90  | 41,4   | 41,4  | 18,95 | 586,16 | 125,27 |
| 2019/08/08 | CH2276 | Female | Two y/o | Treatment (Wk 2) | Treatment | Feed Day | No  | 12:40 | 12:00 - 12:59 | Afternoon    | 37,8 | 80  | 37,4   | 37,4  | 18,95 | 577,31 | 121,77 |
| 2019/08/08 | CH2276 | Female | Two y/o | Treatment (Wk 2) | Treatment | Feed Day | No  | 12:45 | 12:00 - 12:59 | Afternoon    | 37,8 | 76  | 32,2   | 32,2  | 18,95 | 573,39 | 116,63 |
| 2019/08/08 | CH2276 | Female | Two y/o | Treatment (Wk 2) | Treatment | Feed Day | No  | 12:50 | 12:00 - 12:59 | Afternoon    | 37,8 | 73  | 38,4   | 38,4  | 18,95 | 570,27 | 122,68 |
| 2019/08/08 | CH2276 | Female | Two y/o | Treatment (Wk 2) | Treatment | Feed Day | No  | 12:55 | 12:00 - 12:59 | Afternoon    | 37,8 | 70  | 33,2   | 33,2  | 18,95 | 566,99 | 117,68 |
| 2019/08/08 | CH2276 | Female | Two y/o | Treatment (Wk 2) | Treatment | Feed Day | No  | 13:00 | 13:00 - 13:59 | Afternoon    | 37,8 | 66  | 36,8   | 36,8  | 18,95 | 562,34 | 121,22 |
| 2019/08/08 | CH2276 | Female | Two y/o | Treatment (Wk 2) | Treatment | Feed Day | No  | 13:05 | 13:00 - 13:59 | Afternoon    | 37,8 | 66  | 33,8   | 33,8  | 18,95 | 562,34 | 118,29 |
| 2019/08/08 | CH2276 | Female | Two y/o | Treatment (Wk 2) | Treatment | Feed Day | No  | 13:10 | 13:00 - 13:59 | Afternoon    | 37,8 | 66  | 33,4   | 33,4  | 18,95 | 562,34 | 117,88 |
| 2019/08/08 | CH2276 | Female | Two y/o | Treatment (Wk 2) | Treatment | Feed Day | No  | 13:15 | 13:00 - 13:59 | Afternoon    | 37,8 | 69  | 31,8   | 31,8  | 18,95 | 565,86 | 116,20 |
| 2019/08/08 | CH2276 | Female | Two y/o | Treatment (Wk 2) | Treatment | Feed Day | No  | 13:20 | 13:00 - 13:59 | Afternoon    | 37,8 | 124 | 69,6   | 69,6  | 18,95 | 609,04 | 143,24 |
| 2019/08/08 | CH2276 | Female | Two y/o | Treatment (Wk 2) | Treatment | Feed Day | No  | 13:25 | 13:00 - 13:59 | Afternoon    | 37,8 | 84  | 73,6   | 73,6  | 18,95 | 581,01 | 145,18 |
| 2019/08/08 | CH2276 | Female | Two y/o | Treatment (Wk 2) | Treatment | Feed Day | No  | 13:30 | 13:00 - 13:59 | Afternoon    | 37,8 | 87  | 71,8   | 71,8  | 18,95 | 583,64 | 144,32 |
| 2019/08/08 | CH2276 | Female | Two y/o | Treatment (Wk 2) | Treatment | Feed Day | No  | 13:35 | 13:00 - 13:59 | Afternoon    | 37,8 | 80  | 72,0   | 72,0  | 18,95 | 577,31 | 144,42 |
| 2019/08/08 | CH2276 | Female | Two y/o | Treatment (Wk 2) | Treatment | Feed Day | No  | 13:40 | 13:00 - 13:59 | Afternoon    | 37,9 | 85  | 74,8   | 74,8  | 19,05 | 581,90 | 145,74 |
| 2019/08/08 | CH2276 | Female | Two y/o | Treatment (Wk 2) | Treatment | Feed Day | No  | 13:45 | 13:00 - 13:59 | Afternoon    | 37,9 | 67  | 72,2   | 72,2  | 19,05 | 563,53 | 144,51 |
| 2019/08/08 | CH2276 | Female | Two y/o | Treatment (Wk 2) | Treatment | Feed Day | No  | 13:50 | 13:00 - 13:59 | Afternoon    | 37,9 | 63  | 78,0   | 78,0  | 19,05 | 558,62 | 147,20 |
| 2019/08/08 | CH2276 | Female | Two y/o | Treatment (Wk 2) | Treatment | Feed Day | No  | 13:55 | 13:00 - 13:59 | Afternoon    | 37,9 |     | 75,8   | 75,8  | 19,05 |        | 146,20 |
| 2019/08/08 | CH2276 | Female | Two y/o | Treatment (Wk 2) | Treatment | Feed Day | No  | 14:00 | 14:00 - 14:59 | Afternoon    | 37,9 | 88  | 71,2   | 71,2  | 19,05 | 584,49 | 144,03 |
| 2019/08/08 | CH2276 | Female | Two y/o | Treatment (Wk 2) | Treatment | Feed Day | No  | 14:05 | 14:00 - 14:59 | Afternoon    | 37,9 | 63  | 70,8   | 70,8  | 19,05 | 558,62 | 143,83 |
| 2019/08/08 | CH2276 | Female | Two y/o | Treatment (Wk 2) | Treatment | Feed Day | No  | 14:10 | 14:00 - 14:59 | Afternoon    | 38,0 | 68  | 73,2   | 73,2  | 19,15 | 564,71 | 144,99 |



|            |        |        |         |                  |           |          |     |       |               |           |      |     |       |       |       |        |        |
|------------|--------|--------|---------|------------------|-----------|----------|-----|-------|---------------|-----------|------|-----|-------|-------|-------|--------|--------|
| 2019/08/08 | CH2276 | Female | Two y/o | Treatment (Wk 2) | Treatment | Feed Day | No  | 14:15 | 14:00 - 14:59 | Afternoon | 38,0 | 75  | 74,8  | 74,8  | 19,15 | 572,36 | 145,74 |
| 2019/08/08 | CH2276 | Female | Two y/o | Treatment (Wk 2) | Treatment | Feed Day | No  | 14:20 | 14:00 - 14:59 | Afternoon | 38,0 | 90  | 74,0  | 74,0  | 19,15 | 586,16 | 145,37 |
| 2019/08/08 | CH2276 | Female | Two y/o | Treatment (Wk 2) | Treatment | Feed Day | No  | 14:25 | 14:00 - 14:59 | Afternoon | 38,0 | 65  | 66,4  | 66,4  | 19,15 | 561,12 | 141,61 |
| 2019/08/08 | CH2276 | Female | Two y/o | Treatment (Wk 2) | Treatment | Feed Day | No  | 14:30 | 14:00 - 14:59 | Afternoon | 38,0 |     | 76,4  | 76,4  | 19,15 |        | 146,48 |
| 2019/08/08 | CH2276 | Female | Two y/o | Treatment (Wk 2) | Treatment | Feed Day | No  | 14:35 | 14:00 - 14:59 | Afternoon | 38,1 |     | 78,6  | 78,6  | 19,26 |        | 147,46 |
| 2019/08/08 | CH2276 | Female | Two y/o | Treatment (Wk 2) | Treatment | Feed Day | No  | 14:40 | 14:00 - 14:59 | Afternoon | 38,1 | 68  | 74,0  | 74,0  | 19,26 | 564,71 | 145,37 |
| 2019/08/08 | CH2276 | Female | Two y/o | Treatment (Wk 2) | Treatment | Feed Day | No  | 14:45 | 14:00 - 14:59 | Afternoon | 38,1 | 71  | 73,6  | 73,6  | 19,26 | 568,10 | 145,18 |
| 2019/08/08 | CH2276 | Female | Two y/o | Treatment (Wk 2) | Treatment | Feed Day | No  | 14:50 | 14:00 - 14:59 | Afternoon | 38,1 |     | 74,2  | 74,2  | 19,26 |        | 145,46 |
| 2019/08/08 | CH2276 | Female | Two y/o | Treatment (Wk 2) | Treatment | Feed Day | No  | 14:55 | 14:00 - 14:59 | Afternoon | 38,1 | 66  | 77,4  | 77,4  | 19,26 | 562,34 | 146,93 |
| 2019/08/08 | CH2276 | Female | Two y/o | Treatment (Wk 2) | Treatment | Feed Day | No  | 15:00 | 15:00 - 15:59 | Afternoon | 38,1 | 88  | 76,2  | 76,2  | 19,26 | 584,49 | 146,38 |
| 2019/08/08 | CH2276 | Female | Two y/o | Treatment (Wk 2) | Treatment | Feed Day | No  | 15:05 | 15:00 - 15:59 | Afternoon | 38,1 | 74  | 79,4  | 79,4  | 19,26 | 571,33 | 147,81 |
| 2019/08/08 | CH2276 | Female | Two y/o | Treatment (Wk 2) | Treatment | Feed Day | No  | 15:10 | 15:00 - 15:59 | Afternoon | 38,1 | 69  | 78,4  | 78,4  | 19,26 | 565,86 | 147,37 |
| 2019/08/08 | CH2276 | Female | Two y/o | Treatment (Wk 2) | Treatment | Feed Day | No  | 15:15 | 15:00 - 15:59 | Afternoon | 38,1 | 95  | 74,6  | 74,6  | 19,26 | 590,14 | 145,65 |
| 2019/08/08 | CH2276 | Female | Two y/o | Treatment (Wk 2) | Treatment | Feed Day | No  | 15:20 | 15:00 - 15:59 | Afternoon | 38,0 |     | 75,6  | 75,6  | 19,15 |        | 146,11 |
| 2019/08/08 | CH2276 | Female | Two y/o | Treatment (Wk 2) | Treatment | Feed Day | No  | 15:25 | 15:00 - 15:59 | Afternoon | 38,0 |     | 80,2  | 80,2  | 19,15 |        | 148,16 |
| 2019/08/08 | CH2276 | Female | Two y/o | Treatment (Wk 2) | Treatment | Feed Day | Yes | 15:30 | 15:00 - 15:59 | Afternoon | 38,0 | 103 | 85,2  | 85,2  | 19,15 | 596,00 | 150,27 |
| 2019/08/08 | CH2276 | Female | Two y/o | Treatment (Wk 2) | Treatment | Feed Day | Yes | 15:35 | 15:00 - 15:59 | Afternoon | 38,2 | 115 | 57,2  | 57,2  | 19,36 | 603,82 | 136,44 |
| 2019/08/08 | CH2276 | Female | Two y/o | Treatment (Wk 2) | Treatment | Feed Day | Yes | 15:40 | 15:00 - 15:59 | Afternoon | 38,2 | 95  | 50,6  | 50,6  | 19,36 | 590,14 | 132,20 |
| 2019/08/08 | CH2276 | Female | Two y/o | Treatment (Wk 2) | Treatment | Feed Day | Yes | 15:45 | 15:00 - 15:59 | Afternoon | 38,0 | 89  | 55,4  | 55,4  | 19,15 | 585,33 | 135,33 |
| 2019/08/08 | CH2276 | Female | Two y/o | Treatment (Wk 2) | Treatment | Feed Day | Yes | 15:50 | 15:00 - 15:59 | Afternoon | 38,1 | 74  | 32,0  | 32,0  | 19,26 | 571,33 | 116,41 |
| 2019/08/08 | CH2276 | Female | Two y/o | Treatment (Wk 2) | Treatment | Feed Day | Yes | 15:55 | 15:00 - 15:59 | Afternoon | 38,0 | 92  | 44,2  | 44,2  | 19,15 | 587,78 | 127,53 |
| 2019/08/08 | CH2276 | Female | Two y/o | Treatment (Wk 2) | Treatment | Feed Day | Yes | 16:00 | 16:00 - 16:59 | Evening   | 38,2 | 72  | 86,2  | 86,2  | 19,36 | 569,20 | 150,67 |
| 2019/08/08 | CH2276 | Female | Two y/o | Treatment (Wk 2) | Treatment | Feed Day | Yes | 16:05 | 16:00 - 16:59 | Evening   | 38,2 | 106 | 67,2  | 67,2  | 19,36 | 598,06 | 142,02 |
| 2019/08/08 | CH2276 | Female | Two y/o | Treatment (Wk 2) | Treatment | Feed Day | Yes | 16:10 | 16:00 - 16:59 | Evening   | 38,2 | 76  | 70,0  | 70,0  | 19,36 | 573,39 | 143,44 |
| 2019/08/08 | CH2276 | Female | Two y/o | Treatment (Wk 2) | Treatment | Feed Day | Yes | 16:15 | 16:00 - 16:59 | Evening   | 38,2 | 63  | 73,6  | 73,6  | 19,36 | 558,62 | 145,18 |
| 2019/08/08 | CH2276 | Female | Two y/o | Treatment (Wk 2) | Treatment | Feed Day | Yes | 16:20 | 16:00 - 16:59 | Evening   | 38,2 | 92  | 59,8  | 59,8  | 19,36 | 587,78 | 137,98 |
| 2019/08/08 | CH2276 | Female | Two y/o | Treatment (Wk 2) | Treatment | Feed Day | Yes | 16:25 | 16:00 - 16:59 | Evening   | 38,3 | 83  | 72,4  | 72,4  | 19,46 | 580,11 | 144,61 |
| 2019/08/08 | CH2276 | Female | Two y/o | Treatment (Wk 2) | Treatment | Feed Day | No  | 16:30 | 16:00 - 16:59 | Evening   | 38,3 | 61  | 69,8  | 69,8  | 19,46 | 556,01 | 143,34 |
| 2019/08/08 | CH2276 | Female | Two y/o | Treatment (Wk 2) | Treatment | Feed Day | No  | 16:35 | 16:00 - 16:59 | Evening   | 38,4 | 68  | 72,2  | 72,2  | 19,56 | 564,71 | 144,51 |
| 2019/08/08 | CH2276 | Female | Two y/o | Treatment (Wk 2) | Treatment | Feed Day | No  | 16:40 | 16:00 - 16:59 | Evening   | 38,4 | 60  | 76,0  | 76,0  | 19,56 | 554,67 | 146,29 |
| 2019/08/08 | CH2276 | Female | Two y/o | Treatment (Wk 2) | Treatment | Feed Day | No  | 16:45 | 16:00 - 16:59 | Evening   | 38,3 | 69  | 53,8  | 53,8  | 19,46 | 565,86 | 134,32 |
| 2019/08/08 | CH2276 | Female | Two y/o | Treatment (Wk 2) | Treatment | Feed Day | No  | 16:50 | 16:00 - 16:59 | Evening   | 38,3 | 82  | 54,8  | 54,8  | 19,46 | 579,19 | 134,96 |
| 2019/08/08 | CH2276 | Female | Two y/o | Treatment (Wk 2) | Treatment | Feed Day | No  | 16:55 | 16:00 - 16:59 | Evening   | 38,3 | 77  | 65,8  | 65,8  | 19,46 | 574,39 | 141,29 |
| 2019/08/08 | CH2276 | Female | Two y/o | Treatment (Wk 2) | Treatment | Feed Day | No  | 17:00 | 17:00 - 17:59 | Evening   | 38,2 | 71  | 101,8 | 101,8 | 19,36 | 568,10 | 156,47 |
| 2019/08/08 | CH2276 | Female | Two y/o | Treatment (Wk 2) | Treatment | Feed Day | No  | 17:05 | 17:00 - 17:59 | Evening   | 38,1 | 101 | 88,2  | 88,2  | 19,26 | 594,59 | 151,47 |
| 2019/08/08 | CH2276 | Female | Two y/o | Treatment (Wk 2) | Treatment | Feed Day | No  | 17:10 | 17:00 - 17:59 | Evening   | 38,0 | 85  | 77,8  | 77,8  | 19,15 | 581,90 | 147,11 |
| 2019/08/08 | CH2276 | Female | Two y/o | Treatment (Wk 2) | Treatment | Feed Day | No  | 17:15 | 17:00 - 17:59 | Evening   | 38,0 | 101 | 73,4  | 73,4  | 19,15 | 594,59 | 145,08 |
| 2019/08/08 | CH2276 | Female | Two y/o | Treatment (Wk 2) | Treatment | Feed Day | No  | 17:20 | 17:00 - 17:59 | Evening   | 37,9 | 70  | 75,8  | 75,8  | 19,05 | 566,99 | 146,20 |
| 2019/08/08 | CH2276 | Female | Two y/o | Treatment (Wk 2) | Treatment | Feed Day | No  | 17:25 | 17:00 - 17:59 | Evening   | 37,9 | 65  | 78,0  | 78,0  | 19,05 | 561,12 | 147,20 |
| 2019/08/08 | CH2276 | Female | Two y/o | Treatment (Wk 2) | Treatment | Feed Day | No  | 17:30 | 17:00 - 17:59 | Evening   | 37,9 | 86  | 73,2  | 73,2  | 19,05 | 582,77 | 144,99 |
| 2019/08/08 | CH2276 | Female | Two y/o | Treatment (Wk 2) | Treatment | Feed Day | No  | 17:35 | 17:00 - 17:59 | Evening   | 37,8 | 67  | 76,8  | 76,8  | 18,95 | 563,53 | 146,66 |
| 2019/08/08 | CH2276 | Female | Two y/o | Treatment (Wk 2) | Treatment | Feed Day | No  | 17:40 | 17:00 - 17:59 | Evening   | 37,8 | 125 | 83,8  | 83,8  | 18,95 | 609,60 | 149,69 |
| 2019/08/08 | CH2276 | Female | Two y/o | Treatment (Wk 2) | Treatment | Feed Day | No  | 17:45 | 17:00 - 17:59 | Evening   | 37,8 | 67  | 73,6  | 73,6  | 18,95 | 563,53 | 145,18 |
| 2019/08/08 | CH2276 | Female | Two y/o | Treatment (Wk 2) | Treatment | Feed Day | No  | 17:50 | 17:00 - 17:59 | Evening   | 37,8 | 75  | 71,4  | 71,4  | 18,95 | 572,36 | 144,12 |
| 2019/08/08 | CH2276 | Female | Two y/o | Treatment (Wk 2) | Treatment | Feed Day | No  | 17:55 | 17:00 - 17:59 | Evening   | 37,7 | 94  | 72,6  | 72,6  | 18,85 | 589,37 | 144,70 |
| 2019/08/08 | CH2276 | Female | Two y/o | Treatment (Wk 2) | Treatment | Feed Day | No  | 18:00 | 18:00 - 18:59 | Evening   | 37,7 | 49  | 74,2  | 74,2  | 18,85 | 537,80 | 145,46 |
| 2019/08/08 | CH2276 | Female | Two y/o | Treatment (Wk 2) | Treatment | Feed Day | No  | 18:05 | 18:00 - 18:59 | Evening   | 37,7 | 47  | 395,8 | 395,8 | 18,85 | 534,23 | 204,24 |
| 2019/08/08 | CH2276 | Female | Two y/o | Treatment (Wk 2) | Treatment | Feed Day | No  | 18:10 | 18:00 - 18:59 | Evening   | 38,0 | 117 | 114,2 | 114,2 | 19,15 | 605,02 | 160,48 |
| 2019/08/08 | CH2276 | Female | Two y/o | Treatment (Wk 2) | Treatment | Feed Day | No  | 18:15 | 18:00 - 18:59 | Evening   | 38,0 | 59  | 310,2 | 310,2 | 19,15 | 553,30 | 195,60 |
| 2019/08/08 | CH2276 | Female | Two y/o | Treatment (Wk 2) | Treatment | Feed Day | No  | 18:20 | 18:00 - 18:59 | Evening   | 38,0 | 106 | 67,0  | 67,0  | 19,15 | 598,06 | 141,92 |
| 2019/08/08 | CH2276 | Female | Two y/o | Treatment (Wk 2) | Treatment | Feed Day | No  | 18:25 | 18:00 - 18:59 | Evening   | 38,0 | 65  | 61,2  | 61,2  | 19,15 | 561,12 | 138,78 |
| 2019/08/08 | CH2276 | Female | Two y/o | Treatment (Wk 2) | Treatment | Feed Day | No  | 18:30 | 18:00 - 18:59 | Evening   | 37,9 | 68  | 63,6  | 63,6  | 19,05 | 564,71 | 140,11 |
| 2019/08/08 | CH2276 | Female | Two y/o | Treatment (Wk 2) | Treatment | Feed Day | No  | 18:35 | 18:00 - 18:59 | Evening   | 37,9 | 98  | 80,6  | 80,6  | 19,05 | 592,41 | 148,34 |
| 2019/08/08 | CH2276 | Female | Two y/o | Treatment (Wk 2) | Treatment | Feed Day | No  | 18:40 | 18:00 - 18:59 | Evening   | 37,8 | 80  | 82,0  | 82,0  | 18,95 | 577,31 | 148,93 |
| 2019/08/08 | CH2276 | Female | Two y/o | Treatment (Wk 2) | Treatment | Feed Day | No  | 18:45 | 18:00 - 18:59 | Evening   | 37,7 | 85  | 71,8  | 71,8  | 18,85 | 581,90 | 144,32 |
| 2019/08/08 | CH2276 | Female | Two y/o | Treatment (Wk 2) | Treatment | Feed Day | No  | 18:50 | 18:00 - 18:59 | Evening   | 37,5 | 72  | 71,8  | 71,8  | 18,65 | 569,20 | 144,32 |
| 2019/08/08 | CH2276 | Female | Two y/o | Treatment (Wk 2) | Treatment | Feed Day | No  | 18:55 | 18:00 - 18:59 | Evening   | 37,4 | 95  | 73,0  | 73,0  | 18,55 | 590,14 | 144,89 |
| 2019/08/08 | CH2276 | Female | Two y/o | Treatment (Wk 2) | Treatment | Feed Day | No  | 19:00 | 19:00 - 19:59 | Evening   | 37,4 | 70  | 72,4  | 72,4  | 18,55 | 566,99 | 144,61 |
| 2019/08/08 | CH2276 | Female | Two y/o | Treatment (Wk 2) | Treatment | Feed Day | No  | 19:05 | 19:00 - 19:59 | Evening   | 37,4 | 95  | 75,2  | 75,2  | 18,55 | 590,14 | 145,93 |
| 2019/08/08 | CH2276 | Female | Two y/o | Treatment (Wk 2) | Treatment | Feed Day | No  | 19:10 | 19:00 - 19:59 | Evening   | 37,3 | 68  | 74,6  | 74,6  | 18,46 | 564,71 | 145,65 |
| 2019/08/08 | CH2276 | Female | Two y/o | Treatment (Wk 2) | Treatment | Feed Day | No  | 19:15 | 19:00 - 19:59 | Evening   | 37,4 | 70  | 70,2  | 70,2  | 18,55 | 566,99 | 143,54 |
| 2019/08/08 | CH2276 | Female | Two y/o | Treatment (Wk 2) | Treatment | Feed Day | No  | 19:20 | 19:00 - 19:59 | Evening   | 37,3 |     | 80,2  | 80,2  | 18,46 |        | 148,16 |
| 2019/08/08 | CH2276 | Female | Two y/o | Treatment (Wk 2) | Treatment | Feed Day | No  | 19:25 | 19:00 - 19:59 | Evening   | 37,4 | 66  | 76,8  | 76,8  | 18,55 | 562,34 | 146,66 |
| 2019/08/08 | CH2276 | Female | Two y/o | Treatment (Wk 2) | Treatment | Feed Day | No  | 19:30 | 19:00 - 19:59 | Evening   | 37,5 | 97  | 47,2  | 47,2  | 18,65 | 591,66 | 129,80 |
| 2019/08/08 | CH2276 | Female | Two y/o | Treatment (Wk 2) | Treatment | Feed Day | No  | 19:35 | 19:00 - 19:59 | Evening   | 37,5 | 95  | 44,4  | 44,4  | 18,65 | 590,14 | 127,69 |
| 2019/08/08 | CH2276 | Female | Two y/o | Treatment (Wk 2) | Treatment | Feed Day | No  | 19:40 | 19:00 - 19:59 | Evening   | 37,6 | 61  | 44,8  | 44,8  | 18,75 | 556,01 | 127,99 |
| 2019/08/08 | CH2276 | Female | Two y/o | Treatment (Wk 2) | Treatment | Feed Day | No  | 19:45 | 19:00 - 19:59 | Evening   | 37,6 | 98  | 51,6  | 51,6  | 18,75 | 592,41 | 132,87 |
| 2019/08/08 | CH2276 | Female | Two y/o | Treatment (Wk 2) | Treatment | Feed Day | No  | 19:50 | 19:00 - 19:59 | Evening   | 37,6 | 69  | 49,4  | 49,4  | 18,75 | 565,86 | 131,37 |
| 2019/08/08 | CH2276 | Female | Two y/o | Treatment (Wk 2) | Treatment | Feed Day | No  | 19:55 | 19:00 - 19:59 | Evening   | 37,6 | 88  | 48,8  | 48,8  | 18,75 | 584,49 | 130,95 |
| 2019/08/08 | CH2276 | Female | Two y/o | Treatment (Wk 2) | Treatment | Feed Day | No  | 20:00 | 20:00 - 20:59 | Night     | 37,6 | 66  | 46,0  | 46,0  | 18,75 | 562,34 | 128,91 |



|    |            |        |        |         |                  |           |          |    |       |               |               |      |     |       |       |       |        |        |
|----|------------|--------|--------|---------|------------------|-----------|----------|----|-------|---------------|---------------|------|-----|-------|-------|-------|--------|--------|
|    | 2019/08/08 | CH2276 | Female | Two y/o | Treatment (Wk 2) | Treatment | Feed Day | No | 20:05 | 20:00 - 20:59 | Night         | 37,6 | 62  | 45,4  | 45,4  | 18,75 | 557,33 | 128,45 |
|    | 2019/08/08 | CH2276 | Female | Two y/o | Treatment (Wk 2) | Treatment | Feed Day | No | 20:10 | 20:00 - 20:59 | Night         | 37,6 | 92  | 48,2  | 48,2  | 18,75 | 587,78 | 130,52 |
|    | 2019/08/08 | CH2276 | Female | Two y/o | Treatment (Wk 2) | Treatment | Feed Day | No | 20:15 | 20:00 - 20:59 | Night         | 37,5 | 96  | 53,4  | 53,4  | 18,65 | 590,91 | 134,06 |
|    | 2019/08/08 | CH2276 | Female | Two y/o | Treatment (Wk 2) | Treatment | Feed Day | No | 20:20 | 20:00 - 20:59 | Night         | 37,5 | 66  | 51,0  | 51,0  | 18,65 | 562,34 | 132,47 |
|    | 2019/08/08 | CH2276 | Female | Two y/o | Treatment (Wk 2) | Treatment | Feed Day | No | 20:25 | 20:00 - 20:59 | Night         | 37,5 | 92  | 52,4  | 52,4  | 18,65 | 587,78 | 133,41 |
|    | 2019/08/08 | CH2276 | Female | Two y/o | Treatment (Wk 2) | Treatment | Feed Day | No | 20:30 | 20:00 - 20:59 | Night         | 37,5 | 86  | 65,2  | 65,2  | 18,65 | 582,77 | 140,97 |
|    | 2019/08/08 | CH2276 | Female | Two y/o | Treatment (Wk 2) | Treatment | Feed Day | No | 20:35 | 20:00 - 20:59 | Night         | 37,5 | 94  | 75,8  | 75,8  | 18,65 | 589,37 | 146,20 |
|    | 2019/08/08 | CH2276 | Female | Two y/o | Treatment (Wk 2) | Treatment | Feed Day | No | 20:40 | 20:00 - 20:59 | Night         | 37,4 | 68  | 68,6  | 68,6  | 18,55 | 564,71 | 142,74 |
|    | 2019/08/08 | CH2276 | Female | Two y/o | Treatment (Wk 2) | Treatment | Feed Day | No | 20:45 | 20:00 - 20:59 | Night         | 37,4 | 69  | 69,4  | 69,4  | 18,55 | 565,86 | 143,14 |
|    | 2019/08/08 | CH2276 | Female | Two y/o | Treatment (Wk 2) | Treatment | Feed Day | No | 20:50 | 20:00 - 20:59 | Night         | 37,4 | 57  | 71,4  | 71,4  | 18,55 | 550,47 | 144,12 |
|    | 2019/08/08 | CH2276 | Female | Two y/o | Treatment (Wk 2) | Treatment | Feed Day | No | 20:55 | 20:00 - 20:59 | Night         | 37,4 | 61  | 66,8  | 66,8  | 18,55 | 556,01 | 141,81 |
|    | 2019/08/08 | CH2276 | Female | Two y/o | Treatment (Wk 2) | Treatment | Feed Day | No | 21:00 | 21:00 - 21:59 | Night         | 37,5 | 129 | 78,6  | 78,6  | 18,65 | 611,75 | 147,46 |
|    | 2019/08/08 | CH2276 | Female | Two y/o | Treatment (Wk 2) | Treatment | Feed Day | No | 21:05 | 21:00 - 21:59 | Night         | 37,6 | 64  | 110,4 | 110,4 | 18,75 | 559,88 | 159,30 |
|    | 2019/08/08 | CH2276 | Female | Two y/o | Treatment (Wk 2) | Treatment | Feed Day | No | 21:10 | 21:00 - 21:59 | Night         | 37,6 | 141 | 116,4 | 116,4 | 18,75 | 617,75 | 161,14 |
|    | 2019/08/08 | CH2276 | Female | Two y/o | Treatment (Wk 2) | Treatment | Feed Day | No | 21:15 | 21:00 - 21:59 | Night         | 37,5 | 107 | 67,4  | 67,4  | 18,65 | 598,73 | 142,12 |
|    | 2019/08/08 | CH2276 | Female | Two y/o | Treatment (Wk 2) | Treatment | Feed Day | No | 21:20 | 21:00 - 21:59 | Night         | 37,6 | 62  | 73,2  | 73,2  | 18,75 | 557,33 | 144,99 |
|    | 2019/08/08 | CH2276 | Female | Two y/o | Treatment (Wk 2) | Treatment | Feed Day | No | 21:25 | 21:00 - 21:59 | Night         | 37,6 | 114 | 72,0  | 72,0  | 18,75 | 603,20 | 144,42 |
|    | 2019/08/08 | CH2276 | Female | Two y/o | Treatment (Wk 2) | Treatment | Feed Day | No | 21:30 | 21:00 - 21:59 | Night         | 37,4 | 70  | 75,0  | 75,0  | 18,55 | 566,99 | 145,83 |
|    | 2019/08/08 | CH2276 | Female | Two y/o | Treatment (Wk 2) | Treatment | Feed Day | No | 21:35 | 21:00 - 21:59 | Night         | 37,3 | 95  | 91,0  | 91,0  | 18,46 | 590,14 | 152,56 |
|    | 2019/08/08 | CH2276 | Female | Two y/o | Treatment (Wk 2) | Treatment | Feed Day | No | 21:40 | 21:00 - 21:59 | Night         | 37,3 | 108 | 83,2  | 83,2  | 18,46 | 599,39 | 149,44 |
|    | 2019/08/08 | CH2276 | Female | Two y/o | Treatment (Wk 2) | Treatment | Feed Day | No | 21:45 | 21:00 - 21:59 | Night         | 37,4 | 92  | 74,2  | 74,2  | 18,55 | 587,78 | 145,46 |
|    | 2019/08/08 | CH2276 | Female | Two y/o | Treatment (Wk 2) | Treatment | Feed Day | No | 21:50 | 21:00 - 21:59 | Night         | 37,4 | 94  | 212,2 | 212,2 | 18,55 | 589,37 | 182,20 |
|    | 2019/08/08 | CH2276 | Female | Two y/o | Treatment (Wk 2) | Treatment | Feed Day | No | 21:55 | 21:00 - 21:59 | Night         | 37,5 |     | 234,2 | 234,2 | 18,65 |        | 185,68 |
|    | 2019/08/08 | CH2276 | Female | Two y/o | Treatment (Wk 2) | Treatment | Feed Day | No | 22:00 | 22:00 - 22:59 | Night         | 37,5 | 118 | 425,8 | 425,8 | 18,65 | 605,61 | 206,83 |
|    | 2019/08/08 | CH2276 | Female | Two y/o | Treatment (Wk 2) | Treatment | Feed Day | No | 22:05 | 22:00 - 22:59 | Night         | 37,5 | 77  | 97,8  | 97,8  | 18,65 | 574,39 | 155,07 |
|    | 2019/08/08 | CH2276 | Female | Two y/o | Treatment (Wk 2) | Treatment | Feed Day | No | 22:10 | 22:00 - 22:59 | Night         | 37,6 | 103 | 89,0  | 89,0  | 18,75 | 596,00 | 151,78 |
|    | 2019/08/08 | CH2276 | Female | Two y/o | Treatment (Wk 2) | Treatment | Feed Day | No | 22:15 | 22:00 - 22:59 | Night         | 37,6 | 141 | 331,6 | 331,6 | 18,75 | 617,75 | 197,96 |
|    | 2019/08/08 | CH2276 | Female | Two y/o | Treatment (Wk 2) | Treatment | Feed Day | No | 22:20 | 22:00 - 22:59 | Night         | 37,6 | 92  | 121,4 | 121,4 | 18,75 | 587,78 | 162,61 |
|    | 2019/08/08 | CH2276 | Female | Two y/o | Treatment (Wk 2) | Treatment | Feed Day | No | 22:25 | 22:00 - 22:59 | Night         | 37,7 | 84  | 238,8 | 238,8 | 18,85 | 581,01 | 186,36 |
|    | 2019/08/08 | CH2276 | Female | Two y/o | Treatment (Wk 2) | Treatment | Feed Day | No | 22:30 | 22:00 - 22:59 | Night         | 37,7 | 57  | 401,2 | 401,2 | 18,85 | 550,47 | 204,72 |
|    | 2019/08/08 | CH2276 | Female | Two y/o | Treatment (Wk 2) | Treatment | Feed Day | No | 22:35 | 22:00 - 22:59 | Night         | 37,8 | 107 | 90,4  | 90,4  | 18,95 | 598,73 | 152,33 |
|    | 2019/08/08 | CH2276 | Female | Two y/o | Treatment (Wk 2) | Treatment | Feed Day | No | 22:40 | 22:00 - 22:59 | Night         | 37,7 | 88  | 70,4  | 70,4  | 18,85 | 584,49 | 143,64 |
|    | 2019/08/08 | CH2276 | Female | Two y/o | Treatment (Wk 2) | Treatment | Feed Day | No | 22:45 | 22:00 - 22:59 | Night         | 37,6 | 92  | 67,4  | 67,4  | 18,75 | 587,78 | 142,12 |
|    | 2019/08/08 | CH2276 | Female | Two y/o | Treatment (Wk 2) | Treatment | Feed Day | No | 22:50 | 22:00 - 22:59 | Night         | 37,6 | 96  | 63,0  | 63,0  | 18,75 | 590,91 | 139,78 |
|    | 2019/08/08 | CH2276 | Female | Two y/o | Treatment (Wk 2) | Treatment | Feed Day | No | 22:55 | 22:00 - 22:59 | Night         | 37,7 | 65  | 52,4  | 52,4  | 18,85 | 561,12 | 133,41 |
|    | 2019/08/08 | CH2276 | Female | Two y/o | Treatment (Wk 2) | Treatment | Feed Day | No | 23:00 | 23:00 - 23:59 | Night         | 37,7 | 96  | 58,8  | 58,8  | 18,85 | 590,91 | 137,39 |
|    | 2019/08/08 | CH2276 | Female | Two y/o | Treatment (Wk 2) | Treatment | Feed Day | No | 23:05 | 23:00 - 23:59 | Night         | 37,7 | 67  | 49,6  | 49,6  | 18,85 | 563,53 | 131,51 |
|    | 2019/08/08 | CH2276 | Female | Two y/o | Treatment (Wk 2) | Treatment | Feed Day | No | 23:10 | 23:00 - 23:59 | Night         | 37,8 | 80  | 61,4  | 61,4  | 18,95 | 577,31 | 138,89 |
|    | 2019/08/08 | CH2276 | Female | Two y/o | Treatment (Wk 2) | Treatment | Feed Day | No | 23:15 | 23:00 - 23:59 | Night         | 37,8 | 64  | 62,0  | 62,0  | 18,95 | 559,88 | 139,23 |
|    | 2019/08/08 | CH2276 | Female | Two y/o | Treatment (Wk 2) | Treatment | Feed Day | No | 23:20 | 23:00 - 23:59 | Night         | 37,8 | 103 | 59,8  | 59,8  | 18,95 | 596,00 | 137,98 |
|    | 2019/08/08 | CH2276 | Female | Two y/o | Treatment (Wk 2) | Treatment | Feed Day | No | 23:25 | 23:00 - 23:59 | Night         | 37,8 | 64  | 61,4  | 61,4  | 18,95 | 559,88 | 138,89 |
|    | 2019/08/08 | CH2276 | Female | Two y/o | Treatment (Wk 2) | Treatment | Feed Day | No | 23:30 | 23:00 - 23:59 | Night         | 37,8 | 87  | 62,2  | 62,2  | 18,95 | 583,64 | 139,34 |
|    | 2019/08/08 | CH2276 | Female | Two y/o | Treatment (Wk 2) | Treatment | Feed Day | No | 23:35 | 23:00 - 23:59 | Night         | 37,8 | 95  | 64,4  | 64,4  | 18,95 | 590,14 | 140,55 |
|    | 2019/08/08 | CH2276 | Female | Two y/o | Treatment (Wk 2) | Treatment | Feed Day | No | 23:40 | 23:00 - 23:59 | Night         | 37,8 | 99  | 58,0  | 58,0  | 18,95 | 593,14 | 136,92 |
|    | 2019/08/08 | CH2276 | Female | Two y/o | Treatment (Wk 2) | Treatment | Feed Day | No | 23:45 | 23:00 - 23:59 | Night         | 37,7 | 62  | 56,8  | 56,8  | 18,85 | 557,33 | 136,20 |
|    | 2019/08/08 | CH2276 | Female | Two y/o | Treatment (Wk 2) | Treatment | Feed Day | No | 23:50 | 23:00 - 23:59 | Night         | 37,6 | 61  | 48,2  | 48,2  | 18,75 | 556,01 | 130,52 |
|    | 2019/08/08 | CH2276 | Female | Two y/o | Treatment (Wk 2) | Treatment | Feed Day | No | 23:55 | 23:00 - 23:59 | Night         | 37,6 | 53  | 45,4  | 45,4  | 18,75 | 544,43 | 128,45 |
| 52 | 2019/08/09 | CH2276 | Female | Two y/o | Treatment (Wk 2) | Treatment | Feed Day | No | 00:00 | 00:00 - 00:59 | Early Morning | 37,5 | 68  | 46,2  | 46,2  | 18,65 | 564,71 | 129,06 |
|    | 2019/08/09 | CH2276 | Female | Two y/o | Treatment (Wk 2) | Treatment | Feed Day | No | 00:05 | 00:00 - 00:59 | Early Morning | 37,4 | 64  | 46,6  | 46,6  | 18,55 | 559,88 | 129,35 |
|    | 2019/08/09 | CH2276 | Female | Two y/o | Treatment (Wk 2) | Treatment | Feed Day | No | 00:10 | 00:00 - 00:59 | Early Morning | 37,3 | 91  | 43,8  | 43,8  | 18,46 | 586,98 | 127,22 |
|    | 2019/08/09 | CH2276 | Female | Two y/o | Treatment (Wk 2) | Treatment | Feed Day | No | 00:15 | 00:00 - 00:59 | Early Morning | 37,3 | 61  | 45,4  | 45,4  | 18,46 | 556,01 | 128,45 |
|    | 2019/08/09 | CH2276 | Female | Two y/o | Treatment (Wk 2) | Treatment | Feed Day | No | 00:20 | 00:00 - 00:59 | Early Morning | 37,1 | 62  | 53,0  | 53,0  | 18,26 | 557,33 | 133,80 |
|    | 2019/08/09 | CH2276 | Female | Two y/o | Treatment (Wk 2) | Treatment | Feed Day | No | 00:25 | 00:00 - 00:59 | Early Morning | 37,1 | 60  | 49,2  | 49,2  | 18,26 | 554,67 | 131,23 |
|    | 2019/08/09 | CH2276 | Female | Two y/o | Treatment (Wk 2) | Treatment | Feed Day | No | 00:30 | 00:00 - 00:59 | Early Morning | 37,1 | 61  | 51,6  | 51,6  | 18,26 | 556,01 | 132,87 |
|    | 2019/08/09 | CH2276 | Female | Two y/o | Treatment (Wk 2) | Treatment | Feed Day | No | 00:35 | 00:00 - 00:59 | Early Morning | 37,1 | 62  | 45,4  | 45,4  | 18,26 | 557,33 | 128,45 |
|    | 2019/08/09 | CH2276 | Female | Two y/o | Treatment (Wk 2) | Treatment | Feed Day | No | 00:40 | 00:00 - 00:59 | Early Morning | 37,2 | 64  | 45,6  | 45,6  | 18,36 | 559,88 | 128,61 |
|    | 2019/08/09 | CH2276 | Female | Two y/o | Treatment (Wk 2) | Treatment | Feed Day | No | 00:45 | 00:00 - 00:59 | Early Morning | 37,3 | 85  | 49,4  | 49,4  | 18,46 | 581,90 | 131,37 |
|    | 2019/08/09 | CH2276 | Female | Two y/o | Treatment (Wk 2) | Treatment | Feed Day | No | 00:50 | 00:00 - 00:59 | Early Morning | 37,3 | 59  | 49,6  | 49,6  | 18,46 | 553,30 | 131,51 |
|    | 2019/08/09 | CH2276 | Female | Two y/o | Treatment (Wk 2) | Treatment | Feed Day | No | 00:55 | 00:00 - 00:59 | Early Morning | 37,4 | 58  | 45,8  | 45,8  | 18,55 | 551,90 | 128,76 |
|    | 2019/08/09 | CH2276 | Female | Two y/o | Treatment (Wk 2) | Treatment | Feed Day | No | 01:00 | 01:00 - 01:59 | Early Morning | 37,4 | 126 | 71,6  | 71,6  | 18,55 | 610,14 | 144,22 |
|    | 2019/08/09 | CH2276 | Female | Two y/o | Treatment (Wk 2) | Treatment | Feed Day | No | 01:05 | 01:00 - 01:59 | Early Morning | 37,5 | 94  | 67,0  | 67,0  | 18,65 | 589,37 | 141,92 |
|    | 2019/08/09 | CH2276 | Female | Two y/o | Treatment (Wk 2) | Treatment | Feed Day | No | 01:10 | 01:00 - 01:59 | Early Morning | 37,5 | 88  | 65,6  | 65,6  | 18,65 | 584,49 | 141,19 |
|    | 2019/08/09 | CH2276 | Female | Two y/o | Treatment (Wk 2) | Treatment | Feed Day | No | 01:15 | 01:00 - 01:59 | Early Morning | 37,5 | 67  | 66,4  | 66,4  | 18,65 | 563,53 | 141,61 |
|    | 2019/08/09 | CH2276 | Female | Two y/o | Treatment (Wk 2) | Treatment | Feed Day | No | 01:20 | 01:00 - 01:59 | Early Morning | 37,5 | 60  | 64,8  | 64,8  | 18,65 | 554,67 | 140,76 |
|    | 2019/08/09 | CH2276 | Female | Two y/o | Treatment (Wk 2) | Treatment | Feed Day | No | 01:25 | 01:00 - 01:59 | Early Morning | 37,6 | 73  | 68,4  | 68,4  | 18,75 | 570,27 | 142,64 |
|    | 2019/08/09 | CH2276 | Female | Two y/o | Treatment (Wk 2) | Treatment | Feed Day | No | 01:30 | 01:00 - 01:59 | Early Morning | 37,6 | 61  | 72,0  | 72,0  | 18,75 | 556,01 | 144,42 |
|    | 2019/08/09 | CH2276 | Female | Two y/o | Treatment (Wk 2) | Treatment | Feed Day | No | 01:35 | 01:00 - 01:59 | Early Morning | 37,5 | 60  | 88,6  | 88,6  | 18,65 | 554,67 | 151,63 |
|    | 2019/08/09 | CH2276 | Female | Two y/o | Treatment (Wk 2) | Treatment | Feed Day | No | 01:40 | 01:00 - 01:59 | Early Morning | 37,4 | 58  | 80,0  | 80,0  | 18,55 | 551,90 | 148,08 |
|    | 2019/08/09 | CH2276 | Female | Two y/o | Treatment (Wk 2) | Treatment | Feed Day | No | 01:45 | 01:00 - 01:59 | Early Morning | 37,3 |     | 87,2  | 87,2  | 18,46 |        | 151,07 |
|    | 2019/08/09 | CH2276 | Female | Two y/o | Treatment (Wk 2) | Treatment | Feed Day | No | 01:50 | 01:00 - 01:59 | Early Morning | 37,1 | 76  | 74,4  | 74,4  |       |        |        |



|            |        |        |         |                  |           |          |    |       |               |               |      |     |        |       |       |        |        |
|------------|--------|--------|---------|------------------|-----------|----------|----|-------|---------------|---------------|------|-----|--------|-------|-------|--------|--------|
| 2019/08/09 | CH2276 | Female | Two y/o | Treatment (Wk 2) | Treatment | Feed Day | No | 01:55 | 01:00 - 01:59 | Early Morning | 37,0 | 91  | 76,6   | 76,6  | 18,16 | 586,98 | 146,57 |
| 2019/08/09 | CH2276 | Female | Two y/o | Treatment (Wk 2) | Treatment | Feed Day | No | 02:00 | 02:00 - 02:59 | Early Morning | 37,0 | 55  | 76,0   | 76,0  | 18,16 | 547,52 | 146,29 |
| 2019/08/09 | CH2276 | Female | Two y/o | Treatment (Wk 2) | Treatment | Feed Day | No | 02:05 | 02:00 - 02:59 | Early Morning | 36,9 | 60  | 76,2   | 76,2  | 18,06 | 554,67 | 146,38 |
| 2019/08/09 | CH2276 | Female | Two y/o | Treatment (Wk 2) | Treatment | Feed Day | No | 02:10 | 02:00 - 02:59 | Early Morning | 36,8 | 54  | 75,0   | 75,0  | 17,96 | 545,99 | 145,83 |
| 2019/08/09 | CH2276 | Female | Two y/o | Treatment (Wk 2) | Treatment | Feed Day | No | 02:15 | 02:00 - 02:59 | Early Morning | 36,8 | 80  | 75,0   | 75,0  | 17,96 | 577,31 | 145,83 |
| 2019/08/09 | CH2276 | Female | Two y/o | Treatment (Wk 2) | Treatment | Feed Day | No | 02:20 | 02:00 - 02:59 | Early Morning | 36,7 | 60  | 73,6   | 73,6  | 17,87 | 554,67 | 145,18 |
| 2019/08/09 | CH2276 | Female | Two y/o | Treatment (Wk 2) | Treatment | Feed Day | No | 02:25 | 02:00 - 02:59 | Early Morning | 36,6 | 57  | 76,6   | 76,6  | 17,77 | 550,47 | 146,57 |
| 2019/08/09 | CH2276 | Female | Two y/o | Treatment (Wk 2) | Treatment | Feed Day | No | 02:30 | 02:00 - 02:59 | Early Morning | 36,5 | 70  | 79,6   | 79,6  | 17,67 | 566,99 | 147,90 |
| 2019/08/09 | CH2276 | Female | Two y/o | Treatment (Wk 2) | Treatment | Feed Day | No | 02:35 | 02:00 - 02:59 | Early Morning | 36,5 | 92  | 78,6   | 78,6  | 17,67 | 587,78 | 147,46 |
| 2019/08/09 | CH2276 | Female | Two y/o | Treatment (Wk 2) | Treatment | Feed Day | No | 02:40 | 02:00 - 02:59 | Early Morning | 36,5 | 88  | 76,2   | 76,2  | 17,67 | 584,49 | 146,38 |
| 2019/08/09 | CH2276 | Female | Two y/o | Treatment (Wk 2) | Treatment | Feed Day | No | 02:45 | 02:00 - 02:59 | Early Morning | 36,6 | 91  | 81,0   | 81,0  | 17,77 | 586,98 | 148,51 |
| 2019/08/09 | CH2276 | Female | Two y/o | Treatment (Wk 2) | Treatment | Feed Day | No | 02:50 | 02:00 - 02:59 | Early Morning | 36,6 | 61  | 82,2   | 82,2  | 17,77 | 556,01 | 149,02 |
| 2019/08/09 | CH2276 | Female | Two y/o | Treatment (Wk 2) | Treatment | Feed Day | No | 02:55 | 02:00 - 02:59 | Early Morning | 36,7 | 100 | 75,8   | 75,8  | 17,87 | 593,87 | 146,20 |
| 2019/08/09 | CH2276 | Female | Two y/o | Treatment (Wk 2) | Treatment | Feed Day | No | 03:00 | 03:00 - 03:59 | Early Morning | 36,7 | 62  | 47,4   | 47,4  | 17,87 | 557,33 | 129,94 |
| 2019/08/09 | CH2276 | Female | Two y/o | Treatment (Wk 2) | Treatment | Feed Day | No | 03:05 | 03:00 - 03:59 | Early Morning | 36,8 | 67  | 38,6   | 38,6  | 17,96 | 563,53 | 122,86 |
| 2019/08/09 | CH2276 | Female | Two y/o | Treatment (Wk 2) | Treatment | Feed Day | No | 03:10 | 03:00 - 03:59 | Early Morning | 36,8 | 57  | 48,4   | 48,4  | 17,96 | 550,47 | 130,66 |
| 2019/08/09 | CH2276 | Female | Two y/o | Treatment (Wk 2) | Treatment | Feed Day | No | 03:15 | 03:00 - 03:59 | Early Morning | 36,8 | 103 | 69,4   | 69,4  | 17,96 | 596,00 | 143,14 |
| 2019/08/09 | CH2276 | Female | Two y/o | Treatment (Wk 2) | Treatment | Feed Day | No | 03:20 | 03:00 - 03:59 | Early Morning | 37,0 | 95  | 64,0   | 64,0  | 18,16 | 590,14 | 140,33 |
| 2019/08/09 | CH2276 | Female | Two y/o | Treatment (Wk 2) | Treatment | Feed Day | No | 03:25 | 03:00 - 03:59 | Early Morning | 37,0 | 57  | 62,6   | 62,6  | 18,16 | 550,47 | 139,56 |
| 2019/08/09 | CH2276 | Female | Two y/o | Treatment (Wk 2) | Treatment | Feed Day | No | 03:30 | 03:00 - 03:59 | Early Morning | 37,1 | 71  | 55,0   | 55,0  | 18,26 | 568,10 | 135,08 |
| 2019/08/09 | CH2276 | Female | Two y/o | Treatment (Wk 2) | Treatment | Feed Day | No | 03:35 | 03:00 - 03:59 | Early Morning | 37,1 | 60  | 52,8   | 52,8  | 18,26 | 554,67 | 133,67 |
| 2019/08/09 | CH2276 | Female | Two y/o | Treatment (Wk 2) | Treatment | Feed Day | No | 03:40 | 03:00 - 03:59 | Early Morning | 37,2 | 62  | 55,8   | 55,8  | 18,36 | 557,33 | 135,58 |
| 2019/08/09 | CH2276 | Female | Two y/o | Treatment (Wk 2) | Treatment | Feed Day | No | 03:45 | 03:00 - 03:59 | Early Morning | 37,3 | 90  | 56,0   | 56,0  | 18,46 | 586,16 | 135,70 |
| 2019/08/09 | CH2276 | Female | Two y/o | Treatment (Wk 2) | Treatment | Feed Day | No | 03:50 | 03:00 - 03:59 | Early Morning | 37,3 | 42  | 59,4   | 59,4  | 18,46 | 524,42 | 137,75 |
| 2019/08/09 | CH2276 | Female | Two y/o | Treatment (Wk 2) | Treatment | Feed Day | No | 03:55 | 03:00 - 03:59 | Early Morning | 37,4 | 55  | 57,4   | 57,4  | 18,55 | 547,52 | 136,56 |
| 2019/08/09 | CH2276 | Female | Two y/o | Treatment (Wk 2) | Treatment | Feed Day | No | 04:00 | 04:00 - 04:59 | Morning       | 37,4 | 90  | 48,0   | 48,0  | 18,55 | 586,16 | 130,38 |
| 2019/08/09 | CH2276 | Female | Two y/o | Treatment (Wk 2) | Treatment | Feed Day | No | 04:05 | 04:00 - 04:59 | Morning       | 37,4 | 97  | 33,6   | 33,6  | 18,55 | 591,66 | 118,09 |
| 2019/08/09 | CH2276 | Female | Two y/o | Treatment (Wk 2) | Treatment | Feed Day | No | 04:10 | 04:00 - 04:59 | Morning       | 37,4 | 57  | 36,2   | 36,2  | 18,55 | 550,47 | 120,65 |
| 2019/08/09 | CH2276 | Female | Two y/o | Treatment (Wk 2) | Treatment | Feed Day | No | 04:15 | 04:00 - 04:59 | Morning       | 37,3 | 86  | 41,0   | 41,0  | 18,46 | 582,77 | 124,94 |
| 2019/08/09 | CH2276 | Female | Two y/o | Treatment (Wk 2) | Treatment | Feed Day | No | 04:20 | 04:00 - 04:59 | Morning       | 37,3 | 65  | 45,2   | 45,2  | 18,46 | 561,12 | 128,30 |
| 2019/08/09 | CH2276 | Female | Two y/o | Treatment (Wk 2) | Treatment | Feed Day | No | 04:25 | 04:00 - 04:59 | Morning       | 37,3 | 64  | 50,6   | 50,6  | 18,46 | 559,88 | 132,20 |
| 2019/08/09 | CH2276 | Female | Two y/o | Treatment (Wk 2) | Treatment | Feed Day | No | 04:30 | 04:00 - 04:59 | Morning       | 37,3 | 91  | 52,4   | 52,4  | 18,46 | 586,98 | 133,41 |
| 2019/08/09 | CH2276 | Female | Two y/o | Treatment (Wk 2) | Treatment | Feed Day | No | 04:35 | 04:00 - 04:59 | Morning       | 37,3 | 93  | 45,0   | 45,0  | 18,46 | 588,58 | 128,15 |
| 2019/08/09 | CH2276 | Female | Two y/o | Treatment (Wk 2) | Treatment | Feed Day | No | 04:40 | 04:00 - 04:59 | Morning       | 37,3 | 64  | 20,4   | 20,4  | 18,46 | 559,88 | 100,99 |
| 2019/08/09 | CH2276 | Female | Two y/o | Treatment (Wk 2) | Treatment | Feed Day | No | 04:45 | 04:00 - 04:59 | Morning       | 37,3 | 89  | 21,2   | 21,2  | 18,46 | 585,33 | 102,31 |
| 2019/08/09 | CH2276 | Female | Two y/o | Treatment (Wk 2) | Treatment | Feed Day | No | 04:50 | 04:00 - 04:59 | Morning       | 37,1 | 60  | 30,0   | 30,0  | 18,26 | 554,67 | 114,20 |
| 2019/08/09 | CH2276 | Female | Two y/o | Treatment (Wk 2) | Treatment | Feed Day | No | 04:55 | 04:00 - 04:59 | Morning       | 37,1 | 93  | 44,0   | 44,0  | 18,26 | 588,58 | 127,37 |
| 2019/08/09 | CH2276 | Female | Two y/o | Treatment (Wk 2) | Treatment | Feed Day | No | 05:00 | 05:00 - 05:59 | Morning       | 37,1 | 88  | 46,0   | 46,0  | 18,26 | 584,49 | 128,91 |
| 2019/08/09 | CH2276 | Female | Two y/o | Treatment (Wk 2) | Treatment | Feed Day | No | 05:05 | 05:00 - 05:59 | Morning       | 37,0 | 99  | 38,2   | 38,2  | 18,16 | 593,14 | 122,50 |
| 2019/08/09 | CH2276 | Female | Two y/o | Treatment (Wk 2) | Treatment | Feed Day | No | 05:10 | 05:00 - 05:59 | Morning       | 36,9 | 63  | 40,2   | 40,2  | 18,06 | 558,62 | 124,26 |
| 2019/08/09 | CH2276 | Female | Two y/o | Treatment (Wk 2) | Treatment | Feed Day | No | 05:15 | 05:00 - 05:59 | Morning       | 36,9 | 52  | 35,4   | 35,4  | 18,06 | 542,83 | 119,88 |
| 2019/08/09 | CH2276 | Female | Two y/o | Treatment (Wk 2) | Treatment | Feed Day | No | 05:20 | 05:00 - 05:59 | Morning       | 36,9 | 61  | 39,4   | 39,4  | 18,06 | 556,01 | 123,57 |
| 2019/08/09 | CH2276 | Female | Two y/o | Treatment (Wk 2) | Treatment | Feed Day | No | 05:25 | 05:00 - 05:59 | Morning       | 36,9 | 57  | 37,2   | 37,2  | 18,06 | 550,47 | 121,59 |
| 2019/08/09 | CH2276 | Female | Two y/o | Treatment (Wk 2) | Treatment | Feed Day | No | 05:30 | 05:00 - 05:59 | Morning       | 36,9 | 57  | 37,4   | 37,4  | 18,06 | 550,47 | 121,77 |
| 2019/08/09 | CH2276 | Female | Two y/o | Treatment (Wk 2) | Treatment | Feed Day | No | 05:35 | 05:00 - 05:59 | Morning       | 36,9 | 51  | 35,0   | 35,0  | 18,06 | 541,20 | 119,49 |
| 2019/08/09 | CH2276 | Female | Two y/o | Treatment (Wk 2) | Treatment | Feed Day | No | 05:40 | 05:00 - 05:59 | Morning       | 36,9 | 53  | 51,2   | 51,2  | 18,06 | 544,43 | 132,61 |
| 2019/08/09 | CH2276 | Female | Two y/o | Treatment (Wk 2) | Treatment | Feed Day | No | 05:45 | 05:00 - 05:59 | Morning       | 36,9 | 113 | 139,8  | 139,8 | 18,06 | 602,58 | 167,55 |
| 2019/08/09 | CH2276 | Female | Two y/o | Treatment (Wk 2) | Treatment | Feed Day | No | 05:50 | 05:00 - 05:59 | Morning       | 37,0 | 90  | 115,0  | 115,0 | 18,16 | 586,16 | 160,72 |
| 2019/08/09 | CH2276 | Female | Two y/o | Treatment (Wk 2) | Treatment | Feed Day | No | 05:55 | 05:00 - 05:59 | Morning       | 37,1 | 156 | 1161,4 |       | 18,26 | 624,43 |        |
| 2019/08/09 | CH2276 | Female | Two y/o | Treatment (Wk 2) | Treatment | Feed Day | No | 06:00 | 06:00 - 06:59 | Morning       | 37,1 | 104 | 420,0  | 420,0 | 18,26 | 596,69 | 206,35 |
| 2019/08/09 | CH2276 | Female | Two y/o | Treatment (Wk 2) | Treatment | Feed Day | No | 06:05 | 06:00 - 06:59 | Morning       | 37,3 | 167 | 134,2  | 134,2 | 18,46 | 628,84 | 166,12 |
| 2019/08/09 | CH2276 | Female | Two y/o | Treatment (Wk 2) | Treatment | Feed Day | No | 06:10 | 06:00 - 06:59 | Morning       | 37,4 | 56  | 350,2  | 350,2 | 18,55 | 549,01 | 199,90 |
| 2019/08/09 | CH2276 | Female | Two y/o | Treatment (Wk 2) | Treatment | Feed Day | No | 06:15 | 06:00 - 06:59 | Morning       | 37,5 | 59  | 322,0  | 322,0 | 18,65 | 553,30 | 196,92 |
| 2019/08/09 | CH2276 | Female | Two y/o | Treatment (Wk 2) | Treatment | Feed Day | No | 06:20 | 06:00 - 06:59 | Morning       | 37,5 | 121 | 74,6   | 74,6  | 18,65 | 607,35 | 145,65 |
| 2019/08/09 | CH2276 | Female | Two y/o | Treatment (Wk 2) | Treatment | Feed Day | No | 06:25 | 06:00 - 06:59 | Morning       | 37,7 | 145 | 120,8  | 120,8 | 18,85 | 619,62 | 162,44 |
| 2019/08/09 | CH2276 | Female | Two y/o | Treatment (Wk 2) | Treatment | Feed Day | No | 06:30 | 06:00 - 06:59 | Morning       | 38,0 |     | 56,6   | 56,6  | 19,15 |        | 136,07 |
| 2019/08/09 | CH2276 | Female | Two y/o | Treatment (Wk 2) | Treatment | Feed Day | No | 06:35 | 06:00 - 06:59 | Morning       | 37,9 | 92  | 405,0  | 405,0 | 19,05 | 587,78 | 205,05 |
| 2019/08/09 | CH2276 | Female | Two y/o | Treatment (Wk 2) | Treatment | Feed Day | No | 06:40 | 06:00 - 06:59 | Morning       | 37,9 | 105 | 130,2  | 130,2 | 19,05 | 597,38 | 165,06 |
| 2019/08/09 | CH2276 | Female | Two y/o | Treatment (Wk 2) | Treatment | Feed Day | No | 06:45 | 06:00 - 06:59 | Morning       | 37,8 | 165 | 84,8   | 84,8  | 18,95 | 628,06 | 150,10 |
| 2019/08/09 | CH2276 | Female | Two y/o | Treatment (Wk 2) | Treatment | Feed Day | No | 06:50 | 06:00 - 06:59 | Morning       | 37,8 | 102 | 578,4  | 578,4 | 18,95 | 595,30 | 217,74 |
| 2019/08/09 | CH2276 | Female | Two y/o | Treatment (Wk 2) | Treatment | Feed Day | No | 06:55 | 06:00 - 06:59 | Morning       | 37,8 | 82  | 58,2   | 58,2  | 18,95 | 579,19 | 137,04 |
| 2019/08/09 | CH2276 | Female | Two y/o | Treatment (Wk 2) | Treatment | Feed Day | No | 07:00 | 07:00 - 07:59 | Morning       | 37,8 | 114 | 232,0  | 232,0 | 18,95 | 603,20 | 185,35 |
| 2019/08/09 | CH2276 | Female | Two y/o | Treatment (Wk 2) | Treatment | Feed Day | No | 07:05 | 07:00 - 07:59 | Morning       | 37,7 | 76  | 161,8  | 161,8 | 18,85 | 573,39 | 172,67 |
| 2019/08/09 | CH2276 | Female | Two y/o | Treatment (Wk 2) | Treatment | Feed Day | No | 07:10 | 07:00 - 07:59 | Morning       | 37,7 | 107 | 305,6  | 305,6 | 18,85 | 598,73 | 195,07 |
| 2019/08/09 | CH2276 | Female | Two y/o | Treatment (Wk 2) | Treatment | Feed Day | No | 07:15 | 07:00 - 07:59 | Morning       | 37,7 | 99  | 225,4  | 225,4 | 18,85 | 593,14 | 184,33 |
| 2019/08/09 | CH2276 | Female | Two y/o | Treatment (Wk 2) | Treatment | Feed Day | No | 07:20 | 07:00 - 07:59 | Morning       | 37,7 | 112 | 254,8  | 254,8 | 18,85 | 601,96 | 188,65 |
| 2019/08/09 | CH2276 | Female | Two y/o | Treatment (Wk 2) | Treatment | Feed Day | No | 07:25 | 07:00 - 07:59 | Morning       | 37,6 | 120 | 308,6  | 308,6 | 18,75 | 606,78 | 195,42 |
| 2019/08/09 | CH2276 | Female | Two y/o | Treatment (Wk 2) | Treatment | Feed Day | No | 07:30 | 07:00 - 07:59 | Morning       | 37,8 | 165 | 139,2  | 139,2 | 18,95 | 628,06 | 167,40 |
| 2019/08/09 | CH2276 | Female | Two y/o | Treatment (Wk 2) | Treatment | Feed Day | No | 07:35 | 07:00 - 07:59 | Morning       | 38,0 | 104 | 66,6   | 66,6  | 19,15 | 596,69 | 141,71 |
| 2019/08/09 | CH2276 | Female | Two y/o | Treatment (Wk 2) | Treatment | Feed Day | No | 07:40 | 07:00 - 07:59 | Morning       | 37,8 | 92  | 44,6   | 44,6  | 18,95 | 587,78 | 127,84 |



|            |        |        |         |                  |           |          |     |       |               |              |      |     |       |       |       |        |        |
|------------|--------|--------|---------|------------------|-----------|----------|-----|-------|---------------|--------------|------|-----|-------|-------|-------|--------|--------|
| 2019/08/09 | CH2276 | Female | Two y/o | Treatment (Wk 2) | Treatment | Feed Day | No  | 07:45 | 07:00 - 07:59 | Morning      | 37,7 | 117 | 276,2 | 276,2 | 18,85 | 605,02 | 191,50 |
| 2019/08/09 | CH2276 | Female | Two y/o | Treatment (Wk 2) | Treatment | Feed Day | No  | 07:50 | 07:00 - 07:59 | Morning      | 37,7 | 61  | 102,4 | 102,4 | 18,85 | 556,01 | 156,67 |
| 2019/08/09 | CH2276 | Female | Two y/o | Treatment (Wk 2) | Treatment | Feed Day | No  | 07:55 | 07:00 - 07:59 | Morning      | 37,6 | 109 | 69,0  | 69,0  | 18,75 | 600,04 | 142,94 |
| 2019/08/09 | CH2276 | Female | Two y/o | Treatment (Wk 2) | Treatment | Feed Day | No  | 08:00 | 08:00 - 08:59 | Late Morning | 37,5 | 61  | 63,8  | 63,8  | 18,65 | 556,01 | 140,22 |
| 2019/08/09 | CH2276 | Female | Two y/o | Treatment (Wk 2) | Treatment | Feed Day | No  | 08:05 | 08:00 - 08:59 | Late Morning | 37,3 | 91  | 81,8  | 81,8  | 18,46 | 586,98 | 148,85 |
| 2019/08/09 | CH2276 | Female | Two y/o | Treatment (Wk 2) | Treatment | Feed Day | No  | 08:10 | 08:00 - 08:59 | Late Morning | 37,1 | 60  | 192,4 | 192,4 | 18,26 | 554,67 | 178,76 |
| 2019/08/09 | CH2276 | Female | Two y/o | Treatment (Wk 2) | Treatment | Feed Day | No  | 08:15 | 08:00 - 08:59 | Late Morning | 37,3 | 76  | 482,6 | 482,6 | 18,46 | 573,39 | 211,29 |
| 2019/08/09 | CH2276 | Female | Two y/o | Treatment (Wk 2) | Treatment | Feed Day | No  | 08:20 | 08:00 - 08:59 | Late Morning | 37,3 | 60  | 477,2 | 477,2 | 18,46 | 554,67 | 210,89 |
| 2019/08/09 | CH2276 | Female | Two y/o | Treatment (Wk 2) | Treatment | Feed Day | No  | 08:25 | 08:00 - 08:59 | Late Morning | 37,4 | 154 | 79,4  | 79,4  | 18,55 | 623,58 | 147,81 |
| 2019/08/09 | CH2276 | Female | Two y/o | Treatment (Wk 2) | Treatment | Feed Day | No  | 08:30 | 08:00 - 08:59 | Late Morning | 37,4 | 79  | 137,2 | 137,2 | 18,55 | 576,36 | 166,89 |
| 2019/08/09 | CH2276 | Female | Two y/o | Treatment (Wk 2) | Treatment | Feed Day | No  | 08:35 | 08:00 - 08:59 | Late Morning | 37,4 | 96  | 351,2 | 351,2 | 18,55 | 590,91 | 200,00 |
| 2019/08/09 | CH2276 | Female | Two y/o | Treatment (Wk 2) | Treatment | Feed Day | No  | 08:40 | 08:00 - 08:59 | Late Morning | 37,4 | 121 | 67,0  | 67,0  | 18,55 | 607,35 | 141,92 |
| 2019/08/09 | CH2276 | Female | Two y/o | Treatment (Wk 2) | Treatment | Feed Day | No  | 08:45 | 08:00 - 08:59 | Late Morning | 37,3 | 58  | 86,8  | 86,8  | 18,46 | 551,90 | 150,91 |
| 2019/08/09 | CH2276 | Female | Two y/o | Treatment (Wk 2) | Treatment | Feed Day | No  | 08:50 | 08:00 - 08:59 | Late Morning | 37,2 | 88  | 67,0  | 67,0  | 18,36 | 584,49 | 141,92 |
| 2019/08/09 | CH2276 | Female | Two y/o | Treatment (Wk 2) | Treatment | Feed Day | No  | 08:55 | 08:00 - 08:59 | Late Morning | 37,2 | 99  | 109,0 | 109,0 | 18,36 | 593,14 | 158,85 |
| 2019/08/09 | CH2276 | Female | Two y/o | Treatment (Wk 2) | Treatment | Feed Day | No  | 09:00 | 09:00 - 09:59 | Late Morning | 37,3 |     | 176,4 | 176,4 | 18,46 |        | 175,71 |
| 2019/08/09 | CH2276 | Female | Two y/o | Treatment (Wk 2) | Treatment | Feed Day | No  | 09:05 | 09:00 - 09:59 | Late Morning | 37,4 |     | 369,6 | 369,6 | 18,55 |        | 201,81 |
| 2019/08/09 | CH2276 | Female | Two y/o | Treatment (Wk 2) | Treatment | Feed Day | No  | 09:10 | 09:00 - 09:59 | Late Morning | 37,5 | 106 | 304,8 | 304,8 | 18,65 | 598,06 | 194,98 |
| 2019/08/09 | CH2276 | Female | Two y/o | Treatment (Wk 2) | Treatment | Feed Day | No  | 09:15 | 09:00 - 09:59 | Late Morning | 37,5 | 74  | 108,0 | 108,0 | 18,65 | 571,33 | 158,53 |
| 2019/08/09 | CH2276 | Female | Two y/o | Treatment (Wk 2) | Treatment | Feed Day | No  | 09:20 | 09:00 - 09:59 | Late Morning | 37,5 | 94  | 456,4 | 456,4 | 18,65 | 589,37 | 209,30 |
| 2019/08/09 | CH2276 | Female | Two y/o | Treatment (Wk 2) | Treatment | Feed Day | No  | 09:25 | 09:00 - 09:59 | Late Morning | 37,9 | 106 | 64,8  | 64,8  | 19,05 | 598,06 | 140,76 |
| 2019/08/09 | CH2276 | Female | Two y/o | Treatment (Wk 2) | Treatment | Feed Day | No  | 09:30 | 09:00 - 09:59 | Late Morning | 37,9 | 96  | 66,6  | 66,6  | 19,05 | 590,91 | 141,71 |
| 2019/08/09 | CH2276 | Female | Two y/o | Treatment (Wk 2) | Treatment | Feed Day | No  | 09:35 | 09:00 - 09:59 | Late Morning | 37,9 |     | 55,4  | 55,4  | 19,05 |        | 135,33 |
| 2019/08/09 | CH2276 | Female | Two y/o | Treatment (Wk 2) | Treatment | Feed Day | No  | 09:40 | 09:00 - 09:59 | Late Morning | 37,8 | 58  | 65,2  | 65,2  | 18,95 | 551,90 | 140,97 |
| 2019/08/09 | CH2276 | Female | Two y/o | Treatment (Wk 2) | Treatment | Feed Day | No  | 09:45 | 09:00 - 09:59 | Late Morning | 37,7 | 63  | 58,2  | 58,2  | 18,85 | 558,62 | 137,04 |
| 2019/08/09 | CH2276 | Female | Two y/o | Treatment (Wk 2) | Treatment | Feed Day | No  | 09:50 | 09:00 - 09:59 | Late Morning | 37,7 |     | 462,6 | 462,6 | 18,85 |        | 209,78 |
| 2019/08/09 | CH2276 | Female | Two y/o | Treatment (Wk 2) | Treatment | Feed Day | No  | 09:55 | 09:00 - 09:59 | Late Morning | 37,6 | 69  | 506,0 | 506,0 | 18,75 | 565,86 | 212,97 |
| 2019/08/09 | CH2276 | Female | Two y/o | Treatment (Wk 2) | Treatment | Feed Day | No  | 10:00 | 10:00 - 10:59 | Late Morning | 37,6 | 80  | 321,8 | 321,8 | 18,75 | 577,31 | 196,90 |
| 2019/08/09 | CH2276 | Female | Two y/o | Treatment (Wk 2) | Treatment | Feed Day | No  | 10:05 | 10:00 - 10:59 | Late Morning | 37,6 | 119 | 59,6  | 59,6  | 18,75 | 606,20 | 137,86 |
| 2019/08/09 | CH2276 | Female | Two y/o | Treatment (Wk 2) | Treatment | Feed Day | No  | 10:10 | 10:00 - 10:59 | Late Morning | 37,6 | 60  | 79,6  | 79,6  | 18,75 | 554,67 | 147,90 |
| 2019/08/09 | CH2276 | Female | Two y/o | Treatment (Wk 2) | Treatment | Feed Day | No  | 10:15 | 10:00 - 10:59 | Late Morning | 37,5 | 148 | 147,2 | 147,2 | 18,65 | 620,97 | 169,36 |
| 2019/08/09 | CH2276 | Female | Two y/o | Treatment (Wk 2) | Treatment | Feed Day | No  | 10:20 | 10:00 - 10:59 | Late Morning | 37,6 | 111 | 266,8 | 266,8 | 18,75 | 601,33 | 190,28 |
| 2019/08/09 | CH2276 | Female | Two y/o | Treatment (Wk 2) | Treatment | Feed Day | No  | 10:25 | 10:00 - 10:59 | Late Morning | 37,7 | 103 | 113,0 | 113,0 | 18,85 | 596,00 | 160,11 |
| 2019/08/09 | CH2276 | Female | Two y/o | Treatment (Wk 2) | Treatment | Feed Day | No  | 10:30 | 10:00 - 10:59 | Late Morning | 37,8 | 80  | 83,8  | 83,8  | 18,95 | 577,31 | 149,69 |
| 2019/08/09 | CH2276 | Female | Two y/o | Treatment (Wk 2) | Treatment | Feed Day | No  | 10:35 | 10:00 - 10:59 | Late Morning | 37,8 | 76  | 71,2  | 71,2  | 18,95 | 573,39 | 144,03 |
| 2019/08/09 | CH2276 | Female | Two y/o | Treatment (Wk 2) | Treatment | Feed Day | No  | 10:40 | 10:00 - 10:59 | Late Morning | 37,7 | 80  | 118,0 | 118,0 | 18,85 | 577,31 | 161,62 |
| 2019/08/09 | CH2276 | Female | Two y/o | Treatment (Wk 2) | Treatment | Feed Day | No  | 10:45 | 10:00 - 10:59 | Late Morning | 37,8 |     | 580,6 | 580,6 | 18,95 |        | 217,87 |
| 2019/08/09 | CH2276 | Female | Two y/o | Treatment (Wk 2) | Treatment | Feed Day | No  | 10:50 | 10:00 - 10:59 | Late Morning | 38,3 |     | 88,0  | 88,0  | 19,46 |        | 151,39 |
| 2019/08/09 | CH2276 | Female | Two y/o | Treatment (Wk 2) | Treatment | Feed Day | No  | 10:55 | 10:00 - 10:59 | Late Morning | 38,2 | 90  | 95,8  | 95,8  | 19,36 | 586,16 | 154,35 |
| 2019/08/09 | CH2276 | Female | Two y/o | Treatment (Wk 2) | Treatment | Feed Day | No  | 11:00 | 11:00 - 11:59 | Late Morning | 38,0 | 90  | 181,0 | 181,0 | 19,15 | 586,16 | 176,61 |
| 2019/08/09 | CH2276 | Female | Two y/o | Treatment (Wk 2) | Treatment | Feed Day | No  | 11:05 | 11:00 - 11:59 | Late Morning | 38,0 | 106 | 76,8  | 76,8  | 19,15 | 598,06 | 146,66 |
| 2019/08/09 | CH2276 | Female | Two y/o | Treatment (Wk 2) | Treatment | Feed Day | No  | 11:10 | 11:00 - 11:59 | Late Morning | 38,0 | 152 | 45,4  | 45,4  | 19,15 | 622,73 | 128,45 |
| 2019/08/09 | CH2276 | Female | Two y/o | Treatment (Wk 2) | Treatment | Feed Day | No  | 11:15 | 11:00 - 11:59 | Late Morning | 38,0 |     | 401,4 | 401,4 | 19,15 |        | 204,74 |
| 2019/08/09 | CH2276 | Female | Two y/o | Treatment (Wk 2) | Treatment | Feed Day | No  | 11:20 | 11:00 - 11:59 | Late Morning | 38,0 |     | 123,4 | 123,4 | 19,15 |        | 163,18 |
| 2019/08/09 | CH2276 | Female | Two y/o | Treatment (Wk 2) | Treatment | Feed Day | No  | 11:25 | 11:00 - 11:59 | Late Morning | 38,0 |     | 72,4  | 72,4  | 19,15 |        | 144,61 |
| 2019/08/09 | CH2276 | Female | Two y/o | Treatment (Wk 2) | Treatment | Feed Day | Yes | 11:30 | 11:00 - 11:59 | Late Morning | 38,0 | 81  | 69,0  | 69,0  | 19,15 | 578,26 | 142,94 |
| 2019/08/09 | CH2276 | Female | Two y/o | Treatment (Wk 2) | Treatment | Feed Day | Yes | 11:35 | 11:00 - 11:59 | Late Morning | 38,0 | 92  | 116,0 | 116,0 | 19,15 | 587,78 | 161,02 |
| 2019/08/09 | CH2276 | Female | Two y/o | Treatment (Wk 2) | Treatment | Feed Day | Yes | 11:40 | 11:00 - 11:59 | Late Morning | 38,0 | 112 | 77,0  | 77,0  | 19,15 | 601,96 | 146,75 |
| 2019/08/09 | CH2276 | Female | Two y/o | Treatment (Wk 2) | Treatment | Feed Day | Yes | 11:45 | 11:00 - 11:59 | Late Morning | 38,1 |     | 163,4 | 163,4 | 19,26 |        | 173,02 |
| 2019/08/09 | CH2276 | Female | Two y/o | Treatment (Wk 2) | Treatment | Feed Day | Yes | 11:50 | 11:00 - 11:59 | Late Morning | 38,2 | 117 | 440,0 | 440,0 | 19,36 | 605,02 | 208,00 |
| 2019/08/09 | CH2276 | Female | Two y/o | Treatment (Wk 2) | Treatment | Feed Day | Yes | 11:55 | 11:00 - 11:59 | Late Morning | 38,2 | 120 | 65,8  | 65,8  | 19,36 | 606,78 | 141,29 |
| 2019/08/09 | CH2276 | Female | Two y/o | Treatment (Wk 2) | Treatment | Feed Day | Yes | 12:00 | 12:00 - 12:59 | Afternoon    | 38,0 | 111 | 111,8 | 111,8 | 19,15 | 601,33 | 159,74 |
| 2019/08/09 | CH2276 | Female | Two y/o | Treatment (Wk 2) | Treatment | Feed Day | Yes | 12:05 | 12:00 - 12:59 | Afternoon    | 38,0 | 93  | 38,0  | 38,0  | 19,15 | 588,58 | 122,32 |
| 2019/08/09 | CH2276 | Female | Two y/o | Treatment (Wk 2) | Treatment | Feed Day | Yes | 12:10 | 12:00 - 12:59 | Afternoon    | 38,0 | 96  | 34,2  | 34,2  | 19,15 | 590,91 | 118,70 |
| 2019/08/09 | CH2276 | Female | Two y/o | Treatment (Wk 2) | Treatment | Feed Day | Yes | 12:15 | 12:00 - 12:59 | Afternoon    | 38,0 | 86  | 56,6  | 56,6  | 19,15 | 582,77 | 136,07 |
| 2019/08/09 | CH2276 | Female | Two y/o | Treatment (Wk 2) | Treatment | Feed Day | Yes | 12:20 | 12:00 - 12:59 | Afternoon    | 38,0 | 102 | 77,0  | 77,0  | 19,15 | 595,30 | 146,75 |
| 2019/08/09 | CH2276 | Female | Two y/o | Treatment (Wk 2) | Treatment | Feed Day | Yes | 12:25 | 12:00 - 12:59 | Afternoon    | 37,9 | 83  | 77,6  | 77,6  | 19,05 | 580,11 | 147,02 |
| 2019/08/09 | CH2276 | Female | Two y/o | Treatment (Wk 2) | Treatment | Feed Day | No  | 12:30 | 12:00 - 12:59 | Afternoon    | 37,8 | 83  | 81,6  | 81,6  | 18,95 | 580,11 | 148,76 |
| 2019/08/09 | CH2276 | Female | Two y/o | Treatment (Wk 2) | Treatment | Feed Day | No  | 12:35 | 12:00 - 12:59 | Afternoon    | 37,8 | 94  | 87,6  | 87,6  | 18,95 | 589,37 | 151,23 |
| 2019/08/09 | CH2276 | Female | Two y/o | Treatment (Wk 2) | Treatment | Feed Day | No  | 12:40 | 12:00 - 12:59 | Afternoon    | 37,8 | 100 | 66,4  | 66,4  | 18,95 | 593,87 | 141,61 |
| 2019/08/09 | CH2276 | Female | Two y/o | Treatment (Wk 2) | Treatment | Feed Day | No  | 12:45 | 12:00 - 12:59 | Afternoon    | 37,8 | 62  | 65,6  | 65,6  | 18,95 | 557,33 | 141,19 |
| 2019/08/09 | CH2276 | Female | Two y/o | Treatment (Wk 2) | Treatment | Feed Day | No  | 12:50 | 12:00 - 12:59 | Afternoon    | 37,9 | 73  | 72,0  | 72,0  | 19,05 | 570,27 | 144,42 |
| 2019/08/09 | CH2276 | Female | Two y/o | Treatment (Wk 2) | Treatment | Feed Day | No  | 12:55 | 12:00 - 12:59 | Afternoon    | 37,9 | 62  | 64,4  | 64,4  | 19,05 | 557,33 | 140,55 |
| 2019/08/09 | CH2276 | Female | Two y/o | Treatment (Wk 2) | Treatment | Feed Day | No  | 13:00 | 13:00 - 13:59 | Afternoon    | 38,0 | 96  | 69,6  | 69,6  | 19,15 | 590,91 | 143,24 |
| 2019/08/09 | CH2276 | Female | Two y/o | Treatment (Wk 2) | Treatment | Feed Day | No  | 13:05 | 13:00 - 13:59 | Afternoon    | 38,0 | 78  | 68,4  | 68,4  | 19,15 | 575,38 | 142,64 |
| 2019/08/09 | CH2276 | Female | Two y/o | Treatment (Wk 2) | Treatment | Feed Day | No  | 13:10 | 13:00 - 13:59 | Afternoon    | 38,0 | 75  | 66,6  | 66,6  | 19,15 | 572,36 | 141,71 |
| 2019/08/09 | CH2276 | Female | Two y/o | Treatment (Wk 2) | Treatment | Feed Day | No  | 13:15 | 13:00 - 13:59 | Afternoon    | 38,1 | 65  | 69,0  | 69,0  | 19,26 | 561,12 | 142,94 |
| 2019/08/09 | CH2276 | Female | Two y/o | Treatment (Wk 2) | Treatment | Feed Day | No  | 13:20 | 13:00 - 13:59 | Afternoon    | 38,2 | 95  | 73,0  | 73,0  | 19,36 | 590,14 | 144,89 |
| 2019/08/09 | CH2276 | Female | Two y/o | Treatment (Wk 2) | Treatment | Feed Day | No  | 13:25 | 13:00 - 13:59 | Afternoon    | 38,1 | 99  | 72,8  | 72,8  | 19,26 | 593,14 | 144,80 |
| 2019/08/09 | CH2276 | Female | Two y/o | Treatment (Wk 2) | Treatment | Feed Day | No  | 13:30 | 13:00 - 13:59 | Afternoon    | 38,1 | 92  | 77,0  | 77,0  | 19,26 | 587,78 | 146,75 |



|            |        |        |         |                  |           |          |    |       |               |           |      |     |       |       |       |        |        |
|------------|--------|--------|---------|------------------|-----------|----------|----|-------|---------------|-----------|------|-----|-------|-------|-------|--------|--------|
| 2019/08/09 | CH2276 | Female | Two y/o | Treatment (Wk 2) | Treatment | Feed Day | No | 13:35 | 13:00 - 13:59 | Afternoon | 38,1 | 96  | 76,4  | 76,4  | 19,26 | 590,91 | 146,48 |
| 2019/08/09 | CH2276 | Female | Two y/o | Treatment (Wk 2) | Treatment | Feed Day | No | 13:40 | 13:00 - 13:59 | Afternoon | 38,1 | 84  | 72,4  | 72,4  | 19,26 | 581,01 | 144,61 |
| 2019/08/09 | CH2276 | Female | Two y/o | Treatment (Wk 2) | Treatment | Feed Day | No | 13:45 | 13:00 - 13:59 | Afternoon | 38,1 | 76  | 71,0  | 71,0  | 19,26 | 573,39 | 143,93 |
| 2019/08/09 | CH2276 | Female | Two y/o | Treatment (Wk 2) | Treatment | Feed Day | No | 13:50 | 13:00 - 13:59 | Afternoon | 38,1 | 86  | 76,2  | 76,2  | 19,26 | 582,77 | 146,38 |
| 2019/08/09 | CH2276 | Female | Two y/o | Treatment (Wk 2) | Treatment | Feed Day | No | 13:55 | 13:00 - 13:59 | Afternoon | 38,2 | 90  | 74,0  | 74,0  | 19,36 | 586,16 | 145,37 |
| 2019/08/09 | CH2276 | Female | Two y/o | Treatment (Wk 2) | Treatment | Feed Day | No | 14:00 | 14:00 - 14:59 | Afternoon | 38,2 | 62  | 75,8  | 75,8  | 19,36 | 557,33 | 146,20 |
| 2019/08/09 | CH2276 | Female | Two y/o | Treatment (Wk 2) | Treatment | Feed Day | No | 14:05 | 14:00 - 14:59 | Afternoon | 38,2 | 62  | 62,2  | 62,2  | 19,36 | 557,33 | 139,34 |
| 2019/08/09 | CH2276 | Female | Two y/o | Treatment (Wk 2) | Treatment | Feed Day | No | 14:10 | 14:00 - 14:59 | Afternoon | 38,2 | 95  | 65,8  | 65,8  | 19,36 | 590,14 | 141,29 |
| 2019/08/09 | CH2276 | Female | Two y/o | Treatment (Wk 2) | Treatment | Feed Day | No | 14:15 | 14:00 - 14:59 | Afternoon | 38,2 | 114 | 77,0  | 77,0  | 19,36 | 603,20 | 146,75 |
| 2019/08/09 | CH2276 | Female | Two y/o | Treatment (Wk 2) | Treatment | Feed Day | No | 14:20 | 14:00 - 14:59 | Afternoon | 38,1 | 61  | 70,0  | 70,0  | 19,26 | 556,01 | 143,44 |
| 2019/08/09 | CH2276 | Female | Two y/o | Treatment (Wk 2) | Treatment | Feed Day | No | 14:25 | 14:00 - 14:59 | Afternoon | 38,0 | 65  | 77,6  | 77,6  | 19,15 | 561,12 | 147,02 |
| 2019/08/09 | CH2276 | Female | Two y/o | Treatment (Wk 2) | Treatment | Feed Day | No | 14:30 | 14:00 - 14:59 | Afternoon | 38,0 | 90  | 72,2  | 72,2  | 19,15 | 586,16 | 144,51 |
| 2019/08/09 | CH2276 | Female | Two y/o | Treatment (Wk 2) | Treatment | Feed Day | No | 14:35 | 14:00 - 14:59 | Afternoon | 38,0 | 62  | 75,2  | 75,2  | 19,15 | 557,33 | 145,93 |
| 2019/08/09 | CH2276 | Female | Two y/o | Treatment (Wk 2) | Treatment | Feed Day | No | 14:40 | 14:00 - 14:59 | Afternoon | 38,0 | 62  | 74,4  | 74,4  | 19,15 | 557,33 | 145,55 |
| 2019/08/09 | CH2276 | Female | Two y/o | Treatment (Wk 2) | Treatment | Feed Day | No | 14:45 | 14:00 - 14:59 | Afternoon | 38,0 | 90  | 73,0  | 73,0  | 19,15 | 586,16 | 144,89 |
| 2019/08/09 | CH2276 | Female | Two y/o | Treatment (Wk 2) | Treatment | Feed Day | No | 14:50 | 14:00 - 14:59 | Afternoon | 38,0 |     | 87,8  | 87,8  | 19,15 |        | 151,31 |
| 2019/08/09 | CH2276 | Female | Two y/o | Treatment (Wk 2) | Treatment | Feed Day | No | 14:55 | 14:00 - 14:59 | Afternoon | 38,0 | 71  | 69,2  | 69,2  | 19,15 | 568,10 | 143,04 |
| 2019/08/09 | CH2276 | Female | Two y/o | Treatment (Wk 2) | Treatment | Feed Day | No | 15:00 | 15:00 - 15:59 | Afternoon | 38,0 | 118 | 489,2 | 489,2 | 19,15 | 605,61 | 211,77 |
| 2019/08/09 | CH2276 | Female | Two y/o | Treatment (Wk 2) | Treatment | Feed Day | No | 15:05 | 15:00 - 15:59 | Afternoon | 38,0 | 109 | 299,0 | 299,0 | 19,15 | 600,04 | 194,30 |
| 2019/08/09 | CH2276 | Female | Two y/o | Treatment (Wk 2) | Treatment | Feed Day | No | 15:10 | 15:00 - 15:59 | Afternoon | 38,0 | 104 | 48,0  | 48,0  | 19,15 | 596,69 | 130,38 |
| 2019/08/09 | CH2276 | Female | Two y/o | Treatment (Wk 2) | Treatment | Feed Day | No | 15:15 | 15:00 - 15:59 | Afternoon | 38,0 | 84  | 67,8  | 67,8  | 19,15 | 581,01 | 142,33 |
| 2019/08/09 | CH2276 | Female | Two y/o | Treatment (Wk 2) | Treatment | Feed Day | No | 15:20 | 15:00 - 15:59 | Afternoon | 38,2 | 92  | 75,2  | 75,2  | 19,36 | 587,78 | 145,93 |
| 2019/08/09 | CH2276 | Female | Two y/o | Treatment (Wk 2) | Treatment | Feed Day | No | 15:25 | 15:00 - 15:59 | Afternoon | 38,2 | 68  | 71,2  | 71,2  | 19,36 | 564,71 | 144,03 |
| 2019/08/09 | CH2276 | Female | Two y/o | Treatment (Wk 2) | Treatment | Feed Day | No | 15:30 | 15:00 - 15:59 | Afternoon | 38,3 | 65  | 73,8  | 73,8  | 19,46 | 561,12 | 145,27 |
| 2019/08/09 | CH2276 | Female | Two y/o | Treatment (Wk 2) | Treatment | Feed Day | No | 15:35 | 15:00 - 15:59 | Afternoon | 38,3 | 66  | 55,4  | 55,4  | 19,46 | 562,34 | 135,33 |
| 2019/08/09 | CH2276 | Female | Two y/o | Treatment (Wk 2) | Treatment | Feed Day | No | 15:40 | 15:00 - 15:59 | Afternoon | 38,4 | 94  | 74,4  | 74,4  | 19,56 | 589,37 | 145,55 |
| 2019/08/09 | CH2276 | Female | Two y/o | Treatment (Wk 2) | Treatment | Feed Day | No | 15:45 | 15:00 - 15:59 | Afternoon | 38,4 | 65  | 68,2  | 68,2  | 19,56 | 561,12 | 142,53 |
| 2019/08/09 | CH2276 | Female | Two y/o | Treatment (Wk 2) | Treatment | Feed Day | No | 15:50 | 15:00 - 15:59 | Afternoon | 38,4 | 64  | 50,2  | 50,2  | 19,56 | 559,88 | 131,92 |
| 2019/08/09 | CH2276 | Female | Two y/o | Treatment (Wk 2) | Treatment | Feed Day | No | 15:55 | 15:00 - 15:59 | Afternoon | 38,4 | 103 | 53,2  | 53,2  | 19,56 | 596,00 | 133,93 |
| 2019/08/09 | CH2276 | Female | Two y/o | Treatment (Wk 2) | Treatment | Feed Day | No | 16:00 | 16:00 - 16:59 | Evening   | 38,4 | 74  | 69,6  | 69,6  | 19,56 | 571,33 | 143,24 |
| 2019/08/09 | CH2276 | Female | Two y/o | Treatment (Wk 2) | Treatment | Feed Day | No | 16:05 | 16:00 - 16:59 | Evening   | 38,4 | 194 | 23,4  | 23,4  | 19,56 | 638,30 | 105,68 |
| 2019/08/09 | CH2276 | Female | Two y/o | Treatment (Wk 2) | Treatment | Feed Day | No | 16:10 | 16:00 - 16:59 | Evening   | 38,5 | 65  | 54,4  | 54,4  | 19,66 | 561,12 | 134,70 |
| 2019/08/09 | CH2276 | Female | Two y/o | Treatment (Wk 2) | Treatment | Feed Day | No | 16:15 | 16:00 - 16:59 | Evening   | 38,5 | 75  | 22,8  | 22,8  | 19,66 | 572,36 | 104,79 |
| 2019/08/09 | CH2276 | Female | Two y/o | Treatment (Wk 2) | Treatment | Feed Day | No | 16:20 | 16:00 - 16:59 | Evening   | 38,4 | 68  | 26,6  | 26,6  | 19,56 | 564,71 | 110,07 |
| 2019/08/09 | CH2276 | Female | Two y/o | Treatment (Wk 2) | Treatment | Feed Day | No | 16:25 | 16:00 - 16:59 | Evening   | 38,4 | 67  | 25,8  | 25,8  | 19,56 | 563,53 | 109,02 |
| 2019/08/09 | CH2276 | Female | Two y/o | Treatment (Wk 2) | Treatment | Feed Day | No | 16:30 | 16:00 - 16:59 | Evening   | 38,4 | 61  | 25,8  | 25,8  | 19,56 | 556,01 | 109,02 |
| 2019/08/09 | CH2276 | Female | Two y/o | Treatment (Wk 2) | Treatment | Feed Day | No | 16:35 | 16:00 - 16:59 | Evening   | 38,4 | 93  | 15,0  | 15,0  | 19,56 | 588,58 | 90,51  |
| 2019/08/09 | CH2276 | Female | Two y/o | Treatment (Wk 2) | Treatment | Feed Day | No | 16:40 | 16:00 - 16:59 | Evening   | 38,4 | 67  | 18,6  | 18,6  | 19,56 | 563,53 | 97,84  |
| 2019/08/09 | CH2276 | Female | Two y/o | Treatment (Wk 2) | Treatment | Feed Day | No | 16:45 | 16:00 - 16:59 | Evening   | 38,3 | 96  | 17,0  | 17,0  | 19,46 | 590,91 | 94,77  |
| 2019/08/09 | CH2276 | Female | Two y/o | Treatment (Wk 2) | Treatment | Feed Day | No | 16:50 | 16:00 - 16:59 | Evening   | 38,3 | 64  | 18,4  | 18,4  | 19,46 | 559,88 | 97,47  |
| 2019/08/09 | CH2276 | Female | Two y/o | Treatment (Wk 2) | Treatment | Feed Day | No | 16:55 | 16:00 - 16:59 | Evening   | 38,3 | 102 | 18,8  | 18,8  | 19,46 | 595,30 | 98,20  |
| 2019/08/09 | CH2276 | Female | Two y/o | Treatment (Wk 2) | Treatment | Feed Day | No | 17:00 | 17:00 - 17:59 | Evening   | 38,3 | 63  | 29,0  | 29,0  | 19,46 | 558,62 | 113,03 |
| 2019/08/09 | CH2276 | Female | Two y/o | Treatment (Wk 2) | Treatment | Feed Day | No | 17:05 | 17:00 - 17:59 | Evening   | 38,2 | 88  | 22,8  | 22,8  | 19,36 | 584,49 | 104,79 |
| 2019/08/09 | CH2276 | Female | Two y/o | Treatment (Wk 2) | Treatment | Feed Day | No | 17:10 | 17:00 - 17:59 | Evening   | 38,2 | 83  | 23,6  | 23,6  | 19,36 | 580,11 | 105,97 |
| 2019/08/09 | CH2276 | Female | Two y/o | Treatment (Wk 2) | Treatment | Feed Day | No | 17:15 | 17:00 - 17:59 | Evening   | 38,2 | 93  | 31,4  | 31,4  | 19,36 | 588,58 | 115,76 |
| 2019/08/09 | CH2276 | Female | Two y/o | Treatment (Wk 2) | Treatment | Feed Day | No | 17:20 | 17:00 - 17:59 | Evening   | 38,2 | 69  | 46,0  | 46,0  | 19,36 | 565,86 | 128,91 |
| 2019/08/09 | CH2276 | Female | Two y/o | Treatment (Wk 2) | Treatment | Feed Day | No | 17:25 | 17:00 - 17:59 | Evening   | 38,1 | 64  | 59,8  | 59,8  | 19,26 | 559,88 | 137,98 |
| 2019/08/09 | CH2276 | Female | Two y/o | Treatment (Wk 2) | Treatment | Feed Day | No | 17:30 | 17:00 - 17:59 | Evening   | 38,0 | 92  | 82,4  | 82,4  | 19,15 | 587,78 | 149,10 |
| 2019/08/09 | CH2276 | Female | Two y/o | Treatment (Wk 2) | Treatment | Feed Day | No | 17:35 | 17:00 - 17:59 | Evening   | 38,0 | 103 | 64,4  | 64,4  | 19,15 | 596,00 | 140,55 |
| 2019/08/09 | CH2276 | Female | Two y/o | Treatment (Wk 2) | Treatment | Feed Day | No | 17:40 | 17:00 - 17:59 | Evening   | 37,9 | 80  | 81,2  | 81,2  | 19,05 | 577,31 | 148,59 |
| 2019/08/09 | CH2276 | Female | Two y/o | Treatment (Wk 2) | Treatment | Feed Day | No | 17:45 | 17:00 - 17:59 | Evening   | 37,9 | 94  | 89,2  | 89,2  | 19,05 | 589,37 | 151,86 |
| 2019/08/09 | CH2276 | Female | Two y/o | Treatment (Wk 2) | Treatment | Feed Day | No | 17:50 | 17:00 - 17:59 | Evening   | 37,9 | 88  | 215,0 | 215,0 | 19,05 | 584,49 | 182,66 |
| 2019/08/09 | CH2276 | Female | Two y/o | Treatment (Wk 2) | Treatment | Feed Day | No | 17:55 | 17:00 - 17:59 | Evening   | 38,0 | 59  | 245,2 | 245,2 | 19,15 | 553,30 | 187,30 |
| 2019/08/09 | CH2276 | Female | Two y/o | Treatment (Wk 2) | Treatment | Feed Day | No | 18:00 | 18:00 - 18:59 | Evening   | 38,1 | 124 | 68,6  | 68,6  | 19,26 | 609,04 | 142,74 |
| 2019/08/09 | CH2276 | Female | Two y/o | Treatment (Wk 2) | Treatment | Feed Day | No | 18:05 | 18:00 - 18:59 | Evening   | 38,2 | 70  | 77,6  | 77,6  | 19,36 | 566,99 | 147,02 |
| 2019/08/09 | CH2276 | Female | Two y/o | Treatment (Wk 2) | Treatment | Feed Day | No | 18:10 | 18:00 - 18:59 | Evening   | 38,3 | 99  | 81,4  | 81,4  | 19,46 | 593,14 | 148,68 |
| 2019/08/09 | CH2276 | Female | Two y/o | Treatment (Wk 2) | Treatment | Feed Day | No | 18:15 | 18:00 - 18:59 | Evening   | 38,3 | 103 | 284,4 | 284,4 | 19,46 | 596,00 | 192,53 |
| 2019/08/09 | CH2276 | Female | Two y/o | Treatment (Wk 2) | Treatment | Feed Day | No | 18:20 | 18:00 - 18:59 | Evening   | 38,4 | 141 | 78,8  | 78,8  | 19,56 | 617,75 | 147,55 |
| 2019/08/09 | CH2276 | Female | Two y/o | Treatment (Wk 2) | Treatment | Feed Day | No | 18:25 | 18:00 - 18:59 | Evening   | 38,4 | 59  | 236,2 | 236,2 | 19,56 | 553,30 | 185,98 |
| 2019/08/09 | CH2276 | Female | Two y/o | Treatment (Wk 2) | Treatment | Feed Day | No | 18:30 | 18:00 - 18:59 | Evening   | 38,4 | 113 | 107,4 | 107,4 | 19,56 | 602,58 | 158,33 |
| 2019/08/09 | CH2276 | Female | Two y/o | Treatment (Wk 2) | Treatment | Feed Day | No | 18:35 | 18:00 - 18:59 | Evening   | 38,4 | 118 | 154,6 | 154,6 | 19,56 | 605,61 | 171,08 |
| 2019/08/09 | CH2276 | Female | Two y/o | Treatment (Wk 2) | Treatment | Feed Day | No | 18:40 | 18:00 - 18:59 | Evening   | 38,4 | 75  | 119,6 | 119,6 | 19,56 | 572,36 | 162,09 |
| 2019/08/09 | CH2276 | Female | Two y/o | Treatment (Wk 2) | Treatment | Feed Day | No | 18:45 | 18:00 - 18:59 | Evening   | 38,4 | 113 | 93,0  | 93,0  | 19,56 | 602,58 | 153,31 |
| 2019/08/09 | CH2276 | Female | Two y/o | Treatment (Wk 2) | Treatment | Feed Day | No | 18:50 | 18:00 - 18:59 | Evening   | 38,4 | 102 | 60,6  | 60,6  | 19,56 | 595,30 | 138,44 |
| 2019/08/09 | CH2276 | Female | Two y/o | Treatment (Wk 2) | Treatment | Feed Day | No | 18:55 | 18:00 - 18:59 | Evening   | 38,3 | 128 | 331,2 | 331,2 | 19,46 | 611,22 | 197,92 |
| 2019/08/09 | CH2276 | Female | Two y/o | Treatment (Wk 2) | Treatment | Feed Day | No | 19:00 | 19:00 - 19:59 | Evening   | 38,3 | 105 | 72,0  | 72,0  | 19,46 | 597,38 | 144,42 |
| 2019/08/09 | CH2276 | Female | Two y/o | Treatment (Wk 2) | Treatment | Feed Day | No | 19:05 | 19:00 - 19:59 | Evening   | 38,3 | 93  | 49,6  | 49,6  | 19,46 | 588,58 | 131,51 |
| 2019/08/09 | CH2276 | Female | Two y/o | Treatment (Wk 2) | Treatment | Feed Day | No | 19:10 | 19:00 - 19:59 | Evening   | 38,3 | 67  | 67,8  | 67,8  | 19,46 | 563,53 | 142,33 |
| 2019/08/09 | CH2276 | Female | Two y/o | Treatment (Wk 2) | Treatment | Feed Day | No | 19:15 | 19:00 - 19:59 | Evening   | 38,2 | 84  | 74,6  | 74,6  | 19,36 | 581,01 | 145,65 |
| 2019/08/09 | CH2276 | Female | Two y/o | Treatment (Wk 2) | Treatment | Feed Day | No | 19:20 | 19:00 - 19:59 | Evening   | 38,2 | 94  | 60,2  | 60,2  | 19,36 | 589,37 | 138,21 |



|    |            |        |        |         |                  |           |          |    |       |               |               |      |     |      |      |       |        |        |
|----|------------|--------|--------|---------|------------------|-----------|----------|----|-------|---------------|---------------|------|-----|------|------|-------|--------|--------|
|    | 2019/08/09 | CH2276 | Female | Two y/o | Treatment (Wk 2) | Treatment | Feed Day | No | 19:25 | 19:00 - 19:59 | Evening       | 38,0 | 63  | 53,4 | 53,4 | 19,15 | 558,62 | 134,06 |
|    | 2019/08/09 | CH2276 | Female | Two y/o | Treatment (Wk 2) | Treatment | Feed Day | No | 19:30 | 19:00 - 19:59 | Evening       | 38,0 | 97  | 63,2 | 63,2 | 19,15 | 591,66 | 139,89 |
|    | 2019/08/09 | CH2276 | Female | Two y/o | Treatment (Wk 2) | Treatment | Feed Day | No | 19:35 | 19:00 - 19:59 | Evening       | 38,0 | 98  | 58,2 | 58,2 | 19,15 | 592,41 | 137,04 |
|    | 2019/08/09 | CH2276 | Female | Two y/o | Treatment (Wk 2) | Treatment | Feed Day | No | 19:40 | 19:00 - 19:59 | Evening       | 38,0 | 98  | 52,0 | 52,0 | 19,15 | 592,41 | 133,14 |
|    | 2019/08/09 | CH2276 | Female | Two y/o | Treatment (Wk 2) | Treatment | Feed Day | No | 19:45 | 19:00 - 19:59 | Evening       | 38,0 | 64  | 57,4 | 57,4 | 19,15 | 559,88 | 136,56 |
|    | 2019/08/09 | CH2276 | Female | Two y/o | Treatment (Wk 2) | Treatment | Feed Day | No | 19:50 | 19:00 - 19:59 | Evening       | 38,0 | 61  | 54,8 | 54,8 | 19,15 | 556,01 | 134,96 |
|    | 2019/08/09 | CH2276 | Female | Two y/o | Treatment (Wk 2) | Treatment | Feed Day | No | 19:55 | 19:00 - 19:59 | Evening       | 38,0 | 65  | 68,0 | 68,0 | 19,15 | 561,12 | 142,43 |
|    | 2019/08/09 | CH2276 | Female | Two y/o | Treatment (Wk 2) | Treatment | Feed Day | No | 20:00 | 20:00 - 20:59 | Night         | 38,2 | 64  | 74,2 | 74,2 | 19,36 | 559,88 | 145,46 |
|    | 2019/08/09 | CH2276 | Female | Two y/o | Treatment (Wk 2) | Treatment | Feed Day | No | 20:05 | 20:00 - 20:59 | Night         | 38,2 | 70  | 69,4 | 69,4 | 19,36 | 566,99 | 143,14 |
|    | 2019/08/09 | CH2276 | Female | Two y/o | Treatment (Wk 2) | Treatment | Feed Day | No | 20:10 | 20:00 - 20:59 | Night         | 38,2 | 72  | 67,8 | 67,8 | 19,36 | 569,20 | 142,33 |
|    | 2019/08/09 | CH2276 | Female | Two y/o | Treatment (Wk 2) | Treatment | Feed Day | No | 20:15 | 20:00 - 20:59 | Night         | 38,2 | 76  | 70,2 | 70,2 | 19,36 | 573,39 | 143,54 |
|    | 2019/08/09 | CH2276 | Female | Two y/o | Treatment (Wk 2) | Treatment | Feed Day | No | 20:20 | 20:00 - 20:59 | Night         | 38,2 | 83  | 66,8 | 66,8 | 19,36 | 580,11 | 141,81 |
|    | 2019/08/09 | CH2276 | Female | Two y/o | Treatment (Wk 2) | Treatment | Feed Day | No | 20:25 | 20:00 - 20:59 | Night         | 38,2 | 64  | 72,6 | 72,6 | 19,36 | 559,88 | 144,70 |
|    | 2019/08/09 | CH2276 | Female | Two y/o | Treatment (Wk 2) | Treatment | Feed Day | No | 20:30 | 20:00 - 20:59 | Night         | 38,2 | 93  | 61,2 | 61,2 | 19,36 | 588,58 | 138,78 |
|    | 2019/08/09 | CH2276 | Female | Two y/o | Treatment (Wk 2) | Treatment | Feed Day | No | 20:35 | 20:00 - 20:59 | Night         | 38,2 | 73  | 63,2 | 63,2 | 19,36 | 570,27 | 139,89 |
|    | 2019/08/09 | CH2276 | Female | Two y/o | Treatment (Wk 2) | Treatment | Feed Day | No | 20:40 | 20:00 - 20:59 | Night         | 38,1 | 67  | 63,2 | 63,2 | 19,26 | 563,53 | 139,89 |
|    | 2019/08/09 | CH2276 | Female | Two y/o | Treatment (Wk 2) | Treatment | Feed Day | No | 20:45 | 20:00 - 20:59 | Night         | 38,0 | 55  | 62,6 | 62,6 | 19,15 | 547,52 | 139,56 |
|    | 2019/08/09 | CH2276 | Female | Two y/o | Treatment (Wk 2) | Treatment | Feed Day | No | 20:50 | 20:00 - 20:59 | Night         | 38,0 | 64  | 70,2 | 70,2 | 19,15 | 559,88 | 143,54 |
|    | 2019/08/09 | CH2276 | Female | Two y/o | Treatment (Wk 2) | Treatment | Feed Day | No | 20:55 | 20:00 - 20:59 | Night         | 38,0 | 64  | 70,0 | 70,0 | 19,15 | 559,88 | 143,44 |
|    | 2019/08/09 | CH2276 | Female | Two y/o | Treatment (Wk 2) | Treatment | Feed Day | No | 21:00 | 21:00 - 21:59 | Night         | 38,0 | 57  | 58,8 | 58,8 | 19,15 | 550,47 | 137,39 |
|    | 2019/08/09 | CH2276 | Female | Two y/o | Treatment (Wk 2) | Treatment | Feed Day | No | 21:05 | 21:00 - 21:59 | Night         | 38,0 | 70  | 49,8 | 49,8 | 19,15 | 566,99 | 131,65 |
|    | 2019/08/09 | CH2276 | Female | Two y/o | Treatment (Wk 2) | Treatment | Feed Day | No | 21:10 | 21:00 - 21:59 | Night         | 37,9 | 83  | 46,4 | 46,4 | 19,05 | 580,11 | 129,21 |
|    | 2019/08/09 | CH2276 | Female | Two y/o | Treatment (Wk 2) | Treatment | Feed Day | No | 21:15 | 21:00 - 21:59 | Night         | 37,8 | 58  | 59,6 | 59,6 | 18,95 | 551,90 | 137,86 |
|    | 2019/08/09 | CH2276 | Female | Two y/o | Treatment (Wk 2) | Treatment | Feed Day | No | 21:20 | 21:00 - 21:59 | Night         | 37,8 | 60  | 62,6 | 62,6 | 18,95 | 554,67 | 139,56 |
|    | 2019/08/09 | CH2276 | Female | Two y/o | Treatment (Wk 2) | Treatment | Feed Day | No | 21:25 | 21:00 - 21:59 | Night         | 37,7 | 62  | 67,4 | 67,4 | 18,85 | 557,33 | 142,12 |
|    | 2019/08/09 | CH2276 | Female | Two y/o | Treatment (Wk 2) | Treatment | Feed Day | No | 21:30 | 21:00 - 21:59 | Night         | 37,7 | 68  | 79,6 | 79,6 | 18,85 | 564,71 | 147,90 |
|    | 2019/08/09 | CH2276 | Female | Two y/o | Treatment (Wk 2) | Treatment | Feed Day | No | 21:35 | 21:00 - 21:59 | Night         | 37,7 | 80  | 72,2 | 72,2 | 18,85 | 577,31 | 144,51 |
|    | 2019/08/09 | CH2276 | Female | Two y/o | Treatment (Wk 2) | Treatment | Feed Day | No | 21:40 | 21:00 - 21:59 | Night         | 37,7 | 60  | 77,8 | 77,8 | 18,85 | 554,67 | 147,11 |
|    | 2019/08/09 | CH2276 | Female | Two y/o | Treatment (Wk 2) | Treatment | Feed Day | No | 21:45 | 21:00 - 21:59 | Night         | 37,7 | 67  | 70,6 | 70,6 | 18,85 | 563,53 | 143,73 |
|    | 2019/08/09 | CH2276 | Female | Two y/o | Treatment (Wk 2) | Treatment | Feed Day | No | 21:50 | 21:00 - 21:59 | Night         | 37,7 |     | 74,0 | 74,0 | 18,85 |        | 145,37 |
|    | 2019/08/09 | CH2276 | Female | Two y/o | Treatment (Wk 2) | Treatment | Feed Day | No | 21:55 | 21:00 - 21:59 | Night         | 37,6 | 104 | 44,6 | 44,6 | 18,75 | 596,69 | 127,84 |
|    | 2019/08/09 | CH2276 | Female | Two y/o | Treatment (Wk 2) | Treatment | Feed Day | No | 22:00 | 22:00 - 22:59 | Night         | 37,6 | 67  | 49,0 | 49,0 | 18,75 | 563,53 | 131,09 |
|    | 2019/08/09 | CH2276 | Female | Two y/o | Treatment (Wk 2) | Treatment | Feed Day | No | 22:05 | 22:00 - 22:59 | Night         | 37,6 | 92  | 56,2 | 56,2 | 18,75 | 587,78 | 135,83 |
|    | 2019/08/09 | CH2276 | Female | Two y/o | Treatment (Wk 2) | Treatment | Feed Day | No | 22:10 | 22:00 - 22:59 | Night         | 37,6 | 46  | 61,8 | 61,8 | 18,75 | 532,38 | 139,12 |
|    | 2019/08/09 | CH2276 | Female | Two y/o | Treatment (Wk 2) | Treatment | Feed Day | No | 22:15 | 22:00 - 22:59 | Night         | 37,7 | 97  | 68,0 | 68,0 | 18,85 | 591,66 | 142,43 |
|    | 2019/08/09 | CH2276 | Female | Two y/o | Treatment (Wk 2) | Treatment | Feed Day | No | 22:20 | 22:00 - 22:59 | Night         | 37,7 | 63  | 52,6 | 52,6 | 18,85 | 558,62 | 133,54 |
|    | 2019/08/09 | CH2276 | Female | Two y/o | Treatment (Wk 2) | Treatment | Feed Day | No | 22:25 | 22:00 - 22:59 | Night         | 37,7 | 63  | 62,6 | 62,6 | 18,85 | 558,62 | 139,56 |
|    | 2019/08/09 | CH2276 | Female | Two y/o | Treatment (Wk 2) | Treatment | Feed Day | No | 22:30 | 22:00 - 22:59 | Night         | 37,7 | 62  | 65,2 | 65,2 | 18,85 | 557,33 | 140,97 |
|    | 2019/08/09 | CH2276 | Female | Two y/o | Treatment (Wk 2) | Treatment | Feed Day | No | 22:35 | 22:00 - 22:59 | Night         | 37,7 | 64  | 57,6 | 57,6 | 18,85 | 559,88 | 136,68 |
|    | 2019/08/09 | CH2276 | Female | Two y/o | Treatment (Wk 2) | Treatment | Feed Day | No | 22:40 | 22:00 - 22:59 | Night         | 37,6 |     | 62,4 | 62,4 | 18,75 |        | 139,45 |
|    | 2019/08/09 | CH2276 | Female | Two y/o | Treatment (Wk 2) | Treatment | Feed Day | No | 22:45 | 22:00 - 22:59 | Night         | 37,6 | 90  | 67,4 | 67,4 | 18,75 | 586,16 | 142,12 |
|    | 2019/08/09 | CH2276 | Female | Two y/o | Treatment (Wk 2) | Treatment | Feed Day | No | 22:50 | 22:00 - 22:59 | Night         | 37,6 | 61  | 47,6 | 47,6 | 18,75 | 556,01 | 130,09 |
|    | 2019/08/09 | CH2276 | Female | Two y/o | Treatment (Wk 2) | Treatment | Feed Day | No | 22:55 | 22:00 - 22:59 | Night         | 37,5 | 63  | 54,6 | 54,6 | 18,65 | 558,62 | 134,83 |
|    | 2019/08/09 | CH2276 | Female | Two y/o | Treatment (Wk 2) | Treatment | Feed Day | No | 23:00 | 23:00 - 23:59 | Night         | 37,5 | 65  | 54,2 | 54,2 | 18,65 | 561,12 | 134,57 |
|    | 2019/08/09 | CH2276 | Female | Two y/o | Treatment (Wk 2) | Treatment | Feed Day | No | 23:05 | 23:00 - 23:59 | Night         | 37,4 | 90  | 53,0 | 53,0 | 18,55 | 586,16 | 133,80 |
|    | 2019/08/09 | CH2276 | Female | Two y/o | Treatment (Wk 2) | Treatment | Feed Day | No | 23:10 | 23:00 - 23:59 | Night         | 37,4 | 69  | 43,8 | 43,8 | 18,55 | 565,86 | 127,22 |
|    | 2019/08/09 | CH2276 | Female | Two y/o | Treatment (Wk 2) | Treatment | Feed Day | No | 23:15 | 23:00 - 23:59 | Night         | 37,3 | 95  | 46,4 | 46,4 | 18,46 | 590,14 | 129,21 |
|    | 2019/08/09 | CH2276 | Female | Two y/o | Treatment (Wk 2) | Treatment | Feed Day | No | 23:20 | 23:00 - 23:59 | Night         | 37,4 | 99  | 33,6 | 33,6 | 18,55 | 593,14 | 118,09 |
|    | 2019/08/09 | CH2276 | Female | Two y/o | Treatment (Wk 2) | Treatment | Feed Day | No | 23:25 | 23:00 - 23:59 | Night         | 37,4 | 64  | 34,8 | 34,8 | 18,55 | 559,88 | 119,29 |
|    | 2019/08/09 | CH2276 | Female | Two y/o | Treatment (Wk 2) | Treatment | Feed Day | No | 23:30 | 23:00 - 23:59 | Night         | 37,3 | 93  | 39,0 | 39,0 | 18,46 | 588,58 | 123,22 |
|    | 2019/08/09 | CH2276 | Female | Two y/o | Treatment (Wk 2) | Treatment | Feed Day | No | 23:35 | 23:00 - 23:59 | Night         | 37,4 | 70  | 85,6 | 85,6 | 18,55 | 566,99 | 150,43 |
|    | 2019/08/09 | CH2276 | Female | Two y/o | Treatment (Wk 2) | Treatment | Feed Day | No | 23:40 | 23:00 - 23:59 | Night         | 37,3 | 98  | 81,2 | 81,2 | 18,46 | 592,41 | 148,59 |
|    | 2019/08/09 | CH2276 | Female | Two y/o | Treatment (Wk 2) | Treatment | Feed Day | No | 23:45 | 23:00 - 23:59 | Night         | 37,3 | 68  | 81,0 | 81,0 | 18,46 | 564,71 | 148,51 |
|    | 2019/08/09 | CH2276 | Female | Two y/o | Treatment (Wk 2) | Treatment | Feed Day | No | 23:50 | 23:00 - 23:59 | Night         | 37,3 | 95  | 76,8 | 76,8 | 18,46 | 590,14 | 146,66 |
|    | 2019/08/09 | CH2276 | Female | Two y/o | Treatment (Wk 2) | Treatment | Feed Day | No | 23:55 | 23:00 - 23:59 | Night         | 37,3 | 56  | 83,0 | 83,0 | 18,46 | 549,01 | 149,36 |
| 53 | 2019/08/10 | CH2276 | Female | Two y/o | Treatment (Wk 2) | Treatment | Feed Day | No | 00:00 | 00:00 - 00:59 | Early Morning | 37,3 | 90  | 83,0 | 83,0 | 18,46 | 586,16 | 149,36 |
|    | 2019/08/10 | CH2276 | Female | Two y/o | Treatment (Wk 2) | Treatment | Feed Day | No | 00:05 | 00:00 - 00:59 | Early Morning | 37,3 | 65  | 82,0 | 82,0 | 18,46 | 561,12 | 148,93 |
|    | 2019/08/10 | CH2276 | Female | Two y/o | Treatment (Wk 2) | Treatment | Feed Day | No | 00:10 | 00:00 - 00:59 | Early Morning | 37,3 | 61  | 80,2 | 80,2 | 18,46 | 556,01 | 148,16 |
|    | 2019/08/10 | CH2276 | Female | Two y/o | Treatment (Wk 2) | Treatment | Feed Day | No | 00:15 | 00:00 - 00:59 | Early Morning | 37,2 | 61  | 83,4 | 83,4 | 18,36 | 556,01 | 149,52 |
|    | 2019/08/10 | CH2276 | Female | Two y/o | Treatment (Wk 2) | Treatment | Feed Day | No | 00:20 | 00:00 - 00:59 | Early Morning | 37,2 | 57  | 83,6 | 83,6 | 18,36 | 550,47 | 149,61 |
|    | 2019/08/10 | CH2276 | Female | Two y/o | Treatment (Wk 2) | Treatment | Feed Day | No | 00:25 | 00:00 - 00:59 | Early Morning | 37,1 | 82  | 79,8 | 79,8 | 18,26 | 579,19 | 147,99 |
|    | 2019/08/10 | CH2276 | Female | Two y/o | Treatment (Wk 2) | Treatment | Feed Day | No | 00:30 | 00:00 - 00:59 | Early Morning | 37,2 | 95  | 82,4 | 82,4 | 18,36 | 590,14 | 149,10 |
|    | 2019/08/10 | CH2276 | Female | Two y/o | Treatment (Wk 2) | Treatment | Feed Day | No | 00:35 | 00:00 - 00:59 | Early Morning | 37,3 | 91  | 79,8 | 79,8 | 18,46 | 586,98 | 147,99 |
|    | 2019/08/10 | CH2276 | Female | Two y/o | Treatment (Wk 2) | Treatment | Feed Day | No | 00:40 | 00:00 - 00:59 | Early Morning | 37,3 | 61  | 78,0 | 78,0 | 18,46 | 556,01 | 147,20 |
|    | 2019/08/10 | CH2276 | Female | Two y/o | Treatment (Wk 2) | Treatment | Feed Day | No | 00:45 | 00:00 - 00:59 | Early Morning | 37,3 | 64  | 83,0 | 83,0 | 18,46 | 559,88 | 149,36 |
|    | 2019/08/10 | CH2276 | Female | Two y/o | Treatment (Wk 2) | Treatment | Feed Day | No | 00:50 | 00:00 - 00:59 | Early Morning | 37,3 | 65  | 82,8 | 82,8 | 18,46 | 561,12 | 149,27 |
|    | 2019/08/10 | CH2276 | Female | Two y/o | Treatment (Wk 2) | Treatment | Feed Day | No | 00:55 | 00:00 - 00:59 | Early Morning | 37,3 | 96  | 86,6 | 86,6 | 18,46 | 590,91 | 150,83 |
|    | 2019/08/10 | CH2276 | Female | Two y/o | Treatment (Wk 2) | Treatment | Feed Day | No | 01:00 | 01:00 - 01:59 | Early Morning | 37,3 |     | 87,2 | 87,2 | 18,46 |        | 151,07 |
|    | 2019/08/10 | CH2276 | Female | Two y/o | Treatment (Wk 2) | Treatment | Feed Day | No | 01:05 | 01:00 - 01:59 | Early Morning | 37,3 | 91  | 80,4 | 80,4 | 18,46 | 586,98 | 148,25 |
|    | 2019/08/10 | CH2276 | Female | Two y/o | Treatment (Wk 2) | Treatment | Feed Day | No | 01:10 | 01:00 - 01:59 | Early Morning | 37,3 | 61  | 75,8 | 75,8 | 18,46 | 556,01 | 146,20 |



|            |        |        |         |                  |           |          |    |       |               |               |      |     |       |       |       |        |        |
|------------|--------|--------|---------|------------------|-----------|----------|----|-------|---------------|---------------|------|-----|-------|-------|-------|--------|--------|
| 2019/08/10 | CH2276 | Female | Two y/o | Treatment (Wk 2) | Treatment | Feed Day | No | 01:15 | 01:00 - 01:59 | Early Morning | 37,3 | 92  | 75,6  | 75,6  | 18,46 | 587,78 | 146,11 |
| 2019/08/10 | CH2276 | Female | Two y/o | Treatment (Wk 2) | Treatment | Feed Day | No | 01:20 | 01:00 - 01:59 | Early Morning | 37,3 | 88  | 77,2  | 77,2  | 18,46 | 584,49 | 146,84 |
| 2019/08/10 | CH2276 | Female | Two y/o | Treatment (Wk 2) | Treatment | Feed Day | No | 01:25 | 01:00 - 01:59 | Early Morning | 37,3 | 87  | 64,6  | 64,6  | 18,46 | 583,64 | 140,65 |
| 2019/08/10 | CH2276 | Female | Two y/o | Treatment (Wk 2) | Treatment | Feed Day | No | 01:30 | 01:00 - 01:59 | Early Morning | 37,3 | 65  | 51,0  | 51,0  | 18,46 | 561,12 | 132,47 |
| 2019/08/10 | CH2276 | Female | Two y/o | Treatment (Wk 2) | Treatment | Feed Day | No | 01:35 | 01:00 - 01:59 | Early Morning | 37,4 | 63  | 51,0  | 51,0  | 18,55 | 558,62 | 132,47 |
| 2019/08/10 | CH2276 | Female | Two y/o | Treatment (Wk 2) | Treatment | Feed Day | No | 01:40 | 01:00 - 01:59 | Early Morning | 37,5 | 78  | 47,4  | 47,4  | 18,65 | 575,38 | 129,94 |
| 2019/08/10 | CH2276 | Female | Two y/o | Treatment (Wk 2) | Treatment | Feed Day | No | 01:45 | 01:00 - 01:59 | Early Morning | 37,5 | 73  | 56,8  | 56,8  | 18,65 | 570,27 | 136,20 |
| 2019/08/10 | CH2276 | Female | Two y/o | Treatment (Wk 2) | Treatment | Feed Day | No | 01:50 | 01:00 - 01:59 | Early Morning | 37,5 | 59  | 59,8  | 59,8  | 18,65 | 553,30 | 137,98 |
| 2019/08/10 | CH2276 | Female | Two y/o | Treatment (Wk 2) | Treatment | Feed Day | No | 01:55 | 01:00 - 01:59 | Early Morning | 37,6 | 65  | 54,8  | 54,8  | 18,75 | 561,12 | 134,96 |
| 2019/08/10 | CH2276 | Female | Two y/o | Treatment (Wk 2) | Treatment | Feed Day | No | 02:00 | 02:00 - 02:59 | Early Morning | 37,6 | 55  | 38,8  | 38,8  | 18,75 | 547,52 | 123,04 |
| 2019/08/10 | CH2276 | Female | Two y/o | Treatment (Wk 2) | Treatment | Feed Day | No | 02:05 | 02:00 - 02:59 | Early Morning | 37,5 | 57  | 43,6  | 43,6  | 18,65 | 550,47 | 127,06 |
| 2019/08/10 | CH2276 | Female | Two y/o | Treatment (Wk 2) | Treatment | Feed Day | No | 02:10 | 02:00 - 02:59 | Early Morning | 37,5 | 53  | 46,2  | 46,2  | 18,65 | 544,43 | 129,06 |
| 2019/08/10 | CH2276 | Female | Two y/o | Treatment (Wk 2) | Treatment | Feed Day | No | 02:15 | 02:00 - 02:59 | Early Morning | 37,5 | 83  | 44,8  | 44,8  | 18,65 | 580,11 | 127,99 |
| 2019/08/10 | CH2276 | Female | Two y/o | Treatment (Wk 2) | Treatment | Feed Day | No | 02:20 | 02:00 - 02:59 | Early Morning | 37,5 | 57  | 43,0  | 43,0  | 18,65 | 550,47 | 126,58 |
| 2019/08/10 | CH2276 | Female | Two y/o | Treatment (Wk 2) | Treatment | Feed Day | No | 02:25 | 02:00 - 02:59 | Early Morning | 37,5 | 58  | 58,2  | 58,2  | 18,65 | 551,90 | 137,04 |
| 2019/08/10 | CH2276 | Female | Two y/o | Treatment (Wk 2) | Treatment | Feed Day | No | 02:30 | 02:00 - 02:59 | Early Morning | 37,4 | 58  | 58,2  | 58,2  | 18,55 | 551,90 | 137,04 |
| 2019/08/10 | CH2276 | Female | Two y/o | Treatment (Wk 2) | Treatment | Feed Day | No | 02:35 | 02:00 - 02:59 | Early Morning | 37,4 | 62  | 57,8  | 57,8  | 18,55 | 557,33 | 136,80 |
| 2019/08/10 | CH2276 | Female | Two y/o | Treatment (Wk 2) | Treatment | Feed Day | No | 02:40 | 02:00 - 02:59 | Early Morning | 37,4 | 53  | 55,6  | 55,6  | 18,55 | 544,43 | 135,46 |
| 2019/08/10 | CH2276 | Female | Two y/o | Treatment (Wk 2) | Treatment | Feed Day | No | 02:45 | 02:00 - 02:59 | Early Morning | 37,4 | 78  | 57,0  | 57,0  | 18,55 | 575,38 | 136,32 |
| 2019/08/10 | CH2276 | Female | Two y/o | Treatment (Wk 2) | Treatment | Feed Day | No | 02:50 | 02:00 - 02:59 | Early Morning | 37,3 | 52  | 57,4  | 57,4  | 18,46 | 542,83 | 136,56 |
| 2019/08/10 | CH2276 | Female | Two y/o | Treatment (Wk 2) | Treatment | Feed Day | No | 02:55 | 02:00 - 02:59 | Early Morning | 37,3 | 67  | 39,2  | 39,2  | 18,46 | 563,53 | 123,39 |
| 2019/08/10 | CH2276 | Female | Two y/o | Treatment (Wk 2) | Treatment | Feed Day | No | 03:00 | 03:00 - 03:59 | Early Morning | 37,1 |     | 67,0  | 67,0  | 18,26 |        | 141,92 |
| 2019/08/10 | CH2276 | Female | Two y/o | Treatment (Wk 2) | Treatment | Feed Day | No | 03:05 | 03:00 - 03:59 | Early Morning | 37,2 | 65  | 75,6  | 75,6  | 18,36 | 561,12 | 146,11 |
| 2019/08/10 | CH2276 | Female | Two y/o | Treatment (Wk 2) | Treatment | Feed Day | No | 03:10 | 03:00 - 03:59 | Early Morning | 37,1 | 88  | 77,0  | 77,0  | 18,26 | 584,49 | 146,75 |
| 2019/08/10 | CH2276 | Female | Two y/o | Treatment (Wk 2) | Treatment | Feed Day | No | 03:15 | 03:00 - 03:59 | Early Morning | 37,0 | 52  | 80,2  | 80,2  | 18,16 | 542,83 | 148,16 |
| 2019/08/10 | CH2276 | Female | Two y/o | Treatment (Wk 2) | Treatment | Feed Day | No | 03:20 | 03:00 - 03:59 | Early Morning | 36,8 |     | 79,8  | 79,8  | 17,96 |        | 147,99 |
| 2019/08/10 | CH2276 | Female | Two y/o | Treatment (Wk 2) | Treatment | Feed Day | No | 03:25 | 03:00 - 03:59 | Early Morning | 36,8 | 56  | 77,2  | 77,2  | 17,96 | 549,01 | 146,84 |
| 2019/08/10 | CH2276 | Female | Two y/o | Treatment (Wk 2) | Treatment | Feed Day | No | 03:30 | 03:00 - 03:59 | Early Morning | 36,8 | 57  | 83,2  | 83,2  | 17,96 | 550,47 | 149,44 |
| 2019/08/10 | CH2276 | Female | Two y/o | Treatment (Wk 2) | Treatment | Feed Day | No | 03:35 | 03:00 - 03:59 | Early Morning | 36,8 | 67  | 76,4  | 76,4  | 17,96 | 563,53 | 146,48 |
| 2019/08/10 | CH2276 | Female | Two y/o | Treatment (Wk 2) | Treatment | Feed Day | No | 03:40 | 03:00 - 03:59 | Early Morning | 37,0 | 98  | 44,6  | 44,6  | 18,16 | 592,41 | 127,84 |
| 2019/08/10 | CH2276 | Female | Two y/o | Treatment (Wk 2) | Treatment | Feed Day | No | 03:45 | 03:00 - 03:59 | Early Morning | 36,9 | 83  | 64,2  | 64,2  | 18,06 | 580,11 | 140,44 |
| 2019/08/10 | CH2276 | Female | Two y/o | Treatment (Wk 2) | Treatment | Feed Day | No | 03:50 | 03:00 - 03:59 | Early Morning | 36,9 | 94  | 97,0  | 97,0  | 18,06 | 589,37 | 154,78 |
| 2019/08/10 | CH2276 | Female | Two y/o | Treatment (Wk 2) | Treatment | Feed Day | No | 03:55 | 03:00 - 03:59 | Early Morning | 37,1 | 124 | 140,4 | 140,4 | 18,26 | 609,04 | 167,70 |
| 2019/08/10 | CH2276 | Female | Two y/o | Treatment (Wk 2) | Treatment | Feed Day | No | 04:00 | 04:00 - 04:59 | Morning       | 37,3 | 131 | 99,0  | 99,0  | 18,46 | 612,80 | 155,49 |
| 2019/08/10 | CH2276 | Female | Two y/o | Treatment (Wk 2) | Treatment | Feed Day | No | 04:05 | 04:00 - 04:59 | Morning       | 37,4 | 120 | 91,8  | 91,8  | 18,55 | 606,78 | 152,86 |
| 2019/08/10 | CH2276 | Female | Two y/o | Treatment (Wk 2) | Treatment | Feed Day | No | 04:10 | 04:00 - 04:59 | Morning       | 37,6 |     | 453,2 | 453,2 | 18,75 |        | 209,05 |
| 2019/08/10 | CH2276 | Female | Two y/o | Treatment (Wk 2) | Treatment | Feed Day | No | 04:15 | 04:00 - 04:59 | Morning       | 37,9 | 132 | 193,2 | 193,2 | 19,05 | 613,32 | 178,90 |
| 2019/08/10 | CH2276 | Female | Two y/o | Treatment (Wk 2) | Treatment | Feed Day | No | 04:20 | 04:00 - 04:59 | Morning       | 37,9 | 59  | 144,0 | 144,0 | 19,05 | 553,30 | 168,59 |
| 2019/08/10 | CH2276 | Female | Two y/o | Treatment (Wk 2) | Treatment | Feed Day | No | 04:25 | 04:00 - 04:59 | Morning       | 37,8 | 115 | 182,0 | 182,0 | 18,95 | 603,82 | 176,80 |
| 2019/08/10 | CH2276 | Female | Two y/o | Treatment (Wk 2) | Treatment | Feed Day | No | 04:30 | 04:00 - 04:59 | Morning       | 37,9 | 135 | 764,6 | 764,6 | 19,05 | 614,84 | 227,71 |
| 2019/08/10 | CH2276 | Female | Two y/o | Treatment (Wk 2) | Treatment | Feed Day | No | 04:35 | 04:00 - 04:59 | Morning       | 37,9 | 101 | 214,2 | 214,2 | 19,05 | 594,59 | 182,53 |
| 2019/08/10 | CH2276 | Female | Two y/o | Treatment (Wk 2) | Treatment | Feed Day | No | 04:40 | 04:00 - 04:59 | Morning       | 37,9 | 108 | 583,8 | 583,8 | 19,05 | 599,39 | 218,07 |
| 2019/08/10 | CH2276 | Female | Two y/o | Treatment (Wk 2) | Treatment | Feed Day | No | 04:45 | 04:00 - 04:59 | Morning       | 37,9 | 180 | 331,0 | 331,0 | 19,05 | 633,61 | 197,90 |
| 2019/08/10 | CH2276 | Female | Two y/o | Treatment (Wk 2) | Treatment | Feed Day | No | 04:50 | 04:00 - 04:59 | Morning       | 37,9 | 78  | 484,6 | 484,6 | 19,05 | 575,38 | 211,43 |
| 2019/08/10 | CH2276 | Female | Two y/o | Treatment (Wk 2) | Treatment | Feed Day | No | 04:55 | 04:00 - 04:59 | Morning       | 37,9 | 119 | 161,8 | 161,8 | 19,05 | 606,20 | 172,67 |
| 2019/08/10 | CH2276 | Female | Two y/o | Treatment (Wk 2) | Treatment | Feed Day | No | 05:00 | 05:00 - 05:59 | Morning       | 37,8 | 91  | 53,0  | 53,0  | 18,95 | 586,98 | 133,80 |
| 2019/08/10 | CH2276 | Female | Two y/o | Treatment (Wk 2) | Treatment | Feed Day | No | 05:05 | 05:00 - 05:59 | Morning       | 37,8 | 81  | 79,4  | 79,4  | 18,95 | 578,26 | 147,81 |
| 2019/08/10 | CH2276 | Female | Two y/o | Treatment (Wk 2) | Treatment | Feed Day | No | 05:10 | 05:00 - 05:59 | Morning       | 37,8 | 64  | 192,6 | 192,6 | 18,95 | 559,88 | 178,79 |
| 2019/08/10 | CH2276 | Female | Two y/o | Treatment (Wk 2) | Treatment | Feed Day | No | 05:15 | 05:00 - 05:59 | Morning       | 37,8 |     | 371,6 | 371,6 | 18,95 |        | 202,00 |
| 2019/08/10 | CH2276 | Female | Two y/o | Treatment (Wk 2) | Treatment | Feed Day | No | 05:20 | 05:00 - 05:59 | Morning       | 37,8 |     | 200,4 | 200,4 | 18,95 |        | 180,19 |
| 2019/08/10 | CH2276 | Female | Two y/o | Treatment (Wk 2) | Treatment | Feed Day | No | 05:25 | 05:00 - 05:59 | Morning       | 37,8 | 126 | 319,4 | 319,4 | 18,95 | 610,14 | 196,64 |
| 2019/08/10 | CH2276 | Female | Two y/o | Treatment (Wk 2) | Treatment | Feed Day | No | 05:30 | 05:00 - 05:59 | Morning       | 37,8 | 110 | 100,0 | 100,0 | 18,95 | 600,69 | 155,84 |
| 2019/08/10 | CH2276 | Female | Two y/o | Treatment (Wk 2) | Treatment | Feed Day | No | 05:35 | 05:00 - 05:59 | Morning       | 37,7 | 182 | 354,4 | 354,4 | 18,85 | 634,31 | 200,32 |
| 2019/08/10 | CH2276 | Female | Two y/o | Treatment (Wk 2) | Treatment | Feed Day | No | 05:40 | 05:00 - 05:59 | Morning       | 37,7 | 118 | 154,2 | 154,2 | 18,85 | 605,61 | 170,99 |
| 2019/08/10 | CH2276 | Female | Two y/o | Treatment (Wk 2) | Treatment | Feed Day | No | 05:45 | 05:00 - 05:59 | Morning       | 38,0 | 65  | 379,6 | 379,6 | 19,15 | 561,12 | 202,76 |
| 2019/08/10 | CH2276 | Female | Two y/o | Treatment (Wk 2) | Treatment | Feed Day | No | 05:50 | 05:00 - 05:59 | Morning       | 37,9 | 40  | 130,0 | 130,0 | 19,05 | 520,09 | 165,01 |
| 2019/08/10 | CH2276 | Female | Two y/o | Treatment (Wk 2) | Treatment | Feed Day | No | 05:55 | 05:00 - 05:59 | Morning       | 37,8 | 84  | 57,4  | 57,4  | 18,95 | 581,01 | 136,56 |
| 2019/08/10 | CH2276 | Female | Two y/o | Treatment (Wk 2) | Treatment | Feed Day | No | 06:00 | 06:00 - 06:59 | Morning       | 37,8 | 162 | 367,4 | 367,4 | 18,95 | 626,88 | 201,60 |
| 2019/08/10 | CH2276 | Female | Two y/o | Treatment (Wk 2) | Treatment | Feed Day | No | 06:05 | 06:00 - 06:59 | Morning       | 37,8 | 62  | 190,0 | 190,0 | 18,95 | 557,33 | 178,31 |
| 2019/08/10 | CH2276 | Female | Two y/o | Treatment (Wk 2) | Treatment | Feed Day | No | 06:10 | 06:00 - 06:59 | Morning       | 37,8 | 82  | 91,8  | 91,8  | 18,95 | 579,19 | 152,86 |
| 2019/08/10 | CH2276 | Female | Two y/o | Treatment (Wk 2) | Treatment | Feed Day | No | 06:15 | 06:00 - 06:59 | Morning       | 37,9 | 90  | 230,8 | 230,8 | 19,05 | 586,16 | 185,16 |
| 2019/08/10 | CH2276 | Female | Two y/o | Treatment (Wk 2) | Treatment | Feed Day | No | 06:20 | 06:00 - 06:59 | Morning       | 38,0 | 112 | 694,2 | 694,2 | 19,15 | 601,96 | 224,25 |
| 2019/08/10 | CH2276 | Female | Two y/o | Treatment (Wk 2) | Treatment | Feed Day | No | 06:25 | 06:00 - 06:59 | Morning       | 38,4 | 75  | 605,4 | 605,4 | 19,56 | 572,36 | 219,36 |
| 2019/08/10 | CH2276 | Female | Two y/o | Treatment (Wk 2) | Treatment | Feed Day | No | 06:30 | 06:00 - 06:59 | Morning       | 38,4 | 114 | 97,2  | 97,2  | 19,56 | 603,20 | 154,85 |
| 2019/08/10 | CH2276 | Female | Two y/o | Treatment (Wk 2) | Treatment | Feed Day | No | 06:35 | 06:00 - 06:59 | Morning       | 38,3 | 69  | 44,0  | 44,0  | 19,46 | 565,86 | 127,37 |
| 2019/08/10 | CH2276 | Female | Two y/o | Treatment (Wk 2) | Treatment | Feed Day | No | 06:40 | 06:00 - 06:59 | Morning       | 38,0 | 67  | 295,6 | 295,6 | 19,15 | 563,53 | 193,90 |
| 2019/08/10 | CH2276 | Female | Two y/o | Treatment (Wk 2) | Treatment | Feed Day | No | 06:45 | 06:00 - 06:59 | Morning       | 38,2 | 148 | 65,8  | 65,8  | 19,36 | 620,97 | 141,29 |
| 2019/08/10 | CH2276 | Female | Two y/o | Treatment (Wk 2) | Treatment | Feed Day | No | 06:50 | 06:00 - 06:59 | Morning       | 38,2 | 103 | 79,2  | 79,2  | 19,36 | 596,00 | 147,73 |
| 2019/08/10 | CH2276 | Female | Two y/o | Treatment (Wk 2) | Treatment | Feed Day | No | 06:55 | 06:00 - 06:59 | Morning       | 37,9 | 57  | 106,6 | 106,6 | 19,05 | 550,47 | 158,07 |
| 2019/08/10 | CH2276 | Female | Two y/o | Treatment (Wk 2) | Treatment | Feed Day | No | 07:00 | 07:00 - 07:59 | Morning       | 37,8 | 47  | 239,0 | 239,0 | 18,95 | 534,23 | 186,39 |



|            |        |        |         |                  |           |          |     |       |               |              |      |     |       |       |       |        |        |
|------------|--------|--------|---------|------------------|-----------|----------|-----|-------|---------------|--------------|------|-----|-------|-------|-------|--------|--------|
| 2019/08/10 | CH2276 | Female | Two y/o | Treatment (Wk 2) | Treatment | Feed Day | No  | 07:05 | 07:00 - 07:59 | Morning      | 37,8 | 88  | 81,6  | 81,6  | 18,95 | 584,49 | 148,76 |
| 2019/08/10 | CH2276 | Female | Two y/o | Treatment (Wk 2) | Treatment | Feed Day | No  | 07:10 | 07:00 - 07:59 | Morning      | 37,8 | 121 | 117,6 | 117,6 | 18,95 | 607,35 | 161,50 |
| 2019/08/10 | CH2276 | Female | Two y/o | Treatment (Wk 2) | Treatment | Feed Day | No  | 07:15 | 07:00 - 07:59 | Morning      | 37,8 | 76  | 89,8  | 89,8  | 18,95 | 573,39 | 152,10 |
| 2019/08/10 | CH2276 | Female | Two y/o | Treatment (Wk 2) | Treatment | Feed Day | No  | 07:20 | 07:00 - 07:59 | Morning      | 37,7 | 74  | 198,8 | 198,8 | 18,85 | 571,33 | 179,91 |
| 2019/08/10 | CH2276 | Female | Two y/o | Treatment (Wk 2) | Treatment | Feed Day | No  | 07:25 | 07:00 - 07:59 | Morning      | 37,8 | 59  | 79,6  | 79,6  | 18,95 | 553,30 | 147,90 |
| 2019/08/10 | CH2276 | Female | Two y/o | Treatment (Wk 2) | Treatment | Feed Day | No  | 07:30 | 07:00 - 07:59 | Morning      | 37,7 | 89  | 104,0 | 104,0 | 18,85 | 585,33 | 157,21 |
| 2019/08/10 | CH2276 | Female | Two y/o | Treatment (Wk 2) | Treatment | Feed Day | No  | 07:35 | 07:00 - 07:59 | Morning      | 37,8 | 158 | 210,0 | 210,0 | 18,95 | 625,26 | 181,84 |
| 2019/08/10 | CH2276 | Female | Two y/o | Treatment (Wk 2) | Treatment | Feed Day | No  | 07:40 | 07:00 - 07:59 | Morning      | 37,8 | 45  | 201,4 | 201,4 | 18,95 | 530,47 | 180,36 |
| 2019/08/10 | CH2276 | Female | Two y/o | Treatment (Wk 2) | Treatment | Feed Day | No  | 07:45 | 07:00 - 07:59 | Morning      | 37,7 | 64  | 60,8  | 60,8  | 18,85 | 559,88 | 138,55 |
| 2019/08/10 | CH2276 | Female | Two y/o | Treatment (Wk 2) | Treatment | Feed Day | No  | 07:50 | 07:00 - 07:59 | Morning      | 37,5 | 60  | 64,6  | 64,6  | 18,65 | 554,67 | 140,65 |
| 2019/08/10 | CH2276 | Female | Two y/o | Treatment (Wk 2) | Treatment | Feed Day | No  | 07:55 | 07:00 - 07:59 | Morning      | 37,4 | 96  | 5,4   | 5,4   | 18,55 | 590,91 | 55,99  |
| 2019/08/10 | CH2276 | Female | Two y/o | Treatment (Wk 2) | Treatment | Feed Day | No  | 08:00 | 08:00 - 08:59 | Late Morning | 37,4 | 76  | 8,6   | 8,6   | 18,55 | 573,39 | 71,66  |
| 2019/08/10 | CH2276 | Female | Two y/o | Treatment (Wk 2) | Treatment | Feed Day | No  | 08:05 | 08:00 - 08:59 | Late Morning | 37,5 | 61  | 7,2   | 7,2   | 18,65 | 556,01 | 65,66  |
| 2019/08/10 | CH2276 | Female | Two y/o | Treatment (Wk 2) | Treatment | Feed Day | No  | 08:10 | 08:00 - 08:59 | Late Morning | 37,5 | 54  | 7,8   | 7,8   | 18,65 | 545,99 | 68,36  |
| 2019/08/10 | CH2276 | Female | Two y/o | Treatment (Wk 2) | Treatment | Feed Day | No  | 08:15 | 08:00 - 08:59 | Late Morning | 37,5 | 55  | 5,6   | 5,6   | 18,65 | 547,52 | 57,21  |
| 2019/08/10 | CH2276 | Female | Two y/o | Treatment (Wk 2) | Treatment | Feed Day | No  | 08:20 | 08:00 - 08:59 | Late Morning | 37,5 | 92  | 7,0   | 7,0   | 18,65 | 587,78 | 64,72  |
| 2019/08/10 | CH2276 | Female | Two y/o | Treatment (Wk 2) | Treatment | Feed Day | No  | 08:25 | 08:00 - 08:59 | Late Morning | 37,5 | 55  | 65,0  | 65,0  | 18,65 | 547,52 | 140,87 |
| 2019/08/10 | CH2276 | Female | Two y/o | Treatment (Wk 2) | Treatment | Feed Day | No  | 08:30 | 08:00 - 08:59 | Late Morning | 37,5 | 90  | 57,0  | 57,0  | 18,65 | 586,16 | 136,32 |
| 2019/08/10 | CH2276 | Female | Two y/o | Treatment (Wk 2) | Treatment | Feed Day | No  | 08:35 | 08:00 - 08:59 | Late Morning | 37,5 | 80  | 41,8  | 41,8  | 18,65 | 577,31 | 125,60 |
| 2019/08/10 | CH2276 | Female | Two y/o | Treatment (Wk 2) | Treatment | Feed Day | No  | 08:40 | 08:00 - 08:59 | Late Morning | 37,3 | 68  | 58,0  | 58,0  | 18,46 | 564,71 | 136,92 |
| 2019/08/10 | CH2276 | Female | Two y/o | Treatment (Wk 2) | Treatment | Feed Day | No  | 08:45 | 08:00 - 08:59 | Late Morning | 37,1 | 56  | 56,0  | 56,0  | 18,26 | 549,01 | 135,70 |
| 2019/08/10 | CH2276 | Female | Two y/o | Treatment (Wk 2) | Treatment | Feed Day | No  | 08:50 | 08:00 - 08:59 | Late Morning | 37,1 | 56  | 55,4  | 55,4  | 18,26 | 549,01 | 135,33 |
| 2019/08/10 | CH2276 | Female | Two y/o | Treatment (Wk 2) | Treatment | Feed Day | No  | 08:55 | 08:00 - 08:59 | Late Morning | 37,0 | 58  | 53,0  | 53,0  | 18,16 | 551,90 | 133,80 |
| 2019/08/10 | CH2276 | Female | Two y/o | Treatment (Wk 2) | Treatment | Feed Day | No  | 09:00 | 09:00 - 09:59 | Late Morning | 36,9 | 64  | 69,4  | 69,4  | 18,06 | 559,88 | 143,14 |
| 2019/08/10 | CH2276 | Female | Two y/o | Treatment (Wk 2) | Treatment | Feed Day | No  | 09:05 | 09:00 - 09:59 | Late Morning | 36,9 | 58  | 72,4  | 72,4  | 18,06 | 551,90 | 144,61 |
| 2019/08/10 | CH2276 | Female | Two y/o | Treatment (Wk 2) | Treatment | Feed Day | No  | 09:10 | 09:00 - 09:59 | Late Morning | 36,9 | 60  | 67,6  | 67,6  | 18,06 | 554,67 | 142,23 |
| 2019/08/10 | CH2276 | Female | Two y/o | Treatment (Wk 2) | Treatment | Feed Day | No  | 09:15 | 09:00 - 09:59 | Late Morning | 36,8 | 58  | 62,6  | 62,6  | 17,96 | 551,90 | 139,56 |
| 2019/08/10 | CH2276 | Female | Two y/o | Treatment (Wk 2) | Treatment | Feed Day | No  | 09:20 | 09:00 - 09:59 | Late Morning | 36,7 | 59  | 107,4 | 107,4 | 17,87 | 553,30 | 158,33 |
| 2019/08/10 | CH2276 | Female | Two y/o | Treatment (Wk 2) | Treatment | Feed Day | No  | 09:25 | 09:00 - 09:59 | Late Morning | 36,7 | 65  | 120,8 | 120,8 | 17,87 | 561,12 | 162,44 |
| 2019/08/10 | CH2276 | Female | Two y/o | Treatment (Wk 2) | Treatment | Feed Day | No  | 09:30 | 09:00 - 09:59 | Late Morning | 36,8 | 124 | 140,0 | 140,0 | 17,96 | 609,04 | 167,60 |
| 2019/08/10 | CH2276 | Female | Two y/o | Treatment (Wk 2) | Treatment | Feed Day | No  | 09:35 | 09:00 - 09:59 | Late Morning | 36,9 | 35  | 55,0  | 55,0  | 18,06 | 507,97 | 135,08 |
| 2019/08/10 | CH2276 | Female | Two y/o | Treatment (Wk 2) | Treatment | Feed Day | No  | 09:40 | 09:00 - 09:59 | Late Morning | 36,9 | 60  | 154,6 | 154,6 | 18,06 | 554,67 | 171,08 |
| 2019/08/10 | CH2276 | Female | Two y/o | Treatment (Wk 2) | Treatment | Feed Day | No  | 09:45 | 09:00 - 09:59 | Late Morning | 37,1 | 126 | 118,4 | 118,4 | 18,26 | 610,14 | 161,74 |
| 2019/08/10 | CH2276 | Female | Two y/o | Treatment (Wk 2) | Treatment | Feed Day | No  | 09:50 | 09:00 - 09:59 | Late Morning | 37,3 | 62  | 73,4  | 73,4  | 18,46 | 557,33 | 145,08 |
| 2019/08/10 | CH2276 | Female | Two y/o | Treatment (Wk 2) | Treatment | Feed Day | No  | 09:55 | 09:00 - 09:59 | Late Morning | 37,4 | 93  | 173,4 | 173,4 | 18,55 | 588,58 | 175,10 |
| 2019/08/10 | CH2276 | Female | Two y/o | Treatment (Wk 2) | Treatment | Feed Day | No  | 10:00 | 10:00 - 10:59 | Late Morning | 37,5 | 188 | 128,4 | 128,4 | 18,65 | 636,34 | 164,57 |
| 2019/08/10 | CH2276 | Female | Two y/o | Treatment (Wk 2) | Treatment | Feed Day | No  | 10:05 | 10:00 - 10:59 | Late Morning | 37,7 | 98  | 99,4  | 99,4  | 18,85 | 592,41 | 155,63 |
| 2019/08/10 | CH2276 | Female | Two y/o | Treatment (Wk 2) | Treatment | Feed Day | No  | 10:10 | 10:00 - 10:59 | Late Morning | 37,8 | 38  | 227,8 | 227,8 | 18,95 | 515,48 | 184,70 |
| 2019/08/10 | CH2276 | Female | Two y/o | Treatment (Wk 2) | Treatment | Feed Day | No  | 10:15 | 10:00 - 10:59 | Late Morning | 37,8 | 84  | 50,8  | 50,8  | 18,95 | 581,01 | 132,33 |
| 2019/08/10 | CH2276 | Female | Two y/o | Treatment (Wk 2) | Treatment | Feed Day | No  | 10:20 | 10:00 - 10:59 | Late Morning | 37,8 | 56  | 93,0  | 93,0  | 18,95 | 549,01 | 153,31 |
| 2019/08/10 | CH2276 | Female | Two y/o | Treatment (Wk 2) | Treatment | Feed Day | No  | 10:25 | 10:00 - 10:59 | Late Morning | 37,9 |     | 154,6 | 154,6 | 19,05 |        | 171,08 |
| 2019/08/10 | CH2276 | Female | Two y/o | Treatment (Wk 2) | Treatment | Feed Day | No  | 10:30 | 10:00 - 10:59 | Late Morning | 37,9 | 79  | 31,2  | 31,2  | 19,05 | 576,36 | 115,54 |
| 2019/08/10 | CH2276 | Female | Two y/o | Treatment (Wk 2) | Treatment | Feed Day | No  | 10:35 | 10:00 - 10:59 | Late Morning | 37,8 | 70  | 12,4  | 12,4  | 18,95 | 566,99 | 84,04  |
| 2019/08/10 | CH2276 | Female | Two y/o | Treatment (Wk 2) | Treatment | Feed Day | No  | 10:40 | 10:00 - 10:59 | Late Morning | 37,8 | 79  | 25,6  | 25,6  | 18,95 | 576,36 | 108,76 |
| 2019/08/10 | CH2276 | Female | Two y/o | Treatment (Wk 2) | Treatment | Feed Day | No  | 10:45 | 10:00 - 10:59 | Late Morning | 37,9 | 61  | 28,4  | 28,4  | 19,05 | 556,01 | 112,31 |
| 2019/08/10 | CH2276 | Female | Two y/o | Treatment (Wk 2) | Treatment | Feed Day | No  | 10:50 | 10:00 - 10:59 | Late Morning | 37,9 | 64  | 45,2  | 45,2  | 19,05 | 559,88 | 128,30 |
| 2019/08/10 | CH2276 | Female | Two y/o | Treatment (Wk 2) | Treatment | Feed Day | No  | 10:55 | 10:00 - 10:59 | Late Morning | 37,9 | 56  | 63,4  | 63,4  | 19,05 | 549,01 | 140,00 |
| 2019/08/10 | CH2276 | Female | Two y/o | Treatment (Wk 2) | Treatment | Feed Day | No  | 11:00 | 11:00 - 11:59 | Late Morning | 37,8 | 61  | 72,2  | 72,2  | 18,95 | 556,01 | 144,51 |
| 2019/08/10 | CH2276 | Female | Two y/o | Treatment (Wk 2) | Treatment | Feed Day | No  | 11:05 | 11:00 - 11:59 | Late Morning | 37,8 | 58  | 59,2  | 59,2  | 18,95 | 551,90 | 137,63 |
| 2019/08/10 | CH2276 | Female | Two y/o | Treatment (Wk 2) | Treatment | Feed Day | No  | 11:10 | 11:00 - 11:59 | Late Morning | 37,7 | 58  | 46,0  | 46,0  | 18,85 | 551,90 | 128,91 |
| 2019/08/10 | CH2276 | Female | Two y/o | Treatment (Wk 2) | Treatment | Feed Day | No  | 11:15 | 11:00 - 11:59 | Late Morning | 37,6 | 56  | 45,2  | 45,2  | 18,75 | 549,01 | 128,30 |
| 2019/08/10 | CH2276 | Female | Two y/o | Treatment (Wk 2) | Treatment | Feed Day | No  | 11:20 | 11:00 - 11:59 | Late Morning | 37,6 | 80  | 48,8  | 48,8  | 18,75 | 577,31 | 130,95 |
| 2019/08/10 | CH2276 | Female | Two y/o | Treatment (Wk 2) | Treatment | Feed Day | No  | 11:25 | 11:00 - 11:59 | Late Morning | 37,5 | 57  | 37,6  | 37,6  | 18,65 | 550,47 | 121,96 |
| 2019/08/10 | CH2276 | Female | Two y/o | Treatment (Wk 2) | Treatment | Feed Day | Yes | 11:30 | 11:00 - 11:59 | Late Morning | 37,5 | 61  | 41,2  | 41,2  | 18,65 | 556,01 | 125,11 |
| 2019/08/10 | CH2276 | Female | Two y/o | Treatment (Wk 2) | Treatment | Feed Day | Yes | 11:35 | 11:00 - 11:59 | Late Morning | 37,5 | 104 | 112,8 | 112,8 | 18,65 | 596,69 | 160,05 |
| 2019/08/10 | CH2276 | Female | Two y/o | Treatment (Wk 2) | Treatment | Feed Day | Yes | 11:40 | 11:00 - 11:59 | Late Morning | 37,5 | 55  | 52,8  | 52,8  | 18,65 | 547,52 | 133,67 |
| 2019/08/10 | CH2276 | Female | Two y/o | Treatment (Wk 2) | Treatment | Feed Day | Yes | 11:45 | 11:00 - 11:59 | Late Morning | 37,5 | 108 | 123,2 | 123,2 | 18,65 | 599,39 | 163,13 |
| 2019/08/10 | CH2276 | Female | Two y/o | Treatment (Wk 2) | Treatment | Feed Day | Yes | 11:50 | 11:00 - 11:59 | Late Morning | 37,5 | 90  | 71,4  | 71,4  | 18,65 | 586,16 | 144,12 |
| 2019/08/10 | CH2276 | Female | Two y/o | Treatment (Wk 2) | Treatment | Feed Day | Yes | 11:55 | 11:00 - 11:59 | Late Morning | 37,5 |     | 66,2  | 66,2  | 18,65 |        | 141,50 |
| 2019/08/10 | CH2276 | Female | Two y/o | Treatment (Wk 2) | Treatment | Feed Day | Yes | 12:00 | 12:00 - 12:59 | Afternoon    | 37,6 |     | 78,8  | 78,8  | 18,75 |        | 147,55 |
| 2019/08/10 | CH2276 | Female | Two y/o | Treatment (Wk 2) | Treatment | Feed Day | Yes | 12:05 | 12:00 - 12:59 | Afternoon    | 37,6 | 102 | 32,0  | 32,0  | 18,75 | 595,30 | 116,41 |
| 2019/08/10 | CH2276 | Female | Two y/o | Treatment (Wk 2) | Treatment | Feed Day | Yes | 12:10 | 12:00 - 12:59 | Afternoon    | 37,7 | 62  | 27,0  | 27,0  | 18,85 | 557,33 | 110,58 |
| 2019/08/10 | CH2276 | Female | Two y/o | Treatment (Wk 2) | Treatment | Feed Day | Yes | 12:15 | 12:00 - 12:59 | Afternoon    | 37,7 | 78  | 14,8  | 14,8  | 18,85 | 575,38 | 90,05  |
| 2019/08/10 | CH2276 | Female | Two y/o | Treatment (Wk 2) | Treatment | Feed Day | Yes | 12:20 | 12:00 - 12:59 | Afternoon    | 37,7 | 65  | 15,4  | 15,4  | 18,85 | 561,12 | 91,41  |
| 2019/08/10 | CH2276 | Female | Two y/o | Treatment (Wk 2) | Treatment | Feed Day | Yes | 12:25 | 12:00 - 12:59 | Afternoon    | 37,7 | 57  | 25,0  | 25,0  | 18,85 | 550,47 | 107,94 |
| 2019/08/10 | CH2276 | Female | Two y/o | Treatment (Wk 2) | Treatment | Feed Day | No  | 12:30 | 12:00 - 12:59 | Afternoon    | 37,7 | 62  | 24,0  | 24,0  | 18,85 | 557,33 | 106,55 |
| 2019/08/10 | CH2276 | Female | Two y/o | Treatment (Wk 2) | Treatment | Feed Day | No  | 12:35 | 12:00 - 12:59 | Afternoon    | 37,8 | 54  | 76,2  | 76,2  | 18,95 | 545,99 | 146,38 |
| 2019/08/10 | CH2276 | Female | Two y/o | Treatment (Wk 2) | Treatment | Feed Day | No  | 12:40 | 12:00 - 12:59 | Afternoon    | 37,8 | 56  | 100,4 | 100,4 | 18,95 | 549,01 | 155,98 |
| 2019/08/10 | CH2276 | Female | Two y/o | Treatment (Wk 2) | Treatment | Feed Day | No  | 12:45 | 12:00 - 12:59 | Afternoon    | 37,9 | 104 | 154,4 | 154,4 | 19,05 | 596,69 | 171,03 |
| 2019/08/10 | CH2276 | Female | Two y/o | Treatment (Wk 2) | Treatment | Feed Day | No  | 12:50 | 12:00 - 12:59 | Afternoon    | 38,2 |     | 100,4 | 100,4 | 19,36 |        | 155,98 |



|            |        |        |         |                  |           |          |    |       |               |           |      |     |       |       |       |        |        |
|------------|--------|--------|---------|------------------|-----------|----------|----|-------|---------------|-----------|------|-----|-------|-------|-------|--------|--------|
| 2019/08/10 | CH2276 | Female | Two y/o | Treatment (Wk 2) | Treatment | Feed Day | No | 12:55 | 12:00 - 12:59 | Afternoon | 38,2 | 53  | 369,2 | 369,2 | 19,36 | 544,43 | 201,77 |
| 2019/08/10 | CH2276 | Female | Two y/o | Treatment (Wk 2) | Treatment | Feed Day | No | 13:00 | 13:00 - 13:59 | Afternoon | 38,3 | 110 | 105,8 | 105,8 | 19,46 | 600,69 | 157,81 |
| 2019/08/10 | CH2276 | Female | Two y/o | Treatment (Wk 2) | Treatment | Feed Day | No | 13:05 | 13:00 - 13:59 | Afternoon | 38,3 | 138 | 44,8  | 44,8  | 19,46 | 616,31 | 127,99 |
| 2019/08/10 | CH2276 | Female | Two y/o | Treatment (Wk 2) | Treatment | Feed Day | No | 13:10 | 13:00 - 13:59 | Afternoon | 38,2 |     | 73,8  | 73,8  | 19,36 |        | 145,27 |
| 2019/08/10 | CH2276 | Female | Two y/o | Treatment (Wk 2) | Treatment | Feed Day | No | 13:15 | 13:00 - 13:59 | Afternoon | 38,3 | 113 | 65,8  | 65,8  | 19,46 | 602,58 | 141,29 |
| 2019/08/10 | CH2276 | Female | Two y/o | Treatment (Wk 2) | Treatment | Feed Day | No | 13:20 | 13:00 - 13:59 | Afternoon | 38,2 |     | 58,0  | 58,0  | 19,36 |        | 136,92 |
| 2019/08/10 | CH2276 | Female | Two y/o | Treatment (Wk 2) | Treatment | Feed Day | No | 13:25 | 13:00 - 13:59 | Afternoon | 38,3 | 115 | 90,4  | 90,4  | 19,46 | 603,82 | 152,33 |
| 2019/08/10 | CH2276 | Female | Two y/o | Treatment (Wk 2) | Treatment | Feed Day | No | 13:30 | 13:00 - 13:59 | Afternoon | 38,3 | 119 | 46,2  | 46,2  | 19,46 | 606,20 | 129,06 |
| 2019/08/10 | CH2276 | Female | Two y/o | Treatment (Wk 2) | Treatment | Feed Day | No | 13:35 | 13:00 - 13:59 | Afternoon | 38,2 | 125 | 46,8  | 46,8  | 19,36 | 609,60 | 129,50 |
| 2019/08/10 | CH2276 | Female | Two y/o | Treatment (Wk 2) | Treatment | Feed Day | No | 13:40 | 13:00 - 13:59 | Afternoon | 38,2 | 103 | 54,2  | 54,2  | 19,36 | 596,00 | 134,57 |
| 2019/08/10 | CH2276 | Female | Two y/o | Treatment (Wk 2) | Treatment | Feed Day | No | 13:45 | 13:00 - 13:59 | Afternoon | 38,3 | 102 | 77,2  | 77,2  | 19,46 | 595,30 | 146,84 |
| 2019/08/10 | CH2276 | Female | Two y/o | Treatment (Wk 2) | Treatment | Feed Day | No | 13:50 | 13:00 - 13:59 | Afternoon | 38,4 | 37  | 52,6  | 52,6  | 19,56 | 513,06 | 133,54 |
| 2019/08/10 | CH2276 | Female | Two y/o | Treatment (Wk 2) | Treatment | Feed Day | No | 13:55 | 13:00 - 13:59 | Afternoon | 38,4 | 103 | 111,2 | 111,2 | 19,56 | 596,00 | 159,55 |
| 2019/08/10 | CH2276 | Female | Two y/o | Treatment (Wk 2) | Treatment | Feed Day | No | 14:00 | 14:00 - 14:59 | Afternoon | 38,5 | 125 | 20,2  | 20,2  | 19,66 | 609,60 | 100,65 |
| 2019/08/10 | CH2276 | Female | Two y/o | Treatment (Wk 2) | Treatment | Feed Day | No | 14:05 | 14:00 - 14:59 | Afternoon | 38,5 |     | 26,4  | 26,4  | 19,66 |        | 109,81 |
| 2019/08/10 | CH2276 | Female | Two y/o | Treatment (Wk 2) | Treatment | Feed Day | No | 14:10 | 14:00 - 14:59 | Afternoon | 38,4 | 103 | 65,8  | 65,8  | 19,56 | 596,00 | 141,29 |
| 2019/08/10 | CH2276 | Female | Two y/o | Treatment (Wk 2) | Treatment | Feed Day | No | 14:15 | 14:00 - 14:59 | Afternoon | 38,4 | 81  | 47,2  | 47,2  | 19,56 | 578,26 | 129,80 |
| 2019/08/10 | CH2276 | Female | Two y/o | Treatment (Wk 2) | Treatment | Feed Day | No | 14:20 | 14:00 - 14:59 | Afternoon | 38,3 | 102 | 66,4  | 66,4  | 19,46 | 595,30 | 141,61 |
| 2019/08/10 | CH2276 | Female | Two y/o | Treatment (Wk 2) | Treatment | Feed Day | No | 14:25 | 14:00 - 14:59 | Afternoon | 38,3 | 113 | 98,0  | 98,0  | 19,46 | 602,58 | 155,14 |
| 2019/08/10 | CH2276 | Female | Two y/o | Treatment (Wk 2) | Treatment | Feed Day | No | 14:30 | 14:00 - 14:59 | Afternoon | 38,2 | 104 | 51,0  | 51,0  | 19,36 | 596,69 | 132,47 |
| 2019/08/10 | CH2276 | Female | Two y/o | Treatment (Wk 2) | Treatment | Feed Day | No | 14:35 | 14:00 - 14:59 | Afternoon | 38,2 | 123 | 42,8  | 42,8  | 19,36 | 608,49 | 126,42 |
| 2019/08/10 | CH2276 | Female | Two y/o | Treatment (Wk 2) | Treatment | Feed Day | No | 14:40 | 14:00 - 14:59 | Afternoon | 38,3 |     | 49,6  | 49,6  | 19,46 |        | 131,51 |
| 2019/08/10 | CH2276 | Female | Two y/o | Treatment (Wk 2) | Treatment | Feed Day | No | 14:45 | 14:00 - 14:59 | Afternoon | 38,3 |     | 62,2  | 62,2  | 19,46 |        | 139,34 |
| 2019/08/10 | CH2276 | Female | Two y/o | Treatment (Wk 2) | Treatment | Feed Day | No | 14:50 | 14:00 - 14:59 | Afternoon | 38,3 | 105 | 50,8  | 50,8  | 19,46 | 597,38 | 132,33 |
| 2019/08/10 | CH2276 | Female | Two y/o | Treatment (Wk 2) | Treatment | Feed Day | No | 14:55 | 14:00 - 14:59 | Afternoon | 38,1 | 109 | 66,0  | 66,0  | 19,26 | 600,04 | 141,40 |
| 2019/08/10 | CH2276 | Female | Two y/o | Treatment (Wk 2) | Treatment | Feed Day | No | 15:00 | 15:00 - 15:59 | Afternoon | 38,2 | 106 | 39,4  | 39,4  | 19,36 | 598,06 | 123,57 |
| 2019/08/10 | CH2276 | Female | Two y/o | Treatment (Wk 2) | Treatment | Feed Day | No | 15:05 | 15:00 - 15:59 | Afternoon | 38,3 | 104 | 42,4  | 42,4  | 19,46 | 596,69 | 126,10 |
| 2019/08/10 | CH2276 | Female | Two y/o | Treatment (Wk 2) | Treatment | Feed Day | No | 15:10 | 15:00 - 15:59 | Afternoon | 38,3 | 106 | 44,4  | 44,4  | 19,46 | 598,06 | 127,69 |
| 2019/08/10 | CH2276 | Female | Two y/o | Treatment (Wk 2) | Treatment | Feed Day | No | 15:15 | 15:00 - 15:59 | Afternoon | 38,4 | 129 | 27,6  | 27,6  | 19,56 | 611,75 | 111,33 |
| 2019/08/10 | CH2276 | Female | Two y/o | Treatment (Wk 2) | Treatment | Feed Day | No | 15:20 | 15:00 - 15:59 | Afternoon | 38,3 | 95  | 35,6  | 35,6  | 19,46 | 590,14 | 120,08 |
| 2019/08/10 | CH2276 | Female | Two y/o | Treatment (Wk 2) | Treatment | Feed Day | No | 15:25 | 15:00 - 15:59 | Afternoon | 38,4 | 100 | 52,2  | 52,2  | 19,56 | 593,87 | 133,27 |
| 2019/08/10 | CH2276 | Female | Two y/o | Treatment (Wk 2) | Treatment | Feed Day | No | 15:30 | 15:00 - 15:59 | Afternoon | 38,3 | 115 | 48,2  | 48,2  | 19,46 | 603,82 | 130,52 |
| 2019/08/10 | CH2276 | Female | Two y/o | Treatment (Wk 2) | Treatment | Feed Day | No | 15:35 | 15:00 - 15:59 | Afternoon | 38,3 | 85  | 40,8  | 40,8  | 19,46 | 581,90 | 124,77 |
| 2019/08/10 | CH2276 | Female | Two y/o | Treatment (Wk 2) | Treatment | Feed Day | No | 15:40 | 15:00 - 15:59 | Afternoon | 38,3 | 131 | 369,6 | 369,6 | 19,46 | 612,80 | 201,81 |
| 2019/08/10 | CH2276 | Female | Two y/o | Treatment (Wk 2) | Treatment | Feed Day | No | 15:45 | 15:00 - 15:59 | Afternoon | 38,4 | 107 | 427,4 | 427,4 | 19,56 | 598,73 | 206,97 |
| 2019/08/10 | CH2276 | Female | Two y/o | Treatment (Wk 2) | Treatment | Feed Day | No | 15:50 | 15:00 - 15:59 | Afternoon | 38,4 | 106 | 46,0  | 46,0  | 19,56 | 598,06 | 128,91 |
| 2019/08/10 | CH2276 | Female | Two y/o | Treatment (Wk 2) | Treatment | Feed Day | No | 15:55 | 15:00 - 15:59 | Afternoon | 38,5 | 68  | 40,2  | 40,2  | 19,66 | 564,71 | 124,26 |
| 2019/08/10 | CH2276 | Female | Two y/o | Treatment (Wk 2) | Treatment | Feed Day | No | 16:00 | 16:00 - 16:59 | Evening   | 38,5 | 103 | 44,8  | 44,8  | 19,66 | 596,00 | 127,99 |
| 2019/08/10 | CH2276 | Female | Two y/o | Treatment (Wk 2) | Treatment | Feed Day | No | 16:05 | 16:00 - 16:59 | Evening   | 38,5 | 92  | 55,2  | 55,2  | 19,66 | 587,78 | 135,21 |
| 2019/08/10 | CH2276 | Female | Two y/o | Treatment (Wk 2) | Treatment | Feed Day | No | 16:10 | 16:00 - 16:59 | Evening   | 38,5 | 69  | 57,8  | 57,8  | 19,66 | 565,86 | 136,80 |
| 2019/08/10 | CH2276 | Female | Two y/o | Treatment (Wk 2) | Treatment | Feed Day | No | 16:15 | 16:00 - 16:59 | Evening   | 38,5 | 67  | 62,4  | 62,4  | 19,66 | 563,53 | 139,45 |
| 2019/08/10 | CH2276 | Female | Two y/o | Treatment (Wk 2) | Treatment | Feed Day | No | 16:20 | 16:00 - 16:59 | Evening   | 38,5 | 88  | 62,4  | 62,4  | 19,66 | 584,49 | 139,45 |
| 2019/08/10 | CH2276 | Female | Two y/o | Treatment (Wk 2) | Treatment | Feed Day | No | 16:25 | 16:00 - 16:59 | Evening   | 38,5 | 68  | 24,8  | 24,8  | 19,66 | 564,71 | 107,67 |
| 2019/08/10 | CH2276 | Female | Two y/o | Treatment (Wk 2) | Treatment | Feed Day | No | 16:30 | 16:00 - 16:59 | Evening   | 38,5 |     | 45,8  | 45,8  | 19,66 |        | 128,76 |
| 2019/08/10 | CH2276 | Female | Two y/o | Treatment (Wk 2) | Treatment | Feed Day | No | 16:35 | 16:00 - 16:59 | Evening   | 38,6 | 90  | 40,6  | 40,6  | 19,76 | 586,16 | 124,60 |
| 2019/08/10 | CH2276 | Female | Two y/o | Treatment (Wk 2) | Treatment | Feed Day | No | 16:40 | 16:00 - 16:59 | Evening   | 38,4 | 66  | 50,8  | 50,8  | 19,56 | 562,34 | 132,33 |
| 2019/08/10 | CH2276 | Female | Two y/o | Treatment (Wk 2) | Treatment | Feed Day | No | 16:45 | 16:00 - 16:59 | Evening   | 38,4 | 70  | 40,6  | 40,6  | 19,56 | 566,99 | 124,60 |
| 2019/08/10 | CH2276 | Female | Two y/o | Treatment (Wk 2) | Treatment | Feed Day | No | 16:50 | 16:00 - 16:59 | Evening   | 38,4 | 94  | 23,6  | 23,6  | 19,56 | 589,37 | 105,97 |
| 2019/08/10 | CH2276 | Female | Two y/o | Treatment (Wk 2) | Treatment | Feed Day | No | 16:55 | 16:00 - 16:59 | Evening   | 38,4 | 68  | 8,2   | 8,2   | 19,56 | 564,71 | 70,05  |
| 2019/08/10 | CH2276 | Female | Two y/o | Treatment (Wk 2) | Treatment | Feed Day | No | 17:00 | 17:00 - 17:59 | Evening   | 38,4 | 67  | 6,6   | 6,6   | 19,56 | 563,53 | 62,73  |
| 2019/08/10 | CH2276 | Female | Two y/o | Treatment (Wk 2) | Treatment | Feed Day | No | 17:05 | 17:00 - 17:59 | Evening   | 38,4 | 90  | 13,2  | 13,2  | 19,56 | 586,16 | 86,17  |
| 2019/08/10 | CH2276 | Female | Two y/o | Treatment (Wk 2) | Treatment | Feed Day | No | 17:10 | 17:00 - 17:59 | Evening   | 38,4 | 67  | 4,0   | 4,0   | 19,56 | 563,53 | 45,94  |
| 2019/08/10 | CH2276 | Female | Two y/o | Treatment (Wk 2) | Treatment | Feed Day | No | 17:15 | 17:00 - 17:59 | Evening   | 38,4 | 67  | 7,0   | 7,0   | 19,56 | 563,53 | 64,72  |
| 2019/08/10 | CH2276 | Female | Two y/o | Treatment (Wk 2) | Treatment | Feed Day | No | 17:20 | 17:00 - 17:59 | Evening   | 38,4 | 65  | 16,2  | 16,2  | 19,56 | 561,12 | 93,13  |
| 2019/08/10 | CH2276 | Female | Two y/o | Treatment (Wk 2) | Treatment | Feed Day | No | 17:25 | 17:00 - 17:59 | Evening   | 38,4 | 68  | 12,6  | 12,6  | 19,56 | 564,71 | 84,59  |
| 2019/08/10 | CH2276 | Female | Two y/o | Treatment (Wk 2) | Treatment | Feed Day | No | 17:30 | 17:00 - 17:59 | Evening   | 38,3 | 65  | 12,8  | 12,8  | 19,46 | 561,12 | 85,12  |
| 2019/08/10 | CH2276 | Female | Two y/o | Treatment (Wk 2) | Treatment | Feed Day | No | 17:35 | 17:00 - 17:59 | Evening   | 38,3 | 63  | 13,8  | 13,8  | 19,46 | 558,62 | 87,68  |
| 2019/08/10 | CH2276 | Female | Two y/o | Treatment (Wk 2) | Treatment | Feed Day | No | 17:40 | 17:00 - 17:59 | Evening   | 38,3 | 81  | 24,0  | 24,0  | 19,46 | 578,26 | 106,55 |
| 2019/08/10 | CH2276 | Female | Two y/o | Treatment (Wk 2) | Treatment | Feed Day | No | 17:45 | 17:00 - 17:59 | Evening   | 38,2 |     | 41,2  | 41,2  | 19,36 |        | 125,11 |
| 2019/08/10 | CH2276 | Female | Two y/o | Treatment (Wk 2) | Treatment | Feed Day | No | 17:50 | 17:00 - 17:59 | Evening   | 38,1 | 105 | 85,8  | 85,8  | 19,26 | 597,38 | 150,51 |
| 2019/08/10 | CH2276 | Female | Two y/o | Treatment (Wk 2) | Treatment | Feed Day | No | 17:55 | 17:00 - 17:59 | Evening   | 38,0 | 107 | 481,8 | 481,8 | 19,15 | 598,73 | 211,23 |
| 2019/08/10 | CH2276 | Female | Two y/o | Treatment (Wk 2) | Treatment | Feed Day | No | 18:00 | 18:00 - 18:59 | Evening   | 38,0 |     | 153,8 | 153,8 | 19,15 |        | 170,89 |
| 2019/08/10 | CH2276 | Female | Two y/o | Treatment (Wk 2) | Treatment | Feed Day | No | 18:05 | 18:00 - 18:59 | Evening   | 38,2 | 80  | 75,2  | 75,2  | 19,36 | 577,31 | 145,93 |
| 2019/08/10 | CH2276 | Female | Two y/o | Treatment (Wk 2) | Treatment | Feed Day | No | 18:10 | 18:00 - 18:59 | Evening   | 38,2 | 113 | 319,6 | 319,6 | 19,36 | 602,58 | 196,66 |
| 2019/08/10 | CH2276 | Female | Two y/o | Treatment (Wk 2) | Treatment | Feed Day | No | 18:15 | 18:00 - 18:59 | Evening   | 38,1 | 35  | 73,8  | 73,8  | 19,26 | 507,97 | 145,27 |
| 2019/08/10 | CH2276 | Female | Two y/o | Treatment (Wk 2) | Treatment | Feed Day | No | 18:20 | 18:00 - 18:59 | Evening   | 38,1 | 67  | 194,8 | 194,8 | 19,26 | 563,53 | 179,19 |
| 2019/08/10 | CH2276 | Female | Two y/o | Treatment (Wk 2) | Treatment | Feed Day | No | 18:25 | 18:00 - 18:59 | Evening   | 38,3 | 114 | 174,8 | 174,8 | 19,46 | 603,20 | 175,39 |
| 2019/08/10 | CH2276 | Female | Two y/o | Treatment (Wk 2) | Treatment | Feed Day | No | 18:30 | 18:00 - 18:59 | Evening   | 38,3 | 99  | 459,0 | 459,0 | 19,46 | 593,14 | 209,50 |
| 2019/08/10 | CH2276 | Female | Two y/o | Treatment (Wk 2) | Treatment | Feed Day | No | 18:35 | 18:00 - 18:59 | Evening   | 38,4 | 83  | 150,0 | 150,0 | 19,56 | 580,11 | 170,02 |
| 2019/08/10 | CH2276 | Female | Two y/o | Treatment (Wk 2) | Treatment | Feed Day | No | 18:40 | 18:00 - 18:59 | Evening   | 38,3 | 101 | 68,6  | 68,6  | 19,46 | 594,59 | 142,74 |



|    |            |        |        |         |                  |           |          |    |       |               |               |      |     |       |       |       |        |        |
|----|------------|--------|--------|---------|------------------|-----------|----------|----|-------|---------------|---------------|------|-----|-------|-------|-------|--------|--------|
|    | 2019/08/10 | CH2276 | Female | Two y/o | Treatment (Wk 2) | Treatment | Feed Day | No | 18:45 | 18:00 - 18:59 | Evening       | 38,2 | 89  | 49,0  | 49,0  | 19,36 | 585,33 | 131,09 |
|    | 2019/08/10 | CH2276 | Female | Two y/o | Treatment (Wk 2) | Treatment | Feed Day | No | 18:50 | 18:00 - 18:59 | Evening       | 38,0 | 90  | 75,6  | 75,6  | 19,15 | 586,16 | 146,11 |
|    | 2019/08/10 | CH2276 | Female | Two y/o | Treatment (Wk 2) | Treatment | Feed Day | No | 18:55 | 18:00 - 18:59 | Evening       | 38,0 | 118 | 383,2 | 383,2 | 19,15 | 605,61 | 203,09 |
|    | 2019/08/10 | CH2276 | Female | Two y/o | Treatment (Wk 2) | Treatment | Feed Day | No | 19:00 | 19:00 - 19:59 | Evening       | 38,2 | 37  | 136,8 | 136,8 | 19,36 | 513,06 | 166,79 |
|    | 2019/08/10 | CH2276 | Female | Two y/o | Treatment (Wk 2) | Treatment | Feed Day | No | 19:05 | 19:00 - 19:59 | Evening       | 38,2 | 61  | 49,0  | 49,0  | 19,36 | 556,01 | 131,09 |
|    | 2019/08/10 | CH2276 | Female | Two y/o | Treatment (Wk 2) | Treatment | Feed Day | No | 19:10 | 19:00 - 19:59 | Evening       | 38,2 | 62  | 26,8  | 26,8  | 19,36 | 557,33 | 110,33 |
|    | 2019/08/10 | CH2276 | Female | Two y/o | Treatment (Wk 2) | Treatment | Feed Day | No | 19:15 | 19:00 - 19:59 | Evening       | 38,0 | 83  | 47,0  | 47,0  | 19,15 | 580,11 | 129,65 |
|    | 2019/08/10 | CH2276 | Female | Two y/o | Treatment (Wk 2) | Treatment | Feed Day | No | 19:20 | 19:00 - 19:59 | Evening       | 37,9 | 95  | 81,0  | 81,0  | 19,05 | 590,14 | 148,51 |
|    | 2019/08/10 | CH2276 | Female | Two y/o | Treatment (Wk 2) | Treatment | Feed Day | No | 19:25 | 19:00 - 19:59 | Evening       | 37,8 | 70  | 77,8  | 77,8  | 18,95 | 566,99 | 147,11 |
|    | 2019/08/10 | CH2276 | Female | Two y/o | Treatment (Wk 2) | Treatment | Feed Day | No | 19:30 | 19:00 - 19:59 | Evening       | 37,8 | 62  | 77,0  | 77,0  | 18,95 | 557,33 | 146,75 |
|    | 2019/08/10 | CH2276 | Female | Two y/o | Treatment (Wk 2) | Treatment | Feed Day | No | 19:35 | 19:00 - 19:59 | Evening       | 37,7 | 96  | 80,8  | 80,8  | 18,85 | 590,91 | 148,42 |
|    | 2019/08/10 | CH2276 | Female | Two y/o | Treatment (Wk 2) | Treatment | Feed Day | No | 19:40 | 19:00 - 19:59 | Evening       | 37,7 | 95  | 76,0  | 76,0  | 18,85 | 590,14 | 146,29 |
|    | 2019/08/10 | CH2276 | Female | Two y/o | Treatment (Wk 2) | Treatment | Feed Day | No | 19:45 | 19:00 - 19:59 | Evening       | 37,6 | 92  | 75,0  | 75,0  | 18,75 | 587,78 | 145,83 |
|    | 2019/08/10 | CH2276 | Female | Two y/o | Treatment (Wk 2) | Treatment | Feed Day | No | 19:50 | 19:00 - 19:59 | Evening       | 37,5 | 62  | 77,8  | 77,8  | 18,65 | 557,33 | 147,11 |
|    | 2019/08/10 | CH2276 | Female | Two y/o | Treatment (Wk 2) | Treatment | Feed Day | No | 19:55 | 19:00 - 19:59 | Evening       | 37,5 | 63  | 67,0  | 67,0  | 18,65 | 558,62 | 141,92 |
|    | 2019/08/10 | CH2276 | Female | Two y/o | Treatment (Wk 2) | Treatment | Feed Day | No | 20:00 | 20:00 - 20:59 | Night         | 37,5 | 66  | 42,0  | 42,0  | 18,65 | 562,34 | 125,77 |
|    | 2019/08/10 | CH2276 | Female | Two y/o | Treatment (Wk 2) | Treatment | Feed Day | No | 20:05 | 20:00 - 20:59 | Night         | 37,4 | 64  | 39,4  | 39,4  | 18,55 | 559,88 | 123,57 |
|    | 2019/08/10 | CH2276 | Female | Two y/o | Treatment (Wk 2) | Treatment | Feed Day | No | 20:10 | 20:00 - 20:59 | Night         | 37,4 | 73  | 42,0  | 42,0  | 18,55 | 570,27 | 125,77 |
|    | 2019/08/10 | CH2276 | Female | Two y/o | Treatment (Wk 2) | Treatment | Feed Day | No | 20:15 | 20:00 - 20:59 | Night         | 37,4 | 94  | 38,4  | 38,4  | 18,55 | 589,37 | 122,68 |
|    | 2019/08/10 | CH2276 | Female | Two y/o | Treatment (Wk 2) | Treatment | Feed Day | No | 20:20 | 20:00 - 20:59 | Night         | 37,5 | 69  | 40,0  | 40,0  | 18,65 | 565,86 | 124,09 |
|    | 2019/08/10 | CH2276 | Female | Two y/o | Treatment (Wk 2) | Treatment | Feed Day | No | 20:25 | 20:00 - 20:59 | Night         | 37,5 | 98  | 34,2  | 34,2  | 18,65 | 592,41 | 118,70 |
|    | 2019/08/10 | CH2276 | Female | Two y/o | Treatment (Wk 2) | Treatment | Feed Day | No | 20:30 | 20:00 - 20:59 | Night         | 37,5 | 61  | 39,8  | 39,8  | 18,65 | 556,01 | 123,91 |
|    | 2019/08/10 | CH2276 | Female | Two y/o | Treatment (Wk 2) | Treatment | Feed Day | No | 20:35 | 20:00 - 20:59 | Night         | 37,5 | 63  | 36,4  | 36,4  | 18,65 | 558,62 | 120,84 |
|    | 2019/08/10 | CH2276 | Female | Two y/o | Treatment (Wk 2) | Treatment | Feed Day | No | 20:40 | 20:00 - 20:59 | Night         | 37,5 | 62  | 28,4  | 28,4  | 18,65 | 557,33 | 112,31 |
|    | 2019/08/10 | CH2276 | Female | Two y/o | Treatment (Wk 2) | Treatment | Feed Day | No | 20:45 | 20:00 - 20:59 | Night         | 37,5 | 98  | 28,4  | 28,4  | 18,65 | 592,41 | 112,31 |
|    | 2019/08/10 | CH2276 | Female | Two y/o | Treatment (Wk 2) | Treatment | Feed Day | No | 20:50 | 20:00 - 20:59 | Night         | 37,4 | 98  | 26,4  | 26,4  | 18,55 | 592,41 | 109,81 |
|    | 2019/08/10 | CH2276 | Female | Two y/o | Treatment (Wk 2) | Treatment | Feed Day | No | 20:55 | 20:00 - 20:59 | Night         | 37,4 | 62  | 37,0  | 37,0  | 18,55 | 557,33 | 121,40 |
|    | 2019/08/10 | CH2276 | Female | Two y/o | Treatment (Wk 2) | Treatment | Feed Day | No | 21:00 | 21:00 - 21:59 | Night         | 37,4 | 85  | 43,6  | 43,6  | 18,55 | 581,90 | 127,06 |
|    | 2019/08/10 | CH2276 | Female | Two y/o | Treatment (Wk 2) | Treatment | Feed Day | No | 21:05 | 21:00 - 21:59 | Night         | 37,4 | 62  | 25,4  | 25,4  | 18,55 | 557,33 | 108,49 |
|    | 2019/08/10 | CH2276 | Female | Two y/o | Treatment (Wk 2) | Treatment | Feed Day | No | 21:10 | 21:00 - 21:59 | Night         | 37,3 | 98  | 28,0  | 28,0  | 18,46 | 592,41 | 111,83 |
|    | 2019/08/10 | CH2276 | Female | Two y/o | Treatment (Wk 2) | Treatment | Feed Day | No | 21:15 | 21:00 - 21:59 | Night         | 37,3 | 92  | 23,6  | 23,6  | 18,46 | 587,78 | 105,97 |
|    | 2019/08/10 | CH2276 | Female | Two y/o | Treatment (Wk 2) | Treatment | Feed Day | No | 21:20 | 21:00 - 21:59 | Night         | 37,3 | 97  | 31,2  | 31,2  | 18,46 | 591,66 | 115,54 |
|    | 2019/08/10 | CH2276 | Female | Two y/o | Treatment (Wk 2) | Treatment | Feed Day | No | 21:25 | 21:00 - 21:59 | Night         | 37,3 | 135 | 81,4  | 81,4  | 18,46 | 614,84 | 148,68 |
|    | 2019/08/10 | CH2276 | Female | Two y/o | Treatment (Wk 2) | Treatment | Feed Day | No | 21:30 | 21:00 - 21:59 | Night         | 37,1 | 63  | 75,2  | 75,2  | 18,26 | 558,62 | 145,93 |
|    | 2019/08/10 | CH2276 | Female | Two y/o | Treatment (Wk 2) | Treatment | Feed Day | No | 21:35 | 21:00 - 21:59 | Night         | 36,9 | 82  | 66,4  | 66,4  | 18,06 | 579,19 | 141,61 |
|    | 2019/08/10 | CH2276 | Female | Two y/o | Treatment (Wk 2) | Treatment | Feed Day | No | 21:40 | 21:00 - 21:59 | Night         | 36,8 | 70  | 42,4  | 42,4  | 17,96 | 566,99 | 126,10 |
|    | 2019/08/10 | CH2276 | Female | Two y/o | Treatment (Wk 2) | Treatment | Feed Day | No | 21:45 | 21:00 - 21:59 | Night         | 36,9 | 64  | 38,2  | 38,2  | 18,06 | 559,88 | 122,50 |
|    | 2019/08/10 | CH2276 | Female | Two y/o | Treatment (Wk 2) | Treatment | Feed Day | No | 21:50 | 21:00 - 21:59 | Night         | 37,1 | 93  | 36,6  | 36,6  | 18,26 | 588,58 | 121,03 |
|    | 2019/08/10 | CH2276 | Female | Two y/o | Treatment (Wk 2) | Treatment | Feed Day | No | 21:55 | 21:00 - 21:59 | Night         | 37,3 | 68  | 67,6  | 67,6  | 18,46 | 564,71 | 142,23 |
|    | 2019/08/10 | CH2276 | Female | Two y/o | Treatment (Wk 2) | Treatment | Feed Day | No | 22:00 | 22:00 - 22:59 | Night         | 37,3 | 156 | 86,2  | 86,2  | 18,46 | 624,43 | 150,67 |
|    | 2019/08/10 | CH2276 | Female | Two y/o | Treatment (Wk 2) | Treatment | Feed Day | No | 22:05 | 22:00 - 22:59 | Night         | 37,4 |     | 76,6  | 76,6  | 18,55 |        | 146,57 |
|    | 2019/08/10 | CH2276 | Female | Two y/o | Treatment (Wk 2) | Treatment | Feed Day | No | 22:10 | 22:00 - 22:59 | Night         | 37,4 | 98  | 57,8  | 57,8  | 18,55 | 592,41 | 136,80 |
|    | 2019/08/10 | CH2276 | Female | Two y/o | Treatment (Wk 2) | Treatment | Feed Day | No | 22:15 | 22:00 - 22:59 | Night         | 37,4 | 84  | 62,8  | 62,8  | 18,55 | 581,01 | 139,67 |
|    | 2019/08/10 | CH2276 | Female | Two y/o | Treatment (Wk 2) | Treatment | Feed Day | No | 22:20 | 22:00 - 22:59 | Night         | 37,5 | 102 | 45,8  | 45,8  | 18,65 | 595,30 | 128,76 |
|    | 2019/08/10 | CH2276 | Female | Two y/o | Treatment (Wk 2) | Treatment | Feed Day | No | 22:25 | 22:00 - 22:59 | Night         | 37,5 | 94  | 66,2  | 66,2  | 18,65 | 589,37 | 141,50 |
|    | 2019/08/10 | CH2276 | Female | Two y/o | Treatment (Wk 2) | Treatment | Feed Day | No | 22:30 | 22:00 - 22:59 | Night         | 37,6 | 79  | 70,2  | 70,2  | 18,75 | 576,36 | 143,54 |
|    | 2019/08/10 | CH2276 | Female | Two y/o | Treatment (Wk 2) | Treatment | Feed Day | No | 22:35 | 22:00 - 22:59 | Night         | 37,5 | 62  | 68,0  | 68,0  | 18,65 | 557,33 | 142,43 |
|    | 2019/08/10 | CH2276 | Female | Two y/o | Treatment (Wk 2) | Treatment | Feed Day | No | 22:40 | 22:00 - 22:59 | Night         | 37,5 | 89  | 63,4  | 63,4  | 18,65 | 585,33 | 140,00 |
|    | 2019/08/10 | CH2276 | Female | Two y/o | Treatment (Wk 2) | Treatment | Feed Day | No | 22:45 | 22:00 - 22:59 | Night         | 37,4 | 65  | 66,4  | 66,4  | 18,55 | 561,12 | 141,61 |
|    | 2019/08/10 | CH2276 | Female | Two y/o | Treatment (Wk 2) | Treatment | Feed Day | No | 22:50 | 22:00 - 22:59 | Night         | 37,4 | 69  | 73,8  | 73,8  | 18,55 | 565,86 | 145,27 |
|    | 2019/08/10 | CH2276 | Female | Two y/o | Treatment (Wk 2) | Treatment | Feed Day | No | 22:55 | 22:00 - 22:59 | Night         | 37,3 | 66  | 69,0  | 69,0  | 18,46 | 562,34 | 142,94 |
|    | 2019/08/10 | CH2276 | Female | Two y/o | Treatment (Wk 2) | Treatment | Feed Day | No | 23:00 | 23:00 - 23:59 | Night         | 37,3 | 97  | 67,2  | 67,2  | 18,46 | 591,66 | 142,02 |
|    | 2019/08/10 | CH2276 | Female | Two y/o | Treatment (Wk 2) | Treatment | Feed Day | No | 23:05 | 23:00 - 23:59 | Night         | 37,2 | 99  | 67,4  | 67,4  | 18,36 | 593,14 | 142,12 |
|    | 2019/08/10 | CH2276 | Female | Two y/o | Treatment (Wk 2) | Treatment | Feed Day | No | 23:10 | 23:00 - 23:59 | Night         | 37,2 | 70  | 61,4  | 61,4  | 18,36 | 566,99 | 138,89 |
|    | 2019/08/10 | CH2276 | Female | Two y/o | Treatment (Wk 2) | Treatment | Feed Day | No | 23:15 | 23:00 - 23:59 | Night         | 37,3 | 64  | 58,2  | 58,2  | 18,46 | 559,88 | 137,04 |
|    | 2019/08/10 | CH2276 | Female | Two y/o | Treatment (Wk 2) | Treatment | Feed Day | No | 23:20 | 23:00 - 23:59 | Night         | 37,3 | 92  | 57,2  | 57,2  | 18,46 | 587,78 | 136,44 |
|    | 2019/08/10 | CH2276 | Female | Two y/o | Treatment (Wk 2) | Treatment | Feed Day | No | 23:25 | 23:00 - 23:59 | Night         | 37,4 | 63  | 54,6  | 54,6  | 18,55 | 558,62 | 134,83 |
|    | 2019/08/10 | CH2276 | Female | Two y/o | Treatment (Wk 2) | Treatment | Feed Day | No | 23:30 | 23:00 - 23:59 | Night         | 37,4 | 99  | 49,0  | 49,0  | 18,55 | 593,14 | 131,09 |
|    | 2019/08/10 | CH2276 | Female | Two y/o | Treatment (Wk 2) | Treatment | Feed Day | No | 23:35 | 23:00 - 23:59 | Night         | 37,4 | 86  | 51,4  | 51,4  | 18,55 | 582,77 | 132,74 |
|    | 2019/08/10 | CH2276 | Female | Two y/o | Treatment (Wk 2) | Treatment | Feed Day | No | 23:40 | 23:00 - 23:59 | Night         | 37,5 |     | 36,8  | 36,8  | 18,65 |        | 121,22 |
|    | 2019/08/10 | CH2276 | Female | Two y/o | Treatment (Wk 2) | Treatment | Feed Day | No | 23:45 | 23:00 - 23:59 | Night         | 37,5 | 95  | 31,0  | 31,0  | 18,65 | 590,14 | 115,32 |
|    | 2019/08/10 | CH2276 | Female | Two y/o | Treatment (Wk 2) | Treatment | Feed Day | No | 23:50 | 23:00 - 23:59 | Night         | 37,5 | 105 | 35,8  | 35,8  | 18,65 | 597,38 | 120,27 |
|    | 2019/08/10 | CH2276 | Female | Two y/o | Treatment (Wk 2) | Treatment | Feed Day | No | 23:55 | 23:00 - 23:59 | Night         | 37,7 | 90  | 37,6  | 37,6  | 18,85 | 586,16 | 121,96 |
| 54 | 2019/08/11 | CH2276 | Female | Two y/o | Treatment (Wk 2) | Treatment | Fast Day | No | 00:00 | 00:00 - 00:59 | Early Morning | 37,8 | 104 | 43,2  | 43,2  | 18,95 | 596,69 | 126,74 |
|    | 2019/08/11 | CH2276 | Female | Two y/o | Treatment (Wk 2) | Treatment | Fast Day | No | 00:05 | 00:00 - 00:59 | Early Morning | 37,9 | 88  | 38,4  | 38,4  | 19,05 | 584,49 | 122,68 |
|    | 2019/08/11 | CH2276 | Female | Two y/o | Treatment (Wk 2) | Treatment | Fast Day | No | 00:10 | 00:00 - 00:59 | Early Morning | 38,0 | 98  | 59,2  | 59,2  | 19,15 | 592,41 | 137,63 |
|    | 2019/08/11 | CH2276 | Female | Two y/o | Treatment (Wk 2) | Treatment | Fast Day | No | 00:15 | 00:00 - 00:59 | Early Morning | 37,9 | 64  | 58,8  | 58,8  | 19,05 | 559,88 | 137,39 |
|    | 2019/08/11 | CH2276 | Female | Two y/o | Treatment (Wk 2) | Treatment | Fast Day | No | 00:20 | 00:00 - 00:59 | Early Morning | 38,0 | 150 | 37,8  | 37,8  | 19,15 | 621,86 | 122,14 |
|    | 2019/08/11 | CH2276 | Female | Two y/o | Treatment (Wk 2) | Treatment | Fast Day | No | 00:25 | 00:00 - 00:59 | Early Morning | 38,0 | 94  | 33,2  | 33,2  | 19,15 | 589,37 | 117,68 |
|    | 2019/08/11 | CH2276 | Female | Two y/o | Treatment (Wk 2) | Treatment | Fast Day | No | 00:30 | 00:00 - 00:59 | Early Morning | 38,0 | 103 | 27,8  | 27,8  | 19,15 | 596,00 |        |



|            |        |        |         |                  |           |          |    |       |               |               |      |     |       |       |       |        |        |
|------------|--------|--------|---------|------------------|-----------|----------|----|-------|---------------|---------------|------|-----|-------|-------|-------|--------|--------|
| 2019/08/11 | CH2276 | Female | Two y/o | Treatment (Wk 2) | Treatment | Fast Day | No | 00:35 | 00:00 - 00:59 | Early Morning | 38,2 | 152 | 19,4  | 19,4  | 19,36 | 622,73 | 99,28  |
| 2019/08/11 | CH2276 | Female | Two y/o | Treatment (Wk 2) | Treatment | Fast Day | No | 00:40 | 00:00 - 00:59 | Early Morning | 38,2 | 108 | 12,2  | 12,2  | 19,36 | 599,39 | 83,49  |
| 2019/08/11 | CH2276 | Female | Two y/o | Treatment (Wk 2) | Treatment | Fast Day | No | 00:45 | 00:00 - 00:59 | Early Morning | 38,2 | 112 | 21,4  | 21,4  | 19,36 | 601,96 | 102,63 |
| 2019/08/11 | CH2276 | Female | Two y/o | Treatment (Wk 2) | Treatment | Fast Day | No | 00:50 | 00:00 - 00:59 | Early Morning | 38,2 | 106 | 13,8  | 13,8  | 19,36 | 598,06 | 87,68  |
| 2019/08/11 | CH2276 | Female | Two y/o | Treatment (Wk 2) | Treatment | Fast Day | No | 00:55 | 00:00 - 00:59 | Early Morning | 38,3 | 98  | 14,0  | 14,0  | 19,46 | 592,41 | 88,17  |
| 2019/08/11 | CH2276 | Female | Two y/o | Treatment (Wk 2) | Treatment | Fast Day | No | 01:00 | 01:00 - 01:59 | Early Morning | 38,3 | 100 | 10,0  | 10,0  | 19,46 | 593,87 | 76,76  |
| 2019/08/11 | CH2276 | Female | Two y/o | Treatment (Wk 2) | Treatment | Fast Day | No | 01:05 | 01:00 - 01:59 | Early Morning | 38,3 | 106 | 8,0   | 8,0   | 19,46 | 598,06 | 69,22  |
| 2019/08/11 | CH2276 | Female | Two y/o | Treatment (Wk 2) | Treatment | Fast Day | No | 01:10 | 01:00 - 01:59 | Early Morning | 38,4 | 82  | 6,6   | 6,6   | 19,56 | 579,19 | 62,73  |
| 2019/08/11 | CH2276 | Female | Two y/o | Treatment (Wk 2) | Treatment | Fast Day | No | 01:15 | 01:00 - 01:59 | Early Morning | 38,4 | 103 | 14,0  | 14,0  | 19,56 | 596,00 | 88,17  |
| 2019/08/11 | CH2276 | Female | Two y/o | Treatment (Wk 2) | Treatment | Fast Day | No | 01:20 | 01:00 - 01:59 | Early Morning | 38,4 | 102 | 9,2   | 9,2   | 19,56 | 595,30 | 73,94  |
| 2019/08/11 | CH2276 | Female | Two y/o | Treatment (Wk 2) | Treatment | Fast Day | No | 01:25 | 01:00 - 01:59 | Early Morning | 38,4 | 101 | 7,0   | 7,0   | 19,56 | 594,59 | 64,72  |
| 2019/08/11 | CH2276 | Female | Two y/o | Treatment (Wk 2) | Treatment | Fast Day | No | 01:30 | 01:00 - 01:59 | Early Morning | 38,4 | 103 | 4,8   | 4,8   | 19,56 | 596,00 | 52,04  |
| 2019/08/11 | CH2276 | Female | Two y/o | Treatment (Wk 2) | Treatment | Fast Day | No | 01:35 | 01:00 - 01:59 | Early Morning | 38,4 |     | 6,0   | 6,0   | 19,56 |        | 59,53  |
| 2019/08/11 | CH2276 | Female | Two y/o | Treatment (Wk 2) | Treatment | Fast Day | No | 01:40 | 01:00 - 01:59 | Early Morning | 38,5 | 94  | 5,6   | 5,6   | 19,66 | 589,37 | 57,21  |
| 2019/08/11 | CH2276 | Female | Two y/o | Treatment (Wk 2) | Treatment | Fast Day | No | 01:45 | 01:00 - 01:59 | Early Morning | 38,5 | 85  | 7,6   | 7,6   | 19,66 | 581,90 | 67,49  |
| 2019/08/11 | CH2276 | Female | Two y/o | Treatment (Wk 2) | Treatment | Fast Day | No | 01:50 | 01:00 - 01:59 | Early Morning | 38,5 | 96  | 4,4   | 4,4   | 19,66 | 590,91 | 49,12  |
| 2019/08/11 | CH2276 | Female | Two y/o | Treatment (Wk 2) | Treatment | Fast Day | No | 01:55 | 01:00 - 01:59 | Early Morning | 38,5 | 87  | 30,4  | 30,4  | 19,66 | 583,64 | 114,65 |
| 2019/08/11 | CH2276 | Female | Two y/o | Treatment (Wk 2) | Treatment | Fast Day | No | 02:00 | 02:00 - 02:59 | Early Morning | 38,5 | 98  | 26,4  | 26,4  | 19,76 | 592,41 | 109,81 |
| 2019/08/11 | CH2276 | Female | Two y/o | Treatment (Wk 2) | Treatment | Fast Day | No | 02:05 | 02:00 - 02:59 | Early Morning | 38,6 | 109 | 14,8  | 14,8  | 19,76 | 600,04 | 90,05  |
| 2019/08/11 | CH2276 | Female | Two y/o | Treatment (Wk 2) | Treatment | Fast Day | No | 02:10 | 02:00 - 02:59 | Early Morning | 38,6 | 79  | 14,0  | 14,0  | 19,76 | 576,36 | 88,17  |
| 2019/08/11 | CH2276 | Female | Two y/o | Treatment (Wk 2) | Treatment | Fast Day | No | 02:15 | 02:00 - 02:59 | Early Morning | 38,6 | 85  | 16,4  | 16,4  | 19,76 | 581,90 | 93,55  |
| 2019/08/11 | CH2276 | Female | Two y/o | Treatment (Wk 2) | Treatment | Fast Day | No | 02:20 | 02:00 - 02:59 | Early Morning | 38,6 | 87  | 17,4  | 17,4  | 19,76 | 583,64 | 95,56  |
| 2019/08/11 | CH2276 | Female | Two y/o | Treatment (Wk 2) | Treatment | Fast Day | No | 02:25 | 02:00 - 02:59 | Early Morning | 38,6 | 100 | 17,8  | 17,8  | 19,76 | 593,87 | 96,34  |
| 2019/08/11 | CH2276 | Female | Two y/o | Treatment (Wk 2) | Treatment | Fast Day | No | 02:30 | 02:00 - 02:59 | Early Morning | 38,6 | 104 | 23,2  | 23,2  | 19,76 | 596,69 | 105,39 |
| 2019/08/11 | CH2276 | Female | Two y/o | Treatment (Wk 2) | Treatment | Fast Day | No | 02:35 | 02:00 - 02:59 | Early Morning | 38,5 | 76  | 35,6  | 35,6  | 19,66 | 573,39 | 120,08 |
| 2019/08/11 | CH2276 | Female | Two y/o | Treatment (Wk 2) | Treatment | Fast Day | No | 02:40 | 02:00 - 02:59 | Early Morning | 38,5 | 59  | 30,0  | 30,0  | 19,66 | 553,30 | 114,20 |
| 2019/08/11 | CH2276 | Female | Two y/o | Treatment (Wk 2) | Treatment | Fast Day | No | 02:45 | 02:00 - 02:59 | Early Morning | 38,5 | 73  | 27,8  | 27,8  | 19,66 | 570,27 | 111,58 |
| 2019/08/11 | CH2276 | Female | Two y/o | Treatment (Wk 2) | Treatment | Fast Day | No | 02:50 | 02:00 - 02:59 | Early Morning | 38,6 | 99  | 32,8  | 32,8  | 19,76 | 593,14 | 117,26 |
| 2019/08/11 | CH2276 | Female | Two y/o | Treatment (Wk 2) | Treatment | Fast Day | No | 02:55 | 02:00 - 02:59 | Early Morning | 38,7 | 76  | 63,6  | 63,6  | 19,87 | 573,39 | 140,11 |
| 2019/08/11 | CH2276 | Female | Two y/o | Treatment (Wk 2) | Treatment | Fast Day | No | 03:00 | 03:00 - 03:59 | Early Morning | 38,7 | 94  | 82,0  | 82,0  | 19,87 | 589,37 | 148,93 |
| 2019/08/11 | CH2276 | Female | Two y/o | Treatment (Wk 2) | Treatment | Fast Day | No | 03:05 | 03:00 - 03:59 | Early Morning | 38,5 | 96  | 82,8  | 82,8  | 19,66 | 590,91 | 149,27 |
| 2019/08/11 | CH2276 | Female | Two y/o | Treatment (Wk 2) | Treatment | Fast Day | No | 03:10 | 03:00 - 03:59 | Early Morning | 38,4 | 103 | 85,0  | 85,0  | 19,56 | 596,00 | 150,18 |
| 2019/08/11 | CH2276 | Female | Two y/o | Treatment (Wk 2) | Treatment | Fast Day | No | 03:15 | 03:00 - 03:59 | Early Morning | 38,3 | 91  | 72,6  | 72,6  | 19,46 | 586,98 | 144,70 |
| 2019/08/11 | CH2276 | Female | Two y/o | Treatment (Wk 2) | Treatment | Fast Day | No | 03:20 | 03:00 - 03:59 | Early Morning | 38,2 | 103 | 74,0  | 74,0  | 19,36 | 596,00 | 145,37 |
| 2019/08/11 | CH2276 | Female | Two y/o | Treatment (Wk 2) | Treatment | Fast Day | No | 03:25 | 03:00 - 03:59 | Early Morning | 38,2 | 68  | 78,2  | 78,2  | 19,36 | 564,71 | 147,28 |
| 2019/08/11 | CH2276 | Female | Two y/o | Treatment (Wk 2) | Treatment | Fast Day | No | 03:30 | 03:00 - 03:59 | Early Morning | 38,0 | 88  | 77,6  | 77,6  | 19,15 | 584,49 | 147,02 |
| 2019/08/11 | CH2276 | Female | Two y/o | Treatment (Wk 2) | Treatment | Fast Day | No | 03:35 | 03:00 - 03:59 | Early Morning | 38,0 | 60  | 79,8  | 79,8  | 19,15 | 554,67 | 147,99 |
| 2019/08/11 | CH2276 | Female | Two y/o | Treatment (Wk 2) | Treatment | Fast Day | No | 03:40 | 03:00 - 03:59 | Early Morning | 37,9 | 66  | 78,8  | 78,8  | 19,05 | 562,34 | 147,55 |
| 2019/08/11 | CH2276 | Female | Two y/o | Treatment (Wk 2) | Treatment | Fast Day | No | 03:45 | 03:00 - 03:59 | Early Morning | 37,9 | 85  | 78,0  | 78,0  | 19,05 | 581,90 | 147,20 |
| 2019/08/11 | CH2276 | Female | Two y/o | Treatment (Wk 2) | Treatment | Fast Day | No | 03:50 | 03:00 - 03:59 | Early Morning | 37,8 | 73  | 81,2  | 81,2  | 18,95 | 570,27 | 148,59 |
| 2019/08/11 | CH2276 | Female | Two y/o | Treatment (Wk 2) | Treatment | Fast Day | No | 03:55 | 03:00 - 03:59 | Early Morning | 37,8 | 94  | 78,8  | 78,8  | 18,95 | 589,37 | 147,55 |
| 2019/08/11 | CH2276 | Female | Two y/o | Treatment (Wk 2) | Treatment | Fast Day | No | 04:00 | 04:00 - 04:59 | Morning       | 37,8 |     | 70,2  | 70,2  | 18,95 |        | 143,54 |
| 2019/08/11 | CH2276 | Female | Two y/o | Treatment (Wk 2) | Treatment | Fast Day | No | 04:05 | 04:00 - 04:59 | Morning       | 37,8 | 73  | 71,2  | 71,2  | 18,95 | 570,27 | 144,03 |
| 2019/08/11 | CH2276 | Female | Two y/o | Treatment (Wk 2) | Treatment | Fast Day | No | 04:10 | 04:00 - 04:59 | Morning       | 37,7 | 65  | 72,2  | 72,2  | 18,85 | 561,12 | 144,51 |
| 2019/08/11 | CH2276 | Female | Two y/o | Treatment (Wk 2) | Treatment | Fast Day | No | 04:15 | 04:00 - 04:59 | Morning       | 37,7 | 99  | 72,4  | 72,4  | 18,85 | 593,14 | 144,61 |
| 2019/08/11 | CH2276 | Female | Two y/o | Treatment (Wk 2) | Treatment | Fast Day | No | 04:20 | 04:00 - 04:59 | Morning       | 37,6 |     | 73,6  | 73,6  | 18,75 |        | 145,18 |
| 2019/08/11 | CH2276 | Female | Two y/o | Treatment (Wk 2) | Treatment | Fast Day | No | 04:25 | 04:00 - 04:59 | Morning       | 37,6 | 94  | 80,8  | 80,8  | 18,75 | 589,37 | 148,42 |
| 2019/08/11 | CH2276 | Female | Two y/o | Treatment (Wk 2) | Treatment | Fast Day | No | 04:30 | 04:00 - 04:59 | Morning       | 37,6 | 101 | 65,6  | 65,6  | 18,75 | 594,59 | 141,19 |
| 2019/08/11 | CH2276 | Female | Two y/o | Treatment (Wk 2) | Treatment | Fast Day | No | 04:35 | 04:00 - 04:59 | Morning       | 37,6 | 71  | 53,4  | 53,4  | 18,75 | 568,10 | 134,06 |
| 2019/08/11 | CH2276 | Female | Two y/o | Treatment (Wk 2) | Treatment | Fast Day | No | 04:40 | 04:00 - 04:59 | Morning       | 37,6 | 71  | 42,4  | 42,4  | 18,75 | 568,10 | 126,10 |
| 2019/08/11 | CH2276 | Female | Two y/o | Treatment (Wk 2) | Treatment | Fast Day | No | 04:45 | 04:00 - 04:59 | Morning       | 37,6 | 83  | 41,6  | 41,6  | 18,75 | 580,11 | 125,44 |
| 2019/08/11 | CH2276 | Female | Two y/o | Treatment (Wk 2) | Treatment | Fast Day | No | 04:50 | 04:00 - 04:59 | Morning       | 37,6 | 77  | 41,8  | 41,8  | 18,75 | 574,39 | 125,60 |
| 2019/08/11 | CH2276 | Female | Two y/o | Treatment (Wk 2) | Treatment | Fast Day | No | 04:55 | 04:00 - 04:59 | Morning       | 37,5 | 68  | 38,6  | 38,6  | 18,65 | 564,71 | 122,86 |
| 2019/08/11 | CH2276 | Female | Two y/o | Treatment (Wk 2) | Treatment | Fast Day | No | 05:00 | 05:00 - 05:59 | Morning       | 37,5 | 78  | 47,0  | 47,0  | 18,65 | 575,38 | 129,65 |
| 2019/08/11 | CH2276 | Female | Two y/o | Treatment (Wk 2) | Treatment | Fast Day | No | 05:05 | 05:00 - 05:59 | Morning       | 37,5 |     | 34,0  | 34,0  | 18,65 |        | 118,49 |
| 2019/08/11 | CH2276 | Female | Two y/o | Treatment (Wk 2) | Treatment | Fast Day | No | 05:10 | 05:00 - 05:59 | Morning       | 37,4 | 63  | 38,6  | 38,6  | 18,55 | 558,62 | 122,86 |
| 2019/08/11 | CH2276 | Female | Two y/o | Treatment (Wk 2) | Treatment | Fast Day | No | 05:15 | 05:00 - 05:59 | Morning       | 37,4 | 65  | 49,6  | 49,6  | 18,55 | 561,12 | 131,51 |
| 2019/08/11 | CH2276 | Female | Two y/o | Treatment (Wk 2) | Treatment | Fast Day | No | 05:20 | 05:00 - 05:59 | Morning       | 37,4 | 79  | 59,8  | 59,8  | 18,55 | 576,36 | 137,98 |
| 2019/08/11 | CH2276 | Female | Two y/o | Treatment (Wk 2) | Treatment | Fast Day | No | 05:25 | 05:00 - 05:59 | Morning       | 37,5 | 112 | 44,2  | 44,2  | 18,65 | 601,96 | 127,53 |
| 2019/08/11 | CH2276 | Female | Two y/o | Treatment (Wk 2) | Treatment | Fast Day | No | 05:30 | 05:00 - 05:59 | Morning       | 37,4 | 106 | 27,8  | 27,8  | 18,55 | 598,06 | 111,58 |
| 2019/08/11 | CH2276 | Female | Two y/o | Treatment (Wk 2) | Treatment | Fast Day | No | 05:35 | 05:00 - 05:59 | Morning       | 37,4 | 64  | 23,2  | 23,2  | 18,55 | 559,88 | 105,39 |
| 2019/08/11 | CH2276 | Female | Two y/o | Treatment (Wk 2) | Treatment | Fast Day | No | 05:40 | 05:00 - 05:59 | Morning       | 37,4 | 60  | 87,0  | 87,0  | 18,55 | 554,67 | 150,99 |
| 2019/08/11 | CH2276 | Female | Two y/o | Treatment (Wk 2) | Treatment | Fast Day | No | 05:45 | 05:00 - 05:59 | Morning       | 37,5 | 104 | 53,2  | 53,2  | 18,65 | 596,69 | 133,93 |
| 2019/08/11 | CH2276 | Female | Two y/o | Treatment (Wk 2) | Treatment | Fast Day | No | 05:50 | 05:00 - 05:59 | Morning       | 37,5 | 97  | 90,2  | 90,2  | 18,65 | 591,66 | 152,25 |
| 2019/08/11 | CH2276 | Female | Two y/o | Treatment (Wk 2) | Treatment | Fast Day | No | 05:55 | 05:00 - 05:59 | Morning       | 37,4 | 129 | 193,6 | 193,6 | 18,55 | 611,75 | 178,97 |
| 2019/08/11 | CH2276 | Female | Two y/o | Treatment (Wk 2) | Treatment | Fast Day | No | 06:00 | 06:00 - 06:59 | Morning       | 37,5 | 94  | 114,0 | 114,0 | 18,65 | 589,37 | 160,42 |
| 2019/08/11 | CH2276 | Female | Two y/o | Treatment (Wk 2) | Treatment | Fast Day | No | 06:05 | 06:00 - 06:59 | Morning       | 37,5 | 113 | 434,4 | 434,4 | 18,65 | 602,58 | 207,54 |
| 2019/08/11 | CH2276 | Female | Two y/o | Treatment (Wk 2) | Treatment | Fast Day | No | 06:10 | 06:00 - 06:59 | Morning       | 37,5 | 62  | 143,0 | 143,0 | 18,65 | 557,33 | 168,34 |
| 2019/08/11 | CH2276 | Female | Two y/o | Treatment (Wk 2) | Treatment | Fast Day | No | 06:15 | 06:00 - 06:59 | Morning       | 37,5 | 84  | 377,6 | 377,6 | 18,65 | 581,01 | 202,57 |
| 2019/08/11 | CH2276 | Female | Two y/o | Treatment (Wk 2) | Treatment | Fast Day | No | 06:20 | 06:00 - 06:59 | Morning       | 37,6 |     | 76,8  | 76,8  | 18,75 |        | 146,66 |



|            |        |        |         |                  |           |          |    |       |               |              |      |     |        |       |       |        |        |
|------------|--------|--------|---------|------------------|-----------|----------|----|-------|---------------|--------------|------|-----|--------|-------|-------|--------|--------|
| 2019/08/11 | CH2276 | Female | Two y/o | Treatment (Wk 2) | Treatment | Fast Day | No | 06:25 | 06:00 - 06:59 | Morning      | 37,6 | 70  | 362,4  | 362,4 | 18,75 | 566,99 | 201,11 |
| 2019/08/11 | CH2276 | Female | Two y/o | Treatment (Wk 2) | Treatment | Fast Day | No | 06:30 | 06:00 - 06:59 | Morning      | 37,6 | 59  | 1153,4 |       | 18,75 | 553,30 |        |
| 2019/08/11 | CH2276 | Female | Two y/o | Treatment (Wk 2) | Treatment | Fast Day | No | 06:35 | 06:00 - 06:59 | Morning      | 37,9 | 113 | 112,8  | 112,8 | 19,05 | 602,58 | 160,05 |
| 2019/08/11 | CH2276 | Female | Two y/o | Treatment (Wk 2) | Treatment | Fast Day | No | 06:40 | 06:00 - 06:59 | Morning      | 38,0 | 132 | 57,8   | 57,8  | 19,15 | 613,32 | 136,80 |
| 2019/08/11 | CH2276 | Female | Two y/o | Treatment (Wk 2) | Treatment | Fast Day | No | 06:45 | 06:00 - 06:59 | Morning      | 37,9 | 66  | 141,6  | 141,6 | 19,05 | 562,34 | 168,00 |
| 2019/08/11 | CH2276 | Female | Two y/o | Treatment (Wk 2) | Treatment | Fast Day | No | 06:50 | 06:00 - 06:59 | Morning      | 37,8 |     | 44,0   | 44,0  | 18,95 |        | 127,37 |
| 2019/08/11 | CH2276 | Female | Two y/o | Treatment (Wk 2) | Treatment | Fast Day | No | 06:55 | 06:00 - 06:59 | Morning      | 37,8 | 60  | 131,0  | 131,0 | 18,95 | 554,67 | 165,27 |
| 2019/08/11 | CH2276 | Female | Two y/o | Treatment (Wk 2) | Treatment | Fast Day | No | 07:00 | 07:00 - 07:59 | Morning      | 37,7 | 114 | 123,8  | 123,8 | 18,85 | 603,20 | 163,30 |
| 2019/08/11 | CH2276 | Female | Two y/o | Treatment (Wk 2) | Treatment | Fast Day | No | 07:05 | 07:00 - 07:59 | Morning      | 37,7 | 109 | 155,0  | 155,0 | 18,85 | 600,04 | 171,17 |
| 2019/08/11 | CH2276 | Female | Two y/o | Treatment (Wk 2) | Treatment | Fast Day | No | 07:10 | 07:00 - 07:59 | Morning      | 37,7 | 112 | 149,8  | 149,8 | 18,85 | 601,96 | 169,97 |
| 2019/08/11 | CH2276 | Female | Two y/o | Treatment (Wk 2) | Treatment | Fast Day | No | 07:15 | 07:00 - 07:59 | Morning      | 37,7 | 64  | 271,2  | 271,2 | 18,85 | 559,88 | 190,85 |
| 2019/08/11 | CH2276 | Female | Two y/o | Treatment (Wk 2) | Treatment | Fast Day | No | 07:20 | 07:00 - 07:59 | Morning      | 37,6 | 99  | 148,8  | 148,8 | 18,75 | 593,14 | 169,74 |
| 2019/08/11 | CH2276 | Female | Two y/o | Treatment (Wk 2) | Treatment | Fast Day | No | 07:25 | 07:00 - 07:59 | Morning      | 37,6 | 160 | 118,6  | 118,6 | 18,75 | 626,07 | 161,80 |
| 2019/08/11 | CH2276 | Female | Two y/o | Treatment (Wk 2) | Treatment | Fast Day | No | 07:30 | 07:00 - 07:59 | Morning      | 37,6 | 54  | 167,0  | 167,0 | 18,75 | 545,99 | 173,78 |
| 2019/08/11 | CH2276 | Female | Two y/o | Treatment (Wk 2) | Treatment | Fast Day | No | 07:35 | 07:00 - 07:59 | Morning      | 37,5 | 66  | 156,6  | 156,6 | 18,65 | 562,34 | 171,53 |
| 2019/08/11 | CH2276 | Female | Two y/o | Treatment (Wk 2) | Treatment | Fast Day | No | 07:40 | 07:00 - 07:59 | Morning      | 37,5 | 55  | 61,0   | 61,0  | 18,65 | 547,52 | 138,67 |
| 2019/08/11 | CH2276 | Female | Two y/o | Treatment (Wk 2) | Treatment | Fast Day | No | 07:45 | 07:00 - 07:59 | Morning      | 37,6 | 84  | 57,2   | 57,2  | 18,75 | 581,01 | 136,44 |
| 2019/08/11 | CH2276 | Female | Two y/o | Treatment (Wk 2) | Treatment | Fast Day | No | 07:50 | 07:00 - 07:59 | Morning      | 37,5 | 92  | 50,6   | 50,6  | 18,65 | 587,78 | 132,20 |
| 2019/08/11 | CH2276 | Female | Two y/o | Treatment (Wk 2) | Treatment | Fast Day | No | 07:55 | 07:00 - 07:59 | Morning      | 37,4 | 103 | 34,4   | 34,4  | 18,55 | 596,00 | 118,90 |
| 2019/08/11 | CH2276 | Female | Two y/o | Treatment (Wk 2) | Treatment | Fast Day | No | 08:00 | 08:00 - 08:59 | Late Morning | 37,3 |     | 46,6   | 46,6  | 18,46 |        | 129,35 |
| 2019/08/11 | CH2276 | Female | Two y/o | Treatment (Wk 2) | Treatment | Fast Day | No | 08:05 | 08:00 - 08:59 | Late Morning | 37,2 | 79  | 30,2   | 30,2  | 18,36 | 576,36 | 114,42 |
| 2019/08/11 | CH2276 | Female | Two y/o | Treatment (Wk 2) | Treatment | Fast Day | No | 08:10 | 08:00 - 08:59 | Late Morning | 37,1 | 84  | 178,4  | 178,4 | 18,26 | 581,01 | 176,10 |
| 2019/08/11 | CH2276 | Female | Two y/o | Treatment (Wk 2) | Treatment | Fast Day | No | 08:15 | 08:00 - 08:59 | Late Morning | 37,4 | 97  | 52,4   | 52,4  | 18,55 | 591,66 | 133,41 |
| 2019/08/11 | CH2276 | Female | Two y/o | Treatment (Wk 2) | Treatment | Fast Day | No | 08:20 | 08:00 - 08:59 | Late Morning | 37,4 | 108 | 171,2  | 171,2 | 18,55 | 599,39 | 174,65 |
| 2019/08/11 | CH2276 | Female | Two y/o | Treatment (Wk 2) | Treatment | Fast Day | No | 08:25 | 08:00 - 08:59 | Late Morning | 37,4 | 101 | 96,2   | 96,2  | 18,55 | 594,59 | 154,49 |
| 2019/08/11 | CH2276 | Female | Two y/o | Treatment (Wk 2) | Treatment | Fast Day | No | 08:30 | 08:00 - 08:59 | Late Morning | 37,3 | 89  | 89,0   | 89,0  | 18,46 | 585,33 | 151,78 |
| 2019/08/11 | CH2276 | Female | Two y/o | Treatment (Wk 2) | Treatment | Fast Day | No | 08:35 | 08:00 - 08:59 | Late Morning | 37,3 |     | 425,4  | 425,4 | 18,46 |        | 206,80 |
| 2019/08/11 | CH2276 | Female | Two y/o | Treatment (Wk 2) | Treatment | Fast Day | No | 08:40 | 08:00 - 08:59 | Late Morning | 37,4 | 111 | 364,4  | 364,4 | 18,55 | 601,33 | 201,31 |
| 2019/08/11 | CH2276 | Female | Two y/o | Treatment (Wk 2) | Treatment | Fast Day | No | 08:45 | 08:00 - 08:59 | Late Morning | 37,6 |     | 348,0  | 348,0 | 18,75 |        | 199,67 |
| 2019/08/11 | CH2276 | Female | Two y/o | Treatment (Wk 2) | Treatment | Fast Day | No | 08:50 | 08:00 - 08:59 | Late Morning | 37,7 | 162 | 67,8   | 67,8  | 18,85 | 626,88 | 142,33 |
| 2019/08/11 | CH2276 | Female | Two y/o | Treatment (Wk 2) | Treatment | Fast Day | No | 08:55 | 08:00 - 08:59 | Late Morning | 37,6 | 91  | 29,8   | 29,8  | 18,75 | 586,98 | 113,97 |
| 2019/08/11 | CH2276 | Female | Two y/o | Treatment (Wk 2) | Treatment | Fast Day | No | 09:00 | 09:00 - 09:59 | Late Morning | 37,6 | 64  | 11,6   | 11,6  | 18,75 | 559,88 | 81,78  |
| 2019/08/11 | CH2276 | Female | Two y/o | Treatment (Wk 2) | Treatment | Fast Day | No | 09:05 | 09:00 - 09:59 | Late Morning | 37,6 | 92  | 14,2   | 14,2  | 18,75 | 587,78 | 88,65  |
| 2019/08/11 | CH2276 | Female | Two y/o | Treatment (Wk 2) | Treatment | Fast Day | No | 09:10 | 09:00 - 09:59 | Late Morning | 37,6 | 85  | 11,6   | 11,6  | 18,75 | 581,90 | 81,78  |
| 2019/08/11 | CH2276 | Female | Two y/o | Treatment (Wk 2) | Treatment | Fast Day | No | 09:15 | 09:00 - 09:59 | Late Morning | 37,7 | 68  | 14,8   | 14,8  | 18,85 | 564,71 | 90,05  |
| 2019/08/11 | CH2276 | Female | Two y/o | Treatment (Wk 2) | Treatment | Fast Day | No | 09:20 | 09:00 - 09:59 | Late Morning | 37,7 | 63  | 11,4   | 11,4  | 18,85 | 558,62 | 81,19  |
| 2019/08/11 | CH2276 | Female | Two y/o | Treatment (Wk 2) | Treatment | Fast Day | No | 09:25 | 09:00 - 09:59 | Late Morning | 37,7 | 66  | 9,6    | 9,6   | 18,85 | 562,34 | 75,37  |
| 2019/08/11 | CH2276 | Female | Two y/o | Treatment (Wk 2) | Treatment | Fast Day | No | 09:30 | 09:00 - 09:59 | Late Morning | 37,7 | 88  | 13,6   | 13,6  | 18,85 | 584,49 | 87,18  |
| 2019/08/11 | CH2276 | Female | Two y/o | Treatment (Wk 2) | Treatment | Fast Day | No | 09:35 | 09:00 - 09:59 | Late Morning | 37,7 | 86  | 15,8   | 15,8  | 18,85 | 582,77 | 92,28  |
| 2019/08/11 | CH2276 | Female | Two y/o | Treatment (Wk 2) | Treatment | Fast Day | No | 09:40 | 09:00 - 09:59 | Late Morning | 37,7 | 67  | 14,0   | 14,0  | 18,85 | 563,53 | 88,17  |
| 2019/08/11 | CH2276 | Female | Two y/o | Treatment (Wk 2) | Treatment | Fast Day | No | 09:45 | 09:00 - 09:59 | Late Morning | 37,6 | 64  | 15,0   | 15,0  | 18,75 | 559,88 | 90,51  |
| 2019/08/11 | CH2276 | Female | Two y/o | Treatment (Wk 2) | Treatment | Fast Day | No | 09:50 | 09:00 - 09:59 | Late Morning | 37,6 | 88  | 15,2   | 15,2  | 18,75 | 584,49 | 90,96  |
| 2019/08/11 | CH2276 | Female | Two y/o | Treatment (Wk 2) | Treatment | Fast Day | No | 09:55 | 09:00 - 09:59 | Late Morning | 37,6 | 55  | 14,6   | 14,6  | 18,75 | 547,52 | 89,59  |
| 2019/08/11 | CH2276 | Female | Two y/o | Treatment (Wk 2) | Treatment | Fast Day | No | 10:00 | 10:00 - 10:59 | Late Morning | 37,6 | 68  | 16,6   | 16,6  | 18,75 | 564,71 | 93,96  |
| 2019/08/11 | CH2276 | Female | Two y/o | Treatment (Wk 2) | Treatment | Fast Day | No | 10:05 | 10:00 - 10:59 | Late Morning | 37,7 | 58  | 62,4   | 62,4  | 18,85 | 551,90 | 139,45 |
| 2019/08/11 | CH2276 | Female | Two y/o | Treatment (Wk 2) | Treatment | Fast Day | No | 10:10 | 10:00 - 10:59 | Late Morning | 37,7 |     | 76,8   | 76,8  | 18,85 |        | 146,66 |
| 2019/08/11 | CH2276 | Female | Two y/o | Treatment (Wk 2) | Treatment | Fast Day | No | 10:15 | 10:00 - 10:59 | Late Morning | 37,7 | 92  | 20,2   | 20,2  | 18,85 | 587,78 | 100,65 |
| 2019/08/11 | CH2276 | Female | Two y/o | Treatment (Wk 2) | Treatment | Fast Day | No | 10:20 | 10:00 - 10:59 | Late Morning | 37,6 | 66  | 12,2   | 12,2  | 18,75 | 562,34 | 83,49  |
| 2019/08/11 | CH2276 | Female | Two y/o | Treatment (Wk 2) | Treatment | Fast Day | No | 10:25 | 10:00 - 10:59 | Late Morning | 37,6 | 89  | 170,8  | 170,8 | 18,75 | 585,33 | 174,57 |
| 2019/08/11 | CH2276 | Female | Two y/o | Treatment (Wk 2) | Treatment | Fast Day | No | 10:30 | 10:00 - 10:59 | Late Morning | 37,5 | 101 | 79,0   | 79,0  | 18,65 | 594,59 | 147,64 |
| 2019/08/11 | CH2276 | Female | Two y/o | Treatment (Wk 2) | Treatment | Fast Day | No | 10:35 | 10:00 - 10:59 | Late Morning | 37,5 | 107 | 117,6  | 117,6 | 18,65 | 598,73 | 161,50 |
| 2019/08/11 | CH2276 | Female | Two y/o | Treatment (Wk 2) | Treatment | Fast Day | No | 10:40 | 10:00 - 10:59 | Late Morning | 37,5 | 101 | 269,6  | 269,6 | 18,65 | 594,59 | 190,64 |
| 2019/08/11 | CH2276 | Female | Two y/o | Treatment (Wk 2) | Treatment | Fast Day | No | 10:45 | 10:00 - 10:59 | Late Morning | 37,6 | 83  | 24,0   | 24,0  | 18,75 | 580,11 | 106,55 |
| 2019/08/11 | CH2276 | Female | Two y/o | Treatment (Wk 2) | Treatment | Fast Day | No | 10:50 | 10:00 - 10:59 | Late Morning | 37,6 | 66  | 125,4  | 125,4 | 18,75 | 562,34 | 163,75 |
| 2019/08/11 | CH2276 | Female | Two y/o | Treatment (Wk 2) | Treatment | Fast Day | No | 10:55 | 10:00 - 10:59 | Late Morning | 37,6 | 94  | 63,4   | 63,4  | 18,75 | 589,37 | 140,00 |
| 2019/08/11 | CH2276 | Female | Two y/o | Treatment (Wk 2) | Treatment | Fast Day | No | 11:00 | 11:00 - 11:59 | Late Morning | 37,7 | 65  | 309,8  | 309,8 | 18,85 | 561,12 | 195,56 |
| 2019/08/11 | CH2276 | Female | Two y/o | Treatment (Wk 2) | Treatment | Fast Day | No | 11:05 | 11:00 - 11:59 | Late Morning | 37,8 | 182 | 106,2  | 106,2 | 18,95 | 634,31 | 157,94 |
| 2019/08/11 | CH2276 | Female | Two y/o | Treatment (Wk 2) | Treatment | Fast Day | No | 11:10 | 11:00 - 11:59 | Late Morning | 37,8 | 83  | 26,2   | 26,2  | 18,95 | 580,11 | 109,55 |
| 2019/08/11 | CH2276 | Female | Two y/o | Treatment (Wk 2) | Treatment | Fast Day | No | 11:15 | 11:00 - 11:59 | Late Morning | 37,8 | 68  | 20,8   | 20,8  | 18,95 | 564,71 | 101,65 |
| 2019/08/11 | CH2276 | Female | Two y/o | Treatment (Wk 2) | Treatment | Fast Day | No | 11:20 | 11:00 - 11:59 | Late Morning | 37,9 | 63  | 18,8   | 18,8  | 19,05 | 558,62 | 98,20  |
| 2019/08/11 | CH2276 | Female | Two y/o | Treatment (Wk 2) | Treatment | Fast Day | No | 11:25 | 11:00 - 11:59 | Late Morning | 37,9 | 84  | 13,4   | 13,4  | 19,05 | 581,01 | 86,68  |
| 2019/08/11 | CH2276 | Female | Two y/o | Treatment (Wk 2) | Treatment | Fast Day | No | 11:30 | 11:00 - 11:59 | Late Morning | 37,9 | 88  | 34,4   | 34,4  | 19,05 | 584,49 | 118,90 |
| 2019/08/11 | CH2276 | Female | Two y/o | Treatment (Wk 2) | Treatment | Fast Day | No | 11:35 | 11:00 - 11:59 | Late Morning | 37,8 |     | 32,8   | 32,8  | 18,95 |        | 117,26 |
| 2019/08/11 | CH2276 | Female | Two y/o | Treatment (Wk 2) | Treatment | Fast Day | No | 11:40 | 11:00 - 11:59 | Late Morning | 37,8 | 61  | 32,0   | 32,0  | 18,95 | 556,01 | 116,41 |
| 2019/08/11 | CH2276 | Female | Two y/o | Treatment (Wk 2) | Treatment | Fast Day | No | 11:45 | 11:00 - 11:59 | Late Morning | 37,8 | 78  | 113,6  | 113,6 | 18,95 | 575,38 | 160,29 |
| 2019/08/11 | CH2276 | Female | Two y/o | Treatment (Wk 2) | Treatment | Fast Day | No | 11:50 | 11:00 - 11:59 | Late Morning | 37,7 | 68  | 9,8    | 9,8   | 18,85 | 564,71 | 76,07  |
| 2019/08/11 | CH2276 | Female | Two y/o | Treatment (Wk 2) | Treatment | Fast Day | No | 11:55 | 11:00 - 11:59 | Late Morning | 37,7 | 64  | 3,8    | 3,8   | 18,85 | 559,88 | 44,22  |
| 2019/08/11 | CH2276 | Female | Two y/o | Treatment (Wk 2) | Treatment | Fast Day | No | 12:00 | 12:00 - 12:59 | Afternoon    | 37,7 | 73  | 183,0  | 183,0 | 18,85 | 570,27 | 177,00 |
| 2019/08/11 | CH2276 | Female | Two y/o | Treatment (Wk 2) | Treatment | Fast Day | No | 12:05 | 12:00 - 12:59 | Afternoon    | 37,8 | 111 | 139,4  | 139,4 | 18,95 | 601,33 | 167,45 |
| 2019/08/11 | CH2276 | Female | Two y/o | Treatment (Wk 2) | Treatment | Fast Day | No | 12:10 | 12:00 - 12:59 | Afternoon    | 37,9 | 117 | 144,6  | 144,6 | 19,05 | 605,02 | 168,73 |



|            |        |        |         |                  |           |          |    |       |               |           |      |     |       |       |       |        |        |
|------------|--------|--------|---------|------------------|-----------|----------|----|-------|---------------|-----------|------|-----|-------|-------|-------|--------|--------|
| 2019/08/11 | CH2276 | Female | Two y/o | Treatment (Wk 2) | Treatment | Fast Day | No | 12:15 | 12:00 - 12:59 | Afternoon | 37,9 | 78  | 34,4  | 34,4  | 19,05 | 575,38 | 118,90 |
| 2019/08/11 | CH2276 | Female | Two y/o | Treatment (Wk 2) | Treatment | Fast Day | No | 12:20 | 12:00 - 12:59 | Afternoon | 37,9 | 108 | 82,2  | 82,2  | 19,05 | 599,39 | 149,02 |
| 2019/08/11 | CH2276 | Female | Two y/o | Treatment (Wk 2) | Treatment | Fast Day | No | 12:25 | 12:00 - 12:59 | Afternoon | 38,0 | 86  | 40,0  | 40,0  | 19,15 | 582,77 | 124,09 |
| 2019/08/11 | CH2276 | Female | Two y/o | Treatment (Wk 2) | Treatment | Fast Day | No | 12:30 | 12:00 - 12:59 | Afternoon | 38,0 | 92  | 172,2 | 172,2 | 19,15 | 587,78 | 174,86 |
| 2019/08/11 | CH2276 | Female | Two y/o | Treatment (Wk 2) | Treatment | Fast Day | No | 12:35 | 12:00 - 12:59 | Afternoon | 38,1 | 82  | 24,2  | 24,2  | 19,26 | 579,19 | 106,83 |
| 2019/08/11 | CH2276 | Female | Two y/o | Treatment (Wk 2) | Treatment | Fast Day | No | 12:40 | 12:00 - 12:59 | Afternoon | 38,0 |     | 88,4  | 88,4  | 19,15 |        | 151,55 |
| 2019/08/11 | CH2276 | Female | Two y/o | Treatment (Wk 2) | Treatment | Fast Day | No | 12:45 | 12:00 - 12:59 | Afternoon | 38,1 | 108 | 56,6  | 56,6  | 19,26 | 599,39 | 136,07 |
| 2019/08/11 | CH2276 | Female | Two y/o | Treatment (Wk 2) | Treatment | Fast Day | No | 12:50 | 12:00 - 12:59 | Afternoon | 38,1 |     | 248,4 | 248,4 | 19,26 |        | 187,75 |
| 2019/08/11 | CH2276 | Female | Two y/o | Treatment (Wk 2) | Treatment | Fast Day | No | 12:55 | 12:00 - 12:59 | Afternoon | 38,0 | 64  | 14,2  | 14,2  | 19,15 | 559,88 | 88,65  |
| 2019/08/11 | CH2276 | Female | Two y/o | Treatment (Wk 2) | Treatment | Fast Day | No | 13:00 | 13:00 - 13:59 | Afternoon | 38,0 | 84  | 15,4  | 15,4  | 19,15 | 581,01 | 91,41  |
| 2019/08/11 | CH2276 | Female | Two y/o | Treatment (Wk 2) | Treatment | Fast Day | No | 13:05 | 13:00 - 13:59 | Afternoon | 38,0 | 60  | 16,2  | 16,2  | 19,15 | 554,67 | 93,13  |
| 2019/08/11 | CH2276 | Female | Two y/o | Treatment (Wk 2) | Treatment | Fast Day | No | 13:10 | 13:00 - 13:59 | Afternoon | 38,0 | 66  | 13,6  | 13,6  | 19,15 | 562,34 | 87,18  |
| 2019/08/11 | CH2276 | Female | Two y/o | Treatment (Wk 2) | Treatment | Fast Day | No | 13:15 | 13:00 - 13:59 | Afternoon | 38,0 | 80  | 29,6  | 29,6  | 19,15 | 577,31 | 113,73 |
| 2019/08/11 | CH2276 | Female | Two y/o | Treatment (Wk 2) | Treatment | Fast Day | No | 13:20 | 13:00 - 13:59 | Afternoon | 37,9 | 64  | 41,6  | 41,6  | 19,05 | 559,88 | 125,44 |
| 2019/08/11 | CH2276 | Female | Two y/o | Treatment (Wk 2) | Treatment | Fast Day | No | 13:25 | 13:00 - 13:59 | Afternoon | 37,9 | 63  | 38,8  | 38,8  | 19,05 | 558,62 | 123,04 |
| 2019/08/11 | CH2276 | Female | Two y/o | Treatment (Wk 2) | Treatment | Fast Day | No | 13:30 | 13:00 - 13:59 | Afternoon | 37,8 | 61  | 38,4  | 38,4  | 18,95 | 556,01 | 122,68 |
| 2019/08/11 | CH2276 | Female | Two y/o | Treatment (Wk 2) | Treatment | Fast Day | No | 13:35 | 13:00 - 13:59 | Afternoon | 37,8 | 58  | 36,0  | 36,0  | 18,95 | 551,90 | 120,46 |
| 2019/08/11 | CH2276 | Female | Two y/o | Treatment (Wk 2) | Treatment | Fast Day | No | 13:40 | 13:00 - 13:59 | Afternoon | 37,7 | 58  | 39,2  | 39,2  | 18,85 | 551,90 | 123,39 |
| 2019/08/11 | CH2276 | Female | Two y/o | Treatment (Wk 2) | Treatment | Fast Day | No | 13:45 | 13:00 - 13:59 | Afternoon | 37,7 | 64  | 38,0  | 38,0  | 18,85 | 559,88 | 122,32 |
| 2019/08/11 | CH2276 | Female | Two y/o | Treatment (Wk 2) | Treatment | Fast Day | No | 13:50 | 13:00 - 13:59 | Afternoon | 37,6 | 63  | 38,2  | 38,2  | 18,75 | 558,62 | 122,50 |
| 2019/08/11 | CH2276 | Female | Two y/o | Treatment (Wk 2) | Treatment | Fast Day | No | 13:55 | 13:00 - 13:59 | Afternoon | 37,6 | 64  | 35,2  | 35,2  | 18,75 | 559,88 | 119,69 |
| 2019/08/11 | CH2276 | Female | Two y/o | Treatment (Wk 2) | Treatment | Fast Day | No | 14:00 | 14:00 - 14:59 | Afternoon | 37,6 | 73  | 33,0  | 33,0  | 18,75 | 570,27 | 117,47 |
| 2019/08/11 | CH2276 | Female | Two y/o | Treatment (Wk 2) | Treatment | Fast Day | No | 14:05 | 14:00 - 14:59 | Afternoon | 37,5 | 54  | 33,8  | 33,8  | 18,65 | 545,99 | 118,29 |
| 2019/08/11 | CH2276 | Female | Two y/o | Treatment (Wk 2) | Treatment | Fast Day | No | 14:10 | 14:00 - 14:59 | Afternoon | 37,5 | 48  | 36,4  | 36,4  | 18,65 | 536,04 | 120,84 |
| 2019/08/11 | CH2276 | Female | Two y/o | Treatment (Wk 2) | Treatment | Fast Day | No | 14:15 | 14:00 - 14:59 | Afternoon | 37,5 | 65  | 35,6  | 35,6  | 18,65 | 561,12 | 120,08 |
| 2019/08/11 | CH2276 | Female | Two y/o | Treatment (Wk 2) | Treatment | Fast Day | No | 14:20 | 14:00 - 14:59 | Afternoon | 37,5 | 74  | 29,4  | 29,4  | 18,65 | 571,33 | 113,50 |
| 2019/08/11 | CH2276 | Female | Two y/o | Treatment (Wk 2) | Treatment | Fast Day | No | 14:25 | 14:00 - 14:59 | Afternoon | 37,5 | 55  | 62,0  | 62,0  | 18,65 | 547,52 | 139,23 |
| 2019/08/11 | CH2276 | Female | Two y/o | Treatment (Wk 2) | Treatment | Fast Day | No | 14:30 | 14:00 - 14:59 | Afternoon | 37,5 | 64  | 44,2  | 44,2  | 18,65 | 559,88 | 127,53 |
| 2019/08/11 | CH2276 | Female | Two y/o | Treatment (Wk 2) | Treatment | Fast Day | No | 14:35 | 14:00 - 14:59 | Afternoon | 37,5 | 72  | 51,4  | 51,4  | 18,65 | 569,20 | 132,74 |
| 2019/08/11 | CH2276 | Female | Two y/o | Treatment (Wk 2) | Treatment | Fast Day | No | 14:40 | 14:00 - 14:59 | Afternoon | 37,6 |     | 327,6 | 327,6 | 18,75 |        | 197,53 |
| 2019/08/11 | CH2276 | Female | Two y/o | Treatment (Wk 2) | Treatment | Fast Day | No | 14:45 | 14:00 - 14:59 | Afternoon | 37,6 |     | 319,8 | 319,8 | 18,75 |        | 196,68 |
| 2019/08/11 | CH2276 | Female | Two y/o | Treatment (Wk 2) | Treatment | Fast Day | No | 14:50 | 14:00 - 14:59 | Afternoon | 37,7 | 56  | 405,4 | 405,4 | 18,85 | 549,01 | 205,09 |
| 2019/08/11 | CH2276 | Female | Two y/o | Treatment (Wk 2) | Treatment | Fast Day | No | 14:55 | 14:00 - 14:59 | Afternoon | 37,8 | 94  | 131,6 | 131,6 | 18,95 | 589,37 | 165,43 |
| 2019/08/11 | CH2276 | Female | Two y/o | Treatment (Wk 2) | Treatment | Fast Day | No | 15:00 | 15:00 - 15:59 | Afternoon | 37,9 | 114 | 242,2 | 242,2 | 19,05 | 603,20 | 186,86 |
| 2019/08/11 | CH2276 | Female | Two y/o | Treatment (Wk 2) | Treatment | Fast Day | No | 15:05 | 15:00 - 15:59 | Afternoon | 38,0 | 90  | 140,6 | 140,6 | 19,15 | 586,16 | 167,75 |
| 2019/08/11 | CH2276 | Female | Two y/o | Treatment (Wk 2) | Treatment | Fast Day | No | 15:10 | 15:00 - 15:59 | Afternoon | 38,0 | 65  | 16,8  | 16,8  | 19,15 | 561,12 | 94,37  |
| 2019/08/11 | CH2276 | Female | Two y/o | Treatment (Wk 2) | Treatment | Fast Day | No | 15:15 | 15:00 - 15:59 | Afternoon | 38,0 |     | 23,2  | 23,2  | 19,15 |        | 105,39 |
| 2019/08/11 | CH2276 | Female | Two y/o | Treatment (Wk 2) | Treatment | Fast Day | No | 15:20 | 15:00 - 15:59 | Afternoon | 38,0 | 56  | 21,0  | 21,0  | 19,15 | 549,01 | 101,98 |
| 2019/08/11 | CH2276 | Female | Two y/o | Treatment (Wk 2) | Treatment | Fast Day | No | 15:25 | 15:00 - 15:59 | Afternoon | 37,9 |     | 20,0  | 20,0  | 19,05 |        | 100,31 |
| 2019/08/11 | CH2276 | Female | Two y/o | Treatment (Wk 2) | Treatment | Fast Day | No | 15:30 | 15:00 - 15:59 | Afternoon | 37,8 | 58  | 12,2  | 12,2  | 18,95 | 551,90 | 83,49  |
| 2019/08/11 | CH2276 | Female | Two y/o | Treatment (Wk 2) | Treatment | Fast Day | No | 15:35 | 15:00 - 15:59 | Afternoon | 37,7 | 67  | 36,0  | 36,0  | 18,85 | 563,53 | 120,46 |
| 2019/08/11 | CH2276 | Female | Two y/o | Treatment (Wk 2) | Treatment | Fast Day | No | 15:40 | 15:00 - 15:59 | Afternoon | 37,7 |     | 48,0  | 48,0  | 18,85 | 563,53 | 130,38 |
| 2019/08/11 | CH2276 | Female | Two y/o | Treatment (Wk 2) | Treatment | Fast Day | No | 15:45 | 15:00 - 15:59 | Afternoon | 37,7 | 103 | 128,8 | 128,8 | 18,85 | 596,00 | 164,68 |
| 2019/08/11 | CH2276 | Female | Two y/o | Treatment (Wk 2) | Treatment | Fast Day | No | 15:50 | 15:00 - 15:59 | Afternoon | 37,8 | 87  | 11,4  | 11,4  | 18,95 | 583,64 | 81,19  |
| 2019/08/11 | CH2276 | Female | Two y/o | Treatment (Wk 2) | Treatment | Fast Day | No | 15:55 | 15:00 - 15:59 | Afternoon | 37,7 | 58  | 93,2  | 93,2  | 18,85 | 551,90 | 153,39 |
| 2019/08/11 | CH2276 | Female | Two y/o | Treatment (Wk 2) | Treatment | Fast Day | No | 16:00 | 16:00 - 16:59 | Evening   | 37,7 | 61  | 381,6 | 381,6 | 18,85 | 556,01 | 202,94 |
| 2019/08/11 | CH2276 | Female | Two y/o | Treatment (Wk 2) | Treatment | Fast Day | No | 16:05 | 16:00 - 16:59 | Evening   | 37,8 | 109 | 131,6 | 131,6 | 18,95 | 600,04 | 165,43 |
| 2019/08/11 | CH2276 | Female | Two y/o | Treatment (Wk 2) | Treatment | Fast Day | No | 16:10 | 16:00 - 16:59 | Evening   | 37,9 |     | 98,0  | 98,0  | 19,05 |        | 155,14 |
| 2019/08/11 | CH2276 | Female | Two y/o | Treatment (Wk 2) | Treatment | Fast Day | No | 16:15 | 16:00 - 16:59 | Evening   | 38,0 | 113 | 79,4  | 79,4  | 19,15 | 602,58 | 147,81 |
| 2019/08/11 | CH2276 | Female | Two y/o | Treatment (Wk 2) | Treatment | Fast Day | No | 16:20 | 16:00 - 16:59 | Evening   | 38,2 | 110 | 228,4 | 228,4 | 19,36 | 600,69 | 184,79 |
| 2019/08/11 | CH2276 | Female | Two y/o | Treatment (Wk 2) | Treatment | Fast Day | No | 16:25 | 16:00 - 16:59 | Evening   | 38,3 | 58  | 640,6 | 640,6 | 19,46 | 551,90 | 221,38 |
| 2019/08/11 | CH2276 | Female | Two y/o | Treatment (Wk 2) | Treatment | Fast Day | No | 16:30 | 16:00 - 16:59 | Evening   | 38,3 | 93  | 48,6  | 48,6  | 19,46 | 588,58 | 130,81 |
| 2019/08/11 | CH2276 | Female | Two y/o | Treatment (Wk 2) | Treatment | Fast Day | No | 16:35 | 16:00 - 16:59 | Evening   | 38,3 | 104 | 304,8 | 304,8 | 19,46 | 596,69 | 194,98 |
| 2019/08/11 | CH2276 | Female | Two y/o | Treatment (Wk 2) | Treatment | Fast Day | No | 16:40 | 16:00 - 16:59 | Evening   | 38,3 | 107 | 15,4  | 15,4  | 19,46 | 598,73 | 91,41  |
| 2019/08/11 | CH2276 | Female | Two y/o | Treatment (Wk 2) | Treatment | Fast Day | No | 16:45 | 16:00 - 16:59 | Evening   | 38,2 | 81  | 15,2  | 15,2  | 19,36 | 578,26 | 90,96  |
| 2019/08/11 | CH2276 | Female | Two y/o | Treatment (Wk 2) | Treatment | Fast Day | No | 16:50 | 16:00 - 16:59 | Evening   | 38,2 | 64  | 9,8   | 9,8   | 19,36 | 559,88 | 76,07  |
| 2019/08/11 | CH2276 | Female | Two y/o | Treatment (Wk 2) | Treatment | Fast Day | No | 16:55 | 16:00 - 16:59 | Evening   | 38,0 |     | 6,6   | 6,6   | 19,15 |        | 62,73  |
| 2019/08/11 | CH2276 | Female | Two y/o | Treatment (Wk 2) | Treatment | Fast Day | No | 17:00 | 17:00 - 17:59 | Evening   | 37,9 | 64  | 12,8  | 12,8  | 19,05 | 559,88 | 85,12  |
| 2019/08/11 | CH2276 | Female | Two y/o | Treatment (Wk 2) | Treatment | Fast Day | No | 17:05 | 17:00 - 17:59 | Evening   | 37,9 | 61  | 12,0  | 12,0  | 19,05 | 556,01 | 82,93  |
| 2019/08/11 | CH2276 | Female | Two y/o | Treatment (Wk 2) | Treatment | Fast Day | No | 17:10 | 17:00 - 17:59 | Evening   | 37,9 | 62  | 14,2  | 14,2  | 19,05 | 557,33 | 88,65  |
| 2019/08/11 | CH2276 | Female | Two y/o | Treatment (Wk 2) | Treatment | Fast Day | No | 17:15 | 17:00 - 17:59 | Evening   | 37,8 | 53  | 12,6  | 12,6  | 18,95 | 544,43 | 84,59  |
| 2019/08/11 | CH2276 | Female | Two y/o | Treatment (Wk 2) | Treatment | Fast Day | No | 17:20 | 17:00 - 17:59 | Evening   | 37,8 | 63  | 3,0   | 3,0   | 18,95 | 558,62 | 36,34  |
| 2019/08/11 | CH2276 | Female | Two y/o | Treatment (Wk 2) | Treatment | Fast Day | No | 17:25 | 17:00 - 17:59 | Evening   | 37,8 | 59  | 5,4   | 5,4   | 18,95 | 553,30 | 55,99  |
| 2019/08/11 | CH2276 | Female | Two y/o | Treatment (Wk 2) | Treatment | Fast Day | No | 17:30 | 17:00 - 17:59 | Evening   | 37,8 | 55  | 12,4  | 12,4  | 18,95 | 547,52 | 84,04  |
| 2019/08/11 | CH2276 | Female | Two y/o | Treatment (Wk 2) | Treatment | Fast Day | No | 17:35 | 17:00 - 17:59 | Evening   | 37,7 | 53  | 7,8   | 7,8   | 18,85 | 544,43 | 68,36  |
| 2019/08/11 | CH2276 | Female | Two y/o | Treatment (Wk 2) | Treatment | Fast Day | No | 17:40 | 17:00 - 17:59 | Evening   | 37,7 | 60  | 24,2  | 24,2  | 18,85 | 554,67 | 106,83 |
| 2019/08/11 | CH2276 | Female | Two y/o | Treatment (Wk 2) | Treatment | Fast Day | No | 17:45 | 17:00 - 17:59 | Evening   | 37,7 | 100 | 72,6  | 72,6  | 18,85 | 593,87 | 144,70 |
| 2019/08/11 | CH2276 | Female | Two y/o | Treatment (Wk 2) | Treatment | Fast Day | No | 17:50 | 17:00 - 17:59 | Evening   | 37,8 | 125 | 348,4 | 348,4 | 18,95 | 609,60 | 199,72 |
| 2019/08/11 | CH2276 | Female | Two y/o | Treatment (Wk 2) | Treatment | Fast Day | No | 17:55 | 17:00 - 17:59 | Evening   | 38,3 | 109 | 474,6 | 474,6 | 19,46 | 600,04 | 210,69 |
| 2019/08/11 | CH2276 | Female | Two y/o | Treatment (Wk 2) | Treatment | Fast Day | No | 18:00 | 18:00 - 18:59 | Evening   | 38,4 | 147 | 30,4  | 30,4  | 19,56 | 620,52 | 114,65 |



|            |        |        |         |                  |           |          |    |       |               |         |      |     |       |       |       |        |        |
|------------|--------|--------|---------|------------------|-----------|----------|----|-------|---------------|---------|------|-----|-------|-------|-------|--------|--------|
| 2019/08/11 | CH2276 | Female | Two y/o | Treatment (Wk 2) | Treatment | Fast Day | No | 18:05 | 18:00 - 18:59 | Evening | 38,4 | 94  | 37,8  | 37,8  | 19,56 | 589,37 | 122,14 |
| 2019/08/11 | CH2276 | Female | Two y/o | Treatment (Wk 2) | Treatment | Fast Day | No | 18:10 | 18:00 - 18:59 | Evening | 38,4 | 65  | 142,4 | 142,4 | 19,56 | 561,12 | 168,20 |
| 2019/08/11 | CH2276 | Female | Two y/o | Treatment (Wk 2) | Treatment | Fast Day | No | 18:15 | 18:00 - 18:59 | Evening | 38,4 | 103 | 58,2  | 58,2  | 19,56 | 596,00 | 137,04 |
| 2019/08/11 | CH2276 | Female | Two y/o | Treatment (Wk 2) | Treatment | Fast Day | No | 18:20 | 18:00 - 18:59 | Evening | 38,4 | 99  | 128,2 | 128,2 | 19,56 | 593,14 | 164,52 |
| 2019/08/11 | CH2276 | Female | Two y/o | Treatment (Wk 2) | Treatment | Fast Day | No | 18:25 | 18:00 - 18:59 | Evening | 38,4 | 118 | 148,2 | 148,2 | 19,56 | 605,61 | 169,59 |
| 2019/08/11 | CH2276 | Female | Two y/o | Treatment (Wk 2) | Treatment | Fast Day | No | 18:30 | 18:00 - 18:59 | Evening | 38,4 | 77  | 321,0 | 321,0 | 19,56 | 574,39 | 196,81 |
| 2019/08/11 | CH2276 | Female | Two y/o | Treatment (Wk 2) | Treatment | Fast Day | No | 18:35 | 18:00 - 18:59 | Evening | 38,4 | 59  | 418,4 | 418,4 | 19,56 | 553,30 | 206,21 |
| 2019/08/11 | CH2276 | Female | Two y/o | Treatment (Wk 2) | Treatment | Fast Day | No | 18:40 | 18:00 - 18:59 | Evening | 38,4 | 124 | 494,8 | 494,8 | 19,56 | 609,04 | 212,17 |
| 2019/08/11 | CH2276 | Female | Two y/o | Treatment (Wk 2) | Treatment | Fast Day | No | 18:45 | 18:00 - 18:59 | Evening | 38,4 | 111 | 69,6  | 69,6  | 19,56 | 601,33 | 143,24 |
| 2019/08/11 | CH2276 | Female | Two y/o | Treatment (Wk 2) | Treatment | Fast Day | No | 18:50 | 18:00 - 18:59 | Evening | 38,3 | 86  | 5,6   | 5,6   | 19,46 | 582,77 | 57,21  |
| 2019/08/11 | CH2276 | Female | Two y/o | Treatment (Wk 2) | Treatment | Fast Day | No | 18:55 | 18:00 - 18:59 | Evening | 38,2 | 92  | 6,2   | 6,2   | 19,36 | 587,78 | 60,63  |
| 2019/08/11 | CH2276 | Female | Two y/o | Treatment (Wk 2) | Treatment | Fast Day | No | 19:00 | 19:00 - 19:59 | Evening | 38,2 | 59  | 5,2   | 5,2   | 19,36 | 553,30 | 54,72  |
| 2019/08/11 | CH2276 | Female | Two y/o | Treatment (Wk 2) | Treatment | Fast Day | No | 19:05 | 19:00 - 19:59 | Evening | 38,1 | 83  | 17,0  | 17,0  | 19,26 | 580,11 | 94,77  |
| 2019/08/11 | CH2276 | Female | Two y/o | Treatment (Wk 2) | Treatment | Fast Day | No | 19:10 | 19:00 - 19:59 | Evening | 38,0 | 57  | 61,2  | 61,2  | 19,15 | 550,47 | 138,78 |
| 2019/08/11 | CH2276 | Female | Two y/o | Treatment (Wk 2) | Treatment | Fast Day | No | 19:15 | 19:00 - 19:59 | Evening | 37,9 | 62  | 54,0  | 54,0  | 19,05 | 557,33 | 134,45 |
| 2019/08/11 | CH2276 | Female | Two y/o | Treatment (Wk 2) | Treatment | Fast Day | No | 19:20 | 19:00 - 19:59 | Evening | 37,8 | 63  | 48,8  | 48,8  | 18,95 | 558,62 | 130,95 |
| 2019/08/11 | CH2276 | Female | Two y/o | Treatment (Wk 2) | Treatment | Fast Day | No | 19:25 | 19:00 - 19:59 | Evening | 37,7 | 84  | 47,8  | 47,8  | 18,85 | 581,01 | 130,23 |
| 2019/08/11 | CH2276 | Female | Two y/o | Treatment (Wk 2) | Treatment | Fast Day | No | 19:30 | 19:00 - 19:59 | Evening | 37,6 | 53  | 47,2  | 47,2  | 18,75 | 544,43 | 129,80 |
| 2019/08/11 | CH2276 | Female | Two y/o | Treatment (Wk 2) | Treatment | Fast Day | No | 19:35 | 19:00 - 19:59 | Evening | 37,5 | 61  | 49,6  | 49,6  | 18,65 | 556,01 | 131,51 |
| 2019/08/11 | CH2276 | Female | Two y/o | Treatment (Wk 2) | Treatment | Fast Day | No | 19:40 | 19:00 - 19:59 | Evening | 37,4 | 63  | 42,8  | 42,8  | 18,55 | 558,62 | 126,42 |
| 2019/08/11 | CH2276 | Female | Two y/o | Treatment (Wk 2) | Treatment | Fast Day | No | 19:45 | 19:00 - 19:59 | Evening | 37,4 |     | 12,4  | 12,4  | 18,55 |        | 84,04  |
| 2019/08/11 | CH2276 | Female | Two y/o | Treatment (Wk 2) | Treatment | Fast Day | No | 19:50 | 19:00 - 19:59 | Evening | 37,6 | 60  | 4,6   | 4,6   | 18,75 | 554,67 | 50,61  |
| 2019/08/11 | CH2276 | Female | Two y/o | Treatment (Wk 2) | Treatment | Fast Day | No | 19:55 | 19:00 - 19:59 | Evening | 37,6 | 58  | 9,8   | 9,8   | 18,75 | 551,90 | 76,07  |
| 2019/08/11 | CH2276 | Female | Two y/o | Treatment (Wk 2) | Treatment | Fast Day | No | 20:00 | 20:00 - 20:59 | Night   | 37,6 | 65  | 37,8  | 37,8  | 18,75 | 561,12 | 122,14 |
| 2019/08/11 | CH2276 | Female | Two y/o | Treatment (Wk 2) | Treatment | Fast Day | No | 20:05 | 20:00 - 20:59 | Night   | 37,5 | 59  | 54,2  | 54,2  | 18,65 | 553,30 | 134,57 |
| 2019/08/11 | CH2276 | Female | Two y/o | Treatment (Wk 2) | Treatment | Fast Day | No | 20:10 | 20:00 - 20:59 | Night   | 37,4 | 54  | 52,6  | 52,6  | 18,55 | 545,99 | 133,54 |
| 2019/08/11 | CH2276 | Female | Two y/o | Treatment (Wk 2) | Treatment | Fast Day | No | 20:15 | 20:00 - 20:59 | Night   | 37,3 | 62  | 53,0  | 53,0  | 18,46 | 557,33 | 133,80 |
| 2019/08/11 | CH2276 | Female | Two y/o | Treatment (Wk 2) | Treatment | Fast Day | No | 20:20 | 20:00 - 20:59 | Night   | 37,2 | 47  | 52,6  | 52,6  | 18,36 | 534,23 | 133,54 |
| 2019/08/11 | CH2276 | Female | Two y/o | Treatment (Wk 2) | Treatment | Fast Day | No | 20:25 | 20:00 - 20:59 | Night   | 37,1 | 66  | 48,0  | 48,0  | 18,26 | 562,34 | 130,38 |
| 2019/08/11 | CH2276 | Female | Two y/o | Treatment (Wk 2) | Treatment | Fast Day | No | 20:30 | 20:00 - 20:59 | Night   | 37,0 | 50  | 23,2  | 23,2  | 18,16 | 539,52 | 105,39 |
| 2019/08/11 | CH2276 | Female | Two y/o | Treatment (Wk 2) | Treatment | Fast Day | No | 20:35 | 20:00 - 20:59 | Night   | 37,1 | 58  | 18,8  | 18,8  | 18,26 | 551,90 | 98,20  |
| 2019/08/11 | CH2276 | Female | Two y/o | Treatment (Wk 2) | Treatment | Fast Day | No | 20:40 | 20:00 - 20:59 | Night   | 37,1 | 68  | 6,2   | 6,2   | 18,26 | 564,71 | 60,63  |
| 2019/08/11 | CH2276 | Female | Two y/o | Treatment (Wk 2) | Treatment | Fast Day | No | 20:45 | 20:00 - 20:59 | Night   | 37,1 | 76  | 4,2   | 4,2   | 18,26 | 573,39 | 47,57  |
| 2019/08/11 | CH2276 | Female | Two y/o | Treatment (Wk 2) | Treatment | Fast Day | No | 20:50 | 20:00 - 20:59 | Night   | 37,1 | 61  | 18,4  | 18,4  | 18,26 | 556,01 | 97,47  |
| 2019/08/11 | CH2276 | Female | Two y/o | Treatment (Wk 2) | Treatment | Fast Day | No | 20:55 | 20:00 - 20:59 | Night   | 37,2 | 63  | 11,2  | 11,2  | 18,36 | 558,62 | 80,59  |
| 2019/08/11 | CH2276 | Female | Two y/o | Treatment (Wk 2) | Treatment | Fast Day | No | 21:00 | 21:00 - 21:59 | Night   | 37,3 | 70  | 38,8  | 38,8  | 18,46 | 566,99 | 123,04 |
| 2019/08/11 | CH2276 | Female | Two y/o | Treatment (Wk 2) | Treatment | Fast Day | No | 21:05 | 21:00 - 21:59 | Night   | 37,2 | 87  | 36,4  | 36,4  | 18,36 | 583,64 | 120,84 |
| 2019/08/11 | CH2276 | Female | Two y/o | Treatment (Wk 2) | Treatment | Fast Day | No | 21:10 | 21:00 - 21:59 | Night   | 37,1 | 110 | 193,6 | 193,6 | 18,26 | 600,69 | 178,97 |
| 2019/08/11 | CH2276 | Female | Two y/o | Treatment (Wk 2) | Treatment | Fast Day | No | 21:15 | 21:00 - 21:59 | Night   | 37,4 | 73  | 154,4 | 154,4 | 18,55 | 570,27 | 171,03 |
| 2019/08/11 | CH2276 | Female | Two y/o | Treatment (Wk 2) | Treatment | Fast Day | No | 21:20 | 21:00 - 21:59 | Night   | 37,5 | 135 | 242,0 | 242,0 | 18,65 | 614,84 | 186,83 |
| 2019/08/11 | CH2276 | Female | Two y/o | Treatment (Wk 2) | Treatment | Fast Day | No | 21:25 | 21:00 - 21:59 | Night   | 37,5 | 90  | 40,8  | 40,8  | 18,65 | 586,16 | 124,77 |
| 2019/08/11 | CH2276 | Female | Two y/o | Treatment (Wk 2) | Treatment | Fast Day | No | 21:30 | 21:00 - 21:59 | Night   | 37,6 | 82  | 50,0  | 50,0  | 18,75 | 579,19 | 131,79 |
| 2019/08/11 | CH2276 | Female | Two y/o | Treatment (Wk 2) | Treatment | Fast Day | No | 21:35 | 21:00 - 21:59 | Night   | 37,6 | 106 | 128,6 | 128,6 | 18,75 | 598,06 | 164,63 |
| 2019/08/11 | CH2276 | Female | Two y/o | Treatment (Wk 2) | Treatment | Fast Day | No | 21:40 | 21:00 - 21:59 | Night   | 37,7 | 118 | 55,4  | 55,4  | 18,85 | 605,61 | 135,33 |
| 2019/08/11 | CH2276 | Female | Two y/o | Treatment (Wk 2) | Treatment | Fast Day | No | 21:45 | 21:00 - 21:59 | Night   | 37,7 |     | 137,0 | 137,0 | 18,85 |        | 166,84 |
| 2019/08/11 | CH2276 | Female | Two y/o | Treatment (Wk 2) | Treatment | Fast Day | No | 21:50 | 21:00 - 21:59 | Night   | 37,7 | 51  | 459,4 | 459,4 | 18,85 | 541,20 | 209,53 |
| 2019/08/11 | CH2276 | Female | Two y/o | Treatment (Wk 2) | Treatment | Fast Day | No | 21:55 | 21:00 - 21:59 | Night   | 37,8 | 124 | 184,6 | 184,6 | 18,95 | 609,04 | 177,30 |
| 2019/08/11 | CH2276 | Female | Two y/o | Treatment (Wk 2) | Treatment | Fast Day | No | 22:00 | 22:00 - 22:59 | Night   | 37,9 |     | 231,0 | 231,0 | 19,05 |        | 185,19 |
| 2019/08/11 | CH2276 | Female | Two y/o | Treatment (Wk 2) | Treatment | Fast Day | No | 22:05 | 22:00 - 22:59 | Night   | 37,9 | 121 | 255,4 | 255,4 | 19,05 | 607,35 | 188,73 |
| 2019/08/11 | CH2276 | Female | Two y/o | Treatment (Wk 2) | Treatment | Fast Day | No | 22:10 | 22:00 - 22:59 | Night   | 38,0 | 117 | 150,4 | 150,4 | 19,15 | 605,02 | 170,11 |
| 2019/08/11 | CH2276 | Female | Two y/o | Treatment (Wk 2) | Treatment | Fast Day | No | 22:15 | 22:00 - 22:59 | Night   | 38,0 |     | 468,0 | 468,0 | 19,15 |        | 210,19 |
| 2019/08/11 | CH2276 | Female | Two y/o | Treatment (Wk 2) | Treatment | Fast Day | No | 22:20 | 22:00 - 22:59 | Night   | 38,0 | 110 | 382,2 | 382,2 | 19,15 | 600,69 | 203,00 |
| 2019/08/11 | CH2276 | Female | Two y/o | Treatment (Wk 2) | Treatment | Fast Day | No | 22:25 | 22:00 - 22:59 | Night   | 38,0 | 117 | 281,8 | 281,8 | 19,15 | 605,02 | 192,21 |
| 2019/08/11 | CH2276 | Female | Two y/o | Treatment (Wk 2) | Treatment | Fast Day | No | 22:30 | 22:00 - 22:59 | Night   | 38,0 | 106 | 121,8 | 121,8 | 19,15 | 598,06 | 162,73 |
| 2019/08/11 | CH2276 | Female | Two y/o | Treatment (Wk 2) | Treatment | Fast Day | No | 22:35 | 22:00 - 22:59 | Night   | 38,0 | 121 | 58,2  | 58,2  | 19,15 | 607,35 | 137,04 |
| 2019/08/11 | CH2276 | Female | Two y/o | Treatment (Wk 2) | Treatment | Fast Day | No | 22:40 | 22:00 - 22:59 | Night   | 38,0 | 95  | 12,8  | 12,8  | 19,15 | 590,14 | 85,12  |
| 2019/08/11 | CH2276 | Female | Two y/o | Treatment (Wk 2) | Treatment | Fast Day | No | 22:45 | 22:00 - 22:59 | Night   | 38,0 | 70  | 3,6   | 3,6   | 19,15 | 566,99 | 42,42  |
| 2019/08/11 | CH2276 | Female | Two y/o | Treatment (Wk 2) | Treatment | Fast Day | No | 22:50 | 22:00 - 22:59 | Night   | 37,9 | 60  | 8,8   | 8,8   | 19,05 | 554,67 | 72,43  |
| 2019/08/11 | CH2276 | Female | Two y/o | Treatment (Wk 2) | Treatment | Fast Day | No | 22:55 | 22:00 - 22:59 | Night   | 37,8 | 94  | 7,8   | 7,8   | 18,95 | 589,37 | 68,36  |
| 2019/08/11 | CH2276 | Female | Two y/o | Treatment (Wk 2) | Treatment | Fast Day | No | 23:00 | 23:00 - 23:59 | Night   | 37,8 | 56  | 5,8   | 5,8   | 18,95 | 549,01 | 58,39  |
| 2019/08/11 | CH2276 | Female | Two y/o | Treatment (Wk 2) | Treatment | Fast Day | No | 23:05 | 23:00 - 23:59 | Night   | 37,8 | 58  | 8,0   | 8,0   | 18,95 | 551,90 | 69,22  |
| 2019/08/11 | CH2276 | Female | Two y/o | Treatment (Wk 2) | Treatment | Fast Day | No | 23:10 | 23:00 - 23:59 | Night   | 37,8 | 56  | 6,0   | 6,0   | 18,95 | 549,01 | 59,53  |
| 2019/08/11 | CH2276 | Female | Two y/o | Treatment (Wk 2) | Treatment | Fast Day | No | 23:15 | 23:00 - 23:59 | Night   | 37,8 | 60  | 5,2   | 5,2   | 18,95 | 554,67 | 54,72  |
| 2019/08/11 | CH2276 | Female | Two y/o | Treatment (Wk 2) | Treatment | Fast Day | No | 23:20 | 23:00 - 23:59 | Night   | 37,8 | 83  | 20,8  | 20,8  | 18,95 | 580,11 | 101,65 |
| 2019/08/11 | CH2276 | Female | Two y/o | Treatment (Wk 2) | Treatment | Fast Day | No | 23:25 | 23:00 - 23:59 | Night   | 37,8 | 55  | 50,6  | 50,6  | 18,95 | 547,52 | 132,20 |
| 2019/08/11 | CH2276 | Female | Two y/o | Treatment (Wk 2) | Treatment | Fast Day | No | 23:30 | 23:00 - 23:59 | Night   | 37,7 | 53  | 48,2  | 48,2  | 18,85 | 544,43 | 130,52 |
| 2019/08/11 | CH2276 | Female | Two y/o | Treatment (Wk 2) | Treatment | Fast Day | No | 23:35 | 23:00 - 23:59 | Night   | 37,7 | 76  | 42,6  | 42,6  | 18,85 | 573,39 | 126,26 |
| 2019/08/11 | CH2276 | Female | Two y/o | Treatment (Wk 2) | Treatment | Fast Day | No | 23:40 | 23:00 - 23:59 | Night   | 37,6 | 52  | 45,6  | 45,6  | 18,75 | 542,83 | 128,61 |
| 2019/08/11 | CH2276 | Female | Two y/o | Treatment (Wk 2) | Treatment | Fast Day | No | 23:45 | 23:00 - 23:59 | Night   | 37,6 | 63  | 42,0  | 42,0  | 18,75 | 558,62 | 125,77 |
| 2019/08/11 | CH2276 | Female | Two y/o | Treatment (Wk 2) | Treatment | Fast Day | No | 23:50 | 23:00 - 23:59 | Night   | 37,5 | 54  | 38,4  | 38,4  | 18,65 | 545,99 | 122,68 |



|    | 2019/08/11 | CH2276 | Female | Two y/o | Treatment (Wk 2) | Treatment | Fast Day | No | 23:55 | 23:00 - 23:59 | Night         | 37,4 | 67  | 45,0  | 45,0  | 18,55 | 563,53 | 128,15 |
|----|------------|--------|--------|---------|------------------|-----------|----------|----|-------|---------------|---------------|------|-----|-------|-------|-------|--------|--------|
| 55 | 2019/08/12 | CH2276 | Female | Two y/o | Treatment (Wk 2) | Treatment | Feed Day | No | 00:00 | 00:00 - 00:59 | Early Morning | 37,4 | 89  | 61,6  | 61,6  | 18,55 | 585,33 | 139,00 |
|    | 2019/08/12 | CH2276 | Female | Two y/o | Treatment (Wk 2) | Treatment | Feed Day | No | 00:05 | 00:00 - 00:59 | Early Morning | 37,4 | 55  | 52,0  | 52,0  | 18,55 | 547,52 | 133,14 |
|    | 2019/08/12 | CH2276 | Female | Two y/o | Treatment (Wk 2) | Treatment | Feed Day | No | 00:10 | 00:00 - 00:59 | Early Morning | 37,4 | 60  | 16,8  | 16,8  | 18,55 | 554,67 | 94,37  |
|    | 2019/08/12 | CH2276 | Female | Two y/o | Treatment (Wk 2) | Treatment | Feed Day | No | 00:15 | 00:00 - 00:59 | Early Morning | 37,4 | 51  | 8,4   | 8,4   | 18,55 | 541,20 | 70,86  |
|    | 2019/08/12 | CH2276 | Female | Two y/o | Treatment (Wk 2) | Treatment | Feed Day | No | 00:20 | 00:00 - 00:59 | Early Morning | 37,4 | 54  | 5,8   | 5,8   | 18,55 | 545,99 | 58,39  |
|    | 2019/08/12 | CH2276 | Female | Two y/o | Treatment (Wk 2) | Treatment | Feed Day | No | 00:25 | 00:00 - 00:59 | Early Morning | 37,4 | 82  | 4,2   | 4,2   | 18,55 | 579,19 | 47,57  |
|    | 2019/08/12 | CH2276 | Female | Two y/o | Treatment (Wk 2) | Treatment | Feed Day | No | 00:30 | 00:00 - 00:59 | Early Morning | 37,4 | 67  | 6,6   | 6,6   | 18,55 | 563,53 | 62,73  |
|    | 2019/08/12 | CH2276 | Female | Two y/o | Treatment (Wk 2) | Treatment | Feed Day | No | 00:35 | 00:00 - 00:59 | Early Morning | 37,4 | 67  | 20,2  | 20,2  | 18,55 | 563,53 | 100,65 |
|    | 2019/08/12 | CH2276 | Female | Two y/o | Treatment (Wk 2) | Treatment | Feed Day | No | 00:40 | 00:00 - 00:59 | Early Morning | 37,4 |     | 21,8  | 21,8  | 18,55 |        | 103,26 |
|    | 2019/08/12 | CH2276 | Female | Two y/o | Treatment (Wk 2) | Treatment | Feed Day | No | 00:45 | 00:00 - 00:59 | Early Morning | 37,4 |     | 3,4   | 3,4   | 18,55 |        | 40,51  |
|    | 2019/08/12 | CH2276 | Female | Two y/o | Treatment (Wk 2) | Treatment | Feed Day | No | 00:50 | 00:00 - 00:59 | Early Morning | 37,3 | 53  | 5,8   | 5,8   | 18,46 | 544,43 | 58,39  |
|    | 2019/08/12 | CH2276 | Female | Two y/o | Treatment (Wk 2) | Treatment | Feed Day | No | 00:55 | 00:00 - 00:59 | Early Morning | 37,3 | 64  | 6,0   | 6,0   | 18,46 | 559,88 | 59,53  |
|    | 2019/08/12 | CH2276 | Female | Two y/o | Treatment (Wk 2) | Treatment | Feed Day | No | 01:00 | 01:00 - 01:59 | Early Morning | 37,4 |     | 8,2   | 8,2   | 18,55 |        | 70,05  |
|    | 2019/08/12 | CH2276 | Female | Two y/o | Treatment (Wk 2) | Treatment | Feed Day | No | 01:05 | 01:00 - 01:59 | Early Morning | 37,4 | 54  | 11,4  | 11,4  | 18,55 | 545,99 | 81,19  |
|    | 2019/08/12 | CH2276 | Female | Two y/o | Treatment (Wk 2) | Treatment | Feed Day | No | 01:10 | 01:00 - 01:59 | Early Morning | 37,4 | 52  | 3,2   | 3,2   | 18,55 | 542,83 | 38,49  |
|    | 2019/08/12 | CH2276 | Female | Two y/o | Treatment (Wk 2) | Treatment | Feed Day | No | 01:15 | 01:00 - 01:59 | Early Morning | 37,3 | 45  | 4,4   | 4,4   | 18,46 | 530,47 | 49,12  |
|    | 2019/08/12 | CH2276 | Female | Two y/o | Treatment (Wk 2) | Treatment | Feed Day | No | 01:20 | 01:00 - 01:59 | Early Morning | 37,3 | 55  | 3,6   | 3,6   | 18,46 | 547,52 | 42,42  |
|    | 2019/08/12 | CH2276 | Female | Two y/o | Treatment (Wk 2) | Treatment | Feed Day | No | 01:25 | 01:00 - 01:59 | Early Morning | 37,1 | 58  | 2,8   | 2,8   | 18,26 | 551,90 | 34,04  |
|    | 2019/08/12 | CH2276 | Female | Two y/o | Treatment (Wk 2) | Treatment | Feed Day | No | 01:30 | 01:00 - 01:59 | Early Morning | 37,1 | 54  | 6,8   | 6,8   | 18,26 | 545,99 | 63,74  |
|    | 2019/08/12 | CH2276 | Female | Two y/o | Treatment (Wk 2) | Treatment | Feed Day | No | 01:35 | 01:00 - 01:59 | Early Morning | 37,1 | 66  | 6,6   | 6,6   | 18,26 | 562,34 | 62,73  |
|    | 2019/08/12 | CH2276 | Female | Two y/o | Treatment (Wk 2) | Treatment | Feed Day | No | 01:40 | 01:00 - 01:59 | Early Morning | 37,1 | 44  | 7,6   | 7,6   | 18,26 | 528,51 | 67,49  |
|    | 2019/08/12 | CH2276 | Female | Two y/o | Treatment (Wk 2) | Treatment | Feed Day | No | 01:45 | 01:00 - 01:59 | Early Morning | 37,1 | 58  | 11,8  | 11,8  | 18,26 | 551,90 | 82,36  |
|    | 2019/08/12 | CH2276 | Female | Two y/o | Treatment (Wk 2) | Treatment | Feed Day | No | 01:50 | 01:00 - 01:59 | Early Morning | 37,0 | 94  | 4,2   | 4,2   | 18,16 | 589,37 | 47,57  |
|    | 2019/08/12 | CH2276 | Female | Two y/o | Treatment (Wk 2) | Treatment | Feed Day | No | 01:55 | 01:00 - 01:59 | Early Morning | 37,0 | 60  | 5,0   | 5,0   | 18,16 | 554,67 | 53,41  |
|    | 2019/08/12 | CH2276 | Female | Two y/o | Treatment (Wk 2) | Treatment | Feed Day | No | 02:00 | 02:00 - 02:59 | Early Morning | 36,9 | 85  | 5,6   | 5,6   | 18,06 | 581,90 | 57,21  |
|    | 2019/08/12 | CH2276 | Female | Two y/o | Treatment (Wk 2) | Treatment | Feed Day | No | 02:05 | 02:00 - 02:59 | Early Morning | 36,9 | 58  | 15,6  | 15,6  | 18,06 | 551,90 | 91,85  |
|    | 2019/08/12 | CH2276 | Female | Two y/o | Treatment (Wk 2) | Treatment | Feed Day | No | 02:10 | 02:00 - 02:59 | Early Morning | 36,9 | 61  | 18,4  | 18,4  | 18,06 | 556,01 | 97,47  |
|    | 2019/08/12 | CH2276 | Female | Two y/o | Treatment (Wk 2) | Treatment | Feed Day | No | 02:15 | 02:00 - 02:59 | Early Morning | 36,9 | 57  | 20,8  | 20,8  | 18,06 | 550,47 | 101,65 |
|    | 2019/08/12 | CH2276 | Female | Two y/o | Treatment (Wk 2) | Treatment | Feed Day | No | 02:20 | 02:00 - 02:59 | Early Morning | 37,0 | 73  | 41,0  | 41,0  | 18,16 | 570,27 | 124,94 |
|    | 2019/08/12 | CH2276 | Female | Two y/o | Treatment (Wk 2) | Treatment | Feed Day | No | 02:25 | 02:00 - 02:59 | Early Morning | 36,9 | 67  | 49,0  | 49,0  | 18,06 | 563,53 | 131,09 |
|    | 2019/08/12 | CH2276 | Female | Two y/o | Treatment (Wk 2) | Treatment | Feed Day | No | 02:30 | 02:00 - 02:59 | Early Morning | 36,8 |     | 42,8  | 42,8  | 17,96 |        | 126,42 |
|    | 2019/08/12 | CH2276 | Female | Two y/o | Treatment (Wk 2) | Treatment | Feed Day | No | 02:35 | 02:00 - 02:59 | Early Morning | 36,8 | 59  | 54,6  | 54,6  | 17,96 | 553,30 | 134,83 |
|    | 2019/08/12 | CH2276 | Female | Two y/o | Treatment (Wk 2) | Treatment | Feed Day | No | 02:40 | 02:00 - 02:59 | Early Morning | 36,7 | 95  | 61,6  | 61,6  | 17,87 | 590,14 | 139,00 |
|    | 2019/08/12 | CH2276 | Female | Two y/o | Treatment (Wk 2) | Treatment | Feed Day | No | 02:45 | 02:00 - 02:59 | Early Morning | 36,7 |     | 60,2  | 60,2  | 17,87 |        | 138,21 |
|    | 2019/08/12 | CH2276 | Female | Two y/o | Treatment (Wk 2) | Treatment | Feed Day | No | 02:50 | 02:00 - 02:59 | Early Morning | 36,7 | 52  | 58,4  | 58,4  | 17,87 | 542,83 | 137,16 |
|    | 2019/08/12 | CH2276 | Female | Two y/o | Treatment (Wk 2) | Treatment | Feed Day | No | 02:55 | 02:00 - 02:59 | Early Morning | 36,7 | 64  | 52,8  | 52,8  | 17,87 | 559,88 | 133,67 |
|    | 2019/08/12 | CH2276 | Female | Two y/o | Treatment (Wk 2) | Treatment | Feed Day | No | 03:00 | 03:00 - 03:59 | Early Morning | 36,7 | 47  | 50,2  | 50,2  | 17,87 | 534,23 | 131,92 |
|    | 2019/08/12 | CH2276 | Female | Two y/o | Treatment (Wk 2) | Treatment | Feed Day | No | 03:05 | 03:00 - 03:59 | Early Morning | 36,7 | 60  | 51,2  | 51,2  | 17,87 | 554,67 | 132,61 |
|    | 2019/08/12 | CH2276 | Female | Two y/o | Treatment (Wk 2) | Treatment | Feed Day | No | 03:10 | 03:00 - 03:59 | Early Morning | 36,7 | 88  | 50,8  | 50,8  | 17,87 | 584,49 | 132,33 |
|    | 2019/08/12 | CH2276 | Female | Two y/o | Treatment (Wk 2) | Treatment | Feed Day | No | 03:15 | 03:00 - 03:59 | Early Morning | 36,7 | 56  | 53,0  | 53,0  | 17,87 | 549,01 | 133,80 |
|    | 2019/08/12 | CH2276 | Female | Two y/o | Treatment (Wk 2) | Treatment | Feed Day | No | 03:20 | 03:00 - 03:59 | Early Morning | 36,7 | 49  | 53,6  | 53,6  | 17,87 | 537,80 | 134,19 |
|    | 2019/08/12 | CH2276 | Female | Two y/o | Treatment (Wk 2) | Treatment | Feed Day | No | 03:25 | 03:00 - 03:59 | Early Morning | 36,7 |     | 28,8  | 28,8  | 17,87 |        | 112,79 |
|    | 2019/08/12 | CH2276 | Female | Two y/o | Treatment (Wk 2) | Treatment | Feed Day | No | 03:30 | 03:00 - 03:59 | Early Morning | 36,7 | 54  | 5,4   | 5,4   | 17,87 | 545,99 | 55,99  |
|    | 2019/08/12 | CH2276 | Female | Two y/o | Treatment (Wk 2) | Treatment | Feed Day | No | 03:35 | 03:00 - 03:59 | Early Morning | 36,7 | 50  | 4,8   | 4,8   | 17,87 | 539,52 | 52,04  |
|    | 2019/08/12 | CH2276 | Female | Two y/o | Treatment (Wk 2) | Treatment | Feed Day | No | 03:40 | 03:00 - 03:59 | Early Morning | 36,7 | 57  | 5,4   | 5,4   | 17,87 | 550,47 | 55,99  |
|    | 2019/08/12 | CH2276 | Female | Two y/o | Treatment (Wk 2) | Treatment | Feed Day | No | 03:45 | 03:00 - 03:59 | Early Morning | 36,7 | 63  | 7,0   | 7,0   | 17,87 | 558,62 | 64,72  |
|    | 2019/08/12 | CH2276 | Female | Two y/o | Treatment (Wk 2) | Treatment | Feed Day | No | 03:50 | 03:00 - 03:59 | Early Morning | 36,8 | 55  | 5,0   | 5,0   | 17,96 | 547,52 | 53,41  |
|    | 2019/08/12 | CH2276 | Female | Two y/o | Treatment (Wk 2) | Treatment | Feed Day | No | 03:55 | 03:00 - 03:59 | Early Morning | 36,8 | 79  | 4,4   | 4,4   | 17,96 | 576,36 | 49,12  |
|    | 2019/08/12 | CH2276 | Female | Two y/o | Treatment (Wk 2) | Treatment | Feed Day | No | 04:00 | 04:00 - 04:59 | Morning       | 36,8 | 53  | 4,2   | 4,2   | 17,96 | 544,43 | 47,57  |
|    | 2019/08/12 | CH2276 | Female | Two y/o | Treatment (Wk 2) | Treatment | Feed Day | No | 04:05 | 04:00 - 04:59 | Morning       | 36,8 | 57  | 59,4  | 59,4  | 17,96 | 550,47 | 137,75 |
|    | 2019/08/12 | CH2276 | Female | Two y/o | Treatment (Wk 2) | Treatment | Feed Day | No | 04:10 | 04:00 - 04:59 | Morning       | 36,7 | 50  | 47,8  | 47,8  | 17,87 | 539,52 | 130,23 |
|    | 2019/08/12 | CH2276 | Female | Two y/o | Treatment (Wk 2) | Treatment | Feed Day | No | 04:15 | 04:00 - 04:59 | Morning       | 36,6 | 62  | 49,6  | 49,6  | 17,77 | 557,33 | 131,51 |
|    | 2019/08/12 | CH2276 | Female | Two y/o | Treatment (Wk 2) | Treatment | Feed Day | No | 04:20 | 04:00 - 04:59 | Morning       | 36,6 | 54  | 51,2  | 51,2  | 17,77 | 545,99 | 132,61 |
|    | 2019/08/12 | CH2276 | Female | Two y/o | Treatment (Wk 2) | Treatment | Feed Day | No | 04:25 | 04:00 - 04:59 | Morning       | 36,7 | 98  | 24,0  | 24,0  | 17,87 | 592,41 | 106,55 |
|    | 2019/08/12 | CH2276 | Female | Two y/o | Treatment (Wk 2) | Treatment | Feed Day | No | 04:30 | 04:00 - 04:59 | Morning       | 36,7 | 85  | 19,8  | 19,8  | 17,87 | 581,90 | 99,97  |
|    | 2019/08/12 | CH2276 | Female | Two y/o | Treatment (Wk 2) | Treatment | Feed Day | No | 04:35 | 04:00 - 04:59 | Morning       | 36,8 | 61  | 11,8  | 11,8  | 17,96 | 556,01 | 82,36  |
|    | 2019/08/12 | CH2276 | Female | Two y/o | Treatment (Wk 2) | Treatment | Feed Day | No | 04:40 | 04:00 - 04:59 | Morning       | 36,7 | 51  | 30,8  | 30,8  | 17,87 | 541,20 | 115,10 |
|    | 2019/08/12 | CH2276 | Female | Two y/o | Treatment (Wk 2) | Treatment | Feed Day | No | 04:45 | 04:00 - 04:59 | Morning       | 36,7 | 56  | 52,0  | 52,0  | 17,87 | 549,01 | 133,14 |
|    | 2019/08/12 | CH2276 | Female | Two y/o | Treatment (Wk 2) | Treatment | Feed Day | No | 04:50 | 04:00 - 04:59 | Morning       | 36,7 | 64  | 56,2  | 56,2  | 17,87 | 559,88 | 135,83 |
|    | 2019/08/12 | CH2276 | Female | Two y/o | Treatment (Wk 2) | Treatment | Feed Day | No | 04:55 | 04:00 - 04:59 | Morning       | 36,8 |     | 45,4  | 45,4  | 17,96 |        | 128,45 |
|    | 2019/08/12 | CH2276 | Female | Two y/o | Treatment (Wk 2) | Treatment | Feed Day | No | 05:00 | 05:00 - 05:59 | Morning       | 36,9 | 137 | 96,0  | 96,0  | 18,06 | 615,83 | 154,42 |
|    | 2019/08/12 | CH2276 | Female | Two y/o | Treatment (Wk 2) | Treatment | Feed Day | No | 05:05 | 05:00 - 05:59 | Morning       | 37,1 |     | 228,6 | 228,6 | 18,26 |        | 184,82 |
|    | 2019/08/12 | CH2276 | Female | Two y/o | Treatment (Wk 2) | Treatment | Feed Day | No | 05:10 | 05:00 - 05:59 | Morning       | 37,1 | 113 | 94,8  | 94,8  | 18,26 | 602,58 | 153,98 |
|    | 2019/08/12 | CH2276 | Female | Two y/o | Treatment (Wk 2) | Treatment | Feed Day | No | 05:15 | 05:00 - 05:59 | Morning       | 37,3 | 69  | 240,4 | 240,4 | 18,46 | 565,86 | 186,60 |
|    | 2019/08/12 | CH2276 | Female | Two y/o | Treatment (Wk 2) | Treatment | Feed Day | No | 05:20 | 05:00 - 05:59 | Morning       | 37,4 | 57  | 32,6  | 32,6  | 18,55 | 550,47 | 117,05 |
|    | 2019/08/12 | CH2276 | Female | Two y/o | Treatment (Wk 2) | Treatment | Feed Day | No | 05:25 | 05:00 - 05:59 | Morning       | 37,3 | 49  | 235,6 | 235,6 | 18,46 | 537,80 | 185,89 |
|    | 2019/08/12 | CH2276 | Female | Two y/o | Treatment (Wk 2) | Treatment | Feed Day | No | 05:30 | 05:00 - 05:59 | Morning       | 37,3 | 60  | 5,6   | 5,6   | 18,46 | 554,67 | 57,21  |
|    | 2019/08/12 | CH2276 | Female | Two y/o | Treatment (Wk 2) | Treatment | Feed Day | No | 05:35 | 05:00 - 05:59 | Morning       | 37,3 | 61  | 2,4   | 2,4   | 18,46 | 556,01 | 28,91  |
|    | 2019/08/12 | CH2276 | Female | Two y/o | Treatment (Wk 2) | Treatment | Feed Day | No | 05:40 | 05:00 - 05:59 | Morning       | 37,3 | 85  | 8,0   | 8,0   | 18,46 | 581,90 | 69,22  |



|            |        |        |         |                  |           |          |     |       |               |              |      |     |       |       |       |        |        |
|------------|--------|--------|---------|------------------|-----------|----------|-----|-------|---------------|--------------|------|-----|-------|-------|-------|--------|--------|
| 2019/08/12 | CH2276 | Female | Two y/o | Treatment (Wk 2) | Treatment | Feed Day | No  | 05:45 | 05:00 - 05:59 | Morning      | 37,3 | 94  | 4,4   | 4,4   | 18,46 | 589,37 | 49,12  |
| 2019/08/12 | CH2276 | Female | Two y/o | Treatment (Wk 2) | Treatment | Feed Day | No  | 05:50 | 05:00 - 05:59 | Morning      | 37,3 | 49  | 7,2   | 7,2   | 18,46 | 537,80 | 65,66  |
| 2019/08/12 | CH2276 | Female | Two y/o | Treatment (Wk 2) | Treatment | Feed Day | No  | 05:55 | 05:00 - 05:59 | Morning      | 37,1 | 88  | 11,0  | 11,0  | 18,26 | 584,49 | 79,98  |
| 2019/08/12 | CH2276 | Female | Two y/o | Treatment (Wk 2) | Treatment | Feed Day | No  | 06:00 | 06:00 - 06:59 | Morning      | 37,0 | 54  | 6,6   | 6,6   | 18,16 | 545,99 | 62,73  |
| 2019/08/12 | CH2276 | Female | Two y/o | Treatment (Wk 2) | Treatment | Feed Day | No  | 06:05 | 06:00 - 06:59 | Morning      | 36,9 | 57  | 5,6   | 5,6   | 18,06 | 550,47 | 57,21  |
| 2019/08/12 | CH2276 | Female | Two y/o | Treatment (Wk 2) | Treatment | Feed Day | No  | 06:10 | 06:00 - 06:59 | Morning      | 36,8 | 50  | 11,8  | 11,8  | 17,96 | 539,52 | 82,36  |
| 2019/08/12 | CH2276 | Female | Two y/o | Treatment (Wk 2) | Treatment | Feed Day | No  | 06:15 | 06:00 - 06:59 | Morning      | 36,8 | 52  | 6,4   | 6,4   | 17,96 | 542,83 | 61,70  |
| 2019/08/12 | CH2276 | Female | Two y/o | Treatment (Wk 2) | Treatment | Feed Day | No  | 06:20 | 06:00 - 06:59 | Morning      | 36,8 | 60  | 13,2  | 13,2  | 17,96 | 554,67 | 86,17  |
| 2019/08/12 | CH2276 | Female | Two y/o | Treatment (Wk 2) | Treatment | Feed Day | No  | 06:25 | 06:00 - 06:59 | Morning      | 36,8 | 94  | 41,2  | 41,2  | 17,96 | 589,37 | 125,11 |
| 2019/08/12 | CH2276 | Female | Two y/o | Treatment (Wk 2) | Treatment | Feed Day | No  | 06:30 | 06:00 - 06:59 | Morning      | 36,8 | 58  | 106,2 | 106,2 | 17,96 | 551,90 | 157,94 |
| 2019/08/12 | CH2276 | Female | Two y/o | Treatment (Wk 2) | Treatment | Feed Day | No  | 06:35 | 06:00 - 06:59 | Morning      | 36,9 | 174 | 169,2 | 169,2 | 18,06 | 631,46 | 174,24 |
| 2019/08/12 | CH2276 | Female | Two y/o | Treatment (Wk 2) | Treatment | Feed Day | No  | 06:40 | 06:00 - 06:59 | Morning      | 37,0 |     | 154,2 | 154,2 | 18,16 |        | 170,99 |
| 2019/08/12 | CH2276 | Female | Two y/o | Treatment (Wk 2) | Treatment | Feed Day | No  | 06:45 | 06:00 - 06:59 | Morning      | 37,3 | 86  | 262,4 | 262,4 | 18,46 | 582,77 | 189,69 |
| 2019/08/12 | CH2276 | Female | Two y/o | Treatment (Wk 2) | Treatment | Feed Day | No  | 06:50 | 06:00 - 06:59 | Morning      | 37,5 |     | 861,0 |       | 18,65 |        |        |
| 2019/08/12 | CH2276 | Female | Two y/o | Treatment (Wk 2) | Treatment | Feed Day | No  | 06:55 | 06:00 - 06:59 | Morning      | 37,8 | 131 | 41,0  | 41,0  | 18,95 | 612,80 | 124,94 |
| 2019/08/12 | CH2276 | Female | Two y/o | Treatment (Wk 2) | Treatment | Feed Day | No  | 07:00 | 07:00 - 07:59 | Morning      | 37,8 |     | 97,0  | 97,0  | 18,95 |        | 154,78 |
| 2019/08/12 | CH2276 | Female | Two y/o | Treatment (Wk 2) | Treatment | Feed Day | No  | 07:05 | 07:00 - 07:59 | Morning      | 37,8 | 63  | 225,8 | 225,8 | 18,95 | 558,62 | 184,39 |
| 2019/08/12 | CH2276 | Female | Two y/o | Treatment (Wk 2) | Treatment | Feed Day | No  | 07:10 | 07:00 - 07:59 | Morning      | 37,8 | 48  | 232,2 | 232,2 | 18,95 | 536,04 | 185,38 |
| 2019/08/12 | CH2276 | Female | Two y/o | Treatment (Wk 2) | Treatment | Feed Day | No  | 07:15 | 07:00 - 07:59 | Morning      | 37,8 |     | 243,4 | 243,4 | 18,95 |        | 187,04 |
| 2019/08/12 | CH2276 | Female | Two y/o | Treatment (Wk 2) | Treatment | Feed Day | No  | 07:20 | 07:00 - 07:59 | Morning      | 37,8 | 49  | 85,4  | 85,4  | 18,95 | 537,80 | 150,35 |
| 2019/08/12 | CH2276 | Female | Two y/o | Treatment (Wk 2) | Treatment | Feed Day | No  | 07:25 | 07:00 - 07:59 | Morning      | 37,7 | 97  | 40,4  | 40,4  | 18,85 | 591,66 | 124,43 |
| 2019/08/12 | CH2276 | Female | Two y/o | Treatment (Wk 2) | Treatment | Feed Day | No  | 07:30 | 07:00 - 07:59 | Morning      | 37,6 | 90  | 147,0 | 147,0 | 18,75 | 586,16 | 169,31 |
| 2019/08/12 | CH2276 | Female | Two y/o | Treatment (Wk 2) | Treatment | Feed Day | No  | 07:35 | 07:00 - 07:59 | Morning      | 37,6 | 109 | 126,4 | 126,4 | 18,75 | 600,04 | 164,02 |
| 2019/08/12 | CH2276 | Female | Two y/o | Treatment (Wk 2) | Treatment | Feed Day | No  | 07:40 | 07:00 - 07:59 | Morning      | 37,6 |     | 115,6 | 115,6 | 18,75 |        | 160,90 |
| 2019/08/12 | CH2276 | Female | Two y/o | Treatment (Wk 2) | Treatment | Feed Day | No  | 07:45 | 07:00 - 07:59 | Morning      | 38,2 | 111 | 46,2  | 46,2  | 19,36 | 601,33 | 129,06 |
| 2019/08/12 | CH2276 | Female | Two y/o | Treatment (Wk 2) | Treatment | Feed Day | No  | 07:50 | 07:00 - 07:59 | Morning      | 38,1 |     | 316,8 | 316,8 | 19,26 |        | 196,35 |
| 2019/08/12 | CH2276 | Female | Two y/o | Treatment (Wk 2) | Treatment | Feed Day | No  | 07:55 | 07:00 - 07:59 | Morning      | 38,0 | 106 | 163,6 | 163,6 | 19,15 | 598,06 | 173,06 |
| 2019/08/12 | CH2276 | Female | Two y/o | Treatment (Wk 2) | Treatment | Feed Day | No  | 08:00 | 08:00 - 08:59 | Late Morning | 37,9 |     | 55,6  | 55,6  | 19,05 |        | 135,46 |
| 2019/08/12 | CH2276 | Female | Two y/o | Treatment (Wk 2) | Treatment | Feed Day | No  | 08:05 | 08:00 - 08:59 | Late Morning | 37,8 | 118 | 130,2 | 130,2 | 18,95 | 605,61 | 165,06 |
| 2019/08/12 | CH2276 | Female | Two y/o | Treatment (Wk 2) | Treatment | Feed Day | No  | 08:10 | 08:00 - 08:59 | Late Morning | 37,8 | 91  | 75,8  | 75,8  | 18,95 | 586,98 | 146,20 |
| 2019/08/12 | CH2276 | Female | Two y/o | Treatment (Wk 2) | Treatment | Feed Day | No  | 08:15 | 08:00 - 08:59 | Late Morning | 37,8 | 100 | 140,6 | 140,6 | 18,95 | 593,87 | 167,75 |
| 2019/08/12 | CH2276 | Female | Two y/o | Treatment (Wk 2) | Treatment | Feed Day | No  | 08:20 | 08:00 - 08:59 | Late Morning | 37,7 | 75  | 24,2  | 24,2  | 18,85 | 572,36 | 106,83 |
| 2019/08/12 | CH2276 | Female | Two y/o | Treatment (Wk 2) | Treatment | Feed Day | No  | 08:25 | 08:00 - 08:59 | Late Morning | 37,6 | 59  | 50,2  | 50,2  | 18,75 | 553,30 | 131,92 |
| 2019/08/12 | CH2276 | Female | Two y/o | Treatment (Wk 2) | Treatment | Feed Day | No  | 08:30 | 08:00 - 08:59 | Late Morning | 37,6 | 55  | 104,0 | 104,0 | 18,75 | 547,52 | 157,21 |
| 2019/08/12 | CH2276 | Female | Two y/o | Treatment (Wk 2) | Treatment | Feed Day | No  | 08:35 | 08:00 - 08:59 | Late Morning | 37,7 | 117 | 25,6  | 25,6  | 18,85 | 605,02 | 108,76 |
| 2019/08/12 | CH2276 | Female | Two y/o | Treatment (Wk 2) | Treatment | Feed Day | No  | 08:40 | 08:00 - 08:59 | Late Morning | 37,7 | 114 | 84,6  | 84,6  | 18,85 | 603,20 | 150,02 |
| 2019/08/12 | CH2276 | Female | Two y/o | Treatment (Wk 2) | Treatment | Feed Day | No  | 08:45 | 08:00 - 08:59 | Late Morning | 37,7 | 92  | 28,4  | 28,4  | 18,85 | 587,78 | 112,31 |
| 2019/08/12 | CH2276 | Female | Two y/o | Treatment (Wk 2) | Treatment | Feed Day | No  | 08:50 | 08:00 - 08:59 | Late Morning | 37,6 | 78  | 40,6  | 40,6  | 18,75 | 575,38 | 124,60 |
| 2019/08/12 | CH2276 | Female | Two y/o | Treatment (Wk 2) | Treatment | Feed Day | No  | 08:55 | 08:00 - 08:59 | Late Morning | 37,5 | 87  | 40,2  | 40,2  | 18,65 | 583,64 | 124,26 |
| 2019/08/12 | CH2276 | Female | Two y/o | Treatment (Wk 2) | Treatment | Feed Day | No  | 09:00 | 09:00 - 09:59 | Late Morning | 37,4 | 86  | 58,8  | 58,8  | 18,55 | 582,77 | 137,39 |
| 2019/08/12 | CH2276 | Female | Two y/o | Treatment (Wk 2) | Treatment | Feed Day | No  | 09:05 | 09:00 - 09:59 | Late Morning | 37,4 | 100 | 74,6  | 74,6  | 18,55 | 593,87 | 145,65 |
| 2019/08/12 | CH2276 | Female | Two y/o | Treatment (Wk 2) | Treatment | Feed Day | No  | 09:10 | 09:00 - 09:59 | Late Morning | 37,4 | 108 | 348,2 | 348,2 | 18,55 | 599,39 | 199,70 |
| 2019/08/12 | CH2276 | Female | Two y/o | Treatment (Wk 2) | Treatment | Feed Day | No  | 09:15 | 09:00 - 09:59 | Late Morning | 37,5 | 64  | 100,0 | 100,0 | 18,65 | 559,88 | 155,84 |
| 2019/08/12 | CH2276 | Female | Two y/o | Treatment (Wk 2) | Treatment | Feed Day | No  | 09:20 | 09:00 - 09:59 | Late Morning | 37,7 | 75  | 143,6 | 143,6 | 18,85 | 572,36 | 168,49 |
| 2019/08/12 | CH2276 | Female | Two y/o | Treatment (Wk 2) | Treatment | Feed Day | No  | 09:25 | 09:00 - 09:59 | Late Morning | 37,7 | 65  | 22,0  | 22,0  | 18,85 | 561,12 | 103,57 |
| 2019/08/12 | CH2276 | Female | Two y/o | Treatment (Wk 2) | Treatment | Feed Day | No  | 09:30 | 09:00 - 09:59 | Late Morning | 37,7 | 61  | 16,0  | 16,0  | 18,85 | 556,01 | 92,71  |
| 2019/08/12 | CH2276 | Female | Two y/o | Treatment (Wk 2) | Treatment | Feed Day | No  | 09:35 | 09:00 - 09:59 | Late Morning | 37,7 | 154 | 15,2  | 15,2  | 18,85 | 623,58 | 90,96  |
| 2019/08/12 | CH2276 | Female | Two y/o | Treatment (Wk 2) | Treatment | Feed Day | No  | 09:40 | 09:00 - 09:59 | Late Morning | 37,6 | 60  | 38,2  | 38,2  | 18,75 | 554,67 | 122,50 |
| 2019/08/12 | CH2276 | Female | Two y/o | Treatment (Wk 2) | Treatment | Feed Day | No  | 09:45 | 09:00 - 09:59 | Late Morning | 37,6 | 72  | 37,2  | 37,2  | 18,75 | 569,20 | 121,59 |
| 2019/08/12 | CH2276 | Female | Two y/o | Treatment (Wk 2) | Treatment | Feed Day | No  | 09:50 | 09:00 - 09:59 | Late Morning | 37,5 | 56  | 44,6  | 44,6  | 18,65 | 549,01 | 127,84 |
| 2019/08/12 | CH2276 | Female | Two y/o | Treatment (Wk 2) | Treatment | Feed Day | No  | 09:55 | 09:00 - 09:59 | Late Morning | 37,5 | 60  | 38,2  | 38,2  | 18,65 | 554,67 | 122,50 |
| 2019/08/12 | CH2276 | Female | Two y/o | Treatment (Wk 2) | Treatment | Feed Day | No  | 10:00 | 10:00 - 10:59 | Late Morning | 37,4 | 57  | 41,8  | 41,8  | 18,55 | 550,47 | 125,60 |
| 2019/08/12 | CH2276 | Female | Two y/o | Treatment (Wk 2) | Treatment | Feed Day | No  | 10:05 | 10:00 - 10:59 | Late Morning | 37,4 | 59  | 12,8  | 12,8  | 18,55 | 553,30 | 85,12  |
| 2019/08/12 | CH2276 | Female | Two y/o | Treatment (Wk 2) | Treatment | Feed Day | No  | 10:10 | 10:00 - 10:59 | Late Morning | 37,3 | 54  | 5,2   | 5,2   | 18,46 | 545,99 | 54,72  |
| 2019/08/12 | CH2276 | Female | Two y/o | Treatment (Wk 2) | Treatment | Feed Day | No  | 10:15 | 10:00 - 10:59 | Late Morning | 37,1 | 63  | 11,2  | 11,2  | 18,26 | 558,62 | 80,59  |
| 2019/08/12 | CH2276 | Female | Two y/o | Treatment (Wk 2) | Treatment | Feed Day | No  | 10:20 | 10:00 - 10:59 | Late Morning | 37,0 |     | 65,8  | 65,8  | 18,16 |        | 141,29 |
| 2019/08/12 | CH2276 | Female | Two y/o | Treatment (Wk 2) | Treatment | Feed Day | No  | 10:25 | 10:00 - 10:59 | Late Morning | 36,9 | 84  | 17,6  | 17,6  | 18,06 | 581,01 | 95,95  |
| 2019/08/12 | CH2276 | Female | Two y/o | Treatment (Wk 2) | Treatment | Feed Day | Yes | 10:30 | 10:00 - 10:59 | Late Morning | 36,9 | 90  | 28,4  | 28,4  | 18,06 | 586,16 | 112,31 |
| 2019/08/12 | CH2276 | Female | Two y/o | Treatment (Wk 2) | Treatment | Feed Day | Yes | 10:35 | 10:00 - 10:59 | Late Morning | 36,9 |     | 38,0  | 38,0  | 18,06 |        | 122,32 |
| 2019/08/12 | CH2276 | Female | Two y/o | Treatment (Wk 2) | Treatment | Feed Day | Yes | 10:40 | 10:00 - 10:59 | Late Morning | 36,9 | 75  | 106,6 | 106,6 | 18,06 | 572,36 | 158,07 |
| 2019/08/12 | CH2276 | Female | Two y/o | Treatment (Wk 2) | Treatment | Feed Day | Yes | 10:45 | 10:00 - 10:59 | Late Morning | 37,0 | 119 | 216,6 | 216,6 | 18,16 | 606,20 | 182,93 |
| 2019/08/12 | CH2276 | Female | Two y/o | Treatment (Wk 2) | Treatment | Feed Day | Yes | 10:50 | 10:00 - 10:59 | Late Morning | 37,3 | 104 | 150,6 | 150,6 | 18,46 | 596,69 | 170,16 |
| 2019/08/12 | CH2276 | Female | Two y/o | Treatment (Wk 2) | Treatment | Feed Day | Yes | 10:55 | 10:00 - 10:59 | Late Morning | 37,5 |     | 151,6 | 151,6 | 18,65 |        | 170,39 |
| 2019/08/12 | CH2276 | Female | Two y/o | Treatment (Wk 2) | Treatment | Feed Day | Yes | 11:00 | 11:00 - 11:59 | Late Morning | 37,7 | 191 | 16,2  | 16,2  | 18,85 | 637,33 | 93,13  |
| 2019/08/12 | CH2276 | Female | Two y/o | Treatment (Wk 2) | Treatment | Feed Day | Yes | 11:05 | 11:00 - 11:59 | Late Morning | 37,6 | 109 | 79,2  | 79,2  | 18,75 | 600,04 | 147,73 |
| 2019/08/12 | CH2276 | Female | Two y/o | Treatment (Wk 2) | Treatment | Feed Day | Yes | 11:10 | 11:00 - 11:59 | Late Morning | 37,6 | 56  | 30,6  | 30,6  | 18,75 | 549,01 | 114,87 |
| 2019/08/12 | CH2276 | Female | Two y/o | Treatment (Wk 2) | Treatment | Feed Day | Yes | 11:15 | 11:00 - 11:59 | Late Morning | 37,6 | 73  | 11,0  | 11,0  | 18,75 | 570,27 | 79,98  |
| 2019/08/12 | CH2276 | Female | Two y/o | Treatment (Wk 2) | Treatment | Feed Day | Yes | 11:20 | 11:00 - 11:59 | Late Morning | 37,6 | 64  | 19,8  | 19,8  | 18,75 | 559,88 | 99,97  |
| 2019/08/12 | CH2276 | Female | Two y/o | Treatment (Wk 2) | Treatment | Feed Day | Yes | 11:25 | 11:00 - 11:59 | Late Morning | 37,7 | 97  | 38,8  | 38,8  | 18,85 | 591,66 | 123,04 |
| 2019/08/12 | CH2276 | Female | Two y/o | Treatment (Wk 2) | Treatment | Feed Day | No  | 11:30 | 11:00 - 11:59 | Late Morning | 37,7 | 108 | 37,6  | 37,6  | 18,85 | 599,39 | 121,96 |



|            |        |        |         |                  |           |          |     |       |               |              |      |     |       |       |       |        |        |
|------------|--------|--------|---------|------------------|-----------|----------|-----|-------|---------------|--------------|------|-----|-------|-------|-------|--------|--------|
| 2019/08/12 | CH2276 | Female | Two y/o | Treatment (Wk 2) | Treatment | Feed Day | No  | 11:35 | 11:00 - 11:59 | Late Morning | 37,7 | 97  | 30,8  | 30,8  | 18,85 | 591,66 | 115,10 |
| 2019/08/12 | CH2276 | Female | Two y/o | Treatment (Wk 2) | Treatment | Feed Day | No  | 11:40 | 11:00 - 11:59 | Late Morning | 37,7 | 88  | 48,4  | 48,4  | 18,85 | 584,49 | 130,66 |
| 2019/08/12 | CH2276 | Female | Two y/o | Treatment (Wk 2) | Treatment | Feed Day | No  | 11:45 | 11:00 - 11:59 | Late Morning | 37,7 | 91  | 41,6  | 41,6  | 18,85 | 586,98 | 125,44 |
| 2019/08/12 | CH2276 | Female | Two y/o | Treatment (Wk 2) | Treatment | Feed Day | No  | 11:50 | 11:00 - 11:59 | Late Morning | 37,8 | 68  | 6,6   | 6,6   | 18,95 | 564,71 | 62,73  |
| 2019/08/12 | CH2276 | Female | Two y/o | Treatment (Wk 2) | Treatment | Feed Day | No  | 11:55 | 11:00 - 11:59 | Late Morning | 37,8 | 77  | 9,4   | 9,4   | 18,95 | 574,39 | 74,66  |
| 2019/08/12 | CH2276 | Female | Two y/o | Treatment (Wk 2) | Treatment | Feed Day | No  | 12:00 | 12:00 - 12:59 | Afternoon    | 37,8 | 67  | 6,4   | 6,4   | 18,95 | 563,53 | 61,70  |
| 2019/08/12 | CH2276 | Female | Two y/o | Treatment (Wk 2) | Treatment | Feed Day | No  | 12:05 | 12:00 - 12:59 | Afternoon    | 37,9 | 84  | 3,4   | 3,4   | 19,05 | 581,01 | 40,51  |
| 2019/08/12 | CH2276 | Female | Two y/o | Treatment (Wk 2) | Treatment | Feed Day | No  | 12:10 | 12:00 - 12:59 | Afternoon    | 37,9 | 92  | 87,4  | 87,4  | 19,05 | 587,78 | 151,15 |
| 2019/08/12 | CH2276 | Female | Two y/o | Treatment (Wk 2) | Treatment | Feed Day | No  | 12:15 | 12:00 - 12:59 | Afternoon    | 38,0 |     | 5,8   | 5,8   | 19,15 |        | 58,39  |
| 2019/08/12 | CH2276 | Female | Two y/o | Treatment (Wk 2) | Treatment | Feed Day | No  | 12:20 | 12:00 - 12:59 | Afternoon    | 38,0 | 69  | 10,2  | 10,2  | 19,15 | 565,86 | 77,43  |
| 2019/08/12 | CH2276 | Female | Two y/o | Treatment (Wk 2) | Treatment | Feed Day | No  | 12:25 | 12:00 - 12:59 | Afternoon    | 38,0 | 68  | 9,2   | 9,2   | 19,15 | 564,71 | 73,94  |
| 2019/08/12 | CH2276 | Female | Two y/o | Treatment (Wk 2) | Treatment | Feed Day | No  | 12:30 | 12:00 - 12:59 | Afternoon    | 38,0 | 68  | 11,8  | 11,8  | 19,15 | 564,71 | 82,36  |
| 2019/08/12 | CH2276 | Female | Two y/o | Treatment (Wk 2) | Treatment | Feed Day | No  | 12:35 | 12:00 - 12:59 | Afternoon    | 38,0 | 74  | 11,2  | 11,2  | 19,15 | 571,33 | 80,59  |
| 2019/08/12 | CH2276 | Female | Two y/o | Treatment (Wk 2) | Treatment | Feed Day | No  | 12:40 | 12:00 - 12:59 | Afternoon    | 38,0 | 91  | 6,8   | 6,8   | 19,15 | 586,98 | 63,74  |
| 2019/08/12 | CH2276 | Female | Two y/o | Treatment (Wk 2) | Treatment | Feed Day | No  | 12:45 | 12:00 - 12:59 | Afternoon    | 38,0 | 72  | 10,0  | 10,0  | 19,15 | 569,20 | 76,76  |
| 2019/08/12 | CH2276 | Female | Two y/o | Treatment (Wk 2) | Treatment | Feed Day | No  | 12:50 | 12:00 - 12:59 | Afternoon    | 38,0 | 92  | 9,8   | 9,8   | 19,15 | 587,78 | 76,07  |
| 2019/08/12 | CH2276 | Female | Two y/o | Treatment (Wk 2) | Treatment | Feed Day | No  | 12:55 | 12:00 - 12:59 | Afternoon    | 38,0 | 94  | 9,2   | 9,2   | 19,15 | 589,37 | 73,94  |
| 2019/08/12 | CH2276 | Female | Two y/o | Treatment (Wk 2) | Treatment | Feed Day | No  | 13:00 | 13:00 - 13:59 | Afternoon    | 38,0 | 93  | 12,2  | 12,2  | 19,15 | 588,58 | 83,49  |
| 2019/08/12 | CH2276 | Female | Two y/o | Treatment (Wk 2) | Treatment | Feed Day | No  | 13:05 | 13:00 - 13:59 | Afternoon    | 38,0 | 98  | 9,0   | 9,0   | 19,15 | 592,41 | 73,19  |
| 2019/08/12 | CH2276 | Female | Two y/o | Treatment (Wk 2) | Treatment | Feed Day | No  | 13:10 | 13:00 - 13:59 | Afternoon    | 38,0 | 74  | 4,2   | 4,2   | 19,15 | 571,33 | 47,57  |
| 2019/08/12 | CH2276 | Female | Two y/o | Treatment (Wk 2) | Treatment | Feed Day | No  | 13:15 | 13:00 - 13:59 | Afternoon    | 38,0 | 92  | 11,0  | 11,0  | 19,15 | 587,78 | 79,98  |
| 2019/08/12 | CH2276 | Female | Two y/o | Treatment (Wk 2) | Treatment | Feed Day | No  | 13:20 | 13:00 - 13:59 | Afternoon    | 38,0 | 62  | 9,0   | 9,0   | 19,15 | 557,33 | 73,19  |
| 2019/08/12 | CH2276 | Female | Two y/o | Treatment (Wk 2) | Treatment | Feed Day | No  | 13:25 | 13:00 - 13:59 | Afternoon    | 38,0 | 78  | 8,0   | 8,0   | 19,15 | 575,38 | 69,22  |
| 2019/08/12 | CH2276 | Female | Two y/o | Treatment (Wk 2) | Treatment | Feed Day | No  | 13:30 | 13:00 - 13:59 | Afternoon    | 38,0 | 72  | 6,0   | 6,0   | 19,15 | 569,20 | 59,53  |
| 2019/08/12 | CH2276 | Female | Two y/o | Treatment (Wk 2) | Treatment | Feed Day | No  | 13:35 | 13:00 - 13:59 | Afternoon    | 38,0 | 64  | 7,0   | 7,0   | 19,15 | 559,88 | 64,72  |
| 2019/08/12 | CH2276 | Female | Two y/o | Treatment (Wk 2) | Treatment | Feed Day | No  | 13:40 | 13:00 - 13:59 | Afternoon    | 38,0 | 73  | 13,6  | 13,6  | 19,15 | 570,27 | 87,18  |
| 2019/08/12 | CH2276 | Female | Two y/o | Treatment (Wk 2) | Treatment | Feed Day | No  | 13:45 | 13:00 - 13:59 | Afternoon    | 38,0 | 68  | 16,8  | 16,8  | 19,15 | 564,71 | 94,37  |
| 2019/08/12 | CH2276 | Female | Two y/o | Treatment (Wk 2) | Treatment | Feed Day | No  | 13:50 | 13:00 - 13:59 | Afternoon    | 38,0 | 84  | 16,4  | 16,4  | 19,15 | 581,01 | 93,55  |
| 2019/08/12 | CH2276 | Female | Two y/o | Treatment (Wk 2) | Treatment | Feed Day | No  | 13:55 | 13:00 - 13:59 | Afternoon    | 38,0 | 67  | 8,2   | 8,2   | 19,15 | 563,53 | 70,05  |
| 2019/08/12 | CH2276 | Female | Two y/o | Treatment (Wk 2) | Treatment | Feed Day | No  | 14:00 | 14:00 - 14:59 | Afternoon    | 38,0 | 67  | 13,4  | 13,4  | 19,15 | 563,53 | 86,68  |
| 2019/08/12 | CH2276 | Female | Two y/o | Treatment (Wk 2) | Treatment | Feed Day | No  | 14:05 | 14:00 - 14:59 | Afternoon    | 38,1 | 83  | 8,6   | 8,6   | 19,26 | 580,11 | 71,66  |
| 2019/08/12 | CH2276 | Female | Two y/o | Treatment (Wk 2) | Treatment | Feed Day | No  | 14:10 | 14:00 - 14:59 | Afternoon    | 38,1 | 71  | 9,2   | 9,2   | 19,26 | 568,10 | 73,94  |
| 2019/08/12 | CH2276 | Female | Two y/o | Treatment (Wk 2) | Treatment | Feed Day | No  | 14:15 | 14:00 - 14:59 | Afternoon    | 38,1 | 64  | 10,4  | 10,4  | 19,26 | 559,88 | 78,08  |
| 2019/08/12 | CH2276 | Female | Two y/o | Treatment (Wk 2) | Treatment | Feed Day | No  | 14:20 | 14:00 - 14:59 | Afternoon    | 38,0 | 67  | 8,0   | 8,0   | 19,15 | 563,53 | 69,22  |
| 2019/08/12 | CH2276 | Female | Two y/o | Treatment (Wk 2) | Treatment | Feed Day | No  | 14:25 | 14:00 - 14:59 | Afternoon    | 38,0 | 68  | 235,8 | 235,8 | 19,15 | 564,71 | 185,92 |
| 2019/08/12 | CH2276 | Female | Two y/o | Treatment (Wk 2) | Treatment | Feed Day | No  | 14:30 | 14:00 - 14:59 | Afternoon    | 38,0 | 99  | 26,6  | 26,6  | 19,15 | 593,14 | 110,07 |
| 2019/08/12 | CH2276 | Female | Two y/o | Treatment (Wk 2) | Treatment | Feed Day | No  | 14:35 | 14:00 - 14:59 | Afternoon    | 38,0 | 89  | 108,4 | 108,4 | 19,15 | 585,33 | 158,66 |
| 2019/08/12 | CH2276 | Female | Two y/o | Treatment (Wk 2) | Treatment | Feed Day | No  | 14:40 | 14:00 - 14:59 | Afternoon    | 38,1 | 91  | 52,4  | 52,4  | 19,26 | 586,98 | 133,41 |
| 2019/08/12 | CH2276 | Female | Two y/o | Treatment (Wk 2) | Treatment | Feed Day | No  | 14:45 | 14:00 - 14:59 | Afternoon    | 38,0 | 87  | 38,0  | 38,0  | 19,15 | 583,64 | 122,32 |
| 2019/08/12 | CH2276 | Female | Two y/o | Treatment (Wk 2) | Treatment | Feed Day | No  | 14:50 | 14:00 - 14:59 | Afternoon    | 38,0 | 87  | 18,8  | 18,8  | 19,15 | 583,64 | 98,20  |
| 2019/08/12 | CH2276 | Female | Two y/o | Treatment (Wk 2) | Treatment | Feed Day | No  | 14:55 | 14:00 - 14:59 | Afternoon    | 38,0 | 60  | 16,0  | 16,0  | 19,15 | 554,67 | 92,71  |
| 2019/08/12 | CH2276 | Female | Two y/o | Treatment (Wk 2) | Treatment | Feed Day | No  | 15:00 | 15:00 - 15:59 | Afternoon    | 38,0 | 59  | 34,0  | 34,0  | 19,15 | 553,30 | 118,49 |
| 2019/08/12 | CH2276 | Female | Two y/o | Treatment (Wk 2) | Treatment | Feed Day | No  | 15:05 | 15:00 - 15:59 | Afternoon    | 38,0 | 115 | 40,2  | 40,2  | 19,15 | 603,82 | 124,26 |
| 2019/08/12 | CH2276 | Female | Two y/o | Treatment (Wk 2) | Treatment | Feed Day | No  | 15:10 | 15:00 - 15:59 | Afternoon    | 38,0 | 68  | 50,4  | 50,4  | 19,15 | 564,71 | 132,06 |
| 2019/08/12 | CH2276 | Female | Two y/o | Treatment (Wk 2) | Treatment | Feed Day | No  | 15:15 | 15:00 - 15:59 | Afternoon    | 38,0 | 80  | 53,4  | 53,4  | 19,15 | 577,31 | 134,06 |
| 2019/08/12 | CH2276 | Female | Two y/o | Treatment (Wk 2) | Treatment | Feed Day | No  | 15:20 | 15:00 - 15:59 | Afternoon    | 38,2 | 89  | 27,8  | 27,8  | 19,36 | 585,33 | 111,58 |
| 2019/08/12 | CH2276 | Female | Two y/o | Treatment (Wk 2) | Treatment | Feed Day | No  | 15:25 | 15:00 - 15:59 | Afternoon    | 38,2 | 88  | 54,8  | 54,8  | 19,36 | 584,49 | 134,96 |
| 2019/08/12 | CH2276 | Female | Two y/o | Treatment (Wk 2) | Treatment | Feed Day | Yes | 15:30 | 15:00 - 15:59 | Afternoon    | 38,2 | 73  | 59,2  | 59,2  | 19,36 | 570,27 | 137,63 |
| 2019/08/12 | CH2276 | Female | Two y/o | Treatment (Wk 2) | Treatment | Feed Day | Yes | 15:35 | 15:00 - 15:59 | Afternoon    | 38,2 | 80  | 51,0  | 51,0  | 19,36 | 577,31 | 132,47 |
| 2019/08/12 | CH2276 | Female | Two y/o | Treatment (Wk 2) | Treatment | Feed Day | Yes | 15:40 | 15:00 - 15:59 | Afternoon    | 38,2 | 69  | 53,4  | 53,4  | 19,36 | 565,86 | 134,06 |
| 2019/08/12 | CH2276 | Female | Two y/o | Treatment (Wk 2) | Treatment | Feed Day | Yes | 15:45 | 15:00 - 15:59 | Afternoon    | 38,1 | 94  | 51,4  | 51,4  | 19,26 | 589,37 | 132,74 |
| 2019/08/12 | CH2276 | Female | Two y/o | Treatment (Wk 2) | Treatment | Feed Day | Yes | 15:50 | 15:00 - 15:59 | Afternoon    | 38,1 | 80  | 12,4  | 12,4  | 19,26 | 577,31 | 84,04  |
| 2019/08/12 | CH2276 | Female | Two y/o | Treatment (Wk 2) | Treatment | Feed Day | Yes | 15:55 | 15:00 - 15:59 | Afternoon    | 38,0 | 66  | 23,8  | 23,8  | 19,15 | 562,34 | 106,26 |
| 2019/08/12 | CH2276 | Female | Two y/o | Treatment (Wk 2) | Treatment | Feed Day | Yes | 16:00 | 16:00 - 16:59 | Evening      | 38,0 | 79  | 76,6  | 76,6  | 19,15 | 576,36 | 146,57 |
| 2019/08/12 | CH2276 | Female | Two y/o | Treatment (Wk 2) | Treatment | Feed Day | Yes | 16:05 | 16:00 - 16:59 | Evening      | 38,0 | 88  | 41,0  | 41,0  | 19,15 | 584,49 | 124,94 |
| 2019/08/12 | CH2276 | Female | Two y/o | Treatment (Wk 2) | Treatment | Feed Day | Yes | 16:10 | 16:00 - 16:59 | Evening      | 38,0 | 86  | 27,6  | 27,6  | 19,15 | 582,77 | 111,33 |
| 2019/08/12 | CH2276 | Female | Two y/o | Treatment (Wk 2) | Treatment | Feed Day | Yes | 16:15 | 16:00 - 16:59 | Evening      | 38,0 | 83  | 341,0 | 341,0 | 19,15 | 580,11 | 198,95 |
| 2019/08/12 | CH2276 | Female | Two y/o | Treatment (Wk 2) | Treatment | Feed Day | Yes | 16:20 | 16:00 - 16:59 | Evening      | 38,2 | 96  | 29,0  | 29,0  | 19,36 | 590,91 | 113,03 |
| 2019/08/12 | CH2276 | Female | Two y/o | Treatment (Wk 2) | Treatment | Feed Day | Yes | 16:25 | 16:00 - 16:59 | Evening      | 38,2 | 87  | 35,8  | 35,8  | 19,36 | 583,64 | 120,27 |
| 2019/08/12 | CH2276 | Female | Two y/o | Treatment (Wk 2) | Treatment | Feed Day | No  | 16:30 | 16:00 - 16:59 | Evening      | 38,2 | 68  | 43,2  | 43,2  | 19,36 | 564,71 | 126,74 |
| 2019/08/12 | CH2276 | Female | Two y/o | Treatment (Wk 2) | Treatment | Feed Day | No  | 16:35 | 16:00 - 16:59 | Evening      | 38,2 | 95  | 42,4  | 42,4  | 19,36 | 590,14 | 126,10 |
| 2019/08/12 | CH2276 | Female | Two y/o | Treatment (Wk 2) | Treatment | Feed Day | No  | 16:40 | 16:00 - 16:59 | Evening      | 38,2 | 76  | 40,4  | 40,4  | 19,36 | 573,39 | 124,43 |
| 2019/08/12 | CH2276 | Female | Two y/o | Treatment (Wk 2) | Treatment | Feed Day | No  | 16:45 | 16:00 - 16:59 | Evening      | 38,2 | 80  | 41,0  | 41,0  | 19,36 | 577,31 | 124,94 |
| 2019/08/12 | CH2276 | Female | Two y/o | Treatment (Wk 2) | Treatment | Feed Day | No  | 16:50 | 16:00 - 16:59 | Evening      | 38,2 | 79  | 43,0  | 43,0  | 19,36 | 576,36 | 126,58 |
| 2019/08/12 | CH2276 | Female | Two y/o | Treatment (Wk 2) | Treatment | Feed Day | No  | 16:55 | 16:00 - 16:59 | Evening      | 38,2 | 69  | 45,2  | 45,2  | 19,36 | 565,86 | 128,30 |
| 2019/08/12 | CH2276 | Female | Two y/o | Treatment (Wk 2) | Treatment | Feed Day | No  | 17:00 | 17:00 - 17:59 | Evening      | 38,2 | 71  | 41,6  | 41,6  | 19,36 | 568,10 | 125,44 |
| 2019/08/12 | CH2276 | Female | Two y/o | Treatment (Wk 2) | Treatment | Feed Day | No  | 17:05 | 17:00 - 17:59 | Evening      | 38,2 | 67  | 20,8  | 20,8  | 19,36 | 563,53 | 101,65 |
| 2019/08/12 | CH2276 | Female | Two y/o | Treatment (Wk 2) | Treatment | Feed Day | No  | 17:10 | 17:00 - 17:59 | Evening      | 38,0 | 93  | 65,6  | 65,6  | 19,15 | 588,58 | 141,19 |
| 2019/08/12 | CH2276 | Female | Two y/o | Treatment (Wk 2) | Treatment | Feed Day | No  | 17:15 | 17:00 - 17:59 | Evening      | 38,0 | 64  | 44,4  | 44,4  | 19,15 | 559,88 | 127,69 |
| 2019/08/12 | CH2276 | Female | Two y/o | Treatment (Wk 2) | Treatment | Feed Day | No  | 17:20 | 17:00 - 17:59 | Evening      | 38,0 | 70  | 4,8   | 4,8   | 19,15 | 566,99 | 52,04  |



|            |        |        |         |                  |           |          |    |       |               |         |      |     |       |       |       |        |        |
|------------|--------|--------|---------|------------------|-----------|----------|----|-------|---------------|---------|------|-----|-------|-------|-------|--------|--------|
| 2019/08/12 | CH2276 | Female | Two y/o | Treatment (Wk 2) | Treatment | Feed Day | No | 17:25 | 17:00 - 17:59 | Evening | 37,9 | 60  | 5,2   | 5,2   | 19,05 | 554,67 | 54,72  |
| 2019/08/12 | CH2276 | Female | Two y/o | Treatment (Wk 2) | Treatment | Feed Day | No | 17:30 | 17:00 - 17:59 | Evening | 37,8 | 94  | 5,0   | 5,0   | 18,95 | 589,37 | 53,41  |
| 2019/08/12 | CH2276 | Female | Two y/o | Treatment (Wk 2) | Treatment | Feed Day | No | 17:35 | 17:00 - 17:59 | Evening | 37,8 | 67  | 11,0  | 11,0  | 18,95 | 563,53 | 79,98  |
| 2019/08/12 | CH2276 | Female | Two y/o | Treatment (Wk 2) | Treatment | Feed Day | No | 17:40 | 17:00 - 17:59 | Evening | 37,7 | 90  | 6,6   | 6,6   | 18,85 | 586,16 | 62,73  |
| 2019/08/12 | CH2276 | Female | Two y/o | Treatment (Wk 2) | Treatment | Feed Day | No | 17:45 | 17:00 - 17:59 | Evening | 37,7 | 86  | 244,0 | 244,0 | 18,85 | 582,77 | 187,12 |
| 2019/08/12 | CH2276 | Female | Two y/o | Treatment (Wk 2) | Treatment | Feed Day | No | 17:50 | 17:00 - 17:59 | Evening | 37,8 | 104 | 174,0 | 174,0 | 18,95 | 596,69 | 175,22 |
| 2019/08/12 | CH2276 | Female | Two y/o | Treatment (Wk 2) | Treatment | Feed Day | No | 17:55 | 17:00 - 17:59 | Evening | 38,1 | 52  | 28,4  | 28,4  | 19,26 | 542,83 | 112,31 |
| 2019/08/12 | CH2276 | Female | Two y/o | Treatment (Wk 2) | Treatment | Feed Day | No | 18:00 | 18:00 - 18:59 | Evening | 38,1 |     | 17,2  | 17,2  | 19,26 |        | 95,17  |
| 2019/08/12 | CH2276 | Female | Two y/o | Treatment (Wk 2) | Treatment | Feed Day | No | 18:05 | 18:00 - 18:59 | Evening | 38,0 | 114 | 154,0 | 154,0 | 19,15 | 603,20 | 170,94 |
| 2019/08/12 | CH2276 | Female | Two y/o | Treatment (Wk 2) | Treatment | Feed Day | No | 18:10 | 18:00 - 18:59 | Evening | 38,2 | 125 | 97,8  | 97,8  | 19,36 | 609,60 | 155,07 |
| 2019/08/12 | CH2276 | Female | Two y/o | Treatment (Wk 2) | Treatment | Feed Day | No | 18:15 | 18:00 - 18:59 | Evening | 38,2 | 147 | 96,2  | 96,2  | 19,36 | 620,52 | 154,49 |
| 2019/08/12 | CH2276 | Female | Two y/o | Treatment (Wk 2) | Treatment | Feed Day | No | 18:20 | 18:00 - 18:59 | Evening | 38,3 | 110 | 96,2  | 96,2  | 19,46 | 600,69 | 154,49 |
| 2019/08/12 | CH2276 | Female | Two y/o | Treatment (Wk 2) | Treatment | Feed Day | No | 18:25 | 18:00 - 18:59 | Evening | 38,2 |     | 24,0  | 24,0  | 19,36 |        | 106,55 |
| 2019/08/12 | CH2276 | Female | Two y/o | Treatment (Wk 2) | Treatment | Feed Day | No | 18:30 | 18:00 - 18:59 | Evening | 38,1 | 92  | 7,6   | 7,6   | 19,26 | 587,78 | 67,49  |
| 2019/08/12 | CH2276 | Female | Two y/o | Treatment (Wk 2) | Treatment | Feed Day | No | 18:35 | 18:00 - 18:59 | Evening | 38,0 | 69  | 7,4   | 7,4   | 19,15 | 565,86 | 66,59  |
| 2019/08/12 | CH2276 | Female | Two y/o | Treatment (Wk 2) | Treatment | Feed Day | No | 18:40 | 18:00 - 18:59 | Evening | 38,0 | 92  | 8,8   | 8,8   | 19,15 | 587,78 | 72,43  |
| 2019/08/12 | CH2276 | Female | Two y/o | Treatment (Wk 2) | Treatment | Feed Day | No | 18:45 | 18:00 - 18:59 | Evening | 38,0 |     | 6,8   | 6,8   | 19,15 |        | 63,74  |
| 2019/08/12 | CH2276 | Female | Two y/o | Treatment (Wk 2) | Treatment | Feed Day | No | 18:50 | 18:00 - 18:59 | Evening | 38,0 | 66  | 4,2   | 4,2   | 19,15 | 562,34 | 47,57  |
| 2019/08/12 | CH2276 | Female | Two y/o | Treatment (Wk 2) | Treatment | Feed Day | No | 18:55 | 18:00 - 18:59 | Evening | 37,9 | 96  | 5,2   | 5,2   | 19,05 | 590,91 | 54,72  |
| 2019/08/12 | CH2276 | Female | Two y/o | Treatment (Wk 2) | Treatment | Feed Day | No | 19:00 | 19:00 - 19:59 | Evening | 37,7 |     | 8,4   | 8,4   | 18,85 |        | 70,86  |
| 2019/08/12 | CH2276 | Female | Two y/o | Treatment (Wk 2) | Treatment | Feed Day | No | 19:05 | 19:00 - 19:59 | Evening | 37,7 | 70  | 23,4  | 23,4  | 18,85 | 566,99 | 105,68 |
| 2019/08/12 | CH2276 | Female | Two y/o | Treatment (Wk 2) | Treatment | Feed Day | No | 19:10 | 19:00 - 19:59 | Evening | 37,8 | 90  | 24,6  | 24,6  | 18,95 | 586,16 | 107,39 |
| 2019/08/12 | CH2276 | Female | Two y/o | Treatment (Wk 2) | Treatment | Feed Day | No | 19:15 | 19:00 - 19:59 | Evening | 37,8 | 59  | 25,4  | 25,4  | 18,95 | 553,30 | 108,49 |
| 2019/08/12 | CH2276 | Female | Two y/o | Treatment (Wk 2) | Treatment | Feed Day | No | 19:20 | 19:00 - 19:59 | Evening | 37,8 | 83  | 23,6  | 23,6  | 18,95 | 580,11 | 105,97 |
| 2019/08/12 | CH2276 | Female | Two y/o | Treatment (Wk 2) | Treatment | Feed Day | No | 19:25 | 19:00 - 19:59 | Evening | 37,8 | 68  | 62,6  | 62,6  | 18,95 | 564,71 | 139,56 |
| 2019/08/12 | CH2276 | Female | Two y/o | Treatment (Wk 2) | Treatment | Feed Day | No | 19:30 | 19:00 - 19:59 | Evening | 37,8 | 68  | 81,0  | 81,0  | 18,95 | 564,71 | 148,51 |
| 2019/08/12 | CH2276 | Female | Two y/o | Treatment (Wk 2) | Treatment | Feed Day | No | 19:35 | 19:00 - 19:59 | Evening | 37,7 | 90  | 82,4  | 82,4  | 18,85 | 586,16 | 149,10 |
| 2019/08/12 | CH2276 | Female | Two y/o | Treatment (Wk 2) | Treatment | Feed Day | No | 19:40 | 19:00 - 19:59 | Evening | 37,7 | 70  | 80,8  | 80,8  | 18,85 | 566,99 | 148,42 |
| 2019/08/12 | CH2276 | Female | Two y/o | Treatment (Wk 2) | Treatment | Feed Day | No | 19:45 | 19:00 - 19:59 | Evening | 37,6 | 64  | 79,8  | 79,8  | 18,75 | 559,88 | 147,99 |
| 2019/08/12 | CH2276 | Female | Two y/o | Treatment (Wk 2) | Treatment | Feed Day | No | 19:50 | 19:00 - 19:59 | Evening | 37,6 |     | 79,2  | 79,2  | 18,75 | 554,67 | 147,73 |
| 2019/08/12 | CH2276 | Female | Two y/o | Treatment (Wk 2) | Treatment | Feed Day | No | 19:55 | 19:00 - 19:59 | Evening | 37,5 | 60  | 80,0  | 80,0  | 18,65 | 554,67 | 148,08 |
| 2019/08/12 | CH2276 | Female | Two y/o | Treatment (Wk 2) | Treatment | Feed Day | No | 20:00 | 20:00 - 20:59 | Night   | 37,5 | 64  | 85,6  | 85,6  | 18,65 | 559,88 | 150,43 |
| 2019/08/12 | CH2276 | Female | Two y/o | Treatment (Wk 2) | Treatment | Feed Day | No | 20:05 | 20:00 - 20:59 | Night   | 37,4 | 68  | 83,8  | 83,8  | 18,55 | 564,71 | 149,69 |
| 2019/08/12 | CH2276 | Female | Two y/o | Treatment (Wk 2) | Treatment | Feed Day | No | 20:10 | 20:00 - 20:59 | Night   | 37,4 | 67  | 83,6  | 83,6  | 18,55 | 563,53 | 149,61 |
| 2019/08/12 | CH2276 | Female | Two y/o | Treatment (Wk 2) | Treatment | Feed Day | No | 20:15 | 20:00 - 20:59 | Night   | 37,4 | 67  | 82,4  | 82,4  | 18,55 | 563,53 | 149,10 |
| 2019/08/12 | CH2276 | Female | Two y/o | Treatment (Wk 2) | Treatment | Feed Day | No | 20:20 | 20:00 - 20:59 | Night   | 37,3 | 61  | 84,2  | 84,2  | 18,46 | 556,01 | 149,85 |
| 2019/08/12 | CH2276 | Female | Two y/o | Treatment (Wk 2) | Treatment | Feed Day | No | 20:25 | 20:00 - 20:59 | Night   | 37,3 | 63  | 65,4  | 65,4  | 18,46 | 558,62 | 141,08 |
| 2019/08/12 | CH2276 | Female | Two y/o | Treatment (Wk 2) | Treatment | Feed Day | No | 20:30 | 20:00 - 20:59 | Night   | 37,4 | 98  | 6,8   | 6,8   | 18,55 | 592,41 | 63,74  |
| 2019/08/12 | CH2276 | Female | Two y/o | Treatment (Wk 2) | Treatment | Feed Day | No | 20:35 | 20:00 - 20:59 | Night   | 37,4 | 61  | 9,6   | 9,6   | 18,55 | 556,01 | 75,37  |
| 2019/08/12 | CH2276 | Female | Two y/o | Treatment (Wk 2) | Treatment | Feed Day | No | 20:40 | 20:00 - 20:59 | Night   | 37,5 | 99  | 9,8   | 9,8   | 18,65 | 593,14 | 76,07  |
| 2019/08/12 | CH2276 | Female | Two y/o | Treatment (Wk 2) | Treatment | Feed Day | No | 20:45 | 20:00 - 20:59 | Night   | 37,5 | 63  | 5,2   | 5,2   | 18,65 | 558,62 | 54,72  |
| 2019/08/12 | CH2276 | Female | Two y/o | Treatment (Wk 2) | Treatment | Feed Day | No | 20:50 | 20:00 - 20:59 | Night   | 37,5 | 63  | 31,8  | 31,8  | 18,65 | 558,62 | 116,20 |
| 2019/08/12 | CH2276 | Female | Two y/o | Treatment (Wk 2) | Treatment | Feed Day | No | 20:55 | 20:00 - 20:59 | Night   | 37,5 | 103 | 10,4  | 10,4  | 18,65 | 596,00 | 78,08  |
| 2019/08/12 | CH2276 | Female | Two y/o | Treatment (Wk 2) | Treatment | Feed Day | No | 21:00 | 21:00 - 21:59 | Night   | 37,4 |     | 35,4  | 35,4  | 18,55 |        | 119,88 |
| 2019/08/12 | CH2276 | Female | Two y/o | Treatment (Wk 2) | Treatment | Feed Day | No | 21:05 | 21:00 - 21:59 | Night   | 37,1 | 63  | 7,6   | 7,6   | 18,26 | 558,62 | 67,49  |
| 2019/08/12 | CH2276 | Female | Two y/o | Treatment (Wk 2) | Treatment | Feed Day | No | 21:10 | 21:00 - 21:59 | Night   | 37,2 | 57  | 3,4   | 3,4   | 18,36 | 550,47 | 40,51  |
| 2019/08/12 | CH2276 | Female | Two y/o | Treatment (Wk 2) | Treatment | Feed Day | No | 21:15 | 21:00 - 21:59 | Night   | 37,3 | 62  | 15,8  | 15,8  | 18,46 | 557,33 | 92,28  |
| 2019/08/12 | CH2276 | Female | Two y/o | Treatment (Wk 2) | Treatment | Feed Day | No | 21:20 | 21:00 - 21:59 | Night   | 37,4 |     | 4,4   | 4,4   | 18,55 |        | 49,12  |
| 2019/08/12 | CH2276 | Female | Two y/o | Treatment (Wk 2) | Treatment | Feed Day | No | 21:25 | 21:00 - 21:59 | Night   | 37,4 | 140 | 10,0  | 10,0  | 18,55 | 617,28 | 76,76  |
| 2019/08/12 | CH2276 | Female | Two y/o | Treatment (Wk 2) | Treatment | Feed Day | No | 21:30 | 21:00 - 21:59 | Night   | 37,4 | 62  | 7,4   | 7,4   | 18,55 | 557,33 | 66,59  |
| 2019/08/12 | CH2276 | Female | Two y/o | Treatment (Wk 2) | Treatment | Feed Day | No | 21:35 | 21:00 - 21:59 | Night   | 37,5 | 63  | 29,0  | 29,0  | 18,65 | 558,62 | 113,03 |
| 2019/08/12 | CH2276 | Female | Two y/o | Treatment (Wk 2) | Treatment | Feed Day | No | 21:40 | 21:00 - 21:59 | Night   | 37,5 | 74  | 25,0  | 25,0  | 18,65 | 571,33 | 107,94 |
| 2019/08/12 | CH2276 | Female | Two y/o | Treatment (Wk 2) | Treatment | Feed Day | No | 21:45 | 21:00 - 21:59 | Night   | 37,5 | 62  | 24,8  | 24,8  | 18,65 | 557,33 | 107,67 |
| 2019/08/12 | CH2276 | Female | Two y/o | Treatment (Wk 2) | Treatment | Feed Day | No | 21:50 | 21:00 - 21:59 | Night   | 37,4 | 80  | 25,8  | 25,8  | 18,55 | 577,31 | 109,02 |
| 2019/08/12 | CH2276 | Female | Two y/o | Treatment (Wk 2) | Treatment | Feed Day | No | 21:55 | 21:00 - 21:59 | Night   | 37,3 | 76  | 19,4  | 19,4  | 18,46 | 573,39 | 99,28  |
| 2019/08/12 | CH2276 | Female | Two y/o | Treatment (Wk 2) | Treatment | Feed Day | No | 22:00 | 22:00 - 22:59 | Night   | 37,3 | 93  | 20,6  | 20,6  | 18,46 | 588,58 | 101,32 |
| 2019/08/12 | CH2276 | Female | Two y/o | Treatment (Wk 2) | Treatment | Feed Day | No | 22:05 | 22:00 - 22:59 | Night   | 37,3 | 66  | 25,2  | 25,2  | 18,46 | 562,34 | 108,22 |
| 2019/08/12 | CH2276 | Female | Two y/o | Treatment (Wk 2) | Treatment | Feed Day | No | 22:10 | 22:00 - 22:59 | Night   | 37,3 | 59  | 30,4  | 30,4  | 18,46 | 553,30 | 114,65 |
| 2019/08/12 | CH2276 | Female | Two y/o | Treatment (Wk 2) | Treatment | Feed Day | No | 22:15 | 22:00 - 22:59 | Night   | 37,2 | 94  | 29,8  | 29,8  | 18,36 | 589,37 | 113,97 |
| 2019/08/12 | CH2276 | Female | Two y/o | Treatment (Wk 2) | Treatment | Feed Day | No | 22:20 | 22:00 - 22:59 | Night   | 37,2 | 84  | 27,6  | 27,6  | 18,36 | 581,01 | 111,33 |
| 2019/08/12 | CH2276 | Female | Two y/o | Treatment (Wk 2) | Treatment | Feed Day | No | 22:25 | 22:00 - 22:59 | Night   | 37,1 | 64  | 25,8  | 25,8  | 18,26 | 559,88 | 109,02 |
| 2019/08/12 | CH2276 | Female | Two y/o | Treatment (Wk 2) | Treatment | Feed Day | No | 22:30 | 22:00 - 22:59 | Night   | 37,1 | 55  | 23,8  | 23,8  | 18,26 | 547,52 | 106,26 |
| 2019/08/12 | CH2276 | Female | Two y/o | Treatment (Wk 2) | Treatment | Feed Day | No | 22:35 | 22:00 - 22:59 | Night   | 37,1 | 61  | 16,4  | 16,4  | 18,26 | 556,01 | 93,55  |
| 2019/08/12 | CH2276 | Female | Two y/o | Treatment (Wk 2) | Treatment | Feed Day | No | 22:40 | 22:00 - 22:59 | Night   | 37,0 | 79  | 25,0  | 25,0  | 18,16 | 576,36 | 107,94 |
| 2019/08/12 | CH2276 | Female | Two y/o | Treatment (Wk 2) | Treatment | Feed Day | No | 22:45 | 22:00 - 22:59 | Night   | 37,0 | 73  | 33,2  | 33,2  | 18,16 | 570,27 | 117,68 |
| 2019/08/12 | CH2276 | Female | Two y/o | Treatment (Wk 2) | Treatment | Feed Day | No | 22:50 | 22:00 - 22:59 | Night   | 36,9 | 84  | 24,4  | 24,4  | 18,06 | 581,01 | 107,11 |
| 2019/08/12 | CH2276 | Female | Two y/o | Treatment (Wk 2) | Treatment | Feed Day | No | 22:55 | 22:00 - 22:59 | Night   | 36,9 | 60  | 27,0  | 27,0  | 18,06 | 554,67 | 110,58 |
| 2019/08/12 | CH2276 | Female | Two y/o | Treatment (Wk 2) | Treatment | Feed Day | No | 23:00 | 23:00 - 23:59 | Night   | 36,9 | 72  | 24,0  | 24,0  | 18,06 | 569,20 | 106,55 |
| 2019/08/12 | CH2276 | Female | Two y/o | Treatment (Wk 2) | Treatment | Feed Day | No | 23:05 | 23:00 - 23:59 | Night   | 36,8 | 98  | 23,6  | 23,6  | 17,96 | 592,41 | 105,97 |
| 2019/08/12 | CH2276 | Female | Two y/o | Treatment (Wk 2) | Treatment | Feed Day | No | 23:10 | 23:00 - 23:59 | Night   | 36,8 | 60  | 22,8  | 22,8  | 17,96 | 554,67 | 104,79 |



|    |            |        |        |         |                  |           |          |    |       |               |               |      |     |       |       |       |        |        |
|----|------------|--------|--------|---------|------------------|-----------|----------|----|-------|---------------|---------------|------|-----|-------|-------|-------|--------|--------|
|    | 2019/08/12 | CH2276 | Female | Two y/o | Treatment (Wk 2) | Treatment | Feed Day | No | 23:15 | 23:00 - 23:59 | Night         | 36,8 | 60  | 22,4  | 22,4  | 17,96 | 554,67 | 104,19 |
|    | 2019/08/12 | CH2276 | Female | Two y/o | Treatment (Wk 2) | Treatment | Feed Day | No | 23:20 | 23:00 - 23:59 | Night         | 36,7 | 98  | 19,0  | 19,0  | 17,87 | 592,41 | 98,56  |
|    | 2019/08/12 | CH2276 | Female | Two y/o | Treatment (Wk 2) | Treatment | Feed Day | No | 23:25 | 23:00 - 23:59 | Night         | 36,7 | 69  | 23,4  | 23,4  | 17,87 | 565,86 | 105,68 |
|    | 2019/08/12 | CH2276 | Female | Two y/o | Treatment (Wk 2) | Treatment | Feed Day | No | 23:30 | 23:00 - 23:59 | Night         | 36,7 | 100 | 32,0  | 32,0  | 17,87 | 593,87 | 116,41 |
|    | 2019/08/12 | CH2276 | Female | Two y/o | Treatment (Wk 2) | Treatment | Feed Day | No | 23:35 | 23:00 - 23:59 | Night         | 36,7 | 92  | 32,4  | 32,4  | 17,87 | 587,78 | 116,84 |
|    | 2019/08/12 | CH2276 | Female | Two y/o | Treatment (Wk 2) | Treatment | Feed Day | No | 23:40 | 23:00 - 23:59 | Night         | 36,7 | 56  | 39,6  | 39,6  | 17,87 | 549,01 | 123,74 |
|    | 2019/08/12 | CH2276 | Female | Two y/o | Treatment (Wk 2) | Treatment | Feed Day | No | 23:45 | 23:00 - 23:59 | Night         | 36,8 | 60  | 38,2  | 38,2  | 17,96 | 554,67 | 122,50 |
|    | 2019/08/12 | CH2276 | Female | Two y/o | Treatment (Wk 2) | Treatment | Feed Day | No | 23:50 | 23:00 - 23:59 | Night         | 36,8 | 89  | 36,8  | 36,8  | 17,96 | 585,33 | 121,22 |
|    | 2019/08/12 | CH2276 | Female | Two y/o | Treatment (Wk 2) | Treatment | Feed Day | No | 23:55 | 23:00 - 23:59 | Night         | 36,8 | 60  | 28,6  | 28,6  | 17,96 | 554,67 | 112,56 |
| 56 | 2019/08/13 | CH2276 | Female | Two y/o | Treatment (Wk 2) | Treatment | Feed Day | No | 00:00 | 00:00 - 00:59 | Early Morning | 36,8 | 65  | 27,6  | 27,6  | 17,96 | 561,12 | 111,33 |
|    | 2019/08/13 | CH2276 | Female | Two y/o | Treatment (Wk 2) | Treatment | Feed Day | No | 00:05 | 00:00 - 00:59 | Early Morning | 36,7 | 63  | 26,6  | 26,6  | 17,87 | 558,62 | 110,07 |
|    | 2019/08/13 | CH2276 | Female | Two y/o | Treatment (Wk 2) | Treatment | Feed Day | No | 00:10 | 00:00 - 00:59 | Early Morning | 36,7 | 62  | 33,4  | 33,4  | 17,87 | 557,33 | 117,88 |
|    | 2019/08/13 | CH2276 | Female | Two y/o | Treatment (Wk 2) | Treatment | Feed Day | No | 00:15 | 00:00 - 00:59 | Early Morning | 36,7 | 68  | 30,4  | 30,4  | 17,87 | 564,71 | 114,65 |
|    | 2019/08/13 | CH2276 | Female | Two y/o | Treatment (Wk 2) | Treatment | Feed Day | No | 00:20 | 00:00 - 00:59 | Early Morning | 36,7 | 93  | 37,6  | 37,6  | 17,87 | 588,58 | 121,96 |
|    | 2019/08/13 | CH2276 | Female | Two y/o | Treatment (Wk 2) | Treatment | Feed Day | No | 00:25 | 00:00 - 00:59 | Early Morning | 36,7 | 63  | 34,4  | 34,4  | 17,87 | 558,62 | 118,90 |
|    | 2019/08/13 | CH2276 | Female | Two y/o | Treatment (Wk 2) | Treatment | Feed Day | No | 00:30 | 00:00 - 00:59 | Early Morning | 36,7 | 70  | 30,4  | 30,4  | 17,87 | 566,99 | 114,65 |
|    | 2019/08/13 | CH2276 | Female | Two y/o | Treatment (Wk 2) | Treatment | Feed Day | No | 00:35 | 00:00 - 00:59 | Early Morning | 36,7 | 94  | 32,4  | 32,4  | 17,87 | 589,37 | 116,84 |
|    | 2019/08/13 | CH2276 | Female | Two y/o | Treatment (Wk 2) | Treatment | Feed Day | No | 00:40 | 00:00 - 00:59 | Early Morning | 36,7 | 88  | 15,2  | 15,2  | 17,87 | 584,49 | 90,96  |
|    | 2019/08/13 | CH2276 | Female | Two y/o | Treatment (Wk 2) | Treatment | Feed Day | No | 00:45 | 00:00 - 00:59 | Early Morning | 36,8 | 64  | 31,2  | 31,2  | 17,96 | 559,88 | 115,54 |
|    | 2019/08/13 | CH2276 | Female | Two y/o | Treatment (Wk 2) | Treatment | Feed Day | No | 00:50 | 00:00 - 00:59 | Early Morning | 36,9 | 97  | 17,6  | 17,6  | 18,06 | 591,66 | 95,95  |
|    | 2019/08/13 | CH2276 | Female | Two y/o | Treatment (Wk 2) | Treatment | Feed Day | No | 00:55 | 00:00 - 00:59 | Early Morning | 36,9 | 98  | 3,8   | 3,8   | 18,06 | 592,41 | 44,22  |
|    | 2019/08/13 | CH2276 | Female | Two y/o | Treatment (Wk 2) | Treatment | Feed Day | No | 01:00 | 01:00 - 01:59 | Early Morning | 36,8 | 98  | 6,4   | 6,4   | 17,96 | 592,41 | 61,70  |
|    | 2019/08/13 | CH2276 | Female | Two y/o | Treatment (Wk 2) | Treatment | Feed Day | No | 01:05 | 01:00 - 01:59 | Early Morning | 36,8 | 60  | 16,6  | 16,6  | 17,96 | 554,67 | 93,96  |
|    | 2019/08/13 | CH2276 | Female | Two y/o | Treatment (Wk 2) | Treatment | Feed Day | No | 01:10 | 01:00 - 01:59 | Early Morning | 36,8 | 108 | 73,8  | 73,8  | 17,96 | 599,39 | 145,27 |
|    | 2019/08/13 | CH2276 | Female | Two y/o | Treatment (Wk 2) | Treatment | Feed Day | No | 01:15 | 01:00 - 01:59 | Early Morning | 36,9 | 110 | 61,8  | 61,8  | 18,06 | 600,69 | 139,12 |
|    | 2019/08/13 | CH2276 | Female | Two y/o | Treatment (Wk 2) | Treatment | Feed Day | No | 01:20 | 01:00 - 01:59 | Early Morning | 37,0 | 89  | 86,0  | 86,0  | 18,16 | 585,33 | 150,59 |
|    | 2019/08/13 | CH2276 | Female | Two y/o | Treatment (Wk 2) | Treatment | Feed Day | No | 01:25 | 01:00 - 01:59 | Early Morning | 37,1 | 137 | 89,8  | 89,8  | 18,26 | 615,83 | 152,10 |
|    | 2019/08/13 | CH2276 | Female | Two y/o | Treatment (Wk 2) | Treatment | Feed Day | No | 01:30 | 01:00 - 01:59 | Early Morning | 37,3 | 125 | 434,8 | 434,8 | 18,46 | 609,60 | 207,58 |
|    | 2019/08/13 | CH2276 | Female | Two y/o | Treatment (Wk 2) | Treatment | Feed Day | No | 01:35 | 01:00 - 01:59 | Early Morning | 37,4 |     | 215,4 | 215,4 | 18,55 |        | 182,73 |
|    | 2019/08/13 | CH2276 | Female | Two y/o | Treatment (Wk 2) | Treatment | Feed Day | No | 01:40 | 01:00 - 01:59 | Early Morning | 37,4 | 74  | 239,2 | 239,2 | 18,55 | 571,33 | 186,42 |
|    | 2019/08/13 | CH2276 | Female | Two y/o | Treatment (Wk 2) | Treatment | Feed Day | No | 01:45 | 01:00 - 01:59 | Early Morning | 37,5 |     | 84,0  | 84,0  | 18,65 |        | 149,77 |
|    | 2019/08/13 | CH2276 | Female | Two y/o | Treatment (Wk 2) | Treatment | Feed Day | No | 01:50 | 01:00 - 01:59 | Early Morning | 37,6 |     | 340,4 | 340,4 | 18,75 |        | 198,89 |
|    | 2019/08/13 | CH2276 | Female | Two y/o | Treatment (Wk 2) | Treatment | Feed Day | No | 01:55 | 01:00 - 01:59 | Early Morning | 37,6 |     | 261,6 | 261,6 | 18,75 |        | 189,58 |
|    | 2019/08/13 | CH2276 | Female | Two y/o | Treatment (Wk 2) | Treatment | Feed Day | No | 02:00 | 02:00 - 02:59 | Early Morning | 37,7 | 118 | 108,2 | 108,2 | 18,85 | 605,61 | 158,59 |
|    | 2019/08/13 | CH2276 | Female | Two y/o | Treatment (Wk 2) | Treatment | Feed Day | No | 02:05 | 02:00 - 02:59 | Early Morning | 37,7 | 134 | 265,6 | 265,6 | 18,85 | 614,33 | 190,12 |
|    | 2019/08/13 | CH2276 | Female | Two y/o | Treatment (Wk 2) | Treatment | Feed Day | No | 02:10 | 02:00 - 02:59 | Early Morning | 37,7 |     | 737,8 | 737,8 | 18,85 |        | 226,43 |
|    | 2019/08/13 | CH2276 | Female | Two y/o | Treatment (Wk 2) | Treatment | Feed Day | No | 02:15 | 02:00 - 02:59 | Early Morning | 37,8 |     | 225,8 | 225,8 | 18,95 |        | 184,39 |
|    | 2019/08/13 | CH2276 | Female | Two y/o | Treatment (Wk 2) | Treatment | Feed Day | No | 02:20 | 02:00 - 02:59 | Early Morning | 37,8 | 69  | 241,0 | 241,0 | 18,95 | 565,86 | 186,69 |
|    | 2019/08/13 | CH2276 | Female | Two y/o | Treatment (Wk 2) | Treatment | Feed Day | No | 02:25 | 02:00 - 02:59 | Early Morning | 37,8 | 125 | 53,8  | 53,8  | 18,95 | 609,60 | 134,32 |
|    | 2019/08/13 | CH2276 | Female | Two y/o | Treatment (Wk 2) | Treatment | Feed Day | No | 02:30 | 02:00 - 02:59 | Early Morning | 37,8 | 103 | 9,0   | 9,0   | 18,95 | 596,00 | 73,19  |
|    | 2019/08/13 | CH2276 | Female | Two y/o | Treatment (Wk 2) | Treatment | Feed Day | No | 02:35 | 02:00 - 02:59 | Early Morning | 37,7 | 88  | 5,2   | 5,2   | 18,85 | 584,49 | 54,72  |
|    | 2019/08/13 | CH2276 | Female | Two y/o | Treatment (Wk 2) | Treatment | Feed Day | No | 02:40 | 02:00 - 02:59 | Early Morning | 37,5 | 64  | 4,6   | 4,6   | 18,65 | 559,88 | 50,61  |
|    | 2019/08/13 | CH2276 | Female | Two y/o | Treatment (Wk 2) | Treatment | Feed Day | No | 02:45 | 02:00 - 02:59 | Early Morning | 37,5 | 64  | 6,6   | 6,6   | 18,65 | 559,88 | 62,73  |
|    | 2019/08/13 | CH2276 | Female | Two y/o | Treatment (Wk 2) | Treatment | Feed Day | No | 02:50 | 02:00 - 02:59 | Early Morning | 37,6 | 89  | 3,2   | 3,2   | 18,75 | 585,33 | 38,49  |
|    | 2019/08/13 | CH2276 | Female | Two y/o | Treatment (Wk 2) | Treatment | Feed Day | No | 02:55 | 02:00 - 02:59 | Early Morning | 37,6 | 100 | 22,0  | 22,0  | 18,75 | 593,87 | 103,57 |
|    | 2019/08/13 | CH2276 | Female | Two y/o | Treatment (Wk 2) | Treatment | Feed Day | No | 03:00 | 03:00 - 03:59 | Early Morning | 37,6 | 90  | 21,6  | 21,6  | 18,75 | 586,16 | 102,94 |
|    | 2019/08/13 | CH2276 | Female | Two y/o | Treatment (Wk 2) | Treatment | Feed Day | No | 03:05 | 03:00 - 03:59 | Early Morning | 37,6 | 63  | 22,4  | 22,4  | 18,75 | 558,62 | 104,19 |
|    | 2019/08/13 | CH2276 | Female | Two y/o | Treatment (Wk 2) | Treatment | Feed Day | No | 03:10 | 03:00 - 03:59 | Early Morning | 37,7 | 59  | 26,6  | 26,6  | 18,85 | 553,30 | 110,07 |
|    | 2019/08/13 | CH2276 | Female | Two y/o | Treatment (Wk 2) | Treatment | Feed Day | No | 03:15 | 03:00 - 03:59 | Early Morning | 37,7 | 61  | 24,8  | 24,8  | 18,85 | 556,01 | 107,67 |
|    | 2019/08/13 | CH2276 | Female | Two y/o | Treatment (Wk 2) | Treatment | Feed Day | No | 03:20 | 03:00 - 03:59 | Early Morning | 37,7 | 55  | 23,4  | 23,4  | 18,85 | 547,52 | 105,68 |
|    | 2019/08/13 | CH2276 | Female | Two y/o | Treatment (Wk 2) | Treatment | Feed Day | No | 03:25 | 03:00 - 03:59 | Early Morning | 37,7 | 68  | 25,6  | 25,6  | 18,85 | 564,71 | 108,76 |
|    | 2019/08/13 | CH2276 | Female | Two y/o | Treatment (Wk 2) | Treatment | Feed Day | No | 03:30 | 03:00 - 03:59 | Early Morning | 37,6 | 63  | 22,8  | 22,8  | 18,75 | 558,62 | 104,79 |
|    | 2019/08/13 | CH2276 | Female | Two y/o | Treatment (Wk 2) | Treatment | Feed Day | No | 03:35 | 03:00 - 03:59 | Early Morning | 37,6 | 86  | 24,6  | 24,6  | 18,75 | 582,77 | 107,39 |
|    | 2019/08/13 | CH2276 | Female | Two y/o | Treatment (Wk 2) | Treatment | Feed Day | No | 03:40 | 03:00 - 03:59 | Early Morning | 37,5 | 62  | 23,2  | 23,2  | 18,65 | 557,33 | 105,39 |
|    | 2019/08/13 | CH2276 | Female | Two y/o | Treatment (Wk 2) | Treatment | Feed Day | No | 03:45 | 03:00 - 03:59 | Early Morning | 37,5 | 57  | 21,6  | 21,6  | 18,65 | 550,47 | 102,94 |
|    | 2019/08/13 | CH2276 | Female | Two y/o | Treatment (Wk 2) | Treatment | Feed Day | No | 03:50 | 03:00 - 03:59 | Early Morning | 37,4 | 59  | 26,6  | 26,6  | 18,55 | 553,30 | 110,07 |
|    | 2019/08/13 | CH2276 | Female | Two y/o | Treatment (Wk 2) | Treatment | Feed Day | No | 03:55 | 03:00 - 03:59 | Early Morning | 37,4 | 67  | 20,6  | 20,6  | 18,55 | 563,53 | 101,32 |
|    | 2019/08/13 | CH2276 | Female | Two y/o | Treatment (Wk 2) | Treatment | Feed Day | No | 04:00 | 04:00 - 04:59 | Morning       | 37,4 | 58  | 24,8  | 24,8  | 18,55 | 551,90 | 107,67 |
|    | 2019/08/13 | CH2276 | Female | Two y/o | Treatment (Wk 2) | Treatment | Feed Day | No | 04:05 | 04:00 - 04:59 | Morning       | 37,4 | 46  | 24,6  | 24,6  | 18,55 | 532,38 | 107,39 |
|    | 2019/08/13 | CH2276 | Female | Two y/o | Treatment (Wk 2) | Treatment | Feed Day | No | 04:10 | 04:00 - 04:59 | Morning       | 37,4 | 110 | 60,2  | 60,2  | 18,55 | 600,69 | 138,21 |
|    | 2019/08/13 | CH2276 | Female | Two y/o | Treatment (Wk 2) | Treatment | Feed Day | No | 04:15 | 04:00 - 04:59 | Morning       | 37,3 | 60  | 25,4  | 25,4  | 18,46 | 554,67 | 108,49 |
|    | 2019/08/13 | CH2276 | Female | Two y/o | Treatment (Wk 2) | Treatment | Feed Day | No | 04:20 | 04:00 - 04:59 | Morning       | 37,3 | 64  | 22,8  | 22,8  | 18,46 | 559,88 | 104,79 |
|    | 2019/08/13 | CH2276 | Female | Two y/o | Treatment (Wk 2) | Treatment | Feed Day | No | 04:25 | 04:00 - 04:59 | Morning       | 37,2 | 97  | 22,2  | 22,2  | 18,36 | 591,66 | 103,88 |
|    | 2019/08/13 | CH2276 | Female | Two y/o | Treatment (Wk 2) | Treatment | Feed Day | No | 04:30 | 04:00 - 04:59 | Morning       | 37,1 | 88  | 25,2  | 25,2  | 18,26 | 584,49 | 108,22 |
|    | 2019/08/13 | CH2276 | Female | Two y/o | Treatment (Wk 2) | Treatment | Feed Day | No | 04:35 | 04:00 - 04:59 | Morning       | 37,1 | 90  | 24,6  | 24,6  | 18,26 | 586,16 | 107,39 |
|    | 2019/08/13 | CH2276 | Female | Two y/o | Treatment (Wk 2) | Treatment | Feed Day | No | 04:40 | 04:00 - 04:59 | Morning       | 37,1 | 62  | 22,6  | 22,6  | 18,26 | 557,33 | 104,49 |
|    | 2019/08/13 | CH2276 | Female | Two y/o | Treatment (Wk 2) | Treatment | Feed Day | No | 04:45 | 04:00 - 04:59 | Morning       | 37,1 | 97  | 25,0  | 25,0  | 18,26 | 591,66 | 107,94 |
|    | 2019/08/13 | CH2276 | Female | Two y/o | Treatment (Wk 2) | Treatment | Feed Day | No | 04:50 | 04:00 - 04:59 | Morning       | 37,1 | 58  | 21,4  | 21,4  | 18,26 | 551,90 | 102,63 |
|    | 2019/08/13 | CH2276 | Female | Two y/o | Treatment (Wk 2) | Treatment | Feed Day | No | 04:55 | 04:00 - 04:59 | Morning       | 37,1 | 58  | 18,0  | 18,0  | 18,26 | 551,90 | 96,72  |
|    | 2019/08/13 | CH2276 | Female | Two y/o | Treatment (Wk 2) | Treatment | Feed Day | No | 05:00 | 05:00 - 05:59 | Morning       | 37,0 | 58  | 16,0  | 16,0  | 18,16 | 551,90 | 92,71  |



|            |        |        |         |                  |           |          |     |       |               |              |      |     |       |       |       |        |        |
|------------|--------|--------|---------|------------------|-----------|----------|-----|-------|---------------|--------------|------|-----|-------|-------|-------|--------|--------|
| 2019/08/13 | CH2276 | Female | Two y/o | Treatment (Wk 2) | Treatment | Feed Day | No  | 05:05 | 05:00 - 05:59 | Morning      | 36,9 | 56  | 26,4  | 26,4  | 18,06 | 549,01 | 109,81 |
| 2019/08/13 | CH2276 | Female | Two y/o | Treatment (Wk 2) | Treatment | Feed Day | No  | 05:10 | 05:00 - 05:59 | Morning      | 37,0 | 98  | 5,6   | 5,6   | 18,16 | 592,41 | 57,21  |
| 2019/08/13 | CH2276 | Female | Two y/o | Treatment (Wk 2) | Treatment | Feed Day | No  | 05:15 | 05:00 - 05:59 | Morning      | 37,1 | 76  | 4,0   | 4,0   | 18,26 | 573,39 | 45,94  |
| 2019/08/13 | CH2276 | Female | Two y/o | Treatment (Wk 2) | Treatment | Feed Day | No  | 05:20 | 05:00 - 05:59 | Morning      | 37,1 | 58  | 4,6   | 4,6   | 18,26 | 551,90 | 50,61  |
| 2019/08/13 | CH2276 | Female | Two y/o | Treatment (Wk 2) | Treatment | Feed Day | No  | 05:25 | 05:00 - 05:59 | Morning      | 37,0 | 60  | 3,6   | 3,6   | 18,16 | 554,67 | 42,42  |
| 2019/08/13 | CH2276 | Female | Two y/o | Treatment (Wk 2) | Treatment | Feed Day | No  | 05:30 | 05:00 - 05:59 | Morning      | 36,9 | 88  | 4,6   | 4,6   | 18,06 | 584,49 | 50,61  |
| 2019/08/13 | CH2276 | Female | Two y/o | Treatment (Wk 2) | Treatment | Feed Day | No  | 05:35 | 05:00 - 05:59 | Morning      | 36,9 | 57  | 7,2   | 7,2   | 18,06 | 550,47 | 65,66  |
| 2019/08/13 | CH2276 | Female | Two y/o | Treatment (Wk 2) | Treatment | Feed Day | No  | 05:40 | 05:00 - 05:59 | Morning      | 37,0 | 54  | 3,2   | 3,2   | 18,16 | 545,99 | 38,49  |
| 2019/08/13 | CH2276 | Female | Two y/o | Treatment (Wk 2) | Treatment | Feed Day | No  | 05:45 | 05:00 - 05:59 | Morning      | 36,9 | 70  | 6,4   | 6,4   | 18,06 | 566,99 | 61,70  |
| 2019/08/13 | CH2276 | Female | Two y/o | Treatment (Wk 2) | Treatment | Feed Day | No  | 05:50 | 05:00 - 05:59 | Morning      | 36,9 | 50  | 6,4   | 6,4   | 18,06 | 539,52 | 61,70  |
| 2019/08/13 | CH2276 | Female | Two y/o | Treatment (Wk 2) | Treatment | Feed Day | No  | 05:55 | 05:00 - 05:59 | Morning      | 36,8 | 55  | 5,0   | 5,0   | 17,96 | 547,52 | 53,41  |
| 2019/08/13 | CH2276 | Female | Two y/o | Treatment (Wk 2) | Treatment | Feed Day | No  | 06:00 | 06:00 - 06:59 | Morning      | 36,8 |     | 36,8  | 36,8  | 17,96 |        | 121,22 |
| 2019/08/13 | CH2276 | Female | Two y/o | Treatment (Wk 2) | Treatment | Feed Day | No  | 06:05 | 06:00 - 06:59 | Morning      | 36,9 | 180 | 56,4  | 56,4  | 18,06 | 633,61 | 135,95 |
| 2019/08/13 | CH2276 | Female | Two y/o | Treatment (Wk 2) | Treatment | Feed Day | No  | 06:10 | 06:00 - 06:59 | Morning      | 36,9 |     | 120,8 | 120,8 | 18,06 |        | 162,44 |
| 2019/08/13 | CH2276 | Female | Two y/o | Treatment (Wk 2) | Treatment | Feed Day | No  | 06:15 | 06:00 - 06:59 | Morning      | 37,1 | 162 | 104,8 | 104,8 | 18,26 | 626,88 | 157,48 |
| 2019/08/13 | CH2276 | Female | Two y/o | Treatment (Wk 2) | Treatment | Feed Day | No  | 06:20 | 06:00 - 06:59 | Morning      | 37,3 | 72  | 442,8 | 442,8 | 18,46 | 569,20 | 208,22 |
| 2019/08/13 | CH2276 | Female | Two y/o | Treatment (Wk 2) | Treatment | Feed Day | No  | 06:25 | 06:00 - 06:59 | Morning      | 37,4 | 100 | 49,2  | 49,2  | 18,55 | 593,87 | 131,23 |
| 2019/08/13 | CH2276 | Female | Two y/o | Treatment (Wk 2) | Treatment | Feed Day | No  | 06:30 | 06:00 - 06:59 | Morning      | 37,5 |     | 708,4 | 708,4 | 18,65 |        | 224,98 |
| 2019/08/13 | CH2276 | Female | Two y/o | Treatment (Wk 2) | Treatment | Feed Day | No  | 06:35 | 06:00 - 06:59 | Morning      | 37,9 | 143 | 129,4 | 129,4 | 19,05 | 618,69 | 164,84 |
| 2019/08/13 | CH2276 | Female | Two y/o | Treatment (Wk 2) | Treatment | Feed Day | No  | 06:40 | 06:00 - 06:59 | Morning      | 37,8 | 44  | 409,4 | 409,4 | 18,95 | 528,51 | 205,44 |
| 2019/08/13 | CH2276 | Female | Two y/o | Treatment (Wk 2) | Treatment | Feed Day | No  | 06:45 | 06:00 - 06:59 | Morning      | 37,8 | 162 | 152,0 | 152,0 | 18,95 | 626,88 | 170,48 |
| 2019/08/13 | CH2276 | Female | Two y/o | Treatment (Wk 2) | Treatment | Feed Day | No  | 06:50 | 06:00 - 06:59 | Morning      | 37,6 | 71  | 18,6  | 18,6  | 18,75 | 568,10 | 97,84  |
| 2019/08/13 | CH2276 | Female | Two y/o | Treatment (Wk 2) | Treatment | Feed Day | No  | 06:55 | 06:00 - 06:59 | Morning      | 37,6 | 104 | 44,4  | 44,4  | 18,75 | 596,69 | 127,69 |
| 2019/08/13 | CH2276 | Female | Two y/o | Treatment (Wk 2) | Treatment | Feed Day | No  | 07:00 | 07:00 - 07:59 | Morning      | 37,6 | 125 | 800,2 | 800,2 | 18,75 | 609,60 | 229,34 |
| 2019/08/13 | CH2276 | Female | Two y/o | Treatment (Wk 2) | Treatment | Feed Day | No  | 07:05 | 07:00 - 07:59 | Morning      | 38,0 | 172 | 182,8 | 182,8 | 19,15 | 630,73 | 176,96 |
| 2019/08/13 | CH2276 | Female | Two y/o | Treatment (Wk 2) | Treatment | Feed Day | No  | 07:10 | 07:00 - 07:59 | Morning      | 37,9 | 185 | 67,8  | 67,8  | 19,05 | 635,34 | 142,33 |
| 2019/08/13 | CH2276 | Female | Two y/o | Treatment (Wk 2) | Treatment | Feed Day | No  | 07:15 | 07:00 - 07:59 | Morning      | 37,8 | 113 | 24,4  | 24,4  | 18,95 | 602,58 | 107,11 |
| 2019/08/13 | CH2276 | Female | Two y/o | Treatment (Wk 2) | Treatment | Feed Day | No  | 07:20 | 07:00 - 07:59 | Morning      | 37,9 |     | 259,2 | 259,2 | 19,05 |        | 189,26 |
| 2019/08/13 | CH2276 | Female | Two y/o | Treatment (Wk 2) | Treatment | Feed Day | No  | 07:25 | 07:00 - 07:59 | Morning      | 38,0 | 92  | 547,4 | 547,4 | 19,15 | 587,78 | 215,77 |
| 2019/08/13 | CH2276 | Female | Two y/o | Treatment (Wk 2) | Treatment | Feed Day | No  | 07:30 | 07:00 - 07:59 | Morning      | 38,0 | 99  | 385,8 | 385,8 | 19,15 | 593,14 | 203,33 |
| 2019/08/13 | CH2276 | Female | Two y/o | Treatment (Wk 2) | Treatment | Feed Day | No  | 07:35 | 07:00 - 07:59 | Morning      | 38,0 | 42  | 193,4 | 193,4 | 19,15 | 524,42 | 178,94 |
| 2019/08/13 | CH2276 | Female | Two y/o | Treatment (Wk 2) | Treatment | Feed Day | No  | 07:40 | 07:00 - 07:59 | Morning      | 37,8 |     | 56,4  | 56,4  | 18,95 |        | 135,95 |
| 2019/08/13 | CH2276 | Female | Two y/o | Treatment (Wk 2) | Treatment | Feed Day | No  | 07:45 | 07:00 - 07:59 | Morning      | 37,8 | 167 | 33,0  | 33,0  | 18,95 | 628,84 | 117,47 |
| 2019/08/13 | CH2276 | Female | Two y/o | Treatment (Wk 2) | Treatment | Feed Day | No  | 07:50 | 07:00 - 07:59 | Morning      | 37,7 | 89  | 44,0  | 44,0  | 18,85 | 585,33 | 127,37 |
| 2019/08/13 | CH2276 | Female | Two y/o | Treatment (Wk 2) | Treatment | Feed Day | No  | 07:55 | 07:00 - 07:59 | Morning      | 37,7 | 101 | 167,6 | 167,6 | 18,85 | 594,59 | 173,91 |
| 2019/08/13 | CH2276 | Female | Two y/o | Treatment (Wk 2) | Treatment | Feed Day | No  | 08:00 | 08:00 - 08:59 | Late Morning | 37,6 | 88  | 344,2 | 344,2 | 18,75 | 584,49 | 199,29 |
| 2019/08/13 | CH2276 | Female | Two y/o | Treatment (Wk 2) | Treatment | Feed Day | No  | 08:05 | 08:00 - 08:59 | Late Morning | 37,8 | 117 | 14,8  | 14,8  | 18,95 | 605,02 | 90,05  |
| 2019/08/13 | CH2276 | Female | Two y/o | Treatment (Wk 2) | Treatment | Feed Day | No  | 08:10 | 08:00 - 08:59 | Late Morning | 37,9 | 96  | 7,6   | 7,6   | 19,05 | 590,91 | 67,49  |
| 2019/08/13 | CH2276 | Female | Two y/o | Treatment (Wk 2) | Treatment | Feed Day | No  | 08:15 | 08:00 - 08:59 | Late Morning | 37,8 | 70  | 3,0   | 3,0   | 18,95 | 566,99 | 36,34  |
| 2019/08/13 | CH2276 | Female | Two y/o | Treatment (Wk 2) | Treatment | Feed Day | No  | 08:20 | 08:00 - 08:59 | Late Morning | 37,8 | 60  | 10,6  | 10,6  | 18,95 | 554,67 | 78,73  |
| 2019/08/13 | CH2276 | Female | Two y/o | Treatment (Wk 2) | Treatment | Feed Day | No  | 08:25 | 08:00 - 08:59 | Late Morning | 37,7 | 106 | 5,0   | 5,0   | 18,85 | 598,06 | 53,41  |
| 2019/08/13 | CH2276 | Female | Two y/o | Treatment (Wk 2) | Treatment | Feed Day | No  | 08:30 | 08:00 - 08:59 | Late Morning | 37,6 | 59  | 426,2 | 426,2 | 18,75 | 553,30 | 206,87 |
| 2019/08/13 | CH2276 | Female | Two y/o | Treatment (Wk 2) | Treatment | Feed Day | No  | 08:35 | 08:00 - 08:59 | Late Morning | 37,7 | 110 | 38,0  | 38,0  | 18,85 | 600,69 | 122,32 |
| 2019/08/13 | CH2276 | Female | Two y/o | Treatment (Wk 2) | Treatment | Feed Day | No  | 08:40 | 08:00 - 08:59 | Late Morning | 37,8 | 98  | 148,2 | 148,2 | 18,95 | 592,41 | 169,59 |
| 2019/08/13 | CH2276 | Female | Two y/o | Treatment (Wk 2) | Treatment | Feed Day | No  | 08:45 | 08:00 - 08:59 | Late Morning | 37,7 | 52  | 87,6  | 87,6  | 18,85 | 542,83 | 151,23 |
| 2019/08/13 | CH2276 | Female | Two y/o | Treatment (Wk 2) | Treatment | Feed Day | No  | 08:50 | 08:00 - 08:59 | Late Morning | 37,6 | 65  | 7,2   | 7,2   | 18,75 | 561,12 | 65,66  |
| 2019/08/13 | CH2276 | Female | Two y/o | Treatment (Wk 2) | Treatment | Feed Day | No  | 08:55 | 08:00 - 08:59 | Late Morning | 37,5 | 64  | 22,0  | 22,0  | 18,65 | 559,88 | 103,57 |
| 2019/08/13 | CH2276 | Female | Two y/o | Treatment (Wk 2) | Treatment | Feed Day | No  | 09:00 | 09:00 - 09:59 | Late Morning | 37,5 | 90  | 42,2  | 42,2  | 18,65 | 586,16 | 125,93 |
| 2019/08/13 | CH2276 | Female | Two y/o | Treatment (Wk 2) | Treatment | Feed Day | No  | 09:05 | 09:00 - 09:59 | Late Morning | 37,5 | 67  | 17,0  | 17,0  | 18,65 | 563,53 | 94,77  |
| 2019/08/13 | CH2276 | Female | Two y/o | Treatment (Wk 2) | Treatment | Feed Day | No  | 09:10 | 09:00 - 09:59 | Late Morning | 37,8 | 94  | 418,0 | 418,0 | 18,95 | 589,37 | 206,18 |
| 2019/08/13 | CH2276 | Female | Two y/o | Treatment (Wk 2) | Treatment | Feed Day | No  | 09:15 | 09:00 - 09:59 | Late Morning | 37,8 |     | 125,6 | 125,6 | 18,95 |        | 163,80 |
| 2019/08/13 | CH2276 | Female | Two y/o | Treatment (Wk 2) | Treatment | Feed Day | No  | 09:20 | 09:00 - 09:59 | Late Morning | 37,8 | 162 | 284,4 | 284,4 | 18,95 | 626,88 | 192,53 |
| 2019/08/13 | CH2276 | Female | Two y/o | Treatment (Wk 2) | Treatment | Feed Day | No  | 09:25 | 09:00 - 09:59 | Late Morning | 37,8 |     | 14,4  | 14,4  | 18,95 |        | 89,12  |
| 2019/08/13 | CH2276 | Female | Two y/o | Treatment (Wk 2) | Treatment | Feed Day | No  | 09:30 | 09:00 - 09:59 | Late Morning | 37,7 | 86  | 58,2  | 58,2  | 18,85 | 582,77 | 137,04 |
| 2019/08/13 | CH2276 | Female | Two y/o | Treatment (Wk 2) | Treatment | Feed Day | No  | 09:35 | 09:00 - 09:59 | Late Morning | 37,7 | 68  | 62,0  | 62,0  | 18,85 | 564,71 | 139,23 |
| 2019/08/13 | CH2276 | Female | Two y/o | Treatment (Wk 2) | Treatment | Feed Day | No  | 09:40 | 09:00 - 09:59 | Late Morning | 37,8 | 77  | 62,4  | 62,4  | 18,95 | 574,39 | 139,45 |
| 2019/08/13 | CH2276 | Female | Two y/o | Treatment (Wk 2) | Treatment | Feed Day | No  | 09:45 | 09:00 - 09:59 | Late Morning | 38,0 |     | 28,6  | 28,6  | 19,15 |        | 112,56 |
| 2019/08/13 | CH2276 | Female | Two y/o | Treatment (Wk 2) | Treatment | Feed Day | No  | 09:50 | 09:00 - 09:59 | Late Morning | 37,9 |     | 141,2 | 141,2 | 19,05 |        | 167,90 |
| 2019/08/13 | CH2276 | Female | Two y/o | Treatment (Wk 2) | Treatment | Feed Day | No  | 09:55 | 09:00 - 09:59 | Late Morning | 37,8 | 104 | 92,6  | 92,6  | 18,95 | 596,69 | 153,16 |
| 2019/08/13 | CH2276 | Female | Two y/o | Treatment (Wk 2) | Treatment | Feed Day | No  | 10:00 | 10:00 - 10:59 | Late Morning | 37,8 | 70  | 4,2   | 4,2   | 18,95 | 566,99 | 47,57  |
| 2019/08/13 | CH2276 | Female | Two y/o | Treatment (Wk 2) | Treatment | Feed Day | No  | 10:05 | 10:00 - 10:59 | Late Morning | 37,7 | 92  | 105,4 | 105,4 | 18,85 | 587,78 | 157,68 |
| 2019/08/13 | CH2276 | Female | Two y/o | Treatment (Wk 2) | Treatment | Feed Day | No  | 10:10 | 10:00 - 10:59 | Late Morning | 37,7 | 111 | 141,2 | 141,2 | 18,85 | 601,33 | 167,90 |
| 2019/08/13 | CH2276 | Female | Two y/o | Treatment (Wk 2) | Treatment | Feed Day | No  | 10:15 | 10:00 - 10:59 | Late Morning | 37,7 |     | 126,0 | 126,0 | 18,85 |        | 163,91 |
| 2019/08/13 | CH2276 | Female | Two y/o | Treatment (Wk 2) | Treatment | Feed Day | No  | 10:20 | 10:00 - 10:59 | Late Morning | 37,7 | 60  | 87,0  | 87,0  | 18,85 | 554,67 | 150,99 |
| 2019/08/13 | CH2276 | Female | Two y/o | Treatment (Wk 2) | Treatment | Feed Day | No  | 10:25 | 10:00 - 10:59 | Late Morning | 37,8 | 137 | 37,2  | 37,2  | 18,95 | 615,83 | 121,59 |
| 2019/08/13 | CH2276 | Female | Two y/o | Treatment (Wk 2) | Treatment | Feed Day | Yes | 10:30 | 10:00 - 10:59 | Late Morning | 37,9 | 115 | 67,8  | 67,8  | 19,05 | 603,82 | 142,33 |
| 2019/08/13 | CH2276 | Female | Two y/o | Treatment (Wk 2) | Treatment | Feed Day | Yes | 10:35 | 10:00 - 10:59 | Late Morning | 38,0 | 67  | 9,6   | 9,6   | 19,15 | 563,53 | 75,37  |
| 2019/08/13 | CH2276 | Female | Two y/o | Treatment (Wk 2) | Treatment | Feed Day | Yes | 10:40 | 10:00 - 10:59 | Late Morning | 38,0 | 77  | 11,8  | 11,8  | 19,15 | 574,39 | 82,36  |
| 2019/08/13 | CH2276 | Female | Two y/o | Treatment (Wk 2) | Treatment | Feed Day | Yes | 10:45 | 10:00 - 10:59 | Late Morning | 38,1 | 64  | 65,6  | 65,6  | 19,26 | 559,88 | 141,19 |
| 2019/08/13 | CH2276 | Female | Two y/o | Treatment (Wk 2) | Treatment | Feed Day | Yes | 10:50 | 10:00 - 10:59 | Late Morning | 38,2 | 67  | 76,6  | 76,6  | 19,36 | 563,53 | 146,57 |



|            |        |        |         |                  |           |          |     |       |               |              |      |     |       |       |       |        |        |
|------------|--------|--------|---------|------------------|-----------|----------|-----|-------|---------------|--------------|------|-----|-------|-------|-------|--------|--------|
| 2019/08/13 | CH2276 | Female | Two y/o | Treatment (Wk 2) | Treatment | Feed Day | Yes | 10:55 | 10:00 - 10:59 | Late Morning | 38,2 | 92  | 17,6  | 17,6  | 19,36 | 587,78 | 95,95  |
| 2019/08/13 | CH2276 | Female | Two y/o | Treatment (Wk 2) | Treatment | Feed Day | Yes | 11:00 | 11:00 - 11:59 | Late Morning | 38,2 |     | 25,8  | 25,8  | 19,36 |        | 109,02 |
| 2019/08/13 | CH2276 | Female | Two y/o | Treatment (Wk 2) | Treatment | Feed Day | Yes | 11:05 | 11:00 - 11:59 | Late Morning | 38,2 | 62  | 164,2 | 164,2 | 19,36 | 557,33 | 173,19 |
| 2019/08/13 | CH2276 | Female | Two y/o | Treatment (Wk 2) | Treatment | Feed Day | Yes | 11:10 | 11:00 - 11:59 | Late Morning | 38,2 | 35  | 115,4 | 115,4 | 19,36 | 507,97 | 160,84 |
| 2019/08/13 | CH2276 | Female | Two y/o | Treatment (Wk 2) | Treatment | Feed Day | Yes | 11:15 | 11:00 - 11:59 | Late Morning | 38,2 | 109 | 32,8  | 32,8  | 19,36 | 600,04 | 117,26 |
| 2019/08/13 | CH2276 | Female | Two y/o | Treatment (Wk 2) | Treatment | Feed Day | Yes | 11:20 | 11:00 - 11:59 | Late Morning | 38,0 | 100 | 21,8  | 21,8  | 19,15 | 593,87 | 103,26 |
| 2019/08/13 | CH2276 | Female | Two y/o | Treatment (Wk 2) | Treatment | Feed Day | Yes | 11:25 | 11:00 - 11:59 | Late Morning | 37,9 | 107 | 7,0   | 7,0   | 19,05 | 598,73 | 64,72  |
| 2019/08/13 | CH2276 | Female | Two y/o | Treatment (Wk 2) | Treatment | Feed Day | No  | 11:30 | 11:00 - 11:59 | Late Morning | 37,8 | 118 | 21,6  | 21,6  | 18,95 | 605,61 | 102,94 |
| 2019/08/13 | CH2276 | Female | Two y/o | Treatment (Wk 2) | Treatment | Feed Day | No  | 11:35 | 11:00 - 11:59 | Late Morning | 37,8 |     | 48,0  | 48,0  | 18,95 |        | 130,38 |
| 2019/08/13 | CH2276 | Female | Two y/o | Treatment (Wk 2) | Treatment | Feed Day | No  | 11:40 | 11:00 - 11:59 | Late Morning | 37,8 |     | 149,6 | 149,6 | 18,95 |        | 169,92 |
| 2019/08/13 | CH2276 | Female | Two y/o | Treatment (Wk 2) | Treatment | Feed Day | No  | 11:45 | 11:00 - 11:59 | Late Morning | 37,8 | 70  | 68,8  | 68,8  | 18,95 | 566,99 | 142,84 |
| 2019/08/13 | CH2276 | Female | Two y/o | Treatment (Wk 2) | Treatment | Feed Day | No  | 11:50 | 11:00 - 11:59 | Late Morning | 37,8 | 68  | 70,6  | 70,6  | 18,95 | 564,71 | 143,73 |
| 2019/08/13 | CH2276 | Female | Two y/o | Treatment (Wk 2) | Treatment | Feed Day | No  | 11:55 | 11:00 - 11:59 | Late Morning | 37,9 | 87  | 42,4  | 42,4  | 19,05 | 583,64 | 126,10 |
| 2019/08/13 | CH2276 | Female | Two y/o | Treatment (Wk 2) | Treatment | Feed Day | No  | 12:00 | 12:00 - 12:59 | Afternoon    | 38,2 | 94  | 65,2  | 65,2  | 19,36 | 589,37 | 140,97 |
| 2019/08/13 | CH2276 | Female | Two y/o | Treatment (Wk 2) | Treatment | Feed Day | No  | 12:05 | 12:00 - 12:59 | Afternoon    | 38,1 | 74  | 39,0  | 39,0  | 19,26 | 571,33 | 123,22 |
| 2019/08/13 | CH2276 | Female | Two y/o | Treatment (Wk 2) | Treatment | Feed Day | No  | 12:10 | 12:00 - 12:59 | Afternoon    | 38,0 | 44  | 34,6  | 34,6  | 19,15 | 528,51 | 119,10 |
| 2019/08/13 | CH2276 | Female | Two y/o | Treatment (Wk 2) | Treatment | Feed Day | No  | 12:15 | 12:00 - 12:59 | Afternoon    | 38,0 | 90  | 10,2  | 10,2  | 19,15 | 586,16 | 77,43  |
| 2019/08/13 | CH2276 | Female | Two y/o | Treatment (Wk 2) | Treatment | Feed Day | No  | 12:20 | 12:00 - 12:59 | Afternoon    | 38,0 | 86  | 23,8  | 23,8  | 19,15 | 582,77 | 106,26 |
| 2019/08/13 | CH2276 | Female | Two y/o | Treatment (Wk 2) | Treatment | Feed Day | No  | 12:25 | 12:00 - 12:59 | Afternoon    | 38,1 | 89  | 5,6   | 5,6   | 19,26 | 585,33 | 57,21  |
| 2019/08/13 | CH2276 | Female | Two y/o | Treatment (Wk 2) | Treatment | Feed Day | No  | 12:30 | 12:00 - 12:59 | Afternoon    | 38,2 | 75  | 8,0   | 8,0   | 19,36 | 572,36 | 69,22  |
| 2019/08/13 | CH2276 | Female | Two y/o | Treatment (Wk 2) | Treatment | Feed Day | No  | 12:35 | 12:00 - 12:59 | Afternoon    | 38,2 | 92  | 5,6   | 5,6   | 19,36 | 587,78 | 57,21  |
| 2019/08/13 | CH2276 | Female | Two y/o | Treatment (Wk 2) | Treatment | Feed Day | No  | 12:40 | 12:00 - 12:59 | Afternoon    | 38,2 | 82  | 4,4   | 4,4   | 19,36 | 579,19 | 49,12  |
| 2019/08/13 | CH2276 | Female | Two y/o | Treatment (Wk 2) | Treatment | Feed Day | No  | 12:45 | 12:00 - 12:59 | Afternoon    | 38,2 | 96  | 6,0   | 6,0   | 19,36 | 590,91 | 59,53  |
| 2019/08/13 | CH2276 | Female | Two y/o | Treatment (Wk 2) | Treatment | Feed Day | No  | 12:50 | 12:00 - 12:59 | Afternoon    | 38,2 | 71  | 5,2   | 5,2   | 19,36 | 568,10 | 54,72  |
| 2019/08/13 | CH2276 | Female | Two y/o | Treatment (Wk 2) | Treatment | Feed Day | No  | 12:55 | 12:00 - 12:59 | Afternoon    | 38,2 | 74  | 5,0   | 5,0   | 19,36 | 571,33 | 53,41  |
| 2019/08/13 | CH2276 | Female | Two y/o | Treatment (Wk 2) | Treatment | Feed Day | No  | 13:00 | 13:00 - 13:59 | Afternoon    | 38,2 | 90  | 9,4   | 9,4   | 19,36 | 586,16 | 74,66  |
| 2019/08/13 | CH2276 | Female | Two y/o | Treatment (Wk 2) | Treatment | Feed Day | No  | 13:05 | 13:00 - 13:59 | Afternoon    | 38,1 | 83  | 6,0   | 6,0   | 19,26 | 580,11 | 59,53  |
| 2019/08/13 | CH2276 | Female | Two y/o | Treatment (Wk 2) | Treatment | Feed Day | No  | 13:10 | 13:00 - 13:59 | Afternoon    | 38,1 | 83  | 6,6   | 6,6   | 19,26 | 580,11 | 62,73  |
| 2019/08/13 | CH2276 | Female | Two y/o | Treatment (Wk 2) | Treatment | Feed Day | No  | 13:15 | 13:00 - 13:59 | Afternoon    | 38,0 | 100 | 4,2   | 4,2   | 19,15 | 593,87 | 47,57  |
| 2019/08/13 | CH2276 | Female | Two y/o | Treatment (Wk 2) | Treatment | Feed Day | No  | 13:20 | 13:00 - 13:59 | Afternoon    | 38,0 | 83  | 4,8   | 4,8   | 19,15 | 580,11 | 52,04  |
| 2019/08/13 | CH2276 | Female | Two y/o | Treatment (Wk 2) | Treatment | Feed Day | No  | 13:25 | 13:00 - 13:59 | Afternoon    | 38,0 | 82  | 8,4   | 8,4   | 19,15 | 579,19 | 70,86  |
| 2019/08/13 | CH2276 | Female | Two y/o | Treatment (Wk 2) | Treatment | Feed Day | No  | 13:30 | 13:00 - 13:59 | Afternoon    | 38,0 | 91  | 3,0   | 3,0   | 19,15 | 586,98 | 36,34  |
| 2019/08/13 | CH2276 | Female | Two y/o | Treatment (Wk 2) | Treatment | Feed Day | No  | 13:35 | 13:00 - 13:59 | Afternoon    | 38,1 | 95  | 8,2   | 8,2   | 19,26 | 590,14 | 70,05  |
| 2019/08/13 | CH2276 | Female | Two y/o | Treatment (Wk 2) | Treatment | Feed Day | No  | 13:40 | 13:00 - 13:59 | Afternoon    | 38,1 | 88  | 7,2   | 7,2   | 19,26 | 584,49 | 65,66  |
| 2019/08/13 | CH2276 | Female | Two y/o | Treatment (Wk 2) | Treatment | Feed Day | No  | 13:45 | 13:00 - 13:59 | Afternoon    | 38,1 | 94  | 11,8  | 11,8  | 19,26 | 589,37 | 82,36  |
| 2019/08/13 | CH2276 | Female | Two y/o | Treatment (Wk 2) | Treatment | Feed Day | No  | 13:50 | 13:00 - 13:59 | Afternoon    | 38,0 | 70  | 5,6   | 5,6   | 19,15 | 566,99 | 57,21  |
| 2019/08/13 | CH2276 | Female | Two y/o | Treatment (Wk 2) | Treatment | Feed Day | No  | 13:55 | 13:00 - 13:59 | Afternoon    | 38,0 | 81  | 15,4  | 15,4  | 19,15 | 578,26 | 91,41  |
| 2019/08/13 | CH2276 | Female | Two y/o | Treatment (Wk 2) | Treatment | Feed Day | No  | 14:00 | 14:00 - 14:59 | Afternoon    | 38,0 | 89  | 9,2   | 9,2   | 19,15 | 585,33 | 73,94  |
| 2019/08/13 | CH2276 | Female | Two y/o | Treatment (Wk 2) | Treatment | Feed Day | No  | 14:05 | 14:00 - 14:59 | Afternoon    | 38,0 | 86  | 16,0  | 16,0  | 19,15 | 582,77 | 92,71  |
| 2019/08/13 | CH2276 | Female | Two y/o | Treatment (Wk 2) | Treatment | Feed Day | No  | 14:10 | 14:00 - 14:59 | Afternoon    | 38,0 | 89  | 124,4 | 124,4 | 19,15 | 585,33 | 163,47 |
| 2019/08/13 | CH2276 | Female | Two y/o | Treatment (Wk 2) | Treatment | Feed Day | No  | 14:15 | 14:00 - 14:59 | Afternoon    | 38,0 |     | 4,4   | 4,4   | 19,15 |        | 49,12  |
| 2019/08/13 | CH2276 | Female | Two y/o | Treatment (Wk 2) | Treatment | Feed Day | No  | 14:20 | 14:00 - 14:59 | Afternoon    | 38,0 | 78  | 6,0   | 6,0   | 19,15 | 575,38 | 59,53  |
| 2019/08/13 | CH2276 | Female | Two y/o | Treatment (Wk 2) | Treatment | Feed Day | No  | 14:25 | 14:00 - 14:59 | Afternoon    | 38,0 | 89  | 7,2   | 7,2   | 19,15 | 585,33 | 65,66  |
| 2019/08/13 | CH2276 | Female | Two y/o | Treatment (Wk 2) | Treatment | Feed Day | No  | 14:30 | 14:00 - 14:59 | Afternoon    | 38,0 | 83  | 7,0   | 7,0   | 19,15 | 580,11 | 64,72  |
| 2019/08/13 | CH2276 | Female | Two y/o | Treatment (Wk 2) | Treatment | Feed Day | No  | 14:35 | 14:00 - 14:59 | Afternoon    | 38,0 | 108 | 7,2   | 7,2   | 19,15 | 599,39 | 65,66  |
| 2019/08/13 | CH2276 | Female | Two y/o | Treatment (Wk 2) | Treatment | Feed Day | No  | 14:40 | 14:00 - 14:59 | Afternoon    | 38,0 | 98  | 6,8   | 6,8   | 19,15 | 592,41 | 63,74  |
| 2019/08/13 | CH2276 | Female | Two y/o | Treatment (Wk 2) | Treatment | Feed Day | No  | 14:45 | 14:00 - 14:59 | Afternoon    | 38,1 | 98  | 7,8   | 7,8   | 19,26 | 592,41 | 68,36  |
| 2019/08/13 | CH2276 | Female | Two y/o | Treatment (Wk 2) | Treatment | Feed Day | No  | 14:50 | 14:00 - 14:59 | Afternoon    | 38,2 | 94  | 12,4  | 12,4  | 19,36 | 589,37 | 84,04  |
| 2019/08/13 | CH2276 | Female | Two y/o | Treatment (Wk 2) | Treatment | Feed Day | No  | 14:55 | 14:00 - 14:59 | Afternoon    | 38,2 | 68  | 5,2   | 5,2   | 19,36 | 564,71 | 54,72  |
| 2019/08/13 | CH2276 | Female | Two y/o | Treatment (Wk 2) | Treatment | Feed Day | No  | 15:00 | 15:00 - 15:59 | Afternoon    | 38,2 | 114 | 21,6  | 21,6  | 19,36 | 603,20 | 102,94 |
| 2019/08/13 | CH2276 | Female | Two y/o | Treatment (Wk 2) | Treatment | Feed Day | No  | 15:05 | 15:00 - 15:59 | Afternoon    | 38,2 | 73  | 22,4  | 22,4  | 19,36 | 570,27 | 104,19 |
| 2019/08/13 | CH2276 | Female | Two y/o | Treatment (Wk 2) | Treatment | Feed Day | No  | 15:10 | 15:00 - 15:59 | Afternoon    | 38,2 | 82  | 7,0   | 7,0   | 19,36 | 579,19 | 64,72  |
| 2019/08/13 | CH2276 | Female | Two y/o | Treatment (Wk 2) | Treatment | Feed Day | No  | 15:15 | 15:00 - 15:59 | Afternoon    | 38,2 | 75  | 14,2  | 14,2  | 19,36 | 572,36 | 88,65  |
| 2019/08/13 | CH2276 | Female | Two y/o | Treatment (Wk 2) | Treatment | Feed Day | No  | 15:20 | 15:00 - 15:59 | Afternoon    | 38,2 |     | 44,4  | 44,4  | 19,36 |        | 127,69 |
| 2019/08/13 | CH2276 | Female | Two y/o | Treatment (Wk 2) | Treatment | Feed Day | No  | 15:25 | 15:00 - 15:59 | Afternoon    | 38,2 | 73  | 55,6  | 55,6  | 19,36 | 570,27 | 135,46 |
| 2019/08/13 | CH2276 | Female | Two y/o | Treatment (Wk 2) | Treatment | Feed Day | Yes | 15:30 | 15:00 - 15:59 | Afternoon    | 38,1 | 100 | 6,4   | 6,4   | 19,26 | 593,87 | 61,70  |
| 2019/08/13 | CH2276 | Female | Two y/o | Treatment (Wk 2) | Treatment | Feed Day | Yes | 15:35 | 15:00 - 15:59 | Afternoon    | 38,1 | 95  | 8,6   | 8,6   | 19,26 | 590,14 | 71,66  |
| 2019/08/13 | CH2276 | Female | Two y/o | Treatment (Wk 2) | Treatment | Feed Day | Yes | 15:40 | 15:00 - 15:59 | Afternoon    | 38,1 | 89  | 4,8   | 4,8   | 19,26 | 585,33 | 52,04  |
| 2019/08/13 | CH2276 | Female | Two y/o | Treatment (Wk 2) | Treatment | Feed Day | Yes | 15:45 | 15:00 - 15:59 | Afternoon    | 38,1 | 76  | 4,8   | 4,8   | 19,26 | 573,39 | 52,04  |
| 2019/08/13 | CH2276 | Female | Two y/o | Treatment (Wk 2) | Treatment | Feed Day | Yes | 15:50 | 15:00 - 15:59 | Afternoon    | 38,1 | 68  | 3,2   | 3,2   | 19,26 | 564,71 | 38,49  |
| 2019/08/13 | CH2276 | Female | Two y/o | Treatment (Wk 2) | Treatment | Feed Day | Yes | 15:55 | 15:00 - 15:59 | Afternoon    | 38,2 | 71  | 1,4   | 1,4   | 19,36 | 568,10 | 11,07  |
| 2019/08/13 | CH2276 | Female | Two y/o | Treatment (Wk 2) | Treatment | Feed Day | Yes | 16:00 | 16:00 - 16:59 | Evening      | 38,2 | 62  | 7,4   | 7,4   | 19,36 | 557,33 | 66,59  |
| 2019/08/13 | CH2276 | Female | Two y/o | Treatment (Wk 2) | Treatment | Feed Day | Yes | 16:05 | 16:00 - 16:59 | Evening      | 38,2 | 88  | 65,8  | 65,8  | 19,36 | 584,49 | 141,29 |
| 2019/08/13 | CH2276 | Female | Two y/o | Treatment (Wk 2) | Treatment | Feed Day | Yes | 16:10 | 16:00 - 16:59 | Evening      | 38,2 | 80  | 20,2  | 20,2  | 19,36 | 577,31 | 100,65 |
| 2019/08/13 | CH2276 | Female | Two y/o | Treatment (Wk 2) | Treatment | Feed Day | Yes | 16:15 | 16:00 - 16:59 | Evening      | 38,2 | 80  | 41,2  | 41,2  | 19,36 | 577,31 | 125,11 |
| 2019/08/13 | CH2276 | Female | Two y/o | Treatment (Wk 2) | Treatment | Feed Day | Yes | 16:20 | 16:00 - 16:59 | Evening      | 38,3 | 98  | 55,4  | 55,4  | 19,46 | 592,41 | 135,33 |
| 2019/08/13 | CH2276 | Female | Two y/o | Treatment (Wk 2) | Treatment | Feed Day | Yes | 16:25 | 16:00 - 16:59 | Evening      | 38,3 | 93  | 53,0  | 53,0  | 19,46 | 588,58 | 133,80 |
| 2019/08/13 | CH2276 | Female | Two y/o | Treatment (Wk 2) | Treatment | Feed Day | No  | 16:30 | 16:00 - 16:59 | Evening      | 38,2 | 92  | 37,2  | 37,2  | 19,36 | 587,78 | 121,59 |
| 2019/08/13 | CH2276 | Female | Two y/o | Treatment (Wk 2) | Treatment | Feed Day | No  | 16:35 | 16:00 - 16:59 | Evening      | 38,1 | 70  | 34,2  | 34,2  | 19,26 | 566,99 | 118,70 |
| 2019/08/13 | CH2276 | Female | Two y/o | Treatment (Wk 2) | Treatment | Feed Day | No  | 16:40 | 16:00 - 16:59 | Evening      | 38,0 | 98  | 83,4  | 83,4  | 19,15 | 592,41 | 149,52 |



|            |        |        |         |                  |           |          |    |       |               |         |      |     |       |       |       |        |        |
|------------|--------|--------|---------|------------------|-----------|----------|----|-------|---------------|---------|------|-----|-------|-------|-------|--------|--------|
| 2019/08/13 | CH2276 | Female | Two y/o | Treatment (Wk 2) | Treatment | Feed Day | No | 16:45 | 16:00 - 16:59 | Evening | 38,0 | 119 | 31,2  | 31,2  | 19,15 | 606,20 | 115,54 |
| 2019/08/13 | CH2276 | Female | Two y/o | Treatment (Wk 2) | Treatment | Feed Day | No | 16:50 | 16:00 - 16:59 | Evening | 38,0 | 111 | 52,0  | 52,0  | 19,15 | 601,33 | 133,14 |
| 2019/08/13 | CH2276 | Female | Two y/o | Treatment (Wk 2) | Treatment | Feed Day | No | 16:55 | 16:00 - 16:59 | Evening | 38,0 | 64  | 54,6  | 54,6  | 19,15 | 559,88 | 134,83 |
| 2019/08/13 | CH2276 | Female | Two y/o | Treatment (Wk 2) | Treatment | Feed Day | No | 17:00 | 17:00 - 17:59 | Evening | 38,1 | 158 | 54,6  | 54,6  | 19,26 | 625,26 | 134,83 |
| 2019/08/13 | CH2276 | Female | Two y/o | Treatment (Wk 2) | Treatment | Feed Day | No | 17:05 | 17:00 - 17:59 | Evening | 38,2 | 70  | 32,6  | 32,6  | 19,36 | 566,99 | 117,05 |
| 2019/08/13 | CH2276 | Female | Two y/o | Treatment (Wk 2) | Treatment | Feed Day | No | 17:10 | 17:00 - 17:59 | Evening | 38,2 | 80  | 49,0  | 49,0  | 19,36 | 577,31 | 131,09 |
| 2019/08/13 | CH2276 | Female | Two y/o | Treatment (Wk 2) | Treatment | Feed Day | No | 17:15 | 17:00 - 17:59 | Evening | 38,3 |     | 80,6  | 80,6  | 19,46 |        | 148,34 |
| 2019/08/13 | CH2276 | Female | Two y/o | Treatment (Wk 2) | Treatment | Feed Day | No | 17:20 | 17:00 - 17:59 | Evening | 38,2 | 109 | 27,2  | 27,2  | 19,36 | 600,04 | 110,83 |
| 2019/08/13 | CH2276 | Female | Two y/o | Treatment (Wk 2) | Treatment | Feed Day | No | 17:25 | 17:00 - 17:59 | Evening | 38,2 | 93  | 18,8  | 18,8  | 19,36 | 588,58 | 98,20  |
| 2019/08/13 | CH2276 | Female | Two y/o | Treatment (Wk 2) | Treatment | Feed Day | No | 17:30 | 17:00 - 17:59 | Evening | 38,2 | 90  | 65,0  | 65,0  | 19,36 | 586,16 | 140,87 |
| 2019/08/13 | CH2276 | Female | Two y/o | Treatment (Wk 2) | Treatment | Feed Day | No | 17:35 | 17:00 - 17:59 | Evening | 38,1 | 85  | 85,4  | 85,4  | 19,26 | 581,90 | 150,35 |
| 2019/08/13 | CH2276 | Female | Two y/o | Treatment (Wk 2) | Treatment | Feed Day | No | 17:40 | 17:00 - 17:59 | Evening | 38,0 | 82  | 86,0  | 86,0  | 19,15 | 579,19 | 150,59 |
| 2019/08/13 | CH2276 | Female | Two y/o | Treatment (Wk 2) | Treatment | Feed Day | No | 17:45 | 17:00 - 17:59 | Evening | 38,0 | 69  | 57,2  | 57,2  | 19,15 | 565,86 | 136,44 |
| 2019/08/13 | CH2276 | Female | Two y/o | Treatment (Wk 2) | Treatment | Feed Day | No | 17:50 | 17:00 - 17:59 | Evening | 38,0 | 104 | 73,2  | 73,2  | 19,15 | 596,69 | 144,99 |
| 2019/08/13 | CH2276 | Female | Two y/o | Treatment (Wk 2) | Treatment | Feed Day | No | 17:55 | 17:00 - 17:59 | Evening | 38,0 |     | 25,2  | 25,2  | 19,15 | 589,37 | 108,22 |
| 2019/08/13 | CH2276 | Female | Two y/o | Treatment (Wk 2) | Treatment | Feed Day | No | 18:00 | 18:00 - 18:59 | Evening | 38,0 | 106 | 35,4  | 35,4  | 19,15 | 598,06 | 119,88 |
| 2019/08/13 | CH2276 | Female | Two y/o | Treatment (Wk 2) | Treatment | Feed Day | No | 18:05 | 18:00 - 18:59 | Evening | 38,0 | 129 | 24,2  | 24,2  | 19,15 | 611,75 | 106,83 |
| 2019/08/13 | CH2276 | Female | Two y/o | Treatment (Wk 2) | Treatment | Feed Day | No | 18:10 | 18:00 - 18:59 | Evening | 38,0 |     | 15,2  | 15,2  | 19,15 |        | 90,96  |
| 2019/08/13 | CH2276 | Female | Two y/o | Treatment (Wk 2) | Treatment | Feed Day | No | 18:15 | 18:00 - 18:59 | Evening | 37,9 | 96  | 127,8 | 127,8 | 19,05 | 590,91 | 164,41 |
| 2019/08/13 | CH2276 | Female | Two y/o | Treatment (Wk 2) | Treatment | Feed Day | No | 18:20 | 18:00 - 18:59 | Evening | 38,0 | 124 | 105,6 | 105,6 | 19,15 | 609,04 | 157,74 |
| 2019/08/13 | CH2276 | Female | Two y/o | Treatment (Wk 2) | Treatment | Feed Day | No | 18:25 | 18:00 - 18:59 | Evening | 38,0 | 105 | 135,6 | 135,6 | 19,15 | 597,38 | 166,48 |
| 2019/08/13 | CH2276 | Female | Two y/o | Treatment (Wk 2) | Treatment | Feed Day | No | 18:30 | 18:00 - 18:59 | Evening | 38,0 | 86  | 139,8 | 139,8 | 19,15 | 582,77 | 167,55 |
| 2019/08/13 | CH2276 | Female | Two y/o | Treatment (Wk 2) | Treatment | Feed Day | No | 18:35 | 18:00 - 18:59 | Evening | 38,0 | 56  | 79,6  | 79,6  | 19,15 | 549,01 | 147,90 |
| 2019/08/13 | CH2276 | Female | Two y/o | Treatment (Wk 2) | Treatment | Feed Day | No | 18:40 | 18:00 - 18:59 | Evening | 38,0 | 109 | 21,8  | 21,8  | 19,15 | 600,04 | 103,26 |
| 2019/08/13 | CH2276 | Female | Two y/o | Treatment (Wk 2) | Treatment | Feed Day | No | 18:45 | 18:00 - 18:59 | Evening | 37,9 | 103 | 629,6 | 629,6 | 19,05 | 596,00 | 220,76 |
| 2019/08/13 | CH2276 | Female | Two y/o | Treatment (Wk 2) | Treatment | Feed Day | No | 18:50 | 18:00 - 18:59 | Evening | 38,3 |     | 99,4  | 99,4  | 19,46 |        | 155,63 |
| 2019/08/13 | CH2276 | Female | Two y/o | Treatment (Wk 2) | Treatment | Feed Day | No | 18:55 | 18:00 - 18:59 | Evening | 38,5 |     | 4,6   | 4,6   | 19,66 |        | 50,61  |
| 2019/08/13 | CH2276 | Female | Two y/o | Treatment (Wk 2) | Treatment | Feed Day | No | 19:00 | 19:00 - 19:59 | Evening | 38,3 | 103 | 9,8   | 9,8   | 19,46 | 596,00 | 76,07  |
| 2019/08/13 | CH2276 | Female | Two y/o | Treatment (Wk 2) | Treatment | Feed Day | No | 19:05 | 19:00 - 19:59 | Evening | 38,2 | 67  | 2,6   | 2,6   | 19,36 | 563,53 | 31,57  |
| 2019/08/13 | CH2276 | Female | Two y/o | Treatment (Wk 2) | Treatment | Feed Day | No | 19:10 | 19:00 - 19:59 | Evening | 38,2 | 70  | 3,2   | 3,2   | 19,36 | 566,99 | 38,49  |
| 2019/08/13 | CH2276 | Female | Two y/o | Treatment (Wk 2) | Treatment | Feed Day | No | 19:15 | 19:00 - 19:59 | Evening | 38,2 | 100 | 24,4  | 24,4  | 19,36 | 593,87 | 107,11 |
| 2019/08/13 | CH2276 | Female | Two y/o | Treatment (Wk 2) | Treatment | Feed Day | No | 19:20 | 19:00 - 19:59 | Evening | 38,2 | 69  | 86,4  | 86,4  | 19,36 | 565,86 | 150,75 |
| 2019/08/13 | CH2276 | Female | Two y/o | Treatment (Wk 2) | Treatment | Feed Day | No | 19:25 | 19:00 - 19:59 | Evening | 38,2 | 69  | 84,2  | 84,2  | 19,36 | 565,86 | 149,85 |
| 2019/08/13 | CH2276 | Female | Two y/o | Treatment (Wk 2) | Treatment | Feed Day | No | 19:30 | 19:00 - 19:59 | Evening | 38,2 | 65  | 86,0  | 86,0  | 19,36 | 561,12 | 150,59 |
| 2019/08/13 | CH2276 | Female | Two y/o | Treatment (Wk 2) | Treatment | Feed Day | No | 19:35 | 19:00 - 19:59 | Evening | 38,2 |     | 25,4  | 25,4  | 19,36 |        | 108,49 |
| 2019/08/13 | CH2276 | Female | Two y/o | Treatment (Wk 2) | Treatment | Feed Day | No | 19:40 | 19:00 - 19:59 | Evening | 38,2 | 90  | 5,6   | 5,6   | 19,36 | 586,16 | 57,21  |
| 2019/08/13 | CH2276 | Female | Two y/o | Treatment (Wk 2) | Treatment | Feed Day | No | 19:45 | 19:00 - 19:59 | Evening | 38,0 | 70  | 8,2   | 8,2   | 19,15 | 566,99 | 70,05  |
| 2019/08/13 | CH2276 | Female | Two y/o | Treatment (Wk 2) | Treatment | Feed Day | No | 19:50 | 19:00 - 19:59 | Evening | 38,0 | 75  | 12,0  | 12,0  | 19,15 | 572,36 | 82,93  |
| 2019/08/13 | CH2276 | Female | Two y/o | Treatment (Wk 2) | Treatment | Feed Day | No | 19:55 | 19:00 - 19:59 | Evening | 37,9 | 88  | 8,6   | 8,6   | 19,05 | 584,49 | 71,66  |
| 2019/08/13 | CH2276 | Female | Two y/o | Treatment (Wk 2) | Treatment | Feed Day | No | 20:00 | 20:00 - 20:59 | Night   | 37,9 | 55  | 3,8   | 3,8   | 19,05 | 547,52 | 44,22  |
| 2019/08/13 | CH2276 | Female | Two y/o | Treatment (Wk 2) | Treatment | Feed Day | No | 20:05 | 20:00 - 20:59 | Night   | 37,8 | 92  | 8,0   | 8,0   | 18,95 | 587,78 | 69,22  |
| 2019/08/13 | CH2276 | Female | Two y/o | Treatment (Wk 2) | Treatment | Feed Day | No | 20:10 | 20:00 - 20:59 | Night   | 37,8 | 68  | 5,0   | 5,0   | 18,95 | 564,71 | 53,41  |
| 2019/08/13 | CH2276 | Female | Two y/o | Treatment (Wk 2) | Treatment | Feed Day | No | 20:15 | 20:00 - 20:59 | Night   | 37,7 | 71  | 4,2   | 4,2   | 18,85 | 568,10 | 47,57  |
| 2019/08/13 | CH2276 | Female | Two y/o | Treatment (Wk 2) | Treatment | Feed Day | No | 20:20 | 20:00 - 20:59 | Night   | 37,7 | 73  | 5,0   | 5,0   | 18,85 | 570,27 | 53,41  |
| 2019/08/13 | CH2276 | Female | Two y/o | Treatment (Wk 2) | Treatment | Feed Day | No | 20:25 | 20:00 - 20:59 | Night   | 37,7 | 82  | 7,8   | 7,8   | 18,85 | 579,19 | 68,36  |
| 2019/08/13 | CH2276 | Female | Two y/o | Treatment (Wk 2) | Treatment | Feed Day | No | 20:30 | 20:00 - 20:59 | Night   | 37,6 | 103 | 9,6   | 9,6   | 18,75 | 596,00 | 75,37  |
| 2019/08/13 | CH2276 | Female | Two y/o | Treatment (Wk 2) | Treatment | Feed Day | No | 20:35 | 20:00 - 20:59 | Night   | 37,6 | 53  | 6,6   | 6,6   | 18,75 | 544,43 | 62,73  |
| 2019/08/13 | CH2276 | Female | Two y/o | Treatment (Wk 2) | Treatment | Feed Day | No | 20:40 | 20:00 - 20:59 | Night   | 37,5 | 56  | 4,8   | 4,8   | 18,65 | 549,01 | 52,04  |
| 2019/08/13 | CH2276 | Female | Two y/o | Treatment (Wk 2) | Treatment | Feed Day | No | 20:45 | 20:00 - 20:59 | Night   | 37,5 |     | 13,2  | 13,2  | 18,65 |        | 86,17  |
| 2019/08/13 | CH2276 | Female | Two y/o | Treatment (Wk 2) | Treatment | Feed Day | No | 20:50 | 20:00 - 20:59 | Night   | 37,5 | 73  | 4,2   | 4,2   | 18,65 | 570,27 | 47,57  |
| 2019/08/13 | CH2276 | Female | Two y/o | Treatment (Wk 2) | Treatment | Feed Day | No | 20:55 | 20:00 - 20:59 | Night   | 37,5 | 89  | 8,0   | 8,0   | 18,65 | 585,33 | 69,22  |
| 2019/08/13 | CH2276 | Female | Two y/o | Treatment (Wk 2) | Treatment | Feed Day | No | 21:00 | 21:00 - 21:59 | Night   | 37,6 | 63  | 6,4   | 6,4   | 18,75 | 558,62 | 61,70  |
| 2019/08/13 | CH2276 | Female | Two y/o | Treatment (Wk 2) | Treatment | Feed Day | No | 21:05 | 21:00 - 21:59 | Night   | 37,6 | 95  | 8,4   | 8,4   | 18,75 | 590,14 | 70,86  |
| 2019/08/13 | CH2276 | Female | Two y/o | Treatment (Wk 2) | Treatment | Feed Day | No | 21:10 | 21:00 - 21:59 | Night   | 37,6 | 88  | 3,0   | 3,0   | 18,75 | 584,49 | 36,34  |
| 2019/08/13 | CH2276 | Female | Two y/o | Treatment (Wk 2) | Treatment | Feed Day | No | 21:15 | 21:00 - 21:59 | Night   | 37,5 | 62  | 7,6   | 7,6   | 18,65 | 557,33 | 67,49  |
| 2019/08/13 | CH2276 | Female | Two y/o | Treatment (Wk 2) | Treatment | Feed Day | No | 21:20 | 21:00 - 21:59 | Night   | 37,6 | 68  | 6,0   | 6,0   | 18,75 | 564,71 | 59,53  |
| 2019/08/13 | CH2276 | Female | Two y/o | Treatment (Wk 2) | Treatment | Feed Day | No | 21:25 | 21:00 - 21:59 | Night   | 37,6 | 92  | 4,4   | 4,4   | 18,75 | 587,78 | 49,12  |
| 2019/08/13 | CH2276 | Female | Two y/o | Treatment (Wk 2) | Treatment | Feed Day | No | 21:30 | 21:00 - 21:59 | Night   | 37,6 | 67  | 12,2  | 12,2  | 18,75 | 563,53 | 83,49  |
| 2019/08/13 | CH2276 | Female | Two y/o | Treatment (Wk 2) | Treatment | Feed Day | No | 21:35 | 21:00 - 21:59 | Night   | 37,6 | 61  | 2,2   | 2,2   | 18,75 | 556,01 | 26,02  |
| 2019/08/13 | CH2276 | Female | Two y/o | Treatment (Wk 2) | Treatment | Feed Day | No | 21:40 | 21:00 - 21:59 | Night   | 37,6 | 98  | 3,8   | 3,8   | 18,75 | 592,41 | 44,22  |
| 2019/08/13 | CH2276 | Female | Two y/o | Treatment (Wk 2) | Treatment | Feed Day | No | 21:45 | 21:00 - 21:59 | Night   | 37,6 | 95  | 6,2   | 6,2   | 18,75 | 590,14 | 60,63  |
| 2019/08/13 | CH2276 | Female | Two y/o | Treatment (Wk 2) | Treatment | Feed Day | No | 21:50 | 21:00 - 21:59 | Night   | 37,5 | 62  | 4,6   | 4,6   | 18,65 | 557,33 | 50,61  |
| 2019/08/13 | CH2276 | Female | Two y/o | Treatment (Wk 2) | Treatment | Feed Day | No | 21:55 | 21:00 - 21:59 | Night   | 37,5 | 64  | 4,4   | 4,4   | 18,65 | 559,88 | 49,12  |
| 2019/08/13 | CH2276 | Female | Two y/o | Treatment (Wk 2) | Treatment | Feed Day | No | 22:00 | 22:00 - 22:59 | Night   | 37,5 | 60  | 8,0   | 8,0   | 18,65 | 554,67 | 69,22  |
| 2019/08/13 | CH2276 | Female | Two y/o | Treatment (Wk 2) | Treatment | Feed Day | No | 22:05 | 22:00 - 22:59 | Night   | 37,5 | 67  | 2,6   | 2,6   | 18,65 | 563,53 | 31,57  |
| 2019/08/13 | CH2276 | Female | Two y/o | Treatment (Wk 2) | Treatment | Feed Day | No | 22:10 | 22:00 - 22:59 | Night   | 37,5 | 92  | 21,2  | 21,2  | 18,65 | 587,78 | 102,31 |
| 2019/08/13 | CH2276 | Female | Two y/o | Treatment (Wk 2) | Treatment | Feed Day | No | 22:15 | 22:00 - 22:59 | Night   | 37,5 | 70  | 5,0   | 5,0   | 18,65 | 566,99 | 53,41  |
| 2019/08/13 | CH2276 | Female | Two y/o | Treatment (Wk 2) | Treatment | Feed Day | No | 22:20 | 22:00 - 22:59 | Night   | 37,4 | 66  | 6,4   | 6,4   | 18,55 | 562,34 | 61,70  |
| 2019/08/13 | CH2276 | Female | Two y/o | Treatment (Wk 2) | Treatment | Feed Day | No | 22:25 | 22:00 - 22:59 | Night   | 37,4 | 64  | 12,4  | 12,4  | 18,55 | 559,88 | 84,04  |
| 2019/08/13 | CH2276 | Female | Two y/o | Treatment (Wk 2) | Treatment | Feed Day | No | 22:30 | 22:00 - 22:59 | Night   | 37,4 | 63  | 4,8   | 4,8   | 18,55 | 558,62 | 52,04  |



|               |        |        |         |                  |           |          |    |       |               |               |      |     |       |       |       |        |        |
|---------------|--------|--------|---------|------------------|-----------|----------|----|-------|---------------|---------------|------|-----|-------|-------|-------|--------|--------|
| 2019/08/13    | CH2276 | Female | Two y/o | Treatment (Wk 2) | Treatment | Feed Day | No | 22:35 | 22:00 - 22:59 | Night         | 37,4 | 90  | 7,2   | 7,2   | 18,55 | 586,16 | 65,66  |
| 2019/08/13    | CH2276 | Female | Two y/o | Treatment (Wk 2) | Treatment | Feed Day | No | 22:40 | 22:00 - 22:59 | Night         | 37,4 | 64  | 4,4   | 4,4   | 18,55 | 559,88 | 49,12  |
| 2019/08/13    | CH2276 | Female | Two y/o | Treatment (Wk 2) | Treatment | Feed Day | No | 22:45 | 22:00 - 22:59 | Night         | 37,4 | 64  | 4,4   | 4,4   | 18,55 | 559,88 | 49,12  |
| 2019/08/13    | CH2276 | Female | Two y/o | Treatment (Wk 2) | Treatment | Feed Day | No | 22:50 | 22:00 - 22:59 | Night         | 37,4 | 65  | 6,8   | 6,8   | 18,55 | 561,12 | 63,74  |
| 2019/08/13    | CH2276 | Female | Two y/o | Treatment (Wk 2) | Treatment | Feed Day | No | 22:55 | 22:00 - 22:59 | Night         | 37,4 | 66  | 3,0   | 3,0   | 18,55 | 562,34 | 36,34  |
| 2019/08/13    | CH2276 | Female | Two y/o | Treatment (Wk 2) | Treatment | Feed Day | No | 23:00 | 23:00 - 23:59 | Night         | 37,4 | 134 | 20,4  | 20,4  | 18,55 | 614,33 | 100,99 |
| 2019/08/13    | CH2276 | Female | Two y/o | Treatment (Wk 2) | Treatment | Feed Day | No | 23:05 | 23:00 - 23:59 | Night         | 37,4 | 65  | 24,0  | 24,0  | 18,55 | 561,12 | 106,55 |
| 2019/08/13    | CH2276 | Female | Two y/o | Treatment (Wk 2) | Treatment | Feed Day | No | 23:10 | 23:00 - 23:59 | Night         | 37,4 | 63  | 19,2  | 19,2  | 18,55 | 558,62 | 98,92  |
| 2019/08/13    | CH2276 | Female | Two y/o | Treatment (Wk 2) | Treatment | Feed Day | No | 23:15 | 23:00 - 23:59 | Night         | 37,3 | 94  | 22,2  | 22,2  | 18,46 | 589,37 | 103,88 |
| 2019/08/13    | CH2276 | Female | Two y/o | Treatment (Wk 2) | Treatment | Feed Day | No | 23:20 | 23:00 - 23:59 | Night         | 37,3 | 60  | 24,0  | 24,0  | 18,46 | 554,67 | 106,55 |
| 2019/08/13    | CH2276 | Female | Two y/o | Treatment (Wk 2) | Treatment | Feed Day | No | 23:25 | 23:00 - 23:59 | Night         | 37,3 | 90  | 25,0  | 25,0  | 18,46 | 586,16 | 107,94 |
| 2019/08/13    | CH2276 | Female | Two y/o | Treatment (Wk 2) | Treatment | Feed Day | No | 23:30 | 23:00 - 23:59 | Night         | 37,2 | 64  | 24,8  | 24,8  | 18,36 | 559,88 | 107,67 |
| 2019/08/13    | CH2276 | Female | Two y/o | Treatment (Wk 2) | Treatment | Feed Day | No | 23:35 | 23:00 - 23:59 | Night         | 37,1 |     | 18,0  | 18,0  | 18,26 |        | 96,72  |
| 2019/08/13    | CH2276 | Female | Two y/o | Treatment (Wk 2) | Treatment | Feed Day | No | 23:40 | 23:00 - 23:59 | Night         | 37,1 | 61  | 23,8  | 23,8  | 18,26 | 556,01 | 106,26 |
| 2019/08/13    | CH2276 | Female | Two y/o | Treatment (Wk 2) | Treatment | Feed Day | No | 23:45 | 23:00 - 23:59 | Night         | 37,1 | 93  | 24,6  | 24,6  | 18,26 | 588,58 | 107,39 |
| 2019/08/13    | CH2276 | Female | Two y/o | Treatment (Wk 2) | Treatment | Feed Day | No | 23:50 | 23:00 - 23:59 | Night         | 37,1 |     | 22,0  | 22,0  | 18,26 |        | 103,57 |
| 2019/08/13    | CH2276 | Female | Two y/o | Treatment (Wk 2) | Treatment | Feed Day | No | 23:55 | 23:00 - 23:59 | Night         | 37,0 | 61  | 22,2  | 22,2  | 18,16 | 556,01 | 103,88 |
| 57 2019/08/14 | CH2276 | Female | Two y/o | Treatment (Wk 3) | Treatment | Fast Day | No | 00:00 | 00:00 - 00:59 | Early Morning | 37,0 | 90  | 19,4  | 19,4  | 18,16 | 586,16 | 99,28  |
| 2019/08/14    | CH2276 | Female | Two y/o | Treatment (Wk 3) | Treatment | Fast Day | No | 00:05 | 00:00 - 00:59 | Early Morning | 37,0 | 84  | 23,4  | 23,4  | 18,16 | 581,01 | 105,68 |
| 2019/08/14    | CH2276 | Female | Two y/o | Treatment (Wk 3) | Treatment | Fast Day | No | 00:10 | 00:00 - 00:59 | Early Morning | 37,0 |     | 27,2  | 27,2  | 18,16 |        | 110,83 |
| 2019/08/14    | CH2276 | Female | Two y/o | Treatment (Wk 3) | Treatment | Fast Day | No | 00:15 | 00:00 - 00:59 | Early Morning | 37,0 | 90  | 3,6   | 3,6   | 18,16 | 586,16 | 42,42  |
| 2019/08/14    | CH2276 | Female | Two y/o | Treatment (Wk 3) | Treatment | Fast Day | No | 00:20 | 00:00 - 00:59 | Early Morning | 37,0 | 67  | 22,8  | 22,8  | 18,16 | 563,53 | 104,79 |
| 2019/08/14    | CH2276 | Female | Two y/o | Treatment (Wk 3) | Treatment | Fast Day | No | 00:25 | 00:00 - 00:59 | Early Morning | 37,0 | 61  | 2,4   | 2,4   | 18,16 | 556,01 | 28,91  |
| 2019/08/14    | CH2276 | Female | Two y/o | Treatment (Wk 3) | Treatment | Fast Day | No | 00:30 | 00:00 - 00:59 | Early Morning | 37,0 | 61  | 2,8   | 2,8   | 18,16 | 556,01 | 34,04  |
| 2019/08/14    | CH2276 | Female | Two y/o | Treatment (Wk 3) | Treatment | Fast Day | No | 00:35 | 00:00 - 00:59 | Early Morning | 37,0 | 64  | 6,0   | 6,0   | 18,16 | 559,88 | 59,53  |
| 2019/08/14    | CH2276 | Female | Two y/o | Treatment (Wk 3) | Treatment | Fast Day | No | 00:40 | 00:00 - 00:59 | Early Morning | 37,0 | 52  | 5,0   | 5,0   | 18,16 | 542,83 | 53,41  |
| 2019/08/14    | CH2276 | Female | Two y/o | Treatment (Wk 3) | Treatment | Fast Day | No | 00:45 | 00:00 - 00:59 | Early Morning | 37,0 | 58  | 5,6   | 5,6   | 18,16 | 551,90 | 57,21  |
| 2019/08/14    | CH2276 | Female | Two y/o | Treatment (Wk 3) | Treatment | Fast Day | No | 00:50 | 00:00 - 00:59 | Early Morning | 37,0 | 101 | 7,6   | 7,6   | 18,16 | 594,59 | 67,49  |
| 2019/08/14    | CH2276 | Female | Two y/o | Treatment (Wk 3) | Treatment | Fast Day | No | 00:55 | 00:00 - 00:59 | Early Morning | 37,0 | 64  | 5,4   | 5,4   | 18,16 | 559,88 | 55,99  |
| 2019/08/14    | CH2276 | Female | Two y/o | Treatment (Wk 3) | Treatment | Fast Day | No | 01:00 | 01:00 - 01:59 | Early Morning | 36,9 | 61  | 7,0   | 7,0   | 18,06 | 556,01 | 64,72  |
| 2019/08/14    | CH2276 | Female | Two y/o | Treatment (Wk 3) | Treatment | Fast Day | No | 01:05 | 01:00 - 01:59 | Early Morning | 36,9 | 58  | 4,0   | 4,0   | 18,06 | 551,90 | 45,94  |
| 2019/08/14    | CH2276 | Female | Two y/o | Treatment (Wk 3) | Treatment | Fast Day | No | 01:10 | 01:00 - 01:59 | Early Morning | 36,9 | 83  | 14,4  | 14,4  | 18,06 | 580,11 | 89,12  |
| 2019/08/14    | CH2276 | Female | Two y/o | Treatment (Wk 3) | Treatment | Fast Day | No | 01:15 | 01:00 - 01:59 | Early Morning | 36,9 | 61  | 6,4   | 6,4   | 18,06 | 556,01 | 61,70  |
| 2019/08/14    | CH2276 | Female | Two y/o | Treatment (Wk 3) | Treatment | Fast Day | No | 01:20 | 01:00 - 01:59 | Early Morning | 37,0 |     | 6,6   | 6,6   | 18,16 |        | 62,73  |
| 2019/08/14    | CH2276 | Female | Two y/o | Treatment (Wk 3) | Treatment | Fast Day | No | 01:25 | 01:00 - 01:59 | Early Morning | 37,1 | 92  | 3,6   | 3,6   | 18,26 | 587,78 | 42,42  |
| 2019/08/14    | CH2276 | Female | Two y/o | Treatment (Wk 3) | Treatment | Fast Day | No | 01:30 | 01:00 - 01:59 | Early Morning | 37,3 |     | 4,8   | 4,8   | 18,46 |        | 52,04  |
| 2019/08/14    | CH2276 | Female | Two y/o | Treatment (Wk 3) | Treatment | Fast Day | No | 01:35 | 01:00 - 01:59 | Early Morning | 37,3 | 61  | 9,4   | 9,4   | 18,46 | 556,01 | 74,66  |
| 2019/08/14    | CH2276 | Female | Two y/o | Treatment (Wk 3) | Treatment | Fast Day | No | 01:40 | 01:00 - 01:59 | Early Morning | 37,4 | 135 | 158,0 | 158,0 | 18,55 | 614,84 | 171,84 |
| 2019/08/14    | CH2276 | Female | Two y/o | Treatment (Wk 3) | Treatment | Fast Day | No | 01:45 | 01:00 - 01:59 | Early Morning | 37,4 | 63  | 88,0  | 88,0  | 18,55 | 558,62 | 151,39 |
| 2019/08/14    | CH2276 | Female | Two y/o | Treatment (Wk 3) | Treatment | Fast Day | No | 01:50 | 01:00 - 01:59 | Early Morning | 37,4 | 50  | 111,2 | 111,2 | 18,55 | 539,52 | 159,55 |
| 2019/08/14    | CH2276 | Female | Two y/o | Treatment (Wk 3) | Treatment | Fast Day | No | 01:55 | 01:00 - 01:59 | Early Morning | 37,5 | 152 | 56,2  | 56,2  | 18,65 | 622,73 | 135,83 |
| 2019/08/14    | CH2276 | Female | Two y/o | Treatment (Wk 3) | Treatment | Fast Day | No | 02:00 | 02:00 - 02:59 | Early Morning | 37,5 | 109 | 72,4  | 72,4  | 18,65 | 600,04 | 144,61 |
| 2019/08/14    | CH2276 | Female | Two y/o | Treatment (Wk 3) | Treatment | Fast Day | No | 02:05 | 02:00 - 02:59 | Early Morning | 37,4 | 110 | 32,0  | 32,0  | 18,55 | 600,69 | 116,41 |
| 2019/08/14    | CH2276 | Female | Two y/o | Treatment (Wk 3) | Treatment | Fast Day | No | 02:10 | 02:00 - 02:59 | Early Morning | 37,4 | 77  | 97,8  | 97,8  | 18,55 | 574,39 | 155,07 |
| 2019/08/14    | CH2276 | Female | Two y/o | Treatment (Wk 3) | Treatment | Fast Day | No | 02:15 | 02:00 - 02:59 | Early Morning | 37,4 | 150 | 340,4 | 340,4 | 18,55 | 621,86 | 198,89 |
| 2019/08/14    | CH2276 | Female | Two y/o | Treatment (Wk 3) | Treatment | Fast Day | No | 02:20 | 02:00 - 02:59 | Early Morning | 37,5 |     | 348,4 | 348,4 | 18,65 |        | 199,72 |
| 2019/08/14    | CH2276 | Female | Two y/o | Treatment (Wk 3) | Treatment | Fast Day | No | 02:25 | 02:00 - 02:59 | Early Morning | 37,5 | 87  | 195,8 | 195,8 | 18,65 | 583,64 | 179,37 |
| 2019/08/14    | CH2276 | Female | Two y/o | Treatment (Wk 3) | Treatment | Fast Day | No | 02:30 | 02:00 - 02:59 | Early Morning | 37,6 | 66  | 102,4 | 102,4 | 18,75 | 562,34 | 156,67 |
| 2019/08/14    | CH2276 | Female | Two y/o | Treatment (Wk 3) | Treatment | Fast Day | No | 02:35 | 02:00 - 02:59 | Early Morning | 37,6 | 97  | 155,2 | 155,2 | 18,75 | 591,66 | 171,21 |
| 2019/08/14    | CH2276 | Female | Two y/o | Treatment (Wk 3) | Treatment | Fast Day | No | 02:40 | 02:00 - 02:59 | Early Morning | 37,7 | 132 | 221,2 | 221,2 | 18,85 | 613,32 | 183,67 |
| 2019/08/14    | CH2276 | Female | Two y/o | Treatment (Wk 3) | Treatment | Fast Day | No | 02:45 | 02:00 - 02:59 | Early Morning | 37,7 | 137 | 189,0 | 189,0 | 18,85 | 615,83 | 178,13 |
| 2019/08/14    | CH2276 | Female | Two y/o | Treatment (Wk 3) | Treatment | Fast Day | No | 02:50 | 02:00 - 02:59 | Early Morning | 37,7 | 65  | 332,2 | 332,2 | 18,85 | 561,12 | 198,03 |
| 2019/08/14    | CH2276 | Female | Two y/o | Treatment (Wk 3) | Treatment | Fast Day | No | 02:55 | 02:00 - 02:59 | Early Morning | 37,7 |     | 379,0 | 379,0 | 18,85 |        | 202,70 |
| 2019/08/14    | CH2276 | Female | Two y/o | Treatment (Wk 3) | Treatment | Fast Day | No | 03:00 | 03:00 - 03:59 | Early Morning | 37,7 | 74  | 69,0  | 69,0  | 18,85 | 571,33 | 142,94 |
| 2019/08/14    | CH2276 | Female | Two y/o | Treatment (Wk 3) | Treatment | Fast Day | No | 03:05 | 03:00 - 03:59 | Early Morning | 37,7 | 115 | 148,4 | 148,4 | 18,85 | 603,82 | 169,64 |
| 2019/08/14    | CH2276 | Female | Two y/o | Treatment (Wk 3) | Treatment | Fast Day | No | 03:10 | 03:00 - 03:59 | Early Morning | 37,7 | 74  | 63,2  | 63,2  | 18,85 | 571,33 | 139,89 |
| 2019/08/14    | CH2276 | Female | Two y/o | Treatment (Wk 3) | Treatment | Fast Day | No | 03:15 | 03:00 - 03:59 | Early Morning | 37,7 | 73  | 412,4 | 412,4 | 18,85 | 570,27 | 205,70 |
| 2019/08/14    | CH2276 | Female | Two y/o | Treatment (Wk 3) | Treatment | Fast Day | No | 03:20 | 03:00 - 03:59 | Early Morning | 37,7 | 185 | 92,0  | 92,0  | 18,85 | 635,34 | 152,94 |
| 2019/08/14    | CH2276 | Female | Two y/o | Treatment (Wk 3) | Treatment | Fast Day | No | 03:25 | 03:00 - 03:59 | Early Morning | 37,7 |     | 53,4  | 53,4  | 18,85 |        | 134,06 |
| 2019/08/14    | CH2276 | Female | Two y/o | Treatment (Wk 3) | Treatment | Fast Day | No | 03:30 | 03:00 - 03:59 | Early Morning | 37,7 |     | 243,0 | 243,0 | 18,85 |        | 186,98 |
| 2019/08/14    | CH2276 | Female | Two y/o | Treatment (Wk 3) | Treatment | Fast Day | No | 03:35 | 03:00 - 03:59 | Early Morning | 37,7 | 60  | 113,0 | 113,0 | 18,85 | 554,67 | 160,11 |
| 2019/08/14    | CH2276 | Female | Two y/o | Treatment (Wk 3) | Treatment | Fast Day | No | 03:40 | 03:00 - 03:59 | Early Morning | 37,7 |     | 501,8 | 501,8 | 18,85 |        | 212,67 |
| 2019/08/14    | CH2276 | Female | Two y/o | Treatment (Wk 3) | Treatment | Fast Day | No | 03:45 | 03:00 - 03:59 | Early Morning | 37,7 |     | 130,4 | 130,4 | 18,85 |        | 165,11 |
| 2019/08/14    | CH2276 | Female | Two y/o | Treatment (Wk 3) | Treatment | Fast Day | No | 03:50 | 03:00 - 03:59 | Early Morning | 37,7 | 121 | 125,8 | 125,8 | 18,85 | 607,35 | 163,86 |
| 2019/08/14    | CH2276 | Female | Two y/o | Treatment (Wk 3) | Treatment | Fast Day | No | 03:55 | 03:00 - 03:59 | Early Morning | 37,7 | 65  | 78,0  | 78,0  | 18,85 | 561,12 | 147,20 |
| 2019/08/14    | CH2276 | Female | Two y/o | Treatment (Wk 3) | Treatment | Fast Day | No | 04:00 | 04:00 - 04:59 | Morning       | 37,6 |     | 13,8  | 13,8  | 18,75 |        | 87,68  |
| 2019/08/14    | CH2276 | Female | Two y/o | Treatment (Wk 3) | Treatment | Fast Day | No | 04:05 | 04:00 - 04:59 | Morning       | 37,6 | 84  | 4,8   | 4,8   | 18,75 | 581,01 | 52,04  |
| 2019/08/14    | CH2276 | Female | Two y/o | Treatment (Wk 3) | Treatment | Fast Day | No | 04:10 | 04:00 - 04:59 | Morning       | 37,7 | 80  | 8,4   | 8,4   | 18,85 | 577,31 | 70,86  |
| 2019/08/14    | CH2276 | Female | Two y/o | Treatment (Wk 3) | Treatment | Fast Day | No | 04:15 | 04:00 - 04:59 | Morning       | 37,7 | 61  | 5,6   | 5,6   | 18,85 | 556,01 | 57,21  |
| 2019/08/14    | CH2276 | Female | Two y/o | Treatment (Wk 3) | Treatment | Fast Day | No | 04:20 | 04:00 - 04:59 | Morning       | 37,7 | 60  | 10,6  | 10,6  | 18,85 | 554,67 | 78,73  |



|            |        |        |         |                  |           |          |    |       |               |              |      |     |       |       |       |        |        |
|------------|--------|--------|---------|------------------|-----------|----------|----|-------|---------------|--------------|------|-----|-------|-------|-------|--------|--------|
| 2019/08/14 | CH2276 | Female | Two y/o | Treatment (Wk 3) | Treatment | Fast Day | No | 04:25 | 04:00 - 04:59 | Morning      | 37,7 | 66  | 5,4   | 5,4   | 18,85 | 562,34 | 55,99  |
| 2019/08/14 | CH2276 | Female | Two y/o | Treatment (Wk 3) | Treatment | Fast Day | No | 04:30 | 04:00 - 04:59 | Morning      | 37,7 | 91  | 14,0  | 14,0  | 18,85 | 586,98 | 88,17  |
| 2019/08/14 | CH2276 | Female | Two y/o | Treatment (Wk 3) | Treatment | Fast Day | No | 04:35 | 04:00 - 04:59 | Morning      | 37,5 | 61  | 13,2  | 13,2  | 18,65 | 556,01 | 86,17  |
| 2019/08/14 | CH2276 | Female | Two y/o | Treatment (Wk 3) | Treatment | Fast Day | No | 04:40 | 04:00 - 04:59 | Morning      | 37,5 | 62  | 14,2  | 14,2  | 18,65 | 557,33 | 88,65  |
| 2019/08/14 | CH2276 | Female | Two y/o | Treatment (Wk 3) | Treatment | Fast Day | No | 04:45 | 04:00 - 04:59 | Morning      | 37,4 | 59  | 16,6  | 16,6  | 18,55 | 553,30 | 93,96  |
| 2019/08/14 | CH2276 | Female | Two y/o | Treatment (Wk 3) | Treatment | Fast Day | No | 04:50 | 04:00 - 04:59 | Morning      | 37,3 | 61  | 20,4  | 20,4  | 18,46 | 556,01 | 100,99 |
| 2019/08/14 | CH2276 | Female | Two y/o | Treatment (Wk 3) | Treatment | Fast Day | No | 04:55 | 04:00 - 04:59 | Morning      | 37,3 | 60  | 5,8   | 5,8   | 18,46 | 554,67 | 58,39  |
| 2019/08/14 | CH2276 | Female | Two y/o | Treatment (Wk 3) | Treatment | Fast Day | No | 05:00 | 05:00 - 05:59 | Morning      | 37,3 | 88  | 9,0   | 9,0   | 18,46 | 584,49 | 73,19  |
| 2019/08/14 | CH2276 | Female | Two y/o | Treatment (Wk 3) | Treatment | Fast Day | No | 05:05 | 05:00 - 05:59 | Morning      | 37,3 | 92  | 8,2   | 8,2   | 18,46 | 587,78 | 70,05  |
| 2019/08/14 | CH2276 | Female | Two y/o | Treatment (Wk 3) | Treatment | Fast Day | No | 05:10 | 05:00 - 05:59 | Morning      | 37,3 | 64  | 19,2  | 19,2  | 18,46 | 559,88 | 98,92  |
| 2019/08/14 | CH2276 | Female | Two y/o | Treatment (Wk 3) | Treatment | Fast Day | No | 05:15 | 05:00 - 05:59 | Morning      | 37,0 | 63  | 199,4 | 199,4 | 18,16 | 558,62 | 180,01 |
| 2019/08/14 | CH2276 | Female | Two y/o | Treatment (Wk 3) | Treatment | Fast Day | No | 05:20 | 05:00 - 05:59 | Morning      | 37,3 | 132 | 74,2  | 74,2  | 18,46 | 613,32 | 145,46 |
| 2019/08/14 | CH2276 | Female | Two y/o | Treatment (Wk 3) | Treatment | Fast Day | No | 05:25 | 05:00 - 05:59 | Morning      | 37,3 | 58  | 707,0 | 707,0 | 18,46 | 551,90 | 224,91 |
| 2019/08/14 | CH2276 | Female | Two y/o | Treatment (Wk 3) | Treatment | Fast Day | No | 05:30 | 05:00 - 05:59 | Morning      | 37,3 |     | 104,0 | 104,0 | 18,46 |        | 157,21 |
| 2019/08/14 | CH2276 | Female | Two y/o | Treatment (Wk 3) | Treatment | Fast Day | No | 05:35 | 05:00 - 05:59 | Morning      | 37,3 | 58  | 218,0 | 218,0 | 18,46 | 551,90 | 183,15 |
| 2019/08/14 | CH2276 | Female | Two y/o | Treatment (Wk 3) | Treatment | Fast Day | No | 05:40 | 05:00 - 05:59 | Morning      | 37,4 | 105 | 381,8 | 381,8 | 18,55 | 597,38 | 202,96 |
| 2019/08/14 | CH2276 | Female | Two y/o | Treatment (Wk 3) | Treatment | Fast Day | No | 05:45 | 05:00 - 05:59 | Morning      | 37,5 |     | 489,2 | 489,2 | 18,65 |        | 211,77 |
| 2019/08/14 | CH2276 | Female | Two y/o | Treatment (Wk 3) | Treatment | Fast Day | No | 05:50 | 05:00 - 05:59 | Morning      | 37,6 | 61  | 251,2 | 251,2 | 18,75 | 556,01 | 188,15 |
| 2019/08/14 | CH2276 | Female | Two y/o | Treatment (Wk 3) | Treatment | Fast Day | No | 05:55 | 05:00 - 05:59 | Morning      | 37,6 | 80  | 461,4 | 461,4 | 18,75 | 577,31 | 209,69 |
| 2019/08/14 | CH2276 | Female | Two y/o | Treatment (Wk 3) | Treatment | Fast Day | No | 06:00 | 06:00 - 06:59 | Morning      | 37,6 | 112 | 73,8  | 73,8  | 18,75 | 601,96 | 145,27 |
| 2019/08/14 | CH2276 | Female | Two y/o | Treatment (Wk 3) | Treatment | Fast Day | No | 06:05 | 06:00 - 06:59 | Morning      | 37,7 | 115 | 133,0 | 133,0 | 18,85 | 603,82 | 165,80 |
| 2019/08/14 | CH2276 | Female | Two y/o | Treatment (Wk 3) | Treatment | Fast Day | No | 06:10 | 06:00 - 06:59 | Morning      | 37,7 | 39  | 256,6 | 256,6 | 18,85 | 517,82 | 188,90 |
| 2019/08/14 | CH2276 | Female | Two y/o | Treatment (Wk 3) | Treatment | Fast Day | No | 06:15 | 06:00 - 06:59 | Morning      | 37,7 | 62  | 527,2 | 527,2 | 18,85 | 557,33 | 214,43 |
| 2019/08/14 | CH2276 | Female | Two y/o | Treatment (Wk 3) | Treatment | Fast Day | No | 06:20 | 06:00 - 06:59 | Morning      | 37,8 | 52  | 310,4 | 310,4 | 18,95 | 542,83 | 195,63 |
| 2019/08/14 | CH2276 | Female | Two y/o | Treatment (Wk 3) | Treatment | Fast Day | No | 06:25 | 06:00 - 06:59 | Morning      | 37,8 | 102 | 435,6 | 435,6 | 18,95 | 595,30 | 207,64 |
| 2019/08/14 | CH2276 | Female | Two y/o | Treatment (Wk 3) | Treatment | Fast Day | No | 06:30 | 06:00 - 06:59 | Morning      | 37,8 | 121 | 105,4 | 105,4 | 18,95 | 607,35 | 157,68 |
| 2019/08/14 | CH2276 | Female | Two y/o | Treatment (Wk 3) | Treatment | Fast Day | No | 06:35 | 06:00 - 06:59 | Morning      | 37,8 | 64  | 162,2 | 162,2 | 18,95 | 559,88 | 172,76 |
| 2019/08/14 | CH2276 | Female | Two y/o | Treatment (Wk 3) | Treatment | Fast Day | No | 06:40 | 06:00 - 06:59 | Morning      | 37,8 | 97  | 4,0   | 4,0   | 18,95 | 591,66 | 45,94  |
| 2019/08/14 | CH2276 | Female | Two y/o | Treatment (Wk 3) | Treatment | Fast Day | No | 06:45 | 06:00 - 06:59 | Morning      | 37,5 | 61  | 26,6  | 26,6  | 18,65 | 556,01 | 110,07 |
| 2019/08/14 | CH2276 | Female | Two y/o | Treatment (Wk 3) | Treatment | Fast Day | No | 06:50 | 06:00 - 06:59 | Morning      | 37,4 | 73  | 416,6 | 416,6 | 18,55 | 570,27 | 206,06 |
| 2019/08/14 | CH2276 | Female | Two y/o | Treatment (Wk 3) | Treatment | Fast Day | No | 06:55 | 06:00 - 06:59 | Morning      | 37,4 | 69  | 297,8 | 297,8 | 18,55 | 565,86 | 194,16 |
| 2019/08/14 | CH2276 | Female | Two y/o | Treatment (Wk 3) | Treatment | Fast Day | No | 07:00 | 07:00 - 07:59 | Morning      | 37,4 |     | 883,0 |       | 18,55 |        |        |
| 2019/08/14 | CH2276 | Female | Two y/o | Treatment (Wk 3) | Treatment | Fast Day | No | 07:05 | 07:00 - 07:59 | Morning      | 37,8 | 121 | 22,8  | 22,8  | 18,95 | 607,35 | 104,79 |
| 2019/08/14 | CH2276 | Female | Two y/o | Treatment (Wk 3) | Treatment | Fast Day | No | 07:10 | 07:00 - 07:59 | Morning      | 37,8 | 111 | 67,6  | 67,6  | 18,95 | 601,33 | 142,23 |
| 2019/08/14 | CH2276 | Female | Two y/o | Treatment (Wk 3) | Treatment | Fast Day | No | 07:15 | 07:00 - 07:59 | Morning      | 37,6 | 44  | 81,6  | 81,6  | 18,75 | 528,51 | 148,76 |
| 2019/08/14 | CH2276 | Female | Two y/o | Treatment (Wk 3) | Treatment | Fast Day | No | 07:20 | 07:00 - 07:59 | Morning      | 37,6 | 194 | 150,2 | 150,2 | 18,75 | 638,30 | 170,06 |
| 2019/08/14 | CH2276 | Female | Two y/o | Treatment (Wk 3) | Treatment | Fast Day | No | 07:25 | 07:00 - 07:59 | Morning      | 37,6 | 112 | 112,6 | 112,6 | 18,75 | 601,96 | 159,98 |
| 2019/08/14 | CH2276 | Female | Two y/o | Treatment (Wk 3) | Treatment | Fast Day | No | 07:30 | 07:00 - 07:59 | Morning      | 37,7 |     | 108,2 | 108,2 | 18,85 |        | 158,59 |
| 2019/08/14 | CH2276 | Female | Two y/o | Treatment (Wk 3) | Treatment | Fast Day | No | 07:35 | 07:00 - 07:59 | Morning      | 37,7 | 99  | 69,4  | 69,4  | 18,85 | 593,14 | 143,14 |
| 2019/08/14 | CH2276 | Female | Two y/o | Treatment (Wk 3) | Treatment | Fast Day | No | 07:40 | 07:00 - 07:59 | Morning      | 37,7 | 68  | 71,8  | 71,8  | 18,85 | 564,71 | 144,32 |
| 2019/08/14 | CH2276 | Female | Two y/o | Treatment (Wk 3) | Treatment | Fast Day | No | 07:45 | 07:00 - 07:59 | Morning      | 37,7 | 83  | 300,0 | 300,0 | 18,85 | 580,11 | 194,42 |
| 2019/08/14 | CH2276 | Female | Two y/o | Treatment (Wk 3) | Treatment | Fast Day | No | 07:50 | 07:00 - 07:59 | Morning      | 37,7 | 67  | 63,4  | 63,4  | 18,85 | 563,53 | 140,00 |
| 2019/08/14 | CH2276 | Female | Two y/o | Treatment (Wk 3) | Treatment | Fast Day | No | 07:55 | 07:00 - 07:59 | Morning      | 37,6 | 63  | 63,2  | 63,2  | 18,75 | 558,62 | 139,89 |
| 2019/08/14 | CH2276 | Female | Two y/o | Treatment (Wk 3) | Treatment | Fast Day | No | 08:00 | 08:00 - 08:59 | Late Morning | 37,6 | 62  | 61,4  | 61,4  | 18,75 | 557,33 | 138,89 |
| 2019/08/14 | CH2276 | Female | Two y/o | Treatment (Wk 3) | Treatment | Fast Day | No | 08:05 | 08:00 - 08:59 | Late Morning | 37,6 | 62  | 43,8  | 43,8  | 18,75 | 557,33 | 127,22 |
| 2019/08/14 | CH2276 | Female | Two y/o | Treatment (Wk 3) | Treatment | Fast Day | No | 08:10 | 08:00 - 08:59 | Late Morning | 37,6 |     | 112,0 | 112,0 | 18,75 |        | 159,80 |
| 2019/08/14 | CH2276 | Female | Two y/o | Treatment (Wk 3) | Treatment | Fast Day | No | 08:15 | 08:00 - 08:59 | Late Morning | 37,5 |     | 145,4 | 145,4 | 18,65 |        | 168,93 |
| 2019/08/14 | CH2276 | Female | Two y/o | Treatment (Wk 3) | Treatment | Fast Day | No | 08:20 | 08:00 - 08:59 | Late Morning | 37,4 |     | 360,4 | 360,4 | 18,55 |        | 200,92 |
| 2019/08/14 | CH2276 | Female | Two y/o | Treatment (Wk 3) | Treatment | Fast Day | No | 08:25 | 08:00 - 08:59 | Late Morning | 37,5 |     | 350,2 | 350,2 | 18,65 |        | 199,90 |
| 2019/08/14 | CH2276 | Female | Two y/o | Treatment (Wk 3) | Treatment | Fast Day | No | 08:30 | 08:00 - 08:59 | Late Morning | 37,5 | 102 | 58,2  | 58,2  | 18,65 | 595,30 | 137,04 |
| 2019/08/14 | CH2276 | Female | Two y/o | Treatment (Wk 3) | Treatment | Fast Day | No | 08:35 | 08:00 - 08:59 | Late Morning | 37,5 | 104 | 187,4 | 187,4 | 18,65 | 596,69 | 177,83 |
| 2019/08/14 | CH2276 | Female | Two y/o | Treatment (Wk 3) | Treatment | Fast Day | No | 08:40 | 08:00 - 08:59 | Late Morning | 37,5 | 87  | 135,2 | 135,2 | 18,65 | 583,64 | 166,38 |
| 2019/08/14 | CH2276 | Female | Two y/o | Treatment (Wk 3) | Treatment | Fast Day | No | 08:45 | 08:00 - 08:59 | Late Morning | 37,5 |     | 89,8  | 89,8  | 18,65 |        | 152,10 |
| 2019/08/14 | CH2276 | Female | Two y/o | Treatment (Wk 3) | Treatment | Fast Day | No | 08:50 | 08:00 - 08:59 | Late Morning | 37,6 |     | 46,4  | 46,4  | 18,75 |        | 129,21 |
| 2019/08/14 | CH2276 | Female | Two y/o | Treatment (Wk 3) | Treatment | Fast Day | No | 08:55 | 08:00 - 08:59 | Late Morning | 37,6 | 113 | 105,6 | 105,6 | 18,75 | 602,58 | 157,74 |
| 2019/08/14 | CH2276 | Female | Two y/o | Treatment (Wk 3) | Treatment | Fast Day | No | 09:00 | 09:00 - 09:59 | Late Morning | 37,5 | 58  | 201,2 | 201,2 | 18,65 | 551,90 | 180,33 |
| 2019/08/14 | CH2276 | Female | Two y/o | Treatment (Wk 3) | Treatment | Fast Day | No | 09:05 | 09:00 - 09:59 | Late Morning | 37,5 |     | 118,0 | 118,0 | 18,65 |        | 161,62 |
| 2019/08/14 | CH2276 | Female | Two y/o | Treatment (Wk 3) | Treatment | Fast Day | No | 09:10 | 09:00 - 09:59 | Late Morning | 37,5 |     | 144,2 | 144,2 | 18,65 |        | 168,64 |
| 2019/08/14 | CH2276 | Female | Two y/o | Treatment (Wk 3) | Treatment | Fast Day | No | 09:15 | 09:00 - 09:59 | Late Morning | 37,5 |     | 173,4 | 173,4 | 18,65 |        | 603,20 |
| 2019/08/14 | CH2276 | Female | Two y/o | Treatment (Wk 3) | Treatment | Fast Day | No | 09:20 | 09:00 - 09:59 | Late Morning | 37,6 | 123 | 346,6 | 346,6 | 18,75 | 608,49 | 199,53 |
| 2019/08/14 | CH2276 | Female | Two y/o | Treatment (Wk 3) | Treatment | Fast Day | No | 09:25 | 09:00 - 09:59 | Late Morning | 37,6 | 94  | 170,2 | 170,2 | 18,75 | 589,37 | 174,45 |
| 2019/08/14 | CH2276 | Female | Two y/o | Treatment (Wk 3) | Treatment | Fast Day | No | 09:30 | 09:00 - 09:59 | Late Morning | 37,7 | 180 | 134,0 | 134,0 | 18,85 | 633,61 | 166,07 |
| 2019/08/14 | CH2276 | Female | Two y/o | Treatment (Wk 3) | Treatment | Fast Day | No | 09:35 | 09:00 - 09:59 | Late Morning | 37,8 | 82  | 356,8 | 356,8 | 18,95 | 579,19 | 200,56 |
| 2019/08/14 | CH2276 | Female | Two y/o | Treatment (Wk 3) | Treatment | Fast Day | No | 09:40 | 09:00 - 09:59 | Late Morning | 37,7 | 58  | 130,8 | 130,8 | 18,85 | 551,90 | 165,22 |
| 2019/08/14 | CH2276 | Female | Two y/o | Treatment (Wk 3) | Treatment | Fast Day | No | 09:45 | 09:00 - 09:59 | Late Morning | 37,7 | 117 | 512,2 | 512,2 | 18,85 | 605,02 | 213,40 |
| 2019/08/14 | CH2276 | Female | Two y/o | Treatment (Wk 3) | Treatment | Fast Day | No | 09:50 | 09:00 - 09:59 | Late Morning | 37,7 | 132 | 248,8 | 248,8 | 18,85 | 613,32 | 187,81 |
| 2019/08/14 | CH2276 | Female | Two y/o | Treatment (Wk 3) | Treatment | Fast Day | No | 09:55 | 09:00 - 09:59 | Late Morning | 37,7 | 98  | 111,4 | 111,4 | 18,85 | 592,41 | 159,61 |
| 2019/08/14 | CH2276 | Female | Two y/o | Treatment (Wk 3) | Treatment | Fast Day | No | 10:00 | 10:00 - 10:59 | Late Morning | 37,8 | 60  | 250,2 | 250,2 | 18,95 | 554,67 | 188,01 |
| 2019/08/14 | CH2276 | Female | Two y/o | Treatment (Wk 3) | Treatment | Fast Day | No | 10:05 | 10:00 - 10:59 | Late Morning | 37,8 |     | 258,6 | 258,6 | 18,95 |        | 189,17 |
| 2019/08/14 | CH2276 | Female | Two y/o | Treatment (Wk 3) | Treatment | Fast Day | No | 10:10 | 10:00 - 10:59 | Late Morning | 37,8 |     | 118,8 | 118,8 | 18,95 |        | 161,86 |



|            |        |        |         |                  |           |          |    |       |               |              |      |     |       |       |       |        |        |
|------------|--------|--------|---------|------------------|-----------|----------|----|-------|---------------|--------------|------|-----|-------|-------|-------|--------|--------|
| 2019/08/14 | CH2276 | Female | Two y/o | Treatment (Wk 3) | Treatment | Fast Day | No | 10:15 | 10:00 - 10:59 | Late Morning | 37,8 | 73  | 47,0  | 47,0  | 18,95 | 570,27 | 129,65 |
| 2019/08/14 | CH2276 | Female | Two y/o | Treatment (Wk 3) | Treatment | Fast Day | No | 10:20 | 10:00 - 10:59 | Late Morning | 37,7 | 69  | 51,2  | 51,2  | 18,85 | 565,86 | 132,61 |
| 2019/08/14 | CH2276 | Female | Two y/o | Treatment (Wk 3) | Treatment | Fast Day | No | 10:25 | 10:00 - 10:59 | Late Morning | 37,8 | 67  | 75,2  | 75,2  | 18,95 | 563,53 | 145,93 |
| 2019/08/14 | CH2276 | Female | Two y/o | Treatment (Wk 3) | Treatment | Fast Day | No | 10:30 | 10:00 - 10:59 | Late Morning | 37,8 | 67  | 75,8  | 75,8  | 18,95 | 563,53 | 146,20 |
| 2019/08/14 | CH2276 | Female | Two y/o | Treatment (Wk 3) | Treatment | Fast Day | No | 10:35 | 10:00 - 10:59 | Late Morning | 37,9 | 65  | 80,4  | 80,4  | 19,05 | 561,12 | 148,25 |
| 2019/08/14 | CH2276 | Female | Two y/o | Treatment (Wk 3) | Treatment | Fast Day | No | 10:40 | 10:00 - 10:59 | Late Morning | 38,0 | 64  | 77,2  | 77,2  | 19,15 | 559,88 | 146,84 |
| 2019/08/14 | CH2276 | Female | Two y/o | Treatment (Wk 3) | Treatment | Fast Day | No | 10:45 | 10:00 - 10:59 | Late Morning | 38,0 | 72  | 38,4  | 38,4  | 19,15 | 569,20 | 122,68 |
| 2019/08/14 | CH2276 | Female | Two y/o | Treatment (Wk 3) | Treatment | Fast Day | No | 10:50 | 10:00 - 10:59 | Late Morning | 38,0 | 61  | 247,0 | 247,0 | 19,15 | 556,01 | 187,55 |
| 2019/08/14 | CH2276 | Female | Two y/o | Treatment (Wk 3) | Treatment | Fast Day | No | 10:55 | 10:00 - 10:59 | Late Morning | 38,2 | 113 | 107,8 | 107,8 | 19,36 | 602,58 | 158,46 |
| 2019/08/14 | CH2276 | Female | Two y/o | Treatment (Wk 3) | Treatment | Fast Day | No | 11:00 | 11:00 - 11:59 | Late Morning | 38,2 | 98  | 32,0  | 32,0  | 19,36 | 592,41 | 116,41 |
| 2019/08/14 | CH2276 | Female | Two y/o | Treatment (Wk 3) | Treatment | Fast Day | No | 11:05 | 11:00 - 11:59 | Late Morning | 38,2 | 96  | 26,0  | 26,0  | 19,36 | 590,91 | 109,29 |
| 2019/08/14 | CH2276 | Female | Two y/o | Treatment (Wk 3) | Treatment | Fast Day | No | 11:10 | 11:00 - 11:59 | Late Morning | 38,2 | 89  | 18,4  | 18,4  | 19,36 | 585,33 | 97,47  |
| 2019/08/14 | CH2276 | Female | Two y/o | Treatment (Wk 3) | Treatment | Fast Day | No | 11:15 | 11:00 - 11:59 | Late Morning | 38,2 | 113 | 210,6 | 210,6 | 19,36 | 602,58 | 181,94 |
| 2019/08/14 | CH2276 | Female | Two y/o | Treatment (Wk 3) | Treatment | Fast Day | No | 11:20 | 11:00 - 11:59 | Late Morning | 38,2 | 80  | 20,2  | 20,2  | 19,36 | 577,31 | 100,65 |
| 2019/08/14 | CH2276 | Female | Two y/o | Treatment (Wk 3) | Treatment | Fast Day | No | 11:25 | 11:00 - 11:59 | Late Morning | 38,2 | 110 | 66,0  | 66,0  | 19,36 | 600,69 | 141,40 |
| 2019/08/14 | CH2276 | Female | Two y/o | Treatment (Wk 3) | Treatment | Fast Day | No | 11:30 | 11:00 - 11:59 | Late Morning | 38,1 | 83  | 74,0  | 74,0  | 19,26 | 580,11 | 145,37 |
| 2019/08/14 | CH2276 | Female | Two y/o | Treatment (Wk 3) | Treatment | Fast Day | No | 11:35 | 11:00 - 11:59 | Late Morning | 38,0 | 34  | 45,8  | 45,8  | 19,15 | 505,29 | 128,76 |
| 2019/08/14 | CH2276 | Female | Two y/o | Treatment (Wk 3) | Treatment | Fast Day | No | 11:40 | 11:00 - 11:59 | Late Morning | 38,0 | 67  | 11,0  | 11,0  | 19,15 | 563,53 | 79,98  |
| 2019/08/14 | CH2276 | Female | Two y/o | Treatment (Wk 3) | Treatment | Fast Day | No | 11:45 | 11:00 - 11:59 | Late Morning | 38,0 | 60  | 8,8   | 8,8   | 19,15 | 554,67 | 72,43  |
| 2019/08/14 | CH2276 | Female | Two y/o | Treatment (Wk 3) | Treatment | Fast Day | No | 11:50 | 11:00 - 11:59 | Late Morning | 38,0 | 67  | 13,0  | 13,0  | 19,15 | 563,53 | 85,65  |
| 2019/08/14 | CH2276 | Female | Two y/o | Treatment (Wk 3) | Treatment | Fast Day | No | 11:55 | 11:00 - 11:59 | Late Morning | 38,2 | 79  | 45,6  | 45,6  | 19,36 | 576,36 | 128,61 |
| 2019/08/14 | CH2276 | Female | Two y/o | Treatment (Wk 3) | Treatment | Fast Day | No | 12:00 | 12:00 - 12:59 | Afternoon    | 38,2 | 101 | 18,8  | 18,8  | 19,36 | 594,59 | 98,20  |
| 2019/08/14 | CH2276 | Female | Two y/o | Treatment (Wk 3) | Treatment | Fast Day | No | 12:05 | 12:00 - 12:59 | Afternoon    | 38,3 | 63  | 15,0  | 15,0  | 19,46 | 558,62 | 90,51  |
| 2019/08/14 | CH2276 | Female | Two y/o | Treatment (Wk 3) | Treatment | Fast Day | No | 12:10 | 12:00 - 12:59 | Afternoon    | 38,2 | 64  | 9,4   | 9,4   | 19,36 | 559,88 | 74,66  |
| 2019/08/14 | CH2276 | Female | Two y/o | Treatment (Wk 3) | Treatment | Fast Day | No | 12:15 | 12:00 - 12:59 | Afternoon    | 38,2 | 67  | 9,4   | 9,4   | 19,36 | 563,53 | 74,66  |
| 2019/08/14 | CH2276 | Female | Two y/o | Treatment (Wk 3) | Treatment | Fast Day | No | 12:20 | 12:00 - 12:59 | Afternoon    | 38,2 |     | 7,0   | 7,0   | 19,36 |        | 64,72  |
| 2019/08/14 | CH2276 | Female | Two y/o | Treatment (Wk 3) | Treatment | Fast Day | No | 12:25 | 12:00 - 12:59 | Afternoon    | 38,0 | 61  | 7,8   | 7,8   | 19,15 | 556,01 | 68,36  |
| 2019/08/14 | CH2276 | Female | Two y/o | Treatment (Wk 3) | Treatment | Fast Day | No | 12:30 | 12:00 - 12:59 | Afternoon    | 38,0 | 59  | 8,8   | 8,8   | 19,15 | 553,30 | 72,43  |
| 2019/08/14 | CH2276 | Female | Two y/o | Treatment (Wk 3) | Treatment | Fast Day | No | 12:35 | 12:00 - 12:59 | Afternoon    | 38,0 | 60  | 14,2  | 14,2  | 19,15 | 554,67 | 88,65  |
| 2019/08/14 | CH2276 | Female | Two y/o | Treatment (Wk 3) | Treatment | Fast Day | No | 12:40 | 12:00 - 12:59 | Afternoon    | 38,0 | 63  | 13,4  | 13,4  | 19,15 | 558,62 | 86,68  |
| 2019/08/14 | CH2276 | Female | Two y/o | Treatment (Wk 3) | Treatment | Fast Day | No | 12:45 | 12:00 - 12:59 | Afternoon    | 38,0 | 60  | 13,8  | 13,8  | 19,15 | 554,67 | 87,68  |
| 2019/08/14 | CH2276 | Female | Two y/o | Treatment (Wk 3) | Treatment | Fast Day | No | 12:50 | 12:00 - 12:59 | Afternoon    | 37,9 | 62  | 15,6  | 15,6  | 19,05 | 557,33 | 91,85  |
| 2019/08/14 | CH2276 | Female | Two y/o | Treatment (Wk 3) | Treatment | Fast Day | No | 12:55 | 12:00 - 12:59 | Afternoon    | 37,9 | 63  | 16,4  | 16,4  | 19,05 | 558,62 | 93,55  |
| 2019/08/14 | CH2276 | Female | Two y/o | Treatment (Wk 3) | Treatment | Fast Day | No | 13:00 | 13:00 - 13:59 | Afternoon    | 37,9 | 60  | 16,2  | 16,2  | 19,05 | 554,67 | 93,13  |
| 2019/08/14 | CH2276 | Female | Two y/o | Treatment (Wk 3) | Treatment | Fast Day | No | 13:05 | 13:00 - 13:59 | Afternoon    | 37,8 | 79  | 18,8  | 18,8  | 18,95 | 576,36 | 98,20  |
| 2019/08/14 | CH2276 | Female | Two y/o | Treatment (Wk 3) | Treatment | Fast Day | No | 13:10 | 13:00 - 13:59 | Afternoon    | 37,8 | 59  | 15,0  | 15,0  | 18,95 | 553,30 | 90,51  |
| 2019/08/14 | CH2276 | Female | Two y/o | Treatment (Wk 3) | Treatment | Fast Day | No | 13:15 | 13:00 - 13:59 | Afternoon    | 37,8 | 90  | 12,0  | 12,0  | 18,95 | 586,16 | 82,93  |
| 2019/08/14 | CH2276 | Female | Two y/o | Treatment (Wk 3) | Treatment | Fast Day | No | 13:20 | 13:00 - 13:59 | Afternoon    | 37,8 | 61  | 40,2  | 40,2  | 18,95 | 556,01 | 124,26 |
| 2019/08/14 | CH2276 | Female | Two y/o | Treatment (Wk 3) | Treatment | Fast Day | No | 13:25 | 13:00 - 13:59 | Afternoon    | 37,8 | 61  | 90,8  | 90,8  | 18,95 | 556,01 | 152,48 |
| 2019/08/14 | CH2276 | Female | Two y/o | Treatment (Wk 3) | Treatment | Fast Day | No | 13:30 | 13:00 - 13:59 | Afternoon    | 37,7 | 56  | 88,0  | 88,0  | 18,85 | 549,01 | 151,39 |
| 2019/08/14 | CH2276 | Female | Two y/o | Treatment (Wk 3) | Treatment | Fast Day | No | 13:35 | 13:00 - 13:59 | Afternoon    | 37,7 | 62  | 37,8  | 37,8  | 18,85 | 557,33 | 122,14 |
| 2019/08/14 | CH2276 | Female | Two y/o | Treatment (Wk 3) | Treatment | Fast Day | No | 13:40 | 13:00 - 13:59 | Afternoon    | 37,6 | 64  | 31,2  | 31,2  | 18,75 | 559,88 | 115,54 |
| 2019/08/14 | CH2276 | Female | Two y/o | Treatment (Wk 3) | Treatment | Fast Day | No | 13:45 | 13:00 - 13:59 | Afternoon    | 37,6 | 63  | 71,6  | 71,6  | 18,75 | 558,62 | 144,22 |
| 2019/08/14 | CH2276 | Female | Two y/o | Treatment (Wk 3) | Treatment | Fast Day | No | 13:50 | 13:00 - 13:59 | Afternoon    | 37,6 | 58  | 34,6  | 34,6  | 18,75 | 551,90 | 119,10 |
| 2019/08/14 | CH2276 | Female | Two y/o | Treatment (Wk 3) | Treatment | Fast Day | No | 13:55 | 13:00 - 13:59 | Afternoon    | 37,6 | 60  | 13,6  | 13,6  | 18,75 | 554,67 | 87,18  |
| 2019/08/14 | CH2276 | Female | Two y/o | Treatment (Wk 3) | Treatment | Fast Day | No | 14:00 | 14:00 - 14:59 | Afternoon    | 37,6 | 63  | 12,4  | 12,4  | 18,75 | 558,62 | 84,04  |
| 2019/08/14 | CH2276 | Female | Two y/o | Treatment (Wk 3) | Treatment | Fast Day | No | 14:05 | 14:00 - 14:59 | Afternoon    | 37,6 | 91  | 15,4  | 15,4  | 18,75 | 586,98 | 91,41  |
| 2019/08/14 | CH2276 | Female | Two y/o | Treatment (Wk 3) | Treatment | Fast Day | No | 14:10 | 14:00 - 14:59 | Afternoon    | 37,6 | 63  | 37,8  | 37,8  | 18,75 | 558,62 | 122,14 |
| 2019/08/14 | CH2276 | Female | Two y/o | Treatment (Wk 3) | Treatment | Fast Day | No | 14:15 | 14:00 - 14:59 | Afternoon    | 37,6 |     | 26,0  | 26,0  | 18,75 |        | 109,29 |
| 2019/08/14 | CH2276 | Female | Two y/o | Treatment (Wk 3) | Treatment | Fast Day | No | 14:20 | 14:00 - 14:59 | Afternoon    | 37,6 | 86  | 20,8  | 20,8  | 18,75 | 582,77 | 101,65 |
| 2019/08/14 | CH2276 | Female | Two y/o | Treatment (Wk 3) | Treatment | Fast Day | No | 14:25 | 14:00 - 14:59 | Afternoon    | 37,6 | 63  | 34,2  | 34,2  | 18,75 | 558,62 | 118,70 |
| 2019/08/14 | CH2276 | Female | Two y/o | Treatment (Wk 3) | Treatment | Fast Day | No | 14:30 | 14:00 - 14:59 | Afternoon    | 37,6 |     | 11,4  | 11,4  | 18,75 |        | 81,19  |
| 2019/08/14 | CH2276 | Female | Two y/o | Treatment (Wk 3) | Treatment | Fast Day | No | 14:35 | 14:00 - 14:59 | Afternoon    | 37,4 | 63  | 6,8   | 6,8   | 18,55 | 558,62 | 63,74  |
| 2019/08/14 | CH2276 | Female | Two y/o | Treatment (Wk 3) | Treatment | Fast Day | No | 14:40 | 14:00 - 14:59 | Afternoon    | 37,4 | 55  | 9,4   | 9,4   | 18,55 | 547,52 | 74,66  |
| 2019/08/14 | CH2276 | Female | Two y/o | Treatment (Wk 3) | Treatment | Fast Day | No | 14:45 | 14:00 - 14:59 | Afternoon    | 37,3 | 59  | 5,4   | 5,4   | 18,46 | 553,30 | 55,99  |
| 2019/08/14 | CH2276 | Female | Two y/o | Treatment (Wk 3) | Treatment | Fast Day | No | 14:50 | 14:00 - 14:59 | Afternoon    | 37,3 | 52  | 7,4   | 7,4   | 18,46 | 542,83 | 66,59  |
| 2019/08/14 | CH2276 | Female | Two y/o | Treatment (Wk 3) | Treatment | Fast Day | No | 14:55 | 14:00 - 14:59 | Afternoon    | 37,1 | 58  | 7,0   | 7,0   | 18,26 | 551,90 | 64,72  |
| 2019/08/14 | CH2276 | Female | Two y/o | Treatment (Wk 3) | Treatment | Fast Day | No | 15:00 | 15:00 - 15:59 | Afternoon    | 37,1 | 57  | 83,0  | 83,0  | 18,26 | 550,47 | 149,36 |
| 2019/08/14 | CH2276 | Female | Two y/o | Treatment (Wk 3) | Treatment | Fast Day | No | 15:05 | 15:00 - 15:59 | Afternoon    | 37,2 | 100 | 50,4  | 50,4  | 18,36 | 593,87 | 132,06 |
| 2019/08/14 | CH2276 | Female | Two y/o | Treatment (Wk 3) | Treatment | Fast Day | No | 15:10 | 15:00 - 15:59 | Afternoon    | 37,3 |     | 32,4  | 32,4  | 18,46 |        | 116,84 |
| 2019/08/14 | CH2276 | Female | Two y/o | Treatment (Wk 3) | Treatment | Fast Day | No | 15:15 | 15:00 - 15:59 | Afternoon    | 37,4 | 33  | 52,8  | 52,8  | 18,55 | 502,51 | 133,67 |
| 2019/08/14 | CH2276 | Female | Two y/o | Treatment (Wk 3) | Treatment | Fast Day | No | 15:20 | 15:00 - 15:59 | Afternoon    | 37,5 | 110 | 138,0 | 138,0 | 18,65 | 600,69 | 167,10 |
| 2019/08/14 | CH2276 | Female | Two y/o | Treatment (Wk 3) | Treatment | Fast Day | No | 15:25 | 15:00 - 15:59 | Afternoon    | 37,6 |     | 65,4  | 65,4  | 18,75 |        | 141,08 |
| 2019/08/14 | CH2276 | Female | Two y/o | Treatment (Wk 3) | Treatment | Fast Day | No | 15:30 | 15:00 - 15:59 | Afternoon    | 37,7 | 52  | 53,6  | 53,6  | 18,85 | 542,83 | 134,19 |
| 2019/08/14 | CH2276 | Female | Two y/o | Treatment (Wk 3) | Treatment | Fast Day | No | 15:35 | 15:00 - 15:59 | Afternoon    | 37,7 | 93  | 134,8 | 134,8 | 18,85 | 588,58 | 166,28 |
| 2019/08/14 | CH2276 | Female | Two y/o | Treatment (Wk 3) | Treatment | Fast Day | No | 15:40 | 15:00 - 15:59 | Afternoon    | 37,7 | 56  | 72,4  | 72,4  | 18,85 | 549,01 | 144,61 |
| 2019/08/14 | CH2276 | Female | Two y/o | Treatment (Wk 3) | Treatment | Fast Day | No | 15:45 | 15:00 - 15:59 | Afternoon    | 37,8 | 62  | 271,2 | 271,2 | 18,95 | 557,33 | 190,85 |
| 2019/08/14 | CH2276 | Female | Two y/o | Treatment (Wk 3) | Treatment | Fast Day | No | 15:50 | 15:00 - 15:59 | Afternoon    | 37,8 |     | 246,4 | 246,4 | 18,95 |        | 187,47 |
| 2019/08/14 | CH2276 | Female | Two y/o | Treatment (Wk 3) | Treatment | Fast Day | No | 15:55 | 15:00 - 15:59 | Afternoon    | 37,9 | 85  | 79,2  | 79,2  | 19,05 | 581,90 | 147,73 |
| 2019/08/14 | CH2276 | Female | Two y/o | Treatment (Wk 3) | Treatment | Fast Day | No | 16:00 | 16:00 - 16:59 | Evening      | 38,0 | 126 | 414,8 | 414,8 | 19,15 | 610,14 | 205,90 |



|            |        |        |         |                  |           |          |    |       |               |         |      |     |       |       |       |        |        |
|------------|--------|--------|---------|------------------|-----------|----------|----|-------|---------------|---------|------|-----|-------|-------|-------|--------|--------|
| 2019/08/14 | CH2276 | Female | Two y/o | Treatment (Wk 3) | Treatment | Fast Day | No | 16:05 | 16:00 - 16:59 | Evening | 38,2 | 86  | 47,6  | 47,6  | 19,36 | 582,77 | 130,09 |
| 2019/08/14 | CH2276 | Female | Two y/o | Treatment (Wk 3) | Treatment | Fast Day | No | 16:10 | 16:00 - 16:59 | Evening | 38,2 | 67  | 19,2  | 19,2  | 19,36 | 563,53 | 98,92  |
| 2019/08/14 | CH2276 | Female | Two y/o | Treatment (Wk 3) | Treatment | Fast Day | No | 16:15 | 16:00 - 16:59 | Evening | 38,2 | 61  | 29,8  | 29,8  | 19,36 | 556,01 | 113,97 |
| 2019/08/14 | CH2276 | Female | Two y/o | Treatment (Wk 3) | Treatment | Fast Day | No | 16:20 | 16:00 - 16:59 | Evening | 38,2 | 50  | 104,8 | 104,8 | 19,36 | 539,52 | 157,48 |
| 2019/08/14 | CH2276 | Female | Two y/o | Treatment (Wk 3) | Treatment | Fast Day | No | 16:25 | 16:00 - 16:59 | Evening | 38,2 |     | 260,4 | 260,4 | 19,36 |        | 189,42 |
| 2019/08/14 | CH2276 | Female | Two y/o | Treatment (Wk 3) | Treatment | Fast Day | No | 16:30 | 16:00 - 16:59 | Evening | 38,2 | 107 | 102,6 | 102,6 | 19,36 | 598,73 | 156,74 |
| 2019/08/14 | CH2276 | Female | Two y/o | Treatment (Wk 3) | Treatment | Fast Day | No | 16:35 | 16:00 - 16:59 | Evening | 38,3 | 111 | 93,0  | 93,0  | 19,46 | 601,33 | 153,31 |
| 2019/08/14 | CH2276 | Female | Two y/o | Treatment (Wk 3) | Treatment | Fast Day | No | 16:40 | 16:00 - 16:59 | Evening | 38,4 |     | 832,2 |       | 19,56 |        |        |
| 2019/08/14 | CH2276 | Female | Two y/o | Treatment (Wk 3) | Treatment | Fast Day | No | 16:45 | 16:00 - 16:59 | Evening | 38,9 | 111 | 156,0 | 156,0 | 20,07 | 601,33 | 171,39 |
| 2019/08/14 | CH2276 | Female | Two y/o | Treatment (Wk 3) | Treatment | Fast Day | No | 16:50 | 16:00 - 16:59 | Evening | 39,0 | 150 | 73,0  | 73,0  | 20,18 | 621,86 | 144,89 |
| 2019/08/14 | CH2276 | Female | Two y/o | Treatment (Wk 3) | Treatment | Fast Day | No | 16:55 | 16:00 - 16:59 | Evening | 38,9 |     | 65,2  | 65,2  | 20,07 |        | 140,97 |
| 2019/08/14 | CH2276 | Female | Two y/o | Treatment (Wk 3) | Treatment | Fast Day | No | 17:00 | 17:00 - 17:59 | Evening | 38,8 | 68  | 79,2  | 79,2  | 19,97 | 564,71 | 147,73 |
| 2019/08/14 | CH2276 | Female | Two y/o | Treatment (Wk 3) | Treatment | Fast Day | No | 17:05 | 17:00 - 17:59 | Evening | 38,7 |     | 50,2  | 50,2  | 19,87 |        | 131,92 |
| 2019/08/14 | CH2276 | Female | Two y/o | Treatment (Wk 3) | Treatment | Fast Day | No | 17:10 | 17:00 - 17:59 | Evening | 38,7 | 81  | 20,0  | 20,0  | 19,87 | 578,26 | 100,31 |
| 2019/08/14 | CH2276 | Female | Two y/o | Treatment (Wk 3) | Treatment | Fast Day | No | 17:15 | 17:00 - 17:59 | Evening | 38,6 |     | 29,2  | 29,2  | 19,76 |        | 113,27 |
| 2019/08/14 | CH2276 | Female | Two y/o | Treatment (Wk 3) | Treatment | Fast Day | No | 17:20 | 17:00 - 17:59 | Evening | 38,5 |     | 24,4  | 24,4  | 19,66 |        | 107,11 |
| 2019/08/14 | CH2276 | Female | Two y/o | Treatment (Wk 3) | Treatment | Fast Day | No | 17:25 | 17:00 - 17:59 | Evening | 38,5 | 60  | 204,0 | 204,0 | 19,66 | 554,67 | 180,82 |
| 2019/08/14 | CH2276 | Female | Two y/o | Treatment (Wk 3) | Treatment | Fast Day | No | 17:30 | 17:00 - 17:59 | Evening | 38,4 | 182 | 108,8 | 108,8 | 19,56 | 634,31 | 158,79 |
| 2019/08/14 | CH2276 | Female | Two y/o | Treatment (Wk 3) | Treatment | Fast Day | No | 17:35 | 17:00 - 17:59 | Evening | 38,4 | 169 | 134,8 | 134,8 | 19,56 | 629,60 | 166,28 |
| 2019/08/14 | CH2276 | Female | Two y/o | Treatment (Wk 3) | Treatment | Fast Day | No | 17:40 | 17:00 - 17:59 | Evening | 38,4 |     | 224,6 | 224,6 | 19,56 |        | 184,20 |
| 2019/08/14 | CH2276 | Female | Two y/o | Treatment (Wk 3) | Treatment | Fast Day | No | 17:45 | 17:00 - 17:59 | Evening | 38,4 | 138 | 475,0 | 475,0 | 19,56 | 616,31 | 210,72 |
| 2019/08/14 | CH2276 | Female | Two y/o | Treatment (Wk 3) | Treatment | Fast Day | No | 17:50 | 17:00 - 17:59 | Evening | 38,4 | 63  | 345,4 | 345,4 | 19,56 | 558,62 | 199,41 |
| 2019/08/14 | CH2276 | Female | Two y/o | Treatment (Wk 3) | Treatment | Fast Day | No | 17:55 | 17:00 - 17:59 | Evening | 38,4 | 113 | 627,6 | 627,6 | 19,56 | 602,58 | 220,65 |
| 2019/08/14 | CH2276 | Female | Two y/o | Treatment (Wk 3) | Treatment | Fast Day | No | 18:00 | 18:00 - 18:59 | Evening | 38,4 | 119 | 108,8 | 108,8 | 19,56 | 606,20 | 158,79 |
| 2019/08/14 | CH2276 | Female | Two y/o | Treatment (Wk 3) | Treatment | Fast Day | No | 18:05 | 18:00 - 18:59 | Evening | 38,5 | 89  | 120,6 | 120,6 | 19,66 | 585,33 | 162,38 |
| 2019/08/14 | CH2276 | Female | Two y/o | Treatment (Wk 3) | Treatment | Fast Day | No | 18:10 | 18:00 - 18:59 | Evening | 38,5 |     | 241,6 | 241,6 | 19,66 |        | 186,77 |
| 2019/08/14 | CH2276 | Female | Two y/o | Treatment (Wk 3) | Treatment | Fast Day | No | 18:15 | 18:00 - 18:59 | Evening | 38,5 |     | 296,0 | 296,0 | 19,66 |        | 193,95 |
| 2019/08/14 | CH2276 | Female | Two y/o | Treatment (Wk 3) | Treatment | Fast Day | No | 18:20 | 18:00 - 18:59 | Evening | 38,5 | 59  | 165,8 | 165,8 | 19,66 | 553,30 | 173,53 |
| 2019/08/14 | CH2276 | Female | Two y/o | Treatment (Wk 3) | Treatment | Fast Day | No | 18:25 | 18:00 - 18:59 | Evening | 38,5 | 98  | 174,4 | 174,4 | 19,66 | 592,41 | 175,30 |
| 2019/08/14 | CH2276 | Female | Two y/o | Treatment (Wk 3) | Treatment | Fast Day | No | 18:30 | 18:00 - 18:59 | Evening | 38,6 | 75  | 190,8 | 190,8 | 19,76 | 572,36 | 178,46 |
| 2019/08/14 | CH2276 | Female | Two y/o | Treatment (Wk 3) | Treatment | Fast Day | No | 18:35 | 18:00 - 18:59 | Evening | 38,6 | 62  | 240,0 | 240,0 | 19,76 | 557,33 | 186,54 |
| 2019/08/14 | CH2276 | Female | Two y/o | Treatment (Wk 3) | Treatment | Fast Day | No | 18:40 | 18:00 - 18:59 | Evening | 38,6 | 61  | 69,4  | 69,4  | 19,76 | 556,01 | 143,14 |
| 2019/08/14 | CH2276 | Female | Two y/o | Treatment (Wk 3) | Treatment | Fast Day | No | 18:45 | 18:00 - 18:59 | Evening | 38,6 | 95  | 74,4  | 74,4  | 19,76 | 590,14 | 145,55 |
| 2019/08/14 | CH2276 | Female | Two y/o | Treatment (Wk 3) | Treatment | Fast Day | No | 18:50 | 18:00 - 18:59 | Evening | 38,5 | 119 | 358,6 | 358,6 | 19,66 | 606,20 | 200,74 |
| 2019/08/14 | CH2276 | Female | Two y/o | Treatment (Wk 3) | Treatment | Fast Day | No | 18:55 | 18:00 - 18:59 | Evening | 38,5 |     | 223,6 | 223,6 | 19,66 |        | 184,05 |
| 2019/08/14 | CH2276 | Female | Two y/o | Treatment (Wk 3) | Treatment | Fast Day | No | 19:00 | 19:00 - 19:59 | Evening | 38,5 | 169 | 109,0 | 109,0 | 19,66 | 629,60 | 158,85 |
| 2019/08/14 | CH2276 | Female | Two y/o | Treatment (Wk 3) | Treatment | Fast Day | No | 19:05 | 19:00 - 19:59 | Evening | 38,5 | 97  | 269,2 | 269,2 | 19,66 | 591,66 | 190,59 |
| 2019/08/14 | CH2276 | Female | Two y/o | Treatment (Wk 3) | Treatment | Fast Day | No | 19:10 | 19:00 - 19:59 | Evening | 38,5 | 85  | 356,8 | 356,8 | 19,66 | 581,90 | 200,56 |
| 2019/08/14 | CH2276 | Female | Two y/o | Treatment (Wk 3) | Treatment | Fast Day | No | 19:15 | 19:00 - 19:59 | Evening | 38,5 | 61  | 339,6 | 339,6 | 19,66 | 556,01 | 198,81 |
| 2019/08/14 | CH2276 | Female | Two y/o | Treatment (Wk 3) | Treatment | Fast Day | No | 19:20 | 19:00 - 19:59 | Evening | 38,5 | 99  | 534,0 | 534,0 | 19,66 | 593,14 | 214,89 |
| 2019/08/14 | CH2276 | Female | Two y/o | Treatment (Wk 3) | Treatment | Fast Day | No | 19:25 | 19:00 - 19:59 | Evening | 38,5 |     | 197,0 | 197,0 | 19,66 |        | 179,59 |
| 2019/08/14 | CH2276 | Female | Two y/o | Treatment (Wk 3) | Treatment | Fast Day | No | 19:30 | 19:00 - 19:59 | Evening | 38,5 |     | 95,6  | 95,6  | 19,66 |        | 154,28 |
| 2019/08/14 | CH2276 | Female | Two y/o | Treatment (Wk 3) | Treatment | Fast Day | No | 19:35 | 19:00 - 19:59 | Evening | 38,5 | 103 | 229,8 | 229,8 | 19,66 | 596,00 | 185,01 |
| 2019/08/14 | CH2276 | Female | Two y/o | Treatment (Wk 3) | Treatment | Fast Day | No | 19:40 | 19:00 - 19:59 | Evening | 38,5 | 62  | 355,6 | 355,6 | 19,66 | 557,33 | 200,44 |
| 2019/08/14 | CH2276 | Female | Two y/o | Treatment (Wk 3) | Treatment | Fast Day | No | 19:45 | 19:00 - 19:59 | Evening | 38,5 | 134 | 340,0 | 340,0 | 19,66 | 614,33 | 198,85 |
| 2019/08/14 | CH2276 | Female | Two y/o | Treatment (Wk 3) | Treatment | Fast Day | No | 19:50 | 19:00 - 19:59 | Evening | 38,8 | 137 | 29,6  | 29,6  | 19,97 | 615,83 | 113,73 |
| 2019/08/14 | CH2276 | Female | Two y/o | Treatment (Wk 3) | Treatment | Fast Day | No | 19:55 | 19:00 - 19:59 | Evening | 38,6 | 76  | 4,4   | 4,4   | 19,76 | 573,39 | 49,12  |
| 2019/08/14 | CH2276 | Female | Two y/o | Treatment (Wk 3) | Treatment | Fast Day | No | 20:00 | 20:00 - 20:59 | Night   | 38,6 | 76  | 5,2   | 5,2   | 19,76 | 573,39 | 54,72  |
| 2019/08/14 | CH2276 | Female | Two y/o | Treatment (Wk 3) | Treatment | Fast Day | No | 20:05 | 20:00 - 20:59 | Night   | 38,5 | 96  | 12,4  | 12,4  | 19,66 | 590,91 | 84,04  |
| 2019/08/14 | CH2276 | Female | Two y/o | Treatment (Wk 3) | Treatment | Fast Day | No | 20:10 | 20:00 - 20:59 | Night   | 38,4 | 66  | 10,4  | 10,4  | 19,56 | 562,34 | 78,08  |
| 2019/08/14 | CH2276 | Female | Two y/o | Treatment (Wk 3) | Treatment | Fast Day | No | 20:15 | 20:00 - 20:59 | Night   | 38,4 | 94  | 2,6   | 2,6   | 19,56 | 589,37 | 31,57  |
| 2019/08/14 | CH2276 | Female | Two y/o | Treatment (Wk 3) | Treatment | Fast Day | No | 20:20 | 20:00 - 20:59 | Night   | 38,3 | 61  | 5,2   | 5,2   | 19,46 | 556,01 | 54,72  |
| 2019/08/14 | CH2276 | Female | Two y/o | Treatment (Wk 3) | Treatment | Fast Day | No | 20:25 | 20:00 - 20:59 | Night   | 38,3 | 60  | 12,2  | 12,2  | 19,46 | 554,67 | 83,49  |
| 2019/08/14 | CH2276 | Female | Two y/o | Treatment (Wk 3) | Treatment | Fast Day | No | 20:30 | 20:00 - 20:59 | Night   | 38,2 | 56  | 10,2  | 10,2  | 19,36 | 549,01 | 77,43  |
| 2019/08/14 | CH2276 | Female | Two y/o | Treatment (Wk 3) | Treatment | Fast Day | No | 20:35 | 20:00 - 20:59 | Night   | 38,0 | 65  | 351,4 | 351,4 | 19,15 | 561,12 | 200,02 |
| 2019/08/14 | CH2276 | Female | Two y/o | Treatment (Wk 3) | Treatment | Fast Day | No | 20:40 | 20:00 - 20:59 | Night   | 38,3 | 118 | 86,0  | 86,0  | 19,46 | 605,61 | 150,59 |
| 2019/08/14 | CH2276 | Female | Two y/o | Treatment (Wk 3) | Treatment | Fast Day | No | 20:45 | 20:00 - 20:59 | Night   | 38,3 | 92  | 319,2 | 319,2 | 19,46 | 587,78 | 196,62 |
| 2019/08/14 | CH2276 | Female | Two y/o | Treatment (Wk 3) | Treatment | Fast Day | No | 20:50 | 20:00 - 20:59 | Night   | 38,5 | 96  | 496,4 | 496,4 | 19,66 | 590,91 | 212,29 |
| 2019/08/14 | CH2276 | Female | Two y/o | Treatment (Wk 3) | Treatment | Fast Day | No | 20:55 | 20:00 - 20:59 | Night   | 38,7 | 120 | 312,4 | 312,4 | 19,87 | 606,78 | 195,85 |
| 2019/08/14 | CH2276 | Female | Two y/o | Treatment (Wk 3) | Treatment | Fast Day | No | 21:00 | 21:00 - 21:59 | Night   | 38,7 |     | 77,0  | 77,0  | 19,87 |        | 146,75 |
| 2019/08/14 | CH2276 | Female | Two y/o | Treatment (Wk 3) | Treatment | Fast Day | No | 21:05 | 21:00 - 21:59 | Night   | 38,6 | 44  | 719,8 | 719,8 | 19,76 | 528,51 | 225,55 |
| 2019/08/14 | CH2276 | Female | Two y/o | Treatment (Wk 3) | Treatment | Fast Day | No | 21:10 | 21:00 - 21:59 | Night   | 38,6 | 102 | 261,8 | 261,8 | 19,76 | 595,30 | 189,61 |
| 2019/08/14 | CH2276 | Female | Two y/o | Treatment (Wk 3) | Treatment | Fast Day | No | 21:15 | 21:00 - 21:59 | Night   | 38,5 |     | 62,6  | 62,6  | 19,66 |        | 139,56 |
| 2019/08/14 | CH2276 | Female | Two y/o | Treatment (Wk 3) | Treatment | Fast Day | No | 21:20 | 21:00 - 21:59 | Night   | 38,4 | 70  | 4,8   | 4,8   | 19,56 | 566,99 | 52,04  |
| 2019/08/14 | CH2276 | Female | Two y/o | Treatment (Wk 3) | Treatment | Fast Day | No | 21:25 | 21:00 - 21:59 | Night   | 38,3 | 82  | 6,6   | 6,6   | 19,46 | 579,19 | 62,73  |
| 2019/08/14 | CH2276 | Female | Two y/o | Treatment (Wk 3) | Treatment | Fast Day | No | 21:30 | 21:00 - 21:59 | Night   | 38,2 | 60  | 4,8   | 4,8   | 19,36 | 554,67 | 52,04  |
| 2019/08/14 | CH2276 | Female | Two y/o | Treatment (Wk 3) | Treatment | Fast Day | No | 21:35 | 21:00 - 21:59 | Night   | 38,2 | 60  | 5,8   | 5,8   | 19,36 | 554,67 | 58,39  |
| 2019/08/14 | CH2276 | Female | Two y/o | Treatment (Wk 3) | Treatment | Fast Day | No | 21:40 | 21:00 - 21:59 | Night   | 38,0 | 61  | 8,2   | 8,2   | 19,15 | 556,01 | 70,05  |
| 2019/08/14 | CH2276 | Female | Two y/o | Treatment (Wk 3) | Treatment | Fast Day | No | 21:45 | 21:00 - 21:59 | Night   | 38,0 | 56  | 4,2   | 4,2   | 19,15 | 549,01 | 47,57  |
| 2019/08/14 | CH2276 | Female | Two y/o | Treatment (Wk 3) | Treatment | Fast Day | No | 21:50 | 21:00 - 21:59 | Night   | 37,9 | 66  | 15,4  | 15,4  | 19,05 | 562,34 | 91,41  |



|    |            |        |        |         |                  |           |          |    |       |               |               |      |    |      |      |       |        |        |
|----|------------|--------|--------|---------|------------------|-----------|----------|----|-------|---------------|---------------|------|----|------|------|-------|--------|--------|
|    | 2019/08/14 | CH2276 | Female | Two y/o | Treatment (Wk 3) | Treatment | Fast Day | No | 21:55 | 21:00 - 21:59 | Night         | 37,9 | 67 | 11,0 | 11,0 | 19,05 | 563,53 | 79,98  |
|    | 2019/08/14 | CH2276 | Female | Two y/o | Treatment (Wk 3) | Treatment | Fast Day | No | 22:00 | 22:00 - 22:59 | Night         | 37,9 | 52 | 11,2 | 11,2 | 19,05 | 542,83 | 80,59  |
|    | 2019/08/14 | CH2276 | Female | Two y/o | Treatment (Wk 3) | Treatment | Fast Day | No | 22:05 | 22:00 - 22:59 | Night         | 37,9 | 55 | 11,0 | 11,0 | 19,05 | 547,52 | 79,98  |
|    | 2019/08/14 | CH2276 | Female | Two y/o | Treatment (Wk 3) | Treatment | Fast Day | No | 22:10 | 22:00 - 22:59 | Night         | 37,9 | 68 | 67,8 | 67,8 | 19,05 | 564,71 | 142,33 |
|    | 2019/08/14 | CH2276 | Female | Two y/o | Treatment (Wk 3) | Treatment | Fast Day | No | 22:15 | 22:00 - 22:59 | Night         | 37,9 | 62 | 83,6 | 83,6 | 19,05 | 557,33 | 149,61 |
|    | 2019/08/14 | CH2276 | Female | Two y/o | Treatment (Wk 3) | Treatment | Fast Day | No | 22:20 | 22:00 - 22:59 | Night         | 37,8 | 64 | 83,2 | 83,2 | 18,95 | 559,88 | 149,44 |
|    | 2019/08/14 | CH2276 | Female | Two y/o | Treatment (Wk 3) | Treatment | Fast Day | No | 22:25 | 22:00 - 22:59 | Night         | 37,7 | 53 | 75,6 | 75,6 | 18,85 | 544,43 | 146,11 |
|    | 2019/08/14 | CH2276 | Female | Two y/o | Treatment (Wk 3) | Treatment | Fast Day | No | 22:30 | 22:00 - 22:59 | Night         | 37,7 | 61 | 88,2 | 88,2 | 18,85 | 556,01 | 151,47 |
|    | 2019/08/14 | CH2276 | Female | Two y/o | Treatment (Wk 3) | Treatment | Fast Day | No | 22:35 | 22:00 - 22:59 | Night         | 37,6 | 62 | 85,2 | 85,2 | 18,75 | 557,33 | 150,27 |
|    | 2019/08/14 | CH2276 | Female | Two y/o | Treatment (Wk 3) | Treatment | Fast Day | No | 22:40 | 22:00 - 22:59 | Night         | 37,6 | 57 | 82,8 | 82,8 | 18,75 | 550,47 | 149,27 |
|    | 2019/08/14 | CH2276 | Female | Two y/o | Treatment (Wk 3) | Treatment | Fast Day | No | 22:45 | 22:00 - 22:59 | Night         | 37,5 | 83 | 87,8 | 87,8 | 18,65 | 580,11 | 151,31 |
|    | 2019/08/14 | CH2276 | Female | Two y/o | Treatment (Wk 3) | Treatment | Fast Day | No | 22:50 | 22:00 - 22:59 | Night         | 37,4 | 58 | 87,4 | 87,4 | 18,55 | 551,90 | 151,15 |
|    | 2019/08/14 | CH2276 | Female | Two y/o | Treatment (Wk 3) | Treatment | Fast Day | No | 22:55 | 22:00 - 22:59 | Night         | 37,4 | 69 | 89,8 | 89,8 | 18,55 | 565,86 | 152,10 |
|    | 2019/08/14 | CH2276 | Female | Two y/o | Treatment (Wk 3) | Treatment | Fast Day | No | 23:00 | 23:00 - 23:59 | Night         | 37,4 | 94 | 7,0  | 7,0  | 18,55 | 589,37 | 64,72  |
|    | 2019/08/14 | CH2276 | Female | Two y/o | Treatment (Wk 3) | Treatment | Fast Day | No | 23:05 | 23:00 - 23:59 | Night         | 37,3 | 61 | 4,4  | 4,4  | 18,46 | 556,01 | 49,12  |
|    | 2019/08/14 | CH2276 | Female | Two y/o | Treatment (Wk 3) | Treatment | Fast Day | No | 23:10 | 23:00 - 23:59 | Night         | 37,3 | 60 | 3,0  | 3,0  | 18,46 | 554,67 | 36,34  |
|    | 2019/08/14 | CH2276 | Female | Two y/o | Treatment (Wk 3) | Treatment | Fast Day | No | 23:15 | 23:00 - 23:59 | Night         | 37,3 | 64 | 4,8  | 4,8  | 18,46 | 559,88 | 52,04  |
|    | 2019/08/14 | CH2276 | Female | Two y/o | Treatment (Wk 3) | Treatment | Fast Day | No | 23:20 | 23:00 - 23:59 | Night         | 37,2 | 65 | 5,8  | 5,8  | 18,36 | 561,12 | 58,39  |
|    | 2019/08/14 | CH2276 | Female | Two y/o | Treatment (Wk 3) | Treatment | Fast Day | No | 23:25 | 23:00 - 23:59 | Night         | 37,1 | 40 | 1,8  | 1,8  | 18,26 | 520,09 | 19,38  |
|    | 2019/08/14 | CH2276 | Female | Two y/o | Treatment (Wk 3) | Treatment | Fast Day | No | 23:30 | 23:00 - 23:59 | Night         | 37,1 | 67 | 4,4  | 4,4  | 18,26 | 563,53 | 49,12  |
|    | 2019/08/14 | CH2276 | Female | Two y/o | Treatment (Wk 3) | Treatment | Fast Day | No | 23:35 | 23:00 - 23:59 | Night         | 37,1 | 52 | 9,0  | 9,0  | 18,26 | 542,83 | 73,19  |
|    | 2019/08/14 | CH2276 | Female | Two y/o | Treatment (Wk 3) | Treatment | Fast Day | No | 23:40 | 23:00 - 23:59 | Night         | 37,0 | 53 | 6,0  | 6,0  | 18,16 | 544,43 | 59,53  |
|    | 2019/08/14 | CH2276 | Female | Two y/o | Treatment (Wk 3) | Treatment | Fast Day | No | 23:45 | 23:00 - 23:59 | Night         | 36,9 | 64 | 5,8  | 5,8  | 18,06 | 559,88 | 58,39  |
|    | 2019/08/14 | CH2276 | Female | Two y/o | Treatment (Wk 3) | Treatment | Fast Day | No | 23:50 | 23:00 - 23:59 | Night         | 36,9 | 51 | 3,8  | 3,8  | 18,06 | 541,20 | 44,22  |
|    | 2019/08/14 | CH2276 | Female | Two y/o | Treatment (Wk 3) | Treatment | Fast Day | No | 23:55 | 23:00 - 23:59 | Night         | 36,8 | 53 | 4,0  | 4,0  | 17,96 | 544,43 | 45,94  |
| 58 | 2019/08/15 | CH2276 | Female | Two y/o | Treatment (Wk 3) | Treatment | Feed Day | No | 00:00 | 00:00 - 00:59 | Early Morning | 36,8 | 59 | 4,4  | 4,4  | 17,96 | 553,30 | 49,12  |
|    | 2019/08/15 | CH2276 | Female | Two y/o | Treatment (Wk 3) | Treatment | Feed Day | No | 00:05 | 00:00 - 00:59 | Early Morning | 36,8 | 48 | 3,6  | 3,6  | 17,96 | 536,04 | 42,42  |
|    | 2019/08/15 | CH2276 | Female | Two y/o | Treatment (Wk 3) | Treatment | Feed Day | No | 00:10 | 00:00 - 00:59 | Early Morning | 36,8 | 51 | 6,0  | 6,0  | 17,96 | 541,20 | 59,53  |
|    | 2019/08/15 | CH2276 | Female | Two y/o | Treatment (Wk 3) | Treatment | Feed Day | No | 00:15 | 00:00 - 00:59 | Early Morning | 36,8 | 60 | 9,0  | 9,0  | 17,96 | 554,67 | 73,19  |
|    | 2019/08/15 | CH2276 | Female | Two y/o | Treatment (Wk 3) | Treatment | Feed Day | No | 00:20 | 00:00 - 00:59 | Early Morning | 36,8 | 51 | 12,8 | 12,8 | 17,96 | 541,20 | 85,12  |
|    | 2019/08/15 | CH2276 | Female | Two y/o | Treatment (Wk 3) | Treatment | Feed Day | No | 00:25 | 00:00 - 00:59 | Early Morning | 36,9 | 65 | 7,2  | 7,2  | 18,06 | 561,12 | 65,66  |
|    | 2019/08/15 | CH2276 | Female | Two y/o | Treatment (Wk 3) | Treatment | Feed Day | No | 00:30 | 00:00 - 00:59 | Early Morning | 36,9 | 80 | 4,8  | 4,8  | 18,06 | 577,31 | 52,04  |
|    | 2019/08/15 | CH2276 | Female | Two y/o | Treatment (Wk 3) | Treatment | Feed Day | No | 00:35 | 00:00 - 00:59 | Early Morning | 36,8 | 54 | 15,2 | 15,2 | 17,96 | 545,99 | 90,96  |
|    | 2019/08/15 | CH2276 | Female | Two y/o | Treatment (Wk 3) | Treatment | Feed Day | No | 00:40 | 00:00 - 00:59 | Early Morning | 36,9 | 88 | 31,8 | 31,8 | 18,06 | 584,49 | 116,20 |
|    | 2019/08/15 | CH2276 | Female | Two y/o | Treatment (Wk 3) | Treatment | Feed Day | No | 00:45 | 00:00 - 00:59 | Early Morning | 36,9 | 65 | 25,6 | 25,6 | 18,06 | 561,12 | 108,76 |
|    | 2019/08/15 | CH2276 | Female | Two y/o | Treatment (Wk 3) | Treatment | Feed Day | No | 00:50 | 00:00 - 00:59 | Early Morning | 36,9 | 63 | 10,8 | 10,8 | 18,06 | 558,62 | 79,36  |
|    | 2019/08/15 | CH2276 | Female | Two y/o | Treatment (Wk 3) | Treatment | Feed Day | No | 00:55 | 00:00 - 00:59 | Early Morning | 36,8 | 56 | 11,6 | 11,6 | 17,96 | 549,01 | 81,78  |
|    | 2019/08/15 | CH2276 | Female | Two y/o | Treatment (Wk 3) | Treatment | Feed Day | No | 01:00 | 01:00 - 01:59 | Early Morning | 36,7 | 90 | 18,2 | 18,2 | 17,87 | 586,16 | 97,10  |
|    | 2019/08/15 | CH2276 | Female | Two y/o | Treatment (Wk 3) | Treatment | Feed Day | No | 01:05 | 01:00 - 01:59 | Early Morning | 36,7 | 62 | 20,4 | 20,4 | 17,87 | 557,33 | 100,99 |
|    | 2019/08/15 | CH2276 | Female | Two y/o | Treatment (Wk 3) | Treatment | Feed Day | No | 01:10 | 01:00 - 01:59 | Early Morning | 36,7 | 90 | 17,6 | 17,6 | 17,87 | 586,16 | 95,95  |
|    | 2019/08/15 | CH2276 | Female | Two y/o | Treatment (Wk 3) | Treatment | Feed Day | No | 01:15 | 01:00 - 01:59 | Early Morning | 36,6 | 53 | 26,0 | 26,0 | 17,77 | 544,43 | 109,29 |
|    | 2019/08/15 | CH2276 | Female | Two y/o | Treatment (Wk 3) | Treatment | Feed Day | No | 01:20 | 01:00 - 01:59 | Early Morning | 36,6 | 48 | 25,4 | 25,4 | 17,77 | 536,04 | 108,49 |
|    | 2019/08/15 | CH2276 | Female | Two y/o | Treatment (Wk 3) | Treatment | Feed Day | No | 01:25 | 01:00 - 01:59 | Early Morning | 36,6 | 78 | 27,8 | 27,8 | 17,77 | 575,38 | 111,58 |
|    | 2019/08/15 | CH2276 | Female | Two y/o | Treatment (Wk 3) | Treatment | Feed Day | No | 01:30 | 01:00 - 01:59 | Early Morning | 36,5 |    | 23,0 | 23,0 | 17,67 |        | 105,09 |
|    | 2019/08/15 | CH2276 | Female | Two y/o | Treatment (Wk 3) | Treatment | Feed Day | No | 01:35 | 01:00 - 01:59 | Early Morning | 36,5 | 57 | 18,6 | 18,6 | 17,67 | 550,47 | 97,84  |
|    | 2019/08/15 | CH2276 | Female | Two y/o | Treatment (Wk 3) | Treatment | Feed Day | No | 01:40 | 01:00 - 01:59 | Early Morning | 36,5 | 54 | 16,8 | 16,8 | 17,67 | 545,99 | 94,37  |
|    | 2019/08/15 | CH2276 | Female | Two y/o | Treatment (Wk 3) | Treatment | Feed Day | No | 01:45 | 01:00 - 01:59 | Early Morning | 36,5 | 55 | 17,6 | 17,6 | 17,67 | 547,52 | 95,95  |
|    | 2019/08/15 | CH2276 | Female | Two y/o | Treatment (Wk 3) | Treatment | Feed Day | No | 01:50 | 01:00 - 01:59 | Early Morning | 36,5 | 64 | 17,2 | 17,2 | 17,67 | 559,88 | 95,17  |
|    | 2019/08/15 | CH2276 | Female | Two y/o | Treatment (Wk 3) | Treatment | Feed Day | No | 01:55 | 01:00 - 01:59 | Early Morning | 36,5 | 57 | 23,0 | 23,0 | 17,67 | 550,47 | 105,09 |
|    | 2019/08/15 | CH2276 | Female | Two y/o | Treatment (Wk 3) | Treatment | Feed Day | No | 02:00 | 02:00 - 02:59 | Early Morning | 36,4 | 52 | 22,6 | 22,6 | 17,57 | 542,83 | 104,49 |
|    | 2019/08/15 | CH2276 | Female | Two y/o | Treatment (Wk 3) | Treatment | Feed Day | No | 02:05 | 02:00 - 02:59 | Early Morning | 36,4 | 50 | 24,2 | 24,2 | 17,57 | 539,52 | 106,83 |
|    | 2019/08/15 | CH2276 | Female | Two y/o | Treatment (Wk 3) | Treatment | Feed Day | No | 02:10 | 02:00 - 02:59 | Early Morning | 36,4 | 57 | 18,8 | 18,8 | 17,57 | 550,47 | 98,20  |
|    | 2019/08/15 | CH2276 | Female | Two y/o | Treatment (Wk 3) | Treatment | Feed Day | No | 02:15 | 02:00 - 02:59 | Early Morning | 36,4 | 52 | 20,4 | 20,4 | 17,57 | 542,83 | 100,99 |
|    | 2019/08/15 | CH2276 | Female | Two y/o | Treatment (Wk 3) | Treatment | Feed Day | No | 02:20 | 02:00 - 02:59 | Early Morning | 36,4 | 50 | 17,4 | 17,4 | 17,57 | 539,52 | 95,56  |
|    | 2019/08/15 | CH2276 | Female | Two y/o | Treatment (Wk 3) | Treatment | Feed Day | No | 02:25 | 02:00 - 02:59 | Early Morning | 36,3 | 47 | 22,8 | 22,8 | 17,48 | 534,23 | 104,79 |
|    | 2019/08/15 | CH2276 | Female | Two y/o | Treatment (Wk 3) | Treatment | Feed Day | No | 02:30 | 02:00 - 02:59 | Early Morning | 36,2 | 49 | 18,8 | 18,8 | 17,38 | 537,80 | 98,20  |
|    | 2019/08/15 | CH2276 | Female | Two y/o | Treatment (Wk 3) | Treatment | Feed Day | No | 02:35 | 02:00 - 02:59 | Early Morning | 36,2 | 56 | 16,6 | 16,6 | 17,38 | 549,01 | 93,96  |
|    | 2019/08/15 | CH2276 | Female | Two y/o | Treatment (Wk 3) | Treatment | Feed Day | No | 02:40 | 02:00 - 02:59 | Early Morning | 36,2 | 62 | 62,4 | 62,4 | 17,38 | 557,33 | 139,45 |
|    | 2019/08/15 | CH2276 | Female | Two y/o | Treatment (Wk 3) | Treatment | Feed Day | No | 02:45 | 02:00 - 02:59 | Early Morning | 36,4 | 64 | 27,2 | 27,2 | 17,57 | 559,88 | 110,83 |
|    | 2019/08/15 | CH2276 | Female | Two y/o | Treatment (Wk 3) | Treatment | Feed Day | No | 02:50 | 02:00 - 02:59 | Early Morning | 36,5 | 62 | 27,0 | 27,0 | 17,67 | 557,33 | 110,58 |
|    | 2019/08/15 | CH2276 | Female | Two y/o | Treatment (Wk 3) | Treatment | Feed Day | No | 02:55 | 02:00 - 02:59 | Early Morning | 36,6 | 50 | 19,2 | 19,2 | 17,77 | 539,52 | 98,92  |
|    | 2019/08/15 | CH2276 | Female | Two y/o | Treatment (Wk 3) | Treatment | Feed Day | No | 03:00 | 03:00 - 03:59 | Early Morning | 36,6 | 51 | 18,2 | 18,2 | 17,77 | 541,20 | 97,10  |
|    | 2019/08/15 | CH2276 | Female | Two y/o | Treatment (Wk 3) | Treatment | Feed Day | No | 03:05 | 03:00 - 03:59 | Early Morning | 36,7 | 58 | 20,6 | 20,6 | 17,87 | 551,90 | 101,32 |
|    | 2019/08/15 | CH2276 | Female | Two y/o | Treatment (Wk 3) | Treatment | Feed Day | No | 03:10 | 03:00 - 03:59 | Early Morning | 36,7 | 54 | 21,6 | 21,6 | 17,87 | 545,99 | 102,94 |
|    | 2019/08/15 | CH2276 | Female | Two y/o | Treatment (Wk 3) | Treatment | Feed Day | No | 03:15 | 03:00 - 03:59 | Early Morning | 36,7 | 61 | 20,4 | 20,4 | 17,87 | 556,01 | 100,99 |
|    | 2019/08/15 | CH2276 | Female | Two y/o | Treatment (Wk 3) | Treatment | Feed Day | No | 03:20 | 03:00 - 03:59 | Early Morning | 36,8 | 61 | 20,0 | 20,0 | 17,96 | 556,01 | 100,31 |
|    | 2019/08/15 | CH2276 | Female | Two y/o | Treatment (Wk 3) | Treatment | Feed Day | No | 03:25 | 03:00 - 03:59 | Early Morning | 36,8 | 51 | 19,6 | 19,6 | 17,96 | 541,20 | 99,63  |
|    | 2019/08/15 | CH2276 | Female | Two y/o | Treatment (Wk 3) | Treatment | Feed Day | No | 03:30 | 03:00 - 03:59 | Early Morning | 36,8 | 56 | 18,2 | 18,2 | 17,96 | 549,01 | 97,10  |
|    | 2019/08/15 | CH2276 | Female | Two y/o | Treatment (Wk 3) | Treatment | Feed Day | No | 03:35 | 03:00 - 03:59 | Early Morning | 36,8 | 56 | 25,0 | 25,0 | 17,96 | 549,01 | 107,94 |
|    | 2019/08/15 | CH2276 | Female | Two y/o | Treatment (Wk 3) | Treatment | Feed Day | No | 03:40 | 03:00 - 03:59 | Early Morning | 36,8 | 60 | 31,0 | 31,0 | 17,96 | 554,67 | 115,32 |



|            |        |        |         |                  |           |          |    |       |               |               |      |     |        |       |       |        |        |
|------------|--------|--------|---------|------------------|-----------|----------|----|-------|---------------|---------------|------|-----|--------|-------|-------|--------|--------|
| 2019/08/15 | CH2276 | Female | Two y/o | Treatment (Wk 3) | Treatment | Feed Day | No | 03:45 | 03:00 - 03:59 | Early Morning | 36,7 | 57  | 21,8   | 21,8  | 17,87 | 550,47 | 103,26 |
| 2019/08/15 | CH2276 | Female | Two y/o | Treatment (Wk 3) | Treatment | Feed Day | No | 03:50 | 03:00 - 03:59 | Early Morning | 36,7 | 51  | 15,6   | 15,6  | 17,87 | 541,20 | 91,85  |
| 2019/08/15 | CH2276 | Female | Two y/o | Treatment (Wk 3) | Treatment | Feed Day | No | 03:55 | 03:00 - 03:59 | Early Morning | 36,7 | 49  | 13,0   | 13,0  | 17,87 | 537,80 | 85,65  |
| 2019/08/15 | CH2276 | Female | Two y/o | Treatment (Wk 3) | Treatment | Feed Day | No | 04:00 | 04:00 - 04:59 | Morning       | 36,7 | 56  | 23,2   | 23,2  | 17,87 | 549,01 | 105,39 |
| 2019/08/15 | CH2276 | Female | Two y/o | Treatment (Wk 3) | Treatment | Feed Day | No | 04:05 | 04:00 - 04:59 | Morning       | 36,7 | 78  | 9,6    | 9,6   | 17,87 | 575,38 | 75,37  |
| 2019/08/15 | CH2276 | Female | Two y/o | Treatment (Wk 3) | Treatment | Feed Day | No | 04:10 | 04:00 - 04:59 | Morning       | 36,7 |     | 10,4   | 10,4  | 17,87 |        | 78,08  |
| 2019/08/15 | CH2276 | Female | Two y/o | Treatment (Wk 3) | Treatment | Feed Day | No | 04:15 | 04:00 - 04:59 | Morning       | 36,8 | 57  | 11,8   | 11,8  | 17,96 | 550,47 | 82,36  |
| 2019/08/15 | CH2276 | Female | Two y/o | Treatment (Wk 3) | Treatment | Feed Day | No | 04:20 | 04:00 - 04:59 | Morning       | 36,7 | 55  | 32,0   | 32,0  | 17,87 | 547,52 | 116,41 |
| 2019/08/15 | CH2276 | Female | Two y/o | Treatment (Wk 3) | Treatment | Feed Day | No | 04:25 | 04:00 - 04:59 | Morning       | 36,8 | 145 | 21,4   | 21,4  | 17,96 | 619,62 | 102,63 |
| 2019/08/15 | CH2276 | Female | Two y/o | Treatment (Wk 3) | Treatment | Feed Day | No | 04:30 | 04:00 - 04:59 | Morning       | 36,7 | 96  | 91,4   | 91,4  | 17,87 | 590,91 | 152,71 |
| 2019/08/15 | CH2276 | Female | Two y/o | Treatment (Wk 3) | Treatment | Feed Day | No | 04:35 | 04:00 - 04:59 | Morning       | 36,7 | 53  | 307,0  | 307,0 | 17,87 | 544,43 | 195,24 |
| 2019/08/15 | CH2276 | Female | Two y/o | Treatment (Wk 3) | Treatment | Feed Day | No | 04:40 | 04:00 - 04:59 | Morning       | 36,8 | 62  | 114,6  | 114,6 | 17,96 | 557,33 | 160,60 |
| 2019/08/15 | CH2276 | Female | Two y/o | Treatment (Wk 3) | Treatment | Feed Day | No | 04:45 | 04:00 - 04:59 | Morning       | 37,1 | 32  | 100,4  | 100,4 | 18,26 | 499,63 | 155,98 |
| 2019/08/15 | CH2276 | Female | Two y/o | Treatment (Wk 3) | Treatment | Feed Day | No | 04:50 | 04:00 - 04:59 | Morning       | 37,3 | 90  | 82,8   | 82,8  | 18,46 | 586,16 | 149,27 |
| 2019/08/15 | CH2276 | Female | Two y/o | Treatment (Wk 3) | Treatment | Feed Day | No | 04:55 | 04:00 - 04:59 | Morning       | 37,3 | 105 | 66,8   | 66,8  | 18,46 | 597,38 | 141,81 |
| 2019/08/15 | CH2276 | Female | Two y/o | Treatment (Wk 3) | Treatment | Feed Day | No | 05:00 | 05:00 - 05:59 | Morning       | 37,4 | 55  | 1111,0 |       | 18,55 | 547,52 |        |
| 2019/08/15 | CH2276 | Female | Two y/o | Treatment (Wk 3) | Treatment | Feed Day | No | 05:05 | 05:00 - 05:59 | Morning       | 37,5 | 92  | 84,6   | 84,6  | 18,65 | 587,78 | 150,02 |
| 2019/08/15 | CH2276 | Female | Two y/o | Treatment (Wk 3) | Treatment | Feed Day | No | 05:10 | 05:00 - 05:59 | Morning       | 37,6 | 62  | 196,4  | 196,4 | 18,75 | 557,33 | 179,48 |
| 2019/08/15 | CH2276 | Female | Two y/o | Treatment (Wk 3) | Treatment | Feed Day | No | 05:15 | 05:00 - 05:59 | Morning       | 37,6 |     | 84,6   | 84,6  | 18,75 |        | 150,02 |
| 2019/08/15 | CH2276 | Female | Two y/o | Treatment (Wk 3) | Treatment | Feed Day | No | 05:20 | 05:00 - 05:59 | Morning       | 37,6 | 123 | 258,2  | 258,2 | 18,75 | 608,49 | 189,12 |
| 2019/08/15 | CH2276 | Female | Two y/o | Treatment (Wk 3) | Treatment | Feed Day | No | 05:25 | 05:00 - 05:59 | Morning       | 37,7 | 67  | 178,2  | 178,2 | 18,85 | 563,53 | 176,06 |
| 2019/08/15 | CH2276 | Female | Two y/o | Treatment (Wk 3) | Treatment | Feed Day | No | 05:30 | 05:00 - 05:59 | Morning       | 37,7 | 167 | 249,4  | 249,4 | 18,85 | 628,84 | 187,90 |
| 2019/08/15 | CH2276 | Female | Two y/o | Treatment (Wk 3) | Treatment | Feed Day | No | 05:35 | 05:00 - 05:59 | Morning       | 37,7 | 112 | 319,4  | 319,4 | 18,85 | 601,96 | 196,64 |
| 2019/08/15 | CH2276 | Female | Two y/o | Treatment (Wk 3) | Treatment | Feed Day | No | 05:40 | 05:00 - 05:59 | Morning       | 37,7 | 79  | 228,8  | 228,8 | 18,85 | 576,36 | 184,86 |
| 2019/08/15 | CH2276 | Female | Two y/o | Treatment (Wk 3) | Treatment | Feed Day | No | 05:45 | 05:00 - 05:59 | Morning       | 37,7 | 57  | 112,2  | 112,2 | 18,85 | 550,47 | 159,86 |
| 2019/08/15 | CH2276 | Female | Two y/o | Treatment (Wk 3) | Treatment | Feed Day | No | 05:50 | 05:00 - 05:59 | Morning       | 37,7 | 57  | 275,4  | 275,4 | 18,85 | 550,47 | 191,40 |
| 2019/08/15 | CH2276 | Female | Two y/o | Treatment (Wk 3) | Treatment | Feed Day | No | 05:55 | 05:00 - 05:59 | Morning       | 37,7 | 185 | 329,0  | 329,0 | 18,85 | 635,34 | 197,69 |
| 2019/08/15 | CH2276 | Female | Two y/o | Treatment (Wk 3) | Treatment | Feed Day | No | 06:00 | 06:00 - 06:59 | Morning       | 37,8 | 83  | 79,4   | 79,4  | 18,95 | 580,11 | 147,81 |
| 2019/08/15 | CH2276 | Female | Two y/o | Treatment (Wk 3) | Treatment | Feed Day | No | 06:05 | 06:00 - 06:59 | Morning       | 37,8 | 108 | 178,6  | 178,6 | 18,95 | 599,39 | 176,14 |
| 2019/08/15 | CH2276 | Female | Two y/o | Treatment (Wk 3) | Treatment | Feed Day | No | 06:10 | 06:00 - 06:59 | Morning       | 37,8 | 63  | 239,6  | 239,6 | 18,95 | 558,62 | 186,48 |
| 2019/08/15 | CH2276 | Female | Two y/o | Treatment (Wk 3) | Treatment | Feed Day | No | 06:15 | 06:00 - 06:59 | Morning       | 37,8 | 147 | 330,0  | 330,0 | 18,95 | 620,52 | 197,79 |
| 2019/08/15 | CH2276 | Female | Two y/o | Treatment (Wk 3) | Treatment | Feed Day | No | 06:20 | 06:00 - 06:59 | Morning       | 37,9 | 126 | 403,0  | 403,0 | 19,05 | 610,14 | 204,88 |
| 2019/08/15 | CH2276 | Female | Two y/o | Treatment (Wk 3) | Treatment | Feed Day | No | 06:25 | 06:00 - 06:59 | Morning       | 37,9 | 56  | 184,6  | 184,6 | 19,05 | 549,01 | 177,30 |
| 2019/08/15 | CH2276 | Female | Two y/o | Treatment (Wk 3) | Treatment | Feed Day | No | 06:30 | 06:00 - 06:59 | Morning       | 37,9 |     | 140,2  | 140,2 | 19,05 |        | 167,65 |
| 2019/08/15 | CH2276 | Female | Two y/o | Treatment (Wk 3) | Treatment | Feed Day | No | 06:35 | 06:00 - 06:59 | Morning       | 37,9 |     | 376,0  | 376,0 | 19,05 |        | 202,42 |
| 2019/08/15 | CH2276 | Female | Two y/o | Treatment (Wk 3) | Treatment | Feed Day | No | 06:40 | 06:00 - 06:59 | Morning       | 37,8 | 50  | 199,4  | 199,4 | 18,95 | 539,52 | 180,01 |
| 2019/08/15 | CH2276 | Female | Two y/o | Treatment (Wk 3) | Treatment | Feed Day | No | 06:45 | 06:00 - 06:59 | Morning       | 37,8 |     | 234,0  | 234,0 | 18,95 |        | 185,65 |
| 2019/08/15 | CH2276 | Female | Two y/o | Treatment (Wk 3) | Treatment | Feed Day | No | 06:50 | 06:00 - 06:59 | Morning       | 37,8 | 62  | 141,6  | 141,6 | 18,95 | 557,33 | 168,00 |
| 2019/08/15 | CH2276 | Female | Two y/o | Treatment (Wk 3) | Treatment | Feed Day | No | 06:55 | 06:00 - 06:59 | Morning       | 37,8 |     | 157,4  | 157,4 | 18,95 |        | 171,71 |
| 2019/08/15 | CH2276 | Female | Two y/o | Treatment (Wk 3) | Treatment | Feed Day | No | 07:00 | 07:00 - 07:59 | Morning       | 37,8 |     | 109,2  | 109,2 | 18,95 |        | 158,91 |
| 2019/08/15 | CH2276 | Female | Two y/o | Treatment (Wk 3) | Treatment | Feed Day | No | 07:05 | 07:00 - 07:59 | Morning       | 37,8 | 67  | 198,6  | 198,6 | 18,95 | 563,53 | 179,87 |
| 2019/08/15 | CH2276 | Female | Two y/o | Treatment (Wk 3) | Treatment | Feed Day | No | 07:10 | 07:00 - 07:59 | Morning       | 37,8 | 113 | 115,4  | 115,4 | 18,95 | 602,58 | 160,84 |
| 2019/08/15 | CH2276 | Female | Two y/o | Treatment (Wk 3) | Treatment | Feed Day | No | 07:15 | 07:00 - 07:59 | Morning       | 37,7 | 158 | 777,4  | 777,4 | 18,85 | 625,26 | 228,30 |
| 2019/08/15 | CH2276 | Female | Two y/o | Treatment (Wk 3) | Treatment | Feed Day | No | 07:20 | 07:00 - 07:59 | Morning       | 37,7 | 107 | 96,2   | 96,2  | 18,85 | 598,73 | 154,49 |
| 2019/08/15 | CH2276 | Female | Two y/o | Treatment (Wk 3) | Treatment | Feed Day | No | 07:25 | 07:00 - 07:59 | Morning       | 37,7 | 56  | 105,2  | 105,2 | 18,85 | 549,01 | 157,61 |
| 2019/08/15 | CH2276 | Female | Two y/o | Treatment (Wk 3) | Treatment | Feed Day | No | 07:30 | 07:00 - 07:59 | Morning       | 37,7 |     | 257,2  | 257,2 | 18,85 |        | 188,98 |
| 2019/08/15 | CH2276 | Female | Two y/o | Treatment (Wk 3) | Treatment | Feed Day | No | 07:35 | 07:00 - 07:59 | Morning       | 37,8 | 70  | 25,0   | 25,0  | 18,95 | 566,99 | 107,94 |
| 2019/08/15 | CH2276 | Female | Two y/o | Treatment (Wk 3) | Treatment | Feed Day | No | 07:40 | 07:00 - 07:59 | Morning       | 37,6 | 69  | 20,0   | 20,0  | 18,75 | 565,86 | 100,31 |
| 2019/08/15 | CH2276 | Female | Two y/o | Treatment (Wk 3) | Treatment | Feed Day | No | 07:45 | 07:00 - 07:59 | Morning       | 37,4 | 93  | 8,2    | 8,2   | 18,55 | 588,58 | 70,05  |
| 2019/08/15 | CH2276 | Female | Two y/o | Treatment (Wk 3) | Treatment | Feed Day | No | 07:50 | 07:00 - 07:59 | Morning       | 37,4 | 102 | 7,6    | 7,6   | 18,55 | 595,30 | 67,49  |
| 2019/08/15 | CH2276 | Female | Two y/o | Treatment (Wk 3) | Treatment | Feed Day | No | 07:55 | 07:00 - 07:59 | Morning       | 37,4 | 63  | 11,0   | 11,0  | 18,55 | 558,62 | 79,98  |
| 2019/08/15 | CH2276 | Female | Two y/o | Treatment (Wk 3) | Treatment | Feed Day | No | 08:00 | 08:00 - 08:59 | Late Morning  | 37,5 | 56  | 6,0    | 6,0   | 18,65 | 549,01 | 59,53  |
| 2019/08/15 | CH2276 | Female | Two y/o | Treatment (Wk 3) | Treatment | Feed Day | No | 08:05 | 08:00 - 08:59 | Late Morning  | 37,4 | 50  | 10,8   | 10,8  | 18,55 | 539,52 | 79,36  |
| 2019/08/15 | CH2276 | Female | Two y/o | Treatment (Wk 3) | Treatment | Feed Day | No | 08:10 | 08:00 - 08:59 | Late Morning  | 37,3 | 53  | 13,8   | 13,8  | 18,46 | 544,43 | 87,68  |
| 2019/08/15 | CH2276 | Female | Two y/o | Treatment (Wk 3) | Treatment | Feed Day | No | 08:15 | 08:00 - 08:59 | Late Morning  | 37,2 | 58  | 15,2   | 15,2  | 18,36 | 551,90 | 90,96  |
| 2019/08/15 | CH2276 | Female | Two y/o | Treatment (Wk 3) | Treatment | Feed Day | No | 08:20 | 08:00 - 08:59 | Late Morning  | 37,1 | 47  | 9,6    | 9,6   | 18,26 | 534,23 | 75,37  |
| 2019/08/15 | CH2276 | Female | Two y/o | Treatment (Wk 3) | Treatment | Feed Day | No | 08:25 | 08:00 - 08:59 | Late Morning  | 37,1 | 49  | 7,0    | 7,0   | 18,26 | 537,80 | 64,72  |
| 2019/08/15 | CH2276 | Female | Two y/o | Treatment (Wk 3) | Treatment | Feed Day | No | 08:30 | 08:00 - 08:59 | Late Morning  | 37,1 | 52  | 63,2   | 63,2  | 18,26 | 542,83 | 139,89 |
| 2019/08/15 | CH2276 | Female | Two y/o | Treatment (Wk 3) | Treatment | Feed Day | No | 08:35 | 08:00 - 08:59 | Late Morning  | 37,0 | 61  | 47,8   | 47,8  | 18,16 | 556,01 | 130,23 |
| 2019/08/15 | CH2276 | Female | Two y/o | Treatment (Wk 3) | Treatment | Feed Day | No | 08:40 | 08:00 - 08:59 | Late Morning  | 36,9 | 84  | 45,0   | 45,0  | 18,06 | 581,01 | 128,15 |
| 2019/08/15 | CH2276 | Female | Two y/o | Treatment (Wk 3) | Treatment | Feed Day | No | 08:45 | 08:00 - 08:59 | Late Morning  | 36,9 | 56  | 43,4   | 43,4  | 18,06 | 549,01 | 126,90 |
| 2019/08/15 | CH2276 | Female | Two y/o | Treatment (Wk 3) | Treatment | Feed Day | No | 08:50 | 08:00 - 08:59 | Late Morning  | 36,8 | 76  | 54,6   | 54,6  | 17,96 | 573,39 | 134,83 |
| 2019/08/15 | CH2276 | Female | Two y/o | Treatment (Wk 3) | Treatment | Feed Day | No | 08:55 | 08:00 - 08:59 | Late Morning  | 36,8 |     | 20,8   | 20,8  | 17,96 |        | 101,65 |
| 2019/08/15 | CH2276 | Female | Two y/o | Treatment (Wk 3) | Treatment | Feed Day | No | 09:00 | 09:00 - 09:59 | Late Morning  | 36,9 | 54  | 22,2   | 22,2  | 18,06 | 545,99 | 103,88 |
| 2019/08/15 | CH2276 | Female | Two y/o | Treatment (Wk 3) | Treatment | Feed Day | No | 09:05 | 09:00 - 09:59 | Late Morning  | 36,9 | 51  | 20,0   | 20,0  | 18,06 | 541,20 | 100,31 |
| 2019/08/15 | CH2276 | Female | Two y/o | Treatment (Wk 3) | Treatment | Feed Day | No | 09:10 | 09:00 - 09:59 | Late Morning  | 37,0 | 94  | 57,0   | 57,0  | 18,16 | 589,37 | 136,32 |
| 2019/08/15 | CH2276 | Female | Two y/o | Treatment (Wk 3) | Treatment | Feed Day | No | 09:15 | 09:00 - 09:59 | Late Morning  | 37,1 |     | 146,8  | 146,8 | 18,26 |        | 169,26 |
| 2019/08/15 | CH2276 | Female | Two y/o | Treatment (Wk 3) | Treatment | Feed Day | No | 09:20 | 09:00 - 09:59 | Late Morning  | 37,2 | 58  | 163,8  | 163,8 | 18,36 | 551,90 | 173,10 |
| 2019/08/15 | CH2276 | Female | Two y/o | Treatment (Wk 3) | Treatment | Feed Day | No | 09:25 | 09:00 - 09:59 | Late Morning  | 37,3 |     | 89,2   | 89,2  | 18,46 |        | 151,86 |
| 2019/08/15 | CH2276 | Female | Two y/o | Treatment (Wk 3) | Treatment | Feed Day | No | 09:30 | 09:00 - 09:59 | Late Morning  | 37,4 |     | 23,8   | 23,8  | 18,55 |        | 106,26 |



|            |        |        |         |                  |           |          |     |       |               |              |      |     |       |       |       |        |        |
|------------|--------|--------|---------|------------------|-----------|----------|-----|-------|---------------|--------------|------|-----|-------|-------|-------|--------|--------|
| 2019/08/15 | CH2276 | Female | Two y/o | Treatment (Wk 3) | Treatment | Feed Day | No  | 09:35 | 09:00 - 09:59 | Late Morning | 37,4 | 48  | 334,4 | 334,4 | 18,55 | 536,04 | 198,26 |
| 2019/08/15 | CH2276 | Female | Two y/o | Treatment (Wk 3) | Treatment | Feed Day | No  | 09:40 | 09:00 - 09:59 | Late Morning | 37,5 | 117 | 75,0  | 75,0  | 18,65 | 605,02 | 145,83 |
| 2019/08/15 | CH2276 | Female | Two y/o | Treatment (Wk 3) | Treatment | Feed Day | No  | 09:45 | 09:00 - 09:59 | Late Morning | 37,6 | 62  | 55,0  | 55,0  | 18,75 | 557,33 | 135,08 |
| 2019/08/15 | CH2276 | Female | Two y/o | Treatment (Wk 3) | Treatment | Feed Day | No  | 09:50 | 09:00 - 09:59 | Late Morning | 37,6 | 62  | 76,4  | 76,4  | 18,75 | 557,33 | 146,48 |
| 2019/08/15 | CH2276 | Female | Two y/o | Treatment (Wk 3) | Treatment | Feed Day | No  | 09:55 | 09:00 - 09:59 | Late Morning | 37,7 | 64  | 75,4  | 75,4  | 18,85 | 559,88 | 146,02 |
| 2019/08/15 | CH2276 | Female | Two y/o | Treatment (Wk 3) | Treatment | Feed Day | No  | 10:00 | 10:00 - 10:59 | Late Morning | 37,8 | 59  | 72,0  | 72,0  | 18,95 | 553,30 | 144,42 |
| 2019/08/15 | CH2276 | Female | Two y/o | Treatment (Wk 3) | Treatment | Feed Day | No  | 10:05 | 10:00 - 10:59 | Late Morning | 37,8 | 65  | 75,6  | 75,6  | 18,95 | 561,12 | 146,11 |
| 2019/08/15 | CH2276 | Female | Two y/o | Treatment (Wk 3) | Treatment | Feed Day | No  | 10:10 | 10:00 - 10:59 | Late Morning | 37,9 | 85  | 69,6  | 69,6  | 19,05 | 581,90 | 143,24 |
| 2019/08/15 | CH2276 | Female | Two y/o | Treatment (Wk 3) | Treatment | Feed Day | No  | 10:15 | 10:00 - 10:59 | Late Morning | 38,2 | 103 | 65,6  | 65,6  | 19,36 | 596,00 | 141,19 |
| 2019/08/15 | CH2276 | Female | Two y/o | Treatment (Wk 3) | Treatment | Feed Day | No  | 10:20 | 10:00 - 10:59 | Late Morning | 38,1 | 67  | 83,0  | 83,0  | 19,26 | 563,53 | 149,36 |
| 2019/08/15 | CH2276 | Female | Two y/o | Treatment (Wk 3) | Treatment | Feed Day | No  | 10:25 | 10:00 - 10:59 | Late Morning | 38,1 |     | 30,2  | 30,2  | 19,26 |        | 114,42 |
| 2019/08/15 | CH2276 | Female | Two y/o | Treatment (Wk 3) | Treatment | Feed Day | Yes | 10:30 | 10:00 - 10:59 | Late Morning | 38,1 | 154 | 68,8  | 68,8  | 19,26 | 623,58 | 142,84 |
| 2019/08/15 | CH2276 | Female | Two y/o | Treatment (Wk 3) | Treatment | Feed Day | Yes | 10:35 | 10:00 - 10:59 | Late Morning | 38,1 | 101 | 43,2  | 43,2  | 19,26 | 594,59 | 126,74 |
| 2019/08/15 | CH2276 | Female | Two y/o | Treatment (Wk 3) | Treatment | Feed Day | Yes | 10:40 | 10:00 - 10:59 | Late Morning | 38,0 | 69  | 51,4  | 51,4  | 19,15 | 565,86 | 132,74 |
| 2019/08/15 | CH2276 | Female | Two y/o | Treatment (Wk 3) | Treatment | Feed Day | Yes | 10:45 | 10:00 - 10:59 | Late Morning | 38,0 | 58  | 50,2  | 50,2  | 19,15 | 551,90 | 131,92 |
| 2019/08/15 | CH2276 | Female | Two y/o | Treatment (Wk 3) | Treatment | Feed Day | Yes | 10:50 | 10:00 - 10:59 | Late Morning | 38,0 | 54  | 52,4  | 52,4  | 19,15 | 545,99 | 133,41 |
| 2019/08/15 | CH2276 | Female | Two y/o | Treatment (Wk 3) | Treatment | Feed Day | Yes | 10:55 | 10:00 - 10:59 | Late Morning | 38,0 | 56  | 21,6  | 21,6  | 19,15 | 549,01 | 102,94 |
| 2019/08/15 | CH2276 | Female | Two y/o | Treatment (Wk 3) | Treatment | Feed Day | Yes | 11:00 | 11:00 - 11:59 | Late Morning | 37,9 | 60  | 38,6  | 38,6  | 19,05 | 554,67 | 122,86 |
| 2019/08/15 | CH2276 | Female | Two y/o | Treatment (Wk 3) | Treatment | Feed Day | Yes | 11:05 | 11:00 - 11:59 | Late Morning | 37,8 | 60  | 21,4  | 21,4  | 18,95 | 554,67 | 102,63 |
| 2019/08/15 | CH2276 | Female | Two y/o | Treatment (Wk 3) | Treatment | Feed Day | Yes | 11:10 | 11:00 - 11:59 | Late Morning | 37,8 | 62  | 26,8  | 26,8  | 18,95 | 557,33 | 110,33 |
| 2019/08/15 | CH2276 | Female | Two y/o | Treatment (Wk 3) | Treatment | Feed Day | Yes | 11:15 | 11:00 - 11:59 | Late Morning | 37,7 | 56  | 19,0  | 19,0  | 18,85 | 549,01 | 98,56  |
| 2019/08/15 | CH2276 | Female | Two y/o | Treatment (Wk 3) | Treatment | Feed Day | Yes | 11:20 | 11:00 - 11:59 | Late Morning | 37,7 |     | 18,4  | 18,4  | 18,85 |        | 97,47  |
| 2019/08/15 | CH2276 | Female | Two y/o | Treatment (Wk 3) | Treatment | Feed Day | Yes | 11:25 | 11:00 - 11:59 | Late Morning | 37,7 | 57  | 26,2  | 26,2  | 18,85 | 550,47 | 109,55 |
| 2019/08/15 | CH2276 | Female | Two y/o | Treatment (Wk 3) | Treatment | Feed Day | No  | 11:30 | 11:00 - 11:59 | Late Morning | 37,7 | 145 | 208,4 | 208,4 | 18,85 | 619,62 | 181,57 |
| 2019/08/15 | CH2276 | Female | Two y/o | Treatment (Wk 3) | Treatment | Feed Day | No  | 11:35 | 11:00 - 11:59 | Late Morning | 37,9 | 150 | 21,6  | 21,6  | 19,05 | 621,86 | 102,94 |
| 2019/08/15 | CH2276 | Female | Two y/o | Treatment (Wk 3) | Treatment | Feed Day | No  | 11:40 | 11:00 - 11:59 | Late Morning | 37,7 |     | 18,2  | 18,2  | 18,85 |        | 97,10  |
| 2019/08/15 | CH2276 | Female | Two y/o | Treatment (Wk 3) | Treatment | Feed Day | No  | 11:45 | 11:00 - 11:59 | Late Morning | 37,5 | 125 | 37,4  | 37,4  | 18,65 | 609,60 | 121,77 |
| 2019/08/15 | CH2276 | Female | Two y/o | Treatment (Wk 3) | Treatment | Feed Day | No  | 11:50 | 11:00 - 11:59 | Late Morning | 37,4 | 47  | 34,0  | 34,0  | 18,55 | 534,23 | 118,49 |
| 2019/08/15 | CH2276 | Female | Two y/o | Treatment (Wk 3) | Treatment | Feed Day | No  | 11:55 | 11:00 - 11:59 | Late Morning | 37,4 |     | 18,2  | 18,2  | 18,55 |        | 97,10  |
| 2019/08/15 | CH2276 | Female | Two y/o | Treatment (Wk 3) | Treatment | Feed Day | No  | 12:00 | 12:00 - 12:59 | Afternoon    | 37,4 | 102 | 113,0 | 113,0 | 18,55 | 595,30 | 160,11 |
| 2019/08/15 | CH2276 | Female | Two y/o | Treatment (Wk 3) | Treatment | Feed Day | No  | 12:05 | 12:00 - 12:59 | Afternoon    | 37,4 | 182 | 41,2  | 41,2  | 18,55 | 634,31 | 125,11 |
| 2019/08/15 | CH2276 | Female | Two y/o | Treatment (Wk 3) | Treatment | Feed Day | No  | 12:10 | 12:00 - 12:59 | Afternoon    | 37,4 | 57  | 115,6 | 115,6 | 18,55 | 550,47 | 160,90 |
| 2019/08/15 | CH2276 | Female | Two y/o | Treatment (Wk 3) | Treatment | Feed Day | No  | 12:15 | 12:00 - 12:59 | Afternoon    | 37,5 | 53  | 66,4  | 66,4  | 18,65 | 544,43 | 141,61 |
| 2019/08/15 | CH2276 | Female | Two y/o | Treatment (Wk 3) | Treatment | Feed Day | No  | 12:20 | 12:00 - 12:59 | Afternoon    | 37,6 | 113 | 66,0  | 66,0  | 18,75 | 602,58 | 141,40 |
| 2019/08/15 | CH2276 | Female | Two y/o | Treatment (Wk 3) | Treatment | Feed Day | No  | 12:25 | 12:00 - 12:59 | Afternoon    | 37,6 | 34  | 290,4 | 290,4 | 18,75 | 505,29 | 193,27 |
| 2019/08/15 | CH2276 | Female | Two y/o | Treatment (Wk 3) | Treatment | Feed Day | No  | 12:30 | 12:00 - 12:59 | Afternoon    | 37,7 |     | 25,8  | 25,8  | 18,85 |        | 109,02 |
| 2019/08/15 | CH2276 | Female | Two y/o | Treatment (Wk 3) | Treatment | Feed Day | No  | 12:35 | 12:00 - 12:59 | Afternoon    | 37,8 | 78  | 20,0  | 20,0  | 18,95 | 575,38 | 100,31 |
| 2019/08/15 | CH2276 | Female | Two y/o | Treatment (Wk 3) | Treatment | Feed Day | No  | 12:40 | 12:00 - 12:59 | Afternoon    | 37,8 | 92  | 35,0  | 35,0  | 18,95 | 587,78 | 119,49 |
| 2019/08/15 | CH2276 | Female | Two y/o | Treatment (Wk 3) | Treatment | Feed Day | No  | 12:45 | 12:00 - 12:59 | Afternoon    | 37,9 | 73  | 20,8  | 20,8  | 19,05 | 570,27 | 101,65 |
| 2019/08/15 | CH2276 | Female | Two y/o | Treatment (Wk 3) | Treatment | Feed Day | No  | 12:50 | 12:00 - 12:59 | Afternoon    | 37,9 |     | 13,4  | 13,4  | 19,05 |        | 86,68  |
| 2019/08/15 | CH2276 | Female | Two y/o | Treatment (Wk 3) | Treatment | Feed Day | No  | 12:55 | 12:00 - 12:59 | Afternoon    | 38,0 | 71  | 17,4  | 17,4  | 19,15 | 568,10 | 95,56  |
| 2019/08/15 | CH2276 | Female | Two y/o | Treatment (Wk 3) | Treatment | Feed Day | No  | 13:00 | 13:00 - 13:59 | Afternoon    | 38,0 |     | 13,0  | 13,0  | 19,15 |        | 85,65  |
| 2019/08/15 | CH2276 | Female | Two y/o | Treatment (Wk 3) | Treatment | Feed Day | No  | 13:05 | 13:00 - 13:59 | Afternoon    | 38,0 | 107 | 22,6  | 22,6  | 19,15 | 598,73 | 104,49 |
| 2019/08/15 | CH2276 | Female | Two y/o | Treatment (Wk 3) | Treatment | Feed Day | No  | 13:10 | 13:00 - 13:59 | Afternoon    | 38,1 | 71  | 22,0  | 22,0  | 19,26 | 568,10 | 103,57 |
| 2019/08/15 | CH2276 | Female | Two y/o | Treatment (Wk 3) | Treatment | Feed Day | No  | 13:15 | 13:00 - 13:59 | Afternoon    | 38,2 | 69  | 15,8  | 15,8  | 19,36 | 565,86 | 92,28  |
| 2019/08/15 | CH2276 | Female | Two y/o | Treatment (Wk 3) | Treatment | Feed Day | No  | 13:20 | 13:00 - 13:59 | Afternoon    | 38,2 | 70  | 20,8  | 20,8  | 19,36 | 566,99 | 101,65 |
| 2019/08/15 | CH2276 | Female | Two y/o | Treatment (Wk 3) | Treatment | Feed Day | No  | 13:25 | 13:00 - 13:59 | Afternoon    | 38,2 | 75  | 95,2  | 95,2  | 19,36 | 572,36 | 154,13 |
| 2019/08/15 | CH2276 | Female | Two y/o | Treatment (Wk 3) | Treatment | Feed Day | No  | 13:30 | 13:00 - 13:59 | Afternoon    | 38,2 | 63  | 87,6  | 87,6  | 19,36 | 558,62 | 151,23 |
| 2019/08/15 | CH2276 | Female | Two y/o | Treatment (Wk 3) | Treatment | Feed Day | No  | 13:35 | 13:00 - 13:59 | Afternoon    | 38,2 | 69  | 88,8  | 88,8  | 19,36 | 565,86 | 151,71 |
| 2019/08/15 | CH2276 | Female | Two y/o | Treatment (Wk 3) | Treatment | Feed Day | No  | 13:40 | 13:00 - 13:59 | Afternoon    | 38,1 | 67  | 63,4  | 63,4  | 19,26 | 563,53 | 140,00 |
| 2019/08/15 | CH2276 | Female | Two y/o | Treatment (Wk 3) | Treatment | Feed Day | No  | 13:45 | 13:00 - 13:59 | Afternoon    | 38,1 | 84  | 12,6  | 12,6  | 19,26 | 581,01 | 84,59  |
| 2019/08/15 | CH2276 | Female | Two y/o | Treatment (Wk 3) | Treatment | Feed Day | No  | 13:50 | 13:00 - 13:59 | Afternoon    | 38,1 | 66  | 19,6  | 19,6  | 19,26 | 562,34 | 99,63  |
| 2019/08/15 | CH2276 | Female | Two y/o | Treatment (Wk 3) | Treatment | Feed Day | No  | 13:55 | 13:00 - 13:59 | Afternoon    | 38,1 | 68  | 18,4  | 18,4  | 19,26 | 564,71 | 97,47  |
| 2019/08/15 | CH2276 | Female | Two y/o | Treatment (Wk 3) | Treatment | Feed Day | No  | 14:00 | 14:00 - 14:59 | Afternoon    | 38,1 | 67  | 21,4  | 21,4  | 19,26 | 563,53 | 102,63 |
| 2019/08/15 | CH2276 | Female | Two y/o | Treatment (Wk 3) | Treatment | Feed Day | No  | 14:05 | 14:00 - 14:59 | Afternoon    | 38,2 | 72  | 42,2  | 42,2  | 19,36 | 569,20 | 125,93 |
| 2019/08/15 | CH2276 | Female | Two y/o | Treatment (Wk 3) | Treatment | Feed Day | No  | 14:10 | 14:00 - 14:59 | Afternoon    | 38,2 | 67  | 37,0  | 37,0  | 19,36 | 563,53 | 121,40 |
| 2019/08/15 | CH2276 | Female | Two y/o | Treatment (Wk 3) | Treatment | Feed Day | No  | 14:15 | 14:00 - 14:59 | Afternoon    | 38,2 | 63  | 25,6  | 25,6  | 19,36 | 558,62 | 108,76 |
| 2019/08/15 | CH2276 | Female | Two y/o | Treatment (Wk 3) | Treatment | Feed Day | No  | 14:20 | 14:00 - 14:59 | Afternoon    | 38,2 | 69  | 14,8  | 14,8  | 19,36 | 565,86 | 90,05  |
| 2019/08/15 | CH2276 | Female | Two y/o | Treatment (Wk 3) | Treatment | Feed Day | No  | 14:25 | 14:00 - 14:59 | Afternoon    | 38,2 | 66  | 8,8   | 8,8   | 19,36 | 562,34 | 72,43  |
| 2019/08/15 | CH2276 | Female | Two y/o | Treatment (Wk 3) | Treatment | Feed Day | No  | 14:30 | 14:00 - 14:59 | Afternoon    | 38,2 | 68  | 16,0  | 16,0  | 19,36 | 564,71 | 92,71  |
| 2019/08/15 | CH2276 | Female | Two y/o | Treatment (Wk 3) | Treatment | Feed Day | No  | 14:35 | 14:00 - 14:59 | Afternoon    | 38,2 | 67  | 20,0  | 20,0  | 19,36 | 563,53 | 100,31 |
| 2019/08/15 | CH2276 | Female | Two y/o | Treatment (Wk 3) | Treatment | Feed Day | No  | 14:40 | 14:00 - 14:59 | Afternoon    | 38,2 | 65  | 15,0  | 15,0  | 19,36 | 561,12 | 90,51  |
| 2019/08/15 | CH2276 | Female | Two y/o | Treatment (Wk 3) | Treatment | Feed Day | No  | 14:45 | 14:00 - 14:59 | Afternoon    | 38,2 | 65  | 10,4  | 10,4  | 19,36 | 561,12 | 78,08  |
| 2019/08/15 | CH2276 | Female | Two y/o | Treatment (Wk 3) | Treatment | Feed Day | No  | 14:50 | 14:00 - 14:59 | Afternoon    | 38,2 | 90  | 17,4  | 17,4  | 19,36 | 586,16 | 95,56  |
| 2019/08/15 | CH2276 | Female | Two y/o | Treatment (Wk 3) | Treatment | Feed Day | No  | 14:55 | 14:00 - 14:59 | Afternoon    | 38,2 | 76  | 31,8  | 31,8  | 19,36 | 573,39 | 116,20 |
| 2019/08/15 | CH2276 | Female | Two y/o | Treatment (Wk 3) | Treatment | Feed Day | No  | 15:00 | 15:00 - 15:59 | Afternoon    | 38,3 | 67  | 69,0  | 69,0  | 19,46 | 563,53 | 142,94 |
| 2019/08/15 | CH2276 | Female | Two y/o | Treatment (Wk 3) | Treatment | Feed Day | No  | 15:05 | 15:00 - 15:59 | Afternoon    | 38,3 | 81  | 9,6   | 9,6   | 19,46 | 578,26 | 75,37  |
| 2019/08/15 | CH2276 | Female | Two y/o | Treatment (Wk 3) | Treatment | Feed Day | No  | 15:10 | 15:00 - 15:59 | Afternoon    | 38,3 | 58  | 64,2  | 64,2  | 19,46 | 551,90 | 140,44 |
| 2019/08/15 | CH2276 | Female | Two y/o | Treatment (Wk 3) | Treatment | Feed Day | No  | 15:15 | 15:00 - 15:59 | Afternoon    | 38,3 |     | 33,6  | 33,6  | 19,46 |        | 118,09 |
| 2019/08/15 | CH2276 | Female | Two y/o | Treatment (Wk 3) | Treatment | Feed Day | No  | 15:20 | 15:00 - 15:59 | Afternoon    | 38,2 | 85  | 22,0  | 22,0  | 19,36 | 581,90 | 103,57 |



|            |        |        |         |                  |           |          |     |       |               |           |      |     |       |       |       |        |        |
|------------|--------|--------|---------|------------------|-----------|----------|-----|-------|---------------|-----------|------|-----|-------|-------|-------|--------|--------|
| 2019/08/15 | CH2276 | Female | Two y/o | Treatment (Wk 3) | Treatment | Feed Day | No  | 15:25 | 15:00 - 15:59 | Afternoon | 38,1 | 73  | 24,0  | 24,0  | 19,26 | 570,27 | 106,55 |
| 2019/08/15 | CH2276 | Female | Two y/o | Treatment (Wk 3) | Treatment | Feed Day | Yes | 15:30 | 15:00 - 15:59 | Afternoon | 38,0 | 63  | 13,8  | 13,8  | 19,15 | 558,62 | 87,68  |
| 2019/08/15 | CH2276 | Female | Two y/o | Treatment (Wk 3) | Treatment | Feed Day | Yes | 15:35 | 15:00 - 15:59 | Afternoon | 38,0 | 62  | 49,2  | 49,2  | 19,15 | 557,33 | 131,23 |
| 2019/08/15 | CH2276 | Female | Two y/o | Treatment (Wk 3) | Treatment | Feed Day | Yes | 15:40 | 15:00 - 15:59 | Afternoon | 38,0 | 61  | 74,4  | 74,4  | 19,15 | 556,01 | 145,55 |
| 2019/08/15 | CH2276 | Female | Two y/o | Treatment (Wk 3) | Treatment | Feed Day | Yes | 15:45 | 15:00 - 15:59 | Afternoon | 38,0 | 78  | 66,2  | 66,2  | 19,15 | 575,38 | 141,50 |
| 2019/08/15 | CH2276 | Female | Two y/o | Treatment (Wk 3) | Treatment | Feed Day | Yes | 15:50 | 15:00 - 15:59 | Afternoon | 38,0 | 42  | 72,0  | 72,0  | 19,15 | 524,42 | 144,42 |
| 2019/08/15 | CH2276 | Female | Two y/o | Treatment (Wk 3) | Treatment | Feed Day | Yes | 15:55 | 15:00 - 15:59 | Afternoon | 37,9 | 76  | 4,8   | 4,8   | 19,05 | 573,39 | 52,04  |
| 2019/08/15 | CH2276 | Female | Two y/o | Treatment (Wk 3) | Treatment | Feed Day | Yes | 16:00 | 16:00 - 16:59 | Evening   | 37,9 |     | 29,8  | 29,8  | 19,05 |        | 113,97 |
| 2019/08/15 | CH2276 | Female | Two y/o | Treatment (Wk 3) | Treatment | Feed Day | Yes | 16:05 | 16:00 - 16:59 | Evening   | 37,9 | 64  | 86,8  | 86,8  | 19,05 | 559,88 | 150,91 |
| 2019/08/15 | CH2276 | Female | Two y/o | Treatment (Wk 3) | Treatment | Feed Day | Yes | 16:10 | 16:00 - 16:59 | Evening   | 37,9 | 67  | 52,8  | 52,8  | 19,05 | 563,53 | 133,67 |
| 2019/08/15 | CH2276 | Female | Two y/o | Treatment (Wk 3) | Treatment | Feed Day | Yes | 16:15 | 16:00 - 16:59 | Evening   | 37,9 | 83  | 49,8  | 49,8  | 19,05 | 580,11 | 131,65 |
| 2019/08/15 | CH2276 | Female | Two y/o | Treatment (Wk 3) | Treatment | Feed Day | Yes | 16:20 | 16:00 - 16:59 | Evening   | 38,0 | 110 | 12,0  | 12,0  | 19,15 | 600,69 | 82,93  |
| 2019/08/15 | CH2276 | Female | Two y/o | Treatment (Wk 3) | Treatment | Feed Day | Yes | 16:25 | 16:00 - 16:59 | Evening   | 38,0 | 67  | 29,2  | 29,2  | 19,15 | 563,53 | 113,27 |
| 2019/08/15 | CH2276 | Female | Two y/o | Treatment (Wk 3) | Treatment | Feed Day | No  | 16:30 | 16:00 - 16:59 | Evening   | 38,0 | 63  | 10,6  | 10,6  | 19,15 | 558,62 | 78,73  |
| 2019/08/15 | CH2276 | Female | Two y/o | Treatment (Wk 3) | Treatment | Feed Day | No  | 16:35 | 16:00 - 16:59 | Evening   | 38,1 | 64  | 74,0  | 74,0  | 19,26 | 559,88 | 145,37 |
| 2019/08/15 | CH2276 | Female | Two y/o | Treatment (Wk 3) | Treatment | Feed Day | No  | 16:40 | 16:00 - 16:59 | Evening   | 38,0 | 88  | 95,4  | 95,4  | 19,15 | 584,49 | 154,20 |
| 2019/08/15 | CH2276 | Female | Two y/o | Treatment (Wk 3) | Treatment | Feed Day | No  | 16:45 | 16:00 - 16:59 | Evening   | 38,0 | 66  | 83,4  | 83,4  | 19,15 | 562,34 | 149,52 |
| 2019/08/15 | CH2276 | Female | Two y/o | Treatment (Wk 3) | Treatment | Feed Day | No  | 16:50 | 16:00 - 16:59 | Evening   | 38,0 | 67  | 85,2  | 85,2  | 19,15 | 563,53 | 150,27 |
| 2019/08/15 | CH2276 | Female | Two y/o | Treatment (Wk 3) | Treatment | Feed Day | No  | 16:55 | 16:00 - 16:59 | Evening   | 38,1 | 59  | 81,2  | 81,2  | 19,26 | 553,30 | 148,59 |
| 2019/08/15 | CH2276 | Female | Two y/o | Treatment (Wk 3) | Treatment | Feed Day | No  | 17:00 | 17:00 - 17:59 | Evening   | 38,1 | 67  | 82,0  | 82,0  | 19,26 | 563,53 | 148,93 |
| 2019/08/15 | CH2276 | Female | Two y/o | Treatment (Wk 3) | Treatment | Feed Day | No  | 17:05 | 17:00 - 17:59 | Evening   | 38,2 | 64  | 83,4  | 83,4  | 19,36 | 559,88 | 149,52 |
| 2019/08/15 | CH2276 | Female | Two y/o | Treatment (Wk 3) | Treatment | Feed Day | No  | 17:10 | 17:00 - 17:59 | Evening   | 38,2 | 58  | 79,4  | 79,4  | 19,36 | 551,90 | 147,81 |
| 2019/08/15 | CH2276 | Female | Two y/o | Treatment (Wk 3) | Treatment | Feed Day | No  | 17:15 | 17:00 - 17:59 | Evening   | 38,2 | 66  | 82,4  | 82,4  | 19,36 | 562,34 | 149,10 |
| 2019/08/15 | CH2276 | Female | Two y/o | Treatment (Wk 3) | Treatment | Feed Day | No  | 17:20 | 17:00 - 17:59 | Evening   | 38,2 | 65  | 77,2  | 77,2  | 19,36 | 561,12 | 146,84 |
| 2019/08/15 | CH2276 | Female | Two y/o | Treatment (Wk 3) | Treatment | Feed Day | No  | 17:25 | 17:00 - 17:59 | Evening   | 38,1 | 66  | 77,8  | 77,8  | 19,26 | 562,34 | 147,11 |
| 2019/08/15 | CH2276 | Female | Two y/o | Treatment (Wk 3) | Treatment | Feed Day | No  | 17:30 | 17:00 - 17:59 | Evening   | 38,1 | 67  | 78,2  | 78,2  | 19,26 | 563,53 | 147,28 |
| 2019/08/15 | CH2276 | Female | Two y/o | Treatment (Wk 3) | Treatment | Feed Day | No  | 17:35 | 17:00 - 17:59 | Evening   | 38,0 | 67  | 83,0  | 83,0  | 19,15 | 563,53 | 149,36 |
| 2019/08/15 | CH2276 | Female | Two y/o | Treatment (Wk 3) | Treatment | Feed Day | No  | 17:40 | 17:00 - 17:59 | Evening   | 38,0 | 68  | 88,4  | 88,4  | 19,15 | 564,71 | 151,55 |
| 2019/08/15 | CH2276 | Female | Two y/o | Treatment (Wk 3) | Treatment | Feed Day | No  | 17:45 | 17:00 - 17:59 | Evening   | 38,0 | 78  | 31,8  | 31,8  | 19,15 | 575,38 | 116,20 |
| 2019/08/15 | CH2276 | Female | Two y/o | Treatment (Wk 3) | Treatment | Feed Day | No  | 17:50 | 17:00 - 17:59 | Evening   | 37,9 | 76  | 31,0  | 31,0  | 19,05 | 573,39 | 115,32 |
| 2019/08/15 | CH2276 | Female | Two y/o | Treatment (Wk 3) | Treatment | Feed Day | No  | 17:55 | 17:00 - 17:59 | Evening   | 37,8 | 104 | 65,6  | 65,6  | 18,95 | 596,69 | 141,19 |
| 2019/08/15 | CH2276 | Female | Two y/o | Treatment (Wk 3) | Treatment | Feed Day | No  | 18:00 | 18:00 - 18:59 | Evening   | 37,8 | 113 | 43,0  | 43,0  | 18,95 | 602,58 | 126,58 |
| 2019/08/15 | CH2276 | Female | Two y/o | Treatment (Wk 3) | Treatment | Feed Day | No  | 18:05 | 18:00 - 18:59 | Evening   | 37,8 |     | 173,4 | 173,4 | 18,95 |        | 175,10 |
| 2019/08/15 | CH2276 | Female | Two y/o | Treatment (Wk 3) | Treatment | Feed Day | No  | 18:10 | 18:00 - 18:59 | Evening   | 37,8 | 59  | 109,4 | 109,4 | 18,95 | 553,30 | 158,98 |
| 2019/08/15 | CH2276 | Female | Two y/o | Treatment (Wk 3) | Treatment | Feed Day | No  | 18:15 | 18:00 - 18:59 | Evening   | 37,9 |     | 98,0  | 98,0  | 19,05 |        | 155,14 |
| 2019/08/15 | CH2276 | Female | Two y/o | Treatment (Wk 3) | Treatment | Feed Day | No  | 18:20 | 18:00 - 18:59 | Evening   | 38,0 | 33  | 242,4 | 242,4 | 19,15 | 502,51 | 186,89 |
| 2019/08/15 | CH2276 | Female | Two y/o | Treatment (Wk 3) | Treatment | Feed Day | No  | 18:25 | 18:00 - 18:59 | Evening   | 38,0 |     | 141,0 | 141,0 | 19,15 |        | 167,85 |
| 2019/08/15 | CH2276 | Female | Two y/o | Treatment (Wk 3) | Treatment | Feed Day | No  | 18:30 | 18:00 - 18:59 | Evening   | 38,0 | 110 | 159,0 | 159,0 | 19,15 | 600,69 | 172,06 |
| 2019/08/15 | CH2276 | Female | Two y/o | Treatment (Wk 3) | Treatment | Feed Day | No  | 18:35 | 18:00 - 18:59 | Evening   | 38,0 | 115 | 328,2 | 328,2 | 19,15 | 603,82 | 197,60 |
| 2019/08/15 | CH2276 | Female | Two y/o | Treatment (Wk 3) | Treatment | Feed Day | No  | 18:40 | 18:00 - 18:59 | Evening   | 38,1 | 70  | 92,4  | 92,4  | 19,26 | 566,99 | 153,09 |
| 2019/08/15 | CH2276 | Female | Two y/o | Treatment (Wk 3) | Treatment | Feed Day | No  | 18:45 | 18:00 - 18:59 | Evening   | 38,2 | 59  | 274,2 | 274,2 | 19,36 | 553,30 | 191,24 |
| 2019/08/15 | CH2276 | Female | Two y/o | Treatment (Wk 3) | Treatment | Feed Day | No  | 18:50 | 18:00 - 18:59 | Evening   | 38,2 | 67  | 197,0 | 197,0 | 19,36 | 563,53 | 179,59 |
| 2019/08/15 | CH2276 | Female | Two y/o | Treatment (Wk 3) | Treatment | Feed Day | No  | 18:55 | 18:00 - 18:59 | Evening   | 38,2 | 131 | 198,4 | 198,4 | 19,36 | 612,80 | 179,84 |
| 2019/08/15 | CH2276 | Female | Two y/o | Treatment (Wk 3) | Treatment | Feed Day | No  | 19:00 | 19:00 - 19:59 | Evening   | 38,3 | 57  | 107,6 | 107,6 | 19,46 | 550,47 | 158,40 |
| 2019/08/15 | CH2276 | Female | Two y/o | Treatment (Wk 3) | Treatment | Feed Day | No  | 19:05 | 19:00 - 19:59 | Evening   | 38,2 | 106 | 60,6  | 60,6  | 19,36 | 598,06 | 138,44 |
| 2019/08/15 | CH2276 | Female | Two y/o | Treatment (Wk 3) | Treatment | Feed Day | No  | 19:10 | 19:00 - 19:59 | Evening   | 38,2 | 47  | 182,4 | 182,4 | 19,36 | 534,23 | 176,88 |
| 2019/08/15 | CH2276 | Female | Two y/o | Treatment (Wk 3) | Treatment | Feed Day | No  | 19:15 | 19:00 - 19:59 | Evening   | 38,2 | 64  | 14,4  | 14,4  | 19,36 | 559,88 | 89,12  |
| 2019/08/15 | CH2276 | Female | Two y/o | Treatment (Wk 3) | Treatment | Feed Day | No  | 19:20 | 19:00 - 19:59 | Evening   | 38,0 | 79  | 22,6  | 22,6  | 19,15 | 576,36 | 104,49 |
| 2019/08/15 | CH2276 | Female | Two y/o | Treatment (Wk 3) | Treatment | Feed Day | No  | 19:25 | 19:00 - 19:59 | Evening   | 38,0 | 67  | 30,0  | 30,0  | 19,15 | 563,53 | 114,20 |
| 2019/08/15 | CH2276 | Female | Two y/o | Treatment (Wk 3) | Treatment | Feed Day | No  | 19:30 | 19:00 - 19:59 | Evening   | 38,1 | 70  | 34,2  | 34,2  | 19,26 | 566,99 | 118,70 |
| 2019/08/15 | CH2276 | Female | Two y/o | Treatment (Wk 3) | Treatment | Feed Day | No  | 19:35 | 19:00 - 19:59 | Evening   | 38,2 | 65  | 35,4  | 35,4  | 19,36 | 561,12 | 119,88 |
| 2019/08/15 | CH2276 | Female | Two y/o | Treatment (Wk 3) | Treatment | Feed Day | No  | 19:40 | 19:00 - 19:59 | Evening   | 38,2 | 65  | 34,6  | 34,6  | 19,36 | 561,12 | 119,10 |
| 2019/08/15 | CH2276 | Female | Two y/o | Treatment (Wk 3) | Treatment | Feed Day | No  | 19:45 | 19:00 - 19:59 | Evening   | 38,2 | 68  | 23,2  | 23,2  | 19,36 | 564,71 | 105,39 |
| 2019/08/15 | CH2276 | Female | Two y/o | Treatment (Wk 3) | Treatment | Feed Day | No  | 19:50 | 19:00 - 19:59 | Evening   | 38,2 | 65  | 19,4  | 19,4  | 19,36 | 561,12 | 99,28  |
| 2019/08/15 | CH2276 | Female | Two y/o | Treatment (Wk 3) | Treatment | Feed Day | No  | 19:55 | 19:00 - 19:59 | Evening   | 38,2 | 66  | 18,8  | 18,8  | 19,36 | 562,34 | 98,20  |
| 2019/08/15 | CH2276 | Female | Two y/o | Treatment (Wk 3) | Treatment | Feed Day | No  | 20:00 | 20:00 - 20:59 | Night     | 38,2 | 68  | 19,0  | 19,0  | 19,36 | 564,71 | 98,56  |
| 2019/08/15 | CH2276 | Female | Two y/o | Treatment (Wk 3) | Treatment | Feed Day | No  | 20:05 | 20:00 - 20:59 | Night     | 38,2 | 64  | 11,6  | 11,6  | 19,36 | 559,88 | 81,78  |
| 2019/08/15 | CH2276 | Female | Two y/o | Treatment (Wk 3) | Treatment | Feed Day | No  | 20:10 | 20:00 - 20:59 | Night     | 38,2 | 69  | 10,6  | 10,6  | 19,36 | 565,86 | 78,73  |
| 2019/08/15 | CH2276 | Female | Two y/o | Treatment (Wk 3) | Treatment | Feed Day | No  | 20:15 | 20:00 - 20:59 | Night     | 38,2 | 60  | 15,4  | 15,4  | 19,36 | 554,67 | 91,41  |
| 2019/08/15 | CH2276 | Female | Two y/o | Treatment (Wk 3) | Treatment | Feed Day | No  | 20:20 | 20:00 - 20:59 | Night     | 38,2 | 57  | 13,2  | 13,2  | 19,36 | 550,47 | 86,17  |
| 2019/08/15 | CH2276 | Female | Two y/o | Treatment (Wk 3) | Treatment | Feed Day | No  | 20:25 | 20:00 - 20:59 | Night     | 38,2 | 40  | 15,8  | 15,8  | 19,36 | 520,09 | 92,28  |
| 2019/08/15 | CH2276 | Female | Two y/o | Treatment (Wk 3) | Treatment | Feed Day | No  | 20:30 | 20:00 - 20:59 | Night     | 38,2 | 68  | 15,2  | 15,2  | 19,36 | 564,71 | 90,96  |
| 2019/08/15 | CH2276 | Female | Two y/o | Treatment (Wk 3) | Treatment | Feed Day | No  | 20:35 | 20:00 - 20:59 | Night     | 38,2 | 62  | 18,0  | 18,0  | 19,36 | 557,33 | 96,72  |
| 2019/08/15 | CH2276 | Female | Two y/o | Treatment (Wk 3) | Treatment | Feed Day | No  | 20:40 | 20:00 - 20:59 | Night     | 38,2 | 67  | 27,0  | 27,0  | 19,36 | 563,53 | 110,58 |
| 2019/08/15 | CH2276 | Female | Two y/o | Treatment (Wk 3) | Treatment | Feed Day | No  | 20:45 | 20:00 - 20:59 | Night     | 38,2 | 62  | 29,4  | 29,4  | 19,36 | 557,33 | 113,50 |
| 2019/08/15 | CH2276 | Female | Two y/o | Treatment (Wk 3) | Treatment | Feed Day | No  | 20:50 | 20:00 - 20:59 | Night     | 38,2 | 62  | 31,4  | 31,4  | 19,36 | 557,33 | 115,76 |
| 2019/08/15 | CH2276 | Female | Two y/o | Treatment (Wk 3) | Treatment | Feed Day | No  | 20:55 | 20:00 - 20:59 | Night     | 38,2 | 62  | 29,0  | 29,0  | 19,36 | 557,33 | 113,03 |
| 2019/08/15 | CH2276 | Female | Two y/o | Treatment (Wk 3) | Treatment | Feed Day | No  | 21:00 | 21:00 - 21:59 | Night     | 38,2 | 70  | 33,2  | 33,2  | 19,36 | 566,99 | 117,68 |
| 2019/08/15 | CH2276 | Female | Two y/o | Treatment (Wk 3) | Treatment | Feed Day | No  | 21:05 | 21:00 - 21:59 | Night     | 38,2 | 64  | 43,0  | 43,0  | 19,36 | 559,88 | 126,58 |
| 2019/08/15 | CH2276 | Female | Two y/o | Treatment (Wk 3) | Treatment | Feed Day | No  | 21:10 | 21:00 - 21:59 | Night     | 38,1 | 64  | 86,2  | 86,2  | 19,26 | 559,88 | 150,67 |



|    |            |        |        |         |                  |           |          |    |       |               |               |      |     |      |      |       |        |        |
|----|------------|--------|--------|---------|------------------|-----------|----------|----|-------|---------------|---------------|------|-----|------|------|-------|--------|--------|
|    | 2019/08/15 | CH2276 | Female | Two y/o | Treatment (Wk 3) | Treatment | Feed Day | No | 21:15 | 21:00 - 21:59 | Night         | 38,1 | 59  | 90,0 | 90,0 | 19,26 | 553,30 | 152,17 |
|    | 2019/08/15 | CH2276 | Female | Two y/o | Treatment (Wk 3) | Treatment | Feed Day | No | 21:20 | 21:00 - 21:59 | Night         | 38,1 | 68  | 84,4 | 84,4 | 19,26 | 564,71 | 149,94 |
|    | 2019/08/15 | CH2276 | Female | Two y/o | Treatment (Wk 3) | Treatment | Feed Day | No | 21:25 | 21:00 - 21:59 | Night         | 38,1 | 68  | 85,8 | 85,8 | 19,26 | 564,71 | 150,51 |
|    | 2019/08/15 | CH2276 | Female | Two y/o | Treatment (Wk 3) | Treatment | Feed Day | No | 21:30 | 21:00 - 21:59 | Night         | 38,0 | 60  | 83,4 | 83,4 | 19,15 | 554,67 | 149,52 |
|    | 2019/08/15 | CH2276 | Female | Two y/o | Treatment (Wk 3) | Treatment | Feed Day | No | 21:35 | 21:00 - 21:59 | Night         | 38,0 | 86  | 84,4 | 84,4 | 19,15 | 582,77 | 149,94 |
|    | 2019/08/15 | CH2276 | Female | Two y/o | Treatment (Wk 3) | Treatment | Feed Day | No | 21:40 | 21:00 - 21:59 | Night         | 38,0 | 86  | 82,6 | 82,6 | 19,15 | 582,77 | 149,19 |
|    | 2019/08/15 | CH2276 | Female | Two y/o | Treatment (Wk 3) | Treatment | Feed Day | No | 21:45 | 21:00 - 21:59 | Night         | 38,0 | 67  | 81,8 | 81,8 | 19,15 | 563,53 | 148,85 |
|    | 2019/08/15 | CH2276 | Female | Two y/o | Treatment (Wk 3) | Treatment | Feed Day | No | 21:50 | 21:00 - 21:59 | Night         | 37,9 | 63  | 87,8 | 87,8 | 19,05 | 558,62 | 151,31 |
|    | 2019/08/15 | CH2276 | Female | Two y/o | Treatment (Wk 3) | Treatment | Feed Day | No | 21:55 | 21:00 - 21:59 | Night         | 37,9 | 63  | 88,8 | 88,8 | 19,05 | 558,62 | 151,71 |
|    | 2019/08/15 | CH2276 | Female | Two y/o | Treatment (Wk 3) | Treatment | Feed Day | No | 22:00 | 22:00 - 22:59 | Night         | 37,9 | 64  | 90,2 | 90,2 | 19,05 | 559,88 | 152,25 |
|    | 2019/08/15 | CH2276 | Female | Two y/o | Treatment (Wk 3) | Treatment | Feed Day | No | 22:05 | 22:00 - 22:59 | Night         | 37,8 | 67  | 87,6 | 87,6 | 18,95 | 563,53 | 151,23 |
|    | 2019/08/15 | CH2276 | Female | Two y/o | Treatment (Wk 3) | Treatment | Feed Day | No | 22:10 | 22:00 - 22:59 | Night         | 37,8 | 71  | 90,6 | 90,6 | 18,95 | 568,10 | 152,40 |
|    | 2019/08/15 | CH2276 | Female | Two y/o | Treatment (Wk 3) | Treatment | Feed Day | No | 22:15 | 22:00 - 22:59 | Night         | 37,7 | 63  | 86,4 | 86,4 | 18,85 | 558,62 | 150,75 |
|    | 2019/08/15 | CH2276 | Female | Two y/o | Treatment (Wk 3) | Treatment | Feed Day | No | 22:20 | 22:00 - 22:59 | Night         | 37,7 | 57  | 88,6 | 88,6 | 18,85 | 550,47 | 151,63 |
|    | 2019/08/15 | CH2276 | Female | Two y/o | Treatment (Wk 3) | Treatment | Feed Day | No | 22:25 | 22:00 - 22:59 | Night         | 37,7 | 88  | 90,0 | 90,0 | 18,85 | 584,49 | 152,17 |
|    | 2019/08/15 | CH2276 | Female | Two y/o | Treatment (Wk 3) | Treatment | Feed Day | No | 22:30 | 22:00 - 22:59 | Night         | 37,7 | 87  | 76,0 | 76,0 | 18,85 | 583,64 | 146,29 |
|    | 2019/08/15 | CH2276 | Female | Two y/o | Treatment (Wk 3) | Treatment | Feed Day | No | 22:35 | 22:00 - 22:59 | Night         | 37,7 |     | 77,2 | 77,2 | 18,85 |        | 146,84 |
|    | 2019/08/15 | CH2276 | Female | Two y/o | Treatment (Wk 3) | Treatment | Feed Day | No | 22:40 | 22:00 - 22:59 | Night         | 37,6 |     | 6,8  | 6,8  | 18,75 |        | 63,74  |
|    | 2019/08/15 | CH2276 | Female | Two y/o | Treatment (Wk 3) | Treatment | Feed Day | No | 22:45 | 22:00 - 22:59 | Night         | 37,5 | 104 | 45,0 | 45,0 | 18,65 | 596,69 | 128,15 |
|    | 2019/08/15 | CH2276 | Female | Two y/o | Treatment (Wk 3) | Treatment | Feed Day | No | 22:50 | 22:00 - 22:59 | Night         | 37,5 | 69  | 13,2 | 13,2 | 18,65 | 565,86 | 86,17  |
|    | 2019/08/15 | CH2276 | Female | Two y/o | Treatment (Wk 3) | Treatment | Feed Day | No | 22:55 | 22:00 - 22:59 | Night         | 37,5 | 57  | 15,6 | 15,6 | 18,65 | 550,47 | 91,85  |
|    | 2019/08/15 | CH2276 | Female | Two y/o | Treatment (Wk 3) | Treatment | Feed Day | No | 23:00 | 23:00 - 23:59 | Night         | 37,5 | 63  | 13,8 | 13,8 | 18,65 | 558,62 | 87,68  |
|    | 2019/08/15 | CH2276 | Female | Two y/o | Treatment (Wk 3) | Treatment | Feed Day | No | 23:05 | 23:00 - 23:59 | Night         | 37,5 | 63  | 12,0 | 12,0 | 18,65 | 558,62 | 82,93  |
|    | 2019/08/15 | CH2276 | Female | Two y/o | Treatment (Wk 3) | Treatment | Feed Day | No | 23:10 | 23:00 - 23:59 | Night         | 37,5 | 64  | 9,8  | 9,8  | 18,65 | 559,88 | 76,07  |
|    | 2019/08/15 | CH2276 | Female | Two y/o | Treatment (Wk 3) | Treatment | Feed Day | No | 23:15 | 23:00 - 23:59 | Night         | 37,5 | 90  | 4,0  | 4,0  | 18,65 | 586,16 | 45,94  |
|    | 2019/08/15 | CH2276 | Female | Two y/o | Treatment (Wk 3) | Treatment | Feed Day | No | 23:20 | 23:00 - 23:59 | Night         | 37,5 | 86  | 11,6 | 11,6 | 18,65 | 582,77 | 81,78  |
|    | 2019/08/15 | CH2276 | Female | Two y/o | Treatment (Wk 3) | Treatment | Feed Day | No | 23:25 | 23:00 - 23:59 | Night         | 37,5 | 89  | 8,0  | 8,0  | 18,65 | 585,33 | 69,22  |
|    | 2019/08/15 | CH2276 | Female | Two y/o | Treatment (Wk 3) | Treatment | Feed Day | No | 23:30 | 23:00 - 23:59 | Night         | 37,4 | 64  | 3,4  | 3,4  | 18,55 | 559,88 | 40,51  |
|    | 2019/08/15 | CH2276 | Female | Two y/o | Treatment (Wk 3) | Treatment | Feed Day | No | 23:35 | 23:00 - 23:59 | Night         | 37,4 | 62  | 5,0  | 5,0  | 18,55 | 557,33 | 53,41  |
|    | 2019/08/15 | CH2276 | Female | Two y/o | Treatment (Wk 3) | Treatment | Feed Day | No | 23:40 | 23:00 - 23:59 | Night         | 37,4 | 62  | 4,8  | 4,8  | 18,55 | 557,33 | 52,04  |
|    | 2019/08/15 | CH2276 | Female | Two y/o | Treatment (Wk 3) | Treatment | Feed Day | No | 23:45 | 23:00 - 23:59 | Night         | 37,4 | 59  | 4,0  | 4,0  | 18,55 | 553,30 | 45,94  |
|    | 2019/08/15 | CH2276 | Female | Two y/o | Treatment (Wk 3) | Treatment | Feed Day | No | 23:50 | 23:00 - 23:59 | Night         | 37,4 | 92  | 4,2  | 4,2  | 18,55 | 587,78 | 47,57  |
|    | 2019/08/15 | CH2276 | Female | Two y/o | Treatment (Wk 3) | Treatment | Feed Day | No | 23:55 | 23:00 - 23:59 | Night         | 37,4 | 59  | 3,0  | 3,0  | 18,55 | 553,30 | 36,34  |
| 59 | 2019/08/16 | CH2276 | Female | Two y/o | Treatment (Wk 3) | Treatment | Feed Day | No | 00:00 | 00:00 - 00:59 | Early Morning | 37,4 | 83  | 27,0 | 27,0 | 18,55 | 580,11 | 110,58 |
|    | 2019/08/16 | CH2276 | Female | Two y/o | Treatment (Wk 3) | Treatment | Feed Day | No | 00:05 | 00:00 - 00:59 | Early Morning | 37,4 | 69  | 52,4 | 52,4 | 18,55 | 565,86 | 133,41 |
|    | 2019/08/16 | CH2276 | Female | Two y/o | Treatment (Wk 3) | Treatment | Feed Day | No | 00:10 | 00:00 - 00:59 | Early Morning | 37,3 | 64  | 48,4 | 48,4 | 18,46 | 559,88 | 130,66 |
|    | 2019/08/16 | CH2276 | Female | Two y/o | Treatment (Wk 3) | Treatment | Feed Day | No | 00:15 | 00:00 - 00:59 | Early Morning | 37,3 | 68  | 15,4 | 15,4 | 18,46 | 564,71 | 91,41  |
|    | 2019/08/16 | CH2276 | Female | Two y/o | Treatment (Wk 3) | Treatment | Feed Day | No | 00:20 | 00:00 - 00:59 | Early Morning | 37,3 | 69  | 6,4  | 6,4  | 18,46 | 565,86 | 61,70  |
|    | 2019/08/16 | CH2276 | Female | Two y/o | Treatment (Wk 3) | Treatment | Feed Day | No | 00:25 | 00:00 - 00:59 | Early Morning | 37,4 | 55  | 15,0 | 15,0 | 18,55 | 547,52 | 90,51  |
|    | 2019/08/16 | CH2276 | Female | Two y/o | Treatment (Wk 3) | Treatment | Feed Day | No | 00:30 | 00:00 - 00:59 | Early Morning | 37,4 | 70  | 3,8  | 3,8  | 18,55 | 566,99 | 44,22  |
|    | 2019/08/16 | CH2276 | Female | Two y/o | Treatment (Wk 3) | Treatment | Feed Day | No | 00:35 | 00:00 - 00:59 | Early Morning | 37,4 | 63  | 13,4 | 13,4 | 18,55 | 558,62 | 86,68  |
|    | 2019/08/16 | CH2276 | Female | Two y/o | Treatment (Wk 3) | Treatment | Feed Day | No | 00:40 | 00:00 - 00:59 | Early Morning | 37,4 | 61  | 20,4 | 20,4 | 18,55 | 556,01 | 100,99 |
|    | 2019/08/16 | CH2276 | Female | Two y/o | Treatment (Wk 3) | Treatment | Feed Day | No | 00:45 | 00:00 - 00:59 | Early Morning | 37,4 | 66  | 18,4 | 18,4 | 18,55 | 562,34 | 97,47  |
|    | 2019/08/16 | CH2276 | Female | Two y/o | Treatment (Wk 3) | Treatment | Feed Day | No | 00:50 | 00:00 - 00:59 | Early Morning | 37,3 | 62  | 8,0  | 8,0  | 18,46 | 557,33 | 69,22  |
|    | 2019/08/16 | CH2276 | Female | Two y/o | Treatment (Wk 3) | Treatment | Feed Day | No | 00:55 | 00:00 - 00:59 | Early Morning | 37,3 | 94  | 10,2 | 10,2 | 18,46 | 589,37 | 77,43  |
|    | 2019/08/16 | CH2276 | Female | Two y/o | Treatment (Wk 3) | Treatment | Feed Day | No | 01:00 | 01:00 - 01:59 | Early Morning | 37,3 | 83  | 16,2 | 16,2 | 18,46 | 580,11 | 93,13  |
|    | 2019/08/16 | CH2276 | Female | Two y/o | Treatment (Wk 3) | Treatment | Feed Day | No | 01:05 | 01:00 - 01:59 | Early Morning | 37,4 | 59  | 15,4 | 15,4 | 18,55 | 553,30 | 91,41  |
|    | 2019/08/16 | CH2276 | Female | Two y/o | Treatment (Wk 3) | Treatment | Feed Day | No | 01:10 | 01:00 - 01:59 | Early Morning | 37,4 | 79  | 18,6 | 18,6 | 18,55 | 576,36 | 97,84  |
|    | 2019/08/16 | CH2276 | Female | Two y/o | Treatment (Wk 3) | Treatment | Feed Day | No | 01:15 | 01:00 - 01:59 | Early Morning | 37,4 | 59  | 13,2 | 13,2 | 18,55 | 553,30 | 86,17  |
|    | 2019/08/16 | CH2276 | Female | Two y/o | Treatment (Wk 3) | Treatment | Feed Day | No | 01:20 | 01:00 - 01:59 | Early Morning | 37,4 | 64  | 9,8  | 9,8  | 18,55 | 559,88 | 76,07  |
|    | 2019/08/16 | CH2276 | Female | Two y/o | Treatment (Wk 3) | Treatment | Feed Day | No | 01:25 | 01:00 - 01:59 | Early Morning | 37,4 | 66  | 12,6 | 12,6 | 18,55 | 562,34 | 84,59  |
|    | 2019/08/16 | CH2276 | Female | Two y/o | Treatment (Wk 3) | Treatment | Feed Day | No | 01:30 | 01:00 - 01:59 | Early Morning | 37,3 | 70  | 14,6 | 14,6 | 18,46 | 566,99 | 89,59  |
|    | 2019/08/16 | CH2276 | Female | Two y/o | Treatment (Wk 3) | Treatment | Feed Day | No | 01:35 | 01:00 - 01:59 | Early Morning | 37,3 | 68  | 9,8  | 9,8  | 18,46 | 564,71 | 76,07  |
|    | 2019/08/16 | CH2276 | Female | Two y/o | Treatment (Wk 3) | Treatment | Feed Day | No | 01:40 | 01:00 - 01:59 | Early Morning | 37,3 | 60  | 14,8 | 14,8 | 18,46 | 554,67 | 90,05  |
|    | 2019/08/16 | CH2276 | Female | Two y/o | Treatment (Wk 3) | Treatment | Feed Day | No | 01:45 | 01:00 - 01:59 | Early Morning | 37,3 | 76  | 21,6 | 21,6 | 18,46 | 573,39 | 102,94 |
|    | 2019/08/16 | CH2276 | Female | Two y/o | Treatment (Wk 3) | Treatment | Feed Day | No | 01:50 | 01:00 - 01:59 | Early Morning | 37,2 | 63  | 20,8 | 20,8 | 18,36 | 558,62 | 101,65 |
|    | 2019/08/16 | CH2276 | Female | Two y/o | Treatment (Wk 3) | Treatment | Feed Day | No | 01:55 | 01:00 - 01:59 | Early Morning | 37,2 | 86  | 18,8 | 18,8 | 18,36 | 582,77 | 98,20  |
|    | 2019/08/16 | CH2276 | Female | Two y/o | Treatment (Wk 3) | Treatment | Feed Day | No | 02:00 | 02:00 - 02:59 | Early Morning | 37,1 | 68  | 18,2 | 18,2 | 18,26 | 564,71 | 97,10  |
|    | 2019/08/16 | CH2276 | Female | Two y/o | Treatment (Wk 3) | Treatment | Feed Day | No | 02:05 | 02:00 - 02:59 | Early Morning | 37,1 | 90  | 18,4 | 18,4 | 18,26 | 586,16 | 97,47  |
|    | 2019/08/16 | CH2276 | Female | Two y/o | Treatment (Wk 3) | Treatment | Feed Day | No | 02:10 | 02:00 - 02:59 | Early Morning | 37,0 | 88  | 26,2 | 26,2 | 18,16 | 584,49 | 109,55 |
|    | 2019/08/16 | CH2276 | Female | Two y/o | Treatment (Wk 3) | Treatment | Feed Day | No | 02:15 | 02:00 - 02:59 | Early Morning | 37,1 | 96  | 7,0  | 7,0  | 18,26 | 590,91 | 64,72  |
|    | 2019/08/16 | CH2276 | Female | Two y/o | Treatment (Wk 3) | Treatment | Feed Day | No | 02:20 | 02:00 - 02:59 | Early Morning | 37,1 | 38  | 7,2  | 7,2  | 18,26 | 515,48 | 65,66  |
|    | 2019/08/16 | CH2276 | Female | Two y/o | Treatment (Wk 3) | Treatment | Feed Day | No | 02:25 | 02:00 - 02:59 | Early Morning | 37,1 | 53  | 7,2  | 7,2  | 18,26 | 544,43 | 65,66  |
|    | 2019/08/16 | CH2276 | Female | Two y/o | Treatment (Wk 3) | Treatment | Feed Day | No | 02:30 | 02:00 - 02:59 | Early Morning | 37,3 | 80  | 2,4  | 2,4  | 18,46 | 577,31 | 28,91  |
|    | 2019/08/16 | CH2276 | Female | Two y/o | Treatment (Wk 3) | Treatment | Feed Day | No | 02:35 | 02:00 - 02:59 | Early Morning | 37,3 | 65  | 3,6  | 3,6  | 18,46 | 561,12 | 42,42  |
|    | 2019/08/16 | CH2276 | Female | Two y/o | Treatment (Wk 3) | Treatment | Feed Day | No | 02:40 | 02:00 - 02:59 | Early Morning | 37,3 | 59  | 28,6 | 28,6 | 18,46 | 553,30 | 112,56 |
|    | 2019/08/16 | CH2276 | Female | Two y/o | Treatment (Wk 3) | Treatment | Feed Day | No | 02:45 | 02:00 - 02:59 | Early Morning | 37,3 | 124 | 12,6 | 12,6 | 18,46 | 609,04 | 84,59  |
|    | 2019/08/16 | CH2276 | Female | Two y/o | Treatment (Wk 3) | Treatment | Feed Day | No | 02:50 | 02:00 - 02:59 | Early Morning | 37,3 | 104 | 20,0 | 20,0 | 18,46 | 596,69 | 100,31 |
|    | 2019/08/16 | CH2276 | Female | Two y/o | Treatment (Wk 3) | Treatment | Feed Day | No | 02:55 | 02:00 - 02:59 | Early Morning | 37,4 | 74  | 8,6  | 8,6  | 18,55 | 571,33 | 71,66  |
|    | 2019/08/16 | CH2276 | Female | Two y/o | Treatment (Wk 3) | Treatment | Feed Day | No | 03:00 | 03:00 - 03:59 | Early Morning | 37,3 | 64  | 3,0  | 3,0  | 18,46 | 559,88 | 36,34  |



|            |        |        |         |                  |           |          |    |       |               |               |      |     |       |       |       |        |        |
|------------|--------|--------|---------|------------------|-----------|----------|----|-------|---------------|---------------|------|-----|-------|-------|-------|--------|--------|
| 2019/08/16 | CH2276 | Female | Two y/o | Treatment (Wk 3) | Treatment | Feed Day | No | 03:05 | 03:00 - 03:59 | Early Morning | 37,2 | 74  | 11,4  | 11,4  | 18,36 | 571,33 | 81,19  |
| 2019/08/16 | CH2276 | Female | Two y/o | Treatment (Wk 3) | Treatment | Feed Day | No | 03:10 | 03:00 - 03:59 | Early Morning | 37,3 | 92  | 16,8  | 16,8  | 18,46 | 587,78 | 94,37  |
| 2019/08/16 | CH2276 | Female | Two y/o | Treatment (Wk 3) | Treatment | Feed Day | No | 03:15 | 03:00 - 03:59 | Early Morning | 37,3 | 57  | 20,0  | 20,0  | 18,46 | 550,47 | 100,31 |
| 2019/08/16 | CH2276 | Female | Two y/o | Treatment (Wk 3) | Treatment | Feed Day | No | 03:20 | 03:00 - 03:59 | Early Morning | 37,4 | 92  | 19,2  | 19,2  | 18,55 | 587,78 | 98,92  |
| 2019/08/16 | CH2276 | Female | Two y/o | Treatment (Wk 3) | Treatment | Feed Day | No | 03:25 | 03:00 - 03:59 | Early Morning | 37,4 | 63  | 12,6  | 12,6  | 18,55 | 558,62 | 84,59  |
| 2019/08/16 | CH2276 | Female | Two y/o | Treatment (Wk 3) | Treatment | Feed Day | No | 03:30 | 03:00 - 03:59 | Early Morning | 37,3 | 60  | 14,8  | 14,8  | 18,46 | 554,67 | 90,05  |
| 2019/08/16 | CH2276 | Female | Two y/o | Treatment (Wk 3) | Treatment | Feed Day | No | 03:35 | 03:00 - 03:59 | Early Morning | 37,3 | 94  | 24,0  | 24,0  | 18,46 | 589,37 | 106,55 |
| 2019/08/16 | CH2276 | Female | Two y/o | Treatment (Wk 3) | Treatment | Feed Day | No | 03:40 | 03:00 - 03:59 | Early Morning | 37,3 | 65  | 25,4  | 25,4  | 18,46 | 561,12 | 108,49 |
| 2019/08/16 | CH2276 | Female | Two y/o | Treatment (Wk 3) | Treatment | Feed Day | No | 03:45 | 03:00 - 03:59 | Early Morning | 37,1 | 66  | 27,2  | 27,2  | 18,26 | 562,34 | 110,83 |
| 2019/08/16 | CH2276 | Female | Two y/o | Treatment (Wk 3) | Treatment | Feed Day | No | 03:50 | 03:00 - 03:59 | Early Morning | 37,1 | 59  | 20,6  | 20,6  | 18,26 | 553,30 | 101,32 |
| 2019/08/16 | CH2276 | Female | Two y/o | Treatment (Wk 3) | Treatment | Feed Day | No | 03:55 | 03:00 - 03:59 | Early Morning | 37,0 | 64  | 19,2  | 19,2  | 18,16 | 559,88 | 98,92  |
| 2019/08/16 | CH2276 | Female | Two y/o | Treatment (Wk 3) | Treatment | Feed Day | No | 04:00 | 04:00 - 04:59 | Morning       | 36,9 | 63  | 26,0  | 26,0  | 18,06 | 558,62 | 109,29 |
| 2019/08/16 | CH2276 | Female | Two y/o | Treatment (Wk 3) | Treatment | Feed Day | No | 04:05 | 04:00 - 04:59 | Morning       | 36,9 | 76  | 20,0  | 20,0  | 18,06 | 573,39 | 100,31 |
| 2019/08/16 | CH2276 | Female | Two y/o | Treatment (Wk 3) | Treatment | Feed Day | No | 04:10 | 04:00 - 04:59 | Morning       | 36,9 |     | 15,2  | 15,2  | 18,06 |        | 90,96  |
| 2019/08/16 | CH2276 | Female | Two y/o | Treatment (Wk 3) | Treatment | Feed Day | No | 04:15 | 04:00 - 04:59 | Morning       | 36,8 | 57  | 19,2  | 19,2  | 17,96 | 550,47 | 98,92  |
| 2019/08/16 | CH2276 | Female | Two y/o | Treatment (Wk 3) | Treatment | Feed Day | No | 04:20 | 04:00 - 04:59 | Morning       | 36,7 | 58  | 16,8  | 16,8  | 17,87 | 551,90 | 94,37  |
| 2019/08/16 | CH2276 | Female | Two y/o | Treatment (Wk 3) | Treatment | Feed Day | No | 04:25 | 04:00 - 04:59 | Morning       | 36,7 | 117 | 25,2  | 25,2  | 17,87 | 605,02 | 108,22 |
| 2019/08/16 | CH2276 | Female | Two y/o | Treatment (Wk 3) | Treatment | Feed Day | No | 04:30 | 04:00 - 04:59 | Morning       | 36,8 | 54  | 21,2  | 21,2  | 17,96 | 545,99 | 102,31 |
| 2019/08/16 | CH2276 | Female | Two y/o | Treatment (Wk 3) | Treatment | Feed Day | No | 04:35 | 04:00 - 04:59 | Morning       | 37,0 | 73  | 18,6  | 18,6  | 18,16 | 570,27 | 97,84  |
| 2019/08/16 | CH2276 | Female | Two y/o | Treatment (Wk 3) | Treatment | Feed Day | No | 04:40 | 04:00 - 04:59 | Morning       | 37,1 | 59  | 9,0   | 9,0   | 18,26 | 553,30 | 73,19  |
| 2019/08/16 | CH2276 | Female | Two y/o | Treatment (Wk 3) | Treatment | Feed Day | No | 04:45 | 04:00 - 04:59 | Morning       | 37,1 | 60  | 7,6   | 7,6   | 18,26 | 554,67 | 67,49  |
| 2019/08/16 | CH2276 | Female | Two y/o | Treatment (Wk 3) | Treatment | Feed Day | No | 04:50 | 04:00 - 04:59 | Morning       | 37,1 | 54  | 9,2   | 9,2   | 18,26 | 545,99 | 73,94  |
| 2019/08/16 | CH2276 | Female | Two y/o | Treatment (Wk 3) | Treatment | Feed Day | No | 04:55 | 04:00 - 04:59 | Morning       | 37,1 | 51  | 12,0  | 12,0  | 18,26 | 541,20 | 82,93  |
| 2019/08/16 | CH2276 | Female | Two y/o | Treatment (Wk 3) | Treatment | Feed Day | No | 05:00 | 05:00 - 05:59 | Morning       | 37,1 | 53  | 10,0  | 10,0  | 18,26 | 544,43 | 76,76  |
| 2019/08/16 | CH2276 | Female | Two y/o | Treatment (Wk 3) | Treatment | Feed Day | No | 05:05 | 05:00 - 05:59 | Morning       | 37,0 | 51  | 13,4  | 13,4  | 18,16 | 541,20 | 86,68  |
| 2019/08/16 | CH2276 | Female | Two y/o | Treatment (Wk 3) | Treatment | Feed Day | No | 05:10 | 05:00 - 05:59 | Morning       | 37,0 | 52  | 9,0   | 9,0   | 18,16 | 542,83 | 73,19  |
| 2019/08/16 | CH2276 | Female | Two y/o | Treatment (Wk 3) | Treatment | Feed Day | No | 05:15 | 05:00 - 05:59 | Morning       | 37,0 | 63  | 4,2   | 4,2   | 18,16 | 558,62 | 47,57  |
| 2019/08/16 | CH2276 | Female | Two y/o | Treatment (Wk 3) | Treatment | Feed Day | No | 05:20 | 05:00 - 05:59 | Morning       | 36,9 | 64  | 6,4   | 6,4   | 18,06 | 559,88 | 61,70  |
| 2019/08/16 | CH2276 | Female | Two y/o | Treatment (Wk 3) | Treatment | Feed Day | No | 05:25 | 05:00 - 05:59 | Morning       | 36,9 | 88  | 9,6   | 9,6   | 18,06 | 584,49 | 75,37  |
| 2019/08/16 | CH2276 | Female | Two y/o | Treatment (Wk 3) | Treatment | Feed Day | No | 05:30 | 05:00 - 05:59 | Morning       | 36,8 | 60  | 7,4   | 7,4   | 17,96 | 554,67 | 66,59  |
| 2019/08/16 | CH2276 | Female | Two y/o | Treatment (Wk 3) | Treatment | Feed Day | No | 05:35 | 05:00 - 05:59 | Morning       | 36,8 | 92  | 24,0  | 24,0  | 17,96 | 587,78 | 106,55 |
| 2019/08/16 | CH2276 | Female | Two y/o | Treatment (Wk 3) | Treatment | Feed Day | No | 05:40 | 05:00 - 05:59 | Morning       | 36,8 | 60  | 42,2  | 42,2  | 17,96 | 554,67 | 125,93 |
| 2019/08/16 | CH2276 | Female | Two y/o | Treatment (Wk 3) | Treatment | Feed Day | No | 05:45 | 05:00 - 05:59 | Morning       | 36,8 | 67  | 145,2 | 145,2 | 17,96 | 563,53 | 168,88 |
| 2019/08/16 | CH2276 | Female | Two y/o | Treatment (Wk 3) | Treatment | Feed Day | No | 05:50 | 05:00 - 05:59 | Morning       | 36,9 |     | 100,0 | 100,0 | 18,06 |        | 155,84 |
| 2019/08/16 | CH2276 | Female | Two y/o | Treatment (Wk 3) | Treatment | Feed Day | No | 05:55 | 05:00 - 05:59 | Morning       | 36,8 | 107 | 56,4  | 56,4  | 17,96 | 598,73 | 135,95 |
| 2019/08/16 | CH2276 | Female | Two y/o | Treatment (Wk 3) | Treatment | Feed Day | No | 06:00 | 06:00 - 06:59 | Morning       | 36,9 | 123 | 214,0 | 214,0 | 18,06 | 608,49 | 182,50 |
| 2019/08/16 | CH2276 | Female | Two y/o | Treatment (Wk 3) | Treatment | Feed Day | No | 06:05 | 06:00 - 06:59 | Morning       | 37,1 | 197 | 506,8 | 506,8 | 18,26 | 639,25 | 213,03 |
| 2019/08/16 | CH2276 | Female | Two y/o | Treatment (Wk 3) | Treatment | Feed Day | No | 06:10 | 06:00 - 06:59 | Morning       | 37,3 | 64  | 277,4 | 277,4 | 18,46 | 559,88 | 191,65 |
| 2019/08/16 | CH2276 | Female | Two y/o | Treatment (Wk 3) | Treatment | Feed Day | No | 06:15 | 06:00 - 06:59 | Morning       | 37,4 | 169 | 470,4 | 470,4 | 18,55 | 629,60 | 210,37 |
| 2019/08/16 | CH2276 | Female | Two y/o | Treatment (Wk 3) | Treatment | Feed Day | No | 06:20 | 06:00 - 06:59 | Morning       | 37,5 | 118 | 268,2 | 268,2 | 18,65 | 605,61 | 190,46 |
| 2019/08/16 | CH2276 | Female | Two y/o | Treatment (Wk 3) | Treatment | Feed Day | No | 06:25 | 06:00 - 06:59 | Morning       | 37,5 | 103 | 400,2 | 400,2 | 18,65 | 596,00 | 204,63 |
| 2019/08/16 | CH2276 | Female | Two y/o | Treatment (Wk 3) | Treatment | Feed Day | No | 06:30 | 06:00 - 06:59 | Morning       | 37,6 | 105 | 108,4 | 108,4 | 18,75 | 597,38 | 158,66 |
| 2019/08/16 | CH2276 | Female | Two y/o | Treatment (Wk 3) | Treatment | Feed Day | No | 06:35 | 06:00 - 06:59 | Morning       | 37,6 | 113 | 222,6 | 222,6 | 18,75 | 602,58 | 183,89 |
| 2019/08/16 | CH2276 | Female | Two y/o | Treatment (Wk 3) | Treatment | Feed Day | No | 06:40 | 06:00 - 06:59 | Morning       | 37,8 | 128 | 132,2 | 132,2 | 18,95 | 611,22 | 165,59 |
| 2019/08/16 | CH2276 | Female | Two y/o | Treatment (Wk 3) | Treatment | Feed Day | No | 06:45 | 06:00 - 06:59 | Morning       | 37,9 | 65  | 157,6 | 157,6 | 19,05 | 561,12 | 171,75 |
| 2019/08/16 | CH2276 | Female | Two y/o | Treatment (Wk 3) | Treatment | Feed Day | No | 06:50 | 06:00 - 06:59 | Morning       | 37,8 |     | 83,8  | 83,8  | 18,95 |        | 149,69 |
| 2019/08/16 | CH2276 | Female | Two y/o | Treatment (Wk 3) | Treatment | Feed Day | No | 06:55 | 06:00 - 06:59 | Morning       | 37,8 | 103 | 88,0  | 88,0  | 18,95 | 596,00 | 151,39 |
| 2019/08/16 | CH2276 | Female | Two y/o | Treatment (Wk 3) | Treatment | Feed Day | No | 07:00 | 07:00 - 07:59 | Morning       | 37,7 | 72  | 113,6 | 113,6 | 18,85 | 569,20 | 160,29 |
| 2019/08/16 | CH2276 | Female | Two y/o | Treatment (Wk 3) | Treatment | Feed Day | No | 07:05 | 07:00 - 07:59 | Morning       | 37,7 | 128 | 244,8 | 244,8 | 18,85 | 611,22 | 187,24 |
| 2019/08/16 | CH2276 | Female | Two y/o | Treatment (Wk 3) | Treatment | Feed Day | No | 07:10 | 07:00 - 07:59 | Morning       | 37,7 | 103 | 112,6 | 112,6 | 18,85 | 596,00 | 159,98 |
| 2019/08/16 | CH2276 | Female | Two y/o | Treatment (Wk 3) | Treatment | Feed Day | No | 07:15 | 07:00 - 07:59 | Morning       | 37,6 |     | 385,4 | 385,4 | 18,75 |        | 203,29 |
| 2019/08/16 | CH2276 | Female | Two y/o | Treatment (Wk 3) | Treatment | Feed Day | No | 07:20 | 07:00 - 07:59 | Morning       | 37,6 |     | 302,0 | 302,0 | 18,75 |        | 194,66 |
| 2019/08/16 | CH2276 | Female | Two y/o | Treatment (Wk 3) | Treatment | Feed Day | No | 07:25 | 07:00 - 07:59 | Morning       | 37,6 | 108 | 370,8 | 370,8 | 18,75 | 599,39 | 201,92 |
| 2019/08/16 | CH2276 | Female | Two y/o | Treatment (Wk 3) | Treatment | Feed Day | No | 07:30 | 07:00 - 07:59 | Morning       | 37,6 | 112 | 82,0  | 82,0  | 18,75 | 601,96 | 148,93 |
| 2019/08/16 | CH2276 | Female | Two y/o | Treatment (Wk 3) | Treatment | Feed Day | No | 07:35 | 07:00 - 07:59 | Morning       | 37,6 | 83  | 116,0 | 116,0 | 18,75 | 580,11 | 161,02 |
| 2019/08/16 | CH2276 | Female | Two y/o | Treatment (Wk 3) | Treatment | Feed Day | No | 07:40 | 07:00 - 07:59 | Morning       | 37,9 | 98  | 50,0  | 50,0  | 19,05 | 592,41 | 131,79 |
| 2019/08/16 | CH2276 | Female | Two y/o | Treatment (Wk 3) | Treatment | Feed Day | No | 07:45 | 07:00 - 07:59 | Morning       | 37,9 |     | 46,2  | 46,2  | 19,05 |        | 129,06 |
| 2019/08/16 | CH2276 | Female | Two y/o | Treatment (Wk 3) | Treatment | Feed Day | No | 07:50 | 07:00 - 07:59 | Morning       | 37,8 |     | 235,8 | 235,8 | 18,95 |        | 185,92 |
| 2019/08/16 | CH2276 | Female | Two y/o | Treatment (Wk 3) | Treatment | Feed Day | No | 07:55 | 07:00 - 07:59 | Morning       | 37,7 |     | 451,4 | 451,4 | 18,85 |        | 208,91 |
| 2019/08/16 | CH2276 | Female | Two y/o | Treatment (Wk 3) | Treatment | Feed Day | No | 08:00 | 08:00 - 08:59 | Late Morning  | 37,6 | 95  | 72,0  | 72,0  | 18,75 | 590,14 | 144,42 |
| 2019/08/16 | CH2276 | Female | Two y/o | Treatment (Wk 3) | Treatment | Feed Day | No | 08:05 | 08:00 - 08:59 | Late Morning  | 37,8 | 46  | 250,4 | 250,4 | 18,95 | 532,38 | 188,04 |
| 2019/08/16 | CH2276 | Female | Two y/o | Treatment (Wk 3) | Treatment | Feed Day | No | 08:10 | 08:00 - 08:59 | Late Morning  | 38,3 | 114 | 71,0  | 71,0  | 19,46 | 603,20 | 143,93 |
| 2019/08/16 | CH2276 | Female | Two y/o | Treatment (Wk 3) | Treatment | Feed Day | No | 08:15 | 08:00 - 08:59 | Late Morning  | 38,2 | 106 | 304,6 | 304,6 | 19,36 | 598,06 | 194,96 |
| 2019/08/16 | CH2276 | Female | Two y/o | Treatment (Wk 3) | Treatment | Feed Day | No | 08:20 | 08:00 - 08:59 | Late Morning  | 38,1 | 60  | 14,0  | 14,0  | 19,26 | 554,67 | 88,17  |
| 2019/08/16 | CH2276 | Female | Two y/o | Treatment (Wk 3) | Treatment | Feed Day | No | 08:25 | 08:00 - 08:59 | Late Morning  | 37,9 | 82  | 15,8  | 15,8  | 19,05 | 579,19 | 92,28  |
| 2019/08/16 | CH2276 | Female | Two y/o | Treatment (Wk 3) | Treatment | Feed Day | No | 08:30 | 08:00 - 08:59 | Late Morning  | 37,9 | 62  | 25,8  | 25,8  | 19,05 | 557,33 | 109,02 |
| 2019/08/16 | CH2276 | Female | Two y/o | Treatment (Wk 3) | Treatment | Feed Day | No | 08:35 | 08:00 - 08:59 | Late Morning  | 37,8 | 103 | 51,2  | 51,2  | 18,95 | 596,00 | 132,61 |
| 2019/08/16 | CH2276 | Female | Two y/o | Treatment (Wk 3) | Treatment | Feed Day | No | 08:40 | 08:00 - 08:59 | Late Morning  | 37,8 | 53  | 112,4 | 112,4 | 18,95 | 544,43 | 159,92 |
| 2019/08/16 | CH2276 | Female | Two y/o | Treatment (Wk 3) | Treatment | Feed Day | No | 08:45 | 08:00 - 08:59 | Late Morning  | 37,8 | 131 | 222,8 | 222,8 | 18,95 | 612,80 | 183,92 |
| 2019/08/16 | CH2276 | Female | Two y/o | Treatment (Wk 3) | Treatment | Feed Day | No | 08:50 | 08:00 - 08:59 | Late Morning  | 37,9 | 98  | 109,8 | 109,8 | 19,05 | 592,41 | 159,11 |



|            |        |        |         |                  |           |          |     |       |               |              |      |     |       |       |       |        |        |
|------------|--------|--------|---------|------------------|-----------|----------|-----|-------|---------------|--------------|------|-----|-------|-------|-------|--------|--------|
| 2019/08/16 | CH2276 | Female | Two y/o | Treatment (Wk 3) | Treatment | Feed Day | No  | 08:55 | 08:00 - 08:59 | Late Morning | 37,8 | 152 | 476,8 | 476,8 | 18,95 | 622,73 | 210,86 |
| 2019/08/16 | CH2276 | Female | Two y/o | Treatment (Wk 3) | Treatment | Feed Day | No  | 09:00 | 09:00 - 09:59 | Late Morning | 37,9 |     | 77,8  | 77,8  | 19,05 |        | 147,11 |
| 2019/08/16 | CH2276 | Female | Two y/o | Treatment (Wk 3) | Treatment | Feed Day | No  | 09:05 | 09:00 - 09:59 | Late Morning | 38,0 | 110 | 76,6  | 76,6  | 19,15 | 600,69 | 146,57 |
| 2019/08/16 | CH2276 | Female | Two y/o | Treatment (Wk 3) | Treatment | Feed Day | No  | 09:10 | 09:00 - 09:59 | Late Morning | 37,9 |     | 28,6  | 28,6  | 19,05 |        | 112,56 |
| 2019/08/16 | CH2276 | Female | Two y/o | Treatment (Wk 3) | Treatment | Feed Day | No  | 09:15 | 09:00 - 09:59 | Late Morning | 37,9 |     | 21,8  | 21,8  | 19,05 |        | 103,26 |
| 2019/08/16 | CH2276 | Female | Two y/o | Treatment (Wk 3) | Treatment | Feed Day | No  | 09:20 | 09:00 - 09:59 | Late Morning | 37,9 | 60  | 29,4  | 29,4  | 19,05 | 554,67 | 113,50 |
| 2019/08/16 | CH2276 | Female | Two y/o | Treatment (Wk 3) | Treatment | Feed Day | No  | 09:25 | 09:00 - 09:59 | Late Morning | 37,8 | 63  | 37,4  | 37,4  | 18,95 | 558,62 | 121,77 |
| 2019/08/16 | CH2276 | Female | Two y/o | Treatment (Wk 3) | Treatment | Feed Day | No  | 09:30 | 09:00 - 09:59 | Late Morning | 37,6 | 61  | 44,0  | 44,0  | 18,75 | 556,01 | 127,37 |
| 2019/08/16 | CH2276 | Female | Two y/o | Treatment (Wk 3) | Treatment | Feed Day | No  | 09:35 | 09:00 - 09:59 | Late Morning | 37,5 | 60  | 28,6  | 28,6  | 18,65 | 554,67 | 112,56 |
| 2019/08/16 | CH2276 | Female | Two y/o | Treatment (Wk 3) | Treatment | Feed Day | No  | 09:40 | 09:00 - 09:59 | Late Morning | 37,5 | 65  | 45,4  | 45,4  | 18,65 | 561,12 | 128,45 |
| 2019/08/16 | CH2276 | Female | Two y/o | Treatment (Wk 3) | Treatment | Feed Day | No  | 09:45 | 09:00 - 09:59 | Late Morning | 37,4 | 57  | 35,0  | 35,0  | 18,55 | 550,47 | 119,49 |
| 2019/08/16 | CH2276 | Female | Two y/o | Treatment (Wk 3) | Treatment | Feed Day | No  | 09:50 | 09:00 - 09:59 | Late Morning | 37,4 | 61  | 51,8  | 51,8  | 18,55 | 556,01 | 133,01 |
| 2019/08/16 | CH2276 | Female | Two y/o | Treatment (Wk 3) | Treatment | Feed Day | No  | 09:55 | 09:00 - 09:59 | Late Morning | 37,4 | 60  | 51,2  | 51,2  | 18,55 | 554,67 | 132,61 |
| 2019/08/16 | CH2276 | Female | Two y/o | Treatment (Wk 3) | Treatment | Feed Day | No  | 10:00 | 10:00 - 10:59 | Late Morning | 37,4 | 50  | 42,8  | 42,8  | 18,55 | 539,52 | 126,42 |
| 2019/08/16 | CH2276 | Female | Two y/o | Treatment (Wk 3) | Treatment | Feed Day | No  | 10:05 | 10:00 - 10:59 | Late Morning | 37,4 |     | 53,4  | 53,4  | 18,55 |        | 134,06 |
| 2019/08/16 | CH2276 | Female | Two y/o | Treatment (Wk 3) | Treatment | Feed Day | No  | 10:10 | 10:00 - 10:59 | Late Morning | 37,5 | 73  | 30,4  | 30,4  | 18,65 | 570,27 | 114,65 |
| 2019/08/16 | CH2276 | Female | Two y/o | Treatment (Wk 3) | Treatment | Feed Day | No  | 10:15 | 10:00 - 10:59 | Late Morning | 37,5 | 99  | 315,0 | 315,0 | 18,65 | 593,14 | 196,15 |
| 2019/08/16 | CH2276 | Female | Two y/o | Treatment (Wk 3) | Treatment | Feed Day | No  | 10:20 | 10:00 - 10:59 | Late Morning | 37,5 | 107 | 37,8  | 37,8  | 18,65 | 598,73 | 122,14 |
| 2019/08/16 | CH2276 | Female | Two y/o | Treatment (Wk 3) | Treatment | Feed Day | No  | 10:25 | 10:00 - 10:59 | Late Morning | 37,6 | 104 | 66,2  | 66,2  | 18,75 | 596,69 | 141,50 |
| 2019/08/16 | CH2276 | Female | Two y/o | Treatment (Wk 3) | Treatment | Feed Day | Yes | 10:30 | 10:00 - 10:59 | Late Morning | 37,6 | 62  | 68,4  | 68,4  | 18,75 | 557,33 | 142,64 |
| 2019/08/16 | CH2276 | Female | Two y/o | Treatment (Wk 3) | Treatment | Feed Day | Yes | 10:35 | 10:00 - 10:59 | Late Morning | 37,7 | 107 | 35,0  | 35,0  | 18,85 | 598,73 | 119,49 |
| 2019/08/16 | CH2276 | Female | Two y/o | Treatment (Wk 3) | Treatment | Feed Day | Yes | 10:40 | 10:00 - 10:59 | Late Morning | 37,8 | 100 | 46,2  | 46,2  | 18,95 | 593,87 | 129,06 |
| 2019/08/16 | CH2276 | Female | Two y/o | Treatment (Wk 3) | Treatment | Feed Day | Yes | 10:45 | 10:00 - 10:59 | Late Morning | 37,9 | 92  | 181,8 | 181,8 | 19,05 | 587,78 | 176,76 |
| 2019/08/16 | CH2276 | Female | Two y/o | Treatment (Wk 3) | Treatment | Feed Day | Yes | 10:50 | 10:00 - 10:59 | Late Morning | 37,9 | 67  | 189,8 | 189,8 | 19,05 | 563,53 | 178,28 |
| 2019/08/16 | CH2276 | Female | Two y/o | Treatment (Wk 3) | Treatment | Feed Day | Yes | 10:55 | 10:00 - 10:59 | Late Morning | 38,2 | 67  | 227,8 | 227,8 | 19,36 | 563,53 | 184,70 |
| 2019/08/16 | CH2276 | Female | Two y/o | Treatment (Wk 3) | Treatment | Feed Day | Yes | 11:00 | 11:00 - 11:59 | Late Morning | 38,4 |     | 231,2 | 231,2 | 19,56 |        | 185,22 |
| 2019/08/16 | CH2276 | Female | Two y/o | Treatment (Wk 3) | Treatment | Feed Day | Yes | 11:05 | 11:00 - 11:59 | Late Morning | 38,4 | 104 | 178,0 | 178,0 | 19,56 | 596,69 | 176,02 |
| 2019/08/16 | CH2276 | Female | Two y/o | Treatment (Wk 3) | Treatment | Feed Day | Yes | 11:10 | 11:00 - 11:59 | Late Morning | 38,4 | 125 | 281,6 | 281,6 | 19,56 | 609,60 | 192,18 |
| 2019/08/16 | CH2276 | Female | Two y/o | Treatment (Wk 3) | Treatment | Feed Day | Yes | 11:15 | 11:00 - 11:59 | Late Morning | 38,4 | 126 | 101,0 | 101,0 | 19,56 | 610,14 | 156,19 |
| 2019/08/16 | CH2276 | Female | Two y/o | Treatment (Wk 3) | Treatment | Feed Day | Yes | 11:20 | 11:00 - 11:59 | Late Morning | 38,5 |     | 226,6 | 226,6 | 19,66 |        | 184,52 |
| 2019/08/16 | CH2276 | Female | Two y/o | Treatment (Wk 3) | Treatment | Feed Day | Yes | 11:25 | 11:00 - 11:59 | Late Morning | 38,5 | 134 | 89,4  | 89,4  | 19,66 | 614,33 | 151,94 |
| 2019/08/16 | CH2276 | Female | Two y/o | Treatment (Wk 3) | Treatment | Feed Day | No  | 11:30 | 11:00 - 11:59 | Late Morning | 38,5 | 128 | 43,6  | 43,6  | 19,66 | 611,22 | 127,06 |
| 2019/08/16 | CH2276 | Female | Two y/o | Treatment (Wk 3) | Treatment | Feed Day | No  | 11:35 | 11:00 - 11:59 | Late Morning | 38,5 | 126 | 65,2  | 65,2  | 19,66 | 610,14 | 140,97 |
| 2019/08/16 | CH2276 | Female | Two y/o | Treatment (Wk 3) | Treatment | Feed Day | No  | 11:40 | 11:00 - 11:59 | Late Morning | 38,5 | 124 | 59,4  | 59,4  | 19,66 | 609,04 | 137,75 |
| 2019/08/16 | CH2276 | Female | Two y/o | Treatment (Wk 3) | Treatment | Feed Day | No  | 11:45 | 11:00 - 11:59 | Late Morning | 38,6 | 131 | 51,0  | 51,0  | 19,76 | 612,80 | 132,47 |
| 2019/08/16 | CH2276 | Female | Two y/o | Treatment (Wk 3) | Treatment | Feed Day | No  | 11:50 | 11:00 - 11:59 | Late Morning | 38,6 | 125 | 43,4  | 43,4  | 19,76 | 609,60 | 126,90 |
| 2019/08/16 | CH2276 | Female | Two y/o | Treatment (Wk 3) | Treatment | Feed Day | No  | 11:55 | 11:00 - 11:59 | Late Morning | 38,6 | 100 | 74,4  | 74,4  | 19,76 | 593,87 | 145,55 |
| 2019/08/16 | CH2276 | Female | Two y/o | Treatment (Wk 3) | Treatment | Feed Day | No  | 12:00 | 12:00 - 12:59 | Afternoon    | 38,6 | 123 | 65,0  | 65,0  | 19,76 | 608,49 | 140,87 |
| 2019/08/16 | CH2276 | Female | Two y/o | Treatment (Wk 3) | Treatment | Feed Day | No  | 12:05 | 12:00 - 12:59 | Afternoon    | 38,6 | 120 | 22,2  | 22,2  | 19,76 | 606,78 | 103,88 |
| 2019/08/16 | CH2276 | Female | Two y/o | Treatment (Wk 3) | Treatment | Feed Day | No  | 12:10 | 12:00 - 12:59 | Afternoon    | 38,6 |     | 144,2 | 144,2 | 19,76 |        | 168,64 |
| 2019/08/16 | CH2276 | Female | Two y/o | Treatment (Wk 3) | Treatment | Feed Day | No  | 12:15 | 12:00 - 12:59 | Afternoon    | 38,6 | 112 | 41,8  | 41,8  | 19,76 | 601,96 | 125,60 |
| 2019/08/16 | CH2276 | Female | Two y/o | Treatment (Wk 3) | Treatment | Feed Day | No  | 12:20 | 12:00 - 12:59 | Afternoon    | 38,6 | 140 | 53,6  | 53,6  | 19,76 | 617,28 | 134,19 |
| 2019/08/16 | CH2276 | Female | Two y/o | Treatment (Wk 3) | Treatment | Feed Day | No  | 12:25 | 12:00 - 12:59 | Afternoon    | 38,6 | 131 | 36,4  | 36,4  | 19,76 | 612,80 | 120,84 |
| 2019/08/16 | CH2276 | Female | Two y/o | Treatment (Wk 3) | Treatment | Feed Day | No  | 12:30 | 12:00 - 12:59 | Afternoon    | 38,6 | 103 | 86,8  | 86,8  | 19,76 | 596,00 | 150,91 |
| 2019/08/16 | CH2276 | Female | Two y/o | Treatment (Wk 3) | Treatment | Feed Day | No  | 12:35 | 12:00 - 12:59 | Afternoon    | 38,7 | 174 | 108,4 | 108,4 | 19,87 | 631,46 | 158,66 |
| 2019/08/16 | CH2276 | Female | Two y/o | Treatment (Wk 3) | Treatment | Feed Day | No  | 12:40 | 12:00 - 12:59 | Afternoon    | 38,6 | 138 | 51,4  | 51,4  | 19,76 | 616,31 | 132,74 |
| 2019/08/16 | CH2276 | Female | Two y/o | Treatment (Wk 3) | Treatment | Feed Day | No  | 12:45 | 12:00 - 12:59 | Afternoon    | 38,6 | 118 | 31,2  | 31,2  | 19,76 | 605,61 | 115,54 |
| 2019/08/16 | CH2276 | Female | Two y/o | Treatment (Wk 3) | Treatment | Feed Day | No  | 12:50 | 12:00 - 12:59 | Afternoon    | 38,6 | 93  | 26,2  | 26,2  | 19,76 | 588,58 | 109,55 |
| 2019/08/16 | CH2276 | Female | Two y/o | Treatment (Wk 3) | Treatment | Feed Day | No  | 12:55 | 12:00 - 12:59 | Afternoon    | 38,6 |     | 18,2  | 18,2  | 19,76 |        | 97,10  |
| 2019/08/16 | CH2276 | Female | Two y/o | Treatment (Wk 3) | Treatment | Feed Day | No  | 13:00 | 13:00 - 13:59 | Afternoon    | 38,6 | 120 | 74,6  | 74,6  | 19,76 | 606,78 | 145,65 |
| 2019/08/16 | CH2276 | Female | Two y/o | Treatment (Wk 3) | Treatment | Feed Day | No  | 13:05 | 13:00 - 13:59 | Afternoon    | 38,6 | 87  | 78,8  | 78,8  | 19,76 | 583,64 | 147,55 |
| 2019/08/16 | CH2276 | Female | Two y/o | Treatment (Wk 3) | Treatment | Feed Day | No  | 13:10 | 13:00 - 13:59 | Afternoon    | 38,6 | 103 | 113,8 | 113,8 | 19,76 | 596,00 | 160,35 |
| 2019/08/16 | CH2276 | Female | Two y/o | Treatment (Wk 3) | Treatment | Feed Day | No  | 13:15 | 13:00 - 13:59 | Afternoon    | 38,6 | 106 | 151,0 | 151,0 | 19,76 | 598,06 | 170,25 |
| 2019/08/16 | CH2276 | Female | Two y/o | Treatment (Wk 3) | Treatment | Feed Day | No  | 13:20 | 13:00 - 13:59 | Afternoon    | 38,5 | 120 | 44,0  | 44,0  | 19,66 | 606,78 | 127,37 |
| 2019/08/16 | CH2276 | Female | Two y/o | Treatment (Wk 3) | Treatment | Feed Day | No  | 13:25 | 13:00 - 13:59 | Afternoon    | 38,5 | 117 | 50,2  | 50,2  | 19,66 | 605,02 | 131,92 |
| 2019/08/16 | CH2276 | Female | Two y/o | Treatment (Wk 3) | Treatment | Feed Day | No  | 13:30 | 13:00 - 13:59 | Afternoon    | 38,5 | 160 | 41,4  | 41,4  | 19,66 | 626,07 | 125,27 |
| 2019/08/16 | CH2276 | Female | Two y/o | Treatment (Wk 3) | Treatment | Feed Day | No  | 13:35 | 13:00 - 13:59 | Afternoon    | 38,6 | 83  | 12,4  | 12,4  | 19,76 | 580,11 | 84,04  |
| 2019/08/16 | CH2276 | Female | Two y/o | Treatment (Wk 3) | Treatment | Feed Day | No  | 13:40 | 13:00 - 13:59 | Afternoon    | 38,6 | 88  | 12,6  | 12,6  | 19,76 | 584,49 | 84,59  |
| 2019/08/16 | CH2276 | Female | Two y/o | Treatment (Wk 3) | Treatment | Feed Day | No  | 13:45 | 13:00 - 13:59 | Afternoon    | 38,5 | 72  | 22,6  | 22,6  | 19,66 | 569,20 | 104,49 |
| 2019/08/16 | CH2276 | Female | Two y/o | Treatment (Wk 3) | Treatment | Feed Day | No  | 13:50 | 13:00 - 13:59 | Afternoon    | 38,5 |     | 53,2  | 53,2  | 19,66 |        | 133,93 |
| 2019/08/16 | CH2276 | Female | Two y/o | Treatment (Wk 3) | Treatment | Feed Day | No  | 13:55 | 13:00 - 13:59 | Afternoon    | 38,5 |     | 97,0  | 97,0  | 19,66 |        | 154,78 |
| 2019/08/16 | CH2276 | Female | Two y/o | Treatment (Wk 3) | Treatment | Feed Day | No  | 14:00 | 14:00 - 14:59 | Afternoon    | 38,4 | 89  | 16,6  | 16,6  | 19,56 | 585,33 | 93,96  |
| 2019/08/16 | CH2276 | Female | Two y/o | Treatment (Wk 3) | Treatment | Feed Day | No  | 14:05 | 14:00 - 14:59 | Afternoon    | 38,4 | 81  | 26,6  | 26,6  | 19,56 | 578,26 | 110,07 |
| 2019/08/16 | CH2276 | Female | Two y/o | Treatment (Wk 3) | Treatment | Feed Day | No  | 14:10 | 14:00 - 14:59 | Afternoon    | 38,4 | 93  | 17,6  | 17,6  | 19,56 | 588,58 | 95,95  |
| 2019/08/16 | CH2276 | Female | Two y/o | Treatment (Wk 3) | Treatment | Feed Day | No  | 14:15 | 14:00 - 14:59 | Afternoon    | 38,4 |     | 13,4  | 13,4  | 19,56 |        | 86,68  |
| 2019/08/16 | CH2276 | Female | Two y/o | Treatment (Wk 3) | Treatment | Feed Day | No  | 14:20 | 14:00 - 14:59 | Afternoon    | 38,4 |     | 18,0  | 18,0  | 19,56 |        | 96,72  |
| 2019/08/16 | CH2276 | Female | Two y/o | Treatment (Wk 3) | Treatment | Feed Day | No  | 14:25 | 14:00 - 14:59 | Afternoon    | 38,4 | 101 | 15,8  | 15,8  | 19,56 | 594,59 | 92,28  |
| 2019/08/16 | CH2276 | Female | Two y/o | Treatment (Wk 3) | Treatment | Feed Day | No  | 14:30 | 14:00 - 14:59 | Afternoon    | 38,4 | 74  | 25,4  | 25,4  | 19,56 | 571,33 | 108,49 |
| 2019/08/16 | CH2276 | Female | Two y/o | Treatment (Wk 3) | Treatment | Feed Day | No  | 14:35 | 14:00 - 14:59 | Afternoon    | 38,4 | 76  | 9,0   | 9,0   | 19,56 | 573,39 | 73,19  |
| 2019/08/16 | CH2276 | Female | Two y/o | Treatment (Wk 3) | Treatment | Feed Day | No  | 14:40 | 14:00 - 14:59 | Afternoon    | 38,4 | 137 | 17,8  | 17,8  | 19,56 | 615,83 | 96,34  |



|            |        |        |         |                  |           |          |    |       |               |           |      |     |       |       |       |        |        |
|------------|--------|--------|---------|------------------|-----------|----------|----|-------|---------------|-----------|------|-----|-------|-------|-------|--------|--------|
| 2019/08/16 | CH2276 | Female | Two y/o | Treatment (Wk 3) | Treatment | Feed Day | No | 14:45 | 14:00 - 14:59 | Afternoon | 38,3 | 83  | 9,4   | 9,4   | 19,46 | 580,11 | 74,66  |
| 2019/08/16 | CH2276 | Female | Two y/o | Treatment (Wk 3) | Treatment | Feed Day | No | 14:50 | 14:00 - 14:59 | Afternoon | 38,3 | 69  | 19,0  | 19,0  | 19,46 | 565,86 | 98,56  |
| 2019/08/16 | CH2276 | Female | Two y/o | Treatment (Wk 3) | Treatment | Feed Day | No | 14:55 | 14:00 - 14:59 | Afternoon | 38,3 | 92  | 19,6  | 19,6  | 19,46 | 587,78 | 99,63  |
| 2019/08/16 | CH2276 | Female | Two y/o | Treatment (Wk 3) | Treatment | Feed Day | No | 15:00 | 15:00 - 15:59 | Afternoon | 38,3 | 65  | 24,4  | 24,4  | 19,46 | 561,12 | 107,11 |
| 2019/08/16 | CH2276 | Female | Two y/o | Treatment (Wk 3) | Treatment | Feed Day | No | 15:05 | 15:00 - 15:59 | Afternoon | 38,2 | 120 | 58,6  | 58,6  | 19,36 | 606,78 | 137,28 |
| 2019/08/16 | CH2276 | Female | Two y/o | Treatment (Wk 3) | Treatment | Feed Day | No | 15:10 | 15:00 - 15:59 | Afternoon | 38,1 | 111 | 71,8  | 71,8  | 19,26 | 601,33 | 144,32 |
| 2019/08/16 | CH2276 | Female | Two y/o | Treatment (Wk 3) | Treatment | Feed Day | No | 15:15 | 15:00 - 15:59 | Afternoon | 38,1 | 107 | 36,2  | 36,2  | 19,26 | 598,73 | 120,65 |
| 2019/08/16 | CH2276 | Female | Two y/o | Treatment (Wk 3) | Treatment | Feed Day | No | 15:20 | 15:00 - 15:59 | Afternoon | 38,0 | 98  | 20,8  | 20,8  | 19,15 | 592,41 | 101,65 |
| 2019/08/16 | CH2276 | Female | Two y/o | Treatment (Wk 3) | Treatment | Feed Day | No | 15:25 | 15:00 - 15:59 | Afternoon | 38,2 | 75  | 24,0  | 24,0  | 19,36 | 572,36 | 106,55 |
| 2019/08/16 | CH2276 | Female | Two y/o | Treatment (Wk 3) | Treatment | Feed Day | No | 15:30 | 15:00 - 15:59 | Afternoon | 38,2 | 113 | 29,8  | 29,8  | 19,36 | 602,58 | 113,97 |
| 2019/08/16 | CH2276 | Female | Two y/o | Treatment (Wk 3) | Treatment | Feed Day | No | 15:35 | 15:00 - 15:59 | Afternoon | 38,3 | 80  | 46,4  | 46,4  | 19,46 | 577,31 | 129,21 |
| 2019/08/16 | CH2276 | Female | Two y/o | Treatment (Wk 3) | Treatment | Feed Day | No | 15:40 | 15:00 - 15:59 | Afternoon | 38,3 | 83  | 45,0  | 45,0  | 19,46 | 580,11 | 128,15 |
| 2019/08/16 | CH2276 | Female | Two y/o | Treatment (Wk 3) | Treatment | Feed Day | No | 15:45 | 15:00 - 15:59 | Afternoon | 38,3 | 86  | 67,6  | 67,6  | 19,46 | 582,77 | 142,23 |
| 2019/08/16 | CH2276 | Female | Two y/o | Treatment (Wk 3) | Treatment | Feed Day | No | 15:50 | 15:00 - 15:59 | Afternoon | 38,3 | 73  | 70,4  | 70,4  | 19,46 | 570,27 | 143,64 |
| 2019/08/16 | CH2276 | Female | Two y/o | Treatment (Wk 3) | Treatment | Feed Day | No | 15:55 | 15:00 - 15:59 | Afternoon | 38,3 | 75  | 69,4  | 69,4  | 19,46 | 572,36 | 143,14 |
| 2019/08/16 | CH2276 | Female | Two y/o | Treatment (Wk 3) | Treatment | Feed Day | No | 16:00 | 16:00 - 16:59 | Evening   | 38,4 | 69  | 76,0  | 76,0  | 19,56 | 565,86 | 146,29 |
| 2019/08/16 | CH2276 | Female | Two y/o | Treatment (Wk 3) | Treatment | Feed Day | No | 16:05 | 16:00 - 16:59 | Evening   | 38,4 | 70  | 59,8  | 59,8  | 19,56 | 566,99 | 137,98 |
| 2019/08/16 | CH2276 | Female | Two y/o | Treatment (Wk 3) | Treatment | Feed Day | No | 16:10 | 16:00 - 16:59 | Evening   | 38,4 |     | 42,6  | 42,6  | 19,56 |        | 126,26 |
| 2019/08/16 | CH2276 | Female | Two y/o | Treatment (Wk 3) | Treatment | Feed Day | No | 16:15 | 16:00 - 16:59 | Evening   | 38,4 |     | 12,6  | 12,6  | 19,56 |        | 84,59  |
| 2019/08/16 | CH2276 | Female | Two y/o | Treatment (Wk 3) | Treatment | Feed Day | No | 16:20 | 16:00 - 16:59 | Evening   | 38,3 | 74  | 9,2   | 9,2   | 19,46 | 571,33 | 73,94  |
| 2019/08/16 | CH2276 | Female | Two y/o | Treatment (Wk 3) | Treatment | Feed Day | No | 16:25 | 16:00 - 16:59 | Evening   | 38,3 |     | 27,0  | 27,0  | 19,46 |        | 110,58 |
| 2019/08/16 | CH2276 | Female | Two y/o | Treatment (Wk 3) | Treatment | Feed Day | No | 16:30 | 16:00 - 16:59 | Evening   | 38,3 |     | 31,8  | 31,8  | 19,46 |        | 116,20 |
| 2019/08/16 | CH2276 | Female | Two y/o | Treatment (Wk 3) | Treatment | Feed Day | No | 16:35 | 16:00 - 16:59 | Evening   | 38,3 | 84  | 23,6  | 23,6  | 19,46 | 581,01 | 105,97 |
| 2019/08/16 | CH2276 | Female | Two y/o | Treatment (Wk 3) | Treatment | Feed Day | No | 16:40 | 16:00 - 16:59 | Evening   | 38,2 | 90  | 659,2 | 659,2 | 19,36 | 586,16 | 222,41 |
| 2019/08/16 | CH2276 | Female | Two y/o | Treatment (Wk 3) | Treatment | Feed Day | No | 16:45 | 16:00 - 16:59 | Evening   | 38,4 | 119 | 33,8  | 33,8  | 19,56 | 606,20 | 118,29 |
| 2019/08/16 | CH2276 | Female | Two y/o | Treatment (Wk 3) | Treatment | Feed Day | No | 16:50 | 16:00 - 16:59 | Evening   | 38,5 | 111 | 38,2  | 38,2  | 19,66 | 601,33 | 122,50 |
| 2019/08/16 | CH2276 | Female | Two y/o | Treatment (Wk 3) | Treatment | Feed Day | No | 16:55 | 16:00 - 16:59 | Evening   | 38,4 | 92  | 58,2  | 58,2  | 19,56 | 587,78 | 137,04 |
| 2019/08/16 | CH2276 | Female | Two y/o | Treatment (Wk 3) | Treatment | Feed Day | No | 17:00 | 17:00 - 17:59 | Evening   | 38,4 | 94  | 41,2  | 41,2  | 19,56 | 589,37 | 125,11 |
| 2019/08/16 | CH2276 | Female | Two y/o | Treatment (Wk 3) | Treatment | Feed Day | No | 17:05 | 17:00 - 17:59 | Evening   | 38,3 | 73  | 81,2  | 81,2  | 19,46 | 570,27 | 148,59 |
| 2019/08/16 | CH2276 | Female | Two y/o | Treatment (Wk 3) | Treatment | Feed Day | No | 17:10 | 17:00 - 17:59 | Evening   | 38,4 | 86  | 86,0  | 86,0  | 19,56 | 582,77 | 150,59 |
| 2019/08/16 | CH2276 | Female | Two y/o | Treatment (Wk 3) | Treatment | Feed Day | No | 17:15 | 17:00 - 17:59 | Evening   | 38,4 | 79  | 84,6  | 84,6  | 19,56 | 576,36 | 150,02 |
| 2019/08/16 | CH2276 | Female | Two y/o | Treatment (Wk 3) | Treatment | Feed Day | No | 17:20 | 17:00 - 17:59 | Evening   | 38,4 | 74  | 82,4  | 82,4  | 19,56 | 571,33 | 149,10 |
| 2019/08/16 | CH2276 | Female | Two y/o | Treatment (Wk 3) | Treatment | Feed Day | No | 17:25 | 17:00 - 17:59 | Evening   | 38,4 | 74  | 83,6  | 83,6  | 19,56 | 571,33 | 149,61 |
| 2019/08/16 | CH2276 | Female | Two y/o | Treatment (Wk 3) | Treatment | Feed Day | No | 17:30 | 17:00 - 17:59 | Evening   | 38,4 |     | 33,8  | 33,8  | 19,56 |        | 118,29 |
| 2019/08/16 | CH2276 | Female | Two y/o | Treatment (Wk 3) | Treatment | Feed Day | No | 17:35 | 17:00 - 17:59 | Evening   | 38,4 |     | 56,6  | 56,6  | 19,56 |        | 136,07 |
| 2019/08/16 | CH2276 | Female | Two y/o | Treatment (Wk 3) | Treatment | Feed Day | No | 17:40 | 17:00 - 17:59 | Evening   | 38,3 | 113 | 48,8  | 48,8  | 19,46 | 602,58 | 130,95 |
| 2019/08/16 | CH2276 | Female | Two y/o | Treatment (Wk 3) | Treatment | Feed Day | No | 17:45 | 17:00 - 17:59 | Evening   | 38,3 | 100 | 50,0  | 50,0  | 19,46 | 593,87 | 131,79 |
| 2019/08/16 | CH2276 | Female | Two y/o | Treatment (Wk 3) | Treatment | Feed Day | No | 17:50 | 17:00 - 17:59 | Evening   | 38,2 | 65  | 76,0  | 76,0  | 19,36 | 561,12 | 146,29 |
| 2019/08/16 | CH2276 | Female | Two y/o | Treatment (Wk 3) | Treatment | Feed Day | No | 17:55 | 17:00 - 17:59 | Evening   | 38,2 | 105 | 134,4 | 134,4 | 19,36 | 597,38 | 166,17 |
| 2019/08/16 | CH2276 | Female | Two y/o | Treatment (Wk 3) | Treatment | Feed Day | No | 18:00 | 18:00 - 18:59 | Evening   | 38,3 | 111 | 167,0 | 167,0 | 19,46 | 601,33 | 173,78 |
| 2019/08/16 | CH2276 | Female | Two y/o | Treatment (Wk 3) | Treatment | Feed Day | No | 18:05 | 18:00 - 18:59 | Evening   | 38,3 |     | 153,6 | 153,6 | 19,46 |        | 170,85 |
| 2019/08/16 | CH2276 | Female | Two y/o | Treatment (Wk 3) | Treatment | Feed Day | No | 18:10 | 18:00 - 18:59 | Evening   | 38,3 |     | 120,2 | 120,2 | 19,46 |        | 162,27 |
| 2019/08/16 | CH2276 | Female | Two y/o | Treatment (Wk 3) | Treatment | Feed Day | No | 18:15 | 18:00 - 18:59 | Evening   | 38,4 | 60  | 120,2 | 120,2 | 19,56 | 554,67 | 162,27 |
| 2019/08/16 | CH2276 | Female | Two y/o | Treatment (Wk 3) | Treatment | Feed Day | No | 18:20 | 18:00 - 18:59 | Evening   | 38,4 | 99  | 61,8  | 61,8  | 19,56 | 593,14 | 139,12 |
| 2019/08/16 | CH2276 | Female | Two y/o | Treatment (Wk 3) | Treatment | Feed Day | No | 18:25 | 18:00 - 18:59 | Evening   | 38,3 | 100 | 98,4  | 98,4  | 19,46 | 593,87 | 155,28 |
| 2019/08/16 | CH2276 | Female | Two y/o | Treatment (Wk 3) | Treatment | Feed Day | No | 18:30 | 18:00 - 18:59 | Evening   | 38,3 | 60  | 74,4  | 74,4  | 19,46 | 554,67 | 145,55 |
| 2019/08/16 | CH2276 | Female | Two y/o | Treatment (Wk 3) | Treatment | Feed Day | No | 18:35 | 18:00 - 18:59 | Evening   | 38,4 |     | 229,2 | 229,2 | 19,56 |        | 184,92 |
| 2019/08/16 | CH2276 | Female | Two y/o | Treatment (Wk 3) | Treatment | Feed Day | No | 18:40 | 18:00 - 18:59 | Evening   | 38,4 | 123 | 345,0 | 345,0 | 19,56 | 608,49 | 199,37 |
| 2019/08/16 | CH2276 | Female | Two y/o | Treatment (Wk 3) | Treatment | Feed Day | No | 18:45 | 18:00 - 18:59 | Evening   | 38,5 | 101 | 13,8  | 13,8  | 19,66 | 594,59 | 87,68  |
| 2019/08/16 | CH2276 | Female | Two y/o | Treatment (Wk 3) | Treatment | Feed Day | No | 18:50 | 18:00 - 18:59 | Evening   | 38,4 | 74  | 13,6  | 13,6  | 19,56 | 571,33 | 87,18  |
| 2019/08/16 | CH2276 | Female | Two y/o | Treatment (Wk 3) | Treatment | Feed Day | No | 18:55 | 18:00 - 18:59 | Evening   | 38,4 | 65  | 17,2  | 17,2  | 19,56 | 561,12 | 95,17  |
| 2019/08/16 | CH2276 | Female | Two y/o | Treatment (Wk 3) | Treatment | Feed Day | No | 19:00 | 19:00 - 19:59 | Evening   | 38,4 | 70  | 17,0  | 17,0  | 19,56 | 566,99 | 94,77  |
| 2019/08/16 | CH2276 | Female | Two y/o | Treatment (Wk 3) | Treatment | Feed Day | No | 19:05 | 19:00 - 19:59 | Evening   | 38,3 | 98  | 24,0  | 24,0  | 19,46 | 592,41 | 106,55 |
| 2019/08/16 | CH2276 | Female | Two y/o | Treatment (Wk 3) | Treatment | Feed Day | No | 19:10 | 19:00 - 19:59 | Evening   | 38,3 | 70  | 17,6  | 17,6  | 19,46 | 566,99 | 95,95  |
| 2019/08/16 | CH2276 | Female | Two y/o | Treatment (Wk 3) | Treatment | Feed Day | No | 19:15 | 19:00 - 19:59 | Evening   | 38,2 | 70  | 18,8  | 18,8  | 19,36 | 566,99 | 98,20  |
| 2019/08/16 | CH2276 | Female | Two y/o | Treatment (Wk 3) | Treatment | Feed Day | No | 19:20 | 19:00 - 19:59 | Evening   | 38,2 | 69  | 24,6  | 24,6  | 19,36 | 565,86 | 107,39 |
| 2019/08/16 | CH2276 | Female | Two y/o | Treatment (Wk 3) | Treatment | Feed Day | No | 19:25 | 19:00 - 19:59 | Evening   | 38,1 | 55  | 18,6  | 18,6  | 19,26 | 547,52 | 97,84  |
| 2019/08/16 | CH2276 | Female | Two y/o | Treatment (Wk 3) | Treatment | Feed Day | No | 19:30 | 19:00 - 19:59 | Evening   | 38,0 | 72  | 74,0  | 74,0  | 19,15 | 569,20 | 145,37 |
| 2019/08/16 | CH2276 | Female | Two y/o | Treatment (Wk 3) | Treatment | Feed Day | No | 19:35 | 19:00 - 19:59 | Evening   | 38,0 | 69  | 61,2  | 61,2  | 19,15 | 565,86 | 138,78 |
| 2019/08/16 | CH2276 | Female | Two y/o | Treatment (Wk 3) | Treatment | Feed Day | No | 19:40 | 19:00 - 19:59 | Evening   | 38,0 | 69  | 15,8  | 15,8  | 19,15 | 565,86 | 92,28  |
| 2019/08/16 | CH2276 | Female | Two y/o | Treatment (Wk 3) | Treatment | Feed Day | No | 19:45 | 19:00 - 19:59 | Evening   | 37,9 | 66  | 20,6  | 20,6  | 19,05 | 562,34 | 101,32 |
| 2019/08/16 | CH2276 | Female | Two y/o | Treatment (Wk 3) | Treatment | Feed Day | No | 19:50 | 19:00 - 19:59 | Evening   | 37,8 | 71  | 16,8  | 16,8  | 18,95 | 568,10 | 94,37  |
| 2019/08/16 | CH2276 | Female | Two y/o | Treatment (Wk 3) | Treatment | Feed Day | No | 19:55 | 19:00 - 19:59 | Evening   | 37,8 | 97  | 32,4  | 32,4  | 18,95 | 591,66 | 116,84 |
| 2019/08/16 | CH2276 | Female | Two y/o | Treatment (Wk 3) | Treatment | Feed Day | No | 20:00 | 20:00 - 20:59 | Night     | 37,8 | 73  | 18,8  | 18,8  | 18,95 | 570,27 | 98,20  |
| 2019/08/16 | CH2276 | Female | Two y/o | Treatment (Wk 3) | Treatment | Feed Day | No | 20:05 | 20:00 - 20:59 | Night     | 37,7 | 94  | 21,0  | 21,0  | 18,85 | 589,37 | 101,98 |
| 2019/08/16 | CH2276 | Female | Two y/o | Treatment (Wk 3) | Treatment | Feed Day | No | 20:10 | 20:00 - 20:59 | Night     | 37,7 | 110 | 29,8  | 29,8  | 18,85 | 600,69 | 113,97 |
| 2019/08/16 | CH2276 | Female | Two y/o | Treatment (Wk 3) | Treatment | Feed Day | No | 20:15 | 20:00 - 20:59 | Night     | 37,7 | 73  | 28,8  | 28,8  | 18,85 | 570,27 | 112,79 |
| 2019/08/16 | CH2276 | Female | Two y/o | Treatment (Wk 3) | Treatment | Feed Day | No | 20:20 | 20:00 - 20:59 | Night     | 37,8 | 82  | 28,6  | 28,6  | 18,95 | 579,19 | 112,56 |
| 2019/08/16 | CH2276 | Female | Two y/o | Treatment (Wk 3) | Treatment | Feed Day | No | 20:25 | 20:00 - 20:59 | Night     | 37,8 | 79  | 32,0  | 32,0  | 18,95 | 576,36 | 116,41 |
| 2019/08/16 | CH2276 | Female | Two y/o | Treatment (Wk 3) | Treatment | Feed Day | No | 20:30 | 20:00 - 20:59 | Night     | 37,8 | 74  | 22,8  | 22,8  | 18,95 | 571,33 | 104,79 |



|    |            |        |        |         |                  |           |          |    |       |               |               |      |     |      |      |       |        |        |
|----|------------|--------|--------|---------|------------------|-----------|----------|----|-------|---------------|---------------|------|-----|------|------|-------|--------|--------|
|    | 2019/08/16 | CH2276 | Female | Two y/o | Treatment (Wk 3) | Treatment | Feed Day | No | 20:35 | 20:00 - 20:59 | Night         | 37,8 | 62  | 24,6 | 24,6 | 18,95 | 557,33 | 107,39 |
|    | 2019/08/16 | CH2276 | Female | Two y/o | Treatment (Wk 3) | Treatment | Feed Day | No | 20:40 | 20:00 - 20:59 | Night         | 37,8 | 74  | 35,0 | 35,0 | 18,95 | 571,33 | 119,49 |
|    | 2019/08/16 | CH2276 | Female | Two y/o | Treatment (Wk 3) | Treatment | Feed Day | No | 20:45 | 20:00 - 20:59 | Night         | 37,9 | 73  | 20,4 | 20,4 | 19,05 | 570,27 | 100,99 |
|    | 2019/08/16 | CH2276 | Female | Two y/o | Treatment (Wk 3) | Treatment | Feed Day | No | 20:50 | 20:00 - 20:59 | Night         | 37,9 | 174 | 14,4 | 14,4 | 19,05 | 631,46 | 89,12  |
|    | 2019/08/16 | CH2276 | Female | Two y/o | Treatment (Wk 3) | Treatment | Feed Day | No | 20:55 | 20:00 - 20:59 | Night         | 37,9 | 74  | 10,6 | 10,6 | 19,05 | 571,33 | 78,73  |
|    | 2019/08/16 | CH2276 | Female | Two y/o | Treatment (Wk 3) | Treatment | Feed Day | No | 21:00 | 21:00 - 21:59 | Night         | 38,0 | 65  | 9,8  | 9,8  | 19,15 | 561,12 | 76,07  |
|    | 2019/08/16 | CH2276 | Female | Two y/o | Treatment (Wk 3) | Treatment | Feed Day | No | 21:05 | 21:00 - 21:59 | Night         | 38,0 | 69  | 7,6  | 7,6  | 19,15 | 565,86 | 67,49  |
|    | 2019/08/16 | CH2276 | Female | Two y/o | Treatment (Wk 3) | Treatment | Feed Day | No | 21:10 | 21:00 - 21:59 | Night         | 38,0 | 71  | 8,4  | 8,4  | 19,15 | 568,10 | 70,86  |
|    | 2019/08/16 | CH2276 | Female | Two y/o | Treatment (Wk 3) | Treatment | Feed Day | No | 21:15 | 21:00 - 21:59 | Night         | 38,0 | 67  | 13,2 | 13,2 | 19,15 | 563,53 | 86,17  |
|    | 2019/08/16 | CH2276 | Female | Two y/o | Treatment (Wk 3) | Treatment | Feed Day | No | 21:20 | 21:00 - 21:59 | Night         | 38,1 | 87  | 63,4 | 63,4 | 19,26 | 583,64 | 140,00 |
|    | 2019/08/16 | CH2276 | Female | Two y/o | Treatment (Wk 3) | Treatment | Feed Day | No | 21:25 | 21:00 - 21:59 | Night         | 38,2 | 106 | 27,2 | 27,2 | 19,36 | 598,06 | 110,83 |
|    | 2019/08/16 | CH2276 | Female | Two y/o | Treatment (Wk 3) | Treatment | Feed Day | No | 21:30 | 21:00 - 21:59 | Night         | 38,0 | 77  | 17,4 | 17,4 | 19,15 | 574,39 | 95,56  |
|    | 2019/08/16 | CH2276 | Female | Two y/o | Treatment (Wk 3) | Treatment | Feed Day | No | 21:35 | 21:00 - 21:59 | Night         | 37,9 | 109 | 39,4 | 39,4 | 19,05 | 600,04 | 123,57 |
|    | 2019/08/16 | CH2276 | Female | Two y/o | Treatment (Wk 3) | Treatment | Feed Day | No | 21:40 | 21:00 - 21:59 | Night         | 37,8 | 91  | 26,6 | 26,6 | 18,95 | 586,98 | 110,07 |
|    | 2019/08/16 | CH2276 | Female | Two y/o | Treatment (Wk 3) | Treatment | Feed Day | No | 21:45 | 21:00 - 21:59 | Night         | 37,7 | 72  | 20,8 | 20,8 | 18,85 | 569,20 | 101,65 |
|    | 2019/08/16 | CH2276 | Female | Two y/o | Treatment (Wk 3) | Treatment | Feed Day | No | 21:50 | 21:00 - 21:59 | Night         | 37,6 | 71  | 20,2 | 20,2 | 18,75 | 568,10 | 100,65 |
|    | 2019/08/16 | CH2276 | Female | Two y/o | Treatment (Wk 3) | Treatment | Feed Day | No | 21:55 | 21:00 - 21:59 | Night         | 37,5 | 73  | 22,6 | 22,6 | 18,65 | 570,27 | 104,49 |
|    | 2019/08/16 | CH2276 | Female | Two y/o | Treatment (Wk 3) | Treatment | Feed Day | No | 22:00 | 22:00 - 22:59 | Night         | 37,4 | 64  | 22,0 | 22,0 | 18,55 | 559,88 | 103,57 |
|    | 2019/08/16 | CH2276 | Female | Two y/o | Treatment (Wk 3) | Treatment | Feed Day | No | 22:05 | 22:00 - 22:59 | Night         | 37,4 | 92  | 18,6 | 18,6 | 18,55 | 587,78 | 97,84  |
|    | 2019/08/16 | CH2276 | Female | Two y/o | Treatment (Wk 3) | Treatment | Feed Day | No | 22:10 | 22:00 - 22:59 | Night         | 37,4 | 66  | 29,6 | 29,6 | 18,55 | 562,34 | 113,73 |
|    | 2019/08/16 | CH2276 | Female | Two y/o | Treatment (Wk 3) | Treatment | Feed Day | No | 22:15 | 22:00 - 22:59 | Night         | 37,6 | 68  | 37,8 | 37,8 | 18,75 | 564,71 | 122,14 |
|    | 2019/08/16 | CH2276 | Female | Two y/o | Treatment (Wk 3) | Treatment | Feed Day | No | 22:20 | 22:00 - 22:59 | Night         | 37,6 | 79  | 45,4 | 45,4 | 18,75 | 576,36 | 128,45 |
|    | 2019/08/16 | CH2276 | Female | Two y/o | Treatment (Wk 3) | Treatment | Feed Day | No | 22:25 | 22:00 - 22:59 | Night         | 37,6 | 67  | 42,6 | 42,6 | 18,75 | 563,53 | 126,26 |
|    | 2019/08/16 | CH2276 | Female | Two y/o | Treatment (Wk 3) | Treatment | Feed Day | No | 22:30 | 22:00 - 22:59 | Night         | 37,6 | 73  | 42,4 | 42,4 | 18,75 | 570,27 | 126,10 |
|    | 2019/08/16 | CH2276 | Female | Two y/o | Treatment (Wk 3) | Treatment | Feed Day | No | 22:35 | 22:00 - 22:59 | Night         | 37,6 | 70  | 35,6 | 35,6 | 18,75 | 566,99 | 120,08 |
|    | 2019/08/16 | CH2276 | Female | Two y/o | Treatment (Wk 3) | Treatment | Feed Day | No | 22:40 | 22:00 - 22:59 | Night         | 37,6 | 64  | 27,6 | 27,6 | 18,75 | 559,88 | 111,33 |
|    | 2019/08/16 | CH2276 | Female | Two y/o | Treatment (Wk 3) | Treatment | Feed Day | No | 22:45 | 22:00 - 22:59 | Night         | 37,6 | 88  | 36,0 | 36,0 | 18,75 | 584,49 | 120,46 |
|    | 2019/08/16 | CH2276 | Female | Two y/o | Treatment (Wk 3) | Treatment | Feed Day | No | 22:50 | 22:00 - 22:59 | Night         | 37,6 | 81  | 41,4 | 41,4 | 18,75 | 578,26 | 125,27 |
|    | 2019/08/16 | CH2276 | Female | Two y/o | Treatment (Wk 3) | Treatment | Feed Day | No | 22:55 | 22:00 - 22:59 | Night         | 37,5 | 66  | 44,6 | 44,6 | 18,65 | 562,34 | 127,84 |
|    | 2019/08/16 | CH2276 | Female | Two y/o | Treatment (Wk 3) | Treatment | Feed Day | No | 23:00 | 23:00 - 23:59 | Night         | 37,5 | 76  | 41,0 | 41,0 | 18,65 | 573,39 | 124,94 |
|    | 2019/08/16 | CH2276 | Female | Two y/o | Treatment (Wk 3) | Treatment | Feed Day | No | 23:05 | 23:00 - 23:59 | Night         | 37,5 | 63  | 38,0 | 38,0 | 18,65 | 558,62 | 122,32 |
|    | 2019/08/16 | CH2276 | Female | Two y/o | Treatment (Wk 3) | Treatment | Feed Day | No | 23:10 | 23:00 - 23:59 | Night         | 37,5 | 63  | 32,4 | 32,4 | 18,65 | 558,62 | 116,84 |
|    | 2019/08/16 | CH2276 | Female | Two y/o | Treatment (Wk 3) | Treatment | Feed Day | No | 23:15 | 23:00 - 23:59 | Night         | 37,4 | 56  | 33,0 | 33,0 | 18,55 | 549,01 | 117,47 |
|    | 2019/08/16 | CH2276 | Female | Two y/o | Treatment (Wk 3) | Treatment | Feed Day | No | 23:20 | 23:00 - 23:59 | Night         | 37,4 | 62  | 34,8 | 34,8 | 18,55 | 557,33 | 119,29 |
|    | 2019/08/16 | CH2276 | Female | Two y/o | Treatment (Wk 3) | Treatment | Feed Day | No | 23:25 | 23:00 - 23:59 | Night         | 37,4 | 60  | 34,2 | 34,2 | 18,55 | 554,67 | 118,70 |
|    | 2019/08/16 | CH2276 | Female | Two y/o | Treatment (Wk 3) | Treatment | Feed Day | No | 23:30 | 23:00 - 23:59 | Night         | 37,4 | 62  | 32,8 | 32,8 | 18,55 | 557,33 | 117,26 |
|    | 2019/08/16 | CH2276 | Female | Two y/o | Treatment (Wk 3) | Treatment | Feed Day | No | 23:35 | 23:00 - 23:59 | Night         | 37,3 | 65  | 38,6 | 38,6 | 18,46 | 561,12 | 122,86 |
|    | 2019/08/16 | CH2276 | Female | Two y/o | Treatment (Wk 3) | Treatment | Feed Day | No | 23:40 | 23:00 - 23:59 | Night         | 37,4 | 63  | 34,4 | 34,4 | 18,55 | 558,62 | 118,90 |
|    | 2019/08/16 | CH2276 | Female | Two y/o | Treatment (Wk 3) | Treatment | Feed Day | No | 23:45 | 23:00 - 23:59 | Night         | 37,2 | 69  | 23,4 | 23,4 | 18,36 | 565,86 | 105,68 |
|    | 2019/08/16 | CH2276 | Female | Two y/o | Treatment (Wk 3) | Treatment | Feed Day | No | 23:50 | 23:00 - 23:59 | Night         | 36,9 | 63  | 24,6 | 24,6 | 18,06 | 558,62 | 107,39 |
|    | 2019/08/16 | CH2276 | Female | Two y/o | Treatment (Wk 3) | Treatment | Feed Day | No | 23:55 | 23:00 - 23:59 | Night         | 36,8 | 58  | 21,2 | 21,2 | 17,96 | 551,90 | 102,31 |
| 60 | 2019/08/17 | CH2276 | Female | Two y/o | Treatment (Wk 3) | Treatment | Feed Day | No | 00:00 | 00:00 - 00:59 | Early Morning | 36,8 | 69  | 18,4 | 18,4 | 17,96 | 565,86 | 97,47  |
|    | 2019/08/17 | CH2276 | Female | Two y/o | Treatment (Wk 3) | Treatment | Feed Day | No | 00:05 | 00:00 - 00:59 | Early Morning | 36,8 | 57  | 20,4 | 20,4 | 17,96 | 550,47 | 100,99 |
|    | 2019/08/17 | CH2276 | Female | Two y/o | Treatment (Wk 3) | Treatment | Feed Day | No | 00:10 | 00:00 - 00:59 | Early Morning | 36,8 | 58  | 24,2 | 24,2 | 17,96 | 551,90 | 106,83 |
|    | 2019/08/17 | CH2276 | Female | Two y/o | Treatment (Wk 3) | Treatment | Feed Day | No | 00:15 | 00:00 - 00:59 | Early Morning | 36,9 | 60  | 24,2 | 24,2 | 18,06 | 554,67 | 106,83 |
|    | 2019/08/17 | CH2276 | Female | Two y/o | Treatment (Wk 3) | Treatment | Feed Day | No | 00:20 | 00:00 - 00:59 | Early Morning | 37,1 | 60  | 27,0 | 27,0 | 18,26 | 554,67 | 110,58 |
|    | 2019/08/17 | CH2276 | Female | Two y/o | Treatment (Wk 3) | Treatment | Feed Day | No | 00:25 | 00:00 - 00:59 | Early Morning | 37,2 | 61  | 28,0 | 28,0 | 18,36 | 556,01 | 111,83 |
|    | 2019/08/17 | CH2276 | Female | Two y/o | Treatment (Wk 3) | Treatment | Feed Day | No | 00:30 | 00:00 - 00:59 | Early Morning | 37,3 | 67  | 22,4 | 22,4 | 18,46 | 563,53 | 104,19 |
|    | 2019/08/17 | CH2276 | Female | Two y/o | Treatment (Wk 3) | Treatment | Feed Day | No | 00:35 | 00:00 - 00:59 | Early Morning | 37,3 | 85  | 30,8 | 30,8 | 18,46 | 581,90 | 115,10 |
|    | 2019/08/17 | CH2276 | Female | Two y/o | Treatment (Wk 3) | Treatment | Feed Day | No | 00:40 | 00:00 - 00:59 | Early Morning | 37,3 | 59  | 42,8 | 42,8 | 18,46 | 553,30 | 126,42 |
|    | 2019/08/17 | CH2276 | Female | Two y/o | Treatment (Wk 3) | Treatment | Feed Day | No | 00:45 | 00:00 - 00:59 | Early Morning | 37,3 | 63  | 45,8 | 45,8 | 18,46 | 558,62 | 128,76 |
|    | 2019/08/17 | CH2276 | Female | Two y/o | Treatment (Wk 3) | Treatment | Feed Day | No | 00:50 | 00:00 - 00:59 | Early Morning | 37,3 | 62  | 46,8 | 46,8 | 18,46 | 557,33 | 129,50 |
|    | 2019/08/17 | CH2276 | Female | Two y/o | Treatment (Wk 3) | Treatment | Feed Day | No | 00:55 | 00:00 - 00:59 | Early Morning | 37,4 | 61  | 42,0 | 42,0 | 18,55 | 556,01 | 125,77 |
|    | 2019/08/17 | CH2276 | Female | Two y/o | Treatment (Wk 3) | Treatment | Feed Day | No | 01:00 | 01:00 - 01:59 | Early Morning | 37,4 | 53  | 44,4 | 44,4 | 18,55 | 544,43 | 127,69 |
|    | 2019/08/17 | CH2276 | Female | Two y/o | Treatment (Wk 3) | Treatment | Feed Day | No | 01:05 | 01:00 - 01:59 | Early Morning | 37,5 | 50  | 43,8 | 43,8 | 18,65 | 539,52 | 127,22 |
|    | 2019/08/17 | CH2276 | Female | Two y/o | Treatment (Wk 3) | Treatment | Feed Day | No | 01:10 | 01:00 - 01:59 | Early Morning | 37,5 | 61  | 40,0 | 40,0 | 18,65 | 556,01 | 124,09 |
|    | 2019/08/17 | CH2276 | Female | Two y/o | Treatment (Wk 3) | Treatment | Feed Day | No | 01:15 | 01:00 - 01:59 | Early Morning | 37,5 | 65  | 39,4 | 39,4 | 18,65 | 561,12 | 123,57 |
|    | 2019/08/17 | CH2276 | Female | Two y/o | Treatment (Wk 3) | Treatment | Feed Day | No | 01:20 | 01:00 - 01:59 | Early Morning | 37,5 | 78  | 42,8 | 42,8 | 18,65 | 575,38 | 126,42 |
|    | 2019/08/17 | CH2276 | Female | Two y/o | Treatment (Wk 3) | Treatment | Feed Day | No | 01:25 | 01:00 - 01:59 | Early Morning | 37,4 | 63  | 44,2 | 44,2 | 18,55 | 558,62 | 127,53 |
|    | 2019/08/17 | CH2276 | Female | Two y/o | Treatment (Wk 3) | Treatment | Feed Day | No | 01:30 | 01:00 - 01:59 | Early Morning | 37,4 | 98  | 43,6 | 43,6 | 18,55 | 592,41 | 127,06 |
|    | 2019/08/17 | CH2276 | Female | Two y/o | Treatment (Wk 3) | Treatment | Feed Day | No | 01:35 | 01:00 - 01:59 | Early Morning | 37,4 | 58  | 42,2 | 42,2 | 18,55 | 551,90 | 125,93 |
|    | 2019/08/17 | CH2276 | Female | Two y/o | Treatment (Wk 3) | Treatment | Feed Day | No | 01:40 | 01:00 - 01:59 | Early Morning | 37,4 | 59  | 42,4 | 42,4 | 18,55 | 553,30 | 126,10 |
|    | 2019/08/17 | CH2276 | Female | Two y/o | Treatment (Wk 3) | Treatment | Feed Day | No | 01:45 | 01:00 - 01:59 | Early Morning | 37,3 | 106 | 42,4 | 42,4 | 18,46 | 598,06 | 126,10 |
|    | 2019/08/17 | CH2276 | Female | Two y/o | Treatment (Wk 3) | Treatment | Feed Day | No | 01:50 | 01:00 - 01:59 | Early Morning | 37,3 | 52  | 59,6 | 59,6 | 18,46 | 542,83 | 137,86 |
|    | 2019/08/17 | CH2276 | Female | Two y/o | Treatment (Wk 3) | Treatment | Feed Day | No | 01:55 | 01:00 - 01:59 | Early Morning | 37,3 | 67  | 75,2 | 75,2 | 18,46 | 563,53 | 145,93 |
|    | 2019/08/17 | CH2276 | Female | Two y/o | Treatment (Wk 3) | Treatment | Feed Day | No | 02:00 | 02:00 - 02:59 | Early Morning | 37,3 | 63  | 25,2 | 25,2 | 18,46 | 558,62 | 108,22 |
|    | 2019/08/17 | CH2276 | Female | Two y/o | Treatment (Wk 3) | Treatment | Feed Day | No | 02:05 | 02:00 - 02:59 | Early Morning | 37,3 | 56  | 12,4 | 12,4 | 18,46 | 549,01 | 84,04  |
|    | 2019/08/17 | CH2276 | Female | Two y/o | Treatment (Wk 3) | Treatment | Feed Day | No | 02:10 | 02:00 - 02:59 | Early Morning | 37,3 | 67  | 8,2  | 8,2  | 18,46 | 563,53 | 70,05  |
|    | 2019/08/17 | CH2276 | Female | Two y/o | Treatment (Wk 3) | Treatment | Feed Day | No | 02:15 | 02:00 - 02:59 | Early Morning | 37,3 | 56  | 7,8  | 7,8  | 18,46 | 549,01 | 68,36  |
|    | 2019/08/17 | CH2276 | Female | Two y/o | Treatment (Wk 3) | Treatment | Feed Day | No | 02:20 | 02:00 - 02:59 | Early Morning | 37,4 | 61  | 9,4  | 9,4  | 18,55 | 556,01 | 74     |



|            |        |        |         |                  |           |          |    |       |               |               |      |     |       |       |       |        |        |
|------------|--------|--------|---------|------------------|-----------|----------|----|-------|---------------|---------------|------|-----|-------|-------|-------|--------|--------|
| 2019/08/17 | CH2276 | Female | Two y/o | Treatment (Wk 3) | Treatment | Feed Day | No | 02:25 | 02:00 - 02:59 | Early Morning | 37,4 | 60  | 6,4   | 6,4   | 18,55 | 554,67 | 61,70  |
| 2019/08/17 | CH2276 | Female | Two y/o | Treatment (Wk 3) | Treatment | Feed Day | No | 02:30 | 02:00 - 02:59 | Early Morning | 37,4 | 66  | 6,6   | 6,6   | 18,55 | 562,34 | 62,73  |
| 2019/08/17 | CH2276 | Female | Two y/o | Treatment (Wk 3) | Treatment | Feed Day | No | 02:35 | 02:00 - 02:59 | Early Morning | 37,4 | 53  | 7,8   | 7,8   | 18,55 | 544,43 | 68,36  |
| 2019/08/17 | CH2276 | Female | Two y/o | Treatment (Wk 3) | Treatment | Feed Day | No | 02:40 | 02:00 - 02:59 | Early Morning | 37,5 | 70  | 9,6   | 9,6   | 18,65 | 566,99 | 75,37  |
| 2019/08/17 | CH2276 | Female | Two y/o | Treatment (Wk 3) | Treatment | Feed Day | No | 02:45 | 02:00 - 02:59 | Early Morning | 37,5 | 84  | 9,2   | 9,2   | 18,65 | 581,01 | 73,94  |
| 2019/08/17 | CH2276 | Female | Two y/o | Treatment (Wk 3) | Treatment | Feed Day | No | 02:50 | 02:00 - 02:59 | Early Morning | 37,4 | 66  | 10,4  | 10,4  | 18,55 | 562,34 | 78,08  |
| 2019/08/17 | CH2276 | Female | Two y/o | Treatment (Wk 3) | Treatment | Feed Day | No | 02:55 | 02:00 - 02:59 | Early Morning | 37,4 | 67  | 6,0   | 6,0   | 18,55 | 563,53 | 59,53  |
| 2019/08/17 | CH2276 | Female | Two y/o | Treatment (Wk 3) | Treatment | Feed Day | No | 03:00 | 03:00 - 03:59 | Early Morning | 37,4 | 55  | 4,0   | 4,0   | 18,55 | 547,52 | 45,94  |
| 2019/08/17 | CH2276 | Female | Two y/o | Treatment (Wk 3) | Treatment | Feed Day | No | 03:05 | 03:00 - 03:59 | Early Morning | 37,4 | 54  | 12,2  | 12,2  | 18,55 | 545,99 | 83,49  |
| 2019/08/17 | CH2276 | Female | Two y/o | Treatment (Wk 3) | Treatment | Feed Day | No | 03:10 | 03:00 - 03:59 | Early Morning | 37,3 | 86  | 19,2  | 19,2  | 18,46 | 582,77 | 98,92  |
| 2019/08/17 | CH2276 | Female | Two y/o | Treatment (Wk 3) | Treatment | Feed Day | No | 03:15 | 03:00 - 03:59 | Early Morning | 37,2 | 60  | 17,0  | 17,0  | 18,36 | 554,67 | 94,77  |
| 2019/08/17 | CH2276 | Female | Two y/o | Treatment (Wk 3) | Treatment | Feed Day | No | 03:20 | 03:00 - 03:59 | Early Morning | 37,2 | 64  | 27,4  | 27,4  | 18,36 | 559,88 | 111,09 |
| 2019/08/17 | CH2276 | Female | Two y/o | Treatment (Wk 3) | Treatment | Feed Day | No | 03:25 | 03:00 - 03:59 | Early Morning | 37,3 | 65  | 56,2  | 56,2  | 18,46 | 561,12 | 135,83 |
| 2019/08/17 | CH2276 | Female | Two y/o | Treatment (Wk 3) | Treatment | Feed Day | No | 03:30 | 03:00 - 03:59 | Early Morning | 37,3 | 60  | 60,6  | 60,6  | 18,46 | 554,67 | 138,44 |
| 2019/08/17 | CH2276 | Female | Two y/o | Treatment (Wk 3) | Treatment | Feed Day | No | 03:35 | 03:00 - 03:59 | Early Morning | 37,1 | 121 | 36,0  | 36,0  | 18,26 | 607,35 | 120,46 |
| 2019/08/17 | CH2276 | Female | Two y/o | Treatment (Wk 3) | Treatment | Feed Day | No | 03:40 | 03:00 - 03:59 | Early Morning | 37,0 | 68  | 33,2  | 33,2  | 18,16 | 564,71 | 117,68 |
| 2019/08/17 | CH2276 | Female | Two y/o | Treatment (Wk 3) | Treatment | Feed Day | No | 03:45 | 03:00 - 03:59 | Early Morning | 37,0 | 86  | 252,8 | 252,8 | 18,16 | 582,77 | 188,37 |
| 2019/08/17 | CH2276 | Female | Two y/o | Treatment (Wk 3) | Treatment | Feed Day | No | 03:50 | 03:00 - 03:59 | Early Morning | 37,1 | 104 | 177,4 | 177,4 | 18,26 | 596,69 | 175,90 |
| 2019/08/17 | CH2276 | Female | Two y/o | Treatment (Wk 3) | Treatment | Feed Day | No | 03:55 | 03:00 - 03:59 | Early Morning | 37,1 | 83  | 332,8 | 332,8 | 18,26 | 580,11 | 198,09 |
| 2019/08/17 | CH2276 | Female | Two y/o | Treatment (Wk 3) | Treatment | Feed Day | No | 04:00 | 04:00 - 04:59 | Morning       | 37,3 |     | 39,0  | 39,0  | 18,46 |        | 123,22 |
| 2019/08/17 | CH2276 | Female | Two y/o | Treatment (Wk 3) | Treatment | Feed Day | No | 04:05 | 04:00 - 04:59 | Morning       | 37,4 | 71  | 66,4  | 66,4  | 18,55 | 568,10 | 141,61 |
| 2019/08/17 | CH2276 | Female | Two y/o | Treatment (Wk 3) | Treatment | Feed Day | No | 04:10 | 04:00 - 04:59 | Morning       | 37,4 | 84  | 68,4  | 68,4  | 18,55 | 581,01 | 142,64 |
| 2019/08/17 | CH2276 | Female | Two y/o | Treatment (Wk 3) | Treatment | Feed Day | No | 04:15 | 04:00 - 04:59 | Morning       | 37,5 | 96  | 90,2  | 90,2  | 18,65 | 590,91 | 152,25 |
| 2019/08/17 | CH2276 | Female | Two y/o | Treatment (Wk 3) | Treatment | Feed Day | No | 04:20 | 04:00 - 04:59 | Morning       | 37,6 | 44  | 127,4 | 127,4 | 18,75 | 528,51 | 164,30 |
| 2019/08/17 | CH2276 | Female | Two y/o | Treatment (Wk 3) | Treatment | Feed Day | No | 04:25 | 04:00 - 04:59 | Morning       | 37,6 |     | 239,4 | 239,4 | 18,75 |        | 186,45 |
| 2019/08/17 | CH2276 | Female | Two y/o | Treatment (Wk 3) | Treatment | Feed Day | No | 04:30 | 04:00 - 04:59 | Morning       | 37,6 | 141 | 177,2 | 177,2 | 18,75 | 617,75 | 175,86 |
| 2019/08/17 | CH2276 | Female | Two y/o | Treatment (Wk 3) | Treatment | Feed Day | No | 04:35 | 04:00 - 04:59 | Morning       | 37,7 |     | 93,0  | 93,0  | 18,85 |        | 153,31 |
| 2019/08/17 | CH2276 | Female | Two y/o | Treatment (Wk 3) | Treatment | Feed Day | No | 04:40 | 04:00 - 04:59 | Morning       | 37,7 | 107 | 61,0  | 61,0  | 18,85 | 598,73 | 138,67 |
| 2019/08/17 | CH2276 | Female | Two y/o | Treatment (Wk 3) | Treatment | Feed Day | No | 04:45 | 04:00 - 04:59 | Morning       | 37,8 | 118 | 930,4 |       | 18,95 | 605,61 |        |
| 2019/08/17 | CH2276 | Female | Two y/o | Treatment (Wk 3) | Treatment | Feed Day | No | 04:50 | 04:00 - 04:59 | Morning       | 38,1 | 91  | 59,2  | 59,2  | 19,26 | 586,98 | 137,63 |
| 2019/08/17 | CH2276 | Female | Two y/o | Treatment (Wk 3) | Treatment | Feed Day | No | 04:55 | 04:00 - 04:59 | Morning       | 38,1 | 70  | 48,2  | 48,2  | 19,26 | 566,99 | 130,52 |
| 2019/08/17 | CH2276 | Female | Two y/o | Treatment (Wk 3) | Treatment | Feed Day | No | 05:00 | 05:00 - 05:59 | Morning       | 38,2 |     | 17,0  | 17,0  | 19,36 |        | 94,77  |
| 2019/08/17 | CH2276 | Female | Two y/o | Treatment (Wk 3) | Treatment | Feed Day | No | 05:05 | 05:00 - 05:59 | Morning       | 38,0 |     | 373,4 | 373,4 | 19,15 |        | 202,17 |
| 2019/08/17 | CH2276 | Female | Two y/o | Treatment (Wk 3) | Treatment | Feed Day | No | 05:10 | 05:00 - 05:59 | Morning       | 38,0 | 96  | 397,6 | 397,6 | 19,15 | 590,91 | 204,40 |
| 2019/08/17 | CH2276 | Female | Two y/o | Treatment (Wk 3) | Treatment | Feed Day | No | 05:15 | 05:00 - 05:59 | Morning       | 38,0 |     | 449,2 | 449,2 | 19,15 |        | 208,73 |
| 2019/08/17 | CH2276 | Female | Two y/o | Treatment (Wk 3) | Treatment | Feed Day | No | 05:20 | 05:00 - 05:59 | Morning       | 37,9 |     | 112,6 | 112,6 | 19,05 |        | 159,98 |
| 2019/08/17 | CH2276 | Female | Two y/o | Treatment (Wk 3) | Treatment | Feed Day | No | 05:25 | 05:00 - 05:59 | Morning       | 37,9 | 96  | 292,6 | 292,6 | 19,05 | 590,91 | 193,54 |
| 2019/08/17 | CH2276 | Female | Two y/o | Treatment (Wk 3) | Treatment | Feed Day | No | 05:30 | 05:00 - 05:59 | Morning       | 37,9 | 109 | 114,2 | 114,2 | 19,05 | 600,04 | 160,48 |
| 2019/08/17 | CH2276 | Female | Two y/o | Treatment (Wk 3) | Treatment | Feed Day | No | 05:35 | 05:00 - 05:59 | Morning       | 38,1 | 85  | 183,4 | 183,4 | 19,26 | 581,90 | 177,07 |
| 2019/08/17 | CH2276 | Female | Two y/o | Treatment (Wk 3) | Treatment | Feed Day | No | 05:40 | 05:00 - 05:59 | Morning       | 38,0 | 126 | 183,2 | 183,2 | 19,15 | 610,14 | 177,03 |
| 2019/08/17 | CH2276 | Female | Two y/o | Treatment (Wk 3) | Treatment | Feed Day | No | 05:45 | 05:00 - 05:59 | Morning       | 38,0 | 143 | 189,8 | 189,8 | 19,15 | 618,69 | 178,28 |
| 2019/08/17 | CH2276 | Female | Two y/o | Treatment (Wk 3) | Treatment | Feed Day | No | 05:50 | 05:00 - 05:59 | Morning       | 38,0 |     | 55,2  | 55,2  | 19,15 |        | 135,21 |
| 2019/08/17 | CH2276 | Female | Two y/o | Treatment (Wk 3) | Treatment | Feed Day | No | 05:55 | 05:00 - 05:59 | Morning       | 38,0 | 150 | 304,6 | 304,6 | 19,15 | 621,86 | 194,96 |
| 2019/08/17 | CH2276 | Female | Two y/o | Treatment (Wk 3) | Treatment | Feed Day | No | 06:00 | 06:00 - 06:59 | Morning       | 38,0 | 101 | 74,0  | 74,0  | 19,15 | 594,59 | 145,37 |
| 2019/08/17 | CH2276 | Female | Two y/o | Treatment (Wk 3) | Treatment | Feed Day | No | 06:05 | 06:00 - 06:59 | Morning       | 38,0 | 137 | 124,6 | 124,6 | 19,15 | 615,83 | 163,52 |
| 2019/08/17 | CH2276 | Female | Two y/o | Treatment (Wk 3) | Treatment | Feed Day | No | 06:10 | 06:00 - 06:59 | Morning       | 38,0 | 124 | 126,0 | 126,0 | 19,15 | 609,04 | 163,91 |
| 2019/08/17 | CH2276 | Female | Two y/o | Treatment (Wk 3) | Treatment | Feed Day | No | 06:15 | 06:00 - 06:59 | Morning       | 38,0 | 79  | 325,6 | 325,6 | 19,15 | 576,36 | 197,32 |
| 2019/08/17 | CH2276 | Female | Two y/o | Treatment (Wk 3) | Treatment | Feed Day | No | 06:20 | 06:00 - 06:59 | Morning       | 38,0 |     | 58,6  | 58,6  | 19,15 |        | 137,28 |
| 2019/08/17 | CH2276 | Female | Two y/o | Treatment (Wk 3) | Treatment | Feed Day | No | 06:25 | 06:00 - 06:59 | Morning       | 38,2 | 167 | 429,8 | 429,8 | 19,36 | 628,84 | 207,17 |
| 2019/08/17 | CH2276 | Female | Two y/o | Treatment (Wk 3) | Treatment | Feed Day | No | 06:30 | 06:00 - 06:59 | Morning       | 38,2 |     | 75,2  | 75,2  | 19,36 |        | 145,93 |
| 2019/08/17 | CH2276 | Female | Two y/o | Treatment (Wk 3) | Treatment | Feed Day | No | 06:35 | 06:00 - 06:59 | Morning       | 38,0 | 120 | 257,6 | 257,6 | 19,15 | 606,78 | 189,04 |
| 2019/08/17 | CH2276 | Female | Two y/o | Treatment (Wk 3) | Treatment | Feed Day | No | 06:40 | 06:00 - 06:59 | Morning       | 38,0 | 162 | 323,0 | 323,0 | 19,15 | 626,88 | 197,03 |
| 2019/08/17 | CH2276 | Female | Two y/o | Treatment (Wk 3) | Treatment | Feed Day | No | 06:45 | 06:00 - 06:59 | Morning       | 38,0 |     | 27,2  | 27,2  | 19,15 |        | 110,83 |
| 2019/08/17 | CH2276 | Female | Two y/o | Treatment (Wk 3) | Treatment | Feed Day | No | 06:50 | 06:00 - 06:59 | Morning       | 37,9 | 101 | 58,6  | 58,6  | 19,05 | 594,59 | 137,28 |
| 2019/08/17 | CH2276 | Female | Two y/o | Treatment (Wk 3) | Treatment | Feed Day | No | 06:55 | 06:00 - 06:59 | Morning       | 38,0 | 64  | 169,6 | 169,6 | 19,15 | 559,88 | 174,32 |
| 2019/08/17 | CH2276 | Female | Two y/o | Treatment (Wk 3) | Treatment | Feed Day | No | 07:00 | 07:00 - 07:59 | Morning       | 37,9 | 128 | 147,6 | 147,6 | 19,05 | 611,22 | 169,45 |
| 2019/08/17 | CH2276 | Female | Two y/o | Treatment (Wk 3) | Treatment | Feed Day | No | 07:05 | 07:00 - 07:59 | Morning       | 37,9 | 185 | 82,4  | 82,4  | 19,05 | 635,34 | 149,10 |
| 2019/08/17 | CH2276 | Female | Two y/o | Treatment (Wk 3) | Treatment | Feed Day | No | 07:10 | 07:00 - 07:59 | Morning       | 37,8 | 182 | 359,8 | 359,8 | 18,95 | 634,31 | 200,86 |
| 2019/08/17 | CH2276 | Female | Two y/o | Treatment (Wk 3) | Treatment | Feed Day | No | 07:15 | 07:00 - 07:59 | Morning       | 37,9 | 68  | 153,4 | 153,4 | 19,05 | 564,71 | 170,80 |
| 2019/08/17 | CH2276 | Female | Two y/o | Treatment (Wk 3) | Treatment | Feed Day | No | 07:20 | 07:00 - 07:59 | Morning       | 37,8 | 120 | 170,6 | 170,6 | 18,95 | 606,78 | 174,53 |
| 2019/08/17 | CH2276 | Female | Two y/o | Treatment (Wk 3) | Treatment | Feed Day | No | 07:25 | 07:00 - 07:59 | Morning       | 37,9 | 109 | 130,0 | 130,0 | 19,05 | 600,04 | 165,01 |
| 2019/08/17 | CH2276 | Female | Two y/o | Treatment (Wk 3) | Treatment | Feed Day | No | 07:30 | 07:00 - 07:59 | Morning       | 37,8 | 118 | 160,8 | 160,8 | 18,95 | 605,61 | 172,46 |
| 2019/08/17 | CH2276 | Female | Two y/o | Treatment (Wk 3) | Treatment | Feed Day | No | 07:35 | 07:00 - 07:59 | Morning       | 37,8 | 82  | 97,8  | 97,8  | 18,95 | 579,19 | 155,07 |
| 2019/08/17 | CH2276 | Female | Two y/o | Treatment (Wk 3) | Treatment | Feed Day | No | 07:40 | 07:00 - 07:59 | Morning       | 37,8 |     | 94,8  | 94,8  | 18,95 |        | 153,98 |
| 2019/08/17 | CH2276 | Female | Two y/o | Treatment (Wk 3) | Treatment | Feed Day | No | 07:45 | 07:00 - 07:59 | Morning       | 37,8 | 99  | 46,0  | 46,0  | 18,95 | 593,14 | 128,91 |
| 2019/08/17 | CH2276 | Female | Two y/o | Treatment (Wk 3) | Treatment | Feed Day | No | 07:50 | 07:00 - 07:59 | Morning       | 37,6 | 96  | 39,6  | 39,6  | 18,75 | 590,91 | 123,74 |
| 2019/08/17 | CH2276 | Female | Two y/o | Treatment (Wk 3) | Treatment | Feed Day | No | 07:55 | 07:00 - 07:59 | Morning       | 37,6 | 61  | 53,6  | 53,6  | 18,75 | 556,01 | 134,19 |
| 2019/08/17 | CH2276 | Female | Two y/o | Treatment (Wk 3) | Treatment | Feed Day | No | 08:00 | 08:00 - 08:59 | Late Morning  | 37,5 | 65  | 42,6  | 42,6  | 18,65 | 561,12 | 126,26 |
| 2019/08/17 | CH2276 | Female | Two y/o | Treatment (Wk 3) | Treatment | Feed Day | No | 08:05 | 08:00 - 08:59 | Late Morning  | 37,5 |     | 11,2  | 11,2  | 18,65 |        | 80,59  |
| 2019/08/17 | CH2276 | Female | Two y/o | Treatment (Wk 3) | Treatment | Feed Day | No | 08:10 | 08:00 - 08:59 | Late Morning  | 37,4 | 197 | 29,4  | 29,4  | 18,55 | 639,25 | 113,50 |



|            |        |        |         |                  |           |          |     |       |               |              |      |     |       |       |       |        |        |
|------------|--------|--------|---------|------------------|-----------|----------|-----|-------|---------------|--------------|------|-----|-------|-------|-------|--------|--------|
| 2019/08/17 | CH2276 | Female | Two y/o | Treatment (Wk 3) | Treatment | Feed Day | No  | 08:15 | 08:00 - 08:59 | Late Morning | 37,4 | 75  | 34,0  | 34,0  | 18,55 | 572,36 | 118,49 |
| 2019/08/17 | CH2276 | Female | Two y/o | Treatment (Wk 3) | Treatment | Feed Day | No  | 08:20 | 08:00 - 08:59 | Late Morning | 37,4 | 62  | 85,4  | 85,4  | 18,55 | 557,33 | 150,35 |
| 2019/08/17 | CH2276 | Female | Two y/o | Treatment (Wk 3) | Treatment | Feed Day | No  | 08:25 | 08:00 - 08:59 | Late Morning | 37,4 | 58  | 84,0  | 84,0  | 18,55 | 551,90 | 149,77 |
| 2019/08/17 | CH2276 | Female | Two y/o | Treatment (Wk 3) | Treatment | Feed Day | No  | 08:30 | 08:00 - 08:59 | Late Morning | 37,5 | 63  | 81,0  | 81,0  | 18,65 | 558,62 | 148,51 |
| 2019/08/17 | CH2276 | Female | Two y/o | Treatment (Wk 3) | Treatment | Feed Day | No  | 08:35 | 08:00 - 08:59 | Late Morning | 37,5 | 64  | 85,2  | 85,2  | 18,65 | 559,88 | 150,27 |
| 2019/08/17 | CH2276 | Female | Two y/o | Treatment (Wk 3) | Treatment | Feed Day | No  | 08:40 | 08:00 - 08:59 | Late Morning | 37,6 | 64  | 80,4  | 80,4  | 18,75 | 559,88 | 148,25 |
| 2019/08/17 | CH2276 | Female | Two y/o | Treatment (Wk 3) | Treatment | Feed Day | No  | 08:45 | 08:00 - 08:59 | Late Morning | 37,6 | 55  | 83,6  | 83,6  | 18,75 | 547,52 | 149,61 |
| 2019/08/17 | CH2276 | Female | Two y/o | Treatment (Wk 3) | Treatment | Feed Day | No  | 08:50 | 08:00 - 08:59 | Late Morning | 37,6 | 60  | 77,6  | 77,6  | 18,75 | 554,67 | 147,02 |
| 2019/08/17 | CH2276 | Female | Two y/o | Treatment (Wk 3) | Treatment | Feed Day | No  | 08:55 | 08:00 - 08:59 | Late Morning | 37,7 | 63  | 76,4  | 76,4  | 18,85 | 558,62 | 146,48 |
| 2019/08/17 | CH2276 | Female | Two y/o | Treatment (Wk 3) | Treatment | Feed Day | No  | 09:00 | 09:00 - 09:59 | Late Morning | 37,7 | 59  | 75,2  | 75,2  | 18,85 | 553,30 | 145,93 |
| 2019/08/17 | CH2276 | Female | Two y/o | Treatment (Wk 3) | Treatment | Feed Day | No  | 09:05 | 09:00 - 09:59 | Late Morning | 37,8 | 65  | 76,6  | 76,6  | 18,95 | 561,12 | 146,57 |
| 2019/08/17 | CH2276 | Female | Two y/o | Treatment (Wk 3) | Treatment | Feed Day | No  | 09:10 | 09:00 - 09:59 | Late Morning | 37,8 | 63  | 76,0  | 76,0  | 18,95 | 558,62 | 146,29 |
| 2019/08/17 | CH2276 | Female | Two y/o | Treatment (Wk 3) | Treatment | Feed Day | No  | 09:15 | 09:00 - 09:59 | Late Morning | 37,8 | 63  | 75,8  | 75,8  | 18,95 | 558,62 | 146,20 |
| 2019/08/17 | CH2276 | Female | Two y/o | Treatment (Wk 3) | Treatment | Feed Day | No  | 09:20 | 09:00 - 09:59 | Late Morning | 37,8 | 66  | 67,0  | 67,0  | 18,95 | 562,34 | 141,92 |
| 2019/08/17 | CH2276 | Female | Two y/o | Treatment (Wk 3) | Treatment | Feed Day | No  | 09:25 | 09:00 - 09:59 | Late Morning | 37,8 | 75  | 44,4  | 44,4  | 18,95 | 572,36 | 127,69 |
| 2019/08/17 | CH2276 | Female | Two y/o | Treatment (Wk 3) | Treatment | Feed Day | No  | 09:30 | 09:00 - 09:59 | Late Morning | 37,6 | 61  | 52,2  | 52,2  | 18,75 | 556,01 | 133,27 |
| 2019/08/17 | CH2276 | Female | Two y/o | Treatment (Wk 3) | Treatment | Feed Day | No  | 09:35 | 09:00 - 09:59 | Late Morning | 37,5 |     | 43,2  | 43,2  | 18,65 |        | 126,74 |
| 2019/08/17 | CH2276 | Female | Two y/o | Treatment (Wk 3) | Treatment | Feed Day | No  | 09:40 | 09:00 - 09:59 | Late Morning | 37,5 | 74  | 65,4  | 65,4  | 18,65 | 571,33 | 141,08 |
| 2019/08/17 | CH2276 | Female | Two y/o | Treatment (Wk 3) | Treatment | Feed Day | No  | 09:45 | 09:00 - 09:59 | Late Morning | 37,4 | 93  | 73,4  | 73,4  | 18,55 | 588,58 | 145,08 |
| 2019/08/17 | CH2276 | Female | Two y/o | Treatment (Wk 3) | Treatment | Feed Day | No  | 09:50 | 09:00 - 09:59 | Late Morning | 37,4 | 68  | 70,8  | 70,8  | 18,55 | 564,71 | 143,83 |
| 2019/08/17 | CH2276 | Female | Two y/o | Treatment (Wk 3) | Treatment | Feed Day | No  | 09:55 | 09:00 - 09:59 | Late Morning | 37,4 | 64  | 76,0  | 76,0  | 18,55 | 559,88 | 146,29 |
| 2019/08/17 | CH2276 | Female | Two y/o | Treatment (Wk 3) | Treatment | Feed Day | No  | 10:00 | 10:00 - 10:59 | Late Morning | 37,5 | 64  | 73,8  | 73,8  | 18,65 | 559,88 | 145,27 |
| 2019/08/17 | CH2276 | Female | Two y/o | Treatment (Wk 3) | Treatment | Feed Day | No  | 10:05 | 10:00 - 10:59 | Late Morning | 37,5 | 70  | 67,2  | 67,2  | 18,65 | 566,99 | 142,02 |
| 2019/08/17 | CH2276 | Female | Two y/o | Treatment (Wk 3) | Treatment | Feed Day | No  | 10:10 | 10:00 - 10:59 | Late Morning | 37,6 | 68  | 35,0  | 35,0  | 18,75 | 564,71 | 119,49 |
| 2019/08/17 | CH2276 | Female | Two y/o | Treatment (Wk 3) | Treatment | Feed Day | No  | 10:15 | 10:00 - 10:59 | Late Morning | 37,6 | 76  | 114,8 | 114,8 | 18,75 | 573,39 | 160,66 |
| 2019/08/17 | CH2276 | Female | Two y/o | Treatment (Wk 3) | Treatment | Feed Day | No  | 10:20 | 10:00 - 10:59 | Late Morning | 37,6 | 108 | 118,2 | 118,2 | 18,75 | 599,39 | 161,68 |
| 2019/08/17 | CH2276 | Female | Two y/o | Treatment (Wk 3) | Treatment | Feed Day | No  | 10:25 | 10:00 - 10:59 | Late Morning | 37,5 |     | 27,0  | 27,0  | 18,65 |        | 110,58 |
| 2019/08/17 | CH2276 | Female | Two y/o | Treatment (Wk 3) | Treatment | Feed Day | Yes | 10:30 | 10:00 - 10:59 | Late Morning | 37,5 | 94  | 63,0  | 63,0  | 18,65 | 589,37 | 139,78 |
| 2019/08/17 | CH2276 | Female | Two y/o | Treatment (Wk 3) | Treatment | Feed Day | Yes | 10:35 | 10:00 - 10:59 | Late Morning | 37,5 | 67  | 58,8  | 58,8  | 18,65 | 563,53 | 137,39 |
| 2019/08/17 | CH2276 | Female | Two y/o | Treatment (Wk 3) | Treatment | Feed Day | Yes | 10:40 | 10:00 - 10:59 | Late Morning | 37,5 | 71  | 106,2 | 106,2 | 18,65 | 568,10 | 157,94 |
| 2019/08/17 | CH2276 | Female | Two y/o | Treatment (Wk 3) | Treatment | Feed Day | Yes | 10:45 | 10:00 - 10:59 | Late Morning | 37,6 | 70  | 245,2 | 245,2 | 18,75 | 566,99 | 187,30 |
| 2019/08/17 | CH2276 | Female | Two y/o | Treatment (Wk 3) | Treatment | Feed Day | Yes | 10:50 | 10:00 - 10:59 | Late Morning | 38,0 | 113 | 135,4 | 135,4 | 19,15 | 602,58 | 166,43 |
| 2019/08/17 | CH2276 | Female | Two y/o | Treatment (Wk 3) | Treatment | Feed Day | Yes | 10:55 | 10:00 - 10:59 | Late Morning | 38,0 | 101 | 48,6  | 48,6  | 19,15 | 594,59 | 130,81 |
| 2019/08/17 | CH2276 | Female | Two y/o | Treatment (Wk 3) | Treatment | Feed Day | Yes | 11:00 | 11:00 - 11:59 | Late Morning | 37,9 |     | 58,6  | 58,6  | 19,05 |        | 137,28 |
| 2019/08/17 | CH2276 | Female | Two y/o | Treatment (Wk 3) | Treatment | Feed Day | Yes | 11:05 | 11:00 - 11:59 | Late Morning | 37,9 | 119 | 83,0  | 83,0  | 19,05 | 606,20 | 149,36 |
| 2019/08/17 | CH2276 | Female | Two y/o | Treatment (Wk 3) | Treatment | Feed Day | Yes | 11:10 | 11:00 - 11:59 | Late Morning | 38,0 | 96  | 45,0  | 45,0  | 19,15 | 590,91 | 128,15 |
| 2019/08/17 | CH2276 | Female | Two y/o | Treatment (Wk 3) | Treatment | Feed Day | Yes | 11:15 | 11:00 - 11:59 | Late Morning | 38,0 | 87  | 78,2  | 78,2  | 19,15 | 583,64 | 147,28 |
| 2019/08/17 | CH2276 | Female | Two y/o | Treatment (Wk 3) | Treatment | Feed Day | Yes | 11:20 | 11:00 - 11:59 | Late Morning | 38,1 |     | 86,6  | 86,6  | 19,26 |        | 150,83 |
| 2019/08/17 | CH2276 | Female | Two y/o | Treatment (Wk 3) | Treatment | Feed Day | Yes | 11:25 | 11:00 - 11:59 | Late Morning | 38,1 | 90  | 82,2  | 82,2  | 19,26 | 586,16 | 149,02 |
| 2019/08/17 | CH2276 | Female | Two y/o | Treatment (Wk 3) | Treatment | Feed Day | No  | 11:30 | 11:00 - 11:59 | Late Morning | 38,0 | 80  | 81,6  | 81,6  | 19,15 | 577,31 | 148,76 |
| 2019/08/17 | CH2276 | Female | Two y/o | Treatment (Wk 3) | Treatment | Feed Day | No  | 11:35 | 11:00 - 11:59 | Late Morning | 38,0 | 89  | 71,6  | 71,6  | 19,15 | 585,33 | 144,22 |
| 2019/08/17 | CH2276 | Female | Two y/o | Treatment (Wk 3) | Treatment | Feed Day | No  | 11:40 | 11:00 - 11:59 | Late Morning | 38,0 | 55  | 124,8 | 124,8 | 19,15 | 547,52 | 163,58 |
| 2019/08/17 | CH2276 | Female | Two y/o | Treatment (Wk 3) | Treatment | Feed Day | No  | 11:45 | 11:00 - 11:59 | Late Morning | 38,0 | 82  | 80,0  | 80,0  | 19,15 | 579,19 | 148,08 |
| 2019/08/17 | CH2276 | Female | Two y/o | Treatment (Wk 3) | Treatment | Feed Day | No  | 11:50 | 11:00 - 11:59 | Late Morning | 38,0 | 86  | 110,2 | 110,2 | 19,15 | 582,77 | 159,23 |
| 2019/08/17 | CH2276 | Female | Two y/o | Treatment (Wk 3) | Treatment | Feed Day | No  | 11:55 | 11:00 - 11:59 | Late Morning | 38,0 | 94  | 57,8  | 57,8  | 19,15 | 589,37 | 136,80 |
| 2019/08/17 | CH2276 | Female | Two y/o | Treatment (Wk 3) | Treatment | Feed Day | No  | 12:00 | 12:00 - 12:59 | Afternoon    | 38,0 | 113 | 75,4  | 75,4  | 19,15 | 602,58 | 146,02 |
| 2019/08/17 | CH2276 | Female | Two y/o | Treatment (Wk 3) | Treatment | Feed Day | No  | 12:05 | 12:00 - 12:59 | Afternoon    | 38,0 | 80  | 70,8  | 70,8  | 19,15 | 577,31 | 143,83 |
| 2019/08/17 | CH2276 | Female | Two y/o | Treatment (Wk 3) | Treatment | Feed Day | No  | 12:10 | 12:00 - 12:59 | Afternoon    | 38,0 | 69  | 73,4  | 73,4  | 19,15 | 565,86 | 145,08 |
| 2019/08/17 | CH2276 | Female | Two y/o | Treatment (Wk 3) | Treatment | Feed Day | No  | 12:15 | 12:00 - 12:59 | Afternoon    | 38,0 | 89  | 77,0  | 77,0  | 19,15 | 585,33 | 146,75 |
| 2019/08/17 | CH2276 | Female | Two y/o | Treatment (Wk 3) | Treatment | Feed Day | No  | 12:20 | 12:00 - 12:59 | Afternoon    | 38,0 | 69  | 59,2  | 59,2  | 19,15 | 565,86 | 137,63 |
| 2019/08/17 | CH2276 | Female | Two y/o | Treatment (Wk 3) | Treatment | Feed Day | No  | 12:25 | 12:00 - 12:59 | Afternoon    | 38,0 | 65  | 43,8  | 43,8  | 19,15 | 561,12 | 127,22 |
| 2019/08/17 | CH2276 | Female | Two y/o | Treatment (Wk 3) | Treatment | Feed Day | No  | 12:30 | 12:00 - 12:59 | Afternoon    | 38,0 |     | 13,8  | 13,8  | 19,15 |        | 87,68  |
| 2019/08/17 | CH2276 | Female | Two y/o | Treatment (Wk 3) | Treatment | Feed Day | No  | 12:35 | 12:00 - 12:59 | Afternoon    | 38,0 | 79  | 28,4  | 28,4  | 19,15 | 576,36 | 112,31 |
| 2019/08/17 | CH2276 | Female | Two y/o | Treatment (Wk 3) | Treatment | Feed Day | No  | 12:40 | 12:00 - 12:59 | Afternoon    | 38,0 | 69  | 20,4  | 20,4  | 19,15 | 565,86 | 100,99 |
| 2019/08/17 | CH2276 | Female | Two y/o | Treatment (Wk 3) | Treatment | Feed Day | No  | 12:45 | 12:00 - 12:59 | Afternoon    | 37,9 | 62  | 23,8  | 23,8  | 19,05 | 557,33 | 106,26 |
| 2019/08/17 | CH2276 | Female | Two y/o | Treatment (Wk 3) | Treatment | Feed Day | No  | 12:50 | 12:00 - 12:59 | Afternoon    | 37,9 | 92  | 21,8  | 21,8  | 19,05 | 587,78 | 103,26 |
| 2019/08/17 | CH2276 | Female | Two y/o | Treatment (Wk 3) | Treatment | Feed Day | No  | 12:55 | 12:00 - 12:59 | Afternoon    | 37,9 | 63  | 23,6  | 23,6  | 19,05 | 558,62 | 105,97 |
| 2019/08/17 | CH2276 | Female | Two y/o | Treatment (Wk 3) | Treatment | Feed Day | No  | 13:00 | 13:00 - 13:59 | Afternoon    | 37,8 | 84  | 25,2  | 25,2  | 18,95 | 581,01 | 108,22 |
| 2019/08/17 | CH2276 | Female | Two y/o | Treatment (Wk 3) | Treatment | Feed Day | No  | 13:05 | 13:00 - 13:59 | Afternoon    | 37,8 | 66  | 17,8  | 17,8  | 18,95 | 562,34 | 96,34  |
| 2019/08/17 | CH2276 | Female | Two y/o | Treatment (Wk 3) | Treatment | Feed Day | No  | 13:10 | 13:00 - 13:59 | Afternoon    | 37,8 | 67  | 21,6  | 21,6  | 18,95 | 563,53 | 102,94 |
| 2019/08/17 | CH2276 | Female | Two y/o | Treatment (Wk 3) | Treatment | Feed Day | No  | 13:15 | 13:00 - 13:59 | Afternoon    | 37,7 | 94  | 17,4  | 17,4  | 18,85 | 589,37 | 95,56  |
| 2019/08/17 | CH2276 | Female | Two y/o | Treatment (Wk 3) | Treatment | Feed Day | No  | 13:20 | 13:00 - 13:59 | Afternoon    | 37,7 |     | 23,8  | 23,8  | 18,85 |        | 106,26 |
| 2019/08/17 | CH2276 | Female | Two y/o | Treatment (Wk 3) | Treatment | Feed Day | No  | 13:25 | 13:00 - 13:59 | Afternoon    | 37,7 |     | 46,8  | 46,8  | 18,85 |        | 129,50 |
| 2019/08/17 | CH2276 | Female | Two y/o | Treatment (Wk 3) | Treatment | Feed Day | No  | 13:30 | 13:00 - 13:59 | Afternoon    | 37,7 | 94  | 67,2  | 67,2  | 18,85 | 589,37 | 142,02 |
| 2019/08/17 | CH2276 | Female | Two y/o | Treatment (Wk 3) | Treatment | Feed Day | No  | 13:35 | 13:00 - 13:59 | Afternoon    | 37,6 | 67  | 11,6  | 11,6  | 18,75 | 563,53 | 81,78  |
| 2019/08/17 | CH2276 | Female | Two y/o | Treatment (Wk 3) | Treatment | Feed Day | No  | 13:40 | 13:00 - 13:59 | Afternoon    | 37,6 | 61  | 7,0   | 7,0   | 18,75 | 556,01 | 64,72  |
| 2019/08/17 | CH2276 | Female | Two y/o | Treatment (Wk 3) | Treatment | Feed Day | No  | 13:45 | 13:00 - 13:59 | Afternoon    | 37,6 | 70  | 16,4  | 16,4  | 18,75 | 566,99 | 93,55  |
| 2019/08/17 | CH2276 | Female | Two y/o | Treatment (Wk 3) | Treatment | Feed Day | No  | 13:50 | 13:00 - 13:59 | Afternoon    | 37,6 | 62  | 7,2   | 7,2   | 18,75 | 557,33 | 65,66  |
| 2019/08/17 | CH2276 | Female | Two y/o | Treatment (Wk 3) | Treatment | Feed Day | No  | 13:55 | 13:00 - 13:59 | Afternoon    | 37,6 | 50  | 8,0   | 8,0   | 18,75 | 539,52 | 69,22  |
| 2019/08/17 | CH2276 | Female | Two y/o | Treatment (Wk 3) | Treatment | Feed Day | No  | 14:00 | 14:00 - 14:59 | Afternoon    | 37,6 | 57  | 48,8  | 48,8  | 18,75 | 550,47 | 130,95 |



|            |        |        |         |                  |           |          |     |       |               |           |      |     |       |       |       |        |        |
|------------|--------|--------|---------|------------------|-----------|----------|-----|-------|---------------|-----------|------|-----|-------|-------|-------|--------|--------|
| 2019/08/17 | CH2276 | Female | Two y/o | Treatment (Wk 3) | Treatment | Feed Day | No  | 14:05 | 14:00 - 14:59 | Afternoon | 37,6 | 90  | 42,2  | 42,2  | 18,75 | 586,16 | 125,93 |
| 2019/08/17 | CH2276 | Female | Two y/o | Treatment (Wk 3) | Treatment | Feed Day | No  | 14:10 | 14:00 - 14:59 | Afternoon | 37,6 | 59  | 39,8  | 39,8  | 18,75 | 553,30 | 123,91 |
| 2019/08/17 | CH2276 | Female | Two y/o | Treatment (Wk 3) | Treatment | Feed Day | No  | 14:15 | 14:00 - 14:59 | Afternoon | 37,6 | 63  | 39,0  | 39,0  | 18,75 | 558,62 | 123,22 |
| 2019/08/17 | CH2276 | Female | Two y/o | Treatment (Wk 3) | Treatment | Feed Day | No  | 14:20 | 14:00 - 14:59 | Afternoon | 37,6 | 63  | 34,2  | 34,2  | 18,75 | 558,62 | 118,70 |
| 2019/08/17 | CH2276 | Female | Two y/o | Treatment (Wk 3) | Treatment | Feed Day | No  | 14:25 | 14:00 - 14:59 | Afternoon | 37,6 | 104 | 62,8  | 62,8  | 18,75 | 596,69 | 139,67 |
| 2019/08/17 | CH2276 | Female | Two y/o | Treatment (Wk 3) | Treatment | Feed Day | No  | 14:30 | 14:00 - 14:59 | Afternoon | 37,6 | 62  | 71,6  | 71,6  | 18,75 | 557,33 | 144,22 |
| 2019/08/17 | CH2276 | Female | Two y/o | Treatment (Wk 3) | Treatment | Feed Day | No  | 14:35 | 14:00 - 14:59 | Afternoon | 37,6 |     | 72,8  | 72,8  | 18,75 |        | 144,80 |
| 2019/08/17 | CH2276 | Female | Two y/o | Treatment (Wk 3) | Treatment | Feed Day | No  | 14:40 | 14:00 - 14:59 | Afternoon | 37,6 | 63  | 61,4  | 61,4  | 18,75 | 558,62 | 138,89 |
| 2019/08/17 | CH2276 | Female | Two y/o | Treatment (Wk 3) | Treatment | Feed Day | No  | 14:45 | 14:00 - 14:59 | Afternoon | 37,6 | 65  | 83,6  | 83,6  | 18,75 | 561,12 | 149,61 |
| 2019/08/17 | CH2276 | Female | Two y/o | Treatment (Wk 3) | Treatment | Feed Day | No  | 14:50 | 14:00 - 14:59 | Afternoon | 37,6 | 88  | 44,4  | 44,4  | 18,75 | 584,49 | 127,69 |
| 2019/08/17 | CH2276 | Female | Two y/o | Treatment (Wk 3) | Treatment | Feed Day | No  | 14:55 | 14:00 - 14:59 | Afternoon | 37,6 | 62  | 55,8  | 55,8  | 18,75 | 557,33 | 135,58 |
| 2019/08/17 | CH2276 | Female | Two y/o | Treatment (Wk 3) | Treatment | Feed Day | No  | 15:00 | 15:00 - 15:59 | Afternoon | 37,6 | 75  | 114,8 | 114,8 | 18,75 | 572,36 | 160,66 |
| 2019/08/17 | CH2276 | Female | Two y/o | Treatment (Wk 3) | Treatment | Feed Day | No  | 15:05 | 15:00 - 15:59 | Afternoon | 37,8 | 174 | 275,8 | 275,8 | 18,95 | 631,46 | 191,45 |
| 2019/08/17 | CH2276 | Female | Two y/o | Treatment (Wk 3) | Treatment | Feed Day | No  | 15:10 | 15:00 - 15:59 | Afternoon | 38,1 |     | 503,6 | 503,6 | 19,26 |        | 212,80 |
| 2019/08/17 | CH2276 | Female | Two y/o | Treatment (Wk 3) | Treatment | Feed Day | No  | 15:15 | 15:00 - 15:59 | Afternoon | 38,2 | 92  | 58,8  | 58,8  | 19,36 | 587,78 | 137,39 |
| 2019/08/17 | CH2276 | Female | Two y/o | Treatment (Wk 3) | Treatment | Feed Day | No  | 15:20 | 15:00 - 15:59 | Afternoon | 38,2 | 72  | 79,0  | 79,0  | 19,36 | 569,20 | 147,64 |
| 2019/08/17 | CH2276 | Female | Two y/o | Treatment (Wk 3) | Treatment | Feed Day | No  | 15:25 | 15:00 - 15:59 | Afternoon | 38,2 | 83  | 54,2  | 54,2  | 19,36 | 580,11 | 134,57 |
| 2019/08/17 | CH2276 | Female | Two y/o | Treatment (Wk 3) | Treatment | Feed Day | Yes | 15:30 | 15:00 - 15:59 | Afternoon | 38,2 | 71  | 69,4  | 69,4  | 19,36 | 568,10 | 143,14 |
| 2019/08/17 | CH2276 | Female | Two y/o | Treatment (Wk 3) | Treatment | Feed Day | Yes | 15:35 | 15:00 - 15:59 | Afternoon | 38,2 | 69  | 55,8  | 55,8  | 19,36 | 565,86 | 135,58 |
| 2019/08/17 | CH2276 | Female | Two y/o | Treatment (Wk 3) | Treatment | Feed Day | Yes | 15:40 | 15:00 - 15:59 | Afternoon | 38,3 | 96  | 35,8  | 35,8  | 19,46 | 590,91 | 120,27 |
| 2019/08/17 | CH2276 | Female | Two y/o | Treatment (Wk 3) | Treatment | Feed Day | Yes | 15:45 | 15:00 - 15:59 | Afternoon | 38,2 | 62  | 35,2  | 35,2  | 19,36 | 557,33 | 119,69 |
| 2019/08/17 | CH2276 | Female | Two y/o | Treatment (Wk 3) | Treatment | Feed Day | Yes | 15:50 | 15:00 - 15:59 | Afternoon | 38,2 | 68  | 38,2  | 38,2  | 19,36 | 564,71 | 122,50 |
| 2019/08/17 | CH2276 | Female | Two y/o | Treatment (Wk 3) | Treatment | Feed Day | Yes | 15:55 | 15:00 - 15:59 | Afternoon | 38,2 |     | 32,8  | 32,8  | 19,36 |        | 117,26 |
| 2019/08/17 | CH2276 | Female | Two y/o | Treatment (Wk 3) | Treatment | Feed Day | Yes | 16:00 | 16:00 - 16:59 | Evening   | 38,1 | 62  | 44,0  | 44,0  | 19,26 | 557,33 | 127,37 |
| 2019/08/17 | CH2276 | Female | Two y/o | Treatment (Wk 3) | Treatment | Feed Day | Yes | 16:05 | 16:00 - 16:59 | Evening   | 38,1 | 65  | 94,4  | 94,4  | 19,26 | 561,12 | 153,84 |
| 2019/08/17 | CH2276 | Female | Two y/o | Treatment (Wk 3) | Treatment | Feed Day | Yes | 16:10 | 16:00 - 16:59 | Evening   | 38,0 | 64  | 77,8  | 77,8  | 19,15 | 559,88 | 147,11 |
| 2019/08/17 | CH2276 | Female | Two y/o | Treatment (Wk 3) | Treatment | Feed Day | Yes | 16:15 | 16:00 - 16:59 | Evening   | 38,0 | 33  | 46,8  | 46,8  | 19,15 | 502,51 | 129,50 |
| 2019/08/17 | CH2276 | Female | Two y/o | Treatment (Wk 3) | Treatment | Feed Day | Yes | 16:20 | 16:00 - 16:59 | Evening   | 38,0 | 53  | 98,2  | 98,2  | 19,15 | 544,43 | 155,21 |
| 2019/08/17 | CH2276 | Female | Two y/o | Treatment (Wk 3) | Treatment | Feed Day | Yes | 16:25 | 16:00 - 16:59 | Evening   | 38,0 | 86  | 103,4 | 103,4 | 19,15 | 582,77 | 157,01 |
| 2019/08/17 | CH2276 | Female | Two y/o | Treatment (Wk 3) | Treatment | Feed Day | No  | 16:30 | 16:00 - 16:59 | Evening   | 38,0 | 88  | 36,4  | 36,4  | 19,15 | 584,49 | 120,84 |
| 2019/08/17 | CH2276 | Female | Two y/o | Treatment (Wk 3) | Treatment | Feed Day | No  | 16:35 | 16:00 - 16:59 | Evening   | 38,0 | 77  | 203,0 | 203,0 | 19,15 | 574,39 | 180,64 |
| 2019/08/17 | CH2276 | Female | Two y/o | Treatment (Wk 3) | Treatment | Feed Day | No  | 16:40 | 16:00 - 16:59 | Evening   | 38,1 | 57  | 545,0 | 545,0 | 19,26 | 550,47 | 215,62 |
| 2019/08/17 | CH2276 | Female | Two y/o | Treatment (Wk 3) | Treatment | Feed Day | No  | 16:45 | 16:00 - 16:59 | Evening   | 38,1 | 51  | 114,6 | 114,6 | 19,26 | 541,20 | 160,60 |
| 2019/08/17 | CH2276 | Female | Two y/o | Treatment (Wk 3) | Treatment | Feed Day | No  | 16:50 | 16:00 - 16:59 | Evening   | 38,2 | 117 | 385,4 | 385,4 | 19,36 | 605,02 | 203,29 |
| 2019/08/17 | CH2276 | Female | Two y/o | Treatment (Wk 3) | Treatment | Feed Day | No  | 16:55 | 16:00 - 16:59 | Evening   | 38,2 | 115 | 115,8 | 115,8 | 19,36 | 603,82 | 160,96 |
| 2019/08/17 | CH2276 | Female | Two y/o | Treatment (Wk 3) | Treatment | Feed Day | No  | 17:00 | 17:00 - 17:59 | Evening   | 38,3 | 121 | 131,8 | 131,8 | 19,46 | 607,35 | 165,49 |
| 2019/08/17 | CH2276 | Female | Two y/o | Treatment (Wk 3) | Treatment | Feed Day | No  | 17:05 | 17:00 - 17:59 | Evening   | 38,3 | 56  | 170,8 | 170,8 | 19,46 | 549,01 | 174,57 |
| 2019/08/17 | CH2276 | Female | Two y/o | Treatment (Wk 3) | Treatment | Feed Day | No  | 17:10 | 17:00 - 17:59 | Evening   | 38,3 | 65  | 290,8 | 290,8 | 19,46 | 561,12 | 193,32 |
| 2019/08/17 | CH2276 | Female | Two y/o | Treatment (Wk 3) | Treatment | Feed Day | No  | 17:15 | 17:00 - 17:59 | Evening   | 38,3 | 117 | 286,0 | 286,0 | 19,46 | 605,02 | 192,73 |
| 2019/08/17 | CH2276 | Female | Two y/o | Treatment (Wk 3) | Treatment | Feed Day | No  | 17:20 | 17:00 - 17:59 | Evening   | 38,3 | 88  | 50,0  | 50,0  | 19,46 | 584,49 | 131,79 |
| 2019/08/17 | CH2276 | Female | Two y/o | Treatment (Wk 3) | Treatment | Feed Day | No  | 17:25 | 17:00 - 17:59 | Evening   | 38,3 | 59  | 348,8 | 348,8 | 19,46 | 553,30 | 199,76 |
| 2019/08/17 | CH2276 | Female | Two y/o | Treatment (Wk 3) | Treatment | Feed Day | No  | 17:30 | 17:00 - 17:59 | Evening   | 38,3 | 61  | 181,6 | 181,6 | 19,46 | 556,01 | 176,73 |
| 2019/08/17 | CH2276 | Female | Two y/o | Treatment (Wk 3) | Treatment | Feed Day | No  | 17:35 | 17:00 - 17:59 | Evening   | 38,4 | 78  | 156,8 | 156,8 | 19,56 | 575,38 | 171,57 |
| 2019/08/17 | CH2276 | Female | Two y/o | Treatment (Wk 3) | Treatment | Feed Day | No  | 17:40 | 17:00 - 17:59 | Evening   | 38,4 | 172 | 120,4 | 120,4 | 19,56 | 630,73 | 162,32 |
| 2019/08/17 | CH2276 | Female | Two y/o | Treatment (Wk 3) | Treatment | Feed Day | No  | 17:45 | 17:00 - 17:59 | Evening   | 38,4 | 69  | 286,6 | 286,6 | 19,56 | 565,86 | 192,81 |
| 2019/08/17 | CH2276 | Female | Two y/o | Treatment (Wk 3) | Treatment | Feed Day | No  | 17:50 | 17:00 - 17:59 | Evening   | 38,4 | 41  | 198,4 | 198,4 | 19,56 | 522,29 | 179,84 |
| 2019/08/17 | CH2276 | Female | Two y/o | Treatment (Wk 3) | Treatment | Feed Day | No  | 17:55 | 17:00 - 17:59 | Evening   | 38,3 | 98  | 134,4 | 134,4 | 19,46 | 592,41 | 166,17 |
| 2019/08/17 | CH2276 | Female | Two y/o | Treatment (Wk 3) | Treatment | Feed Day | No  | 18:00 | 18:00 - 18:59 | Evening   | 38,4 |     | 175,8 | 175,8 | 19,56 |        | 175,59 |
| 2019/08/17 | CH2276 | Female | Two y/o | Treatment (Wk 3) | Treatment | Feed Day | No  | 18:05 | 18:00 - 18:59 | Evening   | 38,3 | 76  | 52,6  | 52,6  | 19,46 | 573,39 | 133,54 |
| 2019/08/17 | CH2276 | Female | Two y/o | Treatment (Wk 3) | Treatment | Feed Day | No  | 18:10 | 18:00 - 18:59 | Evening   | 38,1 |     | 680,4 | 680,4 | 19,26 |        | 223,54 |
| 2019/08/17 | CH2276 | Female | Two y/o | Treatment (Wk 3) | Treatment | Feed Day | No  | 18:15 | 18:00 - 18:59 | Evening   | 38,2 | 61  | 93,6  | 93,6  | 19,36 | 556,01 | 153,54 |
| 2019/08/17 | CH2276 | Female | Two y/o | Treatment (Wk 3) | Treatment | Feed Day | No  | 18:20 | 18:00 - 18:59 | Evening   | 38,3 | 78  | 64,6  | 64,6  | 19,46 | 575,38 | 140,65 |
| 2019/08/17 | CH2276 | Female | Two y/o | Treatment (Wk 3) | Treatment | Feed Day | No  | 18:25 | 18:00 - 18:59 | Evening   | 38,3 | 73  | 99,8  | 99,8  | 19,46 | 570,27 | 155,77 |
| 2019/08/17 | CH2276 | Female | Two y/o | Treatment (Wk 3) | Treatment | Feed Day | No  | 18:30 | 18:00 - 18:59 | Evening   | 38,4 | 114 | 223,8 | 223,8 | 19,56 | 603,20 | 184,08 |
| 2019/08/17 | CH2276 | Female | Two y/o | Treatment (Wk 3) | Treatment | Feed Day | No  | 18:35 | 18:00 - 18:59 | Evening   | 38,5 | 70  | 895,2 |       | 19,66 | 566,99 |        |
| 2019/08/17 | CH2276 | Female | Two y/o | Treatment (Wk 3) | Treatment | Feed Day | No  | 18:40 | 18:00 - 18:59 | Evening   | 38,5 | 93  | 28,8  | 28,8  | 19,66 | 588,58 | 112,79 |
| 2019/08/17 | CH2276 | Female | Two y/o | Treatment (Wk 3) | Treatment | Feed Day | No  | 18:45 | 18:00 - 18:59 | Evening   | 38,5 | 92  | 35,8  | 35,8  | 19,66 | 587,78 | 120,27 |
| 2019/08/17 | CH2276 | Female | Two y/o | Treatment (Wk 3) | Treatment | Feed Day | No  | 18:50 | 18:00 - 18:59 | Evening   | 38,4 | 132 | 32,2  | 32,2  | 19,56 | 613,32 | 116,63 |
| 2019/08/17 | CH2276 | Female | Two y/o | Treatment (Wk 3) | Treatment | Feed Day | No  | 18:55 | 18:00 - 18:59 | Evening   | 38,4 | 72  | 25,0  | 25,0  | 19,56 | 569,20 | 107,94 |
| 2019/08/17 | CH2276 | Female | Two y/o | Treatment (Wk 3) | Treatment | Feed Day | No  | 19:00 | 19:00 - 19:59 | Evening   | 38,3 | 67  | 18,0  | 18,0  | 19,46 | 563,53 | 96,72  |
| 2019/08/17 | CH2276 | Female | Two y/o | Treatment (Wk 3) | Treatment | Feed Day | No  | 19:05 | 19:00 - 19:59 | Evening   | 38,2 | 70  | 14,8  | 14,8  | 19,36 | 566,99 | 90,05  |
| 2019/08/17 | CH2276 | Female | Two y/o | Treatment (Wk 3) | Treatment | Feed Day | No  | 19:10 | 19:00 - 19:59 | Evening   | 38,1 | 69  | 18,2  | 18,2  | 19,26 | 565,86 | 97,10  |
| 2019/08/17 | CH2276 | Female | Two y/o | Treatment (Wk 3) | Treatment | Feed Day | No  | 19:15 | 19:00 - 19:59 | Evening   | 38,0 | 65  | 22,6  | 22,6  | 19,15 | 561,12 | 104,49 |
| 2019/08/17 | CH2276 | Female | Two y/o | Treatment (Wk 3) | Treatment | Feed Day | No  | 19:20 | 19:00 - 19:59 | Evening   | 37,9 | 62  | 18,2  | 18,2  | 19,05 | 557,33 | 97,10  |
| 2019/08/17 | CH2276 | Female | Two y/o | Treatment (Wk 3) | Treatment | Feed Day | No  | 19:25 | 19:00 - 19:59 | Evening   | 37,8 | 59  | 20,8  | 20,8  | 18,95 | 553,30 | 101,65 |
| 2019/08/17 | CH2276 | Female | Two y/o | Treatment (Wk 3) | Treatment | Feed Day | No  | 19:30 | 19:00 - 19:59 | Evening   | 37,7 | 79  | 15,6  | 15,6  | 18,85 | 576,36 | 91,85  |
| 2019/08/17 | CH2276 | Female | Two y/o | Treatment (Wk 3) | Treatment | Feed Day | No  | 19:35 | 19:00 - 19:59 | Evening   | 37,6 | 56  | 25,2  | 25,2  | 18,75 | 549,01 | 108,22 |
| 2019/08/17 | CH2276 | Female | Two y/o | Treatment (Wk 3) | Treatment | Feed Day | No  | 19:40 | 19:00 - 19:59 | Evening   | 37,5 | 69  | 21,8  | 21,8  | 18,65 | 565,86 | 103,26 |
| 2019/08/17 | CH2276 | Female | Two y/o | Treatment (Wk 3) | Treatment | Feed Day | No  | 19:45 | 19:00 - 19:59 | Evening   | 37,4 | 60  | 22,0  | 22,0  | 18,55 | 554,67 | 103,57 |
| 2019/08/17 | CH2276 | Female | Two y/o | Treatment (Wk 3) | Treatment | Feed Day | No  | 19:50 | 19:00 - 19:59 | Evening   | 37,4 | 75  | 25,6  | 25,6  | 18,55 | 572,36 | 108,76 |



|    |            |        |        |         |                  |           |          |    |       |               |               |      |     |       |       |       |        |        |
|----|------------|--------|--------|---------|------------------|-----------|----------|----|-------|---------------|---------------|------|-----|-------|-------|-------|--------|--------|
|    | 2019/08/17 | CH2276 | Female | Two y/o | Treatment (Wk 3) | Treatment | Feed Day | No | 19:55 | 19:00 - 19:59 | Evening       | 37,4 | 67  | 35,0  | 35,0  | 18,55 | 563,53 | 119,49 |
|    | 2019/08/17 | CH2276 | Female | Two y/o | Treatment (Wk 3) | Treatment | Feed Day | No | 20:00 | 20:00 - 20:59 | Night         | 37,3 | 65  | 39,6  | 39,6  | 18,46 | 561,12 | 123,74 |
|    | 2019/08/17 | CH2276 | Female | Two y/o | Treatment (Wk 3) | Treatment | Feed Day | No | 20:05 | 20:00 - 20:59 | Night         | 37,3 | 65  | 53,8  | 53,8  | 18,46 | 561,12 | 134,32 |
|    | 2019/08/17 | CH2276 | Female | Two y/o | Treatment (Wk 3) | Treatment | Feed Day | No | 20:10 | 20:00 - 20:59 | Night         | 37,3 | 95  | 81,0  | 81,0  | 18,46 | 590,14 | 148,51 |
|    | 2019/08/17 | CH2276 | Female | Two y/o | Treatment (Wk 3) | Treatment | Feed Day | No | 20:15 | 20:00 - 20:59 | Night         | 37,3 | 96  | 17,4  | 17,4  | 18,46 | 590,91 | 95,56  |
|    | 2019/08/17 | CH2276 | Female | Two y/o | Treatment (Wk 3) | Treatment | Feed Day | No | 20:20 | 20:00 - 20:59 | Night         | 37,3 | 64  | 19,6  | 19,6  | 18,46 | 559,88 | 99,63  |
|    | 2019/08/17 | CH2276 | Female | Two y/o | Treatment (Wk 3) | Treatment | Feed Day | No | 20:25 | 20:00 - 20:59 | Night         | 37,3 | 60  | 15,8  | 15,8  | 18,46 | 554,67 | 92,28  |
|    | 2019/08/17 | CH2276 | Female | Two y/o | Treatment (Wk 3) | Treatment | Feed Day | No | 20:30 | 20:00 - 20:59 | Night         | 37,3 | 60  | 18,4  | 18,4  | 18,46 | 554,67 | 97,47  |
|    | 2019/08/17 | CH2276 | Female | Two y/o | Treatment (Wk 3) | Treatment | Feed Day | No | 20:35 | 20:00 - 20:59 | Night         | 37,2 | 58  | 16,6  | 16,6  | 18,36 | 551,90 | 93,96  |
|    | 2019/08/17 | CH2276 | Female | Two y/o | Treatment (Wk 3) | Treatment | Feed Day | No | 20:40 | 20:00 - 20:59 | Night         | 37,2 | 64  | 22,4  | 22,4  | 18,36 | 559,88 | 104,19 |
|    | 2019/08/17 | CH2276 | Female | Two y/o | Treatment (Wk 3) | Treatment | Feed Day | No | 20:45 | 20:00 - 20:59 | Night         | 37,1 | 83  | 37,6  | 37,6  | 18,26 | 580,11 | 121,96 |
|    | 2019/08/17 | CH2276 | Female | Two y/o | Treatment (Wk 3) | Treatment | Feed Day | No | 20:50 | 20:00 - 20:59 | Night         | 37,1 | 65  | 26,4  | 26,4  | 18,26 | 561,12 | 109,81 |
|    | 2019/08/17 | CH2276 | Female | Two y/o | Treatment (Wk 3) | Treatment | Feed Day | No | 20:55 | 20:00 - 20:59 | Night         | 37,0 | 92  | 22,0  | 22,0  | 18,16 | 587,78 | 103,57 |
|    | 2019/08/17 | CH2276 | Female | Two y/o | Treatment (Wk 3) | Treatment | Feed Day | No | 21:00 | 21:00 - 21:59 | Night         | 36,9 | 61  | 23,4  | 23,4  | 18,06 | 556,01 | 105,68 |
|    | 2019/08/17 | CH2276 | Female | Two y/o | Treatment (Wk 3) | Treatment | Feed Day | No | 21:05 | 21:00 - 21:59 | Night         | 36,9 | 61  | 20,2  | 20,2  | 18,06 | 556,01 | 100,65 |
|    | 2019/08/17 | CH2276 | Female | Two y/o | Treatment (Wk 3) | Treatment | Feed Day | No | 21:10 | 21:00 - 21:59 | Night         | 36,8 | 66  | 27,0  | 27,0  | 17,96 | 562,34 | 110,58 |
|    | 2019/08/17 | CH2276 | Female | Two y/o | Treatment (Wk 3) | Treatment | Feed Day | No | 21:15 | 21:00 - 21:59 | Night         | 36,8 | 48  | 24,0  | 24,0  | 17,96 | 536,04 | 106,55 |
|    | 2019/08/17 | CH2276 | Female | Two y/o | Treatment (Wk 3) | Treatment | Feed Day | No | 21:20 | 21:00 - 21:59 | Night         | 36,8 | 63  | 19,0  | 19,0  | 17,96 | 558,62 | 98,56  |
|    | 2019/08/17 | CH2276 | Female | Two y/o | Treatment (Wk 3) | Treatment | Feed Day | No | 21:25 | 21:00 - 21:59 | Night         | 36,7 | 68  | 28,4  | 28,4  | 17,87 | 564,71 | 112,31 |
|    | 2019/08/17 | CH2276 | Female | Two y/o | Treatment (Wk 3) | Treatment | Feed Day | No | 21:30 | 21:00 - 21:59 | Night         | 36,7 | 70  | 34,0  | 34,0  | 17,87 | 566,99 | 118,49 |
|    | 2019/08/17 | CH2276 | Female | Two y/o | Treatment (Wk 3) | Treatment | Feed Day | No | 21:35 | 21:00 - 21:59 | Night         | 36,7 | 57  | 47,6  | 47,6  | 17,87 | 550,47 | 130,09 |
|    | 2019/08/17 | CH2276 | Female | Two y/o | Treatment (Wk 3) | Treatment | Feed Day | No | 21:40 | 21:00 - 21:59 | Night         | 36,7 | 64  | 64,4  | 64,4  | 17,87 | 559,88 | 140,55 |
|    | 2019/08/17 | CH2276 | Female | Two y/o | Treatment (Wk 3) | Treatment | Feed Day | No | 21:45 | 21:00 - 21:59 | Night         | 36,7 | 56  | 70,2  | 70,2  | 17,87 | 549,01 | 143,54 |
|    | 2019/08/17 | CH2276 | Female | Two y/o | Treatment (Wk 3) | Treatment | Feed Day | No | 21:50 | 21:00 - 21:59 | Night         | 36,9 | 61  | 28,8  | 28,8  | 18,06 | 556,01 | 112,79 |
|    | 2019/08/17 | CH2276 | Female | Two y/o | Treatment (Wk 3) | Treatment | Feed Day | No | 21:55 | 21:00 - 21:59 | Night         | 37,0 | 69  | 29,8  | 29,8  | 18,16 | 565,86 | 113,97 |
|    | 2019/08/17 | CH2276 | Female | Two y/o | Treatment (Wk 3) | Treatment | Feed Day | No | 22:00 | 22:00 - 22:59 | Night         | 37,0 | 61  | 25,4  | 25,4  | 18,16 | 556,01 | 108,49 |
|    | 2019/08/17 | CH2276 | Female | Two y/o | Treatment (Wk 3) | Treatment | Feed Day | No | 22:05 | 22:00 - 22:59 | Night         | 37,1 | 68  | 27,8  | 27,8  | 18,26 | 564,71 | 111,58 |
|    | 2019/08/17 | CH2276 | Female | Two y/o | Treatment (Wk 3) | Treatment | Feed Day | No | 22:10 | 22:00 - 22:59 | Night         | 37,1 | 63  | 33,4  | 33,4  | 18,26 | 558,62 | 117,88 |
|    | 2019/08/17 | CH2276 | Female | Two y/o | Treatment (Wk 3) | Treatment | Feed Day | No | 22:15 | 22:00 - 22:59 | Night         | 37,1 | 60  | 32,8  | 32,8  | 18,26 | 554,67 | 117,26 |
|    | 2019/08/17 | CH2276 | Female | Two y/o | Treatment (Wk 3) | Treatment | Feed Day | No | 22:20 | 22:00 - 22:59 | Night         | 37,2 | 60  | 35,2  | 35,2  | 18,36 | 554,67 | 119,69 |
|    | 2019/08/17 | CH2276 | Female | Two y/o | Treatment (Wk 3) | Treatment | Feed Day | No | 22:25 | 22:00 - 22:59 | Night         | 37,3 | 83  | 31,8  | 31,8  | 18,46 | 580,11 | 116,20 |
|    | 2019/08/17 | CH2276 | Female | Two y/o | Treatment (Wk 3) | Treatment | Feed Day | No | 22:30 | 22:00 - 22:59 | Night         | 37,3 | 57  | 32,8  | 32,8  | 18,46 | 550,47 | 117,26 |
|    | 2019/08/17 | CH2276 | Female | Two y/o | Treatment (Wk 3) | Treatment | Feed Day | No | 22:35 | 22:00 - 22:59 | Night         | 37,3 | 57  | 39,4  | 39,4  | 18,46 | 550,47 | 123,57 |
|    | 2019/08/17 | CH2276 | Female | Two y/o | Treatment (Wk 3) | Treatment | Feed Day | No | 22:40 | 22:00 - 22:59 | Night         | 37,3 | 64  | 27,8  | 27,8  | 18,46 | 559,88 | 111,58 |
|    | 2019/08/17 | CH2276 | Female | Two y/o | Treatment (Wk 3) | Treatment | Feed Day | No | 22:45 | 22:00 - 22:59 | Night         | 37,2 | 67  | 26,4  | 26,4  | 18,36 | 563,53 | 109,81 |
|    | 2019/08/17 | CH2276 | Female | Two y/o | Treatment (Wk 3) | Treatment | Feed Day | No | 22:50 | 22:00 - 22:59 | Night         | 37,1 | 64  | 36,2  | 36,2  | 18,26 | 559,88 | 120,65 |
|    | 2019/08/17 | CH2276 | Female | Two y/o | Treatment (Wk 3) | Treatment | Feed Day | No | 22:55 | 22:00 - 22:59 | Night         | 37,1 | 92  | 31,4  | 31,4  | 18,26 | 587,78 | 115,76 |
|    | 2019/08/17 | CH2276 | Female | Two y/o | Treatment (Wk 3) | Treatment | Feed Day | No | 23:00 | 23:00 - 23:59 | Night         | 37,1 |     | 38,8  | 38,8  | 18,26 | 568,10 | 122,14 |
|    | 2019/08/17 | CH2276 | Female | Two y/o | Treatment (Wk 3) | Treatment | Feed Day | No | 23:05 | 23:00 - 23:59 | Night         | 37,2 |     | 41,6  | 41,6  | 18,36 | 568,10 | 122,14 |
|    | 2019/08/17 | CH2276 | Female | Two y/o | Treatment (Wk 3) | Treatment | Feed Day | No | 23:10 | 23:00 - 23:59 | Night         | 37,3 | 61  | 42,0  | 42,0  | 18,46 | 556,01 | 125,77 |
|    | 2019/08/17 | CH2276 | Female | Two y/o | Treatment (Wk 3) | Treatment | Feed Day | No | 23:15 | 23:00 - 23:59 | Night         | 37,3 |     | 33,4  | 33,4  | 18,46 | 556,01 | 117,88 |
|    | 2019/08/17 | CH2276 | Female | Two y/o | Treatment (Wk 3) | Treatment | Feed Day | No | 23:20 | 23:00 - 23:59 | Night         | 37,3 | 61  | 32,8  | 32,8  | 18,46 | 556,01 | 117,26 |
|    | 2019/08/17 | CH2276 | Female | Two y/o | Treatment (Wk 3) | Treatment | Feed Day | No | 23:25 | 23:00 - 23:59 | Night         | 37,3 |     | 33,2  | 33,2  | 18,46 | 556,01 | 117,68 |
|    | 2019/08/17 | CH2276 | Female | Two y/o | Treatment (Wk 3) | Treatment | Feed Day | No | 23:30 | 23:00 - 23:59 | Night         | 37,3 | 62  | 32,0  | 32,0  | 18,46 | 557,33 | 116,41 |
|    | 2019/08/17 | CH2276 | Female | Two y/o | Treatment (Wk 3) | Treatment | Feed Day | No | 23:35 | 23:00 - 23:59 | Night         | 37,3 | 71  | 27,0  | 27,0  | 18,46 | 568,10 | 110,58 |
|    | 2019/08/17 | CH2276 | Female | Two y/o | Treatment (Wk 3) | Treatment | Feed Day | No | 23:40 | 23:00 - 23:59 | Night         | 37,4 |     | 33,6  | 33,6  | 18,55 | 568,10 | 118,09 |
|    | 2019/08/17 | CH2276 | Female | Two y/o | Treatment (Wk 3) | Treatment | Feed Day | No | 23:45 | 23:00 - 23:59 | Night         | 37,3 | 59  | 42,0  | 42,0  | 18,46 | 553,30 | 125,77 |
|    | 2019/08/17 | CH2276 | Female | Two y/o | Treatment (Wk 3) | Treatment | Feed Day | No | 23:50 | 23:00 - 23:59 | Night         | 37,4 | 71  | 37,8  | 37,8  | 18,55 | 568,10 | 122,14 |
|    | 2019/08/17 | CH2276 | Female | Two y/o | Treatment (Wk 3) | Treatment | Feed Day | No | 23:55 | 23:00 - 23:59 | Night         | 37,4 | 56  | 32,4  | 32,4  | 18,55 | 549,01 | 116,84 |
| 61 | 2019/08/18 | CH2276 | Female | Two y/o | Treatment (Wk 3) | Treatment | Fast Day | No | 00:00 | 00:00 - 00:59 | Early Morning | 37,4 | 106 | 106,8 | 106,8 | 18,55 | 598,06 | 158,14 |
|    | 2019/08/18 | CH2276 | Female | Two y/o | Treatment (Wk 3) | Treatment | Fast Day | No | 00:05 | 00:00 - 00:59 | Early Morning | 37,3 | 57  | 45,2  | 45,2  | 18,46 | 550,47 | 128,30 |
|    | 2019/08/18 | CH2276 | Female | Two y/o | Treatment (Wk 3) | Treatment | Fast Day | No | 00:10 | 00:00 - 00:59 | Early Morning | 37,3 | 58  | 51,8  | 51,8  | 18,46 | 551,90 | 133,01 |
|    | 2019/08/18 | CH2276 | Female | Two y/o | Treatment (Wk 3) | Treatment | Fast Day | No | 00:15 | 00:00 - 00:59 | Early Morning | 37,2 | 63  | 46,6  | 46,6  | 18,36 | 558,62 | 129,35 |
|    | 2019/08/18 | CH2276 | Female | Two y/o | Treatment (Wk 3) | Treatment | Fast Day | No | 00:20 | 00:00 - 00:59 | Early Morning | 37,1 | 55  | 50,4  | 50,4  | 18,26 | 547,52 | 132,06 |
|    | 2019/08/18 | CH2276 | Female | Two y/o | Treatment (Wk 3) | Treatment | Fast Day | No | 00:25 | 00:00 - 00:59 | Early Morning | 37,1 | 64  | 30,2  | 30,2  | 18,26 | 559,88 | 114,42 |
|    | 2019/08/18 | CH2276 | Female | Two y/o | Treatment (Wk 3) | Treatment | Fast Day | No | 00:30 | 00:00 - 00:59 | Early Morning | 37,1 | 64  | 25,4  | 25,4  | 18,26 | 559,88 | 108,49 |
|    | 2019/08/18 | CH2276 | Female | Two y/o | Treatment (Wk 3) | Treatment | Fast Day | No | 00:35 | 00:00 - 00:59 | Early Morning | 37,1 | 50  | 24,6  | 24,6  | 18,26 | 539,52 | 107,39 |
|    | 2019/08/18 | CH2276 | Female | Two y/o | Treatment (Wk 3) | Treatment | Fast Day | No | 00:40 | 00:00 - 00:59 | Early Morning | 37,1 | 60  | 33,8  | 33,8  | 18,26 | 554,67 | 118,29 |
|    | 2019/08/18 | CH2276 | Female | Two y/o | Treatment (Wk 3) | Treatment | Fast Day | No | 00:45 | 00:00 - 00:59 | Early Morning | 37,0 | 50  | 24,6  | 24,6  | 18,16 | 539,52 | 107,39 |
|    | 2019/08/18 | CH2276 | Female | Two y/o | Treatment (Wk 3) | Treatment | Fast Day | No | 00:50 | 00:00 - 00:59 | Early Morning | 37,0 | 51  | 31,2  | 31,2  | 18,16 | 541,20 | 115,54 |
|    | 2019/08/18 | CH2276 | Female | Two y/o | Treatment (Wk 3) | Treatment | Fast Day | No | 00:55 | 00:00 - 00:59 | Early Morning | 37,0 | 54  | 25,2  | 25,2  | 18,16 | 545,99 | 108,22 |
|    | 2019/08/18 | CH2276 | Female | Two y/o | Treatment (Wk 3) | Treatment | Fast Day | No | 01:00 | 01:00 - 01:59 | Early Morning | 37,0 | 50  | 21,2  | 21,2  | 18,16 | 539,52 | 102,31 |
|    | 2019/08/18 | CH2276 | Female | Two y/o | Treatment (Wk 3) | Treatment | Fast Day | No | 01:05 | 01:00 - 01:59 | Early Morning | 37,0 | 60  | 26,6  | 26,6  | 18,16 | 554,67 | 110,07 |
|    | 2019/08/18 | CH2276 | Female | Two y/o | Treatment (Wk 3) | Treatment | Fast Day | No | 01:10 | 01:00 - 01:59 | Early Morning | 37,0 | 51  | 29,8  | 29,8  | 18,16 | 541,20 | 113,97 |
|    | 2019/08/18 | CH2276 | Female | Two y/o | Treatment (Wk 3) | Treatment | Fast Day | No | 01:15 | 01:00 - 01:59 | Early Morning | 37,0 | 52  | 26,8  | 26,8  | 18,16 | 542,83 | 110,33 |
|    | 2019/08/18 | CH2276 | Female | Two y/o | Treatment (Wk 3) | Treatment | Fast Day | No | 01:20 | 01:00 - 01:59 | Early Morning | 36,9 | 63  | 18,0  | 18,0  | 18,06 | 558,62 | 96,72  |
|    | 2019/08/18 | CH2276 | Female | Two y/o | Treatment (Wk 3) | Treatment | Fast Day | No | 01:25 | 01:00 - 01:59 | Early Morning | 36,9 | 53  | 26,4  | 26,4  | 18,06 | 544,43 | 109,81 |
|    | 2019/08/18 | CH2276 | Female | Two y/o | Treatment (Wk 3) | Treatment | Fast Day | No | 01:30 | 01:00 - 01:59 | Early Morning | 36,9 | 50  | 24,6  | 24,6  | 18,06 | 539,52 | 107,39 |
|    | 2019/08/18 | CH2276 | Female | Two y/o | Treatment (Wk 3) | Treatment | Fast Day | No | 01:35 | 01:00 - 01:59 | Early Morning | 36,9 | 54  | 18,2  | 18,2  | 18,06 | 545,99 | 97,10  |
|    | 2019/08/18 | CH2276 | Female | Two y/o | Treatment (Wk 3) | Treatment | Fast Day | No | 01:40 | 01:00 - 01:59 | Early Morning | 36,9 | 65  | 23,8  | 23,8  | 18,06 | 561,12 | 106,26 |



|            |        |        |         |                  |           |          |    |       |               |               |      |     |       |       |       |        |        |
|------------|--------|--------|---------|------------------|-----------|----------|----|-------|---------------|---------------|------|-----|-------|-------|-------|--------|--------|
| 2019/08/18 | CH2276 | Female | Two y/o | Treatment (Wk 3) | Treatment | Fast Day | No | 01:45 | 01:00 - 01:59 | Early Morning | 36,9 | 60  | 23,2  | 23,2  | 18,06 | 554,67 | 105,39 |
| 2019/08/18 | CH2276 | Female | Two y/o | Treatment (Wk 3) | Treatment | Fast Day | No | 01:50 | 01:00 - 01:59 | Early Morning | 36,8 | 65  | 19,4  | 19,4  | 17,96 | 561,12 | 99,28  |
| 2019/08/18 | CH2276 | Female | Two y/o | Treatment (Wk 3) | Treatment | Fast Day | No | 01:55 | 01:00 - 01:59 | Early Morning | 36,8 | 51  | 16,8  | 16,8  | 17,96 | 541,20 | 94,37  |
| 2019/08/18 | CH2276 | Female | Two y/o | Treatment (Wk 3) | Treatment | Fast Day | No | 02:00 | 02:00 - 02:59 | Early Morning | 36,8 | 53  | 22,4  | 22,4  | 17,96 | 544,43 | 104,19 |
| 2019/08/18 | CH2276 | Female | Two y/o | Treatment (Wk 3) | Treatment | Fast Day | No | 02:05 | 02:00 - 02:59 | Early Morning | 36,8 | 54  | 28,2  | 28,2  | 17,96 | 545,99 | 112,07 |
| 2019/08/18 | CH2276 | Female | Two y/o | Treatment (Wk 3) | Treatment | Fast Day | No | 02:10 | 02:00 - 02:59 | Early Morning | 36,8 | 60  | 28,2  | 28,2  | 17,96 | 554,67 | 112,07 |
| 2019/08/18 | CH2276 | Female | Two y/o | Treatment (Wk 3) | Treatment | Fast Day | No | 02:15 | 02:00 - 02:59 | Early Morning | 36,9 | 97  | 26,8  | 26,8  | 18,06 | 591,66 | 110,33 |
| 2019/08/18 | CH2276 | Female | Two y/o | Treatment (Wk 3) | Treatment | Fast Day | No | 02:20 | 02:00 - 02:59 | Early Morning | 36,8 | 64  | 48,4  | 48,4  | 17,96 | 559,88 | 130,66 |
| 2019/08/18 | CH2276 | Female | Two y/o | Treatment (Wk 3) | Treatment | Fast Day | No | 02:25 | 02:00 - 02:59 | Early Morning | 36,9 | 43  | 52,6  | 52,6  | 18,06 | 526,50 | 133,54 |
| 2019/08/18 | CH2276 | Female | Two y/o | Treatment (Wk 3) | Treatment | Fast Day | No | 02:30 | 02:00 - 02:59 | Early Morning | 36,9 | 63  | 48,2  | 48,2  | 18,06 | 558,62 | 130,52 |
| 2019/08/18 | CH2276 | Female | Two y/o | Treatment (Wk 3) | Treatment | Fast Day | No | 02:35 | 02:00 - 02:59 | Early Morning | 37,0 | 67  | 34,4  | 34,4  | 18,16 | 563,53 | 118,90 |
| 2019/08/18 | CH2276 | Female | Two y/o | Treatment (Wk 3) | Treatment | Fast Day | No | 02:40 | 02:00 - 02:59 | Early Morning | 37,0 | 91  | 34,4  | 34,4  | 18,16 | 586,98 | 118,90 |
| 2019/08/18 | CH2276 | Female | Two y/o | Treatment (Wk 3) | Treatment | Fast Day | No | 02:45 | 02:00 - 02:59 | Early Morning | 37,0 | 55  | 38,4  | 38,4  | 18,16 | 547,52 | 122,68 |
| 2019/08/18 | CH2276 | Female | Two y/o | Treatment (Wk 3) | Treatment | Fast Day | No | 02:50 | 02:00 - 02:59 | Early Morning | 37,0 | 172 | 45,0  | 45,0  | 18,16 | 630,73 | 128,15 |
| 2019/08/18 | CH2276 | Female | Two y/o | Treatment (Wk 3) | Treatment | Fast Day | No | 02:55 | 02:00 - 02:59 | Early Morning | 37,0 | 112 | 118,8 | 118,8 | 18,16 | 601,96 | 161,86 |
| 2019/08/18 | CH2276 | Female | Two y/o | Treatment (Wk 3) | Treatment | Fast Day | No | 03:00 | 03:00 - 03:59 | Early Morning | 36,9 | 68  | 70,2  | 70,2  | 18,06 | 564,71 | 143,54 |
| 2019/08/18 | CH2276 | Female | Two y/o | Treatment (Wk 3) | Treatment | Fast Day | No | 03:05 | 03:00 - 03:59 | Early Morning | 36,9 | 172 | 97,8  | 97,8  | 18,06 | 630,73 | 155,07 |
| 2019/08/18 | CH2276 | Female | Two y/o | Treatment (Wk 3) | Treatment | Fast Day | No | 03:10 | 03:00 - 03:59 | Early Morning | 36,9 | 112 | 122,0 | 122,0 | 18,06 | 601,96 | 162,79 |
| 2019/08/18 | CH2276 | Female | Two y/o | Treatment (Wk 3) | Treatment | Fast Day | No | 03:15 | 03:00 - 03:59 | Early Morning | 37,1 | 63  | 495,4 | 495,4 | 18,26 | 558,62 | 212,22 |
| 2019/08/18 | CH2276 | Female | Two y/o | Treatment (Wk 3) | Treatment | Fast Day | No | 03:20 | 03:00 - 03:59 | Early Morning | 37,3 | 57  | 243,4 | 243,4 | 18,46 | 550,47 | 187,04 |
| 2019/08/18 | CH2276 | Female | Two y/o | Treatment (Wk 3) | Treatment | Fast Day | No | 03:25 | 03:00 - 03:59 | Early Morning | 37,4 | 114 | 670,0 | 670,0 | 18,55 | 603,20 | 222,99 |
| 2019/08/18 | CH2276 | Female | Two y/o | Treatment (Wk 3) | Treatment | Fast Day | No | 03:30 | 03:00 - 03:59 | Early Morning | 37,5 | 99  | 112,6 | 112,6 | 18,65 | 593,14 | 159,98 |
| 2019/08/18 | CH2276 | Female | Two y/o | Treatment (Wk 3) | Treatment | Fast Day | No | 03:35 | 03:00 - 03:59 | Early Morning | 37,6 |     | 302,2 | 302,2 | 18,75 |        | 194,68 |
| 2019/08/18 | CH2276 | Female | Two y/o | Treatment (Wk 3) | Treatment | Fast Day | No | 03:40 | 03:00 - 03:59 | Early Morning | 37,6 | 105 | 229,4 | 229,4 | 18,75 | 597,38 | 184,95 |
| 2019/08/18 | CH2276 | Female | Two y/o | Treatment (Wk 3) | Treatment | Fast Day | No | 03:45 | 03:00 - 03:59 | Early Morning | 37,7 | 110 | 86,2  | 86,2  | 18,85 | 600,69 | 150,67 |
| 2019/08/18 | CH2276 | Female | Two y/o | Treatment (Wk 3) | Treatment | Fast Day | No | 03:50 | 03:00 - 03:59 | Early Morning | 37,7 | 110 | 74,8  | 74,8  | 18,85 | 600,69 | 145,74 |
| 2019/08/18 | CH2276 | Female | Two y/o | Treatment (Wk 3) | Treatment | Fast Day | No | 03:55 | 03:00 - 03:59 | Early Morning | 37,7 | 103 | 75,8  | 75,8  | 18,85 | 596,00 | 146,20 |
| 2019/08/18 | CH2276 | Female | Two y/o | Treatment (Wk 3) | Treatment | Fast Day | No | 04:00 | 04:00 - 04:59 | Morning       | 37,7 | 135 | 223,6 | 223,6 | 18,85 | 614,84 | 184,05 |
| 2019/08/18 | CH2276 | Female | Two y/o | Treatment (Wk 3) | Treatment | Fast Day | No | 04:05 | 04:00 - 04:59 | Morning       | 37,7 | 103 | 211,6 | 211,6 | 18,85 | 596,00 | 182,10 |
| 2019/08/18 | CH2276 | Female | Two y/o | Treatment (Wk 3) | Treatment | Fast Day | No | 04:10 | 04:00 - 04:59 | Morning       | 37,7 | 98  | 50,2  | 50,2  | 18,85 | 592,41 | 131,92 |
| 2019/08/18 | CH2276 | Female | Two y/o | Treatment (Wk 3) | Treatment | Fast Day | No | 04:15 | 04:00 - 04:59 | Morning       | 37,7 | 131 | 526,6 | 526,6 | 18,85 | 612,80 | 214,39 |
| 2019/08/18 | CH2276 | Female | Two y/o | Treatment (Wk 3) | Treatment | Fast Day | No | 04:20 | 04:00 - 04:59 | Morning       | 37,7 | 41  | 54,6  | 54,6  | 18,85 | 522,29 | 134,83 |
| 2019/08/18 | CH2276 | Female | Two y/o | Treatment (Wk 3) | Treatment | Fast Day | No | 04:25 | 04:00 - 04:59 | Morning       | 37,8 | 59  | 232,2 | 232,2 | 18,95 | 553,30 | 185,38 |
| 2019/08/18 | CH2276 | Female | Two y/o | Treatment (Wk 3) | Treatment | Fast Day | No | 04:30 | 04:00 - 04:59 | Morning       | 37,8 |     | 144,0 | 144,0 | 18,95 |        | 168,59 |
| 2019/08/18 | CH2276 | Female | Two y/o | Treatment (Wk 3) | Treatment | Fast Day | No | 04:35 | 04:00 - 04:59 | Morning       | 37,8 |     | 217,2 | 217,2 | 18,95 |        | 183,02 |
| 2019/08/18 | CH2276 | Female | Two y/o | Treatment (Wk 3) | Treatment | Fast Day | No | 04:40 | 04:00 - 04:59 | Morning       | 37,8 | 51  | 229,0 | 229,0 | 18,95 | 541,20 | 184,89 |
| 2019/08/18 | CH2276 | Female | Two y/o | Treatment (Wk 3) | Treatment | Fast Day | No | 04:45 | 04:00 - 04:59 | Morning       | 37,8 | 77  | 28,4  | 28,4  | 18,95 | 574,39 | 112,31 |
| 2019/08/18 | CH2276 | Female | Two y/o | Treatment (Wk 3) | Treatment | Fast Day | No | 04:50 | 04:00 - 04:59 | Morning       | 37,6 | 62  | 21,8  | 21,8  | 18,75 | 557,33 | 103,26 |
| 2019/08/18 | CH2276 | Female | Two y/o | Treatment (Wk 3) | Treatment | Fast Day | No | 04:55 | 04:00 - 04:59 | Morning       | 37,5 | 59  | 20,0  | 20,0  | 18,65 | 553,30 | 100,31 |
| 2019/08/18 | CH2276 | Female | Two y/o | Treatment (Wk 3) | Treatment | Fast Day | No | 05:00 | 05:00 - 05:59 | Morning       | 37,4 | 60  | 12,0  | 12,0  | 18,55 | 554,67 | 82,93  |
| 2019/08/18 | CH2276 | Female | Two y/o | Treatment (Wk 3) | Treatment | Fast Day | No | 05:05 | 05:00 - 05:59 | Morning       | 37,3 | 51  | 24,6  | 24,6  | 18,46 | 541,20 | 107,39 |
| 2019/08/18 | CH2276 | Female | Two y/o | Treatment (Wk 3) | Treatment | Fast Day | No | 05:10 | 05:00 - 05:59 | Morning       | 37,3 | 100 | 195,2 | 195,2 | 18,46 | 593,87 | 179,26 |
| 2019/08/18 | CH2276 | Female | Two y/o | Treatment (Wk 3) | Treatment | Fast Day | No | 05:15 | 05:00 - 05:59 | Morning       | 37,5 | 113 | 145,4 | 145,4 | 18,65 | 602,58 | 168,93 |
| 2019/08/18 | CH2276 | Female | Two y/o | Treatment (Wk 3) | Treatment | Fast Day | No | 05:20 | 05:00 - 05:59 | Morning       | 37,7 | 114 | 273,2 | 273,2 | 18,85 | 603,20 | 191,11 |
| 2019/08/18 | CH2276 | Female | Two y/o | Treatment (Wk 3) | Treatment | Fast Day | No | 05:25 | 05:00 - 05:59 | Morning       | 37,7 | 61  | 142,4 | 142,4 | 18,85 | 556,01 | 168,20 |
| 2019/08/18 | CH2276 | Female | Two y/o | Treatment (Wk 3) | Treatment | Fast Day | No | 05:30 | 05:00 - 05:59 | Morning       | 37,7 | 105 | 114,8 | 114,8 | 18,85 | 597,38 | 160,66 |
| 2019/08/18 | CH2276 | Female | Two y/o | Treatment (Wk 3) | Treatment | Fast Day | No | 05:35 | 05:00 - 05:59 | Morning       | 37,8 | 92  | 111,4 | 111,4 | 18,95 | 587,78 | 159,61 |
| 2019/08/18 | CH2276 | Female | Two y/o | Treatment (Wk 3) | Treatment | Fast Day | No | 05:40 | 05:00 - 05:59 | Morning       | 37,8 | 119 | 121,2 | 121,2 | 18,95 | 606,20 | 162,56 |
| 2019/08/18 | CH2276 | Female | Two y/o | Treatment (Wk 3) | Treatment | Fast Day | No | 05:45 | 05:00 - 05:59 | Morning       | 37,8 | 54  | 222,2 | 222,2 | 18,95 | 545,99 | 183,82 |
| 2019/08/18 | CH2276 | Female | Two y/o | Treatment (Wk 3) | Treatment | Fast Day | No | 05:50 | 05:00 - 05:59 | Morning       | 37,8 | 57  | 598,2 | 598,2 | 18,95 | 550,47 | 218,94 |
| 2019/08/18 | CH2276 | Female | Two y/o | Treatment (Wk 3) | Treatment | Fast Day | No | 05:55 | 05:00 - 05:59 | Morning       | 37,8 | 49  | 261,0 | 261,0 | 18,95 | 537,80 | 189,50 |
| 2019/08/18 | CH2276 | Female | Two y/o | Treatment (Wk 3) | Treatment | Fast Day | No | 06:00 | 06:00 - 06:59 | Morning       | 37,8 | 103 | 69,8  | 69,8  | 18,95 | 596,00 | 143,34 |
| 2019/08/18 | CH2276 | Female | Two y/o | Treatment (Wk 3) | Treatment | Fast Day | No | 06:05 | 06:00 - 06:59 | Morning       | 37,8 | 89  | 75,2  | 75,2  | 18,95 | 585,33 | 145,93 |
| 2019/08/18 | CH2276 | Female | Two y/o | Treatment (Wk 3) | Treatment | Fast Day | No | 06:10 | 06:00 - 06:59 | Morning       | 37,8 | 102 | 324,0 | 324,0 | 18,95 | 595,30 | 197,14 |
| 2019/08/18 | CH2276 | Female | Two y/o | Treatment (Wk 3) | Treatment | Fast Day | No | 06:15 | 06:00 - 06:59 | Morning       | 37,9 |     | 106,2 | 106,2 | 19,05 |        | 157,94 |
| 2019/08/18 | CH2276 | Female | Two y/o | Treatment (Wk 3) | Treatment | Fast Day | No | 06:20 | 06:00 - 06:59 | Morning       | 37,9 | 92  | 324,6 | 324,6 | 19,05 | 587,78 | 197,21 |
| 2019/08/18 | CH2276 | Female | Two y/o | Treatment (Wk 3) | Treatment | Fast Day | No | 06:25 | 06:00 - 06:59 | Morning       | 37,9 | 80  | 166,0 | 166,0 | 19,05 | 577,31 | 173,57 |
| 2019/08/18 | CH2276 | Female | Two y/o | Treatment (Wk 3) | Treatment | Fast Day | No | 06:30 | 06:00 - 06:59 | Morning       | 37,9 | 131 | 248,4 | 248,4 | 19,05 | 612,80 | 187,75 |
| 2019/08/18 | CH2276 | Female | Two y/o | Treatment (Wk 3) | Treatment | Fast Day | No | 06:35 | 06:00 - 06:59 | Morning       | 37,9 |     | 154,2 | 154,2 | 19,05 |        | 170,99 |
| 2019/08/18 | CH2276 | Female | Two y/o | Treatment (Wk 3) | Treatment | Fast Day | No | 06:40 | 06:00 - 06:59 | Morning       | 38,1 | 132 | 366,4 | 366,4 | 19,26 | 613,32 | 201,50 |
| 2019/08/18 | CH2276 | Female | Two y/o | Treatment (Wk 3) | Treatment | Fast Day | No | 06:45 | 06:00 - 06:59 | Morning       | 38,0 | 180 | 103,2 | 103,2 | 19,15 | 633,61 | 156,94 |
| 2019/08/18 | CH2276 | Female | Two y/o | Treatment (Wk 3) | Treatment | Fast Day | No | 06:50 | 06:00 - 06:59 | Morning       | 38,0 | 111 | 728,2 | 728,2 | 19,15 | 601,33 | 225,96 |
| 2019/08/18 | CH2276 | Female | Two y/o | Treatment (Wk 3) | Treatment | Fast Day | No | 06:55 | 06:00 - 06:59 | Morning       | 37,9 | 60  | 130,6 | 130,6 | 19,05 | 554,67 | 165,17 |
| 2019/08/18 | CH2276 | Female | Two y/o | Treatment (Wk 3) | Treatment | Fast Day | No | 07:00 | 07:00 - 07:59 | Morning       | 37,9 | 115 | 447,4 | 447,4 | 19,05 | 603,82 | 208,59 |
| 2019/08/18 | CH2276 | Female | Two y/o | Treatment (Wk 3) | Treatment | Fast Day | No | 07:05 | 07:00 - 07:59 | Morning       | 37,8 |     | 525,6 | 525,6 | 18,95 |        | 214,32 |
| 2019/08/18 | CH2276 | Female | Two y/o | Treatment (Wk 3) | Treatment | Fast Day | No | 07:10 | 07:00 - 07:59 | Morning       | 37,8 | 55  | 238,8 | 238,8 | 18,95 | 547,52 | 186,36 |
| 2019/08/18 | CH2276 | Female | Two y/o | Treatment (Wk 3) | Treatment | Fast Day | No | 07:15 | 07:00 - 07:59 | Morning       | 37,8 | 38  | 194,4 | 194,4 | 18,95 | 515,48 | 179,12 |
| 2019/08/18 | CH2276 | Female | Two y/o | Treatment (Wk 3) | Treatment | Fast Day | No | 07:20 | 07:00 - 07:59 | Morning       | 37,7 | 66  | 313,0 | 313,0 | 18,85 | 562,34 | 195,92 |
| 2019/08/18 | CH2276 | Female | Two y/o | Treatment (Wk 3) | Treatment | Fast Day | No | 07:25 | 07:00 - 07:59 | Morning       | 37,7 |     | 230,6 | 230,6 | 18,85 |        | 185,13 |
| 2019/08/18 | CH2276 | Female | Two y/o | Treatment (Wk 3) | Treatment | Fast Day | No | 07:30 | 07:00 - 07:59 | Morning       | 37,7 | 103 | 193,8 | 193,8 | 18,85 | 596,00 | 179,01 |



|            |        |        |         |                  |           |          |    |       |               |              |      |     |       |       |       |        |        |
|------------|--------|--------|---------|------------------|-----------|----------|----|-------|---------------|--------------|------|-----|-------|-------|-------|--------|--------|
| 2019/08/18 | CH2276 | Female | Two y/o | Treatment (Wk 3) | Treatment | Fast Day | No | 07:35 | 07:00 - 07:59 | Morning      | 37,7 | 66  | 114,0 | 114,0 | 18,85 | 562,34 | 160,42 |
| 2019/08/18 | CH2276 | Female | Two y/o | Treatment (Wk 3) | Treatment | Fast Day | No | 07:40 | 07:00 - 07:59 | Morning      | 37,7 | 114 | 124,4 | 124,4 | 18,85 | 603,20 | 163,47 |
| 2019/08/18 | CH2276 | Female | Two y/o | Treatment (Wk 3) | Treatment | Fast Day | No | 07:45 | 07:00 - 07:59 | Morning      | 37,6 |     | 39,0  | 39,0  | 18,75 |        | 123,22 |
| 2019/08/18 | CH2276 | Female | Two y/o | Treatment (Wk 3) | Treatment | Fast Day | No | 07:50 | 07:00 - 07:59 | Morning      | 37,4 | 81  | 52,0  | 52,0  | 18,55 | 578,26 | 133,14 |
| 2019/08/18 | CH2276 | Female | Two y/o | Treatment (Wk 3) | Treatment | Fast Day | No | 07:55 | 07:00 - 07:59 | Morning      | 37,3 | 55  | 29,0  | 29,0  | 18,46 | 547,52 | 113,03 |
| 2019/08/18 | CH2276 | Female | Two y/o | Treatment (Wk 3) | Treatment | Fast Day | No | 08:00 | 08:00 - 08:59 | Late Morning | 37,3 | 60  | 70,0  | 70,0  | 18,46 | 554,67 | 143,44 |
| 2019/08/18 | CH2276 | Female | Two y/o | Treatment (Wk 3) | Treatment | Fast Day | No | 08:05 | 08:00 - 08:59 | Late Morning | 37,1 | 59  | 53,4  | 53,4  | 18,26 | 553,30 | 134,06 |
| 2019/08/18 | CH2276 | Female | Two y/o | Treatment (Wk 3) | Treatment | Fast Day | No | 08:10 | 08:00 - 08:59 | Late Morning | 37,1 | 58  | 49,0  | 49,0  | 18,26 | 551,90 | 131,09 |
| 2019/08/18 | CH2276 | Female | Two y/o | Treatment (Wk 3) | Treatment | Fast Day | No | 08:15 | 08:00 - 08:59 | Late Morning | 37,1 | 63  | 42,6  | 42,6  | 18,26 | 558,62 | 126,26 |
| 2019/08/18 | CH2276 | Female | Two y/o | Treatment (Wk 3) | Treatment | Fast Day | No | 08:20 | 08:00 - 08:59 | Late Morning | 37,1 | 51  | 14,0  | 14,0  | 18,26 | 541,20 | 88,17  |
| 2019/08/18 | CH2276 | Female | Two y/o | Treatment (Wk 3) | Treatment | Fast Day | No | 08:25 | 08:00 - 08:59 | Late Morning | 36,9 | 56  | 19,0  | 19,0  | 18,06 | 549,01 | 98,56  |
| 2019/08/18 | CH2276 | Female | Two y/o | Treatment (Wk 3) | Treatment | Fast Day | No | 08:30 | 08:00 - 08:59 | Late Morning | 36,8 | 58  | 43,4  | 43,4  | 17,96 | 551,90 | 126,90 |
| 2019/08/18 | CH2276 | Female | Two y/o | Treatment (Wk 3) | Treatment | Fast Day | No | 08:35 | 08:00 - 08:59 | Late Morning | 36,8 | 108 | 77,8  | 77,8  | 17,96 | 599,39 | 147,11 |
| 2019/08/18 | CH2276 | Female | Two y/o | Treatment (Wk 3) | Treatment | Fast Day | No | 08:40 | 08:00 - 08:59 | Late Morning | 36,8 |     | 43,0  | 43,0  | 17,96 |        | 126,58 |
| 2019/08/18 | CH2276 | Female | Two y/o | Treatment (Wk 3) | Treatment | Fast Day | No | 08:45 | 08:00 - 08:59 | Late Morning | 36,8 | 75  | 59,8  | 59,8  | 17,96 | 572,36 | 137,98 |
| 2019/08/18 | CH2276 | Female | Two y/o | Treatment (Wk 3) | Treatment | Fast Day | No | 08:50 | 08:00 - 08:59 | Late Morning | 36,8 | 66  | 65,2  | 65,2  | 17,96 | 562,34 | 140,97 |
| 2019/08/18 | CH2276 | Female | Two y/o | Treatment (Wk 3) | Treatment | Fast Day | No | 08:55 | 08:00 - 08:59 | Late Morning | 36,9 |     | 63,6  | 63,6  | 18,06 |        | 140,11 |
| 2019/08/18 | CH2276 | Female | Two y/o | Treatment (Wk 3) | Treatment | Fast Day | No | 09:00 | 09:00 - 09:59 | Late Morning | 36,8 | 165 | 82,6  | 82,6  | 17,96 | 628,06 | 149,19 |
| 2019/08/18 | CH2276 | Female | Two y/o | Treatment (Wk 3) | Treatment | Fast Day | No | 09:05 | 09:00 - 09:59 | Late Morning | 37,0 | 81  | 47,4  | 47,4  | 18,16 | 578,26 | 129,94 |
| 2019/08/18 | CH2276 | Female | Two y/o | Treatment (Wk 3) | Treatment | Fast Day | No | 09:10 | 09:00 - 09:59 | Late Morning | 37,1 | 52  | 50,6  | 50,6  | 18,26 | 542,83 | 132,20 |
| 2019/08/18 | CH2276 | Female | Two y/o | Treatment (Wk 3) | Treatment | Fast Day | No | 09:15 | 09:00 - 09:59 | Late Morning | 37,1 | 60  | 48,2  | 48,2  | 18,26 | 554,67 | 130,52 |
| 2019/08/18 | CH2276 | Female | Two y/o | Treatment (Wk 3) | Treatment | Fast Day | No | 09:20 | 09:00 - 09:59 | Late Morning | 37,1 | 62  | 50,0  | 50,0  | 18,26 | 557,33 | 131,79 |
| 2019/08/18 | CH2276 | Female | Two y/o | Treatment (Wk 3) | Treatment | Fast Day | No | 09:25 | 09:00 - 09:59 | Late Morning | 37,2 | 65  | 49,6  | 49,6  | 18,36 | 561,12 | 131,51 |
| 2019/08/18 | CH2276 | Female | Two y/o | Treatment (Wk 3) | Treatment | Fast Day | No | 09:30 | 09:00 - 09:59 | Late Morning | 37,3 | 62  | 48,2  | 48,2  | 18,46 | 557,33 | 130,52 |
| 2019/08/18 | CH2276 | Female | Two y/o | Treatment (Wk 3) | Treatment | Fast Day | No | 09:35 | 09:00 - 09:59 | Late Morning | 37,3 | 59  | 43,4  | 43,4  | 18,46 | 553,30 | 126,90 |
| 2019/08/18 | CH2276 | Female | Two y/o | Treatment (Wk 3) | Treatment | Fast Day | No | 09:40 | 09:00 - 09:59 | Late Morning | 37,4 | 64  | 57,8  | 57,8  | 18,55 | 559,88 | 136,80 |
| 2019/08/18 | CH2276 | Female | Two y/o | Treatment (Wk 3) | Treatment | Fast Day | No | 09:45 | 09:00 - 09:59 | Late Morning | 37,4 | 121 | 81,4  | 81,4  | 18,55 | 607,35 | 148,68 |
| 2019/08/18 | CH2276 | Female | Two y/o | Treatment (Wk 3) | Treatment | Fast Day | No | 09:50 | 09:00 - 09:59 | Late Morning | 37,4 | 57  | 73,2  | 73,2  | 18,55 | 550,47 | 144,99 |
| 2019/08/18 | CH2276 | Female | Two y/o | Treatment (Wk 3) | Treatment | Fast Day | No | 09:55 | 09:00 - 09:59 | Late Morning | 37,4 | 90  | 70,8  | 70,8  | 18,55 | 586,16 | 143,83 |
| 2019/08/18 | CH2276 | Female | Two y/o | Treatment (Wk 3) | Treatment | Fast Day | No | 10:00 | 10:00 - 10:59 | Late Morning | 37,4 | 67  | 71,6  | 71,6  | 18,55 | 563,53 | 144,22 |
| 2019/08/18 | CH2276 | Female | Two y/o | Treatment (Wk 3) | Treatment | Fast Day | No | 10:05 | 10:00 - 10:59 | Late Morning | 37,4 | 61  | 69,4  | 69,4  | 18,55 | 556,01 | 143,14 |
| 2019/08/18 | CH2276 | Female | Two y/o | Treatment (Wk 3) | Treatment | Fast Day | No | 10:10 | 10:00 - 10:59 | Late Morning | 37,5 | 63  | 61,6  | 61,6  | 18,65 | 558,62 | 139,00 |
| 2019/08/18 | CH2276 | Female | Two y/o | Treatment (Wk 3) | Treatment | Fast Day | No | 10:15 | 10:00 - 10:59 | Late Morning | 37,5 |     | 49,2  | 49,2  | 18,65 |        | 131,23 |
| 2019/08/18 | CH2276 | Female | Two y/o | Treatment (Wk 3) | Treatment | Fast Day | No | 10:20 | 10:00 - 10:59 | Late Morning | 37,5 | 68  | 56,8  | 56,8  | 18,65 | 564,71 | 136,20 |
| 2019/08/18 | CH2276 | Female | Two y/o | Treatment (Wk 3) | Treatment | Fast Day | No | 10:25 | 10:00 - 10:59 | Late Morning | 37,6 | 65  | 35,8  | 35,8  | 18,75 | 561,12 | 120,27 |
| 2019/08/18 | CH2276 | Female | Two y/o | Treatment (Wk 3) | Treatment | Fast Day | No | 10:30 | 10:00 - 10:59 | Late Morning | 37,6 | 62  | 40,6  | 40,6  | 18,75 | 557,33 | 124,60 |
| 2019/08/18 | CH2276 | Female | Two y/o | Treatment (Wk 3) | Treatment | Fast Day | No | 10:35 | 10:00 - 10:59 | Late Morning | 37,6 | 94  | 58,2  | 58,2  | 18,75 | 589,37 | 137,04 |
| 2019/08/18 | CH2276 | Female | Two y/o | Treatment (Wk 3) | Treatment | Fast Day | No | 10:40 | 10:00 - 10:59 | Late Morning | 37,7 |     | 323,8 | 323,8 | 18,85 |        | 197,12 |
| 2019/08/18 | CH2276 | Female | Two y/o | Treatment (Wk 3) | Treatment | Fast Day | No | 10:45 | 10:00 - 10:59 | Late Morning | 37,8 | 86  | 65,6  | 65,6  | 18,95 | 582,77 | 141,19 |
| 2019/08/18 | CH2276 | Female | Two y/o | Treatment (Wk 3) | Treatment | Fast Day | No | 10:50 | 10:00 - 10:59 | Late Morning | 37,8 | 68  | 276,4 | 276,4 | 18,95 | 564,71 | 191,52 |
| 2019/08/18 | CH2276 | Female | Two y/o | Treatment (Wk 3) | Treatment | Fast Day | No | 10:55 | 10:00 - 10:59 | Late Morning | 37,8 | 68  | 53,4  | 53,4  | 18,95 | 564,71 | 134,06 |
| 2019/08/18 | CH2276 | Female | Two y/o | Treatment (Wk 3) | Treatment | Fast Day | No | 11:00 | 11:00 - 11:59 | Late Morning | 37,8 | 162 | 86,6  | 86,6  | 18,95 | 626,88 | 150,83 |
| 2019/08/18 | CH2276 | Female | Two y/o | Treatment (Wk 3) | Treatment | Fast Day | No | 11:05 | 11:00 - 11:59 | Late Morning | 37,8 | 66  | 47,0  | 47,0  | 18,95 | 562,34 | 129,65 |
| 2019/08/18 | CH2276 | Female | Two y/o | Treatment (Wk 3) | Treatment | Fast Day | No | 11:10 | 11:00 - 11:59 | Late Morning | 37,7 | 65  | 72,2  | 72,2  | 18,85 | 561,12 | 144,51 |
| 2019/08/18 | CH2276 | Female | Two y/o | Treatment (Wk 3) | Treatment | Fast Day | No | 11:15 | 11:00 - 11:59 | Late Morning | 37,7 | 32  | 132,4 | 132,4 | 18,85 | 499,63 | 165,65 |
| 2019/08/18 | CH2276 | Female | Two y/o | Treatment (Wk 3) | Treatment | Fast Day | No | 11:20 | 11:00 - 11:59 | Late Morning | 37,8 |     | 41,8  | 41,8  | 18,95 |        | 125,60 |
| 2019/08/18 | CH2276 | Female | Two y/o | Treatment (Wk 3) | Treatment | Fast Day | No | 11:25 | 11:00 - 11:59 | Late Morning | 37,8 | 65  | 52,0  | 52,0  | 18,95 | 561,12 | 133,14 |
| 2019/08/18 | CH2276 | Female | Two y/o | Treatment (Wk 3) | Treatment | Fast Day | No | 11:30 | 11:00 - 11:59 | Late Morning | 37,8 | 58  | 51,8  | 51,8  | 18,95 | 551,90 | 133,01 |
| 2019/08/18 | CH2276 | Female | Two y/o | Treatment (Wk 3) | Treatment | Fast Day | No | 11:35 | 11:00 - 11:59 | Late Morning | 37,8 |     | 63,8  | 63,8  | 18,95 |        | 140,22 |
| 2019/08/18 | CH2276 | Female | Two y/o | Treatment (Wk 3) | Treatment | Fast Day | No | 11:40 | 11:00 - 11:59 | Late Morning | 37,8 | 61  | 72,0  | 72,0  | 18,95 | 556,01 | 144,42 |
| 2019/08/18 | CH2276 | Female | Two y/o | Treatment (Wk 3) | Treatment | Fast Day | No | 11:45 | 11:00 - 11:59 | Late Morning | 37,8 | 62  | 71,4  | 71,4  | 18,95 | 557,33 | 144,12 |
| 2019/08/18 | CH2276 | Female | Two y/o | Treatment (Wk 3) | Treatment | Fast Day | No | 11:50 | 11:00 - 11:59 | Late Morning | 37,8 | 63  | 73,2  | 73,2  | 18,95 | 558,62 | 144,99 |
| 2019/08/18 | CH2276 | Female | Two y/o | Treatment (Wk 3) | Treatment | Fast Day | No | 11:55 | 11:00 - 11:59 | Late Morning | 37,8 | 56  | 124,2 | 124,2 | 18,95 | 549,01 | 163,41 |
| 2019/08/18 | CH2276 | Female | Two y/o | Treatment (Wk 3) | Treatment | Fast Day | No | 12:00 | 12:00 - 12:59 | Afternoon    | 37,8 | 70  | 51,2  | 51,2  | 18,95 | 566,99 | 132,61 |
| 2019/08/18 | CH2276 | Female | Two y/o | Treatment (Wk 3) | Treatment | Fast Day | No | 12:05 | 12:00 - 12:59 | Afternoon    | 37,8 | 64  | 47,0  | 47,0  | 18,95 | 559,88 | 129,65 |
| 2019/08/18 | CH2276 | Female | Two y/o | Treatment (Wk 3) | Treatment | Fast Day | No | 12:10 | 12:00 - 12:59 | Afternoon    | 37,9 | 62  | 52,8  | 52,8  | 19,05 | 557,33 | 133,67 |
| 2019/08/18 | CH2276 | Female | Two y/o | Treatment (Wk 3) | Treatment | Fast Day | No | 12:15 | 12:00 - 12:59 | Afternoon    | 38,0 | 62  | 24,2  | 24,2  | 19,15 | 557,33 | 106,83 |
| 2019/08/18 | CH2276 | Female | Two y/o | Treatment (Wk 3) | Treatment | Fast Day | No | 12:20 | 12:00 - 12:59 | Afternoon    | 38,0 | 58  | 27,6  | 27,6  | 19,15 | 551,90 | 111,33 |
| 2019/08/18 | CH2276 | Female | Two y/o | Treatment (Wk 3) | Treatment | Fast Day | No | 12:25 | 12:00 - 12:59 | Afternoon    | 38,0 | 64  | 72,8  | 72,8  | 19,15 | 559,88 | 144,80 |
| 2019/08/18 | CH2276 | Female | Two y/o | Treatment (Wk 3) | Treatment | Fast Day | No | 12:30 | 12:00 - 12:59 | Afternoon    | 38,1 | 147 | 84,6  | 84,6  | 19,26 | 620,52 | 150,02 |
| 2019/08/18 | CH2276 | Female | Two y/o | Treatment (Wk 3) | Treatment | Fast Day | No | 12:35 | 12:00 - 12:59 | Afternoon    | 38,1 | 61  | 80,6  | 80,6  | 19,26 | 556,01 | 148,34 |
| 2019/08/18 | CH2276 | Female | Two y/o | Treatment (Wk 3) | Treatment | Fast Day | No | 12:40 | 12:00 - 12:59 | Afternoon    | 38,1 | 67  | 81,2  | 81,2  | 19,26 | 563,53 | 148,59 |
| 2019/08/18 | CH2276 | Female | Two y/o | Treatment (Wk 3) | Treatment | Fast Day | No | 12:45 | 12:00 - 12:59 | Afternoon    | 38,0 | 60  | 80,6  | 80,6  | 19,15 | 554,67 | 148,34 |
| 2019/08/18 | CH2276 | Female | Two y/o | Treatment (Wk 3) | Treatment | Fast Day | No | 12:50 | 12:00 - 12:59 | Afternoon    | 38,0 | 62  | 83,2  | 83,2  | 19,15 | 557,33 | 149,44 |
| 2019/08/18 | CH2276 | Female | Two y/o | Treatment (Wk 3) | Treatment | Fast Day | No | 12:55 | 12:00 - 12:59 | Afternoon    | 38,0 | 83  | 79,0  | 79,0  | 19,15 | 580,11 | 147,64 |
| 2019/08/18 | CH2276 | Female | Two y/o | Treatment (Wk 3) | Treatment | Fast Day | No | 13:00 | 13:00 - 13:59 | Afternoon    | 37,9 | 65  | 84,6  | 84,6  | 19,05 | 561,12 | 150,02 |
| 2019/08/18 | CH2276 | Female | Two y/o | Treatment (Wk 3) | Treatment | Fast Day | No | 13:05 | 13:00 - 13:59 | Afternoon    | 37,9 | 90  | 85,0  | 85,0  | 19,05 | 586,16 | 150,18 |
| 2019/08/18 | CH2276 | Female | Two y/o | Treatment (Wk 3) | Treatment | Fast Day | No | 13:10 | 13:00 - 13:59 | Afternoon    | 37,9 | 65  | 64,2  | 64,2  | 19,05 | 561,12 | 140,44 |
| 2019/08/18 | CH2276 | Female | Two y/o | Treatment (Wk 3) | Treatment | Fast Day | No | 13:15 | 13:00 - 13:59 | Afternoon    | 37,9 | 60  | 73,6  | 73,6  | 19,05 | 554,67 | 145,18 |
| 2019/08/18 | CH2276 | Female | Two y/o | Treatment (Wk 3) | Treatment | Fast Day | No | 13:20 | 13:00 - 13:59 | Afternoon    | 37,8 | 61  | 71,6  | 71,6  | 18,95 | 556,01 | 144,22 |



|            |        |        |         |                  |           |          |    |       |               |           |      |     |       |       |       |        |        |
|------------|--------|--------|---------|------------------|-----------|----------|----|-------|---------------|-----------|------|-----|-------|-------|-------|--------|--------|
| 2019/08/18 | CH2276 | Female | Two y/o | Treatment (Wk 3) | Treatment | Fast Day | No | 13:25 | 13:00 - 13:59 | Afternoon | 37,8 | 60  | 71,4  | 71,4  | 18,95 | 554,67 | 144,12 |
| 2019/08/18 | CH2276 | Female | Two y/o | Treatment (Wk 3) | Treatment | Fast Day | No | 13:30 | 13:00 - 13:59 | Afternoon | 37,8 | 75  | 67,6  | 67,6  | 18,95 | 572,36 | 142,23 |
| 2019/08/18 | CH2276 | Female | Two y/o | Treatment (Wk 3) | Treatment | Fast Day | No | 13:35 | 13:00 - 13:59 | Afternoon | 37,9 | 67  | 30,2  | 30,2  | 19,05 | 563,53 | 114,42 |
| 2019/08/18 | CH2276 | Female | Two y/o | Treatment (Wk 3) | Treatment | Fast Day | No | 13:40 | 13:00 - 13:59 | Afternoon | 38,0 | 64  | 16,6  | 16,6  | 19,15 | 559,88 | 93,96  |
| 2019/08/18 | CH2276 | Female | Two y/o | Treatment (Wk 3) | Treatment | Fast Day | No | 13:45 | 13:00 - 13:59 | Afternoon | 38,0 | 56  | 19,8  | 19,8  | 19,15 | 549,01 | 99,97  |
| 2019/08/18 | CH2276 | Female | Two y/o | Treatment (Wk 3) | Treatment | Fast Day | No | 13:50 | 13:00 - 13:59 | Afternoon | 38,0 | 61  | 37,4  | 37,4  | 19,15 | 556,01 | 121,77 |
| 2019/08/18 | CH2276 | Female | Two y/o | Treatment (Wk 3) | Treatment | Fast Day | No | 13:55 | 13:00 - 13:59 | Afternoon | 38,0 | 63  | 44,2  | 44,2  | 19,15 | 558,62 | 127,53 |
| 2019/08/18 | CH2276 | Female | Two y/o | Treatment (Wk 3) | Treatment | Fast Day | No | 14:00 | 14:00 - 14:59 | Afternoon | 38,0 | 99  | 72,6  | 72,6  | 19,15 | 593,14 | 144,70 |
| 2019/08/18 | CH2276 | Female | Two y/o | Treatment (Wk 3) | Treatment | Fast Day | No | 14:05 | 14:00 - 14:59 | Afternoon | 37,9 | 63  | 74,2  | 74,2  | 19,05 | 558,62 | 145,46 |
| 2019/08/18 | CH2276 | Female | Two y/o | Treatment (Wk 3) | Treatment | Fast Day | No | 14:10 | 14:00 - 14:59 | Afternoon | 37,9 | 59  | 71,2  | 71,2  | 19,05 | 553,30 | 144,03 |
| 2019/08/18 | CH2276 | Female | Two y/o | Treatment (Wk 3) | Treatment | Fast Day | No | 14:15 | 14:00 - 14:59 | Afternoon | 37,9 | 62  | 69,4  | 69,4  | 19,05 | 557,33 | 143,14 |
| 2019/08/18 | CH2276 | Female | Two y/o | Treatment (Wk 3) | Treatment | Fast Day | No | 14:20 | 14:00 - 14:59 | Afternoon | 37,9 | 63  | 71,8  | 71,8  | 19,05 | 558,62 | 144,32 |
| 2019/08/18 | CH2276 | Female | Two y/o | Treatment (Wk 3) | Treatment | Fast Day | No | 14:25 | 14:00 - 14:59 | Afternoon | 38,0 | 62  | 40,2  | 40,2  | 19,15 | 557,33 | 124,26 |
| 2019/08/18 | CH2276 | Female | Two y/o | Treatment (Wk 3) | Treatment | Fast Day | No | 14:30 | 14:00 - 14:59 | Afternoon | 38,0 | 65  | 73,2  | 73,2  | 19,15 | 561,12 | 144,99 |
| 2019/08/18 | CH2276 | Female | Two y/o | Treatment (Wk 3) | Treatment | Fast Day | No | 14:35 | 14:00 - 14:59 | Afternoon | 38,0 | 104 | 49,0  | 49,0  | 19,15 | 596,69 | 131,09 |
| 2019/08/18 | CH2276 | Female | Two y/o | Treatment (Wk 3) | Treatment | Fast Day | No | 14:40 | 14:00 - 14:59 | Afternoon | 38,0 | 58  | 52,4  | 52,4  | 19,15 | 551,90 | 133,41 |
| 2019/08/18 | CH2276 | Female | Two y/o | Treatment (Wk 3) | Treatment | Fast Day | No | 14:45 | 14:00 - 14:59 | Afternoon | 38,0 | 63  | 56,2  | 56,2  | 19,15 | 558,62 | 135,83 |
| 2019/08/18 | CH2276 | Female | Two y/o | Treatment (Wk 3) | Treatment | Fast Day | No | 14:50 | 14:00 - 14:59 | Afternoon | 38,0 | 64  | 58,4  | 58,4  | 19,15 | 559,88 | 137,16 |
| 2019/08/18 | CH2276 | Female | Two y/o | Treatment (Wk 3) | Treatment | Fast Day | No | 14:55 | 14:00 - 14:59 | Afternoon | 38,0 | 58  | 60,0  | 60,0  | 19,15 | 551,90 | 138,09 |
| 2019/08/18 | CH2276 | Female | Two y/o | Treatment (Wk 3) | Treatment | Fast Day | No | 15:00 | 15:00 - 15:59 | Afternoon | 37,9 | 62  | 86,4  | 86,4  | 19,05 | 557,33 | 150,75 |
| 2019/08/18 | CH2276 | Female | Two y/o | Treatment (Wk 3) | Treatment | Fast Day | No | 15:05 | 15:00 - 15:59 | Afternoon | 37,8 | 86  | 54,0  | 54,0  | 18,95 | 582,77 | 134,45 |
| 2019/08/18 | CH2276 | Female | Two y/o | Treatment (Wk 3) | Treatment | Fast Day | No | 15:10 | 15:00 - 15:59 | Afternoon | 37,8 | 110 | 73,4  | 73,4  | 18,95 | 600,69 | 145,08 |
| 2019/08/18 | CH2276 | Female | Two y/o | Treatment (Wk 3) | Treatment | Fast Day | No | 15:15 | 15:00 - 15:59 | Afternoon | 37,8 | 59  | 79,4  | 79,4  | 18,95 | 553,30 | 147,81 |
| 2019/08/18 | CH2276 | Female | Two y/o | Treatment (Wk 3) | Treatment | Fast Day | No | 15:20 | 15:00 - 15:59 | Afternoon | 37,7 | 52  | 140,0 | 140,0 | 18,85 | 542,83 | 167,60 |
| 2019/08/18 | CH2276 | Female | Two y/o | Treatment (Wk 3) | Treatment | Fast Day | No | 15:25 | 15:00 - 15:59 | Afternoon | 37,7 | 62  | 67,2  | 67,2  | 18,85 | 557,33 | 142,02 |
| 2019/08/18 | CH2276 | Female | Two y/o | Treatment (Wk 3) | Treatment | Fast Day | No | 15:30 | 15:00 - 15:59 | Afternoon | 37,7 | 75  | 112,6 | 112,6 | 18,85 | 572,36 | 159,98 |
| 2019/08/18 | CH2276 | Female | Two y/o | Treatment (Wk 3) | Treatment | Fast Day | No | 15:35 | 15:00 - 15:59 | Afternoon | 37,7 | 78  | 176,4 | 176,4 | 18,85 | 575,38 | 175,71 |
| 2019/08/18 | CH2276 | Female | Two y/o | Treatment (Wk 3) | Treatment | Fast Day | No | 15:40 | 15:00 - 15:59 | Afternoon | 37,8 | 112 | 333,8 | 333,8 | 18,95 | 601,96 | 198,20 |
| 2019/08/18 | CH2276 | Female | Two y/o | Treatment (Wk 3) | Treatment | Fast Day | No | 15:45 | 15:00 - 15:59 | Afternoon | 37,9 | 98  | 58,0  | 58,0  | 19,05 | 592,41 | 136,92 |
| 2019/08/18 | CH2276 | Female | Two y/o | Treatment (Wk 3) | Treatment | Fast Day | No | 15:50 | 15:00 - 15:59 | Afternoon | 38,0 | 76  | 86,0  | 86,0  | 19,15 | 573,39 | 150,59 |
| 2019/08/18 | CH2276 | Female | Two y/o | Treatment (Wk 3) | Treatment | Fast Day | No | 15:55 | 15:00 - 15:59 | Afternoon | 38,0 | 68  | 53,8  | 53,8  | 19,15 | 564,71 | 134,32 |
| 2019/08/18 | CH2276 | Female | Two y/o | Treatment (Wk 3) | Treatment | Fast Day | No | 16:00 | 16:00 - 16:59 | Evening   | 38,0 | 80  | 101,4 | 101,4 | 19,15 | 577,31 | 156,33 |
| 2019/08/18 | CH2276 | Female | Two y/o | Treatment (Wk 3) | Treatment | Fast Day | No | 16:05 | 16:00 - 16:59 | Evening   | 38,2 |     | 52,0  | 52,0  | 19,36 |        | 133,14 |
| 2019/08/18 | CH2276 | Female | Two y/o | Treatment (Wk 3) | Treatment | Fast Day | No | 16:10 | 16:00 - 16:59 | Evening   | 38,2 | 80  | 50,2  | 50,2  | 19,36 | 577,31 | 131,92 |
| 2019/08/18 | CH2276 | Female | Two y/o | Treatment (Wk 3) | Treatment | Fast Day | No | 16:15 | 16:00 - 16:59 | Evening   | 38,2 | 89  | 93,8  | 93,8  | 19,36 | 585,33 | 153,61 |
| 2019/08/18 | CH2276 | Female | Two y/o | Treatment (Wk 3) | Treatment | Fast Day | No | 16:20 | 16:00 - 16:59 | Evening   | 38,2 | 47  | 67,4  | 67,4  | 19,36 | 534,23 | 142,12 |
| 2019/08/18 | CH2276 | Female | Two y/o | Treatment (Wk 3) | Treatment | Fast Day | No | 16:25 | 16:00 - 16:59 | Evening   | 38,3 | 87  | 38,2  | 38,2  | 19,46 | 583,64 | 122,50 |
| 2019/08/18 | CH2276 | Female | Two y/o | Treatment (Wk 3) | Treatment | Fast Day | No | 16:30 | 16:00 - 16:59 | Evening   | 38,3 | 82  | 77,2  | 77,2  | 19,46 | 579,19 | 146,84 |
| 2019/08/18 | CH2276 | Female | Two y/o | Treatment (Wk 3) | Treatment | Fast Day | No | 16:35 | 16:00 - 16:59 | Evening   | 38,2 | 98  | 65,0  | 65,0  | 19,36 | 592,41 | 140,87 |
| 2019/08/18 | CH2276 | Female | Two y/o | Treatment (Wk 3) | Treatment | Fast Day | No | 16:40 | 16:00 - 16:59 | Evening   | 38,2 | 64  | 37,8  | 37,8  | 19,36 | 559,88 | 122,14 |
| 2019/08/18 | CH2276 | Female | Two y/o | Treatment (Wk 3) | Treatment | Fast Day | No | 16:45 | 16:00 - 16:59 | Evening   | 38,2 | 63  | 114,2 | 114,2 | 19,36 | 558,62 | 160,48 |
| 2019/08/18 | CH2276 | Female | Two y/o | Treatment (Wk 3) | Treatment | Fast Day | No | 16:50 | 16:00 - 16:59 | Evening   | 38,2 | 98  | 56,0  | 56,0  | 19,36 | 592,41 | 135,70 |
| 2019/08/18 | CH2276 | Female | Two y/o | Treatment (Wk 3) | Treatment | Fast Day | No | 16:55 | 16:00 - 16:59 | Evening   | 38,2 | 57  | 60,6  | 60,6  | 19,36 | 550,47 | 138,44 |
| 2019/08/18 | CH2276 | Female | Two y/o | Treatment (Wk 3) | Treatment | Fast Day | No | 17:00 | 17:00 - 17:59 | Evening   | 38,2 | 62  | 64,0  | 64,0  | 19,36 | 557,33 | 140,33 |
| 2019/08/18 | CH2276 | Female | Two y/o | Treatment (Wk 3) | Treatment | Fast Day | No | 17:05 | 17:00 - 17:59 | Evening   | 38,1 | 52  | 59,0  | 59,0  | 19,26 | 542,83 | 137,51 |
| 2019/08/18 | CH2276 | Female | Two y/o | Treatment (Wk 3) | Treatment | Fast Day | No | 17:10 | 17:00 - 17:59 | Evening   | 38,1 | 56  | 62,8  | 62,8  | 19,26 | 549,01 | 139,67 |
| 2019/08/18 | CH2276 | Female | Two y/o | Treatment (Wk 3) | Treatment | Fast Day | No | 17:15 | 17:00 - 17:59 | Evening   | 38,0 | 60  | 49,0  | 49,0  | 19,15 | 554,67 | 131,09 |
| 2019/08/18 | CH2276 | Female | Two y/o | Treatment (Wk 3) | Treatment | Fast Day | No | 17:20 | 17:00 - 17:59 | Evening   | 38,0 | 62  | 47,4  | 47,4  | 19,15 | 557,33 | 129,94 |
| 2019/08/18 | CH2276 | Female | Two y/o | Treatment (Wk 3) | Treatment | Fast Day | No | 17:25 | 17:00 - 17:59 | Evening   | 38,0 | 58  | 37,4  | 37,4  | 19,15 | 551,90 | 121,77 |
| 2019/08/18 | CH2276 | Female | Two y/o | Treatment (Wk 3) | Treatment | Fast Day | No | 17:30 | 17:00 - 17:59 | Evening   | 37,9 | 58  | 54,8  | 54,8  | 19,05 | 551,90 | 134,96 |
| 2019/08/18 | CH2276 | Female | Two y/o | Treatment (Wk 3) | Treatment | Fast Day | No | 17:35 | 17:00 - 17:59 | Evening   | 37,9 | 60  | 57,6  | 57,6  | 19,05 | 554,67 | 136,68 |
| 2019/08/18 | CH2276 | Female | Two y/o | Treatment (Wk 3) | Treatment | Fast Day | No | 17:40 | 17:00 - 17:59 | Evening   | 37,8 | 60  | 56,8  | 56,8  | 18,95 | 554,67 | 136,20 |
| 2019/08/18 | CH2276 | Female | Two y/o | Treatment (Wk 3) | Treatment | Fast Day | No | 17:45 | 17:00 - 17:59 | Evening   | 37,8 | 98  | 139,8 | 139,8 | 18,95 | 592,41 | 167,55 |
| 2019/08/18 | CH2276 | Female | Two y/o | Treatment (Wk 3) | Treatment | Fast Day | No | 17:50 | 17:00 - 17:59 | Evening   | 37,9 |     | 318,6 | 318,6 | 19,05 |        | 196,55 |
| 2019/08/18 | CH2276 | Female | Two y/o | Treatment (Wk 3) | Treatment | Fast Day | No | 17:55 | 17:00 - 17:59 | Evening   | 38,0 | 78  | 326,6 | 326,6 | 19,15 | 575,38 | 197,43 |
| 2019/08/18 | CH2276 | Female | Two y/o | Treatment (Wk 3) | Treatment | Fast Day | No | 18:00 | 18:00 - 18:59 | Evening   | 38,1 | 96  | 279,8 | 279,8 | 19,26 | 590,91 | 191,96 |
| 2019/08/18 | CH2276 | Female | Two y/o | Treatment (Wk 3) | Treatment | Fast Day | No | 18:05 | 18:00 - 18:59 | Evening   | 38,2 | 165 | 104,8 | 104,8 | 19,36 | 628,06 | 157,48 |
| 2019/08/18 | CH2276 | Female | Two y/o | Treatment (Wk 3) | Treatment | Fast Day | No | 18:10 | 18:00 - 18:59 | Evening   | 38,2 |     | 257,8 | 257,8 | 19,36 |        | 189,06 |
| 2019/08/18 | CH2276 | Female | Two y/o | Treatment (Wk 3) | Treatment | Fast Day | No | 18:15 | 18:00 - 18:59 | Evening   | 38,3 | 96  | 262,0 | 262,0 | 19,46 | 590,91 | 189,64 |
| 2019/08/18 | CH2276 | Female | Two y/o | Treatment (Wk 3) | Treatment | Fast Day | No | 18:20 | 18:00 - 18:59 | Evening   | 38,3 | 79  | 571,0 | 571,0 | 19,46 | 576,36 | 217,28 |
| 2019/08/18 | CH2276 | Female | Two y/o | Treatment (Wk 3) | Treatment | Fast Day | No | 18:25 | 18:00 - 18:59 | Evening   | 38,3 | 167 | 401,8 | 401,8 | 19,46 | 628,84 | 204,77 |
| 2019/08/18 | CH2276 | Female | Two y/o | Treatment (Wk 3) | Treatment | Fast Day | No | 18:30 | 18:00 - 18:59 | Evening   | 38,3 |     | 139,0 | 139,0 | 19,46 |        | 167,35 |
| 2019/08/18 | CH2276 | Female | Two y/o | Treatment (Wk 3) | Treatment | Fast Day | No | 18:35 | 18:00 - 18:59 | Evening   | 38,4 | 97  | 282,4 | 282,4 | 19,56 | 591,66 | 192,28 |
| 2019/08/18 | CH2276 | Female | Two y/o | Treatment (Wk 3) | Treatment | Fast Day | No | 18:40 | 18:00 - 18:59 | Evening   | 38,4 | 154 | 190,8 | 190,8 | 19,56 | 623,58 | 178,46 |
| 2019/08/18 | CH2276 | Female | Two y/o | Treatment (Wk 3) | Treatment | Fast Day | No | 18:45 | 18:00 - 18:59 | Evening   | 38,4 | 148 | 191,0 | 191,0 | 19,56 | 620,97 | 178,50 |
| 2019/08/18 | CH2276 | Female | Two y/o | Treatment (Wk 3) | Treatment | Fast Day | No | 18:50 | 18:00 - 18:59 | Evening   | 38,4 | 60  | 214,6 | 214,6 | 19,56 | 554,67 | 182,60 |
| 2019/08/18 | CH2276 | Female | Two y/o | Treatment (Wk 3) | Treatment | Fast Day | No | 18:55 | 18:00 - 18:59 | Evening   | 38,4 | 92  | 47,2  | 47,2  | 19,56 | 587,78 | 129,80 |
| 2019/08/18 | CH2276 | Female | Two y/o | Treatment (Wk 3) | Treatment | Fast Day | No | 19:00 | 19:00 - 19:59 | Evening   | 38,3 | 63  | 44,6  | 44,6  | 19,46 | 558,62 | 127,84 |
| 2019/08/18 | CH2276 | Female | Two y/o | Treatment (Wk 3) | Treatment | Fast Day | No | 19:05 | 19:00 - 19:59 | Evening   | 38,2 | 56  | 45,2  | 45,2  | 19,36 | 549,01 | 128,30 |
| 2019/08/18 | CH2276 | Female | Two y/o | Treatment (Wk 3) | Treatment | Fast Day | No | 19:10 | 19:00 - 19:59 | Evening   | 38,1 | 56  | 23,2  | 23,2  | 19,26 | 549,01 | 105,39 |



|    |            |        |        |         |                  |           |          |    |       |               |               |      |     |       |       |       |        |        |
|----|------------|--------|--------|---------|------------------|-----------|----------|----|-------|---------------|---------------|------|-----|-------|-------|-------|--------|--------|
|    | 2019/08/18 | CH2276 | Female | Two y/o | Treatment (Wk 3) | Treatment | Fast Day | No | 19:15 | 19:00 - 19:59 | Evening       | 38,0 | 54  | 23,0  | 23,0  | 19,15 | 545,99 | 105,09 |
|    | 2019/08/18 | CH2276 | Female | Two y/o | Treatment (Wk 3) | Treatment | Fast Day | No | 19:20 | 19:00 - 19:59 | Evening       | 38,1 | 64  | 27,2  | 27,2  | 19,26 | 559,88 | 110,83 |
|    | 2019/08/18 | CH2276 | Female | Two y/o | Treatment (Wk 3) | Treatment | Fast Day | No | 19:25 | 19:00 - 19:59 | Evening       | 38,0 | 55  | 30,4  | 30,4  | 19,15 | 547,52 | 114,65 |
|    | 2019/08/18 | CH2276 | Female | Two y/o | Treatment (Wk 3) | Treatment | Fast Day | No | 19:30 | 19:00 - 19:59 | Evening       | 38,0 | 52  | 34,2  | 34,2  | 19,15 | 542,83 | 118,70 |
|    | 2019/08/18 | CH2276 | Female | Two y/o | Treatment (Wk 3) | Treatment | Fast Day | No | 19:35 | 19:00 - 19:59 | Evening       | 38,0 | 53  | 35,4  | 35,4  | 19,15 | 544,43 | 119,88 |
|    | 2019/08/18 | CH2276 | Female | Two y/o | Treatment (Wk 3) | Treatment | Fast Day | No | 19:40 | 19:00 - 19:59 | Evening       | 37,9 | 57  | 52,0  | 52,0  | 19,05 | 550,47 | 133,14 |
|    | 2019/08/18 | CH2276 | Female | Two y/o | Treatment (Wk 3) | Treatment | Fast Day | No | 19:45 | 19:00 - 19:59 | Evening       | 37,8 | 61  | 62,2  | 62,2  | 18,95 | 556,01 | 139,34 |
|    | 2019/08/18 | CH2276 | Female | Two y/o | Treatment (Wk 3) | Treatment | Fast Day | No | 19:50 | 19:00 - 19:59 | Evening       | 37,8 | 162 | 517,2 | 517,2 | 18,95 | 626,88 | 213,75 |
|    | 2019/08/18 | CH2276 | Female | Two y/o | Treatment (Wk 3) | Treatment | Fast Day | No | 19:55 | 19:00 - 19:59 | Evening       | 38,0 | 98  | 385,4 | 385,4 | 19,15 | 592,41 | 203,29 |
|    | 2019/08/18 | CH2276 | Female | Two y/o | Treatment (Wk 3) | Treatment | Fast Day | No | 20:00 | 20:00 - 20:59 | Night         | 38,0 | 114 | 228,8 | 228,8 | 19,15 | 603,20 | 184,86 |
|    | 2019/08/18 | CH2276 | Female | Two y/o | Treatment (Wk 3) | Treatment | Fast Day | No | 20:05 | 20:00 - 20:59 | Night         | 38,0 | 129 | 292,6 | 292,6 | 19,15 | 611,75 | 193,54 |
|    | 2019/08/18 | CH2276 | Female | Two y/o | Treatment (Wk 3) | Treatment | Fast Day | No | 20:10 | 20:00 - 20:59 | Night         | 38,1 | 114 | 119,6 | 119,6 | 19,26 | 603,20 | 162,09 |
|    | 2019/08/18 | CH2276 | Female | Two y/o | Treatment (Wk 3) | Treatment | Fast Day | No | 20:15 | 20:00 - 20:59 | Night         | 38,2 | 86  | 291,4 | 291,4 | 19,36 | 582,77 | 193,39 |
|    | 2019/08/18 | CH2276 | Female | Two y/o | Treatment (Wk 3) | Treatment | Fast Day | No | 20:20 | 20:00 - 20:59 | Night         | 38,2 |     | 98,6  | 98,6  | 19,36 |        | 155,35 |
|    | 2019/08/18 | CH2276 | Female | Two y/o | Treatment (Wk 3) | Treatment | Fast Day | No | 20:25 | 20:00 - 20:59 | Night         | 38,2 | 60  | 28,4  | 28,4  | 19,36 | 554,67 | 112,31 |
|    | 2019/08/18 | CH2276 | Female | Two y/o | Treatment (Wk 3) | Treatment | Fast Day | No | 20:30 | 20:00 - 20:59 | Night         | 38,0 | 56  | 25,6  | 25,6  | 19,15 | 549,01 | 108,76 |
|    | 2019/08/18 | CH2276 | Female | Two y/o | Treatment (Wk 3) | Treatment | Fast Day | No | 20:35 | 20:00 - 20:59 | Night         | 37,9 | 64  | 15,2  | 15,2  | 19,05 | 559,88 | 90,96  |
|    | 2019/08/18 | CH2276 | Female | Two y/o | Treatment (Wk 3) | Treatment | Fast Day | No | 20:40 | 20:00 - 20:59 | Night         | 38,0 | 58  | 19,0  | 19,0  | 19,15 | 551,90 | 98,56  |
|    | 2019/08/18 | CH2276 | Female | Two y/o | Treatment (Wk 3) | Treatment | Fast Day | No | 20:45 | 20:00 - 20:59 | Night         | 37,9 | 52  | 16,8  | 16,8  | 19,05 | 542,83 | 94,37  |
|    | 2019/08/18 | CH2276 | Female | Two y/o | Treatment (Wk 3) | Treatment | Fast Day | No | 20:50 | 20:00 - 20:59 | Night         | 37,8 | 50  | 18,4  | 18,4  | 18,95 | 539,52 | 97,47  |
|    | 2019/08/18 | CH2276 | Female | Two y/o | Treatment (Wk 3) | Treatment | Fast Day | No | 20:55 | 20:00 - 20:59 | Night         | 37,7 |     | 32,8  | 32,8  | 18,85 |        | 117,26 |
|    | 2019/08/18 | CH2276 | Female | Two y/o | Treatment (Wk 3) | Treatment | Fast Day | No | 21:00 | 21:00 - 21:59 | Night         | 37,6 | 72  | 34,0  | 34,0  | 18,75 | 569,20 | 118,49 |
|    | 2019/08/18 | CH2276 | Female | Two y/o | Treatment (Wk 3) | Treatment | Fast Day | No | 21:05 | 21:00 - 21:59 | Night         | 37,6 | 50  | 27,4  | 27,4  | 18,75 | 539,52 | 111,09 |
|    | 2019/08/18 | CH2276 | Female | Two y/o | Treatment (Wk 3) | Treatment | Fast Day | No | 21:10 | 21:00 - 21:59 | Night         | 37,6 | 51  | 30,8  | 30,8  | 18,75 | 541,20 | 115,10 |
|    | 2019/08/18 | CH2276 | Female | Two y/o | Treatment (Wk 3) | Treatment | Fast Day | No | 21:15 | 21:00 - 21:59 | Night         | 37,6 | 63  | 31,6  | 31,6  | 18,75 | 558,62 | 115,98 |
|    | 2019/08/18 | CH2276 | Female | Two y/o | Treatment (Wk 3) | Treatment | Fast Day | No | 21:20 | 21:00 - 21:59 | Night         | 37,6 | 60  | 31,8  | 31,8  | 18,75 | 554,67 | 116,20 |
|    | 2019/08/18 | CH2276 | Female | Two y/o | Treatment (Wk 3) | Treatment | Fast Day | No | 21:25 | 21:00 - 21:59 | Night         | 37,6 | 57  | 32,4  | 32,4  | 18,75 | 550,47 | 116,84 |
|    | 2019/08/18 | CH2276 | Female | Two y/o | Treatment (Wk 3) | Treatment | Fast Day | No | 21:30 | 21:00 - 21:59 | Night         | 37,5 | 58  | 26,6  | 26,6  | 18,65 | 551,90 | 110,07 |
|    | 2019/08/18 | CH2276 | Female | Two y/o | Treatment (Wk 3) | Treatment | Fast Day | No | 21:35 | 21:00 - 21:59 | Night         | 37,4 | 65  | 19,2  | 19,2  | 18,55 | 561,12 | 98,92  |
|    | 2019/08/18 | CH2276 | Female | Two y/o | Treatment (Wk 3) | Treatment | Fast Day | No | 21:40 | 21:00 - 21:59 | Night         | 37,4 | 51  | 19,0  | 19,0  | 18,55 | 541,20 | 98,56  |
|    | 2019/08/18 | CH2276 | Female | Two y/o | Treatment (Wk 3) | Treatment | Fast Day | No | 21:45 | 21:00 - 21:59 | Night         | 37,4 | 51  | 28,2  | 28,2  | 18,55 | 541,20 | 112,07 |
|    | 2019/08/18 | CH2276 | Female | Two y/o | Treatment (Wk 3) | Treatment | Fast Day | No | 21:50 | 21:00 - 21:59 | Night         | 37,4 | 57  | 26,8  | 26,8  | 18,55 | 550,47 | 110,33 |
|    | 2019/08/18 | CH2276 | Female | Two y/o | Treatment (Wk 3) | Treatment | Fast Day | No | 21:55 | 21:00 - 21:59 | Night         | 37,4 | 44  | 24,4  | 24,4  | 18,55 | 528,51 | 107,11 |
|    | 2019/08/18 | CH2276 | Female | Two y/o | Treatment (Wk 3) | Treatment | Fast Day | No | 22:00 | 22:00 - 22:59 | Night         | 37,4 | 39  | 24,0  | 24,0  | 18,55 | 517,82 | 106,55 |
|    | 2019/08/18 | CH2276 | Female | Two y/o | Treatment (Wk 3) | Treatment | Fast Day | No | 22:05 | 22:00 - 22:59 | Night         | 37,3 | 58  | 21,2  | 21,2  | 18,46 | 551,90 | 102,31 |
|    | 2019/08/18 | CH2276 | Female | Two y/o | Treatment (Wk 3) | Treatment | Fast Day | No | 22:10 | 22:00 - 22:59 | Night         | 37,3 | 46  | 18,6  | 18,6  | 18,46 | 532,38 | 97,84  |
|    | 2019/08/18 | CH2276 | Female | Two y/o | Treatment (Wk 3) | Treatment | Fast Day | No | 22:15 | 22:00 - 22:59 | Night         | 37,3 | 57  | 17,0  | 17,0  | 18,46 | 550,47 | 94,77  |
|    | 2019/08/18 | CH2276 | Female | Two y/o | Treatment (Wk 3) | Treatment | Fast Day | No | 22:20 | 22:00 - 22:59 | Night         | 37,3 | 50  | 19,4  | 19,4  | 18,46 | 539,52 | 99,28  |
|    | 2019/08/18 | CH2276 | Female | Two y/o | Treatment (Wk 3) | Treatment | Fast Day | No | 22:25 | 22:00 - 22:59 | Night         | 37,3 | 50  | 19,6  | 19,6  | 18,46 | 539,52 | 99,63  |
|    | 2019/08/18 | CH2276 | Female | Two y/o | Treatment (Wk 3) | Treatment | Fast Day | No | 22:30 | 22:00 - 22:59 | Night         | 37,2 | 68  | 20,0  | 20,0  | 18,36 | 564,71 | 100,31 |
|    | 2019/08/18 | CH2276 | Female | Two y/o | Treatment (Wk 3) | Treatment | Fast Day | No | 22:35 | 22:00 - 22:59 | Night         | 37,3 |     | 21,2  | 21,2  | 18,46 |        | 102,31 |
|    | 2019/08/18 | CH2276 | Female | Two y/o | Treatment (Wk 3) | Treatment | Fast Day | No | 22:40 | 22:00 - 22:59 | Night         | 37,1 | 58  | 22,0  | 22,0  | 18,26 | 551,90 | 103,57 |
|    | 2019/08/18 | CH2276 | Female | Two y/o | Treatment (Wk 3) | Treatment | Fast Day | No | 22:45 | 22:00 - 22:59 | Night         | 37,1 | 60  | 30,4  | 30,4  | 18,26 | 554,67 | 114,65 |
|    | 2019/08/18 | CH2276 | Female | Two y/o | Treatment (Wk 3) | Treatment | Fast Day | No | 22:50 | 22:00 - 22:59 | Night         | 37,0 |     | 30,2  | 30,2  | 18,16 |        | 114,42 |
|    | 2019/08/18 | CH2276 | Female | Two y/o | Treatment (Wk 3) | Treatment | Fast Day | No | 22:55 | 22:00 - 22:59 | Night         | 36,9 | 74  | 34,2  | 34,2  | 18,06 | 571,33 | 118,70 |
|    | 2019/08/18 | CH2276 | Female | Two y/o | Treatment (Wk 3) | Treatment | Fast Day | No | 23:00 | 23:00 - 23:59 | Night         | 36,9 | 83  | 26,4  | 26,4  | 18,06 | 580,11 | 109,81 |
|    | 2019/08/18 | CH2276 | Female | Two y/o | Treatment (Wk 3) | Treatment | Fast Day | No | 23:05 | 23:00 - 23:59 | Night         | 36,8 | 59  | 20,8  | 20,8  | 17,96 | 553,30 | 101,65 |
|    | 2019/08/18 | CH2276 | Female | Two y/o | Treatment (Wk 3) | Treatment | Fast Day | No | 23:10 | 23:00 - 23:59 | Night         | 36,7 | 59  | 24,6  | 24,6  | 17,87 | 553,30 | 107,39 |
|    | 2019/08/18 | CH2276 | Female | Two y/o | Treatment (Wk 3) | Treatment | Fast Day | No | 23:15 | 23:00 - 23:59 | Night         | 36,6 | 61  | 23,0  | 23,0  | 17,77 | 556,01 | 105,09 |
|    | 2019/08/18 | CH2276 | Female | Two y/o | Treatment (Wk 3) | Treatment | Fast Day | No | 23:20 | 23:00 - 23:59 | Night         | 36,5 | 48  | 23,0  | 23,0  | 17,67 | 536,04 | 105,09 |
|    | 2019/08/18 | CH2276 | Female | Two y/o | Treatment (Wk 3) | Treatment | Fast Day | No | 23:25 | 23:00 - 23:59 | Night         | 36,4 | 54  | 24,8  | 24,8  | 17,57 | 545,99 | 107,67 |
|    | 2019/08/18 | CH2276 | Female | Two y/o | Treatment (Wk 3) | Treatment | Fast Day | No | 23:30 | 23:00 - 23:59 | Night         | 36,4 | 75  | 26,0  | 26,0  | 17,57 | 572,36 | 109,29 |
|    | 2019/08/18 | CH2276 | Female | Two y/o | Treatment (Wk 3) | Treatment | Fast Day | No | 23:35 | 23:00 - 23:59 | Night         | 36,3 | 50  | 33,2  | 33,2  | 17,48 | 539,52 | 117,68 |
|    | 2019/08/18 | CH2276 | Female | Two y/o | Treatment (Wk 3) | Treatment | Fast Day | No | 23:40 | 23:00 - 23:59 | Night         | 36,2 | 63  | 28,2  | 28,2  | 17,38 | 558,62 | 112,07 |
|    | 2019/08/18 | CH2276 | Female | Two y/o | Treatment (Wk 3) | Treatment | Fast Day | No | 23:45 | 23:00 - 23:59 | Night         | 36,2 |     | 33,2  | 33,2  | 17,38 |        | 117,68 |
|    | 2019/08/18 | CH2276 | Female | Two y/o | Treatment (Wk 3) | Treatment | Fast Day | No | 23:50 | 23:00 - 23:59 | Night         | 36,2 |     | 31,6  | 31,6  | 17,38 |        | 115,98 |
|    | 2019/08/18 | CH2276 | Female | Two y/o | Treatment (Wk 3) | Treatment | Fast Day | No | 23:55 | 23:00 - 23:59 | Night         | 36,2 |     | 28,8  | 28,8  | 17,38 |        | 112,79 |
| 62 | 2019/08/19 | CH2276 | Female | Two y/o | Treatment (Wk 3) | Treatment | Feed Day | No | 00:00 | 00:00 - 00:59 | Early Morning | 36,3 | 48  | 30,0  | 30,0  | 17,48 | 536,04 | 114,20 |
|    | 2019/08/19 | CH2276 | Female | Two y/o | Treatment (Wk 3) | Treatment | Feed Day | No | 00:05 | 00:00 - 00:59 | Early Morning | 36,3 | 72  | 56,8  | 56,8  | 17,48 | 569,20 | 136,20 |
|    | 2019/08/19 | CH2276 | Female | Two y/o | Treatment (Wk 3) | Treatment | Feed Day | No | 00:10 | 00:00 - 00:59 | Early Morning | 36,4 |     | 44,8  | 44,8  | 17,57 |        | 127,99 |
|    | 2019/08/19 | CH2276 | Female | Two y/o | Treatment (Wk 3) | Treatment | Feed Day | No | 00:15 | 00:00 - 00:59 | Early Morning | 36,4 | 59  | 365,2 | 365,2 | 17,57 | 553,30 | 201,38 |
|    | 2019/08/19 | CH2276 | Female | Two y/o | Treatment (Wk 3) | Treatment | Feed Day | No | 00:20 | 00:00 - 00:59 | Early Morning | 36,6 | 117 | 384,4 | 384,4 | 17,77 | 605,02 | 203,20 |
|    | 2019/08/19 | CH2276 | Female | Two y/o | Treatment (Wk 3) | Treatment | Feed Day | No | 00:25 | 00:00 - 00:59 | Early Morning | 36,8 | 106 | 461,6 | 461,6 | 17,96 | 598,06 | 209,70 |
|    | 2019/08/19 | CH2276 | Female | Two y/o | Treatment (Wk 3) | Treatment | Feed Day | No | 00:30 | 00:00 - 00:59 | Early Morning | 37,0 | 121 | 110,8 | 110,8 | 18,16 | 607,35 | 159,42 |
|    | 2019/08/19 | CH2276 | Female | Two y/o | Treatment (Wk 3) | Treatment | Feed Day | No | 00:35 | 00:00 - 00:59 | Early Morning | 37,2 |     | 115,4 | 115,4 | 18,36 |        | 160,84 |
|    | 2019/08/19 | CH2276 | Female | Two y/o | Treatment (Wk 3) | Treatment | Feed Day | No | 00:40 | 00:00 - 00:59 | Early Morning | 37,4 | 140 | 77,2  | 77,2  | 18,55 | 617,28 | 146,84 |
|    | 2019/08/19 | CH2276 | Female | Two y/o | Treatment (Wk 3) | Treatment | Feed Day | No | 00:45 | 00:00 - 00:59 | Early Morning | 37,6 | 103 | 83,8  | 83,8  | 18,75 | 596,00 | 149,69 |
|    | 2019/08/19 | CH2276 | Female | Two y/o | Treatment (Wk 3) | Treatment | Feed Day | No | 00:50 | 00:00 - 00:59 | Early Morning | 37,6 | 64  | 514,4 | 514,4 | 18,75 | 559,88 | 213,56 |
|    | 2019/08/19 | CH2276 | Female | Two y/o | Treatment (Wk 3) | Treatment | Feed Day | No | 00:55 | 00:00 - 00:59 | Early Morning | 37,7 | 55  | 113,0 | 113,0 | 18,85 | 547,52 | 160,11 |
|    | 2019/08/19 | CH2276 | Female | Two y/o | Treatment (Wk 3) | Treatment | Feed Day | No | 01:00 | 01:00 - 01:59 | Early Morning | 37,8 | 108 | 57,8  | 57,8  | 18,95 | 599,3  |        |



|            |        |        |         |                  |           |          |    |       |               |               |      |     |       |       |       |        |        |
|------------|--------|--------|---------|------------------|-----------|----------|----|-------|---------------|---------------|------|-----|-------|-------|-------|--------|--------|
| 2019/08/19 | CH2276 | Female | Two y/o | Treatment (Wk 3) | Treatment | Feed Day | No | 01:05 | 01:00 - 01:59 | Early Morning | 37,8 | 148 | 115,0 | 115,0 | 18,95 | 620,97 | 160,72 |
| 2019/08/19 | CH2276 | Female | Two y/o | Treatment (Wk 3) | Treatment | Feed Day | No | 01:10 | 01:00 - 01:59 | Early Morning | 37,9 |     | 120,0 | 120,0 | 19,05 |        | 162,21 |
| 2019/08/19 | CH2276 | Female | Two y/o | Treatment (Wk 3) | Treatment | Feed Day | No | 01:15 | 01:00 - 01:59 | Early Morning | 37,9 | 52  | 341,4 | 341,4 | 19,05 | 542,83 | 199,00 |
| 2019/08/19 | CH2276 | Female | Two y/o | Treatment (Wk 3) | Treatment | Feed Day | No | 01:20 | 01:00 - 01:59 | Early Morning | 37,9 | 60  | 478,0 | 478,0 | 19,05 | 554,67 | 210,94 |
| 2019/08/19 | CH2276 | Female | Two y/o | Treatment (Wk 3) | Treatment | Feed Day | No | 01:25 | 01:00 - 01:59 | Early Morning | 37,9 | 101 | 85,0  | 85,0  | 19,05 | 594,59 | 150,18 |
| 2019/08/19 | CH2276 | Female | Two y/o | Treatment (Wk 3) | Treatment | Feed Day | No | 01:30 | 01:00 - 01:59 | Early Morning | 37,9 | 91  | 89,4  | 89,4  | 19,05 | 586,98 | 151,94 |
| 2019/08/19 | CH2276 | Female | Two y/o | Treatment (Wk 3) | Treatment | Feed Day | No | 01:35 | 01:00 - 01:59 | Early Morning | 37,9 | 56  | 245,0 | 245,0 | 19,05 | 549,01 | 187,27 |
| 2019/08/19 | CH2276 | Female | Two y/o | Treatment (Wk 3) | Treatment | Feed Day | No | 01:40 | 01:00 - 01:59 | Early Morning | 37,9 | 112 | 61,6  | 61,6  | 19,05 | 601,96 | 139,00 |
| 2019/08/19 | CH2276 | Female | Two y/o | Treatment (Wk 3) | Treatment | Feed Day | No | 01:45 | 01:00 - 01:59 | Early Morning | 37,9 | 137 | 114,8 | 114,8 | 19,05 | 615,83 | 160,66 |
| 2019/08/19 | CH2276 | Female | Two y/o | Treatment (Wk 3) | Treatment | Feed Day | No | 01:50 | 01:00 - 01:59 | Early Morning | 37,9 | 162 | 345,0 | 345,0 | 19,05 | 626,88 | 199,37 |
| 2019/08/19 | CH2276 | Female | Two y/o | Treatment (Wk 3) | Treatment | Feed Day | No | 01:55 | 01:00 - 01:59 | Early Morning | 37,9 | 141 | 432,0 | 432,0 | 19,05 | 617,75 | 207,35 |
| 2019/08/19 | CH2276 | Female | Two y/o | Treatment (Wk 3) | Treatment | Feed Day | No | 02:00 | 02:00 - 02:59 | Early Morning | 38,0 | 103 | 52,4  | 52,4  | 19,15 | 596,00 | 133,41 |
| 2019/08/19 | CH2276 | Female | Two y/o | Treatment (Wk 3) | Treatment | Feed Day | No | 02:05 | 02:00 - 02:59 | Early Morning | 37,8 | 129 | 28,8  | 28,8  | 18,95 | 611,75 | 112,79 |
| 2019/08/19 | CH2276 | Female | Two y/o | Treatment (Wk 3) | Treatment | Feed Day | No | 02:10 | 02:00 - 02:59 | Early Morning | 37,8 | 60  | 34,2  | 34,2  | 18,95 | 554,67 | 118,70 |
| 2019/08/19 | CH2276 | Female | Two y/o | Treatment (Wk 3) | Treatment | Feed Day | No | 02:15 | 02:00 - 02:59 | Early Morning | 37,7 | 60  | 35,8  | 35,8  | 18,85 | 554,67 | 120,27 |
| 2019/08/19 | CH2276 | Female | Two y/o | Treatment (Wk 3) | Treatment | Feed Day | No | 02:20 | 02:00 - 02:59 | Early Morning | 37,7 |     | 32,4  | 32,4  | 18,85 |        | 116,84 |
| 2019/08/19 | CH2276 | Female | Two y/o | Treatment (Wk 3) | Treatment | Feed Day | No | 02:25 | 02:00 - 02:59 | Early Morning | 37,6 | 51  | 17,4  | 17,4  | 18,75 | 541,20 | 95,56  |
| 2019/08/19 | CH2276 | Female | Two y/o | Treatment (Wk 3) | Treatment | Feed Day | No | 02:30 | 02:00 - 02:59 | Early Morning | 37,4 | 50  | 21,0  | 21,0  | 18,55 | 539,52 | 101,98 |
| 2019/08/19 | CH2276 | Female | Two y/o | Treatment (Wk 3) | Treatment | Feed Day | No | 02:35 | 02:00 - 02:59 | Early Morning | 37,2 | 80  | 28,0  | 28,0  | 18,36 | 577,31 | 111,83 |
| 2019/08/19 | CH2276 | Female | Two y/o | Treatment (Wk 3) | Treatment | Feed Day | No | 02:40 | 02:00 - 02:59 | Early Morning | 37,1 | 61  | 25,6  | 25,6  | 18,26 | 556,01 | 108,76 |
| 2019/08/19 | CH2276 | Female | Two y/o | Treatment (Wk 3) | Treatment | Feed Day | No | 02:45 | 02:00 - 02:59 | Early Morning | 36,9 | 63  | 116,0 | 116,0 | 18,06 | 558,62 | 161,02 |
| 2019/08/19 | CH2276 | Female | Two y/o | Treatment (Wk 3) | Treatment | Feed Day | No | 02:50 | 02:00 - 02:59 | Early Morning | 37,0 | 126 | 242,8 | 242,8 | 18,16 | 610,14 | 186,95 |
| 2019/08/19 | CH2276 | Female | Two y/o | Treatment (Wk 3) | Treatment | Feed Day | No | 02:55 | 02:00 - 02:59 | Early Morning | 37,2 | 87  | 779,2 | 779,2 | 18,36 | 583,64 | 228,39 |
| 2019/08/19 | CH2276 | Female | Two y/o | Treatment (Wk 3) | Treatment | Feed Day | No | 03:00 | 03:00 - 03:59 | Early Morning | 37,4 | 57  | 154,2 | 154,2 | 18,55 | 550,47 | 170,99 |
| 2019/08/19 | CH2276 | Female | Two y/o | Treatment (Wk 3) | Treatment | Feed Day | No | 03:05 | 03:00 - 03:59 | Early Morning | 37,5 |     | 153,8 | 153,8 | 18,65 |        | 170,89 |
| 2019/08/19 | CH2276 | Female | Two y/o | Treatment (Wk 3) | Treatment | Feed Day | No | 03:10 | 03:00 - 03:59 | Early Morning | 37,5 | 97  | 235,0 | 235,0 | 18,75 | 591,66 | 185,80 |
| 2019/08/19 | CH2276 | Female | Two y/o | Treatment (Wk 3) | Treatment | Feed Day | No | 03:15 | 03:00 - 03:59 | Early Morning | 37,7 | 83  | 676,8 | 676,8 | 18,85 | 580,11 | 223,35 |
| 2019/08/19 | CH2276 | Female | Two y/o | Treatment (Wk 3) | Treatment | Feed Day | No | 03:20 | 03:00 - 03:59 | Early Morning | 38,0 | 126 | 73,6  | 73,6  | 19,15 | 610,14 | 145,18 |
| 2019/08/19 | CH2276 | Female | Two y/o | Treatment (Wk 3) | Treatment | Feed Day | No | 03:25 | 03:00 - 03:59 | Early Morning | 37,9 |     | 190,6 | 190,6 | 19,05 |        | 178,43 |
| 2019/08/19 | CH2276 | Female | Two y/o | Treatment (Wk 3) | Treatment | Feed Day | No | 03:30 | 03:00 - 03:59 | Early Morning | 37,9 | 180 | 201,6 | 201,6 | 19,05 | 633,61 | 180,40 |
| 2019/08/19 | CH2276 | Female | Two y/o | Treatment (Wk 3) | Treatment | Feed Day | No | 03:35 | 03:00 - 03:59 | Early Morning | 38,0 | 78  | 79,0  | 79,0  | 19,15 | 575,38 | 147,64 |
| 2019/08/19 | CH2276 | Female | Two y/o | Treatment (Wk 3) | Treatment | Feed Day | No | 03:40 | 03:00 - 03:59 | Early Morning | 38,0 | 140 | 167,2 | 167,2 | 19,15 | 617,28 | 173,82 |
| 2019/08/19 | CH2276 | Female | Two y/o | Treatment (Wk 3) | Treatment | Feed Day | No | 03:45 | 03:00 - 03:59 | Early Morning | 38,1 | 92  | 90,2  | 90,2  | 19,26 | 587,78 | 152,25 |
| 2019/08/19 | CH2276 | Female | Two y/o | Treatment (Wk 3) | Treatment | Feed Day | No | 03:50 | 03:00 - 03:59 | Early Morning | 38,1 | 83  | 216,8 | 216,8 | 19,26 | 580,11 | 182,96 |
| 2019/08/19 | CH2276 | Female | Two y/o | Treatment (Wk 3) | Treatment | Feed Day | No | 03:55 | 03:00 - 03:59 | Early Morning | 38,1 | 140 | 179,8 | 179,8 | 19,26 | 617,28 | 176,38 |
| 2019/08/19 | CH2276 | Female | Two y/o | Treatment (Wk 3) | Treatment | Feed Day | No | 04:00 | 04:00 - 04:59 | Morning       | 38,2 | 174 | 359,8 | 359,8 | 19,36 | 631,46 | 200,86 |
| 2019/08/19 | CH2276 | Female | Two y/o | Treatment (Wk 3) | Treatment | Feed Day | No | 04:05 | 04:00 - 04:59 | Morning       | 38,1 | 89  | 82,8  | 82,8  | 19,26 | 585,33 | 149,27 |
| 2019/08/19 | CH2276 | Female | Two y/o | Treatment (Wk 3) | Treatment | Feed Day | No | 04:10 | 04:00 - 04:59 | Morning       | 38,0 | 128 | 38,2  | 38,2  | 19,15 | 611,22 | 122,50 |
| 2019/08/19 | CH2276 | Female | Two y/o | Treatment (Wk 3) | Treatment | Feed Day | No | 04:15 | 04:00 - 04:59 | Morning       | 38,0 | 63  | 38,4  | 38,4  | 19,15 | 558,62 | 122,68 |
| 2019/08/19 | CH2276 | Female | Two y/o | Treatment (Wk 3) | Treatment | Feed Day | No | 04:20 | 04:00 - 04:59 | Morning       | 38,0 | 58  | 33,4  | 33,4  | 19,15 | 551,90 | 117,88 |
| 2019/08/19 | CH2276 | Female | Two y/o | Treatment (Wk 3) | Treatment | Feed Day | No | 04:25 | 04:00 - 04:59 | Morning       | 38,0 | 62  | 28,4  | 28,4  | 19,15 | 557,33 | 112,31 |
| 2019/08/19 | CH2276 | Female | Two y/o | Treatment (Wk 3) | Treatment | Feed Day | No | 04:30 | 04:00 - 04:59 | Morning       | 37,9 | 55  | 26,6  | 26,6  | 19,05 | 547,52 | 110,07 |
| 2019/08/19 | CH2276 | Female | Two y/o | Treatment (Wk 3) | Treatment | Feed Day | No | 04:35 | 04:00 - 04:59 | Morning       | 38,0 | 58  | 29,6  | 29,6  | 19,15 | 551,90 | 113,73 |
| 2019/08/19 | CH2276 | Female | Two y/o | Treatment (Wk 3) | Treatment | Feed Day | No | 04:40 | 04:00 - 04:59 | Morning       | 37,9 | 58  | 18,0  | 18,0  | 19,05 | 551,90 | 96,72  |
| 2019/08/19 | CH2276 | Female | Two y/o | Treatment (Wk 3) | Treatment | Feed Day | No | 04:45 | 04:00 - 04:59 | Morning       | 37,8 | 46  | 11,8  | 11,8  | 18,95 | 532,38 | 82,36  |
| 2019/08/19 | CH2276 | Female | Two y/o | Treatment (Wk 3) | Treatment | Feed Day | No | 04:50 | 04:00 - 04:59 | Morning       | 37,7 | 49  | 22,8  | 22,8  | 18,85 | 537,80 | 104,79 |
| 2019/08/19 | CH2276 | Female | Two y/o | Treatment (Wk 3) | Treatment | Feed Day | No | 04:55 | 04:00 - 04:59 | Morning       | 37,6 | 58  | 28,6  | 28,6  | 18,75 | 551,90 | 112,56 |
| 2019/08/19 | CH2276 | Female | Two y/o | Treatment (Wk 3) | Treatment | Feed Day | No | 05:00 | 05:00 - 05:59 | Morning       | 37,6 | 52  | 44,0  | 44,0  | 18,75 | 542,83 | 127,37 |
| 2019/08/19 | CH2276 | Female | Two y/o | Treatment (Wk 3) | Treatment | Feed Day | No | 05:05 | 05:00 - 05:59 | Morning       | 37,5 | 54  | 20,4  | 20,4  | 18,65 | 545,99 | 100,99 |
| 2019/08/19 | CH2276 | Female | Two y/o | Treatment (Wk 3) | Treatment | Feed Day | No | 05:10 | 05:00 - 05:59 | Morning       | 37,4 | 49  | 21,8  | 21,8  | 18,55 | 537,80 | 103,26 |
| 2019/08/19 | CH2276 | Female | Two y/o | Treatment (Wk 3) | Treatment | Feed Day | No | 05:15 | 05:00 - 05:59 | Morning       | 37,3 | 58  | 22,2  | 22,2  | 18,46 | 551,90 | 103,88 |
| 2019/08/19 | CH2276 | Female | Two y/o | Treatment (Wk 3) | Treatment | Feed Day | No | 05:20 | 05:00 - 05:59 | Morning       | 37,2 | 56  | 37,2  | 37,2  | 18,36 | 549,01 | 121,59 |
| 2019/08/19 | CH2276 | Female | Two y/o | Treatment (Wk 3) | Treatment | Feed Day | No | 05:25 | 05:00 - 05:59 | Morning       | 37,1 | 59  | 57,8  | 57,8  | 18,26 | 553,30 | 136,80 |
| 2019/08/19 | CH2276 | Female | Two y/o | Treatment (Wk 3) | Treatment | Feed Day | No | 05:30 | 05:00 - 05:59 | Morning       | 37,1 | 63  | 24,2  | 24,2  | 18,26 | 558,62 | 106,83 |
| 2019/08/19 | CH2276 | Female | Two y/o | Treatment (Wk 3) | Treatment | Feed Day | No | 05:35 | 05:00 - 05:59 | Morning       | 37,1 | 64  | 33,0  | 33,0  | 18,26 | 559,88 | 117,47 |
| 2019/08/19 | CH2276 | Female | Two y/o | Treatment (Wk 3) | Treatment | Feed Day | No | 05:40 | 05:00 - 05:59 | Morning       | 37,1 | 49  | 33,6  | 33,6  | 18,26 | 537,80 | 118,09 |
| 2019/08/19 | CH2276 | Female | Two y/o | Treatment (Wk 3) | Treatment | Feed Day | No | 05:45 | 05:00 - 05:59 | Morning       | 36,9 | 60  | 33,6  | 33,6  | 18,06 | 554,67 | 118,09 |
| 2019/08/19 | CH2276 | Female | Two y/o | Treatment (Wk 3) | Treatment | Feed Day | No | 05:50 | 05:00 - 05:59 | Morning       | 36,8 | 54  | 34,2  | 34,2  | 17,96 | 545,99 | 118,70 |
| 2019/08/19 | CH2276 | Female | Two y/o | Treatment (Wk 3) | Treatment | Feed Day | No | 05:55 | 05:00 - 05:59 | Morning       | 36,7 | 132 | 97,8  | 97,8  | 17,87 | 613,32 | 155,07 |
| 2019/08/19 | CH2276 | Female | Two y/o | Treatment (Wk 3) | Treatment | Feed Day | No | 06:00 | 06:00 - 06:59 | Morning       | 36,7 | 54  | 108,4 | 108,4 | 17,87 | 545,99 | 158,66 |
| 2019/08/19 | CH2276 | Female | Two y/o | Treatment (Wk 3) | Treatment | Feed Day | No | 06:05 | 06:00 - 06:59 | Morning       | 36,8 | 57  | 166,2 | 166,2 | 17,96 | 550,47 | 173,61 |
| 2019/08/19 | CH2276 | Female | Two y/o | Treatment (Wk 3) | Treatment | Feed Day | No | 06:10 | 06:00 - 06:59 | Morning       | 37,0 | 148 | 70,2  | 70,2  | 18,16 | 620,97 | 143,54 |
| 2019/08/19 | CH2276 | Female | Two y/o | Treatment (Wk 3) | Treatment | Feed Day | No | 06:15 | 06:00 - 06:59 | Morning       | 37,4 | 45  | 172,2 | 172,2 | 18,55 | 530,47 | 174,86 |
| 2019/08/19 | CH2276 | Female | Two y/o | Treatment (Wk 3) | Treatment | Feed Day | No | 06:20 | 06:00 - 06:59 | Morning       | 37,5 |     | 187,6 | 187,6 | 18,65 |        | 177,87 |
| 2019/08/19 | CH2276 | Female | Two y/o | Treatment (Wk 3) | Treatment | Feed Day | No | 06:25 | 06:00 - 06:59 | Morning       | 37,6 |     | 403,6 | 403,6 | 18,75 |        | 204,93 |
| 2019/08/19 | CH2276 | Female | Two y/o | Treatment (Wk 3) | Treatment | Feed Day | No | 06:30 | 06:00 - 06:59 | Morning       | 37,7 |     | 467,6 | 467,6 | 18,85 |        | 210,16 |
| 2019/08/19 | CH2276 | Female | Two y/o | Treatment (Wk 3) | Treatment | Feed Day | No | 06:35 | 06:00 - 06:59 | Morning       | 37,8 | 42  | 90,8  | 90,8  | 18,95 | 524,42 | 152,48 |
| 2019/08/19 | CH2276 | Female | Two y/o | Treatment (Wk 3) | Treatment | Feed Day | No | 06:40 | 06:00 - 06:59 | Morning       | 37,8 | 99  | 248,4 | 248,4 | 18,95 | 593,14 | 187,75 |
| 2019/08/19 | CH2276 | Female | Two y/o | Treatment (Wk 3) | Treatment | Feed Day | No | 06:45 | 06:00 - 06:59 | Morning       | 37,8 | 138 | 288,8 | 288,8 | 18,95 | 616,31 | 193,08 |
| 2019/08/19 | CH2276 | Female | Two y/o | Treatment (Wk 3) | Treatment | Feed Day | No | 06:50 | 06:00 - 06:59 | Morning       | 37,9 | 83  | 66,4  | 66,4  | 19,05 | 580,11 | 141,61 |



|            |        |        |         |                  |           |          |     |       |               |              |      |     |        |       |       |        |        |
|------------|--------|--------|---------|------------------|-----------|----------|-----|-------|---------------|--------------|------|-----|--------|-------|-------|--------|--------|
| 2019/08/19 | CH2276 | Female | Two y/o | Treatment (Wk 3) | Treatment | Feed Day | No  | 06:55 | 06:00 - 06:59 | Morning      | 38,0 | 115 | 265,8  | 265,8 | 19,15 | 603,82 | 190,14 |
| 2019/08/19 | CH2276 | Female | Two y/o | Treatment (Wk 3) | Treatment | Feed Day | No  | 07:00 | 07:00 - 07:59 | Morning      | 37,9 | 96  | 384,4  | 384,4 | 19,05 | 590,91 | 203,20 |
| 2019/08/19 | CH2276 | Female | Two y/o | Treatment (Wk 3) | Treatment | Feed Day | No  | 07:05 | 07:00 - 07:59 | Morning      | 37,9 | 91  | 169,8  | 169,8 | 19,05 | 586,98 | 174,37 |
| 2019/08/19 | CH2276 | Female | Two y/o | Treatment (Wk 3) | Treatment | Feed Day | No  | 07:10 | 07:00 - 07:59 | Morning      | 37,8 | 63  | 287,0  | 287,0 | 18,95 | 558,62 | 192,85 |
| 2019/08/19 | CH2276 | Female | Two y/o | Treatment (Wk 3) | Treatment | Feed Day | No  | 07:15 | 07:00 - 07:59 | Morning      | 37,8 | 73  | 82,2   | 82,2  | 18,95 | 570,27 | 149,02 |
| 2019/08/19 | CH2276 | Female | Two y/o | Treatment (Wk 3) | Treatment | Feed Day | No  | 07:20 | 07:00 - 07:59 | Morning      | 37,8 | 75  | 1463,6 |       | 18,95 | 572,36 |        |
| 2019/08/19 | CH2276 | Female | Two y/o | Treatment (Wk 3) | Treatment | Feed Day | No  | 07:25 | 07:00 - 07:59 | Morning      | 38,6 | 45  | 78,2   | 78,2  | 19,76 | 530,47 | 147,28 |
| 2019/08/19 | CH2276 | Female | Two y/o | Treatment (Wk 3) | Treatment | Feed Day | No  | 07:30 | 07:00 - 07:59 | Morning      | 38,4 | 83  | 65,8   | 65,8  | 19,56 | 580,11 | 141,29 |
| 2019/08/19 | CH2276 | Female | Two y/o | Treatment (Wk 3) | Treatment | Feed Day | No  | 07:35 | 07:00 - 07:59 | Morning      | 38,4 | 83  | 68,8   | 68,8  | 19,56 | 580,11 | 142,84 |
| 2019/08/19 | CH2276 | Female | Two y/o | Treatment (Wk 3) | Treatment | Feed Day | No  | 07:40 | 07:00 - 07:59 | Morning      | 38,3 | 66  | 78,4   | 78,4  | 19,46 | 562,34 | 147,37 |
| 2019/08/19 | CH2276 | Female | Two y/o | Treatment (Wk 3) | Treatment | Feed Day | No  | 07:45 | 07:00 - 07:59 | Morning      | 38,2 | 110 | 330,0  | 330,0 | 19,36 | 600,69 | 197,79 |
| 2019/08/19 | CH2276 | Female | Two y/o | Treatment (Wk 3) | Treatment | Feed Day | No  | 07:50 | 07:00 - 07:59 | Morning      | 38,8 | 118 | 67,0   | 67,0  | 19,97 | 605,61 | 141,92 |
| 2019/08/19 | CH2276 | Female | Two y/o | Treatment (Wk 3) | Treatment | Feed Day | No  | 07:55 | 07:00 - 07:59 | Morning      | 38,6 | 96  | 57,8   | 57,8  | 19,76 | 590,91 | 136,80 |
| 2019/08/19 | CH2276 | Female | Two y/o | Treatment (Wk 3) | Treatment | Feed Day | No  | 08:00 | 08:00 - 08:59 | Late Morning | 38,5 | 79  | 69,8   | 69,8  | 19,66 | 576,36 | 143,34 |
| 2019/08/19 | CH2276 | Female | Two y/o | Treatment (Wk 3) | Treatment | Feed Day | No  | 08:05 | 08:00 - 08:59 | Late Morning | 38,4 | 77  | 78,6   | 78,6  | 19,56 | 574,39 | 147,46 |
| 2019/08/19 | CH2276 | Female | Two y/o | Treatment (Wk 3) | Treatment | Feed Day | No  | 08:10 | 08:00 - 08:59 | Late Morning | 38,2 | 59  | 67,8   | 67,8  | 19,36 | 553,30 | 142,33 |
| 2019/08/19 | CH2276 | Female | Two y/o | Treatment (Wk 3) | Treatment | Feed Day | No  | 08:15 | 08:00 - 08:59 | Late Morning | 38,0 | 61  | 53,2   | 53,2  | 19,15 | 556,01 | 133,93 |
| 2019/08/19 | CH2276 | Female | Two y/o | Treatment (Wk 3) | Treatment | Feed Day | No  | 08:20 | 08:00 - 08:59 | Late Morning | 37,8 | 59  | 36,8   | 36,8  | 18,95 | 553,30 | 121,22 |
| 2019/08/19 | CH2276 | Female | Two y/o | Treatment (Wk 3) | Treatment | Feed Day | No  | 08:25 | 08:00 - 08:59 | Late Morning | 37,7 | 58  | 47,0   | 47,0  | 18,85 | 551,90 | 129,65 |
| 2019/08/19 | CH2276 | Female | Two y/o | Treatment (Wk 3) | Treatment | Feed Day | No  | 08:30 | 08:00 - 08:59 | Late Morning | 37,7 | 59  | 40,0   | 40,0  | 19,85 | 553,30 | 124,09 |
| 2019/08/19 | CH2276 | Female | Two y/o | Treatment (Wk 3) | Treatment | Feed Day | No  | 08:35 | 08:00 - 08:59 | Late Morning | 37,6 | 55  | 70,8   | 70,8  | 18,75 | 547,52 | 143,83 |
| 2019/08/19 | CH2276 | Female | Two y/o | Treatment (Wk 3) | Treatment | Feed Day | No  | 08:40 | 08:00 - 08:59 | Late Morning | 37,6 | 80  | 68,2   | 68,2  | 18,75 | 577,31 | 142,53 |
| 2019/08/19 | CH2276 | Female | Two y/o | Treatment (Wk 3) | Treatment | Feed Day | No  | 08:45 | 08:00 - 08:59 | Late Morning | 37,5 | 64  | 59,0   | 59,0  | 18,65 | 559,88 | 137,51 |
| 2019/08/19 | CH2276 | Female | Two y/o | Treatment (Wk 3) | Treatment | Feed Day | No  | 08:50 | 08:00 - 08:59 | Late Morning | 37,5 | 92  | 125,6  | 125,6 | 18,65 | 587,78 | 163,80 |
| 2019/08/19 | CH2276 | Female | Two y/o | Treatment (Wk 3) | Treatment | Feed Day | No  | 08:55 | 08:00 - 08:59 | Late Morning | 37,5 | 150 | 746,4  | 746,4 | 18,65 | 621,86 | 226,85 |
| 2019/08/19 | CH2276 | Female | Two y/o | Treatment (Wk 3) | Treatment | Feed Day | No  | 09:00 | 09:00 - 09:59 | Late Morning | 37,6 | 54  | 195,0  | 195,0 | 18,75 | 545,99 | 179,23 |
| 2019/08/19 | CH2276 | Female | Two y/o | Treatment (Wk 3) | Treatment | Feed Day | No  | 09:05 | 09:00 - 09:59 | Late Morning | 37,6 | 97  | 96,0   | 96,0  | 18,75 | 591,66 | 154,42 |
| 2019/08/19 | CH2276 | Female | Two y/o | Treatment (Wk 3) | Treatment | Feed Day | No  | 09:10 | 09:00 - 09:59 | Late Morning | 37,6 |     | 560,0  | 560,0 | 18,75 | 516,58 | 216,58 |
| 2019/08/19 | CH2276 | Female | Two y/o | Treatment (Wk 3) | Treatment | Feed Day | No  | 09:15 | 09:00 - 09:59 | Late Morning | 37,6 | 79  | 145,4  | 145,4 | 18,75 | 576,36 | 168,93 |
| 2019/08/19 | CH2276 | Female | Two y/o | Treatment (Wk 3) | Treatment | Feed Day | No  | 09:20 | 09:00 - 09:59 | Late Morning | 37,7 | 103 | 324,6  | 324,6 | 18,85 | 596,00 | 197,21 |
| 2019/08/19 | CH2276 | Female | Two y/o | Treatment (Wk 3) | Treatment | Feed Day | No  | 09:25 | 09:00 - 09:59 | Late Morning | 37,8 | 101 | 176,2  | 176,2 | 18,95 | 594,59 | 175,67 |
| 2019/08/19 | CH2276 | Female | Two y/o | Treatment (Wk 3) | Treatment | Feed Day | No  | 09:30 | 09:00 - 09:59 | Late Morning | 37,8 | 115 | 90,0   | 90,0  | 18,95 | 603,82 | 152,17 |
| 2019/08/19 | CH2276 | Female | Two y/o | Treatment (Wk 3) | Treatment | Feed Day | No  | 09:35 | 09:00 - 09:59 | Late Morning | 37,9 | 67  | 64,8   | 64,8  | 19,05 | 563,53 | 140,76 |
| 2019/08/19 | CH2276 | Female | Two y/o | Treatment (Wk 3) | Treatment | Feed Day | No  | 09:40 | 09:00 - 09:59 | Late Morning | 37,8 | 65  | 70,6   | 70,6  | 18,95 | 561,12 | 143,73 |
| 2019/08/19 | CH2276 | Female | Two y/o | Treatment (Wk 3) | Treatment | Feed Day | No  | 09:45 | 09:00 - 09:59 | Late Morning | 37,8 | 82  | 271,2  | 271,2 | 18,95 | 579,19 | 190,85 |
| 2019/08/19 | CH2276 | Female | Two y/o | Treatment (Wk 3) | Treatment | Feed Day | No  | 09:50 | 09:00 - 09:59 | Late Morning | 37,8 | 79  | 179,8  | 179,8 | 18,95 | 576,36 | 176,38 |
| 2019/08/19 | CH2276 | Female | Two y/o | Treatment (Wk 3) | Treatment | Feed Day | No  | 09:55 | 09:00 - 09:59 | Late Morning | 37,8 | 92  | 167,0  | 167,0 | 18,95 | 587,78 | 173,78 |
| 2019/08/19 | CH2276 | Female | Two y/o | Treatment (Wk 3) | Treatment | Feed Day | No  | 10:00 | 10:00 - 10:59 | Late Morning | 37,8 | 67  | 77,0   | 77,0  | 18,95 | 563,53 | 146,75 |
| 2019/08/19 | CH2276 | Female | Two y/o | Treatment (Wk 3) | Treatment | Feed Day | No  | 10:05 | 10:00 - 10:59 | Late Morning | 37,8 | 88  | 75,4   | 75,4  | 18,95 | 584,49 | 146,02 |
| 2019/08/19 | CH2276 | Female | Two y/o | Treatment (Wk 3) | Treatment | Feed Day | No  | 10:10 | 10:00 - 10:59 | Late Morning | 37,8 | 147 | 264,0  | 264,0 | 18,95 | 620,52 | 189,90 |
| 2019/08/19 | CH2276 | Female | Two y/o | Treatment (Wk 3) | Treatment | Feed Day | No  | 10:15 | 10:00 - 10:59 | Late Morning | 37,8 |     | 518,2  | 518,2 | 18,95 |        | 213,82 |
| 2019/08/19 | CH2276 | Female | Two y/o | Treatment (Wk 3) | Treatment | Feed Day | No  | 10:20 | 10:00 - 10:59 | Late Morning | 37,9 | 113 | 227,4  | 227,4 | 19,05 | 602,58 | 184,64 |
| 2019/08/19 | CH2276 | Female | Two y/o | Treatment (Wk 3) | Treatment | Feed Day | No  | 10:25 | 10:00 - 10:59 | Late Morning | 37,9 | 55  | 79,2   | 79,2  | 19,05 | 547,52 | 147,73 |
| 2019/08/19 | CH2276 | Female | Two y/o | Treatment (Wk 3) | Treatment | Feed Day | Yes | 10:30 | 10:00 - 10:59 | Late Morning | 38,0 |     | 249,6  | 249,6 | 19,15 |        | 187,92 |
| 2019/08/19 | CH2276 | Female | Two y/o | Treatment (Wk 3) | Treatment | Feed Day | Yes | 10:35 | 10:00 - 10:59 | Late Morning | 38,0 | 134 | 169,8  | 169,8 | 19,15 | 614,33 | 174,37 |
| 2019/08/19 | CH2276 | Female | Two y/o | Treatment (Wk 3) | Treatment | Feed Day | Yes | 10:40 | 10:00 - 10:59 | Late Morning | 38,0 | 53  | 162,6  | 162,6 | 19,15 | 544,43 | 172,85 |
| 2019/08/19 | CH2276 | Female | Two y/o | Treatment (Wk 3) | Treatment | Feed Day | Yes | 10:45 | 10:00 - 10:59 | Late Morning | 38,0 |     | 481,8  | 481,8 | 19,15 |        | 211,23 |
| 2019/08/19 | CH2276 | Female | Two y/o | Treatment (Wk 3) | Treatment | Feed Day | Yes | 10:50 | 10:00 - 10:59 | Late Morning | 38,2 | 140 | 235,4  | 235,4 | 19,36 | 617,28 | 185,86 |
| 2019/08/19 | CH2276 | Female | Two y/o | Treatment (Wk 3) | Treatment | Feed Day | Yes | 10:55 | 10:00 - 10:59 | Late Morning | 38,2 | 123 | 719,6  | 719,6 | 19,36 | 608,49 | 225,54 |
| 2019/08/19 | CH2276 | Female | Two y/o | Treatment (Wk 3) | Treatment | Feed Day | Yes | 11:00 | 11:00 - 11:59 | Late Morning | 38,3 |     | 43,0   | 43,0  | 19,46 |        | 126,58 |
| 2019/08/19 | CH2276 | Female | Two y/o | Treatment (Wk 3) | Treatment | Feed Day | Yes | 11:05 | 11:00 - 11:59 | Late Morning | 38,2 | 128 | 67,0   | 67,0  | 19,36 | 611,22 | 141,92 |
| 2019/08/19 | CH2276 | Female | Two y/o | Treatment (Wk 3) | Treatment | Feed Day | Yes | 11:10 | 11:00 - 11:59 | Late Morning | 38,2 | 61  | 81,0   | 81,0  | 19,36 | 556,01 | 148,51 |
| 2019/08/19 | CH2276 | Female | Two y/o | Treatment (Wk 3) | Treatment | Feed Day | Yes | 11:15 | 11:00 - 11:59 | Late Morning | 38,2 | 54  | 487,8  | 487,8 | 19,36 | 545,99 | 211,67 |
| 2019/08/19 | CH2276 | Female | Two y/o | Treatment (Wk 3) | Treatment | Feed Day | Yes | 11:20 | 11:00 - 11:59 | Late Morning | 38,2 | 132 | 501,4  | 501,4 | 19,36 | 613,32 | 212,65 |
| 2019/08/19 | CH2276 | Female | Two y/o | Treatment (Wk 3) | Treatment | Feed Day | Yes | 11:25 | 11:00 - 11:59 | Late Morning | 38,2 | 120 | 84,2   | 84,2  | 19,36 | 606,78 | 149,85 |
| 2019/08/19 | CH2276 | Female | Two y/o | Treatment (Wk 3) | Treatment | Feed Day | No  | 11:30 | 11:00 - 11:59 | Late Morning | 38,1 | 78  | 57,6   | 57,6  | 19,26 | 575,38 | 136,68 |
| 2019/08/19 | CH2276 | Female | Two y/o | Treatment (Wk 3) | Treatment | Feed Day | No  | 11:35 | 11:00 - 11:59 | Late Morning | 38,2 | 65  | 65,6   | 65,6  | 19,36 | 561,12 | 141,19 |
| 2019/08/19 | CH2276 | Female | Two y/o | Treatment (Wk 3) | Treatment | Feed Day | No  | 11:40 | 11:00 - 11:59 | Late Morning | 38,2 | 87  | 67,4   | 67,4  | 19,36 | 583,64 | 142,12 |
| 2019/08/19 | CH2276 | Female | Two y/o | Treatment (Wk 3) | Treatment | Feed Day | No  | 11:45 | 11:00 - 11:59 | Late Morning | 38,2 | 65  | 69,0   | 69,0  | 19,36 | 561,12 | 142,94 |
| 2019/08/19 | CH2276 | Female | Two y/o | Treatment (Wk 3) | Treatment | Feed Day | No  | 11:50 | 11:00 - 11:59 | Late Morning | 38,2 | 72  | 61,6   | 61,6  | 19,36 | 569,20 | 139,00 |
| 2019/08/19 | CH2276 | Female | Two y/o | Treatment (Wk 3) | Treatment | Feed Day | No  | 11:55 | 11:00 - 11:59 | Late Morning | 38,2 | 73  | 64,4   | 64,4  | 19,36 | 570,27 | 140,55 |
| 2019/08/19 | CH2276 | Female | Two y/o | Treatment (Wk 3) | Treatment | Feed Day | No  | 12:00 | 12:00 - 12:59 | Afternoon    | 38,2 | 73  | 71,0   | 71,0  | 19,36 | 570,27 | 143,93 |
| 2019/08/19 | CH2276 | Female | Two y/o | Treatment (Wk 3) | Treatment | Feed Day | No  | 12:05 | 12:00 - 12:59 | Afternoon    | 38,2 | 68  | 72,0   | 72,0  | 19,36 | 564,71 | 144,42 |
| 2019/08/19 | CH2276 | Female | Two y/o | Treatment (Wk 3) | Treatment | Feed Day | No  | 12:10 | 12:00 - 12:59 | Afternoon    | 38,3 | 91  | 62,8   | 62,8  | 19,46 | 586,98 | 139,67 |
| 2019/08/19 | CH2276 | Female | Two y/o | Treatment (Wk 3) | Treatment | Feed Day | No  | 12:15 | 12:00 - 12:59 | Afternoon    | 38,3 | 67  | 61,2   | 61,2  | 19,46 | 563,53 | 138,78 |
| 2019/08/19 | CH2276 | Female | Two y/o | Treatment (Wk 3) | Treatment | Feed Day | No  | 12:20 | 12:00 - 12:59 | Afternoon    | 38,4 | 63  | 51,2   | 51,2  | 19,56 | 558,62 | 132,61 |
| 2019/08/19 | CH2276 | Female | Two y/o | Treatment (Wk 3) | Treatment | Feed Day | No  | 12:25 | 12:00 - 12:59 | Afternoon    | 38,3 | 68  | 54,2   | 54,2  | 19,46 | 564,71 | 134,57 |
| 2019/08/19 | CH2276 | Female | Two y/o | Treatment (Wk 3) | Treatment | Feed Day | No  | 12:30 | 12:00 - 12:59 | Afternoon    | 38,2 | 65  | 47,2   | 47,2  | 19,36 | 561,12 | 129,80 |
| 2019/08/19 | CH2276 | Female | Two y/o | Treatment (Wk 3) | Treatment | Feed Day | No  | 12:35 | 12:00 - 12:59 | Afternoon    | 38,2 | 67  | 54,4   | 54,4  | 19,36 | 563,53 | 134,70 |
| 2019/08/19 | CH2276 | Female | Two y/o | Treatment (Wk 3) | Treatment | Feed Day | No  | 12:40 | 12:00 - 12:59 | Afternoon    | 38,2 | 64  | 55,2   | 55,2  | 19,36 | 559,88 | 135,21 |



|            |        |        |         |                  |           |          |     |       |               |           |      |     |      |      |       |        |        |
|------------|--------|--------|---------|------------------|-----------|----------|-----|-------|---------------|-----------|------|-----|------|------|-------|--------|--------|
| 2019/08/19 | CH2276 | Female | Two y/o | Treatment (Wk 3) | Treatment | Feed Day | No  | 12:45 | 12:00 - 12:59 | Afternoon | 38,2 | 65  | 57,8 | 57,8 | 19,36 | 561,12 | 136,80 |
| 2019/08/19 | CH2276 | Female | Two y/o | Treatment (Wk 3) | Treatment | Feed Day | No  | 12:50 | 12:00 - 12:59 | Afternoon | 38,2 | 71  | 60,0 | 60,0 | 19,36 | 568,10 | 138,09 |
| 2019/08/19 | CH2276 | Female | Two y/o | Treatment (Wk 3) | Treatment | Feed Day | No  | 12:55 | 12:00 - 12:59 | Afternoon | 38,2 | 74  | 61,8 | 61,8 | 19,36 | 571,33 | 139,12 |
| 2019/08/19 | CH2276 | Female | Two y/o | Treatment (Wk 3) | Treatment | Feed Day | No  | 13:00 | 13:00 - 13:59 | Afternoon | 38,2 | 70  | 59,2 | 59,2 | 19,36 | 566,99 | 137,63 |
| 2019/08/19 | CH2276 | Female | Two y/o | Treatment (Wk 3) | Treatment | Feed Day | No  | 13:05 | 13:00 - 13:59 | Afternoon | 38,2 | 61  | 57,8 | 57,8 | 19,36 | 556,01 | 136,80 |
| 2019/08/19 | CH2276 | Female | Two y/o | Treatment (Wk 3) | Treatment | Feed Day | No  | 13:10 | 13:00 - 13:59 | Afternoon | 38,2 | 65  | 57,4 | 57,4 | 19,36 | 561,12 | 136,56 |
| 2019/08/19 | CH2276 | Female | Two y/o | Treatment (Wk 3) | Treatment | Feed Day | No  | 13:15 | 13:00 - 13:59 | Afternoon | 38,2 | 114 | 57,2 | 57,2 | 19,36 | 603,20 | 136,44 |
| 2019/08/19 | CH2276 | Female | Two y/o | Treatment (Wk 3) | Treatment | Feed Day | No  | 13:20 | 13:00 - 13:59 | Afternoon | 38,1 | 73  | 49,6 | 49,6 | 19,26 | 570,27 | 131,51 |
| 2019/08/19 | CH2276 | Female | Two y/o | Treatment (Wk 3) | Treatment | Feed Day | No  | 13:25 | 13:00 - 13:59 | Afternoon | 38,1 | 67  | 44,6 | 44,6 | 19,26 | 563,53 | 127,84 |
| 2019/08/19 | CH2276 | Female | Two y/o | Treatment (Wk 3) | Treatment | Feed Day | No  | 13:30 | 13:00 - 13:59 | Afternoon | 38,2 | 97  | 57,6 | 57,6 | 19,36 | 591,66 | 136,68 |
| 2019/08/19 | CH2276 | Female | Two y/o | Treatment (Wk 3) | Treatment | Feed Day | No  | 13:35 | 13:00 - 13:59 | Afternoon | 38,2 | 80  | 63,2 | 63,2 | 19,36 | 577,31 | 139,89 |
| 2019/08/19 | CH2276 | Female | Two y/o | Treatment (Wk 3) | Treatment | Feed Day | No  | 13:40 | 13:00 - 13:59 | Afternoon | 38,2 | 70  | 62,2 | 62,2 | 19,36 | 566,99 | 139,34 |
| 2019/08/19 | CH2276 | Female | Two y/o | Treatment (Wk 3) | Treatment | Feed Day | No  | 13:45 | 13:00 - 13:59 | Afternoon | 38,2 | 66  | 58,0 | 58,0 | 19,36 | 562,34 | 136,92 |
| 2019/08/19 | CH2276 | Female | Two y/o | Treatment (Wk 3) | Treatment | Feed Day | No  | 13:50 | 13:00 - 13:59 | Afternoon | 38,2 | 68  | 48,6 | 48,6 | 19,36 | 564,71 | 130,81 |
| 2019/08/19 | CH2276 | Female | Two y/o | Treatment (Wk 3) | Treatment | Feed Day | No  | 13:55 | 13:00 - 13:59 | Afternoon | 38,1 | 77  | 57,0 | 57,0 | 19,26 | 574,39 | 136,32 |
| 2019/08/19 | CH2276 | Female | Two y/o | Treatment (Wk 3) | Treatment | Feed Day | No  | 14:00 | 14:00 - 14:59 | Afternoon | 38,1 | 105 | 83,4 | 83,4 | 19,26 | 597,38 | 149,52 |
| 2019/08/19 | CH2276 | Female | Two y/o | Treatment (Wk 3) | Treatment | Feed Day | No  | 14:05 | 14:00 - 14:59 | Afternoon | 38,1 | 83  | 88,0 | 88,0 | 19,26 | 580,11 | 151,39 |
| 2019/08/19 | CH2276 | Female | Two y/o | Treatment (Wk 3) | Treatment | Feed Day | No  | 14:10 | 14:00 - 14:59 | Afternoon | 38,1 | 68  | 82,4 | 82,4 | 19,26 | 564,71 | 149,10 |
| 2019/08/19 | CH2276 | Female | Two y/o | Treatment (Wk 3) | Treatment | Feed Day | No  | 14:15 | 14:00 - 14:59 | Afternoon | 38,2 | 64  | 73,4 | 73,4 | 19,36 | 559,88 | 145,08 |
| 2019/08/19 | CH2276 | Female | Two y/o | Treatment (Wk 3) | Treatment | Feed Day | No  | 14:20 | 14:00 - 14:59 | Afternoon | 38,2 | 68  | 91,0 | 91,0 | 19,36 | 564,71 | 152,56 |
| 2019/08/19 | CH2276 | Female | Two y/o | Treatment (Wk 3) | Treatment | Feed Day | No  | 14:25 | 14:00 - 14:59 | Afternoon | 38,1 | 118 | 58,8 | 58,8 | 19,26 | 605,61 | 137,39 |
| 2019/08/19 | CH2276 | Female | Two y/o | Treatment (Wk 3) | Treatment | Feed Day | No  | 14:30 | 14:00 - 14:59 | Afternoon | 38,0 | 78  | 49,6 | 49,6 | 19,15 | 575,38 | 131,51 |
| 2019/08/19 | CH2276 | Female | Two y/o | Treatment (Wk 3) | Treatment | Feed Day | No  | 14:35 | 14:00 - 14:59 | Afternoon | 38,1 | 70  | 72,8 | 72,8 | 19,26 | 566,99 | 144,80 |
| 2019/08/19 | CH2276 | Female | Two y/o | Treatment (Wk 3) | Treatment | Feed Day | No  | 14:40 | 14:00 - 14:59 | Afternoon | 38,2 | 75  | 82,8 | 82,8 | 19,36 | 572,36 | 149,27 |
| 2019/08/19 | CH2276 | Female | Two y/o | Treatment (Wk 3) | Treatment | Feed Day | No  | 14:45 | 14:00 - 14:59 | Afternoon | 38,2 | 70  | 71,4 | 71,4 | 19,36 | 566,99 | 144,12 |
| 2019/08/19 | CH2276 | Female | Two y/o | Treatment (Wk 3) | Treatment | Feed Day | No  | 14:50 | 14:00 - 14:59 | Afternoon | 38,3 | 80  | 91,2 | 91,2 | 19,46 | 577,31 | 152,63 |
| 2019/08/19 | CH2276 | Female | Two y/o | Treatment (Wk 3) | Treatment | Feed Day | No  | 14:55 | 14:00 - 14:59 | Afternoon | 38,3 | 69  | 86,6 | 86,6 | 19,46 | 565,86 | 150,83 |
| 2019/08/19 | CH2276 | Female | Two y/o | Treatment (Wk 3) | Treatment | Feed Day | No  | 15:00 | 15:00 - 15:59 | Afternoon | 38,3 | 70  | 80,4 | 80,4 | 19,46 | 566,99 | 148,25 |
| 2019/08/19 | CH2276 | Female | Two y/o | Treatment (Wk 3) | Treatment | Feed Day | No  | 15:05 | 15:00 - 15:59 | Afternoon | 38,3 | 70  | 68,6 | 68,6 | 19,46 | 566,99 | 142,74 |
| 2019/08/19 | CH2276 | Female | Two y/o | Treatment (Wk 3) | Treatment | Feed Day | No  | 15:10 | 15:00 - 15:59 | Afternoon | 38,3 | 64  | 70,6 | 70,6 | 19,46 | 559,88 | 143,73 |
| 2019/08/19 | CH2276 | Female | Two y/o | Treatment (Wk 3) | Treatment | Feed Day | No  | 15:15 | 15:00 - 15:59 | Afternoon | 38,3 | 87  | 74,6 | 74,6 | 19,46 | 583,64 | 145,65 |
| 2019/08/19 | CH2276 | Female | Two y/o | Treatment (Wk 3) | Treatment | Feed Day | No  | 15:20 | 15:00 - 15:59 | Afternoon | 38,3 | 70  | 72,6 | 72,6 | 19,46 | 566,99 | 144,70 |
| 2019/08/19 | CH2276 | Female | Two y/o | Treatment (Wk 3) | Treatment | Feed Day | No  | 15:25 | 15:00 - 15:59 | Afternoon | 38,3 | 69  | 76,2 | 76,2 | 19,46 | 565,86 | 146,38 |
| 2019/08/19 | CH2276 | Female | Two y/o | Treatment (Wk 3) | Treatment | Feed Day | Yes | 15:30 | 15:00 - 15:59 | Afternoon | 38,3 | 69  | 61,8 | 61,8 | 19,46 | 565,86 | 139,12 |
| 2019/08/19 | CH2276 | Female | Two y/o | Treatment (Wk 3) | Treatment | Feed Day | Yes | 15:35 | 15:00 - 15:59 | Afternoon | 38,2 | 58  | 80,4 | 80,4 | 19,36 | 551,90 | 148,25 |
| 2019/08/19 | CH2276 | Female | Two y/o | Treatment (Wk 3) | Treatment | Feed Day | Yes | 15:40 | 15:00 - 15:59 | Afternoon | 38,2 | 172 | 81,2 | 81,2 | 19,36 | 630,73 | 148,59 |
| 2019/08/19 | CH2276 | Female | Two y/o | Treatment (Wk 3) | Treatment | Feed Day | Yes | 15:45 | 15:00 - 15:59 | Afternoon | 38,2 | 68  | 79,0 | 79,0 | 19,36 | 564,71 | 147,64 |
| 2019/08/19 | CH2276 | Female | Two y/o | Treatment (Wk 3) | Treatment | Feed Day | Yes | 15:50 | 15:00 - 15:59 | Afternoon | 38,2 | 69  | 83,2 | 83,2 | 19,36 | 565,86 | 149,44 |
| 2019/08/19 | CH2276 | Female | Two y/o | Treatment (Wk 3) | Treatment | Feed Day | Yes | 15:55 | 15:00 - 15:59 | Afternoon | 38,2 | 65  | 81,0 | 81,0 | 19,36 | 561,12 | 148,51 |
| 2019/08/19 | CH2276 | Female | Two y/o | Treatment (Wk 3) | Treatment | Feed Day | Yes | 16:00 | 16:00 - 16:59 | Evening   | 38,2 | 70  | 83,4 | 83,4 | 19,36 | 566,99 | 149,52 |
| 2019/08/19 | CH2276 | Female | Two y/o | Treatment (Wk 3) | Treatment | Feed Day | Yes | 16:05 | 16:00 - 16:59 | Evening   | 38,2 | 86  | 48,2 | 48,2 | 19,36 | 582,77 | 130,52 |
| 2019/08/19 | CH2276 | Female | Two y/o | Treatment (Wk 3) | Treatment | Feed Day | Yes | 16:10 | 16:00 - 16:59 | Evening   | 38,2 | 70  | 74,6 | 74,6 | 19,36 | 566,99 | 145,65 |
| 2019/08/19 | CH2276 | Female | Two y/o | Treatment (Wk 3) | Treatment | Feed Day | Yes | 16:15 | 16:00 - 16:59 | Evening   | 38,2 | 83  | 69,8 | 69,8 | 19,36 | 580,11 | 143,34 |
| 2019/08/19 | CH2276 | Female | Two y/o | Treatment (Wk 3) | Treatment | Feed Day | Yes | 16:20 | 16:00 - 16:59 | Evening   | 38,2 | 140 | 49,4 | 49,4 | 19,36 | 617,28 | 131,37 |
| 2019/08/19 | CH2276 | Female | Two y/o | Treatment (Wk 3) | Treatment | Feed Day | Yes | 16:25 | 16:00 - 16:59 | Evening   | 38,1 | 62  | 46,6 | 46,6 | 19,26 | 557,33 | 129,35 |
| 2019/08/19 | CH2276 | Female | Two y/o | Treatment (Wk 3) | Treatment | Feed Day | No  | 16:30 | 16:00 - 16:59 | Evening   | 38,1 | 74  | 49,0 | 49,0 | 19,26 | 571,33 | 131,09 |
| 2019/08/19 | CH2276 | Female | Two y/o | Treatment (Wk 3) | Treatment | Feed Day | No  | 16:35 | 16:00 - 16:59 | Evening   | 38,1 | 63  | 57,8 | 57,8 | 19,26 | 558,62 | 136,80 |
| 2019/08/19 | CH2276 | Female | Two y/o | Treatment (Wk 3) | Treatment | Feed Day | No  | 16:40 | 16:00 - 16:59 | Evening   | 38,1 | 62  | 63,8 | 63,8 | 19,26 | 557,33 | 140,22 |
| 2019/08/19 | CH2276 | Female | Two y/o | Treatment (Wk 3) | Treatment | Feed Day | No  | 16:45 | 16:00 - 16:59 | Evening   | 38,1 | 65  | 65,4 | 65,4 | 19,26 | 561,12 | 141,08 |
| 2019/08/19 | CH2276 | Female | Two y/o | Treatment (Wk 3) | Treatment | Feed Day | No  | 16:50 | 16:00 - 16:59 | Evening   | 38,1 | 70  | 71,0 | 71,0 | 19,26 | 566,99 | 143,93 |
| 2019/08/19 | CH2276 | Female | Two y/o | Treatment (Wk 3) | Treatment | Feed Day | No  | 16:55 | 16:00 - 16:59 | Evening   | 38,2 | 69  | 73,6 | 73,6 | 19,36 | 565,86 | 145,18 |
| 2019/08/19 | CH2276 | Female | Two y/o | Treatment (Wk 3) | Treatment | Feed Day | No  | 17:00 | 17:00 - 17:59 | Evening   | 38,2 | 70  | 68,0 | 68,0 | 19,36 | 566,99 | 142,43 |
| 2019/08/19 | CH2276 | Female | Two y/o | Treatment (Wk 3) | Treatment | Feed Day | No  | 17:05 | 17:00 - 17:59 | Evening   | 38,2 | 68  | 73,0 | 73,0 | 19,36 | 564,71 | 144,89 |
| 2019/08/19 | CH2276 | Female | Two y/o | Treatment (Wk 3) | Treatment | Feed Day | No  | 17:10 | 17:00 - 17:59 | Evening   | 38,2 | 70  | 66,4 | 66,4 | 19,36 | 566,99 | 141,61 |
| 2019/08/19 | CH2276 | Female | Two y/o | Treatment (Wk 3) | Treatment | Feed Day | No  | 17:15 | 17:00 - 17:59 | Evening   | 38,2 | 58  | 62,0 | 62,0 | 19,36 | 551,90 | 139,23 |
| 2019/08/19 | CH2276 | Female | Two y/o | Treatment (Wk 3) | Treatment | Feed Day | No  | 17:20 | 17:00 - 17:59 | Evening   | 38,2 | 68  | 58,6 | 58,6 | 19,36 | 564,71 | 137,28 |
| 2019/08/19 | CH2276 | Female | Two y/o | Treatment (Wk 3) | Treatment | Feed Day | No  | 17:25 | 17:00 - 17:59 | Evening   | 38,2 | 68  | 58,0 | 58,0 | 19,36 | 564,71 | 136,92 |
| 2019/08/19 | CH2276 | Female | Two y/o | Treatment (Wk 3) | Treatment | Feed Day | No  | 17:30 | 17:00 - 17:59 | Evening   | 38,2 | 114 | 59,2 | 59,2 | 19,36 | 603,20 | 137,63 |
| 2019/08/19 | CH2276 | Female | Two y/o | Treatment (Wk 3) | Treatment | Feed Day | No  | 17:35 | 17:00 - 17:59 | Evening   | 38,1 | 62  | 41,2 | 41,2 | 19,26 | 557,33 | 125,11 |
| 2019/08/19 | CH2276 | Female | Two y/o | Treatment (Wk 3) | Treatment | Feed Day | No  | 17:40 | 17:00 - 17:59 | Evening   | 38,0 | 68  | 43,4 | 43,4 | 19,15 | 564,71 | 126,90 |
| 2019/08/19 | CH2276 | Female | Two y/o | Treatment (Wk 3) | Treatment | Feed Day | No  | 17:45 | 17:00 - 17:59 | Evening   | 37,9 | 94  | 65,8 | 65,8 | 19,05 | 589,37 | 141,29 |
| 2019/08/19 | CH2276 | Female | Two y/o | Treatment (Wk 3) | Treatment | Feed Day | No  | 17:50 | 17:00 - 17:59 | Evening   | 37,9 | 99  | 39,0 | 39,0 | 19,05 | 593,14 | 123,22 |
| 2019/08/19 | CH2276 | Female | Two y/o | Treatment (Wk 3) | Treatment | Feed Day | No  | 17:55 | 17:00 - 17:59 | Evening   | 37,8 | 59  | 52,2 | 52,2 | 18,95 | 553,30 | 133,27 |
| 2019/08/19 | CH2276 | Female | Two y/o | Treatment (Wk 3) | Treatment | Feed Day | No  | 18:00 | 18:00 - 18:59 | Evening   | 37,9 | 63  | 49,8 | 49,8 | 19,05 | 558,62 | 131,65 |
| 2019/08/19 | CH2276 | Female | Two y/o | Treatment (Wk 3) | Treatment | Feed Day | No  | 18:05 | 18:00 - 18:59 | Evening   | 37,9 | 88  | 36,4 | 36,4 | 19,05 | 584,49 | 120,84 |
| 2019/08/19 | CH2276 | Female | Two y/o | Treatment (Wk 3) | Treatment | Feed Day | No  | 18:10 | 18:00 - 18:59 | Evening   | 37,8 | 69  | 58,0 | 58,0 | 18,95 | 565,86 | 136,92 |
| 2019/08/19 | CH2276 | Female | Two y/o | Treatment (Wk 3) | Treatment | Feed Day | No  | 18:15 | 18:00 - 18:59 | Evening   | 37,6 | 87  | 85,2 | 85,2 | 18,75 | 583,64 | 150,27 |
| 2019/08/19 | CH2276 | Female | Two y/o | Treatment (Wk 3) | Treatment | Feed Day | No  | 18:20 | 18:00 - 18:59 | Evening   | 37,6 |     | 80,0 | 80,0 | 18,75 |        | 148,08 |
| 2019/08/19 | CH2276 | Female | Two y/o | Treatment (Wk 3) | Treatment | Feed Day | No  | 18:25 | 18:00 - 18:59 | Evening   | 37,5 | 64  | 54,0 | 54,0 | 18,65 | 559,88 | 134,45 |
| 2019/08/19 | CH2276 | Female | Two y/o | Treatment (Wk 3) | Treatment | Feed Day | No  | 18:30 | 18:00 - 18:59 | Evening   | 37,5 | 60  | 53,8 | 53,8 | 18,65 | 554,67 | 134,32 |



|    |            |        |        |         |                  |           |          |    |       |               |               |      |    |      |      |       |        |        |
|----|------------|--------|--------|---------|------------------|-----------|----------|----|-------|---------------|---------------|------|----|------|------|-------|--------|--------|
|    | 2019/08/19 | CH2276 | Female | Two y/o | Treatment (Wk 3) | Treatment | Feed Day | No | 18:35 | 18:00 - 18:59 | Evening       | 37,5 | 81 | 37,2 | 37,2 | 18,65 | 578,26 | 121,59 |
|    | 2019/08/19 | CH2276 | Female | Two y/o | Treatment (Wk 3) | Treatment | Feed Day | No | 18:40 | 18:00 - 18:59 | Evening       | 37,6 | 85 | 24,4 | 24,4 | 18,75 | 581,90 | 107,11 |
|    | 2019/08/19 | CH2276 | Female | Two y/o | Treatment (Wk 3) | Treatment | Feed Day | No | 18:45 | 18:00 - 18:59 | Evening       | 37,6 | 84 | 33,8 | 33,8 | 18,75 | 581,01 | 118,29 |
|    | 2019/08/19 | CH2276 | Female | Two y/o | Treatment (Wk 3) | Treatment | Feed Day | No | 18:50 | 18:00 - 18:59 | Evening       | 37,6 | 69 | 29,8 | 29,8 | 18,75 | 565,86 | 113,97 |
|    | 2019/08/19 | CH2276 | Female | Two y/o | Treatment (Wk 3) | Treatment | Feed Day | No | 18:55 | 18:00 - 18:59 | Evening       | 37,6 | 67 | 31,2 | 31,2 | 18,75 | 563,53 | 115,54 |
|    | 2019/08/19 | CH2276 | Female | Two y/o | Treatment (Wk 3) | Treatment | Feed Day | No | 19:00 | 19:00 - 19:59 | Evening       | 37,6 | 74 | 27,4 | 27,4 | 18,75 | 571,33 | 111,09 |
|    | 2019/08/19 | CH2276 | Female | Two y/o | Treatment (Wk 3) | Treatment | Feed Day | No | 19:05 | 19:00 - 19:59 | Evening       | 37,6 | 56 | 31,2 | 31,2 | 18,75 | 549,01 | 115,54 |
|    | 2019/08/19 | CH2276 | Female | Two y/o | Treatment (Wk 3) | Treatment | Feed Day | No | 19:10 | 19:00 - 19:59 | Evening       | 37,6 | 77 | 34,0 | 34,0 | 18,75 | 574,39 | 118,49 |
|    | 2019/08/19 | CH2276 | Female | Two y/o | Treatment (Wk 3) | Treatment | Feed Day | No | 19:15 | 19:00 - 19:59 | Evening       | 37,5 | 65 | 31,8 | 31,8 | 18,65 | 561,12 | 116,20 |
|    | 2019/08/19 | CH2276 | Female | Two y/o | Treatment (Wk 3) | Treatment | Feed Day | No | 19:20 | 19:00 - 19:59 | Evening       | 37,5 | 65 | 33,4 | 33,4 | 18,65 | 561,12 | 117,88 |
|    | 2019/08/19 | CH2276 | Female | Two y/o | Treatment (Wk 3) | Treatment | Feed Day | No | 19:25 | 19:00 - 19:59 | Evening       | 37,5 | 84 | 73,6 | 73,6 | 18,65 | 581,01 | 145,18 |
|    | 2019/08/19 | CH2276 | Female | Two y/o | Treatment (Wk 3) | Treatment | Feed Day | No | 19:30 | 19:00 - 19:59 | Evening       | 37,4 | 59 | 38,6 | 38,6 | 18,55 | 553,30 | 122,86 |
|    | 2019/08/19 | CH2276 | Female | Two y/o | Treatment (Wk 3) | Treatment | Feed Day | No | 19:35 | 19:00 - 19:59 | Evening       | 37,4 | 95 | 51,8 | 51,8 | 18,55 | 590,14 | 133,01 |
|    | 2019/08/19 | CH2276 | Female | Two y/o | Treatment (Wk 3) | Treatment | Feed Day | No | 19:40 | 19:00 - 19:59 | Evening       | 37,4 | 62 | 25,4 | 25,4 | 18,55 | 557,33 | 108,49 |
|    | 2019/08/19 | CH2276 | Female | Two y/o | Treatment (Wk 3) | Treatment | Feed Day | No | 19:45 | 19:00 - 19:59 | Evening       | 37,4 | 67 | 25,6 | 25,6 | 18,55 | 563,53 | 108,76 |
|    | 2019/08/19 | CH2276 | Female | Two y/o | Treatment (Wk 3) | Treatment | Feed Day | No | 19:50 | 19:00 - 19:59 | Evening       | 37,3 | 69 | 24,0 | 24,0 | 18,46 | 565,86 | 106,55 |
|    | 2019/08/19 | CH2276 | Female | Two y/o | Treatment (Wk 3) | Treatment | Feed Day | No | 19:55 | 19:00 - 19:59 | Evening       | 37,1 | 60 | 31,2 | 31,2 | 18,26 | 554,67 | 115,54 |
|    | 2019/08/19 | CH2276 | Female | Two y/o | Treatment (Wk 3) | Treatment | Feed Day | No | 20:00 | 20:00 - 20:59 | Night         | 37,1 | 68 | 31,8 | 31,8 | 18,26 | 564,71 | 116,20 |
|    | 2019/08/19 | CH2276 | Female | Two y/o | Treatment (Wk 3) | Treatment | Feed Day | No | 20:05 | 20:00 - 20:59 | Night         | 37,0 | 65 | 30,8 | 30,8 | 18,16 | 561,12 | 115,10 |
|    | 2019/08/19 | CH2276 | Female | Two y/o | Treatment (Wk 3) | Treatment | Feed Day | No | 20:10 | 20:00 - 20:59 | Night         | 37,0 | 59 | 32,4 | 32,4 | 18,16 | 553,30 | 116,84 |
|    | 2019/08/19 | CH2276 | Female | Two y/o | Treatment (Wk 3) | Treatment | Feed Day | No | 20:15 | 20:00 - 20:59 | Night         | 37,0 | 73 | 39,0 | 39,0 | 18,16 | 570,27 | 123,22 |
|    | 2019/08/19 | CH2276 | Female | Two y/o | Treatment (Wk 3) | Treatment | Feed Day | No | 20:20 | 20:00 - 20:59 | Night         | 37,0 | 79 | 40,0 | 40,0 | 18,16 | 576,36 | 124,09 |
|    | 2019/08/19 | CH2276 | Female | Two y/o | Treatment (Wk 3) | Treatment | Feed Day | No | 20:25 | 20:00 - 20:59 | Night         | 37,0 | 63 | 32,4 | 32,4 | 18,16 | 558,62 | 116,84 |
|    | 2019/08/19 | CH2276 | Female | Two y/o | Treatment (Wk 3) | Treatment | Feed Day | No | 20:30 | 20:00 - 20:59 | Night         | 37,1 | 66 | 46,6 | 46,6 | 18,26 | 562,34 | 129,35 |
|    | 2019/08/19 | CH2276 | Female | Two y/o | Treatment (Wk 3) | Treatment | Feed Day | No | 20:35 | 20:00 - 20:59 | Night         | 37,1 | 94 | 35,6 | 35,6 | 18,26 | 589,37 | 120,08 |
|    | 2019/08/19 | CH2276 | Female | Two y/o | Treatment (Wk 3) | Treatment | Feed Day | No | 20:40 | 20:00 - 20:59 | Night         | 37,1 | 98 | 55,4 | 55,4 | 18,26 | 592,41 | 135,33 |
|    | 2019/08/19 | CH2276 | Female | Two y/o | Treatment (Wk 3) | Treatment | Feed Day | No | 20:45 | 20:00 - 20:59 | Night         | 37,2 | 66 | 57,8 | 57,8 | 18,36 | 562,34 | 136,80 |
|    | 2019/08/19 | CH2276 | Female | Two y/o | Treatment (Wk 3) | Treatment | Feed Day | No | 20:50 | 20:00 - 20:59 | Night         | 37,3 | 65 | 59,8 | 59,8 | 18,46 | 561,12 | 137,98 |
|    | 2019/08/19 | CH2276 | Female | Two y/o | Treatment (Wk 3) | Treatment | Feed Day | No | 20:55 | 20:00 - 20:59 | Night         | 37,4 | 66 | 49,0 | 49,0 | 18,55 | 562,34 | 131,09 |
|    | 2019/08/19 | CH2276 | Female | Two y/o | Treatment (Wk 3) | Treatment | Feed Day | No | 21:00 | 21:00 - 21:59 | Night         | 37,4 | 65 | 58,4 | 58,4 | 18,55 | 561,12 | 137,16 |
|    | 2019/08/19 | CH2276 | Female | Two y/o | Treatment (Wk 3) | Treatment | Feed Day | No | 21:05 | 21:00 - 21:59 | Night         | 37,5 | 65 | 55,2 | 55,2 | 18,65 | 561,12 | 135,21 |
|    | 2019/08/19 | CH2276 | Female | Two y/o | Treatment (Wk 3) | Treatment | Feed Day | No | 21:10 | 21:00 - 21:59 | Night         | 37,5 | 59 | 52,2 | 52,2 | 18,65 | 553,30 | 133,27 |
|    | 2019/08/19 | CH2276 | Female | Two y/o | Treatment (Wk 3) | Treatment | Feed Day | No | 21:15 | 21:00 - 21:59 | Night         | 37,6 | 68 | 51,6 | 51,6 | 18,75 | 564,71 | 132,87 |
|    | 2019/08/19 | CH2276 | Female | Two y/o | Treatment (Wk 3) | Treatment | Feed Day | No | 21:20 | 21:00 - 21:59 | Night         | 37,6 | 67 | 49,2 | 49,2 | 18,75 | 563,53 | 131,23 |
|    | 2019/08/19 | CH2276 | Female | Two y/o | Treatment (Wk 3) | Treatment | Feed Day | No | 21:25 | 21:00 - 21:59 | Night         | 37,6 | 67 | 54,4 | 54,4 | 18,75 | 563,53 | 134,70 |
|    | 2019/08/19 | CH2276 | Female | Two y/o | Treatment (Wk 3) | Treatment | Feed Day | No | 21:30 | 21:00 - 21:59 | Night         | 37,6 | 69 | 47,0 | 47,0 | 18,75 | 565,86 | 129,65 |
|    | 2019/08/19 | CH2276 | Female | Two y/o | Treatment (Wk 3) | Treatment | Feed Day | No | 21:35 | 21:00 - 21:59 | Night         | 37,6 | 93 | 37,6 | 37,6 | 18,75 | 588,58 | 121,96 |
|    | 2019/08/19 | CH2276 | Female | Two y/o | Treatment (Wk 3) | Treatment | Feed Day | No | 21:40 | 21:00 - 21:59 | Night         | 37,6 | 70 | 38,8 | 38,8 | 18,75 | 566,99 | 123,04 |
|    | 2019/08/19 | CH2276 | Female | Two y/o | Treatment (Wk 3) | Treatment | Feed Day | No | 21:45 | 21:00 - 21:59 | Night         | 37,6 | 65 | 47,6 | 47,6 | 18,75 | 561,12 | 130,09 |
|    | 2019/08/19 | CH2276 | Female | Two y/o | Treatment (Wk 3) | Treatment | Feed Day | No | 21:50 | 21:00 - 21:59 | Night         | 37,6 | 88 | 54,6 | 54,6 | 18,75 | 584,49 | 134,83 |
|    | 2019/08/19 | CH2276 | Female | Two y/o | Treatment (Wk 3) | Treatment | Feed Day | No | 21:55 | 21:00 - 21:59 | Night         | 37,6 | 89 | 49,4 | 49,4 | 18,75 | 585,33 | 131,37 |
|    | 2019/08/19 | CH2276 | Female | Two y/o | Treatment (Wk 3) | Treatment | Feed Day | No | 22:00 | 22:00 - 22:59 | Night         | 37,6 | 90 | 38,8 | 38,8 | 18,75 | 586,16 | 123,04 |
|    | 2019/08/19 | CH2276 | Female | Two y/o | Treatment (Wk 3) | Treatment | Feed Day | No | 22:05 | 22:00 - 22:59 | Night         | 37,6 | 91 | 43,0 | 43,0 | 18,75 | 586,98 | 126,58 |
|    | 2019/08/19 | CH2276 | Female | Two y/o | Treatment (Wk 3) | Treatment | Feed Day | No | 22:10 | 22:00 - 22:59 | Night         | 37,6 | 90 | 54,0 | 54,0 | 18,75 | 586,16 | 134,45 |
|    | 2019/08/19 | CH2276 | Female | Two y/o | Treatment (Wk 3) | Treatment | Feed Day | No | 22:15 | 22:00 - 22:59 | Night         | 37,6 | 68 | 50,8 | 50,8 | 18,75 | 564,71 | 132,33 |
|    | 2019/08/19 | CH2276 | Female | Two y/o | Treatment (Wk 3) | Treatment | Feed Day | No | 22:20 | 22:00 - 22:59 | Night         | 37,6 | 75 | 45,8 | 45,8 | 18,75 | 572,36 | 128,76 |
|    | 2019/08/19 | CH2276 | Female | Two y/o | Treatment (Wk 3) | Treatment | Feed Day | No | 22:25 | 22:00 - 22:59 | Night         | 37,6 | 63 | 47,6 | 47,6 | 18,75 | 558,62 | 130,09 |
|    | 2019/08/19 | CH2276 | Female | Two y/o | Treatment (Wk 3) | Treatment | Feed Day | No | 22:30 | 22:00 - 22:59 | Night         | 37,7 | 70 | 46,6 | 46,6 | 18,85 | 566,99 | 129,35 |
|    | 2019/08/19 | CH2276 | Female | Two y/o | Treatment (Wk 3) | Treatment | Feed Day | No | 22:35 | 22:00 - 22:59 | Night         | 37,7 | 90 | 40,4 | 40,4 | 18,85 | 586,16 | 124,43 |
|    | 2019/08/19 | CH2276 | Female | Two y/o | Treatment (Wk 3) | Treatment | Feed Day | No | 22:40 | 22:00 - 22:59 | Night         | 37,7 | 68 | 41,6 | 41,6 | 18,85 | 564,71 | 125,44 |
|    | 2019/08/19 | CH2276 | Female | Two y/o | Treatment (Wk 3) | Treatment | Feed Day | No | 22:45 | 22:00 - 22:59 | Night         | 37,7 | 94 | 46,4 | 46,4 | 18,85 | 589,37 | 129,21 |
|    | 2019/08/19 | CH2276 | Female | Two y/o | Treatment (Wk 3) | Treatment | Feed Day | No | 22:50 | 22:00 - 22:59 | Night         | 37,7 | 73 | 57,6 | 57,6 | 18,85 | 570,27 | 136,68 |
|    | 2019/08/19 | CH2276 | Female | Two y/o | Treatment (Wk 3) | Treatment | Feed Day | No | 22:55 | 22:00 - 22:59 | Night         | 37,8 | 96 | 42,0 | 42,0 | 18,95 | 590,91 | 125,77 |
|    | 2019/08/19 | CH2276 | Female | Two y/o | Treatment (Wk 3) | Treatment | Feed Day | No | 23:00 | 23:00 - 23:59 | Night         | 37,8 | 69 | 77,2 | 77,2 | 18,95 | 565,86 | 146,84 |
|    | 2019/08/19 | CH2276 | Female | Two y/o | Treatment (Wk 3) | Treatment | Feed Day | No | 23:05 | 23:00 - 23:59 | Night         | 37,8 | 88 | 30,6 | 30,6 | 18,95 | 584,49 | 114,87 |
|    | 2019/08/19 | CH2276 | Female | Two y/o | Treatment (Wk 3) | Treatment | Feed Day | No | 23:10 | 23:00 - 23:59 | Night         | 37,6 | 98 | 31,0 | 31,0 | 18,75 | 592,41 | 115,32 |
|    | 2019/08/19 | CH2276 | Female | Two y/o | Treatment (Wk 3) | Treatment | Feed Day | No | 23:15 | 23:00 - 23:59 | Night         | 37,4 | 61 | 28,8 | 28,8 | 18,55 | 556,01 | 112,79 |
|    | 2019/08/19 | CH2276 | Female | Two y/o | Treatment (Wk 3) | Treatment | Feed Day | No | 23:20 | 23:00 - 23:59 | Night         | 37,1 | 62 | 31,4 | 31,4 | 18,26 | 557,33 | 115,76 |
|    | 2019/08/19 | CH2276 | Female | Two y/o | Treatment (Wk 3) | Treatment | Feed Day | No | 23:25 | 23:00 - 23:59 | Night         | 37,0 | 69 | 28,8 | 28,8 | 18,16 | 565,86 | 112,79 |
|    | 2019/08/19 | CH2276 | Female | Two y/o | Treatment (Wk 3) | Treatment | Feed Day | No | 23:30 | 23:00 - 23:59 | Night         | 36,9 | 62 | 27,4 | 27,4 | 18,06 | 557,33 | 111,09 |
|    | 2019/08/19 | CH2276 | Female | Two y/o | Treatment (Wk 3) | Treatment | Feed Day | No | 23:35 | 23:00 - 23:59 | Night         | 36,8 | 66 | 22,2 | 22,2 | 17,96 | 562,34 | 103,88 |
|    | 2019/08/19 | CH2276 | Female | Two y/o | Treatment (Wk 3) | Treatment | Feed Day | No | 23:40 | 23:00 - 23:59 | Night         | 36,7 | 56 | 28,4 | 28,4 | 17,87 | 549,01 | 112,31 |
|    | 2019/08/19 | CH2276 | Female | Two y/o | Treatment (Wk 3) | Treatment | Feed Day | No | 23:45 | 23:00 - 23:59 | Night         | 36,7 | 69 | 28,8 | 28,8 | 17,87 | 565,86 | 112,79 |
|    | 2019/08/19 | CH2276 | Female | Two y/o | Treatment (Wk 3) | Treatment | Feed Day | No | 23:50 | 23:00 - 23:59 | Night         | 36,7 | 88 | 24,6 | 24,6 | 17,87 | 584,49 | 107,39 |
|    | 2019/08/19 | CH2276 | Female | Two y/o | Treatment (Wk 3) | Treatment | Feed Day | No | 23:55 | 23:00 - 23:59 | Night         | 36,7 | 82 | 29,6 | 29,6 | 17,87 | 579,19 | 113,73 |
| 63 | 2019/08/20 | CH2276 | Female | Two y/o | Treatment (Wk 3) | Treatment | Feed Day | No | 00:00 | 00:00 - 00:59 | Early Morning | 36,7 | 55 | 27,4 | 27,4 | 17,87 | 547,52 | 111,09 |
|    | 2019/08/20 | CH2276 | Female | Two y/o | Treatment (Wk 3) | Treatment | Feed Day | No | 00:05 | 00:00 - 00:59 | Early Morning | 36,7 | 90 | 27,8 | 27,8 | 17,87 | 586,16 | 111,58 |
|    | 2019/08/20 | CH2276 | Female | Two y/o | Treatment (Wk 3) | Treatment | Feed Day | No | 00:10 | 00:00 - 00:59 | Early Morning | 36,7 | 77 | 29,8 | 29,8 | 17,87 | 574,39 | 113,97 |
|    | 2019/08/20 | CH2276 | Female | Two y/o | Treatment (Wk 3) | Treatment | Feed Day | No | 00:15 | 00:00 - 00:59 | Early Morning | 36,6 | 87 | 28,0 | 28,0 | 17,77 | 583,64 | 111,83 |
|    | 2019/08/20 | CH2276 | Female | Two y/o | Treatment (Wk 3) | Treatment | Feed Day | No | 00:20 | 00:00 - 00:59 | Early Morning | 36,6 | 64 | 34,0 | 34,0 | 17,77 |        |        |



|            |        |        |         |                  |           |          |    |       |               |               |      |     |        |       |       |        |        |
|------------|--------|--------|---------|------------------|-----------|----------|----|-------|---------------|---------------|------|-----|--------|-------|-------|--------|--------|
| 2019/08/20 | CH2276 | Female | Two y/o | Treatment (Wk 3) | Treatment | Feed Day | No | 00:25 | 00:00 - 00:59 | Early Morning | 36,6 | 84  | 32,0   | 32,0  | 17,77 | 581,01 | 116,41 |
| 2019/08/20 | CH2276 | Female | Two y/o | Treatment (Wk 3) | Treatment | Feed Day | No | 00:30 | 00:00 - 00:59 | Early Morning | 36,6 | 93  | 30,0   | 30,0  | 17,77 | 588,58 | 114,20 |
| 2019/08/20 | CH2276 | Female | Two y/o | Treatment (Wk 3) | Treatment | Feed Day | No | 00:35 | 00:00 - 00:59 | Early Morning | 36,6 | 63  | 41,6   | 41,6  | 17,77 | 558,62 | 125,44 |
| 2019/08/20 | CH2276 | Female | Two y/o | Treatment (Wk 3) | Treatment | Feed Day | No | 00:40 | 00:00 - 00:59 | Early Morning | 36,7 | 92  | 50,0   | 50,0  | 17,87 | 587,78 | 131,79 |
| 2019/08/20 | CH2276 | Female | Two y/o | Treatment (Wk 3) | Treatment | Feed Day | No | 00:45 | 00:00 - 00:59 | Early Morning | 36,9 | 112 | 54,4   | 54,4  | 18,06 | 601,96 | 134,70 |
| 2019/08/20 | CH2276 | Female | Two y/o | Treatment (Wk 3) | Treatment | Feed Day | No | 00:50 | 00:00 - 00:59 | Early Morning | 37,0 | 93  | 46,4   | 46,4  | 18,16 | 588,58 | 129,21 |
| 2019/08/20 | CH2276 | Female | Two y/o | Treatment (Wk 3) | Treatment | Feed Day | No | 00:55 | 00:00 - 00:59 | Early Morning | 37,0 | 62  | 34,4   | 34,4  | 18,16 | 557,33 | 118,90 |
| 2019/08/20 | CH2276 | Female | Two y/o | Treatment (Wk 3) | Treatment | Feed Day | No | 01:00 | 01:00 - 01:59 | Early Morning | 37,1 | 82  | 32,0   | 32,0  | 18,26 | 579,19 | 116,41 |
| 2019/08/20 | CH2276 | Female | Two y/o | Treatment (Wk 3) | Treatment | Feed Day | No | 01:05 | 01:00 - 01:59 | Early Morning | 37,1 | 68  | 28,8   | 28,8  | 18,26 | 564,71 | 112,79 |
| 2019/08/20 | CH2276 | Female | Two y/o | Treatment (Wk 3) | Treatment | Feed Day | No | 01:10 | 01:00 - 01:59 | Early Morning | 37,2 | 85  | 56,4   | 56,4  | 18,36 | 581,90 | 135,95 |
| 2019/08/20 | CH2276 | Female | Two y/o | Treatment (Wk 3) | Treatment | Feed Day | No | 01:15 | 01:00 - 01:59 | Early Morning | 37,3 | 62  | 44,4   | 44,4  | 18,46 | 557,33 | 127,69 |
| 2019/08/20 | CH2276 | Female | Two y/o | Treatment (Wk 3) | Treatment | Feed Day | No | 01:20 | 01:00 - 01:59 | Early Morning | 37,3 | 62  | 32,2   | 32,2  | 18,46 | 557,33 | 116,63 |
| 2019/08/20 | CH2276 | Female | Two y/o | Treatment (Wk 3) | Treatment | Feed Day | No | 01:25 | 01:00 - 01:59 | Early Morning | 37,3 | 64  | 29,4   | 29,4  | 18,46 | 559,88 | 113,50 |
| 2019/08/20 | CH2276 | Female | Two y/o | Treatment (Wk 3) | Treatment | Feed Day | No | 01:30 | 01:00 - 01:59 | Early Morning | 37,3 | 59  | 27,6   | 27,6  | 18,46 | 553,30 | 111,33 |
| 2019/08/20 | CH2276 | Female | Two y/o | Treatment (Wk 3) | Treatment | Feed Day | No | 01:35 | 01:00 - 01:59 | Early Morning | 37,3 | 58  | 24,8   | 24,8  | 18,46 | 551,90 | 107,67 |
| 2019/08/20 | CH2276 | Female | Two y/o | Treatment (Wk 3) | Treatment | Feed Day | No | 01:40 | 01:00 - 01:59 | Early Morning | 37,3 | 65  | 26,0   | 26,0  | 18,46 | 561,12 | 109,29 |
| 2019/08/20 | CH2276 | Female | Two y/o | Treatment (Wk 3) | Treatment | Feed Day | No | 01:45 | 01:00 - 01:59 | Early Morning | 37,2 | 62  | 32,2   | 32,2  | 18,36 | 557,33 | 116,63 |
| 2019/08/20 | CH2276 | Female | Two y/o | Treatment (Wk 3) | Treatment | Feed Day | No | 01:50 | 01:00 - 01:59 | Early Morning | 37,2 | 60  | 36,2   | 36,2  | 18,36 | 554,67 | 120,65 |
| 2019/08/20 | CH2276 | Female | Two y/o | Treatment (Wk 3) | Treatment | Feed Day | No | 01:55 | 01:00 - 01:59 | Early Morning | 37,2 | 63  | 32,6   | 32,6  | 18,36 | 558,62 | 117,05 |
| 2019/08/20 | CH2276 | Female | Two y/o | Treatment (Wk 3) | Treatment | Feed Day | No | 02:00 | 02:00 - 02:59 | Early Morning | 37,1 | 64  | 33,8   | 33,8  | 18,26 | 559,88 | 118,29 |
| 2019/08/20 | CH2276 | Female | Two y/o | Treatment (Wk 3) | Treatment | Feed Day | No | 02:05 | 02:00 - 02:59 | Early Morning | 37,1 | 59  | 32,0   | 32,0  | 18,26 | 553,30 | 116,41 |
| 2019/08/20 | CH2276 | Female | Two y/o | Treatment (Wk 3) | Treatment | Feed Day | No | 02:10 | 02:00 - 02:59 | Early Morning | 37,0 | 58  | 32,4   | 32,4  | 18,16 | 551,90 | 116,84 |
| 2019/08/20 | CH2276 | Female | Two y/o | Treatment (Wk 3) | Treatment | Feed Day | No | 02:15 | 02:00 - 02:59 | Early Morning | 37,0 | 57  | 39,2   | 39,2  | 18,16 | 550,47 | 123,39 |
| 2019/08/20 | CH2276 | Female | Two y/o | Treatment (Wk 3) | Treatment | Feed Day | No | 02:20 | 02:00 - 02:59 | Early Morning | 37,0 | 98  | 42,0   | 42,0  | 18,16 | 592,41 | 125,77 |
| 2019/08/20 | CH2276 | Female | Two y/o | Treatment (Wk 3) | Treatment | Feed Day | No | 02:25 | 02:00 - 02:59 | Early Morning | 37,1 | 125 | 38,2   | 38,2  | 18,26 | 609,60 | 122,50 |
| 2019/08/20 | CH2276 | Female | Two y/o | Treatment (Wk 3) | Treatment | Feed Day | No | 02:30 | 02:00 - 02:59 | Early Morning | 37,1 | 90  | 38,0   | 38,0  | 18,26 | 586,16 | 122,32 |
| 2019/08/20 | CH2276 | Female | Two y/o | Treatment (Wk 3) | Treatment | Feed Day | No | 02:35 | 02:00 - 02:59 | Early Morning | 37,3 |     | 40,4   | 40,4  | 18,46 |        | 124,43 |
| 2019/08/20 | CH2276 | Female | Two y/o | Treatment (Wk 3) | Treatment | Feed Day | No | 02:40 | 02:00 - 02:59 | Early Morning | 37,3 | 69  | 53,2   | 53,2  | 18,46 | 565,86 | 133,93 |
| 2019/08/20 | CH2276 | Female | Two y/o | Treatment (Wk 3) | Treatment | Feed Day | No | 02:45 | 02:00 - 02:59 | Early Morning | 37,3 | 77  | 78,8   | 78,8  | 18,46 | 574,39 | 147,55 |
| 2019/08/20 | CH2276 | Female | Two y/o | Treatment (Wk 3) | Treatment | Feed Day | No | 02:50 | 02:00 - 02:59 | Early Morning | 37,3 | 110 | 71,6   | 71,6  | 18,46 | 600,69 | 144,22 |
| 2019/08/20 | CH2276 | Female | Two y/o | Treatment (Wk 3) | Treatment | Feed Day | No | 02:55 | 02:00 - 02:59 | Early Morning | 37,2 | 70  | 45,8   | 45,8  | 18,36 | 566,99 | 128,76 |
| 2019/08/20 | CH2276 | Female | Two y/o | Treatment (Wk 3) | Treatment | Feed Day | No | 03:00 | 03:00 - 03:59 | Early Morning | 37,2 | 125 | 79,2   | 79,2  | 18,36 | 609,60 | 147,73 |
| 2019/08/20 | CH2276 | Female | Two y/o | Treatment (Wk 3) | Treatment | Feed Day | No | 03:05 | 03:00 - 03:59 | Early Morning | 37,3 |     | 88,4   | 88,4  | 18,46 |        | 151,55 |
| 2019/08/20 | CH2276 | Female | Two y/o | Treatment (Wk 3) | Treatment | Feed Day | No | 03:10 | 03:00 - 03:59 | Early Morning | 37,3 | 86  | 176,6  | 176,6 | 18,46 | 582,77 | 175,74 |
| 2019/08/20 | CH2276 | Female | Two y/o | Treatment (Wk 3) | Treatment | Feed Day | No | 03:15 | 03:00 - 03:59 | Early Morning | 37,3 | 92  | 61,8   | 61,8  | 18,46 | 587,78 | 139,12 |
| 2019/08/20 | CH2276 | Female | Two y/o | Treatment (Wk 3) | Treatment | Feed Day | No | 03:20 | 03:00 - 03:59 | Early Morning | 37,4 |     | 539,2  | 539,2 | 18,55 |        | 215,23 |
| 2019/08/20 | CH2276 | Female | Two y/o | Treatment (Wk 3) | Treatment | Feed Day | No | 03:25 | 03:00 - 03:59 | Early Morning | 37,4 | 98  | 82,2   | 82,2  | 18,55 | 592,41 | 149,02 |
| 2019/08/20 | CH2276 | Female | Two y/o | Treatment (Wk 3) | Treatment | Feed Day | No | 03:30 | 03:00 - 03:59 | Early Morning | 37,4 | 148 | 37,0   | 37,0  | 18,55 | 620,97 | 121,40 |
| 2019/08/20 | CH2276 | Female | Two y/o | Treatment (Wk 3) | Treatment | Feed Day | No | 03:35 | 03:00 - 03:59 | Early Morning | 37,2 | 71  | 34,8   | 34,8  | 18,36 | 568,10 | 119,29 |
| 2019/08/20 | CH2276 | Female | Two y/o | Treatment (Wk 3) | Treatment | Feed Day | No | 03:40 | 03:00 - 03:59 | Early Morning | 37,1 | 60  | 749,2  | 749,2 | 18,26 | 554,67 | 226,98 |
| 2019/08/20 | CH2276 | Female | Two y/o | Treatment (Wk 3) | Treatment | Feed Day | No | 03:45 | 03:00 - 03:59 | Early Morning | 37,3 |     | 373,6  | 373,6 | 18,46 |        | 202,19 |
| 2019/08/20 | CH2276 | Female | Two y/o | Treatment (Wk 3) | Treatment | Feed Day | No | 03:50 | 03:00 - 03:59 | Early Morning | 37,4 | 113 | 154,2  | 154,2 | 18,55 | 602,58 | 170,99 |
| 2019/08/20 | CH2276 | Female | Two y/o | Treatment (Wk 3) | Treatment | Feed Day | No | 03:55 | 03:00 - 03:59 | Early Morning | 37,5 | 102 | 99,4   | 99,4  | 18,65 | 595,30 | 155,63 |
| 2019/08/20 | CH2276 | Female | Two y/o | Treatment (Wk 3) | Treatment | Feed Day | No | 04:00 | 04:00 - 04:59 | Morning       | 37,5 | 97  | 157,4  | 157,4 | 18,65 | 591,66 | 171,71 |
| 2019/08/20 | CH2276 | Female | Two y/o | Treatment (Wk 3) | Treatment | Feed Day | No | 04:05 | 04:00 - 04:59 | Morning       | 37,6 | 104 | 151,4  | 151,4 | 18,75 | 596,69 | 170,34 |
| 2019/08/20 | CH2276 | Female | Two y/o | Treatment (Wk 3) | Treatment | Feed Day | No | 04:10 | 04:00 - 04:59 | Morning       | 37,6 | 73  | 182,4  | 182,4 | 18,75 | 570,27 | 176,88 |
| 2019/08/20 | CH2276 | Female | Two y/o | Treatment (Wk 3) | Treatment | Feed Day | No | 04:15 | 04:00 - 04:59 | Morning       | 37,6 | 115 | 254,4  | 254,4 | 18,75 | 603,82 | 188,60 |
| 2019/08/20 | CH2276 | Female | Two y/o | Treatment (Wk 3) | Treatment | Feed Day | No | 04:20 | 04:00 - 04:59 | Morning       | 37,7 |     | 110,8  | 110,8 | 18,85 |        | 159,42 |
| 2019/08/20 | CH2276 | Female | Two y/o | Treatment (Wk 3) | Treatment | Feed Day | No | 04:25 | 04:00 - 04:59 | Morning       | 37,6 | 97  | 34,8   | 34,8  | 18,75 | 591,66 | 119,29 |
| 2019/08/20 | CH2276 | Female | Two y/o | Treatment (Wk 3) | Treatment | Feed Day | No | 04:30 | 04:00 - 04:59 | Morning       | 37,5 | 84  | 40,4   | 40,4  | 18,65 | 581,01 | 124,43 |
| 2019/08/20 | CH2276 | Female | Two y/o | Treatment (Wk 3) | Treatment | Feed Day | No | 04:35 | 04:00 - 04:59 | Morning       | 37,6 |     | 37,8   | 37,8  | 18,75 |        | 122,14 |
| 2019/08/20 | CH2276 | Female | Two y/o | Treatment (Wk 3) | Treatment | Feed Day | No | 04:40 | 04:00 - 04:59 | Morning       | 37,6 | 78  | 37,2   | 37,2  | 18,75 | 575,38 | 121,59 |
| 2019/08/20 | CH2276 | Female | Two y/o | Treatment (Wk 3) | Treatment | Feed Day | No | 04:45 | 04:00 - 04:59 | Morning       | 37,4 | 57  | 40,6   | 40,6  | 18,55 | 550,47 | 124,60 |
| 2019/08/20 | CH2276 | Female | Two y/o | Treatment (Wk 3) | Treatment | Feed Day | No | 04:50 | 04:00 - 04:59 | Morning       | 37,3 | 90  | 32,0   | 32,0  | 18,46 | 586,16 | 116,41 |
| 2019/08/20 | CH2276 | Female | Two y/o | Treatment (Wk 3) | Treatment | Feed Day | No | 04:55 | 04:00 - 04:59 | Morning       | 37,2 | 65  | 29,6   | 29,6  | 18,36 | 561,12 | 113,73 |
| 2019/08/20 | CH2276 | Female | Two y/o | Treatment (Wk 3) | Treatment | Feed Day | No | 05:00 | 05:00 - 05:59 | Morning       | 37,1 | 64  | 22,0   | 22,0  | 18,26 | 559,88 | 103,57 |
| 2019/08/20 | CH2276 | Female | Two y/o | Treatment (Wk 3) | Treatment | Feed Day | No | 05:05 | 05:00 - 05:59 | Morning       | 37,1 | 58  | 41,6   | 41,6  | 18,26 | 551,90 | 125,44 |
| 2019/08/20 | CH2276 | Female | Two y/o | Treatment (Wk 3) | Treatment | Feed Day | No | 05:10 | 05:00 - 05:59 | Morning       | 37,1 |     | 52,4   | 52,4  | 18,26 |        | 133,41 |
| 2019/08/20 | CH2276 | Female | Two y/o | Treatment (Wk 3) | Treatment | Feed Day | No | 05:15 | 05:00 - 05:59 | Morning       | 37,3 |     | 188,4  | 188,4 | 18,46 |        | 178,02 |
| 2019/08/20 | CH2276 | Female | Two y/o | Treatment (Wk 3) | Treatment | Feed Day | No | 05:20 | 05:00 - 05:59 | Morning       | 37,4 | 84  | 534,4  | 534,4 | 18,55 | 581,01 | 214,92 |
| 2019/08/20 | CH2276 | Female | Two y/o | Treatment (Wk 3) | Treatment | Feed Day | No | 05:25 | 05:00 - 05:59 | Morning       | 37,4 |     | 41,4   | 41,4  | 18,55 |        | 125,27 |
| 2019/08/20 | CH2276 | Female | Two y/o | Treatment (Wk 3) | Treatment | Feed Day | No | 05:30 | 05:00 - 05:59 | Morning       | 37,5 | 113 | 311,2  | 311,2 | 18,65 | 602,58 | 195,72 |
| 2019/08/20 | CH2276 | Female | Two y/o | Treatment (Wk 3) | Treatment | Feed Day | No | 05:35 | 05:00 - 05:59 | Morning       | 37,6 |     | 80,6   | 80,6  | 18,75 |        | 148,34 |
| 2019/08/20 | CH2276 | Female | Two y/o | Treatment (Wk 3) | Treatment | Feed Day | No | 05:40 | 05:00 - 05:59 | Morning       | 37,6 | 101 | 100,2  | 100,2 | 18,75 | 594,59 | 155,91 |
| 2019/08/20 | CH2276 | Female | Two y/o | Treatment (Wk 3) | Treatment | Feed Day | No | 05:45 | 05:00 - 05:59 | Morning       | 37,7 | 103 | 170,0  | 170,0 | 18,85 | 596,00 | 174,41 |
| 2019/08/20 | CH2276 | Female | Two y/o | Treatment (Wk 3) | Treatment | Feed Day | No | 05:50 | 05:00 - 05:59 | Morning       | 37,7 | 123 | 113,4  | 113,4 | 18,85 | 608,49 | 160,23 |
| 2019/08/20 | CH2276 | Female | Two y/o | Treatment (Wk 3) | Treatment | Feed Day | No | 05:55 | 05:00 - 05:59 | Morning       | 37,8 | 134 | 91,2   | 91,2  | 18,95 | 614,33 | 152,63 |
| 2019/08/20 | CH2276 | Female | Two y/o | Treatment (Wk 3) | Treatment | Feed Day | No | 06:00 | 06:00 - 06:59 | Morning       | 37,9 | 110 | 138,2  | 138,2 | 19,05 | 600,69 | 167,15 |
| 2019/08/20 | CH2276 | Female | Two y/o | Treatment (Wk 3) | Treatment | Feed Day | No | 06:05 | 06:00 - 06:59 | Morning       | 37,9 |     | 326,8  | 326,8 | 19,05 |        | 197,45 |
| 2019/08/20 | CH2276 | Female | Two y/o | Treatment (Wk 3) | Treatment | Feed Day | No | 06:10 | 06:00 - 06:59 | Morning       | 38,0 |     | 1020,0 |       | 19,15 |        |        |



|            |        |        |         |                  |           |          |     |       |               |              |      |     |       |       |       |        |
|------------|--------|--------|---------|------------------|-----------|----------|-----|-------|---------------|--------------|------|-----|-------|-------|-------|--------|
| 2019/08/20 | CH2276 | Female | Two y/o | Treatment (Wk 3) | Treatment | Feed Day | No  | 06:15 | 06:00 - 06:59 | Morning      | 38,0 |     | 404,0 | 404,0 | 19,15 | 204,97 |
| 2019/08/20 | CH2276 | Female | Two y/o | Treatment (Wk 3) | Treatment | Feed Day | No  | 06:20 | 06:00 - 06:59 | Morning      | 38,0 | 129 | 199,0 | 199,0 | 19,15 | 611,75 |
| 2019/08/20 | CH2276 | Female | Two y/o | Treatment (Wk 3) | Treatment | Feed Day | No  | 06:25 | 06:00 - 06:59 | Morning      | 38,0 | 143 | 141,8 | 141,8 | 19,15 | 618,69 |
| 2019/08/20 | CH2276 | Female | Two y/o | Treatment (Wk 3) | Treatment | Feed Day | No  | 06:30 | 06:00 - 06:59 | Morning      | 38,0 | 182 | 310,8 | 310,8 | 19,15 | 634,31 |
| 2019/08/20 | CH2276 | Female | Two y/o | Treatment (Wk 3) | Treatment | Feed Day | No  | 06:35 | 06:00 - 06:59 | Morning      | 38,0 | 56  | 51,6  | 51,6  | 19,15 | 549,01 |
| 2019/08/20 | CH2276 | Female | Two y/o | Treatment (Wk 3) | Treatment | Feed Day | No  | 06:40 | 06:00 - 06:59 | Morning      | 37,8 | 70  | 73,2  | 73,2  | 18,95 | 566,99 |
| 2019/08/20 | CH2276 | Female | Two y/o | Treatment (Wk 3) | Treatment | Feed Day | No  | 06:45 | 06:00 - 06:59 | Morning      | 37,8 | 61  | 63,6  | 63,6  | 18,95 | 556,01 |
| 2019/08/20 | CH2276 | Female | Two y/o | Treatment (Wk 3) | Treatment | Feed Day | No  | 06:50 | 06:00 - 06:59 | Morning      | 37,8 | 60  | 221,0 | 221,0 | 18,95 | 554,67 |
| 2019/08/20 | CH2276 | Female | Two y/o | Treatment (Wk 3) | Treatment | Feed Day | No  | 06:55 | 06:00 - 06:59 | Morning      | 37,8 | 70  | 238,0 | 238,0 | 18,95 | 566,99 |
| 2019/08/20 | CH2276 | Female | Two y/o | Treatment (Wk 3) | Treatment | Feed Day | No  | 07:00 | 07:00 - 07:59 | Morning      | 37,8 | 120 | 118,6 | 118,6 | 18,95 | 606,78 |
| 2019/08/20 | CH2276 | Female | Two y/o | Treatment (Wk 3) | Treatment | Feed Day | No  | 07:05 | 07:00 - 07:59 | Morning      | 37,8 | 72  | 206,0 | 206,0 | 18,95 | 569,20 |
| 2019/08/20 | CH2276 | Female | Two y/o | Treatment (Wk 3) | Treatment | Feed Day | No  | 07:10 | 07:00 - 07:59 | Morning      | 37,8 | 106 | 136,6 | 136,6 | 18,95 | 598,06 |
| 2019/08/20 | CH2276 | Female | Two y/o | Treatment (Wk 3) | Treatment | Feed Day | No  | 07:15 | 07:00 - 07:59 | Morning      | 37,8 | 137 | 576,4 | 576,4 | 18,95 | 615,83 |
| 2019/08/20 | CH2276 | Female | Two y/o | Treatment (Wk 3) | Treatment | Feed Day | No  | 07:20 | 07:00 - 07:59 | Morning      | 37,8 | 92  | 210,0 | 210,0 | 18,95 | 587,78 |
| 2019/08/20 | CH2276 | Female | Two y/o | Treatment (Wk 3) | Treatment | Feed Day | No  | 07:25 | 07:00 - 07:59 | Morning      | 37,8 |     | 68,2  | 68,2  | 18,95 | 142,53 |
| 2019/08/20 | CH2276 | Female | Two y/o | Treatment (Wk 3) | Treatment | Feed Day | No  | 07:30 | 07:00 - 07:59 | Morning      | 37,7 | 65  | 104,2 | 104,2 | 18,85 | 561,12 |
| 2019/08/20 | CH2276 | Female | Two y/o | Treatment (Wk 3) | Treatment | Feed Day | No  | 07:35 | 07:00 - 07:59 | Morning      | 37,7 | 96  | 65,6  | 65,6  | 18,85 | 590,91 |
| 2019/08/20 | CH2276 | Female | Two y/o | Treatment (Wk 3) | Treatment | Feed Day | No  | 07:40 | 07:00 - 07:59 | Morning      | 37,6 | 101 | 75,8  | 75,8  | 18,75 | 594,59 |
| 2019/08/20 | CH2276 | Female | Two y/o | Treatment (Wk 3) | Treatment | Feed Day | No  | 07:45 | 07:00 - 07:59 | Morning      | 37,6 | 71  | 100,8 | 100,8 | 18,75 | 568,10 |
| 2019/08/20 | CH2276 | Female | Two y/o | Treatment (Wk 3) | Treatment | Feed Day | No  | 07:50 | 07:00 - 07:59 | Morning      | 37,7 | 197 | 189,8 | 189,8 | 18,85 | 639,25 |
| 2019/08/20 | CH2276 | Female | Two y/o | Treatment (Wk 3) | Treatment | Feed Day | No  | 07:55 | 07:00 - 07:59 | Morning      | 38,0 | 95  | 60,4  | 60,4  | 19,15 | 590,14 |
| 2019/08/20 | CH2276 | Female | Two y/o | Treatment (Wk 3) | Treatment | Feed Day | No  | 08:00 | 08:00 - 08:59 | Late Morning | 37,9 | 88  | 68,6  | 68,6  | 19,05 | 584,49 |
| 2019/08/20 | CH2276 | Female | Two y/o | Treatment (Wk 3) | Treatment | Feed Day | No  | 08:05 | 08:00 - 08:59 | Late Morning | 37,9 | 62  | 69,4  | 69,4  | 19,05 | 557,33 |
| 2019/08/20 | CH2276 | Female | Two y/o | Treatment (Wk 3) | Treatment | Feed Day | No  | 08:10 | 08:00 - 08:59 | Late Morning | 37,8 | 67  | 72,6  | 72,6  | 18,95 | 563,53 |
| 2019/08/20 | CH2276 | Female | Two y/o | Treatment (Wk 3) | Treatment | Feed Day | No  | 08:15 | 08:00 - 08:59 | Late Morning | 37,8 | 105 | 140,6 | 140,6 | 18,95 | 597,38 |
| 2019/08/20 | CH2276 | Female | Two y/o | Treatment (Wk 3) | Treatment | Feed Day | No  | 08:20 | 08:00 - 08:59 | Late Morning | 37,7 | 62  | 57,4  | 57,4  | 18,85 | 557,33 |
| 2019/08/20 | CH2276 | Female | Two y/o | Treatment (Wk 3) | Treatment | Feed Day | No  | 08:25 | 08:00 - 08:59 | Late Morning | 37,5 | 62  | 47,2  | 47,2  | 18,65 | 557,33 |
| 2019/08/20 | CH2276 | Female | Two y/o | Treatment (Wk 3) | Treatment | Feed Day | Yes | 08:30 | 08:00 - 08:59 | Late Morning | 37,6 | 76  | 96,8  | 96,8  | 18,75 | 573,39 |
| 2019/08/20 | CH2276 | Female | Two y/o | Treatment (Wk 3) | Treatment | Feed Day | Yes | 08:35 | 08:00 - 08:59 | Late Morning | 37,6 | 107 | 275,0 | 275,0 | 18,75 | 598,73 |
| 2019/08/20 | CH2276 | Female | Two y/o | Treatment (Wk 3) | Treatment | Feed Day | Yes | 08:40 | 08:00 - 08:59 | Late Morning | 37,8 | 172 | 44,2  | 44,2  | 18,95 | 630,73 |
| 2019/08/20 | CH2276 | Female | Two y/o | Treatment (Wk 3) | Treatment | Feed Day | Yes | 08:45 | 08:00 - 08:59 | Late Morning | 37,9 | 103 | 28,4  | 28,4  | 19,05 | 596,00 |
| 2019/08/20 | CH2276 | Female | Two y/o | Treatment (Wk 3) | Treatment | Feed Day | Yes | 08:50 | 08:00 - 08:59 | Late Morning | 37,7 |     | 60,4  | 60,4  | 18,85 | 138,32 |
| 2019/08/20 | CH2276 | Female | Two y/o | Treatment (Wk 3) | Treatment | Feed Day | Yes | 08:55 | 08:00 - 08:59 | Late Morning | 37,6 | 103 | 88,0  | 88,0  | 18,75 | 596,00 |
| 2019/08/20 | CH2276 | Female | Two y/o | Treatment (Wk 3) | Treatment | Feed Day | Yes | 09:00 | 09:00 - 09:59 | Late Morning | 37,6 | 91  | 109,4 | 109,4 | 18,75 | 586,98 |
| 2019/08/20 | CH2276 | Female | Two y/o | Treatment (Wk 3) | Treatment | Feed Day | Yes | 09:05 | 09:00 - 09:59 | Late Morning | 37,6 | 91  | 100,6 | 100,6 | 18,75 | 586,98 |
| 2019/08/20 | CH2276 | Female | Two y/o | Treatment (Wk 3) | Treatment | Feed Day | Yes | 09:10 | 09:00 - 09:59 | Late Morning | 37,6 | 114 | 79,8  | 79,8  | 18,75 | 603,20 |
| 2019/08/20 | CH2276 | Female | Two y/o | Treatment (Wk 3) | Treatment | Feed Day | Yes | 09:15 | 09:00 - 09:59 | Late Morning | 37,6 | 91  | 143,0 | 143,0 | 18,75 | 586,98 |
| 2019/08/20 | CH2276 | Female | Two y/o | Treatment (Wk 3) | Treatment | Feed Day | Yes | 09:20 | 09:00 - 09:59 | Late Morning | 37,6 | 88  | 143,6 | 143,6 | 18,75 | 584,49 |
| 2019/08/20 | CH2276 | Female | Two y/o | Treatment (Wk 3) | Treatment | Feed Day | Yes | 09:25 | 09:00 - 09:59 | Late Morning | 37,6 |     | 43,8  | 43,8  | 18,75 | 127,22 |
| 2019/08/20 | CH2276 | Female | Two y/o | Treatment (Wk 3) | Treatment | Feed Day | No  | 09:30 | 09:00 - 09:59 | Late Morning | 37,6 | 94  | 60,8  | 60,8  | 18,75 | 589,37 |
| 2019/08/20 | CH2276 | Female | Two y/o | Treatment (Wk 3) | Treatment | Feed Day | No  | 09:35 | 09:00 - 09:59 | Late Morning | 37,5 | 126 | 41,0  | 41,0  | 18,65 | 610,14 |
| 2019/08/20 | CH2276 | Female | Two y/o | Treatment (Wk 3) | Treatment | Feed Day | No  | 09:40 | 09:00 - 09:59 | Late Morning | 37,5 | 69  | 43,2  | 43,2  | 18,65 | 565,86 |
| 2019/08/20 | CH2276 | Female | Two y/o | Treatment (Wk 3) | Treatment | Feed Day | No  | 09:45 | 09:00 - 09:59 | Late Morning | 37,5 | 67  | 52,4  | 52,4  | 18,65 | 563,53 |
| 2019/08/20 | CH2276 | Female | Two y/o | Treatment (Wk 3) | Treatment | Feed Day | No  | 09:50 | 09:00 - 09:59 | Late Morning | 37,5 | 81  | 65,0  | 65,0  | 18,65 | 578,26 |
| 2019/08/20 | CH2276 | Female | Two y/o | Treatment (Wk 3) | Treatment | Feed Day | No  | 09:55 | 09:00 - 09:59 | Late Morning | 37,5 |     | 44,2  | 44,2  | 18,65 | 127,53 |
| 2019/08/20 | CH2276 | Female | Two y/o | Treatment (Wk 3) | Treatment | Feed Day | No  | 10:00 | 10:00 - 10:59 | Late Morning | 37,5 | 85  | 39,6  | 39,6  | 18,65 | 581,90 |
| 2019/08/20 | CH2276 | Female | Two y/o | Treatment (Wk 3) | Treatment | Feed Day | No  | 10:05 | 10:00 - 10:59 | Late Morning | 37,5 | 86  | 60,0  | 60,0  | 18,65 | 582,77 |
| 2019/08/20 | CH2276 | Female | Two y/o | Treatment (Wk 3) | Treatment | Feed Day | No  | 10:10 | 10:00 - 10:59 | Late Morning | 37,5 | 102 | 58,8  | 58,8  | 18,65 | 595,30 |
| 2019/08/20 | CH2276 | Female | Two y/o | Treatment (Wk 3) | Treatment | Feed Day | No  | 10:15 | 10:00 - 10:59 | Late Morning | 37,4 | 69  | 51,8  | 51,8  | 18,55 | 565,86 |
| 2019/08/20 | CH2276 | Female | Two y/o | Treatment (Wk 3) | Treatment | Feed Day | No  | 10:20 | 10:00 - 10:59 | Late Morning | 37,4 | 68  | 52,0  | 52,0  | 18,55 | 564,71 |
| 2019/08/20 | CH2276 | Female | Two y/o | Treatment (Wk 3) | Treatment | Feed Day | No  | 10:25 | 10:00 - 10:59 | Late Morning | 37,4 | 84  | 41,4  | 41,4  | 18,55 | 581,01 |
| 2019/08/20 | CH2276 | Female | Two y/o | Treatment (Wk 3) | Treatment | Feed Day | No  | 10:30 | 10:00 - 10:59 | Late Morning | 37,5 | 73  | 43,2  | 43,2  | 18,65 | 570,27 |
| 2019/08/20 | CH2276 | Female | Two y/o | Treatment (Wk 3) | Treatment | Feed Day | No  | 10:35 | 10:00 - 10:59 | Late Morning | 37,5 | 101 | 64,0  | 64,0  | 18,65 | 594,59 |
| 2019/08/20 | CH2276 | Female | Two y/o | Treatment (Wk 3) | Treatment | Feed Day | No  | 10:40 | 10:00 - 10:59 | Late Morning | 37,6 | 73  | 65,8  | 65,8  | 18,75 | 570,27 |
| 2019/08/20 | CH2276 | Female | Two y/o | Treatment (Wk 3) | Treatment | Feed Day | No  | 10:45 | 10:00 - 10:59 | Late Morning | 37,7 | 64  | 68,4  | 68,4  | 18,85 | 559,88 |
| 2019/08/20 | CH2276 | Female | Two y/o | Treatment (Wk 3) | Treatment | Feed Day | No  | 10:50 | 10:00 - 10:59 | Late Morning | 37,7 | 70  | 65,2  | 65,2  | 18,85 | 566,99 |
| 2019/08/20 | CH2276 | Female | Two y/o | Treatment (Wk 3) | Treatment | Feed Day | No  | 10:55 | 10:00 - 10:59 | Late Morning | 37,8 | 68  | 66,6  | 66,6  | 18,95 | 564,71 |
| 2019/08/20 | CH2276 | Female | Two y/o | Treatment (Wk 3) | Treatment | Feed Day | No  | 11:00 | 11:00 - 11:59 | Late Morning | 37,8 | 71  | 53,6  | 53,6  | 18,95 | 568,10 |
| 2019/08/20 | CH2276 | Female | Two y/o | Treatment (Wk 3) | Treatment | Feed Day | No  | 11:05 | 11:00 - 11:59 | Late Morning | 37,9 |     | 57,2  | 57,2  | 19,05 | 136,44 |
| 2019/08/20 | CH2276 | Female | Two y/o | Treatment (Wk 3) | Treatment | Feed Day | No  | 11:10 | 11:00 - 11:59 | Late Morning | 37,9 | 70  | 65,0  | 65,0  | 19,05 | 566,99 |
| 2019/08/20 | CH2276 | Female | Two y/o | Treatment (Wk 3) | Treatment | Feed Day | No  | 11:15 | 11:00 - 11:59 | Late Morning | 38,0 | 167 | 76,8  | 76,8  | 19,15 | 628,84 |
| 2019/08/20 | CH2276 | Female | Two y/o | Treatment (Wk 3) | Treatment | Feed Day | No  | 11:20 | 11:00 - 11:59 | Late Morning | 38,0 | 67  | 70,4  | 70,4  | 19,15 | 563,53 |
| 2019/08/20 | CH2276 | Female | Two y/o | Treatment (Wk 3) | Treatment | Feed Day | No  | 11:25 | 11:00 - 11:59 | Late Morning | 38,0 | 69  | 69,0  | 69,0  | 19,15 | 565,86 |
| 2019/08/20 | CH2276 | Female | Two y/o | Treatment (Wk 3) | Treatment | Feed Day | No  | 11:30 | 11:00 - 11:59 | Late Morning | 38,0 | 100 | 76,4  | 76,4  | 19,15 | 593,87 |
| 2019/08/20 | CH2276 | Female | Two y/o | Treatment (Wk 3) | Treatment | Feed Day | No  | 11:35 | 11:00 - 11:59 | Late Morning | 38,0 | 80  | 77,2  | 77,2  | 19,15 | 577,31 |
| 2019/08/20 | CH2276 | Female | Two y/o | Treatment (Wk 3) | Treatment | Feed Day | No  | 11:40 | 11:00 - 11:59 | Late Morning | 38,0 | 67  | 72,0  | 72,0  | 19,15 | 563,53 |
| 2019/08/20 | CH2276 | Female | Two y/o | Treatment (Wk 3) | Treatment | Feed Day | No  | 11:45 | 11:00 - 11:59 | Late Morning | 38,1 |     | 44,6  | 44,6  | 19,26 | 127,84 |
| 2019/08/20 | CH2276 | Female | Two y/o | Treatment (Wk 3) | Treatment | Feed Day | No  | 11:50 | 11:00 - 11:59 | Late Morning | 38,2 | 64  | 54,0  | 54,0  | 19,36 | 559,88 |
| 2019/08/20 | CH2276 | Female | Two y/o | Treatment (Wk 3) | Treatment | Feed Day | No  | 11:55 | 11:00 - 11:59 | Late Morning | 38,2 | 69  | 57,2  | 57,2  | 19,36 | 565,86 |
| 2019/08/20 | CH2276 | Female | Two y/o | Treatment (Wk 3) | Treatment | Feed Day | No  | 12:00 | 12:00 - 12:59 | Afternoon    | 38,2 | 70  | 46,6  | 46,6  | 19,36 | 566,99 |



|            |        |        |         |                  |           |          |    |       |               |           |      |     |       |       |       |        |        |
|------------|--------|--------|---------|------------------|-----------|----------|----|-------|---------------|-----------|------|-----|-------|-------|-------|--------|--------|
| 2019/08/20 | CH2276 | Female | Two y/o | Treatment (Wk 3) | Treatment | Feed Day | No | 12:05 | 12:00 - 12:59 | Afternoon | 38,2 | 69  | 97,6  | 97,6  | 19,36 | 565,86 | 155,00 |
| 2019/08/20 | CH2276 | Female | Two y/o | Treatment (Wk 3) | Treatment | Feed Day | No | 12:10 | 12:00 - 12:59 | Afternoon | 38,2 | 70  | 69,0  | 69,0  | 19,36 | 566,99 | 142,94 |
| 2019/08/20 | CH2276 | Female | Two y/o | Treatment (Wk 3) | Treatment | Feed Day | No | 12:15 | 12:00 - 12:59 | Afternoon | 38,2 |     | 63,0  | 63,0  | 19,36 |        | 139,78 |
| 2019/08/20 | CH2276 | Female | Two y/o | Treatment (Wk 3) | Treatment | Feed Day | No | 12:20 | 12:00 - 12:59 | Afternoon | 38,2 | 73  | 66,0  | 66,0  | 19,36 | 570,27 | 141,40 |
| 2019/08/20 | CH2276 | Female | Two y/o | Treatment (Wk 3) | Treatment | Feed Day | No | 12:25 | 12:00 - 12:59 | Afternoon | 38,2 | 63  | 69,8  | 69,8  | 19,36 | 558,62 | 143,34 |
| 2019/08/20 | CH2276 | Female | Two y/o | Treatment (Wk 3) | Treatment | Feed Day | No | 12:30 | 12:00 - 12:59 | Afternoon | 38,2 | 69  | 77,8  | 77,8  | 19,36 | 565,86 | 147,11 |
| 2019/08/20 | CH2276 | Female | Two y/o | Treatment (Wk 3) | Treatment | Feed Day | No | 12:35 | 12:00 - 12:59 | Afternoon | 38,2 | 72  | 81,4  | 81,4  | 19,36 | 569,20 | 148,68 |
| 2019/08/20 | CH2276 | Female | Two y/o | Treatment (Wk 3) | Treatment | Feed Day | No | 12:40 | 12:00 - 12:59 | Afternoon | 38,2 | 71  | 77,8  | 77,8  | 19,36 | 568,10 | 147,11 |
| 2019/08/20 | CH2276 | Female | Two y/o | Treatment (Wk 3) | Treatment | Feed Day | No | 12:45 | 12:00 - 12:59 | Afternoon | 38,2 | 71  | 72,0  | 72,0  | 19,36 | 568,10 | 144,42 |
| 2019/08/20 | CH2276 | Female | Two y/o | Treatment (Wk 3) | Treatment | Feed Day | No | 12:50 | 12:00 - 12:59 | Afternoon | 38,2 | 191 | 70,8  | 70,8  | 19,36 | 637,33 | 143,83 |
| 2019/08/20 | CH2276 | Female | Two y/o | Treatment (Wk 3) | Treatment | Feed Day | No | 12:55 | 12:00 - 12:59 | Afternoon | 38,3 | 69  | 70,0  | 70,0  | 19,46 | 565,86 | 143,44 |
| 2019/08/20 | CH2276 | Female | Two y/o | Treatment (Wk 3) | Treatment | Feed Day | No | 13:00 | 13:00 - 13:59 | Afternoon | 38,3 | 68  | 67,8  | 67,8  | 19,46 | 564,71 | 142,33 |
| 2019/08/20 | CH2276 | Female | Two y/o | Treatment (Wk 3) | Treatment | Feed Day | No | 13:05 | 13:00 - 13:59 | Afternoon | 38,3 | 68  | 71,0  | 71,0  | 19,46 | 564,71 | 143,93 |
| 2019/08/20 | CH2276 | Female | Two y/o | Treatment (Wk 3) | Treatment | Feed Day | No | 13:10 | 13:00 - 13:59 | Afternoon | 38,4 | 197 | 55,6  | 55,6  | 19,56 | 639,25 | 135,46 |
| 2019/08/20 | CH2276 | Female | Two y/o | Treatment (Wk 3) | Treatment | Feed Day | No | 13:15 | 13:00 - 13:59 | Afternoon | 38,3 | 66  | 60,2  | 60,2  | 19,46 | 562,34 | 138,21 |
| 2019/08/20 | CH2276 | Female | Two y/o | Treatment (Wk 3) | Treatment | Feed Day | No | 13:20 | 13:00 - 13:59 | Afternoon | 38,3 | 68  | 67,2  | 67,2  | 19,46 | 564,71 | 142,02 |
| 2019/08/20 | CH2276 | Female | Two y/o | Treatment (Wk 3) | Treatment | Feed Day | No | 13:25 | 13:00 - 13:59 | Afternoon | 38,3 | 62  | 65,6  | 65,6  | 19,46 | 557,33 | 141,19 |
| 2019/08/20 | CH2276 | Female | Two y/o | Treatment (Wk 3) | Treatment | Feed Day | No | 13:30 | 13:00 - 13:59 | Afternoon | 38,3 | 61  | 65,0  | 65,0  | 19,46 | 556,01 | 140,87 |
| 2019/08/20 | CH2276 | Female | Two y/o | Treatment (Wk 3) | Treatment | Feed Day | No | 13:35 | 13:00 - 13:59 | Afternoon | 38,2 | 67  | 64,6  | 64,6  | 19,36 | 563,53 | 140,65 |
| 2019/08/20 | CH2276 | Female | Two y/o | Treatment (Wk 3) | Treatment | Feed Day | No | 13:40 | 13:00 - 13:59 | Afternoon | 38,2 | 73  | 40,2  | 40,2  | 19,36 | 570,27 | 124,26 |
| 2019/08/20 | CH2276 | Female | Two y/o | Treatment (Wk 3) | Treatment | Feed Day | No | 13:45 | 13:00 - 13:59 | Afternoon | 38,2 | 70  | 41,2  | 41,2  | 19,36 | 566,99 | 125,11 |
| 2019/08/20 | CH2276 | Female | Two y/o | Treatment (Wk 3) | Treatment | Feed Day | No | 13:50 | 13:00 - 13:59 | Afternoon | 38,0 | 66  | 40,0  | 40,0  | 19,15 | 562,34 | 124,09 |
| 2019/08/20 | CH2276 | Female | Two y/o | Treatment (Wk 3) | Treatment | Feed Day | No | 13:55 | 13:00 - 13:59 | Afternoon | 38,0 | 58  | 37,6  | 37,6  | 19,15 | 551,90 | 121,96 |
| 2019/08/20 | CH2276 | Female | Two y/o | Treatment (Wk 3) | Treatment | Feed Day | No | 14:00 | 14:00 - 14:59 | Afternoon | 38,0 | 62  | 37,8  | 37,8  | 19,15 | 557,33 | 122,14 |
| 2019/08/20 | CH2276 | Female | Two y/o | Treatment (Wk 3) | Treatment | Feed Day | No | 14:05 | 14:00 - 14:59 | Afternoon | 37,9 | 62  | 41,8  | 41,8  | 19,05 | 557,33 | 125,60 |
| 2019/08/20 | CH2276 | Female | Two y/o | Treatment (Wk 3) | Treatment | Feed Day | No | 14:10 | 14:00 - 14:59 | Afternoon | 37,9 | 60  | 38,2  | 38,2  | 19,05 | 554,67 | 122,50 |
| 2019/08/20 | CH2276 | Female | Two y/o | Treatment (Wk 3) | Treatment | Feed Day | No | 14:15 | 14:00 - 14:59 | Afternoon | 37,8 | 128 | 36,4  | 36,4  | 18,95 | 611,22 | 120,84 |
| 2019/08/20 | CH2276 | Female | Two y/o | Treatment (Wk 3) | Treatment | Feed Day | No | 14:20 | 14:00 - 14:59 | Afternoon | 37,8 | 57  | 26,0  | 26,0  | 18,95 | 550,47 | 109,29 |
| 2019/08/20 | CH2276 | Female | Two y/o | Treatment (Wk 3) | Treatment | Feed Day | No | 14:25 | 14:00 - 14:59 | Afternoon | 37,8 | 69  | 67,4  | 67,4  | 18,95 | 565,86 | 142,12 |
| 2019/08/20 | CH2276 | Female | Two y/o | Treatment (Wk 3) | Treatment | Feed Day | No | 14:30 | 14:00 - 14:59 | Afternoon | 37,7 |     | 68,4  | 68,4  | 18,85 |        | 142,64 |
| 2019/08/20 | CH2276 | Female | Two y/o | Treatment (Wk 3) | Treatment | Feed Day | No | 14:35 | 14:00 - 14:59 | Afternoon | 37,7 | 62  | 71,2  | 71,2  | 18,85 | 557,33 | 144,03 |
| 2019/08/20 | CH2276 | Female | Two y/o | Treatment (Wk 3) | Treatment | Feed Day | No | 14:40 | 14:00 - 14:59 | Afternoon | 37,7 | 67  | 72,0  | 72,0  | 18,85 | 563,53 | 144,42 |
| 2019/08/20 | CH2276 | Female | Two y/o | Treatment (Wk 3) | Treatment | Feed Day | No | 14:45 | 14:00 - 14:59 | Afternoon | 37,8 | 66  | 71,8  | 71,8  | 18,95 | 562,34 | 144,32 |
| 2019/08/20 | CH2276 | Female | Two y/o | Treatment (Wk 3) | Treatment | Feed Day | No | 14:50 | 14:00 - 14:59 | Afternoon | 37,8 | 72  | 39,2  | 39,2  | 18,95 | 569,20 | 123,39 |
| 2019/08/20 | CH2276 | Female | Two y/o | Treatment (Wk 3) | Treatment | Feed Day | No | 14:55 | 14:00 - 14:59 | Afternoon | 37,8 | 61  | 37,2  | 37,2  | 18,95 | 556,01 | 121,59 |
| 2019/08/20 | CH2276 | Female | Two y/o | Treatment (Wk 3) | Treatment | Feed Day | No | 15:00 | 15:00 - 15:59 | Afternoon | 37,9 | 68  | 35,6  | 35,6  | 19,05 | 564,71 | 120,08 |
| 2019/08/20 | CH2276 | Female | Two y/o | Treatment (Wk 3) | Treatment | Feed Day | No | 15:05 | 15:00 - 15:59 | Afternoon | 37,9 | 67  | 59,8  | 59,8  | 19,05 | 563,53 | 137,98 |
| 2019/08/20 | CH2276 | Female | Two y/o | Treatment (Wk 3) | Treatment | Feed Day | No | 15:10 | 15:00 - 15:59 | Afternoon | 37,9 | 82  | 76,6  | 76,6  | 19,05 | 579,19 | 146,57 |
| 2019/08/20 | CH2276 | Female | Two y/o | Treatment (Wk 3) | Treatment | Feed Day | No | 15:15 | 15:00 - 15:59 | Afternoon | 37,9 | 62  | 79,8  | 79,8  | 19,05 | 557,33 | 147,99 |
| 2019/08/20 | CH2276 | Female | Two y/o | Treatment (Wk 3) | Treatment | Feed Day | No | 15:20 | 15:00 - 15:59 | Afternoon | 37,9 | 67  | 70,2  | 70,2  | 19,05 | 563,53 | 143,54 |
| 2019/08/20 | CH2276 | Female | Two y/o | Treatment (Wk 3) | Treatment | Feed Day | No | 15:25 | 15:00 - 15:59 | Afternoon | 37,9 | 68  | 55,8  | 55,8  | 19,05 | 564,71 | 135,58 |
| 2019/08/20 | CH2276 | Female | Two y/o | Treatment (Wk 3) | Treatment | Feed Day | No | 15:30 | 15:00 - 15:59 | Afternoon | 38,0 | 78  | 58,4  | 58,4  | 19,15 | 575,38 | 137,16 |
| 2019/08/20 | CH2276 | Female | Two y/o | Treatment (Wk 3) | Treatment | Feed Day | No | 15:35 | 15:00 - 15:59 | Afternoon | 38,0 | 67  | 71,0  | 71,0  | 19,15 | 563,53 | 143,93 |
| 2019/08/20 | CH2276 | Female | Two y/o | Treatment (Wk 3) | Treatment | Feed Day | No | 15:40 | 15:00 - 15:59 | Afternoon | 37,9 | 69  | 67,2  | 67,2  | 19,05 | 565,86 | 142,02 |
| 2019/08/20 | CH2276 | Female | Two y/o | Treatment (Wk 3) | Treatment | Feed Day | No | 15:45 | 15:00 - 15:59 | Afternoon | 37,9 | 64  | 53,2  | 53,2  | 19,05 | 559,88 | 133,93 |
| 2019/08/20 | CH2276 | Female | Two y/o | Treatment (Wk 3) | Treatment | Feed Day | No | 15:50 | 15:00 - 15:59 | Afternoon | 37,9 | 64  | 61,2  | 61,2  | 19,05 | 559,88 | 138,78 |
| 2019/08/20 | CH2276 | Female | Two y/o | Treatment (Wk 3) | Treatment | Feed Day | No | 15:55 | 15:00 - 15:59 | Afternoon | 37,9 | 63  | 65,6  | 65,6  | 19,05 | 558,62 | 141,19 |
| 2019/08/20 | CH2276 | Female | Two y/o | Treatment (Wk 3) | Treatment | Feed Day | No | 16:00 | 16:00 - 16:59 | Evening   | 38,0 | 76  | 66,4  | 66,4  | 19,15 | 573,39 | 141,61 |
| 2019/08/20 | CH2276 | Female | Two y/o | Treatment (Wk 3) | Treatment | Feed Day | No | 16:05 | 16:00 - 16:59 | Evening   | 38,0 | 67  | 108,6 | 108,6 | 19,15 | 563,53 | 158,72 |
| 2019/08/20 | CH2276 | Female | Two y/o | Treatment (Wk 3) | Treatment | Feed Day | No | 16:10 | 16:00 - 16:59 | Evening   | 38,0 | 96  | 65,2  | 65,2  | 19,15 | 590,91 | 140,97 |
| 2019/08/20 | CH2276 | Female | Two y/o | Treatment (Wk 3) | Treatment | Feed Day | No | 16:15 | 16:00 - 16:59 | Evening   | 38,0 |     | 41,8  | 41,8  | 19,15 |        | 125,60 |
| 2019/08/20 | CH2276 | Female | Two y/o | Treatment (Wk 3) | Treatment | Feed Day | No | 16:20 | 16:00 - 16:59 | Evening   | 37,9 | 68  | 75,6  | 75,6  | 19,05 | 564,71 | 146,11 |
| 2019/08/20 | CH2276 | Female | Two y/o | Treatment (Wk 3) | Treatment | Feed Day | No | 16:25 | 16:00 - 16:59 | Evening   | 37,9 | 67  | 75,8  | 75,8  | 19,05 | 563,53 | 146,20 |
| 2019/08/20 | CH2276 | Female | Two y/o | Treatment (Wk 3) | Treatment | Feed Day | No | 16:30 | 16:00 - 16:59 | Evening   | 38,0 | 62  | 74,0  | 74,0  | 19,15 | 557,33 | 145,37 |
| 2019/08/20 | CH2276 | Female | Two y/o | Treatment (Wk 3) | Treatment | Feed Day | No | 16:35 | 16:00 - 16:59 | Evening   | 38,0 | 63  | 67,0  | 67,0  | 19,15 | 558,62 | 141,92 |
| 2019/08/20 | CH2276 | Female | Two y/o | Treatment (Wk 3) | Treatment | Feed Day | No | 16:40 | 16:00 - 16:59 | Evening   | 38,0 | 61  | 68,4  | 68,4  | 19,15 | 556,01 | 142,64 |
| 2019/08/20 | CH2276 | Female | Two y/o | Treatment (Wk 3) | Treatment | Feed Day | No | 16:45 | 16:00 - 16:59 | Evening   | 38,0 | 66  | 65,6  | 65,6  | 19,15 | 562,34 | 141,19 |
| 2019/08/20 | CH2276 | Female | Two y/o | Treatment (Wk 3) | Treatment | Feed Day | No | 16:50 | 16:00 - 16:59 | Evening   | 38,0 | 61  | 71,0  | 71,0  | 19,15 | 556,01 | 143,93 |
| 2019/08/20 | CH2276 | Female | Two y/o | Treatment (Wk 3) | Treatment | Feed Day | No | 16:55 | 16:00 - 16:59 | Evening   | 38,1 | 65  | 74,0  | 74,0  | 19,26 | 561,12 | 145,37 |
| 2019/08/20 | CH2276 | Female | Two y/o | Treatment (Wk 3) | Treatment | Feed Day | No | 17:00 | 17:00 - 17:59 | Evening   | 38,1 | 64  | 66,6  | 66,6  | 19,26 | 559,88 | 141,71 |
| 2019/08/20 | CH2276 | Female | Two y/o | Treatment (Wk 3) | Treatment | Feed Day | No | 17:05 | 17:00 - 17:59 | Evening   | 38,1 | 62  | 63,6  | 63,6  | 19,26 | 557,33 | 140,11 |
| 2019/08/20 | CH2276 | Female | Two y/o | Treatment (Wk 3) | Treatment | Feed Day | No | 17:10 | 17:00 - 17:59 | Evening   | 38,2 | 125 | 98,4  | 98,4  | 19,36 | 609,60 | 155,28 |
| 2019/08/20 | CH2276 | Female | Two y/o | Treatment (Wk 3) | Treatment | Feed Day | No | 17:15 | 17:00 - 17:59 | Evening   | 38,2 |     | 155,2 | 155,2 | 19,36 |        | 171,21 |
| 2019/08/20 | CH2276 | Female | Two y/o | Treatment (Wk 3) | Treatment | Feed Day | No | 17:20 | 17:00 - 17:59 | Evening   | 38,2 | 67  | 64,6  | 64,6  | 19,36 | 563,53 | 140,65 |
| 2019/08/20 | CH2276 | Female | Two y/o | Treatment (Wk 3) | Treatment | Feed Day | No | 17:25 | 17:00 - 17:59 | Evening   | 38,1 | 65  | 63,6  | 63,6  | 19,26 | 561,12 | 140,11 |
| 2019/08/20 | CH2276 | Female | Two y/o | Treatment (Wk 3) | Treatment | Feed Day | No | 17:30 | 17:00 - 17:59 | Evening   | 38,0 | 62  | 50,8  | 50,8  | 19,15 | 557,33 | 132,33 |
| 2019/08/20 | CH2276 | Female | Two y/o | Treatment (Wk 3) | Treatment | Feed Day | No | 17:35 | 17:00 - 17:59 | Evening   | 38,0 | 62  | 54,2  | 54,2  | 19,15 | 557,33 | 134,57 |
| 2019/08/20 | CH2276 | Female | Two y/o | Treatment (Wk 3) | Treatment | Feed Day | No | 17:40 | 17:00 - 17:59 | Evening   | 38,0 | 65  | 52,4  | 52,4  | 19,15 | 561,12 | 133,41 |
| 2019/08/20 | CH2276 | Female | Two y/o | Treatment (Wk 3) | Treatment | Feed Day | No | 17:45 | 17:00 - 17:59 | Evening   | 38,0 | 62  | 71,0  | 71,0  | 19,15 | 557,33 | 143,93 |
| 2019/08/20 | CH2276 | Female | Two y/o | Treatment (Wk 3) | Treatment | Feed Day | No | 17:50 | 17:00 - 17:59 | Evening   | 38,0 | 61  | 118,6 | 118,6 | 19,15 | 556,01 | 161,80 |



|            |        |        |         |                  |           |          |    |       |               |         |      |     |       |       |       |        |        |
|------------|--------|--------|---------|------------------|-----------|----------|----|-------|---------------|---------|------|-----|-------|-------|-------|--------|--------|
| 2019/08/20 | CH2276 | Female | Two y/o | Treatment (Wk 3) | Treatment | Feed Day | No | 17:55 | 17:00 - 17:59 | Evening | 37,9 | 111 | 395,2 | 395,2 | 19,05 | 601,33 | 204,19 |
| 2019/08/20 | CH2276 | Female | Two y/o | Treatment (Wk 3) | Treatment | Feed Day | No | 18:00 | 18:00 - 18:59 | Evening | 37,9 | 84  | 66,2  | 66,2  | 19,05 | 581,01 | 141,50 |
| 2019/08/20 | CH2276 | Female | Two y/o | Treatment (Wk 3) | Treatment | Feed Day | No | 18:05 | 18:00 - 18:59 | Evening | 37,9 | 177 | 120,2 | 120,2 | 19,05 | 632,55 | 162,27 |
| 2019/08/20 | CH2276 | Female | Two y/o | Treatment (Wk 3) | Treatment | Feed Day | No | 18:10 | 18:00 - 18:59 | Evening | 37,9 | 54  | 171,8 | 171,8 | 19,05 | 545,99 | 174,78 |
| 2019/08/20 | CH2276 | Female | Two y/o | Treatment (Wk 3) | Treatment | Feed Day | No | 18:15 | 18:00 - 18:59 | Evening | 37,9 | 77  | 108,0 | 108,0 | 19,05 | 574,39 | 158,53 |
| 2019/08/20 | CH2276 | Female | Two y/o | Treatment (Wk 3) | Treatment | Feed Day | No | 18:20 | 18:00 - 18:59 | Evening | 37,8 | 54  | 35,8  | 35,8  | 18,95 | 545,99 | 120,27 |
| 2019/08/20 | CH2276 | Female | Two y/o | Treatment (Wk 3) | Treatment | Feed Day | No | 18:25 | 18:00 - 18:59 | Evening | 37,9 | 52  | 46,0  | 46,0  | 19,05 | 542,83 | 128,91 |
| 2019/08/20 | CH2276 | Female | Two y/o | Treatment (Wk 3) | Treatment | Feed Day | No | 18:30 | 18:00 - 18:59 | Evening | 37,9 | 79  | 66,6  | 66,6  | 19,05 | 576,36 | 141,71 |
| 2019/08/20 | CH2276 | Female | Two y/o | Treatment (Wk 3) | Treatment | Feed Day | No | 18:35 | 18:00 - 18:59 | Evening | 37,9 | 94  | 292,4 | 292,4 | 19,05 | 589,37 | 193,51 |
| 2019/08/20 | CH2276 | Female | Two y/o | Treatment (Wk 3) | Treatment | Feed Day | No | 18:40 | 18:00 - 18:59 | Evening | 38,0 | 74  | 29,8  | 29,8  | 19,15 | 571,33 | 113,97 |
| 2019/08/20 | CH2276 | Female | Two y/o | Treatment (Wk 3) | Treatment | Feed Day | No | 18:45 | 18:00 - 18:59 | Evening | 37,9 |     | 36,0  | 36,0  | 19,05 |        | 120,46 |
| 2019/08/20 | CH2276 | Female | Two y/o | Treatment (Wk 3) | Treatment | Feed Day | No | 18:50 | 18:00 - 18:59 | Evening | 37,9 |     | 25,8  | 25,8  | 19,05 |        | 109,02 |
| 2019/08/20 | CH2276 | Female | Two y/o | Treatment (Wk 3) | Treatment | Feed Day | No | 18:55 | 18:00 - 18:59 | Evening | 38,0 |     | 24,8  | 24,8  | 19,15 |        | 107,67 |
| 2019/08/20 | CH2276 | Female | Two y/o | Treatment (Wk 3) | Treatment | Feed Day | No | 19:00 | 19:00 - 19:59 | Evening | 38,0 | 62  | 27,2  | 27,2  | 19,15 | 557,33 | 110,83 |
| 2019/08/20 | CH2276 | Female | Two y/o | Treatment (Wk 3) | Treatment | Feed Day | No | 19:05 | 19:00 - 19:59 | Evening | 38,0 | 61  | 24,0  | 24,0  | 19,15 | 556,01 | 106,55 |
| 2019/08/20 | CH2276 | Female | Two y/o | Treatment (Wk 3) | Treatment | Feed Day | No | 19:10 | 19:00 - 19:59 | Evening | 38,0 | 66  | 27,0  | 27,0  | 19,15 | 562,34 | 110,58 |
| 2019/08/20 | CH2276 | Female | Two y/o | Treatment (Wk 3) | Treatment | Feed Day | No | 19:15 | 19:00 - 19:59 | Evening | 38,0 | 63  | 33,2  | 33,2  | 19,15 | 558,62 | 117,68 |
| 2019/08/20 | CH2276 | Female | Two y/o | Treatment (Wk 3) | Treatment | Feed Day | No | 19:20 | 19:00 - 19:59 | Evening | 38,0 | 60  | 34,4  | 34,4  | 19,15 | 554,67 | 118,90 |
| 2019/08/20 | CH2276 | Female | Two y/o | Treatment (Wk 3) | Treatment | Feed Day | No | 19:25 | 19:00 - 19:59 | Evening | 38,0 | 58  | 34,2  | 34,2  | 19,15 | 551,90 | 118,70 |
| 2019/08/20 | CH2276 | Female | Two y/o | Treatment (Wk 3) | Treatment | Feed Day | No | 19:30 | 19:00 - 19:59 | Evening | 38,0 | 63  | 66,0  | 66,0  | 19,15 | 558,62 | 141,40 |
| 2019/08/20 | CH2276 | Female | Two y/o | Treatment (Wk 3) | Treatment | Feed Day | No | 19:35 | 19:00 - 19:59 | Evening | 38,0 | 61  | 66,2  | 66,2  | 19,15 | 556,01 | 141,50 |
| 2019/08/20 | CH2276 | Female | Two y/o | Treatment (Wk 3) | Treatment | Feed Day | No | 19:40 | 19:00 - 19:59 | Evening | 38,0 | 67  | 69,2  | 69,2  | 19,15 | 563,53 | 143,04 |
| 2019/08/20 | CH2276 | Female | Two y/o | Treatment (Wk 3) | Treatment | Feed Day | No | 19:45 | 19:00 - 19:59 | Evening | 38,0 | 64  | 70,4  | 70,4  | 19,15 | 559,88 | 143,64 |
| 2019/08/20 | CH2276 | Female | Two y/o | Treatment (Wk 3) | Treatment | Feed Day | No | 19:50 | 19:00 - 19:59 | Evening | 38,0 | 66  | 64,0  | 64,0  | 19,15 | 562,34 | 140,33 |
| 2019/08/20 | CH2276 | Female | Two y/o | Treatment (Wk 3) | Treatment | Feed Day | No | 19:55 | 19:00 - 19:59 | Evening | 38,0 | 64  | 65,6  | 65,6  | 19,15 | 559,88 | 141,19 |
| 2019/08/20 | CH2276 | Female | Two y/o | Treatment (Wk 3) | Treatment | Feed Day | No | 20:00 | 20:00 - 20:59 | Night   | 38,0 | 57  | 69,2  | 69,2  | 19,15 | 550,47 | 143,04 |
| 2019/08/20 | CH2276 | Female | Two y/o | Treatment (Wk 3) | Treatment | Feed Day | No | 20:05 | 20:00 - 20:59 | Night   | 37,9 | 68  | 67,4  | 67,4  | 19,05 | 564,71 | 142,12 |
| 2019/08/20 | CH2276 | Female | Two y/o | Treatment (Wk 3) | Treatment | Feed Day | No | 20:10 | 20:00 - 20:59 | Night   | 37,9 | 64  | 63,4  | 63,4  | 19,05 | 559,88 | 140,00 |
| 2019/08/20 | CH2276 | Female | Two y/o | Treatment (Wk 3) | Treatment | Feed Day | No | 20:15 | 20:00 - 20:59 | Night   | 37,9 |     | 51,2  | 51,2  | 19,05 |        | 132,61 |
| 2019/08/20 | CH2276 | Female | Two y/o | Treatment (Wk 3) | Treatment | Feed Day | No | 20:20 | 20:00 - 20:59 | Night   | 37,8 | 58  | 52,2  | 52,2  | 18,95 | 551,90 | 133,27 |
| 2019/08/20 | CH2276 | Female | Two y/o | Treatment (Wk 3) | Treatment | Feed Day | No | 20:25 | 20:00 - 20:59 | Night   | 37,8 | 57  | 60,8  | 60,8  | 18,95 | 550,47 | 138,55 |
| 2019/08/20 | CH2276 | Female | Two y/o | Treatment (Wk 3) | Treatment | Feed Day | No | 20:30 | 20:00 - 20:59 | Night   | 37,8 | 59  | 63,6  | 63,6  | 18,95 | 553,30 | 140,11 |
| 2019/08/20 | CH2276 | Female | Two y/o | Treatment (Wk 3) | Treatment | Feed Day | No | 20:35 | 20:00 - 20:59 | Night   | 37,7 | 60  | 64,4  | 64,4  | 18,85 | 554,67 | 140,55 |
| 2019/08/20 | CH2276 | Female | Two y/o | Treatment (Wk 3) | Treatment | Feed Day | No | 20:40 | 20:00 - 20:59 | Night   | 37,7 | 54  | 63,6  | 63,6  | 18,85 | 545,99 | 140,11 |
| 2019/08/20 | CH2276 | Female | Two y/o | Treatment (Wk 3) | Treatment | Feed Day | No | 20:45 | 20:00 - 20:59 | Night   | 37,7 | 52  | 63,6  | 63,6  | 18,85 | 542,83 | 140,11 |
| 2019/08/20 | CH2276 | Female | Two y/o | Treatment (Wk 3) | Treatment | Feed Day | No | 20:50 | 20:00 - 20:59 | Night   | 37,6 | 61  | 66,0  | 66,0  | 18,75 | 556,01 | 141,40 |
| 2019/08/20 | CH2276 | Female | Two y/o | Treatment (Wk 3) | Treatment | Feed Day | No | 20:55 | 20:00 - 20:59 | Night   | 37,6 | 56  | 38,4  | 38,4  | 18,75 | 549,01 | 122,68 |
| 2019/08/20 | CH2276 | Female | Two y/o | Treatment (Wk 3) | Treatment | Feed Day | No | 21:00 | 21:00 - 21:59 | Night   | 37,6 | 54  | 40,6  | 40,6  | 18,75 | 545,99 | 124,60 |
| 2019/08/20 | CH2276 | Female | Two y/o | Treatment (Wk 3) | Treatment | Feed Day | No | 21:05 | 21:00 - 21:59 | Night   | 37,6 | 54  | 43,2  | 43,2  | 18,75 | 545,99 | 126,74 |
| 2019/08/20 | CH2276 | Female | Two y/o | Treatment (Wk 3) | Treatment | Feed Day | No | 21:10 | 21:00 - 21:59 | Night   | 37,6 | 59  | 55,8  | 55,8  | 18,75 | 553,30 | 135,58 |
| 2019/08/20 | CH2276 | Female | Two y/o | Treatment (Wk 3) | Treatment | Feed Day | No | 21:15 | 21:00 - 21:59 | Night   | 37,6 | 65  | 65,6  | 65,6  | 18,75 | 561,12 | 141,19 |
| 2019/08/20 | CH2276 | Female | Two y/o | Treatment (Wk 3) | Treatment | Feed Day | No | 21:20 | 21:00 - 21:59 | Night   | 37,6 | 64  | 63,8  | 63,8  | 18,75 | 559,88 | 140,22 |
| 2019/08/20 | CH2276 | Female | Two y/o | Treatment (Wk 3) | Treatment | Feed Day | No | 21:25 | 21:00 - 21:59 | Night   | 37,6 | 59  | 68,8  | 68,8  | 18,75 | 553,30 | 142,84 |
| 2019/08/20 | CH2276 | Female | Two y/o | Treatment (Wk 3) | Treatment | Feed Day | No | 21:30 | 21:00 - 21:59 | Night   | 37,5 | 60  | 64,0  | 64,0  | 18,65 | 554,67 | 140,33 |
| 2019/08/20 | CH2276 | Female | Two y/o | Treatment (Wk 3) | Treatment | Feed Day | No | 21:35 | 21:00 - 21:59 | Night   | 37,5 | 61  | 58,2  | 58,2  | 18,65 | 556,01 | 137,04 |
| 2019/08/20 | CH2276 | Female | Two y/o | Treatment (Wk 3) | Treatment | Feed Day | No | 21:40 | 21:00 - 21:59 | Night   | 37,5 | 60  | 64,4  | 64,4  | 18,65 | 554,67 | 140,55 |
| 2019/08/20 | CH2276 | Female | Two y/o | Treatment (Wk 3) | Treatment | Feed Day | No | 21:45 | 21:00 - 21:59 | Night   | 37,5 | 50  | 54,2  | 54,2  | 18,65 | 539,52 | 134,57 |
| 2019/08/20 | CH2276 | Female | Two y/o | Treatment (Wk 3) | Treatment | Feed Day | No | 21:50 | 21:00 - 21:59 | Night   | 37,5 | 53  | 52,4  | 52,4  | 18,65 | 544,43 | 133,41 |
| 2019/08/20 | CH2276 | Female | Two y/o | Treatment (Wk 3) | Treatment | Feed Day | No | 21:55 | 21:00 - 21:59 | Night   | 37,5 | 47  | 53,2  | 53,2  | 18,65 | 534,23 | 133,93 |
| 2019/08/20 | CH2276 | Female | Two y/o | Treatment (Wk 3) | Treatment | Feed Day | No | 22:00 | 22:00 - 22:59 | Night   | 37,5 | 61  | 55,4  | 55,4  | 18,65 | 556,01 | 135,33 |
| 2019/08/20 | CH2276 | Female | Two y/o | Treatment (Wk 3) | Treatment | Feed Day | No | 22:05 | 22:00 - 22:59 | Night   | 37,4 | 60  | 49,0  | 49,0  | 18,55 | 554,67 | 131,09 |
| 2019/08/20 | CH2276 | Female | Two y/o | Treatment (Wk 3) | Treatment | Feed Day | No | 22:10 | 22:00 - 22:59 | Night   | 37,4 | 62  | 47,0  | 47,0  | 18,55 | 557,33 | 129,65 |
| 2019/08/20 | CH2276 | Female | Two y/o | Treatment (Wk 3) | Treatment | Feed Day | No | 22:15 | 22:00 - 22:59 | Night   | 37,4 | 64  | 51,6  | 51,6  | 18,55 | 559,88 | 132,87 |
| 2019/08/20 | CH2276 | Female | Two y/o | Treatment (Wk 3) | Treatment | Feed Day | No | 22:20 | 22:00 - 22:59 | Night   | 37,4 | 89  | 58,8  | 58,8  | 18,55 | 585,33 | 137,39 |
| 2019/08/20 | CH2276 | Female | Two y/o | Treatment (Wk 3) | Treatment | Feed Day | No | 22:25 | 22:00 - 22:59 | Night   | 37,4 | 68  | 96,6  | 96,6  | 18,55 | 564,71 | 154,64 |
| 2019/08/20 | CH2276 | Female | Two y/o | Treatment (Wk 3) | Treatment | Feed Day | No | 22:30 | 22:00 - 22:59 | Night   | 37,4 | 64  | 79,6  | 79,6  | 18,55 | 559,88 | 147,90 |
| 2019/08/20 | CH2276 | Female | Two y/o | Treatment (Wk 3) | Treatment | Feed Day | No | 22:35 | 22:00 - 22:59 | Night   | 37,5 | 89  | 79,4  | 79,4  | 18,65 | 585,33 | 147,81 |
| 2019/08/20 | CH2276 | Female | Two y/o | Treatment (Wk 3) | Treatment | Feed Day | No | 22:40 | 22:00 - 22:59 | Night   | 37,4 | 100 | 76,8  | 76,8  | 18,55 | 593,87 | 146,66 |
| 2019/08/20 | CH2276 | Female | Two y/o | Treatment (Wk 3) | Treatment | Feed Day | No | 22:45 | 22:00 - 22:59 | Night   | 37,4 | 57  | 82,4  | 82,4  | 18,55 | 550,47 | 149,10 |
| 2019/08/20 | CH2276 | Female | Two y/o | Treatment (Wk 3) | Treatment | Feed Day | No | 22:50 | 22:00 - 22:59 | Night   | 37,4 | 86  | 63,2  | 63,2  | 18,55 | 582,77 | 139,89 |
| 2019/08/20 | CH2276 | Female | Two y/o | Treatment (Wk 3) | Treatment | Feed Day | No | 22:55 | 22:00 - 22:59 | Night   | 37,4 | 57  | 56,4  | 56,4  | 18,55 | 550,47 | 135,95 |
| 2019/08/20 | CH2276 | Female | Two y/o | Treatment (Wk 3) | Treatment | Feed Day | No | 23:00 | 23:00 - 23:59 | Night   | 37,4 | 57  | 59,8  | 59,8  | 18,55 | 550,47 | 137,98 |
| 2019/08/20 | CH2276 | Female | Two y/o | Treatment (Wk 3) | Treatment | Feed Day | No | 23:05 | 23:00 - 23:59 | Night   | 37,4 | 61  | 75,0  | 75,0  | 18,55 | 556,01 | 145,83 |
| 2019/08/20 | CH2276 | Female | Two y/o | Treatment (Wk 3) | Treatment | Feed Day | No | 23:10 | 23:00 - 23:59 | Night   | 37,4 |     | 80,6  | 80,6  | 18,55 |        | 148,34 |
| 2019/08/20 | CH2276 | Female | Two y/o | Treatment (Wk 3) | Treatment | Feed Day | No | 23:15 | 23:00 - 23:59 | Night   | 37,5 |     | 57,2  | 57,2  | 18,65 |        | 136,44 |
| 2019/08/20 | CH2276 | Female | Two y/o | Treatment (Wk 3) | Treatment | Feed Day | No | 23:20 | 23:00 - 23:59 | Night   | 37,4 | 54  | 43,0  | 43,0  | 18,55 | 545,99 | 126,58 |
| 2019/08/20 | CH2276 | Female | Two y/o | Treatment (Wk 3) | Treatment | Feed Day | No | 23:25 | 23:00 - 23:59 | Night   | 37,3 | 65  | 41,6  | 41,6  | 18,46 | 561,12 | 125,44 |
| 2019/08/20 | CH2276 | Female | Two y/o | Treatment (Wk 3) | Treatment | Feed Day | No | 23:30 | 23:00 - 23:59 | Night   | 37,1 | 71  | 36,0  | 36,0  | 18,26 | 568,10 | 120,46 |
| 2019/08/20 | CH2276 | Female | Two y/o | Treatment (Wk 3) | Treatment | Feed Day | No | 23:35 | 23:00 - 23:59 | Night   | 37,2 | 52  | 37,6  | 37,6  | 18,36 | 542,83 | 121,96 |
| 2019/08/20 | CH2276 | Female | Two y/o | Treatment (Wk 3) | Treatment | Feed Day | No | 23:40 | 23:00 - 23:59 | Night   | 37,2 | 62  | 44,6  | 44,6  | 18,36 | 557,33 | 127,84 |



|    |            |        |        |         |                  |           |          |    |       |               |               |      |     |      |      |       |        |        |
|----|------------|--------|--------|---------|------------------|-----------|----------|----|-------|---------------|---------------|------|-----|------|------|-------|--------|--------|
|    | 2019/08/20 | CH2276 | Female | Two y/o | Treatment (Wk 3) | Treatment | Feed Day | No | 23:45 | 23:00 - 23:59 | Night         | 37,2 | 54  | 40,4 | 40,4 | 18,36 | 545,99 | 124,43 |
|    | 2019/08/20 | CH2276 | Female | Two y/o | Treatment (Wk 3) | Treatment | Feed Day | No | 23:50 | 23:00 - 23:59 | Night         | 37,2 | 52  | 41,4 | 41,4 | 18,36 | 542,83 | 125,27 |
|    | 2019/08/20 | CH2276 | Female | Two y/o | Treatment (Wk 3) | Treatment | Feed Day | No | 23:55 | 23:00 - 23:59 | Night         | 37,3 | 59  | 36,6 | 36,6 | 18,46 | 553,30 | 121,03 |
| 64 | 2019/08/22 | CH2276 | Female | Two y/o | Control          | Control   | Fast Day | No | 00:00 | 00:00 - 00:59 | Early Morning | 37,3 | 62  | 43,8 | 43,8 | 18,46 | 557,33 | 127,22 |
|    | 2019/08/22 | CH2276 | Female | Two y/o | Control          | Control   | Fast Day | No | 00:05 | 00:00 - 00:59 | Early Morning | 37,3 | 68  | 42,4 | 42,4 | 18,46 | 564,71 | 126,10 |
|    | 2019/08/22 | CH2276 | Female | Two y/o | Control          | Control   | Fast Day | No | 00:10 | 00:00 - 00:59 | Early Morning | 37,3 | 56  | 56,6 | 56,6 | 18,46 | 549,01 | 136,07 |
|    | 2019/08/22 | CH2276 | Female | Two y/o | Control          | Control   | Fast Day | No | 00:15 | 00:00 - 00:59 | Early Morning | 37,4 | 118 | 62,8 | 62,8 | 18,55 | 605,61 | 139,67 |
|    | 2019/08/22 | CH2276 | Female | Two y/o | Control          | Control   | Fast Day | No | 00:20 | 00:00 - 00:59 | Early Morning | 37,4 | 67  | 29,0 | 29,0 | 18,55 | 563,53 | 113,03 |
|    | 2019/08/22 | CH2276 | Female | Two y/o | Control          | Control   | Fast Day | No | 00:25 | 00:00 - 00:59 | Early Morning | 37,4 | 64  | 29,4 | 29,4 | 18,55 | 559,88 | 113,50 |
|    | 2019/08/22 | CH2276 | Female | Two y/o | Control          | Control   | Fast Day | No | 00:30 | 00:00 - 00:59 | Early Morning | 37,4 | 71  | 43,8 | 43,8 | 18,55 | 568,10 | 127,22 |
|    | 2019/08/22 | CH2276 | Female | Two y/o | Control          | Control   | Fast Day | No | 00:35 | 00:00 - 00:59 | Early Morning | 37,3 | 54  | 42,0 | 42,0 | 18,46 | 545,99 | 125,77 |
|    | 2019/08/22 | CH2276 | Female | Two y/o | Control          | Control   | Fast Day | No | 00:40 | 00:00 - 00:59 | Early Morning | 37,4 | 64  | 35,4 | 35,4 | 18,55 | 559,88 | 119,88 |
|    | 2019/08/22 | CH2276 | Female | Two y/o | Control          | Control   | Fast Day | No | 00:45 | 00:00 - 00:59 | Early Morning | 37,4 | 60  | 51,8 | 51,8 | 18,55 | 554,67 | 133,01 |
|    | 2019/08/22 | CH2276 | Female | Two y/o | Control          | Control   | Fast Day | No | 00:50 | 00:00 - 00:59 | Early Morning | 37,4 | 58  | 50,4 | 50,4 | 18,55 | 551,90 | 132,06 |
|    | 2019/08/22 | CH2276 | Female | Two y/o | Control          | Control   | Fast Day | No | 00:55 | 00:00 - 00:59 | Early Morning | 37,4 | 57  | 43,6 | 43,6 | 18,55 | 550,47 | 127,06 |
|    | 2019/08/22 | CH2276 | Female | Two y/o | Control          | Control   | Fast Day | No | 01:00 | 01:00 - 01:59 | Early Morning | 37,4 | 57  | 49,4 | 49,4 | 18,55 | 550,47 | 131,37 |
|    | 2019/08/22 | CH2276 | Female | Two y/o | Control          | Control   | Fast Day | No | 01:05 | 01:00 - 01:59 | Early Morning | 37,3 | 66  | 49,0 | 49,0 | 18,46 | 562,34 | 131,09 |
|    | 2019/08/22 | CH2276 | Female | Two y/o | Control          | Control   | Fast Day | No | 01:10 | 01:00 - 01:59 | Early Morning | 37,3 | 52  | 53,6 | 53,6 | 18,46 | 542,83 | 134,19 |
|    | 2019/08/22 | CH2276 | Female | Two y/o | Control          | Control   | Fast Day | No | 01:15 | 01:00 - 01:59 | Early Morning | 37,3 | 61  | 53,8 | 53,8 | 18,46 | 556,01 | 134,32 |
|    | 2019/08/22 | CH2276 | Female | Two y/o | Control          | Control   | Fast Day | No | 01:20 | 01:00 - 01:59 | Early Morning | 37,3 | 60  | 38,4 | 38,4 | 18,46 | 554,67 | 122,68 |
|    | 2019/08/22 | CH2276 | Female | Two y/o | Control          | Control   | Fast Day | No | 01:25 | 01:00 - 01:59 | Early Morning | 37,3 | 51  | 38,2 | 38,2 | 18,46 | 541,20 | 122,50 |
|    | 2019/08/22 | CH2276 | Female | Two y/o | Control          | Control   | Fast Day | No | 01:30 | 01:00 - 01:59 | Early Morning | 37,4 | 48  | 39,0 | 39,0 | 18,55 | 536,04 | 123,22 |
|    | 2019/08/22 | CH2276 | Female | Two y/o | Control          | Control   | Fast Day | No | 01:35 | 01:00 - 01:59 | Early Morning | 37,4 | 64  | 43,2 | 43,2 | 18,55 | 559,88 | 126,74 |
|    | 2019/08/22 | CH2276 | Female | Two y/o | Control          | Control   | Fast Day | No | 01:40 | 01:00 - 01:59 | Early Morning | 37,4 | 50  | 45,2 | 45,2 | 18,55 | 539,52 | 128,30 |
|    | 2019/08/22 | CH2276 | Female | Two y/o | Control          | Control   | Fast Day | No | 01:45 | 01:00 - 01:59 | Early Morning | 37,5 | 59  | 48,8 | 48,8 | 18,65 | 553,30 | 130,95 |
|    | 2019/08/22 | CH2276 | Female | Two y/o | Control          | Control   | Fast Day | No | 01:50 | 01:00 - 01:59 | Early Morning | 37,5 | 61  | 81,0 | 81,0 | 18,65 | 556,01 | 148,51 |
|    | 2019/08/22 | CH2276 | Female | Two y/o | Control          | Control   | Fast Day | No | 01:55 | 01:00 - 01:59 | Early Morning | 37,5 | 55  | 87,4 | 87,4 | 18,65 | 547,52 | 151,15 |
|    | 2019/08/22 | CH2276 | Female | Two y/o | Control          | Control   | Fast Day | No | 02:00 | 02:00 - 02:59 | Early Morning | 37,5 | 194 | 93,8 | 93,8 | 18,65 | 638,30 | 153,61 |
|    | 2019/08/22 | CH2276 | Female | Two y/o | Control          | Control   | Fast Day | No | 02:05 | 02:00 - 02:59 | Early Morning | 37,4 | 61  | 89,4 | 89,4 | 18,55 | 556,01 | 151,94 |
|    | 2019/08/22 | CH2276 | Female | Two y/o | Control          | Control   | Fast Day | No | 02:10 | 02:00 - 02:59 | Early Morning | 37,5 | 60  | 90,0 | 90,0 | 18,65 | 554,67 | 152,17 |
|    | 2019/08/22 | CH2276 | Female | Two y/o | Control          | Control   | Fast Day | No | 02:15 | 02:00 - 02:59 | Early Morning | 37,5 | 49  | 88,8 | 88,8 | 18,65 | 537,80 | 151,71 |
|    | 2019/08/22 | CH2276 | Female | Two y/o | Control          | Control   | Fast Day | No | 02:20 | 02:00 - 02:59 | Early Morning | 37,5 | 49  | 91,6 | 91,6 | 18,65 | 537,80 | 152,79 |
|    | 2019/08/22 | CH2276 | Female | Two y/o | Control          | Control   | Fast Day | No | 02:25 | 02:00 - 02:59 | Early Morning | 37,5 | 60  | 87,2 | 87,2 | 18,65 | 554,67 | 151,07 |
|    | 2019/08/22 | CH2276 | Female | Two y/o | Control          | Control   | Fast Day | No | 02:30 | 02:00 - 02:59 | Early Morning | 37,5 | 86  | 91,2 | 91,2 | 18,65 | 582,77 | 152,63 |
|    | 2019/08/22 | CH2276 | Female | Two y/o | Control          | Control   | Fast Day | No | 02:35 | 02:00 - 02:59 | Early Morning | 37,5 | 62  | 83,2 | 83,2 | 18,65 | 557,33 | 149,44 |
|    | 2019/08/22 | CH2276 | Female | Two y/o | Control          | Control   | Fast Day | No | 02:40 | 02:00 - 02:59 | Early Morning | 37,5 | 55  | 88,0 | 88,0 | 18,65 | 547,52 | 151,39 |
|    | 2019/08/22 | CH2276 | Female | Two y/o | Control          | Control   | Fast Day | No | 02:45 | 02:00 - 02:59 | Early Morning | 37,5 | 66  | 62,8 | 62,8 | 18,65 | 562,34 | 139,67 |
|    | 2019/08/22 | CH2276 | Female | Two y/o | Control          | Control   | Fast Day | No | 02:50 | 02:00 - 02:59 | Early Morning | 37,5 | 56  | 38,6 | 38,6 | 18,65 | 549,01 | 122,86 |
|    | 2019/08/22 | CH2276 | Female | Two y/o | Control          | Control   | Fast Day | No | 02:55 | 02:00 - 02:59 | Early Morning | 37,5 | 52  | 46,6 | 46,6 | 18,65 | 542,83 | 129,35 |
|    | 2019/08/22 | CH2276 | Female | Two y/o | Control          | Control   | Fast Day | No | 03:00 | 03:00 - 03:59 | Early Morning | 37,5 | 62  | 44,8 | 44,8 | 18,65 | 557,33 | 127,99 |
|    | 2019/08/22 | CH2276 | Female | Two y/o | Control          | Control   | Fast Day | No | 03:05 | 03:00 - 03:59 | Early Morning | 37,5 | 52  | 45,8 | 45,8 | 18,65 | 542,83 | 128,76 |
|    | 2019/08/22 | CH2276 | Female | Two y/o | Control          | Control   | Fast Day | No | 03:10 | 03:00 - 03:59 | Early Morning | 37,5 | 54  | 44,0 | 44,0 | 18,65 | 545,99 | 127,37 |
|    | 2019/08/22 | CH2276 | Female | Two y/o | Control          | Control   | Fast Day | No | 03:15 | 03:00 - 03:59 | Early Morning | 37,5 | 43  | 44,8 | 44,8 | 18,65 | 526,50 | 127,99 |
|    | 2019/08/22 | CH2276 | Female | Two y/o | Control          | Control   | Fast Day | No | 03:20 | 03:00 - 03:59 | Early Morning | 37,5 | 58  | 48,6 | 48,6 | 18,65 | 551,90 | 130,81 |
|    | 2019/08/22 | CH2276 | Female | Two y/o | Control          | Control   | Fast Day | No | 03:25 | 03:00 - 03:59 | Early Morning | 37,4 | 53  | 52,0 | 52,0 | 18,55 | 544,43 | 133,14 |
|    | 2019/08/22 | CH2276 | Female | Two y/o | Control          | Control   | Fast Day | No | 03:30 | 03:00 - 03:59 | Early Morning | 37,4 | 50  | 31,8 | 31,8 | 18,55 | 539,52 | 116,20 |
|    | 2019/08/22 | CH2276 | Female | Two y/o | Control          | Control   | Fast Day | No | 03:35 | 03:00 - 03:59 | Early Morning | 37,4 | 60  | 50,6 | 50,6 | 18,55 | 554,67 | 132,20 |
|    | 2019/08/22 | CH2276 | Female | Two y/o | Control          | Control   | Fast Day | No | 03:40 | 03:00 - 03:59 | Early Morning | 37,3 | 70  | 39,8 | 39,8 | 18,46 | 566,99 | 123,91 |
|    | 2019/08/22 | CH2276 | Female | Two y/o | Control          | Control   | Fast Day | No | 03:45 | 03:00 - 03:59 | Early Morning | 37,3 | 53  | 42,8 | 42,8 | 18,46 | 544,43 | 126,42 |
|    | 2019/08/22 | CH2276 | Female | Two y/o | Control          | Control   | Fast Day | No | 03:50 | 03:00 - 03:59 | Early Morning | 37,1 | 65  | 47,6 | 47,6 | 18,26 | 561,12 | 130,09 |
|    | 2019/08/22 | CH2276 | Female | Two y/o | Control          | Control   | Fast Day | No | 03:55 | 03:00 - 03:59 | Early Morning | 37,1 | 55  | 47,0 | 47,0 | 18,26 | 547,52 | 129,65 |
|    | 2019/08/22 | CH2276 | Female | Two y/o | Control          | Control   | Fast Day | No | 04:00 | 04:00 - 04:59 | Morning       | 37,1 | 74  | 34,6 | 34,6 | 18,26 | 571,33 | 119,10 |
|    | 2019/08/22 | CH2276 | Female | Two y/o | Control          | Control   | Fast Day | No | 04:05 | 04:00 - 04:59 | Morning       | 37,0 | 58  | 33,8 | 33,8 | 18,16 | 551,90 | 118,29 |
|    | 2019/08/22 | CH2276 | Female | Two y/o | Control          | Control   | Fast Day | No | 04:10 | 04:00 - 04:59 | Morning       | 36,9 | 47  | 35,2 | 35,2 | 18,06 | 534,23 | 119,69 |
|    | 2019/08/22 | CH2276 | Female | Two y/o | Control          | Control   | Fast Day | No | 04:15 | 04:00 - 04:59 | Morning       | 36,9 | 59  | 33,8 | 33,8 | 18,06 | 553,30 | 118,29 |
|    | 2019/08/22 | CH2276 | Female | Two y/o | Control          | Control   | Fast Day | No | 04:20 | 04:00 - 04:59 | Morning       | 36,9 | 51  | 31,6 | 31,6 | 18,06 | 541,20 | 115,98 |
|    | 2019/08/22 | CH2276 | Female | Two y/o | Control          | Control   | Fast Day | No | 04:25 | 04:00 - 04:59 | Morning       | 36,9 | 64  | 35,4 | 35,4 | 18,06 | 559,88 | 119,88 |
|    | 2019/08/22 | CH2276 | Female | Two y/o | Control          | Control   | Fast Day | No | 04:30 | 04:00 - 04:59 | Morning       | 36,9 | 49  | 31,4 | 31,4 | 18,06 | 537,80 | 115,76 |
|    | 2019/08/22 | CH2276 | Female | Two y/o | Control          | Control   | Fast Day | No | 04:35 | 04:00 - 04:59 | Morning       | 36,9 | 58  | 38,2 | 38,2 | 18,06 | 551,90 | 122,50 |
|    | 2019/08/22 | CH2276 | Female | Two y/o | Control          | Control   | Fast Day | No | 04:40 | 04:00 - 04:59 | Morning       | 36,9 | 65  | 39,0 | 39,0 | 18,06 | 561,12 | 123,22 |
|    | 2019/08/22 | CH2276 | Female | Two y/o | Control          | Control   | Fast Day | No | 04:45 | 04:00 - 04:59 | Morning       | 36,9 | 43  | 37,4 | 37,4 | 18,06 | 526,50 | 121,77 |
|    | 2019/08/22 | CH2276 | Female | Two y/o | Control          | Control   | Fast Day | No | 04:50 | 04:00 - 04:59 | Morning       | 36,9 | 55  | 29,8 | 29,8 | 18,06 | 547,52 | 113,97 |
|    | 2019/08/22 | CH2276 | Female | Two y/o | Control          | Control   | Fast Day | No | 04:55 | 04:00 - 04:59 | Morning       | 36,9 | 64  | 57,2 | 57,2 | 18,06 | 559,88 | 136,44 |
|    | 2019/08/22 | CH2276 | Female | Two y/o | Control          | Control   | Fast Day | No | 05:00 | 05:00 - 05:59 | Morning       | 37,0 | 185 | 41,0 | 41,0 | 18,16 | 635,34 | 124,94 |
|    | 2019/08/22 | CH2276 | Female | Two y/o | Control          | Control   | Fast Day | No | 05:05 | 05:00 - 05:59 | Morning       | 37,0 | 51  | 60,4 | 60,4 | 18,16 | 541,20 | 138,32 |
|    | 2019/08/22 | CH2276 | Female | Two y/o | Control          | Control   | Fast Day | No | 05:10 | 05:00 - 05:59 | Morning       | 37,1 | 99  | 80,0 | 80,0 | 18,26 | 593,14 | 148,08 |
|    | 2019/08/22 | CH2276 | Female | Two y/o | Control          | Control   | Fast Day | No | 05:15 | 05:00 - 05:59 | Morning       | 37,0 | 102 | 83,4 | 83,4 | 18,16 | 595,30 | 149,52 |
|    | 2019/08/22 | CH2276 | Female | Two y/o | Control          | Control   | Fast Day | No | 05:20 | 05:00 - 05:59 | Morning       | 36,9 | 70  | 65,4 | 65,4 | 18,06 | 566,99 | 141,08 |
|    | 2019/08/22 | CH2276 | Female | Two y/o | Control          | Control   | Fast Day | No | 05:25 | 05:00 - 05:59 | Morning       | 36,8 | 66  | 86,0 | 86,0 | 17,96 | 562,34 | 150,59 |
|    | 2019/08/22 | CH2276 | Female | Two y/o | Control          | Control   | Fast Day | No | 05:30 | 05:00 - 05:59 | Morning       | 36,8 | 67  | 81,2 | 81,2 | 17,96 | 563,53 | 148,59 |



Dataset S1: LOGGER

|            |        |        |         |         |         |          |    |       |               |              |      |     |        |       |       |        |        |
|------------|--------|--------|---------|---------|---------|----------|----|-------|---------------|--------------|------|-----|--------|-------|-------|--------|--------|
| 2019/08/22 | CH2276 | Female | Two y/o | Control | Control | Fast Day | No | 05:35 | 05:00 - 05:59 | Morning      | 36,9 | 103 | 243,0  | 243,0 | 18,06 | 596,00 | 186,98 |
| 2019/08/22 | CH2276 | Female | Two y/o | Control | Control | Fast Day | No | 05:40 | 05:00 - 05:59 | Morning      | 37,1 |     | 296,8  | 296,8 | 18,26 |        | 194,04 |
| 2019/08/22 | CH2276 | Female | Two y/o | Control | Control | Fast Day | No | 05:45 | 05:00 - 05:59 | Morning      | 37,3 | 177 | 113,2  | 113,2 | 18,46 | 632,55 | 160,17 |
| 2019/08/22 | CH2276 | Female | Two y/o | Control | Control | Fast Day | No | 05:50 | 05:00 - 05:59 | Morning      | 37,4 | 109 | 400,2  | 400,2 | 18,55 | 600,04 | 204,63 |
| 2019/08/22 | CH2276 | Female | Two y/o | Control | Control | Fast Day | No | 05:55 | 05:00 - 05:59 | Morning      | 37,5 | 110 | 235,0  | 235,0 | 18,65 | 600,69 | 185,80 |
| 2019/08/22 | CH2276 | Female | Two y/o | Control | Control | Fast Day | No | 06:00 | 06:00 - 06:59 | Morning      | 37,6 | 103 | 82,8   | 82,8  | 18,75 | 596,00 | 149,27 |
| 2019/08/22 | CH2276 | Female | Two y/o | Control | Control | Fast Day | No | 06:05 | 06:00 - 06:59 | Morning      | 37,6 | 60  | 158,8  | 158,8 | 18,75 | 554,67 | 172,02 |
| 2019/08/22 | CH2276 | Female | Two y/o | Control | Control | Fast Day | No | 06:10 | 06:00 - 06:59 | Morning      | 37,6 | 61  | 301,0  | 301,0 | 18,75 | 556,01 | 194,54 |
| 2019/08/22 | CH2276 | Female | Two y/o | Control | Control | Fast Day | No | 06:15 | 06:00 - 06:59 | Morning      | 37,7 | 98  | 155,2  | 155,2 | 18,85 | 592,41 | 171,21 |
| 2019/08/22 | CH2276 | Female | Two y/o | Control | Control | Fast Day | No | 06:20 | 06:00 - 06:59 | Morning      | 37,9 | 134 | 185,4  | 185,4 | 19,05 | 614,33 | 177,45 |
| 2019/08/22 | CH2276 | Female | Two y/o | Control | Control | Fast Day | No | 06:25 | 06:00 - 06:59 | Morning      | 37,8 | 99  | 347,2  | 347,2 | 18,95 | 593,14 | 199,59 |
| 2019/08/22 | CH2276 | Female | Two y/o | Control | Control | Fast Day | No | 06:30 | 06:00 - 06:59 | Morning      | 37,8 | 99  | 124,6  | 124,6 | 18,95 | 593,14 | 163,52 |
| 2019/08/22 | CH2276 | Female | Two y/o | Control | Control | Fast Day | No | 06:35 | 06:00 - 06:59 | Morning      | 37,8 | 59  | 85,0   | 85,0  | 18,95 | 553,30 | 150,18 |
| 2019/08/22 | CH2276 | Female | Two y/o | Control | Control | Fast Day | No | 06:40 | 06:00 - 06:59 | Morning      | 37,8 | 172 | 119,4  | 119,4 | 18,95 | 630,73 | 162,03 |
| 2019/08/22 | CH2276 | Female | Two y/o | Control | Control | Fast Day | No | 06:45 | 06:00 - 06:59 | Morning      | 37,8 | 107 | 140,0  | 140,0 | 18,95 | 598,73 | 167,60 |
| 2019/08/22 | CH2276 | Female | Two y/o | Control | Control | Fast Day | No | 06:50 | 06:00 - 06:59 | Morning      | 37,8 | 61  | 234,0  | 234,0 | 18,95 | 556,01 | 185,65 |
| 2019/08/22 | CH2276 | Female | Two y/o | Control | Control | Fast Day | No | 06:55 | 06:00 - 06:59 | Morning      | 38,0 | 128 | 171,0  | 171,0 | 19,15 | 611,22 | 174,61 |
| 2019/08/22 | CH2276 | Female | Two y/o | Control | Control | Fast Day | No | 07:00 | 07:00 - 07:59 | Morning      | 38,0 | 167 | 147,2  | 147,2 | 19,15 | 628,84 | 169,36 |
| 2019/08/22 | CH2276 | Female | Two y/o | Control | Control | Fast Day | No | 07:05 | 07:00 - 07:59 | Morning      | 37,9 |     | 204,8  | 204,8 | 19,05 |        | 180,95 |
| 2019/08/22 | CH2276 | Female | Two y/o | Control | Control | Fast Day | No | 07:10 | 07:00 - 07:59 | Morning      | 37,8 |     | 270,4  | 270,4 | 18,95 |        | 190,75 |
| 2019/08/22 | CH2276 | Female | Two y/o | Control | Control | Fast Day | No | 07:15 | 07:00 - 07:59 | Morning      | 37,8 | 143 | 158,8  | 158,8 | 18,95 | 618,69 | 172,02 |
| 2019/08/22 | CH2276 | Female | Two y/o | Control | Control | Fast Day | No | 07:20 | 07:00 - 07:59 | Morning      | 37,8 | 114 | 353,0  | 353,0 | 18,95 | 603,20 | 200,18 |
| 2019/08/22 | CH2276 | Female | Two y/o | Control | Control | Fast Day | No | 07:25 | 07:00 - 07:59 | Morning      | 37,8 | 97  | 71,8   | 71,8  | 18,95 | 591,66 | 144,32 |
| 2019/08/22 | CH2276 | Female | Two y/o | Control | Control | Fast Day | No | 07:30 | 07:00 - 07:59 | Morning      | 37,9 | 74  | 219,4  | 219,4 | 19,05 | 571,33 | 183,38 |
| 2019/08/22 | CH2276 | Female | Two y/o | Control | Control | Fast Day | No | 07:35 | 07:00 - 07:59 | Morning      | 38,0 |     | 66,6   | 66,6  | 19,15 |        | 141,71 |
| 2019/08/22 | CH2276 | Female | Two y/o | Control | Control | Fast Day | No | 07:40 | 07:00 - 07:59 | Morning      | 37,9 |     | 74,0   | 74,0  | 19,05 |        | 145,37 |
| 2019/08/22 | CH2276 | Female | Two y/o | Control | Control | Fast Day | No | 07:45 | 07:00 - 07:59 | Morning      | 37,8 | 61  | 72,8   | 72,8  | 18,95 | 556,01 | 144,80 |
| 2019/08/22 | CH2276 | Female | Two y/o | Control | Control | Fast Day | No | 07:50 | 07:00 - 07:59 | Morning      | 37,7 | 70  | 90,8   | 90,8  | 18,85 | 566,99 | 152,48 |
| 2019/08/22 | CH2276 | Female | Two y/o | Control | Control | Fast Day | No | 07:55 | 07:00 - 07:59 | Morning      | 37,6 | 69  | 210,0  | 210,0 | 18,75 | 565,86 | 181,84 |
| 2019/08/22 | CH2276 | Female | Two y/o | Control | Control | Fast Day | No | 08:00 | 08:00 - 08:59 | Late Morning | 37,5 | 94  | 72,2   | 72,2  | 18,65 | 589,37 | 144,51 |
| 2019/08/22 | CH2276 | Female | Two y/o | Control | Control | Fast Day | No | 08:05 | 08:00 - 08:59 | Late Morning | 37,5 | 109 | 380,2  | 380,2 | 18,65 | 600,04 | 202,81 |
| 2019/08/22 | CH2276 | Female | Two y/o | Control | Control | Fast Day | No | 08:10 | 08:00 - 08:59 | Late Morning | 37,5 | 55  | 228,2  | 228,2 | 18,65 | 547,52 | 184,76 |
| 2019/08/22 | CH2276 | Female | Two y/o | Control | Control | Fast Day | No | 08:15 | 08:00 - 08:59 | Late Morning | 37,5 | 102 | 88,2   | 88,2  | 18,65 | 595,30 | 151,47 |
| 2019/08/22 | CH2276 | Female | Two y/o | Control | Control | Fast Day | No | 08:20 | 08:00 - 08:59 | Late Morning | 37,5 | 57  | 56,0   | 56,0  | 18,65 | 550,47 | 135,70 |
| 2019/08/22 | CH2276 | Female | Two y/o | Control | Control | Fast Day | No | 08:25 | 08:00 - 08:59 | Late Morning | 37,4 | 60  | 76,8   | 76,8  | 18,55 | 554,67 | 146,66 |
| 2019/08/22 | CH2276 | Female | Two y/o | Control | Control | Fast Day | No | 08:30 | 08:00 - 08:59 | Late Morning | 37,5 | 65  | 87,2   | 87,2  | 18,65 | 561,12 | 151,07 |
| 2019/08/22 | CH2276 | Female | Two y/o | Control | Control | Fast Day | No | 08:35 | 08:00 - 08:59 | Late Morning | 37,5 | 62  | 81,4   | 81,4  | 18,65 | 557,33 | 148,68 |
| 2019/08/22 | CH2276 | Female | Two y/o | Control | Control | Fast Day | No | 08:40 | 08:00 - 08:59 | Late Morning | 37,6 | 88  | 657,8  | 657,8 | 18,75 | 584,49 | 222,33 |
| 2019/08/22 | CH2276 | Female | Two y/o | Control | Control | Fast Day | No | 08:45 | 08:00 - 08:59 | Late Morning | 37,7 | 63  | 187,2  | 187,2 | 18,85 | 558,62 | 177,79 |
| 2019/08/22 | CH2276 | Female | Two y/o | Control | Control | Fast Day | No | 08:50 | 08:00 - 08:59 | Late Morning | 37,8 | 92  | 75,2   | 75,2  | 18,95 | 587,78 | 145,93 |
| 2019/08/22 | CH2276 | Female | Two y/o | Control | Control | Fast Day | No | 08:55 | 08:00 - 08:59 | Late Morning | 37,8 | 39  | 1260,4 |       | 18,95 | 517,82 |        |
| 2019/08/22 | CH2276 | Female | Two y/o | Control | Control | Fast Day | No | 09:00 | 09:00 - 09:59 | Late Morning | 38,5 |     | 913,2  |       | 19,66 |        |        |
| 2019/08/22 | CH2276 | Female | Two y/o | Control | Control | Fast Day | No | 09:05 | 09:00 - 09:59 | Late Morning | 38,8 | 148 | 84,4   | 84,4  | 19,97 | 620,97 | 149,94 |
| 2019/08/22 | CH2276 | Female | Two y/o | Control | Control | Fast Day | No | 09:10 | 09:00 - 09:59 | Late Morning | 38,6 | 60  | 330,6  | 330,6 | 19,76 | 554,67 | 197,86 |
| 2019/08/22 | CH2276 | Female | Two y/o | Control | Control | Fast Day | No | 09:15 | 09:00 - 09:59 | Late Morning | 38,6 | 93  | 67,4   | 67,4  | 19,76 | 588,58 | 142,12 |
| 2019/08/22 | CH2276 | Female | Two y/o | Control | Control | Fast Day | No | 09:20 | 09:00 - 09:59 | Late Morning | 38,6 |     | 164,0  | 164,0 | 19,76 |        | 173,15 |
| 2019/08/22 | CH2276 | Female | Two y/o | Control | Control | Fast Day | No | 09:25 | 09:00 - 09:59 | Late Morning | 38,6 |     | 51,4   | 51,4  | 19,76 |        | 132,74 |
| 2019/08/22 | CH2276 | Female | Two y/o | Control | Control | Fast Day | No | 09:30 | 09:00 - 09:59 | Late Morning | 38,4 | 84  | 53,2   | 53,2  | 19,56 | 581,01 | 133,93 |
| 2019/08/22 | CH2276 | Female | Two y/o | Control | Control | Fast Day | No | 09:35 | 09:00 - 09:59 | Late Morning | 38,4 | 88  | 132,6  | 132,6 | 19,56 | 584,49 | 165,70 |
| 2019/08/22 | CH2276 | Female | Two y/o | Control | Control | Fast Day | No | 09:40 | 09:00 - 09:59 | Late Morning | 38,4 | 110 | 69,2   | 69,2  | 19,56 | 600,69 | 143,04 |
| 2019/08/22 | CH2276 | Female | Two y/o | Control | Control | Fast Day | No | 09:45 | 09:00 - 09:59 | Late Morning | 38,4 | 68  | 219,8  | 219,8 | 19,56 | 564,71 | 183,44 |
| 2019/08/22 | CH2276 | Female | Two y/o | Control | Control | Fast Day | No | 09:50 | 09:00 - 09:59 | Late Morning | 38,4 | 83  | 70,6   | 70,6  | 19,56 | 580,11 | 143,73 |
| 2019/08/22 | CH2276 | Female | Two y/o | Control | Control | Fast Day | No | 09:55 | 09:00 - 09:59 | Late Morning | 38,3 | 99  | 51,8   | 51,8  | 19,46 | 593,14 | 133,01 |
| 2019/08/22 | CH2276 | Female | Two y/o | Control | Control | Fast Day | No | 10:00 | 10:00 - 10:59 | Late Morning | 38,3 | 68  | 58,6   | 58,6  | 19,46 | 564,71 | 137,28 |
| 2019/08/22 | CH2276 | Female | Two y/o | Control | Control | Fast Day | No | 10:05 | 10:00 - 10:59 | Late Morning | 38,2 | 64  | 57,4   | 57,4  | 19,36 | 559,88 | 136,56 |
| 2019/08/22 | CH2276 | Female | Two y/o | Control | Control | Fast Day | No | 10:10 | 10:00 - 10:59 | Late Morning | 38,0 | 65  | 54,0   | 54,0  | 19,15 | 561,12 | 134,45 |
| 2019/08/22 | CH2276 | Female | Two y/o | Control | Control | Fast Day | No | 10:15 | 10:00 - 10:59 | Late Morning | 37,9 | 63  | 71,0   | 71,0  | 19,05 | 558,62 | 143,93 |
| 2019/08/22 | CH2276 | Female | Two y/o | Control | Control | Fast Day | No | 10:20 | 10:00 - 10:59 | Late Morning | 37,9 | 111 | 108,0  | 108,0 | 19,05 | 601,33 | 158,53 |
| 2019/08/22 | CH2276 | Female | Two y/o | Control | Control | Fast Day | No | 10:25 | 10:00 - 10:59 | Late Morning | 37,8 | 80  | 65,4   | 65,4  | 18,95 | 577,31 | 141,08 |
| 2019/08/22 | CH2276 | Female | Two y/o | Control | Control | Fast Day | No | 10:30 | 10:00 - 10:59 | Late Morning | 37,8 | 64  | 60,0   | 60,0  | 18,95 | 559,88 | 138,09 |
| 2019/08/22 | CH2276 | Female | Two y/o | Control | Control | Fast Day | No | 10:35 | 10:00 - 10:59 | Late Morning | 37,8 | 73  | 52,2   | 52,2  | 18,95 | 570,27 | 133,27 |
| 2019/08/22 | CH2276 | Female | Two y/o | Control | Control | Fast Day | No | 10:40 | 10:00 - 10:59 | Late Morning | 37,8 | 197 | 62,6   | 62,6  | 18,95 | 639,25 | 139,56 |
| 2019/08/22 | CH2276 | Female | Two y/o | Control | Control | Fast Day | No | 10:45 | 10:00 - 10:59 | Late Morning | 37,7 | 56  | 56,0   | 56,0  | 18,85 | 549,01 | 135,70 |
| 2019/08/22 | CH2276 | Female | Two y/o | Control | Control | Fast Day | No | 10:50 | 10:00 - 10:59 | Late Morning | 37,7 | 52  | 57,6   | 57,6  | 18,85 | 542,83 | 136,68 |
| 2019/08/22 | CH2276 | Female | Two y/o | Control | Control | Fast Day | No | 10:55 | 10:00 - 10:59 | Late Morning | 37,6 | 58  | 64,8   | 64,8  | 18,75 | 551,90 | 140,76 |
| 2019/08/22 | CH2276 | Female | Two y/o | Control | Control | Fast Day | No | 11:00 | 11:00 - 11:59 | Late Morning | 37,6 | 61  | 71,0   | 71,0  | 18,75 | 556,01 | 143,93 |
| 2019/08/22 | CH2276 | Female | Two y/o | Control | Control | Fast Day | No | 11:05 | 11:00 - 11:59 | Late Morning | 37,6 | 56  | 50,6   | 50,6  | 18,75 | 549,01 | 132,20 |
| 2019/08/22 | CH2276 | Female | Two y/o | Control | Control | Fast Day | No | 11:10 | 11:00 - 11:59 | Late Morning | 37,6 | 57  | 63,0   | 63,0  | 18,75 | 550,47 | 139,78 |
| 2019/08/22 | CH2276 | Female | Two y/o | Control | Control | Fast Day | No | 11:15 | 11:00 - 11:59 | Late Morning | 37,5 | 55  | 49,6   | 49,6  | 18,65 | 547,52 | 131,51 |
| 2019/08/22 | CH2276 | Female | Two y/o | Control | Control | Fast Day | No | 11:20 | 11:00 - 11:59 | Late Morning | 37,5 | 59  | 58,4   | 58,4  | 18,65 | 553,30 | 137,16 |



|            |        |        |         |         |         |          |    |       |               |              |      |     |       |       |       |        |        |
|------------|--------|--------|---------|---------|---------|----------|----|-------|---------------|--------------|------|-----|-------|-------|-------|--------|--------|
| 2019/08/22 | CH2276 | Female | Two y/o | Control | Control | Fast Day | No | 11:25 | 11:00 - 11:59 | Late Morning | 37,4 | 61  | 48,0  | 48,0  | 18,55 | 556,01 | 130,38 |
| 2019/08/22 | CH2276 | Female | Two y/o | Control | Control | Fast Day | No | 11:30 | 11:00 - 11:59 | Late Morning | 37,4 | 69  | 73,4  | 73,4  | 18,55 | 565,86 | 145,08 |
| 2019/08/22 | CH2276 | Female | Two y/o | Control | Control | Fast Day | No | 11:35 | 11:00 - 11:59 | Late Morning | 37,4 | 60  | 67,6  | 67,6  | 18,55 | 554,67 | 142,23 |
| 2019/08/22 | CH2276 | Female | Two y/o | Control | Control | Fast Day | No | 11:40 | 11:00 - 11:59 | Late Morning | 37,4 |     | 63,0  | 63,0  | 18,55 |        | 139,78 |
| 2019/08/22 | CH2276 | Female | Two y/o | Control | Control | Fast Day | No | 11:45 | 11:00 - 11:59 | Late Morning | 37,4 | 65  | 83,8  | 83,8  | 18,55 | 561,12 | 149,69 |
| 2019/08/22 | CH2276 | Female | Two y/o | Control | Control | Fast Day | No | 11:50 | 11:00 - 11:59 | Late Morning | 37,4 | 46  | 102,0 | 102,0 | 18,55 | 532,38 | 156,53 |
| 2019/08/22 | CH2276 | Female | Two y/o | Control | Control | Fast Day | No | 11:55 | 11:00 - 11:59 | Late Morning | 37,5 | 78  | 114,4 | 114,4 | 18,65 | 575,38 | 160,54 |
| 2019/08/22 | CH2276 | Female | Two y/o | Control | Control | Fast Day | No | 12:00 | 12:00 - 12:59 | Afternoon    | 37,6 | 56  | 71,4  | 71,4  | 18,75 | 549,01 | 144,12 |
| 2019/08/22 | CH2276 | Female | Two y/o | Control | Control | Fast Day | No | 12:05 | 12:00 - 12:59 | Afternoon    | 37,9 | 112 | 139,0 | 139,0 | 19,05 | 601,96 | 167,35 |
| 2019/08/22 | CH2276 | Female | Two y/o | Control | Control | Fast Day | No | 12:10 | 12:00 - 12:59 | Afternoon    | 38,0 |     | 139,6 | 139,6 | 19,15 |        | 167,50 |
| 2019/08/22 | CH2276 | Female | Two y/o | Control | Control | Fast Day | No | 12:15 | 12:00 - 12:59 | Afternoon    | 38,0 | 87  | 73,4  | 73,4  | 19,15 | 583,64 | 145,08 |
| 2019/08/22 | CH2276 | Female | Two y/o | Control | Control | Fast Day | No | 12:20 | 12:00 - 12:59 | Afternoon    | 38,0 | 89  | 146,2 | 146,2 | 19,15 | 585,33 | 169,12 |
| 2019/08/22 | CH2276 | Female | Two y/o | Control | Control | Fast Day | No | 12:25 | 12:00 - 12:59 | Afternoon    | 37,9 |     | 59,6  | 59,6  | 19,05 |        | 137,86 |
| 2019/08/22 | CH2276 | Female | Two y/o | Control | Control | Fast Day | No | 12:30 | 12:00 - 12:59 | Afternoon    | 37,9 | 98  | 62,0  | 62,0  | 19,05 | 592,41 | 139,23 |
| 2019/08/22 | CH2276 | Female | Two y/o | Control | Control | Fast Day | No | 12:35 | 12:00 - 12:59 | Afternoon    | 37,9 | 60  | 66,0  | 66,0  | 19,05 | 554,67 | 141,40 |
| 2019/08/22 | CH2276 | Female | Two y/o | Control | Control | Fast Day | No | 12:40 | 12:00 - 12:59 | Afternoon    | 37,9 |     | 70,8  | 70,8  | 19,05 |        | 143,83 |
| 2019/08/22 | CH2276 | Female | Two y/o | Control | Control | Fast Day | No | 12:45 | 12:00 - 12:59 | Afternoon    | 37,8 |     | 65,2  | 65,2  | 18,95 |        | 140,97 |
| 2019/08/22 | CH2276 | Female | Two y/o | Control | Control | Fast Day | No | 12:50 | 12:00 - 12:59 | Afternoon    | 37,8 | 63  | 73,2  | 73,2  | 18,95 | 558,62 | 144,99 |
| 2019/08/22 | CH2276 | Female | Two y/o | Control | Control | Fast Day | No | 12:55 | 12:00 - 12:59 | Afternoon    | 37,8 | 54  | 68,8  | 68,8  | 18,95 | 545,99 | 142,84 |
| 2019/08/22 | CH2276 | Female | Two y/o | Control | Control | Fast Day | No | 13:00 | 13:00 - 13:59 | Afternoon    | 37,7 | 57  | 60,8  | 60,8  | 18,85 | 550,47 | 138,55 |
| 2019/08/22 | CH2276 | Female | Two y/o | Control | Control | Fast Day | No | 13:05 | 13:00 - 13:59 | Afternoon    | 37,7 | 57  | 81,2  | 81,2  | 18,85 | 550,47 | 148,59 |
| 2019/08/22 | CH2276 | Female | Two y/o | Control | Control | Fast Day | No | 13:10 | 13:00 - 13:59 | Afternoon    | 37,7 | 65  | 50,8  | 50,8  | 18,85 | 561,12 | 132,33 |
| 2019/08/22 | CH2276 | Female | Two y/o | Control | Control | Fast Day | No | 13:15 | 13:00 - 13:59 | Afternoon    | 37,7 | 68  | 67,2  | 67,2  | 18,85 | 564,71 | 142,02 |
| 2019/08/22 | CH2276 | Female | Two y/o | Control | Control | Fast Day | No | 13:20 | 13:00 - 13:59 | Afternoon    | 37,7 | 67  | 53,2  | 53,2  | 18,85 | 563,53 | 133,93 |
| 2019/08/22 | CH2276 | Female | Two y/o | Control | Control | Fast Day | No | 13:25 | 13:00 - 13:59 | Afternoon    | 37,7 | 65  | 48,6  | 48,6  | 18,85 | 561,12 | 130,81 |
| 2019/08/22 | CH2276 | Female | Two y/o | Control | Control | Fast Day | No | 13:30 | 13:00 - 13:59 | Afternoon    | 37,8 | 69  | 54,2  | 54,2  | 18,95 | 565,86 | 134,57 |
| 2019/08/22 | CH2276 | Female | Two y/o | Control | Control | Fast Day | No | 13:35 | 13:00 - 13:59 | Afternoon    | 37,9 | 64  | 45,4  | 45,4  | 19,05 | 559,88 | 128,45 |
| 2019/08/22 | CH2276 | Female | Two y/o | Control | Control | Fast Day | No | 13:40 | 13:00 - 13:59 | Afternoon    | 38,0 | 65  | 61,8  | 61,8  | 19,15 | 561,12 | 139,12 |
| 2019/08/22 | CH2276 | Female | Two y/o | Control | Control | Fast Day | No | 13:45 | 13:00 - 13:59 | Afternoon    | 38,0 | 57  | 59,6  | 59,6  | 19,15 | 550,47 | 137,86 |
| 2019/08/22 | CH2276 | Female | Two y/o | Control | Control | Fast Day | No | 13:50 | 13:00 - 13:59 | Afternoon    | 38,0 | 61  | 57,4  | 57,4  | 19,15 | 556,01 | 136,56 |
| 2019/08/22 | CH2276 | Female | Two y/o | Control | Control | Fast Day | No | 13:55 | 13:00 - 13:59 | Afternoon    | 38,0 | 61  | 57,8  | 57,8  | 19,15 | 556,01 | 136,80 |
| 2019/08/22 | CH2276 | Female | Two y/o | Control | Control | Fast Day | No | 14:00 | 14:00 - 14:59 | Afternoon    | 38,0 | 56  | 52,6  | 52,6  | 19,15 | 549,01 | 133,54 |
| 2019/08/22 | CH2276 | Female | Two y/o | Control | Control | Fast Day | No | 14:05 | 14:00 - 14:59 | Afternoon    | 38,0 | 63  | 52,0  | 52,0  | 19,15 | 558,62 | 133,14 |
| 2019/08/22 | CH2276 | Female | Two y/o | Control | Control | Fast Day | No | 14:10 | 14:00 - 14:59 | Afternoon    | 38,0 | 54  | 49,8  | 49,8  | 19,15 | 545,99 | 131,65 |
| 2019/08/22 | CH2276 | Female | Two y/o | Control | Control | Fast Day | No | 14:15 | 14:00 - 14:59 | Afternoon    | 38,0 | 66  | 56,2  | 56,2  | 19,15 | 562,34 | 135,83 |
| 2019/08/22 | CH2276 | Female | Two y/o | Control | Control | Fast Day | No | 14:20 | 14:00 - 14:59 | Afternoon    | 37,9 |     | 53,8  | 53,8  | 19,05 |        | 134,32 |
| 2019/08/22 | CH2276 | Female | Two y/o | Control | Control | Fast Day | No | 14:25 | 14:00 - 14:59 | Afternoon    | 37,9 | 53  | 51,8  | 51,8  | 19,05 | 544,43 | 133,01 |
| 2019/08/22 | CH2276 | Female | Two y/o | Control | Control | Fast Day | No | 14:30 | 14:00 - 14:59 | Afternoon    | 37,8 | 52  | 65,0  | 65,0  | 18,95 | 542,83 | 140,87 |
| 2019/08/22 | CH2276 | Female | Two y/o | Control | Control | Fast Day | No | 14:35 | 14:00 - 14:59 | Afternoon    | 37,8 | 53  | 76,6  | 76,6  | 18,95 | 544,43 | 146,57 |
| 2019/08/22 | CH2276 | Female | Two y/o | Control | Control | Fast Day | No | 14:40 | 14:00 - 14:59 | Afternoon    | 37,7 | 52  | 67,8  | 67,8  | 18,85 | 542,83 | 142,33 |
| 2019/08/22 | CH2276 | Female | Two y/o | Control | Control | Fast Day | No | 14:45 | 14:00 - 14:59 | Afternoon    | 37,7 | 75  | 343,8 | 343,8 | 18,85 | 572,36 | 199,24 |
| 2019/08/22 | CH2276 | Female | Two y/o | Control | Control | Fast Day | No | 14:50 | 14:00 - 14:59 | Afternoon    | 37,6 | 71  | 91,6  | 91,6  | 18,75 | 568,10 | 152,79 |
| 2019/08/22 | CH2276 | Female | Two y/o | Control | Control | Fast Day | No | 14:55 | 14:00 - 14:59 | Afternoon    | 37,6 | 57  | 152,2 | 152,2 | 18,75 | 550,47 | 170,53 |
| 2019/08/22 | CH2276 | Female | Two y/o | Control | Control | Fast Day | No | 15:00 | 15:00 - 15:59 | Afternoon    | 37,6 | 90  | 148,8 | 148,8 | 18,75 | 586,16 | 169,74 |
| 2019/08/22 | CH2276 | Female | Two y/o | Control | Control | Fast Day | No | 15:05 | 15:00 - 15:59 | Afternoon    | 37,7 |     | 72,4  | 72,4  | 18,85 |        | 144,61 |
| 2019/08/22 | CH2276 | Female | Two y/o | Control | Control | Fast Day | No | 15:10 | 15:00 - 15:59 | Afternoon    | 37,7 | 57  | 62,8  | 62,8  | 18,85 | 550,47 | 139,67 |
| 2019/08/22 | CH2276 | Female | Two y/o | Control | Control | Fast Day | No | 15:15 | 15:00 - 15:59 | Afternoon    | 37,7 | 53  | 54,2  | 54,2  | 18,85 | 544,43 | 134,57 |
| 2019/08/22 | CH2276 | Female | Two y/o | Control | Control | Fast Day | No | 15:20 | 15:00 - 15:59 | Afternoon    | 37,7 | 55  | 58,2  | 58,2  | 18,85 | 547,52 | 137,04 |
| 2019/08/22 | CH2276 | Female | Two y/o | Control | Control | Fast Day | No | 15:25 | 15:00 - 15:59 | Afternoon    | 37,7 | 56  | 70,8  | 70,8  | 18,85 | 549,01 | 143,83 |
| 2019/08/22 | CH2276 | Female | Two y/o | Control | Control | Fast Day | No | 15:30 | 15:00 - 15:59 | Afternoon    | 37,7 | 101 | 66,2  | 66,2  | 18,85 | 594,59 | 141,50 |
| 2019/08/22 | CH2276 | Female | Two y/o | Control | Control | Fast Day | No | 15:35 | 15:00 - 15:59 | Afternoon    | 37,7 |     | 57,8  | 57,8  | 18,85 |        | 136,80 |
| 2019/08/22 | CH2276 | Female | Two y/o | Control | Control | Fast Day | No | 15:40 | 15:00 - 15:59 | Afternoon    | 37,7 | 74  | 292,2 | 292,2 | 18,85 | 571,33 | 193,49 |
| 2019/08/22 | CH2276 | Female | Two y/o | Control | Control | Fast Day | No | 15:45 | 15:00 - 15:59 | Afternoon    | 37,7 |     | 198,8 | 198,8 | 18,85 |        | 179,91 |
| 2019/08/22 | CH2276 | Female | Two y/o | Control | Control | Fast Day | No | 15:50 | 15:00 - 15:59 | Afternoon    | 37,9 | 81  | 348,6 | 348,6 | 19,05 | 578,26 | 199,74 |
| 2019/08/22 | CH2276 | Female | Two y/o | Control | Control | Fast Day | No | 15:55 | 15:00 - 15:59 | Afternoon    | 38,2 | 103 | 92,8  | 92,8  | 19,36 | 596,00 | 153,24 |
| 2019/08/22 | CH2276 | Female | Two y/o | Control | Control | Fast Day | No | 16:00 | 16:00 - 16:59 | Evening      | 38,2 | 63  | 56,6  | 56,6  | 19,36 | 558,62 | 136,07 |
| 2019/08/22 | CH2276 | Female | Two y/o | Control | Control | Fast Day | No | 16:05 | 16:00 - 16:59 | Evening      | 38,2 |     | 77,2  | 77,2  | 19,36 |        | 146,84 |
| 2019/08/22 | CH2276 | Female | Two y/o | Control | Control | Fast Day | No | 16:10 | 16:00 - 16:59 | Evening      | 38,3 | 158 | 157,6 | 157,6 | 19,46 | 625,26 | 171,75 |
| 2019/08/22 | CH2276 | Female | Two y/o | Control | Control | Fast Day | No | 16:15 | 16:00 - 16:59 | Evening      | 38,3 | 92  | 63,6  | 63,6  | 19,46 | 587,78 | 140,11 |
| 2019/08/22 | CH2276 | Female | Two y/o | Control | Control | Fast Day | No | 16:20 | 16:00 - 16:59 | Evening      | 38,2 | 112 | 156,4 | 156,4 | 19,36 | 601,96 | 171,48 |
| 2019/08/22 | CH2276 | Female | Two y/o | Control | Control | Fast Day | No | 16:25 | 16:00 - 16:59 | Evening      | 38,2 | 109 | 90,6  | 90,6  | 19,36 | 600,04 | 152,40 |
| 2019/08/22 | CH2276 | Female | Two y/o | Control | Control | Fast Day | No | 16:30 | 16:00 - 16:59 | Evening      | 38,2 | 177 | 226,4 | 226,4 | 19,36 | 632,55 | 184,48 |
| 2019/08/22 | CH2276 | Female | Two y/o | Control | Control | Fast Day | No | 16:35 | 16:00 - 16:59 | Evening      | 38,2 | 106 | 68,6  | 68,6  | 19,36 | 598,06 | 142,74 |
| 2019/08/22 | CH2276 | Female | Two y/o | Control | Control | Fast Day | No | 16:40 | 16:00 - 16:59 | Evening      | 38,2 | 90  | 93,6  | 93,6  | 19,36 | 586,16 | 153,54 |
| 2019/08/22 | CH2276 | Female | Two y/o | Control | Control | Fast Day | No | 16:45 | 16:00 - 16:59 | Evening      | 38,2 | 61  | 57,6  | 57,6  | 19,36 | 556,01 | 136,68 |
| 2019/08/22 | CH2276 | Female | Two y/o | Control | Control | Fast Day | No | 16:50 | 16:00 - 16:59 | Evening      | 38,2 | 59  | 51,8  | 51,8  | 19,36 | 553,30 | 133,01 |
| 2019/08/22 | CH2276 | Female | Two y/o | Control | Control | Fast Day | No | 16:55 | 16:00 - 16:59 | Evening      | 38,2 | 64  | 67,8  | 67,8  | 19,36 | 559,88 | 142,33 |
| 2019/08/22 | CH2276 | Female | Two y/o | Control | Control | Fast Day | No | 17:00 | 17:00 - 17:59 | Evening      | 38,0 | 54  | 322,8 | 322,8 | 19,15 | 545,99 | 197,01 |
| 2019/08/22 | CH2276 | Female | Two y/o | Control | Control | Fast Day | No | 17:05 | 17:00 - 17:59 | Evening      | 38,0 |     | 187,0 | 187,0 | 19,15 |        | 177,76 |
| 2019/08/22 | CH2276 | Female | Two y/o | Control | Control | Fast Day | No | 17:10 | 17:00 - 17:59 | Evening      | 38,0 |     | 263,0 | 263,0 | 19,15 |        | 189,77 |



|            |        |        |         |         |         |          |    |       |               |         |      |     |       |       |       |        |
|------------|--------|--------|---------|---------|---------|----------|----|-------|---------------|---------|------|-----|-------|-------|-------|--------|
| 2019/08/22 | CH2276 | Female | Two y/o | Control | Control | Fast Day | No | 17:15 | 17:00 - 17:59 | Evening | 38,1 |     | 198,2 | 198,2 | 19,26 | 179,80 |
| 2019/08/22 | CH2276 | Female | Two y/o | Control | Control | Fast Day | No | 17:20 | 17:00 - 17:59 | Evening | 38,2 | 76  | 304,0 | 304,0 | 19,36 | 194,89 |
| 2019/08/22 | CH2276 | Female | Two y/o | Control | Control | Fast Day | No | 17:25 | 17:00 - 17:59 | Evening | 38,3 |     | 330,0 | 330,0 | 19,46 | 197,79 |
| 2019/08/22 | CH2276 | Female | Two y/o | Control | Control | Fast Day | No | 17:30 | 17:00 - 17:59 | Evening | 38,4 |     | 267,8 | 267,8 | 19,56 | 190,41 |
| 2019/08/22 | CH2276 | Female | Two y/o | Control | Control | Fast Day | No | 17:35 | 17:00 - 17:59 | Evening | 38,5 | 117 | 90,8  | 90,8  | 19,66 | 605,02 |
| 2019/08/22 | CH2276 | Female | Two y/o | Control | Control | Fast Day | No | 17:40 | 17:00 - 17:59 | Evening | 38,6 | 69  | 127,4 | 127,4 | 19,76 | 565,86 |
| 2019/08/22 | CH2276 | Female | Two y/o | Control | Control | Fast Day | No | 17:45 | 17:00 - 17:59 | Evening | 38,6 | 92  | 227,8 | 227,8 | 19,76 | 587,78 |
| 2019/08/22 | CH2276 | Female | Two y/o | Control | Control | Fast Day | No | 17:50 | 17:00 - 17:59 | Evening | 38,5 | 94  | 281,4 | 281,4 | 19,66 | 589,37 |
| 2019/08/22 | CH2276 | Female | Two y/o | Control | Control | Fast Day | No | 17:55 | 17:00 - 17:59 | Evening | 38,5 | 65  | 205,4 | 205,4 | 19,66 | 561,12 |
| 2019/08/22 | CH2276 | Female | Two y/o | Control | Control | Fast Day | No | 18:00 | 18:00 - 18:59 | Evening | 38,6 | 93  | 63,2  | 63,2  | 19,76 | 588,58 |
| 2019/08/22 | CH2276 | Female | Two y/o | Control | Control | Fast Day | No | 18:05 | 18:00 - 18:59 | Evening | 38,5 |     | 56,0  | 56,0  | 19,66 | 135,70 |
| 2019/08/22 | CH2276 | Female | Two y/o | Control | Control | Fast Day | No | 18:10 | 18:00 - 18:59 | Evening | 38,5 | 68  | 60,2  | 60,2  | 19,66 | 564,71 |
| 2019/08/22 | CH2276 | Female | Two y/o | Control | Control | Fast Day | No | 18:15 | 18:00 - 18:59 | Evening | 38,4 | 60  | 66,4  | 66,4  | 19,56 | 554,67 |
| 2019/08/22 | CH2276 | Female | Two y/o | Control | Control | Fast Day | No | 18:20 | 18:00 - 18:59 | Evening | 38,3 | 58  | 56,2  | 56,2  | 19,46 | 551,90 |
| 2019/08/22 | CH2276 | Female | Two y/o | Control | Control | Fast Day | No | 18:25 | 18:00 - 18:59 | Evening | 38,2 | 62  | 99,0  | 99,0  | 19,36 | 557,33 |
| 2019/08/22 | CH2276 | Female | Two y/o | Control | Control | Fast Day | No | 18:30 | 18:00 - 18:59 | Evening | 38,2 | 106 | 264,6 | 264,6 | 19,36 | 598,06 |
| 2019/08/22 | CH2276 | Female | Two y/o | Control | Control | Fast Day | No | 18:35 | 18:00 - 18:59 | Evening | 38,2 | 137 | 220,2 | 220,2 | 19,36 | 615,83 |
| 2019/08/22 | CH2276 | Female | Two y/o | Control | Control | Fast Day | No | 18:40 | 18:00 - 18:59 | Evening | 38,2 |     | 78,6  | 78,6  | 19,36 | 147,46 |
| 2019/08/22 | CH2276 | Female | Two y/o | Control | Control | Fast Day | No | 18:45 | 18:00 - 18:59 | Evening | 38,3 | 83  | 121,2 | 121,2 | 19,46 | 580,11 |
| 2019/08/22 | CH2276 | Female | Two y/o | Control | Control | Fast Day | No | 18:50 | 18:00 - 18:59 | Evening | 38,3 | 111 | 237,4 | 237,4 | 19,46 | 601,33 |
| 2019/08/22 | CH2276 | Female | Two y/o | Control | Control | Fast Day | No | 18:55 | 18:00 - 18:59 | Evening | 38,3 | 71  | 67,2  | 67,2  | 19,46 | 568,10 |
| 2019/08/22 | CH2276 | Female | Two y/o | Control | Control | Fast Day | No | 19:00 | 19:00 - 19:59 | Evening | 38,4 | 77  | 109,8 | 109,8 | 19,56 | 574,39 |
| 2019/08/22 | CH2276 | Female | Two y/o | Control | Control | Fast Day | No | 19:05 | 19:00 - 19:59 | Evening | 38,4 | 55  | 335,0 | 335,0 | 19,56 | 547,52 |
| 2019/08/22 | CH2276 | Female | Two y/o | Control | Control | Fast Day | No | 19:10 | 19:00 - 19:59 | Evening | 38,4 | 75  | 604,6 | 604,6 | 19,56 | 572,36 |
| 2019/08/22 | CH2276 | Female | Two y/o | Control | Control | Fast Day | No | 19:15 | 19:00 - 19:59 | Evening | 38,4 | 52  | 610,0 | 610,0 | 19,56 | 542,83 |
| 2019/08/22 | CH2276 | Female | Two y/o | Control | Control | Fast Day | No | 19:20 | 19:00 - 19:59 | Evening | 38,4 | 88  | 71,6  | 71,6  | 19,56 | 584,49 |
| 2019/08/22 | CH2276 | Female | Two y/o | Control | Control | Fast Day | No | 19:25 | 19:00 - 19:59 | Evening | 38,4 | 65  | 63,4  | 63,4  | 19,56 | 561,12 |
| 2019/08/22 | CH2276 | Female | Two y/o | Control | Control | Fast Day | No | 19:30 | 19:00 - 19:59 | Evening | 38,3 | 57  | 62,0  | 62,0  | 19,46 | 550,47 |
| 2019/08/22 | CH2276 | Female | Two y/o | Control | Control | Fast Day | No | 19:35 | 19:00 - 19:59 | Evening | 38,3 | 57  | 65,2  | 65,2  | 19,46 | 550,47 |
| 2019/08/22 | CH2276 | Female | Two y/o | Control | Control | Fast Day | No | 19:40 | 19:00 - 19:59 | Evening | 38,3 | 61  | 69,2  | 69,2  | 19,46 | 556,01 |
| 2019/08/22 | CH2276 | Female | Two y/o | Control | Control | Fast Day | No | 19:45 | 19:00 - 19:59 | Evening | 38,3 | 64  | 69,0  | 69,0  | 19,46 | 559,88 |
| 2019/08/22 | CH2276 | Female | Two y/o | Control | Control | Fast Day | No | 19:50 | 19:00 - 19:59 | Evening | 38,2 | 59  | 70,0  | 70,0  | 19,36 | 553,30 |
| 2019/08/22 | CH2276 | Female | Two y/o | Control | Control | Fast Day | No | 19:55 | 19:00 - 19:59 | Evening | 38,2 | 64  | 66,2  | 66,2  | 19,36 | 559,88 |
| 2019/08/22 | CH2276 | Female | Two y/o | Control | Control | Fast Day | No | 20:00 | 20:00 - 20:59 | Night   | 38,2 | 65  | 67,8  | 67,8  | 19,36 | 561,12 |
| 2019/08/22 | CH2276 | Female | Two y/o | Control | Control | Fast Day | No | 20:05 | 20:00 - 20:59 | Night   | 38,2 | 65  | 66,2  | 66,2  | 19,36 | 561,12 |
| 2019/08/22 | CH2276 | Female | Two y/o | Control | Control | Fast Day | No | 20:10 | 20:00 - 20:59 | Night   | 38,1 | 66  | 72,8  | 72,8  | 19,26 | 562,34 |
| 2019/08/22 | CH2276 | Female | Two y/o | Control | Control | Fast Day | No | 20:15 | 20:00 - 20:59 | Night   | 38,0 |     | 67,0  | 67,0  | 19,15 | 141,92 |
| 2019/08/22 | CH2276 | Female | Two y/o | Control | Control | Fast Day | No | 20:20 | 20:00 - 20:59 | Night   | 38,0 | 66  | 68,8  | 68,8  | 19,15 | 562,34 |
| 2019/08/22 | CH2276 | Female | Two y/o | Control | Control | Fast Day | No | 20:25 | 20:00 - 20:59 | Night   | 38,0 | 57  | 65,4  | 65,4  | 19,15 | 550,47 |
| 2019/08/22 | CH2276 | Female | Two y/o | Control | Control | Fast Day | No | 20:30 | 20:00 - 20:59 | Night   | 37,9 | 54  | 68,6  | 68,6  | 19,05 | 545,99 |
| 2019/08/22 | CH2276 | Female | Two y/o | Control | Control | Fast Day | No | 20:35 | 20:00 - 20:59 | Night   | 37,9 | 72  | 80,6  | 80,6  | 19,05 | 569,20 |
| 2019/08/22 | CH2276 | Female | Two y/o | Control | Control | Fast Day | No | 20:40 | 20:00 - 20:59 | Night   | 37,8 | 49  | 69,0  | 69,0  | 18,95 | 537,80 |
| 2019/08/22 | CH2276 | Female | Two y/o | Control | Control | Fast Day | No | 20:45 | 20:00 - 20:59 | Night   | 37,8 |     | 70,4  | 70,4  | 18,95 | 143,64 |
| 2019/08/22 | CH2276 | Female | Two y/o | Control | Control | Fast Day | No | 20:50 | 20:00 - 20:59 | Night   | 37,8 |     | 63,0  | 63,0  | 18,95 | 139,78 |
| 2019/08/22 | CH2276 | Female | Two y/o | Control | Control | Fast Day | No | 20:55 | 20:00 - 20:59 | Night   | 37,7 |     | 53,0  | 53,0  | 18,85 | 133,80 |
| 2019/08/22 | CH2276 | Female | Two y/o | Control | Control | Fast Day | No | 21:00 | 21:00 - 21:59 | Night   | 37,7 | 59  | 40,2  | 40,2  | 18,85 | 553,30 |
| 2019/08/22 | CH2276 | Female | Two y/o | Control | Control | Fast Day | No | 21:05 | 21:00 - 21:59 | Night   | 37,7 | 50  | 58,0  | 58,0  | 18,85 | 539,52 |
| 2019/08/22 | CH2276 | Female | Two y/o | Control | Control | Fast Day | No | 21:10 | 21:00 - 21:59 | Night   | 37,7 | 53  | 59,0  | 59,0  | 18,85 | 544,43 |
| 2019/08/22 | CH2276 | Female | Two y/o | Control | Control | Fast Day | No | 21:15 | 21:00 - 21:59 | Night   | 37,6 | 51  | 61,6  | 61,6  | 18,75 | 541,20 |
| 2019/08/22 | CH2276 | Female | Two y/o | Control | Control | Fast Day | No | 21:20 | 21:00 - 21:59 | Night   | 37,6 | 63  | 63,0  | 63,0  | 18,75 | 558,62 |
| 2019/08/22 | CH2276 | Female | Two y/o | Control | Control | Fast Day | No | 21:25 | 21:00 - 21:59 | Night   | 37,6 | 48  | 58,0  | 58,0  | 18,75 | 536,04 |
| 2019/08/22 | CH2276 | Female | Two y/o | Control | Control | Fast Day | No | 21:30 | 21:00 - 21:59 | Night   | 37,6 | 66  | 57,6  | 57,6  | 18,75 | 562,34 |
| 2019/08/22 | CH2276 | Female | Two y/o | Control | Control | Fast Day | No | 21:35 | 21:00 - 21:59 | Night   | 37,6 | 51  | 62,2  | 62,2  | 18,75 | 541,20 |
| 2019/08/22 | CH2276 | Female | Two y/o | Control | Control | Fast Day | No | 21:40 | 21:00 - 21:59 | Night   | 37,6 | 50  | 62,2  | 62,2  | 18,75 | 539,52 |
| 2019/08/22 | CH2276 | Female | Two y/o | Control | Control | Fast Day | No | 21:45 | 21:00 - 21:59 | Night   | 37,6 | 53  | 63,4  | 63,4  | 18,75 | 544,43 |
| 2019/08/22 | CH2276 | Female | Two y/o | Control | Control | Fast Day | No | 21:50 | 21:00 - 21:59 | Night   | 37,6 | 45  | 61,8  | 61,8  | 18,75 | 530,47 |
| 2019/08/22 | CH2276 | Female | Two y/o | Control | Control | Fast Day | No | 21:55 | 21:00 - 21:59 | Night   | 37,6 | 56  | 61,2  | 61,2  | 18,75 | 549,01 |
| 2019/08/22 | CH2276 | Female | Two y/o | Control | Control | Fast Day | No | 22:00 | 22:00 - 22:59 | Night   | 37,5 | 52  | 60,2  | 60,2  | 18,65 | 542,83 |
| 2019/08/22 | CH2276 | Female | Two y/o | Control | Control | Fast Day | No | 22:05 | 22:00 - 22:59 | Night   | 37,5 | 56  | 59,2  | 59,2  | 18,65 | 549,01 |
| 2019/08/22 | CH2276 | Female | Two y/o | Control | Control | Fast Day | No | 22:10 | 22:00 - 22:59 | Night   | 37,5 | 47  | 64,4  | 64,4  | 18,65 | 534,23 |
| 2019/08/22 | CH2276 | Female | Two y/o | Control | Control | Fast Day | No | 22:15 | 22:00 - 22:59 | Night   | 37,4 | 50  | 63,6  | 63,6  | 18,55 | 539,52 |
| 2019/08/22 | CH2276 | Female | Two y/o | Control | Control | Fast Day | No | 22:20 | 22:00 - 22:59 | Night   | 37,4 | 60  | 56,2  | 56,2  | 18,55 | 554,67 |
| 2019/08/22 | CH2276 | Female | Two y/o | Control | Control | Fast Day | No | 22:25 | 22:00 - 22:59 | Night   | 37,4 | 83  | 62,8  | 62,8  | 18,55 | 580,11 |
| 2019/08/22 | CH2276 | Female | Two y/o | Control | Control | Fast Day | No | 22:30 | 22:00 - 22:59 | Night   | 37,4 | 57  | 58,0  | 58,0  | 18,55 | 550,47 |
| 2019/08/22 | CH2276 | Female | Two y/o | Control | Control | Fast Day | No | 22:35 | 22:00 - 22:59 | Night   | 37,4 | 60  | 71,2  | 71,2  | 18,55 | 554,67 |
| 2019/08/22 | CH2276 | Female | Two y/o | Control | Control | Fast Day | No | 22:40 | 22:00 - 22:59 | Night   | 37,4 | 51  | 69,2  | 69,2  | 18,55 | 541,20 |
| 2019/08/22 | CH2276 | Female | Two y/o | Control | Control | Fast Day | No | 22:45 | 22:00 - 22:59 | Night   | 37,4 | 82  | 62,8  | 62,8  | 18,55 | 579,19 |
| 2019/08/22 | CH2276 | Female | Two y/o | Control | Control | Fast Day | No | 22:50 | 22:00 - 22:59 | Night   | 37,3 | 62  | 72,6  | 72,6  | 18,46 | 557,33 |
| 2019/08/22 | CH2276 | Female | Two y/o | Control | Control | Fast Day | No | 22:55 | 22:00 - 22:59 | Night   | 37,3 | 61  | 72,8  | 72,8  | 18,46 | 556,01 |
| 2019/08/22 | CH2276 | Female | Two y/o | Control | Control | Fast Day | No | 23:00 | 23:00 - 23:59 | Night   | 37,3 | 51  | 79,6  | 79,6  | 18,46 | 541,20 |



|    |            |        |        |         |         |         |          |    |       |               |               |      |     |      |      |       |        |        |
|----|------------|--------|--------|---------|---------|---------|----------|----|-------|---------------|---------------|------|-----|------|------|-------|--------|--------|
|    | 2019/08/22 | CH2276 | Female | Two y/o | Control | Control | Fast Day | No | 23:05 | 23:00 - 23:59 | Night         | 37,3 | 58  | 96,8 | 96,8 | 18,46 | 551,90 | 154,71 |
|    | 2019/08/22 | CH2276 | Female | Two y/o | Control | Control | Fast Day | No | 23:10 | 23:00 - 23:59 | Night         | 37,3 | 57  | 93,4 | 93,4 | 18,46 | 550,47 | 153,46 |
|    | 2019/08/22 | CH2276 | Female | Two y/o | Control | Control | Fast Day | No | 23:15 | 23:00 - 23:59 | Night         | 37,3 | 63  | 94,6 | 94,6 | 18,46 | 558,62 | 153,91 |
|    | 2019/08/22 | CH2276 | Female | Two y/o | Control | Control | Fast Day | No | 23:20 | 23:00 - 23:59 | Night         | 37,3 | 52  | 94,6 | 94,6 | 18,46 | 542,83 | 153,91 |
|    | 2019/08/22 | CH2276 | Female | Two y/o | Control | Control | Fast Day | No | 23:25 | 23:00 - 23:59 | Night         | 37,3 | 64  | 87,6 | 87,6 | 18,46 | 559,88 | 151,23 |
|    | 2019/08/22 | CH2276 | Female | Two y/o | Control | Control | Fast Day | No | 23:30 | 23:00 - 23:59 | Night         | 37,3 | 57  | 77,0 | 77,0 | 18,46 | 550,47 | 146,75 |
|    | 2019/08/22 | CH2276 | Female | Two y/o | Control | Control | Fast Day | No | 23:35 | 23:00 - 23:59 | Night         | 37,4 | 61  | 79,0 | 79,0 | 18,55 | 556,01 | 147,64 |
|    | 2019/08/22 | CH2276 | Female | Two y/o | Control | Control | Fast Day | No | 23:40 | 23:00 - 23:59 | Night         | 37,4 | 64  | 58,6 | 58,6 | 18,55 | 559,88 | 137,28 |
|    | 2019/08/22 | CH2276 | Female | Two y/o | Control | Control | Fast Day | No | 23:45 | 23:00 - 23:59 | Night         | 37,4 | 52  | 61,8 | 61,8 | 18,55 | 542,83 | 139,12 |
|    | 2019/08/22 | CH2276 | Female | Two y/o | Control | Control | Fast Day | No | 23:50 | 23:00 - 23:59 | Night         | 37,4 | 124 | 43,2 | 43,2 | 18,55 | 609,04 | 126,74 |
|    | 2019/08/22 | CH2276 | Female | Two y/o | Control | Control | Fast Day | No | 23:55 | 23:00 - 23:59 | Night         | 37,4 | 51  | 33,4 | 33,4 | 18,55 | 541,20 | 117,88 |
| 65 | 2019/08/23 | CH2276 | Female | Two y/o | Control | Control | Feed Day | No | 00:00 | 00:00 - 00:59 | Early Morning | 37,4 | 57  | 35,0 | 35,0 | 18,55 | 550,47 | 119,49 |
|    | 2019/08/23 | CH2276 | Female | Two y/o | Control | Control | Feed Day | No | 00:05 | 00:00 - 00:59 | Early Morning | 37,3 | 48  | 35,6 | 35,6 | 18,46 | 536,04 | 120,08 |
|    | 2019/08/23 | CH2276 | Female | Two y/o | Control | Control | Feed Day | No | 00:10 | 00:00 - 00:59 | Early Morning | 37,3 | 62  | 29,4 | 29,4 | 18,46 | 557,33 | 113,50 |
|    | 2019/08/23 | CH2276 | Female | Two y/o | Control | Control | Feed Day | No | 00:15 | 00:00 - 00:59 | Early Morning | 37,2 | 43  | 39,8 | 39,8 | 18,36 | 526,50 | 123,91 |
|    | 2019/08/23 | CH2276 | Female | Two y/o | Control | Control | Feed Day | No | 00:20 | 00:00 - 00:59 | Early Morning | 37,1 | 60  | 41,6 | 41,6 | 18,26 | 554,67 | 125,44 |
|    | 2019/08/23 | CH2276 | Female | Two y/o | Control | Control | Feed Day | No | 00:25 | 00:00 - 00:59 | Early Morning | 37,1 | 52  | 38,8 | 38,8 | 18,26 | 542,83 | 123,04 |
|    | 2019/08/23 | CH2276 | Female | Two y/o | Control | Control | Feed Day | No | 00:30 | 00:00 - 00:59 | Early Morning | 37,1 | 57  | 42,8 | 42,8 | 18,26 | 550,47 | 126,42 |
|    | 2019/08/23 | CH2276 | Female | Two y/o | Control | Control | Feed Day | No | 00:35 | 00:00 - 00:59 | Early Morning | 37,1 | 50  | 48,6 | 48,6 | 18,26 | 539,52 | 130,81 |
|    | 2019/08/23 | CH2276 | Female | Two y/o | Control | Control | Feed Day | No | 00:40 | 00:00 - 00:59 | Early Morning | 37,0 | 66  | 46,8 | 46,8 | 18,16 | 562,34 | 129,50 |
|    | 2019/08/23 | CH2276 | Female | Two y/o | Control | Control | Feed Day | No | 00:45 | 00:00 - 00:59 | Early Morning | 36,9 | 50  | 51,4 | 51,4 | 18,06 | 539,52 | 132,74 |
|    | 2019/08/23 | CH2276 | Female | Two y/o | Control | Control | Feed Day | No | 00:50 | 00:00 - 00:59 | Early Morning | 36,9 | 46  | 44,8 | 44,8 | 18,06 | 532,38 | 127,99 |
|    | 2019/08/23 | CH2276 | Female | Two y/o | Control | Control | Feed Day | No | 00:55 | 00:00 - 00:59 | Early Morning | 36,8 | 54  | 55,6 | 55,6 | 17,96 | 545,99 | 135,46 |
|    | 2019/08/23 | CH2276 | Female | Two y/o | Control | Control | Feed Day | No | 01:00 | 01:00 - 01:59 | Early Morning | 36,8 | 60  | 36,0 | 36,0 | 17,96 | 554,67 | 120,46 |
|    | 2019/08/23 | CH2276 | Female | Two y/o | Control | Control | Feed Day | No | 01:05 | 01:00 - 01:59 | Early Morning | 36,9 | 56  | 27,8 | 27,8 | 18,06 | 549,01 | 111,58 |
|    | 2019/08/23 | CH2276 | Female | Two y/o | Control | Control | Feed Day | No | 01:10 | 01:00 - 01:59 | Early Morning | 36,9 | 64  | 30,4 | 30,4 | 18,06 | 559,88 | 114,65 |
|    | 2019/08/23 | CH2276 | Female | Two y/o | Control | Control | Feed Day | No | 01:15 | 01:00 - 01:59 | Early Morning | 36,9 | 60  | 32,8 | 32,8 | 18,06 | 554,67 | 117,26 |
|    | 2019/08/23 | CH2276 | Female | Two y/o | Control | Control | Feed Day | No | 01:20 | 01:00 - 01:59 | Early Morning | 36,9 | 48  | 31,8 | 31,8 | 18,06 | 536,04 | 116,20 |
|    | 2019/08/23 | CH2276 | Female | Two y/o | Control | Control | Feed Day | No | 01:25 | 01:00 - 01:59 | Early Morning | 36,9 | 47  | 36,4 | 36,4 | 18,06 | 534,23 | 120,84 |
|    | 2019/08/23 | CH2276 | Female | Two y/o | Control | Control | Feed Day | No | 01:30 | 01:00 - 01:59 | Early Morning | 36,8 | 47  | 32,2 | 32,2 | 17,96 | 534,23 | 116,63 |
|    | 2019/08/23 | CH2276 | Female | Two y/o | Control | Control | Feed Day | No | 01:35 | 01:00 - 01:59 | Early Morning | 36,8 | 53  | 63,8 | 63,8 | 17,96 | 544,43 | 140,22 |
|    | 2019/08/23 | CH2276 | Female | Two y/o | Control | Control | Feed Day | No | 01:40 | 01:00 - 01:59 | Early Morning | 36,8 | 50  | 74,4 | 74,4 | 17,96 | 539,52 | 145,55 |
|    | 2019/08/23 | CH2276 | Female | Two y/o | Control | Control | Feed Day | No | 01:45 | 01:00 - 01:59 | Early Morning | 36,9 | 56  | 76,6 | 76,6 | 18,06 | 549,01 | 146,57 |
|    | 2019/08/23 | CH2276 | Female | Two y/o | Control | Control | Feed Day | No | 01:50 | 01:00 - 01:59 | Early Morning | 36,9 | 50  | 78,0 | 78,0 | 18,06 | 539,52 | 147,20 |
|    | 2019/08/23 | CH2276 | Female | Two y/o | Control | Control | Feed Day | No | 01:55 | 01:00 - 01:59 | Early Morning | 37,0 | 60  | 74,0 | 74,0 | 18,16 | 554,67 | 145,37 |
|    | 2019/08/23 | CH2276 | Female | Two y/o | Control | Control | Feed Day | No | 02:00 | 02:00 - 02:59 | Early Morning | 37,0 | 49  | 72,8 | 72,8 | 18,16 | 537,80 | 144,80 |
|    | 2019/08/23 | CH2276 | Female | Two y/o | Control | Control | Feed Day | No | 02:05 | 02:00 - 02:59 | Early Morning | 37,1 | 58  | 71,2 | 71,2 | 18,26 | 551,90 | 144,03 |
|    | 2019/08/23 | CH2276 | Female | Two y/o | Control | Control | Feed Day | No | 02:10 | 02:00 - 02:59 | Early Morning | 37,1 | 53  | 91,0 | 91,0 | 18,26 | 544,43 | 152,56 |
|    | 2019/08/23 | CH2276 | Female | Two y/o | Control | Control | Feed Day | No | 02:15 | 02:00 - 02:59 | Early Morning | 37,1 | 53  | 77,2 | 77,2 | 18,26 | 544,43 | 146,84 |
|    | 2019/08/23 | CH2276 | Female | Two y/o | Control | Control | Feed Day | No | 02:20 | 02:00 - 02:59 | Early Morning | 37,1 | 61  | 74,0 | 74,0 | 18,26 | 556,01 | 145,37 |
|    | 2019/08/23 | CH2276 | Female | Two y/o | Control | Control | Feed Day | No | 02:25 | 02:00 - 02:59 | Early Morning | 37,1 | 52  | 93,6 | 93,6 | 18,26 | 542,83 | 153,54 |
|    | 2019/08/23 | CH2276 | Female | Two y/o | Control | Control | Feed Day | No | 02:30 | 02:00 - 02:59 | Early Morning | 37,1 |     | 64,0 | 64,0 | 18,26 |        | 140,33 |
|    | 2019/08/23 | CH2276 | Female | Two y/o | Control | Control | Feed Day | No | 02:35 | 02:00 - 02:59 | Early Morning | 37,1 | 64  | 37,4 | 37,4 | 18,26 | 559,88 | 121,77 |
|    | 2019/08/23 | CH2276 | Female | Two y/o | Control | Control | Feed Day | No | 02:40 | 02:00 - 02:59 | Early Morning | 37,0 | 46  | 40,8 | 40,8 | 18,16 | 532,38 | 124,77 |
|    | 2019/08/23 | CH2276 | Female | Two y/o | Control | Control | Feed Day | No | 02:45 | 02:00 - 02:59 | Early Morning | 37,0 | 60  | 39,4 | 39,4 | 18,16 | 554,67 | 123,57 |
|    | 2019/08/23 | CH2276 | Female | Two y/o | Control | Control | Feed Day | No | 02:50 | 02:00 - 02:59 | Early Morning | 37,0 | 55  | 40,4 | 40,4 | 18,16 | 547,52 | 124,43 |
|    | 2019/08/23 | CH2276 | Female | Two y/o | Control | Control | Feed Day | No | 02:55 | 02:00 - 02:59 | Early Morning | 37,0 | 52  | 44,2 | 44,2 | 18,16 | 542,83 | 127,53 |
|    | 2019/08/23 | CH2276 | Female | Two y/o | Control | Control | Feed Day | No | 03:00 | 03:00 - 03:59 | Early Morning | 37,0 | 48  | 47,8 | 47,8 | 18,16 | 536,04 | 130,23 |
|    | 2019/08/23 | CH2276 | Female | Two y/o | Control | Control | Feed Day | No | 03:05 | 03:00 - 03:59 | Early Morning | 37,0 | 46  | 46,2 | 46,2 | 18,16 | 532,38 | 129,06 |
|    | 2019/08/23 | CH2276 | Female | Two y/o | Control | Control | Feed Day | No | 03:10 | 03:00 - 03:59 | Early Morning | 37,0 | 48  | 45,0 | 45,0 | 18,16 | 536,04 | 128,15 |
|    | 2019/08/23 | CH2276 | Female | Two y/o | Control | Control | Feed Day | No | 03:15 | 03:00 - 03:59 | Early Morning | 37,0 | 64  | 42,6 | 42,6 | 18,16 | 559,88 | 126,26 |
|    | 2019/08/23 | CH2276 | Female | Two y/o | Control | Control | Feed Day | No | 03:20 | 03:00 - 03:59 | Early Morning | 36,9 | 47  | 44,8 | 44,8 | 18,06 | 534,23 | 127,99 |
|    | 2019/08/23 | CH2276 | Female | Two y/o | Control | Control | Feed Day | No | 03:25 | 03:00 - 03:59 | Early Morning | 36,9 | 60  | 47,4 | 47,4 | 18,06 | 554,67 | 129,94 |
|    | 2019/08/23 | CH2276 | Female | Two y/o | Control | Control | Feed Day | No | 03:30 | 03:00 - 03:59 | Early Morning | 36,9 | 51  | 45,6 | 45,6 | 18,06 | 541,20 | 128,61 |
|    | 2019/08/23 | CH2276 | Female | Two y/o | Control | Control | Feed Day | No | 03:35 | 03:00 - 03:59 | Early Morning | 36,9 | 58  | 48,6 | 48,6 | 18,06 | 551,90 | 130,81 |
|    | 2019/08/23 | CH2276 | Female | Two y/o | Control | Control | Feed Day | No | 03:40 | 03:00 - 03:59 | Early Morning | 36,9 | 70  | 51,8 | 51,8 | 18,06 | 566,99 | 133,01 |
|    | 2019/08/23 | CH2276 | Female | Two y/o | Control | Control | Feed Day | No | 03:45 | 03:00 - 03:59 | Early Morning | 36,8 | 55  | 52,0 | 52,0 | 17,96 | 547,52 | 133,14 |
|    | 2019/08/23 | CH2276 | Female | Two y/o | Control | Control | Feed Day | No | 03:50 | 03:00 - 03:59 | Early Morning | 36,9 | 48  | 61,0 | 61,0 | 18,06 | 536,04 | 138,67 |
|    | 2019/08/23 | CH2276 | Female | Two y/o | Control | Control | Feed Day | No | 03:55 | 03:00 - 03:59 | Early Morning | 36,9 | 49  | 64,6 | 64,6 | 18,06 | 537,80 | 140,65 |
|    | 2019/08/23 | CH2276 | Female | Two y/o | Control | Control | Feed Day | No | 04:00 | 04:00 - 04:59 | Morning       | 36,8 | 64  | 66,0 | 66,0 | 17,96 | 559,88 | 141,40 |
|    | 2019/08/23 | CH2276 | Female | Two y/o | Control | Control | Feed Day | No | 04:05 | 04:00 - 04:59 | Morning       | 36,8 | 54  | 67,6 | 67,6 | 17,96 | 545,99 | 142,23 |
|    | 2019/08/23 | CH2276 | Female | Two y/o | Control | Control | Feed Day | No | 04:10 | 04:00 - 04:59 | Morning       | 36,8 | 44  | 69,0 | 69,0 | 17,96 | 528,51 | 142,94 |
|    | 2019/08/23 | CH2276 | Female | Two y/o | Control | Control | Feed Day | No | 04:15 | 04:00 - 04:59 | Morning       | 36,8 | 57  | 70,6 | 70,6 | 17,96 | 550,47 | 143,73 |
|    | 2019/08/23 | CH2276 | Female | Two y/o | Control | Control | Feed Day | No | 04:20 | 04:00 - 04:59 | Morning       | 36,8 | 63  | 67,6 | 67,6 | 17,96 | 558,62 | 142,23 |
|    | 2019/08/23 | CH2276 | Female | Two y/o | Control | Control | Feed Day | No | 04:25 | 04:00 - 04:59 | Morning       | 36,8 | 52  | 74,0 | 74,0 | 17,96 | 542,83 | 145,37 |
|    | 2019/08/23 | CH2276 | Female | Two y/o | Control | Control | Feed Day | No | 04:30 | 04:00 - 04:59 | Morning       | 36,8 | 47  | 76,0 | 76,0 | 17,96 | 534,23 | 146,29 |
|    | 2019/08/23 | CH2276 | Female | Two y/o | Control | Control | Feed Day | No | 04:35 | 04:00 - 04:59 | Morning       | 36,8 | 60  | 74,4 | 74,4 | 17,96 | 554,67 | 145,55 |
|    | 2019/08/23 | CH2276 | Female | Two y/o | Control | Control | Feed Day | No | 04:40 | 04:00 - 04:59 | Morning       | 36,8 | 62  | 73,8 | 73,8 | 17,96 | 557,33 | 145,27 |
|    | 2019/08/23 | CH2276 | Female | Two y/o | Control | Control | Feed Day | No | 04:45 | 04:00 - 04:59 | Morning       | 36,8 | 51  | 92,2 | 92,2 | 17,96 | 541,20 | 153,01 |
|    | 2019/08/23 | CH2276 | Female | Two y/o | Control | Control | Feed Day | No | 04:50 | 04:00 - 04:59 | Morning       | 36,9 | 98  | 71,4 | 71,4 | 18,06 | 592,41 | 144,12 |



|            |        |        |         |         |         |          |     |       |               |              |      |     |       |       |       |        |        |
|------------|--------|--------|---------|---------|---------|----------|-----|-------|---------------|--------------|------|-----|-------|-------|-------|--------|--------|
| 2019/08/23 | CH2276 | Female | Two y/o | Control | Control | Feed Day | No  | 04:55 | 04:00 - 04:59 | Morning      | 36,9 | 92  | 114,8 | 114,8 | 18,06 | 587,78 | 160,66 |
| 2019/08/23 | CH2276 | Female | Two y/o | Control | Control | Feed Day | No  | 05:00 | 05:00 - 05:59 | Morning      | 37,0 | 34  | 17,0  | 17,0  | 18,16 | 505,29 | 94,77  |
| 2019/08/23 | CH2276 | Female | Two y/o | Control | Control | Feed Day | No  | 05:05 | 05:00 - 05:59 | Morning      | 37,4 | 102 | 200,6 | 200,6 | 18,55 | 595,30 | 180,22 |
| 2019/08/23 | CH2276 | Female | Two y/o | Control | Control | Feed Day | No  | 05:10 | 05:00 - 05:59 | Morning      | 37,4 | 129 | 95,0  | 95,0  | 18,55 | 611,75 | 154,06 |
| 2019/08/23 | CH2276 | Female | Two y/o | Control | Control | Feed Day | No  | 05:15 | 05:00 - 05:59 | Morning      | 37,5 | 123 | 90,4  | 90,4  | 18,65 | 608,49 | 152,33 |
| 2019/08/23 | CH2276 | Female | Two y/o | Control | Control | Feed Day | No  | 05:20 | 05:00 - 05:59 | Morning      | 37,6 | 56  | 176,6 | 176,6 | 18,75 | 549,01 | 175,74 |
| 2019/08/23 | CH2276 | Female | Two y/o | Control | Control | Feed Day | No  | 05:25 | 05:00 - 05:59 | Morning      | 37,7 | 147 | 265,4 | 265,4 | 18,85 | 620,52 | 190,09 |
| 2019/08/23 | CH2276 | Female | Two y/o | Control | Control | Feed Day | No  | 05:30 | 05:00 - 05:59 | Morning      | 37,8 | 94  | 71,0  | 71,0  | 18,95 | 589,37 | 143,93 |
| 2019/08/23 | CH2276 | Female | Two y/o | Control | Control | Feed Day | No  | 05:35 | 05:00 - 05:59 | Morning      | 37,8 | 104 | 135,6 | 135,6 | 18,95 | 596,69 | 166,48 |
| 2019/08/23 | CH2276 | Female | Two y/o | Control | Control | Feed Day | No  | 05:40 | 05:00 - 05:59 | Morning      | 37,9 | 99  | 60,0  | 60,0  | 19,05 | 593,14 | 138,09 |
| 2019/08/23 | CH2276 | Female | Two y/o | Control | Control | Feed Day | No  | 05:45 | 05:00 - 05:59 | Morning      | 37,9 | 74  | 124,8 | 124,8 | 19,05 | 571,33 | 163,58 |
| 2019/08/23 | CH2276 | Female | Two y/o | Control | Control | Feed Day | No  | 05:50 | 05:00 - 05:59 | Morning      | 37,9 | 96  | 591,4 | 591,4 | 19,05 | 590,91 | 218,53 |
| 2019/08/23 | CH2276 | Female | Two y/o | Control | Control | Feed Day | No  | 05:55 | 05:00 - 05:59 | Morning      | 37,9 | 124 | 123,2 | 123,2 | 19,05 | 609,04 | 163,13 |
| 2019/08/23 | CH2276 | Female | Two y/o | Control | Control | Feed Day | No  | 06:00 | 06:00 - 06:59 | Morning      | 37,9 | 118 | 910,4 |       | 19,05 | 605,61 |        |
| 2019/08/23 | CH2276 | Female | Two y/o | Control | Control | Feed Day | No  | 06:05 | 06:00 - 06:59 | Morning      | 37,9 | 89  | 154,6 | 154,6 | 19,05 | 585,33 | 171,08 |
| 2019/08/23 | CH2276 | Female | Two y/o | Control | Control | Feed Day | No  | 06:10 | 06:00 - 06:59 | Morning      | 37,9 | 150 | 322,6 | 322,6 | 19,05 | 621,86 | 196,99 |
| 2019/08/23 | CH2276 | Female | Two y/o | Control | Control | Feed Day | No  | 06:15 | 06:00 - 06:59 | Morning      | 37,9 | 94  | 287,4 | 287,4 | 19,05 | 589,37 | 192,90 |
| 2019/08/23 | CH2276 | Female | Two y/o | Control | Control | Feed Day | No  | 06:20 | 06:00 - 06:59 | Morning      | 37,9 | 61  | 212,4 | 212,4 | 19,05 | 556,01 | 182,24 |
| 2019/08/23 | CH2276 | Female | Two y/o | Control | Control | Feed Day | No  | 06:25 | 06:00 - 06:59 | Morning      | 37,9 | 84  | 570,2 | 570,2 | 19,05 | 581,01 | 217,23 |
| 2019/08/23 | CH2276 | Female | Two y/o | Control | Control | Feed Day | No  | 06:30 | 06:00 - 06:59 | Morning      | 37,9 | 106 | 142,4 | 142,4 | 19,05 | 598,06 | 168,20 |
| 2019/08/23 | CH2276 | Female | Two y/o | Control | Control | Feed Day | No  | 06:35 | 06:00 - 06:59 | Morning      | 37,9 | 128 | 346,4 | 346,4 | 19,05 | 611,22 | 199,51 |
| 2019/08/23 | CH2276 | Female | Two y/o | Control | Control | Feed Day | No  | 06:40 | 06:00 - 06:59 | Morning      | 37,9 | 71  | 89,4  | 89,4  | 19,05 | 568,10 | 151,94 |
| 2019/08/23 | CH2276 | Female | Two y/o | Control | Control | Feed Day | No  | 06:45 | 06:00 - 06:59 | Morning      | 37,9 | 108 | 203,0 | 203,0 | 19,05 | 599,39 | 180,64 |
| 2019/08/23 | CH2276 | Female | Two y/o | Control | Control | Feed Day | No  | 06:50 | 06:00 - 06:59 | Morning      | 38,2 | 115 | 299,0 | 299,0 | 19,36 | 603,82 | 194,30 |
| 2019/08/23 | CH2276 | Female | Two y/o | Control | Control | Feed Day | No  | 06:55 | 06:00 - 06:59 | Morning      | 38,2 | 32  | 102,4 | 102,4 | 19,36 | 499,63 | 156,67 |
| 2019/08/23 | CH2276 | Female | Two y/o | Control | Control | Feed Day | No  | 07:00 | 07:00 - 07:59 | Morning      | 38,1 |     | 201,6 | 201,6 | 19,26 |        | 180,40 |
| 2019/08/23 | CH2276 | Female | Two y/o | Control | Control | Feed Day | No  | 07:05 | 07:00 - 07:59 | Morning      | 38,0 | 141 | 116,4 | 116,4 | 19,15 | 617,75 | 161,14 |
| 2019/08/23 | CH2276 | Female | Two y/o | Control | Control | Feed Day | No  | 07:10 | 07:00 - 07:59 | Morning      | 38,0 | 71  | 121,6 | 121,6 | 19,15 | 568,10 | 162,67 |
| 2019/08/23 | CH2276 | Female | Two y/o | Control | Control | Feed Day | No  | 07:15 | 07:00 - 07:59 | Morning      | 37,9 | 119 | 705,2 | 705,2 | 19,05 | 606,20 | 224,82 |
| 2019/08/23 | CH2276 | Female | Two y/o | Control | Control | Feed Day | No  | 07:20 | 07:00 - 07:59 | Morning      | 38,5 | 84  | 270,2 | 270,2 | 19,66 | 581,01 | 190,72 |
| 2019/08/23 | CH2276 | Female | Two y/o | Control | Control | Feed Day | No  | 07:25 | 07:00 - 07:59 | Morning      | 38,5 |     | 194,4 | 194,4 | 19,66 |        | 179,12 |
| 2019/08/23 | CH2276 | Female | Two y/o | Control | Control | Feed Day | No  | 07:30 | 07:00 - 07:59 | Morning      | 38,4 | 129 | 220,4 | 220,4 | 19,56 | 611,75 | 183,54 |
| 2019/08/23 | CH2276 | Female | Two y/o | Control | Control | Feed Day | No  | 07:35 | 07:00 - 07:59 | Morning      | 38,2 | 88  | 193,8 | 193,8 | 19,36 | 584,49 | 179,01 |
| 2019/08/23 | CH2276 | Female | Two y/o | Control | Control | Feed Day | No  | 07:40 | 07:00 - 07:59 | Morning      | 38,1 | 108 | 551,4 | 551,4 | 19,26 | 599,39 | 216,03 |
| 2019/08/23 | CH2276 | Female | Two y/o | Control | Control | Feed Day | No  | 07:45 | 07:00 - 07:59 | Morning      | 38,0 | 92  | 135,2 | 135,2 | 19,15 | 587,78 | 166,38 |
| 2019/08/23 | CH2276 | Female | Two y/o | Control | Control | Feed Day | No  | 07:50 | 07:00 - 07:59 | Morning      | 38,0 | 57  | 185,4 | 185,4 | 19,15 | 550,47 | 177,45 |
| 2019/08/23 | CH2276 | Female | Two y/o | Control | Control | Feed Day | No  | 07:55 | 07:00 - 07:59 | Morning      | 37,9 | 103 | 166,2 | 166,2 | 19,05 | 596,00 | 173,61 |
| 2019/08/23 | CH2276 | Female | Two y/o | Control | Control | Feed Day | No  | 08:00 | 08:00 - 08:59 | Late Morning | 37,9 | 59  | 365,0 | 365,0 | 19,05 | 553,30 | 201,37 |
| 2019/08/23 | CH2276 | Female | Two y/o | Control | Control | Feed Day | No  | 08:05 | 08:00 - 08:59 | Late Morning | 37,8 | 119 | 137,6 | 137,6 | 18,95 | 606,20 | 166,99 |
| 2019/08/23 | CH2276 | Female | Two y/o | Control | Control | Feed Day | No  | 08:10 | 08:00 - 08:59 | Late Morning | 37,8 | 74  | 71,4  | 71,4  | 18,95 | 571,33 | 144,12 |
| 2019/08/23 | CH2276 | Female | Two y/o | Control | Control | Feed Day | No  | 08:15 | 08:00 - 08:59 | Late Morning | 37,8 |     | 47,2  | 47,2  | 18,95 |        | 129,80 |
| 2019/08/23 | CH2276 | Female | Two y/o | Control | Control | Feed Day | No  | 08:20 | 08:00 - 08:59 | Late Morning | 37,8 | 66  | 57,4  | 57,4  | 18,95 | 562,34 | 136,56 |
| 2019/08/23 | CH2276 | Female | Two y/o | Control | Control | Feed Day | No  | 08:25 | 08:00 - 08:59 | Late Morning | 37,8 | 73  | 421,2 | 421,2 | 18,95 | 570,27 | 206,45 |
| 2019/08/23 | CH2276 | Female | Two y/o | Control | Control | Feed Day | Yes | 08:30 | 08:00 - 08:59 | Late Morning | 37,9 | 119 | 286,2 | 286,2 | 19,05 | 606,20 | 192,76 |
| 2019/08/23 | CH2276 | Female | Two y/o | Control | Control | Feed Day | Yes | 08:35 | 08:00 - 08:59 | Late Morning | 37,8 |     | 112,4 | 112,4 | 18,95 |        | 159,92 |
| 2019/08/23 | CH2276 | Female | Two y/o | Control | Control | Feed Day | Yes | 08:40 | 08:00 - 08:59 | Late Morning | 37,8 |     | 661,0 | 661,0 | 18,95 |        | 222,50 |
| 2019/08/23 | CH2276 | Female | Two y/o | Control | Control | Feed Day | Yes | 08:45 | 08:00 - 08:59 | Late Morning | 38,3 |     | 60,4  | 60,4  | 19,46 |        | 138,32 |
| 2019/08/23 | CH2276 | Female | Two y/o | Control | Control | Feed Day | Yes | 08:50 | 08:00 - 08:59 | Late Morning | 38,2 |     | 37,6  | 37,6  | 19,36 |        | 121,96 |
| 2019/08/23 | CH2276 | Female | Two y/o | Control | Control | Feed Day | Yes | 08:55 | 08:00 - 08:59 | Late Morning | 38,2 |     | 49,2  | 49,2  | 19,36 |        | 131,23 |
| 2019/08/23 | CH2276 | Female | Two y/o | Control | Control | Feed Day | Yes | 09:00 | 09:00 - 09:59 | Late Morning | 38,0 | 123 | 45,8  | 45,8  | 19,15 | 608,49 | 128,76 |
| 2019/08/23 | CH2276 | Female | Two y/o | Control | Control | Feed Day | Yes | 09:05 | 09:00 - 09:59 | Late Morning | 38,0 |     | 59,2  | 59,2  | 19,15 |        | 137,63 |
| 2019/08/23 | CH2276 | Female | Two y/o | Control | Control | Feed Day | Yes | 09:10 | 09:00 - 09:59 | Late Morning | 38,0 | 143 | 65,2  | 65,2  | 19,15 | 618,69 | 140,97 |
| 2019/08/23 | CH2276 | Female | Two y/o | Control | Control | Feed Day | Yes | 09:15 | 09:00 - 09:59 | Late Morning | 38,0 | 111 | 87,8  | 87,8  | 19,15 | 601,33 | 151,31 |
| 2019/08/23 | CH2276 | Female | Two y/o | Control | Control | Feed Day | Yes | 09:20 | 09:00 - 09:59 | Late Morning | 38,0 | 102 | 64,8  | 64,8  | 19,15 | 595,30 | 140,76 |
| 2019/08/23 | CH2276 | Female | Two y/o | Control | Control | Feed Day | Yes | 09:25 | 09:00 - 09:59 | Late Morning | 38,0 | 99  | 209,0 | 209,0 | 19,15 | 593,14 | 181,67 |
| 2019/08/23 | CH2276 | Female | Two y/o | Control | Control | Feed Day | No  | 09:30 | 09:00 - 09:59 | Late Morning | 38,0 | 115 | 131,0 | 131,0 | 19,15 | 603,82 | 165,27 |
| 2019/08/23 | CH2276 | Female | Two y/o | Control | Control | Feed Day | No  | 09:35 | 09:00 - 09:59 | Late Morning | 38,0 | 96  | 97,4  | 97,4  | 19,15 | 590,91 | 154,93 |
| 2019/08/23 | CH2276 | Female | Two y/o | Control | Control | Feed Day | No  | 09:40 | 09:00 - 09:59 | Late Morning | 38,0 | 89  | 77,0  | 77,0  | 19,15 | 585,33 | 146,75 |
| 2019/08/23 | CH2276 | Female | Two y/o | Control | Control | Feed Day | No  | 09:45 | 09:00 - 09:59 | Late Morning | 38,0 | 86  | 107,8 | 107,8 | 19,15 | 582,77 | 158,46 |
| 2019/08/23 | CH2276 | Female | Two y/o | Control | Control | Feed Day | No  | 09:50 | 09:00 - 09:59 | Late Morning | 38,0 | 103 | 68,6  | 68,6  | 19,15 | 596,00 | 142,74 |
| 2019/08/23 | CH2276 | Female | Two y/o | Control | Control | Feed Day | No  | 09:55 | 09:00 - 09:59 | Late Morning | 38,0 |     | 67,4  | 67,4  | 19,15 |        | 142,12 |
| 2019/08/23 | CH2276 | Female | Two y/o | Control | Control | Feed Day | No  | 10:00 | 10:00 - 10:59 | Late Morning | 38,0 | 78  | 66,2  | 66,2  | 19,15 | 575,38 | 141,50 |
| 2019/08/23 | CH2276 | Female | Two y/o | Control | Control | Feed Day | No  | 10:05 | 10:00 - 10:59 | Late Morning | 38,0 | 66  | 88,4  | 88,4  | 19,15 | 562,34 | 151,55 |
| 2019/08/23 | CH2276 | Female | Two y/o | Control | Control | Feed Day | No  | 10:10 | 10:00 - 10:59 | Late Morning | 38,0 | 167 | 68,0  | 68,0  | 19,15 | 628,84 | 142,43 |
| 2019/08/23 | CH2276 | Female | Two y/o | Control | Control | Feed Day | No  | 10:15 | 10:00 - 10:59 | Late Morning | 38,0 | 90  | 216,0 | 216,0 | 19,15 | 586,16 | 182,83 |
| 2019/08/23 | CH2276 | Female | Two y/o | Control | Control | Feed Day | No  | 10:20 | 10:00 - 10:59 | Late Morning | 38,0 | 147 | 93,6  | 93,6  | 19,15 | 620,52 | 153,54 |
| 2019/08/23 | CH2276 | Female | Two y/o | Control | Control | Feed Day | No  | 10:25 | 10:00 - 10:59 | Late Morning | 37,9 | 72  | 72,0  | 72,0  | 19,05 | 569,20 | 144,42 |
| 2019/08/23 | CH2276 | Female | Two y/o | Control | Control | Feed Day | No  | 10:30 | 10:00 - 10:59 | Late Morning | 37,9 | 74  | 71,6  | 71,6  | 19,05 | 571,33 | 144,22 |
| 2019/08/23 | CH2276 | Female | Two y/o | Control | Control | Feed Day | No  | 10:35 | 10:00 - 10:59 | Late Morning | 37,9 | 69  | 71,8  | 71,8  | 19,05 | 565,86 | 144,32 |
| 2019/08/23 | CH2276 | Female | Two y/o | Control | Control | Feed Day | No  | 10:40 | 10:00 - 10:59 | Late Morning | 37,9 | 80  | 71,8  | 71,8  | 19,05 | 577,31 | 144,32 |



|            |        |        |         |         |         |          |     |       |               |              |      |     |       |       |       |        |        |
|------------|--------|--------|---------|---------|---------|----------|-----|-------|---------------|--------------|------|-----|-------|-------|-------|--------|--------|
| 2019/08/23 | CH2276 | Female | Two y/o | Control | Control | Feed Day | No  | 10:45 | 10:00 - 10:59 | Late Morning | 37,9 | 92  | 70,6  | 70,6  | 19,05 | 587,78 | 143,73 |
| 2019/08/23 | CH2276 | Female | Two y/o | Control | Control | Feed Day | No  | 10:50 | 10:00 - 10:59 | Late Morning | 37,9 |     | 71,8  | 71,8  | 19,05 |        | 144,32 |
| 2019/08/23 | CH2276 | Female | Two y/o | Control | Control | Feed Day | No  | 10:55 | 10:00 - 10:59 | Late Morning | 37,9 |     | 53,0  | 53,0  | 19,05 |        | 133,80 |
| 2019/08/23 | CH2276 | Female | Two y/o | Control | Control | Feed Day | No  | 11:00 | 11:00 - 11:59 | Late Morning | 37,9 | 91  | 58,2  | 58,2  | 19,05 | 586,98 | 137,04 |
| 2019/08/23 | CH2276 | Female | Two y/o | Control | Control | Feed Day | No  | 11:05 | 11:00 - 11:59 | Late Morning | 37,9 | 93  | 57,2  | 57,2  | 19,05 | 588,58 | 136,44 |
| 2019/08/23 | CH2276 | Female | Two y/o | Control | Control | Feed Day | No  | 11:10 | 11:00 - 11:59 | Late Morning | 37,9 | 98  | 70,6  | 70,6  | 19,05 | 592,41 | 143,73 |
| 2019/08/23 | CH2276 | Female | Two y/o | Control | Control | Feed Day | No  | 11:15 | 11:00 - 11:59 | Late Morning | 37,8 | 76  | 48,8  | 48,8  | 18,95 | 573,39 | 130,95 |
| 2019/08/23 | CH2276 | Female | Two y/o | Control | Control | Feed Day | No  | 11:20 | 11:00 - 11:59 | Late Morning | 37,9 | 66  | 51,0  | 51,0  | 19,05 | 562,34 | 132,47 |
| 2019/08/23 | CH2276 | Female | Two y/o | Control | Control | Feed Day | No  | 11:25 | 11:00 - 11:59 | Late Morning | 38,0 |     | 58,6  | 58,6  | 19,15 |        | 137,28 |
| 2019/08/23 | CH2276 | Female | Two y/o | Control | Control | Feed Day | No  | 11:30 | 11:00 - 11:59 | Late Morning | 38,0 | 64  | 70,4  | 70,4  | 19,15 | 559,88 | 143,64 |
| 2019/08/23 | CH2276 | Female | Two y/o | Control | Control | Feed Day | No  | 11:35 | 11:00 - 11:59 | Late Morning | 38,0 | 65  | 76,6  | 76,6  | 19,15 | 561,12 | 146,57 |
| 2019/08/23 | CH2276 | Female | Two y/o | Control | Control | Feed Day | No  | 11:40 | 11:00 - 11:59 | Late Morning | 38,0 | 64  | 69,8  | 69,8  | 19,15 | 559,88 | 143,34 |
| 2019/08/23 | CH2276 | Female | Two y/o | Control | Control | Feed Day | No  | 11:45 | 11:00 - 11:59 | Late Morning | 38,0 | 64  | 72,4  | 72,4  | 19,15 | 559,88 | 144,61 |
| 2019/08/23 | CH2276 | Female | Two y/o | Control | Control | Feed Day | No  | 11:50 | 11:00 - 11:59 | Late Morning | 38,0 | 68  | 65,4  | 65,4  | 19,15 | 564,71 | 141,08 |
| 2019/08/23 | CH2276 | Female | Two y/o | Control | Control | Feed Day | No  | 11:55 | 11:00 - 11:59 | Late Morning | 38,0 | 63  | 52,0  | 52,0  | 19,15 | 558,62 | 133,14 |
| 2019/08/23 | CH2276 | Female | Two y/o | Control | Control | Feed Day | No  | 12:00 | 12:00 - 12:59 | Afternoon    | 37,9 | 68  | 71,2  | 71,2  | 19,05 | 564,71 | 144,03 |
| 2019/08/23 | CH2276 | Female | Two y/o | Control | Control | Feed Day | No  | 12:05 | 12:00 - 12:59 | Afternoon    | 37,9 | 67  | 73,2  | 73,2  | 19,05 | 563,53 | 144,99 |
| 2019/08/23 | CH2276 | Female | Two y/o | Control | Control | Feed Day | No  | 12:10 | 12:00 - 12:59 | Afternoon    | 37,8 | 68  | 74,8  | 74,8  | 18,95 | 564,71 | 145,74 |
| 2019/08/23 | CH2276 | Female | Two y/o | Control | Control | Feed Day | No  | 12:15 | 12:00 - 12:59 | Afternoon    | 37,8 | 63  | 74,0  | 74,0  | 18,95 | 558,62 | 145,37 |
| 2019/08/23 | CH2276 | Female | Two y/o | Control | Control | Feed Day | No  | 12:20 | 12:00 - 12:59 | Afternoon    | 37,8 |     | 69,2  | 69,2  | 18,95 |        | 143,04 |
| 2019/08/23 | CH2276 | Female | Two y/o | Control | Control | Feed Day | No  | 12:25 | 12:00 - 12:59 | Afternoon    | 37,8 | 65  | 72,0  | 72,0  | 18,95 | 561,12 | 144,42 |
| 2019/08/23 | CH2276 | Female | Two y/o | Control | Control | Feed Day | No  | 12:30 | 12:00 - 12:59 | Afternoon    | 37,7 | 63  | 70,6  | 70,6  | 18,85 | 558,62 | 143,73 |
| 2019/08/23 | CH2276 | Female | Two y/o | Control | Control | Feed Day | No  | 12:35 | 12:00 - 12:59 | Afternoon    | 37,7 | 60  | 56,4  | 56,4  | 18,85 | 554,67 | 135,95 |
| 2019/08/23 | CH2276 | Female | Two y/o | Control | Control | Feed Day | No  | 12:40 | 12:00 - 12:59 | Afternoon    | 37,7 | 58  | 71,0  | 71,0  | 18,85 | 551,90 | 143,93 |
| 2019/08/23 | CH2276 | Female | Two y/o | Control | Control | Feed Day | No  | 12:45 | 12:00 - 12:59 | Afternoon    | 37,7 | 58  | 73,4  | 73,4  | 18,85 | 551,90 | 145,08 |
| 2019/08/23 | CH2276 | Female | Two y/o | Control | Control | Feed Day | No  | 12:50 | 12:00 - 12:59 | Afternoon    | 37,7 | 58  | 73,8  | 73,8  | 18,85 | 551,90 | 145,27 |
| 2019/08/23 | CH2276 | Female | Two y/o | Control | Control | Feed Day | No  | 12:55 | 12:00 - 12:59 | Afternoon    | 37,7 | 60  | 58,8  | 58,8  | 18,85 | 554,67 | 137,39 |
| 2019/08/23 | CH2276 | Female | Two y/o | Control | Control | Feed Day | No  | 13:00 | 13:00 - 13:59 | Afternoon    | 37,7 | 74  | 59,0  | 59,0  | 18,85 | 571,33 | 137,51 |
| 2019/08/23 | CH2276 | Female | Two y/o | Control | Control | Feed Day | No  | 13:05 | 13:00 - 13:59 | Afternoon    | 37,7 | 64  | 66,6  | 66,6  | 18,85 | 559,88 | 141,71 |
| 2019/08/23 | CH2276 | Female | Two y/o | Control | Control | Feed Day | No  | 13:10 | 13:00 - 13:59 | Afternoon    | 37,7 | 72  | 49,2  | 49,2  | 18,85 | 569,20 | 131,23 |
| 2019/08/23 | CH2276 | Female | Two y/o | Control | Control | Feed Day | No  | 13:15 | 13:00 - 13:59 | Afternoon    | 37,7 | 61  | 66,4  | 66,4  | 18,85 | 556,01 | 141,61 |
| 2019/08/23 | CH2276 | Female | Two y/o | Control | Control | Feed Day | No  | 13:20 | 13:00 - 13:59 | Afternoon    | 37,7 | 60  | 59,2  | 59,2  | 18,85 | 554,67 | 137,63 |
| 2019/08/23 | CH2276 | Female | Two y/o | Control | Control | Feed Day | No  | 13:25 | 13:00 - 13:59 | Afternoon    | 37,7 | 63  | 62,8  | 62,8  | 18,85 | 558,62 | 139,67 |
| 2019/08/23 | CH2276 | Female | Two y/o | Control | Control | Feed Day | No  | 13:30 | 13:00 - 13:59 | Afternoon    | 37,7 | 58  | 69,8  | 69,8  | 18,85 | 551,90 | 143,34 |
| 2019/08/23 | CH2276 | Female | Two y/o | Control | Control | Feed Day | No  | 13:35 | 13:00 - 13:59 | Afternoon    | 37,7 | 147 | 70,6  | 70,6  | 18,85 | 620,52 | 143,73 |
| 2019/08/23 | CH2276 | Female | Two y/o | Control | Control | Feed Day | No  | 13:40 | 13:00 - 13:59 | Afternoon    | 37,7 | 61  | 69,2  | 69,2  | 18,85 | 556,01 | 143,04 |
| 2019/08/23 | CH2276 | Female | Two y/o | Control | Control | Feed Day | No  | 13:45 | 13:00 - 13:59 | Afternoon    | 37,7 | 56  | 76,6  | 76,6  | 18,85 | 549,01 | 146,57 |
| 2019/08/23 | CH2276 | Female | Two y/o | Control | Control | Feed Day | No  | 13:50 | 13:00 - 13:59 | Afternoon    | 37,7 | 61  | 73,8  | 73,8  | 18,85 | 556,01 | 145,27 |
| 2019/08/23 | CH2276 | Female | Two y/o | Control | Control | Feed Day | No  | 13:55 | 13:00 - 13:59 | Afternoon    | 37,6 | 66  | 70,2  | 70,2  | 18,75 | 562,34 | 143,54 |
| 2019/08/23 | CH2276 | Female | Two y/o | Control | Control | Feed Day | No  | 14:00 | 14:00 - 14:59 | Afternoon    | 37,6 | 61  | 69,2  | 69,2  | 18,75 | 556,01 | 143,04 |
| 2019/08/23 | CH2276 | Female | Two y/o | Control | Control | Feed Day | No  | 14:05 | 14:00 - 14:59 | Afternoon    | 37,6 | 60  | 70,4  | 70,4  | 18,75 | 554,67 | 143,64 |
| 2019/08/23 | CH2276 | Female | Two y/o | Control | Control | Feed Day | No  | 14:10 | 14:00 - 14:59 | Afternoon    | 37,6 | 63  | 67,6  | 67,6  | 18,75 | 558,62 | 142,23 |
| 2019/08/23 | CH2276 | Female | Two y/o | Control | Control | Feed Day | No  | 14:15 | 14:00 - 14:59 | Afternoon    | 37,6 | 66  | 65,8  | 65,8  | 18,75 | 562,34 | 141,29 |
| 2019/08/23 | CH2276 | Female | Two y/o | Control | Control | Feed Day | No  | 14:20 | 14:00 - 14:59 | Afternoon    | 37,6 | 63  | 64,0  | 64,0  | 18,75 | 558,62 | 140,33 |
| 2019/08/23 | CH2276 | Female | Two y/o | Control | Control | Feed Day | No  | 14:25 | 14:00 - 14:59 | Afternoon    | 37,6 | 60  | 63,4  | 63,4  | 18,75 | 554,67 | 140,00 |
| 2019/08/23 | CH2276 | Female | Two y/o | Control | Control | Feed Day | No  | 14:30 | 14:00 - 14:59 | Afternoon    | 37,5 | 58  | 70,4  | 70,4  | 18,65 | 551,90 | 143,64 |
| 2019/08/23 | CH2276 | Female | Two y/o | Control | Control | Feed Day | No  | 14:35 | 14:00 - 14:59 | Afternoon    | 37,5 | 60  | 66,4  | 66,4  | 18,65 | 554,67 | 141,61 |
| 2019/08/23 | CH2276 | Female | Two y/o | Control | Control | Feed Day | No  | 14:40 | 14:00 - 14:59 | Afternoon    | 37,5 | 63  | 64,0  | 64,0  | 18,65 | 558,62 | 140,33 |
| 2019/08/23 | CH2276 | Female | Two y/o | Control | Control | Feed Day | No  | 14:45 | 14:00 - 14:59 | Afternoon    | 37,5 | 70  | 70,0  | 70,0  | 18,65 | 566,99 | 143,44 |
| 2019/08/23 | CH2276 | Female | Two y/o | Control | Control | Feed Day | No  | 14:50 | 14:00 - 14:59 | Afternoon    | 37,5 | 60  | 71,2  | 71,2  | 18,65 | 554,67 | 144,03 |
| 2019/08/23 | CH2276 | Female | Two y/o | Control | Control | Feed Day | No  | 14:55 | 14:00 - 14:59 | Afternoon    | 37,5 | 61  | 66,0  | 66,0  | 18,65 | 556,01 | 141,40 |
| 2019/08/23 | CH2276 | Female | Two y/o | Control | Control | Feed Day | No  | 15:00 | 15:00 - 15:59 | Afternoon    | 37,5 | 56  | 61,4  | 61,4  | 18,65 | 549,01 | 138,89 |
| 2019/08/23 | CH2276 | Female | Two y/o | Control | Control | Feed Day | No  | 15:05 | 15:00 - 15:59 | Afternoon    | 37,5 | 65  | 72,0  | 72,0  | 18,65 | 561,12 | 144,42 |
| 2019/08/23 | CH2276 | Female | Two y/o | Control | Control | Feed Day | No  | 15:10 | 15:00 - 15:59 | Afternoon    | 37,5 | 61  | 66,0  | 66,0  | 18,65 | 556,01 | 141,40 |
| 2019/08/23 | CH2276 | Female | Two y/o | Control | Control | Feed Day | No  | 15:15 | 15:00 - 15:59 | Afternoon    | 37,6 | 58  | 56,2  | 56,2  | 18,75 | 551,90 | 135,83 |
| 2019/08/23 | CH2276 | Female | Two y/o | Control | Control | Feed Day | No  | 15:20 | 15:00 - 15:59 | Afternoon    | 37,6 | 66  | 64,0  | 64,0  | 18,75 | 562,34 | 140,33 |
| 2019/08/23 | CH2276 | Female | Two y/o | Control | Control | Feed Day | No  | 15:25 | 15:00 - 15:59 | Afternoon    | 37,6 | 63  | 72,0  | 72,0  | 18,75 | 558,62 | 144,42 |
| 2019/08/23 | CH2276 | Female | Two y/o | Control | Control | Feed Day | Yes | 15:30 | 15:00 - 15:59 | Afternoon    | 37,6 | 100 | 121,4 | 121,4 | 18,75 | 593,87 | 162,61 |
| 2019/08/23 | CH2276 | Female | Two y/o | Control | Control | Feed Day | Yes | 15:35 | 15:00 - 15:59 | Afternoon    | 37,6 | 73  | 28,8  | 28,8  | 18,75 | 570,27 | 112,79 |
| 2019/08/23 | CH2276 | Female | Two y/o | Control | Control | Feed Day | Yes | 15:40 | 15:00 - 15:59 | Afternoon    | 37,6 | 103 | 43,4  | 43,4  | 18,75 | 596,00 | 126,90 |
| 2019/08/23 | CH2276 | Female | Two y/o | Control | Control | Feed Day | Yes | 15:45 | 15:00 - 15:59 | Afternoon    | 37,6 | 66  | 55,4  | 55,4  | 18,75 | 562,34 | 135,33 |
| 2019/08/23 | CH2276 | Female | Two y/o | Control | Control | Feed Day | Yes | 15:50 | 15:00 - 15:59 | Afternoon    | 37,7 | 60  | 48,8  | 48,8  | 18,85 | 554,67 | 130,95 |
| 2019/08/23 | CH2276 | Female | Two y/o | Control | Control | Feed Day | Yes | 15:55 | 15:00 - 15:59 | Afternoon    | 37,7 | 63  | 53,6  | 53,6  | 18,85 | 558,62 | 134,19 |
| 2019/08/23 | CH2276 | Female | Two y/o | Control | Control | Feed Day | Yes | 16:00 | 16:00 - 16:59 | Evening      | 37,7 | 62  | 47,6  | 47,6  | 18,85 | 557,33 | 130,09 |
| 2019/08/23 | CH2276 | Female | Two y/o | Control | Control | Feed Day | Yes | 16:05 | 16:00 - 16:59 | Evening      | 37,7 | 106 | 52,8  | 52,8  | 18,85 | 598,06 | 133,67 |
| 2019/08/23 | CH2276 | Female | Two y/o | Control | Control | Feed Day | Yes | 16:10 | 16:00 - 16:59 | Evening      | 37,7 | 65  | 42,6  | 42,6  | 18,85 | 561,12 | 126,26 |
| 2019/08/23 | CH2276 | Female | Two y/o | Control | Control | Feed Day | Yes | 16:15 | 16:00 - 16:59 | Evening      | 37,8 | 67  | 46,8  | 46,8  | 18,95 | 563,53 | 129,50 |
| 2019/08/23 | CH2276 | Female | Two y/o | Control | Control | Feed Day | Yes | 16:20 | 16:00 - 16:59 | Evening      | 37,8 | 64  | 47,4  | 47,4  | 18,95 | 559,88 | 129,94 |
| 2019/08/23 | CH2276 | Female | Two y/o | Control | Control | Feed Day | Yes | 16:25 | 16:00 - 16:59 | Evening      | 37,8 | 64  | 47,6  | 47,6  | 18,95 | 559,88 | 130,09 |
| 2019/08/23 | CH2276 | Female | Two y/o | Control | Control | Feed Day | No  | 16:30 | 16:00 - 16:59 | Evening      | 37,8 | 59  | 50,8  | 50,8  | 18,95 | 553,30 | 132,33 |



|            |        |        |         |         |         |          |    |       |               |         |      |     |       |       |       |        |        |
|------------|--------|--------|---------|---------|---------|----------|----|-------|---------------|---------|------|-----|-------|-------|-------|--------|--------|
| 2019/08/23 | CH2276 | Female | Two y/o | Control | Control | Feed Day | No | 16:35 | 16:00 - 16:59 | Evening | 37,8 | 62  | 43,8  | 43,8  | 18,95 | 557,33 | 127,22 |
| 2019/08/23 | CH2276 | Female | Two y/o | Control | Control | Feed Day | No | 16:40 | 16:00 - 16:59 | Evening | 37,8 | 57  | 49,6  | 49,6  | 18,95 | 550,47 | 131,51 |
| 2019/08/23 | CH2276 | Female | Two y/o | Control | Control | Feed Day | No | 16:45 | 16:00 - 16:59 | Evening | 37,8 | 67  | 49,6  | 49,6  | 18,95 | 563,53 | 131,51 |
| 2019/08/23 | CH2276 | Female | Two y/o | Control | Control | Feed Day | No | 16:50 | 16:00 - 16:59 | Evening | 37,8 | 64  | 77,4  | 77,4  | 18,95 | 559,88 | 146,93 |
| 2019/08/23 | CH2276 | Female | Two y/o | Control | Control | Feed Day | No | 16:55 | 16:00 - 16:59 | Evening | 37,8 | 66  | 46,6  | 46,6  | 18,95 | 562,34 | 129,35 |
| 2019/08/23 | CH2276 | Female | Two y/o | Control | Control | Feed Day | No | 17:00 | 17:00 - 17:59 | Evening | 37,8 | 61  | 60,4  | 60,4  | 18,95 | 556,01 | 138,32 |
| 2019/08/23 | CH2276 | Female | Two y/o | Control | Control | Feed Day | No | 17:05 | 17:00 - 17:59 | Evening | 37,9 | 60  | 43,2  | 43,2  | 19,05 | 554,67 | 126,74 |
| 2019/08/23 | CH2276 | Female | Two y/o | Control | Control | Feed Day | No | 17:10 | 17:00 - 17:59 | Evening | 37,8 | 66  | 51,2  | 51,2  | 18,95 | 562,34 | 132,61 |
| 2019/08/23 | CH2276 | Female | Two y/o | Control | Control | Feed Day | No | 17:15 | 17:00 - 17:59 | Evening | 37,8 | 94  | 50,4  | 50,4  | 18,95 | 589,37 | 132,06 |
| 2019/08/23 | CH2276 | Female | Two y/o | Control | Control | Feed Day | No | 17:20 | 17:00 - 17:59 | Evening | 37,8 | 137 | 69,0  | 69,0  | 18,95 | 615,83 | 142,94 |
| 2019/08/23 | CH2276 | Female | Two y/o | Control | Control | Feed Day | No | 17:25 | 17:00 - 17:59 | Evening | 37,8 | 80  | 48,0  | 48,0  | 18,95 | 577,31 | 130,38 |
| 2019/08/23 | CH2276 | Female | Two y/o | Control | Control | Feed Day | No | 17:30 | 17:00 - 17:59 | Evening | 37,8 | 77  | 79,8  | 79,8  | 18,95 | 574,39 | 147,99 |
| 2019/08/23 | CH2276 | Female | Two y/o | Control | Control | Feed Day | No | 17:35 | 17:00 - 17:59 | Evening | 37,8 | 68  | 58,6  | 58,6  | 18,95 | 564,71 | 137,28 |
| 2019/08/23 | CH2276 | Female | Two y/o | Control | Control | Feed Day | No | 17:40 | 17:00 - 17:59 | Evening | 37,7 | 62  | 69,6  | 69,6  | 18,85 | 557,33 | 143,24 |
| 2019/08/23 | CH2276 | Female | Two y/o | Control | Control | Feed Day | No | 17:45 | 17:00 - 17:59 | Evening | 37,7 | 59  | 92,8  | 92,8  | 18,85 | 553,30 | 153,24 |
| 2019/08/23 | CH2276 | Female | Two y/o | Control | Control | Feed Day | No | 17:50 | 17:00 - 17:59 | Evening | 37,7 | 65  | 62,8  | 62,8  | 18,85 | 561,12 | 139,67 |
| 2019/08/23 | CH2276 | Female | Two y/o | Control | Control | Feed Day | No | 17:55 | 17:00 - 17:59 | Evening | 37,7 | 60  | 64,2  | 64,2  | 18,85 | 554,67 | 140,44 |
| 2019/08/23 | CH2276 | Female | Two y/o | Control | Control | Feed Day | No | 18:00 | 18:00 - 18:59 | Evening | 37,7 | 70  | 63,8  | 63,8  | 18,85 | 566,99 | 140,22 |
| 2019/08/23 | CH2276 | Female | Two y/o | Control | Control | Feed Day | No | 18:05 | 18:00 - 18:59 | Evening | 37,7 | 64  | 59,4  | 59,4  | 18,85 | 559,88 | 137,75 |
| 2019/08/23 | CH2276 | Female | Two y/o | Control | Control | Feed Day | No | 18:10 | 18:00 - 18:59 | Evening | 37,6 | 65  | 66,6  | 66,6  | 18,75 | 561,12 | 141,71 |
| 2019/08/23 | CH2276 | Female | Two y/o | Control | Control | Feed Day | No | 18:15 | 18:00 - 18:59 | Evening | 37,6 | 64  | 55,4  | 55,4  | 18,75 | 559,88 | 135,33 |
| 2019/08/23 | CH2276 | Female | Two y/o | Control | Control | Feed Day | No | 18:20 | 18:00 - 18:59 | Evening | 37,6 | 61  | 55,4  | 55,4  | 18,75 | 556,01 | 135,33 |
| 2019/08/23 | CH2276 | Female | Two y/o | Control | Control | Feed Day | No | 18:25 | 18:00 - 18:59 | Evening | 37,6 | 67  | 128,2 | 128,2 | 18,75 | 563,53 | 164,52 |
| 2019/08/23 | CH2276 | Female | Two y/o | Control | Control | Feed Day | No | 18:30 | 18:00 - 18:59 | Evening | 37,6 | 102 | 80,6  | 80,6  | 18,75 | 595,30 | 148,34 |
| 2019/08/23 | CH2276 | Female | Two y/o | Control | Control | Feed Day | No | 18:35 | 18:00 - 18:59 | Evening | 37,7 | 73  | 102,2 | 102,2 | 18,85 | 570,27 | 156,60 |
| 2019/08/23 | CH2276 | Female | Two y/o | Control | Control | Feed Day | No | 18:40 | 18:00 - 18:59 | Evening | 37,7 | 92  | 129,8 | 129,8 | 18,85 | 587,78 | 164,95 |
| 2019/08/23 | CH2276 | Female | Two y/o | Control | Control | Feed Day | No | 18:45 | 18:00 - 18:59 | Evening | 37,7 |     | 67,6  | 67,6  | 18,85 |        | 142,23 |
| 2019/08/23 | CH2276 | Female | Two y/o | Control | Control | Feed Day | No | 18:50 | 18:00 - 18:59 | Evening | 37,6 | 96  | 59,0  | 59,0  | 18,75 | 590,91 | 137,51 |
| 2019/08/23 | CH2276 | Female | Two y/o | Control | Control | Feed Day | No | 18:55 | 18:00 - 18:59 | Evening | 37,6 | 65  | 54,8  | 54,8  | 18,75 | 561,12 | 134,96 |
| 2019/08/23 | CH2276 | Female | Two y/o | Control | Control | Feed Day | No | 19:00 | 19:00 - 19:59 | Evening | 37,7 | 57  | 54,4  | 54,4  | 18,85 | 550,47 | 134,70 |
| 2019/08/23 | CH2276 | Female | Two y/o | Control | Control | Feed Day | No | 19:05 | 19:00 - 19:59 | Evening | 37,7 | 62  | 57,6  | 57,6  | 18,85 | 557,33 | 136,68 |
| 2019/08/23 | CH2276 | Female | Two y/o | Control | Control | Feed Day | No | 19:10 | 19:00 - 19:59 | Evening | 37,7 | 61  | 59,0  | 59,0  | 18,85 | 556,01 | 137,51 |
| 2019/08/23 | CH2276 | Female | Two y/o | Control | Control | Feed Day | No | 19:15 | 19:00 - 19:59 | Evening | 37,7 | 60  | 57,2  | 57,2  | 18,85 | 554,67 | 136,44 |
| 2019/08/23 | CH2276 | Female | Two y/o | Control | Control | Feed Day | No | 19:20 | 19:00 - 19:59 | Evening | 37,7 | 62  | 58,0  | 58,0  | 18,85 | 557,33 | 136,92 |
| 2019/08/23 | CH2276 | Female | Two y/o | Control | Control | Feed Day | No | 19:25 | 19:00 - 19:59 | Evening | 37,7 | 79  | 64,0  | 64,0  | 18,85 | 576,36 | 140,33 |
| 2019/08/23 | CH2276 | Female | Two y/o | Control | Control | Feed Day | No | 19:30 | 19:00 - 19:59 | Evening | 37,6 | 64  | 62,4  | 62,4  | 18,75 | 559,88 | 139,45 |
| 2019/08/23 | CH2276 | Female | Two y/o | Control | Control | Feed Day | No | 19:35 | 19:00 - 19:59 | Evening | 37,6 | 58  | 61,4  | 61,4  | 18,75 | 551,90 | 138,89 |
| 2019/08/23 | CH2276 | Female | Two y/o | Control | Control | Feed Day | No | 19:40 | 19:00 - 19:59 | Evening | 37,5 | 68  | 59,0  | 59,0  | 18,65 | 564,71 | 137,51 |
| 2019/08/23 | CH2276 | Female | Two y/o | Control | Control | Feed Day | No | 19:45 | 19:00 - 19:59 | Evening | 37,5 | 68  | 53,2  | 53,2  | 18,65 | 564,71 | 133,93 |
| 2019/08/23 | CH2276 | Female | Two y/o | Control | Control | Feed Day | No | 19:50 | 19:00 - 19:59 | Evening | 37,6 | 66  | 47,8  | 47,8  | 18,75 | 562,34 | 130,23 |
| 2019/08/23 | CH2276 | Female | Two y/o | Control | Control | Feed Day | No | 19:55 | 19:00 - 19:59 | Evening | 37,5 | 59  | 45,0  | 45,0  | 18,65 | 553,30 | 128,15 |
| 2019/08/23 | CH2276 | Female | Two y/o | Control | Control | Feed Day | No | 20:00 | 20:00 - 20:59 | Night   | 37,5 | 79  | 91,6  | 91,6  | 18,65 | 576,36 | 152,79 |
| 2019/08/23 | CH2276 | Female | Two y/o | Control | Control | Feed Day | No | 20:05 | 20:00 - 20:59 | Night   | 37,5 |     | 102,6 | 102,6 | 18,65 |        | 156,74 |
| 2019/08/23 | CH2276 | Female | Two y/o | Control | Control | Feed Day | No | 20:10 | 20:00 - 20:59 | Night   | 37,5 |     | 68,0  | 68,0  | 18,65 |        | 142,43 |
| 2019/08/23 | CH2276 | Female | Two y/o | Control | Control | Feed Day | No | 20:15 | 20:00 - 20:59 | Night   | 37,6 | 98  | 139,8 | 139,8 | 18,75 | 592,41 | 167,55 |
| 2019/08/23 | CH2276 | Female | Two y/o | Control | Control | Feed Day | No | 20:20 | 20:00 - 20:59 | Night   | 37,8 | 103 | 58,6  | 58,6  | 18,95 | 596,00 | 137,28 |
| 2019/08/23 | CH2276 | Female | Two y/o | Control | Control | Feed Day | No | 20:25 | 20:00 - 20:59 | Night   | 37,8 | 65  | 46,2  | 46,2  | 18,95 | 561,12 | 129,06 |
| 2019/08/23 | CH2276 | Female | Two y/o | Control | Control | Feed Day | No | 20:30 | 20:00 - 20:59 | Night   | 37,7 | 92  | 746,0 | 746,0 | 18,85 | 587,78 | 226,83 |
| 2019/08/23 | CH2276 | Female | Two y/o | Control | Control | Feed Day | No | 20:35 | 20:00 - 20:59 | Night   | 37,8 | 121 | 100,4 | 100,4 | 18,95 | 607,35 | 155,98 |
| 2019/08/23 | CH2276 | Female | Two y/o | Control | Control | Feed Day | No | 20:40 | 20:00 - 20:59 | Night   | 37,8 | 89  | 253,0 | 253,0 | 18,95 | 585,33 | 188,40 |
| 2019/08/23 | CH2276 | Female | Two y/o | Control | Control | Feed Day | No | 20:45 | 20:00 - 20:59 | Night   | 37,8 | 129 | 102,6 | 102,6 | 18,95 | 611,75 | 156,74 |
| 2019/08/23 | CH2276 | Female | Two y/o | Control | Control | Feed Day | No | 20:50 | 20:00 - 20:59 | Night   | 37,7 | 65  | 46,2  | 46,2  | 18,85 | 561,12 | 129,06 |
| 2019/08/23 | CH2276 | Female | Two y/o | Control | Control | Feed Day | No | 20:55 | 20:00 - 20:59 | Night   | 37,7 | 60  | 58,8  | 58,8  | 18,85 | 554,67 | 137,39 |
| 2019/08/23 | CH2276 | Female | Two y/o | Control | Control | Feed Day | No | 21:00 | 21:00 - 21:59 | Night   | 37,7 |     | 56,8  | 56,8  | 18,85 |        | 136,20 |
| 2019/08/23 | CH2276 | Female | Two y/o | Control | Control | Feed Day | No | 21:05 | 21:00 - 21:59 | Night   | 37,8 |     | 49,8  | 49,8  | 18,95 |        | 131,65 |
| 2019/08/23 | CH2276 | Female | Two y/o | Control | Control | Feed Day | No | 21:10 | 21:00 - 21:59 | Night   | 37,7 |     | 46,2  | 46,2  | 18,85 |        | 129,06 |
| 2019/08/23 | CH2276 | Female | Two y/o | Control | Control | Feed Day | No | 21:15 | 21:00 - 21:59 | Night   | 37,6 | 61  | 43,0  | 43,0  | 18,75 | 556,01 | 126,58 |
| 2019/08/23 | CH2276 | Female | Two y/o | Control | Control | Feed Day | No | 21:20 | 21:00 - 21:59 | Night   | 37,6 | 63  | 37,0  | 37,0  | 18,75 | 558,62 | 121,40 |
| 2019/08/23 | CH2276 | Female | Two y/o | Control | Control | Feed Day | No | 21:25 | 21:00 - 21:59 | Night   | 37,6 | 85  | 65,2  | 65,2  | 18,75 | 581,90 | 140,97 |
| 2019/08/23 | CH2276 | Female | Two y/o | Control | Control | Feed Day | No | 21:30 | 21:00 - 21:59 | Night   | 37,5 | 65  | 65,2  | 65,2  | 18,65 | 561,12 | 140,97 |
| 2019/08/23 | CH2276 | Female | Two y/o | Control | Control | Feed Day | No | 21:35 | 21:00 - 21:59 | Night   | 37,3 | 70  | 66,8  | 66,8  | 18,46 | 566,99 | 141,81 |
| 2019/08/23 | CH2276 | Female | Two y/o | Control | Control | Feed Day | No | 21:40 | 21:00 - 21:59 | Night   | 37,1 | 60  | 68,0  | 68,0  | 18,26 | 554,67 | 142,43 |
| 2019/08/23 | CH2276 | Female | Two y/o | Control | Control | Feed Day | No | 21:45 | 21:00 - 21:59 | Night   | 37,0 | 56  | 72,2  | 72,2  | 18,16 | 549,01 | 144,51 |
| 2019/08/23 | CH2276 | Female | Two y/o | Control | Control | Feed Day | No | 21:50 | 21:00 - 21:59 | Night   | 37,0 | 63  | 67,0  | 67,0  | 18,16 | 558,62 | 141,92 |
| 2019/08/23 | CH2276 | Female | Two y/o | Control | Control | Feed Day | No | 21:55 | 21:00 - 21:59 | Night   | 37,1 | 60  | 67,2  | 67,2  | 18,26 | 554,67 | 142,02 |
| 2019/08/23 | CH2276 | Female | Two y/o | Control | Control | Feed Day | No | 22:00 | 22:00 - 22:59 | Night   | 37,2 | 98  | 66,2  | 66,2  | 18,36 | 592,41 | 141,50 |
| 2019/08/23 | CH2276 | Female | Two y/o | Control | Control | Feed Day | No | 22:05 | 22:00 - 22:59 | Night   | 37,3 | 60  | 61,8  | 61,8  | 18,46 | 554,67 | 139,12 |
| 2019/08/23 | CH2276 | Female | Two y/o | Control | Control | Feed Day | No | 22:10 | 22:00 - 22:59 | Night   | 37,3 | 63  | 42,0  | 42,0  | 18,46 | 558,62 | 125,77 |
| 2019/08/23 | CH2276 | Female | Two y/o | Control | Control | Feed Day | No | 22:15 | 22:00 - 22:59 | Night   | 37,3 | 90  | 41,2  | 41,2  | 18,46 | 586,16 | 125,11 |
| 2019/08/23 | CH2276 | Female | Two y/o | Control | Control | Feed Day | No | 22:20 | 22:00 - 22:59 | Night   | 37,3 | 57  | 43,6  | 43,6  | 18,46 | 550,47 | 127,06 |



|    |            |        |        |         |         |         |          |    |       |               |               |      |     |       |       |       |        |        |
|----|------------|--------|--------|---------|---------|---------|----------|----|-------|---------------|---------------|------|-----|-------|-------|-------|--------|--------|
|    | 2019/08/23 | CH2276 | Female | Two y/o | Control | Control | Feed Day | No | 22:25 | 22:00 - 22:59 | Night         | 37,3 | 55  | 46,6  | 46,6  | 18,46 | 547,52 | 129,35 |
|    | 2019/08/23 | CH2276 | Female | Two y/o | Control | Control | Feed Day | No | 22:30 | 22:00 - 22:59 | Night         | 37,4 | 59  | 45,8  | 45,8  | 18,55 | 553,30 | 128,76 |
|    | 2019/08/23 | CH2276 | Female | Two y/o | Control | Control | Feed Day | No | 22:35 | 22:00 - 22:59 | Night         | 37,4 | 65  | 39,2  | 39,2  | 18,55 | 561,12 | 123,39 |
|    | 2019/08/23 | CH2276 | Female | Two y/o | Control | Control | Feed Day | No | 22:40 | 22:00 - 22:59 | Night         | 37,4 | 62  | 40,2  | 40,2  | 18,55 | 557,33 | 124,26 |
|    | 2019/08/23 | CH2276 | Female | Two y/o | Control | Control | Feed Day | No | 22:45 | 22:00 - 22:59 | Night         | 37,4 | 66  | 344,4 | 344,4 | 18,55 | 562,34 | 199,31 |
|    | 2019/08/23 | CH2276 | Female | Two y/o | Control | Control | Feed Day | No | 22:50 | 22:00 - 22:59 | Night         | 37,4 | 112 | 96,2  | 96,2  | 18,55 | 601,96 | 154,49 |
|    | 2019/08/23 | CH2276 | Female | Two y/o | Control | Control | Feed Day | No | 22:55 | 22:00 - 22:59 | Night         | 37,4 | 94  | 59,4  | 59,4  | 18,55 | 589,37 | 137,75 |
|    | 2019/08/23 | CH2276 | Female | Two y/o | Control | Control | Feed Day | No | 23:00 | 23:00 - 23:59 | Night         | 37,5 | 63  | 46,8  | 46,8  | 18,65 | 558,62 | 129,50 |
|    | 2019/08/23 | CH2276 | Female | Two y/o | Control | Control | Feed Day | No | 23:05 | 23:00 - 23:59 | Night         | 37,4 | 59  | 50,2  | 50,2  | 18,55 | 553,30 | 131,92 |
|    | 2019/08/23 | CH2276 | Female | Two y/o | Control | Control | Feed Day | No | 23:10 | 23:00 - 23:59 | Night         | 37,4 | 62  | 58,4  | 58,4  | 18,55 | 557,33 | 137,16 |
|    | 2019/08/23 | CH2276 | Female | Two y/o | Control | Control | Feed Day | No | 23:15 | 23:00 - 23:59 | Night         | 37,4 | 59  | 59,0  | 59,0  | 18,55 | 553,30 | 137,51 |
|    | 2019/08/23 | CH2276 | Female | Two y/o | Control | Control | Feed Day | No | 23:20 | 23:00 - 23:59 | Night         | 37,5 |     | 58,0  | 58,0  | 18,65 |        | 136,92 |
|    | 2019/08/23 | CH2276 | Female | Two y/o | Control | Control | Feed Day | No | 23:25 | 23:00 - 23:59 | Night         | 37,6 | 59  | 59,6  | 59,6  | 18,75 | 553,30 | 137,86 |
|    | 2019/08/23 | CH2276 | Female | Two y/o | Control | Control | Feed Day | No | 23:30 | 23:00 - 23:59 | Night         | 37,6 | 65  | 67,6  | 67,6  | 18,75 | 561,12 | 142,23 |
|    | 2019/08/23 | CH2276 | Female | Two y/o | Control | Control | Feed Day | No | 23:35 | 23:00 - 23:59 | Night         | 37,5 | 67  | 67,4  | 67,4  | 18,65 | 563,53 | 142,12 |
|    | 2019/08/23 | CH2276 | Female | Two y/o | Control | Control | Feed Day | No | 23:40 | 23:00 - 23:59 | Night         | 37,5 | 63  | 66,0  | 66,0  | 18,65 | 558,62 | 141,40 |
|    | 2019/08/23 | CH2276 | Female | Two y/o | Control | Control | Feed Day | No | 23:45 | 23:00 - 23:59 | Night         | 37,5 | 61  | 66,2  | 66,2  | 18,65 | 556,01 | 141,50 |
|    | 2019/08/23 | CH2276 | Female | Two y/o | Control | Control | Feed Day | No | 23:50 | 23:00 - 23:59 | Night         | 37,4 | 60  | 73,4  | 73,4  | 18,55 | 554,67 | 145,08 |
|    | 2019/08/23 | CH2276 | Female | Two y/o | Control | Control | Feed Day | No | 23:55 | 23:00 - 23:59 | Night         | 37,4 | 59  | 74,4  | 74,4  | 18,55 | 553,30 | 145,55 |
| 66 | 2019/08/24 | CH2276 | Female | Two y/o | Control | Control | Feed Day | No | 00:00 | 00:00 - 00:59 | Early Morning | 37,4 | 67  | 79,2  | 79,2  | 18,55 | 563,53 | 147,73 |
|    | 2019/08/24 | CH2276 | Female | Two y/o | Control | Control | Feed Day | No | 00:05 | 00:00 - 00:59 | Early Morning | 37,4 | 70  | 70,6  | 70,6  | 18,55 | 566,99 | 143,73 |
|    | 2019/08/24 | CH2276 | Female | Two y/o | Control | Control | Feed Day | No | 00:10 | 00:00 - 00:59 | Early Morning | 37,4 | 64  | 74,0  | 74,0  | 18,55 | 559,88 | 145,37 |
|    | 2019/08/24 | CH2276 | Female | Two y/o | Control | Control | Feed Day | No | 00:15 | 00:00 - 00:59 | Early Morning | 37,4 | 83  | 73,6  | 73,6  | 18,55 | 580,11 | 145,18 |
|    | 2019/08/24 | CH2276 | Female | Two y/o | Control | Control | Feed Day | No | 00:20 | 00:00 - 00:59 | Early Morning | 37,4 | 63  | 69,0  | 69,0  | 18,55 | 558,62 | 142,94 |
|    | 2019/08/24 | CH2276 | Female | Two y/o | Control | Control | Feed Day | No | 00:25 | 00:00 - 00:59 | Early Morning | 37,4 | 84  | 58,8  | 58,8  | 18,55 | 581,01 | 137,39 |
|    | 2019/08/24 | CH2276 | Female | Two y/o | Control | Control | Feed Day | No | 00:30 | 00:00 - 00:59 | Early Morning | 37,5 | 93  | 61,4  | 61,4  | 18,65 | 588,58 | 138,89 |
|    | 2019/08/24 | CH2276 | Female | Two y/o | Control | Control | Feed Day | No | 00:35 | 00:00 - 00:59 | Early Morning | 37,5 | 65  | 60,4  | 60,4  | 18,65 | 561,12 | 138,32 |
|    | 2019/08/24 | CH2276 | Female | Two y/o | Control | Control | Feed Day | No | 00:40 | 00:00 - 00:59 | Early Morning | 37,5 | 64  | 64,0  | 64,0  | 18,65 | 559,88 | 140,33 |
|    | 2019/08/24 | CH2276 | Female | Two y/o | Control | Control | Feed Day | No | 00:45 | 00:00 - 00:59 | Early Morning | 37,4 | 63  | 59,6  | 59,6  | 18,55 | 558,62 | 137,86 |
|    | 2019/08/24 | CH2276 | Female | Two y/o | Control | Control | Feed Day | No | 00:50 | 00:00 - 00:59 | Early Morning | 37,4 | 68  | 58,6  | 58,6  | 18,55 | 564,71 | 137,28 |
|    | 2019/08/24 | CH2276 | Female | Two y/o | Control | Control | Feed Day | No | 00:55 | 00:00 - 00:59 | Early Morning | 37,4 | 78  | 53,2  | 53,2  | 18,55 | 575,38 | 133,93 |
|    | 2019/08/24 | CH2276 | Female | Two y/o | Control | Control | Feed Day | No | 01:00 | 01:00 - 01:59 | Early Morning | 37,4 | 62  | 58,8  | 58,8  | 18,55 | 557,33 | 137,39 |
|    | 2019/08/24 | CH2276 | Female | Two y/o | Control | Control | Feed Day | No | 01:05 | 01:00 - 01:59 | Early Morning | 37,4 | 65  | 61,4  | 61,4  | 18,55 | 561,12 | 138,89 |
|    | 2019/08/24 | CH2276 | Female | Two y/o | Control | Control | Feed Day | No | 01:10 | 01:00 - 01:59 | Early Morning | 37,5 | 56  | 66,4  | 66,4  | 18,65 | 549,01 | 141,61 |
|    | 2019/08/24 | CH2276 | Female | Two y/o | Control | Control | Feed Day | No | 01:15 | 01:00 - 01:59 | Early Morning | 37,5 | 84  | 64,4  | 64,4  | 18,65 | 581,01 | 140,55 |
|    | 2019/08/24 | CH2276 | Female | Two y/o | Control | Control | Feed Day | No | 01:20 | 01:00 - 01:59 | Early Morning | 37,5 | 63  | 62,0  | 62,0  | 18,65 | 558,62 | 139,23 |
|    | 2019/08/24 | CH2276 | Female | Two y/o | Control | Control | Feed Day | No | 01:25 | 01:00 - 01:59 | Early Morning | 37,5 | 59  | 62,0  | 62,0  | 18,65 | 553,30 | 139,23 |
|    | 2019/08/24 | CH2276 | Female | Two y/o | Control | Control | Feed Day | No | 01:30 | 01:00 - 01:59 | Early Morning | 37,5 | 56  | 58,6  | 58,6  | 18,65 | 549,01 | 137,28 |
|    | 2019/08/24 | CH2276 | Female | Two y/o | Control | Control | Feed Day | No | 01:35 | 01:00 - 01:59 | Early Morning | 37,4 | 65  | 88,6  | 88,6  | 18,55 | 561,12 | 151,63 |
|    | 2019/08/24 | CH2276 | Female | Two y/o | Control | Control | Feed Day | No | 01:40 | 01:00 - 01:59 | Early Morning | 37,5 | 91  | 34,2  | 34,2  | 18,65 | 586,98 | 118,70 |
|    | 2019/08/24 | CH2276 | Female | Two y/o | Control | Control | Feed Day | No | 01:45 | 01:00 - 01:59 | Early Morning | 37,4 | 81  | 103,8 | 103,8 | 18,55 | 578,26 | 157,14 |
|    | 2019/08/24 | CH2276 | Female | Two y/o | Control | Control | Feed Day | No | 01:50 | 01:00 - 01:59 | Early Morning | 37,4 | 66  | 68,4  | 68,4  | 18,46 | 562,34 | 142,64 |
|    | 2019/08/24 | CH2276 | Female | Two y/o | Control | Control | Feed Day | No | 01:55 | 01:00 - 01:59 | Early Morning | 37,3 | 91  | 67,8  | 67,8  | 18,55 | 586,98 | 142,33 |
|    | 2019/08/24 | CH2276 | Female | Two y/o | Control | Control | Feed Day | No | 02:00 | 02:00 - 02:59 | Early Morning | 37,4 | 86  | 252,8 | 252,8 | 18,55 | 582,77 | 188,37 |
|    | 2019/08/24 | CH2276 | Female | Two y/o | Control | Control | Feed Day | No | 02:05 | 02:00 - 02:59 | Early Morning | 37,5 | 50  | 70,2  | 70,2  | 18,65 | 539,52 | 143,54 |
|    | 2019/08/24 | CH2276 | Female | Two y/o | Control | Control | Feed Day | No | 02:10 | 02:00 - 02:59 | Early Morning | 37,5 | 117 | 70,4  | 70,4  | 18,65 | 605,02 | 143,64 |
|    | 2019/08/24 | CH2276 | Female | Two y/o | Control | Control | Feed Day | No | 02:15 | 02:00 - 02:59 | Early Morning | 37,5 | 121 | 48,4  | 48,4  | 18,65 | 607,35 | 130,66 |
|    | 2019/08/24 | CH2276 | Female | Two y/o | Control | Control | Feed Day | No | 02:20 | 02:00 - 02:59 | Early Morning | 37,5 | 112 | 57,4  | 57,4  | 18,65 | 601,96 | 136,56 |
|    | 2019/08/24 | CH2276 | Female | Two y/o | Control | Control | Feed Day | No | 02:25 | 02:00 - 02:59 | Early Morning | 37,4 | 87  | 63,0  | 63,0  | 18,55 | 583,64 | 139,78 |
|    | 2019/08/24 | CH2276 | Female | Two y/o | Control | Control | Feed Day | No | 02:30 | 02:00 - 02:59 | Early Morning | 37,3 | 119 | 150,2 | 150,2 | 18,46 | 606,20 | 170,06 |
|    | 2019/08/24 | CH2276 | Female | Two y/o | Control | Control | Feed Day | No | 02:35 | 02:00 - 02:59 | Early Morning | 37,4 | 99  | 156,8 | 156,8 | 18,55 | 593,14 | 171,57 |
|    | 2019/08/24 | CH2276 | Female | Two y/o | Control | Control | Feed Day | No | 02:40 | 02:00 - 02:59 | Early Morning | 37,5 | 115 | 425,0 | 425,0 | 18,65 | 603,82 | 206,77 |
|    | 2019/08/24 | CH2276 | Female | Two y/o | Control | Control | Feed Day | No | 02:45 | 02:00 - 02:59 | Early Morning | 37,6 | 103 | 149,4 | 149,4 | 18,75 | 596,00 | 169,88 |
|    | 2019/08/24 | CH2276 | Female | Two y/o | Control | Control | Feed Day | No | 02:50 | 02:00 - 02:59 | Early Morning | 37,6 | 141 | 48,0  | 48,0  | 18,75 | 617,75 | 130,38 |
|    | 2019/08/24 | CH2276 | Female | Two y/o | Control | Control | Feed Day | No | 02:55 | 02:00 - 02:59 | Early Morning | 37,6 |     | 182,4 | 182,4 | 18,75 |        | 176,88 |
|    | 2019/08/24 | CH2276 | Female | Two y/o | Control | Control | Feed Day | No | 03:00 | 03:00 - 03:59 | Early Morning | 37,7 | 121 | 150,2 | 150,2 | 18,85 | 607,35 | 170,06 |
|    | 2019/08/24 | CH2276 | Female | Two y/o | Control | Control | Feed Day | No | 03:05 | 03:00 - 03:59 | Early Morning | 37,7 | 98  | 100,6 | 100,6 | 18,85 | 592,41 | 156,05 |
|    | 2019/08/24 | CH2276 | Female | Two y/o | Control | Control | Feed Day | No | 03:10 | 03:00 - 03:59 | Early Morning | 37,7 | 77  | 385,8 | 385,8 | 18,85 | 574,39 | 203,33 |
|    | 2019/08/24 | CH2276 | Female | Two y/o | Control | Control | Feed Day | No | 03:15 | 03:00 - 03:59 | Early Morning | 37,7 | 89  | 157,0 | 157,0 | 18,85 | 585,33 | 171,62 |
|    | 2019/08/24 | CH2276 | Female | Two y/o | Control | Control | Feed Day | No | 03:20 | 03:00 - 03:59 | Early Morning | 37,8 | 113 | 592,0 | 592,0 | 18,95 | 602,58 | 218,57 |
|    | 2019/08/24 | CH2276 | Female | Two y/o | Control | Control | Feed Day | No | 03:25 | 03:00 - 03:59 | Early Morning | 37,8 | 145 | 321,2 | 321,2 | 18,95 | 619,62 | 196,84 |
|    | 2019/08/24 | CH2276 | Female | Two y/o | Control | Control | Feed Day | No | 03:30 | 03:00 - 03:59 | Early Morning | 37,8 | 85  | 78,2  | 78,2  | 18,95 | 581,90 | 147,28 |
|    | 2019/08/24 | CH2276 | Female | Two y/o | Control | Control | Feed Day | No | 03:35 | 03:00 - 03:59 | Early Morning | 37,9 | 169 | 355,6 | 355,6 | 19,05 | 629,60 | 200,44 |
|    | 2019/08/24 | CH2276 | Female | Two y/o | Control | Control | Feed Day | No | 03:40 | 03:00 - 03:59 | Early Morning | 37,8 | 104 | 227,8 | 227,8 | 18,95 | 596,69 | 184,70 |
|    | 2019/08/24 | CH2276 | Female | Two y/o | Control | Control | Feed Day | No | 03:45 | 03:00 - 03:59 | Early Morning | 38,0 | 94  | 121,2 | 121,2 | 19,15 | 589,37 | 162,56 |
|    | 2019/08/24 | CH2276 | Female | Two y/o | Control | Control | Feed Day | No | 03:50 | 03:00 - 03:59 | Early Morning | 37,9 | 165 | 158,6 | 158,6 | 19,05 | 628,06 | 171,97 |
|    | 2019/08/24 | CH2276 | Female | Two y/o | Control | Control | Feed Day | No | 03:55 | 03:00 - 03:59 | Early Morning | 37,7 | 86  | 66,4  | 66,4  | 18,85 | 582,77 | 141,61 |
|    | 2019/08/24 | CH2276 | Female | Two y/o | Control | Control | Feed Day | No | 04:00 | 04:00 - 04:59 | Morning       | 37,7 | 84  | 56,2  | 56,2  | 18,85 | 581,01 | 135,83 |
|    | 2019/08/24 | CH2276 | Female | Two y/o | Control | Control | Feed Day | No | 04:05 | 04:00 - 04:59 | Morning       | 37,7 | 64  | 61,0  | 61,0  | 18,85 | 559,88 | 138,67 |
|    | 2019/08/24 | CH2276 | Female | Two y/o | Control | Control | Feed Day | No | 04:10 | 04:00 - 04:59 | Morning       | 37,7 | 63  | 66,8  | 66,8  | 18,85 | 558,62 | 141,81 |



|            |        |        |         |         |         |          |    |       |               |              |      |     |       |       |       |        |        |
|------------|--------|--------|---------|---------|---------|----------|----|-------|---------------|--------------|------|-----|-------|-------|-------|--------|--------|
| 2019/08/24 | CH2276 | Female | Two y/o | Control | Control | Feed Day | No | 04:15 | 04:00 - 04:59 | Morning      | 37,7 | 90  | 74,0  | 74,0  | 18,85 | 586,16 | 145,37 |
| 2019/08/24 | CH2276 | Female | Two y/o | Control | Control | Feed Day | No | 04:20 | 04:00 - 04:59 | Morning      | 37,7 | 83  | 80,4  | 80,4  | 18,85 | 580,11 | 148,25 |
| 2019/08/24 | CH2276 | Female | Two y/o | Control | Control | Feed Day | No | 04:25 | 04:00 - 04:59 | Morning      | 37,6 | 65  | 79,8  | 79,8  | 18,75 | 561,12 | 147,99 |
| 2019/08/24 | CH2276 | Female | Two y/o | Control | Control | Feed Day | No | 04:30 | 04:00 - 04:59 | Morning      | 37,6 | 69  | 83,4  | 83,4  | 18,75 | 565,86 | 149,52 |
| 2019/08/24 | CH2276 | Female | Two y/o | Control | Control | Feed Day | No | 04:35 | 04:00 - 04:59 | Morning      | 37,6 | 84  | 89,4  | 89,4  | 18,75 | 581,01 | 151,94 |
| 2019/08/24 | CH2276 | Female | Two y/o | Control | Control | Feed Day | No | 04:40 | 04:00 - 04:59 | Morning      | 37,5 | 63  | 79,4  | 79,4  | 18,65 | 558,62 | 147,81 |
| 2019/08/24 | CH2276 | Female | Two y/o | Control | Control | Feed Day | No | 04:45 | 04:00 - 04:59 | Morning      | 37,5 | 63  | 66,0  | 66,0  | 18,65 | 558,62 | 141,40 |
| 2019/08/24 | CH2276 | Female | Two y/o | Control | Control | Feed Day | No | 04:50 | 04:00 - 04:59 | Morning      | 37,5 | 55  | 67,2  | 67,2  | 18,65 | 547,52 | 142,02 |
| 2019/08/24 | CH2276 | Female | Two y/o | Control | Control | Feed Day | No | 04:55 | 04:00 - 04:59 | Morning      | 37,5 | 58  | 57,6  | 57,6  | 18,65 | 551,90 | 136,68 |
| 2019/08/24 | CH2276 | Female | Two y/o | Control | Control | Feed Day | No | 05:00 | 05:00 - 05:59 | Morning      | 37,5 | 61  | 64,0  | 64,0  | 18,65 | 556,01 | 140,33 |
| 2019/08/24 | CH2276 | Female | Two y/o | Control | Control | Feed Day | No | 05:05 | 05:00 - 05:59 | Morning      | 37,5 | 100 | 100,4 | 100,4 | 18,65 | 593,87 | 155,98 |
| 2019/08/24 | CH2276 | Female | Two y/o | Control | Control | Feed Day | No | 05:10 | 05:00 - 05:59 | Morning      | 37,5 | 64  | 169,2 | 169,2 | 18,65 | 559,88 | 174,24 |
| 2019/08/24 | CH2276 | Female | Two y/o | Control | Control | Feed Day | No | 05:15 | 05:00 - 05:59 | Morning      | 37,5 | 113 | 154,6 | 154,6 | 18,65 | 602,58 | 171,08 |
| 2019/08/24 | CH2276 | Female | Two y/o | Control | Control | Feed Day | No | 05:20 | 05:00 - 05:59 | Morning      | 37,5 | 62  | 80,6  | 80,6  | 18,65 | 557,33 | 148,34 |
| 2019/08/24 | CH2276 | Female | Two y/o | Control | Control | Feed Day | No | 05:25 | 05:00 - 05:59 | Morning      | 37,5 | 148 | 386,4 | 386,4 | 18,65 | 620,97 | 203,39 |
| 2019/08/24 | CH2276 | Female | Two y/o | Control | Control | Feed Day | No | 05:30 | 05:00 - 05:59 | Morning      | 37,6 | 124 | 209,8 | 209,8 | 18,75 | 609,04 | 181,80 |
| 2019/08/24 | CH2276 | Female | Two y/o | Control | Control | Feed Day | No | 05:35 | 05:00 - 05:59 | Morning      | 37,6 | 88  | 61,0  | 61,0  | 18,75 | 584,49 | 138,67 |
| 2019/08/24 | CH2276 | Female | Two y/o | Control | Control | Feed Day | No | 05:40 | 05:00 - 05:59 | Morning      | 37,7 | 125 | 86,2  | 86,2  | 18,85 | 609,60 | 150,67 |
| 2019/08/24 | CH2276 | Female | Two y/o | Control | Control | Feed Day | No | 05:45 | 05:00 - 05:59 | Morning      | 37,7 | 118 | 245,4 | 245,4 | 18,85 | 605,61 | 187,33 |
| 2019/08/24 | CH2276 | Female | Two y/o | Control | Control | Feed Day | No | 05:50 | 05:00 - 05:59 | Morning      | 37,7 | 98  | 569,8 | 569,8 | 18,85 | 592,41 | 217,20 |
| 2019/08/24 | CH2276 | Female | Two y/o | Control | Control | Feed Day | No | 05:55 | 05:00 - 05:59 | Morning      | 37,7 | 85  | 135,8 | 135,8 | 18,85 | 581,90 | 166,53 |
| 2019/08/24 | CH2276 | Female | Two y/o | Control | Control | Feed Day | No | 06:00 | 06:00 - 06:59 | Morning      | 37,7 | 83  | 263,0 | 263,0 | 18,85 | 580,11 | 189,77 |
| 2019/08/24 | CH2276 | Female | Two y/o | Control | Control | Feed Day | No | 06:05 | 06:00 - 06:59 | Morning      | 37,7 | 90  | 543,8 | 543,8 | 18,85 | 586,16 | 215,54 |
| 2019/08/24 | CH2276 | Female | Two y/o | Control | Control | Feed Day | No | 06:10 | 06:00 - 06:59 | Morning      | 37,7 | 82  | 472,0 | 472,0 | 18,85 | 579,19 | 210,50 |
| 2019/08/24 | CH2276 | Female | Two y/o | Control | Control | Feed Day | No | 06:15 | 06:00 - 06:59 | Morning      | 37,7 | 128 | 194,4 | 194,4 | 18,85 | 611,22 | 179,12 |
| 2019/08/24 | CH2276 | Female | Two y/o | Control | Control | Feed Day | No | 06:20 | 06:00 - 06:59 | Morning      | 37,7 | 80  | 109,2 | 109,2 | 18,85 | 577,31 | 158,91 |
| 2019/08/24 | CH2276 | Female | Two y/o | Control | Control | Feed Day | No | 06:25 | 06:00 - 06:59 | Morning      | 37,9 | 169 | 275,2 | 275,2 | 19,05 | 629,60 | 191,37 |
| 2019/08/24 | CH2276 | Female | Two y/o | Control | Control | Feed Day | No | 06:30 | 06:00 - 06:59 | Morning      | 37,8 | 197 | 405,2 | 405,2 | 18,95 | 639,25 | 205,07 |
| 2019/08/24 | CH2276 | Female | Two y/o | Control | Control | Feed Day | No | 06:35 | 06:00 - 06:59 | Morning      | 37,8 |     | 213,2 | 213,2 | 18,95 |        | 182,37 |
| 2019/08/24 | CH2276 | Female | Two y/o | Control | Control | Feed Day | No | 06:40 | 06:00 - 06:59 | Morning      | 37,8 | 90  | 201,6 | 201,6 | 18,95 | 586,16 | 180,40 |
| 2019/08/24 | CH2276 | Female | Two y/o | Control | Control | Feed Day | No | 06:45 | 06:00 - 06:59 | Morning      | 37,8 | 125 | 228,2 | 228,2 | 18,95 | 609,60 | 184,76 |
| 2019/08/24 | CH2276 | Female | Two y/o | Control | Control | Feed Day | No | 06:50 | 06:00 - 06:59 | Morning      | 37,8 | 135 | 219,4 | 219,4 | 18,95 | 614,84 | 183,38 |
| 2019/08/24 | CH2276 | Female | Two y/o | Control | Control | Feed Day | No | 06:55 | 06:00 - 06:59 | Morning      | 37,9 |     | 284,0 | 284,0 | 19,05 |        | 192,48 |
| 2019/08/24 | CH2276 | Female | Two y/o | Control | Control | Feed Day | No | 07:00 | 07:00 - 07:59 | Morning      | 37,8 | 150 | 76,6  | 76,6  | 18,95 | 621,86 | 146,57 |
| 2019/08/24 | CH2276 | Female | Two y/o | Control | Control | Feed Day | No | 07:05 | 07:00 - 07:59 | Morning      | 37,8 | 94  | 72,4  | 72,4  | 18,95 | 589,37 | 144,61 |
| 2019/08/24 | CH2276 | Female | Two y/o | Control | Control | Feed Day | No | 07:10 | 07:00 - 07:59 | Morning      | 37,7 | 98  | 239,6 | 239,6 | 18,85 | 592,41 | 186,48 |
| 2019/08/24 | CH2276 | Female | Two y/o | Control | Control | Feed Day | No | 07:15 | 07:00 - 07:59 | Morning      | 37,7 | 119 | 69,0  | 69,0  | 18,85 | 606,20 | 142,94 |
| 2019/08/24 | CH2276 | Female | Two y/o | Control | Control | Feed Day | No | 07:20 | 07:00 - 07:59 | Morning      | 37,7 | 77  | 85,6  | 85,6  | 18,85 | 574,39 | 150,43 |
| 2019/08/24 | CH2276 | Female | Two y/o | Control | Control | Feed Day | No | 07:25 | 07:00 - 07:59 | Morning      | 38,1 | 77  | 77,4  | 77,4  | 19,26 | 574,39 | 146,93 |
| 2019/08/24 | CH2276 | Female | Two y/o | Control | Control | Feed Day | No | 07:30 | 07:00 - 07:59 | Morning      | 38,1 | 120 | 298,4 | 298,4 | 19,26 | 606,78 | 194,23 |
| 2019/08/24 | CH2276 | Female | Two y/o | Control | Control | Feed Day | No | 07:35 | 07:00 - 07:59 | Morning      | 38,0 | 107 | 703,4 | 703,4 | 19,15 | 598,73 | 224,72 |
| 2019/08/24 | CH2276 | Female | Two y/o | Control | Control | Feed Day | No | 07:40 | 07:00 - 07:59 | Morning      | 37,9 | 73  | 494,8 | 494,8 | 19,05 | 570,27 | 212,17 |
| 2019/08/24 | CH2276 | Female | Two y/o | Control | Control | Feed Day | No | 07:45 | 07:00 - 07:59 | Morning      | 37,8 |     | 356,8 | 356,8 | 18,95 |        | 200,56 |
| 2019/08/24 | CH2276 | Female | Two y/o | Control | Control | Feed Day | No | 07:50 | 07:00 - 07:59 | Morning      | 37,9 | 89  | 146,8 | 146,8 | 19,05 | 585,33 | 169,26 |
| 2019/08/24 | CH2276 | Female | Two y/o | Control | Control | Feed Day | No | 07:55 | 07:00 - 07:59 | Morning      | 38,0 | 119 | 55,8  | 55,8  | 19,15 | 606,20 | 135,58 |
| 2019/08/24 | CH2276 | Female | Two y/o | Control | Control | Feed Day | No | 08:00 | 08:00 - 08:59 | Late Morning | 38,0 | 72  | 54,4  | 54,4  | 19,15 | 569,20 | 134,70 |
| 2019/08/24 | CH2276 | Female | Two y/o | Control | Control | Feed Day | No | 08:05 | 08:00 - 08:59 | Late Morning | 37,9 | 64  | 63,2  | 63,2  | 19,05 | 559,88 | 139,89 |
| 2019/08/24 | CH2276 | Female | Two y/o | Control | Control | Feed Day | No | 08:10 | 08:00 - 08:59 | Late Morning | 37,9 | 67  | 38,2  | 38,2  | 19,05 | 563,53 | 122,50 |
| 2019/08/24 | CH2276 | Female | Two y/o | Control | Control | Feed Day | No | 08:15 | 08:00 - 08:59 | Late Morning | 38,0 | 64  | 34,4  | 34,4  | 19,15 | 559,88 | 118,90 |
| 2019/08/24 | CH2276 | Female | Two y/o | Control | Control | Feed Day | No | 08:20 | 08:00 - 08:59 | Late Morning | 37,9 | 63  | 24,6  | 24,6  | 19,05 | 558,62 | 107,39 |
| 2019/08/24 | CH2276 | Female | Two y/o | Control | Control | Feed Day | No | 08:25 | 08:00 - 08:59 | Late Morning | 37,9 | 62  | 40,8  | 40,8  | 19,05 | 557,33 | 124,77 |
| 2019/08/24 | CH2276 | Female | Two y/o | Control | Control | Feed Day | No | 08:30 | 08:00 - 08:59 | Late Morning | 37,9 | 58  | 58,6  | 58,6  | 19,05 | 551,90 | 137,28 |
| 2019/08/24 | CH2276 | Female | Two y/o | Control | Control | Feed Day | No | 08:35 | 08:00 - 08:59 | Late Morning | 37,8 | 61  | 58,0  | 58,0  | 18,95 | 556,01 | 136,92 |
| 2019/08/24 | CH2276 | Female | Two y/o | Control | Control | Feed Day | No | 08:40 | 08:00 - 08:59 | Late Morning | 37,6 | 67  | 67,6  | 67,6  | 18,75 | 563,53 | 142,23 |
| 2019/08/24 | CH2276 | Female | Two y/o | Control | Control | Feed Day | No | 08:45 | 08:00 - 08:59 | Late Morning | 37,5 | 63  | 88,6  | 88,6  | 18,65 | 558,62 | 151,63 |
| 2019/08/24 | CH2276 | Female | Two y/o | Control | Control | Feed Day | No | 08:50 | 08:00 - 08:59 | Late Morning | 37,4 | 94  | 86,8  | 86,8  | 18,55 | 589,37 | 150,91 |
| 2019/08/24 | CH2276 | Female | Two y/o | Control | Control | Feed Day | No | 08:55 | 08:00 - 08:59 | Late Morning | 37,4 | 84  | 81,0  | 81,0  | 18,55 | 581,01 | 148,51 |
| 2019/08/24 | CH2276 | Female | Two y/o | Control | Control | Feed Day | No | 09:00 | 09:00 - 09:59 | Late Morning | 37,5 | 41  | 89,6  | 89,6  | 18,65 | 522,29 | 152,02 |
| 2019/08/24 | CH2276 | Female | Two y/o | Control | Control | Feed Day | No | 09:05 | 09:00 - 09:59 | Late Morning | 37,5 | 72  | 137,8 | 137,8 | 18,65 | 569,20 | 167,05 |
| 2019/08/24 | CH2276 | Female | Two y/o | Control | Control | Feed Day | No | 09:10 | 09:00 - 09:59 | Late Morning | 37,5 | 84  | 30,2  | 30,2  | 18,65 | 581,01 | 114,42 |
| 2019/08/24 | CH2276 | Female | Two y/o | Control | Control | Feed Day | No | 09:15 | 09:00 - 09:59 | Late Morning | 37,6 | 79  | 19,6  | 19,6  | 18,75 | 576,36 | 99,63  |
| 2019/08/24 | CH2276 | Female | Two y/o | Control | Control | Feed Day | No | 09:20 | 09:00 - 09:59 | Late Morning | 37,7 | 54  | 71,2  | 71,2  | 18,85 | 545,99 | 144,03 |
| 2019/08/24 | CH2276 | Female | Two y/o | Control | Control | Feed Day | No | 09:25 | 09:00 - 09:59 | Late Morning | 37,8 | 69  | 59,2  | 59,2  | 18,95 | 565,86 | 137,63 |
| 2019/08/24 | CH2276 | Female | Two y/o | Control | Control | Feed Day | No | 09:30 | 09:00 - 09:59 | Late Morning | 37,7 | 63  | 57,4  | 57,4  | 18,85 | 558,62 | 136,56 |
| 2019/08/24 | CH2276 | Female | Two y/o | Control | Control | Feed Day | No | 09:35 | 09:00 - 09:59 | Late Morning | 37,7 | 84  | 36,6  | 36,6  | 18,85 | 581,01 | 121,03 |
| 2019/08/24 | CH2276 | Female | Two y/o | Control | Control | Feed Day | No | 09:40 | 09:00 - 09:59 | Late Morning | 37,7 | 73  | 177,2 | 177,2 | 18,85 | 570,27 | 175,86 |
| 2019/08/24 | CH2276 | Female | Two y/o | Control | Control | Feed Day | No | 09:45 | 09:00 - 09:59 | Late Morning | 37,9 | 91  | 55,4  | 55,4  | 19,05 | 586,98 | 135,33 |
| 2019/08/24 | CH2276 | Female | Two y/o | Control | Control | Feed Day | No | 09:50 | 09:00 - 09:59 | Late Morning | 37,9 | 74  | 21,4  | 21,4  | 19,05 | 571,33 | 102,63 |
| 2019/08/24 | CH2276 | Female | Two y/o | Control | Control | Feed Day | No | 09:55 | 09:00 - 09:59 | Late Morning | 37,9 | 84  | 29,4  | 29,4  | 19,05 | 581,01 | 113,50 |
| 2019/08/24 | CH2276 | Female | Two y/o | Control | Control | Feed Day | No | 10:00 | 10:00 - 10:59 | Late Morning | 37,9 | 64  | 53,2  | 53,2  | 19,05 | 559,88 | 133,93 |



|            |        |        |         |         |         |          |     |       |               |              |      |     |       |       |       |        |        |
|------------|--------|--------|---------|---------|---------|----------|-----|-------|---------------|--------------|------|-----|-------|-------|-------|--------|--------|
| 2019/08/24 | CH2276 | Female | Two y/o | Control | Control | Feed Day | No  | 10:05 | 10:00 - 10:59 | Late Morning | 38,0 | 64  | 31,4  | 31,4  | 19,15 | 559,88 | 115,76 |
| 2019/08/24 | CH2276 | Female | Two y/o | Control | Control | Feed Day | No  | 10:10 | 10:00 - 10:59 | Late Morning | 38,0 | 64  | 29,4  | 29,4  | 19,15 | 559,88 | 113,50 |
| 2019/08/24 | CH2276 | Female | Two y/o | Control | Control | Feed Day | No  | 10:15 | 10:00 - 10:59 | Late Morning | 38,0 | 62  | 62,0  | 62,0  | 19,15 | 557,33 | 139,23 |
| 2019/08/24 | CH2276 | Female | Two y/o | Control | Control | Feed Day | No  | 10:20 | 10:00 - 10:59 | Late Morning | 38,0 | 80  | 29,2  | 29,2  | 19,15 | 577,31 | 113,27 |
| 2019/08/24 | CH2276 | Female | Two y/o | Control | Control | Feed Day | No  | 10:25 | 10:00 - 10:59 | Late Morning | 38,0 | 65  | 32,0  | 32,0  | 19,15 | 561,12 | 116,41 |
| 2019/08/24 | CH2276 | Female | Two y/o | Control | Control | Feed Day | Yes | 10:30 | 10:00 - 10:59 | Late Morning | 37,9 | 65  | 26,6  | 26,6  | 19,05 | 561,12 | 110,07 |
| 2019/08/24 | CH2276 | Female | Two y/o | Control | Control | Feed Day | Yes | 10:35 | 10:00 - 10:59 | Late Morning | 37,9 | 64  | 16,4  | 16,4  | 19,05 | 559,88 | 93,55  |
| 2019/08/24 | CH2276 | Female | Two y/o | Control | Control | Feed Day | Yes | 10:40 | 10:00 - 10:59 | Late Morning | 37,8 | 68  | 38,4  | 38,4  | 18,95 | 564,71 | 122,68 |
| 2019/08/24 | CH2276 | Female | Two y/o | Control | Control | Feed Day | Yes | 10:45 | 10:00 - 10:59 | Late Morning | 37,8 | 68  | 54,8  | 54,8  | 18,95 | 564,71 | 134,96 |
| 2019/08/24 | CH2276 | Female | Two y/o | Control | Control | Feed Day | Yes | 10:50 | 10:00 - 10:59 | Late Morning | 37,7 | 74  | 58,0  | 58,0  | 18,85 | 571,33 | 136,92 |
| 2019/08/24 | CH2276 | Female | Two y/o | Control | Control | Feed Day | Yes | 10:55 | 10:00 - 10:59 | Late Morning | 37,7 | 63  | 55,0  | 55,0  | 18,85 | 558,62 | 135,08 |
| 2019/08/24 | CH2276 | Female | Two y/o | Control | Control | Feed Day | Yes | 11:00 | 11:00 - 11:59 | Late Morning | 37,7 | 62  | 59,8  | 59,8  | 18,85 | 557,33 | 137,98 |
| 2019/08/24 | CH2276 | Female | Two y/o | Control | Control | Feed Day | Yes | 11:05 | 11:00 - 11:59 | Late Morning | 37,6 | 61  | 39,0  | 39,0  | 18,75 | 556,01 | 123,22 |
| 2019/08/24 | CH2276 | Female | Two y/o | Control | Control | Feed Day | Yes | 11:10 | 11:00 - 11:59 | Late Morning | 37,6 |     | 117,2 | 117,2 | 18,75 |        | 161,38 |
| 2019/08/24 | CH2276 | Female | Two y/o | Control | Control | Feed Day | Yes | 11:15 | 11:00 - 11:59 | Late Morning | 37,7 | 109 | 134,4 | 134,4 | 18,85 | 600,04 | 166,17 |
| 2019/08/24 | CH2276 | Female | Two y/o | Control | Control | Feed Day | Yes | 11:20 | 11:00 - 11:59 | Late Morning | 38,0 | 119 | 63,8  | 63,8  | 19,15 | 606,20 | 140,22 |
| 2019/08/24 | CH2276 | Female | Two y/o | Control | Control | Feed Day | Yes | 11:25 | 11:00 - 11:59 | Late Morning | 38,0 | 103 | 113,2 | 113,2 | 19,15 | 596,00 | 160,17 |
| 2019/08/24 | CH2276 | Female | Two y/o | Control | Control | Feed Day | No  | 11:30 | 11:00 - 11:59 | Late Morning | 38,0 | 128 | 35,6  | 35,6  | 19,15 | 611,22 | 120,08 |
| 2019/08/24 | CH2276 | Female | Two y/o | Control | Control | Feed Day | No  | 11:35 | 11:00 - 11:59 | Late Morning | 38,0 | 77  | 81,8  | 81,8  | 19,15 | 574,39 | 148,85 |
| 2019/08/24 | CH2276 | Female | Two y/o | Control | Control | Feed Day | No  | 11:40 | 11:00 - 11:59 | Late Morning | 38,0 | 83  | 77,2  | 77,2  | 19,15 | 580,11 | 146,84 |
| 2019/08/24 | CH2276 | Female | Two y/o | Control | Control | Feed Day | No  | 11:45 | 11:00 - 11:59 | Late Morning | 38,0 | 71  | 44,8  | 44,8  | 19,15 | 568,10 | 127,99 |
| 2019/08/24 | CH2276 | Female | Two y/o | Control | Control | Feed Day | No  | 11:50 | 11:00 - 11:59 | Late Morning | 38,0 | 90  | 43,8  | 43,8  | 19,15 | 586,16 | 127,22 |
| 2019/08/24 | CH2276 | Female | Two y/o | Control | Control | Feed Day | No  | 11:55 | 11:00 - 11:59 | Late Morning | 38,0 | 98  | 81,6  | 81,6  | 19,15 | 592,41 | 148,76 |
| 2019/08/24 | CH2276 | Female | Two y/o | Control | Control | Feed Day | No  | 12:00 | 12:00 - 12:59 | Afternoon    | 38,0 | 110 | 714,0 | 714,0 | 19,15 | 600,69 | 225,26 |
| 2019/08/24 | CH2276 | Female | Two y/o | Control | Control | Feed Day | No  | 12:05 | 12:00 - 12:59 | Afternoon    | 38,0 | 96  | 160,6 | 160,6 | 19,15 | 590,91 | 172,41 |
| 2019/08/24 | CH2276 | Female | Two y/o | Control | Control | Feed Day | No  | 12:10 | 12:00 - 12:59 | Afternoon    | 38,1 | 78  | 66,4  | 66,4  | 19,26 | 575,38 | 141,61 |
| 2019/08/24 | CH2276 | Female | Two y/o | Control | Control | Feed Day | No  | 12:15 | 12:00 - 12:59 | Afternoon    | 38,1 | 88  | 64,6  | 64,6  | 19,26 | 584,49 | 140,65 |
| 2019/08/24 | CH2276 | Female | Two y/o | Control | Control | Feed Day | No  | 12:20 | 12:00 - 12:59 | Afternoon    | 38,1 | 79  | 67,2  | 67,2  | 19,26 | 576,36 | 142,02 |
| 2019/08/24 | CH2276 | Female | Two y/o | Control | Control | Feed Day | No  | 12:25 | 12:00 - 12:59 | Afternoon    | 38,1 | 73  | 67,6  | 67,6  | 19,26 | 570,27 | 142,23 |
| 2019/08/24 | CH2276 | Female | Two y/o | Control | Control | Feed Day | No  | 12:30 | 12:00 - 12:59 | Afternoon    | 38,1 | 72  | 66,8  | 66,8  | 19,26 | 569,20 | 141,81 |
| 2019/08/24 | CH2276 | Female | Two y/o | Control | Control | Feed Day | No  | 12:35 | 12:00 - 12:59 | Afternoon    | 38,1 | 73  | 71,6  | 71,6  | 19,26 | 570,27 | 144,22 |
| 2019/08/24 | CH2276 | Female | Two y/o | Control | Control | Feed Day | No  | 12:40 | 12:00 - 12:59 | Afternoon    | 38,1 | 68  | 124,0 | 124,0 | 19,26 | 564,71 | 163,35 |
| 2019/08/24 | CH2276 | Female | Two y/o | Control | Control | Feed Day | No  | 12:45 | 12:00 - 12:59 | Afternoon    | 38,2 | 108 | 17,8  | 17,8  | 19,36 | 599,39 | 96,34  |
| 2019/08/24 | CH2276 | Female | Two y/o | Control | Control | Feed Day | No  | 12:50 | 12:00 - 12:59 | Afternoon    | 38,1 | 69  | 20,8  | 20,8  | 19,26 | 565,86 | 101,65 |
| 2019/08/24 | CH2276 | Female | Two y/o | Control | Control | Feed Day | No  | 12:55 | 12:00 - 12:59 | Afternoon    | 38,1 | 72  | 19,8  | 19,8  | 19,26 | 569,20 | 99,97  |
| 2019/08/24 | CH2276 | Female | Two y/o | Control | Control | Feed Day | No  | 13:00 | 13:00 - 13:59 | Afternoon    | 38,1 | 67  | 18,0  | 18,0  | 19,26 | 563,53 | 96,72  |
| 2019/08/24 | CH2276 | Female | Two y/o | Control | Control | Feed Day | No  | 13:05 | 13:00 - 13:59 | Afternoon    | 38,2 | 76  | 17,2  | 17,2  | 19,36 | 573,39 | 95,17  |
| 2019/08/24 | CH2276 | Female | Two y/o | Control | Control | Feed Day | No  | 13:10 | 13:00 - 13:59 | Afternoon    | 38,2 | 82  | 22,6  | 22,6  | 19,36 | 579,19 | 104,49 |
| 2019/08/24 | CH2276 | Female | Two y/o | Control | Control | Feed Day | No  | 13:15 | 13:00 - 13:59 | Afternoon    | 38,2 | 74  | 53,8  | 53,8  | 19,36 | 571,33 | 134,32 |
| 2019/08/24 | CH2276 | Female | Two y/o | Control | Control | Feed Day | No  | 13:20 | 13:00 - 13:59 | Afternoon    | 38,2 | 77  | 62,2  | 62,2  | 19,36 | 574,39 | 139,34 |
| 2019/08/24 | CH2276 | Female | Two y/o | Control | Control | Feed Day | No  | 13:25 | 13:00 - 13:59 | Afternoon    | 38,2 | 140 | 70,2  | 70,2  | 19,36 | 617,28 | 143,54 |
| 2019/08/24 | CH2276 | Female | Two y/o | Control | Control | Feed Day | No  | 13:30 | 13:00 - 13:59 | Afternoon    | 38,2 | 76  | 73,6  | 73,6  | 19,36 | 573,39 | 145,18 |
| 2019/08/24 | CH2276 | Female | Two y/o | Control | Control | Feed Day | No  | 13:35 | 13:00 - 13:59 | Afternoon    | 38,2 | 87  | 73,0  | 73,0  | 19,36 | 583,64 | 144,89 |
| 2019/08/24 | CH2276 | Female | Two y/o | Control | Control | Feed Day | No  | 13:40 | 13:00 - 13:59 | Afternoon    | 38,2 | 69  | 67,2  | 67,2  | 19,36 | 565,86 | 142,02 |
| 2019/08/24 | CH2276 | Female | Two y/o | Control | Control | Feed Day | No  | 13:45 | 13:00 - 13:59 | Afternoon    | 38,2 | 76  | 64,0  | 64,0  | 19,36 | 573,39 | 140,33 |
| 2019/08/24 | CH2276 | Female | Two y/o | Control | Control | Feed Day | No  | 13:50 | 13:00 - 13:59 | Afternoon    | 38,2 |     | 71,4  | 71,4  | 19,36 |        | 144,12 |
| 2019/08/24 | CH2276 | Female | Two y/o | Control | Control | Feed Day | No  | 13:55 | 13:00 - 13:59 | Afternoon    | 38,2 | 68  | 71,8  | 71,8  | 19,36 | 564,71 | 144,32 |
| 2019/08/24 | CH2276 | Female | Two y/o | Control | Control | Feed Day | No  | 14:00 | 14:00 - 14:59 | Afternoon    | 38,2 | 67  | 71,2  | 71,2  | 19,36 | 563,53 | 144,03 |
| 2019/08/24 | CH2276 | Female | Two y/o | Control | Control | Feed Day | No  | 14:05 | 14:00 - 14:59 | Afternoon    | 38,2 | 88  | 44,4  | 44,4  | 19,36 | 584,49 | 127,69 |
| 2019/08/24 | CH2276 | Female | Two y/o | Control | Control | Feed Day | No  | 14:10 | 14:00 - 14:59 | Afternoon    | 38,3 | 72  | 27,2  | 27,2  | 19,46 | 569,20 | 110,83 |
| 2019/08/24 | CH2276 | Female | Two y/o | Control | Control | Feed Day | No  | 14:15 | 14:00 - 14:59 | Afternoon    | 38,3 | 69  | 26,0  | 26,0  | 19,46 | 565,86 | 109,29 |
| 2019/08/24 | CH2276 | Female | Two y/o | Control | Control | Feed Day | No  | 14:20 | 14:00 - 14:59 | Afternoon    | 38,3 | 72  | 22,8  | 22,8  | 19,46 | 569,20 | 104,79 |
| 2019/08/24 | CH2276 | Female | Two y/o | Control | Control | Feed Day | No  | 14:25 | 14:00 - 14:59 | Afternoon    | 38,3 | 68  | 16,0  | 16,0  | 19,46 | 564,71 | 92,71  |
| 2019/08/24 | CH2276 | Female | Two y/o | Control | Control | Feed Day | No  | 14:30 | 14:00 - 14:59 | Afternoon    | 38,3 | 65  | 22,6  | 22,6  | 19,46 | 561,12 | 104,49 |
| 2019/08/24 | CH2276 | Female | Two y/o | Control | Control | Feed Day | No  | 14:35 | 14:00 - 14:59 | Afternoon    | 38,3 | 73  | 37,0  | 37,0  | 19,46 | 570,27 | 121,40 |
| 2019/08/24 | CH2276 | Female | Two y/o | Control | Control | Feed Day | No  | 14:40 | 14:00 - 14:59 | Afternoon    | 38,3 | 74  | 31,6  | 31,6  | 19,46 | 571,33 | 115,98 |
| 2019/08/24 | CH2276 | Female | Two y/o | Control | Control | Feed Day | No  | 14:45 | 14:00 - 14:59 | Afternoon    | 38,3 | 69  | 26,0  | 26,0  | 19,46 | 565,86 | 109,29 |
| 2019/08/24 | CH2276 | Female | Two y/o | Control | Control | Feed Day | No  | 14:50 | 14:00 - 14:59 | Afternoon    | 38,3 | 94  | 71,4  | 71,4  | 19,46 | 589,37 | 144,12 |
| 2019/08/24 | CH2276 | Female | Two y/o | Control | Control | Feed Day | No  | 14:55 | 14:00 - 14:59 | Afternoon    | 38,3 | 65  | 73,4  | 73,4  | 19,46 | 561,12 | 145,08 |
| 2019/08/24 | CH2276 | Female | Two y/o | Control | Control | Feed Day | No  | 15:00 | 15:00 - 15:59 | Afternoon    | 38,3 | 67  | 71,6  | 71,6  | 19,46 | 563,53 | 144,22 |
| 2019/08/24 | CH2276 | Female | Two y/o | Control | Control | Feed Day | No  | 15:05 | 15:00 - 15:59 | Afternoon    | 38,3 | 66  | 68,2  | 68,2  | 19,46 | 562,34 | 142,53 |
| 2019/08/24 | CH2276 | Female | Two y/o | Control | Control | Feed Day | No  | 15:10 | 15:00 - 15:59 | Afternoon    | 38,3 |     | 52,8  | 52,8  | 19,46 |        | 133,67 |
| 2019/08/24 | CH2276 | Female | Two y/o | Control | Control | Feed Day | No  | 15:15 | 15:00 - 15:59 | Afternoon    | 38,3 | 67  | 19,4  | 19,4  | 19,46 | 563,53 | 99,28  |
| 2019/08/24 | CH2276 | Female | Two y/o | Control | Control | Feed Day | No  | 15:20 | 15:00 - 15:59 | Afternoon    | 38,2 | 59  | 48,0  | 48,0  | 19,36 | 553,30 | 130,38 |
| 2019/08/24 | CH2276 | Female | Two y/o | Control | Control | Feed Day | No  | 15:25 | 15:00 - 15:59 | Afternoon    | 38,2 | 69  | 70,6  | 70,6  | 19,36 | 565,86 | 143,73 |
| 2019/08/24 | CH2276 | Female | Two y/o | Control | Control | Feed Day | Yes | 15:30 | 15:00 - 15:59 | Afternoon    | 38,2 | 74  | 43,8  | 43,8  | 19,36 | 571,33 | 127,22 |
| 2019/08/24 | CH2276 | Female | Two y/o | Control | Control | Feed Day | Yes | 15:35 | 15:00 - 15:59 | Afternoon    | 38,2 | 108 | 64,4  | 64,4  | 19,36 | 599,39 | 140,55 |
| 2019/08/24 | CH2276 | Female | Two y/o | Control | Control | Feed Day | Yes | 15:40 | 15:00 - 15:59 | Afternoon    | 38,1 | 92  | 67,0  | 67,0  | 19,26 | 587,78 | 141,92 |
| 2019/08/24 | CH2276 | Female | Two y/o | Control | Control | Feed Day | Yes | 15:45 | 15:00 - 15:59 | Afternoon    | 38,0 | 66  | 64,8  | 64,8  | 19,15 | 562,34 | 140,76 |
| 2019/08/24 | CH2276 | Female | Two y/o | Control | Control | Feed Day | Yes | 15:50 | 15:00 - 15:59 | Afternoon    | 38,0 | 73  | 69,2  | 69,2  | 19,15 | 570,27 | 143,04 |



|            |        |        |         |         |         |          |     |       |               |           |      |     |       |       |       |        |        |
|------------|--------|--------|---------|---------|---------|----------|-----|-------|---------------|-----------|------|-----|-------|-------|-------|--------|--------|
| 2019/08/24 | CH2276 | Female | Two y/o | Control | Control | Feed Day | Yes | 15:55 | 15:00 - 15:59 | Afternoon | 37,9 | 81  | 45,0  | 45,0  | 19,05 | 578,26 | 128,15 |
| 2019/08/24 | CH2276 | Female | Two y/o | Control | Control | Feed Day | Yes | 16:00 | 16:00 - 16:59 | Evening   | 37,9 | 67  | 68,0  | 68,0  | 19,05 | 563,53 | 142,43 |
| 2019/08/24 | CH2276 | Female | Two y/o | Control | Control | Feed Day | Yes | 16:05 | 16:00 - 16:59 | Evening   | 37,9 | 65  | 72,6  | 72,6  | 19,05 | 561,12 | 144,70 |
| 2019/08/24 | CH2276 | Female | Two y/o | Control | Control | Feed Day | Yes | 16:10 | 16:00 - 16:59 | Evening   | 37,9 | 68  | 63,0  | 63,0  | 19,05 | 564,71 | 139,78 |
| 2019/08/24 | CH2276 | Female | Two y/o | Control | Control | Feed Day | Yes | 16:15 | 16:00 - 16:59 | Evening   | 37,9 |     | 43,8  | 43,8  | 19,05 |        | 127,22 |
| 2019/08/24 | CH2276 | Female | Two y/o | Control | Control | Feed Day | Yes | 16:20 | 16:00 - 16:59 | Evening   | 37,9 | 63  | 48,2  | 48,2  | 19,05 | 558,62 | 130,52 |
| 2019/08/24 | CH2276 | Female | Two y/o | Control | Control | Feed Day | Yes | 16:25 | 16:00 - 16:59 | Evening   | 38,0 | 95  | 25,2  | 25,2  | 19,15 | 590,14 | 108,22 |
| 2019/08/24 | CH2276 | Female | Two y/o | Control | Control | Feed Day | No  | 16:30 | 16:00 - 16:59 | Evening   | 38,0 | 67  | 24,0  | 24,0  | 19,15 | 563,53 | 106,55 |
| 2019/08/24 | CH2276 | Female | Two y/o | Control | Control | Feed Day | No  | 16:35 | 16:00 - 16:59 | Evening   | 38,0 | 66  | 21,8  | 21,8  | 19,15 | 562,34 | 103,26 |
| 2019/08/24 | CH2276 | Female | Two y/o | Control | Control | Feed Day | No  | 16:40 | 16:00 - 16:59 | Evening   | 37,9 | 67  | 25,4  | 25,4  | 19,05 | 563,53 | 108,49 |
| 2019/08/24 | CH2276 | Female | Two y/o | Control | Control | Feed Day | No  | 16:45 | 16:00 - 16:59 | Evening   | 37,9 | 68  | 26,2  | 26,2  | 19,05 | 564,71 | 109,55 |
| 2019/08/24 | CH2276 | Female | Two y/o | Control | Control | Feed Day | No  | 16:50 | 16:00 - 16:59 | Evening   | 37,9 | 75  | 25,0  | 25,0  | 19,05 | 572,36 | 107,94 |
| 2019/08/24 | CH2276 | Female | Two y/o | Control | Control | Feed Day | No  | 16:55 | 16:00 - 16:59 | Evening   | 37,8 | 64  | 22,8  | 22,8  | 18,95 | 559,88 | 104,79 |
| 2019/08/24 | CH2276 | Female | Two y/o | Control | Control | Feed Day | No  | 17:00 | 17:00 - 17:59 | Evening   | 37,8 | 70  | 26,8  | 26,8  | 18,95 | 566,99 | 110,33 |
| 2019/08/24 | CH2276 | Female | Two y/o | Control | Control | Feed Day | No  | 17:05 | 17:00 - 17:59 | Evening   | 37,8 | 70  | 33,6  | 33,6  | 18,95 | 566,99 | 118,09 |
| 2019/08/24 | CH2276 | Female | Two y/o | Control | Control | Feed Day | No  | 17:10 | 17:00 - 17:59 | Evening   | 37,9 | 91  | 58,6  | 58,6  | 19,05 | 586,98 | 137,28 |
| 2019/08/24 | CH2276 | Female | Two y/o | Control | Control | Feed Day | No  | 17:15 | 17:00 - 17:59 | Evening   | 37,9 | 65  | 61,8  | 61,8  | 19,05 | 561,12 | 139,12 |
| 2019/08/24 | CH2276 | Female | Two y/o | Control | Control | Feed Day | No  | 17:20 | 17:00 - 17:59 | Evening   | 37,9 | 134 | 56,6  | 56,6  | 19,05 | 614,33 | 136,07 |
| 2019/08/24 | CH2276 | Female | Two y/o | Control | Control | Feed Day | No  | 17:25 | 17:00 - 17:59 | Evening   | 37,9 | 70  | 55,6  | 55,6  | 19,05 | 566,99 | 135,46 |
| 2019/08/24 | CH2276 | Female | Two y/o | Control | Control | Feed Day | No  | 17:30 | 17:00 - 17:59 | Evening   | 37,9 | 69  | 52,0  | 52,0  | 19,05 | 565,86 | 133,14 |
| 2019/08/24 | CH2276 | Female | Two y/o | Control | Control | Feed Day | No  | 17:35 | 17:00 - 17:59 | Evening   | 37,9 | 69  | 20,8  | 20,8  | 19,05 | 565,86 | 101,65 |
| 2019/08/24 | CH2276 | Female | Two y/o | Control | Control | Feed Day | No  | 17:40 | 17:00 - 17:59 | Evening   | 37,9 | 66  | 45,8  | 45,8  | 19,05 | 562,34 | 128,76 |
| 2019/08/24 | CH2276 | Female | Two y/o | Control | Control | Feed Day | No  | 17:45 | 17:00 - 17:59 | Evening   | 37,9 | 67  | 49,6  | 49,6  | 19,05 | 563,53 | 131,51 |
| 2019/08/24 | CH2276 | Female | Two y/o | Control | Control | Feed Day | No  | 17:50 | 17:00 - 17:59 | Evening   | 37,8 | 79  | 49,6  | 49,6  | 18,95 | 576,36 | 131,51 |
| 2019/08/24 | CH2276 | Female | Two y/o | Control | Control | Feed Day | No  | 17:55 | 17:00 - 17:59 | Evening   | 37,8 | 100 | 71,2  | 71,2  | 18,95 | 593,87 | 144,03 |
| 2019/08/24 | CH2276 | Female | Two y/o | Control | Control | Feed Day | No  | 18:00 | 18:00 - 18:59 | Evening   | 37,8 | 78  | 70,4  | 70,4  | 18,95 | 575,38 | 143,64 |
| 2019/08/24 | CH2276 | Female | Two y/o | Control | Control | Feed Day | No  | 18:05 | 18:00 - 18:59 | Evening   | 37,8 | 121 | 49,2  | 49,2  | 18,95 | 607,35 | 131,23 |
| 2019/08/24 | CH2276 | Female | Two y/o | Control | Control | Feed Day | No  | 18:10 | 18:00 - 18:59 | Evening   | 37,8 | 88  | 75,6  | 75,6  | 18,95 | 584,49 | 146,11 |
| 2019/08/24 | CH2276 | Female | Two y/o | Control | Control | Feed Day | No  | 18:15 | 18:00 - 18:59 | Evening   | 37,8 | 112 | 129,2 | 129,2 | 18,95 | 601,96 | 164,79 |
| 2019/08/24 | CH2276 | Female | Two y/o | Control | Control | Feed Day | No  | 18:20 | 18:00 - 18:59 | Evening   | 38,0 | 98  | 42,0  | 42,0  | 19,15 | 592,41 | 125,77 |
| 2019/08/24 | CH2276 | Female | Two y/o | Control | Control | Feed Day | No  | 18:25 | 18:00 - 18:59 | Evening   | 37,9 | 64  | 59,6  | 59,6  | 19,05 | 559,88 | 137,86 |
| 2019/08/24 | CH2276 | Female | Two y/o | Control | Control | Feed Day | No  | 18:30 | 18:00 - 18:59 | Evening   | 37,8 | 79  | 65,6  | 65,6  | 18,95 | 576,36 | 141,19 |
| 2019/08/24 | CH2276 | Female | Two y/o | Control | Control | Feed Day | No  | 18:35 | 18:00 - 18:59 | Evening   | 37,9 | 67  | 57,6  | 57,6  | 19,05 | 563,53 | 136,68 |
| 2019/08/24 | CH2276 | Female | Two y/o | Control | Control | Feed Day | No  | 18:40 | 18:00 - 18:59 | Evening   | 38,0 |     | 59,6  | 59,6  | 19,15 |        | 137,86 |
| 2019/08/24 | CH2276 | Female | Two y/o | Control | Control | Feed Day | No  | 18:45 | 18:00 - 18:59 | Evening   | 38,0 | 102 | 56,4  | 56,4  | 19,15 | 595,30 | 135,95 |
| 2019/08/24 | CH2276 | Female | Two y/o | Control | Control | Feed Day | No  | 18:50 | 18:00 - 18:59 | Evening   | 38,0 | 68  | 77,4  | 77,4  | 19,15 | 564,71 | 146,93 |
| 2019/08/24 | CH2276 | Female | Two y/o | Control | Control | Feed Day | No  | 18:55 | 18:00 - 18:59 | Evening   | 37,9 | 70  | 44,2  | 44,2  | 19,05 | 566,99 | 127,53 |
| 2019/08/24 | CH2276 | Female | Two y/o | Control | Control | Feed Day | No  | 19:00 | 19:00 - 19:59 | Evening   | 37,8 | 73  | 47,6  | 47,6  | 18,95 | 570,27 | 130,09 |
| 2019/08/24 | CH2276 | Female | Two y/o | Control | Control | Feed Day | No  | 19:05 | 19:00 - 19:59 | Evening   | 37,8 | 79  | 48,8  | 48,8  | 18,95 | 576,36 | 130,95 |
| 2019/08/24 | CH2276 | Female | Two y/o | Control | Control | Feed Day | No  | 19:10 | 19:00 - 19:59 | Evening   | 37,7 | 68  | 34,4  | 34,4  | 18,85 | 564,71 | 118,90 |
| 2019/08/24 | CH2276 | Female | Two y/o | Control | Control | Feed Day | No  | 19:15 | 19:00 - 19:59 | Evening   | 37,7 | 69  | 68,8  | 68,8  | 18,85 | 565,86 | 142,84 |
| 2019/08/24 | CH2276 | Female | Two y/o | Control | Control | Feed Day | No  | 19:20 | 19:00 - 19:59 | Evening   | 37,8 | 55  | 60,2  | 60,2  | 18,95 | 547,52 | 138,21 |
| 2019/08/24 | CH2276 | Female | Two y/o | Control | Control | Feed Day | No  | 19:25 | 19:00 - 19:59 | Evening   | 37,7 | 68  | 51,0  | 51,0  | 18,85 | 564,71 | 132,47 |
| 2019/08/24 | CH2276 | Female | Two y/o | Control | Control | Feed Day | No  | 19:30 | 19:00 - 19:59 | Evening   | 37,6 | 59  | 54,8  | 54,8  | 18,75 | 553,30 | 134,96 |
| 2019/08/24 | CH2276 | Female | Two y/o | Control | Control | Feed Day | No  | 19:35 | 19:00 - 19:59 | Evening   | 37,7 | 93  | 55,2  | 55,2  | 18,85 | 588,58 | 135,21 |
| 2019/08/24 | CH2276 | Female | Two y/o | Control | Control | Feed Day | No  | 19:40 | 19:00 - 19:59 | Evening   | 37,8 | 88  | 64,0  | 64,0  | 18,95 | 584,49 | 140,33 |
| 2019/08/24 | CH2276 | Female | Two y/o | Control | Control | Feed Day | No  | 19:45 | 19:00 - 19:59 | Evening   | 37,9 |     | 46,8  | 46,8  | 19,05 |        | 129,50 |
| 2019/08/24 | CH2276 | Female | Two y/o | Control | Control | Feed Day | No  | 19:50 | 19:00 - 19:59 | Evening   | 37,9 | 81  | 43,0  | 43,0  | 19,05 | 578,26 | 126,58 |
| 2019/08/24 | CH2276 | Female | Two y/o | Control | Control | Feed Day | No  | 19:55 | 19:00 - 19:59 | Evening   | 37,8 | 98  | 71,4  | 71,4  | 18,95 | 592,41 | 144,12 |
| 2019/08/24 | CH2276 | Female | Two y/o | Control | Control | Feed Day | No  | 20:00 | 20:00 - 20:59 | Night     | 37,8 | 67  | 76,0  | 76,0  | 18,95 | 563,53 | 146,29 |
| 2019/08/24 | CH2276 | Female | Two y/o | Control | Control | Feed Day | No  | 20:05 | 20:00 - 20:59 | Night     | 37,9 | 92  | 75,8  | 75,8  | 19,05 | 587,78 | 146,20 |
| 2019/08/24 | CH2276 | Female | Two y/o | Control | Control | Feed Day | No  | 20:10 | 20:00 - 20:59 | Night     | 37,9 | 65  | 90,2  | 90,2  | 19,05 | 561,12 | 152,25 |
| 2019/08/24 | CH2276 | Female | Two y/o | Control | Control | Feed Day | No  | 20:15 | 20:00 - 20:59 | Night     | 37,9 | 94  | 88,6  | 88,6  | 19,05 | 589,37 | 151,63 |
| 2019/08/24 | CH2276 | Female | Two y/o | Control | Control | Feed Day | No  | 20:20 | 20:00 - 20:59 | Night     | 37,8 | 96  | 86,4  | 86,4  | 18,95 | 590,91 | 150,75 |
| 2019/08/24 | CH2276 | Female | Two y/o | Control | Control | Feed Day | No  | 20:25 | 20:00 - 20:59 | Night     | 37,7 | 91  | 81,8  | 81,8  | 18,85 | 586,98 | 148,85 |
| 2019/08/24 | CH2276 | Female | Two y/o | Control | Control | Feed Day | No  | 20:30 | 20:00 - 20:59 | Night     | 37,7 | 72  | 53,0  | 53,0  | 18,85 | 569,20 | 133,80 |
| 2019/08/24 | CH2276 | Female | Two y/o | Control | Control | Feed Day | No  | 20:35 | 20:00 - 20:59 | Night     | 37,7 | 59  | 57,4  | 57,4  | 18,85 | 553,30 | 136,56 |
| 2019/08/24 | CH2276 | Female | Two y/o | Control | Control | Feed Day | No  | 20:40 | 20:00 - 20:59 | Night     | 37,6 | 68  | 51,4  | 51,4  | 18,75 | 564,71 | 132,74 |
| 2019/08/24 | CH2276 | Female | Two y/o | Control | Control | Feed Day | No  | 20:45 | 20:00 - 20:59 | Night     | 37,5 |     | 53,2  | 53,2  | 18,65 |        | 133,93 |
| 2019/08/24 | CH2276 | Female | Two y/o | Control | Control | Feed Day | No  | 20:50 | 20:00 - 20:59 | Night     | 37,5 | 86  | 51,0  | 51,0  | 18,65 | 582,77 | 132,47 |
| 2019/08/24 | CH2276 | Female | Two y/o | Control | Control | Feed Day | No  | 20:55 | 20:00 - 20:59 | Night     | 37,5 | 64  | 54,0  | 54,0  | 18,65 | 559,88 | 134,45 |
| 2019/08/24 | CH2276 | Female | Two y/o | Control | Control | Feed Day | No  | 21:00 | 21:00 - 21:59 | Night     | 37,4 | 68  | 61,2  | 61,2  | 18,55 | 564,71 | 138,78 |
| 2019/08/24 | CH2276 | Female | Two y/o | Control | Control | Feed Day | No  | 21:05 | 21:00 - 21:59 | Night     | 37,4 | 68  | 60,2  | 60,2  | 18,55 | 564,71 | 138,21 |
| 2019/08/24 | CH2276 | Female | Two y/o | Control | Control | Feed Day | No  | 21:10 | 21:00 - 21:59 | Night     | 37,4 | 57  | 64,8  | 64,8  | 18,55 | 550,47 | 140,76 |
| 2019/08/24 | CH2276 | Female | Two y/o | Control | Control | Feed Day | No  | 21:15 | 21:00 - 21:59 | Night     | 37,3 | 95  | 56,2  | 56,2  | 18,46 | 590,14 | 135,83 |
| 2019/08/24 | CH2276 | Female | Two y/o | Control | Control | Feed Day | No  | 21:20 | 21:00 - 21:59 | Night     | 37,4 | 97  | 35,4  | 35,4  | 18,55 | 591,66 | 119,88 |
| 2019/08/24 | CH2276 | Female | Two y/o | Control | Control | Feed Day | No  | 21:25 | 21:00 - 21:59 | Night     | 37,4 | 64  | 56,4  | 56,4  | 18,55 | 559,88 | 135,95 |
| 2019/08/24 | CH2276 | Female | Two y/o | Control | Control | Feed Day | No  | 21:30 | 21:00 - 21:59 | Night     | 37,5 | 81  | 45,2  | 45,2  | 18,65 | 578,26 | 128,30 |
| 2019/08/24 | CH2276 | Female | Two y/o | Control | Control | Feed Day | No  | 21:35 | 21:00 - 21:59 | Night     | 37,4 | 65  | 48,8  | 48,8  | 18,55 | 561,12 | 130,95 |
| 2019/08/24 | CH2276 | Female | Two y/o | Control | Control | Feed Day | No  | 21:40 | 21:00 - 21:59 | Night     | 37,4 | 72  | 44,4  | 44,4  | 18,55 | 569,20 | 127,69 |



|    |            |        |        |         |         |         |          |    |       |               |               |      |     |       |       |       |        |        |
|----|------------|--------|--------|---------|---------|---------|----------|----|-------|---------------|---------------|------|-----|-------|-------|-------|--------|--------|
|    | 2019/08/24 | CH2276 | Female | Two y/o | Control | Control | Feed Day | No | 21:45 | 21:00 - 21:59 | Night         | 37,4 | 61  | 53,2  | 53,2  | 18,55 | 556,01 | 133,93 |
|    | 2019/08/24 | CH2276 | Female | Two y/o | Control | Control | Feed Day | No | 21:50 | 21:00 - 21:59 | Night         | 37,4 | 70  | 59,8  | 59,8  | 18,55 | 566,99 | 137,98 |
|    | 2019/08/24 | CH2276 | Female | Two y/o | Control | Control | Feed Day | No | 21:55 | 21:00 - 21:59 | Night         | 37,4 | 75  | 50,0  | 50,0  | 18,55 | 572,36 | 131,79 |
|    | 2019/08/24 | CH2276 | Female | Two y/o | Control | Control | Feed Day | No | 22:00 | 22:00 - 22:59 | Night         | 37,4 | 70  | 50,8  | 50,8  | 18,55 | 566,99 | 132,33 |
|    | 2019/08/24 | CH2276 | Female | Two y/o | Control | Control | Feed Day | No | 22:05 | 22:00 - 22:59 | Night         | 37,5 | 73  | 40,2  | 40,2  | 18,65 | 570,27 | 124,26 |
|    | 2019/08/24 | CH2276 | Female | Two y/o | Control | Control | Feed Day | No | 22:10 | 22:00 - 22:59 | Night         | 37,5 | 63  | 46,4  | 46,4  | 18,65 | 558,62 | 129,21 |
|    | 2019/08/24 | CH2276 | Female | Two y/o | Control | Control | Feed Day | No | 22:15 | 22:00 - 22:59 | Night         | 37,4 | 88  | 45,2  | 45,2  | 18,55 | 584,49 | 128,30 |
|    | 2019/08/24 | CH2276 | Female | Two y/o | Control | Control | Feed Day | No | 22:20 | 22:00 - 22:59 | Night         | 37,4 | 107 | 41,4  | 41,4  | 18,55 | 598,73 | 125,27 |
|    | 2019/08/24 | CH2276 | Female | Two y/o | Control | Control | Feed Day | No | 22:25 | 22:00 - 22:59 | Night         | 37,4 | 93  | 35,6  | 35,6  | 18,55 | 588,58 | 120,08 |
|    | 2019/08/24 | CH2276 | Female | Two y/o | Control | Control | Feed Day | No | 22:30 | 22:00 - 22:59 | Night         | 37,3 | 70  | 49,4  | 49,4  | 18,46 | 566,99 | 131,37 |
|    | 2019/08/24 | CH2276 | Female | Two y/o | Control | Control | Feed Day | No | 22:35 | 22:00 - 22:59 | Night         | 37,3 | 68  | 49,2  | 49,2  | 18,46 | 564,71 | 131,23 |
|    | 2019/08/24 | CH2276 | Female | Two y/o | Control | Control | Feed Day | No | 22:40 | 22:00 - 22:59 | Night         | 37,3 | 88  | 52,6  | 52,6  | 18,46 | 584,49 | 133,54 |
|    | 2019/08/24 | CH2276 | Female | Two y/o | Control | Control | Feed Day | No | 22:45 | 22:00 - 22:59 | Night         | 37,3 | 68  | 53,2  | 53,2  | 18,46 | 564,71 | 133,93 |
|    | 2019/08/24 | CH2276 | Female | Two y/o | Control | Control | Feed Day | No | 22:50 | 22:00 - 22:59 | Night         | 37,3 | 94  | 42,0  | 42,0  | 18,46 | 589,37 | 125,77 |
|    | 2019/08/24 | CH2276 | Female | Two y/o | Control | Control | Feed Day | No | 22:55 | 22:00 - 22:59 | Night         | 37,3 | 120 | 50,0  | 50,0  | 18,46 | 606,78 | 131,79 |
|    | 2019/08/24 | CH2276 | Female | Two y/o | Control | Control | Feed Day | No | 23:00 | 23:00 - 23:59 | Night         | 37,3 | 67  | 48,0  | 48,0  | 18,46 | 563,53 | 130,38 |
|    | 2019/08/24 | CH2276 | Female | Two y/o | Control | Control | Feed Day | No | 23:05 | 23:00 - 23:59 | Night         | 37,4 | 77  | 40,8  | 40,8  | 18,55 | 574,39 | 124,77 |
|    | 2019/08/24 | CH2276 | Female | Two y/o | Control | Control | Feed Day | No | 23:10 | 23:00 - 23:59 | Night         | 37,4 | 92  | 44,2  | 44,2  | 18,55 | 587,78 | 127,53 |
|    | 2019/08/24 | CH2276 | Female | Two y/o | Control | Control | Feed Day | No | 23:15 | 23:00 - 23:59 | Night         | 37,4 | 86  | 44,0  | 44,0  | 18,55 | 582,77 | 127,37 |
|    | 2019/08/24 | CH2276 | Female | Two y/o | Control | Control | Feed Day | No | 23:20 | 23:00 - 23:59 | Night         | 37,5 | 64  | 61,6  | 61,6  | 18,65 | 559,88 | 139,00 |
|    | 2019/08/24 | CH2276 | Female | Two y/o | Control | Control | Feed Day | No | 23:25 | 23:00 - 23:59 | Night         | 37,5 | 64  | 60,6  | 60,6  | 18,65 | 559,88 | 138,44 |
|    | 2019/08/24 | CH2276 | Female | Two y/o | Control | Control | Feed Day | No | 23:30 | 23:00 - 23:59 | Night         | 37,4 | 81  | 46,4  | 46,4  | 18,55 | 578,26 | 129,21 |
|    | 2019/08/24 | CH2276 | Female | Two y/o | Control | Control | Feed Day | No | 23:35 | 23:00 - 23:59 | Night         | 37,4 | 65  | 25,2  | 25,2  | 18,55 | 561,12 | 108,22 |
|    | 2019/08/24 | CH2276 | Female | Two y/o | Control | Control | Feed Day | No | 23:40 | 23:00 - 23:59 | Night         | 37,4 | 92  | 32,2  | 32,2  | 18,55 | 587,78 | 116,63 |
|    | 2019/08/24 | CH2276 | Female | Two y/o | Control | Control | Feed Day | No | 23:45 | 23:00 - 23:59 | Night         | 37,4 | 64  | 36,8  | 36,8  | 18,55 | 559,88 | 121,22 |
|    | 2019/08/24 | CH2276 | Female | Two y/o | Control | Control | Feed Day | No | 23:50 | 23:00 - 23:59 | Night         | 37,4 | 64  | 36,0  | 36,0  | 18,55 | 559,88 | 120,46 |
|    | 2019/08/24 | CH2276 | Female | Two y/o | Control | Control | Feed Day | No | 23:55 | 23:00 - 23:59 | Night         | 37,4 | 90  | 37,0  | 37,0  | 18,55 | 586,16 | 121,40 |
| 67 | 2019/08/25 | CH2276 | Female | Two y/o | Control | Control | Feed Day | No | 00:00 | 00:00 - 00:59 | Early Morning | 37,4 | 63  | 39,6  | 39,6  | 18,55 | 558,62 | 123,74 |
|    | 2019/08/25 | CH2276 | Female | Two y/o | Control | Control | Feed Day | No | 00:05 | 00:00 - 00:59 | Early Morning | 37,4 | 93  | 44,8  | 44,8  | 18,55 | 588,58 | 127,99 |
|    | 2019/08/25 | CH2276 | Female | Two y/o | Control | Control | Feed Day | No | 00:10 | 00:00 - 00:59 | Early Morning | 37,4 | 60  | 45,2  | 45,2  | 18,55 | 554,67 | 128,30 |
|    | 2019/08/25 | CH2276 | Female | Two y/o | Control | Control | Feed Day | No | 00:15 | 00:00 - 00:59 | Early Morning | 37,4 | 88  | 85,6  | 85,6  | 18,55 | 584,49 | 150,43 |
|    | 2019/08/25 | CH2276 | Female | Two y/o | Control | Control | Feed Day | No | 00:20 | 00:00 - 00:59 | Early Morning | 37,4 | 77  | 81,2  | 81,2  | 18,55 | 574,39 | 148,59 |
|    | 2019/08/25 | CH2276 | Female | Two y/o | Control | Control | Feed Day | No | 00:25 | 00:00 - 00:59 | Early Morning | 37,5 | 92  | 93,2  | 93,2  | 18,65 | 587,78 | 153,39 |
|    | 2019/08/25 | CH2276 | Female | Two y/o | Control | Control | Feed Day | No | 00:30 | 00:00 - 00:59 | Early Morning | 37,5 | 63  | 94,0  | 94,0  | 18,65 | 558,62 | 153,69 |
|    | 2019/08/25 | CH2276 | Female | Two y/o | Control | Control | Feed Day | No | 00:35 | 00:00 - 00:59 | Early Morning | 37,5 | 63  | 95,2  | 95,2  | 18,65 | 558,62 | 154,13 |
|    | 2019/08/25 | CH2276 | Female | Two y/o | Control | Control | Feed Day | No | 00:40 | 00:00 - 00:59 | Early Morning | 37,5 | 62  | 94,8  | 94,8  | 18,65 | 557,33 | 153,98 |
|    | 2019/08/25 | CH2276 | Female | Two y/o | Control | Control | Feed Day | No | 00:45 | 00:00 - 00:59 | Early Morning | 37,5 | 62  | 90,4  | 90,4  | 18,65 | 557,33 | 152,33 |
|    | 2019/08/25 | CH2276 | Female | Two y/o | Control | Control | Feed Day | No | 00:50 | 00:00 - 00:59 | Early Morning | 37,5 | 61  | 85,4  | 85,4  | 18,65 | 556,01 | 150,35 |
|    | 2019/08/25 | CH2276 | Female | Two y/o | Control | Control | Feed Day | No | 00:55 | 00:00 - 00:59 | Early Morning | 37,5 | 64  | 87,4  | 87,4  | 18,65 | 559,88 | 151,15 |
|    | 2019/08/25 | CH2276 | Female | Two y/o | Control | Control | Feed Day | No | 01:00 | 01:00 - 01:59 | Early Morning | 37,5 | 86  | 86,2  | 86,2  | 18,65 | 582,77 | 150,67 |
|    | 2019/08/25 | CH2276 | Female | Two y/o | Control | Control | Feed Day | No | 01:05 | 01:00 - 01:59 | Early Morning | 37,4 | 64  | 78,8  | 78,8  | 18,55 | 559,88 | 147,55 |
|    | 2019/08/25 | CH2276 | Female | Two y/o | Control | Control | Feed Day | No | 01:10 | 01:00 - 01:59 | Early Morning | 37,4 | 64  | 82,6  | 82,6  | 18,55 | 559,88 | 149,19 |
|    | 2019/08/25 | CH2276 | Female | Two y/o | Control | Control | Feed Day | No | 01:15 | 01:00 - 01:59 | Early Morning | 37,4 | 60  | 81,4  | 81,4  | 18,55 | 554,67 | 148,68 |
|    | 2019/08/25 | CH2276 | Female | Two y/o | Control | Control | Feed Day | No | 01:20 | 01:00 - 01:59 | Early Morning | 37,3 | 57  | 84,6  | 84,6  | 18,46 | 550,47 | 150,02 |
|    | 2019/08/25 | CH2276 | Female | Two y/o | Control | Control | Feed Day | No | 01:25 | 01:00 - 01:59 | Early Morning | 37,3 |     | 84,0  | 84,0  | 18,46 |        | 149,77 |
|    | 2019/08/25 | CH2276 | Female | Two y/o | Control | Control | Feed Day | No | 01:30 | 01:00 - 01:59 | Early Morning | 37,3 |     | 89,2  | 89,2  | 18,46 |        | 151,86 |
|    | 2019/08/25 | CH2276 | Female | Two y/o | Control | Control | Feed Day | No | 01:35 | 01:00 - 01:59 | Early Morning | 37,2 |     | 86,6  | 86,6  | 18,36 |        | 150,83 |
|    | 2019/08/25 | CH2276 | Female | Two y/o | Control | Control | Feed Day | No | 01:40 | 01:00 - 01:59 | Early Morning | 37,1 | 156 | 86,4  | 86,4  | 18,26 | 624,43 | 150,75 |
|    | 2019/08/25 | CH2276 | Female | Two y/o | Control | Control | Feed Day | No | 01:45 | 01:00 - 01:59 | Early Morning | 37,0 | 65  | 85,8  | 85,8  | 18,16 | 561,12 | 150,51 |
|    | 2019/08/25 | CH2276 | Female | Two y/o | Control | Control | Feed Day | No | 01:50 | 01:00 - 01:59 | Early Morning | 36,9 |     | 84,6  | 84,6  | 18,06 |        | 150,02 |
|    | 2019/08/25 | CH2276 | Female | Two y/o | Control | Control | Feed Day | No | 01:55 | 01:00 - 01:59 | Early Morning | 36,9 | 58  | 79,6  | 79,6  | 18,06 | 551,90 | 147,90 |
|    | 2019/08/25 | CH2276 | Female | Two y/o | Control | Control | Feed Day | No | 02:00 | 02:00 - 02:59 | Early Morning | 36,8 | 87  | 87,4  | 87,4  | 17,96 | 583,64 | 151,15 |
|    | 2019/08/25 | CH2276 | Female | Two y/o | Control | Control | Feed Day | No | 02:05 | 02:00 - 02:59 | Early Morning | 36,8 | 83  | 87,4  | 87,4  | 17,96 | 580,11 | 151,15 |
|    | 2019/08/25 | CH2276 | Female | Two y/o | Control | Control | Feed Day | No | 02:10 | 02:00 - 02:59 | Early Morning | 36,8 | 66  | 82,4  | 82,4  | 17,96 | 562,34 | 149,10 |
|    | 2019/08/25 | CH2276 | Female | Two y/o | Control | Control | Feed Day | No | 02:15 | 02:00 - 02:59 | Early Morning | 36,7 | 63  | 91,2  | 91,2  | 17,87 | 558,62 | 152,63 |
|    | 2019/08/25 | CH2276 | Female | Two y/o | Control | Control | Feed Day | No | 02:20 | 02:00 - 02:59 | Early Morning | 36,7 | 100 | 89,6  | 89,6  | 17,87 | 593,87 | 152,02 |
|    | 2019/08/25 | CH2276 | Female | Two y/o | Control | Control | Feed Day | No | 02:25 | 02:00 - 02:59 | Early Morning | 36,8 | 57  | 86,6  | 86,6  | 17,96 | 550,47 | 150,83 |
|    | 2019/08/25 | CH2276 | Female | Two y/o | Control | Control | Feed Day | No | 02:30 | 02:00 - 02:59 | Early Morning | 36,8 | 65  | 88,0  | 88,0  | 17,96 | 561,12 | 151,39 |
|    | 2019/08/25 | CH2276 | Female | Two y/o | Control | Control | Feed Day | No | 02:35 | 02:00 - 02:59 | Early Morning | 36,8 | 76  | 87,6  | 87,6  | 17,96 | 573,39 | 151,23 |
|    | 2019/08/25 | CH2276 | Female | Two y/o | Control | Control | Feed Day | No | 02:40 | 02:00 - 02:59 | Early Morning | 36,8 | 65  | 57,6  | 57,6  | 17,96 | 561,12 | 136,68 |
|    | 2019/08/25 | CH2276 | Female | Two y/o | Control | Control | Feed Day | No | 02:45 | 02:00 - 02:59 | Early Morning | 36,9 |     | 72,8  | 72,8  | 18,06 |        | 144,80 |
|    | 2019/08/25 | CH2276 | Female | Two y/o | Control | Control | Feed Day | No | 02:50 | 02:00 - 02:59 | Early Morning | 37,0 | 78  | 61,6  | 61,6  | 18,16 | 575,38 | 139,00 |
|    | 2019/08/25 | CH2276 | Female | Two y/o | Control | Control | Feed Day | No | 02:55 | 02:00 - 02:59 | Early Morning | 37,1 | 118 | 110,2 | 110,2 | 18,26 | 605,61 | 159,23 |
|    | 2019/08/25 | CH2276 | Female | Two y/o | Control | Control | Feed Day | No | 03:00 | 03:00 - 03:59 | Early Morning | 37,1 | 55  | 187,0 | 187,0 | 18,26 | 547,52 | 177,76 |
|    | 2019/08/25 | CH2276 | Female | Two y/o | Control | Control | Feed Day | No | 03:05 | 03:00 - 03:59 | Early Morning | 37,2 | 51  | 183,2 | 183,2 | 18,36 | 541,20 | 177,03 |
|    | 2019/08/25 | CH2276 | Female | Two y/o | Control | Control | Feed Day | No | 03:10 | 03:00 - 03:59 | Early Morning | 37,3 | 64  | 159,8 | 159,8 | 18,46 | 559,88 | 172,24 |
|    | 2019/08/25 | CH2276 | Female | Two y/o | Control | Control | Feed Day | No | 03:15 | 03:00 - 03:59 | Early Morning | 37,3 |     | 589,8 | 589,8 | 18,46 |        | 218,43 |
|    | 2019/08/25 | CH2276 | Female | Two y/o | Control | Control | Feed Day | No | 03:20 | 03:00 - 03:59 | Early Morning | 37,4 | 112 | 669,6 | 669,6 | 18,55 | 601,96 | 222,96 |
|    | 2019/08/25 | CH2276 | Female | Two y/o | Control | Control | Feed Day | No | 03:25 | 03:00 - 03:59 | Early Morning | 37,6 | 103 | 96,6  | 96,6  | 18,75 | 596,00 | 154,64 |
|    | 2019/08/25 | CH2276 | Female | Two y/o | Control | Control | Feed Day | No | 03:30 | 03:00 - 03:59 | Early Morning | 37,6 |     | 116,0 | 116,0 | 18,75 |        | 161,02 |



|            |        |        |         |         |         |          |    |       |               |               |      |     |       |       |       |        |        |
|------------|--------|--------|---------|---------|---------|----------|----|-------|---------------|---------------|------|-----|-------|-------|-------|--------|--------|
| 2019/08/25 | CH2276 | Female | Two y/o | Control | Control | Feed Day | No | 03:35 | 03:00 - 03:59 | Early Morning | 37,6 | 66  | 497,4 | 497,4 | 18,75 | 562,34 | 212,36 |
| 2019/08/25 | CH2276 | Female | Two y/o | Control | Control | Feed Day | No | 03:40 | 03:00 - 03:59 | Early Morning | 37,7 | 124 | 47,4  | 47,4  | 18,85 | 609,04 | 129,94 |
| 2019/08/25 | CH2276 | Female | Two y/o | Control | Control | Feed Day | No | 03:45 | 03:00 - 03:59 | Early Morning | 37,6 | 91  | 50,2  | 50,2  | 18,75 | 586,98 | 131,92 |
| 2019/08/25 | CH2276 | Female | Two y/o | Control | Control | Feed Day | No | 03:50 | 03:00 - 03:59 | Early Morning | 37,4 | 69  | 62,8  | 62,8  | 18,55 | 565,86 | 139,67 |
| 2019/08/25 | CH2276 | Female | Two y/o | Control | Control | Feed Day | No | 03:55 | 03:00 - 03:59 | Early Morning | 37,6 | 148 | 141,6 | 141,6 | 18,75 | 620,97 | 168,00 |
| 2019/08/25 | CH2276 | Female | Two y/o | Control | Control | Feed Day | No | 04:00 | 04:00 - 04:59 | Morning       | 37,8 | 129 | 336,4 | 336,4 | 18,95 | 611,75 | 198,47 |
| 2019/08/25 | CH2276 | Female | Two y/o | Control | Control | Feed Day | No | 04:05 | 04:00 - 04:59 | Morning       | 37,7 | 160 | 62,0  | 62,0  | 18,85 | 626,07 | 139,23 |
| 2019/08/25 | CH2276 | Female | Two y/o | Control | Control | Feed Day | No | 04:10 | 04:00 - 04:59 | Morning       | 37,7 | 90  | 352,4 | 352,4 | 18,85 | 586,16 | 200,12 |
| 2019/08/25 | CH2276 | Female | Two y/o | Control | Control | Feed Day | No | 04:15 | 04:00 - 04:59 | Morning       | 37,7 | 101 | 332,0 | 332,0 | 18,85 | 594,59 | 198,01 |
| 2019/08/25 | CH2276 | Female | Two y/o | Control | Control | Feed Day | No | 04:20 | 04:00 - 04:59 | Morning       | 37,7 | 98  | 96,0  | 96,0  | 18,85 | 592,41 | 154,42 |
| 2019/08/25 | CH2276 | Female | Two y/o | Control | Control | Feed Day | No | 04:25 | 04:00 - 04:59 | Morning       | 37,7 |     | 315,4 | 315,4 | 18,85 |        | 196,19 |
| 2019/08/25 | CH2276 | Female | Two y/o | Control | Control | Feed Day | No | 04:30 | 04:00 - 04:59 | Morning       | 37,7 | 112 | 809,0 | 809,0 | 18,85 | 601,96 | 229,73 |
| 2019/08/25 | CH2276 | Female | Two y/o | Control | Control | Feed Day | No | 04:35 | 04:00 - 04:59 | Morning       | 37,7 | 93  | 208,4 | 208,4 | 18,85 | 588,58 | 181,57 |
| 2019/08/25 | CH2276 | Female | Two y/o | Control | Control | Feed Day | No | 04:40 | 04:00 - 04:59 | Morning       | 37,7 | 60  | 366,2 | 366,2 | 18,85 | 554,67 | 201,48 |
| 2019/08/25 | CH2276 | Female | Two y/o | Control | Control | Feed Day | No | 04:45 | 04:00 - 04:59 | Morning       | 37,7 | 137 | 380,2 | 380,2 | 18,85 | 615,83 | 202,81 |
| 2019/08/25 | CH2276 | Female | Two y/o | Control | Control | Feed Day | No | 04:50 | 04:00 - 04:59 | Morning       | 37,7 | 98  | 46,4  | 46,4  | 18,85 | 592,41 | 129,21 |
| 2019/08/25 | CH2276 | Female | Two y/o | Control | Control | Feed Day | No | 04:55 | 04:00 - 04:59 | Morning       | 37,6 | 77  | 31,8  | 31,8  | 18,75 | 574,39 | 116,20 |
| 2019/08/25 | CH2276 | Female | Two y/o | Control | Control | Feed Day | No | 05:00 | 05:00 - 05:59 | Morning       | 37,4 |     | 67,0  | 67,0  | 18,55 |        | 141,92 |
| 2019/08/25 | CH2276 | Female | Two y/o | Control | Control | Feed Day | No | 05:05 | 05:00 - 05:59 | Morning       | 37,5 | 169 | 104,4 | 104,4 | 18,65 | 629,60 | 157,35 |
| 2019/08/25 | CH2276 | Female | Two y/o | Control | Control | Feed Day | No | 05:10 | 05:00 - 05:59 | Morning       | 37,6 | 121 | 170,8 | 170,8 | 18,75 | 607,35 | 174,57 |
| 2019/08/25 | CH2276 | Female | Two y/o | Control | Control | Feed Day | No | 05:15 | 05:00 - 05:59 | Morning       | 37,6 | 69  | 195,0 | 195,0 | 18,75 | 565,86 | 179,23 |
| 2019/08/25 | CH2276 | Female | Two y/o | Control | Control | Feed Day | No | 05:20 | 05:00 - 05:59 | Morning       | 37,6 |     | 175,2 | 175,2 | 18,75 |        | 175,47 |
| 2019/08/25 | CH2276 | Female | Two y/o | Control | Control | Feed Day | No | 05:25 | 05:00 - 05:59 | Morning       | 37,7 | 63  | 365,2 | 365,2 | 18,85 | 558,62 | 201,38 |
| 2019/08/25 | CH2276 | Female | Two y/o | Control | Control | Feed Day | No | 05:30 | 05:00 - 05:59 | Morning       | 37,8 | 115 | 111,6 | 111,6 | 18,95 | 603,82 | 159,67 |
| 2019/08/25 | CH2276 | Female | Two y/o | Control | Control | Feed Day | No | 05:35 | 05:00 - 05:59 | Morning       | 37,7 | 120 | 441,0 | 441,0 | 18,85 | 606,78 | 208,08 |
| 2019/08/25 | CH2276 | Female | Two y/o | Control | Control | Feed Day | No | 05:40 | 05:00 - 05:59 | Morning       | 37,7 | 51  | 510,4 | 510,4 | 18,85 | 541,20 | 213,28 |
| 2019/08/25 | CH2276 | Female | Two y/o | Control | Control | Feed Day | No | 05:45 | 05:00 - 05:59 | Morning       | 37,8 | 77  | 206,0 | 206,0 | 18,95 | 574,39 | 181,16 |
| 2019/08/25 | CH2276 | Female | Two y/o | Control | Control | Feed Day | No | 05:50 | 05:00 - 05:59 | Morning       | 37,8 |     | 290,2 | 290,2 | 18,95 |        | 193,25 |
| 2019/08/25 | CH2276 | Female | Two y/o | Control | Control | Feed Day | No | 05:55 | 05:00 - 05:59 | Morning       | 37,8 | 141 | 29,0  | 29,0  | 18,95 | 617,75 | 113,03 |
| 2019/08/25 | CH2276 | Female | Two y/o | Control | Control | Feed Day | No | 06:00 | 06:00 - 06:59 | Morning       | 37,6 | 108 | 56,8  | 56,8  | 18,75 | 599,39 | 136,20 |
| 2019/08/25 | CH2276 | Female | Two y/o | Control | Control | Feed Day | No | 06:05 | 06:00 - 06:59 | Morning       | 37,7 | 63  | 70,2  | 70,2  | 18,85 | 558,62 | 143,54 |
| 2019/08/25 | CH2276 | Female | Two y/o | Control | Control | Feed Day | No | 06:10 | 06:00 - 06:59 | Morning       | 37,7 | 94  | 69,6  | 69,6  | 18,85 | 589,37 | 143,24 |
| 2019/08/25 | CH2276 | Female | Two y/o | Control | Control | Feed Day | No | 06:15 | 06:00 - 06:59 | Morning       | 37,6 |     | 518,6 | 518,6 | 18,75 |        | 213,85 |
| 2019/08/25 | CH2276 | Female | Two y/o | Control | Control | Feed Day | No | 06:20 | 06:00 - 06:59 | Morning       | 37,6 |     | 197,8 | 197,8 | 18,75 |        | 179,73 |
| 2019/08/25 | CH2276 | Female | Two y/o | Control | Control | Feed Day | No | 06:25 | 06:00 - 06:59 | Morning       | 37,6 | 86  | 143,4 | 143,4 | 18,75 | 582,77 | 168,44 |
| 2019/08/25 | CH2276 | Female | Two y/o | Control | Control | Feed Day | No | 06:30 | 06:00 - 06:59 | Morning       | 37,6 |     | 379,6 | 379,6 | 18,75 |        | 202,76 |
| 2019/08/25 | CH2276 | Female | Two y/o | Control | Control | Feed Day | No | 06:35 | 06:00 - 06:59 | Morning       | 37,7 |     | 348,6 | 348,6 | 18,85 |        | 199,74 |
| 2019/08/25 | CH2276 | Female | Two y/o | Control | Control | Feed Day | No | 06:40 | 06:00 - 06:59 | Morning       | 37,7 | 115 | 471,8 | 471,8 | 18,85 | 603,82 | 210,48 |
| 2019/08/25 | CH2276 | Female | Two y/o | Control | Control | Feed Day | No | 06:45 | 06:00 - 06:59 | Morning       | 37,7 | 88  | 143,8 | 143,8 | 18,85 | 584,49 | 168,54 |
| 2019/08/25 | CH2276 | Female | Two y/o | Control | Control | Feed Day | No | 06:50 | 06:00 - 06:59 | Morning       | 37,8 | 92  | 942,2 |       | 18,95 | 587,78 |        |
| 2019/08/25 | CH2276 | Female | Two y/o | Control | Control | Feed Day | No | 06:55 | 06:00 - 06:59 | Morning       | 37,8 | 82  | 671,6 | 671,6 | 18,95 | 579,19 | 223,07 |
| 2019/08/25 | CH2276 | Female | Two y/o | Control | Control | Feed Day | No | 07:00 | 07:00 - 07:59 | Morning       | 37,8 |     | 125,4 | 125,4 | 18,95 |        | 163,75 |
| 2019/08/25 | CH2276 | Female | Two y/o | Control | Control | Feed Day | No | 07:05 | 07:00 - 07:59 | Morning       | 37,8 | 119 | 615,8 | 615,8 | 18,95 | 606,20 | 219,97 |
| 2019/08/25 | CH2276 | Female | Two y/o | Control | Control | Feed Day | No | 07:10 | 07:00 - 07:59 | Morning       | 37,9 | 121 | 297,0 | 297,0 | 19,05 | 607,35 | 194,07 |
| 2019/08/25 | CH2276 | Female | Two y/o | Control | Control | Feed Day | No | 07:15 | 07:00 - 07:59 | Morning       | 37,8 | 152 | 63,8  | 63,8  | 18,95 | 622,73 | 140,22 |
| 2019/08/25 | CH2276 | Female | Two y/o | Control | Control | Feed Day | No | 07:20 | 07:00 - 07:59 | Morning       | 37,8 | 115 | 279,6 | 279,6 | 18,95 | 603,82 | 191,93 |
| 2019/08/25 | CH2276 | Female | Two y/o | Control | Control | Feed Day | No | 07:25 | 07:00 - 07:59 | Morning       | 37,8 | 75  | 155,6 | 155,6 | 18,95 | 572,36 | 171,30 |
| 2019/08/25 | CH2276 | Female | Two y/o | Control | Control | Feed Day | No | 07:30 | 07:00 - 07:59 | Morning       | 37,8 | 111 | 133,4 | 133,4 | 18,95 | 601,33 | 165,91 |
| 2019/08/25 | CH2276 | Female | Two y/o | Control | Control | Feed Day | No | 07:35 | 07:00 - 07:59 | Morning       | 37,7 | 162 | 166,0 | 166,0 | 18,85 | 626,88 | 173,57 |
| 2019/08/25 | CH2276 | Female | Two y/o | Control | Control | Feed Day | No | 07:40 | 07:00 - 07:59 | Morning       | 37,8 | 90  | 63,0  | 63,0  | 18,95 | 586,16 | 139,78 |
| 2019/08/25 | CH2276 | Female | Two y/o | Control | Control | Feed Day | No | 07:45 | 07:00 - 07:59 | Morning       | 37,6 | 83  | 70,2  | 70,2  | 18,75 | 580,11 | 143,54 |
| 2019/08/25 | CH2276 | Female | Two y/o | Control | Control | Feed Day | No | 07:50 | 07:00 - 07:59 | Morning       | 37,5 | 62  | 28,4  | 28,4  | 18,65 | 557,33 | 112,31 |
| 2019/08/25 | CH2276 | Female | Two y/o | Control | Control | Feed Day | No | 07:55 | 07:00 - 07:59 | Morning       | 37,4 | 77  | 39,8  | 39,8  | 18,55 | 574,39 | 123,91 |
| 2019/08/25 | CH2276 | Female | Two y/o | Control | Control | Feed Day | No | 08:00 | 08:00 - 08:59 | Late Morning  | 37,3 | 76  | 42,2  | 42,2  | 18,46 | 573,39 | 125,93 |
| 2019/08/25 | CH2276 | Female | Two y/o | Control | Control | Feed Day | No | 08:05 | 08:00 - 08:59 | Late Morning  | 37,3 | 58  | 33,4  | 33,4  | 18,46 | 551,90 | 117,88 |
| 2019/08/25 | CH2276 | Female | Two y/o | Control | Control | Feed Day | No | 08:10 | 08:00 - 08:59 | Late Morning  | 37,1 | 60  | 37,4  | 37,4  | 18,26 | 554,67 | 121,77 |
| 2019/08/25 | CH2276 | Female | Two y/o | Control | Control | Feed Day | No | 08:15 | 08:00 - 08:59 | Late Morning  | 37,0 | 65  | 88,2  | 88,2  | 18,16 | 561,12 | 151,47 |
| 2019/08/25 | CH2276 | Female | Two y/o | Control | Control | Feed Day | No | 08:20 | 08:00 - 08:59 | Late Morning  | 36,9 | 120 | 99,8  | 99,8  | 18,06 | 606,78 | 155,77 |
| 2019/08/25 | CH2276 | Female | Two y/o | Control | Control | Feed Day | No | 08:25 | 08:00 - 08:59 | Late Morning  | 37,0 | 70  | 101,2 | 101,2 | 18,16 | 566,99 | 156,26 |
| 2019/08/25 | CH2276 | Female | Two y/o | Control | Control | Feed Day | No | 08:30 | 08:00 - 08:59 | Late Morning  | 37,1 |     | 203,2 | 203,2 | 18,26 |        | 180,68 |
| 2019/08/25 | CH2276 | Female | Two y/o | Control | Control | Feed Day | No | 08:35 | 08:00 - 08:59 | Late Morning  | 37,1 | 86  | 61,8  | 61,8  | 18,26 | 582,77 | 139,12 |
| 2019/08/25 | CH2276 | Female | Two y/o | Control | Control | Feed Day | No | 08:40 | 08:00 - 08:59 | Late Morning  | 37,1 | 64  | 56,4  | 56,4  | 18,26 | 559,88 | 135,95 |
| 2019/08/25 | CH2276 | Female | Two y/o | Control | Control | Feed Day | No | 08:45 | 08:00 - 08:59 | Late Morning  | 37,1 | 62  | 68,2  | 68,2  | 18,26 | 557,33 | 142,53 |
| 2019/08/25 | CH2276 | Female | Two y/o | Control | Control | Feed Day | No | 08:50 | 08:00 - 08:59 | Late Morning  | 37,0 | 60  | 17,8  | 17,8  | 18,16 | 554,67 | 96,34  |
| 2019/08/25 | CH2276 | Female | Two y/o | Control | Control | Feed Day | No | 08:55 | 08:00 - 08:59 | Late Morning  | 37,1 | 59  | 11,8  | 11,8  | 18,26 | 553,30 | 82,36  |
| 2019/08/25 | CH2276 | Female | Two y/o | Control | Control | Feed Day | No | 09:00 | 09:00 - 09:59 | Late Morning  | 37,3 | 56  | 29,4  | 29,4  | 18,46 | 549,01 | 113,50 |
| 2019/08/25 | CH2276 | Female | Two y/o | Control | Control | Feed Day | No | 09:05 | 09:00 - 09:59 | Late Morning  | 37,4 | 60  | 15,8  | 15,8  | 18,55 | 554,67 | 92,28  |
| 2019/08/25 | CH2276 | Female | Two y/o | Control | Control | Feed Day | No | 09:10 | 09:00 - 09:59 | Late Morning  | 37,4 | 54  | 14,4  | 14,4  | 18,55 | 545,99 | 89,12  |
| 2019/08/25 | CH2276 | Female | Two y/o | Control | Control | Feed Day | No | 09:15 | 09:00 - 09:59 | Late Morning  | 37,4 | 57  | 13,6  | 13,6  | 18,55 | 550,47 | 87,18  |
| 2019/08/25 | CH2276 | Female | Two y/o | Control | Control | Feed Day | No | 09:20 | 09:00 - 09:59 | Late Morning  | 37,4 | 58  | 18,6  | 18,6  | 18,55 | 551,90 | 97,84  |



|            |        |        |         |         |         |          |     |       |               |              |      |     |       |       |       |        |        |
|------------|--------|--------|---------|---------|---------|----------|-----|-------|---------------|--------------|------|-----|-------|-------|-------|--------|--------|
| 2019/08/25 | CH2276 | Female | Two y/o | Control | Control | Feed Day | No  | 09:25 | 09:00 - 09:59 | Late Morning | 37,5 | 58  | 17,0  | 17,0  | 18,65 | 551,90 | 94,77  |
| 2019/08/25 | CH2276 | Female | Two y/o | Control | Control | Feed Day | No  | 09:30 | 09:00 - 09:59 | Late Morning | 37,5 | 73  | 59,4  | 59,4  | 18,65 | 570,27 | 137,75 |
| 2019/08/25 | CH2276 | Female | Two y/o | Control | Control | Feed Day | No  | 09:35 | 09:00 - 09:59 | Late Morning | 37,6 | 77  | 63,0  | 63,0  | 18,75 | 574,39 | 139,78 |
| 2019/08/25 | CH2276 | Female | Two y/o | Control | Control | Feed Day | No  | 09:40 | 09:00 - 09:59 | Late Morning | 37,6 | 72  | 67,6  | 67,6  | 18,75 | 569,20 | 142,23 |
| 2019/08/25 | CH2276 | Female | Two y/o | Control | Control | Feed Day | No  | 09:45 | 09:00 - 09:59 | Late Morning | 37,6 |     | 35,0  | 35,0  | 18,75 |        | 119,49 |
| 2019/08/25 | CH2276 | Female | Two y/o | Control | Control | Feed Day | No  | 09:50 | 09:00 - 09:59 | Late Morning | 37,5 | 56  | 13,4  | 13,4  | 18,65 | 549,01 | 86,68  |
| 2019/08/25 | CH2276 | Female | Two y/o | Control | Control | Feed Day | No  | 09:55 | 09:00 - 09:59 | Late Morning | 37,5 | 57  | 127,0 | 127,0 | 18,65 | 550,47 | 164,19 |
| 2019/08/25 | CH2276 | Female | Two y/o | Control | Control | Feed Day | No  | 10:00 | 10:00 - 10:59 | Late Morning | 37,6 | 85  | 81,6  | 81,6  | 18,75 | 581,90 | 148,76 |
| 2019/08/25 | CH2276 | Female | Two y/o | Control | Control | Feed Day | No  | 10:05 | 10:00 - 10:59 | Late Morning | 37,5 | 61  | 52,8  | 52,8  | 18,65 | 556,01 | 133,67 |
| 2019/08/25 | CH2276 | Female | Two y/o | Control | Control | Feed Day | No  | 10:10 | 10:00 - 10:59 | Late Morning | 37,5 | 84  | 66,8  | 66,8  | 18,65 | 581,01 | 141,81 |
| 2019/08/25 | CH2276 | Female | Two y/o | Control | Control | Feed Day | No  | 10:15 | 10:00 - 10:59 | Late Morning | 37,5 | 69  | 56,2  | 56,2  | 18,65 | 565,86 | 135,83 |
| 2019/08/25 | CH2276 | Female | Two y/o | Control | Control | Feed Day | No  | 10:20 | 10:00 - 10:59 | Late Morning | 37,6 | 63  | 95,8  | 95,8  | 18,75 | 558,62 | 154,35 |
| 2019/08/25 | CH2276 | Female | Two y/o | Control | Control | Feed Day | No  | 10:25 | 10:00 - 10:59 | Late Morning | 37,6 | 62  | 88,4  | 88,4  | 18,75 | 557,33 | 151,55 |
| 2019/08/25 | CH2276 | Female | Two y/o | Control | Control | Feed Day | Yes | 10:30 | 10:00 - 10:59 | Late Morning | 37,6 | 71  | 12,4  | 12,4  | 18,75 | 568,10 | 84,04  |
| 2019/08/25 | CH2276 | Female | Two y/o | Control | Control | Feed Day | Yes | 10:35 | 10:00 - 10:59 | Late Morning | 37,6 | 72  | 14,0  | 14,0  | 18,75 | 569,20 | 88,17  |
| 2019/08/25 | CH2276 | Female | Two y/o | Control | Control | Feed Day | Yes | 10:40 | 10:00 - 10:59 | Late Morning | 37,7 | 63  | 82,4  | 82,4  | 18,85 | 558,62 | 149,10 |
| 2019/08/25 | CH2276 | Female | Two y/o | Control | Control | Feed Day | Yes | 10:45 | 10:00 - 10:59 | Late Morning | 37,7 | 60  | 59,6  | 59,6  | 18,85 | 554,67 | 137,86 |
| 2019/08/25 | CH2276 | Female | Two y/o | Control | Control | Feed Day | Yes | 10:50 | 10:00 - 10:59 | Late Morning | 37,7 | 65  | 26,8  | 26,8  | 18,85 | 561,12 | 110,33 |
| 2019/08/25 | CH2276 | Female | Two y/o | Control | Control | Feed Day | Yes | 10:55 | 10:00 - 10:59 | Late Morning | 37,7 | 63  | 33,6  | 33,6  | 18,85 | 558,62 | 118,09 |
| 2019/08/25 | CH2276 | Female | Two y/o | Control | Control | Feed Day | Yes | 11:00 | 11:00 - 11:59 | Late Morning | 37,8 | 53  | 36,0  | 36,0  | 18,95 | 544,43 | 120,46 |
| 2019/08/25 | CH2276 | Female | Two y/o | Control | Control | Feed Day | Yes | 11:05 | 11:00 - 11:59 | Late Morning | 37,8 | 61  | 36,2  | 36,2  | 18,95 | 556,01 | 120,65 |
| 2019/08/25 | CH2276 | Female | Two y/o | Control | Control | Feed Day | Yes | 11:10 | 11:00 - 11:59 | Late Morning | 37,9 | 63  | 35,8  | 35,8  | 19,05 | 558,62 | 120,27 |
| 2019/08/25 | CH2276 | Female | Two y/o | Control | Control | Feed Day | Yes | 11:15 | 11:00 - 11:59 | Late Morning | 37,9 | 70  | 371,8 | 371,8 | 19,05 | 566,99 | 202,02 |
| 2019/08/25 | CH2276 | Female | Two y/o | Control | Control | Feed Day | Yes | 11:20 | 11:00 - 11:59 | Late Morning | 38,0 | 64  | 460,8 | 460,8 | 19,15 | 559,88 | 209,64 |
| 2019/08/25 | CH2276 | Female | Two y/o | Control | Control | Feed Day | Yes | 11:25 | 11:00 - 11:59 | Late Morning | 38,0 | 37  | 220,2 | 220,2 | 19,15 | 513,06 | 183,51 |
| 2019/08/25 | CH2276 | Female | Two y/o | Control | Control | Feed Day | No  | 11:30 | 11:00 - 11:59 | Late Morning | 38,2 | 61  | 44,6  | 44,6  | 19,36 | 556,01 | 127,84 |
| 2019/08/25 | CH2276 | Female | Two y/o | Control | Control | Feed Day | No  | 11:35 | 11:00 - 11:59 | Late Morning | 38,2 |     | 54,4  | 54,4  | 19,36 |        | 134,70 |
| 2019/08/25 | CH2276 | Female | Two y/o | Control | Control | Feed Day | No  | 11:40 | 11:00 - 11:59 | Late Morning | 38,2 | 134 | 34,4  | 34,4  | 19,36 | 614,33 | 118,90 |
| 2019/08/25 | CH2276 | Female | Two y/o | Control | Control | Feed Day | No  | 11:45 | 11:00 - 11:59 | Late Morning | 38,1 | 191 | 94,8  | 94,8  | 19,26 | 637,33 | 153,98 |
| 2019/08/25 | CH2276 | Female | Two y/o | Control | Control | Feed Day | No  | 11:50 | 11:00 - 11:59 | Late Morning | 38,0 | 126 | 43,2  | 43,2  | 19,15 | 610,14 | 126,74 |
| 2019/08/25 | CH2276 | Female | Two y/o | Control | Control | Feed Day | No  | 11:55 | 11:00 - 11:59 | Late Morning | 38,0 | 123 | 100,4 | 100,4 | 19,15 | 608,49 | 155,98 |
| 2019/08/25 | CH2276 | Female | Two y/o | Control | Control | Feed Day | No  | 12:00 | 12:00 - 12:59 | Afternoon    | 38,0 | 103 | 117,6 | 117,6 | 19,15 | 596,00 | 161,50 |
| 2019/08/25 | CH2276 | Female | Two y/o | Control | Control | Feed Day | No  | 12:05 | 12:00 - 12:59 | Afternoon    | 38,0 | 102 | 54,0  | 54,0  | 19,15 | 595,30 | 134,45 |
| 2019/08/25 | CH2276 | Female | Two y/o | Control | Control | Feed Day | No  | 12:10 | 12:00 - 12:59 | Afternoon    | 38,0 | 103 | 78,6  | 78,6  | 19,15 | 596,00 | 147,46 |
| 2019/08/25 | CH2276 | Female | Two y/o | Control | Control | Feed Day | No  | 12:15 | 12:00 - 12:59 | Afternoon    | 38,1 | 94  | 44,8  | 44,8  | 19,26 | 589,37 | 127,99 |
| 2019/08/25 | CH2276 | Female | Two y/o | Control | Control | Feed Day | No  | 12:20 | 12:00 - 12:59 | Afternoon    | 38,0 | 91  | 54,0  | 54,0  | 19,15 | 586,98 | 134,45 |
| 2019/08/25 | CH2276 | Female | Two y/o | Control | Control | Feed Day | No  | 12:25 | 12:00 - 12:59 | Afternoon    | 37,9 | 90  | 67,4  | 67,4  | 19,05 | 586,16 | 142,12 |
| 2019/08/25 | CH2276 | Female | Two y/o | Control | Control | Feed Day | No  | 12:30 | 12:00 - 12:59 | Afternoon    | 37,9 | 92  | 60,4  | 60,4  | 19,05 | 587,78 | 138,32 |
| 2019/08/25 | CH2276 | Female | Two y/o | Control | Control | Feed Day | No  | 12:35 | 12:00 - 12:59 | Afternoon    | 37,9 |     | 222,6 | 222,6 | 19,05 |        | 183,89 |
| 2019/08/25 | CH2276 | Female | Two y/o | Control | Control | Feed Day | No  | 12:40 | 12:00 - 12:59 | Afternoon    | 37,8 | 98  | 59,6  | 59,6  | 18,95 | 592,41 | 137,86 |
| 2019/08/25 | CH2276 | Female | Two y/o | Control | Control | Feed Day | No  | 12:45 | 12:00 - 12:59 | Afternoon    | 37,9 | 77  | 52,4  | 52,4  | 19,05 | 574,39 | 133,41 |
| 2019/08/25 | CH2276 | Female | Two y/o | Control | Control | Feed Day | No  | 12:50 | 12:00 - 12:59 | Afternoon    | 37,8 | 86  | 60,6  | 60,6  | 18,95 | 582,77 | 138,44 |
| 2019/08/25 | CH2276 | Female | Two y/o | Control | Control | Feed Day | No  | 12:55 | 12:00 - 12:59 | Afternoon    | 37,8 | 93  | 32,6  | 32,6  | 18,95 | 588,58 | 117,05 |
| 2019/08/25 | CH2276 | Female | Two y/o | Control | Control | Feed Day | No  | 13:00 | 13:00 - 13:59 | Afternoon    | 37,8 | 67  | 160,8 | 160,8 | 18,95 | 563,53 | 172,46 |
| 2019/08/25 | CH2276 | Female | Two y/o | Control | Control | Feed Day | No  | 13:05 | 13:00 - 13:59 | Afternoon    | 37,9 | 134 | 120,0 | 120,0 | 19,05 | 614,33 | 162,21 |
| 2019/08/25 | CH2276 | Female | Two y/o | Control | Control | Feed Day | No  | 13:10 | 13:00 - 13:59 | Afternoon    | 37,8 | 84  | 50,6  | 50,6  | 18,95 | 581,01 | 132,20 |
| 2019/08/25 | CH2276 | Female | Two y/o | Control | Control | Feed Day | No  | 13:15 | 13:00 - 13:59 | Afternoon    | 37,8 | 102 | 71,8  | 71,8  | 18,95 | 595,30 | 144,32 |
| 2019/08/25 | CH2276 | Female | Two y/o | Control | Control | Feed Day | No  | 13:20 | 13:00 - 13:59 | Afternoon    | 37,8 | 88  | 13,4  | 13,4  | 18,95 | 584,49 | 86,68  |
| 2019/08/25 | CH2276 | Female | Two y/o | Control | Control | Feed Day | No  | 13:25 | 13:00 - 13:59 | Afternoon    | 37,8 | 82  | 34,2  | 34,2  | 18,95 | 579,19 | 118,70 |
| 2019/08/25 | CH2276 | Female | Two y/o | Control | Control | Feed Day | No  | 13:30 | 13:00 - 13:59 | Afternoon    | 37,9 | 65  | 49,0  | 49,0  | 19,05 | 561,12 | 131,09 |
| 2019/08/25 | CH2276 | Female | Two y/o | Control | Control | Feed Day | No  | 13:35 | 13:00 - 13:59 | Afternoon    | 37,9 | 71  | 63,8  | 63,8  | 19,05 | 568,10 | 140,22 |
| 2019/08/25 | CH2276 | Female | Two y/o | Control | Control | Feed Day | No  | 13:40 | 13:00 - 13:59 | Afternoon    | 37,9 | 66  | 66,6  | 66,6  | 19,05 | 562,34 | 141,71 |
| 2019/08/25 | CH2276 | Female | Two y/o | Control | Control | Feed Day | No  | 13:45 | 13:00 - 13:59 | Afternoon    | 37,9 | 63  | 64,2  | 64,2  | 19,05 | 558,62 | 140,44 |
| 2019/08/25 | CH2276 | Female | Two y/o | Control | Control | Feed Day | No  | 13:50 | 13:00 - 13:59 | Afternoon    | 38,0 | 66  | 64,0  | 64,0  | 19,15 | 562,34 | 140,33 |
| 2019/08/25 | CH2276 | Female | Two y/o | Control | Control | Feed Day | No  | 13:55 | 13:00 - 13:59 | Afternoon    | 38,0 | 67  | 67,4  | 67,4  | 19,15 | 563,53 | 142,12 |
| 2019/08/25 | CH2276 | Female | Two y/o | Control | Control | Feed Day | No  | 14:00 | 14:00 - 14:59 | Afternoon    | 38,0 | 59  | 65,8  | 65,8  | 19,15 | 553,30 | 141,29 |
| 2019/08/25 | CH2276 | Female | Two y/o | Control | Control | Feed Day | No  | 14:05 | 14:00 - 14:59 | Afternoon    | 38,0 | 65  | 62,0  | 62,0  | 19,15 | 561,12 | 139,23 |
| 2019/08/25 | CH2276 | Female | Two y/o | Control | Control | Feed Day | No  | 14:10 | 14:00 - 14:59 | Afternoon    | 38,0 | 65  | 65,6  | 65,6  | 19,15 | 561,12 | 141,19 |
| 2019/08/25 | CH2276 | Female | Two y/o | Control | Control | Feed Day | No  | 14:15 | 14:00 - 14:59 | Afternoon    | 38,0 | 54  | 55,8  | 55,8  | 19,15 | 545,99 | 135,58 |
| 2019/08/25 | CH2276 | Female | Two y/o | Control | Control | Feed Day | No  | 14:20 | 14:00 - 14:59 | Afternoon    | 38,0 | 61  | 62,2  | 62,2  | 19,15 | 556,01 | 139,34 |
| 2019/08/25 | CH2276 | Female | Two y/o | Control | Control | Feed Day | No  | 14:25 | 14:00 - 14:59 | Afternoon    | 38,0 | 62  | 42,6  | 42,6  | 19,15 | 557,33 | 126,26 |
| 2019/08/25 | CH2276 | Female | Two y/o | Control | Control | Feed Day | No  | 14:30 | 14:00 - 14:59 | Afternoon    | 37,9 | 61  | 35,4  | 35,4  | 19,05 | 556,01 | 119,88 |
| 2019/08/25 | CH2276 | Female | Two y/o | Control | Control | Feed Day | No  | 14:35 | 14:00 - 14:59 | Afternoon    | 37,9 | 61  | 46,0  | 46,0  | 19,05 | 556,01 | 128,91 |
| 2019/08/25 | CH2276 | Female | Two y/o | Control | Control | Feed Day | No  | 14:40 | 14:00 - 14:59 | Afternoon    | 37,9 | 156 | 16,0  | 16,0  | 19,05 | 624,43 | 92,71  |
| 2019/08/25 | CH2276 | Female | Two y/o | Control | Control | Feed Day | No  | 14:45 | 14:00 - 14:59 | Afternoon    | 37,8 | 67  | 10,0  | 10,0  | 18,95 | 563,53 | 76,76  |
| 2019/08/25 | CH2276 | Female | Two y/o | Control | Control | Feed Day | No  | 14:50 | 14:00 - 14:59 | Afternoon    | 37,8 | 60  | 25,4  | 25,4  | 18,95 | 554,67 | 108,49 |
| 2019/08/25 | CH2276 | Female | Two y/o | Control | Control | Feed Day | No  | 14:55 | 14:00 - 14:59 | Afternoon    | 37,8 | 54  | 30,2  | 30,2  | 18,95 | 545,99 | 114,42 |
| 2019/08/25 | CH2276 | Female | Two y/o | Control | Control | Feed Day | No  | 15:00 | 15:00 - 15:59 | Afternoon    | 37,8 | 62  | 30,4  | 30,4  | 18,95 | 557,33 | 114,65 |
| 2019/08/25 | CH2276 | Female | Two y/o | Control | Control | Feed Day | No  | 15:05 | 15:00 - 15:59 | Afternoon    | 37,8 | 60  | 21,4  | 21,4  | 18,95 | 554,67 | 102,63 |
| 2019/08/25 | CH2276 | Female | Two y/o | Control | Control | Feed Day | No  | 15:10 | 15:00 - 15:59 | Afternoon    | 37,8 | 61  | 40,4  | 40,4  | 18,95 | 556,01 | 124,43 |



|            |        |        |         |         |         |          |    |       |               |           |      |     |       |       |       |        |        |
|------------|--------|--------|---------|---------|---------|----------|----|-------|---------------|-----------|------|-----|-------|-------|-------|--------|--------|
| 2019/08/25 | CH2276 | Female | Two y/o | Control | Control | Feed Day | No | 15:15 | 15:00 - 15:59 | Afternoon | 37,8 | 66  | 33,6  | 33,6  | 18,95 | 562,34 | 118,09 |
| 2019/08/25 | CH2276 | Female | Two y/o | Control | Control | Feed Day | No | 15:20 | 15:00 - 15:59 | Afternoon | 37,7 | 68  | 55,2  | 55,2  | 18,85 | 564,71 | 135,21 |
| 2019/08/25 | CH2276 | Female | Two y/o | Control | Control | Feed Day | No | 15:25 | 15:00 - 15:59 | Afternoon | 37,7 | 94  | 58,8  | 58,8  | 18,85 | 589,37 | 137,39 |
| 2019/08/25 | CH2276 | Female | Two y/o | Control | Control | Feed Day | No | 15:30 | 15:00 - 15:59 | Afternoon | 37,7 | 71  | 32,0  | 32,0  | 18,85 | 568,10 | 116,41 |
| 2019/08/25 | CH2276 | Female | Two y/o | Control | Control | Feed Day | No | 15:35 | 15:00 - 15:59 | Afternoon | 37,7 | 59  | 25,0  | 25,0  | 18,85 | 553,30 | 107,94 |
| 2019/08/25 | CH2276 | Female | Two y/o | Control | Control | Feed Day | No | 15:40 | 15:00 - 15:59 | Afternoon | 37,7 | 59  | 27,6  | 27,6  | 18,85 | 553,30 | 111,33 |
| 2019/08/25 | CH2276 | Female | Two y/o | Control | Control | Feed Day | No | 15:45 | 15:00 - 15:59 | Afternoon | 37,7 | 58  | 24,2  | 24,2  | 18,85 | 551,90 | 106,83 |
| 2019/08/25 | CH2276 | Female | Two y/o | Control | Control | Feed Day | No | 15:50 | 15:00 - 15:59 | Afternoon | 37,7 | 60  | 23,4  | 23,4  | 18,85 | 554,67 | 105,68 |
| 2019/08/25 | CH2276 | Female | Two y/o | Control | Control | Feed Day | No | 15:55 | 15:00 - 15:59 | Afternoon | 37,7 | 67  | 73,6  | 73,6  | 18,85 | 563,53 | 145,18 |
| 2019/08/25 | CH2276 | Female | Two y/o | Control | Control | Feed Day | No | 16:00 | 16:00 - 16:59 | Evening   | 37,7 | 78  | 91,0  | 91,0  | 18,85 | 575,38 | 152,56 |
| 2019/08/25 | CH2276 | Female | Two y/o | Control | Control | Feed Day | No | 16:05 | 16:00 - 16:59 | Evening   | 37,7 |     | 65,2  | 65,2  | 18,85 |        | 140,97 |
| 2019/08/25 | CH2276 | Female | Two y/o | Control | Control | Feed Day | No | 16:10 | 16:00 - 16:59 | Evening   | 37,6 | 90  | 44,2  | 44,2  | 18,75 | 586,16 | 127,53 |
| 2019/08/25 | CH2276 | Female | Two y/o | Control | Control | Feed Day | No | 16:15 | 16:00 - 16:59 | Evening   | 37,6 | 82  | 46,8  | 46,8  | 18,75 | 579,19 | 129,50 |
| 2019/08/25 | CH2276 | Female | Two y/o | Control | Control | Feed Day | No | 16:20 | 16:00 - 16:59 | Evening   | 37,7 | 69  | 37,4  | 37,4  | 18,85 | 565,86 | 121,77 |
| 2019/08/25 | CH2276 | Female | Two y/o | Control | Control | Feed Day | No | 16:25 | 16:00 - 16:59 | Evening   | 37,7 | 88  | 65,2  | 65,2  | 18,85 | 584,49 | 140,97 |
| 2019/08/25 | CH2276 | Female | Two y/o | Control | Control | Feed Day | No | 16:30 | 16:00 - 16:59 | Evening   | 37,7 | 98  | 125,8 | 125,8 | 18,85 | 592,41 | 163,86 |
| 2019/08/25 | CH2276 | Female | Two y/o | Control | Control | Feed Day | No | 16:35 | 16:00 - 16:59 | Evening   | 37,8 | 64  | 66,2  | 66,2  | 18,95 | 559,88 | 141,50 |
| 2019/08/25 | CH2276 | Female | Two y/o | Control | Control | Feed Day | No | 16:40 | 16:00 - 16:59 | Evening   | 37,8 | 61  | 68,4  | 68,4  | 18,95 | 556,01 | 142,64 |
| 2019/08/25 | CH2276 | Female | Two y/o | Control | Control | Feed Day | No | 16:45 | 16:00 - 16:59 | Evening   | 37,8 | 62  | 63,4  | 63,4  | 18,95 | 557,33 | 140,00 |
| 2019/08/25 | CH2276 | Female | Two y/o | Control | Control | Feed Day | No | 16:50 | 16:00 - 16:59 | Evening   | 37,9 | 56  | 45,4  | 45,4  | 19,05 | 549,01 | 128,45 |
| 2019/08/25 | CH2276 | Female | Two y/o | Control | Control | Feed Day | No | 16:55 | 16:00 - 16:59 | Evening   | 37,9 | 62  | 57,4  | 57,4  | 19,05 | 557,33 | 136,56 |
| 2019/08/25 | CH2276 | Female | Two y/o | Control | Control | Feed Day | No | 17:00 | 17:00 - 17:59 | Evening   | 37,8 | 57  | 52,8  | 52,8  | 18,95 | 550,47 | 133,67 |
| 2019/08/25 | CH2276 | Female | Two y/o | Control | Control | Feed Day | No | 17:05 | 17:00 - 17:59 | Evening   | 37,8 | 59  | 35,8  | 35,8  | 18,95 | 553,30 | 120,27 |
| 2019/08/25 | CH2276 | Female | Two y/o | Control | Control | Feed Day | No | 17:10 | 17:00 - 17:59 | Evening   | 37,8 | 64  | 42,2  | 42,2  | 18,95 | 559,88 | 125,93 |
| 2019/08/25 | CH2276 | Female | Two y/o | Control | Control | Feed Day | No | 17:15 | 17:00 - 17:59 | Evening   | 37,8 | 62  | 50,2  | 50,2  | 18,95 | 557,33 | 131,92 |
| 2019/08/25 | CH2276 | Female | Two y/o | Control | Control | Feed Day | No | 17:20 | 17:00 - 17:59 | Evening   | 37,8 | 64  | 57,4  | 57,4  | 18,95 | 559,88 | 136,56 |
| 2019/08/25 | CH2276 | Female | Two y/o | Control | Control | Feed Day | No | 17:25 | 17:00 - 17:59 | Evening   | 37,8 | 51  | 49,8  | 49,8  | 18,95 | 541,20 | 131,65 |
| 2019/08/25 | CH2276 | Female | Two y/o | Control | Control | Feed Day | No | 17:30 | 17:00 - 17:59 | Evening   | 37,8 | 62  | 54,0  | 54,0  | 18,95 | 557,33 | 134,45 |
| 2019/08/25 | CH2276 | Female | Two y/o | Control | Control | Feed Day | No | 17:35 | 17:00 - 17:59 | Evening   | 37,8 | 73  | 69,2  | 69,2  | 18,95 | 570,27 | 143,04 |
| 2019/08/25 | CH2276 | Female | Two y/o | Control | Control | Feed Day | No | 17:40 | 17:00 - 17:59 | Evening   | 37,9 | 88  | 376,0 | 376,0 | 19,05 | 584,49 | 202,42 |
| 2019/08/25 | CH2276 | Female | Two y/o | Control | Control | Feed Day | No | 17:45 | 17:00 - 17:59 | Evening   | 38,0 | 103 | 143,6 | 143,6 | 19,15 | 596,00 | 168,49 |
| 2019/08/25 | CH2276 | Female | Two y/o | Control | Control | Feed Day | No | 17:50 | 17:00 - 17:59 | Evening   | 38,0 | 113 | 26,2  | 26,2  | 19,15 | 602,58 | 109,55 |
| 2019/08/25 | CH2276 | Female | Two y/o | Control | Control | Feed Day | No | 17:55 | 17:00 - 17:59 | Evening   | 38,0 | 98  | 130,6 | 130,6 | 19,15 | 592,41 | 165,17 |
| 2019/08/25 | CH2276 | Female | Two y/o | Control | Control | Feed Day | No | 18:00 | 18:00 - 18:59 | Evening   | 38,0 | 35  | 464,8 | 464,8 | 19,15 | 507,97 | 209,95 |
| 2019/08/25 | CH2276 | Female | Two y/o | Control | Control | Feed Day | No | 18:05 | 18:00 - 18:59 | Evening   | 38,1 | 62  | 138,2 | 138,2 | 19,26 | 557,33 | 167,15 |
| 2019/08/25 | CH2276 | Female | Two y/o | Control | Control | Feed Day | No | 18:10 | 18:00 - 18:59 | Evening   | 38,2 |     | 104,2 | 104,2 | 19,36 |        | 157,28 |
| 2019/08/25 | CH2276 | Female | Two y/o | Control | Control | Feed Day | No | 18:15 | 18:00 - 18:59 | Evening   | 38,2 | 94  | 34,4  | 34,4  | 19,36 | 589,37 | 118,90 |
| 2019/08/25 | CH2276 | Female | Two y/o | Control | Control | Feed Day | No | 18:20 | 18:00 - 18:59 | Evening   | 38,1 | 101 | 134,6 | 134,6 | 19,26 | 594,59 | 166,22 |
| 2019/08/25 | CH2276 | Female | Two y/o | Control | Control | Feed Day | No | 18:25 | 18:00 - 18:59 | Evening   | 38,1 | 106 | 137,6 | 137,6 | 19,26 | 598,06 | 166,99 |
| 2019/08/25 | CH2276 | Female | Two y/o | Control | Control | Feed Day | No | 18:30 | 18:00 - 18:59 | Evening   | 38,2 | 174 | 105,2 | 105,2 | 19,36 | 631,46 | 157,61 |
| 2019/08/25 | CH2276 | Female | Two y/o | Control | Control | Feed Day | No | 18:35 | 18:00 - 18:59 | Evening   | 38,1 | 82  | 53,2  | 53,2  | 19,26 | 579,19 | 133,93 |
| 2019/08/25 | CH2276 | Female | Two y/o | Control | Control | Feed Day | No | 18:40 | 18:00 - 18:59 | Evening   | 38,0 | 89  | 48,0  | 48,0  | 19,15 | 585,33 | 130,38 |
| 2019/08/25 | CH2276 | Female | Two y/o | Control | Control | Feed Day | No | 18:45 | 18:00 - 18:59 | Evening   | 38,0 | 65  | 14,8  | 14,8  | 19,15 | 561,12 | 90,05  |
| 2019/08/25 | CH2276 | Female | Two y/o | Control | Control | Feed Day | No | 18:50 | 18:00 - 18:59 | Evening   | 37,9 | 64  | 24,8  | 24,8  | 19,05 | 559,88 | 107,67 |
| 2019/08/25 | CH2276 | Female | Two y/o | Control | Control | Feed Day | No | 18:55 | 18:00 - 18:59 | Evening   | 37,9 | 68  | 41,0  | 41,0  | 19,05 | 564,71 | 124,94 |
| 2019/08/25 | CH2276 | Female | Two y/o | Control | Control | Feed Day | No | 19:00 | 19:00 - 19:59 | Evening   | 37,9 | 86  | 31,6  | 31,6  | 19,05 | 582,77 | 115,98 |
| 2019/08/25 | CH2276 | Female | Two y/o | Control | Control | Feed Day | No | 19:05 | 19:00 - 19:59 | Evening   | 37,9 | 73  | 33,8  | 33,8  | 19,05 | 570,27 | 118,29 |
| 2019/08/25 | CH2276 | Female | Two y/o | Control | Control | Feed Day | No | 19:10 | 19:00 - 19:59 | Evening   | 37,9 | 76  | 37,0  | 37,0  | 19,05 | 573,39 | 121,40 |
| 2019/08/25 | CH2276 | Female | Two y/o | Control | Control | Feed Day | No | 19:15 | 19:00 - 19:59 | Evening   | 37,8 | 92  | 55,6  | 55,6  | 18,95 | 587,78 | 135,46 |
| 2019/08/25 | CH2276 | Female | Two y/o | Control | Control | Feed Day | No | 19:20 | 19:00 - 19:59 | Evening   | 37,8 | 64  | 52,2  | 52,2  | 18,95 | 559,88 | 133,27 |
| 2019/08/25 | CH2276 | Female | Two y/o | Control | Control | Feed Day | No | 19:25 | 19:00 - 19:59 | Evening   | 37,8 | 80  | 55,4  | 55,4  | 18,95 | 577,31 | 135,33 |
| 2019/08/25 | CH2276 | Female | Two y/o | Control | Control | Feed Day | No | 19:30 | 19:00 - 19:59 | Evening   | 37,8 | 69  | 20,2  | 20,2  | 18,95 | 565,86 | 100,65 |
| 2019/08/25 | CH2276 | Female | Two y/o | Control | Control | Feed Day | No | 19:35 | 19:00 - 19:59 | Evening   | 37,7 | 63  | 26,6  | 26,6  | 18,85 | 558,62 | 110,07 |
| 2019/08/25 | CH2276 | Female | Two y/o | Control | Control | Feed Day | No | 19:40 | 19:00 - 19:59 | Evening   | 37,8 | 78  | 21,0  | 21,0  | 18,95 | 575,38 | 101,98 |
| 2019/08/25 | CH2276 | Female | Two y/o | Control | Control | Feed Day | No | 19:45 | 19:00 - 19:59 | Evening   | 37,9 | 61  | 92,2  | 92,2  | 19,05 | 556,01 | 153,01 |
| 2019/08/25 | CH2276 | Female | Two y/o | Control | Control | Feed Day | No | 19:50 | 19:00 - 19:59 | Evening   | 37,8 | 66  | 42,6  | 42,6  | 18,95 | 562,34 | 126,26 |
| 2019/08/25 | CH2276 | Female | Two y/o | Control | Control | Feed Day | No | 19:55 | 19:00 - 19:59 | Evening   | 37,8 | 64  | 54,0  | 54,0  | 18,95 | 559,88 | 134,45 |
| 2019/08/25 | CH2276 | Female | Two y/o | Control | Control | Feed Day | No | 20:00 | 20:00 - 20:59 | Night     | 37,8 | 58  | 50,6  | 50,6  | 18,95 | 551,90 | 132,20 |
| 2019/08/25 | CH2276 | Female | Two y/o | Control | Control | Feed Day | No | 20:05 | 20:00 - 20:59 | Night     | 37,9 | 96  | 59,6  | 59,6  | 19,05 | 590,91 | 137,86 |
| 2019/08/25 | CH2276 | Female | Two y/o | Control | Control | Feed Day | No | 20:10 | 20:00 - 20:59 | Night     | 37,9 | 99  | 32,8  | 32,8  | 19,05 | 593,14 | 117,26 |
| 2019/08/25 | CH2276 | Female | Two y/o | Control | Control | Feed Day | No | 20:15 | 20:00 - 20:59 | Night     | 37,9 | 70  | 24,2  | 24,2  | 19,05 | 566,99 | 106,83 |
| 2019/08/25 | CH2276 | Female | Two y/o | Control | Control | Feed Day | No | 20:20 | 20:00 - 20:59 | Night     | 37,9 | 68  | 35,8  | 35,8  | 19,05 | 564,71 | 120,27 |
| 2019/08/25 | CH2276 | Female | Two y/o | Control | Control | Feed Day | No | 20:25 | 20:00 - 20:59 | Night     | 37,9 | 62  | 44,6  | 44,6  | 19,05 | 557,33 | 127,84 |
| 2019/08/25 | CH2276 | Female | Two y/o | Control | Control | Feed Day | No | 20:30 | 20:00 - 20:59 | Night     | 37,9 | 68  | 63,8  | 63,8  | 19,05 | 564,71 | 140,22 |
| 2019/08/25 | CH2276 | Female | Two y/o | Control | Control | Feed Day | No | 20:35 | 20:00 - 20:59 | Night     | 37,9 | 67  | 74,6  | 74,6  | 19,05 | 563,53 | 145,65 |
| 2019/08/25 | CH2276 | Female | Two y/o | Control | Control | Feed Day | No | 20:40 | 20:00 - 20:59 | Night     | 37,8 | 69  | 26,0  | 26,0  | 18,95 | 565,86 | 109,29 |
| 2019/08/25 | CH2276 | Female | Two y/o | Control | Control | Feed Day | No | 20:45 | 20:00 - 20:59 | Night     | 37,9 | 61  | 28,2  | 28,2  | 19,05 | 556,01 | 112,07 |
| 2019/08/25 | CH2276 | Female | Two y/o | Control | Control | Feed Day | No | 20:50 | 20:00 - 20:59 | Night     | 37,9 | 60  | 39,6  | 39,6  | 19,05 | 554,67 | 123,74 |
| 2019/08/25 | CH2276 | Female | Two y/o | Control | Control | Feed Day | No | 20:55 | 20:00 - 20:59 | Night     | 37,9 | 99  | 32,6  | 32,6  | 19,05 | 593,14 | 117,05 |
| 2019/08/25 | CH2276 | Female | Two y/o | Control | Control | Feed Day | No | 21:00 | 21:00 - 21:59 | Night     | 37,9 | 72  | 35,8  | 35,8  | 19,05 | 569,20 | 120,27 |



|    |            |        |        |         |         |         |          |    |       |               |               |      |    |      |      |       |        |        |
|----|------------|--------|--------|---------|---------|---------|----------|----|-------|---------------|---------------|------|----|------|------|-------|--------|--------|
|    | 2019/08/25 | CH2276 | Female | Two y/o | Control | Control | Feed Day | No | 21:05 | 21:00 - 21:59 | Night         | 38,0 | 68 | 39,0 | 39,0 | 19,15 | 564,71 | 123,22 |
|    | 2019/08/25 | CH2276 | Female | Two y/o | Control | Control | Feed Day | No | 21:10 | 21:00 - 21:59 | Night         | 38,0 | 70 | 36,8 | 36,8 | 19,15 | 566,99 | 121,22 |
|    | 2019/08/25 | CH2276 | Female | Two y/o | Control | Control | Feed Day | No | 21:15 | 21:00 - 21:59 | Night         | 38,0 | 64 | 39,6 | 39,6 | 19,15 | 559,88 | 123,74 |
|    | 2019/08/25 | CH2276 | Female | Two y/o | Control | Control | Feed Day | No | 21:20 | 21:00 - 21:59 | Night         | 38,0 | 63 | 29,0 | 29,0 | 19,15 | 558,62 | 113,03 |
|    | 2019/08/25 | CH2276 | Female | Two y/o | Control | Control | Feed Day | No | 21:25 | 21:00 - 21:59 | Night         | 38,0 |    | 12,6 | 12,6 | 19,15 |        | 84,59  |
|    | 2019/08/25 | CH2276 | Female | Two y/o | Control | Control | Feed Day | No | 21:30 | 21:00 - 21:59 | Night         | 37,9 | 68 | 16,0 | 16,0 | 19,05 | 564,71 | 92,71  |
|    | 2019/08/25 | CH2276 | Female | Two y/o | Control | Control | Feed Day | No | 21:35 | 21:00 - 21:59 | Night         | 37,9 | 66 | 19,0 | 19,0 | 19,05 | 562,34 | 98,56  |
|    | 2019/08/25 | CH2276 | Female | Two y/o | Control | Control | Feed Day | No | 21:40 | 21:00 - 21:59 | Night         | 37,9 | 62 | 18,0 | 18,0 | 19,05 | 557,33 | 96,72  |
|    | 2019/08/25 | CH2276 | Female | Two y/o | Control | Control | Feed Day | No | 21:45 | 21:00 - 21:59 | Night         | 38,0 | 83 | 19,4 | 19,4 | 19,15 | 580,11 | 99,28  |
|    | 2019/08/25 | CH2276 | Female | Two y/o | Control | Control | Feed Day | No | 21:50 | 21:00 - 21:59 | Night         | 38,0 | 65 | 33,0 | 33,0 | 19,15 | 561,12 | 117,47 |
|    | 2019/08/25 | CH2276 | Female | Two y/o | Control | Control | Feed Day | No | 21:55 | 21:00 - 21:59 | Night         | 38,0 | 71 | 34,4 | 34,4 | 19,15 | 568,10 | 118,90 |
|    | 2019/08/25 | CH2276 | Female | Two y/o | Control | Control | Feed Day | No | 22:00 | 22:00 - 22:59 | Night         | 38,0 | 71 | 56,2 | 56,2 | 19,15 | 568,10 | 135,83 |
|    | 2019/08/25 | CH2276 | Female | Two y/o | Control | Control | Feed Day | No | 22:05 | 22:00 - 22:59 | Night         | 38,0 | 68 | 13,0 | 13,0 | 19,15 | 564,71 | 85,65  |
|    | 2019/08/25 | CH2276 | Female | Two y/o | Control | Control | Feed Day | No | 22:10 | 22:00 - 22:59 | Night         | 38,0 | 67 | 17,0 | 17,0 | 19,15 | 563,53 | 94,77  |
|    | 2019/08/25 | CH2276 | Female | Two y/o | Control | Control | Feed Day | No | 22:15 | 22:00 - 22:59 | Night         | 38,0 | 73 | 61,2 | 61,2 | 19,15 | 570,27 | 138,78 |
|    | 2019/08/25 | CH2276 | Female | Two y/o | Control | Control | Feed Day | No | 22:20 | 22:00 - 22:59 | Night         | 38,0 | 58 | 36,2 | 36,2 | 19,15 | 551,90 | 120,65 |
|    | 2019/08/25 | CH2276 | Female | Two y/o | Control | Control | Feed Day | No | 22:25 | 22:00 - 22:59 | Night         | 37,9 | 62 | 20,0 | 20,0 | 19,05 | 557,33 | 100,31 |
|    | 2019/08/25 | CH2276 | Female | Two y/o | Control | Control | Feed Day | No | 22:30 | 22:00 - 22:59 | Night         | 37,8 | 64 | 26,8 | 26,8 | 18,95 | 559,88 | 110,33 |
|    | 2019/08/25 | CH2276 | Female | Two y/o | Control | Control | Feed Day | No | 22:35 | 22:00 - 22:59 | Night         | 37,9 | 61 | 34,6 | 34,6 | 19,05 | 556,01 | 119,10 |
|    | 2019/08/25 | CH2276 | Female | Two y/o | Control | Control | Feed Day | No | 22:40 | 22:00 - 22:59 | Night         | 37,9 | 80 | 58,8 | 58,8 | 19,05 | 577,31 | 137,39 |
|    | 2019/08/25 | CH2276 | Female | Two y/o | Control | Control | Feed Day | No | 22:45 | 22:00 - 22:59 | Night         | 37,9 | 66 | 45,2 | 45,2 | 19,05 | 562,34 | 128,30 |
|    | 2019/08/25 | CH2276 | Female | Two y/o | Control | Control | Feed Day | No | 22:50 | 22:00 - 22:59 | Night         | 37,8 | 68 | 42,8 | 42,8 | 18,95 | 564,71 | 126,42 |
|    | 2019/08/25 | CH2276 | Female | Two y/o | Control | Control | Feed Day | No | 22:55 | 22:00 - 22:59 | Night         | 37,7 |    | 60,8 | 60,8 | 18,85 |        | 138,55 |
|    | 2019/08/25 | CH2276 | Female | Two y/o | Control | Control | Feed Day | No | 23:00 | 23:00 - 23:59 | Night         | 37,7 | 64 | 39,2 | 39,2 | 18,85 | 559,88 | 123,39 |
|    | 2019/08/25 | CH2276 | Female | Two y/o | Control | Control | Feed Day | No | 23:05 | 23:00 - 23:59 | Night         | 37,8 | 62 | 42,4 | 42,4 | 18,95 | 557,33 | 126,10 |
|    | 2019/08/25 | CH2276 | Female | Two y/o | Control | Control | Feed Day | No | 23:10 | 23:00 - 23:59 | Night         | 37,9 | 60 | 37,6 | 37,6 | 19,05 | 554,67 | 121,96 |
|    | 2019/08/25 | CH2276 | Female | Two y/o | Control | Control | Feed Day | No | 23:15 | 23:00 - 23:59 | Night         | 38,0 | 62 | 38,4 | 38,4 | 19,15 | 557,33 | 122,68 |
|    | 2019/08/25 | CH2276 | Female | Two y/o | Control | Control | Feed Day | No | 23:20 | 23:00 - 23:59 | Night         | 38,0 | 69 | 38,2 | 38,2 | 19,15 | 565,86 | 122,50 |
|    | 2019/08/25 | CH2276 | Female | Two y/o | Control | Control | Feed Day | No | 23:25 | 23:00 - 23:59 | Night         | 38,0 | 60 | 40,6 | 40,6 | 19,15 | 554,67 | 124,60 |
|    | 2019/08/25 | CH2276 | Female | Two y/o | Control | Control | Feed Day | No | 23:30 | 23:00 - 23:59 | Night         | 37,9 | 92 | 36,6 | 36,6 | 19,05 | 587,78 | 121,03 |
|    | 2019/08/25 | CH2276 | Female | Two y/o | Control | Control | Feed Day | No | 23:35 | 23:00 - 23:59 | Night         | 37,8 | 70 | 34,2 | 34,2 | 18,95 | 566,99 | 118,70 |
|    | 2019/08/25 | CH2276 | Female | Two y/o | Control | Control | Feed Day | No | 23:40 | 23:00 - 23:59 | Night         | 37,8 | 66 | 22,6 | 22,6 | 18,95 | 562,34 | 104,49 |
|    | 2019/08/25 | CH2276 | Female | Two y/o | Control | Control | Feed Day | No | 23:45 | 23:00 - 23:59 | Night         | 37,8 | 60 | 23,8 | 23,8 | 18,95 | 554,67 | 106,26 |
|    | 2019/08/25 | CH2276 | Female | Two y/o | Control | Control | Feed Day | No | 23:50 | 23:00 - 23:59 | Night         | 37,8 | 69 | 27,4 | 27,4 | 18,95 | 565,86 | 111,09 |
|    | 2019/08/25 | CH2276 | Female | Two y/o | Control | Control | Feed Day | No | 23:55 | 23:00 - 23:59 | Night         | 37,8 | 57 | 28,8 | 28,8 | 18,95 | 550,47 | 112,79 |
| 68 | 2019/08/26 | CH2276 | Female | Two y/o | Control | Control | Feed Day | No | 00:00 | 00:00 - 00:59 | Early Morning | 37,8 | 69 | 23,0 | 23,0 | 18,95 | 565,86 | 105,09 |
|    | 2019/08/26 | CH2276 | Female | Two y/o | Control | Control | Feed Day | No | 00:05 | 00:00 - 00:59 | Early Morning | 37,8 | 65 | 27,8 | 27,8 | 18,95 | 561,12 | 111,58 |
|    | 2019/08/26 | CH2276 | Female | Two y/o | Control | Control | Feed Day | No | 00:10 | 00:00 - 00:59 | Early Morning | 37,8 | 67 | 42,4 | 42,4 | 18,95 | 563,53 | 126,10 |
|    | 2019/08/26 | CH2276 | Female | Two y/o | Control | Control | Feed Day | No | 00:15 | 00:00 - 00:59 | Early Morning | 37,8 | 64 | 38,6 | 38,6 | 18,95 | 559,88 | 122,86 |
|    | 2019/08/26 | CH2276 | Female | Two y/o | Control | Control | Feed Day | No | 00:20 | 00:00 - 00:59 | Early Morning | 37,8 | 69 | 31,8 | 31,8 | 18,95 | 565,86 | 116,20 |
|    | 2019/08/26 | CH2276 | Female | Two y/o | Control | Control | Feed Day | No | 00:25 | 00:00 - 00:59 | Early Morning | 37,8 | 65 | 25,8 | 25,8 | 18,95 | 561,12 | 109,02 |
|    | 2019/08/26 | CH2276 | Female | Two y/o | Control | Control | Feed Day | No | 00:30 | 00:00 - 00:59 | Early Morning | 37,9 | 75 | 65,6 | 65,6 | 19,05 | 572,36 | 141,19 |
|    | 2019/08/26 | CH2276 | Female | Two y/o | Control | Control | Feed Day | No | 00:35 | 00:00 - 00:59 | Early Morning | 38,0 | 72 | 66,0 | 66,0 | 19,15 | 569,20 | 141,40 |
|    | 2019/08/26 | CH2276 | Female | Two y/o | Control | Control | Feed Day | No | 00:40 | 00:00 - 00:59 | Early Morning | 37,9 | 70 | 62,0 | 62,0 | 19,05 | 566,99 | 139,23 |
|    | 2019/08/26 | CH2276 | Female | Two y/o | Control | Control | Feed Day | No | 00:45 | 00:00 - 00:59 | Early Morning | 37,9 | 61 | 54,8 | 54,8 | 19,05 | 556,01 | 134,96 |
|    | 2019/08/26 | CH2276 | Female | Two y/o | Control | Control | Feed Day | No | 00:50 | 00:00 - 00:59 | Early Morning | 37,9 | 70 | 52,6 | 52,6 | 19,05 | 566,99 | 133,54 |
|    | 2019/08/26 | CH2276 | Female | Two y/o | Control | Control | Feed Day | No | 00:55 | 00:00 - 00:59 | Early Morning | 37,9 | 49 | 48,2 | 48,2 | 19,05 | 537,80 | 130,52 |
|    | 2019/08/26 | CH2276 | Female | Two y/o | Control | Control | Feed Day | No | 01:00 | 01:00 - 01:59 | Early Morning | 37,8 | 60 | 50,8 | 50,8 | 18,95 | 554,67 | 132,33 |
|    | 2019/08/26 | CH2276 | Female | Two y/o | Control | Control | Feed Day | No | 01:05 | 01:00 - 01:59 | Early Morning | 37,8 | 65 | 49,6 | 49,6 | 18,95 | 561,12 | 131,51 |
|    | 2019/08/26 | CH2276 | Female | Two y/o | Control | Control | Feed Day | No | 01:10 | 01:00 - 01:59 | Early Morning | 37,8 | 55 | 50,8 | 50,8 | 18,95 | 547,52 | 132,33 |
|    | 2019/08/26 | CH2276 | Female | Two y/o | Control | Control | Feed Day | No | 01:15 | 01:00 - 01:59 | Early Morning | 37,7 | 56 | 61,8 | 61,8 | 18,85 | 549,01 | 139,12 |
|    | 2019/08/26 | CH2276 | Female | Two y/o | Control | Control | Feed Day | No | 01:20 | 01:00 - 01:59 | Early Morning | 37,7 | 90 | 65,0 | 65,0 | 18,85 | 586,16 | 140,87 |
|    | 2019/08/26 | CH2276 | Female | Two y/o | Control | Control | Feed Day | No | 01:25 | 01:00 - 01:59 | Early Morning | 37,7 | 56 | 66,2 | 66,2 | 18,85 | 549,01 | 141,50 |
|    | 2019/08/26 | CH2276 | Female | Two y/o | Control | Control | Feed Day | No | 01:30 | 01:00 - 01:59 | Early Morning | 37,7 | 55 | 65,6 | 65,6 | 18,85 | 547,52 | 141,19 |
|    | 2019/08/26 | CH2276 | Female | Two y/o | Control | Control | Feed Day | No | 01:35 | 01:00 - 01:59 | Early Morning | 37,7 | 56 | 66,8 | 66,8 | 18,85 | 549,01 | 141,81 |
|    | 2019/08/26 | CH2276 | Female | Two y/o | Control | Control | Feed Day | No | 01:40 | 01:00 - 01:59 | Early Morning | 37,7 | 92 | 67,2 | 67,2 | 18,85 | 587,78 | 142,02 |
|    | 2019/08/26 | CH2276 | Female | Two y/o | Control | Control | Feed Day | No | 01:45 | 01:00 - 01:59 | Early Morning | 37,6 | 70 | 90,6 | 90,6 | 18,75 | 566,99 | 152,40 |
|    | 2019/08/26 | CH2276 | Female | Two y/o | Control | Control | Feed Day | No | 01:50 | 01:00 - 01:59 | Early Morning | 37,6 | 67 | 55,4 | 55,4 | 18,75 | 563,53 | 135,33 |
|    | 2019/08/26 | CH2276 | Female | Two y/o | Control | Control | Feed Day | No | 01:55 | 01:00 - 01:59 | Early Morning | 37,6 | 68 | 53,6 | 53,6 | 18,75 | 564,71 | 134,19 |
|    | 2019/08/26 | CH2276 | Female | Two y/o | Control | Control | Feed Day | No | 02:00 | 02:00 - 02:59 | Early Morning | 37,6 | 67 | 53,0 | 53,0 | 18,75 | 563,53 | 133,80 |
|    | 2019/08/26 | CH2276 | Female | Two y/o | Control | Control | Feed Day | No | 02:05 | 02:00 - 02:59 | Early Morning | 37,6 | 70 | 55,0 | 55,0 | 18,75 | 566,99 | 135,08 |
|    | 2019/08/26 | CH2276 | Female | Two y/o | Control | Control | Feed Day | No | 02:10 | 02:00 - 02:59 | Early Morning | 37,6 | 79 | 51,2 | 51,2 | 18,75 | 576,36 | 132,61 |
|    | 2019/08/26 | CH2276 | Female | Two y/o | Control | Control | Feed Day | No | 02:15 | 02:00 - 02:59 | Early Morning | 37,6 | 57 | 51,6 | 51,6 | 18,75 | 550,47 | 132,87 |
|    | 2019/08/26 | CH2276 | Female | Two y/o | Control | Control | Feed Day | No | 02:20 | 02:00 - 02:59 | Early Morning | 37,6 | 60 | 52,8 | 52,8 | 18,75 | 554,67 | 133,67 |
|    | 2019/08/26 | CH2276 | Female | Two y/o | Control | Control | Feed Day | No | 02:25 | 02:00 - 02:59 | Early Morning | 37,6 | 59 | 48,8 | 48,8 | 18,75 | 553,30 | 130,95 |
|    | 2019/08/26 | CH2276 | Female | Two y/o | Control | Control | Feed Day | No | 02:30 | 02:00 - 02:59 | Early Morning | 37,6 | 56 | 46,4 | 46,4 | 18,75 | 549,01 | 129,21 |
|    | 2019/08/26 | CH2276 | Female | Two y/o | Control | Control | Feed Day | No | 02:35 | 02:00 - 02:59 | Early Morning | 37,6 | 62 | 41,2 | 41,2 | 18,75 | 557,33 | 125,11 |
|    | 2019/08/26 | CH2276 | Female | Two y/o | Control | Control | Feed Day | No | 02:40 | 02:00 - 02:59 | Early Morning | 37,7 | 60 | 41,4 | 41,4 | 18,85 | 554,67 | 125,27 |
|    | 2019/08/26 | CH2276 | Female | Two y/o | Control | Control | Feed Day | No | 02:45 | 02:00 - 02:59 | Early Morning | 37,8 | 67 | 47,8 | 47,8 | 18,95 | 563,53 | 130,23 |
|    | 2019/08/26 | CH2276 | Female | Two y/o | Control | Control | Feed Day | No | 02:50 | 02:00 - 02:59 | Early Morning | 37,8 | 92 | 65,2 | 65,2 | 18,95 | 587,78 | 140,97 |



|            |        |        |         |         |         |          |    |       |               |               |      |     |       |       |       |        |
|------------|--------|--------|---------|---------|---------|----------|----|-------|---------------|---------------|------|-----|-------|-------|-------|--------|
| 2019/08/26 | CH2276 | Female | Two y/o | Control | Control | Feed Day | No | 02:55 | 02:00 - 02:59 | Early Morning | 37,7 |     | 74,0  | 74,0  | 18,85 | 145,37 |
| 2019/08/26 | CH2276 | Female | Two y/o | Control | Control | Feed Day | No | 03:00 | 03:00 - 03:59 | Early Morning | 37,7 |     | 141,8 | 141,8 | 18,85 | 168,05 |
| 2019/08/26 | CH2276 | Female | Two y/o | Control | Control | Feed Day | No | 03:05 | 03:00 - 03:59 | Early Morning | 37,7 |     | 122,6 | 122,6 | 18,85 | 162,96 |
| 2019/08/26 | CH2276 | Female | Two y/o | Control | Control | Feed Day | No | 03:10 | 03:00 - 03:59 | Early Morning | 37,7 | 131 | 71,8  | 71,8  | 18,85 | 612,80 |
| 2019/08/26 | CH2276 | Female | Two y/o | Control | Control | Feed Day | No | 03:15 | 03:00 - 03:59 | Early Morning | 37,8 |     | 128,4 | 128,4 | 18,95 | 164,57 |
| 2019/08/26 | CH2276 | Female | Two y/o | Control | Control | Feed Day | No | 03:20 | 03:00 - 03:59 | Early Morning | 37,9 | 108 | 242,4 | 242,4 | 19,05 | 599,39 |
| 2019/08/26 | CH2276 | Female | Two y/o | Control | Control | Feed Day | No | 03:25 | 03:00 - 03:59 | Early Morning | 38,0 | 117 | 497,0 | 497,0 | 19,15 | 605,02 |
| 2019/08/26 | CH2276 | Female | Two y/o | Control | Control | Feed Day | No | 03:30 | 03:00 - 03:59 | Early Morning | 38,0 | 117 | 339,8 | 339,8 | 19,15 | 605,02 |
| 2019/08/26 | CH2276 | Female | Two y/o | Control | Control | Feed Day | No | 03:35 | 03:00 - 03:59 | Early Morning | 38,1 | 126 | 625,0 | 625,0 | 19,26 | 610,14 |
| 2019/08/26 | CH2276 | Female | Two y/o | Control | Control | Feed Day | No | 03:40 | 03:00 - 03:59 | Early Morning | 38,1 | 191 | 116,2 | 116,2 | 19,26 | 637,33 |
| 2019/08/26 | CH2276 | Female | Two y/o | Control | Control | Feed Day | No | 03:45 | 03:00 - 03:59 | Early Morning | 38,2 | 131 | 361,8 | 361,8 | 19,36 | 612,80 |
| 2019/08/26 | CH2276 | Female | Two y/o | Control | Control | Feed Day | No | 03:50 | 03:00 - 03:59 | Early Morning | 38,2 | 92  | 274,4 | 274,4 | 19,36 | 587,78 |
| 2019/08/26 | CH2276 | Female | Two y/o | Control | Control | Feed Day | No | 03:55 | 03:00 - 03:59 | Early Morning | 38,2 | 124 | 304,4 | 304,4 | 19,36 | 609,04 |
| 2019/08/26 | CH2276 | Female | Two y/o | Control | Control | Feed Day | No | 04:00 | 04:00 - 04:59 | Morning       | 38,2 | 54  | 217,2 | 217,2 | 19,36 | 545,99 |
| 2019/08/26 | CH2276 | Female | Two y/o | Control | Control | Feed Day | No | 04:05 | 04:00 - 04:59 | Morning       | 38,2 | 182 | 232,6 | 232,6 | 19,36 | 634,31 |
| 2019/08/26 | CH2276 | Female | Two y/o | Control | Control | Feed Day | No | 04:10 | 04:00 - 04:59 | Morning       | 38,2 | 103 | 317,2 | 317,2 | 19,36 | 596,00 |
| 2019/08/26 | CH2276 | Female | Two y/o | Control | Control | Feed Day | No | 04:15 | 04:00 - 04:59 | Morning       | 38,2 |     | 267,2 | 267,2 | 19,36 | 190,33 |
| 2019/08/26 | CH2276 | Female | Two y/o | Control | Control | Feed Day | No | 04:20 | 04:00 - 04:59 | Morning       | 38,2 | 115 | 260,0 | 260,0 | 19,36 | 603,82 |
| 2019/08/26 | CH2276 | Female | Two y/o | Control | Control | Feed Day | No | 04:25 | 04:00 - 04:59 | Morning       | 38,2 | 113 | 265,6 | 265,6 | 19,36 | 602,58 |
| 2019/08/26 | CH2276 | Female | Two y/o | Control | Control | Feed Day | No | 04:30 | 04:00 - 04:59 | Morning       | 38,2 | 106 | 189,6 | 189,6 | 19,36 | 598,06 |
| 2019/08/26 | CH2276 | Female | Two y/o | Control | Control | Feed Day | No | 04:35 | 04:00 - 04:59 | Morning       | 38,2 | 109 | 435,2 | 435,2 | 19,36 | 600,04 |
| 2019/08/26 | CH2276 | Female | Two y/o | Control | Control | Feed Day | No | 04:40 | 04:00 - 04:59 | Morning       | 38,2 | 115 | 98,0  | 98,0  | 19,36 | 603,82 |
| 2019/08/26 | CH2276 | Female | Two y/o | Control | Control | Feed Day | No | 04:45 | 04:00 - 04:59 | Morning       | 38,2 | 119 | 199,0 | 199,0 | 19,36 | 606,20 |
| 2019/08/26 | CH2276 | Female | Two y/o | Control | Control | Feed Day | No | 04:50 | 04:00 - 04:59 | Morning       | 38,2 | 91  | 304,2 | 304,2 | 19,36 | 586,98 |
| 2019/08/26 | CH2276 | Female | Two y/o | Control | Control | Feed Day | No | 04:55 | 04:00 - 04:59 | Morning       | 38,2 | 129 | 317,2 | 317,2 | 19,36 | 611,75 |
| 2019/08/26 | CH2276 | Female | Two y/o | Control | Control | Feed Day | No | 05:00 | 05:00 - 05:59 | Morning       | 38,2 | 132 | 20,0  | 20,0  | 19,36 | 613,32 |
| 2019/08/26 | CH2276 | Female | Two y/o | Control | Control | Feed Day | No | 05:05 | 05:00 - 05:59 | Morning       | 38,2 | 141 | 175,6 | 175,6 | 19,36 | 617,75 |
| 2019/08/26 | CH2276 | Female | Two y/o | Control | Control | Feed Day | No | 05:10 | 05:00 - 05:59 | Morning       | 38,2 | 94  | 568,6 | 568,6 | 19,36 | 589,37 |
| 2019/08/26 | CH2276 | Female | Two y/o | Control | Control | Feed Day | No | 05:15 | 05:00 - 05:59 | Morning       | 38,2 | 63  | 564,8 | 564,8 | 19,36 | 558,62 |
| 2019/08/26 | CH2276 | Female | Two y/o | Control | Control | Feed Day | No | 05:20 | 05:00 - 05:59 | Morning       | 38,1 | 123 | 214,0 | 214,0 | 19,26 | 608,49 |
| 2019/08/26 | CH2276 | Female | Two y/o | Control | Control | Feed Day | No | 05:25 | 05:00 - 05:59 | Morning       | 38,1 | 121 | 193,2 | 193,2 | 19,26 | 607,35 |
| 2019/08/26 | CH2276 | Female | Two y/o | Control | Control | Feed Day | No | 05:30 | 05:00 - 05:59 | Morning       | 38,0 | 104 | 541,4 | 541,4 | 19,15 | 596,69 |
| 2019/08/26 | CH2276 | Female | Two y/o | Control | Control | Feed Day | No | 05:35 | 05:00 - 05:59 | Morning       | 38,0 | 100 | 136,8 | 136,8 | 19,15 | 593,87 |
| 2019/08/26 | CH2276 | Female | Two y/o | Control | Control | Feed Day | No | 05:40 | 05:00 - 05:59 | Morning       | 38,0 | 61  | 245,0 | 245,0 | 19,15 | 556,01 |
| 2019/08/26 | CH2276 | Female | Two y/o | Control | Control | Feed Day | No | 05:45 | 05:00 - 05:59 | Morning       | 38,0 | 135 | 168,2 | 168,2 | 19,15 | 614,84 |
| 2019/08/26 | CH2276 | Female | Two y/o | Control | Control | Feed Day | No | 05:50 | 05:00 - 05:59 | Morning       | 38,2 | 156 | 431,0 | 431,0 | 19,36 | 624,43 |
| 2019/08/26 | CH2276 | Female | Two y/o | Control | Control | Feed Day | No | 05:55 | 05:00 - 05:59 | Morning       | 38,1 |     | 188,6 | 188,6 | 19,26 | 178,05 |
| 2019/08/26 | CH2276 | Female | Two y/o | Control | Control | Feed Day | No | 06:00 | 06:00 - 06:59 | Morning       | 38,0 |     | 224,6 | 224,6 | 19,15 | 184,20 |
| 2019/08/26 | CH2276 | Female | Two y/o | Control | Control | Feed Day | No | 06:05 | 06:00 - 06:59 | Morning       | 38,2 | 98  | 98,4  | 98,4  | 19,36 | 592,41 |
| 2019/08/26 | CH2276 | Female | Two y/o | Control | Control | Feed Day | No | 06:10 | 06:00 - 06:59 | Morning       | 38,4 | 117 | 105,4 | 105,4 | 19,56 | 605,02 |
| 2019/08/26 | CH2276 | Female | Two y/o | Control | Control | Feed Day | No | 06:15 | 06:00 - 06:59 | Morning       | 38,3 | 141 | 112,6 | 112,6 | 19,46 | 617,75 |
| 2019/08/26 | CH2276 | Female | Two y/o | Control | Control | Feed Day | No | 06:20 | 06:00 - 06:59 | Morning       | 38,3 | 70  | 247,2 | 247,2 | 19,46 | 566,99 |
| 2019/08/26 | CH2276 | Female | Two y/o | Control | Control | Feed Day | No | 06:25 | 06:00 - 06:59 | Morning       | 38,2 | 103 | 566,2 | 566,2 | 19,36 | 596,00 |
| 2019/08/26 | CH2276 | Female | Two y/o | Control | Control | Feed Day | No | 06:30 | 06:00 - 06:59 | Morning       | 38,1 | 143 | 357,8 | 357,8 | 19,26 | 618,69 |
| 2019/08/26 | CH2276 | Female | Two y/o | Control | Control | Feed Day | No | 06:35 | 06:00 - 06:59 | Morning       | 38,0 |     | 93,8  | 93,8  | 19,15 | 153,61 |
| 2019/08/26 | CH2276 | Female | Two y/o | Control | Control | Feed Day | No | 06:40 | 06:00 - 06:59 | Morning       | 38,0 |     | 546,2 | 546,2 | 19,15 | 215,69 |
| 2019/08/26 | CH2276 | Female | Two y/o | Control | Control | Feed Day | No | 06:45 | 06:00 - 06:59 | Morning       | 38,0 | 38  | 249,4 | 249,4 | 19,15 | 515,48 |
| 2019/08/26 | CH2276 | Female | Two y/o | Control | Control | Feed Day | No | 06:50 | 06:00 - 06:59 | Morning       | 38,0 | 114 | 156,8 | 156,8 | 19,15 | 603,20 |
| 2019/08/26 | CH2276 | Female | Two y/o | Control | Control | Feed Day | No | 06:55 | 06:00 - 06:59 | Morning       | 38,0 | 97  | 290,6 | 290,6 | 19,15 | 591,66 |
| 2019/08/26 | CH2276 | Female | Two y/o | Control | Control | Feed Day | No | 07:00 | 07:00 - 07:59 | Morning       | 38,0 | 97  | 211,6 | 211,6 | 19,15 | 591,66 |
| 2019/08/26 | CH2276 | Female | Two y/o | Control | Control | Feed Day | No | 07:05 | 07:00 - 07:59 | Morning       | 38,0 | 114 | 249,6 | 249,6 | 19,15 | 603,20 |
| 2019/08/26 | CH2276 | Female | Two y/o | Control | Control | Feed Day | No | 07:10 | 07:00 - 07:59 | Morning       | 38,0 | 120 | 142,6 | 142,6 | 19,15 | 606,78 |
| 2019/08/26 | CH2276 | Female | Two y/o | Control | Control | Feed Day | No | 07:15 | 07:00 - 07:59 | Morning       | 38,0 |     | 359,2 | 359,2 | 19,15 | 200,80 |
| 2019/08/26 | CH2276 | Female | Two y/o | Control | Control | Feed Day | No | 07:20 | 07:00 - 07:59 | Morning       | 38,0 | 96  | 186,2 | 186,2 | 19,15 | 590,91 |
| 2019/08/26 | CH2276 | Female | Two y/o | Control | Control | Feed Day | No | 07:25 | 07:00 - 07:59 | Morning       | 37,9 | 103 | 144,2 | 144,2 | 19,05 | 596,00 |
| 2019/08/26 | CH2276 | Female | Two y/o | Control | Control | Feed Day | No | 07:30 | 07:00 - 07:59 | Morning       | 37,9 | 119 | 74,4  | 74,4  | 19,05 | 606,20 |
| 2019/08/26 | CH2276 | Female | Two y/o | Control | Control | Feed Day | No | 07:35 | 07:00 - 07:59 | Morning       | 37,7 | 100 | 72,2  | 72,2  | 18,85 | 593,87 |
| 2019/08/26 | CH2276 | Female | Two y/o | Control | Control | Feed Day | No | 07:40 | 07:00 - 07:59 | Morning       | 37,6 | 62  | 47,6  | 47,6  | 18,75 | 557,33 |
| 2019/08/26 | CH2276 | Female | Two y/o | Control | Control | Feed Day | No | 07:45 | 07:00 - 07:59 | Morning       | 37,5 | 62  | 61,8  | 61,8  | 18,65 | 557,33 |
| 2019/08/26 | CH2276 | Female | Two y/o | Control | Control | Feed Day | No | 07:50 | 07:00 - 07:59 | Morning       | 37,4 | 56  | 63,4  | 63,4  | 18,55 | 549,01 |
| 2019/08/26 | CH2276 | Female | Two y/o | Control | Control | Feed Day | No | 07:55 | 07:00 - 07:59 | Morning       | 37,4 | 66  | 63,6  | 63,6  | 18,55 | 562,34 |
| 2019/08/26 | CH2276 | Female | Two y/o | Control | Control | Feed Day | No | 08:00 | 08:00 - 08:59 | Late Morning  | 37,4 | 59  | 66,2  | 66,2  | 18,55 | 553,30 |
| 2019/08/26 | CH2276 | Female | Two y/o | Control | Control | Feed Day | No | 08:05 | 08:00 - 08:59 | Late Morning  | 37,4 | 66  | 65,2  | 65,2  | 18,55 | 562,34 |
| 2019/08/26 | CH2276 | Female | Two y/o | Control | Control | Feed Day | No | 08:10 | 08:00 - 08:59 | Late Morning  | 37,3 | 64  | 58,0  | 58,0  | 18,46 | 559,88 |
| 2019/08/26 | CH2276 | Female | Two y/o | Control | Control | Feed Day | No | 08:15 | 08:00 - 08:59 | Late Morning  | 37,0 |     | 132,6 | 132,6 | 18,16 | 165,70 |
| 2019/08/26 | CH2276 | Female | Two y/o | Control | Control | Feed Day | No | 08:20 | 08:00 - 08:59 | Late Morning  | 37,0 | 64  | 35,4  | 35,4  | 18,16 | 559,88 |
| 2019/08/26 | CH2276 | Female | Two y/o | Control | Control | Feed Day | No | 08:25 | 08:00 - 08:59 | Late Morning  | 37,0 | 55  | 36,2  | 36,2  | 18,16 | 547,52 |
| 2019/08/26 | CH2276 | Female | Two y/o | Control | Control | Feed Day | No | 08:30 | 08:00 - 08:59 | Late Morning  | 36,9 | 56  | 42,2  | 42,2  | 18,06 | 549,01 |
| 2019/08/26 | CH2276 | Female | Two y/o | Control | Control | Feed Day | No | 08:35 | 08:00 - 08:59 | Late Morning  | 36,9 | 51  | 39,0  | 39,0  | 18,06 | 541,20 |
| 2019/08/26 | CH2276 | Female | Two y/o | Control | Control | Feed Day | No | 08:40 | 08:00 - 08:59 | Late Morning  | 36,9 | 53  | 39,2  | 39,2  | 18,06 | 544,43 |



|            |        |        |         |         |         |          |     |       |               |              |      |     |       |       |       |        |        |
|------------|--------|--------|---------|---------|---------|----------|-----|-------|---------------|--------------|------|-----|-------|-------|-------|--------|--------|
| 2019/08/26 | CH2276 | Female | Two y/o | Control | Control | Feed Day | No  | 08:45 | 08:00 - 08:59 | Late Morning | 36,9 | 48  | 39,6  | 39,6  | 18,06 | 536,04 | 123,74 |
| 2019/08/26 | CH2276 | Female | Two y/o | Control | Control | Feed Day | No  | 08:50 | 08:00 - 08:59 | Late Morning | 36,9 | 57  | 38,0  | 38,0  | 18,06 | 550,47 | 122,32 |
| 2019/08/26 | CH2276 | Female | Two y/o | Control | Control | Feed Day | No  | 08:55 | 08:00 - 08:59 | Late Morning | 36,9 | 63  | 59,4  | 59,4  | 18,06 | 558,62 | 137,75 |
| 2019/08/26 | CH2276 | Female | Two y/o | Control | Control | Feed Day | No  | 09:00 | 09:00 - 09:59 | Late Morning | 36,9 | 58  | 65,2  | 65,2  | 18,06 | 551,90 | 140,97 |
| 2019/08/26 | CH2276 | Female | Two y/o | Control | Control | Feed Day | No  | 09:05 | 09:00 - 09:59 | Late Morning | 36,9 | 54  | 69,6  | 69,6  | 18,06 | 545,99 | 143,24 |
| 2019/08/26 | CH2276 | Female | Two y/o | Control | Control | Feed Day | No  | 09:10 | 09:00 - 09:59 | Late Morning | 36,9 | 61  | 50,0  | 50,0  | 18,06 | 556,01 | 131,79 |
| 2019/08/26 | CH2276 | Female | Two y/o | Control | Control | Feed Day | No  | 09:15 | 09:00 - 09:59 | Late Morning | 36,9 | 58  | 41,0  | 41,0  | 18,06 | 551,90 | 124,94 |
| 2019/08/26 | CH2276 | Female | Two y/o | Control | Control | Feed Day | No  | 09:20 | 09:00 - 09:59 | Late Morning | 36,9 | 62  | 14,2  | 14,2  | 18,06 | 557,33 | 88,65  |
| 2019/08/26 | CH2276 | Female | Two y/o | Control | Control | Feed Day | No  | 09:25 | 09:00 - 09:59 | Late Morning | 36,9 | 56  | 20,4  | 20,4  | 18,06 | 549,01 | 100,99 |
| 2019/08/26 | CH2276 | Female | Two y/o | Control | Control | Feed Day | No  | 09:30 | 09:00 - 09:59 | Late Morning | 36,9 | 59  | 18,6  | 18,6  | 18,06 | 553,30 | 97,84  |
| 2019/08/26 | CH2276 | Female | Two y/o | Control | Control | Feed Day | No  | 09:35 | 09:00 - 09:59 | Late Morning | 36,9 | 55  | 13,6  | 13,6  | 18,06 | 547,52 | 87,18  |
| 2019/08/26 | CH2276 | Female | Two y/o | Control | Control | Feed Day | No  | 09:40 | 09:00 - 09:59 | Late Morning | 36,9 | 60  | 19,8  | 19,8  | 18,06 | 554,67 | 99,97  |
| 2019/08/26 | CH2276 | Female | Two y/o | Control | Control | Feed Day | No  | 09:45 | 09:00 - 09:59 | Late Morning | 36,8 | 58  | 17,4  | 17,4  | 17,96 | 551,90 | 95,56  |
| 2019/08/26 | CH2276 | Female | Two y/o | Control | Control | Feed Day | No  | 09:50 | 09:00 - 09:59 | Late Morning | 36,8 | 55  | 25,2  | 25,2  | 17,96 | 547,52 | 108,22 |
| 2019/08/26 | CH2276 | Female | Two y/o | Control | Control | Feed Day | No  | 09:55 | 09:00 - 09:59 | Late Morning | 36,8 | 52  | 29,4  | 29,4  | 17,96 | 542,83 | 113,50 |
| 2019/08/26 | CH2276 | Female | Two y/o | Control | Control | Feed Day | No  | 10:00 | 10:00 - 10:59 | Late Morning | 36,8 | 62  | 30,8  | 30,8  | 17,96 | 557,33 | 115,10 |
| 2019/08/26 | CH2276 | Female | Two y/o | Control | Control | Feed Day | No  | 10:05 | 10:00 - 10:59 | Late Morning | 36,8 | 99  | 76,8  | 76,8  | 17,96 | 593,14 | 146,66 |
| 2019/08/26 | CH2276 | Female | Two y/o | Control | Control | Feed Day | No  | 10:10 | 10:00 - 10:59 | Late Morning | 36,9 | 62  | 55,4  | 55,4  | 18,06 | 557,33 | 135,33 |
| 2019/08/26 | CH2276 | Female | Two y/o | Control | Control | Feed Day | No  | 10:15 | 10:00 - 10:59 | Late Morning | 36,9 | 90  | 36,8  | 36,8  | 18,06 | 586,16 | 121,22 |
| 2019/08/26 | CH2276 | Female | Two y/o | Control | Control | Feed Day | No  | 10:20 | 10:00 - 10:59 | Late Morning | 36,9 | 54  | 18,6  | 18,6  | 18,06 | 545,99 | 97,84  |
| 2019/08/26 | CH2276 | Female | Two y/o | Control | Control | Feed Day | No  | 10:25 | 10:00 - 10:59 | Late Morning | 36,9 |     | 101,2 | 101,2 | 18,06 |        | 156,26 |
| 2019/08/26 | CH2276 | Female | Two y/o | Control | Control | Feed Day | Yes | 10:30 | 10:00 - 10:59 | Late Morning | 37,0 | 98  | 66,0  | 66,0  | 18,16 | 592,41 | 141,40 |
| 2019/08/26 | CH2276 | Female | Two y/o | Control | Control | Feed Day | Yes | 10:35 | 10:00 - 10:59 | Late Morning | 37,0 | 75  | 65,2  | 65,2  | 18,16 | 572,36 | 140,97 |
| 2019/08/26 | CH2276 | Female | Two y/o | Control | Control | Feed Day | Yes | 10:40 | 10:00 - 10:59 | Late Morning | 37,1 | 65  | 38,0  | 38,0  | 18,26 | 561,12 | 122,32 |
| 2019/08/26 | CH2276 | Female | Two y/o | Control | Control | Feed Day | Yes | 10:45 | 10:00 - 10:59 | Late Morning | 37,1 | 87  | 148,2 | 148,2 | 18,26 | 583,64 | 169,59 |
| 2019/08/26 | CH2276 | Female | Two y/o | Control | Control | Feed Day | Yes | 10:50 | 10:00 - 10:59 | Late Morning | 37,1 | 96  | 26,0  | 26,0  | 18,26 | 590,91 | 109,29 |
| 2019/08/26 | CH2276 | Female | Two y/o | Control | Control | Feed Day | Yes | 10:55 | 10:00 - 10:59 | Late Morning | 37,3 | 61  | 77,0  | 77,0  | 18,46 | 556,01 | 146,75 |
| 2019/08/26 | CH2276 | Female | Two y/o | Control | Control | Feed Day | Yes | 11:00 | 11:00 - 11:59 | Late Morning | 37,4 |     | 114,0 | 114,0 | 18,55 |        | 160,42 |
| 2019/08/26 | CH2276 | Female | Two y/o | Control | Control | Feed Day | Yes | 11:05 | 11:00 - 11:59 | Late Morning | 37,4 | 99  | 115,0 | 115,0 | 18,55 | 593,14 | 160,72 |
| 2019/08/26 | CH2276 | Female | Two y/o | Control | Control | Feed Day | Yes | 11:10 | 11:00 - 11:59 | Late Morning | 37,4 | 107 | 149,8 | 149,8 | 18,55 | 598,73 | 169,97 |
| 2019/08/26 | CH2276 | Female | Two y/o | Control | Control | Feed Day | Yes | 11:15 | 11:00 - 11:59 | Late Morning | 37,5 | 95  | 44,2  | 44,2  | 18,65 | 590,14 | 127,53 |
| 2019/08/26 | CH2276 | Female | Two y/o | Control | Control | Feed Day | Yes | 11:20 | 11:00 - 11:59 | Late Morning | 37,6 | 85  | 47,6  | 47,6  | 18,75 | 581,90 | 130,09 |
| 2019/08/26 | CH2276 | Female | Two y/o | Control | Control | Feed Day | Yes | 11:25 | 11:00 - 11:59 | Late Morning | 37,6 | 60  | 52,2  | 52,2  | 18,75 | 554,67 | 133,27 |
| 2019/08/26 | CH2276 | Female | Two y/o | Control | Control | Feed Day | No  | 11:30 | 11:00 - 11:59 | Late Morning | 37,7 | 73  | 49,2  | 49,2  | 18,85 | 570,27 | 131,23 |
| 2019/08/26 | CH2276 | Female | Two y/o | Control | Control | Feed Day | No  | 11:35 | 11:00 - 11:59 | Late Morning | 37,7 | 66  | 39,8  | 39,8  | 18,85 | 562,34 | 123,91 |
| 2019/08/26 | CH2276 | Female | Two y/o | Control | Control | Feed Day | No  | 11:40 | 11:00 - 11:59 | Late Morning | 37,7 | 65  | 29,0  | 29,0  | 18,85 | 561,12 | 113,03 |
| 2019/08/26 | CH2276 | Female | Two y/o | Control | Control | Feed Day | No  | 11:45 | 11:00 - 11:59 | Late Morning | 37,7 | 125 | 30,2  | 30,2  | 18,85 | 609,60 | 114,42 |
| 2019/08/26 | CH2276 | Female | Two y/o | Control | Control | Feed Day | No  | 11:50 | 11:00 - 11:59 | Late Morning | 37,7 | 66  | 43,6  | 43,6  | 18,85 | 562,34 | 127,06 |
| 2019/08/26 | CH2276 | Female | Two y/o | Control | Control | Feed Day | No  | 11:55 | 11:00 - 11:59 | Late Morning | 37,7 | 62  | 39,8  | 39,8  | 18,85 | 557,33 | 123,91 |
| 2019/08/26 | CH2276 | Female | Two y/o | Control | Control | Feed Day | No  | 12:00 | 12:00 - 12:59 | Afternoon    | 37,7 | 64  | 22,8  | 22,8  | 18,85 | 559,88 | 104,79 |
| 2019/08/26 | CH2276 | Female | Two y/o | Control | Control | Feed Day | No  | 12:05 | 12:00 - 12:59 | Afternoon    | 37,7 | 68  | 33,4  | 33,4  | 18,85 | 564,71 | 117,88 |
| 2019/08/26 | CH2276 | Female | Two y/o | Control | Control | Feed Day | No  | 12:10 | 12:00 - 12:59 | Afternoon    | 37,7 | 60  | 40,4  | 40,4  | 18,85 | 554,67 | 124,43 |
| 2019/08/26 | CH2276 | Female | Two y/o | Control | Control | Feed Day | No  | 12:15 | 12:00 - 12:59 | Afternoon    | 37,7 | 64  | 29,6  | 29,6  | 18,85 | 559,88 | 113,73 |
| 2019/08/26 | CH2276 | Female | Two y/o | Control | Control | Feed Day | No  | 12:20 | 12:00 - 12:59 | Afternoon    | 37,6 | 65  | 33,8  | 33,8  | 18,75 | 561,12 | 118,29 |
| 2019/08/26 | CH2276 | Female | Two y/o | Control | Control | Feed Day | No  | 12:25 | 12:00 - 12:59 | Afternoon    | 37,6 | 71  | 31,8  | 31,8  | 18,75 | 568,10 | 116,20 |
| 2019/08/26 | CH2276 | Female | Two y/o | Control | Control | Feed Day | No  | 12:30 | 12:00 - 12:59 | Afternoon    | 37,6 | 99  | 18,2  | 18,2  | 18,75 | 593,14 | 97,10  |
| 2019/08/26 | CH2276 | Female | Two y/o | Control | Control | Feed Day | No  | 12:35 | 12:00 - 12:59 | Afternoon    | 37,6 | 70  | 31,8  | 31,8  | 18,75 | 566,99 | 116,20 |
| 2019/08/26 | CH2276 | Female | Two y/o | Control | Control | Feed Day | No  | 12:40 | 12:00 - 12:59 | Afternoon    | 37,6 | 63  | 26,6  | 26,6  | 18,75 | 558,62 | 110,07 |
| 2019/08/26 | CH2276 | Female | Two y/o | Control | Control | Feed Day | No  | 12:45 | 12:00 - 12:59 | Afternoon    | 37,5 | 63  | 26,6  | 26,6  | 18,65 | 558,62 | 110,07 |
| 2019/08/26 | CH2276 | Female | Two y/o | Control | Control | Feed Day | No  | 12:50 | 12:00 - 12:59 | Afternoon    | 37,5 | 64  | 32,0  | 32,0  | 18,65 | 559,88 | 116,41 |
| 2019/08/26 | CH2276 | Female | Two y/o | Control | Control | Feed Day | No  | 12:55 | 12:00 - 12:59 | Afternoon    | 37,5 | 66  | 41,6  | 41,6  | 18,65 | 562,34 | 125,44 |
| 2019/08/26 | CH2276 | Female | Two y/o | Control | Control | Feed Day | No  | 13:00 | 13:00 - 13:59 | Afternoon    | 37,5 | 64  | 40,8  | 40,8  | 18,65 | 559,88 | 124,77 |
| 2019/08/26 | CH2276 | Female | Two y/o | Control | Control | Feed Day | No  | 13:05 | 13:00 - 13:59 | Afternoon    | 37,5 | 61  | 36,2  | 36,2  | 18,65 | 556,01 | 120,65 |
| 2019/08/26 | CH2276 | Female | Two y/o | Control | Control | Feed Day | No  | 13:10 | 13:00 - 13:59 | Afternoon    | 37,5 | 80  | 25,2  | 25,2  | 18,65 | 577,31 | 108,22 |
| 2019/08/26 | CH2276 | Female | Two y/o | Control | Control | Feed Day | No  | 13:15 | 13:00 - 13:59 | Afternoon    | 37,5 | 62  | 27,8  | 27,8  | 18,65 | 557,33 | 111,58 |
| 2019/08/26 | CH2276 | Female | Two y/o | Control | Control | Feed Day | No  | 13:20 | 13:00 - 13:59 | Afternoon    | 37,5 | 60  | 49,0  | 49,0  | 18,65 | 554,67 | 131,09 |
| 2019/08/26 | CH2276 | Female | Two y/o | Control | Control | Feed Day | No  | 13:25 | 13:00 - 13:59 | Afternoon    | 37,5 | 60  | 45,8  | 45,8  | 18,65 | 554,67 | 128,76 |
| 2019/08/26 | CH2276 | Female | Two y/o | Control | Control | Feed Day | No  | 13:30 | 13:00 - 13:59 | Afternoon    | 37,5 | 65  | 43,0  | 43,0  | 18,65 | 561,12 | 126,58 |
| 2019/08/26 | CH2276 | Female | Two y/o | Control | Control | Feed Day | No  | 13:35 | 13:00 - 13:59 | Afternoon    | 37,5 | 68  | 41,8  | 41,8  | 18,65 | 564,71 | 125,60 |
| 2019/08/26 | CH2276 | Female | Two y/o | Control | Control | Feed Day | No  | 13:40 | 13:00 - 13:59 | Afternoon    | 37,5 | 65  | 45,6  | 45,6  | 18,65 | 561,12 | 128,61 |
| 2019/08/26 | CH2276 | Female | Two y/o | Control | Control | Feed Day | No  | 13:45 | 13:00 - 13:59 | Afternoon    | 37,5 | 67  | 40,8  | 40,8  | 18,65 | 563,53 | 124,77 |
| 2019/08/26 | CH2276 | Female | Two y/o | Control | Control | Feed Day | No  | 13:50 | 13:00 - 13:59 | Afternoon    | 37,5 | 52  | 45,0  | 45,0  | 18,65 | 542,83 | 128,15 |
| 2019/08/26 | CH2276 | Female | Two y/o | Control | Control | Feed Day | No  | 13:55 | 13:00 - 13:59 | Afternoon    | 37,5 | 56  | 44,0  | 44,0  | 18,65 | 549,01 | 127,37 |
| 2019/08/26 | CH2276 | Female | Two y/o | Control | Control | Feed Day | No  | 14:00 | 14:00 - 14:59 | Afternoon    | 37,5 | 62  | 19,0  | 19,0  | 18,65 | 557,33 | 98,56  |
| 2019/08/26 | CH2276 | Female | Two y/o | Control | Control | Feed Day | No  | 14:05 | 14:00 - 14:59 | Afternoon    | 37,6 | 67  | 8,2   | 8,2   | 18,75 | 563,53 | 70,05  |
| 2019/08/26 | CH2276 | Female | Two y/o | Control | Control | Feed Day | No  | 14:10 | 14:00 - 14:59 | Afternoon    | 37,6 | 80  | 15,8  | 15,8  | 18,75 | 577,31 | 92,28  |
| 2019/08/26 | CH2276 | Female | Two y/o | Control | Control | Feed Day | No  | 14:15 | 14:00 - 14:59 | Afternoon    | 37,6 | 58  | 9,2   | 9,2   | 18,75 | 551,90 | 73,94  |
| 2019/08/26 | CH2276 | Female | Two y/o | Control | Control | Feed Day | No  | 14:20 | 14:00 - 14:59 | Afternoon    | 37,6 | 65  | 15,6  | 15,6  | 18,75 | 561,12 | 91,85  |
| 2019/08/26 | CH2276 | Female | Two y/o | Control | Control | Feed Day | No  | 14:25 | 14:00 - 14:59 | Afternoon    | 37,6 | 74  | 31,2  | 31,2  | 18,75 | 571,33 | 115,54 |
| 2019/08/26 | CH2276 | Female | Two y/o | Control | Control | Feed Day | No  | 14:30 | 14:00 - 14:59 | Afternoon    | 37,6 | 55  | 44,0  | 44,0  | 18,75 | 547,52 | 127,37 |



|            |        |        |         |         |         |          |     |       |               |           |      |     |        |        |       |        |        |
|------------|--------|--------|---------|---------|---------|----------|-----|-------|---------------|-----------|------|-----|--------|--------|-------|--------|--------|
| 2019/08/26 | CH2276 | Female | Two y/o | Control | Control | Feed Day | No  | 14:35 | 14:00 - 14:59 | Afternoon | 37,6 | 64  | 52,4   | 52,4   | 18,75 | 559,88 | 133,41 |
| 2019/08/26 | CH2276 | Female | Two y/o | Control | Control | Feed Day | No  | 14:40 | 14:00 - 14:59 | Afternoon | 37,6 | 90  | 50,6   | 50,6   | 18,75 | 586,16 | 132,20 |
| 2019/08/26 | CH2276 | Female | Two y/o | Control | Control | Feed Day | No  | 14:45 | 14:00 - 14:59 | Afternoon | 37,6 | 60  | 49,8   | 49,8   | 18,75 | 554,67 | 131,65 |
| 2019/08/26 | CH2276 | Female | Two y/o | Control | Control | Feed Day | No  | 14:50 | 14:00 - 14:59 | Afternoon | 37,6 | 65  | 47,2   | 47,2   | 18,75 | 561,12 | 129,80 |
| 2019/08/26 | CH2276 | Female | Two y/o | Control | Control | Feed Day | No  | 14:55 | 14:00 - 14:59 | Afternoon | 37,6 | 66  | 49,0   | 49,0   | 18,75 | 562,34 | 131,09 |
| 2019/08/26 | CH2276 | Female | Two y/o | Control | Control | Feed Day | No  | 15:00 | 15:00 - 15:59 | Afternoon | 37,6 | 59  | 57,6   | 57,6   | 18,75 | 553,30 | 136,68 |
| 2019/08/26 | CH2276 | Female | Two y/o | Control | Control | Feed Day | No  | 15:05 | 15:00 - 15:59 | Afternoon | 37,6 | 92  | 39,4   | 39,4   | 18,75 | 587,78 | 123,57 |
| 2019/08/26 | CH2276 | Female | Two y/o | Control | Control | Feed Day | No  | 15:10 | 15:00 - 15:59 | Afternoon | 37,6 | 74  | 76,4   | 76,4   | 18,75 | 571,33 | 146,48 |
| 2019/08/26 | CH2276 | Female | Two y/o | Control | Control | Feed Day | No  | 15:15 | 15:00 - 15:59 | Afternoon | 37,7 | 95  | 44,6   | 44,6   | 18,85 | 590,14 | 127,84 |
| 2019/08/26 | CH2276 | Female | Two y/o | Control | Control | Feed Day | No  | 15:20 | 15:00 - 15:59 | Afternoon | 37,7 | 95  | 58,6   | 58,6   | 18,85 | 590,14 | 137,28 |
| 2019/08/26 | CH2276 | Female | Two y/o | Control | Control | Feed Day | No  | 15:25 | 15:00 - 15:59 | Afternoon | 37,6 | 69  | 35,2   | 35,2   | 18,75 | 565,86 | 119,69 |
| 2019/08/26 | CH2276 | Female | Two y/o | Control | Control | Feed Day | Yes | 15:30 | 15:00 - 15:59 | Afternoon | 37,7 | 62  | 30,0   | 30,0   | 18,85 | 557,33 | 114,20 |
| 2019/08/26 | CH2276 | Female | Two y/o | Control | Control | Feed Day | Yes | 15:35 | 15:00 - 15:59 | Afternoon | 37,7 | 66  | 55,6   | 55,6   | 18,85 | 562,34 | 135,46 |
| 2019/08/26 | CH2276 | Female | Two y/o | Control | Control | Feed Day | Yes | 15:40 | 15:00 - 15:59 | Afternoon | 37,7 | 63  | 22,0   | 22,0   | 18,85 | 558,62 | 103,57 |
| 2019/08/26 | CH2276 | Female | Two y/o | Control | Control | Feed Day | Yes | 15:45 | 15:00 - 15:59 | Afternoon | 37,7 | 72  | 51,2   | 51,2   | 18,85 | 569,20 | 132,61 |
| 2019/08/26 | CH2276 | Female | Two y/o | Control | Control | Feed Day | Yes | 15:50 | 15:00 - 15:59 | Afternoon | 37,7 | 82  | 58,6   | 58,6   | 18,85 | 579,19 | 137,28 |
| 2019/08/26 | CH2276 | Female | Two y/o | Control | Control | Feed Day | Yes | 15:55 | 15:00 - 15:59 | Afternoon | 38,1 | 104 | 59,8   | 59,8   | 19,26 | 596,69 | 137,98 |
| 2019/08/26 | CH2276 | Female | Two y/o | Control | Control | Feed Day | Yes | 16:00 | 16:00 - 16:59 | Evening   | 38,2 | 86  | 47,6   | 47,6   | 19,36 | 582,77 | 130,09 |
| 2019/08/26 | CH2276 | Female | Two y/o | Control | Control | Feed Day | Yes | 16:05 | 16:00 - 16:59 | Evening   | 38,2 | 81  | 14,2   | 14,2   | 19,36 | 578,26 | 88,65  |
| 2019/08/26 | CH2276 | Female | Two y/o | Control | Control | Feed Day | Yes | 16:10 | 16:00 - 16:59 | Evening   | 38,2 | 108 | 45,6   | 45,6   | 19,36 | 599,39 | 128,61 |
| 2019/08/26 | CH2276 | Female | Two y/o | Control | Control | Feed Day | Yes | 16:15 | 16:00 - 16:59 | Evening   | 38,2 | 67  | 11,0   | 11,0   | 19,36 | 563,53 | 79,98  |
| 2019/08/26 | CH2276 | Female | Two y/o | Control | Control | Feed Day | Yes | 16:20 | 16:00 - 16:59 | Evening   | 38,2 | 83  | 13,6   | 13,6   | 19,36 | 580,11 | 87,18  |
| 2019/08/26 | CH2276 | Female | Two y/o | Control | Control | Feed Day | Yes | 16:25 | 16:00 - 16:59 | Evening   | 38,2 | 87  | 7,4    | 7,4    | 19,36 | 583,64 | 66,59  |
| 2019/08/26 | CH2276 | Female | Two y/o | Control | Control | Feed Day | No  | 16:30 | 16:00 - 16:59 | Evening   | 38,2 | 69  | 12,0   | 12,0   | 19,36 | 565,86 | 82,93  |
| 2019/08/26 | CH2276 | Female | Two y/o | Control | Control | Feed Day | No  | 16:35 | 16:00 - 16:59 | Evening   | 38,2 | 77  | 11,6   | 11,6   | 19,36 | 574,39 | 81,78  |
| 2019/08/26 | CH2276 | Female | Two y/o | Control | Control | Feed Day | No  | 16:40 | 16:00 - 16:59 | Evening   | 38,2 | 79  | 41,8   | 41,8   | 19,36 | 576,36 | 125,60 |
| 2019/08/26 | CH2276 | Female | Two y/o | Control | Control | Feed Day | No  | 16:45 | 16:00 - 16:59 | Evening   | 38,3 | 77  | 32,4   | 32,4   | 19,46 | 574,39 | 116,84 |
| 2019/08/26 | CH2276 | Female | Two y/o | Control | Control | Feed Day | No  | 16:50 | 16:00 - 16:59 | Evening   | 38,3 | 70  | 25,6   | 25,6   | 19,46 | 566,99 | 108,76 |
| 2019/08/26 | CH2276 | Female | Two y/o | Control | Control | Feed Day | No  | 16:55 | 16:00 - 16:59 | Evening   | 38,3 | 60  | 26,2   | 26,2   | 19,46 | 554,67 | 109,55 |
| 2019/08/26 | CH2276 | Female | Two y/o | Control | Control | Feed Day | No  | 17:00 | 17:00 - 17:59 | Evening   | 38,3 | 75  | 26,6   | 26,6   | 19,46 | 572,36 | 110,07 |
| 2019/08/26 | CH2276 | Female | Two y/o | Control | Control | Feed Day | No  | 17:05 | 17:00 - 17:59 | Evening   | 38,3 | 64  | 29,2   | 29,2   | 19,46 | 559,88 | 113,27 |
| 2019/08/26 | CH2276 | Female | Two y/o | Control | Control | Feed Day | No  | 17:10 | 17:00 - 17:59 | Evening   | 38,3 | 86  | 36,2   | 36,2   | 19,46 | 582,77 | 120,65 |
| 2019/08/26 | CH2276 | Female | Two y/o | Control | Control | Feed Day | No  | 17:15 | 17:00 - 17:59 | Evening   | 38,3 | 98  | 43,8   | 43,8   | 19,46 | 592,41 | 127,22 |
| 2019/08/26 | CH2276 | Female | Two y/o | Control | Control | Feed Day | No  | 17:20 | 17:00 - 17:59 | Evening   | 38,2 | 59  | 41,2   | 41,2   | 19,36 | 553,30 | 125,11 |
| 2019/08/26 | CH2276 | Female | Two y/o | Control | Control | Feed Day | No  | 17:25 | 17:00 - 17:59 | Evening   | 38,1 | 65  | 40,6   | 40,6   | 19,26 | 561,12 | 124,60 |
| 2019/08/26 | CH2276 | Female | Two y/o | Control | Control | Feed Day | No  | 17:30 | 17:00 - 17:59 | Evening   | 38,0 | 66  | 34,4   | 34,4   | 19,15 | 562,34 | 118,90 |
| 2019/08/26 | CH2276 | Female | Two y/o | Control | Control | Feed Day | No  | 17:35 | 17:00 - 17:59 | Evening   | 38,0 | 76  | 34,2   | 34,2   | 19,15 | 573,39 | 118,70 |
| 2019/08/26 | CH2276 | Female | Two y/o | Control | Control | Feed Day | No  | 17:40 | 17:00 - 17:59 | Evening   | 38,0 | 185 | 110,6  | 110,6  | 19,15 | 635,34 | 159,36 |
| 2019/08/26 | CH2276 | Female | Two y/o | Control | Control | Feed Day | No  | 17:45 | 17:00 - 17:59 | Evening   | 38,0 | 65  | 53,0   | 53,0   | 19,15 | 561,12 | 133,80 |
| 2019/08/26 | CH2276 | Female | Two y/o | Control | Control | Feed Day | No  | 17:50 | 17:00 - 17:59 | Evening   | 38,3 | 145 | 1142,0 | 1142,0 | 19,46 | 619,62 |        |
| 2019/08/26 | CH2276 | Female | Two y/o | Control | Control | Feed Day | No  | 17:55 | 17:00 - 17:59 | Evening   | 38,8 | 150 | 337,8  | 337,8  | 19,97 | 621,86 | 198,62 |
| 2019/08/26 | CH2276 | Female | Two y/o | Control | Control | Feed Day | No  | 18:00 | 18:00 - 18:59 | Evening   | 38,8 | 102 | 44,6   | 44,6   | 19,97 | 595,30 | 127,84 |
| 2019/08/26 | CH2276 | Female | Two y/o | Control | Control | Feed Day | No  | 18:05 | 18:00 - 18:59 | Evening   | 38,6 | 95  | 66,2   | 66,2   | 19,76 | 590,14 | 141,50 |
| 2019/08/26 | CH2276 | Female | Two y/o | Control | Control | Feed Day | No  | 18:10 | 18:00 - 18:59 | Evening   | 39,0 | 78  | 56,6   | 56,6   | 20,18 | 575,38 | 136,07 |
| 2019/08/26 | CH2276 | Female | Two y/o | Control | Control | Feed Day | No  | 18:15 | 18:00 - 18:59 | Evening   | 38,8 | 109 | 19,2   | 19,2   | 19,97 | 600,04 | 98,92  |
| 2019/08/26 | CH2276 | Female | Two y/o | Control | Control | Feed Day | No  | 18:20 | 18:00 - 18:59 | Evening   | 38,7 | 101 | 26,4   | 26,4   | 19,87 | 594,59 | 109,81 |
| 2019/08/26 | CH2276 | Female | Two y/o | Control | Control | Feed Day | No  | 18:25 | 18:00 - 18:59 | Evening   | 38,6 | 101 | 14,6   | 14,6   | 19,76 | 594,59 | 89,59  |
| 2019/08/26 | CH2276 | Female | Two y/o | Control | Control | Feed Day | No  | 18:30 | 18:00 - 18:59 | Evening   | 38,6 | 96  | 42,8   | 42,8   | 19,76 | 590,91 | 126,42 |
| 2019/08/26 | CH2276 | Female | Two y/o | Control | Control | Feed Day | No  | 18:35 | 18:00 - 18:59 | Evening   | 38,5 | 108 | 57,0   | 57,0   | 19,66 | 599,39 | 136,32 |
| 2019/08/26 | CH2276 | Female | Two y/o | Control | Control | Feed Day | No  | 18:40 | 18:00 - 18:59 | Evening   | 38,4 | 131 | 116,0  | 116,0  | 19,56 | 612,80 | 161,02 |
| 2019/08/26 | CH2276 | Female | Two y/o | Control | Control | Feed Day | No  | 18:45 | 18:00 - 18:59 | Evening   | 38,3 | 97  | 27,8   | 27,8   | 19,46 | 591,66 | 111,58 |
| 2019/08/26 | CH2276 | Female | Two y/o | Control | Control | Feed Day | No  | 18:50 | 18:00 - 18:59 | Evening   | 38,3 | 67  | 23,6   | 23,6   | 19,46 | 563,53 | 105,97 |
| 2019/08/26 | CH2276 | Female | Two y/o | Control | Control | Feed Day | No  | 18:55 | 18:00 - 18:59 | Evening   | 38,2 | 67  | 65,6   | 65,6   | 19,36 | 563,53 | 141,19 |
| 2019/08/26 | CH2276 | Female | Two y/o | Control | Control | Feed Day | No  | 19:00 | 19:00 - 19:59 | Evening   | 38,2 | 65  | 74,6   | 74,6   | 19,36 | 561,12 | 145,65 |
| 2019/08/26 | CH2276 | Female | Two y/o | Control | Control | Feed Day | No  | 19:05 | 19:00 - 19:59 | Evening   | 38,2 | 91  | 76,4   | 76,4   | 19,36 | 586,98 | 146,48 |
| 2019/08/26 | CH2276 | Female | Two y/o | Control | Control | Feed Day | No  | 19:10 | 19:00 - 19:59 | Evening   | 38,1 | 95  | 68,6   | 68,6   | 19,26 | 590,14 | 142,74 |
| 2019/08/26 | CH2276 | Female | Two y/o | Control | Control | Feed Day | No  | 19:15 | 19:00 - 19:59 | Evening   | 37,9 | 67  | 69,8   | 69,8   | 19,05 | 563,53 | 143,34 |
| 2019/08/26 | CH2276 | Female | Two y/o | Control | Control | Feed Day | No  | 19:20 | 19:00 - 19:59 | Evening   | 37,8 | 63  | 76,6   | 76,6   | 18,95 | 558,62 | 146,57 |
| 2019/08/26 | CH2276 | Female | Two y/o | Control | Control | Feed Day | No  | 19:25 | 19:00 - 19:59 | Evening   | 37,7 | 63  | 74,8   | 74,8   | 18,85 | 558,62 | 145,74 |
| 2019/08/26 | CH2276 | Female | Two y/o | Control | Control | Feed Day | No  | 19:30 | 19:00 - 19:59 | Evening   | 37,6 | 82  | 69,4   | 69,4   | 18,75 | 579,19 | 143,14 |
| 2019/08/26 | CH2276 | Female | Two y/o | Control | Control | Feed Day | No  | 19:35 | 19:00 - 19:59 | Evening   | 37,6 | 64  | 98,4   | 98,4   | 18,75 | 559,88 | 155,28 |
| 2019/08/26 | CH2276 | Female | Two y/o | Control | Control | Feed Day | No  | 19:40 | 19:00 - 19:59 | Evening   | 37,5 | 129 | 34,6   | 34,6   | 18,65 | 611,75 | 119,10 |
| 2019/08/26 | CH2276 | Female | Two y/o | Control | Control | Feed Day | No  | 19:45 | 19:00 - 19:59 | Evening   | 37,5 | 64  | 42,2   | 42,2   | 18,65 | 559,88 | 125,93 |
| 2019/08/26 | CH2276 | Female | Two y/o | Control | Control | Feed Day | No  | 19:50 | 19:00 - 19:59 | Evening   | 37,6 | 62  | 43,6   | 43,6   | 18,75 | 557,33 | 127,06 |
| 2019/08/26 | CH2276 | Female | Two y/o | Control | Control | Feed Day | No  | 19:55 | 19:00 - 19:59 | Evening   | 37,6 | 94  | 47,0   | 47,0   | 18,75 | 589,37 | 129,65 |
| 2019/08/26 | CH2276 | Female | Two y/o | Control | Control | Feed Day | No  | 20:00 | 20:00 - 20:59 | Night     | 37,7 | 68  | 47,6   | 47,6   | 18,85 | 564,71 | 130,09 |
| 2019/08/26 | CH2276 | Female | Two y/o | Control | Control | Feed Day | No  | 20:05 | 20:00 - 20:59 | Night     | 37,7 | 97  | 38,0   | 38,0   | 18,85 | 591,66 | 122,32 |
| 2019/08/26 | CH2276 | Female | Two y/o | Control | Control | Feed Day | No  | 20:10 | 20:00 - 20:59 | Night     | 37,8 | 93  | 26,4   | 26,4   | 18,95 | 588,58 | 109,81 |
| 2019/08/26 | CH2276 | Female | Two y/o | Control | Control | Feed Day | No  | 20:15 | 20:00 - 20:59 | Night     | 37,7 | 63  | 30,6   | 30,6   | 18,85 | 558,62 | 114,87 |
| 2019/08/26 | CH2276 | Female | Two y/o | Control | Control | Feed Day | No  | 20:20 | 20:00 - 20:59 | Night     | 37,7 | 64  | 38,0   | 38,0   | 18,85 | 559,88 | 122,32 |



|    |            |        |        |         |         |         |          |    |       |               |               |      |     |       |       |       |        |        |
|----|------------|--------|--------|---------|---------|---------|----------|----|-------|---------------|---------------|------|-----|-------|-------|-------|--------|--------|
|    | 2019/08/26 | CH2276 | Female | Two y/o | Control | Control | Feed Day | No | 20:25 | 20:00 - 20:59 | Night         | 37,7 | 71  | 37,6  | 37,6  | 18,85 | 568,10 | 121,96 |
|    | 2019/08/26 | CH2276 | Female | Two y/o | Control | Control | Feed Day | No | 20:30 | 20:00 - 20:59 | Night         | 37,7 | 66  | 38,0  | 38,0  | 18,85 | 562,34 | 122,32 |
|    | 2019/08/26 | CH2276 | Female | Two y/o | Control | Control | Feed Day | No | 20:35 | 20:00 - 20:59 | Night         | 37,7 | 68  | 37,4  | 37,4  | 18,85 | 564,71 | 121,77 |
|    | 2019/08/26 | CH2276 | Female | Two y/o | Control | Control | Feed Day | No | 20:40 | 20:00 - 20:59 | Night         | 37,7 | 83  | 45,6  | 45,6  | 18,85 | 580,11 | 128,61 |
|    | 2019/08/26 | CH2276 | Female | Two y/o | Control | Control | Feed Day | No | 20:45 | 20:00 - 20:59 | Night         | 37,7 | 91  | 43,4  | 43,4  | 18,85 | 586,98 | 126,90 |
|    | 2019/08/26 | CH2276 | Female | Two y/o | Control | Control | Feed Day | No | 20:50 | 20:00 - 20:59 | Night         | 37,7 | 65  | 39,0  | 39,0  | 18,85 | 561,12 | 123,22 |
|    | 2019/08/26 | CH2276 | Female | Two y/o | Control | Control | Feed Day | No | 20:55 | 20:00 - 20:59 | Night         | 37,7 | 97  | 42,4  | 42,4  | 18,85 | 591,66 | 126,10 |
|    | 2019/08/26 | CH2276 | Female | Two y/o | Control | Control | Feed Day | No | 21:00 | 21:00 - 21:59 | Night         | 37,7 | 69  | 40,2  | 40,2  | 18,85 | 565,86 | 124,26 |
|    | 2019/08/26 | CH2276 | Female | Two y/o | Control | Control | Feed Day | No | 21:05 | 21:00 - 21:59 | Night         | 37,7 | 67  | 35,6  | 35,6  | 18,85 | 563,53 | 120,08 |
|    | 2019/08/26 | CH2276 | Female | Two y/o | Control | Control | Feed Day | No | 21:10 | 21:00 - 21:59 | Night         | 37,7 | 63  | 34,0  | 34,0  | 18,85 | 558,62 | 118,49 |
|    | 2019/08/26 | CH2276 | Female | Two y/o | Control | Control | Feed Day | No | 21:15 | 21:00 - 21:59 | Night         | 37,6 | 73  | 43,4  | 43,4  | 18,75 | 570,27 | 126,90 |
|    | 2019/08/26 | CH2276 | Female | Two y/o | Control | Control | Feed Day | No | 21:20 | 21:00 - 21:59 | Night         | 37,6 | 53  | 27,0  | 27,0  | 18,75 | 544,43 | 110,58 |
|    | 2019/08/26 | CH2276 | Female | Two y/o | Control | Control | Feed Day | No | 21:25 | 21:00 - 21:59 | Night         | 37,6 | 95  | 8,2   | 8,2   | 18,75 | 590,14 | 70,05  |
|    | 2019/08/26 | CH2276 | Female | Two y/o | Control | Control | Feed Day | No | 21:30 | 21:00 - 21:59 | Night         | 37,6 | 71  | 10,6  | 10,6  | 18,75 | 568,10 | 78,73  |
|    | 2019/08/26 | CH2276 | Female | Two y/o | Control | Control | Feed Day | No | 21:35 | 21:00 - 21:59 | Night         | 37,5 | 82  | 40,8  | 40,8  | 18,65 | 579,19 | 124,77 |
|    | 2019/08/26 | CH2276 | Female | Two y/o | Control | Control | Feed Day | No | 21:40 | 21:00 - 21:59 | Night         | 37,5 | 60  | 25,0  | 25,0  | 18,65 | 554,67 | 107,94 |
|    | 2019/08/26 | CH2276 | Female | Two y/o | Control | Control | Feed Day | No | 21:45 | 21:00 - 21:59 | Night         | 37,5 | 90  | 14,8  | 14,8  | 18,65 | 586,16 | 90,05  |
|    | 2019/08/26 | CH2276 | Female | Two y/o | Control | Control | Feed Day | No | 21:50 | 21:00 - 21:59 | Night         | 37,5 | 65  | 11,4  | 11,4  | 18,65 | 561,12 | 81,19  |
|    | 2019/08/26 | CH2276 | Female | Two y/o | Control | Control | Feed Day | No | 21:55 | 21:00 - 21:59 | Night         | 37,5 | 68  | 10,4  | 10,4  | 18,65 | 564,71 | 78,08  |
|    | 2019/08/26 | CH2276 | Female | Two y/o | Control | Control | Feed Day | No | 22:00 | 22:00 - 22:59 | Night         | 37,5 | 92  | 17,4  | 17,4  | 18,65 | 587,78 | 95,56  |
|    | 2019/08/26 | CH2276 | Female | Two y/o | Control | Control | Feed Day | No | 22:05 | 22:00 - 22:59 | Night         | 37,5 | 103 | 46,2  | 46,2  | 18,65 | 596,00 | 129,06 |
|    | 2019/08/26 | CH2276 | Female | Two y/o | Control | Control | Feed Day | No | 22:10 | 22:00 - 22:59 | Night         | 37,5 | 100 | 65,0  | 65,0  | 18,65 | 593,87 | 140,87 |
|    | 2019/08/26 | CH2276 | Female | Two y/o | Control | Control | Feed Day | No | 22:15 | 22:00 - 22:59 | Night         | 37,4 | 69  | 76,4  | 76,4  | 18,55 | 565,86 | 146,48 |
|    | 2019/08/26 | CH2276 | Female | Two y/o | Control | Control | Feed Day | No | 22:20 | 22:00 - 22:59 | Night         | 37,4 | 100 | 72,4  | 72,4  | 18,55 | 593,87 | 144,61 |
|    | 2019/08/26 | CH2276 | Female | Two y/o | Control | Control | Feed Day | No | 22:25 | 22:00 - 22:59 | Night         | 37,4 | 58  | 74,4  | 74,4  | 18,55 | 551,90 | 145,55 |
|    | 2019/08/26 | CH2276 | Female | Two y/o | Control | Control | Feed Day | No | 22:30 | 22:00 - 22:59 | Night         | 37,4 |     | 74,4  | 74,4  | 18,55 |        | 145,55 |
|    | 2019/08/26 | CH2276 | Female | Two y/o | Control | Control | Feed Day | No | 22:35 | 22:00 - 22:59 | Night         | 37,4 | 89  | 77,6  | 77,6  | 18,55 | 585,33 | 147,02 |
|    | 2019/08/26 | CH2276 | Female | Two y/o | Control | Control | Feed Day | No | 22:40 | 22:00 - 22:59 | Night         | 37,4 | 90  | 78,2  | 78,2  | 18,55 | 586,16 | 147,28 |
|    | 2019/08/26 | CH2276 | Female | Two y/o | Control | Control | Feed Day | No | 22:45 | 22:00 - 22:59 | Night         | 37,3 | 86  | 86,6  | 86,6  | 18,46 | 582,77 | 150,83 |
|    | 2019/08/26 | CH2276 | Female | Two y/o | Control | Control | Feed Day | No | 22:50 | 22:00 - 22:59 | Night         | 37,3 | 87  | 83,0  | 83,0  | 18,46 | 583,64 | 149,36 |
|    | 2019/08/26 | CH2276 | Female | Two y/o | Control | Control | Feed Day | No | 22:55 | 22:00 - 22:59 | Night         | 37,3 | 67  | 74,6  | 74,6  | 18,46 | 563,53 | 145,65 |
|    | 2019/08/26 | CH2276 | Female | Two y/o | Control | Control | Feed Day | No | 23:00 | 23:00 - 23:59 | Night         | 37,3 | 92  | 61,6  | 61,6  | 18,46 | 587,78 | 139,00 |
|    | 2019/08/26 | CH2276 | Female | Two y/o | Control | Control | Feed Day | No | 23:05 | 23:00 - 23:59 | Night         | 37,3 | 96  | 60,8  | 60,8  | 18,46 | 590,91 | 138,55 |
|    | 2019/08/26 | CH2276 | Female | Two y/o | Control | Control | Feed Day | No | 23:10 | 23:00 - 23:59 | Night         | 37,4 | 68  | 62,0  | 62,0  | 18,55 | 564,71 | 139,23 |
|    | 2019/08/26 | CH2276 | Female | Two y/o | Control | Control | Feed Day | No | 23:15 | 23:00 - 23:59 | Night         | 37,4 | 61  | 59,6  | 59,6  | 18,55 | 556,01 | 137,86 |
|    | 2019/08/26 | CH2276 | Female | Two y/o | Control | Control | Feed Day | No | 23:20 | 23:00 - 23:59 | Night         | 37,4 | 61  | 77,2  | 77,2  | 18,55 | 556,01 | 146,84 |
|    | 2019/08/26 | CH2276 | Female | Two y/o | Control | Control | Feed Day | No | 23:25 | 23:00 - 23:59 | Night         | 37,5 | 62  | 59,4  | 59,4  | 18,65 | 557,33 | 137,75 |
|    | 2019/08/26 | CH2276 | Female | Two y/o | Control | Control | Feed Day | No | 23:30 | 23:00 - 23:59 | Night         | 37,5 | 65  | 58,8  | 58,8  | 18,65 | 561,12 | 137,39 |
|    | 2019/08/26 | CH2276 | Female | Two y/o | Control | Control | Feed Day | No | 23:35 | 23:00 - 23:59 | Night         | 37,5 | 84  | 57,6  | 57,6  | 18,65 | 581,01 | 136,68 |
|    | 2019/08/26 | CH2276 | Female | Two y/o | Control | Control | Feed Day | No | 23:40 | 23:00 - 23:59 | Night         | 37,5 | 87  | 60,0  | 60,0  | 18,65 | 583,64 | 138,09 |
|    | 2019/08/26 | CH2276 | Female | Two y/o | Control | Control | Feed Day | No | 23:45 | 23:00 - 23:59 | Night         | 37,5 | 59  | 61,6  | 61,6  | 18,65 | 553,30 | 139,00 |
|    | 2019/08/26 | CH2276 | Female | Two y/o | Control | Control | Feed Day | No | 23:50 | 23:00 - 23:59 | Night         | 37,5 | 58  | 23,4  | 23,4  | 18,65 | 551,90 | 105,68 |
|    | 2019/08/26 | CH2276 | Female | Two y/o | Control | Control | Feed Day | No | 23:55 | 23:00 - 23:59 | Night         | 37,5 | 89  | 17,2  | 17,2  | 18,65 | 585,33 | 95,17  |
| 69 | 2019/08/27 | CH2276 | Female | Two y/o | Control | Control | Feed Day | No | 00:00 | 00:00 - 00:59 | Early Morning | 37,4 | 62  | 29,4  | 29,4  | 18,55 | 557,33 | 113,50 |
|    | 2019/08/27 | CH2276 | Female | Two y/o | Control | Control | Feed Day | No | 00:05 | 00:00 - 00:59 | Early Morning | 37,5 | 70  | 25,6  | 25,6  | 18,65 | 566,99 | 108,76 |
|    | 2019/08/27 | CH2276 | Female | Two y/o | Control | Control | Feed Day | No | 00:10 | 00:00 - 00:59 | Early Morning | 37,5 | 64  | 28,6  | 28,6  | 18,65 | 559,88 | 112,56 |
|    | 2019/08/27 | CH2276 | Female | Two y/o | Control | Control | Feed Day | No | 00:15 | 00:00 - 00:59 | Early Morning | 37,5 | 97  | 28,4  | 28,4  | 18,65 | 591,66 | 112,31 |
|    | 2019/08/27 | CH2276 | Female | Two y/o | Control | Control | Feed Day | No | 00:20 | 00:00 - 00:59 | Early Morning | 37,5 | 68  | 20,6  | 20,6  | 18,65 | 564,71 | 101,32 |
|    | 2019/08/27 | CH2276 | Female | Two y/o | Control | Control | Feed Day | No | 00:25 | 00:00 - 00:59 | Early Morning | 37,5 | 102 | 3,8   | 3,8   | 18,65 | 595,30 | 44,22  |
|    | 2019/08/27 | CH2276 | Female | Two y/o | Control | Control | Feed Day | No | 00:30 | 00:00 - 00:59 | Early Morning | 37,6 | 57  | 5,4   | 5,4   | 18,75 | 550,47 | 55,99  |
|    | 2019/08/27 | CH2276 | Female | Two y/o | Control | Control | Feed Day | No | 00:35 | 00:00 - 00:59 | Early Morning | 37,6 | 65  | 10,0  | 10,0  | 18,75 | 561,12 | 76,76  |
|    | 2019/08/27 | CH2276 | Female | Two y/o | Control | Control | Feed Day | No | 00:40 | 00:00 - 00:59 | Early Morning | 37,5 | 67  | 10,4  | 10,4  | 18,65 | 563,53 | 78,08  |
|    | 2019/08/27 | CH2276 | Female | Two y/o | Control | Control | Feed Day | No | 00:45 | 00:00 - 00:59 | Early Morning | 37,5 | 67  | 6,6   | 6,6   | 18,65 | 563,53 | 62,73  |
|    | 2019/08/27 | CH2276 | Female | Two y/o | Control | Control | Feed Day | No | 00:50 | 00:00 - 00:59 | Early Morning | 37,5 | 82  | 54,0  | 54,0  | 18,65 | 579,19 | 134,45 |
|    | 2019/08/27 | CH2276 | Female | Two y/o | Control | Control | Feed Day | No | 00:55 | 00:00 - 00:59 | Early Morning | 37,5 | 83  | 53,8  | 53,8  | 18,65 | 580,11 | 134,32 |
|    | 2019/08/27 | CH2276 | Female | Two y/o | Control | Control | Feed Day | No | 01:00 | 01:00 - 01:59 | Early Morning | 37,5 | 95  | 11,8  | 11,8  | 18,65 | 590,14 | 82,36  |
|    | 2019/08/27 | CH2276 | Female | Two y/o | Control | Control | Feed Day | No | 01:05 | 01:00 - 01:59 | Early Morning | 37,4 |     | 16,4  | 16,4  | 18,55 |        | 93,55  |
|    | 2019/08/27 | CH2276 | Female | Two y/o | Control | Control | Feed Day | No | 01:10 | 01:00 - 01:59 | Early Morning | 37,3 | 82  | 39,2  | 39,2  | 18,46 | 579,19 | 123,39 |
|    | 2019/08/27 | CH2276 | Female | Two y/o | Control | Control | Feed Day | No | 01:15 | 01:00 - 01:59 | Early Morning | 37,3 | 59  | 43,2  | 43,2  | 18,46 | 553,30 | 126,74 |
|    | 2019/08/27 | CH2276 | Female | Two y/o | Control | Control | Feed Day | No | 01:20 | 01:00 - 01:59 | Early Morning | 37,3 | 92  | 63,8  | 63,8  | 18,46 | 587,78 | 140,22 |
|    | 2019/08/27 | CH2276 | Female | Two y/o | Control | Control | Feed Day | No | 01:25 | 01:00 - 01:59 | Early Morning | 37,3 | 56  | 71,6  | 71,6  | 18,46 | 549,01 | 144,22 |
|    | 2019/08/27 | CH2276 | Female | Two y/o | Control | Control | Feed Day | No | 01:30 | 01:00 - 01:59 | Early Morning | 37,2 | 54  | 68,0  | 68,0  | 18,36 | 545,99 | 142,43 |
|    | 2019/08/27 | CH2276 | Female | Two y/o | Control | Control | Feed Day | No | 01:35 | 01:00 - 01:59 | Early Morning | 37,1 | 85  | 108,4 | 108,4 | 18,26 | 581,90 | 158,66 |
|    | 2019/08/27 | CH2276 | Female | Two y/o | Control | Control | Feed Day | No | 01:40 | 01:00 - 01:59 | Early Morning | 37,5 | 110 | 154,8 | 154,8 | 18,65 | 600,69 | 171,12 |
|    | 2019/08/27 | CH2276 | Female | Two y/o | Control | Control | Feed Day | No | 01:45 | 01:00 - 01:59 | Early Morning | 37,5 | 96  | 53,2  | 53,2  | 18,65 | 590,91 | 133,93 |
|    | 2019/08/27 | CH2276 | Female | Two y/o | Control | Control | Feed Day | No | 01:50 | 01:00 - 01:59 | Early Morning | 37,5 | 147 | 136,0 | 136,0 | 18,65 | 620,52 | 166,59 |
|    | 2019/08/27 | CH2276 | Female | Two y/o | Control | Control | Feed Day | No | 01:55 | 01:00 - 01:59 | Early Morning | 37,4 | 119 | 62,0  | 62,0  | 18,55 | 606,20 | 139,23 |
|    | 2019/08/27 | CH2276 | Female | Two y/o | Control | Control | Feed Day | No | 02:00 | 02:00 - 02:59 | Early Morning | 37,5 | 119 | 141,8 | 141,8 | 18,65 | 606,20 | 168,05 |
|    | 2019/08/27 | CH2276 | Female | Two y/o | Control | Control | Feed Day | No | 02:05 | 02:00 - 02:59 | Early Morning | 37,5 | 56  | 149,6 | 149,6 | 18,65 | 549,01 | 169,92 |
|    | 2019/08/27 | CH2276 | Female | Two y/o | Control | Control | Feed Day | No | 02:10 | 02:00 - 02:59 | Early Morning | 37,5 | 109 | 219,6 | 219,6 | 18,65 | 600,04 | 183,41 |



|            |        |        |         |         |         |          |    |       |               |               |      |     |       |       |       |        |        |
|------------|--------|--------|---------|---------|---------|----------|----|-------|---------------|---------------|------|-----|-------|-------|-------|--------|--------|
| 2019/08/27 | CH2276 | Female | Two y/o | Control | Control | Feed Day | No | 02:15 | 02:00 - 02:59 | Early Morning | 37,6 |     | 133,4 | 133,4 | 18,75 |        | 165,91 |
| 2019/08/27 | CH2276 | Female | Two y/o | Control | Control | Feed Day | No | 02:20 | 02:00 - 02:59 | Early Morning | 37,6 | 115 | 159,8 | 159,8 | 18,75 | 603,82 | 172,24 |
| 2019/08/27 | CH2276 | Female | Two y/o | Control | Control | Feed Day | No | 02:25 | 02:00 - 02:59 | Early Morning | 37,6 | 91  | 392,0 | 392,0 | 18,75 | 586,98 | 203,90 |
| 2019/08/27 | CH2276 | Female | Two y/o | Control | Control | Feed Day | No | 02:30 | 02:00 - 02:59 | Early Morning | 37,6 | 95  | 260,0 | 260,0 | 18,75 | 590,14 | 189,36 |
| 2019/08/27 | CH2276 | Female | Two y/o | Control | Control | Feed Day | No | 02:35 | 02:00 - 02:59 | Early Morning | 37,6 | 95  | 153,0 | 153,0 | 18,75 | 590,14 | 170,71 |
| 2019/08/27 | CH2276 | Female | Two y/o | Control | Control | Feed Day | No | 02:40 | 02:00 - 02:59 | Early Morning | 37,6 | 54  | 191,8 | 191,8 | 18,75 | 545,99 | 178,65 |
| 2019/08/27 | CH2276 | Female | Two y/o | Control | Control | Feed Day | No | 02:45 | 02:00 - 02:59 | Early Morning | 37,7 | 194 | 175,0 | 175,0 | 18,85 | 638,30 | 175,43 |
| 2019/08/27 | CH2276 | Female | Two y/o | Control | Control | Feed Day | No | 02:50 | 02:00 - 02:59 | Early Morning | 37,7 | 104 | 285,2 | 285,2 | 18,85 | 596,69 | 192,63 |
| 2019/08/27 | CH2276 | Female | Two y/o | Control | Control | Feed Day | No | 02:55 | 02:00 - 02:59 | Early Morning | 37,6 | 138 | 159,2 | 159,2 | 18,75 | 616,31 | 172,10 |
| 2019/08/27 | CH2276 | Female | Two y/o | Control | Control | Feed Day | No | 03:00 | 03:00 - 03:59 | Early Morning | 37,6 | 172 | 218,6 | 218,6 | 18,75 | 630,73 | 183,25 |
| 2019/08/27 | CH2276 | Female | Two y/o | Control | Control | Feed Day | No | 03:05 | 03:00 - 03:59 | Early Morning | 37,7 | 30  | 63,0  | 63,0  | 18,85 | 493,51 | 139,78 |
| 2019/08/27 | CH2276 | Female | Two y/o | Control | Control | Feed Day | No | 03:10 | 03:00 - 03:59 | Early Morning | 37,7 | 75  | 163,2 | 163,2 | 18,85 | 572,36 | 172,97 |
| 2019/08/27 | CH2276 | Female | Two y/o | Control | Control | Feed Day | No | 03:15 | 03:00 - 03:59 | Early Morning | 37,7 | 165 | 563,4 | 563,4 | 18,85 | 628,06 | 216,80 |
| 2019/08/27 | CH2276 | Female | Two y/o | Control | Control | Feed Day | No | 03:20 | 03:00 - 03:59 | Early Morning | 37,7 |     | 82,6  | 82,6  | 18,85 |        | 149,19 |
| 2019/08/27 | CH2276 | Female | Two y/o | Control | Control | Feed Day | No | 03:25 | 03:00 - 03:59 | Early Morning | 37,7 | 82  | 63,2  | 63,2  | 18,85 | 579,19 | 139,89 |
| 2019/08/27 | CH2276 | Female | Two y/o | Control | Control | Feed Day | No | 03:30 | 03:00 - 03:59 | Early Morning | 37,7 | 38  | 274,2 | 274,2 | 18,85 | 515,48 | 191,24 |
| 2019/08/27 | CH2276 | Female | Two y/o | Control | Control | Feed Day | No | 03:35 | 03:00 - 03:59 | Early Morning | 37,7 | 54  | 72,2  | 72,2  | 18,85 | 545,99 | 144,51 |
| 2019/08/27 | CH2276 | Female | Two y/o | Control | Control | Feed Day | No | 03:40 | 03:00 - 03:59 | Early Morning | 38,1 | 52  | 615,0 | 615,0 | 19,26 | 542,83 | 219,93 |
| 2019/08/27 | CH2276 | Female | Two y/o | Control | Control | Feed Day | No | 03:45 | 03:00 - 03:59 | Early Morning | 38,4 | 105 | 14,8  | 14,8  | 19,56 | 597,38 | 90,05  |
| 2019/08/27 | CH2276 | Female | Two y/o | Control | Control | Feed Day | No | 03:50 | 03:00 - 03:59 | Early Morning | 38,3 | 74  | 14,6  | 14,6  | 19,46 | 571,33 | 89,59  |
| 2019/08/27 | CH2276 | Female | Two y/o | Control | Control | Feed Day | No | 03:55 | 03:00 - 03:59 | Early Morning | 38,2 | 88  | 10,8  | 10,8  | 19,36 | 584,49 | 79,36  |
| 2019/08/27 | CH2276 | Female | Two y/o | Control | Control | Feed Day | No | 04:00 | 04:00 - 04:59 | Morning       | 38,1 | 64  | 19,4  | 19,4  | 19,26 | 559,88 | 99,28  |
| 2019/08/27 | CH2276 | Female | Two y/o | Control | Control | Feed Day | No | 04:05 | 04:00 - 04:59 | Morning       | 38,0 | 64  | 24,4  | 24,4  | 19,15 | 559,88 | 107,11 |
| 2019/08/27 | CH2276 | Female | Two y/o | Control | Control | Feed Day | No | 04:10 | 04:00 - 04:59 | Morning       | 37,9 | 92  | 19,8  | 19,8  | 19,05 | 587,78 | 99,97  |
| 2019/08/27 | CH2276 | Female | Two y/o | Control | Control | Feed Day | No | 04:15 | 04:00 - 04:59 | Morning       | 37,8 | 62  | 28,2  | 28,2  | 18,95 | 557,33 | 112,07 |
| 2019/08/27 | CH2276 | Female | Two y/o | Control | Control | Feed Day | No | 04:20 | 04:00 - 04:59 | Morning       | 37,7 | 97  | 31,8  | 31,8  | 18,85 | 591,66 | 116,20 |
| 2019/08/27 | CH2276 | Female | Two y/o | Control | Control | Feed Day | No | 04:25 | 04:00 - 04:59 | Morning       | 37,6 | 62  | 20,4  | 20,4  | 18,75 | 557,33 | 100,99 |
| 2019/08/27 | CH2276 | Female | Two y/o | Control | Control | Feed Day | No | 04:30 | 04:00 - 04:59 | Morning       | 37,6 | 59  | 7,0   | 7,0   | 18,75 | 553,30 | 64,72  |
| 2019/08/27 | CH2276 | Female | Two y/o | Control | Control | Feed Day | No | 04:35 | 04:00 - 04:59 | Morning       | 37,5 | 59  | 14,6  | 14,6  | 18,65 | 553,30 | 89,59  |
| 2019/08/27 | CH2276 | Female | Two y/o | Control | Control | Feed Day | No | 04:40 | 04:00 - 04:59 | Morning       | 37,4 | 56  | 26,0  | 26,0  | 18,55 | 549,01 | 109,29 |
| 2019/08/27 | CH2276 | Female | Two y/o | Control | Control | Feed Day | No | 04:45 | 04:00 - 04:59 | Morning       | 37,3 | 61  | 11,0  | 11,0  | 18,46 | 556,01 | 79,98  |
| 2019/08/27 | CH2276 | Female | Two y/o | Control | Control | Feed Day | No | 04:50 | 04:00 - 04:59 | Morning       | 37,3 | 59  | 14,6  | 14,6  | 18,46 | 553,30 | 89,59  |
| 2019/08/27 | CH2276 | Female | Two y/o | Control | Control | Feed Day | No | 04:55 | 04:00 - 04:59 | Morning       | 37,1 | 49  | 11,4  | 11,4  | 18,26 | 537,80 | 81,19  |
| 2019/08/27 | CH2276 | Female | Two y/o | Control | Control | Feed Day | No | 05:00 | 05:00 - 05:59 | Morning       | 37,1 | 63  | 60,0  | 60,0  | 18,26 | 558,62 | 138,09 |
| 2019/08/27 | CH2276 | Female | Two y/o | Control | Control | Feed Day | No | 05:05 | 05:00 - 05:59 | Morning       | 37,0 | 58  | 20,6  | 20,6  | 18,16 | 551,90 | 101,32 |
| 2019/08/27 | CH2276 | Female | Two y/o | Control | Control | Feed Day | No | 05:10 | 05:00 - 05:59 | Morning       | 37,0 | 59  | 20,6  | 20,6  | 18,16 | 553,30 | 101,32 |
| 2019/08/27 | CH2276 | Female | Two y/o | Control | Control | Feed Day | No | 05:15 | 05:00 - 05:59 | Morning       | 36,9 | 107 | 15,4  | 15,4  | 18,06 | 598,73 | 91,41  |
| 2019/08/27 | CH2276 | Female | Two y/o | Control | Control | Feed Day | No | 05:20 | 05:00 - 05:59 | Morning       | 37,0 | 63  | 14,6  | 14,6  | 18,16 | 558,62 | 89,59  |
| 2019/08/27 | CH2276 | Female | Two y/o | Control | Control | Feed Day | No | 05:25 | 05:00 - 05:59 | Morning       | 37,0 | 63  | 25,0  | 25,0  | 18,16 | 558,62 | 107,94 |
| 2019/08/27 | CH2276 | Female | Two y/o | Control | Control | Feed Day | No | 05:30 | 05:00 - 05:59 | Morning       | 37,0 | 55  | 32,6  | 32,6  | 18,16 | 547,52 | 117,05 |
| 2019/08/27 | CH2276 | Female | Two y/o | Control | Control | Feed Day | No | 05:35 | 05:00 - 05:59 | Morning       | 37,1 | 128 | 38,0  | 38,0  | 18,26 | 611,22 | 122,32 |
| 2019/08/27 | CH2276 | Female | Two y/o | Control | Control | Feed Day | No | 05:40 | 05:00 - 05:59 | Morning       | 36,9 | 63  | 56,0  | 56,0  | 18,06 | 558,62 | 135,70 |
| 2019/08/27 | CH2276 | Female | Two y/o | Control | Control | Feed Day | No | 05:45 | 05:00 - 05:59 | Morning       | 36,9 | 76  | 250,4 | 250,4 | 18,06 | 573,39 | 188,04 |
| 2019/08/27 | CH2276 | Female | Two y/o | Control | Control | Feed Day | No | 05:50 | 05:00 - 05:59 | Morning       | 37,0 | 53  | 303,6 | 303,6 | 18,16 | 544,43 | 194,84 |
| 2019/08/27 | CH2276 | Female | Two y/o | Control | Control | Feed Day | No | 05:55 | 05:00 - 05:59 | Morning       | 37,1 | 99  | 404,4 | 404,4 | 18,26 | 593,14 | 205,00 |
| 2019/08/27 | CH2276 | Female | Two y/o | Control | Control | Feed Day | No | 06:00 | 06:00 - 06:59 | Morning       | 37,3 | 120 | 106,4 | 106,4 | 18,46 | 606,78 | 158,01 |
| 2019/08/27 | CH2276 | Female | Two y/o | Control | Control | Feed Day | No | 06:05 | 06:00 - 06:59 | Morning       | 37,3 | 152 | 135,8 | 135,8 | 18,46 | 622,73 | 166,53 |
| 2019/08/27 | CH2276 | Female | Two y/o | Control | Control | Feed Day | No | 06:10 | 06:00 - 06:59 | Morning       | 37,4 | 107 | 627,2 | 627,2 | 18,55 | 598,73 | 220,63 |
| 2019/08/27 | CH2276 | Female | Two y/o | Control | Control | Feed Day | No | 06:15 | 06:00 - 06:59 | Morning       | 37,4 | 90  | 322,6 | 322,6 | 18,55 | 586,16 | 196,99 |
| 2019/08/27 | CH2276 | Female | Two y/o | Control | Control | Feed Day | No | 06:20 | 06:00 - 06:59 | Morning       | 37,5 | 188 | 568,6 | 568,6 | 18,65 | 636,34 | 217,13 |
| 2019/08/27 | CH2276 | Female | Two y/o | Control | Control | Feed Day | No | 06:25 | 06:00 - 06:59 | Morning       | 37,5 | 115 | 800,2 | 800,2 | 18,65 | 603,82 | 229,34 |
| 2019/08/27 | CH2276 | Female | Two y/o | Control | Control | Feed Day | No | 06:30 | 06:00 - 06:59 | Morning       | 37,6 | 94  | 122,2 | 122,2 | 18,75 | 589,37 | 162,84 |
| 2019/08/27 | CH2276 | Female | Two y/o | Control | Control | Feed Day | No | 06:35 | 06:00 - 06:59 | Morning       | 37,6 |     | 242,2 | 242,2 | 18,75 |        | 186,86 |
| 2019/08/27 | CH2276 | Female | Two y/o | Control | Control | Feed Day | No | 06:40 | 06:00 - 06:59 | Morning       | 37,7 | 188 | 144,0 | 144,0 | 18,85 | 636,34 | 168,59 |
| 2019/08/27 | CH2276 | Female | Two y/o | Control | Control | Feed Day | No | 06:45 | 06:00 - 06:59 | Morning       | 37,7 | 98  | 51,6  | 51,6  | 18,85 | 592,41 | 132,87 |
| 2019/08/27 | CH2276 | Female | Two y/o | Control | Control | Feed Day | No | 06:50 | 06:00 - 06:59 | Morning       | 37,6 | 76  | 157,8 | 157,8 | 18,75 | 573,39 | 171,79 |
| 2019/08/27 | CH2276 | Female | Two y/o | Control | Control | Feed Day | No | 06:55 | 06:00 - 06:59 | Morning       | 37,8 | 123 | 370,4 | 370,4 | 18,95 | 608,49 | 201,89 |
| 2019/08/27 | CH2276 | Female | Two y/o | Control | Control | Feed Day | No | 07:00 | 07:00 - 07:59 | Morning       | 37,9 | 107 | 24,4  | 24,4  | 19,05 | 598,73 | 107,11 |
| 2019/08/27 | CH2276 | Female | Two y/o | Control | Control | Feed Day | No | 07:05 | 07:00 - 07:59 | Morning       | 37,8 | 104 | 226,2 | 226,2 | 18,95 | 596,69 | 184,45 |
| 2019/08/27 | CH2276 | Female | Two y/o | Control | Control | Feed Day | No | 07:10 | 07:00 - 07:59 | Morning       | 37,9 | 160 | 93,6  | 93,6  | 19,05 | 626,07 | 153,54 |
| 2019/08/27 | CH2276 | Female | Two y/o | Control | Control | Feed Day | No | 07:15 | 07:00 - 07:59 | Morning       | 37,9 | 126 | 161,2 | 161,2 | 19,05 | 610,14 | 172,54 |
| 2019/08/27 | CH2276 | Female | Two y/o | Control | Control | Feed Day | No | 07:20 | 07:00 - 07:59 | Morning       | 37,8 | 55  | 50,8  | 50,8  | 18,95 | 547,52 | 132,33 |
| 2019/08/27 | CH2276 | Female | Two y/o | Control | Control | Feed Day | No | 07:25 | 07:00 - 07:59 | Morning       | 37,7 | 132 | 182,4 | 182,4 | 18,85 | 613,32 | 176,88 |
| 2019/08/27 | CH2276 | Female | Two y/o | Control | Control | Feed Day | No | 07:30 | 07:00 - 07:59 | Morning       | 37,6 | 138 | 157,0 | 157,0 | 18,75 | 616,31 | 171,62 |
| 2019/08/27 | CH2276 | Female | Two y/o | Control | Control | Feed Day | No | 07:35 | 07:00 - 07:59 | Morning       | 37,9 | 152 | 20,2  | 20,2  | 19,05 | 622,73 | 100,65 |
| 2019/08/27 | CH2276 | Female | Two y/o | Control | Control | Feed Day | No | 07:40 | 07:00 - 07:59 | Morning       | 37,9 | 84  | 35,4  | 35,4  | 19,05 | 581,01 | 119,88 |
| 2019/08/27 | CH2276 | Female | Two y/o | Control | Control | Feed Day | No | 07:45 | 07:00 - 07:59 | Morning       | 37,8 | 62  | 33,4  | 33,4  | 18,95 | 557,33 | 117,88 |
| 2019/08/27 | CH2276 | Female | Two y/o | Control | Control | Feed Day | No | 07:50 | 07:00 - 07:59 | Morning       | 37,8 | 67  | 30,0  | 30,0  | 18,95 | 563,53 | 114,20 |
| 2019/08/27 | CH2276 | Female | Two y/o | Control | Control | Feed Day | No | 07:55 | 07:00 - 07:59 | Morning       | 37,7 | 59  | 55,0  | 55,0  | 18,85 | 553,30 | 135,08 |
| 2019/08/27 | CH2276 | Female | Two y/o | Control | Control | Feed Day | No | 08:00 | 08:00 - 08:59 | Late Morning  | 37,6 | 54  | 68,8  | 68,8  | 18,75 | 545,99 | 142,84 |



|            |        |        |         |         |         |          |     |       |               |              |      |     |       |       |       |        |        |
|------------|--------|--------|---------|---------|---------|----------|-----|-------|---------------|--------------|------|-----|-------|-------|-------|--------|--------|
| 2019/08/27 | CH2276 | Female | Two y/o | Control | Control | Feed Day | No  | 08:05 | 08:00 - 08:59 | Late Morning | 37,5 | 137 | 256,2 | 256,2 | 18,65 | 615,83 | 188,84 |
| 2019/08/27 | CH2276 | Female | Two y/o | Control | Control | Feed Day | No  | 08:10 | 08:00 - 08:59 | Late Morning | 37,7 | 105 | 113,6 | 113,6 | 18,85 | 597,38 | 160,29 |
| 2019/08/27 | CH2276 | Female | Two y/o | Control | Control | Feed Day | No  | 08:15 | 08:00 - 08:59 | Late Morning | 37,7 | 84  | 334,4 | 334,4 | 18,85 | 581,01 | 198,26 |
| 2019/08/27 | CH2276 | Female | Two y/o | Control | Control | Feed Day | No  | 08:20 | 08:00 - 08:59 | Late Morning | 37,7 | 103 | 62,0  | 62,0  | 18,85 | 596,00 | 139,23 |
| 2019/08/27 | CH2276 | Female | Two y/o | Control | Control | Feed Day | No  | 08:25 | 08:00 - 08:59 | Late Morning | 37,8 | 98  | 81,4  | 81,4  | 18,95 | 592,41 | 148,68 |
| 2019/08/27 | CH2276 | Female | Two y/o | Control | Control | Feed Day | No  | 08:30 | 08:00 - 08:59 | Late Morning | 37,8 | 69  | 13,8  | 13,8  | 18,95 | 565,86 | 87,68  |
| 2019/08/27 | CH2276 | Female | Two y/o | Control | Control | Feed Day | No  | 08:35 | 08:00 - 08:59 | Late Morning | 37,8 | 90  | 67,8  | 67,8  | 18,95 | 586,16 | 142,33 |
| 2019/08/27 | CH2276 | Female | Two y/o | Control | Control | Feed Day | No  | 08:40 | 08:00 - 08:59 | Late Morning | 37,8 | 82  | 47,0  | 47,0  | 18,95 | 579,19 | 129,65 |
| 2019/08/27 | CH2276 | Female | Two y/o | Control | Control | Feed Day | No  | 08:45 | 08:00 - 08:59 | Late Morning | 37,9 | 134 | 15,2  | 15,2  | 19,05 | 614,33 | 90,96  |
| 2019/08/27 | CH2276 | Female | Two y/o | Control | Control | Feed Day | No  | 08:50 | 08:00 - 08:59 | Late Morning | 37,7 | 109 | 137,2 | 137,2 | 18,85 | 600,04 | 166,89 |
| 2019/08/27 | CH2276 | Female | Two y/o | Control | Control | Feed Day | No  | 08:55 | 08:00 - 08:59 | Late Morning | 37,7 | 82  | 356,2 | 356,2 | 18,85 | 579,19 | 200,50 |
| 2019/08/27 | CH2276 | Female | Two y/o | Control | Control | Feed Day | No  | 09:00 | 09:00 - 09:59 | Late Morning | 37,9 |     | 349,2 | 349,2 | 19,05 |        | 199,80 |
| 2019/08/27 | CH2276 | Female | Two y/o | Control | Control | Feed Day | No  | 09:05 | 09:00 - 09:59 | Late Morning | 37,8 |     | 113,2 | 113,2 | 18,95 |        | 160,17 |
| 2019/08/27 | CH2276 | Female | Two y/o | Control | Control | Feed Day | No  | 09:10 | 09:00 - 09:59 | Late Morning | 37,8 | 138 | 288,6 | 288,6 | 18,95 | 616,31 | 193,05 |
| 2019/08/27 | CH2276 | Female | Two y/o | Control | Control | Feed Day | No  | 09:15 | 09:00 - 09:59 | Late Morning | 37,7 | 88  | 53,6  | 53,6  | 18,85 | 584,49 | 134,19 |
| 2019/08/27 | CH2276 | Female | Two y/o | Control | Control | Feed Day | No  | 09:20 | 09:00 - 09:59 | Late Morning | 37,7 | 77  | 39,2  | 39,2  | 18,85 | 574,39 | 123,39 |
| 2019/08/27 | CH2276 | Female | Two y/o | Control | Control | Feed Day | No  | 09:25 | 09:00 - 09:59 | Late Morning | 37,6 | 37  | 89,4  | 89,4  | 18,75 | 513,06 | 151,94 |
| 2019/08/27 | CH2276 | Female | Two y/o | Control | Control | Feed Day | Yes | 09:30 | 09:00 - 09:59 | Late Morning | 37,6 | 70  | 56,6  | 56,6  | 18,75 | 566,99 | 136,07 |
| 2019/08/27 | CH2276 | Female | Two y/o | Control | Control | Feed Day | Yes | 09:35 | 09:00 - 09:59 | Late Morning | 37,6 | 67  | 57,2  | 57,2  | 18,75 | 563,53 | 136,44 |
| 2019/08/27 | CH2276 | Female | Two y/o | Control | Control | Feed Day | Yes | 09:40 | 09:00 - 09:59 | Late Morning | 37,6 | 79  | 31,0  | 31,0  | 18,75 | 576,36 | 115,32 |
| 2019/08/27 | CH2276 | Female | Two y/o | Control | Control | Feed Day | Yes | 09:45 | 09:00 - 09:59 | Late Morning | 37,6 | 99  | 41,6  | 41,6  | 18,75 | 593,14 | 125,44 |
| 2019/08/27 | CH2276 | Female | Two y/o | Control | Control | Feed Day | Yes | 09:50 | 09:00 - 09:59 | Late Morning | 37,6 | 74  | 26,8  | 26,8  | 18,75 | 571,33 | 110,33 |
| 2019/08/27 | CH2276 | Female | Two y/o | Control | Control | Feed Day | Yes | 09:55 | 09:00 - 09:59 | Late Morning | 37,7 | 64  | 22,4  | 22,4  | 18,85 | 559,88 | 104,19 |
| 2019/08/27 | CH2276 | Female | Two y/o | Control | Control | Feed Day | Yes | 10:00 | 10:00 - 10:59 | Late Morning | 37,7 | 61  | 37,6  | 37,6  | 18,85 | 556,01 | 121,96 |
| 2019/08/27 | CH2276 | Female | Two y/o | Control | Control | Feed Day | Yes | 10:05 | 10:00 - 10:59 | Late Morning | 37,7 | 59  | 51,4  | 51,4  | 18,85 | 553,30 | 132,74 |
| 2019/08/27 | CH2276 | Female | Two y/o | Control | Control | Feed Day | Yes | 10:10 | 10:00 - 10:59 | Late Morning | 37,7 | 87  | 31,4  | 31,4  | 18,85 | 583,64 | 115,76 |
| 2019/08/27 | CH2276 | Female | Two y/o | Control | Control | Feed Day | Yes | 10:15 | 10:00 - 10:59 | Late Morning | 37,7 | 62  | 30,4  | 30,4  | 18,85 | 557,33 | 114,65 |
| 2019/08/27 | CH2276 | Female | Two y/o | Control | Control | Feed Day | Yes | 10:20 | 10:00 - 10:59 | Late Morning | 37,7 | 64  | 24,4  | 24,4  | 18,85 | 559,88 | 107,11 |
| 2019/08/27 | CH2276 | Female | Two y/o | Control | Control | Feed Day | Yes | 10:25 | 10:00 - 10:59 | Late Morning | 37,7 | 60  | 123,4 | 123,4 | 18,85 | 554,67 | 163,18 |
| 2019/08/27 | CH2276 | Female | Two y/o | Control | Control | Feed Day | No  | 10:30 | 10:00 - 10:59 | Late Morning | 37,7 | 98  | 60,4  | 60,4  | 18,85 | 592,41 | 138,32 |
| 2019/08/27 | CH2276 | Female | Two y/o | Control | Control | Feed Day | No  | 10:35 | 10:00 - 10:59 | Late Morning | 37,7 |     | 22,0  | 22,0  | 18,85 |        | 103,57 |
| 2019/08/27 | CH2276 | Female | Two y/o | Control | Control | Feed Day | No  | 10:40 | 10:00 - 10:59 | Late Morning | 37,6 | 59  | 11,4  | 11,4  | 18,75 | 553,30 | 81,19  |
| 2019/08/27 | CH2276 | Female | Two y/o | Control | Control | Feed Day | No  | 10:45 | 10:00 - 10:59 | Late Morning | 37,6 | 60  | 38,2  | 38,2  | 18,75 | 554,67 | 122,50 |
| 2019/08/27 | CH2276 | Female | Two y/o | Control | Control | Feed Day | No  | 10:50 | 10:00 - 10:59 | Late Morning | 37,6 | 92  | 8,4   | 8,4   | 18,75 | 587,78 | 70,86  |
| 2019/08/27 | CH2276 | Female | Two y/o | Control | Control | Feed Day | No  | 10:55 | 10:00 - 10:59 | Late Morning | 37,5 | 63  | 13,6  | 13,6  | 18,65 | 558,62 | 87,18  |
| 2019/08/27 | CH2276 | Female | Two y/o | Control | Control | Feed Day | No  | 11:00 | 11:00 - 11:59 | Late Morning | 37,4 | 61  | 175,8 | 175,8 | 18,55 | 556,01 | 175,59 |
| 2019/08/27 | CH2276 | Female | Two y/o | Control | Control | Feed Day | No  | 11:05 | 11:00 - 11:59 | Late Morning | 37,5 | 102 | 99,8  | 99,8  | 18,65 | 595,30 | 155,77 |
| 2019/08/27 | CH2276 | Female | Two y/o | Control | Control | Feed Day | No  | 11:10 | 11:00 - 11:59 | Late Morning | 37,7 | 73  | 62,4  | 62,4  | 18,85 | 570,27 | 139,45 |
| 2019/08/27 | CH2276 | Female | Two y/o | Control | Control | Feed Day | No  | 11:15 | 11:00 - 11:59 | Late Morning | 37,7 | 82  | 144,0 | 144,0 | 18,85 | 579,19 | 168,59 |
| 2019/08/27 | CH2276 | Female | Two y/o | Control | Control | Feed Day | No  | 11:20 | 11:00 - 11:59 | Late Morning | 37,8 |     | 9,0   | 9,0   | 18,95 |        | 73,19  |
| 2019/08/27 | CH2276 | Female | Two y/o | Control | Control | Feed Day | No  | 11:25 | 11:00 - 11:59 | Late Morning | 37,8 | 93  | 6,6   | 6,6   | 18,95 | 588,58 | 62,73  |
| 2019/08/27 | CH2276 | Female | Two y/o | Control | Control | Feed Day | No  | 11:30 | 11:00 - 11:59 | Late Morning | 37,8 | 64  | 15,4  | 15,4  | 18,95 | 559,88 | 91,41  |
| 2019/08/27 | CH2276 | Female | Two y/o | Control | Control | Feed Day | No  | 11:35 | 11:00 - 11:59 | Late Morning | 37,8 | 83  | 22,8  | 22,8  | 18,95 | 580,11 | 104,79 |
| 2019/08/27 | CH2276 | Female | Two y/o | Control | Control | Feed Day | No  | 11:40 | 11:00 - 11:59 | Late Morning | 37,8 | 72  | 15,4  | 15,4  | 18,95 | 569,20 | 91,41  |
| 2019/08/27 | CH2276 | Female | Two y/o | Control | Control | Feed Day | No  | 11:45 | 11:00 - 11:59 | Late Morning | 37,9 | 66  | 7,6   | 7,6   | 19,05 | 562,34 | 67,49  |
| 2019/08/27 | CH2276 | Female | Two y/o | Control | Control | Feed Day | No  | 11:50 | 11:00 - 11:59 | Late Morning | 37,9 | 69  | 2,4   | 2,4   | 19,05 | 565,86 | 28,91  |
| 2019/08/27 | CH2276 | Female | Two y/o | Control | Control | Feed Day | No  | 11:55 | 11:00 - 11:59 | Late Morning | 37,9 | 65  | 2,0   | 2,0   | 19,05 | 561,12 | 22,86  |
| 2019/08/27 | CH2276 | Female | Two y/o | Control | Control | Feed Day | No  | 12:00 | 12:00 - 12:59 | Afternoon    | 37,9 | 68  | 4,2   | 4,2   | 19,05 | 564,71 | 47,57  |
| 2019/08/27 | CH2276 | Female | Two y/o | Control | Control | Feed Day | No  | 12:05 | 12:00 - 12:59 | Afternoon    | 37,9 | 66  | 8,4   | 8,4   | 19,05 | 562,34 | 70,86  |
| 2019/08/27 | CH2276 | Female | Two y/o | Control | Control | Feed Day | No  | 12:10 | 12:00 - 12:59 | Afternoon    | 37,9 | 62  | 10,2  | 10,2  | 19,05 | 557,33 | 77,43  |
| 2019/08/27 | CH2276 | Female | Two y/o | Control | Control | Feed Day | No  | 12:15 | 12:00 - 12:59 | Afternoon    | 37,9 | 80  | 11,0  | 11,0  | 19,05 | 577,31 | 79,98  |
| 2019/08/27 | CH2276 | Female | Two y/o | Control | Control | Feed Day | No  | 12:20 | 12:00 - 12:59 | Afternoon    | 38,0 | 67  | 13,2  | 13,2  | 19,15 | 563,53 | 86,17  |
| 2019/08/27 | CH2276 | Female | Two y/o | Control | Control | Feed Day | No  | 12:25 | 12:00 - 12:59 | Afternoon    | 38,0 | 68  | 12,2  | 12,2  | 19,15 | 564,71 | 83,49  |
| 2019/08/27 | CH2276 | Female | Two y/o | Control | Control | Feed Day | No  | 12:30 | 12:00 - 12:59 | Afternoon    | 38,0 | 67  | 12,0  | 12,0  | 19,15 | 563,53 | 82,93  |
| 2019/08/27 | CH2276 | Female | Two y/o | Control | Control | Feed Day | No  | 12:35 | 12:00 - 12:59 | Afternoon    | 38,0 | 65  | 16,2  | 16,2  | 19,15 | 561,12 | 93,13  |
| 2019/08/27 | CH2276 | Female | Two y/o | Control | Control | Feed Day | No  | 12:40 | 12:00 - 12:59 | Afternoon    | 37,9 | 64  | 12,4  | 12,4  | 19,05 | 559,88 | 84,04  |
| 2019/08/27 | CH2276 | Female | Two y/o | Control | Control | Feed Day | No  | 12:45 | 12:00 - 12:59 | Afternoon    | 38,0 | 67  | 65,4  | 65,4  | 19,15 | 563,53 | 141,08 |
| 2019/08/27 | CH2276 | Female | Two y/o | Control | Control | Feed Day | No  | 12:50 | 12:00 - 12:59 | Afternoon    | 37,9 | 63  | 26,0  | 26,0  | 19,05 | 558,62 | 109,29 |
| 2019/08/27 | CH2276 | Female | Two y/o | Control | Control | Feed Day | No  | 12:55 | 12:00 - 12:59 | Afternoon    | 37,8 | 65  | 47,8  | 47,8  | 18,95 | 561,12 | 130,23 |
| 2019/08/27 | CH2276 | Female | Two y/o | Control | Control | Feed Day | No  | 13:00 | 13:00 - 13:59 | Afternoon    | 37,8 | 55  | 82,2  | 82,2  | 18,95 | 547,52 | 149,02 |
| 2019/08/27 | CH2276 | Female | Two y/o | Control | Control | Feed Day | No  | 13:05 | 13:00 - 13:59 | Afternoon    | 37,8 | 69  | 83,8  | 83,8  | 18,95 | 565,86 | 149,69 |
| 2019/08/27 | CH2276 | Female | Two y/o | Control | Control | Feed Day | No  | 13:10 | 13:00 - 13:59 | Afternoon    | 37,8 | 62  | 77,4  | 77,4  | 18,95 | 557,33 | 146,93 |
| 2019/08/27 | CH2276 | Female | Two y/o | Control | Control | Feed Day | No  | 13:15 | 13:00 - 13:59 | Afternoon    | 37,8 | 78  | 27,8  | 27,8  | 18,95 | 575,38 | 111,58 |
| 2019/08/27 | CH2276 | Female | Two y/o | Control | Control | Feed Day | No  | 13:20 | 13:00 - 13:59 | Afternoon    | 37,8 | 73  | 3,0   | 3,0   | 18,95 | 570,27 | 36,34  |
| 2019/08/27 | CH2276 | Female | Two y/o | Control | Control | Feed Day | No  | 13:25 | 13:00 - 13:59 | Afternoon    | 37,8 | 71  | 3,4   | 3,4   | 18,95 | 568,10 | 40,51  |
| 2019/08/27 | CH2276 | Female | Two y/o | Control | Control | Feed Day | No  | 13:30 | 13:00 - 13:59 | Afternoon    | 37,8 | 68  | 9,0   | 9,0   | 18,95 | 564,71 | 73,19  |
| 2019/08/27 | CH2276 | Female | Two y/o | Control | Control | Feed Day | No  | 13:35 | 13:00 - 13:59 | Afternoon    | 37,9 | 71  | 14,2  | 14,2  | 19,05 | 568,10 | 88,65  |
| 2019/08/27 | CH2276 | Female | Two y/o | Control | Control | Feed Day | No  | 13:40 | 13:00 - 13:59 | Afternoon    | 37,9 | 70  | 12,6  | 12,6  | 19,05 | 566,99 | 84,59  |
| 2019/08/27 | CH2276 | Female | Two y/o | Control | Control | Feed Day | No  | 13:45 | 13:00 - 13:59 | Afternoon    | 37,9 | 67  | 14,8  | 14,8  | 19,05 | 563,53 | 90,05  |
| 2019/08/27 | CH2276 | Female | Two y/o | Control | Control | Feed Day | No  | 13:50 | 13:00 - 13:59 | Afternoon    | 37,9 | 74  | 12,2  | 12,2  | 19,05 | 571,33 | 83,49  |



|            |        |        |         |         |         |          |     |       |               |           |      |     |       |       |       |        |        |
|------------|--------|--------|---------|---------|---------|----------|-----|-------|---------------|-----------|------|-----|-------|-------|-------|--------|--------|
| 2019/08/27 | CH2276 | Female | Two y/o | Control | Control | Feed Day | No  | 13:55 | 13:00 - 13:59 | Afternoon | 37,8 | 63  | 11,4  | 11,4  | 18,95 | 558,62 | 81,19  |
| 2019/08/27 | CH2276 | Female | Two y/o | Control | Control | Feed Day | No  | 14:00 | 14:00 - 14:59 | Afternoon | 37,7 | 77  | 23,2  | 23,2  | 18,85 | 574,39 | 105,39 |
| 2019/08/27 | CH2276 | Female | Two y/o | Control | Control | Feed Day | No  | 14:05 | 14:00 - 14:59 | Afternoon | 37,7 | 64  | 18,6  | 18,6  | 18,85 | 559,88 | 97,84  |
| 2019/08/27 | CH2276 | Female | Two y/o | Control | Control | Feed Day | No  | 14:10 | 14:00 - 14:59 | Afternoon | 37,7 | 61  | 29,0  | 29,0  | 18,85 | 556,01 | 113,03 |
| 2019/08/27 | CH2276 | Female | Two y/o | Control | Control | Feed Day | No  | 14:15 | 14:00 - 14:59 | Afternoon | 37,7 | 73  | 10,2  | 10,2  | 18,85 | 570,27 | 77,43  |
| 2019/08/27 | CH2276 | Female | Two y/o | Control | Control | Feed Day | No  | 14:20 | 14:00 - 14:59 | Afternoon | 37,7 | 64  | 3,0   | 3,0   | 18,85 | 559,88 | 36,34  |
| 2019/08/27 | CH2276 | Female | Two y/o | Control | Control | Feed Day | No  | 14:25 | 14:00 - 14:59 | Afternoon | 37,7 | 62  | 24,6  | 24,6  | 18,85 | 557,33 | 107,39 |
| 2019/08/27 | CH2276 | Female | Two y/o | Control | Control | Feed Day | No  | 14:30 | 14:00 - 14:59 | Afternoon | 37,7 | 60  | 26,4  | 26,4  | 18,85 | 554,67 | 109,81 |
| 2019/08/27 | CH2276 | Female | Two y/o | Control | Control | Feed Day | No  | 14:35 | 14:00 - 14:59 | Afternoon | 37,7 | 65  | 25,8  | 25,8  | 18,85 | 561,12 | 109,02 |
| 2019/08/27 | CH2276 | Female | Two y/o | Control | Control | Feed Day | No  | 14:40 | 14:00 - 14:59 | Afternoon | 37,7 | 63  | 19,8  | 19,8  | 18,85 | 558,62 | 99,97  |
| 2019/08/27 | CH2276 | Female | Two y/o | Control | Control | Feed Day | No  | 14:45 | 14:00 - 14:59 | Afternoon | 37,7 | 65  | 26,0  | 26,0  | 18,85 | 561,12 | 109,29 |
| 2019/08/27 | CH2276 | Female | Two y/o | Control | Control | Feed Day | No  | 14:50 | 14:00 - 14:59 | Afternoon | 37,7 | 63  | 28,8  | 28,8  | 18,85 | 558,62 | 112,79 |
| 2019/08/27 | CH2276 | Female | Two y/o | Control | Control | Feed Day | No  | 14:55 | 14:00 - 14:59 | Afternoon | 37,7 | 88  | 16,6  | 16,6  | 18,85 | 584,49 | 93,96  |
| 2019/08/27 | CH2276 | Female | Two y/o | Control | Control | Feed Day | No  | 15:00 | 15:00 - 15:59 | Afternoon | 37,7 | 60  | 23,8  | 23,8  | 18,85 | 554,67 | 106,26 |
| 2019/08/27 | CH2276 | Female | Two y/o | Control | Control | Feed Day | No  | 15:05 | 15:00 - 15:59 | Afternoon | 37,7 | 70  | 19,2  | 19,2  | 18,85 | 566,99 | 98,92  |
| 2019/08/27 | CH2276 | Female | Two y/o | Control | Control | Feed Day | No  | 15:10 | 15:00 - 15:59 | Afternoon | 37,7 | 64  | 26,4  | 26,4  | 18,85 | 559,88 | 109,81 |
| 2019/08/27 | CH2276 | Female | Two y/o | Control | Control | Feed Day | No  | 15:15 | 15:00 - 15:59 | Afternoon | 37,6 | 92  | 27,6  | 27,6  | 18,75 | 587,78 | 111,33 |
| 2019/08/27 | CH2276 | Female | Two y/o | Control | Control | Feed Day | No  | 15:20 | 15:00 - 15:59 | Afternoon | 37,6 | 90  | 65,0  | 65,0  | 18,75 | 586,16 | 140,87 |
| 2019/08/27 | CH2276 | Female | Two y/o | Control | Control | Feed Day | No  | 15:25 | 15:00 - 15:59 | Afternoon | 37,6 | 61  | 57,4  | 57,4  | 18,75 | 556,01 | 136,56 |
| 2019/08/27 | CH2276 | Female | Two y/o | Control | Control | Feed Day | Yes | 15:30 | 15:00 - 15:59 | Afternoon | 37,7 | 96  | 69,8  | 69,8  | 18,85 | 590,91 | 143,34 |
| 2019/08/27 | CH2276 | Female | Two y/o | Control | Control | Feed Day | Yes | 15:35 | 15:00 - 15:59 | Afternoon | 37,8 | 126 | 224,4 | 224,4 | 18,95 | 610,14 | 184,17 |
| 2019/08/27 | CH2276 | Female | Two y/o | Control | Control | Feed Day | Yes | 15:40 | 15:00 - 15:59 | Afternoon | 38,0 | 111 | 76,6  | 76,6  | 19,15 | 601,33 | 146,57 |
| 2019/08/27 | CH2276 | Female | Two y/o | Control | Control | Feed Day | Yes | 15:45 | 15:00 - 15:59 | Afternoon | 38,0 | 119 | 256,8 | 256,8 | 19,15 | 606,20 | 188,93 |
| 2019/08/27 | CH2276 | Female | Two y/o | Control | Control | Feed Day | Yes | 15:50 | 15:00 - 15:59 | Afternoon | 38,0 | 98  | 120,2 | 120,2 | 19,15 | 592,41 | 162,27 |
| 2019/08/27 | CH2276 | Female | Two y/o | Control | Control | Feed Day | Yes | 15:55 | 15:00 - 15:59 | Afternoon | 38,0 | 120 | 389,4 | 389,4 | 19,15 | 606,78 | 203,66 |
| 2019/08/27 | CH2276 | Female | Two y/o | Control | Control | Feed Day | Yes | 16:00 | 16:00 - 16:59 | Evening   | 38,1 |     | 131,4 | 131,4 | 19,26 |        | 165,38 |
| 2019/08/27 | CH2276 | Female | Two y/o | Control | Control | Feed Day | Yes | 16:05 | 16:00 - 16:59 | Evening   | 38,1 | 118 | 107,6 | 107,6 | 19,26 | 605,61 | 158,40 |
| 2019/08/27 | CH2276 | Female | Two y/o | Control | Control | Feed Day | Yes | 16:10 | 16:00 - 16:59 | Evening   | 38,2 | 98  | 8,4   | 8,4   | 19,36 | 592,41 | 70,86  |
| 2019/08/27 | CH2276 | Female | Two y/o | Control | Control | Feed Day | Yes | 16:15 | 16:00 - 16:59 | Evening   | 38,2 | 82  | 5,6   | 5,6   | 19,36 | 579,19 | 57,21  |
| 2019/08/27 | CH2276 | Female | Two y/o | Control | Control | Feed Day | Yes | 16:20 | 16:00 - 16:59 | Evening   | 38,0 | 92  | 8,2   | 8,2   | 19,15 | 587,78 | 70,05  |
| 2019/08/27 | CH2276 | Female | Two y/o | Control | Control | Feed Day | Yes | 16:25 | 16:00 - 16:59 | Evening   | 38,0 | 68  | 22,2  | 22,2  | 19,15 | 564,71 | 103,88 |
| 2019/08/27 | CH2276 | Female | Two y/o | Control | Control | Feed Day | No  | 16:30 | 16:00 - 16:59 | Evening   | 37,8 | 72  | 68,0  | 68,0  | 18,95 | 569,20 | 142,43 |
| 2019/08/27 | CH2276 | Female | Two y/o | Control | Control | Feed Day | No  | 16:35 | 16:00 - 16:59 | Evening   | 37,8 | 76  | 46,2  | 46,2  | 18,95 | 573,39 | 129,06 |
| 2019/08/27 | CH2276 | Female | Two y/o | Control | Control | Feed Day | No  | 16:40 | 16:00 - 16:59 | Evening   | 37,8 | 63  | 42,6  | 42,6  | 18,95 | 558,62 | 126,26 |
| 2019/08/27 | CH2276 | Female | Two y/o | Control | Control | Feed Day | No  | 16:45 | 16:00 - 16:59 | Evening   | 37,9 | 64  | 10,4  | 10,4  | 19,05 | 559,88 | 78,08  |
| 2019/08/27 | CH2276 | Female | Two y/o | Control | Control | Feed Day | No  | 16:50 | 16:00 - 16:59 | Evening   | 37,8 | 84  | 109,6 | 109,6 | 18,95 | 581,01 | 159,04 |
| 2019/08/27 | CH2276 | Female | Two y/o | Control | Control | Feed Day | No  | 16:55 | 16:00 - 16:59 | Evening   | 37,8 | 52  | 305,6 | 305,6 | 18,95 | 542,83 | 195,07 |
| 2019/08/27 | CH2276 | Female | Two y/o | Control | Control | Feed Day | No  | 17:00 | 17:00 - 17:59 | Evening   | 37,8 | 90  | 198,8 | 198,8 | 18,95 | 586,16 | 179,91 |
| 2019/08/27 | CH2276 | Female | Two y/o | Control | Control | Feed Day | No  | 17:05 | 17:00 - 17:59 | Evening   | 37,9 | 117 | 148,0 | 148,0 | 19,05 | 605,02 | 169,55 |
| 2019/08/27 | CH2276 | Female | Two y/o | Control | Control | Feed Day | No  | 17:10 | 17:00 - 17:59 | Evening   | 38,0 |     | 105,4 | 105,4 | 19,15 |        | 157,68 |
| 2019/08/27 | CH2276 | Female | Two y/o | Control | Control | Feed Day | No  | 17:15 | 17:00 - 17:59 | Evening   | 38,0 | 115 | 110,2 | 110,2 | 19,15 | 603,82 | 159,23 |
| 2019/08/27 | CH2276 | Female | Two y/o | Control | Control | Feed Day | No  | 17:20 | 17:00 - 17:59 | Evening   | 38,0 |     | 177,2 | 177,2 | 19,15 |        | 175,86 |
| 2019/08/27 | CH2276 | Female | Two y/o | Control | Control | Feed Day | No  | 17:25 | 17:00 - 17:59 | Evening   | 38,1 | 123 | 245,6 | 245,6 | 19,26 | 608,49 | 187,35 |
| 2019/08/27 | CH2276 | Female | Two y/o | Control | Control | Feed Day | No  | 17:30 | 17:00 - 17:59 | Evening   | 38,1 | 104 | 104,6 | 104,6 | 19,26 | 596,69 | 157,41 |
| 2019/08/27 | CH2276 | Female | Two y/o | Control | Control | Feed Day | No  | 17:35 | 17:00 - 17:59 | Evening   | 38,2 | 138 | 267,6 | 267,6 | 19,36 | 616,31 | 190,38 |
| 2019/08/27 | CH2276 | Female | Two y/o | Control | Control | Feed Day | No  | 17:40 | 17:00 - 17:59 | Evening   | 38,4 | 79  | 162,8 | 162,8 | 19,56 | 576,36 | 172,89 |
| 2019/08/27 | CH2276 | Female | Two y/o | Control | Control | Feed Day | No  | 17:45 | 17:00 - 17:59 | Evening   | 38,3 | 83  | 22,4  | 22,4  | 19,46 | 580,11 | 104,19 |
| 2019/08/27 | CH2276 | Female | Two y/o | Control | Control | Feed Day | No  | 17:50 | 17:00 - 17:59 | Evening   | 38,2 | 69  | 149,2 | 149,2 | 19,36 | 565,86 | 169,83 |
| 2019/08/27 | CH2276 | Female | Two y/o | Control | Control | Feed Day | No  | 17:55 | 17:00 - 17:59 | Evening   | 38,2 | 64  | 457,8 | 457,8 | 19,36 | 559,88 | 209,41 |
| 2019/08/27 | CH2276 | Female | Two y/o | Control | Control | Feed Day | No  | 18:00 | 18:00 - 18:59 | Evening   | 38,2 | 121 | 117,8 | 117,8 | 19,36 | 607,35 | 161,56 |
| 2019/08/27 | CH2276 | Female | Two y/o | Control | Control | Feed Day | No  | 18:05 | 18:00 - 18:59 | Evening   | 38,2 | 120 | 107,2 | 107,2 | 19,36 | 606,78 | 158,27 |
| 2019/08/27 | CH2276 | Female | Two y/o | Control | Control | Feed Day | No  | 18:10 | 18:00 - 18:59 | Evening   | 38,3 |     | 252,4 | 252,4 | 19,46 |        | 188,32 |
| 2019/08/27 | CH2276 | Female | Two y/o | Control | Control | Feed Day | No  | 18:15 | 18:00 - 18:59 | Evening   | 38,3 | 162 | 134,8 | 134,8 | 19,46 | 626,88 | 166,28 |
| 2019/08/27 | CH2276 | Female | Two y/o | Control | Control | Feed Day | No  | 18:20 | 18:00 - 18:59 | Evening   | 38,3 | 79  | 296,4 | 296,4 | 19,46 | 576,36 | 193,99 |
| 2019/08/27 | CH2276 | Female | Two y/o | Control | Control | Feed Day | No  | 18:25 | 18:00 - 18:59 | Evening   | 38,3 | 107 | 281,0 | 281,0 | 19,46 | 598,73 | 192,11 |
| 2019/08/27 | CH2276 | Female | Two y/o | Control | Control | Feed Day | No  | 18:30 | 18:00 - 18:59 | Evening   | 38,3 | 118 | 95,6  | 95,6  | 19,46 | 605,61 | 154,28 |
| 2019/08/27 | CH2276 | Female | Two y/o | Control | Control | Feed Day | No  | 18:35 | 18:00 - 18:59 | Evening   | 38,3 | 88  | 25,2  | 25,2  | 19,46 | 584,49 | 108,22 |
| 2019/08/27 | CH2276 | Female | Two y/o | Control | Control | Feed Day | No  | 18:40 | 18:00 - 18:59 | Evening   | 38,2 | 84  | 21,8  | 21,8  | 19,36 | 581,01 | 103,26 |
| 2019/08/27 | CH2276 | Female | Two y/o | Control | Control | Feed Day | No  | 18:45 | 18:00 - 18:59 | Evening   | 38,2 | 62  | 26,4  | 26,4  | 19,36 | 557,33 | 109,81 |
| 2019/08/27 | CH2276 | Female | Two y/o | Control | Control | Feed Day | No  | 18:50 | 18:00 - 18:59 | Evening   | 38,2 | 57  | 14,4  | 14,4  | 19,36 | 550,47 | 89,12  |
| 2019/08/27 | CH2276 | Female | Two y/o | Control | Control | Feed Day | No  | 18:55 | 18:00 - 18:59 | Evening   | 38,2 | 68  | 11,6  | 11,6  | 19,36 | 564,71 | 81,78  |
| 2019/08/27 | CH2276 | Female | Two y/o | Control | Control | Feed Day | No  | 19:00 | 19:00 - 19:59 | Evening   | 38,2 | 67  | 15,0  | 15,0  | 19,36 | 563,53 | 90,51  |
| 2019/08/27 | CH2276 | Female | Two y/o | Control | Control | Feed Day | No  | 19:05 | 19:00 - 19:59 | Evening   | 38,3 | 71  | 14,2  | 14,2  | 19,46 | 568,10 | 88,65  |
| 2019/08/27 | CH2276 | Female | Two y/o | Control | Control | Feed Day | No  | 19:10 | 19:00 - 19:59 | Evening   | 38,3 | 92  | 26,8  | 26,8  | 19,46 | 587,78 | 110,33 |
| 2019/08/27 | CH2276 | Female | Two y/o | Control | Control | Feed Day | No  | 19:15 | 19:00 - 19:59 | Evening   | 38,0 | 66  | 24,6  | 24,6  | 19,15 | 562,34 | 107,39 |
| 2019/08/27 | CH2276 | Female | Two y/o | Control | Control | Feed Day | No  | 19:20 | 19:00 - 19:59 | Evening   | 37,9 | 60  | 19,0  | 19,0  | 19,05 | 554,67 | 98,56  |
| 2019/08/27 | CH2276 | Female | Two y/o | Control | Control | Feed Day | No  | 19:25 | 19:00 - 19:59 | Evening   | 37,8 | 78  | 26,0  | 26,0  | 18,95 | 575,38 | 109,29 |
| 2019/08/27 | CH2276 | Female | Two y/o | Control | Control | Feed Day | No  | 19:30 | 19:00 - 19:59 | Evening   | 37,7 | 71  | 24,4  | 24,4  | 18,85 | 568,10 | 107,11 |
| 2019/08/27 | CH2276 | Female | Two y/o | Control | Control | Feed Day | No  | 19:35 | 19:00 - 19:59 | Evening   | 37,7 | 67  | 9,2   | 9,2   | 18,85 | 563,53 | 73,94  |
| 2019/08/27 | CH2276 | Female | Two y/o | Control | Control | Feed Day | No  | 19:40 | 19:00 - 19:59 | Evening   | 37,7 | 65  | 21,8  | 21,8  | 18,85 | 561,12 | 103,26 |



|    |            |        |        |         |         |         |          |    |       |               |               |      |     |       |       |       |        |        |
|----|------------|--------|--------|---------|---------|---------|----------|----|-------|---------------|---------------|------|-----|-------|-------|-------|--------|--------|
|    | 2019/08/27 | CH2276 | Female | Two y/o | Control | Control | Feed Day | No | 19:45 | 19:00 - 19:59 | Evening       | 37,7 | 72  | 25,2  | 25,2  | 18,85 | 569,20 | 108,22 |
|    | 2019/08/27 | CH2276 | Female | Two y/o | Control | Control | Feed Day | No | 19:50 | 19:00 - 19:59 | Evening       | 37,7 | 67  | 29,2  | 29,2  | 18,85 | 563,53 | 113,27 |
|    | 2019/08/27 | CH2276 | Female | Two y/o | Control | Control | Feed Day | No | 19:55 | 19:00 - 19:59 | Evening       | 37,7 | 63  | 10,0  | 10,0  | 18,85 | 558,62 | 76,76  |
|    | 2019/08/27 | CH2276 | Female | Two y/o | Control | Control | Feed Day | No | 20:00 | 20:00 - 20:59 | Night         | 37,7 | 62  | 19,4  | 19,4  | 18,85 | 557,33 | 99,28  |
|    | 2019/08/27 | CH2276 | Female | Two y/o | Control | Control | Feed Day | No | 20:05 | 20:00 - 20:59 | Night         | 37,7 | 65  | 7,6   | 7,6   | 18,85 | 561,12 | 67,49  |
|    | 2019/08/27 | CH2276 | Female | Two y/o | Control | Control | Feed Day | No | 20:10 | 20:00 - 20:59 | Night         | 37,7 | 61  | 47,6  | 47,6  | 18,85 | 556,01 | 130,09 |
|    | 2019/08/27 | CH2276 | Female | Two y/o | Control | Control | Feed Day | No | 20:15 | 20:00 - 20:59 | Night         | 37,7 | 64  | 55,2  | 55,2  | 18,85 | 559,88 | 135,21 |
|    | 2019/08/27 | CH2276 | Female | Two y/o | Control | Control | Feed Day | No | 20:20 | 20:00 - 20:59 | Night         | 37,7 | 65  | 36,4  | 36,4  | 18,85 | 561,12 | 120,84 |
|    | 2019/08/27 | CH2276 | Female | Two y/o | Control | Control | Feed Day | No | 20:25 | 20:00 - 20:59 | Night         | 37,7 | 62  | 46,4  | 46,4  | 18,85 | 557,33 | 129,21 |
|    | 2019/08/27 | CH2276 | Female | Two y/o | Control | Control | Feed Day | No | 20:30 | 20:00 - 20:59 | Night         | 37,6 | 63  | 52,8  | 52,8  | 18,75 | 558,62 | 133,67 |
|    | 2019/08/27 | CH2276 | Female | Two y/o | Control | Control | Feed Day | No | 20:35 | 20:00 - 20:59 | Night         | 37,6 | 68  | 38,4  | 38,4  | 18,75 | 564,71 | 122,68 |
|    | 2019/08/27 | CH2276 | Female | Two y/o | Control | Control | Feed Day | No | 20:40 | 20:00 - 20:59 | Night         | 37,6 | 66  | 24,4  | 24,4  | 18,75 | 562,34 | 107,11 |
|    | 2019/08/27 | CH2276 | Female | Two y/o | Control | Control | Feed Day | No | 20:45 | 20:00 - 20:59 | Night         | 37,6 | 64  | 25,8  | 25,8  | 18,75 | 559,88 | 109,02 |
|    | 2019/08/27 | CH2276 | Female | Two y/o | Control | Control | Feed Day | No | 20:50 | 20:00 - 20:59 | Night         | 37,6 | 62  | 41,6  | 41,6  | 18,75 | 557,33 | 125,44 |
|    | 2019/08/27 | CH2276 | Female | Two y/o | Control | Control | Feed Day | No | 20:55 | 20:00 - 20:59 | Night         | 37,6 | 88  | 11,2  | 11,2  | 18,75 | 584,49 | 80,59  |
|    | 2019/08/27 | CH2276 | Female | Two y/o | Control | Control | Feed Day | No | 21:00 | 21:00 - 21:59 | Night         | 37,5 | 70  | 28,8  | 28,8  | 18,65 | 566,99 | 112,79 |
|    | 2019/08/27 | CH2276 | Female | Two y/o | Control | Control | Feed Day | No | 21:05 | 21:00 - 21:59 | Night         | 37,5 | 68  | 59,2  | 59,2  | 18,65 | 564,71 | 137,63 |
|    | 2019/08/27 | CH2276 | Female | Two y/o | Control | Control | Feed Day | No | 21:10 | 21:00 - 21:59 | Night         | 37,5 | 89  | 69,8  | 69,8  | 18,65 | 585,33 | 143,34 |
|    | 2019/08/27 | CH2276 | Female | Two y/o | Control | Control | Feed Day | No | 21:15 | 21:00 - 21:59 | Night         | 37,4 | 88  | 72,2  | 72,2  | 18,55 | 584,49 | 144,51 |
|    | 2019/08/27 | CH2276 | Female | Two y/o | Control | Control | Feed Day | No | 21:20 | 21:00 - 21:59 | Night         | 37,4 | 172 | 105,8 | 105,8 | 18,55 | 630,73 | 157,81 |
|    | 2019/08/27 | CH2276 | Female | Two y/o | Control | Control | Feed Day | No | 21:25 | 21:00 - 21:59 | Night         | 37,4 | 96  | 36,0  | 36,0  | 18,55 | 590,91 | 120,46 |
|    | 2019/08/27 | CH2276 | Female | Two y/o | Control | Control | Feed Day | No | 21:30 | 21:00 - 21:59 | Night         | 37,3 | 69  | 75,4  | 75,4  | 18,46 | 565,86 | 146,02 |
|    | 2019/08/27 | CH2276 | Female | Two y/o | Control | Control | Feed Day | No | 21:35 | 21:00 - 21:59 | Night         | 37,3 | 61  | 72,2  | 72,2  | 18,46 | 556,01 | 144,51 |
|    | 2019/08/27 | CH2276 | Female | Two y/o | Control | Control | Feed Day | No | 21:40 | 21:00 - 21:59 | Night         | 37,2 | 62  | 76,0  | 76,0  | 18,36 | 557,33 | 146,29 |
|    | 2019/08/27 | CH2276 | Female | Two y/o | Control | Control | Feed Day | No | 21:45 | 21:00 - 21:59 | Night         | 37,2 | 90  | 75,0  | 75,0  | 18,36 | 586,16 | 145,83 |
|    | 2019/08/27 | CH2276 | Female | Two y/o | Control | Control | Feed Day | No | 21:50 | 21:00 - 21:59 | Night         | 37,1 | 85  | 78,8  | 78,8  | 18,26 | 581,90 | 147,55 |
|    | 2019/08/27 | CH2276 | Female | Two y/o | Control | Control | Feed Day | No | 21:55 | 21:00 - 21:59 | Night         | 37,1 | 63  | 74,4  | 74,4  | 18,26 | 558,62 | 145,55 |
|    | 2019/08/27 | CH2276 | Female | Two y/o | Control | Control | Feed Day | No | 22:00 | 22:00 - 22:59 | Night         | 37,0 | 66  | 84,4  | 84,4  | 18,16 | 562,34 | 149,94 |
|    | 2019/08/27 | CH2276 | Female | Two y/o | Control | Control | Feed Day | No | 22:05 | 22:00 - 22:59 | Night         | 37,0 |     | 87,0  | 87,0  | 18,16 |        | 150,99 |
|    | 2019/08/27 | CH2276 | Female | Two y/o | Control | Control | Feed Day | No | 22:10 | 22:00 - 22:59 | Night         | 37,0 | 66  | 83,4  | 83,4  | 18,16 | 562,34 | 149,52 |
|    | 2019/08/27 | CH2276 | Female | Two y/o | Control | Control | Feed Day | No | 22:15 | 22:00 - 22:59 | Night         | 37,0 | 62  | 70,0  | 70,0  | 18,16 | 557,33 | 143,44 |
|    | 2019/08/27 | CH2276 | Female | Two y/o | Control | Control | Feed Day | No | 22:20 | 22:00 - 22:59 | Night         | 36,9 | 80  | 69,8  | 69,8  | 18,06 | 577,31 | 143,34 |
|    | 2019/08/27 | CH2276 | Female | Two y/o | Control | Control | Feed Day | No | 22:25 | 22:00 - 22:59 | Night         | 36,9 | 55  | 73,8  | 73,8  | 18,06 | 547,52 | 145,27 |
|    | 2019/08/27 | CH2276 | Female | Two y/o | Control | Control | Feed Day | No | 22:30 | 22:00 - 22:59 | Night         | 36,9 | 70  | 71,2  | 71,2  | 18,06 | 566,99 | 144,03 |
|    | 2019/08/27 | CH2276 | Female | Two y/o | Control | Control | Feed Day | No | 22:35 | 22:00 - 22:59 | Night         | 36,8 | 71  | 77,4  | 77,4  | 17,96 | 568,10 | 146,93 |
|    | 2019/08/27 | CH2276 | Female | Two y/o | Control | Control | Feed Day | No | 22:40 | 22:00 - 22:59 | Night         | 36,8 | 84  | 79,2  | 79,2  | 17,96 | 581,01 | 147,73 |
|    | 2019/08/27 | CH2276 | Female | Two y/o | Control | Control | Feed Day | No | 22:45 | 22:00 - 22:59 | Night         | 36,9 | 68  | 75,2  | 75,2  | 18,06 | 564,71 | 145,93 |
|    | 2019/08/27 | CH2276 | Female | Two y/o | Control | Control | Feed Day | No | 22:50 | 22:00 - 22:59 | Night         | 36,8 | 61  | 62,4  | 62,4  | 17,96 | 556,01 | 139,45 |
|    | 2019/08/27 | CH2276 | Female | Two y/o | Control | Control | Feed Day | No | 22:55 | 22:00 - 22:59 | Night         | 36,8 | 88  | 64,6  | 64,6  | 17,96 | 584,49 | 140,65 |
|    | 2019/08/27 | CH2276 | Female | Two y/o | Control | Control | Feed Day | No | 23:00 | 23:00 - 23:59 | Night         | 36,8 | 87  | 81,0  | 81,0  | 17,96 | 583,64 | 148,51 |
|    | 2019/08/27 | CH2276 | Female | Two y/o | Control | Control | Feed Day | No | 23:05 | 23:00 - 23:59 | Night         | 36,7 | 64  | 71,6  | 71,6  | 17,87 | 559,88 | 144,22 |
|    | 2019/08/27 | CH2276 | Female | Two y/o | Control | Control | Feed Day | No | 23:10 | 23:00 - 23:59 | Night         | 36,8 | 74  | 74,4  | 74,4  | 17,96 | 571,33 | 145,55 |
|    | 2019/08/27 | CH2276 | Female | Two y/o | Control | Control | Feed Day | No | 23:15 | 23:00 - 23:59 | Night         | 36,8 | 63  | 86,0  | 86,0  | 17,96 | 558,62 | 150,59 |
|    | 2019/08/27 | CH2276 | Female | Two y/o | Control | Control | Feed Day | No | 23:20 | 23:00 - 23:59 | Night         | 36,8 |     | 84,0  | 84,0  | 17,96 |        | 149,77 |
|    | 2019/08/27 | CH2276 | Female | Two y/o | Control | Control | Feed Day | No | 23:25 | 23:00 - 23:59 | Night         | 36,8 | 64  | 78,4  | 78,4  | 17,96 | 559,88 | 147,37 |
|    | 2019/08/27 | CH2276 | Female | Two y/o | Control | Control | Feed Day | No | 23:30 | 23:00 - 23:59 | Night         | 36,8 | 156 | 75,0  | 75,0  | 17,96 | 624,43 | 145,83 |
|    | 2019/08/27 | CH2276 | Female | Two y/o | Control | Control | Feed Day | No | 23:35 | 23:00 - 23:59 | Night         | 36,7 | 84  | 75,4  | 75,4  | 17,87 | 581,01 | 146,02 |
|    | 2019/08/27 | CH2276 | Female | Two y/o | Control | Control | Feed Day | No | 23:40 | 23:00 - 23:59 | Night         | 36,7 | 92  | 85,8  | 85,8  | 17,87 | 587,78 | 150,51 |
|    | 2019/08/27 | CH2276 | Female | Two y/o | Control | Control | Feed Day | No | 23:45 | 23:00 - 23:59 | Night         | 36,7 | 86  | 88,8  | 88,8  | 17,87 | 582,77 | 151,71 |
|    | 2019/08/27 | CH2276 | Female | Two y/o | Control | Control | Feed Day | No | 23:50 | 23:00 - 23:59 | Night         | 36,8 | 66  | 84,2  | 84,2  | 17,96 | 562,34 | 149,85 |
|    | 2019/08/27 | CH2276 | Female | Two y/o | Control | Control | Feed Day | No | 23:55 | 23:00 - 23:59 | Night         | 36,8 | 60  | 72,4  | 72,4  | 17,96 | 554,67 | 144,61 |
| 70 | 2019/08/28 | CH2276 | Female | Two y/o | Control | Control | Feed Day | No | 00:00 | 00:00 - 00:59 | Early Morning | 36,9 |     | 30,0  | 30,0  | 18,06 |        | 114,20 |
|    | 2019/08/28 | CH2276 | Female | Two y/o | Control | Control | Feed Day | No | 00:05 | 00:00 - 00:59 | Early Morning | 37,0 | 60  | 10,8  | 10,8  | 18,16 | 554,67 | 79,36  |
|    | 2019/08/28 | CH2276 | Female | Two y/o | Control | Control | Feed Day | No | 00:10 | 00:00 - 00:59 | Early Morning | 37,1 | 72  | 13,0  | 13,0  | 18,26 | 569,20 | 85,65  |
|    | 2019/08/28 | CH2276 | Female | Two y/o | Control | Control | Feed Day | No | 00:15 | 00:00 - 00:59 | Early Morning | 37,1 | 57  | 5,2   | 5,2   | 18,26 | 550,47 | 54,72  |
|    | 2019/08/28 | CH2276 | Female | Two y/o | Control | Control | Feed Day | No | 00:20 | 00:00 - 00:59 | Early Morning | 37,1 | 92  | 8,2   | 8,2   | 18,26 | 587,78 | 70,05  |
|    | 2019/08/28 | CH2276 | Female | Two y/o | Control | Control | Feed Day | No | 00:25 | 00:00 - 00:59 | Early Morning | 37,1 | 67  | 11,6  | 11,6  | 18,26 | 563,53 | 81,78  |
|    | 2019/08/28 | CH2276 | Female | Two y/o | Control | Control | Feed Day | No | 00:30 | 00:00 - 00:59 | Early Morning | 37,2 | 94  | 7,0   | 7,0   | 18,36 | 589,37 | 64,72  |
|    | 2019/08/28 | CH2276 | Female | Two y/o | Control | Control | Feed Day | No | 00:35 | 00:00 - 00:59 | Early Morning | 37,3 | 86  | 10,4  | 10,4  | 18,46 | 582,77 | 78,08  |
|    | 2019/08/28 | CH2276 | Female | Two y/o | Control | Control | Feed Day | No | 00:40 | 00:00 - 00:59 | Early Morning | 37,3 | 73  | 5,8   | 5,8   | 18,46 | 570,27 | 58,39  |
|    | 2019/08/28 | CH2276 | Female | Two y/o | Control | Control | Feed Day | No | 00:45 | 00:00 - 00:59 | Early Morning | 37,3 |     | 59,2  | 59,2  | 18,46 |        | 137,63 |
|    | 2019/08/28 | CH2276 | Female | Two y/o | Control | Control | Feed Day | No | 00:50 | 00:00 - 00:59 | Early Morning | 37,4 | 108 | 51,6  | 51,6  | 18,55 | 599,39 | 132,87 |
|    | 2019/08/28 | CH2276 | Female | Two y/o | Control | Control | Feed Day | No | 00:55 | 00:00 - 00:59 | Early Morning | 37,3 | 106 | 42,2  | 42,2  | 18,46 | 598,06 | 125,93 |
|    | 2019/08/28 | CH2276 | Female | Two y/o | Control | Control | Feed Day | No | 01:00 | 01:00 - 01:59 | Early Morning | 37,3 | 98  | 17,6  | 17,6  | 18,46 | 592,41 | 95,95  |
|    | 2019/08/28 | CH2276 | Female | Two y/o | Control | Control | Feed Day | No | 01:05 | 01:00 - 01:59 | Early Morning | 37,1 | 74  | 12,4  | 12,4  | 18,26 | 571,33 | 84,04  |
|    | 2019/08/28 | CH2276 | Female | Two y/o | Control | Control | Feed Day | No | 01:10 | 01:00 - 01:59 | Early Morning | 37,0 | 56  | 15,8  | 15,8  | 18,16 | 549,01 | 92,28  |
|    | 2019/08/28 | CH2276 | Female | Two y/o | Control | Control | Feed Day | No | 01:15 | 01:00 - 01:59 | Early Morning | 37,1 | 55  | 15,2  | 15,2  | 18,26 | 547,52 | 90,96  |
|    | 2019/08/28 | CH2276 | Female | Two y/o | Control | Control | Feed Day | No | 01:20 | 01:00 - 01:59 | Early Morning | 37,1 | 57  | 16,6  | 16,6  | 18,26 | 550,47 | 93,96  |
|    | 2019/08/28 | CH2276 | Female | Two y/o | Control | Control | Feed Day | No | 01:25 | 01:00 - 01:59 | Early Morning | 37,1 | 78  | 38,2  | 38,2  | 18,26 | 575,38 | 122,50 |
|    | 2019/08/28 | CH2276 | Female | Two y/o | Control | Control | Feed Day | No | 01:30 | 01:00 - 01:59 | Early Morning | 37,1 |     | 644,4 | 644,4 | 18,26 |        | 221,59 |



|            |        |        |         |         |         |          |    |       |               |               |      |     |       |       |       |        |        |
|------------|--------|--------|---------|---------|---------|----------|----|-------|---------------|---------------|------|-----|-------|-------|-------|--------|--------|
| 2019/08/28 | CH2276 | Female | Two y/o | Control | Control | Feed Day | No | 01:35 | 01:00 - 01:59 | Early Morning | 37,3 | 80  | 87,2  | 87,2  | 18,46 | 577,31 | 151,07 |
| 2019/08/28 | CH2276 | Female | Two y/o | Control | Control | Feed Day | No | 01:40 | 01:00 - 01:59 | Early Morning | 37,4 | 53  | 162,2 | 162,2 | 18,55 | 544,43 | 172,76 |
| 2019/08/28 | CH2276 | Female | Two y/o | Control | Control | Feed Day | No | 01:45 | 01:00 - 01:59 | Early Morning | 37,4 | 58  | 319,4 | 319,4 | 18,55 | 551,90 | 196,64 |
| 2019/08/28 | CH2276 | Female | Two y/o | Control | Control | Feed Day | No | 01:50 | 01:00 - 01:59 | Early Morning | 37,4 | 41  | 61,4  | 61,4  | 18,55 | 522,29 | 138,89 |
| 2019/08/28 | CH2276 | Female | Two y/o | Control | Control | Feed Day | No | 01:55 | 01:00 - 01:59 | Early Morning | 37,5 | 115 | 112,0 | 112,0 | 18,65 | 603,82 | 159,80 |
| 2019/08/28 | CH2276 | Female | Two y/o | Control | Control | Feed Day | No | 02:00 | 02:00 - 02:59 | Early Morning | 37,6 | 110 | 76,4  | 76,4  | 18,75 | 600,69 | 146,48 |
| 2019/08/28 | CH2276 | Female | Two y/o | Control | Control | Feed Day | No | 02:05 | 02:00 - 02:59 | Early Morning | 37,6 | 60  | 61,0  | 61,0  | 18,75 | 554,67 | 138,67 |
| 2019/08/28 | CH2276 | Female | Two y/o | Control | Control | Feed Day | No | 02:10 | 02:00 - 02:59 | Early Morning | 37,6 | 101 | 270,0 | 270,0 | 18,75 | 594,59 | 190,70 |
| 2019/08/28 | CH2276 | Female | Two y/o | Control | Control | Feed Day | No | 02:15 | 02:00 - 02:59 | Early Morning | 37,6 | 64  | 28,4  | 28,4  | 18,75 | 559,88 | 112,31 |
| 2019/08/28 | CH2276 | Female | Two y/o | Control | Control | Feed Day | No | 02:20 | 02:00 - 02:59 | Early Morning | 37,6 | 98  | 199,4 | 199,4 | 18,75 | 592,41 | 180,01 |
| 2019/08/28 | CH2276 | Female | Two y/o | Control | Control | Feed Day | No | 02:25 | 02:00 - 02:59 | Early Morning | 37,6 | 110 | 105,2 | 105,2 | 18,75 | 600,69 | 157,61 |
| 2019/08/28 | CH2276 | Female | Two y/o | Control | Control | Feed Day | No | 02:30 | 02:00 - 02:59 | Early Morning | 37,6 | 62  | 70,6  | 70,6  | 18,75 | 557,33 | 143,73 |
| 2019/08/28 | CH2276 | Female | Two y/o | Control | Control | Feed Day | No | 02:35 | 02:00 - 02:59 | Early Morning | 37,6 |     | 158,8 | 158,8 | 18,75 |        | 172,02 |
| 2019/08/28 | CH2276 | Female | Two y/o | Control | Control | Feed Day | No | 02:40 | 02:00 - 02:59 | Early Morning | 37,6 | 92  | 46,0  | 46,0  | 18,75 | 587,78 | 128,91 |
| 2019/08/28 | CH2276 | Female | Two y/o | Control | Control | Feed Day | No | 02:45 | 02:00 - 02:59 | Early Morning | 37,5 | 57  | 21,8  | 21,8  | 18,65 | 550,47 | 103,26 |
| 2019/08/28 | CH2276 | Female | Two y/o | Control | Control | Feed Day | No | 02:50 | 02:00 - 02:59 | Early Morning | 37,4 | 55  | 14,0  | 14,0  | 18,55 | 547,52 | 88,17  |
| 2019/08/28 | CH2276 | Female | Two y/o | Control | Control | Feed Day | No | 02:55 | 02:00 - 02:59 | Early Morning | 37,3 | 59  | 10,2  | 10,2  | 18,46 | 553,30 | 77,43  |
| 2019/08/28 | CH2276 | Female | Two y/o | Control | Control | Feed Day | No | 03:00 | 03:00 - 03:59 | Early Morning | 37,0 | 63  | 6,6   | 6,6   | 18,16 | 558,62 | 62,73  |
| 2019/08/28 | CH2276 | Female | Two y/o | Control | Control | Feed Day | No | 03:05 | 03:00 - 03:59 | Early Morning | 37,1 | 62  | 9,0   | 9,0   | 18,26 | 557,33 | 73,19  |
| 2019/08/28 | CH2276 | Female | Two y/o | Control | Control | Feed Day | No | 03:10 | 03:00 - 03:59 | Early Morning | 37,0 | 63  | 8,4   | 8,4   | 18,16 | 558,62 | 70,86  |
| 2019/08/28 | CH2276 | Female | Two y/o | Control | Control | Feed Day | No | 03:15 | 03:00 - 03:59 | Early Morning | 36,9 | 68  | 15,0  | 15,0  | 18,06 | 564,71 | 90,51  |
| 2019/08/28 | CH2276 | Female | Two y/o | Control | Control | Feed Day | No | 03:20 | 03:00 - 03:59 | Early Morning | 36,9 | 59  | 9,6   | 9,6   | 18,06 | 553,30 | 75,37  |
| 2019/08/28 | CH2276 | Female | Two y/o | Control | Control | Feed Day | No | 03:25 | 03:00 - 03:59 | Early Morning | 36,8 | 60  | 44,6  | 44,6  | 17,96 | 554,67 | 127,84 |
| 2019/08/28 | CH2276 | Female | Two y/o | Control | Control | Feed Day | No | 03:30 | 03:00 - 03:59 | Early Morning | 36,8 | 63  | 64,2  | 64,2  | 17,96 | 558,62 | 140,44 |
| 2019/08/28 | CH2276 | Female | Two y/o | Control | Control | Feed Day | No | 03:35 | 03:00 - 03:59 | Early Morning | 36,8 | 64  | 59,2  | 59,2  | 17,96 | 559,88 | 137,63 |
| 2019/08/28 | CH2276 | Female | Two y/o | Control | Control | Feed Day | No | 03:40 | 03:00 - 03:59 | Early Morning | 36,8 | 56  | 62,4  | 62,4  | 17,96 | 549,01 | 139,45 |
| 2019/08/28 | CH2276 | Female | Two y/o | Control | Control | Feed Day | No | 03:45 | 03:00 - 03:59 | Early Morning | 36,8 | 53  | 57,4  | 57,4  | 17,96 | 544,43 | 136,56 |
| 2019/08/28 | CH2276 | Female | Two y/o | Control | Control | Feed Day | No | 03:50 | 03:00 - 03:59 | Early Morning | 36,7 | 54  | 62,0  | 62,0  | 17,87 | 545,99 | 139,23 |
| 2019/08/28 | CH2276 | Female | Two y/o | Control | Control | Feed Day | No | 03:55 | 03:00 - 03:59 | Early Morning | 36,7 | 57  | 60,6  | 60,6  | 17,87 | 550,47 | 138,44 |
| 2019/08/28 | CH2276 | Female | Two y/o | Control | Control | Feed Day | No | 04:00 | 04:00 - 04:59 | Morning       | 36,7 | 55  | 60,2  | 60,2  | 17,87 | 547,52 | 138,21 |
| 2019/08/28 | CH2276 | Female | Two y/o | Control | Control | Feed Day | No | 04:05 | 04:00 - 04:59 | Morning       | 36,7 | 62  | 66,6  | 66,6  | 17,87 | 557,33 | 141,71 |
| 2019/08/28 | CH2276 | Female | Two y/o | Control | Control | Feed Day | No | 04:10 | 04:00 - 04:59 | Morning       | 36,7 | 88  | 72,8  | 72,8  | 17,87 | 584,49 | 144,80 |
| 2019/08/28 | CH2276 | Female | Two y/o | Control | Control | Feed Day | No | 04:15 | 04:00 - 04:59 | Morning       | 36,7 | 95  | 59,0  | 59,0  | 17,87 | 590,14 | 137,51 |
| 2019/08/28 | CH2276 | Female | Two y/o | Control | Control | Feed Day | No | 04:20 | 04:00 - 04:59 | Morning       | 36,7 | 63  | 61,6  | 61,6  | 17,87 | 558,62 | 139,00 |
| 2019/08/28 | CH2276 | Female | Two y/o | Control | Control | Feed Day | No | 04:25 | 04:00 - 04:59 | Morning       | 36,7 | 60  | 58,8  | 58,8  | 17,87 | 554,67 | 137,39 |
| 2019/08/28 | CH2276 | Female | Two y/o | Control | Control | Feed Day | No | 04:30 | 04:00 - 04:59 | Morning       | 36,6 | 53  | 60,4  | 60,4  | 17,77 | 544,43 | 138,32 |
| 2019/08/28 | CH2276 | Female | Two y/o | Control | Control | Feed Day | No | 04:35 | 04:00 - 04:59 | Morning       | 36,6 | 58  | 64,0  | 64,0  | 17,77 | 551,90 | 140,33 |
| 2019/08/28 | CH2276 | Female | Two y/o | Control | Control | Feed Day | No | 04:40 | 04:00 - 04:59 | Morning       | 36,6 | 53  | 66,2  | 66,2  | 17,77 | 544,43 | 141,50 |
| 2019/08/28 | CH2276 | Female | Two y/o | Control | Control | Feed Day | No | 04:45 | 04:00 - 04:59 | Morning       | 36,6 | 56  | 65,8  | 65,8  | 17,77 | 549,01 | 141,29 |
| 2019/08/28 | CH2276 | Female | Two y/o | Control | Control | Feed Day | No | 04:50 | 04:00 - 04:59 | Morning       | 36,6 |     | 67,0  | 67,0  | 17,77 |        | 141,92 |
| 2019/08/28 | CH2276 | Female | Two y/o | Control | Control | Feed Day | No | 04:55 | 04:00 - 04:59 | Morning       | 36,6 | 84  | 66,0  | 66,0  | 17,77 | 581,01 | 141,40 |
| 2019/08/28 | CH2276 | Female | Two y/o | Control | Control | Feed Day | No | 05:00 | 05:00 - 05:59 | Morning       | 36,6 | 84  | 55,0  | 55,0  | 17,77 | 581,01 | 135,08 |
| 2019/08/28 | CH2276 | Female | Two y/o | Control | Control | Feed Day | No | 05:05 | 05:00 - 05:59 | Morning       | 36,6 | 61  | 58,2  | 58,2  | 17,77 | 556,01 | 137,04 |
| 2019/08/28 | CH2276 | Female | Two y/o | Control | Control | Feed Day | No | 05:10 | 05:00 - 05:59 | Morning       | 36,6 | 70  | 59,4  | 59,4  | 17,77 | 566,99 | 137,75 |
| 2019/08/28 | CH2276 | Female | Two y/o | Control | Control | Feed Day | No | 05:15 | 05:00 - 05:59 | Morning       | 36,5 | 62  | 25,8  | 25,8  | 17,67 | 557,33 | 109,02 |
| 2019/08/28 | CH2276 | Female | Two y/o | Control | Control | Feed Day | No | 05:20 | 05:00 - 05:59 | Morning       | 36,8 | 63  | 80,0  | 80,0  | 17,96 | 558,62 | 148,08 |
| 2019/08/28 | CH2276 | Female | Two y/o | Control | Control | Feed Day | No | 05:25 | 05:00 - 05:59 | Morning       | 36,8 | 154 | 124,0 | 124,0 | 17,96 | 623,58 | 163,35 |
| 2019/08/28 | CH2276 | Female | Two y/o | Control | Control | Feed Day | No | 05:30 | 05:00 - 05:59 | Morning       | 36,8 | 194 | 189,2 | 189,2 | 17,96 | 638,30 | 178,17 |
| 2019/08/28 | CH2276 | Female | Two y/o | Control | Control | Feed Day | No | 05:35 | 05:00 - 05:59 | Morning       | 36,9 | 111 | 200,6 | 200,6 | 18,06 | 601,33 | 180,22 |
| 2019/08/28 | CH2276 | Female | Two y/o | Control | Control | Feed Day | No | 05:40 | 05:00 - 05:59 | Morning       | 37,0 | 85  | 169,4 | 169,4 | 18,16 | 581,90 | 174,28 |
| 2019/08/28 | CH2276 | Female | Two y/o | Control | Control | Feed Day | No | 05:45 | 05:00 - 05:59 | Morning       | 37,3 | 88  | 71,4  | 71,4  | 18,46 | 584,49 | 144,12 |
| 2019/08/28 | CH2276 | Female | Two y/o | Control | Control | Feed Day | No | 05:50 | 05:00 - 05:59 | Morning       | 37,4 |     | 110,0 | 110,0 | 18,55 |        | 159,17 |
| 2019/08/28 | CH2276 | Female | Two y/o | Control | Control | Feed Day | No | 05:55 | 05:00 - 05:59 | Morning       | 37,5 | 115 | 218,6 | 218,6 | 18,65 | 603,82 | 183,25 |
| 2019/08/28 | CH2276 | Female | Two y/o | Control | Control | Feed Day | No | 06:00 | 06:00 - 06:59 | Morning       | 37,5 | 114 | 213,8 | 213,8 | 18,65 | 603,20 | 182,47 |
| 2019/08/28 | CH2276 | Female | Two y/o | Control | Control | Feed Day | No | 06:05 | 06:00 - 06:59 | Morning       | 37,5 | 114 | 140,6 | 140,6 | 18,65 | 603,20 | 167,75 |
| 2019/08/28 | CH2276 | Female | Two y/o | Control | Control | Feed Day | No | 06:10 | 06:00 - 06:59 | Morning       | 37,6 | 93  | 75,4  | 75,4  | 18,75 | 588,58 | 146,02 |
| 2019/08/28 | CH2276 | Female | Two y/o | Control | Control | Feed Day | No | 06:15 | 06:00 - 06:59 | Morning       | 37,6 | 95  | 29,6  | 29,6  | 18,75 | 590,14 | 113,73 |
| 2019/08/28 | CH2276 | Female | Two y/o | Control | Control | Feed Day | No | 06:20 | 06:00 - 06:59 | Morning       | 37,6 | 148 | 425,2 | 425,2 | 18,75 | 620,97 | 206,78 |
| 2019/08/28 | CH2276 | Female | Two y/o | Control | Control | Feed Day | No | 06:25 | 06:00 - 06:59 | Morning       | 37,9 |     | 85,0  | 85,0  | 19,05 |        | 150,18 |
| 2019/08/28 | CH2276 | Female | Two y/o | Control | Control | Feed Day | No | 06:30 | 06:00 - 06:59 | Morning       | 37,9 |     | 215,8 | 215,8 | 19,05 |        | 182,80 |
| 2019/08/28 | CH2276 | Female | Two y/o | Control | Control | Feed Day | No | 06:35 | 06:00 - 06:59 | Morning       | 37,8 | 99  | 88,6  | 88,6  | 18,95 | 593,14 | 151,63 |
| 2019/08/28 | CH2276 | Female | Two y/o | Control | Control | Feed Day | No | 06:40 | 06:00 - 06:59 | Morning       | 37,8 |     | 67,2  | 67,2  | 18,95 |        | 142,02 |
| 2019/08/28 | CH2276 | Female | Two y/o | Control | Control | Feed Day | No | 06:45 | 06:00 - 06:59 | Morning       | 37,8 | 57  | 195,0 | 195,0 | 18,95 | 550,47 | 179,23 |
| 2019/08/28 | CH2276 | Female | Two y/o | Control | Control | Feed Day | No | 06:50 | 06:00 - 06:59 | Morning       | 37,8 | 104 | 357,0 | 357,0 | 18,95 | 596,69 | 200,58 |
| 2019/08/28 | CH2276 | Female | Two y/o | Control | Control | Feed Day | No | 06:55 | 06:00 - 06:59 | Morning       | 37,7 | 60  | 161,0 | 161,0 | 18,85 | 554,67 | 172,50 |
| 2019/08/28 | CH2276 | Female | Two y/o | Control | Control | Feed Day | No | 07:00 | 07:00 - 07:59 | Morning       | 37,8 | 58  | 111,2 | 111,2 | 18,95 | 551,90 | 159,55 |
| 2019/08/28 | CH2276 | Female | Two y/o | Control | Control | Feed Day | No | 07:05 | 07:00 - 07:59 | Morning       | 37,9 | 126 | 121,6 | 121,6 | 19,05 | 610,14 | 162,67 |
| 2019/08/28 | CH2276 | Female | Two y/o | Control | Control | Feed Day | No | 07:10 | 07:00 - 07:59 | Morning       | 37,8 | 42  | 171,0 | 171,0 | 18,95 | 524,42 | 174,61 |
| 2019/08/28 | CH2276 | Female | Two y/o | Control | Control | Feed Day | No | 07:15 | 07:00 - 07:59 | Morning       | 37,8 | 45  | 206,0 | 206,0 | 18,95 | 530,47 | 181,16 |
| 2019/08/28 | CH2276 | Female | Two y/o | Control | Control | Feed Day | No | 07:20 | 07:00 - 07:59 | Morning       | 37,8 |     | 62,0  | 62,0  | 18,95 |        | 139,23 |



|            |        |        |         |         |         |          |     |       |               |              |      |     |       |       |       |        |        |
|------------|--------|--------|---------|---------|---------|----------|-----|-------|---------------|--------------|------|-----|-------|-------|-------|--------|--------|
| 2019/08/28 | CH2276 | Female | Two y/o | Control | Control | Feed Day | No  | 07:25 | 07:00 - 07:59 | Morning      | 37,8 | 126 | 93,8  | 93,8  | 18,95 | 610,14 | 153,61 |
| 2019/08/28 | CH2276 | Female | Two y/o | Control | Control | Feed Day | No  | 07:30 | 07:00 - 07:59 | Morning      | 37,9 | 63  | 864,2 |       | 19,05 | 558,62 |        |
| 2019/08/28 | CH2276 | Female | Two y/o | Control | Control | Feed Day | No  | 07:35 | 07:00 - 07:59 | Morning      | 38,0 | 123 | 48,4  | 48,4  | 19,15 | 608,49 | 130,66 |
| 2019/08/28 | CH2276 | Female | Two y/o | Control | Control | Feed Day | No  | 07:40 | 07:00 - 07:59 | Morning      | 38,0 |     | 74,4  | 74,4  | 19,15 |        | 145,55 |
| 2019/08/28 | CH2276 | Female | Two y/o | Control | Control | Feed Day | No  | 07:45 | 07:00 - 07:59 | Morning      | 37,9 | 101 | 45,0  | 45,0  | 19,05 | 594,59 | 128,15 |
| 2019/08/28 | CH2276 | Female | Two y/o | Control | Control | Feed Day | No  | 07:50 | 07:00 - 07:59 | Morning      | 37,8 | 67  | 16,0  | 16,0  | 18,95 | 563,53 | 92,71  |
| 2019/08/28 | CH2276 | Female | Two y/o | Control | Control | Feed Day | No  | 07:55 | 07:00 - 07:59 | Morning      | 37,6 | 60  | 17,0  | 17,0  | 18,75 | 554,67 | 94,77  |
| 2019/08/28 | CH2276 | Female | Two y/o | Control | Control | Feed Day | No  | 08:00 | 08:00 - 08:59 | Late Morning | 37,5 | 111 | 39,8  | 39,8  | 18,65 | 601,33 | 123,91 |
| 2019/08/28 | CH2276 | Female | Two y/o | Control | Control | Feed Day | No  | 08:05 | 08:00 - 08:59 | Late Morning | 37,5 | 75  | 46,4  | 46,4  | 18,65 | 572,36 | 129,21 |
| 2019/08/28 | CH2276 | Female | Two y/o | Control | Control | Feed Day | No  | 08:10 | 08:00 - 08:59 | Late Morning | 37,5 | 63  | 44,4  | 44,4  | 18,65 | 558,62 | 127,69 |
| 2019/08/28 | CH2276 | Female | Two y/o | Control | Control | Feed Day | No  | 08:15 | 08:00 - 08:59 | Late Morning | 37,5 | 64  | 61,8  | 61,8  | 18,65 | 559,88 | 139,12 |
| 2019/08/28 | CH2276 | Female | Two y/o | Control | Control | Feed Day | No  | 08:20 | 08:00 - 08:59 | Late Morning | 37,5 | 57  | 51,2  | 51,2  | 18,65 | 550,47 | 132,61 |
| 2019/08/28 | CH2276 | Female | Two y/o | Control | Control | Feed Day | No  | 08:25 | 08:00 - 08:59 | Late Morning | 37,6 | 60  | 30,8  | 30,8  | 18,75 | 554,67 | 115,10 |
| 2019/08/28 | CH2276 | Female | Two y/o | Control | Control | Feed Day | Yes | 08:30 | 08:00 - 08:59 | Late Morning | 37,7 | 62  | 23,4  | 23,4  | 18,85 | 557,33 | 105,68 |
| 2019/08/28 | CH2276 | Female | Two y/o | Control | Control | Feed Day | Yes | 08:35 | 08:00 - 08:59 | Late Morning | 37,7 |     | 108,6 | 108,6 | 18,85 |        | 158,72 |
| 2019/08/28 | CH2276 | Female | Two y/o | Control | Control | Feed Day | Yes | 08:40 | 08:00 - 08:59 | Late Morning | 37,7 | 50  | 221,0 | 221,0 | 18,85 | 539,52 | 183,63 |
| 2019/08/28 | CH2276 | Female | Two y/o | Control | Control | Feed Day | Yes | 08:45 | 08:00 - 08:59 | Late Morning | 37,6 | 56  | 510,6 | 510,6 | 18,75 | 549,01 | 213,29 |
| 2019/08/28 | CH2276 | Female | Two y/o | Control | Control | Feed Day | Yes | 08:50 | 08:00 - 08:59 | Late Morning | 37,7 | 57  | 106,0 | 106,0 | 18,85 | 550,47 | 157,88 |
| 2019/08/28 | CH2276 | Female | Two y/o | Control | Control | Feed Day | Yes | 08:55 | 08:00 - 08:59 | Late Morning | 37,7 | 64  | 332,8 | 332,8 | 18,85 | 559,88 | 198,09 |
| 2019/08/28 | CH2276 | Female | Two y/o | Control | Control | Feed Day | Yes | 09:00 | 09:00 - 09:59 | Late Morning | 37,8 |     | 316,6 | 316,6 | 18,95 |        | 196,33 |
| 2019/08/28 | CH2276 | Female | Two y/o | Control | Control | Feed Day | Yes | 09:05 | 09:00 - 09:59 | Late Morning | 37,8 | 98  | 108,4 | 108,4 | 18,95 | 592,41 | 158,66 |
| 2019/08/28 | CH2276 | Female | Two y/o | Control | Control | Feed Day | Yes | 09:10 | 09:00 - 09:59 | Late Morning | 37,9 | 108 | 64,2  | 64,2  | 19,05 | 599,39 | 140,44 |
| 2019/08/28 | CH2276 | Female | Two y/o | Control | Control | Feed Day | Yes | 09:15 | 09:00 - 09:59 | Late Morning | 37,9 | 97  | 97,8  | 97,8  | 19,05 | 591,66 | 155,07 |
| 2019/08/28 | CH2276 | Female | Two y/o | Control | Control | Feed Day | Yes | 09:20 | 09:00 - 09:59 | Late Morning | 37,9 | 117 | 35,8  | 35,8  | 19,05 | 605,02 | 120,27 |
| 2019/08/28 | CH2276 | Female | Two y/o | Control | Control | Feed Day | Yes | 09:25 | 09:00 - 09:59 | Late Morning | 37,9 |     | 22,4  | 22,4  | 19,05 |        | 104,19 |
| 2019/08/28 | CH2276 | Female | Two y/o | Control | Control | Feed Day | No  | 09:30 | 09:00 - 09:59 | Late Morning | 37,9 | 66  | 26,4  | 26,4  | 19,05 | 562,34 | 109,81 |
| 2019/08/28 | CH2276 | Female | Two y/o | Control | Control | Feed Day | No  | 09:35 | 09:00 - 09:59 | Late Morning | 37,8 | 61  | 45,8  | 45,8  | 18,95 | 556,01 | 128,76 |
| 2019/08/28 | CH2276 | Female | Two y/o | Control | Control | Feed Day | No  | 09:40 | 09:00 - 09:59 | Late Morning | 37,8 | 82  | 37,0  | 37,0  | 18,95 | 579,19 | 121,40 |
| 2019/08/28 | CH2276 | Female | Two y/o | Control | Control | Feed Day | No  | 09:45 | 09:00 - 09:59 | Late Morning | 37,8 | 86  | 67,8  | 67,8  | 18,95 | 582,77 | 142,33 |
| 2019/08/28 | CH2276 | Female | Two y/o | Control | Control | Feed Day | No  | 09:50 | 09:00 - 09:59 | Late Morning | 37,8 | 72  | 57,4  | 57,4  | 18,95 | 569,20 | 136,56 |
| 2019/08/28 | CH2276 | Female | Two y/o | Control | Control | Feed Day | No  | 09:55 | 09:00 - 09:59 | Late Morning | 37,7 | 85  | 14,6  | 14,6  | 18,85 | 581,90 | 89,59  |
| 2019/08/28 | CH2276 | Female | Two y/o | Control | Control | Feed Day | No  | 10:00 | 10:00 - 10:59 | Late Morning | 37,6 | 76  | 11,4  | 11,4  | 18,75 | 573,39 | 81,19  |
| 2019/08/28 | CH2276 | Female | Two y/o | Control | Control | Feed Day | No  | 10:05 | 10:00 - 10:59 | Late Morning | 37,6 | 82  | 18,2  | 18,2  | 18,75 | 579,19 | 97,10  |
| 2019/08/28 | CH2276 | Female | Two y/o | Control | Control | Feed Day | No  | 10:10 | 10:00 - 10:59 | Late Morning | 37,6 | 84  | 127,0 | 127,0 | 18,75 | 581,01 | 164,19 |
| 2019/08/28 | CH2276 | Female | Two y/o | Control | Control | Feed Day | No  | 10:15 | 10:00 - 10:59 | Late Morning | 37,7 | 69  | 130,2 | 130,2 | 18,85 | 565,86 | 165,06 |
| 2019/08/28 | CH2276 | Female | Two y/o | Control | Control | Feed Day | No  | 10:20 | 10:00 - 10:59 | Late Morning | 37,8 | 194 | 220,0 | 220,0 | 18,95 | 638,30 | 183,47 |
| 2019/08/28 | CH2276 | Female | Two y/o | Control | Control | Feed Day | No  | 10:25 | 10:00 - 10:59 | Late Morning | 37,8 | 115 | 422,4 | 422,4 | 18,95 | 603,82 | 206,55 |
| 2019/08/28 | CH2276 | Female | Two y/o | Control | Control | Feed Day | No  | 10:30 | 10:00 - 10:59 | Late Morning | 37,8 | 100 | 346,8 | 346,8 | 18,95 | 593,87 | 199,55 |
| 2019/08/28 | CH2276 | Female | Two y/o | Control | Control | Feed Day | No  | 10:35 | 10:00 - 10:59 | Late Morning | 37,8 | 115 | 442,6 | 442,6 | 18,95 | 603,82 | 208,21 |
| 2019/08/28 | CH2276 | Female | Two y/o | Control | Control | Feed Day | No  | 10:40 | 10:00 - 10:59 | Late Morning | 37,8 | 111 | 239,6 | 239,6 | 18,95 | 601,33 | 186,48 |
| 2019/08/28 | CH2276 | Female | Two y/o | Control | Control | Feed Day | No  | 10:45 | 10:00 - 10:59 | Late Morning | 37,8 | 110 | 110,8 | 110,8 | 18,95 | 600,69 | 159,42 |
| 2019/08/28 | CH2276 | Female | Two y/o | Control | Control | Feed Day | No  | 10:50 | 10:00 - 10:59 | Late Morning | 37,9 | 118 | 34,2  | 34,2  | 19,05 | 605,61 | 118,70 |
| 2019/08/28 | CH2276 | Female | Two y/o | Control | Control | Feed Day | No  | 10:55 | 10:00 - 10:59 | Late Morning | 37,8 | 83  | 14,4  | 14,4  | 18,95 | 580,11 | 89,12  |
| 2019/08/28 | CH2276 | Female | Two y/o | Control | Control | Feed Day | No  | 11:00 | 11:00 - 11:59 | Late Morning | 37,9 | 80  | 13,8  | 13,8  | 19,05 | 577,31 | 87,68  |
| 2019/08/28 | CH2276 | Female | Two y/o | Control | Control | Feed Day | No  | 11:05 | 11:00 - 11:59 | Late Morning | 38,0 | 80  | 15,4  | 15,4  | 19,15 | 577,31 | 91,41  |
| 2019/08/28 | CH2276 | Female | Two y/o | Control | Control | Feed Day | No  | 11:10 | 11:00 - 11:59 | Late Morning | 38,0 | 88  | 8,6   | 8,6   | 19,15 | 584,49 | 71,66  |
| 2019/08/28 | CH2276 | Female | Two y/o | Control | Control | Feed Day | No  | 11:15 | 11:00 - 11:59 | Late Morning | 38,0 | 80  | 11,2  | 11,2  | 19,15 | 577,31 | 80,59  |
| 2019/08/28 | CH2276 | Female | Two y/o | Control | Control | Feed Day | No  | 11:20 | 11:00 - 11:59 | Late Morning | 38,0 | 84  | 7,4   | 7,4   | 19,15 | 581,01 | 66,59  |
| 2019/08/28 | CH2276 | Female | Two y/o | Control | Control | Feed Day | No  | 11:25 | 11:00 - 11:59 | Late Morning | 38,0 | 89  | 12,4  | 12,4  | 19,15 | 585,33 | 84,04  |
| 2019/08/28 | CH2276 | Female | Two y/o | Control | Control | Feed Day | No  | 11:30 | 11:00 - 11:59 | Late Morning | 38,0 | 74  | 15,4  | 15,4  | 19,15 | 571,33 | 91,41  |
| 2019/08/28 | CH2276 | Female | Two y/o | Control | Control | Feed Day | No  | 11:35 | 11:00 - 11:59 | Late Morning | 38,0 | 81  | 17,8  | 17,8  | 19,15 | 578,26 | 96,34  |
| 2019/08/28 | CH2276 | Female | Two y/o | Control | Control | Feed Day | No  | 11:40 | 11:00 - 11:59 | Late Morning | 38,0 | 74  | 17,8  | 17,8  | 19,15 | 571,33 | 96,34  |
| 2019/08/28 | CH2276 | Female | Two y/o | Control | Control | Feed Day | No  | 11:45 | 11:00 - 11:59 | Late Morning | 38,0 | 66  | 17,8  | 17,8  | 19,15 | 562,34 | 96,34  |
| 2019/08/28 | CH2276 | Female | Two y/o | Control | Control | Feed Day | No  | 11:50 | 11:00 - 11:59 | Late Morning | 38,0 | 62  | 15,8  | 15,8  | 19,15 | 557,33 | 92,28  |
| 2019/08/28 | CH2276 | Female | Two y/o | Control | Control | Feed Day | No  | 11:55 | 11:00 - 11:59 | Late Morning | 38,0 | 63  | 20,2  | 20,2  | 19,15 | 558,62 | 100,65 |
| 2019/08/28 | CH2276 | Female | Two y/o | Control | Control | Feed Day | No  | 12:00 | 12:00 - 12:59 | Afternoon    | 38,0 | 85  | 19,2  | 19,2  | 19,15 | 581,90 | 98,92  |
| 2019/08/28 | CH2276 | Female | Two y/o | Control | Control | Feed Day | No  | 12:05 | 12:00 - 12:59 | Afternoon    | 38,0 | 79  | 17,2  | 17,2  | 19,15 | 576,36 | 95,17  |
| 2019/08/28 | CH2276 | Female | Two y/o | Control | Control | Feed Day | No  | 12:10 | 12:00 - 12:59 | Afternoon    | 38,0 | 73  | 14,0  | 14,0  | 19,15 | 570,27 | 88,17  |
| 2019/08/28 | CH2276 | Female | Two y/o | Control | Control | Feed Day | No  | 12:15 | 12:00 - 12:59 | Afternoon    | 38,0 | 64  | 13,6  | 13,6  | 19,15 | 559,88 | 87,18  |
| 2019/08/28 | CH2276 | Female | Two y/o | Control | Control | Feed Day | No  | 12:20 | 12:00 - 12:59 | Afternoon    | 38,0 | 60  | 42,6  | 42,6  | 19,15 | 554,67 | 126,26 |
| 2019/08/28 | CH2276 | Female | Two y/o | Control | Control | Feed Day | No  | 12:25 | 12:00 - 12:59 | Afternoon    | 38,0 | 67  | 44,0  | 44,0  | 19,15 | 563,53 | 127,37 |
| 2019/08/28 | CH2276 | Female | Two y/o | Control | Control | Feed Day | No  | 12:30 | 12:00 - 12:59 | Afternoon    | 38,0 | 60  | 41,8  | 41,8  | 19,15 | 554,67 | 125,60 |
| 2019/08/28 | CH2276 | Female | Two y/o | Control | Control | Feed Day | No  | 12:35 | 12:00 - 12:59 | Afternoon    | 38,0 | 61  | 39,0  | 39,0  | 19,15 | 556,01 | 123,22 |
| 2019/08/28 | CH2276 | Female | Two y/o | Control | Control | Feed Day | No  | 12:40 | 12:00 - 12:59 | Afternoon    | 38,0 | 145 | 32,6  | 32,6  | 19,15 | 619,62 | 117,05 |
| 2019/08/28 | CH2276 | Female | Two y/o | Control | Control | Feed Day | No  | 12:45 | 12:00 - 12:59 | Afternoon    | 38,0 | 65  | 13,6  | 13,6  | 19,15 | 561,12 | 87,18  |
| 2019/08/28 | CH2276 | Female | Two y/o | Control | Control | Feed Day | No  | 12:50 | 12:00 - 12:59 | Afternoon    | 38,0 | 65  | 18,2  | 18,2  | 19,15 | 561,12 | 97,10  |
| 2019/08/28 | CH2276 | Female | Two y/o | Control | Control | Feed Day | No  | 12:55 | 12:00 - 12:59 | Afternoon    | 38,0 | 68  | 36,4  | 36,4  | 19,15 | 564,71 | 120,84 |
| 2019/08/28 | CH2276 | Female | Two y/o | Control | Control | Feed Day | No  | 13:00 | 13:00 - 13:59 | Afternoon    | 37,9 | 63  | 18,8  | 18,8  | 19,05 | 558,62 | 98,20  |
| 2019/08/28 | CH2276 | Female | Two y/o | Control | Control | Feed Day | No  | 13:05 | 13:00 - 13:59 | Afternoon    | 37,9 | 67  | 13,8  | 13,8  | 19,05 | 563,53 | 87,68  |
| 2019/08/28 | CH2276 | Female | Two y/o | Control | Control | Feed Day | No  | 13:10 | 13:00 - 13:59 | Afternoon    | 38,0 | 65  | 19,0  | 19,0  | 19,15 | 561,12 | 98,56  |



|            |        |        |         |         |         |          |     |       |               |           |      |     |       |       |       |        |        |
|------------|--------|--------|---------|---------|---------|----------|-----|-------|---------------|-----------|------|-----|-------|-------|-------|--------|--------|
| 2019/08/28 | CH2276 | Female | Two y/o | Control | Control | Feed Day | No  | 13:15 | 13:00 - 13:59 | Afternoon | 38,0 | 67  | 19,6  | 19,6  | 19,15 | 563,53 | 99,63  |
| 2019/08/28 | CH2276 | Female | Two y/o | Control | Control | Feed Day | No  | 13:20 | 13:00 - 13:59 | Afternoon | 38,0 | 62  | 27,2  | 27,2  | 19,15 | 557,33 | 110,83 |
| 2019/08/28 | CH2276 | Female | Two y/o | Control | Control | Feed Day | No  | 13:25 | 13:00 - 13:59 | Afternoon | 38,0 | 65  | 24,0  | 24,0  | 19,15 | 561,12 | 106,55 |
| 2019/08/28 | CH2276 | Female | Two y/o | Control | Control | Feed Day | No  | 13:30 | 13:00 - 13:59 | Afternoon | 38,0 | 62  | 19,4  | 19,4  | 19,15 | 557,33 | 99,28  |
| 2019/08/28 | CH2276 | Female | Two y/o | Control | Control | Feed Day | No  | 13:35 | 13:00 - 13:59 | Afternoon | 38,0 | 68  | 23,6  | 23,6  | 19,15 | 564,71 | 105,97 |
| 2019/08/28 | CH2276 | Female | Two y/o | Control | Control | Feed Day | No  | 13:40 | 13:00 - 13:59 | Afternoon | 38,0 | 59  | 21,2  | 21,2  | 19,15 | 553,30 | 102,31 |
| 2019/08/28 | CH2276 | Female | Two y/o | Control | Control | Feed Day | No  | 13:45 | 13:00 - 13:59 | Afternoon | 38,0 | 67  | 17,6  | 17,6  | 19,15 | 563,53 | 95,95  |
| 2019/08/28 | CH2276 | Female | Two y/o | Control | Control | Feed Day | No  | 13:50 | 13:00 - 13:59 | Afternoon | 38,0 | 68  | 25,4  | 25,4  | 19,15 | 564,71 | 108,49 |
| 2019/08/28 | CH2276 | Female | Two y/o | Control | Control | Feed Day | No  | 13:55 | 13:00 - 13:59 | Afternoon | 38,0 | 74  | 18,6  | 18,6  | 19,15 | 571,33 | 97,84  |
| 2019/08/28 | CH2276 | Female | Two y/o | Control | Control | Feed Day | No  | 14:00 | 14:00 - 14:59 | Afternoon | 38,0 | 70  | 20,4  | 20,4  | 19,15 | 566,99 | 100,99 |
| 2019/08/28 | CH2276 | Female | Two y/o | Control | Control | Feed Day | No  | 14:05 | 14:00 - 14:59 | Afternoon | 38,0 | 80  | 19,0  | 19,0  | 19,15 | 577,31 | 98,56  |
| 2019/08/28 | CH2276 | Female | Two y/o | Control | Control | Feed Day | No  | 14:10 | 14:00 - 14:59 | Afternoon | 38,0 | 63  | 21,4  | 21,4  | 19,15 | 558,62 | 102,63 |
| 2019/08/28 | CH2276 | Female | Two y/o | Control | Control | Feed Day | No  | 14:15 | 14:00 - 14:59 | Afternoon | 37,9 | 60  | 19,0  | 19,0  | 19,05 | 554,67 | 98,56  |
| 2019/08/28 | CH2276 | Female | Two y/o | Control | Control | Feed Day | No  | 14:20 | 14:00 - 14:59 | Afternoon | 37,9 | 94  | 7,8   | 7,8   | 19,05 | 589,37 | 68,36  |
| 2019/08/28 | CH2276 | Female | Two y/o | Control | Control | Feed Day | No  | 14:25 | 14:00 - 14:59 | Afternoon | 37,9 | 66  | 8,0   | 8,0   | 19,05 | 562,34 | 69,22  |
| 2019/08/28 | CH2276 | Female | Two y/o | Control | Control | Feed Day | No  | 14:30 | 14:00 - 14:59 | Afternoon | 37,9 | 63  | 9,8   | 9,8   | 19,05 | 558,62 | 76,07  |
| 2019/08/28 | CH2276 | Female | Two y/o | Control | Control | Feed Day | No  | 14:35 | 14:00 - 14:59 | Afternoon | 37,9 | 63  | 8,2   | 8,2   | 19,05 | 558,62 | 70,05  |
| 2019/08/28 | CH2276 | Female | Two y/o | Control | Control | Feed Day | No  | 14:40 | 14:00 - 14:59 | Afternoon | 37,9 | 63  | 8,6   | 8,6   | 19,05 | 558,62 | 71,66  |
| 2019/08/28 | CH2276 | Female | Two y/o | Control | Control | Feed Day | No  | 14:45 | 14:00 - 14:59 | Afternoon | 37,9 | 68  | 24,2  | 24,2  | 19,05 | 564,71 | 106,83 |
| 2019/08/28 | CH2276 | Female | Two y/o | Control | Control | Feed Day | No  | 14:50 | 14:00 - 14:59 | Afternoon | 37,9 | 90  | 12,8  | 12,8  | 19,05 | 586,16 | 85,12  |
| 2019/08/28 | CH2276 | Female | Two y/o | Control | Control | Feed Day | No  | 14:55 | 14:00 - 14:59 | Afternoon | 37,9 | 61  | 13,0  | 13,0  | 19,05 | 556,01 | 85,65  |
| 2019/08/28 | CH2276 | Female | Two y/o | Control | Control | Feed Day | No  | 15:00 | 15:00 - 15:59 | Afternoon | 37,9 | 59  | 13,6  | 13,6  | 19,05 | 553,30 | 87,18  |
| 2019/08/28 | CH2276 | Female | Two y/o | Control | Control | Feed Day | No  | 15:05 | 15:00 - 15:59 | Afternoon | 37,9 | 94  | 26,0  | 26,0  | 19,05 | 589,37 | 109,29 |
| 2019/08/28 | CH2276 | Female | Two y/o | Control | Control | Feed Day | No  | 15:10 | 15:00 - 15:59 | Afternoon | 38,0 | 64  | 18,0  | 18,0  | 19,15 | 559,88 | 96,72  |
| 2019/08/28 | CH2276 | Female | Two y/o | Control | Control | Feed Day | No  | 15:15 | 15:00 - 15:59 | Afternoon | 38,0 | 71  | 35,0  | 35,0  | 19,15 | 568,10 | 119,49 |
| 2019/08/28 | CH2276 | Female | Two y/o | Control | Control | Feed Day | No  | 15:20 | 15:00 - 15:59 | Afternoon | 38,0 | 67  | 36,8  | 36,8  | 19,15 | 563,53 | 121,22 |
| 2019/08/28 | CH2276 | Female | Two y/o | Control | Control | Feed Day | No  | 15:25 | 15:00 - 15:59 | Afternoon | 38,0 | 88  | 200,2 | 200,2 | 19,15 | 584,49 | 180,15 |
| 2019/08/28 | CH2276 | Female | Two y/o | Control | Control | Feed Day | Yes | 15:30 | 15:00 - 15:59 | Afternoon | 38,0 | 118 | 107,4 | 107,4 | 19,15 | 605,61 | 158,33 |
| 2019/08/28 | CH2276 | Female | Two y/o | Control | Control | Feed Day | Yes | 15:35 | 15:00 - 15:59 | Afternoon | 38,1 | 111 | 73,0  | 73,0  | 19,26 | 601,33 | 144,89 |
| 2019/08/28 | CH2276 | Female | Two y/o | Control | Control | Feed Day | Yes | 15:40 | 15:00 - 15:59 | Afternoon | 38,2 | 119 | 40,6  | 40,6  | 19,36 | 606,20 | 124,60 |
| 2019/08/28 | CH2276 | Female | Two y/o | Control | Control | Feed Day | Yes | 15:45 | 15:00 - 15:59 | Afternoon | 38,2 | 71  | 186,2 | 186,2 | 19,36 | 568,10 | 177,60 |
| 2019/08/28 | CH2276 | Female | Two y/o | Control | Control | Feed Day | Yes | 15:50 | 15:00 - 15:59 | Afternoon | 38,3 |     | 131,4 | 131,4 | 19,46 |        | 165,38 |
| 2019/08/28 | CH2276 | Female | Two y/o | Control | Control | Feed Day | Yes | 15:55 | 15:00 - 15:59 | Afternoon | 38,4 | 124 | 63,4  | 63,4  | 19,56 | 609,04 | 140,00 |
| 2019/08/28 | CH2276 | Female | Two y/o | Control | Control | Feed Day | Yes | 16:00 | 16:00 - 16:59 | Evening   | 38,4 | 138 | 414,2 | 414,2 | 19,56 | 616,31 | 205,85 |
| 2019/08/28 | CH2276 | Female | Two y/o | Control | Control | Feed Day | Yes | 16:05 | 16:00 - 16:59 | Evening   | 38,3 | 100 | 91,6  | 91,6  | 19,46 | 593,87 | 152,79 |
| 2019/08/28 | CH2276 | Female | Two y/o | Control | Control | Feed Day | Yes | 16:10 | 16:00 - 16:59 | Evening   | 38,2 | 83  | 308,6 | 308,6 | 19,36 | 580,11 | 195,42 |
| 2019/08/28 | CH2276 | Female | Two y/o | Control | Control | Feed Day | Yes | 16:15 | 16:00 - 16:59 | Evening   | 38,2 |     | 77,8  | 77,8  | 19,36 |        | 147,11 |
| 2019/08/28 | CH2276 | Female | Two y/o | Control | Control | Feed Day | Yes | 16:20 | 16:00 - 16:59 | Evening   | 38,2 | 105 | 278,8 | 278,8 | 19,36 | 597,38 | 191,83 |
| 2019/08/28 | CH2276 | Female | Two y/o | Control | Control | Feed Day | Yes | 16:25 | 16:00 - 16:59 | Evening   | 38,3 | 135 | 197,6 | 197,6 | 19,46 | 614,84 | 179,69 |
| 2019/08/28 | CH2276 | Female | Two y/o | Control | Control | Feed Day | No  | 16:30 | 16:00 - 16:59 | Evening   | 38,3 |     | 30,4  | 30,4  | 19,46 |        | 114,65 |
| 2019/08/28 | CH2276 | Female | Two y/o | Control | Control | Feed Day | No  | 16:35 | 16:00 - 16:59 | Evening   | 38,2 |     | 34,0  | 34,0  | 19,36 |        | 118,49 |
| 2019/08/28 | CH2276 | Female | Two y/o | Control | Control | Feed Day | No  | 16:40 | 16:00 - 16:59 | Evening   | 38,1 | 84  | 11,2  | 11,2  | 19,26 | 581,01 | 80,59  |
| 2019/08/28 | CH2276 | Female | Two y/o | Control | Control | Feed Day | No  | 16:45 | 16:00 - 16:59 | Evening   | 37,9 | 66  | 3,4   | 3,4   | 19,05 | 562,34 | 40,51  |
| 2019/08/28 | CH2276 | Female | Two y/o | Control | Control | Feed Day | No  | 16:50 | 16:00 - 16:59 | Evening   | 37,8 | 79  | 18,4  | 18,4  | 18,95 | 576,36 | 97,47  |
| 2019/08/28 | CH2276 | Female | Two y/o | Control | Control | Feed Day | No  | 16:55 | 16:00 - 16:59 | Evening   | 37,7 | 62  | 9,2   | 9,2   | 18,85 | 557,33 | 73,94  |
| 2019/08/28 | CH2276 | Female | Two y/o | Control | Control | Feed Day | No  | 17:00 | 17:00 - 17:59 | Evening   | 37,7 | 65  | 41,0  | 41,0  | 18,85 | 561,12 | 124,94 |
| 2019/08/28 | CH2276 | Female | Two y/o | Control | Control | Feed Day | No  | 17:05 | 17:00 - 17:59 | Evening   | 37,8 | 53  | 93,6  | 93,6  | 18,95 | 544,43 | 153,54 |
| 2019/08/28 | CH2276 | Female | Two y/o | Control | Control | Feed Day | No  | 17:10 | 17:00 - 17:59 | Evening   | 37,8 |     | 135,0 | 135,0 | 18,95 |        | 166,33 |
| 2019/08/28 | CH2276 | Female | Two y/o | Control | Control | Feed Day | No  | 17:15 | 17:00 - 17:59 | Evening   | 37,6 | 68  | 36,6  | 36,6  | 18,75 | 564,71 | 121,03 |
| 2019/08/28 | CH2276 | Female | Two y/o | Control | Control | Feed Day | No  | 17:20 | 17:00 - 17:59 | Evening   | 37,6 | 63  | 41,2  | 41,2  | 18,75 | 558,62 | 125,11 |
| 2019/08/28 | CH2276 | Female | Two y/o | Control | Control | Feed Day | No  | 17:25 | 17:00 - 17:59 | Evening   | 37,6 | 76  | 40,2  | 40,2  | 18,75 | 573,39 | 124,26 |
| 2019/08/28 | CH2276 | Female | Two y/o | Control | Control | Feed Day | No  | 17:30 | 17:00 - 17:59 | Evening   | 37,6 | 84  | 42,2  | 42,2  | 18,75 | 581,01 | 125,93 |
| 2019/08/28 | CH2276 | Female | Two y/o | Control | Control | Feed Day | No  | 17:35 | 17:00 - 17:59 | Evening   | 37,7 | 62  | 19,0  | 19,0  | 18,85 | 557,33 | 98,56  |
| 2019/08/28 | CH2276 | Female | Two y/o | Control | Control | Feed Day | No  | 17:40 | 17:00 - 17:59 | Evening   | 37,8 | 66  | 9,8   | 9,8   | 18,95 | 562,34 | 76,07  |
| 2019/08/28 | CH2276 | Female | Two y/o | Control | Control | Feed Day | No  | 17:45 | 17:00 - 17:59 | Evening   | 37,7 | 65  | 12,6  | 12,6  | 18,85 | 561,12 | 84,59  |
| 2019/08/28 | CH2276 | Female | Two y/o | Control | Control | Feed Day | No  | 17:50 | 17:00 - 17:59 | Evening   | 37,7 |     | 19,6  | 19,6  | 18,85 |        | 99,63  |
| 2019/08/28 | CH2276 | Female | Two y/o | Control | Control | Feed Day | No  | 17:55 | 17:00 - 17:59 | Evening   | 37,7 | 96  | 17,4  | 17,4  | 18,85 | 590,91 | 95,56  |
| 2019/08/28 | CH2276 | Female | Two y/o | Control | Control | Feed Day | No  | 18:00 | 18:00 - 18:59 | Evening   | 37,7 | 63  | 9,0   | 9,0   | 18,85 | 558,62 | 73,19  |
| 2019/08/28 | CH2276 | Female | Two y/o | Control | Control | Feed Day | No  | 18:05 | 18:00 - 18:59 | Evening   | 37,6 | 68  | 14,4  | 14,4  | 18,75 | 564,71 | 89,12  |
| 2019/08/28 | CH2276 | Female | Two y/o | Control | Control | Feed Day | No  | 18:10 | 18:00 - 18:59 | Evening   | 37,6 | 60  | 14,2  | 14,2  | 18,75 | 554,67 | 88,65  |
| 2019/08/28 | CH2276 | Female | Two y/o | Control | Control | Feed Day | No  | 18:15 | 18:00 - 18:59 | Evening   | 37,5 | 82  | 8,8   | 8,8   | 18,65 | 579,19 | 72,43  |
| 2019/08/28 | CH2276 | Female | Two y/o | Control | Control | Feed Day | No  | 18:20 | 18:00 - 18:59 | Evening   | 37,5 | 62  | 26,0  | 26,0  | 18,65 | 557,33 | 109,29 |
| 2019/08/28 | CH2276 | Female | Two y/o | Control | Control | Feed Day | No  | 18:25 | 18:00 - 18:59 | Evening   | 37,5 | 124 | 50,4  | 50,4  | 18,65 | 609,04 | 132,06 |
| 2019/08/28 | CH2276 | Female | Two y/o | Control | Control | Feed Day | No  | 18:30 | 18:00 - 18:59 | Evening   | 37,6 | 61  | 140,4 | 140,4 | 18,75 | 556,01 | 167,70 |
| 2019/08/28 | CH2276 | Female | Two y/o | Control | Control | Feed Day | No  | 18:35 | 18:00 - 18:59 | Evening   | 37,7 | 97  | 53,0  | 53,0  | 18,85 | 591,66 | 133,80 |
| 2019/08/28 | CH2276 | Female | Two y/o | Control | Control | Feed Day | No  | 18:40 | 18:00 - 18:59 | Evening   | 37,8 |     | 87,6  | 87,6  | 18,95 |        | 151,23 |
| 2019/08/28 | CH2276 | Female | Two y/o | Control | Control | Feed Day | No  | 18:45 | 18:00 - 18:59 | Evening   | 37,9 | 102 | 133,6 | 133,6 | 19,05 | 595,30 | 165,96 |
| 2019/08/28 | CH2276 | Female | Two y/o | Control | Control | Feed Day | No  | 18:50 | 18:00 - 18:59 | Evening   | 37,9 | 111 | 21,0  | 21,0  | 19,05 | 601,33 | 101,98 |
| 2019/08/28 | CH2276 | Female | Two y/o | Control | Control | Feed Day | No  | 18:55 | 18:00 - 18:59 | Evening   | 37,8 | 89  | 15,2  | 15,2  | 18,95 | 585,33 | 90,96  |
| 2019/08/28 | CH2276 | Female | Two y/o | Control | Control | Feed Day | No  | 19:00 | 19:00 - 19:59 | Evening   | 37,8 | 67  | 15,0  | 15,0  | 18,95 | 563,53 | 90,51  |



|    |            |        |        |         |         |         |          |    |       |               |               |      |     |       |       |       |        |        |
|----|------------|--------|--------|---------|---------|---------|----------|----|-------|---------------|---------------|------|-----|-------|-------|-------|--------|--------|
|    | 2019/08/28 | CH2276 | Female | Two y/o | Control | Control | Feed Day | No | 19:05 | 19:00 - 19:59 | Evening       | 37,7 | 63  | 19,6  | 19,6  | 18,85 | 558,62 | 99,63  |
|    | 2019/08/28 | CH2276 | Female | Two y/o | Control | Control | Feed Day | No | 19:10 | 19:00 - 19:59 | Evening       | 37,7 | 60  | 47,0  | 47,0  | 18,85 | 554,67 | 129,65 |
|    | 2019/08/28 | CH2276 | Female | Two y/o | Control | Control | Feed Day | No | 19:15 | 19:00 - 19:59 | Evening       | 37,7 | 55  | 50,4  | 50,4  | 18,85 | 547,52 | 132,06 |
|    | 2019/08/28 | CH2276 | Female | Two y/o | Control | Control | Feed Day | No | 19:20 | 19:00 - 19:59 | Evening       | 37,7 | 65  | 12,0  | 12,0  | 18,85 | 561,12 | 82,93  |
|    | 2019/08/28 | CH2276 | Female | Two y/o | Control | Control | Feed Day | No | 19:25 | 19:00 - 19:59 | Evening       | 37,8 | 68  | 15,8  | 15,8  | 18,95 | 564,71 | 92,28  |
|    | 2019/08/28 | CH2276 | Female | Two y/o | Control | Control | Feed Day | No | 19:30 | 19:00 - 19:59 | Evening       | 37,8 | 98  | 129,4 | 129,4 | 18,95 | 592,41 | 164,84 |
|    | 2019/08/28 | CH2276 | Female | Two y/o | Control | Control | Feed Day | No | 19:35 | 19:00 - 19:59 | Evening       | 37,6 | 70  | 33,4  | 33,4  | 18,75 | 566,99 | 117,88 |
|    | 2019/08/28 | CH2276 | Female | Two y/o | Control | Control | Feed Day | No | 19:40 | 19:00 - 19:59 | Evening       | 37,6 | 68  | 33,4  | 33,4  | 18,75 | 564,71 | 117,88 |
|    | 2019/08/28 | CH2276 | Female | Two y/o | Control | Control | Feed Day | No | 19:45 | 19:00 - 19:59 | Evening       | 37,5 | 60  | 31,0  | 31,0  | 18,65 | 554,67 | 115,32 |
|    | 2019/08/28 | CH2276 | Female | Two y/o | Control | Control | Feed Day | No | 19:50 | 19:00 - 19:59 | Evening       | 37,4 | 61  | 33,0  | 33,0  | 18,55 | 556,01 | 117,47 |
|    | 2019/08/28 | CH2276 | Female | Two y/o | Control | Control | Feed Day | No | 19:55 | 19:00 - 19:59 | Evening       | 37,4 | 49  | 27,6  | 27,6  | 18,55 | 537,80 | 111,33 |
|    | 2019/08/28 | CH2276 | Female | Two y/o | Control | Control | Feed Day | No | 20:00 | 20:00 - 20:59 | Night         | 37,4 | 85  | 57,8  | 57,8  | 18,55 | 581,90 | 136,80 |
|    | 2019/08/28 | CH2276 | Female | Two y/o | Control | Control | Feed Day | No | 20:05 | 20:00 - 20:59 | Night         | 37,5 | 83  | 71,2  | 71,2  | 18,65 | 580,11 | 144,03 |
|    | 2019/08/28 | CH2276 | Female | Two y/o | Control | Control | Feed Day | No | 20:10 | 20:00 - 20:59 | Night         | 37,5 | 66  | 71,0  | 71,0  | 18,65 | 562,34 | 143,93 |
|    | 2019/08/28 | CH2276 | Female | Two y/o | Control | Control | Feed Day | No | 20:15 | 20:00 - 20:59 | Night         | 37,4 | 70  | 72,0  | 72,0  | 18,55 | 566,99 | 144,42 |
|    | 2019/08/28 | CH2276 | Female | Two y/o | Control | Control | Feed Day | No | 20:20 | 20:00 - 20:59 | Night         | 37,4 | 74  | 72,0  | 72,0  | 18,55 | 571,33 | 144,42 |
|    | 2019/08/28 | CH2276 | Female | Two y/o | Control | Control | Feed Day | No | 20:25 | 20:00 - 20:59 | Night         | 37,4 | 65  | 71,2  | 71,2  | 18,55 | 561,12 | 144,03 |
|    | 2019/08/28 | CH2276 | Female | Two y/o | Control | Control | Feed Day | No | 20:30 | 20:00 - 20:59 | Night         | 37,4 | 61  | 70,6  | 70,6  | 18,55 | 556,01 | 143,73 |
|    | 2019/08/28 | CH2276 | Female | Two y/o | Control | Control | Feed Day | No | 20:35 | 20:00 - 20:59 | Night         | 37,4 | 98  | 70,4  | 70,4  | 18,55 | 592,41 | 143,64 |
|    | 2019/08/28 | CH2276 | Female | Two y/o | Control | Control | Feed Day | No | 20:40 | 20:00 - 20:59 | Night         | 37,4 | 92  | 75,0  | 75,0  | 18,55 | 587,78 | 145,83 |
|    | 2019/08/28 | CH2276 | Female | Two y/o | Control | Control | Feed Day | No | 20:45 | 20:00 - 20:59 | Night         | 37,4 | 92  | 64,8  | 64,8  | 18,55 | 587,78 | 140,76 |
|    | 2019/08/28 | CH2276 | Female | Two y/o | Control | Control | Feed Day | No | 20:50 | 20:00 - 20:59 | Night         | 37,4 | 59  | 69,2  | 69,2  | 18,55 | 553,30 | 143,04 |
|    | 2019/08/28 | CH2276 | Female | Two y/o | Control | Control | Feed Day | No | 20:55 | 20:00 - 20:59 | Night         | 37,4 | 60  | 72,4  | 72,4  | 18,55 | 554,67 | 144,61 |
|    | 2019/08/28 | CH2276 | Female | Two y/o | Control | Control | Feed Day | No | 21:00 | 21:00 - 21:59 | Night         | 37,4 | 92  | 69,2  | 69,2  | 18,55 | 587,78 | 143,04 |
|    | 2019/08/28 | CH2276 | Female | Two y/o | Control | Control | Feed Day | No | 21:05 | 21:00 - 21:59 | Night         | 37,4 | 62  | 69,0  | 69,0  | 18,55 | 557,33 | 142,94 |
|    | 2019/08/28 | CH2276 | Female | Two y/o | Control | Control | Feed Day | No | 21:10 | 21:00 - 21:59 | Night         | 37,4 | 61  | 73,0  | 73,0  | 18,55 | 556,01 | 144,89 |
|    | 2019/08/28 | CH2276 | Female | Two y/o | Control | Control | Feed Day | No | 21:15 | 21:00 - 21:59 | Night         | 37,4 | 61  | 81,6  | 81,6  | 18,55 | 556,01 | 148,76 |
|    | 2019/08/28 | CH2276 | Female | Two y/o | Control | Control | Feed Day | No | 21:20 | 21:00 - 21:59 | Night         | 37,4 | 86  | 73,0  | 73,0  | 18,55 | 582,77 | 144,89 |
|    | 2019/08/28 | CH2276 | Female | Two y/o | Control | Control | Feed Day | No | 21:25 | 21:00 - 21:59 | Night         | 37,4 | 90  | 68,8  | 68,8  | 18,55 | 586,16 | 142,84 |
|    | 2019/08/28 | CH2276 | Female | Two y/o | Control | Control | Feed Day | No | 21:30 | 21:00 - 21:59 | Night         | 37,4 | 91  | 75,6  | 75,6  | 18,55 | 586,98 | 146,11 |
|    | 2019/08/28 | CH2276 | Female | Two y/o | Control | Control | Feed Day | No | 21:35 | 21:00 - 21:59 | Night         | 37,4 | 81  | 70,0  | 70,0  | 18,55 | 578,26 | 143,44 |
|    | 2019/08/28 | CH2276 | Female | Two y/o | Control | Control | Feed Day | No | 21:40 | 21:00 - 21:59 | Night         | 37,4 | 68  | 69,2  | 69,2  | 18,55 | 564,71 | 143,04 |
|    | 2019/08/28 | CH2276 | Female | Two y/o | Control | Control | Feed Day | No | 21:45 | 21:00 - 21:59 | Night         | 37,4 | 63  | 41,0  | 41,0  | 18,55 | 558,62 | 124,94 |
|    | 2019/08/28 | CH2276 | Female | Two y/o | Control | Control | Feed Day | No | 21:50 | 21:00 - 21:59 | Night         | 37,5 | 84  | 12,4  | 12,4  | 18,65 | 581,01 | 84,04  |
|    | 2019/08/28 | CH2276 | Female | Two y/o | Control | Control | Feed Day | No | 21:55 | 21:00 - 21:59 | Night         | 37,4 | 76  | 13,6  | 13,6  | 18,55 | 573,39 | 87,18  |
|    | 2019/08/28 | CH2276 | Female | Two y/o | Control | Control | Feed Day | No | 22:00 | 22:00 - 22:59 | Night         | 37,5 | 62  | 12,6  | 12,6  | 18,65 | 557,33 | 84,59  |
|    | 2019/08/28 | CH2276 | Female | Two y/o | Control | Control | Feed Day | No | 22:05 | 22:00 - 22:59 | Night         | 37,5 | 95  | 12,0  | 12,0  | 18,65 | 590,14 | 82,93  |
|    | 2019/08/28 | CH2276 | Female | Two y/o | Control | Control | Feed Day | No | 22:10 | 22:00 - 22:59 | Night         | 37,5 | 63  | 11,8  | 11,8  | 18,65 | 558,62 | 82,36  |
|    | 2019/08/28 | CH2276 | Female | Two y/o | Control | Control | Feed Day | No | 22:15 | 22:00 - 22:59 | Night         | 37,5 | 56  | 13,8  | 13,8  | 18,65 | 549,01 | 87,68  |
|    | 2019/08/28 | CH2276 | Female | Two y/o | Control | Control | Feed Day | No | 22:20 | 22:00 - 22:59 | Night         | 37,5 | 61  | 18,2  | 18,2  | 18,65 | 556,01 | 97,10  |
|    | 2019/08/28 | CH2276 | Female | Two y/o | Control | Control | Feed Day | No | 22:25 | 22:00 - 22:59 | Night         | 37,6 | 69  | 16,0  | 16,0  | 18,75 | 565,86 | 92,71  |
|    | 2019/08/28 | CH2276 | Female | Two y/o | Control | Control | Feed Day | No | 22:30 | 22:00 - 22:59 | Night         | 37,5 | 61  | 15,0  | 15,0  | 18,65 | 556,01 | 90,51  |
|    | 2019/08/28 | CH2276 | Female | Two y/o | Control | Control | Feed Day | No | 22:35 | 22:00 - 22:59 | Night         | 37,5 | 65  | 11,4  | 11,4  | 18,65 | 561,12 | 81,19  |
|    | 2019/08/28 | CH2276 | Female | Two y/o | Control | Control | Feed Day | No | 22:40 | 22:00 - 22:59 | Night         | 37,4 | 73  | 11,6  | 11,6  | 18,55 | 570,27 | 81,78  |
|    | 2019/08/28 | CH2276 | Female | Two y/o | Control | Control | Feed Day | No | 22:45 | 22:00 - 22:59 | Night         | 37,4 | 63  | 9,2   | 9,2   | 18,55 | 558,62 | 73,94  |
|    | 2019/08/28 | CH2276 | Female | Two y/o | Control | Control | Feed Day | No | 22:50 | 22:00 - 22:59 | Night         | 37,3 | 72  | 6,4   | 6,4   | 18,46 | 569,20 | 61,70  |
|    | 2019/08/28 | CH2276 | Female | Two y/o | Control | Control | Feed Day | No | 22:55 | 22:00 - 22:59 | Night         | 37,2 | 61  | 8,0   | 8,0   | 18,36 | 556,01 | 69,22  |
|    | 2019/08/28 | CH2276 | Female | Two y/o | Control | Control | Feed Day | No | 23:00 | 23:00 - 23:59 | Night         | 37,3 | 61  | 13,8  | 13,8  | 18,46 | 556,01 | 87,68  |
|    | 2019/08/28 | CH2276 | Female | Two y/o | Control | Control | Feed Day | No | 23:05 | 23:00 - 23:59 | Night         | 37,3 | 60  | 6,8   | 6,8   | 18,46 | 554,67 | 63,74  |
|    | 2019/08/28 | CH2276 | Female | Two y/o | Control | Control | Feed Day | No | 23:10 | 23:00 - 23:59 | Night         | 37,3 | 62  | 11,6  | 11,6  | 18,46 | 557,33 | 81,78  |
|    | 2019/08/28 | CH2276 | Female | Two y/o | Control | Control | Feed Day | No | 23:15 | 23:00 - 23:59 | Night         | 37,3 | 70  | 16,4  | 16,4  | 18,46 | 566,99 | 93,55  |
|    | 2019/08/28 | CH2276 | Female | Two y/o | Control | Control | Feed Day | No | 23:20 | 23:00 - 23:59 | Night         | 37,3 | 50  | 16,6  | 16,6  | 18,46 | 539,52 | 93,96  |
|    | 2019/08/28 | CH2276 | Female | Two y/o | Control | Control | Feed Day | No | 23:25 | 23:00 - 23:59 | Night         | 37,2 | 85  | 7,0   | 7,0   | 18,36 | 581,90 | 64,72  |
|    | 2019/08/28 | CH2276 | Female | Two y/o | Control | Control | Feed Day | No | 23:30 | 23:00 - 23:59 | Night         | 37,2 | 84  | 7,2   | 7,2   | 18,36 | 581,01 | 65,66  |
|    | 2019/08/28 | CH2276 | Female | Two y/o | Control | Control | Feed Day | No | 23:35 | 23:00 - 23:59 | Night         | 37,2 | 56  | 4,0   | 4,0   | 18,36 | 549,01 | 45,94  |
|    | 2019/08/28 | CH2276 | Female | Two y/o | Control | Control | Feed Day | No | 23:40 | 23:00 - 23:59 | Night         | 37,2 | 69  | 4,0   | 4,0   | 18,36 | 565,86 | 45,94  |
|    | 2019/08/28 | CH2276 | Female | Two y/o | Control | Control | Feed Day | No | 23:45 | 23:00 - 23:59 | Night         | 37,1 | 63  | 12,2  | 12,2  | 18,26 | 558,62 | 83,49  |
|    | 2019/08/28 | CH2276 | Female | Two y/o | Control | Control | Feed Day | No | 23:50 | 23:00 - 23:59 | Night         | 37,1 | 63  | 8,2   | 8,2   | 18,26 | 558,62 | 70,05  |
|    | 2019/08/28 | CH2276 | Female | Two y/o | Control | Control | Feed Day | No | 23:55 | 23:00 - 23:59 | Night         | 37,1 | 62  | 15,4  | 15,4  | 18,26 | 557,33 | 91,41  |
| 71 | 2019/08/29 | CH2276 | Female | Two y/o | Control | Control | Feed Day | No | 00:00 | 00:00 - 00:59 | Early Morning | 37,1 | 82  | 4,4   | 4,4   | 18,26 | 579,19 | 49,12  |
|    | 2019/08/29 | CH2276 | Female | Two y/o | Control | Control | Feed Day | No | 00:05 | 00:00 - 00:59 | Early Morning | 37,1 | 65  | 8,8   | 8,8   | 18,26 | 561,12 | 72,43  |
|    | 2019/08/29 | CH2276 | Female | Two y/o | Control | Control | Feed Day | No | 00:10 | 00:00 - 00:59 | Early Morning | 37,2 | 68  | 11,4  | 11,4  | 18,36 | 564,71 | 81,19  |
|    | 2019/08/29 | CH2276 | Female | Two y/o | Control | Control | Feed Day | No | 00:15 | 00:00 - 00:59 | Early Morning | 37,1 | 60  | 6,0   | 6,0   | 18,26 | 554,67 | 59,53  |
|    | 2019/08/29 | CH2276 | Female | Two y/o | Control | Control | Feed Day | No | 00:20 | 00:00 - 00:59 | Early Morning | 37,1 | 57  | 4,6   | 4,6   | 18,26 | 550,47 | 50,61  |
|    | 2019/08/29 | CH2276 | Female | Two y/o | Control | Control | Feed Day | No | 00:25 | 00:00 - 00:59 | Early Morning | 37,1 | 88  | 6,0   | 6,0   | 18,26 | 584,49 | 59,53  |
|    | 2019/08/29 | CH2276 | Female | Two y/o | Control | Control | Feed Day | No | 00:30 | 00:00 - 00:59 | Early Morning | 37,1 | 138 | 44,4  | 44,4  | 18,26 | 616,31 | 127,69 |
|    | 2019/08/29 | CH2276 | Female | Two y/o | Control | Control | Feed Day | No | 00:35 | 00:00 - 00:59 | Early Morning | 37,0 | 60  | 41,0  | 41,0  | 18,16 | 554,67 | 124,94 |
|    | 2019/08/29 | CH2276 | Female | Two y/o | Control | Control | Feed Day | No | 00:40 | 00:00 - 00:59 | Early Morning | 36,9 | 65  | 40,0  | 40,0  | 18,06 | 561,12 | 124,09 |
|    | 2019/08/29 | CH2276 | Female | Two y/o | Control | Control | Feed Day | No | 00:45 | 00:00 - 00:59 | Early Morning | 36,8 | 63  | 46,0  | 46,0  | 17,96 | 558,62 | 128,91 |
|    | 2019/08/29 | CH2276 | Female | Two y/o | Control | Control | Feed Day | No | 00:50 | 00:00 - 00:59 | Early Morning | 36,7 | 65  | 44,2  | 44,2  | 17,87 | 561,12 | 127,53 |



|            |        |        |         |         |         |          |    |       |               |               |      |     |        |       |       |        |        |
|------------|--------|--------|---------|---------|---------|----------|----|-------|---------------|---------------|------|-----|--------|-------|-------|--------|--------|
| 2019/08/29 | CH2276 | Female | Two y/o | Control | Control | Feed Day | No | 00:55 | 00:00 - 00:59 | Early Morning | 36,7 | 59  | 47,2   | 47,2  | 17,87 | 553,30 | 129,80 |
| 2019/08/29 | CH2276 | Female | Two y/o | Control | Control | Feed Day | No | 01:00 | 01:00 - 01:59 | Early Morning | 36,6 | 57  | 43,8   | 43,8  | 17,77 | 550,47 | 127,22 |
| 2019/08/29 | CH2276 | Female | Two y/o | Control | Control | Feed Day | No | 01:05 | 01:00 - 01:59 | Early Morning | 36,6 | 88  | 43,2   | 43,2  | 17,77 | 584,49 | 126,74 |
| 2019/08/29 | CH2276 | Female | Two y/o | Control | Control | Feed Day | No | 01:10 | 01:00 - 01:59 | Early Morning | 36,5 | 59  | 58,0   | 58,0  | 17,67 | 553,30 | 136,92 |
| 2019/08/29 | CH2276 | Female | Two y/o | Control | Control | Feed Day | No | 01:15 | 01:00 - 01:59 | Early Morning | 36,5 | 90  | 34,4   | 34,4  | 17,67 | 586,16 | 118,90 |
| 2019/08/29 | CH2276 | Female | Two y/o | Control | Control | Feed Day | No | 01:20 | 01:00 - 01:59 | Early Morning | 36,6 | 66  | 37,4   | 37,4  | 17,77 | 562,34 | 121,77 |
| 2019/08/29 | CH2276 | Female | Two y/o | Control | Control | Feed Day | No | 01:25 | 01:00 - 01:59 | Early Morning | 36,6 | 56  | 32,6   | 32,6  | 17,77 | 549,01 | 117,05 |
| 2019/08/29 | CH2276 | Female | Two y/o | Control | Control | Feed Day | No | 01:30 | 01:00 - 01:59 | Early Morning | 36,6 | 80  | 36,8   | 36,8  | 17,77 | 577,31 | 121,22 |
| 2019/08/29 | CH2276 | Female | Two y/o | Control | Control | Feed Day | No | 01:35 | 01:00 - 01:59 | Early Morning | 36,6 | 95  | 35,0   | 35,0  | 17,77 | 590,14 | 119,49 |
| 2019/08/29 | CH2276 | Female | Two y/o | Control | Control | Feed Day | No | 01:40 | 01:00 - 01:59 | Early Morning | 36,6 | 60  | 34,0   | 34,0  | 17,77 | 554,67 | 118,49 |
| 2019/08/29 | CH2276 | Female | Two y/o | Control | Control | Feed Day | No | 01:45 | 01:00 - 01:59 | Early Morning | 36,6 | 61  | 37,4   | 37,4  | 17,77 | 556,01 | 121,77 |
| 2019/08/29 | CH2276 | Female | Two y/o | Control | Control | Feed Day | No | 01:50 | 01:00 - 01:59 | Early Morning | 36,6 | 63  | 39,4   | 39,4  | 17,77 | 558,62 | 123,57 |
| 2019/08/29 | CH2276 | Female | Two y/o | Control | Control | Feed Day | No | 01:55 | 01:00 - 01:59 | Early Morning | 36,6 | 59  | 47,2   | 47,2  | 17,77 | 553,30 | 129,80 |
| 2019/08/29 | CH2276 | Female | Two y/o | Control | Control | Feed Day | No | 02:00 | 02:00 - 02:59 | Early Morning | 36,8 | 86  | 10,6   | 10,6  | 17,96 | 582,77 | 78,73  |
| 2019/08/29 | CH2276 | Female | Two y/o | Control | Control | Feed Day | No | 02:05 | 02:00 - 02:59 | Early Morning | 36,9 | 123 | 1082,2 |       | 18,06 | 608,49 |        |
| 2019/08/29 | CH2276 | Female | Two y/o | Control | Control | Feed Day | No | 02:10 | 02:00 - 02:59 | Early Morning | 37,0 | 102 | 119,2  | 119,2 | 18,16 | 595,30 | 161,97 |
| 2019/08/29 | CH2276 | Female | Two y/o | Control | Control | Feed Day | No | 02:15 | 02:00 - 02:59 | Early Morning | 37,1 |     | 87,0   | 87,0  | 18,26 |        | 150,99 |
| 2019/08/29 | CH2276 | Female | Two y/o | Control | Control | Feed Day | No | 02:20 | 02:00 - 02:59 | Early Morning | 37,1 | 137 | 417,4  | 417,4 | 18,26 | 615,83 | 206,13 |
| 2019/08/29 | CH2276 | Female | Two y/o | Control | Control | Feed Day | No | 02:25 | 02:00 - 02:59 | Early Morning | 37,1 | 110 | 299,4  | 299,4 | 18,26 | 600,69 | 194,35 |
| 2019/08/29 | CH2276 | Female | Two y/o | Control | Control | Feed Day | No | 02:30 | 02:00 - 02:59 | Early Morning | 37,3 | 57  | 513,0  | 513,0 | 18,46 | 550,47 | 213,46 |
| 2019/08/29 | CH2276 | Female | Two y/o | Control | Control | Feed Day | No | 02:35 | 02:00 - 02:59 | Early Morning | 37,3 | 66  | 72,6   | 72,6  | 18,46 | 562,34 | 144,70 |
| 2019/08/29 | CH2276 | Female | Two y/o | Control | Control | Feed Day | No | 02:40 | 02:00 - 02:59 | Early Morning | 37,4 | 79  | 141,6  | 141,6 | 18,55 | 576,36 | 168,00 |
| 2019/08/29 | CH2276 | Female | Two y/o | Control | Control | Feed Day | No | 02:45 | 02:00 - 02:59 | Early Morning | 37,5 | 82  | 62,0   | 62,0  | 18,65 | 579,19 | 139,23 |
| 2019/08/29 | CH2276 | Female | Two y/o | Control | Control | Feed Day | No | 02:50 | 02:00 - 02:59 | Early Morning | 37,5 | 75  | 148,2  | 148,2 | 18,65 | 572,36 | 169,59 |
| 2019/08/29 | CH2276 | Female | Two y/o | Control | Control | Feed Day | No | 02:55 | 02:00 - 02:59 | Early Morning | 37,5 | 46  | 154,8  | 154,8 | 18,65 | 532,38 | 171,12 |
| 2019/08/29 | CH2276 | Female | Two y/o | Control | Control | Feed Day | No | 03:00 | 03:00 - 03:59 | Early Morning | 37,5 | 97  | 421,8  | 421,8 | 18,65 | 591,66 | 206,50 |
| 2019/08/29 | CH2276 | Female | Two y/o | Control | Control | Feed Day | No | 03:05 | 03:00 - 03:59 | Early Morning | 37,5 | 86  | 37,6   | 37,6  | 18,65 | 582,77 | 121,96 |
| 2019/08/29 | CH2276 | Female | Two y/o | Control | Control | Feed Day | No | 03:10 | 03:00 - 03:59 | Early Morning | 37,5 | 82  | 56,0   | 56,0  | 18,65 | 579,19 | 135,70 |
| 2019/08/29 | CH2276 | Female | Two y/o | Control | Control | Feed Day | No | 03:15 | 03:00 - 03:59 | Early Morning | 37,5 | 90  | 61,6   | 61,6  | 18,65 | 586,16 | 139,00 |
| 2019/08/29 | CH2276 | Female | Two y/o | Control | Control | Feed Day | No | 03:20 | 03:00 - 03:59 | Early Morning | 37,5 | 57  | 222,0  | 222,0 | 18,65 | 550,47 | 183,79 |
| 2019/08/29 | CH2276 | Female | Two y/o | Control | Control | Feed Day | No | 03:25 | 03:00 - 03:59 | Early Morning | 37,5 | 84  | 431,0  | 431,0 | 18,65 | 581,01 | 207,26 |
| 2019/08/29 | CH2276 | Female | Two y/o | Control | Control | Feed Day | No | 03:30 | 03:00 - 03:59 | Early Morning | 37,5 | 112 | 146,2  | 146,2 | 18,65 | 601,96 | 169,12 |
| 2019/08/29 | CH2276 | Female | Two y/o | Control | Control | Feed Day | No | 03:35 | 03:00 - 03:59 | Early Morning | 37,5 | 105 | 147,4  | 147,4 | 18,65 | 597,38 | 169,40 |
| 2019/08/29 | CH2276 | Female | Two y/o | Control | Control | Feed Day | No | 03:40 | 03:00 - 03:59 | Early Morning | 37,5 | 54  | 417,4  | 417,4 | 18,65 | 545,99 | 206,13 |
| 2019/08/29 | CH2276 | Female | Two y/o | Control | Control | Feed Day | No | 03:45 | 03:00 - 03:59 | Early Morning | 37,6 | 115 | 248,0  | 248,0 | 18,75 | 603,82 | 187,70 |
| 2019/08/29 | CH2276 | Female | Two y/o | Control | Control | Feed Day | No | 03:50 | 03:00 - 03:59 | Early Morning | 37,5 | 64  | 12,8   | 12,8  | 18,65 | 559,88 | 85,12  |
| 2019/08/29 | CH2276 | Female | Two y/o | Control | Control | Feed Day | No | 03:55 | 03:00 - 03:59 | Early Morning | 37,4 | 56  | 17,8   | 17,8  | 18,55 | 549,01 | 96,34  |
| 2019/08/29 | CH2276 | Female | Two y/o | Control | Control | Feed Day | No | 04:00 | 04:00 - 04:59 | Morning       | 37,3 | 59  | 21,2   | 21,2  | 18,46 | 553,30 | 102,31 |
| 2019/08/29 | CH2276 | Female | Two y/o | Control | Control | Feed Day | No | 04:05 | 04:00 - 04:59 | Morning       | 37,3 | 60  | 16,2   | 16,2  | 18,46 | 554,67 | 93,13  |
| 2019/08/29 | CH2276 | Female | Two y/o | Control | Control | Feed Day | No | 04:10 | 04:00 - 04:59 | Morning       | 37,3 | 57  | 18,8   | 18,8  | 18,46 | 550,47 | 98,20  |
| 2019/08/29 | CH2276 | Female | Two y/o | Control | Control | Feed Day | No | 04:15 | 04:00 - 04:59 | Morning       | 37,3 | 87  | 18,6   | 18,6  | 18,46 | 583,64 | 97,84  |
| 2019/08/29 | CH2276 | Female | Two y/o | Control | Control | Feed Day | No | 04:20 | 04:00 - 04:59 | Morning       | 37,2 | 54  | 18,8   | 18,8  | 18,36 | 545,99 | 98,20  |
| 2019/08/29 | CH2276 | Female | Two y/o | Control | Control | Feed Day | No | 04:25 | 04:00 - 04:59 | Morning       | 37,2 | 61  | 16,0   | 16,0  | 18,36 | 556,01 | 92,71  |
| 2019/08/29 | CH2276 | Female | Two y/o | Control | Control | Feed Day | No | 04:30 | 04:00 - 04:59 | Morning       | 37,1 | 59  | 30,0   | 30,0  | 18,26 | 553,30 | 114,20 |
| 2019/08/29 | CH2276 | Female | Two y/o | Control | Control | Feed Day | No | 04:35 | 04:00 - 04:59 | Morning       | 37,0 | 54  | 29,6   | 29,6  | 18,16 | 545,99 | 113,73 |
| 2019/08/29 | CH2276 | Female | Two y/o | Control | Control | Feed Day | No | 04:40 | 04:00 - 04:59 | Morning       | 36,9 | 57  | 19,6   | 19,6  | 18,06 | 550,47 | 99,63  |
| 2019/08/29 | CH2276 | Female | Two y/o | Control | Control | Feed Day | No | 04:45 | 04:00 - 04:59 | Morning       | 36,8 | 62  | 22,6   | 22,6  | 17,96 | 557,33 | 104,49 |
| 2019/08/29 | CH2276 | Female | Two y/o | Control | Control | Feed Day | No | 04:50 | 04:00 - 04:59 | Morning       | 36,6 | 52  | 22,2   | 22,2  | 17,77 | 542,83 | 103,88 |
| 2019/08/29 | CH2276 | Female | Two y/o | Control | Control | Feed Day | No | 04:55 | 04:00 - 04:59 | Morning       | 36,5 | 55  | 19,8   | 19,8  | 17,67 | 547,52 | 99,97  |
| 2019/08/29 | CH2276 | Female | Two y/o | Control | Control | Feed Day | No | 05:00 | 05:00 - 05:59 | Morning       | 36,4 | 50  | 105,0  | 105,0 | 17,57 | 539,52 | 157,55 |
| 2019/08/29 | CH2276 | Female | Two y/o | Control | Control | Feed Day | No | 05:05 | 05:00 - 05:59 | Morning       | 36,2 | 51  | 22,6   | 22,6  | 17,38 | 541,20 | 104,49 |
| 2019/08/29 | CH2276 | Female | Two y/o | Control | Control | Feed Day | No | 05:10 | 05:00 - 05:59 | Morning       | 36,1 | 88  | 22,2   | 22,2  | 17,29 | 584,49 | 103,88 |
| 2019/08/29 | CH2276 | Female | Two y/o | Control | Control | Feed Day | No | 05:15 | 05:00 - 05:59 | Morning       | 36,1 |     | 24,6   | 24,6  | 17,29 |        | 107,39 |
| 2019/08/29 | CH2276 | Female | Two y/o | Control | Control | Feed Day | No | 05:20 | 05:00 - 05:59 | Morning       | 36,3 | 76  | 16,2   | 16,2  | 17,48 | 573,39 | 93,13  |
| 2019/08/29 | CH2276 | Female | Two y/o | Control | Control | Feed Day | No | 05:25 | 05:00 - 05:59 | Morning       | 36,5 | 76  | 108,0  | 108,0 | 17,67 | 573,39 | 158,53 |
| 2019/08/29 | CH2276 | Female | Two y/o | Control | Control | Feed Day | No | 05:30 | 05:00 - 05:59 | Morning       | 36,7 |     | 416,6  | 416,6 | 17,87 |        | 206,06 |
| 2019/08/29 | CH2276 | Female | Two y/o | Control | Control | Feed Day | No | 05:35 | 05:00 - 05:59 | Morning       | 37,1 | 94  | 191,0  | 191,0 | 18,26 | 589,37 | 178,50 |
| 2019/08/29 | CH2276 | Female | Two y/o | Control | Control | Feed Day | No | 05:40 | 05:00 - 05:59 | Morning       | 37,8 | 107 | 33,4   | 33,4  | 18,95 | 598,73 | 117,88 |
| 2019/08/29 | CH2276 | Female | Two y/o | Control | Control | Feed Day | No | 05:45 | 05:00 - 05:59 | Morning       | 37,9 | 57  | 463,2  | 463,2 | 19,05 | 550,47 | 209,83 |
| 2019/08/29 | CH2276 | Female | Two y/o | Control | Control | Feed Day | No | 05:50 | 05:00 - 05:59 | Morning       | 38,0 | 114 | 32,0   | 32,0  | 19,15 | 603,20 | 116,41 |
| 2019/08/29 | CH2276 | Female | Two y/o | Control | Control | Feed Day | No | 05:55 | 05:00 - 05:59 | Morning       | 38,0 | 74  | 34,2   | 34,2  | 19,15 | 571,33 | 118,70 |
| 2019/08/29 | CH2276 | Female | Two y/o | Control | Control | Feed Day | No | 06:00 | 06:00 - 06:59 | Morning       | 37,8 | 73  | 24,2   | 24,2  | 18,95 | 570,27 | 106,83 |
| 2019/08/29 | CH2276 | Female | Two y/o | Control | Control | Feed Day | No | 06:05 | 06:00 - 06:59 | Morning       | 37,7 | 123 | 129,6  | 129,6 | 18,85 | 608,49 | 164,90 |
| 2019/08/29 | CH2276 | Female | Two y/o | Control | Control | Feed Day | No | 06:10 | 06:00 - 06:59 | Morning       | 38,2 | 99  | 534,4  | 534,4 | 19,36 | 593,14 | 214,92 |
| 2019/08/29 | CH2276 | Female | Two y/o | Control | Control | Feed Day | No | 06:15 | 06:00 - 06:59 | Morning       | 38,1 | 174 | 223,6  | 223,6 | 19,26 | 631,46 | 184,05 |
| 2019/08/29 | CH2276 | Female | Two y/o | Control | Control | Feed Day | No | 06:20 | 06:00 - 06:59 | Morning       | 38,1 | 117 | 525,8  | 525,8 | 19,26 | 605,02 | 214,34 |
| 2019/08/29 | CH2276 | Female | Two y/o | Control | Control | Feed Day | No | 06:25 | 06:00 - 06:59 | Morning       | 38,0 |     | 114,0  | 114,0 | 19,15 |        | 160,42 |
| 2019/08/29 | CH2276 | Female | Two y/o | Control | Control | Feed Day | No | 06:30 | 06:00 - 06:59 | Morning       | 38,0 | 177 | 229,6  | 229,6 | 19,15 | 632,55 | 184,98 |
| 2019/08/29 | CH2276 | Female | Two y/o | Control | Control | Feed Day | No | 06:35 | 06:00 - 06:59 | Morning       | 38,0 | 111 | 727,0  | 727,0 | 19,15 | 601,33 | 225,91 |
| 2019/08/29 | CH2276 | Female | Two y/o | Control | Control | Feed Day | No | 06:40 | 06:00 - 06:59 | Morning       | 38,0 |     | 345,0  | 345,0 | 19,15 |        | 199,37 |



|            |        |        |         |         |         |          |     |       |               |              |      |     |       |       |       |        |        |
|------------|--------|--------|---------|---------|---------|----------|-----|-------|---------------|--------------|------|-----|-------|-------|-------|--------|--------|
| 2019/08/29 | CH2276 | Female | Two y/o | Control | Control | Feed Day | No  | 06:45 | 06:00 - 06:59 | Morning      | 38,0 |     | 187,2 | 187,2 | 19,15 |        | 177,79 |
| 2019/08/29 | CH2276 | Female | Two y/o | Control | Control | Feed Day | No  | 06:50 | 06:00 - 06:59 | Morning      | 37,9 | 69  | 167,0 | 167,0 | 19,05 | 565,86 | 173,78 |
| 2019/08/29 | CH2276 | Female | Two y/o | Control | Control | Feed Day | No  | 06:55 | 06:00 - 06:59 | Morning      | 37,9 | 76  | 115,2 | 115,2 | 19,05 | 573,39 | 160,78 |
| 2019/08/29 | CH2276 | Female | Two y/o | Control | Control | Feed Day | No  | 07:00 | 07:00 - 07:59 | Morning      | 37,9 | 180 | 145,6 | 145,6 | 19,05 | 633,61 | 168,97 |
| 2019/08/29 | CH2276 | Female | Two y/o | Control | Control | Feed Day | No  | 07:05 | 07:00 - 07:59 | Morning      | 38,2 |     | 245,4 | 245,4 | 19,36 |        | 187,33 |
| 2019/08/29 | CH2276 | Female | Two y/o | Control | Control | Feed Day | No  | 07:10 | 07:00 - 07:59 | Morning      | 38,3 | 132 | 157,4 | 157,4 | 19,46 | 613,32 | 171,71 |
| 2019/08/29 | CH2276 | Female | Two y/o | Control | Control | Feed Day | No  | 07:15 | 07:00 - 07:59 | Morning      | 38,1 | 156 | 103,0 | 103,0 | 19,26 | 624,43 | 156,87 |
| 2019/08/29 | CH2276 | Female | Two y/o | Control | Control | Feed Day | No  | 07:20 | 07:00 - 07:59 | Morning      | 38,0 |     | 85,8  | 85,8  | 19,15 |        | 150,51 |
| 2019/08/29 | CH2276 | Female | Two y/o | Control | Control | Feed Day | No  | 07:25 | 07:00 - 07:59 | Morning      | 37,9 |     | 75,8  | 75,8  | 19,05 |        | 146,20 |
| 2019/08/29 | CH2276 | Female | Two y/o | Control | Control | Feed Day | No  | 07:30 | 07:00 - 07:59 | Morning      | 37,8 | 93  | 60,4  | 60,4  | 18,95 | 588,58 | 138,32 |
| 2019/08/29 | CH2276 | Female | Two y/o | Control | Control | Feed Day | No  | 07:35 | 07:00 - 07:59 | Morning      | 37,9 |     | 68,6  | 68,6  | 19,05 |        | 142,74 |
| 2019/08/29 | CH2276 | Female | Two y/o | Control | Control | Feed Day | No  | 07:40 | 07:00 - 07:59 | Morning      | 38,0 |     | 209,4 | 209,4 | 19,15 |        | 181,74 |
| 2019/08/29 | CH2276 | Female | Two y/o | Control | Control | Feed Day | No  | 07:45 | 07:00 - 07:59 | Morning      | 38,0 | 111 | 762,6 | 762,6 | 19,15 | 601,33 | 227,62 |
| 2019/08/29 | CH2276 | Female | Two y/o | Control | Control | Feed Day | No  | 07:50 | 07:00 - 07:59 | Morning      | 37,9 | 57  | 50,4  | 50,4  | 19,05 | 550,47 | 132,06 |
| 2019/08/29 | CH2276 | Female | Two y/o | Control | Control | Feed Day | No  | 07:55 | 07:00 - 07:59 | Morning      | 37,8 | 66  | 17,8  | 17,8  | 18,95 | 562,34 | 96,34  |
| 2019/08/29 | CH2276 | Female | Two y/o | Control | Control | Feed Day | No  | 08:00 | 08:00 - 08:59 | Late Morning | 37,6 | 60  | 8,6   | 8,6   | 18,75 | 554,67 | 71,66  |
| 2019/08/29 | CH2276 | Female | Two y/o | Control | Control | Feed Day | No  | 08:05 | 08:00 - 08:59 | Late Morning | 37,5 | 58  | 4,0   | 4,0   | 18,65 | 551,90 | 45,94  |
| 2019/08/29 | CH2276 | Female | Two y/o | Control | Control | Feed Day | No  | 08:10 | 08:00 - 08:59 | Late Morning | 37,4 | 64  | 236,4 | 236,4 | 18,55 | 559,88 | 186,01 |
| 2019/08/29 | CH2276 | Female | Two y/o | Control | Control | Feed Day | No  | 08:15 | 08:00 - 08:59 | Late Morning | 37,3 |     | 79,2  | 79,2  | 18,46 |        | 147,73 |
| 2019/08/29 | CH2276 | Female | Two y/o | Control | Control | Feed Day | No  | 08:20 | 08:00 - 08:59 | Late Morning | 37,4 | 58  | 169,8 | 169,8 | 18,55 | 551,90 | 174,37 |
| 2019/08/29 | CH2276 | Female | Two y/o | Control | Control | Feed Day | No  | 08:25 | 08:00 - 08:59 | Late Morning | 37,6 | 121 | 105,0 | 105,0 | 18,75 | 607,35 | 157,55 |
| 2019/08/29 | CH2276 | Female | Two y/o | Control | Control | Feed Day | No  | 08:30 | 08:00 - 08:59 | Late Morning | 37,7 | 71  | 21,4  | 21,4  | 18,85 | 568,10 | 102,63 |
| 2019/08/29 | CH2276 | Female | Two y/o | Control | Control | Feed Day | No  | 08:35 | 08:00 - 08:59 | Late Morning | 37,7 |     | 72,0  | 72,0  | 18,85 |        | 144,42 |
| 2019/08/29 | CH2276 | Female | Two y/o | Control | Control | Feed Day | No  | 08:40 | 08:00 - 08:59 | Late Morning | 37,8 | 94  | 28,4  | 28,4  | 18,95 | 589,37 | 112,31 |
| 2019/08/29 | CH2276 | Female | Two y/o | Control | Control | Feed Day | No  | 08:45 | 08:00 - 08:59 | Late Morning | 37,8 | 68  | 203,4 | 203,4 | 18,95 | 564,71 | 180,71 |
| 2019/08/29 | CH2276 | Female | Two y/o | Control | Control | Feed Day | No  | 08:50 | 08:00 - 08:59 | Late Morning | 37,8 | 97  | 148,0 | 148,0 | 18,95 | 591,66 | 169,55 |
| 2019/08/29 | CH2276 | Female | Two y/o | Control | Control | Feed Day | No  | 08:55 | 08:00 - 08:59 | Late Morning | 37,9 | 64  | 19,8  | 19,8  | 19,05 | 559,88 | 99,97  |
| 2019/08/29 | CH2276 | Female | Two y/o | Control | Control | Feed Day | No  | 09:00 | 09:00 - 09:59 | Late Morning | 37,8 | 78  | 47,2  | 47,2  | 18,95 | 575,38 | 129,80 |
| 2019/08/29 | CH2276 | Female | Two y/o | Control | Control | Feed Day | No  | 09:05 | 09:00 - 09:59 | Late Morning | 37,8 | 112 | 102,4 | 102,4 | 18,95 | 601,96 | 156,67 |
| 2019/08/29 | CH2276 | Female | Two y/o | Control | Control | Feed Day | No  | 09:10 | 09:00 - 09:59 | Late Morning | 37,8 | 110 | 144,8 | 144,8 | 18,95 | 600,69 | 168,78 |
| 2019/08/29 | CH2276 | Female | Two y/o | Control | Control | Feed Day | No  | 09:15 | 09:00 - 09:59 | Late Morning | 37,8 | 81  | 155,2 | 155,2 | 18,95 | 578,26 | 171,21 |
| 2019/08/29 | CH2276 | Female | Two y/o | Control | Control | Feed Day | No  | 09:20 | 09:00 - 09:59 | Late Morning | 37,9 | 120 | 334,8 | 334,8 | 19,05 | 606,78 | 198,30 |
| 2019/08/29 | CH2276 | Female | Two y/o | Control | Control | Feed Day | No  | 09:25 | 09:00 - 09:59 | Late Morning | 37,9 | 59  | 455,6 | 455,6 | 19,05 | 553,30 | 209,24 |
| 2019/08/29 | CH2276 | Female | Two y/o | Control | Control | Feed Day | No  | 09:30 | 09:00 - 09:59 | Late Morning | 37,9 | 68  | 84,6  | 84,6  | 19,05 | 564,71 | 150,02 |
| 2019/08/29 | CH2276 | Female | Two y/o | Control | Control | Feed Day | No  | 09:35 | 09:00 - 09:59 | Late Morning | 38,0 |     | 123,4 | 123,4 | 19,15 |        | 163,18 |
| 2019/08/29 | CH2276 | Female | Two y/o | Control | Control | Feed Day | No  | 09:40 | 09:00 - 09:59 | Late Morning | 37,9 | 100 | 304,0 | 304,0 | 19,05 | 593,87 | 194,89 |
| 2019/08/29 | CH2276 | Female | Two y/o | Control | Control | Feed Day | No  | 09:45 | 09:00 - 09:59 | Late Morning | 37,9 | 57  | 274,6 | 274,6 | 19,05 | 550,47 | 191,29 |
| 2019/08/29 | CH2276 | Female | Two y/o | Control | Control | Feed Day | No  | 09:50 | 09:00 - 09:59 | Late Morning | 37,9 | 123 | 193,8 | 193,8 | 19,05 | 608,49 | 179,01 |
| 2019/08/29 | CH2276 | Female | Two y/o | Control | Control | Feed Day | No  | 09:55 | 09:00 - 09:59 | Late Morning | 38,0 | 56  | 163,8 | 163,8 | 19,15 | 549,01 | 173,10 |
| 2019/08/29 | CH2276 | Female | Two y/o | Control | Control | Feed Day | No  | 10:00 | 10:00 - 10:59 | Late Morning | 38,0 | 121 | 76,4  | 76,4  | 19,15 | 607,35 | 146,48 |
| 2019/08/29 | CH2276 | Female | Two y/o | Control | Control | Feed Day | No  | 10:05 | 10:00 - 10:59 | Late Morning | 38,0 | 182 | 603,6 | 603,6 | 19,15 | 634,31 | 219,26 |
| 2019/08/29 | CH2276 | Female | Two y/o | Control | Control | Feed Day | No  | 10:10 | 10:00 - 10:59 | Late Morning | 38,3 |     | 23,2  | 23,2  | 19,46 |        | 105,39 |
| 2019/08/29 | CH2276 | Female | Two y/o | Control | Control | Feed Day | No  | 10:15 | 10:00 - 10:59 | Late Morning | 38,3 | 63  | 4,2   | 4,2   | 19,46 | 558,62 | 47,57  |
| 2019/08/29 | CH2276 | Female | Two y/o | Control | Control | Feed Day | No  | 10:20 | 10:00 - 10:59 | Late Morning | 38,2 | 63  | 5,8   | 5,8   | 19,36 | 558,62 | 58,39  |
| 2019/08/29 | CH2276 | Female | Two y/o | Control | Control | Feed Day | No  | 10:25 | 10:00 - 10:59 | Late Morning | 38,2 | 68  | 4,2   | 4,2   | 19,36 | 564,71 | 47,57  |
| 2019/08/29 | CH2276 | Female | Two y/o | Control | Control | Feed Day | Yes | 10:30 | 10:00 - 10:59 | Late Morning | 38,0 | 59  | 5,0   | 5,0   | 19,15 | 553,30 | 53,41  |
| 2019/08/29 | CH2276 | Female | Two y/o | Control | Control | Feed Day | Yes | 10:35 | 10:00 - 10:59 | Late Morning | 38,0 | 56  | 14,6  | 14,6  | 19,15 | 549,01 | 89,59  |
| 2019/08/29 | CH2276 | Female | Two y/o | Control | Control | Feed Day | Yes | 10:40 | 10:00 - 10:59 | Late Morning | 38,0 | 88  | 95,0  | 95,0  | 19,15 | 584,49 | 154,06 |
| 2019/08/29 | CH2276 | Female | Two y/o | Control | Control | Feed Day | Yes | 10:45 | 10:00 - 10:59 | Late Morning | 37,9 | 44  | 352,0 | 352,0 | 19,05 | 528,51 | 200,08 |
| 2019/08/29 | CH2276 | Female | Two y/o | Control | Control | Feed Day | Yes | 10:50 | 10:00 - 10:59 | Late Morning | 37,8 | 105 | 55,8  | 55,8  | 18,95 | 597,38 | 135,58 |
| 2019/08/29 | CH2276 | Female | Two y/o | Control | Control | Feed Day | Yes | 10:55 | 10:00 - 10:59 | Late Morning | 37,8 | 108 | 129,8 | 129,8 | 18,95 | 599,39 | 164,95 |
| 2019/08/29 | CH2276 | Female | Two y/o | Control | Control | Feed Day | Yes | 11:00 | 11:00 - 11:59 | Late Morning | 37,8 |     | 213,8 | 213,8 | 18,95 |        | 182,47 |
| 2019/08/29 | CH2276 | Female | Two y/o | Control | Control | Feed Day | Yes | 11:05 | 11:00 - 11:59 | Late Morning | 38,2 | 124 | 98,2  | 98,2  | 19,36 | 609,04 | 155,21 |
| 2019/08/29 | CH2276 | Female | Two y/o | Control | Control | Feed Day | Yes | 11:10 | 11:00 - 11:59 | Late Morning | 38,2 |     | 49,4  | 49,4  | 19,36 |        | 131,37 |
| 2019/08/29 | CH2276 | Female | Two y/o | Control | Control | Feed Day | Yes | 11:15 | 11:00 - 11:59 | Late Morning | 38,0 | 145 | 103,0 | 103,0 | 19,15 | 619,62 | 156,87 |
| 2019/08/29 | CH2276 | Female | Two y/o | Control | Control | Feed Day | Yes | 11:20 | 11:00 - 11:59 | Late Morning | 38,0 | 117 | 36,0  | 36,0  | 19,15 | 605,02 | 120,46 |
| 2019/08/29 | CH2276 | Female | Two y/o | Control | Control | Feed Day | Yes | 11:25 | 11:00 - 11:59 | Late Morning | 38,0 | 36  | 27,0  | 27,0  | 19,15 | 510,56 | 110,58 |
| 2019/08/29 | CH2276 | Female | Two y/o | Control | Control | Feed Day | No  | 11:30 | 11:00 - 11:59 | Late Morning | 38,1 | 94  | 6,6   | 6,6   | 19,26 | 589,37 | 62,73  |
| 2019/08/29 | CH2276 | Female | Two y/o | Control | Control | Feed Day | No  | 11:35 | 11:00 - 11:59 | Late Morning | 38,1 | 80  | 44,8  | 44,8  | 19,26 | 577,31 | 127,99 |
| 2019/08/29 | CH2276 | Female | Two y/o | Control | Control | Feed Day | No  | 11:40 | 11:00 - 11:59 | Late Morning | 38,1 | 98  | 9,4   | 9,4   | 19,26 | 592,41 | 74,66  |
| 2019/08/29 | CH2276 | Female | Two y/o | Control | Control | Feed Day | No  | 11:45 | 11:00 - 11:59 | Late Morning | 38,1 | 69  | 15,6  | 15,6  | 19,26 | 565,86 | 91,85  |
| 2019/08/29 | CH2276 | Female | Two y/o | Control | Control | Feed Day | No  | 11:50 | 11:00 - 11:59 | Late Morning | 38,2 | 73  | 5,0   | 5,0   | 19,36 | 570,27 | 53,41  |
| 2019/08/29 | CH2276 | Female | Two y/o | Control | Control | Feed Day | No  | 11:55 | 11:00 - 11:59 | Late Morning | 38,2 | 80  | 5,4   | 5,4   | 19,36 | 577,31 | 55,99  |
| 2019/08/29 | CH2276 | Female | Two y/o | Control | Control | Feed Day | No  | 12:00 | 12:00 - 12:59 | Afternoon    | 38,2 | 75  | 7,2   | 7,2   | 19,36 | 572,36 | 65,66  |
| 2019/08/29 | CH2276 | Female | Two y/o | Control | Control | Feed Day | No  | 12:05 | 12:00 - 12:59 | Afternoon    | 38,2 | 70  | 7,6   | 7,6   | 19,36 | 566,99 | 67,49  |
| 2019/08/29 | CH2276 | Female | Two y/o | Control | Control | Feed Day | No  | 12:10 | 12:00 - 12:59 | Afternoon    | 38,2 | 132 | 38,2  | 38,2  | 19,36 | 613,32 | 122,50 |
| 2019/08/29 | CH2276 | Female | Two y/o | Control | Control | Feed Day | No  | 12:15 | 12:00 - 12:59 | Afternoon    | 38,2 | 68  | 72,2  | 72,2  | 19,36 | 564,71 | 144,51 |
| 2019/08/29 | CH2276 | Female | Two y/o | Control | Control | Feed Day | No  | 12:20 | 12:00 - 12:59 | Afternoon    | 38,2 | 83  | 55,8  | 55,8  | 19,36 | 580,11 | 135,58 |
| 2019/08/29 | CH2276 | Female | Two y/o | Control | Control | Feed Day | No  | 12:25 | 12:00 - 12:59 | Afternoon    | 38,2 | 68  | 36,4  | 36,4  | 19,36 | 564,71 | 120,84 |
| 2019/08/29 | CH2276 | Female | Two y/o | Control | Control | Feed Day | No  | 12:30 | 12:00 - 12:59 | Afternoon    | 38,2 | 78  | 36,8  | 36,8  | 19,36 | 575,38 | 121,22 |



|            |        |        |         |         |         |          |     |       |               |           |      |     |       |       |       |        |        |
|------------|--------|--------|---------|---------|---------|----------|-----|-------|---------------|-----------|------|-----|-------|-------|-------|--------|--------|
| 2019/08/29 | CH2276 | Female | Two y/o | Control | Control | Feed Day | No  | 12:35 | 12:00 - 12:59 | Afternoon | 38,2 | 73  | 25,8  | 25,8  | 19,36 | 570,27 | 109,02 |
| 2019/08/29 | CH2276 | Female | Two y/o | Control | Control | Feed Day | No  | 12:40 | 12:00 - 12:59 | Afternoon | 38,2 | 69  | 21,8  | 21,8  | 19,36 | 565,86 | 103,26 |
| 2019/08/29 | CH2276 | Female | Two y/o | Control | Control | Feed Day | No  | 12:45 | 12:00 - 12:59 | Afternoon | 38,2 | 70  | 21,0  | 21,0  | 19,36 | 566,99 | 101,98 |
| 2019/08/29 | CH2276 | Female | Two y/o | Control | Control | Feed Day | No  | 12:50 | 12:00 - 12:59 | Afternoon | 38,2 |     | 66,2  | 66,2  | 19,36 |        | 141,50 |
| 2019/08/29 | CH2276 | Female | Two y/o | Control | Control | Feed Day | No  | 12:55 | 12:00 - 12:59 | Afternoon | 38,2 | 83  | 18,8  | 18,8  | 19,36 | 580,11 | 98,20  |
| 2019/08/29 | CH2276 | Female | Two y/o | Control | Control | Feed Day | No  | 13:00 | 13:00 - 13:59 | Afternoon | 38,2 | 64  | 5,4   | 5,4   | 19,36 | 559,88 | 55,99  |
| 2019/08/29 | CH2276 | Female | Two y/o | Control | Control | Feed Day | No  | 13:05 | 13:00 - 13:59 | Afternoon | 38,2 | 70  | 5,2   | 5,2   | 19,36 | 566,99 | 54,72  |
| 2019/08/29 | CH2276 | Female | Two y/o | Control | Control | Feed Day | No  | 13:10 | 13:00 - 13:59 | Afternoon | 38,2 | 66  | 8,0   | 8,0   | 19,36 | 562,34 | 69,22  |
| 2019/08/29 | CH2276 | Female | Two y/o | Control | Control | Feed Day | No  | 13:15 | 13:00 - 13:59 | Afternoon | 38,2 | 68  | 7,2   | 7,2   | 19,36 | 564,71 | 65,66  |
| 2019/08/29 | CH2276 | Female | Two y/o | Control | Control | Feed Day | No  | 13:20 | 13:00 - 13:59 | Afternoon | 38,1 | 71  | 6,6   | 6,6   | 19,26 | 568,10 | 62,73  |
| 2019/08/29 | CH2276 | Female | Two y/o | Control | Control | Feed Day | No  | 13:25 | 13:00 - 13:59 | Afternoon | 38,1 | 67  | 4,0   | 4,0   | 19,26 | 563,53 | 45,94  |
| 2019/08/29 | CH2276 | Female | Two y/o | Control | Control | Feed Day | No  | 13:30 | 13:00 - 13:59 | Afternoon | 38,0 | 79  | 60,4  | 60,4  | 19,15 | 576,36 | 138,32 |
| 2019/08/29 | CH2276 | Female | Two y/o | Control | Control | Feed Day | No  | 13:35 | 13:00 - 13:59 | Afternoon | 38,1 | 92  | 30,4  | 30,4  | 19,26 | 587,78 | 114,65 |
| 2019/08/29 | CH2276 | Female | Two y/o | Control | Control | Feed Day | No  | 13:40 | 13:00 - 13:59 | Afternoon | 38,2 | 63  | 2,2   | 2,2   | 19,36 | 558,62 | 26,02  |
| 2019/08/29 | CH2276 | Female | Two y/o | Control | Control | Feed Day | No  | 13:45 | 13:00 - 13:59 | Afternoon | 38,2 | 64  | 3,0   | 3,0   | 19,36 | 559,88 | 36,34  |
| 2019/08/29 | CH2276 | Female | Two y/o | Control | Control | Feed Day | No  | 13:50 | 13:00 - 13:59 | Afternoon | 38,2 | 71  | 6,8   | 6,8   | 19,36 | 568,10 | 63,74  |
| 2019/08/29 | CH2276 | Female | Two y/o | Control | Control | Feed Day | No  | 13:55 | 13:00 - 13:59 | Afternoon | 38,1 | 67  | 4,0   | 4,0   | 19,26 | 563,53 | 45,94  |
| 2019/08/29 | CH2276 | Female | Two y/o | Control | Control | Feed Day | No  | 14:00 | 14:00 - 14:59 | Afternoon | 38,1 | 65  | 6,8   | 6,8   | 19,26 | 561,12 | 63,74  |
| 2019/08/29 | CH2276 | Female | Two y/o | Control | Control | Feed Day | No  | 14:05 | 14:00 - 14:59 | Afternoon | 38,0 | 65  | 2,4   | 2,4   | 19,15 | 561,12 | 28,91  |
| 2019/08/29 | CH2276 | Female | Two y/o | Control | Control | Feed Day | No  | 14:10 | 14:00 - 14:59 | Afternoon | 38,0 | 72  | 60,4  | 60,4  | 19,15 | 569,20 | 138,32 |
| 2019/08/29 | CH2276 | Female | Two y/o | Control | Control | Feed Day | No  | 14:15 | 14:00 - 14:59 | Afternoon | 38,0 | 70  | 78,4  | 78,4  | 19,15 | 566,99 | 147,37 |
| 2019/08/29 | CH2276 | Female | Two y/o | Control | Control | Feed Day | No  | 14:20 | 14:00 - 14:59 | Afternoon | 38,0 | 69  | 74,4  | 74,4  | 19,15 | 565,86 | 145,55 |
| 2019/08/29 | CH2276 | Female | Two y/o | Control | Control | Feed Day | No  | 14:25 | 14:00 - 14:59 | Afternoon | 37,9 | 63  | 74,6  | 74,6  | 19,05 | 558,62 | 145,65 |
| 2019/08/29 | CH2276 | Female | Two y/o | Control | Control | Feed Day | No  | 14:30 | 14:00 - 14:59 | Afternoon | 37,9 | 64  | 78,6  | 78,6  | 19,05 | 559,88 | 147,46 |
| 2019/08/29 | CH2276 | Female | Two y/o | Control | Control | Feed Day | No  | 14:35 | 14:00 - 14:59 | Afternoon | 37,9 | 67  | 68,0  | 68,0  | 19,05 | 563,53 | 142,43 |
| 2019/08/29 | CH2276 | Female | Two y/o | Control | Control | Feed Day | No  | 14:40 | 14:00 - 14:59 | Afternoon | 37,9 | 102 | 26,2  | 26,2  | 19,05 | 595,30 | 109,55 |
| 2019/08/29 | CH2276 | Female | Two y/o | Control | Control | Feed Day | No  | 14:45 | 14:00 - 14:59 | Afternoon | 37,9 | 84  | 27,2  | 27,2  | 19,05 | 581,01 | 110,83 |
| 2019/08/29 | CH2276 | Female | Two y/o | Control | Control | Feed Day | No  | 14:50 | 14:00 - 14:59 | Afternoon | 37,8 |     | 39,4  | 39,4  | 18,95 |        | 123,57 |
| 2019/08/29 | CH2276 | Female | Two y/o | Control | Control | Feed Day | No  | 14:55 | 14:00 - 14:59 | Afternoon | 37,8 | 89  | 54,8  | 54,8  | 18,95 | 585,33 | 134,96 |
| 2019/08/29 | CH2276 | Female | Two y/o | Control | Control | Feed Day | No  | 15:00 | 15:00 - 15:59 | Afternoon | 37,9 |     | 38,0  | 38,0  | 19,05 |        | 122,32 |
| 2019/08/29 | CH2276 | Female | Two y/o | Control | Control | Feed Day | No  | 15:05 | 15:00 - 15:59 | Afternoon | 37,9 | 162 | 73,8  | 73,8  | 19,05 | 626,88 | 145,27 |
| 2019/08/29 | CH2276 | Female | Two y/o | Control | Control | Feed Day | No  | 15:10 | 15:00 - 15:59 | Afternoon | 38,0 | 68  | 33,0  | 33,0  | 19,15 | 564,71 | 117,47 |
| 2019/08/29 | CH2276 | Female | Two y/o | Control | Control | Feed Day | No  | 15:15 | 15:00 - 15:59 | Afternoon | 38,0 | 66  | 26,8  | 26,8  | 19,15 | 562,34 | 110,33 |
| 2019/08/29 | CH2276 | Female | Two y/o | Control | Control | Feed Day | No  | 15:20 | 15:00 - 15:59 | Afternoon | 38,0 | 66  | 46,8  | 46,8  | 19,15 | 562,34 | 129,50 |
| 2019/08/29 | CH2276 | Female | Two y/o | Control | Control | Feed Day | No  | 15:25 | 15:00 - 15:59 | Afternoon | 37,9 | 67  | 31,4  | 31,4  | 19,05 | 563,53 | 115,76 |
| 2019/08/29 | CH2276 | Female | Two y/o | Control | Control | Feed Day | Yes | 15:30 | 15:00 - 15:59 | Afternoon | 37,9 | 86  | 25,2  | 25,2  | 19,05 | 582,77 | 108,22 |
| 2019/08/29 | CH2276 | Female | Two y/o | Control | Control | Feed Day | Yes | 15:35 | 15:00 - 15:59 | Afternoon | 38,0 | 87  | 39,6  | 39,6  | 19,15 | 583,64 | 123,74 |
| 2019/08/29 | CH2276 | Female | Two y/o | Control | Control | Feed Day | Yes | 15:40 | 15:00 - 15:59 | Afternoon | 37,9 | 77  | 44,4  | 44,4  | 19,05 | 574,39 | 127,69 |
| 2019/08/29 | CH2276 | Female | Two y/o | Control | Control | Feed Day | Yes | 15:45 | 15:00 - 15:59 | Afternoon | 38,0 | 94  | 44,0  | 44,0  | 19,15 | 589,37 | 127,37 |
| 2019/08/29 | CH2276 | Female | Two y/o | Control | Control | Feed Day | Yes | 15:50 | 15:00 - 15:59 | Afternoon | 38,0 | 60  | 23,6  | 23,6  | 19,15 | 554,67 | 105,97 |
| 2019/08/29 | CH2276 | Female | Two y/o | Control | Control | Feed Day | Yes | 15:55 | 15:00 - 15:59 | Afternoon | 38,2 | 69  | 73,6  | 73,6  | 19,36 | 565,86 | 145,18 |
| 2019/08/29 | CH2276 | Female | Two y/o | Control | Control | Feed Day | Yes | 16:00 | 16:00 - 16:59 | Evening   | 38,3 | 67  | 75,6  | 75,6  | 19,46 | 563,53 | 146,11 |
| 2019/08/29 | CH2276 | Female | Two y/o | Control | Control | Feed Day | Yes | 16:05 | 16:00 - 16:59 | Evening   | 38,3 | 82  | 65,2  | 65,2  | 19,46 | 579,19 | 140,97 |
| 2019/08/29 | CH2276 | Female | Two y/o | Control | Control | Feed Day | Yes | 16:10 | 16:00 - 16:59 | Evening   | 38,3 | 76  | 75,4  | 75,4  | 19,46 | 573,39 | 146,02 |
| 2019/08/29 | CH2276 | Female | Two y/o | Control | Control | Feed Day | Yes | 16:15 | 16:00 - 16:59 | Evening   | 38,3 | 70  | 48,6  | 48,6  | 19,46 | 566,99 | 130,81 |
| 2019/08/29 | CH2276 | Female | Two y/o | Control | Control | Feed Day | Yes | 16:20 | 16:00 - 16:59 | Evening   | 38,3 | 63  | 61,0  | 61,0  | 19,46 | 558,62 | 138,67 |
| 2019/08/29 | CH2276 | Female | Two y/o | Control | Control | Feed Day | Yes | 16:25 | 16:00 - 16:59 | Evening   | 38,3 | 69  | 95,2  | 95,2  | 19,46 | 565,86 | 154,13 |
| 2019/08/29 | CH2276 | Female | Two y/o | Control | Control | Feed Day | No  | 16:30 | 16:00 - 16:59 | Evening   | 38,3 | 65  | 96,4  | 96,4  | 19,46 | 561,12 | 154,57 |
| 2019/08/29 | CH2276 | Female | Two y/o | Control | Control | Feed Day | No  | 16:35 | 16:00 - 16:59 | Evening   | 38,3 | 65  | 87,2  | 87,2  | 19,46 | 561,12 | 151,07 |
| 2019/08/29 | CH2276 | Female | Two y/o | Control | Control | Feed Day | No  | 16:40 | 16:00 - 16:59 | Evening   | 38,3 | 73  | 84,8  | 84,8  | 19,46 | 570,27 | 150,10 |
| 2019/08/29 | CH2276 | Female | Two y/o | Control | Control | Feed Day | No  | 16:45 | 16:00 - 16:59 | Evening   | 38,3 | 67  | 87,0  | 87,0  | 19,46 | 563,53 | 150,99 |
| 2019/08/29 | CH2276 | Female | Two y/o | Control | Control | Feed Day | No  | 16:50 | 16:00 - 16:59 | Evening   | 38,3 | 68  | 88,8  | 88,8  | 19,46 | 564,71 | 151,71 |
| 2019/08/29 | CH2276 | Female | Two y/o | Control | Control | Feed Day | No  | 16:55 | 16:00 - 16:59 | Evening   | 38,3 | 75  | 96,4  | 96,4  | 19,46 | 572,36 | 154,57 |
| 2019/08/29 | CH2276 | Female | Two y/o | Control | Control | Feed Day | No  | 17:00 | 17:00 - 17:59 | Evening   | 38,2 | 65  | 95,6  | 95,6  | 19,36 | 561,12 | 154,28 |
| 2019/08/29 | CH2276 | Female | Two y/o | Control | Control | Feed Day | No  | 17:05 | 17:00 - 17:59 | Evening   | 38,2 | 70  | 91,4  | 91,4  | 19,36 | 566,99 | 152,71 |
| 2019/08/29 | CH2276 | Female | Two y/o | Control | Control | Feed Day | No  | 17:10 | 17:00 - 17:59 | Evening   | 38,2 | 88  | 85,6  | 85,6  | 19,36 | 584,49 | 150,43 |
| 2019/08/29 | CH2276 | Female | Two y/o | Control | Control | Feed Day | No  | 17:15 | 17:00 - 17:59 | Evening   | 38,2 | 62  | 88,6  | 88,6  | 19,36 | 557,33 | 151,63 |
| 2019/08/29 | CH2276 | Female | Two y/o | Control | Control | Feed Day | No  | 17:20 | 17:00 - 17:59 | Evening   | 38,2 | 92  | 84,2  | 84,2  | 19,36 | 587,78 | 149,85 |
| 2019/08/29 | CH2276 | Female | Two y/o | Control | Control | Feed Day | No  | 17:25 | 17:00 - 17:59 | Evening   | 38,2 | 65  | 83,2  | 83,2  | 19,36 | 561,12 | 149,44 |
| 2019/08/29 | CH2276 | Female | Two y/o | Control | Control | Feed Day | No  | 17:30 | 17:00 - 17:59 | Evening   | 38,2 | 103 | 47,6  | 47,6  | 19,36 | 596,00 | 130,09 |
| 2019/08/29 | CH2276 | Female | Two y/o | Control | Control | Feed Day | No  | 17:35 | 17:00 - 17:59 | Evening   | 38,1 | 64  | 10,8  | 10,8  | 19,26 | 559,88 | 79,36  |
| 2019/08/29 | CH2276 | Female | Two y/o | Control | Control | Feed Day | No  | 17:40 | 17:00 - 17:59 | Evening   | 38,0 | 68  | 7,4   | 7,4   | 19,15 | 564,71 | 66,59  |
| 2019/08/29 | CH2276 | Female | Two y/o | Control | Control | Feed Day | No  | 17:45 | 17:00 - 17:59 | Evening   | 38,0 | 88  | 23,4  | 23,4  | 19,15 | 584,49 | 105,68 |
| 2019/08/29 | CH2276 | Female | Two y/o | Control | Control | Feed Day | No  | 17:50 | 17:00 - 17:59 | Evening   | 37,9 | 100 | 88,6  | 88,6  | 19,05 | 593,87 | 151,63 |
| 2019/08/29 | CH2276 | Female | Two y/o | Control | Control | Feed Day | No  | 17:55 | 17:00 - 17:59 | Evening   | 38,0 | 38  | 128,4 | 128,4 | 19,15 | 515,48 | 164,57 |
| 2019/08/29 | CH2276 | Female | Two y/o | Control | Control | Feed Day | No  | 18:00 | 18:00 - 18:59 | Evening   | 38,0 |     | 115,6 | 115,6 | 19,15 |        | 160,90 |
| 2019/08/29 | CH2276 | Female | Two y/o | Control | Control | Feed Day | No  | 18:05 | 18:00 - 18:59 | Evening   | 38,0 | 134 | 77,0  | 77,0  | 19,15 | 614,33 | 146,75 |
| 2019/08/29 | CH2276 | Female | Two y/o | Control | Control | Feed Day | No  | 18:10 | 18:00 - 18:59 | Evening   | 38,0 | 88  | 35,6  | 35,6  | 19,15 | 584,49 | 120,08 |
| 2019/08/29 | CH2276 | Female | Two y/o | Control | Control | Feed Day | No  | 18:15 | 18:00 - 18:59 | Evening   | 38,0 | 80  | 137,0 | 137,0 | 19,15 | 577,31 | 166,84 |
| 2019/08/29 | CH2276 | Female | Two y/o | Control | Control | Feed Day | No  | 18:20 | 18:00 - 18:59 | Evening   | 38,0 | 125 | 353,4 | 353,4 | 19,15 | 609,60 | 200,22 |



|    |            |        |        |         |         |         |          |    |       |               |               |      |     |       |       |       |        |        |
|----|------------|--------|--------|---------|---------|---------|----------|----|-------|---------------|---------------|------|-----|-------|-------|-------|--------|--------|
|    | 2019/08/29 | CH2276 | Female | Two y/o | Control | Control | Feed Day | No | 18:25 | 18:00 - 18:59 | Evening       | 38,1 |     | 168,0 | 168,0 | 19,26 |        | 173,99 |
|    | 2019/08/29 | CH2276 | Female | Two y/o | Control | Control | Feed Day | No | 18:30 | 18:00 - 18:59 | Evening       | 38,2 | 118 | 29,2  | 29,2  | 19,36 | 605,61 | 113,27 |
|    | 2019/08/29 | CH2276 | Female | Two y/o | Control | Control | Feed Day | No | 18:35 | 18:00 - 18:59 | Evening       | 38,1 | 52  | 88,6  | 88,6  | 19,26 | 542,83 | 151,63 |
|    | 2019/08/29 | CH2276 | Female | Two y/o | Control | Control | Feed Day | No | 18:40 | 18:00 - 18:59 | Evening       | 38,0 | 94  | 112,6 | 112,6 | 19,15 | 589,37 | 159,98 |
|    | 2019/08/29 | CH2276 | Female | Two y/o | Control | Control | Feed Day | No | 18:45 | 18:00 - 18:59 | Evening       | 38,0 | 111 | 36,2  | 36,2  | 19,15 | 601,33 | 120,65 |
|    | 2019/08/29 | CH2276 | Female | Two y/o | Control | Control | Feed Day | No | 18:50 | 18:00 - 18:59 | Evening       | 38,1 |     | 79,8  | 79,8  | 19,26 |        | 147,99 |
|    | 2019/08/29 | CH2276 | Female | Two y/o | Control | Control | Feed Day | No | 18:55 | 18:00 - 18:59 | Evening       | 38,0 | 78  | 23,6  | 23,6  | 19,15 | 575,38 | 105,97 |
|    | 2019/08/29 | CH2276 | Female | Two y/o | Control | Control | Feed Day | No | 19:00 | 19:00 - 19:59 | Evening       | 37,9 | 70  | 18,6  | 18,6  | 19,05 | 566,99 | 97,84  |
|    | 2019/08/29 | CH2276 | Female | Two y/o | Control | Control | Feed Day | No | 19:05 | 19:00 - 19:59 | Evening       | 38,1 | 85  | 22,6  | 22,6  | 19,26 | 581,90 | 104,49 |
|    | 2019/08/29 | CH2276 | Female | Two y/o | Control | Control | Feed Day | No | 19:10 | 19:00 - 19:59 | Evening       | 38,1 | 70  | 13,0  | 13,0  | 19,26 | 566,99 | 85,65  |
|    | 2019/08/29 | CH2276 | Female | Two y/o | Control | Control | Feed Day | No | 19:15 | 19:00 - 19:59 | Evening       | 38,0 | 75  | 20,0  | 20,0  | 19,15 | 572,36 | 100,31 |
|    | 2019/08/29 | CH2276 | Female | Two y/o | Control | Control | Feed Day | No | 19:20 | 19:00 - 19:59 | Evening       | 38,0 | 70  | 15,0  | 15,0  | 19,15 | 566,99 | 90,51  |
|    | 2019/08/29 | CH2276 | Female | Two y/o | Control | Control | Feed Day | No | 19:25 | 19:00 - 19:59 | Evening       | 38,0 | 73  | 16,2  | 16,2  | 19,15 | 570,27 | 93,13  |
|    | 2019/08/29 | CH2276 | Female | Two y/o | Control | Control | Feed Day | No | 19:30 | 19:00 - 19:59 | Evening       | 38,0 | 74  | 15,0  | 15,0  | 19,15 | 571,33 | 90,51  |
|    | 2019/08/29 | CH2276 | Female | Two y/o | Control | Control | Feed Day | No | 19:35 | 19:00 - 19:59 | Evening       | 38,0 | 66  | 35,6  | 35,6  | 19,15 | 562,34 | 120,08 |
|    | 2019/08/29 | CH2276 | Female | Two y/o | Control | Control | Feed Day | No | 19:40 | 19:00 - 19:59 | Evening       | 38,0 | 67  | 8,8   | 8,8   | 19,15 | 563,53 | 72,43  |
|    | 2019/08/29 | CH2276 | Female | Two y/o | Control | Control | Feed Day | No | 19:45 | 19:00 - 19:59 | Evening       | 38,0 | 73  | 8,4   | 8,4   | 19,15 | 570,27 | 70,86  |
|    | 2019/08/29 | CH2276 | Female | Two y/o | Control | Control | Feed Day | No | 19:50 | 19:00 - 19:59 | Evening       | 37,8 | 67  | 8,2   | 8,2   | 18,95 | 563,53 | 70,05  |
|    | 2019/08/29 | CH2276 | Female | Two y/o | Control | Control | Feed Day | No | 19:55 | 19:00 - 19:59 | Evening       | 37,6 | 62  | 6,6   | 6,6   | 18,75 | 557,33 | 62,73  |
|    | 2019/08/29 | CH2276 | Female | Two y/o | Control | Control | Feed Day | No | 20:00 | 20:00 - 20:59 | Night         | 37,4 | 112 | 12,2  | 12,2  | 18,55 | 601,96 | 83,49  |
|    | 2019/08/29 | CH2276 | Female | Two y/o | Control | Control | Feed Day | No | 20:05 | 20:00 - 20:59 | Night         | 37,3 | 72  | 10,2  | 10,2  | 18,46 | 569,20 | 77,43  |
|    | 2019/08/29 | CH2276 | Female | Two y/o | Control | Control | Feed Day | No | 20:10 | 20:00 - 20:59 | Night         | 37,1 | 68  | 9,6   | 9,6   | 18,26 | 564,71 | 75,37  |
|    | 2019/08/29 | CH2276 | Female | Two y/o | Control | Control | Feed Day | No | 20:15 | 20:00 - 20:59 | Night         | 37,0 | 71  | 14,6  | 14,6  | 18,16 | 568,10 | 89,59  |
|    | 2019/08/29 | CH2276 | Female | Two y/o | Control | Control | Feed Day | No | 20:20 | 20:00 - 20:59 | Night         | 36,9 | 85  | 9,0   | 9,0   | 18,06 | 581,90 | 73,19  |
|    | 2019/08/29 | CH2276 | Female | Two y/o | Control | Control | Feed Day | No | 20:25 | 20:00 - 20:59 | Night         | 36,9 | 64  | 5,4   | 5,4   | 18,06 | 559,88 | 55,99  |
|    | 2019/08/29 | CH2276 | Female | Two y/o | Control | Control | Feed Day | No | 20:30 | 20:00 - 20:59 | Night         | 36,8 | 69  | 7,6   | 7,6   | 17,96 | 565,86 | 67,49  |
|    | 2019/08/29 | CH2276 | Female | Two y/o | Control | Control | Feed Day | No | 20:35 | 20:00 - 20:59 | Night         | 36,7 | 63  | 27,2  | 27,2  | 17,87 | 558,62 | 110,83 |
|    | 2019/08/29 | CH2276 | Female | Two y/o | Control | Control | Feed Day | No | 20:40 | 20:00 - 20:59 | Night         | 36,9 |     | 87,6  | 87,6  | 18,06 |        | 151,23 |
|    | 2019/08/29 | CH2276 | Female | Two y/o | Control | Control | Feed Day | No | 20:45 | 20:00 - 20:59 | Night         | 37,1 | 98  | 8,8   | 8,8   | 18,26 | 592,41 | 72,43  |
|    | 2019/08/29 | CH2276 | Female | Two y/o | Control | Control | Feed Day | No | 20:50 | 20:00 - 20:59 | Night         | 37,1 | 64  | 11,0  | 11,0  | 18,26 | 559,88 | 79,98  |
|    | 2019/08/29 | CH2276 | Female | Two y/o | Control | Control | Feed Day | No | 20:55 | 20:00 - 20:59 | Night         | 37,1 | 63  | 5,8   | 5,8   | 18,26 | 558,62 | 58,39  |
|    | 2019/08/29 | CH2276 | Female | Two y/o | Control | Control | Feed Day | No | 21:00 | 21:00 - 21:59 | Night         | 37,3 | 61  | 10,4  | 10,4  | 18,46 | 556,01 | 78,08  |
|    | 2019/08/29 | CH2276 | Female | Two y/o | Control | Control | Feed Day | No | 21:05 | 21:00 - 21:59 | Night         | 37,4 | 66  | 9,4   | 9,4   | 18,55 | 562,34 | 74,66  |
|    | 2019/08/29 | CH2276 | Female | Two y/o | Control | Control | Feed Day | No | 21:10 | 21:00 - 21:59 | Night         | 37,5 | 58  | 7,8   | 7,8   | 18,65 | 551,90 | 68,36  |
|    | 2019/08/29 | CH2276 | Female | Two y/o | Control | Control | Feed Day | No | 21:15 | 21:00 - 21:59 | Night         | 37,6 | 63  | 8,6   | 8,6   | 18,75 | 558,62 | 71,66  |
|    | 2019/08/29 | CH2276 | Female | Two y/o | Control | Control | Feed Day | No | 21:20 | 21:00 - 21:59 | Night         | 37,6 | 67  | 9,8   | 9,8   | 18,75 | 563,53 | 76,07  |
|    | 2019/08/29 | CH2276 | Female | Two y/o | Control | Control | Feed Day | No | 21:25 | 21:00 - 21:59 | Night         | 37,6 |     | 13,0  | 13,0  | 18,75 |        | 85,65  |
|    | 2019/08/29 | CH2276 | Female | Two y/o | Control | Control | Feed Day | No | 21:30 | 21:00 - 21:59 | Night         | 37,7 | 73  | 13,2  | 13,2  | 18,85 | 570,27 | 86,17  |
|    | 2019/08/29 | CH2276 | Female | Two y/o | Control | Control | Feed Day | No | 21:35 | 21:00 - 21:59 | Night         | 37,7 | 66  | 16,0  | 16,0  | 18,85 | 562,34 | 92,71  |
|    | 2019/08/29 | CH2276 | Female | Two y/o | Control | Control | Feed Day | No | 21:40 | 21:00 - 21:59 | Night         | 37,6 | 59  | 16,0  | 16,0  | 18,75 | 553,30 | 92,71  |
|    | 2019/08/29 | CH2276 | Female | Two y/o | Control | Control | Feed Day | No | 21:45 | 21:00 - 21:59 | Night         | 37,5 | 57  | 18,6  | 18,6  | 18,65 | 550,47 | 97,84  |
|    | 2019/08/29 | CH2276 | Female | Two y/o | Control | Control | Feed Day | No | 21:50 | 21:00 - 21:59 | Night         | 37,4 | 63  | 16,0  | 16,0  | 18,55 | 558,62 | 92,71  |
|    | 2019/08/29 | CH2276 | Female | Two y/o | Control | Control | Feed Day | No | 21:55 | 21:00 - 21:59 | Night         | 37,4 | 63  | 7,6   | 7,6   | 18,55 | 558,62 | 67,49  |
|    | 2019/08/29 | CH2276 | Female | Two y/o | Control | Control | Feed Day | No | 22:00 | 22:00 - 22:59 | Night         | 37,3 | 66  | 11,8  | 11,8  | 18,46 | 562,34 | 82,36  |
|    | 2019/08/29 | CH2276 | Female | Two y/o | Control | Control | Feed Day | No | 22:05 | 22:00 - 22:59 | Night         | 37,3 | 65  | 12,8  | 12,8  | 18,46 | 561,12 | 85,12  |
|    | 2019/08/29 | CH2276 | Female | Two y/o | Control | Control | Feed Day | No | 22:10 | 22:00 - 22:59 | Night         | 37,2 | 68  | 9,6   | 9,6   | 18,36 | 564,71 | 75,37  |
|    | 2019/08/29 | CH2276 | Female | Two y/o | Control | Control | Feed Day | No | 22:15 | 22:00 - 22:59 | Night         | 37,1 | 67  | 11,2  | 11,2  | 18,26 | 563,53 | 80,59  |
|    | 2019/08/29 | CH2276 | Female | Two y/o | Control | Control | Feed Day | No | 22:20 | 22:00 - 22:59 | Night         | 37,1 | 60  | 5,6   | 5,6   | 18,26 | 554,67 | 57,21  |
|    | 2019/08/29 | CH2276 | Female | Two y/o | Control | Control | Feed Day | No | 22:25 | 22:00 - 22:59 | Night         | 37,1 | 88  | 11,2  | 11,2  | 18,26 | 584,49 | 80,59  |
|    | 2019/08/29 | CH2276 | Female | Two y/o | Control | Control | Feed Day | No | 22:30 | 22:00 - 22:59 | Night         | 37,1 | 62  | 12,8  | 12,8  | 18,26 | 557,33 | 85,12  |
|    | 2019/08/29 | CH2276 | Female | Two y/o | Control | Control | Feed Day | No | 22:35 | 22:00 - 22:59 | Night         | 37,1 | 65  | 12,0  | 12,0  | 18,26 | 561,12 | 82,93  |
|    | 2019/08/29 | CH2276 | Female | Two y/o | Control | Control | Feed Day | No | 22:40 | 22:00 - 22:59 | Night         | 37,1 | 64  | 6,8   | 6,8   | 18,26 | 559,88 | 63,74  |
|    | 2019/08/29 | CH2276 | Female | Two y/o | Control | Control | Feed Day | No | 22:45 | 22:00 - 22:59 | Night         | 37,1 | 63  | 6,4   | 6,4   | 18,26 | 558,62 | 61,70  |
|    | 2019/08/29 | CH2276 | Female | Two y/o | Control | Control | Feed Day | No | 22:50 | 22:00 - 22:59 | Night         | 37,1 | 92  | 4,6   | 4,6   | 18,26 | 587,78 | 50,61  |
|    | 2019/08/29 | CH2276 | Female | Two y/o | Control | Control | Feed Day | No | 22:55 | 22:00 - 22:59 | Night         | 37,1 | 69  | 7,0   | 7,0   | 18,26 | 565,86 | 64,72  |
|    | 2019/08/29 | CH2276 | Female | Two y/o | Control | Control | Feed Day | No | 23:00 | 23:00 - 23:59 | Night         | 37,1 | 66  | 7,2   | 7,2   | 18,26 | 562,34 | 65,66  |
|    | 2019/08/29 | CH2276 | Female | Two y/o | Control | Control | Feed Day | No | 23:05 | 23:00 - 23:59 | Night         | 37,1 | 68  | 5,4   | 5,4   | 18,26 | 564,71 | 55,99  |
|    | 2019/08/29 | CH2276 | Female | Two y/o | Control | Control | Feed Day | No | 23:10 | 23:00 - 23:59 | Night         | 37,1 | 65  | 5,8   | 5,8   | 18,26 | 561,12 | 58,39  |
|    | 2019/08/29 | CH2276 | Female | Two y/o | Control | Control | Feed Day | No | 23:15 | 23:00 - 23:59 | Night         | 37,1 | 64  | 15,8  | 15,8  | 18,26 | 559,88 | 92,28  |
|    | 2019/08/29 | CH2276 | Female | Two y/o | Control | Control | Feed Day | No | 23:20 | 23:00 - 23:59 | Night         | 37,1 | 62  | 13,4  | 13,4  | 18,26 | 557,33 | 86,68  |
|    | 2019/08/29 | CH2276 | Female | Two y/o | Control | Control | Feed Day | No | 23:25 | 23:00 - 23:59 | Night         | 37,1 | 75  | 11,2  | 11,2  | 18,26 | 572,36 | 80,59  |
|    | 2019/08/29 | CH2276 | Female | Two y/o | Control | Control | Feed Day | No | 23:30 | 23:00 - 23:59 | Night         | 37,1 | 64  | 12,2  | 12,2  | 18,26 | 559,88 | 83,49  |
|    | 2019/08/29 | CH2276 | Female | Two y/o | Control | Control | Feed Day | No | 23:35 | 23:00 - 23:59 | Night         | 37,0 | 66  | 6,0   | 6,0   | 18,16 | 562,34 | 59,53  |
|    | 2019/08/29 | CH2276 | Female | Two y/o | Control | Control | Feed Day | No | 23:40 | 23:00 - 23:59 | Night         | 36,9 | 67  | 13,8  | 13,8  | 18,06 | 563,53 | 87,68  |
|    | 2019/08/29 | CH2276 | Female | Two y/o | Control | Control | Feed Day | No | 23:45 | 23:00 - 23:59 | Night         | 36,9 | 67  | 13,6  | 13,6  | 18,06 | 563,53 | 87,18  |
|    | 2019/08/29 | CH2276 | Female | Two y/o | Control | Control | Feed Day | No | 23:50 | 23:00 - 23:59 | Night         | 36,8 | 60  | 16,2  | 16,2  | 17,96 | 554,67 | 93,13  |
|    | 2019/08/29 | CH2276 | Female | Two y/o | Control | Control | Feed Day | No | 23:55 | 23:00 - 23:59 | Night         | 36,8 | 65  | 11,6  | 11,6  | 17,96 | 561,12 | 81,78  |
| 72 | 2019/08/30 | CH2276 | Female | Two y/o | Control | Control | Feed Day | No | 00:00 | 00:00 - 00:59 | Early Morning | 36,8 | 73  | 15,8  | 15,8  | 17,96 | 570,27 | 92,28  |
|    | 2019/08/30 | CH2276 | Female | Two y/o | Control | Control | Feed Day | No | 00:05 | 00:00 - 00:59 | Early Morning | 36,8 | 65  | 18,0  | 18,0  | 17,96 | 561,12 | 96,72  |
|    | 2019/08/30 | CH2276 | Female | Two y/o | Control | Control | Feed Day | No | 00:10 | 00:00 - 00:59 | Early Morning | 36,8 | 67  | 18,2  | 18,2  | 17,96 | 563,53 | 97,10  |



|            |        |        |         |         |         |          |    |       |               |               |      |     |       |       |       |        |        |
|------------|--------|--------|---------|---------|---------|----------|----|-------|---------------|---------------|------|-----|-------|-------|-------|--------|--------|
| 2019/08/30 | CH2276 | Female | Two y/o | Control | Control | Feed Day | No | 00:15 | 00:00 - 00:59 | Early Morning | 36,8 | 70  | 16,0  | 16,0  | 17,96 | 566,99 | 92,71  |
| 2019/08/30 | CH2276 | Female | Two y/o | Control | Control | Feed Day | No | 00:20 | 00:00 - 00:59 | Early Morning | 36,8 | 63  | 12,4  | 12,4  | 17,96 | 558,62 | 84,04  |
| 2019/08/30 | CH2276 | Female | Two y/o | Control | Control | Feed Day | No | 00:25 | 00:00 - 00:59 | Early Morning | 36,7 | 67  | 11,8  | 11,8  | 17,87 | 563,53 | 82,36  |
| 2019/08/30 | CH2276 | Female | Two y/o | Control | Control | Feed Day | No | 00:30 | 00:00 - 00:59 | Early Morning | 36,7 | 66  | 39,6  | 39,6  | 17,87 | 562,34 | 123,74 |
| 2019/08/30 | CH2276 | Female | Two y/o | Control | Control | Feed Day | No | 00:35 | 00:00 - 00:59 | Early Morning | 36,7 | 67  | 61,8  | 61,8  | 17,87 | 563,53 | 139,12 |
| 2019/08/30 | CH2276 | Female | Two y/o | Control | Control | Feed Day | No | 00:40 | 00:00 - 00:59 | Early Morning | 36,8 |     | 104,0 | 104,0 | 17,96 |        | 157,21 |
| 2019/08/30 | CH2276 | Female | Two y/o | Control | Control | Feed Day | No | 00:45 | 00:00 - 00:59 | Early Morning | 36,9 |     | 20,0  | 20,0  | 18,06 |        | 100,31 |
| 2019/08/30 | CH2276 | Female | Two y/o | Control | Control | Feed Day | No | 00:50 | 00:00 - 00:59 | Early Morning | 37,1 | 76  | 15,6  | 15,6  | 18,26 | 573,39 | 91,85  |
| 2019/08/30 | CH2276 | Female | Two y/o | Control | Control | Feed Day | No | 00:55 | 00:00 - 00:59 | Early Morning | 37,2 | 58  | 9,2   | 9,2   | 18,36 | 551,90 | 73,94  |
| 2019/08/30 | CH2276 | Female | Two y/o | Control | Control | Feed Day | No | 01:00 | 01:00 - 01:59 | Early Morning | 37,3 | 56  | 10,8  | 10,8  | 18,46 | 549,01 | 79,36  |
| 2019/08/30 | CH2276 | Female | Two y/o | Control | Control | Feed Day | No | 01:05 | 01:00 - 01:59 | Early Morning | 37,3 | 83  | 16,6  | 16,6  | 18,46 | 580,11 | 93,96  |
| 2019/08/30 | CH2276 | Female | Two y/o | Control | Control | Feed Day | No | 01:10 | 01:00 - 01:59 | Early Morning | 37,3 | 60  | 17,0  | 17,0  | 18,46 | 554,67 | 94,77  |
| 2019/08/30 | CH2276 | Female | Two y/o | Control | Control | Feed Day | No | 01:15 | 01:00 - 01:59 | Early Morning | 37,1 | 71  | 19,2  | 19,2  | 18,26 | 568,10 | 98,92  |
| 2019/08/30 | CH2276 | Female | Two y/o | Control | Control | Feed Day | No | 01:20 | 01:00 - 01:59 | Early Morning | 37,0 | 94  | 13,8  | 13,8  | 18,16 | 589,37 | 87,68  |
| 2019/08/30 | CH2276 | Female | Two y/o | Control | Control | Feed Day | No | 01:25 | 01:00 - 01:59 | Early Morning | 37,0 | 108 | 13,2  | 13,2  | 18,16 | 599,39 | 86,17  |
| 2019/08/30 | CH2276 | Female | Two y/o | Control | Control | Feed Day | No | 01:30 | 01:00 - 01:59 | Early Morning | 37,0 | 62  | 6,0   | 6,0   | 18,16 | 557,33 | 59,53  |
| 2019/08/30 | CH2276 | Female | Two y/o | Control | Control | Feed Day | No | 01:35 | 01:00 - 01:59 | Early Morning | 37,1 | 64  | 7,4   | 7,4   | 18,26 | 559,88 | 66,59  |
| 2019/08/30 | CH2276 | Female | Two y/o | Control | Control | Feed Day | No | 01:40 | 01:00 - 01:59 | Early Morning | 37,2 | 62  | 6,8   | 6,8   | 18,36 | 557,33 | 63,74  |
| 2019/08/30 | CH2276 | Female | Two y/o | Control | Control | Feed Day | No | 01:45 | 01:00 - 01:59 | Early Morning | 37,3 | 72  | 5,0   | 5,0   | 18,46 | 569,20 | 53,41  |
| 2019/08/30 | CH2276 | Female | Two y/o | Control | Control | Feed Day | No | 01:50 | 01:00 - 01:59 | Early Morning | 37,4 | 63  | 8,0   | 8,0   | 18,55 | 558,62 | 69,22  |
| 2019/08/30 | CH2276 | Female | Two y/o | Control | Control | Feed Day | No | 01:55 | 01:00 - 01:59 | Early Morning | 37,4 | 64  | 23,6  | 23,6  | 18,55 | 559,88 | 105,97 |
| 2019/08/30 | CH2276 | Female | Two y/o | Control | Control | Feed Day | No | 02:00 | 02:00 - 02:59 | Early Morning | 37,4 | 61  | 24,8  | 24,8  | 18,55 | 556,01 | 107,67 |
| 2019/08/30 | CH2276 | Female | Two y/o | Control | Control | Feed Day | No | 02:05 | 02:00 - 02:59 | Early Morning | 37,4 | 63  | 21,6  | 21,6  | 18,55 | 558,62 | 102,94 |
| 2019/08/30 | CH2276 | Female | Two y/o | Control | Control | Feed Day | No | 02:10 | 02:00 - 02:59 | Early Morning | 37,3 | 90  | 24,8  | 24,8  | 18,46 | 586,16 | 107,67 |
| 2019/08/30 | CH2276 | Female | Two y/o | Control | Control | Feed Day | No | 02:15 | 02:00 - 02:59 | Early Morning | 37,3 | 82  | 16,2  | 16,2  | 18,46 | 579,19 | 93,13  |
| 2019/08/30 | CH2276 | Female | Two y/o | Control | Control | Feed Day | No | 02:20 | 02:00 - 02:59 | Early Morning | 37,3 | 77  | 24,4  | 24,4  | 18,46 | 574,39 | 107,11 |
| 2019/08/30 | CH2276 | Female | Two y/o | Control | Control | Feed Day | No | 02:25 | 02:00 - 02:59 | Early Morning | 37,2 | 70  | 25,2  | 25,2  | 18,36 | 566,99 | 108,22 |
| 2019/08/30 | CH2276 | Female | Two y/o | Control | Control | Feed Day | No | 02:30 | 02:00 - 02:59 | Early Morning | 37,1 | 61  | 22,8  | 22,8  | 18,26 | 556,01 | 104,79 |
| 2019/08/30 | CH2276 | Female | Two y/o | Control | Control | Feed Day | No | 02:35 | 02:00 - 02:59 | Early Morning | 37,0 | 51  | 32,2  | 32,2  | 18,16 | 541,20 | 116,63 |
| 2019/08/30 | CH2276 | Female | Two y/o | Control | Control | Feed Day | No | 02:40 | 02:00 - 02:59 | Early Morning | 37,0 | 74  | 55,2  | 55,2  | 18,16 | 571,33 | 135,21 |
| 2019/08/30 | CH2276 | Female | Two y/o | Control | Control | Feed Day | No | 02:45 | 02:00 - 02:59 | Early Morning | 37,0 | 60  | 41,4  | 41,4  | 18,16 | 554,67 | 125,27 |
| 2019/08/30 | CH2276 | Female | Two y/o | Control | Control | Feed Day | No | 02:50 | 02:00 - 02:59 | Early Morning | 37,1 | 62  | 24,6  | 24,6  | 18,26 | 557,33 | 107,39 |
| 2019/08/30 | CH2276 | Female | Two y/o | Control | Control | Feed Day | No | 02:55 | 02:00 - 02:59 | Early Morning | 37,1 | 71  | 25,4  | 25,4  | 18,26 | 568,10 | 108,49 |
| 2019/08/30 | CH2276 | Female | Two y/o | Control | Control | Feed Day | No | 03:00 | 03:00 - 03:59 | Early Morning | 37,1 | 60  | 25,6  | 25,6  | 18,26 | 554,67 | 108,76 |
| 2019/08/30 | CH2276 | Female | Two y/o | Control | Control | Feed Day | No | 03:05 | 03:00 - 03:59 | Early Morning | 37,1 | 63  | 27,0  | 27,0  | 18,26 | 558,62 | 110,58 |
| 2019/08/30 | CH2276 | Female | Two y/o | Control | Control | Feed Day | No | 03:10 | 03:00 - 03:59 | Early Morning | 37,0 | 60  | 28,2  | 28,2  | 18,16 | 554,67 | 112,07 |
| 2019/08/30 | CH2276 | Female | Two y/o | Control | Control | Feed Day | No | 03:15 | 03:00 - 03:59 | Early Morning | 37,0 | 66  | 22,8  | 22,8  | 18,16 | 562,34 | 104,79 |
| 2019/08/30 | CH2276 | Female | Two y/o | Control | Control | Feed Day | No | 03:20 | 03:00 - 03:59 | Early Morning | 37,0 | 59  | 21,0  | 21,0  | 18,16 | 553,30 | 101,98 |
| 2019/08/30 | CH2276 | Female | Two y/o | Control | Control | Feed Day | No | 03:25 | 03:00 - 03:59 | Early Morning | 36,9 | 65  | 14,4  | 14,4  | 18,06 | 561,12 | 89,12  |
| 2019/08/30 | CH2276 | Female | Two y/o | Control | Control | Feed Day | No | 03:30 | 03:00 - 03:59 | Early Morning | 36,9 | 63  | 18,8  | 18,8  | 18,06 | 558,62 | 98,20  |
| 2019/08/30 | CH2276 | Female | Two y/o | Control | Control | Feed Day | No | 03:35 | 03:00 - 03:59 | Early Morning | 36,9 | 56  | 19,8  | 19,8  | 18,06 | 549,01 | 99,97  |
| 2019/08/30 | CH2276 | Female | Two y/o | Control | Control | Feed Day | No | 03:40 | 03:00 - 03:59 | Early Morning | 36,9 | 64  | 18,6  | 18,6  | 18,06 | 559,88 | 97,84  |
| 2019/08/30 | CH2276 | Female | Two y/o | Control | Control | Feed Day | No | 03:45 | 03:00 - 03:59 | Early Morning | 36,9 | 55  | 20,4  | 20,4  | 18,06 | 547,52 | 100,99 |
| 2019/08/30 | CH2276 | Female | Two y/o | Control | Control | Feed Day | No | 03:50 | 03:00 - 03:59 | Early Morning | 36,9 | 93  | 29,6  | 29,6  | 18,06 | 588,58 | 113,73 |
| 2019/08/30 | CH2276 | Female | Two y/o | Control | Control | Feed Day | No | 03:55 | 03:00 - 03:59 | Early Morning | 36,9 | 64  | 79,0  | 79,0  | 18,06 | 559,88 | 147,64 |
| 2019/08/30 | CH2276 | Female | Two y/o | Control | Control | Feed Day | No | 04:00 | 04:00 - 04:59 | Morning       | 36,9 | 61  | 90,4  | 90,4  | 18,06 | 556,01 | 152,33 |
| 2019/08/30 | CH2276 | Female | Two y/o | Control | Control | Feed Day | No | 04:05 | 04:00 - 04:59 | Morning       | 36,9 | 65  | 86,8  | 86,8  | 18,06 | 561,12 | 150,91 |
| 2019/08/30 | CH2276 | Female | Two y/o | Control | Control | Feed Day | No | 04:10 | 04:00 - 04:59 | Morning       | 36,9 | 112 | 38,8  | 38,8  | 18,06 | 601,96 | 123,04 |
| 2019/08/30 | CH2276 | Female | Two y/o | Control | Control | Feed Day | No | 04:15 | 04:00 - 04:59 | Morning       | 37,0 | 104 | 119,8 | 119,8 | 18,16 | 596,69 | 162,15 |
| 2019/08/30 | CH2276 | Female | Two y/o | Control | Control | Feed Day | No | 04:20 | 04:00 - 04:59 | Morning       | 37,0 | 140 | 239,4 | 239,4 | 18,16 | 617,28 | 186,45 |
| 2019/08/30 | CH2276 | Female | Two y/o | Control | Control | Feed Day | No | 04:25 | 04:00 - 04:59 | Morning       | 37,1 | 93  | 84,6  | 84,6  | 18,26 | 588,58 | 150,02 |
| 2019/08/30 | CH2276 | Female | Two y/o | Control | Control | Feed Day | No | 04:30 | 04:00 - 04:59 | Morning       | 37,1 | 103 | 57,4  | 57,4  | 18,26 | 596,00 | 136,56 |
| 2019/08/30 | CH2276 | Female | Two y/o | Control | Control | Feed Day | No | 04:35 | 04:00 - 04:59 | Morning       | 37,1 |     | 94,0  | 94,0  | 18,26 |        | 153,69 |
| 2019/08/30 | CH2276 | Female | Two y/o | Control | Control | Feed Day | No | 04:40 | 04:00 - 04:59 | Morning       | 37,2 |     | 166,2 | 166,2 | 18,36 |        | 173,61 |
| 2019/08/30 | CH2276 | Female | Two y/o | Control | Control | Feed Day | No | 04:45 | 04:00 - 04:59 | Morning       | 37,3 | 83  | 415,6 | 415,6 | 18,46 | 580,11 | 205,97 |
| 2019/08/30 | CH2276 | Female | Two y/o | Control | Control | Feed Day | No | 04:50 | 04:00 - 04:59 | Morning       | 37,4 |     | 194,2 | 194,2 | 18,55 |        | 179,08 |
| 2019/08/30 | CH2276 | Female | Two y/o | Control | Control | Feed Day | No | 04:55 | 04:00 - 04:59 | Morning       | 37,5 |     | 514,6 | 514,6 | 18,65 | 553,30 | 213,57 |
| 2019/08/30 | CH2276 | Female | Two y/o | Control | Control | Feed Day | No | 05:00 | 05:00 - 05:59 | Morning       | 37,6 | 148 | 55,0  | 55,0  | 18,75 | 620,97 | 135,08 |
| 2019/08/30 | CH2276 | Female | Two y/o | Control | Control | Feed Day | No | 05:05 | 05:00 - 05:59 | Morning       | 37,6 |     | 308,8 | 308,8 | 18,75 |        | 195,44 |
| 2019/08/30 | CH2276 | Female | Two y/o | Control | Control | Feed Day | No | 05:10 | 05:00 - 05:59 | Morning       | 37,6 | 113 | 242,6 | 242,6 | 18,75 | 602,58 | 186,92 |
| 2019/08/30 | CH2276 | Female | Two y/o | Control | Control | Feed Day | No | 05:15 | 05:00 - 05:59 | Morning       | 37,6 | 59  | 154,6 | 154,6 | 18,75 | 553,30 | 171,08 |
| 2019/08/30 | CH2276 | Female | Two y/o | Control | Control | Feed Day | No | 05:20 | 05:00 - 05:59 | Morning       | 37,6 | 53  | 426,6 | 426,6 | 18,75 | 544,43 | 206,90 |
| 2019/08/30 | CH2276 | Female | Two y/o | Control | Control | Feed Day | No | 05:25 | 05:00 - 05:59 | Morning       | 37,6 | 56  | 365,8 | 365,8 | 18,75 | 549,01 | 201,44 |
| 2019/08/30 | CH2276 | Female | Two y/o | Control | Control | Feed Day | No | 05:30 | 05:00 - 05:59 | Morning       | 37,6 | 98  | 162,4 | 162,4 | 18,75 | 592,41 | 172,80 |
| 2019/08/30 | CH2276 | Female | Two y/o | Control | Control | Feed Day | No | 05:35 | 05:00 - 05:59 | Morning       | 37,6 | 57  | 143,4 | 143,4 | 18,75 | 550,47 | 168,44 |
| 2019/08/30 | CH2276 | Female | Two y/o | Control | Control | Feed Day | No | 05:40 | 05:00 - 05:59 | Morning       | 37,6 | 103 | 382,6 | 382,6 | 18,75 | 596,00 | 203,04 |
| 2019/08/30 | CH2276 | Female | Two y/o | Control | Control | Feed Day | No | 05:45 | 05:00 - 05:59 | Morning       | 37,7 |     | 239,6 | 239,6 | 18,85 |        | 186,48 |
| 2019/08/30 | CH2276 | Female | Two y/o | Control | Control | Feed Day | No | 05:50 | 05:00 - 05:59 | Morning       | 37,7 | 98  | 439,8 | 439,8 | 18,85 | 592,41 | 207,98 |
| 2019/08/30 | CH2276 | Female | Two y/o | Control | Control | Feed Day | No | 05:55 | 05:00 - 05:59 | Morning       | 37,7 | 60  | 197,0 | 197,0 | 18,85 | 554,67 | 179,59 |
| 2019/08/30 | CH2276 | Female | Two y/o | Control | Control | Feed Day | No | 06:00 | 06:00 - 06:59 | Morning       | 37,7 | 188 | 90,4  | 90,4  | 18,85 | 636,34 | 152,33 |



|            |        |        |         |         |         |          |     |       |               |              |      |     |       |       |       |        |        |
|------------|--------|--------|---------|---------|---------|----------|-----|-------|---------------|--------------|------|-----|-------|-------|-------|--------|--------|
| 2019/08/30 | CH2276 | Female | Two y/o | Control | Control | Feed Day | No  | 06:05 | 06:00 - 06:59 | Morning      | 37,7 | 145 | 83,2  | 83,2  | 18,85 | 619,62 | 149,44 |
| 2019/08/30 | CH2276 | Female | Two y/o | Control | Control | Feed Day | No  | 06:10 | 06:00 - 06:59 | Morning      | 37,7 | 106 | 59,6  | 59,6  | 18,85 | 598,06 | 137,86 |
| 2019/08/30 | CH2276 | Female | Two y/o | Control | Control | Feed Day | No  | 06:15 | 06:00 - 06:59 | Morning      | 37,7 | 113 | 277,6 | 277,6 | 18,85 | 602,58 | 191,68 |
| 2019/08/30 | CH2276 | Female | Two y/o | Control | Control | Feed Day | No  | 06:20 | 06:00 - 06:59 | Morning      | 37,9 | 86  | 260,6 | 260,6 | 19,05 | 582,77 | 189,45 |
| 2019/08/30 | CH2276 | Female | Two y/o | Control | Control | Feed Day | No  | 06:25 | 06:00 - 06:59 | Morning      | 37,9 |     | 299,8 | 299,8 | 19,05 |        | 194,40 |
| 2019/08/30 | CH2276 | Female | Two y/o | Control | Control | Feed Day | No  | 06:30 | 06:00 - 06:59 | Morning      | 37,9 | 92  | 239,2 | 239,2 | 19,05 | 587,78 | 186,42 |
| 2019/08/30 | CH2276 | Female | Two y/o | Control | Control | Feed Day | No  | 06:35 | 06:00 - 06:59 | Morning      | 37,9 | 60  | 454,8 | 454,8 | 19,05 | 554,67 | 209,18 |
| 2019/08/30 | CH2276 | Female | Two y/o | Control | Control | Feed Day | No  | 06:40 | 06:00 - 06:59 | Morning      | 37,9 | 51  | 395,8 | 395,8 | 19,05 | 541,20 | 204,24 |
| 2019/08/30 | CH2276 | Female | Two y/o | Control | Control | Feed Day | No  | 06:45 | 06:00 - 06:59 | Morning      | 37,8 | 57  | 109,8 | 109,8 | 18,95 | 550,47 | 159,11 |
| 2019/08/30 | CH2276 | Female | Two y/o | Control | Control | Feed Day | No  | 06:50 | 06:00 - 06:59 | Morning      | 37,8 | 58  | 190,8 | 190,8 | 18,95 | 551,90 | 178,46 |
| 2019/08/30 | CH2276 | Female | Two y/o | Control | Control | Feed Day | No  | 06:55 | 06:00 - 06:59 | Morning      | 37,8 | 61  | 172,4 | 172,4 | 18,95 | 556,01 | 174,90 |
| 2019/08/30 | CH2276 | Female | Two y/o | Control | Control | Feed Day | No  | 07:00 | 07:00 - 07:59 | Morning      | 37,8 | 177 | 424,4 | 424,4 | 18,95 | 632,55 | 206,72 |
| 2019/08/30 | CH2276 | Female | Two y/o | Control | Control | Feed Day | No  | 07:05 | 07:00 - 07:59 | Morning      | 37,9 | 194 | 547,8 | 547,8 | 19,05 | 638,30 | 215,80 |
| 2019/08/30 | CH2276 | Female | Two y/o | Control | Control | Feed Day | No  | 07:10 | 07:00 - 07:59 | Morning      | 37,9 |     | 287,6 | 287,6 | 19,05 |        | 192,93 |
| 2019/08/30 | CH2276 | Female | Two y/o | Control | Control | Feed Day | No  | 07:15 | 07:00 - 07:59 | Morning      | 37,9 | 158 | 36,0  | 36,0  | 19,05 | 625,26 | 120,46 |
| 2019/08/30 | CH2276 | Female | Two y/o | Control | Control | Feed Day | No  | 07:20 | 07:00 - 07:59 | Morning      | 37,8 | 108 | 116,4 | 116,4 | 18,95 | 599,39 | 161,14 |
| 2019/08/30 | CH2276 | Female | Two y/o | Control | Control | Feed Day | No  | 07:25 | 07:00 - 07:59 | Morning      | 37,8 | 106 | 81,0  | 81,0  | 18,95 | 598,06 | 148,51 |
| 2019/08/30 | CH2276 | Female | Two y/o | Control | Control | Feed Day | No  | 07:30 | 07:00 - 07:59 | Morning      | 37,7 | 67  | 135,8 | 135,8 | 18,85 | 563,53 | 166,53 |
| 2019/08/30 | CH2276 | Female | Two y/o | Control | Control | Feed Day | No  | 07:35 | 07:00 - 07:59 | Morning      | 37,7 | 103 | 89,0  | 89,0  | 18,85 | 596,00 | 151,78 |
| 2019/08/30 | CH2276 | Female | Two y/o | Control | Control | Feed Day | No  | 07:40 | 07:00 - 07:59 | Morning      | 37,7 | 83  | 11,4  | 11,4  | 18,85 | 580,11 | 81,19  |
| 2019/08/30 | CH2276 | Female | Two y/o | Control | Control | Feed Day | No  | 07:45 | 07:00 - 07:59 | Morning      | 37,5 | 66  | 20,4  | 20,4  | 18,65 | 562,34 | 100,99 |
| 2019/08/30 | CH2276 | Female | Two y/o | Control | Control | Feed Day | No  | 07:50 | 07:00 - 07:59 | Morning      | 37,3 | 62  | 61,8  | 61,8  | 18,46 | 557,33 | 139,12 |
| 2019/08/30 | CH2276 | Female | Two y/o | Control | Control | Feed Day | No  | 07:55 | 07:00 - 07:59 | Morning      | 37,3 | 69  | 31,4  | 31,4  | 18,46 | 565,86 | 115,76 |
| 2019/08/30 | CH2276 | Female | Two y/o | Control | Control | Feed Day | No  | 08:00 | 08:00 - 08:59 | Late Morning | 37,4 | 66  | 31,6  | 31,6  | 18,55 | 562,34 | 115,98 |
| 2019/08/30 | CH2276 | Female | Two y/o | Control | Control | Feed Day | No  | 08:05 | 08:00 - 08:59 | Late Morning | 37,4 | 68  | 19,0  | 19,0  | 18,55 | 564,71 | 98,56  |
| 2019/08/30 | CH2276 | Female | Two y/o | Control | Control | Feed Day | No  | 08:10 | 08:00 - 08:59 | Late Morning | 37,2 |     | 69,4  | 69,4  | 18,36 |        | 143,14 |
| 2019/08/30 | CH2276 | Female | Two y/o | Control | Control | Feed Day | No  | 08:15 | 08:00 - 08:59 | Late Morning | 37,1 | 103 | 192,0 | 192,0 | 18,26 | 596,00 | 178,68 |
| 2019/08/30 | CH2276 | Female | Two y/o | Control | Control | Feed Day | No  | 08:20 | 08:00 - 08:59 | Late Morning | 37,3 | 65  | 104,6 | 104,6 | 18,46 | 561,12 | 157,41 |
| 2019/08/30 | CH2276 | Female | Two y/o | Control | Control | Feed Day | No  | 08:25 | 08:00 - 08:59 | Late Morning | 37,3 | 53  | 132,6 | 132,6 | 18,46 | 544,43 | 165,70 |
| 2019/08/30 | CH2276 | Female | Two y/o | Control | Control | Feed Day | No  | 08:30 | 08:00 - 08:59 | Late Morning | 37,4 | 57  | 190,2 | 190,2 | 18,55 | 550,47 | 178,35 |
| 2019/08/30 | CH2276 | Female | Two y/o | Control | Control | Feed Day | No  | 08:35 | 08:00 - 08:59 | Late Morning | 37,4 | 91  | 9,6   | 9,6   | 18,55 | 586,98 | 75,37  |
| 2019/08/30 | CH2276 | Female | Two y/o | Control | Control | Feed Day | No  | 08:40 | 08:00 - 08:59 | Late Morning | 37,4 | 86  | 31,4  | 31,4  | 18,55 | 582,77 | 115,76 |
| 2019/08/30 | CH2276 | Female | Two y/o | Control | Control | Feed Day | No  | 08:45 | 08:00 - 08:59 | Late Morning | 37,4 |     | 83,8  | 83,8  | 18,55 |        | 149,69 |
| 2019/08/30 | CH2276 | Female | Two y/o | Control | Control | Feed Day | No  | 08:50 | 08:00 - 08:59 | Late Morning | 37,5 | 65  | 73,8  | 73,8  | 18,65 | 561,12 | 145,27 |
| 2019/08/30 | CH2276 | Female | Two y/o | Control | Control | Feed Day | No  | 08:55 | 08:00 - 08:59 | Late Morning | 37,6 | 61  | 77,2  | 77,2  | 18,75 | 556,01 | 146,84 |
| 2019/08/30 | CH2276 | Female | Two y/o | Control | Control | Feed Day | No  | 09:00 | 09:00 - 09:59 | Late Morning | 37,6 | 64  | 75,6  | 75,6  | 18,75 | 559,88 | 146,11 |
| 2019/08/30 | CH2276 | Female | Two y/o | Control | Control | Feed Day | No  | 09:05 | 09:00 - 09:59 | Late Morning | 37,6 | 64  | 36,6  | 36,6  | 18,75 | 559,88 | 121,03 |
| 2019/08/30 | CH2276 | Female | Two y/o | Control | Control | Feed Day | No  | 09:10 | 09:00 - 09:59 | Late Morning | 37,7 | 88  | 11,2  | 11,2  | 18,85 | 584,49 | 80,59  |
| 2019/08/30 | CH2276 | Female | Two y/o | Control | Control | Feed Day | No  | 09:15 | 09:00 - 09:59 | Late Morning | 37,7 | 68  | 58,4  | 58,4  | 18,85 | 564,71 | 137,16 |
| 2019/08/30 | CH2276 | Female | Two y/o | Control | Control | Feed Day | No  | 09:20 | 09:00 - 09:59 | Late Morning | 37,7 | 64  | 73,2  | 73,2  | 18,85 | 559,88 | 144,99 |
| 2019/08/30 | CH2276 | Female | Two y/o | Control | Control | Feed Day | No  | 09:25 | 09:00 - 09:59 | Late Morning | 37,6 | 59  | 74,4  | 74,4  | 18,75 | 553,30 | 145,55 |
| 2019/08/30 | CH2276 | Female | Two y/o | Control | Control | Feed Day | No  | 09:30 | 09:00 - 09:59 | Late Morning | 37,6 | 60  | 42,4  | 42,4  | 18,75 | 554,67 | 126,10 |
| 2019/08/30 | CH2276 | Female | Two y/o | Control | Control | Feed Day | No  | 09:35 | 09:00 - 09:59 | Late Morning | 37,6 | 58  | 44,8  | 44,8  | 18,75 | 551,90 | 127,99 |
| 2019/08/30 | CH2276 | Female | Two y/o | Control | Control | Feed Day | No  | 09:40 | 09:00 - 09:59 | Late Morning | 37,7 | 63  | 87,2  | 87,2  | 18,85 | 558,62 | 151,07 |
| 2019/08/30 | CH2276 | Female | Two y/o | Control | Control | Feed Day | No  | 09:45 | 09:00 - 09:59 | Late Morning | 37,7 | 54  | 70,6  | 70,6  | 18,85 | 545,99 | 143,73 |
| 2019/08/30 | CH2276 | Female | Two y/o | Control | Control | Feed Day | No  | 09:50 | 09:00 - 09:59 | Late Morning | 37,7 | 58  | 66,6  | 66,6  | 18,85 | 551,90 | 141,71 |
| 2019/08/30 | CH2276 | Female | Two y/o | Control | Control | Feed Day | No  | 09:55 | 09:00 - 09:59 | Late Morning | 37,8 | 62  | 66,8  | 66,8  | 18,95 | 557,33 | 141,81 |
| 2019/08/30 | CH2276 | Female | Two y/o | Control | Control | Feed Day | No  | 10:00 | 10:00 - 10:59 | Late Morning | 37,9 | 93  | 49,6  | 49,6  | 19,05 | 588,58 | 131,51 |
| 2019/08/30 | CH2276 | Female | Two y/o | Control | Control | Feed Day | No  | 10:05 | 10:00 - 10:59 | Late Morning | 38,0 |     | 35,4  | 35,4  | 19,15 |        | 119,88 |
| 2019/08/30 | CH2276 | Female | Two y/o | Control | Control | Feed Day | No  | 10:10 | 10:00 - 10:59 | Late Morning | 38,0 | 57  | 70,4  | 70,4  | 19,15 | 550,47 | 143,64 |
| 2019/08/30 | CH2276 | Female | Two y/o | Control | Control | Feed Day | No  | 10:15 | 10:00 - 10:59 | Late Morning | 37,9 | 60  | 80,0  | 80,0  | 19,05 | 554,67 | 148,08 |
| 2019/08/30 | CH2276 | Female | Two y/o | Control | Control | Feed Day | No  | 10:20 | 10:00 - 10:59 | Late Morning | 37,8 | 64  | 72,8  | 72,8  | 18,95 | 559,88 | 144,80 |
| 2019/08/30 | CH2276 | Female | Two y/o | Control | Control | Feed Day | No  | 10:25 | 10:00 - 10:59 | Late Morning | 37,8 | 63  | 161,6 | 161,6 | 18,95 | 558,62 | 172,63 |
| 2019/08/30 | CH2276 | Female | Two y/o | Control | Control | Feed Day | Yes | 10:30 | 10:00 - 10:59 | Late Morning | 37,8 | 103 | 83,0  | 83,0  | 18,95 | 596,00 | 149,36 |
| 2019/08/30 | CH2276 | Female | Two y/o | Control | Control | Feed Day | Yes | 10:35 | 10:00 - 10:59 | Late Morning | 37,7 |     | 36,6  | 36,6  | 18,85 |        | 121,03 |
| 2019/08/30 | CH2276 | Female | Two y/o | Control | Control | Feed Day | Yes | 10:40 | 10:00 - 10:59 | Late Morning | 37,6 | 65  | 45,4  | 45,4  | 18,75 | 561,12 | 128,45 |
| 2019/08/30 | CH2276 | Female | Two y/o | Control | Control | Feed Day | Yes | 10:45 | 10:00 - 10:59 | Late Morning | 37,6 | 60  | 35,0  | 35,0  | 18,75 | 554,67 | 119,49 |
| 2019/08/30 | CH2276 | Female | Two y/o | Control | Control | Feed Day | Yes | 10:50 | 10:00 - 10:59 | Late Morning | 37,7 | 94  | 38,0  | 38,0  | 18,85 | 589,37 | 122,32 |
| 2019/08/30 | CH2276 | Female | Two y/o | Control | Control | Feed Day | Yes | 10:55 | 10:00 - 10:59 | Late Morning | 37,7 | 79  | 365,0 | 365,0 | 18,85 | 576,36 | 201,37 |
| 2019/08/30 | CH2276 | Female | Two y/o | Control | Control | Feed Day | Yes | 11:00 | 11:00 - 11:59 | Late Morning | 37,9 | 99  | 76,4  | 76,4  | 19,05 | 593,14 | 146,48 |
| 2019/08/30 | CH2276 | Female | Two y/o | Control | Control | Feed Day | Yes | 11:05 | 11:00 - 11:59 | Late Morning | 37,8 | 114 | 141,4 | 141,4 | 18,95 | 603,20 | 167,95 |
| 2019/08/30 | CH2276 | Female | Two y/o | Control | Control | Feed Day | Yes | 11:10 | 11:00 - 11:59 | Late Morning | 37,8 | 71  | 50,8  | 50,8  | 18,95 | 568,10 | 132,33 |
| 2019/08/30 | CH2276 | Female | Two y/o | Control | Control | Feed Day | Yes | 11:15 | 11:00 - 11:59 | Late Morning | 37,8 | 148 | 60,0  | 60,0  | 18,95 | 620,97 | 138,09 |
| 2019/08/30 | CH2276 | Female | Two y/o | Control | Control | Feed Day | Yes | 11:20 | 11:00 - 11:59 | Late Morning | 37,9 | 84  | 433,4 | 433,4 | 19,05 | 581,01 | 207,46 |
| 2019/08/30 | CH2276 | Female | Two y/o | Control | Control | Feed Day | Yes | 11:25 | 11:00 - 11:59 | Late Morning | 37,9 |     | 32,8  | 32,8  | 19,05 |        | 117,26 |
| 2019/08/30 | CH2276 | Female | Two y/o | Control | Control | Feed Day | No  | 11:30 | 11:00 - 11:59 | Late Morning | 38,0 | 104 | 60,0  | 60,0  | 19,15 | 596,69 | 138,09 |
| 2019/08/30 | CH2276 | Female | Two y/o | Control | Control | Feed Day | No  | 11:35 | 11:00 - 11:59 | Late Morning | 37,9 | 88  | 59,4  | 59,4  | 19,05 | 584,49 | 137,75 |
| 2019/08/30 | CH2276 | Female | Two y/o | Control | Control | Feed Day | No  | 11:40 | 11:00 - 11:59 | Late Morning | 37,9 | 70  | 49,8  | 49,8  | 19,05 | 566,99 | 131,65 |
| 2019/08/30 | CH2276 | Female | Two y/o | Control | Control | Feed Day | No  | 11:45 | 11:00 - 11:59 | Late Morning | 38,0 | 71  | 39,4  | 39,4  | 19,15 | 568,10 | 123,57 |
| 2019/08/30 | CH2276 | Female | Two y/o | Control | Control | Feed Day | No  | 11:50 | 11:00 - 11:59 | Late Morning | 38,0 | 61  | 6,2   | 6,2   | 19,15 | 556,01 | 60,63  |



|            |        |        |         |         |         |          |    |       |               |              |      |     |       |       |       |        |        |
|------------|--------|--------|---------|---------|---------|----------|----|-------|---------------|--------------|------|-----|-------|-------|-------|--------|--------|
| 2019/08/30 | CH2276 | Female | Two y/o | Control | Control | Feed Day | No | 11:55 | 11:00 - 11:59 | Late Morning | 38,0 |     | 3,6   | 3,6   | 19,15 |        | 42,42  |
| 2019/08/30 | CH2276 | Female | Two y/o | Control | Control | Feed Day | No | 12:00 | 12:00 - 12:59 | Afternoon    | 38,0 | 125 | 5,0   | 5,0   | 19,15 | 609,60 | 53,41  |
| 2019/08/30 | CH2276 | Female | Two y/o | Control | Control | Feed Day | No | 12:05 | 12:00 - 12:59 | Afternoon    | 37,9 | 70  | 6,6   | 6,6   | 19,05 | 566,99 | 62,73  |
| 2019/08/30 | CH2276 | Female | Two y/o | Control | Control | Feed Day | No | 12:10 | 12:00 - 12:59 | Afternoon    | 37,9 | 70  | 3,6   | 3,6   | 19,05 | 566,99 | 42,42  |
| 2019/08/30 | CH2276 | Female | Two y/o | Control | Control | Feed Day | No | 12:15 | 12:00 - 12:59 | Afternoon    | 37,9 | 67  | 5,0   | 5,0   | 19,05 | 563,53 | 53,41  |
| 2019/08/30 | CH2276 | Female | Two y/o | Control | Control | Feed Day | No | 12:20 | 12:00 - 12:59 | Afternoon    | 37,8 | 66  | 10,0  | 10,0  | 18,95 | 562,34 | 76,76  |
| 2019/08/30 | CH2276 | Female | Two y/o | Control | Control | Feed Day | No | 12:25 | 12:00 - 12:59 | Afternoon    | 37,8 | 62  | 12,0  | 12,0  | 18,95 | 557,33 | 82,93  |
| 2019/08/30 | CH2276 | Female | Two y/o | Control | Control | Feed Day | No | 12:30 | 12:00 - 12:59 | Afternoon    | 37,8 | 68  | 11,6  | 11,6  | 18,95 | 564,71 | 81,78  |
| 2019/08/30 | CH2276 | Female | Two y/o | Control | Control | Feed Day | No | 12:35 | 12:00 - 12:59 | Afternoon    | 37,8 | 92  | 12,6  | 12,6  | 18,95 | 587,78 | 84,59  |
| 2019/08/30 | CH2276 | Female | Two y/o | Control | Control | Feed Day | No | 12:40 | 12:00 - 12:59 | Afternoon    | 37,8 | 71  | 38,4  | 38,4  | 18,95 | 568,10 | 122,68 |
| 2019/08/30 | CH2276 | Female | Two y/o | Control | Control | Feed Day | No | 12:45 | 12:00 - 12:59 | Afternoon    | 37,8 | 83  | 74,0  | 74,0  | 18,95 | 580,11 | 145,37 |
| 2019/08/30 | CH2276 | Female | Two y/o | Control | Control | Feed Day | No | 12:50 | 12:00 - 12:59 | Afternoon    | 37,8 | 82  | 70,4  | 70,4  | 18,95 | 579,19 | 143,64 |
| 2019/08/30 | CH2276 | Female | Two y/o | Control | Control | Feed Day | No | 12:55 | 12:00 - 12:59 | Afternoon    | 37,8 | 74  | 67,0  | 67,0  | 18,95 | 571,33 | 141,92 |
| 2019/08/30 | CH2276 | Female | Two y/o | Control | Control | Feed Day | No | 13:00 | 13:00 - 13:59 | Afternoon    | 37,9 | 70  | 70,6  | 70,6  | 19,05 | 566,99 | 143,73 |
| 2019/08/30 | CH2276 | Female | Two y/o | Control | Control | Feed Day | No | 13:05 | 13:00 - 13:59 | Afternoon    | 38,0 | 85  | 67,8  | 67,8  | 19,15 | 581,90 | 142,33 |
| 2019/08/30 | CH2276 | Female | Two y/o | Control | Control | Feed Day | No | 13:10 | 13:00 - 13:59 | Afternoon    | 38,0 | 79  | 69,6  | 69,6  | 19,15 | 576,36 | 143,24 |
| 2019/08/30 | CH2276 | Female | Two y/o | Control | Control | Feed Day | No | 13:15 | 13:00 - 13:59 | Afternoon    | 38,1 | 79  | 65,6  | 65,6  | 19,26 | 576,36 | 141,19 |
| 2019/08/30 | CH2276 | Female | Two y/o | Control | Control | Feed Day | No | 13:20 | 13:00 - 13:59 | Afternoon    | 38,1 | 73  | 64,8  | 64,8  | 19,26 | 570,27 | 140,76 |
| 2019/08/30 | CH2276 | Female | Two y/o | Control | Control | Feed Day | No | 13:25 | 13:00 - 13:59 | Afternoon    | 38,1 | 84  | 64,6  | 64,6  | 19,26 | 581,01 | 140,65 |
| 2019/08/30 | CH2276 | Female | Two y/o | Control | Control | Feed Day | No | 13:30 | 13:00 - 13:59 | Afternoon    | 38,1 | 67  | 69,8  | 69,8  | 19,26 | 563,53 | 143,34 |
| 2019/08/30 | CH2276 | Female | Two y/o | Control | Control | Feed Day | No | 13:35 | 13:00 - 13:59 | Afternoon    | 38,2 | 64  | 47,4  | 47,4  | 19,36 | 559,88 | 129,94 |
| 2019/08/30 | CH2276 | Female | Two y/o | Control | Control | Feed Day | No | 13:40 | 13:00 - 13:59 | Afternoon    | 38,2 | 68  | 6,8   | 6,8   | 19,36 | 564,71 | 63,74  |
| 2019/08/30 | CH2276 | Female | Two y/o | Control | Control | Feed Day | No | 13:45 | 13:00 - 13:59 | Afternoon    | 38,1 | 65  | 6,2   | 6,2   | 19,26 | 561,12 | 60,63  |
| 2019/08/30 | CH2276 | Female | Two y/o | Control | Control | Feed Day | No | 13:50 | 13:00 - 13:59 | Afternoon    | 38,1 | 75  | 9,4   | 9,4   | 19,26 | 572,36 | 74,66  |
| 2019/08/30 | CH2276 | Female | Two y/o | Control | Control | Feed Day | No | 13:55 | 13:00 - 13:59 | Afternoon    | 38,0 | 69  | 8,0   | 8,0   | 19,15 | 565,86 | 69,22  |
| 2019/08/30 | CH2276 | Female | Two y/o | Control | Control | Feed Day | No | 14:00 | 14:00 - 14:59 | Afternoon    | 38,0 | 68  | 11,6  | 11,6  | 19,15 | 564,71 | 81,78  |
| 2019/08/30 | CH2276 | Female | Two y/o | Control | Control | Feed Day | No | 14:05 | 14:00 - 14:59 | Afternoon    | 38,0 | 65  | 9,8   | 9,8   | 19,15 | 561,12 | 76,07  |
| 2019/08/30 | CH2276 | Female | Two y/o | Control | Control | Feed Day | No | 14:10 | 14:00 - 14:59 | Afternoon    | 38,0 | 66  | 10,4  | 10,4  | 19,15 | 562,34 | 78,08  |
| 2019/08/30 | CH2276 | Female | Two y/o | Control | Control | Feed Day | No | 14:15 | 14:00 - 14:59 | Afternoon    | 38,0 | 69  | 47,8  | 47,8  | 19,15 | 565,86 | 130,23 |
| 2019/08/30 | CH2276 | Female | Two y/o | Control | Control | Feed Day | No | 14:20 | 14:00 - 14:59 | Afternoon    | 38,0 | 74  | 57,4  | 57,4  | 19,15 | 571,33 | 136,56 |
| 2019/08/30 | CH2276 | Female | Two y/o | Control | Control | Feed Day | No | 14:25 | 14:00 - 14:59 | Afternoon    | 37,9 | 60  | 48,4  | 48,4  | 19,05 | 554,67 | 130,66 |
| 2019/08/30 | CH2276 | Female | Two y/o | Control | Control | Feed Day | No | 14:30 | 14:00 - 14:59 | Afternoon    | 37,9 | 64  | 19,4  | 19,4  | 19,05 | 559,88 | 99,28  |
| 2019/08/30 | CH2276 | Female | Two y/o | Control | Control | Feed Day | No | 14:35 | 14:00 - 14:59 | Afternoon    | 37,9 | 78  | 25,0  | 25,0  | 19,05 | 575,38 | 107,94 |
| 2019/08/30 | CH2276 | Female | Two y/o | Control | Control | Feed Day | No | 14:40 | 14:00 - 14:59 | Afternoon    | 37,8 | 62  | 12,0  | 12,0  | 18,95 | 557,33 | 82,93  |
| 2019/08/30 | CH2276 | Female | Two y/o | Control | Control | Feed Day | No | 14:45 | 14:00 - 14:59 | Afternoon    | 37,8 | 64  | 9,2   | 9,2   | 18,95 | 559,88 | 73,94  |
| 2019/08/30 | CH2276 | Female | Two y/o | Control | Control | Feed Day | No | 14:50 | 14:00 - 14:59 | Afternoon    | 37,8 | 65  | 59,0  | 59,0  | 18,95 | 561,12 | 137,51 |
| 2019/08/30 | CH2276 | Female | Two y/o | Control | Control | Feed Day | No | 14:55 | 14:00 - 14:59 | Afternoon    | 37,8 | 67  | 74,4  | 74,4  | 18,95 | 563,53 | 145,55 |
| 2019/08/30 | CH2276 | Female | Two y/o | Control | Control | Feed Day | No | 15:00 | 15:00 - 15:59 | Afternoon    | 37,8 | 65  | 74,4  | 74,4  | 18,95 | 561,12 | 145,55 |
| 2019/08/30 | CH2276 | Female | Two y/o | Control | Control | Feed Day | No | 15:05 | 15:00 - 15:59 | Afternoon    | 37,8 | 65  | 58,4  | 58,4  | 18,95 | 561,12 | 137,16 |
| 2019/08/30 | CH2276 | Female | Two y/o | Control | Control | Feed Day | No | 15:10 | 15:00 - 15:59 | Afternoon    | 37,8 | 121 | 51,0  | 51,0  | 18,95 | 607,35 | 132,47 |
| 2019/08/30 | CH2276 | Female | Two y/o | Control | Control | Feed Day | No | 15:15 | 15:00 - 15:59 | Afternoon    | 37,7 | 65  | 44,8  | 44,8  | 18,85 | 561,12 | 127,99 |
| 2019/08/30 | CH2276 | Female | Two y/o | Control | Control | Feed Day | No | 15:20 | 15:00 - 15:59 | Afternoon    | 37,7 | 68  | 43,6  | 43,6  | 18,85 | 564,71 | 127,06 |
| 2019/08/30 | CH2276 | Female | Two y/o | Control | Control | Feed Day | No | 15:25 | 15:00 - 15:59 | Afternoon    | 37,7 | 103 | 17,4  | 17,4  | 18,85 | 596,00 | 95,56  |
| 2019/08/30 | CH2276 | Female | Two y/o | Control | Control | Feed Day | No | 15:30 | 15:00 - 15:59 | Afternoon    | 37,7 | 61  | 33,0  | 33,0  | 18,85 | 556,01 | 117,47 |
| 2019/08/30 | CH2276 | Female | Two y/o | Control | Control | Feed Day | No | 15:35 | 15:00 - 15:59 | Afternoon    | 37,7 | 132 | 361,8 | 361,8 | 18,85 | 613,32 | 201,05 |
| 2019/08/30 | CH2276 | Female | Two y/o | Control | Control | Feed Day | No | 15:40 | 15:00 - 15:59 | Afternoon    | 37,8 | 104 | 91,0  | 91,0  | 18,95 | 596,69 | 152,56 |
| 2019/08/30 | CH2276 | Female | Two y/o | Control | Control | Feed Day | No | 15:45 | 15:00 - 15:59 | Afternoon    | 37,9 | 135 | 113,2 | 113,2 | 19,05 | 614,84 | 160,17 |
| 2019/08/30 | CH2276 | Female | Two y/o | Control | Control | Feed Day | No | 15:50 | 15:00 - 15:59 | Afternoon    | 37,9 | 96  | 159,2 | 159,2 | 19,05 | 590,91 | 172,10 |
| 2019/08/30 | CH2276 | Female | Two y/o | Control | Control | Feed Day | No | 15:55 | 15:00 - 15:59 | Afternoon    | 37,9 |     | 37,8  | 37,8  | 19,05 |        | 122,14 |
| 2019/08/30 | CH2276 | Female | Two y/o | Control | Control | Feed Day | No | 16:00 | 16:00 - 16:59 | Evening      | 37,9 | 90  | 52,6  | 52,6  | 19,05 | 586,16 | 133,54 |
| 2019/08/30 | CH2276 | Female | Two y/o | Control | Control | Feed Day | No | 16:05 | 16:00 - 16:59 | Evening      | 37,9 | 112 | 391,8 | 391,8 | 19,05 | 601,96 | 203,88 |
| 2019/08/30 | CH2276 | Female | Two y/o | Control | Control | Feed Day | No | 16:10 | 16:00 - 16:59 | Evening      | 37,9 | 96  | 47,4  | 47,4  | 19,05 | 590,91 | 129,94 |
| 2019/08/30 | CH2276 | Female | Two y/o | Control | Control | Feed Day | No | 16:15 | 16:00 - 16:59 | Evening      | 37,8 | 67  | 15,8  | 15,8  | 18,95 | 563,53 | 92,28  |
| 2019/08/30 | CH2276 | Female | Two y/o | Control | Control | Feed Day | No | 16:20 | 16:00 - 16:59 | Evening      | 37,8 |     | 52,2  | 52,2  | 18,95 |        | 133,27 |
| 2019/08/30 | CH2276 | Female | Two y/o | Control | Control | Feed Day | No | 16:25 | 16:00 - 16:59 | Evening      | 37,8 | 64  | 20,6  | 20,6  | 18,95 | 559,88 | 101,32 |
| 2019/08/30 | CH2276 | Female | Two y/o | Control | Control | Feed Day | No | 16:30 | 16:00 - 16:59 | Evening      | 37,9 |     | 9,0   | 9,0   | 19,05 |        | 73,19  |
| 2019/08/30 | CH2276 | Female | Two y/o | Control | Control | Feed Day | No | 16:35 | 16:00 - 16:59 | Evening      | 37,9 |     | 6,8   | 6,8   | 19,05 | 557,33 | 63,74  |
| 2019/08/30 | CH2276 | Female | Two y/o | Control | Control | Feed Day | No | 16:40 | 16:00 - 16:59 | Evening      | 38,0 | 62  | 20,0  | 20,0  | 19,15 | 557,33 | 100,31 |
| 2019/08/30 | CH2276 | Female | Two y/o | Control | Control | Feed Day | No | 16:45 | 16:00 - 16:59 | Evening      | 38,0 |     | 6,4   | 6,4   | 19,15 |        | 61,70  |
| 2019/08/30 | CH2276 | Female | Two y/o | Control | Control | Feed Day | No | 16:50 | 16:00 - 16:59 | Evening      | 38,1 | 64  | 13,8  | 13,8  | 19,26 | 559,88 | 87,68  |
| 2019/08/30 | CH2276 | Female | Two y/o | Control | Control | Feed Day | No | 16:55 | 16:00 - 16:59 | Evening      | 38,1 | 102 | 260,6 | 260,6 | 19,26 | 595,30 | 189,45 |
| 2019/08/30 | CH2276 | Female | Two y/o | Control | Control | Feed Day | No | 17:00 | 17:00 - 17:59 | Evening      | 38,2 | 69  | 19,4  | 19,4  | 19,36 | 565,86 | 99,28  |
| 2019/08/30 | CH2276 | Female | Two y/o | Control | Control | Feed Day | No | 17:05 | 17:00 - 17:59 | Evening      | 38,0 | 39  | 10,0  | 10,0  | 19,15 | 517,82 | 76,76  |
| 2019/08/30 | CH2276 | Female | Two y/o | Control | Control | Feed Day | No | 17:10 | 17:00 - 17:59 | Evening      | 37,8 | 64  | 4,0   | 4,0   | 18,95 | 559,88 | 45,94  |
| 2019/08/30 | CH2276 | Female | Two y/o | Control | Control | Feed Day | No | 17:15 | 17:00 - 17:59 | Evening      | 37,7 | 65  | 11,8  | 11,8  | 18,85 | 561,12 | 82,36  |
| 2019/08/30 | CH2276 | Female | Two y/o | Control | Control | Feed Day | No | 17:20 | 17:00 - 17:59 | Evening      | 37,7 | 70  | 7,2   | 7,2   | 18,85 | 566,99 | 65,66  |
| 2019/08/30 | CH2276 | Female | Two y/o | Control | Control | Feed Day | No | 17:25 | 17:00 - 17:59 | Evening      | 37,7 | 80  | 5,4   | 5,4   | 18,85 | 577,31 | 55,99  |
| 2019/08/30 | CH2276 | Female | Two y/o | Control | Control | Feed Day | No | 17:30 | 17:00 - 17:59 | Evening      | 37,6 | 68  | 9,0   | 9,0   | 18,75 | 564,71 | 73,19  |
| 2019/08/30 | CH2276 | Female | Two y/o | Control | Control | Feed Day | No | 17:35 | 17:00 - 17:59 | Evening      | 37,7 |     | 5,0   | 5,0   | 18,85 |        | 53,41  |
| 2019/08/30 | CH2276 | Female | Two y/o | Control | Control | Feed Day | No | 17:40 | 17:00 - 17:59 | Evening      | 37,6 | 64  | 7,6   | 7,6   | 18,75 | 559,88 | 67,49  |



|            |        |        |         |         |         |          |    |       |               |         |      |     |       |       |       |        |        |
|------------|--------|--------|---------|---------|---------|----------|----|-------|---------------|---------|------|-----|-------|-------|-------|--------|--------|
| 2019/08/30 | CH2276 | Female | Two y/o | Control | Control | Feed Day | No | 17:45 | 17:00 - 17:59 | Evening | 37,5 | 62  | 20,2  | 20,2  | 18,65 | 557,33 | 100,65 |
| 2019/08/30 | CH2276 | Female | Two y/o | Control | Control | Feed Day | No | 17:50 | 17:00 - 17:59 | Evening | 37,5 | 121 | 126,6 | 126,6 | 18,65 | 607,35 | 164,08 |
| 2019/08/30 | CH2276 | Female | Two y/o | Control | Control | Feed Day | No | 17:55 | 17:00 - 17:59 | Evening | 37,7 |     | 238,2 | 238,2 | 18,85 |        | 186,28 |
| 2019/08/30 | CH2276 | Female | Two y/o | Control | Control | Feed Day | No | 18:00 | 18:00 - 18:59 | Evening | 37,9 | 103 | 49,0  | 49,0  | 19,05 | 596,00 | 131,09 |
| 2019/08/30 | CH2276 | Female | Two y/o | Control | Control | Feed Day | No | 18:05 | 18:00 - 18:59 | Evening | 38,0 | 60  | 360,2 | 360,2 | 19,15 | 554,67 | 200,90 |
| 2019/08/30 | CH2276 | Female | Two y/o | Control | Control | Feed Day | No | 18:10 | 18:00 - 18:59 | Evening | 38,0 | 61  | 123,2 | 123,2 | 19,15 | 556,01 | 163,13 |
| 2019/08/30 | CH2276 | Female | Two y/o | Control | Control | Feed Day | No | 18:15 | 18:00 - 18:59 | Evening | 38,1 |     | 26,2  | 26,2  | 19,26 |        | 109,55 |
| 2019/08/30 | CH2276 | Female | Two y/o | Control | Control | Feed Day | No | 18:20 | 18:00 - 18:59 | Evening | 38,1 | 93  | 341,0 | 341,0 | 19,26 | 588,58 | 198,95 |
| 2019/08/30 | CH2276 | Female | Two y/o | Control | Control | Feed Day | No | 18:25 | 18:00 - 18:59 | Evening | 38,1 | 57  | 721,6 | 721,6 | 19,26 | 550,47 | 225,64 |
| 2019/08/30 | CH2276 | Female | Two y/o | Control | Control | Feed Day | No | 18:30 | 18:00 - 18:59 | Evening | 38,2 | 79  | 65,2  | 65,2  | 19,36 | 576,36 | 140,97 |
| 2019/08/30 | CH2276 | Female | Two y/o | Control | Control | Feed Day | No | 18:35 | 18:00 - 18:59 | Evening | 38,2 | 86  | 144,8 | 144,8 | 19,36 | 582,77 | 168,78 |
| 2019/08/30 | CH2276 | Female | Two y/o | Control | Control | Feed Day | No | 18:40 | 18:00 - 18:59 | Evening | 38,2 | 123 | 81,2  | 81,2  | 19,36 | 608,49 | 148,59 |
| 2019/08/30 | CH2276 | Female | Two y/o | Control | Control | Feed Day | No | 18:45 | 18:00 - 18:59 | Evening | 38,2 | 114 | 110,2 | 110,2 | 19,36 | 603,20 | 159,23 |
| 2019/08/30 | CH2276 | Female | Two y/o | Control | Control | Feed Day | No | 18:50 | 18:00 - 18:59 | Evening | 38,2 |     | 175,0 | 175,0 | 19,36 |        | 175,43 |
| 2019/08/30 | CH2276 | Female | Two y/o | Control | Control | Feed Day | No | 18:55 | 18:00 - 18:59 | Evening | 38,2 | 55  | 101,0 | 101,0 | 19,36 | 547,52 | 156,19 |
| 2019/08/30 | CH2276 | Female | Two y/o | Control | Control | Feed Day | No | 19:00 | 19:00 - 19:59 | Evening | 38,2 | 76  | 80,2  | 80,2  | 19,36 | 573,39 | 148,16 |
| 2019/08/30 | CH2276 | Female | Two y/o | Control | Control | Feed Day | No | 19:05 | 19:00 - 19:59 | Evening | 38,2 | 152 | 100,4 | 100,4 | 19,36 | 622,73 | 155,98 |
| 2019/08/30 | CH2276 | Female | Two y/o | Control | Control | Feed Day | No | 19:10 | 19:00 - 19:59 | Evening | 38,2 |     | 160,6 | 160,6 | 19,36 |        | 172,41 |
| 2019/08/30 | CH2276 | Female | Two y/o | Control | Control | Feed Day | No | 19:15 | 19:00 - 19:59 | Evening | 38,2 | 106 | 13,8  | 13,8  | 19,36 | 598,06 | 87,68  |
| 2019/08/30 | CH2276 | Female | Two y/o | Control | Control | Feed Day | No | 19:20 | 19:00 - 19:59 | Evening | 38,0 | 92  | 45,0  | 45,0  | 19,15 | 587,78 | 128,15 |
| 2019/08/30 | CH2276 | Female | Two y/o | Control | Control | Feed Day | No | 19:25 | 19:00 - 19:59 | Evening | 38,0 | 59  | 82,2  | 82,2  | 19,15 | 553,30 | 149,02 |
| 2019/08/30 | CH2276 | Female | Two y/o | Control | Control | Feed Day | No | 19:30 | 19:00 - 19:59 | Evening | 38,1 | 93  | 6,4   | 6,4   | 19,26 | 588,58 | 61,70  |
| 2019/08/30 | CH2276 | Female | Two y/o | Control | Control | Feed Day | No | 19:35 | 19:00 - 19:59 | Evening | 37,9 | 84  | 14,6  | 14,6  | 19,05 | 581,01 | 89,59  |
| 2019/08/30 | CH2276 | Female | Two y/o | Control | Control | Feed Day | No | 19:40 | 19:00 - 19:59 | Evening | 37,8 | 79  | 7,4   | 7,4   | 18,95 | 576,36 | 66,59  |
| 2019/08/30 | CH2276 | Female | Two y/o | Control | Control | Feed Day | No | 19:45 | 19:00 - 19:59 | Evening | 37,7 | 83  | 6,6   | 6,6   | 18,85 | 580,11 | 62,73  |
| 2019/08/30 | CH2276 | Female | Two y/o | Control | Control | Feed Day | No | 19:50 | 19:00 - 19:59 | Evening | 37,7 | 67  | 6,4   | 6,4   | 18,85 | 563,53 | 61,70  |
| 2019/08/30 | CH2276 | Female | Two y/o | Control | Control | Feed Day | No | 19:55 | 19:00 - 19:59 | Evening | 37,6 | 65  | 11,4  | 11,4  | 18,75 | 561,12 | 81,19  |
| 2019/08/30 | CH2276 | Female | Two y/o | Control | Control | Feed Day | No | 20:00 | 20:00 - 20:59 | Night   | 37,6 | 73  | 7,2   | 7,2   | 18,75 | 570,27 | 65,66  |
| 2019/08/30 | CH2276 | Female | Two y/o | Control | Control | Feed Day | No | 20:05 | 20:00 - 20:59 | Night   | 37,5 | 92  | 9,4   | 9,4   | 18,65 | 587,78 | 74,66  |
| 2019/08/30 | CH2276 | Female | Two y/o | Control | Control | Feed Day | No | 20:10 | 20:00 - 20:59 | Night   | 37,5 | 72  | 9,2   | 9,2   | 18,65 | 569,20 | 73,94  |
| 2019/08/30 | CH2276 | Female | Two y/o | Control | Control | Feed Day | No | 20:15 | 20:00 - 20:59 | Night   | 37,4 | 93  | 6,4   | 6,4   | 18,55 | 588,58 | 61,70  |
| 2019/08/30 | CH2276 | Female | Two y/o | Control | Control | Feed Day | No | 20:20 | 20:00 - 20:59 | Night   | 37,4 | 81  | 5,0   | 5,0   | 18,55 | 578,26 | 53,41  |
| 2019/08/30 | CH2276 | Female | Two y/o | Control | Control | Feed Day | No | 20:25 | 20:00 - 20:59 | Night   | 37,4 | 65  | 4,6   | 4,6   | 18,55 | 561,12 | 50,61  |
| 2019/08/30 | CH2276 | Female | Two y/o | Control | Control | Feed Day | No | 20:30 | 20:00 - 20:59 | Night   | 37,3 | 93  | 12,0  | 12,0  | 18,46 | 588,58 | 82,93  |
| 2019/08/30 | CH2276 | Female | Two y/o | Control | Control | Feed Day | No | 20:35 | 20:00 - 20:59 | Night   | 37,4 | 64  | 8,2   | 8,2   | 18,55 | 559,88 | 70,05  |
| 2019/08/30 | CH2276 | Female | Two y/o | Control | Control | Feed Day | No | 20:40 | 20:00 - 20:59 | Night   | 37,5 | 68  | 10,2  | 10,2  | 18,65 | 564,71 | 77,43  |
| 2019/08/30 | CH2276 | Female | Two y/o | Control | Control | Feed Day | No | 20:45 | 20:00 - 20:59 | Night   | 37,6 | 61  | 11,4  | 11,4  | 18,75 | 556,01 | 81,19  |
| 2019/08/30 | CH2276 | Female | Two y/o | Control | Control | Feed Day | No | 20:50 | 20:00 - 20:59 | Night   | 37,6 | 90  | 7,0   | 7,0   | 18,75 | 586,16 | 64,72  |
| 2019/08/30 | CH2276 | Female | Two y/o | Control | Control | Feed Day | No | 20:55 | 20:00 - 20:59 | Night   | 37,7 | 79  | 5,4   | 5,4   | 18,85 | 576,36 | 55,99  |
| 2019/08/30 | CH2276 | Female | Two y/o | Control | Control | Feed Day | No | 21:00 | 21:00 - 21:59 | Night   | 37,7 | 67  | 11,2  | 11,2  | 18,85 | 563,53 | 80,59  |
| 2019/08/30 | CH2276 | Female | Two y/o | Control | Control | Feed Day | No | 21:05 | 21:00 - 21:59 | Night   | 37,6 | 64  | 9,4   | 9,4   | 18,75 | 559,88 | 74,66  |
| 2019/08/30 | CH2276 | Female | Two y/o | Control | Control | Feed Day | No | 21:10 | 21:00 - 21:59 | Night   | 37,4 | 67  | 9,0   | 9,0   | 18,55 | 563,53 | 73,19  |
| 2019/08/30 | CH2276 | Female | Two y/o | Control | Control | Feed Day | No | 21:15 | 21:00 - 21:59 | Night   | 37,2 | 93  | 12,4  | 12,4  | 18,36 | 588,58 | 84,04  |
| 2019/08/30 | CH2276 | Female | Two y/o | Control | Control | Feed Day | No | 21:20 | 21:00 - 21:59 | Night   | 37,0 | 55  | 7,6   | 7,6   | 18,16 | 547,52 | 67,49  |
| 2019/08/30 | CH2276 | Female | Two y/o | Control | Control | Feed Day | No | 21:25 | 21:00 - 21:59 | Night   | 36,9 | 98  | 12,6  | 12,6  | 18,06 | 592,41 | 84,59  |
| 2019/08/30 | CH2276 | Female | Two y/o | Control | Control | Feed Day | No | 21:30 | 21:00 - 21:59 | Night   | 36,8 | 88  | 19,4  | 19,4  | 17,96 | 584,49 | 99,28  |
| 2019/08/30 | CH2276 | Female | Two y/o | Control | Control | Feed Day | No | 21:35 | 21:00 - 21:59 | Night   | 36,7 | 63  | 14,6  | 14,6  | 17,87 | 558,62 | 89,59  |
| 2019/08/30 | CH2276 | Female | Two y/o | Control | Control | Feed Day | No | 21:40 | 21:00 - 21:59 | Night   | 36,7 | 67  | 12,0  | 12,0  | 17,87 | 563,53 | 82,93  |
| 2019/08/30 | CH2276 | Female | Two y/o | Control | Control | Feed Day | No | 21:45 | 21:00 - 21:59 | Night   | 36,7 | 65  | 18,6  | 18,6  | 17,87 | 561,12 | 97,84  |
| 2019/08/30 | CH2276 | Female | Two y/o | Control | Control | Feed Day | No | 21:50 | 21:00 - 21:59 | Night   | 36,7 | 67  | 13,8  | 13,8  | 17,87 | 563,53 | 87,68  |
| 2019/08/30 | CH2276 | Female | Two y/o | Control | Control | Feed Day | No | 21:55 | 21:00 - 21:59 | Night   | 36,7 | 97  | 13,2  | 13,2  | 17,87 | 591,66 | 86,17  |
| 2019/08/30 | CH2276 | Female | Two y/o | Control | Control | Feed Day | No | 22:00 | 22:00 - 22:59 | Night   | 36,7 | 57  | 10,0  | 10,0  | 17,87 | 550,47 | 76,76  |
| 2019/08/30 | CH2276 | Female | Two y/o | Control | Control | Feed Day | No | 22:05 | 22:00 - 22:59 | Night   | 36,7 | 62  | 14,6  | 14,6  | 17,87 | 557,33 | 89,59  |
| 2019/08/30 | CH2276 | Female | Two y/o | Control | Control | Feed Day | No | 22:10 | 22:00 - 22:59 | Night   | 36,6 | 61  | 15,8  | 15,8  | 17,77 | 556,01 | 92,28  |
| 2019/08/30 | CH2276 | Female | Two y/o | Control | Control | Feed Day | No | 22:15 | 22:00 - 22:59 | Night   | 36,6 | 65  | 10,4  | 10,4  | 17,77 | 561,12 | 78,08  |
| 2019/08/30 | CH2276 | Female | Two y/o | Control | Control | Feed Day | No | 22:20 | 22:00 - 22:59 | Night   | 36,6 | 61  | 8,8   | 8,8   | 17,77 | 556,01 | 72,43  |
| 2019/08/30 | CH2276 | Female | Two y/o | Control | Control | Feed Day | No | 22:25 | 22:00 - 22:59 | Night   | 36,8 | 68  | 4,2   | 4,2   | 17,96 | 564,71 | 47,57  |
| 2019/08/30 | CH2276 | Female | Two y/o | Control | Control | Feed Day | No | 22:30 | 22:00 - 22:59 | Night   | 37,1 |     | 3,6   | 3,6   | 18,26 |        | 42,42  |
| 2019/08/30 | CH2276 | Female | Two y/o | Control | Control | Feed Day | No | 22:35 | 22:00 - 22:59 | Night   | 37,3 | 73  | 3,0   | 3,0   | 18,46 | 570,27 | 36,34  |
| 2019/08/30 | CH2276 | Female | Two y/o | Control | Control | Feed Day | No | 22:40 | 22:00 - 22:59 | Night   | 37,4 | 97  | 15,8  | 15,8  | 18,55 | 591,66 | 92,28  |
| 2019/08/30 | CH2276 | Female | Two y/o | Control | Control | Feed Day | No | 22:45 | 22:00 - 22:59 | Night   | 37,4 | 62  | 17,6  | 17,6  | 18,55 | 557,33 | 95,95  |
| 2019/08/30 | CH2276 | Female | Two y/o | Control | Control | Feed Day | No | 22:50 | 22:00 - 22:59 | Night   | 37,3 | 62  | 26,0  | 26,0  | 18,46 | 557,33 | 109,29 |
| 2019/08/30 | CH2276 | Female | Two y/o | Control | Control | Feed Day | No | 22:55 | 22:00 - 22:59 | Night   | 37,3 | 93  | 35,2  | 35,2  | 18,46 | 588,58 | 119,69 |
| 2019/08/30 | CH2276 | Female | Two y/o | Control | Control | Feed Day | No | 23:00 | 23:00 - 23:59 | Night   | 37,3 | 100 | 23,0  | 23,0  | 18,46 | 593,87 | 105,09 |
| 2019/08/30 | CH2276 | Female | Two y/o | Control | Control | Feed Day | No | 23:05 | 23:00 - 23:59 | Night   | 37,2 | 92  | 30,2  | 30,2  | 18,36 | 587,78 | 114,42 |
| 2019/08/30 | CH2276 | Female | Two y/o | Control | Control | Feed Day | No | 23:10 | 23:00 - 23:59 | Night   | 37,1 | 59  | 27,4  | 27,4  | 18,26 | 553,30 | 111,09 |
| 2019/08/30 | CH2276 | Female | Two y/o | Control | Control | Feed Day | No | 23:15 | 23:00 - 23:59 | Night   | 37,1 | 63  | 26,2  | 26,2  | 18,26 | 558,62 | 109,55 |
| 2019/08/30 | CH2276 | Female | Two y/o | Control | Control | Feed Day | No | 23:20 | 23:00 - 23:59 | Night   | 37,1 | 84  | 29,2  | 29,2  | 18,26 | 581,01 | 113,27 |
| 2019/08/30 | CH2276 | Female | Two y/o | Control | Control | Feed Day | No | 23:25 | 23:00 - 23:59 | Night   | 37,1 | 84  | 38,6  | 38,6  | 18,26 | 581,01 | 122,86 |
| 2019/08/30 | CH2276 | Female | Two y/o | Control | Control | Feed Day | No | 23:30 | 23:00 - 23:59 | Night   | 37,1 | 61  | 26,2  | 26,2  | 18,26 | 556,01 | 109,55 |



|    |            |        |        |         |         |         |          |    |       |               |               |      |     |       |       |       |        |        |
|----|------------|--------|--------|---------|---------|---------|----------|----|-------|---------------|---------------|------|-----|-------|-------|-------|--------|--------|
|    | 2019/08/30 | CH2276 | Female | Two y/o | Control | Control | Feed Day | No | 23:35 | 23:00 - 23:59 | Night         | 37,1 | 92  | 35,2  | 35,2  | 18,26 | 587,78 | 119,69 |
|    | 2019/08/30 | CH2276 | Female | Two y/o | Control | Control | Feed Day | No | 23:40 | 23:00 - 23:59 | Night         | 37,0 | 68  | 36,6  | 36,6  | 18,16 | 564,71 | 121,03 |
|    | 2019/08/30 | CH2276 | Female | Two y/o | Control | Control | Feed Day | No | 23:45 | 23:00 - 23:59 | Night         | 37,0 | 58  | 37,6  | 37,6  | 18,16 | 551,90 | 121,96 |
|    | 2019/08/30 | CH2276 | Female | Two y/o | Control | Control | Feed Day | No | 23:50 | 23:00 - 23:59 | Night         | 37,0 | 61  | 33,6  | 33,6  | 18,16 | 556,01 | 118,09 |
|    | 2019/08/30 | CH2276 | Female | Two y/o | Control | Control | Feed Day | No | 23:55 | 23:00 - 23:59 | Night         | 37,0 | 98  | 26,8  | 26,8  | 18,16 | 592,41 | 110,33 |
| 73 | 2019/08/31 | CH2276 | Female | Two y/o | Control | Control | Feed Day | No | 00:00 | 00:00 - 00:59 | Early Morning | 37,0 | 68  | 37,4  | 37,4  | 18,16 | 564,71 | 121,77 |
|    | 2019/08/31 | CH2276 | Female | Two y/o | Control | Control | Feed Day | No | 00:05 | 00:00 - 00:59 | Early Morning | 37,1 | 108 | 93,2  | 93,2  | 18,26 | 599,39 | 153,39 |
|    | 2019/08/31 | CH2276 | Female | Two y/o | Control | Control | Feed Day | No | 00:10 | 00:00 - 00:59 | Early Morning | 37,1 | 65  | 95,4  | 95,4  | 18,26 | 561,12 | 154,20 |
|    | 2019/08/31 | CH2276 | Female | Two y/o | Control | Control | Feed Day | No | 00:15 | 00:00 - 00:59 | Early Morning | 37,1 | 64  | 95,4  | 95,4  | 18,26 | 559,88 | 154,20 |
|    | 2019/08/31 | CH2276 | Female | Two y/o | Control | Control | Feed Day | No | 00:20 | 00:00 - 00:59 | Early Morning | 37,1 | 60  | 94,0  | 94,0  | 18,26 | 554,67 | 153,69 |
|    | 2019/08/31 | CH2276 | Female | Two y/o | Control | Control | Feed Day | No | 00:25 | 00:00 - 00:59 | Early Morning | 37,2 | 63  | 98,8  | 98,8  | 18,36 | 558,62 | 155,42 |
|    | 2019/08/31 | CH2276 | Female | Two y/o | Control | Control | Feed Day | No | 00:30 | 00:00 - 00:59 | Early Morning | 37,2 |     | 36,8  | 36,8  | 18,36 |        | 121,22 |
|    | 2019/08/31 | CH2276 | Female | Two y/o | Control | Control | Feed Day | No | 00:35 | 00:00 - 00:59 | Early Morning | 37,3 | 66  | 5,0   | 5,0   | 18,46 | 562,34 | 53,41  |
|    | 2019/08/31 | CH2276 | Female | Two y/o | Control | Control | Feed Day | No | 00:40 | 00:00 - 00:59 | Early Morning | 37,1 | 92  | 6,2   | 6,2   | 18,26 | 587,78 | 60,63  |
|    | 2019/08/31 | CH2276 | Female | Two y/o | Control | Control | Feed Day | No | 00:45 | 00:00 - 00:59 | Early Morning | 37,1 | 93  | 3,6   | 3,6   | 18,26 | 588,58 | 42,42  |
|    | 2019/08/31 | CH2276 | Female | Two y/o | Control | Control | Feed Day | No | 00:50 | 00:00 - 00:59 | Early Morning | 37,2 | 60  | 5,4   | 5,4   | 18,36 | 554,67 | 55,99  |
|    | 2019/08/31 | CH2276 | Female | Two y/o | Control | Control | Feed Day | No | 00:55 | 00:00 - 00:59 | Early Morning | 37,3 | 60  | 15,6  | 15,6  | 18,46 | 554,67 | 91,85  |
|    | 2019/08/31 | CH2276 | Female | Two y/o | Control | Control | Feed Day | No | 01:00 | 01:00 - 01:59 | Early Morning | 37,3 | 53  | 10,2  | 10,2  | 18,46 | 544,43 | 77,43  |
|    | 2019/08/31 | CH2276 | Female | Two y/o | Control | Control | Feed Day | No | 01:05 | 01:00 - 01:59 | Early Morning | 37,1 | 93  | 13,2  | 13,2  | 18,26 | 588,58 | 86,17  |
|    | 2019/08/31 | CH2276 | Female | Two y/o | Control | Control | Feed Day | No | 01:10 | 01:00 - 01:59 | Early Morning | 37,1 | 96  | 9,8   | 9,8   | 18,26 | 590,91 | 76,07  |
|    | 2019/08/31 | CH2276 | Female | Two y/o | Control | Control | Feed Day | No | 01:15 | 01:00 - 01:59 | Early Morning | 37,1 | 58  | 13,6  | 13,6  | 18,26 | 551,90 | 87,18  |
|    | 2019/08/31 | CH2276 | Female | Two y/o | Control | Control | Feed Day | No | 01:20 | 01:00 - 01:59 | Early Morning | 37,0 | 60  | 19,4  | 19,4  | 18,16 | 554,67 | 99,28  |
|    | 2019/08/31 | CH2276 | Female | Two y/o | Control | Control | Feed Day | No | 01:25 | 01:00 - 01:59 | Early Morning | 37,0 | 56  | 14,8  | 14,8  | 18,16 | 549,01 | 90,05  |
|    | 2019/08/31 | CH2276 | Female | Two y/o | Control | Control | Feed Day | No | 01:30 | 01:00 - 01:59 | Early Morning | 37,0 | 59  | 30,4  | 30,4  | 18,16 | 553,30 | 114,65 |
|    | 2019/08/31 | CH2276 | Female | Two y/o | Control | Control | Feed Day | No | 01:35 | 01:00 - 01:59 | Early Morning | 37,2 | 70  | 33,4  | 33,4  | 18,36 | 566,99 | 117,88 |
|    | 2019/08/31 | CH2276 | Female | Two y/o | Control | Control | Feed Day | No | 01:40 | 01:00 - 01:59 | Early Morning | 37,2 | 93  | 32,2  | 32,2  | 18,36 | 588,58 | 116,63 |
|    | 2019/08/31 | CH2276 | Female | Two y/o | Control | Control | Feed Day | No | 01:45 | 01:00 - 01:59 | Early Morning | 37,2 | 140 | 5,4   | 5,4   | 18,36 | 617,28 | 55,99  |
|    | 2019/08/31 | CH2276 | Female | Two y/o | Control | Control | Feed Day | No | 01:50 | 01:00 - 01:59 | Early Morning | 37,1 |     | 6,8   | 6,8   | 18,26 |        | 63,74  |
|    | 2019/08/31 | CH2276 | Female | Two y/o | Control | Control | Feed Day | No | 01:55 | 01:00 - 01:59 | Early Morning | 37,2 | 86  | 10,2  | 10,2  | 18,36 | 582,77 | 77,43  |
|    | 2019/08/31 | CH2276 | Female | Two y/o | Control | Control | Feed Day | No | 02:00 | 02:00 - 02:59 | Early Morning | 37,3 |     | 30,6  | 30,6  | 18,46 |        | 114,87 |
|    | 2019/08/31 | CH2276 | Female | Two y/o | Control | Control | Feed Day | No | 02:05 | 02:00 - 02:59 | Early Morning | 37,3 | 110 | 73,6  | 73,6  | 18,46 | 600,69 | 145,18 |
|    | 2019/08/31 | CH2276 | Female | Two y/o | Control | Control | Feed Day | No | 02:10 | 02:00 - 02:59 | Early Morning | 37,3 | 84  | 106,8 | 106,8 | 18,46 | 581,01 | 158,14 |
|    | 2019/08/31 | CH2276 | Female | Two y/o | Control | Control | Feed Day | No | 02:15 | 02:00 - 02:59 | Early Morning | 37,3 | 118 | 196,6 | 196,6 | 18,46 | 605,61 | 179,52 |
|    | 2019/08/31 | CH2276 | Female | Two y/o | Control | Control | Feed Day | No | 02:20 | 02:00 - 02:59 | Early Morning | 37,4 | 86  | 269,4 | 269,4 | 18,55 | 582,77 | 190,62 |
|    | 2019/08/31 | CH2276 | Female | Two y/o | Control | Control | Feed Day | No | 02:25 | 02:00 - 02:59 | Early Morning | 37,6 | 119 | 75,2  | 75,2  | 18,75 | 606,20 | 145,93 |
|    | 2019/08/31 | CH2276 | Female | Two y/o | Control | Control | Feed Day | No | 02:30 | 02:00 - 02:59 | Early Morning | 37,7 | 129 | 78,6  | 78,6  | 18,85 | 611,75 | 147,46 |
|    | 2019/08/31 | CH2276 | Female | Two y/o | Control | Control | Feed Day | No | 02:35 | 02:00 - 02:59 | Early Morning | 37,6 | 63  | 114,0 | 114,0 | 18,75 | 558,62 | 160,42 |
|    | 2019/08/31 | CH2276 | Female | Two y/o | Control | Control | Feed Day | No | 02:40 | 02:00 - 02:59 | Early Morning | 37,5 | 112 | 566,0 | 566,0 | 18,65 | 601,96 | 216,96 |
|    | 2019/08/31 | CH2276 | Female | Two y/o | Control | Control | Feed Day | No | 02:45 | 02:00 - 02:59 | Early Morning | 37,6 | 131 | 122,0 | 122,0 | 18,75 | 612,80 | 162,79 |
|    | 2019/08/31 | CH2276 | Female | Two y/o | Control | Control | Feed Day | No | 02:50 | 02:00 - 02:59 | Early Morning | 37,6 | 61  | 153,0 | 153,0 | 18,75 | 556,01 | 170,71 |
|    | 2019/08/31 | CH2276 | Female | Two y/o | Control | Control | Feed Day | No | 02:55 | 02:00 - 02:59 | Early Morning | 37,6 |     | 34,0  | 34,0  | 18,75 |        | 118,49 |
|    | 2019/08/31 | CH2276 | Female | Two y/o | Control | Control | Feed Day | No | 03:00 | 03:00 - 03:59 | Early Morning | 37,5 | 109 | 13,2  | 13,2  | 18,65 | 600,04 | 86,17  |
|    | 2019/08/31 | CH2276 | Female | Two y/o | Control | Control | Feed Day | No | 03:05 | 03:00 - 03:59 | Early Morning | 37,4 | 85  | 14,2  | 14,2  | 18,55 | 581,90 | 88,65  |
|    | 2019/08/31 | CH2276 | Female | Two y/o | Control | Control | Feed Day | No | 03:10 | 03:00 - 03:59 | Early Morning | 37,3 | 123 | 23,0  | 23,0  | 18,46 | 608,49 | 105,09 |
|    | 2019/08/31 | CH2276 | Female | Two y/o | Control | Control | Feed Day | No | 03:15 | 03:00 - 03:59 | Early Morning | 37,3 | 62  | 6,0   | 6,0   | 18,46 | 557,33 | 59,53  |
|    | 2019/08/31 | CH2276 | Female | Two y/o | Control | Control | Feed Day | No | 03:20 | 03:00 - 03:59 | Early Morning | 37,2 | 63  | 7,2   | 7,2   | 18,36 | 558,62 | 65,66  |
|    | 2019/08/31 | CH2276 | Female | Two y/o | Control | Control | Feed Day | No | 03:25 | 03:00 - 03:59 | Early Morning | 37,3 | 72  | 11,0  | 11,0  | 18,46 | 569,20 | 79,98  |
|    | 2019/08/31 | CH2276 | Female | Two y/o | Control | Control | Feed Day | No | 03:30 | 03:00 - 03:59 | Early Morning | 37,3 | 58  | 12,6  | 12,6  | 18,46 | 551,90 | 84,59  |
|    | 2019/08/31 | CH2276 | Female | Two y/o | Control | Control | Feed Day | No | 03:35 | 03:00 - 03:59 | Early Morning | 37,2 | 59  | 8,4   | 8,4   | 18,36 | 553,30 | 70,86  |
|    | 2019/08/31 | CH2276 | Female | Two y/o | Control | Control | Feed Day | No | 03:40 | 03:00 - 03:59 | Early Morning | 37,1 | 59  | 7,6   | 7,6   | 18,26 | 553,30 | 67,49  |
|    | 2019/08/31 | CH2276 | Female | Two y/o | Control | Control | Feed Day | No | 03:45 | 03:00 - 03:59 | Early Morning | 37,1 | 64  | 8,8   | 8,8   | 18,26 | 559,88 | 72,43  |
|    | 2019/08/31 | CH2276 | Female | Two y/o | Control | Control | Feed Day | No | 03:50 | 03:00 - 03:59 | Early Morning | 37,1 | 58  | 7,6   | 7,6   | 18,26 | 551,90 | 67,49  |
|    | 2019/08/31 | CH2276 | Female | Two y/o | Control | Control | Feed Day | No | 03:55 | 03:00 - 03:59 | Early Morning | 37,1 | 88  | 5,4   | 5,4   | 18,26 | 584,49 | 55,99  |
|    | 2019/08/31 | CH2276 | Female | Two y/o | Control | Control | Feed Day | No | 04:00 | 04:00 - 04:59 | Morning       | 37,1 | 59  | 4,0   | 4,0   | 18,26 | 553,30 | 45,94  |
|    | 2019/08/31 | CH2276 | Female | Two y/o | Control | Control | Feed Day | No | 04:05 | 04:00 - 04:59 | Morning       | 37,1 | 54  | 19,6  | 19,6  | 18,26 | 545,99 | 99,63  |
|    | 2019/08/31 | CH2276 | Female | Two y/o | Control | Control | Feed Day | No | 04:10 | 04:00 - 04:59 | Morning       | 37,1 | 59  | 18,2  | 18,2  | 18,26 | 553,30 | 97,10  |
|    | 2019/08/31 | CH2276 | Female | Two y/o | Control | Control | Feed Day | No | 04:15 | 04:00 - 04:59 | Morning       | 37,0 | 90  | 15,4  | 15,4  | 18,16 | 586,16 | 91,41  |
|    | 2019/08/31 | CH2276 | Female | Two y/o | Control | Control | Feed Day | No | 04:20 | 04:00 - 04:59 | Morning       | 36,9 | 58  | 11,8  | 11,8  | 18,06 | 551,90 | 82,36  |
|    | 2019/08/31 | CH2276 | Female | Two y/o | Control | Control | Feed Day | No | 04:25 | 04:00 - 04:59 | Morning       | 36,7 | 96  | 16,2  | 16,2  | 17,87 | 590,91 | 93,13  |
|    | 2019/08/31 | CH2276 | Female | Two y/o | Control | Control | Feed Day | No | 04:30 | 04:00 - 04:59 | Morning       | 36,6 | 56  | 14,2  | 14,2  | 17,77 | 549,01 | 88,65  |
|    | 2019/08/31 | CH2276 | Female | Two y/o | Control | Control | Feed Day | No | 04:35 | 04:00 - 04:59 | Morning       | 36,5 | 67  | 27,4  | 27,4  | 17,67 | 563,53 | 111,09 |
|    | 2019/08/31 | CH2276 | Female | Two y/o | Control | Control | Feed Day | No | 04:40 | 04:00 - 04:59 | Morning       | 36,6 | 62  | 2,0   | 2,0   | 17,77 | 557,33 | 22,86  |
|    | 2019/08/31 | CH2276 | Female | Two y/o | Control | Control | Feed Day | No | 04:45 | 04:00 - 04:59 | Morning       | 36,5 | 82  | 18,6  | 18,6  | 17,67 | 579,19 | 97,84  |
|    | 2019/08/31 | CH2276 | Female | Two y/o | Control | Control | Feed Day | No | 04:50 | 04:00 - 04:59 | Morning       | 36,5 | 55  | 26,0  | 26,0  | 17,67 | 547,52 | 109,29 |
|    | 2019/08/31 | CH2276 | Female | Two y/o | Control | Control | Feed Day | No | 04:55 | 04:00 - 04:59 | Morning       | 36,5 | 54  | 27,0  | 27,0  | 17,67 | 545,99 | 110,58 |
|    | 2019/08/31 | CH2276 | Female | Two y/o | Control | Control | Feed Day | No | 05:00 | 05:00 - 05:59 | Morning       | 36,5 | 90  | 46,0  | 46,0  | 17,67 | 586,16 | 128,91 |
|    | 2019/08/31 | CH2276 | Female | Two y/o | Control | Control | Feed Day | No | 05:05 | 05:00 - 05:59 | Morning       | 36,5 | 55  | 28,4  | 28,4  | 17,67 | 547,52 | 112,31 |
|    | 2019/08/31 | CH2276 | Female | Two y/o | Control | Control | Feed Day | No | 05:10 | 05:00 - 05:59 | Morning       | 36,5 | 98  | 25,6  | 25,6  | 17,67 | 592,41 | 108,76 |
|    | 2019/08/31 | CH2276 | Female | Two y/o | Control | Control | Feed Day | No | 05:15 | 05:00 - 05:59 | Morning       | 36,5 | 57  | 27,2  | 27,2  | 17,67 | 550,47 | 110,83 |
|    | 2019/08/31 | CH2276 | Female | Two y/o | Control | Control | Feed Day | No | 05:20 | 05:00 - 05:59 | Morning       | 36,4 | 50  | 26,0  | 26,0  | 17,57 | 539,52 | 109,29 |



|            |        |        |         |         |         |          |     |       |               |              |      |     |       |       |       |        |        |
|------------|--------|--------|---------|---------|---------|----------|-----|-------|---------------|--------------|------|-----|-------|-------|-------|--------|--------|
| 2019/08/31 | CH2276 | Female | Two y/o | Control | Control | Feed Day | No  | 05:25 | 05:00 - 05:59 | Morning      | 36,4 | 60  | 34,2  | 34,2  | 17,57 | 554,67 | 118,70 |
| 2019/08/31 | CH2276 | Female | Two y/o | Control | Control | Feed Day | No  | 05:30 | 05:00 - 05:59 | Morning      | 36,4 | 52  | 34,4  | 34,4  | 17,57 | 542,83 | 118,90 |
| 2019/08/31 | CH2276 | Female | Two y/o | Control | Control | Feed Day | No  | 05:35 | 05:00 - 05:59 | Morning      | 36,3 |     | 51,2  | 51,2  | 17,48 |        | 132,61 |
| 2019/08/31 | CH2276 | Female | Two y/o | Control | Control | Feed Day | No  | 05:40 | 05:00 - 05:59 | Morning      | 36,3 | 56  | 44,0  | 44,0  | 17,48 | 549,01 | 127,37 |
| 2019/08/31 | CH2276 | Female | Two y/o | Control | Control | Feed Day | No  | 05:45 | 05:00 - 05:59 | Morning      | 36,4 |     | 86,4  | 86,4  | 17,57 |        | 150,75 |
| 2019/08/31 | CH2276 | Female | Two y/o | Control | Control | Feed Day | No  | 05:50 | 05:00 - 05:59 | Morning      | 36,6 | 95  | 251,4 | 251,4 | 17,77 | 590,14 | 188,18 |
| 2019/08/31 | CH2276 | Female | Two y/o | Control | Control | Feed Day | No  | 05:55 | 05:00 - 05:59 | Morning      | 36,7 | 37  | 94,0  | 94,0  | 17,87 | 513,06 | 153,69 |
| 2019/08/31 | CH2276 | Female | Two y/o | Control | Control | Feed Day | No  | 06:00 | 06:00 - 06:59 | Morning      | 37,1 |     | 134,2 | 134,2 | 18,26 |        | 166,12 |
| 2019/08/31 | CH2276 | Female | Two y/o | Control | Control | Feed Day | No  | 06:05 | 06:00 - 06:59 | Morning      | 37,3 |     | 457,4 | 457,4 | 18,46 |        | 209,38 |
| 2019/08/31 | CH2276 | Female | Two y/o | Control | Control | Feed Day | No  | 06:10 | 06:00 - 06:59 | Morning      | 37,4 | 169 | 198,8 | 198,8 | 18,55 | 629,60 | 179,91 |
| 2019/08/31 | CH2276 | Female | Two y/o | Control | Control | Feed Day | No  | 06:15 | 06:00 - 06:59 | Morning      | 37,5 | 106 | 200,4 | 200,4 | 18,65 | 598,06 | 180,19 |
| 2019/08/31 | CH2276 | Female | Two y/o | Control | Control | Feed Day | No  | 06:20 | 06:00 - 06:59 | Morning      | 37,7 |     | 61,4  | 61,4  | 18,85 |        | 138,89 |
| 2019/08/31 | CH2276 | Female | Two y/o | Control | Control | Feed Day | No  | 06:25 | 06:00 - 06:59 | Morning      | 38,0 | 125 | 158,2 | 158,2 | 19,15 | 609,60 | 171,88 |
| 2019/08/31 | CH2276 | Female | Two y/o | Control | Control | Feed Day | No  | 06:30 | 06:00 - 06:59 | Morning      | 38,0 | 84  | 208,8 | 208,8 | 19,15 | 581,01 | 181,63 |
| 2019/08/31 | CH2276 | Female | Two y/o | Control | Control | Feed Day | No  | 06:35 | 06:00 - 06:59 | Morning      | 37,9 | 64  | 300,4 | 300,4 | 19,05 | 559,88 | 194,47 |
| 2019/08/31 | CH2276 | Female | Two y/o | Control | Control | Feed Day | No  | 06:40 | 06:00 - 06:59 | Morning      | 37,9 | 65  | 160,4 | 160,4 | 19,05 | 561,12 | 172,37 |
| 2019/08/31 | CH2276 | Female | Two y/o | Control | Control | Feed Day | No  | 06:45 | 06:00 - 06:59 | Morning      | 37,8 | 34  | 114,4 | 114,4 | 18,95 | 505,29 | 160,54 |
| 2019/08/31 | CH2276 | Female | Two y/o | Control | Control | Feed Day | No  | 06:50 | 06:00 - 06:59 | Morning      | 37,8 |     | 139,2 | 139,2 | 18,95 |        | 167,40 |
| 2019/08/31 | CH2276 | Female | Two y/o | Control | Control | Feed Day | No  | 06:55 | 06:00 - 06:59 | Morning      | 37,8 | 117 | 457,2 | 457,2 | 18,95 | 605,02 | 209,36 |
| 2019/08/31 | CH2276 | Female | Two y/o | Control | Control | Feed Day | No  | 07:00 | 07:00 - 07:59 | Morning      | 38,0 |     | 75,0  | 75,0  | 19,15 |        | 145,83 |
| 2019/08/31 | CH2276 | Female | Two y/o | Control | Control | Feed Day | No  | 07:05 | 07:00 - 07:59 | Morning      | 38,0 | 118 | 74,0  | 74,0  | 19,15 | 605,61 | 145,37 |
| 2019/08/31 | CH2276 | Female | Two y/o | Control | Control | Feed Day | No  | 07:10 | 07:00 - 07:59 | Morning      | 38,0 | 120 | 213,2 | 213,2 | 19,15 | 606,78 | 182,37 |
| 2019/08/31 | CH2276 | Female | Two y/o | Control | Control | Feed Day | No  | 07:15 | 07:00 - 07:59 | Morning      | 38,0 | 105 | 89,6  | 89,6  | 19,15 | 597,38 | 152,02 |
| 2019/08/31 | CH2276 | Female | Two y/o | Control | Control | Feed Day | No  | 07:20 | 07:00 - 07:59 | Morning      | 37,9 | 105 | 170,2 | 170,2 | 19,05 | 597,38 | 174,45 |
| 2019/08/31 | CH2276 | Female | Two y/o | Control | Control | Feed Day | No  | 07:25 | 07:00 - 07:59 | Morning      | 37,8 | 62  | 121,0 | 121,0 | 18,95 | 557,33 | 162,50 |
| 2019/08/31 | CH2276 | Female | Two y/o | Control | Control | Feed Day | No  | 07:30 | 07:00 - 07:59 | Morning      | 37,8 | 150 | 59,6  | 59,6  | 18,95 | 621,86 | 137,86 |
| 2019/08/31 | CH2276 | Female | Two y/o | Control | Control | Feed Day | No  | 07:35 | 07:00 - 07:59 | Morning      | 38,2 | 162 | 63,6  | 63,6  | 19,36 | 626,88 | 140,11 |
| 2019/08/31 | CH2276 | Female | Two y/o | Control | Control | Feed Day | No  | 07:40 | 07:00 - 07:59 | Morning      | 38,0 | 103 | 60,4  | 60,4  | 19,15 | 596,00 | 138,32 |
| 2019/08/31 | CH2276 | Female | Two y/o | Control | Control | Feed Day | No  | 07:45 | 07:00 - 07:59 | Morning      | 38,2 | 97  | 26,6  | 26,6  | 19,36 | 591,66 | 110,07 |
| 2019/08/31 | CH2276 | Female | Two y/o | Control | Control | Feed Day | No  | 07:50 | 07:00 - 07:59 | Morning      | 37,8 | 113 | 172,2 | 172,2 | 18,95 | 602,58 | 174,86 |
| 2019/08/31 | CH2276 | Female | Two y/o | Control | Control | Feed Day | No  | 07:55 | 07:00 - 07:59 | Morning      | 37,8 | 63  | 184,6 | 184,6 | 18,95 | 558,62 | 177,30 |
| 2019/08/31 | CH2276 | Female | Two y/o | Control | Control | Feed Day | No  | 08:00 | 08:00 - 08:59 | Late Morning | 37,8 | 60  | 820,8 | 820,8 | 18,95 | 554,67 | 230,25 |
| 2019/08/31 | CH2276 | Female | Two y/o | Control | Control | Feed Day | No  | 08:05 | 08:00 - 08:59 | Late Morning | 37,8 | 137 | 77,4  | 77,4  | 18,95 | 615,83 | 146,93 |
| 2019/08/31 | CH2276 | Female | Two y/o | Control | Control | Feed Day | No  | 08:10 | 08:00 - 08:59 | Late Morning | 37,8 | 111 | 91,0  | 91,0  | 18,95 | 601,33 | 152,56 |
| 2019/08/31 | CH2276 | Female | Two y/o | Control | Control | Feed Day | No  | 08:15 | 08:00 - 08:59 | Late Morning | 37,7 | 99  | 86,6  | 86,6  | 18,85 | 593,14 | 150,83 |
| 2019/08/31 | CH2276 | Female | Two y/o | Control | Control | Feed Day | No  | 08:20 | 08:00 - 08:59 | Late Morning | 37,7 |     | 442,8 | 442,8 | 18,85 |        | 208,22 |
| 2019/08/31 | CH2276 | Female | Two y/o | Control | Control | Feed Day | No  | 08:25 | 08:00 - 08:59 | Late Morning | 37,7 | 57  | 113,2 | 113,2 | 18,85 | 550,47 | 160,17 |
| 2019/08/31 | CH2276 | Female | Two y/o | Control | Control | Feed Day | No  | 08:30 | 08:00 - 08:59 | Late Morning | 37,7 | 123 | 145,0 | 145,0 | 18,85 | 608,49 | 168,83 |
| 2019/08/31 | CH2276 | Female | Two y/o | Control | Control | Feed Day | No  | 08:35 | 08:00 - 08:59 | Late Morning | 37,7 | 117 | 49,0  | 49,0  | 18,85 | 605,02 | 131,09 |
| 2019/08/31 | CH2276 | Female | Two y/o | Control | Control | Feed Day | No  | 08:40 | 08:00 - 08:59 | Late Morning | 37,6 | 81  | 64,6  | 64,6  | 18,75 | 578,26 | 140,65 |
| 2019/08/31 | CH2276 | Female | Two y/o | Control | Control | Feed Day | No  | 08:45 | 08:00 - 08:59 | Late Morning | 37,5 | 72  | 63,0  | 63,0  | 18,65 | 569,20 | 139,78 |
| 2019/08/31 | CH2276 | Female | Two y/o | Control | Control | Feed Day | No  | 08:50 | 08:00 - 08:59 | Late Morning | 37,5 | 109 | 155,2 | 155,2 | 18,65 | 600,04 | 171,21 |
| 2019/08/31 | CH2276 | Female | Two y/o | Control | Control | Feed Day | No  | 08:55 | 08:00 - 08:59 | Late Morning | 37,5 | 65  | 98,8  | 98,8  | 18,65 | 561,12 | 155,42 |
| 2019/08/31 | CH2276 | Female | Two y/o | Control | Control | Feed Day | No  | 09:00 | 09:00 - 09:59 | Late Morning | 37,5 | 79  | 50,6  | 50,6  | 18,65 | 576,36 | 132,20 |
| 2019/08/31 | CH2276 | Female | Two y/o | Control | Control | Feed Day | No  | 09:05 | 09:00 - 09:59 | Late Morning | 37,6 | 76  | 39,0  | 39,0  | 18,75 | 573,39 | 123,22 |
| 2019/08/31 | CH2276 | Female | Two y/o | Control | Control | Feed Day | No  | 09:10 | 09:00 - 09:59 | Late Morning | 37,6 | 61  | 76,4  | 76,4  | 18,75 | 556,01 | 146,48 |
| 2019/08/31 | CH2276 | Female | Two y/o | Control | Control | Feed Day | No  | 09:15 | 09:00 - 09:59 | Late Morning | 37,6 | 67  | 83,8  | 83,8  | 18,75 | 563,53 | 149,69 |
| 2019/08/31 | CH2276 | Female | Two y/o | Control | Control | Feed Day | No  | 09:20 | 09:00 - 09:59 | Late Morning | 37,6 | 69  | 23,6  | 23,6  | 18,75 | 565,86 | 105,97 |
| 2019/08/31 | CH2276 | Female | Two y/o | Control | Control | Feed Day | No  | 09:25 | 09:00 - 09:59 | Late Morning | 37,7 | 63  | 14,8  | 14,8  | 18,85 | 558,62 | 90,05  |
| 2019/08/31 | CH2276 | Female | Two y/o | Control | Control | Feed Day | No  | 09:30 | 09:00 - 09:59 | Late Morning | 37,6 | 59  | 25,0  | 25,0  | 18,75 | 553,30 | 107,94 |
| 2019/08/31 | CH2276 | Female | Two y/o | Control | Control | Feed Day | No  | 09:35 | 09:00 - 09:59 | Late Morning | 37,6 | 118 | 98,6  | 98,6  | 18,75 | 605,61 | 155,35 |
| 2019/08/31 | CH2276 | Female | Two y/o | Control | Control | Feed Day | No  | 09:40 | 09:00 - 09:59 | Late Morning | 37,5 |     | 43,6  | 43,6  | 18,65 |        | 127,06 |
| 2019/08/31 | CH2276 | Female | Two y/o | Control | Control | Feed Day | No  | 09:45 | 09:00 - 09:59 | Late Morning | 37,5 | 84  | 61,2  | 61,2  | 18,65 | 581,01 | 138,78 |
| 2019/08/31 | CH2276 | Female | Two y/o | Control | Control | Feed Day | No  | 09:50 | 09:00 - 09:59 | Late Morning | 37,5 | 80  | 278,0 | 278,0 | 18,65 | 577,31 | 191,73 |
| 2019/08/31 | CH2276 | Female | Two y/o | Control | Control | Feed Day | No  | 09:55 | 09:00 - 09:59 | Late Morning | 37,5 | 97  | 46,4  | 46,4  | 18,65 | 591,66 | 129,21 |
| 2019/08/31 | CH2276 | Female | Two y/o | Control | Control | Feed Day | No  | 10:00 | 10:00 - 10:59 | Late Morning | 37,5 | 78  | 54,2  | 54,2  | 18,65 | 575,38 | 134,57 |
| 2019/08/31 | CH2276 | Female | Two y/o | Control | Control | Feed Day | No  | 10:05 | 10:00 - 10:59 | Late Morning | 37,6 | 86  | 66,6  | 66,6  | 18,75 | 582,77 | 141,71 |
| 2019/08/31 | CH2276 | Female | Two y/o | Control | Control | Feed Day | No  | 10:10 | 10:00 - 10:59 | Late Morning | 37,6 | 63  | 88,6  | 88,6  | 18,75 | 558,62 | 151,63 |
| 2019/08/31 | CH2276 | Female | Two y/o | Control | Control | Feed Day | No  | 10:15 | 10:00 - 10:59 | Late Morning | 37,6 | 47  | 168,6 | 168,6 | 18,75 | 534,23 | 174,12 |
| 2019/08/31 | CH2276 | Female | Two y/o | Control | Control | Feed Day | No  | 10:20 | 10:00 - 10:59 | Late Morning | 37,6 | 58  | 58,0  | 58,0  | 18,75 | 551,90 | 136,92 |
| 2019/08/31 | CH2276 | Female | Two y/o | Control | Control | Feed Day | No  | 10:25 | 10:00 - 10:59 | Late Morning | 37,6 | 91  | 65,8  | 65,8  | 18,75 | 586,98 | 141,29 |
| 2019/08/31 | CH2276 | Female | Two y/o | Control | Control | Feed Day | Yes | 10:30 | 10:00 - 10:59 | Late Morning | 37,6 | 115 | 252,0 | 252,0 | 18,75 | 603,82 | 188,26 |
| 2019/08/31 | CH2276 | Female | Two y/o | Control | Control | Feed Day | Yes | 10:35 | 10:00 - 10:59 | Late Morning | 37,6 | 88  | 125,4 | 125,4 | 18,75 | 584,49 | 163,75 |
| 2019/08/31 | CH2276 | Female | Two y/o | Control | Control | Feed Day | Yes | 10:40 | 10:00 - 10:59 | Late Morning | 37,5 |     | 235,2 | 235,2 | 18,65 |        | 185,83 |
| 2019/08/31 | CH2276 | Female | Two y/o | Control | Control | Feed Day | Yes | 10:45 | 10:00 - 10:59 | Late Morning | 37,6 | 137 | 285,8 | 285,8 | 18,75 | 615,83 | 192,71 |
| 2019/08/31 | CH2276 | Female | Two y/o | Control | Control | Feed Day | Yes | 10:50 | 10:00 - 10:59 | Late Morning | 37,9 | 147 | 66,4  | 66,4  | 19,05 | 620,52 | 141,61 |
| 2019/08/31 | CH2276 | Female | Two y/o | Control | Control | Feed Day | Yes | 10:55 | 10:00 - 10:59 | Late Morning | 38,0 |     | 67,0  | 67,0  | 19,15 |        | 141,92 |
| 2019/08/31 | CH2276 | Female | Two y/o | Control | Control | Feed Day | Yes | 11:00 | 11:00 - 11:59 | Late Morning | 38,0 |     | 49,8  | 49,8  | 19,15 |        | 131,65 |
| 2019/08/31 | CH2276 | Female | Two y/o | Control | Control | Feed Day | Yes | 11:05 | 11:00 - 11:59 | Late Morning | 38,1 | 191 | 192,6 | 192,6 | 19,26 | 637,33 | 178,79 |
| 2019/08/31 | CH2276 | Female | Two y/o | Control | Control | Feed Day | Yes | 11:10 | 11:00 - 11:59 | Late Morning | 38,2 | 111 | 313,6 | 313,6 | 19,36 | 601,33 | 195,99 |



|            |        |        |         |         |         |          |     |       |               |              |      |     |       |       |       |        |        |
|------------|--------|--------|---------|---------|---------|----------|-----|-------|---------------|--------------|------|-----|-------|-------|-------|--------|--------|
| 2019/08/31 | CH2276 | Female | Two y/o | Control | Control | Feed Day | Yes | 11:15 | 11:00 - 11:59 | Late Morning | 38,1 | 156 | 213,8 | 213,8 | 19,26 | 624,43 | 182,47 |
| 2019/08/31 | CH2276 | Female | Two y/o | Control | Control | Feed Day | Yes | 11:20 | 11:00 - 11:59 | Late Morning | 38,0 | 140 | 134,2 | 134,2 | 19,15 | 617,28 | 166,12 |
| 2019/08/31 | CH2276 | Female | Two y/o | Control | Control | Feed Day | Yes | 11:25 | 11:00 - 11:59 | Late Morning | 38,0 |     | 65,2  | 65,2  | 19,15 |        | 140,97 |
| 2019/08/31 | CH2276 | Female | Two y/o | Control | Control | Feed Day | No  | 11:30 | 11:00 - 11:59 | Late Morning | 38,0 | 79  | 72,4  | 72,4  | 19,15 | 576,36 | 144,61 |
| 2019/08/31 | CH2276 | Female | Two y/o | Control | Control | Feed Day | No  | 11:35 | 11:00 - 11:59 | Late Morning | 37,9 | 75  | 74,6  | 74,6  | 19,05 | 572,36 | 145,65 |
| 2019/08/31 | CH2276 | Female | Two y/o | Control | Control | Feed Day | No  | 11:40 | 11:00 - 11:59 | Late Morning | 37,9 | 65  | 50,2  | 50,2  | 19,05 | 561,12 | 131,92 |
| 2019/08/31 | CH2276 | Female | Two y/o | Control | Control | Feed Day | No  | 11:45 | 11:00 - 11:59 | Late Morning | 37,9 | 67  | 80,2  | 80,2  | 19,05 | 563,53 | 148,16 |
| 2019/08/31 | CH2276 | Female | Two y/o | Control | Control | Feed Day | No  | 11:50 | 11:00 - 11:59 | Late Morning | 37,9 | 78  | 76,4  | 76,4  | 19,05 | 575,38 | 146,48 |
| 2019/08/31 | CH2276 | Female | Two y/o | Control | Control | Feed Day | No  | 11:55 | 11:00 - 11:59 | Late Morning | 37,9 | 65  | 81,0  | 81,0  | 19,05 | 561,12 | 148,51 |
| 2019/08/31 | CH2276 | Female | Two y/o | Control | Control | Feed Day | No  | 12:00 | 12:00 - 12:59 | Afternoon    | 37,9 | 77  | 83,2  | 83,2  | 19,05 | 574,39 | 149,44 |
| 2019/08/31 | CH2276 | Female | Two y/o | Control | Control | Feed Day | No  | 12:05 | 12:00 - 12:59 | Afternoon    | 37,9 | 68  | 77,4  | 77,4  | 19,05 | 564,71 | 146,93 |
| 2019/08/31 | CH2276 | Female | Two y/o | Control | Control | Feed Day | No  | 12:10 | 12:00 - 12:59 | Afternoon    | 37,8 | 65  | 76,6  | 76,6  | 18,95 | 561,12 | 146,57 |
| 2019/08/31 | CH2276 | Female | Two y/o | Control | Control | Feed Day | No  | 12:15 | 12:00 - 12:59 | Afternoon    | 37,8 | 65  | 75,0  | 75,0  | 18,95 | 561,12 | 145,83 |
| 2019/08/31 | CH2276 | Female | Two y/o | Control | Control | Feed Day | No  | 12:20 | 12:00 - 12:59 | Afternoon    | 37,8 | 68  | 78,6  | 78,6  | 18,95 | 564,71 | 147,46 |
| 2019/08/31 | CH2276 | Female | Two y/o | Control | Control | Feed Day | No  | 12:25 | 12:00 - 12:59 | Afternoon    | 37,8 | 68  | 87,4  | 87,4  | 18,95 | 564,71 | 151,15 |
| 2019/08/31 | CH2276 | Female | Two y/o | Control | Control | Feed Day | No  | 12:30 | 12:00 - 12:59 | Afternoon    | 37,8 | 68  | 87,0  | 87,0  | 18,95 | 564,71 | 150,99 |
| 2019/08/31 | CH2276 | Female | Two y/o | Control | Control | Feed Day | No  | 12:35 | 12:00 - 12:59 | Afternoon    | 37,8 | 70  | 93,0  | 93,0  | 18,95 | 566,99 | 153,31 |
| 2019/08/31 | CH2276 | Female | Two y/o | Control | Control | Feed Day | No  | 12:40 | 12:00 - 12:59 | Afternoon    | 37,8 | 63  | 94,8  | 94,8  | 18,95 | 558,62 | 153,98 |
| 2019/08/31 | CH2276 | Female | Two y/o | Control | Control | Feed Day | No  | 12:45 | 12:00 - 12:59 | Afternoon    | 37,8 | 64  | 92,2  | 92,2  | 18,95 | 559,88 | 153,01 |
| 2019/08/31 | CH2276 | Female | Two y/o | Control | Control | Feed Day | No  | 12:50 | 12:00 - 12:59 | Afternoon    | 37,8 | 65  | 76,6  | 76,6  | 18,95 | 561,12 | 146,57 |
| 2019/08/31 | CH2276 | Female | Two y/o | Control | Control | Feed Day | No  | 12:55 | 12:00 - 12:59 | Afternoon    | 37,8 | 73  | 77,2  | 77,2  | 18,95 | 570,27 | 146,84 |
| 2019/08/31 | CH2276 | Female | Two y/o | Control | Control | Feed Day | No  | 13:00 | 13:00 - 13:59 | Afternoon    | 37,9 | 67  | 83,8  | 83,8  | 19,05 | 563,53 | 149,69 |
| 2019/08/31 | CH2276 | Female | Two y/o | Control | Control | Feed Day | No  | 13:05 | 13:00 - 13:59 | Afternoon    | 37,9 | 66  | 104,6 | 104,6 | 19,05 | 562,34 | 157,41 |
| 2019/08/31 | CH2276 | Female | Two y/o | Control | Control | Feed Day | No  | 13:10 | 13:00 - 13:59 | Afternoon    | 37,9 | 69  | 99,0  | 99,0  | 19,05 | 565,86 | 155,49 |
| 2019/08/31 | CH2276 | Female | Two y/o | Control | Control | Feed Day | No  | 13:15 | 13:00 - 13:59 | Afternoon    | 37,9 | 72  | 97,6  | 97,6  | 19,05 | 569,20 | 155,00 |
| 2019/08/31 | CH2276 | Female | Two y/o | Control | Control | Feed Day | No  | 13:20 | 13:00 - 13:59 | Afternoon    | 37,9 | 70  | 97,8  | 97,8  | 19,05 | 566,99 | 155,07 |
| 2019/08/31 | CH2276 | Female | Two y/o | Control | Control | Feed Day | No  | 13:25 | 13:00 - 13:59 | Afternoon    | 37,9 | 67  | 98,0  | 98,0  | 19,05 | 563,53 | 155,14 |
| 2019/08/31 | CH2276 | Female | Two y/o | Control | Control | Feed Day | No  | 13:30 | 13:00 - 13:59 | Afternoon    | 37,9 | 67  | 90,2  | 90,2  | 19,05 | 563,53 | 152,25 |
| 2019/08/31 | CH2276 | Female | Two y/o | Control | Control | Feed Day | No  | 13:35 | 13:00 - 13:59 | Afternoon    | 37,9 | 65  | 87,8  | 87,8  | 19,05 | 561,12 | 151,31 |
| 2019/08/31 | CH2276 | Female | Two y/o | Control | Control | Feed Day | No  | 13:40 | 13:00 - 13:59 | Afternoon    | 37,9 | 67  | 90,0  | 90,0  | 19,05 | 563,53 | 152,17 |
| 2019/08/31 | CH2276 | Female | Two y/o | Control | Control | Feed Day | No  | 13:45 | 13:00 - 13:59 | Afternoon    | 37,9 | 68  | 90,2  | 90,2  | 19,05 | 564,71 | 152,25 |
| 2019/08/31 | CH2276 | Female | Two y/o | Control | Control | Feed Day | No  | 13:50 | 13:00 - 13:59 | Afternoon    | 37,9 | 64  | 90,2  | 90,2  | 19,05 | 559,88 | 152,25 |
| 2019/08/31 | CH2276 | Female | Two y/o | Control | Control | Feed Day | No  | 13:55 | 13:00 - 13:59 | Afternoon    | 37,9 | 82  | 88,4  | 88,4  | 19,05 | 579,19 | 151,55 |
| 2019/08/31 | CH2276 | Female | Two y/o | Control | Control | Feed Day | No  | 14:00 | 14:00 - 14:59 | Afternoon    | 37,9 | 67  | 92,4  | 92,4  | 19,05 | 563,53 | 153,09 |
| 2019/08/31 | CH2276 | Female | Two y/o | Control | Control | Feed Day | No  | 14:05 | 14:00 - 14:59 | Afternoon    | 37,9 | 67  | 94,8  | 94,8  | 19,05 | 563,53 | 153,98 |
| 2019/08/31 | CH2276 | Female | Two y/o | Control | Control | Feed Day | No  | 14:10 | 14:00 - 14:59 | Afternoon    | 37,9 | 61  | 28,6  | 28,6  | 19,05 | 556,01 | 112,56 |
| 2019/08/31 | CH2276 | Female | Two y/o | Control | Control | Feed Day | No  | 14:15 | 14:00 - 14:59 | Afternoon    | 37,9 |     | 76,6  | 76,6  | 19,05 |        | 146,57 |
| 2019/08/31 | CH2276 | Female | Two y/o | Control | Control | Feed Day | No  | 14:20 | 14:00 - 14:59 | Afternoon    | 37,8 | 65  | 33,6  | 33,6  | 18,95 | 561,12 | 118,09 |
| 2019/08/31 | CH2276 | Female | Two y/o | Control | Control | Feed Day | No  | 14:25 | 14:00 - 14:59 | Afternoon    | 37,8 | 65  | 53,0  | 53,0  | 18,95 | 561,12 | 133,80 |
| 2019/08/31 | CH2276 | Female | Two y/o | Control | Control | Feed Day | No  | 14:30 | 14:00 - 14:59 | Afternoon    | 37,9 | 69  | 23,6  | 23,6  | 19,05 | 565,86 | 105,97 |
| 2019/08/31 | CH2276 | Female | Two y/o | Control | Control | Feed Day | No  | 14:35 | 14:00 - 14:59 | Afternoon    | 37,9 | 68  | 19,6  | 19,6  | 19,05 | 564,71 | 99,63  |
| 2019/08/31 | CH2276 | Female | Two y/o | Control | Control | Feed Day | No  | 14:40 | 14:00 - 14:59 | Afternoon    | 37,9 | 83  | 22,2  | 22,2  | 19,05 | 580,11 | 103,88 |
| 2019/08/31 | CH2276 | Female | Two y/o | Control | Control | Feed Day | No  | 14:45 | 14:00 - 14:59 | Afternoon    | 37,9 | 61  | 62,6  | 62,6  | 19,05 | 556,01 | 139,56 |
| 2019/08/31 | CH2276 | Female | Two y/o | Control | Control | Feed Day | No  | 14:50 | 14:00 - 14:59 | Afternoon    | 37,9 | 83  | 51,0  | 51,0  | 19,05 | 580,11 | 132,47 |
| 2019/08/31 | CH2276 | Female | Two y/o | Control | Control | Feed Day | No  | 14:55 | 14:00 - 14:59 | Afternoon    | 38,0 | 65  | 31,0  | 31,0  | 19,15 | 561,12 | 115,32 |
| 2019/08/31 | CH2276 | Female | Two y/o | Control | Control | Feed Day | No  | 15:00 | 15:00 - 15:59 | Afternoon    | 37,9 | 60  | 128,2 | 128,2 | 19,05 | 554,67 | 164,52 |
| 2019/08/31 | CH2276 | Female | Two y/o | Control | Control | Feed Day | No  | 15:05 | 15:00 - 15:59 | Afternoon    | 37,9 | 75  | 115,0 | 115,0 | 19,05 | 572,36 | 160,72 |
| 2019/08/31 | CH2276 | Female | Two y/o | Control | Control | Feed Day | No  | 15:10 | 15:00 - 15:59 | Afternoon    | 37,9 | 60  | 41,6  | 41,6  | 19,05 | 554,67 | 125,44 |
| 2019/08/31 | CH2276 | Female | Two y/o | Control | Control | Feed Day | No  | 15:15 | 15:00 - 15:59 | Afternoon    | 37,8 | 141 | 167,2 | 167,2 | 18,95 | 617,75 | 173,82 |
| 2019/08/31 | CH2276 | Female | Two y/o | Control | Control | Feed Day | No  | 15:20 | 15:00 - 15:59 | Afternoon    | 37,8 |     | 45,0  | 45,0  | 18,95 |        | 128,15 |
| 2019/08/31 | CH2276 | Female | Two y/o | Control | Control | Feed Day | No  | 15:25 | 15:00 - 15:59 | Afternoon    | 37,9 | 110 | 56,2  | 56,2  | 19,05 | 600,69 | 135,83 |
| 2019/08/31 | CH2276 | Female | Two y/o | Control | Control | Feed Day | Yes | 15:30 | 15:00 - 15:59 | Afternoon    | 38,0 | 191 | 290,8 | 290,8 | 19,15 | 637,33 | 193,32 |
| 2019/08/31 | CH2276 | Female | Two y/o | Control | Control | Feed Day | Yes | 15:35 | 15:00 - 15:59 | Afternoon    | 38,0 | 109 | 45,4  | 45,4  | 19,15 | 600,04 | 128,45 |
| 2019/08/31 | CH2276 | Female | Two y/o | Control | Control | Feed Day | Yes | 15:40 | 15:00 - 15:59 | Afternoon    | 38,0 | 67  | 44,4  | 44,4  | 19,15 | 563,53 | 127,69 |
| 2019/08/31 | CH2276 | Female | Two y/o | Control | Control | Feed Day | Yes | 15:45 | 15:00 - 15:59 | Afternoon    | 38,0 | 65  | 25,6  | 25,6  | 19,15 | 561,12 | 108,76 |
| 2019/08/31 | CH2276 | Female | Two y/o | Control | Control | Feed Day | Yes | 15:50 | 15:00 - 15:59 | Afternoon    | 37,9 | 94  | 62,4  | 62,4  | 19,05 | 589,37 | 139,45 |
| 2019/08/31 | CH2276 | Female | Two y/o | Control | Control | Feed Day | Yes | 15:55 | 15:00 - 15:59 | Afternoon    | 37,9 | 63  | 77,0  | 77,0  | 19,05 | 558,62 | 146,75 |
| 2019/08/31 | CH2276 | Female | Two y/o | Control | Control | Feed Day | Yes | 16:00 | 16:00 - 16:59 | Evening      | 38,0 | 67  | 73,0  | 73,0  | 19,15 | 563,53 | 144,89 |
| 2019/08/31 | CH2276 | Female | Two y/o | Control | Control | Feed Day | Yes | 16:05 | 16:00 - 16:59 | Evening      | 38,0 | 73  | 74,2  | 74,2  | 19,15 | 570,27 | 145,46 |
| 2019/08/31 | CH2276 | Female | Two y/o | Control | Control | Feed Day | Yes | 16:10 | 16:00 - 16:59 | Evening      | 38,0 | 65  | 89,0  | 89,0  | 19,15 | 561,12 | 151,78 |
| 2019/08/31 | CH2276 | Female | Two y/o | Control | Control | Feed Day | Yes | 16:15 | 16:00 - 16:59 | Evening      | 38,1 | 68  | 95,6  | 95,6  | 19,26 | 564,71 | 154,28 |
| 2019/08/31 | CH2276 | Female | Two y/o | Control | Control | Feed Day | Yes | 16:20 | 16:00 - 16:59 | Evening      | 38,2 | 60  | 96,8  | 96,8  | 19,36 | 554,67 | 154,71 |
| 2019/08/31 | CH2276 | Female | Two y/o | Control | Control | Feed Day | Yes | 16:25 | 16:00 - 16:59 | Evening      | 38,2 | 71  | 91,6  | 91,6  | 19,36 | 568,10 | 152,79 |
| 2019/08/31 | CH2276 | Female | Two y/o | Control | Control | Feed Day | No  | 16:30 | 16:00 - 16:59 | Evening      | 38,2 | 82  | 84,4  | 84,4  | 19,36 | 579,19 | 149,94 |
| 2019/08/31 | CH2276 | Female | Two y/o | Control | Control | Feed Day | No  | 16:35 | 16:00 - 16:59 | Evening      | 38,2 | 67  | 85,6  | 85,6  | 19,36 | 563,53 | 150,43 |
| 2019/08/31 | CH2276 | Female | Two y/o | Control | Control | Feed Day | No  | 16:40 | 16:00 - 16:59 | Evening      | 38,2 | 61  | 88,4  | 88,4  | 19,36 | 556,01 | 151,55 |
| 2019/08/31 | CH2276 | Female | Two y/o | Control | Control | Feed Day | No  | 16:45 | 16:00 - 16:59 | Evening      | 38,3 | 68  | 87,2  | 87,2  | 19,46 | 564,71 | 151,07 |
| 2019/08/31 | CH2276 | Female | Two y/o | Control | Control | Feed Day | No  | 16:50 | 16:00 - 16:59 | Evening      | 38,3 | 100 | 81,2  | 81,2  | 19,46 | 593,87 | 148,59 |
| 2019/08/31 | CH2276 | Female | Two y/o | Control | Control | Feed Day | No  | 16:55 | 16:00 - 16:59 | Evening      | 38,3 | 93  | 75,2  | 75,2  | 19,46 | 588,58 | 145,93 |
| 2019/08/31 | CH2276 | Female | Two y/o | Control | Control | Feed Day | No  | 17:00 | 17:00 - 17:59 | Evening      | 38,3 | 113 | 76,2  | 76,2  | 19,46 | 602,58 | 146,38 |



|            |        |        |         |         |         |          |    |       |               |         |      |     |       |       |       |        |        |
|------------|--------|--------|---------|---------|---------|----------|----|-------|---------------|---------|------|-----|-------|-------|-------|--------|--------|
| 2019/08/31 | CH2276 | Female | Two y/o | Control | Control | Feed Day | No | 17:05 | 17:00 - 17:59 | Evening | 38,3 | 98  | 37,4  | 37,4  | 19,46 | 592,41 | 121,77 |
| 2019/08/31 | CH2276 | Female | Two y/o | Control | Control | Feed Day | No | 17:10 | 17:00 - 17:59 | Evening | 38,3 | 88  | 48,4  | 48,4  | 19,46 | 584,49 | 130,66 |
| 2019/08/31 | CH2276 | Female | Two y/o | Control | Control | Feed Day | No | 17:15 | 17:00 - 17:59 | Evening | 38,2 | 102 | 11,2  | 11,2  | 19,36 | 595,30 | 80,59  |
| 2019/08/31 | CH2276 | Female | Two y/o | Control | Control | Feed Day | No | 17:20 | 17:00 - 17:59 | Evening | 38,2 | 63  | 43,8  | 43,8  | 19,36 | 558,62 | 127,22 |
| 2019/08/31 | CH2276 | Female | Two y/o | Control | Control | Feed Day | No | 17:25 | 17:00 - 17:59 | Evening | 38,1 |     | 27,0  | 27,0  | 19,26 |        | 110,58 |
| 2019/08/31 | CH2276 | Female | Two y/o | Control | Control | Feed Day | No | 17:30 | 17:00 - 17:59 | Evening | 38,0 | 74  | 36,8  | 36,8  | 19,15 | 571,33 | 121,22 |
| 2019/08/31 | CH2276 | Female | Two y/o | Control | Control | Feed Day | No | 17:35 | 17:00 - 17:59 | Evening | 38,0 | 67  | 39,2  | 39,2  | 19,15 | 563,53 | 123,39 |
| 2019/08/31 | CH2276 | Female | Two y/o | Control | Control | Feed Day | No | 17:40 | 17:00 - 17:59 | Evening | 37,9 | 68  | 25,6  | 25,6  | 19,05 | 564,71 | 108,76 |
| 2019/08/31 | CH2276 | Female | Two y/o | Control | Control | Feed Day | No | 17:45 | 17:00 - 17:59 | Evening | 37,9 | 108 | 77,2  | 77,2  | 19,05 | 599,39 | 146,84 |
| 2019/08/31 | CH2276 | Female | Two y/o | Control | Control | Feed Day | No | 17:50 | 17:00 - 17:59 | Evening | 38,0 | 129 | 138,4 | 138,4 | 19,15 | 611,75 | 167,20 |
| 2019/08/31 | CH2276 | Female | Two y/o | Control | Control | Feed Day | No | 17:55 | 17:00 - 17:59 | Evening | 38,0 | 72  | 490,8 | 490,8 | 19,15 | 569,20 | 211,89 |
| 2019/08/31 | CH2276 | Female | Two y/o | Control | Control | Feed Day | No | 18:00 | 18:00 - 18:59 | Evening | 38,0 | 119 | 62,6  | 62,6  | 19,15 | 606,20 | 139,56 |
| 2019/08/31 | CH2276 | Female | Two y/o | Control | Control | Feed Day | No | 18:05 | 18:00 - 18:59 | Evening | 38,3 | 118 | 40,0  | 40,0  | 19,46 | 605,61 | 124,09 |
| 2019/08/31 | CH2276 | Female | Two y/o | Control | Control | Feed Day | No | 18:10 | 18:00 - 18:59 | Evening | 38,3 | 91  | 59,4  | 59,4  | 19,46 | 586,98 | 137,75 |
| 2019/08/31 | CH2276 | Female | Two y/o | Control | Control | Feed Day | No | 18:15 | 18:00 - 18:59 | Evening | 38,3 | 82  | 59,2  | 59,2  | 19,46 | 579,19 | 137,63 |
| 2019/08/31 | CH2276 | Female | Two y/o | Control | Control | Feed Day | No | 18:20 | 18:00 - 18:59 | Evening | 38,3 | 61  | 513,4 | 513,4 | 19,46 | 556,01 | 213,49 |
| 2019/08/31 | CH2276 | Female | Two y/o | Control | Control | Feed Day | No | 18:25 | 18:00 - 18:59 | Evening | 38,4 |     | 109,2 | 109,2 | 19,56 |        | 158,91 |
| 2019/08/31 | CH2276 | Female | Two y/o | Control | Control | Feed Day | No | 18:30 | 18:00 - 18:59 | Evening | 38,5 | 60  | 113,8 | 113,8 | 19,66 | 554,67 | 160,35 |
| 2019/08/31 | CH2276 | Female | Two y/o | Control | Control | Feed Day | No | 18:35 | 18:00 - 18:59 | Evening | 38,5 | 73  | 131,6 | 131,6 | 19,66 | 570,27 | 165,43 |
| 2019/08/31 | CH2276 | Female | Two y/o | Control | Control | Feed Day | No | 18:40 | 18:00 - 18:59 | Evening | 38,5 |     | 204,4 | 204,4 | 19,66 |        | 180,88 |
| 2019/08/31 | CH2276 | Female | Two y/o | Control | Control | Feed Day | No | 18:45 | 18:00 - 18:59 | Evening | 38,6 |     | 72,8  | 72,8  | 19,76 |        | 144,80 |
| 2019/08/31 | CH2276 | Female | Two y/o | Control | Control | Feed Day | No | 18:50 | 18:00 - 18:59 | Evening | 38,5 | 120 | 28,4  | 28,4  | 19,66 | 606,78 | 112,31 |
| 2019/08/31 | CH2276 | Female | Two y/o | Control | Control | Feed Day | No | 18:55 | 18:00 - 18:59 | Evening | 38,4 | 88  | 14,0  | 14,0  | 19,56 | 584,49 | 88,17  |
| 2019/08/31 | CH2276 | Female | Two y/o | Control | Control | Feed Day | No | 19:00 | 19:00 - 19:59 | Evening | 38,3 | 92  | 9,8   | 9,8   | 19,46 | 587,78 | 76,07  |
| 2019/08/31 | CH2276 | Female | Two y/o | Control | Control | Feed Day | No | 19:05 | 19:00 - 19:59 | Evening | 38,2 | 62  | 13,8  | 13,8  | 19,36 | 557,33 | 87,68  |
| 2019/08/31 | CH2276 | Female | Two y/o | Control | Control | Feed Day | No | 19:10 | 19:00 - 19:59 | Evening | 38,0 | 60  | 7,4   | 7,4   | 19,15 | 554,67 | 66,59  |
| 2019/08/31 | CH2276 | Female | Two y/o | Control | Control | Feed Day | No | 19:15 | 19:00 - 19:59 | Evening | 38,0 | 191 | 19,4  | 19,4  | 19,15 | 637,33 | 99,28  |
| 2019/08/31 | CH2276 | Female | Two y/o | Control | Control | Feed Day | No | 19:20 | 19:00 - 19:59 | Evening | 38,0 | 97  | 21,4  | 21,4  | 19,15 | 591,66 | 102,63 |
| 2019/08/31 | CH2276 | Female | Two y/o | Control | Control | Feed Day | No | 19:25 | 19:00 - 19:59 | Evening | 37,9 | 80  | 28,8  | 28,8  | 19,05 | 577,31 | 112,79 |
| 2019/08/31 | CH2276 | Female | Two y/o | Control | Control | Feed Day | No | 19:30 | 19:00 - 19:59 | Evening | 37,8 | 73  | 41,8  | 41,8  | 18,95 | 570,27 | 125,60 |
| 2019/08/31 | CH2276 | Female | Two y/o | Control | Control | Feed Day | No | 19:35 | 19:00 - 19:59 | Evening | 37,8 | 86  | 31,8  | 31,8  | 18,95 | 582,77 | 116,20 |
| 2019/08/31 | CH2276 | Female | Two y/o | Control | Control | Feed Day | No | 19:40 | 19:00 - 19:59 | Evening | 37,8 | 65  | 5,2   | 5,2   | 18,95 | 561,12 | 54,72  |
| 2019/08/31 | CH2276 | Female | Two y/o | Control | Control | Feed Day | No | 19:45 | 19:00 - 19:59 | Evening | 37,7 | 85  | 4,2   | 4,2   | 18,85 | 581,90 | 47,57  |
| 2019/08/31 | CH2276 | Female | Two y/o | Control | Control | Feed Day | No | 19:50 | 19:00 - 19:59 | Evening | 37,7 | 74  | 10,0  | 10,0  | 18,85 | 571,33 | 76,76  |
| 2019/08/31 | CH2276 | Female | Two y/o | Control | Control | Feed Day | No | 19:55 | 19:00 - 19:59 | Evening | 37,7 | 74  | 17,0  | 17,0  | 18,85 | 571,33 | 94,77  |
| 2019/08/31 | CH2276 | Female | Two y/o | Control | Control | Feed Day | No | 20:00 | 20:00 - 20:59 | Night   | 37,7 | 62  | 54,8  | 54,8  | 18,85 | 557,33 | 134,96 |
| 2019/08/31 | CH2276 | Female | Two y/o | Control | Control | Feed Day | No | 20:05 | 20:00 - 20:59 | Night   | 37,6 | 67  | 56,4  | 56,4  | 18,75 | 563,53 | 135,95 |
| 2019/08/31 | CH2276 | Female | Two y/o | Control | Control | Feed Day | No | 20:10 | 20:00 - 20:59 | Night   | 37,5 | 94  | 51,8  | 51,8  | 18,65 | 589,37 | 133,01 |
| 2019/08/31 | CH2276 | Female | Two y/o | Control | Control | Feed Day | No | 20:15 | 20:00 - 20:59 | Night   | 37,5 | 97  | 61,2  | 61,2  | 18,65 | 591,66 | 138,78 |
| 2019/08/31 | CH2276 | Female | Two y/o | Control | Control | Feed Day | No | 20:20 | 20:00 - 20:59 | Night   | 37,5 | 71  | 92,2  | 92,2  | 18,65 | 568,10 | 153,01 |
| 2019/08/31 | CH2276 | Female | Two y/o | Control | Control | Feed Day | No | 20:25 | 20:00 - 20:59 | Night   | 37,6 | 95  | 90,4  | 90,4  | 18,75 | 590,14 | 152,33 |
| 2019/08/31 | CH2276 | Female | Two y/o | Control | Control | Feed Day | No | 20:30 | 20:00 - 20:59 | Night   | 37,6 | 68  | 92,6  | 92,6  | 18,75 | 564,71 | 153,16 |
| 2019/08/31 | CH2276 | Female | Two y/o | Control | Control | Feed Day | No | 20:35 | 20:00 - 20:59 | Night   | 37,6 | 65  | 90,6  | 90,6  | 18,75 | 561,12 | 152,40 |
| 2019/08/31 | CH2276 | Female | Two y/o | Control | Control | Feed Day | No | 20:40 | 20:00 - 20:59 | Night   | 37,7 | 63  | 93,0  | 93,0  | 18,85 | 558,62 | 153,31 |
| 2019/08/31 | CH2276 | Female | Two y/o | Control | Control | Feed Day | No | 20:45 | 20:00 - 20:59 | Night   | 37,7 | 97  | 87,2  | 87,2  | 18,85 | 591,66 | 151,07 |
| 2019/08/31 | CH2276 | Female | Two y/o | Control | Control | Feed Day | No | 20:50 | 20:00 - 20:59 | Night   | 37,7 | 75  | 92,8  | 92,8  | 18,85 | 572,36 | 153,24 |
| 2019/08/31 | CH2276 | Female | Two y/o | Control | Control | Feed Day | No | 20:55 | 20:00 - 20:59 | Night   | 37,7 | 90  | 89,2  | 89,2  | 18,85 | 586,16 | 151,86 |
| 2019/08/31 | CH2276 | Female | Two y/o | Control | Control | Feed Day | No | 21:00 | 21:00 - 21:59 | Night   | 37,6 | 81  | 51,0  | 51,0  | 18,75 | 578,26 | 132,47 |
| 2019/08/31 | CH2276 | Female | Two y/o | Control | Control | Feed Day | No | 21:05 | 21:00 - 21:59 | Night   | 37,6 |     | 28,4  | 28,4  | 18,75 |        | 112,31 |
| 2019/08/31 | CH2276 | Female | Two y/o | Control | Control | Feed Day | No | 21:10 | 21:00 - 21:59 | Night   | 37,5 | 83  | 35,6  | 35,6  | 18,65 | 580,11 | 120,08 |
| 2019/08/31 | CH2276 | Female | Two y/o | Control | Control | Feed Day | No | 21:15 | 21:00 - 21:59 | Night   | 37,5 | 64  | 6,6   | 6,6   | 18,65 | 559,88 | 62,73  |
| 2019/08/31 | CH2276 | Female | Two y/o | Control | Control | Feed Day | No | 21:20 | 21:00 - 21:59 | Night   | 37,4 |     | 26,8  | 26,8  | 18,55 |        | 110,33 |
| 2019/08/31 | CH2276 | Female | Two y/o | Control | Control | Feed Day | No | 21:25 | 21:00 - 21:59 | Night   | 37,4 | 90  | 31,2  | 31,2  | 18,55 | 586,16 | 115,54 |
| 2019/08/31 | CH2276 | Female | Two y/o | Control | Control | Feed Day | No | 21:30 | 21:00 - 21:59 | Night   | 37,4 | 62  | 35,6  | 35,6  | 18,55 | 557,33 | 120,08 |
| 2019/08/31 | CH2276 | Female | Two y/o | Control | Control | Feed Day | No | 21:35 | 21:00 - 21:59 | Night   | 37,4 | 95  | 36,0  | 36,0  | 18,55 | 590,14 | 120,46 |
| 2019/08/31 | CH2276 | Female | Two y/o | Control | Control | Feed Day | No | 21:40 | 21:00 - 21:59 | Night   | 37,5 | 73  | 39,2  | 39,2  | 18,65 | 570,27 | 123,39 |
| 2019/08/31 | CH2276 | Female | Two y/o | Control | Control | Feed Day | No | 21:45 | 21:00 - 21:59 | Night   | 37,5 | 61  | 64,2  | 64,2  | 18,65 | 556,01 | 140,44 |
| 2019/08/31 | CH2276 | Female | Two y/o | Control | Control | Feed Day | No | 21:50 | 21:00 - 21:59 | Night   | 37,5 | 102 | 8,4   | 8,4   | 18,65 | 595,30 | 70,86  |
| 2019/08/31 | CH2276 | Female | Two y/o | Control | Control | Feed Day | No | 21:55 | 21:00 - 21:59 | Night   | 37,5 | 67  | 6,0   | 6,0   | 18,65 | 563,53 | 59,53  |
| 2019/08/31 | CH2276 | Female | Two y/o | Control | Control | Feed Day | No | 22:00 | 22:00 - 22:59 | Night   | 37,4 | 63  | 8,6   | 8,6   | 18,55 | 558,62 | 71,66  |
| 2019/08/31 | CH2276 | Female | Two y/o | Control | Control | Feed Day | No | 22:05 | 22:00 - 22:59 | Night   | 37,3 | 99  | 4,6   | 4,6   | 18,46 | 593,14 | 50,61  |
| 2019/08/31 | CH2276 | Female | Two y/o | Control | Control | Feed Day | No | 22:10 | 22:00 - 22:59 | Night   | 37,3 | 98  | 5,2   | 5,2   | 18,46 | 592,41 | 54,72  |
| 2019/08/31 | CH2276 | Female | Two y/o | Control | Control | Feed Day | No | 22:15 | 22:00 - 22:59 | Night   | 37,2 | 93  | 48,2  | 48,2  | 18,36 | 588,58 | 130,52 |
| 2019/08/31 | CH2276 | Female | Two y/o | Control | Control | Feed Day | No | 22:20 | 22:00 - 22:59 | Night   | 37,3 | 63  | 82,2  | 82,2  | 18,46 | 558,62 | 149,02 |
| 2019/08/31 | CH2276 | Female | Two y/o | Control | Control | Feed Day | No | 22:25 | 22:00 - 22:59 | Night   | 37,3 | 92  | 35,0  | 35,0  | 18,46 | 587,78 | 119,49 |
| 2019/08/31 | CH2276 | Female | Two y/o | Control | Control | Feed Day | No | 22:30 | 22:00 - 22:59 | Night   | 37,3 | 64  | 33,2  | 33,2  | 18,46 | 559,88 | 117,68 |
| 2019/08/31 | CH2276 | Female | Two y/o | Control | Control | Feed Day | No | 22:35 | 22:00 - 22:59 | Night   | 37,2 | 64  | 50,0  | 50,0  | 18,36 | 559,88 | 131,79 |
| 2019/08/31 | CH2276 | Female | Two y/o | Control | Control | Feed Day | No | 22:40 | 22:00 - 22:59 | Night   | 37,1 | 63  | 39,8  | 39,8  | 18,26 | 558,62 | 123,91 |
| 2019/08/31 | CH2276 | Female | Two y/o | Control | Control | Feed Day | No | 22:45 | 22:00 - 22:59 | Night   | 37,1 | 64  | 41,2  | 41,2  | 18,26 | 559,88 | 125,11 |
| 2019/08/31 | CH2276 | Female | Two y/o | Control | Control | Feed Day | No | 22:50 | 22:00 - 22:59 | Night   | 37,0 | 64  | 42,6  | 42,6  | 18,16 | 559,88 | 126,26 |



|    |            |        |        |         |         |         |          |    |       |               |               |      |     |       |       |       |        |        |
|----|------------|--------|--------|---------|---------|---------|----------|----|-------|---------------|---------------|------|-----|-------|-------|-------|--------|--------|
|    | 2019/08/31 | CH2276 | Female | Two y/o | Control | Control | Feed Day | No | 22:55 | 22:00 - 22:59 | Night         | 36,9 | 69  | 60,6  | 60,6  | 18,06 | 565,86 | 138,44 |
|    | 2019/08/31 | CH2276 | Female | Two y/o | Control | Control | Feed Day | No | 23:00 | 23:00 - 23:59 | Night         | 37,0 | 63  | 92,8  | 92,8  | 18,16 | 558,62 | 153,24 |
|    | 2019/08/31 | CH2276 | Female | Two y/o | Control | Control | Feed Day | No | 23:05 | 23:00 - 23:59 | Night         | 37,1 | 95  | 89,0  | 89,0  | 18,26 | 590,14 | 151,78 |
|    | 2019/08/31 | CH2276 | Female | Two y/o | Control | Control | Feed Day | No | 23:10 | 23:00 - 23:59 | Night         | 37,0 | 67  | 88,8  | 88,8  | 18,16 | 563,53 | 151,71 |
|    | 2019/08/31 | CH2276 | Female | Two y/o | Control | Control | Feed Day | No | 23:15 | 23:00 - 23:59 | Night         | 37,0 | 63  | 85,6  | 85,6  | 18,16 | 558,62 | 150,43 |
|    | 2019/08/31 | CH2276 | Female | Two y/o | Control | Control | Feed Day | No | 23:20 | 23:00 - 23:59 | Night         | 37,1 | 59  | 83,4  | 83,4  | 18,26 | 553,30 | 149,52 |
|    | 2019/08/31 | CH2276 | Female | Two y/o | Control | Control | Feed Day | No | 23:25 | 23:00 - 23:59 | Night         | 37,1 | 92  | 64,6  | 64,6  | 18,26 | 587,78 | 140,65 |
|    | 2019/08/31 | CH2276 | Female | Two y/o | Control | Control | Feed Day | No | 23:30 | 23:00 - 23:59 | Night         | 37,3 | 63  | 8,2   | 8,2   | 18,46 | 558,62 | 70,05  |
|    | 2019/08/31 | CH2276 | Female | Two y/o | Control | Control | Feed Day | No | 23:35 | 23:00 - 23:59 | Night         | 37,3 | 63  | 10,8  | 10,8  | 18,46 | 558,62 | 79,36  |
|    | 2019/08/31 | CH2276 | Female | Two y/o | Control | Control | Feed Day | No | 23:40 | 23:00 - 23:59 | Night         | 37,3 | 69  | 21,0  | 21,0  | 18,46 | 565,86 | 101,98 |
|    | 2019/08/31 | CH2276 | Female | Two y/o | Control | Control | Feed Day | No | 23:45 | 23:00 - 23:59 | Night         | 37,3 | 61  | 18,2  | 18,2  | 18,46 | 556,01 | 97,10  |
|    | 2019/08/31 | CH2276 | Female | Two y/o | Control | Control | Feed Day | No | 23:50 | 23:00 - 23:59 | Night         | 37,3 | 61  | 16,4  | 16,4  | 18,46 | 556,01 | 93,55  |
|    | 2019/08/31 | CH2276 | Female | Two y/o | Control | Control | Feed Day | No | 23:55 | 23:00 - 23:59 | Night         | 37,3 | 97  | 28,4  | 28,4  | 18,46 | 591,66 | 112,31 |
| 74 | 2019/09/01 | CH2276 | Female | Two y/o | Control | Control | Feed Day | No | 00:00 | 00:00 - 00:59 | Early Morning | 37,4 | 62  | 5,8   | 5,8   | 18,55 | 557,33 | 58,39  |
|    | 2019/09/01 | CH2276 | Female | Two y/o | Control | Control | Feed Day | No | 00:05 | 00:00 - 00:59 | Early Morning | 37,4 | 59  | 7,6   | 7,6   | 18,55 | 553,30 | 67,49  |
|    | 2019/09/01 | CH2276 | Female | Two y/o | Control | Control | Feed Day | No | 00:10 | 00:00 - 00:59 | Early Morning | 37,4 | 75  | 9,4   | 9,4   | 18,55 | 572,36 | 74,66  |
|    | 2019/09/01 | CH2276 | Female | Two y/o | Control | Control | Feed Day | No | 00:15 | 00:00 - 00:59 | Early Morning | 37,4 | 98  | 6,4   | 6,4   | 18,55 | 592,41 | 61,70  |
|    | 2019/09/01 | CH2276 | Female | Two y/o | Control | Control | Feed Day | No | 00:20 | 00:00 - 00:59 | Early Morning | 37,3 | 62  | 3,8   | 3,8   | 18,46 | 557,33 | 44,22  |
|    | 2019/09/01 | CH2276 | Female | Two y/o | Control | Control | Feed Day | No | 00:25 | 00:00 - 00:59 | Early Morning | 37,1 | 60  | 12,6  | 12,6  | 18,26 | 554,67 | 84,59  |
|    | 2019/09/01 | CH2276 | Female | Two y/o | Control | Control | Feed Day | No | 00:30 | 00:00 - 00:59 | Early Morning | 37,1 | 70  | 21,6  | 21,6  | 18,26 | 566,99 | 102,94 |
|    | 2019/09/01 | CH2276 | Female | Two y/o | Control | Control | Feed Day | No | 00:35 | 00:00 - 00:59 | Early Morning | 37,1 | 60  | 15,6  | 15,6  | 18,26 | 554,67 | 91,85  |
|    | 2019/09/01 | CH2276 | Female | Two y/o | Control | Control | Feed Day | No | 00:40 | 00:00 - 00:59 | Early Morning | 37,1 | 93  | 27,4  | 27,4  | 18,26 | 588,58 | 111,09 |
|    | 2019/09/01 | CH2276 | Female | Two y/o | Control | Control | Feed Day | No | 00:45 | 00:00 - 00:59 | Early Morning | 37,1 | 56  | 15,2  | 15,2  | 18,26 | 549,01 | 90,96  |
|    | 2019/09/01 | CH2276 | Female | Two y/o | Control | Control | Feed Day | No | 00:50 | 00:00 - 00:59 | Early Morning | 37,1 | 62  | 3,2   | 3,2   | 18,26 | 557,33 | 38,49  |
|    | 2019/09/01 | CH2276 | Female | Two y/o | Control | Control | Feed Day | No | 00:55 | 00:00 - 00:59 | Early Morning | 37,1 | 63  | 12,4  | 12,4  | 18,26 | 558,62 | 84,04  |
|    | 2019/09/01 | CH2276 | Female | Two y/o | Control | Control | Feed Day | No | 01:00 | 01:00 - 01:59 | Early Morning | 37,2 | 59  | 22,2  | 22,2  | 18,36 | 553,30 | 103,88 |
|    | 2019/09/01 | CH2276 | Female | Two y/o | Control | Control | Feed Day | No | 01:05 | 01:00 - 01:59 | Early Morning | 37,3 | 88  | 24,2  | 24,2  | 18,46 | 584,49 | 106,83 |
|    | 2019/09/01 | CH2276 | Female | Two y/o | Control | Control | Feed Day | No | 01:10 | 01:00 - 01:59 | Early Morning | 37,3 | 90  | 15,2  | 15,2  | 18,46 | 586,16 | 90,96  |
|    | 2019/09/01 | CH2276 | Female | Two y/o | Control | Control | Feed Day | No | 01:15 | 01:00 - 01:59 | Early Morning | 37,3 | 90  | 18,6  | 18,6  | 18,46 | 586,16 | 97,84  |
|    | 2019/09/01 | CH2276 | Female | Two y/o | Control | Control | Feed Day | No | 01:20 | 01:00 - 01:59 | Early Morning | 37,2 | 98  | 34,2  | 34,2  | 18,36 | 592,41 | 118,70 |
|    | 2019/09/01 | CH2276 | Female | Two y/o | Control | Control | Feed Day | No | 01:25 | 01:00 - 01:59 | Early Morning | 37,1 | 84  | 19,6  | 19,6  | 18,26 | 581,01 | 99,63  |
|    | 2019/09/01 | CH2276 | Female | Two y/o | Control | Control | Feed Day | No | 01:30 | 01:00 - 01:59 | Early Morning | 37,1 | 108 | 13,4  | 13,4  | 18,26 | 599,39 | 86,68  |
|    | 2019/09/01 | CH2276 | Female | Two y/o | Control | Control | Feed Day | No | 01:35 | 01:00 - 01:59 | Early Morning | 37,1 | 61  | 18,0  | 18,0  | 18,26 | 556,01 | 96,72  |
|    | 2019/09/01 | CH2276 | Female | Two y/o | Control | Control | Feed Day | No | 01:40 | 01:00 - 01:59 | Early Morning | 37,1 | 96  | 17,6  | 17,6  | 18,26 | 590,91 | 95,95  |
|    | 2019/09/01 | CH2276 | Female | Two y/o | Control | Control | Feed Day | No | 01:45 | 01:00 - 01:59 | Early Morning | 37,1 |     | 15,4  | 15,4  | 18,26 |        | 91,41  |
|    | 2019/09/01 | CH2276 | Female | Two y/o | Control | Control | Feed Day | No | 01:50 | 01:00 - 01:59 | Early Morning | 37,1 | 59  | 43,4  | 43,4  | 18,26 | 553,30 | 126,90 |
|    | 2019/09/01 | CH2276 | Female | Two y/o | Control | Control | Feed Day | No | 01:55 | 01:00 - 01:59 | Early Morning | 37,1 | 67  | 40,6  | 40,6  | 18,26 | 563,53 | 124,60 |
|    | 2019/09/01 | CH2276 | Female | Two y/o | Control | Control | Feed Day | No | 02:00 | 02:00 - 02:59 | Early Morning | 37,1 | 88  | 27,4  | 27,4  | 18,26 | 584,49 | 111,09 |
|    | 2019/09/01 | CH2276 | Female | Two y/o | Control | Control | Feed Day | No | 02:05 | 02:00 - 02:59 | Early Morning | 37,1 | 63  | 11,4  | 11,4  | 18,26 | 558,62 | 81,19  |
|    | 2019/09/01 | CH2276 | Female | Two y/o | Control | Control | Feed Day | No | 02:10 | 02:00 - 02:59 | Early Morning | 37,1 | 86  | 15,2  | 15,2  | 18,26 | 582,77 | 90,96  |
|    | 2019/09/01 | CH2276 | Female | Two y/o | Control | Control | Feed Day | No | 02:15 | 02:00 - 02:59 | Early Morning | 37,0 | 61  | 15,8  | 15,8  | 18,16 | 556,01 | 92,28  |
|    | 2019/09/01 | CH2276 | Female | Two y/o | Control | Control | Feed Day | No | 02:20 | 02:00 - 02:59 | Early Morning | 37,0 | 61  | 22,6  | 22,6  | 18,16 | 556,01 | 104,49 |
|    | 2019/09/01 | CH2276 | Female | Two y/o | Control | Control | Feed Day | No | 02:25 | 02:00 - 02:59 | Early Morning | 37,0 | 100 | 26,0  | 26,0  | 18,16 | 593,87 | 109,29 |
|    | 2019/09/01 | CH2276 | Female | Two y/o | Control | Control | Feed Day | No | 02:30 | 02:00 - 02:59 | Early Morning | 37,0 | 57  | 33,4  | 33,4  | 18,16 | 550,47 | 117,88 |
|    | 2019/09/01 | CH2276 | Female | Two y/o | Control | Control | Feed Day | No | 02:35 | 02:00 - 02:59 | Early Morning | 37,0 | 55  | 34,8  | 34,8  | 18,16 | 547,52 | 119,29 |
|    | 2019/09/01 | CH2276 | Female | Two y/o | Control | Control | Feed Day | No | 02:40 | 02:00 - 02:59 | Early Morning | 36,9 | 59  | 44,4  | 44,4  | 18,06 | 553,30 | 127,69 |
|    | 2019/09/01 | CH2276 | Female | Two y/o | Control | Control | Feed Day | No | 02:45 | 02:00 - 02:59 | Early Morning | 37,0 | 56  | 50,8  | 50,8  | 18,16 | 549,01 | 132,33 |
|    | 2019/09/01 | CH2276 | Female | Two y/o | Control | Control | Feed Day | No | 02:50 | 02:00 - 02:59 | Early Morning | 37,0 | 124 | 58,2  | 58,2  | 18,16 | 609,04 | 137,04 |
|    | 2019/09/01 | CH2276 | Female | Two y/o | Control | Control | Feed Day | No | 02:55 | 02:00 - 02:59 | Early Morning | 37,0 | 103 | 82,2  | 82,2  | 18,16 | 596,00 | 149,02 |
|    | 2019/09/01 | CH2276 | Female | Two y/o | Control | Control | Feed Day | No | 03:00 | 03:00 - 03:59 | Early Morning | 37,0 | 98  | 149,8 | 149,8 | 18,16 | 592,41 | 169,97 |
|    | 2019/09/01 | CH2276 | Female | Two y/o | Control | Control | Feed Day | No | 03:05 | 03:00 - 03:59 | Early Morning | 37,1 |     | 209,6 | 209,6 | 18,26 |        | 181,77 |
|    | 2019/09/01 | CH2276 | Female | Two y/o | Control | Control | Feed Day | No | 03:10 | 03:00 - 03:59 | Early Morning | 37,2 | 68  | 318,4 | 318,4 | 18,36 | 564,71 | 196,53 |
|    | 2019/09/01 | CH2276 | Female | Two y/o | Control | Control | Feed Day | No | 03:15 | 03:00 - 03:59 | Early Morning | 37,3 | 112 | 58,8  | 58,8  | 18,46 | 601,96 | 137,39 |
|    | 2019/09/01 | CH2276 | Female | Two y/o | Control | Control | Feed Day | No | 03:20 | 03:00 - 03:59 | Early Morning | 37,3 | 112 | 232,8 | 232,8 | 18,46 | 601,96 | 185,47 |
|    | 2019/09/01 | CH2276 | Female | Two y/o | Control | Control | Feed Day | No | 03:25 | 03:00 - 03:59 | Early Morning | 37,5 | 121 | 462,8 | 462,8 | 18,65 | 607,35 | 209,80 |
|    | 2019/09/01 | CH2276 | Female | Two y/o | Control | Control | Feed Day | No | 03:30 | 03:00 - 03:59 | Early Morning | 37,6 |     | 210,2 | 210,2 | 18,75 |        | 181,87 |
|    | 2019/09/01 | CH2276 | Female | Two y/o | Control | Control | Feed Day | No | 03:35 | 03:00 - 03:59 | Early Morning | 37,6 | 119 | 155,0 | 155,0 | 18,75 | 606,20 | 171,17 |
|    | 2019/09/01 | CH2276 | Female | Two y/o | Control | Control | Feed Day | No | 03:40 | 03:00 - 03:59 | Early Morning | 37,8 | 49  | 488,2 | 488,2 | 18,95 | 537,80 | 211,70 |
|    | 2019/09/01 | CH2276 | Female | Two y/o | Control | Control | Feed Day | No | 03:45 | 03:00 - 03:59 | Early Morning | 37,9 |     | 219,8 | 219,8 | 19,05 |        | 183,44 |
|    | 2019/09/01 | CH2276 | Female | Two y/o | Control | Control | Feed Day | No | 03:50 | 03:00 - 03:59 | Early Morning | 37,9 |     | 234,2 | 234,2 | 19,05 |        | 185,68 |
|    | 2019/09/01 | CH2276 | Female | Two y/o | Control | Control | Feed Day | No | 03:55 | 03:00 - 03:59 | Early Morning | 38,0 | 177 | 39,4  | 39,4  | 19,15 | 632,55 | 123,57 |
|    | 2019/09/01 | CH2276 | Female | Two y/o | Control | Control | Feed Day | No | 04:00 | 04:00 - 04:59 | Morning       | 38,0 | 77  | 12,2  | 12,2  | 19,15 | 574,39 | 83,49  |
|    | 2019/09/01 | CH2276 | Female | Two y/o | Control | Control | Feed Day | No | 04:05 | 04:00 - 04:59 | Morning       | 37,8 | 77  | 3,4   | 3,4   | 18,95 | 574,39 | 40,51  |
|    | 2019/09/01 | CH2276 | Female | Two y/o | Control | Control | Feed Day | No | 04:10 | 04:00 - 04:59 | Morning       | 37,6 | 68  | 16,8  | 16,8  | 18,75 | 564,71 | 94,37  |
|    | 2019/09/01 | CH2276 | Female | Two y/o | Control | Control | Feed Day | No | 04:15 | 04:00 - 04:59 | Morning       | 37,4 | 84  | 5,0   | 5,0   | 18,55 | 581,01 | 53,41  |
|    | 2019/09/01 | CH2276 | Female | Two y/o | Control | Control | Feed Day | No | 04:20 | 04:00 - 04:59 | Morning       | 37,3 | 61  | 7,8   | 7,8   | 18,46 | 556,01 | 68,36  |
|    | 2019/09/01 | CH2276 | Female | Two y/o | Control | Control | Feed Day | No | 04:25 | 04:00 - 04:59 | Morning       | 37,1 | 66  | 217,0 | 217,0 | 18,26 | 562,34 | 182,99 |
|    | 2019/09/01 | CH2276 | Female | Two y/o | Control | Control | Feed Day | No | 04:30 | 04:00 - 04:59 | Morning       | 37,3 | 94  | 28,8  | 28,8  | 18,46 | 589,37 | 112,79 |
|    | 2019/09/01 | CH2276 | Female | Two y/o | Control | Control | Feed Day | No | 04:35 | 04:00 - 04:59 | Morning       | 37,3 | 74  | 21,2  | 21,2  | 18,46 | 571,33 | 102,31 |
|    | 2019/09/01 | CH2276 | Female | Two y/o | Control | Control | Feed Day | No | 04:40 | 04:00 - 04:59 | Morning       | 37,4 | 91  | 17,8  | 17,8  | 18,55 | 586,98 | 96,34  |



|            |        |        |         |         |         |          |     |       |               |              |      |     |        |       |       |        |        |
|------------|--------|--------|---------|---------|---------|----------|-----|-------|---------------|--------------|------|-----|--------|-------|-------|--------|--------|
| 2019/09/01 | CH2276 | Female | Two y/o | Control | Control | Feed Day | No  | 04:45 | 04:00 - 04:59 | Morning      | 37,3 | 72  | 16,0   | 16,0  | 18,46 | 569,20 | 92,71  |
| 2019/09/01 | CH2276 | Female | Two y/o | Control | Control | Feed Day | No  | 04:50 | 04:00 - 04:59 | Morning      | 37,1 | 59  | 16,6   | 16,6  | 18,26 | 553,30 | 93,96  |
| 2019/09/01 | CH2276 | Female | Two y/o | Control | Control | Feed Day | No  | 04:55 | 04:00 - 04:59 | Morning      | 37,1 | 83  | 23,2   | 23,2  | 18,26 | 580,11 | 105,39 |
| 2019/09/01 | CH2276 | Female | Two y/o | Control | Control | Feed Day | No  | 05:00 | 05:00 - 05:59 | Morning      | 37,1 | 58  | 53,0   | 53,0  | 18,26 | 551,90 | 133,80 |
| 2019/09/01 | CH2276 | Female | Two y/o | Control | Control | Feed Day | No  | 05:05 | 05:00 - 05:59 | Morning      | 37,1 | 54  | 16,4   | 16,4  | 18,26 | 545,99 | 93,55  |
| 2019/09/01 | CH2276 | Female | Two y/o | Control | Control | Feed Day | No  | 05:10 | 05:00 - 05:59 | Morning      | 37,1 | 85  | 28,4   | 28,4  | 18,26 | 581,90 | 112,31 |
| 2019/09/01 | CH2276 | Female | Two y/o | Control | Control | Feed Day | No  | 05:15 | 05:00 - 05:59 | Morning      | 36,8 |     | 21,2   | 21,2  | 17,96 |        | 102,31 |
| 2019/09/01 | CH2276 | Female | Two y/o | Control | Control | Feed Day | No  | 05:20 | 05:00 - 05:59 | Morning      | 36,7 | 57  | 15,4   | 15,4  | 17,87 | 550,47 | 91,41  |
| 2019/09/01 | CH2276 | Female | Two y/o | Control | Control | Feed Day | No  | 05:25 | 05:00 - 05:59 | Morning      | 36,7 | 64  | 23,0   | 23,0  | 17,87 | 559,88 | 105,09 |
| 2019/09/01 | CH2276 | Female | Two y/o | Control | Control | Feed Day | No  | 05:30 | 05:00 - 05:59 | Morning      | 36,7 | 57  | 21,0   | 21,0  | 17,87 | 550,47 | 101,98 |
| 2019/09/01 | CH2276 | Female | Two y/o | Control | Control | Feed Day | No  | 05:35 | 05:00 - 05:59 | Morning      | 36,8 |     | 18,0   | 18,0  | 17,96 |        | 96,72  |
| 2019/09/01 | CH2276 | Female | Two y/o | Control | Control | Feed Day | No  | 05:40 | 05:00 - 05:59 | Morning      | 36,8 | 63  | 18,6   | 18,6  | 17,96 | 558,62 | 97,84  |
| 2019/09/01 | CH2276 | Female | Two y/o | Control | Control | Feed Day | No  | 05:45 | 05:00 - 05:59 | Morning      | 36,9 | 62  | 20,6   | 20,6  | 18,06 | 557,33 | 101,32 |
| 2019/09/01 | CH2276 | Female | Two y/o | Control | Control | Feed Day | No  | 05:50 | 05:00 - 05:59 | Morning      | 36,9 | 59  | 28,6   | 28,6  | 18,06 | 553,30 | 112,56 |
| 2019/09/01 | CH2276 | Female | Two y/o | Control | Control | Feed Day | No  | 05:55 | 05:00 - 05:59 | Morning      | 36,9 | 55  | 32,6   | 32,6  | 18,06 | 547,52 | 117,05 |
| 2019/09/01 | CH2276 | Female | Two y/o | Control | Control | Feed Day | No  | 06:00 | 06:00 - 06:59 | Morning      | 36,8 | 82  | 32,8   | 32,8  | 17,96 | 579,19 | 117,26 |
| 2019/09/01 | CH2276 | Female | Two y/o | Control | Control | Feed Day | No  | 06:05 | 06:00 - 06:59 | Morning      | 36,9 | 98  | 3234,8 |       | 18,06 | 592,41 |        |
| 2019/09/01 | CH2276 | Female | Two y/o | Control | Control | Feed Day | No  | 06:10 | 06:00 - 06:59 | Morning      | 37,0 | 120 | 262,6  | 262,6 | 18,16 | 606,78 | 189,72 |
| 2019/09/01 | CH2276 | Female | Two y/o | Control | Control | Feed Day | No  | 06:15 | 06:00 - 06:59 | Morning      | 37,1 | 145 | 611,0  | 611,0 | 18,26 | 619,62 | 219,69 |
| 2019/09/01 | CH2276 | Female | Two y/o | Control | Control | Feed Day | No  | 06:20 | 06:00 - 06:59 | Morning      | 37,6 | 120 | 58,4   | 58,4  | 18,75 | 606,78 | 137,16 |
| 2019/09/01 | CH2276 | Female | Two y/o | Control | Control | Feed Day | No  | 06:25 | 06:00 - 06:59 | Morning      | 37,7 | 141 | 57,4   | 57,4  | 18,85 | 617,75 | 136,56 |
| 2019/09/01 | CH2276 | Female | Two y/o | Control | Control | Feed Day | No  | 06:30 | 06:00 - 06:59 | Morning      | 37,7 | 152 | 173,6  | 173,6 | 18,85 | 622,73 | 175,14 |
| 2019/09/01 | CH2276 | Female | Two y/o | Control | Control | Feed Day | No  | 06:35 | 06:00 - 06:59 | Morning      | 37,6 |     | 212,4  | 212,4 | 18,75 |        | 182,24 |
| 2019/09/01 | CH2276 | Female | Two y/o | Control | Control | Feed Day | No  | 06:40 | 06:00 - 06:59 | Morning      | 38,2 | 126 | 439,4  | 439,4 | 19,36 | 610,14 | 207,95 |
| 2019/09/01 | CH2276 | Female | Two y/o | Control | Control | Feed Day | No  | 06:45 | 06:00 - 06:59 | Morning      | 38,2 | 154 | 140,6  | 140,6 | 19,36 | 623,58 | 167,75 |
| 2019/09/01 | CH2276 | Female | Two y/o | Control | Control | Feed Day | No  | 06:50 | 06:00 - 06:59 | Morning      | 38,1 |     | 81,4   |       | 19,26 |        | 148,68 |
| 2019/09/01 | CH2276 | Female | Two y/o | Control | Control | Feed Day | No  | 06:55 | 06:00 - 06:59 | Morning      | 38,2 | 68  | 429,6  | 429,6 | 19,36 | 564,71 | 207,15 |
| 2019/09/01 | CH2276 | Female | Two y/o | Control | Control | Feed Day | No  | 07:00 | 07:00 - 07:59 | Morning      | 38,2 | 165 | 230,2  | 230,2 | 19,36 | 628,06 | 185,07 |
| 2019/09/01 | CH2276 | Female | Two y/o | Control | Control | Feed Day | No  | 07:05 | 07:00 - 07:59 | Morning      | 38,0 | 84  | 150,6  | 150,6 | 19,15 | 581,01 | 170,16 |
| 2019/09/01 | CH2276 | Female | Two y/o | Control | Control | Feed Day | No  | 07:10 | 07:00 - 07:59 | Morning      | 37,9 | 182 | 324,0  | 324,0 | 19,05 | 634,31 | 197,14 |
| 2019/09/01 | CH2276 | Female | Two y/o | Control | Control | Feed Day | No  | 07:15 | 07:00 - 07:59 | Morning      | 38,0 |     | 673,8  | 673,8 | 19,15 |        | 223,19 |
| 2019/09/01 | CH2276 | Female | Two y/o | Control | Control | Feed Day | No  | 07:20 | 07:00 - 07:59 | Morning      | 38,0 | 47  | 139,4  | 139,4 | 19,15 | 534,23 | 167,45 |
| 2019/09/01 | CH2276 | Female | Two y/o | Control | Control | Feed Day | No  | 07:25 | 07:00 - 07:59 | Morning      | 38,0 |     | 301,2  | 301,2 | 19,15 |        | 194,56 |
| 2019/09/01 | CH2276 | Female | Two y/o | Control | Control | Feed Day | No  | 07:30 | 07:00 - 07:59 | Morning      | 37,9 | 167 | 188,2  | 188,2 | 19,05 | 628,84 | 177,98 |
| 2019/09/01 | CH2276 | Female | Two y/o | Control | Control | Feed Day | No  | 07:35 | 07:00 - 07:59 | Morning      | 37,9 | 113 | 163,8  | 163,8 | 19,05 | 602,58 | 173,10 |
| 2019/09/01 | CH2276 | Female | Two y/o | Control | Control | Feed Day | No  | 07:40 | 07:00 - 07:59 | Morning      | 37,9 | 194 | 73,6   | 73,6  | 19,05 | 638,30 | 145,18 |
| 2019/09/01 | CH2276 | Female | Two y/o | Control | Control | Feed Day | No  | 07:45 | 07:00 - 07:59 | Morning      | 37,9 | 140 | 125,4  | 125,4 | 19,05 | 617,28 | 163,75 |
| 2019/09/01 | CH2276 | Female | Two y/o | Control | Control | Feed Day | No  | 07:50 | 07:00 - 07:59 | Morning      | 38,0 | 112 | 757,6  | 757,6 | 19,15 | 601,96 | 227,38 |
| 2019/09/01 | CH2276 | Female | Two y/o | Control | Control | Feed Day | No  | 07:55 | 07:00 - 07:59 | Morning      | 38,3 | 68  | 344,2  | 344,2 | 19,46 | 564,71 | 199,29 |
| 2019/09/01 | CH2276 | Female | Two y/o | Control | Control | Feed Day | No  | 08:00 | 08:00 - 08:59 | Late Morning | 38,3 |     | 99,8   | 99,8  | 19,46 |        | 155,77 |
| 2019/09/01 | CH2276 | Female | Two y/o | Control | Control | Feed Day | No  | 08:05 | 08:00 - 08:59 | Late Morning | 38,4 | 140 | 71,8   | 71,8  | 19,56 | 617,28 | 144,32 |
| 2019/09/01 | CH2276 | Female | Two y/o | Control | Control | Feed Day | No  | 08:10 | 08:00 - 08:59 | Late Morning | 38,3 | 102 | 147,0  | 147,0 | 19,46 | 595,30 | 169,31 |
| 2019/09/01 | CH2276 | Female | Two y/o | Control | Control | Feed Day | No  | 08:15 | 08:00 - 08:59 | Late Morning | 38,2 | 100 | 322,4  | 322,4 | 19,36 | 593,87 | 196,97 |
| 2019/09/01 | CH2276 | Female | Two y/o | Control | Control | Feed Day | No  | 08:20 | 08:00 - 08:59 | Late Morning | 38,0 | 118 | 210,8  | 210,8 | 19,15 | 605,61 | 181,97 |
| 2019/09/01 | CH2276 | Female | Two y/o | Control | Control | Feed Day | No  | 08:25 | 08:00 - 08:59 | Late Morning | 38,0 | 82  | 304,8  | 304,8 | 19,15 | 579,19 | 194,98 |
| 2019/09/01 | CH2276 | Female | Two y/o | Control | Control | Feed Day | No  | 08:30 | 08:00 - 08:59 | Late Morning | 38,0 |     | 483,8  | 483,8 | 19,15 |        | 211,37 |
| 2019/09/01 | CH2276 | Female | Two y/o | Control | Control | Feed Day | No  | 08:35 | 08:00 - 08:59 | Late Morning | 38,0 | 111 | 902,0  |       | 19,15 |        | 601,33 |
| 2019/09/01 | CH2276 | Female | Two y/o | Control | Control | Feed Day | No  | 08:40 | 08:00 - 08:59 | Late Morning | 38,2 | 150 | 135,6  | 135,6 | 19,36 | 621,86 | 166,48 |
| 2019/09/01 | CH2276 | Female | Two y/o | Control | Control | Feed Day | No  | 08:45 | 08:00 - 08:59 | Late Morning | 38,2 | 80  | 57,0   | 57,0  | 19,36 | 577,31 | 136,32 |
| 2019/09/01 | CH2276 | Female | Two y/o | Control | Control | Feed Day | No  | 08:50 | 08:00 - 08:59 | Late Morning | 38,2 | 135 | 477,8  | 477,8 | 19,36 | 614,84 | 210,93 |
| 2019/09/01 | CH2276 | Female | Two y/o | Control | Control | Feed Day | No  | 08:55 | 08:00 - 08:59 | Late Morning | 38,1 | 75  | 586,2  | 586,2 | 19,26 | 572,36 | 218,21 |
| 2019/09/01 | CH2276 | Female | Two y/o | Control | Control | Feed Day | No  | 09:00 | 09:00 - 09:59 | Late Morning | 38,0 | 61  | 119,4  | 119,4 | 19,15 | 556,01 | 162,03 |
| 2019/09/01 | CH2276 | Female | Two y/o | Control | Control | Feed Day | No  | 09:05 | 09:00 - 09:59 | Late Morning | 38,0 | 191 | 62,8   | 62,8  | 19,15 | 637,33 | 139,67 |
| 2019/09/01 | CH2276 | Female | Two y/o | Control | Control | Feed Day | No  | 09:10 | 09:00 - 09:59 | Late Morning | 38,1 | 169 | 95,8   | 95,8  | 19,26 | 629,60 | 154,35 |
| 2019/09/01 | CH2276 | Female | Two y/o | Control | Control | Feed Day | No  | 09:15 | 09:00 - 09:59 | Late Morning | 38,1 | 128 | 221,2  | 221,2 | 19,26 | 611,22 | 183,67 |
| 2019/09/01 | CH2276 | Female | Two y/o | Control | Control | Feed Day | No  | 09:20 | 09:00 - 09:59 | Late Morning | 38,4 | 123 | 58,2   | 58,2  | 19,56 | 608,49 | 137,04 |
| 2019/09/01 | CH2276 | Female | Two y/o | Control | Control | Feed Day | No  | 09:25 | 09:00 - 09:59 | Late Morning | 38,4 |     | 176,6  | 176,6 | 19,56 |        | 175,74 |
| 2019/09/01 | CH2276 | Female | Two y/o | Control | Control | Feed Day | No  | 09:30 | 09:00 - 09:59 | Late Morning | 38,3 | 107 | 334,0  | 334,0 | 19,46 | 598,73 | 198,22 |
| 2019/09/01 | CH2276 | Female | Two y/o | Control | Control | Feed Day | No  | 09:35 | 09:00 - 09:59 | Late Morning | 38,2 | 129 | 118,4  | 118,4 | 19,36 | 611,75 | 161,74 |
| 2019/09/01 | CH2276 | Female | Two y/o | Control | Control | Feed Day | No  | 09:40 | 09:00 - 09:59 | Late Morning | 38,2 | 111 | 490,0  | 490,0 | 19,36 | 601,33 | 211,83 |
| 2019/09/01 | CH2276 | Female | Two y/o | Control | Control | Feed Day | No  | 09:45 | 09:00 - 09:59 | Late Morning | 38,1 | 107 | 146,8  | 146,8 | 19,26 | 598,73 | 169,26 |
| 2019/09/01 | CH2276 | Female | Two y/o | Control | Control | Feed Day | No  | 09:50 | 09:00 - 09:59 | Late Morning | 38,1 |     | 173,8  | 173,8 | 19,26 |        | 175,18 |
| 2019/09/01 | CH2276 | Female | Two y/o | Control | Control | Feed Day | No  | 09:55 | 09:00 - 09:59 | Late Morning | 38,0 |     | 80,8   | 80,8  | 19,15 |        | 148,42 |
| 2019/09/01 | CH2276 | Female | Two y/o | Control | Control | Feed Day | No  | 10:00 | 10:00 - 10:59 | Late Morning | 38,0 | 110 | 67,0   | 67,0  | 19,15 | 600,69 | 141,92 |
| 2019/09/01 | CH2276 | Female | Two y/o | Control | Control | Feed Day | No  | 10:05 | 10:00 - 10:59 | Late Morning | 38,0 | 94  | 418,8  | 418,8 | 19,15 | 589,37 | 206,24 |
| 2019/09/01 | CH2276 | Female | Two y/o | Control | Control | Feed Day | No  | 10:10 | 10:00 - 10:59 | Late Morning | 38,0 | 112 | 285,8  | 285,8 | 19,15 | 601,96 | 192,71 |
| 2019/09/01 | CH2276 | Female | Two y/o | Control | Control | Feed Day | No  | 10:15 | 10:00 - 10:59 | Late Morning | 38,0 | 79  | 127,2  | 127,2 | 19,15 | 576,36 | 164,24 |
| 2019/09/01 | CH2276 | Female | Two y/o | Control | Control | Feed Day | No  | 10:20 | 10:00 - 10:59 | Late Morning | 38,0 | 59  | 71,6   | 71,6  | 19,15 | 553,30 | 144,22 |
| 2019/09/01 | CH2276 | Female | Two y/o | Control | Control | Feed Day | No  | 10:25 | 10:00 - 10:59 | Late Morning | 38,0 | 158 | 494,6  | 494,6 | 19,15 | 625,26 | 212,16 |
| 2019/09/01 | CH2276 | Female | Two y/o | Control | Control | Feed Day | Yes | 10:30 | 10:00 - 10:59 | Late Morning | 38,0 | 100 | 89,2   | 89,2  | 19,15 | 593,87 | 151,86 |



|            |        |        |         |         |         |          |     |       |               |              |      |     |       |       |       |        |        |
|------------|--------|--------|---------|---------|---------|----------|-----|-------|---------------|--------------|------|-----|-------|-------|-------|--------|--------|
| 2019/09/01 | CH2276 | Female | Two y/o | Control | Control | Feed Day | Yes | 10:35 | 10:00 - 10:59 | Late Morning | 37,9 | 90  | 82,6  | 82,6  | 19,05 | 586,16 | 149,19 |
| 2019/09/01 | CH2276 | Female | Two y/o | Control | Control | Feed Day | Yes | 10:40 | 10:00 - 10:59 | Late Morning | 37,9 | 68  | 130,0 | 130,0 | 19,05 | 564,71 | 165,01 |
| 2019/09/01 | CH2276 | Female | Two y/o | Control | Control | Feed Day | Yes | 10:45 | 10:00 - 10:59 | Late Morning | 38,0 | 180 | 553,4 | 553,4 | 19,15 | 633,61 | 216,16 |
| 2019/09/01 | CH2276 | Female | Two y/o | Control | Control | Feed Day | Yes | 10:50 | 10:00 - 10:59 | Late Morning | 38,0 |     | 243,6 | 243,6 | 19,15 |        | 187,07 |
| 2019/09/01 | CH2276 | Female | Two y/o | Control | Control | Feed Day | Yes | 10:55 | 10:00 - 10:59 | Late Morning | 38,1 | 121 | 309,4 | 309,4 | 19,26 | 607,35 | 195,51 |
| 2019/09/01 | CH2276 | Female | Two y/o | Control | Control | Feed Day | Yes | 11:00 | 11:00 - 11:59 | Late Morning | 38,1 | 118 | 228,2 | 228,2 | 19,26 | 605,61 | 184,76 |
| 2019/09/01 | CH2276 | Female | Two y/o | Control | Control | Feed Day | Yes | 11:05 | 11:00 - 11:59 | Late Morning | 38,1 | 84  | 118,0 | 118,0 | 19,26 | 581,01 | 161,62 |
| 2019/09/01 | CH2276 | Female | Two y/o | Control | Control | Feed Day | Yes | 11:10 | 11:00 - 11:59 | Late Morning | 38,1 | 83  | 159,4 | 159,4 | 19,26 | 580,11 | 172,15 |
| 2019/09/01 | CH2276 | Female | Two y/o | Control | Control | Feed Day | Yes | 11:15 | 11:00 - 11:59 | Late Morning | 38,2 | 92  | 178,6 | 178,6 | 19,36 | 587,78 | 176,14 |
| 2019/09/01 | CH2276 | Female | Two y/o | Control | Control | Feed Day | Yes | 11:20 | 11:00 - 11:59 | Late Morning | 38,3 | 118 | 56,2  | 56,2  | 19,46 | 605,61 | 135,83 |
| 2019/09/01 | CH2276 | Female | Two y/o | Control | Control | Feed Day | Yes | 11:25 | 11:00 - 11:59 | Late Morning | 38,1 | 107 | 23,2  | 23,2  | 19,26 | 598,73 | 105,39 |
| 2019/09/01 | CH2276 | Female | Two y/o | Control | Control | Feed Day | No  | 11:30 | 11:00 - 11:59 | Late Morning | 38,0 | 131 | 48,4  | 48,4  | 19,15 | 612,80 | 130,66 |
| 2019/09/01 | CH2276 | Female | Two y/o | Control | Control | Feed Day | No  | 11:35 | 11:00 - 11:59 | Late Morning | 38,0 | 118 | 82,0  | 82,0  | 19,15 | 605,61 | 148,93 |
| 2019/09/01 | CH2276 | Female | Two y/o | Control | Control | Feed Day | No  | 11:40 | 11:00 - 11:59 | Late Morning | 38,0 | 125 | 91,2  | 91,2  | 19,15 | 609,60 | 152,63 |
| 2019/09/01 | CH2276 | Female | Two y/o | Control | Control | Feed Day | No  | 11:45 | 11:00 - 11:59 | Late Morning | 38,0 |     | 49,0  | 49,0  | 19,15 |        | 131,09 |
| 2019/09/01 | CH2276 | Female | Two y/o | Control | Control | Feed Day | No  | 11:50 | 11:00 - 11:59 | Late Morning | 38,0 | 110 | 64,8  | 64,8  | 19,15 | 600,69 | 140,76 |
| 2019/09/01 | CH2276 | Female | Two y/o | Control | Control | Feed Day | No  | 11:55 | 11:00 - 11:59 | Late Morning | 38,0 |     | 50,6  | 50,6  | 19,15 |        | 132,20 |
| 2019/09/01 | CH2276 | Female | Two y/o | Control | Control | Feed Day | No  | 12:00 | 12:00 - 12:59 | Afternoon    | 38,0 |     | 202,8 | 202,8 | 19,15 |        | 180,61 |
| 2019/09/01 | CH2276 | Female | Two y/o | Control | Control | Feed Day | No  | 12:05 | 12:00 - 12:59 | Afternoon    | 38,0 | 114 | 50,8  | 50,8  | 19,15 | 603,20 | 132,33 |
| 2019/09/01 | CH2276 | Female | Two y/o | Control | Control | Feed Day | No  | 12:10 | 12:00 - 12:59 | Afternoon    | 38,0 | 45  | 22,2  | 22,2  | 19,15 | 530,47 | 103,88 |
| 2019/09/01 | CH2276 | Female | Two y/o | Control | Control | Feed Day | No  | 12:15 | 12:00 - 12:59 | Afternoon    | 38,0 | 117 | 40,2  | 40,2  | 19,15 | 605,02 | 124,26 |
| 2019/09/01 | CH2276 | Female | Two y/o | Control | Control | Feed Day | No  | 12:20 | 12:00 - 12:59 | Afternoon    | 38,0 | 88  | 117,8 | 117,8 | 19,15 | 584,49 | 161,56 |
| 2019/09/01 | CH2276 | Female | Two y/o | Control | Control | Feed Day | No  | 12:25 | 12:00 - 12:59 | Afternoon    | 38,1 | 92  | 67,8  | 67,8  | 19,26 | 587,78 | 142,33 |
| 2019/09/01 | CH2276 | Female | Two y/o | Control | Control | Feed Day | No  | 12:30 | 12:00 - 12:59 | Afternoon    | 38,2 |     | 62,6  | 62,6  | 19,36 |        | 139,56 |
| 2019/09/01 | CH2276 | Female | Two y/o | Control | Control | Feed Day | No  | 12:35 | 12:00 - 12:59 | Afternoon    | 38,1 | 115 | 52,8  | 52,8  | 19,26 | 603,82 | 133,67 |
| 2019/09/01 | CH2276 | Female | Two y/o | Control | Control | Feed Day | No  | 12:40 | 12:00 - 12:59 | Afternoon    | 38,0 |     | 54,2  | 54,2  | 19,15 |        | 134,57 |
| 2019/09/01 | CH2276 | Female | Two y/o | Control | Control | Feed Day | No  | 12:45 | 12:00 - 12:59 | Afternoon    | 38,1 | 169 | 42,4  | 42,4  | 19,26 | 629,60 | 126,10 |
| 2019/09/01 | CH2276 | Female | Two y/o | Control | Control | Feed Day | No  | 12:50 | 12:00 - 12:59 | Afternoon    | 38,0 |     | 59,6  | 59,6  | 19,15 |        | 137,86 |
| 2019/09/01 | CH2276 | Female | Two y/o | Control | Control | Feed Day | No  | 12:55 | 12:00 - 12:59 | Afternoon    | 38,0 | 103 | 138,4 | 138,4 | 19,15 | 596,00 | 167,20 |
| 2019/09/01 | CH2276 | Female | Two y/o | Control | Control | Feed Day | No  | 13:00 | 13:00 - 13:59 | Afternoon    | 38,1 | 167 | 58,4  | 58,4  | 19,26 | 628,84 | 137,16 |
| 2019/09/01 | CH2276 | Female | Two y/o | Control | Control | Feed Day | No  | 13:05 | 13:00 - 13:59 | Afternoon    | 38,4 | 86  | 57,8  | 57,8  | 19,56 | 582,77 | 136,80 |
| 2019/09/01 | CH2276 | Female | Two y/o | Control | Control | Feed Day | No  | 13:10 | 13:00 - 13:59 | Afternoon    | 38,4 | 109 | 58,4  | 58,4  | 19,56 | 600,04 | 137,16 |
| 2019/09/01 | CH2276 | Female | Two y/o | Control | Control | Feed Day | No  | 13:15 | 13:00 - 13:59 | Afternoon    | 38,4 |     | 59,0  | 59,0  | 19,56 |        | 137,51 |
| 2019/09/01 | CH2276 | Female | Two y/o | Control | Control | Feed Day | No  | 13:20 | 13:00 - 13:59 | Afternoon    | 38,3 |     | 37,0  | 37,0  | 19,46 |        | 121,40 |
| 2019/09/01 | CH2276 | Female | Two y/o | Control | Control | Feed Day | No  | 13:25 | 13:00 - 13:59 | Afternoon    | 38,3 | 98  | 56,2  | 56,2  | 19,46 | 592,41 | 135,83 |
| 2019/09/01 | CH2276 | Female | Two y/o | Control | Control | Feed Day | No  | 13:30 | 13:00 - 13:59 | Afternoon    | 38,3 | 80  | 61,0  | 61,0  | 19,46 | 577,31 | 138,67 |
| 2019/09/01 | CH2276 | Female | Two y/o | Control | Control | Feed Day | No  | 13:35 | 13:00 - 13:59 | Afternoon    | 38,3 | 64  | 133,4 | 133,4 | 19,46 | 559,88 | 165,91 |
| 2019/09/01 | CH2276 | Female | Two y/o | Control | Control | Feed Day | No  | 13:40 | 13:00 - 13:59 | Afternoon    | 38,3 | 108 | 58,4  | 58,4  | 19,46 | 599,39 | 137,16 |
| 2019/09/01 | CH2276 | Female | Two y/o | Control | Control | Feed Day | No  | 13:45 | 13:00 - 13:59 | Afternoon    | 38,2 | 152 | 39,8  | 39,8  | 19,36 | 622,73 | 123,91 |
| 2019/09/01 | CH2276 | Female | Two y/o | Control | Control | Feed Day | No  | 13:50 | 13:00 - 13:59 | Afternoon    | 38,1 | 101 | 39,4  | 39,4  | 19,26 | 594,59 | 123,57 |
| 2019/09/01 | CH2276 | Female | Two y/o | Control | Control | Feed Day | No  | 13:55 | 13:00 - 13:59 | Afternoon    | 38,1 | 111 | 25,6  | 25,6  | 19,26 | 601,33 | 108,76 |
| 2019/09/01 | CH2276 | Female | Two y/o | Control | Control | Feed Day | No  | 14:00 | 14:00 - 14:59 | Afternoon    | 38,2 | 100 | 85,2  | 85,2  | 19,36 | 593,87 | 150,27 |
| 2019/09/01 | CH2276 | Female | Two y/o | Control | Control | Feed Day | No  | 14:05 | 14:00 - 14:59 | Afternoon    | 38,2 | 103 | 40,8  | 40,8  | 19,36 | 596,00 | 124,77 |
| 2019/09/01 | CH2276 | Female | Two y/o | Control | Control | Feed Day | No  | 14:10 | 14:00 - 14:59 | Afternoon    | 38,2 | 75  | 46,0  | 46,0  | 19,36 | 572,36 | 128,91 |
| 2019/09/01 | CH2276 | Female | Two y/o | Control | Control | Feed Day | No  | 14:15 | 14:00 - 14:59 | Afternoon    | 38,3 | 77  | 51,4  | 51,4  | 19,46 | 574,39 | 132,74 |
| 2019/09/01 | CH2276 | Female | Two y/o | Control | Control | Feed Day | No  | 14:20 | 14:00 - 14:59 | Afternoon    | 38,4 | 83  | 54,6  | 54,6  | 19,56 | 580,11 | 134,83 |
| 2019/09/01 | CH2276 | Female | Two y/o | Control | Control | Feed Day | No  | 14:25 | 14:00 - 14:59 | Afternoon    | 38,4 | 92  | 43,0  | 43,0  | 19,56 | 587,78 | 126,58 |
| 2019/09/01 | CH2276 | Female | Two y/o | Control | Control | Feed Day | No  | 14:30 | 14:00 - 14:59 | Afternoon    | 38,4 | 72  | 48,6  | 48,6  | 19,56 | 569,20 | 130,81 |
| 2019/09/01 | CH2276 | Female | Two y/o | Control | Control | Feed Day | No  | 14:35 | 14:00 - 14:59 | Afternoon    | 38,3 | 96  | 48,6  | 48,6  | 19,46 | 590,91 | 130,81 |
| 2019/09/01 | CH2276 | Female | Two y/o | Control | Control | Feed Day | No  | 14:40 | 14:00 - 14:59 | Afternoon    | 38,3 | 107 | 32,8  | 32,8  | 19,46 | 598,73 | 117,26 |
| 2019/09/01 | CH2276 | Female | Two y/o | Control | Control | Feed Day | No  | 14:45 | 14:00 - 14:59 | Afternoon    | 38,3 | 67  | 48,6  | 48,6  | 19,46 | 563,53 | 130,81 |
| 2019/09/01 | CH2276 | Female | Two y/o | Control | Control | Feed Day | No  | 14:50 | 14:00 - 14:59 | Afternoon    | 38,2 | 90  | 57,6  | 57,6  | 19,36 | 586,16 | 136,68 |
| 2019/09/01 | CH2276 | Female | Two y/o | Control | Control | Feed Day | No  | 14:55 | 14:00 - 14:59 | Afternoon    | 38,0 | 145 | 51,4  | 51,4  | 19,15 | 619,62 | 132,74 |
| 2019/09/01 | CH2276 | Female | Two y/o | Control | Control | Feed Day | No  | 15:00 | 15:00 - 15:59 | Afternoon    | 38,0 |     | 25,0  | 25,0  | 19,15 |        | 107,94 |
| 2019/09/01 | CH2276 | Female | Two y/o | Control | Control | Feed Day | No  | 15:05 | 15:00 - 15:59 | Afternoon    | 37,9 | 86  | 69,2  | 69,2  | 19,05 | 582,77 | 143,04 |
| 2019/09/01 | CH2276 | Female | Two y/o | Control | Control | Feed Day | No  | 15:10 | 15:00 - 15:59 | Afternoon    | 37,9 | 94  | 43,4  | 43,4  | 19,05 | 589,37 | 126,90 |
| 2019/09/01 | CH2276 | Female | Two y/o | Control | Control | Feed Day | No  | 15:15 | 15:00 - 15:59 | Afternoon    | 37,9 | 105 | 114,4 | 114,4 | 19,05 | 597,38 | 160,54 |
| 2019/09/01 | CH2276 | Female | Two y/o | Control | Control | Feed Day | No  | 15:20 | 15:00 - 15:59 | Afternoon    | 38,0 | 68  | 59,2  | 59,2  | 19,15 | 564,71 | 137,63 |
| 2019/09/01 | CH2276 | Female | Two y/o | Control | Control | Feed Day | No  | 15:25 | 15:00 - 15:59 | Afternoon    | 38,0 | 77  | 50,8  | 50,8  | 19,15 | 574,39 | 132,33 |
| 2019/09/01 | CH2276 | Female | Two y/o | Control | Control | Feed Day | No  | 15:30 | 15:00 - 15:59 | Afternoon    | 38,0 | 73  | 61,8  | 61,8  | 19,15 | 570,27 | 139,12 |
| 2019/09/01 | CH2276 | Female | Two y/o | Control | Control | Feed Day | No  | 15:35 | 15:00 - 15:59 | Afternoon    | 38,1 | 88  | 53,8  | 53,8  | 19,26 | 584,49 | 134,32 |
| 2019/09/01 | CH2276 | Female | Two y/o | Control | Control | Feed Day | No  | 15:40 | 15:00 - 15:59 | Afternoon    | 38,1 | 75  | 49,8  | 49,8  | 19,26 | 572,36 | 131,65 |
| 2019/09/01 | CH2276 | Female | Two y/o | Control | Control | Feed Day | No  | 15:45 | 15:00 - 15:59 | Afternoon    | 38,1 | 191 | 53,8  | 53,8  | 19,26 | 637,33 | 134,32 |
| 2019/09/01 | CH2276 | Female | Two y/o | Control | Control | Feed Day | No  | 15:50 | 15:00 - 15:59 | Afternoon    | 38,2 | 74  | 59,6  | 59,6  | 19,36 | 571,33 | 137,86 |
| 2019/09/01 | CH2276 | Female | Two y/o | Control | Control | Feed Day | No  | 15:55 | 15:00 - 15:59 | Afternoon    | 38,1 | 74  | 51,2  | 51,2  | 19,26 | 571,33 | 132,61 |
| 2019/09/01 | CH2276 | Female | Two y/o | Control | Control | Feed Day | No  | 16:00 | 16:00 - 16:59 | Evening      | 38,1 |     | 48,6  | 48,6  | 19,26 |        | 130,81 |
| 2019/09/01 | CH2276 | Female | Two y/o | Control | Control | Feed Day | No  | 16:05 | 16:00 - 16:59 | Evening      | 38,1 | 82  | 58,2  | 58,2  | 19,26 | 579,19 | 137,04 |
| 2019/09/01 | CH2276 | Female | Two y/o | Control | Control | Feed Day | No  | 16:10 | 16:00 - 16:59 | Evening      | 38,1 | 71  | 57,8  | 57,8  | 19,26 | 568,10 | 136,80 |
| 2019/09/01 | CH2276 | Female | Two y/o | Control | Control | Feed Day | No  | 16:15 | 16:00 - 16:59 | Evening      | 38,1 | 98  | 54,6  | 54,6  | 19,26 | 592,41 | 134,83 |
| 2019/09/01 | CH2276 | Female | Two y/o | Control | Control | Feed Day | No  | 16:20 | 16:00 - 16:59 | Evening      | 38,0 |     | 53,6  | 53,6  | 19,15 |        | 134,19 |



|            |        |        |         |         |         |          |    |       |               |         |      |     |       |       |       |        |        |
|------------|--------|--------|---------|---------|---------|----------|----|-------|---------------|---------|------|-----|-------|-------|-------|--------|--------|
| 2019/09/01 | CH2276 | Female | Two y/o | Control | Control | Feed Day | No | 16:25 | 16:00 - 16:59 | Evening | 38,0 | 64  | 68,2  | 68,2  | 19,15 | 559,88 | 142,53 |
| 2019/09/01 | CH2276 | Female | Two y/o | Control | Control | Feed Day | No | 16:30 | 16:00 - 16:59 | Evening | 38,0 | 90  | 49,4  | 49,4  | 19,15 | 586,16 | 131,37 |
| 2019/09/01 | CH2276 | Female | Two y/o | Control | Control | Feed Day | No | 16:35 | 16:00 - 16:59 | Evening | 37,9 |     | 73,6  | 73,6  | 19,05 |        | 145,18 |
| 2019/09/01 | CH2276 | Female | Two y/o | Control | Control | Feed Day | No | 16:40 | 16:00 - 16:59 | Evening | 37,9 | 102 | 66,0  | 66,0  | 19,05 | 595,30 | 141,40 |
| 2019/09/01 | CH2276 | Female | Two y/o | Control | Control | Feed Day | No | 16:45 | 16:00 - 16:59 | Evening | 38,0 | 78  | 68,0  | 68,0  | 19,15 | 575,38 | 142,43 |
| 2019/09/01 | CH2276 | Female | Two y/o | Control | Control | Feed Day | No | 16:50 | 16:00 - 16:59 | Evening | 38,0 | 100 | 73,8  | 73,8  | 19,15 | 593,87 | 145,27 |
| 2019/09/01 | CH2276 | Female | Two y/o | Control | Control | Feed Day | No | 16:55 | 16:00 - 16:59 | Evening | 38,0 | 60  | 60,4  | 60,4  | 19,15 | 554,67 | 138,32 |
| 2019/09/01 | CH2276 | Female | Two y/o | Control | Control | Feed Day | No | 17:00 | 17:00 - 17:59 | Evening | 37,9 | 90  | 68,8  | 68,8  | 19,05 | 586,16 | 142,84 |
| 2019/09/01 | CH2276 | Female | Two y/o | Control | Control | Feed Day | No | 17:05 | 17:00 - 17:59 | Evening | 37,7 | 84  | 65,6  | 65,6  | 18,85 | 581,01 | 141,19 |
| 2019/09/01 | CH2276 | Female | Two y/o | Control | Control | Feed Day | No | 17:10 | 17:00 - 17:59 | Evening | 37,6 |     | 44,8  | 44,8  | 18,75 |        | 127,99 |
| 2019/09/01 | CH2276 | Female | Two y/o | Control | Control | Feed Day | No | 17:15 | 17:00 - 17:59 | Evening | 37,8 | 65  | 48,6  | 48,6  | 18,95 | 561,12 | 130,81 |
| 2019/09/01 | CH2276 | Female | Two y/o | Control | Control | Feed Day | No | 17:20 | 17:00 - 17:59 | Evening | 37,9 |     | 48,0  | 48,0  | 19,05 |        | 130,38 |
| 2019/09/01 | CH2276 | Female | Two y/o | Control | Control | Feed Day | No | 17:25 | 17:00 - 17:59 | Evening | 37,9 | 69  | 54,4  | 54,4  | 19,05 | 565,86 | 134,70 |
| 2019/09/01 | CH2276 | Female | Two y/o | Control | Control | Feed Day | No | 17:30 | 17:00 - 17:59 | Evening | 38,0 |     | 50,6  | 50,6  | 19,15 |        | 132,20 |
| 2019/09/01 | CH2276 | Female | Two y/o | Control | Control | Feed Day | No | 17:35 | 17:00 - 17:59 | Evening | 38,0 |     | 53,6  | 53,6  | 19,15 |        | 134,19 |
| 2019/09/01 | CH2276 | Female | Two y/o | Control | Control | Feed Day | No | 17:40 | 17:00 - 17:59 | Evening | 37,9 |     | 47,6  | 47,6  | 19,05 |        | 130,09 |
| 2019/09/01 | CH2276 | Female | Two y/o | Control | Control | Feed Day | No | 17:45 | 17:00 - 17:59 | Evening | 37,9 | 72  | 45,4  | 45,4  | 19,05 | 569,20 | 128,45 |
| 2019/09/01 | CH2276 | Female | Two y/o | Control | Control | Feed Day | No | 17:50 | 17:00 - 17:59 | Evening | 37,8 | 82  | 57,2  | 57,2  | 18,95 | 579,19 | 136,44 |
| 2019/09/01 | CH2276 | Female | Two y/o | Control | Control | Feed Day | No | 17:55 | 17:00 - 17:59 | Evening | 37,8 | 88  | 61,6  | 61,6  | 18,95 | 584,49 | 139,00 |
| 2019/09/01 | CH2276 | Female | Two y/o | Control | Control | Feed Day | No | 18:00 | 18:00 - 18:59 | Evening | 37,7 | 93  | 59,0  | 59,0  | 18,85 | 588,58 | 137,51 |
| 2019/09/01 | CH2276 | Female | Two y/o | Control | Control | Feed Day | No | 18:05 | 18:00 - 18:59 | Evening | 37,7 | 67  | 43,4  | 43,4  | 18,85 | 563,53 | 126,90 |
| 2019/09/01 | CH2276 | Female | Two y/o | Control | Control | Feed Day | No | 18:10 | 18:00 - 18:59 | Evening | 37,7 | 68  | 65,0  | 65,0  | 18,85 | 564,71 | 140,87 |
| 2019/09/01 | CH2276 | Female | Two y/o | Control | Control | Feed Day | No | 18:15 | 18:00 - 18:59 | Evening | 37,7 | 77  | 66,8  | 66,8  | 18,85 | 574,39 | 141,81 |
| 2019/09/01 | CH2276 | Female | Two y/o | Control | Control | Feed Day | No | 18:20 | 18:00 - 18:59 | Evening | 37,6 | 92  | 65,8  | 65,8  | 18,75 | 587,78 | 141,29 |
| 2019/09/01 | CH2276 | Female | Two y/o | Control | Control | Feed Day | No | 18:25 | 18:00 - 18:59 | Evening | 37,5 | 66  | 63,8  | 63,8  | 18,65 | 562,34 | 140,22 |
| 2019/09/01 | CH2276 | Female | Two y/o | Control | Control | Feed Day | No | 18:30 | 18:00 - 18:59 | Evening | 37,6 | 82  | 59,4  | 59,4  | 18,75 | 579,19 | 137,75 |
| 2019/09/01 | CH2276 | Female | Two y/o | Control | Control | Feed Day | No | 18:35 | 18:00 - 18:59 | Evening | 37,6 | 131 | 48,8  | 48,8  | 18,75 | 612,80 | 130,95 |
| 2019/09/01 | CH2276 | Female | Two y/o | Control | Control | Feed Day | No | 18:40 | 18:00 - 18:59 | Evening | 37,5 | 92  | 27,4  | 27,4  | 18,65 | 587,78 | 111,09 |
| 2019/09/01 | CH2276 | Female | Two y/o | Control | Control | Feed Day | No | 18:45 | 18:00 - 18:59 | Evening | 37,5 | 105 | 67,8  | 67,8  | 18,65 | 597,38 | 142,33 |
| 2019/09/01 | CH2276 | Female | Two y/o | Control | Control | Feed Day | No | 18:50 | 18:00 - 18:59 | Evening | 37,4 | 83  | 36,0  | 36,0  | 18,55 | 580,11 | 120,46 |
| 2019/09/01 | CH2276 | Female | Two y/o | Control | Control | Feed Day | No | 18:55 | 18:00 - 18:59 | Evening | 37,5 | 79  | 22,8  | 22,8  | 18,65 | 576,36 | 104,79 |
| 2019/09/01 | CH2276 | Female | Two y/o | Control | Control | Feed Day | No | 19:00 | 19:00 - 19:59 | Evening | 37,5 | 73  | 226,0 | 226,0 | 18,65 | 570,27 | 184,42 |
| 2019/09/01 | CH2276 | Female | Two y/o | Control | Control | Feed Day | No | 19:05 | 19:00 - 19:59 | Evening | 37,4 | 115 | 104,0 | 104,0 | 18,55 | 603,82 | 157,21 |
| 2019/09/01 | CH2276 | Female | Two y/o | Control | Control | Feed Day | No | 19:10 | 19:00 - 19:59 | Evening | 37,4 | 90  | 27,6  | 27,6  | 18,55 | 586,16 | 111,33 |
| 2019/09/01 | CH2276 | Female | Two y/o | Control | Control | Feed Day | No | 19:15 | 19:00 - 19:59 | Evening | 37,3 | 97  | 28,6  | 28,6  | 18,46 | 591,66 | 112,56 |
| 2019/09/01 | CH2276 | Female | Two y/o | Control | Control | Feed Day | No | 19:20 | 19:00 - 19:59 | Evening | 37,2 | 93  | 26,2  | 26,2  | 18,36 | 588,58 | 109,55 |
| 2019/09/01 | CH2276 | Female | Two y/o | Control | Control | Feed Day | No | 19:25 | 19:00 - 19:59 | Evening | 37,1 | 67  | 41,6  | 41,6  | 18,26 | 563,53 | 125,44 |
| 2019/09/01 | CH2276 | Female | Two y/o | Control | Control | Feed Day | No | 19:30 | 19:00 - 19:59 | Evening | 36,8 | 61  | 42,8  | 42,8  | 17,96 | 556,01 | 126,42 |
| 2019/09/01 | CH2276 | Female | Two y/o | Control | Control | Feed Day | No | 19:35 | 19:00 - 19:59 | Evening | 36,7 | 75  | 45,0  | 45,0  | 17,87 | 572,36 | 128,15 |
| 2019/09/01 | CH2276 | Female | Two y/o | Control | Control | Feed Day | No | 19:40 | 19:00 - 19:59 | Evening | 36,5 | 90  | 43,6  | 43,6  | 17,67 | 586,16 | 127,06 |
| 2019/09/01 | CH2276 | Female | Two y/o | Control | Control | Feed Day | No | 19:45 | 19:00 - 19:59 | Evening | 36,4 | 64  | 45,0  | 45,0  | 17,57 | 559,88 | 128,15 |
| 2019/09/01 | CH2276 | Female | Two y/o | Control | Control | Feed Day | No | 19:50 | 19:00 - 19:59 | Evening | 36,4 | 64  | 51,0  | 51,0  | 17,57 | 559,88 | 132,47 |
| 2019/09/01 | CH2276 | Female | Two y/o | Control | Control | Feed Day | No | 19:55 | 19:00 - 19:59 | Evening | 36,4 | 73  | 56,2  | 56,2  | 17,57 | 570,27 | 135,83 |
| 2019/09/01 | CH2276 | Female | Two y/o | Control | Control | Feed Day | No | 20:00 | 20:00 - 20:59 | Night   | 36,4 | 85  | 65,2  | 65,2  | 17,57 | 581,90 | 140,97 |
| 2019/09/01 | CH2276 | Female | Two y/o | Control | Control | Feed Day | No | 20:05 | 20:00 - 20:59 | Night   | 36,4 | 63  | 63,8  | 63,8  | 17,57 | 558,62 | 140,22 |
| 2019/09/01 | CH2276 | Female | Two y/o | Control | Control | Feed Day | No | 20:10 | 20:00 - 20:59 | Night   | 36,5 | 85  | 55,6  | 55,6  | 17,67 | 581,90 | 135,46 |
| 2019/09/01 | CH2276 | Female | Two y/o | Control | Control | Feed Day | No | 20:15 | 20:00 - 20:59 | Night   | 36,6 | 95  | 78,0  | 78,0  | 17,77 | 590,14 | 147,20 |
| 2019/09/01 | CH2276 | Female | Two y/o | Control | Control | Feed Day | No | 20:20 | 20:00 - 20:59 | Night   | 36,7 | 92  | 83,2  | 83,2  | 17,87 | 587,78 | 149,44 |
| 2019/09/01 | CH2276 | Female | Two y/o | Control | Control | Feed Day | No | 20:25 | 20:00 - 20:59 | Night   | 36,6 | 92  | 68,4  | 68,4  | 17,77 | 587,78 | 142,64 |
| 2019/09/01 | CH2276 | Female | Two y/o | Control | Control | Feed Day | No | 20:30 | 20:00 - 20:59 | Night   | 36,5 | 92  | 77,0  | 77,0  | 17,67 | 587,78 | 146,75 |
| 2019/09/01 | CH2276 | Female | Two y/o | Control | Control | Feed Day | No | 20:35 | 20:00 - 20:59 | Night   | 36,5 | 82  | 84,0  | 84,0  | 17,67 | 579,19 | 149,77 |
| 2019/09/01 | CH2276 | Female | Two y/o | Control | Control | Feed Day | No | 20:40 | 20:00 - 20:59 | Night   | 36,5 | 82  | 80,6  | 80,6  | 17,67 | 579,19 | 148,34 |
| 2019/09/01 | CH2276 | Female | Two y/o | Control | Control | Feed Day | No | 20:45 | 20:00 - 20:59 | Night   | 36,5 | 81  | 53,2  | 53,2  | 17,67 | 578,26 | 133,93 |
| 2019/09/01 | CH2276 | Female | Two y/o | Control | Control | Feed Day | No | 20:50 | 20:00 - 20:59 | Night   | 36,6 | 62  | 53,2  | 53,2  | 17,77 | 557,33 | 133,93 |
| 2019/09/01 | CH2276 | Female | Two y/o | Control | Control | Feed Day | No | 20:55 | 20:00 - 20:59 | Night   | 36,7 | 69  | 44,0  | 44,0  | 17,87 | 565,86 | 127,37 |
| 2019/09/01 | CH2276 | Female | Two y/o | Control | Control | Feed Day | No | 21:00 | 21:00 - 21:59 | Night   | 36,7 | 67  | 50,0  | 50,0  | 17,87 | 563,53 | 131,79 |
| 2019/09/01 | CH2276 | Female | Two y/o | Control | Control | Feed Day | No | 21:05 | 21:00 - 21:59 | Night   | 36,8 | 100 | 52,2  | 52,2  | 17,96 | 593,87 | 133,27 |
| 2019/09/01 | CH2276 | Female | Two y/o | Control | Control | Feed Day | No | 21:10 | 21:00 - 21:59 | Night   | 36,8 | 80  | 45,6  | 45,6  | 17,96 | 577,31 | 128,61 |
| 2019/09/01 | CH2276 | Female | Two y/o | Control | Control | Feed Day | No | 21:15 | 21:00 - 21:59 | Night   | 36,9 |     | 23,6  | 23,6  | 18,06 |        | 105,97 |
| 2019/09/01 | CH2276 | Female | Two y/o | Control | Control | Feed Day | No | 21:20 | 21:00 - 21:59 | Night   | 37,0 |     | 29,6  | 29,6  | 18,16 |        | 113,73 |
| 2019/09/01 | CH2276 | Female | Two y/o | Control | Control | Feed Day | No | 21:25 | 21:00 - 21:59 | Night   | 37,0 |     | 24,4  | 24,4  | 18,16 |        | 107,11 |
| 2019/09/01 | CH2276 | Female | Two y/o | Control | Control | Feed Day | No | 21:30 | 21:00 - 21:59 | Night   | 37,0 | 64  | 25,4  | 25,4  | 18,16 | 559,88 | 108,49 |
| 2019/09/01 | CH2276 | Female | Two y/o | Control | Control | Feed Day | No | 21:35 | 21:00 - 21:59 | Night   | 37,1 | 61  | 29,6  | 29,6  | 18,26 | 556,01 | 113,73 |
| 2019/09/01 | CH2276 | Female | Two y/o | Control | Control | Feed Day | No | 21:40 | 21:00 - 21:59 | Night   | 37,2 | 64  | 23,0  | 23,0  | 18,36 | 559,88 | 105,09 |
| 2019/09/01 | CH2276 | Female | Two y/o | Control | Control | Feed Day | No | 21:45 | 21:00 - 21:59 | Night   | 37,3 | 59  | 28,6  | 28,6  | 18,46 | 553,30 | 112,56 |
| 2019/09/01 | CH2276 | Female | Two y/o | Control | Control | Feed Day | No | 21:50 | 21:00 - 21:59 | Night   | 37,3 | 90  | 23,6  | 23,6  | 18,46 | 586,16 | 105,97 |
| 2019/09/01 | CH2276 | Female | Two y/o | Control | Control | Feed Day | No | 21:55 | 21:00 - 21:59 | Night   | 37,3 | 84  | 22,0  | 22,0  | 18,46 | 581,01 | 103,57 |
| 2019/09/01 | CH2276 | Female | Two y/o | Control | Control | Feed Day | No | 22:00 | 22:00 - 22:59 | Night   | 37,3 |     | 26,0  | 26,0  | 18,46 |        | 109,29 |
| 2019/09/01 | CH2276 | Female | Two y/o | Control | Control | Feed Day | No | 22:05 | 22:00 - 22:59 | Night   | 37,3 | 62  | 35,0  | 35,0  | 18,46 | 557,33 | 119,49 |
| 2019/09/01 | CH2276 | Female | Two y/o | Control | Control | Feed Day | No | 22:10 | 22:00 - 22:59 | Night   | 37,2 | 85  | 35,6  | 35,6  | 18,36 | 581,90 | 120,08 |



|    |            |        |        |         |         |         |          |    |       |               |               |      |    |      |      |       |        |        |
|----|------------|--------|--------|---------|---------|---------|----------|----|-------|---------------|---------------|------|----|------|------|-------|--------|--------|
|    | 2019/09/01 | CH2276 | Female | Two y/o | Control | Control | Feed Day | No | 22:15 | 22:00 - 22:59 | Night         | 37,2 | 63 | 30,2 | 30,2 | 18,36 | 558,62 | 114,42 |
|    | 2019/09/01 | CH2276 | Female | Two y/o | Control | Control | Feed Day | No | 22:20 | 22:00 - 22:59 | Night         | 37,2 | 65 | 32,6 | 32,6 | 18,36 | 561,12 | 117,05 |
|    | 2019/09/01 | CH2276 | Female | Two y/o | Control | Control | Feed Day | No | 22:25 | 22:00 - 22:59 | Night         | 37,1 | 59 | 51,8 | 51,8 | 18,26 | 553,30 | 133,01 |
|    | 2019/09/01 | CH2276 | Female | Two y/o | Control | Control | Feed Day | No | 22:30 | 22:00 - 22:59 | Night         | 37,1 | 83 | 77,4 | 77,4 | 18,26 | 580,11 | 146,93 |
|    | 2019/09/01 | CH2276 | Female | Two y/o | Control | Control | Feed Day | No | 22:35 | 22:00 - 22:59 | Night         | 37,1 | 69 | 77,0 | 77,0 | 18,26 | 565,86 | 146,75 |
|    | 2019/09/01 | CH2276 | Female | Two y/o | Control | Control | Feed Day | No | 22:40 | 22:00 - 22:59 | Night         | 37,2 | 60 | 80,8 | 80,8 | 18,36 | 554,67 | 148,42 |
|    | 2019/09/01 | CH2276 | Female | Two y/o | Control | Control | Feed Day | No | 22:45 | 22:00 - 22:59 | Night         | 37,1 | 62 | 81,2 | 81,2 | 18,26 | 557,33 | 148,59 |
|    | 2019/09/01 | CH2276 | Female | Two y/o | Control | Control | Feed Day | No | 22:50 | 22:00 - 22:59 | Night         | 37,1 |    | 86,4 | 86,4 | 18,26 |        | 150,75 |
|    | 2019/09/01 | CH2276 | Female | Two y/o | Control | Control | Feed Day | No | 22:55 | 22:00 - 22:59 | Night         | 37,2 | 85 | 51,2 | 51,2 | 18,36 | 581,90 | 132,61 |
|    | 2019/09/01 | CH2276 | Female | Two y/o | Control | Control | Feed Day | No | 23:00 | 23:00 - 23:59 | Night         | 37,3 | 70 | 32,4 | 32,4 | 18,46 | 566,99 | 116,84 |
|    | 2019/09/01 | CH2276 | Female | Two y/o | Control | Control | Feed Day | No | 23:05 | 23:00 - 23:59 | Night         | 37,2 | 61 | 32,8 | 32,8 | 18,36 | 556,01 | 117,26 |
|    | 2019/09/01 | CH2276 | Female | Two y/o | Control | Control | Feed Day | No | 23:10 | 23:00 - 23:59 | Night         | 37,1 | 55 | 29,4 | 29,4 | 18,26 | 547,52 | 113,50 |
|    | 2019/09/01 | CH2276 | Female | Two y/o | Control | Control | Feed Day | No | 23:15 | 23:00 - 23:59 | Night         | 37,1 | 79 | 26,8 | 26,8 | 18,26 | 576,36 | 110,33 |
|    | 2019/09/01 | CH2276 | Female | Two y/o | Control | Control | Feed Day | No | 23:20 | 23:00 - 23:59 | Night         | 37,1 | 60 | 31,0 | 31,0 | 18,26 | 554,67 | 115,32 |
|    | 2019/09/01 | CH2276 | Female | Two y/o | Control | Control | Feed Day | No | 23:25 | 23:00 - 23:59 | Night         | 37,0 | 66 | 32,0 | 32,0 | 18,16 | 562,34 | 116,41 |
|    | 2019/09/01 | CH2276 | Female | Two y/o | Control | Control | Feed Day | No | 23:30 | 23:00 - 23:59 | Night         | 36,9 | 61 | 36,4 | 36,4 | 18,06 | 556,01 | 120,84 |
|    | 2019/09/01 | CH2276 | Female | Two y/o | Control | Control | Feed Day | No | 23:35 | 23:00 - 23:59 | Night         | 36,9 | 64 | 56,2 | 56,2 | 18,06 | 559,88 | 135,83 |
|    | 2019/09/01 | CH2276 | Female | Two y/o | Control | Control | Feed Day | No | 23:40 | 23:00 - 23:59 | Night         | 36,9 | 82 | 49,8 | 49,8 | 18,06 | 579,19 | 131,65 |
|    | 2019/09/01 | CH2276 | Female | Two y/o | Control | Control | Feed Day | No | 23:45 | 23:00 - 23:59 | Night         | 36,9 | 86 | 51,4 | 51,4 | 18,06 | 582,77 | 132,74 |
|    | 2019/09/01 | CH2276 | Female | Two y/o | Control | Control | Feed Day | No | 23:50 | 23:00 - 23:59 | Night         | 36,9 | 57 | 54,8 | 54,8 | 18,06 | 550,47 | 134,96 |
|    | 2019/09/01 | CH2276 | Female | Two y/o | Control | Control | Feed Day | No | 23:55 | 23:00 - 23:59 | Night         | 36,9 | 69 | 58,2 | 58,2 | 18,06 | 565,86 | 137,04 |
| 75 | 2019/09/02 | CH2276 | Female | Two y/o | Control | Control | Feed Day | No | 00:00 | 00:00 - 00:59 | Early Morning | 36,9 | 63 | 55,4 | 55,4 | 18,06 | 558,62 | 135,33 |
|    | 2019/09/02 | CH2276 | Female | Two y/o | Control | Control | Feed Day | No | 00:05 | 00:00 - 00:59 | Early Morning | 36,9 | 59 | 59,4 | 59,4 | 18,06 | 553,30 | 137,75 |
|    | 2019/09/02 | CH2276 | Female | Two y/o | Control | Control | Feed Day | No | 00:10 | 00:00 - 00:59 | Early Morning | 36,9 | 60 | 62,8 | 62,8 | 18,06 | 554,67 | 139,67 |
|    | 2019/09/02 | CH2276 | Female | Two y/o | Control | Control | Feed Day | No | 00:15 | 00:00 - 00:59 | Early Morning | 36,9 | 56 | 58,6 | 58,6 | 18,06 | 549,01 | 137,28 |
|    | 2019/09/02 | CH2276 | Female | Two y/o | Control | Control | Feed Day | No | 00:20 | 00:00 - 00:59 | Early Morning | 36,9 | 63 | 59,2 | 59,2 | 18,06 | 558,62 | 137,63 |
|    | 2019/09/02 | CH2276 | Female | Two y/o | Control | Control | Feed Day | No | 00:25 | 00:00 - 00:59 | Early Morning | 37,0 | 91 | 40,0 | 40,0 | 18,16 | 586,98 | 124,09 |
|    | 2019/09/02 | CH2276 | Female | Two y/o | Control | Control | Feed Day | No | 00:30 | 00:00 - 00:59 | Early Morning | 37,0 | 63 | 38,2 | 38,2 | 18,16 | 558,62 | 122,50 |
|    | 2019/09/02 | CH2276 | Female | Two y/o | Control | Control | Feed Day | No | 00:35 | 00:00 - 00:59 | Early Morning | 37,1 | 61 | 37,4 | 37,4 | 18,26 | 556,01 | 121,77 |
|    | 2019/09/02 | CH2276 | Female | Two y/o | Control | Control | Feed Day | No | 00:40 | 00:00 - 00:59 | Early Morning | 37,1 | 65 | 34,8 | 34,8 | 18,26 | 561,12 | 119,29 |
|    | 2019/09/02 | CH2276 | Female | Two y/o | Control | Control | Feed Day | No | 00:45 | 00:00 - 00:59 | Early Morning | 37,2 | 66 | 25,4 | 25,4 | 18,36 | 562,34 | 108,49 |
|    | 2019/09/02 | CH2276 | Female | Two y/o | Control | Control | Feed Day | No | 00:50 | 00:00 - 00:59 | Early Morning | 37,2 | 60 | 17,6 | 17,6 | 18,36 | 554,67 | 95,95  |
|    | 2019/09/02 | CH2276 | Female | Two y/o | Control | Control | Feed Day | No | 00:55 | 00:00 - 00:59 | Early Morning | 37,1 | 42 | 20,4 | 20,4 | 18,26 | 524,42 | 100,99 |
|    | 2019/09/02 | CH2276 | Female | Two y/o | Control | Control | Feed Day | No | 01:00 | 01:00 - 01:59 | Early Morning | 37,1 | 66 | 18,8 | 18,8 | 18,26 | 562,34 | 98,20  |
|    | 2019/09/02 | CH2276 | Female | Two y/o | Control | Control | Feed Day | No | 01:05 | 01:00 - 01:59 | Early Morning | 37,1 | 60 | 19,2 | 19,2 | 18,26 | 554,67 | 98,92  |
|    | 2019/09/02 | CH2276 | Female | Two y/o | Control | Control | Feed Day | No | 01:10 | 01:00 - 01:59 | Early Morning | 37,1 | 64 | 21,0 | 21,0 | 18,26 | 559,88 | 101,98 |
|    | 2019/09/02 | CH2276 | Female | Two y/o | Control | Control | Feed Day | No | 01:15 | 01:00 - 01:59 | Early Morning | 37,1 | 54 | 26,8 | 26,8 | 18,26 | 545,99 | 110,33 |
|    | 2019/09/02 | CH2276 | Female | Two y/o | Control | Control | Feed Day | No | 01:20 | 01:00 - 01:59 | Early Morning | 37,0 | 54 | 17,8 | 17,8 | 18,16 | 545,99 | 96,34  |
|    | 2019/09/02 | CH2276 | Female | Two y/o | Control | Control | Feed Day | No | 01:25 | 01:00 - 01:59 | Early Morning | 36,9 | 60 | 12,0 | 12,0 | 18,06 | 554,67 | 82,93  |
|    | 2019/09/02 | CH2276 | Female | Two y/o | Control | Control | Feed Day | No | 01:30 | 01:00 - 01:59 | Early Morning | 36,9 | 56 | 21,6 | 21,6 | 18,06 | 549,01 | 102,94 |
|    | 2019/09/02 | CH2276 | Female | Two y/o | Control | Control | Feed Day | No | 01:35 | 01:00 - 01:59 | Early Morning | 36,9 | 67 | 26,0 | 26,0 | 18,06 | 563,53 | 109,29 |
|    | 2019/09/02 | CH2276 | Female | Two y/o | Control | Control | Feed Day | No | 01:40 | 01:00 - 01:59 | Early Morning | 36,8 | 68 | 17,4 | 17,4 | 17,96 | 564,71 | 95,56  |
|    | 2019/09/02 | CH2276 | Female | Two y/o | Control | Control | Feed Day | No | 01:45 | 01:00 - 01:59 | Early Morning | 36,7 | 61 | 22,0 | 22,0 | 17,87 | 556,01 | 103,57 |
|    | 2019/09/02 | CH2276 | Female | Two y/o | Control | Control | Feed Day | No | 01:50 | 01:00 - 01:59 | Early Morning | 36,7 | 55 | 25,4 | 25,4 | 17,87 | 547,52 | 108,49 |
|    | 2019/09/02 | CH2276 | Female | Two y/o | Control | Control | Feed Day | No | 01:55 | 01:00 - 01:59 | Early Morning | 36,7 | 57 | 19,4 | 19,4 | 17,87 | 550,47 | 99,28  |
|    | 2019/09/02 | CH2276 | Female | Two y/o | Control | Control | Feed Day | No | 02:00 | 02:00 - 02:59 | Early Morning | 36,7 | 60 | 30,0 | 30,0 | 17,87 | 554,67 | 114,20 |
|    | 2019/09/02 | CH2276 | Female | Two y/o | Control | Control | Feed Day | No | 02:05 | 02:00 - 02:59 | Early Morning | 36,7 | 55 | 27,0 | 27,0 | 17,87 | 547,52 | 110,58 |
|    | 2019/09/02 | CH2276 | Female | Two y/o | Control | Control | Feed Day | No | 02:10 | 02:00 - 02:59 | Early Morning | 36,7 | 61 | 27,6 | 27,6 | 17,87 | 556,01 | 111,33 |
|    | 2019/09/02 | CH2276 | Female | Two y/o | Control | Control | Feed Day | No | 02:15 | 02:00 - 02:59 | Early Morning | 36,6 | 57 | 19,2 | 19,2 | 17,77 | 550,47 | 98,92  |
|    | 2019/09/02 | CH2276 | Female | Two y/o | Control | Control | Feed Day | No | 02:20 | 02:00 - 02:59 | Early Morning | 36,7 | 57 | 23,2 | 23,2 | 17,87 | 550,47 | 105,39 |
|    | 2019/09/02 | CH2276 | Female | Two y/o | Control | Control | Feed Day | No | 02:25 | 02:00 - 02:59 | Early Morning | 36,7 | 68 | 16,0 | 16,0 | 17,87 | 564,71 | 92,71  |
|    | 2019/09/02 | CH2276 | Female | Two y/o | Control | Control | Feed Day | No | 02:30 | 02:00 - 02:59 | Early Morning | 36,7 | 61 | 23,0 | 23,0 | 17,87 | 556,01 | 105,09 |
|    | 2019/09/02 | CH2276 | Female | Two y/o | Control | Control | Feed Day | No | 02:35 | 02:00 - 02:59 | Early Morning | 36,7 | 95 | 20,2 | 20,2 | 17,87 | 590,14 | 100,65 |
|    | 2019/09/02 | CH2276 | Female | Two y/o | Control | Control | Feed Day | No | 02:40 | 02:00 - 02:59 | Early Morning | 36,6 | 65 | 21,0 | 21,0 | 17,77 | 561,12 | 101,98 |
|    | 2019/09/02 | CH2276 | Female | Two y/o | Control | Control | Feed Day | No | 02:45 | 02:00 - 02:59 | Early Morning | 36,6 | 51 | 32,2 | 32,2 | 17,77 | 541,20 | 116,63 |
|    | 2019/09/02 | CH2276 | Female | Two y/o | Control | Control | Feed Day | No | 02:50 | 02:00 - 02:59 | Early Morning | 36,6 | 57 | 35,0 | 35,0 | 17,77 | 550,47 | 119,49 |



| Variable             | Effect                     | Level               | (-) Level           | <i>t</i> | <i>p</i> | df  | <i>d</i>    | 95% CI for |       |
|----------------------|----------------------------|---------------------|---------------------|----------|----------|-----|-------------|------------|-------|
|                      |                            |                     |                     |          |          |     |             | Lower      | Upper |
| <i>Behaviour</i>     | Study Period               | Control             | Treatment           | 0,98     | 0,328    | 128 | 0,37        | -0,38      | 1,12  |
|                      | Feed/Fast Day              | Fast Day            | Feed Day            | 1,30     | 0,196    | 128 | 0,50        | -0,25      | 1,24  |
|                      | Study Period*Feed/Fast Day | Control, Fast Day   | Treatment, Feed Day | 1,20     | 0,232    | 128 | <b>0,87</b> | -0,55      | 2,29  |
|                      | Study Period*Feed/Fast Day | Control, Fast Day   | Control, Feed Day   | 0,98     | 0,327    | 128 | 0,71        | -0,71      | 2,12  |
|                      | Study Period*Feed/Fast Day | Control, Fast Day   | Treatment, Fast Day | 0,79     | 0,429    | 128 | 0,58        | -0,86      | 2,03  |
|                      | Study Period*Feed/Fast Day | Treatment, Fast Day | Treatment, Feed Day | 1,12     | 0,267    | 128 | 0,29        | -0,22      | 0,79  |
|                      | Study Period*Feed/Fast Day | Control, Feed Day   | Treatment, Feed Day | 0,82     | 0,412    | 128 | 0,16        | -0,23      | 0,55  |
|                      | Study Period*Feed/Fast Day | Treatment, Fast Day | Control, Feed Day   | 0,51     | 0,612    | 128 | 0,12        | -0,35      | 0,59  |
|                      | Treatment Wk               | Treatment (Wk 2)    | Treatment (Wk 3)    | 0,86     | 0,392    | 128 | 0,24        | -0,31      | 0,79  |
|                      | Treatment Wk               | Control             | Treatment (Wk 3)    | 0,93     | 0,356    | 128 | 0,20        | -0,23      | 0,64  |
|                      | Treatment Wk               | Treatment (Wk 1)    | Treatment (Wk 3)    | 0,63     | 0,532    | 128 | 0,20        | -0,43      | 0,84  |
|                      | Treatment Wk               | Treatment (Wk 2)    | Treatment (Wk 1)    | 0,11     | 0,911    | 128 | 0,04        | -0,63      | 0,71  |
|                      | Treatment Wk               | Treatment (Wk 2)    | Control             | 0,15     | 0,881    | 128 | 0,04        | -0,45      | 0,52  |
|                      | Treatment Wk               | Control             | Treatment (Wk 1)    | 0,00     | 0,997    | 128 | 0,00        | -0,58      | 0,58  |
| Appetitive behaviour | Study Period               | Control             | Treatment           | 7,03     | < 0,0001 | 57  | <b>2,18</b> | 1,45       | 2,90  |
|                      | Feed/Fast Day              | Fast Day            | Feed Day            | 5,04     | < 0,0001 | 57  | <b>2,00</b> | 1,13       | 2,85  |
|                      | Study Period*Feed/Fast Day | Control, Fast Day   | Treatment, Fast Day | 7,85     | < 0,0001 | 57  | <b>2,43</b> | 1,67       | 3,18  |
|                      | Study Period*Feed/Fast Day | Control, Fast Day   | Control, Feed Day   | 5,21     | < 0,0001 | 57  | <b>2,07</b> | 1,20       | 2,93  |
|                      | Study Period*Feed/Fast Day | Control, Fast Day   | Treatment, Feed Day | 3,10     | 0,003    | 57  | <b>1,93</b> | 0,65       | 3,19  |
|                      | Study Period*Feed/Fast Day | Treatment, Feed Day | Treatment, Fast Day | 1,27     | 0,210    | 57  | 0,50        | -0,28      | 1,29  |
|                      | Study Period*Feed/Fast Day | Control, Feed Day   | Treatment, Fast Day | 1,04     | 0,301    | 57  | 0,36        | -0,32      | 1,04  |
|                      | Study Period*Feed/Fast Day | Treatment, Feed Day | Control, Feed Day   | 0,46     | 0,649    | 57  | 0,14        | -0,47      | 0,75  |
|                      | Treatment Wk               | Treatment (Wk 2)    | Treatment (Wk 3)    | 1,45     | 0,152    | 57  | 0,63        | -0,23      | 1,50  |
|                      | Treatment Wk               | Treatment (Wk 1)    | Treatment (Wk 3)    | 0,92     | 0,360    | 57  | 0,51        | -0,57      | 1,58  |
|                      | Treatment Wk               | Control             | Treatment (Wk 3)    | 1,21     | 0,230    | 57  | 0,44        | -0,27      | 1,14  |
|                      | Treatment Wk               | Treatment (Wk 2)    | Control             | 0,57     | 0,571    | 57  | 0,20        | -0,48      | 0,88  |
|                      | Treatment Wk               | Treatment (Wk 2)    | Treatment (Wk 1)    | 0,24     | 0,812    | 57  | 0,13        | -0,93      | 1,19  |
|                      | Treatment Wk               | Treatment (Wk 1)    | Control             | 0,14     | 0,887    | 57  | 0,07        | -0,87      | 1,01  |
| Attention            | Study Period               | Control             | Treatment           | 7,42     | < 0,0001 | 61  | <b>2,05</b> | 1,39       | 2,69  |
|                      | Feed/Fast Day              | Fast Day            | Feed Day            | 5,12     | < 0,0001 | 61  | <b>1,86</b> | 1,07       | 2,64  |
|                      | Study Period*Feed/Fast Day | Control, Fast Day   | Treatment, Fast Day | 8,71     | < 0,0001 | 61  | <b>2,40</b> | 1,71       | 3,09  |
|                      | Study Period*Feed/Fast Day | Control, Fast Day   | Control, Feed Day   | 5,60     | < 0,0001 | 61  | <b>2,04</b> | 1,23       | 2,83  |
|                      | Study Period*Feed/Fast Day | Control, Fast Day   | Treatment, Feed Day | 3,13     | 0,003    | 61  | <b>1,69</b> | 0,59       | 2,79  |
|                      | Study Period*Feed/Fast Day | Treatment, Feed Day | Treatment, Fast Day | 1,95     | 0,055    | 61  | 0,71        | -0,02      | 1,43  |
|                      | Study Period*Feed/Fast Day | Control, Feed Day   | Treatment, Fast Day | 1,04     | 0,305    | 61  | 0,37        | -0,33      | 1,06  |
|                      | Study Period*Feed/Fast Day | Treatment, Feed Day | Control, Feed Day   | 1,25     | 0,216    | 61  | 0,34        | -0,20      | 0,89  |



Dataset S1: RMSSE

|               |                            |                     |                     |      |          |     |             |       |      |
|---------------|----------------------------|---------------------|---------------------|------|----------|-----|-------------|-------|------|
| Auto-grooming | Treatment Wk               | Treatment (Wk 1)    | Treatment (Wk 2)    | 1,04 | 0,301    | 61  | 0,46        | -0,41 | 1,31 |
|               | Treatment Wk               | Treatment (Wk 1)    | Treatment (Wk 3)    | 1,09 | 0,282    | 61  | 0,44        | -0,36 | 1,23 |
|               | Treatment Wk               | Treatment (Wk 1)    | Control             | 1,20 | 0,237    | 61  | 0,42        | -0,28 | 1,12 |
|               | Treatment Wk               | Control             | Treatment (Wk 2)    | 0,09 | 0,929    | 61  | 0,03        | -0,69 | 0,75 |
|               | Treatment Wk               | Treatment (Wk 3)    | Treatment (Wk 2)    | 0,05 | 0,963    | 61  | 0,02        | -0,79 | 0,83 |
|               | Treatment Wk               | Control             | Treatment (Wk 3)    | 0,04 | 0,966    | 61  | 0,01        | -0,62 | 0,65 |
|               | Study Period               | Control             | Treatment           | 5,97 | < 0,0001 | 28  | <b>2,49</b> | 1,43  | 3,52 |
|               | Feed/Fast Day              | Fast Day            | Feed Day            | 4,73 | < 0,0001 | 28  | <b>2,49</b> | 1,26  | 3,70 |
|               | Study Period*Feed/Fast Day | Control, Fast Day   | Treatment, Feed Day | 3,06 | 0,005    | 28  | <b>2,51</b> | 0,76  | 4,23 |
|               | Study Period*Feed/Fast Day | Control, Fast Day   | Control, Feed Day   | 4,69 | < 0,0001 | 28  | <b>2,47</b> | 1,24  | 3,67 |
|               | Study Period*Feed/Fast Day | Control, Fast Day   | Treatment, Fast Day | 5,92 | < 0,0001 | 28  | <b>2,47</b> | 1,41  | 3,49 |
|               | Study Period*Feed/Fast Day | Treatment, Fast Day | Treatment, Feed Day | 0,08 | 0,934    | 28  | 0,04        | -0,99 | 1,08 |
|               | Study Period*Feed/Fast Day | Control, Feed Day   | Treatment, Feed Day | 0,09 | 0,928    | 28  | 0,04        | -0,78 | 0,85 |
|               | Study Period*Feed/Fast Day | Treatment, Fast Day | Control, Feed Day   | 0,01 | 0,990    | 28  | 0,01        | -0,93 | 0,94 |
|               | Treatment Wk               | Treatment (Wk 3)    | Treatment (Wk 1)    | 0,79 | 0,436    | 28  | <b>0,85</b> | -1,28 | 2,97 |
|               | Treatment Wk               | Treatment (Wk 3)    | Treatment (Wk 2)    | 1,20 | 0,242    | 28  | 0,65        | -0,43 | 1,71 |
|               | Treatment Wk               | Control             | Treatment (Wk 1)    | 0,46 | 0,650    | 28  | 0,47        | -1,56 | 2,49 |
|               | Treatment Wk               | Treatment (Wk 3)    | Control             | 0,79 | 0,434    | 28  | 0,38        | -0,57 | 1,32 |
|               | Treatment Wk               | Control             | Treatment (Wk 2)    | 0,61 | 0,545    | 28  | 0,27        | -0,59 | 1,11 |
|               | Treatment Wk               | Treatment (Wk 2)    | Treatment (Wk 1)    | 0,20 | 0,846    | 28  | 0,21        | -1,87 | 2,29 |
| Locomotion    | Study Period               | Treatment           | Control             | 0,18 | 0,857    | 101 | 0,09        | -0,94 | 1,12 |
|               | Feed/Fast Day              | Fast Day            | Feed Day            | 0,09 | 0,929    | 101 | 0,05        | -0,98 | 1,08 |
|               | Study Period*Feed/Fast Day | Treatment, Feed Day | Control, Feed Day   | 2,69 | 0,008    | 101 | 0,59        | 0,15  | 1,03 |
|               | Study Period*Feed/Fast Day | Control, Fast Day   | Control, Feed Day   | 0,54 | 0,592    | 101 | 0,54        | -1,44 | 2,52 |
|               | Study Period*Feed/Fast Day | Treatment, Feed Day | Treatment, Fast Day | 1,55 | 0,125    | 101 | 0,45        | -0,12 | 1,02 |
|               | Study Period*Feed/Fast Day | Control, Fast Day   | Treatment, Fast Day | 0,39 | 0,697    | 101 | 0,40        | -1,61 | 2,41 |
|               | Study Period*Feed/Fast Day | Treatment, Fast Day | Control, Feed Day   | 0,52 | 0,606    | 101 | 0,14        | -0,40 | 0,68 |
|               | Study Period*Feed/Fast Day | Treatment, Feed Day | Control, Fast Day   | 0,05 | 0,963    | 101 | 0,05        | -1,94 | 2,04 |
|               | Treatment Wk               | Treatment (Wk 3)    | Control             | 2,99 | 0,004    | 101 | 0,77        | 0,25  | 1,29 |
|               | Treatment Wk               | Treatment (Wk 3)    | Treatment (Wk 2)    | 1,94 | 0,056    | 101 | 0,61        | -0,01 | 1,22 |
|               | Treatment Wk               | Treatment (Wk 3)    | Treatment (Wk 1)    | 1,41 | 0,162    | 101 | 0,51        | -0,20 | 1,22 |
|               | Treatment Wk               | Treatment (Wk 1)    | Control             | 0,83 | 0,410    | 101 | 0,27        | -0,36 | 0,89 |
|               | Treatment Wk               | Treatment (Wk 2)    | Control             | 0,64 | 0,522    | 101 | 0,17        | -0,35 | 0,68 |
|               | Treatment Wk               | Treatment (Wk 1)    | Treatment (Wk 2)    | 0,26 | 0,793    | 101 | 0,10        | -0,62 | 0,81 |
|               | Study Period               | Control             | Treatment           | 6,02 | < 0,0001 | 17  | <b>2,86</b> | 1,50  | 4,17 |
|               | Feed/Fast Day              | Fast Day            | Feed Day            | 4,30 | 0,001    | 17  | <b>3,33</b> | 1,42  | 5,18 |
|               | Study Period*Feed/Fast Day | Control, Fast Day   | Treatment, Feed Day | 3,63 | 0,002    | 17  | <b>3,68</b> | 1,31  | 5,97 |
|               | Study Period*Feed/Fast Day | Control, Fast Day   | Control, Feed Day   | 3,85 | 0,001    | 17  | <b>2,98</b> | 1,14  | 4,77 |
|               | Study Period*Feed/Fast Day | Control, Fast Day   | Treatment, Fast Day | 4,28 | 0,001    | 17  | <b>2,03</b> | 0,86  | 3,16 |



Dataset S1: RMSSE

|                            |                            |                     |                     |         |          |       |             |       |       |
|----------------------------|----------------------------|---------------------|---------------------|---------|----------|-------|-------------|-------|-------|
| Olfactory exploration      | Study Period*Feed/Fast Day | Treatment, Fast Day | Treatment, Feed Day | 2,13    | 0,049    | 17    | <b>1,65</b> | 0,01  | 3,24  |
|                            | Study Period*Feed/Fast Day | Treatment, Fast Day | Control, Feed Day   | 1,20    | 0,245    | 17    | <b>0,95</b> | -0,64 | 2,52  |
|                            | Study Period*Feed/Fast Day | Control, Feed Day   | Treatment, Feed Day | 1,46    | 0,161    | 17    | 0,69        | -0,27 | 1,64  |
|                            | Treatment Wk               | Control             | Treatment (Wk 1)    | 1,00    | 0,333    | 17    | 0,61        | -0,62 | 1,82  |
|                            | Treatment Wk               | Control             | Treatment (Wk 2)    | 0,77    | 0,450    | 17    | 0,61        | -0,96 | 2,17  |
|                            | Treatment Wk               | Treatment (Wk 3)    | Treatment (Wk 1)    | 0,75    | 0,465    | 17    | 0,48        | -0,80 | 1,75  |
|                            | Treatment Wk               | Treatment (Wk 3)    | Treatment (Wk 2)    | 0,59    | 0,562    | 17    | 0,48        | -1,13 | 2,08  |
|                            | Treatment Wk               | Control             | Treatment (Wk 3)    | 0,24    | 0,815    | 17    | 0,13        | -0,93 | 1,19  |
|                            | Treatment Wk               | Treatment (Wk 2)    | Treatment (Wk 1)    | 0,00    | 1,000    | 17    | 0,00        | -1,70 | 1,70  |
| Scent-marking              | Study Period               | Control             | Treatment           | 6,20    | < 0,0001 | 40    | <b>2,07</b> | 1,27  | 2,86  |
|                            | Feed/Fast Day              | Fast Day            | Feed Day            | 4,42    | < 0,0001 | 40    | <b>1,98</b> | 0,99  | 2,96  |
|                            | Study Period*Feed/Fast Day | Control, Fast Day   | Treatment, Fast Day | 6,36    | < 0,0001 | 40    | <b>2,12</b> | 1,31  | 2,92  |
|                            | Study Period*Feed/Fast Day | Control, Fast Day   | Treatment, Feed Day | 3,07    | 0,004    | 40    | <b>2,02</b> | 0,64  | 3,36  |
|                            | Study Period*Feed/Fast Day | Control, Fast Day   | Control, Feed Day   | 4,35    | < 0,0001 | 40    | <b>1,95</b> | 0,97  | 2,92  |
|                            | Study Period*Feed/Fast Day | Control, Feed Day   | Treatment, Fast Day | 0,39    | 0,700    | 40    | 0,17        | -0,70 | 1,04  |
|                            | Study Period*Feed/Fast Day | Treatment, Feed Day | Treatment, Fast Day | 0,24    | 0,810    | 40    | 0,11        | -0,77 | 0,99  |
|                            | Study Period*Feed/Fast Day | Control, Feed Day   | Treatment, Feed Day | 0,19    | 0,852    | 40    | 0,06        | -0,59 | 0,72  |
|                            | Treatment Wk               | Treatment (Wk 2)    | Treatment (Wk 3)    | 0,55    | 0,583    | 40    | 0,29        | -0,73 | 1,30  |
|                            | Treatment Wk               | Control             | Treatment (Wk 3)    | 0,57    | 0,573    | 40    | 0,24        | -0,59 | 1,07  |
|                            | Treatment Wk               | Treatment (Wk 1)    | Treatment (Wk 3)    | 0,34    | 0,734    | 40    | 0,17        | -0,79 | 1,12  |
|                            | Treatment Wk               | Treatment (Wk 2)    | Treatment (Wk 1)    | 0,24    | 0,813    | 40    | 0,12        | -0,87 | 1,11  |
|                            | Treatment Wk               | Control             | Treatment (Wk 1)    | 0,18    | 0,858    | 40    | 0,07        | -0,72 | 0,87  |
|                            | Treatment Wk               | Treatment (Wk 2)    | Control             | 0,11    | 0,916    | 40    | 0,05        | -0,82 | 0,91  |
|                            | Vocalisation               | Study Period        | Treatment           | Control | 0,00     | 1,000 | 3           | 0,00  | -1,79 |
| Feed/Fast Day              |                            | Fast Day            | Feed Day            |         |          | 3     | 0,00        |       |       |
| Study Period*Feed/Fast Day |                            | Control, Fast Day   | Control, Feed Day   |         |          | 3     | <b>2,74</b> |       |       |
| Study Period*Feed/Fast Day |                            | Treatment, Feed Day | Control, Feed Day   | 3,00    | 0,058    | 3     | <b>2,74</b> | -0,08 | 5,41  |
| Study Period*Feed/Fast Day |                            | Control, Fast Day   | Treatment, Fast Day | 1,66    | 0,196    | 3     | <b>1,51</b> | -0,69 | 3,56  |
| Study Period*Feed/Fast Day |                            | Treatment, Feed Day | Treatment, Fast Day |         |          | 3     | <b>1,51</b> |       |       |
| Study Period*Feed/Fast Day |                            | Treatment, Fast Day | Control, Feed Day   | 1,34    | 0,272    | 3     | <b>1,22</b> | -0,87 | 3,17  |
| Study Period*Feed/Fast Day |                            | Treatment, Feed Day | Control, Fast Day   | 0,00    | 1,000    | 3     | 0,00        | -1,79 | 1,79  |
| Agnostic behaviour         | Treatment Wk               | Control             | Treatment (Wk 2)    | 0,77    | 0,495    | 3     | 0,71        | -1,21 | 2,53  |
| Affiliative behaviour      | Study Period               | Treatment           | Control             | 0,39    | 0,698    | 22    | 0,22        | -0,87 | 1,30  |
|                            | Feed/Fast Day              | Fast Day            | Feed Day            | 1,78    | 0,089    | 22    | <b>0,99</b> | -0,15 | 2,10  |
|                            | Study Period*Feed/Fast Day | Control, Fast Day   | Control, Feed Day   | 2,49    | 0,021    | 22    | <b>1,87</b> | 0,28  | 3,42  |
|                            | Study Period*Feed/Fast Day | Treatment, Fast Day | Control, Feed Day   | 1,61    | 0,123    | 22    | <b>1,20</b> | -0,32 | 2,70  |
|                            | Study Period*Feed/Fast Day | Treatment, Feed Day | Control, Feed Day   | 2,29    | 0,032    | 22    | <b>1,10</b> | 0,09  | 2,08  |
|                            | Study Period*Feed/Fast Day | Control, Fast Day   | Treatment, Feed Day | 0,94    | 0,357    | 22    | 0,77        | -0,86 | 2,38  |
|                            | Study Period*Feed/Fast Day | Control, Fast Day   | Treatment, Fast Day | 0,66    | 0,515    | 22    | 0,66        | -1,31 | 2,62  |



Dataset S1: RMSSE

|                                  |                            |                     |                     |      |       |     |             |       |      |
|----------------------------------|----------------------------|---------------------|---------------------|------|-------|-----|-------------|-------|------|
| Interspecific behaviour          | Treatment Wk               | Treatment (Wk 3)    | Treatment (Wk 1)    | 2,53 | 0,019 | 22  | <b>2,92</b> | 0,47  | 5,31 |
|                                  | Treatment Wk               | Treatment (Wk 3)    | Control             | 2,45 | 0,023 | 22  | <b>2,52</b> | 0,35  | 4,64 |
|                                  | Treatment Wk               | Treatment (Wk 2)    | Treatment (Wk 1)    | 2,64 | 0,015 | 22  | <b>2,02</b> | 0,39  | 3,61 |
|                                  | Treatment Wk               | Treatment (Wk 2)    | Control             | 2,93 | 0,008 | 22  | <b>1,62</b> | 0,42  | 2,78 |
|                                  | Treatment Wk               | Treatment (Wk 3)    | Treatment (Wk 2)    | 0,80 | 0,430 | 22  | <b>0,90</b> | -1,32 | 3,10 |
|                                  | Treatment Wk               | Control             | Treatment (Wk 1)    | 0,65 | 0,526 | 22  | 0,40        | -0,83 | 1,63 |
|                                  | Study Period               | Control             | Treatment           | 0,19 | 0,849 | 68  | 0,10        | -0,95 | 1,15 |
|                                  | Feed/Fast Day              | Feed Day            | Fast Day            | 1,41 | 0,163 | 68  | 0,76        | -0,30 | 1,81 |
|                                  | Study Period*Feed/Fast Day | Treatment, Feed Day | Treatment, Fast Day | 3,50 | 0,001 | 68  | <b>1,22</b> | 0,50  | 1,93 |
|                                  | Study Period*Feed/Fast Day | Control, Feed Day   | Treatment, Fast Day | 2,55 | 0,013 | 68  | <b>0,86</b> | 0,18  | 1,53 |
|                                  | Study Period*Feed/Fast Day | Treatment, Feed Day | Control, Fast Day   | 0,64 | 0,523 | 68  | 0,66        | -1,35 | 2,65 |
|                                  | Study Period*Feed/Fast Day | Control, Fast Day   | Treatment, Fast Day | 0,54 | 0,589 | 68  | 0,57        | -1,48 | 2,61 |
|                                  | Study Period*Feed/Fast Day | Treatment, Feed Day | Control, Feed Day   | 1,38 | 0,173 | 68  | 0,36        | -0,16 | 0,88 |
|                                  | Study Period*Feed/Fast Day | Control, Feed Day   | Control, Fast Day   | 0,29 | 0,773 | 68  | 0,29        | -1,70 | 2,28 |
|                                  | Treatment Wk               | Treatment (Wk 3)    | Treatment (Wk 1)    | 0,47 | 0,638 | 68  | 0,19        | -0,61 | 1,00 |
|                                  | Treatment Wk               | Treatment (Wk 3)    | Treatment (Wk 2)    | 0,44 | 0,664 | 68  | 0,17        | -0,59 | 0,92 |
|                                  | Treatment Wk               | Treatment (Wk 3)    | Control             | 0,32 | 0,753 | 68  | 0,10        | -0,54 | 0,74 |
|                                  | Treatment Wk               | Control             | Treatment (Wk 1)    | 0,26 | 0,795 | 68  | 0,09        | -0,59 | 0,77 |
|                                  | Treatment Wk               | Control             | Treatment (Wk 2)    | 0,20 | 0,839 | 68  | 0,06        | -0,56 | 0,69 |
|                                  | Treatment Wk               | Treatment (Wk 2)    | Treatment (Wk 1)    | 0,06 | 0,950 | 68  | 0,03        | -0,76 | 0,82 |
| Faecal consistency score (grade) | Study Period               | Treatment           | Control             | 3,31 | 0,001 | 209 | 0,65        | 0,26  | 1,03 |
|                                  | Feed/Fast Day              | Feed Day            | Fast Day            | 2,18 | 0,031 | 209 | 0,43        | 0,04  | 0,81 |
|                                  | Study Period*Feed/Fast Day | Treatment, Fast Day | Control, Fast Day   | 3,43 | 0,001 | 209 | <b>1,23</b> | 0,51  | 1,94 |
|                                  | Study Period*Feed/Fast Day | Treatment, Feed Day | Control, Fast Day   | 3,17 | 0,002 | 209 | <b>1,07</b> | 0,40  | 1,74 |
|                                  | Study Period*Feed/Fast Day | Control, Feed Day   | Control, Fast Day   | 3,04 | 0,003 | 209 | <b>1,01</b> | 0,35  | 1,66 |
|                                  | Study Period*Feed/Fast Day | Treatment, Fast Day | Control, Feed Day   | 1,12 | 0,263 | 209 | 0,22        | -0,17 | 0,61 |
|                                  | Study Period*Feed/Fast Day | Treatment, Fast Day | Treatment, Feed Day | 0,75 | 0,453 | 209 | 0,16        | -0,25 | 0,56 |
|                                  | Study Period*Feed/Fast Day | Treatment, Feed Day | Control, Feed Day   | 0,42 | 0,677 | 209 | 0,07        | -0,24 | 0,37 |
|                                  | Treatment Wk               | Treatment (Wk 3)    | Control             | 1,78 | 0,076 | 209 | 0,35        | -0,04 | 0,73 |
|                                  | Treatment Wk               | Treatment (Wk 3)    | Treatment (Wk 2)    | 1,08 | 0,283 | 209 | 0,25        | -0,21 | 0,72 |
|                                  | Treatment Wk               | Treatment (Wk 1)    | Control             | 0,93 | 0,354 | 209 | 0,18        | -0,21 | 0,57 |
|                                  | Treatment Wk               | Treatment (Wk 3)    | Treatment (Wk 1)    | 0,67 | 0,505 | 209 | 0,16        | -0,31 | 0,64 |
|                                  | Treatment Wk               | Treatment (Wk 2)    | Control             | 0,49 | 0,626 | 209 | 0,09        | -0,28 | 0,47 |
|                                  | Treatment Wk               | Treatment (Wk 1)    | Treatment (Wk 2)    | 0,38 | 0,702 | 209 | 0,09        | -0,38 | 0,56 |
|                                  | Study Period               | Treatment           | Control             | 1,71 | 0,090 | 170 | 0,39        | -0,06 | 0,84 |
|                                  | Feed/Fast Day              | Feed Day            | Fast Day            | 1,32 | 0,190 | 170 | 0,30        | -0,15 | 0,75 |
|                                  | Study Period*Feed/Fast Day | Treatment, Feed Day | Control, Fast Day   | 1,74 | 0,084 | 170 | 0,69        | -0,09 | 1,48 |
|                                  | Study Period*Feed/Fast Day | Treatment, Feed Day | Control, Feed Day   | 2,86 | 0,005 | 170 | 0,49        | 0,15  | 0,82 |
|                                  | Study Period*Feed/Fast Day | Treatment, Feed Day | Treatment, Fast Day | 1,69 | 0,093 | 170 | 0,40        | -0,07 | 0,86 |



## Dataset S1: RMSSE

|                                                          |                              |                     |                     |       |          |       |      |       |      |
|----------------------------------------------------------|------------------------------|---------------------|---------------------|-------|----------|-------|------|-------|------|
| Faecal glucocorticoid metabolite concentration (µg/g DW) | Study Period*Feed/Fast Day   | Treatment, Fast Day | Control, Fast Day   | 0,70  | 0,487    | 170   | 0,30 | -0,54 | 1,13 |
|                                                          | Study Period*Feed/Fast Day   | Control, Feed Day   | Control, Fast Day   | 0,52  | 0,600    | 170   | 0,21 | -0,57 | 0,98 |
|                                                          | Study Period*Feed/Fast Day   | Treatment, Fast Day | Control, Feed Day   | 0,40  | 0,691    | 170   | 0,09 | -0,35 | 0,53 |
|                                                          | Treatment Wk                 | Treatment (Wk 2)    | Control             | 2,76  | 0,006    | 170   | 0,58 | 0,16  | 1,00 |
|                                                          | Treatment Wk                 | Treatment (Wk 2)    | Treatment (Wk 3)    | 1,64  | 0,104    | 170   | 0,43 | -0,09 | 0,95 |
|                                                          | Treatment Wk                 | Treatment (Wk 1)    | Control             | 1,82  | 0,070    | 170   | 0,40 | -0,03 | 0,82 |
|                                                          | Treatment Wk                 | Treatment (Wk 1)    | Treatment (Wk 3)    | 0,90  | 0,368    | 170   | 0,24 | -0,28 | 0,77 |
|                                                          | Treatment Wk                 | Treatment (Wk 2)    | Treatment (Wk 1)    | 0,72  | 0,474    | 170   | 0,19 | -0,33 | 0,70 |
|                                                          | Treatment Wk                 | Treatment (Wk 3)    | Control             | 0,71  | 0,478    | 170   | 0,15 | -0,27 | 0,58 |
| Body temperature (°C)                                    | Study Period                 | Control             | Treatment           | 1,51  | 0,132    | 33439 | 0,02 | -0,01 | 0,05 |
|                                                          | Feed/Fast Day                | Feed Day            | Fast Day            | 0,77  | 0,441    | 33439 | 0,01 | -0,02 | 0,04 |
|                                                          | Study Period*Feed/Fast Day   | Control, Fast Day   | Treatment, Fast Day | 5,03  | < 0,0001 | 33439 | 0,13 | 0,08  | 0,18 |
|                                                          | Study Period*Feed/Fast Day   | Treatment, Feed Day | Treatment, Fast Day | 7,59  | < 0,0001 | 33439 | 0,12 | 0,09  | 0,15 |
|                                                          | Study Period*Feed/Fast Day   | Control, Fast Day   | Control, Feed Day   | 4,02  | < 0,0001 | 33439 | 0,10 | 0,05  | 0,14 |
|                                                          | Study Period*Feed/Fast Day   | Treatment, Feed Day | Control, Feed Day   | 6,77  | < 0,0001 | 33439 | 0,09 | 0,06  | 0,11 |
|                                                          | Study Period*Feed/Fast Day   | Control, Feed Day   | Treatment, Fast Day | 2,13  | 0,034    | 33439 | 0,03 | 0,00  | 0,06 |
|                                                          | Study Period*Feed/Fast Day   | Control, Fast Day   | Treatment, Feed Day | 0,44  | 0,663    | 33439 | 0,01 | -0,04 | 0,06 |
|                                                          | Treatment Wk                 | Treatment (Wk 3)    | Treatment (Wk 2)    | 6,93  | < 0,0001 | 33439 | 0,13 | 0,09  | 0,16 |
|                                                          | Treatment Wk                 | Treatment (Wk 3)    | Control             | 6,60  | < 0,0001 | 33439 | 0,10 | 0,07  | 0,13 |
|                                                          | Treatment Wk                 | Treatment (Wk 3)    | Treatment (Wk 1)    | 4,37  | < 0,0001 | 33439 | 0,08 | 0,04  | 0,12 |
|                                                          | Treatment Wk                 | Treatment (Wk 1)    | Treatment (Wk 2)    | 2,56  | 0,011    | 33439 | 0,05 | 0,01  | 0,08 |
|                                                          | Treatment Wk                 | Control             | Treatment (Wk 2)    | 1,70  | 0,090    | 33439 | 0,03 | 0,00  | 0,06 |
|                                                          | Treatment Wk                 | Treatment (Wk 1)    | Control             | 1,37  | 0,172    | 33439 | 0,02 | -0,01 | 0,05 |
|                                                          | Feeding Time                 | Yes                 | No                  | 9,46  | < 0,0001 | 16698 | 0,41 | 0,32  | 0,49 |
|                                                          | Feeding Time*Part of the Day | Yes, Evening        | No, Evening         | 7,24  | < 0,0001 | 16698 | 0,65 | 0,48  | 0,83 |
|                                                          | Feeding Time*Part of the Day | Yes, Afternoon      | No, Afternoon       | 6,22  | < 0,0001 | 16698 | 0,54 | 0,37  | 0,71 |
|                                                          | Feeding Time*Part of the Day | Yes, Late Morning   | No, Late Morning    | 1,07  | 0,285    | 16698 | 0,04 | -0,03 | 0,11 |
| Heart rate (bpm)                                         | Study Period                 | Control             | Treatment           | 7,11  | < 0,0001 | 30221 | 0,11 | 0,08  | 0,14 |
|                                                          | Feed/Fast Day                | Feed Day            | Fast Day            | 13,26 | < 0,0001 | 30221 | 0,20 | 0,17  | 0,23 |
|                                                          | Study Period*Feed/Fast Day   | Control, Feed Day   | Treatment, Fast Day | 18,97 | < 0,0001 | 30221 | 0,31 | 0,27  | 0,34 |
|                                                          | Study Period*Feed/Fast Day   | Treatment, Feed Day | Treatment, Fast Day | 18,05 | < 0,0001 | 30221 | 0,30 | 0,26  | 0,33 |
|                                                          | Study Period*Feed/Fast Day   | Control, Fast Day   | Treatment, Fast Day | 7,59  | < 0,0001 | 30221 | 0,20 | 0,15  | 0,26 |
|                                                          | Study Period*Feed/Fast Day   | Control, Feed Day   | Control, Fast Day   | 4,03  | < 0,0001 | 30221 | 0,10 | 0,05  | 0,15 |
|                                                          | Study Period*Feed/Fast Day   | Treatment, Feed Day | Control, Fast Day   | 3,64  | 0,000    | 30221 | 0,09 | 0,04  | 0,14 |
|                                                          | Study Period*Feed/Fast Day   | Control, Feed Day   | Treatment, Feed Day | 0,68  | 0,499    | 30221 | 0,01 | -0,02 | 0,03 |
|                                                          | Treatment Wk                 | Control             | Treatment (Wk 2)    | 10,33 | < 0,0001 | 30221 | 0,17 | 0,13  | 0,20 |
|                                                          | Treatment Wk                 | Treatment (Wk 1)    | Treatment (Wk 2)    | 6,25  | < 0,0001 | 30221 | 0,12 | 0,08  | 0,16 |
|                                                          | Treatment Wk                 | Treatment (Wk 3)    | Treatment (Wk 2)    | 4,34  | < 0,0001 | 30221 | 0,08 | 0,05  | 0,12 |
|                                                          | Treatment Wk                 | Control             | Treatment (Wk 3)    | 5,12  | < 0,0001 | 30221 | 0,08 | 0,05  | 0,11 |



## Dataset S1: RMSSE

|                           |                              |                     |                     |       |          |       |      |       |      |
|---------------------------|------------------------------|---------------------|---------------------|-------|----------|-------|------|-------|------|
|                           | Treatment Wk                 | Control             | Treatment (Wk 1)    | 2,85  | 0,004    | 30221 | 0,05 | 0,01  | 0,08 |
|                           | Treatment Wk                 | Treatment (Wk 1)    | Treatment (Wk 3)    | 1,90  | 0,058    | 30221 | 0,04 | 0,00  | 0,07 |
|                           | Feeding Time                 | Yes                 | No                  | 1,97  | 0,048    | 14834 | 0,09 | 0,00  | 0,18 |
|                           | Feeding Time*Part of the Day | Yes, Evening        | No, Evening         | 2,31  | 0,021    | 14834 | 0,22 | 0,03  | 0,40 |
|                           | Feeding Time*Part of the Day | Yes, Afternoon      | No, Afternoon       | 2,12  | 0,034    | 14834 | 0,19 | 0,01  | 0,36 |
|                           | Feeding Time*Part of the Day | No, Late Morning    | Yes, Late Morning   | 3,69  | 0,000    | 14834 | 0,14 | 0,07  | 0,21 |
| Locomotor activity (ODBA) | Study Period                 | Treatment           | Control             | 15,48 | < 0,0001 | 33399 | 0,22 | 0,19  | 0,25 |
|                           | Feed/Fast Day                | Feed Day            | Fast Day            | 0,38  | 0,707    | 33399 | 0,01 | -0,02 | 0,03 |
|                           | Study Period*Feed/Fast Day   | Treatment, Fast Day | Control, Fast Day   | 10,13 | < 0,0001 | 33399 | 0,26 | 0,21  | 0,31 |
|                           | Study Period*Feed/Fast Day   | Treatment, Feed Day | Control, Fast Day   | 9,39  | < 0,0001 | 33399 | 0,23 | 0,18  | 0,27 |
|                           | Study Period*Feed/Fast Day   | Treatment, Fast Day | Control, Feed Day   | 14,11 | < 0,0001 | 33399 | 0,22 | 0,19  | 0,25 |
|                           | Study Period*Feed/Fast Day   | Treatment, Feed Day | Control, Feed Day   | 14,44 | < 0,0001 | 33399 | 0,18 | 0,16  | 0,21 |
|                           | Study Period*Feed/Fast Day   | Control, Feed Day   | Control, Fast Day   | 1,82  | 0,068    | 33399 | 0,04 | 0,00  | 0,09 |
|                           | Study Period*Feed/Fast Day   | Treatment, Fast Day | Treatment, Feed Day | 2,11  | 0,035    | 33399 | 0,03 | 0,00  | 0,06 |
|                           | Treatment Wk                 | Treatment (Wk 1)    | Control             | 16,66 | < 0,0001 | 33399 | 0,25 | 0,22  | 0,28 |
|                           | Treatment Wk                 | Treatment (Wk 2)    | Control             | 14,14 | < 0,0001 | 33399 | 0,21 | 0,19  | 0,24 |
|                           | Treatment Wk                 | Treatment (Wk 3)    | Control             | 8,68  | < 0,0001 | 33399 | 0,13 | 0,10  | 0,16 |
|                           | Treatment Wk                 | Treatment (Wk 1)    | Treatment (Wk 3)    | 6,66  | < 0,0001 | 33399 | 0,12 | 0,09  | 0,16 |
|                           | Treatment Wk                 | Treatment (Wk 2)    | Treatment (Wk 3)    | 4,56  | < 0,0001 | 33399 | 0,08 | 0,05  | 0,12 |
|                           | Treatment Wk                 | Treatment (Wk 1)    | Treatment (Wk 2)    | 2,10  | 0,036    | 33399 | 0,04 | 0,00  | 0,07 |
|                           | Feeding Time                 | Yes                 | No                  | 7,74  | < 0,0001 | 16686 | 0,33 | 0,25  | 0,42 |
|                           | Feeding Time*Part of the Day | Yes, Evening        | No, Evening         | 5,79  | < 0,0001 | 16686 | 0,52 | 0,35  | 0,70 |
|                           | Feeding Time*Part of the Day | Yes, Afternoon      | No, Afternoon       | 5,44  | < 0,0001 | 16686 | 0,47 | 0,30  | 0,64 |
|                           | Feeding Time*Part of the Day | Yes, Late Morning   | No, Late Morning    | 0,34  | 0,731    | 16686 | 0,01 | -0,06 | 0,08 |
